# Supplementary material for: Proteomic and Phospho-Proteomic Profile of Human Platelets in Basal, Resting State: Insights into Integrin Signaling
Source: PubMed Central journal article supplement (PMC2762604; doi:10.1371/journal.pone.0007627), 2009-10-27
Supplement: pone.0007627.s007.pdf [file pone.0007627.s007.pdf]

| Reference                   | Peptide                                                   | MH+        | z | P (pro)  | Sf     | Score   | Coverage | MW       |
|-----------------------------|-----------------------------------------------------------|------------|---|----------|--------|---------|----------|----------|
| File, Scan(s)               |                                                           |            |   | P (pep)  | Sf     | XC      |          | Sp       |
| gi 12667788 ref NP_002464.1 | 1] myosin, heavy polypeptide 9, non-muscle [Homo sapiens] |            |   | 1.00E-30 | 102.39 | 1150.38 | 48.20    | 226529.8 |
| AHQ-1-2, 2081 - 2102        | R.ALEEEAMEQK.A                                            | 1049.18068 | 2 | 2.60E-04 | 0.90   | 3.40    | -        | 1012.8   |
| AHQ-1-3, 2030               | R.ALEEEAMEQK.A                                            | 1049.18068 | 1 | 8.60E-04 | 0.60   | 2.44    | -        | 769.9    |
| AHQ-1-2, 2058 - 2125        | R.ALEEEAMEQK.A                                            | 1049.18068 | 1 | 1.65E-04 | 0.33   | 2.22    | -        | 626.6    |
| AHQ-1-1, 2201               | R.ALEEEAMEQK.A                                            | 1049.18068 | 2 | 4.13E-05 | 0.92   | 3.58    | -        | 1020.0   |
| AHQ-1-4, 2020               | R.ALEEEAMEQK.A                                            | 1049.18068 | 2 | 5.24E-04 | 0.74   | 2.79    | -        | 714.7    |
| AHQ-1-1, 3891               | K.ALELDSNLYR.I                                            | 1194.31920 | 2 | 9.12E-07 | 0.94   | 3.54    | -        | 1216.7   |
| AHQ-1-3, 3809               | K.ALELDSNLYR.I                                            | 1194.31920 | 1 | 4.26E-06 | 0.10   | 2.26    | -        | 212.2    |
| AHQ-1-4, 3843               | K.ALELDSNLYR.I                                            | 1194.31920 | 2 | 9.53E-07 | 0.95   | 4.14    | -        | 1120.9   |
| AHQ-1-3, 3806 - 3813        | K.ALELDSNLYR.I                                            | 1194.31920 | 2 | 5.38E-08 | 0.94   | 4.04    | -        | 1107.4   |
| AHQ-1-5, 3721               | K.ALELDSNLYR.I                                            | 1194.31920 | 1 | 7.75E-04 | 0.13   | 2.27    | -        | 206.1    |
| AHQ-1-2, 3821               | K.ALELDSNLYR.I                                            | 1194.31920 | 2 | 9.25E-08 | 0.95   | 3.64    | -        | 1496.1   |
| AHQ-1-13- , 3863            | K.ALELDSNLYR.I                                            | 1194.31920 | 2 | 8.93E-06 | 0.85   | 3.20    | -        | 863.0    |
| AHQ-1-5, 3707 - 3713        | K.ALELDSNLYR.I                                            | 1194.31920 | 2 | 1.35E-07 | 0.95   | 4.03    | -        | 1267.7   |
| AHQ-1-2, 3943 - 4013        | K.ALELDSNLYR.I                                            | 1194.31920 | 2 | 6.09E-07 | 0.95   | 4.07    | -        | 1145.5   |
| AHQ-1-3, 3905               | K.ALELDSNLYR.I                                            | 1194.31920 | 2 | 9.05E-06 | 0.86   | 2.85    | -        | 1006.6   |
| AHQ-1-6, 2782               | R.ALEQQVEEMK.T                                            | 1205.36380 | 2 | 4.06E-05 | 0.84   | 3.23    | -        | 835.8    |
| AHQ-1-3, 2873               | R.ALEQQVEEMK.T                                            | 1205.36380 | 2 | 1.20E-04 | 0.83   | 3.32    | -        | 974.6    |
| AHQ-1-1, 3000               | R.ALEQQVEEMK.T                                            | 1205.36380 | 2 | 3.10E-05 | 0.89   | 3.17    | -        | 1083.9   |
| AHQ-1-2, 2981 - 3059        | R.ALEQQVEEMK.T                                            | 1205.36380 | 2 | 2.20E-05 | 0.90   | 3.66    | -        | 1014.8   |
| AHQ-1-2, 2215               | R.ALEQQVEEMK.T                                            | 1221.36320 | 2 | 5.09E-06 | 0.80   | 3.44    | -        | 794.6    |
| AHQ-1-7, 2813               | R.ALEQQVEEMK.T                                            | 1205.36380 | 2 | 5.90E-04 | 0.77   | 2.94    | -        | 919.0    |
| AHQ-1-1, 2280               | R.ALEQQVEEMK.T                                            | 1221.36320 | 2 | 4.05E-06 | 0.82   | 2.97    | -        | 928.1    |
| AHQ-1-3, 2138               | R.ALEQQVEEMK.T                                            | 1221.36320 | 2 | 2.84E-05 | 0.82   | 3.40    | -        | 874.5    |
| AHQ-1-4, 2890 - 2891        | R.ALEQQVEEMK.T                                            | 1205.36380 | 2 | 7.47E-05 | 0.90   | 3.65    | -        | 1027.1   |
| AHQ-1-5, 2006               | R.ALEQQVEEMK.T                                            | 1221.36320 | 2 | 4.34E-05 | 0.67   | 2.83    | -        | 770.8    |
| AHQ-1-3, 6527 - 6589        | R.ALEQQVEEMK.TQLEEELEDELQATEDAK.L                         | 3165.38394 | 3 | 1.62E-12 | 0.97   | 6.15    | -        | 1761.3   |
| AHQ-1-2, 7349               | R.ALEQQVEEMK.TQLEEELEDELQATEDAK.L                         | 3149.38454 | 3 | 5.26E-07 | 0.96   | 6.21    | -        | 1493.5   |
| AHQ-1-2, 6951 - 7026        | R.ALEQQVEEMK.TQLEEELEDELQATEDAK.L                         | 3165.38394 | 3 | 6.37E-09 | 0.97   | 5.76    | -        | 1838.1   |
| AHQ-1-1, 6456 - 6471        | R.ALEQQVEEMK.TQLEEELEDELQATEDAK.L                         | 3165.38394 | 3 | 5.16E-14 | 0.97   | 5.91    | -        | 1958.4   |
| AHQ-1-2, 6713 - 6777        | R.ALEQQVEEMK.TQLEEELEDELQATEDAK.L                         | 3165.38394 | 3 | 1.24E-11 | 0.97   | 6.07    | -        | 1638.4   |
| AHQ-1-3, 7209               | R.ALEQQVEEMK.TQLEEELEDELQATEDAK.L                         | 3149.38454 | 3 | 3.00E-08 | 0.96   | 5.58    | -        | 1405.8   |
| AHQ-1-6, 6470 - 6538        | R.ALEQQVEEMK.TQLEEELEDELQATEDAK.L                         | 3165.38394 | 3 | 3.26E-07 | 0.96   | 5.99    | -        | 1293.7   |
| AHQ-1-4, 7386               | R.ALEQQVEEMK.TQLEEELEDELQATEDAK.L                         | 3149.38454 | 3 | 1.41E-05 | 0.96   | 6.15    | -        | 1244.7   |
| AHQ-1-5, 6634               | R.ALEQQVEEMK.TQLEEELEDELQATEDAK.L                         | 3165.38394 | 3 | 1.56E-08 | 0.95   | 5.75    | -        | 1044.2   |
| AHQ-1-2, 5537               | K.ANLQIDQINTDLNLER.S                                      | 1871.04187 | 2 | 7.19E-09 | 0.97   | 5.83    | -        | 1302.7   |
| AHQ-1-3, 5391               | K.ANLQIDQINTDLNLER.S                                      | 1871.04187 | 2 | 1.03E-08 | 0.97   | 5.74    | -        | 1435.3   |
| AHQ-1-3, 5102 - 5175        | K.ANLQIDQINTDLNLER.S                                      | 1871.04187 | 2 | 5.38E-11 | 0.98   | 6.06    | -        | 1555.4   |
| AHQ-1-10, 4577              | K.ANLQIDQINTDLNLER.S                                      | 1871.04187 | 2 | 2.65E-06 | 0.96   | 5.08    | -        | 1432.6   |
| AHQ-1-8, 5091               | K.ANLQIDQINTDLNLER.S                                      | 1871.04187 | 2 | 6.45E-05 | 0.97   | 5.10    | -        | 1538.6   |
| AHQ-1-2, 5093               | K.ANLQIDQINTDLNLER.S                                      | 1871.04187 | 2 | 1.25E-06 | 0.96   | 5.22    | -        | 874.6    |
| AHQ-1-4, 4966 - 5034        | K.ANLQIDQINTDLNLER.S                                      | 1871.04187 | 2 | 3.79E-05 | 0.83   | 4.17    | -        | 408.8    |
| AHQ-1-2, 5230 - 5301        | K.ANLQIDQINTDLNLER.S                                      | 1871.04187 | 2 | 1.08E-10 | 0.98   | 6.18    | -        | 1786.5   |
| AHQ-1-4, 5242               | K.ANLQIDQINTDLNLER.S                                      | 1871.04187 | 2 | 2.46E-06 | 0.87   | 3.74    | -        | 643.4    |
| AHQ-1-9, 5011               | K.ANLQIDQINTDLNLER.S                                      | 1871.04187 | 2 | 4.98E-04 | 0.97   | 5.19    | -        | 1550.6   |
| AHQ-1-1, 5387               | K.ANLQIDQINTDLNLER.S                                      | 1871.04187 | 2 | 3.74E-04 | 0.97   | 4.95    | -        | 1762.1   |
| AHQ-1-1, 5189 - 5251        | K.ANLQIDQINTDLNLER.S                                      | 1871.04187 | 2 | 5.97E-04 | 0.97   | 5.35    | -        | 1315.4   |
| AHQ-1-2, 5369 - 5438        | K.ANLQIDQINTDLNLER.S                                      | 1871.04187 | 2 | 3.56E-07 | 0.98   | 7.12    | -        | 1738.0   |
| AHQ-1-6, 5094 - 5096        | K.ANLQIDQINTDLNLER.S                                      | 1871.04187 | 2 | 4.78E-07 | 0.96   | 4.82    | -        | 1178.2   |
| AHQ-1-1, 4980               | K.ANLQIDQINTDLNLER.S                                      | 1871.04187 | 2 | 1.15E-08 | 0.94   | 4.83    | -        | 700.2    |
| AHQ-1-3, 5267               | K.ANLQIDQINTDLNLER.S                                      | 1871.04187 | 2 | 3.73E-10 | 0.97   | 5.78    | -        | 1276.1   |
| AHQ-1-5, 2215               | K.ASITALEAK.I                                             | 904.04321  | 2 | 5.19E-06 | 0.90   | 3.02    | -        | 954.5    |
| AHQ-1-4, 2367               | K.ASITALEAK.I                                             | 904.04321  | 2 | 2.59E-06 | 0.89   | 2.91    | -        | 913.0    |
| AHQ-1-1, 2512               | K.ASITALEAK.I                                             | 904.04321  | 2 | 5.98E-05 | 0.92   | 3.01    | -        | 1125.4   |
| AHQ-1-2, 2445               | K.ASITALEAK.I                                             | 904.04321  | 2 | 2.30E-06 | 0.90   | 3.14    | -        | 940.9    |
| AHQ-1-3, 2350               | K.ASITALEAK.I                                             | 904.04321  | 2 | 1.40E-04 | 0.92   | 2.94    | -        | 1120.5   |
| AHQ-1-1, 2237               | R.ASREEILAAQAK.E                                          | 1216.36955 | 2 | 1.84E-05 | 0.92   | 3.32    | -        | 1417.8   |
| AHQ-1-3, 2063               | R.ASREEILAAQAK.E                                          | 1216.36955 | 2 | 4.00E-06 | 0.93   | 3.54    | -        | 1583.8   |
| AHQ-1-2, 2115 - 2174        | R.ASREEILAAQAK.E                                          | 1216.36955 | 2 | 9.21E-05 | 0.91   | 3.24    | -        | 1360.2   |
| AHQ-1-4, 2044               | R.ASREEILAAQAK.E                                          | 1216.36955 | 2 | 1.41E-06 | 0.91   | 3.38    | -        | 1467.0   |
| AHQ-1-2, 3317               | R.DELADEIANSSGK.G                                         | 1349.38323 | 2 | 2.19E-07 | 0.97   | 4.56    | -        | 1896.4   |
| AHQ-1-1, 3284               | R.DELADEIANSSGK.G                                         | 1349.38323 | 2 | 1.64E-05 | 0.93   | 4.06    | -        | 1012.7   |
| AHQ-1-3, 3214               | R.DELADEIANSSGK.G                                         | 1349.38323 | 2 | 3.87E-07 | 0.97   | 4.29    | -        | 1792.8   |
| AHQ-1-6, 6895               | K.DFSALESQLODQQLQEQENR.Q                                  | 2494.61059 | 3 | 3.22E-05 | 0.96   | 5.08    | -        | 1529.2   |
| AHQ-1-4, 7224               | K.DFSALESQLODQQLQEQENR.Q                                  | 2494.61059 | 3 | 1.48E-06 | 0.91   | 3.98    | -        | 1459.1   |
| AHQ-1-1, 6839 - 6911        | K.DFSALESQLODQQLQEQENR.Q                                  | 2494.61059 | 2 | 1.14E-07 | 0.94   | 4.79    | -        | 879.4    |
| AHQ-1-1, 6740               | K.DFSALESQLODQQLQEQENR.Q                                  | 2494.61059 | 3 | 3.25E-10 | 0.98   | 6.38    | -        | 2039.0   |
| AHQ-1-2, 7199 - 7227        | K.DFSALESQLODQQLQEQENR.Q                                  | 2494.61059 | 3 | 6.82E-08 | 0.93   | 4.17    | -        | 1395.3   |
| AHQ-1-5, 7038               | K.DFSALESQLODQQLQEQENR.Q                                  | 2494.61059 | 3 | 3.87E-05 | 0.95   | 4.68    | -        | 1770.4   |
| AHQ-1-3, 6898               | K.DFSALESQLODQQLQEQENR.Q                                  | 2494.61059 | 3 | 6.85E-05 | 0.93   | 4.32    | -        | 1529.8   |
| AHQ-1-3, 6646               | K.DFSALESQLODQQLQEQENRQK.L                                | 2750.91328 | 3 | 1.09E-10 | 0.84   | 3.85    | -        | 531.1    |
| AHQ-1-1, 6413               | K.DFSALESQLODQQLQEQENRQK.L                                | 2750.91328 | 3 | 3.50E-05 | 0.70   | 3.27    | -        | 523.2    |
| AHQ-1-2, 6607 - 6681        | K.DFSALESQLODQQLQEQENRQK.L                                | 2750.91328 | 3 | 1.24E-10 | 0.93   | 5.54    | -        | 590.2    |
| AHQ-1-3, 6441 - 6511        | K.DFSALESQLODQQLQEQENRQK.L                                | 2750.91328 | 3 | 1.19E-12 | 0.95   | 5.33    | -        | 982.2    |
| AHQ-1-2, 6749 - 6751        | K.DFSALESQLODQQLQEQENRQK.L                                | 2750.91328 | 3 | 4.40E-06 | 0.62   | 3.11    | -        | 587.6    |
| AHQ-1-9, 7338               | R.DLGEELALKTELEDTLDSTAAQQELR.S                            | 3019.21860 | 3 | 1.99E-06 | 0.96   | 5.30    | -        | 1869.5   |
| AHQ-1-2, 7437               | R.DLGEELALKTELEDTLDSTAAQQELR.S                            | 3019.21860 | 3 | 1.18E-09 | 0.97   | 5.12    | -        | 2058.3   |
| AHQ-1-5, 7505               | R.DLGEELALKTELEDTLDSTAAQQELR.S                            | 3019.21860 | 3 | 2.71E-07 | 0.97   | 5.53    | -        | 2113.2   |
| AHQ-1-7, 7528               | R.DLGEELALKTELEDTLDSTAAQQELR.S                            | 3019.21860 | 3 | 4.46E-06 | 0.85   | 3.85    | -        | 950.2    |
| AHQ-1-3, 7154 - 7223        | R.DLGEELALKTELEDTLDSTAAQQELR.S                            | 3019.21860 | 3 | 1.67E-15 | 0.99   | 7.55    | -        | 3012.9   |
| AHQ-1-6, 7314               | R.DLGEELALKTELEDTLDSTAAQQELR.S                            | 3019.21860 | 3 | 1.46E-08 | 0.95   | 5.30    | -        | 1573.8   |
| AHQ-1-1, 7039               | R.DLGEELALKTELEDTLDSTAAQQELR.S                            | 3019.21860 | 3 | 3.89E-09 | 0.93   | 4.51    | -        | 1396.7   |
| AHQ-1-3, 7361               | R.DLGEELALKTELEDTLDSTAAQQELR.S                            | 3019.21860 | 3 | 1.29E-08 | 0.95   | 5.24    | -        | 1638.8   |
| AHQ-1-2, 3151               | R.ELEDATETADAMNR.E                                        | 1566.63006 | 2 | 2.81E-05 | 0.75   | 2.61    | -        | 786.1    |
| AHQ-1-3, 2871               | R.ELEDATETADAMNR.E                                        | 1566.63006 | 2 | 4.35E-08 | 0.87   | 3.82    | -        | 845.6    |
| AHQ-1-6, 2794 - 2806        | R.ELEDATETADAMNR.E                                        | 1566.63006 | 2 | 1.78E-04 | 0.88   | 3.88    | -        | 844.1    |
| AHQ-1-5, 2806               | R.ELEDATETADAMNR.E                                        | 1566.63006 | 2 | 5.54E-07 | 0.75   | 2.92    | -        | 809.8    |
| AHQ-1-2, 2333               | R.ELEDATETADAMNR.E                                        | 1566.63006 | 2 | 4.82E-05 | 0.68   | 2.85    | -        | 643.9    |
| AHQ-1-10, 2685              | R.ELEDATETADAMNR.E                                        | 1566.63006 | 2 | 2.26E-04 | 0.87   | 3.51    | -        | 863.0    |
| AHQ-1-4, 2895 - 2900        | R.ELEDATETADAMNR.E                                        | 1566.63006 | 2 | 4.49E-05 | 0.88   | 3.59    | -        | 1012.1   |
| AHQ-1-2, 2862               | R.ELEDATETADAMNR.E                                        | 1566.63006 | 2 | 1.57E-05 | 0.52   | 2.61    | -        | 306.6    |
| AHQ-1-1, 2936 - 2937        | R.ELEDATETADAMNR.E                                        | 1566.63006 | 2 | 3.31E-06 | 0.95   | 4.26    | -        | 1321.7   |
| AHQ-1-3, 2222               | R.ELEDATETADAMNR.E                                        | 1566.63006 | 2 | 1.51E-04 | 0.84   | 3.12    | -        | 814.8    |
| AHQ-1-9, 5834               | R.ELESQISELQEDLESER.A                                     | 2035.10956 | 2 | 9.59E-04 | 0.92   | 4.32    | -        | 772.7    |
| AHQ-1-3, 5901               | R.ELESQISELQEDLESER.A                                     | 2035.10956 | 2 | 2.23E-08 | 0.94   | 4.93    | -        | 904.5    |
| AHQ-1-3, 5835 - 5905        | R.ELESQISELQEDLESER.A                                     | 2035.10956 | 2 | 2.71E-06 | 0.97   | 5.93    | -        | 1426.7   |
| AHQ-1-2, 6141               | R.ELESQISELQEDLESER.A                                     | 2035.10956 | 2 | 2.68E-04 | 0.82   | 3.83    | -        | 682.9    |
| AHQ-1-3, 5470               | R.ELESQISELQEDLESER.A                                     | 2035.10956 | 2 | 1.10E-06 | 0.96   | 4.74    | -        | 1105.6   |
| AHQ-1-4, 5982 - 6051        | R.ELESQISELQEDLESER.A                                     | 2035.10956 | 2 | 2.43E-04 | 0.85   | 4.40    | -        | 822.4    |
| AHQ-1-4, 5484               | R.ELESQISELQEDLESER.A                                     | 2035.10956 | 2 | 1.20E-04 | 0.83   | 3.39    | -        | 897.4    |
| AHQ-1-7, 5986               | R.ELESQISELQEDLESER.A                                     | 2035.10956 | 2 | 1.30E-07 | 0.94   | 4.67    | -        | 888.4    |
| AHQ-1-2, 5999 - 6070        | R.ELESQISELQEDLESER.A                                     | 2035.10956 | 2 | 1.06E-11 | 0.94   | 4.90    | -        | 942.7    |
| AHQ-1-2, 6387               | R.ELESQISELQEDLESER.A                                     | 2035.10956 | 2 | 2.37E-07 | 0.93   | 3.99    | -        | 1007.0   |
| AHQ-1-2, 5659               | R.ELESQISELQEDLESER.A                                     | 2035.10956 | 2 | 7.85E-06 | 0.89   | 3.98    | -        | 669.2    |

|                        |                                |            |   |          |      |      |   |        |
|------------------------|--------------------------------|------------|---|----------|------|------|---|--------|
| AHQ-1-2, 6091          | R.ELESQISELQEDLESER.A          | 2035.10956 | 3 | 2.47E-06 | 0.98 | 6.22 | - | 2334.7 |
| AHQ-1-1, 5843 - 5907   | R.ELESQISELQEDLESER.A          | 2035.10956 | 2 | 2.70E-08 | 0.94 | 4.74 | - | 918.8  |
| AHQ-1-3, 2542          | R.EMEALEEDER.K                 | 1251.30306 | 2 | 6.75E-04 | 0.58 | 2.55 | - | 479.5  |
| AHQ-1-2, 2285          | R.EMEALEEDER.Q                 | 1379.47597 | 2 | 6.03E-05 | 0.93 | 3.50 | - | 1365.7 |
| AHQ-1-1, 2347          | R.EMEALEEDER.Q                 | 1379.47597 | 2 | 2.94E-04 | 0.84 | 2.80 | - | 1043.7 |
| AHQ-1-4, 2203          | R.EMEALEEDER.Q                 | 1379.47597 | 2 | 7.47E-07 | 0.90 | 3.21 | - | 1237.8 |
| AHQ-1-3, 2205          | R.EMEALEEDER.Q                 | 1379.47597 | 2 | 9.53E-05 | 0.86 | 2.82 | - | 1191.1 |
| AHQ-1-2, 4747          | K.EQADFAIALAK.A                | 1306.44632 | 1 | 1.74E-05 | 0.36 | 2.64 | - | 272.6  |
| AHQ-1-3, 4490          | K.EQADFAIALAK.A                | 1306.44632 | 2 | 4.53E-04 | 0.79 | 2.71 | - | 684.4  |
| AHQ-1-2, 4939          | K.EQADFAIALAK.A                | 1306.44632 | 2 | 3.46E-05 | 0.71 | 2.75 | - | 500.1  |
| AHQ-1-2, 4651          | K.EQADFAIALAK.A                | 1306.44632 | 1 | 6.54E-05 | 0.33 | 2.76 | - | 249.7  |
| AHQ-1-4, 2406          | R.EQLEEEEEAKHNLEK.Q            | 1855.93770 | 2 | 3.85E-07 | 0.89 | 4.23 | - | 669.4  |
| AHQ-1-6, 2324          | R.EQLEEEEEAKHNLEK.Q            | 1855.93770 | 2 | 6.33E-08 | 0.90 | 4.25 | - | 726.2  |
| AHQ-1-1, 2552          | R.EQLEEEEEAKHNLEK.Q            | 1855.93770 | 2 | 7.99E-07 | 0.91 | 4.41 | - | 790.9  |
| AHQ-1-2, 2350          | R.EQLEEEEEAKHNLEK.Q            | 1855.93770 | 2 | 6.78E-06 | 0.74 | 3.15 | - | 615.0  |
| AHQ-1-5, 2301          | R.EQLEEEEEAKHNLEK.Q            | 1855.93770 | 2 | 1.12E-04 | 0.83 | 3.81 | - | 546.4  |
| AHQ-1-3, 2401 - 2409   | R.EQLEEEEEAKHNLEK.Q            | 1855.93770 | 2 | 8.86E-05 | 0.90 | 4.13 | - | 833.0  |
| AHQ-1-2, 3595          | R.FLSNGHVTPGQQDK.D             | 1641.80946 | 2 | 7.36E-06 | 0.69 | 3.04 | - | 464.9  |
| AHQ-1-2, 5329 - 5397   | R.FLSNGHVTPGQQDKDMFQETMEAM.R.I | 3028.39040 | 3 | 3.93E-06 | 0.86 | 5.08 | - | 946.9  |
| AHQ-1-2, 6131 - 6210   | R.FLSNGHVTPGQQDKDMFQETMEAM.R.I | 3012.39100 | 3 | 1.76E-05 | 0.91 | 4.64 | - | 657.3  |
| AHQ-1-6, 5971          | R.FLSNGHVTPGQQDKDMFQETMEAM.R.I | 3012.39100 | 3 | 3.07E-05 | 0.91 | 4.76 | - | 653.1  |
| AHQ-1-2, 4438          | R.GDLPFVPPR.R                  | 1000.17581 | 2 | 2.38E-05 | 0.74 | 2.73 | - | 785.5  |
| AHQ-1-1, 3044          | K.HEAMITDLEER.L                | 1344.47646 | 2 | 1.71E-08 | 0.97 | 3.83 | - | 1614.0 |
| AHQ-1-2, 2991          | K.HEAMITDLEER.L                | 1344.47646 | 1 | 4.00E-05 | 0.68 | 2.93 | - | 652.2  |
| AHQ-1-3, 2430          | K.HEAMITDLEER.L                | 1360.47586 | 2 | 7.81E-04 | 0.96 | 3.79 | - | 1490.4 |
| AHQ-1-2, 2978          | K.HEAMITDLEER.L                | 1344.47646 | 2 | 1.28E-07 | 0.95 | 3.69 | - | 1120.6 |
| AHQ-1-6, 3434          | R.HEMPPHIYAITDAYR.S            | 1916.14944 | 3 | 2.15E-09 | 0.97 | 4.37 | - | 2369.9 |
| AHQ-1-6, 3151          | R.HEMPPHIYAITDAYR.S            | 1932.14884 | 3 | 3.46E-08 | 0.96 | 4.61 | - | 1785.4 |
| AHQ-1-5, 3163          | R.HEMPPHIYAITDAYR.S            | 1932.14884 | 2 | 8.71E-04 | 0.78 | 2.74 | - | 650.9  |
| AHQ-1-1, 3459          | R.HEMPPHIYAITDAYR.S            | 1932.14884 | 2 | 1.80E-04 | 0.94 | 3.55 | - | 1152.4 |
| AHQ-1-3, 3319          | R.HEMPPHIYAITDAYR.S            | 1932.14884 | 3 | 8.89E-09 | 0.97 | 5.01 | - | 1973.7 |
| AHQ-1-3, 3323          | R.HEMPPHIYAITDAYR.S            | 1932.14884 | 2 | 7.93E-06 | 0.85 | 3.15 | - | 692.8  |
| AHQ-1-2, 3423          | R.HEMPPHIYAITDAYR.S            | 1932.14884 | 2 | 3.51E-04 | 0.82 | 2.88 | - | 627.2  |
| AHQ-1-2, 3426 - 3437   | R.HEMPPHIYAITDAYR.S            | 1932.14884 | 3 | 1.43E-07 | 0.97 | 4.70 | - | 2429.2 |
| AHQ-1-2, 3843 - 3857   | R.HEMPPHIYAITDAYR.S            | 1916.14944 | 3 | 5.03E-07 | 0.97 | 4.21 | - | 2354.5 |
| AHQ-1-2, 3758 - 3829   | R.HEMPPHIYAITDAYR.S            | 1916.14944 | 2 | 7.08E-05 | 0.95 | 4.30 | - | 1002.5 |
| AHQ-1-7, 3178          | R.HEMPPHIYAITDAYR.S            | 1932.14884 | 2 | 7.44E-04 | 0.58 | 2.70 | - | 464.5  |
| AHQ-1-5, 3178          | R.HEMPPHIYAITDAYR.S            | 1932.14884 | 3 | 5.42E-06 | 0.92 | 4.14 | - | 1204.9 |
| AHQ-1-2, 3754          | R.HEMPPHIYAITDAYR.S            | 1916.14944 | 3 | 8.42E-10 | 0.97 | 4.25 | - | 2763.0 |
| AHQ-1-3, 3627          | R.HEMPPHIYAITDAYR.S            | 1916.14944 | 3 | 1.97E-09 | 0.96 | 4.07 | - | 2083.3 |
| AHQ-1-1, 3797          | R.HEMPPHIYAITDAYR.S            | 1916.14944 | 3 | 9.90E-07 | 0.94 | 3.72 | - | 1663.5 |
| AHQ-1-10, 3317         | R.HEMPPHIYAITDAYR.S            | 1916.14944 | 2 | 1.65E-06 | 0.55 | 2.98 | - | 320.5  |
| AHQ-1-2, 5023          | K.HSQAVEELAEQLEQTK.R           | 1840.96940 | 2 | 1.22E-11 | 0.98 | 5.77 | - | 1925.6 |
| AHQ-1-1, 4659          | K.HSQAVEELAEQLEQTK.R           | 1840.96940 | 3 | 3.21E-05 | 0.94 | 4.38 | - | 1475.7 |
| AHQ-1-3, 4597          | K.HSQAVEELAEQLEQTK.R           | 1840.96940 | 2 | 4.16E-14 | 0.98 | 6.28 | - | 2331.1 |
| AHQ-1-5, 4474 - 4481   | K.HSQAVEELAEQLEQTK.R           | 1840.96940 | 2 | 2.02E-06 | 0.99 | 6.24 | - | 2646.6 |
| AHQ-1-2, 4766          | K.HSQAVEELAEQLEQTK.R           | 1840.96940 | 3 | 4.57E-04 | 0.97 | 4.97 | - | 1984.9 |
| AHQ-1-2, 4758          | K.HSQAVEELAEQLEQTK.R           | 1840.96940 | 2 | 6.22E-07 | 0.98 | 4.94 | - | 2202.1 |
| AHQ-1-3, 4533 - 4609   | K.HSQAVEELAEQLEQTK.R           | 1840.96940 | 2 | 5.54E-05 | 0.98 | 5.67 | - | 2429.0 |
| AHQ-1-3, 4598 - 4611   | K.HSQAVEELAEQLEQTK.R           | 1840.96940 | 3 | 6.86E-07 | 0.96 | 5.38 | - | 1500.0 |
| AHQ-1-3, 4169 - 4237   | K.HSQAVEELAEQLEQTKR.V          | 1997.15575 | 3 | 2.21E-12 | 0.98 | 7.60 | - | 2155.4 |
| AHQ-1-2, 4321 - 4401   | K.HSQAVEELAEQLEQTKR.V          | 1997.15575 | 3 | 1.88E-11 | 0.98 | 7.03 | - | 2331.5 |
| AHQ-1-2, 4322 - 4327   | K.HSQAVEELAEQLEQTKR.V          | 1997.15575 | 2 | 4.00E-09 | 0.98 | 6.05 | - | 2421.6 |
| AHQ-1-3, 4183          | K.HSQAVEELAEQLEQTKR.V          | 1997.15575 | 2 | 9.11E-11 | 0.98 | 6.09 | - | 2449.5 |
| AHQ-1-3, 4485          | K.HSQAVEELAEQLEQTKR.V          | 1997.15575 | 3 | 3.77E-09 | 0.97 | 5.92 | - | 1618.2 |
| AHQ-1-5, 4071          | K.HSQAVEELAEQLEQTKR.V          | 1997.15575 | 2 | 3.70E-06 | 0.98 | 6.16 | - | 1986.1 |
| AHQ-1-6, 4023          | K.HSQAVEELAEQLEQTKR.V          | 1997.15575 | 3 | 2.56E-05 | 0.95 | 4.98 | - | 1279.7 |
| AHQ-1-2, 4415          | K.HSQAVEELAEQLEQTKR.V          | 1997.15575 | 2 | 1.04E-11 | 0.98 | 5.36 | - | 2020.9 |
| AHQ-1-1, 4241 - 4315   | K.HSQAVEELAEQLEQTKR.V          | 1997.15575 | 2 | 4.79E-09 | 0.98 | 5.81 | - | 2456.8 |
| AHQ-1-4, 4223          | K.HSQAVEELAEQLEQTKR.V          | 1997.15575 | 3 | 8.22E-09 | 0.97 | 5.42 | - | 1621.8 |
| AHQ-1-4, 4220 - 4228   | K.HSQAVEELAEQLEQTKR.V          | 1997.15575 | 2 | 4.36E-05 | 0.96 | 5.10 | - | 1134.2 |
| AHQ-1-5, 4061          | K.HSQAVEELAEQLEQTKR.V          | 1997.15575 | 3 | 5.83E-07 | 0.97 | 5.73 | - | 1383.0 |
| AHQ-1-1, 4311          | K.HSQAVEELAEQLEQTKR.V          | 1997.15575 | 3 | 5.30E-09 | 0.97 | 5.48 | - | 1485.1 |
| AHQ-1-2, 4069 - 4147   | R.IAEFTTNLTETEEEK.S            | 1654.75371 | 2 | 2.01E-10 | 0.98 | 5.04 | - | 2370.2 |
| AHQ-1-2, 4005 - 4074   | R.IAEFTTNLTETEEEK.S            | 1654.75371 | 2 | 1.16E-10 | 0.95 | 4.53 | - | 1554.5 |
| AHQ-1-3, 3783 - 3857   | R.IAEFTTNLTETEEEK.S            | 1654.75371 | 2 | 1.67E-05 | 0.96 | 4.57 | - | 1715.3 |
| AHQ-1-4, 4068          | R.IAEFTTNLTETEEEK.S            | 1654.75371 | 2 | 2.23E-06 | 0.97 | 5.04 | - | 1940.1 |
| AHQ-1-4, 3958          | R.IAEFTTNLTETEEEK.S            | 1654.75371 | 2 | 6.47E-07 | 0.86 | 3.26 | - | 1202.9 |
| AHQ-1-3, 3927 - 3999   | R.IAEFTTNLTETEEEK.S            | 1654.75371 | 2 | 1.38E-09 | 0.96 | 4.30 | - | 1696.0 |
| AHQ-1-6, 3608 - 3658   | R.IAEFTTNLTETEEEK.S            | 1654.75371 | 2 | 3.02E-04 | 0.95 | 3.94 | - | 1527.3 |
| AHQ-1-1, 4065          | R.IAEFTTNLTETEEEK.S            | 1654.75371 | 2 | 9.21E-04 | 0.83 | 3.09 | - | 992.3  |
| AHQ-1-2, 3918 - 3989   | R.IAEFTTNLTETEEEK.S            | 1654.75371 | 2 | 5.70E-09 | 0.97 | 4.96 | - | 1684.4 |
| AHQ-1-7, 3752          | R.IAEFTTNLTETEEEK.S            | 1654.75371 | 2 | 4.15E-05 | 0.95 | 3.86 | - | 1423.5 |
| AHQ-1-1, 3971 - 3993   | R.IAEFTTNLTETEEEK.S            | 1654.75371 | 2 | 1.57E-07 | 0.89 | 3.34 | - | 1312.7 |
| AHQ-1-4, 3806 - 3884   | R.IAEFTTNLTETEEEK.S            | 1654.75371 | 2 | 1.24E-06 | 0.96 | 4.31 | - | 1745.8 |
| AHQ-1-5, 3694          | R.IAEFTTNLTETEEEK.S            | 1654.75371 | 2 | 5.20E-08 | 0.95 | 4.53 | - | 1224.5 |
| AHQ-1-1, 3843 - 3907   | R.IAEFTTNLTETEEEK.S            | 1654.75371 | 2 | 2.07E-10 | 0.97 | 4.69 | - | 1976.4 |
| AHQ-1-2, 4222          | R.IAEFTTNLTETEEEK.S            | 1654.75371 | 2 | 4.65E-06 | 0.97 | 4.30 | - | 2616.6 |
| AHQ-1-3, 4013          | R.IAEFTTNLTETEEEK.S            | 1654.75371 | 2 | 1.72E-06 | 0.95 | 3.81 | - | 1880.5 |
| AHQ-1-1, 5321          | R.IAQLEEELEEEQGNTLINDR.L       | 2473.58969 | 3 | 5.73E-06 | 0.78 | 3.45 | - | 850.4  |
| AHQ-1-1, 5603          | R.IAQLEEELEEEQGNTLINDRLK.K     | 2714.92085 | 3 | 8.77E-09 | 0.85 | 3.84 | - | 868.1  |
| AHQ-1-1, 5608          | R.IAQLEEELEEEQGNTLINDRLK.K     | 2714.92085 | 2 | 3.83E-06 | 0.92 | 4.53 | - | 932.9  |
| AHQ-1-4, 3444 - 3460   | K.IAQLEEQDNETK.E               | 1531.64695 | 2 | 2.70E-05 | 0.97 | 4.82 | - | 1589.5 |
| AHQ-1-10, 3128 - 3143  | K.IAQLEEQDNETK.E               | 1531.64695 | 2 | 4.53E-06 | 0.96 | 4.13 | - | 1501.4 |
| AHQ-1-5, 3325 - 3395   | K.IAQLEEQDNETK.E               | 1531.64695 | 2 | 2.01E-04 | 0.91 | 3.14 | - | 1500.9 |
| AHQ-1-1, 3888          | K.IAQLEEQDNETK.E               | 1531.64695 | 2 | 3.11E-06 | 0.86 | 3.39 | - | 880.7  |
| AHQ-1-2, 3522 - 3594   | K.IAQLEEQDNETK.E               | 1531.64695 | 2 | 8.60E-06 | 0.96 | 4.24 | - | 1491.8 |
| AHQ-1-6, 3294 - 3295   | K.IAQLEEQDNETK.E               | 1531.64695 | 2 | 1.13E-08 | 0.98 | 5.33 | - | 1854.4 |
| AHQ-1-1, 3253          | K.IAQLEEQDNETK.E               | 1531.64695 | 2 | 4.88E-09 | 0.96 | 4.45 | - | 1752.8 |
| AHQ-1-2, 3246          | K.IAQLEEQDNETK.E               | 1531.64695 | 2 | 3.29E-04 | 0.92 | 3.30 | - | 1250.9 |
| AHQ-1-3, 3539 - 3587   | K.IAQLEEQDNETK.E               | 1531.64695 | 2 | 3.45E-04 | 0.91 | 3.23 | - | 1260.3 |
| AHQ-1-3, 3623          | K.IAQLEEQDNETK.E               | 1531.64695 | 2 | 6.83E-10 | 0.96 | 4.61 | - | 1445.8 |
| AHQ-1-8, 3198 - 3204   | K.IAQLEEQDNETK.E               | 1531.64695 | 2 | 2.63E-06 | 0.89 | 3.33 | - | 1175.3 |
| AHQ-1-3, 3130 - 3207   | K.IAQLEEQDNETK.E               | 1531.64695 | 2 | 3.50E-08 | 0.96 | 3.99 | - | 1671.7 |
| AHQ-1-11, 3198 - 3266  | K.IAQLEEQDNETK.E               | 1531.64695 | 2 | 5.91E-06 | 0.96 | 4.68 | - | 1470.3 |
| AHQ-1-2, 3962 - 3997   | K.IAQLEEQDNETK.E               | 1531.64695 | 2 | 5.36E-08 | 0.84 | 3.22 | - | 559.7  |
| AHQ-1-7, 3322          | K.IAQLEEQDNETK.E               | 1531.64695 | 2 | 6.23E-05 | 0.68 | 2.54 | - | 782.2  |
| AHQ-1-1, 3463 - 3465   | K.IAQLEEQDNETK.E               | 1531.64695 | 2 | 3.90E-10 | 0.97 | 4.96 | - | 1899.9 |
| AHQ-1-3, 3401 - 3437   | K.IAQLEEQDNETK.E               | 1531.64695 | 2 | 1.01E-06 | 0.96 | 4.47 | - | 1355.3 |
| AHQ-1-9, 3214          | K.IAQLEEQDNETK.E               | 1531.64695 | 2 | 4.28E-06 | 0.97 | 5.12 | - | 1554.2 |
| AHQ-1-4, 3224          | K.IAQLEEQDNETK.E               | 1531.64695 | 2 | 1.59E-04 | 0.84 | 3.10 | - | 913.3  |
| AHQ-1-2, 3666 - 3746   | K.IAQLEEQDNETK.E               | 1531.64695 | 2 | 1.46E-07 | 0.97 | 5.42 | - | 1505.1 |
| AHQ-1-2, 6781 - 6845   | R.IIGLDQVAGMSETALPGAFK.T       | 2019.35101 | 2 | 1.09E-05 | 0.96 | 4.60 | - | 1462.8 |
| AHQ-1-2, 6922          | R.IIGLDQVAGMSETALPGAFK.T       | 2019.35101 | 2 | 4.86E-04 | 0.95 | 4.61 | - | 1281.0 |
| AHQ-1-13 - 6453 - 6455 | R.IIGLDQVAGMSETALPGAFK.T       | 2019.35101 | 2 | 2.81E-04 | 0.95 | 4.98 | - | 968.3  |
| AHQ-1-11, 5930 - 5931  | R.IIGLDQVAGMSETALPGAFK.T       | 2019.35101 | 2 | 8.77E-05 | 0.96 | 4.97 | - | 1159.9 |
| AHQ-1-14 - 6220 - 6223 | R.IIGLDQVAGMSETALPGAFK.T       | 2019.35101 | 2 | 1.06E-06 | 0.98 | 5.78 | - | 1513.9 |
| AHQ-1-6, 6582 - 6610   | R.IIGLDQVAGMSEIALPGAFK.I       | 2019.35101 | 2 | 2.58E-07 | 0.97 | 5.91 | - | 1456.4 |



|                        |                              |            |   |          |      |      |   |        |
|------------------------|------------------------------|------------|---|----------|------|------|---|--------|
| AHQ-1-6, 4008          | K.KQELEEICHLEAR.V            | 1771.93036 | 2 | 1.07E-05 | 0.97 | 5.33 | - | 1798.1 |
| AHQ-1-5, 4054          | K.KQELEEICHLEAR.V            | 1771.93036 | 2 | 6.10E-05 | 0.95 | 4.95 | - | 1325.2 |
| AHQ-1-4, 4188          | K.KQELEEICHLEAR.V            | 1771.93036 | 2 | 1.69E-06 | 0.95 | 4.65 | - | 1414.2 |
| AHQ-1-1, 4252          | K.KQELEEICHLEAR.V            | 1771.93036 | 3 | 4.38E-06 | 0.95 | 5.10 | - | 1388.5 |
| AHQ-1-5, 2757          | K.KVEAQLQELQVK.F             | 1413.64470 | 2 | 1.42E-05 | 0.97 | 5.12 | - | 1806.0 |
| AHQ-1-3, 2925 - 2998   | K.KVEAQLQELQVK.F             | 1413.64470 | 2 | 2.65E-06 | 0.95 | 4.76 | - | 1161.0 |
| AHQ-1-4, 2944          | K.KVEAQLQELQVK.F             | 1413.64470 | 1 | 4.32E-04 | 0.36 | 2.52 | - | 394.3  |
| AHQ-1-1, 3091          | K.KVEAQLQELQVK.F             | 1413.64470 | 2 | 5.98E-06 | 0.95 | 4.15 | - | 1460.5 |
| AHQ-1-4, 2930          | K.KVEAQLQELQVK.F             | 1413.64470 | 2 | 1.67E-06 | 0.96 | 4.42 | - | 1828.8 |
| AHQ-1-2, 3055          | K.KVEAQLQELQVK.F             | 1413.64470 | 1 | 2.08E-07 | 0.53 | 2.96 | - | 396.5  |
| AHQ-1-3, 2938          | K.KVEAQLQELQVK.F             | 1413.64470 | 3 | 4.05E-07 | 0.93 | 4.88 | - | 1134.2 |
| AHQ-1-2, 3051          | K.KVEAQLQELQVK.F             | 1413.64470 | 3 | 1.04E-06 | 0.91 | 3.91 | - | 1390.0 |
| AHQ-1-6, 2810          | K.KVEAQLQELQVK.F             | 1413.64470 | 2 | 4.52E-07 | 0.95 | 4.19 | - | 1459.2 |
| AHQ-1-2, 3045          | K.KVEAQLQELQVK.F             | 1413.64470 | 1 | 2.31E-04 | 0.19 | 2.40 | - | 314.9  |
| AHQ-1-2, 3977          | K.KVIQYAYVASSHK.S            | 1607.87775 | 2 | 1.48E-05 | 0.83 | 2.71 | - | 1008.2 |
| AHQ-1-1, 3904 - 3984   | K.LEEEQIILEDQNCCK.L          | 1762.91700 | 2 | 3.46E-09 | 0.97 | 5.44 | - | 1164.2 |
| AHQ-1-2, 4085 - 4109   | K.LEEEQIILEDQNCCK.L          | 1762.91700 | 2 | 1.88E-09 | 0.98 | 5.93 | - | 1595.9 |
| AHQ-1-4, 4014          | K.LEEEQIILEDQNCCK.L          | 1762.91700 | 2 | 6.70E-09 | 0.96 | 5.02 | - | 1304.7 |
| AHQ-1-2, 3987          | K.LEEEQIILEDQNCCK.L          | 1762.91700 | 2 | 1.57E-04 | 0.80 | 3.57 | - | 274.4  |
| AHQ-1-4, 3922          | K.LEEEQIILEDQNCCK.L          | 1762.91700 | 2 | 1.58E-08 | 0.95 | 4.11 | - | 1279.2 |
| AHQ-1-3, 3953 - 4030   | K.LEEEQIILEDQNCCK.L          | 1762.91700 | 2 | 5.18E-09 | 0.96 | 4.85 | - | 1247.0 |
| AHQ-1-3, 7181 - 7182   | K.LEGDSTDLSDQIAELQAQIAELK.M  | 2488.68740 | 2 | 3.36E-11 | 0.96 | 6.09 | - | 769.8  |
| AHQ-1-2, 7325          | K.LEGDSTDLSDQIAELQAQIAELK.M  | 2488.68740 | 3 | 2.79E-07 | 0.96 | 5.82 | - | 1372.2 |
| AHQ-1-1, 6944          | K.LEGDSTDLSDQIAELQAQIAELK.M  | 2488.68740 | 3 | 1.59E-05 | 0.91 | 4.63 | - | 941.3  |
| AHQ-1-2, 3662          | R.LEVNLQAMK.A                | 1046.26630 | 2 | 7.45E-05 | 0.91 | 3.87 | - | 788.0  |
| AHQ-1-5, 3411          | R.LEVNLQAMK.A                | 1046.26630 | 2 | 7.03E-07 | 0.77 | 2.72 | - | 500.0  |
| AHQ-1-1, 3664 - 3715   | R.LEVNLQAMK.A                | 1046.26630 | 2 | 3.51E-04 | 0.76 | 3.01 | - | 595.7  |
| AHQ-1-3, 3555 - 3571   | R.LEVNLQAMK.A                | 1046.26630 | 2 | 6.87E-05 | 0.85 | 3.54 | - | 581.6  |
| AHQ-1-2, 2677          | R.LEVNLQAMK.A                | 1062.26570 | 2 | 1.55E-05 | 0.88 | 3.10 | - | 771.7  |
| AHQ-1-6, 3402          | R.LEVNLQAMK.A                | 1046.26630 | 2 | 1.47E-05 | 0.79 | 3.10 | - | 610.9  |
| AHQ-1-2, 3634          | K.LKDVLLQVDDER.R             | 1443.62767 | 2 | 8.21E-11 | 0.96 | 4.58 | - | 1573.2 |
| AHQ-1-3, 3507 - 3579   | K.LKDVLLQVDDER.R             | 1443.62767 | 2 | 8.89E-08 | 0.96 | 4.00 | - | 1883.6 |
| AHQ-1-1, 3217          | K.LKDVLLQVDDER.N             | 1599.81402 | 2 | 3.29E-04 | 0.81 | 3.29 | - | 939.3  |
| AHQ-1-2, 3169          | K.LKDVLLQVDDER.N             | 1599.81402 | 3 | 3.68E-04 | 0.87 | 3.02 | - | 1286.6 |
| AHQ-1-5, 2878          | K.LKDVLLQVDDER.N             | 1599.81402 | 2 | 7.16E-05 | 0.88 | 3.43 | - | 1088.0 |
| AHQ-1-3, 3061          | K.LKDVLLQVDDER.N             | 1599.81402 | 2 | 1.39E-05 | 0.87 | 3.88 | - | 909.1  |
| AHQ-1-2, 2966          | K.LKNKHEAMITLLEER.L          | 1828.08363 | 2 | 1.20E-07 | 0.93 | 3.59 | - | 1051.6 |
| AHQ-1-2, 2065          | K.LKQVDEKNSFR.E              | 1493.64677 | 2 | 4.50E-05 | 0.63 | 2.77 | - | 532.3  |
| AHQ-1-2, 7415 - 7481   | K.LLQEQEQLOAETELCAEAEELR.A   | 2503.72536 | 2 | 3.25E-06 | 0.86 | 3.13 | - | 886.9  |
| AHQ-1-2, 7543          | K.LLQEQEQLOAETELCAEAEELR.A   | 2503.72536 | 2 | 2.82E-04 | 0.84 | 2.93 | - | 881.1  |
| AHQ-1-2, 7469 - 7537   | K.LLQEQEQLOAETELCAEAEELR.A   | 2503.72536 | 3 | 1.19E-05 | 0.93 | 4.96 | - | 1240.8 |
| AHQ-1-5, 6205          | R.LQEQELDDLLVDLDHQR.Q        | 1951.12699 | 3 | 3.52E-04 | 0.87 | 4.10 | - | 644.4  |
| AHQ-1-1, 6160 - 6164   | R.LQEQELDDLLVDLDHQR.Q        | 1951.12699 | 3 | 1.70E-05 | 0.92 | 4.76 | - | 957.1  |
| AHQ-1-2, 6503          | R.LQEQELDDLLVDLDHQR.Q        | 1951.12699 | 3 | 4.62E-06 | 0.74 | 3.23 | - | 735.6  |
| AHQ-1-1, 6159          | R.LQEQELDDLLVDLDHQR.Q        | 1951.12699 | 2 | 2.37E-06 | 0.96 | 4.80 | - | 1443.5 |
| AHQ-1-5, 6209 - 6210   | R.LQEQELDDLLVDLDHQR.Q        | 1951.12699 | 2 | 1.38E-09 | 0.98 | 5.89 | - | 1977.9 |
| AHQ-1-2, 5875          | R.LQEQELDDLLVDLDHQR.Q        | 1951.12699 | 3 | 4.68E-06 | 0.92 | 4.57 | - | 895.3  |
| AHQ-1-4, 6255          | R.LQEQELDDLLVDLDHQR.Q        | 1951.12699 | 2 | 5.90E-08 | 0.96 | 5.03 | - | 1458.8 |
| AHQ-1-7, 6233          | R.LQEQELDDLLVDLDHQR.Q        | 1951.12699 | 2 | 5.68E-09 | 0.96 | 4.38 | - | 1608.4 |
| AHQ-1-3, 5031 - 5035   | R.LQEQELDDLLVDLDHQR.Q        | 1951.12699 | 2 | 1.74E-12 | 0.96 | 4.62 | - | 1565.9 |
| AHQ-1-6, 6106          | R.LQEQELDDLLVDLDHQR.Q        | 1951.12699 | 3 | 7.87E-05 | 0.80 | 3.51 | - | 752.8  |
| AHQ-1-4, 6258          | R.LQEQELDDLLVDLDHQR.Q        | 1951.12699 | 3 | 3.82E-05 | 0.76 | 3.45 | - | 468.7  |
| AHQ-1-3, 6141          | R.LQEQELDDLLVDLDHQR.Q        | 1951.12699 | 2 | 4.33E-11 | 0.96 | 4.81 | - | 1552.6 |
| AHQ-1-2, 5859          | R.LQEQELDDLLVDLDHQR.Q        | 1951.12699 | 2 | 3.16E-06 | 0.90 | 4.02 | - | 1061.1 |
| AHQ-1-2, 6495 - 6570   | R.LQEQELDDLLVDLDHQR.Q        | 1951.12699 | 2 | 1.92E-09 | 0.95 | 4.62 | - | 1260.3 |
| AHQ-1-2, 6313 - 6385   | R.LQEQELDDLLVDLDHQR.Q        | 1951.12699 | 2 | 2.23E-11 | 0.97 | 5.61 | - | 1403.8 |
| AHQ-1-6, 6110 - 6114   | R.LQEQELDDLLVDLDHQR.Q        | 1951.12699 | 2 | 5.91E-11 | 0.97 | 5.44 | - | 1616.9 |
| AHQ-1-1, 5728          | R.LQEQELDDLLVDLDHQR.Q        | 1951.12699 | 3 | 1.41E-06 | 0.92 | 4.58 | - | 860.5  |
| AHQ-1-3, 6123          | K.LQVELDNVTGLLSQSDSK.S       | 1947.13342 | 2 | 5.37E-12 | 0.97 | 5.72 | - | 1297.2 |
| AHQ-1-4, 5624          | K.LQVELDNVTGLLSQSDSK.S       | 1947.13342 | 2 | 1.65E-07 | 0.96 | 5.22 | - | 1207.1 |
| AHQ-1-3, 5459 - 5517   | K.LQVELDNVTGLLSQSDSK.S       | 1947.13342 | 2 | 4.19E-08 | 0.94 | 4.57 | - | 1046.8 |
| AHQ-1-2, 5671          | K.LQVELDNVTGLLSQSDSK.S       | 1947.13342 | 2 | 1.65E-06 | 0.95 | 4.65 | - | 1009.0 |
| AHQ-1-4, 5951 - 5983   | K.LQVELDNVTGLLSQSDSK.S       | 1947.13342 | 2 | 3.37E-07 | 0.97 | 5.37 | - | 1394.9 |
| AHQ-1-4, 6099          | K.LQVELDNVTGLLSQSDSK.S       | 1947.13342 | 2 | 1.27E-07 | 0.88 | 4.00 | - | 686.1  |
| AHQ-1-3, 5838 - 5909   | K.LQVELDNVTGLLSQSDSK.S       | 1947.13342 | 2 | 1.00E-30 | 0.98 | 6.57 | - | 1394.4 |
| AHQ-1-2, 6066 - 6133   | K.LQVELDNVTGLLSQSDSK.S       | 1947.13342 | 2 | 2.93E-10 | 0.98 | 5.90 | - | 1541.2 |
| AHQ-1-1, 5532          | K.LQVELDNVTGLLSQSDSK.S       | 1947.13342 | 2 | 2.67E-07 | 0.95 | 4.35 | - | 1298.6 |
| AHQ-1-1, 5824 - 5887   | K.LQVELDNVTGLLSQSDSK.S       | 1947.13342 | 2 | 1.92E-06 | 0.98 | 5.69 | - | 1878.7 |
| AHQ-1-3, 5945 - 6023   | K.LQVELDNVTGLLSQSDSK.S       | 1947.13342 | 2 | 3.95E-08 | 0.98 | 6.50 | - | 1244.5 |
| AHQ-1-2, 6206 - 6246   | K.LQVELDNVTGLLSQSDSK.S       | 1947.13342 | 2 | 2.54E-10 | 0.97 | 5.92 | - | 1424.7 |
| AHQ-1-5, 6039          | K.LQVELDNVTGLLSQSDSK.S       | 1947.13342 | 2 | 5.14E-05 | 0.87 | 3.26 | - | 949.8  |
| AHQ-1-2, 5983 - 6053   | K.LQVELDNVTGLLSQSDSK.S       | 1947.13342 | 2 | 3.16E-07 | 0.98 | 6.20 | - | 1632.1 |
| AHQ-1-5, 5914 - 5967   | K.LQVELDNVTGLLSQSDSK.S       | 1947.13342 | 2 | 6.62E-12 | 0.98 | 6.29 | - | 1748.3 |
| AHQ-1-6, 5834          | K.LQVELDNVTGLLSQSDSK.S       | 1947.13342 | 2 | 1.58E-05 | 0.95 | 4.46 | - | 1273.6 |
| AHQ-1-3, 6215          | K.LQVELDNVTGLLSQSDSK.S       | 1947.13342 | 2 | 2.50E-12 | 0.97 | 5.77 | - | 1421.3 |
| AHQ-1-1, 3651          | R.LTEM*ETLQSQLM*AEK.L        | 1785.03091 | 2 | 1.38E-04 | 0.78 | 3.07 | - | 881.4  |
| AHQ-1-3, 5201          | R.LTEM*ETLQSQLM*AEK.L        | 1753.03211 | 2 | 8.08E-04 | 0.61 | 2.85 | - | 669.5  |
| AHQ-1-6, 5066          | R.LTEM*ETLQSQLM*AEK.L        | 1753.03211 | 2 | 2.78E-05 | 0.69 | 3.00 | - | 770.5  |
| AHQ-1-3, 4074          | R.LTEM*ETLQSQLM*AEK.L        | 1769.03151 | 2 | 3.27E-06 | 0.97 | 4.31 | - | 2310.2 |
| AHQ-1-2, 5322 - 5331   | R.LTEM*ETLQSQLM*AEK.L        | 1769.03151 | 2 | 6.94E-04 | 0.57 | 3.43 | - | 684.7  |
| AHQ-1-2, 4757          | R.LTEM*ETLQSQLM*AEK.L        | 1769.03151 | 2 | 2.02E-06 | 0.95 | 4.73 | - | 1047.4 |
| AHQ-1-3, 3566 - 3637   | R.LTEM*ETLQSQLM*AEK.L        | 1785.03091 | 2 | 1.20E-06 | 0.95 | 4.09 | - | 1273.8 |
| AHQ-1-2, 5381          | R.LTEM*ETLQSQLM*AEK.L        | 1753.03211 | 2 | 6.78E-05 | 0.97 | 4.73 | - | 1639.1 |
| AHQ-1-2, 4225 - 4299   | R.LTEM*ETLQSQLM*AEK.L        | 1769.03151 | 2 | 2.93E-07 | 0.98 | 5.09 | - | 2313.5 |
| AHQ-1-3, 4617 - 4694   | R.LTEM*ETLQSQLM*AEK.L        | 1769.03151 | 2 | 1.84E-06 | 0.94 | 4.14 | - | 1241.5 |
| AHQ-1-4, 4679          | R.LTEM*ETLQSQLM*AEK.L        | 1769.03151 | 2 | 1.45E-05 | 0.87 | 3.72 | - | 883.8  |
| AHQ-1-5, 5137 - 5143   | R.LTEM*ETLQSQLM*AEK.L        | 1753.03211 | 2 | 1.53E-06 | 0.95 | 4.51 | - | 1417.4 |
| AHQ-1-2, 4850 - 4923   | R.LTEM*ETLQSQLM*AEK.L        | 1769.03151 | 2 | 3.08E-06 | 0.76 | 3.52 | - | 651.4  |
| AHQ-1-2, 3693 - 3774   | R.LTEM*ETLQSQLM*AEK.L        | 1785.03091 | 2 | 7.57E-06 | 0.96 | 4.77 | - | 1179.7 |
| AHQ-1-1, 6796          | K.LTKDFSALESQLODQTELLQEENR.Q | 2837.04608 | 3 | 3.09E-06 | 0.82 | 3.73 | - | 950.8  |
| AHQ-1-2, 6857          | K.LTKDFSALESQLODQTELLQEENR.Q | 2837.04608 | 3 | 1.35E-07 | 0.94 | 5.12 | - | 1454.9 |
| AHQ-1-2, 4110          | K.MEDSVGCLETAEEVK.R          | 1698.85159 | 2 | 3.07E-06 | 0.93 | 3.82 | - | 919.0  |
| AHQ-1-4, 4026          | K.MEDSVGCLETAEEVK.R          | 1698.85159 | 2 | 3.17E-05 | 0.90 | 3.79 | - | 763.5  |
| AHQ-1-3, 3981 - 3985   | K.MEDSVGCLETAEEVK.R          | 1698.85159 | 2 | 5.03E-07 | 0.92 | 4.65 | - | 654.8  |
| AHQ-1-2, 3713          | K.MEDSVGCLETAEEVK.R          | 1855.03794 | 3 | 2.05E-05 | 0.79 | 3.52 | - | 818.9  |
| AHQ-1-3, 3595          | K.MEDSVGCLETAEEVK.R          | 1855.03794 | 3 | 6.84E-07 | 0.77 | 3.19 | - | 705.3  |
| AHQ-1-1, 3345          | K.MEDSVGCLETAEEVK.R          | 1871.03734 | 2 | 4.14E-05 | 0.81 | 3.16 | - | 494.4  |
| AHQ-1-2, 3709          | K.MEDSVGCLETAEEVK.R          | 1855.03794 | 2 | 3.66E-04 | 0.76 | 3.43 | - | 412.5  |
| AHQ-1-4, 3620          | K.MEDSVGCLETAEEVK.R          | 1855.03794 | 2 | 1.85E-06 | 0.77 | 3.25 | - | 511.7  |
| AHQ-1-3, 3529 - 3603   | K.MEDSVGCLETAEEVK.R          | 1855.03794 | 2 | 6.47E-06 | 0.73 | 3.12 | - | 408.8  |
| AHQ-1-2, 5761 - 5829   | K.MQNNIQLEEQLEEEESAR.Q       | 2334.46063 | 3 | 9.56E-08 | 0.82 | 3.79 | - | 1022.8 |
| AHQ-1-7, 5328 - 5341   | K.NFINNPLAQADWAAK.K          | 1673.85315 | 2 | 2.25E-10 | 0.95 | 4.67 | - | 1142.1 |
| AHQ-1-9, 5187          | K.NFINNPLAQADWAAK.K          | 1673.85315 | 2 | 1.28E-06 | 0.93 | 4.00 | - | 882.4  |
| AHQ-1-2, 6125          | K.NFINNPLAQADWAAK.K          | 1673.85315 | 2 | 3.43E-09 | 0.91 | 3.89 | - | 1040.2 |
| AHQ-1-14 - 5203 - 5214 | K.NFINNPLAQADWAAK.K          | 1673.85315 | 2 | 2.18E-09 | 0.96 | 4.86 | - | 1137.7 |
| AHQ-1-3, 5977          | K.NFINNPLAQADWAAK.K          | 1673.85315 | 2 | 1.23E-08 | 0.92 | 4.15 | - | 756.0  |
| AHQ-1-2, 5669          | K.NFINNPLAQADWAAK.K          | 1673.85315 | 2 | 2.77E-08 | 0.88 | 3.74 | - | 722.2  |

|                        |                               |            |   |          |      |      |   |        |
|------------------------|-------------------------------|------------|---|----------|------|------|---|--------|
| AHQ-1-13 - 5279 - 5347 | K.NFINNPLAQADWAAK.K           | 1673.85315 | 2 | 8.36E-07 | 0.97 | 5.77 | - | 1091.2 |
| AHQ-1-3, 5362 - 5386   | K.NFINNPLAQADWAAK.K           | 1673.85315 | 2 | 8.39E-04 | 0.45 | 2.66 | - | 406.7  |
| AHQ-1-13, 5033         | K.NFINNPLAQADWAAK.K           | 1673.85315 | 2 | 1.19E-09 | 0.96 | 5.04 | - | 1152.0 |
| AHQ-1-2, 5463 - 5533   | K.NFINNPLAQADWAAK.K           | 1673.85315 | 2 | 4.83E-11 | 0.96 | 5.32 | - | 1227.2 |
| AHQ-1-2, 5899          | K.NFINNPLAQADWAAK.K           | 1673.85315 | 2 | 1.50E-04 | 0.93 | 3.92 | - | 1007.9 |
| AHQ-1-1, 5911          | K.NFINNPLAQADWAAK.K           | 1673.85315 | 2 | 2.00E-07 | 0.89 | 3.25 | - | 883.2  |
| AHQ-1-1, 5443 - 5452   | K.NFINNPLAQADWAAK.K           | 1673.85315 | 2 | 2.24E-11 | 0.96 | 4.88 | - | 1081.3 |
| AHQ-1-6, 5279 - 5283   | K.NFINNPLAQADWAAK.K           | 1673.85315 | 2 | 5.99E-06 | 0.96 | 5.59 | - | 975.0  |
| AHQ-1-10, 4725         | K.NFINNPLAQADWAAK.K           | 1673.85315 | 2 | 2.49E-07 | 0.92 | 4.07 | - | 960.6  |
| AHQ-1-4, 5470          | K.NFINNPLAQADWAAK.K           | 1673.85315 | 2 | 2.65E-05 | 0.93 | 4.25 | - | 965.2  |
| AHQ-1-5, 5373          | K.NFINNPLAQADWAAK.K           | 1673.85315 | 2 | 2.69E-06 | 0.95 | 4.82 | - | 1053.1 |
| AHQ-1-11, 4872 - 4882  | K.NFINNPLAQADWAAK.K           | 1673.85315 | 2 | 3.54E-07 | 0.95 | 4.95 | - | 867.2  |
| AHQ-1-2, 3155          | K.NKHEAMITDLEER.L             | 1586.75247 | 2 | 1.19E-08 | 0.89 | 3.61 | - | 995.1  |
| AHQ-1-3, 2199          | K.NKHEAMITDLEER.L             | 1602.75187 | 3 | 5.97E-06 | 0.94 | 3.79 | - | 1813.9 |
| AHQ-1-3, 2541          | K.NKHEAMITDLEER.L             | 1586.75247 | 2 | 1.10E-08 | 0.94 | 3.63 | - | 1534.3 |
| AHQ-1-2, 2637          | K.NKHEAMITDLEER.L             | 1586.75247 | 2 | 9.74E-10 | 0.93 | 3.78 | - | 1211.1 |
| AHQ-1-4, 2554          | K.NKHEAMITDLEER.L             | 1586.75247 | 2 | 1.16E-07 | 0.92 | 3.50 | - | 1135.1 |
| AHQ-1-11, 5258         | K.NLPYSEEVIMYK.G              | 1728.98720 | 2 | 1.09E-04 | 0.81 | 3.47 | - | 402.1  |
| AHQ-1-5, 5823 - 5841   | K.NLPYSEEVIMYK.G              | 1728.98720 | 2 | 6.53E-04 | 0.91 | 3.09 | - | 867.9  |
| AHQ-1-12, 5453         | K.NLPYSEEVIMYK.G              | 1728.98720 | 2 | 2.31E-04 | 0.91 | 3.90 | - | 595.7  |
| AHQ-1-3, 5847          | K.NLPYSEEVIMYK.G              | 1728.98720 | 2 | 1.71E-05 | 0.84 | 3.48 | - | 553.6  |
| AHQ-1-9, 5634 - 5643   | K.NLPYSEEVIMYK.G              | 1728.98720 | 2 | 2.49E-04 | 0.76 | 3.15 | - | 513.1  |
| AHQ-1-3, 5225          | K.NLPYSEEVIMYK.G              | 1744.98660 | 2 | 1.49E-04 | 0.92 | 3.66 | - | 882.2  |
| AHQ-1-13, 5341 - 5400  | K.NLPYSEEVIMYK.G              | 1728.98720 | 2 | 3.54E-04 | 0.86 | 3.41 | - | 623.5  |
| AHQ-1-13 - 5739 - 5741 | K.NLPYSEEVIMYK.G              | 1728.98720 | 2 | 8.92E-07 | 0.94 | 4.12 | - | 871.4  |
| AHQ-1-6, 5143          | K.NLPYSEEVIMYK.G              | 1744.98660 | 2 | 2.22E-04 | 0.93 | 3.56 | - | 871.8  |
| AHQ-1-4, 5302          | K.NLPYSEEVIMYK.G              | 1744.98660 | 2 | 1.62E-07 | 0.91 | 4.08 | - | 619.3  |
| AHQ-1-2, 6009 - 6079   | K.NLPYSEEVIMYK.G              | 1728.98720 | 2 | 4.68E-06 | 0.94 | 4.04 | - | 912.3  |
| AHQ-1-2, 6211          | K.NLPYSEEVIMYK.G              | 1728.98720 | 2 | 2.32E-04 | 0.83 | 3.02 | - | 656.1  |
| AHQ-1-2, 5379          | K.NLPYSEEVIMYK.G              | 1744.98660 | 2 | 2.26E-09 | 0.94 | 4.08 | - | 873.1  |
| AHQ-1-1, 5863          | K.NLPYSEEVIMYK.G              | 1728.98720 | 2 | 4.87E-05 | 0.88 | 3.21 | - | 702.0  |
| AHQ-1-1, 5299 - 5300   | K.NLPYSEEVIMYK.G              | 1744.98660 | 2 | 9.73E-06 | 0.95 | 4.34 | - | 1164.6 |
| AHQ-1-5, 5538          | K.NMDPLNDNIATLLHQSSDK.F       | 2127.32169 | 2 | 7.18E-08 | 0.93 | 4.42 | - | 751.4  |
| AHQ-1-2, 5837          | K.NMDPLNDNIATLLHQSSDK.F       | 2127.32169 | 2 | 6.97E-08 | 0.91 | 4.05 | - | 782.4  |
| AHQ-1-2, 5945 - 6018   | K.NMDPLNDNIATLLHQSSDK.F       | 2127.32169 | 2 | 1.24E-07 | 0.94 | 4.45 | - | 867.2  |
| AHQ-1-3, 5117          | K.NM'DPLNDNIATLLHQSSDK.F      | 2143.32109 | 3 | 3.09E-05 | 0.87 | 3.93 | - | 922.3  |
| AHQ-1-2, 5254          | K.NM'DPLNDNIATLLHQSSDK.F      | 2143.32109 | 3 | 2.62E-07 | 0.66 | 3.21 | - | 690.8  |
| AHQ-1-6, 5460          | K.NMDPLNDNIATLLHQSSDK.F       | 2127.32169 | 2 | 1.19E-04 | 0.89 | 4.55 | - | 617.9  |
| AHQ-1-1, 5653          | K.NMDPLNDNIATLLHQSSDK.F       | 2127.32169 | 2 | 5.79E-05 | 0.91 | 3.90 | - | 895.3  |
| AHQ-1-2, 5746          | K.NMDPLNDNIATLLHQSSDK.F       | 2127.32169 | 2 | 5.97E-05 | 0.84 | 3.93 | - | 534.5  |
| AHQ-1-2, 5261 - 5339   | K.NM'DPLNDNIATLLHQSSDK.F      | 2143.32109 | 2 | 1.22E-08 | 0.94 | 4.15 | - | 1207.4 |
| AHQ-1-3, 7286 - 7287   | K.PAGPPGILALLDEECWFPK.A       | 2112.43315 | 2 | 5.83E-08 | 0.98 | 5.58 | - | 1765.4 |
| AHQ-1-2, 7425          | K.PAGPPGILALLDEECWFPK.A       | 2112.43315 | 2 | 6.06E-07 | 0.98 | 6.43 | - | 2426.5 |
| AHQ-1-2, 2442          | K.PLLQVSR.Q                   | 812.98013  | 1 | 5.40E-04 | 0.45 | 2.16 | - | 388.9  |
| AHQ-1-1, 3320          | R.QAQQERDELADEIANSSGK.G       | 2090.15168 | 2 | 1.29E-05 | 0.94 | 4.68 | - | 718.1  |
| AHQ-1-3, 2826          | R.QAQQERDELADEIANSSGK.G       | 2090.15168 | 2 | 9.49E-07 | 0.87 | 4.26 | - | 423.8  |
| AHQ-1-1, 2939          | R.QAQQERDELADEIANSSGK.G       | 2090.15168 | 2 | 2.58E-04 | 0.66 | 3.43 | - | 392.9  |
| AHQ-1-3, 3299          | R.QAQQERDELADEIANSSGK.G       | 2090.15168 | 2 | 1.06E-04 | 0.84 | 3.60 | - | 565.8  |
| AHQ-1-3, 3213 - 3291   | R.QAQQERDELADEIANSSGK.G       | 2090.15168 | 3 | 1.00E-03 | 0.75 | 3.56 | - | 604.4  |
| AHQ-1-2, 3411          | R.QAQQERDELADEIANSSGK.G       | 2090.15168 | 2 | 6.67E-06 | 0.86 | 4.14 | - | 396.4  |
| AHQ-1-3, 2287          | K.QIATLHAQVADM*K.K            | 1442.66637 | 2 | 4.82E-05 | 0.78 | 2.99 | - | 582.8  |
| AHQ-1-2, 2378          | K.QIATLHAQVADM*K.K            | 1442.66637 | 2 | 7.93E-04 | 0.68 | 3.09 | - | 342.4  |
| AHQ-1-3, 2031          | R.QLEEAEEEAQR.A               | 1332.35590 | 2 | 8.95E-06 | 0.81 | 3.56 | - | 585.1  |
| AHQ-1-2, 2106          | R.QLEEAEEEAQR.A               | 1332.35590 | 2 | 2.86E-04 | 0.82 | 3.31 | - | 692.8  |
| AHQ-1-1, 2180          | R.QLEEAEEEAQR.A               | 1332.35590 | 2 | 7.36E-06 | 0.86 | 3.36 | - | 811.6  |
| AHQ-1-5, 1910          | R.QLEEAEEEAQR.A               | 1332.35590 | 2 | 2.64E-06 | 0.76 | 3.29 | - | 681.7  |
| AHQ-1-1, 3735          | R.RGDLFPVPR.R                 | 1156.36217 | 2 | 6.64E-07 | 0.96 | 3.68 | - | 1524.6 |
| AHQ-1-2, 3715 - 3791   | R.RGDLFPVPR.R                 | 1156.36217 | 2 | 8.47E-06 | 0.95 | 3.76 | - | 1351.1 |
| AHQ-1-3, 3602          | R.RGDLFPVPR.R                 | 1156.36217 | 2 | 4.08E-05 | 0.93 | 3.27 | - | 1441.9 |
| AHQ-1-4, 3616          | R.RGDLFPVPR.R                 | 1156.36217 | 2 | 1.13E-05 | 0.94 | 3.43 | - | 1178.6 |
| AHQ-1-10, 3263         | R.RGDLFPVPR.R                 | 1156.36217 | 2 | 2.86E-06 | 0.93 | 3.32 | - | 1364.5 |
| AHQ-1-6, 3415 - 3487   | R.RGDLFPVPR.R                 | 1156.36217 | 2 | 1.58E-05 | 0.91 | 3.40 | - | 1056.6 |
| AHQ-1-9, 3276          | R.RGDLFPVPR.R                 | 1156.36217 | 2 | 1.42E-05 | 0.93 | 3.59 | - | 1024.8 |
| AHQ-1-11, 3352         | R.RGDLFPVPR.R                 | 1156.36217 | 2 | 2.53E-05 | 0.86 | 3.11 | - | 826.9  |
| AHQ-1-3, 6803          | R.RKLEGSDTLDSDQIAELQAIAELK.M  | 2773.04667 | 3 | 2.26E-08 | 0.96 | 6.03 | - | 1275.3 |
| AHQ-1-4, 6978          | R.RKLEGSDTLDSDQIAELQAIAELK.M  | 2773.04667 | 3 | 2.21E-07 | 0.95 | 5.77 | - | 1127.5 |
| AHQ-1-2, 7126          | R.RKLEGSDTLDSDQIAELQAIAELK.M  | 2773.04667 | 3 | 1.72E-04 | 0.95 | 5.43 | - | 1297.9 |
| AHQ-1-2, 7021          | R.RKLEGSDTLDSDQIAELQAIAELK.M  | 2773.04667 | 3 | 3.05E-09 | 0.97 | 6.11 | - | 1974.2 |
| AHQ-1-1, 6744          | R.RKLEGSDTLDSDQIAELQAIAELK.M  | 2773.04667 | 3 | 1.18E-08 | 0.95 | 5.70 | - | 1392.1 |
| AHQ-1-3, 2003          | K.ROLEEAEEEAQR.A              | 1488.54225 | 2 | 1.46E-09 | 0.98 | 4.79 | - | 3347.0 |
| AHQ-1-2, 2083          | K.ROLEEAEEEAQR.A              | 1488.54225 | 2 | 2.04E-08 | 0.98 | 5.05 | - | 3426.6 |
| AHQ-1-6, 6139          | K.SGFEPASLKEEVGEEAIVLVENGKK.V | 2790.07246 | 3 | 1.30E-08 | 0.93 | 4.97 | - | 1160.1 |
| AHQ-1-2, 6373 - 6450   | K.SGFEPASLKEEVGEEAIVLVENGKK.V | 2790.07246 | 3 | 1.47E-08 | 0.97 | 6.26 | - | 1342.5 |
| AHQ-1-2, 7523          | K.SGFEPASLKEEVGEEAIVLVENGKK.V | 2790.07246 | 3 | 3.35E-12 | 0.92 | 4.95 | - | 685.2  |
| AHQ-1-2, 6606          | K.SGFEPASLKEEVGEEAIVLVENGKK.V | 2790.07246 | 3 | 7.38E-10 | 0.93 | 4.88 | - | 997.9  |
| AHQ-1-2, 6518          | K.SGFEPASLKEEVGEEAIVLVENGKK.V | 2790.07246 | 3 | 4.62E-10 | 0.96 | 5.26 | - | 1458.5 |
| AHQ-1-5, 6302          | K.SGFEPASLKEEVGEEAIVLVENGKK.V | 2790.07246 | 3 | 1.39E-09 | 0.71 | 3.28 | - | 576.8  |
| AHQ-1-3, 6195          | K.SGFEPASLKEEVGEEAIVLVENGKK.V | 2790.07246 | 3 | 2.43E-05 | 0.88 | 4.74 | - | 471.7  |
| AHQ-1-2, 7123          | K.SGFEPASLKEEVGEEAIVLVENGKK.V | 2790.07246 | 3 | 1.42E-05 | 0.88 | 4.27 | - | 697.3  |
| AHQ-1-13, 5779 - 5835  | K.SGFEPASLKEEVGEEAIVLVENGKK.V | 2790.07246 | 3 | 6.80E-05 | 0.63 | 3.52 | - | 429.7  |
| AHQ-1-1, 6176 - 6235   | K.SGFEPASLKEEVGEEAIVLVENGKK.V | 2790.07246 | 3 | 1.45E-11 | 0.94 | 5.23 | - | 1017.0 |
| AHQ-1-1, 6328          | K.SGFEPASLKEEVGEEAIVLVENGKK.V | 2790.07246 | 3 | 3.06E-10 | 0.96 | 5.49 | - | 1370.6 |
| AHQ-1-5, 6974 - 7045   | K.SMEAEMIQLEELAAAER.A         | 2050.30064 | 2 | 4.12E-06 | 0.95 | 3.98 | - | 1924.5 |
| AHQ-1-3, 4802          | K.SM*EAEM*IQLEELAAAER.A       | 2082.29944 | 2 | 2.87E-05 | 0.93 | 4.16 | - | 1003.4 |
| AHQ-1-2, 6002 - 6081   | K.SM*EAEM*IQLEELAAAER.A       | 2066.30004 | 2 | 2.62E-07 | 0.95 | 5.40 | - | 1495.1 |
| AHQ-1-3, 6877          | K.SMEAEMIQLEELAAAER.A         | 2050.30064 | 3 | 4.29E-08 | 0.97 | 5.10 | - | 2261.0 |
| AHQ-1-2, 4974 - 5038   | K.SM*EAEM*IQLEELAAAER.A       | 2082.29944 | 2 | 2.87E-09 | 0.97 | 5.29 | - | 1747.9 |
| AHQ-1-3, 5575 - 5646   | K.SMEAEM*IQLEELAAAER.A        | 2066.30004 | 2 | 9.06E-07 | 0.88 | 4.46 | - | 985.2  |
| AHQ-1-1, 4812          | K.SM*EAEM*IQLEELAAAER.A       | 2082.29944 | 2 | 6.14E-10 | 0.97 | 4.97 | - | 1639.1 |
| AHQ-1-1, 4941          | K.SM*EAEM*IQLEELAAAER.A       | 2082.29944 | 2 | 2.17E-06 | 0.87 | 3.69 | - | 846.6  |
| AHQ-1-2, 7013 - 7078   | K.SMEAEMIQLEELAAAER.A         | 2050.30064 | 2 | 1.05E-06 | 0.98 | 6.33 | - | 1727.3 |
| AHQ-1-2, 7058          | K.SMEAEMIQLEELAAAER.A         | 2050.30064 | 3 | 5.32E-08 | 0.95 | 5.02 | - | 1475.0 |
| AHQ-1-3, 6825 - 6893   | K.SMEAEMIQLEELAAAER.A         | 2050.30064 | 2 | 4.07E-05 | 0.98 | 6.17 | - | 1676.0 |
| AHQ-1-2, 7141 - 7209   | K.SMEAEMIQLEELAAAER.A         | 2050.30064 | 2 | 3.27E-07 | 0.95 | 4.79 | - | 1309.1 |
| AHQ-1-5, 3435          | R.SMMQDREDQSILCTGESGAGK.T     | 2302.50687 | 2 | 6.68E-07 | 0.97 | 5.68 | - | 1394.4 |
| AHQ-1-7, 3486          | R.SMMQDREDQSILCTGESGAGK.T     | 2302.50687 | 2 | 6.67E-04 | 0.78 | 3.45 | - | 795.4  |
| AHQ-1-2, 3673          | R.SMMQDREDQSILCTGESGAGK.T     | 2302.50687 | 2 | 4.95E-07 | 0.97 | 5.88 | - | 1588.2 |
| AHQ-1-7, 3665 - 3674   | K.TDLLLEPYNK.Y                | 1206.36989 | 2 | 1.36E-05 | 0.91 | 3.76 | - | 1028.1 |
| AHQ-1-4, 3790 - 3791   | K.TDLLLEPYNK.Y                | 1206.36989 | 2 | 4.54E-05 | 0.93 | 3.87 | - | 1133.2 |
| AHQ-1-3, 3757          | K.TDLLLEPYNK.Y                | 1206.36989 | 2 | 1.01E-06 | 0.83 | 3.32 | - | 920.1  |
| AHQ-1-6, 3584 - 3595   | K.TDLLLEPYNK.Y                | 1206.36989 | 2 | 1.36E-05 | 0.92 | 4.01 | - | 970.1  |
| AHQ-1-5, 3618 - 3641   | K.TDLLLEPYNK.Y                | 1206.36989 | 2 | 1.70E-04 | 0.81 | 3.10 | - | 929.4  |
| AHQ-1-2, 3874 - 3897   | K.TDLLLEPYNK.Y                | 1206.36989 | 2 | 1.41E-06 | 0.93 | 4.13 | - | 1043.2 |
| AHQ-1-2, 3883          | K.TDLLLEPYNK.Y                | 1206.36989 | 1 | 1.59E-04 | 0.29 | 2.21 | - | 350.3  |
| AHQ-1-1, 3839          | K.TDLLLEPYNK.Y                | 1206.36989 | 2 | 4.54E-05 | 0.91 | 3.89 | - | 1253.8 |
| AHQ-1-2, 4082          | K.TDLLLEPYNK.YR.F             | 1525.73037 | 2 | 1.71E-06 | 0.62 | 2.84 | - | 524.1  |
| AHQ-1-1, 4397 - 4419   | K.TELEDTLSDTAAQQLR.S          | 1921.00969 | 2 | 3.21E-05 | 0.90 | 3.50 | - | 1154.6 |

|                        |                           |            |   |          |      |      |   |        |
|------------------------|---------------------------|------------|---|----------|------|------|---|--------|
| AHQ-1-4, 4478          | K.TELEDTLTDSTAAQQELR.S    | 1921.00969 | 2 | 4.31E-08 | 0.97 | 5.43 | - | 1958.7 |
| AHQ-1-2, 4583          | K.TELEDTLTDSTAAQQELR.S    | 1921.00969 | 3 | 1.42E-04 | 0.97 | 5.38 | - | 2131.7 |
| AHQ-1-2, 4559          | K.TELEDTLTDSTAAQQELR.S    | 1921.00969 | 2 | 1.99E-07 | 0.94 | 4.30 | - | 1491.8 |
| AHQ-1-5, 4414          | K.TELEDTLTDSTAAQQELR.S    | 1921.00969 | 2 | 9.81E-06 | 0.96 | 4.60 | - | 1615.5 |
| AHQ-1-3, 4405 - 4411   | K.TELEDTLTDSTAAQQELR.S    | 1921.00969 | 2 | 2.23E-07 | 0.97 | 5.57 | - | 1769.5 |
| AHQ-1-3, 3134 - 3135   | R.TEMEDLMSSK.D            | 1171.32449 | 2 | 5.52E-04 | 0.85 | 2.78 | - | 742.9  |
| AHQ-1-2, 3245 - 3249   | R.TEMEDLMSSK.D            | 1171.32449 | 2 | 2.46E-05 | 0.88 | 3.09 | - | 799.1  |
| AHQ-1-1, 3227          | R.TEMEDLMSSK.D            | 1171.32449 | 2 | 2.80E-05 | 0.77 | 2.68 | - | 483.0  |
| AHQ-1-6, 3279          | R.TEMEDLMSSKDDV.GK.S      | 1685.85626 | 2 | 5.76E-07 | 0.63 | 3.01 | - | 699.4  |
| AHQ-1-2, 3533          | R.TEMEDLMSSKDDV.GK.S      | 1685.85626 | 2 | 5.63E-06 | 0.92 | 4.11 | - | 1048.5 |
| AHQ-1-4, 3220          | R.TEMEDLMSSKDDV.GK.S      | 1685.85626 | 2 | 9.12E-05 | 0.67 | 3.10 | - | 597.4  |
| AHQ-1-5, 3291          | R.TEMEDLMSSKDDV.GK.S      | 1685.85626 | 2 | 2.47E-05 | 0.85 | 3.13 | - | 973.8  |
| AHQ-1-3, 6494          | R.TFHIFYYLLSGAGEHLK.T     | 1997.28378 | 3 | 1.54E-06 | 0.93 | 4.19 | - | 1343.7 |
| AHQ-1-4, 6676          | R.TFHIFYYLLSGAGEHLK.T     | 1997.28378 | 3 | 7.29E-05 | 0.90 | 3.94 | - | 1007.5 |
| AHQ-1-2, 6774          | R.TFHIFYYLLSGAGEHLK.T     | 1997.28378 | 2 | 1.13E-07 | 0.97 | 5.27 | - | 1430.0 |
| AHQ-1-2, 6675          | R.TFHIFYYLLSGAGEHLK.T     | 1997.28378 | 3 | 1.48E-04 | 0.96 | 5.12 | - | 1550.6 |
| AHQ-1-1, 6599          | R.TFHIFYYLLSGAGEHLK.T     | 1997.28378 | 3 | 6.01E-08 | 0.94 | 4.20 | - | 1371.9 |
| AHQ-1-2, 6677          | R.TFHIFYYLLSGAGEHLK.T     | 1997.28378 | 2 | 5.06E-09 | 0.99 | 5.72 | - | 3195.9 |
| AHQ-1-9, 6404          | R.TFHIFYYLLSGAGEHLK.T     | 1997.28378 | 2 | 7.17E-05 | 0.97 | 4.97 | - | 1787.9 |
| AHQ-1-1, 2121          | K.VAAYDKLEK.T             | 1037.19123 | 2 | 1.29E-04 | 0.80 | 2.67 | - | 735.5  |
| AHQ-1-3, 1894          | K.VAAYDKLEK.T             | 1037.19123 | 2 | 8.48E-04 | 0.69 | 2.55 | - | 624.5  |
| AHQ-1-2, 1978 - 2029   | K.VAAYDKLEK.T             | 1037.19123 | 2 | 8.45E-04 | 0.83 | 3.02 | - | 603.2  |
| AHQ-1-3, 3321          | K.VEAQLOEQVK.F            | 1285.47179 | 2 | 6.11E-04 | 0.86 | 3.37 | - | 941.3  |
| AHQ-1-4, 3350 - 3351   | K.VEAQLOEQVK.F            | 1285.47179 | 1 | 4.65E-04 | 0.13 | 2.46 | - | 406.0  |
| AHQ-1-5, 3197          | K.VEAQLOEQVK.F            | 1285.47179 | 2 | 1.06E-04 | 0.90 | 3.64 | - | 1078.8 |
| AHQ-1-6, 3204          | K.VEAQLOEQVK.F            | 1285.47179 | 2 | 7.26E-06 | 0.80 | 2.82 | - | 915.1  |
| AHQ-1-4, 3346          | K.VEAQLOEQVK.F            | 1285.47179 | 2 | 2.44E-06 | 0.93 | 3.55 | - | 1393.6 |
| AHQ-1-10, 5277         | K.VEDMAELTCLNEASVLHNLK.E  | 2288.58457 | 3 | 1.48E-07 | 0.89 | 4.45 | - | 790.2  |
| AHQ-1-5, 6094          | K.VEDMAELTCLNEASVLHNLK.E  | 2288.58457 | 2 | 4.18E-07 | 0.91 | 4.05 | - | 728.7  |
| AHQ-1-5, 5998 - 6075   | K.VEDMAELTCLNEASVLHNLK.E  | 2288.58457 | 2 | 4.24E-04 | 0.89 | 4.01 | - | 711.6  |
| AHQ-1-5, 5285 - 5359   | K.VEDM*AELTCLNEASVLHNLK.E | 2304.58397 | 2 | 1.29E-05 | 0.83 | 3.70 | - | 574.2  |
| AHQ-1-2, 5498 - 5534   | K.VEDM*AELTCLNEASVLHNLK.E | 2304.58397 | 3 | 7.88E-07 | 0.93 | 4.33 | - | 1253.1 |
| AHQ-1-2, 5507 - 5573   | K.VEDM*AELTCLNEASVLHNLK.E | 2304.58397 | 2 | 6.97E-10 | 0.88 | 4.09 | - | 571.7  |
| AHQ-1-6, 5970 - 5982   | K.VEDMAELTCLNEASVLHNLK.E  | 2288.58457 | 2 | 7.08E-11 | 0.96 | 4.99 | - | 1029.1 |
| AHQ-1-9, 5874          | K.VEDMAELTCLNEASVLHNLK.E  | 2288.58457 | 3 | 2.70E-06 | 0.72 | 3.38 | - | 590.8  |
| AHQ-1-6, 5272          | K.VEDM*AELTCLNEASVLHNLK.E | 2304.58397 | 2 | 1.60E-08 | 0.85 | 3.65 | - | 663.6  |
| AHQ-1-9, 5867 - 5936   | K.VEDMAELTCLNEASVLHNLK.E  | 2288.58457 | 2 | 6.05E-05 | 0.66 | 3.38 | - | 309.0  |
| AHQ-1-10, 5244 - 5276  | K.VEDMAELTCLNEASVLHNLK.E  | 2288.58457 | 2 | 3.36E-12 | 0.92 | 4.65 | - | 598.9  |
| AHQ-1-13 - 5316 - 5323 | K.VEDM*AELTCLNEASVLHNLK.E | 2304.58397 | 2 | 2.06E-04 | 0.63 | 3.07 | - | 509.1  |
| AHQ-1-2, 6154 - 6221   | K.VEDMAELTCLNEASVLHNLK.E  | 2288.58457 | 2 | 5.59E-06 | 0.84 | 3.82 | - | 596.9  |
| AHQ-1-2, 6197          | K.VEDMAELTCLNEASVLHNLK.E  | 2288.58457 | 3 | 1.01E-07 | 0.69 | 3.03 | - | 535.2  |
| AHQ-1-4, 6152          | K.VEDMAELTCLNEASVLHNLK.E  | 2288.58457 | 2 | 2.15E-08 | 0.96 | 4.92 | - | 931.6  |
| AHQ-1-4, 6143          | K.VEDMAELTCLNEASVLHNLK.E  | 2288.58457 | 3 | 3.08E-06 | 0.85 | 3.42 | - | 855.1  |
| AHQ-1-4, 5455          | K.VEDM*AELTCLNEASVLHNLK.E | 2304.58397 | 2 | 5.33E-04 | 0.55 | 2.98 | - | 481.8  |
| AHQ-1-2, 6399          | K.VEDMAELTCLNEASVLHNLK.E  | 2288.58457 | 2 | 1.06E-12 | 0.96 | 5.16 | - | 1033.0 |
| AHQ-1-1, 5400 - 5464   | K.VEDM*AELTCLNEASVLHNLK.E | 2304.58397 | 2 | 6.67E-08 | 0.90 | 3.98 | - | 649.0  |
| AHQ-1-2, 6401          | K.VEDMAELTCLNEASVLHNLK.E  | 2288.58457 | 3 | 5.32E-05 | 0.81 | 3.83 | - | 563.3  |
| AHQ-1-10, 4708         | K.VEDM*AELTCLNEASVLHNLK.E | 2304.58397 | 2 | 1.76E-12 | 0.90 | 3.97 | - | 686.3  |
| AHQ-1-6, 5986          | K.VEDMAELTCLNEASVLHNLK.E  | 2288.58457 | 3 | 2.65E-08 | 0.85 | 3.65 | - | 748.6  |
| AHQ-1-8, 5807          | K.VEDMAELTCLNEASVLHNLK.E  | 2288.58457 | 2 | 5.16E-04 | 0.24 | 2.58 | - | 271.7  |
| AHQ-1-1, 6184 - 6197   | K.VEDMAELTCLNEASVLHNLK.E  | 2288.58457 | 2 | 8.32E-06 | 0.66 | 3.14 | - | 620.9  |
| AHQ-1-3, 6038          | K.VEDMAELTCLNEASVLHNLK.E  | 2288.58457 | 3 | 1.31E-04 | 0.82 | 3.73 | - | 491.3  |
| AHQ-1-1, 6041          | K.VEDMAELTCLNEASVLHNLK.E  | 2288.58457 | 3 | 2.18E-07 | 0.83 | 3.60 | - | 771.3  |
| AHQ-1-3, 6035          | K.VEDMAELTCLNEASVLHNLK.E  | 2288.58457 | 2 | 6.87E-11 | 0.91 | 4.09 | - | 703.3  |
| AHQ-1-3, 5354          | K.VEDM*AELTCLNEASVLHNLK.E | 2304.58397 | 2 | 4.66E-06 | 0.91 | 4.43 | - | 665.8  |
| AHQ-1-3, 5350 - 5367   | K.VEDM*AELTCLNEASVLHNLK.E | 2304.58397 | 3 | 1.29E-04 | 0.76 | 3.37 | - | 711.0  |
| AHQ-1-7, 6061 - 6069   | K.VEDMAELTCLNEASVLHNLK.E  | 2288.58457 | 2 | 2.46E-07 | 0.87 | 4.20 | - | 469.0  |
| AHQ-1-7, 6074          | K.VEDMAELTCLNEASVLHNLK.E  | 2288.58457 | 3 | 2.60E-10 | 0.93 | 4.55 | - | 948.7  |
| AHQ-1-13, 4935 - 5015  | K.VEDM*AELTCLNEASVLHNLK.E | 2304.58397 | 2 | 1.03E-05 | 0.70 | 3.36 | - | 319.2  |
| AHQ-1-1, 2164          | R.VEEEEERCOHLQAEK.K       | 1916.01642 | 2 | 7.15E-04 | 0.85 | 3.64 | - | 883.9  |
| AHQ-1-2, 2110          | R.VEEEEERCOHLQAEK.K       | 1916.01642 | 3 | 6.55E-09 | 0.91 | 4.33 | - | 906.1  |
| AHQ-1-10, 3585         | K.VIQLAYVASSHK.S          | 1479.70484 | 2 | 1.44E-06 | 0.95 | 3.84 | - | 1309.3 |
| AHQ-1-3, 4015          | K.VIQLAYVASSHK.S          | 1479.70484 | 2 | 9.39E-04 | 0.93 | 3.78 | - | 1114.0 |
| AHQ-1-6, 3796          | K.VIQLAYVASSHK.S          | 1479.70484 | 2 | 3.87E-05 | 0.95 | 3.99 | - | 1441.0 |
| AHQ-1-6, 3795 - 3804   | K.VIQLAYVASSHK.S          | 1479.70484 | 3 | 8.76E-06 | 0.85 | 3.78 | - | 745.2  |
| AHQ-1-7, 3884          | K.VIQLAYVASSHK.S          | 1479.70484 | 2 | 5.79E-08 | 0.94 | 4.17 | - | 1137.8 |
| AHQ-1-1, 4125 - 4127   | K.VIQLAYVASSHK.S          | 1479.70484 | 2 | 3.42E-07 | 0.94 | 4.19 | - | 1084.9 |
| AHQ-1-5, 3857          | K.VIQLAYVASSHK.S          | 1479.70484 | 3 | 1.08E-04 | 0.73 | 3.06 | - | 545.3  |
| AHQ-1-9, 3648          | K.VIQLAYVASSHK.S          | 1479.70484 | 2 | 9.00E-04 | 0.94 | 3.35 | - | 1431.0 |
| AHQ-1-4, 4043          | K.VIQLAYVASSHK.S          | 1479.70484 | 2 | 1.07E-06 | 0.94 | 3.83 | - | 1236.8 |
| AHQ-1-5, 3851          | K.VIQLAYVASSHK.S          | 1479.70484 | 2 | 2.16E-08 | 0.95 | 3.95 | - | 1392.8 |
| AHQ-1-2, 4154 - 4169   | K.VIQLAYVASSHK.S          | 1479.70484 | 2 | 1.57E-04 | 0.92 | 3.75 | - | 1101.6 |
| AHQ-1-2, 4275          | K.VIQLAYVASSHK.S          | 1479.70484 | 2 | 9.57E-05 | 0.95 | 4.03 | - | 1358.6 |
| AHQ-1-6, 6499          | R.VISGVLQGNVFK.K          | 1487.81155 | 2 | 6.63E-06 | 0.96 | 4.01 | - | 1909.5 |
| AHQ-1-4, 6690 - 6755   | R.VISGVLQGNVFK.K          | 1487.81155 | 2 | 3.40E-10 | 0.97 | 4.79 | - | 1634.9 |
| AHQ-1-13, 6016         | R.VISGVLQGNVFK.K          | 1487.81155 | 2 | 4.14E-05 | 0.95 | 4.24 | - | 1155.2 |
| AHQ-1-2, 6609 - 6682   | R.VISGVLQGNVFK.K          | 1487.81155 | 2 | 6.30E-09 | 0.96 | 4.85 | - | 1324.9 |
| AHQ-1-2, 6694          | R.VISGVLQGNVFK.K          | 1487.81155 | 1 | 1.05E-04 | 0.30 | 2.89 | - | 330.6  |
| AHQ-1-3, 6521 - 6585   | R.VISGVLQGNVFK.K          | 1487.81155 | 2 | 4.23E-09 | 0.97 | 4.24 | - | 1979.3 |
| AHQ-1-10, 5756         | R.VISGVLQGNVFK.K          | 1487.81155 | 2 | 3.68E-04 | 0.96 | 4.47 | - | 1437.3 |
| AHQ-1-5, 6629 - 6702   | R.VISGVLQGNVFK.K          | 1487.81155 | 2 | 3.70E-05 | 0.96 | 4.23 | - | 1674.7 |
| AHQ-1-2, 6722 - 6785   | R.VISGVLQGNVFK.K          | 1487.81155 | 2 | 1.85E-07 | 0.97 | 4.46 | - | 2008.6 |
| AHQ-1-2, 6939          | R.VISGVLQGNVFK.K          | 1487.81155 | 2 | 6.60E-09 | 0.98 | 4.60 | - | 2370.5 |
| AHQ-1-1, 6492 - 6496   | R.VISGVLQGNVFK.K          | 1487.81155 | 2 | 1.20E-04 | 0.89 | 2.86 | - | 1294.6 |
| AHQ-1-7, 6606          | R.VISGVLQGNVFK.K          | 1487.81155 | 2 | 9.71E-04 | 0.97 | 4.58 | - | 1941.4 |
| AHQ-1-1, 5971          | R.VISGVLQGNVFK.E          | 1615.98446 | 2 | 2.63E-07 | 0.94 | 4.41 | - | 1159.1 |
| AHQ-1-5, 4859 - 4933   | K.VSHLLGINVDFTR.G         | 1572.79026 | 2 | 7.14E-11 | 0.96 | 4.53 | - | 1401.9 |
| AHQ-1-1, 5091          | K.VSHLLGINVDFTR.G         | 1572.79026 | 2 | 1.34E-09 | 0.95 | 4.43 | - | 1340.2 |
| AHQ-1-1, 5095          | K.VSHLLGINVDFTR.G         | 1572.79026 | 3 | 2.39E-05 | 0.91 | 3.89 | - | 1239.2 |
| AHQ-1-2, 5095 - 5145   | K.VSHLLGINVDFTR.G         | 1572.79026 | 2 | 8.08E-11 | 0.96 | 4.33 | - | 1550.5 |
| AHQ-1-2, 5139          | K.VSHLLGINVDFTR.G         | 1572.79026 | 3 | 5.16E-04 | 0.83 | 3.30 | - | 984.8  |
| AHQ-1-4, 5066          | K.VSHLLGINVDFTR.G         | 1572.79026 | 2 | 2.83E-10 | 0.97 | 4.84 | - | 1470.5 |
| AHQ-1-2, 5422          | K.VSHLLGINVDFTR.G         | 1572.79026 | 2 | 1.59E-06 | 0.95 | 3.68 | - | 1289.3 |
| AHQ-1-3, 4985          | K.VSHLLGINVDFTR.G         | 1572.79026 | 2 | 7.94E-12 | 0.94 | 3.94 | - | 1240.0 |
| AHQ-1-7, 4858          | K.VSHLLGINVDFTR.G         | 1572.79026 | 2 | 1.97E-11 | 0.96 | 4.15 | - | 1608.6 |
| AHQ-1-3, 4993          | K.VSHLLGINVDFTR.G         | 1572.79026 | 3 | 1.32E-05 | 0.89 | 3.75 | - | 1080.2 |
| AHQ-1-6, 4806 - 4854   | K.VSHLLGINVDFTR.G         | 1572.79026 | 2 | 3.41E-08 | 0.94 | 4.08 | - | 1293.7 |
| AHQ-1-2, 3290          | R.VVQFQR.Q                | 925.06580  | 2 | 8.76E-04 | 0.79 | 2.74 | - | 467.6  |
| AHQ-1-5, 3019          | R.VVQFQR.Q                | 925.06580  | 2 | 4.83E-05 | 0.74 | 2.52 | - | 493.0  |
| AHQ-1-5, 3983 - 4001   | R.YEILTPNSIPK.G           | 1275.47536 | 2 | 8.29E-05 | 0.91 | 3.86 | - | 1011.8 |
| AHQ-1-2, 4265          | R.YEILTPNSIPK.G           | 1275.47536 | 2 | 1.38E-05 | 0.85 | 3.44 | - | 901.1  |
| AHQ-1-1, 4185 - 4188   | R.YEILTPNSIPK.G           | 1275.47536 | 2 | 1.31E-04 | 0.92 | 3.66 | - | 1137.5 |
| AHQ-1-2, 4178 - 4197   | R.YEILTPNSIPK.G           | 1275.47536 | 2 | 7.77E-06 | 0.91 | 3.05 | - | 1145.7 |
| AHQ-1-4, 4107 - 4115   | R.YEILTPNSIPK.G           | 1275.47536 | 2 | 4.50E-05 | 0.93 | 3.03 | - | 1466.9 |
| AHQ-1-2, 4429          | R.YEILTPNSIPK.G           | 1275.47536 | 2 | 1.69E-04 | 0.86 | 2.83 | - | 1014.7 |
| AHQ-1-2, 4262          | R.YEILTPNSIPK.G           | 1275.47536 | 1 | 8.79E-04 | 0.53 | 2.54 | - | 585.9  |
| AHQ-1-2, 4434          | R.YEILTPNSIPK.G           | 1275.47536 | 1 | 5.31E-04 | 0.46 | 1.92 | - | 734.4  |

|                                                            |                                  |            |   |          |      |       |        |        |          |
|------------------------------------------------------------|----------------------------------|------------|---|----------|------|-------|--------|--------|----------|
| AHQ-1-3, 4042 - 4113                                       | R.YEILTNPISPK.G                  | 1275.47536 | 2 | 1.16E-05 | 0.89 | 3.72  | -      | 949.8  |          |
| AHQ-1-1, 6147                                              | K.YLYVDKFNFINPLAQADWAAK.K        | 2455.75199 | 3 | 1.67E-08 | 0.96 | 5.10  | -      | 1370.2 |          |
| AHQ-1-2, 6363                                              | K.YLYVDKFNFINPLAQADWAAK.K        | 2455.75199 | 2 | 3.11E-10 | 0.93 | 4.21  | -      | 952.4  |          |
| AHQ-1-10, 5433                                             | K.YLYVDKFNFINPLAQADWAAK.K        | 2455.75199 | 2 | 8.60E-04 | 0.55 | 2.58  | -      | 291.9  |          |
| AHQ-1-2, 6267                                              | K.YLYVDKFNFINPLAQADWAAK.K        | 2455.75199 | 2 | 9.78E-04 | 0.65 | 2.67  | -      | 560.3  |          |
| gj4507485[ref]NP_003237.1  thrombospondin 1 [Homo sapiens] |                                  |            |   |          |      | 29.55 | 350.31 | 30.50  | 129351.8 |
| AHQ-1-2, 4279                                              | K.AGTLDL.SLTVQGK.Q               | 1303.48711 | 2 | 4.77E-04 | 0.94 | 3.70  | -      | 1381.0 |          |
| AHQ-1-2, 2842                                              | R.AQLYIDCEK.M                    | 1141.27636 | 2 | 6.54E-05 | 0.89 | 3.43  | -      | 675.7  |          |
| AHQ-1-2, 2838                                              | R.AQLYIDCEK.M                    | 1141.27636 | 1 | 4.57E-04 | 0.15 | 1.93  | -      | 487.9  |          |
| AHQ-1-2, 6301                                              | R.AQLYIDCEK.M ENAEILDVPIQSVFTR.D | 2988.33923 | 3 | 1.91E-05 | 0.94 | 4.86  | -      | 1181.3 |          |
| AHQ-1-1, 4000                                              | R.CENTDPGYNCLPCPPR.F             | 1954.10800 | 2 | 1.36E-06 | 0.70 | 3.00  | -      | 425.3  |          |
| AHQ-1-3, 3873                                              | R.CENTDPGYNCLPCPPR.F             | 1954.10800 | 2 | 3.06E-11 | 0.89 | 3.78  | -      | 591.2  |          |
| AHQ-1-4, 4200                                              | R.CENTDPGYNCLPCPPR.F             | 1954.10800 | 2 | 1.79E-05 | 0.88 | 3.80  | -      | 458.7  |          |
| AHQ-1-3, 4134                                              | R.CENTDPGYNCLPCPPR.F             | 1954.10800 | 2 | 4.85E-06 | 0.88 | 4.00  | -      | 475.9  |          |
| AHQ-1-5, 4011 - 4014                                       | R.CENTDPGYNCLPCPPR.F             | 1954.10800 | 2 | 9.65E-06 | 0.93 | 4.15  | -      | 752.4  |          |
| AHQ-1-4, 3930                                              | R.CENTDPGYNCLPCPPR.F             | 1954.10800 | 2 | 3.44E-08 | 0.80 | 2.79  | -      | 619.4  |          |
| AHQ-1-2, 4257                                              | R.CENTDPGYNCLPCPPR.F             | 1954.10800 | 2 | 4.42E-12 | 0.90 | 3.85  | -      | 734.9  |          |
| AHQ-1-4, 3971                                              | K.CNYLGHYSDDPM.YR.C              | 1677.84222 | 2 | 1.13E-06 | 0.93 | 3.82  | -      | 802.4  |          |
| AHQ-1-5, 3311                                              | K.CNYLGHYSDDPM.YR.C              | 1693.84162 | 2 | 1.59E-04 | 0.89 | 3.76  | -      | 737.2  |          |
| AHQ-1-3, 3933                                              | K.CNYLGHYSDDPM.YR.C              | 1677.84222 | 2 | 7.69E-09 | 0.93 | 3.60  | -      | 938.4  |          |
| AHQ-1-4, 3423                                              | K.CNYLGHYSDDPM.YR.C              | 1693.84162 | 2 | 8.28E-05 | 0.90 | 3.41  | -      | 740.1  |          |
| AHQ-1-4, 3450                                              | K.DCVGDVTENQICNK.Q               | 1654.75869 | 2 | 1.18E-06 | 0.91 | 4.08  | -      | 698.4  |          |
| AHQ-1-2, 3510                                              | K.DCVGDVTENQICNK.Q               | 1654.75869 | 2 | 3.99E-05 | 0.91 | 3.45  | -      | 1011.2 |          |
| AHQ-1-5, 2669                                              | K.DHSGQVFSVVSNGK.A               | 1461.56164 | 2 | 3.31E-07 | 0.95 | 3.85  | -      | 1451.4 |          |
| AHQ-1-13- , 2833                                           | K.DHSGQVFSVVSNGK.A               | 1461.56164 | 2 | 3.11E-06 | 0.92 | 3.38  | -      | 1046.2 |          |
| AHQ-1-2, 2859                                              | K.DHSGQVFSVVSNGK.A               | 1461.56164 | 2 | 3.17E-08 | 0.95 | 3.70  | -      | 1277.8 |          |
| AHQ-1-5, 3087                                              | R.DNCQYVYNDQD.R                  | 1575.64166 | 2 | 7.28E-05 | 0.91 | 3.50  | -      | 1101.8 |          |
| AHQ-1-2, 3418                                              | R.DNCQYVYNDQD.R                  | 1575.64166 | 2 | 2.30E-05 | 0.84 | 3.27  | -      | 891.3  |          |
| AHQ-1-2, 3233 - 3309                                       | R.DNCQYVYNDQD.R                  | 1575.64166 | 2 | 1.17E-04 | 0.86 | 3.53  | -      | 694.3  |          |
| AHQ-1-2, 3087                                              | R.DNCQYVYNDQD.R                  | 1575.64166 | 2 | 4.09E-05 | 0.93 | 3.89  | -      | 1222.2 |          |
| AHQ-1-3, 3122 - 3137                                       | R.DNCQYVYNDQD.R                  | 1575.64166 | 2 | 2.51E-05 | 0.93 | 4.30  | -      | 922.3  |          |
| AHQ-1-4, 3355                                              | R.DNCQYVYNDQD.R                  | 1575.64166 | 2 | 6.60E-07 | 0.88 | 3.68  | -      | 939.4  |          |
| AHQ-1-7, 3102                                              | R.DNCQYVYNDQD.R                  | 1575.64166 | 2 | 6.48E-05 | 0.95 | 4.34  | -      | 1373.2 |          |
| AHQ-1-3, 3297                                              | R.DNCQYVYNDQD.R                  | 1575.64166 | 2 | 6.26E-07 | 0.91 | 3.96  | -      | 847.6  |          |
| AHQ-1-3, 4186 - 4257                                       | R.DTMDGVDGQDCDNCPLHNPQLDSDSDR.I  | 3324.31882 | 3 | 7.83E-08 | 0.92 | 4.59  | -      | 826.7  |          |
| AHQ-1-6, 3824                                              | R.DTMDGVDGQDCDNCPLHNPQLDSDSDR.I  | 3340.31822 | 3 | 4.26E-13 | 0.88 | 4.00  | -      | 829.7  |          |
| AHQ-1-4, 4172                                              | R.DTMDGVDGQDCDNCPLHNPQLDSDSDR.I  | 3324.31882 | 3 | 1.69E-04 | 0.90 | 4.57  | -      | 674.2  |          |
| AHQ-1-4, 4318                                              | R.DTMDGVDGQDCDNCPLHNPQLDSDSDR.I  | 3324.31882 | 3 | 6.91E-09 | 0.93 | 5.03  | -      | 673.6  |          |
| AHQ-1-3, 3790 - 3859                                       | R.DTMDGVDGQDCDNCPLHNPQLDSDSDR.I  | 3340.31822 | 3 | 2.72E-06 | 0.90 | 4.50  | -      | 913.5  |          |
| AHQ-1-2, 4317 - 4385                                       | R.DTMDGVDGQDCDNCPLHNPQLDSDSDR.I  | 3324.31882 | 3 | 4.00E-06 | 0.92 | 4.71  | -      | 697.0  |          |
| AHQ-1-1, 3880                                              | R.DTMDGVDGQDCDNCPLHNPQLDSDSDR.I  | 3340.31822 | 3 | 2.32E-04 | 0.87 | 4.81  | -      | 558.2  |          |
| AHQ-1-5, 3882                                              | R.DTMDGVDGQDCDNCPLHNPQLDSDSDR.I  | 3340.31822 | 3 | 3.64E-13 | 0.77 | 3.20  | -      | 904.3  |          |
| AHQ-1-4, 3908                                              | R.DTMDGVDGQDCDNCPLHNPQLDSDSDR.I  | 3340.31822 | 3 | 1.00E-30 | 0.84 | 3.97  | -      | 744.3  |          |
| AHQ-1-2, 3969 - 4042                                       | R.DTMDGVDGQDCDNCPLHNPQLDSDSDR.I  | 3340.31822 | 3 | 1.22E-14 | 0.94 | 5.17  | -      | 914.4  |          |
| AHQ-1-5, 3565                                              | K.FQDLVDAV.R                     | 1063.18877 | 2 | 3.71E-04 | 0.90 | 3.06  | -      | 1103.5 |          |
| AHQ-1-10, 3315                                             | K.FQDLVDAV.R                     | 1063.18877 | 1 | 2.48E-04 | 0.15 | 1.94  | -      | 365.8  |          |
| AHQ-1-11, 3423                                             | K.FQDLVDAV.R                     | 1063.18877 | 2 | 4.98E-05 | 0.89 | 2.71  | -      | 1042.4 |          |
| AHQ-1-3, 3695                                              | K.FQDLVDAV.R                     | 1063.18877 | 2 | 5.64E-05 | 0.89 | 2.75  | -      | 1231.8 |          |
| AHQ-1-10, 3320                                             | K.FQDLVDAV.R                     | 1063.18877 | 2 | 2.24E-06 | 0.82 | 2.80  | -      | 847.0  |          |
| AHQ-1-3, 2929                                              | R.FTGSQPFQGGVEHATANK.Q           | 1877.00666 | 2 | 7.04E-08 | 0.73 | 3.55  | -      | 422.3  |          |
| AHQ-1-2, 3114                                              | R.FTGSQPFQGGVEHATANK.Q           | 1877.00666 | 2 | 3.59E-11 | 0.86 | 3.81  | -      | 474.6  |          |
| AHQ-1-1, 3025                                              | R.FTGSQPFQGGVEHATANK.Q           | 1877.00666 | 2 | 7.29E-11 | 0.74 | 3.58  | -      | 274.0  |          |
| AHQ-1-4, 3084                                              | R.FTGSQPFQGGVEHATANK.Q           | 1877.00666 | 2 | 1.63E-08 | 0.82 | 3.50  | -      | 583.5  |          |
| AHQ-1-2, 3198                                              | R.FTGSQPFQGGVEHATANK.Q           | 1877.00666 | 2 | 3.79E-08 | 0.81 | 3.50  | -      | 528.2  |          |
| AHQ-1-6, 2750                                              | R.FTGSQPFQGGVEHATANK.Q           | 1877.00666 | 2 | 1.20E-04 | 0.68 | 3.03  | -      | 499.7  |          |
| AHQ-1-2, 2969 - 3038                                       | R.FTGSQPFQGGVEHATANK.Q           | 1877.00666 | 2 | 8.53E-07 | 0.92 | 4.47  | -      | 691.0  |          |
| AHQ-1-4, 2871 - 2898                                       | R.FTGSQPFQGGVEHATANK.Q           | 1877.00666 | 2 | 5.86E-07 | 0.91 | 4.31  | -      | 475.5  |          |
| AHQ-1-4, 2836 - 2908                                       | R.FTGSQPFQGGVEHATANK.Q           | 1877.00666 | 3 | 2.13E-05 | 0.63 | 3.13  | -      | 489.9  |          |
| AHQ-1-3, 2867                                              | R.FTGSQPFQGGVEHATANK.Q           | 1877.00666 | 3 | 8.54E-06 | 0.89 | 4.39  | -      | 627.4  |          |
| AHQ-1-3, 3034                                              | R.FTGSQPFQGGVEHATANK.Q           | 1877.00666 | 2 | 1.00E-10 | 0.95 | 4.71  | -      | 739.3  |          |
| AHQ-1-3, 2834 - 2905                                       | R.FTGSQPFQGGVEHATANK.Q           | 1877.00666 | 2 | 3.61E-08 | 0.93 | 4.43  | -      | 611.7  |          |
| AHQ-1-1, 5673                                              | R.FVFGTTPEDILR.N                 | 1395.58470 | 2 | 5.22E-04 | 0.72 | 2.65  | -      | 774.3  |          |
| AHQ-1-6, 5520 - 5559                                       | R.FVFGTTPEDILR.N                 | 1395.58470 | 1 | 5.43E-07 | 0.03 | 1.95  | -      | 89.3   |          |
| AHQ-1-11, 5046 - 5066                                      | R.FVFGTTPEDILR.N                 | 1395.58470 | 2 | 8.22E-05 | 0.75 | 3.20  | -      | 585.6  |          |
| AHQ-1-6, 5540                                              | R.FVFGTTPEDILR.N                 | 1395.58470 | 1 | 3.24E-05 | 0.22 | 2.63  | -      | 103.5  |          |
| AHQ-1-10, 4889                                             | R.FVFGTTPEDILR.N                 | 1395.58470 | 2 | 2.35E-05 | 0.80 | 2.86  | -      | 822.3  |          |
| AHQ-1-4, 5722                                              | R.FVFGTTPEDILR.N                 | 1395.58470 | 2 | 1.05E-04 | 0.87 | 2.87  | -      | 836.9  |          |
| AHQ-1-4, 5732                                              | R.FVFGTTPEDILR.N                 | 1395.58470 | 1 | 3.27E-05 | 0.07 | 1.94  | -      | 145.9  |          |
| AHQ-1-2, 5789                                              | R.FVFGTTPEDILR.N                 | 1395.58470 | 2 | 1.98E-04 | 0.69 | 2.65  | -      | 548.0  |          |
| AHQ-1-3, 5710                                              | K.GFLLLASLR.Q                    | 990.22407  | 2 | 4.98E-05 | 0.97 | 3.63  | -      | 2394.9 |          |
| AHQ-1-6, 5608                                              | K.GFLLLASLR.Q                    | 990.22407  | 2 | 1.19E-04 | 0.97 | 4.34  | -      | 2100.0 |          |
| AHQ-1-2, 5895                                              | K.GFLLLASLR.Q                    | 990.22407  | 2 | 3.04E-04 | 0.97 | 3.61  | -      | 2098.4 |          |
| AHQ-1-7, 4448                                              | K.GGVNDFQGVQLNVR.F               | 1617.74799 | 2 | 1.28E-05 | 0.91 | 3.94  | -      | 940.9  |          |
| AHQ-1-5, 4469                                              | K.GGVNDFQGVQLNVR.F               | 1617.74799 | 2 | 8.75E-05 | 0.90 | 4.17  | -      | 901.7  |          |
| AHQ-1-1, 4595 - 4663                                       | K.GGVNDFQGVQLNVR.F               | 1617.74799 | 2 | 3.66E-05 | 0.92 | 4.33  | -      | 1050.8 |          |
| AHQ-1-10, 4115 - 4180                                      | K.GGVNDFQGVQLNVR.F               | 1617.74799 | 2 | 9.67E-06 | 0.71 | 3.35  | -      | 615.4  |          |
| AHQ-1-4, 4594 - 4607                                       | K.GGVNDFQGVQLNVR.F               | 1617.74799 | 2 | 3.73E-04 | 0.67 | 3.42  | -      | 600.9  |          |
| AHQ-1-2, 4897 - 4913                                       | K.GGVNDFQGVQLNVR.F               | 1617.74799 | 2 | 2.72E-04 | 0.87 | 4.18  | -      | 667.5  |          |
| AHQ-1-2, 4801                                              | K.GGVNDFQGVQLNVR.F               | 1617.74799 | 2 | 3.47E-10 | 0.91 | 4.23  | -      | 809.1  |          |
| AHQ-1-10, 4007 - 4017                                      | K.GGVNDFQGVQLNVR.F               | 1617.74799 | 2 | 4.34E-04 | 0.91 | 4.54  | -      | 878.7  |          |
| AHQ-1-5, 4567 - 4638                                       | K.GGVNDFQGVQLNVR.F               | 1617.74799 | 2 | 1.01E-09 | 0.93 | 4.22  | -      | 994.1  |          |
| AHQ-1-6, 4322 - 4390                                       | K.GGVNDFQGVQLNVR.F               | 1617.74799 | 2 | 4.65E-05 | 0.90 | 3.92  | -      | 890.3  |          |
| AHQ-1-5, 4803                                              | K.GGVNDFQGVQLNVR.F               | 1617.74799 | 2 | 1.28E-05 | 0.63 | 2.82  | -      | 545.6  |          |
| AHQ-1-13, 4273 - 4335                                      | K.GGVNDFQGVQLNVR.F               | 1617.74799 | 2 | 2.34E-07 | 0.83 | 4.18  | -      | 482.8  |          |
| AHQ-1-4, 4826 - 4894                                       | K.GGVNDFQGVQLNVR.F               | 1617.74799 | 2 | 2.92E-07 | 0.88 | 4.29  | -      | 694.2  |          |
| AHQ-1-3, 4378                                              | K.GGVNDFQGVQLNVR.F               | 1617.74799 | 2 | 3.12E-06 | 0.84 | 3.41  | -      | 798.0  |          |
| AHQ-1-6, 4539 - 4582                                       | K.GGVNDFQGVQLNVR.F               | 1617.74799 | 2 | 4.41E-10 | 0.90 | 4.07  | -      | 736.6  |          |
| AHQ-1-3, 4761 - 4826                                       | K.GGVNDFQGVQLNVR.F               | 1617.74799 | 2 | 2.23E-06 | 0.90 | 3.95  | -      | 777.6  |          |
| AHQ-1-2, 4715 - 4797                                       | K.GGVNDFQGVQLNVR.F               | 1617.74799 | 2 | 4.71E-08 | 0.94 | 4.67  | -      | 1031.5 |          |
| AHQ-1-10, 3911 - 3920                                      | K.GGVNDFQGVQLNVR.F               | 1617.74799 | 2 | 1.12E-06 | 0.92 | 4.45  | -      | 941.8  |          |
| AHQ-1-9, 4671                                              | K.GGVNDFQGVQLNVR.F               | 1617.74799 | 2 | 8.14E-04 | 0.83 | 3.70  | -      | 665.5  |          |
| AHQ-1-11, 4134 - 4151                                      | K.GGVNDFQGVQLNVR.F               | 1617.74799 | 2 | 9.13E-05 | 0.89 | 4.55  | -      | 748.4  |          |
| AHQ-1-13- , 4544                                           | K.GGVNDFQGVQLNVR.F               | 1617.74799 | 2 | 4.06E-04 | 0.75 | 3.53  | -      | 566.0  |          |
| AHQ-1-7, 4636                                              | K.GGVNDFQGVQLNVR.F               | 1617.74799 | 2 | 5.14E-07 | 0.92 | 4.29  | -      | 839.9  |          |
| AHQ-1-9, 4326 - 4403                                       | K.GGVNDFQGVQLNVR.F               | 1617.74799 | 2 | 1.52E-05 | 0.80 | 3.37  | -      | 603.8  |          |
| AHQ-1-9, 4531                                              | K.GGVNDFQGVQLNVR.F               | 1617.74799 | 2 | 1.01E-08 | 0.94 | 4.07  | -      | 1267.1 |          |
| AHQ-1-4, 2160 - 2175                                       | K.GPDPSSPAFR.I                   | 1031.10364 | 2 | 4.05E-06 | 0.70 | 3.02  | -      | 481.3  |          |
| AHQ-1-6, 2054                                              | K.GPDPSSPAFR.I                   | 1031.10364 | 2 | 2.57E-04 | 0.55 | 2.53  | -      | 478.8  |          |
| AHQ-1-5, 2039                                              | K.GPDPSSPAFR.I                   | 1031.10364 | 2 | 3.93E-06 | 0.65 | 2.63  | -      | 419.2  |          |
| AHQ-1-3, 2174                                              | K.GPDPSSPAFR.I                   | 1031.10364 | 2 | 5.28E-05 | 0.76 | 2.74  | -      | 530.0  |          |
| AHQ-1-2, 2250                                              | K.GPDPSSPAFR.I                   | 1031.10364 | 2 | 1.42E-04 | 0.60 | 2.78  | -      | 409.2  |          |
| AHQ-1-11, 2142                                             | K.GPDPSSPAFR.I                   | 1031.10364 | 2 | 1.21E-04 | 0.71 | 3.17  | -      | 395.8  |          |
| AHQ-1-10, 2089                                             | K.GPDPSSPAFR.I                   | 1031.10364 | 2 | 1.36E-04 | 0.82 | 3.18  | -      | 585.3  |          |
| AHQ-1-4, 3106                                              | R.GTLLALER.K                     | 873.03234  | 2 | 8.01E-04 | 0.91 | 3.49  | -      | 1053.6 |          |
| AHQ-1-6, 2950                                              | R.GTLLALER.K                     | 873.03234  | 2 | 7.78E-04 | 0.91 | 3.09  | -      | 1047.7 |          |
| AHQ-1-2, 3189                                              | R.GTLLALER.K                     | 873.03234  | 2 | 9.92E-04 | 0.92 | 3.32  | -      | 1156.1 |          |
| AHQ-1-12, 3026                                             | R.GTLLALER.K                     | 873.03234  | 2 | 1.05E-04 | 0.84 | 3.03  | -      | 942.9  |          |

|                          |                             |            |   |          |      |      |   |        |
|--------------------------|-----------------------------|------------|---|----------|------|------|---|--------|
| AHQ-1-3, 3079 - 3083     | R.GTLALER.K                 | 873.03234  | 2 | 8.01E-04 | 0.90 | 3.62 | - | 869.7  |
| AHQ-1-2, 2779            | K.GTSONDPNWWWV.R.H          | 1373.45608 | 2 | 1.37E-06 | 0.76 | 3.29 | - | 884.4  |
| AHQ-1-7, 2593            | K.GTSONDPNWWWV.R.H          | 1373.45608 | 2 | 1.43E-04 | 0.49 | 2.61 | - | 709.0  |
| AHQ-1-1, 6531 - 6596     | R.IEDANLIPVPDDKFQDLVDAV.R.A | 2580.87450 | 2 | 4.00E-05 | 0.51 | 2.67 | - | 253.3  |
| AHQ-1-3, 6613 - 6631     | R.IEDANLIPVPDDKFQDLVDAV.R.A | 2580.87450 | 3 | 1.73E-06 | 0.60 | 3.27 | - | 274.0  |
| AHQ-1-1, 6516 - 6587     | R.IEDANLIPVPDDKFQDLVDAV.R.A | 2580.87450 | 3 | 4.64E-10 | 0.67 | 3.44 | - | 344.9  |
| AHQ-1-1, 6648            | R.IEDANLIPVPDDKFQDLVDAV.R.A | 2580.87450 | 3 | 1.32E-08 | 0.88 | 4.31 | - | 497.6  |
| AHQ-1-3, 6765            | R.IEDANLIPVPDDKFQDLVDAV.R.A | 2580.87450 | 3 | 1.77E-08 | 0.60 | 3.29 | - | 312.9  |
| AHQ-1-14 - , 6344        | R.IEDANLIPVPDDKFQDLVDAV.R.A | 2580.87450 | 3 | 5.38E-05 | 0.82 | 3.64 | - | 535.6  |
| AHQ-1-10, 5931 - 5939    | R.IEDANLIPVPDDKFQDLVDAV.R.A | 2580.87450 | 2 | 1.28E-06 | 0.73 | 3.42 | - | 390.7  |
| AHQ-1-10, 5869 - 5932    | R.IEDANLIPVPDDKFQDLVDAV.R.A | 2580.87450 | 3 | 9.01E-07 | 0.74 | 3.93 | - | 365.9  |
| AHQ-1-13, 6027 - 6105    | R.IEDANLIPVPDDKFQDLVDAV.R.A | 2580.87450 | 3 | 1.30E-05 | 0.73 | 3.73 | - | 365.6  |
| AHQ-1-7, 6749 - 6761     | R.IEDANLIPVPDDKFQDLVDAV.R.A | 2580.87450 | 3 | 1.07E-06 | 0.60 | 3.15 | - | 354.0  |
| AHQ-1-10, 5800 - 5865    | R.IEDANLIPVPDDKFQDLVDAV.R.A | 2580.87450 | 2 | 1.22E-05 | 0.84 | 3.76 | - | 347.4  |
| AHQ-1-5, 6713 - 6787     | R.IEDANLIPVPDDKFQDLVDAV.R.A | 2580.87450 | 3 | 5.71E-08 | 0.67 | 3.25 | - | 400.7  |
| AHQ-1-4, 6774 - 6854     | R.IEDANLIPVPDDKFQDLVDAV.R.A | 2580.87450 | 3 | 9.56E-12 | 0.64 | 3.30 | - | 330.7  |
| AHQ-1-4, 6783 - 6855     | R.IEDANLIPVPDDKFQDLVDAV.R.A | 2580.87450 | 2 | 3.46E-08 | 0.65 | 3.13 | - | 198.3  |
| AHQ-1-4, 6931 - 6932     | R.IEDANLIPVPDDKFQDLVDAV.R.A | 2580.87450 | 3 | 1.68E-08 | 0.72 | 3.51 | - | 347.6  |
| AHQ-1-12, 6131 - 6134    | R.IEDANLIPVPDDKFQDLVDAV.R.A | 2580.87450 | 2 | 9.14E-09 | 0.72 | 3.36 | - | 211.7  |
| AHQ-1-7, 6756 - 6770     | R.IEDANLIPVPDDKFQDLVDAV.R.A | 2580.87450 | 2 | 4.78E-06 | 0.76 | 3.34 | - | 279.9  |
| AHQ-1-6, 6574 - 6640     | R.IEDANLIPVPDDKFQDLVDAV.R.A | 2580.87450 | 3 | 2.80E-09 | 0.76 | 3.95 | - | 369.6  |
| AHQ-1-2, 6782 - 6849     | R.IEDANLIPVPDDKFQDLVDAV.R.A | 2580.87450 | 3 | 1.65E-08 | 0.78 | 3.48 | - | 535.1  |
| AHQ-1-11, 5908 - 5974    | R.IEDANLIPVPDDKFQDLVDAV.R.A | 2580.87450 | 3 | 8.46E-09 | 0.73 | 3.21 | - | 355.9  |
| AHQ-1-11, 5914           | R.IEDANLIPVPDDKFQDLVDAV.R.A | 2580.87450 | 2 | 3.94E-05 | 0.49 | 2.63 | - | 246.9  |
| AHQ-1-2, 2715            | K.IMADSGPIYDK.T             | 1210.38204 | 2 | 3.69E-05 | 0.88 | 3.30 | - | 762.3  |
| AHQ-1-14 - , 2332 - 2367 | K.IM'ADSGPIYDK.T            | 1226.38144 | 2 | 9.80E-04 | 0.71 | 2.77 | - | 521.7  |
| AHQ-1-11, 2550           | K.IMADSGPIYDK.T             | 1210.38204 | 2 | 2.06E-06 | 0.91 | 3.54 | - | 688.8  |
| AHQ-1-2, 2461            | K.IM'ADSGPIYDK.T            | 1226.38144 | 2 | 4.35E-05 | 0.75 | 3.16 | - | 507.0  |
| AHQ-1-13, 6343 - 6344    | R.IPESGGDNSVDFIFELTGAAR.K   | 2196.35899 | 2 | 4.21E-10 | 0.97 | 6.11 | - | 922.2  |
| AHQ-1-14 - , 6543        | R.IPESGGDNSVDFIFELTGAAR.K   | 2196.35899 | 2 | 9.45E-12 | 0.97 | 5.55 | - | 1088.1 |
| AHQ-1-4, 7170            | R.IPESGGDNSVDFIFELTGAAR.K   | 2196.35899 | 2 | 3.10E-10 | 0.95 | 5.03 | - | 1009.8 |
| AHQ-1-10, 6117 - 6196    | R.IPESGGDNSVDFIFELTGAAR.K   | 2196.35899 | 2 | 4.47E-08 | 0.96 | 5.30 | - | 1091.8 |
| AHQ-1-2, 7177 - 7245     | R.IPESGGDNSVDFIFELTGAAR.K   | 2196.35899 | 2 | 1.33E-08 | 0.97 | 5.33 | - | 1204.6 |
| AHQ-1-9, 7083            | R.IPESGGDNSVDFIFELTGAAR.K   | 2196.35899 | 2 | 6.33E-11 | 0.95 | 4.77 | - | 944.5  |
| AHQ-1-9, 6930            | R.IPESGGDNSVDFIFELTGAAR.K   | 2196.35899 | 2 | 3.54E-08 | 0.96 | 5.57 | - | 1030.5 |
| AHQ-1-13 - , 6795        | R.IPESGGDNSVDFIFELTGAAR.K   | 2196.35899 | 2 | 5.75E-09 | 0.97 | 5.50 | - | 1252.1 |
| AHQ-1-1, 6851            | R.IPESGGDNSVDFIFELTGAAR.K   | 2196.35899 | 2 | 5.01E-06 | 0.97 | 5.49 | - | 1239.9 |
| AHQ-1-3, 7006 - 7083     | R.IPESGGDNSVDFIFELTGAAR.K   | 2196.35899 | 2 | 1.04E-09 | 0.97 | 5.25 | - | 1361.8 |
| AHQ-1-7, 7145            | R.IPESGGDNSVDFIFELTGAAR.K   | 2196.35899 | 2 | 4.01E-07 | 0.93 | 4.46 | - | 867.0  |
| AHQ-1-6, 6970 - 6972     | R.IPESGGDNSVDFIFELTGAAR.K   | 2196.35899 | 2 | 1.50E-10 | 0.96 | 5.83 | - | 914.5  |
| AHQ-1-5, 7126 - 7133     | R.IPESGGDNSVDFIFELTGAAR.K   | 2196.35899 | 2 | 3.39E-09 | 0.97 | 5.75 | - | 1338.6 |
| AHQ-1-10, 2211 - 2256    | R.KDHSGQVFSVSNKG.A          | 1589.73455 | 2 | 1.90E-06 | 0.59 | 2.82 | - | 498.1  |
| AHQ-1-6, 2198            | R.KDHSGQVFSVSNKG.A          | 1589.73455 | 3 | 3.72E-07 | 0.91 | 3.62 | - | 1405.3 |
| AHQ-1-6, 2203            | R.KDHSGQVFSVSNKG.A          | 1589.73455 | 2 | 4.29E-05 | 0.90 | 3.78 | - | 982.7  |
| AHQ-1-9, 2158 - 2227     | R.KDHSGQVFSVSNKG.A          | 1589.73455 | 2 | 1.13E-09 | 0.73 | 3.20 | - | 485.1  |
| AHQ-1-5, 2305            | R.KDHSGQVFSVSNKG.A          | 1589.73455 | 2 | 1.27E-07 | 0.71 | 2.80 | - | 831.1  |
| AHQ-1-3, 2357            | R.KDHSGQVFSVSNKG.A          | 1589.73455 | 2 | 2.32E-07 | 0.78 | 2.85 | - | 928.5  |
| AHQ-1-4, 2346            | R.KDHSGQVFSVSNKG.A          | 1589.73455 | 2 | 3.58E-07 | 0.86 | 3.36 | - | 839.9  |
| AHQ-1-3, 2462            | R.KDHSGQVFSVSNKG.A          | 1589.73455 | 2 | 2.01E-05 | 0.93 | 3.50 | - | 1195.6 |
| AHQ-1-2, 2554            | R.KDHSGQVFSVSNKG.A          | 1589.73455 | 2 | 3.69E-08 | 0.94 | 3.71 | - | 1405.5 |
| AHQ-1-2, 2469            | R.KDHSGQVFSVSNKG.A          | 1589.73455 | 2 | 9.08E-09 | 0.89 | 3.96 | - | 894.5  |
| AHQ-1-4, 2444            | R.KDHSGQVFSVSNKG.A          | 1589.73455 | 2 | 5.28E-07 | 0.88 | 3.35 | - | 957.1  |
| AHQ-1-2, 2507            | K.KIMADSGPIYDK.T            | 1338.55496 | 1 | 2.61E-04 | 0.68 | 2.75 | - | 582.9  |
| AHQ-1-4, 2395            | K.KIMADSGPIYDK.T            | 1338.55496 | 2 | 4.90E-04 | 0.86 | 3.56 | - | 694.0  |
| AHQ-1-2, 2509            | K.KIMADSGPIYDK.T            | 1338.55496 | 2 | 1.24E-04 | 0.84 | 3.38 | - | 546.1  |
| AHQ-1-3, 2373            | R.KVTEENKELANEL.R           | 1673.84976 | 2 | 2.88E-10 | 0.93 | 4.18 | - | 1538.3 |
| AHQ-1-1, 2531            | R.KVTEENKELANEL.R           | 1673.84976 | 3 | 9.43E-04 | 0.68 | 3.13 | - | 625.2  |
| AHQ-1-6, 2359            | R.KVTEENKELANEL.R           | 1673.84976 | 2 | 4.85E-09 | 0.95 | 4.46 | - | 1332.2 |
| AHQ-1-5, 2226            | R.KVTEENKELANEL.R           | 1673.84976 | 3 | 4.07E-05 | 0.85 | 3.92 | - | 786.2  |
| AHQ-1-3, 2378 - 2451     | R.KVTEENKELANEL.R           | 1673.84976 | 3 | 3.82E-06 | 0.85 | 4.23 | - | 683.1  |
| AHQ-1-4, 2360 - 2370     | R.KVTEENKELANEL.R           | 1673.84976 | 2 | 3.07E-11 | 0.95 | 4.99 | - | 1204.8 |
| AHQ-1-4, 2375            | R.KVTEENKELANEL.R           | 1673.84976 | 3 | 7.23E-06 | 0.80 | 3.60 | - | 794.5  |
| AHQ-1-1, 2476 - 2545     | R.KVTEENKELANEL.R           | 1673.84976 | 2 | 7.98E-08 | 0.95 | 4.80 | - | 1386.4 |
| AHQ-1-2, 2474            | R.KVTEENKELANEL.R           | 1673.84976 | 2 | 1.38E-07 | 0.93 | 4.66 | - | 1119.1 |
| AHQ-1-3, 2122            | R.KVTEENKELANEL.R           | 1673.84976 | 2 | 5.49E-08 | 0.93 | 4.55 | - | 1146.0 |
| AHQ-1-6, 2236            | R.KVTEENKELANEL.R           | 1673.84976 | 2 | 6.98E-07 | 0.94 | 4.84 | - | 1215.9 |
| AHQ-1-3, 2531            | R.LCNSPSPQMNGKPCGEAR.E      | 2135.34557 | 2 | 8.81E-07 | 0.80 | 3.55 | - | 357.6  |
| AHQ-1-2, 2262            | R.LCNSPSPQM'NGKPCGEAR.E     | 2151.34497 | 2 | 2.64E-04 | 0.71 | 3.24 | - | 422.5  |
| AHQ-1-5, 2478            | R.LCNSPSPQMNGKPCGEAR.E      | 2135.34557 | 2 | 4.67E-10 | 0.90 | 4.04 | - | 569.8  |
| AHQ-1-2, 2609            | R.LCNSPSPQMNGKPCGEAR.E      | 2135.34557 | 3 | 5.98E-05 | 0.86 | 3.52 | - | 980.4  |
| AHQ-1-2, 2605 - 2610     | R.LCNSPSPQMNGKPCGEAR.E      | 2135.34557 | 2 | 5.85E-09 | 0.82 | 3.83 | - | 502.6  |
| AHQ-1-4, 2206            | R.LCNSPSPQM'NGKPCGEAR.E     | 2151.34497 | 3 | 1.93E-05 | 0.84 | 3.88 | - | 664.8  |
| AHQ-1-2, 5905 - 5914     | K.MENAEALDVPQSVFTR.D        | 1850.08607 | 2 | 2.60E-04 | 0.92 | 4.60 | - | 533.1  |
| AHQ-1-1, 5764            | K.MENAEALDVPQSVFTR.D        | 1850.08607 | 2 | 2.21E-04 | 0.64 | 3.08 | - | 267.1  |
| AHQ-1-5, 5489 - 5494     | K.M'ENAEALDVPQSVFTR.D       | 1866.08547 | 2 | 1.86E-04 | 0.80 | 3.49 | - | 635.7  |
| AHQ-1-11, 5146 - 5159    | K.MENAEALDVPQSVFTR.D        | 1850.08607 | 2 | 6.34E-07 | 0.93 | 4.57 | - | 595.2  |
| AHQ-1-4, 5844            | K.MENAEALDVPQSVFTR.D        | 1850.08607 | 2 | 6.38E-04 | 0.89 | 3.72 | - | 725.8  |
| AHQ-1-3, 5747            | K.MENAEALDVPQSVFTR.D        | 1850.08607 | 2 | 1.31E-08 | 0.89 | 4.10 | - | 486.0  |
| AHQ-1-9, 5523 - 5531     | K.MENAEALDVPQSVFTR.D        | 1850.08607 | 2 | 2.31E-09 | 0.93 | 4.61 | - | 550.9  |
| AHQ-1-3, 5489            | K.M'ENAEALDVPQSVFTR.D       | 1866.08547 | 2 | 1.33E-07 | 0.90 | 3.83 | - | 645.4  |
| AHQ-1-5, 5710            | K.MENAEALDVPQSVFTR.D        | 1850.08607 | 2 | 6.34E-04 | 0.88 | 3.53 | - | 613.0  |
| AHQ-1-7, 5692            | K.MENAEALDVPQSVFTR.D        | 1850.08607 | 2 | 3.32E-05 | 0.78 | 3.46 | - | 361.0  |
| AHQ-1-2, 5665            | K.M'ENAEALDVPQSVFTR.D       | 1866.08547 | 2 | 7.32E-10 | 0.93 | 4.31 | - | 728.7  |
| AHQ-1-3, 3138            | K.QVTSYWDNTPTR.A            | 1596.68241 | 2 | 5.73E-07 | 0.71 | 2.67 | - | 695.9  |
| AHQ-1-7, 3056            | K.QVTSYWDNTPTR.A            | 1596.68241 | 2 | 1.23E-06 | 0.87 | 3.11 | - | 762.4  |
| AHQ-1-1, 3252            | K.QVTSYWDNTPTR.A            | 1596.68241 | 2 | 8.09E-06 | 0.76 | 3.17 | - | 528.3  |
| AHQ-1-2, 3262            | K.QVTSYWDNTPTR.A            | 1596.68241 | 2 | 7.73E-06 | 0.92 | 3.64 | - | 903.9  |
| AHQ-1-9, 2976            | K.QVTSYWDNTPTR.A            | 1596.68241 | 2 | 2.00E-05 | 0.71 | 2.58 | - | 504.1  |
| AHQ-1-5, 3041            | K.QVTSYWDNTPTR.A            | 1596.68241 | 2 | 1.05E-06 | 0.90 | 3.66 | - | 657.4  |
| AHQ-1-9, 2679            | R.RPPLCYHNGVQYR.N           | 1661.86889 | 2 | 1.46E-04 | 0.89 | 3.32 | - | 946.7  |
| AHQ-1-2, 2786            | R.RPPLCYHNGVQYR.N           | 1661.86889 | 2 | 1.88E-04 | 0.86 | 3.27 | - | 628.9  |
| AHQ-1-2, 2933            | R.RPPLCYHNGVQYR.N           | 1661.86889 | 2 | 1.92E-06 | 0.88 | 3.82 | - | 593.9  |
| AHQ-1-5, 2683 - 2753     | R.RPPLCYHNGVQYR.N           | 1661.86889 | 2 | 9.98E-04 | 0.93 | 4.05 | - | 671.9  |
| AHQ-1-4, 3946            | K.SITLHVQEDR.A              | 1208.34588 | 2 | 2.21E-06 | 0.93 | 3.45 | - | 1287.3 |
| AHQ-1-13, 3836           | K.SITLHVQEDR.A              | 1208.34588 | 2 | 1.36E-05 | 0.93 | 3.33 | - | 1538.7 |
| AHQ-1-2, 4067 - 4086     | K.SITLHVQEDR.A              | 1208.34588 | 2 | 2.85E-06 | 0.95 | 3.89 | - | 1391.0 |
| AHQ-1-6, 3704 - 3756     | K.SITLHVQEDR.A              | 1208.34588 | 2 | 1.66E-07 | 0.93 | 2.93 | - | 1430.1 |
| AHQ-1-11, 3616           | K.SITLHVQEDR.A              | 1208.34588 | 2 | 9.80E-05 | 0.92 | 3.46 | - | 1270.8 |
| AHQ-1-13 - , 3975        | K.SITLHVQEDR.A              | 1208.34588 | 2 | 2.79E-06 | 0.93 | 3.54 | - | 1242.9 |
| AHQ-1-3, 3922            | K.SITLHVQEDR.A              | 1208.34588 | 2 | 8.99E-07 | 0.91 | 3.01 | - | 1159.0 |
| AHQ-1-10, 3516           | K.SITLHVQEDR.A              | 1208.34588 | 2 | 7.48E-06 | 0.94 | 3.92 | - | 1195.6 |
| AHQ-1-13, 3747 - 3827    | K.SITLHVQEDR.A              | 1208.34588 | 2 | 2.67E-05 | 0.88 | 3.00 | - | 981.8  |
| AHQ-1-12, 3738           | K.SITLHVQEDR.A              | 1208.34588 | 2 | 2.17E-06 | 0.90 | 2.92 | - | 1191.1 |
| AHQ-1-5, 3798            | K.SITLHVQEDR.A              | 1208.34588 | 2 | 3.60E-06 | 0.87 | 2.92 | - | 1047.1 |
| AHQ-1-1, 4583            | R.TIVTTLQDSIR.K             | 1247.42355 | 2 | 5.18E-07 | 0.97 | 4.16 | - | 1850.6 |
| AHQ-1-12, 4266           | R.TIVTTLQDSIR.K             | 1247.42355 | 2 | 4.70E-07 | 0.95 | 3.45 | - | 1666.0 |
| AHQ-1-6, 4335 - 4338     | R.TIVTTLQDSIR.K             | 1247.42355 | 2 | 7.47E-07 | 0.97 | 3.95 | - | 1872.5 |



|                             |                                          |            |   |          |       |        |       |         |
|-----------------------------|------------------------------------------|------------|---|----------|-------|--------|-------|---------|
| AHQ-1-4, 4620               | R.TIVTTLQDSIR.K                          | 1247.42355 | 2 | 6.97E-05 | 0.92  | 3.20   | -     | 1213.6  |
| AHQ-1-2, 4690               | R.TIVTTLQDSIR.K                          | 1247.42355 | 2 | 2.83E-07 | 0.96  | 4.41   | -     | 1542.7  |
| AHQ-1-4, 4536 - 4548        | R.TIVTTLQDSIR.K                          | 1247.42355 | 2 | 3.35E-07 | 0.97  | 4.06   | -     | 1824.6  |
| AHQ-1-7, 4416               | R.TIVTTLQDSIR.K                          | 1247.42355 | 2 | 5.35E-07 | 0.95  | 3.52   | -     | 1470.3  |
| AHQ-1-9, 4244 - 4314        | R.TIVTTLQDSIR.K                          | 1247.42355 | 2 | 3.66E-06 | 0.94  | 3.24   | -     | 1439.5  |
| AHQ-1-6, 3282               | R.TIVTTLQDSIR.K                          | 1247.42355 | 2 | 1.55E-05 | 0.95  | 3.30   | -     | 1497.0  |
| AHQ-1-3, 3386               | R.TIVTTLQDSIR.K                          | 1247.42355 | 2 | 3.34E-04 | 0.95  | 3.38   | -     | 1748.3  |
| AHQ-1-5, 4419               | R.TIVTTLQDSIR.K                          | 1247.42355 | 2 | 2.95E-06 | 0.96  | 4.09   | -     | 1414.9  |
| AHQ-1-3, 4513 - 4531        | R.TIVTTLQDSIR.K                          | 1247.42355 | 2 | 5.57E-06 | 0.97  | 4.21   | -     | 1900.0  |
| AHQ-1-6, 2475               | K.VTEENKELANELR.R                        | 1545.67685 | 2 | 4.09E-05 | 0.89  | 3.66   | -     | 997.6   |
| AHQ-1-9, 2452 - 2455        | K.VTEENKELANELR.R                        | 1545.67685 | 2 | 2.61E-06 | 0.88  | 3.98   | -     | 791.8   |
| AHQ-1-5, 2454               | K.VTEENKELANELR.R                        | 1545.67685 | 2 | 4.32E-08 | 0.79  | 3.23   | -     | 791.1   |
| gi 28626504 ref NP_113659.3 | UNC-112 related protein 2 [Homo sapiens] |            |   | 1.00E-30 | 27.75 | 330.36 | 62.60 | 75429.7 |
| AHQ-1-9, 3120               | K.AGDALWLR.F                             | 902.03223  | 2 | 4.22E-04 | 0.92  | 3.94   | -     | 1148.3  |
| AHQ-1-14 - , 6440           | R.ARGEELDEDLFLQLTGGHEAF                  | 2348.51032 | 2 | 8.38E-04 | 0.92  | 4.13   | -     | 1168.8  |
| AHQ-1-6, 6740 - 6806        | R.ASFSQLPQAVAAICR.L                      | 1768.02967 | 2 | 1.63E-04 | 0.96  | 4.85   | -     | 896.2   |
| AHQ-1-12, 6377 - 6378       | R.ASFSQLPQAVAAICR.L                      | 1768.02967 | 2 | 7.51E-08 | 0.94  | 4.39   | -     | 1044.6  |
| AHQ-1-11, 6083 - 6151       | R.ASFSQLPQAVAAICR.L                      | 1768.02967 | 2 | 4.16E-05 | 0.84  | 3.49   | -     | 528.5   |
| AHQ-1-10, 6045              | R.ASFSQLPQAVAAICR.L                      | 1768.02967 | 2 | 1.95E-04 | 0.91  | 4.00   | -     | 823.3   |
| AHQ-1-1, 6785               | R.ASFSQLPQAVAAICR.L                      | 1768.02967 | 2 | 1.03E-05 | 0.89  | 3.97   | -     | 641.3   |
| AHQ-1-9, 6732 - 6786        | R.ASFSQLPQAVAAICR.L                      | 1768.02967 | 2 | 4.53E-06 | 0.96  | 5.13   | -     | 936.7   |
| AHQ-1-4, 7046               | R.ASFSQLPQAVAAICR.L                      | 1768.02967 | 2 | 6.96E-07 | 0.96  | 4.90   | -     | 1025.2  |
| AHQ-1-6, 6787 - 6855        | R.ASFSQLPQAVAAICR.L                      | 1768.02967 | 2 | 4.82E-08 | 0.94  | 4.41   | -     | 898.5   |
| AHQ-1-2, 7090               | R.ASFSQLPQAVAAICR.L                      | 1768.02967 | 2 | 2.34E-04 | 0.90  | 3.90   | -     | 711.3   |
| AHQ-1-6, 6790               | R.ASFSQLPQAVAAICR.L                      | 1768.02967 | 3 | 2.19E-06 | 0.92  | 4.46   | -     | 1056.2  |
| AHQ-1-6, 7074               | R.ASFSQLPQAVAAICR.L                      | 1768.02967 | 2 | 1.13E-09 | 0.90  | 4.02   | -     | 731.1   |
| AHQ-1-7, 6986               | R.ASFSQLPQAVAAICR.L                      | 1768.02967 | 2 | 1.41E-08 | 0.93  | 4.20   | -     | 760.5   |
| AHQ-1-5, 6985               | R.ASFSQLPQAVAAICR.L                      | 1768.02967 | 2 | 1.43E-08 | 0.93  | 4.02   | -     | 923.6   |
| AHQ-1-3, 6882               | R.ASFSQLPQAVAAICR.L                      | 1768.02967 | 2 | 1.03E-06 | 0.90  | 3.79   | -     | 718.0   |
| AHQ-1-9, 3443               | K.EKEPEEELYDLK.V                         | 1609.71294 | 2 | 4.59E-10 | 0.82  | 3.55   | -     | 608.2   |
| AHQ-1-7, 3657               | K.EKEPEEELYDLK.V                         | 1609.71294 | 2 | 2.31E-05 | 0.74  | 3.30   | -     | 376.8   |
| AHQ-1-3, 3750               | K.EKEPEEELYDLK.V                         | 1609.71294 | 2 | 4.08E-04 | 0.66  | 2.72   | -     | 374.0   |
| AHQ-1-6, 3484 - 3530        | K.EKEPEEELYDLK.V                         | 1609.71294 | 2 | 5.95E-04 | 0.55  | 2.93   | -     | 305.4   |
| AHQ-1-6, 7115 - 7194        | R.FIQAWQSLPDPFGISYVMVR.F                 | 2258.62653 | 2 | 1.11E-09 | 0.96  | 5.33   | -     | 757.7   |
| AHQ-1-6, 7068               | R.FIQAWQSLPDPFGISYVMVR.F                 | 2274.62593 | 2 | 4.32E-05 | 0.92  | 4.46   | -     | 578.4   |
| AHQ-1-12, 6493              | R.FIQAWQSLPDPFGISYVMVR.F                 | 2274.62593 | 2 | 2.59E-04 | 0.94  | 4.57   | -     | 653.3   |
| AHQ-1-6, 3206               | K.GCEVVPDINVSGQK.F                       | 1489.63335 | 1 | 5.75E-08 | 0.90  | 4.01   | -     | 819.5   |
| AHQ-1-9, 3155               | K.GCEVVPDINVSGQK.F                       | 1489.63335 | 1 | 4.06E-06 | 0.86  | 3.39   | -     | 774.5   |
| AHQ-1-9, 3151               | K.GCEVVPDINVSGQK.F                       | 1489.63335 | 1 | 6.25E-04 | 0.70  | 2.82   | -     | 673.0   |
| AHQ-1-7, 3257               | K.GCEVVPDINVSGQK.F                       | 1489.63335 | 2 | 6.69E-04 | 0.82  | 3.09   | -     | 694.7   |
| AHQ-1-6, 7146 - 7147        | R.GEELDEDLFLQLTGGHEAF                    | 2121.24574 | 2 | 2.72E-08 | 0.93  | 4.10   | -     | 1129.8  |
| AHQ-1-14 - , 6619           | R.GEELDEDLFLQLTGGHEAF                    | 2121.24574 | 2 | 1.90E-08 | 0.86  | 3.49   | -     | 753.8   |
| AHQ-1-6, 3067               | R.GM*PAHFSDSAQTEACYHM*LSR.P              | 2430.63997 | 3 | 2.73E-05 | 0.91  | 4.32   | -     | 1220.1  |
| AHQ-1-6, 3990               | R.GM*PAHFSDSAQTEACYHM*LSR.P              | 2398.64117 | 3 | 3.41E-08 | 0.97  | 5.97   | -     | 1357.9  |
| AHQ-1-9, 2611               | R.HPEELSLLR.A                            | 1094.24601 | 1 | 5.87E-05 | 0.22  | 1.95   | -     | 282.1   |
| AHQ-1-14 - , 3888           | R.IDLAVGDVVK.T                           | 1029.21223 | 1 | 1.07E-04 | 0.58  | 2.35   | -     | 575.3   |
| AHQ-1-6, 3818 - 3886        | R.IDLAVGDVVK.T                           | 1029.21223 | 2 | 9.58E-05 | 0.88  | 3.32   | -     | 899.6   |
| AHQ-1-13 - , 3987           | R.IDLAVGDVVK.T                           | 1029.21223 | 1 | 4.29E-04 | 0.82  | 3.13   | -     | 643.6   |
| AHQ-1-6, 3819 - 3887        | R.IDLAVGDVVK.T                           | 1029.21223 | 1 | 4.02E-05 | 0.24  | 2.00   | -     | 414.2   |
| AHQ-1-11, 3672              | R.IDLAVGDVVK.T                           | 1029.21223 | 1 | 4.24E-04 | 0.34  | 2.19   | -     | 424.0   |
| AHQ-1-1, 4061               | R.IDLAVGDVVK.T                           | 1029.21223 | 2 | 4.39E-04 | 0.93  | 3.54   | -     | 1433.9  |
| AHQ-1-6, 4471 - 4542        | R.ILEAHQNVAQLSLAEQRLR.F                  | 2105.38372 | 2 | 1.00E-30 | 0.98  | 6.56   | -     | 2325.8  |
| AHQ-1-6, 4706               | R.ILEAHQNVAQLSLAEQRLR.F                  | 2105.38372 | 2 | 1.80E-13 | 0.98  | 7.27   | -     | 1553.9  |
| AHQ-1-6, 4486 - 4562        | R.ILEAHQNVAQLSLAEQRLR.F                  | 2105.38372 | 3 | 5.48E-05 | 0.63  | 3.09   | -     | 1132.1  |
| AHQ-1-11, 4220              | R.ILEAHQNVAQLSLAEQRLR.F                  | 2105.38372 | 3 | 3.00E-05 | 0.95  | 5.92   | -     | 1249.0  |
| AHQ-1-5, 4599               | R.ILEAHQNVAQLSLAEQRLR.F                  | 2105.38372 | 2 | 2.07E-04 | 0.92  | 4.89   | -     | 1128.4  |
| AHQ-1-11, 4222              | R.ILEAHQNVAQLSLAEQRLR.F                  | 2105.38372 | 2 | 3.33E-14 | 0.98  | 6.82   | -     | 2072.5  |
| AHQ-1-12, 4401              | R.ILEAHQNVAQLSLAEQRLR.F                  | 2105.38372 | 2 | 1.00E-08 | 0.98  | 5.74   | -     | 2006.8  |
| AHQ-1-13 - , 4567 - 4637    | R.ILEAHQNVAQLSLAEQRLR.F                  | 2105.38372 | 2 | 4.20E-05 | 0.98  | 5.54   | -     | 2018.0  |
| AHQ-1-9, 4639 - 4647        | R.ILEAHQNVAQLSLAEQRLR.F                  | 2105.38372 | 2 | 9.24E-06 | 0.95  | 4.67   | -     | 1398.0  |
| AHQ-1-9, 4418 - 4486        | R.ILEAHQNVAQLSLAEQRLR.F                  | 2105.38372 | 3 | 8.05E-07 | 0.91  | 4.84   | -     | 1111.5  |
| AHQ-1-1, 4709 - 4732        | R.ILEAHQNVAQLSLAEQRLR.F                  | 2105.38372 | 3 | 1.29E-05 | 0.85  | 3.82   | -     | 898.8   |
| AHQ-1-13, 4381              | R.ILEAHQNVAQLSLAEQRLR.F                  | 2105.38372 | 2 | 1.50E-11 | 0.98  | 5.72   | -     | 1787.1  |
| AHQ-1-9, 4383 - 4454        | R.ILEAHQNVAQLSLAEQRLR.F                  | 2105.38372 | 2 | 2.31E-06 | 0.98  | 5.85   | -     | 2575.6  |
| AHQ-1-6, 4887               | R.ILEAHQNVAQLSLAEQRLR.F                  | 2105.38372 | 2 | 5.00E-15 | 0.97  | 5.19   | -     | 1430.3  |
| AHQ-1-7, 4522               | R.ILEAHQNVAQLSLAEQRLR.F                  | 2105.38372 | 2 | 7.43E-08 | 0.98  | 6.05   | -     | 2122.6  |
| AHQ-1-3, 4666               | R.ILEAHQNVAQLSLAEQRLR.F                  | 2105.38372 | 3 | 8.54E-08 | 0.96  | 4.90   | -     | 2134.2  |
| AHQ-1-6, 4566               | R.ILEAHQNVAQLSLAEQRLR.F                  | 2105.38372 | 2 | 1.95E-13 | 0.98  | 7.06   | -     | 2111.0  |
| AHQ-1-9, 2486 - 2487        | R.KDEILGIANNR.L                          | 1243.39499 | 2 | 9.05E-04 | 0.88  | 3.06   | -     | 894.5   |
| AHQ-1-13, 2754 - 2811       | R.KDEILGIANNR.L                          | 1243.39499 | 2 | 2.11E-07 | 0.95  | 4.12   | -     | 1387.2  |
| AHQ-1-13 - , 2767 - 2831    | R.KDEILGIANNR.L                          | 1243.39499 | 2 | 1.44E-07 | 0.94  | 3.96   | -     | 1261.6  |
| AHQ-1-6, 2674 - 2751        | R.KDEILGIANNR.L                          | 1243.39499 | 2 | 3.68E-06 | 0.79  | 3.35   | -     | 870.0   |
| AHQ-1-6, 2519 - 2590        | R.KDEILGIANNR.L                          | 1243.39499 | 1 | 2.83E-05 | 0.48  | 2.08   | -     | 344.6   |
| AHQ-1-6, 2515 - 2586        | R.KDEILGIANNR.L                          | 1243.39499 | 2 | 6.10E-07 | 0.95  | 4.28   | -     | 1280.4  |
| AHQ-1-12, 2619              | R.KDEILGIANNR.L                          | 1243.39499 | 2 | 5.21E-04 | 0.94  | 3.40   | -     | 1370.2  |
| AHQ-1-9, 2482 - 2555        | R.KDEILGIANNR.L                          | 1243.39499 | 1 | 1.52E-05 | 0.31  | 2.00   | -     | 279.0   |
| AHQ-1-11, 3863              | R.KQDWSDHAIWWEQK.R                       | 1858.00504 | 2 | 2.24E-04 | 0.69  | 2.96   | -     | 634.7   |
| AHQ-1-7, 3970 - 4048        | R.KQDWSDHAIWWEQK.R                       | 1858.00504 | 2 | 9.85E-04 | 0.79  | 3.44   | -     | 631.0   |
| AHQ-1-6, 3967               | R.KQDWSDHAIWWEQK.R                       | 1858.00504 | 3 | 1.26E-09 | 0.94  | 4.34   | -     | 1363.9  |
| AHQ-1-8, 6886 - 6895        | K.LEGSAPTDVLDLSTTIPELK.D                 | 2100.35256 | 2 | 4.54E-06 | 0.81  | 3.89   | -     | 487.2   |
| AHQ-1-9, 6766               | K.LEGSAPTDVLDLSTTIPELK.D                 | 2100.35256 | 2 | 2.95E-07 | 0.82  | 3.64   | -     | 380.5   |
| AHQ-1-6, 5770               | K.LEGSAPTDVLDLSTTIPELK.D                 | 2100.35256 | 2 | 1.17E-04 | 0.75  | 3.60   | -     | 343.4   |
| AHQ-1-7, 6952 - 6954        | K.LEGSAPTDVLDLSTTIPELK.D                 | 2100.35256 | 2 | 8.35E-06 | 0.96  | 5.31   | -     | 1006.5  |
| AHQ-1-6, 6359               | K.LEGSAPTDVLDLSTTIPELK.D                 | 2100.35256 | 2 | 2.32E-04 | 0.91  | 4.28   | -     | 640.1   |
| AHQ-1-7, 5826               | K.LEGSAPTDVLDLSTTIPELK.D                 | 2100.35256 | 2 | 1.88E-04 | 0.74  | 3.35   | -     | 439.2   |
| AHQ-1-10, 6008 - 6071       | K.LEGSAPTDVLDLSTTIPELK.D                 | 2100.35256 | 2 | 6.66E-04 | 0.74  | 3.35   | -     | 455.9   |
| AHQ-1-6, 6542 - 6554        | K.LEGSAPTDVLDLSTTIPELK.D                 | 2100.35256 | 2 | 4.19E-05 | 0.93  | 3.94   | -     | 1056.1  |
| AHQ-1-6, 6658 - 6735        | K.LEGSAPTDVLDLSTTIPELK.D                 | 2100.35256 | 2 | 8.15E-05 | 0.89  | 3.92   | -     | 741.0   |
| AHQ-1-5, 6961               | K.LEGSAPTDVLDLSTTIPELK.D                 | 2100.35256 | 2 | 2.00E-05 | 0.82  | 3.66   | -     | 541.8   |
| AHQ-1-6, 6775 - 6842        | K.LEGSAPTDVLDLSTTIPELK.D                 | 2100.35256 | 2 | 1.91E-06 | 0.95  | 4.66   | -     | 942.2   |
| AHQ-1-4, 7006               | K.LEGSAPTDVLDLSTTIPELK.D                 | 2100.35256 | 2 | 5.30E-05 | 0.48  | 3.10   | -     | 355.8   |
| AHQ-1-13 - , 6669 - 6704    | K.LEGSAPTDVLDLSTTIPELK.D                 | 2100.35256 | 2 | 9.35E-04 | 0.63  | 2.87   | -     | 459.5   |
| AHQ-1-3, 6839 - 6915        | K.LEGSAPTDVLDLSTTIPELK.D                 | 2100.35256 | 2 | 1.67E-04 | 0.83  | 3.92   | -     | 521.1   |
| AHQ-1-6, 6478               | K.LEGSAPTDVLDLSTTIPELK.DHLR.I            | 2621.92493 | 3 | 3.71E-10 | 0.79  | 3.57   | -     | 361.6   |
| AHQ-1-6, 2395               | R.LFFGPQHR.P                             | 1002.15349 | 2 | 4.94E-05 | 0.84  | 2.57   | -     | 892.9   |
| AHQ-1-6, 5972               | K.LLVPSPEGMSEIYLR.C                      | 1705.01201 | 3 | 1.39E-09 | 0.98  | 5.36   | -     | 2534.2  |
| AHQ-1-12, 4687 - 4745       | K.LLVPSPEGM*SEIYLR.C                     | 1721.01141 | 2 | 1.16E-06 | 0.55  | 2.53   | -     | 277.0   |
| AHQ-1-5, 6098 - 6114        | K.LLVPSPEGMSEIYLR.C                      | 1705.01201 | 2 | 1.27E-05 | 0.57  | 3.05   | -     | 182.4   |
| AHQ-1-6, 1871 - 1930        | R.LPRPSSLSDK.T                           | 1100.25055 | 2 | 7.19E-04 | 0.88  | 2.65   | -     | 1390.1  |
| AHQ-1-4, 7207               | K.LSQSGVEGEPAGTDPGLDLDLVALSNLEVK.L       | 3027.24073 | 3 | 4.61E-04 | 0.90  | 4.44   | -     | 1106.2  |
| AHQ-1-3, 7045               | K.LSQSGVEGEPAGTDPGLDLDLVALSNLEVK.L       | 3027.24073 | 3 | 9.47E-07 | 0.86  | 3.39   | -     | 1216.8  |
| AHQ-1-7, 7176               | K.LSQSGVEGEPAGTDPGLDLDLVALSNLEVK.L       | 3027.24073 | 3 | 1.04E-05 | 0.88  | 4.29   | -     | 974.3   |
| AHQ-1-6, 6980 - 7050        | K.LSQSGVEGEPAGTDPGLDLDLVALSNLEVK.L       | 3027.24073 | 3 | 8.59E-10 | 0.94  | 5.32   | -     | 1165.9  |
| AHQ-1-2, 7217 - 7221        | K.LSQSGVEGEPAGTDPGLDLDLVALSNLEVK.L       | 3027.24073 | 3 | 4.75E-11 | 0.88  | 3.98   | -     | 1191.7  |
| AHQ-1-1, 6859 - 6928        | K.LSQSGVEGEPAGTDPGLDLDLVALSNLEVK.L       | 3027.24073 | 3 | 8.74E-06 | 0.96  | 5.19   | -     | 1797.6  |
| AHQ-1-7, 2309               | R.LTQLYEQAR.W                            | 1122.25622 | 2 | 3.85E-05 | 0.85  | 2.99   | -     | 1155.6  |
| AHQ-1-6, 2240 - 2306        | R.LTQLYEQAR.W                            | 1122.25622 | 2 | 5.55E-06 | 0.90  | 3.60   | -     | 861.3   |

|                            |                                                         |            |   |          |       |        |       |         |
|----------------------------|---------------------------------------------------------|------------|---|----------|-------|--------|-------|---------|
| AHQ-1-6, 2294              | R.LTQLYEQAR.W                                           | 1122.25622 | 1 | 1.21E-04 | 0.30  | 1.95   | -     | 128.1   |
| AHQ-1-9, 2234              | R.LTQLYEQAR.W                                           | 1122.25622 | 2 | 4.55E-05 | 0.93  | 3.35   | -     | 1503.6  |
| AHQ-1-6, 5106              | R.QWLQHTHTLTK.Y                                         | 1569.78807 | 2 | 1.25E-08 | 0.44  | 2.96   | -     | 200.7   |
| AHQ-1-14 - , 4080          | K.SQDEAPGDPQIQLNLK.G                                    | 1753.89174 | 2 | 2.05E-06 | 0.85  | 3.38   | -     | 486.5   |
| AHQ-1-12, 4009 - 4081      | K.SQDEAPGDPQIQLNLK.G                                    | 1753.89174 | 2 | 1.68E-08 | 0.89  | 4.00   | -     | 502.6   |
| AHQ-1-4, 4290              | K.SQDEAPGDPQIQLNLK.G                                    | 1753.89174 | 2 | 2.41E-06 | 0.81  | 3.46   | -     | 469.1   |
| AHQ-1-7, 4152 - 4154       | K.SQDEAPGDPQIQLNLK.G                                    | 1753.89174 | 2 | 1.44E-08 | 0.87  | 3.96   | -     | 433.6   |
| AHQ-1-3, 4249              | K.SQDEAPGDPQIQLNLK.G                                    | 1753.89174 | 2 | 6.26E-04 | 0.83  | 3.66   | -     | 424.5   |
| AHQ-1-6, 4326              | K.SQDEAPGDPQIQLNLK.G                                    | 1753.89174 | 2 | 1.12E-09 | 0.87  | 3.67   | -     | 521.5   |
| AHQ-1-6, 4064 - 4146       | K.SQDEAPGDPQIQLNLK.G                                    | 1753.89174 | 2 | 4.35E-06 | 0.88  | 4.23   | -     | 522.1   |
| AHQ-1-6, 4214              | K.SQDEAPGDPQIQLNLK.G                                    | 1753.89174 | 2 | 1.77E-05 | 0.83  | 3.63   | -     | 443.2   |
| AHQ-1-14 - , 4424 - 4430   | K.TASGDYIDSSWELR.V                                      | 1600.66783 | 2 | 7.17E-07 | 0.90  | 3.31   | -     | 957.1   |
| AHQ-1-9, 4342              | K.TASGDYIDSSWELR.V                                      | 1600.66783 | 2 | 2.26E-04 | 0.92  | 3.55   | -     | 934.2   |
| AHQ-1-13, 4280             | K.TASGDYIDSSWELR.V                                      | 1600.66783 | 2 | 1.83E-04 | 0.78  | 2.91   | -     | 757.4   |
| AHQ-1-6, 4382 - 4450       | K.TASGDYIDSSWELR.V                                      | 1600.66783 | 2 | 7.71E-09 | 0.96  | 4.42   | -     | 1145.6  |
| AHQ-1-6, 4519 - 4586       | K.TASGDYIDSSWELR.V                                      | 1600.66783 | 2 | 3.28E-08 | 0.90  | 3.23   | -     | 1109.8  |
| AHQ-1-7, 3893              | R.TSGGGPNNHPHGPDAEGLNPGYLVAPR.F                         | 2783.95312 | 3 | 7.70E-05 | 0.79  | 3.96   | -     | 584.2   |
| AHQ-1-9, 3748              | R.TSGGGPNNHPHGPDAEGLNPGYLVAPR.F                         | 2783.95312 | 2 | 4.95E-04 | 0.94  | 4.40   | -     | 1003.2  |
| AHQ-1-9, 3759              | R.TSGGGPNNHPHGPDAEGLNPGYLVAPR.F                         | 2783.95312 | 2 | 2.75E-07 | 0.95  | 5.10   | -     | 1001.8  |
| AHQ-1-9, 3911              | R.TSGGGPNNHPHGPDAEGLNPGYLVAPR.F                         | 2783.95312 | 2 | 3.13E-04 | 0.90  | 4.21   | -     | 621.3   |
| AHQ-1-1, 4135 - 4136       | R.TSGGGPNNHPHGPDAEGLNPGYLVAPR.F                         | 2783.95312 | 3 | 4.07E-10 | 0.94  | 5.13   | -     | 977.8   |
| AHQ-1-3, 4021              | R.TSGGGPNNHPHGPDAEGLNPGYLVAPR.F                         | 2783.95312 | 3 | 1.97E-05 | 0.94  | 5.46   | -     | 1069.6  |
| AHQ-1-6, 3854 - 3934       | R.TSGGGPNNHPHGPDAEGLNPGYLVAPR.F                         | 2783.95312 | 3 | 7.66E-05 | 0.98  | 7.05   | -     | 1653.6  |
| AHQ-1-6, 3794 - 3866       | R.TSGGGPNNHPHGPDAEGLNPGYLVAPR.F                         | 2783.95312 | 2 | 6.23E-06 | 0.95  | 4.79   | -     | 854.7   |
| AHQ-1-5, 3887              | R.TSGGGPNNHPHGPDAEGLNPGYLVAPR.F                         | 2783.95312 | 2 | 2.68E-04 | 0.84  | 3.64   | -     | 472.0   |
| AHQ-1-6, 7310 - 7311       | R.TM'ADSSYTVSEVQAILAFSLQQR.T                            | 2448.73471 | 3 | 5.35E-09 | 0.97  | 5.88   | -     | 1795.6  |
| AHQ-1-9, 3971 - 3974       | R.VFVGEEDEPEAESVTLR.V                                   | 1777.91007 | 2 | 9.09E-10 | 0.96  | 4.69   | -     | 1449.6  |
| AHQ-1-1, 4192 - 4257       | R.VFVGEEDEPEAESVTLR.V                                   | 1777.91007 | 2 | 2.22E-10 | 0.96  | 4.69   | -     | 1509.7  |
| AHQ-1-14 - , 3983 - 4052   | R.VFVGEEDEPEAESVTLR.V                                   | 1777.91007 | 2 | 3.41E-10 | 0.96  | 4.67   | -     | 1494.8  |
| AHQ-1-4, 4192              | R.VFVGEEDEPEAESVTLR.V                                   | 1777.91007 | 2 | 1.61E-05 | 0.86  | 3.48   | -     | 957.2   |
| AHQ-1-10, 3732             | R.VFVGEEDEPEAESVTLR.V                                   | 1777.91007 | 2 | 2.79E-05 | 0.95  | 4.41   | -     | 1231.9  |
| AHQ-1-13 - , 4108          | R.VFVGEEDEPEAESVTLR.V                                   | 1777.91007 | 2 | 8.97E-10 | 0.96  | 4.33   | -     | 1774.3  |
| AHQ-1-5, 4103              | R.VFVGEEDEPEAESVTLR.V                                   | 1777.91007 | 2 | 6.25E-09 | 0.94  | 4.08   | -     | 1183.7  |
| AHQ-1-6, 4032              | R.VFVGEEDEPEAESVTLR.V                                   | 1777.91007 | 3 | 4.11E-04 | 0.97  | 4.97   | -     | 1993.3  |
| AHQ-1-6, 3963 - 4034       | R.VFVGEEDEPEAESVTLR.V                                   | 1777.91007 | 2 | 3.49E-09 | 0.95  | 4.63   | -     | 1313.7  |
| AHQ-1-12, 3933             | R.VFVGEEDEPEAESVTLR.V                                   | 1777.91007 | 2 | 1.22E-07 | 0.92  | 4.20   | -     | 1035.9  |
| AHQ-1-8, 4047              | R.VFVGEEDEPEAESVTLR.V                                   | 1777.91007 | 2 | 1.19E-10 | 0.94  | 4.40   | -     | 1052.0  |
| AHQ-1-11, 3818             | R.VFVGEEDEPEAESVTLR.V                                   | 1777.91007 | 2 | 1.08E-05 | 0.95  | 4.24   | -     | 1476.3  |
| AHQ-1-6, 4102              | R.VFVGEEDEPEAESVTLR.V                                   | 1777.91007 | 2 | 1.37E-09 | 0.91  | 3.73   | -     | 1108.1  |
| AHQ-1-2, 4287 - 4326       | R.VFVGEEDEPEAESVTLR.V                                   | 1777.91007 | 2 | 2.95E-06 | 0.83  | 3.40   | -     | 877.5   |
| AHQ-1-7, 4100              | R.VFVGEEDEPEAESVTLR.V                                   | 1777.91007 | 2 | 4.23E-06 | 0.93  | 4.35   | -     | 1075.5  |
| AHQ-1-14 - , 2788 - 2866   | R.VTGESHIGGVLLK.I                                       | 1310.52448 | 2 | 9.01E-07 | 0.95  | 3.98   | -     | 1450.3  |
| AHQ-1-1, 3029              | R.VTGESHIGGVLLK.I                                       | 1310.52448 | 2 | 1.31E-06 | 0.97  | 4.48   | -     | 2088.1  |
| AHQ-1-8, 2494              | R.VTGESHIGGVLLK.I                                       | 1310.52448 | 2 | 2.39E-09 | 0.95  | 3.93   | -     | 1666.0  |
| AHQ-1-12, 2851             | R.VTGESHIGGVLLK.I                                       | 1310.52448 | 2 | 2.78E-06 | 0.87  | 3.38   | -     | 1115.6  |
| AHQ-1-11, 2743             | R.VTGESHIGGVLLK.I                                       | 1310.52448 | 2 | 9.60E-06 | 0.91  | 3.83   | -     | 1377.0  |
| AHQ-1-6, 2694              | R.VTGESHIGGVLLK.I                                       | 1310.52448 | 1 | 2.11E-04 | 0.55  | 1.97   | -     | 815.8   |
| AHQ-1-10, 2689             | R.VTGESHIGGVLLK.I                                       | 1310.52448 | 2 | 8.11E-05 | 0.56  | 2.51   | -     | 808.4   |
| AHQ-1-9, 2627              | R.VTGESHIGGVLLK.I                                       | 1310.52448 | 2 | 8.87E-07 | 0.94  | 4.09   | -     | 1433.3  |
| AHQ-1-9, 2644              | R.VTGESHIGGVLLK.I                                       | 1310.52448 | 1 | 1.06E-08 | 0.88  | 3.43   | -     | 970.9   |
| AHQ-1-6, 2710              | R.VTGESHIGGVLLK.I                                       | 1310.52448 | 1 | 7.46E-08 | 0.88  | 3.21   | -     | 931.6   |
| AHQ-1-6, 2690 - 2760       | R.VTGESHIGGVLLK.I                                       | 1310.52448 | 2 | 8.53E-10 | 0.97  | 4.80   | -     | 2091.2  |
| AHQ-1-11, 4550             | K.VVLAGGVAPALFR.G                                       | 1270.54832 | 2 | 4.57E-09 | 0.94  | 3.51   | -     | 1410.6  |
| AHQ-1-1, 5096              | K.VVLAGGVAPALFR.G                                       | 1270.54832 | 2 | 1.25E-06 | 0.97  | 4.64   | -     | 164.3   |
| AHQ-1-10, 4412             | K.VVLAGGVAPALFR.G                                       | 1270.54832 | 2 | 5.14E-08 | 0.97  | 4.34   | -     | 1874.2  |
| AHQ-1-6, 4818 - 4886       | K.VVLAGGVAPALFR.G                                       | 1270.54832 | 2 | 1.14E-07 | 0.98  | 5.60   | -     | 1815.1  |
| AHQ-1-9, 4760 - 4762       | K.VVLAGGVAPALFR.G                                       | 1270.54832 | 1 | 2.09E-04 | 0.75  | 3.41   | -     | 244.2   |
| AHQ-1-9, 4756              | K.VVLAGGVAPALFR.G                                       | 1270.54832 | 2 | 9.49E-08 | 0.97  | 4.70   | -     | 1832.5  |
| AHQ-1-2, 5161              | K.VVLAGGVAPALFR.G                                       | 1270.54832 | 2 | 5.81E-07 | 0.96  | 4.44   | -     | 1535.2  |
| AHQ-1-7, 4904              | K.VVLAGGVAPALFR.G                                       | 1270.54832 | 2 | 6.07E-08 | 0.97  | 4.93   | -     | 1703.7  |
| AHQ-1-3, 5019              | K.VVLAGGVAPALFR.G                                       | 1270.54832 | 2 | 6.81E-07 | 0.97  | 5.26   | -     | 1678.0  |
| AHQ-1-4, 5106              | K.VVLAGGVAPALFR.G                                       | 1270.54832 | 2 | 4.66E-08 | 0.96  | 4.53   | -     | 1443.0  |
| AHQ-1-5, 4949              | K.VVLAGGVAPALFR.G                                       | 1270.54832 | 2 | 5.12E-08 | 0.96  | 4.53   | -     | 1409.2  |
| AHQ-1-6, 2470 - 2471       | K.YGILADAR.L                                            | 878.99544  | 2 | 6.11E-05 | 0.93  | 3.20   | -     | 1269.8  |
| AHQ-1-9, 5342              | K.YYFFDLDPK.T                                           | 1295.42046 | 2 | 4.89E-05 | 0.91  | 3.79   | -     | 887.6   |
| AHQ-1-6, 5411 - 5478       | K.YYFFDLDPK.T                                           | 1295.42046 | 2 | 6.79E-06 | 0.77  | 3.67   | -     | 586.6   |
| gi 4827056 ref NP_005103.1 | WD repeat-containing protein 1 isoform 2 [Homo sapiens] |            |   | 1.00E-30 | 13.04 | 160.31 | 49.80 | 58001.9 |
| AHQ-1-6, 5034              | K.AHDGGIYAISWSPDSTHLLSASGDK.T                           | 2586.75455 | 2 | 1.81E-05 | 0.91  | 3.98   | -     | 908.2   |
| AHQ-1-6, 5151              | K.AHDGGIYAISWSPDSTHLLSASGDK.T                           | 2586.75455 | 3 | 1.55E-05 | 0.93  | 5.21   | -     | 965.3   |
| AHQ-1-6, 5035              | K.AHDGGIYAISWSPDSTHLLSASGDK.T                           | 2586.75455 | 3 | 1.27E-08 | 0.97  | 5.94   | -     | 1683.1  |
| AHQ-1-9, 5702              | K.CFSDNPGYEPEVAVHPGGDVAIGGVDGNVR.L                      | 3400.67708 | 3 | 1.75E-12 | 0.93  | 4.65   | -     | 932.2   |
| AHQ-1-6, 5708 - 5790       | K.CFSDNPGYEPEVAVHPGGDVAIGGVDGNVR.L                      | 3400.67708 | 3 | 1.00E-30 | 0.96  | 5.62   | -     | 1125.6  |
| AHQ-1-13 - , 5643          | K.CFSDNPGYEPEVAVHPGGDVAIGGVDGNVR.L                      | 3400.67708 | 3 | 1.15E-06 | 0.82  | 3.64   | -     | 687.6   |
| AHQ-1-10, 5107             | K.CFSDNPGYEPEVAVHPGGDVAIGGVDGNVR.L                      | 3400.67708 | 3 | 1.00E-30 | 0.96  | 5.44   | -     | 1001.0  |
| AHQ-1-6, 5855              | K.CFSDNPGYEPEVAVHPGGDVAIGGVDGNVR.L                      | 3400.67708 | 3 | 1.82E-10 | 0.91  | 4.19   | -     | 946.2   |
| AHQ-1-7, 5893              | K.CFSDNPGYEPEVAVHPGGDVAIGGVDGNVR.L                      | 3400.67708 | 3 | 6.88E-14 | 0.96  | 5.14   | -     | 1427.4  |
| AHQ-1-5, 5951              | K.CFSDNPGYEPEVAVHPGGDVAIGGVDGNVR.L                      | 3400.67708 | 3 | 1.50E-08 | 0.80  | 3.72   | -     | 592.8   |
| AHQ-1-6, 3968 - 4010       | R.FATASADGQIYIDGK.T                                     | 1720.86021 | 2 | 1.92E-04 | 0.61  | 2.90   | -     | 423.7   |
| AHQ-1-6, 5831              | K.FGAVFLWDSGSSVGEITGHNK.V                               | 2209.40259 | 2 | 1.22E-04 | 0.93  | 4.23   | -     | 970.1   |
| AHQ-1-6, 5815 - 5832       | K.FGAVFLWDSGSSVGEITGHNK.V                               | 2209.40259 | 3 | 7.33E-08 | 0.79  | 3.51   | -     | 838.2   |
| AHQ-1-6, 4867              | K.GPVTDVAYSHDGAFLAVCDASK.V                              | 2282.47194 | 2 | 9.99E-05 | 0.71  | 3.55   | -     | 603.1   |
| AHQ-1-6, 4718 - 4795       | K.GPVTDVAYSHDGAFLAVCDASK.V                              | 2282.47194 | 2 | 5.59E-07 | 0.97  | 4.86   | -     | 1633.0  |
| AHQ-1-6, 1740              | R.IAVVGEGR.E                                            | 800.92621  | 2 | 7.90E-04 | 0.73  | 2.55   | -     | 676.2   |
| AHQ-1-6, 2222              | K.KIDIAWTEDESKR.I                                       | 1462.63267 | 2 | 1.16E-06 | 0.94  | 3.88   | -     | 1329.1  |
| AHQ-1-6, 3047              | K.KVFASLPQVER.G                                         | 1274.49383 | 2 | 2.24E-05 | 0.83  | 2.91   | -     | 903.3   |
| AHQ-1-6, 5584 - 5654       | R.LATGSDDNCAAFFEGPPFK.F                                 | 2046.20216 | 2 | 2.01E-09 | 0.94  | 4.65   | -     | 883.2   |
| AHQ-1-6, 5663 - 5726       | R.LATGSDDNCAAFFEGPPFK.F                                 | 2046.20216 | 2 | 3.50E-06 | 0.89  | 4.10   | -     | 873.6   |
| AHQ-1-6, 5523 - 5590       | R.LATGSDDNCAAFFEGPPFK.F                                 | 2046.20216 | 2 | 1.41E-07 | 0.84  | 3.78   | -     | 630.7   |
| AHQ-1-6, 5782 - 5812       | R.LATGSDDNCAAFFEGPPFK.F                                 | 2046.20216 | 2 | 1.90E-09 | 0.91  | 4.75   | -     | 708.4   |
| AHQ-1-13, 3997 - 4021      | R.LYSILGTTLLKDEGK.L                                     | 1538.76736 | 2 | 4.64E-05 | 0.85  | 3.44   | -     | 735.2   |
| AHQ-1-6, 3930              | R.LYSILGTTLLKDEGK.L                                     | 1538.76736 | 3 | 2.00E-05 | 0.47  | 3.34   | -     | 287.6   |
| AHQ-1-7, 4012              | R.LYSILGTTLLKDEGK.L                                     | 1538.76736 | 2 | 1.67E-04 | 0.90  | 3.41   | -     | 1073.1  |
| AHQ-1-6, 3919 - 3950       | R.LYSILGTTLLKDEGK.L                                     | 1538.76736 | 2 | 8.78E-05 | 0.92  | 4.00   | -     | 933.8   |
| AHQ-1-6, 4982 - 5059       | R.MTVDESGQLISCSMDDTVRY                                  | 2146.36365 | 2 | 6.97E-06 | 0.72  | 3.28   | -     | 584.9   |
| AHQ-1-6, 4299              | R.NIDNPALADIYTEHAHQVVAK.Y                               | 2419.67805 | 2 | 1.68E-05 | 0.69  | 3.31   | -     | 446.6   |
| AHQ-1-7, 1896              | K.SIQCLTVHKNKGK.S                                       | 1443.65418 | 2 | 8.84E-05 | 0.80  | 2.79   | -     | 876.6   |
| AHQ-1-6, 4198              | K.SIYSGSHDHGINYWDSETGENDSFAGK.G                         | 3138.17570 | 3 | 7.57E-08 | 0.98  | 6.18   | -     | 2306.3  |
| AHQ-1-12, 3879             | K.YAPSGFYIAGDVSQK.L                                     | 1619.75589 | 2 | 2.39E-08 | 0.87  | 3.52   | -     | 588.9   |
| AHQ-1-6, 3928 - 3999       | K.YAPSGFYIAGDVSQK.L                                     | 1619.75589 | 2 | 9.64E-06 | 0.86  | 3.01   | -     | 706.6   |
| AHQ-1-11, 3775 - 3780      | K.YAPSGFYIAGDVSQK.L                                     | 1619.75589 | 2 | 1.85E-08 | 0.89  | 3.85   | -     | 608.2   |
| AHQ-1-6, 2772              | K.YEYQPFAGK.I                                           | 1103.20822 | 2 | 6.71E-07 | 0.78  | 2.80   | -     | 615.1   |
| gi 7669492 ref NP_002037.2 | glyceraldehyde-3-phosphate dehydrogenase [Homo sapiens] |            |   | 1.00E-30 | 9.38  | 110.38 | 48.40 | 36053.0 |
| AHQ-1-9, 3866 - 3872       | R.GALQNIIPASTGAAK.A                                     | 1412.61680 | 1 | 1.49E-04 | 0.73  | 3.01   | -     | 565.4   |
| AHQ-1-11, 3540             | R.GALQNIIPASTGAAK.A                                     | 1412.61680 | 1 | 2.93E-07 | 0.78  | 3.19   | -     | 567.2   |
| AHQ-1-9, 3460 - 3530       | R.GALQNIIPASTGAAK.A                                     | 1412.61680 | 1 | 2.75E-04 | 0.75  | 3.05   | -     | 573.0   |
| AHQ-1-9, 3470 - 3539       | R.GALQNIIPASTGAAK.A                                     | 1412.61680 | 1 | 3.42E-08 | 0.80  | 3.24   | -     | 647.3   |
| AHQ-1-9, 6095 - 6160       | K.GILGTYTEHQVSSDFNSDTHSSTFDAGAGIALNDHFVK.L              | 4039.28524 | 3 | 1.38E-07 | 0.97  | 6.85   | -     | 1387.6  |

|                                                    |                                |            |   |          |        |         |       |          |
|----------------------------------------------------|--------------------------------|------------|---|----------|--------|---------|-------|----------|
| AHQ-1-13, 4115                                     | K.RVIISAPSADAPMFVM*GVNHEK.Y    | 2386.77962 | 3 | 5.36E-07 | 0.79   | 3.46    | -     | 990.4    |
| AHQ-1-9, 4042 - 4056                               | K.RVIISAPSADAPMFVM*GVNHEK.Y    | 2386.77962 | 3 | 2.48E-05 | 0.92   | 4.99    | -     | 948.8    |
| AHQ-1-9, 4543                                      | K.RVIISAPSADAPMFVMGVNHEK.Y     | 2370.78022 | 3 | 3.66E-08 | 0.95   | 4.80    | -     | 1262.8   |
| AHQ-1-9, 4747 - 4755                               | K.RVIISAPSADAPMFVMGVNHEK.Y     | 2370.78022 | 3 | 1.73E-08 | 0.97   | 5.87    | -     | 1613.1   |
| AHQ-1-9, 7352 - 7354                               | K.VDIAINDPFDLNYMYYM*FYDSTHGK.F | 3326.74330 | 3 | 2.45E-05 | 0.79   | 4.83    | -     | 485.6    |
| AHQ-1-10, 6293                                     | K.VIHDNFIVGELMTTVHAITATQK.T    | 2596.98694 | 3 | 1.00E-30 | 0.97   | 7.44    | -     | 2083.7   |
| AHQ-1-11, 6387                                     | K.VIHDNFIVGELMTTVHAITATQK.T    | 2596.98694 | 2 | 7.99E-06 | 0.97   | 6.00    | -     | 1984.4   |
| AHQ-1-10, 6296                                     | K.VIHDNFIVGELMTTVHAITATQK.T    | 2596.98694 | 2 | 2.63E-09 | 0.96   | 5.75    | -     | 2225.0   |
| AHQ-1-9, 7162 - 7166                               | K.VIHDNFIVGELMTTVHAITATQK.T    | 2596.98694 | 3 | 4.68E-12 | 0.99   | 7.53    | -     | 2465.0   |
| AHQ-1-9, 5159                                      | R.VIISAPSADAPMFVMGVNHEK.Y      | 2214.59387 | 2 | 3.93E-07 | 0.95   | 4.41    | -     | 914.2    |
| AHQ-1-10, 4724 - 4779                              | R.VIISAPSADAPMFVMGVNHEK.Y      | 2214.59387 | 2 | 2.92E-04 | 0.56   | 3.24    | -     | 627.4    |
| AHQ-1-9, 4864 - 4910                               | R.VIISAPSADAPMFVMGVNHEK.Y      | 2214.59387 | 2 | 5.88E-06 | 0.90   | 3.78    | -     | 678.9    |
| AHQ-1-9, 4379 - 4380                               | R.VIISAPSADAPMFVM*GVNHEK.Y     | 2230.59327 | 2 | 7.90E-07 | 0.49   | 3.51    | -     | 282.7    |
| AHQ-1-10, 4593                                     | R.VIISAPSADAPMFVMGVNHEK.Y      | 2214.59387 | 2 | 1.15E-04 | 0.55   | 3.04    | -     | 255.7    |
| AHQ-1-14, 4988                                     | R.VPTANVSVDLTCR.L              | 1532.74450 | 2 | 1.43E-06 | 0.90   | 3.52    | -     | 894.8    |
| AHQ-1-14 - , 4098                                  | R.VPTANVSVDLTCR.L              | 1532.74450 | 2 | 1.27E-10 | 0.93   | 3.91    | -     | 916.6    |
| AHQ-1-13, 4029 - 4087                              | R.VPTANVSVDLTCR.L              | 1532.74450 | 2 | 2.75E-04 | 0.95   | 4.23    | -     | 1094.0   |
| AHQ-1-12, 4003 - 4065                              | R.VPTANVSVDLTCR.L              | 1532.74450 | 2 | 4.00E-09 | 0.93   | 3.98    | -     | 1066.3   |
| AHQ-1-9, 4340 - 4350                               | R.VPTANVSVDLTCR.L              | 1532.74450 | 2 | 3.27E-06 | 0.94   | 4.14    | -     | 984.2    |
| AHQ-1-11, 3914                                     | R.VPTANVSVDLTCR.L              | 1532.74450 | 2 | 6.27E-08 | 0.95   | 4.26    | -     | 1085.8   |
| AHQ-1-14 - , 4252                                  | R.VPTANVSVDLTCR.L              | 1532.74450 | 2 | 2.94E-04 | 0.86   | 3.08    | -     | 845.0    |
| AHQ-1-9, 4199 - 4270                               | R.VPTANVSVDLTCR.L              | 1532.74450 | 2 | 4.58E-09 | 0.96   | 4.41    | -     | 1285.9   |
| AHQ-1-9, 4062 - 4122                               | R.VPTANVSVDLTCR.L              | 1532.74450 | 2 | 1.42E-07 | 0.96   | 4.40    | -     | 1105.3   |
| AHQ-1-9, 3959 - 3976                               | R.VPTANVSVDLTCR.L              | 1532.74450 | 2 | 1.92E-10 | 0.93   | 3.64    | -     | 943.7    |
| AHQ-1-9, 3874                                      | R.VPTANVSVDLTCR.L              | 1532.74450 | 2 | 9.76E-08 | 0.86   | 3.33    | -     | 811.1    |
| AHQ-1-6, 4184                                      | R.VPTANVSVDLTCR.L              | 1532.74450 | 2 | 5.33E-09 | 0.93   | 3.70    | -     | 997.4    |
| AHQ-1-10, 3805 - 3859                              | R.VPTANVSVDLTCR.L              | 1532.74450 | 2 | 1.01E-08 | 0.96   | 4.20    | -     | 1273.9   |
| AHQ-1-13 - , 4243 - 4307                           | R.VPTANVSVDLTCR.L              | 1532.74450 | 2 | 1.59E-09 | 0.95   | 4.24    | -     | 1033.1   |
| AHQ-1-4, 4367                                      | R.VPTANVSVDLTCR.L              | 1532.74450 | 2 | 1.00E-07 | 0.88   | 3.41    | -     | 757.4    |
| AHQ-1-9, 7446 - 7462                               | K.WGDAGAEYVVESTGVFTTMEK.A      | 2278.48027 | 2 | 9.12E-07 | 0.93   | 4.41    | -     | 804.2    |
| AHQ-1-9, 7304 - 7375                               | K.WGDAGAEYVVESTGVFTTMEK.A      | 2278.48027 | 2 | 1.31E-08 | 0.96   | 5.04    | -     | 1104.9   |
| AHQ-1-9, 7187                                      | K.WGDAGAEYVVESTGVFTTMEK.A      | 2278.48027 | 2 | 2.96E-08 | 0.95   | 4.77    | -     | 916.4    |
| AHQ-1-9, 6896 - 6962                               | K.WGDAGAEYVVESTGVFTTMEK.A      | 2278.48027 | 2 | 1.04E-06 | 0.92   | 3.70    | -     | 995.2    |
| AHQ-1-9, 6811                                      | K.WGDAGAEYVVESTGVFTTMEK.A      | 2278.48027 | 2 | 2.69E-10 | 0.77   | 3.22    | -     | 598.5    |
| AHQ-1-9, 6736                                      | K.WGDAGAEYVVESTGVFTTMEK.A      | 2294.47967 | 2 | 4.40E-04 | 0.61   | 3.28    | -     | 343.5    |
| AHQ-1-9, 6712                                      | K.WGDAGAEYVVESTGVFTTMEK.A      | 2278.48027 | 2 | 1.52E-06 | 0.89   | 4.03    | -     | 718.7    |
| AHQ-1-9, 6631 - 6648                               | K.WGDAGAEYVVESTGVFTTMEK.A      | 2294.47967 | 2 | 3.16E-04 | 0.55   | 2.77    | -     | 382.8    |
| AHQ-1-9, 6628                                      | K.WGDAGAEYVVESTGVFTTMEK.A      | 2278.48027 | 2 | 2.92E-07 | 0.89   | 3.88    | -     | 735.9    |
| AHQ-1-9, 6538 - 6615                               | K.WGDAGAEYVVESTGVFTTMEK.A      | 2278.48027 | 2 | 7.93E-10 | 0.93   | 4.56    | -     | 730.4    |
| AHQ-1-13 - , 5703                                  | K.WGDAGAEYVVESTGVFTTMEK.A      | 2294.47967 | 2 | 1.46E-05 | 0.95   | 5.09    | -     | 871.8    |
| AHQ-1-13 - , 5792                                  | K.WGDAGAEYVVESTGVFTTMEK.A      | 2294.47967 | 2 | 1.30E-07 | 0.94   | 4.39    | -     | 887.5    |
| AHQ-1-13 - , 6285 - 6347                           | K.WGDAGAEYVVESTGVFTTMEK.A      | 2278.48027 | 2 | 4.50E-08 | 0.95   | 4.76    | -     | 956.0    |
| AHQ-1-13 - , 6384                                  | K.WGDAGAEYVVESTGVFTTMEK.A      | 2278.48027 | 2 | 1.96E-04 | 0.69   | 2.99    | -     | 606.0    |
| AHQ-1-9, 6387 - 6451                               | K.WGDAGAEYVVESTGVFTTMEK.A      | 2278.48027 | 2 | 3.47E-08 | 0.94   | 4.54    | -     | 838.0    |
| AHQ-1-9, 7031                                      | K.WGDAGAEYVVESTGVFTTMEK.A      | 2278.48027 | 2 | 6.83E-04 | 0.41   | 3.35    | -     | 162.3    |
| AHQ-1-14 - , 6055                                  | K.WGDAGAEYVVESTGVFTTMEK.A      | 2278.48027 | 2 | 1.95E-06 | 0.94   | 4.16    | -     | 961.7    |
| gj 16753233[ref NP_006280.2] tain 1 [Homo sapiens] |                                |            |   | 5.55E-16 | 116.92 | 1320.37 | 55.40 | 269665.3 |
| AHQ-1-3, 3193 - 3201                               | K.AAAFEQENETVVVK.E             | 1664.79496 | 2 | 3.56E-08 | 0.95   | 4.87    | -     | 1305.2   |
| AHQ-1-1, 4007                                      | K.AAAFEQENETVVVK.E             | 1664.79496 | 2 | 8.60E-04 | 0.80   | 3.19    | -     | 817.9    |
| AHQ-1-14 - , 3147                                  | K.AAAFEQENETVVVK.E             | 1664.79496 | 2 | 3.79E-05 | 0.96   | 4.74    | -     | 1418.2   |
| AHQ-1-2, 3974                                      | K.AAAFEQENETVVVK.E             | 1664.79496 | 2 | 7.30E-04 | 0.84   | 3.68    | -     | 936.6    |
| AHQ-1-4, 3215 - 3290                               | K.AAAFEQENETVVVK.E             | 1664.79496 | 2 | 2.84E-06 | 0.93   | 4.58    | -     | 1120.6   |
| AHQ-1-2, 3566                                      | K.AAAFEQENETVVVK.E             | 1664.79496 | 2 | 1.46E-04 | 0.94   | 4.25    | -     | 1394.6   |
| AHQ-1-2, 3322 - 3395                               | K.AAAFEQENETVVVK.E             | 1664.79496 | 2 | 7.81E-05 | 0.93   | 4.01    | -     | 1220.8   |
| AHQ-1-1, 3288                                      | K.AAAFEQENETVVVK.E             | 1664.79496 | 2 | 3.39E-05 | 0.93   | 4.31    | -     | 1244.8   |
| AHQ-1-12, 3095                                     | K.AAAFEQENETVVVK.E             | 1664.79496 | 2 | 2.46E-05 | 0.85   | 3.96    | -     | 738.8    |
| AHQ-1-5, 2490                                      | R.AAM*EPIVISAK.T               | 1146.38260 | 1 | 8.64E-04 | 0.43   | 2.48    | -     | 262.2    |
| AHQ-1-4, 3288                                      | R.AAM*EPIVISAK.T               | 1130.38320 | 1 | 3.07E-04 | 0.75   | 2.76    | -     | 870.4    |
| AHQ-1-4, 2596 - 2598                               | R.AAM*EPIVISAK.T               | 1146.38260 | 2 | 1.18E-05 | 0.79   | 2.51    | -     | 785.3    |
| AHQ-1-1, 2749                                      | R.AAM*EPIVISAK.T               | 1146.38260 | 2 | 5.12E-07 | 0.84   | 3.08    | -     | 773.9    |
| AHQ-1-3, 2597                                      | R.AAM*EPIVISAK.T               | 1146.38260 | 2 | 7.85E-05 | 0.74   | 2.84    | -     | 643.4    |
| AHQ-1-3, 2606                                      | R.AAM*EPIVISAK.T               | 1146.38260 | 1 | 6.43E-04 | 0.38   | 2.50    | -     | 173.9    |
| AHQ-1-2, 2685                                      | R.AAM*EPIVISAK.T               | 1146.38260 | 2 | 1.61E-06 | 0.84   | 2.93    | -     | 777.4    |
| AHQ-1-3, 3266                                      | R.AAM*EPIVISAK.T               | 1130.38320 | 2 | 2.68E-07 | 0.79   | 2.61    | -     | 607.2    |
| AHQ-1-2, 2683                                      | R.AAM*EPIVISAK.T               | 1146.38260 | 1 | 3.28E-04 | 0.07   | 2.01    | -     | 141.8    |
| AHQ-1-6, 3142                                      | R.AAM*EPIVISAK.T               | 1130.38320 | 1 | 6.77E-05 | 0.24   | 2.17    | -     | 560.3    |
| AHQ-1-3, 1973                                      | K.ADAEGESDLENSR.K              | 1393.35296 | 2 | 2.68E-07 | 0.88   | 3.45    | -     | 906.4    |
| AHQ-1-2, 2022                                      | K.ADAEGESDLENSR.K              | 1393.35296 | 2 | 8.74E-08 | 0.93   | 3.42    | -     | 1287.9   |
| AHQ-1-1, 2123                                      | K.ADAEGESDLENSR.K              | 1393.35296 | 2 | 4.27E-07 | 0.93   | 3.76    | -     | 1066.5   |
| AHQ-1-2, 2021 - 2089                               | K.ADAEGESDLENSR.K              | 1393.35296 | 2 | 8.40E-07 | 0.94   | 3.91    | -     | 1249.2   |
| AHQ-1-5, 1839                                      | K.ADAEGESDLENSR.K              | 1393.35296 | 2 | 1.82E-07 | 0.83   | 3.00    | -     | 782.1    |
| AHQ-1-2, 1593 - 1666                               | K.ADAEGESDLENSR.L              | 1521.52588 | 2 | 4.60E-06 | 0.83   | 2.80    | -     | 1121.3   |
| AHQ-1-3, 2517                                      | K.AGALQCSPSDAYTK.K             | 1470.58689 | 2 | 2.11E-04 | 0.69   | 3.12    | -     | 566.1    |
| AHQ-1-1, 2745                                      | K.AGALQCSPSDAYTK.K             | 1470.58689 | 2 | 8.91E-04 | 0.90   | 3.67    | -     | 851.7    |
| AHQ-1-6, 2562                                      | K.AGALQCSPSDAYTK.K             | 1470.58689 | 2 | 2.19E-04 | 0.89   | 3.26    | -     | 928.5    |
| AHQ-1-4, 2646                                      | K.AGALQCSPSDAYTK.K             | 1470.58689 | 2 | 1.75E-04 | 0.83   | 3.42    | -     | 682.6    |
| AHQ-1-2, 2742                                      | K.AGALQCSPSDAYTK.K             | 1470.58689 | 1 | 2.34E-06 | 0.85   | 3.72    | -     | 620.6    |
| AHQ-1-8, 6286 - 6303                               | K.AGFLDKDFLPK.E                | 1364.61374 | 2 | 4.85E-04 | 0.96   | 4.35    | -     | 1938.4   |
| AHQ-1-4, 4090 - 4170                               | K.AIAVTVQEMVTK.S               | 1290.55498 | 2 | 2.00E-04 | 0.92   | 3.73    | -     | 983.6    |
| AHQ-1-1, 3019                                      | K.AIAVTVQEMVTK.S               | 1306.55438 | 2 | 2.38E-04 | 0.88   | 3.05    | -     | 1033.9   |
| AHQ-1-3, 4050 - 4123                               | K.AIAVTVQEMVTK.S               | 1290.55498 | 2 | 9.21E-09 | 0.95   | 3.86    | -     | 1502.0   |
| AHQ-1-2, 4282                                      | K.AIAVTVQEMVTK.S               | 1290.55498 | 2 | 1.92E-09 | 0.96   | 4.34    | -     | 1516.1   |
| AHQ-1-4, 2970                                      | K.AIAVTVQEMVTK.S               | 1306.55438 | 2 | 5.17E-04 | 0.95   | 3.94    | -     | 1222.7   |
| AHQ-1-3, 2945 - 2957                               | K.AIAVTVQEMVTK.S               | 1306.55438 | 2 | 3.47E-08 | 0.96   | 4.18    | -     | 1280.0   |
| AHQ-1-5, 3946 - 3957                               | K.AIAVTVQEMVTK.S               | 1290.55498 | 2 | 2.49E-07 | 0.95   | 4.44    | -     | 1185.9   |
| AHQ-1-2, 3043                                      | K.AIAVTVQEMVTK.S               | 1306.55438 | 2 | 3.33E-04 | 0.92   | 3.77    | -     | 800.9    |
| AHQ-1-2, 4427                                      | K.AIAVTVQEMVTK.S               | 1290.55498 | 2 | 3.11E-05 | 0.95   | 3.62    | -     | 1425.0   |
| AHQ-1-2, 2743                                      | K.ALDGAFTEENR.A                | 1223.27427 | 2 | 1.02E-06 | 0.95   | 3.45    | -     | 1894.8   |
| AHQ-1-3, 2507                                      | K.ALDGAFTEENR.A                | 1223.27427 | 2 | 3.99E-06 | 0.87   | 2.82    | -     | 1006.8   |
| AHQ-1-3, 2641 - 2715                               | K.ALDGAFTEENR.A                | 1223.27427 | 2 | 7.39E-06 | 0.94   | 3.59    | -     | 1453.6   |
| AHQ-1-13 - , 2765                                  | K.ALDGAFTEENR.A                | 1223.27427 | 2 | 3.01E-04 | 0.94   | 3.31    | -     | 1456.8   |
| AHQ-1-4, 2664                                      | K.ALDGAFTEENR.A                | 1223.27427 | 2 | 1.41E-04 | 0.95   | 3.97    | -     | 1499.3   |
| AHQ-1-5, 2505 - 2578                               | K.ALDGAFTEENR.A                | 1223.27427 | 2 | 2.23E-06 | 0.92   | 3.52    | -     | 1301.8   |
| AHQ-1-4, 2503                                      | K.ALDGAFTEENR.A                | 1223.27427 | 2 | 2.21E-07 | 0.95   | 3.45    | -     | 1831.4   |
| AHQ-1-2, 2593                                      | K.ALDGAFTEENR.A                | 1223.27427 | 2 | 1.82E-04 | 0.89   | 2.88    | -     | 1228.0   |
| AHQ-1-13 - , 3440                                  | K.ALDYYMLR.N                   | 1061.23626 | 2 | 2.33E-05 | 0.91   | 2.73    | -     | 1072.3   |
| AHQ-1-13, 3923                                     | K.ALDYYMLR.N                   | 1045.23686 | 2 | 1.08E-04 | 0.94   | 3.48    | -     | 847.1    |
| AHQ-1-13 - , 4083 - 4088                           | K.ALDYYMLR.N                   | 1045.23686 | 2 | 1.27E-04 | 0.94   | 3.42    | -     | 982.2    |
| AHQ-1-8, 3739                                      | K.ALDYYMLR.N                   | 1045.23686 | 2 | 9.04E-06 | 0.93   | 3.35    | -     | 796.9    |
| AHQ-1-2, 2033 - 2046                               | R.ALEATTEHIR.Q                 | 1141.25953 | 2 | 3.92E-08 | 0.82   | 3.11    | -     | 962.4    |
| AHQ-1-7, 1852                                      | R.ALEATTEHIR.Q                 | 1141.25953 | 2 | 2.28E-04 | 0.74   | 2.80    | -     | 903.2    |
| AHQ-1-2, 2161                                      | R.ALEATTEHIR.Q                 | 1141.25953 | 2 | 3.78E-06 | 0.86   | 3.06    | -     | 1018.2   |
| AHQ-1-5, 1786 - 1855                               | R.ALEATTEHIR.Q                 | 1141.25953 | 2 | 3.83E-06 | 0.73   | 2.95    | -     | 796.3    |
| AHQ-1-3, 1985                                      | R.ALEATTEHIR.Q                 | 1141.25953 | 1 | 1.29E-05 | 0.11   | 1.89    | -     | 346.2    |
| AHQ-1-6, 1830 - 1883                               | R.ALEATTEHIR.Q                 | 1141.25953 | 2 | 2.11E-05 | 0.64   | 2.61    | -     | 765.6    |
| AHQ-1-3, 1961 - 1993                               | R.ALEATTEHIR.Q                 | 1141.25953 | 2 | 4.15E-04 | 0.89   | 2.95    | -     | 1511.7   |
| AHQ-1-4, 1934                                      | R.ALEATTEHIR.Q                 | 1141.25953 | 2 | 1.27E-05 | 0.93   | 3.61    | -     | 1465.0   |

|                      |                                     |            |   |          |      |      |   |        |
|----------------------|-------------------------------------|------------|---|----------|------|------|---|--------|
| AHQ-1-7, 3410        | K.ALGDILISATK.A                     | 989.14811  | 1 | 8.85E-05 | 0.15 | 2.32 | - | 245.6  |
| AHQ-1-4, 3516        | K.ALGDILISATK.A                     | 989.14811  | 2 | 2.21E-06 | 0.92 | 3.60 | - | 952.5  |
| AHQ-1-3, 3483        | K.ALGDILISATK.A                     | 989.14811  | 2 | 2.97E-06 | 0.89 | 3.51 | - | 708.5  |
| AHQ-1-2, 3581        | K.ALGDILISATK.A                     | 989.14811  | 2 | 2.14E-06 | 0.93 | 3.82 | - | 872.3  |
| AHQ-1-6, 3366        | K.ALGDILISATK.A                     | 989.14811  | 2 | 5.14E-05 | 0.87 | 3.14 | - | 745.7  |
| AHQ-1-1, 3553        | K.ALGDILISATK.A                     | 989.14811  | 2 | 5.64E-05 | 0.93 | 4.00 | - | 659.2  |
| AHQ-1-5, 3389        | K.ALGDILISATK.A                     | 989.14811  | 2 | 3.08E-05 | 0.82 | 3.01 | - | 687.6  |
| AHQ-1-5, 2499 - 2569 | K.ALSTDPAAPNLK.S                    | 1198.35099 | 2 | 2.38E-05 | 0.57 | 2.89 | - | 399.2  |
| AHQ-1-3, 2635        | K.ALSTDPAAPNLK.S                    | 1198.35099 | 2 | 1.48E-07 | 0.78 | 2.90 | - | 668.8  |
| AHQ-1-2, 2718 - 2745 | K.ALSTDPAAPNLK.S                    | 1198.35099 | 2 | 2.96E-06 | 0.78 | 3.23 | - | 621.0  |
| AHQ-1-1, 2768 - 2775 | K.ALSTDPAAPNLK.S                    | 1198.35099 | 2 | 3.62E-05 | 0.83 | 3.33 | - | 606.8  |
| AHQ-1-7, 2589        | K.ALSTDPAAPNLK.S                    | 1198.35099 | 2 | 2.79E-06 | 0.81 | 3.09 | - | 713.5  |
| AHQ-1-4, 6647 - 6722 | R.ANQAIQMACQSLGEPGCTQAQVLSAATIVAK.H | 3220.64522 | 3 | 6.21E-04 | 0.90 | 4.63 | - | 686.5  |
| AHQ-1-3, 6323        | K.APGQLECEETAIAALNSCLR.D            | 2077.32566 | 3 | 5.31E-05 | 0.86 | 4.27 | - | 685.9  |
| AHQ-1-4, 6459 - 6464 | K.APGQLECEETAIAALNSCLR.D            | 2077.32566 | 2 | 7.67E-08 | 0.98 | 6.50 | - | 1646.0 |
| AHQ-1-3, 5615        | K.APGQLECEETAIAALNSCLR.D            | 2077.32566 | 2 | 2.32E-08 | 0.97 | 5.04 | - | 1337.4 |
| AHQ-1-4, 5727 - 5807 | K.APGQLECEETAIAALNSCLR.D            | 2077.32566 | 2 | 3.68E-06 | 0.93 | 4.10 | - | 1060.1 |
| AHQ-1-2, 6493        | K.APGQLECEETAIAALNSCLR.D            | 2077.32566 | 2 | 6.99E-08 | 0.97 | 5.66 | - | 1335.6 |
| AHQ-1-3, 6321        | K.APGQLECEETAIAALNSCLR.D            | 2077.32566 | 2 | 2.11E-08 | 0.97 | 5.57 | - | 1492.1 |
| AHQ-1-1, 6264        | K.APGQLECEETAIAALNSCLR.D            | 2077.32566 | 2 | 3.22E-05 | 0.96 | 5.06 | - | 1245.1 |
| AHQ-1-2, 6498        | K.APGQLECEETAIAALNSCLR.D            | 2077.32566 | 3 | 4.12E-05 | 0.84 | 3.92 | - | 778.3  |
| AHQ-1-2, 6758        | K.APGQLECEETAIAALNSCLR.D            | 2077.32566 | 2 | 8.75E-11 | 0.97 | 4.84 | - | 1318.7 |
| AHQ-1-3, 6905 - 6909 | K.AQEACGPLEMDSALSVMQLEK.D           | 2391.66165 | 3 | 7.46E-10 | 0.97 | 5.75 | - | 1809.9 |
| AHQ-1-1, 6771 - 6784 | K.AQEACGPLEMDSALSVMQLEK.D           | 2391.66165 | 3 | 9.40E-06 | 0.93 | 4.37 | - | 1470.2 |
| AHQ-1-6, 6875        | K.AQEACGPLEMDSALSVMQLEK.D           | 2391.66165 | 3 | 3.22E-04 | 0.91 | 4.51 | - | 1007.8 |
| AHQ-1-5, 7019 - 7022 | K.AQEACGPLEMDSALSVMQLEK.D           | 2391.66165 | 3 | 1.34E-06 | 0.97 | 5.78 | - | 2159.5 |
| AHQ-1-1, 6767        | K.AQEACGPLEMDSALSVMQLEK.D           | 2391.66165 | 2 | 6.08E-05 | 0.87 | 3.32 | - | 901.8  |
| AHQ-1-2, 7165        | K.AQEACGPLEMDSALSVMQLEK.D           | 2391.66165 | 3 | 1.72E-05 | 0.95 | 4.69 | - | 1722.7 |
| AHQ-1-2, 7082 - 7083 | K.AQEACGPLEMDSALSVMQLEK.D           | 2391.66165 | 3 | 2.15E-08 | 0.98 | 5.79 | - | 2428.1 |
| AHQ-1-4, 3004        | K.ASAGPOPPLVQSCK.A                  | 1457.67763 | 1 | 6.83E-08 | 0.27 | 2.95 | - | 294.8  |
| AHQ-1-1, 3117        | K.ASAGPOPPLVQSCK.A                  | 1457.67763 | 1 | 1.51E-04 | 0.26 | 2.27 | - | 346.6  |
| AHQ-1-4, 3243        | K.ASAGPOPPLVQSCK.A                  | 1457.67763 | 2 | 2.40E-08 | 0.74 | 3.18 | - | 370.6  |
| AHQ-1-4, 2947 - 3018 | K.ASAGPOPPLVQSCK.A                  | 1457.67763 | 2 | 1.51E-06 | 0.92 | 4.24 | - | 608.0  |
| AHQ-1-5, 2846        | K.ASAGPOPPLVQSCK.A                  | 1457.67763 | 1 | 3.26E-11 | 0.68 | 3.11 | - | 474.2  |
| AHQ-1-5, 2811        | K.ASAGPOPPLVQSCK.A                  | 1457.67763 | 2 | 2.18E-05 | 0.74 | 2.74 | - | 491.5  |
| AHQ-1-2, 3030 - 3101 | K.ASAGPOPPLVQSCK.A                  | 1457.67763 | 2 | 1.05E-09 | 0.90 | 3.75 | - | 535.5  |
| AHQ-1-4, 2994        | K.ASAGPOPPLVQSCK.A                  | 1457.67763 | 1 | 4.19E-06 | 0.18 | 2.05 | - | 415.7  |
| AHQ-1-7, 2794 - 2873 | K.ASAGPOPPLVQSCK.A                  | 1457.67763 | 2 | 1.68E-07 | 0.89 | 3.86 | - | 583.8  |
| AHQ-1-6, 2875        | K.ASAGPOPPLVQSCK.A                  | 1457.67763 | 1 | 2.28E-09 | 0.76 | 4.02 | - | 394.3  |
| AHQ-1-6, 2856        | K.ASAGPOPPLVQSCK.A                  | 1457.67763 | 2 | 2.28E-06 | 0.69 | 3.00 | - | 328.4  |
| AHQ-1-3, 2983 - 2989 | K.ASAGPOPPLVQSCK.A                  | 1457.67763 | 1 | 5.11E-07 | 0.16 | 2.07 | - | 333.0  |
| AHQ-1-3, 2954 - 2973 | K.ASAGPOPPLVQSCK.A                  | 1457.67763 | 2 | 6.35E-06 | 0.86 | 3.61 | - | 468.7  |
| AHQ-1-1, 3096        | K.ASAGPOPPLVQSCK.A                  | 1457.67763 | 2 | 2.16E-05 | 0.68 | 2.93 | - | 385.7  |
| AHQ-1-1, 4387 - 4400 | K.ASVPTIQDQASAMQLSQCAK.N            | 2136.39332 | 2 | 6.53E-05 | 0.90 | 4.02 | - | 638.0  |
| AHQ-1-2, 4065        | K.ASVPTIQDQASAMQLSQCAK.N            | 2136.39332 | 2 | 1.47E-08 | 0.95 | 4.76 | - | 847.2  |
| AHQ-1-2, 4485 - 4553 | K.ASVPTIQDQASAMQLSQCAK.N            | 2136.39332 | 2 | 2.21E-10 | 0.94 | 4.66 | - | 998.7  |
| AHQ-1-5, 3730 - 3731 | K.ASVPTIQDQASAMQLSQCAK.N            | 2136.39332 | 2 | 6.22E-07 | 0.94 | 4.98 | - | 667.2  |
| AHQ-1-3, 3937        | K.ASVPTIQDQASAMQLSQCAK.N            | 2136.39332 | 2 | 2.43E-07 | 0.95 | 4.87 | - | 801.4  |
| AHQ-1-5, 3879        | K.ASVPTIQDQASAMQLSQCAK.N            | 2136.39332 | 2 | 1.60E-09 | 0.87 | 3.78 | - | 581.5  |
| AHQ-1-4, 3987 - 3994 | K.ASVPTIQDQASAMQLSQCAK.N            | 2136.39332 | 2 | 1.89E-07 | 0.91 | 4.38 | - | 617.0  |
| AHQ-1-4, 3826        | K.ASVPTIQDQASAMQLSQCAK.N            | 2136.39332 | 2 | 6.31E-06 | 0.54 | 2.64 | - | 388.5  |
| AHQ-1-7, 3758        | K.ASVPTIQDQASAMQLSQCAK.N            | 2136.39332 | 2 | 9.69E-05 | 0.86 | 3.71 | - | 533.5  |
| AHQ-1-6, 3666 - 3674 | K.ASVPTIQDQASAMQLSQCAK.N            | 2136.39332 | 2 | 1.35E-06 | 0.90 | 4.03 | - | 725.1  |
| AHQ-1-1, 3824 - 3827 | K.ASVPTIQDQASAMQLSQCAK.N            | 2136.39332 | 2 | 9.00E-08 | 0.92 | 4.28 | - | 668.3  |
| AHQ-1-3, 4350 - 4426 | K.ASVPTIQDQASAMQLSQCAK.N            | 2136.39332 | 2 | 6.79E-07 | 0.93 | 4.65 | - | 660.1  |
| AHQ-1-4, 4414 - 4491 | K.ASVPTIQDQASAMQLSQCAK.N            | 2136.39332 | 2 | 1.36E-09 | 0.95 | 5.39 | - | 660.6  |
| AHQ-1-3, 3785        | K.ASVPTIQDQASAMQLSQCAK.N            | 2136.39332 | 2 | 2.80E-07 | 0.88 | 3.80 | - | 671.3  |
| AHQ-1-1, 4481        | K.ASVPTIQDQASAMQLSQCAK.N            | 2136.39332 | 2 | 4.07E-13 | 0.89 | 4.29 | - | 558.8  |
| AHQ-1-1, 3967        | K.ASVPTIQDQASAMQLSQCAK.N            | 2136.39332 | 2 | 3.36E-08 | 0.87 | 3.89 | - | 723.6  |
| AHQ-1-2, 4633 - 4674 | K.ASVPTIQDQASAMQLSQCAK.N            | 2136.39332 | 2 | 4.26E-10 | 0.94 | 4.55 | - | 795.6  |
| AHQ-1-4, 4583        | K.ASVPTIQDQASAMQLSQCAK.N            | 2136.39332 | 2 | 9.44E-15 | 0.84 | 3.91 | - | 453.9  |
| AHQ-1-2, 4975        | K.ASVPTIQDQASAMQLSQCAK.N            | 2136.39332 | 2 | 1.09E-07 | 0.93 | 4.22 | - | 797.1  |
| AHQ-1-6, 4238        | K.ASVPTIQDQASAMQLSQCAK.N            | 2136.39332 | 2 | 2.97E-06 | 0.86 | 3.79 | - | 510.1  |
| AHQ-1-5, 4325 - 4341 | K.ASVPTIQDQASAMQLSQCAK.N            | 2136.39332 | 2 | 5.79E-08 | 0.92 | 4.22 | - | 789.6  |
| AHQ-1-5, 4495        | K.ASVPTIQDQASAMQLSQCAK.N            | 2136.39332 | 2 | 2.55E-10 | 0.92 | 4.60 | - | 601.0  |
| AHQ-1-4, 4499        | K.ASVPTIQDQASAMQLSQCAK.N            | 2136.39332 | 2 | 1.18E-05 | 0.67 | 2.91 | - | 399.7  |
| AHQ-1-7, 4320 - 4332 | K.ASVPTIQDQASAMQLSQCAK.N            | 2136.39332 | 2 | 5.85E-06 | 0.88 | 3.64 | - | 656.5  |
| AHQ-1-6, 4408        | K.ASVPTIQDQASAMQLSQCAK.N            | 2136.39332 | 2 | 3.91E-05 | 0.67 | 3.36 | - | 352.9  |
| AHQ-1-4, 4402        | K.ASVPTIQDQASAMQLSQCAK.N            | 2136.39332 | 2 | 5.94E-07 | 0.88 | 4.31 | - | 467.2  |
| AHQ-1-3, 4519        | K.ASVPTIQDQASAMQLSQCAK.N            | 2136.39332 | 2 | 6.78E-10 | 0.88 | 3.87 | - | 524.7  |
| AHQ-1-5, 5042        | K.AVAEQIPLLVQGV.R.G                 | 1493.77619 | 1 | 6.86E-07 | 0.27 | 2.94 | - | 118.0  |
| AHQ-1-2, 5595        | K.AVAEQIPLLVQGV.R.G                 | 1493.77619 | 2 | 1.28E-05 | 0.90 | 3.99 | - | 754.4  |
| AHQ-1-5, 4989 - 5057 | K.AVAEQIPLLVQGV.R.G                 | 1493.77619 | 2 | 1.03E-08 | 0.95 | 4.52 | - | 1074.7 |
| AHQ-1-2, 5477        | K.AVAEQIPLLVQGV.R.G                 | 1493.77619 | 2 | 2.25E-07 | 0.93 | 3.08 | - | 1195.8 |
| AHQ-1-4, 5126 - 5134 | K.AVAEQIPLLVQGV.R.G                 | 1493.77619 | 2 | 2.34E-07 | 0.89 | 3.41 | - | 747.6  |
| AHQ-1-4, 5144        | K.AVAEQIPLLVQGV.R.G                 | 1493.77619 | 1 | 6.50E-07 | 0.71 | 3.35 | - | 252.3  |
| AHQ-1-2, 5225        | K.AVAEQIPLLVQGV.R.G                 | 1493.77619 | 1 | 1.63E-05 | 0.74 | 3.61 | - | 358.0  |
| AHQ-1-2, 5210        | K.AVAEQIPLLVQGV.R.G                 | 1493.77619 | 3 | 4.13E-09 | 0.97 | 4.74 | - | 2583.7 |
| AHQ-1-1, 5173        | K.AVAEQIPLLVQGV.R.G                 | 1493.77619 | 3 | 2.49E-06 | 0.97 | 4.31 | - | 2592.4 |
| AHQ-1-1, 5143        | K.AVAEQIPLLVQGV.R.G                 | 1493.77619 | 2 | 1.73E-04 | 0.81 | 3.46 | - | 579.3  |
| AHQ-1-7, 4985 - 4993 | K.AVAEQIPLLVQGV.R.G                 | 1493.77619 | 2 | 8.97E-05 | 0.90 | 4.31 | - | 621.0  |
| AHQ-1-2, 5187 - 5257 | K.AVAEQIPLLVQGV.R.G                 | 1493.77619 | 2 | 1.78E-07 | 0.82 | 3.03 | - | 629.7  |
| AHQ-1-6, 4943 - 4947 | K.AVAEQIPLLVQGV.R.G                 | 1493.77619 | 2 | 7.80E-07 | 0.75 | 2.99 | - | 500.6  |
| AHQ-1-3, 5057        | K.AVAEQIPLLVQGV.R.G                 | 1493.77619 | 3 | 5.08E-06 | 0.95 | 4.45 | - | 1729.4 |
| AHQ-1-6, 3747        | K.AVASAAAALV.LK.A                   | 1085.32216 | 2 | 8.94E-07 | 0.96 | 3.06 | - | 2088.3 |
| AHQ-1-2, 4161        | K.AVASAAAALV.LK.A                   | 1085.32216 | 2 | 1.09E-04 | 0.95 | 3.79 | - | 1652.8 |
| AHQ-1-2, 4077        | K.AVASAAAALV.LK.A                   | 1085.32216 | 2 | 1.21E-05 | 0.92 | 3.69 | - | 1137.8 |
| AHQ-1-4, 3976 - 4022 | K.AVASAAAALV.LK.A                   | 1085.32216 | 2 | 5.46E-07 | 0.95 | 4.16 | - | 1341.8 |
| AHQ-1-1, 3964 - 4031 | K.AVASAAAALV.LK.A                   | 1085.32216 | 2 | 2.84E-06 | 0.97 | 4.05 | - | 2000.7 |
| AHQ-1-3, 3993        | K.AVASAAAALV.LK.A                   | 1085.32216 | 2 | 1.71E-04 | 0.96 | 3.89 | - | 1714.5 |
| AHQ-1-5, 3793        | K.AVASAAAALV.LK.A                   | 1085.32216 | 2 | 7.78E-08 | 0.97 | 4.23 | - | 2074.1 |
| AHQ-1-1, 3872 - 3892 | K.AVEGCVSASQAATEDGQLLR.G            | 2064.22056 | 2 | 6.07E-08 | 0.97 | 5.58 | - | 1618.7 |
| AHQ-1-1, 3983        | K.AVEGCVSASQAATEDGQLLR.G            | 2064.22056 | 2 | 8.14E-08 | 0.86 | 3.89 | - | 827.9  |
| AHQ-1-4, 4294 - 4328 | K.AVEGCVSASQAATEDGQLLR.G            | 2064.22056 | 2 | 2.66E-07 | 0.92 | 4.12 | - | 1127.8 |
| AHQ-1-2, 5937 - 6011 | K.AVEGCVSASQAATEDGQLLR.G            | 2064.22056 | 2 | 5.24E-04 | 0.41 | 2.80 | - | 507.2  |
| AHQ-1-2, 4858        | K.AVEGCVSASQAATEDGQLLR.G            | 2064.22056 | 2 | 1.10E-06 | 0.78 | 3.73 | - | 701.5  |
| AHQ-1-2, 4554 - 4631 | K.AVEGCVSASQAATEDGQLLR.G            | 2064.22056 | 2 | 3.42E-07 | 0.90 | 4.10 | - | 965.0  |
| AHQ-1-1, 4165        | K.AVEGCVSASQAATEDGQLLR.G            | 2064.22056 | 2 | 1.46E-06 | 0.97 | 5.21 | - | 1719.4 |
| AHQ-1-6, 4048 - 4059 | K.AVEGCVSASQAATEDGQLLR.G            | 2064.22056 | 2 | 2.69E-04 | 0.64 | 2.77 | - | 575.5  |
| AHQ-1-4, 4151 - 4224 | K.AVEGCVSASQAATEDGQLLR.G            | 2064.22056 | 2 | 4.50E-06 | 0.60 | 3.21 | - | 446.7  |
| AHQ-1-2, 4405 - 4481 | K.AVEGCVSASQAATEDGQLLR.G            | 2064.22056 | 2 | 2.92E-06 | 0.96 | 5.19 | - | 1310.5 |
| AHQ-1-1, 4256        | K.AVEGCVSASQAATEDGQLLR.G            | 2064.22056 | 2 | 3.77E-06 | 0.80 | 3.24 | - | 940.7  |
| AHQ-1-3, 3845 - 3921 | K.AVEGCVSASQAATEDGQLLR.G            | 2064.22056 | 2 | 3.49E-05 | 0.92 | 3.81 | - | 1238.6 |
| AHQ-1-2, 5515        | K.AVEGCVSASQAATEDGQLLR.G            | 2064.22056 | 2 | 6.30E-07 | 0.95 | 4.73 | - | 1153.4 |
| AHQ-1-3, 4509        | K.AVEGCVSASQAATEDGQLLR.G            | 2064.22056 | 2 | 1.08E-07 | 0.75 | 3.31 | - | 785.2  |
| AHQ-1-5, 4261 - 4301 | K.AVEGCVSASQAATEDGQLLR.G            | 2064.22056 | 2 | 2.43E-04 | 0.67 | 3.37 | - | 690.1  |
| AHQ-1-4, 3907        | K.AVEGCVSASQAATEDGQLLR.G            | 2064.22056 | 2 | 5.90E-05 | 0.87 | 3.65 | - | 1029.1 |

|                       |                                   |            |   |          |      |      |   |        |
|-----------------------|-----------------------------------|------------|---|----------|------|------|---|--------|
| AHQ-1-3, 3995         | K.AVEGCVSASQAATEDGQLLR.G          | 2064.22056 | 2 | 9.63E-04 | 0.65 | 3.24 | - | 719.3  |
| AHQ-1-2, 4261 - 4330  | K.AVEGCVSASQAATEDGQLLR.G          | 2064.22056 | 2 | 1.20E-06 | 0.87 | 4.22 | - | 680.9  |
| AHQ-1-3, 4130 - 4201  | K.AVEGCVSASQAATEDGQLLR.G          | 2064.22056 | 2 | 2.88E-07 | 0.96 | 4.89 | - | 1456.8 |
| AHQ-1-2, 4153 - 4155  | K.AVEGCVSASQAATEDGQLLR.G          | 2064.22056 | 2 | 5.66E-06 | 0.95 | 4.44 | - | 1582.1 |
| AHQ-1-4, 3999         | K.AVEGCVSASQAATEDGQLLR.G          | 2064.22056 | 2 | 4.14E-06 | 0.91 | 4.14 | - | 1235.7 |
| AHQ-1-2, 3961         | K.AVEGCVSASQAATEDGQLLR.G          | 2064.22056 | 2 | 1.34E-04 | 0.86 | 3.59 | - | 944.2  |
| AHQ-1-5, 4430         | K.AVEGCVSASQAATEDGQLLR.G          | 2064.22056 | 2 | 4.62E-05 | 0.71 | 2.98 | - | 441.7  |
| AHQ-1-3, 4269 - 4338  | K.AVEGCVSASQAATEDGQLLR.G          | 2064.22056 | 2 | 1.21E-05 | 0.83 | 3.19 | - | 888.4  |
| AHQ-1-2, 5162         | K.AVEGCVSASQAATEDGQLLR.G          | 2064.22056 | 2 | 7.86E-04 | 0.90 | 4.02 | - | 1111.9 |
| AHQ-1-2, 4043         | K.AVEGCVSASQAATEDGQLLR.G          | 2064.22056 | 2 | 7.96E-09 | 0.90 | 3.73 | - | 1046.0 |
| AHQ-1-5, 7338 - 7346  | K.AVSSIAIQLLGEVAQGNENYAGIAAR.D    | 2574.83158 | 3 | 2.75E-05 | 0.72 | 3.77 | - | 730.7  |
| AHQ-1-3, 7085 - 7153  | K.AVSSIAIQLLGEVAQGNENYAGIAAR.D    | 2574.83158 | 3 | 4.24E-06 | 0.97 | 6.02 | - | 2039.2 |
| AHQ-1-6, 7170         | K.AVSSIAIQLLGEVAQGNENYAGIAAR.D    | 2574.83158 | 3 | 6.03E-04 | 0.92 | 4.12 | - | 1419.9 |
| AHQ-1-2, 7230 - 7294  | K.AVSSIAIQLLGEVAQGNENYAGIAAR.D    | 2574.83158 | 3 | 7.74E-12 | 0.98 | 6.34 | - | 2599.8 |
| AHQ-1-2, 5925         | R.AVTD SINQLITM*CTQQAPGQK.E       | 2322.60252 | 3 | 1.20E-04 | 0.87 | 4.14 | - | 663.5  |
| AHQ-1-6, 6090         | R.AVTD SINQLITM*CTQQAPGQK.E       | 2306.60312 | 2 | 3.50E-05 | 0.67 | 2.84 | - | 473.1  |
| AHQ-1-5, 6233         | R.AVTD SINQLITM*CTQQAPGQK.E       | 2306.60312 | 2 | 5.43E-07 | 0.82 | 3.57 | - | 372.9  |
| AHQ-1-1, 6059         | R.AVTD SINQLITM*CTQQAPGQK.E       | 2306.60312 | 2 | 7.91E-07 | 0.83 | 3.86 | - | 408.8  |
| AHQ-1-3, 4833 - 4843  | R.AVTD SINQLITM*CTQQAPGQK.E       | 2306.60312 | 2 | 2.35E-06 | 0.86 | 4.11 | - | 418.4  |
| AHQ-1-9, 6076         | R.AVTD SINQLITM*CTQQAPGQK.E       | 2306.60312 | 2 | 7.42E-04 | 0.59 | 3.05 | - | 340.0  |
| AHQ-1-4, 5886         | R.AVTD SINQLITM*CTQQAPGQK.E       | 2322.60252 | 2 | 7.82E-05 | 0.65 | 3.12 | - | 380.2  |
| AHQ-1-2, 4891 - 4973  | R.AVTD SINQLITM*CTQQAPGQK.E       | 2306.60312 | 2 | 3.05E-06 | 0.50 | 3.21 | - | 226.8  |
| AHQ-1-3, 6110         | R.AVTD SINQLITM*CTQQAPGQK.E       | 2306.60312 | 2 | 2.03E-04 | 0.86 | 3.77 | - | 623.4  |
| AHQ-1-2, 6273 - 6281  | R.AVTD SINQLITM*CTQQAPGQK.E       | 2306.60312 | 2 | 1.48E-05 | 0.89 | 3.92 | - | 664.1  |
| AHQ-1-1, 5720         | R.AVTD SINQLITM*CTQQAPGQK.E       | 2322.60252 | 2 | 3.26E-05 | 0.77 | 3.60 | - | 443.9  |
| AHQ-1-1, 5727         | R.AVTD SINQLITM*CTQQAPGQK.E       | 2322.60252 | 3 | 1.14E-04 | 0.77 | 3.48 | - | 494.4  |
| AHQ-1-4, 4912         | R.AVTD SINQLITM*CTQQAPGQK.E       | 2306.60312 | 2 | 2.17E-06 | 0.77 | 3.38 | - | 525.6  |
| AHQ-1-3, 5875         | R.AVTD SINQLITM*CTQQAPGQKCEDNLR.E | 3182.51068 | 3 | 1.85E-09 | 0.91 | 5.01 | - | 686.7  |
| AHQ-1-6, 6150 - 6222  | R.AVTD SINQLITM*CTQQAPGQKCEDNLR.E | 3166.51128 | 3 | 8.45E-08 | 0.91 | 4.41 | - | 973.9  |
| AHQ-1-1, 5864         | R.AVTD SINQLITM*CTQQAPGQKCEDNLR.E | 3182.51068 | 3 | 3.82E-07 | 0.92 | 4.47 | - | 1099.9 |
| AHQ-1-4, 6286 - 6354  | R.AVTD SINQLITM*CTQQAPGQKCEDNLR.E | 3166.51128 | 3 | 4.71E-11 | 0.92 | 4.70 | - | 888.3  |
| AHQ-1-1, 6135         | R.AVTD SINQLITM*CTQQAPGQKCEDNLR.E | 3166.51128 | 3 | 1.01E-07 | 0.92 | 4.81 | - | 874.2  |
| AHQ-1-2, 6357 - 6426  | R.AVTD SINQLITM*CTQQAPGQKCEDNLR.E | 3166.51128 | 3 | 9.44E-15 | 0.94 | 5.29 | - | 1190.7 |
| AHQ-1-2, 5191         | R.AVTD SINQLITM*CTQQAPGQKCEDNLR.E | 3166.51128 | 3 | 1.22E-06 | 0.79 | 3.46 | - | 643.1  |
| AHQ-1-3, 6261 - 6342  | R.AVTD SINQLITM*CTQQAPGQKCEDNLR.E | 3166.51128 | 3 | 4.05E-14 | 0.94 | 4.82 | - | 1398.9 |
| AHQ-1-3, 6151 - 6197  | R.AVTD SINQLITM*CTQQAPGQKCEDNLR.E | 3166.51128 | 3 | 5.50E-13 | 0.95 | 5.48 | - | 1113.1 |
| AHQ-1-4, 5988 - 6058  | R.AVTD SINQLITM*CTQQAPGQKCEDNLR.E | 3182.51068 | 3 | 3.19E-08 | 0.90 | 4.93 | - | 752.1  |
| AHQ-1-2, 6047 - 6117  | R.AVTD SINQLITM*CTQQAPGQKCEDNLR.E | 3182.51068 | 3 | 9.73E-10 | 0.94 | 5.57 | - | 1077.9 |
| AHQ-1-5, 6285 - 6359  | R.AVTD SINQLITM*CTQQAPGQKCEDNLR.E | 3166.51128 | 3 | 1.51E-13 | 0.95 | 5.36 | - | 1289.7 |
| AHQ-1-4, 2431         | R.CVSCLPQQR.D                     | 1079.23309 | 2 | 1.44E-04 | 0.85 | 2.96 | - | 887.9  |
| AHQ-1-5, 2353         | R.CVSCLPQQR.D                     | 1079.23309 | 2 | 9.06E-04 | 0.74 | 2.85 | - | 683.2  |
| AHQ-1-4, 2436         | R.CVSCLPQQR.D                     | 1079.23309 | 1 | 1.25E-04 | 0.43 | 2.60 | - | 147.8  |
| AHQ-1-3, 2427         | R.CVSCLPQQR.D                     | 1079.23309 | 2 | 1.89E-04 | 0.91 | 3.29 | - | 888.7  |
| AHQ-1-3, 3609         | R.DDILNGSHPVFDDK.A                | 1544.64741 | 2 | 3.13E-10 | 0.83 | 3.29 | - | 786.2  |
| AHQ-1-10, 3209 - 3269 | R.DDILNGSHPVFDDK.A                | 1544.64741 | 2 | 2.56E-05 | 0.30 | 2.52 | - | 455.0  |
| AHQ-1-9, 3591         | R.DDILNGSHPVFDDK.A                | 1544.64741 | 2 | 1.18E-07 | 0.95 | 4.11 | - | 1367.2 |
| AHQ-1-13, 3462        | R.DDILNGSHPVFDDK.A                | 1544.64741 | 2 | 1.61E-06 | 0.90 | 3.51 | - | 997.0  |
| AHQ-1-1, 3660         | R.DDILNGSHPVFDDK.A                | 1544.64741 | 2 | 5.78E-06 | 0.86 | 3.61 | - | 744.8  |
| AHQ-1-7, 3765         | R.DDILNGSHPVFDDK.A                | 1544.64741 | 2 | 6.47E-08 | 0.91 | 3.49 | - | 1080.3 |
| AHQ-1-4, 3631         | R.DDILNGSHPVFDDK.A                | 1544.64741 | 2 | 9.54E-08 | 0.93 | 3.92 | - | 1060.5 |
| AHQ-1-7, 3552         | R.DDILNGSHPVFDDK.A                | 1544.64741 | 2 | 5.48E-08 | 0.90 | 3.48 | - | 930.1  |
| AHQ-1-8, 3562 - 3634  | R.DDILNGSHPVFDDK.A                | 1544.64741 | 2 | 2.24E-09 | 0.96 | 4.21 | - | 1397.5 |
| AHQ-1-10, 3433        | R.DDILNGSHPVFDDK.A                | 1544.64741 | 2 | 1.22E-07 | 0.90 | 3.68 | - | 1002.8 |
| AHQ-1-8, 4842         | K.DHFGLEGDEESTMLEDVSPK.K          | 2323.43307 | 2 | 2.81E-04 | 0.95 | 4.69 | - | 1072.2 |
| AHQ-1-2, 6289         | R.DKAPGQLECECTAIAALNSCLR.D        | 2320.58644 | 3 | 7.54E-05 | 0.76 | 3.54 | - | 767.5  |
| AHQ-1-2, 6290 - 6309  | R.DKAPGQLECECTAIAALNSCLR.D        | 2320.58644 | 2 | 1.93E-08 | 0.96 | 5.17 | - | 1222.7 |
| AHQ-1-3, 5743         | R.DKAPGQLECECTAIAALNSCLR.D        | 2320.58644 | 2 | 1.94E-09 | 0.89 | 3.42 | - | 905.5  |
| AHQ-1-2, 5531         | R.DKAPGQLECECTAIAALNSCLR.D        | 2320.58644 | 2 | 1.80E-11 | 0.87 | 3.50 | - | 802.1  |
| AHQ-1-3, 6105 - 6107  | R.DKAPGQLECECTAIAALNSCLR.D        | 2320.58644 | 2 | 2.95E-08 | 0.97 | 5.59 | - | 1513.3 |
| AHQ-1-2, 5919         | R.DKAPGQLECECTAIAALNSCLR.D        | 2320.58644 | 2 | 2.81E-07 | 0.94 | 4.65 | - | 893.4  |
| AHQ-1-3, 6347         | R.DKAPGQLECECTAIAALNSCLR.D        | 2320.58644 | 2 | 6.71E-10 | 0.70 | 3.07 | - | 579.0  |
| AHQ-1-5, 5405         | R.DKAPGQLECECTAIAALNSCLR.D        | 2320.58644 | 2 | 3.03E-10 | 0.95 | 4.71 | - | 900.3  |
| AHQ-1-3, 6042 - 6109  | R.DKAPGQLECECTAIAALNSCLR.D        | 2320.58644 | 3 | 2.96E-05 | 0.86 | 4.71 | - | 809.1  |
| AHQ-1-4, 6239         | R.DKAPGQLECECTAIAALNSCLR.D        | 2320.58644 | 2 | 6.02E-09 | 0.92 | 4.47 | - | 913.4  |
| AHQ-1-6, 6078         | R.DKAPGQLECECTAIAALNSCLR.D        | 2320.58644 | 2 | 1.04E-09 | 0.95 | 4.73 | - | 1075.7 |
| AHQ-1-9, 6060         | R.DKAPGQLECECTAIAALNSCLR.D        | 2320.58644 | 2 | 4.69E-10 | 0.86 | 3.56 | - | 730.2  |
| AHQ-1-3, 6273 - 6346  | R.DKAPGQLECECTAIAALNSCLR.D        | 2320.58644 | 3 | 1.38E-10 | 0.91 | 3.88 | - | 1329.9 |
| AHQ-1-4, 6499         | R.DKAPGQLECECTAIAALNSCLR.D        | 2320.58644 | 2 | 6.74E-12 | 0.94 | 4.25 | - | 1101.3 |
| AHQ-1-4, 5452 - 5490  | R.DKAPGQLECECTAIAALNSCLR.D        | 2320.58644 | 2 | 5.01E-07 | 0.91 | 4.60 | - | 725.8  |
| AHQ-1-1, 6091         | R.DKAPGQLECECTAIAALNSCLR.D        | 2320.58644 | 2 | 1.75E-10 | 0.96 | 5.04 | - | 1172.7 |
| AHQ-1-1, 5417         | R.DKAPGQLECECTAIAALNSCLR.D        | 2320.58644 | 2 | 1.33E-13 | 0.96 | 4.91 | - | 1261.6 |
| AHQ-1-3, 5327 - 5373  | R.DKAPGQLECECTAIAALNSCLR.D        | 2320.58644 | 2 | 2.70E-12 | 0.95 | 4.28 | - | 1258.9 |
| AHQ-1-3, 5885         | R.DKAPGQLECECTAIAALNSCLR.D        | 2320.58644 | 2 | 6.99E-04 | 0.84 | 3.37 | - | 742.2  |
| AHQ-1-8, 6154         | R.DKAPGQLECECTAIAALNSCLR.D        | 2320.58644 | 2 | 1.91E-11 | 0.94 | 4.56 | - | 1007.5 |
| AHQ-1-4, 6403         | R.DKAPGQLECECTAIAALNSCLR.D        | 2320.58644 | 2 | 8.96E-05 | 0.89 | 3.72 | - | 820.7  |
| AHQ-1-4, 5416 - 5482  | R.DLDQASLAAVSQQLAPR.E             | 1783.96422 | 2 | 9.65E-11 | 0.96 | 5.61 | - | 814.0  |
| AHQ-1-4, 5476 - 5492  | R.DLDQASLAAVSQQLAPR.E             | 1783.96422 | 3 | 3.25E-05 | 0.94 | 4.45 | - | 1882.0 |
| AHQ-1-1, 5371         | R.DLDQASLAAVSQQLAPR.E             | 1783.96422 | 3 | 7.85E-06 | 0.96 | 4.37 | - | 2122.5 |
| AHQ-1-2, 5505         | R.DLDQASLAAVSQQLAPR.E             | 1783.96422 | 3 | 4.41E-05 | 0.95 | 4.48 | - | 2202.3 |
| AHQ-1-5, 5421         | R.DLDQASLAAVSQQLAPR.E             | 1783.96422 | 3 | 1.27E-08 | 0.93 | 4.46 | - | 1642.0 |
| AHQ-1-14 - , 5131     | R.DLDQASLAAVSQQLAPR.E             | 1783.96422 | 2 | 1.73E-04 | 0.75 | 3.03 | - | 720.7  |
| AHQ-1-2, 4875         | R.DLDQASLAAVSQQLAPR.E             | 1783.96422 | 2 | 1.46E-05 | 0.65 | 2.57 | - | 789.0  |
| AHQ-1-2, 5929         | R.DLDQASLAAVSQQLAPR.E             | 1783.96422 | 2 | 1.20E-04 | 0.56 | 2.55 | - | 590.8  |
| AHQ-1-3, 5355 - 5358  | R.DLDQASLAAVSQQLAPR.E             | 1783.96422 | 3 | 4.78E-06 | 0.94 | 5.00 | - | 1763.7 |
| AHQ-1-3, 5342 - 5409  | R.DLDQASLAAVSQQLAPR.E             | 1783.96422 | 2 | 3.98E-06 | 0.86 | 3.77 | - | 709.9  |
| AHQ-1-3, 4737         | R.DLDQASLAAVSQQLAPR.E             | 1783.96422 | 2 | 7.95E-06 | 0.93 | 4.29 | - | 1052.4 |
| AHQ-1-2, 3766         | R.DPPSWSVLAGHSR.T                 | 1409.53156 | 3 | 8.21E-05 | 0.87 | 3.91 | - | 757.7  |
| AHQ-1-2, 3759         | R.DPPSWSVLAGHSR.T                 | 1409.53156 | 2 | 5.60E-07 | 0.81 | 2.84 | - | 378.1  |
| AHQ-1-5, 3479 - 3495  | R.DPPSWSVLAGHSR.T                 | 1409.53156 | 2 | 1.20E-08 | 0.90 | 3.60 | - | 692.0  |
| AHQ-1-3, 3621 - 3629  | R.DPPSWSVLAGHSR.T                 | 1409.53156 | 2 | 2.70E-08 | 0.94 | 3.98 | - | 692.9  |
| AHQ-1-6, 3454         | R.DPPSWSVLAGHSR.T                 | 1409.53156 | 2 | 9.72E-09 | 0.80 | 3.26 | - | 413.8  |
| AHQ-1-4, 3646 - 3648  | R.DPPSWSVLAGHSR.T                 | 1409.53156 | 2 | 4.04E-10 | 0.94 | 3.91 | - | 743.4  |
| AHQ-1-7, 3520         | R.DPPSWSVLAGHSR.T                 | 1409.53156 | 2 | 1.13E-07 | 0.80 | 2.72 | - | 514.8  |
| AHQ-1-4, 3656         | R.DPPSWSVLAGHSR.T                 | 1409.53156 | 3 | 3.02E-07 | 0.88 | 4.25 | - | 594.6  |
| AHQ-1-3, 3625         | R.DPPSWSVLAGHSR.T                 | 1409.53156 | 3 | 9.40E-07 | 0.92 | 4.44 | - | 678.4  |
| AHQ-1-1, 5360         | R.DPVQLNLLYQAR.D                  | 1529.76539 | 2 | 3.86E-07 | 0.97 | 4.89 | - | 1549.1 |
| AHQ-1-9, 5163         | R.DPVQLNLLYQAR.D                  | 1529.76539 | 2 | 2.57E-08 | 0.94 | 4.24 | - | 1247.1 |
| AHQ-1-8, 5230 - 5304  | R.DPVQLNLLYQAR.D                  | 1529.76539 | 2 | 2.20E-05 | 0.96 | 4.73 | - | 1522.4 |
| AHQ-1-13 - , 5216     | R.DPVQLNLLYQAR.D                  | 1529.76539 | 2 | 2.01E-06 | 0.81 | 3.34 | - | 737.6  |
| AHQ-1-6, 2379         | K.EAAYHPEVAPDVR.L                 | 1454.56910 | 1 | 8.05E-04 | 0.22 | 1.90 | - | 370.5  |
| AHQ-1-6, 2366         | K.EAAYHPEVAPDVR.L                 | 1454.56910 | 2 | 1.87E-06 | 0.82 | 3.06 | - | 651.0  |
| AHQ-1-5, 2350         | K.EAAYHPEVAPDVR.L                 | 1454.56910 | 2 | 3.90E-04 | 0.84 | 2.67 | - | 1010.5 |
| AHQ-1-2, 2551 - 2559  | K.EAAYHPEVAPDVR.L                 | 1454.56910 | 1 | 4.58E-05 | 0.58 | 2.48 | - | 430.9  |
| AHQ-1-2, 2549 - 2550  | K.EAAYHPEVAPDVR.L                 | 1454.56910 | 2 | 1.63E-06 | 0.88 | 3.43 | - | 774.4  |
| AHQ-1-3, 2465         | K.EAAYHPEVAPDVR.L                 | 1454.56910 | 2 | 2.15E-06 | 0.67 | 2.51 | - | 799.7  |
| AHQ-1-3, 2467         | K.EAAYHPEVAPDVR.L                 | 1454.56910 | 1 | 5.85E-04 | 0.81 | 2.87 | - | 709.2  |
| AHQ-1-7, 2392         | K.EAAYHPEVAPDVR.L                 | 1454.56910 | 2 | 6.69E-04 | 0.67 | 2.84 | - | 614.4  |

|                       |                                       |            |   |          |      |      |   |        |
|-----------------------|---------------------------------------|------------|---|----------|------|------|---|--------|
| AHQ-1-2, 6169 - 6237  | K.EADESLNFEEQILEAAK.S                 | 1937.05072 | 2 | 1.34E-07 | 0.97 | 5.34 | - | 1564.4 |
| AHQ-1-1, 6265         | K.EADESLNFEEQILEAAK.S                 | 1937.05072 | 2 | 5.66E-09 | 0.94 | 4.64 | - | 1275.2 |
| AHQ-1-7, 6176         | K.EADESLNFEEQILEAAK.S                 | 1937.05072 | 2 | 2.27E-07 | 0.86 | 3.68 | - | 978.1  |
| AHQ-1-5, 6246 - 6325  | K.EADESLNFEEQILEAAK.S                 | 1937.05072 | 2 | 2.25E-06 | 0.97 | 5.29 | - | 1584.9 |
| AHQ-1-5, 6146         | K.EADESLNFEEQILEAAK.S                 | 1937.05072 | 2 | 1.50E-06 | 0.89 | 3.74 | - | 1078.8 |
| AHQ-1-3, 6062 - 6101  | K.EADESLNFEEQILEAAK.S                 | 1937.05072 | 2 | 4.34E-08 | 0.94 | 4.53 | - | 1125.5 |
| AHQ-1-6, 6030         | K.EADESLNFEEQILEAAK.S                 | 1937.05072 | 2 | 4.02E-05 | 0.94 | 4.53 | - | 1044.0 |
| AHQ-1-3, 6159 - 6233  | K.EADESLNFEEQILEAAK.S                 | 1937.05072 | 2 | 3.23E-05 | 0.95 | 4.85 | - | 1246.2 |
| AHQ-1-2, 6297 - 6371  | K.EADESLNFEEQILEAAK.S                 | 1937.05072 | 2 | 2.28E-08 | 0.97 | 5.49 | - | 1859.5 |
| AHQ-1-4, 5979         | K.EADESLNFEEQILEAAK.S                 | 1937.05072 | 2 | 2.08E-10 | 0.89 | 4.07 | - | 711.1  |
| AHQ-1-2, 6443 - 6519  | K.EADESLNFEEQILEAAK.S                 | 1937.05072 | 2 | 5.72E-09 | 0.97 | 5.25 | - | 1522.7 |
| AHQ-1-4, 6140 - 6210  | K.EADESLNFEEQILEAAK.S                 | 1937.05072 | 2 | 5.08E-07 | 0.95 | 4.65 | - | 1308.2 |
| AHQ-1-10, 5332        | K.EADESLNFEEQILEAAK.S                 | 1937.05072 | 2 | 6.97E-04 | 0.63 | 3.05 | - | 726.8  |
| AHQ-1-2, 7551         | K.EADESLNFEEQILEAAK.S                 | 1937.05072 | 2 | 6.92E-04 | 0.61 | 2.70 | - | 676.1  |
| AHQ-1-9, 5999         | K.EADESLNFEEQILEAAK.S                 | 1937.05072 | 2 | 2.63E-05 | 0.94 | 4.35 | - | 1366.1 |
| AHQ-1-10, 5440 - 5499 | K.EADESLNFEEQILEAAK.S                 | 1937.05072 | 2 | 4.00E-04 | 0.62 | 3.32 | - | 788.4  |
| AHQ-1-4, 6283 - 6352  | K.EADESLNFEEQILEAAK.S                 | 1937.05072 | 2 | 7.40E-08 | 0.96 | 4.97 | - | 1234.7 |
| AHQ-1-4, 6444         | K.EADESLNFEEQILEAAK.S                 | 1937.05072 | 2 | 3.94E-07 | 0.91 | 3.99 | - | 1183.4 |
| AHQ-1-1, 6027 - 6088  | K.EADESLNFEEQILEAAK.S                 | 1937.05072 | 2 | 2.67E-07 | 0.96 | 5.03 | - | 1632.7 |
| AHQ-1-1, 7004         | R.ECANGYLELDHVLTLTKPSPK.K             | 2883.30906 | 3 | 1.33E-06 | 0.90 | 3.93 | - | 1177.2 |
| AHQ-1-5, 7459 - 7462  | R.ECANGYLELDHVLTLTKPSPK.K             | 2883.30906 | 2 | 9.94E-05 | 0.89 | 4.38 | - | 630.1  |
| AHQ-1-3, 7253         | R.ECANGYLELDHVLTLTKPSPK.K             | 2883.30906 | 3 | 1.04E-09 | 0.93 | 4.56 | - | 1144.1 |
| AHQ-1-9, 7286 - 7288  | R.ECANGYLELDHVLTLTKPSPK.K             | 2883.30906 | 3 | 2.32E-06 | 0.84 | 4.01 | - | 900.3  |
| AHQ-1-9, 7284         | R.ECANGYLELDHVLTLTKPSPK.K             | 2883.30906 | 2 | 1.15E-04 | 0.83 | 3.77 | - | 627.4  |
| AHQ-1-6, 7266         | R.ECANGYLELDHVLTLTKPSPK.K             | 2883.30906 | 3 | 1.89E-14 | 0.94 | 4.86 | - | 1418.8 |
| AHQ-1-4, 7430         | R.ECANGYLELDHVLTLTKPSPK.K             | 2883.30906 | 3 | 3.12E-08 | 0.95 | 5.43 | - | 1210.8 |
| AHQ-1-2, 7389 - 7395  | R.ECANGYLELDHVLTLTKPSPK.K             | 2883.30906 | 3 | 2.33E-06 | 0.96 | 5.57 | - | 1516.8 |
| AHQ-1-2, 7385 - 7450  | R.EGISQEAALHTQMLTAVQEIISHLIEPLANAAR.A | 3372.79804 | 3 | 7.60E-06 | 0.88 | 4.51 | - | 751.3  |
| AHQ-1-8, 7542 - 7544  | R.EGISQEAALHTQMLTAVQEIISHLIEPLANAAR.A | 3372.79804 | 3 | 6.22E-07 | 0.98 | 7.11 | - | 1806.3 |
| AHQ-1-10, 6444 - 6445 | R.EGISQEAALHTQMLTAVQEIISHLIEPLANAAR.A | 3372.79804 | 3 | 1.24E-08 | 0.97 | 6.31 | - | 1637.3 |
| AHQ-1-4, 7400 - 7427  | R.EGISQEAALHTQMLTAVQEIISHLIEPLANAAR.A | 3372.79804 | 3 | 4.33E-07 | 0.78 | 3.49 | - | 674.7  |
| AHQ-1-3, 7222 - 7289  | R.EGISQEAALHTQMLTAVQEIISHLIEPLANAAR.A | 3372.79804 | 3 | 2.42E-11 | 0.98 | 6.95 | - | 1901.4 |
| AHQ-1-3, 7163         | R.EGISQEAALHTQMLTAVQEIISHLIEPLANAAR.A | 3388.79744 | 3 | 5.58E-08 | 0.95 | 5.51 | - | 1009.0 |
| AHQ-1-5, 7445 - 7515  | R.EGISQEAALHTQMLTAVQEIISHLIEPLANAAR.A | 3372.79804 | 3 | 1.35E-10 | 0.95 | 5.61 | - | 1177.4 |
| AHQ-1-11, 6523        | R.EGISQEAALHTQMLTAVQEIISHLIEPLANAAR.A | 3372.79804 | 3 | 3.90E-08 | 0.90 | 4.40 | - | 937.1  |
| AHQ-1-1, 6999         | R.EGISQEAALHTQMLTAVQEIISHLIEPLANAAR.A | 3372.79804 | 3 | 1.40E-05 | 0.69 | 3.01 | - | 1030.1 |
| AHQ-1-7, 7532         | R.EGISQEAALHTQMLTAVQEIISHLIEPLANAAR.A | 3372.79804 | 3 | 2.43E-06 | 0.95 | 5.69 | - | 1608.0 |
| AHQ-1-2, 7309         | R.EGISQEAALHTQMLTAVQEIISHLIEPLANAAR.A | 3388.79744 | 3 | 3.07E-07 | 0.88 | 4.18 | - | 767.9  |
| AHQ-1-6, 7264 - 7318  | R.EGISQEAALHTQMLTAVQEIISHLIEPLANAAR.A | 3372.79804 | 3 | 5.45E-09 | 0.95 | 5.74 | - | 1343.3 |
| AHQ-1-2, 7314         | R.ELLENVPQINDMSYFGCLDSVMENSK.V        | 3132.48814 | 3 | 1.25E-07 | 0.94 | 4.62 | - | 1144.8 |
| AHQ-1-4, 7251         | R.ELLENVPQINDMSYFGCLDSVMENSK.V        | 3148.48814 | 3 | 4.58E-05 | 0.85 | 4.46 | - | 687.0  |
| AHQ-1-2, 6919         | R.ELLENVPQINDMSYFGCLDSVMENSK.V        | 3148.48814 | 3 | 4.64E-06 | 0.62 | 3.43 | - | 326.3  |
| AHQ-1-7, 3041 - 3042  | R.EQGVVEHETLLLR.R                     | 1553.69898 | 2 | 2.16E-04 | 0.85 | 3.44 | - | 515.5  |
| AHQ-1-8, 2812 - 2885  | R.EQGVVEHETLLLR.R                     | 1553.69898 | 2 | 7.28E-04 | 0.84 | 3.14 | - | 686.3  |
| AHQ-1-8, 5546 - 5548  | R.ERIEAPAGPPSDFGLFLSDDPPK.K           | 2571.77979 | 3 | 2.22E-15 | 0.97 | 6.52 | - | 1614.0 |
| AHQ-1-13 - , 5663     | R.ERIEAPAGPPSDFGLFLSDDPPK.K           | 2571.77979 | 3 | 2.33E-11 | 0.98 | 7.10 | - | 2149.9 |
| AHQ-1-13, 5340        | R.ERIEAPAGPPSDFGLFLSDDPPK.K           | 2571.77979 | 3 | 5.55E-16 | 0.98 | 6.70 | - | 1764.0 |
| AHQ-1-1, 5771 - 5833  | R.ERIEAPAGPPSDFGLFLSDDPPK.K           | 2571.77979 | 3 | 2.93E-08 | 0.92 | 5.07 | - | 1172.2 |
| AHQ-1-14 - , 5514     | R.ERIEAPAGPPSDFGLFLSDDPPK.K           | 2571.77979 | 3 | 5.07E-13 | 0.97 | 5.75 | - | 1777.5 |
| AHQ-1-8, 5116 - 5195  | R.ERIEAPAGPPSDFGLFLSDDPPK.G           | 2699.95270 | 3 | 2.36E-06 | 0.98 | 6.40 | - | 1880.9 |
| AHQ-1-13 - , 5275     | R.ERIEAPAGPPSDFGLFLSDDPPK.G           | 2699.95270 | 3 | 2.92E-04 | 0.97 | 5.17 | - | 1803.2 |
| AHQ-1-13, 4981        | R.ERIEAPAGPPSDFGLFLSDDPPK.G           | 2699.95270 | 3 | 1.15E-08 | 0.97 | 5.47 | - | 1830.2 |
| AHQ-1-14 - , 5146     | R.ERIEAPAGPPSDFGLFLSDDPPK.G           | 2699.95270 | 3 | 9.63E-08 | 0.97 | 5.59 | - | 1808.2 |
| AHQ-1-4, 2364         | K.EVANSTANLVK.T                       | 1146.27608 | 2 | 4.36E-04 | 0.74 | 2.69 | - | 907.1  |
| AHQ-1-13, 4541 - 4603 | K.EVIQEWNLTKN.R                       | 1487.68214 | 2 | 4.32E-06 | 0.94 | 4.04 | - | 1331.7 |
| AHQ-1-1, 4859 - 4935  | K.EVIQEWNLTKN.R                       | 1487.68214 | 2 | 3.12E-04 | 0.81 | 2.90 | - | 734.9  |
| AHQ-1-8, 4712         | K.EVIQEWNLTKN.R                       | 1487.68214 | 1 | 5.46E-04 | 0.33 | 2.73 | - | 198.8  |
| AHQ-1-8, 4706 - 4720  | K.EVIQEWNLTKN.R                       | 1487.68214 | 2 | 4.07E-07 | 0.93 | 4.48 | - | 963.0  |
| AHQ-1-11, 4384 - 4462 | K.EVIQEWNLTKN.R                       | 1487.68214 | 2 | 9.62E-05 | 0.83 | 3.19 | - | 655.8  |
| AHQ-1-8, 4075         | K.EVIQEWNLTKNR.W                      | 1643.86849 | 2 | 4.05E-05 | 0.70 | 3.51 | - | 577.2  |
| AHQ-1-8, 2936 - 3004  | K.FFYSDQNVDSDR.D                      | 1378.42795 | 2 | 8.68E-06 | 0.93 | 3.58 | - | 1105.4 |
| AHQ-1-9, 2928         | K.FFYSDQNVDSDR.D                      | 1378.42795 | 2 | 1.65E-05 | 0.91 | 3.26 | - | 978.1  |
| AHQ-1-10, 2855        | K.FFYSDQNVDSDR.D                      | 1378.42795 | 2 | 3.26E-05 | 0.90 | 3.28 | - | 1008.5 |
| AHQ-1-7, 3017         | K.FFYSDQNVDSDR.D                      | 1378.42795 | 2 | 3.10E-06 | 0.83 | 3.08 | - | 664.5  |
| AHQ-1-8, 6150 - 6175  | K.FFYSDQNVDSDRDPVQLNLLVQAR.D          | 2889.17074 | 3 | 9.59E-09 | 0.98 | 5.59 | - | 2529.3 |
| AHQ-1-1, 6137         | K.FFYSDQNVDSDRDPVQLNLLVQAR.D          | 2889.17074 | 3 | 2.73E-05 | 0.82 | 3.31 | - | 851.3  |
| AHQ-1-8, 6243         | K.FFYSDQNVDSDRDPVQLNLLVQAR.D          | 2889.17074 | 3 | 5.64E-12 | 0.96 | 5.33 | - | 1756.1 |
| AHQ-1-10, 5428        | K.FFYSDQNVDSDRDPVQLNLLVQAR.D          | 2889.17074 | 3 | 8.15E-07 | 0.93 | 4.32 | - | 1537.5 |
| AHQ-1-8, 6182         | K.FFYSDQNVDSDRDPVQLNLLVQAR.D          | 2889.17074 | 2 | 7.63E-04 | 0.52 | 2.95 | - | 232.0  |
| AHQ-1-3, 6394 - 6465  | R.FGQDFSTFLEAGVEM*AGQAPSQEDR.A        | 2734.89265 | 3 | 3.02E-05 | 0.93 | 5.50 | - | 876.6  |
| AHQ-1-2, 6550 - 6619  | R.FGQDFSTFLEAGVEM*AGQAPSQEDR.A        | 2734.89265 | 3 | 6.17E-08 | 0.92 | 4.81 | - | 895.0  |
| AHQ-1-4, 6563         | R.FGQDFSTFLEAGVEM*AGQAPSQEDR.A        | 2734.89265 | 2 | 2.80E-05 | 0.88 | 3.36 | - | 1107.0 |
| AHQ-1-4, 7291         | R.FGQDFSTFLEAGVEM*AGQAPSQEDR.A        | 2718.89325 | 3 | 1.16E-07 | 0.82 | 4.22 | - | 499.1  |
| AHQ-1-4, 7288 - 7292  | R.FGQDFSTFLEAGVEM*AGQAPSQEDR.A        | 2718.89325 | 2 | 9.36E-04 | 0.90 | 4.13 | - | 931.1  |
| AHQ-1-3, 7115         | R.FGQDFSTFLEAGVEM*AGQAPSQEDR.A        | 2718.89325 | 3 | 3.07E-11 | 0.85 | 3.95 | - | 658.2  |
| AHQ-1-1, 6321         | R.FGQDFSTFLEAGVEM*AGQAPSQEDR.A        | 2734.89265 | 2 | 2.51E-07 | 0.80 | 3.41 | - | 724.4  |
| AHQ-1-1, 6312         | R.FGQDFSTFLEAGVEM*AGQAPSQEDR.A        | 2734.89265 | 3 | 2.86E-06 | 0.85 | 4.24 | - | 650.7  |
| AHQ-1-2, 6565 - 6637  | R.FGQDFSTFLEAGVEM*AGQAPSQEDR.A        | 2734.89265 | 2 | 1.91E-07 | 0.93 | 4.26 | - | 1074.7 |
| AHQ-1-2, 7470 - 7538  | R.FGQDFSTFLEAGVEM*AGQAPSQEDR.A        | 2718.89325 | 3 | 1.06E-05 | 0.79 | 4.00 | - | 718.2  |
| AHQ-1-3, 7422         | R.FGQDFSTFLEAGVEM*AGQAPSQEDR.A        | 2718.89325 | 3 | 1.05E-07 | 0.86 | 4.25 | - | 596.3  |
| AHQ-1-4, 6559 - 6627  | R.FGQDFSTFLEAGVEM*AGQAPSQEDR.A        | 2734.89265 | 3 | 3.52E-06 | 0.88 | 4.40 | - | 683.3  |
| AHQ-1-2, 7254         | R.FGQDFSTFLEAGVEM*AGQAPSQEDR.A        | 2718.89325 | 3 | 3.01E-06 | 0.87 | 4.62 | - | 689.3  |
| AHQ-1-3, 6395 - 6475  | R.FGQDFSTFLEAGVEM*AGQAPSQEDR.A        | 2734.89265 | 2 | 7.81E-06 | 0.83 | 3.12 | - | 1100.7 |
| AHQ-1-3, 7341         | R.FGQDFSTFLEAGVEM*AGQAPSQEDR.A        | 2718.89325 | 3 | 1.29E-07 | 0.85 | 4.01 | - | 704.9  |
| AHQ-1-4, 2791 - 2794  | K.FLPSLRDEH                           | 1243.35032 | 2 | 1.25E-04 | 0.69 | 2.79 | - | 345.2  |
| AHQ-1-2, 5377         | K.GLAVAVSELLR.S                       | 1086.26701 | 2 | 3.47E-07 | 0.97 | 4.67 | - | 1994.3 |
| AHQ-1-4, 5279         | K.GLAVAVSELLR.S                       | 1086.26701 | 2 | 1.01E-06 | 0.98 | 5.03 | - | 1956.4 |
| AHQ-1-1, 5323         | K.GLAVAVSELLR.S                       | 1086.26701 | 2 | 9.24E-06 | 0.97 | 4.57 | - | 2011.7 |
| AHQ-1-3, 5217         | K.GLAVAVSELLR.S                       | 1086.26701 | 2 | 4.74E-07 | 0.98 | 4.36 | - | 2406.3 |
| AHQ-1-9, 4970         | K.GLAVAVSELLR.S                       | 1086.26701 | 2 | 1.86E-06 | 0.98 | 4.80 | - | 2185.5 |
| AHQ-1-5, 5158         | K.GLAVAVSELLR.S                       | 1086.26701 | 2 | 7.71E-07 | 0.97 | 4.74 | - | 1973.3 |
| AHQ-1-6, 5102         | K.GLAVAVSELLR.S                       | 1086.26701 | 2 | 7.92E-07 | 0.97 | 5.14 | - | 1650.4 |
| AHQ-1-8, 4924         | K.GLAVAVSELLR.S                       | 1086.26701 | 2 | 7.19E-07 | 0.98 | 5.27 | - | 2207.6 |
| AHQ-1-2, 6618         | R.GSQAQPDSPSAQLALIAASQSFLOPGGK.M      | 2756.02103 | 3 | 5.90E-08 | 0.92 | 4.34 | - | 1371.5 |
| AHQ-1-2, 6873 - 6938  | R.GSQAQPDSPSAQLALIAASQSFLOPGGK.M      | 2756.02103 | 2 | 2.81E-06 | 0.93 | 5.14 | - | 762.5  |
| AHQ-1-2, 6961 - 7025  | R.GSQAQPDSPSAQLALIAASQSFLOPGGK.M      | 2756.02103 | 3 | 3.69E-06 | 0.91 | 4.70 | - | 1021.9 |
| AHQ-1-5, 6821 - 6885  | R.GSQAQPDSPSAQLALIAASQSFLOPGGK.M      | 2756.02103 | 2 | 4.65E-04 | 0.94 | 5.24 | - | 893.2  |
| AHQ-1-2, 7009         | R.GSQAQPDSPSAQLALIAASQSFLOPGGK.M      | 2756.02103 | 2 | 1.81E-09 | 0.86 | 4.11 | - | 524.9  |
| AHQ-1-2, 7211         | R.GSQAQPDSPSAQLALIAASQSFLOPGGK.M      | 2756.02103 | 2 | 5.85E-08 | 0.86 | 4.00 | - | 466.5  |
| AHQ-1-6, 6662 - 6736  | R.GSQAQPDSPSAQLALIAASQSFLOPGGK.M      | 2756.02103 | 3 | 2.59E-10 | 0.93 | 5.14 | - | 970.5  |
| AHQ-1-6, 6590 - 6666  | R.GSQAQPDSPSAQLALIAASQSFLOPGGK.M      | 2756.02103 | 2 | 2.45E-07 | 0.94 | 5.02 | - | 749.4  |
| AHQ-1-5, 6749 - 6813  | R.GSQAQPDSPSAQLALIAASQSFLOPGGK.M      | 2756.02103 | 3 | 5.90E-07 | 0.91 | 4.61 | - | 1054.0 |
| AHQ-1-2, 6834 - 6897  | R.GSQAQPDSPSAQLALIAASQSFLOPGGK.M      | 2756.02103 | 3 | 8.72E-06 | 0.89 | 4.29 | - | 881.4  |
| AHQ-1-3, 6842         | R.GSQAQPDSPSAQLALIAASQSFLOPGGK.M      | 2756.02103 | 2 | 5.46E-04 | 0.84 | 3.98 | - | 498.9  |
| AHQ-1-4, 6799 - 6866  | R.GSQAQPDSPSAQLALIAASQSFLOPGGK.M      | 2756.02103 | 2 | 2.92E-06 | 0.93 | 5.39 | - | 593.7  |
| AHQ-1-1, 6543 - 6603  | R.GSQAQPDSPSAQLALIAASQSFLOPGGK.M      | 2756.02103 | 3 | 8.64E-04 | 0.92 | 4.63 | - | 1293.4 |
| AHQ-1-1, 6611 - 6680  | R.GSQAQPDSPSAQLALIAASQSFLOPGGK.M      | 2756.02103 | 2 | 9.99E-05 | 0.96 | 5.75 | - | 1039.0 |

|                        |                                   |            |   |          |      |      |   |        |
|------------------------|-----------------------------------|------------|---|----------|------|------|---|--------|
| AHQ-1-1, 6659 - 6721   | R.GSQAQPDSPSAQLALIAASQSFLOPPGGK.M | 2756.02103 | 3 | 7.04E-05 | 0.93 | 4.79 | - | 1115.5 |
| AHQ-1-1, 6809 - 6881   | R.GSQAQPDSPSAQLALIAASQSFLOPPGGK.M | 2756.02103 | 3 | 7.22E-09 | 0.88 | 3.62 | - | 1413.7 |
| AHQ-1-5, 7537          | K.GTEWVDPEDPTVIAENELGGAAAIEAAAK.K | 3053.32301 | 3 | 1.38E-11 | 0.98 | 6.14 | - | 2252.5 |
| AHQ-1-6, 7342          | K.GTEWVDPEDPTVIAENELGGAAAIEAAAK.K | 3053.32301 | 3 | 3.06E-11 | 0.97 | 6.21 | - | 1906.4 |
| AHQ-1-7, 7556          | K.GTEWVDPEDPTVIAENELGGAAAIEAAAK.K | 3053.32301 | 3 | 5.55E-14 | 0.97 | 6.39 | - | 1421.4 |
| AHQ-1-13 - 7019        | K.GTEWVDPEDPTVIAENELGGAAAIEAAAK.K | 3053.32301 | 3 | 1.16E-05 | 0.92 | 4.56 | - | 1530.5 |
| AHQ-1-9, 7371          | K.GTEWVDPEDPTVIAENELGGAAAIEAAAK.K | 3053.32301 | 3 | 3.82E-08 | 0.96 | 5.83 | - | 1526.6 |
| AHQ-1-4, 7378          | R.GVAALTSDDPAVQAIIVLDTASDVLDK.A   | 2470.75835 | 3 | 2.25E-05 | 0.98 | 7.30 | - | 2272.0 |
| AHQ-1-4, 7375          | R.GVAALTSDDPAVQAIIVLDTASDVLDK.A   | 2470.75835 | 2 | 9.51E-08 | 0.98 | 6.72 | - | 1178.3 |
| AHQ-1-2, 7278 - 7345   | R.GVAALTSDDPAVQAIIVLDTASDVLDK.A   | 2470.75835 | 3 | 1.11E-15 | 0.98 | 6.39 | - | 2786.6 |
| AHQ-1-6, 7211          | R.GVAALTSDDPAVQAIIVLDTASDVLDK.A   | 2470.75835 | 3 | 7.26E-10 | 0.98 | 6.32 | - | 1987.8 |
| AHQ-1-8, 7483          | R.GVGAATAVTQALNELLQHV.K           | 2092.38495 | 3 | 5.16E-07 | 0.94 | 4.64 | - | 1080.5 |
| AHQ-1-2, 7529          | R.GVGAATAVTQALNELLQHV.K           | 2092.38495 | 2 | 8.30E-04 | 0.47 | 2.94 | - | 452.9  |
| AHQ-1-2, 7398          | R.GVGAATAVTQALNELLQHV.K           | 2092.38495 | 2 | 1.97E-05 | 0.96 | 5.56 | - | 898.9  |
| AHQ-1-2, 7397          | R.GVGAATAVTQALNELLQHV.K           | 2092.38495 | 3 | 1.71E-06 | 0.95 | 4.70 | - | 1181.2 |
| AHQ-1-4, 5980          | R.GVGAATAVTQALNELLQHV.K           | 2092.38495 | 3 | 5.79E-08 | 0.93 | 4.56 | - | 1056.1 |
| AHQ-1-2, 6031 - 6049   | R.GVGAATAVTQALNELLQHV.K           | 2092.38495 | 3 | 6.77E-07 | 0.93 | 4.57 | - | 1209.3 |
| AHQ-1-9, 7290          | R.GVGAATAVTQALNELLQHV.K           | 2092.38495 | 2 | 2.60E-05 | 0.93 | 5.06 | - | 776.4  |
| AHQ-1-7, 7486          | R.GVGAATAVTQALNELLQHV.K           | 2092.38495 | 2 | 1.96E-05 | 0.85 | 4.13 | - | 547.0  |
| AHQ-1-8, 7482          | R.GVGAATAVTQALNELLQHV.K           | 2092.38495 | 2 | 1.45E-05 | 0.94 | 4.96 | - | 885.6  |
| AHQ-1-7, 7484          | R.GVGAATAVTQALNELLQHV.K           | 2092.38495 | 3 | 2.39E-08 | 0.92 | 4.00 | - | 1098.4 |
| AHQ-1-12, 6658         | R.GVGAATAVTQALNELLQHV.K           | 2092.38495 | 3 | 1.78E-09 | 0.94 | 4.44 | - | 1292.9 |
| AHQ-1-13 - 6893 - 6968 | R.GVGAATAVTQALNELLQHV.K           | 2092.38495 | 3 | 2.90E-06 | 0.93 | 5.22 | - | 1011.1 |
| AHQ-1-3, 7261          | R.GVGAATAVTQALNELLQHV.K           | 2092.38495 | 2 | 3.30E-07 | 0.94 | 5.08 | - | 912.2  |
| AHQ-1-5, 7455          | R.GVGAATAVTQALNELLQHV.K           | 2092.38495 | 2 | 3.58E-07 | 0.95 | 5.37 | - | 1051.8 |
| AHQ-1-1, 5912          | R.GVGAATAVTQALNELLQHV.K           | 2092.38495 | 2 | 1.87E-05 | 0.89 | 4.43 | - | 545.9  |
| AHQ-1-14 - 6728        | R.GVGAATAVTQALNELLQHV.K           | 2092.38495 | 2 | 1.89E-05 | 0.81 | 4.15 | - | 560.7  |
| AHQ-1-3, 5862          | R.GVGAATAVTQALNELLQHV.K           | 2092.38495 | 2 | 7.36E-06 | 0.92 | 4.75 | - | 557.6  |
| AHQ-1-4, 7438          | R.GVGAATAVTQALNELLQHV.K           | 2092.38495 | 3 | 2.90E-07 | 0.91 | 4.16 | - | 961.8  |
| AHQ-1-6, 7274          | R.GVGAATAVTQALNELLQHV.K           | 2092.38495 | 3 | 2.90E-08 | 0.91 | 4.32 | - | 961.6  |
| AHQ-1-2, 6033          | R.GVGAATAVTQALNELLQHV.K           | 2092.38495 | 2 | 1.93E-05 | 0.86 | 4.22 | - | 521.2  |
| AHQ-1-6, 7275          | R.GVGAATAVTQALNELLQHV.K           | 2092.38495 | 2 | 2.32E-04 | 0.92 | 4.71 | - | 821.4  |
| AHQ-1-1, 7015          | R.GVGAATAVTQALNELLQHV.K           | 2092.38495 | 2 | 1.03E-05 | 0.94 | 5.01 | - | 786.1  |
| AHQ-1-1, 6996          | R.GVGAATAVTQALNELLQHV.K           | 2092.38495 | 3 | 7.23E-07 | 0.88 | 4.08 | - | 978.4  |
| AHQ-1-14 - 6726        | R.GVGAATAVTQALNELLQHV.K           | 2092.38495 | 3 | 2.39E-04 | 0.84 | 3.16 | - | 1032.2 |
| AHQ-1-5, 7453          | R.GVGAATAVTQALNELLQHV.K           | 2092.38495 | 3 | 1.29E-09 | 0.94 | 4.94 | - | 1153.4 |
| AHQ-1-7, 3265          | R.IGITNHDEYSLV.R                  | 1517.66833 | 2 | 1.66E-10 | 0.90 | 3.71 | - | 1062.6 |
| AHQ-1-10, 3115 - 3185  | R.IGITNHDEYSLV.R                  | 1517.66833 | 2 | 1.31E-09 | 0.93 | 3.48 | - | 1374.2 |
| AHQ-1-13, 3657         | R.IGITNHDEYSLV.R                  | 1517.66833 | 2 | 6.25E-06 | 0.85 | 3.00 | - | 835.6  |
| AHQ-1-13 - 3439 - 3445 | R.IGITNHDEYSLV.R                  | 1517.66833 | 2 | 2.76E-08 | 0.94 | 3.57 | - | 1364.4 |
| AHQ-1-11, 3183         | R.IGITNHDEYSLV.R                  | 1517.66833 | 2 | 3.85E-09 | 0.92 | 3.79 | - | 1136.3 |
| AHQ-1-13, 3366         | R.IGITNHDEYSLV.R                  | 1517.66833 | 3 | 9.38E-05 | 0.82 | 3.55 | - | 672.3  |
| AHQ-1-13, 3279 - 3357  | R.IGITNHDEYSLV.R                  | 1517.66833 | 2 | 1.49E-04 | 0.94 | 3.76 | - | 1465.9 |
| AHQ-1-13 - 3448 - 3461 | R.IGITNHDEYSLV.R                  | 1517.66833 | 3 | 1.79E-09 | 0.93 | 4.36 | - | 908.0  |
| AHQ-1-10, 3391         | R.IGITNHDEYSLV.R                  | 1517.66833 | 2 | 8.49E-06 | 0.92 | 3.51 | - | 1079.0 |
| AHQ-1-8, 3234 - 3308   | R.IGITNHDEYSLV.R                  | 1517.66833 | 2 | 7.59E-09 | 0.95 | 4.02 | - | 1438.8 |
| AHQ-1-12, 3593         | R.IGITNHDEYSLV.R                  | 1517.66833 | 2 | 5.07E-04 | 0.73 | 2.76 | - | 600.5  |
| AHQ-1-12, 3271         | R.IGITNHDEYSLV.R                  | 1517.66833 | 2 | 1.62E-10 | 0.95 | 4.15 | - | 1353.4 |
| AHQ-1-8, 4886          | R.ILAAQATSDLVNAI.K                | 1457.69748 | 2 | 1.21E-07 | 0.98 | 5.03 | - | 1922.5 |
| AHQ-1-2, 5274          | R.ILAAQATSDLVNAI.K                | 1457.69748 | 2 | 6.97E-10 | 0.97 | 4.80 | - | 2015.1 |
| AHQ-1-1, 4272          | R.ILAAQATSDLVNAI.K                | 1457.69748 | 2 | 9.14E-07 | 0.98 | 4.82 | - | 2239.3 |
| AHQ-1-7, 5064          | R.ILAAQATSDLVNAI.K                | 1457.69748 | 2 | 3.72E-08 | 0.97 | 5.07 | - | 1781.2 |
| AHQ-1-4, 5186          | R.ILAAQATSDLVNAI.K                | 1457.69748 | 2 | 1.20E-08 | 0.98 | 5.66 | - | 2055.6 |
| AHQ-1-2, 4609          | R.ILAAQATSDLVNAI.K                | 1457.69748 | 2 | 1.92E-05 | 0.86 | 3.00 | - | 959.5  |
| AHQ-1-2, 4373          | R.ILAAQATSDLVNAI.K                | 1457.69748 | 2 | 5.43E-08 | 0.97 | 4.34 | - | 1994.1 |
| AHQ-1-3, 5127 - 5147   | R.ILAAQATSDLVNAI.K                | 1457.69748 | 2 | 8.54E-09 | 0.98 | 5.02 | - | 2106.1 |
| AHQ-1-5, 4162          | R.ILAAQATSDLVNAI.K                | 1457.69748 | 2 | 9.01E-08 | 0.96 | 3.45 | - | 1743.2 |
| AHQ-1-2, 5449          | R.ILAAQATSDLVNAI.K                | 1457.69748 | 2 | 2.60E-07 | 0.98 | 4.85 | - | 2148.6 |
| AHQ-1-4, 4520          | R.ILAAQATSDLVNAI.K                | 1457.69748 | 2 | 3.02E-08 | 0.89 | 3.11 | - | 926.0  |
| AHQ-1-1, 5187 - 5191   | R.ILAAQATSDLVNAI.K                | 1457.69748 | 2 | 1.16E-09 | 0.98 | 5.53 | - | 2485.0 |
| AHQ-1-3, 4245          | R.ILAAQATSDLVNAI.K                | 1457.69748 | 2 | 1.90E-09 | 0.97 | 4.63 | - | 1490.0 |
| AHQ-1-4, 4282          | R.ILAAQATSDLVNAI.K                | 1457.69748 | 2 | 1.11E-06 | 0.97 | 4.61 | - | 2274.2 |
| AHQ-1-5, 5331          | R.ILAAQATSDLVNAI.K                | 1457.69748 | 2 | 2.95E-04 | 0.82 | 2.95 | - | 1290.4 |
| AHQ-1-1, 4713          | R.ILAAQATSDLVNAI.K                | 1457.69748 | 2 | 1.59E-06 | 0.96 | 3.68 | - | 1957.6 |
| AHQ-1-5, 5103 - 5135   | R.ILAAQATSDLVNAI.K                | 1457.69748 | 2 | 4.71E-05 | 0.96 | 3.82 | - | 2063.3 |
| AHQ-1-5, 5125          | R.ILAAQATSDLVNAI.K                | 1457.69748 | 1 | 5.98E-04 | 0.88 | 3.80 | - | 821.8  |
| AHQ-1-3, 4483          | R.ILAAQATSDLVNAI.K                | 1457.69748 | 2 | 8.10E-07 | 0.96 | 3.94 | - | 1733.0 |
| AHQ-1-6, 4099          | R.ILAAQATSDLVNAI.K                | 1457.69748 | 2 | 1.16E-05 | 0.97 | 4.61 | - | 2144.1 |
| AHQ-1-13, 5633         | R.IPEAPAGPPSDFGLFLSDDDPK.K        | 2286.47890 | 3 | 2.43E-04 | 0.63 | 3.28 | - | 623.7  |
| AHQ-1-9, 6056          | R.IPEAPAGPPSDFGLFLSDDDPK.K        | 2286.47890 | 2 | 4.70E-04 | 0.93 | 4.57 | - | 692.9  |
| AHQ-1-13 - 5972 - 5996 | R.IPEAPAGPPSDFGLFLSDDDPK.K        | 2286.47890 | 2 | 1.84E-07 | 0.97 | 5.43 | - | 1107.9 |
| AHQ-1-14 - 5794        | R.IPEAPAGPPSDFGLFLSDDDPK.K        | 2286.47890 | 2 | 1.37E-05 | 0.93 | 4.60 | - | 746.5  |
| AHQ-1-7, 6221          | R.IPEAPAGPPSDFGLFLSDDDPK.K        | 2286.47890 | 2 | 7.50E-04 | 0.93 | 4.37 | - | 705.6  |
| AHQ-1-13, 5589 - 5648  | R.IPEAPAGPPSDFGLFLSDDDPK.K        | 2286.47890 | 2 | 3.53E-04 | 0.94 | 4.58 | - | 1118.0 |
| AHQ-1-10, 5377 - 5381  | R.IPEAPAGPPSDFGLFLSDDDPK.K        | 2286.47890 | 2 | 3.24E-04 | 0.91 | 4.37 | - | 675.0  |
| AHQ-1-1, 6043 - 6099   | R.IPEAPAGPPSDFGLFLSDDDPK.K        | 2286.47890 | 2 | 4.26E-05 | 0.85 | 4.04 | - | 721.3  |
| AHQ-1-13, 5219 - 5283  | R.IPEAPAGPPSDFGLFLSDDDPK.K        | 2414.65181 | 3 | 1.76E-05 | 0.89 | 3.87 | - | 1200.0 |
| AHQ-1-10, 4924 - 5001  | R.IPEAPAGPPSDFGLFLSDDDPK.K        | 2414.65181 | 3 | 2.48E-05 | 0.91 | 3.96 | - | 1373.4 |
| AHQ-1-1, 5713          | R.IPEAPAGPPSDFGLFLSDDDPK.K        | 2414.65181 | 3 | 4.72E-08 | 0.95 | 5.23 | - | 1183.3 |
| AHQ-1-9, 5399 - 5412   | R.IPEAPAGPPSDFGLFLSDDDPK.K        | 2414.65181 | 3 | 8.74E-05 | 0.90 | 4.10 | - | 1243.4 |
| AHQ-1-14 - 5363 - 5446 | R.IPEAPAGPPSDFGLFLSDDDPK.K        | 2414.65181 | 3 | 1.20E-11 | 0.95 | 4.58 | - | 1664.5 |
| AHQ-1-8, 5387 - 5394   | R.IPEAPAGPPSDFGLFLSDDDPK.K        | 2414.65181 | 2 | 5.58E-08 | 0.97 | 5.44 | - | 1309.8 |
| AHQ-1-11, 5090         | R.IPEAPAGPPSDFGLFLSDDDPK.K        | 2414.65181 | 3 | 6.07E-10 | 0.93 | 4.25 | - | 1385.5 |
| AHQ-1-14, 6274 - 6349  | R.IPEAPAGPPSDFGLFLSDDDPK.K        | 2414.65181 | 3 | 2.48E-06 | 0.94 | 4.84 | - | 1288.6 |
| AHQ-1-8, 2461          | R.KFYSDQNVDSR.D                   | 1506.60087 | 2 | 9.22E-05 | 0.83 | 3.48 | - | 706.3  |
| AHQ-1-8, 2189          | K.KGIWLEAGK.A                     | 1002.19171 | 1 | 3.13E-04 | 0.21 | 2.22 | - | 395.8  |
| AHQ-1-4, 2727          | K.LAQAAQSSVATITR.L                | 1417.59344 | 2 | 5.56E-09 | 0.97 | 4.79 | - | 2006.5 |
| AHQ-1-4, 2740          | K.LAQAAQSSVATITR.L                | 1417.59344 | 1 | 8.20E-04 | 0.79 | 3.64 | - | 241.5  |
| AHQ-1-2, 3050 - 3127   | K.LAQAAQSSVATITR.L                | 1417.59344 | 2 | 5.26E-07 | 0.95 | 4.47 | - | 1466.2 |
| AHQ-1-5, 2462 - 2465   | K.LAQAAQSSVATITR.L                | 1417.59344 | 2 | 2.87E-08 | 0.97 | 4.62 | - | 1675.2 |
| AHQ-1-2, 2645 - 2669   | K.LAQAAQSSVATITR.L                | 1417.59344 | 2 | 4.08E-10 | 0.94 | 3.80 | - | 1419.2 |
| AHQ-1-2, 2819          | K.LAQAAQSSVATITR.L                | 1417.59344 | 1 | 1.34E-04 | 0.37 | 2.97 | - | 177.6  |
| AHQ-1-9, 2590          | K.LAQAAQSSVATITR.L                | 1417.59344 | 2 | 9.14E-07 | 0.98 | 4.44 | - | 2277.9 |
| AHQ-1-5, 2617 - 2630   | K.LAQAAQSSVATITR.L                | 1417.59344 | 2 | 1.78E-08 | 0.98 | 5.42 | - | 1971.7 |
| AHQ-1-14 - 2744        | K.LAQAAQSSVATITR.L                | 1417.59344 | 2 | 1.57E-07 | 0.96 | 4.03 | - | 1704.7 |
| AHQ-1-4, 2567          | K.LAQAAQSSVATITR.L                | 1417.59344 | 2 | 1.17E-09 | 0.97 | 4.92 | - | 1594.9 |
| AHQ-1-7, 2648 - 2701   | K.LAQAAQSSVATITR.L                | 1417.59344 | 2 | 7.85E-07 | 0.96 | 4.45 | - | 1629.7 |
| AHQ-1-3, 2569          | K.LAQAAQSSVATITR.L                | 1417.59344 | 2 | 3.35E-07 | 0.97 | 4.66 | - | 1525.6 |
| AHQ-1-2, 2797 - 2833   | K.LAQAAQSSVATITR.L                | 1417.59344 | 2 | 1.87E-09 | 0.97 | 4.91 | - | 1350.3 |
| AHQ-1-1, 2843 - 2911   | K.LAQAAQSSVATITR.L                | 1417.59344 | 2 | 3.65E-06 | 0.94 | 3.69 | - | 1539.8 |
| AHQ-1-6, 2623 - 2632   | K.LAQAAQSSVATITR.L                | 1417.59344 | 2 | 6.31E-08 | 0.95 | 4.03 | - | 1327.3 |
| AHQ-1-3, 2725 - 2763   | K.LAQAAQSSVATITR.L                | 1417.59344 | 2 | 1.15E-11 | 0.96 | 4.23 | - | 1614.3 |
| AHQ-1-7, 2505          | K.LAQAAQSSVATITR.L                | 1417.59344 | 2 | 2.04E-05 | 0.70 | 2.55 | - | 789.2  |
| AHQ-1-6, 2479          | K.LAQAAQSSVATITR.L                | 1417.59344 | 2 | 3.81E-11 | 0.95 | 4.08 | - | 1460.3 |
| AHQ-1-2, 3139          | R.LASEAKPAAVAENEIEIGSHIK.H        | 2236.46779 | 2 | 6.49E-12 | 0.95 | 4.68 | - | 941.0  |
| AHQ-1-4, 3260 - 3263   | R.LASEAKPAAVAENEIEIGSHIK.H        | 2236.46779 | 2 | 2.97E-07 | 0.96 | 5.67 | - | 825.7  |
| AHQ-1-4, 3258 - 3294   | R.LASEAKPAAVAENEIEIGSHIK.H        | 2236.46779 | 3 | 2.85E-08 | 0.96 | 5.40 | - | 1422.4 |

|                       |                                     |            |   |          |      |      |   |        |
|-----------------------|-------------------------------------|------------|---|----------|------|------|---|--------|
| AHQ-1-2, 3366         | R.LASEAKPAAVAEENEEIGSHIK.H          | 2236.46779 | 3 | 1.98E-09 | 0.97 | 5.73 | - | 1820.7 |
| AHQ-1-2, 3371         | R.LASEAKPAAVAEENEEIGSHIK.H          | 2236.46779 | 2 | 2.65E-09 | 0.94 | 4.90 | - | 920.5  |
| AHQ-1-1, 3377 - 3385  | R.LASEAKPAAVAEENEEIGSHIK.H          | 2236.46779 | 2 | 8.80E-09 | 0.95 | 5.30 | - | 772.3  |
| AHQ-1-1, 3368         | R.LASEAKPAAVAEENEEIGSHIK.H          | 2236.46779 | 3 | 2.49E-08 | 0.97 | 5.72 | - | 2369.2 |
| AHQ-1-3, 3219 - 3262  | R.LASEAKPAAVAEENEEIGSHIK.H          | 2236.46779 | 3 | 1.05E-11 | 0.97 | 5.96 | - | 1741.8 |
| AHQ-1-3, 3261         | R.LASEAKPAAVAEENEEIGSHIK.H          | 2236.46779 | 2 | 3.11E-06 | 0.91 | 3.92 | - | 710.3  |
| AHQ-1-4, 3046         | R.LASEAKPAAVAEENEEIGSHIK.H          | 2236.46779 | 3 | 4.19E-06 | 0.94 | 4.91 | - | 1319.8 |
| AHQ-1-6, 3112         | R.LASEAKPAAVAEENEEIGSHIK.H          | 2236.46779 | 2 | 5.68E-07 | 0.86 | 4.08 | - | 463.1  |
| AHQ-1-3, 3565         | R.LASEAKPAAVAEENEEIGSHIK.H          | 2236.46779 | 3 | 4.37E-12 | 0.95 | 5.24 | - | 1269.9 |
| AHQ-1-6, 3100         | R.LASEAKPAAVAEENEEIGSHIK.H          | 2236.46779 | 3 | 1.18E-06 | 0.97 | 5.19 | - | 2159.4 |
| AHQ-1-2, 3137         | R.LASEAKPAAVAEENEEIGSHIK.H          | 2236.46779 | 3 | 6.59E-07 | 0.95 | 5.10 | - | 1515.0 |
| AHQ-1-1, 3667         | R.LASEAKPAAVAEENEEIGSHIK.H          | 2236.46779 | 3 | 9.21E-07 | 0.96 | 4.86 | - | 1661.4 |
| AHQ-1-5, 3113 - 3118  | R.LASEAKPAAVAEENEEIGSHIK.H          | 2236.46779 | 3 | 1.99E-12 | 0.97 | 6.17 | - | 1848.0 |
| AHQ-1-3, 5774         | K.LGAASLGAEDPETQVVLINAVK.D          | 2196.48671 | 2 | 1.30E-04 | 0.95 | 4.76 | - | 932.5  |
| AHQ-1-3, 5494 - 5569  | K.LGAASLGAEDPETQVVLINAVK.D          | 2196.48671 | 2 | 3.79E-06 | 0.97 | 5.25 | - | 1194.5 |
| AHQ-1-2, 5431 - 5511  | K.LGAASLGAEDPETQVVLINAVK.D          | 2196.48671 | 2 | 4.72E-06 | 0.96 | 5.59 | - | 954.1  |
| AHQ-1-13, 5155        | K.LGAASLGAEDPETQVVLINAVK.D          | 2196.48671 | 2 | 1.26E-05 | 0.91 | 3.87 | - | 998.4  |
| AHQ-1-3, 5538 - 5554  | K.LGAASLGAEDPETQVVLINAVK.D          | 2196.48671 | 3 | 2.74E-08 | 0.92 | 4.46 | - | 1225.5 |
| AHQ-1-3, 5279 - 5349  | K.LGAASLGAEDPETQVVLINAVK.D          | 2196.48671 | 2 | 1.27E-07 | 0.97 | 5.37 | - | 1138.7 |
| AHQ-1-6, 5262 - 5286  | K.LGAASLGAEDPETQVVLINAVK.D          | 2196.48671 | 2 | 8.27E-10 | 0.96 | 5.13 | - | 1185.3 |
| AHQ-1-6, 5450         | K.LGAASLGAEDPETQVVLINAVK.D          | 2196.48671 | 2 | 5.01E-06 | 0.96 | 5.03 | - | 1102.8 |
| AHQ-1-3, 5413         | K.LGAASLGAEDPETQVVLINAVK.D          | 2196.48671 | 2 | 7.55E-09 | 0.92 | 4.50 | - | 708.3  |
| AHQ-1-1, 5379         | K.LGAASLGAEDPETQVVLINAVK.D          | 2196.48671 | 2 | 4.71E-07 | 0.95 | 4.50 | - | 1229.2 |
| AHQ-1-5, 5330 - 5385  | K.LGAASLGAEDPETQVVLINAVK.D          | 2196.48671 | 2 | 3.40E-09 | 0.96 | 5.20 | - | 1165.5 |
| AHQ-1-7, 5524 - 5544  | K.LGAASLGAEDPETQVVLINAVK.D          | 2196.48671 | 2 | 1.62E-04 | 0.97 | 5.28 | - | 1430.2 |
| AHQ-1-2, 5673 - 5741  | K.LGAASLGAEDPETQVVLINAVK.D          | 2196.48671 | 2 | 7.01E-06 | 0.97 | 5.60 | - | 1546.0 |
| AHQ-1-7, 5337         | K.LGAASLGAEDPETQVVLINAVK.D          | 2196.48671 | 2 | 1.16E-05 | 0.87 | 3.86 | - | 749.9  |
| AHQ-1-4, 5604 - 5674  | K.LGAASLGAEDPETQVVLINAVK.D          | 2196.48671 | 2 | 1.47E-04 | 0.96 | 5.22 | - | 1098.1 |
| AHQ-1-1, 5581         | K.LGAASLGAEDPETQVVLINAVK.D          | 2196.48671 | 3 | 6.83E-09 | 0.98 | 6.18 | - | 2827.9 |
| AHQ-1-4, 5634 - 5648  | K.LGAASLGAEDPETQVVLINAVK.D          | 2196.48671 | 3 | 7.24E-09 | 0.95 | 3.88 | - | 2204.4 |
| AHQ-1-2, 5710 - 5718  | K.LGAASLGAEDPETQVVLINAVK.D          | 2196.48671 | 3 | 1.64E-10 | 0.97 | 4.82 | - | 2433.6 |
| AHQ-1-1, 5569 - 5575  | K.LGAASLGAEDPETQVVLINAVK.D          | 2196.48671 | 2 | 1.11E-05 | 0.97 | 5.45 | - | 1071.6 |
| AHQ-1-4, 5864 - 5883  | K.LGAASLGAEDPETQVVLINAVK.D          | 2196.48671 | 2 | 6.65E-12 | 0.96 | 5.01 | - | 1248.6 |
| AHQ-1-2, 5897 - 5941  | K.LGAASLGAEDPETQVVLINAVK.D          | 2196.48671 | 2 | 4.64E-10 | 0.96 | 4.98 | - | 1095.8 |
| AHQ-1-1, 5721         | K.LGAASLGAEDPETQVVLINAVK.D          | 2196.48671 | 2 | 7.25E-05 | 0.95 | 4.42 | - | 989.4  |
| AHQ-1-5, 5713         | K.LGAASLGAEDPETQVVLINAVK.D          | 2196.48671 | 2 | 2.89E-11 | 0.97 | 5.52 | - | 1437.9 |
| AHQ-1-5, 5518 - 5593  | K.LGAASLGAEDPETQVVLINAVK.D          | 2196.48671 | 2 | 2.16E-05 | 0.97 | 5.26 | - | 1268.1 |
| AHQ-1-11, 4831        | K.LGAASLGAEDPETQVVLINAVK.D          | 2196.48671 | 2 | 1.23E-05 | 0.90 | 4.34 | - | 548.5  |
| AHQ-1-14, 6162        | K.LGAASLGAEDPETQVVLINAVK.D          | 2196.48671 | 2 | 5.90E-05 | 0.91 | 4.08 | - | 882.8  |
| AHQ-1-8, 3429         | K.LHTDDDELINWLDHGR.T                | 1721.81153 | 2 | 3.17E-05 | 0.97 | 5.25 | - | 1865.0 |
| AHQ-1-9, 3572 - 3584  | K.LHTDDDELINWLDHGR.T                | 1721.81153 | 2 | 1.72E-04 | 0.94 | 3.69 | - | 1332.9 |
| AHQ-1-1, 4024         | K.LHTDDDELINWLDHGR.T                | 1721.81153 | 2 | 6.97E-06 | 0.96 | 3.96 | - | 1870.2 |
| AHQ-1-9, 3588 - 3652  | K.LHTDDDELINWLDHGR.T                | 1721.81153 | 3 | 7.66E-04 | 0.78 | 3.38 | - | 748.9  |
| AHQ-1-2, 4587         | K.LLAALLEDEGGSGR.P                  | 1401.54764 | 2 | 5.94E-05 | 0.96 | 3.99 | - | 1626.3 |
| AHQ-1-3, 4425         | K.LLAALLEDEGGSGR.P                  | 1401.54764 | 2 | 5.20E-10 | 0.97 | 3.95 | - | 1941.2 |
| AHQ-1-11, 4854 - 4912 | K.LLAALLEDEGGSGRPLQAQK.G            | 2123.43896 | 2 | 4.62E-09 | 0.97 | 5.55 | - | 1450.0 |
| AHQ-1-2, 5373 - 5383  | K.LLAALLEDEGGSGRPLQAQK.G            | 2123.43896 | 2 | 1.44E-06 | 0.94 | 5.10 | - | 611.3  |
| AHQ-1-4, 5410         | K.LLAALLEDEGGSGRPLQAQK.G            | 2123.43896 | 2 | 2.25E-04 | 0.98 | 6.23 | - | 1428.4 |
| AHQ-1-7, 5284         | K.LLAALLEDEGGSGRPLQAQK.G            | 2123.43896 | 2 | 4.66E-12 | 0.98 | 6.70 | - | 1753.9 |
| AHQ-1-11, 4852        | K.LLAALLEDEGGSGRPLQAQK.G            | 2123.43896 | 3 | 1.23E-09 | 0.95 | 5.21 | - | 1267.6 |
| AHQ-1-9, 5119 - 5127  | K.LLAALLEDEGGSGRPLQAQK.G            | 2123.43896 | 2 | 2.90E-09 | 0.98 | 6.76 | - | 1480.2 |
| AHQ-1-4, 5408 - 5420  | K.LLAALLEDEGGSGRPLQAQK.G            | 2123.43896 | 3 | 1.25E-05 | 0.97 | 5.91 | - | 1532.4 |
| AHQ-1-7, 5290         | K.LLAALLEDEGGSGRPLQAQK.G            | 2123.43896 | 3 | 1.47E-10 | 0.96 | 5.17 | - | 1527.0 |
| AHQ-1-9, 5122         | K.LLAALLEDEGGSGRPLQAQK.G            | 2123.43896 | 3 | 1.92E-10 | 0.97 | 5.47 | - | 1859.0 |
| AHQ-1-2, 5371         | K.LLAALLEDEGGSGRPLQAQK.G            | 2123.43896 | 3 | 3.64E-05 | 0.94 | 4.66 | - | 1156.1 |
| AHQ-1-3, 5317         | K.LLAALLEDEGGSGRPLQAQK.G            | 2123.43896 | 2 | 2.00E-06 | 0.96 | 5.38 | - | 1240.6 |
| AHQ-1-3, 5321 - 5322  | K.LLAALLEDEGGSGRPLQAQK.G            | 2123.43896 | 3 | 5.59E-12 | 0.97 | 5.79 | - | 1886.3 |
| AHQ-1-10, 4697        | K.LLAALLEDEGGSGRPLQAQK.G            | 2123.43896 | 2 | 7.31E-12 | 0.97 | 6.44 | - | 1095.7 |
| AHQ-1-6, 5236         | K.LLAALLEDEGGSGRPLQAQK.G            | 2123.43896 | 2 | 6.78E-07 | 0.98 | 6.38 | - | 1415.2 |
| AHQ-1-13 - 5331       | K.LLAALLEDEGGSGRPLQAQK.G            | 2123.43896 | 3 | 1.15E-08 | 0.93 | 4.28 | - | 1202.2 |
| AHQ-1-5, 5309 - 5333  | K.LLAALLEDEGGSGRPLQAQK.G            | 2123.43896 | 3 | 2.64E-10 | 0.94 | 4.79 | - | 1308.5 |
| AHQ-1-1, 5461         | K.LLAALLEDEGGSGRPLQAQK.G            | 2123.43896 | 3 | 9.27E-09 | 0.97 | 5.44 | - | 1825.4 |
| AHQ-1-13, 5032        | K.LLAALLEDEGGSGRPLQAQK.G            | 2123.43896 | 2 | 1.28E-05 | 0.95 | 5.21 | - | 758.4  |
| AHQ-1-8, 4987 - 5004  | K.LLAALLEDEGGSGRPLQAQK.G            | 2123.43896 | 3 | 3.19E-08 | 0.98 | 5.79 | - | 1995.0 |
| AHQ-1-3, 5527         | K.LLAALLEDEGGSGRPLQAQK.G            | 2123.43896 | 2 | 5.60E-07 | 0.95 | 4.84 | - | 1055.5 |
| AHQ-1-6, 5235         | K.LLAALLEDEGGSGRPLQAQK.G            | 2123.43896 | 3 | 1.85E-09 | 0.96 | 5.52 | - | 1557.0 |
| AHQ-1-10, 4699        | K.LLAALLEDEGGSGRPLQAQK.G            | 2123.43896 | 3 | 2.97E-07 | 0.94 | 5.41 | - | 1146.0 |
| AHQ-1-13, 5036        | K.LLAALLEDEGGSGRPLQAQK.G            | 2123.43896 | 3 | 9.94E-09 | 0.95 | 5.05 | - | 1331.7 |
| AHQ-1-12, 5075        | K.LLAALLEDEGGSGRPLQAQK.G            | 2123.43896 | 2 | 3.16E-09 | 0.97 | 5.76 | - | 1213.8 |
| AHQ-1-5, 5310         | K.LLAALLEDEGGSGRPLQAQK.G            | 2123.43896 | 2 | 8.66E-11 | 0.97 | 5.78 | - | 1249.0 |
| AHQ-1-12, 5073        | K.LLAALLEDEGGSGRPLQAQK.G            | 2123.43896 | 3 | 2.27E-05 | 0.95 | 4.42 | - | 1374.3 |
| AHQ-1-1, 5460         | K.LLAALLEDEGGSGRPLQAQK.G            | 2123.43896 | 2 | 4.76E-10 | 0.96 | 5.85 | - | 880.4  |
| AHQ-1-2, 5462         | K.LLAALLEDEGGSGRPLQAQK.G            | 2123.43896 | 2 | 2.97E-04 | 0.98 | 6.17 | - | 1494.2 |
| AHQ-1-2, 5465         | K.LLAALLEDEGGSGRPLQAQK.G            | 2123.43896 | 3 | 3.58E-09 | 0.96 | 5.54 | - | 1307.2 |
| AHQ-1-8, 4988         | K.LLAALLEDEGGSGRPLQAQK.G            | 2123.43896 | 2 | 2.02E-08 | 0.97 | 6.45 | - | 1056.4 |
| AHQ-1-3, 5329         | K.LLAALLEDEGGSGRPLQAQKGLAGAVSELLR.S | 3190.68337 | 3 | 1.81E-05 | 0.84 | 4.38 | - | 828.5  |
| AHQ-1-4, 5418         | K.LLAALLEDEGGSGRPLQAQKGLAGAVSELLR.S | 3190.68337 | 3 | 1.21E-04 | 0.75 | 4.22 | - | 484.3  |
| AHQ-1-5, 5318         | K.LLAALLEDEGGSGRPLQAQKGLAGAVSELLR.S | 3190.68337 | 3 | 4.58E-06 | 0.82 | 5.07 | - | 405.9  |
| AHQ-1-2, 4710 - 4723  | R.LLSDSLPPSTGTFQEAQSR.L             | 2035.20076 | 2 | 2.23E-06 | 0.66 | 3.51 | - | 160.7  |
| AHQ-1-4, 4442 - 4510  | R.LLSDSLPPSTGTFQEAQSR.L             | 2035.20076 | 2 | 7.39E-08 | 0.78 | 3.78 | - | 263.4  |
| AHQ-1-4, 4306 - 4374  | R.LLSDSLPPSTGTFQEAQSR.L             | 2035.20076 | 2 | 1.62E-05 | 0.89 | 3.98 | - | 368.9  |
| AHQ-1-7, 4225 - 4304  | R.LLSDSLPPSTGTFQEAQSR.L             | 2035.20076 | 2 | 2.00E-05 | 0.77 | 3.83 | - | 221.0  |
| AHQ-1-1, 4213 - 4279  | R.LLSDSLPPSTGTFQEAQSR.L             | 2035.20076 | 2 | 5.54E-08 | 0.68 | 2.93 | - | 347.9  |
| AHQ-1-2, 4557 - 4617  | R.LLSDSLPPSTGTFQEAQSR.L             | 2035.20076 | 2 | 7.14E-07 | 0.94 | 4.44 | - | 551.4  |
| AHQ-1-2, 4479 - 4549  | R.LLSDSLPPSTGTFQEAQSR.L             | 2035.20076 | 2 | 2.71E-04 | 0.81 | 3.52 | - | 271.3  |
| AHQ-1-3, 4461 - 4530  | R.LLSDSLPPSTGTFQEAQSR.L             | 2035.20076 | 2 | 2.62E-04 | 0.78 | 3.55 | - | 280.2  |
| AHQ-1-2, 4341 - 4413  | R.LLSDSLPPSTGTFQEAQSR.L             | 2035.20076 | 2 | 1.66E-09 | 0.89 | 3.85 | - | 467.2  |
| AHQ-1-3, 4311 - 4390  | R.LLSDSLPPSTGTFQEAQSR.L             | 2035.20076 | 2 | 4.99E-06 | 0.91 | 4.56 | - | 427.4  |
| AHQ-1-5, 4297 - 4366  | R.LLSDSLPPSTGTFQEAQSR.L             | 2035.20076 | 2 | 3.24E-10 | 0.79 | 3.78 | - | 336.2  |
| AHQ-1-1, 4348 - 4415  | R.LLSDSLPPSTGTFQEAQSR.L             | 2035.20076 | 2 | 7.91E-12 | 0.62 | 2.94 | - | 247.7  |
| AHQ-1-3, 4253 - 4321  | R.LLSDSLPPSTGTFQEAQSR.L             | 2035.20076 | 2 | 1.24E-11 | 0.90 | 4.06 | - | 395.3  |
| AHQ-1-5, 4153 - 4229  | R.LLSDSLPPSTGTFQEAQSR.L             | 2035.20076 | 2 | 1.39E-14 | 0.93 | 4.66 | - | 418.1  |
| AHQ-1-1, 4544         | R.LLSDSLPPSTGTFQEAQSR.L             | 2035.20076 | 2 | 7.70E-04 | 0.29 | 2.64 | - | 233.7  |
| AHQ-1-6, 4122 - 4191  | R.LLSDSLPPSTGTFQEAQSR.L             | 2035.20076 | 2 | 2.29E-06 | 0.74 | 3.43 | - | 281.9  |
| AHQ-1-3, 4233         | R.LLSDSLPPSTGTFQEAQSR.L             | 2035.20076 | 3 | 5.26E-04 | 0.95 | 4.90 | - | 1328.2 |
| AHQ-1-3, 5757 - 5829  | R.LNEAAAGLNQAATELVQASR.G            | 2028.21299 | 2 | 2.26E-13 | 0.98 | 5.51 | - | 2261.6 |
| AHQ-1-2, 6058 - 6129  | R.LNEAAAGLNQAATELVQASR.G            | 2028.21299 | 2 | 3.96E-11 | 0.98 | 6.05 | - | 1914.8 |
| AHQ-1-2, 5918 - 5987  | R.LNEAAAGLNQAATELVQASR.G            | 2028.21299 | 2 | 2.18E-05 | 0.95 | 4.62 | - | 1050.4 |
| AHQ-1-10, 4939        | R.LNEAAAGLNQAATELVQASR.G            | 2028.21299 | 2 | 3.82E-04 | 0.90 | 3.69 | - | 900.2  |
| AHQ-1-4, 5750         | R.LNEAAAGLNQAATELVQASR.G            | 2028.21299 | 2 | 2.76E-12 | 0.98 | 6.01 | - | 1663.1 |
| AHQ-1-4, 5758         | R.LNEAAAGLNQAATELVQASR.G            | 2028.21299 | 3 | 1.17E-04 | 0.98 | 6.45 | - | 1849.4 |
| AHQ-1-7, 5634         | R.LNEAAAGLNQAATELVQASR.G            | 2028.21299 | 3 | 3.64E-10 | 0.98 | 5.30 | - | 2562.6 |
| AHQ-1-2, 5375 - 5443  | R.LNEAAAGLNQAATELVQASR.G            | 2028.21299 | 2 | 9.67E-05 | 0.95 | 4.36 | - | 1374.8 |
| AHQ-1-3, 5641 - 5642  | R.LNEAAAGLNQAATELVQASR.G            | 2028.21299 | 3 | 7.67E-11 | 0.98 | 6.72 | - | 2417.5 |
| AHQ-1-6, 5550         | R.LNEAAAGLNQAATELVQASR.G            | 2028.21299 | 2 | 1.41E-11 | 0.97 | 5.04 | - | 1688.9 |
| AHQ-1-6, 5566         | R.LNEAAAGLNQAATELVQASR.G            | 2028.21299 | 3 | 1.14E-04 | 0.98 | 6.30 | - | 3391.6 |
| AHQ-1-3, 5637 - 5701  | R.LNEAAAGLNQAATELVQASR.G            | 2028.21299 | 2 | 7.55E-14 | 0.98 | 6.20 | - | 1794.7 |



|                          |                                  |            |   |          |      |      |   |        |
|--------------------------|----------------------------------|------------|---|----------|------|------|---|--------|
| AHQ-1-5, 6021            | R.LNEAAAGLNQAATELVQASR.G         | 2028.21299 | 2 | 2.23E-08 | 0.93 | 4.12 | - | 1084.8 |
| AHQ-1-4, 5990 - 6007     | R.LNEAAAGLNQAATELVQASR.G         | 2028.21299 | 2 | 1.81E-07 | 0.96 | 4.90 | - | 1406.0 |
| AHQ-1-2, 6198            | R.LNEAAAGLNQAATELVQASR.G         | 2028.21299 | 2 | 5.63E-13 | 0.98 | 5.92 | - | 1886.1 |
| AHQ-1-1, 5687 - 5749     | R.LNEAAAGLNQAATELVQASR.G         | 2028.21299 | 2 | 5.91E-13 | 0.98 | 5.77 | - | 2126.9 |
| AHQ-1-4, 4566 - 4596     | R.LNEAAAGLNQAATELVQASR.G         | 2028.21299 | 2 | 1.57E-05 | 0.85 | 3.94 | - | 601.0  |
| AHQ-1-5, 5883            | R.LNEAAAGLNQAATELVQASR.G         | 2028.21299 | 2 | 6.22E-09 | 0.95 | 4.97 | - | 968.6  |
| AHQ-1-1, 5691            | R.LNEAAAGLNQAATELVQASR.G         | 2028.21299 | 3 | 3.62E-04 | 0.96 | 5.16 | - | 1672.8 |
| AHQ-1-5, 4483            | R.LNEAAAGLNQAATELVQASR.G         | 2028.21299 | 2 | 1.06E-08 | 0.97 | 5.63 | - | 1169.4 |
| AHQ-1-11, 5095           | R.LNEAAAGLNQAATELVQASR.G         | 2028.21299 | 2 | 4.18E-08 | 0.97 | 4.64 | - | 1574.1 |
| AHQ-1-3, 5543            | R.LNEAAAGLNQAATELVQASR.G         | 2028.21299 | 2 | 5.17E-09 | 0.98 | 5.89 | - | 1454.8 |
| AHQ-1-8, 5451            | R.LNEAAAGLNQAATELVQASR.G         | 2028.21299 | 2 | 4.64E-07 | 0.95 | 4.44 | - | 1283.8 |
| AHQ-1-2, 5591            | R.LNEAAAGLNQAATELVQASR.G         | 2028.21299 | 2 | 5.90E-08 | 0.89 | 3.70 | - | 885.5  |
| AHQ-1-2, 4650            | R.LNEAAAGLNQAATELVQASR.G         | 2028.21299 | 2 | 3.67E-09 | 0.94 | 4.59 | - | 1019.2 |
| AHQ-1-3, 5899 - 5978     | R.LNEAAAGLNQAATELVQASR.G         | 2028.21299 | 2 | 1.37E-06 | 0.81 | 3.08 | - | 712.7  |
| AHQ-1-2, 6113            | R.LNEAAAGLNQAATELVQASR.G         | 2028.21299 | 3 | 6.39E-06 | 0.88 | 3.67 | - | 1054.4 |
| AHQ-1-2, 5827 - 5835     | R.LNEAAAGLNQAATELVQASR.G         | 2028.21299 | 3 | 2.11E-07 | 0.98 | 6.62 | - | 2391.8 |
| AHQ-1-3, 5411            | R.LNEAAAGLNQAATELVQASR.G         | 2028.21299 | 2 | 7.39E-12 | 0.97 | 5.34 | - | 1432.3 |
| AHQ-1-9, 5468            | R.LNEAAAGLNQAATELVQASR.G         | 2028.21299 | 2 | 1.37E-09 | 0.96 | 4.61 | - | 1580.6 |
| AHQ-1-2, 5817 - 5847     | R.LNEAAAGLNQAATELVQASR.G         | 2028.21299 | 2 | 3.58E-09 | 0.97 | 5.42 | - | 1525.7 |
| AHQ-1-7, 5625            | R.LNEAAAGLNQAATELVQASR.G         | 2028.21299 | 2 | 7.11E-11 | 0.97 | 5.59 | - | 1401.5 |
| AHQ-1-3, 4499 - 4574     | R.LNEAAAGLNQAATELVQASR.G         | 2028.21299 | 2 | 5.74E-08 | 0.94 | 4.80 | - | 853.7  |
| AHQ-1-5, 5550 - 5625     | R.LNEAAAGLNQAATELVQASR.G         | 2028.21299 | 2 | 8.56E-11 | 0.98 | 6.03 | - | 1636.8 |
| AHQ-1-1, 5857 - 5883     | R.LNEAAAGLNQAATELVQASR.G         | 2028.21299 | 2 | 2.33E-07 | 0.92 | 4.19 | - | 904.6  |
| AHQ-1-2, 5583 - 5621     | R.LNEAAAGLNQAATELVQASRGTPODLAR.A | 2867.12501 | 3 | 1.11E-04 | 0.54 | 3.07 | - | 541.6  |
| AHQ-1-2, 2185            | R.MATNAAQNAIK.K                  | 1204.38227 | 2 | 3.51E-05 | 0.87 | 3.12 | - | 1040.6 |
| AHQ-1-3, 2046            | R.MATNAAQNAIK.K                  | 1204.38227 | 2 | 8.19E-04 | 0.47 | 2.72 | - | 515.3  |
| AHQ-1-6, 1920 - 1996     | R.MATNAAQNAIK.K                  | 1204.38227 | 2 | 6.83E-04 | 0.61 | 2.82 | - | 638.5  |
| AHQ-1-4, 1940 - 2006     | R.MATNAAQNAIK.K                  | 1204.38227 | 2 | 7.15E-06 | 0.78 | 3.15 | - | 673.8  |
| AHQ-1-2, 2079 - 2105     | R.MATNAAQNAIK.K                  | 1204.38227 | 2 | 1.32E-06 | 0.83 | 3.63 | - | 574.4  |
| AHQ-1-4, 4376            | R.MVAAATNNLCEAANAAVQGHASQEK.L    | 2558.79098 | 3 | 5.14E-05 | 0.62 | 3.26 | - | 551.0  |
| AHQ-1-1, 4223            | R.MVAAATNNLCEAANAAVQGHASQEK.L    | 2574.79038 | 3 | 5.06E-08 | 0.73 | 3.68 | - | 542.8  |
| AHQ-1-3, 4162            | R.MVAAATNNLCEAANAAVQGHASQEK.L    | 2574.79038 | 3 | 6.89E-09 | 0.93 | 5.07 | - | 923.6  |
| AHQ-1-3, 4538 - 4563     | R.MVAAATNNLCEAANAAVQGHASQEK.L    | 2558.79098 | 3 | 2.65E-05 | 0.96 | 4.75 | - | 1736.3 |
| AHQ-1-2, 4305 - 4306     | R.MVAAATNNLCEAANAAVQGHASQEK.L    | 2574.79038 | 3 | 2.42E-09 | 0.95 | 5.26 | - | 1068.1 |
| AHQ-1-5, 3191            | R.MVAAATNNLCEAANAAVQGHASQEK.L    | 2558.79098 | 3 | 1.75E-06 | 0.93 | 4.30 | - | 1307.1 |
| AHQ-1-5, 4077 - 4079     | R.MVAAATNNLCEAANAAVQGHASQEK.L    | 2574.79038 | 3 | 2.07E-12 | 0.95 | 5.79 | - | 1126.3 |
| AHQ-1-2, 4221            | R.MVAAATNNLCEAANAAVQGHASQEK.L    | 2574.79038 | 3 | 6.96E-09 | 0.90 | 4.70 | - | 845.6  |
| AHQ-1-9, 4331            | R.MVAAATNNLCEAANAAVQGHASQEK.L    | 2558.79098 | 3 | 9.26E-05 | 0.79 | 3.51 | - | 1013.6 |
| AHQ-1-4, 4210            | R.MVAAATNNLCEAANAAVQGHASQEK.L    | 2574.79038 | 2 | 2.61E-06 | 0.68 | 3.01 | - | 475.5  |
| AHQ-1-7, 4348 - 4361     | R.MVAAATNNLCEAANAAVQGHASQEK.L    | 2558.79098 | 3 | 8.99E-07 | 0.82 | 3.43 | - | 888.9  |
| AHQ-1-2, 4605            | R.MVAAATNNLCEAANAAVQGHASQEK.L    | 2558.79098 | 2 | 1.09E-04 | 0.53 | 2.74 | - | 352.2  |
| AHQ-1-6, 4196 - 4275     | R.MVAAATNNLCEAANAAVQGHASQEK.L    | 2558.79098 | 3 | 3.57E-07 | 0.95 | 4.36 | - | 1691.1 |
| AHQ-1-5, 4270 - 4345     | R.MVAAATNNLCEAANAAVQGHASQEK.L    | 2558.79098 | 3 | 2.18E-05 | 0.77 | 4.00 | - | 752.9  |
| AHQ-1-2, 4493 - 4562     | R.MVAAATNNLCEAANAAVQGHASQEK.L    | 2558.79098 | 3 | 1.79E-04 | 0.90 | 4.39 | - | 1138.2 |
| AHQ-1-1, 6608 - 6627     | K.MVGGIAQIIAAQEEMLR.K            | 1847.19347 | 2 | 4.18E-04 | 0.79 | 3.30 | - | 765.5  |
| AHQ-1-13 - , 6584        | K.MVGGIAQIIAAQEEMLR.K            | 1847.19347 | 2 | 3.77E-04 | 0.97 | 5.07 | - | 1595.7 |
| AHQ-1-2, 6589            | K.MVGGIAQIIAAQEEMLR.K            | 1847.19347 | 2 | 2.20E-09 | 0.97 | 5.87 | - | 1483.9 |
| AHQ-1-6, 6671 - 6672     | K.MVGGIAQIIAAQEEMLR.K            | 1847.19347 | 2 | 2.21E-07 | 0.98 | 6.48 | - | 2230.7 |
| AHQ-1-5, 6778 - 6845     | K.MVGGIAQIIAAQEEMLR.K            | 1847.19347 | 2 | 5.47E-04 | 0.96 | 4.82 | - | 1531.8 |
| AHQ-1-7, 6844            | K.MVGGIAQIIAAQEEMLR.K            | 1847.19347 | 2 | 1.23E-05 | 0.97 | 4.95 | - | 1771.3 |
| AHQ-1-13 - , 5853 - 5915 | K.MVGGIAQIIAAQEEMLR.K            | 1863.19287 | 2 | 3.08E-08 | 0.96 | 4.55 | - | 1658.3 |
| AHQ-1-4, 7156 - 7168     | K.MVGGIAQIIAAQEEMLR.K            | 1831.19407 | 2 | 3.04E-10 | 0.98 | 5.80 | - | 1968.9 |
| AHQ-1-2, 6911            | K.MVGGIAQIIAAQEEMLR.K            | 1847.19347 | 3 | 3.14E-06 | 0.98 | 6.11 | - | 2408.4 |
| AHQ-1-2, 7191            | K.MVGGIAQIIAAQEEMLR.K            | 1831.19407 | 2 | 7.61E-08 | 0.97 | 5.11 | - | 1434.4 |
| AHQ-1-14 - , 6334        | K.MVGGIAQIIAAQEEMLR.K            | 1847.19347 | 2 | 1.48E-04 | 0.97 | 5.24 | - | 1373.1 |
| AHQ-1-4, 7026            | K.MVGGIAQIIAAQEEMLR.K            | 1831.19407 | 2 | 5.96E-04 | 0.76 | 3.78 | - | 753.3  |
| AHQ-1-3, 6133            | K.MVGGIAQIIAAQEEMLR.K            | 1863.19287 | 2 | 3.01E-06 | 0.96 | 4.70 | - | 1318.9 |
| AHQ-1-5, 7109            | K.MVGGIAQIIAAQEEMLR.K            | 1831.19407 | 2 | 2.10E-11 | 0.97 | 5.55 | - | 1680.6 |
| AHQ-1-4, 6256            | K.MVGGIAQIIAAQEEMLR.K            | 1863.19287 | 2 | 3.49E-10 | 0.98 | 5.51 | - | 1872.9 |
| AHQ-1-4, 6862 - 6863     | K.MVGGIAQIIAAQEEMLR.K            | 1847.19347 | 2 | 4.30E-04 | 0.95 | 4.92 | - | 1214.2 |
| AHQ-1-12, 6214           | K.MVGGIAQIIAAQEEMLR.K            | 1847.19347 | 2 | 8.75E-07 | 0.96 | 4.52 | - | 1286.9 |
| AHQ-1-9, 6640            | K.MVGGIAQIIAAQEEMLR.K            | 1847.19347 | 2 | 5.68E-10 | 0.98 | 5.51 | - | 1629.4 |
| AHQ-1-6, 6966            | K.MVGGIAQIIAAQEEMLR.K            | 1831.19407 | 2 | 7.62E-11 | 0.98 | 6.13 | - | 1614.5 |
| AHQ-1-4, 6576            | K.MVGGIAQIIAAQEEMLR.K            | 1847.19347 | 2 | 4.37E-06 | 0.95 | 4.67 | - | 1289.0 |
| AHQ-1-13, 6141           | K.MVGGIAQIIAAQEEMLR.K            | 1847.19347 | 2 | 9.94E-05 | 0.90 | 3.63 | - | 887.9  |
| AHQ-1-1, 6131            | K.MVGGIAQIIAAQEEMLR.K            | 1863.19287 | 2 | 3.07E-07 | 0.97 | 5.12 | - | 1633.3 |
| AHQ-1-9, 6915            | K.MVGGIAQIIAAQEEMLR.K            | 1831.19407 | 2 | 4.78E-12 | 0.97 | 4.92 | - | 1628.1 |
| AHQ-1-4, 6486            | K.MVGGIAQIIAAQEEMLR.K            | 1847.19347 | 2 | 6.07E-07 | 0.93 | 4.27 | - | 889.7  |
| AHQ-1-3, 6997 - 7063     | K.MVGGIAQIIAAQEEMLR.K            | 1831.19407 | 2 | 1.12E-11 | 0.97 | 5.61 | - | 1413.8 |
| AHQ-1-2, 4573 - 4642     | K.NGNLPEFGDAISTASK.A             | 1621.73018 | 2 | 3.03E-05 | 0.93 | 3.92 | - | 791.4  |
| AHQ-1-3, 4371 - 4429     | K.NGNLPEFGDAISTASK.A             | 1621.73018 | 2 | 5.25E-06 | 0.86 | 3.49 | - | 527.0  |
| AHQ-1-2, 4714            | K.NGNLPEFGDAISTASK.A             | 1621.73018 | 2 | 1.34E-11 | 0.86 | 3.75 | - | 492.9  |
| AHQ-1-3, 4497 - 4566     | K.NGNLPEFGDAISTASK.A             | 1621.73018 | 2 | 2.69E-07 | 0.81 | 3.08 | - | 591.6  |
| AHQ-1-1, 4656            | K.NGNLPEFGDAISTASK.A             | 1621.73018 | 2 | 7.57E-06 | 0.78 | 3.02 | - | 537.8  |
| AHQ-1-6, 4624            | K.NGNLPEFGDAISTASK.A             | 1621.73018 | 2 | 5.58E-08 | 0.79 | 3.21 | - | 462.9  |
| AHQ-1-1, 4559            | K.NGNLPEFGDAISTASK.A             | 1621.73018 | 2 | 3.87E-04 | 0.56 | 3.07 | - | 255.0  |
| AHQ-1-4, 4448 - 4518     | K.NGNLPEFGDAISTASK.A             | 1621.73018 | 2 | 4.61E-06 | 0.89 | 3.99 | - | 522.3  |
| AHQ-1-1, 4421 - 4495     | K.NGNLPEFGDAISTASK.A             | 1621.73018 | 2 | 3.15E-07 | 0.92 | 3.85 | - | 784.1  |
| AHQ-1-9, 4623            | K.NGNLPEFGDAISTASK.A             | 1621.73018 | 2 | 2.20E-05 | 0.51 | 3.11 | - | 280.4  |
| AHQ-1-3, 4231            | K.NLGTALAE.LR.T                  | 1058.21367 | 1 | 1.78E-04 | 0.21 | 2.21 | - | 113.1  |
| AHQ-1-4, 4244            | K.NLGTALAE.LR.T                  | 1058.21367 | 2 | 5.40E-04 | 0.86 | 3.25 | - | 883.6  |
| AHQ-1-2, 4375 - 4381     | K.NLGTALAE.LR.T                  | 1058.21367 | 2 | 3.35E-04 | 0.86 | 2.96 | - | 918.0  |
| AHQ-1-1, 4343            | K.NLGTALAE.LR.T                  | 1058.21367 | 2 | 9.33E-04 | 0.86 | 3.02 | - | 887.3  |
| AHQ-1-3, 2722            | K.PAAVAENEIEGSHIK.H              | 1636.78798 | 3 | 3.93E-09 | 0.97 | 5.33 | - | 1769.8 |
| AHQ-1-5, 2601            | K.PAAVAENEIEGSHIK.H              | 1636.78798 | 3 | 9.25E-11 | 0.97 | 5.55 | - | 2012.3 |
| AHQ-1-6, 2619            | K.PAAVAENEIEGSHIK.H              | 1636.78798 | 2 | 4.23E-10 | 0.98 | 5.72 | - | 2200.7 |
| AHQ-1-1, 2891            | K.PAAVAENEIEGSHIK.H              | 1636.78798 | 2 | 8.69E-09 | 0.93 | 4.04 | - | 1131.8 |
| AHQ-1-6, 2584            | K.PAAVAENEIEGSHIK.H              | 1636.78798 | 3 | 5.74E-07 | 0.96 | 4.97 | - | 1594.1 |
| AHQ-1-3, 2731            | K.PAAVAENEIEGSHIK.H              | 1636.78798 | 2 | 2.13E-07 | 0.98 | 5.20 | - | 1940.6 |
| AHQ-1-4, 2723            | K.PAAVAENEIEGSHIK.H              | 1636.78798 | 3 | 3.19E-12 | 0.97 | 5.51 | - | 2182.7 |
| AHQ-1-5, 2603            | K.PAAVAENEIEGSHIK.H              | 1636.78798 | 2 | 1.74E-13 | 0.98 | 5.44 | - | 2106.7 |
| AHQ-1-2, 2783 - 2837     | K.PAAVAENEIEGSHIK.H              | 1636.78798 | 2 | 9.94E-08 | 0.97 | 5.04 | - | 1707.3 |
| AHQ-1-4, 2722            | K.PAAVAENEIEGSHIK.H              | 1636.78798 | 2 | 4.03E-07 | 0.98 | 5.59 | - | 2177.5 |
| AHQ-1-7, 2637            | K.PAAVAENEIEGSHIK.H              | 1636.78798 | 2 | 2.06E-07 | 0.96 | 3.88 | - | 1683.8 |
| AHQ-1-2, 2802 - 2814     | K.PAAVAENEIEGSHIK.H              | 1636.78798 | 3 | 1.51E-09 | 0.97 | 5.67 | - | 1888.0 |
| AHQ-1-1, 2895            | K.PAAVAENEIEGSHIK.H              | 1636.78798 | 3 | 8.56E-07 | 0.96 | 4.97 | - | 1471.1 |
| AHQ-1-6, 3154 - 3176     | K.QAAASATQIIAAQHAASTPK.A         | 1996.17099 | 3 | 4.96E-06 | 0.82 | 3.75 | - | 1094.5 |
| AHQ-1-3, 3471 - 3478     | K.QAAASATQIIAAQHAASTPK.A         | 1996.17099 | 2 | 9.37E-10 | 0.87 | 4.45 | - | 466.3  |
| AHQ-1-3, 3315            | K.QAAASATQIIAAQHAASTPK.A         | 1996.17099 | 2 | 9.90E-04 | 0.88 | 3.92 | - | 723.5  |
| AHQ-1-1, 3577            | K.QAAASATQIIAAQHAASTPK.A         | 1996.17099 | 2 | 1.54E-07 | 0.72 | 3.51 | - | 527.5  |
| AHQ-1-1, 3444 - 3460     | K.QAAASATQIIAAQHAASTPK.A         | 1996.17099 | 2 | 6.21E-06 | 0.78 | 3.69 | - | 425.5  |
| AHQ-1-2, 3258            | K.QAAASATQIIAAQHAASTPK.A         | 1996.17099 | 2 | 2.91E-04 | 0.45 | 2.78 | - | 329.2  |
| AHQ-1-1, 3413            | K.QAAASATQIIAAQHAASTPK.A         | 1996.17099 | 3 | 5.55E-06 | 0.76 | 3.22 | - | 857.1  |
| AHQ-1-5, 3337            | K.QAAASATQIIAAQHAASTPK.A         | 1996.17099 | 2 | 2.30E-07 | 0.87 | 4.03 | - | 542.0  |
| AHQ-1-5, 3170            | K.QAAASATQIIAAQHAASTPK.A         | 1996.17099 | 2 | 5.46E-04 | 0.94 | 5.24 | - | 750.0  |
| AHQ-1-4, 3498            | K.QAAASATQIIAAQHAASTPK.A         | 1996.17099 | 3 | 2.26E-04 | 0.82 | 3.30 | - | 971.7  |
| AHQ-1-5, 3167            | K.QAAASATQIIAAQHAASTPK.A         | 1996.17099 | 3 | 6.02E-04 | 0.71 | 3.32 | - | 570.4  |

|                          |                                            |            |   |          |      |      |   |        |
|--------------------------|--------------------------------------------|------------|---|----------|------|------|---|--------|
| AHQ-1-4, 3500 - 3508     | K.QAAASATQIAAAQHAASPK.A                    | 1996.17099 | 2 | 4.75E-07 | 0.93 | 4.98 | - | 653.1  |
| AHQ-1-2, 4058            | K.QAAASATQIAAAQHAASPK.A                    | 1996.17099 | 2 | 2.27E-08 | 0.63 | 3.34 | - | 362.4  |
| AHQ-1-2, 3605            | K.QAAASATQIAAAQHAASPK.A                    | 1996.17099 | 2 | 2.02E-09 | 0.88 | 4.45 | - | 617.8  |
| AHQ-1-2, 3599            | K.QAAASATQIAAAQHAASPK.A                    | 1996.17099 | 3 | 8.20E-04 | 0.75 | 3.15 | - | 817.8  |
| AHQ-1-6, 3163            | K.QAAASATQIAAAQHAASPK.A                    | 1996.17099 | 2 | 5.21E-04 | 0.85 | 3.54 | - | 646.8  |
| AHQ-1-2, 3422            | K.QAAASATQIAAAQHAASPK.A                    | 1996.17099 | 2 | 5.23E-07 | 0.90 | 3.92 | - | 624.1  |
| AHQ-1-1, 4075 - 4151     | R.QELAVFCSPEPPAK.T                         | 1574.77985 | 2 | 9.13E-08 | 0.83 | 2.97 | - | 738.8  |
| AHQ-1-5, 4017 - 4030     | R.QELAVFCSPEPPAK.T                         | 1574.77985 | 2 | 5.75E-08 | 0.93 | 4.07 | - | 1017.5 |
| AHQ-1-2, 4223 - 4294     | R.QELAVFCSPEPPAK.T                         | 1574.77985 | 2 | 2.20E-06 | 0.91 | 3.52 | - | 1037.8 |
| AHQ-1-5, 7357 - 7437     | R.QNLLQAAGNVGQASGELLQQIGESDTPHFQDALMQLAK.A | 4138.52644 | 3 | 3.02E-11 | 0.94 | 5.14 | - | 919.2  |
| AHQ-1-6, 7250            | R.QNLLQAAGNVGQASGELLQQIGESDTPHFQDALMQLAK.A | 4138.52644 | 3 | 3.52E-04 | 0.71 | 3.28 | - | 434.3  |
| AHQ-1-2, 7354            | R.QNLLQAAGNVGQASGELLQQIGESDTPHFQDALMQLAK.A | 4154.52584 | 3 | 4.55E-08 | 0.94 | 4.94 | - | 1284.9 |
| AHQ-1-4, 7394 - 7470     | R.QNLLQAAGNVGQASGELLQQIGESDTPHFQDALMQLAK.A | 4154.52584 | 3 | 4.65E-08 | 0.85 | 4.26 | - | 645.6  |
| AHQ-1-3, 7237 - 7238     | R.QNLLQAAGNVGQASGELLQQIGESDTPHFQDALMQLAK.A | 4138.52644 | 3 | 1.68E-09 | 0.94 | 5.44 | - | 968.3  |
| AHQ-1-13 - , 3879 - 3881 | K.QVAASTAQLLVACK.V                         | 1461.70942 | 2 | 3.08E-06 | 0.92 | 4.18 | - | 551.9  |
| AHQ-1-2, 4017 - 4089     | K.QVAASTAQLLVACK.V                         | 1461.70942 | 2 | 2.76E-06 | 0.89 | 3.68 | - | 539.8  |
| AHQ-1-10, 3464           | K.QVAASTAQLLVACK.V                         | 1461.70942 | 2 | 9.65E-05 | 0.76 | 2.73 | - | 515.3  |
| AHQ-1-3, 4967            | K.RVAGSVTELIQAAEAM*K.G                     | 1791.06327 | 2 | 2.13E-04 | 0.91 | 4.32 | - | 497.9  |
| AHQ-1-4, 6086            | K.RVAGSVTELIQAAEAM.K.G                     | 1775.06387 | 2 | 9.48E-05 | 0.98 | 5.86 | - | 2350.5 |
| AHQ-1-2, 5129            | K.RVAGSVTELIQAAEAM*K.G                     | 1791.06327 | 2 | 2.93E-05 | 0.95 | 4.42 | - | 817.4  |
| AHQ-1-4, 5051            | K.RVAGSVTELIQAAEAM*K.G                     | 1791.06327 | 2 | 5.70E-05 | 0.92 | 3.97 | - | 644.0  |
| AHQ-1-3, 5985            | K.RVAGSVTELIQAAEAM.K.G                     | 1775.06387 | 2 | 4.15E-05 | 0.97 | 5.23 | - | 1556.6 |
| AHQ-1-2, 6173            | K.RVAGSVTELIQAAEAM.K.G                     | 1775.06387 | 2 | 3.73E-07 | 0.98 | 5.73 | - | 1965.8 |
| AHQ-1-2, 6182            | K.RVAGSVTELIQAAEAM.K.G                     | 1775.06387 | 3 | 3.52E-05 | 0.89 | 4.09 | - | 1025.2 |
| AHQ-1-4, 3695            | R.SGASGPENFVQGSMP*PPAQQITSGQMHR.G          | 2945.19807 | 3 | 1.12E-05 | 0.71 | 3.59 | - | 341.0  |
| AHQ-1-1, 3389            | R.SGASGPENFVQGSMP*PPAQQITSGQM*HR.G         | 2961.19747 | 3 | 6.97E-05 | 0.84 | 3.90 | - | 809.1  |
| AHQ-1-4, 3927            | R.SGASGPENFVQGSMP*PPAQQITSGQM*HR.G         | 2945.19807 | 3 | 4.51E-05 | 0.59 | 3.52 | - | 333.8  |
| AHQ-1-9, 2788            | K.SIAAATSALVK.A                            | 1032.21612 | 2 | 6.77E-04 | 0.91 | 3.08 | - | 1122.6 |
| AHQ-1-4, 3048            | K.SIAAATSALVK.A                            | 1032.21612 | 2 | 5.04E-05 | 0.89 | 3.55 | - | 955.4  |
| AHQ-1-10, 2797 - 2879    | K.SIAAATSALVK.A                            | 1032.21612 | 2 | 9.94E-04 | 0.82 | 2.99 | - | 852.0  |
| AHQ-1-1, 3177            | K.SIAAATSALVK.A                            | 1032.21612 | 2 | 7.13E-06 | 0.85 | 2.97 | - | 828.1  |
| AHQ-1-2, 3150            | K.SIAAATSALVK.A                            | 1032.21612 | 2 | 9.02E-06 | 0.91 | 3.14 | - | 1187.9 |
| AHQ-1-13 - , 3996        | K.SKDHFLGLEDDEESTM*LEDSVSPK.K              | 2554.68304 | 3 | 1.70E-04 | 0.95 | 4.96 | - | 1587.0 |
| AHQ-1-8, 4208            | K.SKDHFLGLEDDEESTM*LEDSVSPK.K              | 2538.68364 | 2 | 2.52E-11 | 0.96 | 5.08 | - | 1112.7 |
| AHQ-1-8, 4209            | K.SKDHFLGLEDDEESTM*LEDSVSPK.K              | 2538.68364 | 3 | 5.91E-06 | 0.97 | 5.77 | - | 1936.1 |
| AHQ-1-9, 4276            | K.SKDHFLGLEDDEESTM*LEDSVSPK.K              | 2538.68364 | 3 | 1.29E-05 | 0.95 | 4.17 | - | 1901.6 |
| AHQ-1-12, 4230 - 4234    | K.SKDHFLGLEDDEESTM*LEDSVSPK.K              | 2538.68364 | 3 | 1.44E-06 | 0.97 | 5.70 | - | 1916.8 |
| AHQ-1-8, 3867            | K.SKDHFLGLEDDEESTM*LEDSVSPK.K              | 2554.68304 | 3 | 1.10E-08 | 0.96 | 5.63 | - | 1489.3 |
| AHQ-1-1, 5493 - 5523     | K.SNTSPEELGPLANQLTSDYGR.L                  | 2250.36505 | 2 | 6.83E-07 | 0.80 | 3.58 | - | 389.1  |
| AHQ-1-2, 5001 - 5022     | K.SNTSPEELGPLANQLTSDYGR.L                  | 2250.36505 | 2 | 5.72E-06 | 0.73 | 3.18 | - | 438.0  |
| AHQ-1-4, 5695 - 5696     | K.SNTSPEELGPLANQLTSDYGR.L                  | 2250.36505 | 2 | 5.28E-05 | 0.91 | 4.13 | - | 708.4  |
| AHQ-1-4, 5539 - 5611     | K.SNTSPEELGPLANQLTSDYGR.L                  | 2250.36505 | 2 | 5.29E-09 | 0.89 | 4.32 | - | 428.8  |
| AHQ-1-2, 5251            | K.SNTSPEELGPLANQLTSDYGR.L                  | 2250.36505 | 2 | 9.19E-07 | 0.89 | 3.95 | - | 640.7  |
| AHQ-1-4, 5450            | K.SNTSPEELGPLANQLTSDYGR.L                  | 2250.36505 | 2 | 3.97E-06 | 0.84 | 3.73 | - | 491.8  |
| AHQ-1-4, 5362 - 5380     | K.SNTSPEELGPLANQLTSDYGR.L                  | 2250.36505 | 2 | 1.07E-06 | 0.74 | 3.40 | - | 404.7  |
| AHQ-1-2, 5457 - 5525     | K.SNTSPEELGPLANQLTSDYGR.L                  | 2250.36505 | 2 | 1.03E-07 | 0.89 | 3.93 | - | 516.4  |
| AHQ-1-7, 5301 - 5305     | K.SNTSPEELGPLANQLTSDYGR.L                  | 2250.36505 | 2 | 3.85E-05 | 0.85 | 3.88 | - | 441.7  |
| AHQ-1-4, 4964            | K.SNTSPEELGPLANQLTSDYGR.L                  | 2250.36505 | 2 | 1.74E-08 | 0.74 | 3.19 | - | 456.6  |
| AHQ-1-4, 4750 - 4759     | K.SNTSPEELGPLANQLTSDYGR.L                  | 2250.36505 | 2 | 1.84E-08 | 0.89 | 4.08 | - | 493.4  |
| AHQ-1-3, 4695            | K.SNTSPEELGPLANQLTSDYGR.L                  | 2250.36505 | 2 | 1.27E-04 | 0.80 | 3.62 | - | 498.3  |
| AHQ-1-8, 5219            | K.SNTSPEELGPLANQLTSDYGR.L                  | 2250.36505 | 2 | 3.76E-05 | 0.88 | 3.44 | - | 710.4  |
| AHQ-1-3, 5337 - 5405     | K.SNTSPEELGPLANQLTSDYGR.L                  | 2250.36505 | 2 | 6.75E-07 | 0.78 | 3.34 | - | 439.8  |
| AHQ-1-3, 4859            | K.SNTSPEELGPLANQLTSDYGR.L                  | 2250.36505 | 2 | 1.57E-04 | 0.55 | 3.00 | - | 322.5  |
| AHQ-1-2, 5587 - 5657     | K.SNTSPEELGPLANQLTSDYGR.L                  | 2250.36505 | 2 | 2.32E-04 | 0.74 | 3.17 | - | 422.0  |
| AHQ-1-1, 5355 - 5419     | K.SNTSPEELGPLANQLTSDYGR.L                  | 2250.36505 | 2 | 3.88E-05 | 0.85 | 3.94 | - | 433.9  |
| AHQ-1-2, 5699 - 5773     | K.SNTSPEELGPLANQLTSDYGR.L                  | 2250.36505 | 2 | 5.37E-07 | 0.90 | 4.30 | - | 475.9  |
| AHQ-1-2, 5869 - 5882     | K.SNTSPEELGPLANQLTSDYGR.L                  | 2250.36505 | 2 | 4.86E-05 | 0.39 | 3.08 | - | 405.1  |
| AHQ-1-9, 5171            | K.SNTSPEELGPLANQLTSDYGR.L                  | 2250.36505 | 2 | 1.18E-04 | 0.52 | 2.83 | - | 247.7  |
| AHQ-1-3, 5118            | K.SNTSPEELGPLANQLTSDYGR.L                  | 2250.36505 | 2 | 1.12E-07 | 0.83 | 3.39 | - | 518.6  |
| AHQ-1-3, 5202 - 5277     | K.SNTSPEELGPLANQLTSDYGR.L                  | 2250.36505 | 2 | 2.18E-05 | 0.63 | 2.76 | - | 394.4  |
| AHQ-1-5, 5570            | K.SNTSPEELGPLANQLTSDYGR.L                  | 2250.36505 | 2 | 1.78E-09 | 0.94 | 4.61 | - | 717.5  |
| AHQ-1-3, 5593            | K.SNTSPEELGPLANQLTSDYGR.L                  | 2250.36505 | 2 | 2.05E-07 | 0.67 | 3.17 | - | 299.5  |
| AHQ-1-5, 5473            | K.SNTSPEELGPLANQLTSDYGR.L                  | 2250.36505 | 2 | 2.44E-05 | 0.88 | 3.95 | - | 444.4  |
| AHQ-1-3, 5426 - 5493     | K.SNTSPEELGPLANQLTSDYGR.L                  | 2250.36505 | 2 | 6.63E-10 | 0.87 | 3.95 | - | 391.7  |
| AHQ-1-1, 4679            | K.SNTSPEELGPLANQLTSDYGR.L                  | 2250.36505 | 2 | 1.96E-06 | 0.73 | 3.55 | - | 264.4  |
| AHQ-1-6, 5464            | K.SNTSPEELGPLANQLTSDYGR.L                  | 2250.36505 | 2 | 5.40E-06 | 0.78 | 3.35 | - | 468.0  |
| AHQ-1-6, 4600            | K.SNTSPEELGPLANQLTSDYGR.L                  | 2250.36505 | 2 | 9.97E-07 | 0.69 | 3.17 | - | 335.3  |
| AHQ-1-5, 4685            | K.SNTSPEELGPLANQLTSDYGR.L                  | 2250.36505 | 2 | 2.00E-08 | 0.82 | 3.74 | - | 392.1  |
| AHQ-1-5, 5295 - 5377     | K.SNTSPEELGPLANQLTSDYGR.L                  | 2250.36505 | 2 | 4.95E-07 | 0.92 | 4.40 | - | 611.1  |
| AHQ-1-2, 4831            | K.SNTSPEELGPLANQLTSDYGR.L                  | 2250.36505 | 2 | 5.11E-09 | 0.86 | 4.16 | - | 610.0  |
| AHQ-1-6, 5223            | K.SNTSPEELGPLANQLTSDYGR.L                  | 2250.36505 | 2 | 2.95E-06 | 0.91 | 4.33 | - | 528.6  |
| AHQ-1-2, 7113 - 7173     | R.EDSGLQQTQVIAAATQCALSTSQVLVACTK.V         | 3056.37009 | 3 | 8.89E-04 | 0.78 | 3.65 | - | 966.9  |
| AHQ-1-2, 7351 - 7427     | R.EDSGLQQTQVIAAATQCALSTSQVLVACTK.V         | 3056.37009 | 3 | 6.50E-07 | 0.97 | 5.64 | - | 1904.4 |
| AHQ-1-4, 7358 - 7367     | R.EDSGLQQTQVIAAATQCALSTSQVLVACTK.V         | 3056.37009 | 3 | 1.87E-10 | 0.97 | 5.50 | - | 2367.8 |
| AHQ-1-5, 7374            | R.EDSGLQQTQVIAAATQCALSTSQVLVACTK.V         | 3056.37009 | 3 | 8.16E-14 | 0.97 | 6.31 | - | 1872.0 |
| AHQ-1-2, 7446 - 7517     | R.EDSGLQQTQVIAAATQCALSTSQVLVACTK.V         | 3056.37009 | 3 | 1.07E-07 | 0.95 | 4.95 | - | 1345.0 |
| AHQ-1-6, 7119 - 7186     | R.EDSGLQQTQVIAAATQCALSTSQVLVACTK.V         | 3056.37009 | 3 | 5.85E-13 | 0.96 | 5.69 | - | 1582.2 |
| AHQ-1-7, 7397            | R.EDSGLQQTQVIAAATQCALSTSQVLVACTK.V         | 3056.37009 | 3 | 2.39E-11 | 0.98 | 6.54 | - | 2083.5 |
| AHQ-1-3, 7429            | R.EDSGLQQTQVIAAATQCALSTSQVLVACTK.V         | 3056.37009 | 3 | 4.75E-08 | 0.88 | 4.17 | - | 871.4  |
| AHQ-1-10, 3976           | K.TKEIQEWNLTNIK.R                          | 1716.95938 | 2 | 2.78E-08 | 0.95 | 4.24 | - | 1439.5 |
| AHQ-1-9, 4211            | K.TKEIQEWNLTNIK.R                          | 1716.95938 | 2 | 1.17E-06 | 0.96 | 4.81 | - | 1422.8 |
| AHQ-1-12, 4235           | K.TKEIQEWNLTNIK.R                          | 1716.95938 | 2 | 2.10E-04 | 0.96 | 4.52 | - | 1582.4 |
| AHQ-1-8, 4151 - 4155     | K.TKEIQEWNLTNIK.R                          | 1716.95938 | 2 | 2.01E-04 | 0.96 | 4.77 | - | 1597.4 |
| AHQ-1-8, 4159            | K.TKEIQEWNLTNIK.R                          | 1716.95938 | 3 | 1.54E-06 | 0.93 | 4.91 | - | 990.9  |
| AHQ-1-11, 4087           | K.TKEIQEWNLTNIK.R                          | 1716.95938 | 2 | 1.22E-04 | 0.96 | 4.09 | - | 1863.2 |
| AHQ-1-8, 3428            | K.TKEIQEWNLTNIK.R.W                        | 1873.14573 | 2 | 4.39E-06 | 0.96 | 4.60 | - | 1220.9 |
| AHQ-1-9, 6460 - 6466     | K.TLAESALQLLYTAK.E                         | 1522.76793 | 2 | 5.63E-04 | 0.95 | 3.86 | - | 1386.8 |
| AHQ-1-12, 6069           | K.TLAESALQLLYTAK.E                         | 1522.76793 | 2 | 1.51E-04 | 0.95 | 4.07 | - | 1070.2 |
| AHQ-1-14 - , 6198 - 6204 | K.TLAESALQLLYTAK.E                         | 1522.76793 | 2 | 7.29E-06 | 0.97 | 4.85 | - | 1448.1 |
| AHQ-1-7, 6616 - 6617     | K.TLAESALQLLYTAK.E                         | 1522.76793 | 2 | 2.56E-06 | 0.94 | 4.00 | - | 953.6  |
| AHQ-1-3, 6498 - 6561     | K.TLAESALQLLYTAK.E                         | 1522.76793 | 2 | 6.84E-09 | 0.97 | 4.80 | - | 1422.5 |
| AHQ-1-6, 6487 - 6495     | K.TLAESALQLLYTAK.E                         | 1522.76793 | 2 | 3.32E-07 | 0.96 | 4.55 | - | 1252.2 |
| AHQ-1-4, 6666 - 6730     | K.TLAESALQLLYTAK.E                         | 1522.76793 | 2 | 4.69E-08 | 0.97 | 5.25 | - | 1198.4 |
| AHQ-1-2, 6669 - 6745     | K.TLAESALQLLYTAK.E                         | 1522.76793 | 2 | 1.10E-11 | 0.97 | 5.28 | - | 1326.2 |
| AHQ-1-4, 6886            | K.TLAESALQLLYTAK.E                         | 1522.76793 | 2 | 1.35E-09 | 0.95 | 4.09 | - | 1070.0 |
| AHQ-1-2, 6914 - 6917     | K.TLAESALQLLYTAK.E                         | 1522.76793 | 2 | 1.51E-04 | 0.94 | 4.01 | - | 1157.3 |
| AHQ-1-1, 6643 - 6684     | K.TLAESALQLLYTAK.E                         | 1522.76793 | 2 | 3.16E-07 | 0.84 | 3.22 | - | 752.9  |
| AHQ-1-5, 6605 - 6614     | K.TLAESALQLLYTAK.E                         | 1522.76793 | 2 | 1.92E-05 | 0.97 | 5.01 | - | 1197.4 |
| AHQ-1-3, 6731 - 6801     | K.TLAESALQLLYTAK.E                         | 1522.76793 | 2 | 5.29E-06 | 0.93 | 3.68 | - | 1257.5 |
| AHQ-1-1, 6469 - 6475     | K.TLAESALQLLYTAK.E                         | 1522.76793 | 2 | 1.45E-09 | 0.97 | 5.06 | - | 1163.9 |
| AHQ-1-13, 6000           | K.TLAESALQLLYTAK.E                         | 1522.76793 | 2 | 1.27E-04 | 0.82 | 2.91 | - | 751.6  |
| AHQ-1-1, 3391            | K.TLSHPQQMALLDQTK.T                        | 1711.96464 | 2 | 5.03E-05 | 0.95 | 4.73 | - | 841.0  |
| AHQ-1-6, 3114            | K.TLSHPQQMALLDQTK.T                        | 1711.96464 | 2 | 6.49E-05 | 0.95 | 4.58 | - | 959.9  |
| AHQ-1-2, 3409            | K.TLSHPQQMALLDQTK.T                        | 1711.96464 | 2 | 7.92E-06 | 0.92 | 4.07 | - | 758.8  |
| AHQ-1-2, 3383 - 3387     | K.TLSHPQQMALLDQTK.T                        | 1711.96464 | 3 | 2.56E-06 | 0.93 | 4.91 | - | 937.0  |
| AHQ-1-3, 3258            | K.TLSHPQQMALLDQTK.T                        | 1711.96464 | 3 | 3.25E-08 | 0.95 | 5.17 | - | 1311.9 |
| AHQ-1-4, 3262            | K.TLSHPQQMALLDQTK.T                        | 1711.96464 | 3 | 3.45E-06 | 0.95 | 4.57 | - | 1442.6 |

|                          |                             |            |   |          |      |      |   |        |
|--------------------------|-----------------------------|------------|---|----------|------|------|---|--------|
| AHQ-1-4, 3254            | K.TLSHPQQMALLDQTK.T         | 1711.96464 | 2 | 5.29E-05 | 0.88 | 3.49 | - | 558.7  |
| AHQ-1-5, 3122            | K.TLSHPQQMALLDQTK.T         | 1711.96464 | 2 | 7.73E-07 | 0.95 | 4.59 | - | 870.7  |
| AHQ-1-5, 3129            | K.TLSHPQQMALLDQTK.T         | 1711.96464 | 3 | 3.87E-05 | 0.95 | 4.78 | - | 1642.5 |
| AHQ-1-8, 3028            | K.TLSHPQQMALLDQTK.T         | 1711.96464 | 2 | 2.49E-05 | 0.90 | 4.47 | - | 440.4  |
| AHQ-1-3, 2509 - 2526     | K.TLSHPQQMALLDQTK.T         | 1727.96404 | 2 | 2.02E-04 | 0.88 | 3.75 | - | 481.8  |
| AHQ-1-5, 2398            | K.TLSHPQQMALLDQTK.T         | 1727.96404 | 2 | 5.67E-04 | 0.81 | 3.16 | - | 466.0  |
| AHQ-1-5, 4317 - 4322     | K.TMLESAGGLIQTAR.A          | 1448.67095 | 2 | 2.63E-07 | 0.93 | 4.11 | - | 1315.5 |
| AHQ-1-3, 4143            | K.TMLESAGGLIQTAR.A          | 1448.67095 | 2 | 4.49E-09 | 0.91 | 4.02 | - | 1129.2 |
| AHQ-1-1, 3611            | K.TMLESAGGLIQTAR.A          | 1464.67035 | 2 | 2.05E-06 | 0.97 | 5.16 | - | 2043.6 |
| AHQ-1-3, 4330 - 4397     | K.TMLESAGGLIQTAR.A          | 1448.67095 | 2 | 1.83E-07 | 0.96 | 4.71 | - | 1642.1 |
| AHQ-1-5, 3374 - 3443     | K.TMLESAGGLIQTAR.A          | 1464.67035 | 2 | 1.07E-09 | 0.94 | 4.37 | - | 1185.9 |
| AHQ-1-4, 4426 - 4440     | K.TMLESAGGLIQTAR.A          | 1448.67095 | 2 | 9.81E-09 | 0.95 | 4.31 | - | 1646.8 |
| AHQ-1-3, 4381            | K.TMLESAGGLIQTAR.A          | 1464.67035 | 2 | 3.62E-04 | 0.77 | 2.87 | - | 898.3  |
| AHQ-1-4, 4447            | K.TMLESAGGLIQTAR.A          | 1448.67095 | 1 | 5.23E-04 | 0.05 | 2.07 | - | 171.2  |
| AHQ-1-1, 4371 - 4452     | K.TMLESAGGLIQTAR.A          | 1448.67095 | 2 | 2.48E-07 | 0.93 | 4.22 | - | 1282.4 |
| AHQ-1-2, 4482 - 4550     | K.TMLESAGGLIQTAR.A          | 1448.67095 | 2 | 9.21E-12 | 0.95 | 4.76 | - | 1491.9 |
| AHQ-1-2, 4302            | K.TMLESAGGLIQTAR.A          | 1448.67095 | 2 | 3.86E-09 | 0.92 | 3.98 | - | 1215.4 |
| AHQ-1-4, 3563 - 3592     | K.TMLESAGGLIQTAR.A          | 1464.67035 | 2 | 4.96E-04 | 0.93 | 3.84 | - | 1337.1 |
| AHQ-1-6, 4250 - 4254     | K.TMLESAGGLIQTAR.A          | 1448.67095 | 2 | 1.92E-07 | 0.94 | 4.51 | - | 1376.3 |
| AHQ-1-8, 4201            | K.TMLESAGGLIQTAR.A          | 1448.67095 | 2 | 1.25E-05 | 0.90 | 3.36 | - | 1520.4 |
| AHQ-1-2, 3658 - 3730     | K.TMLESAGGLIQTAR.A          | 1464.67035 | 2 | 1.14E-05 | 0.95 | 4.36 | - | 1466.1 |
| AHQ-1-10, 4405           | K.TMQFEPSTMVYDAGR.I         | 1838.07571 | 2 | 2.71E-04 | 0.88 | 3.33 | - | 585.1  |
| AHQ-1-14 - , 4826        | K.TMQFEPSTMVYDAGR.I         | 1838.07571 | 2 | 9.56E-04 | 0.65 | 2.96 | - | 446.4  |
| AHQ-1-13 - , 4063 - 4123 | K.TMQFEPSTMVYDAGR.I         | 1854.07511 | 2 | 4.21E-05 | 0.88 | 3.61 | - | 437.1  |
| AHQ-1-13 - , 4936 - 4937 | K.TMQFEPSTMVYDAGR.I         | 1838.07571 | 2 | 1.81E-07 | 0.96 | 5.27 | - | 720.5  |
| AHQ-1-8, 3398            | K.TM"QFEPSTMVYDAGR.I        | 1870.07451 | 2 | 2.17E-05 | 0.45 | 2.65 | - | 347.7  |
| AHQ-1-8, 4241            | K.TM"QFEPSTMVYDAGR.I        | 1854.07511 | 2 | 5.84E-05 | 0.80 | 3.35 | - | 558.9  |
| AHQ-1-8, 4819            | K.TMQFEPSTMVYDAGR.I         | 1838.07571 | 2 | 1.76E-04 | 0.90 | 4.24 | - | 522.4  |
| AHQ-1-13, 4180           | K.TM"QFEPSTMVYDAGR.I        | 1854.07511 | 2 | 1.53E-05 | 0.85 | 3.41 | - | 549.3  |
| AHQ-1-8, 3683            | K.TVTDMLM"TCAR.I            | 1445.70887 | 2 | 1.29E-04 | 0.74 | 3.06 | - | 403.7  |
| AHQ-1-8, 5114            | K.TYGVSFLLV.E               | 1161.37395 | 2 | 4.66E-06 | 0.90 | 3.36 | - | 693.5  |
| AHQ-1-8, 5215            | K.TYGVSFLLV.E               | 1161.37395 | 2 | 3.42E-05 | 0.91 | 3.28 | - | 774.5  |
| AHQ-1-12, 5129 - 5131    | K.TYGVSFLLV.E               | 1161.37395 | 2 | 5.03E-08 | 0.93 | 3.72 | - | 760.6  |
| AHQ-1-11, 4920           | K.TYGVSFLLV.E               | 1161.37395 | 2 | 7.52E-07 | 0.91 | 3.84 | - | 813.8  |
| AHQ-1-2, 6594            | R.VAGSVTELIQAAEAMK.G        | 1618.87752 | 2 | 7.54E-11 | 0.97 | 4.54 | - | 1531.7 |
| AHQ-1-7, 5365            | R.VAGSVTELIQAAEAM"K.G       | 1634.87692 | 2 | 6.75E-05 | 0.92 | 3.95 | - | 1054.2 |
| AHQ-1-4, 6586 - 6594     | R.VAGSVTELIQAAEAMK.G        | 1618.87752 | 2 | 2.71E-06 | 0.97 | 4.86 | - | 1503.1 |
| AHQ-1-5, 6457 - 6526     | R.VAGSVTELIQAAEAMK.G        | 1618.87752 | 2 | 1.41E-09 | 0.96 | 5.02 | - | 1277.1 |
| AHQ-1-4, 5498 - 5506     | R.VAGSVTELIQAAEAM"K.G       | 1634.87692 | 2 | 4.23E-05 | 0.95 | 4.34 | - | 1381.4 |
| AHQ-1-7, 6510            | R.VAGSVTELIQAAEAMK.G        | 1618.87752 | 2 | 1.64E-06 | 0.97 | 5.23 | - | 1646.5 |
| AHQ-1-3, 5390 - 5458     | R.VAGSVTELIQAAEAM"K.G       | 1634.87692 | 2 | 5.06E-06 | 0.95 | 4.79 | - | 1231.6 |
| AHQ-1-3, 6426            | R.VAGSVTELIQAAEAMK.G        | 1618.87752 | 2 | 9.72E-06 | 0.91 | 3.96 | - | 1026.2 |
| AHQ-1-13 - , 6340        | R.VAGSVTELIQAAEAMK.G        | 1618.87752 | 2 | 1.27E-05 | 0.96 | 4.95 | - | 1183.4 |
| AHQ-1-6, 6398 - 6410     | R.VAGSVTELIQAAEAMK.G        | 1618.87752 | 2 | 1.62E-07 | 0.98 | 5.79 | - | 2176.7 |
| AHQ-1-1, 6415 - 6417     | R.VAGSVTELIQAAEAMK.G        | 1618.87752 | 2 | 7.11E-07 | 0.98 | 5.11 | - | 2292.1 |
| AHQ-1-1, 6553            | R.VAGSVTELIQAAEAMK.G        | 1618.87752 | 2 | 1.06E-07 | 0.85 | 2.96 | - | 877.4  |
| AHQ-1-9, 6346            | R.VAGSVTELIQAAEAMK.G        | 1618.87752 | 2 | 9.22E-05 | 0.96 | 4.20 | - | 1692.4 |
| AHQ-1-9, 5232            | R.VAGSVTELIQAAEAM"K.G       | 1634.87692 | 2 | 1.14E-05 | 0.92 | 4.00 | - | 971.5  |
| AHQ-1-4, 3708            | K.VEHGSVALPAMR.S            | 1380.64144 | 2 | 7.06E-07 | 0.89 | 3.07 | - | 1020.3 |
| AHQ-1-2, 6285 - 6353     | K.VGAIPANALDDGQWSQGLISAAR.M | 2311.53959 | 2 | 7.89E-04 | 0.93 | 4.47 | - | 912.7  |
| AHQ-1-3, 6025 - 6089     | K.VGAIPANALDDGQWSQGLISAAR.M | 2311.53959 | 2 | 1.14E-08 | 0.88 | 4.34 | - | 477.2  |
| AHQ-1-2, 6109 - 6149     | K.VGAIPANALDDGQWSQGLISAAR.M | 2311.53959 | 2 | 8.24E-11 | 0.94 | 4.83 | - | 661.5  |
| AHQ-1-5, 5894 - 5953     | K.VGAIPANALDDGQWSQGLISAAR.M | 2311.53959 | 2 | 4.36E-09 | 0.94 | 4.37 | - | 1014.4 |
| AHQ-1-3, 6161            | K.VGAIPANALDDGQWSQGLISAAR.M | 2311.53959 | 2 | 2.90E-06 | 0.80 | 3.61 | - | 443.9  |
| AHQ-1-1, 5996 - 6063     | K.VGAIPANALDDGQWSQGLISAAR.M | 2311.53959 | 2 | 2.44E-08 | 0.90 | 4.44 | - | 585.3  |
| AHQ-1-13, 5453 - 5517    | K.VGAIPANALDDGQWSQGLISAAR.M | 2311.53959 | 2 | 1.73E-09 | 0.90 | 4.03 | - | 793.3  |
| AHQ-1-5, 6033 - 6113     | K.VGAIPANALDDGQWSQGLISAAR.M | 2311.53959 | 2 | 1.26E-11 | 0.96 | 5.32 | - | 873.0  |
| AHQ-1-2, 5979 - 6025     | K.VGAIPANALDDGQWSQGLISAAR.M | 2311.53959 | 2 | 4.32E-11 | 0.97 | 5.54 | - | 1051.0 |
| AHQ-1-1, 5939 - 6003     | K.VGAIPANALDDGQWSQGLISAAR.M | 2311.53959 | 2 | 2.41E-10 | 0.95 | 4.97 | - | 816.4  |
| AHQ-1-5, 6239 - 6250     | K.VGAIPANALDDGQWSQGLISAAR.M | 2311.53959 | 2 | 2.09E-06 | 0.75 | 3.04 | - | 420.4  |
| AHQ-1-2, 5911 - 5955     | K.VGAIPANALDDGQWSQGLISAAR.M | 2311.53959 | 2 | 3.57E-07 | 0.93 | 4.62 | - | 755.7  |
| AHQ-1-7, 6021 - 6100     | K.VGAIPANALDDGQWSQGLISAAR.M | 2311.53959 | 2 | 5.69E-08 | 0.96 | 5.82 | - | 822.5  |
| AHQ-1-4, 6272            | K.VGAIPANALDDGQWSQGLISAAR.M | 2311.53959 | 2 | 7.83E-04 | 0.79 | 3.22 | - | 452.1  |
| AHQ-1-4, 6138 - 6215     | K.VGAIPANALDDGQWSQGLISAAR.M | 2311.53959 | 2 | 1.08E-09 | 0.96 | 5.21 | - | 1145.3 |
| AHQ-1-7, 5880            | K.VGAIPANALDDGQWSQGLISAAR.M | 2311.53959 | 2 | 8.63E-06 | 0.88 | 4.06 | - | 584.9  |
| AHQ-1-1, 5837 - 5899     | K.VGAIPANALDDGQWSQGLISAAR.M | 2311.53959 | 2 | 4.24E-09 | 0.88 | 4.16 | - | 393.8  |
| AHQ-1-4, 6043            | K.VGAIPANALDDGQWSQGLISAAR.M | 2311.53959 | 2 | 3.85E-05 | 0.83 | 3.51 | - | 612.6  |
| AHQ-1-9, 5656 - 5683     | K.VGAIPANALDDGQWSQGLISAAR.M | 2311.53959 | 2 | 2.08E-07 | 0.93 | 4.95 | - | 623.4  |
| AHQ-1-11, 5255           | K.VGAIPANALDDGQWSQGLISAAR.M | 2311.53959 | 2 | 1.79E-06 | 0.49 | 2.75 | - | 367.5  |
| AHQ-1-4, 5924 - 5938     | K.VGAIPANALDDGQWSQGLISAAR.M | 2311.53959 | 2 | 7.50E-08 | 0.96 | 4.96 | - | 1186.2 |
| AHQ-1-4, 5800            | K.VGAIPANALDDGQWSQGLISAAR.M | 2311.53959 | 2 | 2.47E-07 | 0.87 | 3.81 | - | 599.5  |
| AHQ-1-9, 5898 - 5935     | K.VGAIPANALDDGQWSQGLISAAR.M | 2311.53959 | 2 | 9.16E-11 | 0.97 | 6.04 | - | 1089.7 |
| AHQ-1-11, 5359 - 5426    | K.VGAIPANALDDGQWSQGLISAAR.M | 2311.53959 | 2 | 1.21E-06 | 0.96 | 5.24 | - | 934.2  |
| AHQ-1-1, 5821            | K.VGAIPANALDDGQWSQGLISAAR.M | 2311.53959 | 3 | 4.16E-06 | 0.77 | 3.18 | - | 1005.2 |
| AHQ-1-1, 5761 - 5825     | K.VGAIPANALDDGQWSQGLISAAR.M | 2311.53959 | 2 | 4.86E-04 | 0.69 | 3.43 | - | 352.5  |
| AHQ-1-3, 5941 - 5949     | K.VGAIPANALDDGQWSQGLISAAR.M | 2311.53959 | 2 | 3.15E-11 | 0.91 | 4.53 | - | 440.0  |
| AHQ-1-12, 5619           | K.VGAIPANALDDGQWSQGLISAAR.M | 2311.53959 | 2 | 1.41E-06 | 0.83 | 3.96 | - | 485.7  |
| AHQ-1-9, 6051            | K.VGAIPANALDDGQWSQGLISAAR.M | 2311.53959 | 2 | 3.16E-05 | 0.51 | 2.97 | - | 208.7  |
| AHQ-1-3, 5786 - 5857     | K.VGAIPANALDDGQWSQGLISAAR.M | 2311.53959 | 2 | 8.92E-08 | 0.96 | 5.63 | - | 977.5  |
| AHQ-1-10, 5207 - 5287    | K.VGAIPANALDDGQWSQGLISAAR.M | 2311.53959 | 2 | 4.37E-08 | 0.95 | 5.79 | - | 649.7  |
| AHQ-1-6, 5788 - 5814     | K.VGAIPANALDDGQWSQGLISAAR.M | 2311.53959 | 2 | 1.35E-06 | 0.95 | 4.33 | - | 1125.7 |
| AHQ-1-6, 5894            | K.VGAIPANALDDGQWSQGLISAAR.M | 2311.53959 | 2 | 1.42E-09 | 0.95 | 4.75 | - | 761.5  |
| AHQ-1-6, 5990            | K.VGAIPANALDDGQWSQGLISAAR.M | 2311.53959 | 2 | 7.17E-11 | 0.94 | 5.00 | - | 673.5  |
| AHQ-1-6, 6100            | K.VGAIPANALDDGQWSQGLISAAR.M | 2311.53959 | 2 | 9.10E-11 | 0.95 | 5.01 | - | 767.9  |
| AHQ-1-2, 6114 - 6189     | K.VGAIPANALDDGQWSQGLISAAR.M | 2311.53959 | 3 | 3.02E-05 | 0.95 | 4.73 | - | 1627.7 |
| AHQ-1-8, 5962            | K.VGAIPANALDDGQWSQGLISAAR.M | 2311.53959 | 2 | 2.87E-12 | 0.96 | 5.36 | - | 991.2  |
| AHQ-1-4, 3892            | K.VGDDPAVWLK.N              | 1228.37879 | 2 | 7.77E-09 | 0.92 | 3.71 | - | 903.0  |
| AHQ-1-2, 4026            | K.VGDDPAVWLK.N              | 1228.37879 | 2 | 3.52E-08 | 0.93 | 3.82 | - | 884.8  |
| AHQ-1-1, 3959            | K.VGDDPAVWLK.N              | 1228.37879 | 2 | 7.32E-08 | 0.94 | 4.16 | - | 879.7  |
| AHQ-1-3, 3825 - 3893     | K.VGDDPAVWLK.N              | 1228.37879 | 2 | 7.25E-08 | 0.92 | 3.68 | - | 842.6  |
| AHQ-1-7, 3792 - 3840     | K.VGDDPAVWLK.N              | 1228.37879 | 2 | 5.40E-04 | 0.90 | 3.27 | - | 989.9  |
| AHQ-1-2, 3963 - 4037     | K.VGDDPAVWLK.N              | 1228.37879 | 2 | 5.34E-09 | 0.94 | 4.32 | - | 897.7  |
| AHQ-1-6, 3710 - 3754     | K.VGDDPAVWLK.N              | 1228.37879 | 2 | 3.11E-08 | 0.89 | 3.30 | - | 771.0  |
| AHQ-1-3, 3874            | K.VGDDPAVWLK.N              | 1228.37879 | 2 | 3.12E-08 | 0.93 | 4.37 | - | 770.6  |
| AHQ-1-5, 3747            | K.VGDDPAVWLK.N              | 1228.37879 | 2 | 5.23E-09 | 0.92 | 3.99 | - | 825.3  |
| AHQ-1-2, 3417            | K.VGDDPAVWLKNSAK.V          | 1628.81068 | 2 | 9.30E-07 | 0.81 | 3.31 | - | 571.9  |
| AHQ-1-4, 2386 - 2403     | K.VLGEAMTGISQNAK.N          | 1435.62901 | 2 | 1.27E-04 | 0.94 | 4.27 | - | 1209.6 |
| AHQ-1-4, 3362            | K.VLGEAMTGISQNAK.N          | 1419.62961 | 2 | 6.13E-12 | 0.94 | 3.67 | - | 1418.1 |
| AHQ-1-7, 3076            | K.VLGEAMTGISQNAK.N          | 1419.62961 | 2 | 1.12E-08 | 0.96 | 3.81 | - | 1677.0 |
| AHQ-1-4, 3196 - 3231     | K.VLGEAMTGISQNAK.N          | 1419.62961 | 1 | 1.13E-04 | 0.77 | 3.13 | - | 478.2  |
| AHQ-1-3, 3165 - 3166     | K.VLGEAMTGISQNAK.N          | 1419.62961 | 1 | 8.90E-04 | 0.55 | 2.03 | - | 538.7  |
| AHQ-1-14 - , 2371 - 2451 | K.VLGEAMTGISQNAK.N          | 1435.62901 | 2 | 1.48E-04 | 0.95 | 3.83 | - | 1575.4 |
| AHQ-1-2, 3286            | K.VLGEAMTGISQNAK.N          | 1419.62961 | 1 | 6.52E-07 | 0.70 | 3.11 | - | 516.3  |
| AHQ-1-2, 3259 - 3303     | K.VLGEAMTGISQNAK.N          | 1419.62961 | 2 | 2.20E-08 | 0.97 | 4.99 | - | 1729.8 |
| AHQ-1-2, 2589            | K.VLGEAMTGISQNAK.N          | 1435.62901 | 2 | 3.30E-06 | 0.95 | 3.57 | - | 1598.2 |
| AHQ-1-3, 2495            | K.VLGEAMTGISQNAK.N          | 1435.62901 | 2 | 9.99E-05 | 0.93 | 3.54 | - | 1099.7 |
| AHQ-1-2, 2478            | K.VLGEAMTGISQNAK.N          | 1435.62901 | 2 | 2.85E-07 | 0.90 | 4.07 | - | 753.2  |

|                       |                                   |            |   |          |      |      |   |        |
|-----------------------|-----------------------------------|------------|---|----------|------|------|---|--------|
| AHQ-1-4, 3186         | K.VLGEAMTGISQNAK.N                | 1419.62961 | 2 | 2.87E-09 | 0.97 | 3.62 | - | 2373.8 |
| AHQ-1-2, 3430 - 3433  | K.VLGEAMTGISQNAK.N                | 1419.62961 | 2 | 4.68E-07 | 0.97 | 3.94 | - | 1945.7 |
| AHQ-1-1, 3275 - 3291  | K.VLGEAMTGISQNAK.N                | 1419.62961 | 2 | 6.72E-05 | 0.98 | 5.41 | - | 1788.4 |
| AHQ-1-1, 4901         | K.VLGEAMTGISQNAKGNLPEFGDAISTASK.A | 3038.33659 | 3 | 3.51E-04 | 0.85 | 4.31 | - | 362.9  |
| AHQ-1-4, 5514 - 5582  | K.VLGEAMTGISQNAKGNLPEFGDAISTASK.A | 3022.33719 | 3 | 6.56E-11 | 0.83 | 4.11 | - | 575.9  |
| AHQ-1-3, 5401 - 5465  | K.VLGEAMTGISQNAKGNLPEFGDAISTASK.A | 3022.33719 | 3 | 7.35E-10 | 0.93 | 5.25 | - | 935.3  |
| AHQ-1-2, 5018 - 5089  | K.VLGEAMTGISQNAKGNLPEFGDAISTASK.A | 3038.33659 | 3 | 5.88E-05 | 0.87 | 4.33 | - | 604.5  |
| AHQ-1-1, 4991         | K.VLGEAMTGISQNAKGNLPEFGDAISTASK.A | 3038.33659 | 3 | 1.59E-05 | 0.91 | 4.56 | - | 880.7  |
| AHQ-1-1, 5472         | K.VLGEAMTGISQNAKGNLPEFGDAISTASK.A | 3022.33719 | 3 | 8.22E-04 | 0.90 | 4.49 | - | 961.2  |
| AHQ-1-2, 5585 - 5649  | K.VLGEAMTGISQNAKGNLPEFGDAISTASK.A | 3022.33719 | 3 | 3.01E-08 | 0.93 | 5.28 | - | 780.3  |
| AHQ-1-3, 1625 - 1657  | K.VLVQNAAGSQEKL                   | 1244.37976 | 2 | 8.18E-07 | 0.93 | 3.63 | - | 1079.3 |
| AHQ-1-6, 1791         | K.VLVQNAAGSQEKL                   | 1244.37976 | 2 | 1.41E-07 | 0.92 | 3.59 | - | 1064.4 |
| AHQ-1-6, 1596 - 1614  | K.VLVQNAAGSQEKL                   | 1244.37976 | 2 | 1.54E-09 | 0.90 | 3.51 | - | 865.7  |
| AHQ-1-1, 1932 - 2012  | K.VLVQNAAGSQEKL                   | 1244.37976 | 2 | 6.08E-04 | 0.83 | 2.83 | - | 904.2  |
| AHQ-1-2, 1758 - 1959  | K.VLVQNAAGSQEKL                   | 1244.37976 | 1 | 3.67E-05 | 0.33 | 2.32 | - | 454.4  |
| AHQ-1-3, 1717 - 1790  | K.VLVQNAAGSQEKL                   | 1244.37976 | 2 | 6.92E-06 | 0.90 | 3.53 | - | 902.9  |
| AHQ-1-2, 1665 - 1730  | K.VLVQNAAGSQEKL                   | 1244.37976 | 2 | 1.71E-07 | 0.94 | 3.82 | - | 1074.6 |
| AHQ-1-3, 1850 - 1929  | K.VLVQNAAGSQEKL                   | 1244.37976 | 2 | 2.55E-08 | 0.90 | 3.30 | - | 969.5  |
| AHQ-1-5, 1543 - 1606  | K.VLVQNAAGSQEKL                   | 1244.37976 | 2 | 2.83E-06 | 0.92 | 3.66 | - | 1009.0 |
| AHQ-1-2, 1989         | K.VLVQNAAGSQEKL                   | 1244.37976 | 2 | 6.51E-08 | 0.94 | 3.43 | - | 1360.8 |
| AHQ-1-4, 1611 - 1670  | K.VLVQNAAGSQEKL                   | 1244.37976 | 2 | 4.03E-06 | 0.93 | 3.62 | - | 1170.8 |
| AHQ-1-4, 1712 - 1835  | K.VLVQNAAGSQEKL                   | 1244.37976 | 1 | 1.22E-05 | 0.33 | 2.35 | - | 293.1  |
| AHQ-1-4, 1730 - 1790  | K.VLVQNAAGSQEKL                   | 1244.37976 | 2 | 3.65E-04 | 0.76 | 3.00 | - | 649.9  |
| AHQ-1-4, 1874 - 1952  | K.VLVQNAAGSQEKL                   | 1244.37976 | 2 | 2.99E-10 | 0.87 | 3.38 | - | 703.9  |
| AHQ-1-6, 1694         | K.VLVQNAAGSQEKL                   | 1244.37976 | 2 | 2.13E-07 | 0.81 | 3.08 | - | 622.0  |
| AHQ-1-2, 1793 - 1857  | K.VLVQNAAGSQEKL                   | 1244.37976 | 2 | 1.72E-06 | 0.92 | 3.94 | - | 1002.5 |
| AHQ-1-3, 4413         | K.VM*VTNVTSLLK.T                  | 1221.49262 | 2 | 4.91E-05 | 0.80 | 2.99 | - | 666.6  |
| AHQ-1-2, 4569         | K.VM*VTNVTSLLK.T                  | 1221.49262 | 2 | 1.86E-04 | 0.76 | 3.04 | - | 730.3  |
| AHQ-1-5, 4679 - 4689  | K.VM*VTNVTSLLK.T                  | 1205.49322 | 2 | 1.16E-06 | 0.96 | 4.55 | - | 1155.4 |
| AHQ-1-2, 4937         | K.VM*VTNVTSLLK.T                  | 1205.49322 | 2 | 5.72E-06 | 0.91 | 3.77 | - | 839.7  |
| AHQ-1-4, 4828 - 4838  | K.VM*VTNVTSLLK.T                  | 1205.49322 | 2 | 5.29E-07 | 0.94 | 4.30 | - | 917.5  |
| AHQ-1-2, 4958         | K.VM*VTNVTSLLK.T                  | 1221.49262 | 2 | 5.75E-04 | 0.63 | 2.82 | - | 736.1  |
| AHQ-1-2, 5030         | K.VM*VTNVTSLLK.T                  | 1205.49322 | 2 | 4.18E-05 | 0.88 | 3.59 | - | 728.5  |
| AHQ-1-7, 4629 - 4646  | K.VM*VTNVTSLLK.T                  | 1205.49322 | 2 | 7.24E-05 | 0.86 | 3.43 | - | 681.7  |
| AHQ-1-3, 4785         | K.VM*VTNVTSLLK.T                  | 1205.49322 | 2 | 2.02E-04 | 0.92 | 4.03 | - | 822.3  |
| AHQ-1-4, 4455 - 4471  | K.VM*VTNVTSLLK.T                  | 1221.49262 | 2 | 5.87E-04 | 0.89 | 3.53 | - | 768.8  |
| AHQ-1-6, 4255 - 4332  | K.VM*VTNVTSLLK.T                  | 1221.49262 | 2 | 8.27E-06 | 0.85 | 3.30 | - | 726.3  |
| AHQ-1-1, 4489         | K.VM*VTNVTSLLK.T                  | 1221.49262 | 2 | 3.24E-04 | 0.62 | 2.65 | - | 514.7  |
| AHQ-1-1, 4839 - 4840  | K.VM*VTNVTSLLK.T                  | 1205.49322 | 2 | 1.60E-04 | 0.93 | 4.23 | - | 921.2  |
| AHQ-1-6, 4610         | K.VM*VTNVTSLLK.T                  | 1205.49322 | 2 | 1.37E-05 | 0.91 | 3.97 | - | 765.8  |
| AHQ-1-5, 4314         | K.VM*VTNVTSLLK.T                  | 1221.49262 | 2 | 6.62E-07 | 0.81 | 3.38 | - | 625.4  |
| AHQ-1-11, 2720        | R.VQELGHGCAALVTK.A                | 1484.70307 | 2 | 5.09E-04 | 0.95 | 3.75 | - | 1450.9 |
| AHQ-1-6, 2706         | R.VQELGHGCAALVTK.A                | 1484.70307 | 2 | 1.24E-04 | 0.96 | 4.42 | - | 1465.1 |
| AHQ-1-1, 2909 - 2980  | R.VQELGHGCAALVTK.A                | 1484.70307 | 2 | 3.93E-04 | 0.94 | 4.34 | - | 1014.7 |
| AHQ-1-4, 2806         | R.VQELGHGCAALVTK.A                | 1484.70307 | 2 | 6.62E-05 | 0.98 | 5.05 | - | 1928.1 |
| AHQ-1-3, 2823         | R.VQELGHGCAALVTK.A                | 1484.70307 | 1 | 5.48E-06 | 0.83 | 3.80 | - | 497.4  |
| AHQ-1-1, 2967         | R.VQELGHGCAALVTK.A                | 1484.70307 | 2 | 2.71E-08 | 0.97 | 5.05 | - | 1626.2 |
| AHQ-1-7, 2726         | R.VQELGHGCAALVTK.A                | 1484.70307 | 2 | 9.66E-04 | 0.94 | 3.81 | - | 1298.1 |
| AHQ-1-2, 2935         | R.VQELGHGCAALVTK.A                | 1484.70307 | 1 | 3.13E-07 | 0.84 | 3.78 | - | 578.8  |
| AHQ-1-2, 2914         | R.VQELGHGCAALVTK.A                | 1484.70307 | 2 | 2.98E-04 | 0.95 | 4.38 | - | 1194.2 |
| AHQ-1-2, 2739 - 2809  | K.VSHVLAALQAGNR.G                 | 1336.52525 | 2 | 9.66E-09 | 0.97 | 4.69 | - | 1756.2 |
| AHQ-1-2, 2806         | K.VSHVLAALQAGNR.G                 | 1336.52525 | 1 | 5.54E-06 | 0.88 | 3.54 | - | 509.2  |
| AHQ-1-5, 2554 - 2570  | K.VSHVLAALQAGNR.G                 | 1336.52525 | 2 | 6.68E-05 | 0.90 | 3.17 | - | 1006.3 |
| AHQ-1-4, 2660 - 2730  | K.VSHVLAALQAGNR.G                 | 1336.52525 | 2 | 3.65E-11 | 0.96 | 4.12 | - | 1669.6 |
| AHQ-1-4, 2707         | K.VSHVLAALQAGNR.G                 | 1336.52525 | 1 | 6.94E-06 | 0.88 | 3.37 | - | 553.7  |
| AHQ-1-5, 2562         | K.VSHVLAALQAGNR.G                 | 1336.52525 | 1 | 1.25E-04 | 0.34 | 2.24 | - | 278.3  |
| AHQ-1-7, 2600         | K.VSHVLAALQAGNR.G                 | 1336.52525 | 1 | 3.50E-06 | 0.67 | 2.62 | - | 482.3  |
| AHQ-1-6, 2676         | K.VSHVLAALQAGNR.G                 | 1336.52525 | 2 | 1.57E-04 | 0.95 | 3.33 | - | 1694.5 |
| AHQ-1-7, 2596         | K.VSHVLAALQAGNR.G                 | 1336.52525 | 2 | 9.46E-07 | 0.94 | 3.65 | - | 1311.9 |
| AHQ-1-3, 2653 - 2727  | K.VSHVLAALQAGNR.G                 | 1336.52525 | 2 | 3.06E-05 | 0.96 | 4.19 | - | 1591.3 |
| AHQ-1-4, 2714         | K.VSHVLAALQAGNR.G                 | 1336.52525 | 2 | 8.35E-09 | 0.98 | 5.20 | - | 1828.5 |
| AHQ-1-3, 2706         | K.VSHVLAALQAGNR.G                 | 1336.52525 | 1 | 1.40E-07 | 0.80 | 3.35 | - | 423.6  |
| AHQ-1-1, 2888         | K.VSHVLAALQAGNR.G                 | 1336.52525 | 1 | 2.18E-04 | 0.39 | 2.03 | - | 479.9  |
| AHQ-1-1, 2887         | K.VSHVLAALQAGNR.G                 | 1336.52525 | 2 | 7.00E-07 | 0.97 | 4.36 | - | 2118.4 |
| AHQ-1-6, 2570 - 2574  | K.VSHVLAALQAGNR.G                 | 1336.52525 | 2 | 2.31E-07 | 0.96 | 4.19 | - | 1713.7 |
| AHQ-1-4, 2716         | K.VSHVLAALQAGNR.G                 | 1336.52525 | 1 | 1.63E-04 | 0.78 | 3.28 | - | 377.2  |
| AHQ-1-7, 6934 - 6953  | K.VSQMAQYFPEPLTAAVGAASK.T         | 2183.51313 | 2 | 5.31E-05 | 0.95 | 4.84 | - | 870.0  |
| AHQ-1-6, 6734 - 6750  | K.VSQMAQYFPEPLTAAVGAASK.T         | 2183.51313 | 2 | 2.87E-07 | 0.95 | 5.14 | - | 763.9  |
| AHQ-1-6, 5927         | K.VSQMAQYFPEPLTAAVGAASK.T         | 2199.51253 | 2 | 2.02E-07 | 0.94 | 4.06 | - | 1244.8 |
| AHQ-1-3, 5922 - 5989  | K.VSQMAQYFPEPLTAAVGAASK.T         | 2199.51253 | 2 | 1.75E-05 | 0.92 | 4.62 | - | 797.0  |
| AHQ-1-12, 6307        | K.VSQMAQYFPEPLTAAVGAASK.T         | 2183.51313 | 2 | 5.81E-04 | 0.76 | 3.71 | - | 335.1  |
| AHQ-1-2, 7119         | K.VSQMAQYFPEPLTAAVGAASK.T         | 2183.51313 | 2 | 4.52E-11 | 0.98 | 6.17 | - | 1260.1 |
| AHQ-1-2, 6985 - 7055  | K.VSQMAQYFPEPLTAAVGAASK.T         | 2183.51313 | 2 | 1.14E-05 | 0.96 | 5.51 | - | 954.8  |
| AHQ-1-10, 5987 - 6032 | K.VSQMAQYFPEPLTAAVGAASK.T         | 2183.51313 | 2 | 6.13E-04 | 0.87 | 3.82 | - | 777.2  |
| AHQ-1-2, 6894 - 6973  | K.VSQMAQYFPEPLTAAVGAASK.T         | 2183.51313 | 2 | 8.03E-07 | 0.96 | 5.74 | - | 853.3  |
| AHQ-1-2, 6886         | K.VSQMAQYFPEPLTAAVGAASK.T         | 2183.51313 | 2 | 3.91E-09 | 0.93 | 4.51 | - | 801.0  |
| AHQ-1-11, 6102 - 6107 | K.VSQMAQYFPEPLTAAVGAASK.T         | 2183.51313 | 2 | 7.42E-05 | 0.89 | 4.45 | - | 493.8  |
| AHQ-1-4, 6100         | K.VSQMAQYFPEPLTAAVGAASK.T         | 2199.51253 | 2 | 1.18E-04 | 0.88 | 3.54 | - | 808.5  |
| AHQ-1-4, 6867         | K.VSQMAQYFPEPLTAAVGAASK.T         | 2183.51313 | 2 | 2.99E-04 | 0.87 | 4.25 | - | 549.7  |
| AHQ-1-4, 6958         | K.VSQMAQYFPEPLTAAVGAASK.T         | 2183.51313 | 3 | 2.16E-06 | 0.82 | 3.71 | - | 931.1  |
| AHQ-1-11, 5395        | K.VSQMAQYFPEPLTAAVGAASK.T         | 2199.51253 | 2 | 2.24E-06 | 0.87 | 4.04 | - | 651.0  |
| AHQ-1-3, 6854 - 6929  | K.VSQMAQYFPEPLTAAVGAASK.T         | 2183.51313 | 2 | 6.82E-06 | 0.92 | 5.16 | - | 487.3  |
| AHQ-1-3, 6797 - 6805  | K.VSQMAQYFPEPLTAAVGAASK.T         | 2183.51313 | 3 | 2.38E-07 | 0.97 | 5.14 | - | 2147.5 |
| AHQ-1-3, 5973         | K.VSQMAQYFPEPLTAAVGAASK.T         | 2199.51253 | 2 | 2.30E-05 | 0.92 | 4.36 | - | 775.3  |
| AHQ-1-4, 7079 - 7142  | K.VSQMAQYFPEPLTAAVGAASK.T         | 2183.51313 | 2 | 1.61E-08 | 0.97 | 5.34 | - | 1222.6 |
| AHQ-1-3, 6707 - 6789  | K.VSQMAQYFPEPLTAAVGAASK.T         | 2183.51313 | 2 | 2.15E-06 | 0.96 | 5.71 | - | 857.6  |
| AHQ-1-3, 6119         | K.VSQMAQYFPEPLTAAVGAASK.T         | 2199.51253 | 2 | 1.51E-05 | 0.82 | 3.83 | - | 527.9  |
| AHQ-1-3, 6010         | K.VSQMAQYFPEPLTAAVGAASK.T         | 2199.51253 | 2 | 3.24E-06 | 0.93 | 4.78 | - | 726.4  |
| AHQ-1-5, 7098         | K.VSQMAQYFPEPLTAAVGAASK.T         | 2183.51313 | 2 | 5.47E-06 | 0.76 | 2.93 | - | 591.0  |
| AHQ-1-3, 5990 - 5997  | K.VSQMAQYFPEPLTAAVGAASK.T         | 2199.51253 | 3 | 4.01E-10 | 0.93 | 4.44 | - | 1353.0 |
| AHQ-1-5, 6911 - 6913  | K.VSQMAQYFPEPLTAAVGAASK.T         | 2183.51313 | 2 | 1.27E-06 | 0.97 | 6.35 | - | 1006.4 |
| AHQ-1-7, 5950         | K.VSQMAQYFPEPLTAAVGAASK.T         | 2199.51253 | 2 | 3.14E-05 | 0.95 | 4.80 | - | 981.5  |
| AHQ-1-1, 6807 - 6833  | K.VSQMAQYFPEPLTAAVGAASK.T         | 2183.51313 | 2 | 2.52E-08 | 0.96 | 5.55 | - | 772.8  |
| AHQ-1-1, 6677 - 6735  | K.VSQMAQYFPEPLTAAVGAASK.T         | 2183.51313 | 2 | 2.18E-07 | 0.96 | 5.31 | - | 903.5  |
| AHQ-1-5, 6037 - 6038  | K.VSQMAQYFPEPLTAAVGAASK.T         | 2199.51253 | 2 | 1.31E-04 | 0.96 | 5.09 | - | 1253.6 |
| AHQ-1-14 - , 6418     | K.VSQMAQYFPEPLTAAVGAASK.T         | 2183.51313 | 2 | 1.10E-05 | 0.95 | 5.26 | - | 823.6  |
| AHQ-1-1, 5989         | K.VSQMAQYFPEPLTAAVGAASK.T         | 2199.51253 | 2 | 1.22E-04 | 0.95 | 4.83 | - | 1028.9 |
| AHQ-1-2, 4745         | K.VVAPTSSPVCQEQQLVEAGR.L          | 2142.41919 | 2 | 8.01E-06 | 0.90 | 4.23 | - | 415.6  |
| AHQ-1-5, 4818 - 4897  | K.VVAPTSSPVCQEQQLVEAGR.L          | 2142.41919 | 2 | 2.95E-11 | 0.93 | 4.74 | - | 492.3  |
| AHQ-1-5, 4710 - 4715  | K.VVAPTSSPVCQEQQLVEAGR.L          | 2142.41919 | 2 | 6.16E-07 | 0.96 | 5.05 | - | 1010.2 |
| AHQ-1-14, 5353 - 5360 | K.VVAPTSSPVCQEQQLVEAGR.L          | 2142.41919 | 2 | 7.07E-07 | 0.92 | 4.22 | - | 765.9  |
| AHQ-1-5, 4601         | K.VVAPTSSPVCQEQQLVEAGR.L          | 2142.41919 | 2 | 1.54E-07 | 0.93 | 4.70 | - | 537.3  |
| AHQ-1-11, 4307        | K.VVAPTSSPVCQEQQLVEAGR.L          | 2142.41919 | 2 | 1.99E-04 | 0.81 | 3.86 | - | 381.3  |
| AHQ-1-9, 4582         | K.VVAPTSSPVCQEQQLVEAGR.L          | 2142.41919 | 2 | 2.48E-07 | 0.95 | 4.91 | - | 871.9  |
| AHQ-1-4, 5110 - 5124  | K.VVAPTSSPVCQEQQLVEAGR.L          | 2142.41919 | 2 | 3.94E-10 | 0.85 | 3.96 | - | 410.3  |
| AHQ-1-1, 5065         | K.VVAPTSSPVCQEQQLVEAGR.L          | 2142.41919 | 2 | 6.11E-12 | 0.93 | 4.93 | - | 478.1  |
| AHQ-1-4, 4979         | K.VVAPTSSPVCQEQQLVEAGR.L          | 2142.41919 | 2 | 7.16E-12 | 0.92 | 4.15 | - | 604.5  |

|                            |                                                    |            |   |          |       |        |       |         |
|----------------------------|----------------------------------------------------|------------|---|----------|-------|--------|-------|---------|
| AHQ-1-2, 5175 - 5178       | K.VWAPTISPPVCEQLVEAGR.L                            | 2142.41919 | 2 | 9.72E-12 | 0.94  | 4.82   | -     | 689.3   |
| AHQ-1-4, 4795 - 4870       | K.VWAPTISPPVCEQLVEAGR.L                            | 2142.41919 | 2 | 4.69E-07 | 0.96  | 5.34   | -     | 691.0   |
| AHQ-1-1, 4896              | K.VWAPTISPPVCEQLVEAGR.L                            | 2142.41919 | 2 | 2.95E-05 | 0.52  | 2.75   | -     | 261.9   |
| AHQ-1-4, 4670              | K.VWAPTISPPVCEQLVEAGR.L                            | 2142.41919 | 2 | 1.49E-08 | 0.91  | 4.57   | -     | 408.0   |
| AHQ-1-1, 4723              | K.VWAPTISPPVCEQLVEAGR.L                            | 2142.41919 | 2 | 7.78E-05 | 0.92  | 4.21   | -     | 717.2   |
| AHQ-1-6, 4622 - 4623       | K.VWAPTISPPVCEQLVEAGR.L                            | 2142.41919 | 2 | 1.72E-07 | 0.97  | 5.87   | -     | 1027.9  |
| AHQ-1-1, 4620              | K.VWAPTISPPVCEQLVEAGR.L                            | 2142.41919 | 2 | 5.70E-07 | 0.91  | 4.55   | -     | 415.3   |
| AHQ-1-2, 5035 - 5049       | K.VWAPTISPPVCEQLVEAGR.L                            | 2142.41919 | 2 | 4.54E-13 | 0.96  | 5.06   | -     | 904.8   |
| AHQ-1-14 - , 4544          | K.VWAPTISPPVCEQLVEAGR.L                            | 2142.41919 | 2 | 2.27E-04 | 0.55  | 2.76   | -     | 309.7   |
| AHQ-1-6, 4959              | K.VWAPTISPPVCEQLVEAGR.L                            | 2142.41919 | 2 | 1.10E-04 | 0.39  | 2.76   | -     | 235.2   |
| AHQ-1-12, 4467             | K.VWAPTISPPVCEQLVEAGR.L                            | 2142.41919 | 2 | 2.48E-07 | 0.95  | 5.06   | -     | 738.4   |
| AHQ-1-2, 4861 - 4930       | K.VWAPTISPPVCEQLVEAGR.L                            | 2142.41919 | 2 | 1.09E-04 | 0.93  | 4.47   | -     | 627.1   |
| AHQ-1-3, 5042 - 5110       | K.VWAPTISPPVCEQLVEAGR.L                            | 2142.41919 | 2 | 4.97E-04 | 0.64  | 3.52   | -     | 407.3   |
| AHQ-1-3, 4902 - 4971       | K.VWAPTISPPVCEQLVEAGR.L                            | 2142.41919 | 2 | 4.42E-13 | 0.89  | 4.02   | -     | 523.0   |
| AHQ-1-3, 4741 - 4750       | K.VWAPTISPPVCEQLVEAGR.L                            | 2142.41919 | 3 | 4.98E-10 | 0.91  | 4.48   | -     | 968.1   |
| AHQ-1-3, 4733              | K.VWAPTISPPVCEQLVEAGR.L                            | 2142.41919 | 2 | 1.47E-05 | 0.93  | 4.49   | -     | 649.0   |
| AHQ-1-10, 4183             | K.VWAPTISPPVCEQLVEAGR.L                            | 2142.41919 | 2 | 1.04E-04 | 0.84  | 3.71   | -     | 370.2   |
| AHQ-1-5, 5049              | K.VWAPTISPPVCEQLVEAGR.L                            | 2142.41919 | 2 | 1.38E-05 | 0.77  | 3.81   | -     | 364.1   |
| AHQ-1-3, 4607              | K.VWAPTISPPVCEQLVEAGR.L                            | 2142.41919 | 2 | 2.98E-04 | 0.66  | 3.78   | -     | 118.0   |
| AHQ-1-8, 4667              | K.VWAPTISPPVCEQLVEAGR.L                            | 2142.41919 | 2 | 2.43E-08 | 0.91  | 4.53   | -     | 555.7   |
| gj4501885[refl]NP_001092.1 | beta actin; beta cytoskeletal actin [Homo sapiens] |            |   | 5.55E-16 | 13.29 | 150.37 | 36.00 | 41736.5 |
| AHQ-1-14 - , 6012          | R.CPEALFQPSFLGM*ESCGIHETTFNSIM*K.C                 | 3267.67588 | 3 | 3.56E-05 | 0.91  | 4.68   | -     | 499.6   |
| AHQ-1-12, 5881 - 5907      | R.CPEALFQPSFLGM*ESCGIHETTFNSIM*K.C                 | 3267.67588 | 3 | 2.56E-05 | 0.65  | 3.38   | -     | 347.6   |
| AHQ-1-13, 5776 - 5832      | R.CPEALFQPSFLGM*ESCGIHETTFNSIM*K.C                 | 3267.67588 | 3 | 1.36E-09 | 0.94  | 5.05   | -     | 843.8   |
| AHQ-1-13, 6217 - 6237      | R.CPEALFQPSFLGM*ESCGIHETTFNSIM*K.C                 | 3251.67648 | 3 | 3.80E-08 | 0.82  | 4.64   | -     | 601.1   |
| AHQ-1-10, 6228             | R.CPEALFQPSFLGM*ESCGIHETTFNSIM*K.C                 | 3235.67708 | 3 | 4.33E-04 | 0.83  | 4.04   | -     | 568.3   |
| AHQ-1-10, 6141 - 6207      | R.CPEALFQPSFLGM*ESCGIHETTFNSIM*K.C                 | 3235.67708 | 3 | 2.03E-05 | 0.78  | 3.51   | -     | 515.4   |
| AHQ-1-10, 5991 - 6063      | R.CPEALFQPSFLGM*ESCGIHETTFNSIM*K.C                 | 3251.67648 | 3 | 4.08E-06 | 0.79  | 4.25   | -     | 576.9   |
| AHQ-1-10, 5553 - 5607      | R.CPEALFQPSFLGM*ESCGIHETTFNSIM*K.C                 | 3267.67588 | 3 | 2.82E-04 | 0.44  | 3.07   | -     | 327.6   |
| AHQ-1-9, 7036 - 7118       | R.CPEALFQPSFLGM*ESCGIHETTFNSIM*K.C                 | 3235.67708 | 3 | 5.09E-07 | 0.96  | 5.68   | -     | 1041.7  |
| AHQ-1-9, 6730 - 6795       | R.CPEALFQPSFLGM*ESCGIHETTFNSIM*K.C                 | 3251.67648 | 3 | 4.70E-04 | 0.67  | 4.04   | -     | 330.6   |
| AHQ-1-9, 6636 - 6714       | R.CPEALFQPSFLGM*ESCGIHETTFNSIM*K.C                 | 3251.67648 | 3 | 5.44E-07 | 0.64  | 3.93   | -     | 263.8   |
| AHQ-1-8, 7599              | R.CPEALFQPSFLGM*ESCGIHETTFNSIM*K.C                 | 3235.67708 | 3 | 1.44E-09 | 0.91  | 4.24   | -     | 781.7   |
| AHQ-1-8, 7311 - 7382       | R.CPEALFQPSFLGM*ESCGIHETTFNSIM*K.C                 | 3235.67708 | 3 | 4.83E-14 | 0.96  | 5.41   | -     | 1181.6  |
| AHQ-1-8, 7222 - 7290       | R.CPEALFQPSFLGM*ESCGIHETTFNSIM*K.C                 | 3235.67708 | 3 | 3.20E-12 | 0.96  | 5.37   | -     | 1130.1  |
| AHQ-1-8, 7088 - 7159       | R.CPEALFQPSFLGM*ESCGIHETTFNSIM*K.C                 | 3235.67708 | 3 | 2.09E-07 | 0.94  | 5.12   | -     | 864.8   |
| AHQ-1-8, 7079 - 7146       | R.CPEALFQPSFLGM*ESCGIHETTFNSIM*K.C                 | 3251.67648 | 3 | 7.52E-05 | 0.80  | 4.38   | -     | 529.9   |
| AHQ-1-8, 6846 - 6915       | R.CPEALFQPSFLGM*ESCGIHETTFNSIM*K.C                 | 3251.67648 | 3 | 9.56E-08 | 0.80  | 4.47   | -     | 590.3   |
| AHQ-1-8, 6755 - 6822       | R.CPEALFQPSFLGM*ESCGIHETTFNSIM*K.C                 | 3251.67648 | 3 | 1.11E-04 | 0.72  | 3.92   | -     | 386.6   |
| AHQ-1-8, 6554              | R.CPEALFQPSFLGM*ESCGIHETTFNSIM*K.C                 | 3267.67588 | 3 | 5.20E-04 | 0.73  | 3.82   | -     | 452.2   |
| AHQ-1-5, 7303              | R.CPEALFQPSFLGM*ESCGIHETTFNSIM*K.C                 | 3235.67708 | 3 | 2.28E-05 | 0.85  | 3.74   | -     | 542.5   |
| AHQ-1-8, 6402 - 6471       | R.CPEALFQPSFLGM*ESCGIHETTFNSIM*K.C                 | 3267.67588 | 3 | 1.46E-06 | 0.94  | 4.89   | -     | 938.6   |
| AHQ-1-13 - , 6157 - 6239   | R.CPEALFQPSFLGM*ESCGIHETTFNSIM*K.C                 | 3267.67588 | 3 | 6.61E-04 | 0.86  | 4.10   | -     | 524.0   |
| AHQ-1-13 - , 6495 - 6560   | R.CPEALFQPSFLGM*ESCGIHETTFNSIM*K.C                 | 3251.67648 | 3 | 1.01E-04 | 0.92  | 5.21   | -     | 731.5   |
| AHQ-1-13 - , 6623 - 6683   | R.CPEALFQPSFLGM*ESCGIHETTFNSIM*K.C                 | 3251.67648 | 3 | 3.54E-05 | 0.81  | 4.45   | -     | 545.3   |
| AHQ-1-13 - , 6757          | R.CPEALFQPSFLGM*ESCGIHETTFNSIM*K.C                 | 3251.67648 | 3 | 2.42E-04 | 0.66  | 3.54   | -     | 365.4   |
| AHQ-1-8, 7522 - 7591       | K.EKLCYALDFEQEMATAASSSSLEK.S                       | 2810.10410 | 2 | 5.24E-09 | 0.93  | 4.46   | -     | 854.5   |
| AHQ-1-8, 7487 - 7559       | K.EKLCYALDFEQEMATAASSSSLEK.S                       | 2810.10410 | 3 | 3.09E-05 | 0.93  | 5.00   | -     | 1187.0  |
| AHQ-1-8, 7628              | K.EKLCYALDFEQEMATAASSSSLEK.S                       | 2810.10410 | 3 | 1.00E-06 | 0.89  | 4.40   | -     | 845.3   |
| AHQ-1-8, 7658 - 7659       | K.EKLCYALDFEQEMATAASSSSLEK.S                       | 2810.10410 | 2 | 6.14E-08 | 0.88  | 3.86   | -     | 739.3   |
| AHQ-1-9, 7099 - 7171       | K.EKLCYALDFEQEMATAASSSSLEK.S                       | 2810.10410 | 2 | 1.66E-05 | 0.91  | 4.03   | -     | 771.0   |
| AHQ-1-8, 7250 - 7318       | K.EKLCYALDFEQEMATAASSSSLEK.S                       | 2810.10410 | 2 | 7.71E-08 | 0.89  | 4.31   | -     | 552.9   |
| AHQ-1-8, 5583 - 5658       | K.EKLCYALDFEQEMATAASSSSLEK.S                       | 2826.10350 | 3 | 1.88E-05 | 0.82  | 4.03   | -     | 599.7   |
| AHQ-1-4, 7310              | K.EKLCYALDFEQEMATAASSSSLEK.S                       | 2810.10410 | 3 | 4.32E-04 | 0.75  | 3.83   | -     | 788.6   |
| AHQ-1-8, 7528              | K.EKLCYALDFEQEMATAASSSSLEK.S                       | 2810.10410 | 2 | 1.96E-08 | 0.91  | 4.71   | -     | 854.7   |
| AHQ-1-8, 7336 - 7414       | K.EKLCYALDFEQEMATAASSSSLEK.S                       | 2810.10410 | 3 | 2.74E-05 | 0.93  | 4.91   | -     | 1325.8  |
| AHQ-1-10, 6259 - 6260      | K.EKLCYALDFEQEMATAASSSSLEK.S                       | 2810.10410 | 3 | 1.55E-06 | 0.94  | 5.21   | -     | 1159.7  |
| AHQ-1-10, 6240             | K.EKLCYALDFEQEMATAASSSSLEK.S                       | 2810.10410 | 2 | 3.14E-06 | 0.56  | 2.77   | -     | 638.5   |
| AHQ-1-8, 7386 - 7454       | K.EKLCYALDFEQEMATAASSSSLEK.S                       | 2810.10410 | 2 | 2.24E-09 | 0.89  | 3.69   | -     | 759.5   |
| AHQ-1-8, 7466 - 7534       | R.FRCPEALFQPSFLGM*ESCGIHETTFNSIM*K.C               | 3539.03813 | 3 | 5.63E-06 | 0.93  | 4.86   | -     | 988.4   |
| AHQ-1-8, 6738 - 6851       | R.FRCPEALFQPSFLGM*ESCGIHETTFNSIM*K.C               | 3555.03753 | 3 | 1.63E-08 | 0.94  | 5.61   | -     | 1089.3  |
| AHQ-1-8, 7090 - 7155       | R.FRCPEALFQPSFLGM*ESCGIHETTFNSIM*K.C               | 3539.03813 | 3 | 5.57E-11 | 0.98  | 7.44   | -     | 1997.5  |
| AHQ-1-13 - , 6581 - 6645   | R.FRCPEALFQPSFLGM*ESCGIHETTFNSIM*K.C               | 3555.03753 | 3 | 2.34E-06 | 0.88  | 4.42   | -     | 704.2   |
| AHQ-1-10, 5888 - 5959      | R.FRCPEALFQPSFLGM*ESCGIHETTFNSIM*K.C               | 3555.03753 | 3 | 2.74E-05 | 0.81  | 4.65   | -     | 746.2   |
| AHQ-1-8, 2395 - 2467       | R.GYVFTTAAE.E                                      | 1133.19273 | 2 | 4.57E-04 | 0.91  | 3.02   | -     | 1158.8  |
| AHQ-1-13 - , 2624 - 2663   | R.GYVFTTAAE.E                                      | 1133.19273 | 2 | 1.08E-04 | 0.91  | 3.45   | -     | 971.2   |
| AHQ-1-10, 2391 - 2463      | R.GYVFTTAAE.E                                      | 1133.19273 | 2 | 4.47E-04 | 0.91  | 3.34   | -     | 1015.5  |
| AHQ-1-11, 2480 - 2490      | R.GYVFTTAAE.E                                      | 1133.19273 | 2 | 6.89E-05 | 0.94  | 3.09   | -     | 1278.2  |
| AHQ-1-5, 2429              | R.GYVFTTAAE.E                                      | 1133.19273 | 2 | 7.21E-05 | 0.89  | 3.13   | -     | 980.5   |
| AHQ-1-6, 2443 - 2494       | R.GYVFTTAAE.E                                      | 1133.19273 | 2 | 3.37E-04 | 0.82  | 2.84   | -     | 862.1   |
| AHQ-1-14 - , 2523 - 2527   | R.GYVFTTAAE.E                                      | 1133.19273 | 2 | 5.34E-04 | 0.89  | 3.26   | -     | 987.1   |
| AHQ-1-3, 2533              | R.GYVFTTAAE.E                                      | 1133.19273 | 2 | 1.10E-04 | 0.93  | 3.07   | -     | 1254.2  |
| AHQ-1-9, 2374 - 2446       | R.GYVFTTAAE.E                                      | 1133.19273 | 2 | 7.58E-04 | 0.91  | 3.18   | -     | 945.1   |
| AHQ-1-2, 2627              | R.GYVFTTAAE.E                                      | 1133.19273 | 2 | 5.22E-04 | 0.91  | 3.02   | -     | 1184.4  |
| AHQ-1-13, 2641 - 2661      | R.GYVFTTAAE.E                                      | 1133.19273 | 2 | 2.52E-05 | 0.87  | 2.97   | -     | 797.4   |
| AHQ-1-8, 2281 - 2325       | R.GYVFTTAAE.E                                      | 1133.19273 | 2 | 1.06E-04 | 0.91  | 3.15   | -     | 1233.1  |
| AHQ-1-7, 2473              | R.GYVFTTAAE.E                                      | 1133.19273 | 2 | 9.61E-04 | 0.85  | 3.08   | -     | 842.4   |
| AHQ-1-13, 4607             | R.KDLYANTVLSGGTTMYPGIADR.M                         | 2344.62976 | 2 | 1.71E-05 | 0.91  | 3.96   | -     | 766.7   |
| AHQ-1-10, 3949 - 3959      | R.KDLYANTVLSGGTTMYPGIADR.M                         | 2360.62916 | 2 | 3.94E-04 | 0.95  | 4.51   | -     | 1159.2  |
| AHQ-1-10, 4307             | R.KDLYANTVLSGGTTMYPGIADR.M                         | 2344.62976 | 2 | 1.68E-06 | 0.78  | 2.91   | -     | 636.2   |
| AHQ-1-8, 4730 - 4759       | R.KDLYANTVLSGGTTMYPGIADR.M                         | 2344.62976 | 2 | 9.17E-06 | 0.96  | 4.42   | -     | 1395.6  |
| AHQ-1-8, 4324              | R.KDLYANTVLSGGTTMYPGIADR.M                         | 2360.62916 | 3 | 5.50E-05 | 0.96  | 4.80   | -     | 1607.7  |
| AHQ-1-14 - , 4699 - 4752   | R.KDLYANTVLSGGTTMYPGIADR.M                         | 2344.62976 | 2 | 5.24E-04 | 0.72  | 2.93   | -     | 526.1   |
| AHQ-1-13, 4156             | R.KDLYANTVLSGGTTMYPGIADR.M                         | 2360.62916 | 2 | 3.60E-05 | 0.63  | 2.65   | -     | 571.3   |
| AHQ-1-13 - , 4369          | R.KDLYANTVLSGGTTMYPGIADR.M                         | 2360.62916 | 2 | 4.92E-04 | 0.82  | 3.04   | -     | 688.8   |
| AHQ-1-10, 6495 - 6531      | K.LCYALDFEQEMATAASSSSLEK.S                         | 2552.81665 | 2 | 5.91E-05 | 0.90  | 3.50   | -     | 1003.7  |
| AHQ-1-9, 7374 - 7444       | K.LCYALDFEQEMATAASSSSLEK.S                         | 2552.81665 | 3 | 6.07E-06 | 0.96  | 5.55   | -     | 1708.3  |
| AHQ-1-10, 6219 - 6277      | K.LCYALDFEQEMATAASSSSLEK.S                         | 2552.81665 | 2 | 1.65E-06 | 0.97  | 5.14   | -     | 1852.8  |
| AHQ-1-5, 5779              | R.TTGIVM*DSGDGVTHTVPIYEGYALPHAILR.L                | 3201.59868 | 3 | 5.18E-06 | 0.93  | 4.80   | -     | 1048.3  |
| AHQ-1-5, 6050              | R.TTGIVM*DSGDGVTHTVPIYEGYALPHAILR.L                | 3185.59928 | 3 | 6.22E-08 | 0.97  | 5.95   | -     | 1854.3  |
| AHQ-1-5, 6147              | R.TTGIVM*DSGDGVTHTVPIYEGYALPHAILR.L                | 3185.59928 | 3 | 7.95E-10 | 0.97  | 5.23   | -     | 2259.1  |
| AHQ-1-8, 6204 - 6272       | R.TTGIVM*DSGDGVTHTVPIYEGYALPHAILR.L                | 3185.59928 | 3 | 3.98E-07 | 0.97  | 5.96   | -     | 1838.7  |
| AHQ-1-9, 5390 - 5410       | R.TTGIVM*DSGDGVTHTVPIYEGYALPHAILR.L                | 3201.59868 | 3 | 6.05E-09 | 0.97  | 6.23   | -     | 1392.1  |
| AHQ-1-9, 5478 - 5550       | R.TTGIVM*DSGDGVTHTVPIYEGYALPHAILR.L                | 3201.59868 | 3 | 4.62E-09 | 0.97  | 5.72   | -     | 1976.5  |
| AHQ-1-9, 5715 - 5795       | R.TTGIVM*DSGDGVTHTVPIYEGYALPHAILR.L                | 3185.59928 | 3 | 3.85E-12 | 0.96  | 6.17   | -     | 1189.7  |
| AHQ-1-9, 5851 - 5931       | R.TTGIVM*DSGDGVTHTVPIYEGYALPHAILR.L                | 3185.59928 | 3 | 2.00E-11 | 0.97  | 6.22   | -     | 1465.4  |
| AHQ-1-9, 5926 - 6004       | R.TTGIVM*DSGDGVTHTVPIYEGYALPHAILR.L                | 3201.59868 | 3 | 9.24E-05 | 0.68  | 3.85   | -     | 788.7   |
| AHQ-1-9, 5998 - 6072       | R.TTGIVM*DSGDGVTHTVPIYEGYALPHAILR.L                | 3185.59928 | 3 | 9.01E-09 | 0.94  | 5.22   | -     | 1182.4  |
| AHQ-1-4, 5918              | R.TTGIVM*DSGDGVTHTVPIYEGYALPHAILR.L                | 3201.59868 | 3 | 5.57E-07 | 0.93  | 4.78   | -     | 1111.8  |
| AHQ-1-4, 5819              | R.TTGIVM*DSGDGVTHTVPIYEGYALPHAILR.L                | 3201.59868 | 3 | 7.37E-08 | 0.96  | 6.09   | -     | 1089.4  |
| AHQ-1-3, 6073              | R.TTGIVM*DSGDGVTHTVPIYEGYALPHAILR.L                | 3185.59928 | 3 | 8.10E-07 | 0.93  | 4.74   | -     | 1066.2  |
| AHQ-1-5, 5646              | R.TTGIVM*DSGDGVTHTVPIYEGYALPHAILR.L                | 3201.59868 | 3 | 2.03E-06 | 0.92  | 5.16   | -     | 723.6   |
| AHQ-1-4, 6126              | R.TTGIVM*DSGDGVTHTVPIYEGYALPHAILR.L                | 3185.59928 | 3 | 1.93E-06 | 0.96  | 5.95   | -     | 1329.5  |
| AHQ-1-8, 5934 - 5998       | R.TTGIVM*DSGDGVTHTVPIYEGYALPHAILR.L                | 3185.59928 | 3 | 3.15E-11 | 0.98  | 6.82   | -     | 1772.2  |
| AHQ-1-8, 5796 - 5866       | R.TTGIVM*DSGDGVTHTVPIYEGYALPHAILR.L                | 3185.59928 | 3 | 5.55E-16 | 0.96  | 5.79   | -     | 1562.0  |
| AHQ-1-14, 6444             | R.TTGIVM*DSGDGVTHTVPIYEGYALPHAILR.L                | 3201.59868 | 3 | 1.27E-06 | 0.78  | 4.13   | -     | 649.3   |
| AHQ-1-8, 5714 - 5782       | R.TTGIVM*DSGDGVTHTVPIYEGYALPHAILR.L                | 3185.59928 | 3 | 1.34E-13 | 0.98  | 6.78   | -     | 2008.9  |

|                           |                                                                         |            |   |          |        |         |       |          |
|---------------------------|-------------------------------------------------------------------------|------------|---|----------|--------|---------|-------|----------|
| AHQ-1-8, 5466 - 5530      | R.TTGIVM*DSGDGVTHTVPIYEGYALPHAILR.L                                     | 3201.59868 | 3 | 2.03E-09 | 0.96   | 5.76    | -     | 1264.9   |
| AHQ-1-10, 4857 - 4915     | R.TTGIVM*DSGDGVTHTVPIYEGYALPHAILR.L                                     | 3201.59868 | 3 | 9.54E-08 | 0.95   | 5.17    | -     | 1493.0   |
| AHQ-1-10, 4975 - 5031     | R.TTGIVM*DSGDGVTHTVPIYEGYALPHAILR.L                                     | 3201.59868 | 3 | 2.32E-10 | 0.98   | 6.81    | -     | 1764.1   |
| AHQ-1-10, 5191 - 5247     | R.TTGIVMDSGGDVTHTVPIYEGYALPHAILR.L                                      | 3185.59928 | 3 | 6.00E-11 | 0.97   | 5.98    | -     | 1747.2   |
| AHQ-1-10, 5303 - 5359     | R.TTGIVMDSGGDVTHTVPIYEGYALPHAILR.L                                      | 3185.59928 | 3 | 4.66E-10 | 0.97   | 6.37    | -     | 1552.5   |
| AHQ-1-3, 5733 - 5805      | R.TTGIVM*DSGDGVTHTVPIYEGYALPHAILR.L                                     | 3201.59868 | 3 | 1.60E-06 | 0.96   | 5.53    | -     | 1378.2   |
| AHQ-1-8, 5370 - 5398      | R.TTGIVM*DSGDGVTHTVPIYEGYALPHAILR.L                                     | 3201.59868 | 3 | 2.35E-08 | 0.96   | 5.93    | -     | 1166.9   |
| AHQ-1-8, 5287 - 5320      | R.TTGIVM*DSGDGVTHTVPIYEGYALPHAILR.L                                     | 3201.59868 | 3 | 5.67E-06 | 0.61   | 3.16    | -     | 605.2    |
| AHQ-1-2, 6187 - 6253      | R.TTGIVMDSGGDVTHTVPIYEGYALPHAILR.L                                      | 3185.59928 | 3 | 1.96E-06 | 0.94   | 5.46    | -     | 914.2    |
| AHQ-1-8, 6066 - 6131      | R.TTGIVMDSGGDVTHTVPIYEGYALPHAILR.L                                      | 3185.59928 | 3 | 7.65E-11 | 0.96   | 5.87    | -     | 1544.9   |
| AHQ-1-2, 5913 - 5982      | R.TTGIVM*DSGDGVTHTVPIYEGYALPHAILR.L                                     | 3201.59868 | 3 | 9.10E-05 | 0.96   | 5.84    | -     | 1468.7   |
| AHQ-1-13- , 5560 - 5636   | R.TTGIVM*DSGDGVTHTVPIYEGYALPHAILR.L                                     | 3201.59868 | 3 | 6.25E-09 | 0.97   | 5.83    | -     | 2136.4   |
| AHQ-1-13- , 5823 - 5903   | R.TTGIVMDSGGDVTHTVPIYEGYALPHAILR.L                                      | 3185.59928 | 3 | 2.78E-15 | 0.97   | 5.80    | -     | 1954.5   |
| AHQ-1-14- , 5419 - 5484   | R.TTGIVM*DSGDGVTHTVPIYEGYALPHAILR.L                                     | 3201.59868 | 3 | 1.09E-05 | 0.95   | 5.35    | -     | 1037.1   |
| AHQ-1-6, 6034 - 6042      | R.TTGIVMDSGGDVTHTVPIYEGYALPHAILR.L                                      | 3185.59928 | 3 | 5.51E-12 | 0.97   | 5.91    | -     | 1376.6   |
| AHQ-1-14, 6270 - 6324     | R.TTGIVM*DSGDGVTHTVPIYEGYALPHAILR.L                                     | 3201.59868 | 3 | 8.39E-08 | 0.98   | 6.88    | -     | 2224.4   |
| AHQ-1-11, 5098            | R.TTGIVM*DSGDGVTHTVPIYEGYALPHAILR.L                                     | 3201.59868 | 3 | 2.96E-13 | 0.97   | 6.55    | -     | 1618.1   |
| AHQ-1-11, 5186            | R.TTGIVM*DSGDGVTHTVPIYEGYALPHAILR.L                                     | 3201.59868 | 3 | 4.36E-09 | 0.95   | 5.34    | -     | 1283.5   |
| AHQ-1-11, 5308 - 5368     | R.TTGIVMDSGGDVTHTVPIYEGYALPHAILR.L                                      | 3185.59928 | 3 | 6.24E-07 | 0.93   | 4.79    | -     | 1205.6   |
| AHQ-1-11, 5446            | R.TTGIVMDSGGDVTHTVPIYEGYALPHAILR.L                                      | 3185.59928 | 3 | 1.41E-08 | 0.96   | 5.41    | -     | 1600.2   |
| AHQ-1-7, 6130             | R.TTGIVMDSGGDVTHTVPIYEGYALPHAILR.L                                      | 3185.59928 | 3 | 1.26E-09 | 0.95   | 5.35    | -     | 1425.5   |
| AHQ-1-1, 6001 - 6075      | R.TTGIVMDSGGDVTHTVPIYEGYALPHAILR.L                                      | 3185.59928 | 3 | 1.28E-12 | 0.95   | 5.16    | -     | 1499.9   |
| AHQ-1-12, 5321 - 5383     | R.TTGIVM*DSGDGVTHTVPIYEGYALPHAILR.L                                     | 3201.59868 | 3 | 4.76E-08 | 0.93   | 4.71    | -     | 1094.3   |
| AHQ-1-12, 5654 - 5714     | R.TTGIVMDSGGDVTHTVPIYEGYALPHAILR.L                                      | 3185.59928 | 3 | 4.59E-10 | 0.91   | 4.98    | -     | 653.5    |
| AHQ-1-1, 5751 - 5820      | R.TTGIVM*DSGDGVTHTVPIYEGYALPHAILR.L                                     | 3201.59868 | 3 | 3.45E-08 | 0.97   | 5.95    | -     | 1514.8   |
| AHQ-1-7, 5978 - 6052      | R.TTGIVMDSGGDVTHTVPIYEGYALPHAILR.L                                      | 3185.59928 | 3 | 2.32E-07 | 0.74   | 3.39    | -     | 810.1    |
| AHQ-1-13, 5611            | R.TTGIVMDSGGDVTHTVPIYEGYALPHAILR.L                                      | 3185.59928 | 3 | 8.09E-10 | 0.95   | 5.65    | -     | 992.9    |
| AHQ-1-13, 5472 - 5547     | R.TTGIVMDSGGDVTHTVPIYEGYALPHAILR.L                                      | 3185.59928 | 3 | 2.18E-11 | 0.97   | 5.93    | -     | 1787.5   |
| AHQ-1-7, 5620 - 5689      | R.TTGIVM*DSGDGVTHTVPIYEGYALPHAILR.L                                     | 3201.59868 | 3 | 1.30E-07 | 0.94   | 5.26    | -     | 1053.9   |
| AHQ-1-14- , 5678 - 5758   | R.TTGIVMDSGGDVTHTVPIYEGYALPHAILR.L                                      | 3185.59928 | 3 | 9.75E-12 | 0.97   | 5.46    | -     | 1924.4   |
| AHQ-1-13, 5245 - 5308     | R.TTGIVM*DSGDGVTHTVPIYEGYALPHAILR.L                                     | 3201.59868 | 3 | 3.44E-08 | 0.97   | 5.77    | -     | 1664.3   |
| AHQ-1-13, 3919            | R.VAPEEHPVLLTEAPLNPKA                                                   | 1955.24351 | 3 | 1.43E-04 | 0.52   | 3.05    | -     | 519.5    |
| AHQ-1-13, 3883 - 3943     | R.VAPEEHPVLLTEAPLNPKA                                                   | 1955.24351 | 2 | 1.32E-05 | 0.94   | 4.62    | -     | 960.2    |
| AHQ-1-12, 3801 - 3873     | R.VAPEEHPVLLTEAPLNPKA                                                   | 1955.24351 | 3 | 3.82E-05 | 0.87   | 4.87    | -     | 734.8    |
| AHQ-1-12, 3793 - 3861     | R.VAPEEHPVLLTEAPLNPKA                                                   | 1955.24351 | 2 | 1.30E-06 | 0.92   | 4.64    | -     | 712.4    |
| AHQ-1-14, 4824            | R.VAPEEHPVLLTEAPLNPKA                                                   | 1955.24351 | 2 | 2.23E-07 | 0.90   | 4.04    | -     | 721.9    |
| AHQ-1-11, 3676            | R.VAPEEHPVLLTEAPLNPKA                                                   | 1955.24351 | 2 | 7.14E-06 | 0.92   | 4.03    | -     | 905.9    |
| AHQ-1-10, 3587 - 3647     | R.VAPEEHPVLLTEAPLNPKA                                                   | 1955.24351 | 3 | 8.43E-05 | 0.84   | 4.34    | -     | 1046.6   |
| AHQ-1-10, 3584 - 3643     | R.VAPEEHPVLLTEAPLNPKA                                                   | 1955.24351 | 2 | 1.52E-09 | 0.91   | 4.55    | -     | 757.8    |
| AHQ-1-13- , 4043 - 4100   | R.VAPEEHPVLLTEAPLNPKA                                                   | 1955.24351 | 3 | 9.63E-04 | 0.75   | 3.99    | -     | 880.6    |
| AHQ-1-13- , 4044 - 4113   | R.VAPEEHPVLLTEAPLNPKA                                                   | 1955.24351 | 2 | 6.78E-10 | 0.94   | 4.55    | -     | 1099.6   |
| AHQ-1-9, 3606 - 3680      | R.VAPEEHPVLLTEAPLNPKA                                                   | 1955.24351 | 2 | 7.21E-07 | 0.93   | 4.20    | -     | 992.7    |
| AHQ-1-8, 3872 - 3947      | R.VAPEEHPVLLTEAPLNPKA                                                   | 1955.24351 | 2 | 3.51E-06 | 0.94   | 4.67    | -     | 963.2    |
| AHQ-1-8, 3847 - 3856      | R.VAPEEHPVLLTEAPLNPKA                                                   | 1955.24351 | 2 | 2.25E-09 | 0.93   | 4.81    | -     | 785.2    |
| AHQ-1-8, 3717 - 3787      | R.VAPEEHPVLLTEAPLNPKA                                                   | 1955.24351 | 2 | 5.07E-07 | 0.94   | 4.71    | -     | 932.8    |
| AHQ-1-8, 3572 - 3641      | R.VAPEEHPVLLTEAPLNPKA                                                   | 1955.24351 | 2 | 1.18E-05 | 0.94   | 4.84    | -     | 951.4    |
| AHQ-1-8, 3556 - 3637      | R.VAPEEHPVLLTEAPLNPKA                                                   | 1955.24351 | 3 | 9.23E-04 | 0.72   | 4.03    | -     | 586.1    |
| AHQ-1-8, 3476 - 3548      | R.VAPEEHPVLLTEAPLNPKA                                                   | 1955.24351 | 2 | 2.18E-04 | 0.93   | 4.56    | -     | 750.2    |
| AHQ-1-7, 3900             | R.VAPEEHPVLLTEAPLNPKA                                                   | 1955.24351 | 2 | 1.42E-04 | 0.88   | 3.92    | -     | 830.5    |
| AHQ-1-6, 3823             | R.VAPEEHPVLLTEAPLNPKA                                                   | 1955.24351 | 3 | 1.87E-04 | 0.75   | 3.72    | -     | 792.7    |
| AHQ-1-14- , 3944 - 3963   | R.VAPEEHPVLLTEAPLNPKA                                                   | 1955.24351 | 2 | 4.26E-05 | 0.91   | 4.39    | -     | 928.1    |
| AHQ-1-6, 3822             | R.VAPEEHPVLLTEAPLNPKA                                                   | 1955.24351 | 2 | 3.14E-06 | 0.87   | 4.00    | -     | 665.1    |
| AHQ-1-5, 3893 - 3894      | R.VAPEEHPVLLTEAPLNPKA                                                   | 1955.24351 | 2 | 1.50E-05 | 0.89   | 3.94    | -     | 665.0    |
| AHQ-1-9, 3750 - 3818      | R.VAPEEHPVLLTEAPLNPKA                                                   | 1955.24351 | 2 | 7.75E-06 | 0.90   | 4.21    | -     | 643.1    |
| AHQ-1-1, 4133             | R.VAPEEHPVLLTEAPLNPKA                                                   | 1955.24351 | 2 | 4.12E-06 | 0.89   | 3.82    | -     | 815.1    |
| gi4507949 ref NP_003395.1 | tyrosine 3-monooxygenase/tryptophan 5-monooxygenase activation protein, |            |   | 5.55E-16 | 4.54   | 50.28   | 30.10 | 28082.2  |
| AHQ-1-13- , 1960          | K.AVTEQQGHELSNEER.N                                                     | 1599.64147 | 2 | 1.16E-04 | 0.75   | 3.03    | -     | 548.9    |
| AHQ-1-10, 1796 - 1851     | K.AVTEQQGHELSNEER.N                                                     | 1599.64147 | 2 | 8.66E-06 | 0.90   | 3.70    | -     | 830.0    |
| AHQ-1-13- , 4227 - 4237   | K.QTTVSNQQAYQEAFEISK.K                                                  | 2160.28351 | 2 | 5.38E-07 | 0.76   | 4.00    | -     | 385.1    |
| AHQ-1-10, 3815 - 3816     | K.QTTVSNQQAYQEAFEISK.K                                                  | 2160.28351 | 2 | 4.16E-08 | 0.92   | 4.80    | -     | 607.5    |
| AHQ-1-10, 4011 - 4016     | K.QTTVSNQQAYQEAFEISK.K                                                  | 2160.28351 | 2 | 3.60E-09 | 0.96   | 5.58    | -     | 1147.2   |
| AHQ-1-13, 6319            | K.TAFDEAIAELDTLNEESYK.D                                                 | 2160.27705 | 2 | 1.44E-07 | 0.93   | 4.65    | -     | 937.8    |
| AHQ-1-13- , 6771 - 6828   | K.TAFDEAIAELDTLNEESYK.D                                                 | 2160.27705 | 2 | 5.94E-05 | 0.97   | 5.28    | -     | 1334.4   |
| AHQ-1-10, 6135 - 6208     | K.TAFDEAIAELDTLNEESYK.D                                                 | 2160.27705 | 2 | 8.00E-06 | 0.93   | 4.36    | -     | 918.8    |
| AHQ-1-10, 6144            | K.TAFDEAIAELDTLNEESYK.D                                                 | 2160.27705 | 3 | 5.64E-04 | 0.95   | 4.16    | -     | 1840.7   |
| AHQ-1-10, 6411            | K.TAFDEAIAELDTLNEESYK.D                                                 | 2160.27705 | 2 | 4.35E-04 | 0.57   | 3.16    | -     | 356.8    |
| AHQ-1-14- , 6530          | K.TAFDEAIAELDTLNEESYK.D                                                 | 2160.27705 | 2 | 3.89E-10 | 0.96   | 5.19    | -     | 1145.9   |
| AHQ-1-10, 6464            | K.TAFDEAIAELDTLNEESYKSTLIM*QLLR.D                                       | 3347.69249 | 3 | 5.55E-16 | 0.96   | 5.23    | -     | 1922.7   |
| AHQ-1-13- , 3004 - 3013   | K.YLIPNATQPESK.V                                                        | 1361.52512 | 2 | 3.70E-06 | 0.88   | 3.83    | -     | 641.6    |
| AHQ-1-10, 2739 - 2805     | K.YLIPNATQPESK.V                                                        | 1361.52512 | 2 | 1.71E-05 | 0.84   | 3.29    | -     | 573.2    |
| AHQ-1-10, 2737            | K.YLIPNATQPESK.V                                                        | 1361.52512 | 1 | 1.84E-05 | 0.83   | 3.56    | -     | 642.4    |
| AHQ-1-10, 2821            | K.YLIPNATQPESK.V                                                        | 1361.52512 | 1 | 9.71E-05 | 0.21   | 1.89    | -     | 443.5    |
| AHQ-1-10, 2913            | K.YLIPNATQPESK.V                                                        | 1361.52512 | 1 | 5.25E-08 | 0.75   | 2.43    | -     | 835.8    |
| gi5729770 ref NP_000382.3 | ceroid-lipofuscinosis, neuronal 2, late infantile (Jansky-Bielschowsky  |            |   | 5.55E-16 | 0.96   | 10.25   | 4.80  | 61246.7  |
| AHQ-1-8, 7468             | R.VPIPWVSGTSASTPVFGGILSLINEHR.I                                         | 2836.23725 | 3 | 5.55E-16 | 0.96   | 4.91    | -     | 1666.3   |
| gi9507215 ref NP_061816.1 | tubulin, alpha-like 2; tubulin, alpha 8 [Homo sapiens]                  |            |   | 1.11E-15 | 4.32   | 50.22   | 13.10 | 50093.2  |
| AHQ-1-7, 5473 - 5496      | R.AVMIDLEPTVVDEV.R.A                                                    | 1686.95185 | 2 | 2.90E-04 | 0.76   | 3.45    | -     | 643.9    |
| AHQ-1-14- , 4920          | R.AVM*IDLEPTVVDEV.R.A                                                   | 1702.95125 | 2 | 3.97E-07 | 0.92   | 4.33    | -     | 792.7    |
| AHQ-1-7, 3553             | K.DVNVIAIAIK.T                                                          | 1014.20080 | 2 | 1.68E-06 | 0.93   | 3.38    | -     | 1233.9   |
| AHQ-1-7, 5698 - 5733      | R.IHFPLVLYAPIISAEK.A                                                    | 1800.13312 | 2 | 2.77E-07 | 0.81   | 3.22    | -     | 461.1    |
| AHQ-1-9, 5554             | R.IHFPLVLYAPIISAEK.A                                                    | 1800.13312 | 2 | 9.36E-04 | 0.85   | 3.57    | -     | 450.7    |
| AHQ-1-14, 6189            | K.INDDDSFTFFSETGNGK.H                                                   | 1996.03358 | 2 | 3.12E-10 | 0.94   | 4.34    | -     | 994.9    |
| AHQ-1-7, 5550 - 5626      | K.INDDDSFTFFSETGNGK.H                                                   | 1996.03358 | 2 | 2.44E-11 | 0.87   | 3.86    | -     | 669.1    |
| AHQ-1-14- , 5286          | K.INDDDSFTFFSETGNGK.H                                                   | 1996.03358 | 2 | 1.11E-15 | 0.91   | 3.98    | -     | 799.7    |
| AHQ-1-13, 5144            | K.INDDDSFTFFSETGNGK.H                                                   | 1996.03358 | 2 | 1.49E-07 | 0.67   | 3.50    | -     | 306.0    |
| gi4504517 ref NP_001531.1 | heat shock 27kDa protein 1; heat shock 27kD protein 1 [Homo sapiens] [M |            |   | 1.11E-15 | 1.91   | 20.34   | 26.30 | 22782.3  |
| AHQ-1-11, 6356            | R.LPEEWSQWLGGSSWPGYVRPLPPAAIESPAVAAPAYS.R.A                             | 4095.56787 | 3 | 1.11E-15 | 0.97   | 6.87    | -     | 1219.1   |
| AHQ-1-13, 4520            | R.VSLDVNHFAPDELTVK.T                                                    | 1784.99058 | 2 | 3.18E-04 | 0.91   | 3.83    | -     | 1046.6   |
| AHQ-1-10, 4308            | R.VSLDVNHFAPDELTVK.T                                                    | 1784.99058 | 2 | 7.27E-08 | 0.93   | 4.18    | -     | 985.9    |
| gi4503745 ref NP_001447.1 | filamin 1 (actin-binding protein-280); filamin 1; filamin A, alpha (act |            |   | 1.67E-15 | 103.52 | 1210.36 | 56.00 | 280757.4 |
| AHQ-1-4, 5438 - 5507      | R.AEAGVPAEFSIWTR.E                                                      | 1534.69735 | 2 | 2.98E-09 | 0.88   | 3.92    | -     | 483.3    |
| AHQ-1-5, 5341 - 5414      | R.AEAGVPAEFSIWTR.E                                                      | 1534.69735 | 2 | 4.65E-09 | 0.93   | 4.19    | -     | 708.1    |
| AHQ-1-1, 2424             | R.AEFTVETR.S                                                            | 953.03118  | 2 | 2.21E-04 | 0.87   | 2.78    | -     | 1018.1   |
| AHQ-1-5, 2147             | R.AEFTVETR.S                                                            | 953.03118  | 2 | 7.02E-04 | 0.87   | 2.72    | -     | 983.7    |
| AHQ-1-6, 2430             | K.AEISFEDR.K                                                            | 967.01472  | 2 | 3.74E-04 | 0.78   | 2.61    | -     | 961.8    |
| AHQ-1-1, 2664             | K.AEISFEDR.K                                                            | 967.01472  | 2 | 5.01E-04 | 0.88   | 3.02    | -     | 1032.3   |
| AHQ-1-4, 2642             | K.AFGPGLQGGGAGSAGS.PAR.F                                                | 1430.55077 | 2 | 2.41E-06 | 0.92   | 3.30    | -     | 1356.5   |
| AHQ-1-9, 2531             | K.AFGPGLQGGGAGSAGS.PAR.F                                                | 1430.55077 | 2 | 5.78E-05 | 0.88   | 2.68    | -     | 1446.2   |
| AHQ-1-7, 2584             | K.AFGPGLQGGGAGSAGS.PAR.F                                                | 1430.55077 | 2 | 1.01E-05 | 0.84   | 2.81    | -     | 931.4    |
| AHQ-1-1, 2700 - 2771      | K.AFGPGLQGGGAGSAGS.PAR.F                                                | 1430.55077 | 2 | 4.11E-10 | 0.93   | 3.37    | -     | 1263.3   |
| AHQ-1-1, 2915 - 2996      | K.AFGPGLQGGGAGSAGS.PAR.F                                                | 1430.55077 | 2 | 4.16E-06 | 0.93   | 3.45    | -     | 1302.9   |
| AHQ-1-3, 2625 - 2695      | K.AFGPGLQGGGAGSAGS.PAR.F                                                | 1430.55077 | 2 | 4.11E-06 | 0.92   | 3.02    | -     | 1294.6   |
| AHQ-1-5, 2538             | K.AFGPGLQGGGAGSAGS.PAR.F                                                | 1430.55077 | 2 | 6.36E-05 | 0.93   | 2.73    | -     | 2041.5   |
| AHQ-1-2, 2711 - 2781      | K.AFGPGLQGGGAGSAGS.PAR.F                                                | 1430.55077 | 2 | 7.59E-07 | 0.95   | 3.71    | -     | 1579.8   |
| AHQ-1-8, 2465             | K.AFGPGLQGGGAGSAGS.PAR.F                                                | 1430.55077 | 2 | 1.93E-05 | 0.90   | 3.39    | -     | 1105.6   |
| AHQ-1-6, 2552 - 2580      | K.AFGPGLQGGGAGSAGS.PAR.F                                                | 1430.55077 | 2 | 4.36E-08 | 0.96   | 3.38    | -     | 1823.6   |
| AHQ-1-14, 4396            | K.AGNMMLVGVHGR.P.T                                                      | 1435.68033 | 2 | 5.16E-07 | 0.74   | 2.93    | -     | 572.3    |

|                        |                                  |            |   |          |      |      |   |        |
|------------------------|----------------------------------|------------|---|----------|------|------|---|--------|
| AHQ-1-14, 4173         | K.AGNMMLLVGVHGR.T                | 1435.68033 | 3 | 1.27E-07 | 0.79 | 3.12 | - | 1108.1 |
| AHQ-1-14 - 2908        | K.AGNMMLLVGVHGR.T                | 1451.67973 | 2 | 1.55E-06 | 0.80 | 2.82 | - | 626.8  |
| AHQ-1-14 - 2912 - 2934 | K.AGNMMLLVGVHGR.T                | 1451.67973 | 3 | 1.29E-06 | 0.86 | 3.48 | - | 1098.5 |
| AHQ-1-14, 4148         | K.AGNMMLLVGVHGR.T                | 1435.68033 | 2 | 2.92E-05 | 0.84 | 3.23 | - | 929.6  |
| AHQ-1-14 - 3458 - 3482 | K.AGNMMLLVGVHGR.T                | 1435.68033 | 3 | 2.25E-08 | 0.92 | 4.47 | - | 1137.6 |
| AHQ-1-14 - 3454 - 3504 | K.AGNMMLLVGVHGR.T                | 1435.68033 | 2 | 5.13E-09 | 0.85 | 3.35 | - | 739.4  |
| AHQ-1-14, 3812         | K.AGNMMLLVGVHGR.T                | 1451.67973 | 3 | 3.62E-07 | 0.94 | 3.58 | - | 1931.6 |
| AHQ-1-14, 3638 - 3712  | K.AGNMMLLVGVHGR.T                | 1451.67973 | 2 | 3.74E-05 | 0.78 | 3.03 | - | 710.4  |
| AHQ-1-14 - 2782 - 2846 | K.AGNMMLLVGVHGR.T                | 1451.67973 | 3 | 3.20E-06 | 0.90 | 3.90 | - | 1125.6 |
| AHQ-1-5, 3123          | K.AGNMMLLVGVHGR.T                | 1435.68033 | 3 | 6.10E-06 | 0.90 | 3.29 | - | 1767.3 |
| AHQ-1-14 - 3206 - 3211 | K.AGNMMLLVGVHGR.T                | 1435.68033 | 2 | 7.65E-06 | 0.76 | 3.27 | - | 552.0  |
| AHQ-1-14 - 3227        | K.AGNMMLLVGVHGR.T                | 1435.68033 | 1 | 2.21E-07 | 0.45 | 2.29 | - | 126.1  |
| AHQ-1-14 - 2778 - 2843 | K.AGNMMLLVGVHGR.T                | 1451.67973 | 2 | 1.32E-04 | 0.88 | 3.60 | - | 881.9  |
| AHQ-1-14 - 3207        | K.AGNMMLLVGVHGR.T                | 1435.68033 | 3 | 2.25E-08 | 0.92 | 3.79 | - | 1532.3 |
| AHQ-1-2, 1761 - 1838   | R.AGQSAAGAAPPGGVDTR.D            | 1443.50471 | 2 | 4.90E-04 | 0.80 | 3.53 | - | 607.1  |
| AHQ-1-4, 1668          | R.AGQSAAGAAPPGGVDTR.D            | 1443.50471 | 2 | 5.61E-05 | 0.53 | 2.92 | - | 653.5  |
| AHQ-1-5, 2170          | K.AGVAPLQVK.V                    | 883.07036  | 2 | 1.35E-04 | 0.63 | 2.65 | - | 442.2  |
| AHQ-1-4, 2304          | K.AGVAPLQVK.V                    | 883.07036  | 2 | 3.27E-04 | 0.63 | 2.54 | - | 529.1  |
| AHQ-1-3, 2379          | K.AGVAPLQVK.V                    | 883.07036  | 1 | 7.75E-04 | 0.28 | 1.95 | - | 480.4  |
| AHQ-1-1, 2451 - 2485   | K.AGVAPLQVK.V                    | 883.07036  | 2 | 1.18E-04 | 0.69 | 2.51 | - | 513.1  |
| AHQ-1-3, 2310 - 2311   | K.AGVAPLQVK.V                    | 883.07036  | 2 | 2.98E-05 | 0.89 | 3.16 | - | 737.1  |
| AHQ-1-2, 7474 - 7534   | K.AHEPTYFTVDCAEAGQGDVSIIG.K      | 2567.76960 | 3 | 4.69E-05 | 0.97 | 6.18 | - | 1447.3 |
| AHQ-1-2, 6747          | K.AHEPTYFTVDCAEAGQGDVSIIG.K      | 2567.76960 | 3 | 1.70E-04 | 0.87 | 3.79 | - | 1098.0 |
| AHQ-1-4, 2651 - 2663   | K.AHVVPFCFASK.V                  | 1232.39073 | 2 | 2.64E-04 | 0.70 | 2.61 | - | 503.7  |
| AHQ-1-3, 2633          | K.AHVVPFCFASK.V                  | 1232.39073 | 2 | 5.38E-05 | 0.70 | 2.58 | - | 507.4  |
| AHQ-1-1, 2787 - 2805   | K.AHVVPFCFASK.V                  | 1232.39073 | 2 | 6.17E-08 | 0.86 | 2.87 | - | 851.0  |
| AHQ-1-2, 2726          | K.AHVVPFCFASK.V                  | 1232.39073 | 2 | 1.73E-04 | 0.66 | 2.63 | - | 549.2  |
| AHQ-1-4, 6498 - 6570   | R.ALGALVDSAPGLCPDWSDWASKPVTNAR.E | 3233.53437 | 3 | 1.67E-15 | 0.95 | 5.66 | - | 958.5  |
| AHQ-1-7, 6437 - 6440   | R.ALGALVDSAPGLCPDWSDWASKPVTNAR.E | 3233.53437 | 3 | 1.24E-06 | 0.94 | 5.42 | - | 811.5  |
| AHQ-1-6, 6227 - 6306   | R.ALGALVDSAPGLCPDWSDWASKPVTNAR.E | 3233.53437 | 3 | 4.56E-12 | 0.95 | 5.70 | - | 885.5  |
| AHQ-1-4, 6362 - 6427   | R.ALGALVDSAPGLCPDWSDWASKPVTNAR.E | 3233.53437 | 3 | 1.31E-05 | 0.66 | 3.53 | - | 408.7  |
| AHQ-1-6, 6318 - 6382   | R.ALGALVDSAPGLCPDWSDWASKPVTNAR.E | 3233.53437 | 3 | 7.42E-11 | 0.94 | 5.41 | - | 784.8  |
| AHQ-1-9, 6366          | R.ALGALVDSAPGLCPDWSDWASKPVTNAR.E | 3233.53437 | 3 | 1.47E-07 | 0.88 | 4.43 | - | 646.8  |
| AHQ-1-1, 6116 - 6183   | R.ALGALVDSAPGLCPDWSDWASKPVTNAR.E | 3233.53437 | 3 | 7.26E-06 | 0.89 | 4.70 | - | 666.0  |
| AHQ-1-3, 6330 - 6397   | R.ALGALVDSAPGLCPDWSDWASKPVTNAR.E | 3233.53437 | 3 | 2.98E-06 | 0.90 | 4.64 | - | 898.5  |
| AHQ-1-1, 6247 - 6307   | R.ALGALVDSAPGLCPDWSDWASKPVTNAR.E | 3233.53437 | 3 | 1.63E-06 | 0.88 | 4.59 | - | 529.4  |
| AHQ-1-1, 6367 - 6431   | R.ALGALVDSAPGLCPDWSDWASKPVTNAR.E | 3233.53437 | 3 | 1.97E-06 | 0.88 | 4.88 | - | 453.0  |
| AHQ-1-2, 6286 - 6337   | R.ALGALVDSAPGLCPDWSDWASKPVTNAR.E | 3233.53437 | 3 | 3.44E-05 | 0.93 | 5.27 | - | 766.3  |
| AHQ-1-3, 6213 - 6257   | R.ALGALVDSAPGLCPDWSDWASKPVTNAR.E | 3233.53437 | 3 | 6.16E-08 | 0.87 | 4.52 | - | 506.6  |
| AHQ-1-5, 6518 - 6534   | R.ALGALVDSAPGLCPDWSDWASKPVTNAR.E | 3233.53437 | 3 | 1.04E-12 | 0.89 | 4.67 | - | 497.6  |
| AHQ-1-10, 5663         | R.ALGALVDSAPGLCPDWSDWASKPVTNAR.E | 3233.53437 | 3 | 5.77E-09 | 0.60 | 3.16 | - | 325.7  |
| AHQ-1-3, 6463 - 6542   | R.ALGALVDSAPGLCPDWSDWASKPVTNAR.E | 3233.53437 | 3 | 3.96E-09 | 0.87 | 4.21 | - | 748.0  |
| AHQ-1-5, 6363 - 6442   | R.ALGALVDSAPGLCPDWSDWASKPVTNAR.E | 3233.53437 | 3 | 1.64E-08 | 0.95 | 5.84 | - | 951.2  |
| AHQ-1-2, 6622 - 6699   | R.ALGALVDSAPGLCPDWSDWASKPVTNAR.E | 3233.53437 | 3 | 1.10E-05 | 0.92 | 5.12 | - | 512.8  |
| AHQ-1-8, 6406 - 6482   | R.ALGALVDSAPGLCPDWSDWASKPVTNAR.E | 3233.53437 | 3 | 3.29E-07 | 0.87 | 4.43 | - | 486.4  |
| AHQ-1-2, 6421 - 6489   | R.ALGALVDSAPGLCPDWSDWASKPVTNAR.E | 3233.53437 | 3 | 6.34E-10 | 0.95 | 5.32 | - | 993.4  |
| AHQ-1-5, 6277          | R.ALGALVDSAPGLCPDWSDWASKPVTNAR.E | 3233.53437 | 3 | 4.53E-06 | 0.93 | 5.12 | - | 817.1  |
| AHQ-1-2, 6529 - 6593   | R.ALGALVDSAPGLCPDWSDWASKPVTNAR.E | 3233.53437 | 3 | 3.44E-11 | 0.96 | 6.19 | - | 937.6  |
| AHQ-1-9, 6282          | R.ALGALVDSAPGLCPDWSDWASKPVTNAR.E | 3233.53437 | 3 | 5.99E-11 | 0.94 | 5.89 | - | 625.5  |
| AHQ-1-2, 1506          | R.ALQTGGPHVK.A                   | 1109.26067 | 1 | 5.11E-05 | 0.05 | 1.89 | - | 169.8  |
| AHQ-1-2, 1542 - 1602   | R.ALQTGGPHVK.A                   | 1109.26067 | 1 | 6.28E-04 | 0.02 | 1.91 | - | 224.1  |
| AHQ-1-3, 1547          | R.ALQTGGPHVK.A                   | 1109.26067 | 2 | 9.04E-04 | 0.72 | 2.93 | - | 531.1  |
| AHQ-1-4, 3375 - 3396   | R.ANLPQSFQVDTSK.A                | 1435.56409 | 2 | 3.87E-07 | 0.70 | 2.77 | - | 367.5  |
| AHQ-1-5, 3254 - 3329   | R.ANLPQSFQVDTSK.A                | 1435.56409 | 2 | 3.24E-08 | 0.93 | 3.89 | - | 679.9  |
| AHQ-1-2, 3374 - 3449   | R.ANLPQSFQVDTSK.A                | 1435.56409 | 2 | 5.69E-09 | 0.91 | 3.55 | - | 658.6  |
| AHQ-1-1, 3592 - 3659   | R.ANLPQSFQVDTSK.A                | 1435.56409 | 2 | 9.58E-09 | 0.89 | 3.61 | - | 597.8  |
| AHQ-1-3, 3339 - 3411   | R.ANLPQSFQVDTSK.A                | 1435.56409 | 2 | 3.44E-05 | 0.88 | 3.43 | - | 648.2  |
| AHQ-1-9, 3162          | R.ANLPQSFQVDTSK.A                | 1435.56409 | 2 | 1.17E-05 | 0.79 | 2.93 | - | 533.2  |
| AHQ-1-9, 3171          | R.ANLPQSFQVDTSK.A                | 1435.56409 | 1 | 4.89E-04 | 0.52 | 2.64 | - | 390.5  |
| AHQ-1-2, 3654          | R.ANLPQSFQVDTSK.A                | 1435.56409 | 1 | 1.12E-07 | 0.33 | 2.62 | - | 334.0  |
| AHQ-1-7, 3281          | R.ANLPQSFQVDTSK.A                | 1435.56409 | 1 | 2.44E-06 | 0.53 | 2.66 | - | 450.5  |
| AHQ-1-2, 3462          | R.ANLPQSFQVDTSK.A                | 1435.56409 | 1 | 8.70E-06 | 0.78 | 3.30 | - | 489.6  |
| AHQ-1-3, 3351 - 3353   | R.ANLPQSFQVDTSK.A                | 1435.56409 | 1 | 1.51E-04 | 0.33 | 2.20 | - | 368.5  |
| AHQ-1-1, 3552          | R.APSVANVGSCHDSLK.I              | 1656.84249 | 2 | 6.68E-05 | 0.83 | 3.69 | - | 485.7  |
| AHQ-1-4, 3499          | R.APSVANVGSCHDSLK.I              | 1656.84249 | 2 | 1.84E-04 | 0.92 | 4.23 | - | 546.3  |
| AHQ-1-5, 3345 - 3346   | R.APSVANVGSCHDSLK.I              | 1656.84249 | 2 | 1.59E-06 | 0.94 | 4.87 | - | 841.5  |
| AHQ-1-5, 1707          | K.ATCAPQHGAAPGGPADASK.V          | 1791.92336 | 2 | 1.67E-04 | 0.94 | 4.48 | - | 846.9  |
| AHQ-1-1, 2029 - 2036   | K.ATCAPQHGAAPGGPADASK.V          | 1791.92336 | 2 | 3.37E-08 | 0.95 | 4.16 | - | 1018.9 |
| AHQ-1-13 - 1951 - 2031 | K.ATCAPQHGAAPGGPADASK.V          | 1791.92336 | 2 | 2.51E-05 | 0.92 | 4.29 | - | 541.5  |
| AHQ-1-4, 1799          | K.ATCAPQHGAAPGGPADASK.V          | 1791.92336 | 2 | 1.13E-06 | 0.84 | 3.90 | - | 543.3  |
| AHQ-1-11, 1894 - 1898  | K.ATCAPQHGAAPGGPADASK.V          | 1791.92336 | 2 | 4.24E-04 | 0.90 | 4.27 | - | 590.6  |
| AHQ-1-3, 1801 - 1862   | K.ATCAPQHGAAPGGPADASK.V          | 1791.92336 | 2 | 6.10E-05 | 0.96 | 4.87 | - | 982.2  |
| AHQ-1-7, 1725          | K.ATCAPQHGAAPGGPADASK.V          | 1791.92336 | 2 | 1.26E-05 | 0.90 | 4.10 | - | 632.4  |
| AHQ-1-1, 3783          | R.AWGPGLGEGVVVK.S                | 1227.39403 | 2 | 4.95E-04 | 0.92 | 3.84 | - | 834.5  |
| AHQ-1-5, 3570          | R.AWGPGLGEGVVVK.S                | 1227.39403 | 2 | 6.90E-05 | 0.93 | 3.48 | - | 1059.2 |
| AHQ-1-2, 3831 - 3901   | R.AWGPGLGEGVVVK.S                | 1227.39403 | 2 | 1.92E-05 | 0.91 | 4.24 | - | 730.8  |
| AHQ-1-4, 3743          | R.AWGPGLGEGVVVK.S                | 1227.39403 | 2 | 2.80E-06 | 0.87 | 3.47 | - | 781.8  |
| AHQ-1-6, 3546          | R.AWGPGLGEGVVVK.S                | 1227.39403 | 2 | 7.29E-04 | 0.84 | 3.29 | - | 573.9  |
| AHQ-1-7, 3636          | R.AWGPGLGEGVVVK.S                | 1227.39403 | 2 | 4.51E-05 | 0.88 | 2.97 | - | 994.9  |
| AHQ-1-3, 3703          | R.AWGPGLGEGVVVK.S                | 1227.39403 | 2 | 5.26E-05 | 0.83 | 3.21 | - | 617.4  |
| AHQ-1-2, 3283 - 3358   | R.AYGPGLIEPTGNMVK.K              | 1434.64274 | 2 | 3.59E-04 | 0.68 | 2.74 | - | 639.7  |
| AHQ-1-5, 3075 - 3149   | R.AYGPGLIEPTGNMVK.K              | 1434.64274 | 2 | 2.72E-04 | 0.82 | 3.41 | - | 605.6  |
| AHQ-1-1, 2872          | R.AYGPGLIEPTGNMVK.K              | 1450.64214 | 2 | 6.38E-08 | 0.92 | 3.59 | - | 803.3  |
| AHQ-1-4, 3503 - 3575   | R.AYGPGLIEPTGNMVK.K              | 1434.64274 | 2 | 6.45E-06 | 0.73 | 2.99 | - | 656.7  |
| AHQ-1-7, 3152 - 3156   | R.AYGPGLIEPTGNMVK.K              | 1434.64274 | 2 | 2.99E-04 | 0.85 | 3.79 | - | 533.4  |
| AHQ-1-4, 2635 - 2748   | R.AYGPGLIEPTGNMVK.K              | 1450.64214 | 2 | 2.20E-04 | 0.42 | 2.91 | - | 261.2  |
| AHQ-1-3, 2617 - 2669   | R.AYGPGLIEPTGNMVK.K              | 1450.64214 | 2 | 2.69E-04 | 0.63 | 3.26 | - | 341.3  |
| AHQ-1-2, 6459          | K.CAPGVVGAEAADIDFDIR.N           | 2017.24863 | 2 | 5.33E-06 | 0.74 | 3.12 | - | 505.8  |
| AHQ-1-2, 6403          | K.CAPGVVGAEAADIDFDIR.N           | 2017.24863 | 3 | 4.19E-10 | 0.97 | 5.50 | - | 1769.9 |
| AHQ-1-2, 6339 - 6386   | K.CAPGVVGAEAADIDFDIR.N           | 2017.24863 | 2 | 1.39E-04 | 0.96 | 5.15 | - | 874.2  |
| AHQ-1-3, 6053          | K.CAPGVVGAEAADIDFDIR.N           | 2017.24863 | 2 | 7.46E-08 | 0.90 | 3.72 | - | 818.6  |
| AHQ-1-3, 6221 - 6253   | K.CAPGVVGAEAADIDFDIR.N           | 2017.24863 | 2 | 5.56E-06 | 0.83 | 3.53 | - | 521.1  |
| AHQ-1-3, 6235 - 6242   | K.CAPGVVGAEAADIDFDIR.N           | 2017.24863 | 3 | 1.60E-09 | 0.96 | 5.62 | - | 1524.8 |
| AHQ-1-1, 6139 - 6148   | K.CAPGVVGAEAADIDFDIR.N           | 2017.24863 | 2 | 1.67E-05 | 0.82 | 3.88 | - | 442.4  |
| AHQ-1-1, 6155          | K.CAPGVVGAEAADIDFDIR.N           | 2017.24863 | 3 | 2.23E-11 | 0.96 | 4.56 | - | 1663.9 |
| AHQ-1-5, 6337 - 6403   | K.CAPGVVGAEAADIDFDIR.N           | 2017.24863 | 2 | 1.03E-06 | 0.79 | 3.73 | - | 394.4  |
| AHQ-1-4, 6380          | K.CAPGVVGAEAADIDFDIR.N           | 2017.24863 | 2 | 2.08E-07 | 0.85 | 3.84 | - | 452.1  |
| AHQ-1-2, 6837          | K.CAPGVVGAEAADIDFDIRNDNTFTVK.Y   | 3052.31840 | 3 | 7.43E-06 | 0.77 | 3.59 | - | 544.0  |
| AHQ-1-3, 6405 - 6469   | K.CAPGVVGAEAADIDFDIRNDNTFTVK.Y   | 3052.31840 | 3 | 4.23E-04 | 0.69 | 3.47 | - | 329.8  |
| AHQ-1-2, 6599 - 6665   | K.CAPGVVGAEAADIDFDIRNDNTFTVK.Y   | 3052.31840 | 3 | 6.01E-05 | 0.54 | 3.34 | - | 472.6  |
| AHQ-1-2, 6733 - 6753   | K.CAPGVVGAEAADIDFDIRNDNTFTVK.Y   | 3052.31840 | 3 | 6.62E-05 | 0.88 | 4.36 | - | 577.1  |
| AHQ-1-3, 2994 - 2995   | K.CSGPGLSPGMVR.A                 | 1219.41699 | 2 | 7.34E-05 | 0.80 | 3.02 | - | 627.1  |
| AHQ-1-1, 3084          | K.CSGPGLSPGMVR.A                 | 1219.41699 | 2 | 1.69E-07 | 0.63 | 2.79 | - | 544.7  |
| AHQ-1-5, 5450 - 5451   | R.CSYOPTM*EGVHTVHTFAGVPIPR.S     | 2686.06233 | 2 | 7.81E-12 | 0.93 | 4.15 | - | 881.8  |
| AHQ-1-2, 5149          | R.CSYOPTM*EGVHTVHTFAGVPIPR.S     | 2702.06173 | 2 | 9.21E-11 | 0.95 | 4.44 | - | 877.4  |
| AHQ-1-5, 4953 - 4955   | R.CSYOPTM*EGVHTVHTFAGVPIPR.S     | 2702.06173 | 3 | 3.81E-05 | 0.77 | 3.22 | - | 542.6  |
| AHQ-1-2, 5603 - 5670   | R.CSYOPTM*EGVHTVHTFAGVPIPR.S     | 2686.06233 | 3 | 2.18E-11 | 0.94 | 5.30 | - | 762.5  |

|                          |                                       |            |   |          |      |      |   |        |
|--------------------------|---------------------------------------|------------|---|----------|------|------|---|--------|
| AHQ-1-1, 5121            | R.CSYOPTM*EGVHTVHVTFAGVPIPR.S         | 2702.06173 | 2 | 1.83E-06 | 0.83 | 3.30 | - | 634.0  |
| AHQ-1-4, 5063 - 5067     | R.CSYOPTM*EGVHTVHVTFAGVPIPR.S         | 2702.06173 | 3 | 8.01E-06 | 0.84 | 3.85 | - | 692.9  |
| AHQ-1-4, 5554            | R.CSYOPTM*EGVHTVHVTFAGVPIPR.S         | 2686.06233 | 3 | 6.85E-08 | 0.87 | 3.79 | - | 804.6  |
| AHQ-1-3, 5451            | R.CSYOPTM*EGVHTVHVTFAGVPIPR.S         | 2686.06233 | 3 | 2.48E-09 | 0.85 | 3.95 | - | 859.4  |
| AHQ-1-3, 5466            | R.CSYOPTM*EGVHTVHVTFAGVPIPR.S         | 2686.06233 | 2 | 3.20E-07 | 0.92 | 3.56 | - | 1019.1 |
| AHQ-1-6, 4902 - 4908     | R.CSYOPTM*EGVHTVHVTFAGVPIPR.S         | 2702.06173 | 3 | 1.04E-04 | 0.82 | 4.04 | - | 239.6  |
| AHQ-1-2, 5641 - 5645     | R.CSYOPTM*EGVHTVHVTFAGVPIPR.S         | 2686.06233 | 2 | 1.43E-08 | 0.96 | 5.02 | - | 982.9  |
| AHQ-1-2, 4775            | R.DAEMPATEKDLAEDAPWKK.K               | 2018.19047 | 2 | 2.02E-04 | 0.94 | 4.43 | - | 1186.3 |
| AHQ-1-1, 4097            | R.DAEM*PATEKDLAEDAPWKK.K              | 2034.18987 | 2 | 2.09E-04 | 0.88 | 3.68 | - | 698.1  |
| AHQ-1-1, 3596 - 3672     | R.DAEM*PATEKDLAEDAPWKK.I              | 2162.36278 | 3 | 1.14E-05 | 0.71 | 3.11 | - | 606.7  |
| AHQ-1-2, 4295            | R.DAEMPATEKDLAEDAPWKK.I               | 2146.36338 | 2 | 1.48E-05 | 0.90 | 3.45 | - | 1129.0 |
| AHQ-1-1, 4067 - 4131     | K.DAGEGGLSLAIEGPKS.A                  | 1501.62084 | 2 | 5.48E-06 | 0.93 | 4.46 | - | 1331.1 |
| AHQ-1-8, 4004            | K.DAGEGGLSLAIEGPKS.A                  | 1501.62084 | 2 | 7.74E-06 | 0.89 | 3.86 | - | 985.8  |
| AHQ-1-13, 3880 - 3949    | K.DAGEGGLSLAIEGPKS.A                  | 1501.62084 | 2 | 3.87E-05 | 0.51 | 2.60 | - | 821.8  |
| AHQ-1-5, 4025 - 4098     | K.DAGEGGLSLAIEGPKS.A                  | 1501.62084 | 2 | 1.13E-08 | 0.97 | 5.52 | - | 1448.1 |
| AHQ-1-10, 3656           | K.DAGEGGLSLAIEGPKS.A                  | 1501.62084 | 2 | 7.43E-07 | 0.94 | 3.91 | - | 1440.8 |
| AHQ-1-4, 4110 - 4183     | K.DAGEGGLSLAIEGPKS.A                  | 1501.62084 | 2 | 1.89E-08 | 0.96 | 4.80 | - | 1347.9 |
| AHQ-1-13 - , 4008        | K.DAGEGGLSLAIEGPKS.A                  | 1501.62084 | 2 | 2.46E-07 | 0.92 | 4.03 | - | 1048.9 |
| AHQ-1-5, 4133            | K.DAGEGGLSLAIEGPKS.A                  | 1501.62084 | 2 | 4.58E-08 | 0.92 | 3.70 | - | 1177.4 |
| AHQ-1-3, 3978 - 4058     | K.DAGEGGLSLAIEGPKS.A                  | 1501.62084 | 2 | 1.64E-05 | 0.94 | 4.32 | - | 1208.2 |
| AHQ-1-1, 4208            | K.DAGEGGLSLAIEGPKS.A                  | 1501.62084 | 2 | 6.91E-06 | 0.92 | 4.27 | - | 1035.7 |
| AHQ-1-6, 3975            | K.DAGEGGLSLAIEGPKS.A                  | 1501.62084 | 2 | 1.82E-06 | 0.84 | 3.56 | - | 756.7  |
| AHQ-1-3, 4979            | K.DAGEGLLAVQITDPEGK.P                 | 1713.86752 | 2 | 8.07E-06 | 0.84 | 2.81 | - | 1258.8 |
| AHQ-1-2, 5117            | K.DAGEGLLAVQITDPEGK.P                 | 1713.86752 | 2 | 2.97E-07 | 0.93 | 4.15 | - | 1264.7 |
| AHQ-1-1, 4967            | K.DAGEGLLAVQITDPEGK.P                 | 1713.86752 | 2 | 4.75E-07 | 0.92 | 3.77 | - | 1387.1 |
| AHQ-1-7, 4372 - 4385     | K.DAGEGLLAVQITDPEGKPK.K               | 1939.15612 | 2 | 3.50E-08 | 0.93 | 4.11 | - | 1275.1 |
| AHQ-1-2, 4618 - 4637     | K.DAGEGLLAVQITDPEGKPK.K               | 1939.15612 | 3 | 4.50E-12 | 0.93 | 4.30 | - | 1328.5 |
| AHQ-1-10, 3953           | K.DAGEGLLAVQITDPEGKPK.K               | 1939.15612 | 2 | 2.95E-07 | 0.88 | 3.98 | - | 1006.0 |
| AHQ-1-2, 4851            | K.DAGEGLLAVQITDPEGKPK.K               | 1939.15612 | 2 | 1.32E-06 | 0.71 | 3.22 | - | 635.8  |
| AHQ-1-1, 4492 - 4560     | K.DAGEGLLAVQITDPEGKPK.K               | 1939.15612 | 3 | 3.70E-04 | 0.72 | 3.03 | - | 805.3  |
| AHQ-1-1, 4491 - 4555     | K.DAGEGLLAVQITDPEGKPK.K               | 1939.15612 | 2 | 1.31E-10 | 0.96 | 4.70 | - | 1529.9 |
| AHQ-1-8, 4223            | K.DAGEGLLAVQITDPEGKPK.K               | 1939.15612 | 2 | 9.43E-05 | 0.89 | 4.15 | - | 903.3  |
| AHQ-1-9, 4250 - 4264     | K.DAGEGLLAVQITDPEGKPK.K               | 1939.15612 | 2 | 8.78E-05 | 0.89 | 4.09 | - | 912.5  |
| AHQ-1-5, 4395            | K.DAGEGLLAVQITDPEGKPK.K               | 1939.15612 | 3 | 1.24E-08 | 0.79 | 3.03 | - | 938.1  |
| AHQ-1-11, 4072           | K.DAGEGLLAVQITDPEGKPK.K               | 1939.15612 | 2 | 3.62E-12 | 0.94 | 4.51 | - | 1105.8 |
| AHQ-1-3, 4454 - 4522     | K.DAGEGLLAVQITDPEGKPK.K               | 1939.15612 | 2 | 2.36E-06 | 0.94 | 4.40 | - | 1246.9 |
| AHQ-1-2, 4751 - 4827     | K.DAGEGLLAVQITDPEGKPK.K               | 1939.15612 | 2 | 8.51E-09 | 0.95 | 4.36 | - | 1179.6 |
| AHQ-1-3, 4687            | K.DAGEGLLAVQITDPEGKPK.K               | 1939.15612 | 2 | 7.16E-07 | 0.78 | 3.12 | - | 897.7  |
| AHQ-1-6, 4308 - 4314     | K.DAGEGLLAVQITDPEGKPK.K               | 1939.15612 | 2 | 6.55E-07 | 0.94 | 3.83 | - | 1515.9 |
| AHQ-1-4, 4483 - 4562     | K.DAGEGLLAVQITDPEGKPK.K               | 1939.15612 | 2 | 2.36E-05 | 0.74 | 2.96 | - | 859.4  |
| AHQ-1-2, 4613 - 4685     | K.DAGEGLLAVQITDPEGKPK.K               | 1939.15612 | 2 | 1.51E-06 | 0.96 | 4.36 | - | 1566.6 |
| AHQ-1-1, 4636 - 4717     | K.DAGEGLLAVQITDPEGKPK.K               | 1939.15612 | 2 | 8.50E-09 | 0.94 | 4.27 | - | 1109.4 |
| AHQ-1-6, 4319            | K.DAGEGLLAVQITDPEGKPK.K               | 1939.15612 | 3 | 2.48E-06 | 0.80 | 3.28 | - | 985.9  |
| AHQ-1-2, 4706            | K.DAGEGLLAVQITDPEGKPK.K               | 1939.15612 | 3 | 2.26E-06 | 0.90 | 3.73 | - | 1489.7 |
| AHQ-1-7, 4620            | R.DAGYGGGLSLAIEGPKS.V                 | 1551.67986 | 2 | 2.01E-04 | 0.63 | 3.04 | - | 420.6  |
| AHQ-1-5, 4611 - 4687     | R.DAGYGGGLSLAIEGPKS.V                 | 1551.67986 | 2 | 7.83E-11 | 0.95 | 4.16 | - | 1497.6 |
| AHQ-1-1, 4704            | R.DAGYGGGLSLAIEGPKS.V                 | 1551.67986 | 2 | 9.31E-06 | 0.58 | 3.17 | - | 544.0  |
| AHQ-1-5, 4402            | R.DAGYGGGLSLAIEGPKS.V                 | 1551.67986 | 2 | 8.54E-08 | 0.76 | 2.58 | - | 1158.2 |
| AHQ-1-4, 4856            | R.DAGYGGGLSLAIEGPKS.V                 | 1551.67986 | 2 | 6.43E-05 | 0.61 | 3.01 | - | 660.8  |
| AHQ-1-3, 4627            | R.DAGYGGGLSLAIEGPKS.V                 | 1551.67986 | 2 | 1.57E-13 | 0.96 | 4.34 | - | 1573.1 |
| AHQ-1-1, 4603            | R.DAGYGGGLSLAIEGPKS.V                 | 1551.67986 | 2 | 3.21E-10 | 0.94 | 4.34 | - | 1256.9 |
| AHQ-1-5, 4882            | R.DAGYGGGLSLAIEGPKS.V                 | 1551.67986 | 2 | 4.67E-07 | 0.81 | 3.40 | - | 757.0  |
| AHQ-1-1, 4361 - 4435     | R.DAGYGGGLSLAIEGPKS.V                 | 1551.67986 | 2 | 2.38E-09 | 0.96 | 4.56 | - | 1457.5 |
| AHQ-1-2, 4759            | R.DAGYGGGLSLAIEGPKS.V                 | 1551.67986 | 2 | 1.42E-06 | 0.95 | 4.38 | - | 1514.4 |
| AHQ-1-5, 4753            | R.DAGYGGGLSLAIEGPKS.V                 | 1551.67986 | 2 | 2.39E-04 | 0.75 | 2.94 | - | 1012.6 |
| AHQ-1-3, 1883 - 1945     | R.DAPQDFHPR.D                         | 1198.22650 | 2 | 6.17E-05 | 0.59 | 2.58 | - | 553.2  |
| AHQ-1-1, 4881 - 4963     | K.DGSCGVAYVQEPGDYEVSVK.F              | 2260.41990 | 2 | 1.28E-04 | 0.78 | 4.03 | - | 511.6  |
| AHQ-1-1, 5055            | K.DGSCGVAYVQEPGDYEVSVK.F              | 2260.41990 | 2 | 2.22E-05 | 0.38 | 3.01 | - | 305.3  |
| AHQ-1-5, 4958 - 5029     | K.DGSCGVAYVQEPGDYEVSVK.F              | 2260.41990 | 2 | 1.52E-04 | 0.91 | 4.82 | - | 616.1  |
| AHQ-1-5, 5255            | K.DGSCGVAYVQEPGDYEVSVK.F              | 2260.41990 | 2 | 2.15E-05 | 0.92 | 4.49 | - | 759.3  |
| AHQ-1-4, 4996 - 5003     | K.DGSCGVAYVQEPGDYEVSVK.F              | 2260.41990 | 2 | 1.49E-05 | 0.90 | 4.55 | - | 608.2  |
| AHQ-1-3, 4909 - 4910     | K.DGSCGVAYVQEPGDYEVSVK.F              | 2260.41990 | 2 | 9.49E-05 | 0.87 | 4.10 | - | 604.1  |
| AHQ-1-2, 5046 - 5050     | K.DGSCGVAYVQEPGDYEVSVK.F              | 2260.41990 | 2 | 1.61E-05 | 0.89 | 4.55 | - | 587.2  |
| AHQ-1-6, 4927 - 5002     | K.DGSCGVAYVQEPGDYEVSVK.F              | 2260.41990 | 2 | 6.26E-04 | 0.78 | 3.42 | - | 602.2  |
| AHQ-1-6, 5088            | K.DGSCGVAYVQEPGDYEVSVK.F              | 2260.41990 | 2 | 1.22E-06 | 0.60 | 3.47 | - | 395.4  |
| AHQ-1-8, 4942 - 4946     | K.DGSCGVAYVQEPGDYEVSVK.F              | 2260.41990 | 2 | 1.29E-04 | 0.87 | 4.56 | - | 650.7  |
| AHQ-1-5, 5099 - 5178     | K.DGSCGVAYVQEPGDYEVSVK.F              | 2260.41990 | 2 | 9.63E-06 | 0.88 | 4.52 | - | 590.1  |
| AHQ-1-14, 3353           | K.DKGEYTLVVK.W                        | 1152.32223 | 1 | 7.34E-04 | 0.37 | 2.39 | - | 613.4  |
| AHQ-1-11, 2416           | K.DKGEYTLVVK.W                        | 1152.32223 | 1 | 2.31E-04 | 0.34 | 2.16 | - | 572.9  |
| AHQ-1-12, 2469           | K.DKGEYTLVVK.W                        | 1152.32223 | 2 | 9.56E-04 | 0.74 | 2.52 | - | 615.9  |
| AHQ-1-1, 2637 - 2641     | K.DKGEYTLVVK.W                        | 1152.32223 | 1 | 4.77E-04 | 0.48 | 2.76 | - | 509.1  |
| AHQ-1-14 - , 2466 - 2532 | K.DKGEYTLVVK.W                        | 1152.32223 | 2 | 2.11E-06 | 0.75 | 2.79 | - | 557.6  |
| AHQ-1-1, 3315            | K.DNNGNTYSYVPR.K                      | 1591.64109 | 2 | 8.57E-05 | 0.81 | 2.81 | - | 1063.6 |
| AHQ-1-2, 3427            | K.DNNGNTYSYVPR.K                      | 1591.64109 | 2 | 1.13E-04 | 0.84 | 2.72 | - | 1111.9 |
| AHQ-1-2, 3223            | R.DVDIIDHHDNTYTVK.Y                   | 1785.89230 | 3 | 1.54E-05 | 0.71 | 3.15 | - | 526.3  |
| AHQ-1-3, 3093 - 3095     | R.DVDIIDHHDNTYTVK.Y                   | 1785.89230 | 2 | 5.96E-07 | 0.92 | 3.94 | - | 1027.2 |
| AHQ-1-2, 3265            | R.DVDIIDHHDNTYTVK.Y                   | 1785.89230 | 2 | 1.55E-07 | 0.96 | 4.56 | - | 1092.4 |
| AHQ-1-3, 3342            | R.DVDIIDHHDNTYTVK.Y                   | 1785.89230 | 2 | 1.83E-06 | 0.79 | 3.00 | - | 941.7  |
| AHQ-1-7, 3009            | R.DVDIIDHHDNTYTVK.Y                   | 1785.89230 | 2 | 2.28E-05 | 0.78 | 2.84 | - | 812.0  |
| AHQ-1-1, 3123 - 3203     | R.DVDIIDHHDNTYTVK.Y                   | 1785.89230 | 2 | 1.76E-04 | 0.94 | 3.66 | - | 1340.2 |
| AHQ-1-2, 3135 - 3205     | R.DVDIIDHHDNTYTVK.Y                   | 1785.89230 | 3 | 4.65E-05 | 0.70 | 3.19 | - | 413.6  |
| AHQ-1-2, 3381 - 3447     | R.DVDIIDHHDNTYTVK.Y                   | 1785.89230 | 2 | 6.27E-07 | 0.84 | 3.33 | - | 617.1  |
| AHQ-1-4, 3034 - 3110     | R.DVDIIDHHDNTYTVK.Y                   | 1785.89230 | 2 | 1.60E-06 | 0.90 | 3.73 | - | 961.4  |
| AHQ-1-6, 2984            | R.DVDIIDHHDNTYTVK.Y                   | 1785.89230 | 2 | 4.28E-04 | 0.76 | 2.81 | - | 852.3  |
| AHQ-1-3, 3185            | R.DVDIIDHHDNTYTVK.Y                   | 1785.89230 | 2 | 2.16E-06 | 0.86 | 3.58 | - | 907.2  |
| AHQ-1-1, 3280            | R.DVDIIDHHDNTYTVK.Y                   | 1785.89230 | 2 | 4.05E-06 | 0.85 | 3.39 | - | 793.2  |
| AHQ-1-9, 2899 - 2904     | R.DVDIIDHHDNTYTVK.Y                   | 1785.89230 | 2 | 6.60E-05 | 0.40 | 2.70 | - | 511.1  |
| AHQ-1-6, 3334            | R.EAGAGGLAIAVEGPKS.A                  | 1427.58510 | 1 | 6.09E-09 | 0.65 | 3.60 | - | 269.7  |
| AHQ-1-4, 3479            | R.EAGAGGLAIAVEGPKS.A                  | 1427.58510 | 2 | 2.81E-06 | 0.96 | 4.50 | - | 1331.4 |
| AHQ-1-5, 3353            | R.EAGAGGLAIAVEGPKS.A                  | 1427.58510 | 1 | 2.15E-07 | 0.73 | 3.37 | - | 290.2  |
| AHQ-1-8, 3201 - 3202     | R.EAGAGGLAIAVEGPKS.A                  | 1427.58510 | 1 | 1.40E-04 | 0.68 | 3.63 | - | 302.2  |
| AHQ-1-5, 3350 - 3373     | R.EAGAGGLAIAVEGPKS.A                  | 1427.58510 | 2 | 6.13E-08 | 0.97 | 4.27 | - | 1785.9 |
| AHQ-1-1, 3487 - 3556     | R.EAGAGGLAIAVEGPKS.A                  | 1427.58510 | 2 | 8.95E-08 | 0.96 | 4.34 | - | 1831.9 |
| AHQ-1-3, 3461 - 3474     | R.EAGAGGLAIAVEGPKS.A                  | 1427.58510 | 2 | 4.31E-06 | 0.94 | 4.16 | - | 1047.8 |
| AHQ-1-6, 3318 - 3319     | R.EAGAGGLAIAVEGPKS.A                  | 1427.58510 | 2 | 3.23E-10 | 0.95 | 4.17 | - | 1356.5 |
| AHQ-1-6, 2530 - 2532     | R.EATTFESVDAR.A                       | 1226.27493 | 2 | 1.67E-04 | 0.83 | 2.94 | - | 975.1  |
| AHQ-1-2, 2701 - 2774     | R.EATTFESVDAR.A                       | 1226.27493 | 2 | 1.09E-05 | 0.88 | 3.30 | - | 830.4  |
| AHQ-1-1, 2731 - 2761     | R.EATTFESVDAR.A                       | 1226.27493 | 2 | 7.18E-05 | 0.86 | 3.38 | - | 771.7  |
| AHQ-1-3, 2611            | R.EATTFESVDAR.A                       | 1226.27493 | 2 | 8.87E-06 | 0.86 | 3.04 | - | 991.7  |
| AHQ-1-6, 6308 - 6383     | R.EEGPYEVEVTDGVPVPGSPFFLEAVAPT.KPSK.V | 3487.85286 | 3 | 1.71E-09 | 0.95 | 5.41 | - | 1068.2 |
| AHQ-1-5, 6461 - 6538     | R.EEGPYEVEVTDGVPVPGSPFFLEAVAPT.KPSK.V | 3487.85286 | 3 | 4.83E-08 | 0.95 | 5.89 | - | 699.0  |
| AHQ-1-3, 6473 - 6553     | R.EEGPYEVEVTDGVPVPGSPFFLEAVAPT.KPSK.V | 3487.85286 | 3 | 2.84E-07 | 0.87 | 4.41 | - | 508.3  |
| AHQ-1-8, 6510            | R.EEGPYEVEVTDGVPVPGSPFFLEAVAPT.KPSK.V | 3487.85286 | 3 | 2.01E-08 | 0.89 | 4.73 | - | 647.7  |
| AHQ-1-3, 6322 - 6401     | R.EEGPYEVEVTDGVPVPGSPFFLEAVAPT.KPSK.V | 3487.85286 | 3 | 1.03E-07 | 0.96 | 6.83 | - | 800.4  |
| AHQ-1-9, 6371            | R.EEGPYEVEVTDGVPVPGSPFFLEAVAPT.KPSK.V | 3487.85286 | 3 | 4.87E-06 | 0.67 | 3.57 | - | 362.4  |
| AHQ-1-1, 6259 - 6331     | R.EEGPYEVEVTDGVPVPGSPFFLEAVAPT.KPSK.V | 3487.85286 | 3 | 5.91E-07 | 0.95 | 6.00 | - | 735.8  |
| AHQ-1-1, 6347 - 6405     | R.EEGPYEVEVTDGVPVPGSPFFLEAVAPT.KPSK.V | 3487.85286 | 3 | 5.13E-10 | 0.88 | 4.66 | - | 522.7  |



|                        |                                       |            |   |          |      |      |   |        |
|------------------------|---------------------------------------|------------|---|----------|------|------|---|--------|
| AHQ-1-7, 6461 - 6533   | R.EEGPYEVEVTDGVPVPGSPFFLEAVAPTCKPSK.V | 3487.85286 | 3 | 1.00E-04 | 0.91 | 4.94 | - | 527.6  |
| AHQ-1-4, 6488 - 6558   | R.EEGPYEVEVTDGVPVPGSPFFLEAVAPTCKPSK.V | 3487.85286 | 3 | 4.00E-08 | 0.94 | 5.32 | - | 755.0  |
| AHQ-1-2, 6470 - 6537   | R.EEGPYEVEVTDGVPVPGSPFFLEAVAPTCKPSK.V | 3487.85286 | 3 | 4.39E-09 | 0.93 | 5.36 | - | 705.9  |
| AHQ-1-4, 6606 - 6623   | R.EEGPYEVEVTDGVPVPGSPFFLEAVAPTCKPSK.V | 3487.85286 | 3 | 7.20E-11 | 0.92 | 5.35 | - | 582.2  |
| AHQ-1-2, 6601 - 6666   | R.EEGPYEVEVTDGVPVPGSPFFLEAVAPTCKPSK.V | 3487.85286 | 3 | 4.12E-05 | 0.91 | 5.05 | - | 524.2  |
| AHQ-1-5, 5174 - 5243   | R.EGYPYSISVLYGDEEVPR.S                | 1911.05809 | 2 | 3.05E-05 | 0.74 | 3.42 | - | 409.3  |
| AHQ-1-2, 5334          | R.EGYPYSISVLYGDEEVPR.S                | 1911.05809 | 3 | 3.97E-04 | 0.95 | 5.11 | - | 1463.9 |
| AHQ-1-2, 5266 - 5345   | R.EGYPYSISVLYGDEEVPR.S                | 1911.05809 | 2 | 1.94E-09 | 0.90 | 3.81 | - | 1069.6 |
| AHQ-1-3, 5125 - 5206   | R.EGYPYSISVLYGDEEVPR.S                | 1911.05809 | 2 | 4.08E-09 | 0.91 | 4.02 | - | 947.6  |
| AHQ-1-10, 4569 - 4583  | R.EGYPYSISVLYGDEEVPR.S                | 1911.05809 | 2 | 1.04E-06 | 0.86 | 3.69 | - | 677.9  |
| AHQ-1-2, 5026          | R.EGYPYSISVLYGDEEVPR.S                | 1911.05809 | 2 | 2.29E-06 | 0.86 | 3.89 | - | 620.7  |
| AHQ-1-1, 5211          | R.EGYPYSISVLYGDEEVPR.S                | 1911.05809 | 3 | 1.16E-05 | 0.95 | 4.90 | - | 1523.1 |
| AHQ-1-1, 5153 - 5219   | R.EGYPYSISVLYGDEEVPR.S                | 1911.05809 | 2 | 6.59E-08 | 0.92 | 3.98 | - | 1140.3 |
| AHQ-1-1, 4872          | R.EGYPYSISVLYGDEEVPR.S                | 1911.05809 | 2 | 9.54E-07 | 0.39 | 3.18 | - | 378.6  |
| AHQ-1-9, 5008 - 5027   | R.EGYPYSISVLYGDEEVPR.S                | 1911.05809 | 2 | 7.70E-06 | 0.93 | 4.18 | - | 983.4  |
| AHQ-1-6, 5099          | R.EGYPYSISVLYGDEEVPR.S                | 1911.05809 | 2 | 2.62E-06 | 0.88 | 3.78 | - | 886.7  |
| AHQ-1-7, 5078 - 5153   | R.EGYPYSISVLYGDEEVPR.S                | 1911.05809 | 2 | 7.59E-06 | 0.59 | 2.83 | - | 484.3  |
| AHQ-1-7, 3913          | R.ENGYYLIDVK.F                        | 1150.30633 | 1 | 4.66E-04 | 0.11 | 1.93 | - | 252.4  |
| AHQ-1-5, 3898 - 3969   | R.ENGYYLIDVK.F                        | 1150.30633 | 2 | 5.49E-04 | 0.67 | 2.79 | - | 471.3  |
| AHQ-1-4, 4072          | R.ENGYYLIDVK.F                        | 1150.30633 | 2 | 2.75E-04 | 0.86 | 3.19 | - | 604.4  |
| AHQ-1-5, 1490          | K.ETGEHLVHV.K                         | 1149.28166 | 1 | 7.60E-05 | 0.30 | 2.38 | - | 259.6  |
| AHQ-1-13, -3539 - 3547 | K.FADQHVPSPFVK.V                      | 1516.68203 | 2 | 4.53E-06 | 0.80 | 3.28 | - | 586.4  |
| AHQ-1-6, 3350          | K.FADQHVPSPFVK.V                      | 1516.68203 | 2 | 1.26E-06 | 0.87 | 3.65 | - | 504.4  |
| AHQ-1-3, 3542          | K.FADQHVPSPFVK.V                      | 1516.68203 | 3 | 1.65E-07 | 0.91 | 3.74 | - | 1105.9 |
| AHQ-1-5, 3378          | K.FADQHVPSPFVK.V                      | 1516.68203 | 3 | 1.60E-07 | 0.91 | 4.09 | - | 957.7  |
| AHQ-1-1, 3617          | K.FADQHVPSPFVK.V                      | 1516.68203 | 2 | 1.86E-05 | 0.87 | 3.29 | - | 614.2  |
| AHQ-1-1, 3619          | K.FADQHVPSPFVK.V                      | 1516.68203 | 3 | 1.60E-05 | 0.95 | 3.90 | - | 1535.5 |
| AHQ-1-7, 3388 - 3390   | K.FADQHVPSPFVK.V                      | 1516.68203 | 2 | 6.99E-07 | 0.72 | 3.23 | - | 399.2  |
| AHQ-1-3, 3525          | K.FADQHVPSPFVK.V                      | 1516.68203 | 2 | 7.03E-05 | 0.76 | 3.31 | - | 524.2  |
| AHQ-1-4, 3551          | K.FADQHVPSPFVK.V                      | 1516.68203 | 3 | 2.04E-08 | 0.95 | 4.17 | - | 1600.1 |
| AHQ-1-6, 3352          | K.FADQHVPSPFVK.V                      | 1516.68203 | 3 | 2.06E-06 | 0.87 | 3.84 | - | 835.4  |
| AHQ-1-4, 3538          | K.FADQHVPSPFVK.V                      | 1516.68203 | 2 | 3.37E-04 | 0.81 | 3.53 | - | 400.1  |
| AHQ-1-5, 5623 - 5627   | R.FGGEHVPNSPFQVTLAGDQPSVQPLR.S        | 2947.25342 | 2 | 4.03E-06 | 0.93 | 4.31 | - | 1033.5 |
| AHQ-1-12, 5283         | R.FGGEHVPNSPFQVTLAGDQPSVQPLR.S        | 2947.25342 | 2 | 3.74E-06 | 0.95 | 5.14 | - | 1101.8 |
| AHQ-1-13, 5197         | R.FGGEHVPNSPFQVTLAGDQPSVQPLR.S        | 2947.25342 | 3 | 4.21E-04 | 0.87 | 4.19 | - | 777.1  |
| AHQ-1-4, 5811 - 5891   | R.FGGEHVPNSPFQVTLAGDQPSVQPLR.S        | 2947.25342 | 3 | 1.42E-10 | 0.94 | 5.09 | - | 838.7  |
| AHQ-1-9, 5392 - 5459   | R.FGGEHVPNSPFQVTLAGDQPSVQPLR.S        | 2947.25342 | 3 | 1.86E-04 | 0.84 | 4.28 | - | 590.0  |
| AHQ-1-1, 5499 - 5504   | R.FGGEHVPNSPFQVTLAGDQPSVQPLR.S        | 2947.25342 | 3 | 2.07E-04 | 0.89 | 4.49 | - | 738.3  |
| AHQ-1-4, 5747 - 5770   | R.FGGEHVPNSPFQVTLAGDQPSVQPLR.S        | 2947.25342 | 2 | 2.50E-08 | 0.95 | 4.69 | - | 963.7  |
| AHQ-1-12, 5255         | R.FGGEHVPNSPFQVTLAGDQPSVQPLR.S        | 2947.25342 | 3 | 2.52E-05 | 0.75 | 3.54 | - | 441.2  |
| AHQ-1-2, 5926          | R.FGGEHVPNSPFQVTLAGDQPSVQPLR.S        | 2947.25342 | 2 | 2.56E-06 | 0.87 | 3.42 | - | 785.7  |
| AHQ-1-10, 4900         | R.FGGEHVPNSPFQVTLAGDQPSVQPLR.S        | 2947.25342 | 3 | 1.66E-04 | 0.73 | 3.50 | - | 550.6  |
| AHQ-1-2, 5893 - 5961   | R.FGGEHVPNSPFQVTLAGDQPSVQPLR.S        | 2947.25342 | 3 | 1.97E-06 | 0.91 | 4.72 | - | 801.3  |
| AHQ-1-1, 5609 - 5671   | R.FGGEHVPNSPFQVTLAGDQPSVQPLR.S        | 2947.25342 | 3 | 1.50E-05 | 0.91 | 4.63 | - | 779.3  |
| AHQ-1-3, 5709 - 5773   | R.FGGEHVPNSPFQVTLAGDQPSVQPLR.S        | 2947.25342 | 3 | 7.42E-11 | 0.93 | 5.72 | - | 779.5  |
| AHQ-1-2, 5793 - 5861   | R.FGGEHVPNSPFQVTLAGDQPSVQPLR.S        | 2947.25342 | 2 | 7.60E-10 | 0.98 | 6.03 | - | 1506.3 |
| AHQ-1-1, 5675 - 5680   | R.FGGEHVPNSPFQVTLAGDQPSVQPLR.S        | 2947.25342 | 2 | 2.94E-12 | 0.97 | 6.01 | - | 1276.8 |
| AHQ-1-3, 5657 - 5685   | R.FGGEHVPNSPFQVTLAGDQPSVQPLR.S        | 2947.25342 | 2 | 4.72E-05 | 0.97 | 5.61 | - | 1228.2 |
| AHQ-1-1, 5735 - 5799   | R.FGGEHVPNSPFQVTLAGDQPSVQPLR.S        | 2947.25342 | 3 | 7.84E-08 | 0.85 | 4.24 | - | 754.3  |
| AHQ-1-2, 5757 - 5826   | R.FGGEHVPNSPFQVTLAGDQPSVQPLR.S        | 2947.25342 | 3 | 6.74E-10 | 0.95 | 5.75 | - | 718.9  |
| AHQ-1-13, -5615        | R.FGGEHVPNSPFQVTLAGDQPSVQPLR.S        | 2947.25342 | 3 | 2.95E-04 | 0.87 | 4.22 | - | 657.5  |
| AHQ-1-8, 5415 - 5432   | R.FGGEHVPNSPFQVTLAGDQPSVQPLR.S        | 2947.25342 | 3 | 5.95E-07 | 0.94 | 5.23 | - | 1051.1 |
| AHQ-1-3, 5578 - 5645   | R.FGGEHVPNSPFQVTLAGDQPSVQPLR.S        | 2947.25342 | 3 | 3.72E-07 | 0.94 | 4.94 | - | 872.2  |
| AHQ-1-2, 5617 - 5691   | R.FGGEHVPNSPFQVTLAGDQPSVQPLR.S        | 2947.25342 | 3 | 2.70E-05 | 0.95 | 5.64 | - | 1062.9 |
| AHQ-1-5, 5201 - 5269   | K.FNEEHIPDPSFVVPVSPSGDAR.R            | 2468.66280 | 2 | 5.18E-08 | 0.94 | 5.26 | - | 663.2  |
| AHQ-1-8, 5086          | K.FNEEHIPDPSFVVPVSPSGDAR.R            | 2468.66280 | 2 | 5.53E-08 | 0.96 | 5.17 | - | 865.4  |
| AHQ-1-5, 5401 - 5438   | K.FNEEHIPDPSFVVPVSPSGDAR.R            | 2468.66280 | 2 | 2.87E-07 | 0.90 | 4.34 | - | 533.2  |
| AHQ-1-9, 5034          | K.FNEEHIPDPSFVVPVSPSGDAR.R            | 2468.66280 | 2 | 2.00E-04 | 0.83 | 3.13 | - | 777.6  |
| AHQ-1-6, 5146          | K.FNEEHIPDPSFVVPVSPSGDAR.R            | 2468.66280 | 2 | 5.79E-04 | 0.74 | 2.90 | - | 549.7  |
| AHQ-1-1, 3937 - 4012   | K.FNGTHIPGSPFK.I                      | 1302.46259 | 2 | 9.80E-06 | 0.62 | 2.69 | - | 486.8  |
| AHQ-1-3, 3879          | K.FNGTHIPGSPFK.I                      | 1302.46259 | 2 | 1.58E-05 | 0.74 | 3.02 | - | 580.8  |
| AHQ-1-4, 3894          | K.FNGTHIPGSPFK.I                      | 1302.46259 | 2 | 1.54E-06 | 0.44 | 2.58 | - | 438.5  |
| AHQ-1-2, 4030          | K.FNGTHIPGSPFK.I                      | 1302.46259 | 2 | 2.20E-06 | 0.84 | 2.77 | - | 797.0  |
| AHQ-1-1, 3837          | K.FNGTHIPGSPFK.I                      | 1302.46259 | 2 | 1.27E-07 | 0.87 | 3.30 | - | 761.4  |
| AHQ-1-5, 3729          | K.FNGTHIPGSPFK.I                      | 1302.46259 | 2 | 1.19E-05 | 0.86 | 3.58 | - | 558.6  |
| AHQ-1-5, 2889          | R.FVPAEMGHTVSVK.Y                     | 1503.74821 | 2 | 9.36E-06 | 0.92 | 3.75 | - | 800.1  |
| AHQ-1-1, 3148          | R.FVPAEMGHTVSVK.Y                     | 1503.74821 | 2 | 7.75E-08 | 0.74 | 2.79 | - | 622.3  |
| AHQ-1-6, 2914          | R.FVPAEMGHTVSVK.Y                     | 1503.74821 | 2 | 9.30E-05 | 0.75 | 2.63 | - | 562.1  |
| AHQ-1-4, 6924 - 6938   | R.GAGSYTIMVLFADQATPTSPIR.V            | 2297.61623 | 2 | 1.11E-05 | 0.89 | 4.14 | - | 524.5  |
| AHQ-1-3, 6250          | R.GAGSYTIMVLFADQATPTSPIR.V            | 2313.61563 | 2 | 6.03E-05 | 0.39 | 2.64 | - | 280.2  |
| AHQ-1-2, 6266          | R.GAGSYTIMVLFADQATPTSPIR.V            | 2313.61563 | 2 | 1.15E-05 | 0.93 | 4.59 | - | 743.4  |
| AHQ-1-6, 3283 - 3298   | R.GAGTGGLGLAVEGPEAK.M                 | 1571.71430 | 2 | 1.87E-07 | 0.86 | 3.10 | - | 969.9  |
| AHQ-1-8, 3180          | R.GAGTGGLGLAVEGPEAK.M                 | 1571.71430 | 2 | 4.56E-05 | 0.87 | 3.24 | - | 793.1  |
| AHQ-1-1, 3621 - 3649   | R.GAGTGGLGLAVEGPEAK.M                 | 1571.71430 | 2 | 2.06E-04 | 0.88 | 3.41 | - | 975.4  |
| AHQ-1-3, 3631          | R.GAGTGGLGLAVEGPEAK.M                 | 1571.71430 | 2 | 1.38E-05 | 0.21 | 2.66 | - | 255.5  |
| AHQ-1-2, 3455 - 3529   | R.GAGTGGLGLAVEGPEAK.M                 | 1571.71430 | 2 | 7.02E-07 | 0.93 | 4.57 | - | 828.5  |
| AHQ-1-3, 3513          | R.GAGTGGLGLAVEGPEAK.M                 | 1571.71430 | 2 | 1.73E-05 | 0.51 | 2.57 | - | 468.7  |
| AHQ-1-3, 3361 - 3429   | R.GAGTGGLGLAVEGPEAK.M                 | 1571.71430 | 2 | 6.27E-06 | 0.89 | 3.59 | - | 856.0  |
| AHQ-1-1, 3464 - 3535   | R.GAGTGGLGLAVEGPEAK.M                 | 1571.71430 | 2 | 6.68E-07 | 0.85 | 3.68 | - | 648.1  |
| AHQ-1-5, 3306 - 3330   | R.GAGTGGLGLAVEGPEAK.M                 | 1571.71430 | 2 | 1.07E-06 | 0.86 | 3.33 | - | 833.6  |
| AHQ-1-4, 3442 - 3448   | R.GAGTGGLGLAVEGPEAK.M                 | 1571.71430 | 2 | 1.82E-04 | 0.74 | 3.28 | - | 616.2  |
| AHQ-1-2, 3674 - 3750   | R.GAGTGGLGLAVEGPEAK.M                 | 1571.71430 | 2 | 7.34E-06 | 0.88 | 3.68 | - | 897.7  |
| AHQ-1-3, 3446 - 3499   | K.GKLDVQFSLTK.G                       | 1293.49392 | 2 | 2.81E-05 | 0.90 | 3.53 | - | 848.1  |
| AHQ-1-1, 5067 - 5137   | K.GLVEPVDVVDNADGTQTVNYVPSR.E          | 2545.74387 | 3 | 1.07E-05 | 0.72 | 3.27 | - | 567.0  |
| AHQ-1-3, 5007 - 5081   | K.GLVEPVDVVDNADGTQTVNYVPSR.E          | 2545.74387 | 2 | 5.52E-09 | 0.93 | 4.36 | - | 1112.6 |
| AHQ-1-1, 5216 - 5279   | K.GLVEPVDVVDNADGTQTVNYVPSR.E          | 2545.74387 | 2 | 1.79E-11 | 0.96 | 5.09 | - | 1182.3 |
| AHQ-1-2, 5137 - 5205   | K.GLVEPVDVVDNADGTQTVNYVPSR.E          | 2545.74387 | 2 | 1.84E-08 | 0.93 | 4.48 | - | 882.8  |
| AHQ-1-1, 5064 - 5135   | K.GLVEPVDVVDNADGTQTVNYVPSR.E          | 2545.74387 | 2 | 1.90E-10 | 0.96 | 5.17 | - | 944.5  |
| AHQ-1-1, 4931 - 4995   | K.GLVEPVDVVDNADGTQTVNYVPSR.E          | 2545.74387 | 2 | 4.39E-08 | 0.93 | 4.37 | - | 824.2  |
| AHQ-1-4, 5187          | K.GLVEPVDVVDNADGTQTVNYVPSR.E          | 2545.74387 | 2 | 1.81E-05 | 0.79 | 3.42 | - | 535.8  |
| AHQ-1-1, 6437          | K.GLVEPVDVVDNADGTQTVNYVPSR.E          | 4437.77937 | 3 | 5.47E-08 | 0.82 | 3.70 | - | 541.5  |
| AHQ-1-2, 6735 - 6738   | K.GLVEPVDVVDNADGTQTVNYVPSR.E          | 4437.77937 | 3 | 2.26E-13 | 0.95 | 5.92 | - | 882.7  |
| AHQ-1-4, 2228 - 2235   | K.GTVEPQLEAR.G                        | 1100.20741 | 2 | 1.06E-04 | 0.80 | 2.92 | - | 555.5  |
| AHQ-1-3, 2231          | K.GTVEPQLEAR.G                        | 1100.20741 | 2 | 3.40E-05 | 0.73 | 2.89 | - | 553.5  |
| AHQ-1-6, 2115 - 2119   | K.GTVEPQLEAR.G                        | 1100.20741 | 2 | 3.35E-06 | 0.75 | 2.95 | - | 417.1  |
| AHQ-1-2, 2315 - 2385   | K.GTVEPQLEAR.G                        | 1100.20741 | 2 | 1.73E-04 | 0.73 | 3.03 | - | 493.2  |
| AHQ-1-1, 2367          | K.GTVEPQLEAR.G                        | 1100.20741 | 2 | 4.08E-04 | 0.78 | 2.76 | - | 566.6  |
| AHQ-1-2, 5399 - 5421   | K.HTAM*VSWGVSIPNSPFR.V                | 1960.20541 | 2 | 1.06E-10 | 0.96 | 5.20 | - | 1149.1 |
| AHQ-1-3, 5186 - 5255   | K.HTAM*VSWGVSIPNSPFR.V                | 1960.20541 | 2 | 3.60E-05 | 0.94 | 4.26 | - | 1043.4 |
| AHQ-1-2, 5143          | K.HTAM*VSWGVSIPNSPFR.V                | 1960.20541 | 2 | 1.23E-05 | 0.94 | 4.31 | - | 1040.9 |
| AHQ-1-1, 5681          | K.HTAM*VSWGVSIPNSPFR.V                | 1944.20601 | 2 | 4.69E-04 | 0.96 | 5.20 | - | 1058.9 |
| AHQ-1-4, 5272 - 5283   | K.HTAM*VSWGVSIPNSPFR.V                | 1960.20541 | 2 | 6.43E-06 | 0.96 | 4.69 | - | 1263.8 |
| AHQ-1-4, 5688          | K.HTAM*VSWGVSIPNSPFR.V                | 1944.20601 | 2 | 7.07E-05 | 0.97 | 4.93 | - | 1619.4 |
| AHQ-1-2, 5393          | K.HTAM*VSWGVSIPNSPFR.V                | 1960.20541 | 3 | 4.03E-05 | 0.87 | 3.93 | - | 1148.9 |
| AHQ-1-1, 5333 - 5336   | K.HTAM*VSWGVSIPNSPFR.V                | 1960.20541 | 3 | 8.59E-05 | 0.84 | 3.78 | - | 946.8  |
| AHQ-1-1, 5327          | K.HTAM*VSWGVSIPNSPFR.V                | 1960.20541 | 2 | 3.79E-05 | 0.95 | 5.05 | - | 1009.2 |
| AHQ-1-2, 5781 - 5782   | K.HTAM*VSWGVSIPNSPFR.V                | 1944.20601 | 2 | 4.53E-04 | 0.96 | 4.53 | - | 1244.7 |

|                        |                               |            |   |          |      |      |   |        |
|------------------------|-------------------------------|------------|---|----------|------|------|---|--------|
| AHQ-1-5, 5185          | K.HTAM*VSWGVSIPNSPFR.V        | 1960.20541 | 2 | 1.15E-06 | 0.95 | 4.65 | - | 1187.8 |
| AHQ-1-2, 5786 - 5795   | K.HTAMVSWGVSIPNSPFR.V         | 1944.20601 | 3 | 2.52E-05 | 0.72 | 3.99 | - | 432.5  |
| AHQ-1-1, 4063          | R.IANLQTDLSDGLR.L             | 1416.56231 | 2 | 2.21E-06 | 0.94 | 4.24 | - | 964.9  |
| AHQ-1-9, 4111          | R.IANLQTDLSDGLR.L             | 1416.56231 | 2 | 4.03E-07 | 0.92 | 4.14 | - | 792.1  |
| AHQ-1-2, 4465 - 4541   | R.IANLQTDLSDGLR.L             | 1416.56231 | 2 | 8.79E-07 | 0.92 | 4.15 | - | 827.2  |
| AHQ-1-3, 3917          | R.IANLQTDLSDGLR.L             | 1416.56231 | 2 | 2.21E-07 | 0.95 | 3.93 | - | 1246.3 |
| AHQ-1-10, 3864         | R.IANLQTDLSDGLR.L             | 1416.56231 | 2 | 1.17E-07 | 0.92 | 3.36 | - | 976.4  |
| AHQ-1-2, 4355          | R.IANLQTDLSDGLR.L             | 1416.56231 | 2 | 3.39E-06 | 0.95 | 4.34 | - | 1190.9 |
| AHQ-1-1, 4247          | R.IANLQTDLSDGLR.L             | 1416.56231 | 2 | 7.47E-06 | 0.95 | 4.30 | - | 1336.2 |
| AHQ-1-5, 4233 - 4234   | R.IANLQTDLSDGLR.L             | 1416.56231 | 2 | 5.34E-07 | 0.94 | 4.41 | - | 948.2  |
| AHQ-1-2, 4139          | R.IANLQTDLSDGLR.L             | 1416.56231 | 2 | 8.90E-07 | 0.95 | 3.86 | - | 1237.4 |
| AHQ-1-1, 3963          | R.IANLQTDLSDGLR.L             | 1416.56231 | 2 | 9.99E-07 | 0.92 | 3.66 | - | 926.2  |
| AHQ-1-1, 4372          | R.IANLQTDLSDGLR.L             | 1416.56231 | 1 | 5.66E-04 | 0.43 | 2.48 | - | 304.6  |
| AHQ-1-5, 3843          | R.IANLQTDLSDGLR.L             | 1416.56231 | 2 | 4.75E-05 | 0.92 | 3.83 | - | 915.1  |
| AHQ-1-1, 4516          | R.IANLQTDLSDGLR.L             | 1416.56231 | 2 | 6.56E-06 | 0.90 | 3.57 | - | 741.6  |
| AHQ-1-13 - 4299 - 4308 | R.IANLQTDLSDGLR.L             | 1416.56231 | 2 | 6.30E-07 | 0.94 | 4.01 | - | 994.7  |
| AHQ-1-3, 4214          | R.IANLQTDLSDGLR.L             | 1416.56231 | 2 | 2.94E-06 | 0.94 | 4.24 | - | 966.9  |
| AHQ-1-2, 4061          | R.IANLQTDLSDGLR.L             | 1416.56231 | 1 | 2.49E-05 | 0.39 | 2.63 | - | 244.5  |
| AHQ-1-2, 4053 - 4066   | R.IANLQTDLSDGLR.L             | 1416.56231 | 2 | 3.31E-06 | 0.94 | 4.02 | - | 1140.4 |
| AHQ-1-2, 4614 - 4670   | R.IANLQTDLSDGLR.L             | 1416.56231 | 2 | 1.26E-07 | 0.93 | 3.37 | - | 1227.0 |
| AHQ-1-8, 4136          | R.IANLQTDLSDGLR.L             | 1416.56231 | 2 | 1.51E-04 | 0.82 | 2.81 | - | 884.0  |
| AHQ-1-13, 4107         | R.IANLQTDLSDGLR.L             | 1416.56231 | 2 | 2.57E-08 | 0.95 | 4.02 | - | 1127.1 |
| AHQ-1-6, 4166 - 4186   | R.IANLQTDLSDGLR.L             | 1416.56231 | 2 | 8.24E-08 | 0.92 | 4.01 | - | 908.5  |
| AHQ-1-11, 3939         | R.IANLQTDLSDGLR.L             | 1416.56231 | 2 | 3.57E-04 | 0.92 | 3.82 | - | 1021.1 |
| AHQ-1-7, 4242 - 4256   | R.IANLQTDLSDGLR.L             | 1416.56231 | 2 | 6.48E-07 | 0.89 | 3.42 | - | 849.7  |
| AHQ-1-12, 4073         | R.IANLQTDLSDGLR.L             | 1416.56231 | 2 | 1.77E-04 | 0.92 | 3.99 | - | 881.6  |
| AHQ-1-6, 3771          | R.IANLQTDLSDGLR.L             | 1416.56231 | 2 | 1.75E-05 | 0.92 | 3.30 | - | 1384.8 |
| AHQ-1-4, 3970          | R.IANLQTDLSDGLR.L             | 1416.56231 | 2 | 1.04E-05 | 0.93 | 3.71 | - | 1064.4 |
| AHQ-1-3, 4313 - 4383   | R.IANLQTDLSDGLR.L             | 1416.56231 | 2 | 3.77E-06 | 0.92 | 4.12 | - | 823.6  |
| AHQ-1-4, 4371          | R.IANLQTDLSDGLR.L             | 1416.56231 | 2 | 2.31E-08 | 0.94 | 4.72 | - | 829.9  |
| AHQ-1-3, 4514          | R.IANLQTDLSDGLR.L             | 1416.56231 | 2 | 3.14E-05 | 0.78 | 2.73 | - | 727.0  |
| AHQ-1-1, 5867 - 5875   | K.IPEISIQDM*TAQVTSPSGK.T      | 2003.26361 | 2 | 2.64E-05 | 0.93 | 4.66 | - | 639.4  |
| AHQ-1-4, 4240 - 4270   | K.IPEISIQDM*TAQVTSPSGK.T      | 2019.26301 | 2 | 2.23E-04 | 0.98 | 5.58 | - | 1809.2 |
| AHQ-1-6, 4103 - 4108   | K.IPEISIQDM*TAQVTSPSGK.T      | 2019.26301 | 2 | 2.04E-05 | 0.98 | 5.90 | - | 1880.7 |
| AHQ-1-5, 5946 - 5955   | K.IPEISIQDM*TAQVTSPSGK.T      | 2003.26361 | 2 | 2.29E-13 | 0.97 | 5.08 | - | 1337.7 |
| AHQ-1-1, 5621          | K.IPEISIQDM*TAQVTSPSGK.T      | 2003.26361 | 3 | 1.74E-04 | 0.89 | 4.26 | - | 703.6  |
| AHQ-1-1, 5584 - 5643   | K.IPEISIQDM*TAQVTSPSGK.T      | 2003.26361 | 2 | 7.90E-08 | 0.98 | 5.47 | - | 1963.8 |
| AHQ-1-5, 5611          | K.IPEISIQDM*TAQVTSPSGK.T      | 2003.26361 | 3 | 9.24E-07 | 0.93 | 4.57 | - | 1260.8 |
| AHQ-1-5, 5589 - 5645   | K.IPEISIQDM*TAQVTSPSGK.T      | 2003.26361 | 2 | 1.04E-09 | 0.98 | 5.93 | - | 2116.8 |
| AHQ-1-5, 4154 - 4225   | K.IPEISIQDM*TAQVTSPSGK.T      | 2019.26301 | 2 | 2.17E-05 | 0.97 | 4.94 | - | 1829.4 |
| AHQ-1-3, 5605          | K.IPEISIQDM*TAQVTSPSGK.T      | 2003.26361 | 2 | 3.41E-09 | 0.98 | 5.47 | - | 1859.6 |
| AHQ-1-1, 4193 - 4261   | K.IPEISIQDM*TAQVTSPSGK.T      | 2019.26301 | 2 | 3.24E-07 | 0.98 | 5.82 | - | 2145.4 |
| AHQ-1-7, 5582          | K.IPEISIQDM*TAQVTSPSGK.T      | 2003.26361 | 2 | 1.50E-08 | 0.96 | 5.09 | - | 1115.8 |
| AHQ-1-6, 5506          | K.IPEISIQDM*TAQVTSPSGK.T      | 2003.26361 | 2 | 3.95E-08 | 0.97 | 5.34 | - | 1695.0 |
| AHQ-1-5, 5130          | K.IPEISIQDM*TAQVTSPSGK.T      | 2003.26361 | 2 | 5.07E-07 | 0.78 | 3.42 | - | 599.7  |
| AHQ-1-5, 4951          | K.IPEISIQDM*TAQVTSPSGK.T      | 2003.26361 | 2 | 3.57E-07 | 0.91 | 3.80 | - | 1030.1 |
| AHQ-1-8, 5471          | K.IPEISIQDM*TAQVTSPSGK.T      | 2003.26361 | 2 | 2.20E-11 | 0.97 | 5.21 | - | 1696.4 |
| AHQ-1-12, 5249         | K.IPEISIQDM*TAQVTSPSGK.T      | 2003.26361 | 2 | 5.55E-12 | 0.98 | 5.75 | - | 1652.8 |
| AHQ-1-3, 4225          | K.IPEISIQDM*TAQVTSPSGK.T      | 2019.26301 | 2 | 2.31E-04 | 0.95 | 4.33 | - | 1407.1 |
| AHQ-1-3, 2549          | K.IVGPSSGAAPCK.V              | 1157.36530 | 2 | 1.34E-05 | 0.82 | 2.97 | - | 601.2  |
| AHQ-1-5, 2466          | K.IVGPSSGAAPCK.V              | 1157.36530 | 2 | 3.60E-07 | 0.91 | 3.51 | - | 886.1  |
| AHQ-1-2, 2625          | K.IVGPSSGAAPCK.V              | 1157.36530 | 2 | 1.95E-08 | 0.92 | 3.43 | - | 978.9  |
| AHQ-1-4, 2571          | K.IVGPSSGAAPCK.V              | 1157.36530 | 2 | 1.92E-06 | 0.90 | 3.94 | - | 716.6  |
| AHQ-1-3, 4243 - 4319   | K.IVGPSSGAAPCKVEPGLGADNSVVR.F | 2451.78478 | 3 | 1.05E-07 | 0.93 | 4.71 | - | 1256.9 |
| AHQ-1-3, 4259 - 4277   | K.IVGPSSGAAPCKVEPGLGADNSVVR.F | 2451.78478 | 2 | 1.69E-05 | 0.89 | 4.41 | - | 415.5  |
| AHQ-1-4, 4320 - 4322   | K.IVGPSSGAAPCKVEPGLGADNSVVR.F | 2451.78478 | 2 | 3.97E-05 | 0.91 | 4.46 | - | 416.1  |
| AHQ-1-4, 4314 - 4324   | K.IVGPSSGAAPCKVEPGLGADNSVVR.F | 2451.78478 | 3 | 4.74E-04 | 0.94 | 4.97 | - | 1463.6 |
| AHQ-1-1, 4424          | K.IVGPSSGAAPCKVEPGLGADNSVVR.F | 2451.78478 | 3 | 1.25E-04 | 0.82 | 3.94 | - | 739.6  |
| AHQ-1-5, 4210          | K.IVGPSSGAAPCKVEPGLGADNSVVR.F | 2451.78478 | 3 | 3.43E-07 | 0.81 | 3.95 | - | 785.2  |
| AHQ-1-1, 4295 - 4296   | K.IVGPSSGAAPCKVEPGLGADNSVVR.F | 2451.78478 | 2 | 5.09E-07 | 0.92 | 4.84 | - | 335.3  |
| AHQ-1-1, 4285 - 4360   | K.IVGPSSGAAPCKVEPGLGADNSVVR.F | 2451.78478 | 3 | 8.39E-08 | 0.94 | 5.19 | - | 1250.6 |
| AHQ-1-2, 4391 - 4462   | K.IVGPSSGAAPCKVEPGLGADNSVVR.F | 2451.78478 | 3 | 2.02E-10 | 0.92 | 5.08 | - | 1015.9 |
| AHQ-1-6, 4139          | K.IVGPSSGAAPCKVEPGLGADNSVVR.F | 2451.78478 | 3 | 1.23E-04 | 0.94 | 4.57 | - | 1251.2 |
| AHQ-1-2, 4393 - 4463   | K.IVGPSSGAAPCKVEPGLGADNSVVR.F | 2451.78478 | 2 | 1.68E-05 | 0.90 | 4.30 | - | 579.7  |
| AHQ-1-2, 4533          | K.IVGPSSGAAPCKVEPGLGADNSVVR.F | 2451.78478 | 3 | 1.99E-08 | 0.84 | 3.58 | - | 969.4  |
| AHQ-1-2, 4538          | K.IVGPSSGAAPCKVEPGLGADNSVVR.F | 2451.78478 | 2 | 9.81E-04 | 0.88 | 3.81 | - | 467.8  |
| AHQ-1-1, 4479 - 4549   | R.KDGSFCGWAYVQEPGDYEVSK.F     | 2388.59282 | 2 | 7.95E-06 | 0.91 | 4.38 | - | 816.5  |
| AHQ-1-1, 4475 - 4547   | R.KDGSFCGWAYVQEPGDYEVSK.F     | 2388.59282 | 3 | 4.67E-06 | 0.91 | 4.83 | - | 991.6  |
| AHQ-1-4, 4467 - 4472   | K.KNGQHVASSPIPVISQSEIGDASR.V  | 2577.83547 | 2 | 1.93E-06 | 0.94 | 5.01 | - | 727.0  |
| AHQ-1-2, 4610 - 4686   | K.KNGQHVASSPIPVISQSEIGDASR.V  | 2577.83547 | 3 | 2.30E-05 | 0.66 | 3.28 | - | 822.7  |
| AHQ-1-8, 4148          | K.KNGQHVASSPIPVISQSEIGDASR.V  | 2577.83547 | 2 | 5.95E-05 | 0.93 | 4.56 | - | 732.9  |
| AHQ-1-1, 4523 - 4569   | K.KNGQHVASSPIPVISQSEIGDASR.V  | 2577.83547 | 3 | 8.83E-13 | 0.97 | 5.95 | - | 2059.0 |
| AHQ-1-4, 4462          | K.KNGQHVASSPIPVISQSEIGDASR.V  | 2577.83547 | 3 | 5.09E-09 | 0.98 | 5.86 | - | 2417.4 |
| AHQ-1-3, 4441 - 4445   | K.KNGQHVASSPIPVISQSEIGDASR.V  | 2577.83547 | 3 | 5.75E-09 | 0.97 | 5.63 | - | 1853.1 |
| AHQ-1-1, 4428 - 4497   | K.KNGQHVASSPIPVISQSEIGDASR.V  | 2577.83547 | 3 | 2.06E-08 | 0.96 | 5.51 | - | 1723.3 |
| AHQ-1-5, 4237          | K.KNGQHVASSPIPVISQSEIGDASR.V  | 2577.83547 | 2 | 3.32E-04 | 0.57 | 2.83 | - | 331.5  |
| AHQ-1-5, 4315 - 4342   | K.KNGQHVASSPIPVISQSEIGDASR.V  | 2577.83547 | 3 | 1.65E-10 | 0.95 | 5.01 | - | 1601.0 |
| AHQ-1-1, 4500          | K.KNGQHVASSPIPVISQSEIGDASR.V  | 2577.83547 | 2 | 1.59E-07 | 0.74 | 3.37 | - | 402.7  |
| AHQ-1-3, 3447 - 3451   | K.KTHIQDNHDGTYTVAYVPDVTGR.Y   | 2588.77367 | 2 | 1.03E-05 | 0.95 | 4.77 | - | 923.9  |
| AHQ-1-1, 3543          | K.KTHIQDNHDGTYTVAYVPDVTGR.Y   | 2588.77367 | 2 | 8.24E-05 | 0.92 | 4.67 | - | 638.7  |
| AHQ-1-4, 3622          | K.KTHIQDNHDGTYTVAYVPDVTGR.Y   | 2588.77367 | 3 | 4.65E-04 | 0.82 | 3.46 | - | 875.6  |
| AHQ-1-1, 3643 - 3709   | K.KTHIQDNHDGTYTVAYVPDVTGR.Y   | 2588.77367 | 3 | 1.19E-08 | 0.91 | 4.24 | - | 958.3  |
| AHQ-1-2, 3722          | K.KTHIQDNHDGTYTVAYVPDVTGR.Y   | 2588.77367 | 2 | 1.56E-05 | 0.80 | 3.41 | - | 485.7  |
| AHQ-1-3, 3439 - 3457   | K.KTHIQDNHDGTYTVAYVPDVTGR.Y   | 2588.77367 | 3 | 1.88E-08 | 0.94 | 4.62 | - | 1266.4 |
| AHQ-1-6, 3280          | K.KTHIQDNHDGTYTVAYVPDVTGR.Y   | 2588.77367 | 3 | 3.45E-04 | 0.86 | 3.79 | - | 872.8  |
| AHQ-1-2, 3545 - 3613   | K.KTHIQDNHDGTYTVAYVPDVTGR.Y   | 2588.77367 | 3 | 1.31E-08 | 0.95 | 5.50 | - | 1029.0 |
| AHQ-1-2, 3690 - 3761   | K.KTHIQDNHDGTYTVAYVPDVTGR.Y   | 2588.77367 | 3 | 1.15E-04 | 0.96 | 4.84 | - | 1467.5 |
| AHQ-1-1, 3540          | K.KTHIQDNHDGTYTVAYVPDVTGR.Y   | 2588.77367 | 3 | 1.60E-08 | 0.95 | 5.03 | - | 1110.2 |
| AHQ-1-2, 4137 - 4165   | K.LDVQFSGLTK.G                | 1108.26945 | 2 | 5.74E-05 | 0.92 | 3.70 | - | 912.7  |
| AHQ-1-1, 4059          | K.LDVQFSGLTK.G                | 1108.26945 | 2 | 8.39E-07 | 0.93 | 3.55 | - | 1088.4 |
| AHQ-1-3, 4006          | K.LDVQFSGLTK.G                | 1108.26945 | 2 | 8.22E-07 | 0.94 | 3.70 | - | 1173.4 |
| AHQ-1-3, 4005 - 4081   | K.LDVQFSGLTK.G                | 1108.26945 | 1 | 2.59E-04 | 0.08 | 2.03 | - | 222.8  |
| AHQ-1-4, 4042          | K.LDVQFSGLTK.G                | 1108.26945 | 1 | 3.12E-05 | 0.46 | 2.31 | - | 329.4  |
| AHQ-1-2, 4151          | K.LDVQFSGLTK.G                | 1108.26945 | 1 | 4.57E-05 | 0.16 | 2.17 | - | 213.9  |
| AHQ-1-4, 4044 - 4060   | K.LDVQFSGLTK.G                | 1108.26945 | 2 | 2.24E-04 | 0.83 | 3.11 | - | 787.0  |
| AHQ-1-2, 4138          | K.LDVQFSGLTK.G                | 1108.26945 | 1 | 3.96E-06 | 0.09 | 1.90 | - | 224.5  |
| AHQ-1-1, 4068          | K.LDVQFSGLTK.G                | 1108.26945 | 1 | 4.68E-05 | 0.16 | 2.09 | - | 233.7  |
| AHQ-1-6, 4788 - 4798   | K.LPQLPITNFSR.D               | 1286.50461 | 2 | 3.91E-05 | 0.88 | 3.45 | - | 622.1  |
| AHQ-1-3, 4949 - 4959   | K.LPQLPITNFSR.D               | 1286.50461 | 2 | 3.59E-05 | 0.75 | 2.64 | - | 604.6  |
| AHQ-1-2, 5085          | K.LPQLPITNFSR.D               | 1286.50461 | 2 | 5.57E-04 | 0.88 | 3.28 | - | 735.8  |
| AHQ-1-11, 4502         | K.LPQLPITNFSR.D               | 1286.50461 | 2 | 6.87E-05 | 0.89 | 2.98 | - | 851.4  |
| AHQ-1-2, 5302 - 5347   | K.LPQLPITNFSR.D               | 1286.50461 | 2 | 8.56E-06 | 0.85 | 3.14 | - | 590.0  |
| AHQ-1-2, 5115          | K.LPQLPITNFSR.D               | 1286.50461 | 1 | 6.02E-05 | 0.44 | 2.90 | - | 165.7  |
| AHQ-1-3, 5194          | K.LPQLPITNFSR.D               | 1286.50461 | 2 | 6.68E-06 | 0.83 | 3.24 | - | 550.9  |
| AHQ-1-4, 5271          | K.LPQLPITNFSR.D               | 1286.50461 | 2 | 1.18E-05 | 0.89 | 3.22 | - | 755.4  |
| AHQ-1-2, 5105          | K.LPQLPITNFSR.D               | 1286.50461 | 1 | 6.91E-04 | 0.40 | 2.15 | - | 274.3  |
| AHQ-1-5, 4918          | K.LPQLPITNFSR.D               | 1286.50461 | 1 | 3.83E-04 | 0.25 | 2.35 | - | 133.5  |

|                      |                                 |            |   |          |      |      |   |        |
|----------------------|---------------------------------|------------|---|----------|------|------|---|--------|
| AHQ-1-1, 5152 - 5223 | K.LPQLPITNFSR.D                 | 1286.50461 | 2 | 2.56E-05 | 0.83 | 3.43 | - | 612.5  |
| AHQ-1-5, 4847 - 4917 | K.LPQLPITNFSR.D                 | 1286.50461 | 2 | 3.95E-04 | 0.88 | 3.32 | - | 625.5  |
| AHQ-1-1, 4989 - 5052 | K.LPQLPITNFSR.D                 | 1286.50461 | 2 | 3.24E-05 | 0.91 | 3.45 | - | 701.3  |
| AHQ-1-2, 5213        | K.LPQLPITNFSR.D                 | 1286.50461 | 2 | 1.12E-06 | 0.84 | 2.86 | - | 886.9  |
| AHQ-1-4, 5027 - 5036 | K.LPQLPITNFSR.D                 | 1286.50461 | 2 | 6.40E-05 | 0.87 | 2.98 | - | 679.3  |
| AHQ-1-3, 5487 - 5553 | K.LQVEPAVDTSGVQCYGPGIEGGGVFR.E  | 2766.03597 | 2 | 1.45E-06 | 0.95 | 5.42 | - | 840.3  |
| AHQ-1-6, 5416 - 5494 | K.LQVEPAVDTSGVQCYGPGIEGGGVFR.E  | 2766.03597 | 2 | 1.26E-10 | 0.97 | 5.61 | - | 1151.2 |
| AHQ-1-1, 5477 - 5551 | K.LQVEPAVDTSGVQCYGPGIEGGGVFR.E  | 2766.03597 | 3 | 3.89E-15 | 0.98 | 6.83 | - | 2337.5 |
| AHQ-1-7, 5562 - 5572 | K.LQVEPAVDTSGVQCYGPGIEGGGVFR.E  | 2766.03597 | 2 | 4.65E-08 | 0.93 | 4.28 | - | 858.2  |
| AHQ-1-2, 5634 - 5701 | K.LQVEPAVDTSGVQCYGPGIEGGGVFR.E  | 2766.03597 | 2 | 1.18E-07 | 0.96 | 5.73 | - | 692.1  |
| AHQ-1-4, 5606 - 5687 | K.LQVEPAVDTSGVQCYGPGIEGGGVFR.E  | 2766.03597 | 2 | 1.88E-08 | 0.96 | 5.50 | - | 1039.3 |
| AHQ-1-2, 5823        | K.LQVEPAVDTSGVQCYGPGIEGGGVFR.E  | 2766.03597 | 3 | 5.21E-05 | 0.93 | 4.85 | - | 1016.7 |
| AHQ-1-1, 5648        | K.LQVEPAVDTSGVQCYGPGIEGGGVFR.E  | 2766.03597 | 2 | 1.41E-10 | 0.96 | 5.09 | - | 1035.6 |
| AHQ-1-5, 5549 - 5617 | K.LQVEPAVDTSGVQCYGPGIEGGGVFR.E  | 2766.03597 | 2 | 2.36E-08 | 0.97 | 5.43 | - | 1063.6 |
| AHQ-1-9, 5328 - 5408 | K.LQVEPAVDTSGVQCYGPGIEGGGVFR.E  | 2766.03597 | 2 | 2.41E-06 | 0.90 | 3.81 | - | 957.9  |
| AHQ-1-1, 5485 - 5559 | K.LQVEPAVDTSGVQCYGPGIEGGGVFR.E  | 2766.03597 | 2 | 1.61E-05 | 0.85 | 3.51 | - | 845.4  |
| AHQ-1-2, 5737 - 5806 | K.LQVEPAVDTSGVQCYGPGIEGGGVFR.E  | 2766.03597 | 2 | 8.63E-05 | 0.94 | 3.95 | - | 1221.4 |
| AHQ-1-4, 5595 - 5663 | K.LQVEPAVDTSGVQCYGPGIEGGGVFR.E  | 2766.03597 | 3 | 3.95E-08 | 0.98 | 7.28 | - | 2288.2 |
| AHQ-1-4, 5788 - 5808 | K.LQVEPAVDTSGVQCYGPGIEGGGVFR.E  | 2766.03597 | 2 | 1.60E-08 | 0.91 | 4.30 | - | 718.2  |
| AHQ-1-2, 5633 - 5653 | K.LQVEPAVDTSGVQCYGPGIEGGGVFR.E  | 2766.03597 | 3 | 6.76E-05 | 0.95 | 4.96 | - | 1250.7 |
| AHQ-1-3, 5654        | K.LQVEPAVDTSGVQCYGPGIEGGGVFR.E  | 2766.03597 | 2 | 4.05E-09 | 0.93 | 4.72 | - | 758.4  |
| AHQ-1-3, 5519        | K.LQVEPAVDTSGVQCYGPGIEGGGVFR.E  | 2766.03597 | 2 | 9.42E-07 | 0.81 | 3.58 | - | 384.8  |
| AHQ-1-6, 3019        | R.LRNGHVGISFVPE                 | 1424.67564 | 2 | 4.70E-04 | 0.62 | 2.75 | - | 496.5  |
| AHQ-1-1, 3325        | R.LRNGHVGISFVPE                 | 1424.67564 | 3 | 5.62E-04 | 0.94 | 3.64 | - | 1778.6 |
| AHQ-1-5, 2835        | R.LRNGHVGISFVPE                 | 1424.67564 | 3 | 1.69E-05 | 0.91 | 3.40 | - | 1498.7 |
| AHQ-1-9, 2903        | R.LRNGHVGISFVPE                 | 1424.67564 | 3 | 1.61E-06 | 0.91 | 3.59 | - | 1734.0 |
| AHQ-1-5, 2986        | R.LRNGHVGISFVPE                 | 1424.67564 | 2 | 5.95E-04 | 0.68 | 2.64 | - | 646.3  |
| AHQ-1-1, 4191        | R.LSPFMADIR.D                   | 1050.25664 | 2 | 7.21E-04 | 0.60 | 2.55 | - | 344.4  |
| AHQ-1-3, 4093 - 4097 | R.LSPFMADIR.D                   | 1050.25664 | 2 | 8.30E-06 | 0.60 | 2.63 | - | 450.1  |
| AHQ-1-1, 3491 - 3571 | R.LTVSSLQESGLK.V                | 1262.43499 | 2 | 1.06E-04 | 0.74 | 2.87 | - | 521.3  |
| AHQ-1-1, 3588        | R.LTVSSLQESGLK.V                | 1262.43499 | 2 | 2.88E-07 | 0.90 | 3.35 | - | 920.2  |
| AHQ-1-5, 3938        | R.LVSNHSLHETSSVFDLSLTK.A        | 2201.42190 | 3 | 1.43E-04 | 0.87 | 3.57 | - | 841.1  |
| AHQ-1-13, 4056       | R.LVSNHSLHETSSVFDLSLTK.A        | 2201.42190 | 2 | 2.70E-04 | 0.93 | 4.42 | - | 840.1  |
| AHQ-1-11, 4118       | R.LVSNHSLHETSSVFDLSLTK.A        | 2201.42190 | 2 | 1.90E-08 | 0.97 | 5.55 | - | 1067.3 |
| AHQ-1-13, 4069       | R.LVSNHSLHETSSVFDLSLTK.A        | 2201.42190 | 3 | 6.03E-04 | 0.81 | 3.30 | - | 879.9  |
| AHQ-1-1, 4587        | R.LVSNHSLHETSSVFDLSLTK.A        | 2201.42190 | 2 | 4.20E-11 | 0.97 | 5.25 | - | 1112.2 |
| AHQ-1-1, 4591        | R.LVSNHSLHETSSVFDLSLTK.A        | 2201.42190 | 3 | 3.54E-11 | 0.97 | 5.81 | - | 1377.3 |
| AHQ-1-7, 4093        | R.LVSNHSLHETSSVFDLSLTK.A        | 2201.42190 | 2 | 1.16E-05 | 0.96 | 5.51 | - | 1082.9 |
| AHQ-1-1, 4308        | R.LVSNHSLHETSSVFDLSLTK.A        | 2201.42190 | 2 | 5.40E-06 | 0.96 | 5.45 | - | 1143.9 |
| AHQ-1-14 - 4091      | R.LVSNHSLHETSSVFDLSLTK.A        | 2201.42190 | 3 | 3.25E-06 | 0.96 | 4.71 | - | 1501.2 |
| AHQ-1-5, 4266        | R.LVSNHSLHETSSVFDLSLTK.A        | 2201.42190 | 2 | 4.68E-07 | 0.96 | 5.14 | - | 1166.0 |
| AHQ-1-6, 4022        | R.LVSNHSLHETSSVFDLSLTK.A        | 2201.42190 | 2 | 6.18E-06 | 0.93 | 4.81 | - | 924.3  |
| AHQ-1-1, 4307        | R.LVSNHSLHETSSVFDLSLTK.A        | 2201.42190 | 3 | 7.51E-09 | 0.96 | 5.09 | - | 1550.3 |
| AHQ-1-13 - 4241      | R.LVSNHSLHETSSVFDLSLTK.A        | 2201.42190 | 3 | 1.14E-06 | 0.95 | 4.98 | - | 1087.2 |
| AHQ-1-7, 4413        | R.LVSNHSLHETSSVFDLSLTK.A        | 2201.42190 | 2 | 3.84E-05 | 0.90 | 4.28 | - | 545.0  |
| AHQ-1-5, 4073        | R.LVSNHSLHETSSVFDLSLTK.A        | 2201.42190 | 2 | 7.10E-08 | 0.98 | 5.80 | - | 1650.1 |
| AHQ-1-5, 4409 - 4426 | R.LVSNHSLHETSSVFDLSLTK.A        | 2201.42190 | 3 | 2.69E-10 | 0.96 | 4.77 | - | 1582.9 |
| AHQ-1-8, 4027        | R.LVSNHSLHETSSVFDLSLTK.A        | 2201.42190 | 2 | 2.31E-07 | 0.97 | 5.18 | - | 1419.6 |
| AHQ-1-8, 4029        | R.LVSNHSLHETSSVFDLSLTK.A        | 2201.42190 | 3 | 2.98E-07 | 0.96 | 4.88 | - | 1435.8 |
| AHQ-1-5, 4415 - 4497 | R.LVSNHSLHETSSVFDLSLTK.A        | 2201.42190 | 2 | 1.55E-08 | 0.97 | 5.23 | - | 1353.7 |
| AHQ-1-6, 4354        | R.LVSNHSLHETSSVFDLSLTK.A        | 2201.42190 | 3 | 2.60E-08 | 0.92 | 3.96 | - | 1136.2 |
| AHQ-1-6, 4362        | R.LVSNHSLHETSSVFDLSLTK.A        | 2201.42190 | 2 | 8.93E-08 | 0.94 | 4.74 | - | 878.7  |
| AHQ-1-10, 3795       | R.LVSNHSLHETSSVFDLSLTK.A        | 2201.42190 | 3 | 4.09E-06 | 0.92 | 4.32 | - | 874.6  |
| AHQ-1-11, 3886       | R.LVSNHSLHETSSVFDLSLTK.A        | 2201.42190 | 2 | 1.72E-06 | 0.95 | 5.05 | - | 811.6  |
| AHQ-1-14 - 4088      | R.LVSNHSLHETSSVFDLSLTK.A        | 2201.42190 | 2 | 1.48E-10 | 0.96 | 5.24 | - | 1092.8 |
| AHQ-1-4, 4231        | R.LVSNHSLHETSSVFDLSLTK.A        | 2201.42190 | 2 | 1.14E-08 | 0.97 | 5.66 | - | 1431.1 |
| AHQ-1-4, 4236        | R.LVSNHSLHETSSVFDLSLTK.A        | 2201.42190 | 3 | 7.54E-10 | 0.97 | 5.89 | - | 1743.3 |
| AHQ-1-4, 4576 - 4604 | R.LVSNHSLHETSSVFDLSLTK.A        | 2201.42190 | 2 | 7.38E-10 | 0.97 | 5.09 | - | 1342.2 |
| AHQ-1-4, 2524        | K.MDCQCEPEGYR.V                 | 1447.55375 | 2 | 8.30E-06 | 0.84 | 3.26 | - | 709.8  |
| AHQ-1-1, 2341        | K.MDCQCEPEGYR.V                 | 1463.55315 | 2 | 1.65E-05 | 0.93 | 2.82 | - | 1789.2 |
| AHQ-1-1, 2600        | K.MDCQCEPEGYR.V                 | 1447.55375 | 2 | 5.45E-05 | 0.76 | 3.08 | - | 640.5  |
| AHQ-1-5, 2433        | K.MDCQCEPEGYR.V                 | 1447.55375 | 2 | 3.47E-06 | 0.85 | 3.37 | - | 696.3  |
| AHQ-1-5, 2995        | R.NGHVGISFVPE                   | 1155.33104 | 1 | 8.06E-07 | 0.39 | 2.34 | - | 408.8  |
| AHQ-1-3, 4837        | K.NGQHVASSPPIVVISQSEIGDASR.V    | 2449.66256 | 3 | 1.69E-07 | 0.76 | 3.13 | - | 1161.0 |
| AHQ-1-4, 4914        | K.NGQHVASSPPIVVISQSEIGDASR.V    | 2449.66256 | 2 | 3.97E-07 | 0.93 | 4.44 | - | 694.2  |
| AHQ-1-1, 4844        | K.NGQHVASSPPIVVISQSEIGDASR.V    | 2449.66256 | 2 | 7.23E-04 | 0.98 | 5.48 | - | 1742.7 |
| AHQ-1-5, 4957        | K.NGQHVASSPPIVVISQSEIGDASR.V    | 2449.66256 | 3 | 3.96E-05 | 0.73 | 3.29 | - | 757.4  |
| AHQ-1-5, 4789        | K.NGQHVASSPPIVVISQSEIGDASR.V    | 2449.66256 | 2 | 3.58E-09 | 0.96 | 4.82 | - | 1240.4 |
| AHQ-1-5, 1833        | K.RAEFTVETR.S                   | 1109.21754 | 2 | 1.19E-05 | 0.94 | 3.53 | - | 945.5  |
| AHQ-1-1, 2212        | K.RAEFTVETR.S                   | 1109.21754 | 2 | 3.02E-05 | 0.90 | 3.40 | - | 774.8  |
| AHQ-1-3, 2038 - 2045 | K.RAEFTVETR.S                   | 1109.21754 | 2 | 4.15E-06 | 0.94 | 3.43 | - | 1136.9 |
| AHQ-1-2, 2101        | K.RAEFTVETR.S                   | 1109.21754 | 2 | 2.31E-06 | 0.92 | 3.53 | - | 972.4  |
| AHQ-1-4, 3082        | R.RAPSVANVGHCDLSLK.I            | 1813.02884 | 3 | 2.43E-05 | 0.97 | 5.13 | - | 2325.6 |
| AHQ-1-5, 2919        | R.RAPSVANVGHCDLSLK.I            | 1813.02884 | 3 | 1.12E-06 | 0.97 | 5.97 | - | 1931.0 |
| AHQ-1-1, 3201 - 3204 | R.RAPSVANVGHCDLSLK.I            | 1813.02884 | 3 | 5.13E-05 | 0.98 | 5.45 | - | 2108.2 |
| AHQ-1-3, 3049        | R.RAPSVANVGHCDLSLK.I            | 1813.02884 | 3 | 6.55E-06 | 0.98 | 5.04 | - | 2653.5 |
| AHQ-1-1, 3143 - 3220 | R.RLTVSSLQESGLK.V               | 1418.62134 | 2 | 3.99E-04 | 0.97 | 4.33 | - | 2196.5 |
| AHQ-1-5, 2810 - 2883 | R.RLTVSSLQESGLK.V               | 1418.62134 | 2 | 1.63E-05 | 0.98 | 4.87 | - | 2385.5 |
| AHQ-1-4, 2940 - 3086 | R.RLTVSSLQESGLK.V               | 1418.62134 | 2 | 6.88E-05 | 0.97 | 4.38 | - | 1877.4 |
| AHQ-1-5, 3047 - 3095 | R.RLTVSSLQESGLK.V               | 1418.62134 | 2 | 1.39E-05 | 0.96 | 3.87 | - | 2025.2 |
| AHQ-1-3, 7345 - 7406 | K.SADFVVEAIGDDVGTGFGSVEGSPQAK.I | 2696.90399 | 3 | 4.95E-07 | 0.96 | 6.20 | - | 1546.8 |
| AHQ-1-2, 7561 - 7562 | K.SADFVVEAIGDDVGTGFGSVEGSPQAK.I | 2696.90399 | 2 | 4.65E-04 | 0.88 | 3.37 | - | 1063.2 |
| AHQ-1-7, 3886        | R.SAGGGEVLYYEDPAGHQEEAK.V       | 2314.45074 | 3 | 1.07E-09 | 0.92 | 4.05 | - | 1339.9 |
| AHQ-1-2, 4370        | R.SAGGGEVLYYEDPAGHQEEAK.V       | 2314.45074 | 2 | 3.22E-07 | 0.88 | 4.20 | - | 469.4  |
| AHQ-1-4, 3947 - 4010 | R.SAGGGEVLYYEDPAGHQEEAK.V       | 2314.45074 | 2 | 1.57E-06 | 0.90 | 4.37 | - | 568.9  |
| AHQ-1-1, 4177        | R.SAGGGEVLYYEDPAGHQEEAK.V       | 2314.45074 | 2 | 1.62E-07 | 0.87 | 4.09 | - | 567.5  |
| AHQ-1-3, 4105        | R.SAGGGEVLYYEDPAGHQEEAK.V       | 2314.45074 | 2 | 1.20E-07 | 0.87 | 4.18 | - | 470.3  |
| AHQ-1-4, 4011        | R.SAGGGEVLYYEDPAGHQEEAK.V       | 2314.45074 | 3 | 1.63E-10 | 0.95 | 4.70 | - | 1187.9 |
| AHQ-1-1, 4119 - 4199 | R.SAGGGEVLYYEDPAGHQEEAK.V       | 2314.45074 | 3 | 1.82E-07 | 0.90 | 4.19 | - | 1093.7 |
| AHQ-1-1, 4316        | R.SAGGGEVLYYEDPAGHQEEAK.V       | 2314.45074 | 2 | 9.85E-06 | 0.60 | 3.33 | - | 227.7  |
| AHQ-1-7, 3880 - 3881 | R.SAGGGEVLYYEDPAGHQEEAK.V       | 2314.45074 | 2 | 1.52E-05 | 0.90 | 4.45 | - | 530.9  |
| AHQ-1-4, 4100        | R.SAGGGEVLYYEDPAGHQEEAK.V       | 2314.45074 | 2 | 4.77E-05 | 0.88 | 4.23 | - | 564.2  |
| AHQ-1-5, 3869        | R.SAGGGEVLYYEDPAGHQEEAK.V       | 2314.45074 | 2 | 6.35E-06 | 0.93 | 5.18 | - | 605.2  |
| AHQ-1-3, 3969        | R.SAGGGEVLYYEDPAGHQEEAK.V       | 2314.45074 | 2 | 8.31E-09 | 0.93 | 4.87 | - | 635.9  |
| AHQ-1-2, 4253 - 4254 | R.SAGGGEVLYYEDPAGHQEEAK.V       | 2314.45074 | 2 | 1.02E-07 | 0.95 | 5.13 | - | 843.1  |
| AHQ-1-3, 3973        | R.SAGGGEVLYYEDPAGHQEEAK.V       | 2314.45074 | 3 | 6.57E-06 | 0.91 | 3.87 | - | 999.3  |
| AHQ-1-2, 4417 - 4437 | R.SAGGGEVLYYEDPAGHQEEAK.V       | 2314.45074 | 3 | 4.52E-04 | 0.92 | 4.10 | - | 1319.8 |
| AHQ-1-2, 4105 - 4173 | R.SAGGGEVLYYEDPAGHQEEAK.V       | 2314.45074 | 3 | 3.65E-08 | 0.93 | 4.16 | - | 1330.3 |
| AHQ-1-2, 4103 - 4174 | R.SAGGGEVLYYEDPAGHQEEAK.V       | 2314.45074 | 2 | 1.87E-07 | 0.94 | 4.97 | - | 741.8  |
| AHQ-1-2, 4527        | R.SAGGGEVLYYEDPAGHQEEAK.V       | 2314.45074 | 2 | 2.16E-07 | 0.92 | 4.37 | - | 669.5  |
| AHQ-1-5, 3853 - 3931 | R.SAGGGEVLYYEDPAGHQEEAK.V       | 2314.45074 | 3 | 7.18E-09 | 0.94 | 4.60 | - | 1112.8 |
| AHQ-1-6, 3788        | R.SAGGGEVLYYEDPAGHQEEAK.V       | 2314.45074 | 3 | 1.63E-07 | 0.89 | 3.98 | - | 1012.9 |
| AHQ-1-1, 3992 - 4055 | R.SAGGGEVLYYEDPAGHQEEAK.V       | 2314.45074 | 3 | 9.62E-10 | 0.94 | 4.38 | - | 1453.3 |
| AHQ-1-1, 4039 - 4103 | R.SAGGGEVLYYEDPAGHQEEAK.V       | 2314.45074 | 2 | 1.62E-06 | 0.91 | 4.13 | - | 716.0  |
| AHQ-1-8, 3839        | R.SAGGGEVLYYEDPAGHQEEAK.V       | 2314.45074 | 2 | 2.37E-05 | 0.92 | 4.42 | - | 655.8  |
| AHQ-1-9, 3760 - 3806 | R.SAGGGEVLYYEDPAGHQEEAK.V       | 2314.45074 | 2 | 1.57E-04 | 0.78 | 3.49 | - | 382.6  |
| AHQ-1-1, 3509        | K.SPFEVYVDK.S                   | 1084.20321 | 1 | 3.39E-04 | 0.77 | 3.18 | - | 836.4  |

|                          |                              |            |   |          |      |      |   |        |
|--------------------------|------------------------------|------------|---|----------|------|------|---|--------|
| AHQ-1-4, 3446            | K.SPFEVYVDK.S                | 1084.20321 | 2 | 1.65E-05 | 0.90 | 3.02 | - | 1038.9 |
| AHQ-1-1, 3501 - 3504     | K.SPFEVYVDK.S                | 1084.20321 | 2 | 4.18E-06 | 0.94 | 3.56 | - | 1163.3 |
| AHQ-1-1, 3500            | K.SPFEVYVDK.S                | 1084.20321 | 1 | 2.32E-04 | 0.74 | 2.38 | - | 1005.2 |
| AHQ-1-3, 3413            | K.SPFEVYVDK.S                | 1084.20321 | 2 | 2.50E-05 | 0.93 | 3.60 | - | 1098.7 |
| AHQ-1-3, 3431            | K.SPFEVYVDK.S                | 1084.20321 | 1 | 6.79E-08 | 0.77 | 2.54 | - | 792.8  |
| AHQ-1-7, 3341            | K.SPFEVYVDK.S                | 1084.20321 | 2 | 1.98E-05 | 0.94 | 3.29 | - | 1450.1 |
| AHQ-1-2, 3509 - 3521     | K.SPFEVYVDK.S                | 1084.20321 | 2 | 9.69E-06 | 0.95 | 3.48 | - | 1405.3 |
| AHQ-1-2, 3517            | K.SPFEVYVDK.S                | 1084.20321 | 1 | 1.61E-05 | 0.86 | 3.29 | - | 869.2  |
| AHQ-1-5, 3322            | K.SPFEVYVDK.S                | 1084.20321 | 2 | 1.78E-06 | 0.90 | 2.78 | - | 1247.0 |
| AHQ-1-5, 3341            | K.SPFEVYVDK.S                | 1084.20321 | 1 | 2.59E-06 | 0.84 | 2.99 | - | 868.0  |
| AHQ-1-6, 4958 - 4972     | K.SPFSVAVSPSLDLSK.I          | 1534.73557 | 2 | 3.58E-05 | 0.77 | 3.05 | - | 765.1  |
| AHQ-1-2, 5262            | K.SPFSVAVSPSLDLSK.I          | 1534.73557 | 2 | 5.20E-04 | 0.84 | 3.42 | - | 640.9  |
| AHQ-1-3, 5122            | K.SPFSVAVSPSLDLSK.I          | 1534.73557 | 2 | 2.47E-04 | 0.88 | 3.15 | - | 1039.9 |
| AHQ-1-2, 5146 - 5221     | K.SPFSVAVSPSLDLSK.I          | 1534.73557 | 2 | 2.27E-04 | 0.94 | 4.54 | - | 1026.3 |
| AHQ-1-3, 5013 - 5082     | K.SPFSVAVSPSLDLSK.I          | 1534.73557 | 2 | 1.18E-05 | 0.85 | 4.24 | - | 549.7  |
| AHQ-1-1, 5036 - 5093     | K.SPFSVAVSPSLDLSK.I          | 1534.73557 | 2 | 3.78E-06 | 0.92 | 3.80 | - | 1111.8 |
| AHQ-1-5, 5037 - 5038     | K.SPFSVAVSPSLDLSK.I          | 1534.73557 | 2 | 3.30E-07 | 0.95 | 4.63 | - | 1048.4 |
| AHQ-1-2, 3787            | R.SPYTVTGGACNPSACR.A         | 1871.04208 | 2 | 4.24E-05 | 0.86 | 3.90 | - | 362.1  |
| AHQ-1-1, 3708            | R.SPYTVTGGACNPSACR.A         | 1871.04208 | 2 | 2.41E-08 | 0.90 | 3.88 | - | 653.7  |
| AHQ-1-5, 3417            | R.SPYTVTGGACNPSACR.A         | 1871.04208 | 2 | 5.41E-05 | 0.91 | 4.22 | - | 534.3  |
| AHQ-1-6, 3328 - 3399     | R.SPYTVTGGACNPSACR.A         | 1871.04208 | 2 | 7.91E-04 | 0.88 | 3.69 | - | 502.8  |
| AHQ-1-1, 3531 - 3565     | R.SPYTVTGGACNPSACR.A         | 1871.04208 | 2 | 5.12E-04 | 0.41 | 2.74 | - | 318.5  |
| AHQ-1-6, 3379            | R.SPYTVTGGACNPSACR.A         | 1871.04208 | 2 | 2.66E-05 | 0.89 | 4.07 | - | 463.5  |
| AHQ-1-3, 3453 - 3521     | R.SPYTVTGGACNPSACR.A         | 1871.04208 | 2 | 1.16E-04 | 0.84 | 4.05 | - | 335.1  |
| AHQ-1-2, 2841            | K.SQGDASKVTAQGPGLPSGNIANK.T  | 2327.49419 | 2 | 4.46E-04 | 0.77 | 4.10 | - | 329.1  |
| AHQ-1-14 - , 2188        | K.SSFTVDCSK.A                | 1032.10676 | 1 | 1.85E-05 | 0.58 | 2.65 | - | 416.5  |
| AHQ-1-14 - , 2163 - 2234 | K.SSFTVDCSK.A                | 1032.10676 | 1 | 3.01E-04 | 0.49 | 1.95 | - | 505.0  |
| AHQ-1-3, 5066 - 5133     | R.TFSVWVYVPEVTGTHK.V         | 1751.96228 | 2 | 5.79E-04 | 0.78 | 3.20 | - | 435.4  |
| AHQ-1-6, 4879 - 4955     | R.TFSVWVYVPEVTGTHK.V         | 1751.96228 | 2 | 9.85E-04 | 0.32 | 2.73 | - | 206.9  |
| AHQ-1-7, 4988 - 5061     | R.TFSVWVYVPEVTGTHK.V         | 1751.96228 | 2 | 8.22E-04 | 0.46 | 2.76 | - | 298.2  |
| AHQ-1-5, 5002 - 5011     | R.TFSVWVYVPEVTGTHK.V         | 1751.96228 | 3 | 3.20E-06 | 0.64 | 3.46 | - | 399.2  |
| AHQ-1-3, 5083            | R.TFSVWVYVPEVTGTHK.V         | 1751.96228 | 3 | 4.18E-06 | 0.71 | 3.27 | - | 466.8  |
| AHQ-1-1, 3337 - 3344     | K.TGAVNKPAAFFVDAK.H          | 1647.85391 | 2 | 4.18E-05 | 0.88 | 4.11 | - | 732.7  |
| AHQ-1-5, 2955            | K.TGAVNKPAAFFVDAK.H          | 1647.85391 | 3 | 7.81E-09 | 0.93 | 4.42 | - | 900.9  |
| AHQ-1-2, 3138 - 3211     | K.TGAVNKPAAFFVDAK.H          | 1647.85391 | 3 | 1.14E-06 | 0.87 | 3.56 | - | 854.0  |
| AHQ-1-4, 3087 - 3090     | K.TGAVNKPAAFFVDAK.H          | 1647.85391 | 2 | 1.94E-07 | 0.91 | 4.13 | - | 685.0  |
| AHQ-1-4, 3096            | K.TGAVNKPAAFFVDAK.H          | 1647.85391 | 3 | 6.11E-07 | 0.75 | 3.06 | - | 916.6  |
| AHQ-1-6, 2962            | K.TGAVNKPAAFFVDAK.H          | 1647.85391 | 2 | 9.06E-06 | 0.87 | 3.70 | - | 549.1  |
| AHQ-1-3, 3065            | K.TGAVNKPAAFFVDAK.H          | 1647.85391 | 3 | 3.42E-08 | 0.76 | 3.12 | - | 779.2  |
| AHQ-1-1, 3137 - 3209     | K.TGAVNKPAAFFVDAK.H          | 1647.85391 | 3 | 1.59E-05 | 0.93 | 4.14 | - | 1185.2 |
| AHQ-1-2, 3133 - 3202     | K.TGAVNKPAAFFVDAK.H          | 1647.85391 | 2 | 9.17E-06 | 0.94 | 4.42 | - | 873.1  |
| AHQ-1-2, 3070 - 3142     | R.TGVELGKPTHFTVNAK.A         | 1699.93205 | 2 | 1.55E-07 | 0.88 | 3.74 | - | 651.4  |
| AHQ-1-3, 2950 - 3021     | R.TGVELGKPTHFTVNAK.A         | 1699.93205 | 2 | 4.09E-04 | 0.82 | 3.53 | - | 568.1  |
| AHQ-1-3, 2851 - 2866     | R.TGVELGKPTHFTVNAK.A         | 1699.93205 | 3 | 5.53E-06 | 0.82 | 4.12 | - | 512.0  |
| AHQ-1-1, 3016            | R.TGVELGKPTHFTVNAK.A         | 1699.93205 | 3 | 1.43E-04 | 0.63 | 3.26 | - | 538.3  |
| AHQ-1-1, 3147            | R.TGVELGKPTHFTVNAK.A         | 1699.93205 | 2 | 7.44E-05 | 0.89 | 3.84 | - | 710.4  |
| AHQ-1-2, 2953            | R.TGVELGKPTHFTVNAK.A         | 1699.93205 | 2 | 3.11E-06 | 0.92 | 4.43 | - | 657.2  |
| AHQ-1-5, 2702            | R.TGVELGKPTHFTVNAK.A         | 1699.93205 | 2 | 2.59E-06 | 0.87 | 3.81 | - | 539.5  |
| AHQ-1-1, 3200 - 3273     | K.THEAEIVEGENHXYCIR.F        | 2060.19046 | 3 | 8.16E-11 | 0.94 | 4.73 | - | 1034.1 |
| AHQ-1-8, 2996            | K.THEAEIVEGENHXYCIR.F        | 2060.19046 | 2 | 5.99E-13 | 0.98 | 5.01 | - | 1883.4 |
| AHQ-1-1, 3285            | K.THEAEIVEGENHXYCIR.F        | 2060.19046 | 2 | 1.30E-05 | 0.92 | 4.84 | - | 553.5  |
| AHQ-1-2, 3231            | K.THEAEIVEGENHXYCIR.F        | 2060.19046 | 3 | 8.67E-08 | 0.92 | 4.40 | - | 896.7  |
| AHQ-1-5, 3091            | K.THEAEIVEGENHXYCIR.F        | 2060.19046 | 2 | 7.36E-13 | 0.98 | 5.55 | - | 2102.3 |
| AHQ-1-5, 2890 - 2961     | K.THEAEIVEGENHXYCIR.F        | 2060.19046 | 3 | 1.16E-06 | 0.93 | 4.17 | - | 1047.0 |
| AHQ-1-5, 2958 - 3013     | K.THEAEIVEGENHXYCIR.F        | 2060.19046 | 2 | 3.57E-10 | 0.99 | 6.48 | - | 2472.8 |
| AHQ-1-4, 3239            | K.THEAEIVEGENHXYCIR.F        | 2060.19046 | 2 | 2.20E-08 | 0.97 | 4.79 | - | 1798.9 |
| AHQ-1-4, 3150            | K.THEAEIVEGENHXYCIR.F        | 2060.19046 | 2 | 6.14E-12 | 0.98 | 5.27 | - | 1901.2 |
| AHQ-1-3, 3090            | K.THEAEIVEGENHXYCIR.F        | 2060.19046 | 3 | 5.77E-05 | 0.85 | 3.62 | - | 831.2  |
| AHQ-1-7, 2990            | K.THEAEIVEGENHXYCIR.F        | 2060.19046 | 2 | 6.34E-04 | 0.98 | 5.29 | - | 1754.1 |
| AHQ-1-4, 3076 - 3146     | K.THEAEIVEGENHXYCIR.F        | 2060.19046 | 3 | 1.60E-07 | 0.91 | 4.16 | - | 1165.2 |
| AHQ-1-1, 3985            | K.THQDNDHOGTYTVAVYVDPVDTGR.Y | 2460.60076 | 2 | 4.27E-11 | 0.97 | 4.63 | - | 1635.5 |
| AHQ-1-1, 3859 - 3932     | K.THQDNDHOGTYTVAVYVDPVDTGR.Y | 2460.60076 | 3 | 8.77E-04 | 0.73 | 3.25 | - | 381.2  |
| AHQ-1-10, 2920 - 2928    | R.TPCEELVK.H                 | 1090.27249 | 2 | 3.25E-04 | 0.80 | 2.96 | - | 783.6  |
| AHQ-1-4, 3190            | R.TPCEELVK.H                 | 1090.27249 | 2 | 5.77E-04 | 0.89 | 3.34 | - | 771.5  |
| AHQ-1-4, 3203            | R.TPCEELVK.H                 | 1090.27249 | 1 | 1.98E-06 | 0.52 | 2.49 | - | 496.0  |
| AHQ-1-13, 3123 - 3138    | R.TPCEELVK.H                 | 1090.27249 | 2 | 3.60E-05 | 0.87 | 3.03 | - | 866.9  |
| AHQ-1-1, 3259            | R.TPCEELVK.H                 | 1090.27249 | 2 | 2.08E-06 | 0.79 | 2.69 | - | 630.5  |
| AHQ-1-14 - , 3095 - 3158 | R.TPCEELVK.H                 | 1090.27249 | 2 | 3.48E-05 | 0.87 | 3.30 | - | 666.1  |
| AHQ-1-7, 3088 - 3097     | R.TPCEELVK.H                 | 1090.27249 | 2 | 4.46E-06 | 0.91 | 3.17 | - | 928.3  |
| AHQ-1-3, 3163            | R.TPCEELVK.H                 | 1090.27249 | 2 | 2.43E-05 | 0.68 | 2.89 | - | 520.6  |
| AHQ-1-13 - , 3169        | R.TPCEELVK.H                 | 1090.27249 | 2 | 3.79E-05 | 0.84 | 2.66 | - | 1018.8 |
| AHQ-1-14, 4014 - 4017    | R.TPCEELVK.H                 | 1090.27249 | 2 | 9.42E-07 | 0.75 | 2.73 | - | 600.4  |
| AHQ-1-14 - , 3107        | R.TPCEELVK.H                 | 1090.27249 | 1 | 3.58E-05 | 0.59 | 2.82 | - | 501.6  |
| AHQ-1-11, 3002           | R.TPCEELVK.H                 | 1090.27249 | 2 | 8.91E-07 | 0.81 | 2.76 | - | 640.2  |
| AHQ-1-6, 3054            | R.TPCEELVK.H                 | 1090.27249 | 2 | 7.28E-05 | 0.80 | 3.06 | - | 622.1  |
| AHQ-1-5, 3069            | R.TPCEELVK.H                 | 1090.27249 | 2 | 6.40E-05 | 0.89 | 3.19 | - | 792.0  |
| AHQ-1-2, 3582 - 3653     | R.VANPSGNLTETYVQDR.G         | 1764.87462 | 2 | 6.34E-13 | 0.93 | 4.17 | - | 703.8  |
| AHQ-1-1, 3235            | R.VANPSGNLTETYVQDR.G         | 1764.87462 | 2 | 7.10E-09 | 0.94 | 4.27 | - | 876.9  |
| AHQ-1-7, 3268            | R.VANPSGNLTETYVQDR.G         | 1764.87462 | 2 | 1.70E-04 | 0.90 | 3.85 | - | 870.2  |
| AHQ-1-1, 3615            | R.VANPSGNLTETYVQDR.G         | 1764.87462 | 2 | 8.03E-13 | 0.59 | 2.50 | - | 555.2  |
| AHQ-1-4, 3504            | R.VANPSGNLTETYVQDR.G         | 1764.87462 | 2 | 7.45E-10 | 0.89 | 3.85 | - | 609.6  |
| AHQ-1-3, 3325            | R.VANPSGNLTETYVQDR.G         | 1764.87462 | 2 | 1.73E-13 | 0.89 | 4.03 | - | 484.7  |
| AHQ-1-2, 3726            | R.VANPSGNLTETYVQDR.G         | 1764.87462 | 2 | 2.36E-05 | 0.93 | 4.06 | - | 1006.3 |
| AHQ-1-1, 3511 - 3591     | R.VANPSGNLTETYVQDR.G         | 1764.87462 | 2 | 8.00E-12 | 0.96 | 4.64 | - | 1089.9 |
| AHQ-1-3, 3462 - 3537     | R.VANPSGNLTETYVQDR.G         | 1764.87462 | 2 | 7.95E-10 | 0.95 | 4.79 | - | 908.7  |
| AHQ-1-2, 3415 - 3485     | R.VANPSGNLTETYVQDR.G         | 1764.87462 | 2 | 3.62E-11 | 0.93 | 4.08 | - | 857.3  |
| AHQ-1-13 - , 3369        | R.VANPSGNLTETYVQDR.G         | 1764.87462 | 2 | 3.11E-05 | 0.86 | 3.67 | - | 599.4  |
| AHQ-1-5, 3410            | R.VANPSGNLTETYVQDR.G         | 1764.87462 | 2 | 2.72E-08 | 0.88 | 3.99 | - | 756.7  |
| AHQ-1-8, 3154            | R.VANPSGNLTETYVQDR.G         | 1764.87462 | 2 | 1.58E-05 | 0.90 | 3.51 | - | 919.3  |
| AHQ-1-5, 3218 - 3278     | R.VANPSGNLTETYVQDR.G         | 1764.87462 | 2 | 3.91E-10 | 0.91 | 3.82 | - | 658.4  |
| AHQ-1-3, 3306 - 3377     | R.VANPSGNLTETYVQDR.G         | 1764.87462 | 2 | 5.89E-12 | 0.95 | 4.14 | - | 1267.6 |
| AHQ-1-1, 3373 - 3443     | R.VANPSGNLTETYVQDR.G         | 1764.87462 | 2 | 4.02E-13 | 0.94 | 4.05 | - | 972.4  |
| AHQ-1-8, 2647            | K.VAQPITDNDKDGTVTVR.Y        | 1816.00621 | 2 | 3.49E-06 | 0.82 | 3.25 | - | 613.5  |
| AHQ-1-10, 2495           | K.VAQPITDNDKDGTVTVR.Y        | 1816.00621 | 2 | 2.76E-04 | 0.34 | 2.67 | - | 264.2  |
| AHQ-1-4, 2858            | K.VAQPITDNDKDGTVTVR.Y        | 1816.00621 | 2 | 2.20E-05 | 0.89 | 4.27 | - | 490.6  |
| AHQ-1-3, 2846            | K.VAQPITDNDKDGTVTVR.Y        | 1816.00621 | 2 | 4.16E-04 | 0.88 | 3.87 | - | 613.8  |
| AHQ-1-9, 2690            | K.VAQPITDNDKDGTVTVR.Y        | 1816.00621 | 2 | 5.84E-04 | 0.57 | 2.90 | - | 408.2  |
| AHQ-1-5, 2515            | K.VAQPITDNDKDGTVTVR.Y        | 1816.00621 | 2 | 8.37E-06 | 0.67 | 3.14 | - | 456.7  |
| AHQ-1-1, 2861 - 2927     | K.VAQPITDNDKDGTVTVR.Y        | 1816.00621 | 2 | 6.11E-07 | 0.92 | 4.08 | - | 795.4  |
| AHQ-1-5, 2739            | K.VAQPITDNDKDGTVTVR.Y        | 1816.00621 | 2 | 1.98E-05 | 0.93 | 4.17 | - | 909.0  |
| AHQ-1-1, 2979            | K.VAQPITDNDKDGTVTVR.Y        | 1816.00621 | 2 | 8.51E-07 | 0.87 | 3.70 | - | 675.8  |
| AHQ-1-4, 2776            | K.VAQPITDNDKDGTVTVR.Y        | 1816.00621 | 2 | 5.55E-06 | 0.82 | 3.35 | - | 643.9  |
| AHQ-1-2, 2949            | K.VAQPITDNDKDGTVTVR.Y        | 1816.00621 | 2 | 3.21E-05 | 0.81 | 3.52 | - | 489.7  |
| AHQ-1-13 - , 2915        | K.VAQPITDNDKDGTVTVR.Y        | 1816.00621 | 2 | 2.44E-04 | 0.81 | 3.19 | - | 587.7  |
| AHQ-1-3, 3654            | K.VDINTEDLEDGTCR.V           | 1638.69283 | 2 | 2.88E-07 | 0.81 | 3.21 | - | 877.3  |
| AHQ-1-4, 3438            | K.VDINTEDLEDGTCR.V           | 1638.69283 | 2 | 1.87E-04 | 0.89 | 3.45 | - | 883.6  |
| AHQ-1-9, 3548            | K.VDINTEDLEDGTCR.V           | 1638.69283 | 2 | 9.22E-07 | 0.89 | 3.49 | - | 958.0  |

|                       |                                              |            |   |          |      |      |   |        |
|-----------------------|----------------------------------------------|------------|---|----------|------|------|---|--------|
| AHQ-1-1, 3387         | K.VDINTEDEDLGTCTR.V                          | 1638.69283 | 2 | 7.90E-06 | 0.88 | 3.50 | - | 830.1  |
| AHQ-1-5, 3307 - 3377  | K.VDINTEDEDLGTCTR.V                          | 1638.69283 | 2 | 4.98E-04 | 0.92 | 3.54 | - | 943.1  |
| AHQ-1-6, 3567         | K.VDINTEDEDLGTCTR.V                          | 1638.69283 | 2 | 3.03E-05 | 0.87 | 3.35 | - | 830.3  |
| AHQ-1-1, 3609 - 3669  | K.VDINTEDEDLGTCTR.V                          | 1638.69283 | 2 | 5.28E-06 | 0.87 | 3.38 | - | 852.7  |
| AHQ-1-13, 3505        | K.VDINTEDEDLGTCTR.V                          | 1638.69283 | 2 | 2.69E-04 | 0.91 | 3.35 | - | 1214.7 |
| AHQ-1-8, 3609         | K.VDINTEDEDLGTCTR.V                          | 1638.69283 | 2 | 1.26E-04 | 0.91 | 3.96 | - | 898.8  |
| AHQ-1-5, 3463         | K.VDINTEDEDLGTCTR.V                          | 1638.69283 | 2 | 3.29E-06 | 0.87 | 3.27 | - | 888.8  |
| AHQ-1-5, 3613         | K.VDINTEDEDLGTCTR.V                          | 1638.69283 | 2 | 1.74E-05 | 0.92 | 3.80 | - | 991.3  |
| AHQ-1-1, 3492         | K.VDINTEDEDLGTCTR.V                          | 1638.69283 | 2 | 6.43E-08 | 0.91 | 3.53 | - | 1132.5 |
| AHQ-1-5, 3761         | K.VDINTEDEDLGTCTR.V                          | 1638.69283 | 2 | 7.30E-09 | 0.89 | 3.22 | - | 995.7  |
| AHQ-1-7, 3664 - 3737  | K.VDINTEDEDLGTCTR.V                          | 1638.69283 | 2 | 7.56E-06 | 0.85 | 3.19 | - | 850.3  |
| AHQ-1-2, 3785         | K.VDINTEDEDLGTCTR.V                          | 1638.69283 | 2 | 1.27E-06 | 0.92 | 3.93 | - | 876.5  |
| AHQ-1-3, 3385         | K.VDINTEDEDLGTCTR.V                          | 1638.69283 | 2 | 4.40E-08 | 0.87 | 3.68 | - | 847.7  |
| AHQ-1-6, 2482         | K.VDVGKQDEFTVK.S                             | 1365.51377 | 2 | 6.94E-09 | 0.78 | 3.07 | - | 609.2  |
| AHQ-1-1, 2703         | K.VDVGKQDEFTVK.S                             | 1365.51377 | 2 | 4.03E-09 | 0.86 | 3.32 | - | 740.4  |
| AHQ-1-5, 2461         | K.VDVGKQDEFTVK.S                             | 1365.51377 | 2 | 1.64E-07 | 0.75 | 3.41 | - | 400.2  |
| AHQ-1-3, 2565         | K.VDVGKQDEFTVK.S                             | 1365.51377 | 2 | 2.02E-06 | 0.87 | 3.32 | - | 655.5  |
| AHQ-1-4, 2566 - 2572  | K.VDVGKQDEFTVK.S                             | 1365.51377 | 2 | 3.43E-09 | 0.88 | 3.62 | - | 706.6  |
| AHQ-1-3, 2575         | K.VDVGKQDEFTVK.S                             | 1365.51377 | 1 | 4.73E-06 | 0.26 | 2.55 | - | 281.2  |
| AHQ-1-2, 2647 - 2659  | K.VDVGKQDEFTVK.S                             | 1365.51377 | 2 | 3.14E-05 | 0.85 | 3.18 | - | 738.1  |
| AHQ-1-3, 2710 - 2789  | K.VEPGLGADNSVVR.F                            | 1313.44209 | 2 | 9.36E-08 | 0.74 | 2.98 | - | 259.8  |
| AHQ-1-2, 2805 - 2878  | K.VEPGLGADNSVVR.F                            | 1313.44209 | 2 | 1.02E-07 | 0.89 | 3.74 | - | 438.7  |
| AHQ-1-1, 2840 - 2917  | K.VEPGLGADNSVVR.F                            | 1313.44209 | 2 | 2.79E-04 | 0.70 | 2.70 | - | 271.3  |
| AHQ-1-3, 6297 - 6369  | K.VEYTPYEEGLHSVDVTDYDGSPPVSSPFQVPVTEGCDPSR.V | 4300.57494 | 3 | 2.61E-07 | 0.96 | 6.38 | - | 1170.2 |
| AHQ-1-1, 6339         | K.VEYTPYEEGLHSVDVTDYDGSPPVSSPFQVPVTEGCDPSR.V | 4300.57494 | 3 | 3.83E-07 | 0.82 | 4.06 | - | 496.1  |
| AHQ-1-3, 6438 - 6449  | K.VEYTPYEEGLHSVDVTDYDGSPPVSSPFQVPVTEGCDPSR.V | 4300.57494 | 3 | 2.69E-04 | 0.86 | 4.45 | - | 367.9  |
| AHQ-1-4, 6534         | K.VEYTPYEEGLHSVDVTDYDGSPPVSSPFQVPVTEGCDPSR.V | 4300.57494 | 3 | 2.19E-05 | 0.90 | 5.12 | - | 457.6  |
| AHQ-1-2, 6465 - 6533  | K.VEYTPYEEGLHSVDVTDYDGSPPVSSPFQVPVTEGCDPSR.V | 4300.57494 | 3 | 6.72E-06 | 0.94 | 5.15 | - | 994.0  |
| AHQ-1-1, 6219 - 6279  | K.VEYTPYEEGLHSVDVTDYDGSPPVSSPFQVPVTEGCDPSR.V | 4300.57494 | 3 | 4.05E-05 | 0.93 | 5.11 | - | 849.3  |
| AHQ-1-5, 6422 - 6502  | K.VEYTPYEEGLHSVDVTDYDGSPPVSSPFQVPVTEGCDPSR.V | 4300.57494 | 3 | 6.34E-05 | 0.95 | 5.64 | - | 713.6  |
| AHQ-1-3, 7214 - 7221  | K.VGSAADIPINISSETDLSLLTATVPPSGR.E            | 2895.25495 | 2 | 3.50E-04 | 0.89 | 4.02 | - | 716.6  |
| AHQ-1-1, 6907 - 6971  | K.VGSAADIPINISSETDLSLLTATVPPSGR.E            | 2895.25495 | 2 | 1.51E-09 | 0.94 | 4.86 | - | 786.9  |
| AHQ-1-8, 7434 - 7472  | K.VGSAADIPINISSETDLSLLTATVPPSGR.E            | 2895.25495 | 2 | 1.93E-05 | 0.93 | 4.96 | - | 582.8  |
| AHQ-1-10, 6343 - 6344 | K.VGSAADIPINISSETDLSLLTATVPPSGR.E            | 2895.25495 | 2 | 2.80E-07 | 0.95 | 5.17 | - | 801.1  |
| AHQ-1-5, 7407         | K.VGSAADIPINISSETDLSLLTATVPPSGR.E            | 2895.25495 | 2 | 7.46E-09 | 0.96 | 5.74 | - | 779.1  |
| AHQ-1-8, 7435 - 7440  | K.VGSAADIPINISSETDLSLLTATVPPSGR.E            | 2895.25495 | 3 | 8.29E-04 | 0.79 | 3.86 | - | 598.0  |
| AHQ-1-2, 1507 - 1583  | R.VHGPQISGTTNKPNK.F                          | 1635.80645 | 2 | 2.63E-04 | 0.90 | 3.45 | - | 922.3  |
| AHQ-1-1, 4532         | K.VHSPSGALEECYVTEIDQDK.Y                     | 2279.42322 | 2 | 4.01E-11 | 0.96 | 5.40 | - | 1146.3 |
| AHQ-1-4, 4523         | K.VHSPSGALEECYVTEIDQDK.Y                     | 2279.42322 | 2 | 1.86E-06 | 0.89 | 3.75 | - | 1121.2 |
| AHQ-1-4, 4608         | K.VHSPSGALEECYVTEIDQDK.Y                     | 2279.42322 | 2 | 4.83E-06 | 0.94 | 4.41 | - | 1162.0 |
| AHQ-1-7, 4393         | K.VHSPSGALEECYVTEIDQDK.Y                     | 2279.42322 | 2 | 2.81E-04 | 0.96 | 4.75 | - | 1272.4 |
| AHQ-1-3, 4489         | K.VHSPSGALEECYVTEIDQDK.Y                     | 2279.42322 | 3 | 1.18E-04 | 0.95 | 4.87 | - | 1451.1 |
| AHQ-1-6, 4323         | K.VHSPSGALEECYVTEIDQDK.Y                     | 2279.42322 | 2 | 6.30E-08 | 0.97 | 5.51 | - | 1241.4 |
| AHQ-1-5, 4389         | K.VHSPSGALEECYVTEIDQDK.Y                     | 2279.42322 | 2 | 1.52E-08 | 0.94 | 4.84 | - | 714.7  |
| AHQ-1-9, 4615 - 4624  | K.VHSPSGALEECYVTEIDQDKYAVR.F                 | 2768.99349 | 3 | 4.80E-13 | 0.93 | 4.91 | - | 897.4  |
| AHQ-1-5, 4801         | K.VHSPSGALEECYVTEIDQDKYAVR.F                 | 2768.99349 | 3 | 7.19E-11 | 0.90 | 4.57 | - | 659.3  |
| AHQ-1-5, 4741         | K.VHSPSGALEECYVTEIDQDKYAVR.F                 | 2768.99349 | 2 | 1.67E-15 | 0.94 | 4.63 | - | 868.3  |
| AHQ-1-5, 4703 - 4726  | K.VHSPSGALEECYVTEIDQDKYAVR.F                 | 2768.99349 | 3 | 6.95E-11 | 0.91 | 4.65 | - | 676.2  |
| AHQ-1-3, 4817         | K.VHSPSGALEECYVTEIDQDKYAVR.F                 | 2768.99349 | 3 | 3.86E-06 | 0.69 | 3.27 | - | 355.1  |
| AHQ-1-2, 4993         | K.VHSPSGALEECYVTEIDQDKYAVR.F                 | 2768.99349 | 3 | 1.11E-14 | 0.86 | 3.83 | - | 705.4  |
| AHQ-1-4, 4882         | K.VHSPSGALEECYVTEIDQDKYAVR.F                 | 2768.99349 | 3 | 1.94E-09 | 0.92 | 4.83 | - | 631.3  |
| AHQ-1-4, 4892         | K.VHSPSGALEECYVTEIDQDKYAVR.F                 | 2768.99349 | 2 | 2.77E-06 | 0.90 | 4.62 | - | 445.1  |
| AHQ-1-6, 4662         | K.VHSPSGALEECYVTEIDQDKYAVR.F                 | 2768.99349 | 3 | 7.61E-05 | 0.92 | 4.69 | - | 673.6  |
| AHQ-1-1, 4925         | K.VHSPSGALEECYVTEIDQDKYAVR.F                 | 2768.99349 | 2 | 1.04E-09 | 0.94 | 4.45 | - | 1235.0 |
| AHQ-1-7, 4713         | K.VHSPSGALEECYVTEIDQDKYAVR.F                 | 2768.99349 | 3 | 1.67E-06 | 0.92 | 5.26 | - | 553.5  |
| AHQ-1-8, 4596         | K.VHSPSGALEECYVTEIDQDKYAVR.F                 | 2768.99349 | 2 | 1.48E-08 | 0.92 | 4.28 | - | 794.8  |
| AHQ-1-8, 4587 - 4659  | K.VHSPSGALEECYVTEIDQDKYAVR.F                 | 2768.99349 | 3 | 6.46E-07 | 0.84 | 3.61 | - | 748.3  |
| AHQ-1-1, 4855 - 4920  | K.VHSPSGALEECYVTEIDQDKYAVR.F                 | 2768.99349 | 3 | 7.47E-09 | 0.95 | 5.26 | - | 861.9  |
| AHQ-1-4, 3814         | K.VNQPASFAVSLNGAK.G                          | 1503.68480 | 2 | 3.86E-08 | 0.83 | 3.66 | - | 511.8  |
| AHQ-1-4, 3926         | K.VNQPASFAVSLNGAK.G                          | 1503.68480 | 2 | 4.34E-06 | 0.91 | 3.69 | - | 673.9  |
| AHQ-1-8, 3538         | K.VNQPASFAVSLNGAK.G                          | 1503.68480 | 2 | 4.39E-09 | 0.91 | 4.05 | - | 666.8  |
| AHQ-1-5, 3693 - 3719  | K.VNQPASFAVSLNGAK.G                          | 1503.68480 | 2 | 1.02E-07 | 0.82 | 3.68 | - | 478.9  |
| AHQ-1-5, 3787 - 3862  | K.VNQPASFAVSLNGAK.G                          | 1503.68480 | 2 | 5.18E-06 | 0.91 | 4.35 | - | 559.0  |
| AHQ-1-2, 4014         | K.VNQPASFAVSLNGAK.G                          | 1503.68480 | 2 | 1.15E-05 | 0.92 | 4.12 | - | 620.2  |
| AHQ-1-9, 3575         | K.VNQPASFAVSLNGAK.G                          | 1503.68480 | 2 | 7.27E-05 | 0.87 | 3.49 | - | 652.1  |
| AHQ-1-1, 3855 - 3919  | K.VNQPASFAVSLNGAK.G                          | 1503.68480 | 2 | 3.71E-08 | 0.82 | 3.41 | - | 480.5  |
| AHQ-1-3, 3789 - 3870  | K.VNQPASFAVSLNGAK.G                          | 1503.68480 | 2 | 9.58E-07 | 0.87 | 3.85 | - | 548.7  |
| AHQ-1-6, 3650 - 3728  | K.VNQPASFAVSLNGAK.G                          | 1503.68480 | 2 | 2.36E-07 | 0.92 | 4.36 | - | 601.2  |
| AHQ-1-2, 3930         | K.VNQPASFAVSLNGAK.G                          | 1503.68480 | 2 | 5.11E-07 | 0.94 | 4.09 | - | 708.5  |
| AHQ-1-3, 3877         | K.VNQPASFAVSLNGAK.G                          | 1503.68480 | 2 | 3.16E-08 | 0.65 | 2.85 | - | 481.2  |
| AHQ-1-7, 3809 - 3825  | K.VNQPASFAVSLNGAK.G                          | 1503.68480 | 2 | 1.64E-06 | 0.78 | 3.12 | - | 477.9  |
| AHQ-1-2, 1589 - 1662  | K.VPVHDTVDAK.V                               | 1168.28175 | 1 | 5.73E-04 | 0.62 | 2.39 | - | 739.4  |
| AHQ-1-1, 1804 - 1865  | K.VPVHDTVDAK.V                               | 1168.28175 | 2 | 1.36E-07 | 0.96 | 3.71 | - | 1548.2 |
| AHQ-1-3, 1673         | K.VPVHDTVDAK.V                               | 1168.28175 | 2 | 6.01E-07 | 0.88 | 2.86 | - | 848.5  |
| AHQ-1-3, 1579         | K.VPVHDTVDAK.V                               | 1168.28175 | 2 | 5.19E-08 | 0.92 | 3.27 | - | 1181.3 |
| AHQ-1-4, 1596         | K.VPVHDTVDAK.V                               | 1168.28175 | 2 | 1.35E-08 | 0.93 | 3.41 | - | 1196.2 |
| AHQ-1-2, 1559 - 1617  | K.VPVHDTVDAK.V                               | 1168.28175 | 2 | 6.95E-08 | 0.96 | 3.25 | - | 1750.4 |
| AHQ-1-4, 4243         | R.VQVQDNEGCPVEALVK.D                         | 1786.98493 | 2 | 1.28E-06 | 0.94 | 3.99 | - | 1367.4 |
| AHQ-1-3, 4310         | R.VQVQDNEGCPVEALVK.D                         | 1786.98493 | 2 | 4.11E-04 | 0.93 | 4.10 | - | 958.9  |
| AHQ-1-3, 4198 - 4218  | R.VQVQDNEGCPVEALVK.D                         | 1786.98493 | 2 | 1.36E-09 | 0.97 | 5.41 | - | 1384.6 |
| AHQ-1-2, 4466         | R.VQVQDNEGCPVEALVK.D                         | 1786.98493 | 2 | 9.75E-10 | 0.94 | 4.67 | - | 1124.5 |
| AHQ-1-2, 4325 - 4397  | R.VQVQDNEGCPVEALVK.D                         | 1786.98493 | 2 | 4.67E-07 | 0.97 | 5.32 | - | 1409.7 |
| AHQ-1-4, 4387         | R.VQVQDNEGCPVEALVK.D                         | 1786.98493 | 2 | 1.12E-10 | 0.88 | 3.98 | - | 693.3  |
| AHQ-1-1, 4239         | R.VQVQDNEGCPVEALVK.D                         | 1786.98493 | 2 | 1.53E-06 | 0.95 | 4.45 | - | 1200.0 |
| AHQ-1-1, 4412         | R.VQVQDNEGCPVEALVK.D                         | 1786.98493 | 2 | 1.18E-06 | 0.92 | 4.35 | - | 1151.9 |
| AHQ-1-5, 4305         | R.VQVQDNEGCPVEALVK.D                         | 1786.98493 | 2 | 6.62E-07 | 0.94 | 4.08 | - | 1265.8 |
| AHQ-1-1, 5481 - 5497  | R.VQVQDNEGCPVEALVKDNGNGTYSYVPR.K             | 3359.60342 | 3 | 1.43E-06 | 0.86 | 3.92 | - | 900.9  |
| AHQ-1-2, 5509 - 5582  | R.VQVQDNEGCPVEALVKDNGNGTYSYVPR.K             | 3359.60342 | 3 | 2.22E-15 | 0.95 | 5.00 | - | 1491.6 |
| AHQ-1-2, 5374 - 5441  | R.VQVQDNEGCPVEALVKDNGNGTYSYVPR.K             | 3359.60342 | 3 | 6.24E-06 | 0.92 | 4.37 | - | 1153.5 |
| AHQ-1-3, 5410         | R.VQVQDNEGCPVEALVKDNGNGTYSYVPR.K             | 3359.60342 | 3 | 6.21E-08 | 0.91 | 4.12 | - | 1317.4 |
| AHQ-1-3, 5138 - 5209  | R.VQVQDNEGCPVEALVKDNGNGTYSYVPR.K             | 3359.60342 | 3 | 9.59E-09 | 0.95 | 5.30 | - | 1301.7 |
| AHQ-1-5, 5261 - 5329  | R.VQVQDNEGCPVEALVKDNGNGTYSYVPR.K             | 3359.60342 | 3 | 4.06E-07 | 0.77 | 3.59 | - | 912.6  |
| AHQ-1-1, 5147         | R.VQVQDNEGCPVEALVKDNGNGTYSYVPR.K             | 3359.60342 | 3 | 8.92E-07 | 0.94 | 4.69 | - | 1417.3 |
| AHQ-1-1, 5351 - 5415  | R.VQVQDNEGCPVEALVKDNGNGTYSYVPR.K             | 3359.60342 | 3 | 3.92E-08 | 0.93 | 4.84 | - | 1097.6 |
| AHQ-1-7, 4701         | R.VSGGGLHEGHTFEPAEFIIDTR.D                   | 2441.64058 | 3 | 4.63E-06 | 0.95 | 4.84 | - | 1050.8 |
| AHQ-1-1, 4959         | R.VSGGGLHEGHTFEPAEFIIDTR.D                   | 2441.64058 | 2 | 3.84E-04 | 0.96 | 5.16 | - | 1236.6 |
| AHQ-1-1, 4943 - 5019  | R.VSGGGLHEGHTFEPAEFIIDTR.D                   | 2441.64058 | 3 | 3.49E-10 | 0.96 | 5.83 | - | 1399.8 |
| AHQ-1-3, 4861         | R.VSGGGLHEGHTFEPAEFIIDTR.D                   | 2441.64058 | 3 | 2.79E-09 | 0.93 | 4.65 | - | 941.1  |
| AHQ-1-5, 4862         | R.VSGGGLHEGHTFEPAEFIIDTR.D                   | 2441.64058 | 3 | 5.17E-11 | 0.95 | 5.23 | - | 1164.3 |
| AHQ-1-5, 4694 - 4765  | R.VSGGGLHEGHTFEPAEFIIDTR.D                   | 2441.64058 | 3 | 1.87E-09 | 0.95 | 5.45 | - | 1086.2 |
| AHQ-1-4, 4926 - 5004  | R.VSGGGLHEGHTFEPAEFIIDTR.D                   | 2441.64058 | 3 | 6.67E-10 | 0.96 | 5.52 | - | 1365.4 |
| AHQ-1-9, 4600         | R.VSGGGLHEGHTFEPAEFIIDTR.D                   | 2441.64058 | 2 | 2.04E-04 | 0.89 | 4.06 | - | 567.4  |
| AHQ-1-13, 4608        | R.VSGGGLHEGHTFEPAEFIIDTR.D                   | 2441.64058 | 2 | 5.82E-06 | 0.72 | 2.92 | - | 415.9  |
| AHQ-1-9, 4616         | R.VSGGGLHEGHTFEPAEFIIDTR.D                   | 2441.64058 | 3 | 7.50E-06 | 0.94 | 4.57 | - | 1145.7 |
| AHQ-1-8, 4432         | R.VSGGGLHEGHTFEPAEFIIDTR.D                   | 2441.64058 | 3 | 5.01E-08 | 0.93 | 4.71 | - | 1009.8 |
| AHQ-1-13 - , 4879     | R.VSGGGLHEGHTFEPAEFIIDTR.D                   | 2441.64058 | 3 | 2.67E-06 | 0.95 | 5.27 | - | 1410.0 |
| AHQ-1-2, 5057         | R.VSGGGLHEGHTFEPAEFIIDTR.D                   | 2441.64058 | 3 | 1.95E-06 | 0.95 | 4.99 | - | 1122.6 |

|                         |                                            |            |   |          |      |      |   |        |
|-------------------------|--------------------------------------------|------------|---|----------|------|------|---|--------|
| AHQ-1-6, 4675           | R.VSGGGLHEGHTFEPAEFIIDTR.D                 | 2441.64058 | 2 | 6.51E-04 | 0.81 | 3.33 | - | 622.3  |
| AHQ-1-2, 5065           | R.VSGGGLHEGHTFEPAEFIIDTR.D                 | 2441.64058 | 2 | 3.74E-05 | 0.87 | 3.73 | - | 647.1  |
| AHQ-1-13, 4543 - 4611   | R.VSGGGLHEGHTFEPAEFIIDTR.D                 | 2441.64058 | 3 | 8.27E-04 | 0.89 | 4.30 | - | 696.1  |
| AHQ-1-1, 2796 - 2868    | K.VTAQGGPLEPSGNIANK.T                      | 1653.81855 | 2 | 7.52E-07 | 0.91 | 4.52 | - | 657.0  |
| AHQ-1-4, 2731           | K.VTAQGGPLEPSGNIANK.T                      | 1653.81855 | 2 | 1.22E-04 | 0.78 | 3.53 | - | 422.9  |
| AHQ-1-6, 2724           | K.VTAQGGPLEPSGNIANK.T                      | 1653.81855 | 2 | 1.17E-06 | 0.92 | 4.20 | - | 861.3  |
| AHQ-1-6, 2626           | K.VTAQGGPLEPSGNIANK.T                      | 1653.81855 | 2 | 2.26E-07 | 0.70 | 3.08 | - | 402.2  |
| AHQ-1-2, 2775 - 2846    | K.VTAQGGPLEPSGNIANK.T                      | 1653.81855 | 2 | 1.77E-05 | 0.92 | 4.44 | - | 617.2  |
| AHQ-1-3, 2721 - 2790    | K.VTAQGGPLEPSGNIANK.T                      | 1653.81855 | 2 | 3.38E-06 | 0.84 | 4.03 | - | 482.8  |
| AHQ-1-3, 2829 - 2901    | K.VTAQGGPLEPSGNIANK.T                      | 1653.81855 | 2 | 4.29E-10 | 0.89 | 4.41 | - | 463.0  |
| AHQ-1-5, 2703 - 2713    | K.VTAQGGPLEPSGNIANK.T                      | 1653.81855 | 2 | 5.76E-05 | 0.77 | 3.44 | - | 409.2  |
| AHQ-1-2, 2917 - 2985    | K.VTAQGGPLEPSGNIANK.T                      | 1653.81855 | 2 | 1.23E-07 | 0.88 | 4.08 | - | 480.6  |
| AHQ-1-8, 2489           | K.VTAQGGPLEPSGNIANK.T                      | 1653.81855 | 2 | 3.37E-04 | 0.77 | 3.06 | - | 639.3  |
| AHQ-1-9, 2586           | K.VTAQGGPLEPSGNIANK.T                      | 1653.81855 | 2 | 6.27E-04 | 0.89 | 3.61 | - | 615.7  |
| AHQ-1-1, 3369           | K.VTVLFAGQHIAK.S                           | 1284.53185 | 3 | 5.60E-05 | 0.80 | 3.60 | - | 690.6  |
| AHQ-1-1, 3375           | K.VTVLFAGQHIAK.S                           | 1284.53185 | 1 | 8.53E-04 | 0.24 | 1.84 | - | 573.1  |
| AHQ-1-3, 3226           | K.VTVLFAGQHIAK.S                           | 1284.53185 | 3 | 1.89E-05 | 0.78 | 3.69 | - | 585.9  |
| AHQ-1-6, 3076           | K.VTVLFAGQHIAK.S                           | 1284.53185 | 3 | 7.57E-05 | 0.87 | 4.00 | - | 654.2  |
| AHQ-1-3, 3149 - 3230    | K.VTVLFAGQHIAK.S                           | 1284.53185 | 2 | 5.06E-08 | 0.91 | 3.76 | - | 831.6  |
| AHQ-1-2, 3334 - 3363    | K.VTVLFAGQHIAK.S                           | 1284.53185 | 2 | 6.90E-07 | 0.93 | 3.85 | - | 976.5  |
| AHQ-1-5, 3058           | K.VTVLFAGQHIAK.S                           | 1284.53185 | 2 | 1.47E-07 | 0.91 | 3.43 | - | 1070.0 |
| AHQ-1-5, 3067           | K.VTVLFAGQHIAK.S                           | 1284.53185 | 1 | 1.62E-04 | 0.22 | 1.86 | - | 493.8  |
| AHQ-1-2, 3349           | K.VTVLFAGQHIAK.S                           | 1284.53185 | 1 | 5.63E-04 | 0.66 | 3.19 | - | 484.8  |
| AHQ-1-1, 3367           | K.VTVLFAGQHIAK.S                           | 1284.53185 | 2 | 6.99E-07 | 0.92 | 4.14 | - | 825.6  |
| AHQ-1-6, 3062           | K.VTVLFAGQHIAK.S                           | 1284.53185 | 2 | 6.30E-05 | 0.86 | 3.29 | - | 788.1  |
| AHQ-1-7, 3080           | K.VTVLFAGQHIAK.S                           | 1284.53185 | 2 | 8.40E-05 | 0.82 | 3.09 | - | 634.1  |
| AHQ-1-4, 3240           | K.VTVLFAGQHIAK.S                           | 1284.53185 | 2 | 2.88E-05 | 0.90 | 3.74 | - | 754.5  |
| AHQ-1-5, 5290 - 5321    | R.VTYCPTPEGNYIINIK.F                       | 1884.14221 | 2 | 3.04E-08 | 0.85 | 3.67 | - | 377.6  |
| AHQ-1-1, 5183           | R.VTYCPTPEGNYIINIK.F                       | 1884.14221 | 2 | 7.67E-08 | 0.90 | 3.84 | - | 463.9  |
| AHQ-1-2, 5293 - 5319    | R.VTYCPTPEGNYIINIK.F                       | 1884.14221 | 2 | 1.26E-05 | 0.87 | 3.65 | - | 412.5  |
| AHQ-1-1, 4828           | R.VTYCPTPEGNYIINIK.F                       | 1884.14221 | 2 | 7.01E-04 | 0.57 | 2.78 | - | 247.0  |
| AHQ-1-4, 5075           | R.VTYCPTPEGNYIINIK.F                       | 1884.14221 | 2 | 1.99E-09 | 0.78 | 3.37 | - | 332.0  |
| AHQ-1-1, 5199           | R.VTYCPTPEGNYIINIK.F                       | 1884.14221 | 3 | 1.03E-04 | 0.86 | 3.96 | - | 627.4  |
| AHQ-1-1, 5309           | R.VTYCPTPEGNYIINIK.F                       | 1884.14221 | 2 | 6.88E-06 | 0.77 | 3.57 | - | 304.2  |
| AHQ-1-6, 4923           | R.VTYCPTPEGNYIINIK.F                       | 1884.14221 | 2 | 1.61E-05 | 0.88 | 3.57 | - | 544.1  |
| AHQ-1-5, 5123 - 5193    | R.VTYCPTPEGNYIINIK.F                       | 1884.14221 | 2 | 5.24E-07 | 0.92 | 4.47 | - | 520.0  |
| AHQ-1-7, 4997           | R.VTYCPTPEGNYIINIK.F                       | 1884.14221 | 2 | 6.86E-04 | 0.42 | 2.56 | - | 267.8  |
| AHQ-1-4, 5212           | R.VTYCPTPEGNYIINIK.F                       | 1884.14221 | 2 | 5.35E-05 | 0.68 | 3.46 | - | 301.4  |
| AHQ-1-3, 5143           | R.VTYCPTPEGNYIINIK.F                       | 1884.14221 | 2 | 3.56E-05 | 0.88 | 3.60 | - | 451.2  |
| AHQ-1-8, 5351           | R.VTYTPMAPGSYLISIK.Y                       | 1742.07225 | 2 | 1.19E-05 | 0.71 | 2.79 | - | 393.0  |
| AHQ-1-6, 4987           | R.VTYTPMAPGSYLISIK.Y                       | 1758.07165 | 2 | 9.42E-04 | 0.62 | 2.69 | - | 326.9  |
| AHQ-1-13, 5217          | R.VTYTPMAPGSYLISIK.Y                       | 1742.07225 | 2 | 7.87E-04 | 0.70 | 2.83 | - | 443.8  |
| AHQ-1-13- , 5527        | R.VTYTPMAPGSYLISIK.Y                       | 1742.07225 | 2 | 2.45E-04 | 0.89 | 3.66 | - | 748.4  |
| AHQ-1-6, 5490           | R.VTYTPMAPGSYLISIK.Y                       | 1742.07225 | 2 | 8.04E-04 | 0.72 | 2.62 | - | 614.7  |
| AHQ-1-11, 5027          | R.VTYTPMAPGSYLISIK.Y                       | 1742.07225 | 2 | 4.51E-04 | 0.81 | 3.07 | - | 510.2  |
| AHQ-1-4, 5698 - 5763    | R.VTYTPMAPGSYLISIK.Y                       | 1742.07225 | 2 | 8.16E-04 | 0.80 | 3.03 | - | 712.4  |
| AHQ-1-5, 5515 - 5561    | R.VTYTPMAPGSYLISIK.Y                       | 1742.07225 | 2 | 1.45E-04 | 0.82 | 3.17 | - | 600.1  |
| AHQ-1-14- , 4923 - 4943 | R.VTYTPMAPGSYLISIK.Y                       | 1758.07165 | 2 | 1.89E-04 | 0.52 | 2.94 | - | 311.2  |
| AHQ-1-2, 5785 - 5803    | R.VTYTPMAPGSYLISIK.Y                       | 1742.07225 | 2 | 5.14E-05 | 0.46 | 2.71 | - | 328.9  |
| AHQ-1-9, 5374 - 5376    | R.VTYTPMAPGSYLISIK.Y                       | 1742.07225 | 2 | 6.48E-04 | 0.77 | 3.42 | - | 432.8  |
| AHQ-1-14- , 5382        | R.VTYTPMAPGSYLISIK.Y                       | 1742.07225 | 2 | 6.85E-04 | 0.84 | 3.24 | - | 636.1  |
| AHQ-1-4, 5614 - 5694    | R.VTYTPMAPGSYLISIK.Y                       | 1742.07225 | 2 | 2.08E-05 | 0.80 | 2.76 | - | 745.5  |
| AHQ-1-4, 2671           | R.YAPSEAGLHEM.DIR.Y                        | 1605.75422 | 2 | 3.43E-05 | 0.84 | 2.81 | - | 1005.8 |
| AHQ-1-13- , 3472        | R.YAPSEAGLHEM.DIR.Y                        | 1589.75482 | 2 | 2.54E-07 | 0.88 | 3.48 | - | 739.0  |
| AHQ-1-1, 2784           | R.YAPSEAGLHEM.DIR.Y                        | 1605.75422 | 2 | 4.67E-05 | 0.82 | 2.89 | - | 880.7  |
| AHQ-1-13- , 2748        | R.YAPSEAGLHEM.DIR.Y                        | 1605.75422 | 2 | 8.39E-04 | 0.68 | 2.53 | - | 692.1  |
| AHQ-1-13, 3382          | R.YAPSEAGLHEM.DIR.Y                        | 1589.75482 | 2 | 9.51E-04 | 0.74 | 2.80 | - | 776.3  |
| AHQ-1-5, 3287           | R.YAPSEAGLHEM.DIR.Y                        | 1589.75482 | 2 | 2.17E-04 | 0.91 | 3.79 | - | 993.5  |
| AHQ-1-9, 3188           | R.YAPSEAGLHEM.DIR.Y                        | 1589.75482 | 2 | 2.02E-04 | 0.70 | 2.76 | - | 645.5  |
| AHQ-1-6, 3287           | R.YAPSEAGLHEM.DIR.Y                        | 1589.75482 | 2 | 4.62E-06 | 0.67 | 2.64 | - | 621.0  |
| AHQ-1-8, 3161           | R.YAPSEAGLHEM.DIR.Y                        | 1589.75482 | 2 | 2.08E-05 | 0.75 | 3.01 | - | 761.0  |
| AHQ-1-1, 4392           | K.YGGDEIPFSPYR.V                           | 1401.50466 | 1 | 2.22E-04 | 0.17 | 2.02 | - | 356.5  |
| AHQ-1-2, 4497 - 4498    | K.YGGDEIPFSPYR.V                           | 1401.50466 | 1 | 7.78E-04 | 0.39 | 2.75 | - | 430.9  |
| AHQ-1-12, 4113 - 4114   | K.YGGDEIPFSPYR.V                           | 1401.50466 | 2 | 6.13E-04 | 0.76 | 3.42 | - | 471.9  |
| AHQ-1-1, 4409           | K.YGGDEIPFSPYR.V                           | 1401.50466 | 1 | 4.16E-07 | 0.25 | 2.26 | - | 426.8  |
| AHQ-1-1, 4380 - 4443    | K.YGGDEIPFSPYR.V                           | 1401.50466 | 2 | 2.69E-05 | 0.72 | 3.10 | - | 438.8  |
| AHQ-1-3, 4346           | K.YGGDEIPFSPYR.V                           | 1401.50466 | 1 | 1.00E-06 | 0.57 | 2.78 | - | 495.5  |
| AHQ-1-4, 4403 - 4404    | K.YGGDEIPFSPYR.V                           | 1401.50466 | 1 | 5.16E-04 | 0.27 | 2.31 | - | 381.4  |
| AHQ-1-3, 4345           | K.YGGDEIPFSPYR.V                           | 1401.50466 | 1 | 9.45E-04 | 0.22 | 1.85 | - | 457.6  |
| AHQ-1-10, 3127          | K.YGGPYHIGGSPFK.A                          | 1380.53182 | 2 | 3.86E-06 | 0.96 | 4.42 | - | 1636.6 |
| AHQ-1-9, 3123           | K.YGGPYHIGGSPFK.A                          | 1380.53182 | 1 | 6.36E-04 | 0.88 | 3.09 | - | 795.3  |
| AHQ-1-11, 3191 - 3194   | K.YGGPYHIGGSPFK.A                          | 1380.53182 | 2 | 7.88E-07 | 0.98 | 5.10 | - | 1982.0 |
| AHQ-1-1, 3493           | K.YGGPYHIGGSPFK.A                          | 1380.53182 | 2 | 7.08E-06 | 0.93 | 3.69 | - | 1179.1 |
| AHQ-1-5, 3213           | K.YGGPYHIGGSPFK.A                          | 1380.53182 | 2 | 5.98E-07 | 0.96 | 4.39 | - | 1583.6 |
| AHQ-1-6, 3214           | K.YGGPYHIGGSPFK.A                          | 1380.53182 | 2 | 4.29E-07 | 0.93 | 3.86 | - | 1335.0 |
| AHQ-1-13- , 3488        | K.YGGPYHIGGSPFK.A                          | 1380.53182 | 2 | 3.31E-05 | 0.95 | 3.98 | - | 1329.5 |
| AHQ-1-3, 3383           | K.YGGPYHIGGSPFK.A                          | 1380.53182 | 2 | 3.56E-07 | 0.97 | 4.13 | - | 1915.1 |
| AHQ-1-5, 3219           | K.YGGPYHIGGSPFK.A                          | 1380.53182 | 1 | 3.09E-07 | 0.87 | 3.54 | - | 562.6  |
| AHQ-1-4, 3384           | K.YGGPYHIGGSPFK.A                          | 1380.53182 | 2 | 3.75E-08 | 0.97 | 4.48 | - | 2163.4 |
| AHQ-1-5, 3222           | K.YGGPYHIGGSPFK.A                          | 1380.53182 | 3 | 9.62E-05 | 0.88 | 4.24 | - | 687.3  |
| AHQ-1-2, 3499           | K.YGGPYHIGGSPFK.A                          | 1380.53182 | 2 | 4.10E-07 | 0.94 | 3.71 | - | 1275.9 |
| AHQ-1-8, 3092           | K.YGGPYHIGGSPFK.A                          | 1380.53182 | 2 | 6.00E-06 | 0.93 | 3.24 | - | 1606.9 |
| AHQ-1-8, 3097           | K.YGGPYHIGGSPFK.A                          | 1380.53182 | 2 | 1.35E-10 | 0.95 | 3.99 | - | 1370.7 |
| AHQ-1-3, 3195 - 3197    | K.YGGQVPVNFPSK.L                           | 1291.43658 | 2 | 9.66E-04 | 0.86 | 3.15 | - | 559.7  |
| AHQ-1-1, 3164           | K.YGGQVPVNFPSK.L                           | 1291.43658 | 1 | 1.21E-04 | 0.33 | 2.64 | - | 289.5  |
| AHQ-1-5, 2966 - 2997    | K.YGGQVPVNFPSK.L                           | 1291.43658 | 2 | 1.81E-05 | 0.86 | 2.96 | - | 513.0  |
| AHQ-1-1, 3144           | K.YGGQVPVNFPSK.L                           | 1291.43658 | 2 | 1.30E-04 | 0.88 | 3.25 | - | 587.1  |
| AHQ-1-3, 3062 - 3063    | K.YGGQVPVNFPSK.L                           | 1291.43658 | 1 | 6.53E-05 | 0.28 | 1.87 | - | 446.7  |
| AHQ-1-3, 3053 - 3054    | K.YGGQVPVNFPSK.L                           | 1291.43658 | 2 | 2.28E-05 | 0.93 | 4.11 | - | 642.4  |
| AHQ-1-6, 2975 - 2986    | K.YGGQVPVNFPSK.L                           | 1291.43658 | 2 | 8.19E-06 | 0.91 | 3.79 | - | 564.0  |
| AHQ-1-2, 3147 - 3217    | K.YGGQVPVNFPSK.L                           | 1291.43658 | 2 | 7.05E-05 | 0.92 | 3.62 | - | 524.0  |
| AHQ-1-1, 6207           | K.YGGQVPVNFPSKLVQEPVAVDTSGVQCYGPIEGGQVFR.E | 4038.44995 | 3 | 6.40E-09 | 0.93 | 4.76 | - | 1034.7 |
| AHQ-1-4, 4411           | K.YGQHVPGSPFQFTVGLGEGGAH.K.V               | 2596.88377 | 3 | 1.55E-05 | 0.86 | 3.77 | - | 887.8  |
| AHQ-1-5, 4197           | K.YGQHVPGSPFQFTVGLGEGGAH.K.V               | 2596.88377 | 3 | 5.06E-04 | 0.87 | 3.99 | - | 777.9  |
| AHQ-1-1, 2989           | K.YNEQHVPGSPFTAR.V                         | 1603.71978 | 2 | 6.82E-07 | 0.90 | 3.62 | - | 630.9  |
| AHQ-1-8, 2498           | K.YNEQHVPGSPFTAR.V                         | 1603.71978 | 2 | 1.03E-05 | 0.91 | 3.77 | - | 622.2  |
| AHQ-1-4, 2852 - 2863    | K.YNEQHVPGSPFTAR.V                         | 1603.71978 | 2 | 7.26E-08 | 0.95 | 4.54 | - | 680.4  |
| AHQ-1-4, 3130           | K.YNEQHVPGSPFTAR.V                         | 1603.71978 | 2 | 1.40E-08 | 0.84 | 3.33 | - | 425.3  |
| AHQ-1-5, 2991           | K.YNEQHVPGSPFTAR.V                         | 1603.71978 | 2 | 1.62E-06 | 0.67 | 2.91 | - | 460.2  |
| AHQ-1-1, 2999           | K.YNEQHVPGSPFTAR.V                         | 1603.71978 | 3 | 3.49E-06 | 0.91 | 4.52 | - | 1012.7 |
| AHQ-1-3, 2847           | K.YNEQHVPGSPFTAR.V                         | 1603.71978 | 2 | 1.58E-04 | 0.65 | 2.78 | - | 404.5  |
| AHQ-1-3, 3127           | K.YNEQHVPGSPFTAR.V                         | 1603.71978 | 2 | 1.30E-06 | 0.69 | 2.63 | - | 522.9  |
| AHQ-1-2, 2965           | K.YNEQHVPGSPFTAR.V                         | 1603.71978 | 2 | 4.55E-04 | 0.77 | 2.63 | - | 505.7  |
| AHQ-1-5, 2701           | K.YNEQHVPGSPFTAR.V                         | 1603.71978 | 2 | 1.02E-05 | 0.93 | 3.61 | - | 907.5  |
| AHQ-1-10, 2661          | K.YNEQHVPGSPFTAR.V                         | 1603.71978 | 2 | 1.32E-04 | 0.50 | 2.55 | - | 344.7  |
| AHQ-1-5, 2706           | K.YNEQHVPGSPFTAR.V                         | 1603.71978 | 3 | 2.65E-08 | 0.92 | 4.08 | - | 1138.1 |
| AHQ-1-13- , 2943        | K.YNEQHVPGSPFTAR.V                         | 1603.71978 | 2 | 3.50E-08 | 0.80 | 2.95 | - | 442.9  |

|                                                                                              |                                  |            |   |          |      |       |       |          |
|----------------------------------------------------------------------------------------------|----------------------------------|------------|---|----------|------|-------|-------|----------|
| AHQ-1-6, 2744                                                                                | K.YNEQHVPGSPFTAR.V               | 1603.71978 | 2 | 5.77E-04 | 0.90 | 3.33  | -     | 770.1    |
| AHQ-1-11, 2731                                                                               | K.YNEQHVPGSPFTAR.V               | 1603.71978 | 2 | 7.05E-04 | 0.65 | 2.73  | -     | 399.8    |
| AHQ-1-3, 4446 - 4455                                                                         | K.YTPVQQGPGVGNVTVGGDPPIK.S       | 2287.55640 | 2 | 3.66E-04 | 0.59 | 2.64  | -     | 581.3    |
| AHQ-1-2, 4598                                                                                | K.YTPVQQGPGVGNVTVGGDPPIK.S       | 2287.55640 | 2 | 1.66E-06 | 0.84 | 3.57  | -     | 687.4    |
| AHQ-1-10, 4111                                                                               | K.YTPVQQGPGVGNVTVGGDPPIK.S       | 2287.55640 | 2 | 1.54E-04 | 0.85 | 4.13  | -     | 390.5    |
| AHQ-1-11, 4226                                                                               | K.YTPVQQGPGVGNVTVGGDPPIK.S       | 2287.55640 | 2 | 4.38E-08 | 0.84 | 3.22  | -     | 756.5    |
| AHQ-1-3, 4589 - 4657                                                                         | K.YTPVQQGPGVGNVTVGGDPPIK.S       | 2287.55640 | 2 | 1.78E-07 | 0.92 | 4.37  | -     | 618.8    |
| AHQ-1-1, 4729 - 4803                                                                         | K.YTPVQQGPGVGNVTVGGDPPIK.S       | 2287.55640 | 2 | 1.13E-07 | 0.94 | 4.77  | -     | 718.4    |
| AHQ-1-2, 4725 - 4805                                                                         | K.YTPVQQGPGVGNVTVGGDPPIK.S       | 2287.55640 | 2 | 1.29E-05 | 0.96 | 4.80  | -     | 1283.9   |
| AHQ-1-9, 4492                                                                                | K.YTPVQQGPGVGNVTVGGDPPIK.S       | 2287.55640 | 2 | 3.27E-05 | 0.89 | 3.52  | -     | 736.3    |
| AHQ-1-1, 4588 - 4655                                                                         | K.YTPVQQGPGVGNVTVGGDPPIK.S       | 2287.55640 | 2 | 8.52E-07 | 0.95 | 5.27  | -     | 619.3    |
| AHQ-1-1, 4468                                                                                | K.YTPVQQGPGVGNVTVGGDPPIK.S       | 2287.55640 | 2 | 5.41E-05 | 0.86 | 3.96  | -     | 454.5    |
| AHQ-1-2, 4909 - 4977                                                                         | K.YTPVQQGPGVGNVTVGGDPPIK.S       | 2287.55640 | 2 | 1.92E-08 | 0.91 | 4.40  | -     | 537.7    |
| AHQ-1-3, 4757 - 4825                                                                         | K.YTPVQQGPGVGNVTVGGDPPIK.S       | 2287.55640 | 2 | 6.12E-07 | 0.95 | 5.24  | -     | 697.8    |
| AHQ-1-4, 4846                                                                                | K.YTPVQQGPGVGNVTVGGDPPIK.S       | 2287.55640 | 2 | 4.42E-09 | 0.90 | 4.02  | -     | 662.3    |
| AHQ-1-4, 4662 - 4730                                                                         | K.YTPVQQGPGVGNVTVGGDPPIK.S       | 2287.55640 | 2 | 3.32E-08 | 0.94 | 4.49  | -     | 803.7    |
| AHQ-1-5, 4553 - 4625                                                                         | K.YTPVQQGPGVGNVTVGGDPPIK.S       | 2287.55640 | 2 | 5.09E-05 | 0.95 | 4.73  | -     | 811.8    |
| AHQ-1-6, 4546                                                                                | K.YTPVQQGPGVGNVTVGGDPPIK.S       | 2287.55640 | 2 | 4.84E-05 | 0.93 | 4.41  | -     | 775.9    |
| AHQ-1-8, 4559                                                                                | K.YTPVQQGPGVGNVTVGGDPPIK.S       | 2287.55640 | 2 | 1.33E-04 | 0.74 | 3.33  | -     | 381.3    |
| AHQ-1-3, 6733 - 6807                                                                         | R.YWPOEAGEYAVHVLCSNSEDIR.L       | 2538.73318 | 2 | 1.44E-05 | 0.82 | 3.08  | -     | 700.6    |
| AHQ-1-2, 6566                                                                                | R.YWPOEAGEYAVHVLCSNSEDIR.L       | 2538.73318 | 2 | 3.04E-11 | 0.94 | 3.90  | -     | 1235.3   |
| AHQ-1-1, 6667                                                                                | R.YWPOEAGEYAVHVLCSNSEDIR.L       | 2538.73318 | 2 | 2.69E-06 | 0.86 | 3.51  | -     | 772.1    |
| AHQ-1-1, 6805                                                                                | R.YWPOEAGEYAVHVLCSNSEDIR.L       | 2538.73318 | 2 | 1.23E-07 | 0.87 | 3.27  | -     | 749.9    |
| AHQ-1-3, 6726 - 6794                                                                         | R.YWPOEAGEYAVHVLCSNSEDIR.L       | 2538.73318 | 3 | 2.83E-06 | 0.67 | 3.03  | -     | 545.6    |
| AHQ-1-2, 6779                                                                                | R.YWPOEAGEYAVHVLCSNSEDIR.L       | 2538.73318 | 2 | 2.72E-08 | 0.92 | 3.79  | -     | 1141.1   |
| AHQ-1-2, 7033 - 7101                                                                         | R.YWPOEAGEYAVHVLCSNSEDIR.L       | 2538.73318 | 3 | 7.06E-12 | 0.82 | 3.47  | -     | 653.6    |
| AHQ-1-5, 6846                                                                                | R.YWPOEAGEYAVHVLCSNSEDIR.L       | 2538.73318 | 2 | 4.16E-05 | 0.75 | 2.53  | -     | 771.0    |
| AHQ-1-2, 6925 - 6989                                                                         | R.YWPOEAGEYAVHVLCSNSEDIR.L       | 2538.73318 | 2 | 1.86E-06 | 0.95 | 4.73  | -     | 1017.1   |
| AHQ-1-1, 6355 - 6379                                                                         | R.YWPOEAGEYAVHVLCSNSEDIR.L       | 2538.73318 | 2 | 2.65E-09 | 0.93 | 3.66  | -     | 1000.6   |
| gj 13124879[ref NP_002465.1] smooth muscle myosin heavy chain 11 isoform SM1 [Homo sapiens]  |                                  |            |   | 3.89E-15 | 7.60 | 90.35 | 5.00  | 227336.7 |
| AHQ-1-1, 4889                                                                                | R.DLGEELALK.T                    | 1117.23151 | 2 | 1.55E-04 | 0.86 | 3.41  | -     | 683.7    |
| AHQ-1-2, 5039                                                                                | R.DLGEELALK.T                    | 1117.23151 | 2 | 3.32E-06 | 0.89 | 3.44  | -     | 855.8    |
| AHQ-1-6, 2702                                                                                | R.EDQSILCTGESGAGK.T              | 1553.63107 | 2 | 2.87E-04 | 0.63 | 2.95  | -     | 386.1    |
| AHQ-1-1, 3027                                                                                | K.FDQLLAEK.N                     | 1093.21165 | 2 | 3.78E-05 | 0.90 | 2.86  | -     | 1225.9   |
| AHQ-1-4, 2883                                                                                | K.FDQLLAEK.N                     | 1093.21165 | 1 | 4.41E-05 | 0.56 | 2.07  | -     | 971.8    |
| AHQ-1-2, 2993                                                                                | K.FDQLLAEK.N                     | 1093.21165 | 2 | 1.43E-04 | 0.93 | 3.29  | -     | 1627.7   |
| AHQ-1-2, 3005                                                                                | K.FDQLLAEK.N                     | 1093.21165 | 1 | 1.25E-04 | 0.44 | 2.41  | -     | 694.5    |
| AHQ-1-3, 2890                                                                                | K.FDQLLAEK.N                     | 1093.21165 | 2 | 1.79E-05 | 0.92 | 3.25  | -     | 1426.5   |
| AHQ-1-1, 3032                                                                                | K.FDQLLAEK.N                     | 1093.21165 | 1 | 7.50E-04 | 0.79 | 2.71  | -     | 949.3    |
| AHQ-1-3, 2481                                                                                | K.KEEELQALAL.R                   | 1258.40643 | 3 | 8.40E-05 | 0.93 | 3.35  | -     | 1812.9   |
| AHQ-1-1, 2647                                                                                | K.KEEELQALAL.R                   | 1258.40643 | 3 | 5.31E-04 | 0.91 | 3.61  | -     | 1526.6   |
| AHQ-1-3, 2469                                                                                | K.KEEELQALAL.R                   | 1258.40643 | 2 | 4.14E-04 | 0.89 | 3.37  | -     | 1049.8   |
| AHQ-1-2, 2565 - 2566                                                                         | K.KEEELQALAL.R                   | 1258.40643 | 2 | 1.51E-04 | 0.83 | 3.20  | -     | 905.0    |
| AHQ-1-2, 2594                                                                                | K.KEEELQALAL.R                   | 1258.40643 | 3 | 2.36E-06 | 0.94 | 3.64  | -     | 1848.0   |
| AHQ-1-6, 2654                                                                                | R.KFDQLLAEK.N                    | 1221.38456 | 2 | 8.85E-04 | 0.87 | 3.05  | -     | 1089.7   |
| AHQ-1-3, 2801                                                                                | R.KFDQLLAEK.N                    | 1221.38456 | 1 | 1.44E-06 | 0.31 | 2.04  | -     | 689.1    |
| AHQ-1-3, 2797 - 2874                                                                         | R.KFDQLLAEK.N                    | 1221.38456 | 2 | 1.71E-04 | 0.82 | 3.36  | -     | 720.0    |
| AHQ-1-1, 5440 - 5509                                                                         | K.LQQLFNHTM*FILEQEEYQR.E         | 2484.77198 | 3 | 4.61E-14 | 0.98 | 6.85  | -     | 2274.9   |
| AHQ-1-2, 5563 - 5630                                                                         | K.LQQLFNHTM*FILEQEEYQR.E         | 2484.77198 | 3 | 2.39E-14 | 0.98 | 6.74  | -     | 1697.4   |
| AHQ-1-3, 5289                                                                                | K.LQQLFNHTM*FILEQEEYQR.E         | 2484.77198 | 3 | 7.66E-14 | 0.98 | 6.62  | -     | 2429.9   |
| AHQ-1-5, 6137 - 6174                                                                         | K.LQQLFNHTM*FILEQEEYQR.E         | 2468.77258 | 3 | 4.66E-11 | 0.98 | 6.00  | -     | 2743.4   |
| AHQ-1-2, 6265 - 6287                                                                         | K.LQQLFNHTM*FILEQEEYQR.E         | 2468.77258 | 3 | 3.89E-15 | 0.98 | 6.96  | -     | 3070.0   |
| AHQ-1-2, 6269                                                                                | K.LQQLFNHTM*FILEQEEYQR.E         | 2468.77258 | 2 | 4.42E-10 | 0.96 | 4.51  | -     | 1574.3   |
| AHQ-1-3, 5230 - 5297                                                                         | K.LQQLFNHTM*FILEQEEYQR.E         | 2484.77198 | 2 | 2.02E-04 | 0.66 | 2.81  | -     | 437.8    |
| AHQ-1-4, 6218                                                                                | K.LQQLFNHTM*FILEQEEYQR.E         | 2468.77258 | 3 | 4.65E-05 | 0.95 | 5.05  | -     | 1478.7   |
| AHQ-1-2, 6481 - 6549                                                                         | K.LQQLFNHTM*FILEQEEYQR.E         | 2468.77258 | 3 | 1.44E-13 | 0.97 | 5.62  | -     | 2271.4   |
| AHQ-1-6, 6040                                                                                | K.LQQLFNHTM*FILEQEEYQR.E         | 2468.77258 | 3 | 2.72E-09 | 0.98 | 6.25  | -     | 3443.9   |
| AHQ-1-1, 6083 - 6108                                                                         | K.LQQLFNHTM*FILEQEEYQR.E         | 2468.77258 | 3 | 8.39E-08 | 0.96 | 5.46  | -     | 1651.4   |
| AHQ-1-4, 6226                                                                                | K.LQQLFNHTM*FILEQEEYQR.E         | 2468.77258 | 2 | 4.15E-06 | 0.97 | 4.37  | -     | 1840.8   |
| AHQ-1-2, 6610 - 6611                                                                         | K.QLLQANPILEAFGNAK.T             | 1727.98540 | 2 | 3.45E-11 | 0.97 | 5.43  | -     | 1043.5   |
| AHQ-1-2, 6447 - 6513                                                                         | K.QLLQANPILEAFGNAK.T             | 1727.98540 | 2 | 1.91E-10 | 0.97 | 4.54  | -     | 1424.3   |
| AHQ-1-5, 6519                                                                                | K.QLLQANPILEAFGNAK.T             | 1727.98540 | 2 | 4.72E-04 | 0.61 | 2.83  | -     | 561.6    |
| AHQ-1-2, 6338 - 6346                                                                         | K.QLLQANPILEAFGNAK.T             | 1727.98540 | 2 | 5.07E-06 | 0.95 | 4.73  | -     | 1015.8   |
| AHQ-1-6, 6230 - 6240                                                                         | K.QLLQANPILEAFGNAK.T             | 1727.98540 | 2 | 4.26E-07 | 0.91 | 3.93  | -     | 663.7    |
| AHQ-1-5, 6353 - 6378                                                                         | K.QLLQANPILEAFGNAK.T             | 1727.98540 | 2 | 1.82E-06 | 0.93 | 4.03  | -     | 903.8    |
| AHQ-1-9, 6174 - 6183                                                                         | K.QLLQANPILEAFGNAK.T             | 1727.98540 | 2 | 6.96E-04 | 0.90 | 3.84  | -     | 680.1    |
| AHQ-1-3, 6282 - 6329                                                                         | K.QLLQANPILEAFGNAK.T             | 1727.98540 | 2 | 1.07E-06 | 0.95 | 4.72  | -     | 881.6    |
| AHQ-1-3, 6461                                                                                | K.QLLQANPILEAFGNAK.T             | 1727.98540 | 2 | 2.76E-06 | 0.93 | 3.91  | -     | 824.8    |
| AHQ-1-1, 6171 - 6243                                                                         | K.QLLQANPILEAFGNAK.T             | 1727.98540 | 2 | 1.33E-10 | 0.96 | 4.57  | -     | 1213.4   |
| AHQ-1-7, 6356 - 6373                                                                         | K.QLLQANPILEAFGNAK.T             | 1727.98540 | 2 | 1.84E-05 | 0.94 | 4.32  | -     | 922.3    |
| AHQ-1-4, 6612                                                                                | K.QLLQANPILEAFGNAK.T             | 1727.98540 | 2 | 3.84E-10 | 0.96 | 4.62  | -     | 1190.7   |
| AHQ-1-1, 6303 - 6351                                                                         | K.QLLQANPILEAFGNAK.T             | 1727.98540 | 2 | 2.29E-06 | 0.92 | 3.59  | -     | 1042.6   |
| AHQ-1-1, 6407                                                                                | K.QLLQANPILEAFGNAK.T             | 1727.98540 | 2 | 3.00E-08 | 0.94 | 4.72  | -     | 671.3    |
| AHQ-1-4, 6458                                                                                | K.QLLQANPILEAFGNAK.T             | 1727.98540 | 2 | 2.87E-05 | 0.71 | 3.07  | -     | 483.6    |
| AHQ-1-4, 5948                                                                                | K.TQLEELDELQATEDAK.L             | 1963.04334 | 3 | 1.11E-07 | 0.96 | 5.81  | -     | 1302.9   |
| AHQ-1-5, 5829 - 5830                                                                         | K.TQLEELDELQATEDAK.L             | 1963.04334 | 2 | 2.23E-07 | 0.98 | 6.40  | -     | 2436.1   |
| AHQ-1-4, 5895 - 5931                                                                         | K.TQLEELDELQATEDAK.L             | 1963.04334 | 2 | 4.51E-08 | 0.98 | 6.26  | -     | 1863.0   |
| AHQ-1-3, 5797 - 5803                                                                         | K.TQLEELDELQATEDAK.L             | 1963.04334 | 2 | 6.78E-07 | 0.96 | 4.73  | -     | 1571.0   |
| AHQ-1-1, 5788                                                                                | K.TQLEELDELQATEDAK.L             | 1963.04334 | 3 | 9.99E-05 | 0.92 | 5.04  | -     | 989.4    |
| AHQ-1-1, 5803                                                                                | K.TQLEELDELQATEDAK.L             | 1963.04334 | 2 | 5.33E-04 | 0.92 | 3.38  | -     | 1200.2   |
| AHQ-1-1, 4117                                                                                | K.TQLEELDELQATEDAK.L             | 1963.04334 | 2 | 1.49E-04 | 0.93 | 4.38  | -     | 831.6    |
| AHQ-1-6, 5755                                                                                | K.TQLEELDELQATEDAK.L             | 1963.04334 | 2 | 1.37E-07 | 0.98 | 6.39  | -     | 2175.4   |
| AHQ-1-2, 5974 - 5990                                                                         | K.TQLEELDELQATEDAK.L             | 1963.04334 | 3 | 3.07E-08 | 0.96 | 6.06  | -     | 1221.4   |
| AHQ-1-2, 5965 - 6037                                                                         | K.TQLEELDELQATEDAK.L             | 1963.04334 | 2 | 2.41E-08 | 0.98 | 5.94  | -     | 2037.4   |
| AHQ-1-7, 5832                                                                                | K.TQLEELDELQATEDAK.L             | 1963.04334 | 2 | 2.32E-08 | 0.97 | 5.39  | -     | 1652.7   |
| AHQ-1-2, 4214 - 4217                                                                         | K.TQLEELDELQATEDAK.L             | 1963.04334 | 2 | 6.57E-13 | 0.97 | 5.54  | -     | 1181.0   |
| AHQ-1-3, 5809 - 5823                                                                         | K.TQLEELDELQATEDAK.L             | 1963.04334 | 3 | 3.99E-06 | 0.96 | 5.72  | -     | 1281.6   |
| gj 21956645[ref NP_665807.1] myotrophin; granule cell differentiation protein [Homo sapiens] |                                  |            |   | 3.89E-15 | 3.86 | 40.32 | 49.20 | 12894.7  |
| AHQ-1-14, 4512                                                                               | K.GADINAPDKHHITPLLSAVYEGHVSCVK.L | 3031.39193 | 3 | 1.53E-06 | 0.95 | 5.74  | -     | 930.5    |
| AHQ-1-14, 5412                                                                               | K.GADINAPDKHHITPLLSAVYEGHVSCVK.L | 3031.39193 | 3 | 7.38E-07 | 0.97 | 6.16  | -     | 1793.2   |
| AHQ-1-14, 4028 - 4090                                                                        | K.GPDGLTAFEATDNQAIK.A            | 1748.87196 | 2 | 5.78E-08 | 0.96 | 4.94  | -     | 1190.8   |
| AHQ-1-13, 3908 - 3963                                                                        | K.GPDGLTAFEATDNQAIK.A            | 1748.87196 | 2 | 5.99E-07 | 0.97 | 5.08  | -     | 1638.7   |
| AHQ-1-14, 4902 - 4960                                                                        | K.GPDGLTAFEATDNQAIK.A            | 1748.87196 | 2 | 7.69E-07 | 0.94 | 4.40  | -     | 971.2    |
| AHQ-1-14, 4920                                                                               | K.GPDGLTAFEATDNQAIK.A            | 1748.87196 | 2 | 7.57E-08 | 0.97 | 5.59  | -     | 1093.7   |
| AHQ-1-14, 5020 - 5086                                                                        | K.GPDGLTAFEATDNQAIK.A            | 1748.87196 | 2 | 9.98E-04 | 0.74 | 3.56  | -     | 547.5    |
| AHQ-1-14, 4804 - 4864                                                                        | K.GPDGLTAFEATDNQAIK.A            | 1748.87196 | 2 | 9.43E-04 | 0.96 | 4.67  | -     | 1394.2   |
| AHQ-1-13, 4019 - 4088                                                                        | K.GPDGLTAFEATDNQAIK.A            | 1748.87196 | 2 | 3.41E-08 | 0.94 | 5.04  | -     | 953.6    |
| AHQ-1-14, 4043                                                                               | K.GPDGLTAFEATDNQAIK.A            | 1748.87196 | 3 | 1.75E-07 | 0.88 | 4.05  | -     | 929.8    |
| AHQ-1-13, 4107 - 4171                                                                        | K.GPDGLTAFEATDNQAIK.A            | 1748.87196 | 2 | 4.03E-06 | 0.97 | 4.93  | -     | 1753.8   |
| AHQ-1-13, 4236                                                                               | K.GPDGLTAFEATDNQAIK.A            | 1748.87196 | 2 | 2.61E-07 | 0.85 | 3.10  | -     | 774.5    |
| AHQ-1-14, 3938 - 4007                                                                        | K.GPDGLTAFEATDNQAIK.A            | 1748.87196 | 2 | 3.89E-15 | 0.98 | 5.91  | -     | 1681.1   |
| AHQ-1-14, 4015                                                                               | K.HHITPLLSAVYEGHVSCVK.L          | 2149.45825 | 3 | 4.35E-09 | 0.98 | 6.37  | -     | 2520.8   |
| AHQ-1-14, 3598                                                                               | K.NGDLDEVKDYVAK.G                | 1466.57496 | 2 | 8.10E-10 | 0.92 | 3.10  | -     | 1395.2   |
| AHQ-1-14, 4472                                                                               | K.NGDLDEVKDYVAK.G                | 1466.57496 | 2 | 3.51E-08 | 0.95 | 3.82  | -     | 1689.7   |
| AHQ-1-13, 3801                                                                               | K.NGDLDEVKDYVAK.G                | 1466.57496 | 2 | 1.35E-08 | 0.88 | 3.70  | -     | 829.1    |
| AHQ-1-14, 3707 - 3708                                                                        | K.NGDLDEVKDYVAK.G                | 1466.57496 | 2 | 3.79E-08 | 0.95 | 4.02  | -     | 1647.6   |
| AHQ-1-13, 3687 - 3757                                                                        | K.NGDLDEVKDYVAK.G                | 1466.57496 | 2 | 7.38E-08 | 0.87 | 3.02  | -     | 1076.8   |





|                            |                                                                          |            |   |          |       |        |       |          |
|----------------------------|--------------------------------------------------------------------------|------------|---|----------|-------|--------|-------|----------|
| AHQ-1-7, 7069              | K.GHYTEGAELIENLVLEWR.H                                                   | 2029.23935 | 3 | 1.97E-04 | 0.92  | 4.41   | -     | 1577.3   |
| AHQ-1-12, 6478             | K.GHYTEGAELIENLVLEWR.H                                                   | 2029.23935 | 3 | 2.00E-06 | 0.86  | 4.38   | -     | 1103.1   |
| AHQ-1-14-, 6566 - 6567     | K.GHYTEGAELIENLVLEWR.H                                                   | 2029.23935 | 2 | 1.89E-12 | 0.99  | 7.21   | -     | 2927.0   |
| AHQ-1-8, 7020              | K.GHYTEGAELIENLVLEWR.H                                                   | 2029.23935 | 2 | 1.01E-09 | 0.98  | 6.08   | -     | 2675.0   |
| AHQ-1-8, 7031              | K.GHYTEGAELIENLVLEWR.H                                                   | 2029.23935 | 3 | 1.28E-04 | 0.92  | 4.42   | -     | 1708.8   |
| AHQ-1-10, 6165             | K.GHYTEGAELIENLVLEWR.H                                                   | 2029.23935 | 2 | 5.10E-07 | 0.98  | 5.99   | -     | 1982.8   |
| AHQ-1-11, 6280             | K.GHYTEGAELIENLVLEWR.H                                                   | 2029.23935 | 3 | 3.37E-04 | 0.90  | 3.98   | -     | 1604.0   |
| AHQ-1-4, 7196              | K.GHYTEGAELIENLVLEWR.H                                                   | 2029.23935 | 2 | 1.71E-06 | 0.98  | 5.68   | -     | 2849.0   |
| AHQ-1-11, 6275 - 6352      | K.GHYTEGAELIENLVLEWR.H                                                   | 2029.23935 | 2 | 2.81E-05 | 0.98  | 5.64   | -     | 1982.9   |
| AHQ-1-7, 7068 - 7070       | K.GHYTEGAELIENLVLEWR.H                                                   | 2029.23935 | 2 | 8.96E-09 | 0.99  | 7.50   | -     | 2438.9   |
| AHQ-1-9, 6922              | K.GHYTEGAELIENLVLEWR.H                                                   | 2029.23935 | 3 | 1.45E-06 | 0.77  | 4.14   | -     | 698.1    |
| AHQ-1-9, 6914 - 6992       | K.GHYTEGAELIENLVLEWR.H                                                   | 2029.23935 | 2 | 6.59E-11 | 0.98  | 6.24   | -     | 2071.6   |
| AHQ-1-6, 6987 - 7007       | K.GHYTEGAELIENLVLEWR.H                                                   | 2029.23935 | 2 | 3.31E-06 | 0.93  | 4.09   | -     | 1435.3   |
| AHQ-1-13, 6359             | K.GHYTEGAELIENLVLEWR.H                                                   | 2029.23935 | 2 | 6.80E-12 | 0.99  | 7.28   | -     | 2839.4   |
| AHQ-1-13, 6360             | K.GHYTEGAELIENLVLEWR.H                                                   | 2029.23935 | 3 | 2.20E-04 | 0.96  | 4.72   | -     | 2500.4   |
| AHQ-1-13-, 6596            | R.GLSM*AATFIGNNTAIQEIFNR.V                                               | 2285.56551 | 2 | 1.71E-08 | 0.89  | 4.32   | -     | 734.3    |
| AHQ-1-14-, 6284 - 6366     | R.GLSM*AATFIGNNTAIQEIFNR.V                                               | 2285.56551 | 2 | 9.81E-08 | 0.95  | 4.69   | -     | 992.2    |
| AHQ-1-13, 6169             | R.GLSM*AATFIGNNTAIQEIFNR.V                                               | 2285.56551 | 2 | 3.22E-06 | 0.90  | 4.27   | -     | 711.9    |
| AHQ-1-7, 6882 - 6888       | R.GLSM*AATFIGNNTAIQEIFNR.V                                               | 2285.56551 | 2 | 9.49E-08 | 0.93  | 4.51   | -     | 845.5    |
| AHQ-1-9, 6704              | R.GLSM*AATFIGNNTAIQEIFNR.V                                               | 2285.56551 | 2 | 4.99E-11 | 0.93  | 4.36   | -     | 779.5    |
| AHQ-1-7, 3050              | R.IMNSFSVM*PSPK.V                                                        | 1354.62100 | 2 | 4.63E-04 | 0.83  | 2.83   | -     | 807.5    |
| AHQ-1-7, 4032              | R.IMNSFSVM*PSPK.V                                                        | 1338.62160 | 2 | 5.04E-06 | 0.93  | 3.56   | -     | 1095.8   |
| AHQ-1-7, 3902 - 3917       | R.IMNSFSVM*PSPK.V                                                        | 1338.62160 | 2 | 3.25E-05 | 0.95  | 3.93   | -     | 1364.4   |
| AHQ-1-13-, 3436            | R.ISVYNEAYGR.K                                                           | 1335.44622 | 2 | 8.34E-06 | 0.75  | 2.77   | -     | 571.6    |
| AHQ-1-14, 4068 - 4072      | R.ISVYNEAYGR.K                                                           | 1335.44622 | 2 | 6.32E-07 | 0.89  | 3.13   | -     | 968.7    |
| AHQ-1-7, 3172              | R.ISVYNEAYGR.K                                                           | 1335.44622 | 2 | 4.65E-07 | 0.94  | 3.24   | -     | 1323.5   |
| AHQ-1-1, 3364 - 3372       | R.ISVYNEAYGR.K                                                           | 1335.44622 | 2 | 5.53E-04 | 0.64  | 2.69   | -     | 446.8    |
| AHQ-1-8, 3088              | R.ISVYNEAYGR.K                                                           | 1335.44622 | 2 | 2.99E-08 | 0.93  | 3.13   | -     | 1296.9   |
| AHQ-1-14-, 3174            | R.ISVYNEAYGR.K                                                           | 1335.44622 | 2 | 1.25E-08 | 0.92  | 3.46   | -     | 1023.4   |
| AHQ-1-7, 3261              | R.ISVYNEAYGR.K                                                           | 1335.44622 | 2 | 4.06E-08 | 0.92  | 3.11   | -     | 1158.4   |
| AHQ-1-7, 3190 - 3262       | R.ISVYNEAYGR.K                                                           | 1335.44622 | 1 | 1.93E-04 | 0.25  | 2.37   | -     | 190.9    |
| AHQ-1-7, 5252              | K.LGALFOPDSFVHGNSSGAGNNWAK.G                                             | 2388.58260 | 2 | 3.55E-08 | 0.67  | 2.81   | -     | 547.4    |
| AHQ-1-13-, 5160            | K.LGALFOPDSFVHGNSSGAGNNWAK.G                                             | 2388.58260 | 3 | 8.36E-08 | 0.86  | 3.73   | -     | 877.0    |
| AHQ-1-7, 5249              | R.LHFFM*PGFAPLTAQGSQQYR.A                                                | 2313.62224 | 2 | 7.89E-06 | 0.95  | 4.72   | -     | 895.2    |
| AHQ-1-10, 5304             | R.LHFFM*PGFAPLTAQGSQQYR.A                                                | 2297.62284 | 3 | 8.99E-04 | 0.96  | 4.85   | -     | 1796.3   |
| AHQ-1-10, 5297             | R.LHFFM*PGFAPLTAQGSQQYR.A                                                | 2297.62284 | 2 | 9.10E-05 | 0.92  | 3.99   | -     | 727.6    |
| AHQ-1-11, 4858             | R.LHFFM*PGFAPLTAQGSQQYR.A                                                | 2313.62224 | 2 | 1.18E-06 | 0.98  | 5.86   | -     | 1347.3   |
| AHQ-1-14-, 5830            | R.LHFFM*PGFAPLTAQGSQQYR.A                                                | 2297.62284 | 3 | 2.29E-04 | 0.72  | 3.28   | -     | 1102.6   |
| AHQ-1-8, 5659              | R.LHFFM*PGFAPLTAQGSQQYR.A                                                | 2297.62284 | 2 | 5.51E-06 | 0.97  | 5.50   | -     | 957.5    |
| AHQ-1-9, 5790 - 5794       | R.LHFFM*PGFAPLTAQGSQQYR.A                                                | 2297.62284 | 2 | 1.95E-05 | 0.95  | 4.92   | -     | 749.4    |
| AHQ-1-9, 5100 - 5108       | R.LHFFM*PGFAPLTAQGSQQYR.A                                                | 2313.62224 | 3 | 1.96E-04 | 0.98  | 5.95   | -     | 2300.1   |
| AHQ-1-11, 5476             | R.LHFFM*PGFAPLTAQGSQQYR.A                                                | 2297.62284 | 2 | 3.17E-08 | 0.96  | 5.42   | -     | 797.3    |
| AHQ-1-7, 7018 - 7082       | K.LTTPYTDLNHLVSLTMSGITSLR.F                                              | 2693.06979 | 2 | 5.39E-11 | 0.94  | 4.43   | -     | 958.4    |
| AHQ-1-1, 6815              | K.LTTPYTDLNHLVSLTMSGITSLR.F                                              | 2709.06919 | 3 | 1.28E-06 | 0.83  | 3.74   | -     | 832.2    |
| AHQ-1-9, 6839 - 6908       | K.LTTPYTDLNHLVSLTMSGITSLR.F                                              | 2709.06919 | 3 | 4.16E-04 | 0.91  | 4.92   | -     | 910.2    |
| AHQ-1-8, 7447              | K.LTTPYTDLNHLVSLTMSGITSLR.F                                              | 2693.06979 | 3 | 1.25E-08 | 0.94  | 5.02   | -     | 1119.5   |
| AHQ-1-9, 6888              | K.LTTPYTDLNHLVSLTMSGITSLR.F                                              | 2693.06979 | 3 | 3.64E-09 | 0.87  | 3.87   | -     | 875.6    |
| AHQ-1-9, 7186 - 7255       | K.LTTPYTDLNHLVSLTMSGITSLR.F                                              | 2693.06979 | 2 | 8.57E-08 | 0.95  | 5.18   | -     | 786.3    |
| AHQ-1-7, 7445              | K.LTTPYTDLNHLVSLTMSGITSLR.F                                              | 2693.06979 | 2 | 1.17E-06 | 0.95  | 5.25   | -     | 733.8    |
| AHQ-1-7, 7444 - 7446       | K.LTTPYTDLNHLVSLTMSGITSLR.F                                              | 2693.06979 | 3 | 1.49E-05 | 0.94  | 5.12   | -     | 1125.7   |
| AHQ-1-7, 7078              | K.LTTPYTDLNHLVSLTMSGITSLR.F                                              | 2693.06979 | 3 | 7.84E-06 | 0.93  | 4.76   | -     | 1168.2   |
| AHQ-1-8, 7446              | K.LTTPYTDLNHLVSLTMSGITSLR.F                                              | 2693.06979 | 2 | 2.14E-09 | 0.95  | 5.29   | -     | 805.4    |
| AHQ-1-7, 7013 - 7040       | K.LTTPYTDLNHLVSLTMSGITSLR.F                                              | 2709.06919 | 3 | 2.29E-05 | 0.91  | 5.17   | -     | 667.7    |
| AHQ-1-9, 7256              | K.LTTPYTDLNHLVSLTMSGITSLR.F                                              | 2693.06979 | 3 | 3.91E-09 | 0.93  | 4.77   | -     | 1219.5   |
| AHQ-1-10, 6100             | K.LTTPYTDLNHLVSLTMSGITSLR.F                                              | 2693.06979 | 2 | 3.93E-04 | 0.77  | 3.62   | -     | 434.3    |
| AHQ-1-14-, 6496 - 6534     | K.LTTPYTDLNHLVSLTMSGITSLR.F                                              | 2709.06919 | 3 | 6.96E-06 | 0.95  | 5.40   | -     | 1109.9   |
| AHQ-1-4, 7411              | K.LTTPYTDLNHLVSLTMSGITSLR.F                                              | 2693.06979 | 3 | 4.73E-04 | 0.80  | 3.38   | -     | 975.4    |
| AHQ-1-9, 5424              | R.NSSCFEVIWIPNNVK.V                                                      | 1695.87718 | 2 | 1.43E-06 | 0.89  | 3.52   | -     | 863.5    |
| AHQ-1-7, 3001              | R.VSEHFSAMFK.R                                                           | 1183.36152 | 2 | 9.03E-07 | 0.87  | 2.68   | -     | 1041.2   |
| AHQ-1-9, 5266              | R.YLTVACIFR.G                                                            | 1144.36822 | 2 | 1.02E-04 | 0.86  | 2.79   | -     | 758.9    |
| AHQ-1-11, 4956             | R.YLTVACIFR.G                                                            | 1144.36822 | 2 | 5.29E-04 | 0.88  | 2.66   | -     | 896.6    |
| gi 4758012 ref NP_004850.1 | clathrin heavy chain; clathrin, heavy polypeptide-like 2 [Homo sapiens]  |            |   | 2.55E-14 | 20.14 | 220.35 | 19.50 | 191612.6 |
| AHQ-1-4, 7464              | K.AFMATDLNPELLELLEK.I                                                    | 1948.26956 | 2 | 4.34E-04 | 0.23  | 2.71   | -     | 195.0    |
| AHQ-1-3, 7285              | K.AFMATDLNPELLELLEK.I                                                    | 1948.26956 | 2 | 6.10E-05 | 0.92  | 4.31   | -     | 610.9    |
| AHQ-1-3, 4527              | R.ALEHFTDLYDIK.R                                                         | 1465.63179 | 2 | 5.73E-06 | 0.90  | 3.24   | -     | 969.0    |
| AHQ-1-3, 7281              | R.FQSVPAQPGQTSPLLQYFGILLDQGQLNK.Y                                        | 3189.60926 | 3 | 2.92E-06 | 0.89  | 4.18   | -     | 1016.2   |
| AHQ-1-6, 7300              | R.FQSVPAQPGQTSPLLQYFGILLDQGQLNK.Y                                        | 3189.60926 | 3 | 3.94E-04 | 0.70  | 3.40   | -     | 543.5    |
| AHQ-1-3, 4913              | R.GQFSTDELVAEVEK.R                                                       | 1552.66462 | 2 | 2.35E-07 | 0.95  | 4.51   | -     | 1292.4   |
| AHQ-1-1, 4945              | R.GQFSTDELVAEVEK.R                                                       | 1552.66462 | 2 | 3.98E-05 | 0.88  | 3.22   | -     | 1044.4   |
| AHQ-1-4, 4896              | R.GQFSTDELVAEVEK.R                                                       | 1708.85097 | 2 | 6.14E-10 | 0.85  | 3.53   | -     | 784.9    |
| AHQ-1-5, 4738              | R.GQFSTDELVAEVEK.R                                                       | 1708.85097 | 2 | 6.97E-07 | 0.83  | 3.40   | -     | 727.3    |
| AHQ-1-3, 4821              | R.GQFSTDELVAEVEK.R                                                       | 1708.85097 | 2 | 3.10E-09 | 0.88  | 3.53   | -     | 909.8    |
| AHQ-1-3, 3378              | K.HDVVFLITK.Y                                                            | 1072.28194 | 2 | 1.35E-07 | 0.92  | 3.06   | -     | 1134.8   |
| AHQ-1-3, 3517              | R.HSSLAGCQINNYR.T                                                        | 1520.69551 | 2 | 2.16E-06 | 0.96  | 4.21   | -     | 1247.4   |
| AHQ-1-3, 2085              | R.IHEGCEEPATHNALAK.I                                                     | 1778.92458 | 2 | 2.06E-05 | 0.91  | 3.83   | -     | 831.7    |
| AHQ-1-3, 5357              | R.ISGETIFVTAPHEATAGIIVGNR.K                                              | 2354.64751 | 3 | 2.55E-14 | 0.97  | 5.96   | -     | 1352.0   |
| AHQ-1-3, 7094              | R.KFDVNTSAVQVLIHIGLNDL.R                                                 | 2369.66218 | 3 | 9.35E-13 | 0.98  | 6.49   | -     | 2046.6   |
| AHQ-1-6, 4423              | R.LASTLVHLGEYQAAVDGAR.K                                                  | 1972.19103 | 3 | 4.15E-05 | 0.83  | 3.09   | -     | 1071.3   |
| AHQ-1-3, 4578              | R.LASTLVHLGEYQAAVDGAR.K                                                  | 1972.19103 | 3 | 4.47E-04 | 0.91  | 4.18   | -     | 1134.0   |
| AHQ-1-3, 4583 - 4585       | R.LASTLVHLGEYQAAVDGAR.K                                                  | 1972.19103 | 2 | 1.90E-11 | 0.97  | 5.34   | -     | 1196.9   |
| AHQ-1-3, 4415              | K.LHIEVGTPTGNQPPFK.K                                                     | 1946.23831 | 2 | 7.60E-09 | 0.89  | 4.12   | -     | 506.8    |
| AHQ-1-3, 3795              | K.LLYNNVSNFGR.L                                                          | 1297.44435 | 2 | 6.98E-04 | 0.89  | 3.13   | -     | 886.6    |
| AHQ-1-3, 6865              | R.LPVVIGLLDVEDCSSEVIK.N                                                  | 2043.36744 | 2 | 2.69E-05 | 0.96  | 5.29   | -     | 1184.0   |
| AHQ-1-3, 6374              | R.NLQNLILITAIK.A                                                         | 1354.66353 | 2 | 1.26E-06 | 0.97  | 5.05   | -     | 1820.7   |
| AHQ-1-3, 4398              | R.NNLAGAELFAR.K                                                          | 1305.42165 | 2 | 4.68E-08 | 0.90  | 3.43   | -     | 977.5    |
| AHQ-1-4, 7092              | R.RPLIDQVVQVLTALSETQDPEEVSVTVK.A                                         | 2883.20103 | 3 | 5.50E-07 | 0.93  | 4.74   | -     | 941.3    |
| AHQ-1-5, 7041              | R.RPLIDQVVQVLTALSETQDPEEVSVTVK.A                                         | 2883.20103 | 3 | 3.38E-04 | 0.95  | 5.30   | -     | 1354.5   |
| AHQ-1-3, 6918 - 6922       | R.RPLIDQVVQVLTALSETQDPEEVSVTVK.A                                         | 2883.20103 | 3 | 1.64E-06 | 0.98  | 6.93   | -     | 1643.7   |
| AHQ-1-5, 5105              | R.TSIDAYDNFNISLAQR.L                                                     | 1944.04818 | 2 | 8.84E-08 | 0.96  | 4.52   | -     | 1908.5   |
| AHQ-1-3, 7062              | K.VGYTPDWIFLLR.N                                                         | 1480.73443 | 2 | 1.55E-08 | 0.89  | 3.69   | -     | 572.6    |
| AHQ-1-4, 7228              | K.VGYTPDWIFLLR.N                                                         | 1480.73443 | 2 | 1.20E-07 | 0.83  | 3.54   | -     | 428.2    |
| AHQ-1-3, 3153              | K.VIQCAETGQVQK.I                                                         | 1509.70940 | 2 | 5.73E-06 | 0.96  | 3.88   | -     | 1929.2   |
| AHQ-1-3, 3830              | R.VVGAMQLYSVDR.K                                                         | 1338.55819 | 2 | 4.90E-06 | 0.93  | 3.50   | -     | 1212.4   |
| AHQ-1-3, 3218              | R.VVGAMQLYSVDR.K                                                         | 1354.55759 | 2 | 3.95E-04 | 0.64  | 2.71   | -     | 573.3    |
| gi 4501881 ref NP_001091.1 | alpha 1 actin precursor; alpha skeletal muscle actin [Homo sapiens] [MA] |            |   | 3.05E-14 | 12.38 | 180.27 | 46.40 | 42050.8  |
| AHQ-1-1, 2093              | K.AGFAGDDAPR.A                                                           | 977.01283  | 2 | 4.50E-05 | 0.85  | 2.75   | -     | 1047.6   |
| AHQ-1-8, 1551 - 1620       | K.AGFAGDDAPR.A                                                           | 977.01283  | 2 | 5.45E-06 | 0.88  | 3.66   | -     | 799.2    |
| AHQ-1-8, 1687 - 1768       | K.AGFAGDDAPR.A                                                           | 977.01283  | 2 | 7.78E-06 | 0.89  | 3.37   | -     | 965.6    |
| AHQ-1-13-, 2027 - 2096     | K.AGFAGDDAPR.A                                                           | 977.01283  | 2 | 6.29E-05 | 0.89  | 3.28   | -     | 993.5    |
| AHQ-1-13, 2034 - 2090      | K.AGFAGDDAPR.A                                                           | 977.01283  | 2 | 5.22E-04 | 0.88  | 3.38   | -     | 949.8    |
| AHQ-1-8, 1908 - 1975       | K.AGFAGDDAPR.A                                                           | 977.01283  | 2 | 1.61E-05 | 0.89  | 3.31   | -     | 989.3    |
| AHQ-1-12, 2013             | K.AGFAGDDAPR.A                                                           | 977.01283  | 2 | 2.13E-04 | 0.87  | 2.65   | -     | 1203.0   |
| AHQ-1-12, 1890 - 1953      | K.AGFAGDDAPR.A                                                           | 977.01283  | 2 | 3.29E-04 | 0.86  | 3.33   | -     | 967.7    |
| AHQ-1-10, 1829 - 1849      | K.AGFAGDDAPR.A                                                           | 977.01283  | 2 | 3.89E-04 | 0.84  | 2.78   | -     | 1003.7   |
| AHQ-1-8, 2040              | K.AGFAGDDAPR.A                                                           | 977.01283  | 2 | 3.69E-04 | 0.86  | 2.86   | -     | 978.4    |
| AHQ-1-9, 1676 - 1746       | K.AGFAGDDAPR.A                                                           | 977.01283  | 2 | 1.22E-06 | 0.87  | 3.03   | -     | 937.0    |
| AHQ-1-4, 3276              | R.AVFPISVGRPR.H                                                          | 1199.43018 | 2 | 3.98E-05 | 0.21  | 2.50   | -     | 397.8    |

|                         |                                |            |   |          |      |      |   |        |
|-------------------------|--------------------------------|------------|---|----------|------|------|---|--------|
| AHQ-1-8, 4055           | R.DLTDYLMK.I                   | 999.16326  | 1 | 8.88E-05 | 0.50 | 2.49 | - | 488.1  |
| AHQ-1-8, 3789 - 3860    | R.DLTDYLM*K.I                  | 1015.16266 | 2 | 2.90E-04 | 0.88 | 3.55 | - | 546.9  |
| AHQ-1-8, 3309           | R.DLTDYLMK.I                   | 999.16326  | 1 | 5.97E-05 | 0.23 | 1.86 | - | 376.1  |
| AHQ-1-5, 4593           | R.DLTDYLMK.I                   | 999.16326  | 2 | 5.60E-04 | 0.62 | 2.51 | - | 413.8  |
| AHQ-1-12, 4287          | R.DLTDYLMK.I                   | 999.16326  | 2 | 3.83E-04 | 0.78 | 2.74 | - | 454.9  |
| AHQ-1-8, 4497 - 4540    | R.DLTDYLMK.I                   | 999.16326  | 2 | 1.02E-04 | 0.46 | 2.55 | - | 322.2  |
| AHQ-1-9, 3711           | R.DLTDYLM*K.I                  | 1015.16266 | 1 | 6.02E-05 | 0.15 | 2.11 | - | 109.2  |
| AHQ-1-1, 4573           | R.DLTDYLMK.I                   | 999.16326  | 2 | 2.78E-04 | 0.68 | 2.88 | - | 399.7  |
| AHQ-1-13- , 3803        | R.DLTDYLM*K.I                  | 1015.16266 | 1 | 5.64E-04 | 0.20 | 2.20 | - | 140.6  |
| AHQ-1-14- , 4850 - 4911 | K.DLYANNVMSGGTTM*YPGIADR.M     | 2263.49384 | 2 | 9.17E-05 | 0.65 | 3.74 | - | 373.7  |
| AHQ-1-8, 1969           | K.DSYVGDEAQS.K.R               | 1199.20634 | 1 | 1.78E-04 | 0.23 | 2.06 | - | 250.9  |
| AHQ-1-8, 1479 - 1547    | K.DSYVGDEAQS.K.R               | 1199.20634 | 2 | 2.50E-05 | 0.69 | 3.28 | - | 539.3  |
| AHQ-1-8, 1943 - 2017    | K.DSYVGDEAQS.K.R               | 1199.20634 | 2 | 4.47E-04 | 0.67 | 3.24 | - | 567.8  |
| AHQ-1-13, 2983 - 3006   | K.EITALAPSTM.K.I               | 1162.38206 | 2 | 4.75E-05 | 0.87 | 3.01 | - | 734.3  |
| AHQ-1-2, 2529           | K.EITALAPSTM*K.I               | 1178.38146 | 2 | 2.35E-06 | 0.80 | 3.09 | - | 617.1  |
| AHQ-1-12, 2935 - 2937   | K.EITALAPSTM.K.I               | 1162.38206 | 1 | 8.76E-05 | 0.70 | 3.00 | - | 414.2  |
| AHQ-1-12, 2933 - 2934   | K.EITALAPSTM.K.I               | 1162.38206 | 2 | 5.10E-04 | 0.84 | 3.02 | - | 722.5  |
| AHQ-1-6, 2895 - 2910    | K.EITALAPSTM.K.I               | 1162.38206 | 2 | 2.33E-04 | 0.61 | 2.61 | - | 441.6  |
| AHQ-1-13- , 2428 - 2503 | K.EITALAPSTM*K.I               | 1178.38146 | 2 | 1.09E-04 | 0.76 | 3.13 | - | 512.2  |
| AHQ-1-14- , 2882 - 2956 | K.EITALAPSTM.K.I               | 1162.38206 | 1 | 3.50E-05 | 0.57 | 2.92 | - | 280.4  |
| AHQ-1-14, 3894          | K.EITALAPSTM.K.I               | 1162.38206 | 1 | 4.79E-07 | 0.34 | 2.68 | - | 196.8  |
| AHQ-1-10, 2261 - 2275   | K.EITALAPSTM*K.I               | 1178.38146 | 2 | 9.01E-04 | 0.58 | 2.60 | - | 451.5  |
| AHQ-1-13- , 2975 - 3027 | K.EITALAPSTM.K.I               | 1162.38206 | 2 | 1.69E-04 | 0.78 | 2.80 | - | 613.3  |
| AHQ-1-14, 3244 - 3276   | K.EITALAPSTM*K.I               | 1178.38146 | 2 | 8.01E-05 | 0.50 | 2.79 | - | 385.1  |
| AHQ-1-14, 3872 - 3928   | K.EITALAPSTM.K.I               | 1162.38206 | 1 | 5.69E-06 | 0.61 | 2.68 | - | 401.7  |
| AHQ-1-9, 2255 - 2259    | K.EITALAPSTM*K.I               | 1178.38146 | 2 | 5.83E-04 | 0.90 | 3.17 | - | 927.2  |
| AHQ-1-3, 3027           | K.EITALAPSTM.K.I               | 1162.38206 | 1 | 3.89E-06 | 0.35 | 2.19 | - | 319.6  |
| AHQ-1-14- , 2880 - 2954 | K.EITALAPSTM.K.I               | 1162.38206 | 2 | 1.00E-04 | 0.74 | 2.99 | - | 529.8  |
| AHQ-1-4, 3030           | K.EITALAPSTM.K.I               | 1162.38206 | 1 | 2.84E-07 | 0.58 | 2.38 | - | 356.8  |
| AHQ-1-10, 2708 - 2767   | K.EITALAPSTM.K.I               | 1162.38206 | 1 | 4.68E-04 | 0.65 | 2.32 | - | 439.1  |
| AHQ-1-1, 3140           | K.EITALAPSTM.K.I               | 1162.38206 | 1 | 9.43E-04 | 0.27 | 2.41 | - | 307.0  |
| AHQ-1-4, 2423           | K.EITALAPSTM*K.I               | 1178.38146 | 2 | 6.37E-04 | 0.81 | 2.81 | - | 746.1  |
| AHQ-1-14- , 2378 - 2402 | K.EITALAPSTM*K.I               | 1178.38146 | 2 | 3.35E-06 | 0.90 | 3.68 | - | 713.1  |
| AHQ-1-8, 2557 - 2626    | K.EITALAPSTM.K.I               | 1162.38206 | 2 | 3.41E-04 | 0.83 | 2.93 | - | 722.9  |
| AHQ-1-8, 2553 - 2766    | K.EITALAPSTM.K.I               | 1162.38206 | 1 | 3.20E-04 | 0.72 | 3.28 | - | 341.4  |
| AHQ-1-8, 7310 - 7390    | K.EKLCYVALDFENEM*ATAASSSSLEK.S | 2812.07683 | 2 | 7.05E-07 | 0.79 | 4.03 | - | 425.6  |
| AHQ-1-8, 7239 - 7320    | K.EKLCYVALDFENEM*ATAASSSSLEK.S | 2812.07683 | 3 | 9.60E-04 | 0.57 | 3.19 | - | 686.3  |
| AHQ-1-8, 7338 - 7407    | K.EKLCYVALDFENEM*ATAASSSSLEK.S | 2812.07683 | 3 | 1.44E-04 | 0.66 | 3.57 | - | 579.9  |
| AHQ-1-12, 1878 - 1939   | R.HOGVMVGMGQK.D                | 1172.40691 | 2 | 1.32E-06 | 0.81 | 3.02 | - | 620.9  |
| AHQ-1-8, 1525 - 1591    | R.HOGVMVGMGQK.D                | 1172.40691 | 2 | 2.71E-05 | 0.94 | 3.97 | - | 773.2  |
| AHQ-1-8, 2485           | R.HOGVMVGMGQKDSYVGDEAQS.K.R    | 2352.59065 | 2 | 1.71E-04 | 0.90 | 3.76 | - | 652.1  |
| AHQ-1-8, 2487           | R.HOGVMVGMGQKDSYVGDEAQS.K.R    | 2352.59065 | 3 | 5.90E-05 | 0.98 | 4.33 | - | 3199.5 |
| AHQ-1-5, 2870           | K.IWHTFYNELR.V                 | 1516.68695 | 3 | 1.61E-05 | 0.92 | 4.39 | - | 1485.0 |
| AHQ-1-13, 3121          | K.IWHTFYNELR.V                 | 1516.68695 | 3 | 1.38E-05 | 0.93 | 4.12 | - | 1258.5 |
| AHQ-1-13, 3117 - 3183   | K.IWHTFYNELR.V                 | 1516.68695 | 2 | 1.18E-06 | 0.80 | 3.44 | - | 671.7  |
| AHQ-1-12, 3354          | K.IWHTFYNELR.V                 | 1516.68695 | 2 | 1.40E-05 | 0.59 | 2.74 | - | 413.6  |
| AHQ-1-8, 2985 - 3056    | K.IWHTFYNELR.V                 | 1516.68695 | 2 | 5.07E-08 | 0.87 | 3.74 | - | 898.9  |
| AHQ-1-8, 2901 - 2965    | K.IWHTFYNELR.V                 | 1516.68695 | 3 | 9.34E-08 | 0.93 | 3.94 | - | 1557.1 |
| AHQ-1-8, 2681           | K.IWHTFYNELR.V                 | 1516.68695 | 3 | 1.68E-05 | 0.94 | 4.55 | - | 1663.2 |
| AHQ-1-12, 3006 - 3013   | K.IWHTFYNELR.V                 | 1516.68695 | 3 | 2.25E-05 | 0.87 | 3.80 | - | 1240.9 |
| AHQ-1-12, 2995 - 3059   | K.IWHTFYNELR.V                 | 1516.68695 | 2 | 8.09E-07 | 0.79 | 3.19 | - | 832.0  |
| AHQ-1-8, 2589 - 2657    | K.IWHTFYNELR.V                 | 1516.68695 | 2 | 1.02E-05 | 0.82 | 3.43 | - | 872.0  |
| AHQ-1-11, 2954          | K.IWHTFYNELR.V                 | 1516.68695 | 3 | 1.28E-04 | 0.95 | 4.65 | - | 1444.0 |
| AHQ-1-11, 2946 - 2960   | K.IWHTFYNELR.V                 | 1516.68695 | 2 | 3.76E-05 | 0.89 | 3.75 | - | 1104.4 |
| AHQ-1-6, 2916           | K.IWHTFYNELR.V                 | 1516.68695 | 3 | 1.80E-05 | 0.90 | 4.12 | - | 1455.4 |
| AHQ-1-10, 2976          | K.IWHTFYNELR.V                 | 1516.68695 | 2 | 3.13E-07 | 0.90 | 3.35 | - | 942.9  |
| AHQ-1-10, 2820          | K.IWHTFYNELR.V                 | 1516.68695 | 3 | 5.69E-05 | 0.92 | 4.14 | - | 1127.6 |
| AHQ-1-10, 2757 - 2832   | K.IWHTFYNELR.V                 | 1516.68695 | 2 | 1.30E-04 | 0.73 | 3.16 | - | 813.4  |
| AHQ-1-8, 2840 - 2920    | K.IWHTFYNELR.V                 | 1516.68695 | 2 | 1.46E-04 | 0.69 | 2.74 | - | 615.6  |
| AHQ-1-8, 2493 - 2561    | K.IWHTFYNELR.V                 | 1516.68695 | 2 | 4.46E-06 | 0.86 | 3.93 | - | 803.1  |
| AHQ-1-12, 3135          | K.IWHTFYNELR.V                 | 1516.68695 | 2 | 1.67E-09 | 0.93 | 3.37 | - | 1164.1 |
| AHQ-1-5, 2861 - 2931    | K.IWHTFYNELR.V                 | 1516.68695 | 2 | 1.64E-05 | 0.52 | 2.60 | - | 602.2  |
| AHQ-1-8, 2517 - 2586    | K.IWHTFYNELR.V                 | 1516.68695 | 3 | 1.11E-04 | 0.96 | 4.29 | - | 1747.1 |
| AHQ-1-9, 2734 - 2803    | K.IWHTFYNELR.V                 | 1516.68695 | 2 | 3.02E-06 | 0.79 | 3.67 | - | 651.1  |
| AHQ-1-9, 2743           | K.IWHTFYNELR.V                 | 1516.68695 | 3 | 9.54E-04 | 0.92 | 3.98 | - | 1694.8 |
| AHQ-1-9, 2982 - 2994    | K.IWHTFYNELR.V                 | 1516.68695 | 2 | 5.82E-10 | 0.92 | 3.57 | - | 1101.0 |
| AHQ-1-3, 3002 - 3074    | K.IWHTFYNELR.V                 | 1516.68695 | 2 | 4.77E-04 | 0.38 | 2.57 | - | 529.0  |
| AHQ-1-13- , 3155 - 3159 | K.IWHTFYNELR.V                 | 1516.68695 | 2 | 3.53E-08 | 0.72 | 3.23 | - | 735.4  |
| AHQ-1-13- , 3156 - 3173 | K.IWHTFYNELR.V                 | 1516.68695 | 3 | 2.42E-06 | 0.94 | 4.27 | - | 1374.1 |
| AHQ-1-9, 5316 - 5334    | R.LDLAGRDLTYLMK.I              | 1624.88375 | 2 | 9.77E-04 | 0.57 | 2.76 | - | 560.3  |
| AHQ-1-9, 4468 - 4551    | K.SYELPDGQVITIGNER.F           | 1791.93998 | 2 | 9.55E-12 | 0.95 | 4.67 | - | 871.6  |
| AHQ-1-2, 5430           | K.SYELPDGQVITIGNER.F           | 1791.93998 | 2 | 2.36E-07 | 0.91 | 3.83 | - | 723.0  |
| AHQ-1-9, 4562 - 4586    | K.SYELPDGQVITIGNER.F           | 1791.93998 | 2 | 3.44E-13 | 0.92 | 4.02 | - | 783.9  |
| AHQ-1-9, 4684           | K.SYELPDGQVITIGNER.F           | 1791.93998 | 2 | 4.43E-12 | 0.96 | 4.30 | - | 1229.8 |
| AHQ-1-13- , 4596        | K.SYELPDGQVITIGNER.F           | 1791.93998 | 2 | 1.57E-11 | 0.95 | 4.63 | - | 992.4  |
| AHQ-1-9, 4838 - 4906    | K.SYELPDGQVITIGNER.F           | 1791.93998 | 2 | 9.21E-11 | 0.94 | 4.15 | - | 968.8  |
| AHQ-1-9, 4974 - 5026    | K.SYELPDGQVITIGNER.F           | 1791.93998 | 2 | 3.90E-09 | 0.96 | 4.92 | - | 1095.3 |
| AHQ-1-7, 4677           | K.SYELPDGQVITIGNER.F           | 1791.93998 | 2 | 1.67E-06 | 0.88 | 3.33 | - | 604.2  |
| AHQ-1-9, 5095 - 5166    | K.SYELPDGQVITIGNER.F           | 1791.93998 | 2 | 1.09E-11 | 0.95 | 4.00 | - | 1346.1 |
| AHQ-1-4, 4776           | K.SYELPDGQVITIGNER.F           | 1791.93998 | 2 | 4.27E-08 | 0.89 | 3.42 | - | 925.7  |
| AHQ-1-7, 5044 - 5066    | K.SYELPDGQVITIGNER.F           | 1791.93998 | 2 | 1.39E-04 | 0.59 | 2.68 | - | 623.9  |
| AHQ-1-2, 5245           | K.SYELPDGQVITIGNER.F           | 1791.93998 | 2 | 7.41E-08 | 0.89 | 3.82 | - | 659.3  |
| AHQ-1-6, 5238           | K.SYELPDGQVITIGNER.F           | 1791.93998 | 2 | 1.53E-07 | 0.96 | 4.79 | - | 1286.6 |
| AHQ-1-6, 4990 - 5020    | K.SYELPDGQVITIGNER.F           | 1791.93998 | 2 | 7.01E-06 | 0.95 | 4.12 | - | 1095.2 |
| AHQ-1-13- , 4696 - 4720 | K.SYELPDGQVITIGNER.F           | 1791.93998 | 2 | 5.50E-13 | 0.94 | 4.02 | - | 1056.5 |
| AHQ-1-8, 5234 - 5302    | K.SYELPDGQVITIGNER.F           | 1791.93998 | 2 | 1.86E-11 | 0.97 | 5.19 | - | 1489.3 |
| AHQ-1-8, 5127 - 5194    | K.SYELPDGQVITIGNER.F           | 1791.93998 | 2 | 4.96E-11 | 0.96 | 4.85 | - | 1030.1 |
| AHQ-1-13- , 4989 - 5071 | K.SYELPDGQVITIGNER.F           | 1791.93998 | 2 | 4.94E-10 | 0.96 | 4.73 | - | 1112.3 |
| AHQ-1-10, 4067 - 4141   | K.SYELPDGQVITIGNER.F           | 1791.93998 | 2 | 6.57E-07 | 0.95 | 4.46 | - | 942.0  |
| AHQ-1-1, 5131 - 5177    | K.SYELPDGQVITIGNER.F           | 1791.93998 | 2 | 9.60E-10 | 0.93 | 3.69 | - | 862.3  |
| AHQ-1-10, 4237 - 4300   | K.SYELPDGQVITIGNER.F           | 1791.93998 | 2 | 3.42E-07 | 0.94 | 4.62 | - | 782.2  |
| AHQ-1-10, 4409 - 4471   | K.SYELPDGQVITIGNER.F           | 1791.93998 | 2 | 5.27E-11 | 0.95 | 4.58 | - | 1047.8 |
| AHQ-1-10, 4453 - 4527   | K.SYELPDGQVITIGNER.F           | 1791.93998 | 2 | 8.87E-13 | 0.97 | 5.38 | - | 1236.4 |
| AHQ-1-10, 4484          | K.SYELPDGQVITIGNER.F           | 1791.93998 | 3 | 2.93E-08 | 0.95 | 4.66 | - | 1371.4 |
| AHQ-1-10, 4624 - 4679   | K.SYELPDGQVITIGNER.F           | 1791.93998 | 2 | 3.51E-11 | 0.96 | 4.77 | - | 1196.2 |
| AHQ-1-8, 4994 - 5058    | K.SYELPDGQVITIGNER.F           | 1791.93998 | 2 | 1.58E-10 | 0.96 | 4.66 | - | 1296.3 |
| AHQ-1-8, 4894 - 4958    | K.SYELPDGQVITIGNER.F           | 1791.93998 | 2 | 3.05E-14 | 0.97 | 5.20 | - | 1035.9 |
| AHQ-1-11, 4280          | K.SYELPDGQVITIGNER.F           | 1791.93998 | 2 | 1.32E-06 | 0.76 | 2.75 | - | 680.6  |
| AHQ-1-11, 4379          | K.SYELPDGQVITIGNER.F           | 1791.93998 | 2 | 9.66E-11 | 0.91 | 4.01 | - | 824.4  |
| AHQ-1-11, 4760 - 4824   | K.SYELPDGQVITIGNER.F           | 1791.93998 | 2 | 2.04E-12 | 0.96 | 4.62 | - | 1264.8 |
| AHQ-1-8, 4750 - 4812    | K.SYELPDGQVITIGNER.F           | 1791.93998 | 2 | 1.03E-12 | 0.96 | 4.63 | - | 1198.2 |
| AHQ-1-2, 4969           | K.SYELPDGQVITIGNER.F           | 1791.93998 | 2 | 9.93E-05 | 0.91 | 4.01 | - | 673.3  |
| AHQ-1-2, 4863 - 4867    | K.SYELPDGQVITIGNER.F           | 1791.93998 | 2 | 3.46E-06 | 0.89 | 3.90 | - | 714.9  |
| AHQ-1-5, 5263 - 5337    | K.SYELPDGQVITIGNER.F           | 1791.93998 | 2 | 2.78E-07 | 0.92 | 4.13 | - | 968.5  |
| AHQ-1-5, 5089           | K.SYELPDGQVITIGNER.F           | 1791.93998 | 2 | 1.05E-06 | 0.90 | 3.61 | - | 953.9  |
| AHQ-1-8, 4623           | K.SYELPDGQVITIGNER.F           | 1791.93998 | 3 | 4.54E-09 | 0.94 | 4.40 | - | 1556.9 |
| AHQ-1-8, 4618 - 4682    | K.SYELPDGQVITIGNER.F           | 1791.93998 | 2 | 1.97E-10 | 0.95 | 4.66 | - | 1124.1 |

|                                                                                                     |                                     |            |   |          |       |        |       |         |
|-----------------------------------------------------------------------------------------------------|-------------------------------------|------------|---|----------|-------|--------|-------|---------|
| AHQ-1-13- , 5145 - 5223                                                                             | K.SYELPDGQVITIGNER.F                | 1791.93998 | 2 | 7.32E-12 | 0.96  | 4.76   | -     | 1186.3  |
| AHQ-1-8, 4485                                                                                       | K.SYELPDGQVITIGNER.F                | 1791.93998 | 2 | 1.09E-07 | 0.82  | 3.46   | -     | 557.9   |
| AHQ-1-14, 5756                                                                                      | K.SYELPDGQVITIGNER.F                | 1791.93998 | 2 | 2.80E-06 | 0.85  | 3.72   | -     | 661.0   |
| AHQ-1-5, 4681                                                                                       | K.SYELPDGQVITIGNER.F                | 1791.93998 | 2 | 3.09E-09 | 0.86  | 3.48   | -     | 674.0   |
| AHQ-1-12, 4318                                                                                      | K.SYELPDGQVITIGNER.F                | 1791.93998 | 2 | 3.99E-09 | 0.88  | 3.09   | -     | 807.8   |
| AHQ-1-12, 4441 - 4442                                                                               | K.SYELPDGQVITIGNER.F                | 1791.93998 | 2 | 1.12E-11 | 0.95  | 4.47   | -     | 909.1   |
| AHQ-1-12, 4525                                                                                      | K.SYELPDGQVITIGNER.F                | 1791.93998 | 2 | 7.51E-10 | 0.95  | 4.27   | -     | 975.6   |
| AHQ-1-12, 4767 - 4830                                                                               | K.SYELPDGQVITIGNER.F                | 1791.93998 | 2 | 1.73E-10 | 0.87  | 3.26   | -     | 772.5   |
| AHQ-1-12, 4963                                                                                      | K.SYELPDGQVITIGNER.F                | 1791.93998 | 2 | 3.61E-04 | 0.81  | 3.12   | -     | 773.1   |
| AHQ-1-1, 5297 - 5301                                                                                | K.SYELPDGQVITIGNER.F                | 1791.93998 | 2 | 2.20E-07 | 0.96  | 4.89   | -     | 1166.7  |
| AHQ-1-14- , 4542                                                                                    | K.SYELPDGQVITIGNER.F                | 1791.93998 | 2 | 3.27E-09 | 0.87  | 3.42   | -     | 848.1   |
| AHQ-1-3, 4841                                                                                       | K.SYELPDGQVITIGNER.F                | 1791.93998 | 2 | 1.68E-06 | 0.80  | 3.06   | -     | 564.8   |
| AHQ-1-3, 5090 - 5091                                                                                | K.SYELPDGQVITIGNER.F                | 1791.93998 | 2 | 1.67E-10 | 0.95  | 4.69   | -     | 786.5   |
| AHQ-1-13, 4292                                                                                      | K.SYELPDGQVITIGNER.F                | 1791.93998 | 2 | 1.42E-07 | 0.89  | 3.47   | -     | 829.3   |
| AHQ-1-3, 5251                                                                                       | K.SYELPDGQVITIGNER.F                | 1791.93998 | 2 | 1.19E-04 | 0.93  | 3.90   | -     | 795.7   |
| AHQ-1-13, 4391                                                                                      | K.SYELPDGQVITIGNER.F                | 1791.93998 | 2 | 3.95E-08 | 0.77  | 3.01   | -     | 612.6   |
| AHQ-1-9, 5214                                                                                       | K.SYELPDGQVITIGNER.F                | 1791.93998 | 2 | 1.10E-11 | 0.96  | 4.64   | -     | 1078.2  |
| AHQ-1-13, 4487 - 4488                                                                               | K.SYELPDGQVITIGNER.F                | 1791.93998 | 2 | 9.86E-07 | 0.95  | 4.11   | -     | 1217.8  |
| AHQ-1-13, 4737 - 4795                                                                               | K.SYELPDGQVITIGNER.F                | 1791.93998 | 2 | 1.18E-08 | 0.92  | 4.06   | -     | 817.2   |
| AHQ-1-13, 4876 - 4948                                                                               | K.SYELPDGQVITIGNER.F                | 1791.93998 | 2 | 3.52E-11 | 0.96  | 4.73   | -     | 1171.1  |
| AHQ-1-4, 5148                                                                                       | K.SYELPDGQVITIGNER.F                | 1791.93998 | 2 | 9.78E-09 | 0.95  | 4.01   | -     | 1237.3  |
| AHQ-1-10, 3625                                                                                      | R.VAPEEHPTLLTEAPLNPK.A              | 1957.21627 | 2 | 7.22E-06 | 0.60  | 2.82   | -     | 352.5   |
| AHQ-1-12, 3749 - 3815                                                                               | K.YPIEHGIITNWDDMEK.I                | 1978.17114 | 2 | 2.44E-04 | 0.50  | 2.91   | -     | 371.3   |
| AHQ-1-10, 4088 - 4104                                                                               | K.YPIEHGIITNWDDMEK.I                | 1962.17174 | 3 | 4.08E-07 | 0.83  | 4.12   | -     | 835.8   |
| AHQ-1-13, 4331                                                                                      | K.YPIEHGIITNWDDMEK.I                | 1962.17174 | 2 | 6.85E-04 | 0.84  | 3.97   | -     | 676.8   |
| AHQ-1-13, 4485                                                                                      | K.YPIEHGIITNWDDMEK.I                | 1962.17174 | 2 | 7.06E-06 | 0.83  | 3.80   | -     | 455.9   |
| AHQ-1-9, 5064 - 5143                                                                                | K.YPIEHGIITNWDDMEK.I                | 1962.17174 | 2 | 1.83E-04 | 0.82  | 3.54   | -     | 627.4   |
| AHQ-1-9, 4702 - 4724                                                                                | K.YPIEHGIITNWDDMEK.I                | 1962.17174 | 2 | 9.21E-06 | 0.86  | 3.56   | -     | 722.2   |
| AHQ-1-9, 4506                                                                                       | K.YPIEHGIITNWDDMEK.I                | 1962.17174 | 2 | 8.72E-05 | 0.38  | 2.58   | -     | 518.4   |
| AHQ-1-9, 4140                                                                                       | K.YPIEHGIITNWDDMEK.I                | 1962.17174 | 2 | 1.08E-04 | 0.90  | 4.12   | -     | 781.3   |
| AHQ-1-13- , 4069 - 4145                                                                             | K.YPIEHGIITNWDDMEK.I                | 1978.17114 | 2 | 5.13E-04 | 0.90  | 3.91   | -     | 651.2   |
| AHQ-1-13- , 4543 - 4611                                                                             | K.YPIEHGIITNWDDMEK.I                | 1962.17174 | 2 | 4.73E-04 | 0.92  | 4.57   | -     | 823.7   |
| AHQ-1-9, 3962                                                                                       | K.YPIEHGIITNWDDMEK.I                | 1978.17114 | 2 | 1.45E-04 | 0.83  | 3.47   | -     | 729.9   |
| AHQ-1-13- , 4644 - 4724                                                                             | K.YPIEHGIITNWDDMEK.I                | 1962.17174 | 2 | 4.27E-05 | 0.80  | 3.81   | -     | 531.1   |
| AHQ-1-4, 4842                                                                                       | K.YPIEHGIITNWDDMEK.I                | 1962.17174 | 2 | 4.35E-05 | 0.78  | 3.54   | -     | 549.9   |
| AHQ-1-8, 5094 - 5096                                                                                | K.YPIEHGIITNWDDMEK.I                | 1962.17174 | 2 | 5.28E-05 | 0.88  | 4.22   | -     | 583.6   |
| AHQ-1-8, 4523 - 4595                                                                                | K.YPIEHGIITNWDDMEK.I                | 1962.17174 | 2 | 1.53E-04 | 0.87  | 4.04   | -     | 562.8   |
| AHQ-1-3, 4650                                                                                       | K.YPIEHGIITNWDDMEK.I                | 1962.17174 | 2 | 7.09E-05 | 0.68  | 3.20   | -     | 554.1   |
| AHQ-1-4, 4694                                                                                       | K.YPIEHGIITNWDDMEK.I                | 1962.17174 | 2 | 3.40E-04 | 0.52  | 2.82   | -     | 474.4   |
| AHQ-1-6, 4480                                                                                       | K.YPIEHGIITNWDDMEK.I                | 1962.17174 | 2 | 8.39E-04 | 0.92  | 4.10   | -     | 1005.0  |
| AHQ-1-9, 4068                                                                                       | K.YPIEHGIITNWDDMEK.I                | 1978.17114 | 2 | 7.21E-04 | 0.58  | 3.00   | -     | 439.9   |
| AHQ-1-8, 5544                                                                                       | K.YPIEHGIITNWDDMEK.IKIIWHHTFYNELR.V | 3475.83549 | 3 | 1.27E-04 | 0.92  | 5.39   | -     | 690.4   |
| gi 29741246 ref XP_294070.1  similar to Glyceraldehyde 3-phosphate dehydrogenase, liver (GAPDH) [Ho |                                     |            |   | 3.28E-14 | 4.99  | 60.34  | 17.70 | 35302.0 |
| AHQ-1-13- , 5417 - 5497                                                                             | K.AENGLVINGNPITIFQER.D              | 2114.39062 | 2 | 6.69E-09 | 0.65  | 2.74   | -     | 682.2   |
| AHQ-1-9, 5291 - 5359                                                                                | K.AENGLVINGNPITIFQER.D              | 2114.39062 | 2 | 7.76E-07 | 0.74  | 3.64   | -     | 503.6   |
| AHQ-1-9, 5435 - 5502                                                                                | K.AENGLVINGNPITIFQER.D              | 2114.39062 | 2 | 2.71E-06 | 0.65  | 3.60   | -     | 316.8   |
| AHQ-1-9, 5570 - 5572                                                                                | K.AENGLVINGNPITIFQER.D              | 2114.39062 | 2 | 2.87E-07 | 0.81  | 3.44   | -     | 796.9   |
| AHQ-1-13, 5185                                                                                      | K.AENGLVINGNPITIFQER.D              | 2114.39062 | 2 | 1.53E-07 | 0.63  | 3.10   | -     | 432.7   |
| AHQ-1-12, 5238                                                                                      | K.AENGLVINGNPITIFQER.D              | 2114.39062 | 2 | 7.61E-06 | 0.23  | 2.53   | -     | 298.2   |
| AHQ-1-14- , 5036                                                                                    | K.LISWYENEFYSNR.V                   | 1778.90145 | 2 | 1.16E-06 | 0.89  | 3.22   | -     | 954.7   |
| AHQ-1-9, 5648 - 5718                                                                                | K.LVINGNPITIFQER.D                  | 1614.87029 | 2 | 2.06E-12 | 0.94  | 3.87   | -     | 1164.0  |
| AHQ-1-10, 5260                                                                                      | K.LVINGNPITIFQER.D                  | 1614.87029 | 2 | 6.67E-06 | 0.94  | 3.87   | -     | 1321.9  |
| AHQ-1-12, 5603 - 5678                                                                               | K.LVINGNPITIFQER.D                  | 1614.87029 | 2 | 9.00E-07 | 0.80  | 3.16   | -     | 569.4   |
| AHQ-1-11, 5288 - 5360                                                                               | K.LVINGNPITIFQER.D                  | 1614.87029 | 2 | 3.25E-11 | 0.95  | 3.86   | -     | 1199.9  |
| AHQ-1-12, 5473 - 5539                                                                               | K.LVINGNPITIFQER.D                  | 1614.87029 | 2 | 1.67E-10 | 0.89  | 3.69   | -     | 852.9   |
| AHQ-1-9, 5854 - 5856                                                                                | K.LVINGNPITIFQER.D                  | 1614.87029 | 2 | 1.33E-08 | 0.93  | 4.11   | -     | 918.4   |
| AHQ-1-13- , 5747 - 5811                                                                             | K.LVINGNPITIFQER.D                  | 1614.87029 | 2 | 4.32E-08 | 0.96  | 4.33   | -     | 1479.4  |
| AHQ-1-9, 5215 - 5258                                                                                | K.LVINGNPITIFQERDPSK.I              | 2042.32440 | 2 | 1.41E-05 | 0.58  | 3.40   | -     | 477.9   |
| AHQ-1-11, 5934                                                                                      | K.VLHDNFGIVKGLM*TTVHAITATQK.T       | 2612.04471 | 3 | 1.48E-12 | 0.96  | 5.58   | -     | 2454.8  |
| AHQ-1-10, 5821                                                                                      | K.VLHDNFGIVKGLM*TTVHAITATQK.T       | 2612.04471 | 3 | 1.15E-08 | 0.97  | 5.61   | -     | 1338.2  |
| AHQ-1-9, 7111 - 7182                                                                                | K.VLHDNFGIVKGLM*TTVHAITATQK.T       | 2596.04531 | 2 | 1.78E-04 | 0.96  | 5.64   | -     | 1862.9  |
| AHQ-1-9, 6659                                                                                       | K.VLHDNFGIVKGLM*TTVHAITATQK.T       | 2612.04471 | 3 | 2.58E-05 | 0.91  | 4.72   | -     | 1615.7  |
| AHQ-1-9, 6512 - 6586                                                                                | K.VLHDNFGIVKGLM*TTVHAITATQK.T       | 2612.04471 | 3 | 3.28E-14 | 0.97  | 6.86   | -     | 2321.7  |
| AHQ-1-11, 5944                                                                                      | K.VLHDNFGIVKGLM*TTVHAITATQK.T       | 2612.04471 | 2 | 9.04E-05 | 0.76  | 3.71   | -     | 855.4   |
| AHQ-1-11, 6386                                                                                      | K.VLHDNFGIVKGLM*TTVHAITATQK.T       | 2596.04531 | 3 | 7.61E-08 | 0.96  | 6.90   | -     | 1873.2  |
| gi 4507729 ref NP_001060.1  tubulin, beta polypeptide (Homo sapiens)                                |                                     |            |   | 3.39E-14 | 10.24 | 120.36 | 36.60 | 49906.7 |
| AHQ-1-14, 5760                                                                                      | R.AILVLEPGTMDSVR.S                  | 1616.86162 | 2 | 1.57E-06 | 0.64  | 3.46   | -     | 296.3   |
| AHQ-1-13- , 4964 - 4988                                                                             | R.AILVLEPGTMDSVR.S                  | 1616.86162 | 2 | 4.14E-04 | 0.87  | 3.38   | -     | 672.9   |
| AHQ-1-11, 4583                                                                                      | R.AILVLEPGTMDSVR.S                  | 1616.86162 | 2 | 5.02E-04 | 0.81  | 3.52   | -     | 449.7   |
| AHQ-1-14- , 4875 - 4890                                                                             | R.AILVLEPGTMDSVR.S                  | 1616.86162 | 2 | 2.39E-04 | 0.91  | 4.47   | -     | 660.8   |
| AHQ-1-12, 2925                                                                                      | R.EIVHIQAGCGQIQGAK.F                | 1825.03962 | 2 | 8.15E-08 | 0.89  | 3.56   | -     | 847.6   |
| AHQ-1-7, 2914                                                                                       | K.EVDEQMLNVQNK.N                    | 1447.59668 | 2 | 1.54E-04 | 0.91  | 4.28   | -     | 1019.2  |
| AHQ-1-9, 2852                                                                                       | K.EVDEQMLNVQNK.N                    | 1447.59668 | 2 | 1.11E-04 | 0.78  | 3.27   | -     | 705.8   |
| AHQ-1-7, 2925                                                                                       | K.EVDEQMLNVQNK.N                    | 1447.59668 | 1 | 8.96E-07 | 0.60  | 3.23   | -     | 328.1   |
| AHQ-1-13- , 6459                                                                                    | K.GHYTEGAELVSLDVVR.K                | 1960.13388 | 2 | 4.00E-08 | 0.99  | 7.25   | -     | 2436.4  |
| AHQ-1-9, 6459                                                                                       | K.GHYTEGAELVSLDVVR.K                | 1960.13388 | 3 | 7.45E-05 | 0.91  | 4.74   | -     | 1038.4  |
| AHQ-1-10, 5759                                                                                      | K.GHYTEGAELVSLDVVR.K                | 1960.13388 | 3 | 5.92E-04 | 0.83  | 3.75   | -     | 1098.9  |
| AHQ-1-14- , 6218                                                                                    | K.GHYTEGAELVSLDVVR.K                | 1960.13388 | 2 | 3.39E-14 | 0.98  | 6.73   | -     | 2492.1  |
| AHQ-1-11, 5871                                                                                      | K.GHYTEGAELVSLDVVR.K                | 1960.13388 | 2 | 1.93E-07 | 0.96  | 4.81   | -     | 1220.0  |
| AHQ-1-13, 6004 - 6015                                                                               | K.GHYTEGAELVSLDVVR.K                | 1960.13388 | 3 | 7.18E-06 | 0.90  | 4.83   | -     | 863.2   |
| AHQ-1-13- , 6451 - 6452                                                                             | K.GHYTEGAELVSLDVVR.K                | 1960.13388 | 3 | 8.28E-06 | 0.94  | 5.31   | -     | 1247.0  |
| AHQ-1-7, 4717                                                                                       | K.GHYTEGAELVSLDVVR.K                | 1960.13388 | 2 | 9.37E-11 | 0.98  | 6.52   | -     | 1313.7  |
| AHQ-1-9, 6447 - 6454                                                                                | K.GHYTEGAELVSLDVVR.K                | 1960.13388 | 2 | 9.91E-07 | 0.98  | 6.45   | -     | 2556.9  |
| AHQ-1-7, 6584 - 6636                                                                                | K.GHYTEGAELVSLDVVR.K                | 1960.13388 | 2 | 3.35E-07 | 0.98  | 6.48   | -     | 2627.4  |
| AHQ-1-7, 6585 - 6614                                                                                | K.GHYTEGAELVSLDVVR.K                | 1960.13388 | 3 | 1.11E-04 | 0.88  | 4.40   | -     | 815.4   |
| AHQ-1-13, 6003                                                                                      | K.GHYTEGAELVSLDVVR.K                | 1960.13388 | 2 | 2.43E-08 | 0.99  | 6.55   | -     | 3013.5  |
| AHQ-1-12, 6073                                                                                      | K.GHYTEGAELVSLDVVR.K                | 1960.13388 | 2 | 3.85E-08 | 0.98  | 6.45   | -     | 2253.1  |
| AHQ-1-8, 6535 - 6542                                                                                | K.GHYTEGAELVSLDVVR.K                | 1960.13388 | 2 | 1.49E-12 | 0.99  | 6.80   | -     | 2859.3  |
| AHQ-1-10, 5751                                                                                      | K.GHYTEGAELVSLDVVR.K                | 1960.13388 | 2 | 1.12E-09 | 0.98  | 5.49   | -     | 2087.8  |
| AHQ-1-7, 4653                                                                                       | R.ISEQFTAMFR.R                      | 1230.41818 | 2 | 6.53E-06 | 0.93  | 3.51   | -     | 1151.5  |
| AHQ-1-7, 3633                                                                                       | R.ISEQFTAM*FR.R                     | 1246.41758 | 2 | 5.09E-06 | 0.90  | 3.46   | -     | 883.1   |
| AHQ-1-7, 4550 - 4558                                                                                | R.ISEQFTAMFR.R                      | 1230.41818 | 2 | 7.30E-06 | 0.92  | 3.86   | -     | 1088.6  |
| AHQ-1-9, 7154 - 7156                                                                                | K.LTTPYTDLNLHLSATMSGVTTCLR.F        | 2711.06527 | 3 | 5.35E-07 | 0.91  | 4.41   | -     | 1300.1  |
| AHQ-1-7, 6386 - 6460                                                                                | K.LTTPYTDLNLHLSATMSGVTTCLR.F        | 2727.06467 | 3 | 2.94E-04 | 0.67  | 3.10   | -     | 681.3   |
| AHQ-1-7, 7352                                                                                       | K.LTTPYTDLNLHLSATMSGVTTCLR.F        | 2711.06527 | 2 | 2.99E-09 | 0.96  | 5.95   | -     | 718.5   |
| AHQ-1-9, 7155                                                                                       | K.LTTPYTDLNLHLSATMSGVTTCLR.F        | 2711.06527 | 2 | 1.39E-08 | 0.92  | 4.60   | -     | 764.7   |
| AHQ-1-7, 7353                                                                                       | K.LTTPYTDLNLHLSATMSGVTTCLR.F        | 2711.06527 | 3 | 8.45E-07 | 0.89  | 4.12   | -     | 1180.6  |
| AHQ-1-8, 7346                                                                                       | K.LTTPYTDLNLHLSATMSGVTTCLR.F        | 2711.06527 | 3 | 1.28E-05 | 0.88  | 4.01   | -     | 1062.6  |
| AHQ-1-7, 6488                                                                                       | K.LTTPYTDLNLHLSATMSGVTTCLR.F        | 2711.06527 | 2 | 9.88E-06 | 0.85  | 3.31   | -     | 716.1   |
| AHQ-1-12, 6150                                                                                      | K.M*SATFIGNSTAIQELFK.R              | 1875.13550 | 2 | 2.42E-06 | 0.79  | 3.38   | -     | 981.2   |
| AHQ-1-7, 6800                                                                                       | K.M*SATFIGNSTAIQELFK.R              | 1875.13550 | 2 | 1.84E-08 | 0.92  | 4.62   | -     | 1125.2  |
| AHQ-1-14- , 6003                                                                                    | K.M*SATFIGNSTAIQELFK.R              | 1875.13550 | 2 | 1.66E-05 | 0.66  | 3.60   | -     | 645.2   |
| AHQ-1-7, 6368 - 6369                                                                                | K.M*SATFIGNSTAIQELFK.R              | 1875.13550 | 2 | 7.12E-05 | 0.86  | 4.29   | -     | 996.1   |
| AHQ-1-9, 6063                                                                                       | K.NSSYFVEWIPNNVK.T                  | 1697.87148 | 2 | 1.30E-04 | 0.47  | 2.66   | -     | 464.3   |
| AHQ-1-7, 5645 - 5721                                                                                | K.NSSYFVEWIPNNVK.T                  | 1697.87148 | 2 | 1.02E-05 | 0.91  | 4.52   | -     | 762.4   |
| AHQ-1-7, 5800                                                                                       | K.NSSYFVEWIPNNVK.T                  | 1697.87148 | 2 | 4.11E-09 | 0.88  | 3.43   | -     | 873.4   |
| AHQ-1-7, 6212                                                                                       | K.NSSYFVEWIPNNVK.T                  | 1697.87148 | 2 | 2.24E-04 | 0.84  | 3.59   | -     | 692.6   |

|                             |                                                                        |            |   |          |       |        |       |          |
|-----------------------------|------------------------------------------------------------------------|------------|---|----------|-------|--------|-------|----------|
| AHQ-1-7, 6297 - 6310        | K.NSSYFVEWIPNNVK.T                                                     | 1697.87148 | 2 | 8.28E-05 | 0.46  | 2.88   | -     | 490.3    |
| AHQ-1-7, 6382 - 6456        | K.NSSYFVEWIPNNVK.T                                                     | 1697.87148 | 2 | 8.34E-07 | 0.88  | 4.04   | -     | 759.3    |
| AHQ-1-7, 5548 - 5624        | K.NSSYFVEWIPNNVK.T                                                     | 1697.87148 | 2 | 6.06E-09 | 0.95  | 5.14   | -     | 917.1    |
| AHQ-1-12, 5378 - 5446       | K.NSSYFVEWIPNNVK.T                                                     | 1697.87148 | 2 | 9.87E-07 | 0.88  | 3.87   | -     | 723.1    |
| AHQ-1-8, 6572               | R.SGPFQGIQFRPNDNFVFGQSGAGNNWAK.G                                       | 2800.03898 | 3 | 2.79E-05 | 0.96  | 5.87   | -     | 1379.8   |
| AHQ-1-7, 6732 - 6797        | R.SGPFQGIQFRPNDNFVFGQSGAGNNWAK.G                                       | 2800.03898 | 3 | 1.10E-09 | 0.98  | 6.62   | -     | 2545.6   |
| AHQ-1-8, 6576 - 6646        | R.SGPFQGIQFRPNDNFVFGQSGAGNNWAK.G                                       | 2800.03898 | 2 | 3.54E-06 | 0.95  | 4.94   | -     | 973.3    |
| AHQ-1-7, 6700 - 6768        | R.SGPFQGIQFRPNDNFVFGQSGAGNNWAK.G                                       | 2800.03898 | 2 | 3.78E-07 | 0.97  | 6.12   | -     | 1026.3   |
| AHQ-1-3, 6614               | R.SGPFQGIQFRPNDNFVFGQSGAGNNWAK.G                                       | 2800.03898 | 3 | 2.76E-10 | 0.97  | 5.44   | -     | 1885.5   |
| AHQ-1-13, 6045 - 6103       | R.SGPFQGIQFRPNDNFVFGQSGAGNNWAK.G                                       | 2800.03898 | 3 | 2.87E-08 | 0.95  | 5.50   | -     | 1490.0   |
| AHQ-1-11, 5867 - 5927       | R.SGPFQGIQFRPNDNFVFGQSGAGNNWAK.G                                       | 2800.03898 | 3 | 3.87E-11 | 0.97  | 6.58   | -     | 1631.9   |
| AHQ-1-9, 6452 - 6532        | R.SGPFQGIQFRPNDNFVFGQSGAGNNWAK.G                                       | 2800.03898 | 2 | 3.76E-04 | 0.96  | 5.46   | -     | 1103.7   |
| AHQ-1-10, 5769              | R.SGPFQGIQFRPNDNFVFGQSGAGNNWAK.G                                       | 2800.03898 | 2 | 2.68E-04 | 0.92  | 4.49   | -     | 593.3    |
| AHQ-1-9, 6458 - 6527        | R.SGPFQGIQFRPNDNFVFGQSGAGNNWAK.G                                       | 2800.03898 | 3 | 4.39E-14 | 0.97  | 6.68   | -     | 1706.0   |
| AHQ-1-13- , 6500 - 6564     | R.SGPFQGIQFRPNDNFVFGQSGAGNNWAK.G                                       | 2800.03898 | 3 | 2.06E-07 | 0.93  | 5.07   | -     | 1112.2   |
| AHQ-1-13, 5963 - 6019       | R.SGPFQGIQFRPNDNFVFGQSGAGNNWAK.G                                       | 2800.03898 | 3 | 8.40E-05 | 0.94  | 5.33   | -     | 1227.2   |
| AHQ-1-10, 5757 - 5832       | R.SGPFQGIQFRPNDNFVFGQSGAGNNWAK.G                                       | 2800.03898 | 3 | 1.80E-04 | 0.88  | 4.68   | -     | 730.5    |
| AHQ-1-14- , 6166 - 6227     | R.SGPFQGIQFRPNDNFVFGQSGAGNNWAK.G                                       | 2800.03898 | 3 | 7.95E-10 | 0.98  | 6.53   | -     | 2260.6   |
| AHQ-1-14- , 6308            | R.SGPFQGIQFRPNDNFVFGQSGAGNNWAK.G                                       | 2800.03898 | 3 | 5.19E-07 | 0.98  | 6.38   | -     | 2408.7   |
| AHQ-1-7, 2361               | K.TAVCDIPPR.G                                                          | 1030.18038 | 2 | 1.61E-05 | 0.90  | 2.86   | -     | 1072.0   |
| gi 21361657 ref NP_005304.3 | glucose regulated protein, 58kDa; glucose regulated protein, 58k [Homo |            |   | 3.66E-14 | 13.02 | 160.36 | 41.40 | 56782.0  |
| AHQ-1-7, 2077 - 2110        | R.EATNPPVIQEEKPK.K                                                     | 1580.76433 | 2 | 6.38E-07 | 0.82  | 3.28   | -     | 605.4    |
| AHQ-1-7, 6022 - 6037        | R.ELSDFISYLR.E                                                         | 1371.52000 | 2 | 2.07E-04 | 0.96  | 4.25   | -     | 1246.2   |
| AHQ-1-7, 6298               | R.FAHTNVESLYNEYDDNGEGILFR.P                                            | 2753.96046 | 3 | 1.30E-07 | 0.88  | 4.14   | -     | 846.0    |
| AHQ-1-7, 6666               | R.FAHTNVESLYNEYDDNGEGILFR.P                                            | 2753.96046 | 2 | 2.37E-10 | 0.96  | 4.95   | -     | 1260.2   |
| AHQ-1-7, 6830               | R.FAHTNVESLYNEYDDNGEGILFR.P                                            | 2753.96046 | 2 | 1.06E-06 | 0.46  | 2.60   | -     | 360.8    |
| AHQ-1-7, 6665 - 6676        | R.FAHTNVESLYNEYDDNGEGILFR.P                                            | 2753.96046 | 3 | 2.09E-06 | 0.94  | 4.60   | -     | 1603.7   |
| AHQ-1-7, 5702               | K.FIGENIFGICPHMTEDNKDLIQGK.D                                           | 2850.21952 | 2 | 1.96E-04 | 0.73  | 3.17   | -     | 573.7    |
| AHQ-1-9, 7140               | K.FISDKDASIVGFDDSFSEAHSEFLK.A                                          | 2940.16492 | 3 | 9.59E-10 | 0.98  | 5.93   | -     | 2834.3   |
| AHQ-1-7, 7336 - 7344        | K.FISDKDASIVGFDDSFSEAHSEFLK.A                                          | 2940.16492 | 3 | 3.66E-14 | 0.98  | 7.27   | -     | 2824.5   |
| AHQ-1-7, 7305 - 7338        | K.FISDKDASIVGFDDSFSEAHSEFLK.A                                          | 2940.16492 | 2 | 2.92E-07 | 0.83  | 3.59   | -     | 677.7    |
| AHQ-1-7, 4169 - 4240        | R.FLQDYFDGNLKR.Y                                                       | 1516.68203 | 2 | 4.58E-04 | 0.83  | 3.41   | -     | 766.3    |
| AHQ-1-7, 2470               | K.FVM"QEFSR.D                                                          | 1189.32290 | 2 | 3.17E-05 | 0.91  | 3.23   | -     | 971.4    |
| AHQ-1-7, 4700 - 4704        | R.GPFTIYFSPANK.K                                                       | 1342.52349 | 2 | 2.21E-07 | 0.78  | 2.84   | -     | 571.8    |
| AHQ-1-7, 6032               | R.KTFSHELSDFGLESTAGEIPVVAIR.T                                          | 2705.01562 | 2 | 9.69E-06 | 0.95  | 4.78   | -     | 1056.2   |
| AHQ-1-7, 6029               | R.KTFSHELSDFGLESTAGEIPVVAIR.T                                          | 2705.01562 | 3 | 2.79E-05 | 0.92  | 4.37   | -     | 1180.4   |
| AHQ-1-7, 2249 - 2260        | K.LSKDPNVIAM.K                                                         | 1198.43727 | 2 | 2.79E-05 | 0.85  | 3.11   | -     | 1048.0   |
| AHQ-1-7, 3514 - 3524        | K.MDATANDVPSPYEVR.G                                                    | 1665.80646 | 2 | 1.68E-05 | 0.53  | 2.78   | -     | 368.4    |
| AHQ-1-7, 3122 - 3148        | K.M"DATANDVPSPYEVR.G                                                   | 1681.80586 | 2 | 4.23E-05 | 0.87  | 3.71   | -     | 432.6    |
| AHQ-1-7, 2482               | K.SEPIPESNDGPVK.V                                                      | 1369.45928 | 1 | 2.83E-04 | 0.29  | 2.22   | -     | 368.0    |
| AHQ-1-9, 6370               | K.TFSHELSDFGLESTAGEIPVVAIR.T                                           | 2576.84271 | 3 | 3.22E-05 | 0.78  | 3.81   | -     | 683.5    |
| AHQ-1-7, 6518               | K.TFSHELSDFGLESTAGEIPVVAIR.T                                           | 2576.84271 | 2 | 7.16E-05 | 0.96  | 4.62   | -     | 1403.5   |
| AHQ-1-7, 4506 - 4578        | K.VVAENFDEIVNENK.D                                                     | 1833.97686 | 2 | 1.34E-04 | 0.89  | 4.28   | -     | 749.0    |
| AHQ-1-7, 3124               | K.YGVSGYPTLK.I                                                         | 1085.23435 | 1 | 2.08E-04 | 0.57  | 2.60   | -     | 376.0    |
| AHQ-1-7, 3120 - 3136        | K.YGVSGYPTLK.I                                                         | 1085.23435 | 2 | 9.90E-05 | 0.89  | 3.37   | -     | 627.0    |
| gi 4501891 ref NP_001093.1  | actinin, alpha 1 [Homo sapiens]                                        |            |   | 4.22E-14 | 39.48 | 440.32 | 50.60 | 103056.9 |
| AHQ-1-6, 7299 - 7379        | R.AAPFNW"EGAM"EDLQDTFIVHTIEEIQLTTAHEQFK.A                              | 4396.81902 | 3 | 1.69E-05 | 0.94  | 5.56   | -     | 687.9    |
| AHQ-1-5, 7541 - 7543        | R.AAPFNW"EGAM"EDLQDTFIVHTIEEIQLTTAHEQFK.A                              | 4380.81962 | 3 | 8.42E-08 | 0.94  | 6.32   | -     | 1396.3   |
| AHQ-1-5, 7489 - 7490        | R.AAPFNW"EGAM"EDLQDTFIVHTIEEIQLTTAHEQFK.A                              | 4396.81902 | 3 | 4.52E-07 | 0.92  | 5.15   | -     | 945.2    |
| AHQ-1-4, 5594               | K.AGTQIENIEEDFRDGLK.L                                                  | 1936.06918 | 2 | 2.90E-05 | 0.72  | 4.13   | -     | 612.7    |
| AHQ-1-10, 4825              | K.AGTQIENIEEDFRDGLK.L                                                  | 1936.06918 | 2 | 1.54E-04 | 0.47  | 3.36   | -     | 501.7    |
| AHQ-1-5, 5454               | K.AGTQIENIEEDFRDGLK.L                                                  | 1936.06918 | 2 | 3.48E-06 | 0.85  | 4.37   | -     | 866.3    |
| AHQ-1-12, 5174              | K.AGTQIENIEEDFRDGLK.L                                                  | 1936.06918 | 2 | 1.01E-04 | 0.85  | 4.04   | -     | 579.0    |
| AHQ-1-6, 5391 - 5459        | K.AGTQIENIEEDFRDGLK.L                                                  | 1936.06918 | 2 | 4.76E-06 | 0.77  | 4.16   | -     | 741.8    |
| AHQ-1-11, 4966              | K.AGTQIENIEEDFRDGLK.L                                                  | 1936.06918 | 2 | 5.15E-05 | 0.84  | 3.79   | -     | 605.1    |
| AHQ-1-6, 5400               | K.AGTQIENIEEDFRDGLK.L                                                  | 1936.06918 | 3 | 1.88E-04 | 0.60  | 3.37   | -     | 373.6    |
| AHQ-1-4, 6771               | K.AIMTYVSSFYHAFSGAQK.A                                                 | 2009.27323 | 3 | 1.59E-07 | 0.85  | 3.90   | -     | 685.4    |
| AHQ-1-5, 5733               | K.AIMTYVSSFYHAFSGAQK.A                                                 | 2025.27263 | 3 | 8.48E-07 | 0.76  | 3.22   | -     | 872.1    |
| AHQ-1-5, 5667 - 5742        | K.AIMTYVSSFYHAFSGAQK.A                                                 | 2025.27263 | 2 | 2.50E-09 | 0.87  | 3.92   | -     | 578.0    |
| AHQ-1-7, 6680               | K.AIMTYVSSFYHAFSGAQK.A                                                 | 2009.27323 | 2 | 9.13E-05 | 0.75  | 3.35   | -     | 380.1    |
| AHQ-1-5, 6601 - 6670        | K.AIMTYVSSFYHAFSGAQK.A                                                 | 2009.27323 | 2 | 9.79E-09 | 0.93  | 4.44   | -     | 906.3    |
| AHQ-1-5, 6645 - 6653        | K.AIMTYVSSFYHAFSGAQK.A                                                 | 2009.27323 | 3 | 5.02E-05 | 0.79  | 3.14   | -     | 708.8    |
| AHQ-1-4, 6766               | K.AIMTYVSSFYHAFSGAQK.A                                                 | 2009.27323 | 2 | 2.10E-07 | 0.96  | 5.14   | -     | 1124.4   |
| AHQ-1-6, 5636               | K.AIMTYVSSFYHAFSGAQK.A                                                 | 2025.27263 | 2 | 2.76E-04 | 0.72  | 3.23   | -     | 485.3    |
| AHQ-1-5, 3241               | R.ASFNHFRDRHSGTLGPEEFK.A                                               | 2292.40855 | 3 | 3.70E-06 | 0.95  | 4.52   | -     | 1923.9   |
| AHQ-1-5, 3251               | R.ASFNHFRDRHSGTLGPEEFK.A                                               | 2292.40855 | 2 | 1.21E-05 | 0.94  | 4.03   | -     | 1198.1   |
| AHQ-1-5, 3467 - 3483        | R.ASFNHFRDRHSGTLGPEEFK.A                                               | 2292.40855 | 2 | 3.19E-08 | 0.79  | 3.24   | -     | 538.3    |
| AHQ-1-5, 1514 - 1529        | K.ATLPDADKER.L                                                         | 1116.20684 | 2 | 7.80E-05 | 0.66  | 2.76   | -     | 464.7    |
| AHQ-1-1, 5791               | K.DDPLTNLNTAFDVAEK.Y                                                   | 1763.88340 | 2 | 4.95E-06 | 0.90  | 4.29   | -     | 760.4    |
| AHQ-1-3, 5831               | K.DDPLTNLNTAFDVAEK.Y                                                   | 1763.88340 | 2 | 3.70E-07 | 0.89  | 3.86   | -     | 762.7    |
| AHQ-1-9, 5724               | K.DDPLTNLNTAFDVAEK.Y                                                   | 1763.88340 | 2 | 4.05E-05 | 0.90  | 4.08   | -     | 758.7    |
| AHQ-1-5, 5969               | K.DDPLTNLNTAFDVAEK.Y                                                   | 1763.88340 | 2 | 7.01E-06 | 0.96  | 4.25   | -     | 1448.4   |
| AHQ-1-5, 5870 - 5937        | K.DDPLTNLNTAFDVAEK.Y                                                   | 1763.88340 | 2 | 1.07E-12 | 0.97  | 5.71   | -     | 1343.7   |
| AHQ-1-2, 6007               | K.DDPLTNLNTAFDVAEK.Y                                                   | 1763.88340 | 2 | 4.76E-06 | 0.88  | 3.44   | -     | 944.7    |
| AHQ-1-6, 5778 - 5779        | K.DDPLTNLNTAFDVAEK.Y                                                   | 1763.88340 | 2 | 2.21E-05 | 0.97  | 5.50   | -     | 1293.2   |
| AHQ-1-5, 5299               | K.DDPLTNLNTAFDVAEK.Y                                                   | 1763.88340 | 2 | 4.94E-09 | 0.92  | 3.89   | -     | 973.3    |
| AHQ-1-4, 5944 - 5966        | K.DDPLTNLNTAFDVAEK.Y                                                   | 1763.88340 | 2 | 3.28E-06 | 0.97  | 5.11   | -     | 1704.8   |
| AHQ-1-5, 4981 - 4982        | K.DGLGFCALIHR.H                                                        | 1260.44730 | 2 | 1.71E-05 | 0.92  | 3.01   | -     | 1304.4   |
| AHQ-1-4, 5112               | K.DGLGFCALIHR.H                                                        | 1260.44730 | 2 | 1.03E-04 | 0.96  | 3.00   | -     | 2087.2   |
| AHQ-1-5, 5214               | K.DGLGFCALIHR.H                                                        | 1260.44730 | 2 | 2.75E-06 | 0.94  | 3.17   | -     | 1578.6   |
| AHQ-1-5, 2406 - 2409        | R.DHSGTLGPEEFK.A                                                       | 1317.38606 | 2 | 2.11E-06 | 0.94  | 3.97   | -     | 951.1    |
| AHQ-1-4, 2540               | R.DHSGTLGPEEFK.A                                                       | 1317.38606 | 2 | 7.89E-05 | 0.91  | 3.56   | -     | 960.2    |
| AHQ-1-6, 2435               | R.DHSGTLGPEEFK.A                                                       | 1317.38606 | 2 | 9.99E-06 | 0.91  | 3.27   | -     | 837.0    |
| AHQ-1-6, 3738               | K.DYETATLSEIK.A                                                        | 1270.36761 | 2 | 9.23E-07 | 0.94  | 3.61   | -     | 1234.9   |
| AHQ-1-5, 3799 - 3803        | K.DYETATLSEIK.A                                                        | 1270.36761 | 2 | 2.06E-07 | 0.94  | 3.86   | -     | 1302.4   |
| AHQ-1-5, 3393 - 3445        | R.ELPPDQAEYCIAR.M                                                      | 1563.71392 | 2 | 2.19E-04 | 0.40  | 2.51   | -     | 132.0    |
| AHQ-1-4, 3652 - 3732        | R.ELPPDQAEYCIAR.M                                                      | 1563.71392 | 2 | 4.15E-05 | 0.41  | 2.56   | -     | 132.6    |
| AHQ-1-6, 3166               | R.ETADTDADQVM"ASFK.I                                                   | 1746.83148 | 2 | 4.23E-05 | 0.72  | 2.89   | -     | 709.7    |
| AHQ-1-1, 4592 - 4593        | R.ETADTDADQVM"ASFK.I                                                   | 1730.83208 | 2 | 2.35E-08 | 0.92  | 3.83   | -     | 1028.9   |
| AHQ-1-13, 4285              | R.ETADTDADQVM"ASFK.I                                                   | 1730.83208 | 2 | 1.59E-07 | 0.94  | 3.88   | -     | 1103.5   |
| AHQ-1-10, 4055              | R.ETADTDADQVM"ASFK.I                                                   | 1730.83208 | 2 | 3.14E-05 | 0.81  | 3.52   | -     | 596.3    |
| AHQ-1-7, 3230               | R.ETADTDADQVM"ASFK.I                                                   | 1746.83148 | 2 | 1.15E-04 | 0.88  | 4.16   | -     | 544.1    |
| AHQ-1-13- , 3281            | R.ETADTDADQVM"ASFK.I                                                   | 1746.83148 | 2 | 1.18E-05 | 0.89  | 3.81   | -     | 663.8    |
| AHQ-1-2, 4733               | R.ETADTDADQVM"ASFK.I                                                   | 1730.83208 | 2 | 1.29E-07 | 0.91  | 3.70   | -     | 1064.5   |
| AHQ-1-13- , 4484            | R.ETADTDADQVM"ASFK.I                                                   | 1730.83208 | 2 | 4.01E-09 | 0.95  | 4.20   | -     | 1415.9   |
| AHQ-1-5, 3205               | R.ETADTDADQVM"ASFK.I                                                   | 1746.83148 | 2 | 1.26E-07 | 0.94  | 4.22   | -     | 1053.8   |
| AHQ-1-3, 4575               | R.ETADTDADQVM"ASFK.I                                                   | 1730.83208 | 2 | 1.67E-05 | 0.93  | 4.12   | -     | 968.4    |
| AHQ-1-6, 4454               | R.ETADTDADQVM"ASFK.I                                                   | 1730.83208 | 2 | 6.25E-06 | 0.95  | 3.68   | -     | 1336.5   |
| AHQ-1-5, 4530 - 4607        | R.ETADTDADQVM"ASFK.I                                                   | 1730.83208 | 2 | 6.24E-05 | 0.97  | 5.52   | -     | 1330.7   |
| AHQ-1-4, 4639               | R.ETADTDADQVM"ASFK.I                                                   | 1730.83208 | 2 | 2.34E-07 | 0.93  | 4.18   | -     | 1007.9   |
| AHQ-1-5, 2149               | K.GISQEQM"NEFR.A                                                       | 1355.45931 | 2 | 4.92E-04 | 0.82  | 2.96   | -     | 831.0    |
| AHQ-1-4, 3024               | K.GISQEQM"NEFR.A                                                       | 1339.45991 | 2 | 4.77E-05 | 0.85  | 3.06   | -     | 889.3    |
| AHQ-1-3, 3026               | K.GISQEQM"NEFR.A                                                       | 1339.45991 | 2 | 1.26E-07 | 0.74  | 2.59   | -     | 773.7    |
| AHQ-1-6, 2894               | K.GISQEQM"NEFR.A                                                       | 1339.45991 | 2 | 3.40E-05 | 0.86  | 3.14   | -     | 879.9    |
| AHQ-1-5, 2851 - 2867        | K.GISQEQM"NEFR.A                                                       | 1339.45991 | 2 | 1.22E-05 | 0.89  | 3.46   | -     | 846.7    |
| AHQ-1-6, 2171               | K.GISQEQM"NEFR.A                                                       | 1355.45931 | 2 | 8.25E-06 | 0.83  | 3.10   | -     | 777.7    |
| AHQ-1-5, 3094               | K.GISQEQM"NEFR.A                                                       | 1339.45991 | 2 | 1.14E-06 | 0.81  | 2.83   | -     | 721.2    |

|                       |                                |            |   |          |      |      |   |        |
|-----------------------|--------------------------------|------------|---|----------|------|------|---|--------|
| AHQ-1-2, 3146         | K.GISQEQMNEFR.A                | 1339.45991 | 2 | 9.63E-05 | 0.70 | 2.65 | - | 687.1  |
| AHQ-1-4, 2280         | K.GISQEQMNEFR.A                | 1355.45931 | 2 | 7.19E-06 | 0.90 | 3.20 | - | 990.2  |
| AHQ-1-5, 1973         | R.HRPELIDYQK.L                 | 1228.38202 | 3 | 1.23E-04 | 0.91 | 3.84 | - | 937.0  |
| AHQ-1-6, 2027         | R.HRPELIDYQK.L                 | 1228.38202 | 3 | 2.16E-04 | 0.94 | 3.88 | - | 1369.4 |
| AHQ-1-7, 2012         | R.HRPELIDYQK.L                 | 1228.38202 | 2 | 3.77E-04 | 0.88 | 3.15 | - | 679.4  |
| AHQ-1-4, 2154         | R.HRPELIDYQK.L                 | 1228.38202 | 2 | 3.36E-04 | 0.92 | 3.75 | - | 609.7  |
| AHQ-1-9, 1975         | R.HRPELIDYQK.L                 | 1228.38202 | 2 | 6.89E-05 | 0.88 | 3.45 | - | 606.7  |
| AHQ-1-5, 1965 - 2029  | R.HRPELIDYQK.L                 | 1228.38202 | 2 | 4.43E-04 | 0.89 | 3.66 | - | 564.5  |
| AHQ-1-7, 5050 - 5082  | K.ICDQWDNLGALTQK.R             | 1663.83349 | 2 | 1.96E-05 | 0.92 | 3.78 | - | 1254.5 |
| AHQ-1-4, 5060 - 5132  | K.ICDQWDNLGALTQK.R             | 1663.83349 | 2 | 6.11E-08 | 0.97 | 4.35 | - | 2107.8 |
| AHQ-1-3, 5074         | K.ICDQWDNLGALTQK.R             | 1663.83349 | 2 | 2.64E-05 | 0.98 | 5.17 | - | 2418.7 |
| AHQ-1-5, 5439         | K.ICDQWDNLGALTQK.R             | 1663.83349 | 2 | 3.97E-07 | 0.94 | 3.78 | - | 1401.3 |
| AHQ-1-6, 4974         | K.ICDQWDNLGALTQK.R             | 1663.83349 | 2 | 8.77E-06 | 0.97 | 4.13 | - | 2150.6 |
| AHQ-1-5, 4655 - 4730  | K.ICDQWDNLGALTQK.R             | 1663.83349 | 2 | 5.39E-12 | 0.96 | 5.23 | - | 1284.3 |
| AHQ-1-5, 5058 - 5066  | K.ICDQWDNLGALTQK.R             | 1663.83349 | 2 | 1.58E-10 | 0.98 | 5.42 | - | 2732.9 |
| AHQ-1-10, 4464        | K.ICDQWDNLGALTQK.R             | 1663.83349 | 2 | 8.69E-05 | 0.88 | 3.54 | - | 1168.5 |
| AHQ-1-6, 5983 - 6000  | K.IDQLEGDHQLIQEALIFDNK.H       | 2340.57447 | 3 | 1.41E-07 | 0.93 | 4.90 | - | 1215.4 |
| AHQ-1-10, 5284 - 5345 | K.IDQLEGDHQLIQEALIFDNK.H       | 2340.57447 | 2 | 7.89E-04 | 0.92 | 4.04 | - | 1016.6 |
| AHQ-1-5, 6185         | K.IDQLEGDHQLIQEALIFDNK.H       | 2340.57447 | 3 | 8.38E-07 | 0.96 | 4.94 | - | 1828.8 |
| AHQ-1-5, 5950         | K.IDQLEGDHQLIQEALIFDNK.H       | 2340.57447 | 3 | 4.78E-08 | 0.97 | 5.37 | - | 2279.0 |
| AHQ-1-5, 3474         | K.ILAGDKNYITMDEL.R             | 1769.01293 | 2 | 4.14E-04 | 0.87 | 3.78 | - | 555.5  |
| AHQ-1-5, 4159 - 4195  | K.ILAGDKNYITMDEL.R             | 1753.01353 | 2 | 1.56E-05 | 0.96 | 4.80 | - | 1131.6 |
| AHQ-1-5, 4190         | K.ILAGDKNYITMDEL.R             | 1753.01353 | 3 | 5.91E-06 | 0.90 | 4.17 | - | 828.4  |
| AHQ-1-5, 5046 - 5118  | R.ISIEMHGTLLEDQLSHLR.Q         | 1980.23497 | 2 | 1.39E-04 | 0.92 | 4.08 | - | 956.7  |
| AHQ-1-5, 4411         | R.ISIEMHGTLLEDQLSHLR.Q         | 1996.23437 | 3 | 1.84E-07 | 0.95 | 4.44 | - | 1829.4 |
| AHQ-1-5, 4413         | R.ISIEMHGTLLEDQLSHLR.Q         | 1996.23437 | 2 | 1.16E-05 | 0.85 | 3.76 | - | 371.8  |
| AHQ-1-5, 5043         | R.ISIEMHGTLLEDQLSHLR.Q         | 1980.23497 | 3 | 2.89E-12 | 0.97 | 5.23 | - | 2006.4 |
| AHQ-1-5, 4370         | K.IVQTYHVNMMAGTNPYTTITPQINGK.W | 2908.23575 | 2 | 9.27E-07 | 0.91 | 3.97 | - | 910.9  |
| AHQ-1-5, 4739         | K.IVQTYHVNMMAGTNPYTTITPQINGK.W | 2892.23635 | 2 | 1.33E-05 | 0.66 | 2.89 | - | 423.2  |
| AHQ-1-5, 4867         | K.IVQTYHVNMMAGTNPYTTITPQINGK.W | 2892.23635 | 2 | 4.18E-13 | 0.93 | 4.63 | - | 940.2  |
| AHQ-1-5, 4222         | K.IVQTYHVNMMAGTNPYTTITPQINGK.W | 2908.23575 | 2 | 1.00E-04 | 0.78 | 3.03 | - | 596.2  |
| AHQ-1-5, 4869 - 4873  | R.KAGTQIENIEDFRDGLK.L          | 2064.24210 | 2 | 1.02E-04 | 0.88 | 4.50 | - | 959.2  |
| AHQ-1-5, 4485 - 4507  | R.KDDPLTNLNTAFDVAEK.Y          | 1892.05631 | 2 | 2.96E-09 | 0.95 | 4.70 | - | 1166.9 |
| AHQ-1-7, 4980         | R.KDDPLTNLNTAFDVAEK.Y          | 1892.05631 | 2 | 6.11E-04 | 0.97 | 4.90 | - | 1927.1 |
| AHQ-1-9, 4840         | R.KDDPLTNLNTAFDVAEK.Y          | 1892.05631 | 2 | 4.99E-07 | 0.96 | 5.29 | - | 1021.5 |
| AHQ-1-6, 4931         | R.KDDPLTNLNTAFDVAEK.Y          | 1892.05631 | 2 | 1.15E-05 | 0.95 | 4.64 | - | 1014.4 |
| AHQ-1-5, 4975 - 5045  | R.KDDPLTNLNTAFDVAEK.Y          | 1892.05631 | 2 | 1.54E-07 | 0.97 | 5.11 | - | 1333.8 |
| AHQ-1-5, 5134         | R.KDDPLTNLNTAFDVAEK.Y          | 1892.05631 | 2 | 3.57E-05 | 0.94 | 4.39 | - | 920.6  |
| AHQ-1-4, 5100         | R.KDDPLTNLNTAFDVAEK.Y          | 1892.05631 | 2 | 3.18E-07 | 0.97 | 5.44 | - | 1280.1 |
| AHQ-1-6, 4315         | R.KQFGAQAANVIGPWQTK.M          | 1887.17410 | 2 | 9.02E-04 | 0.93 | 4.59 | - | 912.1  |
| AHQ-1-7, 3301 - 3305  | R.LAILGIHNEVSK.I               | 1294.52505 | 2 | 1.22E-06 | 0.92 | 3.61 | - | 979.8  |
| AHQ-1-5, 3249         | R.LAILGIHNEVSK.I               | 1294.52505 | 2 | 7.40E-09 | 0.95 | 4.17 | - | 1034.9 |
| AHQ-1-4, 6307         | K.LASDLEWLR.R                  | 1216.41115 | 2 | 1.16E-07 | 0.97 | 4.40 | - | 2345.4 |
| AHQ-1-7, 6236         | K.LASDLEWLR.R                  | 1216.41115 | 2 | 9.05E-07 | 0.97 | 4.59 | - | 2086.7 |
| AHQ-1-4, 6314         | K.LASDLEWLR.R                  | 1216.41115 | 1 | 3.97E-04 | 0.22 | 2.21 | - | 397.6  |
| AHQ-1-1, 6203 - 6204  | K.LASDLEWLR.R                  | 1216.41115 | 2 | 3.93E-08 | 0.98 | 4.99 | - | 2537.2 |
| AHQ-1-5, 6211 - 6278  | K.LASDLEWLR.R                  | 1216.41115 | 2 | 4.55E-07 | 0.97 | 4.17 | - | 1954.2 |
| AHQ-1-3, 6191         | K.LASDLEWLR.R                  | 1216.41115 | 2 | 6.28E-08 | 0.97 | 4.20 | - | 1782.3 |
| AHQ-1-6, 6119         | K.LASDLEWLR.R                  | 1216.41115 | 2 | 9.41E-08 | 0.96 | 3.40 | - | 1984.6 |
| AHQ-1-14 - 6291       | K.LLETIDQLYLEYAK.R             | 1712.96427 | 2 | 1.48E-08 | 0.94 | 4.07 | - | 1159.3 |
| AHQ-1-5, 6742 - 6805  | K.LLETIDQLYLEYAK.R             | 1712.96427 | 2 | 2.30E-10 | 0.98 | 5.52 | - | 1480.3 |
| AHQ-1-3, 6675         | K.LLETIDQLYLEYAK.R             | 1712.96427 | 2 | 2.31E-09 | 0.97 | 5.18 | - | 1152.2 |
| AHQ-1-10, 5889 - 5897 | K.LLETIDQLYLEYAK.R             | 1712.96427 | 2 | 5.78E-05 | 0.82 | 3.38 | - | 601.6  |
| AHQ-1-2, 6853 - 6865  | K.LLETIDQLYLEYAK.R             | 1712.96427 | 2 | 2.60E-04 | 0.92 | 3.71 | - | 1053.2 |
| AHQ-1-6, 6630         | K.LLETIDQLYLEYAK.R             | 1712.96427 | 2 | 5.79E-08 | 0.96 | 4.87 | - | 1207.5 |
| AHQ-1-7, 6824         | K.LLETIDQLYLEYAK.R             | 1712.96427 | 2 | 1.71E-07 | 0.96 | 4.79 | - | 1147.8 |
| AHQ-1-1, 6572         | K.LLETIDQLYLEYAK.R             | 1712.96427 | 2 | 1.32E-07 | 0.95 | 4.16 | - | 1329.1 |
| AHQ-1-5, 6874 - 6942  | K.LLETIDQLYLEYAK.R             | 1712.96427 | 2 | 1.29E-08 | 0.98 | 5.27 | - | 1439.4 |
| AHQ-1-5, 4678         | K.LRKDDPLTNLNTAFDVAEK.Y        | 2161.40091 | 3 | 3.23E-04 | 0.86 | 3.81 | - | 831.3  |
| AHQ-1-6, 2535 - 2551  | R.LSNRPAFMPSEGR.M              | 1462.65941 | 2 | 8.33E-05 | 0.87 | 3.94 | - | 694.1  |
| AHQ-1-5, 3427 - 3430  | K.M*LD AEDIVGTARPDEK.A         | 1776.94709 | 2 | 5.97E-04 | 0.63 | 3.09 | - | 484.7  |
| AHQ-1-5, 3674         | K.M*LD AEDIVGTARPDEK.A         | 1760.94769 | 2 | 8.45E-06 | 0.86 | 3.63 | - | 1008.3 |
| AHQ-1-8, 3989         | K.M*LD AEDIVGTARPDEK.A         | 1760.94769 | 2 | 7.27E-06 | 0.62 | 3.20 | - | 485.4  |
| AHQ-1-6, 3951         | K.M*LD AEDIVGTARPDEK.A         | 1760.94769 | 3 | 5.28E-07 | 0.86 | 4.02 | - | 596.3  |
| AHQ-1-6, 3946         | K.M*LD AEDIVGTARPDEK.A         | 1760.94769 | 2 | 3.64E-06 | 0.89 | 4.27 | - | 874.0  |
| AHQ-1-4, 3712         | K.M*LD AEDIVGTARPDEK.A         | 1776.94709 | 2 | 5.02E-05 | 0.83 | 3.47 | - | 470.2  |
| AHQ-1-5, 3981         | K.M*LD AEDIVGTARPDEK.A         | 1760.94769 | 2 | 8.40E-09 | 0.93 | 4.34 | - | 1091.9 |
| AHQ-1-4, 4130 - 4139  | K.M*LD AEDIVGTARPDEK.A         | 1760.94769 | 2 | 1.74E-06 | 0.92 | 3.98 | - | 1079.6 |
| AHQ-1-5, 3989 - 3990  | K.M*LD AEDIVGTARPDEK.A         | 1760.94769 | 3 | 1.39E-08 | 0.80 | 3.56 | - | 691.1  |
| AHQ-1-9, 3887         | K.M*LD AEDIVGTARPDEK.A         | 1760.94769 | 2 | 7.25E-07 | 0.84 | 3.79 | - | 798.9  |
| AHQ-1-9, 3888         | K.M*LD AEDIVGTARPDEK.A         | 1760.94769 | 3 | 7.48E-08 | 0.61 | 3.11 | - | 416.4  |
| AHQ-1-5, 3547         | K.M*LD AEDIVGTARPDEK.A         | 1776.94709 | 3 | 4.18E-04 | 0.87 | 3.51 | - | 955.7  |
| AHQ-1-5, 3545         | K.M*LD AEDIVGTARPDEK.A         | 1776.94709 | 2 | 6.20E-05 | 0.92 | 3.71 | - | 1084.0 |
| AHQ-1-7, 5780         | R.MVSDINNAWGCLEQVEK.G          | 1995.22333 | 2 | 4.37E-05 | 0.90 | 4.11 | - | 733.0  |
| AHQ-1-5, 5411 - 5485  | R.MVSDINNAWGCLEQVEK.G          | 2011.22273 | 2 | 3.69E-10 | 0.98 | 5.33 | - | 1508.3 |
| AHQ-1-4, 5922         | R.MVSDINNAWGCLEQVEK.G          | 1995.22333 | 2 | 3.34E-06 | 0.64 | 3.02 | - | 373.6  |
| AHQ-1-4, 5835         | R.MVSDINNAWGCLEQVEK.G          | 2011.22273 | 2 | 1.70E-07 | 0.92 | 4.17 | - | 668.3  |
| AHQ-1-4, 5623         | R.MVSDINNAWGCLEQVEK.G          | 1995.22333 | 2 | 5.28E-04 | 0.88 | 3.81 | - | 657.6  |
| AHQ-1-5, 5281 - 5287  | R.MVSDINNAWGCLEQVEK.G          | 2011.22273 | 2 | 8.46E-09 | 0.95 | 4.47 | - | 1037.0 |
| AHQ-1-6, 5442         | R.MVSDINNAWGCLEQVEK.G          | 1995.22333 | 2 | 2.33E-07 | 0.95 | 4.55 | - | 1292.3 |
| AHQ-1-3, 5798         | R.MVSDINNAWGCLEQVEK.G          | 1995.22333 | 2 | 1.63E-06 | 0.73 | 2.90 | - | 635.3  |
| AHQ-1-5, 6226         | R.MVSDINNAWGCLEQVEK.G          | 1995.22333 | 2 | 1.03E-11 | 0.95 | 4.31 | - | 1167.0 |
| AHQ-1-5, 5478         | R.MVSDINNAWGCLEQVEK.G          | 2011.22273 | 2 | 4.93E-08 | 0.85 | 4.03 | - | 479.8  |
| AHQ-1-9, 5632         | R.MVSDINNAWGCLEQVEK.G          | 1995.22333 | 2 | 2.33E-04 | 0.45 | 2.72 | - | 428.7  |
| AHQ-1-5, 5530 - 5531  | R.MVSDINNAWGCLEQVEK.G          | 1995.22333 | 2 | 2.05E-08 | 0.97 | 5.50 | - | 1167.7 |
| AHQ-1-5, 6045 - 6115  | R.MVSDINNAWGCLEQVEK.G          | 1995.22333 | 2 | 1.35E-07 | 0.96 | 4.88 | - | 1292.0 |
| AHQ-1-5, 5654 - 5699  | R.MVSDINNAWGCLEQVEK.G          | 1995.22333 | 2 | 1.57E-06 | 0.95 | 4.80 | - | 1227.8 |
| AHQ-1-5, 5695 - 5703  | R.MVSDINNAWGCLEQVEK.G          | 2011.22273 | 2 | 1.01E-07 | 0.95 | 4.81 | - | 902.0  |
| AHQ-1-5, 5891         | R.MVSDINNAWGCLEQVEK.G          | 2011.22273 | 2 | 3.51E-10 | 0.94 | 4.67 | - | 847.8  |
| AHQ-1-6, 5911         | R.MVSDINNAWGCLEQVEK.G          | 1995.22333 | 2 | 1.26E-07 | 0.93 | 4.43 | - | 940.6  |
| AHQ-1-6, 5188         | R.MVSDINNAWGCLEQVEK.G          | 2011.22273 | 2 | 1.83E-10 | 0.96 | 4.66 | - | 1128.6 |
| AHQ-1-6, 5728         | R.MVSDINNAWGCLEQVEK.G          | 1995.22333 | 2 | 3.14E-05 | 0.95 | 4.74 | - | 1138.2 |
| AHQ-1-5, 5785         | R.MVSDINNAWGCLEQVEK.G          | 1995.22333 | 2 | 1.36E-07 | 0.97 | 5.31 | - | 1269.2 |
| AHQ-1-6, 5630         | R.MVSDINNAWGCLEQVEK.G          | 2011.22273 | 2 | 8.86E-06 | 0.92 | 4.37 | - | 666.2  |
| AHQ-1-6, 5594         | R.MVSDINNAWGCLEQVEK.G          | 1995.22333 | 2 | 2.49E-09 | 0.95 | 4.45 | - | 1157.6 |
| AHQ-1-9, 4642 - 4710  | K.NVNIQNFHISWK.D               | 1500.68583 | 2 | 4.17E-09 | 0.96 | 4.63 | - | 1320.4 |
| AHQ-1-4, 4946         | K.NVNIQNFHISWK.D               | 1500.68583 | 2 | 1.86E-07 | 0.95 | 4.32 | - | 1127.6 |
| AHQ-1-5, 4717 - 4734  | K.NVNIQNFHISWK.D               | 1500.68583 | 2 | 3.02E-06 | 0.94 | 4.04 | - | 1182.0 |
| AHQ-1-6, 4712         | K.NVNIQNFHISWK.D               | 1500.68583 | 2 | 2.08E-05 | 0.93 | 3.33 | - | 1191.3 |
| AHQ-1-4, 5287         | K.QFGAQAANVIGPWQTK.M           | 1759.00118 | 2 | 1.34E-05 | 0.76 | 3.14 | - | 635.2  |
| AHQ-1-6, 5130         | K.QFGAQAANVIGPWQTK.M           | 1759.00118 | 2 | 5.07E-04 | 0.82 | 3.97 | - | 459.9  |
| AHQ-1-5, 4145         | R.TINEVENQILTR.D               | 1430.58898 | 1 | 1.15E-05 | 0.44 | 2.38 | - | 405.6  |
| AHQ-1-3, 4061         | R.TINEVENQILTR.D               | 1430.58898 | 2 | 2.40E-05 | 0.91 | 3.85 | - | 997.7  |
| AHQ-1-7, 3992         | R.TINEVENQILTR.D               | 1430.58898 | 2 | 7.71E-04 | 0.78 | 3.53 | - | 784.3  |
| AHQ-1-5, 4078 - 4149  | R.TINEVENQILTR.D               | 1430.58898 | 2 | 4.81E-08 | 0.86 | 3.64 | - | 670.5  |
| AHQ-1-4, 3658         | R.TINEVENQILTR.D               | 1430.58898 | 2 | 6.21E-07 | 0.77 | 2.90 | - | 554.9  |
| AHQ-1-5, 3014 - 3085  | R.TINEVENQILTR.D               | 1430.58898 | 2 | 3.04E-07 | 0.85 | 3.18 | - | 886.4  |

|                           |                                                                         |            |   |          |       |        |       |          |
|---------------------------|-------------------------------------------------------------------------|------------|---|----------|-------|--------|-------|----------|
| AHQ-1-5, 3954             | R.TINEVENQILTR.D                                                        | 1430.58898 | 1 | 7.96E-04 | 0.14  | 2.50   | -     | 152.0    |
| AHQ-1-6, 3914             | R.TINEVENQILTR.D                                                        | 1430.58898 | 2 | 5.10E-06 | 0.87  | 3.49   | -     | 807.1    |
| AHQ-1-8, 3945             | R.TINEVENQILTR.D                                                        | 1430.58898 | 2 | 2.78E-05 | 0.82  | 3.17   | -     | 869.3    |
| AHQ-1-4, 4082             | R.TINEVENQILTR.D                                                        | 1430.58898 | 2 | 7.32E-08 | 0.91  | 3.83   | -     | 1125.3   |
| AHQ-1-9, 3863 - 3867      | R.TINEVENQILTR.D                                                        | 1430.58898 | 2 | 1.91E-04 | 0.78  | 3.09   | -     | 665.8    |
| AHQ-1-2, 7215             | R.VEQIAAIAQELNELDYDPSVSNAR.C                                            | 2810.02233 | 3 | 1.86E-07 | 0.95  | 5.38   | -     | 1190.4   |
| AHQ-1-1, 6855             | R.VEQIAAIAQELNELDYDPSVSNAR.C                                            | 2810.02233 | 3 | 1.64E-06 | 0.98  | 6.46   | -     | 1782.0   |
| AHQ-1-5, 7269 - 7299      | R.VEQIAAIAQELNELDYDPSVSNAR.C                                            | 2810.02233 | 2 | 7.34E-05 | 0.91  | 4.04   | -     | 799.2    |
| AHQ-1-3, 7042             | R.VEQIAAIAQELNELDYDPSVSNAR.C                                            | 2810.02233 | 3 | 4.98E-05 | 0.94  | 5.04   | -     | 945.8    |
| AHQ-1-1, 6856 - 6860      | R.VEQIAAIAQELNELDYDPSVSNAR.C                                            | 2810.02233 | 2 | 7.28E-08 | 0.93  | 4.85   | -     | 887.6    |
| AHQ-1-5, 7137 - 7214      | R.VEQIAAIAQELNELDYDPSVSNAR.C                                            | 2810.02233 | 3 | 1.58E-05 | 0.89  | 4.16   | -     | 1147.3   |
| AHQ-1-11, 6078            | R.VGWQLLTTIAR.T                                                         | 1387.60894 | 2 | 9.82E-08 | 0.94  | 3.66   | -     | 1354.6   |
| AHQ-1-9, 6683 - 6703      | R.VGWQLLTTIAR.T                                                         | 1387.60894 | 2 | 2.18E-06 | 0.95  | 4.46   | -     | 1173.2   |
| AHQ-1-7, 6889             | R.VGWQLLTTIAR.T                                                         | 1387.60894 | 2 | 1.84E-06 | 0.93  | 4.13   | -     | 1234.1   |
| AHQ-1-13- , 6671          | R.VGWQLLTTIAR.T                                                         | 1387.60894 | 2 | 3.01E-07 | 0.95  | 3.61   | -     | 1757.2   |
| AHQ-1-6, 6722             | R.VGWQLLTTIAR.T                                                         | 1387.60894 | 2 | 9.49E-06 | 0.96  | 4.28   | -     | 1499.4   |
| AHQ-1-14- , 6410          | R.VGWQLLTTIAR.T                                                         | 1387.60894 | 2 | 1.49E-04 | 0.86  | 3.30   | -     | 823.7    |
| AHQ-1-8, 6791             | R.VGWQLLTTIAR.T                                                         | 1387.60894 | 2 | 4.40E-07 | 0.94  | 3.83   | -     | 1360.7   |
| AHQ-1-2, 6986             | R.VGWQLLTTIAR.T                                                         | 1387.60894 | 2 | 1.28E-06 | 0.95  | 3.90   | -     | 1506.7   |
| AHQ-1-13, 6207            | R.VGWQLLTTIAR.T                                                         | 1387.60894 | 2 | 5.87E-06 | 0.89  | 3.60   | -     | 1291.0   |
| AHQ-1-3, 6782             | R.VGWQLLTTIAR.T                                                         | 1387.60894 | 2 | 7.76E-08 | 0.97  | 4.33   | -     | 1825.9   |
| AHQ-1-10, 5955            | R.VGWQLLTTIAR.T                                                         | 1387.60894 | 2 | 7.26E-07 | 0.95  | 3.95   | -     | 1414.4   |
| AHQ-1-4, 6922 - 6926      | R.VGWQLLTTIAR.T                                                         | 1387.60894 | 2 | 2.70E-09 | 0.96  | 4.35   | -     | 1436.8   |
| AHQ-1-5, 6801 - 6879      | R.VGWQLLTTIAR.T                                                         | 1387.60894 | 2 | 1.57E-05 | 0.96  | 4.19   | -     | 1700.5   |
| AHQ-1-1, 6645 - 6703      | R.VGWQLLTTIAR.T                                                         | 1387.60894 | 2 | 5.50E-07 | 0.94  | 3.82   | -     | 1233.5   |
| AHQ-1-9, 4232             | K.VLAVNGENEQLMEDYEK.L                                                   | 2053.23635 | 2 | 1.11E-04 | 0.92  | 4.07   | -     | 942.6    |
| AHQ-1-8, 4207             | K.VLAVNGENEQLMEDYEK.L                                                   | 2053.23635 | 2 | 4.09E-06 | 0.89  | 4.39   | -     | 605.2    |
| AHQ-1-7, 4346             | K.VLAVNGENEQLMEDYEK.L                                                   | 2053.23635 | 2 | 7.40E-08 | 0.96  | 5.31   | -     | 1131.6   |
| AHQ-1-6, 4248             | K.VLAVNGENEQLMEDYEK.L                                                   | 2053.23635 | 2 | 6.74E-06 | 0.94  | 4.79   | -     | 912.5    |
| AHQ-1-5, 4786 - 4791      | K.VLAVNGENEQLMEDYEK.L                                                   | 2053.23635 | 2 | 4.22E-14 | 0.97  | 5.29   | -     | 1605.9   |
| AHQ-1-5, 4642             | K.VLAVNGENEQLMEDYEK.L                                                   | 2053.23635 | 2 | 2.71E-09 | 0.93  | 4.46   | -     | 857.8    |
| AHQ-1-5, 4527             | K.VLAVNGENEQLMEDYEK.L                                                   | 2053.23635 | 2 | 5.55E-12 | 0.98  | 5.99   | -     | 1707.8   |
| AHQ-1-5, 4438             | K.VLAVNGENEQLMEDYEK.L                                                   | 2053.23635 | 2 | 3.50E-10 | 0.96  | 5.03   | -     | 1056.1   |
| AHQ-1-5, 4350             | K.VLAVNGENEQLMEDYEK.L                                                   | 2053.23635 | 3 | 5.00E-10 | 0.91  | 4.39   | -     | 1130.0   |
| AHQ-1-5, 4327             | K.VLAVNGENEQLMEDYEK.L                                                   | 2053.23635 | 2 | 2.53E-07 | 0.96  | 5.00   | -     | 1209.8   |
| AHQ-1-5, 3859             | K.VLAVNGENEQLMEDYEK.L                                                   | 2069.23575 | 2 | 2.15E-05 | 0.93  | 4.00   | -     | 1093.1   |
| AHQ-1-5, 3775 - 3783      | K.VLAVNGENEQLMEDYEK.L                                                   | 2069.23575 | 2 | 1.20E-08 | 0.95  | 4.99   | -     | 887.6    |
| AHQ-1-5, 3591 - 3661      | K.VLAVNGENEQLMEDYEK.L                                                   | 2069.23575 | 2 | 2.27E-07 | 0.96  | 4.68   | -     | 1637.1   |
| AHQ-1-5, 3502             | K.VLAVNGENEQLMEDYEK.L                                                   | 2069.23575 | 2 | 3.12E-09 | 0.93  | 4.36   | -     | 689.1    |
| AHQ-1-4, 3730 - 3734      | K.VLAVNGENEQLMEDYEK.L                                                   | 2069.23575 | 2 | 4.11E-06 | 0.96  | 5.07   | -     | 1070.0   |
| AHQ-1-3, 4406             | K.VLAVNGENEQLMEDYEK.L                                                   | 2053.23635 | 2 | 3.16E-06 | 0.96  | 5.12   | -     | 1364.6   |
| AHQ-1-2, 4575 - 4577      | K.VLAVNGENEQLMEDYEK.L                                                   | 2053.23635 | 2 | 6.79E-05 | 0.95  | 4.64   | -     | 1273.6   |
| AHQ-1-1, 4451             | K.VLAVNGENEQLMEDYEK.L                                                   | 2053.23635 | 2 | 4.10E-05 | 0.92  | 4.24   | -     | 1007.7   |
| AHQ-1-1, 3757             | K.VLAVNGENEQLMEDYEK.L                                                   | 2069.23575 | 2 | 3.90E-07 | 0.82  | 4.14   | -     | 528.5    |
| gj4557305[ref]NP_000025.1 | aldolase A; fructose-bisphosphate aldolase; Aldolase A, fructose-bispho |            |   | 6.05E-14 | 14.05 | 160.29 | 62.40 | 39419.7  |
| AHQ-1-8, 2111 - 2115      | R.ALANSLACQGGK.Y                                                        | 1134.28859 | 2 | 1.07E-04 | 0.80  | 3.31   | -     | 629.2    |
| AHQ-1-14- , 2308          | R.ALANSLACQGGK.Y                                                        | 1134.28859 | 2 | 5.80E-05 | 0.71  | 2.53   | -     | 805.5    |
| AHQ-1-8, 4475             | R.ALANSLACQGGKYTPSGQAGAAASESLFVSNHAY                                    | 3344.61352 | 3 | 7.69E-04 | 0.60  | 3.16   | -     | 311.1    |
| AHQ-1-8, 4582 - 4651      | R.ALANSLACQGGKYTPSGQAGAAASESLFVSNHAY                                    | 3344.61352 | 3 | 2.32E-06 | 0.70  | 3.42   | -     | 342.1    |
| AHQ-1-8, 4156             | K.ALSDHHIYLEGTLTKPNMVTGPHACTQK.F                                        | 3134.57879 | 3 | 7.07E-09 | 0.96  | 5.82   | -     | 1061.4   |
| AHQ-1-9, 4334             | K.ALSDHHIYLEGTLTKPNMVTGPHACTQK.F                                        | 3134.57879 | 3 | 6.19E-05 | 0.86  | 3.54   | -     | 954.1    |
| AHQ-1-8, 6246 - 6259      | K.CPLLKPWALTFYSYGR.A                                                    | 1811.13929 | 2 | 5.21E-09 | 0.94  | 4.58   | -     | 659.3    |
| AHQ-1-9, 6126 - 6190      | K.CPLLKPWALTFYSYGR.A                                                    | 1811.13929 | 2 | 1.21E-05 | 0.74  | 3.36   | -     | 452.4    |
| AHQ-1-9, 4298 - 4310      | K.FSHEEIAMATVTLR.R                                                      | 1676.91875 | 2 | 1.50E-09 | 0.96  | 4.65   | -     | 1323.8   |
| AHQ-1-9, 3631             | K.FSHEEIAMATVTLR.R                                                      | 1692.91815 | 2 | 8.87E-04 | 0.90  | 4.11   | -     | 830.9    |
| AHQ-1-8, 4233             | K.FSHEEIAMATVTLR.R                                                      | 1676.91875 | 2 | 8.87E-09 | 0.95  | 4.16   | -     | 1590.7   |
| AHQ-1-11, 2848            | K.GILADESTGSIAR.R                                                       | 1333.47008 | 2 | 1.06E-08 | 0.96  | 4.43   | -     | 1266.2   |
| AHQ-1-9, 2815 - 2826      | K.GILADESTGSIAR.R                                                       | 1333.47008 | 2 | 2.39E-09 | 0.97  | 5.03   | -     | 1613.9   |
| AHQ-1-12, 2909            | K.GILADESTGSIAR.R                                                       | 1333.47008 | 2 | 1.41E-05 | 0.94  | 3.90   | -     | 1164.7   |
| AHQ-1-8, 2770 - 2790      | K.GILADESTGSIAR.R                                                       | 1333.47008 | 2 | 5.74E-08 | 0.97  | 4.90   | -     | 1540.7   |
| AHQ-1-8, 2772             | K.GILADESTGSIAR.R                                                       | 1333.47008 | 1 | 6.63E-05 | 0.75  | 2.78   | -     | 603.1    |
| AHQ-1-9, 4614 - 4683      | K.GVVPFLAGTNGETTTQGLDGLSER.C                                            | 2273.44329 | 2 | 6.05E-14 | 0.91  | 5.64   | -     | 764.3    |
| AHQ-1-8, 4435             | K.GVVPFLAGTNGETTTQGLDGLSER.C                                            | 2273.44329 | 2 | 2.89E-07 | 0.76  | 4.62   | -     | 519.5    |
| AHQ-1-9, 4274 - 4302      | K.GVVPFLAGTNGETTTQGLDGLSER.C                                            | 2273.44329 | 2 | 1.45E-08 | 0.90  | 4.97   | -     | 1123.7   |
| AHQ-1-1, 4777             | K.GVVPFLAGTNGETTTQGLDGLSER.C                                            | 2273.44329 | 2 | 4.96E-08 | 0.47  | 3.41   | -     | 355.9    |
| AHQ-1-9, 4095             | K.IGEHTPSALAIM*ENANVLAR.Y                                               | 2104.40788 | 2 | 5.03E-05 | 0.96  | 4.30   | -     | 1206.7   |
| AHQ-1-9, 5039             | K.IGEHTPSALAIMENANVLAR.Y                                                | 2108.40788 | 2 | 2.99E-11 | 0.96  | 5.09   | -     | 1024.4   |
| AHQ-1-9, 5398 - 5467      | K.IGEHTPSALAIMENANVLAR.Y                                                | 2108.40788 | 2 | 3.08E-06 | 0.89  | 3.81   | -     | 736.9    |
| AHQ-1-8, 5364 - 5367      | K.IGEHTPSALAIMENANVLAR.Y                                                | 2108.40788 | 2 | 1.24E-04 | 0.96  | 5.42   | -     | 838.3    |
| AHQ-1-9, 7467             | R.TVPPAVTGITFLSGGQSEEEASINLNAIK.C                                       | 3059.37393 | 3 | 6.95E-05 | 0.79  | 3.58   | -     | 701.3    |
| AHQ-1-9, 4316             | K.VDKGVVPLAGTNGETTTQGLDGLSER.C                                          | 2615.83564 | 3 | 1.31E-07 | 0.77  | 3.92   | -     | 1063.7   |
| AHQ-1-9, 6040 - 6084      | R.VNPGIGVILFHETLYQK.A                                                   | 2090.43072 | 2 | 5.08E-07 | 0.93  | 5.01   | -     | 675.3    |
| AHQ-1-9, 5888 - 5964      | R.VNPGIGVILFHETLYQK.A                                                   | 2090.43072 | 2 | 3.13E-06 | 0.97  | 5.09   | -     | 1602.5   |
| AHQ-1-9, 6054 - 6124      | R.YASICQNGIVPIVEPEILPDGDHDLK.R                                          | 3023.36334 | 3 | 4.16E-04 | 0.83  | 4.42   | -     | 514.9    |
| AHQ-1-9, 5582 - 5652      | R.YASICQNGIVPIVEPEILPDGDHDLK.R                                          | 3179.54969 | 3 | 6.91E-08 | 0.92  | 5.16   | -     | 651.6    |
| AHQ-1-8, 4475             | K.YTPSGGAGAAASESLFVSNHAY                                                | 2229.34753 | 2 | 7.01E-05 | 0.89  | 3.98   | -     | 534.9    |
| AHQ-1-8, 4582 - 4651      | K.YTPSGGAGAAASESLFVSNHAY                                                | 2229.34753 | 2 | 1.99E-07 | 0.84  | 3.92   | -     | 411.7    |
| AHQ-1-9, 4487 - 4554      | K.YTPSGGAGAAASESLFVSNHAY                                                | 2229.34753 | 2 | 4.91E-04 | 0.82  | 3.24   | -     | 652.0    |
| gj4504745[ref]NP_000410.1 | integrin alpha 2b precursor [Homo sapiens]                              |            |   | 1.12E-13 | 32.78 | 370.32 | 43.40 | 113374.2 |
| AHQ-1-4, 2030             | R.AEAQVELR.G                                                            | 916.01408  | 2 | 6.80E-05 | 0.91  | 3.22   | -     | 1289.2   |
| AHQ-1-4, 1774 - 1838      | R.AEAQVELR.G                                                            | 916.01408  | 2 | 6.57E-04 | 0.84  | 2.86   | -     | 1006.9   |
| AHQ-1-4, 1764 - 2050      | R.AEAQVELR.G                                                            | 916.01408  | 1 | 7.87E-04 | 0.04  | 1.81   | -     | 174.0    |
| AHQ-1-11, 4892            | R.AEGGQCPSSLFDLR.D                                                      | 1564.74505 | 2 | 1.10E-05 | 0.93  | 4.33   | -     | 858.6    |
| AHQ-1-1, 5473 - 5480      | R.AEGGQCPSSLFDLR.D                                                      | 1564.74505 | 2 | 2.93E-09 | 0.95  | 4.39   | -     | 949.3    |
| AHQ-1-10, 4743            | R.AEGGQCPSSLFDLR.D                                                      | 1564.74505 | 2 | 5.85E-07 | 0.83  | 2.94   | -     | 731.4    |
| AHQ-1-13, 5071 - 5072     | R.AEGGQCPSSLFDLR.D                                                      | 1564.74505 | 2 | 5.36E-07 | 0.96  | 4.58   | -     | 1073.2   |
| AHQ-1-9, 5231             | R.AEGGQCPSSLFDLR.D                                                      | 1564.74505 | 2 | 3.65E-05 | 0.94  | 4.42   | -     | 906.7    |
| AHQ-1-4, 5136 - 5215      | R.AEGGQCPSSLFDLR.D                                                      | 1564.74505 | 2 | 1.62E-05 | 0.81  | 2.92   | -     | 765.8    |
| AHQ-1-7, 5357 - 5376      | R.AEGGQCPSSLFDLR.D                                                      | 1564.74505 | 2 | 7.34E-04 | 0.94  | 4.17   | -     | 870.2    |
| AHQ-1-13- , 5372          | R.AEGGQCPSSLFDLR.D                                                      | 1564.74505 | 2 | 3.20E-05 | 0.90  | 3.33   | -     | 1000.8   |
| AHQ-1-4, 5456 - 5522      | R.AEGGQCPSSLFDLR.D                                                      | 1564.74505 | 2 | 1.25E-06 | 0.93  | 4.15   | -     | 1010.9   |
| AHQ-1-4, 5655             | R.AEGGQCPSSLFDLR.D                                                      | 1564.74505 | 2 | 8.37E-10 | 0.95  | 4.39   | -     | 1029.6   |
| AHQ-1-5, 5354 - 5389      | R.AEGGQCPSSLFDLR.D                                                      | 1564.74505 | 2 | 1.88E-08 | 0.94  | 3.36   | -     | 1250.8   |
| AHQ-1-6, 5294 - 5314      | R.AEGGQCPSSLFDLR.D                                                      | 1564.74505 | 2 | 8.73E-09 | 0.93  | 3.56   | -     | 1151.8   |
| AHQ-1-3, 5313 - 5389      | R.AEGGQCPSSLFDLR.D                                                      | 1564.74505 | 2 | 7.22E-07 | 0.92  | 3.68   | -     | 986.1    |
| AHQ-1-1, 3008 - 3011      | R.ALNSNVEGFER.L                                                         | 1122.21308 | 2 | 6.15E-06 | 0.91  | 3.58   | -     | 811.9    |
| AHQ-1-4, 2835 - 2884      | R.ALNSNVEGFER.L                                                         | 1122.21308 | 2 | 4.94E-06 | 0.88  | 3.37   | -     | 790.1    |
| AHQ-1-6, 2754             | R.ALNSNVEGFER.L                                                         | 1122.21308 | 2 | 2.84E-07 | 0.82  | 2.69   | -     | 746.1    |
| AHQ-1-5, 2722             | R.ALNSNVEGFER.L                                                         | 1122.21308 | 2 | 5.94E-05 | 0.90  | 3.01   | -     | 1199.6   |
| AHQ-1-3, 2857 - 2859      | R.ALNSNVEGFER.L                                                         | 1122.21308 | 2 | 4.49E-07 | 0.90  | 3.22   | -     | 952.4    |
| AHQ-1-7, 2781             | R.ALNSNVEGFER.L                                                         | 1122.21308 | 2 | 1.12E-05 | 0.90  | 3.10   | -     | 986.3    |
| AHQ-1-6, 2752             | R.ALNSNVEGFER.L                                                         | 1122.21308 | 1 | 8.74E-04 | 0.14  | 2.05   | -     | 68.1     |
| AHQ-1-4, 5210 - 5282      | K.ASVQLLVQDSLNPVAK.S                                                    | 1682.94293 | 2 | 3.67E-07 | 0.88  | 4.32   | -     | 640.7    |
| AHQ-1-3, 5165 - 5199      | K.ASVQLLVQDSLNPVAK.S                                                    | 1682.94293 | 2 | 8.10E-04 | 0.54  | 2.69   | -     | 590.6    |
| AHQ-1-5, 5129 - 5133      | K.ASVQLLVQDSLNPVAK.S                                                    | 1682.94293 | 2 | 1.28E-05 | 0.94  | 4.80   | -     | 926.5    |
| AHQ-1-4, 3108             | R.DETRNVGSTLQTFK.A                                                      | 1724.85363 | 2 | 4.44E-06 | 0.90  | 3.84   | -     | 1001.3   |
| AHQ-1-3, 3987             | R.DGYNDIAVAAPYGGPSGR.G                                                  | 1780.87574 | 2 | 1.03E-04 | 0.65  | 3.14   | -     | 408.4    |

|                          |                                      |            |   |          |      |      |   |        |
|--------------------------|--------------------------------------|------------|---|----------|------|------|---|--------|
| AHQ-1-4, 4180 - 4258     | R.DGYNIDIAVAAPYGGPSGR.G              | 1780.87574 | 2 | 3.72E-08 | 0.94 | 4.73 | - | 887.3  |
| AHQ-1-6, 3902            | R.DGYNIDIAVAAPYGGPSGR.G              | 1780.87574 | 2 | 7.85E-08 | 0.90 | 3.92 | - | 831.6  |
| AHQ-1-5, 4203            | R.DGYNIDIAVAAPYGGPSGR.G              | 1780.87574 | 2 | 4.70E-10 | 0.89 | 4.16 | - | 812.7  |
| AHQ-1-5, 3971            | R.DGYNIDIAVAAPYGGPSGR.G              | 1780.87574 | 2 | 8.36E-10 | 0.91 | 4.25 | - | 664.0  |
| AHQ-1-4, 4642 - 4643     | R.FGSAIAPLGLDRD                      | 1332.48700 | 1 | 1.98E-04 | 0.60 | 2.60 | - | 447.7  |
| AHQ-1-4, 5942 - 6023     | R.FGSAIAPLGLDRDRDGYNDIAVAAPYGGPSGR.G | 3094.34015 | 3 | 1.66E-12 | 0.93 | 5.04 | - | 1021.2 |
| AHQ-1-7, 6009 - 6050     | R.FGSAIAPLGLDRDRDGYNDIAVAAPYGGPSGR.G | 3094.34015 | 3 | 2.75E-06 | 0.85 | 4.65 | - | 481.1  |
| AHQ-1-4, 6090 - 6163     | R.FGSAIAPLGLDRDRDGYNDIAVAAPYGGPSGR.G | 3094.34015 | 3 | 8.95E-07 | 0.93 | 5.61 | - | 669.2  |
| AHQ-1-5, 6006 - 6077     | R.FGSAIAPLGLDRDRDGYNDIAVAAPYGGPSGR.G | 3094.34015 | 3 | 1.65E-05 | 0.95 | 5.84 | - | 991.6  |
| AHQ-1-6, 5839 - 5907     | R.FGSAIAPLGLDRDRDGYNDIAVAAPYGGPSGR.G | 3094.34015 | 3 | 2.09E-06 | 0.81 | 3.66 | - | 890.2  |
| AHQ-1-1, 6072            | R.FGSAIAPLGLDRDRDGYNDIAVAAPYGGPSGR.G | 3094.34015 | 3 | 1.86E-05 | 0.82 | 3.44 | - | 993.3  |
| AHQ-1-6, 5980            | R.FGSAIAPLGLDRDRDGYNDIAVAAPYGGPSGR.G | 3094.34015 | 3 | 6.60E-04 | 0.85 | 4.45 | - | 793.2  |
| AHQ-1-3, 5910 - 5958     | R.FGSAIAPLGLDRDRDGYNDIAVAAPYGGPSGR.G | 3094.34015 | 3 | 1.90E-06 | 0.87 | 4.43 | - | 550.9  |
| AHQ-1-4, 6618 - 6687     | R.GAVDIDNNGYPLDVLVGGAYGANQVAVYR.A    | 2827.05458 | 2 | 1.13E-05 | 0.85 | 4.15 | - | 725.4  |
| AHQ-1-4, 6751 - 6818     | R.GAVDIDNNGYPLDVLVGGAYGANQVAVYR.A    | 2827.05458 | 2 | 4.21E-08 | 0.95 | 5.10 | - | 681.9  |
| AHQ-1-4, 6491 - 6562     | R.GAVDIDNNGYPLDVLVGGAYGANQVAVYR.A    | 2827.05458 | 2 | 8.16E-06 | 0.93 | 4.94 | - | 613.9  |
| AHQ-1-4, 6890 - 6963     | R.GAVDIDNNGYPLDVLVGGAYGANQVAVYR.A    | 2827.05458 | 2 | 2.64E-08 | 0.97 | 5.99 | - | 863.4  |
| AHQ-1-4, 6484 - 6551     | R.GAVDIDNNGYPLDVLVGGAYGANQVAVYR.A    | 2827.05458 | 3 | 6.82E-05 | 0.69 | 3.67 | - | 490.0  |
| AHQ-1-4, 6400 - 6467     | R.GAVDIDNNGYPLDVLVGGAYGANQVAVYR.A    | 2827.05458 | 2 | 4.71E-08 | 0.96 | 5.29 | - | 988.9  |
| AHQ-1-4, 7018 - 7082     | R.GAVDIDNNGYPLDVLVGGAYGANQVAVYR.A    | 2827.05458 | 3 | 1.41E-05 | 0.95 | 5.31 | - | 1470.6 |
| AHQ-1-4, 7044 - 7115     | R.GAVDIDNNGYPLDVLVGGAYGANQVAVYR.A    | 2827.05458 | 2 | 1.76E-05 | 0.95 | 5.18 | - | 686.5  |
| AHQ-1-4, 7190 - 7238     | R.GAVDIDNNGYPLDVLVGGAYGANQVAVYR.A    | 2827.05458 | 2 | 2.01E-05 | 0.94 | 4.72 | - | 739.0  |
| AHQ-1-4, 7510 - 7584     | R.GAVDIDNNGYPLDVLVGGAYGANQVAVYR.A    | 2827.05458 | 3 | 5.62E-05 | 0.82 | 3.91 | - | 765.4  |
| AHQ-1-4, 6610 - 6684     | R.GAVDIDNNGYPLDVLVGGAYGANQVAVYR.A    | 2827.05458 | 2 | 3.90E-13 | 0.97 | 5.77 | - | 845.6  |
| AHQ-1-4, 6891 - 6954     | R.GAVDIDNNGYPLDVLVGGAYGANQVAVYR.A    | 2827.05458 | 3 | 8.94E-04 | 0.86 | 4.43 | - | 725.9  |
| AHQ-1-13, 4911 - 4921    | R.GEAQVWTQLLR.A                      | 1301.47614 | 2 | 5.51E-05 | 0.93 | 4.17 | - | 915.2  |
| AHQ-1-10, 4536 - 4595    | R.GEAQVWTQLLR.A                      | 1301.47614 | 2 | 9.79E-06 | 0.93 | 3.82 | - | 1169.5 |
| AHQ-1-1, 5312            | R.GEAQVWTQLLR.A                      | 1301.47614 | 2 | 5.94E-06 | 0.89 | 3.31 | - | 1198.0 |
| AHQ-1-11, 4716           | R.GEAQVWTQLLR.A                      | 1301.47614 | 2 | 1.06E-06 | 0.93 | 3.92 | - | 1003.4 |
| AHQ-1-10, 4795 - 4797    | R.GEAQVWTQLLR.A                      | 1301.47614 | 1 | 9.28E-04 | 0.23 | 2.25 | - | 249.0  |
| AHQ-1-11, 4710           | R.GEAQVWTQLLR.A                      | 1301.47614 | 2 | 3.03E-06 | 0.94 | 4.42 | - | 931.4  |
| AHQ-1-12, 4942           | R.GEAQVWTQLLR.A                      | 1301.47614 | 2 | 5.28E-06 | 0.91 | 3.67 | - | 935.7  |
| AHQ-1-13 - , 5196 - 5204 | R.GEAQVWTQLLR.A                      | 1301.47614 | 2 | 1.95E-06 | 0.95 | 4.20 | - | 1060.7 |
| AHQ-1-4, 5612 - 5679     | R.GNSFPASLVAAEEGER.E                 | 1733.86053 | 2 | 1.79E-08 | 0.95 | 4.75 | - | 889.4  |
| AHQ-1-4, 5878 - 5947     | R.GNSFPASLVAAEEGER.E                 | 1733.86053 | 2 | 6.34E-12 | 0.93 | 4.35 | - | 897.6  |
| AHQ-1-4, 5746 - 5812     | R.GNSFPASLVAAEEGER.E                 | 1733.86053 | 2 | 1.12E-13 | 0.93 | 4.43 | - | 937.2  |
| AHQ-1-4, 5535 - 5610     | R.GNSFPASLVAAEEGER.E                 | 1733.86053 | 2 | 1.94E-06 | 0.89 | 3.95 | - | 658.6  |
| AHQ-1-4, 5407 - 5474     | R.GNSFPASLVAAEEGER.E                 | 1733.86053 | 2 | 1.15E-07 | 0.78 | 3.51 | - | 483.0  |
| AHQ-1-4, 6074            | R.GNSFPASLVAAEEGER.E                 | 1733.86053 | 2 | 1.03E-09 | 0.88 | 3.81 | - | 679.0  |
| AHQ-1-4, 6835 - 6902     | R.GNSFPASLVAAEEGEREQNSLDSWGP.V       | 2976.16043 | 3 | 2.62E-04 | 0.72 | 3.58 | - | 504.5  |
| AHQ-1-4, 6611 - 6642     | R.GNSFPASLVAAEEGEREQNSLDSWGP.V       | 2976.16043 | 3 | 2.31E-07 | 0.73 | 3.69 | - | 415.2  |
| AHQ-1-4, 6470 - 6544     | R.GNSFPASLVAAEEGEREQNSLDSWGP.V       | 2976.16043 | 3 | 1.83E-04 | 0.76 | 4.27 | - | 435.4  |
| AHQ-1-4, 6710 - 6767     | R.GNSFPASLVAAEEGEREQNSLDSWGP.V       | 2976.16043 | 3 | 4.15E-09 | 0.82 | 4.14 | - | 486.7  |
| AHQ-1-4, 5182            | R.GPHALGAPSLLTGTQLYGR.F              | 2023.32431 | 2 | 2.03E-07 | 0.96 | 5.05 | - | 849.2  |
| AHQ-1-6, 5190            | R.GPHALGAPSLLTGTQLYGR.F              | 2023.32431 | 2 | 8.90E-08 | 0.96 | 5.49 | - | 996.0  |
| AHQ-1-2, 5467            | R.GPHALGAPSLLTGTQLYGR.F              | 2023.32431 | 2 | 3.42E-09 | 0.95 | 4.98 | - | 732.5  |
| AHQ-1-7, 5152            | R.GPHALGAPSLLTGTQLYGR.F              | 2023.32431 | 2 | 1.16E-05 | 0.95 | 5.03 | - | 892.1  |
| AHQ-1-4, 5322 - 5384     | R.GPHALGAPSLLTGTQLYGR.F              | 2023.32431 | 2 | 1.38E-06 | 0.98 | 6.30 | - | 1244.5 |
| AHQ-1-2, 5474            | R.GPHALGAPSLLTGTQLYGR.F              | 2023.32431 | 3 | 2.33E-04 | 0.89 | 3.44 | - | 1309.1 |
| AHQ-1-5, 5238            | R.GPHALGAPSLLTGTQLYGR.F              | 2023.32431 | 2 | 2.22E-06 | 0.95 | 4.68 | - | 815.4  |
| AHQ-1-1, 5435            | R.GPHALGAPSLLTGTQLYGR.F              | 2023.32431 | 3 | 3.29E-05 | 0.86 | 3.76 | - | 874.9  |
| AHQ-1-6, 5186 - 5187     | R.GPHALGAPSLLTGTQLYGR.F              | 2023.32431 | 3 | 8.85E-06 | 0.85 | 3.44 | - | 1197.0 |
| AHQ-1-5, 5241 - 5242     | R.GPHALGAPSLLTGTQLYGR.F              | 2023.32431 | 3 | 1.33E-05 | 0.84 | 3.98 | - | 739.9  |
| AHQ-1-4, 5324 - 5400     | R.GPHALGAPSLLTGTQLYGR.F              | 2023.32431 | 3 | 4.51E-05 | 0.86 | 3.60 | - | 929.9  |
| AHQ-1-4, 5435            | R.GPHALGAPSLLTGTQLYGR.F              | 2023.32431 | 2 | 4.87E-07 | 0.91 | 4.30 | - | 609.3  |
| AHQ-1-4, 5436 - 5508     | R.GQVLVFLQGSEGLR.S                   | 1503.72793 | 2 | 9.90E-10 | 0.97 | 4.77 | - | 1617.3 |
| AHQ-1-4, 5290 - 5359     | R.GQVLVFLQGSEGLR.S                   | 1503.72793 | 2 | 1.60E-07 | 0.96 | 4.28 | - | 1509.5 |
| AHQ-1-4, 5188 - 5262     | R.GQVLVFLQGSEGLR.S                   | 1503.72793 | 2 | 1.01E-06 | 0.97 | 5.25 | - | 1471.4 |
| AHQ-1-3, 5154            | R.GQVLVFLQGSEGLR.S                   | 1503.72793 | 2 | 3.17E-08 | 0.97 | 5.04 | - | 1432.1 |
| AHQ-1-6, 5026            | R.GQVLVFLQGSEGLR.S                   | 1503.72793 | 2 | 2.22E-05 | 0.94 | 4.00 | - | 1037.9 |
| AHQ-1-5, 5085            | R.GQVLVFLQGSEGLR.S                   | 1503.72793 | 2 | 4.15E-07 | 0.97 | 4.88 | - | 1681.9 |
| AHQ-1-7, 4410 - 4485     | R.HDLLVGPALYMESR.A                   | 1601.85188 | 2 | 3.28E-05 | 0.93 | 3.94 | - | 1102.3 |
| AHQ-1-5, 4417            | R.HDLLVGPALYMESR.A                   | 1601.85188 | 2 | 3.51E-07 | 0.97 | 4.56 | - | 1712.6 |
| AHQ-1-4, 3990            | R.HDLLVGPALYMESR.A                   | 1617.85128 | 3 | 3.55E-04 | 0.84 | 3.48 | - | 959.6  |
| AHQ-1-4, 4532 - 4602     | R.HDLLVGPALYMESR.A                   | 1601.85188 | 2 | 2.05E-05 | 0.96 | 4.75 | - | 1253.4 |
| AHQ-1-4, 3819 - 3847     | K.HSPICHTTMAFLR.D                    | 1572.83705 | 2 | 1.00E-07 | 0.59 | 2.61 | - | 274.8  |
| AHQ-1-11, 4142 - 4143    | K.IVLLDVPVR.A                        | 1024.28196 | 2 | 8.58E-04 | 0.88 | 3.33 | - | 763.7  |
| AHQ-1-3, 4553            | K.IVLLDVPVR.A                        | 1024.28196 | 2 | 4.94E-04 | 0.90 | 3.35 | - | 931.2  |
| AHQ-1-12, 4306           | K.IVLLDVPVR.A                        | 1024.28196 | 2 | 7.50E-04 | 0.90 | 3.60 | - | 758.5  |
| AHQ-1-5, 4450            | K.IVLLDVPVR.A                        | 1024.28196 | 2 | 9.01E-04 | 0.94 | 3.89 | - | 1168.0 |
| AHQ-1-6, 4363 - 4376     | K.IVLLDVPVR.A                        | 1024.28196 | 2 | 2.56E-04 | 0.85 | 3.37 | - | 736.4  |
| AHQ-1-4, 4588            | R.IYYENDFSWDK.R                      | 1416.51610 | 1 | 1.28E-06 | 0.48 | 2.35 | - | 437.8  |
| AHQ-1-6, 3855 - 3923     | R.IYYENDFSWDK.R                      | 1572.70245 | 2 | 2.84E-04 | 0.62 | 2.74 | - | 589.7  |
| AHQ-1-7, 3985            | R.IYYENDFSWDK.R                      | 1572.70245 | 2 | 5.29E-07 | 0.92 | 3.47 | - | 1199.7 |
| AHQ-1-4, 4066 - 4138     | R.IYYENDFSWDK.R                      | 1572.70245 | 2 | 9.38E-07 | 0.96 | 4.30 | - | 1492.5 |
| AHQ-1-13 - , 6756        | R.LQDPVLVSCDSAPCTVVQCQLQEMAR.G       | 2996.36144 | 2 | 3.25E-05 | 0.69 | 2.99 | - | 298.8  |
| AHQ-1-13 - , 5875        | R.LQDPVLVSCDSAPCTVVQCQLQEMAR.G       | 3012.36084 | 3 | 2.99E-04 | 0.92 | 4.08 | - | 1290.5 |
| AHQ-1-11, 6228           | R.LQDPVLVSCDSAPCTVVQCQLQEMAR.G       | 2996.36144 | 2 | 1.17E-06 | 0.85 | 3.47 | - | 513.7  |
| AHQ-1-10, 6052 - 6112    | R.LQDPVLVSCDSAPCTVVQCQLQEMAR.G       | 2996.36144 | 2 | 7.49E-06 | 0.93 | 4.88 | - | 441.9  |
| AHQ-1-10, 6033 - 6115    | R.LQDPVLVSCDSAPCTVVQCQLQEMAR.G       | 2996.36144 | 3 | 3.40E-06 | 0.77 | 3.72 | - | 500.1  |
| AHQ-1-10, 6247           | R.LQDPVLVSCDSAPCTVVQCQLQEMAR.G       | 2996.36144 | 2 | 5.30E-06 | 0.31 | 2.52 | - | 180.5  |
| AHQ-1-4, 4626 - 4666     | K.LS1NAELQDR.Q                       | 1272.43310 | 2 | 3.13E-08 | 0.92 | 3.65 | - | 958.0  |
| AHQ-1-5, 4547            | K.LS1NAELQDR.Q                       | 1272.43310 | 2 | 3.50E-05 | 0.93 | 3.64 | - | 1320.4 |
| AHQ-1-10, 2084           | R.NRPPLEEDDEEGE                      | 1529.50164 | 2 | 1.04E-10 | 0.93 | 3.68 | - | 1327.5 |
| AHQ-1-11, 2138           | R.NRPPLEEDDEEGE                      | 1529.50164 | 2 | 1.88E-06 | 0.86 | 3.47 | - | 857.7  |
| AHQ-1-13 - , 2215        | R.NRPPLEEDDEEGE                      | 1529.50164 | 2 | 1.42E-08 | 0.91 | 3.22 | - | 1191.9 |
| AHQ-1-7, 2778            | R.NVGSQTLQTFK.A                      | 1223.36055 | 2 | 1.46E-05 | 0.69 | 2.90 | - | 354.9  |
| AHQ-1-9, 2691 - 2694     | R.NVGSQTLQTFK.A                      | 1223.36055 | 1 | 6.78E-04 | 0.12 | 1.88 | - | 194.9  |
| AHQ-1-9, 2700            | R.NVGSQTLQTFK.A                      | 1223.36055 | 2 | 1.00E-04 | 0.84 | 3.13 | - | 543.3  |
| AHQ-1-4, 3332            | R.NVGSQTLQTFK.A                      | 1223.36055 | 1 | 7.16E-06 | 0.50 | 2.43 | - | 346.0  |
| AHQ-1-10, 2695           | R.NVGSQTLQTFK.A                      | 1223.36055 | 2 | 3.63E-07 | 0.89 | 3.77 | - | 568.0  |
| AHQ-1-11, 2779           | R.NVGSQTLQTFK.A                      | 1223.36055 | 2 | 5.71E-04 | 0.82 | 3.10 | - | 509.9  |
| AHQ-1-4, 3062 - 3127     | R.NVGSQTLQTFK.A                      | 1223.36055 | 2 | 7.08E-04 | 0.73 | 2.89 | - | 455.9  |
| AHQ-1-4, 3119            | R.NVGSQTLQTFK.A                      | 1223.36055 | 1 | 5.03E-04 | 0.10 | 2.03 | - | 154.8  |
| AHQ-1-4, 7426            | R.QGLGASVVSWSDVIVACAPQWQHWNVLEK.T    | 3139.53208 | 3 | 1.43E-07 | 0.91 | 5.30 | - | 531.8  |
| AHQ-1-5, 6286 - 6362     | R.SRPSQVLDSFPPTGSAFGFSRLR.G          | 2354.60606 | 3 | 1.91E-08 | 0.97 | 6.19 | - | 1522.6 |
| AHQ-1-4, 6240 - 6306     | R.SRPSQVLDSFPPTGSAFGFSRLR.G          | 2354.60606 | 3 | 2.05E-08 | 0.97 | 6.15 | - | 1564.9 |
| AHQ-1-4, 6244 - 6311     | R.SRPSQVLDSFPPTGSAFGFSRLR.G          | 2354.60606 | 2 | 1.38E-07 | 0.95 | 5.53 | - | 539.0  |
| AHQ-1-6, 6102 - 6147     | R.SRPSQVLDSFPPTGSAFGFSRLR.G          | 2354.60606 | 3 | 2.39E-11 | 0.97 | 6.00 | - | 1855.4 |
| AHQ-1-4, 6358 - 6422     | R.SRPSQVLDSFPPTGSAFGFSRLR.G          | 2354.60606 | 3 | 8.09E-08 | 0.96 | 6.20 | - | 1276.7 |
| AHQ-1-7, 6208 - 6224     | R.SRPSQVLDSFPPTGSAFGFSRLR.G          | 2354.60606 | 3 | 5.47E-09 | 0.97 | 5.71 | - | 1886.6 |
| AHQ-1-1, 6173            | R.SRPSQVLDSFPPTGSAFGFSRLR.G          | 2354.60606 | 3 | 6.37E-09 | 0.97 | 5.87 | - | 1940.2 |
| AHQ-1-3, 6174 - 6186     | R.SRPSQVLDSFPPTGSAFGFSRLR.G          | 2354.60606 | 3 | 2.38E-09 | 0.96 | 6.26 | - | 1265.9 |
| AHQ-1-5, 6199 - 6221     | R.SRPSQVLDSFPPTGSAFGFSRLR.G          | 2354.60606 | 3 | 1.44E-11 | 0.96 | 5.86 | - | 1083.5 |
| AHQ-1-14 - , 5878        | R.SRPSQVLDSFPPTGSAFGFSRLR.G          | 2354.60606 | 3 | 1.91E-05 | 0.85 | 4.04 | - | 1001.8 |
| AHQ-1-4, 3980            | K.TEEAEKTPVGSCLAQPEGSR.R             | 2295.46902 | 2 | 1.82E-11 | 0.81 | 3.62 | - | 488.5  |
| AHQ-1-6, 3659            | K.TEEAEKTPVGSCLAQPEGSR.R             | 2295.46902 | 2 | 1.34E-06 | 0.90 | 3.75 | - | 671.2  |

|                            |                                                                    |            |   |          |      |        |       |         |
|----------------------------|--------------------------------------------------------------------|------------|---|----------|------|--------|-------|---------|
| AHQ-1-10, 3429             | K.TEEAEKTPVGSFCFLAQPESEGR.R                                        | 2295.46902 | 2 | 1.35E-09 | 0.84 | 3.65   | -     | 494.2   |
| AHQ-1-4, 3759 - 3831       | K.TEEAEKTPVGSFCFLAQPESEGR.R                                        | 2295.46902 | 2 | 2.24E-07 | 0.95 | 4.74   | -     | 716.3   |
| AHQ-1-7, 3734 - 3762       | K.TEEAEKTPVGSFCFLAQPESEGR.R                                        | 2295.46902 | 2 | 5.95E-04 | 0.82 | 3.35   | -     | 510.9   |
| AHQ-1-5, 3689              | K.TEEAEKTPVGSFCFLAQPESEGR.R                                        | 2295.46902 | 2 | 2.74E-08 | 0.95 | 4.85   | -     | 699.7   |
| AHQ-1-4, 5856              | R.TLGPSQEETGGVFLCPWR.A                                             | 2036.25364 | 3 | 4.66E-06 | 0.92 | 4.47   | -     | 1036.6  |
| AHQ-1-5, 5723 - 5789       | R.TLGPSQEETGGVFLCPWR.A                                             | 2036.25364 | 2 | 9.42E-07 | 0.96 | 5.34   | -     | 1098.1  |
| AHQ-1-4, 5914 - 5975       | R.TLGPSQEETGGVFLCPWR.A                                             | 2036.25364 | 2 | 1.48E-06 | 0.97 | 5.20   | -     | 1269.8  |
| AHQ-1-13, 5319             | R.TLGPSQEETGGVFLCPWR.A                                             | 2036.25364 | 3 | 4.52E-04 | 0.60 | 3.06   | -     | 474.9   |
| AHQ-1-11, 5174 - 5240      | R.TLGPSQEETGGVFLCPWR.A                                             | 2036.25364 | 2 | 4.41E-05 | 0.84 | 3.78   | -     | 922.1   |
| AHQ-1-6, 5666              | R.TLGPSQEETGGVFLCPWR.A                                             | 2036.25364 | 2 | 1.10E-07 | 0.92 | 4.30   | -     | 716.9   |
| AHQ-1-10, 5025 - 5092      | R.TLGPSQEETGGVFLCPWR.A                                             | 2036.25364 | 2 | 4.45E-06 | 0.92 | 4.47   | -     | 758.4   |
| AHQ-1-1, 5715 - 5780       | R.TLGPSQEETGGVFLCPWR.A                                             | 2036.25364 | 2 | 4.06E-05 | 0.88 | 4.00   | -     | 727.8   |
| AHQ-1-3, 5683 - 5703       | R.TLGPSQEETGGVFLCPWR.A                                             | 2036.25364 | 2 | 1.82E-04 | 0.59 | 2.92   | -     | 588.1   |
| AHQ-1-4, 5771 - 5848       | R.TLGPSQEETGGVFLCPWR.A                                             | 2036.25364 | 2 | 3.39E-09 | 0.95 | 4.47   | -     | 1108.0  |
| AHQ-1-13- , 5612 - 5644    | R.TLGPSQEETGGVFLCPWR.A                                             | 2036.25364 | 2 | 1.44E-06 | 0.94 | 4.85   | -     | 738.8   |
| AHQ-1-7, 5716              | R.TLGPSQEETGGVFLCPWR.A                                             | 2036.25364 | 2 | 3.13E-04 | 0.95 | 4.89   | -     | 1110.5  |
| AHQ-1-9, 5566              | R.TLGPSQEETGGVFLCPWR.A                                             | 2036.25364 | 2 | 4.91E-06 | 0.92 | 4.13   | -     | 788.3   |
| AHQ-1-12, 5358 - 5431      | R.TLGPSQEETGGVFLCPWR.A                                             | 2036.25364 | 2 | 3.30E-08 | 0.94 | 4.30   | -     | 1114.9  |
| AHQ-1-4, 3842 - 3911       | K.TPVGSCFLAQPESEGR.R                                               | 1607.76993 | 2 | 1.54E-07 | 0.94 | 4.74   | -     | 848.2   |
| AHQ-1-3, 3839              | K.TPVGSCFLAQPESEGR.R                                               | 1607.76993 | 2 | 9.50E-05 | 0.76 | 3.05   | -     | 719.3   |
| AHQ-1-9, 3622              | K.TPVGSCFLAQPESEGR.R                                               | 1607.76993 | 2 | 1.84E-06 | 0.89 | 3.48   | -     | 871.4   |
| AHQ-1-7, 3780              | K.TPVGSCFLAQPESEGR.R                                               | 1607.76993 | 2 | 6.91E-06 | 0.91 | 4.20   | -     | 701.7   |
| AHQ-1-5, 3750              | K.TPVGSCFLAQPESEGR.R                                               | 1607.76993 | 2 | 1.87E-07 | 0.90 | 3.97   | -     | 597.0   |
| AHQ-1-6, 3694              | K.TPVGSCFLAQPESEGR.R                                               | 1607.76993 | 2 | 1.11E-07 | 0.86 | 3.29   | -     | 825.3   |
| AHQ-1-4, 4030 - 4032       | K.TPVGSCFLAQPESEGR.R                                               | 1607.76993 | 2 | 8.48E-08 | 0.94 | 4.21   | -     | 1084.5  |
| AHQ-1-1, 3901              | K.TPVGSCFLAQPESEGR.R                                               | 1607.76993 | 2 | 7.41E-08 | 0.91 | 4.08   | -     | 647.2   |
| AHQ-1-10, 3448             | K.TPVGSCFLAQPESEGR.R                                               | 1607.76993 | 2 | 3.43E-06 | 0.94 | 4.30   | -     | 825.4   |
| AHQ-1-11, 3547             | K.TPVGSCFLAQPESEGR.R                                               | 1607.76993 | 2 | 1.30E-07 | 0.90 | 3.78   | -     | 694.6   |
| AHQ-1-4, 4978              | K.TPVSCFNQMCGVATGHNIPQK.L                                          | 2462.81122 | 3 | 1.94E-05 | 0.91 | 4.26   | -     | 988.4   |
| AHQ-1-4, 5214 - 5255       | K.TPVSCFNQMCGVATGHNIPQK.L                                          | 2462.81122 | 3 | 8.77E-05 | 0.95 | 5.06   | -     | 1373.0  |
| AHQ-1-4, 5440              | K.TPVSCFNQMCGVATGHNIPQK.L                                          | 2462.81122 | 3 | 9.42E-06 | 0.91 | 4.79   | -     | 957.7   |
| AHQ-1-4, 6383              | K.TPVSCFNQMCGVATGHNIPQK.L                                          | 2462.81122 | 3 | 1.51E-04 | 0.93 | 4.71   | -     | 1029.5  |
| AHQ-1-4, 4771              | K.TPVSCFNQM*CVGATGHNIPQK.L                                         | 2478.81062 | 3 | 1.41E-06 | 0.91 | 4.06   | -     | 1230.0  |
| AHQ-1-4, 4680 - 4702       | K.TPVSCFNQM*CVGATGHNIPQK.L                                         | 2478.81062 | 3 | 6.68E-07 | 0.96 | 5.02   | -     | 1555.7  |
| AHQ-1-4, 5776              | K.TPVSCFNQMCGVATGHNIPQK.L                                          | 2462.81122 | 3 | 6.52E-08 | 0.96 | 4.96   | -     | 1402.9  |
| AHQ-1-5, 4594              | K.TPVSCFNQM*CVGATGHNIPQK.L                                         | 2478.81062 | 3 | 3.02E-08 | 0.93 | 4.57   | -     | 1292.6  |
| AHQ-1-13, 2719             | R.VAIVVGAPR.T                                                      | 882.08560  | 2 | 2.75E-04 | 0.93 | 3.32   | -     | 1168.1  |
| AHQ-1-7, 2540              | R.VAIVVGAPR.T                                                      | 882.08560  | 2 | 5.81E-06 | 0.93 | 3.45   | -     | 1427.2  |
| AHQ-1-5, 2494 - 2495       | R.VAIVVGAPR.T                                                      | 882.08560  | 2 | 5.76E-06 | 0.94 | 3.69   | -     | 1277.6  |
| AHQ-1-13- , 2719           | R.VAIVVGAPR.T                                                      | 882.08560  | 2 | 3.54E-05 | 0.90 | 2.68   | -     | 1101.2  |
| AHQ-1-12, 2606             | R.VAIVVGAPR.T                                                      | 882.08560  | 2 | 2.89E-05 | 0.92 | 3.14   | -     | 1179.6  |
| AHQ-1-4, 2602 - 2606       | R.VAIVVGAPR.T                                                      | 882.08560  | 2 | 4.43E-04 | 0.95 | 3.82   | -     | 1395.4  |
| AHQ-1-6, 2514              | R.VAIVVGAPR.T                                                      | 882.08560  | 2 | 3.03E-06 | 0.92 | 3.53   | -     | 1238.8  |
| AHQ-1-4, 7526 - 7594       | R.VLLGSQQAAGTTLNLDLGGK.H                                           | 1999.29783 | 2 | 4.75E-08 | 0.98 | 5.82   | -     | 1942.3  |
| AHQ-1-4, 6134 - 6207       | R.VLLGSQQAAGTTLNLDLGGK.H                                           | 1999.29783 | 2 | 2.77E-07 | 0.97 | 5.67   | -     | 1478.2  |
| AHQ-1-4, 6947 - 6966       | R.VLLGSQQAAGTTLNLDLGGK.H                                           | 1999.29783 | 2 | 3.43E-06 | 0.97 | 5.52   | -     | 1696.9  |
| AHQ-1-4, 6802 - 6875       | R.VLLGSQQAAGTTLNLDLGGK.H                                           | 1999.29783 | 2 | 5.13E-08 | 0.96 | 5.91   | -     | 1163.1  |
| AHQ-1-4, 6707 - 6788       | R.VLLGSQQAAGTTLNLDLGGK.H                                           | 1999.29783 | 2 | 3.16E-12 | 0.96 | 5.43   | -     | 1437.3  |
| AHQ-1-4, 6620 - 6624       | R.VLLGSQQAAGTTLNLDLGGK.H                                           | 1999.29783 | 2 | 1.40E-04 | 0.97 | 5.65   | -     | 1228.4  |
| AHQ-1-5, 5987              | R.VLLGSQQAAGTTLNLDLGGK.H                                           | 1999.29783 | 2 | 6.64E-07 | 0.92 | 4.26   | -     | 1052.0  |
| AHQ-1-4, 6278 - 6302       | R.VLLGSQQAAGTTLNLDLGGK.H                                           | 1999.29783 | 2 | 3.17E-06 | 0.98 | 6.38   | -     | 2184.0  |
| AHQ-1-4, 7035 - 7098       | R.VLLGSQQAAGTTLNLDLGGK.H                                           | 1999.29783 | 2 | 5.73E-06 | 0.95 | 5.47   | -     | 924.8   |
| AHQ-1-4, 4259 - 4266       | R.VVLCELGNPMK.K                                                    | 1261.53692 | 2 | 3.93E-07 | 0.96 | 4.46   | -     | 1380.0  |
| AHQ-1-4, 4267              | R.VVLCELGNPMK.K                                                    | 1261.53692 | 1 | 1.59E-05 | 0.78 | 3.00   | -     | 754.3   |
| AHQ-1-5, 4165 - 4174       | R.VVLCELGNPMK.K                                                    | 1261.53692 | 2 | 3.14E-08 | 0.95 | 4.00   | -     | 1306.6  |
| AHQ-1-4, 3419 - 3430       | R.VVLCELGNPM*K.K                                                   | 1277.53632 | 2 | 4.59E-04 | 0.94 | 4.18   | -     | 1226.8  |
| AHQ-1-4, 4303 - 4379       | R.VYFLQPR.G                                                        | 1036.25129 | 2 | 8.11E-06 | 0.95 | 3.94   | -     | 1284.0  |
| AHQ-1-6, 4142              | R.VYFLQPR.G                                                        | 1036.25129 | 2 | 2.40E-05 | 0.95 | 3.26   | -     | 1329.2  |
| AHQ-1-5, 4189 - 4193       | R.VYFLQPR.G                                                        | 1036.25129 | 2 | 8.87E-06 | 0.95 | 3.67   | -     | 1392.3  |
| gj10835002[ref]NP_001166.1 | ] Rho GDP dissociation inhibitor (GDI) beta; Ly-GDI [Homo sapiens] |            |   | 1.22E-13 | 5.51 | 60.30  | 47.30 | 22987.8 |
| AHQ-1-10, 2384 - 2385      | K.APEPHVEEDDDDELDSK.L                                              | 1940.90995 | 2 | 3.01E-11 | 0.98 | 6.06   | -     | 1747.4  |
| AHQ-1-10, 2404 - 2440      | K.APEPHVEEDDDDELDSK.L                                              | 1940.90995 | 3 | 2.21E-05 | 0.89 | 4.08   | -     | 788.4   |
| AHQ-1-13- , 2561           | K.APEPHVEEDDDDELDSK.L                                              | 1940.90995 | 2 | 1.22E-13 | 0.97 | 5.69   | -     | 1484.5  |
| AHQ-1-13, 2581             | K.APEPHVEEDDDDELDSK.L                                              | 1940.90995 | 2 | 6.49E-10 | 0.97 | 5.50   | -     | 1320.6  |
| AHQ-1-13, 5372             | K.ATFM*VGSYGPRPEEYFLTPVEEAPK.G                                     | 2962.27864 | 3 | 5.51E-05 | 0.73 | 3.32   | -     | 543.1   |
| AHQ-1-14- , 5556 - 5579    | K.ATFM*VGSYGPRPEEYFLTPVEEAPK.G                                     | 2962.27864 | 3 | 4.95E-04 | 0.87 | 4.16   | -     | 771.4   |
| AHQ-1-12, 5433 - 5438      | K.ATFM*VGSYGPRPEEYFLTPVEEAPK.G                                     | 2962.27864 | 3 | 1.26E-09 | 0.93 | 4.96   | -     | 833.5   |
| AHQ-1-10, 5289 - 5347      | K.ATFMVGSYGPRPEEYFLTPVEEAPK.G                                      | 2946.27924 | 2 | 3.72E-05 | 0.92 | 4.56   | -     | 704.3   |
| AHQ-1-14- , 5771           | K.ATFMVGSYGPRPEEYFLTPVEEAPK.G                                      | 2946.27924 | 3 | 8.04E-04 | 0.71 | 3.18   | -     | 597.9   |
| AHQ-1-10, 2979             | K.ELQEMDKDESLIK.Y                                                  | 1693.85489 | 2 | 1.32E-07 | 0.91 | 4.26   | -     | 837.5   |
| AHQ-1-13- , 6763 - 6764    | R.LTLVCESAPGITMDLTGDLEALKK.E                                       | 2675.11274 | 3 | 1.43E-08 | 0.85 | 3.68   | -     | 758.1   |
| AHQ-1-10, 6095 - 6153      | R.LTLVCESAPGITMDLTGDLEALKK.E                                       | 2675.11274 | 3 | 1.02E-07 | 0.83 | 3.63   | -     | 574.4   |
| AHQ-1-11, 3262 - 3291      | K.TLLGDGPVVTDPK.A                                                  | 1312.49400 | 2 | 6.26E-05 | 0.93 | 3.31   | -     | 1432.9  |
| AHQ-1-13- , 3423 - 3503    | K.TLLGDGPVVTDPK.A                                                  | 1312.49400 | 2 | 8.40E-09 | 0.94 | 3.79   | -     | 1379.5  |
| AHQ-1-13, 3418             | K.TLLGDGPVVTDPK.A                                                  | 1312.49400 | 2 | 6.11E-04 | 0.90 | 3.72   | -     | 986.0   |
| gj4505879[ref]NP_002655.1  | ] pleckstrin; p47 [Homo sapiens]                                   |            |   | 1.23E-13 | 9.34 | 110.41 | 41.40 | 40082.5 |
| AHQ-1-11, 5315 - 5339      | R.EDPAYLHYDPAGAEDPLGAIHLR.G                                        | 2684.89982 | 3 | 2.46E-05 | 0.97 | 6.57   | -     | 1032.9  |
| AHQ-1-12, 5469             | R.EDPAYLHYDPAGAEDPLGAIHLR.G                                        | 2684.89982 | 3 | 7.76E-07 | 0.97 | 6.08   | -     | 2086.8  |
| AHQ-1-10, 5153             | R.EDPAYLHYDPAGAEDPLGAIHLR.G                                        | 2684.89982 | 2 | 2.10E-04 | 0.56 | 2.63   | -     | 429.3   |
| AHQ-1-8, 5695 - 5754       | R.EDPAYLHYDPAGAEDPLGAIHLR.G                                        | 2684.89982 | 3 | 4.07E-09 | 0.98 | 6.86   | -     | 1850.0  |
| AHQ-1-8, 5715 - 5790       | R.EDPAYLHYDPAGAEDPLGAIHLR.G                                        | 2684.89982 | 2 | 7.24E-05 | 0.80 | 3.40   | -     | 481.9   |
| AHQ-1-10, 5125 - 5155      | R.EDPAYLHYDPAGAEDPLGAIHLR.G                                        | 2684.89982 | 3 | 1.10E-05 | 0.93 | 5.37   | -     | 800.7   |
| AHQ-1-13- , 5764           | R.EDPAYLHYDPAGAEDPLGAIHLR.G                                        | 2684.89982 | 3 | 9.43E-05 | 0.96 | 6.22   | -     | 1330.4  |
| AHQ-1-13, 5423 - 5425      | R.EDPAYLHYDPAGAEDPLGAIHLR.G                                        | 2684.89982 | 3 | 8.65E-12 | 0.97 | 6.44   | -     | 1521.2  |
| AHQ-1-8, 2509 - 2539       | K.GSTLTPCQDFGKR.M                                                  | 1555.69502 | 2 | 1.93E-09 | 0.32 | 2.65   | -     | 238.7   |
| AHQ-1-11, 2800             | K.GSTLTPCQDFGKR.M                                                  | 1555.69502 | 2 | 3.32E-05 | 0.55 | 2.51   | -     | 451.2   |
| AHQ-1-8, 7298 - 7347       | K.IFNHCFTGNCVIDWLVSNQSVR.N                                         | 2669.97641 | 2 | 9.49E-05 | 0.97 | 4.62   | -     | 1632.8  |
| AHQ-1-13, 6555 - 6557      | R.KSEENLFEITADEVHYFLQAATPK.E                                       | 3024.32650 | 3 | 1.23E-13 | 0.99 | 7.74   | -     | 3272.0  |
| AHQ-1-10, 6412 - 6413      | R.KSEENLFEITADEVHYFLQAATPK.E                                       | 3024.32650 | 3 | 3.89E-08 | 0.98 | 7.73   | -     | 2394.2  |
| AHQ-1-12, 6661 - 6734      | R.KSEENLFEITADEVHYFLQAATPK.E                                       | 3024.32650 | 3 | 9.36E-09 | 0.98 | 7.24   | -     | 2094.8  |
| AHQ-1-8, 7502 - 7503       | R.KSEENLFEITADEVHYFLQAATPK.E                                       | 3024.32650 | 3 | 3.30E-10 | 0.99 | 8.22   | -     | 3039.0  |
| AHQ-1-11, 6491             | R.KSEENLFEITADEVHYFLQAATPK.E                                       | 3024.32650 | 3 | 1.56E-12 | 0.98 | 7.41   | -     | 2707.5  |
| AHQ-1-13- , 6975           | R.KSEENLFEITADEVHYFLQAATPK.E                                       | 3024.32650 | 3 | 6.64E-12 | 0.98 | 7.07   | -     | 2862.7  |
| AHQ-1-12, 5545             | R.LPETIDLGALYSM*K.D                                                | 1680.98719 | 2 | 7.04E-05 | 0.95 | 4.49   | -     | 1137.1  |
| AHQ-1-8, 5795 - 5871       | R.LPETIDLGALYSM*K.D                                                | 1680.98719 | 2 | 5.51E-04 | 0.95 | 4.29   | -     | 1189.6  |
| AHQ-1-10, 5915             | R.LPETIDLGALYSM*K.D                                                | 1664.98779 | 2 | 5.22E-05 | 0.95 | 3.92   | -     | 1394.3  |
| AHQ-1-9, 6670              | R.LPETIDLGALYSM*K.D                                                | 1664.98779 | 2 | 2.05E-05 | 0.96 | 4.61   | -     | 1467.8  |
| AHQ-1-8, 6932              | R.LPETIDLGALYSM*K.D                                                | 1664.98779 | 2 | 1.18E-05 | 0.96 | 3.55   | -     | 1858.1  |
| AHQ-1-11, 6026 - 6098      | R.LPETIDLGALYSM*K.D                                                | 1664.98779 | 2 | 9.26E-05 | 0.97 | 3.86   | -     | 2490.9  |
| AHQ-1-8, 6778 - 6860       | R.LPETIDLGALYSM*K.D                                                | 1664.98779 | 2 | 1.61E-06 | 0.98 | 5.02   | -     | 1865.0  |
| AHQ-1-12, 6213 - 6237      | R.LPETIDLGALYSM*K.D                                                | 1664.98779 | 2 | 5.41E-09 | 0.98 | 4.86   | -     | 2048.5  |
| AHQ-1-1, 5980              | R.LPETIDLGALYSM*K.D                                                | 1680.98719 | 2 | 3.55E-05 | 0.90 | 3.85   | -     | 759.6   |
| AHQ-1-12, 5137 - 5197      | R.LPETIDLGALYSM*KDTEK.G                                            | 2154.46684 | 3 | 1.03E-05 | 0.84 | 3.90   | -     | 842.9   |
| AHQ-1-8, 6274 - 6298       | R.NRQEGLMIASLLNEGYLQPADGMSK.S                                      | 2824.18382 | 2 | 2.14E-04 | 0.98 | 6.54   | -     | 1756.6  |
| AHQ-1-8, 6256 - 6278       | R.NRQEGLMIASLLNEGYLQPADGMSK.S                                      | 2824.18382 | 3 | 8.14E-04 | 0.89 | 4.42   | -     | 767.1   |
| AHQ-1-10, 5579             | R.NRQEGLMIASLLNEGYLQPADGMSK.S                                      | 2824.18382 | 2 | 7.82E-05 | 0.90 | 4.06   | -     | 707.8   |
| AHQ-1-10, 5563 - 5565      | R.NRQEGLMIASLLNEGYLQPADGMSK.S                                      | 2824.18382 | 3 | 7.48E-06 | 0.76 | 3.59   | -     | 630.7   |



|                             |                                                                         |            |   |          |      |       |       |         |
|-----------------------------|-------------------------------------------------------------------------|------------|---|----------|------|-------|-------|---------|
| AHQ-1-10, 5321              | R.NRQEGLMIASSLLNEGVLQPAAGDM*SK.S                                        | 2840.18322 | 2 | 2.12E-04 | 0.91 | 4.35  | -     | 518.8   |
| AHQ-1-11, 4352              | K.QQDHFQAAFLER.D                                                        | 1766.89390 | 2 | 3.92E-07 | 0.42 | 2.54  | -     | 117.3   |
| AHQ-1-8, 4488               | K.QQDHFQAAFLER.D                                                        | 1766.89390 | 2 | 1.49E-07 | 0.75 | 2.98  | -     | 237.7   |
| AHQ-1-8, 7568               | K.SEEENLFEIITADEVHYFLQAATPK.E                                           | 2896.15359 | 3 | 1.61E-10 | 0.93 | 4.76  | -     | 1080.5  |
| AHQ-1-10, 6465              | K.SEEENLFEIITADEVHYFLQAATPK.E                                           | 2896.15359 | 2 | 6.32E-06 | 0.85 | 4.44  | -     | 400.9   |
| AHQ-1-10, 6467              | K.SEEENLFEIITADEVHYFLQAATPK.E                                           | 2896.15359 | 3 | 4.07E-09 | 0.91 | 4.48  | -     | 969.9   |
| AHQ-1-12, 6701              | K.SEEENLFEIITADEVHYFLQAATPK.E                                           | 2896.15359 | 3 | 3.34E-08 | 0.89 | 4.40  | -     | 705.1   |
| AHQ-1-9, 7366               | K.SEEENLFEIITADEVHYFLQAATPK.E                                           | 2896.15359 | 3 | 1.77E-12 | 0.95 | 5.18  | -     | 1256.2  |
| AHQ-1-13-, 7016             | K.SEEENLFEIITADEVHYFLQAATPK.E                                           | 2896.15359 | 3 | 9.52E-09 | 0.89 | 4.55  | -     | 773.1   |
| gi 7656991 ref NP_055140.1  | coronin, actin binding protein, 1C; coronin, actin-binding protein, 1C; |            |   | 1.91E-13 | 6.55 | 80.31 | 23.40 | 53248.7 |
| AHQ-1-6, 5964 - 6031        | R.AIFLADGNVFTTGF.SR.M                                                   | 1716.91793 | 2 | 1.13E-09 | 0.96 | 4.89  | -     | 1349.2  |
| AHQ-1-6, 6112 - 6171        | R.AIFLADGNVFTTGF.SR.M                                                   | 1716.91793 | 2 | 2.09E-05 | 0.97 | 4.86  | -     | 1761.8  |
| AHQ-1-7, 6136               | R.AIFLADGNVFTTGF.SR.M                                                   | 1716.91793 | 2 | 6.05E-05 | 0.96 | 5.00  | -     | 1217.1  |
| AHQ-1-6, 3262               | R.KCEPIIMTVPR.K                                                         | 1345.65706 | 2 | 2.16E-05 | 0.61 | 2.74  | -     | 512.2   |
| AHQ-1-6, 2614               | R.KCEPIIMTVPR.K                                                         | 1361.65646 | 2 | 2.16E-05 | 0.71 | 2.57  | -     | 547.8   |
| AHQ-1-7, 7364 - 7438        | R.KSDLFQDDLYPDTAGPEAALEAEWFEFG.N                                        | 3273.46087 | 3 | 8.00E-10 | 0.97 | 6.15  | -     | 1386.2  |
| AHQ-1-6, 7142               | R.KSDLFQDDLYPDTAGPEAALEAEWFEFG.N                                        | 3273.46087 | 3 | 9.79E-08 | 0.90 | 4.74  | -     | 699.8   |
| AHQ-1-6, 3972               | K.NADPILISL.K.H                                                         | 1084.29103 | 1 | 1.16E-04 | 0.06 | 1.94  | -     | 301.8   |
| AHQ-1-6, 3974               | K.NADPILISL.K.H                                                         | 1084.29103 | 2 | 1.96E-05 | 0.87 | 2.99  | -     | 730.4   |
| AHQ-1-7, 2368               | K.SIKDTICNQDER.I                                                        | 1480.58332 | 2 | 3.67E-05 | 0.93 | 3.27  | -     | 1496.0  |
| AHQ-1-6, 2330               | K.SIKDTICNQDER.I                                                        | 1480.58332 | 2 | 2.57E-05 | 0.82 | 2.91  | -     | 937.6   |
| AHQ-1-6, 4410 - 4455        | R.VTWDSFCAV.NPR.F                                                       | 1540.68205 | 2 | 1.30E-04 | 0.67 | 2.69  | -     | 626.5   |
| AHQ-1-7, 6308               | R.YFEITDESPVYHYLNTFSSK.E                                                | 2441.63258 | 2 | 9.44E-07 | 0.96 | 4.99  | -     | 1011.5  |
| AHQ-1-7, 6312               | R.YFEITDESPVYHYLNTFSSK.E                                                | 2441.63258 | 3 | 7.81E-08 | 0.93 | 4.45  | -     | 857.1   |
| AHQ-1-6, 6190 - 6199        | R.YFEITDESPVYHYLNTFSSK.E                                                | 2441.63258 | 3 | 1.11E-04 | 0.83 | 3.28  | -     | 737.9   |
| AHQ-1-6, 6194               | R.YFEITDESPVYHYLNTFSSK.E                                                | 2441.63258 | 2 | 1.91E-13 | 0.93 | 4.76  | -     | 728.2   |
| AHQ-1-9, 6166               | R.YFEITDESPVYHYLNTFSSK.E                                                | 2441.63258 | 2 | 6.48E-05 | 0.74 | 3.03  | -     | 526.5   |
| AHQ-1-10, 5504              | R.YFEITDESPVYHYLNTFSSK.E                                                | 2441.63258 | 3 | 8.56E-04 | 0.77 | 3.02  | -     | 749.2   |
| AHQ-1-10, 5508              | R.YFEITDESPVYHYLNTFSSK.E                                                | 2441.63258 | 2 | 7.36E-05 | 0.74 | 3.04  | -     | 735.7   |
| gi 30151108 ref XP_301187.1 | similar to actin beta, cytoskeletal - Kenyan clawed frog [Homo sapiens] |            |   | 2.14E-13 | 1.93 | 20.31 | 7.40  | 32164.8 |
| AHQ-1-1, 4981               | K.DLYANTVLSGGTTM.YPGIADR.M                                              | 2232.45624 | 2 | 4.08E-06 | 0.91 | 4.26  | -     | 669.1   |
| AHQ-1-1, 5123 - 5133        | K.DLYANTVLSGGTTM.YPGIADR.M                                              | 2232.45624 | 2 | 2.39E-04 | 0.93 | 4.43  | -     | 831.2   |
| AHQ-1-2, 5125               | K.DLYANTVLSGGTTM.YPGIADR.M                                              | 2232.45624 | 2 | 4.08E-09 | 0.86 | 3.81  | -     | 585.2   |
| AHQ-1-2, 5275               | K.DLYANTVLSGGTTM.YPGIADR.M                                              | 2232.45624 | 2 | 3.22E-05 | 0.84 | 4.34  | -     | 475.6   |
| AHQ-1-2, 5622               | K.DLYANTVLSGGTTM.YPGIADR.M                                              | 2216.45684 | 2 | 8.79E-05 | 0.78 | 3.27  | -     | 571.1   |
| AHQ-1-3, 4997               | K.DLYANTVLSGGTTM.YPGIADR.M                                              | 2232.45624 | 2 | 6.06E-13 | 0.94 | 4.61  | -     | 820.5   |
| AHQ-1-3, 5126 - 5131        | K.DLYANTVLSGGTTM.YPGIADR.M                                              | 2232.45624 | 2 | 1.84E-06 | 0.93 | 4.64  | -     | 838.4   |
| AHQ-1-4, 5082               | K.DLYANTVLSGGTTM.YPGIADR.M                                              | 2232.45624 | 2 | 8.47E-09 | 0.95 | 4.68  | -     | 997.6   |
| AHQ-1-4, 5236               | K.DLYANTVLSGGTTM.YPGIADR.M                                              | 2232.45624 | 2 | 2.29E-04 | 0.92 | 4.96  | -     | 736.2   |
| AHQ-1-4, 5563               | K.DLYANTVLSGGTTM.YPGIADR.M                                              | 2216.45684 | 2 | 8.46E-08 | 0.94 | 4.42  | -     | 1115.5  |
| AHQ-1-5, 5062               | K.DLYANTVLSGGTTM.YPGIADR.M                                              | 2232.45624 | 2 | 2.61E-06 | 0.97 | 4.87  | -     | 1381.3  |
| AHQ-1-5, 5182               | K.DLYANTVLSGGTTM.YPGIADR.M                                              | 2232.45624 | 2 | 7.22E-05 | 0.87 | 3.97  | -     | 684.5   |
| AHQ-1-5, 5529               | K.DLYANTVLSGGTTM.YPGIADR.M                                              | 2216.45684 | 2 | 2.66E-07 | 0.93 | 4.50  | -     | 795.9   |
| AHQ-1-6, 4951               | K.DLYANTVLSGGTTM.YPGIADR.M                                              | 2232.45624 | 2 | 5.77E-08 | 0.92 | 4.29  | -     | 850.9   |
| AHQ-1-6, 5086               | K.DLYANTVLSGGTTM.YPGIADR.M                                              | 2232.45624 | 2 | 4.09E-06 | 0.94 | 5.01  | -     | 789.4   |
| AHQ-1-6, 5407               | K.DLYANTVLSGGTTM.YPGIADR.M                                              | 2216.45684 | 2 | 6.86E-06 | 0.97 | 5.97  | -     | 1485.2  |
| AHQ-1-7, 5674               | K.DLYANTVLSGGTTM.YPGIADR.M                                              | 2216.45684 | 2 | 2.09E-05 | 0.89 | 4.17  | -     | 705.9   |
| AHQ-1-8, 5002 - 5066        | K.DLYANTVLSGGTTM.YPGIADR.M                                              | 2232.45624 | 2 | 1.54E-07 | 0.95 | 5.13  | -     | 785.2   |
| AHQ-1-8, 5132 - 5198        | K.DLYANTVLSGGTTM.YPGIADR.M                                              | 2232.45624 | 2 | 1.43E-05 | 0.96 | 5.33  | -     | 1006.4  |
| AHQ-1-8, 5266 - 5342        | K.DLYANTVLSGGTTM.YPGIADR.M                                              | 2232.45624 | 2 | 4.24E-05 | 0.95 | 5.10  | -     | 954.2   |
| AHQ-1-8, 5355 - 5427        | K.DLYANTVLSGGTTM.YPGIADR.M                                              | 2216.45684 | 2 | 1.18E-04 | 0.94 | 4.62  | -     | 870.1   |
| AHQ-1-8, 5362 - 5442        | K.DLYANTVLSGGTTM.YPGIADR.M                                              | 2232.45624 | 2 | 4.49E-05 | 0.90 | 3.87  | -     | 843.8   |
| AHQ-1-8, 5702 - 5768        | K.DLYANTVLSGGTTM.YPGIADR.M                                              | 2216.45684 | 2 | 1.90E-04 | 0.95 | 5.11  | -     | 869.4   |
| AHQ-1-8, 5834 - 5902        | K.DLYANTVLSGGTTM.YPGIADR.M                                              | 2216.45684 | 2 | 1.68E-06 | 0.96 | 5.29  | -     | 983.9   |
| AHQ-1-8, 5966 - 6035        | K.DLYANTVLSGGTTM.YPGIADR.M                                              | 2216.45684 | 2 | 2.46E-05 | 0.96 | 5.37  | -     | 804.1   |
| AHQ-1-8, 6102 - 6167        | K.DLYANTVLSGGTTM.YPGIADR.M                                              | 2216.45684 | 2 | 1.80E-06 | 0.96 | 6.11  | -     | 821.1   |
| AHQ-1-8, 6234 - 6310        | K.DLYANTVLSGGTTM.YPGIADR.M                                              | 2216.45684 | 2 | 5.29E-04 | 0.95 | 5.11  | -     | 767.1   |
| AHQ-1-8, 6590 - 6667        | K.DLYANTVLSGGTTM.YPGIADR.M                                              | 2216.45684 | 2 | 2.68E-05 | 0.95 | 5.89  | -     | 657.0   |
| AHQ-1-8, 6979 - 7019        | K.DLYANTVLSGGTTM.YPGIADR.M                                              | 2216.45684 | 2 | 4.64E-04 | 0.94 | 5.04  | -     | 697.8   |
| AHQ-1-8, 7032 - 7106        | K.DLYANTVLSGGTTM.YPGIADR.M                                              | 2216.45684 | 2 | 7.47E-05 | 0.90 | 4.31  | -     | 763.5   |
| AHQ-1-8, 7411               | K.DLYANTVLSGGTTM.YPGIADR.M                                              | 2216.45684 | 2 | 1.45E-04 | 0.85 | 3.51  | -     | 780.7   |
| AHQ-1-8, 7642               | K.DLYANTVLSGGTTM.YPGIADR.M                                              | 2216.45684 | 2 | 1.07E-07 | 0.93 | 4.73  | -     | 861.4   |
| AHQ-1-9, 4903               | K.DLYANTVLSGGTTM.YPGIADR.M                                              | 2232.45624 | 2 | 4.93E-09 | 0.92 | 4.26  | -     | 713.6   |
| AHQ-1-9, 5014 - 5090        | K.DLYANTVLSGGTTM.YPGIADR.M                                              | 2232.45624 | 2 | 3.49E-04 | 0.92 | 4.25  | -     | 700.0   |
| AHQ-1-9, 5511 - 5586        | K.DLYANTVLSGGTTM.YPGIADR.M                                              | 2216.45684 | 2 | 8.44E-05 | 0.96 | 5.14  | -     | 1245.7  |
| AHQ-1-9, 5791 - 5858        | K.DLYANTVLSGGTTM.YPGIADR.M                                              | 2216.45684 | 2 | 5.16E-04 | 0.78 | 3.47  | -     | 674.0   |
| AHQ-1-10, 4408 - 4427       | K.DLYANTVLSGGTTM.YPGIADR.M                                              | 2232.45624 | 2 | 2.14E-13 | 0.96 | 5.64  | -     | 782.1   |
| AHQ-1-10, 4507 - 4633       | K.DLYANTVLSGGTTM.YPGIADR.M                                              | 2232.45624 | 2 | 7.78E-04 | 0.96 | 4.88  | -     | 1281.0  |
| AHQ-1-10, 4691 - 4701       | K.DLYANTVLSGGTTM.YPGIADR.M                                              | 2232.45624 | 2 | 6.49E-08 | 0.93 | 4.85  | -     | 849.0   |
| AHQ-1-10, 4835              | K.DLYANTVLSGGTTM.YPGIADR.M                                              | 2216.45684 | 2 | 4.29E-05 | 0.93 | 4.43  | -     | 865.4   |
| AHQ-1-10, 4916 - 4991       | K.DLYANTVLSGGTTM.YPGIADR.M                                              | 2216.45684 | 2 | 4.99E-06 | 0.96 | 5.49  | -     | 835.8   |
| AHQ-1-10, 5163 - 5179       | K.DLYANTVLSGGTTM.YPGIADR.M                                              | 2216.45684 | 2 | 4.63E-06 | 0.96 | 5.06  | -     | 964.3   |
| AHQ-1-11, 4534              | K.DLYANTVLSGGTTM.YPGIADR.M                                              | 2232.45624 | 2 | 4.50E-07 | 0.97 | 5.58  | -     | 1267.6  |
| AHQ-1-11, 4650              | K.DLYANTVLSGGTTM.YPGIADR.M                                              | 2232.45624 | 2 | 2.41E-05 | 0.92 | 4.46  | -     | 764.6   |
| AHQ-1-11, 4918              | K.DLYANTVLSGGTTM.YPGIADR.M                                              | 2216.45684 | 2 | 2.56E-05 | 0.96 | 5.52  | -     | 1152.6  |
| AHQ-1-12, 4689              | K.DLYANTVLSGGTTM.YPGIADR.M                                              | 2232.45624 | 2 | 6.37E-07 | 0.93 | 4.80  | -     | 595.1   |
| AHQ-1-12, 4998              | K.DLYANTVLSGGTTM.YPGIADR.M                                              | 2232.45624 | 2 | 8.19E-04 | 0.94 | 4.90  | -     | 962.8   |
| AHQ-1-12, 5090              | K.DLYANTVLSGGTTM.YPGIADR.M                                              | 2216.45684 | 2 | 3.61E-04 | 0.93 | 3.90  | -     | 1140.2  |
| AHQ-1-12, 5222 - 5278       | K.DLYANTVLSGGTTM.YPGIADR.M                                              | 2216.45684 | 2 | 6.90E-04 | 0.91 | 4.51  | -     | 609.8   |
| AHQ-1-12, 5422              | K.DLYANTVLSGGTTM.YPGIADR.M                                              | 2216.45684 | 2 | 3.18E-06 | 0.86 | 3.97  | -     | 676.1   |
| AHQ-1-13, 4639 - 4703       | K.DLYANTVLSGGTTM.YPGIADR.M                                              | 2232.45624 | 2 | 7.80E-09 | 0.95 | 5.21  | -     | 970.5   |
| AHQ-1-13, 4763 - 4784       | K.DLYANTVLSGGTTM.YPGIADR.M                                              | 2232.45624 | 2 | 1.11E-04 | 0.94 | 4.86  | -     | 858.2   |
| AHQ-1-13, 5011 - 5067       | K.DLYANTVLSGGTTM.YPGIADR.M                                              | 2216.45684 | 2 | 2.70E-05 | 0.96 | 4.96  | -     | 1375.0  |
| AHQ-1-13, 5053              | K.DLYANTVLSGGTTM.YPGIADR.M                                              | 2232.45624 | 2 | 3.36E-05 | 0.85 | 3.95  | -     | 598.6   |
| AHQ-1-14, 5529 - 5588       | K.DLYANTVLSGGTTM.YPGIADR.M                                              | 2232.45624 | 2 | 4.50E-06 | 0.76 | 3.46  | -     | 527.3   |
| AHQ-1-14, 5648 - 5704       | K.DLYANTVLSGGTTM.YPGIADR.M                                              | 2232.45624 | 2 | 4.92E-06 | 0.96 | 5.24  | -     | 1140.2  |
| AHQ-1-14, 5764 - 5820       | K.DLYANTVLSGGTTM.YPGIADR.M                                              | 2232.45624 | 2 | 7.34E-07 | 0.97 | 5.45  | -     | 1138.1  |
| AHQ-1-14, 5876 - 5936       | K.DLYANTVLSGGTTM.YPGIADR.M                                              | 2232.45624 | 2 | 1.77E-04 | 0.95 | 5.31  | -     | 980.8   |
| AHQ-1-14, 5960 - 6016       | K.DLYANTVLSGGTTM.YPGIADR.M                                              | 2216.45684 | 2 | 1.55E-06 | 0.97 | 5.70  | -     | 1495.9  |
| AHQ-1-14, 6357 - 6426       | K.DLYANTVLSGGTTM.YPGIADR.M                                              | 2216.45684 | 2 | 6.91E-04 | 0.76 | 3.61  | -     | 389.1   |
| AHQ-1-13-, 4811 - 4876      | K.DLYANTVLSGGTTM.YPGIADR.M                                              | 2232.45624 | 2 | 2.75E-10 | 0.98 | 5.67  | -     | 1644.5  |
| AHQ-1-13-, 4943 - 5011      | K.DLYANTVLSGGTTM.YPGIADR.M                                              | 2232.45624 | 2 | 1.73E-04 | 0.95 | 5.17  | -     | 937.9   |
| AHQ-1-13-, 5059             | K.DLYANTVLSGGTTM.YPGIADR.M                                              | 2232.45624 | 2 | 1.69E-04 | 0.93 | 4.46  | -     | 967.4   |
| AHQ-1-13-, 5183 - 5203      | K.DLYANTVLSGGTTM.YPGIADR.M                                              | 2232.45624 | 2 | 4.11E-08 | 0.96 | 5.15  | -     | 1032.6  |
| AHQ-1-13-, 5264 - 5327      | K.DLYANTVLSGGTTM.YPGIADR.M                                              | 2216.45684 | 2 | 1.77E-08 | 0.96 | 5.56  | -     | 1079.5  |
| AHQ-1-13-, 5305             | K.DLYANTVLSGGTTM.YPGIADR.M                                              | 2232.45624 | 2 | 2.37E-04 | 0.82 | 3.62  | -     | 659.3   |
| AHQ-1-13-, 5468 - 5531      | K.DLYANTVLSGGTTM.YPGIADR.M                                              | 2216.45684 | 2 | 4.94E-06 | 0.97 | 6.20  | -     | 924.1   |
| AHQ-1-13-, 5595 - 5675      | K.DLYANTVLSGGTTM.YPGIADR.M                                              | 2216.45684 | 2 | 7.38E-04 | 0.96 | 5.40  | -     | 1053.0  |
| AHQ-1-13-, 5753             | K.DLYANTVLSGGTTM.YPGIADR.M                                              | 2216.45684 | 2 | 2.47E-08 | 0.94 | 4.71  | -     | 920.0   |
| AHQ-1-14-, 4711 - 4782      | K.DLYANTVLSGGTTM.YPGIADR.M                                              | 2232.45624 | 2 | 8.61E-07 | 0.94 | 5.01  | -     | 691.8   |
| AHQ-1-14-, 4820 - 4902      | K.DLYANTVLSGGTTM.YPGIADR.M                                              | 2232.45624 | 2 | 1.01E-04 | 0.97 | 5.35  | -     | 1180.8  |
| AHQ-1-14-, 4962 - 5035      | K.DLYANTVLSGGTTM.YPGIADR.M                                              | 2232.45624 | 2 | 5.35E-06 | 0.95 | 4.98  | -     | 987.3   |
| AHQ-1-14-, 5098 - 5170      | K.DLYANTVLSGGTTM.YPGIADR.M                                              | 2232.45624 | 2 | 1.60E-08 | 0.95 | 5.16  | -     | 765.3   |
| AHQ-1-14-, 5130 - 5191      | K.DLYANTVLSGGTTM.YPGIADR.M                                              | 2216.45684 | 2 | 2.85E-12 | 0.97 | 5.84  | -     | 1157.8  |
| AHQ-1-14-, 5280 - 5342      | K.DLYANTVLSGGTTM.YPGIADR.M                                              | 2216.45684 | 2 | 1.71E-06 | 0.95 | 4.99  | -     | 999.6   |
| AHQ-1-14-, 5402 - 5474      | K.DLYANTVLSGGTTM.YPGIADR.M                                              | 2216.45684 | 2 | 2.78E-05 | 0.95 | 5.27  | -     | 863.1   |
| gi 27498332 ref XP_212565.1 | similar to tubulin, beta 5 [Homo sapiens]                               |            |   | 2.28E-13 | 5.03 | 60.32 | 11.90 | 49670.5 |

|                             |                                              |            |   |          |       |        |       |         |
|-----------------------------|----------------------------------------------|------------|---|----------|-------|--------|-------|---------|
| AHQ-1-11, 5312              | R.ALTVPELTQQVFDK.N                           | 1660.89259 | 2 | 4.02E-05 | 0.73  | 2.89   | -     | 348.8   |
| AHQ-1-8, 5640               | R.ALTVPELTQQVFDK.N                           | 1660.89259 | 2 | 8.47E-04 | 0.89  | 3.70   | -     | 590.8   |
| AHQ-1-7, 5805 - 5876        | R.ALTVPELTQQVFDK.N                           | 1660.89259 | 2 | 2.23E-04 | 0.87  | 3.47   | -     | 413.9   |
| AHQ-1-11, 5266 - 5323       | R.ALTVPELTQQVFDK.N                           | 1660.89259 | 2 | 1.82E-04 | 0.86  | 3.84   | -     | 388.5   |
| AHQ-1-7, 4041               | R.IMNTFVSPVSPK.V                             | 1320.58277 | 2 | 1.67E-06 | 0.84  | 3.25   | -     | 690.3   |
| AHQ-1-7, 3372               | R.IMNTFVSPVSPK.V                             | 1336.58217 | 2 | 1.49E-04 | 0.87  | 3.01   | -     | 931.7   |
| AHQ-1-7, 3530 - 3600        | R.IMNTFVSPVSPK.V                             | 1336.58217 | 2 | 1.44E-04 | 0.64  | 2.90   | -     | 427.6   |
| AHQ-1-7, 3896 - 3969        | R.IMNTFVSPVSPK.V                             | 1320.58277 | 2 | 1.71E-05 | 0.91  | 3.15   | -     | 1363.0  |
| AHQ-1-7, 7194               | K.MAVTFIGNSTAIQELFK.R                        | 1871.19002 | 2 | 8.71E-04 | 0.85  | 3.59   | -     | 630.5   |
| AHQ-1-7, 7288               | K.MAVTFIGNSTAIQELFK.R                        | 1871.19002 | 2 | 7.26E-07 | 0.96  | 5.06   | -     | 1030.1  |
| AHQ-1-14, 6411 - 6432       | K.M*AVTFIGNSTAIQELFK.R                       | 1887.18942 | 2 | 5.15E-07 | 0.95  | 4.72   | -     | 1052.0  |
| AHQ-1-7, 7021 - 7084        | K.M*AVTFIGNSTAIQELFK.R                       | 1887.18942 | 2 | 2.28E-13 | 0.97  | 5.04   | -     | 1204.7  |
| AHQ-1-7, 6709 - 6714        | K.M*AVTFIGNSTAIQELFK.R                       | 1887.18942 | 2 | 3.36E-04 | 0.92  | 3.94   | -     | 849.6   |
| AHQ-1-1, 6564               | K.M*AVTFIGNSTAIQELFK.R                       | 1887.18942 | 2 | 1.49E-07 | 0.98  | 4.75   | -     | 2063.9  |
| AHQ-1-13, 6213              | K.M*AVTFIGNSTAIQELFK.R                       | 1887.18942 | 2 | 1.08E-04 | 0.67  | 2.99   | -     | 573.5   |
| AHQ-1-13, 6300              | K.M*AVTFIGNSTAIQELFK.R                       | 1887.18942 | 2 | 2.09E-08 | 0.95  | 4.50   | -     | 973.1   |
| AHQ-1-13, 6448 - 6515       | K.M*AVTFIGNSTAIQELFK.R                       | 1887.18942 | 2 | 7.96E-04 | 0.91  | 3.96   | -     | 949.9   |
| AHQ-1-13, 6700 - 6747       | K.M*AVTFIGNSTAIQELFK.R                       | 1887.18942 | 2 | 1.22E-11 | 0.96  | 4.76   | -     | 1064.6  |
| AHQ-1-14, 6200 - 6259       | K.M*AVTFIGNSTAIQELFK.R                       | 1887.18942 | 2 | 3.05E-08 | 0.98  | 6.45   | -     | 1784.5  |
| AHQ-1-14, 6499              | K.M*AVTFIGNSTAIQELFK.R                       | 1887.18942 | 2 | 6.52E-08 | 0.94  | 4.38   | -     | 785.2   |
| AHQ-1-7, 4481               | R.YLTVAAVFR.G                                | 1040.23994 | 2 | 2.66E-05 | 0.90  | 3.32   | -     | 819.3   |
| gi 11968039 ref NP_071930.1 | hypothetical protein FLJ22405 [Homo sapiens] |            |   | 2.34E-13 | 0.95  | 10.21  | 4.60  | 46880.2 |
| AHQ-1-14, 6544              | R.AVAPSPSAIGLLEQFAR.G                        | 1842.08850 | 2 | 2.34E-13 | 0.95  | 4.27   | -     | 837.7   |
| gi 4826898 ref NP_005013.1  | profilin 1; profilin-1 [Homo sapiens]        |            |   | 2.64E-13 | 18.00 | 200.29 | 71.40 | 15054.2 |
| AHQ-1-13, 4881 - 4892       | K.CSVIRDLLQDGEFSM*DLR.T                      | 2259.50329 | 3 | 4.08E-05 | 0.94  | 4.84   | -     | 1157.1  |
| AHQ-1-13, 5044              | K.CSVIRDLLQDGEFSM*DLR.T                      | 2259.50329 | 3 | 1.37E-04 | 0.94  | 5.00   | -     | 1243.8  |
| AHQ-1-13, 5155              | K.CSVIRDLLQDGEFSM*DLR.T                      | 2259.50329 | 3 | 2.70E-05 | 0.97  | 5.57   | -     | 1773.5  |
| AHQ-1-13, 1805 - 1863       | K.CYEM*ASHLR.R                               | 1184.32794 | 2 | 2.69E-05 | 0.87  | 2.73   | -     | 1302.4  |
| AHQ-1-13, 1923 - 1983       | K.CYEM*ASHLR.R                               | 1184.32794 | 2 | 4.98E-05 | 0.95  | 3.36   | -     | 1672.4  |
| AHQ-1-13, 2455 - 2477       | K.CYEM*ASHLR.R                               | 1168.32854 | 2 | 6.50E-04 | 0.95  | 3.51   | -     | 1649.8  |
| AHQ-1-14, 2438 - 2450       | K.CYEM*ASHLR.R                               | 1168.32854 | 2 | 5.99E-04 | 0.95  | 2.96   | -     | 2002.0  |
| AHQ-1-13, 1700 - 1769       | K.CYEM*ASHLR.R                               | 1184.32794 | 2 | 4.00E-05 | 0.77  | 2.59   | -     | 834.0   |
| AHQ-1-13, 1973 - 2029       | K.CYEM*ASHLR.R                               | 1184.32794 | 2 | 6.26E-04 | 0.83  | 2.72   | -     | 1079.9  |
| AHQ-1-13, 2094              | K.CYEM*ASHLR.R                               | 1184.32794 | 2 | 3.35E-04 | 0.88  | 2.65   | -     | 1253.7  |
| AHQ-1-13, 2557 - 2569       | K.CYEM*ASHLR.R                               | 1168.32854 | 2 | 3.60E-04 | 0.95  | 3.81   | -     | 1661.9  |
| AHQ-1-13, 4203              | K.DRSSFYVNGLTGGQK.C                          | 1742.91379 | 2 | 7.82E-10 | 0.97  | 5.58   | -     | 1333.3  |
| AHQ-1-13, 4023 - 4096       | K.DRSSFYVNGLTGGQK.C                          | 1742.91379 | 2 | 1.66E-06 | 0.97  | 5.58   | -     | 1098.8  |
| AHQ-1-13, 4344              | K.DRSSFYVNGLTGGQK.C                          | 1742.91379 | 2 | 7.61E-12 | 0.97  | 5.34   | -     | 1150.5  |
| AHQ-1-13, 4153 - 4157       | K.DRSSFYVNGLTGGQK.C                          | 1742.91379 | 2 | 2.64E-13 | 0.95  | 5.24   | -     | 779.7   |
| AHQ-1-12, 5398              | R.DSLLQDGEFSMDLR.T                           | 1626.77023 | 2 | 3.93E-07 | 0.87  | 2.96   | -     | 1180.1  |
| AHQ-1-13, 4765              | R.DSLLQDGEFSMDLR.T                           | 1642.76963 | 3 | 5.24E-08 | 0.94  | 4.42   | -     | 1686.8  |
| AHQ-1-13, 4707 - 4785       | R.DSLLQDGEFSMDLR.T                           | 1642.76963 | 2 | 3.39E-08 | 0.96  | 3.66   | -     | 2032.6  |
| AHQ-1-12, 5254 - 5317       | R.DSLLQDGEFSMDLR.T                           | 1626.77023 | 2 | 2.00E-10 | 0.97  | 4.55   | -     | 1869.2  |
| AHQ-1-13, 4472 - 4483       | R.DSLLQDGEFSMDLR.T                           | 1642.76963 | 2 | 8.05E-05 | 0.96  | 4.78   | -     | 1538.8  |
| AHQ-1-12, 5122 - 5193       | R.DSLLQDGEFSMDLR.T                           | 1626.77023 | 2 | 1.97E-09 | 0.97  | 4.97   | -     | 1503.5  |
| AHQ-1-12, 4547 - 4621       | R.DSLLQDGEFSMDLR.T                           | 1642.76963 | 2 | 6.47E-09 | 0.95  | 3.78   | -     | 1843.8  |
| AHQ-1-13, 4831 - 4912       | R.DSLLQDGEFSMDLR.T                           | 1642.76963 | 2 | 5.50E-04 | 0.96  | 4.03   | -     | 1741.1  |
| AHQ-1-12, 4458 - 4459       | R.DSLLQDGEFSMDLR.T                           | 1642.76963 | 2 | 1.96E-08 | 0.95  | 4.40   | -     | 1133.5  |
| AHQ-1-14, 5426 - 5438       | R.DSLLQDGEFSMDLR.T                           | 1626.77023 | 2 | 9.80E-11 | 0.97  | 4.85   | -     | 2035.6  |
| AHQ-1-13, 4979              | R.DSLLQDGEFSMDLR.T                           | 1642.76963 | 2 | 2.99E-04 | 0.95  | 4.19   | -     | 1496.9  |
| AHQ-1-13, 6977 - 7044       | R.DSLLQDGEFSMDLR.T                           | 1626.77023 | 2 | 1.29E-06 | 0.92  | 3.51   | -     | 1240.3  |
| AHQ-1-13, 5336 - 5363       | R.DSLLQDGEFSMDLR.T                           | 1626.77023 | 2 | 1.83E-07 | 0.92  | 4.05   | -     | 1138.4  |
| AHQ-1-14, 5508 - 5586       | R.DSLLQDGEFSMDLR.T                           | 1626.77023 | 2 | 7.71E-06 | 0.96  | 4.32   | -     | 1801.2  |
| AHQ-1-13, 5371 - 5449       | R.DSLLQDGEFSMDLR.T                           | 1642.76963 | 2 | 4.29E-05 | 0.85  | 3.27   | -     | 1116.0  |
| AHQ-1-13, 5495 - 5559       | R.DSLLQDGEFSMDLR.T                           | 1626.77023 | 2 | 2.65E-07 | 0.97  | 4.54   | -     | 2033.9  |
| AHQ-1-14, 5163 - 5242       | R.DSLLQDGEFSMDLR.T                           | 1626.77023 | 2 | 2.74E-06 | 0.95  | 3.94   | -     | 1512.6  |
| AHQ-1-13, 5563              | R.DSLLQDGEFSMDLR.T                           | 1642.76963 | 2 | 6.73E-04 | 0.94  | 3.62   | -     | 1593.5  |
| AHQ-1-14, 4680 - 4698       | R.DSLLQDGEFSMDLR.T                           | 1642.76963 | 2 | 4.39E-06 | 0.94  | 3.68   | -     | 1512.5  |
| AHQ-1-13, 5623 - 5692       | R.DSLLQDGEFSMDLR.T                           | 1626.77023 | 2 | 2.61E-08 | 0.97  | 4.81   | -     | 2074.3  |
| AHQ-1-13, 4576 - 4643       | R.DSLLQDGEFSMDLR.T                           | 1642.76963 | 2 | 1.07E-09 | 0.97  | 5.65   | -     | 1355.3  |
| AHQ-1-14, 5338 - 5396       | R.DSLLQDGEFSMDLR.T                           | 1642.76963 | 2 | 6.03E-05 | 0.78  | 2.96   | -     | 856.6   |
| AHQ-1-13, 5759 - 5825       | R.DSLLQDGEFSMDLR.T                           | 1626.77023 | 2 | 1.56E-08 | 0.97  | 4.49   | -     | 2106.2  |
| AHQ-1-13, 5424 - 5487       | R.DSLLQDGEFSMDLR.T                           | 1626.77023 | 2 | 2.05E-08 | 0.95  | 3.44   | -     | 1897.6  |
| AHQ-1-13, 5307 - 5367       | R.DSLLQDGEFSMDLR.T                           | 1626.77023 | 2 | 1.47E-07 | 0.98  | 5.08   | -     | 2163.8  |
| AHQ-1-13, 4287 - 4368       | R.DSLLQDGEFSMDLR.T                           | 1642.76963 | 2 | 5.14E-09 | 0.95  | 4.54   | -     | 1095.1  |
| AHQ-1-14, 4550              | R.DSLLQDGEFSMDLR.T                           | 1642.76963 | 2 | 1.46E-05 | 0.88  | 3.35   | -     | 912.4   |
| AHQ-1-13, 4373 - 4440       | R.DSLLQDGEFSMDLR.T                           | 1642.76963 | 2 | 1.54E-06 | 0.95  | 4.11   | -     | 1320.8  |
| AHQ-1-13, 5183 - 5248       | R.DSLLQDGEFSMDLR.T                           | 1626.77023 | 2 | 4.64E-10 | 0.97  | 4.83   | -     | 2123.8  |
| AHQ-1-13, 4499 - 4565       | R.DSLLQDGEFSMDLR.T                           | 1642.76963 | 2 | 7.44E-10 | 0.97  | 4.25   | -     | 1979.8  |
| AHQ-1-13, 4623              | R.DSLLQDGEFSMDLR.T                           | 1642.76963 | 2 | 1.05E-06 | 0.94  | 3.98   | -     | 1652.1  |
| AHQ-1-13, 4721 - 4725       | R.DSLLQDGEFSMDLR.T                           | 1642.76963 | 2 | 2.90E-06 | 0.96  | 3.74   | -     | 1762.7  |
| AHQ-1-14, 5544              | R.DSLLQDGEFSMDLR.T                           | 1642.76963 | 2 | 7.50E-05 | 0.89  | 3.11   | -     | 1337.6  |
| AHQ-1-13, 5069 - 5127       | R.DSLLQDGEFSMDLR.T                           | 1626.77023 | 2 | 9.80E-06 | 0.96  | 4.01   | -     | 1873.2  |
| AHQ-1-13, 5100 - 5173       | R.DSLLQDGEFSMDLR.T                           | 1642.76963 | 2 | 8.12E-06 | 0.90  | 3.83   | -     | 956.3   |
| AHQ-1-13, 3617 - 3683       | K.DSPSVWAAVPGK.T                             | 1214.35211 | 2 | 2.74E-06 | 0.88  | 3.61   | -     | 841.0   |
| AHQ-1-13, 3435 - 3444       | K.DSPSVWAAVPGK.T                             | 1214.35211 | 2 | 1.22E-06 | 0.89  | 3.12   | -     | 1122.8  |
| AHQ-1-14, 3632 - 3644       | K.DSPSVWAAVPGK.T                             | 1214.35211 | 2 | 3.65E-08 | 0.89  | 3.09   | -     | 1057.9  |
| AHQ-1-13, 3373 - 3375       | K.DSPSVWAAVPGK.T                             | 1214.35211 | 2 | 2.41E-06 | 0.89  | 3.53   | -     | 1090.9  |
| AHQ-1-13, 3534 - 3599       | K.DSPSVWAAVPGK.T                             | 1214.35211 | 2 | 2.75E-05 | 0.93  | 3.51   | -     | 1248.7  |
| AHQ-1-13, 3748              | K.DSPSVWAAVPGK.T                             | 1214.35211 | 2 | 3.56E-06 | 0.90  | 3.60   | -     | 896.4   |
| AHQ-1-13, 3648 - 3712       | K.DSPSVWAAVPGK.T                             | 1214.35211 | 2 | 4.49E-05 | 0.86  | 2.65   | -     | 1048.7  |
| AHQ-1-12, 3533 - 3553       | K.DSPSVWAAVPGK.T                             | 1214.35211 | 2 | 3.09E-06 | 0.87  | 3.18   | -     | 881.0   |
| AHQ-1-13, 6252 - 6256       | K.DSPSVWAAVPGKTFVNITPAEVLGK.D                | 2840.26581 | 3 | 1.92E-04 | 0.94  | 4.62   | -     | 1532.4  |
| AHQ-1-13, 6675              | K.DSPSVWAAVPGKTFVNITPAEVLGK.D                | 2840.26581 | 3 | 5.47E-09 | 0.93  | 4.50   | -     | 1620.1  |
| AHQ-1-13, 2305              | K.KCYEMASHLR.R                               | 1296.50145 | 2 | 2.02E-07 | 0.79  | 2.77   | -     | 782.3   |
| AHQ-1-14, 4400              | R.SSFYVNGLTGGQK.C                            | 1471.63957 | 1 | 2.25E-09 | 0.51  | 2.77   | -     | 391.6   |
| AHQ-1-14, 5272              | R.SSFYVNGLTGGQK.C                            | 1471.63957 | 2 | 1.54E-07 | 0.93  | 4.22   | -     | 828.4   |
| AHQ-1-14, 5281              | R.SSFYVNGLTGGQK.C                            | 1471.63957 | 1 | 5.23E-06 | 0.44  | 2.18   | -     | 511.7   |
| AHQ-1-12, 4246              | R.SSFYVNGLTGGQK.C                            | 1471.63957 | 1 | 2.78E-06 | 0.39  | 2.17   | -     | 345.8   |
| AHQ-1-12, 4383 - 4462       | R.SSFYVNGLTGGQK.C                            | 1471.63957 | 2 | 6.37E-05 | 0.97  | 4.79   | -     | 1296.1  |
| AHQ-1-13, 4197 - 4237       | R.SSFYVNGLTGGQK.C                            | 1471.63957 | 1 | 1.39E-06 | 0.75  | 3.06   | -     | 476.7   |
| AHQ-1-13, 4200 - 4561       | R.SSFYVNGLTGGQK.C                            | 1471.63957 | 1 | 2.55E-05 | 0.58  | 3.22   | -     | 393.4   |
| AHQ-1-13, 4283              | R.SSFYVNGLTGGQK.C                            | 1471.63957 | 2 | 1.52E-08 | 0.92  | 3.74   | -     | 836.8   |
| AHQ-1-13, 4195 - 4223       | R.SSFYVNGLTGGQK.C                            | 1471.63957 | 2 | 1.46E-07 | 0.95  | 4.22   | -     | 974.6   |
| AHQ-1-14, 4390              | R.SSFYVNGLTGGQK.C                            | 1471.63957 | 2 | 2.55E-08 | 0.95  | 4.17   | -     | 972.4   |
| AHQ-1-14, 4539 - 4616       | R.SSFYVNGLTGGQK.C                            | 1471.63957 | 1 | 2.50E-09 | 0.53  | 2.34   | -     | 408.6   |
| AHQ-1-13, 4940              | R.SSFYVNGLTGGQK.C                            | 1471.63957 | 2 | 9.54E-05 | 0.77  | 2.58   | -     | 660.9   |
| AHQ-1-12, 4473 - 4543       | R.SSFYVNGLTGGQK.C                            | 1471.63957 | 2 | 1.06E-10 | 0.95  | 3.86   | -     | 1419.7  |
| AHQ-1-13, 4767 - 4833       | R.SSFYVNGLTGGQK.C                            | 1471.63957 | 2 | 3.43E-08 | 0.89  | 3.62   | -     | 795.5   |
| AHQ-1-13, 4619 - 4699       | R.SSFYVNGLTGGQK.C                            | 1471.63957 | 2 | 1.12E-08 | 0.97  | 4.63   | -     | 1669.4  |
| AHQ-1-13, 4471 - 4551       | R.SSFYVNGLTGGQK.C                            | 1471.63957 | 2 | 9.58E-08 | 0.95  | 4.29   | -     | 952.8   |
| AHQ-1-13, 4391 - 4792       | R.SSFYVNGLTGGQK.C                            | 1471.63957 | 1 | 4.12E-05 | 0.44  | 3.02   | -     | 314.1   |
| AHQ-1-13, 4387 - 4691       | R.SSFYVNGLTGGQK.C                            | 1471.63957 | 1 | 2.30E-09 | 0.79  | 3.31   | -     | 538.7   |
| AHQ-1-13, 4385 - 4451       | R.SSFYVNGLTGGQK.C                            | 1471.63957 | 2 | 2.44E-07 | 0.92  | 4.14   | -     | 733.8   |
| AHQ-1-13, 4364 - 4443       | R.SSFYVNGLTGGQK.C                            | 1471.63957 | 2 | 4.84E-09 | 0.97  | 4.40   | -     | 1703.2  |
| AHQ-1-13, 4495 - 4575       | R.SSFYVNGLTGGQK.C                            | 1471.63957 | 2 | 8.81E-06 | 0.90  | 3.92   | -     | 782.8   |
| AHQ-1-12, 4241              | R.SSFYVNGLTGGQK.C                            | 1471.63957 | 2 | 4.35E-04 | 0.94  | 4.03   | -     | 936.6   |

|                            |                                                                          |            |   |          |       |        |       |         |
|----------------------------|--------------------------------------------------------------------------|------------|---|----------|-------|--------|-------|---------|
| AHQ-1-12, 4389 - 4463      | R.SSFYVNGLTGGQK.C                                                        | 1471.63957 | 1 | 4.02E-07 | 0.73  | 2.68   | -     | 569.8   |
| AHQ-1-13- ,5125            | R.SSFYVNGLTGGQKCSVIR.D                                                   | 2088.37322 | 2 | 1.53E-07 | 0.86  | 3.32   | -     | 760.2   |
| AHQ-1-12, 3014 - 3094      | K.STGGAPTNNVTVK.T                                                        | 1380.52843 | 2 | 1.32E-08 | 0.89  | 4.03   | -     | 442.5   |
| AHQ-1-13- ,3323 - 3387     | K.STGGAPTNNVTVK.T                                                        | 1380.52843 | 2 | 1.16E-06 | 0.90  | 3.55   | -     | 551.7   |
| AHQ-1-13- ,3239 - 3299     | K.STGGAPTNNVTVK.T                                                        | 1380.52843 | 2 | 4.89E-07 | 0.81  | 3.32   | -     | 423.6   |
| AHQ-1-13- ,3001 - 3071     | K.STGGAPTNNVTVK.T                                                        | 1380.52843 | 2 | 6.41E-06 | 0.80  | 3.33   | -     | 381.7   |
| AHQ-1-13- ,3100            | K.STGGAPTNNVTVK.T                                                        | 1380.52843 | 1 | 3.63E-04 | 0.71  | 3.07   | -     | 435.5   |
| AHQ-1-13, 3015 - 3078      | K.STGGAPTNNVTVK.T                                                        | 1380.52843 | 2 | 3.21E-06 | 0.94  | 4.31   | -     | 651.6   |
| AHQ-1-13, 3122 - 3165      | K.STGGAPTNNVTVK.T                                                        | 1380.52843 | 2 | 2.52E-07 | 0.71  | 2.65   | -     | 436.6   |
| AHQ-1-13, 3230 - 3289      | K.STGGAPTNNVTVK.T                                                        | 1380.52843 | 2 | 1.29E-05 | 0.83  | 3.31   | -     | 511.3   |
| AHQ-1-13- ,3140            | K.STGGAPTNNVTVKTKDK.T                                                    | 1724.89354 | 2 | 2.87E-05 | 0.84  | 3.55   | -     | 530.9   |
| AHQ-1-13- ,2964            | K.STGGAPTNNVTVKTKDK.T                                                    | 1724.89354 | 2 | 2.73E-04 | 0.73  | 3.25   | -     | 403.8   |
| AHQ-1-13- ,3621 - 3699     | K.TDKTLVLLMGK.E                                                          | 1219.51989 | 2 | 2.42E-07 | 0.96  | 4.15   | -     | 1542.1  |
| AHQ-1-12, 3573             | K.TDKTLVLLMGK.E                                                          | 1219.51989 | 2 | 1.20E-05 | 0.94  | 3.51   | -     | 1171.6  |
| AHQ-1-13- ,2987 - 2991     | K.TDKTLVLLMGK.E                                                          | 1235.51929 | 2 | 5.84E-05 | 0.91  | 3.56   | -     | 957.3   |
| AHQ-1-13, 3537 - 3600      | K.TDKTLVLLMGK.E                                                          | 1219.51989 | 2 | 3.27E-04 | 0.77  | 2.61   | -     | 891.5   |
| AHQ-1-12, 5553 - 5609      | K.TFVNITPAEVGVLVGK.D                                                     | 1644.93630 | 2 | 6.03E-04 | 0.57  | 2.52   | -     | 406.5   |
| AHQ-1-12, 5670 - 5691      | K.TFVNITPAEVGVLVGK.D                                                     | 1644.93630 | 3 | 3.35E-07 | 0.95  | 4.73   | -     | 1370.6  |
| AHQ-1-13, 5659 - 5715      | K.TFVNITPAEVGVLVGK.D                                                     | 1644.93630 | 2 | 4.33E-06 | 0.89  | 3.96   | -     | 712.5   |
| AHQ-1-13, 5552             | K.TFVNITPAEVGVLVGK.D                                                     | 1644.93630 | 3 | 2.72E-06 | 0.96  | 4.79   | -     | 1523.4  |
| AHQ-1-14- ,5911            | K.TFVNITPAEVGVLVGK.D                                                     | 1644.93630 | 2 | 1.84E-05 | 0.83  | 3.54   | -     | 580.0   |
| AHQ-1-12, 5646 - 5705      | K.TFVNITPAEVGVLVGK.D                                                     | 1644.93630 | 2 | 2.42E-07 | 0.94  | 4.57   | -     | 773.6   |
| AHQ-1-13, 5527             | K.TFVNITPAEVGVLVGK.D                                                     | 1644.93630 | 2 | 3.68E-05 | 0.95  | 4.35   | -     | 1065.7  |
| AHQ-1-13, 5255 - 5335      | K.TFVNITPAEVGVLVGK.D                                                     | 1644.93630 | 2 | 4.40E-04 | 0.62  | 3.16   | -     | 419.6   |
| AHQ-1-12, 5401             | K.TFVNITPAEVGVLVGK.D                                                     | 1644.93630 | 2 | 8.32E-05 | 0.83  | 3.36   | -     | 519.8   |
| AHQ-1-14- ,5826            | K.TFVNITPAEVGVLVGK.D                                                     | 1644.93630 | 2 | 3.54E-06 | 0.82  | 3.26   | -     | 799.0   |
| AHQ-1-13- ,5637 - 5653     | K.TFVNITPAEVGVLVGK.D                                                     | 1644.93630 | 2 | 2.15E-04 | 0.85  | 3.38   | -     | 818.9   |
| AHQ-1-13- ,5744 - 5799     | K.TFVNITPAEVGVLVGK.D                                                     | 1644.93630 | 2 | 6.02E-04 | 0.90  | 4.23   | -     | 667.2   |
| AHQ-1-13, 5515 - 5576      | K.TFVNITPAEVGVLVGK.D                                                     | 1644.93630 | 2 | 7.20E-07 | 0.94  | 4.42   | -     | 948.5   |
| AHQ-1-13- ,5827 - 5907     | K.TFVNITPAEVGVLVGK.D                                                     | 1644.93630 | 2 | 4.65E-08 | 0.95  | 4.74   | -     | 970.0   |
| AHQ-1-13- ,5877 - 5939     | K.TFVNITPAEVGVLVGK.D                                                     | 1644.93630 | 3 | 2.75E-09 | 0.97  | 5.83   | -     | 1436.4  |
| AHQ-1-13- ,6092 - 6159     | K.TFVNITPAEVGVLVGK.D                                                     | 1644.93630 | 2 | 1.80E-06 | 0.95  | 4.79   | -     | 1011.3  |
| AHQ-1-13- ,5543 - 5551     | K.TFVNITPAEVGVLVGKDR.S                                                   | 1916.21052 | 2 | 6.44E-08 | 0.94  | 4.58   | -     | 845.7   |
| AHQ-1-13, 5233             | K.TFVNITPAEVGVLVGKDR.S                                                   | 1916.21052 | 3 | 7.47E-05 | 0.65  | 3.09   | -     | 592.5   |
| AHQ-1-13, 5236 - 5303      | K.TFVNITPAEVGVLVGKDR.S                                                   | 1916.21052 | 2 | 6.66E-06 | 0.91  | 4.11   | -     | 790.5   |
| AHQ-1-13, 5936 - 5980      | K.TFVNITPAEVGVLVGKDR.S                                                   | 1916.21052 | 2 | 1.84E-04 | 0.68  | 3.50   | -     | 591.2   |
| AHQ-1-13- ,2899 - 2919     | R.TKSTGGAPTNNVTVK.T                                                      | 1609.80568 | 3 | 1.74E-05 | 0.82  | 3.50   | -     | 897.5   |
| AHQ-1-13, 2771 - 2849      | R.TKSTGGAPTNNVTVK.T                                                      | 1609.80568 | 2 | 1.01E-04 | 0.89  | 3.87   | -     | 676.8   |
| AHQ-1-13- ,2821 - 2885     | R.TKSTGGAPTNNVTVK.T                                                      | 1609.80568 | 2 | 7.15E-04 | 0.95  | 4.43   | -     | 983.9   |
| AHQ-1-12, 2803             | R.TKSTGGAPTNNVTVK.T                                                      | 1609.80568 | 2 | 1.40E-05 | 0.92  | 3.99   | -     | 894.9   |
| AHQ-1-13- ,3776 - 3855     | K.TLVLLMGK.E                                                             | 875.15478  | 2 | 1.08E-05 | 0.71  | 2.54   | -     | 462.6   |
| AHQ-1-14- ,3023            | K.TLVLLMGK.E                                                             | 891.15418  | 2 | 4.68E-04 | 0.81  | 2.71   | -     | 559.1   |
| AHQ-1-13, 3592 - 3780      | K.TLVLLMGK.E                                                             | 875.15478  | 1 | 8.58E-04 | 0.57  | 2.60   | -     | 625.7   |
| AHQ-1-14- ,3816            | K.TLVLLMGK.E                                                             | 875.15478  | 2 | 1.67E-05 | 0.81  | 2.96   | -     | 536.1   |
| AHQ-1-12, 3665 - 3666      | K.TLVLLMGK.E                                                             | 875.15478  | 2 | 1.05E-05 | 0.75  | 2.82   | -     | 502.7   |
| AHQ-1-12, 2955             | K.TLVLLMGK.E                                                             | 891.15418  | 2 | 1.50E-04 | 0.73  | 2.70   | -     | 578.9   |
| AHQ-1-13, 3656 - 3731      | K.TLVLLMGK.E                                                             | 875.15478  | 2 | 1.46E-05 | 0.82  | 2.94   | -     | 465.3   |
| AHQ-1-13- ,3060 - 3127     | K.TLVLLMGK.E                                                             | 891.15418  | 2 | 6.65E-04 | 0.82  | 2.65   | -     | 703.9   |
| gj4502549[ref]NP_001734.1  | calmodulin 2 (phosphorylase kinase, delta); phosphorylase kinase delta   |            |   | 2.93E-13 | 1.92  | 20.26  | 22.10 | 16837.5 |
| AHQ-1-11, 3895 - 3950      | K.EAFSLFDKDDGDTITK.E                                                     | 1845.98441 | 2 | 1.65E-04 | 0.93  | 3.74   | -     | 1070.1  |
| AHQ-1-12, 4077 - 4141      | K.EAFSLFDKDDGDTITK.E                                                     | 1845.98441 | 2 | 8.35E-09 | 0.95  | 4.28   | -     | 1496.5  |
| AHQ-1-12, 3745 - 3809      | R.VFDKDGNGYISAAELR.H                                                     | 1755.90933 | 2 | 2.93E-13 | 0.97  | 5.10   | -     | 1457.2  |
| AHQ-1-12, 3874 - 3946      | R.VFDKDGNGYISAAELR.H                                                     | 1755.90933 | 2 | 1.51E-04 | 0.81  | 3.50   | -     | 712.0   |
| AHQ-1-11, 3730             | R.VFDKDGNGYISAAELR.H                                                     | 1755.90933 | 2 | 5.15E-09 | 0.97  | 4.79   | -     | 1580.9  |
| AHQ-1-13, 3828             | R.VFDKDGNGYISAAELR.H                                                     | 1755.90933 | 2 | 1.92E-10 | 0.95  | 4.31   | -     | 1238.9  |
| AHQ-1-14, 4744             | R.VFDKDGNGYISAAELR.H                                                     | 1755.90933 | 2 | 8.23E-07 | 0.60  | 2.53   | -     | 610.9   |
| AHQ-1-11, 3623 - 3668      | R.VFDKDGNGYISAAELR.H                                                     | 1755.90933 | 2 | 1.08E-04 | 0.84  | 3.43   | -     | 945.5   |
| gj21735621[ref]NP_005909.2 | mitochondrial malate dehydrogenase precursor [Homo sapiens]              |            |   | 3.05E-13 | 6.33  | 70.34  | 37.00 | 35503.0 |
| AHQ-1-9, 3100              | K.AGAGSATLSMAYAGAR.F                                                     | 1455.62204 | 2 | 6.36E-05 | 0.84  | 3.62   | -     | 675.7   |
| AHQ-1-9, 6390 - 6470       | K.GYLGPEQLPDCLKGCDDVVPAGVPR.K                                            | 2813.24211 | 2 | 6.69E-08 | 0.87  | 4.16   | -     | 412.4   |
| AHQ-1-9, 5308              | K.IFVGTLLDIVR.A                                                          | 1234.46961 | 2 | 6.43E-07 | 0.94  | 3.92   | -     | 1337.4  |
| AHQ-1-9, 5714              | R.LTYLDIAHTPGVAADLSHIETK.A                                               | 2366.65506 | 3 | 5.48E-09 | 0.98  | 6.71   | -     | 2519.9  |
| AHQ-1-9, 5711              | R.LTYLDIAHTPGVAADLSHIETK.A                                               | 2366.65506 | 2 | 3.59E-04 | 0.80  | 3.01   | -     | 617.6   |
| AHQ-1-9, 5608 - 5616       | K.SQETECTYFSTPLLLGK.K                                                    | 1976.19328 | 2 | 1.14E-08 | 0.97  | 5.49   | -     | 1748.2  |
| AHQ-1-9, 6744              | K.VAVLGASGGIGQPLSLLLN.N                                                  | 1794.17156 | 2 | 3.05E-13 | 0.97  | 5.69   | -     | 1343.9  |
| AHQ-1-13, 6244 - 6272      | K.VAVLGASGGIGQPLSLLLN.N                                                  | 1794.17156 | 2 | 6.94E-04 | 0.94  | 4.28   | -     | 1172.6  |
| AHQ-1-13- ,6688            | K.VAVLGASGGIGQPLSLLLN.N                                                  | 1794.17156 | 2 | 1.39E-09 | 0.93  | 3.89   | -     | 1156.7  |
| AHQ-1-9, 4991 - 5062       | K.VDFPQDLTALTGR.I                                                        | 1561.72111 | 2 | 1.08E-05 | 0.75  | 3.05   | -     | 619.6   |
| gj4502295[ref]NP_001677.1  | ATP synthase, H+ transporting, mitochondrial F1 complex, beta polypepti  |            |   | 3.50E-13 | 10.58 | 120.27 | 28.80 | 57952.2 |
| AHQ-1-7, 7560              | R.DQEGQDVLFDINIFR.F                                                      | 1923.11524 | 2 | 3.90E-11 | 0.96  | 5.14   | -     | 1147.2  |
| AHQ-1-8, 7570              | R.DQEGQDVLFDINIFR.F                                                      | 1923.11524 | 2 | 3.50E-13 | 0.97  | 5.34   | -     | 1264.0  |
| AHQ-1-7, 4618 - 4669       | R.FTQAGSEVSALLGR.I                                                       | 1436.59522 | 2 | 3.43E-06 | 0.92  | 3.58   | -     | 1229.7  |
| AHQ-1-8, 4431              | R.FTQAGSEVSALLGR.I                                                       | 1436.59522 | 2 | 1.55E-09 | 0.94  | 4.24   | -     | 1043.9  |
| AHQ-1-8, 7455              | K.GFQQILAGEYDHLPEQAFYMVGPIIEEAVK.A                                       | 3352.76051 | 3 | 4.52E-08 | 0.87  | 4.52   | -     | 541.4   |
| AHQ-1-7, 7456              | K.GFQQILAGEYDHLPEQAFYMVGPIIEEAVK.A                                       | 3352.76051 | 3 | 1.28E-06 | 0.71  | 3.38   | -     | 576.3   |
| AHQ-1-7, 7341              | K.GFQQILAGEYDHLPEQAFYMVGPIIEEAVK.A                                       | 3368.75991 | 3 | 3.99E-05 | 0.92  | 5.26   | -     | 897.1   |
| AHQ-1-8, 3769 - 3799       | R.IMNVIGEPIDER.G                                                         | 1386.59962 | 2 | 5.19E-05 | 0.85  | 3.54   | -     | 757.6   |
| AHQ-1-7, 4854              | R.IPSAVGYOPLATDMGTMQER.I                                                 | 2267.56880 | 2 | 2.18E-04 | 0.88  | 4.03   | -     | 419.0   |
| AHQ-1-7, 4106              | R.IPSAVGYOPLATDMGTMQER.I                                                 | 2283.56820 | 2 | 9.27E-05 | 0.74  | 4.46   | -     | 392.3   |
| AHQ-1-7, 4362              | R.IPSAVGYOPLATDMGTMQER.I                                                 | 2283.56820 | 2 | 6.09E-04 | 0.78  | 4.59   | -     | 531.6   |
| AHQ-1-8, 4772              | R.IPSAVGYOPLATDMGTMQER.I                                                 | 2267.56880 | 2 | 3.10E-05 | 0.84  | 3.52   | -     | 474.9   |
| AHQ-1-7, 4280              | R.LVLEVAQHLGESTVR.T                                                      | 1651.88893 | 2 | 2.66E-07 | 0.97  | 4.38   | -     | 1569.3  |
| AHQ-1-8, 4141              | R.LVLEVAQHLGESTVR.T                                                      | 1651.88893 | 2 | 3.81E-07 | 0.97  | 4.38   | -     | 1650.0  |
| AHQ-1-7, 5934 - 5936       | R.VALTGLTVAEYFR.D                                                        | 1440.66861 | 2 | 1.58E-05 | 0.98  | 4.41   | -     | 2119.6  |
| AHQ-1-8, 5675              | R.VALTGLTVAEYFR.D                                                        | 1440.66861 | 2 | 2.83E-04 | 0.89  | 3.26   | -     | 1106.8  |
| AHQ-1-8, 3301 - 3306       | K.VALVYQMNQPPGAR.A                                                       | 1601.85511 | 2 | 2.29E-05 | 0.82  | 3.35   | -     | 719.0   |
| AHQ-1-7, 4825              | K.VLDSGAPIKIPVGPETLGR.I                                                  | 1920.24231 | 2 | 1.81E-07 | 0.90  | 4.43   | -     | 397.5   |
| AHQ-1-8, 4740              | K.VLDSGAPIKIPVGPETLGR.I                                                  | 1920.24231 | 2 | 1.18E-04 | 0.63  | 3.08   | -     | 320.7   |
| gj4505981[ref]NP_002695.1  | pro-platelet basic protein (includes platelet basic protein, beta; Pro-p |            |   | 3.68E-13 | 7.12  | 80.30  | 40.60 | 13894.1 |
| AHQ-1-14, 5392 - 5457      | K.EESLSDLYAELR.C                                                         | 1540.61070 | 2 | 8.36E-08 | 0.68  | 2.85   | -     | 586.8   |
| AHQ-1-14, 5709 - 5769      | K.EESLSDLYAELR.C                                                         | 1540.61070 | 2 | 2.00E-04 | 0.89  | 3.30   | -     | 1086.0  |
| AHQ-1-14- ,4740 - 4806     | K.EESLSDLYAELR.C                                                         | 1540.61070 | 2 | 4.97E-09 | 0.97  | 4.92   | -     | 1381.6  |
| AHQ-1-14, 5604 - 5664      | K.EESLSDLYAELR.C                                                         | 1540.61070 | 2 | 6.29E-09 | 0.97  | 4.87   | -     | 1505.5  |
| AHQ-1-14- ,4450 - 4518     | K.EESLSDLYAELR.C                                                         | 1540.61070 | 2 | 2.24E-10 | 0.88  | 3.62   | -     | 581.9   |
| AHQ-1-14- ,4683            | K.GKEESLSDLYAELR.C                                                       | 1725.83517 | 2 | 1.89E-11 | 0.98  | 6.05   | -     | 2537.1  |
| AHQ-1-13, 4149             | K.GKEESLSDLYAELR.C                                                       | 1725.83517 | 3 | 8.21E-04 | 0.74  | 3.71   | -     | 628.6   |
| AHQ-1-14- ,4483            | K.GKEESLSDLYAELR.C                                                       | 1725.83517 | 2 | 3.43E-05 | 0.87  | 2.76   | -     | 1155.9  |
| AHQ-1-14- ,4684            | K.GKEESLSDLYAELR.C                                                       | 1725.83517 | 3 | 1.80E-04 | 0.89  | 3.39   | -     | 1241.7  |
| AHQ-1-14- ,4398 - 4466     | K.GKEESLSDLYAELR.C                                                       | 1725.83517 | 2 | 5.67E-11 | 0.98  | 5.48   | -     | 2721.8  |
| AHQ-1-14- ,4310 - 4370     | K.GKEESLSDLYAELR.C                                                       | 1725.83517 | 2 | 2.06E-11 | 0.98  | 5.66   | -     | 2279.2  |
| AHQ-1-14- ,4262 - 4338     | K.GKEESLSDLYAELR.C                                                       | 1725.83517 | 3 | 1.36E-06 | 0.90  | 4.34   | -     | 966.8   |
| AHQ-1-14- ,4171 - 4244     | K.GKEESLSDLYAELR.C                                                       | 1725.83517 | 2 | 1.29E-11 | 0.98  | 5.12   | -     | 2598.2  |
| AHQ-1-12, 4134 - 4137      | K.GKEESLSDLYAELR.C                                                       | 1725.83517 | 2 | 1.42E-11 | 0.98  | 5.41   | -     | 2082.9  |
| AHQ-1-14- ,4087 - 4154     | K.GKEESLSDLYAELR.C                                                       | 1725.83517 | 2 | 1.59E-10 | 0.98  | 5.59   | -     | 2617.2  |
| AHQ-1-14- ,4056 - 4060     | K.GKEESLSDLYAELR.C                                                       | 1725.83517 | 3 | 2.06E-05 | 0.89  | 4.23   | -     | 823.2   |
| AHQ-1-14- ,3967 - 3975     | K.GKEESLSDLYAELR.C                                                       | 1725.83517 | 3 | 1.38E-05 | 0.89  | 4.38   | -     | 1019.0  |
| AHQ-1-14- ,3966 - 4031     | K.GKEESLSDLYAELR.C                                                       | 1725.83517 | 2 | 1.66E-10 | 0.98  | 6.03   | -     | 2280.6  |

|                            |                                                                         |            |   |          |      |       |       |         |
|----------------------------|-------------------------------------------------------------------------|------------|---|----------|------|-------|-------|---------|
| AHQ-1-14 - , 3827          | K.GKEESLSDLYAELR.C                                                      | 1725.83517 | 2 | 2.08E-06 | 0.97 | 4.65  | -     | 1790.6  |
| AHQ-1-13- , 4352           | K.GKEESLSDLYAELR.C                                                      | 1725.83517 | 3 | 3.65E-05 | 0.91 | 3.95  | -     | 1192.3  |
| AHQ-1-13- , 4311 - 4345    | K.GKEESLSDLYAELR.C                                                      | 1725.83517 | 2 | 9.97E-10 | 0.98 | 5.56  | -     | 2412.7  |
| AHQ-1-14, 5961             | K.GKEESLSDLYAELR.C                                                      | 1725.83517 | 2 | 4.79E-07 | 0.92 | 3.99  | -     | 1177.5  |
| AHQ-1-14, 5877 - 5900      | K.GKEESLSDLYAELR.C                                                      | 1725.83517 | 2 | 7.15E-07 | 0.96 | 4.27  | -     | 1438.4  |
| AHQ-1-14, 5750 - 5818      | K.GKEESLSDLYAELR.C                                                      | 1725.83517 | 2 | 3.75E-08 | 0.98 | 5.39  | -     | 2082.6  |
| AHQ-1-11, 4011             | K.GKEESLSDLYAELR.C                                                      | 1725.83517 | 2 | 9.33E-08 | 0.97 | 4.84  | -     | 2247.8  |
| AHQ-1-14, 5606 - 5678      | K.GKEESLSDLYAELR.C                                                      | 1725.83517 | 2 | 3.08E-10 | 0.98 | 4.72  | -     | 2173.7  |
| AHQ-1-14 - , 4140 - 4219   | K.GKEESLSDLYAELR.C                                                      | 1725.83517 | 3 | 1.42E-05 | 0.95 | 4.95  | -     | 1598.1  |
| AHQ-1-14, 4816 - 4872      | K.GKEESLSDLYAELR.C                                                      | 1725.83517 | 2 | 3.24E-10 | 0.98 | 5.53  | -     | 1939.8  |
| AHQ-1-14, 5465 - 5536      | K.GKEESLSDLYAELR.C                                                      | 1725.83517 | 2 | 5.99E-08 | 0.97 | 4.51  | -     | 2256.3  |
| AHQ-1-14, 4844             | K.GKEESLSDLYAELR.C                                                      | 1725.83517 | 3 | 2.36E-04 | 0.94 | 4.52  | -     | 1377.1  |
| AHQ-1-14, 4928 - 5001      | K.GKEESLSDLYAELR.C                                                      | 1725.83517 | 2 | 1.93E-05 | 0.97 | 4.76  | -     | 1939.1  |
| AHQ-1-10, 3908             | K.GKEESLSDLYAELR.C                                                      | 1725.83517 | 2 | 7.91E-10 | 0.95 | 4.03  | -     | 1560.5  |
| AHQ-1-14, 5045 - 5121      | K.GKEESLSDLYAELR.C                                                      | 1725.83517 | 3 | 2.85E-06 | 0.93 | 4.18  | -     | 1314.4  |
| AHQ-1-14, 5060 - 5140      | K.GKEESLSDLYAELR.C                                                      | 1725.83517 | 2 | 5.23E-11 | 0.98 | 5.52  | -     | 2351.7  |
| AHQ-1-14, 5317 - 5349      | K.GKEESLSDLYAELR.C                                                      | 1725.83517 | 2 | 3.68E-13 | 0.98 | 5.20  | -     | 2604.5  |
| AHQ-1-14, 5200 - 5257      | K.GKEESLSDLYAELR.C                                                      | 1725.83517 | 2 | 2.48E-11 | 0.98 | 5.86  | -     | 2787.8  |
| AHQ-1-14, 5174 - 5245      | K.GKEESLSDLYAELR.C                                                      | 1725.83517 | 3 | 4.20E-06 | 0.83 | 3.77  | -     | 739.3   |
| AHQ-1-14 - , 4970 - 5050   | K.GKEESLSDLYAELR.C                                                      | 1725.83517 | 2 | 6.19E-09 | 0.91 | 3.84  | -     | 1085.2  |
| AHQ-1-14, 5229 - 5289      | K.GTHCNQVEVIATLK.D                                                      | 1571.78073 | 2 | 1.73E-04 | 0.89 | 3.49  | -     | 837.3   |
| AHQ-1-14, 5097 - 5166      | K.GTHCNQVEVIATLK.D                                                      | 1571.78073 | 2 | 3.60E-07 | 0.96 | 4.50  | -     | 1483.8  |
| AHQ-1-14, 5361 - 5377      | K.GTHCNQVEVIATLK.D                                                      | 1571.78073 | 2 | 6.59E-09 | 0.91 | 3.69  | -     | 975.7   |
| AHQ-1-14, 4974 - 4998      | K.GTHCNQVEVIATLK.D                                                      | 1571.78073 | 2 | 8.70E-06 | 0.96 | 4.73  | -     | 1435.0  |
| AHQ-1-14, 4836 - 4917      | K.GTHCNQVEVIATLK.D                                                      | 1571.78073 | 2 | 9.91E-08 | 0.98 | 4.85  | -     | 2094.3  |
| AHQ-1-14, 5493             | K.GTHCNQVEVIATLK.D                                                      | 1571.78073 | 2 | 5.71E-05 | 0.94 | 4.03  | -     | 1141.8  |
| AHQ-1-14, 4709 - 4780      | K.GTHCNQVEVIATLK.D                                                      | 1571.78073 | 2 | 3.98E-10 | 0.98 | 5.42  | -     | 2279.7  |
| AHQ-1-13, 3401 - 3415      | K.GTHCNQVEVIATLK.D                                                      | 1571.78073 | 2 | 2.38E-05 | 0.92 | 3.68  | -     | 1059.0  |
| AHQ-1-14, 4580 - 4650      | K.GTHCNQVEVIATLK.D                                                      | 1571.78073 | 2 | 1.07E-08 | 0.97 | 4.73  | -     | 1882.7  |
| AHQ-1-14, 4464 - 4521      | K.GTHCNQVEVIATLK.D                                                      | 1571.78073 | 2 | 1.68E-10 | 0.98 | 5.23  | -     | 1778.9  |
| AHQ-1-14 - , 4288 - 4350   | K.GTHCNQVEVIATLK.D                                                      | 1571.78073 | 2 | 3.00E-05 | 0.97 | 4.29  | -     | 1866.7  |
| AHQ-1-14, 4368             | K.GTHCNQVEVIATLK.D                                                      | 1571.78073 | 2 | 2.94E-05 | 0.96 | 4.35  | -     | 1499.4  |
| AHQ-1-14 - , 4027 - 4055   | K.GTHCNQVEVIATLK.D                                                      | 1571.78073 | 2 | 5.93E-08 | 0.98 | 5.23  | -     | 2101.9  |
| AHQ-1-13- , 3484           | K.GTHCNQVEVIATLK.D                                                      | 1571.78073 | 2 | 1.33E-07 | 0.97 | 4.07  | -     | 2252.3  |
| AHQ-1-14, 4250 - 4312      | K.GTHCNQVEVIATLK.D                                                      | 1571.78073 | 2 | 3.25E-05 | 0.96 | 4.60  | -     | 1423.3  |
| AHQ-1-14, 4336 - 4408      | K.GTHCNQVEVIATLK.D                                                      | 1571.78073 | 2 | 8.13E-05 | 0.97 | 4.42  | -     | 1719.4  |
| AHQ-1-14 - , 3886 - 3960   | K.GTHCNQVEVIATLK.D                                                      | 1571.78073 | 2 | 7.35E-06 | 0.97 | 5.11  | -     | 1685.5  |
| AHQ-1-14 - , 3762 - 3826   | K.GTHCNQVEVIATLK.D                                                      | 1571.78073 | 2 | 2.39E-06 | 0.96 | 4.78  | -     | 1291.6  |
| AHQ-1-14 - , 3674 - 3746   | K.GTHCNQVEVIATLK.D                                                      | 1571.78073 | 2 | 2.95E-06 | 0.97 | 4.43  | -     | 1626.3  |
| AHQ-1-14 - , 3607 - 3682   | K.GTHCNQVEVIATLK.D                                                      | 1571.78073 | 2 | 5.07E-07 | 0.98 | 5.59  | -     | 2085.7  |
| AHQ-1-14 - , 3478 - 3554   | K.GTHCNQVEVIATLK.D                                                      | 1571.78073 | 2 | 2.64E-07 | 0.98 | 5.08  | -     | 2109.4  |
| AHQ-1-14 - , 3347 - 3426   | K.GTHCNQVEVIATLK.D                                                      | 1571.78073 | 2 | 7.81E-08 | 0.97 | 4.74  | -     | 1588.5  |
| AHQ-1-14 - , 3078 - 3154   | K.GTHCNQVEVIATLKDGR.K                                                   | 1900.10650 | 2 | 3.73E-09 | 0.98 | 6.09  | -     | 2318.2  |
| AHQ-1-14 - , 3223          | K.GTHCNQVEVIATLKDGR.K                                                   | 1900.10650 | 2 | 1.93E-07 | 0.97 | 4.97  | -     | 1196.2  |
| AHQ-1-14 - , 3224 - 3290   | K.GTHCNQVEVIATLKDGR.K                                                   | 1900.10650 | 3 | 2.81E-10 | 0.97 | 5.55  | -     | 1241.2  |
| AHQ-1-14, 3977             | K.GTHCNQVEVIATLKDGR.K                                                   | 1900.10650 | 2 | 3.44E-07 | 0.97 | 4.76  | -     | 1539.2  |
| AHQ-1-14 - , 3074 - 3150   | K.GTHCNQVEVIATLKDGR.K                                                   | 1900.10650 | 3 | 4.57E-07 | 0.95 | 4.89  | -     | 1399.2  |
| AHQ-1-14, 4044 - 4122      | K.GTHCNQVEVIATLKDGR.K                                                   | 1900.10650 | 3 | 6.07E-07 | 0.92 | 4.04  | -     | 1148.0  |
| AHQ-1-14, 4076 - 4132      | K.GTHCNQVEVIATLKDGR.K                                                   | 1900.10650 | 2 | 4.12E-04 | 0.97 | 5.19  | -     | 1685.0  |
| AHQ-1-14 - , 3511 - 3575   | K.GTHCNQVEVIATLKDGR.K                                                   | 1900.10650 | 3 | 2.24E-09 | 0.91 | 4.58  | -     | 732.1   |
| AHQ-1-14, 4346             | K.GTHCNQVEVIATLKDGR.K                                                   | 1900.10650 | 3 | 2.47E-09 | 0.89 | 4.30  | -     | 797.4   |
| AHQ-1-14, 4257             | K.GTHCNQVEVIATLKDGR.K                                                   | 1900.10650 | 2 | 9.14E-05 | 0.92 | 4.19  | -     | 919.5   |
| AHQ-1-14 - , 3655          | K.GTHCNQVEVIATLKDGR.K                                                   | 1900.10650 | 3 | 1.37E-04 | 0.92 | 4.20  | -     | 1049.7  |
| AHQ-1-14, 3676             | K.GTHCNQVEVIATLKDGRK.I                                                  | 2028.27941 | 3 | 4.02E-07 | 0.81 | 3.52  | -     | 903.5   |
| AHQ-1-14 - , 2808          | K.GTHCNQVEVIATLKDGRK.I                                                  | 2028.27941 | 2 | 7.34E-05 | 0.96 | 5.85  | -     | 977.3   |
| AHQ-1-14, 3760 - 3820      | K.ICLDPPDAPR.I                                                          | 1058.19059 | 2 | 1.45E-05 | 0.84 | 3.16  | -     | 848.1   |
| AHQ-1-14 - , 2562 - 2660   | R.KICLDPDAPR.I                                                          | 1186.36350 | 1 | 2.55E-05 | 0.17 | 2.54  | -     | 153.9   |
| AHQ-1-14 - , 2542 - 2564   | R.KICLDPDAPR.I                                                          | 1186.36350 | 2 | 5.52E-05 | 0.86 | 3.31  | -     | 846.7   |
| AHQ-1-14 - , 2748          | R.KICLDPDAPR.I                                                          | 1186.36350 | 2 | 7.11E-05 | 0.83 | 3.16  | -     | 733.6   |
| AHQ-1-14, 3516 - 3596      | R.KICLDPDAPR.I                                                          | 1186.36350 | 2 | 2.39E-06 | 0.83 | 3.21  | -     | 699.1   |
| AHQ-1-14, 3404 - 3460      | R.KICLDPDAPR.I                                                          | 1186.36350 | 2 | 3.10E-05 | 0.89 | 3.25  | -     | 901.7   |
| AHQ-1-13- , 2699           | R.KICLDPDAPR.I                                                          | 1186.36350 | 2 | 8.44E-06 | 0.92 | 3.50  | -     | 1064.5  |
| AHQ-1-14, 3802             | R.KICLDPDAPR.I                                                          | 1186.36350 | 2 | 7.93E-05 | 0.72 | 2.80  | -     | 597.1   |
| AHQ-1-14 - , 2626 - 2687   | R.KICLDPDAPR.I                                                          | 1186.36350 | 2 | 1.65E-05 | 0.85 | 3.02  | -     | 875.8   |
| AHQ-1-13, 2697             | R.KICLDPDAPR.I                                                          | 1186.36350 | 2 | 2.07E-05 | 0.84 | 3.16  | -     | 682.2   |
| AHQ-1-14 - , 3239 - 3302   | K.NIQSLEVIQK.G                                                          | 1101.27845 | 2 | 1.35E-06 | 0.83 | 3.32  | -     | 673.1   |
| AHQ-1-14 - , 4183          | K.NIQSLEVIQK.G                                                          | 1101.27845 | 2 | 2.25E-04 | 0.94 | 3.35  | -     | 1637.3  |
| AHQ-1-14 - , 4186 - 4266   | K.NIQSLEVIQK.G                                                          | 1101.27845 | 1 | 4.58E-04 | 0.82 | 2.67  | -     | 798.0   |
| AHQ-1-14, 4197 - 4261      | K.NIQSLEVIQK.G                                                          | 1101.27845 | 2 | 4.80E-06 | 0.83 | 3.19  | -     | 652.1   |
| AHQ-1-14, 4377 - 4436      | K.NIQSLEVIQK.G                                                          | 1101.27845 | 2 | 3.40E-04 | 0.79 | 2.66  | -     | 778.4   |
| AHQ-1-14 - , 3559 - 3623   | K.NIQSLEVIQK.G                                                          | 1101.27845 | 2 | 9.58E-05 | 0.67 | 2.79  | -     | 600.4   |
| AHQ-1-14, 4288 - 4348      | K.NIQSLEVIQK.G                                                          | 1101.27845 | 2 | 1.42E-06 | 0.87 | 3.44  | -     | 745.3   |
| AHQ-1-14 - , 3752          | K.NIQSLEVIQK.G                                                          | 1101.27845 | 2 | 1.97E-04 | 0.81 | 2.66  | -     | 1145.3  |
| AHQ-1-14 - , 3714 - 3778   | K.NIQSLEVIQK.G                                                          | 1101.27845 | 1 | 2.26E-04 | 0.89 | 3.16  | -     | 1130.4  |
| AHQ-1-14, 4680 - 4682      | K.NIQSLEVIQK.G                                                          | 1101.27845 | 2 | 3.76E-04 | 0.80 | 2.76  | -     | 943.0   |
| AHQ-1-14 - , 3366 - 3446   | K.NIQSLEVIQK.G                                                          | 1101.27845 | 2 | 2.43E-06 | 0.81 | 3.18  | -     | 587.0   |
| AHQ-1-12, 3298             | K.NIQSLEVIQK.G                                                          | 1101.27845 | 2 | 5.80E-05 | 0.90 | 3.75  | -     | 813.6   |
| AHQ-1-14, 5120             | K.NIQSLEVIQK.G                                                          | 1101.27845 | 1 | 3.16E-05 | 0.82 | 2.88  | -     | 763.2   |
| gij4759082 ref NP_004648.1 | serum deprivation response protein; serum deprivation response; phospho |            |   | 3.94E-13 | 5.33 | 60.27 | 25.20 | 47172.9 |
| AHQ-1-13, 6007             | R.DNSQVNAVTVLTLDDK.L                                                    | 1730.94122 | 2 | 4.96E-05 | 0.95 | 4.31  | -     | 1111.8  |
| AHQ-1-1, 6520              | R.DNSQVNAVTVLTLDDK.L                                                    | 1730.94122 | 2 | 1.48E-04 | 0.75 | 3.27  | -     | 712.3   |
| AHQ-1-12, 6209             | R.DNSQVNAVTVLTLDDK.L                                                    | 1730.94122 | 2 | 1.14E-04 | 0.70 | 3.03  | -     | 559.7   |
| AHQ-1-12, 6078 - 6098      | R.DNSQVNAVTVLTLDDK.L                                                    | 1730.94122 | 2 | 2.31E-06 | 0.97 | 5.17  | -     | 1726.7  |
| AHQ-1-11, 5910             | R.DNSQVNAVTVLTLDDK.L                                                    | 1730.94122 | 2 | 6.72E-04 | 0.95 | 4.15  | -     | 1495.2  |
| AHQ-1-13- , 6416           | R.DNSQVNAVTVLTLDDK.L                                                    | 1730.94122 | 2 | 1.53E-04 | 0.90 | 3.43  | -     | 906.3   |
| AHQ-1-6, 6575              | R.DNSQVNAVTVLTLDDK.L                                                    | 1730.94122 | 2 | 3.55E-05 | 0.92 | 3.94  | -     | 934.2   |
| AHQ-1-9, 6526 - 6603       | R.DNSQVNAVTVLTLDDK.L                                                    | 1730.94122 | 2 | 2.12E-05 | 0.96 | 4.88  | -     | 1202.5  |
| AHQ-1-7, 6717              | R.DNSQVNAVTVLTLDDK.L                                                    | 1730.94122 | 2 | 5.92E-04 | 0.90 | 3.21  | -     | 1122.9  |
| AHQ-1-13- , 3651 - 3669    | K.LVNMMLDAVQENQHK.M                                                     | 1639.85851 | 2 | 1.19E-04 | 0.90 | 3.82  | -     | 857.4   |
| AHQ-1-11, 3386 - 3446      | K.LVNMMLDAVQENQHK.M                                                     | 1639.85851 | 2 | 7.46E-07 | 0.90 | 4.07  | -     | 816.6   |
| AHQ-1-9, 3382              | K.LVNMMLDAVQENQHK.M                                                     | 1639.85851 | 3 | 1.56E-06 | 0.62 | 3.26  | -     | 268.7   |
| AHQ-1-9, 3891              | R.QEKPPSPSPM*PSPSPSLNLGNTTEAIR.D                                        | 3056.30877 | 3 | 1.47E-04 | 0.82 | 4.39  | -     | 481.3   |
| AHQ-1-6, 3354              | R.SDGDPPQVAVLQVHTQS                                                     | 1778.90130 | 2 | 4.50E-07 | 0.74 | 2.85  | -     | 607.3   |
| AHQ-1-9, 6354 - 6422       | K.VLIFQEENIEIPASVFKV.Q                                                  | 1963.26241 | 2 | 3.99E-07 | 0.96 | 5.28  | -     | 968.4   |
| AHQ-1-6, 6316 - 6334       | K.VLIFQEENIEIPASVFKV.Q                                                  | 1963.26241 | 2 | 7.01E-06 | 0.95 | 4.83  | -     | 829.5   |
| AHQ-1-10, 5593             | K.VLIFQEENIEIPASVFKV.Q                                                  | 1963.26241 | 2 | 5.10E-05 | 0.91 | 3.82  | -     | 843.3   |
| AHQ-1-9, 6231 - 6286       | K.VLIFQEENIEIPASVFKV.Q                                                  | 1963.26241 | 2 | 1.10E-04 | 0.96 | 5.02  | -     | 847.0   |
| AHQ-1-7, 6436 - 6468       | K.VLIFQEENIEIPASVFKV.Q                                                  | 1963.26241 | 2 | 8.53E-06 | 0.94 | 4.70  | -     | 980.3   |
| AHQ-1-11, 5687 - 5702      | K.VLIFQEENIEIPASVFKV.Q                                                  | 1963.26241 | 2 | 6.17E-05 | 0.94 | 4.15  | -     | 959.6   |
| AHQ-1-5, 6477              | K.VLIFQEENIEIPASVFKV.Q                                                  | 1963.26241 | 2 | 1.72E-05 | 0.96 | 5.23  | -     | 787.4   |
| AHQ-1-13- , 6228           | K.VLIFQEENIEIPASVFKV.Q                                                  | 1963.26241 | 2 | 3.91E-09 | 0.95 | 4.62  | -     | 933.6   |
| AHQ-1-12, 5905 - 5926      | K.VLIFQEENIEIPASVFKV.Q                                                  | 1963.26241 | 2 | 6.92E-05 | 0.95 | 5.07  | -     | 741.0   |
| AHQ-1-4, 6547 - 6548       | K.VLIFQEENIEIPASVFKV.Q                                                  | 1963.26241 | 2 | 4.27E-06 | 0.96 | 5.43  | -     | 897.1   |
| AHQ-1-3, 6382              | K.VLIFQEENIEIPASVFKV.Q                                                  | 1963.26241 | 2 | 5.05E-05 | 0.95 | 4.53  | -     | 1110.9  |
| AHQ-1-13, 5836             | K.VLIFQEENIEIPASVFKV.Q                                                  | 1963.26241 | 2 | 5.97E-06 | 0.96 | 4.91  | -     | 1085.5  |
| AHQ-1-8, 6366              | K.VLIFQEENIEIPASVFKV.Q                                                  | 1963.26241 | 2 | 9.02E-05 | 0.94 | 4.59  | -     | 780.8   |
| AHQ-1-1, 6337 - 6348       | K.VLIFQEENIEIPASVFKV.Q                                                  | 1963.26241 | 2 | 4.63E-04 | 0.90 | 4.15  | -     | 716.1   |

|                                                                                                     |                                 |            |   |          |       |        |       |          |
|-----------------------------------------------------------------------------------------------------|---------------------------------|------------|---|----------|-------|--------|-------|----------|
| AHQ-1-14 - , 6030 - 6031                                                                            | K.VLIFQEENEIPASVFK.Q            | 1963.26241 | 2 | 4.03E-05 | 0.93  | 4.29   | -     | 899.4    |
| AHQ-1-6, 2823 - 2827                                                                                | R.YEGSYALTSEEAER.S              | 1605.64124 | 2 | 3.94E-13 | 0.94  | 3.98   | -     | 897.5    |
| AHQ-1-12, 2845                                                                                      | R.YEGSYALTSEEAER.S              | 1605.64124 | 2 | 1.64E-10 | 0.89  | 3.19   | -     | 832.7    |
| gi 23510338 ref NP_003325.2  ubiquitin-activating enzyme E1; A1S9T and BN75 temperature sensitivity |                                 |            |   | 4.11E-13 | 5.22  | 60.24  | 8.30  | 117848.1 |
| AHQ-1-4, 4835                                                                                       | R.ALPAVQQNNLDEDLIR.K            | 1810.00167 | 2 | 4.11E-13 | 0.82  | 3.20   | -     | 455.8    |
| AHQ-1-4, 4739                                                                                       | R.ALPAVQQNNLDEDLIR.K            | 1810.00167 | 2 | 5.93E-06 | 0.89  | 3.81   | -     | 603.9    |
| AHQ-1-4, 2443                                                                                       | R.KPLLESGLTGT.K                 | 1244.46280 | 2 | 2.40E-04 | 0.82  | 3.29   | -     | 695.8    |
| AHQ-1-5, 5458                                                                                       | R.LAGTQPLEVLEAVQR.S             | 1624.86348 | 2 | 2.58E-07 | 0.85  | 3.48   | -     | 540.2    |
| AHQ-1-4, 5543                                                                                       | R.LAGTQPLEVLEAVQR.S             | 1624.86348 | 2 | 3.10E-05 | 0.80  | 3.53   | -     | 399.2    |
| AHQ-1-4, 3810                                                                                       | R.LQTSVSLVSLGR.G                | 1260.46546 | 2 | 4.73E-04 | 0.88  | 3.01   | -     | 1046.2   |
| AHQ-1-4, 6108                                                                                       | R.NEEDAAELVALAQAVNAR.A          | 1885.02541 | 2 | 1.90E-05 | 0.96  | 4.32   | -     | 1818.2   |
| AHQ-1-4, 4168                                                                                       | R.YDGGQAVFGSDLQEK.L             | 1656.77453 | 2 | 3.18E-06 | 0.89  | 3.26   | -     | 940.0    |
| gi 4506025 ref NP_000936.1  protein phosphatase 3, regulatory subunit B, alpha isoform 1; protein p |                                 |            |   | 4.27E-13 | 1.83  | 20.25  | 16.50 | 19299.8  |
| AHQ-1-12, 4307                                                                                      | K.EFIEGVSQFSVK.G                | 1370.53201 | 2 | 1.73E-04 | 0.86  | 3.26   | -     | 755.3    |
| AHQ-1-12, 5333 - 5343                                                                               | R.VIDIFDTDNGEVDFK.E             | 1784.90107 | 2 | 4.27E-13 | 0.97  | 5.05   | -     | 1609.8   |
| gi 10835187 ref NP_000627.1  superoxide dismutase 2, mitochondrial [Homo sapiens]                   |                                 |            |   | 4.34E-13 | 4.36  | 50.24  | 39.60 | 24733.0  |
| AHQ-1-11, 5684 - 5758                                                                               | K.AIWNVINWENVTTER.Y             | 1744.93137 | 2 | 5.55E-07 | 0.86  | 3.71   | -     | 677.0    |
| AHQ-1-13, 5913                                                                                      | K.AIWNVINWENVTTER.Y             | 1744.93137 | 2 | 7.13E-04 | 0.92  | 3.86   | -     | 1117.7   |
| AHQ-1-12, 5977                                                                                      | K.AIWNVINWENVTTER.Y             | 1744.93137 | 2 | 1.40E-06 | 0.92  | 3.45   | -     | 1263.2   |
| AHQ-1-11, 5772                                                                                      | K.AIWNVINWENVTTER.Y             | 1744.93137 | 3 | 1.57E-08 | 0.95  | 4.88   | -     | 1408.3   |
| AHQ-1-14 - , 6104                                                                                   | K.AIWNVINWENVTTER.Y             | 1744.93137 | 2 | 2.87E-05 | 0.84  | 3.42   | -     | 776.5    |
| AHQ-1-11, 4332                                                                                      | K.FNGGGHINHSIFWTLNLSPNGGGEPK.G  | 2638.83761 | 3 | 2.27E-05 | 0.65  | 3.10   | -     | 595.3    |
| AHQ-1-11, 4334                                                                                      | K.FNGGGHINHSIFWTLNLSPNGGGEPK.G  | 2638.83761 | 2 | 5.47E-08 | 0.85  | 3.94   | -     | 466.5    |
| AHQ-1-11, 3694 - 3755                                                                               | K.GDVTAQIALQPAK.F               | 1425.65548 | 2 | 6.63E-06 | 0.80  | 2.57   | -     | 922.8    |
| AHQ-1-11, 2419 - 2486                                                                               | K.HHAAAYNNLNVTEEK.Y             | 1739.86999 | 2 | 5.79E-06 | 0.51  | 2.56   | -     | 162.5    |
| AHQ-1-11, 2546                                                                                      | K.HHAAAYNNLNVTEEK.Y             | 1739.86999 | 2 | 4.31E-07 | 0.85  | 3.27   | -     | 733.4    |
| AHQ-1-11, 2282 - 2355                                                                               | K.HHAAAYNNLNVTEEK.Y             | 1739.86999 | 2 | 4.34E-13 | 0.97  | 4.86   | -     | 1414.6   |
| AHQ-1-11, 6555                                                                                      | K.LTAAASVGVQSGGWGLGFNK.E        | 2036.27841 | 2 | 2.05E-07 | 0.79  | 3.56   | -     | 501.5    |
| AHQ-1-11, 5778                                                                                      | K.LTAAASVGVQSGGWGLGFNK.E        | 2036.27841 | 2 | 8.32E-04 | 0.91  | 4.18   | -     | 777.5    |
| gi 4502027 ref NP_000468.1  albumin precursor; PR00883 protein [Homo sapiens]                       |                                 |            |   | 5.95E-13 | 26.99 | 310.33 | 54.50 | 69366.4  |
| AHQ-1-6, 2466                                                                                       | K.AAFTECCQAADK.A                | 1374.47927 | 2 | 1.10E-04 | 0.90  | 3.00   | -     | 1126.2   |
| AHQ-1-5, 2455 - 2470                                                                                | K.AAFTECCQAADK.A                | 1374.47927 | 2 | 1.89E-07 | 0.90  | 3.33   | -     | 1072.2   |
| AHQ-1-6, 2480                                                                                       | K.AAFTECCQAADK.A                | 1374.47927 | 1 | 4.11E-04 | 0.56  | 2.45   | -     | 620.9    |
| AHQ-1-6, 7231 - 7302                                                                                | K.ALVLIAFAQYLQCCPFEDHVK.L       | 2492.87697 | 3 | 1.32E-09 | 0.96  | 5.14   | -     | 1310.3   |
| AHQ-1-5, 7415                                                                                       | K.ALVLIAFAQYLQCCPFEDHVK.L       | 2492.87697 | 3 | 2.24E-11 | 0.95  | 4.88   | -     | 1236.4   |
| AHQ-1-6, 4478 - 4548                                                                                | K.AVMDDFAAFVEK.C                | 1359.52946 | 2 | 3.05E-08 | 0.93  | 3.32   | -     | 1216.7   |
| AHQ-1-13 - , 5579                                                                                   | K.AVMDDFAAFVEK.C                | 1343.53006 | 2 | 1.48E-06 | 0.94  | 3.70   | -     | 1181.5   |
| AHQ-1-3, 5674                                                                                       | K.AVMDDFAAFVEK.C                | 1343.53006 | 2 | 1.14E-04 | 0.87  | 3.56   | -     | 757.3    |
| AHQ-1-5, 4631                                                                                       | K.AVMDDFAAFVEK.C                | 1359.52946 | 2 | 2.36E-05 | 0.96  | 3.97   | -     | 1562.9   |
| AHQ-1-6, 5578                                                                                       | K.AVMDDFAAFVEK.C                | 1343.53006 | 2 | 4.75E-10 | 0.96  | 4.04   | -     | 1460.5   |
| AHQ-1-6, 5583 - 5586                                                                                | K.AVMDDFAAFVEK.C                | 1343.53006 | 1 | 3.61E-04 | 0.77  | 2.40   | -     | 1137.4   |
| AHQ-1-5, 5665 - 5666                                                                                | K.AVMDDFAAFVEK.C                | 1343.53006 | 2 | 2.00E-09 | 0.95  | 4.09   | -     | 1314.6   |
| AHQ-1-14 - , 5428                                                                                   | K.AVMDDFAAFVEK.C                | 1343.53006 | 2 | 1.90E-07 | 0.95  | 4.14   | -     | 1267.4   |
| AHQ-1-6, 2110                                                                                       | K.CCAAADPHCEYAK.V               | 1556.67999 | 2 | 2.65E-07 | 0.90  | 3.79   | -     | 734.6    |
| AHQ-1-5, 2378                                                                                       | K.CCTESLVNR.R                   | 1141.25805 | 2 | 2.62E-04 | 0.82  | 2.67   | -     | 972.8    |
| AHQ-1-6, 6932 - 6955                                                                                | K.DVFLGMFLYEYAR.R               | 1640.88331 | 2 | 1.74E-06 | 0.96  | 4.69   | -     | 970.2    |
| AHQ-1-5, 2573                                                                                       | R.FKDLGEEFNK.A                  | 1227.34766 | 2 | 2.37E-04 | 0.83  | 3.06   | -     | 829.5    |
| AHQ-1-14 - , 2699 - 2759                                                                            | R.FKDLGEEFNK.A                  | 1227.34766 | 2 | 5.96E-05 | 0.65  | 2.70   | -     | 498.7    |
| AHQ-1-5, 2877                                                                                       | K.FQNALLVR.Y                    | 961.14282  | 2 | 8.39E-06 | 0.87  | 2.74   | -     | 898.2    |
| AHQ-1-6, 2899 - 2930                                                                                | K.FQNALLVR.Y                    | 961.14282  | 2 | 3.80E-04 | 0.91  | 2.98   | -     | 1166.2   |
| AHQ-1-6, 6670 - 6686                                                                                | R.HPYFYAPELFFAK.R               | 1744.02658 | 2 | 2.27E-05 | 0.50  | 2.52   | -     | 266.8    |
| AHQ-1-6, 6682                                                                                       | R.HPYFYAPELFFAK.R               | 1744.02658 | 3 | 1.91E-07 | 0.95  | 4.59   | -     | 1097.1   |
| AHQ-1-5, 6786                                                                                       | R.HPYFYAPELFFAK.R               | 1744.02658 | 3 | 9.38E-06 | 0.91  | 3.90   | -     | 1022.4   |
| AHQ-1-5, 2522                                                                                       | K.KQTALVELVK.H                  | 1129.37494 | 1 | 1.17E-04 | 0.24  | 2.26   | -     | 347.4    |
| AHQ-1-5, 3211                                                                                       | K.KVPQVSTPTLVEVSR.N             | 1640.90605 | 2 | 2.46E-08 | 0.86  | 3.17   | -     | 606.4    |
| AHQ-1-5, 3490                                                                                       | K.KVPQVSTPTLVEVSR.N             | 1640.90605 | 2 | 4.36E-08 | 0.88  | 3.43   | -     | 616.6    |
| AHQ-1-9, 3339                                                                                       | K.KVPQVSTPTLVEVSR.N             | 1640.90605 | 2 | 2.90E-05 | 0.71  | 2.67   | -     | 530.3    |
| AHQ-1-10, 3280 - 3344                                                                               | K.KVPQVSTPTLVEVSR.N             | 1640.90605 | 2 | 9.50E-08 | 0.62  | 2.88   | -     | 438.9    |
| AHQ-1-2, 3806                                                                                       | K.KVPQVSTPTLVEVSR.N             | 1640.90605 | 2 | 3.76E-07 | 0.93  | 3.91   | -     | 832.7    |
| AHQ-1-6, 3450                                                                                       | K.KVPQVSTPTLVEVSR.N             | 1640.90605 | 3 | 2.77E-06 | 0.95  | 4.73   | -     | 1524.0   |
| AHQ-1-6, 3448 - 3455                                                                                | K.KVPQVSTPTLVEVSR.N             | 1640.90605 | 2 | 2.70E-08 | 0.95  | 4.08   | -     | 1315.0   |
| AHQ-1-6, 3186                                                                                       | K.KVPQVSTPTLVEVSR.N             | 1640.90605 | 2 | 3.27E-05 | 0.74  | 2.88   | -     | 439.1    |
| AHQ-1-5, 3494                                                                                       | K.KVPQVSTPTLVEVSR.N             | 1640.90605 | 3 | 1.65E-08 | 0.96  | 5.18   | -     | 1655.2   |
| AHQ-1-4, 3690                                                                                       | K.KVPQVSTPTLVEVSR.N             | 1640.90605 | 2 | 6.17E-06 | 0.85  | 3.23   | -     | 652.8    |
| AHQ-1-5, 2265 - 2293                                                                                | K.LKECCCKPPEK.S                 | 1549.83503 | 2 | 1.36E-04 | 0.91  | 3.76   | -     | 1062.7   |
| AHQ-1-6, 2316 - 2336                                                                                | K.LKECCCKPPEK.S                 | 1549.83503 | 2 | 2.37E-04 | 0.93  | 4.32   | -     | 996.4    |
| AHQ-1-5, 3262 - 3270                                                                                | K.LVNEVTEFAK.T                  | 1150.30633 | 2 | 2.54E-06 | 0.86  | 3.23   | -     | 705.3    |
| AHQ-1-3, 3374                                                                                       | K.LVNEVTEFAK.T                  | 1150.30633 | 2 | 1.00E-05 | 0.86  | 3.28   | -     | 739.4    |
| AHQ-1-1, 3481                                                                                       | K.LVNEVTEFAK.T                  | 1150.30633 | 2 | 9.73E-06 | 0.78  | 2.72   | -     | 674.1    |
| AHQ-1-6, 3140                                                                                       | K.LVNEVTEFAK.T                  | 1150.30633 | 1 | 2.83E-06 | 0.50  | 2.27   | -     | 408.6    |
| AHQ-1-13, 3329 - 3335                                                                               | K.LVNEVTEFAK.T                  | 1150.30633 | 2 | 1.54E-05 | 0.73  | 3.03   | -     | 412.3    |
| AHQ-1-6, 5871                                                                                       | R.LVRPEVDMCTAFHNEETFLK.K        | 2781.15719 | 3 | 5.30E-04 | 0.97  | 5.49   | -     | 1938.1   |
| AHQ-1-6, 5439                                                                                       | R.LVRPEVDMCTAFHNEETFLK.K        | 2781.15719 | 3 | 9.42E-10 | 0.97  | 6.27   | -     | 1467.0   |
| AHQ-1-5, 5490 - 5519                                                                                | R.LVRPEVDMCTAFHNEETFLK.K        | 2781.15719 | 3 | 1.15E-09 | 0.98  | 6.53   | -     | 1908.8   |
| AHQ-1-6, 5124                                                                                       | K.QNCLFEQLGEYK.F                | 1659.79847 | 2 | 3.66E-05 | 0.84  | 3.36   | -     | 613.2    |
| AHQ-1-6, 3982 - 4011                                                                                | R.RHPDYSVVLNLLR.L               | 1468.72842 | 2 | 3.78E-08 | 0.93  | 3.32   | -     | 1315.3   |
| AHQ-1-5, 4038 - 4105                                                                                | R.RHPDYSVVLNLLR.L               | 1468.72842 | 2 | 2.21E-04 | 0.75  | 2.88   | -     | 576.4    |
| AHQ-1-3, 4209                                                                                       | R.RHPDYSVVLNLLR.L               | 1468.72842 | 2 | 1.47E-04 | 0.88  | 3.14   | -     | 905.6    |
| AHQ-1-6, 6098                                                                                       | R.RHPYFYAPPELLFFAK.R            | 1900.21293 | 2 | 5.36E-06 | 0.98  | 5.14   | -     | 2994.7   |
| AHQ-1-7, 6125                                                                                       | R.RHPYFYAPPELLFFAK.R            | 1900.21293 | 2 | 6.78E-05 | 0.95  | 4.40   | -     | 1187.8   |
| AHQ-1-5, 6187                                                                                       | R.RHPYFYAPPELLFFAK.R            | 1900.21293 | 3 | 1.26E-11 | 0.97  | 5.53   | -     | 1900.6   |
| AHQ-1-6, 6095                                                                                       | R.RHPYFYAPPELLFFAK.R            | 1900.21293 | 3 | 1.37E-09 | 0.98  | 5.54   | -     | 2051.3   |
| AHQ-1-6, 7222 - 7223                                                                                | K.RMPCAEDYLSVVLNQLCVLHEK.T      | 2678.10170 | 3 | 1.48E-04 | 0.98  | 6.68   | -     | 1660.2   |
| AHQ-1-5, 7405 - 7406                                                                                | K.RMPCAEDYLSVVLNQLCVLHEK.T      | 2678.10170 | 3 | 2.88E-06 | 0.97  | 6.08   | -     | 1742.1   |
| AHQ-1-6, 7187 - 7188                                                                                | K.RMPCAEDYLSVVLNQLCVLHEK.T      | 2678.10170 | 3 | 3.11E-05 | 0.96  | 5.65   | -     | 1361.2   |
| AHQ-1-6, 4754 - 4822                                                                                | R.RPCFSALEVDETYVPK.E            | 1913.14041 | 3 | 1.15E-08 | 0.89  | 4.09   | -     | 771.0    |
| AHQ-1-4, 4911 - 4980                                                                                | R.RPCFSALEVDETYVPK.E            | 1913.14041 | 2 | 1.18E-04 | 0.70  | 3.39   | -     | 380.4    |
| AHQ-1-10, 4320 - 4377                                                                               | R.RPCFSALEVDETYVPK.E            | 1913.14041 | 2 | 2.53E-04 | 0.90  | 4.12   | -     | 613.4    |
| AHQ-1-7, 4817                                                                                       | R.RPCFSALEVDETYVPK.E            | 1913.14041 | 2 | 2.79E-05 | 0.69  | 3.22   | -     | 380.1    |
| AHQ-1-13 - , 4844                                                                                   | R.RPCFSALEVDETYVPK.E            | 1913.14041 | 3 | 7.19E-04 | 0.87  | 3.87   | -     | 791.5    |
| AHQ-1-3, 4893                                                                                       | R.RPCFSALEVDETYVPK.E            | 1913.14041 | 2 | 9.69E-04 | 0.80  | 3.99   | -     | 519.8    |
| AHQ-1-5, 4827                                                                                       | R.RPCFSALEVDETYVPK.E            | 1913.14041 | 2 | 1.62E-04 | 0.89  | 4.32   | -     | 482.8    |
| AHQ-1-6, 4748                                                                                       | R.RPCFSALEVDETYVPK.E            | 1913.14041 | 2 | 7.72E-04 | 0.89  | 3.66   | -     | 774.3    |
| AHQ-1-11, 4471                                                                                      | R.RPCFSALEVDETYVPK.E            | 1913.14041 | 2 | 7.10E-06 | 0.74  | 3.42   | -     | 359.4    |
| AHQ-1-7, 7140                                                                                       | K.SHCIAVENDEMPADLPSLAADFVESK.D  | 2977.22697 | 3 | 1.39E-04 | 0.92  | 4.87   | -     | 774.0    |
| AHQ-1-5, 7115 - 7121                                                                                | K.SHCIAVENDEMPADLPSLAADFVESK.D  | 2977.22697 | 2 | 1.42E-04 | 0.95  | 4.84   | -     | 1172.7   |
| AHQ-1-6, 6906 - 6974                                                                                | K.SHCIAVENDEMPADLPSLAADFVESK.D  | 2977.22697 | 3 | 1.00E-09 | 0.95  | 5.63   | -     | 970.2    |
| AHQ-1-3, 7018 - 7081                                                                                | K.SHCIAVENDEMPADLPSLAADFVESK.D  | 2977.22697 | 3 | 1.16E-04 | 0.81  | 4.47   | -     | 300.8    |
| AHQ-1-5, 7161 - 7177                                                                                | K.SHCIAVENDEMPADLPSLAADFVESK.D  | 2977.22697 | 3 | 2.43E-04 | 0.93  | 5.01   | -     | 958.6    |
| AHQ-1-5, 7075 - 7151                                                                                | K.SHCIAVENDEMPADLPSLAADFVESK.D  | 2977.22697 | 3 | 9.47E-10 | 0.95  | 5.84   | -     | 705.0    |
| AHQ-1-5, 6589                                                                                       | K.SHCIAVENDEM*PADLPSLAADFVESK.D | 2993.22637 | 2 | 9.48E-05 | 0.95  | 4.62   | -     | 1107.0   |
| AHQ-1-5, 2501                                                                                       | K.SLHTLFDGDK.L                  | 1018.14800 | 1 | 2.28E-05 | 0.56  | 2.08   | -     | 606.7    |
| AHQ-1-5, 5150                                                                                       | K.SLHTLFDGDKLCTVATLR.E          | 1934.24913 | 2 | 7.51E-05 | 0.88  | 3.30   | -     | 889.2    |
| AHQ-1-5, 6051                                                                                       | K.VFDEFKPLVEEPQNLK.Q            | 2046.35142 | 2 | 3.17E-08 | 0.92  | 4.40   | -     | 546.0    |
| AHQ-1-3, 5993                                                                                       | K.VFDEFKPLVEEPQNLK.Q            | 2046.35142 | 2 | 2.97E-05 | 0.87  | 3.52   | -     | 607.5    |
| AHQ-1-5, 5857                                                                                       | K.VFDEFKPLVEEPQNLK.Q            | 2046.35142 | 2 | 2.24E-04 | 0.91  | 4.51   | -     | 532.3    |
| AHQ-1-2, 6170                                                                                       | K.VFDEFKPLVEEPQNLK.Q            | 2046.35142 | 2 | 5.99E-06 | 0.90  | 4.28   | -     | 439.4    |

|                             |                                                                         |            |   |          |       |        |       |         |
|-----------------------------|-------------------------------------------------------------------------|------------|---|----------|-------|--------|-------|---------|
| AHQ-1-5, 6053               | K.VFDEFKPLVVEEPQNLK.Q                                                   | 2046.35142 | 3 | 1.80E-06 | 0.97  | 5.52   | -     | 1555.5  |
| AHQ-1-6, 5914 - 5915        | K.VFDEFKPLVVEEPQNLK.Q                                                   | 2046.35142 | 3 | 5.38E-06 | 0.97  | 5.37   | -     | 1440.5  |
| AHQ-1-1, 5977               | K.VFDEFKPLVVEEPQNLK.Q                                                   | 2046.35142 | 2 | 1.91E-05 | 0.86  | 3.43   | -     | 489.6   |
| AHQ-1-9, 5812               | K.VFDEFKPLVVEEPQNLK.Q                                                   | 2046.35142 | 2 | 7.77E-05 | 0.80  | 3.79   | -     | 355.6   |
| AHQ-1-4, 6106               | K.VFDEFKPLVVEEPQNLK.Q                                                   | 2046.35142 | 2 | 1.66E-04 | 0.79  | 3.70   | -     | 349.2   |
| AHQ-1-7, 6004               | K.VFDEFKPLVVEEPQNLK.Q                                                   | 2046.35142 | 2 | 5.17E-05 | 0.70  | 3.44   | -     | 240.3   |
| AHQ-1-7, 6024               | K.VFDEFKPLVVEEPQNLK.Q                                                   | 2046.35142 | 3 | 1.50E-10 | 0.96  | 5.06   | -     | 1568.4  |
| AHQ-1-6, 5878 - 5946        | K.VFDEFKPLVVEEPQNLK.Q                                                   | 2046.35142 | 2 | 5.95E-13 | 0.92  | 4.70   | -     | 467.3   |
| AHQ-1-5, 3017 - 3051        | K.VHTECCHGDLLCADDRADLA                                                  | 2091.20307 | 2 | 9.21E-07 | 0.93  | 4.14   | -     | 878.3   |
| AHQ-1-5, 3762               | K.VHTECCHGDLLCADDRADLA                                                  | 2589.77855 | 2 | 5.56E-06 | 0.66  | 2.97   | -     | 474.7   |
| AHQ-1-5, 3745               | K.VHTECCHGDLLCADDRADLA                                                  | 2589.77855 | 3 | 6.24E-05 | 0.89  | 4.43   | -     | 602.7   |
| AHQ-1-6, 3910               | K.VPQVSTPTLVEVSR.N                                                      | 1512.73313 | 2 | 3.00E-07 | 0.86  | 3.15   | -     | 827.7   |
| AHQ-1-5, 3961               | K.VPQVSTPTLVEVSR.N                                                      | 1512.73313 | 2 | 2.15E-04 | 0.88  | 3.22   | -     | 814.2   |
| AHQ-1-5, 2297 - 2298        | K.YICENQDSISSK.L                                                        | 1445.53420 | 2 | 3.81E-09 | 0.93  | 3.61   | -     | 947.3   |
| AHQ-1-7, 2341               | K.YICENQDSISSK.L                                                        | 1445.53420 | 2 | 8.05E-05 | 0.82  | 3.14   | -     | 756.3   |
| AHQ-1-6, 2420               | K.YICENQDSISSK.L                                                        | 1445.53420 | 2 | 4.42E-04 | 0.92  | 3.89   | -     | 767.2   |
| AHQ-1-6, 2314               | K.YICENQDSISSK.L                                                        | 1445.53420 | 1 | 1.42E-07 | 0.53  | 2.79   | -     | 283.0   |
| AHQ-1-6, 2307               | K.YICENQDSISSK.L                                                        | 1445.53420 | 2 | 4.28E-06 | 0.92  | 3.72   | -     | 656.3   |
| AHQ-1-1, 2493               | K.YICENQDSISSK.L                                                        | 1445.53420 | 2 | 1.01E-05 | 0.83  | 3.02   | -     | 717.6   |
| gi 6912638 ref NP_036557.1  | ras suppressor protein 1 [Homo sapiens]                                 |            |   | 5.99E-13 | 6.12  | 70.34  | 45.80 | 31540.1 |
| AHQ-1-10, 6395 - 6396       | K.AENNPWVPIADQQLGVSHVFEYR.S                                             | 3032.35678 | 3 | 1.16E-06 | 0.86  | 3.93   | -     | 610.7   |
| AHQ-1-10, 5735 - 5791       | R.ALYSDNDNFELPPDIGK.L                                                   | 2021.25559 | 2 | 1.63E-05 | 0.93  | 4.72   | -     | 491.7   |
| AHQ-1-10, 5685 - 5689       | R.ALYSDNDNFELPPDIGK.L                                                   | 2021.25559 | 3 | 7.29E-06 | 0.88  | 4.41   | -     | 713.6   |
| AHQ-1-10, 5604 - 5679       | R.ALYSDNDNFELPPDIGK.L                                                   | 2021.25559 | 2 | 2.15E-10 | 0.93  | 4.65   | -     | 594.0   |
| AHQ-1-13- , 6272 - 6335     | R.ALYSDNDNFELPPDIGK.L                                                   | 2021.25559 | 2 | 8.03E-06 | 0.89  | 4.32   | -     | 443.3   |
| AHQ-1-10, 6375              | R.GISNMLDVNGLFTLSHITQLVLSHKN.L                                          | 2853.28963 | 3 | 8.46E-09 | 0.60  | 3.61   | -     | 361.9   |
| AHQ-1-10, 6376              | R.GISNMLDVNGLFTLSHITQLVLSHKN.L                                          | 2853.28963 | 2 | 1.93E-08 | 0.86  | 4.15   | -     | 334.9   |
| AHQ-1-10, 6313 - 6317       | R.GISNMLDVNGLFTLSHITQLVLSHKN.L                                          | 2853.28963 | 3 | 1.17E-11 | 0.90  | 4.80   | -     | 674.5   |
| AHQ-1-11, 5440 - 5511       | K.LQLLSLRDNDLISLPK.E                                                    | 1839.16919 | 2 | 3.40E-04 | 0.54  | 3.18   | -     | 663.9   |
| AHQ-1-10, 5296              | K.LQLLSLRDNDLISLPK.E                                                    | 1839.16919 | 2 | 7.06E-07 | 0.94  | 5.16   | -     | 1362.3  |
| AHQ-1-10, 5379 - 5453       | R.LTVLPPELGNLDTGQK.Q                                                    | 1809.09672 | 2 | 9.88E-05 | 0.96  | 4.60   | -     | 965.2   |
| AHQ-1-10, 5389              | R.LTVLPPELGNLDTGQK.Q                                                    | 1809.09672 | 3 | 3.72E-07 | 0.96  | 5.59   | -     | 1247.1  |
| AHQ-1-10, 5492 - 5561       | R.LTVLPPELGNLDTGQK.Q                                                    | 1809.09672 | 2 | 3.10E-07 | 0.87  | 3.79   | -     | 453.5   |
| AHQ-1-11, 5514 - 5570       | R.LTVLPPELGNLDTGQK.Q                                                    | 1809.09672 | 2 | 2.04E-04 | 0.84  | 3.67   | -     | 384.3   |
| AHQ-1-13- , 6012 - 6083     | R.LTVLPPELGNLDTGQK.Q                                                    | 1809.09672 | 2 | 2.45E-05 | 0.93  | 4.02   | -     | 777.9   |
| AHQ-1-12, 5734 - 5793       | R.LTVLPPELGNLDTGQK.Q                                                    | 1809.09672 | 2 | 4.16E-04 | 0.52  | 3.00   | -     | 262.0   |
| AHQ-1-12, 5737              | R.LTVLPPELGNLDTGQK.Q                                                    | 1809.09672 | 2 | 5.60E-10 | 0.91  | 4.04   | -     | 499.8   |
| AHQ-1-10, 6291 - 6361       | K.NLEVLNFFNQEELPTQISSLQK.L                                              | 2820.14663 | 2 | 9.56E-05 | 0.87  | 4.21   | -     | 375.2   |
| AHQ-1-11, 6447              | K.NLEVLNFFNQEELPTQISSLQK.L                                              | 2820.14663 | 3 | 5.99E-13 | 0.97  | 6.85   | -     | 1300.3  |
| gi 4503571 ref NP_001419.1  | enolase 1; phosphopyruvate hydratase; MYC promoter-binding protein 1; n |            |   | 6.19E-13 | 13.19 | 160.38 | 45.20 | 47168.7 |
| AHQ-1-14- , 5299 - 5300     | R.AAVPSGASTGIYEALELR.D                                                  | 1806.00979 | 2 | 4.54E-10 | 0.87  | 4.18   | -     | 327.2   |
| AHQ-1-13- , 5441 - 5451     | R.AAVPSGASTGIYEALELR.D                                                  | 1806.00979 | 2 | 6.35E-06 | 0.96  | 4.99   | -     | 946.0   |
| AHQ-1-12, 5169              | R.AAVPSGASTGIYEALELR.D                                                  | 1806.00979 | 2 | 1.99E-05 | 0.88  | 4.18   | -     | 477.5   |
| AHQ-1-8, 5274 - 5344        | R.AAVPSGASTGIYEALELR.D                                                  | 1806.00979 | 2 | 2.62E-06 | 0.92  | 3.93   | -     | 620.9   |
| AHQ-1-13, 5139              | R.AAVPSGASTGIYEALELR.D                                                  | 1806.00979 | 2 | 3.59E-10 | 0.95  | 5.23   | -     | 526.3   |
| AHQ-1-14, 6216 - 6286       | R.AAVPSGASTGIYEALELR.D                                                  | 1806.00979 | 2 | 7.65E-08 | 0.94  | 4.21   | -     | 918.0   |
| AHQ-1-11, 4970              | R.AAVPSGASTGIYEALELR.D                                                  | 1806.00979 | 2 | 1.00E-04 | 0.83  | 3.69   | -     | 375.5   |
| AHQ-1-8, 4679 - 4754        | K.DATNVGDEGGFAPNILENK.E                                                 | 1962.06350 | 2 | 1.54E-08 | 0.88  | 4.18   | -     | 898.7   |
| AHQ-1-8, 6231               | K.DATNVGDEGGFAPNILENK.E                                                 | 1962.06350 | 2 | 6.19E-13 | 0.81  | 4.72   | -     | 533.0   |
| AHQ-1-11, 6284              | K.DYPVSIEDPFQDDDWGAWQK.F                                                | 2511.63977 | 2 | 9.94E-06 | 0.54  | 2.64   | -     | 429.7   |
| AHQ-1-8, 4782               | K.FTASAGIQVGGDLTVTNP.KR                                                 | 2034.25590 | 2 | 1.52E-07 | 0.92  | 4.24   | -     | 948.5   |
| AHQ-1-13- , 4381 - 4384     | R.GNPTVEVDLFTSK.G                                                       | 1407.55065 | 1 | 8.59E-04 | 0.32  | 2.61   | -     | 439.0   |
| AHQ-1-8, 4196               | R.GNPTVEVDLFTSK.G                                                       | 1407.55065 | 1 | 4.86E-04 | 0.24  | 1.98   | -     | 564.2   |
| AHQ-1-8, 4203 - 4204        | R.GNPTVEVDLFTSK.G                                                       | 1407.55065 | 2 | 1.04E-07 | 0.82  | 3.36   | -     | 749.9   |
| AHQ-1-8, 4205               | R.GNPTVEVDLFTSK.G                                                       | 1407.55065 | 1 | 9.86E-09 | 0.52  | 3.26   | -     | 455.0   |
| AHQ-1-8, 6188               | R.HIADLAGNSEVILPVPAFNVINGGSHAGNK.L                                      | 3013.35654 | 3 | 1.84E-08 | 0.96  | 5.55   | -     | 1277.7  |
| AHQ-1-8, 2140               | R.IGAEVYHNLK.N                                                          | 1144.30502 | 2 | 5.24E-05 | 0.94  | 3.92   | -     | 1249.4  |
| AHQ-1-8, 5570               | K.LAM*QEFM*ILPVGAANFR.E                                                 | 1941.30692 | 2 | 1.30E-06 | 0.96  | 4.99   | -     | 961.9   |
| AHQ-1-8, 6491               | K.LAMQEFM*ILPVGAANFR.E                                                  | 1925.30752 | 2 | 1.29E-04 | 0.91  | 4.63   | -     | 741.1   |
| AHQ-1-9, 6099 - 6167        | K.LAM*QEFM*ILPVGAANFR.E                                                 | 1925.30752 | 2 | 1.12E-04 | 0.49  | 3.18   | -     | 412.2   |
| AHQ-1-9, 6963               | K.LAMQEFM*ILPVGAANFR.E                                                  | 1909.30812 | 2 | 1.76E-04 | 0.82  | 3.98   | -     | 395.4   |
| AHQ-1-8, 7082               | K.LAMQEFM*ILPVGAANFR.E                                                  | 1909.30812 | 2 | 6.73E-04 | 0.93  | 4.76   | -     | 632.0   |
| AHQ-1-8, 3133 - 3220        | K.LAQANGWGMVMSHR.S                                                      | 1526.74832 | 2 | 1.70E-04 | 0.66  | 2.59   | -     | 964.8   |
| AHQ-1-8, 3038 - 3042        | K.LMIEMDGTENK.S                                                         | 1281.48208 | 2 | 4.23E-04 | 0.90  | 3.68   | -     | 705.7   |
| AHQ-1-8, 7111               | K.SFIKIDYPPVSIEDPFQDDDWGAWQK.F                                          | 2987.22328 | 3 | 3.73E-10 | 0.98  | 7.57   | -     | 2481.9  |
| AHQ-1-8, 7104               | K.SFIKIDYPPVSIEDPFQDDDWGAWQK.F                                          | 2987.22328 | 2 | 3.68E-05 | 0.63  | 3.30   | -     | 468.3   |
| AHQ-1-8, 4866 - 4882        | R.YISPDQLADLYK.S                                                        | 1426.59557 | 2 | 2.63E-09 | 0.96  | 4.94   | -     | 871.5   |
| AHQ-1-8, 4876 - 4955        | R.YISPDQLADLYK.S                                                        | 1426.59557 | 1 | 8.65E-06 | 0.67  | 3.13   | -     | 501.0   |
| AHQ-1-9, 4878               | R.YISPDQLADLYK.S                                                        | 1426.59557 | 2 | 3.51E-07 | 0.87  | 3.38   | -     | 700.4   |
| gi 4758086 ref NP_004069.1  | cysteine and glycine-rich protein 1; cysteine-rich protein; LIM-domain  |            |   | 6.68E-13 | 5.59  | 60.25  | 45.60 | 20567.3 |
| AHQ-1-11, 4030 - 4095       | K.GFGFGQAGALVHSE                                                        | 1434.53788 | 2 | 3.09E-07 | 0.93  | 3.41   | -     | 1163.4  |
| AHQ-1-13, 4185              | K.GFGFGQAGALVHSE                                                        | 1434.53788 | 2 | 4.46E-04 | 0.74  | 2.98   | -     | 583.3   |
| AHQ-1-13- , 4377            | K.GFGFGQAGALVHSE                                                        | 1434.53788 | 2 | 1.89E-05 | 0.86  | 3.28   | -     | 811.3   |
| AHQ-1-12, 3315              | K.GLESTTLADKDGEIYCK.G                                                   | 1902.06957 | 2 | 1.57E-06 | 0.97  | 4.98   | -     | 1473.6  |
| AHQ-1-11, 3230              | K.GLESTTLADKDGEIYCK.G                                                   | 1902.06957 | 3 | 8.27E-06 | 0.92  | 4.59   | -     | 814.3   |
| AHQ-1-11, 3162 - 3210       | K.GLESTTLADKDGEIYCK.G                                                   | 1902.06957 | 2 | 1.26E-07 | 0.96  | 5.09   | -     | 1263.2  |
| AHQ-1-13- , 2685            | K.GYGYGQAGTLSTDK.G                                                      | 1475.54194 | 2 | 1.67E-04 | 0.86  | 3.12   | -     | 839.0   |
| AHQ-1-11, 2522              | K.GYGYGQAGTLSTDK.G                                                      | 1475.54194 | 2 | 3.20E-07 | 0.95  | 3.97   | -     | 1337.5  |
| AHQ-1-13- , 3737            | K.GYGYGQAGTLSTDKGESLGIK.H                                               | 2160.32665 | 2 | 8.31E-09 | 0.90  | 4.40   | -     | 608.2   |
| AHQ-1-12, 3526              | K.GYGYGQAGTLSTDKGESLGIK.H                                               | 2160.32665 | 2 | 9.10E-11 | 0.94  | 4.59   | -     | 1085.1  |
| AHQ-1-13, 3605              | K.GYGYGQAGTLSTDKGESLGIK.H                                               | 2160.32665 | 2 | 5.88E-10 | 0.78  | 3.57   | -     | 465.6   |
| AHQ-1-11, 3358 - 3434       | K.GYGYGQAGTLSTDKGESLGIK.H                                               | 2160.32665 | 3 | 8.57E-07 | 0.72  | 3.04   | -     | 765.3   |
| AHQ-1-13- , 3739            | K.GYGYGQAGTLSTDKGESLGIK.H                                               | 2160.32665 | 3 | 4.34E-10 | 0.76  | 3.04   | -     | 675.6   |
| AHQ-1-11, 3430 - 3438       | K.GYGYGQAGTLSTDKGESLGIK.H                                               | 2160.32665 | 2 | 3.24E-11 | 0.89  | 3.83   | -     | 970.7   |
| AHQ-1-11, 3391 - 3392       | K.NLDDTTVAHVHGEIYCK.S                                                   | 1938.10514 | 2 | 6.68E-13 | 0.96  | 4.38   | -     | 1119.3  |
| AHQ-1-12, 3493              | K.NLDDTTVAHVHGEIYCK.S                                                   | 1938.10514 | 2 | 6.53E-04 | 0.91  | 3.91   | -     | 907.8   |
| AHQ-1-11, 3840              | K.TVYFAEEVQCEGNSFHK.S                                                   | 2047.19015 | 2 | 3.67E-09 | 0.89  | 4.08   | -     | 647.3   |
| gi 20535366 ref XP_053177.4 | similar to Tubulin alpha-3/alpha-7 chain (Alpha-tubulin 3/7) [Homo sap  |            |   | 7.43E-13 | 2.73  | 30.25  | 9.60  | 49858.2 |
| AHQ-1-12, 3074              | K.DVNAAIATIK.T                                                          | 1016.17355 | 2 | 6.55E-05 | 0.94  | 3.41   | -     | 1559.5  |
| AHQ-1-8, 2882               | K.DVNAAIATIK.T                                                          | 1016.17355 | 1 | 1.41E-04 | 0.15  | 1.88   | -     | 398.8   |
| AHQ-1-7, 3280               | K.DVNAAIATIK.T                                                          | 1016.17355 | 1 | 3.24E-04 | 0.44  | 2.11   | -     | 491.7   |
| AHQ-1-7, 3114               | K.DVNAAIATIK.T                                                          | 1016.17355 | 2 | 8.46E-04 | 0.87  | 3.49   | -     | 969.0   |
| AHQ-1-4, 5472               | K.TIGGGDSSFNTFFSETGAGK.H                                                | 2009.07549 | 2 | 7.57E-06 | 0.88  | 3.33   | -     | 975.1   |
| AHQ-1-3, 5363               | K.TIGGGDSSFNTFFSETGAGK.H                                                | 2009.07549 | 2 | 8.97E-06 | 0.69  | 2.96   | -     | 607.1   |
| AHQ-1-7, 5130 - 5201        | K.TIGGGDSSFNTFFSETGAGK.H                                                | 2009.07549 | 2 | 9.34E-05 | 0.76  | 3.57   | -     | 399.8   |
| AHQ-1-7, 5361 - 5433        | K.TIGGGDSSFNTFFSETGAGK.H                                                | 2009.07549 | 2 | 1.95E-10 | 0.95  | 4.62   | -     | 1108.8  |
| AHQ-1-7, 5468               | K.TIGGGDSSFNTFFSETGAGK.H                                                | 2009.07549 | 2 | 3.70E-09 | 0.94  | 4.65   | -     | 904.4   |
| AHQ-1-7, 5614               | K.TIGGGDSSFNTFFSETGAGK.H                                                | 2009.07549 | 2 | 1.04E-09 | 0.93  | 4.90   | -     | 625.2   |
| AHQ-1-7, 4976               | K.TIGGGDSSFNTFFSETGAGK.H                                                | 2009.07549 | 2 | 1.65E-06 | 0.80  | 3.55   | -     | 374.5   |
| AHQ-1-6, 5303               | K.TIGGGDSSFNTFFSETGAGK.H                                                | 2009.07549 | 2 | 3.68E-07 | 0.88  | 3.69   | -     | 843.0   |
| AHQ-1-9, 5230               | K.TIGGGDSSFNTFFSETGAGK.H                                                | 2009.07549 | 2 | 5.83E-07 | 0.86  | 3.74   | -     | 625.1   |
| AHQ-1-10, 4736 - 4811       | K.TIGGGDSSFNTFFSETGAGK.H                                                | 2009.07549 | 2 | 1.29E-04 | 0.28  | 2.93   | -     | 345.3   |
| AHQ-1-11, 4538              | K.TIGGGDSSFNTFFSETGAGK.H                                                | 2009.07549 | 2 | 1.31E-05 | 0.89  | 3.99   | -     | 476.7   |
| AHQ-1-1, 5425               | K.TIGGGDSSFNTFFSETGAGK.H                                                | 2009.07549 | 2 | 1.41E-07 | 0.94  | 4.80   | -     | 739.1   |
| AHQ-1-12, 5053              | K.TIGGGDSSFNTFFSETGAGK.H                                                | 2009.07549 | 2 | 1.64E-07 | 0.91  | 4.53   | -     | 485.2   |
| AHQ-1-14- , 5148 - 5211     | K.TIGGGDSSFNTFFSETGAGK.H                                                | 2009.07549 | 2 | 7.43E-13 | 0.95  | 5.09   | -     | 791.3   |
| AHQ-1-13, 5020 - 5084       | K.TIGGGDSSFNTFFSETGAGK.H                                                | 2009.07549 | 2 | 4.49E-05 | 0.82  | 3.44   | -     | 681.5   |

|                            |                                                                        |            |   |          |       |        |       |         |
|----------------------------|------------------------------------------------------------------------|------------|---|----------|-------|--------|-------|---------|
| AHQ-1-14, 5981 - 6040      | K.TIGGGDDSFNTFFSETGAGK.H                                               | 2009.07549 | 2 | 7.51E-04 | 0.40  | 2.98   | -     | 281.2   |
| AHQ-1-14, 6100 - 6156      | K.TIGGGDDSFNTFFSETGAGK.H                                               | 2009.07549 | 2 | 8.22E-05 | 0.64  | 2.94   | -     | 458.6   |
| AHQ-1-14, 6281             | K.TIGGGDDSFNTFFSETGAGK.H                                               | 2009.07549 | 2 | 2.30E-08 | 0.74  | 3.56   | -     | 457.8   |
| AHQ-1-14 - , 5371          | K.TIGGGDDSFNTFFSETGAGK.H                                               | 2009.07549 | 2 | 9.22E-07 | 0.80  | 3.24   | -     | 717.4   |
| AHQ-1-12, 5514 - 5573      | R.TIOFVDCWPTGFK.V                                                      | 1600.81899 | 2 | 1.42E-05 | 0.84  | 3.72   | -     | 647.5   |
| gi 5453631 ref NP_000120.1 | coagulation factor XIII A1 subunit precursor; Coagulation factor XIII, |            |   | 7.59E-13 | 24.00 | 280.29 | 41.90 | 83232.8 |
| AHQ-1-5, 5423 - 5545       | R.AVPNNNSNAEEDDLPTVELQGVPR.G                                           | 2603.82656 | 2 | 5.45E-05 | 0.39  | 3.01   | -     | 133.2   |
| AHQ-1-5, 2235 - 2257       | R.CGPAASVQAIK.H                                                        | 1032.19627 | 2 | 3.11E-05 | 0.91  | 2.96   | -     | 1177.5  |
| AHQ-1-5, 2513              | R.CLGIPIR.I                                                            | 787.95073  | 1 | 3.10E-04 | 0.49  | 2.17   | -     | 333.7   |
| AHQ-1-5, 2477              | K.DGTHVVENVVDATHIGK.L                                                  | 1692.81163 | 3 | 4.46E-07 | 0.90  | 4.11   | -     | 1012.1  |
| AHQ-1-6, 2499              | K.DGTHVVENVVDATHIGK.L                                                  | 1692.81163 | 3 | 3.76E-05 | 0.88  | 4.03   | -     | 914.8   |
| AHQ-1-6, 2500              | K.DGTHVVENVVDATHIGK.L                                                  | 1692.81163 | 2 | 1.21E-05 | 0.83  | 3.59   | -     | 620.0   |
| AHQ-1-9, 2472              | K.DGTHVVENVVDATHIGK.L                                                  | 1692.81163 | 2 | 8.64E-13 | 0.95  | 4.39   | -     | 1220.3  |
| AHQ-1-5, 2619              | K.DGTHVVENVVDATHIGK.L                                                  | 1692.81163 | 2 | 4.60E-05 | 0.94  | 3.99   | -     | 1272.8  |
| AHQ-1-5, 2473              | K.DGTHVVENVVDATHIGK.L                                                  | 1692.81163 | 2 | 3.53E-10 | 0.94  | 4.13   | -     | 1073.4  |
| AHQ-1-9, 4339              | R.EIRPNSTVQWEEVCRPWVSGHR.K                                             | 2724.99524 | 3 | 2.51E-04 | 0.75  | 3.59   | -     | 436.2   |
| AHQ-1-5, 5927 - 6001       | K.ETFDVTLLEPLSFK.K                                                     | 1526.71190 | 2 | 4.10E-09 | 0.93  | 4.05   | -     | 860.9   |
| AHQ-1-9, 5746 - 5748       | K.ETFDVTLLEPLSFK.K                                                     | 1526.71190 | 2 | 2.75E-06 | 0.74  | 2.96   | -     | 642.0   |
| AHQ-1-10, 5187             | K.ETFDVTLLEPLSFK.K                                                     | 1526.71190 | 2 | 2.42E-06 | 0.92  | 3.47   | -     | 1047.0  |
| AHQ-1-11, 5287 - 5334      | K.ETFDVTLLEPLSFK.K                                                     | 1526.71190 | 2 | 1.32E-07 | 0.91  | 3.61   | -     | 948.1   |
| AHQ-1-5, 7194              | R.GTQVVGSDMTVTVOFTNPLK.E                                               | 2123.41609 | 2 | 2.95E-08 | 0.90  | 3.78   | -     | 1080.5  |
| AHQ-1-5, 6986              | R.GTQVVGSDMTVTVOFTNPLK.E                                               | 2123.41609 | 2 | 1.05E-05 | 0.91  | 4.00   | -     | 720.6   |
| AHQ-1-5, 6803              | R.GTQVVGSDMTVTVOFTNPLK.E                                               | 2123.41609 | 2 | 2.90E-11 | 0.98  | 4.79   | -     | 2254.5  |
| AHQ-1-5, 6598 - 6667       | R.GTQVVGSDMTVTVOFTNPLK.E                                               | 2123.41609 | 2 | 7.25E-05 | 0.92  | 4.03   | -     | 938.7   |
| AHQ-1-3, 5863              | K.GTYPVPIVSELQSGK.W                                                    | 1688.94594 | 2 | 5.31E-06 | 0.64  | 2.60   | -     | 403.6   |
| AHQ-1-5, 5765 - 5833       | K.GTYPVPIVSELQSGK.W                                                    | 1688.94594 | 2 | 3.81E-04 | 0.83  | 3.25   | -     | 495.0   |
| AHQ-1-12, 5439             | K.GTYPVPIVSELQSGK.W                                                    | 1688.94594 | 2 | 2.73E-05 | 0.66  | 2.84   | -     | 352.6   |
| AHQ-1-13 - , 5724 - 5729   | K.GTYPVPIVSELQSGK.W                                                    | 1688.94594 | 2 | 2.28E-04 | 0.59  | 2.90   | -     | 239.0   |
| AHQ-1-6, 5736 - 5739       | K.GTYPVPIVSELQSGK.W                                                    | 1688.94594 | 2 | 1.60E-04 | 0.73  | 3.19   | -     | 319.3   |
| AHQ-1-7, 7252 - 7257       | R.GVNLQEFNLVTVHFLK.E                                                   | 1946.23831 | 2 | 4.28E-08 | 0.97  | 5.12   | -     | 1431.7  |
| AHQ-1-8, 7158              | R.GVNLQEFNLVTVHFLK.E                                                   | 1946.23831 | 2 | 6.92E-06 | 0.95  | 4.74   | -     | 959.2   |
| AHQ-1-12, 6513             | R.GVNLQEFNLVTVHFLK.E                                                   | 1946.23831 | 2 | 2.90E-07 | 0.95  | 4.65   | -     | 1125.5  |
| AHQ-1-14 - , 6594 - 6595   | R.GVNLQEFNLVTVHFLK.E                                                   | 1946.23831 | 2 | 4.07E-08 | 0.97  | 5.84   | -     | 1500.8  |
| AHQ-1-10, 6235             | R.GVNLQEFNLVTVHFLK.E                                                   | 1946.23831 | 2 | 5.62E-08 | 0.95  | 5.30   | -     | 919.5   |
| AHQ-1-5, 7321              | R.GVNLQEFNLVTVHFLK.E                                                   | 1946.23831 | 2 | 1.32E-08 | 0.96  | 4.95   | -     | 1653.1  |
| AHQ-1-11, 6307             | R.GVNLQEFNLVTVHFLK.E                                                   | 1946.23831 | 2 | 1.12E-07 | 0.96  | 5.46   | -     | 1103.9  |
| AHQ-1-6, 7086 - 7094       | R.GVNLQEFNLVTVHFLK.E                                                   | 1946.23831 | 2 | 4.70E-09 | 0.95  | 4.59   | -     | 992.5   |
| AHQ-1-5, 7209 - 7219       | R.GVNLQEFNLVTVHFLK.E                                                   | 1946.23831 | 3 | 1.66E-07 | 0.86  | 3.81   | -     | 869.6   |
| AHQ-1-13 - , 6843          | R.GVNLQEFNLVTVHFLK.E                                                   | 1946.23831 | 3 | 4.60E-06 | 0.89  | 4.04   | -     | 707.0   |
| AHQ-1-9, 7038 - 7039       | R.GVNLQEFNLVTVHFLK.E                                                   | 1946.23831 | 2 | 4.21E-08 | 0.96  | 4.90   | -     | 1131.7  |
| AHQ-1-2, 7265              | R.GVNLQEFNLVTVHFLK.E                                                   | 1946.23831 | 2 | 1.63E-06 | 0.89  | 3.84   | -     | 980.2   |
| AHQ-1-1, 6908              | R.GVNLQEFNLVTVHFLK.E                                                   | 1946.23831 | 3 | 4.08E-07 | 0.80  | 3.39   | -     | 692.7   |
| AHQ-1-5, 7186 - 7253       | R.GVNLQEFNLVTVHFLK.E                                                   | 1946.23831 | 2 | 4.56E-06 | 0.96  | 4.92   | -     | 1314.6  |
| AHQ-1-5, 6863 - 6939       | R.IVTNYFSAHNDANLQMDIFLEEDGNVNSK.L                                      | 3415.64559 | 3 | 1.58E-05 | 0.94  | 5.77   | -     | 902.7   |
| AHQ-1-5, 7051 - 7118       | R.IVTNYFSAHNDANLQMDIFLEEDGNVNSK.L                                      | 3415.64559 | 3 | 1.64E-07 | 0.96  | 5.46   | -     | 1568.9  |
| AHQ-1-5, 2089 - 2101       | K.KDGTHTVVENVVDATHIGK.L                                                | 1820.98455 | 3 | 5.38E-04 | 0.95  | 4.04   | -     | 1815.0  |
| AHQ-1-5, 2094 - 2095       | K.KDGTHTVVENVVDATHIGK.L                                                | 1820.98455 | 2 | 2.22E-09 | 0.97  | 4.89   | -     | 1576.8  |
| AHQ-1-5, 2221 - 2289       | K.KDGTHTVVENVVDATHIGK.L                                                | 1820.98455 | 2 | 7.59E-13 | 0.93  | 3.85   | -     | 936.0   |
| AHQ-1-5, 2223 - 2295       | K.KDGTHTVVENVVDATHIGK.L                                                | 1820.98455 | 3 | 5.27E-05 | 0.97  | 5.88   | -     | 1547.5  |
| AHQ-1-6, 2132              | K.KDGTHTVVENVVDATHIGK.L                                                | 1820.98455 | 2 | 5.04E-07 | 0.94  | 4.26   | -     | 1012.9  |
| AHQ-1-9, 2107              | K.KDGTHTVVENVVDATHIGK.L                                                | 1820.98455 | 3 | 1.91E-04 | 0.79  | 3.28   | -     | 1193.7  |
| AHQ-1-7, 2124              | K.KDGTHTVVENVVDATHIGK.L                                                | 1820.98455 | 2 | 1.17E-05 | 0.92  | 3.79   | -     | 1048.6  |
| AHQ-1-11, 4786             | K.KETFDVTLLEPLSFK.K                                                    | 1654.88482 | 2 | 6.08E-04 | 0.91  | 3.54   | -     | 1409.9  |
| AHQ-1-5, 5355              | K.KETFDVTLLEPLSFK.K                                                    | 1654.88482 | 2 | 1.00E-04 | 0.80  | 3.26   | -     | 979.5   |
| AHQ-1-5, 5226              | K.KETFDVTLLEPLSFK.K                                                    | 1654.88482 | 2 | 2.59E-06 | 0.97  | 4.61   | -     | 1798.5  |
| AHQ-1-6, 5174              | K.KETFDVTLLEPLSFK.K                                                    | 1654.88482 | 2 | 1.21E-05 | 0.94  | 3.92   | -     | 1342.4  |
| AHQ-1-5, 2599              | R.KLIASMSDLSR.H                                                        | 1308.53039 | 2 | 9.30E-08 | 0.95  | 4.18   | -     | 1299.3  |
| AHQ-1-9, 4651              | R.LALETALMYGAK.K                                                       | 1281.54655 | 2 | 5.97E-08 | 0.97  | 4.05   | -     | 1717.2  |
| AHQ-1-9, 4176              | R.LALETALMYGAK.K                                                       | 1297.54595 | 2 | 7.73E-05 | 0.71  | 2.65   | -     | 879.9   |
| AHQ-1-5, 4763 - 4779       | R.LALETALMYGAK.K                                                       | 1281.54655 | 2 | 1.43E-04 | 0.97  | 4.26   | -     | 1908.6  |
| AHQ-1-14 - , 2283          | K.LIASMSDLSR.H                                                         | 1196.35688 | 2 | 3.10E-05 | 0.86  | 3.04   | -     | 717.3   |
| AHQ-1-5, 2929              | K.LIASMSDLSR.H                                                         | 1180.35748 | 2 | 6.67E-06 | 0.94  | 3.57   | -     | 1166.2  |
| AHQ-1-5, 2141 - 2150       | K.LIASMSDLSR.H                                                         | 1196.35688 | 2 | 6.46E-04 | 0.91  | 3.30   | -     | 830.6   |
| AHQ-1-5, 5706 - 5709       | R.M*YVAVWTPYGVLR.T                                                     | 1571.86734 | 2 | 1.95E-05 | 0.96  | 4.37   | -     | 1202.2  |
| AHQ-1-7, 5704              | R.M*YVAVWTPYGVLR.T                                                     | 1571.86734 | 2 | 2.62E-08 | 0.95  | 3.83   | -     | 1215.0  |
| AHQ-1-11, 5634             | R.MYVAVWTPYGVLR.T                                                      | 1555.86794 | 2 | 6.88E-04 | 0.78  | 3.10   | -     | 461.2   |
| AHQ-1-6, 6180 - 6246       | R.MYVAVWTPYGVLR.T                                                      | 1555.86794 | 2 | 6.37E-05 | 0.93  | 3.85   | -     | 1038.5  |
| AHQ-1-6, 5670              | R.M*YVAVWTPYGVLR.T                                                     | 1571.86734 | 2 | 1.14E-04 | 0.92  | 3.83   | -     | 874.0   |
| AHQ-1-5, 6331              | R.MYVAVWTPYGVLR.T                                                      | 1555.86794 | 2 | 1.04E-05 | 0.91  | 4.38   | -     | 648.4   |
| AHQ-1-6, 6716              | R.NPETDTYILFNPWCEDDAVYLDNEKER.E                                        | 3349.53903 | 3 | 2.12E-11 | 0.88  | 4.33   | -     | 731.6   |
| AHQ-1-9, 6718              | R.NPETDTYILFNPWCEDDAVYLDNEKER.E                                        | 3349.53903 | 3 | 3.57E-06 | 0.94  | 4.99   | -     | 1001.1  |
| AHQ-1-5, 3586              | R.NVWVHLDGPGVTRP.P                                                     | 1450.62682 | 2 | 4.46E-06 | 0.92  | 3.57   | -     | 101.6   |
| AHQ-1-5, 3627 - 3647       | R.NVWVHLDGPGVTRP.M.K                                                   | 1807.11248 | 2 | 2.07E-06 | 0.90  | 3.69   | -     | 668.6   |
| AHQ-1-5, 3209              | R.NVWVHLDGPGVTRP.M.K                                                   | 1823.11188 | 2 | 5.62E-06 | 0.92  | 4.24   | -     | 789.6   |
| AHQ-1-5, 4445              | K.QIGGDMMDITDXYK.F                                                     | 1645.83696 | 2 | 1.65E-05 | 0.71  | 2.62   | -     | 552.0   |
| AHQ-1-5, 5885 - 5909       | R.SNVDMDFEVENAVLKG.D                                                   | 1767.93869 | 2 | 4.45E-08 | 0.90  | 4.14   | -     | 1054.6  |
| AHQ-1-5, 4757 - 4758       | R.SNVDMDFEVENAVLKG.D                                                   | 1783.93809 | 2 | 1.42E-08 | 0.97  | 5.35   | -     | 1421.6  |
| AHQ-1-6, 5383 - 5430       | R.SNVDMDFEVENAVLKG.D                                                   | 1767.93869 | 2 | 4.75E-05 | 0.85  | 3.67   | -     | 972.3   |
| AHQ-1-5, 5479 - 5493       | R.SNVDMDFEVENAVLKG.D                                                   | 1767.93869 | 2 | 7.70E-09 | 0.97  | 5.27   | -     | 1709.4  |
| AHQ-1-6, 4680              | R.SNVDMDFEVENAVLKG.D                                                   | 1783.93809 | 2 | 1.28E-06 | 0.97  | 4.70   | -     | 2049.0  |
| AHQ-1-11, 5358 - 5362      | K.STVLTPIEIIK.V                                                        | 1327.63485 | 2 | 7.68E-05 | 0.92  | 3.96   | -     | 967.8   |
| AHQ-1-13, 5507             | K.STVLTPIEIIK.V                                                        | 1327.63485 | 2 | 2.34E-04 | 0.91  | 3.08   | -     | 1409.8  |
| AHQ-1-9, 5694              | K.STVLTPIEIIK.V                                                        | 1327.63485 | 2 | 1.62E-04 | 0.90  | 3.28   | -     | 1167.8  |
| AHQ-1-13 - , 5851 - 5852   | K.STVLTPIEIIK.V                                                        | 1327.63485 | 2 | 2.64E-05 | 0.94  | 3.66   | -     | 1565.8  |
| AHQ-1-3, 5991              | K.STVLTPIEIIK.V                                                        | 1327.63485 | 2 | 4.57E-05 | 0.77  | 2.93   | -     | 712.6   |
| AHQ-1-7, 5877              | K.STVLTPIEIIK.V                                                        | 1327.63485 | 2 | 3.73E-05 | 0.88  | 3.24   | -     | 1322.4  |
| AHQ-1-10, 5215             | K.STVLTPIEIIK.V                                                        | 1327.63485 | 2 | 6.87E-04 | 0.88  | 3.28   | -     | 1180.2  |
| AHQ-1-5, 5578 - 5594       | R.YPQENKGTYPVIVSELQSGK.W                                               | 2448.75607 | 2 | 3.27E-04 | 0.66  | 2.94   | -     | 455.7   |
| gi 5453595 ref NP_006358.1 | adenylyl cyclase-associated protein [Homo sapiens]                     |            |   | 8.62E-13 | 11.48 | 140.34 | 43.40 | 51672.7 |
| AHQ-1-7, 7508 - 7510       | K.AGAAPYVQAFDSSLGAPVAEYLK.I                                            | 2352.66999 | 3 | 2.04E-07 | 0.94  | 5.43   | -     | 956.9   |
| AHQ-1-7, 2890 - 2961       | R.ALLVITASCCQQAENK.L                                                   | 1759.96271 | 2 | 1.14E-06 | 0.81  | 3.64   | -     | 566.2   |
| AHQ-1-9, 2704 - 2715       | R.ALLVITASCCQQAENK.L                                                   | 1759.96271 | 2 | 6.73E-07 | 0.96  | 4.92   | -     | 1051.1  |
| AHQ-1-7, 2780 - 2784       | R.ALLVITASCCQQAENK.L                                                   | 1759.96271 | 2 | 5.07E-04 | 0.96  | 5.02   | -     | 867.0   |
| AHQ-1-7, 7029              | R.ALLVITASCCQQAENKLSDLLAPISEQIK.E                                      | 3168.60826 | 3 | 1.23E-08 | 0.93  | 5.16   | -     | 1047.4  |
| AHQ-1-7, 6776 - 6858       | R.ALLVITASCCQQAENKLSDLLAPISEQIK.E                                      | 3168.60826 | 3 | 5.94E-06 | 0.90  | 4.78   | -     | 792.6   |
| AHQ-1-7, 2566 - 2636       | K.KEPAVLELEGGK.K                                                       | 1213.40557 | 2 | 4.64E-07 | 0.68  | 2.52   | -     | 468.2   |
| AHQ-1-11, 2642             | K.KEPAVLELEGGK.K                                                       | 1213.40557 | 2 | 1.73E-05 | 0.86  | 3.43   | -     | 525.7   |
| AHQ-1-7, 1566              | R.LEAVSHTSDMHR.G                                                       | 1383.51591 | 1 | 9.77E-04 | 0.36  | 2.86   | -     | 331.3   |
| AHQ-1-7, 1549              | R.LEAVSHTSDMHR.G                                                       | 1383.51591 | 2 | 6.47E-04 | 0.95  | 4.21   | -     | 1455.0  |
| AHQ-1-7, 7116              | K.LFNHLSAVSESIQALGVVAM*APK.P                                           | 2486.87415 | 3 | 5.57E-05 | 0.93  | 4.52   | -     | 1224.4  |
| AHQ-1-7, 7584 - 7588       | K.LGLVFDDVVGIVEIINSK.D                                                 | 1931.26186 | 2 | 2.09E-11 | 0.98  | 6.85   | -     | 1656.1  |
| AHQ-1-10, 4588             | K.LSDLLAPISEQIK.E                                                      | 1427.66814 | 1 | 1.79E-05 | 0.29  | 2.29   | -     | 443.4   |
| AHQ-1-13, 4893             | K.LSDLLAPISEQIK.E                                                      | 1427.66814 | 2 | 2.34E-06 | 0.86  | 3.30   | -     | 837.4   |
| AHQ-1-11, 4732             | K.LSDLLAPISEQIK.E                                                      | 1427.66814 | 2 | 1.23E-05 | 0.82  | 3.39   | -     | 604.7   |
| AHQ-1-9, 4990              | K.LSDLLAPISEQIK.E                                                      | 1427.66814 | 2 | 7.05E-05 | 0.66  | 2.89   | -     | 495.2   |
| AHQ-1-7, 5116 - 5134       | K.LSDLLAPISEQIK.E                                                      | 1427.66814 | 2 | 1.20E-06 | 0.94  | 4.30   | -     | 1059.6  |
| AHQ-1-7, 5121              | K.LSDLLAPISEQIK.E                                                      | 1427.66814 | 1 | 7.43E-06 | 0.72  | 3.16   | -     | 485.0   |

|                            |                                                                        |            |   |          |       |        |       |         |
|----------------------------|------------------------------------------------------------------------|------------|---|----------|-------|--------|-------|---------|
| AHQ-1-7, 5077 - 5148       | K.LSDLLAPISEQIK.E                                                      | 1427.66814 | 1 | 6.96E-05 | 0.26  | 2.21   | -     | 333.6   |
| AHQ-1-7, 3389 - 3393       | K.NSLDCEIVSAK.S                                                        | 1237.36245 | 1 | 6.38E-06 | 0.32  | 2.04   | -     | 517.9   |
| AHQ-1-7, 3085 - 3110       | K.NSLDCEIVSAK.S                                                        | 1237.36245 | 2 | 2.24E-04 | 0.88  | 3.17   | -     | 848.8   |
| AHQ-1-7, 4721              | R.SALFAQINQGESITHALK.H                                                 | 1929.16615 | 2 | 8.10E-09 | 0.85  | 3.72   | -     | 501.5   |
| AHQ-1-9, 4720              | R.SALFAQINQGESITHALK.H                                                 | 1929.16615 | 2 | 4.03E-08 | 0.95  | 4.77   | -     | 947.0   |
| AHQ-1-10, 4375             | R.SALFAQINQGESITHALK.H                                                 | 1929.16615 | 2 | 2.08E-07 | 0.82  | 4.05   | -     | 486.8   |
| AHQ-1-7, 4936              | R.SALFAQINQGESITHALK.H                                                 | 1929.16615 | 2 | 1.26E-07 | 0.86  | 4.21   | -     | 455.5   |
| AHQ-1-7, 4829 - 4864       | R.SALFAQINQGESITHALK.H                                                 | 1929.16615 | 3 | 1.91E-05 | 0.74  | 3.55   | -     | 543.1   |
| AHQ-1-7, 4830 - 4840       | R.SALFAQINQGESITHALK.H                                                 | 1929.16615 | 2 | 2.55E-07 | 0.92  | 4.33   | -     | 769.1   |
| AHQ-1-7, 5041              | R.SALFAQINQGESITHALK.H                                                 | 1929.16615 | 2 | 1.81E-08 | 0.74  | 3.64   | -     | 451.2   |
| AHQ-1-7, 2101              | R.SGPKPFSAPKQTPSPSPK.R                                                 | 1839.08461 | 3 | 3.80E-04 | 0.81  | 3.58   | -     | 781.0   |
| AHQ-1-14 - , 6507          | K.SSEMNVLIPTGGDFNEFPVPEQFK.T                                           | 2813.08809 | 2 | 1.96E-05 | 0.44  | 2.79   | -     | 228.6   |
| AHQ-1-14 - , 5994          | K.SSEM*NVLIPTGGDFNEFPVPEQFK.T                                          | 2829.08749 | 2 | 2.26E-04 | 0.82  | 4.00   | -     | 271.4   |
| AHQ-1-13 - , 6664 - 6676   | K.SSEMNVLIPTGGDFNEFPVPEQFK.T                                           | 2813.08809 | 2 | 4.51E-05 | 0.66  | 2.88   | -     | 348.1   |
| AHQ-1-9, 4780              | R.VENQENVSNLVIETELK.Q                                                  | 2074.23206 | 2 | 4.62E-04 | 0.55  | 2.69   | -     | 457.4   |
| AHQ-1-10, 4364 - 4368      | R.VENQENVSNLVIETELK.Q                                                  | 2074.23206 | 2 | 1.40E-04 | 0.91  | 4.43   | -     | 670.1   |
| AHQ-1-8, 4799              | R.VENQENVSNLVIETELK.Q                                                  | 2074.23206 | 2 | 3.09E-08 | 0.93  | 4.98   | -     | 661.4   |
| AHQ-1-7, 5185              | R.VENQENVSNLVIETELK.Q                                                  | 2074.23206 | 2 | 1.80E-06 | 0.95  | 4.62   | -     | 877.3   |
| AHQ-1-7, 5032 - 5101       | R.VENQENVSNLVIETELK.Q                                                  | 2074.23206 | 2 | 1.51E-06 | 0.94  | 4.49   | -     | 938.6   |
| AHQ-1-11, 4499             | R.VENQENVSNLVIETELK.Q                                                  | 2074.23206 | 2 | 2.44E-04 | 0.90  | 4.02   | -     | 835.5   |
| AHQ-1-7, 4901              | R.VENQENVSNLVIETELK.Q                                                  | 2074.23206 | 3 | 1.83E-06 | 0.90  | 4.41   | -     | 817.4   |
| AHQ-1-12, 4665             | R.VENQENVSNLVIETELK.Q                                                  | 2074.23206 | 2 | 8.62E-13 | 0.93  | 4.50   | -     | 793.7   |
| AHQ-1-13, 4649             | R.VENQENVSNLVIETELK.Q                                                  | 2074.23206 | 2 | 5.36E-04 | 0.93  | 3.85   | -     | 1012.8  |
| AHQ-1-7, 4888 - 4956       | R.VENQENVSNLVIETELK.Q                                                  | 2074.23206 | 2 | 6.02E-08 | 0.95  | 5.02   | -     | 926.2   |
| AHQ-1-14, 5636             | R.VENQENVSNLVIETELK.Q                                                  | 2074.23206 | 2 | 5.65E-06 | 0.83  | 3.73   | -     | 539.7   |
| AHQ-1-7, 4689              | R.VENQENVSNLVIETELK.Q                                                  | 2074.23206 | 2 | 6.27E-05 | 0.59  | 3.17   | -     | 352.5   |
| AHQ-1-14 - , 4786          | R.VENQENVSNLVIETELK.Q                                                  | 2074.23206 | 2 | 2.82E-04 | 0.92  | 4.18   | -     | 832.8   |
| AHQ-1-7, 4366              | R.VENQENVSNLVIETELK.Q                                                  | 2074.23206 | 2 | 2.38E-05 | 0.89  | 4.18   | -     | 530.7   |
| AHQ-1-5, 4923              | R.VENQENVSNLVIETELK.Q                                                  | 2074.23206 | 2 | 4.05E-06 | 0.68  | 3.40   | -     | 699.5   |
| gi 770529 ref NP_057271.1  | bridging integrator 2; bridging integrator-2; breast cancer associated |            |   | 9.16E-13 | 4.82  | 60.31  | 19.70 | 61746.8 |
| AHQ-1-13 - , 6121 - 6200   | K.AIWVNDLLWEDYEEK.L                                                    | 2038.20157 | 2 | 3.02E-08 | 0.96  | 4.69   | -     | 1295.0  |
| AHQ-1-6, 6208              | K.AIWVNDLLWEDYEEK.L                                                    | 2038.20157 | 2 | 7.75E-05 | 0.75  | 3.13   | -     | 712.2   |
| AHQ-1-10, 5503 - 5569      | K.AIWVNDLLWEDYEEK.L                                                    | 2038.20157 | 2 | 1.56E-07 | 0.95  | 4.95   | -     | 1002.5  |
| AHQ-1-7, 6434              | K.AIWVNDLLWEDYEEK.L                                                    | 2038.20157 | 2 | 9.16E-13 | 0.96  | 4.60   | -     | 1414.2  |
| AHQ-1-13, 5764             | K.AIWVNDLLWEDYEEK.L                                                    | 2038.20157 | 2 | 2.73E-05 | 0.88  | 3.63   | -     | 995.8   |
| AHQ-1-7, 6337              | K.AIWVNDLLWEDYEEK.L                                                    | 2038.20157 | 2 | 5.70E-06 | 0.65  | 3.13   | -     | 388.6   |
| AHQ-1-10, 6397 - 6439      | K.AQTVFEDLNQELLEELPILYNSR.I                                            | 2736.02649 | 2 | 4.45E-05 | 0.85  | 3.56   | -     | 642.1   |
| AHQ-1-10, 6447 - 6448      | K.AQTVFEDLNQELLEELPILYNSR.I                                            | 2736.02649 | 3 | 2.73E-04 | 0.95  | 6.20   | -     | 716.0   |
| AHQ-1-11, 2776             | R.FEQSASNFYQQQAEHGK.L                                                  | 2000.07352 | 2 | 6.69E-06 | 0.86  | 4.13   | -     | 500.4   |
| AHQ-1-7, 2789              | R.FEQSASNFYQQQAEHGK.L                                                  | 2000.07352 | 2 | 7.78E-05 | 0.90  | 4.20   | -     | 680.1   |
| AHQ-1-9, 2687              | R.FEQSASNFYQQQAEHGK.L                                                  | 2000.07352 | 2 | 8.76E-08 | 0.93  | 4.15   | -     | 928.7   |
| AHQ-1-13 - , 2928          | R.FEQSASNFYQQQAEHGK.L                                                  | 2000.07352 | 2 | 2.49E-05 | 0.95  | 4.85   | -     | 836.8   |
| AHQ-1-10, 2545             | R.FEQSASNFYQQQAEHGK.L                                                  | 2000.07352 | 2 | 2.13E-06 | 0.66  | 3.15   | -     | 392.7   |
| AHQ-1-10, 2663             | R.FEQSASNFYQQQAEHGK.L                                                  | 2000.07352 | 2 | 4.70E-10 | 0.93  | 4.63   | -     | 685.8   |
| AHQ-1-13, 2897             | R.FEQSASNFYQQQAEHGK.L                                                  | 2000.07352 | 2 | 1.37E-04 | 0.84  | 3.53   | -     | 670.8   |
| AHQ-1-9, 6828 - 6895       | R.IGCYVTIFQNSNLR.D                                                     | 1800.07167 | 2 | 4.88E-08 | 0.92  | 4.87   | -     | 679.0   |
| AHQ-1-9, 6758 - 6830       | R.IGCYVTIFQNSNLR.D                                                     | 1800.07167 | 2 | 9.58E-06 | 0.91  | 3.70   | -     | 963.3   |
| AHQ-1-6, 6866              | R.IGCYVTIFQNSNLR.D                                                     | 1800.07167 | 2 | 6.83E-06 | 0.93  | 3.64   | -     | 1109.0  |
| AHQ-1-13, 6257 - 6275      | R.IGCYVTIFQNSNLR.D                                                     | 1800.07167 | 2 | 2.36E-04 | 0.73  | 3.40   | -     | 723.5   |
| AHQ-1-7, 7000              | R.IGCYVTIFQNSNLR.D                                                     | 1800.07167 | 2 | 2.51E-07 | 0.93  | 4.06   | -     | 952.3   |
| AHQ-1-7, 4344              | R.TATVSSPLTSPSTSLK.S                                                   | 1976.21467 | 2 | 2.06E-04 | 0.75  | 3.58   | -     | 532.9   |
| AHQ-1-6, 4282              | R.TATVSSPLTSPSTSLK.S                                                   | 1976.21467 | 2 | 1.53E-06 | 0.55  | 2.74   | -     | 494.3   |
| AHQ-1-9, 4215              | R.TATVSSPLTSPSTSLK.S                                                   | 1976.21467 | 2 | 6.90E-04 | 0.74  | 3.38   | -     | 562.1   |
| AHQ-1-10, 4609             | R.VSETLQEIYSSEWDGHEELK.A                                               | 2380.50595 | 2 | 3.38E-04 | 0.60  | 2.85   | -     | 341.5   |
| gi 4504165 ref NP_000168.1 | gelsolin (amyloidosis, Finnish type); Gelsolin [Homo sapiens]          |            |   | 1.04E-12 | 23.39 | 260.33 | 40.90 | 85696.9 |
| AHQ-1-5, 3757              | K.AGALNSNDAFVLK.T                                                      | 1320.47622 | 1 | 2.90E-08 | 0.41  | 2.39   | -     | 412.4   |
| AHQ-1-5, 3837 - 3910       | K.AGALNSNDAFVLK.T                                                      | 1320.47622 | 2 | 6.88E-09 | 0.93  | 3.83   | -     | 870.7   |
| AHQ-1-5, 3755              | K.AGALNSNDAFVLK.T                                                      | 1320.47622 | 2 | 3.23E-08 | 0.84  | 3.69   | -     | 574.6   |
| AHQ-1-5, 3655              | K.AGALNSNDAFVLK.T                                                      | 1320.47622 | 2 | 1.42E-04 | 0.63  | 3.23   | -     | 354.7   |
| AHQ-1-5, 3506 - 3585       | K.AGALNSNDAFVLK.T                                                      | 1320.47622 | 2 | 3.97E-06 | 0.90  | 3.67   | -     | 968.3   |
| AHQ-1-5, 3874              | K.AGALNSNDAFVLK.T                                                      | 1320.47622 | 1 | 1.28E-06 | 0.50  | 2.32   | -     | 545.9   |
| AHQ-1-6, 3492 - 3566       | K.AGALNSNDAFVLK.T                                                      | 1320.47622 | 2 | 8.74E-07 | 0.88  | 3.78   | -     | 669.3   |
| AHQ-1-5, 2951              | K.AGKPEGLQWR.V                                                         | 1255.45060 | 3 | 5.99E-06 | 0.92  | 4.35   | -     | 1153.5  |
| AHQ-1-6, 5844              | R.AQPQVAEGSEPDGFWEALGKK.A                                              | 2273.44345 | 2 | 2.95E-05 | 0.75  | 3.41   | -     | 375.3   |
| AHQ-1-13, 5443             | R.AQPQVAEGSEPDGFWEALGKK.A                                              | 2273.44345 | 2 | 6.55E-05 | 0.91  | 4.10   | -     | 791.9   |
| AHQ-1-7, 5736              | R.AQPQVAEGSEPDGFWEALGKK.A                                              | 2273.44345 | 2 | 7.33E-08 | 0.93  | 4.88   | -     | 601.8   |
| AHQ-1-7, 5933              | R.AQPQVAEGSEPDGFWEALGKK.A                                              | 2273.44345 | 2 | 2.40E-07 | 0.93  | 4.47   | -     | 704.3   |
| AHQ-1-5, 5718 - 5729       | R.AQPQVAEGSEPDGFWEALGKK.A                                              | 2273.44345 | 2 | 6.15E-05 | 0.97  | 6.12   | -     | 1079.2  |
| AHQ-1-6, 5642              | R.AQPQVAEGSEPDGFWEALGKK.A                                              | 2273.44345 | 2 | 3.58E-06 | 0.80  | 3.76   | -     | 437.2   |
| AHQ-1-11, 5318             | R.AQPQVAEGSEPDGFWEALGKK.A                                              | 2273.44345 | 2 | 1.40E-07 | 0.93  | 4.98   | -     | 566.2   |
| AHQ-1-11, 5167             | R.AQPQVAEGSEPDGFWEALGKK.A                                              | 2273.44345 | 2 | 1.17E-05 | 0.90  | 4.37   | -     | 539.3   |
| AHQ-1-6, 5944              | R.AQPQVAEGSEPDGFWEALGKK.A                                              | 2273.44345 | 2 | 1.05E-04 | 0.84  | 4.09   | -     | 286.5   |
| AHQ-1-9, 5575              | R.AQPQVAEGSEPDGFWEALGKK.A                                              | 2273.44345 | 2 | 7.44E-05 | 0.91  | 4.57   | -     | 431.1   |
| AHQ-1-5, 5858              | R.AQPQVAEGSEPDGFWEALGKK.A                                              | 2273.44345 | 2 | 2.43E-06 | 0.96  | 5.25   | -     | 718.4   |
| AHQ-1-10, 5019 - 5024      | R.AQPQVAEGSEPDGFWEALGKK.A                                              | 2273.44345 | 2 | 3.30E-05 | 0.95  | 5.40   | -     | 744.0   |
| AHQ-1-5, 5949 - 6017       | R.AQPQVAEGSEPDGFWEALGKK.A                                              | 2273.44345 | 2 | 3.79E-07 | 0.97  | 6.02   | -     | 1040.7  |
| AHQ-1-2, 6106              | R.AQPQVAEGSEPDGFWEALGKK.A                                              | 2273.44345 | 2 | 5.66E-04 | 0.48  | 2.64   | -     | 388.0   |
| AHQ-1-5, 6167              | R.AQPQVAEGSEPDGFWEALGKK.A                                              | 2273.44345 | 2 | 6.37E-04 | 0.84  | 3.61   | -     | 503.9   |
| AHQ-1-5, 6067 - 6085       | R.AQPQVAEGSEPDGFWEALGKK.A                                              | 2273.44345 | 2 | 3.08E-06 | 0.97  | 6.65   | -     | 840.8   |
| AHQ-1-8, 5732 - 5800       | R.AQPQVAEGSEPDGFWEALGKK.A                                              | 2273.44345 | 2 | 2.24E-07 | 0.94  | 4.55   | -     | 821.4   |
| AHQ-1-9, 5731              | R.AQPQVAEGSEPDGFWEALGKK.A                                              | 2273.44345 | 2 | 6.81E-04 | 0.85  | 3.55   | -     | 534.2   |
| AHQ-1-5, 5825 - 5903       | R.DPDQTDGLGLSYLSSHIANVER.V                                             | 2388.53285 | 3 | 3.48E-10 | 0.95  | 5.01   | -     | 1208.2  |
| AHQ-1-7, 5814              | R.DPDQTDGLGLSYLSSHIANVER.V                                             | 2388.53285 | 3 | 1.16E-08 | 0.86  | 3.53   | -     | 1246.8  |
| AHQ-1-6, 5774              | R.DPDQTDGLGLSYLSSHIANVER.V                                             | 2388.53285 | 3 | 4.86E-05 | 0.96  | 5.13   | -     | 1374.0  |
| AHQ-1-13, 2329 - 2387      | K.DSQEEKTEALTSK.R                                                      | 1666.72289 | 2 | 4.95E-07 | 0.93  | 3.69   | -     | 1279.5  |
| AHQ-1-8, 2087              | K.DSQEEKTEALTSK.R                                                      | 1666.72289 | 2 | 9.69E-08 | 0.90  | 3.50   | -     | 1132.4  |
| AHQ-1-13, 2333             | K.DSQEEKTEALTSK.R                                                      | 1666.72289 | 3 | 4.79E-09 | 0.95  | 4.30   | -     | 1878.1  |
| AHQ-1-11, 2190             | K.DSQEEKTEALTSK.R                                                      | 1666.72289 | 2 | 3.85E-05 | 0.89  | 3.62   | -     | 983.9   |
| AHQ-1-5, 2187 - 2259       | K.DSQEEKTEALTSK.R                                                      | 1666.72289 | 2 | 1.94E-07 | 0.95  | 4.21   | -     | 1383.9  |
| AHQ-1-7, 2149              | K.DSQEEKTEALTSK.R                                                      | 1666.72289 | 2 | 1.99E-05 | 0.85  | 3.10   | -     | 1186.5  |
| AHQ-1-5, 2106              | K.DSQEEKTEALTSK.R                                                      | 1666.72289 | 3 | 3.86E-06 | 0.95  | 3.74   | -     | 2090.3  |
| AHQ-1-5, 2099 - 2113       | K.DSQEEKTEALTSK.R                                                      | 1666.72289 | 2 | 2.50E-06 | 0.92  | 3.50   | -     | 1346.5  |
| AHQ-1-9, 2118 - 2120       | K.DSQEEKTEALTSK.R                                                      | 1666.72289 | 2 | 1.50E-07 | 0.96  | 4.79   | -     | 1483.6  |
| AHQ-1-13 - , 2279          | K.DSQEEKTEALTSK.R                                                      | 1666.72289 | 2 | 9.98E-09 | 0.94  | 3.78   | -     | 1460.1  |
| AHQ-1-10, 2131             | K.DSQEEKTEALTSK.R                                                      | 1666.72289 | 2 | 1.21E-09 | 0.94  | 3.83   | -     | 1457.7  |
| AHQ-1-13 - , 2287          | K.DSQEEKTEALTSK.R                                                      | 1666.72289 | 3 | 4.96E-06 | 0.97  | 4.11   | -     | 2794.4  |
| AHQ-1-6, 2135              | K.DSQEEKTEALTSK.R                                                      | 1666.72289 | 3 | 6.86E-06 | 0.91  | 3.36   | -     | 1583.3  |
| AHQ-1-2, 2338              | K.DSQEEKTEALTSK.R                                                      | 1666.72289 | 2 | 1.38E-08 | 0.91  | 3.65   | -     | 1323.2  |
| AHQ-1-1, 2364              | K.DSQEEKTEALTSK.R                                                      | 1666.72289 | 2 | 9.93E-06 | 0.93  | 3.71   | -     | 1563.3  |
| AHQ-1-6, 2120 - 2122       | K.DSQEEKTEALTSK.R                                                      | 1666.72289 | 2 | 2.89E-09 | 0.95  | 3.94   | -     | 1539.3  |
| AHQ-1-5, 6474 - 6549       | R.EVQGFEATFLGYFK.S                                                     | 1723.90570 | 2 | 2.12E-11 | 0.97  | 5.10   | -     | 1455.1  |
| AHQ-1-13 - , 6225 - 6273   | R.EVQGFEATFLGYFK.S                                                     | 1723.90570 | 2 | 6.53E-11 | 0.96  | 4.59   | -     | 1331.8  |
| AHQ-1-5, 6597 - 6665       | R.EVQGFEATFLGYFK.S                                                     | 1723.90570 | 2 | 6.06E-05 | 0.84  | 3.53   | -     | 718.8   |
| AHQ-1-13, 5869 - 5891      | R.EVQGFEATFLGYFK.S                                                     | 1723.90570 | 2 | 2.23E-07 | 0.97  | 4.34   | -     | 1871.9  |
| AHQ-1-12, 5925 - 6006      | R.EVQGFEATFLGYFK.S                                                     | 1723.90570 | 2 | 8.21E-07 | 0.94  | 4.03   | -     | 990.7   |
| AHQ-1-5, 7606              | R.EVQGFEATFLGYFK.S                                                     | 1723.90570 | 2 | 1.13E-06 | 0.94  | 3.27   | -     | 1439.1  |
| AHQ-1-5, 6841 - 6870       | R.EVQGFEATFLGYFK.S                                                     | 1723.90570 | 2 | 2.43E-06 | 0.91  | 3.24   | -     | 1152.8  |



|                             |                                                                          |            |   |          |       |        |       |         |
|-----------------------------|--------------------------------------------------------------------------|------------|---|----------|-------|--------|-------|---------|
| AHQ-1-5, 6937 - 7017        | R.EVQGFESATFLGYFK.S                                                      | 1723.90570 | 2 | 2.19E-07 | 0.96  | 4.16   | -     | 1382.9  |
| AHQ-1-14 - , 6051           | R.EVQGFESATFLGYFK.S                                                      | 1723.90570 | 2 | 4.99E-09 | 0.90  | 3.91   | -     | 817.1   |
| AHQ-1-5, 7483 - 7557        | K.FDLVVPNTLYGDFFTGDAYVILK.T                                              | 2706.08359 | 2 | 2.50E-04 | 0.79  | 3.19   | -     | 448.3   |
| AHQ-1-7, 2212 - 2216        | K.HVVPNEVVVQR.L                                                          | 1276.46981 | 2 | 1.08E-08 | 0.91  | 3.20   | -     | 730.1   |
| AHQ-1-9, 2174               | K.HVVPNEVVVQR.L                                                          | 1276.46981 | 2 | 9.54E-08 | 0.91  | 3.29   | -     | 662.4   |
| AHQ-1-5, 2395               | K.HVVPNEVVVQR.L                                                          | 1276.46981 | 1 | 1.41E-08 | 0.46  | 2.14   | -     | 481.2   |
| AHQ-1-5, 2389 - 2414        | K.HVVPNEVVVQR.L                                                          | 1276.46981 | 2 | 6.11E-05 | 0.87  | 3.03   | -     | 610.8   |
| AHQ-1-5, 2185 - 2186        | K.HVVPNEVVVQR.L                                                          | 1276.46981 | 1 | 3.26E-09 | 0.47  | 2.53   | -     | 309.9   |
| AHQ-1-5, 2181 - 2253        | K.HVVPNEVVVQR.L                                                          | 1276.46981 | 2 | 2.95E-09 | 0.90  | 3.17   | -     | 726.8   |
| AHQ-1-6, 2202               | K.HVVPNEVVVQR.L                                                          | 1276.46981 | 2 | 8.77E-10 | 0.88  | 3.45   | -     | 567.0   |
| AHQ-1-11, 2266              | K.HVVPNEVVVQR.L                                                          | 1276.46981 | 2 | 2.24E-04 | 0.87  | 3.02   | -     | 547.8   |
| AHQ-1-5, 6419 - 6493        | R.IEGSNKVPVDPATYGFYGGDSYIILYNR.H                                         | 3401.72499 | 3 | 1.58E-11 | 0.89  | 4.00   | -     | 1086.0  |
| AHQ-1-5, 6907 - 6919        | R.IEGSNKVPVDPATYGFYGGDSYIILYNR.H                                         | 3401.72499 | 3 | 6.28E-05 | 0.96  | 5.31   | -     | 1353.3  |
| AHQ-1-5, 6789               | R.IEGSNKVPVDPATYGFYGGDSYIILYNR.H                                         | 3401.72499 | 3 | 1.25E-06 | 0.95  | 4.93   | -     | 1461.4  |
| AHQ-1-5, 6573 - 6641        | R.IEGSNKVPVDPATYGFYGGDSYIILYNR.H                                         | 3401.72499 | 3 | 3.91E-05 | 0.91  | 4.24   | -     | 1088.1  |
| AHQ-1-6, 6362 - 6388        | R.IEGSNKVPVDPATYGFYGGDSYIILYNR.H                                         | 3401.72499 | 3 | 6.68E-04 | 0.87  | 4.05   | -     | 992.8   |
| AHQ-1-5, 5714 - 5715        | K.NWRDPDQTDGLGLSYLSSHIANVER.V                                            | 2845.03323 | 2 | 8.66E-04 | 0.75  | 3.53   | -     | 337.3   |
| AHQ-1-5, 5689 - 5761        | K.NWRDPDQTDGLGLSYLSSHIANVER.V                                            | 2845.03323 | 3 | 5.49E-08 | 0.95  | 5.49   | -     | 978.2   |
| AHQ-1-5, 6329               | K.NWRDPDQTDGLGLSYLSSHIANVER.V                                            | 2845.03323 | 3 | 1.36E-12 | 0.93  | 4.89   | -     | 967.7   |
| AHQ-1-5, 2017               | K.PALPAGTEDTAK.E                                                         | 1171.28241 | 2 | 1.86E-07 | 0.81  | 2.87   | -     | 458.7   |
| AHQ-1-5, 2415               | K.PALPAGTEDTAKEDAANR.K                                                   | 1827.93072 | 2 | 1.09E-06 | 0.93  | 4.04   | -     | 778.4   |
| AHQ-1-5, 4833 - 4903        | K.QTQVSVLPEGGETPLFK.Q                                                    | 1831.05925 | 2 | 1.02E-04 | 0.77  | 3.09   | -     | 399.2   |
| AHQ-1-5, 5030 - 5035        | K.QTQVSVLPEGGETPLFK.Q                                                    | 1831.05925 | 2 | 2.36E-07 | 0.88  | 3.80   | -     | 486.4   |
| AHQ-1-5, 2942               | K.SEDCFILDHGK.D                                                          | 1322.42590 | 3 | 1.08E-05 | 0.73  | 3.04   | -     | 423.8   |
| AHQ-1-7, 2980               | K.SEDCFILDHGK.D                                                          | 1322.42590 | 2 | 5.59E-05 | 0.96  | 3.71   | -     | 1657.4  |
| AHQ-1-5, 2921               | K.SEDCFILDHGK.D                                                          | 1322.42590 | 2 | 1.94E-04 | 0.95  | 3.90   | -     | 1405.8  |
| AHQ-1-6, 2967               | K.SEDCFILDHGK.D                                                          | 1322.42590 | 2 | 3.87E-06 | 0.91  | 3.00   | -     | 1047.7  |
| AHQ-1-8, 2075               | K.TGAQELLR.V                                                             | 888.00387  | 2 | 7.43E-05 | 0.81  | 2.66   | -     | 907.2   |
| AHQ-1-5, 2054               | K.TGAQELLR.V                                                             | 888.00387  | 2 | 1.02E-04 | 0.85  | 2.88   | -     | 892.3   |
| AHQ-1-6, 2087               | K.TGAQELLR.V                                                             | 888.00387  | 2 | 9.37E-06 | 0.88  | 2.93   | -     | 1011.0  |
| AHQ-1-5, 4603 - 4673        | K.TPSAAYLVVGTGASEAEK.T                                                   | 1838.99510 | 2 | 9.27E-06 | 0.95  | 4.59   | -     | 1142.0  |
| AHQ-1-6, 4298               | K.TPSAAYLVVGTGASEAEK.T                                                   | 1838.99510 | 2 | 1.28E-04 | 0.72  | 3.13   | -     | 580.9   |
| AHQ-1-5, 4491 - 4561        | K.TPSAAYLVVGTGASEAEK.T                                                   | 1838.99510 | 2 | 1.30E-05 | 0.98  | 5.16   | -     | 2021.2  |
| AHQ-1-10, 3964 - 4032       | K.TPSAAYLVVGTGASEAEK.T                                                   | 1838.99510 | 2 | 4.69E-04 | 0.89  | 3.55   | -     | 1061.7  |
| AHQ-1-5, 4663 - 4742        | K.TPSAAYLVVGTGASEAEK.T                                                   | 1838.99510 | 2 | 1.04E-12 | 0.97  | 5.62   | -     | 1492.2  |
| AHQ-1-6, 4935               | R.VHVSEEGTEPEAMLQVLGPK.P                                                 | 2151.42630 | 2 | 3.48E-07 | 0.97  | 5.69   | -     | 1064.4  |
| AHQ-1-8, 4815               | R.VHVSEEGTEPEAMLQVLGPK.P                                                 | 2151.42630 | 2 | 1.59E-04 | 0.95  | 4.70   | -     | 754.0   |
| AHQ-1-5, 4927 - 4997        | R.VHVSEEGTEPEAMLQVLGPK.P                                                 | 2151.42630 | 2 | 2.55E-07 | 0.97  | 5.83   | -     | 1268.7  |
| AHQ-1-5, 5314               | R.VHVSEEGTEPEAMLQVLGPKPALPAGTEDTAK.E                                     | 3303.68611 | 3 | 1.64E-08 | 0.95  | 6.02   | -     | 688.9   |
| AHQ-1-5, 4385               | R.VHVSEEGTEPEAM*LQVLGPKPALPAGTEDTAK.E                                    | 3319.68551 | 3 | 9.87E-05 | 0.92  | 4.76   | -     | 765.3   |
| AHQ-1-6, 5234               | R.VHVSEEGTEPEAMLQVLGPKPALPAGTEDTAK.E                                     | 3303.68611 | 3 | 6.76E-09 | 0.92  | 4.76   | -     | 674.6   |
| AHQ-1-5, 5098               | R.VHVSEEGTEPEAMLQVLGPKPALPAGTEDTAKEDAANR.K                               | 3960.33442 | 3 | 4.99E-10 | 0.97  | 6.29   | -     | 1184.5  |
| AHQ-1-5, 3549 - 3626        | R.VPFDATLHTSTAMAAQHGM*DDGDTGQK.Q                                         | 2891.10081 | 3 | 1.90E-05 | 0.92  | 5.47   | -     | 1120.2  |
| AHQ-1-5, 3141               | R.VPFDATLHTSTAMAAQHGM*DDGDTGQK.Q                                         | 2907.10021 | 3 | 6.55E-04 | 0.80  | 3.70   | -     | 568.9   |
| AHQ-1-5, 4026               | R.VPFDATLHTSTAMAAQHGMDDGDTGQK.Q                                          | 2875.10141 | 3 | 2.26E-08 | 0.97  | 6.22   | -     | 1231.1  |
| AHQ-1-5, 6978               | K.VPVDPATYGFYGGDSYIILYNR.H                                               | 2773.04698 | 2 | 2.38E-06 | 0.74  | 3.05   | -     | 632.9   |
| AHQ-1-5, 6914               | K.VPVDPATYGFYGGDSYIILYNR.H                                               | 2773.04698 | 3 | 9.67E-04 | 0.81  | 4.49   | -     | 876.5   |
| AHQ-1-5, 6681               | K.VPVDPATYGFYGGDSYIILYNR.H                                               | 2773.04698 | 2 | 3.16E-07 | 0.93  | 4.16   | -     | 901.0   |
| AHQ-1-5, 5537 - 5607        | K.VSNAGAGTM*SVSLVADENPFAQGALK.S                                          | 2480.73680 | 2 | 2.89E-06 | 0.93  | 4.86   | -     | 767.0   |
| AHQ-1-6, 5458 - 5527        | K.VSNAGAGTM*SVSLVADENPFAQGALK.S                                          | 2480.73680 | 2 | 1.12E-07 | 0.83  | 3.15   | -     | 747.8   |
| AHQ-1-5, 1705               | R.YIETDPANR.D                                                            | 1079.14506 | 2 | 2.04E-05 | 0.64  | 2.67   | -     | 502.5   |
| gi 23308579 ref NP_006592.3 | unactive progesterone receptor, 23 kD; likely ortholog of mouse telomere |            |   | 1.17E-12 | 0.94  | 10.24  | 10.60 | 18697.3 |
| AHQ-1-11, 4599              | K.HLNEIDLFCIDPNDSK.H                                                     | 2069.24049 | 3 | 1.17E-12 | 0.94  | 4.78   | -     | 1090.2  |
| gi 14251209 ref NP_001279.2 | chloride intracellular channel 1; p64CLCP; chloride channel ABP [Homo    |            |   | 1.19E-12 | 9.19  | 110.26 | 51.00 | 26922.5 |
| AHQ-1-13 - , 5867           | R.EEFASCTPDDDEIEIAYEQVAK.A                                               | 2575.69730 | 2 | 1.13E-08 | 0.46  | 2.57   | -     | 406.3   |
| AHQ-1-12, 5602              | R.EEFASCTPDDDEIEIAYEQVAK.A                                               | 2575.69730 | 3 | 1.26E-10 | 0.96  | 5.02   | -     | 1690.9  |
| AHQ-1-13, 5520              | R.EEFASCTPDDDEIEIAYEQVAK.A                                               | 2575.69730 | 2 | 6.39E-07 | 0.41  | 2.62   | -     | 370.5   |
| AHQ-1-10, 5313              | R.EEFASCTPDDDEIEIAYEQVAK.A                                               | 2575.69730 | 3 | 1.86E-06 | 0.91  | 4.70   | -     | 971.9   |
| AHQ-1-9, 6456               | K.FLDGNELTLADCNLLPK.L                                                    | 1935.18752 | 2 | 1.64E-08 | 0.70  | 3.56   | -     | 757.9   |
| AHQ-1-10, 5595 - 5669       | K.FLDGNELTLADCNLLPK.L                                                    | 1935.18752 | 2 | 4.63E-07 | 0.92  | 5.04   | -     | 986.5   |
| AHQ-1-12, 5882              | K.FLDGNELTLADCNLLPK.L                                                    | 1935.18752 | 2 | 1.86E-04 | 0.89  | 4.29   | -     | 1086.7  |
| AHQ-1-10, 5704              | K.FLDGNELTLADCNLLPK.L                                                    | 1935.18752 | 2 | 3.76E-07 | 0.90  | 4.38   | -     | 1020.0  |
| AHQ-1-10, 3503              | K.FSAYIKNSPALNDNLEK.G                                                    | 2039.23424 | 2 | 1.19E-12 | 0.88  | 4.68   | -     | 795.6   |
| AHQ-1-9, 3280               | K.GVTFNVTVDTK.R                                                          | 1282.42476 | 2 | 5.48E-06 | 0.92  | 3.74   | -     | 1038.6  |
| AHQ-1-13 - , 3477 - 3543    | K.GVTFNVTVDTK.R                                                          | 1282.42476 | 2 | 2.40E-06 | 0.93  | 3.99   | -     | 948.0   |
| AHQ-1-13, 3434              | K.GVTFNVTVDTK.R                                                          | 1282.42476 | 2 | 8.85E-07 | 0.93  | 3.72   | -     | 934.6   |
| AHQ-1-10, 3181 - 3245       | K.GVTFNVTVDTK.R                                                          | 1282.42476 | 2 | 3.08E-06 | 0.91  | 3.52   | -     | 1029.5  |
| AHQ-1-10, 2337              | K.IGNCPFSQR.L                                                            | 1080.19948 | 2 | 8.83E-04 | 0.82  | 3.10   | -     | 558.6   |
| AHQ-1-9, 5835               | R.KFLDGNELTLADCNLLPK.L                                                   | 2063.36044 | 2 | 1.67E-04 | 0.75  | 3.41   | -     | 733.6   |
| AHQ-1-10, 5337              | R.KFLDGNELTLADCNLLPK.L                                                   | 2063.36044 | 2 | 4.18E-07 | 0.88  | 4.84   | -     | 982.7   |
| AHQ-1-10, 5164 - 5219       | R.KFLDGNELTLADCNLLPK.L                                                   | 2063.36044 | 2 | 3.78E-04 | 0.87  | 4.52   | -     | 1016.9  |
| AHQ-1-10, 4863              | K.LAALNPESNTAGLDIFAK.F                                                   | 1846.07392 | 2 | 3.90E-06 | 0.96  | 5.26   | -     | 917.2   |
| AHQ-1-10, 5135              | K.LAALNPESNTAGLDIFAK.F                                                   | 1846.07392 | 2 | 1.75E-06 | 0.94  | 4.68   | -     | 790.4   |
| AHQ-1-10, 5017              | K.LAALNPESNTAGLDIFAK.F                                                   | 1846.07392 | 2 | 6.77E-05 | 0.87  | 4.12   | -     | 367.2   |
| AHQ-1-9, 5378 - 5400        | K.LAALNPESNTAGLDIFAK.F                                                   | 1846.07392 | 2 | 1.94E-06 | 0.96  | 5.22   | -     | 753.5   |
| AHQ-1-13 - , 5613           | K.LAALNPESNTAGLDIFAK.F                                                   | 1846.07392 | 2 | 2.64E-07 | 0.92  | 4.43   | -     | 624.2   |
| AHQ-1-14, 6266 - 6344       | K.LAALNPESNTAGLDIFAK.F                                                   | 1846.07392 | 2 | 3.54E-04 | 0.85  | 4.14   | -     | 385.1   |
| AHQ-1-12, 5262              | K.LAALNPESNTAGLDIFAK.F                                                   | 1846.07392 | 2 | 3.00E-04 | 0.96  | 4.47   | -     | 1038.2  |
| AHQ-1-9, 5590 - 5671        | K.LAALNPESNTAGLDIFAK.F                                                   | 1846.07392 | 2 | 3.49E-06 | 0.90  | 3.77   | -     | 725.7   |
| AHQ-1-14 - , 5359           | K.LAALNPESNTAGLDIFAK.F                                                   | 1846.07392 | 2 | 2.86E-05 | 0.93  | 4.60   | -     | 659.0   |
| AHQ-1-13 - , 5491           | K.LAALNPESNTAGLDIFAK.F                                                   | 1846.07392 | 2 | 1.92E-06 | 0.94  | 4.52   | -     | 791.7   |
| AHQ-1-13, 5300              | K.LAALNPESNTAGLDIFAK.F                                                   | 1846.07392 | 2 | 2.96E-11 | 0.94  | 4.92   | -     | 607.2   |
| AHQ-1-13, 5133 - 5191       | K.LAALNPESNTAGLDIFAK.F                                                   | 1846.07392 | 2 | 1.26E-05 | 0.89  | 3.73   | -     | 567.1   |
| AHQ-1-14 - , 5736           | R.LFM*VLWLK.G                                                            | 1066.38391 | 2 | 4.11E-04 | 0.88  | 2.70   | -     | 1039.3  |
| AHQ-1-13 - , 2923           | K.LHVQVCK.K                                                              | 1097.35623 | 1 | 3.28E-04 | 0.74  | 2.31   | -     | 774.6   |
| AHQ-1-10, 2177              | K.NSNPALNDNLEK.G                                                         | 1329.39838 | 2 | 1.79E-07 | 0.55  | 3.23   | -     | 370.4   |
| AHQ-1-10, 4683              | K.VLDNYLTSPLPEEVDETSADDEGVQR.K                                           | 2994.12446 | 2 | 5.21E-04 | 0.38  | 2.85   | -     | 215.6   |
| AHQ-1-13 - , 5351           | K.VLDNYLTSPLPEEVDETSADDEGVQR.K                                           | 2994.12446 | 2 | 1.28E-05 | 0.68  | 3.60   | -     | 248.9   |
| AHQ-1-12, 5135              | K.VLDNYLTSPLPEEVDETSADDEGVQR.K                                           | 2994.12446 | 2 | 1.30E-08 | 0.90  | 4.77   | -     | 321.3   |
| AHQ-1-12, 5118              | K.VLDNYLTSPLPEEVDETSADDEGVQR.K                                           | 2994.12446 | 2 | 6.77E-06 | 0.75  | 3.48   | -     | 326.4   |
| AHQ-1-10, 4760 - 4824       | K.VLDNYLTSPLPEEVDETSADDEGVQR.K                                           | 2994.12446 | 3 | 5.45E-07 | 0.94  | 5.19   | -     | 937.5   |
| AHQ-1-10, 4765 - 4823       | K.VLDNYLTSPLPEEVDETSADDEGVQR.K                                           | 2994.12446 | 2 | 3.30E-07 | 0.91  | 4.59   | -     | 404.7   |
| AHQ-1-10, 4967              | K.VLDNYLTSPLPEEVDETSADDEGVQR.K                                           | 2994.12446 | 2 | 2.93E-04 | 0.60  | 2.75   | -     | 385.7   |
| AHQ-1-13, 5076              | K.VLDNYLTSPLPEEVDETSADDEGVQR.K                                           | 2994.12446 | 2 | 4.83E-06 | 0.50  | 2.81   | -     | 290.7   |
| gi 5453549 ref NP_006397.1  | thioredoxin peroxidase; thioredoxin peroxidase (antioxidant enzyme) [Ho  |            |   | 1.26E-12 | 2.65  | 30.23  | 10.00 | 30539.7 |
| AHQ-1-13, 3768              | K.DYGVYLEDSDGHTLR.G                                                      | 1625.72052 | 2 | 3.60E-07 | 0.96  | 4.53   | -     | 1107.2  |
| AHQ-1-10, 3504              | K.DYGVYLEDSDGHTLR.G                                                      | 1625.72052 | 2 | 1.26E-12 | 0.97  | 4.27   | -     | 1802.7  |
| AHQ-1-10, 4629              | R.IPLLSDLTHQISK.D                                                        | 1465.71961 | 2 | 2.55E-08 | 0.96  | 3.94   | -     | 1366.6  |
| AHQ-1-13 - , 3092           | R.LVQAFQYTDK.H                                                           | 1213.36412 | 2 | 1.51E-04 | 0.71  | 2.63   | -     | 910.5   |
| gi 13994151 ref NP_066272.1 | PDZ and LIM domain 1 (elfin); carboxy terminal LIM domain protein 1 [H   |            |   | 1.29E-12 | 16.63 | 200.29 | 60.50 | 36071.5 |
| AHQ-1-13, 6307              | K.AALANLCIGDVTIADGENTSNM*THLEAQR.N.I                                     | 3331.63807 | 3 | 1.99E-08 | 0.91  | 4.85   | -     | 526.4   |
| AHQ-1-14 - , 6546           | K.AALANLCIGDVTIADGENTSNM*THLEAQR.N.I                                     | 3331.63807 | 3 | 1.92E-08 | 0.86  | 4.14   | -     | 577.0   |
| AHQ-1-14 - , 6462 - 6518    | K.AALANLCIGDVTIADGENTSNM*THLEAQR.N.I                                     | 3331.63807 | 3 | 4.23E-08 | 0.91  | 4.80   | -     | 617.2   |
| AHQ-1-14 - , 6047           | K.AALANLCIGDVTIADGENTSNM*THLEAQR.N.I                                     | 3331.63807 | 3 | 4.28E-10 | 0.89  | 4.45   | -     | 505.8   |
| AHQ-1-14 - , 5922 - 5987    | K.AALANLCIGDVTIADGENTSNM*THLEAQR.N.I                                     | 3331.63807 | 3 | 6.14E-05 | 0.77  | 3.74   | -     | 673.6   |
| AHQ-1-13 - , 6851 - 6853    | K.AALANLCIGDVTIADGENTSNM*THLEAQR.N.I                                     | 3315.63867 | 3 | 1.29E-12 | 0.95  | 5.75   | -     | 738.4   |
| AHQ-1-13 - , 6715 - 6789    | K.AALANLCIGDVTIADGENTSNM*THLEAQR.N.I                                     | 3331.63807 | 3 | 2.39E-05 | 0.92  | 5.05   | -     | 483.3   |

|                                                                                                     |                                     |            |   |          |       |        |       |          |
|-----------------------------------------------------------------------------------------------------|-------------------------------------|------------|---|----------|-------|--------|-------|----------|
| AHQ-1-14- , 6606                                                                                    | K.AALANLCIGDVITAIDGENTSNMTHLEAQRN.I | 3315.63867 | 3 | 6.67E-08 | 0.91  | 4.97   | -     | 643.6    |
| AHQ-1-11, 6198 - 6272                                                                               | K.AALANLCIGDVITAIDGENTSNMTHLEAQRN.I | 3331.63807 | 3 | 7.87E-04 | 0.81  | 4.26   | -     | 374.8    |
| AHQ-1-13- , 4579                                                                                    | K.CGTGIVGVFVK.L                     | 1138.36198 | 2 | 1.80E-06 | 0.91  | 3.30   | -     | 1069.2   |
| AHQ-1-12, 4399                                                                                      | K.CGTGIVGVFVK.L                     | 1138.36198 | 2 | 8.70E-04 | 0.93  | 3.00   | -     | 1196.4   |
| AHQ-1-14- , 3638 - 3640                                                                             | K.DFEQPLAISR.V                      | 1176.30388 | 2 | 1.24E-06 | 0.94  | 4.21   | -     | 981.9    |
| AHQ-1-14, 4562                                                                                      | K.DFEQPLAISR.V                      | 1176.30388 | 1 | 3.16E-04 | 0.37  | 1.87   | -     | 395.9    |
| AHQ-1-14, 4557 - 4560                                                                               | K.DFEQPLAISR.V                      | 1176.30388 | 2 | 5.97E-05 | 0.88  | 3.67   | -     | 723.1    |
| AHQ-1-13, 3613 - 3631                                                                               | K.DFEQPLAISR.V                      | 1176.30388 | 2 | 5.87E-05 | 0.87  | 3.15   | -     | 799.8    |
| AHQ-1-12, 3569                                                                                      | K.DFEQPLAISR.V                      | 1176.30388 | 2 | 6.79E-07 | 0.92  | 3.67   | -     | 973.3    |
| AHQ-1-13- , 3459                                                                                    | K.GCTDNLTLTVAR.S                    | 1322.47058 | 2 | 7.44E-04 | 0.84  | 3.39   | -     | 724.1    |
| AHQ-1-10, 3756                                                                                      | K.GHFFVEDQIYCEK.H                   | 1673.82684 | 2 | 7.33E-06 | 0.91  | 3.57   | -     | 862.9    |
| AHQ-1-13- , 4156 - 4228                                                                             | K.GHFFVEDQIYCEK.H                   | 1673.82684 | 2 | 3.71E-05 | 0.96  | 4.44   | -     | 1190.2   |
| AHQ-1-12, 3922 - 3945                                                                               | K.GHFFVEDQIYCEK.H                   | 1673.82684 | 2 | 5.25E-05 | 0.94  | 4.02   | -     | 1034.4   |
| AHQ-1-12, 3995 - 4018                                                                               | K.GHFFVEDQIYCEK.H                   | 1673.82684 | 2 | 1.71E-06 | 0.96  | 4.31   | -     | 1200.2   |
| AHQ-1-13, 3980 - 4044                                                                               | K.GHFFVEDQIYCEK.H                   | 1673.82684 | 2 | 2.17E-05 | 0.96  | 4.09   | -     | 1333.5   |
| AHQ-1-14, 4916 - 4996                                                                               | K.GHFFVEDQIYCEK.H                   | 1673.82684 | 2 | 5.26E-04 | 0.93  | 3.74   | -     | 1012.8   |
| AHQ-1-14- , 4039                                                                                    | K.GHFFVEDQIYCEK.H                   | 1673.82684 | 2 | 7.41E-05 | 0.93  | 3.70   | -     | 1067.3   |
| AHQ-1-9, 3970                                                                                       | K.GHFFVEDQIYCEK.H                   | 1673.82684 | 2 | 1.66E-05 | 0.96  | 4.27   | -     | 1380.2   |
| AHQ-1-12, 2997                                                                                      | R.HPECYVCTDCGTNLK.Q                 | 1858.02023 | 2 | 6.07E-04 | 0.83  | 3.35   | -     | 500.4    |
| AHQ-1-12, 2669                                                                                      | R.HRHPECYVCTDCGTNLK.Q               | 2151.34648 | 3 | 4.93E-10 | 0.97  | 4.95   | -     | 1653.7   |
| AHQ-1-14- , 2751                                                                                    | R.HRHPECYVCTDCGTNLK.Q               | 2151.34648 | 3 | 1.83E-06 | 0.97  | 5.01   | -     | 1917.0   |
| AHQ-1-13- , 2789                                                                                    | R.HRHPECYVCTDCGTNLK.Q               | 2151.34648 | 2 | 2.42E-04 | 0.89  | 4.24   | -     | 449.9    |
| AHQ-1-13, 3227                                                                                      | R.IKGTDLNLTIVAR.S                   | 1563.80174 | 2 | 5.59E-07 | 0.83  | 3.53   | -     | 703.1    |
| AHQ-1-9, 3052 - 3054                                                                                | R.IKGTDLNLTIVAR.S                   | 1563.80174 | 2 | 3.47E-08 | 0.94  | 4.11   | -     | 1051.2   |
| AHQ-1-14- , 3178                                                                                    | R.IKGTDLNLTIVAR.S                   | 1563.80174 | 2 | 1.71E-09 | 0.94  | 4.04   | -     | 1009.7   |
| AHQ-1-11, 3056                                                                                      | R.IKGTDLNLTIVAR.S                   | 1563.80174 | 3 | 3.37E-05 | 0.82  | 3.66   | -     | 1136.0   |
| AHQ-1-12, 3122                                                                                      | R.IKGTDLNLTIVAR.S                   | 1563.80174 | 2 | 2.65E-08 | 0.93  | 4.06   | -     | 810.3    |
| AHQ-1-14, 4069                                                                                      | R.IKGTDLNLTIVAR.S                   | 1563.80174 | 2 | 8.12E-08 | 0.91  | 3.60   | -     | 943.2    |
| AHQ-1-11, 3048                                                                                      | R.IKGTDLNLTIVAR.S                   | 1563.80174 | 2 | 4.60E-07 | 0.93  | 4.23   | -     | 1009.4   |
| AHQ-1-13- , 3341                                                                                    | R.IKGTDLNLTIVAR.S                   | 1563.80174 | 2 | 2.39E-08 | 0.90  | 3.95   | -     | 703.2    |
| AHQ-1-13- , 3480 - 3531                                                                             | R.IKGTDLNLTIVAR.S                   | 1563.80174 | 2 | 4.86E-04 | 0.87  | 3.58   | -     | 606.5    |
| AHQ-1-13- , 4932                                                                                    | K.LPM*CDKCGTIVGVFVK.L               | 1900.27298 | 2 | 8.09E-04 | 0.89  | 3.50   | -     | 686.5    |
| AHQ-1-13, 4668                                                                                      | K.LPM*CDKCGTIVGVFVK.L               | 1900.27298 | 2 | 7.87E-04 | 0.53  | 2.67   | -     | 385.0    |
| AHQ-1-13- , 5380                                                                                    | K.LPM*CDKCGTIVGVFVK.L               | 1884.27358 | 3 | 2.30E-05 | 0.78  | 3.29   | -     | 860.5    |
| AHQ-1-12, 5113                                                                                      | K.LPM*CDKCGTIVGVFVK.L               | 1884.27358 | 3 | 2.31E-07 | 0.79  | 3.63   | -     | 699.4    |
| AHQ-1-12, 4682                                                                                      | K.LPM*CDKCGTIVGVFVK.L               | 1900.27298 | 3 | 1.04E-04 | 0.56  | 3.03   | -     | 723.3    |
| AHQ-1-14, 4606 - 4664                                                                               | R.LVGGKDFEQPLAISR.V                 | 1630.86972 | 2 | 2.88E-08 | 0.96  | 4.36   | -     | 1501.9   |
| AHQ-1-9, 3586                                                                                       | R.LVGGKDFEQPLAISR.V                 | 1630.86972 | 2 | 1.03E-04 | 0.77  | 3.29   | -     | 558.3    |
| AHQ-1-14- , 3792                                                                                    | R.LVGGKDFEQPLAISR.V                 | 1630.86972 | 2 | 1.23E-08 | 0.96  | 4.62   | -     | 1372.3   |
| AHQ-1-9, 3374                                                                                       | K.M*NLASEPQEVHLIGSAHNR.S            | 2120.33559 | 2 | 1.35E-07 | 0.91  | 3.96   | -     | 820.6    |
| AHQ-1-13, 3667 - 3699                                                                               | K.M*NLASEPQEVHLIGSAHNR.S            | 2120.33559 | 3 | 8.74E-04 | 0.61  | 3.16   | -     | 590.2    |
| AHQ-1-13- , 3833                                                                                    | K.M*NLASEPQEVHLIGSAHNR.S            | 2120.33559 | 2 | 5.14E-06 | 0.92  | 3.95   | -     | 761.1    |
| AHQ-1-13, 3668 - 3683                                                                               | K.M*NLASEPQEVHLIGSAHNR.S            | 2120.33559 | 2 | 2.76E-05 | 0.89  | 3.86   | -     | 566.6    |
| AHQ-1-13, 6308                                                                                      | K.QSTSLVLQLEISEEK.G                 | 1981.18977 | 2 | 4.91E-07 | 0.91  | 3.49   | -     | 1203.9   |
| AHQ-1-9, 6859                                                                                       | K.QSTSLVLQLEISEEK.G                 | 1981.18977 | 2 | 2.17E-04 | 0.94  | 3.95   | -     | 1144.7   |
| AHQ-1-12, 6410                                                                                      | K.QSTSLVLQLEISEEK.G                 | 1981.18977 | 2 | 1.24E-07 | 0.90  | 3.33   | -     | 1261.3   |
| AHQ-1-13- , 6752                                                                                    | K.QSTSLVLQLEISEEK.G                 | 1981.18977 | 2 | 2.96E-11 | 0.96  | 4.82   | -     | 1583.3   |
| AHQ-1-9, 2890                                                                                       | R.SAMPFTASPASSTAR.V                 | 1583.74859 | 2 | 9.79E-06 | 0.55  | 2.77   | -     | 373.0    |
| AHQ-1-12, 2417 - 2418                                                                               | R.SAM*PFTASPASSTAR.V                | 1599.74799 | 2 | 5.94E-07 | 0.91  | 3.58   | -     | 1138.3   |
| AHQ-1-11, 2390                                                                                      | R.SAM*PFTASPASSTAR.V                | 1599.74799 | 2 | 6.09E-07 | 0.79  | 2.66   | -     | 968.3    |
| AHQ-1-9, 2308                                                                                       | R.SAM*PFTASPASSTAR.V                | 1599.74799 | 2 | 3.40E-07 | 0.85  | 3.16   | -     | 938.6    |
| AHQ-1-13- , 2511 - 2512                                                                             | R.SAM*PFTASPASSTAR.V                | 1599.74799 | 2 | 6.61E-04 | 0.91  | 3.67   | -     | 1132.6   |
| AHQ-1-12, 5301                                                                                      | R.VITNQYNNPAGLYSSENISFNNALESK.T     | 3103.30221 | 3 | 1.07E-04 | 0.90  | 4.62   | -     | 687.5    |
| AHQ-1-13- , 4913 - 4980                                                                             | R.VTPPEGYEVTVFVK.P                  | 1662.90695 | 2 | 1.99E-04 | 0.59  | 2.63   | -     | 198.6    |
| AHQ-1-12, 3551                                                                                      | K.VVWSPLVTEEGK.R                    | 1245.40612 | 1 | 2.70E-05 | 0.59  | 2.01   | -     | 837.6    |
| AHQ-1-13- , 3215                                                                                    | K.VVWSPLVTEEGKR.H                   | 1401.59247 | 2 | 9.73E-07 | 0.80  | 2.85   | -     | 837.6    |
| AHQ-1-11, 3010                                                                                      | K.VVWSPLVTEEGKR.H                   | 1401.59247 | 2 | 1.83E-06 | 0.76  | 2.77   | -     | 670.3    |
| AHQ-1-14- , 3180 - 3188                                                                             | K.VVWSPLVTEEGKR.H                   | 1401.59247 | 2 | 1.51E-08 | 0.77  | 2.55   | -     | 879.7    |
| gi 27500274 ref XP_113950.3  similar to Munc13-4 protein [Homo sapiens]                             |                                     |            |   | 1.41E-12 | 12.26 | 140.31 | 21.30 | 132321.1 |
| AHQ-1-4, 7391 - 7536                                                                                | K.AFGELCPNTAPLQVLTEALQTGTTEWFLK.Q   | 3472.91108 | 3 | 1.00E-06 | 0.71  | 3.67   | -     | 377.4    |
| AHQ-1-4, 7347                                                                                       | K.ALLGLVQDVIGDLHQCQR.T              | 2037.32944 | 3 | 4.50E-07 | 0.97  | 4.56   | -     | 1982.8   |
| AHQ-1-4, 6654                                                                                       | R.ALLYEDALYTVLHR.L                  | 1677.92484 | 2 | 3.59E-10 | 0.97  | 4.48   | -     | 1993.9   |
| AHQ-1-4, 6047 - 6056                                                                                | R.AVQMDELVPLGELTK.H                 | 1643.92698 | 2 | 5.44E-09 | 0.80  | 3.44   | -     | 506.8    |
| AHQ-1-4, 2488                                                                                       | R.DELEQAASSR.E                      | 1090.16939 | 2 | 1.03E-05 | 0.94  | 3.56   | -     | 1596.2   |
| AHQ-1-4, 4863                                                                                       | K.HSTSAVDLSTCFQAISHTAR.Q            | 2191.36726 | 3 | 1.05E-09 | 0.98  | 6.13   | -     | 1940.7   |
| AHQ-1-4, 4876                                                                                       | K.HSTSAVDLSTCFQAISHTAR.Q            | 2191.36726 | 2 | 1.12E-06 | 0.97  | 4.81   | -     | 1760.3   |
| AHQ-1-4, 3594 - 3614                                                                                | R.IQQAETTSEELGAVTVKA.K              | 1933.10674 | 2 | 2.33E-08 | 0.98  | 5.72   | -     | 1808.5   |
| AHQ-1-4, 3468                                                                                       | R.LGHPEPNHTEASELLR.Y                | 1900.08490 | 2 | 4.34E-04 | 0.57  | 2.81   | -     | 339.4    |
| AHQ-1-4, 5599 - 5660                                                                                | K.LPQALAWAELEQR.V                   | 1525.73360 | 2 | 1.41E-12 | 0.94  | 4.20   | -     | 1089.7   |
| AHQ-1-4, 7387 - 7402                                                                                | R.LPLTYPPAPNGDPILQLLEGR.K           | 2178.51621 | 2 | 6.30E-06 | 0.86  | 3.76   | -     | 635.9    |
| AHQ-1-4, 4238 - 4248                                                                                | R.SVFP.LSVSDSPAR.L                  | 1362.51311 | 2 | 1.77E-04 | 0.82  | 2.87   | -     | 909.6    |
| AHQ-1-4, 4384                                                                                       | R.TLAEQLEVGIAK.H                    | 1272.47301 | 2 | 3.06E-05 | 0.95  | 3.44   | -     | 1575.4   |
| AHQ-1-4, 6446 - 6456                                                                                | R.WFQPAIPSWLQK.T                    | 1501.75533 | 2 | 6.30E-05 | 0.84  | 3.50   | -     | 459.1    |
| AHQ-1-4, 3531                                                                                       | R.YLQEAHFHVEPEEHQQTQLQR.V           | 2383.56113 | 2 | 8.34E-04 | 0.88  | 3.69   | -     | 686.3    |
| AHQ-1-4, 3451 - 3528                                                                                | R.YLQEAHFHVEPEEHQQTQLQR.V           | 2383.56113 | 3 | 5.86E-04 | 0.93  | 4.27   | -     | 1455.5   |
| gi 4502303 ref NP_001688.1  mitochondrial ATP synthase, O subunit; ATP synthase, H+ transporting, m |                                     |            |   | 1.71E-12 | 2.68  | 30.23  | 23.50 | 23272.2  |
| AHQ-1-11, 6330                                                                                      | R.FSPLTTNLIINLAENGR.L               | 1874.13050 | 2 | 1.71E-12 | 0.83  | 3.78   | -     | 731.3    |
| AHQ-1-14- , 5588                                                                                    | R.GEVPCTVTSASPLEEATLSELK.T          | 2320.55669 | 2 | 2.31E-05 | 0.93  | 4.69   | -     | 729.9    |
| AHQ-1-11, 3182                                                                                      | K.VAASVLNPNYK.R                     | 1161.37549 | 2 | 2.45E-07 | 0.92  | 3.98   | -     | 678.8    |
| gi 4503689 ref NP_000499.1  fibrinogen, alpha chain isoform alpha-E preproprotein [Homo sapiens] [M |                                     |            |   | 1.84E-12 | 15.29 | 190.26 | 32.60 | 94972.5  |
| AHQ-1-7, 6073 - 6092                                                                                | K.DSDWPFCSDEDWNYK.C                 | 1965.98609 | 2 | 2.40E-07 | 0.92  | 3.54   | -     | 707.8    |
| AHQ-1-6, 5903                                                                                       | K.DSDWPFCSDEDWNYK.C                 | 1965.98609 | 2 | 7.69E-10 | 0.91  | 3.70   | -     | 586.4    |
| AHQ-1-8, 6068                                                                                       | K.DSDWPFCSDEDWNYK.C                 | 1965.98609 | 2 | 9.00E-04 | 0.84  | 3.28   | -     | 476.2    |
| AHQ-1-9, 5922 - 5924                                                                                | K.DSDWPFCSDEDWNYK.C                 | 1965.98609 | 2 | 1.41E-06 | 0.89  | 3.96   | -     | 571.0    |
| AHQ-1-6, 5884                                                                                       | K.DSHSLTTNIMEILR.G                  | 1630.84839 | 2 | 4.84E-06 | 0.97  | 4.41   | -     | 2061.2   |
| AHQ-1-10, 5213                                                                                      | K.DSHSLTTNIMEILR.G                  | 1630.84839 | 2 | 2.20E-04 | 0.95  | 4.23   | -     | 1146.1   |
| AHQ-1-6, 2186                                                                                       | K.ESSSHHPGIAEFPSR.G                 | 1638.72252 | 2 | 1.69E-05 | 0.81  | 2.88   | -     | 717.1    |
| AHQ-1-11, 2275                                                                                      | K.ESSSHHPGIAEFPSR.G                 | 1638.72252 | 2 | 2.31E-04 | 0.67  | 2.66   | -     | 536.3    |
| AHQ-1-9, 2499                                                                                       | R.EVDLKDQYEDQQK.Q                   | 1510.58460 | 2 | 2.83E-05 | 0.74  | 3.15   | -     | 434.9    |
| AHQ-1-13- , 2717                                                                                    | R.EVDLKDQYEDQQK.Q                   | 1510.58460 | 2 | 4.33E-06 | 0.88  | 3.54   | -     | 792.9    |
| AHQ-1-2, 2707                                                                                       | R.EVDLKDQYEDQQK.Q                   | 1510.58460 | 2 | 3.55E-05 | 0.80  | 2.95   | -     | 717.1    |
| AHQ-1-6, 2526                                                                                       | R.EVDLKDQYEDQQK.Q                   | 1510.58460 | 2 | 4.75E-06 | 0.81  | 3.01   | -     | 830.1    |
| AHQ-1-14- , 2666                                                                                    | R.EVDLKDQYEDQQK.Q                   | 1510.58460 | 2 | 4.81E-08 | 0.68  | 2.70   | -     | 597.2    |
| AHQ-1-8, 2459                                                                                       | R.EVDLKDQYEDQQK.Q                   | 1510.58460 | 2 | 1.29E-06 | 0.86  | 3.09   | -     | 769.6    |
| AHQ-1-4, 2631                                                                                       | R.EVDLKDQYEDQQK.Q                   | 1510.58460 | 2 | 1.38E-05 | 0.75  | 3.06   | -     | 550.7    |
| AHQ-1-6, 6622                                                                                       | K.EVVTSEDSGSDCEAMDGLTSLGIGTLDGFR.H  | 3131.34937 | 3 | 2.18E-05 | 0.91  | 4.66   | -     | 838.6    |
| AHQ-1-7, 6804                                                                                       | K.EVVTSEDSGSDCEAMDGLTSLGIGTLDGFR.H  | 3131.34937 | 3 | 2.64E-05 | 0.91  | 4.30   | -     | 1234.3   |
| AHQ-1-6, 6880                                                                                       | K.EVVTSEDSGSDCEAMDGLTSLGIGTLDGFR.H  | 3131.34937 | 3 | 3.17E-08 | 0.93  | 4.73   | -     | 1133.2   |
| AHQ-1-13- , 6432                                                                                    | K.EVVTSEDSGSDCEAMDGLTSLGIGTLDGFR.H  | 3131.34937 | 3 | 1.52E-06 | 0.85  | 3.87   | -     | 966.6    |
| AHQ-1-13- , 6031                                                                                    | K.EVVTSEDSGSDCEAMDGLTSLGIGTLDGFR.H  | 3147.34877 | 3 | 1.39E-05 | 0.90  | 4.56   | -     | 915.6    |
| AHQ-1-13- , 6304                                                                                    | K.EVVTSEDSGSDCEAMDGLTSLGIGTLDGFR.H  | 3147.34877 | 3 | 1.96E-04 | 0.92  | 4.45   | -     | 1154.2   |
| AHQ-1-1, 6376 - 6380                                                                                | K.EVVTSEDSGSDCEAMDGLTSLGIGTLDGFR.H  | 3147.34877 | 3 | 6.47E-04 | 0.91  | 4.87   | -     | 911.8    |
| AHQ-1-6, 1659                                                                                       | R.GGSTSYGTGSETESPR.N                | 1573.55765 | 2 | 1.71E-05 | 0.70  | 2.96   | -     | 525.0    |
| AHQ-1-7, 1640 - 1692                                                                                | R.GGSTSYGTGSETESPR.N                | 1573.55765 | 2 | 8.03E-05 | 0.42  | 2.51   | -     | 253.1    |
| AHQ-1-5, 4881                                                                                       | K.GLIDEVNDQFTNR.I                   | 1521.61384 | 2 | 1.47E-06 | 0.95  | 4.31   | -     | 1127.1   |
| AHQ-1-10, 4281 - 4311                                                                               | K.GLIDEVNDQFTNR.I                   | 1521.61384 | 2 | 4.89E-07 | 0.91  | 3.47   | -     | 933.3    |
| AHQ-1-1, 4852 - 4853                                                                                | K.GLIDEVNDQFTNR.I                   | 1521.61384 | 2 | 1.90E-08 | 0.95  | 4.77   | -     | 1134.4   |

|                                                                                                     |                                                 |            |   |          |       |        |       |          |
|-----------------------------------------------------------------------------------------------------|-------------------------------------------------|------------|---|----------|-------|--------|-------|----------|
| AHQ-1-4, 4950                                                                                       | K.GLIDEVNDQFTNR.I                               | 1521.61384 | 2 | 2.97E-06 | 0.82  | 2.93   | -     | 776.5    |
| AHQ-1-9, 4754 - 4759                                                                                | K.GLIDEVNDQFTNR.I                               | 1521.61384 | 2 | 8.46E-09 | 0.93  | 4.13   | -     | 886.2    |
| AHQ-1-9, 5192                                                                                       | K.GLIDEVNDQFTNR.I                               | 1521.61384 | 2 | 1.56E-07 | 0.93  | 4.17   | -     | 1047.2   |
| AHQ-1-6, 4155                                                                                       | K.GLIDEVNDQFTNR.I                               | 1521.61384 | 2 | 5.26E-07 | 0.87  | 3.78   | -     | 646.5    |
| AHQ-1-6, 4723 - 4791                                                                                | K.GLIDEVNDQFTNR.I                               | 1521.61384 | 2 | 1.97E-08 | 0.93  | 4.03   | -     | 813.7    |
| AHQ-1-12, 4561                                                                                      | K.GLIDEVNDQFTNR.I                               | 1521.61384 | 2 | 9.76E-09 | 0.93  | 3.80   | -     | 1027.2   |
| AHQ-1-3, 4865                                                                                       | K.GLIDEVNDQFTNR.I                               | 1521.61384 | 2 | 8.14E-06 | 0.84  | 3.07   | -     | 796.6    |
| AHQ-1-8, 4807                                                                                       | K.GLIDEVNDQFTNR.I                               | 1521.61384 | 2 | 1.72E-09 | 0.85  | 3.73   | -     | 691.8    |
| AHQ-1-2, 5019                                                                                       | K.GLIDEVNDQFTNR.I                               | 1521.61384 | 2 | 1.79E-06 | 0.93  | 4.21   | -     | 979.3    |
| AHQ-1-4, 2258                                                                                       | R.GSESGIFTNTK.E                                 | 1141.21317 | 1 | 5.55E-04 | 0.11  | 1.89   | -     | 219.3    |
| AHQ-1-13 - , 2363                                                                                   | R.GSESGIFTNTK.E                                 | 1141.21317 | 1 | 2.53E-04 | 0.26  | 2.06   | -     | 266.1    |
| AHQ-1-3, 2273                                                                                       | R.GSESGIFTNTK.E                                 | 1141.21317 | 2 | 1.43E-04 | 0.71  | 2.56   | -     | 697.7    |
| AHQ-1-6, 2127                                                                                       | R.GSESGIFTNTK.E                                 | 1141.21317 | 1 | 3.90E-04 | 0.23  | 2.07   | -     | 315.8    |
| AHQ-1-6, 2276                                                                                       | R.GSESGIFTNTK.E                                 | 1141.21317 | 1 | 4.86E-04 | 0.14  | 1.85   | -     | 192.5    |
| AHQ-1-6, 2131                                                                                       | R.GSESGIFTNTK.E                                 | 1141.21317 | 2 | 1.15E-07 | 0.83  | 2.93   | -     | 843.5    |
| AHQ-1-12, 2582                                                                                      | R.HRHPDEAAFFDTASTGK.T                           | 1887.98954 | 3 | 4.60E-04 | 0.96  | 4.57   | -     | 1930.2   |
| AHQ-1-13 - , 2739                                                                                   | R.HRHPDEAAFFDTASTGK.T                           | 1887.98954 | 2 | 5.16E-06 | 0.96  | 4.93   | -     | 1042.5   |
| AHQ-1-10, 2481                                                                                      | R.HRHPDEAAFFDTASTGK.T                           | 1887.98954 | 2 | 1.61E-04 | 0.94  | 4.55   | -     | 862.8    |
| AHQ-1-6, 2444                                                                                       | R.HRHPDEAAFFDTASTGK.T                           | 1887.98954 | 2 | 5.41E-06 | 0.97  | 5.27   | -     | 1280.3   |
| AHQ-1-6, 2372 - 2448                                                                                | R.HRHPDEAAFFDTASTGK.T                           | 1887.98954 | 3 | 8.89E-05 | 0.96  | 4.13   | -     | 2161.1   |
| AHQ-1-13 - , 2735 - 2808                                                                            | R.HRHPDEAAFFDTASTGK.T                           | 1887.98954 | 3 | 4.43E-06 | 0.93  | 4.15   | -     | 1212.3   |
| AHQ-1-11, 2519                                                                                      | R.HRHPDEAAFFDTASTGK.T                           | 1887.98954 | 2 | 6.28E-04 | 0.97  | 5.03   | -     | 1344.0   |
| AHQ-1-7, 2452                                                                                       | R.HRHPDEAAFFDTASTGK.T                           | 1887.98954 | 2 | 6.81E-04 | 0.94  | 4.35   | -     | 858.6    |
| AHQ-1-13, 2759                                                                                      | R.HRHPDEAAFFDTASTGK.T                           | 1887.98954 | 2 | 1.93E-05 | 0.91  | 3.74   | -     | 822.7    |
| AHQ-1-7, 2747                                                                                       | R.MELERPGGNEITR.G                               | 1502.67870 | 2 | 7.60E-05 | 0.85  | 3.48   | -     | 667.0    |
| AHQ-1-1, 3457                                                                                       | R.NPSSSGTGGTATWKPSSGPGSTGWSNCGSSGTSTGNQNPQSPR.P | 4123.15285 | 3 | 1.22E-04 | 0.62  | 3.58   | -     | 335.8    |
| AHQ-1-6, 2100 - 2170                                                                                | R.NPSSAGSWNSGSSGPGSTGNNR.N                      | 1964.94443 | 2 | 2.01E-08 | 0.96  | 4.47   | -     | 1129.6   |
| AHQ-1-7, 2120 - 2196                                                                                | R.NPSSAGSWNSGSSGPGSTGNNR.N                      | 1964.94443 | 2 | 1.84E-12 | 0.95  | 4.84   | -     | 837.7    |
| AHQ-1-9, 2094                                                                                       | R.NPSSAGSWNSGSSGPGSTGNNR.N                      | 1964.94443 | 2 | 5.46E-08 | 0.92  | 4.23   | -     | 790.4    |
| AHQ-1-1, 2329                                                                                       | R.NPSSAGSWNSGSSGPGSTGNNR.N                      | 1964.94443 | 2 | 3.89E-04 | 0.84  | 3.40   | -     | 732.1    |
| AHQ-1-6, 2683                                                                                       | K.NSLFEYQK.N                                    | 1029.12765 | 1 | 8.15E-06 | 0.14  | 2.08   | -     | 165.9    |
| AHQ-1-9, 2106                                                                                       | R.PGSTGTWNPSSER.G                               | 1433.46515 | 2 | 6.20E-04 | 0.91  | 3.88   | -     | 693.6    |
| AHQ-1-1, 2384                                                                                       | R.PGSTGTWNPSSER.G                               | 1433.46515 | 2 | 7.13E-07 | 0.82  | 3.35   | -     | 523.3    |
| AHQ-1-8, 2080                                                                                       | R.PGSTGTWNPSSER.G                               | 1433.46515 | 2 | 4.82E-06 | 0.85  | 3.67   | -     | 505.0    |
| AHQ-1-6, 4779 - 4850                                                                                | R.PNNPDWGTFEVSGNVSPGTR.R                        | 2261.34962 | 2 | 2.72E-10 | 0.96  | 4.99   | -     | 1133.5   |
| AHQ-1-10, 4292 - 4356                                                                               | R.PNNPDWGTFEVSGNVSPGTR.R                        | 2261.34962 | 2 | 1.32E-04 | 0.59  | 3.46   | -     | 403.9    |
| AHQ-1-12, 4585 - 4647                                                                               | R.PNNPDWGTFEVSGNVSPGTR.R                        | 2261.34962 | 2 | 3.24E-07 | 0.90  | 4.10   | -     | 730.7    |
| AHQ-1-13, 4620                                                                                      | R.PNNPDWGTFEVSGNVSPGTR.R                        | 2261.34962 | 2 | 2.71E-04 | 0.82  | 3.48   | -     | 338.4    |
| AHQ-1-10, 6363 - 6364                                                                               | K.TFPGFFSPMLGEFVSETESR.G                        | 2266.51432 | 2 | 1.11E-09 | 0.88  | 4.15   | -     | 453.2    |
| AHQ-1-7, 7453                                                                                       | K.TFPGFFSPMLGEFVSETESR.G                        | 2266.51432 | 2 | 1.47E-05 | 0.69  | 3.02   | -     | 291.3    |
| AHQ-1-3, 7233 - 7235                                                                                | K.TFPGFFSPMLGEFVSETESR.G                        | 2266.51432 | 2 | 8.27E-05 | 0.89  | 3.86   | -     | 538.8    |
| AHQ-1-11, 6243 - 6248                                                                               | K.TFPGFFSPMLGEFVSETESR.G                        | 2282.51372 | 2 | 8.58E-04 | 0.56  | 3.33   | -     | 188.6    |
| AHQ-1-11, 6442                                                                                      | K.TFPGFFSPMLGEFVSETESR.G                        | 2266.51432 | 2 | 1.84E-08 | 0.81  | 3.36   | -     | 345.8    |
| AHQ-1-2, 7303 - 7378                                                                                | K.TFPGFFSPMLGEFVSETESR.G                        | 2266.51432 | 2 | 6.66E-05 | 0.74  | 3.17   | -     | 312.3    |
| AHQ-1-6, 7242 - 7322                                                                                | K.TFPGFFSPMLGEFVSETESR.G                        | 2266.51432 | 2 | 1.35E-05 | 0.85  | 3.54   | -     | 417.2    |
| AHQ-1-5, 7107 - 7145                                                                                | K.TFPGFFSPMLGEFVSETESR.G                        | 2282.51372 | 2 | 3.08E-04 | 0.59  | 2.91   | -     | 177.1    |
| AHQ-1-12, 6455                                                                                      | K.TFPGFFSPMLGEFVSETESR.G                        | 2282.51372 | 2 | 4.97E-04 | 0.73  | 3.49   | -     | 200.6    |
| AHQ-1-13 - , 6793                                                                                   | K.TFPGFFSPMLGEFVSETESR.G                        | 2282.51372 | 2 | 1.21E-04 | 0.52  | 2.82   | -     | 217.0    |
| AHQ-1-13 - , 6941 - 6999                                                                            | K.TFPGFFSPMLGEFVSETESR.G                        | 2266.51432 | 2 | 1.13E-09 | 0.77  | 3.51   | -     | 310.8    |
| AHQ-1-13, 6333                                                                                      | K.TFPGFFSPMLGEFVSETESR.G                        | 2282.51372 | 2 | 3.95E-04 | 0.68  | 3.14   | -     | 187.1    |
| AHQ-1-3, 7038                                                                                       | K.TFPGFFSPMLGEFVSETESR.G                        | 2282.51372 | 2 | 6.86E-07 | 0.75  | 3.00   | -     | 340.0    |
| AHQ-1-3, 2419                                                                                       | K.VQHILQLQK.N                                   | 1107.33106 | 2 | 4.63E-04 | 0.81  | 2.75   | -     | 721.2    |
| AHQ-1-7, 2242                                                                                       | K.VQHILQLQK.N                                   | 1107.33106 | 1 | 2.48E-04 | 0.64  | 2.68   | -     | 552.3    |
| AHQ-1-3, 2414                                                                                       | K.VQHILQLQK.N                                   | 1107.33106 | 1 | 9.00E-04 | 0.22  | 2.11   | -     | 482.5    |
| AHQ-1-6, 2235                                                                                       | K.VQHILQLQK.N                                   | 1107.33106 | 2 | 5.25E-05 | 0.83  | 2.97   | -     | 777.4    |
| AHQ-1-8, 2117 - 2119                                                                                | K.VQHILQLQK.N                                   | 1107.33106 | 1 | 4.51E-04 | 0.70  | 2.82   | -     | 678.4    |
| AHQ-1-10, 2236                                                                                      | K.VQHILQLQK.N                                   | 1107.33106 | 1 | 4.89E-04 | 0.74  | 2.93   | -     | 600.4    |
| AHQ-1-10, 2231                                                                                      | K.VQHILQLQK.N                                   | 1107.33106 | 1 | 4.89E-04 | 0.66  | 2.84   | -     | 676.4    |
| AHQ-1-9, 2166                                                                                       | K.VQHILQLQK.N                                   | 1107.33106 | 1 | 5.72E-04 | 0.65  | 2.49   | -     | 711.5    |
| AHQ-1-9, 2172                                                                                       | K.VQHILQLQK.N                                   | 1107.33106 | 1 | 3.51E-04 | 0.72  | 2.81   | -     | 596.4    |
| gi 29729616 ref XP_292963.1  similar to peptidylprolyl isomerase A (cyclophilin A) [Homo sapiens] [ |                                                 |            |   | 1.88E-12 | 1.87  | 20.32  | 16.40 | 18025.4  |
| AHQ-1-12, 4743 - 4805                                                                               | K.HTGPGLISM*ANAGPNTNGSQFFICTAK.S                | 2810.11545 | 3 | 6.16E-08 | 0.97  | 6.44   | -     | 1368.2   |
| AHQ-1-12, 4893                                                                                      | K.HTGPGLISM*ANAGPNTNGSQFFICTAK.S                | 2810.11545 | 2 | 3.36E-04 | 0.58  | 3.27   | -     | 241.5    |
| AHQ-1-12, 5365 - 5425                                                                               | K.HTGPGLISM*ANAGPNTNGSQFFICTAK.S                | 2794.11605 | 2 | 1.22E-05 | 0.91  | 4.75   | -     | 731.9    |
| AHQ-1-12, 5379 - 5437                                                                               | K.HTGPGLISM*ANAGPNTNGSQFFICTAK.S                | 2794.11605 | 3 | 1.88E-12 | 0.91  | 4.91   | -     | 1126.3   |
| AHQ-1-12, 5485 - 5486                                                                               | K.HTGPGLISM*ANAGPNTNGSQFFICTAK.S                | 2794.11605 | 2 | 7.51E-05 | 0.91  | 4.36   | -     | 686.3    |
| AHQ-1-13, 4747                                                                                      | K.HTGPGLISM*ANAGPNTNGSQFFICTAK.S                | 2810.11545 | 3 | 8.85E-04 | 0.89  | 4.61   | -     | 900.9    |
| AHQ-1-13, 4755                                                                                      | K.HTGPGLISM*ANAGPNTNGSQFFICTAK.S                | 2810.11545 | 2 | 6.39E-04 | 0.83  | 3.82   | -     | 466.2    |
| AHQ-1-13, 4861                                                                                      | K.HTGPGLISM*ANAGPNTNGSQFFICTAK.S                | 2810.11545 | 3 | 3.33E-04 | 0.62  | 3.43   | -     | 514.9    |
| AHQ-1-13 - , 5003                                                                                   | K.HTGPGLISM*ANAGPNTNGSQFFICTAK.S                | 2810.11545 | 3 | 1.54E-05 | 0.90  | 4.60   | -     | 827.8    |
| AHQ-1-14 - , 4883                                                                                   | K.HTGPGLISM*ANAGPNTNGSQFFICTAK.S                | 2810.11545 | 3 | 1.07E-05 | 0.96  | 5.56   | -     | 1393.5   |
| gi 4505257 ref NP_002435.1  moesin [Homo sapiens]                                                   |                                                 |            |   | 2.12E-12 | 13.91 | 150.29 | 31.90 | 67819.5  |
| AHQ-1-6, 2114 - 2116                                                                                | R.ALELEQER.K                                    | 988.07707  | 2 | 1.52E-04 | 0.89  | 2.96   | -     | 1278.8   |
| AHQ-1-6, 2474                                                                                       | K.ALTSELANAR.D                                  | 1046.15975 | 2 | 2.41E-06 | 0.90  | 3.38   | -     | 805.6    |
| AHQ-1-6, 7207                                                                                       | K.EGILNDIYCPPTAVLLASYAVQSK.Y                    | 2869.19288 | 2 | 3.27E-07 | 0.76  | 3.94   | -     | 241.4    |
| AHQ-1-6, 7208                                                                                       | K.EGILNDIYCPPTAVLLASYAVQSK.Y                    | 2869.19288 | 3 | 1.99E-09 | 0.93  | 5.25   | -     | 902.6    |
| AHQ-1-6, 3167                                                                                       | K.ERQEAEAEKALLQASR.D                            | 1959.10752 | 3 | 1.44E-08 | 0.84  | 3.60   | -     | 866.9    |
| AHQ-1-6, 6251 - 6319                                                                                | R.EVWFFGLQYQDTK.G                               | 1661.83760 | 2 | 4.95E-05 | 0.95  | 3.91   | -     | 1216.4   |
| AHQ-1-13, 6416                                                                                      | K.FYPEDVSEELIQDITQR.L                           | 2083.24065 | 2 | 1.80E-06 | 0.94  | 4.32   | -     | 1123.5   |
| AHQ-1-6, 7148 - 7150                                                                                | K.FYPEDVSEELIQDITQR.L                           | 2083.24065 | 2 | 1.28E-09 | 0.96  | 5.81   | -     | 915.8    |
| AHQ-1-6, 7151 - 7154                                                                                | K.FYPEDVSEELIQDITQR.L                           | 2083.24065 | 3 | 5.43E-10 | 0.95  | 5.01   | -     | 1339.7   |
| AHQ-1-13 - , 6875                                                                                   | K.FYPEDVSEELIQDITQR.L                           | 2083.24065 | 2 | 7.81E-06 | 0.92  | 4.00   | -     | 990.4    |
| AHQ-1-7, 7361                                                                                       | K.FYPEDVSEELIQDITQR.L                           | 2083.24065 | 2 | 9.40E-07 | 0.91  | 3.89   | -     | 1137.1   |
| AHQ-1-6, 5047                                                                                       | R.GMLREDAVLEYLK.I                               | 1537.80610 | 2 | 2.35E-04 | 0.89  | 3.91   | -     | 876.1    |
| AHQ-1-6, 6256                                                                                       | K.IAQDLEM*YGVNYFSIK.N                           | 1892.16455 | 2 | 6.82E-07 | 0.93  | 4.51   | -     | 921.9    |
| AHQ-1-6, 6370                                                                                       | K.IAQDLEM*YGVNYFSIK.N                           | 1892.16455 | 2 | 8.14E-07 | 0.81  | 3.17   | -     | 667.2    |
| AHQ-1-6, 5574 - 5650                                                                                | K.IAQDLEM*YGVNYFSIK.N                           | 1908.16395 | 2 | 1.05E-07 | 0.97  | 4.78   | -     | 1454.0   |
| AHQ-1-6, 6144                                                                                       | K.IAQDLEM*YGVNYFSIK.N                           | 1892.16455 | 2 | 9.21E-07 | 0.91  | 3.95   | -     | 885.9    |
| AHQ-1-6, 1826                                                                                       | R.IQVWHEEHR.G                                   | 1234.34835 | 2 | 1.32E-04 | 0.94  | 3.69   | -     | 1320.1   |
| AHQ-1-6, 2194                                                                                       | R.ISOLEMAR.Q                                    | 948.12272  | 2 | 1.18E-04 | 0.86  | 2.95   | -     | 904.2    |
| AHQ-1-6, 4730 - 4731                                                                                | K.KTQEQLALEMAELTAR.I                            | 1833.10018 | 2 | 2.75E-10 | 0.97  | 4.97   | -     | 1519.9   |
| AHQ-1-6, 3070                                                                                       | K.TAM*STPHVAEPAENEQDEQDENGAEASADLR.A            | 3330.36796 | 3 | 2.99E-11 | 0.97  | 5.89   | -     | 1696.9   |
| AHQ-1-6, 3607                                                                                       | K.TAMSTPHVAEPAENEQDEQDENGAEASADLR.A             | 3314.36856 | 3 | 2.12E-12 | 0.96  | 5.35   | -     | 1396.9   |
| AHQ-1-6, 5378 - 5382                                                                                | K.TQEQLALEMAELTAR.I                             | 1704.92727 | 2 | 2.53E-09 | 0.98  | 5.53   | -     | 1699.2   |
| gi 4507877 ref NP_003364.1  vinculin isoform VCL [Homo sapiens]                                     |                                                 |            |   | 2.15E-12 | 49.20 | 600.29 | 50.20 | 116721.6 |
| AHQ-1-14 - , 6742                                                                                   | K.AIPDLTAPVAAVQAAVSNLVR.V                       | 2077.41342 | 2 | 2.83E-07 | 0.97  | 5.12   | -     | 1278.3   |
| AHQ-1-4, 7462 - 7535                                                                                | K.AIPDLTAPVAAVQAAVSNLVR.V                       | 2077.41342 | 2 | 3.85E-08 | 0.97  | 5.44   | -     | 980.3    |
| AHQ-1-13 - , 6988                                                                                   | K.AIPDLTAPVAAVQAAVSNLVR.V                       | 2077.41342 | 2 | 1.64E-11 | 0.96  | 5.00   | -     | 1007.2   |
| AHQ-1-4, 7466                                                                                       | K.AIPDLTAPVAAVQAAVSNLVR.V                       | 2077.41342 | 3 | 2.97E-05 | 0.95  | 4.40   | -     | 1651.3   |
| AHQ-1-12, 6675 - 6677                                                                               | K.AIPDLTAPVAAVQAAVSNLVR.V                       | 2077.41342 | 2 | 2.08E-04 | 0.96  | 4.97   | -     | 969.0    |
| AHQ-1-11, 6498 - 6566                                                                               | K.AIPDLTAPVAAVQAAVSNLVR.V                       | 2077.41342 | 2 | 4.14E-10 | 0.97  | 5.31   | -     | 1343.4   |
| AHQ-1-10, 6425 - 6501                                                                               | K.AIPDLTAPVAAVQAAVSNLVR.V                       | 2077.41342 | 2 | 2.79E-08 | 0.97  | 5.85   | -     | 1185.2   |
| AHQ-1-9, 7326                                                                                       | K.AIPDLTAPVAAVQAAVSNLVR.V                       | 2077.41342 | 2 | 3.85E-04 | 0.96  | 4.91   | -     | 981.2    |
| AHQ-1-8, 7526                                                                                       | K.AIPDLTAPVAAVQAAVSNLVR.V                       | 2077.41342 | 2 | 6.21E-07 | 0.97  | 5.32   | -     | 982.4    |
| AHQ-1-1, 7031 - 7104                                                                                | K.AIPDLTAPVAAVQAAVSNLVR.V                       | 2077.41342 | 2 | 4.33E-06 | 0.96  | 4.34   | -     | 1111.0   |
| AHQ-1-3, 7218 - 7290                                                                                | K.AIPDLTAPVAAVQAAVSNLVR.V                       | 2077.41342 | 2 | 2.72E-06 | 0.93  | 4.19   | -     | 982.1    |
| AHQ-1-5, 7349                                                                                       | K.AIPDLTAPVAAVQAAVSNLVR.V                       | 2077.41342 | 2 | 8.42E-08 | 0.95  | 4.35   | -     | 1032.4   |

|                      |                              |            |   |          |      |      |   |        |
|----------------------|------------------------------|------------|---|----------|------|------|---|--------|
| AHQ-1-5, 7493 - 7494 | K.AIPDLTAPVAAVQAAVSNLVR.V    | 2077.41342 | 2 | 5.65E-10 | 0.97 | 5.55 | - | 1062.8 |
| AHQ-1-6, 7306 - 7370 | K.AIPDLTAPVAAVQAAVSNLVR.V    | 2077.41342 | 2 | 9.29E-11 | 0.97 | 5.01 | - | 1068.9 |
| AHQ-1-7, 7512        | K.AIPDLTAPVAAVQAAVSNLVR.V    | 2077.41342 | 2 | 1.11E-06 | 0.97 | 5.34 | - | 1039.4 |
| AHQ-1-2, 7429        | K.AIPDLTAPVAAVQAAVSNLVR.V    | 2077.41342 | 2 | 1.79E-06 | 0.97 | 5.31 | - | 1075.5 |
| AHQ-1-5, 3273 - 3299 | R.ALASQLQDSLK.D              | 1174.32943 | 2 | 1.30E-05 | 0.91 | 3.69 | - | 1001.7 |
| AHQ-1-4, 3399 - 3472 | R.ALASQLQDSLK.D              | 1174.32943 | 2 | 2.39E-05 | 0.83 | 3.33 | - | 755.4  |
| AHQ-1-3, 3389        | R.ALASQLQDSLK.D              | 1174.32943 | 2 | 1.69E-05 | 0.84 | 3.23 | - | 782.7  |
| AHQ-1-8, 3184        | R.ALASQLQDSLK.D              | 1174.32943 | 2 | 1.22E-04 | 0.83 | 2.68 | - | 1018.3 |
| AHQ-1-7, 3504 - 3572 | K.AQQVSGQLDVLTAQ.V           | 1458.64233 | 2 | 2.18E-04 | 0.89 | 3.24 | - | 1066.7 |
| AHQ-1-4, 3607 - 3678 | K.AQQVSGQLDVLTAQ.V           | 1458.64233 | 2 | 8.46E-11 | 0.97 | 5.38 | - | 1676.5 |
| AHQ-1-5, 3458 - 3530 | K.AQQVSGQLDVLTAQ.V           | 1458.64233 | 2 | 1.20E-09 | 0.96 | 4.20 | - | 1307.5 |
| AHQ-1-4, 3671        | K.AQQVSGQLDVLTAQ.V           | 1458.64233 | 1 | 2.17E-04 | 0.34 | 2.51 | - | 406.8  |
| AHQ-1-4, 3675        | K.AQQVSGQLDVLTAQ.V           | 1458.64233 | 1 | 1.63E-05 | 0.70 | 3.56 | - | 354.5  |
| AHQ-1-5, 3522        | K.AQQVSGQLDVLTAQ.V           | 1458.64233 | 1 | 2.16E-04 | 0.75 | 3.56 | - | 397.7  |
| AHQ-1-1, 3748        | K.AQQVSGQLDVLTAQ.V           | 1458.64233 | 2 | 3.75E-04 | 0.95 | 3.46 | - | 1410.5 |
| AHQ-1-8, 3330        | K.AQQVSGQLDVLTAQ.V           | 1458.64233 | 2 | 1.97E-11 | 0.96 | 4.64 | - | 1363.4 |
| AHQ-1-2, 3809        | K.AQQVSGQLDVLTAQ.V           | 1458.64233 | 2 | 6.37E-10 | 0.96 | 4.64 | - | 1282.3 |
| AHQ-1-7, 3588        | K.AQQVSGQLDVLTAQ.V           | 1458.64233 | 2 | 3.74E-05 | 0.95 | 3.67 | - | 1446.1 |
| AHQ-1-4, 2720        | K.AVAGNISDPGLQK.S            | 1270.41721 | 2 | 8.58E-05 | 0.59 | 2.55 | - | 533.9  |
| AHQ-1-7, 2440        | K.AVAGNISDPGLQK.S            | 1270.41721 | 2 | 3.75E-04 | 0.70 | 2.97 | - | 515.2  |
| AHQ-1-5, 2401 - 2417 | K.AVAGNISDPGLQK.S            | 1270.41721 | 2 | 1.19E-04 | 0.86 | 3.65 | - | 640.7  |
| AHQ-1-5, 2530        | K.AVAGNISDPGLQK.S            | 1270.41721 | 2 | 2.21E-05 | 0.76 | 3.40 | - | 578.7  |
| AHQ-1-2, 2581 - 2599 | K.AVAGNISDPGLQK.S            | 1270.41721 | 2 | 1.02E-05 | 0.78 | 3.10 | - | 609.0  |
| AHQ-1-4, 2490        | K.AVAGNISDPGLQK.S            | 1270.41721 | 2 | 9.51E-06 | 0.69 | 2.78 | - | 690.3  |
| AHQ-1-1, 2631        | K.AVAGNISDPGLQK.S            | 1270.41721 | 2 | 3.20E-06 | 0.89 | 3.47 | - | 736.6  |
| AHQ-1-3, 2515        | K.AVAGNISDPGLQK.S            | 1270.41721 | 2 | 3.72E-05 | 0.85 | 3.15 | - | 819.2  |
| AHQ-1-3, 6050        | K.CDRVDQLTAQLADLAAR.G        | 1918.12182 | 2 | 2.90E-04 | 0.94 | 3.88 | - | 1359.3 |
| AHQ-1-6, 6018        | K.CDRVDQLTAQLADLAAR.G        | 1918.12182 | 3 | 1.38E-05 | 0.96 | 5.12 | - | 1565.0 |
| AHQ-1-4, 6154        | K.CDRVDQLTAQLADLAAR.G        | 1918.12182 | 2 | 6.35E-06 | 0.94 | 4.08 | - | 1252.6 |
| AHQ-1-4, 6160        | K.CDRVDQLTAQLADLAAR.G        | 1918.12182 | 3 | 9.76E-05 | 0.89 | 4.25 | - | 1126.9 |
| AHQ-1-4, 6367        | K.CDRVDQLTAQLADLAAR.G        | 1918.12182 | 2 | 7.81E-07 | 0.92 | 3.77 | - | 1010.6 |
| AHQ-1-5, 6126 - 6141 | K.CDRVDQLTAQLADLAAR.G        | 1918.12182 | 2 | 5.31E-05 | 0.94 | 3.50 | - | 1349.1 |
| AHQ-1-5, 6130 - 6145 | K.CDRVDQLTAQLADLAAR.G        | 1918.12182 | 3 | 7.64E-07 | 0.96 | 5.59 | - | 1480.7 |
| AHQ-1-6, 6011 - 6068 | K.CDRVDQLTAQLADLAAR.G        | 1918.12182 | 2 | 6.15E-05 | 0.78 | 2.99 | - | 789.3  |
| AHQ-1-3, 6055        | K.CDRVDQLTAQLADLAAR.G        | 1918.12182 | 3 | 1.94E-06 | 0.89 | 4.13 | - | 1233.5 |
| AHQ-1-4, 6587        | K.CDRVDQLTAQLADLAAR.G        | 1918.12182 | 2 | 2.04E-05 | 0.69 | 3.17 | - | 417.0  |
| AHQ-1-4, 2359        | R.DPSASPGDAGEQAIR.Q          | 1471.51169 | 1 | 2.02E-05 | 0.27 | 2.07 | - | 215.4  |
| AHQ-1-4, 2343        | R.DPSASPGDAGEQAIR.Q          | 1471.51169 | 2 | 2.15E-12 | 0.87 | 3.22 | - | 725.8  |
| AHQ-1-5, 2290        | R.DPSASPGDAGEQAIR.Q          | 1471.51169 | 1 | 6.71E-04 | 0.18 | 2.02 | - | 115.3  |
| AHQ-1-4, 2244        | R.DPSASPGDAGEQAIR.Q          | 1471.51169 | 2 | 7.52E-06 | 0.88 | 3.66 | - | 706.4  |
| AHQ-1-3, 2293 - 2361 | R.DPSASPGDAGEQAIR.Q          | 1471.51169 | 2 | 7.35E-07 | 0.92 | 3.93 | - | 720.7  |
| AHQ-1-7, 2325        | R.DPSASPGDAGEQAIR.Q          | 1471.51169 | 2 | 1.81E-04 | 0.91 | 3.38 | - | 821.8  |
| AHQ-1-1, 2447        | R.DPSASPGDAGEQAIR.Q          | 1471.51169 | 2 | 1.17E-07 | 0.86 | 3.24 | - | 692.0  |
| AHQ-1-6, 2284        | R.DPSASPGDAGEQAIR.Q          | 1471.51169 | 2 | 1.69E-08 | 0.91 | 3.78 | - | 676.4  |
| AHQ-1-5, 2587        | R.DYLDGSR.G                  | 939.00451  | 1 | 9.22E-05 | 0.21 | 1.95 | - | 199.0  |
| AHQ-1-5, 2491        | R.DYLDGSR.G                  | 939.00451  | 1 | 6.17E-04 | 0.59 | 2.59 | - | 389.6  |
| AHQ-1-3, 4874        | K.ELLPVLISAM.K.I             | 1230.54265 | 2 | 6.44E-04 | 0.64 | 2.75 | - | 660.5  |
| AHQ-1-5, 6007        | K.ELLPVLISAM.K.I             | 1214.54325 | 2 | 6.31E-07 | 0.86 | 3.32 | - | 659.8  |
| AHQ-1-5, 4762        | K.ELLPVLISAM.K.I             | 1230.54265 | 2 | 3.02E-06 | 0.86 | 3.27 | - | 806.7  |
| AHQ-1-4, 6148        | K.ELLPVLISAM.K.I             | 1214.54325 | 2 | 2.15E-06 | 0.68 | 2.83 | - | 541.5  |
| AHQ-1-4, 4915 - 4948 | K.ELLPVLISAM.K.I             | 1230.54265 | 2 | 3.75E-05 | 0.87 | 3.64 | - | 733.1  |
| AHQ-1-6, 5966        | K.ELLPVLISAM.K.I             | 1214.54325 | 2 | 9.32E-05 | 0.68 | 3.02 | - | 414.6  |
| AHQ-1-6, 2634 - 2642 | R.ELTPQVVAAR.I               | 1171.32878 | 2 | 8.65E-04 | 0.92 | 3.00 | - | 1320.1 |
| AHQ-1-5, 2633 - 2646 | R.ELTPQVVAAR.I               | 1171.32878 | 2 | 6.59E-04 | 0.93 | 3.40 | - | 1281.9 |
| AHQ-1-5, 3082        | K.ETVQTTEDQILK.R             | 1405.53306 | 1 | 7.87E-06 | 0.08 | 2.26 | - | 113.7  |
| AHQ-1-14 - , 3134    | K.ETVQTTEDQILK.R             | 1405.53306 | 2 | 4.97E-04 | 0.76 | 2.61 | - | 668.7  |
| AHQ-1-4, 3202        | K.ETVQTTEDQILK.R             | 1405.53306 | 1 | 9.92E-10 | 0.13 | 2.62 | - | 156.4  |
| AHQ-1-14 - , 3054    | K.ETVQTTEDQILK.R.D           | 1561.71942 | 2 | 2.85E-06 | 0.57 | 2.89 | - | 405.6  |
| AHQ-1-4, 3043        | K.ETVQTTEDQILK.R.D           | 1561.71942 | 2 | 1.14E-05 | 0.90 | 3.54 | - | 976.3  |
| AHQ-1-14, 3914       | K.ETVQTTEDQILK.R.D           | 1561.71942 | 2 | 2.26E-08 | 0.69 | 3.07 | - | 610.3  |
| AHQ-1-5, 2894        | K.ETVQTTEDQILK.R.D           | 1561.71942 | 2 | 2.28E-07 | 0.71 | 2.90 | - | 707.0  |
| AHQ-1-9, 2848        | K.ETVQTTEDQILK.R.D           | 1561.71942 | 2 | 6.75E-06 | 0.80 | 3.11 | - | 749.4  |
| AHQ-1-6, 2923 - 2938 | K.ETVQTTEDQILK.R.D           | 1561.71942 | 2 | 1.78E-05 | 0.54 | 2.94 | - | 543.6  |
| AHQ-1-12, 2943       | K.ETVQTTEDQILK.R.D           | 1561.71942 | 2 | 5.90E-05 | 0.74 | 2.89 | - | 912.4  |
| AHQ-1-3, 3041        | K.ETVQTTEDQILK.R.D           | 1561.71942 | 2 | 6.39E-05 | 0.86 | 2.96 | - | 1161.5 |
| AHQ-1-1, 6824 - 6904 | R.GILSGTSDLLTFDEAEVR.K       | 2037.25656 | 2 | 1.12E-05 | 0.79 | 3.54 | - | 592.3  |
| AHQ-1-4, 7570        | R.GILSGTSDLLTFDEAEVR.K       | 2037.25656 | 2 | 2.59E-04 | 0.80 | 3.53 | - | 558.6  |
| AHQ-1-4, 7227 - 7298 | R.GILSGTSDLLTFDEAEVR.K       | 2037.25656 | 2 | 4.26E-05 | 0.91 | 3.96 | - | 822.0  |
| AHQ-1-4, 7100 - 7179 | R.GILSGTSDLLTFDEAEVR.K       | 2037.25656 | 2 | 4.11E-05 | 0.81 | 3.48 | - | 622.0  |
| AHQ-1-5, 7273        | R.GILSGTSDLLTFDEAEVR.K       | 2037.25656 | 2 | 2.09E-04 | 0.94 | 4.61 | - | 887.8  |
| AHQ-1-11, 6338       | R.GILSGTSDLLTFDEAEVR.K       | 2037.25656 | 2 | 8.34E-07 | 0.93 | 4.63 | - | 804.3  |
| AHQ-1-4, 6830        | R.GILSGTSDLLTFDEAEVR.K.I     | 2165.42947 | 3 | 2.43E-09 | 0.81 | 3.57 | - | 715.9  |
| AHQ-1-4, 6822        | R.GILSGTSDLLTFDEAEVR.K.I     | 2165.42947 | 2 | 2.78E-08 | 0.89 | 3.80 | - | 1012.5 |
| AHQ-1-12, 2139       | K.GNDIAAAK.R                 | 872.98920  | 2 | 1.18E-04 | 0.87 | 2.77 | - | 1150.8 |
| AHQ-1-4, 1531 - 2227 | K.GNDIAAAK.R                 | 872.98920  | 1 | 2.84E-04 | 0.27 | 2.06 | - | 315.5  |
| AHQ-1-5, 3509        | K.GWLRDPSASPGDAGEQAIR.Q      | 1984.11876 | 2 | 3.40E-04 | 0.92 | 4.65 | - | 666.1  |
| AHQ-1-4, 3662        | K.GWLRDPSASPGDAGEQAIR.Q      | 1984.11876 | 2 | 8.42E-07 | 0.87 | 4.01 | - | 609.9  |
| AHQ-1-4, 3668        | K.GWLRDPSASPGDAGEQAIR.Q      | 1984.11876 | 3 | 6.62E-08 | 0.88 | 4.23 | - | 829.2  |
| AHQ-1-4, 2223        | K.IAELCDDPKER.D              | 1347.47690 | 3 | 3.14E-06 | 0.83 | 3.48 | - | 710.0  |
| AHQ-1-4, 2218        | K.IAELCDDPKER.D              | 1347.47690 | 2 | 1.92E-06 | 0.81 | 3.08 | - | 571.5  |
| AHQ-1-3, 3157        | R.IPTISTQLK.I                | 1001.20202 | 2 | 1.87E-04 | 0.74 | 2.52 | - | 634.5  |
| AHQ-1-12, 3050       | R.IPTISTQLK.I                | 1001.20202 | 2 | 5.48E-04 | 0.77 | 2.55 | - | 679.3  |
| AHQ-1-5, 3174        | R.KIAELCDDPKERDDILR.S        | 2088.32839 | 3 | 5.30E-06 | 0.62 | 3.18 | - | 508.9  |
| AHQ-1-4, 3323        | R.KIAELCDDPKERDDILR.S        | 2088.32839 | 3 | 4.17E-04 | 0.81 | 3.29 | - | 929.7  |
| AHQ-1-5, 3175        | R.KIAELCDDPKERDDILR.S        | 2088.32839 | 2 | 1.59E-04 | 0.65 | 3.60 | - | 275.2  |
| AHQ-1-4, 4460 - 4530 | K.KIDAAQNWLADPNNGPPEGEEQIR.G | 2509.67332 | 2 | 1.59E-09 | 0.87 | 3.92 | - | 513.6  |
| AHQ-1-5, 4365 - 4433 | K.KIDAAQNWLADPNNGPPEGEEQIR.G | 2509.67332 | 2 | 1.03E-05 | 0.74 | 3.29 | - | 332.8  |
| AHQ-1-4, 3458        | R.LANVMMGPYR.Q               | 1152.41560 | 2 | 2.02E-04 | 0.90 | 3.73 | - | 783.9  |
| AHQ-1-5, 3301 - 3334 | R.LANVMMGPYR.Q               | 1152.41560 | 2 | 1.08E-04 | 0.93 | 3.79 | - | 845.9  |
| AHQ-1-6, 2802 - 2816 | R.LANVMM*GPYR.Q              | 1168.41500 | 2 | 1.39E-04 | 0.78 | 3.16 | - | 714.8  |
| AHQ-1-4, 2924 - 2928 | R.LANVMM*GPYR.Q              | 1168.41500 | 2 | 2.66E-04 | 0.83 | 3.69 | - | 610.8  |
| AHQ-1-2, 4558        | K.LLAAVATAPPDAPNREEVFDER.A   | 2382.61458 | 3 | 5.73E-04 | 0.84 | 3.74 | - | 705.6  |
| AHQ-1-4, 4486 - 4487 | K.LLAAVATAPPDAPNREEVFDER.A   | 2382.61458 | 3 | 5.46E-10 | 0.62 | 3.11 | - | 603.0  |
| AHQ-1-3, 4401 - 4402 | K.LLAAVATAPPDAPNREEVFDER.A   | 2382.61458 | 3 | 3.79E-07 | 0.66 | 3.78 | - | 585.2  |
| AHQ-1-5, 4302 - 4374 | K.LLAAVATAPPDAPNREEVFDER.A   | 2382.61458 | 3 | 2.57E-09 | 0.82 | 3.81 | - | 806.9  |
| AHQ-1-4, 4582 - 4590 | K.LLAAVATAPPDAPNREEVFDER.A   | 2382.61458 | 2 | 5.14E-05 | 0.89 | 3.82 | - | 761.3  |
| AHQ-1-4, 4382 - 4451 | K.LLAAVATAPPDAPNREEVFDER.A   | 2382.61458 | 2 | 3.89E-04 | 0.77 | 3.81 | - | 268.2  |
| AHQ-1-4, 4458        | R.LTDELAPPKPPPEGEVPPPPPEEK.D | 3025.44391 | 3 | 6.07E-05 | 0.68 | 4.10 | - | 463.2  |
| AHQ-1-4, 4648 - 4718 | R.LTDELAPPKPPPEGEVPPPPPEEK.D | 4028.46845 | 3 | 4.04E-05 | 0.86 | 4.08 | - | 796.5  |
| AHQ-1-6, 3682        | K.LVQAAQM*QSDPYSVVAR.D       | 1991.25773 | 2 | 1.03E-05 | 0.94 | 4.24 | - | 929.5  |
| AHQ-1-3, 4662 - 4677 | K.LVQAAQM*QSDPYSVVAR.D       | 1975.25833 | 2 | 2.70E-04 | 0.74 | 3.02 | - | 596.5  |
| AHQ-1-6, 4570 - 4571 | K.LVQAAQM*QSDPYSVVAR.D       | 1975.25833 | 2 | 2.85E-05 | 0.94 | 5.16 | - | 675.2  |
| AHQ-1-4, 4726 - 4748 | K.LVQAAQM*QSDPYSVVAR.D       | 1975.25833 | 3 | 6.00E-07 | 0.95 | 4.80 | - | 1418.0 |
| AHQ-1-3, 3835 - 3838 | K.LVQAAQM*QSDPYSVVAR.D       | 1991.25773 | 2 | 4.87E-05 | 0.89 | 3.98 | - | 584.2  |
| AHQ-1-1, 3871        | K.LVQAAQM*QSDPYSVVAR.D       | 1991.25773 | 2 | 2.19E-06 | 0.73 | 2.91 | - | 569.1  |
| AHQ-1-4, 3888        | K.LVQAAQM*QSDPYSVVAR.D       | 1991.25773 | 3 | 1.68E-06 | 0.95 | 4.81 | - | 1486.1 |
| AHQ-1-4, 4480        | R.MALLMAEMSR.L               | 1153.46531 | 2 | 7.12E-08 | 0.96 | 4.42 | - | 1715.6 |

|                                                                                                    |                                   |            |   |          |      |       |      |         |
|----------------------------------------------------------------------------------------------------|-----------------------------------|------------|---|----------|------|-------|------|---------|
| AHQ-1-2, 4419                                                                                      | K.MLGQMTDQVADLR.A                 | 1478.72055 | 2 | 1.90E-07 | 0.93 | 4.01  | -    | 1227.2  |
| AHQ-1-4, 2958 - 2960                                                                               | K.M*LGQM*TDQVADLR.A               | 1510.71935 | 2 | 6.71E-05 | 0.95 | 4.06  | -    | 1570.9  |
| AHQ-1-2, 4009                                                                                      | K.M*LGQMTDQVADLR.A                | 1494.71995 | 2 | 1.20E-05 | 0.84 | 3.02  | -    | 709.4   |
| AHQ-1-8, 4116                                                                                      | K.MLGQMTDQVADLR.A                 | 1478.72055 | 2 | 3.70E-06 | 0.93 | 4.61  | -    | 987.7   |
| AHQ-1-5, 3754 - 3766                                                                               | K.M*LGQMTDQVADLR.A                | 1494.71995 | 2 | 7.73E-08 | 0.97 | 4.08  | -    | 2467.9  |
| AHQ-1-6, 3699                                                                                      | K.M*LGQMTDQVADLR.A                | 1494.71995 | 2 | 5.90E-05 | 0.95 | 3.40  | -    | 1720.6  |
| AHQ-1-5, 2849                                                                                      | K.M*LGQM*TDQVADLR.A               | 1510.71935 | 2 | 2.38E-05 | 0.96 | 4.07  | -    | 1673.8  |
| AHQ-1-6, 4135 - 4140                                                                               | K.MLGQMTDQVADLR.A                 | 1478.72055 | 2 | 4.72E-07 | 0.96 | 4.44  | -    | 1608.7  |
| AHQ-1-3, 4274                                                                                      | K.MLGQMTDQVADLR.A                 | 1478.72055 | 2 | 2.44E-05 | 0.94 | 3.95  | -    | 1329.1  |
| AHQ-1-7, 4192                                                                                      | K.MLGQMTDQVADLR.A                 | 1478.72055 | 2 | 4.41E-07 | 0.95 | 3.91  | -    | 1659.9  |
| AHQ-1-4, 3820 - 3878                                                                               | K.M*LGQMTDQVADLR.A                | 1494.71995 | 2 | 8.24E-06 | 0.93 | 3.53  | -    | 1393.3  |
| AHQ-1-4, 4312                                                                                      | K.M*LGQM*TDQVADLR.A               | 1510.71935 | 2 | 8.31E-04 | 0.86 | 3.35  | -    | 971.0   |
| AHQ-1-5, 3242 - 3250                                                                               | K.MLGQM*TDQVADLR.A                | 1494.71995 | 2 | 3.07E-06 | 0.90 | 3.62  | -    | 1304.4  |
| AHQ-1-4, 4292                                                                                      | K.MLGQMTDQVADLR.A                 | 1478.72055 | 2 | 8.52E-04 | 0.80 | 2.92  | -    | 1119.6  |
| AHQ-1-5, 4181 - 4182                                                                               | K.MLGQMTDQVADLR.A                 | 1478.72055 | 2 | 5.18E-07 | 0.97 | 5.08  | -    | 1533.3  |
| AHQ-1-4, 3374                                                                                      | K.MLGQM*TDQVADLR.A                | 1494.71995 | 2 | 1.25E-04 | 0.94 | 3.59  | -    | 1734.4  |
| AHQ-1-5, 3105                                                                                      | K.M*SAEINEIR.V                    | 1192.36823 | 2 | 5.36E-06 | 0.91 | 2.82  | -    | 1231.5  |
| AHQ-1-4, 3235                                                                                      | K.M*SAEINEIR.V                    | 1192.36823 | 2 | 8.61E-04 | 0.86 | 3.01  | -    | 863.8   |
| AHQ-1-4, 3988                                                                                      | K.MSAEINEIR.V                     | 1176.36883 | 2 | 7.02E-06 | 0.96 | 4.27  | -    | 1920.0  |
| AHQ-1-5, 3753 - 3759                                                                               | K.MSAEINEIR.V                     | 1176.36883 | 2 | 6.48E-06 | 0.94 | 3.80  | -    | 1536.1  |
| AHQ-1-4, 3667                                                                                      | K.MTGLVDEAIDTK.S                  | 1293.46936 | 2 | 5.53E-07 | 0.96 | 3.72  | -    | 1789.1  |
| AHQ-1-6, 3490                                                                                      | K.MTGLVDEAIDTK.S                  | 1293.46936 | 2 | 3.83E-08 | 0.97 | 4.13  | -    | 1590.2  |
| AHQ-1-5, 3057                                                                                      | K.M*TLVDEAIDTK.S                  | 1309.46876 | 2 | 6.89E-07 | 0.94 | 3.80  | -    | 1260.2  |
| AHQ-1-4, 3123 - 3198                                                                               | K.M*TLVDEAIDTK.S                  | 1309.46876 | 2 | 2.28E-08 | 0.91 | 3.11  | -    | 1190.9  |
| AHQ-1-5, 3525                                                                                      | K.MTGLVDEAIDTK.S                  | 1293.46936 | 2 | 1.08E-09 | 0.97 | 3.98  | -    | 1703.5  |
| AHQ-1-4, 3212                                                                                      | K.M*TLVDEAIDTK.S                  | 1309.46876 | 1 | 9.18E-04 | 0.23 | 2.27  | -    | 205.7   |
| AHQ-1-4, 3176                                                                                      | K.M*TLVDEAIDTK.S                  | 1309.46876 | 2 | 9.15E-07 | 0.94 | 3.58  | -    | 1375.6  |
| AHQ-1-5, 2857                                                                                      | R.NPQNQAAYEHFETMK.N               | 1737.87437 | 3 | 6.42E-04 | 0.78 | 3.27  | -    | 551.5   |
| AHQ-1-5, 2855                                                                                      | R.NPQNQAAYEHFETMK.N               | 1737.87437 | 2 | 2.03E-05 | 0.95 | 4.14  | -    | 1189.4  |
| AHQ-1-4, 3022                                                                                      | R.NPQNQAAYEHFETMK.N               | 1737.87437 | 2 | 1.74E-04 | 0.96 | 4.32  | -    | 1268.5  |
| AHQ-1-4, 2495                                                                                      | R.NPQNQAAYEHFETMK.N               | 1753.87377 | 2 | 4.89E-05 | 0.90 | 4.02  | -    | 673.2   |
| AHQ-1-4, 2247                                                                                      | K.NGQIEEALKNR.N                   | 1272.39320 | 2 | 9.21E-05 | 0.83 | 2.79  | -    | 1199.0  |
| AHQ-1-4, 2991                                                                                      | K.NQWIDNVEK.M                     | 1146.23464 | 1 | 2.14E-04 | 0.38 | 2.36  | -    | 240.7   |
| AHQ-1-5, 2826                                                                                      | K.NQWIDNVEK.M                     | 1146.23464 | 1 | 5.95E-04 | 0.18 | 1.83  | -    | 274.3   |
| AHQ-1-4, 3142                                                                                      | K.QVATALQNLQTK.T                  | 1315.50112 | 2 | 1.79E-04 | 0.93 | 4.07  | -    | 1041.5  |
| AHQ-1-5, 2769 - 2777                                                                               | K.QVATALQNLQTK.T                  | 1315.50112 | 2 | 3.66E-07 | 0.91 | 3.83  | -    | 660.8   |
| AHQ-1-4, 2926 - 2927                                                                               | K.QVATALQNLQTK.T                  | 1315.50112 | 2 | 3.72E-09 | 0.90 | 3.47  | -    | 778.5   |
| AHQ-1-6, 3374                                                                                      | R.SLGEISALTSK.L                   | 1106.25186 | 2 | 9.07E-06 | 0.92 | 3.44  | -    | 908.6   |
| AHQ-1-4, 3536                                                                                      | R.SLGEISALTSK.L                   | 1106.25186 | 2 | 8.80E-07 | 0.94 | 3.96  | -    | 966.0   |
| AHQ-1-4, 3543                                                                                      | R.SLGEISALTSK.L                   | 1106.25186 | 1 | 1.20E-06 | 0.20 | 2.44  | -    | 188.7   |
| AHQ-1-5, 3386                                                                                      | R.SLGEISALTSK.L                   | 1106.25186 | 1 | 2.63E-07 | 0.20 | 2.10  | -    | 187.9   |
| AHQ-1-3, 3545                                                                                      | R.SLGEISALTSK.L                   | 1106.25186 | 2 | 1.63E-05 | 0.94 | 3.74  | -    | 1079.7  |
| AHQ-1-7, 3416                                                                                      | R.SLGEISALTSK.L                   | 1106.25186 | 1 | 2.46E-05 | 0.62 | 2.82  | -    | 335.3   |
| AHQ-1-1, 3633                                                                                      | R.SLGEISALTSK.L                   | 1106.25186 | 2 | 3.18E-07 | 0.95 | 3.90  | -    | 1144.7  |
| AHQ-1-5, 3261                                                                                      | K.SLLDASEEAIKK.D                  | 1304.47187 | 2 | 7.90E-05 | 0.80 | 2.98  | -    | 782.6   |
| AHQ-1-7, 3296 - 3300                                                                               | K.SLLDASEEAIKK.D                  | 1304.47187 | 2 | 7.40E-06 | 0.79 | 2.91  | -    | 685.1   |
| AHQ-1-4, 3394 - 3470                                                                               | K.SLLDASEEAIKK.D                  | 1304.47187 | 2 | 2.04E-06 | 0.89 | 3.34  | -    | 827.1   |
| AHQ-1-6, 3276                                                                                      | K.SLLDASEEAIKK.D                  | 1304.47187 | 2 | 6.95E-06 | 0.73 | 2.65  | -    | 568.4   |
| AHQ-1-3, 3409                                                                                      | K.SLLDASEEAIKK.D                  | 1304.47187 | 2 | 5.81E-05 | 0.75 | 2.73  | -    | 768.9   |
| AHQ-1-3, 2431                                                                                      | K.STVEGIQASVK.T                   | 1119.25064 | 2 | 1.90E-06 | 0.86 | 3.04  | -    | 745.5   |
| AHQ-1-4, 2404                                                                                      | K.STVEGIQASVK.T                   | 1119.25064 | 2 | 3.63E-07 | 0.92 | 3.70  | -    | 779.9   |
| AHQ-1-12, 2494 - 2495                                                                              | R.TDAGFTLR.W                      | 880.96819  | 2 | 9.47E-06 | 0.86 | 2.65  | -    | 903.2   |
| AHQ-1-4, 2506                                                                                      | R.TDAGFTLR.W                      | 880.96819  | 2 | 9.13E-06 | 0.89 | 2.79  | -    | 988.6   |
| AHQ-1-9, 7276                                                                                      | R.TIESLEPVAQIQSHLVMHEEGEVGDK.A    | 3103.49334 | 3 | 7.49E-05 | 0.79 | 3.60  | -    | 502.4   |
| AHQ-1-11, 6436                                                                                     | R.TIESLEPVAQIQSHLVMHEEGEVGDK.A    | 3119.49274 | 3 | 6.04E-04 | 0.79 | 3.60  | -    | 411.4   |
| AHQ-1-1, 4892                                                                                      | R.TNISDEESEQATEM*LVHNAQNLQ*QSVK.E | 3080.30897 | 3 | 6.87E-04 | 0.80 | 3.75  | -    | 822.5   |
| AHQ-1-12, 5330 - 5391                                                                              | R.TNISDEESEQATEM*LVHNAQNLQ*QSVK.E | 3080.30897 | 3 | 2.57E-05 | 0.91 | 4.43  | -    | 695.0   |
| AHQ-1-12, 5689 - 5746                                                                              | R.TNISDEESEQATEM*LVHNAQNLQ*QSVK.E | 3064.30957 | 3 | 2.85E-04 | 0.90 | 4.97  | -    | 736.8   |
| AHQ-1-4, 5367                                                                                      | R.TNISDEESEQATEM*LVHNAQNLQ*QSVK.E | 3064.30957 | 3 | 2.71E-04 | 0.82 | 4.14  | -    | 496.1   |
| AHQ-1-12, 5697 - 5729                                                                              | R.TNISDEESEQATEM*LVHNAQNLQ*QSVK.E | 3048.31017 | 3 | 4.89E-06 | 0.86 | 4.12  | -    | 580.1   |
| AHQ-1-4, 4935                                                                                      | R.TNISDEESEQATEM*LVHNAQNLQ*QSVK.E | 3080.30897 | 3 | 4.80E-04 | 0.59 | 3.01  | -    | 326.6   |
| AHQ-1-10, 6251                                                                                     | R.TNISDEESEQATEM*LVHNAQNLQ*QSVK.E | 3048.31017 | 3 | 2.35E-06 | 0.92 | 4.94  | -    | 602.6   |
| AHQ-1-13, 6391 - 6468                                                                              | R.TNISDEESEQATEM*LVHNAQNLQ*QSVK.E | 3048.31017 | 3 | 2.15E-08 | 0.46 | 3.11  | -    | 415.0   |
| AHQ-1-13, 6740 - 6792                                                                              | R.TNISDEESEQATEM*LVHNAQNLQ*QSVK.E | 3064.30957 | 3 | 9.95E-09 | 0.57 | 3.28  | -    | 363.9   |
| AHQ-1-14, 5460 - 5463                                                                              | R.TNISDEESEQATEM*LVHNAQNLQ*QSVK.E | 3080.30897 | 3 | 1.37E-04 | 0.78 | 3.61  | -    | 496.7   |
| AHQ-1-4, 6338 - 6339                                                                               | R.TNISDEESEQATEM*LVHNAQNLQ*QSVK.E | 3064.30957 | 3 | 5.11E-05 | 0.82 | 4.27  | -    | 561.1   |
| AHQ-1-10, 5449                                                                                     | R.TNISDEESEQATEM*LVHNAQNLQ*QSVK.E | 3048.31017 | 3 | 7.03E-07 | 0.83 | 4.26  | -    | 536.5   |
| AHQ-1-5, 7297 - 7301                                                                               | R.TNISDEESEQATEM*LVHNAQNLQ*QSVK.E | 3048.31017 | 3 | 3.67E-08 | 0.94 | 5.28  | -    | 797.7   |
| AHQ-1-9, 7119                                                                                      | R.TNISDEESEQATEM*LVHNAQNLQ*QSVK.E | 3048.31017 | 3 | 5.03E-05 | 0.90 | 4.57  | -    | 659.9   |
| AHQ-1-1, 6825                                                                                      | R.TNISDEESEQATEM*LVHNAQNLQ*QSVK.E | 3064.30957 | 3 | 1.58E-04 | 0.81 | 4.02  | -    | 488.6   |
| AHQ-1-8, 7279                                                                                      | R.TNISDEESEQATEM*LVHNAQNLQ*QSVK.E | 3048.31017 | 3 | 6.60E-04 | 0.70 | 3.14  | -    | 573.4   |
| AHQ-1-4, 7024                                                                                      | R.TNISDEESEQATEM*LVHNAQNLQ*QSVK.E | 3064.30957 | 3 | 2.27E-04 | 0.54 | 3.41  | -    | 404.6   |
| AHQ-1-12, 3170                                                                                     | R.TNLLQVCEI                       | 1134.28859 | 2 | 7.00E-04 | 0.87 | 3.29  | -    | 1021.2  |
| AHQ-1-4, 5626                                                                                      | K.VAM*ANIQPQMLVAGATSIAR.R         | 2059.44338 | 2 | 4.64E-05 | 0.88 | 4.44  | -    | 567.2   |
| AHQ-1-5, 5505                                                                                      | K.VAM*ANIQPQMLVAGATSIAR.R         | 2059.44338 | 3 | 2.60E-05 | 0.93 | 4.77  | -    | 1818.0  |
| AHQ-1-5, 5021 - 5095                                                                               | K.VAM*ANIQPQMLVAGATSIAR.R         | 2075.44278 | 2 | 1.08E-05 | 0.80 | 3.68  | -    | 534.4   |
| AHQ-1-7, 5385 - 5456                                                                               | K.VAM*ANIQPQMLVAGATSIAR.R         | 2059.44338 | 2 | 1.73E-04 | 0.89 | 4.47  | -    | 559.9   |
| AHQ-1-4, 5531 - 5598                                                                               | K.VAM*ANIQPQMLVAGATSIAR.R         | 2059.44338 | 3 | 1.32E-08 | 0.87 | 3.93  | -    | 1715.1  |
| AHQ-1-4, 6234                                                                                      | K.VAMANIQPQMLVAGATSIAR.R          | 2043.44398 | 3 | 8.51E-05 | 0.94 | 4.89  | -    | 1301.9  |
| AHQ-1-2, 5689                                                                                      | K.VAM*ANIQPQMLVAGATSIAR.R         | 2059.44338 | 2 | 2.76E-06 | 0.88 | 4.46  | -    | 612.3   |
| AHQ-1-4, 5802                                                                                      | K.VAMANIQPQMLVAGATSIAR.R          | 2059.44338 | 3 | 9.01E-04 | 0.92 | 4.65  | -    | 1419.6  |
| AHQ-1-4, 5111                                                                                      | K.VAM*ANIQPQMLVAGATSIAR.R         | 2075.44278 | 3 | 8.72E-05 | 0.94 | 4.26  | -    | 1982.3  |
| AHQ-1-5, 6197                                                                                      | K.VAMANIQPQMLVAGATSIAR.R          | 2043.44398 | 3 | 8.91E-10 | 0.96 | 5.34  | -    | 1628.0  |
| AHQ-1-3, 5643 - 5713                                                                               | K.VAMANIQPQMLVAGATSIAR.R          | 2059.44338 | 2 | 7.91E-04 | 0.55 | 3.45  | -    | 364.4   |
| AHQ-1-5, 6179 - 6193                                                                               | K.VAMANIQPQMLVAGATSIAR.R          | 2043.44398 | 2 | 3.13E-06 | 0.95 | 5.03  | -    | 799.2   |
| AHQ-1-5, 5690                                                                                      | K.VAMANIQPQMLVAGATSIAR.R          | 2059.44338 | 3 | 7.11E-06 | 0.90 | 4.58  | -    | 1330.9  |
| AHQ-1-4, 5335                                                                                      | R.VDQLTQAQLADLAAR.G               | 1485.66778 | 2 | 5.36E-06 | 0.95 | 3.83  | -    | 1652.9  |
| AHQ-1-4, 5234 - 5235                                                                               | R.VDQLTQAQLADLAAR.G               | 1485.66778 | 1 | 5.57E-04 | 0.66 | 2.79  | -    | 338.5   |
| AHQ-1-5, 5149 - 5157                                                                               | R.VDQLTQAQLADLAAR.G               | 1485.66778 | 2 | 1.94E-07 | 0.98 | 4.99  | -    | 2421.9  |
| AHQ-1-2, 5726                                                                                      | R.VLQLTSWDEDAWASK.D               | 1749.90156 | 2 | 1.21E-05 | 0.86 | 2.57  | -    | 1078.4  |
| AHQ-1-4, 5518 - 5579                                                                               | R.VLQLTSWDEDAWASK.D               | 1749.90156 | 2 | 2.40E-04 | 0.78 | 2.83  | -    | 765.0   |
| AHQ-1-7, 5532 - 5533                                                                               | R.VLQLTSWDEDAWASK.D               | 1749.90156 | 2 | 3.20E-08 | 0.98 | 5.42  | -    | 1625.9  |
| AHQ-1-3, 5533                                                                                      | R.VLQLTSWDEDAWASK.D               | 1749.90156 | 2 | 7.69E-06 | 0.78 | 2.54  | -    | 847.4   |
| AHQ-1-1, 5595 - 5596                                                                               | R.VLQLTSWDEDAWASK.D               | 1749.90156 | 2 | 2.56E-08 | 0.97 | 5.31  | -    | 1590.1  |
| AHQ-1-5, 5442 - 5517                                                                               | R.VLQLTSWDEDAWASK.D               | 1749.90156 | 2 | 1.71E-07 | 0.95 | 4.02  | -    | 1301.9  |
| AHQ-1-4, 5836                                                                                      | R.VLQLTSWDEDAWASK.D               | 1749.90156 | 2 | 2.69E-08 | 0.94 | 4.22  | -    | 925.0   |
| AHQ-1-5, 5525 - 5587                                                                               | R.VLQLTSWDEDAWASK.D               | 1749.90156 | 2 | 1.64E-05 | 0.97 | 5.20  | -    | 1475.3  |
| AHQ-1-6, 5438 - 5507                                                                               | R.VLQLTSWDEDAWASK.D               | 1749.90156 | 2 | 4.11E-05 | 0.79 | 3.07  | -    | 688.5   |
| AHQ-1-4, 5622 - 5654                                                                               | R.VLQLTSWDEDAWASK.D               | 1749.90156 | 2 | 2.94E-11 | 0.97 | 5.34  | -    | 1427.5  |
| AHQ-1-4, 3343                                                                                      | R.VMLVNSMNTVK.E                   | 1236.53081 | 1 | 1.18E-04 | 0.29 | 1.97  | -    | 392.0   |
| AHQ-1-4, 3280                                                                                      | R.VMLVNSMNTVK.E                   | 1236.53081 | 2 | 2.47E-04 | 0.89 | 3.16  | -    | 987.0   |
| AHQ-1-4, 2484                                                                                      | R.VMLVNSMNTVK.E                   | 1252.53021 | 2 | 4.14E-05 | 0.93 | 3.34  | -    | 1114.5  |
| AHQ-1-5, 3157                                                                                      | R.VMLVNSMNTVK.E                   | 1236.53081 | 2 | 8.78E-04 | 0.87 | 3.23  | -    | 899.8   |
| AHQ-1-4, 3647                                                                                      | R.VMLVNSMNTVK.E                   | 1236.53081 | 2 | 7.93E-07 | 0.75 | 3.06  | -    | 615.2   |
| gi4504515[ref NP_002146.1] heat shock 70kDa protein 6 (HSP70B); heat shock 70kD protein 6 (HSP70B) |                                   |            |   | 2.29E-12 | 3.92 | 50.24 | 6.40 | 70853.4 |
| AHQ-1-6, 5063 - 5075                                                                               | R.ARFEELCSDLFR.S                  | 1544.71384 | 2 | 5.38E-06 | 0.95 | 4.72  | -    | 998.9   |
| AHQ-1-6, 5138                                                                                      | R.FEELCSDLFR.S                    | 1317.44926 | 2 | 7.58E-05 | 0.86 | 3.53  | -    | 778.3   |

|                             |                                                                         |            |   |          |       |        |       |         |
|-----------------------------|-------------------------------------------------------------------------|------------|---|----------|-------|--------|-------|---------|
| AHQ-1-6, 4942 - 4956        | R.IINEPTAAAIAYGLDR.R                                                    | 1688.90603 | 2 | 2.29E-12 | 0.95  | 4.43   | -     | 1117.4  |
| AHQ-1-6, 4504               | K.LLQDFNFKG.E                                                           | 1082.23369 | 1 | 4.16E-04 | 0.39  | 2.31   | -     | 436.0   |
| AHQ-1-6, 4403 - 4407        | K.LLQDFNFKG.E                                                           | 1082.23369 | 1 | 5.97E-06 | 0.25  | 2.22   | -     | 340.9   |
| AHQ-1-6, 4488               | K.LLQDFNFKGKLNK.S                                                       | 1566.78249 | 2 | 1.04E-04 | 0.93  | 4.06   | -     | 1174.6  |
| AHQ-1-6, 4343 - 4400        | K.LLQDFNFKGKLNK.S                                                       | 1566.78249 | 2 | 1.60E-06 | 0.91  | 3.84   | -     | 1020.3  |
| gi 5802974 ref NP_006784.1  | peroxiredoxin 3; antioxidant protein 1; thioredoxin-dependent peroxide  |            |   |          |       |        |       |         |
| AHQ-1-11, 4359              | K.AFYQVYETHGVECPANWTPDSPTIKPSPAASK.E                                    | 3388.70790 | 3 | 2.40E-06 | 0.93  | 4.65   | -     | 1131.4  |
| AHQ-1-11, 3883 - 3884       | K.DLSLDDFK.G                                                            | 953.02795  | 1 | 4.32E-05 | 0.30  | 2.16   | -     | 451.0   |
| AHQ-1-11, 5110 - 5112       | R.DYGVLLLEGSGLALR.G                                                     | 1463.66058 | 2 | 2.34E-12 | 0.98  | 5.72   | -     | 2746.7  |
| AHQ-1-11, 5336              | R.GLFIIDPNGVIK.H                                                        | 1286.54452 | 2 | 1.25E-05 | 0.87  | 3.59   | -     | 821.8   |
| AHQ-1-11, 5326              | R.GLFIIDPNGVIK.H                                                        | 1286.54452 | 1 | 3.33E-06 | 0.24  | 2.01   | -     | 286.4   |
| AHQ-1-11, 5059              | R.GLFIIDPNGVIK.H                                                        | 1286.54452 | 2 | 6.53E-06 | 0.87  | 3.07   | -     | 1120.1  |
| AHQ-1-11, 5187              | R.GLFIIDPNGVIK.H                                                        | 1286.54452 | 2 | 7.45E-04 | 0.38  | 2.56   | -     | 389.0   |
| AHQ-1-11, 4894              | K.GTAVVNGEFDKLSLDDFK.G                                                  | 1956.14200 | 2 | 1.43E-04 | 0.86  | 3.85   | -     | 730.8   |
| AHQ-1-11, 2878 - 2926       | K.HLSVNDLPVGR.S                                                         | 1207.36435 | 2 | 1.12E-05 | 0.78  | 3.02   | -     | 493.1   |
| gi 29732955 ref XP_291603.1 | similar to glyceraldehyde 3-phosphate dehydrogenase [Homo sapiens] [MA  |            |   |          |       |        |       |         |
| AHQ-1-9, 4471 - 4518        | K.NISNASCTTNCIAPLAK.M                                                   | 1838.05353 | 2 | 2.55E-08 | 0.75  | 3.36   | -     | 689.0   |
| AHQ-1-10, 3671 - 3739       | K.NISNASCTTNCIAPLAK.M                                                   | 1838.05353 | 2 | 4.40E-08 | 0.94  | 4.54   | -     | 1092.0  |
| AHQ-1-10, 3848 - 3872       | K.NISNASCTTNCIAPLAK.M                                                   | 1838.05353 | 2 | 2.50E-12 | 0.83  | 3.77   | -     | 1229.8  |
| AHQ-1-11, 4082              | K.NISNASCTTNCIAPLAK.M                                                   | 1838.05353 | 2 | 1.62E-05 | 0.49  | 3.14   | -     | 615.6   |
| AHQ-1-12, 3947              | K.NISNASCTTNCIAPLAK.M                                                   | 1838.05353 | 2 | 2.81E-07 | 0.66  | 3.29   | -     | 861.9   |
| AHQ-1-9, 4278 - 4354        | K.NISNASCTTNCIAPLAK.M                                                   | 1838.05353 | 2 | 6.13E-07 | 0.86  | 4.24   | -     | 1130.3  |
| gi 5453898 ref NP_006212.1  | protein (peptidyl-prolyl cis/trans isomerase) NIMA-interacting 1; dod;  |            |   |          |       |        |       |         |
| AHQ-1-12, 4050              | R.TKEALELINGYIQK.I                                                      | 1749.98614 | 2 | 2.75E-12 | 0.96  | 4.29   | -     | 1689.8  |
| gi 5031987 ref NP_005720.1  | peptidylprolyl isomerase F (cyclophilin F) [Homo sapiens]               |            |   |          |       |        |       |         |
| AHQ-1-12, 3814 - 3890       | R.FPDENFTLK.H                                                           | 1111.22866 | 2 | 8.58E-04 | 0.79  | 2.90   | -     | 608.0   |
| AHQ-1-12, 3731 - 3778       | R.FPDENFTLK.H                                                           | 1111.22866 | 2 | 4.91E-05 | 0.76  | 2.75   | -     | 607.4   |
| AHQ-1-12, 3999 - 4030       | R.FPDENFTLK.H                                                           | 1111.22866 | 2 | 1.47E-04 | 0.77  | 2.67   | -     | 609.1   |
| AHQ-1-12, 5021              | K.GSGDPPSSSSSGNPLVYLDVDANGKPLGR.V                                       | 2834.99028 | 2 | 7.68E-06 | 0.57  | 2.74   | -     | 296.8   |
| AHQ-1-11, 4819              | K.GSGDPPSSSSSGNPLVYLDVDANGKPLGR.V                                       | 2834.99028 | 3 | 2.82E-12 | 0.85  | 3.70   | -     | 804.2   |
| AHQ-1-14 - 5318 - 5319      | K.HVPGVLSM*ANAGPNTNGSQFFICTIK.T                                         | 2836.19605 | 3 | 1.38E-04 | 0.94  | 4.91   | -     | 1186.3  |
| AHQ-1-12, 5721              | K.HVPGVLSMANAGPNTNGSQFFICTIK.T                                          | 2820.19665 | 2 | 1.02E-07 | 0.67  | 3.29   | -     | 307.5   |
| AHQ-1-12, 5810 - 5874       | K.HVPGVLSMANAGPNTNGSQFFICTIK.T                                          | 2820.19665 | 3 | 2.40E-05 | 0.91  | 4.12   | -     | 1586.4  |
| AHQ-1-12, 5175 - 5233       | K.HVPGVLSM*ANAGPNTNGSQFFICTIK.T                                         | 2836.19605 | 3 | 1.80E-05 | 0.96  | 5.67   | -     | 1324.7  |
| AHQ-1-12, 5677 - 5754       | K.HVPGVLSMANAGPNTNGSQFFICTIK.T                                          | 2820.19665 | 3 | 1.42E-05 | 0.89  | 3.87   | -     | 1313.5  |
| AHQ-1-12, 1550 - 1595       | K.HVVFVGHV.K                                                            | 923.09628  | 1 | 5.30E-04 | 0.25  | 2.15   | -     | 341.9   |
| AHQ-1-12, 4558              | R.VIPSFMCQAGDFTNHNGTGGK.S                                               | 2240.46178 | 2 | 7.62E-06 | 0.81  | 3.47   | -     | 718.7   |
| AHQ-1-12, 3955              | R.VIPSFMCQAGDFTNHNGTGGK.S                                               | 2256.46118 | 2 | 1.72E-05 | 0.82  | 3.55   | -     | 384.7   |
| gi 5031635 ref NP_005498.1  | cofilin 1 (non-muscle) [Homo sapiens]                                   |            |   |          |       |        |       |         |
| AHQ-1-12, 4115              | K.AVLFCLSEDKK.K                                                         | 1183.35638 | 2 | 2.31E-04 | 0.88  | 3.20   | -     | 764.0   |
| AHQ-1-12, 3485 - 3549       | K.AVLFCLSEDKK.N                                                         | 1311.52930 | 2 | 1.79E-05 | 0.72  | 2.83   | -     | 639.6   |
| AHQ-1-12, 3362 - 3425       | K.AVLFCLSEDKK.N                                                         | 1311.52930 | 2 | 5.41E-09 | 0.91  | 3.60   | -     | 910.2   |
| AHQ-1-12, 3395              | K.AVLFCLSEDKK.N                                                         | 1311.52930 | 1 | 6.42E-04 | 0.68  | 3.00   | -     | 460.9   |
| AHQ-1-12, 5581 - 5598       | K.EILVGDVGQTVDDPYATFVK.M                                                | 2167.40069 | 2 | 1.08E-07 | 0.96  | 5.13   | -     | 1035.1  |
| AHQ-1-13 - 5548 - 5611      | K.EILVGDVGQTVDDPYATFVK.M                                                | 2167.40069 | 2 | 9.88E-05 | 0.53  | 2.68   | -     | 504.7   |
| AHQ-1-14 - 5634             | K.EILVGDVGQTVDDPYATFVK.M                                                | 2167.40069 | 2 | 5.91E-07 | 0.97  | 5.20   | -     | 1533.6  |
| AHQ-1-12, 5261 - 5314       | K.EILVGDVGQTVDDPYATFVK.M                                                | 2167.40069 | 2 | 3.85E-06 | 0.79  | 3.29   | -     | 454.6   |
| AHQ-1-13 - 5772             | K.EILVGDVGQTVDDPYATFVK.M                                                | 2167.40069 | 2 | 2.88E-08 | 0.97  | 5.32   | -     | 1314.1  |
| AHQ-1-11, 5275 - 5346       | K.EILVGDVGQTVDDPYATFVK.M                                                | 2167.40069 | 2 | 1.71E-08 | 0.96  | 5.06   | -     | 1045.6  |
| AHQ-1-12, 5459 - 5534       | K.EILVGDVGQTVDDPYATFVK.M                                                | 2167.40069 | 2 | 5.85E-10 | 0.98  | 6.36   | -     | 1374.0  |
| AHQ-1-13, 5436              | K.EILVGDVGQTVDDPYATFVK.M                                                | 2167.40069 | 2 | 1.11E-05 | 0.96  | 4.60   | -     | 1339.4  |
| AHQ-1-12, 5351 - 5409       | K.EILVGDVGQTVDDPYATFVK.M                                                | 2167.40069 | 2 | 2.24E-06 | 0.97  | 4.97   | -     | 1606.9  |
| AHQ-1-12, 5887 - 5893       | K.ESKEDLVFIWAPESAPLK.S                                                  | 2335.68256 | 3 | 5.94E-05 | 0.78  | 3.82   | -     | 576.5   |
| AHQ-1-12, 2433 - 2501       | K.HELQANCYEEVKDR.C                                                      | 1792.90812 | 3 | 2.05E-09 | 0.98  | 6.32   | -     | 2116.3  |
| AHQ-1-12, 2491              | K.HELQANCYEEVKDR.C                                                      | 1792.90812 | 2 | 5.59E-04 | 0.89  | 3.87   | -     | 481.8   |
| AHQ-1-12, 2571              | K.HELQANCYEEVKDR.C                                                      | 1792.90812 | 3 | 1.77E-08 | 0.97  | 5.09   | -     | 1973.7  |
| AHQ-1-12, 2573 - 2578       | K.HELQANCYEEVKDR.C                                                      | 1792.90812 | 2 | 2.95E-07 | 0.96  | 4.21   | -     | 1258.7  |
| AHQ-1-12, 2362 - 2425       | K.HELQANCYEEVKDR.C                                                      | 1792.90812 | 2 | 1.44E-06 | 0.98  | 4.96   | -     | 2177.4  |
| AHQ-1-12, 2323 - 2385       | K.HELQANCYEEVKDR.C                                                      | 1792.90812 | 3 | 3.05E-07 | 0.98  | 5.88   | -     | 3112.6  |
| AHQ-1-14 - 2470             | K.HELQANCYEEVKDR.C                                                      | 1792.90812 | 3 | 7.47E-06 | 0.93  | 3.83   | -     | 1537.0  |
| AHQ-1-12, 2950              | K.KAVLFCLSEDKK.N                                                        | 1439.70221 | 2 | 2.99E-04 | 0.84  | 3.57   | -     | 652.7   |
| AHQ-1-12, 2957              | K.KAVLFCLSEDKK.N                                                        | 1439.70221 | 3 | 2.12E-06 | 0.95  | 5.03   | -     | 1217.8  |
| AHQ-1-12, 6221 - 6285       | K.KEDLVFIWAPESAPLK.S                                                    | 1991.31745 | 3 | 2.84E-11 | 0.95  | 5.41   | -     | 1111.9  |
| AHQ-1-13 - 6633             | K.KEDLVFIWAPESAPLK.S                                                    | 1991.31745 | 3 | 1.20E-06 | 0.95  | 5.32   | -     | 1255.5  |
| AHQ-1-13 - 6639             | K.KEDLVFIWAPESAPLK.S                                                    | 1991.31745 | 2 | 2.56E-04 | 0.96  | 5.15   | -     | 1019.7  |
| AHQ-1-12, 6345              | K.KEDLVFIWAPESAPLK.S                                                    | 1991.31745 | 2 | 1.28E-06 | 0.95  | 4.80   | -     | 957.4   |
| AHQ-1-11, 6042 - 6043       | K.KEDLVFIWAPESAPLK.S                                                    | 1991.31745 | 2 | 5.80E-07 | 0.94  | 4.34   | -     | 1013.3  |
| AHQ-1-12, 6217 - 6274       | K.KEDLVFIWAPESAPLK.S                                                    | 1991.31745 | 2 | 2.83E-09 | 0.97  | 5.56   | -     | 1326.7  |
| AHQ-1-12, 6254              | K.KNILEEGKEILVGDVGQTVDDPYATFVK.M                                        | 3192.60499 | 3 | 1.20E-07 | 0.98  | 6.67   | -     | 2071.0  |
| AHQ-1-12, 4002              | K.LGGSVAISLEGKPL                                                        | 1341.57848 | 2 | 9.14E-07 | 0.95  | 4.14   | -     | 1323.1  |
| AHQ-1-14 - 4492 - 4507      | K.LGGSVAISLEGKPL                                                        | 1341.57848 | 2 | 5.36E-04 | 0.89  | 3.54   | -     | 1116.5  |
| AHQ-1-12, 4374 - 4438       | K.LGGSVAISLEGKPL                                                        | 1341.57848 | 2 | 1.43E-07 | 0.95  | 4.11   | -     | 1232.7  |
| AHQ-1-13 - 4532             | K.LGGSVAISLEGKPL                                                        | 1341.57848 | 2 | 4.16E-04 | 0.95  | 4.64   | -     | 985.0   |
| AHQ-1-12, 4231 - 4310       | K.LGGSVAISLEGKPL                                                        | 1341.57848 | 2 | 2.18E-04 | 0.93  | 3.45   | -     | 1416.1  |
| AHQ-1-12, 4437 - 4497       | K.LGGSVAISLEGKPL                                                        | 1341.57848 | 2 | 4.18E-06 | 0.95  | 3.87   | -     | 1220.0  |
| AHQ-1-12, 6283 - 6354       | K.NIILEEGKEILVGDVGQTVDDPYATFVK.M                                        | 3064.43208 | 3 | 2.08E-04 | 0.90  | 5.31   | -     | 764.6   |
| AHQ-1-12, 6635 - 6695       | K.NIILEEGKEILVGDVGQTVDDPYATFVK.M                                        | 3064.43208 | 3 | 6.47E-04 | 0.95  | 5.30   | -     | 1399.6  |
| AHQ-1-13, 6259 - 6335       | K.NIILEEGKEILVGDVGQTVDDPYATFVK.M                                        | 3064.43208 | 3 | 2.90E-12 | 0.97  | 6.37   | -     | 1977.5  |
| AHQ-1-12, 6409 - 6465       | K.NIILEEGKEILVGDVGQTVDDPYATFVK.M                                        | 3064.43208 | 3 | 9.22E-12 | 0.97  | 6.98   | -     | 1522.5  |
| AHQ-1-12, 6690 - 6750       | K.NIILEEGKEILVGDVGQTVDDPYATFVK.M                                        | 3064.43208 | 3 | 2.47E-09 | 0.97  | 6.66   | -     | 1755.6  |
| AHQ-1-12, 3130 - 3251       | R.YALYDATYETK.E                                                         | 1338.44364 | 1 | 3.33E-06 | 0.46  | 2.60   | -     | 332.7   |
| AHQ-1-12, 3119 - 3189       | R.YALYDATYETK.E                                                         | 1338.44364 | 2 | 2.04E-05 | 0.92  | 3.49   | -     | 987.5   |
| AHQ-1-12, 3213              | R.YALYDATYETK.E                                                         | 1338.44364 | 2 | 2.62E-07 | 0.95  | 3.70   | -     | 1219.5  |
| AHQ-1-13, 3294              | R.YALYDATYETK.E                                                         | 1338.44364 | 1 | 1.86E-08 | 0.54  | 2.61   | -     | 298.8   |
| AHQ-1-13 - 3373             | R.YALYDATYETK.E                                                         | 1338.44364 | 1 | 1.58E-06 | 0.47  | 2.70   | -     | 375.0   |
| AHQ-1-11, 3096 - 3155       | R.YALYDATYETK.E                                                         | 1338.44364 | 2 | 4.21E-06 | 0.90  | 3.33   | -     | 938.0   |
| AHQ-1-12, 2866              | R.YALYDATYETKESK.K                                                      | 1682.80875 | 2 | 1.05E-05 | 0.94  | 3.72   | -     | 1344.6  |
| gi 4757826 ref NP_004039.1  | beta-2-microglobulin [Homo sapiens]                                     |            |   |          |       |        |       |         |
| AHQ-1-14 - 6408             | K.SNLFNCYSGFGFHPDIEVDLLK.N                                              | 2556.83155 | 2 | 1.24E-05 | 0.78  | 3.21   | -     | 476.3   |
| AHQ-1-14 - 6415 - 6479      | K.SNLFNCYSGFGFHPDIEVDLLK.N                                              | 2556.83155 | 3 | 1.49E-04 | 0.65  | 3.17   | -     | 306.7   |
| AHQ-1-14 - 6555 - 6559      | K.SNLFNCYSGFGFHPDIEVDLLK.N                                              | 2556.83155 | 3 | 5.47E-07 | 0.83  | 4.32   | -     | 422.5   |
| AHQ-1-14 - 6459 - 6531      | K.SNLFNCYSGFGFHPDIEVDLLKNGER.I                                          | 3013.28710 | 3 | 3.36E-12 | 0.90  | 4.11   | -     | 945.7   |
| AHQ-1-14 - 6107 - 6187      | K.SNLFNCYSGFGFHPDIEVDLLKNGER.I                                          | 3013.28710 | 3 | 6.01E-12 | 0.72  | 3.56   | -     | 516.5   |
| AHQ-1-14 - 6326 - 6387      | K.SNLFNCYSGFGFHPDIEVDLLKNGER.I                                          | 3013.28710 | 3 | 1.30E-08 | 0.84  | 3.82   | -     | 760.6   |
| AHQ-1-14 - 2142 - 2274      | K.VEHSDLSFSK.D                                                          | 1149.23530 | 1 | 2.40E-05 | 0.82  | 3.21   | -     | 613.3   |
| AHQ-1-14 - 1992 - 2058      | R.VNHVTLSPQK.I                                                          | 1123.28735 | 2 | 1.58E-04 | 0.82  | 2.70   | -     | 716.5   |
| AHQ-1-14 - 1844 - 1903      | R.VNHVTLSPQK.I                                                          | 1123.28735 | 1 | 4.20E-04 | 0.48  | 2.51   | -     | 347.4   |
| AHQ-1-14 - 2190 - 2216      | R.VNHVTLSPQK.I                                                          | 1123.28735 | 1 | 1.22E-08 | 0.66  | 2.93   | -     | 337.7   |
| gi 4557677 ref NP_000203.1  | integrin beta chain, beta 3 precursor; platelet glycoprotein IIIa precu |            |   |          |       |        |       |         |
| AHQ-1-3, 5505               | R.CDLKENLLKDNCAPISEIFPVSAR.V                                            | 2938.23689 | 3 | 3.76E-12 | 18.94 | 230.30 | 37.40 | 87185.6 |
| AHQ-1-6, 5344               | R.CDLKENLLKDNCAPISEIFPVSAR.V                                            | 2938.23689 | 3 | 3.43E-06 | 0.89  | 4.27   | -     | 841.3   |
| AHQ-1-4, 5524 - 5596        | R.CDLKENLLKDNCAPISEIFPVSAR.V                                            | 2938.23689 | 3 | 6.67E-05 | 0.79  | 3.66   | -     | 709.9   |
| AHQ-1-9, 5332               | R.CDLKENLLKDNCAPISEIFPVSAR.V                                            | 2938.23689 | 3 | 7.19E-04 | 0.91  | 4.79   | -     | 820.5   |
| AHQ-1-3, 5377 - 5443        | R.CDLKENLLKDNCAPISEIFPVSAR.V                                            | 2938.23689 | 3 | 9.62E-04 | 0.93  | 4.37   | -     | 1340.8  |
| AHQ-1-3, 5374 - 5442        | R.CDLKENLLKDNCAPISEIFPVSAR.V                                            | 2938.23689 | 2 | 8.62E-06 | 0.86  | 3.69   | -     | 682.2   |
| AHQ-1-1, 5516               | R.CDLKENLLKDNCAPISEIFPVSAR.V                                            | 2938.23689 | 3 | 1.21E-06 | 0.90  | 4.61   | -     | 773.8   |
| AHQ-1-2, 4586               | R.CGPGWLGSCQCESEEDYRPSQDQCESPR.E                                        | 3380.49342 | 3 | 7.17E-05 | 0.92  | 4.80   | -     | 1114.0  |
|                             |                                                                         |            |   | 1.05E-04 | 0.87  | 4.46   | -     | 409.2   |

|                                                                                                        |                                             |            |   |          |      |       |       |        |
|--------------------------------------------------------------------------------------------------------|---------------------------------------------|------------|---|----------|------|-------|-------|--------|
| AHQ-1-5, 4441                                                                                          | R.CGPGWLGSCQCESEEDYRPSQQDECSPR.E            | 3380.49342 | 3 | 7.98E-07 | 0.52 | 3.00  | -     | 481.9  |
| AHQ-1-4, 4492 - 4511                                                                                   | R.CGPGWLGSCQCESEEDYRPSQQDECSPR.E            | 3380.49342 | 3 | 9.03E-06 | 0.72 | 3.38  | -     | 427.3  |
| AHQ-1-1, 4429                                                                                          | R.CGPGWLGSCQCESEEDYRPSQQDECSPR.E            | 3380.49342 | 3 | 3.30E-07 | 0.86 | 4.12  | -     | 613.8  |
| AHQ-1-3, 4430 - 4502                                                                                   | R.CGPGWLGSCQCESEEDYRPSQQDECSPR.E            | 3380.49342 | 3 | 4.09E-09 | 0.87 | 4.42  | -     | 545.5  |
| AHQ-1-6, 4358                                                                                          | R.CGPGWLGSCQCESEEDYRPSQQDECSPR.E            | 3380.49342 | 3 | 1.40E-07 | 0.82 | 4.13  | -     | 335.1  |
| AHQ-1-1, 4533 - 4551                                                                                   | R.DAPEGGFDAIM*QATVCDEK.I                    | 2072.21656 | 2 | 8.50E-05 | 0.95 | 4.32  | -     | 1147.8 |
| AHQ-1-3, 5998 - 6017                                                                                   | R.DAPEGGFDAIMQATVCDEK.I                     | 2056.21716 | 2 | 2.50E-05 | 0.96 | 5.29  | -     | 830.3  |
| AHQ-1-3, 5930 - 5950                                                                                   | R.DAPEGGFDAIMQATVCDEK.I                     | 2056.21716 | 2 | 5.79E-07 | 0.90 | 3.69  | -     | 715.7  |
| AHQ-1-1, 5885 - 5925                                                                                   | R.DAPEGGFDAIMQATVCDEK.I                     | 2056.21716 | 2 | 2.21E-09 | 0.92 | 4.16  | -     | 855.0  |
| AHQ-1-3, 4549 - 4619                                                                                   | R.DAPEGGFDAIM*QATVCDEK.I                    | 2072.21656 | 2 | 4.82E-05 | 0.89 | 3.75  | -     | 653.3  |
| AHQ-1-3, 6098 - 6167                                                                                   | R.DAPEGGFDAIMQATVCDEK.I                     | 2056.21716 | 2 | 2.09E-06 | 0.96 | 5.19  | -     | 692.1  |
| AHQ-1-3, 6030 - 6099                                                                                   | R.DAPEGGFDAIMQATVCDEK.I                     | 2056.21716 | 2 | 1.04E-05 | 0.93 | 4.25  | -     | 944.6  |
| AHQ-1-3, 5009                                                                                          | K.DDLWSIQNLGK.L                             | 1390.52332 | 2 | 5.49E-07 | 0.93 | 4.18  | -     | 906.6  |
| AHQ-1-4, 5094                                                                                          | K.DDLWSIQNLGK.L                             | 1390.52332 | 2 | 3.50E-04 | 0.93 | 3.92  | -     | 797.4  |
| AHQ-1-1, 5043                                                                                          | K.DDLWSIQNLGK.L                             | 1390.52332 | 2 | 1.50E-04 | 0.90 | 3.98  | -     | 702.0  |
| AHQ-1-4, 5104                                                                                          | K.DDLWSIQNLGK.L                             | 1390.52332 | 1 | 2.05E-06 | 0.55 | 2.59  | -     | 430.1  |
| AHQ-1-2, 5174                                                                                          | K.DDLWSIQNLGK.L                             | 1390.52332 | 2 | 1.07E-05 | 0.79 | 2.94  | -     | 856.7  |
| AHQ-1-5, 4521 - 4523                                                                                   | K.DNCAPESIEFPVSEAR.V                        | 1822.93099 | 2 | 7.89E-05 | 0.90 | 3.48  | -     | 1048.1 |
| AHQ-1-1, 4508                                                                                          | K.DNCAPESIEFPVSEAR.V                        | 1822.93099 | 2 | 4.06E-06 | 0.54 | 2.73  | -     | 572.3  |
| AHQ-1-3, 4431 - 4506                                                                                   | K.DNCAPESIEFPVSEAR.V                        | 1822.93099 | 2 | 3.22E-04 | 0.95 | 3.81  | -     | 1482.0 |
| AHQ-1-9, 4396                                                                                          | K.DNCAPESIEFPVSEAR.V                        | 1822.93099 | 2 | 4.77E-04 | 0.92 | 3.09  | -     | 1450.1 |
| AHQ-1-6, 4427                                                                                          | K.DNCAPESIEFPVSEAR.V                        | 1822.93099 | 2 | 3.76E-06 | 0.72 | 3.03  | -     | 667.5  |
| AHQ-1-7, 3232 - 3308                                                                                   | K.EATSTFTNITYR.G                            | 1404.50685 | 2 | 1.96E-07 | 0.42 | 2.59  | -     | 511.7  |
| AHQ-1-6, 3286                                                                                          | K.EATSTFTNITYR.G                            | 1404.50685 | 2 | 3.76E-06 | 0.51 | 2.68  | -     | 343.0  |
| AHQ-1-1, 3467                                                                                          | K.EATSTFTNITYR.G                            | 1404.50685 | 2 | 3.68E-06 | 0.83 | 3.30  | -     | 664.9  |
| AHQ-1-4, 3426                                                                                          | K.EATSTFTNITYR.G                            | 1404.50685 | 2 | 2.72E-05 | 0.84 | 2.92  | -     | 915.8  |
| AHQ-1-5, 3294                                                                                          | K.EATSTFTNITYR.G                            | 1404.50685 | 2 | 2.42E-07 | 0.64 | 2.61  | -     | 555.6  |
| AHQ-1-2, 2466 - 2467                                                                                   | R.FQYYEDSSGK.S                              | 1224.25749 | 1 | 7.76E-04 | 0.61 | 2.30  | -     | 622.1  |
| AHQ-1-4, 2338 - 2344                                                                                   | R.FQYYEDSSGK.S                              | 1224.25749 | 1 | 8.36E-05 | 0.40 | 1.86  | -     | 534.7  |
| AHQ-1-3, 3662 - 3663                                                                                   | R.GECLCGQCCHSSDFGK.I                        | 2006.16137 | 3 | 1.74E-06 | 0.83 | 3.66  | -     | 655.4  |
| AHQ-1-2, 3805                                                                                          | R.GECLCGQCCHSSDFGK.I                        | 2006.16137 | 2 | 8.00E-09 | 0.87 | 3.57  | -     | 727.7  |
| AHQ-1-6, 3575                                                                                          | R.GECLCGQCCHSSDFGK.I                        | 2006.16137 | 2 | 1.31E-05 | 0.77 | 3.02  | -     | 875.9  |
| AHQ-1-3, 3655 - 3658                                                                                   | R.GECLCGQCCHSSDFGK.I                        | 2006.16137 | 2 | 2.03E-06 | 0.96 | 4.25  | -     | 1491.4 |
| AHQ-1-4, 3702 - 3735                                                                                   | R.GECLCGQCCHSSDFGK.I                        | 2006.16137 | 2 | 2.66E-07 | 0.94 | 4.14  | -     | 1190.6 |
| AHQ-1-1, 3707 - 3776                                                                                   | R.GECLCGQCCHSSDFGK.I                        | 2006.16137 | 2 | 2.89E-07 | 0.92 | 3.52  | -     | 1260.0 |
| AHQ-1-5, 3609                                                                                          | R.GECLCGQCCHSSDFGK.I                        | 2006.16137 | 2 | 4.37E-09 | 0.95 | 4.34  | -     | 1297.5 |
| AHQ-1-3, 4354                                                                                          | R.GKCEGSCVCIQPGSYGDTCEKCPCTPDACTFKK.E       | 4028.42584 | 3 | 2.12E-05 | 0.90 | 4.71  | -     | 579.8  |
| AHQ-1-4, 1876 - 1946                                                                                   | K.GSGDSSQVTVSPQR.I                          | 1533.58302 | 2 | 2.87E-04 | 0.40 | 2.76  | -     | 456.3  |
| AHQ-1-4, 2012 - 2078                                                                                   | K.GSGDSSQVTVSPQR.I                          | 1533.58302 | 2 | 8.38E-04 | 0.78 | 3.37  | -     | 703.6  |
| AHQ-1-3, 2002 - 2067                                                                                   | K.GSGDSSQVTVSPQR.I                          | 1533.58302 | 2 | 4.64E-05 | 0.58 | 3.20  | -     | 664.2  |
| AHQ-1-1, 2081                                                                                          | K.GSGDSSQVTVSPQR.I                          | 1533.58302 | 2 | 5.77E-04 | 0.70 | 2.69  | -     | 883.6  |
| AHQ-1-7, 1778 - 1840                                                                                   | K.GSGDSSQVTVSPQR.I                          | 1533.58302 | 2 | 2.77E-04 | 0.81 | 3.25  | -     | 978.4  |
| AHQ-1-2, 2811                                                                                          | K.HVLTLDQVTR.F                              | 1283.45912 | 2 | 9.83E-08 | 0.88 | 3.50  | -     | 533.1  |
| AHQ-1-6, 2592                                                                                          | K.HVLTLDQVTR.F                              | 1283.45912 | 2 | 3.64E-05 | 0.86 | 3.48  | -     | 556.2  |
| AHQ-1-4, 2712                                                                                          | K.HVLTLDQVTR.F                              | 1283.45912 | 2 | 1.67E-05 | 0.82 | 3.33  | -     | 537.5  |
| AHQ-1-3, 2534                                                                                          | K.HVLTLDQVTR.F                              | 1283.45912 | 2 | 1.10E-05 | 0.93 | 3.41  | -     | 901.4  |
| AHQ-1-3, 2703 - 2705                                                                                   | K.HVLTLDQVTR.F                              | 1283.45912 | 2 | 3.39E-07 | 0.92 | 3.45  | -     | 768.4  |
| AHQ-1-7, 2606                                                                                          | K.HVLTLDQVTR.F                              | 1283.45912 | 2 | 6.37E-04 | 0.78 | 3.14  | -     | 427.6  |
| AHQ-1-5, 2589                                                                                          | K.HVLTLDQVTR.F                              | 1283.45912 | 2 | 3.16E-07 | 0.94 | 3.79  | -     | 925.9  |
| AHQ-1-4, 2715                                                                                          | K.HVLTLDQVTR.F                              | 1283.45912 | 1 | 6.40E-04 | 0.39 | 2.11  | -     | 400.5  |
| AHQ-1-4, 2719                                                                                          | K.HVLTLDQVTR.F                              | 1283.45912 | 1 | 1.83E-04 | 0.56 | 2.75  | -     | 312.5  |
| AHQ-1-8, 2473                                                                                          | K.HVLTLDQVTR.F                              | 1283.45912 | 2 | 1.09E-06 | 0.90 | 3.55  | -     | 636.9  |
| AHQ-1-3, 4605                                                                                          | K.IGDTVSFSIAEK.V                            | 1267.41009 | 2 | 4.82E-05 | 0.93 | 3.66  | -     | 951.0  |
| AHQ-1-3, 4414 - 4482                                                                                   | K.IGDTVSFSIAEK.V                            | 1267.41009 | 2 | 1.52E-06 | 0.79 | 2.60  | -     | 704.3  |
| AHQ-1-1, 4085                                                                                          | K.IGDTVSFSIAEK.V                            | 1267.41009 | 2 | 1.25E-08 | 0.92 | 3.34  | -     | 1079.9 |
| AHQ-1-3, 3667                                                                                          | K.IGDTVSFSIAEK.V                            | 1267.41009 | 2 | 6.70E-05 | 0.93 | 3.03  | -     | 1291.0 |
| AHQ-1-3, 5161                                                                                          | R.LAGVQPNDDGQCHVGSNDNHYSASTTM*DYPPLGLMTEK.L | 4013.35457 | 3 | 7.28E-05 | 0.83 | 4.36  | -     | 844.2  |
| AHQ-1-3, 5523 - 5591                                                                                   | R.LAGVQPNDDGQCHVGSNDNHYSASTTMDYPSLGLMTEK.L  | 3997.35517 | 3 | 5.44E-11 | 0.96 | 6.06  | -     | 1014.2 |
| AHQ-1-4, 5584                                                                                          | R.LAGVQPNDDGQCHVGSNDNHYSASTTMDYPSLGLMTEK.L  | 3997.35517 | 3 | 6.74E-04 | 0.89 | 4.44  | -     | 765.4  |
| AHQ-1-3, 5393 - 5457                                                                                   | R.LAGVQPNDDGQCHVGSNDNHYSASTTMDYPSLGLMTEK.L  | 3997.35517 | 3 | 5.77E-04 | 0.80 | 3.56  | -     | 677.3  |
| AHQ-1-2, 4126 - 4141                                                                                   | R.NDASHLLVFTTDAK.T                          | 1532.67977 | 2 | 7.74E-06 | 0.91 | 3.85  | -     | 883.0  |
| AHQ-1-1, 4501                                                                                          | R.NDASHLLVFTTDAK.T                          | 1532.67977 | 2 | 8.68E-06 | 0.93 | 3.90  | -     | 986.4  |
| AHQ-1-6, 3768 - 3774                                                                                   | R.NDASHLLVFTTDAK.T                          | 1532.67977 | 2 | 6.93E-06 | 0.96 | 4.65  | -     | 1404.7 |
| AHQ-1-3, 3950 - 3959                                                                                   | R.NDASHLLVFTTDAK.T                          | 1532.67977 | 3 | 4.80E-06 | 0.97 | 5.29  | -     | 1823.9 |
| AHQ-1-5, 3805 - 3821                                                                                   | R.NDASHLLVFTTDAK.T                          | 1532.67977 | 2 | 5.93E-09 | 0.97 | 5.12  | -     | 1626.8 |
| AHQ-1-3, 4299                                                                                          | R.NDASHLLVFTTDAK.T                          | 1532.67977 | 2 | 7.28E-06 | 0.88 | 3.53  | -     | 822.3  |
| AHQ-1-1, 4049 - 4073                                                                                   | R.NDASHLLVFTTDAK.T                          | 1532.67977 | 2 | 9.72E-10 | 0.97 | 5.28  | -     | 1366.6 |
| AHQ-1-4, 4484                                                                                          | R.NDASHLLVFTTDAK.T                          | 1532.67977 | 2 | 1.12E-04 | 0.85 | 3.46  | -     | 753.1  |
| AHQ-1-3, 3942 - 3947                                                                                   | R.NDASHLLVFTTDAK.T                          | 1532.67977 | 2 | 8.78E-09 | 0.97 | 4.41  | -     | 1728.8 |
| AHQ-1-3, 4449 - 4459                                                                                   | R.NDASHLLVFTTDAK.T                          | 1532.67977 | 2 | 3.76E-12 | 0.96 | 4.52  | -     | 1223.3 |
| AHQ-1-5, 4405                                                                                          | R.NDASHLLVFTTDAK.T                          | 1532.67977 | 2 | 1.02E-08 | 0.91 | 3.86  | -     | 870.4  |
| AHQ-1-8, 3462                                                                                          | R.NDASHLLVFTTDAK.T                          | 1532.67977 | 2 | 1.39E-09 | 0.97 | 5.19  | -     | 1281.2 |
| AHQ-1-4, 4522 - 4528                                                                                   | K.SILYVVEEPCPK.G                            | 1564.78173 | 2 | 2.57E-06 | 0.85 | 2.90  | -     | 996.3  |
| AHQ-1-1, 4513 - 4515                                                                                   | K.SILYVVEEPCPK.G                            | 1564.78173 | 2 | 1.89E-04 | 0.91 | 3.93  | -     | 845.9  |
| AHQ-1-3, 2922                                                                                          | R.TDTCM*SSNGLLCSGR.G                        | 1677.81726 | 2 | 2.83E-08 | 0.93 | 3.70  | -     | 1340.3 |
| AHQ-1-5, 2815                                                                                          | R.TDTCM*SSNGLLCSGR.G                        | 1677.81726 | 2 | 2.97E-06 | 0.85 | 3.08  | -     | 1077.0 |
| AHQ-1-5, 2910                                                                                          | R.TDTCM*SSNGLLCSGR.G                        | 1677.81726 | 2 | 2.14E-06 | 0.88 | 3.34  | -     | 969.8  |
| AHQ-1-3, 3007                                                                                          | R.TDTCM*SSNGLLCSGR.G                        | 1677.81726 | 2 | 6.96E-09 | 0.92 | 3.66  | -     | 1042.6 |
| AHQ-1-4, 3776                                                                                          | R.TDTCM*SSNGLLCSGR.G                        | 1661.81786 | 2 | 2.26E-07 | 0.92 | 3.56  | -     | 1062.9 |
| AHQ-1-7, 3585                                                                                          | R.TDTCM*SSNGLLCSGR.G                        | 1661.81786 | 2 | 5.73E-04 | 0.50 | 2.52  | -     | 621.4  |
| AHQ-1-4, 3602 - 3651                                                                                   | R.TDTCM*SSNGLLCSGR.G                        | 1661.81786 | 2 | 1.86E-09 | 0.81 | 3.19  | -     | 731.8  |
| AHQ-1-3, 3635 - 3702                                                                                   | R.TDTCM*SSNGLLCSGR.G                        | 1661.81786 | 2 | 6.00E-09 | 0.74 | 2.78  | -     | 605.3  |
| AHQ-1-4, 3070                                                                                          | R.TDTCM*SSNGLLCSGR.G                        | 1677.81726 | 2 | 3.52E-07 | 0.66 | 2.65  | -     | 464.3  |
| AHQ-1-1, 3679                                                                                          | R.TDTCM*SSNGLLCSGR.G                        | 1661.81786 | 2 | 7.10E-07 | 0.88 | 3.50  | -     | 899.7  |
| AHQ-1-4, 2972                                                                                          | R.TDTCM*SSNGLLCSGR.G                        | 1677.81726 | 2 | 1.64E-08 | 0.96 | 4.05  | -     | 1661.4 |
| AHQ-1-6, 3479 - 3495                                                                                   | R.TDTCM*SSNGLLCSGR.G                        | 1661.81786 | 2 | 1.01E-07 | 0.77 | 2.75  | -     | 750.7  |
| AHQ-1-3, 2830                                                                                          | R.TDTCM*SSNGLLCSGR.G                        | 1677.81726 | 2 | 1.98E-06 | 0.87 | 3.29  | -     | 935.3  |
| AHQ-1-4, 2882                                                                                          | R.TDTCM*SSNGLLCSGR.G                        | 1677.81726 | 2 | 5.20E-08 | 0.93 | 3.77  | -     | 1172.2 |
| AHQ-1-1, 2904                                                                                          | R.TDTCM*SSNGLLCSGR.G                        | 1677.81726 | 2 | 2.97E-06 | 0.96 | 4.42  | -     | 1327.7 |
| AHQ-1-1, 2141                                                                                          | R.VLEDRPLSDK.G                              | 1172.31354 | 2 | 1.18E-05 | 0.92 | 3.72  | -     | 1054.3 |
| AHQ-1-3, 1914 - 1989                                                                                   | R.VLEDRPLSDK.G                              | 1172.31354 | 2 | 2.07E-05 | 0.93 | 3.73  | -     | 967.5  |
| AHQ-1-7, 1817                                                                                          | R.VLEDRPLSDK.G                              | 1172.31354 | 2 | 3.84E-04 | 0.85 | 2.76  | -     | 1119.8 |
| AHQ-1-4, 1911                                                                                          | R.VLEDRPLSDK.G                              | 1172.31354 | 2 | 8.16E-06 | 0.85 | 3.26  | -     | 807.6  |
| AHQ-1-3, 2791                                                                                          | R.VLEDRPLSDKGGSDSSQVTVSPQR.I                | 2686.87396 | 3 | 6.17E-09 | 0.93 | 4.65  | -     | 1472.9 |
| AHQ-1-2, 2891                                                                                          | R.VLEDRPLSDKGGSDSSQVTVSPQR.I                | 2686.87396 | 3 | 4.49E-09 | 0.93 | 4.30  | -     | 1660.8 |
| AHQ-1-3, 3275 - 3346                                                                                   | K.WDTANNPLYK.E                              | 1222.33111 | 2 | 9.18E-04 | 0.81 | 3.20  | -     | 512.4  |
| AHQ-1-1, 3427                                                                                          | K.WDTANNPLYK.E                              | 1222.33111 | 2 | 7.16E-05 | 0.66 | 2.86  | -     | 567.6  |
| AHQ-1-4, 3740 - 3766                                                                                   | K.YCEDDDFSCVR.Y                             | 1514.59674 | 2 | 1.10E-05 | 0.91 | 3.24  | -     | 970.1  |
| AHQ-1-3, 3691 - 3761                                                                                   | K.YCEDDDFSCVR.Y                             | 1514.59674 | 2 | 7.86E-04 | 0.93 | 3.63  | -     | 1151.8 |
| AHQ-1-1, 3733                                                                                          | K.YCEDDDFSCVR.Y                             | 1514.59674 | 2 | 3.68E-05 | 0.94 | 3.34  | -     | 1281.4 |
| gjl18104967[ref][NP_000953.2] prostaglandin-endoperoxide synthase 1 isoform 1 precursor; prostaglandin |                                             |            |   | 4.20E-12 | 7.08 | 80.27 | 23.20 | 6886.0 |
| AHQ-1-6, 3966                                                                                          | K.AEHPTWGDQLFQTR.L                          | 1917.02765 | 2 | 3.50E-07 | 0.76 | 3.11  | -     | 466.5  |
| AHQ-1-6, 3883                                                                                          | K.ALGHGVDLGHYGDNLER.Q                       | 1937.10524 | 3 | 6.76E-05 | 0.80 | 3.42  | -     | 774.8  |
| AHQ-1-6, 3874                                                                                          | K.ALGHGVDLGHYGDNLER.Q                       | 1937.10524 | 2 | 7.05E-04 | 0.95 | 4.93  | -     | 1140.0 |
| AHQ-1-6, 5192                                                                                          | R.FGMKPYTFSQELVGEK.E                        | 1862.13845 | 2 | 3.68E-08 | 0.91 | 3.98  | -     | 579.9  |
| AHQ-1-6, 7014 - 7079                                                                                   | K.GLLGNPCISPEYKPFSTFGGEVGFNIVK.T            | 3069.47853 | 3 | 4.20E-08 | 0.87 | 4.49  | -     | 451.3  |
| AHQ-1-6, 7324                                                                                          | K.IVIEEYVQQLSGYFLQK.F                       | 2171.52045 | 3 | 4.20E-12 | 0.96 | 5.44  | -     | 1494.5 |

|                             |                                                                       |            |   |          |       |        |       |         |
|-----------------------------|-----------------------------------------------------------------------|------------|---|----------|-------|--------|-------|---------|
| AHQ-1-6, 3326 - 3396        | R.VPDASQDDGPAVERPSTEL                                                 | 1984.06747 | 2 | 2.63E-09 | 0.95  | 4.85   | -     | 1069.7  |
| AHQ-1-6, 5454 - 5484        | K.YQVLGDGEMYPSPVEEAPVLM*HYPR.G                                        | 2838.20739 | 3 | 4.36E-04 | 0.89  | 4.79   | -     | 677.3   |
| AHQ-1-6, 5987 - 6006        | K.YQVLGDGEMYPSPVEEAPVLMHYPR.G                                         | 2822.20799 | 3 | 1.46E-10 | 0.94  | 5.41   | -     | 799.6   |
| gi 27498267 ref XP_209737.1 | similar to tyrosine 3/tryptophan 5 -monooxygenase activation protein, |            |   | 4.60E-12 | 3.56  | 40.39  | 33.70 | 11063.6 |
| AHQ-1-11, 5622              | R.DICNDVLSLLEK.F                                                      | 1420.61093 | 2 | 6.08E-08 | 0.91  | 3.60   | -     | 975.7   |
| AHQ-1-13, 5740              | R.DICNDVLSLLEK.F                                                      | 1420.61093 | 2 | 2.38E-05 | 0.96  | 3.89   | -     | 1613.0  |
| AHQ-1-13- , 6908            | R.DICNDVLSLLEK.F                                                      | 1420.61093 | 2 | 1.95E-06 | 0.98  | 5.69   | -     | 2131.2  |
| AHQ-1-13- , 6095 - 6100     | R.DICNDVLSLLEK.F                                                      | 1420.61093 | 2 | 1.12E-06 | 0.95  | 3.81   | -     | 1551.1  |
| AHQ-1-13, 5749              | R.DICNDVLSLLEK.F                                                      | 1420.61093 | 1 | 5.48E-06 | 0.20  | 2.16   | -     | 531.4   |
| AHQ-1-10, 5853              | R.DICNDVLSLLEK.F                                                      | 1420.61093 | 2 | 5.44E-06 | 0.86  | 2.98   | -     | 1020.0  |
| AHQ-1-10, 5515              | R.DICNDVLSLLEK.F                                                      | 1420.61093 | 1 | 3.75E-10 | 0.76  | 2.75   | -     | 800.0   |
| AHQ-1-10, 4763 - 4821       | K.GIVDQSQQAYQEAFEISK.K                                                | 2042.19176 | 2 | 1.17E-08 | 0.98  | 5.57   | -     | 1636.6  |
| AHQ-1-10, 4881 - 4944       | K.GIVDQSQQAYQEAFEISK.K                                                | 2042.19176 | 2 | 4.87E-11 | 0.98  | 5.90   | -     | 1891.4  |
| AHQ-1-10, 4980 - 5037       | K.GIVDQSQQAYQEAFEISK.K                                                | 2042.19176 | 2 | 2.76E-07 | 0.94  | 4.30   | -     | 1212.1  |
| AHQ-1-10, 5096 - 5151       | K.GIVDQSQQAYQEAFEISK.K                                                | 2042.19176 | 2 | 3.60E-09 | 0.97  | 5.13   | -     | 1639.0  |
| AHQ-1-10, 5217 - 5281       | K.GIVDQSQQAYQEAFEISK.K                                                | 2042.19176 | 2 | 4.20E-06 | 0.97  | 5.54   | -     | 1391.4  |
| AHQ-1-10, 4720 - 4731       | K.GIVDQSQQAYQEAFEISK.K                                                | 2042.19176 | 3 | 7.00E-10 | 0.99  | 7.15   | -     | 2797.0  |
| AHQ-1-10, 5617 - 5680       | K.GIVDQSQQAYQEAFEISK.K                                                | 2042.19176 | 2 | 1.91E-05 | 0.84  | 3.84   | -     | 657.0   |
| AHQ-1-10, 4659 - 4707       | K.GIVDQSQQAYQEAFEISK.K                                                | 2042.19176 | 2 | 2.86E-08 | 0.98  | 5.66   | -     | 1985.6  |
| AHQ-1-10, 5925 - 5985       | K.GIVDQSQQAYQEAFEISK.K                                                | 2042.19176 | 2 | 1.83E-07 | 0.93  | 4.14   | -     | 1034.9  |
| AHQ-1-10, 6504              | K.GIVDQSQQAYQEAFEISK.K                                                | 2042.19176 | 2 | 8.19E-09 | 0.96  | 5.27   | -     | 1086.8  |
| AHQ-1-10, 4451              | K.GIVDQSQQAYQEAFEISK.K                                                | 2042.19176 | 2 | 1.92E-09 | 0.95  | 4.80   | -     | 1078.2  |
| AHQ-1-11, 4842              | K.GIVDQSQQAYQEAFEISK.K                                                | 2042.19176 | 2 | 2.39E-07 | 0.96  | 5.50   | -     | 990.3   |
| AHQ-1-11, 4848              | K.GIVDQSQQAYQEAFEISK.K                                                | 2042.19176 | 3 | 2.36E-05 | 0.96  | 4.93   | -     | 1770.4  |
| AHQ-1-11, 5012 - 5088       | K.GIVDQSQQAYQEAFEISK.K                                                | 2042.19176 | 2 | 1.72E-04 | 0.69  | 3.06   | -     | 488.0   |
| AHQ-1-11, 5248              | K.GIVDQSQQAYQEAFEISK.K                                                | 2042.19176 | 2 | 1.67E-07 | 0.97  | 5.59   | -     | 1245.7  |
| AHQ-1-1, 5384               | K.GIVDQSQQAYQEAFEISK.K                                                | 2042.19176 | 2 | 1.61E-05 | 0.94  | 4.59   | -     | 990.7   |
| AHQ-1-12, 4954 - 5013       | K.GIVDQSQQAYQEAFEISK.K                                                | 2042.19176 | 2 | 3.34E-07 | 0.97  | 5.50   | -     | 1662.7  |
| AHQ-1-12, 5010              | K.GIVDQSQQAYQEAFEISK.K                                                | 2042.19176 | 2 | 7.55E-09 | 0.96  | 5.26   | -     | 1264.2  |
| AHQ-1-12, 5018              | K.GIVDQSQQAYQEAFEISK.K                                                | 2042.19176 | 3 | 1.46E-08 | 0.97  | 5.15   | -     | 2241.1  |
| AHQ-1-13, 4632              | K.GIVDQSQQAYQEAFEISK.K                                                | 2042.19176 | 2 | 1.30E-10 | 0.96  | 5.00   | -     | 1348.2  |
| AHQ-1-13, 4715              | K.GIVDQSQQAYQEAFEISK.K                                                | 2042.19176 | 2 | 1.01E-09 | 0.96  | 4.65   | -     | 1335.6  |
| AHQ-1-13, 4959 - 5028       | K.GIVDQSQQAYQEAFEISK.K                                                | 2042.19176 | 2 | 5.87E-10 | 0.97  | 5.35   | -     | 1439.9  |
| AHQ-1-13, 4968 - 4988       | K.GIVDQSQQAYQEAFEISK.K                                                | 2042.19176 | 3 | 1.65E-09 | 0.98  | 6.13   | -     | 2126.8  |
| AHQ-1-13, 5088 - 5152       | K.GIVDQSQQAYQEAFEISK.K                                                | 2042.19176 | 2 | 5.20E-05 | 0.91  | 4.12   | -     | 799.8   |
| AHQ-1-13, 5345              | K.GIVDQSQQAYQEAFEISK.K                                                | 2042.19176 | 2 | 4.60E-12 | 0.97  | 5.27   | -     | 1748.3  |
| AHQ-1-10, 4303 - 4367       | K.GIVDQSQQAYQEAFEISK.K                                                | 2042.19176 | 2 | 5.64E-09 | 0.96  | 4.47   | -     | 1442.6  |
| AHQ-1-13- , 5676            | K.GIVDQSQQAYQEAFEISK.K                                                | 2042.19176 | 2 | 7.49E-10 | 0.97  | 5.48   | -     | 1336.5  |
| AHQ-1-14, 5940              | K.GIVDQSQQAYQEAFEISK.K                                                | 2042.19176 | 2 | 1.02E-07 | 0.96  | 5.10   | -     | 1158.2  |
| AHQ-1-13- , 5433 - 5501     | K.GIVDQSQQAYQEAFEISK.K                                                | 2042.19176 | 2 | 4.41E-09 | 0.97  | 5.90   | -     | 1381.4  |
| AHQ-1-13- , 4852            | K.GIVDQSQQAYQEAFEISK.K                                                | 2042.19176 | 2 | 4.04E-11 | 0.95  | 4.68   | -     | 1376.7  |
| AHQ-1-13- , 4960            | K.GIVDQSQQAYQEAFEISK.K                                                | 2042.19176 | 2 | 2.48E-10 | 0.96  | 4.65   | -     | 1223.9  |
| AHQ-1-13- , 5224 - 5267     | K.GIVDQSQQAYQEAFEISK.K                                                | 2042.19176 | 2 | 8.48E-08 | 0.97  | 5.98   | -     | 1283.8  |
| AHQ-1-13- , 5235 - 5243     | K.GIVDQSQQAYQEAFEISK.K                                                | 2042.19176 | 3 | 1.43E-08 | 0.99  | 7.84   | -     | 3166.3  |
| AHQ-1-14- , 5118            | K.GIVDQSQQAYQEAFEISK.K                                                | 2042.19176 | 2 | 1.08E-07 | 0.97  | 5.11   | -     | 1421.8  |
| AHQ-1-10, 4341              | K.GIVDQSQQAYQEAFEISK.E                                                | 2170.36467 | 3 | 8.81E-04 | 0.77  | 3.25   | -     | 785.2   |
| AHQ-1-10, 4335              | K.GIVDQSQQAYQEAFEISK.E                                                | 2170.36467 | 2 | 9.67E-06 | 0.85  | 4.17   | -     | 438.7   |
| AHQ-1-11, 4363 - 4368       | K.KGIVDQSQQAYQEAFEISK.K                                               | 2170.36467 | 2 | 9.71E-06 | 0.98  | 6.42   | -     | 1784.3  |
| AHQ-1-13- , 4727            | K.KGIVDQSQQAYQEAFEISK.K                                               | 2170.36467 | 2 | 1.08E-06 | 0.98  | 5.58   | -     | 1910.6  |
| gi 4507357 ref NP_003555.1  | transglutinin 2; SM22-alpha homolog [Homo sapiens]                    |            |   | 4.74E-12 | 12.01 | 150.27 | 66.80 | 22391.3 |
| AHQ-1-11, 5486 - 5559       | R.DDGLFSGDPNWFPK.K                                                    | 1595.69288 | 2 | 7.21E-09 | 0.97  | 4.91   | -     | 1630.6  |
| AHQ-1-12, 5669 - 5722       | R.DDGLFSGDPNWFPK.K                                                    | 1595.69288 | 2 | 1.90E-05 | 0.92  | 3.60   | -     | 1003.1  |
| AHQ-1-12, 5877              | R.DDGLFSGDPNWFPK.K                                                    | 1595.69288 | 2 | 2.24E-04 | 0.94  | 4.27   | -     | 1153.9  |
| AHQ-1-12, 5731 - 5779       | R.DDGLFSGDPNWFPK.K                                                    | 1595.69288 | 2 | 2.99E-06 | 0.96  | 4.42   | -     | 1314.8  |
| AHQ-1-11, 5707              | R.DDGLFSGDPNWFPK.K                                                    | 1595.69288 | 2 | 4.63E-04 | 0.94  | 4.23   | -     | 923.2   |
| AHQ-1-11, 5614 - 5647       | R.DDGLFSGDPNWFPK.K                                                    | 1595.69288 | 2 | 8.56E-09 | 0.96  | 4.40   | -     | 1472.9  |
| AHQ-1-11, 6046              | K.DGTVLCELINALYPEGQAPVK.K                                             | 2289.59066 | 2 | 2.76E-06 | 0.89  | 3.87   | -     | 801.0   |
| AHQ-1-13, 5961 - 5972       | K.DGTVLCELINALYPEGQAPVK.K                                             | 2289.59066 | 2 | 8.67E-06 | 0.74  | 3.30   | -     | 493.9   |
| AHQ-1-13- , 6359            | K.DGTVLCELINALYPEGQAPVK.K                                             | 2289.59066 | 2 | 4.30E-09 | 0.95  | 4.85   | -     | 878.5   |
| AHQ-1-11, 5832              | K.DGTVLCELINALYPEGQAPVK.K                                             | 2289.59066 | 2 | 1.25E-04 | 0.83  | 3.59   | -     | 634.5   |
| AHQ-1-14- , 6732            | K.DGTVLCELINALYPEGQAPVK.K                                             | 2289.59066 | 2 | 5.51E-06 | 0.93  | 4.48   | -     | 765.8   |
| AHQ-1-12, 6029              | K.DGTVLCELINALYPEGQAPVK.K                                             | 2289.59066 | 2 | 4.61E-04 | 0.92  | 4.32   | -     | 809.3   |
| AHQ-1-11, 5398 - 5399       | K.DGTVLCELINALYPEGQAPVK.K                                             | 2417.76357 | 2 | 1.04E-05 | 0.85  | 3.95   | -     | 552.2   |
| AHQ-1-11, 5406              | K.DGTVLCELINALYPEGQAPVK.K                                             | 2417.76357 | 3 | 3.06E-07 | 0.74  | 3.16   | -     | 854.9   |
| AHQ-1-12, 6605 - 6611       | K.DGTVLCELINALYPEGQAPVK.K                                             | 2417.76357 | 3 | 1.52E-10 | 0.95  | 5.43   | -     | 1042.1  |
| AHQ-1-11, 5602              | K.DGTVLCELINALYPEGQAPVK.K                                             | 2417.76357 | 3 | 4.18E-08 | 0.83  | 3.53   | -     | 1101.6  |
| AHQ-1-12, 6613 - 6614       | K.DGTVLCELINALYPEGQAPVK.K                                             | 2417.76357 | 2 | 1.22E-07 | 0.88  | 4.62   | -     | 504.9   |
| AHQ-1-13, 6488 - 6491       | K.DGTVLCELINALYPEGQAPVK.K                                             | 2417.76357 | 3 | 1.34E-06 | 0.91  | 4.40   | -     | 1058.1  |
| AHQ-1-11, 6435 - 6443       | K.DGTVLCELINALYPEGQAPVK.K                                             | 2417.76357 | 3 | 1.49E-07 | 0.89  | 4.20   | -     | 912.5   |
| AHQ-1-12, 5594              | K.DGTVLCELINALYPEGQAPVK.K                                             | 2417.76357 | 3 | 7.07E-07 | 0.84  | 3.70   | -     | 762.8   |
| AHQ-1-13- , 6932            | K.DGTVLCELINALYPEGQAPVK.K                                             | 2417.76357 | 3 | 3.56E-08 | 0.76  | 3.51   | -     | 565.2   |
| AHQ-1-14- , 6690            | K.DGTVLCELINALYPEGQAPVK.K                                             | 2417.76357 | 3 | 2.55E-08 | 0.92  | 4.54   | -     | 912.7   |
| AHQ-1-14- , 6694            | K.DGTVLCELINALYPEGQAPVK.K                                             | 2417.76357 | 2 | 3.55E-06 | 0.63  | 2.84   | -     | 521.4   |
| AHQ-1-11, 2663              | R.GASQAGMTGGMPR.Q                                                     | 1384.56732 | 2 | 1.15E-04 | 0.81  | 3.25   | -     | 816.4   |
| AHQ-1-12, 1966 - 2025       | R.GPAYGLSR.E                                                          | 820.91599  | 2 | 2.89E-04 | 0.83  | 3.07   | -     | 793.5   |
| AHQ-1-12, 1991              | R.GPAYGLSR.E                                                          | 820.91599  | 1 | 2.25E-04 | 0.22  | 2.11   | -     | 205.9   |
| AHQ-1-11, 2502              | K.IQASTMAFK.Q                                                         | 997.19374  | 1 | 7.33E-04 | 0.63  | 2.76   | -     | 468.1   |
| AHQ-1-12, 2298              | K.KIQASTMAFK.Q                                                        | 1125.36665 | 2 | 4.57E-04 | 0.84  | 2.91   | -     | 1042.5  |
| AHQ-1-11, 2162 - 2218       | R.NFSDNQLQEGK.N                                                       | 1280.32582 | 2 | 9.96E-04 | 0.90  | 3.43   | -     | 892.7   |
| AHQ-1-12, 2101 - 2161       | R.NFSDNQLQEGK.N                                                       | 1280.32582 | 2 | 1.72E-04 | 0.88  | 3.49   | -     | 842.4   |
| AHQ-1-12, 2162 - 2245       | R.NFSDNQLQEGK.N                                                       | 1280.32582 | 1 | 3.25E-07 | 0.17  | 2.20   | -     | 299.4   |
| AHQ-1-11, 2334 - 2411       | R.NFSDNQLQEGK.N                                                       | 1280.32582 | 1 | 6.98E-05 | 0.41  | 2.28   | -     | 316.7   |
| AHQ-1-12, 2381              | R.NFSDNQLQEGK.N                                                       | 1280.32582 | 1 | 9.82E-06 | 0.11  | 2.14   | -     | 181.4   |
| AHQ-1-12, 2586              | R.NFSDNQLQEGK.N                                                       | 1280.32582 | 1 | 4.75E-06 | 0.14  | 1.93   | -     | 376.9   |
| AHQ-1-14- , 2298            | R.NFSDNQLQEGK.N                                                       | 1280.32582 | 2 | 8.38E-04 | 0.81  | 2.99   | -     | 778.5   |
| AHQ-1-11, 2410              | R.NFSDNQLQEGK.N                                                       | 1280.32582 | 2 | 1.05E-05 | 0.87  | 3.37   | -     | 971.2   |
| AHQ-1-11, 2558              | R.NFSDNQLQEGK.N                                                       | 1280.32582 | 1 | 1.14E-06 | 0.20  | 1.93   | -     | 393.0   |
| AHQ-1-13- , 2325 - 2328     | R.NFSDNQLQEGK.N                                                       | 1280.32582 | 2 | 5.37E-05 | 0.87  | 3.22   | -     | 849.4   |
| AHQ-1-11, 2959 - 3018       | K.NVIGLQMTN.R                                                         | 1203.39751 | 2 | 1.57E-07 | 0.93  | 3.47   | -     | 1260.1  |
| AHQ-1-11, 2322 - 2330       | K.NVIGLQMTN.R                                                         | 1219.39691 | 2 | 1.62E-06 | 0.93  | 3.47   | -     | 1146.6  |
| AHQ-1-12, 5318              | K.QMEQISQFLQAAER.Y                                                    | 1679.87950 | 3 | 3.29E-10 | 0.95  | 4.86   | -     | 1507.2  |
| AHQ-1-12, 5821 - 5845       | K.QMEQISQFLQAAER.Y                                                    | 1679.87950 | 2 | 1.48E-05 | 0.97  | 4.57   | -     | 2126.1  |
| AHQ-1-11, 5654              | K.QMEQISQFLQAAER.Y                                                    | 1679.87950 | 2 | 5.26E-05 | 0.95  | 4.07   | -     | 1505.0  |
| AHQ-1-11, 5264 - 5320       | K.QMEQISQFLQAAER.Y                                                    | 1679.87950 | 2 | 2.83E-05 | 0.97  | 4.91   | -     | 1339.9  |
| AHQ-1-12, 4786              | K.QM*EQISQFLQAAER.Y                                                   | 1695.87890 | 2 | 6.76E-07 | 0.88  | 3.90   | -     | 645.2   |
| AHQ-1-14- , 5456            | K.QMEQISQFLQAAER.Y                                                    | 1679.87950 | 2 | 1.00E-06 | 0.93  | 3.59   | -     | 1162.0  |
| AHQ-1-11, 5102              | K.QMEQISQFLQAAER.Y                                                    | 1679.87950 | 2 | 5.97E-04 | 0.94  | 4.29   | -     | 975.5   |
| AHQ-1-11, 4246 - 4263       | R.TLMNLGGLAVAR.D                                                      | 1216.47932 | 2 | 4.85E-05 | 0.88  | 3.91   | -     | 936.8   |
| AHQ-1-11, 3466              | R.TLMNLGGLAVAR.D                                                      | 1232.47872 | 2 | 2.03E-05 | 0.90  | 3.59   | -     | 990.4   |
| AHQ-1-12, 3953              | R.TLMNLGGLAVAR.D                                                      | 1232.47872 | 2 | 2.32E-05 | 0.93  | 3.32   | -     | 1301.1  |
| AHQ-1-12, 4367 - 4447       | R.TLMNLGGLAVAR.D                                                      | 1216.47932 | 2 | 3.29E-06 | 0.93  | 4.11   | -     | 1056.2  |
| AHQ-1-13- , 4628 - 4631     | R.TLMNLGGLAVAR.D                                                      | 1216.47932 | 2 | 6.39E-07 | 0.91  | 4.26   | -     | 906.0   |
| AHQ-1-14- , 4600            | R.TLMNLGGLAVAR.D                                                      | 1216.47932 | 2 | 1.58E-04 | 0.92  | 3.61   | -     | 1167.4  |
| AHQ-1-13- , 6867 - 6868     | R.YGINTTDFQTVDLWEGK.N                                                 | 2101.30080 | 2 | 1.40E-09 | 0.97  | 5.30   | -     | 1180.6  |
| AHQ-1-11, 6235              | R.YGINTTDFQTVDLWEGK.N                                                 | 2101.30080 | 2 | 1.71E-06 | 0.94  | 4.82   | -     | 728.9   |
| AHQ-1-11, 6226 - 6304       | R.YGINTTDFQTVDLWEGK.N                                                 | 2101.30080 | 2 | 3.23E-05 | 0.92  | 4.30   | -     | 804.0   |
| AHQ-1-12, 6371 - 6441       | R.YGINTTDFQTVDLWEGK.N                                                 | 2101.30080 | 2 | 3.07E-11 | 0.97  | 4.84   | -     | 1460.7  |



|                             |                                                                         |            |   |          |      |        |       |          |
|-----------------------------|-------------------------------------------------------------------------|------------|---|----------|------|--------|-------|----------|
| AHQ-1-11, 5996 - 6076       | R.YGINTTDFQTVDLWEGK.N                                                   | 2101.30080 | 2 | 3.79E-05 | 0.81 | 3.58   | -     | 673.0    |
| AHQ-1-13, 6332 - 6411       | R.YGINTTDFQTVDLWEGK.N                                                   | 2101.30080 | 2 | 2.24E-09 | 0.95 | 4.91   | -     | 1018.6   |
| AHQ-1-14- , 6620            | R.YGINTTDFQTVDLWEGK.N                                                   | 2101.30080 | 2 | 4.74E-12 | 0.96 | 4.94   | -     | 1276.1   |
| AHQ-1-11, 6440 - 6514       | R.YGINTTDFQTVDLWEGK.N                                                   | 2101.30080 | 2 | 9.17E-07 | 0.95 | 4.47   | -     | 1045.8   |
| AHQ-1-12, 6537              | R.YGINTTDFQTVDLWEGK.N                                                   | 2101.30080 | 2 | 2.19E-08 | 0.96 | 5.20   | -     | 1089.1   |
| AHQ-1-11, 6596              | R.YGINTTDFQTVDLWEGK.N                                                   | 2101.30080 | 2 | 1.52E-07 | 0.91 | 4.05   | -     | 865.0    |
| gi 5453740 ref NP_006462.1  | myosin regulatory light chain MRCL3; myosin, light polypeptide, regulat |            |   | 4.79E-12 | 6.33 | 70.29  | 32.70 | 19794.0  |
| AHQ-1-11, 5875 - 5952       | R.ATSNVFMFDQSQIQEFK.E                                                   | 2092.31741 | 2 | 1.36E-05 | 0.80 | 3.53   | -     | 561.9    |
| AHQ-1-14- , 5664            | R.ATSNVFMFDQSQIQEFK.E                                                   | 2108.31681 | 2 | 5.43E-08 | 0.73 | 3.25   | -     | 447.4    |
| AHQ-1-14- , 5447 - 5448     | R.ATSNVFMFDQSQIQEFK.E                                                   | 2108.31681 | 2 | 1.20E-08 | 0.97 | 5.38   | -     | 1260.8   |
| AHQ-1-12, 5969 - 5973       | R.ATSNVFMFDQSQIQEFK.E                                                   | 2092.31741 | 2 | 2.71E-04 | 0.97 | 5.00   | -     | 1717.9   |
| AHQ-1-12, 5322              | R.ATSNVFMFDQSQIQEFK.E                                                   | 2108.31681 | 2 | 3.26E-07 | 0.96 | 4.30   | -     | 1495.9   |
| AHQ-1-14- , 6108 - 6110     | R.ATSNVFMFDQSQIQEFK.E                                                   | 2092.31741 | 2 | 6.44E-09 | 0.98 | 4.99   | -     | 2072.9   |
| AHQ-1-11, 5118 - 5188       | R.ATSNVFMFDQSQIQEFK.E                                                   | 2108.31681 | 2 | 1.60E-07 | 0.97 | 4.66   | -     | 1563.8   |
| AHQ-1-11, 5700 - 5770       | R.ATSNVFMFDQSQIQEFK.E                                                   | 2092.31741 | 2 | 2.65E-06 | 0.96 | 4.55   | -     | 1654.9   |
| AHQ-1-11, 5523              | R.DGFIDKEDLHDMLASLKG.N                                                  | 2005.23806 | 3 | 9.12E-09 | 0.90 | 3.31   | -     | 1732.9   |
| AHQ-1-11, 5626 - 5635       | R.DGFIDKEDLHDMLASLKG.N                                                  | 2005.23806 | 3 | 4.79E-12 | 0.97 | 4.82   | -     | 1885.6   |
| AHQ-1-11, 5627              | R.DGFIDKEDLHDMLASLKG.N                                                  | 2005.23806 | 2 | 8.19E-10 | 0.97 | 5.29   | -     | 1740.8   |
| AHQ-1-11, 5518 - 5574       | R.DGFIDKEDLHDMLASLKG.N                                                  | 2005.23806 | 2 | 1.58E-06 | 0.98 | 5.82   | -     | 2454.0   |
| AHQ-1-11, 5708              | R.DGFIDKEDLHDMLASLKG.N                                                  | 2005.23806 | 2 | 6.54E-04 | 0.89 | 3.77   | -     | 816.2    |
| AHQ-1-14- , 5879            | R.DGFIDKEDLHDMLASLKG.N                                                  | 2005.23806 | 2 | 5.25E-12 | 0.97 | 4.80   | -     | 1570.9   |
| AHQ-1-11, 4318 - 4320       | R.DGFIDKEDLHDM*LASLKG.N                                                 | 2021.23746 | 2 | 3.86E-05 | 0.96 | 5.29   | -     | 1026.5   |
| AHQ-1-12, 4505              | R.DGFIDKEDLHDM*LASLKG.N                                                 | 2021.23746 | 2 | 2.75E-04 | 0.90 | 3.93   | -     | 661.6    |
| AHQ-1-12, 5745              | R.DGFIDKEDLHDMLASLKG.N                                                  | 2005.23806 | 2 | 8.99E-12 | 0.95 | 4.93   | -     | 1201.3   |
| AHQ-1-12, 5742              | R.DGFIDKEDLHDMLASLKG.N                                                  | 2005.23806 | 3 | 2.68E-05 | 0.80 | 3.43   | -     | 857.4    |
| AHQ-1-11, 2600              | R.ELLTTMGDR.F                                                           | 1036.18513 | 2 | 9.12E-05 | 0.81 | 2.73   | -     | 678.8    |
| AHQ-1-12, 4146              | K.GNFNIEFTR.I                                                           | 1261.36733 | 2 | 4.20E-04 | 0.78 | 3.31   | -     | 623.5    |
| AHQ-1-13, 4176 - 4179       | K.GNFNIEFTR.I                                                           | 1261.36733 | 2 | 7.57E-06 | 0.70 | 2.75   | -     | 677.1    |
| AHQ-1-14, 5122              | K.GNFNIEFTR.I                                                           | 1261.36733 | 2 | 5.02E-05 | 0.76 | 2.81   | -     | 686.9    |
| AHQ-1-13- , 4363 - 4371     | K.GNFNIEFTR.I                                                           | 1261.36733 | 2 | 8.67E-04 | 0.82 | 3.34   | -     | 700.3    |
| AHQ-1-11, 4139 - 4184       | K.GNFNIEFTR.I                                                           | 1261.36733 | 2 | 8.91E-04 | 0.84 | 3.11   | -     | 1035.2   |
| AHQ-1-11, 4362              | K.GNFNIEFTR.I                                                           | 1261.36733 | 1 | 3.79E-04 | 0.41 | 2.14   | -     | 359.5    |
| AHQ-1-11, 4355              | K.GNFNIEFTR.I                                                           | 1261.36733 | 2 | 6.02E-04 | 0.78 | 2.95   | -     | 882.2    |
| AHQ-1-11, 3436              | K.KGNFNIEFTR.I                                                          | 1389.54025 | 2 | 2.96E-09 | 0.95 | 4.19   | -     | 980.1    |
| gi 18860900 ref NP_002834.2 | protein tyrosine phosphatase, receptor type, J precursor; protein tyro  |            |   | 4.82E-12 | 7.95 | 90.26  | 16.80 | 145926.2 |
| AHQ-1-1, 3468               | R.AGSPATPVHDESLVGPVDPSSGQSR.D                                           | 2576.71806 | 3 | 1.08E-04 | 0.92 | 4.60   | -     | 1201.2   |
| AHQ-1-1, 4432 - 4444        | K.AYAVILTTGEAGHPSADVLK.Y                                                | 2014.26782 | 3 | 2.76E-09 | 0.96 | 4.67   | -     | 1601.0   |
| AHQ-1-1, 4431               | K.AYAVILTTGEAGHPSADVLK.Y                                                | 2014.26782 | 2 | 2.33E-07 | 0.98 | 5.27   | -     | 2074.4   |
| AHQ-1-1, 3079               | K.GDPLGTEGGLDASNTER.S                                                   | 1689.71978 | 2 | 1.17E-08 | 0.94 | 4.05   | -     | 1051.1   |
| AHQ-1-1, 5263 - 5267        | K.GLIDGAEYSYFSR.Y                                                       | 1501.62253 | 2 | 5.52E-09 | 0.97 | 4.33   | -     | 2276.2   |
| AHQ-1-1, 4968               | K.SFCTDPASM*ASFDCEVVPK.E                                                | 2167.37954 | 2 | 5.17E-04 | 0.60 | 2.93   | -     | 568.0    |
| AHQ-1-1, 5739               | K.SFCTDPASMASFDCEVVPK.E                                                 | 2151.38014 | 2 | 6.38E-06 | 0.87 | 4.21   | -     | 655.8    |
| AHQ-1-1, 5404               | K.SPDGASEYVYHLVIESK.H                                                   | 1895.05866 | 2 | 4.82E-12 | 0.93 | 4.21   | -     | 1059.4   |
| AHQ-1-1, 4325               | K.VITEPIVSDLR.V                                                         | 1339.56259 | 2 | 5.41E-04 | 0.83 | 3.02   | -     | 565.5    |
| AHQ-1-1, 3899               | R.VLLESIGSHEELTQDSR.L                                                   | 1914.06352 | 2 | 3.40E-07 | 0.86 | 3.54   | -     | 896.9    |
| AHQ-1-1, 3911               | R.VLLESIGSHEELTQDSR.L                                                   | 1914.06352 | 3 | 3.75E-10 | 0.93 | 4.63   | -     | 748.4    |
| gi 12408656 ref NP_005177.2 | calpain 1, large subunit; calpain, large polypeptide L1; calcium-activ  |            |   | 5.11E-12 | 9.84 | 110.30 | 15.80 | 81889.4  |
| AHQ-1-6, 3634               | R.DFFLANASR.A                                                           | 1041.14166 | 2 | 7.89E-05 | 0.87 | 2.85   | -     | 1163.7   |
| AHQ-1-6, 6416 - 6448        | R.DM*ETIGFAVYVPELVGQPAVHLK.R                                            | 2757.15391 | 3 | 5.11E-12 | 0.93 | 4.08   | -     | 1191.0   |
| AHQ-1-6, 6760               | R.DMETIGFAVYVPELVGQPAVHLK.R                                             | 2741.15451 | 3 | 1.36E-07 | 0.83 | 3.73   | -     | 782.8    |
| AHQ-1-6, 6154               | R.FRLPPGEYVVPSTFEPNKEGDFVLR.F                                           | 2994.39160 | 3 | 1.93E-07 | 0.96 | 5.95   | -     | 1363.0   |
| AHQ-1-6, 4391 - 4411        | R.KAPSDLYQILK.A                                                         | 1389.66474 | 2 | 3.01E-06 | 0.95 | 4.50   | -     | 1148.9   |
| AHQ-1-6, 3783               | R.KWNTLLYEGTWR.R                                                        | 1555.71826 | 2 | 3.51E-09 | 0.91 | 3.62   | -     | 921.1    |
| AHQ-1-6, 4875               | R.LPPGEYVVPSTFEPNKE                                                     | 1874.12573 | 2 | 6.80E-05 | 0.89 | 3.87   | -     | 706.1    |
| AHQ-1-6, 5898               | R.LPPGEYVVPSTFEPNKEGDFVLR.F                                             | 2691.03055 | 2 | 4.21E-04 | 0.70 | 3.20   | -     | 258.0    |
| AHQ-1-6, 5886               | R.LPPGEYVVPSTFEPNKEGDFVLR.F                                             | 2691.03055 | 3 | 2.65E-07 | 0.83 | 4.02   | -     | 451.4    |
| AHQ-1-6, 6584               | K.LVVFVHSAEGNEFWASALLEK.A                                               | 2177.44364 | 3 | 2.64E-08 | 0.90 | 4.18   | -     | 893.8    |
| AHQ-1-6, 3083               | R.SEQFINLR.E                                                            | 1007.12521 | 2 | 8.40E-04 | 0.85 | 2.68   | -     | 1032.5   |
| AHQ-1-6, 3302               | K.YLGDQYEQLR.V                                                          | 1285.38720 | 2 | 2.37E-07 | 0.91 | 3.41   | -     | 979.3    |
| gi 5453555 ref NP_006316.1  | ras-related nuclear protein [Homo sapiens]                              |            |   | 5.33E-12 | 1.56 | 20.19  | 12.50 | 24422.9  |
| AHQ-1-10, 5279              | K.SNYNFEKPFLLWLR.K                                                      | 1786.02509 | 2 | 5.33E-12 | 0.82 | 3.86   | -     | 524.4    |
| AHQ-1-10, 4085              | R.VCENPIVLCGNK.V                                                        | 1518.78102 | 2 | 1.90E-04 | 0.73 | 3.01   | -     | 554.7    |
| gi 21361755 ref NP_004090.3 | stomatin; erythrocyte membrane protein band 7.2 (stomatin) [Homo sapie  |            |   | 5.41E-12 | 9.87 | 110.38 | 51.00 | 31708.5  |
| AHQ-1-14- , 4687 - 4688     | K.EASMVITESPAALQLR.Y                                                    | 1716.98119 | 2 | 3.81E-08 | 0.93 | 4.13   | -     | 1078.9   |
| AHQ-1-1, 4863 - 4875        | K.EASMVITESPAALQLR.Y                                                    | 1716.98119 | 2 | 1.50E-05 | 0.79 | 3.55   | -     | 774.4    |
| AHQ-1-14- , 4100            | K.EASM*VITESPAALQLR.Y                                                   | 1732.98059 | 2 | 1.38E-07 | 0.93 | 4.12   | -     | 1006.0   |
| AHQ-1-13- , 4240            | K.EASM*VITESPAALQLR.Y                                                   | 1732.98059 | 2 | 5.10E-05 | 0.94 | 4.36   | -     | 1261.5   |
| AHQ-1-1, 4320               | K.EASM*VITESPAALQLR.Y                                                   | 1732.98059 | 2 | 2.66E-07 | 0.95 | 4.10   | -     | 1518.1   |
| AHQ-1-13- , 4751            | K.EASMVITESPAALQLR.Y                                                    | 1716.98119 | 2 | 7.89E-08 | 0.93 | 4.31   | -     | 927.1    |
| AHQ-1-9, 7250               | K.GPGLFFILPCTDSFIK.V                                                    | 1814.13672 | 2 | 4.19E-05 | 0.94 | 4.57   | -     | 758.2    |
| AHQ-1-10, 6348 - 6349       | K.GPGLFFILPCTDSFIK.V                                                    | 1814.13672 | 2 | 6.83E-05 | 0.95 | 5.20   | -     | 770.5    |
| AHQ-1-13- , 6935            | K.GPGLFFILPCTDSFIK.V                                                    | 1814.13672 | 2 | 1.71E-06 | 0.94 | 4.49   | -     | 833.7    |
| AHQ-1-1, 2547               | R.LLAQTTLR.N                                                            | 916.10035  | 2 | 3.09E-05 | 0.83 | 2.96   | -     | 621.4    |
| AHQ-1-10, 6271              | K.NLSQILSDREEIAHNMQSTLDDATDAWGK.V                                       | 3373.65339 | 3 | 1.20E-09 | 0.98 | 7.59   | -     | 2373.6   |
| AHQ-1-10, 6073              | K.NLSQILSDREEIAHNMQSTLDDATDAWGK.V                                       | 3373.65339 | 3 | 2.04E-06 | 0.91 | 4.28   | -     | 1180.8   |
| AHQ-1-13- , 7023            | K.NSTIVFPLPIDMLQGIIGAK.H                                                | 2128.56375 | 2 | 3.68E-04 | 0.89 | 3.98   | -     | 456.5    |
| AHQ-1-10, 6383              | K.NSTIVFPLPIDMLQGIIGAK.H                                                | 2144.56315 | 2 | 4.63E-05 | 0.90 | 4.27   | -     | 471.2    |
| AHQ-1-1, 5604 - 5668        | R.TISFDIPPEQLTK.D                                                       | 1602.85305 | 2 | 3.39E-04 | 0.60 | 2.56   | -     | 283.6    |
| AHQ-1-1, 2400               | K.VIAAEGEMNASR.A                                                        | 1248.39191 | 2 | 1.57E-08 | 0.97 | 4.67   | -     | 1438.6   |
| AHQ-1-13- , 2319            | K.VIAAEGEMNASR.A                                                        | 1248.39191 | 2 | 8.13E-08 | 0.97 | 4.66   | -     | 1411.7   |
| AHQ-1-13, 2375              | K.VIAAEGEMNASR.A                                                        | 1248.39191 | 2 | 6.35E-06 | 0.95 | 4.06   | -     | 1271.1   |
| AHQ-1-10, 2156              | K.VIAAEGEMNASR.A                                                        | 1248.39191 | 2 | 6.01E-06 | 0.96 | 3.49   | -     | 1692.1   |
| AHQ-1-10, 3695              | R.VQATLAVANITNADSATR.L                                                  | 1931.09731 | 2 | 5.91E-10 | 0.96 | 5.48   | -     | 882.1    |
| AHQ-1-10, 3563              | R.VQATLAVANITNADSATR.L                                                  | 1931.09731 | 2 | 2.63E-06 | 0.93 | 4.80   | -     | 654.4    |
| AHQ-1-1, 3920               | R.VQATLAVANITNADSATR.L                                                  | 1931.09731 | 2 | 5.41E-12 | 0.96 | 4.90   | -     | 1087.8   |
| AHQ-1-1, 4008 - 4032        | R.VQATLAVANITNADSATR.L                                                  | 1931.09731 | 2 | 1.17E-08 | 0.97 | 4.96   | -     | 1458.4   |
| AHQ-1-1, 4277               | R.VQATLAVANITNADSATR.L                                                  | 1931.09731 | 2 | 9.26E-10 | 0.96 | 4.75   | -     | 1179.6   |
| AHQ-1-2, 4113               | R.VQATLAVANITNADSATR.L                                                  | 1931.09731 | 2 | 3.18E-08 | 0.92 | 3.76   | -     | 1110.4   |
| AHQ-1-13- , 4116            | R.VQATLAVANITNADSATR.L                                                  | 1931.09731 | 2 | 7.37E-08 | 0.93 | 4.31   | -     | 885.0    |
| AHQ-1-1, 4629               | R.VQATLAVANITNADSATR.L                                                  | 1931.09731 | 2 | 6.42E-08 | 0.93 | 4.54   | -     | 757.8    |
| AHQ-1-10, 3779 - 3855       | R.VQATLAVANITNADSATR.L                                                  | 1931.09731 | 2 | 3.88E-11 | 0.96 | 5.26   | -     | 1072.1   |
| AHQ-1-13, 3811              | R.YLQTLTIIAAEK.N                                                        | 1352.55813 | 2 | 3.58E-04 | 0.81 | 2.65   | -     | 1249.5   |
| AHQ-1-10, 3539              | R.YLQTLTIIAAEK.N                                                        | 1352.55813 | 2 | 1.32E-04 | 0.90 | 3.26   | -     | 1202.1   |
| AHQ-1-1, 4019               | R.YLQTLTIIAAEK.N                                                        | 1352.55813 | 2 | 1.14E-07 | 0.95 | 3.77   | -     | 1710.8   |
| AHQ-1-14, 4756 - 4758       | R.YLQTLTIIAAEK.N                                                        | 1352.55813 | 2 | 5.07E-04 | 0.85 | 3.14   | -     | 850.1    |
| gi 4507953 ref NP_003397.1  | tyrosine 3/tryptophan 5-monoxygenase activation protein, zeta polypep   |            |   | 6.33E-12 | 9.66 | 110.29 | 53.10 | 27744.9  |
| AHQ-1-10, 3233 - 3376       | K.FLIPNASQAESK.V                                                        | 1305.46156 | 1 | 3.94E-07 | 0.35 | 2.03   | -     | 382.5    |
| AHQ-1-10, 3019 - 3080       | K.FLIPNASQAESK.V                                                        | 1305.46156 | 2 | 1.29E-09 | 0.88 | 2.78   | -     | 700.5    |
| AHQ-1-11, 3166              | K.FLIPNASQAESK.V                                                        | 1305.46156 | 2 | 4.96E-07 | 0.77 | 2.79   | -     | 529.4    |
| AHQ-1-13, 3501              | K.FLIPNASQAESK.V                                                        | 1305.46156 | 1 | 1.58E-04 | 0.30 | 1.93   | -     | 475.7    |
| AHQ-1-13- , 6963            | K.IETELRDICNDVLSLLEK.F                                                  | 2162.44718 | 3 | 7.50E-04 | 0.83 | 4.21   | -     | 963.1    |
| AHQ-1-10, 6393              | K.IETELRDICNDVLSLLEK.F                                                  | 2162.44718 | 3 | 1.21E-07 | 0.91 | 5.14   | -     | 1090.6   |
| AHQ-1-10, 5675 - 5731       | K.IETELRDICNDVLSLLEK.F                                                  | 2162.44718 | 2 | 4.59E-06 | 0.93 | 4.61   | -     | 1077.7   |
| AHQ-1-10, 6405 - 6415       | R.LGLALNFSVYFYIILNSPEK.A                                                | 2318.65200 | 2 | 4.68E-05 | 0.95 | 5.15   | -     | 807.6    |
| AHQ-1-10, 6401 - 6404       | R.LGLALNFSVYFYIILNSPEK.A                                                | 2318.65200 | 2 | 1.35E-06 | 0.81 | 4.00   | -     | 292.0    |
| AHQ-1-10, 2283 - 2320       | K.SVTEQGAELNSNEER.N                                                     | 1549.57922 | 2 | 5.73E-09 | 0.96 | 5.05   | -     | 958.5    |
| AHQ-1-13- , 2376            | K.SVTEQGAELNSNEER.N                                                     | 1549.57922 | 2 | 8.41E-10 | 0.90 | 3.92   | -     | 1039.4   |

|                            |                                                                         |            |   |          |       |        |       |         |
|----------------------------|-------------------------------------------------------------------------|------------|---|----------|-------|--------|-------|---------|
| AHQ-1-10, 2472 - 2539      | K.SVTEQGAELSNEER.N                                                      | 1549.57922 | 2 | 1.25E-06 | 0.96  | 4.66   | -     | 1571.0  |
| AHQ-1-14, - 2288 - 2346    | K.SVTEQGAELSNEER.N                                                      | 1549.57922 | 2 | 9.14E-10 | 0.95  | 4.29   | -     | 1554.0  |
| AHQ-1-12, 2329 - 2330      | K.SVTEQGAELSNEER.N                                                      | 1549.57922 | 2 | 3.33E-09 | 0.92  | 4.32   | -     | 1054.3  |
| AHQ-1-11, 2296 - 2299      | K.SVTEQGAELSNEER.N                                                      | 1549.57922 | 2 | 9.98E-06 | 0.95  | 4.12   | -     | 1261.7  |
| AHQ-1-14, - 2186 - 2256    | K.SVTEQGAELSNEER.N                                                      | 1549.57922 | 2 | 6.52E-07 | 0.96  | 4.48   | -     | 1542.9  |
| AHQ-1-13, 2421             | K.SVTEQGAELSNEER.N                                                      | 1549.57922 | 2 | 1.46E-06 | 0.93  | 4.25   | -     | 1194.4  |
| AHQ-1-10, 2223 - 2264      | K.SVTEQGAELSNEER.N                                                      | 1549.57922 | 2 | 1.00E-06 | 0.93  | 3.36   | -     | 1587.2  |
| AHQ-1-9, 2239              | K.SVTEQGAELSNEER.N                                                      | 1549.57922 | 2 | 7.16E-06 | 0.92  | 3.92   | -     | 1134.0  |
| AHQ-1-10, 4571             | K.SVTEQGAELSNEERNLLSVAYK.N                                              | 2438.63331 | 2 | 8.46E-04 | 0.81  | 3.34   | -     | 713.9   |
| AHQ-1-10, 4709 - 4712      | K.SVTEQGAELSNEERNLLSVAYK.N                                              | 2438.63331 | 2 | 4.44E-05 | 0.95  | 5.17   | -     | 794.5   |
| AHQ-1-10, 5656 - 5729      | K.TAFDEAIAELDTLSEESYK.D                                                 | 2133.25160 | 2 | 1.23E-09 | 0.83  | 3.44   | -     | 634.1   |
| AHQ-1-13, 6431             | K.TAFDEAIAELDTLSEESYK.D                                                 | 2133.25160 | 2 | 1.20E-06 | 0.97  | 5.44   | -     | 1400.2  |
| AHQ-1-10, 6299             | K.TAFDEAIAELDTLSEESYK.D                                                 | 2133.25160 | 3 | 3.01E-07 | 0.96  | 5.78   | -     | 1274.4  |
| AHQ-1-13, 6432 - 6445      | K.TAFDEAIAELDTLSEESYK.D                                                 | 2133.25160 | 3 | 4.84E-10 | 0.96  | 5.19   | -     | 1490.8  |
| AHQ-1-14, - 6568 - 6640    | K.TAFDEAIAELDTLSEESYK.D                                                 | 2133.25160 | 2 | 7.62E-09 | 0.96  | 5.09   | -     | 1048.3  |
| AHQ-1-13, - 5797           | K.TAFDEAIAELDTLSEESYK.D                                                 | 2133.25160 | 2 | 3.02E-06 | 0.96  | 4.96   | -     | 1094.8  |
| AHQ-1-13, - 6811 - 6887    | K.TAFDEAIAELDTLSEESYK.D                                                 | 2133.25160 | 2 | 2.10E-08 | 0.97  | 5.36   | -     | 1357.5  |
| AHQ-1-13, - 6891           | K.TAFDEAIAELDTLSEESYK.D                                                 | 2133.25160 | 3 | 1.08E-05 | 0.95  | 5.39   | -     | 1108.9  |
| AHQ-1-11, 6388             | K.TAFDEAIAELDTLSEESYK.D                                                 | 2133.25160 | 2 | 6.33E-12 | 0.97  | 5.56   | -     | 1188.3  |
| AHQ-1-9, 7200              | K.TAFDEAIAELDTLSEESYK.D                                                 | 2133.25160 | 2 | 2.57E-05 | 0.96  | 5.31   | -     | 976.8   |
| AHQ-1-12, 6566             | K.TAFDEAIAELDTLSEESYK.D                                                 | 2133.25160 | 2 | 2.87E-09 | 0.89  | 3.48   | -     | 1108.6  |
| AHQ-1-10, 6252 - 6295      | K.TAFDEAIAELDTLSEESYK.D                                                 | 2133.25160 | 2 | 3.26E-11 | 0.96  | 5.17   | -     | 1252.1  |
| AHQ-1-10, 6369 - 6441      | K.TAFDEAIAELDTLSEESYK.D                                                 | 3320.66704 | 3 | 4.53E-04 | 0.89  | 4.56   | -     | 803.1   |
| AHQ-1-10, 6511             | K.TAFDEAIAELDTLSEESYK.D                                                 | 3320.66704 | 3 | 2.55E-11 | 0.96  | 5.73   | -     | 1376.0  |
| AHQ-1-10, 1487 - 1557      | R.VVSSIEQK.T                                                            | 890.01653  | 2 | 9.11E-07 | 0.66  | 3.14   | -     | 400.2   |
| AHQ-1-13, - 2628           | R.YDDMAACMK.S                                                           | 1106.27579 | 2 | 3.48E-06 | 0.92  | 3.09   | -     | 1105.5  |
| AHQ-1-10, 2445             | R.YDDMAACMK.S                                                           | 1106.27579 | 1 | 6.21E-04 | 0.26  | 1.81   | -     | 314.6   |
| AHQ-1-10, 2137 - 2216      | R.YLAEVAAGDDK.K                                                         | 1152.23595 | 2 | 4.46E-05 | 0.92  | 3.13   | -     | 994.6   |
| AHQ-1-13, - 2388           | R.YLAEVAAGDDK.K                                                         | 1152.23595 | 1 | 2.49E-05 | 0.79  | 2.53   | -     | 1400.7  |
| AHQ-1-13, - 2391           | R.YLAEVAAGDDK.K                                                         | 1152.23595 | 2 | 5.20E-04 | 0.90  | 2.95   | -     | 1045.2  |
| AHQ-1-10, 2133 - 2212      | R.YLAEVAAGDDK.K                                                         | 1152.23595 | 1 | 2.27E-05 | 0.77  | 2.86   | -     | 1031.3  |
| AHQ-1-13, 2435             | R.YLAEVAAGDDK.K                                                         | 1152.23595 | 1 | 5.81E-05 | 0.58  | 2.20   | -     | 991.5   |
| AHQ-1-10, 2027             | R.YLAEVAAGDDK.K                                                         | 1280.40887 | 2 | 3.35E-05 | 0.84  | 3.18   | -     | 873.6   |
| AHQ-1-10, 1940             | R.YLAEVAAGDDK.K                                                         | 1280.40887 | 3 | 1.16E-05 | 0.78  | 3.09   | -     | 996.9   |
| AHQ-1-10, 1929 - 1988      | R.YLAEVAAGDDK.K                                                         | 1280.40887 | 1 | 2.45E-04 | 0.88  | 3.62   | -     | 865.8   |
| AHQ-1-10, 1912 - 1967      | R.YLAEVAAGDDK.K                                                         | 1280.40887 | 2 | 2.86E-05 | 0.96  | 4.30   | -     | 1614.0  |
| AHQ-1-11, 2030 - 2099      | R.YLAEVAAGDDK.K                                                         | 1280.40887 | 2 | 2.62E-04 | 0.90  | 3.09   | -     | 1453.5  |
| AHQ-1-13, 2157 - 2229      | R.YLAEVAAGDDK.K                                                         | 1280.40887 | 2 | 5.70E-05 | 0.86  | 3.08   | -     | 1024.5  |
| AHQ-1-13, - 2069 - 2135    | R.YLAEVAAGDDK.K                                                         | 1280.40887 | 2 | 5.34E-08 | 0.95  | 3.82   | -     | 1553.7  |
| gj4885063[ref]NP_005156.1  | aldolase C, fructose-bisphosphate; Aldolase C, fructose-bisphosphatase  |            |   | 6.50E-12 | 0.80  | 10.26  | 6.30  | 39455.6 |
| AHQ-1-9, 4343 - 4382       | K.GVVPFLAGTDGEGTTQGLDGLSER.C                                            | 2274.42806 | 2 | 2.67E-07 | 0.79  | 4.65   | -     | 615.1   |
| AHQ-1-9, 4786              | K.GVVPFLAGTDGEGTTQGLDGLSER.C                                            | 2274.42806 | 2 | 1.21E-10 | 0.69  | 4.01   | -     | 358.4   |
| AHQ-1-10, 4236             | K.GVVPFLAGTDGEGTTQGLDGLSER.C                                            | 2274.42806 | 2 | 8.61E-08 | 0.52  | 3.86   | -     | 273.4   |
| AHQ-1-12, 4506             | K.GVVPFLAGTDGEGTTQGLDGLSER.C                                            | 2274.42806 | 2 | 6.50E-12 | 0.80  | 4.18   | -     | 682.9   |
| AHQ-1-8, 4671 - 4742       | K.GVVPFLAGTDGEGTTQGLDGLSER.C                                            | 2274.42806 | 2 | 6.01E-10 | 0.88  | 5.21   | -     | 740.4   |
| gj30159830[ref]XP_302246.1 | similar to HSPC280 [Homo sapiens]                                       |            |   | 6.92E-12 | 1.92  | 20.24  | 3.90  | 45644.4 |
| AHQ-1-14, - 6682 - 6752    | K.CANLFEALVGLT.K.A                                                      | 1437.68632 | 2 | 4.35E-07 | 0.97  | 4.74   | -     | 1522.5  |
| AHQ-1-14, - 6639           | R.DDKCANLFEALVGLT.K.A                                                   | 1796.03496 | 3 | 2.90E-04 | 0.93  | 4.20   | -     | 1710.9  |
| AHQ-1-14, - 6630 - 6707    | R.DDKCANLFEALVGLT.K.A                                                   | 1796.03496 | 2 | 6.92E-12 | 0.96  | 4.30   | -     | 1314.4  |
| gj17986273[ref]NP_524144.1 | fast skeletal myosin alkali light chain 1 isoform 1f; A1 catalytic; A2  |            |   | 7.42E-12 | 1.85  | 20.20  | 8.20  | 21145.0 |
| AHQ-1-12, 3429             | R.VFDKENGNTVMGAELR.H                                                    | 1723.93228 | 2 | 1.61E-07 | 0.52  | 2.54   | -     | 467.2   |
| AHQ-1-13, 3327             | R.VFDKENGNTVMGAELR.H                                                    | 1723.93228 | 2 | 4.19E-05 | 0.83  | 2.90   | -     | 904.0   |
| AHQ-1-14, - 2690 - 2692    | R.VFDKENGNTVMGAELR.H                                                    | 1739.93168 | 2 | 1.31E-09 | 0.93  | 3.92   | -     | 980.0   |
| AHQ-1-14, - 3340           | R.VFDKENGNTVMGAELR.H                                                    | 1723.93228 | 2 | 7.42E-12 | 0.92  | 3.98   | -     | 963.6   |
| AHQ-1-12, 2630 - 2694      | R.VFDKENGNTVMGAELR.H                                                    | 1739.93168 | 2 | 6.28E-06 | 0.86  | 3.61   | -     | 840.6   |
| gj4504523[ref]NP_002148.1  | heat shock 10kDa protein 1 (chaperonin 10); heat shock 10kD protein 1 ( |            |   | 8.07E-12 | 1.89  | 20.28  | 25.50 | 10931.6 |
| AHQ-1-14, - 3007           | K.VLQATVAVGSSGK.G                                                       | 1316.52902 | 2 | 4.02E-04 | 0.89  | 3.19   | -     | 810.0   |
| AHQ-1-14, - 2834 - 2836    | K.VLQATVAVGSSGK.G                                                       | 1316.52902 | 2 | 6.89E-11 | 0.98  | 5.53   | -     | 1807.5  |
| AHQ-1-14, 3728             | K.VLQATVAVGSSGK.G                                                       | 1316.52902 | 2 | 8.07E-12 | 0.97  | 4.92   | -     | 1336.6  |
| AHQ-1-14, - 5028 - 5106    | K.VVLDKDYFLFR.D                                                         | 1530.74861 | 2 | 8.30E-10 | 0.90  | 3.38   | -     | 1022.7  |
| AHQ-1-14, - 5030           | K.VVLDKDYFLFR.D                                                         | 1530.74861 | 3 | 2.88E-07 | 0.86  | 3.41   | -     | 584.0   |
| AHQ-1-14, 5928 - 6001      | K.VVLDKDYFLFR.D                                                         | 1530.74861 | 2 | 2.81E-10 | 0.92  | 3.60   | -     | 1023.1  |
| gj4503327[ref]NP_000389.1  | cytochrome b5 reductase membrane-bound isoform; diaphorase (NADH) [Homo |            |   | 8.19E-12 | 9.01  | 110.33 | 49.50 | 34234.6 |
| AHQ-1-9, 4532              | R.AIMKDPDDHTVCHLLFANQTEK.D                                              | 2585.89793 | 3 | 8.19E-12 | 0.88  | 4.19   | -     | 837.6   |
| AHQ-1-9, 5114              | R.APEAWDYGQGFVNEEMIR.D                                                  | 2129.29457 | 2 | 2.92E-05 | 0.91  | 3.79   | -     | 834.8   |
| AHQ-1-9, 4790 - 4791       | K.DILLRPELELR.N                                                         | 1496.73370 | 2 | 2.97E-07 | 0.84  | 3.88   | -     | 575.2   |
| AHQ-1-9, 6238 - 6246       | R.FALPSPQHILGLPVGQHIYSAR.I                                              | 2515.94007 | 3 | 4.51E-10 | 0.95  | 5.58   | -     | 1110.1  |
| AHQ-1-9, 6250 - 6254       | R.FALPSPQHILGLPVGQHIYSAR.I                                              | 2515.94007 | 2 | 1.14E-07 | 0.95  | 5.29   | -     | 679.2   |
| AHQ-1-9, 2872              | R.GPSGLLVYQGG.G                                                         | 1119.29547 | 1 | 1.15E-05 | 0.79  | 3.39   | -     | 464.9   |
| AHQ-1-9, 2866              | R.GPSGLLVYQGG.G                                                         | 1119.29547 | 2 | 3.32E-05 | 0.96  | 4.27   | -     | 1398.1  |
| AHQ-1-9, 6086              | R.IDGNLVVRYPISDDDKGFVDLVK.V                                             | 2977.35765 | 3 | 2.51E-05 | 0.97  | 6.57   | -     | 1251.8  |
| AHQ-1-9, 3627              | R.STPAITLESPIK.Y                                                        | 1372.54621 | 1 | 2.88E-05 | 0.64  | 3.01   | -     | 428.4   |
| AHQ-1-11, 3603             | R.STPAITLESPIK.Y                                                        | 1372.54621 | 2 | 3.15E-04 | 0.53  | 2.68   | -     | 559.9   |
| AHQ-1-12, 3719             | R.STPAITLESPIK.Y                                                        | 1372.54621 | 2 | 2.58E-05 | 0.62  | 2.70   | -     | 449.6   |
| AHQ-1-9, 4638              | R.STPAITLESPIK.Y                                                        | 1902.18061 | 2 | 1.56E-05 | 0.88  | 3.94   | -     | 651.2   |
| AHQ-1-9, 6012              | K.SVGMIAAGGTGTPMLQVIR.A                                                 | 1902.31543 | 2 | 3.35E-05 | 0.78  | 3.66   | -     | 475.2   |
| AHQ-1-9, 5528              | K.SVGMIAAGGTGTPMLQVIR.A                                                 | 1918.31483 | 2 | 1.06E-04 | 0.82  | 3.83   | -     | 538.9   |
| AHQ-1-9, 5080 - 5104       | K.SVGMIAAGGTGTPMLQVIR.A                                                 | 1918.31483 | 2 | 1.71E-04 | 0.56  | 3.15   | -     | 371.1   |
| gj5729877[ref]NP_006588.1  | heat shock 70kDa protein 8 isoform 1; heat shock cognate protein, 71-kD |            |   | 8.52E-12 | 14.41 | 160.27 | 27.20 | 70897.6 |
| AHQ-1-7, 4486              | R.ARFEELNADLFR.G                                                        | 1481.63768 | 2 | 1.05E-04 | 0.82  | 2.90   | -     | 704.3   |
| AHQ-1-6, 4387              | R.ARFEELNADLFR.G                                                        | 1481.63768 | 3 | 1.91E-04 | 0.97  | 5.37   | -     | 1952.1  |
| AHQ-1-6, 4380 - 4460       | R.ARFEELNADLFR.G                                                        | 1481.63768 | 2 | 2.16E-07 | 0.96  | 4.50   | -     | 1104.2  |
| AHQ-1-6, 4746              | R.FEELNADLFR.G                                                          | 1254.37310 | 2 | 1.10E-06 | 0.91  | 3.70   | -     | 977.9   |
| AHQ-1-6, 5362              | K.GPAVGDIDLTGTYSCVGVFQHGK.V                                             | 2265.53088 | 2 | 4.11E-10 | 0.95  | 5.22   | -     | 764.6   |
| AHQ-1-14, - 5166 - 5244    | K.GPAVGDIDLTGTYSCVGVFQHGK.V                                             | 2265.53088 | 3 | 5.17E-05 | 0.86  | 4.00   | -     | 588.8   |
| AHQ-1-6, 5754 - 5772       | K.ILDKCNEINWLDK.N                                                       | 1776.04688 | 2 | 4.55E-05 | 0.93  | 4.46   | -     | 1116.2  |
| AHQ-1-6, 2834 - 2835       | K.MKEIAEAYLGT.K                                                         | 1253.49320 | 2 | 3.04E-07 | 0.92  | 3.55   | -     | 1146.8  |
| AHQ-1-6, 3378              | R.MVNHFAIEFK.R                                                          | 1236.46756 | 2 | 6.64E-08 | 0.94  | 3.88   | -     | 1186.6  |
| AHQ-1-6, 2778              | K.NQVAMNPTNTVFDK.R                                                      | 1666.83756 | 2 | 8.52E-12 | 0.90  | 3.45   | -     | 853.1   |
| AHQ-1-13, - 3756           | K.NQVAMNPTNTVFDK.R                                                      | 1650.83816 | 2 | 2.36E-04 | 0.91  | 3.74   | -     | 826.3   |
| AHQ-1-6, 3446              | K.NQVAMNPTNTVFDK.R                                                      | 1650.83816 | 2 | 2.54E-11 | 0.93  | 4.23   | -     | 772.6   |
| AHQ-1-6, 3427              | K.NQVAMNPTNTVFDK.R                                                      | 1666.83756 | 2 | 4.73E-06 | 0.89  | 3.53   | -     | 817.5   |
| AHQ-1-6, 4098              | K.NSLESYAFNMK.A                                                         | 1304.45393 | 2 | 3.83E-06 | 0.89  | 3.59   | -     | 832.4   |
| AHQ-1-6, 3304              | K.NSLESYAFNMK.A                                                         | 1320.45333 | 2 | 1.07E-05 | 0.86  | 3.34   | -     | 819.3   |
| AHQ-1-6, 2598              | R.RFDDAVQSDMK.H                                                         | 1411.56603 | 2 | 2.46E-06 | 0.96  | 4.33   | -     | 1539.9  |
| AHQ-1-12, 5093 - 5107      | K.SFYPEEVSSMVLTK.M                                                      | 1617.84485 | 2 | 1.72E-04 | 0.64  | 3.04   | -     | 294.1   |
| AHQ-1-6, 5256 - 5323       | K.SFYPEEVSSMVLTK.M                                                      | 1617.84485 | 2 | 3.35E-04 | 0.74  | 3.20   | -     | 440.8   |
| AHQ-1-6, 4484 - 4555       | K.SFYPEEVSSMVLTK.M                                                      | 1633.84425 | 2 | 1.06E-04 | 0.87  | 3.11   | -     | 756.1   |
| AHQ-1-6, 6922 - 6986       | K.SINPDEAVYGAQAAILSGDK.S                                                | 2261.47411 | 2 | 3.82E-08 | 0.97  | 5.38   | -     | 1438.3  |
| AHQ-1-7, 7090              | K.SINPDEAVYGAQAAILSGDK.S                                                | 2261.47411 | 2 | 8.76E-06 | 0.94  | 4.42   | -     | 981.9   |
| AHQ-1-6, 3010              | K.SQIHDIVLVGGSTR.I                                                      | 1482.66712 | 1 | 1.05E-11 | 0.92  | 4.27   | -     | 719.3   |
| AHQ-1-9, 2916              | K.SQIHDIVLVGGSTR.I                                                      | 1482.66712 | 2 | 2.03E-08 | 0.97  | 4.02   | -     | 1985.0  |
| AHQ-1-6, 3000 - 3002       | K.SQIHDIVLVGGSTR.I                                                      | 1482.66712 | 2 | 2.07E-08 | 0.97  | 4.53   | -     | 1844.5  |
| AHQ-1-6, 3003              | K.SQIHDIVLVGGSTR.I                                                      | 1482.66712 | 1 | 3.95E-05 | 0.91  | 3.69   | -     | 894.5   |
| AHQ-1-7, 3034              | K.SQIHDIVLVGGSTR.I                                                      | 1482.66712 | 2 | 1.76E-10 | 0.98  | 4.42   | -     | 2585.0  |
| AHQ-1-8, 2802              | K.SQIHDIVLVGGSTR.I                                                      | 1482.66712 | 1 | 8.98E-04 | 0.86  | 3.45   | -     | 730.1   |
| AHQ-1-6, 4580 - 4650       | K.TVTVNAVTVPAVFNDSSQR.Q                                                 | 1983.17068 | 2 | 1.14E-04 | 0.87  | 4.10   | -     | 442.7   |

|                             |                                                                         |            |   |          |       |        |       |         |
|-----------------------------|-------------------------------------------------------------------------|------------|---|----------|-------|--------|-------|---------|
| AHQ-1-6, 4722 - 4770        | K.TVTNAVTVPAYFNDSQR.Q                                                   | 1983.17068 | 2 | 7.87E-04 | 0.77  | 3.59   | -     | 308.9   |
| AHQ-1-6, 4840 - 4872        | K.TVTNAVTVPAYFNDSQR.Q                                                   | 1983.17068 | 2 | 2.38E-04 | 0.56  | 3.26   | -     | 234.2   |
| AHQ-1-6, 4666               | K.TVTNAVTVPAYFNDSQR.Q                                                   | 1983.17068 | 3 | 2.00E-04 | 0.92  | 4.28   | -     | 1266.3  |
| gi 18201905 ref NP_000166.2 | glucose phosphate isomerase; neuroleukin; glucose-6-phosphate isomeras  |            |   | 8.67E-12 | 6.87  | 80.29  | 24.40 | 63146.7 |
| AHQ-1-7, 6926               | K.ILLANFLAQTALM*R.G                                                     | 1721.05778 | 2 | 1.38E-04 | 0.94  | 3.62   | -     | 1419.9  |
| AHQ-1-7, 7481               | K.ILLANFLAQTALMR.G                                                      | 1705.05838 | 2 | 6.87E-09 | 0.97  | 5.74   | -     | 1432.6  |
| AHQ-1-7, 5140 - 5141        | K.KIEPELDGSAQVTSHDASTNGLNFIK.Q                                          | 2886.16347 | 3 | 3.07E-04 | 0.90  | 4.73   | -     | 803.6   |
| AHQ-1-7, 3028               | K.TFTTQETITNAETA.K.E                                                    | 1656.77283 | 2 | 1.08E-05 | 0.80  | 3.32   | -     | 692.4   |
| AHQ-1-7, 7301 - 7317        | K.TITDVINIGIGSDGLPLM*VTEALPKYSSGGPR.V                                   | 3346.79723 | 3 | 6.51E-07 | 0.84  | 3.77   | -     | 814.3   |
| AHQ-1-7, 6358 - 6372        | K.TLAQLNPESLFIASK.T                                                     | 1833.11828 | 2 | 7.10E-05 | 0.74  | 3.41   | -     | 417.1   |
| AHQ-1-7, 3289               | K.VFEGNRPTNSIVFTK.L                                                     | 1709.92693 | 2 | 3.90E-04 | 0.79  | 3.36   | -     | 741.8   |
| AHQ-1-7, 3938 - 3958        | R.VVYVNSIDGTHIAK.T                                                      | 1603.80282 | 2 | 8.67E-12 | 0.88  | 3.20   | -     | 808.4   |
| gi 10834976 ref NP_000572.1 | glutathione peroxidase 1 [Homo sapiens]                                 |            |   | 8.73E-12 | 5.04  | 60.29  | 42.80 | 21909.0 |
| AHQ-1-11, 5126 - 5200       | K.CEVNGAGAHPLFAFLR.E                                                    | 1760.99723 | 2 | 8.73E-12 | 0.86  | 3.60   | -     | 550.9   |
| AHQ-1-11, 3934              | K.FLVGPDGPVPLR.R                                                        | 1170.38561 | 2 | 1.29E-04 | 0.74  | 2.60   | -     | 682.4   |
| AHQ-1-11, 4758 - 4759       | R.GLVLVGFPCNQFGHQENAK.N                                                 | 2117.37312 | 2 | 1.16E-04 | 0.86  | 4.02   | -     | 473.6   |
| AHQ-1-11, 3750 - 3754       | K.LITWSPVCR.N                                                           | 1133.34543 | 2 | 2.23E-04 | 0.65  | 2.59   | -     | 496.7   |
| AHQ-1-14, 4846              | R.PLAGGEPVSLGSLR.G                                                      | 1353.54935 | 2 | 3.05E-06 | 0.96  | 4.74   | -     | 1124.3  |
| AHQ-1-14 - , 3974           | R.PLAGGEPVSLGSLR.G                                                      | 1353.54935 | 2 | 1.24E-07 | 0.96  | 4.23   | -     | 1063.8  |
| AHQ-1-11, 3735 - 3742       | R.PLAGGEPVSLGSLR.G                                                      | 1353.54935 | 2 | 3.76E-09 | 0.96  | 5.03   | -     | 1105.5  |
| AHQ-1-11, 5023              | K.YVRPGGGFEPNFMFLFEK.C                                                  | 1989.28515 | 2 | 3.91E-06 | 0.97  | 5.72   | -     | 1624.1  |
| AHQ-1-11, 5031              | K.YVRPGGGFEPNFMFLFEK.C                                                  | 1989.28515 | 3 | 9.10E-04 | 0.95  | 4.82   | -     | 1421.0  |
| gi 16507237 ref NP_005338.1 | heat shock 70kDa protein 5 (glucose-regulated protein, 78kDa); BiP; he  |            |   | 9.14E-12 | 11.26 | 130.30 | 22.50 | 72332.5 |
| AHQ-1-6, 5023               | R.AKFEELNMDLFR.S                                                        | 1513.74309 | 2 | 8.58E-08 | 0.92  | 3.89   | -     | 984.1   |
| AHQ-1-6, 4162               | R.AKFEELNM*DLFR.S                                                       | 1529.74249 | 2 | 1.37E-06 | 0.87  | 2.77   | -     | 1143.0  |
| AHQ-1-6, 5751               | K.DNHLGTFDITGIPPA.P.R.G                                                 | 1935.17239 | 2 | 8.98E-09 | 0.95  | 4.44   | -     | 1060.6  |
| AHQ-1-6, 5660               | K.DNHLGTFDITGIPPA.P.R.G                                                 | 1935.17239 | 2 | 6.20E-09 | 0.95  | 4.43   | -     | 1071.3  |
| AHQ-1-6, 6067 - 6142        | R.IEISFYEGEDFSETLTR.A                                                   | 2166.28328 | 2 | 4.60E-08 | 0.95  | 4.08   | -     | 1450.1  |
| AHQ-1-6, 7415               | R.IEISFYEGEDFSETLTR.A                                                   | 2166.28328 | 2 | 1.05E-06 | 0.95  | 4.34   | -     | 1275.5  |
| AHQ-1-6, 6211 - 6279        | R.IEISFYEGEDFSETLTR.A                                                   | 2166.28328 | 2 | 2.23E-04 | 0.92  | 3.98   | -     | 960.1   |
| AHQ-1-6, 6350               | R.IEISFYEGEDFSETLTR.A                                                   | 2166.28328 | 2 | 1.95E-06 | 0.95  | 4.61   | -     | 1057.0  |
| AHQ-1-6, 4768 - 4794        | K.IEWLESHQDADIEDFK.A                                                    | 1976.08864 | 2 | 9.14E-12 | 0.98  | 5.96   | -     | 1904.9  |
| AHQ-1-6, 4446 - 4459        | R.IINEPTAAAIAGLDK.R.E                                                   | 1817.07894 | 2 | 1.37E-10 | 0.76  | 3.77   | -     | 804.5   |
| AHQ-1-6, 3731               | K.KSDIDEIVLVGGSTR.I                                                     | 1589.77277 | 2 | 2.55E-08 | 0.96  | 4.30   | -     | 1648.9  |
| AHQ-1-6, 3256               | K.KSQIFSTASDNQPTVTIK.V                                                  | 1966.18156 | 2 | 5.63E-05 | 0.88  | 4.21   | -     | 734.6   |
| AHQ-1-6, 3442               | K.KVTHAVTVPAYFNDAQR.Q                                                   | 2017.27663 | 2 | 8.99E-08 | 0.97  | 5.79   | -     | 1280.7  |
| AHQ-1-6, 4386               | K.SDIDEIVLVGGSTR.I                                                      | 1461.59985 | 1 | 2.36E-06 | 0.35  | 2.31   | -     | 364.8   |
| AHQ-1-6, 3742               | K.SQIFSTASDNQPTVTIK.V                                                   | 1838.00865 | 2 | 5.53E-05 | 0.81  | 3.27   | -     | 784.7   |
| AHQ-1-7, 3833 - 3836        | K.SQIFSTASDNQPTVTIK.V                                                   | 1838.00865 | 2 | 1.05E-06 | 0.92  | 4.23   | -     | 863.4   |
| AHQ-1-6, 2928 - 3008        | K.TKPYIQVDIGGGQTK.T                                                     | 1605.81703 | 2 | 1.54E-04 | 0.79  | 3.26   | -     | 664.7   |
| AHQ-1-6, 3898               | K.VTHAVTVPAYFNDAQR.Q                                                    | 1889.10372 | 2 | 2.38E-11 | 0.95  | 4.83   | -     | 751.4   |
| AHQ-1-7, 3982               | K.VTHAVTVPAYFNDAQR.Q                                                    | 1889.10372 | 2 | 4.66E-08 | 0.88  | 3.96   | -     | 487.8   |
| AHQ-1-6, 4031               | K.VTHAVTVPAYFNDAQR.Q                                                    | 1889.10372 | 2 | 1.33E-05 | 0.80  | 3.20   | -     | 432.3   |
| gi 4758606 ref NP_004508.1  | integrin-linked kinase [Homo sapiens]                                   |            |   | 9.81E-12 | 11.75 | 140.32 | 34.30 | 51418.9 |
| AHQ-1-13, 5019 - 5023       | R.EVFPADLSNMEIGM*K.V                                                    | 1697.95498 | 2 | 5.07E-04 | 0.74  | 3.10   | -     | 598.7   |
| AHQ-1-10, 5197              | R.EVFPADLSNMEIGM*K.V                                                    | 1681.95558 | 2 | 9.60E-06 | 0.55  | 2.57   | -     | 281.8   |
| AHQ-1-7, 5350 - 5364        | R.EVFPADLSNMEIGM*K.V                                                    | 1697.95498 | 2 | 4.18E-05 | 0.89  | 3.88   | -     | 561.7   |
| AHQ-1-13 - , 5299           | R.EVFPADLSNMEIGM*K.V                                                    | 1697.95498 | 2 | 3.51E-06 | 0.71  | 3.35   | -     | 366.7   |
| AHQ-1-7, 5797               | K.FDMIVPILEK.M                                                          | 1205.49168 | 2 | 4.35E-05 | 0.91  | 3.42   | -     | 868.5   |
| AHQ-1-7, 2138               | R.GDDTPLHLAASHGHR.D                                                     | 1584.67809 | 2 | 1.31E-10 | 0.89  | 3.20   | -     | 1162.6  |
| AHQ-1-9, 1983 - 1984        | R.GDDTPLHLAASHGHR.D                                                     | 1584.67809 | 2 | 1.85E-07 | 0.47  | 2.79   | -     | 365.6   |
| AHQ-1-10, 2063              | R.GDDTPLHLAASHGHR.D                                                     | 1584.67809 | 2 | 2.38E-07 | 0.78  | 2.93   | -     | 802.6   |
| AHQ-1-7, 1909 - 2028        | R.GDDTPLHLAASHGHR.D                                                     | 1584.67809 | 2 | 1.48E-10 | 0.94  | 3.82   | -     | 1203.5  |
| AHQ-1-7, 5205               | R.GM*AFHLTLEPLIPR.H                                                     | 1611.93301 | 2 | 2.27E-05 | 0.86  | 3.20   | -     | 816.4   |
| AHQ-1-7, 6114 - 6142        | R.GM*AFHLTLEPLIPR.H                                                     | 1595.93361 | 2 | 8.90E-05 | 0.94  | 3.78   | -     | 1298.7  |
| AHQ-1-7, 2233               | K.LNENHSGELWK.G                                                         | 1327.42732 | 2 | 3.85E-04 | 0.76  | 2.97   | -     | 957.8   |
| AHQ-1-7, 2429               | K.LNENHSGELWK.G                                                         | 1327.42732 | 2 | 4.36E-07 | 0.84  | 3.68   | -     | 849.9   |
| AHQ-1-7, 2428 - 2433        | K.LNENHSGELWK.G                                                         | 1327.42732 | 1 | 2.23E-05 | 0.42  | 2.23   | -     | 386.3   |
| AHQ-1-7, 6449               | R.LWLDNTENDLNQGGDHHGFSPLHWACR.E                                         | 3113.28217 | 3 | 1.06E-08 | 0.93  | 5.03   | -     | 1028.3  |
| AHQ-1-7, 6301 - 6381        | R.LWLDNTENDLNQGGDHHGFSPLHWACR.E                                         | 3113.28217 | 3 | 6.37E-09 | 0.97  | 6.48   | -     | 1343.5  |
| AHQ-1-7, 4321 - 4392        | R.M*YAPAWVAPEALQK.K                                                     | 1591.85542 | 2 | 6.03E-05 | 0.93  | 3.98   | -     | 864.4   |
| AHQ-1-7, 4822               | R.M*YAPAWVAPEALQK.K                                                     | 1575.85602 | 2 | 3.87E-08 | 0.93  | 3.38   | -     | 1097.7  |
| AHQ-1-13 - , 4317 - 4389    | R.M*YAPAWVAPEALQK.K                                                     | 1591.85542 | 2 | 1.01E-05 | 0.87  | 3.05   | -     | 710.5   |
| AHQ-1-9, 4730               | R.M*YAPAWVAPEALQK.K                                                     | 1575.85602 | 2 | 9.81E-12 | 0.94  | 3.84   | -     | 1158.9  |
| AHQ-1-13, 4196              | R.M*YAPAWVAPEALQK.K                                                     | 1591.85542 | 2 | 4.54E-05 | 0.89  | 3.31   | -     | 820.5   |
| AHQ-1-10, 4352              | R.M*YAPAWVAPEALQK.K                                                     | 1575.85602 | 2 | 1.32E-04 | 0.89  | 3.29   | -     | 864.3   |
| AHQ-1-11, 4096              | R.M*YAPAWVAPEALQK.K                                                     | 1591.85542 | 2 | 8.28E-04 | 0.83  | 2.76   | -     | 804.2   |
| AHQ-1-11, 4491 - 4498       | R.M*YAPAWVAPEALQK.K                                                     | 1575.85602 | 2 | 9.65E-06 | 0.94  | 3.66   | -     | 1192.1  |
| AHQ-1-7, 4838               | R.SAVVEMILMR.G                                                          | 1149.45316 | 2 | 3.04E-07 | 0.96  | 4.15   | -     | 1393.9  |
| AHQ-1-7, 3026               | R.SVMIDEDMTAR.I                                                         | 1268.44340 | 2 | 7.63E-06 | 0.78  | 2.60   | -     | 839.9   |
| AHQ-1-7, 4656               | K.VALEGLRPTIPPGISPHVCK.L                                                | 2143.53829 | 3 | 6.10E-10 | 0.79  | 3.54   | -     | 912.0   |
| AHQ-1-7, 4649 - 4661        | K.VALEGLRPTIPPGISPHVCK.L                                                | 2143.53829 | 2 | 6.25E-04 | 0.94  | 4.98   | -     | 613.0   |
| AHQ-1-7, 2909               | R.WOGNDIVKV.V                                                           | 1059.20012 | 1 | 2.46E-04 | 0.75  | 2.34   | -     | 955.3   |
| gi 4506413 ref NP_002875.1  | RAP1A, member of RAS oncogene family; RAS-related protein RAP1A [Homo s |            |   | 1.15E-11 | 5.49  | 60.28  | 33.20 | 20987.1 |
| AHQ-1-11, 2442              | K.CDLEDERVVGK.E                                                         | 1321.43945 | 2 | 1.44E-05 | 0.92  | 3.54   | -     | 1191.6  |
| AHQ-1-14 - , 5867 - 5871    | K.INVNEIFYDLVR.Q                                                        | 1495.70427 | 2 | 5.92E-04 | 0.92  | 3.88   | -     | 1033.6  |
| AHQ-1-13 - , 6863           | K.INVNEIFYDLVR.Q                                                        | 1495.70427 | 2 | 4.41E-09 | 0.97  | 5.66   | -     | 1374.5  |
| AHQ-1-13, 6407              | K.INVNEIFYDLVR.Q                                                        | 1495.70427 | 2 | 1.12E-07 | 0.95  | 4.98   | -     | 948.1   |
| AHQ-1-12, 6534              | K.INVNEIFYDLVR.Q                                                        | 1495.70427 | 2 | 1.49E-05 | 0.93  | 4.03   | -     | 1054.6  |
| AHQ-1-11, 5527              | K.INVNEIFYDLVR.Q                                                        | 1495.70427 | 2 | 5.26E-07 | 0.89  | 3.71   | -     | 876.0   |
| AHQ-1-11, 6402              | K.INVNEIFYDLVR.Q                                                        | 1495.70427 | 2 | 1.01E-06 | 0.97  | 5.20   | -     | 1524.9  |
| AHQ-1-11, 5751 - 5790       | K.INVNEIFYDLVR.Q                                                        | 1495.70427 | 2 | 1.39E-08 | 0.95  | 4.52   | -     | 965.3   |
| AHQ-1-11, 6316              | K.INVNEIFYDLVR.Q                                                        | 1495.70427 | 1 | 1.59E-06 | 0.48  | 3.20   | -     | 292.9   |
| AHQ-1-11, 6314 - 6384       | K.INVNEIFYDLVR.Q                                                        | 1495.70427 | 1 | 4.34E-04 | 0.35  | 2.90   | -     | 238.4   |
| AHQ-1-11, 6311 - 6312       | K.INVNEIFYDLVR.Q                                                        | 1495.70427 | 2 | 4.63E-08 | 0.95  | 4.42   | -     | 1105.1  |
| AHQ-1-11, 6178 - 6180       | K.INVNEIFYDLVR.Q                                                        | 1495.70427 | 2 | 1.39E-06 | 0.95  | 4.14   | -     | 1268.8  |
| AHQ-1-14 - , 6610           | K.INVNEIFYDLVR.Q                                                        | 1495.70427 | 2 | 3.89E-09 | 0.96  | 4.61   | -     | 1373.1  |
| AHQ-1-13 - , 2879 - 2880    | K.LVVLGSGGVGK.S                                                         | 986.19059  | 2 | 4.31E-04 | 0.94  | 4.15   | -     | 1083.8  |
| AHQ-1-12, 2758 - 2763       | K.LVVLGSGGVGK.S                                                         | 986.19059  | 2 | 3.26E-06 | 0.88  | 3.38   | -     | 948.1   |
| AHQ-1-14 - , 2823           | K.LVVLGSGGVGK.S                                                         | 986.19059  | 1 | 1.10E-04 | 0.54  | 2.85   | -     | 199.5   |
| AHQ-1-11, 5990 - 6048       | K.SALTVQFVQGFVFEK.Y                                                     | 1666.94196 | 2 | 2.78E-05 | 0.95  | 4.95   | -     | 1215.0  |
| AHQ-1-11, 5858 - 5928       | K.SALTVQFVQGFVFEK.Y                                                     | 1666.94196 | 2 | 8.36E-04 | 0.92  | 3.66   | -     | 1375.2  |
| AHQ-1-11, 5742 - 5803       | K.SALTVQFVQGFVFEK.Y                                                     | 1666.94196 | 2 | 1.79E-06 | 0.96  | 4.80   | -     | 1387.9  |
| AHQ-1-11, 5752 - 5754       | K.SKINVNEIFYDLVR.Q                                                      | 1710.95483 | 2 | 1.15E-11 | 0.96  | 4.82   | -     | 1124.6  |
| AHQ-1-14 - , 6142           | K.SKINVNEIFYDLVR.Q                                                      | 1710.95483 | 3 | 6.39E-08 | 0.92  | 4.19   | -     | 1330.0  |
| AHQ-1-11, 5171 - 5195       | K.SKINVNEIFYDLVR.Q                                                      | 1710.95483 | 2 | 1.32E-07 | 0.95  | 4.41   | -     | 1041.4  |
| AHQ-1-11, 5756              | K.SKINVNEIFYDLVR.Q                                                      | 1710.95483 | 3 | 1.77E-06 | 0.93  | 4.04   | -     | 1639.1  |
| AHQ-1-11, 4979              | K.SKINVNEIFYDLVR.Q                                                      | 1710.95483 | 2 | 1.30E-09 | 0.90  | 3.97   | -     | 747.7   |
| AHQ-1-11, 5939 - 6004       | K.SKINVNEIFYDLVR.Q                                                      | 1710.95483 | 2 | 6.45E-11 | 0.95  | 4.59   | -     | 1138.1  |
| AHQ-1-14 - , 6068 - 6139    | K.SKINVNEIFYDLVR.Q                                                      | 1710.95483 | 2 | 1.73E-10 | 0.95  | 4.26   | -     | 1121.8  |
| AHQ-1-11, 4747 - 4755       | K.SKINVNEIFYDLVR.Q                                                      | 1710.95483 | 2 | 5.38E-04 | 0.46  | 3.05   | -     | 377.0   |
| AHQ-1-11, 6111              | K.SKINVNEIFYDLVR.Q                                                      | 1710.95483 | 2 | 3.49E-08 | 0.95  | 4.13   | -     | 1379.8  |
| AHQ-1-11, 2730 - 2794       | K.YDPTIEDSYR.K                                                          | 1259.30338 | 2 | 2.24E-07 | 0.80  | 2.84   | -     | 418.6   |
| AHQ-1-13 - , 2904           | K.YDPTIEDSYR.K                                                          | 1259.30338 | 2 | 4.01E-05 | 0.89  | 3.13   | -     | 495.1   |
| AHQ-1-12, 2795 - 2797       | K.YDPTIEDSYR.K                                                          | 1259.30338 | 2 | 3.02E-04 | 0.69  | 2.76   | -     | 299.4   |
| AHQ-1-13, 2885 - 2893       | K.YDPTIEDSYR.K                                                          | 1259.30338 | 2 | 3.95E-08 | 0.81  | 3.06   | -     | 407.5   |
| AHQ-1-14 - , 2830 - 2851    | K.YDPTIEDSYR.K                                                          | 1259.30338 | 2 | 5.66E-05 | 0.75  | 2.61   | -     | 400.9   |



|                             |                                                                         |            |   |          |      |        |       |         |
|-----------------------------|-------------------------------------------------------------------------|------------|---|----------|------|--------|-------|---------|
| AHQ-1-9, 2008 - 2079        | K.IVADKDYSVTANSK.I                                                      | 1511.65887 | 2 | 2.01E-11 | 0.97 | 4.84   | -     | 1868.3  |
| AHQ-1-13 - , 2600           | K.IVVVTAGVR.Q                                                           | 914.12760  | 2 | 1.27E-04 | 0.89 | 3.40   | -     | 835.6   |
| AHQ-1-13 - , 3496           | K.LIAPVAEEEEATVPNNK.I                                                   | 1695.89534 | 2 | 3.60E-04 | 0.87 | 3.39   | -     | 767.0   |
| AHQ-1-9, 3532               | K.LIAPVAEEEEATVPNNK.I                                                   | 1695.89534 | 2 | 3.77E-06 | 0.65 | 2.85   | -     | 490.2   |
| AHQ-1-14 - , 3548           | K.LIAPVAEEEEATVPNNK.I                                                   | 1695.89534 | 2 | 1.61E-05 | 0.87 | 3.23   | -     | 805.9   |
| AHQ-1-9, 2039 - 2042        | K.LKDDDEVAQLK.K                                                         | 1159.31477 | 1 | 4.06E-04 | 0.31 | 2.49   | -     | 485.4   |
| AHQ-1-14 - , 2243           | K.LKDDDEVAQLK.K                                                         | 1159.31477 | 2 | 1.52E-05 | 0.65 | 2.64   | -     | 495.2   |
| AHQ-1-9, 2038 - 2043        | K.LKDDDEVAQLK.K                                                         | 1159.31477 | 2 | 7.92E-05 | 0.77 | 3.21   | -     | 527.6   |
| AHQ-1-9, 4026               | K.LKGEEMMDLQHGSLFLQTPK.I                                                | 2190.57228 | 2 | 6.34E-05 | 0.53 | 3.83   | -     | 423.9   |
| AHQ-1-9, 4572               | K.LKGEEMMDLQHGSLFLQTPK.I                                                | 2174.57288 | 2 | 3.74E-04 | 0.94 | 4.08   | -     | 1162.5  |
| AHQ-1-9, 3814 - 3883        | K.MVVESAYEVIK.L                                                         | 1268.50463 | 2 | 7.66E-09 | 0.93 | 3.79   | -     | 901.2   |
| AHQ-1-14 - , 3931           | K.MVVESAYEVIK.L                                                         | 1268.50463 | 2 | 7.68E-07 | 0.85 | 2.88   | -     | 801.8   |
| AHQ-1-13 - , 4039           | K.MVVESAYEVIK.L                                                         | 1268.50463 | 2 | 4.47E-06 | 0.86 | 3.10   | -     | 868.6   |
| AHQ-1-14 - , 6532           | K.SLADELALVDVLEDK.L                                                     | 1630.81843 | 2 | 3.58E-05 | 0.93 | 3.44   | -     | 1455.5  |
| AHQ-1-13 - , 6780 - 6783    | K.SLADELALVDVLEDK.L                                                     | 1630.81843 | 2 | 5.20E-08 | 0.96 | 5.37   | -     | 1374.0  |
| AHQ-1-9, 6932 - 6938        | K.SLADELALVDVLEDK.L                                                     | 1630.81843 | 2 | 1.71E-04 | 0.96 | 4.48   | -     | 1652.7  |
| AHQ-1-9, 6506               | K.SLADELALVDVLEDK.L                                                     | 1630.81843 | 2 | 1.71E-04 | 0.80 | 2.87   | -     | 872.3   |
| AHQ-1-11, 6239 - 6246       | K.SLADELALVDVLEDK.L                                                     | 1630.81843 | 2 | 8.34E-06 | 0.86 | 3.96   | -     | 716.9   |
| AHQ-1-13, 6331              | K.SLADELALVDVLEDK.L                                                     | 1630.81843 | 2 | 4.39E-08 | 0.97 | 5.22   | -     | 1483.1  |
| AHQ-1-14 - , 6603 - 6631    | K.SLADELALVDVLEDKL.K.G                                                  | 1872.14959 | 2 | 3.52E-06 | 0.93 | 3.96   | -     | 1196.0  |
| AHQ-1-9, 7094 - 7172        | K.SLADELALVDVLEDKL.K.G                                                  | 1872.14959 | 2 | 1.14E-05 | 0.84 | 3.42   | -     | 745.7   |
| gi 4759096 ref NP_004252.1  | 15 kDa selenoprotein [Homo sapiens]                                     |            |   | 2.17E-11 | 0.93 | 10.24  | 9.90  | 17640.3 |
| AHQ-1-13, 5824              | K.LLDDNGNIAEELSILK.W                                                    | 1757.96344 | 2 | 8.87E-09 | 0.97 | 4.84   | -     | 1416.0  |
| AHQ-1-12, 5855 - 5886       | K.LLDDNGNIAEELSILK.W                                                    | 1757.96344 | 2 | 2.17E-11 | 0.93 | 4.30   | -     | 872.4   |
| gi 13775198 ref NP_112576.1 | SH3 domain binding glutamic acid-rich protein like 3; SH3BGL3-like pr   |            |   | 2.22E-11 | 4.17 | 50.27  | 34.40 | 10437.7 |
| AHQ-1-13 - , 4920 - 4987    | R.IQYQLVDISQDNALR.D                                                     | 1776.97168 | 2 | 3.69E-11 | 0.98 | 5.19   | -     | 2176.7  |
| AHQ-1-14 - , 4726 - 4804    | R.IQYQLVDISQDNALR.D                                                     | 1776.97168 | 2 | 2.48E-08 | 0.98 | 5.35   | -     | 2015.8  |
| AHQ-1-13 - , 4823           | R.IQYQLVDISQDNALR.D                                                     | 1776.97168 | 2 | 2.22E-11 | 0.97 | 5.05   | -     | 1824.6  |
| AHQ-1-14, 5573 - 5584       | R.IQYQLVDISQDNALR.D                                                     | 1776.97168 | 2 | 7.08E-09 | 0.98 | 5.36   | -     | 2097.5  |
| AHQ-1-13, 4588              | R.IQYQLVDISQDNALR.D                                                     | 1776.97168 | 2 | 7.48E-04 | 0.94 | 4.08   | -     | 1372.6  |
| AHQ-1-13, 4675 - 4735       | R.IQYQLVDISQDNALR.D                                                     | 1776.97168 | 2 | 8.78E-06 | 0.97 | 5.13   | -     | 1546.2  |
| AHQ-1-13, 4685              | R.IQYQLVDISQDNALRDEM.R.A                                                | 2308.55751 | 3 | 9.97E-04 | 0.87 | 3.60   | -     | 755.5   |
| AHQ-1-13, 4447              | R.IQYQLVDISQDNALRDEM.R.A                                                | 2324.55691 | 3 | 2.29E-07 | 0.56 | 3.03   | -     | 419.9   |
| AHQ-1-13, 4159 - 4239       | R.IQYQLVDISQDNALRDEM.R.A                                                | 2324.55691 | 3 | 4.53E-08 | 0.87 | 4.26   | -     | 609.3   |
| AHQ-1-13 - , 5255 - 5284    | R.IQYQLVDISQDNALRDEM.R.A                                                | 2308.55751 | 3 | 3.90E-06 | 0.79 | 3.38   | -     | 836.3   |
| AHQ-1-13 - , 5241 - 5245    | R.IQYQLVDISQDNALRDEM.R.A                                                | 2308.55751 | 2 | 5.95E-04 | 0.89 | 4.08   | -     | 617.1   |
| AHQ-1-13 - , 5119 - 5188    | R.IQYQLVDISQDNALRDEM.R.A                                                | 2308.55751 | 3 | 6.74E-06 | 0.88 | 3.45   | -     | 965.7   |
| AHQ-1-13 - , 4981 - 5053    | R.IQYQLVDISQDNALRDEM.R.A                                                | 2308.55751 | 3 | 6.66E-06 | 0.71 | 3.66   | -     | 459.3   |
| AHQ-1-13 - , 4351           | R.IQYQLVDISQDNALRDEM.R.A                                                | 2324.55691 | 3 | 5.39E-04 | 0.78 | 3.48   | -     | 380.9   |
| AHQ-1-14 - , 5000 - 5063    | R.IQYQLVDISQDNALRDEM.R.A                                                | 2308.55751 | 3 | 6.23E-08 | 0.87 | 3.92   | -     | 790.8   |
| AHQ-1-13 - , 4656 - 4719    | R.IQYQLVDISQDNALRDEM.R.A                                                | 2324.55691 | 3 | 7.78E-06 | 0.83 | 4.18   | -     | 429.6   |
| AHQ-1-14 - , 4599           | R.IQYQLVDISQDNALRDEM.R.A                                                | 2324.55691 | 3 | 2.72E-07 | 0.73 | 3.04   | -     | 691.7   |
| AHQ-1-13 - , 4825           | R.IQYQLVDISQDNALRDEM.R.A                                                | 2324.55691 | 3 | 1.89E-04 | 0.58 | 3.20   | -     | 284.0   |
| AHQ-1-13 - , 4555 - 4557    | R.IQYQLVDISQDNALRDEM.R.A                                                | 2324.55691 | 3 | 2.68E-06 | 0.75 | 3.45   | -     | 518.1   |
| AHQ-1-14 - , 1816           | R.VYSTSVTGSR.E                                                          | 1057.13940 | 2 | 8.18E-06 | 0.86 | 2.85   | -     | 933.6   |
| AHQ-1-13 - , 2008           | R.VYSTSVTGSR.E                                                          | 1057.13940 | 2 | 5.67E-05 | 0.91 | 2.60   | -     | 1337.2  |
| AHQ-1-13 - , 1883 - 1948    | R.VYSTSVTGSR.E                                                          | 1057.13940 | 2 | 1.34E-05 | 0.95 | 3.95   | -     | 1270.8  |
| AHQ-1-13 - , 1759 - 1825    | R.VYSTSVTGSR.E                                                          | 1057.13940 | 2 | 7.21E-06 | 0.89 | 2.94   | -     | 936.2   |
| AHQ-1-13, 1958 - 2038       | R.VYSTSVTGSR.E                                                          | 1057.13940 | 2 | 1.80E-06 | 0.86 | 3.03   | -     | 848.9   |
| AHQ-1-13 - , 1623 - 1703    | R.VYSTSVTGSR.E                                                          | 1057.13940 | 2 | 1.61E-05 | 0.83 | 2.64   | -     | 826.0   |
| AHQ-1-13, 2363              | R.VYSTSVTGSREIK.S                                                       | 1427.58510 | 2 | 3.10E-05 | 0.82 | 3.11   | -     | 797.4   |
| AHQ-1-13 - , 2316           | R.VYSTSVTGSREIK.S                                                       | 1427.58510 | 2 | 1.07E-05 | 0.59 | 3.00   | -     | 565.6   |
| AHQ-1-14 - , 2291           | R.VYSTSVTGSREIK.S                                                       | 1427.58510 | 2 | 6.05E-04 | 0.64 | 2.80   | -     | 551.4   |
| gi 4506005 ref NP_002700.1  | protein phosphatase 1, catalytic subunit, beta isoform [Homo sapiens] [ |            |   | 2.35E-11 | 2.88 | 30.30  | 16.50 | 37186.6 |
| AHQ-1-9, 7230 - 7232        | R.EIFLSQPILLELEAPL.K.I                                                  | 1954.33857 | 2 | 2.15E-07 | 0.96 | 5.77   | -     | 707.9   |
| AHQ-1-14 - , 6671           | R.EIFLSQPILLELEAPL.K.I                                                  | 1954.33857 | 2 | 2.74E-05 | 0.94 | 4.55   | -     | 781.4   |
| AHQ-1-13 - , 6919           | R.EIFLSQPILLELEAPL.K.I                                                  | 1954.33857 | 2 | 5.49E-08 | 0.95 | 5.01   | -     | 700.4   |
| AHQ-1-12, 6601              | R.EIFLSQPILLELEAPL.K.I                                                  | 1954.33857 | 2 | 2.87E-07 | 0.95 | 5.38   | -     | 598.7   |
| AHQ-1-9, 5263               | K.IFCCGGGLSPDLQSMEQIR.R                                                 | 2251.54930 | 3 | 2.08E-05 | 0.89 | 4.38   | -     | 1236.4  |
| AHQ-1-9, 5259               | K.IFCCGGGLSPDLQSMEQIR.R                                                 | 2251.54930 | 2 | 1.24E-05 | 0.96 | 4.74   | -     | 1480.4  |
| AHQ-1-9, 7163 - 7164        | K.TFTDFCNCLPIAAIVDEK.I                                                  | 2117.38502 | 2 | 2.44E-06 | 0.98 | 6.06   | -     | 1212.3  |
| AHQ-1-9, 7004               | K.TFTDFCNCLPIAAIVDEK.I                                                  | 2117.38502 | 2 | 2.35E-11 | 0.97 | 4.57   | -     | 1423.8  |
| gi 4504349 ref NP_000509.1  | beta globin [Homo sapiens]                                              |            |   | 2.36E-11 | 8.99 | 100.28 | 70.70 | 15998.3 |
| AHQ-1-13 - , 3105 - 3175    | K.EFTPPVQAAAYQK.V                                                       | 1379.54213 | 2 | 5.05E-07 | 0.82 | 2.85   | -     | 680.1   |
| AHQ-1-14 - , 5046 - 5047    | R.FFESFGDLSLTPDAVM.GNPK.V                                               | 2076.27158 | 2 | 3.36E-07 | 0.95 | 5.14   | -     | 850.1   |
| AHQ-1-13 - , 5732           | R.FFESFGDLSLTPDAVMGNPK.V                                                | 2060.27218 | 2 | 1.15E-06 | 0.95 | 4.84   | -     | 864.5   |
| AHQ-1-13, 5499              | R.FFESFGDLSLTPDAVMGNPK.V                                                | 2060.27218 | 2 | 8.83E-05 | 0.86 | 3.29   | -     | 844.0   |
| AHQ-1-13, 5403              | R.FFESFGDLSLTPDAVMGNPK.V                                                | 2060.27218 | 2 | 1.07E-04 | 0.92 | 4.41   | -     | 616.8   |
| AHQ-1-13, 4903              | R.FFESFGDLSLTPDAVM.GNPK.V                                               | 2076.27158 | 3 | 5.89E-05 | 0.92 | 3.53   | -     | 1545.4  |
| AHQ-1-13 - , 5140 - 5151    | R.FFESFGDLSLTPDAVM.GNPK.V                                               | 2076.27158 | 2 | 6.83E-05 | 0.90 | 4.29   | -     | 598.5   |
| AHQ-1-13, 3519 - 3525       | K.GTFATLSELHCDK.L                                                       | 1480.62492 | 2 | 3.80E-09 | 0.84 | 3.42   | -     | 627.8   |
| AHQ-1-13 - , 3615           | K.GTFATLSELHCDK.L                                                       | 1480.62492 | 2 | 2.32E-08 | 0.77 | 3.40   | -     | 496.6   |
| AHQ-1-13 - , 5173 - 5200    | K.GTFATLSELHCDKLVDPENFR.L                                               | 2588.83687 | 3 | 2.36E-11 | 0.96 | 5.38   | -     | 1052.0  |
| AHQ-1-13, 4885              | K.GTFATLSELHCDKLVDPENFR.L                                               | 2588.83687 | 3 | 3.06E-09 | 0.95 | 5.18   | -     | 1133.8  |
| AHQ-1-13, 4905              | K.GTFATLSELHCDKLVDPENFR.L                                               | 2588.83687 | 2 | 2.34E-06 | 0.76 | 3.04   | -     | 561.7   |
| AHQ-1-13 - , 4963 - 5017    | K.KVLGAFSDGLAHLNLIK.G                                                   | 1799.06362 | 2 | 5.06E-06 | 0.94 | 4.46   | -     | 1096.9  |
| AHQ-1-13 - , 4969           | K.KVLGAFSDGLAHLNLIK.G                                                   | 1799.06362 | 3 | 7.21E-06 | 0.93 | 4.99   | -     | 908.2   |
| AHQ-1-13 - , 3584           | K.SAVTALWGK.V                                                           | 933.08624  | 2 | 6.18E-05 | 0.90 | 3.01   | -     | 817.4   |
| AHQ-1-13, 3474              | K.SAVTALWGK.V                                                           | 933.08624  | 2 | 1.58E-04 | 0.76 | 2.60   | -     | 699.3   |
| AHQ-1-13, 4999 - 5056       | K.VLGAFSDDLALHLDNLK.G                                                   | 1670.89071 | 2 | 7.13E-11 | 0.97 | 5.65   | -     | 1688.3  |
| AHQ-1-13, 4767 - 4841       | K.VLGAFSDDLALHLDNLK.G                                                   | 1670.89071 | 2 | 1.27E-10 | 0.97 | 4.91   | -     | 1850.9  |
| AHQ-1-13 - , 5300           | K.VLGAFSDDLALHLDNLK.G                                                   | 1670.89071 | 3 | 1.60E-07 | 0.84 | 3.50   | -     | 596.9   |
| AHQ-1-13 - , 5111           | K.VLGAFSDDLALHLDNLK.G                                                   | 1670.89071 | 2 | 1.97E-10 | 0.97 | 5.20   | -     | 1548.1  |
| AHQ-1-13 - , 5293           | K.VLGAFSDDLALHLDNLK.G                                                   | 1670.89071 | 2 | 3.92E-07 | 0.95 | 4.50   | -     | 1393.9  |
| AHQ-1-13 - , 3345           | K.VNVDEVGGALGR.L                                                        | 1315.41484 | 1 | 2.28E-05 | 0.46 | 2.51   | -     | 360.1   |
| AHQ-1-13 - , 3343           | K.VNVDEVGGALGR.L                                                        | 1315.41484 | 2 | 1.85E-04 | 0.97 | 4.52   | -     | 1919.3  |
| AHQ-1-13 - , 3349           | K.VNVDEVGGALGR.L                                                        | 1315.41484 | 1 | 2.81E-07 | 0.73 | 3.40   | -     | 337.2   |
| AHQ-1-13, 3273 - 3275       | K.VNVDEVGGALGR.L                                                        | 1315.41484 | 1 | 9.10E-05 | 0.61 | 2.81   | -     | 347.2   |
| AHQ-1-13 - , 2535 - 2543    | K.VVAGVANALAHK.Y                                                        | 1150.35593 | 2 | 7.77E-08 | 0.93 | 3.15   | -     | 1455.5  |
| gi 24119203 ref NP_705935.1 | tropomyosin 3 [Homo sapiens]                                            |            |   | 2.46E-11 | 5.63 | 60.29  | 20.20 | 29032.5 |
| AHQ-1-9, 2278               | R.AREQAEEVASLNR.R                                                       | 1544.65218 | 2 | 9.03E-06 | 0.98 | 5.70   | -     | 3481.3  |
| AHQ-1-1, 3887 - 3903        | R.IQLVEEELDR.A                                                          | 1244.37653 | 2 | 8.34E-05 | 0.79 | 2.66   | -     | 643.8   |
| AHQ-1-13 - , 3827 - 3840    | R.IQLVEEELDR.A                                                          | 1244.37653 | 2 | 1.02E-06 | 0.90 | 3.70   | -     | 843.0   |
| AHQ-1-11, 3515              | R.IQLVEEELDR.A                                                          | 1244.37653 | 2 | 2.79E-05 | 0.87 | 2.94   | -     | 969.8   |
| AHQ-1-10, 3408 - 3425       | R.IQLVEEELDR.A                                                          | 1244.37653 | 2 | 8.76E-08 | 0.92 | 3.75   | -     | 1017.8  |
| AHQ-1-9, 3538               | R.IQLVEEELDR.A                                                          | 1244.37653 | 1 | 9.35E-04 | 0.71 | 2.94   | -     | 682.4   |
| AHQ-1-9, 3528 - 3598        | R.IQLVEEELDR.A                                                          | 1244.37653 | 1 | 1.80E-05 | 0.60 | 2.74   | -     | 578.7   |
| AHQ-1-9, 3510 - 3590        | R.IQLVEEELDR.A                                                          | 1244.37653 | 2 | 2.59E-07 | 0.91 | 3.63   | -     | 855.9   |
| AHQ-1-13 - , 3829           | R.IQLVEEELDR.A                                                          | 1244.37653 | 1 | 8.14E-06 | 0.43 | 2.41   | -     | 384.6   |
| AHQ-1-10, 2672              | K.IQVLQQQADDAEER.A                                                      | 1643.73738 | 2 | 6.38E-07 | 0.96 | 4.29   | -     | 1460.5  |
| AHQ-1-9, 2706               | K.IQVLQQQADDAEER.A                                                      | 1643.73738 | 2 | 1.33E-08 | 0.97 | 4.51   | -     | 1878.9  |
| AHQ-1-9, 2423               | R.KIQVLQQQADDAEER.A                                                     | 1771.91030 | 2 | 6.49E-08 | 0.97 | 4.86   | -     | 1724.3  |
| AHQ-1-9, 2523               | R.KIQVLQQQADDAEER.A                                                     | 1771.91030 | 2 | 3.32E-05 | 0.96 | 4.90   | -     | 1332.3  |
| AHQ-1-9, 2427 - 2440        | R.KIQVLQQQADDAEER.A                                                     | 1771.91030 | 3 | 2.46E-11 | 0.98 | 5.30   | -     | 2262.3  |
| AHQ-1-10, 2449              | R.KIQVLQQQADDAEER.A                                                     | 1771.91030 | 2 | 4.38E-04 | 0.96 | 4.98   | -     | 1225.9  |
| AHQ-1-10, 3131              | R.IQLVEEELDR.A                                                          | 1400.56288 | 2 | 2.57E-07 | 0.98 | 5.23   | -     | 2012.3  |
| AHQ-1-9, 3019 - 3026        | K.TIDLEDKLC.C                                                           | 1190.32563 | 2 | 2.08E-05 | 0.81 | 3.07   | -     | 639.6   |



|                             |                                                                         |            |   |          |      |       |       |         |
|-----------------------------|-------------------------------------------------------------------------|------------|---|----------|------|-------|-------|---------|
| AHQ-1-7, 5200 - 5204        | R.YYWGQYTWDMAK.H                                                        | 1669.84009 | 2 | 6.33E-04 | 0.89 | 3.20  | -     | 826.9   |
| AHQ-1-10, 4140              | R.YYWGQYTWDM*AK.H                                                       | 1685.83949 | 2 | 3.69E-05 | 0.91 | 3.83  | -     | 968.2   |
| AHQ-1-14- , 4567 - 4598     | R.YYWGQYTWDM*AK.H                                                       | 1685.83949 | 2 | 2.86E-06 | 0.86 | 3.11  | -     | 733.8   |
| AHQ-1-14- , 5086 - 5090     | R.YYWGQYTWDMAK.H                                                        | 1669.84009 | 2 | 2.30E-04 | 0.96 | 4.18  | -     | 1444.8  |
| AHQ-1-7, 5285               | R.YYWGQYTWDMAK.H                                                        | 1669.84009 | 2 | 7.44E-04 | 0.93 | 3.31  | -     | 1286.8  |
| gi 5031601 ref NP_005711.1  | actin related protein 2/3 complex subunit 1B; ARP2/3 protein complex su |            |   |          |      |       |       |         |
| AHQ-1-9, 2254 - 2256        | K.ASSEGTAAGAGLDSLHK.N                                                   | 1629.71071 | 2 | 4.70E-05 | 0.51 | 2.98  | -     | 500.9   |
| AHQ-1-9, 4136               | K.ASSEGTAAGAGLDSLHKNSVQISVLSGGK.A                                       | 2887.10986 | 3 | 3.35E-11 | 0.91 | 4.70  | -     | 1073.1  |
| AHQ-1-9, 2426               | K.EVEERPAPTPWGSK.M                                                      | 1583.72678 | 2 | 7.44E-08 | 0.94 | 4.27  | -     | 962.9   |
| AHQ-1-9, 3286               | K.NSVSQISVLSGGK.A                                                       | 1276.42175 | 1 | 2.86E-06 | 0.16 | 1.98  | -     | 270.8   |
| AHQ-1-9, 2926               | K.NSVSQISVLSGGK.A                                                       | 1276.42175 | 2 | 2.21E-06 | 0.95 | 3.71  | -     | 1347.4  |
| AHQ-1-9, 3452               | R.TQIAICPNNHEVHIYEK.S                                                   | 2068.29887 | 2 | 3.15E-05 | 0.93 | 4.46  | -     | 1007.1  |
| AHQ-1-9, 3338 - 3352        | R.TQIAICPNNHEVHIYEK.S                                                   | 2068.29887 | 2 | 1.87E-07 | 0.95 | 5.00  | -     | 894.4   |
| AHQ-1-9, 3192               | R.VAVVSHDSTVCLADADKK.M                                                  | 2004.20995 | 2 | 2.25E-06 | 0.95 | 4.82  | -     | 1049.4  |
| gi 22043610 ref XP_171081.1 | similar to ras-related C3 botulinum toxin substrate 1 isoform Rac1; rh  |            |   |          |      |       |       |         |
| AHQ-1-11, 2755              | R.HHCNPPIILVGT.K.L                                                      | 1588.85612 | 3 | 7.29E-04 | 0.87 | 3.39  | -     | 1253.5  |
| AHQ-1-11, 3814 - 3815       | K.KLTPITYPQGLAMAK.E                                                     | 1632.99216 | 2 | 7.56E-05 | 0.88 | 3.89  | -     | 645.7   |
| AHQ-1-11, 4595              | K.PVNLGLWDTAGQEDYDR.L                                                   | 1950.05441 | 2 | 3.49E-11 | 0.98 | 5.64  | -     | 2428.8  |
| gi 21624607 ref NP_066972.1 | coactosin-like 1 [Homo sapiens]                                         |            |   |          |      |       |       |         |
| AHQ-1-13, 2357              | R.AAYNLVR.D                                                             | 806.93245  | 2 | 4.34E-04 | 0.82 | 2.72  | -     | 823.2   |
| AHQ-1-12, 2215 - 2217       | R.AAYNLVR.D                                                             | 806.93245  | 2 | 1.06E-04 | 0.84 | 2.72  | -     | 650.8   |
| AHQ-1-13- , 5429 - 5445     | R.DDGSAVIIVWTFK.Y                                                       | 1338.49001 | 2 | 2.40E-07 | 0.93 | 4.00  | -     | 985.9   |
| AHQ-1-13- , 5459            | R.DDGSAVIIVWTFK.Y                                                       | 1338.49001 | 2 | 1.84E-06 | 0.95 | 3.74  | -     | 1311.3  |
| AHQ-1-13- , 4301            | K.ELEEDFIK.S                                                            | 1480.64154 | 2 | 8.27E-04 | 0.60 | 3.05  | -     | 448.3   |
| AHQ-1-13, 6435              | K.FALITWIGENVSGLQR.A                                                    | 1805.06986 | 2 | 2.67E-08 | 0.97 | 5.55  | -     | 1889.2  |
| AHQ-1-13- , 2944            | R.KELEEDFIK.S                                                           | 1151.29110 | 2 | 9.47E-05 | 0.75 | 2.91  | -     | 711.4   |
| AHQ-1-13- , 2947            | R.KELEEDFIK.S                                                           | 1151.29110 | 1 | 6.14E-04 | 0.37 | 2.43  | -     | 479.3   |
| AHQ-1-13, 2905              | R.KELEEDFIK.S                                                           | 1151.29110 | 1 | 2.15E-04 | 0.59 | 2.73  | -     | 523.2   |
| AHQ-1-13, 2902 - 2906       | R.KELEEDFIK.S                                                           | 1151.29110 | 2 | 3.70E-04 | 0.80 | 3.02  | -     | 767.5   |
| AHQ-1-12, 2815              | R.KELEEDFIK.S                                                           | 1151.29110 | 2 | 4.23E-04 | 0.84 | 2.92  | -     | 902.7   |
| AHQ-1-13- , 5568            | K.YDGSITVPGEQGAEQHFQIQCTDDVR.L                                          | 3116.27790 | 3 | 1.34E-08 | 0.60 | 3.13  | -     | 306.6   |
| AHQ-1-13, 5159 - 5221       | K.YDGSITVPGEQGAEQHFQIQCTDDVR.L                                          | 3116.27790 | 3 | 3.53E-11 | 0.90 | 4.93  | -     | 570.0   |
| gi 4759300 ref NP_004772.1  | vesicle-associated membrane protein 3 (cellubrevin); vesicle-associated |            |   |          |      |       |       |         |
| AHQ-1-14- , 3604            | R.ADALQAGASQFETSAAK.L                                                   | 1666.77095 | 2 | 8.72E-09 | 0.93 | 4.07  | -     | 968.7   |
| AHQ-1-13- , 3679            | R.ADALQAGASQFETSAAK.L                                                   | 1666.77095 | 2 | 3.55E-11 | 0.94 | 4.74  | -     | 931.3   |
| AHQ-1-13, 3558              | R.ADALQAGASQFETSAAK.L                                                   | 1666.77095 | 2 | 3.12E-04 | 0.86 | 3.59  | -     | 720.4   |
| AHQ-1-13- , 3835            | R.LQQTQNGQDEVVDMIR.V                                                    | 1933.13344 | 3 | 4.54E-08 | 0.93 | 4.20  | -     | 1347.5  |
| AHQ-1-13- , 4889            | R.LQQTQNGQDEVVDMIR.V                                                    | 1917.13404 | 2 | 7.78E-04 | 0.55 | 3.22  | -     | 546.8   |
| AHQ-1-13- , 5025            | R.LQQTQNGQDEVVDMIR.V                                                    | 1917.13404 | 2 | 3.63E-08 | 0.98 | 5.51  | -     | 2464.4  |
| AHQ-1-13- , 3823 - 3831     | R.LQQTQNGQDEVVDMIR.V                                                    | 1933.13344 | 2 | 5.39E-06 | 0.96 | 5.06  | -     | 1295.2  |
| AHQ-1-13, 4768              | R.LQQTQNGQDEVVDMIR.V                                                    | 1917.13404 | 2 | 1.51E-07 | 0.98 | 5.56  | -     | 1839.6  |
| gi 4885413 ref NP_005331.1  | histidine triad nucleotide binding protein 1; Histidine triad nucleotid |            |   |          |      |       |       |         |
| AHQ-1-13, 5373 - 5387       | R.CLAFHDISPQAPTHFLVLPK.K                                                | 2293.67220 | 3 | 4.93E-06 | 0.94 | 4.73  | -     | 1354.6  |
| AHQ-1-13- , 4005            | R.MVVNEGSDGGQSVYVHHLVHLGGR.Q                                            | 2548.82255 | 3 | 3.83E-11 | 0.84 | 3.63  | -     | 718.4   |
| AHQ-1-13- , 2465            | R.PGGDTIFGK.I                                                           | 891.99098  | 2 | 1.76E-06 | 0.89 | 3.36  | -     | 676.3   |
| gi 7657056 ref NP_055415.1  | EH-domain containing 3; EH domain containing 3 [Homo sapiens]           |            |   |          |      |       |       |         |
| AHQ-1-7, 2836 - 2866        | K.ADQIETQQLMR.V                                                         | 1333.49681 | 2 | 4.16E-11 | 8.07 | 90.34 | 34.00 | 60886.7 |
| AHQ-1-7, 6365               | R.DKPMYDEIFYTLSPVDGK.I                                                  | 2119.37953 | 2 | 3.40E-05 | 0.89 | 3.23  | -     | 1399.8  |
| AHQ-1-7, 5941               | R.FHEFHSPALEDADFNKPMVLLVQGYSTGK.T                                       | 3394.75749 | 3 | 4.16E-11 | 0.97 | 6.62  | -     | 1389.2  |
| AHQ-1-10, 6385              | R.FVCAQLPNPVLSEISVIDTPGILSGEK.Q                                         | 2886.30971 | 2 | 3.99E-04 | 0.87 | 3.78  | -     | 724.8   |
| AHQ-1-8, 7478 - 7479        | R.FVCAQLPNPVLSEISVIDTPGILSGEK.Q                                         | 2886.30971 | 2 | 2.44E-04 | 0.95 | 4.78  | -     | 1113.0  |
| AHQ-1-7, 5741               | K.GGAFEGTLLHGFPGHGYGEGAGGIDDAEWWVAR.D                                   | 3317.48513 | 3 | 2.68E-06 | 0.98 | 6.75  | -     | 1966.3  |
| AHQ-1-7, 6033               | K.LADIKDKGMLDDDEFALANHLIK.V                                             | 2573.86063 | 3 | 5.07E-05 | 0.57 | 3.12  | -     | 634.2   |
| AHQ-1-7, 5045               | K.LFEAEQDLFR.D                                                          | 1397.51432 | 2 | 8.08E-07 | 0.95 | 3.33  | -     | 1825.7  |
| AHQ-1-7, 2857 - 2865        | R.MDQDLQAQDFSK.F                                                        | 1439.57624 | 2 | 5.92E-04 | 0.95 | 4.63  | -     | 1427.9  |
| AHQ-1-8, 6158 - 6162        | R.VYIGSFWSHPLLPDNR.K                                                    | 2015.30234 | 2 | 3.09E-04 | 0.91 | 3.58  | -     | 1046.6  |
| AHQ-1-7, 6333 - 6338        | R.VYIGSFWSHPLLPDNR.K                                                    | 2015.30234 | 2 | 1.63E-05 | 0.85 | 3.71  | -     | 547.1   |
| gi 7616781 ref NP_056461.1  | RAP1B, member of RAS oncogene family; K-REV; RAS-related protein RAP4B  |            |   |          |      |       |       |         |
| AHQ-1-11, 4171              | K.DTDDVPMILVGNK.C                                                       | 1417.61048 | 2 | 2.20E-07 | 0.85 | 3.48  | -     | 796.8   |
| AHQ-1-11, 6206 - 6279       | R.KQVEVDAQQCMLEILDAGTEQFTAM*R.D                                         | 3131.50548 | 3 | 2.02E-08 | 0.95 | 4.63  | -     | 1518.2  |
| AHQ-1-14- , 6447 - 6512     | R.KQVEVDAQQCMLEILDAGTEQFTAM*R.D                                         | 3131.50548 | 3 | 2.89E-06 | 0.93 | 4.61  | -     | 1180.8  |
| AHQ-1-11, 6560              | R.KQVEVDAQQCMLEILDAGTEQFTAM*R.D                                         | 3131.50548 | 3 | 4.18E-09 | 0.94 | 5.33  | -     | 839.9   |
| AHQ-1-13- , 6689 - 6759     | R.KQVEVDAQQCMLEILDAGTEQFTAM*R.D                                         | 3131.50548 | 3 | 4.78E-06 | 0.91 | 4.23  | -     | 1386.8  |
| AHQ-1-14- , 5268            | R.KQVEVDAQQCM*LEILDAGTEQFTAM*R.D                                        | 3147.50488 | 3 | 2.19E-08 | 0.95 | 5.04  | -     | 1339.6  |
| AHQ-1-11, 6516 - 6590       | K.QVEVDAQQCM*LEILDAGTEQFTAM*R.D                                         | 3019.33197 | 3 | 3.05E-04 | 0.73 | 3.26  | -     | 644.2   |
| AHQ-1-11, 3868 - 3927       | R.QWNNCAFLESSAK.S                                                       | 1556.68148 | 2 | 3.15E-05 | 0.51 | 2.86  | -     | 394.2   |
| AHQ-1-11, 3986 - 4058       | R.QWNNCAFLESSAK.S                                                       | 1556.68148 | 2 | 4.85E-05 | 0.55 | 2.89  | -     | 204.5   |
| AHQ-1-11, 3607 - 3620       | R.VKDTRDVPMLVGNK.C                                                      | 1644.91497 | 3 | 6.50E-06 | 0.94 | 4.34  | -     | 1691.5  |
| AHQ-1-11, 3598 - 3658       | R.VKDTRDVPMLVGNK.C                                                      | 1644.91497 | 2 | 4.41E-10 | 0.97 | 5.09  | -     | 1904.1  |
| AHQ-1-13- , 4003            | R.VKDTRDVPMLVGNK.C                                                      | 1644.91497 | 2 | 3.23E-07 | 0.97 | 5.13  | -     | 1489.1  |
| AHQ-1-13, 3839              | R.VKDTRDVPMLVGNK.C                                                      | 1644.91497 | 2 | 9.29E-06 | 0.98 | 4.89  | -     | 1957.2  |
| AHQ-1-12, 3759              | R.VKDTRDVPMLVGNK.C                                                      | 1644.91497 | 2 | 7.37E-07 | 0.97 | 4.71  | -     | 1772.8  |
| AHQ-1-11, 3202              | R.VKDTRDVP*ILVGNK.C                                                     | 1660.91437 | 3 | 2.21E-04 | 0.89 | 3.77  | -     | 1323.1  |
| AHQ-1-11, 3218 - 3254       | R.VKDTRDVP*ILVGNK.C                                                     | 1660.91437 | 2 | 1.37E-04 | 0.96 | 4.78  | -     | 1229.9  |
| AHQ-1-14- , 3900 - 3914     | R.VKDTRDVPMLVGNK.C                                                      | 1644.91497 | 2 | 3.45E-06 | 0.96 | 4.27  | -     | 1534.0  |
| AHQ-1-13- , 4012            | R.VKDTRDVPMLVGNK.C                                                      | 1644.91497 | 3 | 3.04E-06 | 0.95 | 4.56  | -     | 1931.5  |
| AHQ-1-11, 4351              | R.VKDTRDVPMLVGNKCDLEDER.V                                               | 2563.84420 | 2 | 7.35E-06 | 0.80 | 3.38  | -     | 481.4   |
| AHQ-1-11, 4278 - 4358       | R.VKDTRDVPMLVGNKCDLEDER.V                                               | 2563.84420 | 3 | 8.43E-09 | 0.93 | 4.79  | -     | 1057.7  |
| AHQ-1-13, 4073              | R.VKDTRDVP*ILVGNKCDLEDER.V                                              | 2579.84360 | 3 | 1.08E-04 | 0.87 | 4.46  | -     | 680.9   |
| AHQ-1-14, 5009              | R.VKDTRDVP*ILVGNKCDLEDER.V                                              | 2579.84360 | 3 | 2.29E-04 | 0.87 | 4.24  | -     | 825.8   |
| AHQ-1-11, 4200 - 4258       | R.VKDTRDVPMLVGNKCDLEDER.V                                               | 2563.84420 | 2 | 2.72E-05 | 0.85 | 3.21  | -     | 892.0   |
| AHQ-1-11, 4148 - 4219       | R.VKDTRDVPMLVGNKCDLEDER.V                                               | 2563.84420 | 3 | 4.20E-11 | 0.97 | 5.96  | -     | 1809.7  |
| AHQ-1-13- , 4612            | R.VKDTRDVPMLVGNKCDLEDER.V                                               | 2563.84420 | 3 | 3.15E-05 | 0.93 | 4.51  | -     | 1010.3  |
| AHQ-1-11, 4020 - 4092       | R.VKDTRDVP*ILVGNKCDLEDER.V                                              | 2579.84360 | 3 | 7.39E-10 | 0.94 | 5.16  | -     | 1557.4  |
| AHQ-1-11, 3916              | R.VKDTRDVP*ILVGNKCDLEDER.V                                              | 2579.84360 | 2 | 7.31E-04 | 0.79 | 3.38  | -     | 524.5   |
| AHQ-1-11, 3906 - 3954       | R.VKDTRDVP*ILVGNKCDLEDER.V                                              | 2579.84360 | 3 | 9.85E-05 | 0.83 | 3.86  | -     | 861.2   |
| AHQ-1-11, 4378              | R.VKDTRDVPMLVGNKCDLEDERVVGK.E                                           | 2947.33182 | 3 | 8.34E-08 | 0.93 | 5.30  | -     | 1273.5  |
| gi 20149570 ref NP_005816.2 | RAS guanyl releasing protein 2 isoform 1; calcium and diacylglycerol-r  |            |   |          |      |       |       |         |
| AHQ-1-6, 5419               | K.ILFQDYHSFVTHGCTVDNPNVLER.F                                            | 2750.03824 | 2 | 4.53E-11 | 1.84 | 20.21 | 6.30  | 75547.0 |
| AHQ-1-6, 6838               | K.LWEGTTELVTATGNYGNYR.R                                                 | 2158.35558 | 3 | 5.91E-04 | 0.92 | 3.40  | -     | 1416.1  |
| gi 5803225 ref NP_006752.1  | tyrosine 3-tryptophan 5-monoxygenase activation protein, epsilon poly   |            |   |          |      |       |       |         |
| AHQ-1-9, 6983 - 6986        | K.AAFDDAIAELDTLSEESYK.D                                                 | 2089.19882 | 2 | 4.64E-11 | 0.93 | 4.48  | -     | 909.7   |
| AHQ-1-10, 6183              | K.AAFDDAIAELDTLSEESYK.D                                                 | 2089.19882 | 3 | 1.06E-05 | 0.75 | 3.27  | -     | 695.9   |
| AHQ-1-10, 6179 - 6180       | K.AAFDDAIAELDTLSEESYK.D                                                 | 2089.19882 | 2 | 2.72E-07 | 0.97 | 5.05  | -     | 1431.2  |
| AHQ-1-13, 6263 - 6339       | K.AAFDDAIAELDTLSEESYK.D                                                 | 2089.19882 | 2 | 1.19E-08 | 0.98 | 5.64  | -     | 1633.5  |
| AHQ-1-10, 2464              | K.EAAENSLVAYK.A                                                         | 1195.30397 | 2 | 2.10E-05 | 0.62 | 3.02  | -     | 698.2   |
| AHQ-1-9, 2663               | K.EAAENSLVAYK.A                                                         | 1195.30397 | 1 | 7.05E-10 | 0.62 | 2.42  | -     | 360.9   |
| gi 5902128 ref NP_008880.1  | synixin binding protein 2; Hunc18b [Homo sapiens]                       |            |   |          |      |       |       |         |
| AHQ-1-6, 6418               | K.AAHIFFTDTCPEPLFSELGR.S                                                | 2310.57011 | 2 | 4.65E-11 | 0.97 | 5.49  | -     | 1143.1  |
| AHQ-1-6, 6422 - 6438        | K.AAHIFFTDTCPEPLFSELGR.S                                                | 2310.57011 | 3 | 1.73E-06 | 0.95 | 5.36  | -     | 951.6   |
| AHQ-1-6, 6694 - 6695        | R.EPIPSLEAIYLLSPTKEK.S                                                  | 1901.18939 | 2 | 6.10E-07 | 0.92 | 4.32  | -     | 838.8   |
| AHQ-1-14- , 6351            | R.EPIPSLEAIYLLSPTKEK.S                                                  | 1901.18939 | 2 | 7.45E-07 | 0.75 | 3.04  | -     | 648.7   |
| AHQ-1-6, 3175               | R.KGPEDTAQLAHAVLAK.L                                                    | 1649.87303 | 3 | 4.84E-06 | 0.96 | 5.10  | -     | 1710.2  |
| AHQ-1-6, 3180               | R.KGPEDTAQLAHAVLAK.L                                                    | 1649.87303 | 2 | 1.27E-10 | 0.85 | 3.52  | -     | 718.9   |
| AHQ-1-6, 3716               | K.LCSVEQDLAM*GSDAEGEK.I                                                 | 1957.08386 | 2 | 3.41E-10 | 0.95 | 4.15  | -     | 1436.7  |
| AHQ-1-6, 2332               | K.LIQHANVQAHSSLIR.N                                                     | 1687.92773 | 2 | 9.28E-08 | 0.95 | 4.34  | -     | 1442.0  |
| AHQ-1-6, 6488               | K.LIVPVLLDAAVPAYDK.I                                                    | 1698.03911 | 2 | 8.04E-11 | 0.97 | 4.59  | -     | 2154.8  |

|                            |                                                                         |            |   |          |      |        |       |          |
|----------------------------|-------------------------------------------------------------------------|------------|---|----------|------|--------|-------|----------|
| AHQ-1-6, 5542              | R.NLWPFVSDPAPTASSQAASAR.F                                               | 2273.48981 | 2 | 1.13E-04 | 0.81 | 3.66   | -     | 437.8    |
| AHQ-1-6, 6044 - 6124       | R.REPIPSLEAIYLLSPTEK.S                                                  | 2057.37574 | 2 | 4.14E-04 | 0.96 | 5.06   | -     | 1417.5   |
| AHQ-1-6, 4858 - 4928       | K.WEVLIGSSHLTPTR.F                                                      | 1709.97007 | 2 | 2.25E-09 | 0.96 | 4.57   | -     | 1333.2   |
| AHQ-1-6, 2032              | R.YETTLGSEAR.E                                                          | 1127.18649 | 2 | 1.08E-04 | 0.85 | 2.54   | -     | 815.5    |
| gj4505942[ref]NP_009057.1  | valosin-containing protein; yeast Cdc48p homolog; transitional endoplas |            |   | 4.74E-11 | 8.42 | 100.28 | 18.90 | 89321.3  |
| AHQ-1-5, 4146 - 4219       | K.AIANCEQANFISIK.G                                                      | 1580.78762 | 2 | 6.66E-05 | 0.81 | 3.87   | -     | 827.5    |
| AHQ-1-5, 3781              | R.ELQELVQYPVEHPDK.F                                                     | 1825.01157 | 2 | 1.12E-04 | 0.90 | 4.18   | -     | 671.0    |
| AHQ-1-5, 3789 - 3790       | R.ELQELVQYPVEHPDK.F                                                     | 1825.01157 | 3 | 1.72E-04 | 0.73 | 3.31   | -     | 707.7    |
| AHQ-1-5, 3631              | R.GILLYGPPGTGK.T                                                        | 1173.38627 | 2 | 8.86E-04 | 0.63 | 3.01   | -     | 646.9    |
| AHQ-1-5, 6945              | R.IVSQLLTMLDGLK.Q                                                       | 1431.76657 | 2 | 2.47E-08 | 0.97 | 4.72   | -     | 1466.3   |
| AHQ-1-5, 5895 - 5897       | R.LDQLYIPLPEK.S                                                         | 1557.81228 | 2 | 2.80E-06 | 0.85 | 3.71   | -     | 651.4    |
| AHQ-1-5, 3055              | R.LEILQHTK.N                                                            | 1095.31705 | 1 | 2.66E-06 | 0.60 | 2.51   | -     | 452.8    |
| AHQ-1-5, 5155 - 5225       | R.LIVDEAINEDNSVVSLSQPK.M                                                | 2171.39088 | 2 | 1.09E-04 | 0.97 | 5.67   | -     | 879.5    |
| AHQ-1-5, 7433 - 7434       | K.NAPAFIDELDAIPK.R                                                      | 1812.09907 | 2 | 4.74E-11 | 0.96 | 4.97   | -     | 1275.3   |
| AHQ-1-5, 5079              | K.VVETDPSYCVAPDVIHCEGEPIKR.E                                            | 3085.45473 | 3 | 2.42E-09 | 0.84 | 4.03   | -     | 385.8    |
| AHQ-1-5, 3491              | R.WALSQSNPSALR.E                                                        | 1330.47434 | 2 | 7.77E-06 | 0.90 | 3.75   | -     | 1069.6   |
| gj4501893[ref]NP_001094.1  | actinin, alpha 2 [Homo sapiens]                                         |            |   | 5.16E-11 | 9.18 | 100.28 | 11.40 | 103853.1 |
| AHQ-1-4, 4695              | K.AGTQIENIEDFR.N                                                        | 1522.59861 | 2 | 5.27E-04 | 0.81 | 3.25   | -     | 775.5    |
| AHQ-1-5, 5121 - 5189       | K.COLEINFNTLQTK.L                                                       | 1610.81373 | 2 | 1.75E-09 | 0.98 | 5.54   | -     | 1400.5   |
| AHQ-1-6, 5027 - 5100       | K.COLEINFNTLQTK.L                                                       | 1610.81373 | 2 | 5.68E-04 | 0.85 | 2.92   | -     | 1037.4   |
| AHQ-1-4, 5195 - 5196       | K.COLEINFNTLQTK.L                                                       | 1610.81373 | 2 | 1.87E-09 | 0.96 | 4.65   | -     | 1447.1   |
| AHQ-1-1, 5140              | K.COLEINFNTLQTK.L                                                       | 1610.81373 | 2 | 6.82E-07 | 0.90 | 4.12   | -     | 663.9    |
| AHQ-1-5, 4965              | K.EGILLWCOR.K                                                           | 1176.37031 | 2 | 5.43E-06 | 0.94 | 3.62   | -     | 1030.8   |
| AHQ-1-9, 4123 - 4202       | R.FAIQDISVEETSAAK.E                                                     | 1538.68108 | 2 | 1.53E-09 | 0.96 | 4.70   | -     | 1215.8   |
| AHQ-1-3, 4347              | R.FAIQDISVEETSAAK.E                                                     | 1538.68108 | 2 | 1.15E-04 | 0.91 | 3.44   | -     | 1031.2   |
| AHQ-1-7, 4281 - 4293       | R.FAIQDISVEETSAAK.E                                                     | 1538.68108 | 2 | 4.39E-04 | 0.79 | 3.41   | -     | 604.6    |
| AHQ-1-2, 4514              | R.FAIQDISVEETSAAK.E                                                     | 1538.68108 | 2 | 9.84E-04 | 0.78 | 2.75   | -     | 883.9    |
| AHQ-1-6, 4211 - 4215       | R.FAIQDISVEETSAAK.E                                                     | 1538.68108 | 2 | 5.14E-06 | 0.95 | 3.95   | -     | 1404.1   |
| AHQ-1-10, 3900             | R.FAIQDISVEETSAAK.E                                                     | 1538.68108 | 2 | 1.56E-04 | 0.68 | 2.75   | -     | 730.7    |
| AHQ-1-1, 4383 - 4399       | R.FAIQDISVEETSAAK.E                                                     | 1538.68108 | 2 | 8.92E-04 | 0.89 | 2.99   | -     | 1132.6   |
| AHQ-1-4, 4391              | R.FAIQDISVEETSAAK.E                                                     | 1538.68108 | 2 | 4.64E-09 | 0.92 | 3.57   | -     | 1094.7   |
| AHQ-1-13, 4124 - 4183      | R.FAIQDISVEETSAAK.E                                                     | 1538.68108 | 2 | 9.20E-05 | 0.86 | 3.47   | -     | 794.7    |
| AHQ-1-5, 4265 - 4333       | R.FAIQDISVEETSAAK.E                                                     | 1538.68108 | 2 | 5.90E-07 | 0.96 | 3.98   | -     | 1601.7   |
| AHQ-1-5, 4150              | R.FAIQDISVEETSAAK.E                                                     | 1538.68108 | 2 | 5.52E-05 | 0.94 | 3.64   | -     | 1488.3   |
| AHQ-1-5, 6377              | K.GYEEWLLNEIR.R                                                         | 1422.56701 | 2 | 3.33E-07 | 0.94 | 3.33   | -     | 1507.5   |
| AHQ-1-1, 6132              | K.GYEEWLLNEIR.R                                                         | 1422.56701 | 2 | 1.37E-06 | 0.95 | 3.73   | -     | 1417.0   |
| AHQ-1-5, 6234              | K.GYEEWLLNEIR.R                                                         | 1422.56701 | 1 | 2.29E-05 | 0.39 | 2.34   | -     | 270.3    |
| AHQ-1-4, 5711              | K.GYEEWLLNEIR.R                                                         | 1422.56701 | 2 | 4.28E-07 | 0.93 | 3.39   | -     | 1366.0   |
| AHQ-1-6, 6108              | K.GYEEWLLNEIR.R                                                         | 1422.56701 | 2 | 1.90E-07 | 0.96 | 4.32   | -     | 1679.4   |
| AHQ-1-6, 5518              | K.GYEEWLLNEIR.R                                                         | 1422.56701 | 2 | 3.60E-07 | 0.92 | 2.92   | -     | 1519.3   |
| AHQ-1-5, 6225              | K.GYEEWLLNEIR.R                                                         | 1422.56701 | 1 | 6.45E-05 | 0.18 | 2.05   | -     | 261.9    |
| AHQ-1-4, 6276              | K.GYEEWLLNEIR.R                                                         | 1422.56701 | 2 | 5.23E-08 | 0.97 | 4.73   | -     | 1711.8   |
| AHQ-1-5, 5586              | K.GYEEWLLNEIR.R                                                         | 1422.56701 | 2 | 1.31E-05 | 0.90 | 3.27   | -     | 1142.3   |
| AHQ-1-5, 6222              | K.GYEEWLLNEIR.R                                                         | 1422.56701 | 2 | 2.22E-07 | 0.97 | 4.75   | -     | 1809.5   |
| AHQ-1-4, 2306              | K.HEAFESDLAAHQDR.V                                                      | 1626.66861 | 2 | 6.70E-08 | 0.97 | 4.31   | -     | 2081.3   |
| AHQ-1-5, 2153              | K.HEAFESDLAAHQDR.V                                                      | 1626.66861 | 2 | 5.16E-11 | 0.97 | 4.67   | -     | 1493.3   |
| AHQ-1-5, 2157 - 2158       | K.HEAFESDLAAHQDR.V                                                      | 1626.66861 | 3 | 1.66E-08 | 0.98 | 5.22   | -     | 2148.4   |
| AHQ-1-5, 3883              | R.KAGTQIENIEDFR.N                                                       | 1650.77152 | 2 | 4.55E-07 | 0.91 | 4.08   | -     | 698.8    |
| AHQ-1-5, 1877 - 1955       | R.KHEAFESDLAAHQDR.V                                                     | 1754.84152 | 2 | 1.96E-07 | 0.95 | 3.83   | -     | 1429.4   |
| AHQ-1-6, 1867 - 1938       | R.KHEAFESDLAAHQDR.V                                                     | 1754.84152 | 2 | 9.57E-09 | 0.96 | 4.43   | -     | 1447.7   |
| AHQ-1-7, 1924              | R.KHEAFESDLAAHQDR.V                                                     | 1754.84152 | 2 | 4.37E-08 | 0.95 | 4.35   | -     | 1160.9   |
| AHQ-1-5, 4843 - 4845       | K.LVSIAGEEIVDGNVK.M                                                     | 1543.74400 | 2 | 7.31E-04 | 0.90 | 3.18   | -     | 1104.5   |
| AHQ-1-5, 4613 - 4683       | K.LVSIAGEEIVDGNVK.M                                                     | 1543.74400 | 2 | 2.14E-05 | 0.95 | 4.05   | -     | 1099.1   |
| AHQ-1-5, 4381 - 4457       | K.LVSIAGEEIVDGNVK.M                                                     | 1543.74400 | 2 | 8.08E-05 | 0.87 | 4.15   | -     | 971.2    |
| AHQ-1-5, 4249              | K.LVSIAGEEIVDGNVK.M                                                     | 1543.74400 | 2 | 3.10E-06 | 0.80 | 3.90   | -     | 513.7    |
| AHQ-1-5, 3469              | K.TFTAWCNSHLR.K                                                         | 1394.54018 | 2 | 5.93E-08 | 0.89 | 2.99   | -     | 980.2    |
| AHQ-1-6, 3456              | K.TFTAWCNSHLR.K                                                         | 1394.54018 | 2 | 3.66E-06 | 0.83 | 2.93   | -     | 806.2    |
| AHQ-1-5, 3590              | K.TFTAWCNSHLR.K                                                         | 1394.54018 | 2 | 2.01E-06 | 0.88 | 2.74   | -     | 901.3    |
| gj4504391[ref]NP_000179.1  | hexokinase 1 isoform HK1; brain form hexokinase [Homo sapiens]          |            |   | 5.26E-11 | 7.15 | 90.24  | 14.10 | 102502.4 |
| AHQ-1-4, 4610              | K.ATDCVGHDDVTLR.D                                                       | 1557.75406 | 2 | 5.26E-11 | 0.88 | 3.43   | -     | 857.5    |
| AHQ-1-4, 2800 - 2803       | K.FLSQIESDR.L                                                           | 1095.18763 | 1 | 3.02E-05 | 0.20 | 2.21   | -     | 207.2    |
| AHQ-1-4, 2799              | K.FLSQIESDR.L                                                           | 1095.18763 | 2 | 4.80E-05 | 0.77 | 2.93   | -     | 687.3    |
| AHQ-1-4, 3372              | K.GAALITAVGVR.L                                                         | 1028.23070 | 2 | 2.11E-04 | 0.97 | 4.06   | -     | 2501.8   |
| AHQ-1-4, 5830 - 5834       | K.GDFIALDLGGSSFR.I                                                      | 1455.59700 | 2 | 8.60E-09 | 0.97 | 4.63   | -     | 1857.9   |
| AHQ-1-4, 2200 - 2252       | R.HIDLVEGDGR.M                                                          | 1240.30483 | 2 | 5.42E-06 | 0.94 | 3.84   | -     | 1091.7   |
| AHQ-1-4, 5940              | R.LGVEPSDDDCVSVQHVCVTSFR.S                                              | 2622.86999 | 3 | 8.13E-06 | 0.67 | 3.80   | -     | 223.8    |
| AHQ-1-4, 6170              | K.LPVGFTFSFPCQSK.I                                                      | 1744.99134 | 2 | 5.70E-06 | 0.96 | 4.82   | -     | 1023.5   |
| AHQ-1-5, 6117 - 6175       | K.LPVGFTFSFPCQSK.I                                                      | 1744.99134 | 2 | 6.75E-04 | 0.90 | 3.84   | -     | 659.7    |
| AHQ-1-4, 2822              | R.LVNEYSLNAK.Q                                                          | 1208.34588 | 1 | 1.75E-07 | 0.61 | 2.20   | -     | 576.3    |
| AHQ-1-4, 6387 - 6391       | R.TPDGTENGDFLALDLGGTNR.V                                                | 2211.33051 | 2 | 2.48E-10 | 0.95 | 4.47   | -     | 1107.3   |
| AHQ-1-4, 6303 - 6322       | R.TPDGTENGDFLALDLGGTNR.V                                                | 2211.33051 | 2 | 2.26E-07 | 0.95 | 4.45   | -     | 954.0    |
| gj4557591[ref]NP_001449.1  | gamma filamin; filamin 2; filamin C, gamma (actin-binding protein-28);  |            |   | 5.60E-11 | 1.83 | 30.28  | 1.70  | 288897.4 |
| AHQ-1-1, 4776 - 4800       | R.GQHVPSPFPQFTVGPLGEGGAH.K                                              | 2305.53673 | 3 | 2.98E-08 | 0.89 | 4.56   | -     | 516.6    |
| AHQ-1-8, 4255              | R.GQHVPSPFPQFTVGPLGEGGAH.K                                              | 2305.53673 | 3 | 1.43E-04 | 0.92 | 4.64   | -     | 816.7    |
| AHQ-1-7, 4508              | R.GQHVPSPFPQFTVGPLGEGGAH.K                                              | 2305.53673 | 3 | 7.56E-06 | 0.87 | 4.29   | -     | 500.9    |
| AHQ-1-6, 4499              | R.GQHVPSPFPQFTVGPLGEGGAH.K                                              | 2305.53673 | 2 | 2.04E-08 | 0.92 | 4.62   | -     | 485.2    |
| AHQ-1-6, 4487              | R.GQHVPSPFPQFTVGPLGEGGAH.K                                              | 2305.53673 | 3 | 5.11E-05 | 0.87 | 4.35   | -     | 516.2    |
| AHQ-1-4, 4734 - 4738       | R.GQHVPSPFPQFTVGPLGEGGAH.K                                              | 2305.53673 | 3 | 2.06E-07 | 0.93 | 5.16   | -     | 701.4    |
| AHQ-1-4, 4735              | R.GQHVPSPFPQFTVGPLGEGGAH.K                                              | 2305.53673 | 2 | 3.38E-07 | 0.94 | 5.02   | -     | 474.5    |
| AHQ-1-5, 4537              | R.GQHVPSPFPQFTVGPLGEGGAH.K                                              | 2305.53673 | 2 | 5.60E-11 | 0.96 | 5.57   | -     | 689.3    |
| AHQ-1-8, 4260              | R.GQHVPSPFPQFTVGPLGEGGAH.K                                              | 2305.53673 | 2 | 2.44E-07 | 0.95 | 5.19   | -     | 571.4    |
| AHQ-1-3, 1906 - 1978       | K.IECDDKDGSDVR.Y                                                        | 1628.67809 | 2 | 2.65E-06 | 0.78 | 3.17   | -     | 623.2    |
| AHQ-1-2, 2011              | K.IECDDKDGSDVR.Y                                                        | 1628.67809 | 3 | 6.17E-06 | 0.69 | 3.39   | -     | 335.8    |
| AHQ-1-4, 1907              | K.IECDDKDGSDVR.Y                                                        | 1628.67809 | 2 | 5.94E-04 | 0.67 | 2.79   | -     | 517.5    |
| AHQ-1-3, 2006 - 2115       | K.NDNDTFTVK.Y                                                           | 1054.09237 | 1 | 6.01E-05 | 0.09 | 1.87   | -     | 174.2    |
| gj4885609[ref]NP_005408.1  | v-src sarcoma (Schmidt-Ruppin A-2) viral oncogene homolog; Protooncogen |            |   | 5.68E-11 | 3.03 | 40.23  | 15.10 | 59834.4  |
| AHQ-1-7, 7496              | R.KEPEERPTFEYLQAFLEDYFTSTEPQYQPGENL                                     | 3998.26826 | 3 | 2.11E-08 | 0.68 | 3.30   | -     | 277.6    |
| AHQ-1-7, 4153 - 4157       | K.LFGGFSNDTSTSPQR.A                                                     | 1713.82931 | 2 | 5.68E-11 | 0.95 | 4.61   | -     | 1067.1   |
| AHQ-1-7, 3872              | K.LFGGFSNDTSTSPQR.A                                                     | 1713.82931 | 2 | 4.27E-07 | 0.93 | 4.00   | -     | 956.3    |
| AHQ-1-7, 2538              | R.LTTVCPTSFKPTQGLAK.D                                                   | 1832.11198 | 2 | 8.36E-05 | 0.55 | 2.85   | -     | 270.1    |
| AHQ-1-7, 6574 - 6644       | R.TQFNLSLQLVAYYSK.H                                                     | 1790.99681 | 2 | 2.91E-06 | 0.95 | 4.14   | -     | 1250.8   |
| AHQ-1-7, 6426              | R.TQFNLSLQLVAYYSK.H                                                     | 1790.99681 | 2 | 3.06E-07 | 0.85 | 3.23   | -     | 766.8    |
| gj4759212[ref]NP_004598.1  | beta-tubulin cofactor A [Homo sapiens]                                  |            |   | 5.78E-11 | 3.81 | 40.32  | 26.90 | 12854.8  |
| AHQ-1-13, 3526             | R.ILENEKDLLEEAEYK.E                                                     | 1852.97372 | 2 | 1.87E-10 | 0.97 | 5.20   | -     | 1833.3   |
| AHQ-1-13 - , 3460          | R.ILENEKDLLEEAEYK.E                                                     | 2209.35284 | 3 | 4.83E-10 | 0.97 | 6.30   | -     | 1441.7   |
| AHQ-1-13, 3371             | R.ILENEKDLLEEAEYK.E                                                     | 2209.35284 | 2 | 2.49E-09 | 0.96 | 4.85   | -     | 1259.1   |
| AHQ-1-13, 3367             | R.ILENEKDLLEEAEYK.E                                                     | 2209.35284 | 3 | 5.78E-11 | 0.96 | 5.02   | -     | 1436.8   |
| AHQ-1-13 - , 3845 - 3885   | R.LEAAYLDLQR.I                                                          | 1192.34645 | 2 | 5.90E-06 | 0.97 | 3.88   | -     | 2016.9   |
| AHQ-1-13 - , 3508 - 3533   | R.LEAAYLDLQR.I                                                          | 1348.53280 | 2 | 1.17E-07 | 0.92 | 4.16   | -     | 645.2    |
| AHQ-1-13, 3403             | R.LEAAYLDLQR.I                                                          | 1348.53280 | 2 | 1.48E-05 | 0.89 | 3.95   | -     | 553.4    |
| gj17986260[ref]NP_524147.1 | smooth muscle and non-muscle myosin alkali light chain isoform 2 [Homo  |            |   | 5.88E-11 | 3.29 | 40.26  | 23.30 | 12969.7  |
| AHQ-1-12, 5441             | K.M*TEEEVEMLVAGHEDSNGCINYEELVR.M                                        | 3188.42436 | 3 | 5.88E-11 | 0.94 | 4.72   | -     | 1332.3   |
| AHQ-1-12, 5769 - 5827      | K.M*TEEEVEMLVAGHEDSNGCINYEELVR.M                                        | 3172.42496 | 3 | 4.17E-05 | 0.76 | 4.69   | -     | 609.7    |
| AHQ-1-12, 5819 - 5899      | K.MTEEEVEMLVAGHEDSNGCINYEELVR.M                                         | 3156.42556 | 3 | 3.06E-05 | 0.92 | 4.96   | -     | 1123.7   |
| AHQ-1-12, 5885 - 5957      | K.M*TEEEVEMLVAGHEDSNGCINYEELVR.M                                        | 3172.42496 | 3 | 2.24E-07 | 0.89 | 4.98   | -     | 815.2    |
| AHQ-1-12, 5902             | K.MTEEEVEMLVAGHEDSNGCINYEELVR.M                                         | 3156.42556 | 3 | 5.72E-04 | 0.94 | 4.77   | -     | 1566.8   |
| AHQ-1-12, 5994             | K.MTEEEVEMLVAGHEDSNGCINYEELVR.M                                         | 3156.42556 | 3 | 4.32E-04 | 0.65 | 3.29   | -     | 764.4    |



|                             |                                                                         |            |       |          |       |          |       |          |
|-----------------------------|-------------------------------------------------------------------------|------------|-------|----------|-------|----------|-------|----------|
| AHQ-1-12, 6055 - 6135       | K.M*TEEEVEMLVAGHEDSNGCINYEELVR.M                                        | 3172.42496 | 3     | 8.64E-05 | 0.87  | 4.50     | -     | 759.1    |
| AHQ-1-12, 6631 - 6689       | K.M*TEEEVEMLVAGHEDSNGCINYEELVR.M                                        | 3172.42496 | 3     | 3.30E-06 | 0.87  | 4.61     | -     | 708.8    |
| AHQ-1-13, 6057 - 6131       | K.M*TEEEVEM*LVAGHEDSNGCINYEELVR.M                                       | 3172.42496 | 3     | 4.84E-04 | 0.53  | 3.30     | -     | 683.7    |
| AHQ-1-14, 5504 - 5558       | K.M*TEEEVEM*LVAGHEDSNGCINYEELVR.M                                       | 3188.42436 | 3     | 1.30E-09 | 0.96  | 5.25     | -     | 1554.3   |
| AHQ-1-14, 5772 - 5854       | K.M*TEEEVEMLVAGHEDSNGCINYEELVR.M                                        | 3172.42496 | 3     | 4.19E-04 | 0.64  | 4.02     | -     | 547.5    |
| gi 4506713 ref NP_002945.1  | ubiquitin and ribosomal protein S27a precursor; ubiquitin carboxyl exte |            |       |          |       |          |       |          |
| AHQ-1-14, 4446 - 4464       | K.TITLEVEPSDITIENVK.A                                                   | 1788.97431 | 2     | 5.95E-11 | 0.80  | 4.14     | -     | 673.0    |
| AHQ-1-14, 4352 - 4383       | K.TITLEVEPSDITIENVK.A                                                   | 1788.97431 | 2     | 3.87E-05 | 0.88  | 4.07     | -     | 578.0    |
| gi 6681259 ref NP_031377.1  | multimerin [Homo sapiens]                                               |            |       |          |       |          |       |          |
| AHQ-1-3, 2358 - 2441        | R.AQEQQSLLIHTNQAESHTAVGR.G                                              | 2306.43830 | 3     | 6.57E-11 | 20.77 | 230.28   | 21.90 | 138070.8 |
| AHQ-1-3, 2365 - 2370        | R.AQEQQSLLIHTNQAESHTAVGR.G                                              | 2306.43830 | 2     | 1.01E-07 | 0.93  | 4.85     | -     | 917.3    |
| AHQ-1-2, 2459               | R.AQEQQSLLIHTNQAESHTAVGR.G                                              | 2306.43830 | 2     | 3.63E-09 | 0.94  | 5.21     | -     | 531.3    |
| AHQ-1-3, 7129               | K.CTSDMETILTFIPQFHR.L                                                   | 2098.38838 | 2     | 1.71E-06 | 0.94  | 4.84     | -     | 742.4    |
| AHQ-1-3, 6425               | K.CTSDMETILTFIPQFHR.L                                                   | 2114.38778 | 3     | 8.01E-05 | 0.84  | 4.10     | -     | 473.5    |
| AHQ-1-4, 4186               | R.DQALQLQVLNSR.F                                                        | 1385.55144 | 2     | 2.87E-09 | 0.86  | 3.85     | -     | 686.3    |
| AHQ-1-3, 4318               | R.DQALQLQVLNSR.F                                                        | 1385.55144 | 2     | 6.22E-04 | 0.63  | 2.71     | -     | 748.3    |
| AHQ-1-3, 2821               | K.EVHEQLLSTEQVSDQK.N                                                    | 1870.99550 | 2     | 4.40E-06 | 0.94  | 3.34     | -     | 1549.5   |
| AHQ-1-14, 6118              | K.FPPVTTFSGYLLYR.T                                                      | 1661.92388 | 2     | 7.05E-05 | 0.96  | 4.99     | -     | 892.4    |
| AHQ-1-10, 5683              | K.FPPVTTFSGYLLYR.T                                                      | 1661.92388 | 2     | 1.61E-08 | 0.93  | 3.59     | -     | 937.8    |
| AHQ-1-13, 5940              | K.FPPVTTFSGYLLYR.T                                                      | 1661.92388 | 2     | 2.14E-09 | 0.93  | 3.52     | -     | 911.2    |
| AHQ-1-13, 6348 - 6353       | K.FPPVTTFSGYLLYR.T                                                      | 1661.92388 | 2     | 5.78E-04 | 0.92  | 3.27     | -     | 929.6    |
| AHQ-1-2, 6630 - 6642        | K.FPPVTTFSGYLLYR.T                                                      | 1661.92388 | 2     | 5.68E-04 | 0.93  | 4.36     | -     | 793.9    |
| AHQ-1-3, 6467 - 6479        | K.FPPVTTFSGYLLYR.T                                                      | 1661.92388 | 2     | 4.46E-06 | 0.90  | 3.63     | -     | 659.7    |
| AHQ-1-3, 5925               | K.FVLVQENRPLTDIVELR.N                                                   | 1661.92388 | 2     | 7.14E-10 | 0.93  | 4.05     | -     | 789.4    |
| AHQ-1-1, 5957               | K.FVLVQENRPLTDIVELR.N                                                   | 2143.47187 | 3     | 7.99E-09 | 0.91  | 4.41     | -     | 950.3    |
| AHQ-1-3, 6165 - 6190        | K.GLTEFVEPIIQIK.T                                                       | 1487.76518 | 2     | 3.68E-05 | 0.95  | 4.35     | -     | 1429.5   |
| AHQ-1-1, 6167               | K.GLTEFVEPIIQIK.T                                                       | 1487.76518 | 2     | 1.08E-05 | 0.93  | 4.34     | -     | 1011.8   |
| AHQ-1-3, 2445               | R.GVAEQQQQCGDPEVM*QK.M                                                  | 1487.76518 | 2     | 9.68E-05 | 0.91  | 3.66     | -     | 946.3    |
| AHQ-1-3, 2114               | R.GVAEQQQQCGDPEVM*QK.M                                                  | 2119.27971 | 2     | 1.05E-04 | 0.94  | 4.84     | -     | 759.4    |
| AHQ-1-2, 4075               | K.HSLPDIQLQK.G                                                          | 2135.27911 | 2     | 8.93E-04 | 0.81  | 3.67     | -     | 462.0    |
| AHQ-1-3, 3881               | K.HSLPDIQLQK.G                                                          | 1292.50915 | 2     | 7.15E-07 | 0.87  | 3.16     | -     | 683.9    |
| AHQ-1-3, 6061               | K.IENLTSAVNSLNFIIK.E                                                    | 1292.50915 | 2     | 9.92E-07 | 0.90  | 3.42     | -     | 779.5    |
| AHQ-1-3, 5174               | K.IFQNDM*QETVAQLFK.T                                                    | 1777.05472 | 2     | 5.65E-05 | 0.94  | 4.67     | -     | 821.0    |
| AHQ-1-1, 5405               | K.IFQNDM*QETVAQLFK.T                                                    | 1829.06683 | 2     | 1.56E-05 | 0.89  | 3.69     | -     | 1014.1   |
| AHQ-1-1, 6541               | K.IFQNDM*QETVAQLFK.T                                                    | 1829.06683 | 2     | 6.08E-05 | 0.69  | 2.89     | -     | 533.1    |
| AHQ-1-3, 6606 - 6609        | K.IFQNDM*QETVAQLFK.T                                                    | 1813.06743 | 2     | 3.32E-04 | 0.94  | 4.21     | -     | 1125.4   |
| AHQ-1-3, 6710 - 6717        | K.IFQNDM*QETVAQLFK.T                                                    | 1813.06743 | 2     | 8.18E-07 | 0.98  | 5.64     | -     | 2024.2   |
| AHQ-1-5, 6701 - 6709        | K.IFQNDM*QETVAQLFK.T                                                    | 1813.06743 | 2     | 2.58E-06 | 0.96  | 4.81     | -     | 1607.7   |
| AHQ-1-3, 6806               | K.IFQNDM*QETVAQLFK.T                                                    | 1813.06743 | 2     | 2.08E-08 | 0.98  | 5.22     | -     | 2012.9   |
| AHQ-1-3, 5347               | K.IFQNDM*QETVAQLFK.T                                                    | 1813.06743 | 2     | 2.76E-06 | 0.88  | 3.83     | -     | 803.9    |
| AHQ-1-13, 5289              | R.IPYLVGVYFK.Y                                                          | 1829.06683 | 2     | 8.31E-07 | 0.88  | 4.05     | -     | 834.3    |
| AHQ-1-10, 4941              | R.IPYLVGVYFK.Y                                                          | 1199.46532 | 2     | 6.11E-05 | 0.71  | 2.62     | -     | 891.3    |
| AHQ-1-14, 5476              | R.IPYLVGVYFK.Y                                                          | 1199.46532 | 2     | 1.39E-05 | 0.94  | 3.67     | -     | 1187.0   |
| AHQ-1-13, 4013              | K.LAFESINSEIHCDR.V                                                      | 1199.46532 | 2     | 8.92E-04 | 0.93  | 2.83     | -     | 1333.3   |
| AHQ-1-10, 3620              | K.LAFESINSEIHCDR.V                                                      | 1936.04933 | 2     | 7.35E-06 | 0.94  | 4.77     | -     | 946.7    |
| AHQ-1-3, 2870               | K.LKVEHQQLLSTEQVSDQK.N                                                  | 1936.04933 | 2     | 1.91E-05 | 0.91  | 3.52     | -     | 1132.0   |
| AHQ-1-3, 2865 - 2943        | K.LKVEHQQLLSTEQVSDQK.N                                                  | 2112.32666 | 3     | 2.14E-04 | 0.95  | 5.19     | -     | 1496.6   |
| AHQ-1-10, 3417 - 3491       | K.LVEENALAPDFSK.G                                                       | 2112.32666 | 2     | 1.05E-06 | 0.97  | 5.38     | -     | 1773.1   |
| AHQ-1-13, 3872              | K.LVEENALAPDFSK.G                                                       | 1433.58810 | 2     | 4.31E-05 | 0.94  | 4.20     | -     | 964.2    |
| AHQ-1-1, 3940 - 3996        | K.LVEENALAPDFSK.G                                                       | 1433.58810 | 2     | 5.85E-05 | 0.72  | 2.88     | -     | 584.6    |
| AHQ-1-3, 7155               | K.M*SEQLNDLTYDM*EILQPLLEQGASLR.Q                                        | 1433.58810 | 2     | 6.38E-05 | 0.90  | 2.94     | -     | 1146.2   |
| AHQ-1-3, 2134               | K.QTHLEGALEQEHSR.S                                                      | 3041.40062 | 3     | 1.30E-04 | 0.92  | 4.25     | -     | 1130.8   |
| AHQ-1-3, 6781 - 6799        | K.TMTIINNAIDFIQDNYALK.E                                                 | 1635.72018 | 2     | 1.48E-08 | 0.76  | 3.06     | -     | 341.8    |
| AHQ-1-3, 7034               | K.TMTIINNAIDFIQDNYALK.E                                                 | 2199.51256 | 2     | 4.04E-05 | 0.70  | 3.45     | -     | 445.5    |
| AHQ-1-3, 7234               | K.TMTIINNAIDFIQDNYALK.E                                                 | 2199.51256 | 2     | 1.97E-04 | 0.73  | 3.41     | -     | 555.4    |
| AHQ-1-4, 3524               | K.TVSSLSEDLSETR.Q                                                       | 2199.51256 | 2     | 6.57E-11 | 0.95  | 5.10     | -     | 815.4    |
| AHQ-1-3, 4103               | R.YNFVLQVAK.T                                                           | 1424.49324 | 2     | 5.81E-05 | 0.69  | 3.21     | -     | 552.6    |
| gi 4885183 ref NP_005210.1  | diaphanous 1; deafness, autosomal dominant 1; hDia1 [Homo sapiens] [MAS |            |       |          |       |          |       |          |
| AHQ-1-3, 6259 - 6271        | R.DM*PLLSCLSELR.V                                                       | 1082.27683 | 2     | 1.97E-05 | 0.93  | 3.10     | -     | 1338.6   |
| AHQ-1-3, 3295               | R.DVQNFPAATDEKDKFVEK.M                                                  | 6.73E-11   | 10.19 | 120.29   | 16.60 | 138977.7 | -     | 721.8    |
| AHQ-1-3, 4601               | R.LGLHQVLQDLR.E                                                         | 1451.69163 | 2     | 7.04E-05 | 0.90  | 3.59     | -     | 285.5    |
| AHQ-1-3, 6554               | K.LQFSEQVENIKPEIVSVAACEELR.K                                            | 2082.25588 | 2     | 3.17E-06 | 0.57  | 3.22     | -     | 710.2    |
| AHQ-1-3, 5269               | K.LVAEDLSQDCFWTK.V                                                      | 1292.51238 | 2     | 3.38E-07 | 0.78  | 2.90     | -     | 916.2    |
| AHQ-1-4, 5376               | K.LVAEDLSQDCFWTK.V                                                      | 1711.85486 | 2     | 7.23E-05 | 0.91  | 3.78     | -     | 1514.2   |
| AHQ-1-3, 7311               | R.M*EM*DFNEFVQILLNTVK.D                                                 | 2892.23121 | 3     | 2.24E-06 | 0.96  | 5.74     | -     | 725.4    |
| AHQ-1-3, 6283               | K.MLSEKDEYDDLAESEQFVGMV*GTVPR.L                                         | 1713.88927 | 2     | 1.45E-07 | 0.89  | 3.63     | -     | 618.0    |
| AHQ-1-3, 5806 - 5874        | K.QDLEAEVQLTGEVAK.L                                                     | 2219.52085 | 2     | 6.73E-11 | 0.97  | 4.86     | -     | 1503.4   |
| AHQ-1-3, 6021               | K.TAQNLSIFLGSFR.M                                                       | 1713.88927 | 2     | 1.45E-07 | 0.86  | 3.56     | -     | 412.3    |
| AHQ-1-3, 7282               | K.VGCLQLINALITPAEELDFR.V                                                | 3076.40186 | 3     | 2.82E-04 | 0.65  | 3.48     | -     | 958.5    |
| AHQ-1-3, 7135               | K.VGCLQLINALITPAEELDFR.V                                                | 1717.85617 | 2     | 2.91E-05 | 0.87  | 4.19     | -     | 653.3    |
| AHQ-1-3, 5069               | R.VQLNVFDEGGEEEDSYDLK.G                                                 | 2274.62236 | 2     | 9.40E-06 | 0.96  | 5.33     | -     | 831.7    |
| gi 4557703 ref NP_000414.1  | keratin 2a [Homo sapiens]                                               |            |       |          |       |          |       |          |
| AHQ-1-1, 6832               | R.FGGFGGPGVGGVGGGGPGGPGGPGGIVHEVSNQSLQLPLNVK.V                          | 2274.62236 | 2     | 3.59E-07 | 0.89  | 4.23     | -     | 628.5    |
| AHQ-1-14, 6502              | R.FGGFGGPGVGGVGGGGPGGPGGPGGIVHEVSNQSLQLPLNVK.V                          | 2129.22304 | 2     | 1.04E-04 | 0.94  | 4.33     | -     | 1124.2   |
| AHQ-1-4, 3111 - 3112        | R.FLEQQNQVLQTK.W                                                        | 6.80E-11   | 2.75  | 30.26    | 12.90 | 65869.4  | -     | 954.4    |
| AHQ-1-5, 2998               | R.FLEQQNQVLQTK.W                                                        | 4094.54151 | 3     | 2.30E-04 | 0.91  | 4.56     | -     | 1006.2   |
| AHQ-1-6, 2988               | R.FLEQQNQVLQTK.W                                                        | 4094.54151 | 3     | 6.80E-11 | 0.84  | 3.85     | -     | 2097.1   |
| AHQ-1-11, 2928              | R.FLEQQNQVLQTK.W                                                        | 1476.65935 | 2     | 3.59E-07 | 0.97  | 4.82     | -     | 2241.6   |
| AHQ-1-12, 2962              | R.FLEQQNQVLQTK.W                                                        | 1476.65935 | 2     | 1.72E-06 | 0.97  | 5.22     | -     | 2340.8   |
| AHQ-1-13, 3046              | R.FLEQQNQVLQTK.W                                                        | 1476.65935 | 2     | 1.78E-06 | 0.98  | 4.82     | -     | 1538.7   |
| AHQ-1-13, 3080 - 3088       | R.FLEQQNQVLQTK.W                                                        | 1476.65935 | 2     | 1.65E-04 | 0.92  | 3.46     | -     | 2192.8   |
| AHQ-1-14, 3031              | R.FLEQQNQVLQTK.W                                                        | 1476.65935 | 2     | 1.41E-08 | 0.96  | 4.00     | -     | 1604.9   |
| AHQ-1-1, 3145               | R.FLEQQNQVLQTK.W                                                        | 1476.65935 | 2     | 1.77E-04 | 0.95  | 4.22     | -     | 2417.7   |
| AHQ-1-14, 5647              | K.VLYDAEISQIHQSVTDTNVLISM*DNSR.N                                        | 1476.65935 | 2     | 3.00E-07 | 0.97  | 5.03     | -     | 1825.4   |
| gi 11321601 ref NP_002618.1 | phosphofructokinase, platelet; Phosphofructokinase, platelet type [Hom  |            |       |          |       |          |       |          |
| AHQ-1-5, 3667               | K.AIGVLTSGGDAQGMNAAVR.A                                                 | 3066.34680 | 3     | 9.83E-08 | 0.95  | 5.13     | -     | 1440.8   |
| AHQ-1-5, 6238 - 6241        | K.EIGWTDVGGWGTGGGGSILGTR.R                                              | 7.18E-11   | 3.80  | 40.28    | 9.30  | 85595.6  | -     | 1468.9   |
| AHQ-1-5, 6626               | R.GITNLVICVGGDSLGTGANLFR.K                                              | 1789.00750 | 2     | 7.18E-11 | 0.97  | 5.58     | -     | 1259.3   |
| gi 13518026 ref NP_004978.2 | LIM and senescent cell antigen-like domains 1 [Homo sapiens]            |            |       |          |       |          |       |          |
| AHQ-1-9, 4810               | K.AWCVNCFACTCNTK.L                                                      | 1413.51529 | 2     | 8.03E-05 | 0.93  | 3.95     | -     | 954.4    |
| AHQ-1-13, 6956              | R.CDLQCEVLADIGFVK.N                                                     | 2120.30735 | 2     | 2.13E-04 | 0.95  | 4.69     | -     | 691.7    |
| AHQ-1-11, 4314              | K.CHAIIDEQPLIFK.N                                                       | 2137.40264 | 2     | 6.23E-10 | 0.95  | 5.36     | -     | 37251.2  |
| AHQ-1-12, 4471              | K.CHAIIDEQPLIFK.N                                                       | 1884.08097 | 2     | 7.59E-11 | 4.11  | 50.24    | 20.00 | 315.5    |
| AHQ-1-8, 4484               | K.CHAIIDEQPLIFK.N                                                       | 1770.01757 | 2     | 1.79E-04 | 0.58  | 2.75     | -     | 1362.3   |
| AHQ-1-10, 4164              | K.CHAIIDEQPLIFK.N                                                       | 1585.84900 | 2     | 1.64E-07 | 0.85  | 2.56     | -     | 1406.7   |
| AHQ-1-9, 3087               | K.MGVPCGACR.R                                                           | 1585.84900 | 2     | 9.49E-04 | 0.94  | 3.82     | -     | 971.6    |
| AHQ-1-12, 3497 - 3538       | R.VIEGDVVSALNK.A                                                        | 1585.84900 | 2     | 7.39E-04 | 0.90  | 3.57     | -     | 1421.6   |
| AHQ-1-8, 3374               | R.VIEGDVVSALNK.A                                                        | 1585.84900 | 2     | 1.06E-05 | 0.96  | 4.32     | -     | 1109.3   |
| AHQ-1-14, 4478              | R.VIEGDVVSALNK.A                                                        | 1585.84900 | 2     | 4.98E-06 | 0.93  | 3.70     | -     | 454.2    |
| AHQ-1-13, 3603              | R.VIEGDVVSALNK.A                                                        | 1123.35250 | 2     | 4.76E-04 | 0.80  | 2.67     | -     | 1545.1   |
| AHQ-1-11, 3394              | R.VIEGDVVSALNK.A                                                        | 1244.41966 | 2     | 7.59E-11 | 0.96  | 3.93     | -     | 1228.8   |
| AHQ-1-9, 3398 - 3411        | R.VIEGDVVSALNK.A                                                        | 1244.41966 | 2     | 1.38E-09 | 0.96  | 4.66     | -     | 1298.6   |
| AHQ-1-14, 3574              | R.VIEGDVVSALNK.A                                                        | 1244.41966 | 2     | 4.05E-07 | 0.96  | 4.36     | -     | 493.5    |
| gi 10863927 ref NP_066953.1 | peptidylprolyl isomerase A (cyclophilin A) [Homo sapiens]               |            |       |          |       |          |       |          |
| AHQ-1-12, 4085 - 4098       | K.EGMNIVEAMER.F                                                         | 1244.41966 | 1     | 9.36E-05 | 0.31  | 1.97     | -     | 913.6    |
|                             |                                                                         | 1244.41966 | 2     | 5.03E-09 | 0.93  | 4.22     | -     | 1274.5   |
|                             |                                                                         | 1244.41966 | 2     | 5.29E-07 | 0.96  | 4.77     | -     | 1367.7   |
|                             |                                                                         | 1244.41966 | 2     | 3.46E-07 | 0.96  | 4.19     | -     | 1367.7   |
|                             |                                                                         | 1279.46942 | 2     | 7.61E-11 | 7.79  | 90.24    | 30.90 | 18012.4  |
|                             |                                                                         |            |       | 2.00E-04 | 0.85  | 3.18     | -     | 713.6    |

|                            |                                                                         |            |   |          |       |        |       |          |
|----------------------------|-------------------------------------------------------------------------|------------|---|----------|-------|--------|-------|----------|
| AHQ-1-14, 4932             | K.FEDENFILK.H                                                           | 1155.28144 | 2 | 6.50E-05 | 0.74  | 3.01   | -     | 590.2    |
| AHQ-1-12, 3969 - 3970      | K.FEDENFILK.H                                                           | 1155.28144 | 2 | 1.29E-04 | 0.81  | 3.53   | -     | 530.8    |
| AHQ-1-13- , 4147           | K.FEDENFILK.H                                                           | 1155.28144 | 2 | 1.17E-04 | 0.75  | 2.86   | -     | 500.0    |
| AHQ-1-13, 3972             | K.FEDENFILK.H                                                           | 1155.28144 | 2 | 6.69E-04 | 0.77  | 3.19   | -     | 538.8    |
| AHQ-1-12, 3847 - 3909      | K.FEDENFILK.H                                                           | 1155.28144 | 2 | 5.18E-04 | 0.84  | 3.50   | -     | 633.6    |
| AHQ-1-12, 3767             | K.ITIADCGGLE                                                            | 1121.24345 | 2 | 1.87E-04 | 0.91  | 3.27   | -     | 1525.7   |
| AHQ-1-12, 3402 - 3478      | K.KITIADCGGLE                                                           | 1249.41637 | 2 | 8.04E-08 | 0.83  | 3.16   | -     | 651.7    |
| AHQ-1-14- , 3372           | K.KITIADCGGLE                                                           | 1249.41637 | 2 | 1.76E-05 | 0.90  | 3.84   | -     | 1260.1   |
| AHQ-1-12, 3277 - 3337      | K.KITIADCGGLE                                                           | 1249.41637 | 2 | 1.47E-06 | 0.92  | 3.81   | -     | 1414.6   |
| AHQ-1-13- , 4840           | K.SIYGKFEFEDENFILK.H                                                    | 1833.03047 | 2 | 7.47E-08 | 0.94  | 4.19   | -     | 1204.6   |
| AHQ-1-14, 5580 - 5601      | K.SIYGKFEFEDENFILK.H                                                    | 1833.03047 | 2 | 3.39E-06 | 0.94  | 4.28   | -     | 1134.4   |
| AHQ-1-12, 4551 - 4613      | K.SIYGKFEFEDENFILK.H                                                    | 1833.03047 | 2 | 1.74E-08 | 0.96  | 4.57   | -     | 1303.5   |
| AHQ-1-12, 4762 - 4831      | K.SIYGKFEFEDENFILK.H                                                    | 1833.03047 | 2 | 4.82E-06 | 0.88  | 3.68   | -     | 998.2    |
| AHQ-1-14- , 4735           | K.SIYGKFEFEDENFILK.H                                                    | 1833.03047 | 2 | 7.61E-11 | 0.94  | 4.80   | -     | 1014.7   |
| AHQ-1-13, 4591             | K.SIYGKFEFEDENFILK.H                                                    | 1833.03047 | 2 | 7.34E-08 | 0.93  | 4.09   | -     | 1161.1   |
| AHQ-1-12, 3791             | K.VKEGMNIVEAMER.F                                                       | 1506.77390 | 2 | 1.51E-05 | 0.87  | 3.68   | -     | 1245.6   |
| AHQ-1-12, 3613             | K.VKEGMNIVEAMER.F                                                       | 1506.77390 | 2 | 7.64E-07 | 0.94  | 3.85   | -     | 1407.3   |
| AHQ-1-14- , 2120           | K.VKEGMNIVEAMER.F                                                       | 1538.77270 | 2 | 6.62E-04 | 0.83  | 3.01   | -     | 689.9    |
| AHQ-1-12, 2941             | K.VKEGMNIVEAMER.F                                                       | 1522.77330 | 2 | 4.31E-04 | 0.87  | 3.36   | -     | 941.6    |
| AHQ-1-12, 4290             | R.VSFEFADKVPK.T                                                         | 1380.61317 | 2 | 1.28E-09 | 0.87  | 3.24   | -     | 1017.6   |
| AHQ-1-12, 4519             | R.VSFEFADKVPK.T                                                         | 1380.61317 | 3 | 5.31E-06 | 0.64  | 3.38   | -     | 423.2    |
| AHQ-1-12, 4513 - 4517      | R.VSFEFADKVPK.T                                                         | 1380.61317 | 2 | 2.07E-08 | 0.83  | 3.47   | -     | 807.8    |
| gj 5174393 ref NP_006001.1 | arginine-rich, mutated in early stage tumors; arginine-rich protein [Ho |            |   | 8.04E-11 | 3.44  | 40.30  | 25.20 | 2690.2   |
| AHQ-1-12, 4545             | K.DRDVTFSPATIELEIK.F                                                    | 1949.15100 | 2 | 1.18E-08 | 0.97  | 4.98   | -     | 1915.8   |
| AHQ-1-12, 5435 - 5498      | K.DRDVTFSPATIELEIK.F                                                    | 1949.15100 | 2 | 1.98E-08 | 0.98  | 5.90   | -     | 1921.3   |
| AHQ-1-12, 2885             | K.IINEVSKPLAHHIPVEK.I                                                   | 1925.26378 | 2 | 9.81E-04 | 0.88  | 3.75   | -     | 753.2    |
| AHQ-1-12, 3186 - 3249      | K.ILDWGETCKGCAEK.S                                                      | 1784.94596 | 2 | 8.04E-11 | 0.82  | 3.53   | -     | 496.5    |
| AHQ-1-12, 3765             | K.QIDLSTVDLK.K                                                          | 1132.28932 | 2 | 3.29E-04 | 0.77  | 2.55   | -     | 604.9    |
| gj 4507109 ref NP_000336.1 | alpha-synuclein isoform NACP140; non A4 component of amyloid precursor  |            |   | 8.26E-11 | 4.98  | 60.31  | 34.30 | 14460.1  |
| AHQ-1-12, 2197 - 2267      | K.EGVVHGVATVAEK.T                                                       | 1296.45466 | 2 | 7.52E-06 | 0.84  | 2.81   | -     | 769.5    |
| AHQ-1-13- , 2291 - 2295    | K.EGVVHGVATVAEK.T                                                       | 1296.45466 | 2 | 6.89E-07 | 0.78  | 3.04   | -     | 555.5    |
| AHQ-1-13- , 4801           | K.EQVTVNGGAVVTGVTAAQK.T                                                 | 1929.16446 | 2 | 1.63E-06 | 0.91  | 3.77   | -     | 842.6    |
| AHQ-1-13, 4528             | K.EQVTVNGGAVVTGVTAAQK.T                                                 | 1929.16446 | 2 | 4.72E-08 | 0.95  | 5.12   | -     | 790.4    |
| AHQ-1-14, 5498             | K.EQVTVNGGAVVTGVTAAQK.T                                                 | 1929.16446 | 2 | 1.09E-06 | 0.96  | 5.13   | -     | 1018.8   |
| AHQ-1-12, 4557 - 4619      | K.EQVTVNGGAVVTGVTAAQK.T                                                 | 1929.16446 | 2 | 8.26E-11 | 0.97  | 5.69   | -     | 1152.6   |
| AHQ-1-14- , 4672 - 4676    | K.EQVTVNGGAVVTGVTAAQK.T                                                 | 1929.16446 | 2 | 1.89E-08 | 0.98  | 5.95   | -     | 1532.9   |
| AHQ-1-12, 2117             | K.TKEGVLYVGSK.T                                                         | 1181.36357 | 2 | 5.75E-06 | 0.83  | 3.03   | -     | 703.6    |
| AHQ-1-13- , 2177           | K.TKEGVVHGVATVAEK.T                                                     | 1525.73191 | 2 | 3.81E-06 | 0.95  | 3.94   | -     | 1406.6   |
| AHQ-1-12, 4181 - 4191      | K.TKEQVTVNGGAVVTGVTAAQK.T                                               | 2158.44170 | 3 | 4.58E-04 | 0.93  | 5.06   | -     | 1141.7   |
| AHQ-1-13, 4173             | K.TKEQVTVNGGAVVTGVTAAQK.T                                               | 2158.44170 | 3 | 8.12E-04 | 0.86  | 3.67   | -     | 1112.6   |
| AHQ-1-12, 4175             | K.TKEQVTVNGGAVVTGVTAAQK.T                                               | 2158.44170 | 2 | 1.49E-05 | 0.96  | 4.72   | -     | 1302.9   |
| AHQ-1-13- , 4368           | K.TKEQVTVNGGAVVTGVTAAQK.T                                               | 2158.44170 | 2 | 1.33E-07 | 0.98  | 6.28   | -     | 1645.5   |
| AHQ-1-14- , 4378           | K.TKEQVTVNGGAVVTGVTAAQK.T                                               | 2158.44170 | 2 | 2.16E-05 | 0.97  | 5.72   | -     | 1337.4   |
| AHQ-1-14- , 4372 - 4379    | K.TKEQVTVNGGAVVTGVTAAQK.T                                               | 2158.44170 | 3 | 1.83E-05 | 0.92  | 4.68   | -     | 1107.3   |
| AHQ-1-13, 4175             | K.TKEQVTVNGGAVVTGVTAAQK.T                                               | 2158.44170 | 2 | 1.50E-06 | 0.96  | 4.80   | -     | 1350.8   |
| AHQ-1-12, 4094 - 4101      | K.TVEGAGSIAAATGFVK.K                                                    | 1479.66001 | 1 | 8.61E-04 | 0.48  | 2.78   | -     | 421.1    |
| gj 4505733 ref NP_002610.1 | platelet factor 4 (chemokine (C-X-C motif) ligand 4); platelet factor 4 |            |   | 8.34E-11 | 5.57  | 60.29  | 38.60 | 10844.9  |
| AHQ-1-14- , 4475           | K.AGPHCPPTAQLIATLK.N                                                    | 1579.84600 | 2 | 7.10E-06 | 0.55  | 2.61   | -     | 578.2    |
| AHQ-1-13, 4121 - 4188      | K.AGPHCPPTAQLIATLK.N                                                    | 1579.84600 | 2 | 8.63E-07 | 0.93  | 3.93   | -     | 1026.6   |
| AHQ-1-14- , 4242 - 4308    | K.AGPHCPPTAQLIATLK.N                                                    | 1579.84600 | 2 | 3.01E-08 | 0.91  | 3.78   | -     | 764.3    |
| AHQ-1-14, 5030 - 5048      | K.AGPHCPPTAQLIATLK.N                                                    | 1579.84600 | 2 | 1.25E-06 | 0.94  | 4.06   | -     | 828.4    |
| AHQ-1-13- , 4316           | K.AGPHCPPTAQLIATLK.N                                                    | 1579.84600 | 2 | 7.01E-04 | 0.91  | 3.41   | -     | 924.2    |
| AHQ-1-14- , 4111 - 4115    | K.AGPHCPPTAQLIATLK.N                                                    | 1579.84600 | 2 | 1.11E-04 | 0.95  | 4.23   | -     | 1084.7   |
| AHQ-1-14, 4944 - 4965      | K.AGPHCPPTAQLIATLKNGR.K                                                 | 1907.18700 | 3 | 8.34E-11 | 0.97  | 5.22   | -     | 1698.1   |
| AHQ-1-14, 4948 - 5006      | K.AGPHCPPTAQLIATLKNGR.K                                                 | 1907.18700 | 2 | 1.50E-06 | 0.90  | 4.28   | -     | 638.7    |
| AHQ-1-14- , 3926 - 3935    | K.AGPHCPPTAQLIATLKNGR.K                                                 | 1907.18700 | 3 | 9.65E-10 | 0.98  | 5.83   | -     | 2686.5   |
| AHQ-1-14- , 4059           | K.AGPHCPPTAQLIATLKNGR.K                                                 | 1907.18700 | 2 | 2.03E-09 | 0.94  | 4.51   | -     | 942.5    |
| AHQ-1-14- , 4044           | K.AGPHCPPTAQLIATLKNGR.K                                                 | 1907.18700 | 3 | 3.62E-08 | 0.95  | 4.99   | -     | 1408.6   |
| AHQ-1-14, 4813             | K.AGPHCPPTAQLIATLKNGR.K                                                 | 1907.18700 | 3 | 4.43E-08 | 0.94  | 4.64   | -     | 1303.5   |
| AHQ-1-14, 4808 - 4821      | K.AGPHCPPTAQLIATLKNGR.K                                                 | 1907.18700 | 2 | 3.30E-10 | 0.97  | 4.95   | -     | 1736.2   |
| AHQ-1-14, 4686             | K.AGPHCPPTAQLIATLKNGR.K                                                 | 2035.35992 | 3 | 5.86E-06 | 0.90  | 3.71   | -     | 1333.5   |
| AHQ-1-14- , 2534 - 2599    | R.HITSLEVIK.A                                                           | 1040.23825 | 2 | 1.11E-05 | 0.88  | 3.34   | -     | 575.4    |
| AHQ-1-14- , 2658 - 2735    | R.HITSLEVIK.A                                                           | 1040.23825 | 2 | 1.33E-06 | 0.88  | 3.48   | -     | 469.8    |
| AHQ-1-14, 3584 - 3640      | R.HITSLEVIK.A                                                           | 1040.23825 | 2 | 5.61E-05 | 0.88  | 3.35   | -     | 568.7    |
| AHQ-1-14, 3470 - 3528      | R.HITSLEVIK.A                                                           | 1040.23825 | 2 | 1.82E-04 | 0.85  | 2.95   | -     | 554.1    |
| AHQ-1-13, 2715             | R.HITSLEVIK.A                                                           | 1040.23825 | 2 | 7.03E-04 | 0.74  | 2.97   | -     | 414.6    |
| AHQ-1-13- , 2705           | R.HITSLEVIK.A                                                           | 1040.23825 | 2 | 4.97E-05 | 0.80  | 2.95   | -     | 534.9    |
| AHQ-1-14, 5812 - 5813      | K.ICLDLQAPLYK.K                                                         | 1335.59400 | 2 | 3.29E-05 | 0.94  | 4.20   | -     | 1172.2   |
| AHQ-1-14- , 4936           | K.ICLDLQAPLYK.K                                                         | 1335.59400 | 1 | 4.66E-04 | 0.60  | 2.87   | -     | 532.9    |
| AHQ-1-14- , 4926           | K.ICLDLQAPLYK.K                                                         | 1335.59400 | 2 | 1.20E-05 | 0.95  | 4.10   | -     | 1414.8   |
| AHQ-1-14- , 5139           | K.ICLDLQAPLYK.K                                                         | 1335.59400 | 2 | 4.03E-05 | 0.93  | 4.15   | -     | 1185.6   |
| AHQ-1-14- , 4546 - 4606    | R.KICLDLQAPLYK.K                                                        | 1463.76691 | 2 | 4.03E-07 | 0.97  | 5.19   | -     | 1501.7   |
| AHQ-1-14- , 4602           | R.KICLDLQAPLYK.K                                                        | 1463.76691 | 1 | 6.56E-06 | 0.87  | 3.75   | -     | 741.0    |
| AHQ-1-14, 5417 - 5482      | R.KICLDLQAPLYK.K                                                        | 1463.76691 | 2 | 6.98E-06 | 0.97  | 4.90   | -     | 1575.7   |
| AHQ-1-14, 5437 - 5444      | R.KICLDLQAPLYK.K                                                        | 1463.76691 | 1 | 4.79E-05 | 0.83  | 3.04   | -     | 952.4    |
| AHQ-1-14- , 4560 - 4624    | R.KICLDLQAPLYK.K                                                        | 1463.76691 | 1 | 8.48E-04 | 0.58  | 2.32   | -     | 865.3    |
| AHQ-1-14- , 4558 - 4559    | R.KICLDLQAPLYK.K                                                        | 1463.76691 | 3 | 1.13E-06 | 0.89  | 3.69   | -     | 1171.7   |
| gj 5729887 ref NP_006624.1 | IQ motif containing GTPase activating protein 2 [Homo sapiens]          |            |   | 8.74E-11 | 10.73 | 120.27 | 14.30 | 180611.0 |
| AHQ-1-3, 4035              | K.AWVNQLLETQGEASK.L                                                     | 1662.78230 | 2 | 1.47E-06 | 0.86  | 3.64   | -     | 674.1    |
| AHQ-1-5, 5786              | K.GVLLDIDDLTQNFQK.N                                                     | 1719.91690 | 2 | 7.23E-06 | 0.95  | 4.22   | -     | 1281.7   |
| AHQ-1-3, 7363              | K.IGGILANLSDVEAALHAAVIAINEAVEK.Q                                        | 2932.31842 | 3 | 7.11E-04 | 0.90  | 4.34   | -     | 931.8    |
| AHQ-1-3, 7130              | K.KPEAQLPAVYPFAAAMYQNELFNLQK.G                                          | 2983.43222 | 3 | 1.82E-04 | 0.76  | 3.65   | -     | 594.4    |
| AHQ-1-3, 5929              | K.LGIAPQIQLDLGK.V                                                       | 1366.63117 | 2 | 8.80E-08 | 0.88  | 3.53   | -     | 572.1    |
| AHQ-1-3, 4925 - 4937       | K.LPYDVTTTEQALTYPEVK.N                                                  | 1968.19269 | 2 | 1.14E-09 | 0.98  | 4.92   | -     | 2106.5   |
| AHQ-1-5, 4931              | K.LPYDVTTTEQALTYPEVK.N                                                  | 1968.19269 | 2 | 8.74E-11 | 0.96  | 4.52   | -     | 1669.8   |
| AHQ-1-3, 6046              | R.NPNVALTLVDDNLAPEYQK.E                                                 | 2115.32901 | 2 | 5.58E-08 | 0.91  | 4.29   | -     | 614.8    |
| AHQ-1-3, 6957              | R.NQPGNTLLETIPATAQQEVDHATDMVSR.A                                        | 3268.51558 | 3 | 7.51E-08 | 0.72  | 3.05   | -     | 510.0    |
| AHQ-1-3, 4577              | K.SLIINTNPVEVYK.A                                                       | 1490.72593 | 2 | 1.62E-06 | 0.92  | 3.57   | -     | 1115.3   |
| AHQ-1-4, 4263              | K.TLVGSENPLTVIR.K                                                       | 1496.73370 | 2 | 4.64E-06 | 0.92  | 3.61   | -     | 1091.9   |
| AHQ-1-3, 4238              | K.TLVGSENPLTVIR.K                                                       | 1496.73370 | 2 | 1.35E-04 | 0.85  | 3.83   | -     | 493.0    |
| AHQ-1-5, 4257 - 4259       | K.VDQVQDIVTGNPTVIK.M                                                    | 1726.95257 | 2 | 1.99E-04 | 0.89  | 3.72   | -     | 975.5    |
| AHQ-1-4, 4355 - 4359       | K.VDQVQDIVTGNPTVIK.M                                                    | 1726.95257 | 2 | 1.33E-04 | 0.93  | 3.92   | -     | 1219.1   |
| AHQ-1-3, 4223 - 4294       | K.VDQVQDIVTGNPTVIK.M                                                    | 1726.95257 | 2 | 2.21E-05 | 0.96  | 4.88   | -     | 1357.5   |
| AHQ-1-3, 5974              | R.VVAVGYINEAIDEGNPLR.T                                                  | 1930.15092 | 2 | 1.62E-07 | 0.98  | 5.32   | -     | 1867.1   |
| gj 6005727 ref NP_006576.1 | chaperonin containing TCP1, subunit 8 (theta); T-complex protein 1, the |            |   | 9.31E-11 | 1.77  | 20.19  | 5.70  | 59662.4  |
| AHQ-1-7, 2709 - 2712       | K.AIADTGANVVVTGGK.V                                                     | 1373.53743 | 2 | 9.31E-11 | 0.92  | 3.28   | -     | 1198.5   |
| AHQ-1-7, 5424              | K.IAVYSCPPFGMITETK.G                                                    | 1834.10347 | 2 | 3.37E-04 | 0.86  | 3.72   | -     | 487.9    |
| gj 7661728 ref NP_054736.1 | HSPC003 protein [Homo sapiens]                                          |            |   | 1.23E-10 | 0.93  | 10.25  | 21.60 | 13507.4  |
| AHQ-1-14- , 5571           | R.VTAAIANSNIWAAYDRNGQAFNEDNLK.F                                         | 2968.18636 | 3 | 1.23E-10 | 0.93  | 5.07   | -     | 735.1    |
| gj 4504183 ref NP_000843.1 | glutathione transferase; deafness, X-linked 7; fatty acid ethyl ester s |            |   | 1.26E-10 | 9.12  | 110.29 | 64.30 | 23355.7  |
| AHQ-1-11, 5056             | K.AFLASPEVYVNLPIPINGKQ.Q                                                | 1905.14305 | 2 | 8.56E-06 | 0.83  | 3.14   | -     | 882.1    |
| AHQ-1-14, 6170             | K.AFLASPEVYVNLPIPINGKQ.Q                                                | 2033.27283 | 2 | 6.72E-04 | 0.64  | 2.74   | -     | 730.5    |
| AHQ-1-13- , 5549           | K.ALPGQLKPFETLLSQNGGK.T                                                 | 2127.42930 | 2 | 3.71E-05 | 0.20  | 2.56   | -     | 234.3    |
| AHQ-1-11, 5026 - 5086      | K.ALPGQLKPFETLLSQNGGK.T                                                 | 2127.42930 | 2 | 2.08E-07 | 0.91  | 4.21   | -     | 546.4    |
| AHQ-1-11, 5028 - 5042      | K.ALPGQLKPFETLLSQNGGK.T                                                 | 2127.42930 | 3 | 3.69E-06 | 0.81  | 3.75   | -     | 628.6    |
| AHQ-1-11, 5127             | K.ALPGQLKPFETLLSQNGGK.T                                                 | 2127.42930 | 2 | 3.33E-06 | 0.80  | 3.48   | -     | 408.9    |
| AHQ-1-11, 3139             | K.ASCLYQLPK.F                                                           | 1138.31884 | 1 | 4.78E-04 | 0.44  | 2.45   | -     | 242.1    |

|                             |                                                                         |            |   |          |       |        |       |          |
|-----------------------------|-------------------------------------------------------------------------|------------|---|----------|-------|--------|-------|----------|
| AHQ-1-11, 3062 - 3135       | K.ASCLYGLPK.F                                                           | 1138.31884 | 2 | 1.38E-06 | 0.88  | 2.79   | -     | 969.6    |
| AHQ-1-11, 4962              | K.DQEEAALVDMVNDGVEDLR.C                                                 | 2134.26783 | 2 | 8.37E-06 | 0.96  | 4.93   | -     | 1056.4   |
| AHQ-1-11, 4958              | K.DQEEAALVDMVNDGVEDLR.C                                                 | 2118.26843 | 2 | 7.57E-09 | 0.93  | 4.49   | -     | 730.0    |
| AHQ-1-11, 6202 - 6271       | K.DQEEAALVDMVNDGVEDLR.C                                                 | 2118.26843 | 2 | 1.63E-08 | 0.96  | 5.26   | -     | 935.9    |
| AHQ-1-11, 5784 - 5852       | K.DQEEAALVDMVNDGVEDLR.C                                                 | 2118.26843 | 2 | 1.59E-05 | 0.92  | 4.11   | -     | 948.1    |
| AHQ-1-11, 5947 - 6022       | K.DQEEAALVDMVNDGVEDLR.C                                                 | 2118.26843 | 2 | 1.26E-10 | 0.98  | 5.87   | -     | 1370.1   |
| AHQ-1-11, 4578 - 4644       | K.FQDGDLTLYQSNILR.H                                                     | 1885.06701 | 2 | 7.51E-10 | 0.92  | 4.18   | -     | 777.0    |
| AHQ-1-11, 4702 - 4783       | K.FQDGDLTLYQSNILR.H                                                     | 1885.06701 | 2 | 5.15E-09 | 0.97  | 5.24   | -     | 1462.6   |
| AHQ-1-14, 4928 - 4955       | K.FQDGDLTLYQSNILR.H                                                     | 1885.06701 | 2 | 9.37E-09 | 0.94  | 4.64   | -     | 895.4    |
| AHQ-1-11, 5726 - 5796       | R.MLLADQGGQSWKEEVTVETWQEGSLK.A                                          | 3009.33685 | 3 | 2.77E-08 | 0.95  | 5.81   | -     | 1100.7   |
| AHQ-1-11, 5866              | R.MLLADQGGQSWKEEVTVETWQEGSLK.A                                          | 2993.33745 | 3 | 4.16E-04 | 0.68  | 3.38   | -     | 533.6    |
| AHQ-1-11, 2276              | R.TLGLYK.D                                                              | 751.89356  | 1 | 2.74E-04 | 0.44  | 1.97   | -     | 664.0    |
| AHQ-1-11, 4304 - 4331       | K.YISLIYTYEAGKDDYVK.A                                                   | 2156.37637 | 2 | 1.63E-06 | 0.90  | 4.09   | -     | 674.2    |
| AHQ-1-13, 4740              | K.YISLIYTYEAGKDDYVK.A                                                   | 2156.37637 | 2 | 6.66E-09 | 0.94  | 4.58   | -     | 805.4    |
| AHQ-1-11, 4420              | K.YISLIYTYEAGKDDYVK.A                                                   | 2156.37637 | 2 | 5.84E-07 | 0.77  | 3.25   | -     | 535.2    |
| gj 13899317 ref NP_113657.1 | SH3 domain binding glutamic acid-rich protein like 2 [Homo sapiens] [M] |            |   | 1.28E-10 | 6.37  | 70.30  | 72.00 | 12326.0  |
| AHQ-1-14, 5490 - 5492       | K.ESNTVFSFLGKPR.L                                                       | 1595.82383 | 2 | 9.40E-08 | 0.81  | 3.42   | -     | 574.6    |
| AHQ-1-13, 5665              | K.ESNTVFSFLGKPR.L                                                       | 1595.82383 | 2 | 4.39E-08 | 0.73  | 3.43   | -     | 394.8    |
| AHQ-1-14, 4982              | R.FLEANKIEFEEVDITM*SEEQR.Q                                              | 2574.80223 | 2 | 2.06E-04 | 0.92  | 4.32   | -     | 919.2    |
| AHQ-1-14, 5865 - 5925       | R.FLEANKIEFEEVDITM*SEEQR.Q                                              | 2574.80223 | 3 | 4.59E-04 | 0.96  | 5.08   | -     | 1614.5   |
| AHQ-1-14, 5874              | R.FLEANKIEFEEVDITM*SEEQR.Q                                              | 2574.80223 | 2 | 3.51E-04 | 0.88  | 3.41   | -     | 1097.6   |
| AHQ-1-14, 4974 - 5042       | R.FLEANKIEFEEVDITM*SEEQR.Q                                              | 2574.80223 | 3 | 3.08E-08 | 0.98  | 5.95   | -     | 2110.7   |
| AHQ-1-14, 5141 - 5149       | K.IEFEEVDITM*SEEQR.Q                                                    | 1872.00051 | 2 | 1.14E-04 | 0.80  | 3.20   | -     | 807.2    |
| AHQ-1-14, 4291              | K.IEFEEVDITM*SEEQR.Q                                                    | 1872.00051 | 2 | 1.28E-10 | 0.96  | 4.77   | -     | 1161.1   |
| AHQ-1-14, 4700              | K.KPTQGNPLPPOIFNGDR.Y                                                   | 1880.09682 | 2 | 2.73E-04 | 0.90  | 3.68   | -     | 831.9    |
| AHQ-1-14, 3756 - 3771       | K.KPTQGNPLPPOIFNGDR.Y                                                   | 1880.09682 | 2 | 2.83E-04 | 0.85  | 3.32   | -     | 741.0    |
| AHQ-1-14, 5722 - 5762       | K.KPTQGNPLPPOIFNGDR.Y                                                   | 3380.64432 | 3 | 5.24E-05 | 0.86  | 4.13   | -     | 845.2    |
| AHQ-1-14, 4454 - 4532       | R.VFIASSSGFVAIK.K                                                       | 1326.56551 | 2 | 3.80E-07 | 0.98  | 4.19   | -     | 2584.6   |
| AHQ-1-14, 5352              | R.YCGDYDSFFESK.E                                                        | 1519.57010 | 2 | 1.28E-06 | 0.96  | 3.88   | -     | 1111.2   |
| AHQ-1-14, 4463              | R.YCGDYDSFFESK.E                                                        | 1519.57010 | 2 | 7.24E-07 | 0.96  | 4.16   | -     | 1185.2   |
| gj 18104989 ref NP_002822.2 | protein tyrosine phosphatase, non-receptor type 6 isoform 1; protein-t  |            |   | 1.32E-10 | 2.59  | 30.24  | 9.40  | 67560.7  |
| AHQ-1-14, 6670              | K.FATLTELVEYTYQQQVGLQDR.D                                               | 2503.74859 | 3 | 9.30E-07 | 0.94  | 4.71   | -     | 1184.6   |
| AHQ-1-6, 4443 - 4463        | R.IQNSGDFYDLYGGEK.F                                                     | 1706.79040 | 2 | 3.92E-05 | 0.73  | 3.54   | -     | 333.3    |
| AHQ-1-6, 4111 - 4188        | R.IQNSGDFYDLYGGEK.F                                                     | 1706.79040 | 2 | 1.45E-05 | 0.76  | 3.35   | -     | 460.3    |
| AHQ-1-6, 7219               | R.YTVGGLETFSLTDLVEHF.K                                                  | 2272.49536 | 2 | 1.32E-10 | 0.89  | 4.36   | -     | 410.9    |
| gj 4502051 ref NP_000688.1  | arachidonate 12-lipoxygenase; 12(S)-lipoxygenase [Homo sapiens]         |            |   | 1.44E-10 | 7.74  | 90.21  | 17.60 | 75721.8  |
| AHQ-1-6, 4966               | R.AAAQLTYCCLPPDLDLADR.G                                                 | 2140.33708 | 2 | 1.41E-08 | 0.86  | 3.93   | -     | 346.3    |
| AHQ-1-6, 2258               | K.AVSTGGGHVQLLR.R                                                       | 1352.52468 | 2 | 1.44E-10 | 0.86  | 3.34   | -     | 1004.6   |
| AHQ-1-6, 3428               | K.GDPELQAWCR.E                                                          | 1233.33558 | 2 | 3.37E-07 | 0.61  | 2.78   | -     | 395.2    |
| AHQ-1-6, 5515               | R.GLLGLPGALYHADLR.L                                                     | 1637.90708 | 2 | 2.06E-10 | 0.93  | 3.82   | -     | 845.9    |
| AHQ-1-6, 5207               | R.ITVQGGACAEVAFPCYR.W                                                   | 1999.25659 | 2 | 1.24E-09 | 0.87  | 3.43   | -     | 893.9    |
| AHQ-1-6, 4634               | R.LPGDNALDM*FQK.H                                                       | 1349.53784 | 2 | 3.30E-06 | 0.95  | 3.82   | -     | 1365.5   |
| AHQ-1-6, 3760               | R.LPGDNALDM*FQK.H                                                       | 1365.53724 | 2 | 1.48E-04 | 0.88  | 3.20   | -     | 896.6    |
| AHQ-1-6, 5098               | R.WYGEDILSLPEGTAR.L                                                     | 1771.95190 | 2 | 4.96E-05 | 0.86  | 3.98   | -     | 595.7    |
| AHQ-1-6, 4995               | R.YVEGIVHLFYQR.D                                                        | 1524.74730 | 2 | 7.03E-07 | 0.92  | 3.11   | -     | 1154.9   |
| gj 4506925 ref NP_003013.1  | SH3 domain binding glutamic acid-rich protein like; SH3-binding domain  |            |   | 1.46E-10 | 2.83  | 30.33  | 50.00 | 12774.2  |
| AHQ-1-13, 6061 - 6135       | R.ENNAVYFLGLTAPPQSK.E                                                   | 1850.06426 | 2 | 3.09E-05 | 0.92  | 4.66   | -     | 572.6    |
| AHQ-1-13, 6145 - 6207       | R.ENNAVYFLGLTAPPQSK.E                                                   | 1850.06426 | 2 | 1.58E-04 | 0.88  | 4.05   | -     | 608.4    |
| AHQ-1-13, 4915 - 4980       | R.ENVPENSRPATGYPLPPQIFNESQYR.G                                          | 3005.24660 | 3 | 8.54E-08 | 0.89  | 4.43   | -     | 713.9    |
| AHQ-1-13, 5291              | R.ENVPENSRPATGYPLPPQIFNESQYR.G                                          | 3005.24660 | 3 | 4.19E-10 | 0.93  | 4.77   | -     | 1007.9   |
| AHQ-1-13, 5068 - 5147       | R.ENVPENSRPATGYPLPPQIFNESQYR.G                                          | 3005.24660 | 3 | 1.46E-10 | 0.97  | 6.52   | -     | 1275.5   |
| AHQ-1-13, 5159 - 5227       | R.ENVPENSRPATGYPLPPQIFNESQYR.G                                          | 3005.24660 | 3 | 4.75E-08 | 0.96  | 5.68   | -     | 1277.1   |
| AHQ-1-13, 4799 - 4859       | R.ENVPENSRPATGYPLPPQIFNESQYR.G                                          | 3005.24660 | 3 | 1.87E-05 | 0.94  | 4.79   | -     | 1174.9   |
| AHQ-1-13, 2432 - 2435       | R.VYIASSSGTAIK.K                                                        | 1284.44065 | 2 | 1.50E-05 | 0.94  | 4.20   | -     | 1512.8   |
| AHQ-1-13, 2524              | R.VYIASSSGTAIK.K                                                        | 1284.44065 | 2 | 2.82E-05 | 0.92  | 3.73   | -     | 1559.7   |
| gj 21618359 ref NP_004095.3 | fatty acid synthase [Homo sapiens]                                      |            |   | 1.68E-10 | 1.81  | 20.31  | 1.60  | 273262.0 |
| AHQ-1-1, 6439               | R.LHLSGIDANPNALFPVVEFPAPR.G                                             | 2473.81368 | 2 | 1.99E-07 | 0.82  | 3.30   | -     | 462.3    |
| AHQ-1-2, 7122               | K.LPEDPLLSGLLDSPALK.A                                                   | 1779.06739 | 2 | 1.68E-10 | 0.98  | 6.24   | -     | 2232.4   |
| AHQ-1-3, 6937 - 6959        | K.LPEDPLLSGLLDSPALK.A                                                   | 1779.06739 | 2 | 1.68E-05 | 0.97  | 5.08   | -     | 1556.8   |
| AHQ-1-1, 6811 - 6817        | K.LPEDPLLSGLLDSPALK.A                                                   | 1779.06739 | 2 | 4.00E-09 | 0.98  | 4.86   | -     | 1931.8   |
| gj 4506365 ref NP_002856.1  | RAB2, member RAS oncogene family [Homo sapiens]                         |            |   | 1.88E-10 | 0.96  | 10.18  | 6.10  | 23545.4  |
| AHQ-1-14, 5386              | K.LQIWDTAGQESFR.S                                                       | 1551.68478 | 2 | 2.30E-04 | 0.65  | 2.56   | -     | 352.6    |
| AHQ-1-11, 4218              | K.LQIWDTAGQESFR.S                                                       | 1551.68478 | 2 | 1.88E-10 | 0.96  | 3.56   | -     | 1765.5   |
| gj 4758304 ref NP_004902.1  | protein disulfide isomerase related protein (calcium-binding protein, i |            |   | 1.93E-10 | 6.51  | 80.22  | 16.90 | 72931.9  |
| AHQ-1-6, 4720               | K.DLGLSESDVNAALDESQK.F                                                  | 2248.38737 | 2 | 1.93E-10 | 0.95  | 4.42   | -     | 1236.8   |
| AHQ-1-6, 6166 - 6170        | R.EVSOQDWTTPPEVTLVLT.K.E                                                | 2137.41772 | 2 | 7.87E-04 | 0.39  | 3.19   | -     | 220.1    |
| AHQ-1-6, 4707               | K.FAMEPEEFDSDTLR.E                                                      | 1687.80890 | 2 | 1.44E-08 | 0.86  | 3.46   | -     | 617.6    |
| AHQ-1-6, 3686               | R.FDVSGYPTIK.I                                                          | 1127.27123 | 1 | 1.52E-04 | 0.26  | 2.10   | -     | 437.8    |
| AHQ-1-6, 3688               | R.FDVSGYPTIK.I                                                          | 1127.27123 | 2 | 6.40E-05 | 0.90  | 2.99   | -     | 1162.7   |
| AHQ-1-6, 3779               | R.FDVSGYPTIK.I                                                          | 1127.27123 | 2 | 2.54E-06 | 0.82  | 2.57   | -     | 920.0    |
| AHQ-1-6, 2882               | K.IDATSASVLSR.F                                                         | 1191.31686 | 2 | 1.76E-06 | 0.93  | 3.48   | -     | 1278.9   |
| AHQ-1-6, 1970 - 2034        | K.RSPPIPLAK.V                                                           | 979.20128  | 2 | 3.39E-04 | 0.81  | 2.52   | -     | 654.7    |
| AHQ-1-6, 2927               | K.VSQQLVVMQPEK.F                                                        | 1443.69431 | 2 | 6.46E-05 | 0.85  | 2.68   | -     | 1260.7   |
| gj 12025678 ref NP_004915.2 | actinin, alpha 4 [Homo sapiens]                                         |            |   | 1.96E-10 | 10.60 | 130.27 | 22.30 | 104853.3 |
| AHQ-1-5, 3462               | R.ASFNFHDKDHGALGPEEFK.A                                                 | 2204.34290 | 2 | 1.88E-08 | 0.66  | 2.94   | -     | 525.3    |
| AHQ-1-5, 2077               | R.EAILAIH.K                                                             | 895.08114  | 2 | 1.85E-04 | 0.89  | 2.94   | -     | 952.0    |
| AHQ-1-5, 2086               | R.EAILAIH.K                                                             | 895.08114  | 1 | 4.54E-05 | 0.49  | 1.94   | -     | 345.2    |
| AHQ-1-6, 4724               | R.ETTTDTADQVIASF.K.V                                                    | 1742.81936 | 2 | 1.05E-05 | 0.90  | 3.18   | -     | 1425.5   |
| AHQ-1-4, 4908               | R.ETTTDTADQVIASF.K.V                                                    | 1742.81936 | 2 | 1.40E-07 | 0.95  | 4.53   | -     | 1362.1   |
| AHQ-1-14, 5558 - 5617       | R.ETTTDTADQVIASF.K.V                                                    | 1742.81936 | 2 | 7.34E-07 | 0.84  | 3.29   | -     | 925.6    |
| AHQ-1-5, 4811               | R.ETTTDTADQVIASF.K.V                                                    | 1742.81936 | 2 | 1.21E-07 | 0.91  | 4.20   | -     | 1023.7   |
| AHQ-1-5, 2159               | K.GISQEQM*QEFR.A                                                        | 1369.48598 | 2 | 5.66E-04 | 0.47  | 2.70   | -     | 559.5    |
| AHQ-1-5, 2445 - 2453        | K.HRDYETATLSDIK.A                                                       | 1549.66719 | 2 | 2.48E-04 | 0.92  | 3.65   | -     | 891.3    |
| AHQ-1-5, 4901               | K.ICDQWDALGSLTHSR.R                                                     | 1760.90926 | 2 | 5.57E-10 | 0.93  | 4.10   | -     | 1009.3   |
| AHQ-1-5, 3819               | R.KDDPVTNLNNAFEVAK.Y                                                    | 1905.05509 | 2 | 3.69E-09 | 0.91  | 3.73   | -     | 917.4    |
| AHQ-1-5, 4443               | R.KDDPVTNLNNAFEVAK.Y                                                    | 1905.05509 | 2 | 1.93E-05 | 0.97  | 5.36   | -     | 1144.9   |
| AHQ-1-4, 4104               | R.M*APYQGPDAVPGALDYK.S                                                  | 1810.02037 | 2 | 1.67E-05 | 0.87  | 3.30   | -     | 752.2    |
| AHQ-1-5, 4286               | R.MAPYQGPDAVPGALDYK.S                                                   | 1794.02097 | 2 | 4.78E-05 | 0.90  | 4.10   | -     | 669.5    |
| AHQ-1-5, 4217               | K.MLDAEDIVNTARPDEK.A                                                    | 1817.99924 | 2 | 3.95E-06 | 0.90  | 3.85   | -     | 883.6    |
| AHQ-1-5, 4095               | K.MVSDINNGWQHLEQAEK.G                                                   | 2000.18160 | 2 | 1.96E-10 | 0.90  | 4.27   | -     | 593.5    |
| AHQ-1-4, 7290               | R.SIVDYKPNLDLLEQQHQLIQALIFDNK.H                                         | 3326.74423 | 3 | 5.70E-04 | 0.83  | 4.30   | -     | 664.0    |
| AHQ-1-4, 6807               | R.VEQIAIAQELNELDYDSSHVNTR.C                                             | 2907.09810 | 3 | 8.15E-05 | 0.83  | 4.08   | -     | 518.0    |
| AHQ-1-5, 6717 - 6729        | R.VEQIAIAQELNELDYDSSHVNTR.C                                             | 2907.09810 | 3 | 2.73E-10 | 0.91  | 4.75   | -     | 944.9    |
| gj 21361370 ref NP_002853.2 | phosphorylase, glycogen; brain [Homo sapiens]                           |            |   | 1.99E-10 | 5.67  | 60.24  | 10.60 | 96695.3  |
| AHQ-1-5, 3813               | R.GLAGLDVAEVR.K                                                         | 1157.30210 | 2 | 8.89E-06 | 0.96  | 4.39   | -     | 1481.1   |
| AHQ-1-5, 3635 - 3662        | R.HLDHVAALFPGVDVDR.L                                                    | 1662.83036 | 2 | 7.76E-04 | 0.97  | 4.33   | -     | 1936.3   |
| AHQ-1-5, 6058 - 6059        | K.LLPLVSDVDFIR.D                                                        | 1401.67552 | 2 | 1.99E-10 | 0.90  | 3.47   | -     | 647.1    |
| AHQ-1-5, 7419               | K.LQDFNVGDYIEAVLDR.N                                                    | 1868.03645 | 2 | 2.59E-09 | 0.96  | 4.69   | -     | 1199.0   |
| AHQ-1-5, 4313               | K.LVTSIGDVTNHPVVGDR.L                                                   | 1893.09067 | 2 | 1.25E-08 | 0.92  | 4.16   | -     | 695.2    |
| AHQ-1-5, 6769 - 6830        | R.WLLLCNPGDLADTIVEK.I                                                   | 1844.16436 | 2 | 2.74E-05 | 0.96  | 4.83   | -     | 1385.1   |
| gj 28269681 ref NP_783313.1 | NADH-ubiquinone oxidoreductase subunit B14.7 [Homo sapiens]             |            |   | 2.07E-10 | 1.35  | 20.28  | 27.00 | 14852.0  |
| AHQ-1-13, 6708              | R.EKPPDPLNYFLGGCAGGLTLGAR.T                                             | 2423.68676 | 3 | 2.07E-10 | 0.96  | 5.67   | -     | 1524.3   |
| AHQ-1-14, 6463              | R.EKPPDPLNYFLGGCAGGLTLGAR.T                                             | 2423.68676 | 3 | 3.87E-05 | 0.94  | 4.25   | -     | 1747.5   |
| AHQ-1-13, 4800 - 4867       | R.VTLNPPGTFLEGVAK.V                                                     | 1543.78883 | 2 | 1.72E-04 | 0.39  | 2.51   | -     | 273.2    |
| gj 9257257 ref NP_059830.1  | WD repeat-containing protein 1 isoform 1 [Homo sapiens]                 |            |   | 2.12E-10 | 1.73  | 20.24  | 7.90  | 66193.1  |
| AHQ-1-10, 3935              | R.LHHVSSLAWLDEHTLVTTSHDASVK.E                                           | 2785.06406 | 3 | 2.11E-06 | 0.91  | 4.09   | -     | 1105.6   |
| AHQ-1-6, 4203               | R.LHHVSSLAWLDEHTLVTTSHDASVK.E                                           | 2785.06406 | 3 | 2.12E-10 | 0.94  | 4.74   | -     | 1119.4   |

|                             |                                                                          |            |   |          |      |       |       |         |
|-----------------------------|--------------------------------------------------------------------------|------------|---|----------|------|-------|-------|---------|
| AHQ-1-6, 5087               | K.VVTVFVADGYSENNVYFGHHA.K                                                | 2541.75861 | 3 | 3.91E-08 | 0.78 | 3.36  | -     | 695.9   |
| gi 4507383 ref NP_001052.1  | thromboxane A synthase 1 (platelet, cytochrome P450, family 5, subfamily |            |   | 2.12E-10 | 7.17 | 90.23 | 21.50 | 60675.3 |
| AHQ-1-7, 2414               | R.DVFSSTGCKPNPSR.Q                                                       | 1553.67913 | 2 | 3.87E-08 | 0.56 | 2.82  | -     | 501.0   |
| AHQ-1-7, 2477               | R.EAAGDCEVLGQR.I                                                         | 1377.46310 | 2 | 1.98E-04 | 0.86 | 3.61  | -     | 1050.8  |
| AHQ-1-7, 4476 - 4556        | R.FQACPETQVPLQLESK.S                                                     | 1877.10807 | 2 | 2.12E-10 | 0.96 | 4.50  | -     | 1541.9  |
| AHQ-1-10, 4033              | R.FQACPETQVPLQLESK.S                                                     | 1877.10807 | 2 | 1.54E-05 | 0.96 | 4.45  | -     | 1276.9  |
| AHQ-1-7, 3466               | R.GALMSAFSPEK.L                                                          | 1138.31906 | 1 | 1.08E-04 | 0.37 | 2.32  | -     | 601.6   |
| AHQ-1-7, 4101               | R.HSASPMGVQDFDIVR.D                                                      | 1659.84828 | 2 | 4.75E-06 | 0.95 | 3.98  | -     | 1257.6  |
| AHQ-1-7, 5273               | K.LYGPLCGYVILGR.R                                                        | 1433.65622 | 2 | 1.09E-05 | 0.89 | 2.92  | -     | 1061.1  |
| AHQ-1-7, 3544               | K.NRDELNGFFNK.L                                                          | 1354.45276 | 2 | 5.49E-04 | 0.87 | 3.17  | -     | 888.9   |
| AHQ-1-14 - , 5974           | K.PSPFIGNLTFRR.Q                                                         | 1396.61752 | 2 | 2.50E-06 | 0.76 | 2.62  | -     | 566.3   |
| AHQ-1-7, 3092               | R.YAESGDADFQIR.C                                                         | 1372.42172 | 2 | 4.83E-10 | 0.95 | 4.06  | -     | 1383.6  |
| gi 7661818 ref NP_054900.1  | HSPC159 protein [Homo sapiens]                                           |            |   | 2.16E-10 | 4.29 | 50.27 | 43.00 | 19011.6 |
| AHQ-1-13, 6379              | R.GEEQSAIPYFPFIPDQPR.V                                                   | 2239.47029 | 2 | 1.89E-05 | 0.84 | 3.91  | -     | 279.2   |
| AHQ-1-13- , 6835 - 6836     | R.GEEQSAIPYFPFIPDQPR.V                                                   | 2239.47029 | 2 | 1.62E-05 | 0.84 | 3.58  | -     | 384.7   |
| AHQ-1-14- , 6586            | R.GEEQSAIPYFPFIPDQPR.V                                                   | 2239.47029 | 2 | 3.99E-05 | 0.92 | 4.61  | -     | 355.7   |
| AHQ-1-12, 6502              | R.GEEQSAIPYFPFIPDQPR.V                                                   | 2239.47029 | 2 | 4.19E-06 | 0.82 | 3.60  | -     | 308.1   |
| AHQ-1-11, 6310              | R.GEEQSAIPYFPFIPDQPR.V                                                   | 2239.47029 | 2 | 2.15E-04 | 0.92 | 4.42  | -     | 418.9   |
| AHQ-1-13- , 3873 - 3884     | R.IQTLAIDAITK.I                                                          | 1203.41068 | 2 | 7.81E-04 | 0.80 | 3.10  | -     | 578.5   |
| AHQ-1-11, 4623              | K.LDDGHLNLSLSSPVQADVFPRL                                                 | 2445.62923 | 2 | 2.10E-06 | 0.79 | 3.34  | -     | 721.2   |
| AHQ-1-11, 4736 - 4796       | K.LDDGHLNLSLSSPVQADVFPRL                                                 | 2445.62923 | 2 | 1.24E-06 | 0.97 | 5.34  | -     | 1595.8  |
| AHQ-1-13- , 6711            | R.NSCISGERGEEQSAIPYFPFIPDQPR.V                                           | 3144.41922 | 3 | 3.18E-04 | 0.67 | 3.37  | -     | 421.9   |
| AHQ-1-13- , 6844            | R.NSCISGERGEEQSAIPYFPFIPDQPR.V                                           | 3144.41922 | 3 | 1.14E-05 | 0.79 | 3.55  | -     | 671.2   |
| AHQ-1-11, 4594              | R.VFVDGHLQDFDFYHR.I                                                      | 1780.96540 | 2 | 6.45E-10 | 0.96 | 4.62  | -     | 1653.9  |
| AHQ-1-11, 4704              | R.VFVDGHLQDFDFYHR.I                                                      | 1780.96540 | 2 | 2.16E-10 | 0.91 | 3.47  | -     | 1112.2  |
| gi 21464101 ref NP_036611.2 | tyrosine 3-monooxygenase/tryptophan 5-monooxygenase activation protein   |            |   | 2.18E-10 | 3.75 | 40.31 | 29.60 | 28302.4 |
| AHQ-1-10, 6279              | R.LGALNYSVYYEQNAPEQACHLAK.T                                              | 3015.38773 | 3 | 2.18E-10 | 0.96 | 6.15  | -     | 1136.4  |
| AHQ-1-10, 3963 - 4036       | R.NLLSVAYKNVVGAR.R                                                       | 1504.75906 | 2 | 6.34E-06 | 0.95 | 4.18  | -     | 1253.1  |
| AHQ-1-10, 3768              | R.NLLSVAYKNVVGAR.R                                                       | 1504.75906 | 2 | 4.51E-07 | 0.92 | 3.31  | -     | 1373.3  |
| AHQ-1-13- , 3128            | K.NVTELNEPLSNEER.N                                                       | 1644.72215 | 2 | 9.25E-08 | 0.94 | 4.49  | -     | 864.3   |
| AHQ-1-14- , 3083            | K.NVTELNEPLSNEER.N                                                       | 1644.72215 | 2 | 7.71E-07 | 0.93 | 3.94  | -     | 907.8   |
| AHQ-1-10, 2876              | K.NVTELNEPLSNEER.N                                                       | 1644.72215 | 2 | 5.48E-04 | 0.91 | 3.53  | -     | 875.1   |
| AHQ-1-11, 2966 - 2968       | K.NVTELNEPLSNEER.N                                                       | 1644.72215 | 2 | 4.12E-04 | 0.81 | 3.03  | -     | 682.5   |
| AHQ-1-14, 3952              | K.NVTELNEPLSNEER.N                                                       | 1644.72215 | 2 | 5.85E-04 | 0.86 | 3.81  | -     | 489.4   |
| AHQ-1-10, 6012 - 6075       | K.TAFDDAIAELDTLNEDSYK.D                                                  | 2132.22370 | 2 | 4.15E-05 | 0.64 | 3.36  | -     | 627.1   |
| AHQ-1-13- , 6668 - 6681     | K.TAFDDAIAELDTLNEDSYK.D                                                  | 2132.22370 | 2 | 3.40E-05 | 0.87 | 3.99  | -     | 808.6   |
| AHQ-1-10, 5840              | K.TAFDDAIAELDTLNEDSYK.D                                                  | 2132.22370 | 2 | 2.14E-09 | 0.83 | 3.91  | -     | 656.4   |
| AHQ-1-14- , 6451 - 6452     | K.TAFDDAIAELDTLNEDSYK.D                                                  | 2132.22370 | 2 | 7.27E-06 | 0.93 | 4.23  | -     | 1005.6  |
| AHQ-1-13, 6229 - 6251       | K.TAFDDAIAELDTLNEDSYK.D                                                  | 2132.22370 | 2 | 3.87E-10 | 0.93 | 3.94  | -     | 1073.9  |
| gi 30159310 ref XP_301899.1 | similar to beta-actin [Homo sapiens]                                     |            |   | 2.32E-10 | 1.46 | 20.18 | 9.20  | 32376.4 |
| AHQ-1-8, 1475 - 2015        | K.DSYVGNEAQS.K.R                                                         | 1198.22158 | 1 | 2.32E-10 | 0.59 | 2.71  | -     | 357.5   |
| AHQ-1-8, 1705               | K.DSYVGNEAQS.K.R                                                         | 1198.22158 | 2 | 6.24E-06 | 0.72 | 3.27  | -     | 532.9   |
| AHQ-1-8, 1801 - 1873        | K.DSYVGNEAQS.K.R                                                         | 1198.22158 | 2 | 2.56E-05 | 0.72 | 3.08  | -     | 664.4   |
| AHQ-1-13- , 1661 - 1737     | K.DSYVGNEAQS.K.R                                                         | 1198.22158 | 2 | 8.15E-04 | 0.49 | 2.88  | -     | 428.4   |
| AHQ-1-13, 1819 - 1877       | K.DSYVGNEAQS.K.R                                                         | 1198.22158 | 1 | 9.33E-07 | 0.38 | 2.17  | -     | 406.8   |
| AHQ-1-9, 1542 - 1602        | K.DSYVGNEAQS.K.R                                                         | 1198.22158 | 1 | 5.21E-08 | 0.71 | 2.80  | -     | 512.5   |
| AHQ-1-9, 1856               | K.DSYVGNEAQS.K.R                                                         | 1198.22158 | 1 | 1.17E-08 | 0.56 | 2.58  | -     | 405.7   |
| AHQ-1-13- , 1705            | K.DSYVGNEAQS.K.R                                                         | 1198.22158 | 1 | 4.05E-04 | 0.05 | 1.81  | -     | 209.2   |
| AHQ-1-12, 1638 - 1702       | K.DSYVGNEAQS.K.R                                                         | 1198.22158 | 2 | 2.30E-06 | 0.64 | 3.00  | -     | 597.1   |
| AHQ-1-12, 1707 - 1846       | K.DSYVGNEAQS.K.R                                                         | 1198.22158 | 1 | 1.26E-08 | 0.42 | 2.49  | -     | 338.2   |
| AHQ-1-12, 1757 - 1821       | K.DSYVGNEAQS.K.R                                                         | 1198.22158 | 2 | 3.47E-06 | 0.56 | 3.10  | -     | 500.5   |
| AHQ-1-8, 4723 - 4795        | K.SYKLLDGGVITIGNER.F                                                     | 1807.04092 | 2 | 1.22E-05 | 0.80 | 3.41  | -     | 679.7   |
| AHQ-1-9, 4570 - 4575        | K.SYKLLDGGVITIGNER.F                                                     | 1807.04092 | 2 | 4.23E-04 | 0.72 | 2.96  | -     | 541.6   |
| AHQ-1-8, 4892 - 4971        | K.SYKLLDGGVITIGNER.F                                                     | 1807.04092 | 2 | 2.25E-06 | 0.87 | 3.49  | -     | 724.1   |
| gi 4507745 ref NP_003320.1  | thioredoxin [Homo sapiens]                                               |            |   | 2.33E-10 | 0.93 | 10.17 | 12.40 | 11693.3 |
| AHQ-1-13- , 4000            | K.TAFQALDAAGDK.L                                                         | 1337.41728 | 1 | 7.56E-06 | 0.53 | 2.10  | -     | 916.3   |
| AHQ-1-14- , 3891 - 3898     | K.TAFQALDAAGDK.L                                                         | 1337.41728 | 2 | 2.33E-10 | 0.93 | 3.48  | -     | 1470.7  |
| AHQ-1-14- , 3899            | K.TAFQALDAAGDK.L                                                         | 1337.41728 | 1 | 3.57E-05 | 0.79 | 2.88  | -     | 1010.6  |
| AHQ-1-14, 4788              | K.TAFQALDAAGDK.L                                                         | 1337.41728 | 2 | 6.39E-06 | 0.92 | 3.39  | -     | 1275.0  |
| gi 20127528 ref NP_037459.2 | parvin, beta; CGI-56 protein; beta-parvin [Homo sapiens]                 |            |   | 2.41E-10 | 5.13 | 60.26 | 21.70 | 41714.0 |
| AHQ-1-14- , 3544            | K.ARPEDVVNLDL.K.S                                                        | 1369.54878 | 2 | 3.72E-04 | 0.94 | 4.26  | -     | 998.1   |
| AHQ-1-9, 3287 - 3290        | K.ARPEDVVNLDL.K.S                                                        | 1369.54878 | 2 | 1.34E-05 | 0.93 | 4.14  | -     | 875.9   |
| AHQ-1-9, 3294               | K.ARPEDVVNLDL.K.S                                                        | 1369.54878 | 1 | 3.93E-05 | 0.41 | 2.35  | -     | 298.4   |
| AHQ-1-9, 3306               | K.ARPEDVVNLDL.K.S                                                        | 1369.54878 | 1 | 1.08E-06 | 0.67 | 3.12  | -     | 318.0   |
| AHQ-1-13, 3482              | K.ARPEDVVNLDL.K.S                                                        | 1369.54878 | 2 | 1.86E-04 | 0.95 | 4.23  | -     | 1216.2  |
| AHQ-1-10, 3244              | K.ARPEDVVNLDL.K.S                                                        | 1369.54878 | 2 | 6.54E-05 | 0.93 | 3.94  | -     | 937.5   |
| AHQ-1-13- , 3587            | K.ARPEDVVNLDL.K.S                                                        | 1369.54878 | 2 | 1.35E-05 | 0.88 | 3.72  | -     | 762.1   |
| AHQ-1-14, 4438              | K.ARPEDVVNLDL.K.S                                                        | 1369.54878 | 2 | 1.93E-05 | 0.93 | 3.99  | -     | 1068.9  |
| AHQ-1-9, 5438               | R.DAFDVLFDHAPDKLSVVK.K                                                   | 2019.24293 | 2 | 3.17E-05 | 0.83 | 3.63  | -     | 667.2   |
| AHQ-1-9, 3703               | K.LNVAEVTQSEIGQK.Q                                                       | 1516.67865 | 2 | 4.65E-06 | 0.96 | 4.75  | -     | 1262.2  |
| AHQ-1-13, 3748              | K.LNVAEVTQSEIGQK.Q                                                       | 1516.67865 | 2 | 1.08E-05 | 0.83 | 3.20  | -     | 998.5   |
| AHQ-1-13- , 3888            | K.LNVAEVTQSEIGQK.Q                                                       | 1516.67865 | 2 | 1.98E-08 | 0.95 | 4.27  | -     | 1351.4  |
| AHQ-1-9, 3464               | R.LPEHVTQVVVVR.K                                                         | 1475.76086 | 2 | 5.40E-05 | 0.90 | 3.75  | -     | 895.7   |
| AHQ-1-9, 3223               | K.SLITFVNK.H                                                             | 922.10336  | 2 | 2.92E-05 | 0.83 | 2.60  | -     | 781.5   |
| AHQ-1-9, 6375 - 6444        | K.VLLDWINDLVLEER.I                                                       | 1713.95549 | 2 | 3.26E-08 | 0.90 | 4.11  | -     | 795.5   |
| AHQ-1-9, 7202 - 7220        | K.VLLDWINDLVLEER.I                                                       | 1713.95549 | 2 | 2.41E-10 | 0.95 | 5.14  | -     | 1136.3  |
| AHQ-1-9, 7464               | K.VLLDWINDLVLEER.I                                                       | 1713.95549 | 2 | 7.22E-04 | 0.59 | 3.01  | -     | 664.4   |
| gi 4758442 ref NP_004115.1  | glia maturation factor, beta [Homo sapiens]                              |            |   | 2.47E-10 | 2.33 | 30.25 | 35.20 | 16713.1 |
| AHQ-1-12, 5954              | R.LVLDDEELGISPDELKDELPER.Q                                               | 2638.90589 | 3 | 2.47E-10 | 0.96 | 5.06  | -     | 1717.9  |
| AHQ-1-12, 6257 - 6318       | R.VSYPLCFIFSSPVGCKPEQQM*MYAGSK.N                                         | 3131.61197 | 3 | 7.04E-08 | 0.62 | 3.45  | -     | 688.2   |
| AHQ-1-12, 6101              | R.VSYPLCFIFSSPVGCKPEQQM*MYAGSK.N                                         | 3147.61137 | 3 | 1.40E-05 | 0.75 | 3.41  | -     | 626.1   |
| gi 4557361 ref NP_001187.1  | BH3 interacting domain death agonist; BH3-interacting domain death agon  |            |   | 2.52E-10 | 2.76 | 30.23 | 28.70 | 21994.6 |
| AHQ-1-11, 5836              | R.DVFTHTVNFNINQLR.T                                                      | 1819.01348 | 2 | 1.98E-05 | 0.90 | 3.99  | -     | 794.8   |
| AHQ-1-11, 5880              | R.ELDALGHEPLVLPAPQWEGYDELQDTGDR.S                                        | 3167.38790 | 3 | 6.27E-05 | 0.89 | 4.24  | -     | 824.9   |
| AHQ-1-11, 2715              | R.IEADSESDIIR.N                                                          | 1505.56635 | 2 | 2.52E-10 | 0.97 | 4.54  | -     | 2071.1  |
| gi 12707570 ref NP_004083.2 | mitochondrial short-chain enoyl-coenzyme A hydratase 1 precursor [Homo   |            |   | 2.61E-10 | 1.50 | 20.21 | 13.10 | 31371.2 |
| AHQ-1-10, 4925              | K.AQFAQPELIGTIPGAGGTQR.L                                                 | 2126.40140 | 2 | 2.94E-04 | 0.55 | 2.58  | -     | 571.6   |
| AHQ-1-10, 6400              | K.ICPVELVVEEIQCAEK.I                                                     | 1992.25744 | 2 | 2.61E-10 | 0.96 | 4.23  | -     | 1372.5  |
| gi 27480104 ref XP_208215.1 | similar to triosephosphate isomerase 1 [Homo sapiens]                    |            |   | 2.67E-10 | 5.27 | 60.24 | 27.70 | 26942.6 |
| AHQ-1-13, 3070              | R.HVFGESDELIGQK.V                                                        | 1459.58565 | 2 | 4.36E-05 | 0.94 | 4.03  | -     | 818.3   |
| AHQ-1-10, 2816 - 2843       | R.HVFGESDELIGQK.V                                                        | 1459.58565 | 2 | 2.67E-10 | 0.96 | 4.73  | -     | 839.3   |
| AHQ-1-13- , 3113            | R.HVFGESDELIGQK.V                                                        | 1459.58565 | 2 | 6.95E-09 | 0.96 | 4.71  | -     | 791.0   |
| AHQ-1-13- , 2835            | R.IYGGSVTGATCK.E                                                         | 1328.51672 | 2 | 2.13E-08 | 0.90 | 3.77  | -     | 585.1   |
| AHQ-1-10, 2625              | R.IYGGSVTGATCK.E                                                         | 1328.51672 | 1 | 5.64E-05 | 0.42 | 2.57  | -     | 335.1   |
| AHQ-1-10, 2611              | R.IYGGSVTGATCK.E                                                         | 1328.51672 | 2 | 1.34E-04 | 0.90 | 3.33  | -     | 798.1   |
| AHQ-1-13, 2826 - 2829       | R.IYGGSVTGATCK.E                                                         | 1328.51672 | 2 | 2.87E-07 | 0.88 | 3.77  | -     | 589.3   |
| AHQ-1-13- , 2168 - 2236     | K.SNVSDAVAQSTR.I                                                         | 1235.28659 | 2 | 8.87E-04 | 0.88 | 3.26  | -     | 1072.8  |
| AHQ-1-10, 2039              | K.SNVSDAVAQSTR.I                                                         | 1235.28659 | 2 | 9.42E-06 | 0.96 | 3.78  | -     | 2283.7  |
| AHQ-1-10, 3971 - 4015       | K.VTNGAFTGEISPGMIK.D                                                     | 1622.86786 | 2 | 5.00E-06 | 0.83 | 3.34  | -     | 818.4   |
| AHQ-1-10, 3512 - 3571       | K.VTNGAFTGEISPGMIK.D                                                     | 1638.86726 | 2 | 2.60E-07 | 0.75 | 3.03  | -     | 700.7   |
| AHQ-1-10, 3997              | K.VTNGAFTGEISPGMIK.D                                                     | 1638.86726 | 2 | 2.79E-05 | 0.60 | 2.58  | -     | 620.8   |
| AHQ-1-10, 4936 - 5016       | K.VVLAYPEVVAIGTGK.T                                                      | 1603.88587 | 2 | 1.13E-05 | 0.87 | 3.51  | -     | 775.0   |
| gi 20357552 ref NP_005222.2 | cortactin isoform a; oncogene EMS1 [Homo sapiens]                        |            |   | 2.80E-10 | 1.90 | 20.30 | 8.00  | 61585.7 |
| AHQ-1-14- , 4707            | K.ASAGHAVSIAQDDAGADDWETDPDFVNDVSEK.E                                     | 3334.37643 | 3 | 2.64E-06 | 0.93 | 5.03  | -     | 823.8   |
| AHQ-1-14- , 4851 - 4922     | K.ASAGHAVSIAQDDAGADDWETDPDFVNDVSEK.E                                     | 3334.37643 | 3 | 1.27E-04 | 0.90 | 4.78  | -     | 582.4   |
| AHQ-1-14- , 4992            | K.ASAGHAVSIAQDDAGADDWETDPDFVNDVSEK.E                                     | 3334.37643 | 3 | 2.80E-10 | 0.95 | 5.98  | -     | 789.3   |
| AHQ-1-12, 5198 - 5257       | R.YGLFPANVVELR.Q                                                         | 1442.64306 | 2 | 9.98E-10 | 0.94 | 4.32  | -     | 681.7   |



|                             |                                                                         |            |   |          |      |      |       |          |
|-----------------------------|-------------------------------------------------------------------------|------------|---|----------|------|------|-------|----------|
| AHQ-1-1, 6349 - 6427        | K.DIENQYETQITQIEHEVSSSGQEVQSSAK.E                                       | 3266.38667 | 3 | 3.27E-07 | 0.95 | 5.45 | -     | 1103.2   |
| AHQ-1-3, 6502 - 6514        | K.DIENQYETQITQIEHEVSSSGQEVQSSAK.E                                       | 3266.38667 | 3 | 6.98E-05 | 0.92 | 4.52 | -     | 1063.6   |
| AHQ-1-4, 6648               | K.DIENQYETQITQIEHEVSSSGQEVQSSAK.E                                       | 3266.38667 | 3 | 4.03E-04 | 0.92 | 4.68 | -     | 766.1    |
| AHQ-1-6, 6467               | K.DIENQYETQITQIEHEVSSSGQEVQSSAK.E                                       | 3266.38667 | 3 | 8.74E-08 | 0.93 | 4.76 | -     | 1011.3   |
| AHQ-1-14 - , 6120 - 6127    | K.DIENQYETQITQIEHEVSSSGQEVQSSAK.E                                       | 3266.38667 | 3 | 5.15E-07 | 0.96 | 5.75 | -     | 1587.4   |
| AHQ-1-12, 6001              | K.DIENQYETQITQIEHEVSSSGQEVQSSAK.E                                       | 3266.38667 | 3 | 2.78E-04 | 0.94 | 4.79 | -     | 1325.9   |
| AHQ-1-14 - , 5018           | R.GGGGSGFYSGYGGGSGGFSASSLGGGFGGGS.R.G                                   | 2706.73770 | 2 | 1.76E-09 | 0.92 | 4.49 | -     | 742.8    |
| AHQ-1-13 - , 5292           | R.HGVQELIEIQLSK.K                                                       | 1839.03978 | 2 | 3.32E-10 | 0.96 | 5.10 | -     | 1389.8   |
| AHQ-1-14 - , 6616           | K.NYSPYYNTIDDLKQIVDLTVGNK.T                                             | 2904.13412 | 3 | 5.03E-06 | 0.88 | 4.00 | -     | 636.0    |
| AHQ-1-14 - , 6484           | K.SDLEM*QYETLQEEELM*ALK.K                                               | 2204.46135 | 2 | 9.60E-08 | 0.92 | 4.10 | -     | 938.9    |
| AHQ-1-12, 6411              | K.SDLEM*QYETLQEEELM*ALK.K                                               | 2204.46135 | 2 | 3.19E-05 | 0.71 | 2.83 | -     | 841.9    |
| AHQ-1-8, 4847               | K.TLNDMRQEYQLIAK.N                                                      | 1853.08996 | 2 | 6.43E-06 | 0.53 | 2.84 | -     | 641.3    |
| gj 5453832 ref NP_006380.1  | oxygen regulated protein precursor; oxygen regulated protein (150kD) [H |            |   |          |      |      |       |          |
| AHQ-1-3, 6667               | R.VFEELCADLFR.V                                                         | 1658.81048 | 2 | 3.36E-10 | 0.96 | 4.40 | 6.20  | 111334.8 |
| AHQ-1-3, 6487 - 6562        | K.VLQLINDNTALSYGVFR.R                                                   | 2096.37206 | 2 | 2.26E-08 | 0.96 | 4.36 | -     | 1409.0   |
| AHQ-1-3, 7430               | R.VPGVQQALQSAEM*SLDEIEQVILVGGATR.V                                      | 3153.55387 | 3 | 6.80E-04 | 0.66 | 3.65 | -     | 337.3    |
| gj 5174727 ref NP_005989.1  | chaperonin containing TCP1, subunit 3 (gamma); TCP1 (t-complex-1) ring  |            |   |          |      |      |       |          |
| AHQ-1-6, 3802               | R.AVAQALEVPR.T                                                          | 1167.38326 | 2 | 2.48E-04 | 0.89 | 3.41 | -     | 1108.6   |
| AHQ-1-6, 4502               | K.IPGGIEDSCVLR.G                                                        | 1430.65218 | 2 | 4.12E-07 | 0.95 | 4.64 | -     | 1147.9   |
| AHQ-1-6, 2822               | R.TLIQNCGASTIR.L                                                        | 1335.51249 | 2 | 2.61E-04 | 0.73 | 2.88 | -     | 561.8    |
| AHQ-1-6, 5551 - 5568        | R.WSSLACNIALDAVK.M                                                      | 1549.77353 | 2 | 3.65E-10 | 0.96 | 4.60 | -     | 1377.7   |
| gj 4502201 ref NP_001649.1  | ADP-ribosylation factor 1 [Homo sapiens]                                |            |   |          |      |      |       |          |
| AHQ-1-12, 4523 - 4589       | R.DAVLLVFANK.Q                                                          | 1090.29726 | 1 | 4.84E-05 | 0.85 | 2.94 | -     | 946.7    |
| AHQ-1-12, 4515 - 4578       | R.DAVLLVFANK.Q                                                          | 1090.29726 | 2 | 5.86E-06 | 0.97 | 4.52 | -     | 2175.5   |
| AHQ-1-12, 4774              | R.HYFQNTQGLIFVVDNDR.E                                                   | 2154.32702 | 2 | 5.20E-07 | 0.98 | 5.61 | -     | 1960.4   |
| AHQ-1-12, 4919              | R.HYFQNTQGLIFVVDNDR.E                                                   | 2154.32702 | 2 | 3.97E-08 | 0.98 | 5.96 | -     | 1855.0   |
| AHQ-1-12, 5143 - 5211       | R.HYFQNTQGLIFVVDNDR.E                                                   | 2154.32702 | 2 | 1.64E-09 | 0.98 | 5.53 | -     | 1813.3   |
| AHQ-1-12, 4959 - 5029       | R.HYFQNTQGLIFVVDNDRER.V                                                 | 2439.62792 | 3 | 3.63E-04 | 0.44 | 3.31 | -     | 274.5    |
| AHQ-1-12, 4445 - 4509       | R.HYFQNTQGLIFVVDNDRER.V                                                 | 2439.62792 | 3 | 6.18E-08 | 0.92 | 4.26 | -     | 1186.3   |
| AHQ-1-12, 4871 - 4885       | R.HYFQNTQGLIFVVDNDRER.V                                                 | 2439.62792 | 3 | 3.86E-10 | 0.94 | 4.94 | -     | 1054.7   |
| AHQ-1-11, 4606 - 4684       | R.HYFQNTQGLIFVVDNDRER.V                                                 | 2439.62792 | 3 | 1.29E-04 | 0.80 | 3.79 | -     | 673.4    |
| AHQ-1-12, 3673              | R.ILMVGLDAAGK.T                                                         | 1088.34632 | 1 | 6.08E-05 | 0.78 | 2.59 | -     | 1254.3   |
| AHQ-1-12, 3127              | R.ILM*VGLDAAGK.T                                                        | 1104.34572 | 2 | 3.48E-04 | 0.92 | 3.44 | -     | 1349.7   |
| AHQ-1-12, 3667 - 3669       | R.ILMVGLDAAGK.T                                                         | 1088.34632 | 2 | 6.33E-06 | 0.95 | 4.04 | -     | 1222.6   |
| AHQ-1-12, 3683              | R.ILMVGLDAAGK.T                                                         | 1088.34632 | 1 | 9.58E-04 | 0.80 | 3.50 | -     | 634.5    |
| AHQ-1-14 - , 6268           | K.LGEIVTTIPTIGFNVETVEYK.N                                               | 2324.65485 | 2 | 6.11E-04 | 0.48 | 2.79 | -     | 188.7    |
| AHQ-1-12, 6177 - 6234       | K.LGEIVTTIPTIGFNVETVEYK.N                                               | 2324.65485 | 2 | 4.32E-04 | 0.72 | 3.86 | -     | 162.9    |
| AHQ-1-13 - , 6512 - 6523    | K.LGEIVTTIPTIGFNVETVEYK.N                                               | 2324.65485 | 2 | 3.69E-04 | 0.49 | 3.38 | -     | 171.4    |
| AHQ-1-12, 2609 - 2611       | R.MLAEDELR.D                                                            | 977.11769  | 2 | 7.61E-04 | 0.89 | 2.99 | -     | 982.5    |
| AHQ-1-12, 6567              | R.M*LAEDELRDAVLLVFANK.Q                                                 | 2064.39175 | 3 | 7.82E-10 | 0.96 | 4.30 | -     | 2039.8   |
| AHQ-1-12, 6565 - 6625       | R.M*LAEDELRDAVLLVFANK.Q                                                 | 2064.39175 | 2 | 1.01E-04 | 0.89 | 3.90 | -     | 712.9    |
| AHQ-1-13 - , 5244 - 5252    | K.NISFTVVDVGGQDK.I                                                      | 1566.69621 | 2 | 3.48E-08 | 0.93 | 4.13 | -     | 773.4    |
| AHQ-1-11, 4780              | K.NISFTVVDVGGQDK.I                                                      | 1566.69621 | 2 | 1.53E-04 | 0.87 | 3.13 | -     | 1002.0   |
| AHQ-1-14 - , 5110 - 5114    | K.NISFTVVDVGGQDK.I                                                      | 1566.69621 | 2 | 2.60E-06 | 0.87 | 3.77 | -     | 624.3    |
| AHQ-1-12, 4913 - 4969       | K.NISFTVVDVGGQDK.I                                                      | 1566.69621 | 2 | 6.80E-09 | 0.95 | 4.48 | -     | 1006.4   |
| AHQ-1-13, 4952 - 4963       | K.NISFTVVDVGGQDK.I                                                      | 1566.69621 | 2 | 4.47E-04 | 0.90 | 4.12 | -     | 678.2    |
| gj 11496277 ref NP_068805.1 | mitogen-activated protein kinase kinase 1 interacting protein 1; MEK p  |            |   |          |      |      |       |          |
| AHQ-1-14 - , 5451           | K.SIIICYNTYQVVFNR.L                                                     | 2070.31322 | 2 | 3.19E-06 | 0.92 | 3.81 | -     | 1113.8   |
| AHQ-1-14 - , 5274           | K.VANDNAPEHALRPFGLSTFALADQGSK.L                                         | 2929.19327 | 3 | 4.48E-10 | 0.93 | 5.43 | -     | 673.5    |
| gj 14149680 ref NP_056107.1 | KIAA0747 protein [Homo sapiens]                                         |            |   |          |      |      |       |          |
| AHQ-1-4, 5752               | K.AVYSTNCPVWEEAFR.F                                                     | 1830.99795 | 2 | 1.28E-04 | 0.82 | 2.99 | -     | 819.2    |
| AHQ-1-12, 5382              | R.FEWELPLDEAQR.R                                                        | 1533.66622 | 2 | 1.67E-07 | 0.82 | 3.49 | -     | 537.8    |
| AHQ-1-4, 3320 - 3391        | R.GSNPHLQTFTR.V                                                         | 1506.64724 | 2 | 4.04E-06 | 0.87 | 3.02 | -     | 940.0    |
| AHQ-1-4, 4020               | R.IHVEAQDLIAK.D                                                         | 1350.58860 | 2 | 4.59E-10 | 0.74 | 2.84 | -     | 534.9    |
| AHQ-1-7, 7246               | R.LLVPPLDQVLAQLR.S                                                      | 1790.13977 | 2 | 6.24E-06 | 0.79 | 3.51 | -     | 416.4    |
| AHQ-1-12, 3975              | R.LTHVDSPLAPAGPLGQVK.L                                                  | 1930.19405 | 2 | 1.93E-06 | 0.97 | 5.13 | -     | 1746.8   |
| AHQ-1-4, 4219               | R.LTHVDSPLAPAGPLGQVK.L                                                  | 1930.19405 | 2 | 2.07E-04 | 0.84 | 3.24 | -     | 757.1    |
| gj 4504521 ref NP_002147.1  | heat shock 60kDa protein 1 (chaperonin); mitochondrial matrix protein P |            |   |          |      |      |       |          |
| AHQ-1-14 - , 6627           | R.ALMM*LGQVDLADAVATM*GPK.G                                              | 2146.55768 | 3 | 4.75E-10 | 0.98 | 6.27 | -     | 2329.6   |
| AHQ-1-7, 5750               | K.CEFQDAYVLLSEK.K                                                       | 1603.77482 | 2 | 9.54E-07 | 0.95 | 3.68 | -     | 1739.8   |
| AHQ-1-7, 5537               | K.ISSIQSIVPALEIANAHR.K                                                  | 1920.20240 | 2 | 3.09E-04 | 0.69 | 3.19 | -     | 346.4    |
| AHQ-1-7, 5889               | K.TLNDELEIEGMK.F                                                        | 1505.71604 | 2 | 3.11E-06 | 0.83 | 2.68 | -     | 1124.8   |
| gj 4504345 ref NP_000508.1  | alpha 2 globin [Homo sapiens]                                           |            |   |          |      |      |       |          |
| AHQ-1-13 - , 4388           | K.FLASVSTVLTSK.Y                                                        | 1253.46970 | 2 | 1.77E-06 | 0.91 | 3.45 | 30.30 | 15257.4  |
| AHQ-1-13 - , 4187           | K.TYFPFHDLSHGSAQVK.G                                                    | 1835.01138 | 3 | 2.66E-05 | 0.88 | 4.16 | -     | 573.4    |
| AHQ-1-13 - , 4115 - 4183    | K.TYFPFHDLSHGSAQVK.G                                                    | 1835.01138 | 2 | 3.52E-04 | 0.75 | 3.17 | -     | 641.8    |
| AHQ-1-13, 4003              | K.TYFPFHDLSHGSAQVK.G                                                    | 1835.01138 | 3 | 1.08E-05 | 0.72 | 3.26 | -     | 464.6    |
| AHQ-1-13 - , 2651           | K.VGAHAGEYGAALER.M                                                      | 1530.62397 | 3 | 2.50E-05 | 0.97 | 5.44 | -     | 2334.9   |
| AHQ-1-13 - , 2647           | K.VGAHAGEYGAALER.M                                                      | 1530.62397 | 2 | 3.69E-08 | 0.96 | 4.09 | -     | 1657.5   |
| AHQ-1-13, 2654 - 2657       | K.VGAHAGEYGAALER.M                                                      | 1530.62397 | 2 | 5.00E-10 | 0.97 | 4.94 | -     | 1594.8   |
| gj 4758950 ref NP_000933.1  | peptidylprolyl isomerase B (cyclophilin B) [Homo sapiens]               |            |   |          |      |      |       |          |
| AHQ-1-12, 4119              | K.DFMFIQGGDFTR.G                                                        | 1287.42660 | 2 | 4.52E-04 | 0.87 | 2.90 | -     | 934.1    |
| AHQ-1-11, 4006              | K.DFMFIQGGDFTR.G                                                        | 1287.42660 | 2 | 3.10E-04 | 0.89 | 3.19 | -     | 1173.3   |
| AHQ-1-11, 2882              | R.DKPLKDVIIADCGK.I                                                      | 1573.83653 | 2 | 2.71E-08 | 0.89 | 3.53 | -     | 963.5    |
| AHQ-1-12, 2946 - 2954       | R.DKPLKDVIIADCGK.I                                                      | 1573.83653 | 3 | 6.13E-07 | 0.94 | 4.23 | -     | 1290.4   |
| AHQ-1-12, 2951              | R.DKPLKDVIIADCGK.I                                                      | 1573.83653 | 2 | 4.30E-07 | 0.91 | 3.81 | -     | 876.9    |
| AHQ-1-11, 4122              | K.DTNGSQFITTVK.T                                                        | 1458.59766 | 2 | 5.28E-07 | 0.92 | 3.59 | -     | 1366.3   |
| AHQ-1-11, 2396              | K.DVIADCGK.I                                                            | 992.12891  | 1 | 1.18E-05 | 0.68 | 2.29 | -     | 616.4    |
| AHQ-1-12, 3103              | K.HYGPWVSMANAGK.D                                                       | 1475.65664 | 2 | 5.24E-10 | 0.95 | 4.13 | -     | 1232.4   |
| AHQ-1-12, 3146 - 3158       | K.IEVEKPFIAK.E                                                          | 1245.49240 | 2 | 1.83E-05 | 0.92 | 3.54 | -     | 1274.3   |
| AHQ-1-11, 4166              | K.TVDNFVALATGEK.G                                                       | 1365.51377 | 2 | 6.62E-05 | 0.92 | 3.67 | -     | 1106.7   |
| AHQ-1-11, 4172 - 4174       | K.TVDNFVALATGEK.G                                                       | 1365.51377 | 1 | 7.83E-04 | 0.25 | 2.09 | -     | 308.0    |
| AHQ-1-14, 5402              | K.TVDNFVALATGEK.G                                                       | 1365.51377 | 2 | 1.92E-04 | 0.88 | 3.89 | -     | 648.7    |
| AHQ-1-12, 4602              | K.TVDNFVALATGEK.G                                                       | 1365.51377 | 2 | 2.65E-06 | 0.90 | 3.23 | -     | 880.6    |
| AHQ-1-12, 4305              | K.TVDNFVALATGEK.G                                                       | 1365.51377 | 2 | 2.05E-05 | 0.87 | 3.52 | -     | 826.3    |
| AHQ-1-11, 3987              | R.VIKDFMIQGGDFTR.G                                                      | 1627.88933 | 2 | 1.27E-06 | 0.85 | 3.32 | -     | 790.3    |
| AHQ-1-12, 4133              | R.VIKDFMIQGGDFTR.G                                                      | 1627.88933 | 2 | 1.85E-06 | 0.88 | 3.54 | -     | 901.7    |
| gj 4758484 ref NP_004823.1  | glutathione-S-transferase like; glutathione transferase omega [Homo sap |            |   |          |      |      |       |          |
| AHQ-1-10, 3720              | K.EDPTVSALLTSEK.D                                                       | 1390.51840 | 1 | 1.27E-04 | 0.48 | 2.78 | -     | 252.4    |
| AHQ-1-10, 2955              | K.EDYAGLKEEFR.K                                                         | 1357.45019 | 2 | 5.27E-10 | 0.87 | 2.91 | -     | 1012.5   |
| AHQ-1-10, 2461              | K.GSAPPGPVPEGSIR.I                                                      | 1321.46422 | 1 | 1.86E-04 | 0.27 | 2.59 | -     | 205.0    |
| AHQ-1-13 - , 2989 - 2992    | R.HEVININLK.N                                                           | 1080.26247 | 2 | 2.72E-07 | 0.92 | 3.24 | -     | 993.9    |
| AHQ-1-10, 2677              | R.HEVININLK.N                                                           | 1080.26247 | 1 | 2.48E-04 | 0.75 | 3.00 | -     | 543.6    |
| AHQ-1-13 - , 2924           | R.SONKEDYAGLKEEFR.K                                                     | 1814.93364 | 3 | 2.87E-08 | 0.82 | 3.62 | -     | 780.9    |
| AHQ-1-12, 4582              | K.VPSLVGSFIR.S                                                          | 1075.28583 | 2 | 1.90E-06 | 0.86 | 2.78 | -     | 856.2    |
| gj 24497612 ref NP_116262.2 | nm23-phosphorylated unknown substrate; SH3 domain-containing 70 kDa pr  |            |   |          |      |      |       |          |
| AHQ-1-6, 6752               | K.LGCDWATIFSR.D                                                         | 1426.62208 | 2 | 5.46E-07 | 0.97 | 3.56 | 9.20  | 72695.6  |
| AHQ-1-6, 6598               | R.LVGEALLESNTIDHVCSPSLR.C                                               | 2588.91822 | 2 | 5.27E-10 | 0.96 | 4.72 | -     | 1252.1   |
| AHQ-1-6, 6210               | R.RPYEDQGLGETTPLTICQPMQPLR.V                                            | 2916.32264 | 3 | 6.94E-05 | 0.94 | 5.50 | -     | 868.4    |
| gj 7706497 ref NP_057392.1  | UMP-CMP kinase [Homo sapiens]                                           |            |   |          |      |      |       |          |
| AHQ-1-11, 5740              | R.IQTYLQSTKPIIDLVEEMGK.V                                                | 2371.73502 | 2 | 6.11E-10 | 0.90 | 4.67 | 27.60 | 25854.7  |
| AHQ-1-11, 2578              | R.KNPDQSYGELIEK.Y                                                       | 1521.65375 | 2 | 3.58E-07 | 0.93 | 4.36 | -     | 755.6    |
| AHQ-1-11, 6492              | K.SVDEVFDEVQIFDK.E                                                      | 1769.92954 | 2 | 2.92E-04 | 0.79 | 3.07 | -     | 681.2    |
| AHQ-1-11, 6494              | K.SVDEVFDEVQIFDK.E                                                      | 1956.09563 | 2 | 5.34E-04 | 0.93 | 4.31 | -     | 916.4    |
| AHQ-1-11, 3594 - 3667       | K.YGYTHLSAGELLR.D                                                       | 1480.64969 | 2 | 3.36E-07 | 0.93 | 3.75 | -     | 1097.9   |
| gj 4502011 ref NP_000467.1  | adenylate kinase 1 [Homo sapiens]                                       |            |   |          |      |      |       |          |
| AHQ-1-11, 3680 - 3684       | K.ATEPVIAFYEK.R                                                         | 1268.43969 | 1 | 7.51E-05 | 0.31 | 2.09 | -     | 463.5    |

|                            |                                                                         |            |   |          |       |        |       |          |
|----------------------------|-------------------------------------------------------------------------|------------|---|----------|-------|--------|-------|----------|
| AHQ-1-11, 6483             | K.GQLVPLETVLDMR.D                                                       | 1584.90590 | 2 | 6.27E-10 | 0.95  | 4.79   | -     | 693.2    |
| AHQ-1-11, 6222 - 6303      | K.GQLVPLETVLDM*LR.D                                                     | 1600.90530 | 2 | 4.38E-06 | 0.87  | 4.11   | -     | 396.5    |
| AHQ-1-11, 5016             | R.IGPPTLLLYVDAGPETM*TQR.L                                               | 2220.53174 | 2 | 9.14E-05 | 0.85  | 3.61   | -     | 703.8    |
| AHQ-1-11, 3380 - 3460      | K.IIFVVGPGSGK.G                                                         | 1131.34939 | 2 | 1.56E-04 | 0.91  | 3.59   | -     | 1515.6   |
| AHQ-1-11, 5900 - 5971      | R.KVNAEGSVDSVFSQVCTHLDALK                                               | 2506.77407 | 3 | 9.80E-05 | 0.93  | 4.40   | -     | 1359.8   |
| AHQ-1-11, 3651             | K.YGYTHLSTGDLR.S                                                        | 1496.64912 | 2 | 4.87E-04 | 0.93  | 3.76   | -     | 1127.8   |
| gj19923437[ref]NP_057366.2 | adenylate kinase 3 alpha like [Homo sapiens]                            |            |   | 6.66E-10 | 2.24  | 30.21  | 19.40 | 25565.2  |
| AHQ-1-10, 3119             | K.AYEDQTKPVLEYQK.K                                                      | 1876.05535 | 2 | 3.05E-04 | 0.78  | 3.50   | -     | 487.8    |
| AHQ-1-10, 6024 - 6040      | K.NLTQYSWLLDGFPR.T                                                      | 1710.91339 | 2 | 6.66E-10 | 0.95  | 4.17   | -     | 1440.8   |
| AHQ-1-10, 4415 - 4417      | K.TVGIDDLTGEPLIQR.E                                                     | 1627.82100 | 2 | 6.16E-04 | 0.51  | 2.92   | -     | 327.8    |
| gj4507907[ref]NP_000543.1  | von Willebrand factor precursor; Coagulation factor VIII VWF (von Wille |            |   | 6.96E-10 | 22.80 | 260.30 | 12.90 | 309296.7 |
| AHQ-1-1, 5053              | K.AFVLSVDELEQQR.D                                                       | 1621.77332 | 2 | 7.68E-05 | 0.93  | 3.54   | -     | 1835.0   |
| AHQ-1-1, 4025              | K.AHLLSLVDVM*QR.E                                                       | 1398.65673 | 2 | 2.15E-08 | 0.94  | 3.68   | -     | 1185.2   |
| AHQ-1-1, 4201 - 4267       | R.CLPTACTIQLR.G                                                         | 1335.57568 | 2 | 2.39E-06 | 0.57  | 2.52   | -     | 496.3    |
| AHQ-1-1, 5109 - 5175       | R.EGGPSQIGDALGFAVR.Y                                                    | 1574.71988 | 2 | 2.08E-06 | 0.63  | 3.18   | -     | 504.7    |
| AHQ-1-1, 5756              | R.EQAPNLVYMTGNPASDEIK.R                                                 | 2177.42062 | 2 | 2.43E-05 | 0.93  | 4.12   | -     | 685.8    |
| AHQ-1-1, 4820              | R.EQAPNLVYMTGNPASDEIK.R                                                 | 2193.42002 | 2 | 4.35E-04 | 0.88  | 3.77   | -     | 627.5    |
| AHQ-1-1, 4187              | K.EQDLEVLHNGACSPGAR.Q                                                   | 1968.13770 | 2 | 2.02E-07 | 0.92  | 4.36   | -     | 958.1    |
| AHQ-1-1, 6273              | R.IEDLPTMTLGNLFLHK.L                                                    | 1916.23079 | 2 | 4.24E-04 | 0.89  | 3.92   | -     | 906.6    |
| AHQ-1-1, 6867              | R.IGWPNAPILIQDFETLPR.E                                                  | 2081.40223 | 2 | 2.76E-08 | 0.92  | 4.31   | -     | 728.7    |
| AHQ-1-1, 6968              | R.IGWPNAPILIQDFETLPR.E                                                  | 2081.40223 | 2 | 1.28E-07 | 0.96  | 5.06   | -     | 1029.3   |
| AHQ-1-3, 7211              | R.IGWPNAPILIQDFETLPR.E                                                  | 2081.40223 | 2 | 6.07E-06 | 0.90  | 4.14   | -     | 582.5    |
| AHQ-1-3, 2615              | R.ILAGPAGDSNVVK.L                                                       | 1241.41901 | 2 | 2.26E-04 | 0.87  | 2.89   | -     | 1019.6   |
| AHQ-1-2, 2695              | R.ILAGPAGDSNVVK.L                                                       | 1241.41901 | 2 | 2.75E-06 | 0.93  | 3.57   | -     | 1064.2   |
| AHQ-1-1, 2728              | R.ILAGPAGDSNVVK.L                                                       | 1241.41901 | 2 | 2.10E-07 | 0.88  | 3.54   | -     | 823.3    |
| AHQ-1-1, 6313              | K.ILDELLQTCDVPEDCPVCEVAGR.R                                             | 2692.97859 | 2 | 1.82E-04 | 0.89  | 4.35   | -     | 461.7    |
| AHQ-1-1, 3780 - 3852       | R.ILTSDFVQDCNK.L                                                        | 1441.58869 | 2 | 7.04E-05 | 0.89  | 3.39   | -     | 962.5    |
| AHQ-1-1, 5849              | R.LPGDIQVPIGVGPNANVQELER.I                                              | 2415.73085 | 3 | 4.32E-06 | 0.86  | 3.49   | -     | 1130.3   |
| AHQ-1-1, 5845              | R.LPGDIQVPIGVGPNANVQELER.I                                              | 2415.73085 | 2 | 7.06E-08 | 0.72  | 3.09   | -     | 377.0    |
| AHQ-1-1, 4263              | K.LTGSCSYVLFQNK.E                                                       | 1518.71629 | 2 | 3.62E-04 | 0.94  | 3.68   | -     | 1269.8   |
| AHQ-1-1, 5555              | K.RLPGDIQVPIGVGPNANVQELER.I                                             | 2571.91720 | 3 | 7.06E-06 | 0.98  | 5.98   | -     | 2701.3   |
| AHQ-1-1, 5664              | K.RLPGDIQVPIGVGPNANVQELER.I                                             | 2571.91720 | 3 | 4.48E-04 | 0.96  | 5.49   | -     | 1719.1   |
| AHQ-1-1, 4077              | R.SGFTYVLEHEGECGR.C                                                     | 1774.91285 | 2 | 6.96E-10 | 0.90  | 3.35   | -     | 932.6    |
| AHQ-1-1, 3499              | R.SKEFMEEVIQR.M                                                         | 1396.59450 | 2 | 1.13E-05 | 0.91  | 3.03   | -     | 1168.2   |
| AHQ-1-1, 2588              | R.SKEFM*EEVIQR.M                                                        | 1412.59390 | 2 | 1.25E-05 | 0.94  | 3.55   | -     | 1081.9   |
| AHQ-1-1, 5051 - 5060       | K.SVGSQWASPENPCLINECVR.V                                                | 2306.51832 | 2 | 6.08E-06 | 0.95  | 4.80   | -     | 749.4    |
| AHQ-1-2, 5171 - 5201       | K.SVGSQWASPENPCLINECVR.V                                                | 2306.51832 | 2 | 3.73E-06 | 0.85  | 3.81   | -     | 484.2    |
| AHQ-1-3, 5025 - 5045       | K.SVGSQWASPENPCLINECVR.V                                                | 2306.51832 | 2 | 6.84E-07 | 0.82  | 3.81   | -     | 330.2    |
| AHQ-1-2, 6323              | K.YTGLCGCDENGANDFMLR.D                                                  | 2209.42291 | 2 | 5.91E-07 | 0.91  | 4.14   | -     | 621.7    |
| AHQ-1-1, 4584 - 4585       | K.VIVIPVIGIPHANLK.Q                                                     | 1527.87891 | 2 | 2.56E-07 | 0.89  | 4.00   | -     | 435.6    |
| AHQ-1-1, 4692              | R.VTVFPIGIDGR.Y                                                         | 1174.37426 | 2 | 4.49E-06 | 0.94  | 3.68   | -     | 1097.1   |
| AHQ-1-2, 3035              | K.YAGSQVASTSEVLK.Y                                                      | 1440.58064 | 2 | 1.75E-06 | 0.93  | 3.85   | -     | 982.0    |
| AHQ-1-1, 3017 - 3023       | K.YAGSQVASTSEVLK.Y                                                      | 1440.58064 | 2 | 1.15E-09 | 0.96  | 4.72   | -     | 953.4    |
| AHQ-1-1, 6641              | K.YLFPGECCQYVLVQDYGCSNPGTFR.I                                           | 2874.15305 | 2 | 1.90E-06 | 0.79  | 2.90   | -     | 790.0    |
| AHQ-1-1, 3472 - 3545       | R.YLSDHSFVLVSQDGR.E                                                     | 1624.73576 | 2 | 7.84E-06 | 0.91  | 3.04   | -     | 1444.4   |
| AHQ-1-1, 6064              | K.YTLFQIFSK.I                                                           | 1147.34728 | 2 | 8.58E-08 | 0.93  | 3.21   | -     | 1002.8   |
| gj4503643[ref]NP_000121.1  | coagulation factor V precursor; labile factor; factor V Leiden [Homo sa |            |   | 7.01E-10 | 4.33  | 50.22  | 3.00  | 251716.5 |
| AHQ-1-3, 6026 - 6094       | R.AADIEQQAVFAVFDENK.S                                                   | 1896.04666 | 2 | 2.30E-06 | 0.95  | 4.36   | -     | 1362.0   |
| AHQ-1-1, 3309              | R.AEVDVIVQVR.F                                                          | 1144.26019 | 2 | 1.54E-04 | 0.97  | 4.00   | -     | 2146.4   |
| AHQ-1-1, 5268              | R.DPDNIAAWYLR.S                                                         | 1334.46145 | 2 | 7.71E-05 | 0.61  | 2.60   | -     | 521.6    |
| AHQ-1-1, 3277              | K.EVITIGIQTGAK.H                                                        | 1358.56590 | 2 | 2.05E-05 | 0.88  | 3.00   | -     | 1415.0   |
| AHQ-1-5, 4986              | R.GEYEEHLGILGPIIR.A                                                     | 1696.92816 | 2 | 7.01E-10 | 0.93  | 3.58   | -     | 1220.1   |
| AHQ-1-2, 5207 - 5277       | R.GEYEEHLGILGPIIR.A                                                     | 1696.92816 | 2 | 3.30E-05 | 0.91  | 3.65   | -     | 886.7    |
| gj4501993[ref]NP_003605.1  | alkylglycerone phosphate synthase precursor [Homo sapiens]              |            |   | 7.10E-10 | 0.86  | 10.18  | 2.60  | 72911.4  |
| AHQ-1-6, 6136              | R.GISDPLTVFEQTEAAAR.E                                                   | 1805.96665 | 2 | 7.10E-10 | 0.86  | 3.63   | -     | 595.7    |
| gj14211923[ref]NP_115982.1 | PKCI-1-related HIT protein [Homo sapiens]                               |            |   | 7.27E-10 | 1.82  | 20.30  | 22.70 | 17161.6  |
| AHQ-1-13, 5924             | R.ISQAEEDDQQLGHLLLVAK.Q                                                 | 2235.52293 | 2 | 2.53E-09 | 0.95  | 4.65   | -     | 1333.4   |
| AHQ-1-13 - , 6360          | R.ISQAEEDDQQLGHLLLVAK.Q                                                 | 2235.52293 | 2 | 1.54E-06 | 0.97  | 5.93   | -     | 1379.2   |
| AHQ-1-13 - , 6355 - 6364   | R.ISQAEEDDQQLGHLLLVAK.Q                                                 | 2235.52293 | 3 | 2.98E-06 | 0.92  | 4.73   | -     | 953.4    |
| AHQ-1-13, 5920 - 5923      | R.ISQAEEDDQQLGHLLLVAK.Q                                                 | 2235.52293 | 3 | 7.27E-10 | 0.88  | 4.21   | -     | 826.1    |
| AHQ-1-13, 5928             | K.SLPADILYEDQQLVFR.D                                                    | 2069.32354 | 2 | 7.10E-06 | 0.94  | 3.89   | -     | 1037.7   |
| gj30160191[ref]XP_294035.2 | similar to Pyruvate kinase, M1 isozyme (Pyruvate kinase muscle isozyme  |            |   | 7.33E-10 | 0.94  | 10.21  | 2.80  | 50222.2  |
| AHQ-1-7, 5188 - 5213       | K.IYYVDGLISLQVK.Q                                                       | 1463.70048 | 2 | 7.33E-10 | 0.94  | 3.94   | -     | 1195.3   |
| AHQ-1-7, 5292 - 5320       | K.IYYVDGLISLQVK.Q                                                       | 1463.70048 | 2 | 9.39E-09 | 0.96  | 4.26   | -     | 1766.8   |
| AHQ-1-7, 5048              | K.IYYVDGLISLQVK.Q                                                       | 1463.70048 | 2 | 1.97E-08 | 0.96  | 4.24   | -     | 1758.2   |
| gj5803011[ref]NP_001966.1  | enolase 2; enolase-2, gamma, neuronal; neurone-specific enolase; neuron |            |   | 7.35E-10 | 0.97  | 10.25  | 3.70  | 47268.3  |
| AHQ-1-8, 6795              | R.YITDQQLGALYQDFVR.D                                                    | 1860.05915 | 2 | 7.35E-10 | 0.97  | 4.98   | -     | 1199.3   |
| gj10346135[ref]NP_055083.1 | microtubule-associated protein, RP/EB family, member 2; T-cell activat  |            |   | 7.51E-10 | 1.86  | 20.28  | 9.80  | 37031.1  |
| AHQ-1-13, 6393             | R.FQDNLDFIQWFK.K                                                        | 1601.78539 | 2 | 8.73E-05 | 0.91  | 3.53   | -     | 995.1    |
| AHQ-1-9, 7056              | R.FQDNLDFIQWFK.K                                                        | 1601.78539 | 2 | 3.16E-07 | 0.96  | 4.32   | -     | 1429.2   |
| AHQ-1-12, 6510             | R.FQDNLDFIQWFK.K                                                        | 1601.78539 | 2 | 7.51E-10 | 0.95  | 4.55   | -     | 1156.7   |
| AHQ-1-13 - , 6848          | R.FQDNLDFIQWFK.K                                                        | 1601.78539 | 2 | 1.17E-09 | 0.96  | 4.71   | -     | 1137.7   |
| AHQ-1-12, 4853             | K.SDKDLETQVQLNEQVHSLK.L                                                 | 2325.56134 | 3 | 9.80E-08 | 0.90  | 4.08   | -     | 1017.9   |
| AHQ-1-9, 4859              | K.SDKDLETQVQLNEQVHSLK.L                                                 | 2325.56134 | 3 | 3.00E-07 | 0.96  | 5.50   | -     | 1412.6   |
| AHQ-1-9, 4858              | K.SDKDLETQVQLNEQVHSLK.L                                                 | 2325.56134 | 2 | 1.33E-04 | 0.92  | 4.32   | -     | 767.1    |
| gj4507651[ref]NP_003281.1  | tropomyosin 4 [Homo sapiens]                                            |            |   | 7.95E-10 | 6.20  | 70.28  | 25.40 | 28521.6  |
| AHQ-1-9, 1894              | K.AEGDVAALNR.R                                                          | 1016.09051 | 2 | 1.62E-04 | 0.91  | 2.98   | -     | 1466.3   |
| AHQ-1-9, 4096              | R.AEVSELKCGDLEELK.N                                                     | 1851.02256 | 2 | 1.27E-05 | 0.92  | 4.27   | -     | 796.1    |
| AHQ-1-9, 6216              | R.AEVSELKCGDLEELKKNVTNNLK.S                                             | 2634.89893 | 3 | 9.16E-07 | 0.86  | 4.46   | -     | 923.0    |
| AHQ-1-9, 6114 - 6127       | R.AEVSELKCGDLEELKKNVTNNLK.S                                             | 2634.89893 | 3 | 1.02E-08 | 0.92  | 4.75   | -     | 1134.2   |
| AHQ-1-9, 1718 - 1791       | R.EKAEGDVAALNR.R                                                        | 1273.37796 | 2 | 8.79E-05 | 0.79  | 2.71   | -     | 925.0    |
| AHQ-1-10, 2524             | K.IQALQQQADEAEDR.A                                                      | 1615.68404 | 2 | 3.99E-05 | 0.93  | 3.51   | -     | 1224.2   |
| AHQ-1-9, 2528 - 2535       | K.IQALQQQADEAEDR.A                                                      | 1615.68404 | 2 | 7.95E-10 | 0.98  | 5.59   | -     | 1737.7   |
| AHQ-1-11, 2560             | K.IQALQQQADEAEDR.A                                                      | 1615.68404 | 2 | 2.51E-07 | 0.97  | 4.31   | -     | 1673.4   |
| AHQ-1-9, 2251 - 2288       | R.KIQALQQQADEAEDR.A                                                     | 1743.85695 | 3 | 2.77E-08 | 0.94  | 4.67   | -     | 1307.7   |
| AHQ-1-9, 2574              | R.KIQALQQQADEAEDR.A                                                     | 1743.85695 | 2 | 1.43E-09 | 0.96  | 4.83   | -     | 1317.8   |
| AHQ-1-10, 2321             | R.KIQALQQQADEAEDR.A                                                     | 1743.85695 | 2 | 7.10E-07 | 0.96  | 5.03   | -     | 1738.7   |
| AHQ-1-9, 2484              | R.KIQALQQQADEAEDR.A                                                     | 1743.85695 | 2 | 8.12E-05 | 0.95  | 4.68   | -     | 1257.6   |
| AHQ-1-9, 1967              | K.YSEKEDKYEIEIK.L                                                       | 1690.78605 | 3 | 2.00E-06 | 0.73  | 3.41   | -     | 889.6    |
| AHQ-1-9, 2059              | K.YSEKEDKYEIEIK.L                                                       | 1690.78605 | 3 | 2.12E-05 | 0.85  | 3.65   | -     | 1219.1   |
| gj4507869[ref]NP_003361.1  | vasodilator-stimulated phosphoprotein [Homo sapiens]                    |            |   | 8.05E-10 | 2.94  | 40.24  | 13.40 | 39829.4  |
| AHQ-1-8, 2121              | R.ATVMLYDGNKR.W                                                         | 1383.55582 | 2 | 1.36E-04 | 0.63  | 2.69   | -     | 490.9    |
| AHQ-1-8, 6258              | K.VKEEIEAFVQLR.K                                                        | 1703.96061 | 2 | 8.05E-10 | 0.97  | 4.79   | -     | 1636.3   |
| AHQ-1-14 - , 3035          | R.VQIYHNPTANSFR.V                                                       | 1547.69936 | 2 | 1.01E-05 | 0.48  | 2.76   | -     | 415.1    |
| AHQ-1-13 - , 3137          | K.YNQATPNFHQWR.D                                                        | 1562.67258 | 2 | 7.37E-09 | 0.86  | 3.61   | -     | 564.2    |
| gj4507951[ref]NP_003396.1  | tyrosine 3/tryptophan 5 -monooxygenase activation protein, eta polypept |            |   | 8.07E-10 | 6.18  | 70.25  | 34.60 | 28218.5  |
| AHQ-1-14 - , 3019          | K.AVTELNEPLSNEDR.N                                                      | 1587.67060 | 2 | 2.78E-04 | 0.66  | 2.88   | -     | 447.6    |
| AHQ-1-10, 2795 - 2865      | K.AVTELNEPLSNEDR.N                                                      | 1587.67060 | 2 | 1.60E-06 | 0.95  | 4.93   | -     | 915.1    |
| AHQ-1-13 - , 3053          | K.AVTELNEPLSNEDR.N                                                      | 1587.67060 | 2 | 1.38E-06 | 0.85  | 3.33   | -     | 711.3    |
| AHQ-1-10, 5495 - 5507      | K.ELETVCNDVLSLLDK.F                                                     | 1749.96137 | 2 | 8.07E-10 | 0.93  | 4.36   | -     | 776.2    |
| AHQ-1-13, 6403             | K.ELETVCNDVLSLLDK.F                                                     | 1749.96137 | 2 | 3.29E-07 | 0.79  | 3.50   | -     | 495.7    |
| AHQ-1-13 - , 6864          | K.ELETVCNDVLSLLDK.F                                                     | 1749.96137 | 2 | 5.88E-07 | 0.93  | 4.31   | -     | 855.1    |
| AHQ-1-10, 6263             | K.ELETVCNDVLSLLDK.F                                                     | 1749.96137 | 2 | 4.37E-06 | 0.94  | 4.72   | -     | 829.1    |
| AHQ-1-10, 3889             | K.FLIKNCNDFQYESK.V                                                      | 1808.00430 | 2 | 1.09E-04 | 0.91  | 3.85   | -     | 701.4    |
| AHQ-1-13 - , 2333          | K.KNSVVEASEAAYK.E                                                       | 1396.52786 | 2 | 2.82E-08 | 0.90  | 3.27   | -     | 1061.8   |
| AHQ-1-10, 2629             | K.NSVVEASEAAYK.E                                                        | 1268.35495 | 1 | 1.31E-05 | 0.63  | 2.21   | -     | 578.2    |
| AHQ-1-13 - , 2672          | K.NSVVEASEAAYK.E                                                        | 1268.35495 | 2 | 1.20E-07 | 0.87  | 3.33   | -     | 751.1    |

|                            |                                                                         |            |   |          |      |        |       |         |
|----------------------------|-------------------------------------------------------------------------|------------|---|----------|------|--------|-------|---------|
| AHQ-1-10, 2468             | K.NSVVEASEAAYK.E                                                        | 1268.35495 | 2 | 1.36E-08 | 0.90 | 3.13   | -     | 990.4   |
| AHQ-1-13-, 6232 - 6235     | K.QAFDDAIAELDLTINEDSYK.D                                                | 2159.24915 | 2 | 5.89E-07 | 0.94 | 4.61   | -     | 761.3   |
| AHQ-1-14-, 6040            | K.QAFDDAIAELDLTINEDSYK.D                                                | 2159.24915 | 2 | 7.55E-05 | 0.84 | 3.77   | -     | 565.3   |
| AHQ-1-10, 5545 - 5619      | K.QAFDDAIAELDLTINEDSYK.D                                                | 2159.24915 | 2 | 8.54E-06 | 0.29 | 2.63   | -     | 153.9   |
| AHQ-1-10, 2100             | R.YLAEVASGEK.K                                                          | 1067.17419 | 2 | 2.52E-05 | 0.87 | 2.99   | -     | 1086.2  |
| AHQ-1-10, 2099             | R.YLAEVASGEK.K                                                          | 1067.17419 | 1 | 1.72E-04 | 0.44 | 2.81   | -     | 282.4   |
| AHQ-1-10, 2093             | R.YLAEVASGEK.K                                                          | 1067.17419 | 1 | 1.16E-04 | 0.16 | 2.02   | -     | 361.6   |
| AHQ-1-13-, 2257 - 2267     | R.YLAEVASGEK.K                                                          | 1067.17419 | 2 | 6.49E-07 | 0.75 | 2.83   | -     | 860.2   |
| gj4502565[ref]NP_001740.1  | calpain, small subunit 1; calpain, small polypeptide; calcium-dependent |            |   | 8.11E-10 | 3.95 | 50.24  | 36.20 | 28315.5 |
| AHQ-1-12, 6597             | R.LFAQLAGDDMEVSATELM*NILNK.V                                            | 2540.89556 | 3 | 5.53E-05 | 0.73 | 3.87   | -     | 479.9   |
| AHQ-1-12, 6413             | R.SGTICSSSELPAGFAEAGFHLEHLYNM*IIR.R                                     | 3353.73016 | 3 | 8.41E-04 | 0.69 | 3.04   | -     | 587.4   |
| AHQ-1-12, 2819 - 2883      | K.TDGFIDTCR.S                                                           | 1143.20921 | 2 | 9.15E-06 | 0.68 | 2.50   | -     | 495.6   |
| AHQ-1-11, 2307             | R.THYSNIEANESSEVR.Q                                                     | 1778.81502 | 2 | 2.42E-05 | 0.96 | 4.14   | -     | 1668.1  |
| AHQ-1-10, 2220 - 2281      | R.THYSNIEANESSEVR.Q                                                     | 1778.81502 | 2 | 5.89E-05 | 0.95 | 4.27   | -     | 1290.5  |
| AHQ-1-12, 6381 - 6418      | R.YSDESGNM*DFDNFISCLVR.L                                                | 2287.42568 | 2 | 2.75E-08 | 0.95 | 4.62   | -     | 1171.8  |
| AHQ-1-11, 6154 - 6210      | R.YSDESGNM*DFDNFISCLVR.L                                                | 2287.42568 | 2 | 4.97E-08 | 0.81 | 3.52   | -     | 517.3   |
| AHQ-1-10, 6120             | R.YSDESGNM*DFDNFISCLVR.L                                                | 2287.42568 | 2 | 3.29E-07 | 0.95 | 4.75   | -     | 1214.7  |
| AHQ-1-13, 6320             | R.YSDESGNM*DFDNFISCLVR.L                                                | 2287.42568 | 2 | 4.77E-06 | 0.83 | 3.52   | -     | 577.4   |
| AHQ-1-13-, 6773            | R.YSDESGNM*DFDNFISCLVR.L                                                | 2287.42568 | 2 | 2.68E-07 | 0.90 | 3.98   | -     | 713.7   |
| AHQ-1-14-, 6523            | R.YSDESGNM*DFDNFISCLVR.L                                                | 2287.42568 | 2 | 8.11E-10 | 0.90 | 3.77   | -     | 887.1   |
| gj4505775[ref]NP_002626.1  | phosphate carrier precursor isoform 1b; phosphate carrier, mitochondria |            |   | 8.71E-10 | 2.43 | 30.21  | 15.20 | 39958.5 |
| AHQ-1-9, 6559              | K.GWAPFTFLGYSMQGLCK.F                                                   | 1818.10896 | 2 | 5.34E-06 | 0.94 | 4.15   | -     | 979.3   |
| AHQ-1-9, 2470              | R.IQTQPGYANTLR.D                                                        | 1362.51634 | 2 | 2.73E-04 | 0.67 | 3.02   | -     | 393.8   |
| AHQ-1-9, 7239              | K.YYALCGFGVLSCLGTHAVVPLDLVK.C                                           | 2914.38804 | 2 | 8.71E-10 | 0.82 | 3.68   | -     | 552.5   |
| gj17986258[ref]NP_066299.2 | smooth muscle and non-muscle myosin alkali light chain isoform 1 [Homo  |            |   | 8.80E-10 | 7.08 | 80.27  | 42.40 | 16930.0 |
| AHQ-1-14-, 4302            | K.DOGTYEDYVEGLR.V                                                       | 1545.58904 | 2 | 1.39E-05 | 0.85 | 3.46   | -     | 1162.8  |
| AHQ-1-13-, 4355            | K.DOGTYEDYVEGLR.V                                                       | 1545.58904 | 2 | 2.77E-06 | 0.95 | 3.76   | -     | 1492.9  |
| AHQ-1-12, 3913             | K.EAFQLFDR.T                                                            | 1026.12699 | 2 | 1.21E-04 | 0.77 | 2.93   | -     | 701.5   |
| AHQ-1-12, 2229 - 2273      | R.HVLVLTGEEK.M                                                          | 996.18547  | 2 | 6.99E-07 | 0.88 | 3.30   | -     | 638.9   |
| AHQ-1-13-, 2359            | R.HVLVLTGEEK.M                                                          | 996.18547  | 2 | 9.42E-07 | 0.82 | 2.88   | -     | 608.8   |
| AHQ-1-14, 3216             | R.HVLVLTGEEK.M                                                          | 996.18547  | 1 | 7.00E-04 | 0.40 | 2.12   | -     | 457.7   |
| AHQ-1-13, 2414             | R.HVLVLTGEEK.M                                                          | 996.18547  | 2 | 4.62E-06 | 0.86 | 3.27   | -     | 682.5   |
| AHQ-1-12, 2333             | R.HVLVLTGEEK.M                                                          | 996.18547  | 2 | 4.72E-05 | 0.86 | 3.09   | -     | 752.4   |
| AHQ-1-12, 2239 - 2285      | R.HVLVLTGEEK.M                                                          | 996.18547  | 1 | 2.00E-05 | 0.70 | 3.24   | -     | 565.9   |
| AHQ-1-14-, 2312 - 2366     | R.HVLVLTGEEK.M                                                          | 996.18547  | 2 | 7.85E-05 | 0.85 | 2.74   | -     | 736.0   |
| AHQ-1-12, 2226 - 2374      | R.HVLVLTGEEK.M                                                          | 996.18547  | 1 | 8.00E-04 | 0.74 | 2.48   | -     | 803.9   |
| AHQ-1-14-, 2320            | R.HVLVLTGEEK.M                                                          | 996.18547  | 1 | 8.20E-04 | 0.79 | 2.84   | -     | 726.5   |
| AHQ-1-13-, 2356            | R.HVLVLTGEEK.M                                                          | 996.18547  | 1 | 4.90E-04 | 0.61 | 2.52   | -     | 661.2   |
| AHQ-1-12, 3978 - 3990      | K.NKDGTYEDYVEGLR.V                                                      | 1787.86505 | 3 | 2.53E-06 | 0.79 | 3.35   | -     | 932.3   |
| AHQ-1-14-, 3774            | K.NKDGTYEDYVEGLR.V                                                      | 1787.86505 | 2 | 1.00E-07 | 0.94 | 3.84   | -     | 1416.7  |
| AHQ-1-12, 3967 - 3977      | K.NKDGTYEDYVEGLR.V                                                      | 1787.86505 | 2 | 1.21E-09 | 0.89 | 3.82   | -     | 910.7   |
| AHQ-1-12, 3729             | K.NKDGTYEDYVEGLR.V                                                      | 1787.86505 | 3 | 7.12E-06 | 0.83 | 3.69   | -     | 1092.1  |
| AHQ-1-12, 3723             | K.NKDGTYEDYVEGLR.V                                                      | 1787.86505 | 2 | 6.10E-05 | 0.93 | 4.04   | -     | 985.8   |
| AHQ-1-12, 3601 - 3661      | K.NKDGTYEDYVEGLR.V                                                      | 1787.86505 | 2 | 1.87E-09 | 0.96 | 4.38   | -     | 1460.3  |
| AHQ-1-13, 3729             | K.NKDGTYEDYVEGLR.V                                                      | 1787.86505 | 2 | 1.56E-06 | 0.93 | 4.18   | -     | 1106.9  |
| AHQ-1-13, 4012             | K.NKDGTYEDYVEGLR.V                                                      | 1787.86505 | 2 | 5.65E-09 | 0.86 | 3.40   | -     | 806.2   |
| AHQ-1-13-, 3876 - 3887     | K.NKDGTYEDYVEGLR.V                                                      | 1787.86505 | 2 | 2.82E-09 | 0.95 | 4.25   | -     | 1430.5  |
| AHQ-1-12, 3594 - 3653      | K.NKDGTYEDYVEGLR.V                                                      | 1787.86505 | 3 | 3.41E-04 | 0.93 | 4.38   | -     | 1342.5  |
| AHQ-1-14-, 3947            | K.NKDGTYEDYVEGLR.V                                                      | 1787.86505 | 2 | 5.51E-06 | 0.89 | 3.69   | -     | 1007.8  |
| AHQ-1-14, 4652 - 4725      | K.NKDGTYEDYVEGLR.V                                                      | 1787.86505 | 2 | 1.66E-07 | 0.91 | 4.11   | -     | 1029.5  |
| AHQ-1-12, 4057             | K.NKDGTYEDYVEGLR.V                                                      | 1787.86505 | 2 | 3.81E-07 | 0.65 | 3.21   | -     | 683.3   |
| AHQ-1-14, 3504             | R.VFDKENGNTVM*GAEIR.H                                                   | 1739.93168 | 2 | 1.98E-04 | 0.84 | 3.19   | -     | 770.5   |
| AHQ-1-13-, 3407 - 3429     | R.VFDKENGNTVM*GAEIR.H                                                   | 1739.93168 | 2 | 1.07E-08 | 0.94 | 4.38   | -     | 1206.8  |
| AHQ-1-12, 3257 - 3259      | R.VFDKENGNTVM*GAEIR.H                                                   | 1739.93168 | 2 | 8.55E-04 | 0.94 | 3.92   | -     | 1282.2  |
| AHQ-1-14-, 2715            | R.VFDKENGNTVM*GAEIR.H                                                   | 1739.93168 | 2 | 8.62E-05 | 0.81 | 2.63   | -     | 838.2   |
| AHQ-1-12, 3219 - 3281      | R.VFDKENGNTVM*GAEIR.H                                                   | 1739.93168 | 2 | 8.80E-10 | 0.95 | 4.33   | -     | 1305.1  |
| AHQ-1-12, 6186             | K.VLDFEHFLPM*LQTVAK.N                                                   | 1905.24957 | 2 | 5.82E-06 | 0.90 | 4.35   | -     | 477.8   |
| AHQ-1-12, 6525             | K.VLDFEHFLPM*LQTVAK.N                                                   | 1889.25017 | 2 | 8.59E-08 | 0.94 | 4.69   | -     | 864.0   |
| AHQ-1-12, 6087 - 6157      | K.VLDFEHFLPM*LQTVAK.N                                                   | 1905.24957 | 3 | 1.22E-05 | 0.89 | 3.80   | -     | 1143.4  |
| AHQ-1-13, 6048             | K.VLDFEHFLPM*LQTVAK.N                                                   | 1905.24957 | 3 | 9.57E-05 | 0.73 | 3.16   | -     | 600.9   |
| AHQ-1-12, 6386 - 6445      | K.VLDFEHFLPM*LQTVAK.N                                                   | 1905.24957 | 2 | 2.08E-05 | 0.88 | 3.74   | -     | 771.9   |
| AHQ-1-13-, 6865            | K.VLDFEHFLPM*LQTVAK.N                                                   | 1889.25017 | 3 | 1.15E-05 | 0.88 | 3.90   | -     | 1166.0  |
| AHQ-1-14-, 6234 - 6264     | K.VLDFEHFLPM*LQTVAK.N                                                   | 1905.24957 | 2 | 6.78E-04 | 0.93 | 3.97   | -     | 898.9   |
| gj4758638[ref]NP_004896.1  | peroxiredoxin 6; antioxidant protein 2; non-selenium glutathione peroxi |            |   | 9.94E-10 | 8.82 | 110.33 | 53.10 | 25034.8 |
| AHQ-1-10, 3669             | R.DFTPVCTTELGR.A                                                        | 1397.53591 | 1 | 1.04E-04 | 0.46 | 2.81   | -     | 140.7   |
| AHQ-1-10, 3660             | R.DFTPVCTTELGR.A                                                        | 1397.53591 | 1 | 9.40E-04 | 0.32 | 2.24   | -     | 202.0   |
| AHQ-1-13-, 3960 - 4007     | R.DFTPVCTTELGR.A                                                        | 1397.53591 | 2 | 5.53E-06 | 0.81 | 2.87   | -     | 630.9   |
| AHQ-1-10, 4481 - 4539      | K.DGDSVMM*VLPTIPEEEAK.K                                                 | 1831.03469 | 2 | 8.85E-05 | 0.74 | 2.99   | -     | 784.0   |
| AHQ-1-10, 3961 - 3984      | K.DGDSVMM*VLPTIPEEEAK.K                                                 | 1847.03409 | 2 | 1.60E-05 | 0.48 | 2.52   | -     | 375.2   |
| AHQ-1-13-, 2683            | K.DINAYNCEEPTEK.L                                                       | 1584.64363 | 2 | 9.69E-05 | 0.66 | 2.77   | -     | 645.8   |
| AHQ-1-10, 5180 - 5249      | K.DINAYNCEEPTEKLPFPPIIDDR.N                                             | 2651.88650 | 2 | 5.85E-04 | 0.90 | 4.49   | -     | 528.2   |
| AHQ-1-10, 5651 - 5727      | R.ELAILLGMGLDPAEKDEK.G                                                  | 1886.19976 | 2 | 6.20E-08 | 0.97 | 5.14   | -     | 1227.8  |
| AHQ-1-13-, 6323 - 6387     | R.ELAILLGMGLDPAEKDEK.G                                                  | 1886.19976 | 2 | 1.80E-04 | 0.94 | 4.62   | -     | 936.9   |
| AHQ-1-10, 5860 - 5921      | R.FHDFLGDSDWGLFHSHPR.D                                                  | 2032.24831 | 2 | 1.91E-05 | 0.99 | 6.59   | -     | 2624.4  |
| AHQ-1-10, 5859 - 5861      | R.FHDFLGDSDWGLFHSHPR.D                                                  | 2032.24831 | 3 | 9.94E-10 | 0.97 | 5.80   | -     | 1610.8  |
| AHQ-1-14-, 5928 - 5995     | K.LIALSIDSVEDHLAWSK.D                                                   | 1898.14883 | 2 | 1.38E-06 | 0.96 | 4.68   | -     | 1062.5  |
| AHQ-1-13-, 6124            | K.LIALSIDSVEDHLAWSK.D                                                   | 1898.14883 | 3 | 3.80E-05 | 0.50 | 3.37   | -     | 249.4   |
| AHQ-1-10, 5524             | K.LIALSIDSVEDHLAWSK.D                                                   | 1898.14883 | 2 | 2.84E-09 | 0.94 | 4.22   | -     | 1178.8  |
| AHQ-1-10, 5476             | K.LIALSIDSVEDHLAWSK.D                                                   | 1898.14883 | 3 | 1.43E-05 | 0.53 | 3.48   | -     | 346.5   |
| AHQ-1-13-, 6123            | K.LIALSIDSVEDHLAWSK.D                                                   | 1898.14883 | 2 | 2.52E-07 | 0.86 | 2.96   | -     | 888.7   |
| AHQ-1-14-, 5915            | K.LIALSIDSVEDHLAWSK.D                                                   | 1898.14883 | 3 | 1.90E-04 | 0.54 | 3.17   | -     | 356.4   |
| AHQ-1-10, 5420 - 5475      | K.LIALSIDSVEDHLAWSK.D                                                   | 1898.14883 | 2 | 9.90E-08 | 0.96 | 4.85   | -     | 1332.6  |
| AHQ-1-13, 4483             | K.LPFPPIIDDR.N                                                          | 1086.26548 | 2 | 5.25E-05 | 0.86 | 3.25   | -     | 611.8   |
| AHQ-1-10, 4196             | K.LPFPPIIDDR.N                                                          | 1086.26548 | 2 | 1.98E-05 | 0.92 | 3.36   | -     | 896.1   |
| AHQ-1-13-, 4693            | K.LPFPPIIDDR.N                                                          | 1086.26548 | 2 | 4.08E-05 | 0.95 | 3.17   | -     | 1463.3  |
| AHQ-1-10, 4696             | R.VATPVWDKGDSDVM*VLPTIPEEEAK.K                                          | 2744.06717 | 3 | 8.72E-04 | 0.56 | 3.16   | -     | 297.3   |
| AHQ-1-10, 3591             | R.VVVFVGPDK.K                                                           | 1008.19471 | 1 | 1.86E-04 | 0.76 | 2.33   | -     | 969.7   |
| AHQ-1-10, 3599             | R.VVVFVGPDK.K                                                           | 1008.19471 | 2 | 4.80E-06 | 0.88 | 3.19   | -     | 654.1   |
| gj4507677[ref]NP_003290.1  | tumor rejection antigen (gp96) 1; Tumor rejection antigen-1 (gp96); glu |            |   | 9.94E-10 | 9.17 | 110.28 | 18.40 | 92468.2 |
| AHQ-1-5, 6593              | R.EAVEKEFEPLLNWMK.D                                                     | 1864.15434 | 2 | 3.70E-04 | 0.86 | 3.30   | -     | 879.2   |
| AHQ-1-5, 3929              | R.FQSSHHTDITSLDQYVER.M                                                  | 2261.39276 | 3 | 2.43E-08 | 0.98 | 5.53   | -     | 2393.7  |
| AHQ-1-5, 3927 - 3949       | R.FQSSHHTDITSLDQYVER.M                                                  | 2261.39276 | 2 | 4.99E-06 | 0.96 | 4.94   | -     | 1225.0  |
| AHQ-1-5, 4047 - 4117       | K.GVVDSDDLPLNVSRE                                                       | 1486.60940 | 1 | 7.51E-04 | 0.63 | 2.53   | -     | 474.5   |
| AHQ-1-6, 4038              | K.GVVDSDDLPLNVSRE                                                       | 1486.60940 | 2 | 1.06E-09 | 0.93 | 4.18   | -     | 881.3   |
| AHQ-1-5, 7317 - 7318       | K.GYEVYILTEPVDEYCIQALPEFDGK.R                                           | 2951.24921 | 2 | 4.27E-05 | 0.62 | 2.85   | -     | 310.6   |
| AHQ-1-5, 7011 - 7074       | K.GYEVYILTEPVDEYCIQALPEFDGK.R                                           | 3107.43557 | 3 | 9.94E-10 | 0.87 | 4.43   | -     | 612.7   |
| AHQ-1-5, 3365 - 3437       | K.IADDKYNDTFWK.E                                                        | 1516.63566 | 2 | 1.20E-04 | 0.88 | 3.39   | -     | 861.8   |
| AHQ-1-5, 6454 - 6521       | K.KYSQINFPIYVWSSK.T                                                     | 2008.30657 | 2 | 1.04E-08 | 0.97 | 5.04   | -     | 1841.0  |
| AHQ-1-5, 5339              | R.LISLTDENALSGNEELTVK.I                                                 | 2047.24975 | 2 | 3.20E-05 | 0.90 | 4.11   | -     | 793.6   |
| AHQ-1-5, 5229              | R.LISLTDENALSGNEELTVK.I                                                 | 2047.24975 | 2 | 7.99E-07 | 0.95 | 5.20   | -     | 1115.8  |
| AHQ-1-5, 2653              | R.SGYLLPDTK.A                                                           | 994.12321  | 1 | 1.35E-06 | 0.70 | 2.89   | -     | 629.0   |
| AHQ-1-5, 2642              | R.SGYLLPDTK.A                                                           | 994.12321  | 1 | 6.92E-05 | 0.79 | 2.66   | -     | 768.4   |
| AHQ-1-5, 2649 - 2650       | R.SGYLLPDTK.A                                                           | 994.12321  | 2 | 2.71E-05 | 0.88 | 2.86   | -     | 944.2   |
| AHQ-1-5, 2662              | K.TETVEEPEEEEEAAKEEK.E                                                  | 2109.20871 | 2 | 5.87E-05 | 0.45 | 2.73   | -     | 312.3   |
| AHQ-1-5, 7065 - 7086       | K.YSQINFPIYVWSSK.T                                                      | 1880.13366 | 2 | 5.79E-06 | 0.96 | 4.91   | -     | 1035.7  |
| gj29739414[ref]XP_294015.1 | similar to Glycerlaldehyde 3-phosphate dehydrogenase, liver (GAPDH) [Ho |            |   | 1.03E-09 | 4.54 | 50.25  | 17.70 | 26917.6 |
| AHQ-1-11, 3902             | K.IISNASCTNCLAPLAK.V                                                    | 1837.10868 | 2 | 9.82E-08 | 0.80 | 3.73   | -     | 806.7   |



|                             |                                                                         |            |   |          |      |       |       |         |
|-----------------------------|-------------------------------------------------------------------------|------------|---|----------|------|-------|-------|---------|
| AHQ-1-14 - , 3995           | K.IISNASCTTNCLAPLAK.V                                                   | 1837.10868 | 2 | 3.71E-06 | 0.92 | 3.78  | -     | 1519.4  |
| AHQ-1-11, 3762 - 3822       | K.IISNASCTTNCLAPLAK.V                                                   | 1837.10868 | 2 | 1.46E-07 | 0.87 | 4.20  | -     | 1282.1  |
| AHQ-1-9, 3926 - 3947        | K.IISNASCTTNCLAPLAK.V                                                   | 1837.10868 | 2 | 3.54E-08 | 0.89 | 4.37  | -     | 1202.3  |
| AHQ-1-9, 4020 - 4087        | K.IISNASCTTNCLAPLAK.V                                                   | 1837.10868 | 2 | 3.26E-05 | 0.62 | 3.37  | -     | 773.9   |
| AHQ-1-9, 4142 - 4212        | K.IISNASCTTNCLAPLAK.V                                                   | 1837.10868 | 2 | 6.17E-09 | 0.81 | 4.06  | -     | 961.5   |
| AHQ-1-9, 5007 - 5038        | K.LISWYDNEFGYSNR.V                                                      | 1764.87478 | 2 | 2.13E-07 | 0.95 | 4.30  | -     | 1243.8  |
| AHQ-1-9, 5174 - 5242        | K.LISWYDNEFGYSNR.V                                                      | 1764.87478 | 2 | 9.49E-08 | 0.94 | 4.42  | -     | 887.8   |
| AHQ-1-9, 5363               | K.LISWYDNEFGYSNR.V                                                      | 1764.87478 | 2 | 2.62E-04 | 0.88 | 3.63  | -     | 772.6   |
| AHQ-1-9, 5495               | K.LISWYDNEFGYSNR.V                                                      | 1764.87478 | 2 | 1.56E-04 | 0.85 | 3.71  | -     | 687.6   |
| AHQ-1-14 - , 5022 - 5102    | K.LISWYDNEFGYSNR.V                                                      | 1764.87478 | 2 | 1.10E-07 | 0.96 | 4.57  | -     | 1510.2  |
| AHQ-1-9, 4827               | K.LISWYDNEFGYSNR.V                                                      | 1764.87478 | 2 | 1.03E-09 | 0.94 | 4.35  | -     | 716.4   |
| AHQ-1-13 - , 5137 - 5139    | K.LISWYDNEFGYSNR.V                                                      | 1764.87478 | 2 | 1.44E-09 | 0.97 | 4.55  | -     | 1380.1  |
| AHQ-1-10, 4591 - 4611       | K.LISWYDNEFGYSNR.V                                                      | 1764.87478 | 2 | 2.00E-08 | 0.95 | 4.70  | -     | 992.7   |
| AHQ-1-11, 4686 - 4751       | K.LISWYDNEFGYSNR.V                                                      | 1764.87478 | 2 | 1.29E-06 | 0.59 | 2.91  | -     | 747.8   |
| AHQ-1-11, 4827              | K.LISWYDNEFGYSNR.V                                                      | 1764.87478 | 2 | 3.97E-06 | 0.95 | 4.20  | -     | 1075.7  |
| AHQ-1-12, 4894              | K.LISWYDNEFGYSNR.V                                                      | 1764.87478 | 2 | 5.13E-04 | 0.75 | 2.53  | -     | 998.3   |
| AHQ-1-13, 4864              | K.LISWYDNEFGYSNR.V                                                      | 1764.87478 | 2 | 4.61E-09 | 0.93 | 4.25  | -     | 829.3   |
| AHQ-1-14, 5966 - 6028       | K.LISWYDNEFGYSNR.V                                                      | 1764.87478 | 2 | 2.20E-09 | 0.97 | 4.96  | -     | 1345.2  |
| AHQ-1-9, 2730               | R.VVDMMAHMASK.E                                                         | 1202.47292 | 2 | 2.35E-04 | 0.95 | 3.64  | -     | 1160.3  |
| AHQ-1-9, 2134               | R.VVDMMAHM*ASKE                                                         | 1347.58686 | 2 | 4.67E-04 | 0.87 | 3.97  | -     | 1119.6  |
| AHQ-1-9, 2942               | R.VVDMMAHMASK.E                                                         | 1331.58746 | 2 | 1.55E-05 | 0.97 | 4.21  | -     | 1881.0  |
| gi 13489087 ref NP_109591.1 | serine (or cysteine) proteinase inhibitor, clade B (ovalbumin), member  |            |   | 1.07E-09 | 4.58 | 50.23 | 22.20 | 42741.5 |
| AHQ-1-9, 4363               | K.FAYGYIEDLK.C                                                          | 1219.36713 | 2 | 2.39E-08 | 0.95 | 3.31  | -     | 1327.2  |
| AHQ-1-9, 4567               | R.LGVQDLFNSK.A                                                          | 1208.34588 | 2 | 2.60E-05 | 0.91 | 2.71  | -     | 1250.5  |
| AHQ-1-9, 4036               | K.TYGADLASVDFQHASEDAR.K                                                 | 2054.11949 | 3 | 5.36E-09 | 0.88 | 4.09  | -     | 640.2   |
| AHQ-1-9, 4010 - 4078        | K.TYGADLASVDFQHASEDAR.K                                                 | 2054.11949 | 2 | 1.07E-09 | 0.93 | 4.06  | -     | 953.7   |
| AHQ-1-8, 4065 - 4144        | K.TYGADLASVDFQHASEDAR.K                                                 | 2054.11949 | 3 | 6.90E-05 | 0.61 | 3.26  | -     | 418.8   |
| AHQ-1-8, 4059               | K.TYGADLASVDFQHASEDAR.K                                                 | 2054.11949 | 2 | 3.14E-09 | 0.90 | 3.69  | -     | 901.9   |
| AHQ-1-9, 6340               | K.TYNFLPEFLVSTQK.T                                                      | 1687.91650 | 2 | 2.99E-04 | 0.94 | 4.67  | -     | 578.9   |
| AHQ-1-9, 7234 - 7306        | R.VLELPYQGEELSMVLLPDDIEDETLGKK.I                                        | 3375.82891 | 3 | 6.31E-09 | 0.86 | 4.57  | -     | 557.5   |
| gi 5729997 ref NP_004154.2  | RAB27B, member RAS oncogene family [Homo sapiens]                       |            |   | 1.07E-09 | 5.93 | 70.24 | 35.30 | 24607.7 |
| AHQ-1-11, 6286              | K.AVETLLDLIMK.R                                                         | 1246.54211 | 2 | 1.96E-08 | 0.90 | 3.73  | -     | 843.3   |
| AHQ-1-10, 5295              | K.AVETLLDLIMK.R                                                         | 1262.54151 | 2 | 5.79E-06 | 0.88 | 3.43  | -     | 938.6   |
| AHQ-1-10, 6160 - 6163       | K.AVETLLDLIMK.R                                                         | 1246.54211 | 2 | 9.83E-08 | 0.91 | 3.90  | -     | 761.9   |
| AHQ-1-10, 4917              | K.AVETLLDLIMK.R                                                         | 1418.72786 | 2 | 5.27E-04 | 0.71 | 2.67  | -     | 647.2   |
| AHQ-1-13 - , 3132           | K.LLALGDSGVGK.T                                                         | 1030.20023 | 2 | 1.06E-06 | 0.84 | 2.68  | -     | 1030.5  |
| AHQ-1-13 - , 3133           | K.LLALGDSGVGK.T                                                         | 1030.20023 | 1 | 5.74E-04 | 0.48 | 2.03  | -     | 548.7   |
| AHQ-1-11, 2930              | K.LLALGDSGVGK.T                                                         | 1030.20023 | 1 | 5.54E-04 | 0.30 | 2.07  | -     | 354.9   |
| AHQ-1-10, 2836              | K.LLALGDSGVGK.T                                                         | 1030.20023 | 1 | 1.67E-04 | 0.58 | 2.16  | -     | 723.2   |
| AHQ-1-13, 3097              | K.LLALGDSGVGK.T                                                         | 1030.20023 | 1 | 5.60E-04 | 0.57 | 2.35  | -     | 704.7   |
| AHQ-1-10, 5720 - 5767       | R.NWMSQLQANAYCENPDVILIGNK.A                                             | 2680.99772 | 2 | 1.20E-07 | 0.71 | 3.16  | -     | 508.9   |
| AHQ-1-11, 5987              | R.NWMSQLQANAYCENPDVILIGNK.A                                             | 2680.99772 | 2 | 5.95E-05 | 0.88 | 4.03  | -     | 443.4   |
| AHQ-1-10, 5887              | R.NWMSQLQANAYCENPDVILIGNK.A                                             | 2680.99772 | 2 | 8.68E-04 | 0.80 | 3.32  | -     | 578.2   |
| AHQ-1-10, 3399 - 3401       | K.VHLQLWDTAGQER.F                                                       | 1553.70390 | 2 | 2.76E-08 | 0.95 | 4.09  | -     | 1209.2  |
| AHQ-1-12, 3637              | K.VHLQLWDTAGQER.F                                                       | 1553.70390 | 2 | 5.54E-08 | 0.94 | 3.62  | -     | 1245.9  |
| AHQ-1-13, 3743              | K.VHLQLWDTAGQER.F                                                       | 1553.70390 | 2 | 6.59E-06 | 0.92 | 3.73  | -     | 1159.7  |
| AHQ-1-11, 3444 - 3510       | K.VHLQLWDTAGQER.F                                                       | 1553.70390 | 2 | 7.43E-06 | 0.92 | 3.62  | -     | 821.8   |
| AHQ-1-13 - , 3868           | K.VHLQLWDTAGQER.F                                                       | 1553.70390 | 2 | 4.31E-08 | 0.96 | 3.87  | -     | 1769.6  |
| AHQ-1-10, 4272 - 4312       | K.YGIPYFETSAAATGQNVK.A                                                  | 1976.13177 | 2 | 4.54E-06 | 0.74 | 3.45  | -     | 710.3   |
| AHQ-1-10, 4124 - 4179       | K.YGIPYFETSAAATGQNVK.A                                                  | 1976.13177 | 2 | 1.07E-09 | 0.95 | 4.87  | -     | 752.2   |
| AHQ-1-11, 4302 - 4339       | K.YGIPYFETSAAATGQNVK.A                                                  | 1976.13177 | 2 | 4.93E-08 | 0.95 | 4.26  | -     | 1179.8  |
| AHQ-1-12, 4470              | K.YGIPYFETSAAATGQNVK.A                                                  | 1976.13177 | 2 | 4.48E-04 | 0.78 | 3.54  | -     | 408.8   |
| AHQ-1-13 - , 4647 - 4711    | K.YGIPYFETSAAATGQNVK.A                                                  | 1976.13177 | 2 | 3.07E-08 | 0.91 | 4.12  | -     | 757.7   |
| gi 4557395 ref NP_000058.1  | carbonic anhydrase II; carbonic dehydratase II; carbonic dehydratase II |            |   | 1.07E-09 | 4.68 | 60.28 | 32.30 | 29245.8 |
| AHQ-1-10, 6292              | K.AVQPPDGLAVLGFILK.V                                                    | 1669.98899 | 2 | 3.16E-09 | 0.95 | 4.79  | -     | 664.3   |
| AHQ-1-13 - , 6895           | K.AVQPPDGLAVLGFILK.V                                                    | 1669.98899 | 2 | 1.68E-08 | 0.94 | 4.55  | -     | 636.3   |
| AHQ-1-10, 3048              | K.EPISVSSEQVLK.F                                                        | 1316.48265 | 1 | 9.76E-04 | 0.41 | 3.00  | -     | 161.8   |
| AHQ-1-10, 3931 - 4004       | R.ILNNGHAFNVEFDDSQDK.A                                                  | 2064.15751 | 2 | 1.07E-09 | 0.97 | 5.61  | -     | 1757.9  |
| AHQ-1-10, 3763              | R.ILNNGHAFNVEFDDSQDK.A                                                  | 2064.15751 | 2 | 2.39E-06 | 0.87 | 3.90  | -     | 947.2   |
| AHQ-1-10, 3129              | K.SADFTNFPPR.G                                                          | 1170.21306 | 2 | 1.66E-06 | 0.85 | 3.02  | -     | 818.2   |
| AHQ-1-10, 3559              | K.VVDVLDISK.T                                                           | 988.16011  | 2 | 4.58E-05 | 0.87 | 3.66  | -     | 436.7   |
| AHQ-1-13, 4472              | K.YDP5LKLPLSYDQATSLR.I                                                  | 2141.36647 | 2 | 4.61E-07 | 0.64 | 3.00  | -     | 418.8   |
| gi 4505303 ref NP_002466.1  | myosin alkali light chain 1 slow a; myosin light chain 1, slow-twitch m |            |   | 1.09E-09 | 2.69 | 30.20 | 11.50 | 22763.8 |
| AHQ-1-12, 2677 - 2757       | R.ALGNPTNAEVLK.V                                                        | 1355.52211 | 2 | 1.09E-09 | 0.85 | 3.97  | -     | 435.1   |
| AHQ-1-12, 2779              | R.ALGNPTNAEVLK.V                                                        | 1355.52211 | 2 | 5.10E-06 | 0.84 | 3.13  | -     | 622.6   |
| AHQ-1-12, 2877 - 2905       | R.ALGNPTNAEVLK.V                                                        | 1355.52211 | 2 | 1.29E-07 | 0.84 | 3.71  | -     | 425.2   |
| AHQ-1-12, 2585              | R.ALGNPTNAEVLK.V                                                        | 1355.52211 | 2 | 4.03E-07 | 0.70 | 3.32  | -     | 350.9   |
| AHQ-1-13 - , 2743           | K.ILYSQCGDVMR.A                                                         | 1359.55429 | 2 | 2.97E-06 | 0.92 | 3.11  | -     | 1154.1  |
| AHQ-1-13 - , 3395           | K.ILYSQCGDVMR.A                                                         | 1343.55489 | 2 | 5.09E-07 | 0.90 | 3.09  | -     | 975.6   |
| AHQ-1-14 - , 2694 - 2768    | K.ILYSQCGDVMR.A                                                         | 1359.55429 | 2 | 1.17E-05 | 0.94 | 3.46  | -     | 1192.3  |
| AHQ-1-12, 3174 - 3237       | K.ILYSQCGDVMR.A                                                         | 1343.55489 | 2 | 1.74E-08 | 0.91 | 3.23  | -     | 1020.1  |
| gi 4507645 ref NP_000356.1  | triosephosphate isomerase 1 [Homo sapiens]                              |            |   | 1.18E-09 | 3.55 | 40.27 | 30.90 | 26669.3 |
| AHQ-1-13 - , 4023           | K.DCGATWVVLGHSER.R                                                      | 1588.72671 | 2 | 2.38E-07 | 0.89 | 3.78  | -     | 701.4   |
| AHQ-1-13, 3868              | K.DCGATWVVLGHSER.R                                                      | 1588.72671 | 2 | 8.03E-07 | 0.91 | 3.72  | -     | 951.8   |
| AHQ-1-10, 3581 - 3653       | K.DCGATWVVLGHSER.R                                                      | 1588.72671 | 2 | 1.18E-09 | 0.95 | 4.28  | -     | 1256.3  |
| AHQ-1-14 - , 6574           | K.ELASQPDVDGFLVGGASLKPFEFVDIINAK.Q                                      | 3031.40532 | 3 | 1.78E-06 | 0.58 | 3.48  | -     | 171.1   |
| AHQ-1-10, 6007 - 6085       | K.ELASQPDVDGFLVGGASLKPFEFVDIINAK.Q                                      | 3031.40532 | 3 | 7.64E-07 | 0.80 | 3.84  | -     | 238.4   |
| AHQ-1-13 - , 6684           | K.ELASQPDVDGFLVGGASLKPFEFVDIINAK.Q                                      | 3031.40532 | 3 | 7.58E-06 | 0.69 | 3.47  | -     | 233.9   |
| AHQ-1-10, 4815              | K.QSLGELIGLTKNA.V                                                       | 1415.61746 | 2 | 8.42E-05 | 0.83 | 3.14  | -     | 706.0   |
| AHQ-1-13, 5349              | K.VPADTEVVCAPPTAYIDFAR.Q                                                | 2194.44943 | 2 | 3.54E-07 | 0.96 | 5.31  | -     | 871.4   |
| AHQ-1-13 - , 5656           | K.VPADTEVVCAPPTAYIDFAR.Q                                                | 2194.44943 | 2 | 6.60E-06 | 0.93 | 4.28  | -     | 763.8   |
| gi 4503573 ref NP_001967.1  | enolase 3; enolase-3, beta, muscle; muscle specific enolase; beta enola |            |   | 1.25E-09 | 0.71 | 10.21 | 3.50  | 46958.5 |
| AHQ-1-8, 3776               | K.VNQGIVSVTSIQACK.L                                                     | 1635.82159 | 2 | 7.73E-06 | 0.90 | 4.19  | -     | 582.5   |
| AHQ-1-8, 3979               | K.VNQGIVSVTSIQACK.L                                                     | 1635.82159 | 2 | 1.25E-09 | 0.71 | 3.24  | -     | 632.4   |
| AHQ-1-13, 3751              | K.VNQGIVSVTSIQACK.L                                                     | 1635.82159 | 2 | 6.49E-04 | 0.89 | 3.59  | -     | 745.3   |
| AHQ-1-14, 4594 - 4648       | K.VNQGIVSVTSIQACK.L                                                     | 1635.82159 | 2 | 2.88E-05 | 0.75 | 2.96  | -     | 590.7   |
| AHQ-1-13 - , 3889           | K.VNQGIVSVTSIQACK.L                                                     | 1635.82159 | 2 | 5.98E-07 | 0.83 | 3.02  | -     | 796.8   |
| AHQ-1-8, 3693               | K.VNQGIVSVTSIQACK.L                                                     | 1635.82159 | 2 | 1.52E-06 | 0.94 | 3.99  | -     | 1051.2  |
| gi 29568101 ref NP_006467.3 | ATP synthase, H+ transporting, mitochondrial F0 complex, subunit g; AT  |            |   | 1.33E-09 | 2.44 | 30.22 | 14.60 | 11400.3 |
| AHQ-1-14 - , 3660 - 3731    | K.TPALVNAAVTYSK.P                                                       | 1335.53080 | 2 | 1.33E-09 | 0.93 | 4.19  | -     | 869.6   |
| AHQ-1-14 - , 3678 - 3715    | K.TPALVNAAVTYSKPR.L                                                     | 1588.83283 | 2 | 4.85E-05 | 0.96 | 4.47  | -     | 1196.4  |
| AHQ-1-14, 4512 - 4570       | K.TPALVNAAVTYSKPR.L                                                     | 1588.83283 | 2 | 2.84E-06 | 0.91 | 4.03  | -     | 869.5   |
| AHQ-1-14 - , 4388           | K.VELVPPTPAIEPR.A                                                       | 1418.66294 | 2 | 9.83E-05 | 0.60 | 2.53  | -     | 259.6   |
| gi 16933567 ref NP_005361.2 | mel transforming oncogene; ras-associated protein RAB6 [Homo sapiens]   |            |   | 1.33E-09 | 0.92 | 10.20 | 6.80  | 23668.1 |
| AHQ-1-11, 5723              | K.ANINVENAFFTLAR.D                                                      | 1580.76926 | 2 | 1.33E-09 | 0.92 | 3.92  | -     | 909.7   |
| gi 29730023 ref XP_291482.1 | similar to 78 kDa glucose-regulated protein precursor (GRP 78) (Immuno  |            |   | 1.39E-09 | 5.31 | 60.25 | 13.30 | 63563.0 |
| AHQ-1-5, 4902               | R.IINKPTAAAIAYGLDK.R                                                    | 1659.95097 | 2 | 3.59E-07 | 0.70 | 3.26  | -     | 701.9   |
| AHQ-1-7, 4874               | R.IINKPTAAAIAYGLDK.R                                                    | 1659.95097 | 2 | 1.15E-05 | 0.87 | 3.30  | -     | 989.4   |
| AHQ-1-6, 4782 - 4863        | R.IINKPTAAAIAYGLDK.R                                                    | 1659.95097 | 2 | 1.96E-08 | 0.82 | 4.16  | -     | 774.9   |
| AHQ-1-9, 4758               | R.IINKPTAAAIAYGLDK.R                                                    | 1659.95097 | 2 | 1.88E-05 | 0.83 | 4.32  | -     | 726.1   |
| AHQ-1-6, 3468 - 3523        | K.KKELEEIVQPIISK.L                                                      | 1654.97263 | 2 | 3.20E-07 | 0.96 | 4.79  | -     | 1452.4  |
| AHQ-1-5, 3595               | K.LYGSAGPPPTGEEDTAEKDEL                                                 | 2177.26447 | 2 | 8.47E-09 | 0.93 | 4.32  | -     | 847.4   |
| AHQ-1-6, 3512 - 3594        | K.LYGSAGPPPTGEEDTAEKDEL                                                 | 2177.26447 | 2 | 1.18E-05 | 0.96 | 5.02  | -     | 866.5   |
| AHQ-1-6, 3430               | K.LYGSAGPPPTGEEDTAEKDEL                                                 | 2177.26447 | 2 | 1.00E-03 | 0.83 | 3.32  | -     | 787.3   |
| AHQ-1-6, 4030               | R.NELESYAYSLK.N                                                         | 1317.42597 | 2 | 3.74E-04 | 0.87 | 2.79  | -     | 1089.5  |
| AHQ-1-5, 5855               | K.TFAPKEISAMVLT.K                                                       | 1536.86124 | 2 | 9.24E-06 | 0.90 | 2.96  | -     | 1300.7  |
| AHQ-1-6, 5764               | K.TFAPKEISAMVLT.K                                                       | 1536.86124 | 2 | 1.39E-09 | 0.87 | 3.12  | -     | 1269.1  |

|                             |                                                                         |            |   |          |      |       |      |         |
|-----------------------------|-------------------------------------------------------------------------|------------|---|----------|------|-------|------|---------|
| AHQ-1-6, 4919 - 4992        | K.TFAPKEISAM*VLT.K.M                                                    | 1552.86064 | 2 | 1.19E-05 | 0.85 | 3.61  | -    | 1115.2  |
| gi 29742827 ref XP_294099.1 | similar to myosin:SUBUNIT=regulatory light chain [Homo sapiens]         |            |   |          |      |       |      |         |
| AHQ-1-11, 2267 - 2339       | K.EAFNM>IDQNR.D                                                         | 1254.35498 | 2 | 6.81E-04 | 0.66 | 2.70  | -    | 540.9   |
| AHQ-1-11, 3132              | R.FTDEEVDLYR.E                                                          | 1416.47127 | 2 | 1.80E-04 | 0.94 | 3.69  | -    | 1267.6  |
| AHQ-1-11, 3615 - 3678       | R.FTDEEVDLYR.E                                                          | 1416.47127 | 2 | 3.58E-08 | 0.97 | 4.63  | -    | 1707.0  |
| AHQ-1-11, 3679 - 3739       | R.FTDEEVDLYR.E                                                          | 1416.47127 | 1 | 9.65E-06 | 0.37 | 1.82  | -    | 427.7   |
| AHQ-1-11, 3692              | R.FTDEEVDLYR.E                                                          | 1416.47127 | 1 | 4.78E-05 | 0.61 | 2.54  | -    | 443.4   |
| AHQ-1-11, 3738 - 3751       | R.FTDEEVDLYR.E                                                          | 1416.47127 | 2 | 1.43E-09 | 0.97 | 4.55  | -    | 1901.3  |
| AHQ-1-12, 3706 - 3769       | R.FTDEEVDLYR.E                                                          | 1416.47127 | 2 | 1.31E-08 | 0.97 | 4.56  | -    | 1686.9  |
| AHQ-1-13, 3847              | R.FTDEEVDLYR.E                                                          | 1416.47127 | 2 | 8.77E-08 | 0.95 | 3.44  | -    | 1575.9  |
| AHQ-1-14, 4760 - 4761       | R.FTDEEVDLYR.E                                                          | 1416.47127 | 2 | 5.83E-08 | 0.97 | 4.40  | -    | 1664.6  |
| AHQ-1-13 - , 3991           | R.FTDEEVDLYR.E                                                          | 1416.47127 | 2 | 2.47E-09 | 0.96 | 3.57  | -    | 1753.8  |
| AHQ-1-14 - , 3894 - 3895    | R.FTDEEVDLYR.E                                                          | 1416.47127 | 2 | 1.05E-08 | 0.97 | 4.64  | -    | 1698.5  |
| gi 21361621 ref NP_002624.2 | phosphoglucomutase 1 [Homo sapiens]                                     |            |   |          |      |       |      |         |
| AHQ-1-7, 3806               | K.FNISNGGPAPEAITDK.I                                                    | 1631.76820 | 2 | 1.44E-09 | 0.93 | 3.44  | -    | 1638.9  |
| AHQ-1-7, 4078 - 4086        | K.TIEEYAVCPDLK.V                                                        | 1439.61271 | 2 | 6.11E-04 | 0.52 | 2.52  | -    | 767.2   |
| gi 5803227 ref NP_006817.1  | tyrosine 3/tryptophan 5 -monooxygenase activation protein, theta polype |            |   |          |      |       |      |         |
| AHQ-1-14 - , 2287           | K.AVTEQGAELSNEER.N                                                      | 1533.57979 | 2 | 5.43E-06 | 0.89 | 2.92  | -    | 1374.4  |
| AHQ-1-13 - , 2311           | K.AVTEQGAELSNEER.N                                                      | 1533.57979 | 2 | 1.58E-09 | 0.93 | 3.91  | -    | 1172.7  |
| AHQ-1-10, 2141 - 2165       | K.AVTEQGAELSNEER.N                                                      | 1533.57979 | 2 | 5.92E-07 | 0.84 | 3.16  | -    | 950.0   |
| AHQ-1-13 - , 4217           | K.QTIDNSQQAQYQAFDISK.K                                                  | 2016.11116 | 2 | 1.50E-05 | 0.86 | 3.53  | -    | 793.5   |
| AHQ-1-10, 3823              | K.QTIDNSQQAQYQAFDISK.K                                                  | 2016.11116 | 2 | 3.20E-04 | 0.45 | 2.77  | -    | 133.3   |
| AHQ-1-13 - , 6767           | K.TAFDEAIAELDTLNEDSYK.D                                                 | 2146.25037 | 2 | 4.41E-09 | 0.95 | 4.72  | -    | 1160.8  |
| AHQ-1-10, 6127              | K.TAFDEAIAELDTLNEDSYK.D                                                 | 2146.25037 | 2 | 2.59E-05 | 0.96 | 4.83  | -    | 1082.8  |
| AHQ-1-13, 6315 - 6316       | K.TAFDEAIAELDTLNEDSYK.D                                                 | 2146.25037 | 2 | 4.10E-06 | 0.95 | 4.83  | -    | 1004.4  |
| AHQ-1-14 - , 6522 - 6528    | K.TAFDEAIAELDTLNEDSYK.D                                                 | 2146.25037 | 2 | 8.64E-06 | 0.95 | 5.14  | -    | 989.2   |
| AHQ-1-10, 2551              | R.YLAEVACGDDR.K                                                         | 1270.35099 | 2 | 7.22E-08 | 0.91 | 2.92  | -    | 1249.9  |
| AHQ-1-10, 2553              | K.YLIANATNPESK.V                                                        | 1321.46099 | 2 | 2.39E-04 | 0.94 | 3.37  | -    | 1726.3  |
| AHQ-1-10, 2643 - 2707       | K.YLIANATNPESK.V                                                        | 1321.46099 | 1 | 1.45E-07 | 0.81 | 3.03  | -    | 814.2   |
| AHQ-1-10, 2648              | K.YLIANATNPESK.V                                                        | 1321.46099 | 2 | 1.30E-04 | 0.92 | 3.60  | -    | 1183.3  |
| gi 12545410 ref NP_031394.1 | RAS p21 protein activator 3; GTPase activating protein III; Ins(1,3,4,  |            |   |          |      |       |      |         |
| AHQ-1-5, 5375               | K.SADVEPVASAAHILGEVCR.E                                                 | 2070.26993 | 2 | 1.60E-09 | 0.95 | 4.88  | -    | 1055.6  |
| AHQ-1-5, 6513               | K.SLPCPFYGEDFYCEIPR.S                                                   | 2056.26024 | 2 | 1.90E-05 | 0.82 | 3.60  | -    | 429.9   |
| gi 20127408 ref NP_000173.2 | hydroxyacyl dehydrogenase, subunit A; trifunctional protein, alpha sub  |            |   |          |      |       |      |         |
| AHQ-1-6, 6556               | R.DSIFSNLTGQLDYQGFEK.A                                                  | 2063.20943 | 2 | 6.76E-08 | 0.96 | 4.92  | -    | 1075.3  |
| AHQ-1-6, 2616               | K.DTSASAVAVGLK.Q                                                        | 1119.25064 | 1 | 2.83E-04 | 0.20 | 2.22  | -    | 392.8   |
| AHQ-1-6, 4704               | R.FGGGNPELLTQMVSK.G                                                     | 1578.81508 | 2 | 4.98E-06 | 0.91 | 3.83  | -    | 806.3   |
| AHQ-1-6, 3094               | K.TGIEQGS DAGYLCE SQK.F                                                 | 1844.93497 | 2 | 1.76E-09 | 0.92 | 3.83  | -    | 875.2   |
| AHQ-1-6, 3596               | K.TLQEVTLQSQAQR.I                                                       | 1631.76974 | 2 | 1.18E-05 | 0.95 | 3.91  | -    | 1896.1  |
| AHQ-1-6, 6202               | K.TVLGTPEVLLGALPGAGGTQR.L                                               | 2008.30795 | 3 | 1.65E-07 | 0.87 | 4.18  | -    | 836.4   |
| gi 8922673 ref NP_060692.1  | parvin, alpha; alpha-parvin; actopaxin [Homo sapiens]                   |            |   |          |      |       |      |         |
| AHQ-1-9, 4644 - 4656        | R.DAFDTLFDHAPDK.L                                                       | 1492.57096 | 2 | 8.48E-08 | 0.93 | 3.89  | -    | 1137.1  |
| AHQ-1-9, 4654               | R.DAFDTLFDHAPDK.L                                                       | 1492.57096 | 1 | 1.82E-04 | 0.47 | 2.34  | -    | 520.3   |
| AHQ-1-9, 4664               | R.DAFDTLFDHAPDK.L                                                       | 1492.57096 | 1 | 2.60E-06 | 0.87 | 3.91  | -    | 605.0   |
| AHQ-1-13 - , 4779           | R.DAFDTLFDHAPDK.L                                                       | 1492.57096 | 2 | 4.31E-09 | 0.93 | 3.47  | -    | 1288.4  |
| AHQ-1-9, 4307               | R.DAFDTLFDHAPDK.L                                                       | 1492.57096 | 2 | 1.79E-09 | 0.96 | 3.68  | -    | 1632.3  |
| gi 4505759 ref NP_002622.1  | phosphogluconate dehydrogenase; 6-phosphogluconate dehydrogenase [Homo  |            |   |          |      |       |      |         |
| AHQ-1-14, 5518              | R.DYFGAHTYLLAK.P                                                        | 1528.68958 | 2 | 1.67E-06 | 0.96 | 4.04  | -    | 1603.4  |
| AHQ-1-8, 6438               | K.LVPLDLDGDIIDGGNSEYR.D                                                 | 2161.39768 | 2 | 5.75E-05 | 0.97 | 5.51  | -    | 1555.0  |
| AHQ-1-8, 6622               | K.LVPLDLDGDIIDGGNSEYR.D                                                 | 2161.39768 | 2 | 1.79E-09 | 0.98 | 4.84  | -    | 2241.5  |
| AHQ-1-8, 4465               | K.VGTGEPCDDWVGDEGAGHFVK.M                                               | 2280.43619 | 2 | 4.92E-05 | 0.81 | 3.31  | -    | 587.9   |
| AHQ-1-8, 4464               | K.VGTGEPCDDWVGDEGAGHFVK.M                                               | 2280.43619 | 3 | 9.80E-09 | 0.84 | 4.12  | -    | 352.1   |
| gi 30150022 ref XP_300862.1 | similar to beta-tubulin 4Q [Homo sapiens]                               |            |   |          |      |       |      |         |
| AHQ-1-7, 6493               | K.EAESDCDCLQGFQLTHSLGGGTSGMGLTLISK.I                                    | 3315.65550 | 3 | 5.74E-06 | 0.93 | 4.49  | -    | 1401.9  |
| AHQ-1-13 - , 6252           | K.EAESDCDCLQGFQLTHSLGGGTSGMGLTLISK.I                                    | 3315.65550 | 3 | 3.96E-04 | 0.85 | 3.86  | -    | 944.0   |
| AHQ-1-9, 3224 - 3236        | R.FPQGQLNADR.K                                                          | 1131.26634 | 2 | 1.26E-06 | 0.85 | 3.05  | -    | 792.0   |
| AHQ-1-8, 3197 - 3236        | R.FPQGQLNADR.K                                                          | 1131.26634 | 2 | 3.57E-05 | 0.90 | 3.13  | -    | 852.8   |
| AHQ-1-7, 3616               | R.FPQGQLNADR.K                                                          | 1131.26634 | 2 | 9.21E-07 | 0.85 | 3.06  | -    | 714.8   |
| AHQ-1-7, 3480 - 3496        | R.FPQGQLNADR.K                                                          | 1131.26634 | 2 | 6.19E-05 | 0.88 | 3.17  | -    | 760.6   |
| AHQ-1-7, 3340 - 3409        | R.FPQGQLNADR.K                                                          | 1131.26634 | 2 | 1.41E-04 | 0.91 | 3.54  | -    | 888.3   |
| AHQ-1-7, 3956               | R.KLAVNMVPPFR.L                                                         | 1272.58771 | 2 | 3.11E-07 | 0.95 | 4.07  | -    | 1261.0  |
| AHQ-1-8, 4329               | K.LAVNMVPPFR.L                                                          | 1144.41480 | 2 | 3.37E-05 | 0.94 | 3.83  | -    | 899.1   |
| AHQ-1-7, 4536               | K.LAVNMVPPFR.L                                                          | 1144.41480 | 2 | 3.23E-06 | 0.94 | 4.01  | -    | 888.2   |
| AHQ-1-10, 4116              | K.LAVNMVPPFR.L                                                          | 1144.41480 | 2 | 1.52E-06 | 0.90 | 3.41  | -    | 731.2   |
| AHQ-1-9, 4400 - 4406        | K.LAVNMVPPFR.L                                                          | 1144.41480 | 2 | 2.76E-08 | 0.94 | 4.29  | -    | 773.3   |
| AHQ-1-7, 5864 - 5892        | R.LHFFMPGFAPLTSR.G                                                      | 1621.92962 | 2 | 1.24E-08 | 0.94 | 3.67  | -    | 895.7   |
| AHQ-1-11, 5416              | R.LHFFMPGFAPLTSR.G                                                      | 1621.92962 | 2 | 6.91E-05 | 0.93 | 3.57  | -    | 1037.1  |
| AHQ-1-7, 5874               | R.LHFFMPGFAPLTSR.G                                                      | 1621.92962 | 3 | 7.20E-04 | 0.82 | 3.55  | -    | 931.9   |
| AHQ-1-9, 5695 - 5698        | R.LHFFMPGFAPLTSR.G                                                      | 1621.92962 | 2 | 1.85E-09 | 0.92 | 3.76  | -    | 737.3   |
| gi 19913424 ref NP_001681.2 | ATPase, H+ transporting, lysosomal 70kD, V1 subunit A, isoform 1; V-AT  |            |   |          |      |       |      |         |
| AHQ-1-6, 4318               | R.LAEMPADSGYPAYLGR.L                                                    | 1782.99819 | 2 | 1.12E-08 | 0.95 | 4.58  | -    | 949.5   |
| AHQ-1-6, 3078               | R.TALVANTSMPVAAR.E                                                      | 1516.74852 | 2 | 1.91E-09 | 0.98 | 5.09  | -    | 1974.1  |
| AHQ-1-6, 3192               | R.VGHSSELVGEIIR.L                                                       | 1309.49658 | 2 | 3.19E-08 | 0.92 | 3.38  | -    | 1140.0  |
| gi 4502097 ref NP_001142.1  | solute carrier family 25 (mitochondrial carrier; adenine nucleotide tra |            |   |          |      |       |      |         |
| AHQ-1-10, 3176 - 3247       | R.AAYFGVYDTAK.G                                                         | 1206.32845 | 2 | 1.19E-06 | 0.92 | 3.62  | -    | 802.5   |
| AHQ-1-10, 4248              | K.DFLAGAVAAVSK.T                                                        | 1220.39980 | 2 | 5.22E-04 | 0.93 | 3.34  | -    | 2189.0  |
| AHQ-1-10, 5240              | R.YFPTQALNFAFK.D                                                        | 1447.66130 | 1 | 3.20E-06 | 0.58 | 2.92  | -    | 409.8   |
| AHQ-1-13, 5519              | R.YFPTQALNFAFK.D                                                        | 1447.66130 | 2 | 1.92E-09 | 0.89 | 2.91  | -    | 831.3   |
| AHQ-1-13 - , 5789 - 5855    | R.YFPTQALNFAFK.D                                                        | 1447.66130 | 2 | 3.08E-07 | 0.86 | 3.23  | -    | 695.7   |
| AHQ-1-10, 5231 - 5252       | R.YFPTQALNFAFK.D                                                        | 1447.66130 | 2 | 1.06E-07 | 0.92 | 3.08  | -    | 868.8   |
| gi 4503117 ref NP_000091.1  | cystatin B; stefin B; liver thiol proteinase inhibitor; CPI-B [Homo sap |            |   |          |      |       |      |         |
| AHQ-1-13 - , 3600 - 3655    | K.SQVVAGTNYFIK.V                                                        | 1327.51036 | 2 | 1.59E-06 | 0.92 | 3.76  | -    | 988.7   |
| AHQ-1-13 - , 3804           | R.VFQSLPHENKPLTLSNYQTNK.A                                               | 2459.74218 | 3 | 5.10E-06 | 0.70 | 3.39  | -    | 542.5   |
| AHQ-1-13 - , 3813           | R.VFQSLPHENKPLTLSNYQTNK.A                                               | 2459.74218 | 2 | 6.97E-04 | 0.91 | 4.21  | -    | 890.6   |
| AHQ-1-13, 3295              | K.VHVGDDEFVHLR.V                                                        | 1423.55823 | 2 | 2.16E-09 | 0.83 | 2.94  | -    | 515.5   |
| gi 7657431 ref NP_055205.1  | EBNA-2 co-activator (100kD) [Homo sapiens]                              |            |   |          |      |       |      |         |
| AHQ-1-4, 6378 - 6402        | R.DIQNTQCLLNVHLSAGCPHVTLQFADSK.G                                        | 3299.63749 | 3 | 2.17E-09 | 0.96 | 5.00  | -    | 1638.6  |
| AHQ-1-4, 6574               | K.DTNGENIAESLVAEGLATR.R                                                 | 1961.07704 | 2 | 1.10E-08 | 0.96 | 4.36  | -    | 1767.3  |
| AHQ-1-4, 6680               | R.NLPLGLVQEGEPFSEATLFTK.E                                               | 2307.54125 | 2 | 3.24E-04 | 0.90 | 4.30  | -    | 515.9   |
| AHQ-1-4, 5043               | K.VNVTVDYIRPASPATETVPAFSER.T                                            | 2620.89872 | 2 | 2.11E-04 | 0.61 | 2.83  | -    | 376.9   |
| AHQ-1-4, 5039               | K.VNVTVDYIRPASPATETVPAFSER.T                                            | 2620.89872 | 3 | 3.90E-05 | 0.78 | 3.55  | -    | 671.5   |
| gi 4505773 ref NP_002625.1  | prohibitin [Homo sapiens]                                               |            |   |          |      |       |      |         |
| AHQ-1-10, 3473              | R.ILFRPVASQLPR.I                                                        | 1397.69333 | 2 | 4.46E-04 | 0.84 | 3.09  | -    | 778.5   |
| AHQ-1-10, 3948              | R.KLEAAEDYIQLSR.S                                                       | 1607.78978 | 2 | 2.21E-09 | 0.98 | 4.92  | -    | 2169.0  |
| gi 4507171 ref NP_003109.1  | secreted protein, acidic, cysteine-rich (osteonectin); Osteonectin (sec |            |   |          |      |       |      |         |
| AHQ-1-9, 3055               | R.LEAGDHPVELLAR.D                                                       | 1420.59579 | 2 | 1.32E-04 | 0.93 | 3.90  | -    | 866.5   |
| AHQ-1-8, 3057               | R.LEAGDHPVELLAR.D                                                       | 1420.59579 | 2 | 2.22E-09 | 0.94 | 4.37  | -    | 1053.6  |
| AHQ-1-9, 7126               | K.NYNNYIFVHWQFQLDQHPIDGYLSHTELAPLR.A                                    | 4102.58560 | 3 | 2.69E-07 | 0.94 | 5.58  | -    | 685.2   |
| AHQ-1-9, 2723               | R.LEAGDHPVELLAR.D                                                       | 1576.78214 | 2 | 2.29E-07 | 0.90 | 3.89  | -    | 595.4   |
| AHQ-1-9, 6550 - 6560        | K.YIPPCLDSELTFFPLR.M                                                    | 1952.21655 | 2 | 6.65E-08 | 0.58 | 2.94  | -    | 199.1   |
| gi 4504973 ref NP_002292.1  | lactate dehydrogenase C [Homo sapiens]                                  |            |   |          |      |       |      |         |
| AHQ-1-9, 2475               | R.VIGSGCNLDSAR.F                                                        | 1250.36445 | 2 | 2.25E-09 | 0.91 | 10.18 | 3.60 | 36311.0 |
| AHQ-1-10, 2361              | R.VIGSGCNLDSAR.F                                                        | 1250.36445 | 2 | 3.67E-07 | 0.87 | 3.33  | -    | 579.9   |
| AHQ-1-11, 2348 - 2415       | R.VIGSGCNLDSAR.F                                                        | 1250.36445 | 2 | 7.77E-07 | 0.88 | 3.25  | -    | 723.8   |
| AHQ-1-9, 2379               | R.VIGSGCNLDSAR.F                                                        | 1250.36445 | 2 | 2.83E-06 | 0.85 | 3.48  | -    | 788.2   |
| gi 25188179 ref NP_005653.3 | voltage-dependent anion channel 3 [Homo sapiens]                        |            |   |          |      |       |      |         |
| AHQ-1-10, 3240              | K.LSQNNFALGYKA                                                          | 1255.40424 | 1 | 1.09E-04 | 0.58 | 2.38  | -    | 691.2   |

|                             |                                                                         |            |   |          |      |       |      |          |
|-----------------------------|-------------------------------------------------------------------------|------------|---|----------|------|-------|------|----------|
| AHQ-1-13- , 3365 - 3431     | K.LSQNNFALGYKA                                                          | 1255.40424 | 2 | 2.22E-04 | 0.82 | 3.05  | -    | 749.8    |
| AHQ-1-10, 3120              | K.LSQNNFALGYKA                                                          | 1255.40424 | 2 | 3.44E-04 | 0.89 | 2.75  | -    | 1228.6   |
| AHQ-1-10, 4705              | K.LTLDTIFVPTNGK.K                                                       | 1419.64771 | 2 | 2.41E-07 | 0.93 | 3.72  | -    | 1261.8   |
| AHQ-1-10, 4596 - 4615       | K.LTLDTIFVPTNGK.K                                                       | 1419.64771 | 2 | 9.89E-05 | 0.92 | 3.89  | -    | 816.8    |
| AHQ-1-10, 4047              | K.LTLDTIFVPTNGK.K                                                       | 1547.82062 | 2 | 4.90E-04 | 0.57 | 2.87  | -    | 447.0    |
| AHQ-1-10, 4288              | K.LTSLALIDGK.N                                                          | 1031.22813 | 2 | 8.34E-05 | 0.89 | 3.91  | -    | 698.7    |
| AHQ-1-13, 3696              | K.VCNYGLTFTQK.W                                                         | 1332.50706 | 2 | 5.10E-04 | 0.79 | 3.08  | -    | 638.6    |
| AHQ-1-10, 3423 - 3424       | K.VCNYGLTFTQK.W                                                         | 1332.50706 | 2 | 7.69E-05 | 0.94 | 4.33  | -    | 958.5    |
| AHQ-1-10, 4391              | K.VNNASLIGLGYQTLRPGVK.L                                                 | 2102.42298 | 3 | 1.03E-06 | 0.88 | 4.36  | -    | 755.3    |
| AHQ-1-10, 4095              | K.VNNASLIGLGYQTLRPGVK.L                                                 | 2102.42298 | 3 | 3.85E-07 | 0.89 | 3.99  | -    | 1079.2   |
| AHQ-1-10, 4093              | K.VNNASLIGLGYQTLRPGVK.L                                                 | 2102.42298 | 2 | 1.77E-08 | 0.85 | 3.93  | -    | 524.5    |
| AHQ-1-10, 4223 - 4299       | K.VNNASLIGLGYQTLRPGVK.L                                                 | 2102.42298 | 2 | 2.93E-09 | 0.85 | 3.76  | -    | 637.0    |
| AHQ-1-10, 4384              | K.VNNASLIGLGYQTLRPGVK.L                                                 | 2102.42298 | 2 | 2.34E-09 | 0.85 | 3.88  | -    | 517.3    |
| AHQ-1-13, 4521              | K.VNNASLIGLGYQTLRPGVK.L                                                 | 2102.42298 | 3 | 8.52E-07 | 0.79 | 4.10  | -    | 587.5    |
| AHQ-1-13, 4525              | K.VNNASLIGLGYQTLRPGVK.L                                                 | 2102.42298 | 2 | 5.56E-07 | 0.86 | 3.63  | -    | 642.1    |
| AHQ-1-13- , 4744            | K.VNNASLIGLGYQTLRPGVK.L                                                 | 2102.42298 | 2 | 8.64E-09 | 0.88 | 4.04  | -    | 549.4    |
| AHQ-1-10, 3619              | K.YKVCNYGLTFTQK.W                                                       | 1623.85410 | 2 | 3.02E-07 | 0.96 | 4.67  | -    | 1350.3   |
| gi 20539300 ref XP_088391.4 | similar to tropomyosin 4 [Homo sapiens]                                 |            |   |          |      |       |      |          |
| AHQ-1-9, 3412 - 3488        | R.KLVILEGELER.A                                                         | 1299.54160 | 2 | 5.33E-06 | 0.95 | 4.10  | -    | 1575.7   |
| AHQ-1-9, 3576               | R.KLVILEGELER.A                                                         | 1299.54160 | 2 | 1.76E-06 | 0.90 | 3.75  | -    | 934.4    |
| AHQ-1-10, 3411              | R.KLVILEGELER.A                                                         | 1299.54160 | 2 | 1.45E-04 | 0.96 | 4.39  | -    | 1529.8   |
| AHQ-1-9, 3407 - 3484        | R.KLVILEGELER.A                                                         | 1299.54160 | 1 | 2.40E-09 | 0.45 | 2.48  | -    | 388.4    |
| AHQ-1-9, 4014               | R.KLVILEGELER.A                                                         | 1171.36868 | 2 | 1.80E-08 | 0.95 | 3.70  | -    | 1642.1   |
| gi 4557419 ref NP_000631.1  | CD36 antigen (collagen type I receptor, thrombospondin receptor); CD36  |            |   |          |      |       |      |          |
| AHQ-1-6, 4755               | K.AFASPVENPDNYCFCTEK.I                                                  | 2152.30319 | 2 | 9.03E-05 | 0.69 | 3.14  | -    | 439.8    |
| AHQ-1-5, 4857 - 4934        | K.AFASPVENPDNYCFCTEK.I                                                  | 2152.30319 | 2 | 2.62E-06 | 0.90 | 3.85  | -    | 621.5    |
| AHQ-1-5, 4781 - 4849        | K.AFASPVENPDNYCFCTEK.I                                                  | 2152.30319 | 2 | 1.76E-07 | 0.88 | 3.63  | -    | 722.9    |
| AHQ-1-1, 4831               | K.AFASPVENPDNYCFCTEK.I                                                  | 2152.30319 | 2 | 1.26E-04 | 0.41 | 2.54  | -    | 354.1    |
| AHQ-1-5, 2818 - 2895        | K.RLQVNLVLPSEK.I                                                        | 1524.83342 | 3 | 9.89E-04 | 0.83 | 3.64  | -    | 903.5    |
| AHQ-1-6, 5616 - 5635        | K.SQVLQFFSSDICR.S                                                       | 1588.76661 | 2 | 3.24E-05 | 0.94 | 3.48  | -    | 1541.2   |
| AHQ-1-5, 5681 - 5705        | K.SQVLQFFSSDICR.S                                                       | 1588.76661 | 2 | 4.02E-07 | 0.97 | 4.91  | -    | 1717.6   |
| AHQ-1-1, 5755               | K.SQVLQFFSSDICR.S                                                       | 1588.76661 | 2 | 4.51E-06 | 0.97 | 4.96  | -    | 1477.0   |
| AHQ-1-7, 5693               | K.SQVLQFFSSDICR.S                                                       | 1588.76661 | 2 | 1.66E-04 | 0.76 | 2.58  | -    | 1037.8   |
| AHQ-1-5, 7309 - 7314        | R.TYLDIQPIGTFTLQFAK.R                                                   | 1957.25787 | 2 | 2.40E-09 | 0.96 | 4.54  | -    | 1328.8   |
| gi 13129150 ref NP_005339.1 | heat shock 90kDa protein 1, alpha; heat shock 90kDa protein 1, alpha [H |            |   |          |      |       |      |          |
| AHQ-1-5, 2446               | K.DQVANSFVER.L                                                          | 1236.31618 | 2 | 3.28E-04 | 0.94 | 3.55  | -    | 1369.4   |
| AHQ-1-5, 2382               | K.FYEQFSK.N                                                             | 949.04099  | 1 | 7.12E-04 | 0.73 | 2.51  | -    | 732.4    |
| AHQ-1-5, 6970               | K.HGLEVIYMIPEIDYCVQQLK.E                                                | 2579.97320 | 3 | 1.72E-05 | 0.87 | 4.04  | -    | 1167.7   |
| AHQ-1-5, 4137               | R.NPDDITNEEYGEFYK.S                                                     | 1834.87381 | 2 | 2.43E-09 | 0.97 | 4.99  | -    | 1505.5   |
| AHQ-1-6, 4080               | R.NPDDITNEEYGEFYK.S                                                     | 1834.87381 | 2 | 3.88E-07 | 0.92 | 4.35  | -    | 694.6    |
| AHQ-1-5, 4063               | R.RAPFDLFENR.K                                                          | 1265.40235 | 2 | 7.52E-05 | 0.80 | 3.17  | -    | 544.5    |
| gi 450521 ref NP_001055.1   | transketolase [Homo sapiens]                                            |            |   |          |      |       |      |          |
| AHQ-1-6, 4732               | K.ILATPPQEDAPSDIANIR.M                                                  | 2021.26036 | 2 | 2.08E-06 | 0.91 | 4.05  | -    | 410.6    |
| AHQ-1-6, 3848 - 3894        | R.SVPTTTFVPSDGVATEK.A                                                   | 1886.04854 | 2 | 5.61E-04 | 0.55 | 2.84  | -    | 269.7    |
| AHQ-1-6, 7174               | R.TVPFCSTFAAFFTR.A                                                      | 1653.88190 | 2 | 2.64E-09 | 0.77 | 3.16  | -    | 312.9    |
| gi 4504077 ref NP_000165.1  | glycoprotein IX (platelet) [Homo sapiens]                               |            |   |          |      |       |      |          |
| AHQ-1-11, 4750              | R.ALETMGLWVDCR.G                                                        | 1452.68135 | 2 | 3.19E-09 | 0.93 | 3.08  | -    | 1241.4   |
| AHQ-1-12, 4157              | R.ALETMGLWVDCR.G                                                        | 1468.68075 | 2 | 2.88E-04 | 0.90 | 2.60  | -    | 1108.2   |
| AHQ-1-12, 4927              | R.ALETMGLWVDCR.G                                                        | 1452.68135 | 2 | 2.12E-04 | 0.93 | 3.87  | -    | 941.2    |
| AHQ-1-11, 4024 - 4035       | R.ALETMGLWVDCR.G                                                        | 1468.68075 | 2 | 1.52E-04 | 0.87 | 3.66  | -    | 781.8    |
| AHQ-1-12, 2635 - 2715       | R.CASPSLAAHGPLGR.L                                                      | 1395.56962 | 2 | 2.70E-09 | 0.83 | 3.43  | -    | 909.7    |
| AHQ-1-11, 2604 - 2624       | R.CASPSLAAHGPLGR.L                                                      | 1395.56962 | 2 | 1.20E-06 | 0.92 | 3.35  | -    | 1221.9   |
| AHQ-1-14- , 2758            | R.CASPSLAAHGPLGR.L                                                      | 1395.56962 | 2 | 6.07E-07 | 0.93 | 3.43  | -    | 1316.3   |
| AHQ-1-11, 3232 - 3298       | R.GHGLTALPALPAR.T                                                       | 1274.49706 | 2 | 4.88E-05 | 0.96 | 4.35  | -    | 1335.4   |
| AHQ-1-12, 3427              | R.GHGLTALPALPAR.T                                                       | 1274.49706 | 2 | 2.80E-04 | 0.93 | 3.33  | -    | 967.3    |
| AHQ-1-11, 3295 - 3296       | R.GHGLTALPALPAR.T                                                       | 1274.49706 | 3 | 2.38E-05 | 0.89 | 3.30  | -    | 1092.9   |
| AHQ-1-11, 3299              | R.GHGLTALPALPAR.T                                                       | 1274.49706 | 1 | 9.71E-05 | 0.63 | 2.47  | -    | 408.8    |
| AHQ-1-11, 5108              | R.LWLEDRTPEALLQVR.C                                                     | 1840.11574 | 2 | 3.95E-05 | 0.89 | 4.13  | -    | 735.1    |
| AHQ-1-11, 3075 - 3098       | R.TPEALLQVR.C                                                           | 1027.19957 | 2 | 4.75E-04 | 0.84 | 3.00  | -    | 832.1    |
| AHQ-1-14- , 3228            | R.TPEALLQVR.C                                                           | 1027.19957 | 2 | 3.60E-06 | 0.94 | 3.02  | -    | 1586.6   |
| AHQ-1-14, 4189              | R.TPEALLQVR.C                                                           | 1027.19957 | 2 | 2.87E-05 | 0.92 | 3.27  | -    | 1145.1   |
| gi 4758759 ref NP_004528.1  | nucleosome assembly protein 1-like 1; HSP22-like protein interacting pr |            |   |          |      |       |      |          |
| AHQ-1-7, 7370               | K.GIPEFWLTVFK.N                                                         | 1337.58999 | 2 | 2.71E-09 | 0.81 | 2.97  | -    | 282.5    |
| AHQ-1-7, 3786               | R.KYAVLYQPLFDKR.F                                                       | 1641.93733 | 2 | 5.64E-04 | 0.55 | 2.81  | -    | 369.7    |
| AHQ-1-7, 5757 - 5828        | R.LDGLVETPTGYIESLPR.V                                                   | 1861.08535 | 2 | 4.92E-05 | 0.93 | 3.98  | -    | 952.6    |
| AHQ-1-7, 5633 - 5676        | K.NVDLLSDMVQEHDEPIK.H                                                   | 2096.34751 | 2 | 3.07E-08 | 0.95 | 4.85  | -    | 1000.5   |
| AHQ-1-7, 4966               | K.YAVLYQPLFDKR.F                                                        | 1357.57807 | 2 | 7.72E-06 | 0.94 | 3.35  | -    | 1226.9   |
| gi 5453990 ref NP_006254.1  | proteasome (prosome, macropain) activator subunit 1 (PA28 alpha); Prote |            |   |          |      |       |      |          |
| AHQ-1-10, 5637              | K.ISELDALFEPALNEANLSNLK.A                                               | 2430.73906 | 2 | 2.74E-09 | 0.82 | 3.86  | -    | 398.7    |
| AHQ-1-10, 6105              | R.NAYAVLYDIILK.N                                                        | 1396.65574 | 2 | 3.71E-06 | 0.90 | 3.43  | -    | 789.7    |
| gi 4757766 ref NP_004299.1  | Rho GTPase activating protein 1; RhoGAP; p50rhoGAP; CDC42 GTPase-activa |            |   |          |      |       |      |          |
| AHQ-1-11, 5663              | K.FLLDHQGELFPPSPDPSGL                                                   | 1970.17037 | 2 | 3.74E-05 | 0.45 | 2.83  | -    | 483.5    |
| AHQ-1-7, 6412               | K.FLLDHQGELFPPSPDPSGL                                                   | 1970.17037 | 2 | 1.03E-04 | 0.63 | 2.84  | -    | 467.1    |
| AHQ-1-8, 4060 - 4132        | K.NPEQEPPIVLR.E                                                         | 1405.62426 | 2 | 2.43E-04 | 0.67 | 2.54  | -    | 717.1    |
| AHQ-1-8, 6391 - 6392        | R.VPATLQVLQTLPEENYQVLR.F                                                | 2312.65053 | 2 | 2.67E-06 | 0.93 | 4.68  | -    | 712.1    |
| AHQ-1-11, 5715              | R.VPATLQVLQTLPEENYQVLR.F                                                | 2312.65053 | 2 | 2.66E-04 | 0.74 | 3.50  | -    | 331.8    |
| AHQ-1-7, 6457               | R.VPATLQVLQTLPEENYQVLR.F                                                | 2312.65053 | 2 | 2.89E-09 | 0.93 | 4.80  | -    | 619.0    |
| gi 4502695 ref NP_001779.1  | cell division cycle 10; cell division cycle 10 (homolog to CDC10 of S.c |            |   |          |      |       |      |          |
| AHQ-1-8, 5531               | K.NLEGGYGFANLNPQVYR.K                                                   | 1955.16216 | 2 | 7.51E-06 | 0.95 | 4.91  | -    | 1057.8   |
| AHQ-1-13- , 6701            | K.STLINSFLTDLYSPEYGPISHR.I                                              | 2608.88640 | 3 | 4.69E-05 | 0.68 | 3.14  | -    | 430.1    |
| AHQ-1-14- , 6215            | K.STLINSFLTDLYSPEYGPISHR.I                                              | 2608.88640 | 3 | 2.58E-07 | 0.63 | 3.07  | -    | 378.3    |
| AHQ-1-14- , 6434            | K.STLINSFLTDLYSPEYGPISHR.I                                              | 2608.88640 | 3 | 3.05E-09 | 0.86 | 4.03  | -    | 587.5    |
| AHQ-1-8, 6842               | K.STLINSFLTDLYSPEYGPISHR.I                                              | 2608.88640 | 3 | 1.76E-05 | 0.75 | 3.32  | -    | 698.1    |
| gi 4505369 ref NP_002486.1  | NADH dehydrogenase (ubiquinone) Fe-S protein 4, 18kDa (NADH-coenzyme Q  |            |   |          |      |       |      |          |
| AHQ-1-12, 4554              | K.LDITTLTGVPPEHIK.T                                                     | 1666.89713 | 2 | 3.38E-09 | 0.81 | 3.46  | -    | 570.2    |
| gi 22027538 ref NP_037506.2 | programmed cell death 6 interacting protein; ALG-2 interacting protein  |            |   |          |      |       |      |          |
| AHQ-1-5, 4831               | K.LANQAADYFGDAFK.Q                                                      | 1531.65033 | 2 | 3.45E-09 | 0.89 | 3.57  | -    | 810.6    |
| AHQ-1-5, 3127 - 3133        | R.LLDEEATDNDLR.A                                                        | 1533.57656 | 2 | 1.36E-06 | 0.91 | 3.56  | -    | 1153.9   |
| gi 10716563 ref NP_001737.1 | calnexin [Homo sapiens]                                                 |            |   |          |      |       |      |          |
| AHQ-1-5, 2329               | K.AEDELINR.S                                                            | 1089.13826 | 2 | 1.70E-04 | 0.85 | 2.79  | -    | 1226.1   |
| AHQ-1-4, 5167               | K.APVPTGEVYFADSFDR.G                                                    | 1771.90722 | 2 | 1.69E-04 | 0.91 | 3.63  | -    | 1018.8   |
| AHQ-1-3, 5115               | K.APVPTGEVYFADSFDR.G                                                    | 1771.90722 | 2 | 1.66E-06 | 0.87 | 3.28  | -    | 820.9    |
| AHQ-1-5, 5065               | K.APVPTGEVYFADSFDR.G                                                    | 1771.90722 | 2 | 3.58E-09 | 0.88 | 3.79  | -    | 867.7    |
| AHQ-1-6, 4998 - 5007        | K.APVPTGEVYFADSFDR.G                                                    | 1771.90722 | 2 | 1.57E-07 | 0.93 | 4.42  | -    | 1066.0   |
| AHQ-1-1, 5160               | K.APVPTGEVYFADSFDR.G                                                    | 1771.90722 | 2 | 1.96E-07 | 0.90 | 3.70  | -    | 846.0    |
| gi 8922385 ref NP_060776.1  | hypothetical protein FLJ11036 [Homo sapiens]                            |            |   |          |      |       |      |          |
| AHQ-1-13- , 6209            | R.IHSLVQGFIPLFQK.F                                                      | 1627.95380 | 2 | 3.58E-09 | 0.97 | 4.45  | -    | 1552.8   |
| gi 5032161 ref NP_005639.1  | elongin C; transcription elongation factor B (SIII), polypeptide 1 (15k |            |   |          |      |       |      |          |
| AHQ-1-13, 4651 - 4723       | K.AMLSGPQQAENETNEVNF.R.E                                                | 2212.38515 | 2 | 2.43E-07 | 0.94 | 4.84  | -    | 1206.5   |
| AHQ-1-13- , 3180            | K.LISSDGHFVIVK.R                                                        | 1345.52569 | 2 | 3.61E-09 | 0.81 | 3.27  | -    | 615.9    |
| gi 27482573 ref XP_208709.1 | similar to Ubiquitin-conjugating enzyme E2-18 kDa UbchH7 (Ubiquitin-pro |            |   |          |      |       |      |          |
| AHQ-1-12, 4801              | K.GQVCLPVIASENWKPATK.T                                                  | 2000.30757 | 2 | 7.08E-07 | 0.94 | 4.48  | -    | 754.5    |
| AHQ-1-12, 6491 - 6494       | K.TDQVIQSLIALVNDPQPEHPLR.A                                              | 2484.79318 | 2 | 1.70E-06 | 0.93 | 5.00  | -    | 547.0    |
| AHQ-1-12, 6479 - 6490       | K.TDQVIQSLIALVNDPQPEHPLR.A                                              | 2484.79318 | 3 | 3.62E-09 | 0.96 | 5.25  | -    | 1430.0   |
| gi 14149734 ref NP_065174.1 | coronin, actin binding protein, 1B [Homo sapiens]                       |            |   |          |      |       |      |          |
| AHQ-1-7, 7214               | R.KSDFDQDLYPDTAGPEALEAEWVSGR.D                                          | 3211.39431 | 3 | 3.68E-09 | 0.96 | 5.25  | -    | 1426.1   |
| gi 29737978 ref XP_290747.1 | similar to Myosin heavy chain, nonmuscle type B (Cellular myosin heavy  |            |   |          |      |       |      |          |
|                             |                                                                         |            |   | 4.22E-09 | 4.49 | 50.24 | 2.10 | 191380.7 |

|                             |                                                                         |            |   |          |      |       |       |         |
|-----------------------------|-------------------------------------------------------------------------|------------|---|----------|------|-------|-------|---------|
| AHQ-1-3, 4037 - 4073        | K.ADFCIIHYAGK.V                                                         | 1296.47641 | 2 | 1.38E-04 | 0.87 | 2.71  | -     | 1123.4  |
| AHQ-1-2, 4185 - 4186        | K.ADFCIIHYAGK.V                                                         | 1296.47641 | 1 | 4.06E-04 | 0.76 | 3.09  | -     | 696.3   |
| AHQ-1-4, 4078               | K.ADFCIIHYAGK.V                                                         | 1296.47641 | 2 | 4.22E-09 | 0.92 | 3.70  | -     | 970.0   |
| AHQ-1-1, 4123               | K.ADFCIIHYAGK.V                                                         | 1296.47641 | 2 | 1.84E-04 | 0.87 | 3.24  | -     | 882.8   |
| AHQ-1-6, 3871 - 3884        | K.ADFCIIHYAGK.V                                                         | 1296.47641 | 2 | 1.40E-07 | 0.95 | 3.62  | -     | 1328.7  |
| AHQ-1-5, 3926               | K.ADFCIIHYAGK.V                                                         | 1296.47641 | 2 | 3.33E-05 | 0.88 | 3.50  | -     | 724.7   |
| AHQ-1-2, 4198               | K.ADFCIIHYAGK.V                                                         | 1296.47641 | 2 | 7.39E-06 | 0.96 | 3.95  | -     | 1315.8  |
| AHQ-1-5, 2781 - 2797        | R.AGVLAHLEEER.D                                                         | 1224.34854 | 2 | 3.15E-07 | 0.95 | 4.14  | -     | 1590.9  |
| AHQ-1-12, 2930              | R.AGVLAHLEEER.D                                                         | 1224.34854 | 2 | 1.05E-07 | 0.82 | 2.93  | -     | 927.6   |
| AHQ-1-1, 3124               | R.AGVLAHLEEER.D                                                         | 1224.34854 | 1 | 8.00E-05 | 0.36 | 1.84  | -     | 657.3   |
| AHQ-1-2, 3023 - 3102        | R.AGVLAHLEEER.D                                                         | 1224.34854 | 2 | 1.06E-06 | 0.96 | 4.14  | -     | 1778.2  |
| AHQ-1-6, 2758 - 2826        | R.AGVLAHLEEER.D                                                         | 1224.34854 | 2 | 4.89E-05 | 0.92 | 3.30  | -     | 1288.0  |
| AHQ-1-4, 2950 - 2963        | R.AGVLAHLEEER.D                                                         | 1224.34854 | 2 | 5.93E-07 | 0.96 | 4.42  | -     | 1492.7  |
| AHQ-1-13 - , 3087           | R.AGVLAHLEEER.D                                                         | 1224.34854 | 2 | 2.54E-08 | 0.95 | 4.01  | -     | 1388.6  |
| AHQ-1-3, 2953               | R.AGVLAHLEEER.D                                                         | 1224.34854 | 2 | 5.58E-07 | 0.94 | 3.84  | -     | 1464.5  |
| AHQ-1-1, 3121               | R.AGVLAHLEEER.D                                                         | 1224.34854 | 2 | 1.64E-06 | 0.94 | 3.82  | -     | 1390.1  |
| AHQ-1-3, 3794               | K.DKADFCIIHYAGK.V                                                       | 1539.73719 | 3 | 1.07E-06 | 0.94 | 3.99  | -     | 1761.0  |
| AHQ-1-3, 3787               | K.DKADFCIIHYAGK.V                                                       | 1539.73719 | 2 | 4.25E-09 | 0.97 | 4.62  | -     | 1699.6  |
| AHQ-1-1, 3884               | K.DKADFCIIHYAGK.V                                                       | 1539.73719 | 2 | 1.41E-08 | 0.93 | 3.71  | -     | 1176.6  |
| AHQ-1-2, 3926               | K.DKADFCIIHYAGK.V                                                       | 1539.73719 | 2 | 4.85E-08 | 0.97 | 4.71  | -     | 1896.5  |
| AHQ-1-2, 3929               | K.DKADFCIIHYAGK.V                                                       | 1539.73719 | 3 | 4.81E-07 | 0.86 | 3.34  | -     | 1107.2  |
| AHQ-1-2, 4949 - 5017        | K.LDPHVLVDQLR.C                                                         | 1319.53460 | 2 | 9.67E-06 | 0.74 | 2.61  | -     | 625.0   |
| AHQ-1-1, 4860               | K.LDPHVLVDQLR.C                                                         | 1319.53460 | 3 | 2.98E-06 | 0.78 | 3.06  | -     | 781.4   |
| AHQ-1-1, 4843 - 4847        | K.LDPHVLVDQLR.C                                                         | 1319.53460 | 2 | 5.30E-05 | 0.73 | 2.77  | -     | 542.7   |
| AHQ-1-3, 4813               | K.LDPHVLVDQLR.C                                                         | 1319.53460 | 3 | 4.10E-06 | 0.79 | 3.64  | -     | 668.6   |
| AHQ-1-2, 4961 - 4965        | K.LDPHVLVDQLR.C                                                         | 1319.53460 | 3 | 2.86E-06 | 0.88 | 3.09  | -     | 951.4   |
| AHQ-1-2, 4127               | K.VDYKADWELMK.N                                                         | 1398.60886 | 2 | 9.17E-09 | 0.77 | 3.03  | -     | 645.8   |
| gi 5031597 ref NP_005710.1  | actin related protein 2/3 complex subunit 3; ARP2/3 protein complex sub |            |   | 4.60E-09 | 1.92 | 20.27 | 9.00  | 20546.5 |
| AHQ-1-11, 6127              | K.DTIDVDEAIYFK.A                                                        | 1592.72721 | 2 | 1.49E-06 | 0.94 | 3.79  | -     | 1092.2  |
| AHQ-1-12, 6317 - 6319       | K.DTIDVDEAIYFK.A                                                        | 1592.72721 | 2 | 4.60E-09 | 0.97 | 5.44  | -     | 1611.1  |
| AHQ-1-14 - , 6446           | K.DTIDVDEAIYFK.A                                                        | 1592.72721 | 2 | 6.31E-06 | 0.92 | 3.62  | -     | 1332.2  |
| AHQ-1-11, 5651              | R.ETKDTDIVDEAIYFK.A                                                     | 1951.11899 | 2 | 1.37E-06 | 0.94 | 4.07  | -     | 1148.0  |
| gi 29740995 ref XP_291768.1 | similar to Proteasome activator complex subunit 2 (Proteasome activato  |            |   | 4.63E-09 | 0.96 | 10.25 | 9.60  | 19192.6 |
| AHQ-1-10, 6231              | R.AFYALYHISSNLEK.T                                                      | 1899.13528 | 2 | 4.63E-09 | 0.96 | 5.06  | -     | 1284.6  |
| gi 6005846 ref NP_009215.1  | PTK9L protein tyrosine kinase 9-like (A6-related protein); protein tyro |            |   | 4.64E-09 | 4.82 | 50.29 | 26.90 | 39547.7 |
| AHQ-1-12, 6230              | R.AVLPLLLDAQQPCCYLLYR.L                                                 | 2035.39506 | 2 | 6.82E-07 | 0.79 | 3.25  | -     | 457.9   |
| AHQ-1-13 - , 6679           | R.AVLPLLLDAQQPCCYLLYR.L                                                 | 2035.39506 | 2 | 3.65E-07 | 0.96 | 4.98  | -     | 863.7   |
| AHQ-1-9, 6767 - 6768        | R.AVLPLLLDAQQPCCYLLYR.L                                                 | 2035.39506 | 2 | 4.64E-09 | 0.96 | 5.36  | -     | 914.7   |
| AHQ-1-13 - , 6568 - 6632    | R.AVLPLLLDAQQPCCYLLYR.L                                                 | 2035.39506 | 2 | 7.20E-05 | 0.53 | 2.82  | -     | 287.7   |
| AHQ-1-12, 6334              | R.AVLPLLLDAQQPCCYLLYR.L                                                 | 2035.39506 | 3 | 1.09E-07 | 0.91 | 3.75  | -     | 1250.6  |
| AHQ-1-12, 6323              | R.AVLPLLLDAQQPCCYLLYR.L                                                 | 2035.39506 | 2 | 1.23E-05 | 0.94 | 4.57  | -     | 780.9   |
| AHQ-1-14 - , 6422           | R.AVLPLLLDAQQPCCYLLYR.L                                                 | 2035.39506 | 2 | 1.10E-06 | 0.96 | 5.28  | -     | 938.2   |
| AHQ-1-11, 3970              | R.ETIELVHTEPTDVAQLPSR.V                                                 | 2136.34822 | 2 | 7.28E-06 | 0.94 | 4.63  | -     | 1009.1  |
| AHQ-1-9, 4155               | R.ETIELVHTEPTDVAQLPSR.V                                                 | 2136.34822 | 2 | 2.48E-04 | 0.94 | 4.40  | -     | 947.9   |
| AHQ-1-11, 4163              | K.HQTLLQGLAFFLQPEAQR.A                                                  | 1935.17562 | 2 | 6.77E-09 | 0.97 | 5.15  | -     | 1459.3  |
| AHQ-1-9, 4311               | K.HQTLLQGLAFFLQPEAQR.A                                                  | 1935.17562 | 2 | 9.88E-08 | 0.95 | 4.96  | -     | 765.7   |
| AHQ-1-11, 5959              | K.KIEIGDGAELTAEFYDEVHPK.Q                                               | 2475.73515 | 3 | 1.13E-08 | 0.96 | 5.83  | -     | 1424.4  |
| AHQ-1-13 - , 4824           | K.VVIEDEQLVLGASQEPVGR.W                                                 | 2039.27568 | 2 | 1.58E-05 | 0.97 | 4.50  | -     | 2358.8  |
| AHQ-1-13, 4600              | K.VVIEDEQLVLGASQEPVGR.W                                                 | 2039.27568 | 2 | 1.43E-06 | 0.96 | 3.79  | -     | 2003.4  |
| AHQ-1-12, 4629              | K.VVIEDEQLVLGASQEPVGR.W                                                 | 2039.27568 | 3 | 7.43E-04 | 0.97 | 4.92  | -     | 2354.9  |
| AHQ-1-12, 4642              | K.VVIEDEQLVLGASQEPVGR.W                                                 | 2039.27568 | 2 | 4.14E-07 | 0.98 | 5.75  | -     | 2160.3  |
| gi 24797067 ref NP_002107.3 | major histocompatibility complex, class I, A precursor; HLA-A1 class I  |            |   | 4.70E-09 | 5.33 | 60.28 | 23.30 | 40840.5 |
| AHQ-1-6, 5119               | R.APWIEQEGPEYWDQETR.N                                                   | 2135.23420 | 2 | 4.75E-07 | 0.90 | 4.10  | -     | 617.4   |
| AHQ-1-9, 5056               | R.APWIEQEGPEYWDQETR.N                                                   | 2135.23420 | 2 | 1.21E-05 | 0.92 | 4.01  | -     | 840.5   |
| AHQ-1-8, 5100               | R.APWIEQEGPEYWDQETR.N                                                   | 2135.23420 | 2 | 4.70E-09 | 0.97 | 5.59  | -     | 1369.1  |
| AHQ-1-5, 5195               | R.APWIEQEGPEYWDQETR.N                                                   | 2135.23420 | 2 | 2.88E-08 | 0.95 | 4.44  | -     | 925.1   |
| AHQ-1-8, 3314 - 3318        | R.DGEDQTDQTLVETRPAGDGTFOK.W                                             | 2638.69666 | 2 | 5.78E-08 | 0.84 | 4.06  | -     | 411.4   |
| AHQ-1-12, 4905              | R.FIAYGYVDQTFVRF.F                                                      | 1630.82504 | 2 | 1.65E-08 | 0.96 | 4.32  | -     | 1616.5  |
| AHQ-1-8, 3217               | K.WAAVVVPSGEEQR.Y                                                       | 1428.57478 | 1 | 2.80E-05 | 0.69 | 3.81  | -     | 270.8   |
| AHQ-1-8, 2044               | R.YTCHVQHEGLPK.P                                                        | 1470.63495 | 2 | 4.57E-04 | 0.92 | 3.68  | -     | 812.7   |
| AHQ-1-8, 3005 - 3076        | R.YTCHVQHEGLPKPLTLR.W                                                   | 2051.35781 | 2 | 8.49E-09 | 0.94 | 4.28  | -     | 1495.1  |
| AHQ-1-8, 3070               | R.YTCHVQHEGLPKPLTLR.W                                                   | 2051.35781 | 3 | 2.42E-06 | 0.93 | 4.99  | -     | 1558.9  |
| gi 9968867 ref NP_065123.1  | elF-5A2 protein; elF5A1 [Homo sapiens]                                  |            |   | 4.79E-09 | 2.85 | 30.27 | 19.60 | 16793.1 |
| AHQ-1-12, 3622              | K.KYEDICPSTHMDVFNPK.R                                                   | 2163.41723 | 3 | 4.79E-09 | 0.95 | 4.97  | -     | 1665.9  |
| AHQ-1-12, 3626              | K.KYEDICPSTHMDVFNPK.R                                                   | 2163.41723 | 2 | 2.39E-06 | 0.97 | 4.77  | -     | 1445.3  |
| AHQ-1-12, 3051              | K.KYEDICPSTHMDVFNPK.R                                                   | 2179.41663 | 3 | 1.07E-04 | 0.95 | 5.32  | -     | 1212.8  |
| AHQ-1-12, 4761              | K.VHVLGIDIFTK.G                                                         | 1299.54329 | 2 | 1.47E-08 | 0.95 | 4.46  | -     | 1079.3  |
| gi 5803187 ref NP_006746.1  | transaldolase 1; dihydroxyacetone transferase; glycero transferase [H   |            |   | 4.89E-09 | 2.49 | 30.20 | 10.70 | 37539.9 |
| AHQ-1-9, 4860 - 4886        | K.ALAGCDFLTISP.K                                                        | 1394.61830 | 2 | 4.89E-09 | 0.91 | 3.95  | -     | 900.1   |
| AHQ-1-9, 3015               | K.LSSTWEGIQAGK.E                                                        | 1277.40821 | 2 | 2.08E-04 | 0.94 | 3.69  | -     | 1300.3  |
| AHQ-1-9, 2698               | K.SYEPLDPGVK.S                                                          | 1234.33696 | 2 | 6.85E-04 | 0.64 | 2.78  | -     | 416.1   |
| gi 1749842 ref NP_004461.2  | FK506-binding protein 2 precursor; FK506-binding protein 2 (13kD); pep  |            |   | 4.92E-09 | 3.48 | 40.21 | 19.00 | 15649.2 |
| AHQ-1-13, 4119              | K.GWDQGLLGM*CEGEK.R                                                     | 1597.75215 | 2 | 8.50E-06 | 0.89 | 3.68  | -     | 952.7   |
| AHQ-1-13 - , 5108           | K.GWDQGLLGM*CEGEK.R                                                     | 1581.75275 | 2 | 1.34E-04 | 0.82 | 3.05  | -     | 657.4   |
| AHQ-1-13 - , 4296           | K.GWDQGLLGM*CEGEK.R                                                     | 1597.75215 | 2 | 3.29E-04 | 0.75 | 2.63  | -     | 800.6   |
| AHQ-1-13 - , 3993           | R.KLVIPSELGYGER.G                                                       | 1461.68782 | 2 | 2.67E-06 | 0.92 | 4.22  | -     | 701.1   |
| AHQ-1-13, 3755 - 3825       | R.KLVIPSELGYGER.G                                                       | 1461.68782 | 2 | 1.19E-04 | 0.75 | 3.12  | -     | 425.5   |
| AHQ-1-13 - , 4325           | K.LVIPSELGYGER.G                                                        | 1333.51491 | 2 | 1.27E-07 | 0.79 | 3.00  | -     | 412.7   |
| AHQ-1-13, 4135 - 4140       | K.LVIPSELGYGER.G                                                        | 1333.51491 | 2 | 4.92E-09 | 0.84 | 2.99  | -     | 540.6   |
| gi 5031599 ref NP_005722.1  | actin related protein 2/3 complex subunit 2; ARP2/3 protein complex sub |            |   | 5.08E-09 | 6.22 | 80.22 | 40.70 | 34332.8 |
| AHQ-1-9, 2159 - 2167        | R.ASHAPQVLFSHR.E                                                        | 1451.61481 | 2 | 3.47E-08 | 0.82 | 3.13  | -     | 539.6   |
| AHQ-1-9, 2558               | K.DSIVHQAQMLK.R                                                         | 1199.40563 | 1 | 5.08E-09 | 0.54 | 3.06  | -     | 478.3   |
| AHQ-1-9, 2582               | K.ELQAHADELLK.R                                                         | 1324.46487 | 1 | 1.31E-05 | 0.34 | 2.01  | -     | 439.3   |
| AHQ-1-9, 2596               | K.ELQAHADELLK.R                                                         | 1324.46487 | 2 | 3.49E-07 | 0.76 | 2.98  | -     | 789.2   |
| AHQ-1-14 - , 2787           | K.ELQAHADELLK.R                                                         | 1324.46487 | 2 | 1.57E-05 | 0.89 | 3.43  | -     | 1128.8  |
| AHQ-1-9, 2483 - 2559        | K.ELQAHADELLK.R.V                                                       | 1480.65123 | 2 | 7.91E-06 | 0.89 | 2.93  | -     | 995.3   |
| AHQ-1-14 - , 6582           | K.FENAAAGNKPEAVEVTFADFDGVLYHISNPNQD.K.T                                 | 3638.89648 | 3 | 8.87E-06 | 0.86 | 3.84  | -     | 699.9   |
| AHQ-1-9, 3190               | R.IIETLALK.F                                                            | 1030.24013 | 2 | 2.59E-05 | 0.73 | 2.67  | -     | 534.6   |
| AHQ-1-10, 6339 - 6340       | R.VYGSFLVNPESGYNSVLLYDLENLPASK.D                                        | 3090.42808 | 3 | 5.44E-07 | 0.69 | 3.77  | -     | 195.5   |
| AHQ-1-9, 2607               | K.YFQFQEEGKEGENR.A                                                      | 1761.82929 | 2 | 1.91E-04 | 0.95 | 4.30  | -     | 1329.1  |
| AHQ-1-10, 2617              | K.YFQFQEEGKEGENR.A                                                      | 1761.82929 | 2 | 6.36E-05 | 0.93 | 3.82  | -     | 1128.8  |
| gi 4507725 ref NP_000362.1  | transthyretin (prealbumin, amyloidosis type I); Transthyretin (prealbum |            |   | 5.17E-09 | 4.73 | 50.33 | 49.00 | 15886.9 |
| AHQ-1-13 - , 3943 - 4015    | K.AADDTWEPFASGK.T                                                       | 1395.45529 | 2 | 2.22E-06 | 0.87 | 3.11  | -     | 959.9   |
| AHQ-1-13 - , 4179 - 4184    | R.GSPAINVAHVFR.K                                                        | 1367.58095 | 2 | 7.28E-08 | 0.95 | 4.54  | -     | 1134.6  |
| AHQ-1-13, 3999 - 4007       | R.GSPAINVAHVFR.K                                                        | 1367.58095 | 2 | 1.27E-06 | 0.90 | 3.78  | -     | 861.8   |
| AHQ-1-13, 3199              | R.KAADDTWEPFASGK.T                                                      | 1523.62820 | 2 | 3.50E-04 | 0.97 | 4.92  | -     | 1366.4  |
| AHQ-1-13 - , 3301           | R.KAADDTWEPFASGK.T                                                      | 1523.62820 | 2 | 8.43E-04 | 0.96 | 4.66  | -     | 1390.4  |
| AHQ-1-13 - , 6051           | R.RYTIALLSPYSYSTTAVVTNPK.E                                              | 2517.86154 | 2 | 2.61E-06 | 0.98 | 5.85  | -     | 2034.1  |
| AHQ-1-13 - , 5683 - 5693    | K.TSESGELHGLTTEEEFVEGIYK.V                                              | 2456.60073 | 3 | 9.95E-08 | 0.98 | 6.60  | -     | 1653.9  |
| AHQ-1-13 - , 5687 - 5689    | K.TSESGELHGLTTEEEFVEGIYK.V                                              | 2456.60073 | 2 | 1.15E-06 | 0.98 | 6.16  | -     | 1446.9  |
| AHQ-1-13, 5273 - 5336       | K.TSESGELHGLTTEEEFVEGIYK.V                                              | 2456.60073 | 3 | 3.21E-06 | 0.97 | 5.97  | -     | 1636.3  |
| AHQ-1-13, 5331 - 5333       | K.TSESGELHGLTTEEEFVEGIYK.V                                              | 2456.60073 | 2 | 5.17E-09 | 0.96 | 5.23  | -     | 1092.9  |
| gi 5803133 ref NP_006825.1  | RAB32, member RAS oncogene family [Homo sapiens]                        |            |   | 5.37E-09 | 1.70 | 20.20 | 12.40 | 24997.1 |
| AHQ-1-10, 4485              | K.VHLPNGSIPAVLLANK.C                                                    | 1741.07044 | 2 | 5.37E-09 | 0.77 | 2.88  | -     | 366.3   |
| AHQ-1-10, 3945              | K.VLVIGELGVGK.T                                                         | 1084.33417 | 2 | 4.49E-08 | 0.94 | 3.92  | -     | 1275.1  |
| gi 6912238 ref NP_036226.1  | peroxiredoxin 5; antioxidant enzyme B166 [Homo sapiens]                 |            |   | 5.46E-09 | 6.32 | 70.26 | 31.30 | 22026.2 |
| AHQ-1-12, 6557              | K.ETDLLDSDLSVIFGNR.R                                                    | 1908.09888 | 2 | 5.46E-09 | 0.97 | 5.08  | -     | 1290.8  |

|                              |                                                                         |            |   |          |       |        |       |          |
|------------------------------|-------------------------------------------------------------------------|------------|---|----------|-------|--------|-------|----------|
| AHQ-1-12, 3839 - 3902        | R.FSMVVQDGIK.A                                                          | 1223.46709 | 2 | 4.58E-05 | 0.86  | 3.46   | -     | 626.9    |
| AHQ-1-12, 2998               | R.FSMVVQDGIK.A                                                          | 1239.46649 | 2 | 6.80E-04 | 0.89  | 2.99   | -     | 1222.4   |
| AHQ-1-12, 5186 - 5191        | K.GVLFVGPFAFTPGCSK.T                                                    | 1595.84389 | 2 | 6.25E-04 | 0.88  | 4.10   | -     | 542.9    |
| AHQ-1-12, 4626 - 4633        | K.KGVLFVGPFAFTPGCSK.T                                                   | 1724.01680 | 2 | 1.88E-08 | 0.98  | 5.25   | -     | 1850.7   |
| AHQ-1-12, 4197               | K.THLPGFVQAEAL.K.A                                                      | 1540.74504 | 3 | 7.24E-07 | 0.95  | 4.09   | -     | 1862.6   |
| AHQ-1-12, 4710               | K.VNLAELFK.G                                                            | 934.11414  | 2 | 2.75E-04 | 0.80  | 2.86   | -     | 711.3    |
| gi 21361322 ref NP_006078.2  | tubulin, beta, 5 [Homo sapiens]                                         |            |   | 5.69E-09 | 2.46  | 30.28  | 13.70 | 49585.5  |
| AHQ-1-7, 2940                | R.EIVHLQAGQCGNQIGAK.F                                                   | 1825.03962 | 3 | 3.94E-05 | 0.90  | 3.62   | -     | 1544.2   |
| AHQ-1-7, 3036                | R.EIVHLQAGQCGNQIGAK.F                                                   | 1825.03962 | 2 | 5.69E-09 | 0.90  | 4.27   | -     | 770.2    |
| AHQ-1-13, 3009               | R.EIVHLQAGQCGNQIGAK.F                                                   | 1825.03962 | 2 | 9.38E-06 | 0.88  | 3.86   | -     | 868.4    |
| AHQ-1-14 - , 3011            | R.EIVHLQAGQCGNQIGAK.F                                                   | 1825.03962 | 2 | 2.98E-06 | 0.92  | 3.95   | -     | 1138.3   |
| AHQ-1-7, 2924 - 2932         | R.EIVHLQAGQCGNQIGAK.F                                                   | 1825.03962 | 2 | 1.55E-04 | 0.95  | 4.69   | -     | 1256.2   |
| AHQ-1-7, 5501 - 5577         | K.FWEVISDEHGIDPTGTYHGDSLQLER.I                                          | 3118.27220 | 3 | 5.54E-06 | 0.95  | 5.58   | -     | 993.8    |
| AHQ-1-7, 6884 - 6948         | K.M*AATFIGNSTAIQELFK.R                                                  | 1859.13607 | 2 | 1.52E-04 | 0.61  | 3.29   | -     | 320.6    |
| gi 201495943 ref NP_031381.2 | heat shock 90kDa protein 1, beta; heat shock 90kD protein 1, beta; Hea  |            |   | 5.76E-09 | 5.85  | 70.26  | 11.50 | 83263.6  |
| AHQ-1-5, 4075                | R.ALLFIPR.R                                                             | 830.05229  | 2 | 3.79E-04 | 0.80  | 2.54   | -     | 949.6    |
| AHQ-1-5, 2435                | K.EDQTEYLEER.R                                                          | 1312.32145 | 2 | 4.56E-05 | 0.51  | 2.57   | -     | 495.3    |
| AHQ-1-5, 5711                | K.HSQFIGYPTILYLEK.E                                                     | 1810.08487 | 2 | 7.90E-05 | 0.97  | 5.18   | -     | 1623.9   |
| AHQ-1-5, 3418 - 3431         | K.IDIIPNQR.T                                                            | 1195.35034 | 2 | 4.39E-04 | 0.76  | 2.61   | -     | 488.5    |
| AHQ-1-6, 4151                | R.NPDDITQEEYGEFYK.S                                                     | 1848.90048 | 2 | 1.11E-08 | 0.96  | 4.82   | -     | 1308.6   |
| AHQ-1-5, 3979 - 3982         | K.SLTNDWEDHLAVK.H                                                       | 1528.64798 | 2 | 5.76E-09 | 0.88  | 3.71   | -     | 834.2    |
| AHQ-1-5, 4335 - 4343         | R.TLTLVDGTIGMTK.A                                                       | 1350.60718 | 2 | 1.04E-04 | 0.96  | 4.01   | -     | 1283.9   |
| gi 5803201 ref NP_006818.1   | transmembrane trafficking protein [Homo sapiens]                        |            |   | 6.41E-09 | 2.70  | 40.22  | 17.40 | 24975.8  |
| AHQ-1-11, 2386               | K.ITDSAGHILYSK.E                                                        | 1305.46156 | 2 | 6.41E-09 | 0.97  | 4.31   | -     | 1569.7   |
| AHQ-1-11, 5951               | R.LEDLSESVINDFAYMK.K                                                    | 1875.08916 | 2 | 9.81E-05 | 0.95  | 4.37   | -     | 1377.4   |
| AHQ-1-11, 2980               | K.KLPLEVELR.R                                                           | 1097.33294 | 1 | 2.62E-04 | 0.13  | 1.96   | -     | 225.8    |
| AHQ-1-11, 5243               | R.LEDLSESVINDFAYM*K.K                                                   | 2047.27492 | 2 | 6.24E-04 | 0.65  | 2.69   | -     | 458.8    |
| gi 27764873 ref NP_057070.2  | cytokine receptor-like factor 3; cytokine receptor-like molecule 9; cy  |            |   | 7.06E-09 | 0.95  | 10.22  | 3.20  | 49737.6  |
| AHQ-1-7, 3366                | K.LIEHGVTAEIDLVR.E                                                      | 1566.74089 | 2 | 7.06E-09 | 0.95  | 4.42   | -     | 1140.2   |
| gi 4757810 ref NP_004037.1   | ATP synthase, H+ transporting, mitochondrial F1 complex, alpha subunit, |            |   | 7.08E-09 | 8.13  | 90.26  | 21.50 | 59750.5  |
| AHQ-1-7, 5809                | K.FENAFLSHVVSQHQALLGTIR.A                                               | 2368.67911 | 3 | 7.08E-09 | 0.97  | 5.13   | -     | 1769.3   |
| AHQ-1-7, 3597                | K.GIRPAINVGLSVSR.V                                                      | 1439.68861 | 2 | 9.05E-06 | 0.94  | 3.98   | -     | 962.6    |
| AHQ-1-7, 6326                | K.GMSLNLEPDNVGVVFGNDK.L                                                 | 2105.35763 | 2 | 3.85E-07 | 0.90  | 4.42   | -     | 471.3    |
| AHQ-1-7, 5677                | K.GM*SLNLEPDNVGVVFGNDK.L                                                | 2121.35703 | 2 | 3.80E-06 | 0.79  | 3.75   | -     | 328.4    |
| AHQ-1-7, 2842                | R.GYLDKLEPSK.I                                                          | 1150.30633 | 2 | 1.67E-05 | 0.80  | 2.70   | -     | 859.8    |
| AHQ-1-7, 3489                | K.HALIIYDLSK.Q                                                          | 1288.47413 | 2 | 1.19E-06 | 0.95  | 3.57   | -     | 134.12   |
| AHQ-1-7, 6846                | K.LKEIVTNFLAGFEA                                                        | 1552.79572 | 2 | 1.42E-05 | 0.89  | 3.28   | -     | 1021.0   |
| AHQ-1-14 - , 5298 - 5376     | R.TGAIVDVPVGEELLGR.V                                                    | 1625.84824 | 2 | 5.99E-04 | 0.65  | 3.36   | -     | 382.7    |
| AHQ-1-7, 5476 - 5477         | R.TGAIVDVPVGEELLGR.V                                                    | 1625.84824 | 2 | 3.06E-06 | 0.95  | 4.81   | -     | 839.4    |
| AHQ-1-7, 3865                | K.TGTAEMSSILEER.I                                                       | 1424.55988 | 2 | 4.26E-06 | 0.96  | 4.07   | -     | 1669.6   |
| gi 4758714 ref NP_004519.1   | microsomal glutathione S-transferase 3; microsomal glutathione S-transf |            |   | 7.11E-09 | 0.95  | 10.22  | 9.20  | 16516.2  |
| AHQ-1-12, 3702               | R.VLYAYGYTGEPSK.R                                                       | 1611.77536 | 2 | 7.11E-09 | 0.95  | 4.33   | -     | 1124.9   |
| gi 29150259 ref NP_803875.1  | fibrocytin L; polycystic kidney and hepatic disease-like 1 [Homo sapi   |            |   | 7.35E-09 | 0.73  | 10.15  | 0.40  | 46574.5  |
| AHQ-1-1, 4696                | K.IVGEDYPPGWSEDSFGAR.V                                                  | 1885.96719 | 2 | 7.35E-09 | 0.73  | 3.06   | -     | 445.4    |
| gi 4757768 ref NP_004300.1   | Rho GDP dissociation inhibitor (GDI) alpha [Homo sapiens]               |            |   | 7.42E-09 | 2.78  | 30.25  | 15.70 | 23206.9  |
| AHQ-1-13, 4527               | R.AEEYEFLLTPVEEAPK.G                                                    | 1752.89898 | 2 | 7.42E-09 | 0.91  | 3.45   | -     | 980.1    |
| AHQ-1-10, 4243               | R.AEEYEFLLTPVEEAPK.G                                                    | 1752.89898 | 2 | 5.56E-05 | 0.63  | 2.92   | -     | 479.6    |
| AHQ-1-12, 4565               | R.AEEYEFLLTPVEEAPK.G                                                    | 1752.89898 | 2 | 5.88E-05 | 0.91  | 3.40   | -     | 1116.7   |
| AHQ-1-13 - , 4753            | R.AEEYEFLLTPVEEAPK.G                                                    | 1752.89898 | 2 | 8.61E-07 | 0.91  | 4.14   | -     | 786.1    |
| AHQ-1-13, 3848               | K.SIQEIQELDKDDESLR.K                                                    | 1919.03693 | 2 | 1.92E-05 | 0.94  | 4.46   | -     | 1014.2   |
| AHQ-1-13 - , 4016            | K.SIQEIQELDKDDESLR.K                                                    | 1919.03693 | 2 | 9.78E-06 | 0.90  | 4.08   | -     | 872.5    |
| AHQ-1-10, 3588               | K.SIQEIQELDKDDESLR.K                                                    | 1919.03693 | 2 | 2.11E-07 | 0.92  | 4.10   | -     | 963.6    |
| AHQ-1-10, 3212               | K.SIQEIQELDKDDESLR.K                                                    | 2047.20984 | 2 | 1.06E-04 | 0.94  | 5.01   | -     | 998.9    |
| gi 4505763 ref NP_000282.1   | phosphoglycerate kinase 1 [Homo sapiens]                                |            |   | 7.65E-09 | 6.11  | 70.27  | 29.70 | 44614.4  |
| AHQ-1-8, 5920                | K.ACANPAAGSVILLENL.R.F                                                  | 1771.03187 | 2 | 3.92E-04 | 0.95  | 4.50   | -     | 1283.0   |
| AHQ-1-9, 5927                | K.ACANPAAGSVILLENL.R.F                                                  | 1771.03187 | 2 | 7.65E-09 | 0.90  | 3.91   | -     | 953.6    |
| AHQ-1-8, 2285                | R.AHSSMVGNLPOK.A                                                        | 1368.58752 | 1 | 3.70E-07 | 0.89  | 3.66   | -     | 756.5    |
| AHQ-1-8, 2283                | R.AHSSMVGNLPOK.A                                                        | 1368.58752 | 2 | 4.38E-05 | 0.97  | 4.34   | -     | 1876.0   |
| AHQ-1-9, 5439                | K.ALESPPFLLAILGGAK.V                                                    | 1770.06542 | 2 | 9.53E-05 | 0.97  | 4.88   | -     | 1641.9   |
| AHQ-1-8, 5360                | K.ALESPPFLLAILGGAK.V                                                    | 1770.06542 | 2 | 1.64E-07 | 0.97  | 5.47   | -     | 1736.1   |
| AHQ-1-8, 4771 - 4843         | K.DVFLKDCVGPVEK.A                                                       | 1750.00620 | 2 | 1.28E-06 | 0.96  | 4.55   | -     | 1452.4   |
| AHQ-1-9, 5383                | K.ITLPVDFVTADKFDENAK.T                                                  | 2024.25948 | 2 | 5.31E-07 | 0.83  | 3.76   | -     | 514.3    |
| AHQ-1-8, 5374                | K.ITLPVDFVTADKFDENAK.T                                                  | 2024.25948 | 2 | 1.80E-08 | 0.85  | 3.94   | -     | 498.1    |
| AHQ-1-8, 4858 - 4860         | K.TGQATVAGSIPAGWMLDCCGPSSKK.Y                                           | 2607.90190 | 2 | 4.76E-05 | 0.64  | 3.34   | -     | 181.6    |
| AHQ-1-8, 5267                | K.VLNNMEIGTSLFDEEGAK.I                                                  | 1968.17459 | 2 | 9.99E-08 | 0.89  | 4.49   | -     | 474.3    |
| gi 4504041 ref NP_002061.1   | guanine nucleotide binding protein (G protein), alpha inhibiting activi |            |   | 7.74E-09 | 5.14  | 60.23  | 20.60 | 40450.7  |
| AHQ-1-9, 4574                | K.AMGNLQIDFADPSR.A                                                      | 1535.70716 | 2 | 1.44E-04 | 0.72  | 2.85   | -     | 764.9    |
| AHQ-1-9, 5668                | R.EYQLNDSAAAYLNDLER.I                                                   | 2078.18096 | 2 | 7.74E-09 | 0.96  | 4.58   | -     | 1294.7   |
| AHQ-1-9, 2151                | K.IIHEDGYSEEECR.Q                                                       | 1638.69452 | 2 | 1.01E-05 | 0.86  | 2.99   | -     | 919.7    |
| AHQ-1-9, 4763                | K.IHSPHTICFPEYTGANK.Y                                                   | 2051.30821 | 2 | 2.37E-04 | 0.80  | 3.56   | -     | 487.9    |
| AHQ-1-9, 5606                | K.IHSPHTICFPEYTGANKYDEAASYIQSK.F                                        | 3307.63156 | 3 | 3.54E-05 | 0.89  | 4.66   | -     | 459.6    |
| AHQ-1-9, 2520                | K.YDEAASYIQSK.F                                                         | 1275.34595 | 2 | 1.35E-04 | 0.91  | 3.19   | -     | 1222.5   |
| gi 4557731 ref NP_000618.1   | latent transforming growth factor beta binding protein 1 precursor [Hom |            |   | 7.98E-09 | 9.90  | 110.28 | 10.80 | 152790.9 |
| AHQ-1-1, 3760                | R.ASGLGDHCEINCELEDK.S                                                   | 2065.13910 | 2 | 2.48E-06 | 0.96  | 5.01   | -     | 1400.2   |
| AHQ-1-3, 3721                | R.ASGLGDHCEINCELEDK.S                                                   | 2065.13910 | 2 | 3.01E-06 | 0.94  | 4.57   | -     | 1311.5   |
| AHQ-1-1, 4004                | R.ASGLGDHCEINCELEDKSVCQR.G                                              | 2696.84428 | 3 | 3.57E-06 | 0.85  | 3.69   | -     | 925.5    |
| AHQ-1-1, 2689 - 2709         | R.CTCGGQYQLSAAK.D                                                       | 1446.58862 | 2 | 1.14E-04 | 0.95  | 4.30   | -     | 1015.1   |
| AHQ-1-1, 4204                | K.CVIDICEITQVQHLCSQGR.C                                                 | 2209.38110 | 2 | 7.98E-09 | 0.97  | 4.62   | -     | 1599.3   |
| AHQ-1-3, 2135                | K.DQCEDIDECQHR.H                                                        | 1607.61898 | 2 | 1.35E-07 | 0.86  | 3.39   | -     | 651.8    |
| AHQ-1-1, 3447 - 3449         | K.EAQPGQSQVSYQGLPVQK.T                                                  | 1945.12244 | 2 | 1.36E-05 | 0.94  | 4.17   | -     | 940.7    |
| AHQ-1-4, 6178                | K.IGFQPDPTFSSCVDPDPVISEEKGPCYR.L                                        | 3112.43550 | 3 | 1.01E-04 | 0.74  | 4.06   | -     | 292.4    |
| AHQ-1-1, 5983 - 5987         | K.IGFQPDPTFSSCVDPDPVISEEKGPCYR.L                                        | 3112.43550 | 3 | 3.24E-07 | 0.95  | 5.58   | -     | 1150.4   |
| AHQ-1-1, 3136                | K.LCQIPVHGASVPK.L                                                       | 1407.66344 | 2 | 7.52E-08 | 0.88  | 3.54   | -     | 558.5    |
| AHQ-1-3, 2927                | R.TSTDLDVDDVQPK.E                                                       | 1433.50014 | 2 | 5.22E-06 | 0.92  | 3.97   | -     | 1034.6   |
| AHQ-1-1, 2929 - 2987         | R.TSTDLDVDDVQPK.E                                                       | 1433.50014 | 2 | 4.65E-07 | 0.86  | 3.26   | -     | 812.9    |
| AHQ-1-3, 2686 - 2694         | R.TSTDLDVDDVQPKKEE.K                                                    | 1819.90213 | 2 | 3.04E-07 | 0.91  | 3.99   | -     | 1206.5   |
| AHQ-1-4, 2691                | R.TSTDLDVDDVQPKKEE.K                                                    | 1819.90213 | 2 | 2.98E-07 | 0.94  | 4.18   | -     | 1484.6   |
| AHQ-1-5, 2586                | R.TSTDLDVDDVQPKKEE.K                                                    | 1819.90213 | 2 | 9.39E-08 | 0.78  | 2.97   | -     | 1049.3   |
| AHQ-1-2, 2770                | R.TSTDLDVDDVQPKKEE.K                                                    | 1819.90213 | 2 | 1.87E-04 | 0.87  | 3.57   | -     | 1183.9   |
| AHQ-1-1, 3671                | R.YTICIEGYR.F                                                           | 1387.51964 | 2 | 1.57E-06 | 0.90  | 3.08   | -     | 719.5    |
| gi 21361670 ref NP_054782.2  | src homology 3 domain-containing protein HIP-55; HIP-55 protein [Homo   |            |   | 7.99E-09 | 3.49  | 40.23  | 16.00 | 48294.0  |
| AHQ-1-11, 3302               | R.FQDVGPAQPVGSVYQK.T                                                    | 1720.90658 | 2 | 5.35E-08 | 0.89  | 3.29   | -     | 920.7    |
| AHQ-1-12, 3413               | R.FQDVGPAQPVGSVYQK.T                                                    | 1720.90658 | 2 | 2.81E-08 | 0.95  | 4.51   | -     | 1027.9   |
| AHQ-1-10, 3215 - 3217        | R.FQDVGPAQPVGSVYQK.T                                                    | 1720.90658 | 2 | 7.99E-09 | 0.96  | 4.41   | -     | 1263.4   |
| AHQ-1-12, 5463               | K.FVLINWTEGQVNDVR.K                                                     | 1719.92182 | 2 | 4.28E-06 | 0.95  | 4.13   | -     | 1263.0   |
| AHQ-1-12, 5410 - 5479        | K.SPDTWALFTYEGNSNDIR.V                                                  | 2087.19108 | 2 | 2.20E-04 | 0.68  | 3.07   | -     | 613.6    |
| AHQ-1-13, 5500 - 5508        | R.VAGTGGGLEEMVEELNSGK.V                                                 | 2007.16599 | 2 | 4.71E-04 | 0.82  | 3.56   | -     | 557.1    |
| AHQ-1-12, 5549               | R.VAGTGGGLEEMVEELNSGK.V                                                 | 2007.16599 | 2 | 1.32E-05 | 0.91  | 4.33   | -     | 801.3    |
| gi 4557801 ref NP_000261.1   | purine nucleoside phosphorylase [Homo sapiens]                          |            |   | 8.52E-09 | 13.14 | 150.33 | 61.90 | 32147.7  |
| AHQ-1-9, 1520                | K.ANHEEVLAAK.Q                                                          | 1139.24364 | 1 | 3.55E-05 | 0.74  | 2.77   | -     | 740.4    |
| AHQ-1-9, 4402 - 4410         | R.DHINLPFGSQGNPLR.G                                                     | 1665.83425 | 2 | 2.84E-08 | 0.91  | 4.65   | -     | 514.1    |
| AHQ-1-9, 5662                | K.FEVGDIMLIR.D                                                          | 1193.44099 | 2 | 1.07E-05 | 0.92  | 3.57   | -     | 1188.8   |
| AHQ-1-9, 4556                | R.FHMYEGYPLWK.V                                                         | 1471.70636 | 2 | 2.33E-05 | 0.87  | 3.17   | -     | 923.1    |
| AHQ-1-9, 4558                | R.FHMYEGYPLWK.V                                                         | 1471.70636 | 1 | 3.58E-06 | 0.81  | 2.79   | -     | 918.3    |
| AHQ-1-9, 3068                | R.FPAMSDAYDR.T                                                          | 1173.28036 | 2 | 2.67E-04 | 0.94  | 3.35   | -     | 1343.0   |
| AHQ-1-13 - , 4167            | K.HRPQVAIICSGSLGLTDK.L                                                  | 1981.26589 | 3 | 3.68E-06 | 0.98  | 5.31   | -     | 4012.6   |
| AHQ-1-9, 7312                | K.LEQFVSILMASIPLPK.A                                                    | 1902.28716 | 2 | 4.34E-07 | 0.95  | 5.28   | -     | 764.9    |

|                            |                                                                          |            |   |          |      |       |       |         |
|----------------------------|--------------------------------------------------------------------------|------------|---|----------|------|-------|-------|---------|
| AHQ-1-9, 4871 - 4943       | K.LGADAVGMSTVPEVIVAR.H                                                   | 1786.08666 | 2 | 4.00E-04 | 0.92 | 3.87  | -     | 953.8   |
| AHQ-1-13, 4139             | K.LGADAVGM*STVPEVIVAR.H                                                  | 1802.08606 | 2 | 4.89E-05 | 0.94 | 4.67  | -     | 851.8   |
| AHQ-1-10, 3916             | K.LGADAVGM*STVPEVIVAR.H                                                  | 1802.08606 | 2 | 5.36E-04 | 0.89 | 3.62  | -     | 869.9   |
| AHQ-1-13, -4321            | K.LGADAVGM*STVPEVIVAR.H                                                  | 1802.08606 | 2 | 7.64E-05 | 0.94 | 4.57  | -     | 770.8   |
| AHQ-1-9, 4222 - 4223       | K.LGADAVGM*STVPEVIVAR.H                                                  | 1802.08606 | 2 | 1.84E-05 | 0.95 | 4.15  | -     | 1223.9  |
| AHQ-1-11, 4656             | K.LGADAVGMSTVPEVIVAR.H                                                   | 1786.08666 | 2 | 9.80E-06 | 0.52 | 2.71  | -     | 593.1   |
| AHQ-1-11, 4027             | K.LGADAVGM*STVPEVIVAR.H                                                  | 1802.08606 | 2 | 4.21E-04 | 0.84 | 3.55  | -     | 709.3   |
| AHQ-1-13, -6003 - 6015     | K.LTQAQIFDYSEIPNFRP.S                                                    | 2040.26383 | 2 | 1.18E-05 | 0.91 | 4.54  | -     | 516.8   |
| AHQ-1-9, 5996 - 6070       | K.LTQAQIFDYSEIPNFRP.S                                                    | 2040.26383 | 2 | 3.21E-05 | 0.79 | 3.52  | -     | 427.8   |
| AHQ-1-13, -6025            | K.LTQAQIFDYSEIPNFRP.S                                                    | 2040.26383 | 3 | 8.46E-05 | 0.86 | 4.08  | -     | 894.6   |
| AHQ-1-9, 5115              | R.LVGFSLNLR.A                                                            | 1023.21261 | 2 | 3.15E-06 | 0.91 | 2.89  | -     | 1386.7  |
| AHQ-1-9, 4931              | R.VVGFSLITNK.V                                                           | 1126.32960 | 2 | 3.85E-05 | 0.92 | 3.84  | -     | 777.1   |
| AHQ-1-13, -5180 - 5184     | R.VVGFSLITNK.V                                                           | 1126.32960 | 2 | 3.45E-04 | 0.92 | 3.60  | -     | 731.1   |
| AHQ-1-9, 6058 - 6096       | R.VFHLLGVDTLVVTAAGGLNPK.F                                                | 2236.59890 | 2 | 8.52E-09 | 0.99 | 6.63  | -     | 2850.1  |
| AHQ-1-9, 2775              | K.VIM*DYSELEK.A                                                          | 1243.40878 | 2 | 3.83E-05 | 0.88 | 3.15  | -     | 673.4   |
| AHQ-1-9, 3506 - 3526       | K.VIMDYSELEK.A                                                           | 1227.40938 | 2 | 6.81E-05 | 0.81 | 2.80  | -     | 458.6   |
| gj4507649[ref]NP_003280.1  | tropomyosin 2 (beta) [Homo sapiens]                                      |            |   | 9.40E-09 | 1.91 | 20.23 | 4.90  | 32989.6 |
| AHQ-1-9, 2650              | K.ATDAEADVASLNR.R                                                        | 1333.38703 | 2 | 4.40E-07 | 0.93 | 3.34  | -     | 1654.1  |
| AHQ-1-9, 2406              | K.KATDAEADVASLNR.R                                                       | 1461.55994 | 2 | 9.40E-09 | 0.97 | 4.58  | -     | 2225.9  |
| gj5031593[ref]NP_005708.1  | actin related protein 2/3 complex subunit 5; Arp2/3 protein complex sub  |            |   | 1.00E-08 | 6.39 | 70.34 | 53.60 | 16320.3 |
| AHQ-1-12, 2978 - 3047      | K.ALAAGGVGSIVR.V                                                         | 1071.25558 | 2 | 1.73E-07 | 0.98 | 4.35  | -     | 2384.6  |
| AHQ-1-12, 3561             | K.AVQSLDKNGVLLM*K.Y                                                      | 1647.91883 | 2 | 5.95E-06 | 0.89 | 3.84  | -     | 632.5   |
| AHQ-1-12, 4019 - 4082      | K.AVQSLDKNGVLLM*K.Y                                                      | 1631.91943 | 2 | 1.74E-06 | 0.97 | 5.29  | -     | 1471.5  |
| AHQ-1-12, 4026             | K.AVQSLDKNGVLLM*K.Y                                                      | 1631.91943 | 3 | 5.46E-04 | 0.89 | 3.43  | -     | 1160.4  |
| AHQ-1-12, 3469 - 3498      | K.AVQSLDKNGVLLM*K.Y                                                      | 1647.91883 | 2 | 1.00E-08 | 0.92 | 4.12  | -     | 628.4   |
| AHQ-1-12, 4125             | K.GFESPSDNSSAM*LLQWHEK.A                                                 | 2180.33989 | 2 | 1.59E-06 | 0.95 | 4.35  | -     | 1295.5  |
| AHQ-1-12, 4210 - 4215      | K.GFESPSDNSSAM*LLQWHEK.A                                                 | 2180.33989 | 2 | 1.51E-07 | 0.66 | 2.98  | -     | 472.4   |
| AHQ-1-12, 4527             | K.GFESPSDNSSAM*LLQWHEK.A                                                 | 2164.34049 | 2 | 6.03E-07 | 0.93 | 4.68  | -     | 865.5   |
| AHQ-1-12, 4649 - 4663      | K.GFESPSDNSSAM*LLQWHEK.A                                                 | 2164.34049 | 2 | 1.12E-06 | 0.92 | 4.25  | -     | 622.0   |
| AHQ-1-12, 4271 - 4334      | R.KVDVDEYDENKFDVEEDGGDQAGPDEGEVDSCLR.Q                                   | 3890.92031 | 3 | 1.46E-05 | 0.98 | 6.85  | -     | 1849.6  |
| AHQ-1-12, 4535 - 4598      | K.VDVDEYDENKFDVEEDGGDQAGPDEGEVDSCLR.Q                                    | 3762.74739 | 3 | 8.02E-07 | 0.96 | 5.69  | -     | 1379.1  |
| gj4758208[ref]NP_004081.1  | dual specificity phosphatase 3; vaccinia virus phosphatase VH1-related;  |            |   | 1.02E-08 | 3.46 | 40.23 | 31.90 | 20478.2 |
| AHQ-1-11, 4106             | R.AADFIDQALQAK.N                                                         | 1291.43488 | 2 | 5.78E-05 | 0.94 | 4.12  | -     | 1236.4  |
| AHQ-1-11, 5211 - 5283      | K.ANDTQEFNLSAYFER.A                                                      | 1805.88207 | 2 | 1.67E-05 | 0.76 | 3.06  | -     | 753.5   |
| AHQ-1-14, -5539            | K.ANDTQEFNLSAYFER.A                                                      | 1805.88207 | 2 | 1.02E-08 | 0.63 | 3.25  | -     | 366.5   |
| AHQ-1-11, 5704 - 5724      | R.EIGPNDGFLAQLCQLNDR.L                                                   | 2062.24949 | 2 | 4.49E-06 | 0.93 | 4.53  | -     | 889.2   |
| AHQ-1-11, 3962 - 3968      | R.IYVGNASVAQDIPK.L                                                       | 1475.67136 | 2 | 4.06E-05 | 0.95 | 4.56  | -     | 1182.8  |
| AHQ-1-11, 3619             | R.IYVGNASVAQDIPK.L                                                       | 1475.67136 | 2 | 3.54E-05 | 0.96 | 4.05  | -     | 1439.6  |
| gj28077085[ref]NP_004559.3 | serine (or cysteine) proteinase inhibitor, clade B (ovalbumin), member   |            |   | 1.16E-08 | 1.82 | 20.22 | 10.10 | 42587.6 |
| AHQ-1-9, 4783              | K.SGGGGDIHQGFQSLLETVNK.T                                                 | 2045.19887 | 3 | 1.16E-08 | 0.94 | 4.37  | -     | 1422.4  |
| AHQ-1-9, 4772              | K.SGGGGDIHQGFQSLLETVNK.T                                                 | 2045.19887 | 2 | 3.55E-05 | 0.84 | 3.76  | -     | 692.0   |
| AHQ-1-9, 7372              | K.TYIGEIFTQILVYVGGK.E                                                    | 2055.44459 | 2 | 5.95E-07 | 0.89 | 4.01  | -     | 918.3   |
| gj6598323[ref]NP_001485.2  | GDP dissociation inhibitor 2; rab GDP-dissociation inhibitor, beta [Homo |            |   | 1.19E-08 | 3.63 | 40.31 | 16.20 | 50662.9 |
| AHQ-1-14, 6210             | R.NPYGGEASITPLEDLTK.R                                                    | 2118.28499 | 2 | 1.29E-06 | 0.78 | 3.37  | -     | 714.7   |
| AHQ-1-9, 6907              | K.SPYLYPLGLGELPQGFAR.L                                                   | 2142.44089 | 2 | 1.96E-06 | 0.95 | 4.63  | -     | 822.1   |
| AHQ-1-8, 7022 - 7023       | K.SPYLYPLGLGELPQGFAR.L                                                   | 2142.44089 | 2 | 3.19E-05 | 0.97 | 5.68  | -     | 1048.5  |
| AHQ-1-7, 7089              | K.SPYLYPLGLGELPQGFAR.L                                                   | 2142.44089 | 2 | 4.16E-06 | 0.96 | 5.03  | -     | 950.4   |
| AHQ-1-6, 6954              | K.SPYLYPLGLGELPQGFAR.L                                                   | 2142.44089 | 2 | 1.44E-05 | 0.97 | 5.52  | -     | 946.0   |
| AHQ-1-8, 4157              | R.TDDYLDQPCYETINR.I                                                      | 1904.98887 | 2 | 2.28E-04 | 0.93 | 4.53  | -     | 507.0   |
| AHQ-1-8, 7511              | K.VPSTEAELASSLMGLFEK.R                                                   | 1981.25641 | 2 | 1.19E-08 | 0.97 | 6.22  | -     | 1414.6  |
| gj4502687[ref]NP_003865.1  | CD84 antigen (leukocyte antigen); leukocyte antigen CD84 [Homo sapiens]  |            |   | 1.24E-08 | 1.56 | 20.26 | 11.60 | 36870.6 |
| AHQ-1-7, 5030 - 5080       | R.IHALGPNYLVISDLR.M                                                      | 1796.06296 | 2 | 1.24E-08 | 0.97 | 5.23  | -     | 1577.4  |
| AHQ-1-7, 3778              | K.TSVAVYTPGDSETAIPVVTVTHR.N                                              | 2288.49956 | 2 | 4.80E-04 | 0.58 | 3.10  | -     | 327.2   |
| gj17318569[ref]NP_006112.2 | keratin 1; Keratin-1; cytokeratin 1; hair alpha protein [Homo sapiens]   |            |   | 1.27E-08 | 4.03 | 50.25 | 9.90  | 66063.6 |
| AHQ-1-14, -3951            | K.LNLDLEDALQQAQ.E                                                        | 1358.47963 | 2 | 1.54E-05 | 0.94 | 4.07  | -     | 1579.8  |
| AHQ-1-3, 4034              | K.LNLDLEDALQQAQ.E                                                        | 1358.47963 | 2 | 4.83E-04 | 0.92 | 3.48  | -     | 1387.8  |
| AHQ-1-4, 4080              | K.LNLDLEDALQQAQ.E                                                        | 1358.47963 | 2 | 6.58E-04 | 0.89 | 3.23  | -     | 1429.0  |
| AHQ-1-13, -4048            | K.LNLDLEDALQQAQ.E                                                        | 1358.47963 | 2 | 5.73E-06 | 0.96 | 4.53  | -     | 1647.6  |
| AHQ-1-13, 5813             | R.SLDDLSIAEYK.A                                                          | 1303.48388 | 2 | 4.00E-07 | 0.89 | 3.19  | -     | 1062.6  |
| AHQ-1-12, 5861             | R.SLDDLSIAEYK.A                                                          | 1303.48388 | 2 | 4.71E-06 | 0.95 | 4.38  | -     | 1291.6  |
| AHQ-1-1, 6272              | R.SLDDLSIAEYK.A                                                          | 1303.48388 | 2 | 8.35E-08 | 0.94 | 4.08  | -     | 1394.5  |
| AHQ-1-13, -6197            | R.SLDDLSIAEYK.A                                                          | 1303.48388 | 2 | 1.27E-08 | 0.97 | 5.08  | -     | 1604.0  |
| AHQ-1-14, -5982 - 5992     | R.SLDDLSIAEYK.A                                                          | 1303.48388 | 2 | 7.82E-05 | 0.93 | 3.37  | -     | 1315.1  |
| AHQ-1-14, -4678 - 4706     | K.SLNNQFASFIDK.V                                                         | 1384.51877 | 2 | 3.82E-04 | 0.59 | 2.53  | -     | 449.8   |
| AHQ-1-14, -6362            | R.THNLPEYFESFINNLR.R                                                     | 1995.18315 | 2 | 3.43E-05 | 0.68 | 3.10  | -     | 334.9   |
| AHQ-1-1, 4705 - 4748       | K.WELLQVDTSTR.T                                                          | 1476.61621 | 2 | 3.75E-06 | 0.83 | 2.85  | -     | 996.4   |
| gj475897[ref]NP_004150.1   | proteasome beta 8 subunit isoform E1 propeptide; proteasome subunit, be  |            |   | 1.28E-08 | 1.59 | 20.17 | 9.60  | 29769.4 |
| AHQ-1-11, 2496             | K.FQHGVIAVDSR.A                                                          | 1300.44824 | 2 | 1.27E-04 | 0.76 | 2.60  | -     | 885.3   |
| AHQ-1-11, 3980 - 3983      | K.VESTVDLLHQYR.E                                                         | 1662.78230 | 2 | 1.28E-08 | 0.83 | 3.40  | -     | 815.6   |
| gj21361399[ref]NP_055040.2 | protein phosphatase 2 (formerly 2A), regulatory subunit A (PR 65), alp   |            |   | 1.34E-08 | 3.66 | 40.29 | 11.70 | 65308.3 |
| AHQ-1-6, 3911              | R.AISHHEPSDLEAHFVPLVK.R                                                  | 2214.46551 | 3 | 1.65E-08 | 0.97 | 5.78  | -     | 1596.3  |
| AHQ-1-6, 5466 - 5538       | K.IGPILDNSTLQSEVKPILEK.L                                                 | 2195.54185 | 3 | 1.34E-08 | 0.90 | 3.68  | -     | 1189.4  |
| AHQ-1-6, 3708              | R.LAGGDWFTSR.T                                                           | 1110.20399 | 2 | 1.10E-06 | 0.87 | 2.93  | -     | 698.8   |
| AHQ-1-6, 5934              | K.SEIIPMFSNLSADEQDSVR.L                                                  | 2139.32924 | 2 | 7.18E-08 | 0.92 | 4.20  | -     | 823.7   |
| AHQ-1-6, 5868 - 5938       | K.SEIIPMFSNLSADEQDSVR.L                                                  | 2139.32924 | 2 | 1.88E-04 | 0.93 | 4.44  | -     | 832.2   |
| gj29742410[ref]XP_291183.1 | similar to TREM-like transcript 1 [Homo sapiens]                         |            |   | 1.41E-08 | 2.33 | 30.22 | 16.70 | 32678.3 |
| AHQ-1-13, -4392 - 4456     | R.FLPEGCQPLVSSAVDR.R                                                     | 1776.99174 | 2 | 8.09E-08 | 0.91 | 3.76  | -     | 592.4   |
| AHQ-1-11, 4131             | R.FLPEGCQPLVSSAVDR.R                                                     | 1776.99174 | 2 | 1.41E-08 | 0.82 | 3.58  | -     | 385.6   |
| AHQ-1-13, -4305            | R.FLPEGCQPLVSSAVDR.R                                                     | 1776.99174 | 2 | 4.42E-06 | 0.87 | 3.78  | -     | 429.6   |
| AHQ-1-9, 5099              | K.VLVCSKPVYATVIFPQGNK.G                                                  | 2152.54196 | 2 | 5.25E-05 | 0.88 | 3.97  | -     | 517.4   |
| AHQ-1-11, 3662             | R.VSLNILPPEEEEEHK.I                                                      | 1865.03087 | 3 | 5.79E-04 | 0.63 | 3.38  | -     | 548.7   |
| gj4557014[ref]NP_001743.1  | catalase [Homo sapiens]                                                  |            |   | 1.51E-08 | 4.30 | 60.23 | 15.40 | 59755.8 |
| AHQ-1-7, 2581              | K.DAQIFIQK.K                                                             | 963.11234  | 1 | 1.97E-05 | 0.48 | 2.29  | -     | 673.1   |
| AHQ-1-7, 5058              | R.DPILFSPFHSQK.R                                                         | 1529.76385 | 2 | 1.75E-06 | 0.85 | 3.02  | -     | 703.7   |
| AHQ-1-7, 2576              | R.FNTANDNNVTQVR.A                                                        | 1494.54849 | 2 | 5.05E-04 | 0.16 | 2.53  | -     | 303.6   |
| AHQ-1-7, 2462              | R.FNTANDNNVTQVR.A                                                        | 1494.54849 | 2 | 4.17E-05 | 0.85 | 3.12  | -     | 963.5   |
| AHQ-1-7, 4692              | K.GAGAFGYFEVTHDITK.Y                                                     | 1713.87091 | 2 | 1.20E-05 | 0.93 | 4.41  | -     | 819.6   |
| AHQ-1-7, 4670 - 4730       | R.LGPNYLHLPVNCYPYR.A                                                     | 1815.08803 | 2 | 4.16E-04 | 0.26 | 2.70  | -     | 306.7   |
| AHQ-1-7, 3974              | K.NAIHTFVQSGSHLAAR.E                                                     | 1709.89026 | 2 | 1.51E-08 | 0.95 | 4.65  | -     | 1230.1  |
| gj5123454[ref]NP_005336.2  | heat shock 70kDa protein 1A; heat shock 70kDa protein 1A; heat shock-ind |            |   | 1.51E-08 | 2.65 | 40.19 | 10.50 | 70037.7 |
| AHQ-1-6, 5354 - 5358       | K.AAAIGIDLGLTYSCVGFQHGK.V                                                | 2267.54677 | 3 | 3.57E-06 | 0.73 | 3.53  | -     | 461.1   |
| AHQ-1-6, 4163              | K.NALESYAFNMK.S                                                          | 1288.45450 | 2 | 4.55E-05 | 0.83 | 2.74  | -     | 928.5   |
| AHQ-1-6, 6828 - 6899       | K.SINPDEAVAYGAAVQAAILM*GDK.S                                             | 2321.59293 | 2 | 1.51E-08 | 0.88 | 3.82  | -     | 700.2   |
| AHQ-1-6, 2168              | K.VEIANDQQGNR.T                                                          | 1229.32518 | 1 | 5.09E-04 | 0.21 | 1.86  | -     | 307.8   |
| gj4506183[ref]NP_002779.1  | proteasome alpha 3 subunit isoform 1; proteasome subunit C8; macropain   |            |   | 1.58E-08 | 0.95 | 10.21 | 5.50  | 28433.1 |
| AHQ-1-10, 3881             | R.HVGMVAAGLADAR.S                                                        | 1381.62943 | 2 | 1.58E-08 | 0.95 | 4.10  | -     | 1022.0  |
| gj30154095[ref]XP_293967.2 | similar to gamma actin-like protein [Homo sapiens]                       |            |   | 1.61E-08 | 1.53 | 20.18 | 12.20 | 19259.0 |
| AHQ-1-8, 5022 - 5098       | K.DLYTSTVLSSGGTTM*YPGIADR.M                                              | 2235.45690 | 2 | 1.61E-08 | 0.76 | 3.34  | -     | 495.7   |
| AHQ-1-8, 6374 - 6452       | K.DLYTSTVLSSGGTTM*YPGIADR.M                                              | 2219.45750 | 2 | 2.89E-06 | 0.34 | 2.86  | -     | 371.9   |
| AHQ-1-8, 6531 - 6532       | K.DLYTSTVLSSGGTTM*YPGIADR.M                                              | 2219.45750 | 2 | 1.12E-04 | 0.44 | 2.70  | -     | 376.2   |
| AHQ-1-10, 4423             | K.DLYTSTVLSSGGTTM*YPGIADR.M                                              | 2235.45690 | 2 | 5.41E-06 | 0.70 | 3.50  | -     | 366.4   |
| AHQ-1-13, 4724 - 4787      | K.DLYTSTVLSSGGTTM*YPGIADR.M                                              | 2235.45690 | 2 | 1.14E-05 | 0.46 | 3.09  | -     | 345.5   |
| AHQ-1-13, 4949             | K.DLYTSTVLSSGGTTM*YPGIADR.M                                              | 2235.45690 | 2 | 8.04E-05 | 0.64 | 3.38  | -     | 486.4   |
| AHQ-1-14, 5490 - 5560      | K.DLYTSTVLSSGGTTM*YPGIADR.M                                              | 2235.45690 | 2 | 3.76E-05 | 0.66 | 3.45  | -     | 489.6   |
| AHQ-1-14, 5652 - 5724      | K.DLYTSTVLSSGGTTM*YPGIADR.M                                              | 2235.45690 | 2 | 1.16E-05 | 0.57 | 3.08  | -     | 376.6   |
| AHQ-1-14, 5912             | K.DLYTSTVLSSGGTTM*YPGIADR.M                                              | 2235.45690 | 2 | 5.85E-05 | 0.55 | 3.10  | -     | 449.0   |
| AHQ-1-14, 6017             | K.DLYTSTVLSSGGTTM*YPGIADR.M                                              | 2219.45750 | 2 | 1.48E-07 | 0.77 | 3.34  | -     | 397.4   |

|                             |                                                                          |            |   |          |      |        |       |          |
|-----------------------------|--------------------------------------------------------------------------|------------|---|----------|------|--------|-------|----------|
| AHQ-1-13- , 4992            | K.DLYTSTVLSSGGTTM*YPGIADR.M                                              | 2235.45690 | 2 | 1.55E-04 | 0.56 | 3.06   | -     | 377.4    |
| AHQ-1-13- , 5301            | K.DLYTSTVLSSGGTTM*YPGIADR.M                                              | 2219.45750 | 2 | 3.67E-06 | 0.42 | 3.46   | -     | 413.8    |
| AHQ-1-14- , 4758            | K.DLYTSTVLSSGGTTM*YPGIADR.M                                              | 2235.45690 | 2 | 3.52E-07 | 0.76 | 3.37   | -     | 449.4    |
| AHQ-1-14- , 4843            | K.DLYTSTVLSSGGTTM*YPGIADR.M                                              | 2235.45690 | 2 | 4.08E-06 | 0.55 | 3.13   | -     | 452.3    |
| AHQ-1-14- , 4968            | K.DLYTSTVLSSGGTTM*YPGIADR.M                                              | 2235.45690 | 2 | 2.37E-04 | 0.28 | 2.71   | -     | 287.1    |
| AHQ-1-14- , 5074 - 5091     | K.DLYTSTVLSSGGTTM*YPGIADR.M                                              | 2235.45690 | 2 | 5.61E-05 | 0.62 | 3.60   | -     | 527.1    |
| gi 4503747 ref NP_001448.1  | filamin B, beta (actin binding protein 278); beta filamin; filamin 1 (a  |            |   | 1.62E-08 | 4.10 | 60.24  | 2.00  | 278191.4 |
| AHQ-1-1- , 3701 - 3703      | K.DLAEDAPWK.K                                                            | 1045.12708 | 1 | 7.03E-06 | 0.48 | 2.42   | -     | 616.2    |
| AHQ-1-7, 3628               | K.DLAEDAPWK.K                                                            | 1045.12708 | 1 | 7.23E-04 | 0.27 | 2.10   | -     | 445.1    |
| AHQ-1-4, 3696               | K.DLAEDAPWK.K                                                            | 1045.12708 | 1 | 1.47E-05 | 0.26 | 2.15   | -     | 465.1    |
| AHQ-1-2, 3790               | K.DLAEDAPWK.K                                                            | 1045.12708 | 2 | 2.23E-04 | 0.80 | 3.14   | -     | 768.2    |
| AHQ-1-2, 3786               | K.DLAEDAPWK.K                                                            | 1045.12708 | 1 | 2.31E-06 | 0.52 | 1.84   | -     | 819.0    |
| AHQ-1-3, 3015               | K.DLAEDAPWK.K                                                            | 1173.29999 | 2 | 6.50E-04 | 0.71 | 2.60   | -     | 875.5    |
| AHQ-1-13, 6001              | R.LIALLEVLSSQK.R                                                         | 1227.51852 | 2 | 8.75E-05 | 0.94 | 3.71   | -     | 1252.5   |
| AHQ-1-2, 6678               | R.LIALLEVLSSQK.R                                                         | 1227.51852 | 2 | 1.03E-07 | 0.97 | 4.12   | -     | 1704.3   |
| AHQ-1-6, 6475               | R.LIALLEVLSSQK.R                                                         | 1227.51852 | 2 | 9.42E-08 | 0.96 | 4.44   | -     | 1134.3   |
| AHQ-1-3, 6509               | R.LIALLEVLSSQK.R                                                         | 1227.51852 | 2 | 8.38E-08 | 0.97 | 4.28   | -     | 1637.4   |
| AHQ-1-1, 6491               | R.LIALLEVLSSQK.R                                                         | 1227.51852 | 2 | 4.82E-07 | 0.97 | 4.25   | -     | 1461.7   |
| AHQ-1-4, 6671 - 6672        | R.LIALLEVLSSQK.R                                                         | 1227.51852 | 2 | 1.79E-06 | 0.97 | 4.20   | -     | 1458.1   |
| AHQ-1-5, 6577               | R.LIALLEVLSSQK.R                                                         | 1227.51852 | 2 | 1.62E-08 | 0.98 | 4.87   | -     | 1680.1   |
| AHQ-1-14- , 6219 - 6222     | R.LIALLEVLSSQK.R                                                         | 1227.51852 | 2 | 4.66E-06 | 0.97 | 4.59   | -     | 1270.2   |
| AHQ-1-11, 5834              | R.LIALLEVLSSQK.R                                                         | 1227.51852 | 2 | 8.35E-06 | 0.97 | 4.58   | -     | 1229.6   |
| AHQ-1-10, 5724              | R.LIALLEVLSSQK.R                                                         | 1227.51852 | 2 | 2.86E-07 | 0.96 | 4.25   | -     | 1292.7   |
| AHQ-1-9, 6396               | R.LIALLEVLSSQK.R                                                         | 1227.51852 | 2 | 9.63E-07 | 0.96 | 4.40   | -     | 1256.8   |
| AHQ-1-7, 3593               | R.LLGGWQNK.I                                                             | 972.16560  | 2 | 8.47E-04 | 0.78 | 2.74   | -     | 633.2    |
| AHQ-1-2, 1930               | K.LVSDSK.A                                                               | 761.88676  | 1 | 4.19E-04 | 0.20 | 2.02   | -     | 279.4    |
| AHQ-1-2, 6719 - 6794        | R.QM*QLENVSVALEFLDR.E                                                    | 1909.15348 | 2 | 4.34E-05 | 0.89 | 3.92   | -     | 832.3    |
| AHQ-1-1, 6463               | R.QM*QLENVSVALEFLDR.E                                                    | 1909.15348 | 2 | 4.69E-06 | 0.91 | 4.03   | -     | 1061.4   |
| gi 4504743 ref NP_002194.1  | integrin alpha 2 precursor; Integrin, alpha-2 (CD49B); alpha-2 subunit o |            |   | 1.63E-08 | 3.40 | 40.25  | 5.80  | 129294.4 |
| AHQ-1-3, 3765               | K.AGDISCNADINPLK.I                                                       | 1489.63335 | 2 | 2.07E-05 | 0.66 | 3.15   | -     | 575.2    |
| AHQ-1-3, 4847               | K.KGILGQHOFLEGPGEIENR.F                                                  | 2224.46193 | 2 | 1.23E-05 | 0.95 | 4.94   | -     | 699.7    |
| AHQ-1-3, 3418               | K.TQVGLIYANPR.V                                                          | 1474.64668 | 2 | 1.63E-08 | 0.89 | 3.03   | -     | 1061.0   |
| AHQ-1-4, 5294               | R.VDISLENPGTSPALEAYSETAK.V                                               | 2293.46974 | 2 | 4.27E-06 | 0.91 | 4.16   | -     | 688.8    |
| AHQ-1-3, 5195               | R.VDISLENPGTSPALEAYSETAK.V                                               | 2293.46974 | 2 | 4.90E-08 | 0.91 | 4.35   | -     | 706.6    |
| gi 14745898 ref XP_016144.2 | similar to tyrosine 3-monoxygenase/tryptophan 5-monoxygenase activat     |            |   | 1.81E-08 | 0.97 | 10.25  | 7.50  | 18201.0  |
| AHQ-1-10, 6164 - 6176       | K.LLCCDLDLVDK.N                                                          | 1479.74157 | 2 | 1.81E-08 | 0.97 | 4.99   | -     | 979.7    |
| AHQ-1-9, 6979 - 6998        | K.LLCCDLDLVDK.N                                                          | 1479.74157 | 2 | 2.79E-05 | 0.96 | 4.41   | -     | 1139.2   |
| gi 4543597 ref NP_006126.1  | F-actin capping protein alpha-1 subunit; Cap Z [Homo sapiens]            |            |   | 1.82E-08 | 4.14 | 50.25  | 26.20 | 32922.5  |
| AHQ-1-9, 3180               | K.DHYSNGFCTVYAK.T                                                        | 1563.67248 | 2 | 5.84E-04 | 0.75 | 2.79   | -     | 748.6    |
| AHQ-1-13- , 5488            | K.FTITPTTAQVGVGLK.I                                                      | 1571.88532 | 2 | 3.27E-06 | 0.87 | 3.53   | -     | 588.9    |
| AHQ-1-9, 3170               | K.IQVHYEYEDGNVQLVSHK.D                                                   | 2030.22904 | 2 | 1.67E-06 | 0.97 | 5.10   | -     | 1638.1   |
| AHQ-1-9, 4044               | R.LLLNNDLLR.E                                                            | 1198.39736 | 2 | 1.62E-04 | 0.79 | 3.07   | -     | 839.0    |
| AHQ-1-9, 5514               | K.TIDGQQTIIACIESHQFQPK.N                                                 | 2316.57620 | 3 | 3.19E-05 | 0.55 | 3.17   | -     | 209.9    |
| AHQ-1-9, 5510 - 5515        | K.TIDGQQTIIACIESHQFQPK.N                                                 | 2316.57620 | 2 | 1.82E-08 | 0.76 | 3.89   | -     | 295.7    |
| gi 4502985 ref NP_001854.1  | cytochrome c oxidase subunit VIb; human cytochrome oxidase subunit VIb   |            |   | 1.84E-08 | 0.97 | 10.23  | 20.90 | 10192.3  |
| AHQ-1-14- , 6138            | R.VYQSLCPTSWTWDWDEQR.A                                                   | 2272.43560 | 2 | 1.84E-08 | 0.97 | 4.68   | -     | 1479.2   |
| gi 14165439 ref NP_002131.2 | heterogeneous nuclear ribonucleoprotein K isoform a; dC-stretch bindin   |            |   | 1.85E-08 | 0.82 | 10.18  | 4.10  | 51027.9  |
| AHQ-1-7, 5297 - 5368        | R.GSYGDLGGPIITQVTPK.D                                                    | 1918.18004 | 2 | 1.85E-08 | 0.82 | 3.38   | -     | 634.5    |
| AHQ-1-6, 5247 - 5312        | R.GSYGDLGGPIITQVTPK.D                                                    | 1918.18004 | 2 | 5.39E-05 | 0.82 | 3.69   | -     | 582.5    |
| gi 4759140 ref NP_004243.1  | solute carrier family 9 (sodium/hydrogen exchanger), isoform 3 regulato  |            |   | 1.87E-08 | 0.93 | 10.19  | 3.90  | 38868.2  |
| AHQ-1-13- , 3931            | R.LLVVDPETDEQLQK.L                                                       | 1627.81777 | 2 | 1.87E-08 | 0.93 | 3.83   | -     | 745.1    |
| AHQ-1-9, 3779               | R.LLVVDPETDEQLQK.L                                                       | 1627.81777 | 2 | 3.75E-05 | 0.78 | 3.01   | -     | 596.4    |
| gi 4507855 ref NP_003472.1  | Ubiquitin isopeptidase T; Ubiquitin-specific protease-5 (ubiquitin isop  |            |   | 1.89E-08 | 1.68 | 20.25  | 5.40  | 93393.2  |
| AHQ-1-5, 4262               | K.IFQNAPTDPTQDFSTQVAK.L                                                  | 2109.28133 | 2 | 1.11E-04 | 0.72 | 2.85   | -     | 678.4    |
| AHQ-1-5, 7274               | R.IGWELIQESGVPLKPLFGPGYTGIR.N                                            | 2858.28283 | 3 | 1.89E-08 | 0.96 | 5.00   | -     | 1737.2   |
| gi 4757812 ref NP_004880.1  | ATP synthase, H+ transporting, mitochondrial F0 complex, subunit f, iso  |            |   | 1.90E-08 | 2.73 | 30.22  | 25.50 | 10917.8  |
| AHQ-1-13- , 6144            | R.DFSPSGIFGAFQR.G                                                        | 1429.56124 | 2 | 6.05E-08 | 0.94 | 3.90   | -     | 1122.9   |
| AHQ-1-14- , 5934            | R.DFSPSGIFGAFQR.G                                                        | 1429.56124 | 2 | 2.42E-06 | 0.94 | 3.94   | -     | 1030.8   |
| AHQ-1-13, 5752              | R.DFSPSGIFGAFQR.G                                                        | 1429.56124 | 2 | 1.90E-08 | 0.94 | 3.65   | -     | 1301.7   |
| AHQ-1-14- , 5970 - 5978     | K.LGELPSWILMR.D                                                          | 1315.60936 | 2 | 9.56E-07 | 0.93 | 4.36   | -     | 656.5    |
| AHQ-1-14- , 5534            | K.LGELPSWILMR.D                                                          | 1331.60876 | 2 | 8.25E-06 | 0.86 | 3.32   | -     | 581.9    |
| gi 4505753 ref NP_002620.1  | phosphoglycerate mutase 1 (brain); Phosphoglycerate mutase A, nonmuscle  |            |   | 1.98E-08 | 1.69 | 20.22  | 16.50 | 28803.7  |
| AHQ-1-10, 3809 - 3824       | R.SYDVPPPM*EPDHPFYSNISK.D                                                | 2434.66506 | 2 | 9.03E-05 | 0.78 | 3.32   | -     | 374.4    |
| AHQ-1-10, 4604              | R.YADLTEDQLPSCSELKOTIAR.A                                                | 2427.62735 | 2 | 1.98E-08 | 0.91 | 4.49   | -     | 513.2    |
| AHQ-1-10, 4597              | R.YADLTEDQLPSCSELKOTIAR.A                                                | 2427.62735 | 3 | 4.53E-05 | 0.76 | 3.59   | -     | 502.9    |
| gi 5031571 ref NP_005713.1  | actin-related protein 2; ARP2 (actin-related protein 2, yeast) homolog   |            |   | 2.02E-08 | 4.51 | 60.25  | 19.00 | 44760.5  |
| AHQ-1-9, 5804 - 5819        | K.CGAYGNSNPFHEHIFPALVGR.P                                                | 2094.33801 | 2 | 7.63E-04 | 0.35 | 2.82   | -     | 379.5    |
| AHQ-1-9, 6115               | K.CGAYGNSNPFHEHIFPALVGR.P                                                | 2573.95654 | 3 | 5.82E-06 | 0.48 | 3.25   | -     | 277.1    |
| AHQ-1-8, 3853               | K.DLMVGDSEASLR.S                                                         | 1335.46633 | 2 | 6.21E-08 | 0.95 | 3.89   | -     | 1176.0   |
| AHQ-1-9, 3768               | K.DLMVGDSEASLR.S                                                         | 1335.46633 | 2 | 2.02E-08 | 0.90 | 2.97   | -     | 1107.2   |
| AHQ-1-9, 3355 - 3356        | K.HIVLSSGGSTM*YPLPSR.L                                                   | 1789.04907 | 2 | 6.42E-06 | 0.97 | 4.84   | -     | 1802.2   |
| AHQ-1-9, 4119               | K.HLWDYTFGPEK.L                                                          | 1393.52736 | 2 | 1.47E-06 | 0.92 | 3.47   | -     | 697.8    |
| AHQ-1-13- , 4357            | K.HLWDYTFGPEK.L                                                          | 1393.52736 | 2 | 4.79E-05 | 0.86 | 2.99   | -     | 537.9    |
| AHQ-1-8, 4140               | K.HLWDYTFGPEK.L                                                          | 1393.52736 | 2 | 3.18E-06 | 0.86 | 3.07   | -     | 534.9    |
| AHQ-1-8, 3441               | K.ILLTEPPMNPDK.N                                                         | 1354.64066 | 2 | 9.02E-04 | 0.70 | 3.14   | -     | 439.9    |
| AHQ-1-9, 3518 - 3556        | K.ILLTEPPMNPDK.N                                                         | 1354.64066 | 2 | 2.59E-04 | 0.89 | 3.56   | -     | 577.1    |
| gi 4557675 ref NP_000201.1  | integrin alpha chain, alpha 6 [Homo sapiens]                             |            |   | 2.08E-08 | 2.65 | 30.22  | 4.90  | 119509.5 |
| AHQ-1-4, 3515               | K.FGSCQQGVAATFTK.D                                                       | 1503.66172 | 2 | 6.25E-08 | 0.87 | 3.19   | -     | 911.7    |
| AHQ-1-4, 6227               | R.NSYPDVAVGSLSDSVTIFR.S                                                  | 2028.20822 | 2 | 2.08E-08 | 0.92 | 4.31   | -     | 632.4    |
| AHQ-1-4, 3960               | K.VFIYHGSANGINTKPTQVLK.G                                                 | 2188.51433 | 3 | 3.75E-05 | 0.85 | 3.55   | -     | 1204.4   |
| gi 5453603 ref NP_006422.1  | chaperonin containing TCP1, subunit 2 (beta); chaperonin containing t-c  |            |   | 2.09E-08 | 1.91 | 30.18  | 7.90  | 57487.9  |
| AHQ-1-7, 3145               | R.EALLSSAVDHGSDEVK.F                                                     | 1657.76083 | 2 | 2.09E-08 | 0.92 | 3.58   | -     | 1156.9   |
| AHQ-1-7, 3201 - 3210        | R.GATQILDEAER.S                                                          | 1331.41427 | 1 | 7.20E-04 | 0.08 | 2.41   | -     | 191.1    |
| AHQ-1-7, 5820               | R.SLHDALCVLAQTVK.D                                                       | 1556.80920 | 2 | 3.73E-08 | 0.91 | 2.75   | -     | 1568.3   |
| gi 18570595 ref XP_095590.1 | similar to myosin regulatory light chain [Homo sapiens]                  |            |   | 2.20E-08 | 0.92 | 10.18  | 8.90  | 13951.5  |
| AHQ-1-11, 3086 - 3107       | K.LNGTDPEDVIR.H                                                          | 1229.32195 | 2 | 2.20E-08 | 0.92 | 3.59   | -     | 998.9    |
| AHQ-1-12, 3099              | K.LNGTDPEDVIR.H                                                          | 1229.32195 | 2 | 7.97E-08 | 0.90 | 3.30   | -     | 954.7    |
| AHQ-1-14, 4030              | K.LNGTDPEDVIR.H                                                          | 1229.32195 | 2 | 1.19E-04 | 0.91 | 3.53   | -     | 974.6    |
| AHQ-1-11, 2955 - 3026       | K.LNGTDPEDVIR.H                                                          | 1229.32195 | 2 | 8.39E-07 | 0.94 | 3.62   | -     | 1360.1   |
| gi 28376654 ref NP_778250.1 | hypothetical protein INM01 [Homo sapiens]                                |            |   | 2.29E-08 | 0.92 | 10.25  | 10.90 | 28153.2  |
| AHQ-1-13- , 5704 - 5708     | K.LALEDISADPEDTVGGHPSWSGWEDDAK.G                                         | 2999.10449 | 3 | 2.29E-08 | 0.92 | 4.99   | -     | 841.0    |
| gi 25306267 ref NP_001700.2 | brain-derived neurotrophic factor isoform a preproprotein [Homo sapien   |            |   | 2.37E-08 | 0.95 | 10.22  | 6.10  | 27817.8  |
| AHQ-1-13- , 3785            | K.TAVDMSGGT*TVLKV.V                                                      | 1508.71993 | 2 | 2.37E-08 | 0.95 | 4.45   | -     | 1154.2   |
| gi 4758076 ref NP_004068.1  | citrate synthase precursor; Citrate synthase, mitochondrial [Homo sapie  |            |   | 2.39E-08 | 0.88 | 10.15  | 2.40  | 51706.2  |
| AHQ-1-8, 3392               | K.IVNVNLEQQK.A                                                           | 1210.44805 | 2 | 2.39E-08 | 0.88 | 3.01   | -     | 509.4    |
| gi 5729842 ref NP_006699.1  | glyoxalase I; lactoyl glutathione lyase; lactoylglutathione lyase [Homo  |            |   | 2.44E-08 | 1.88 | 20.32  | 20.10 | 20719.6  |
| AHQ-1-11, 4610 - 4614       | R.FGFHIGIAPVDVYSACK.R                                                    | 1793.03600 | 2 | 2.27E-05 | 0.91 | 3.62   | -     | 1156.5   |
| AHQ-1-11, 6382 - 6454       | K.GLAFIQDPDGYWIELNPNK.M                                                  | 2304.58542 | 2 | 2.44E-08 | 0.98 | 6.30   | -     | 1142.1   |
| gi 20070125 ref NP_000909.2 | prolyl 4-hydroxylase, beta subunit; v-erb-a avian erythroblastic leuke   |            |   | 2.45E-08 | 8.47 | 100.29 | 27.00 | 57115.9  |
| AHQ-1-7, 5217               | K.HNQLPLVIEFTEQAPK.I                                                     | 1966.22639 | 2 | 5.90E-04 | 0.97 | 5.80   | -     | 1258.0   |
| AHQ-1-7, 3750 - 3822        | K.IKPHLMSQELPEDWDKQPVK.V                                                 | 2419.78460 | 3 | 1.35E-04 | 0.91 | 4.09   | -     | 806.0    |
| AHQ-1-7, 5404               | R.ILEFFGLK.K                                                             | 967.18573  | 2 | 5.41E-04 | 0.84 | 3.13   | -     | 520.6    |
| AHQ-1-7, 5317               | K.ILFIFIDSDHTDNQR.I                                                      | 1835.00968 | 2 | 6.83E-05 | 0.89 | 3.62   | -     | 1023.7   |
| AHQ-1-7, 2632               | K.LGETYKDHENIVIAK.M                                                      | 1730.94291 | 2 | 3.91E-05 | 0.93 | 3.76   | -     | 1340.0   |
| AHQ-1-7, 2682 - 2690        | R.LITLEEEM*TK.Y                                                          | 1223.41900 | 2 | 5.25E-04 | 0.77 | 2.55   | -     | 767.6    |
| AHQ-1-7, 2264               | K.MDSTANEVAVK.V                                                          | 1294.41421 | 2 | 1.77E-06 | 0.81 | 3.37   | -     | 831.4    |
| AHQ-1-7, 3926 - 4006        | K.VDATEESDLAQQYGV.R.G                                                    | 1781.85882 | 2 | 4.06E-05 | 0.88 | 3.29   | -     | 1297.9   |

|                             |                                                                         |            |   |          |      |       |       |          |
|-----------------------------|-------------------------------------------------------------------------|------------|---|----------|------|-------|-------|----------|
| AHQ-1-7, 2142               | K.YKPESEELTAER.I                                                        | 1452.54828 | 1 | 3.45E-05 | 0.11 | 1.85  | -     | 260.2    |
| AHQ-1-7, 2140               | K.YKPESEELTAER.I                                                        | 1452.54828 | 2 | 2.45E-08 | 0.61 | 2.74  | -     | 311.2    |
| AHQ-1-7, 4057 - 4128        | K.YQLDKDGVVLFK.K                                                        | 1425.65394 | 2 | 7.25E-06 | 0.85 | 3.63  | -     | 1014.1   |
| gi 7657313 ref NP_055277.1  | Lsm1 protein [Homo sapiens]                                             |            |   | 2.59E-08 | 0.88 | 10.21 | 12.00 | 15179.3  |
| AHQ-1-12, 5755              | R.SIDQFANLVHLQTVVER.I                                                   | 1871.08670 | 2 | 2.59E-08 | 0.88 | 4.13  | -     | 662.6    |
| gi 4504483 ref NP_000185.1  | hypoxanthine phosphoribosyltransferase 1 [Homo sapiens]                 |            |   | 2.60E-08 | 1.86 | 20.19 | 10.60 | 24579.2  |
| AHQ-1-10, 6068              | K.FFADLLDYIKA                                                           | 1245.44772 | 2 | 2.60E-08 | 0.94 | 3.86  | -     | 871.4    |
| AHQ-1-10, 5052              | K.NVLVEDIIDTGK.T                                                        | 1929.64090 | 2 | 3.62E-04 | 0.92 | 3.37  | -     | 1234.3   |
| gi 28603830 ref NP_776155.1 | hypothetical protein MGC51029 [Homo sapiens]                            |            |   | 2.82E-08 | 0.89 | 10.21 | 11.00 | 17177.5  |
| AHQ-1-12, 6634              | K.AAPEINNLIEATEFIK.Q                                                    | 1903.12224 | 2 | 2.82E-08 | 0.89 | 4.16  | -     | 540.0    |
| gi 22042381 ref XP_065237.3 | similar to FKSG30 [Homo sapiens]                                        |            |   | 2.86E-08 | 1.43 | 20.19 | 3.50  | 42016.0  |
| AHQ-1-8, 2219               | K.QEYDESGPSIVHR.K                                                       | 1517.58206 | 3 | 3.15E-05 | 0.70 | 3.08  | -     | 689.8    |
| AHQ-1-13- , 2980            | K.QEYDESGPSIVHR.K                                                       | 1517.58206 | 2 | 1.56E-04 | 0.57 | 2.85  | -     | 495.6    |
| AHQ-1-13- , 2453 - 2492     | K.QEYDESGPSIVHR.K                                                       | 1517.58206 | 2 | 2.86E-08 | 0.63 | 2.75  | -     | 311.1    |
| AHQ-1-10, 2296 - 2299       | K.QEYDESGPSIVHR.K                                                       | 1517.58206 | 2 | 6.20E-08 | 0.83 | 3.46  | -     | 451.1    |
| AHQ-1-14, 3810              | K.QEYDESGPSIVHR.K                                                       | 1517.58206 | 2 | 4.84E-04 | 0.40 | 2.65  | -     | 461.4    |
| AHQ-1-13, 2457 - 2518       | K.QEYDESGPSIVHR.K                                                       | 1517.58206 | 2 | 6.20E-04 | 0.65 | 2.76  | -     | 345.8    |
| AHQ-1-14- , 2395 - 2408     | K.QEYDESGPSIVHR.K                                                       | 1517.58206 | 2 | 5.39E-05 | 0.40 | 2.56  | -     | 244.2    |
| AHQ-1-8, 3449 - 3524        | R.VAPEEHPILLTEAPLNPK.A                                                  | 1969.27019 | 2 | 2.40E-04 | 0.80 | 3.85  | -     | 451.9    |
| AHQ-1-8, 3660 - 3731        | R.VAPEEHPILLTEAPLNPK.A                                                  | 1969.27019 | 2 | 4.58E-04 | 0.73 | 3.43  | -     | 415.8    |
| AHQ-1-10, 3611              | R.VAPEEHPILLTEAPLNPK.A                                                  | 1969.27019 | 2 | 8.98E-04 | 0.21 | 2.52  | -     | 179.6    |
| gi 20070158 ref NP_003567.2 | serine/threonine kinase 24 (STE20 homolog, yeast); STE20-like kinase 3  |            |   | 2.95E-08 | 0.72 | 10.16 | 3.40  | 49307.6  |
| AHQ-1-7, 3949               | K.SQACGGNLSIEELR.G                                                      | 1592.71366 | 2 | 2.95E-08 | 0.72 | 3.18  | -     | 854.3    |
| gi 5032041 ref NP_005605.1  | Ras homolog enriched in brain 2 [Homo sapiens]                          |            |   | 3.02E-08 | 0.92 | 10.18 | 8.70  | 20497.4  |
| AHQ-1-12, 5070              | K.ALAESWNAAFLESSAK.E                                                    | 1695.85389 | 2 | 6.16E-05 | 0.81 | 3.54  | -     | 459.9    |
| AHQ-1-12, 4882              | K.ALAESWNAAFLESSAK.E                                                    | 1695.85389 | 2 | 3.02E-08 | 0.92 | 3.59  | -     | 995.6    |
| gi 5803217 ref NP_006821.1  | ubiquinol-cytochrome c reductase (6.4kD) subunit [Homo sapiens]         |            |   | 3.05E-08 | 0.77 | 10.14 | 21.40 | 6569.6   |
| AHQ-1-14- , 6286            | R.LILDWVVPYINGK.F                                                       | 1431.70332 | 2 | 3.05E-08 | 0.77 | 2.73  | -     | 766.5    |
| AHQ-1-14- , 6140 - 6206     | R.LILDWVVPYINGK.F                                                       | 1431.70332 | 2 | 2.18E-04 | 0.46 | 2.58  | -     | 397.1    |
| gi 18426915 ref NP_004386.2 | drebrin 1 isoform a; drebrin E; drebrin-1; drebrin E2 [Homo sapiens] [  |            |   | 3.38E-08 | 1.92 | 20.26 | 5.40  | 71438.9  |
| AHQ-1-13- , 4199            | K.LAASGEGGLQELSGHFENQK.V                                                | 2073.20908 | 2 | 2.61E-05 | 0.93 | 4.75  | -     | 792.8    |
| AHQ-1-8, 4031               | K.LAASGEGGLQELSGHFENQK.V                                                | 2073.20908 | 2 | 3.38E-08 | 0.96 | 5.25  | -     | 1098.5   |
| AHQ-1-13- , 5715            | K.YVLINWVGEDVDPAR.K                                                     | 1746.94404 | 2 | 4.45E-04 | 0.95 | 3.98  | -     | 1547.3   |
| AHQ-1-13, 5376              | K.YVLINWVGEDVDPAR.K                                                     | 1746.94404 | 2 | 1.11E-05 | 0.96 | 4.61  | -     | 1414.2   |
| gi 9910542 ref NP_064535.1  | SAR1a gene homolog 1; SAR1 protein [Homo sapiens]                       |            |   | 3.53E-08 | 2.19 | 30.21 | 33.30 | 22366.6  |
| AHQ-1-14- , 3863            | R.EIFGLYQQTGK.G                                                         | 1314.46845 | 1 | 2.00E-04 | 0.40 | 2.48  | -     | 227.8    |
| AHQ-1-11, 3606 - 3611       | R.EIFGLYQQTGK.G                                                         | 1314.46845 | 2 | 7.38E-04 | 0.93 | 3.50  | -     | 1173.9   |
| AHQ-1-11, 5895              | R.LGQHVPTLHPTSEELTIAGMTFTTDFLGGHEQAR.R                                  | 3694.08659 | 3 | 3.53E-08 | 0.88 | 4.24  | -     | 592.8    |
| AHQ-1-11, 6451 - 6452       | K.NYLPAINGIVFLVDCADHSR.L                                                | 2276.55690 | 2 | 3.70E-06 | 0.91 | 4.05  | -     | 728.2    |
| AHQ-1-11, 6187              | K.NYLPAINGIVFLVDCADHSR.L                                                | 2276.55690 | 2 | 2.10E-04 | 0.34 | 2.50  | -     | 314.8    |
| gi 11968045 ref NP_071934.1 | hypothetical protein FLJ22056 [Homo sapiens]                            |            |   | 3.54E-08 | 0.94 | 10.24 | 8.00  | 36010.3  |
| AHQ-1-11, 6431              | K.DPTSLLLGLVQAEADSTSEGLEDAVHSR.G                                        | 2798.95471 | 3 | 3.54E-08 | 0.94 | 4.87  | -     | 1208.4   |
| gi 5901944 ref NP_008977.1  | elastin microfibril interface located protein; TNF? elastin microfibril |            |   | 3.65E-08 | 4.31 | 50.27 | 9.60  | 106894.7 |
| AHQ-1-3, 3610               | R.APAPASAPPPGSEELLR.Q                                                   | 1660.85268 | 2 | 3.65E-08 | 0.65 | 2.94  | -     | 274.2    |
| AHQ-1-3, 3029               | R.GLEEGQAQAGQCPSELEGR.L                                                 | 1888.99421 | 2 | 2.00E-05 | 0.90 | 4.03  | -     | 781.0    |
| AHQ-1-3, 3131               | R.GTELGGAAAGGGHPPGYTSLASR.L                                             | 2142.27464 | 2 | 6.36E-05 | 0.84 | 3.84  | -     | 353.6    |
| AHQ-1-3, 3687 - 3694        | R.LDVTAGGLQGLR.E                                                        | 1200.37012 | 2 | 2.65E-07 | 0.96 | 4.26  | -     | 1571.0   |
| AHQ-1-3, 3793               | R.PARPNLSGSSAGSPSLGSGEGPGESEK.V                                         | 2596.74928 | 3 | 3.60E-07 | 0.96 | 5.40  | -     | 1493.1   |
| gi 10863977 ref NP_067000.1 | LSM2 homolog, U6 small nuclear RNA associated; U6 snRNA-associated Sm-  |            |   | 3.76E-08 | 0.97 | 10.26 | 20.00 | 10834.5  |
| AHQ-1-14- , 5398 - 5400     | R.YVQLPADEVDTQLLQDAAR.K                                                 | 2146.34311 | 2 | 3.76E-08 | 0.97 | 5.28  | -     | 1366.2   |
| AHQ-1-14, 6262 - 6325       | R.YVQLPADEVDTQLLQDAAR.K                                                 | 2146.34311 | 2 | 1.61E-06 | 0.94 | 4.49  | -     | 890.5    |
| gi 15147250 ref NP_150281.1 | protein phosphatase 1, regulatory (inhibitor) subunit 14A; 17-kDa PKC-  |            |   | 3.79E-08 | 0.86 | 10.20 | 10.90 | 16692.9  |
| AHQ-1-12, 6497              | K.SCGKPVDFIQELLAK.L                                                     | 1836.09909 | 2 | 3.79E-08 | 0.86 | 4.02  | -     | 491.7    |
| gi 21361198 ref NP_000286.2 | serine (or cysteine) proteinase inhibitor, clade A (alpha-1 antiprotei  |            |   | 3.87E-08 | 1.91 | 20.24 | 7.90  | 46722.2  |
| AHQ-1-7, 3738               | K.LQHLELNELTHDITK.F                                                     | 1805.02503 | 2 | 6.87E-04 | 0.95 | 4.20  | -     | 1338.0   |
| AHQ-1-7, 4681 - 4761        | K.VFSNAGDLSGVTEEAPLK.L                                                  | 1835.00476 | 2 | 3.87E-08 | 0.96 | 4.75  | -     | 1441.8   |
| gi 23111030 ref NP_037478.2 | sorting nexin 12 [Homo sapiens]                                         |            |   | 3.88E-08 | 0.95 | 10.25 | 8.60  | 18884.4  |
| AHQ-1-12, 4923 - 4926       | R.GDEGIFEESEIER.R                                                       | 1657.71615 | 2 | 3.88E-08 | 0.95 | 5.03  | -     | 697.7    |
| gi 8923114 ref NP_060140.1  | ubiquitin-specific protease otubain 1 [Homo sapiens]                    |            |   | 3.93E-08 | 0.52 | 10.15 | 6.60  | 31311.8  |
| AHQ-1-9, 2603               | R.GEGGTTNPHIFEGSEPK.V                                                   | 1854.95463 | 2 | 3.93E-08 | 0.52 | 2.96  | -     | 367.8    |
| gi 5031595 ref NP_005709.1  | actin related protein 2/3 complex subunit 4; Arp2/3 protein complex sub |            |   | 4.09E-08 | 3.75 | 40.26 | 31.00 | 19666.9  |
| AHQ-1-11, 4179              | R.AENFFLR.R                                                             | 1010.17070 | 2 | 7.31E-04 | 0.97 | 4.25  | -     | 1764.8   |
| AHQ-1-12, 4219 - 4229       | K.ELLLOPVTISR.N                                                         | 1269.51549 | 2 | 2.01E-04 | 0.89 | 3.45  | -     | 732.2    |
| AHQ-1-12, 5583              | R.KPVEGYDISFLITNFHTEQM*YK.H                                             | 2678.01211 | 3 | 2.83E-05 | 0.94 | 5.23  | -     | 1210.3   |
| AHQ-1-12, 3142              | K.VLIEGSINSVR.V                                                         | 1187.37134 | 2 | 2.01E-06 | 0.90 | 3.21  | -     | 1118.7   |
| AHQ-1-11, 3120              | K.VLIEGSINSVR.V                                                         | 1187.37134 | 2 | 4.09E-08 | 0.95 | 3.57  | -     | 1610.5   |
| gi 21361884 ref NP_116235.2 | RAB2B [Homo sapiens]                                                    |            |   | 4.23E-08 | 0.80 | 10.16 | 8.30  | 24214.2  |
| AHQ-1-11, 2830              | K.IGPQSSISTSVGPSASQR.N                                                  | 1800.95164 | 2 | 4.23E-08 | 0.80 | 3.28  | -     | 672.6    |
| gi 5031973 ref NP_005733.1  | protein disulfide isomerase-related protein [Homo sapiens]              |            |   | 4.54E-08 | 4.34 | 50.20 | 18.20 | 48121.0  |
| AHQ-1-7, 7337               | R.DGELPVEDDIDLSDVLELDLKGDEL                                             | 2759.86565 | 2 | 1.35E-05 | 0.84 | 3.14  | -     | 997.3    |
| AHQ-1-7, 2054               | K.GESPVYDGGRR.T                                                         | 1152.15291 | 2 | 3.13E-04 | 0.83 | 2.77  | -     | 902.6    |
| AHQ-1-7, 4940               | K.GSFSSEQINEFLR.E                                                       | 1484.59520 | 2 | 8.84E-08 | 0.86 | 3.13  | -     | 884.5    |
| AHQ-1-13- , 4192 - 4197     | R.GSTAPVGGGAFPTIVER.E                                                   | 1616.79990 | 2 | 1.30E-06 | 0.86 | 3.90  | -     | 736.6    |
| AHQ-1-7, 4108 - 4126        | R.GSTAPVGGGAFPTIVER.E                                                   | 1616.79990 | 2 | 2.66E-05 | 0.91 | 3.98  | -     | 845.8    |
| AHQ-1-8, 4052               | R.GSTAPVGGGAFPTIVER.E                                                   | 1616.79990 | 2 | 1.11E-04 | 0.90 | 3.79  | -     | 836.1    |
| AHQ-1-11, 3866              | R.GSTAPVGGGAFPTIVER.E                                                   | 1616.79990 | 2 | 5.58E-04 | 0.30 | 2.52  | -     | 446.8    |
| AHQ-1-12, 3997              | R.GSTAPVGGGAFPTIVER.E                                                   | 1616.79990 | 2 | 5.05E-05 | 0.81 | 3.24  | -     | 789.3    |
| AHQ-1-13, 4015              | R.GSTAPVGGGAFPTIVER.E                                                   | 1616.79990 | 2 | 1.53E-04 | 0.50 | 2.69  | -     | 508.4    |
| AHQ-1-13- , 6275            | R.TGEAIVDAALSALR.Q                                                      | 1387.56411 | 2 | 4.54E-08 | 0.94 | 3.45  | -     | 1864.3   |
| AHQ-1-7, 6442               | R.TGEAIVDAALSALR.Q                                                      | 1387.56411 | 2 | 4.83E-07 | 0.90 | 3.38  | -     | 1329.1   |
| gi 13128974 ref NP_076933.1 | hypothetical protein MGC3265 [Homo sapiens]                             |            |   | 4.64E-08 | 0.93 | 10.21 | 4.50  | 46867.3  |
| AHQ-1-7, 4397               | R.SYYSVQTAEWQAHPLYGSR.P                                                 | 2244.40703 | 2 | 4.64E-08 | 0.93 | 4.22  | -     | 1012.4   |
| gi 27480842 ref XP_208238.1 | similar to bA92K2.2 (similar to ubiquitin) [Homo sapiens]               |            |   | 4.76E-08 | 1.89 | 30.18 | 19.90 | 17969.9  |
| AHQ-1-14, 4000 - 4001       | K.ESTLHLVLR.L                                                           | 1068.25169 | 2 | 1.62E-07 | 0.85 | 3.50  | -     | 723.3    |
| AHQ-1-14- , 3036            | K.ESTLHLVLR.L                                                           | 1068.25169 | 1 | 3.14E-04 | 0.37 | 2.25  | -     | 211.2    |
| AHQ-1-14- , 2039 - 2099     | K.IQDKEGIPDPQQR.L                                                       | 1524.66087 | 2 | 4.76E-08 | 0.79 | 3.00  | -     | 653.8    |
| AHQ-1-14, 3176 - 3232       | R.TLSDYNIQK.E                                                           | 1082.18886 | 1 | 2.42E-04 | 0.25 | 2.02  | -     | 480.7    |
| gi 30158844 ref XP_292513.2 | similar to KIAA1879 protein [Homo sapiens]                              |            |   | 4.81E-08 | 2.06 | 30.20 | 1.90  | 203894.8 |
| AHQ-1-7, 3337               | K.AVDSLVPVIGR.G                                                         | 1027.19957 | 1 | 1.21E-04 | 0.18 | 2.02  | -     | 167.1    |
| AHQ-1-7, 4253               | K.TSIAIDTIINQK.H                                                        | 1317.51378 | 2 | 1.07E-04 | 0.93 | 3.37  | -     | 1565.3   |
| AHQ-1-7, 3089               | R.VVDALGNAIDGK.G                                                        | 1172.31354 | 2 | 4.81E-08 | 0.95 | 3.91  | -     | 1308.1   |
| gi 4826848 ref NP_004991.1  | NADH dehydrogenase (ubiquinone) 1 alpha subcomplex, 5; NADH dehydrogena |            |   | 4.82E-08 | 0.98 | 10.35 | 22.40 | 13458.6  |
| AHQ-1-14- , 6650            | K.KLEDLQGGQLEEVILQAEHELNLAR.K                                           | 2975.30339 | 3 | 4.82E-08 | 0.98 | 6.98  | -     | 2166.7   |
| gi 4507767 ref NP_003326.1  | ubiquitin-activating enzyme E1-like; Ubiquitin-activating enzyme-2; ubi |            |   | 4.84E-08 | 3.44 | 40.25 | 7.70  | 111719.5 |
| AHQ-1-5, 3510               | R.APASAAAESADAPPYVCTVR.Y                                                | 1935.10448 | 2 | 1.02E-05 | 0.76 | 3.22  | -     | 502.4    |
| AHQ-1-5, 7333               | R.GLNPDQLQVPLTYPLDPTTEHIYGDNFFSR.V                                      | 3434.79811 | 3 | 1.22E-04 | 0.73 | 3.70  | -     | 279.7    |
| AHQ-1-4, 4971               | R.VDGVAAALDSFQAR.R                                                      | 1420.55265 | 2 | 3.69E-05 | 0.97 | 3.88  | -     | 2519.7   |
| AHQ-1-4, 4814               | R.VLVSGLQGLGAEVAK.N                                                     | 1441.69805 | 2 | 4.84E-08 | 0.97 | 4.98  | -     | 2049.8   |
| gi 4502021 ref NP_003680.1  | aldo-keto reductase family 7, member A2 (afatoxin aldehyde reductase);  |            |   | 4.88E-08 | 1.86 | 20.22 | 10.30 | 36648.3  |
| AHQ-1-9, 3811               | K.ALQAAYGASAPSVTSALR.W                                                  | 1806.01302 | 2 | 4.88E-08 | 0.91 | 4.46  | -     | 637.9    |
| AHQ-1-9, 5610 - 5612        | R.FYAYNPLAGLLTGK.Y                                                      | 1585.82741 | 2 | 8.13E-04 | 0.95 | 4.44  | -     | 1002.0   |
| gi 11128019 ref NP_061820.1 | cytochrome c [Homo sapiens]                                             |            |   | 4.95E-08 | 0.91 | 10.17 | 13.30 | 11748.7  |
| AHQ-1-13- , 2213 - 2216     | K.TGQAPGYSYTAANK.N                                                      | 1429.51641 | 2 | 4.95E-08 | 0.91 | 3.49  | -     | 784.2    |
| gi 4504557 ref NP_000864.1  | intercellular adhesion molecule 2 precursor [Homo sapiens]              |            |   | 5.01E-08 | 0.94 | 10.24 | 5.80  | 30653.1  |
| AHQ-1-7, 7536 - 7540        | R.VPTVEPLDSLTLFLFR.G                                                    | 1848.17455 | 2 | 5.01E-08 | 0.94 | 4.73  | -     | 590.7    |
| gi 4826657 ref NP_004333.1  | caldesmon 1 isoform 3; H-CAD; L-CAD [Homo sapiens]                      |            |   | 5.07E-08 | 2.60 | 30.21 | 10.00 | 62662.9  |
| AHQ-1-13- , 2687            | K.GNMFSSPTAAGTPNK.E                                                     | 1448.56286 | 2 | 1.16E-05 | 0.85 | 3.10  | -     | 870.5    |



|                             |                                                                                   |                                                                         |                         |            |          |          |         |        |          |         |
|-----------------------------|-----------------------------------------------------------------------------------|-------------------------------------------------------------------------|-------------------------|------------|----------|----------|---------|--------|----------|---------|
| AHQ-1-6, 2667 - 2675        | K.SAKPTKPAASDLPVPAEAGVR.N                                                         | 1992.26539                                                              | 3                       | 2.58E-04   | 0.89     | 3.96     | -       | 982.9  |          |         |
| AHQ-1-13, 3760              | K.TTTTTNQVEGDDAAFLER.L                                                            | 2099.15534                                                              | 2                       | 2.18E-04   | 0.86     | 3.76     | -       | 784.5  |          |         |
| AHQ-1-10, 3513              | K.TTTTTNQVEGDDAAFLER.L                                                            | 2099.15534                                                              | 2                       | 5.21E-06   | 0.95     | 4.28     | -       | 1253.3 |          |         |
| AHQ-1-6, 3751 - 3759        | K.TTTTTNQVEGDDAAFLER.L                                                            | 2099.15534                                                              | 2                       | 5.07E-08   | 0.86     | 3.91     | -       | 657.5  |          |         |
| gi 20270259 ref NP_620061.1 | phosphoglycerate kinase 2; phosphoglycerate kinase 1, pseudogene 2 [Homo sapiens] | K.LGDVYYNDAFGTAHR.A                                                     | 1635.76178              | 2          | 5.23E-08 | 0.93     | 4.10    | 1024.8 |          |         |
| AHQ-1-8, 3384               | platelet glycoprotein Ib alpha polypeptide precursor [Homo sapiens] [MA           | R.AWLLFLR.G                                                             | 919.14753               | 2          | 7.94E-05 | 0.92     | 3.22    | 997.4  |          |         |
| AHQ-1-12, 5681 - 5690       |                                                                                   | R.GLGELOQELYLK.G                                                        | 1263.46458              | 2          | 2.26E-05 | 0.92     | 3.72    | 1186.9 |          |         |
| AHQ-1-4, 5146               |                                                                                   | R.GLGELOQELYLK.G                                                        | 1263.46458              | 2          | 1.33E-04 | 0.94     | 3.91    | 1380.1 |          |         |
| AHQ-1-1, 5157               |                                                                                   | R.GLGELOQELYLK.G                                                        | 1263.46458              | 2          | 6.40E-06 | 0.95     | 4.03    | 1434.5 |          |         |
| AHQ-1-3, 5046               |                                                                                   | R.GLGELOQELYLK.G                                                        | 1263.46458              | 2          | 4.71E-05 | 0.94     | 3.89    | 1374.7 |          |         |
| AHQ-1-9, 4887               |                                                                                   | R.GDQLLSTVSIR.Y                                                         | 1189.34410              | 2          | 2.88E-07 | 0.94     | 3.62    | 1261.7 |          |         |
| AHQ-1-13, 4036 - 4053       |                                                                                   | R.GDQLLSTVSIR.Y                                                         | 1189.34410              | 2          | 8.73E-05 | 0.95     | 3.40    | 1534.2 |          |         |
| AHQ-1-14, 5014              |                                                                                   | R.GDQLLSTVSIR.Y                                                         | 1189.34410              | 2          | 5.26E-08 | 0.95     | 4.46    | 1113.8 |          |         |
| AHQ-1-12, 4001 - 4023       |                                                                                   | R.GDQLLSTVSIR.Y                                                         | 1189.34410              | 2          | 9.40E-04 | 0.93     | 3.29    | 1393.9 |          |         |
| AHQ-1-14 - , 4082 - 4102    |                                                                                   | R.GDQLLSTVSIR.Y                                                         | 1189.34410              | 2          | 2.31E-07 | 0.95     | 4.32    | 1170.9 |          |         |
| AHQ-1-4, 4255               |                                                                                   | R.GDQLLSTVSIR.Y                                                         | 1189.34410              | 2          | 1.40E-05 | 0.95     | 3.93    | 1406.1 |          |         |
| AHQ-1-13 - , 4215 - 4245    |                                                                                   | R.GDQLLSTVSIR.Y                                                         | 1189.34410              | 2          | 2.70E-07 | 0.96     | 4.30    | 1300.6 |          |         |
| AHQ-1-1, 4292               |                                                                                   | R.GDQLLSTVSIR.Y                                                         | 1189.34410              | 2          | 2.27E-06 | 0.95     | 3.82    | 1397.6 |          |         |
| AHQ-1-3, 4189               |                                                                                   | R.GVLRGHESSR.N                                                          | 1183.29965              | 2          | 2.87E-04 | 0.72     | 2.85    | 585.8  |          |         |
| AHQ-1-3, 2105               |                                                                                   | R.GVLRGHESSR.N                                                          | 1183.29965              | 2          | 6.74E-04 | 0.90     | 3.17    | 996.6  |          |         |
| AHQ-1-4, 2103 - 2110        |                                                                                   | R.LTQLNLDRCCLTK.L                                                       | 1605.83862              | 2          | 3.56E-04 | 0.69     | 3.86    | 399.1  |          |         |
| AHQ-1-3, 3697               |                                                                                   | R.WLQDNAENYVWK.Q                                                        | 1665.82948              | 2          | 9.39E-07 | 0.97     | 4.58    | 1636.9 |          |         |
| AHQ-1-1, 5056               |                                                                                   | R.WLQDNAENYVWK.Q                                                        | 1665.82948              | 2          | 1.04E-06 | 0.95     | 4.12    | 1423.1 |          |         |
| AHQ-1-3, 4981               |                                                                                   | R.WLQDNAENYVWK.Q                                                        | 1665.82948              | 2          | 1.58E-07 | 0.97     | 4.90    | 1697.7 |          |         |
| AHQ-1-3, 5178 - 5253        |                                                                                   | thrombospondin 2 [Homo sapiens]                                         | R.DDDYAGFVFGYQSSSR.F    | 1814.84582 | 2        | 5.40E-08 | 1.34    | 20.18  | 129954.5 |         |
| gi 4507487 ref NP_003238.1  |                                                                                   | R.DDDYAGFVFGYQSSSR.F                                                    | 1814.84582              | 2          | 1.84E-07 | 0.78     | 3.37    | 640.3  |          |         |
| AHQ-1-1, 5317               |                                                                                   | R.NALWHTGNTPGQVR.T                                                      | 1551.69124              | 2          | 1.76E-04 | 0.90     | 3.51    | 1097.3 |          |         |
| AHQ-1-2, 5514               |                                                                                   | R.NALWHTGNTPGQVR.T                                                      | 1551.69124              | 2          | 1.19E-04 | 0.76     | 3.26    | 669.0  |          |         |
| AHQ-1-6, 2559               |                                                                                   | R.NALWHTGNTPGQVR.T                                                      | 1551.69124              | 2          | 6.38E-05 | 0.78     | 2.77    | 759.1  |          |         |
| AHQ-1-7, 2570               |                                                                                   | R.NALWHTGNTPGQVR.T                                                      | 1551.69124              | 2          | 6.87E-06 | 0.43     | 2.66    | 565.2  |          |         |
| AHQ-1-8, 2446               |                                                                                   | R.NALWHTGNTPGQVR.T                                                      | 1551.69124              | 2          | 1.45E-05 | 0.88     | 3.40    | 973.5  |          |         |
| AHQ-1-9, 2507 - 2576        |                                                                                   | R.NALWHTGNTPGQVR.T                                                      | 1551.69124              | 2          | 9.40E-04 | 0.87     | 3.30    | 909.9  |          |         |
| AHQ-1-11, 2584 - 2587       |                                                                                   | phosphodiesterase 5A isoform 1; cGMP-binding cGMP-specific 3',5'-cyclic | R.FNAEVDQITGYK.T        | 1385.50354 | 2        | 3.64E-07 | 0.94    | 3.70   | 1165.4   |         |
| AHQ-1-1, 2844 - 2849        |                                                                                   | R.FPWTTENTGNVQQCIR.S                                                    | 2067.22783              | 2          | 1.45E-04 | 0.12     | 2.57    | 155.3  |          |         |
| gi 4505667 ref NP_001074.1  |                                                                                   | K.VIGVQQLVNR.M                                                          | 1131.37098              | 2          | 5.70E-08 | 0.77     | 3.05    | 527.7  |          |         |
| AHQ-1-5, 3822 - 3830        |                                                                                   | similar to epsilon isoform of 14-3-3 protein [Homo sapiens]             | K.EAAKNSIVAYK.A         | 1194.36234 | 2        | 7.62E-04 | 0.67    | 2.81   | 652.1    |         |
| AHQ-1-5, 3863               |                                                                                   | K.LICCDILDVLDK.H                                                        | 1479.74157              | 2          | 1.12E-04 | 0.92     | 3.88    | 873.9  |          |         |
| gi 20532885 ref XP_086931.2 |                                                                                   | K.LICCDILDVLDK.H                                                        | 1479.74157              | 2          | 2.84E-06 | 0.96     | 4.33    | 1067.1 |          |         |
| AHQ-1-13 - , 2680           |                                                                                   | K.LICCDILDVLDK.H                                                        | 1479.74157              | 2          | 5.75E-08 | 0.97     | 5.57    | 1113.8 |          |         |
| AHQ-1-11, 6264              |                                                                                   | R.YLAEFATGNDRK.E                                                        | 1385.50677              | 2          | 8.18E-07 | 0.94     | 3.71    | 1413.3 |          |         |
| AHQ-1-13, 6347              |                                                                                   | R.YLAEFATGNDRK.E                                                        | 1385.50677              | 2          | 1.78E-04 | 0.84     | 3.12    | 849.1  |          |         |
| AHQ-1-13 - , 6797           |                                                                                   | similar to ADP/ATP carrier protein, fibroblast isoform (ADP/ATP trans   | R.AAYFGIYDTAK.G         | 1220.35512 | 2        | 2.66E-04 | 0.89    | 2.90   | 841.9    |         |
| AHQ-1-10, 2513 - 2584       |                                                                                   | R.AAYFGIYDTAK.G                                                         | 1220.35512              | 2          | 6.00E-08 | 0.89     | 3.07    | 1041.9 |          |         |
| AHQ-1-10, 2379              |                                                                                   | R.AAYFGIYDTAK.G                                                         | 1220.35512              | 2          | 4.41E-04 | 0.92     | 3.60    | 932.6  |          |         |
| gi 30151001 ref XP_170195.2 |                                                                                   | R.AAYFGIYDTAK.G                                                         | 1220.35512              | 1          | 4.67E-04 | 0.72     | 2.39    | 890.0  |          |         |
| AHQ-1-10, 3496 - 3499       |                                                                                   | hepatitis B virus x-interacting protein; hepatitis B virus x-interactin | K.NPSIVGLCTDSQGLNLGCR.G | 2163.41855 | 2        | 6.16E-08 | 0.98    | 5.94   | 2008.6   |         |
| gi 4545170 ref NP_006393.1  |                                                                                   | programmed cell death 10; apoptosis-related protein 15 [Homo sapiens]   | R.LIHQTNLILQTFK.T       | 1569.87265 | 2        | 6.35E-08 | 0.87    | 3.28   | 759.6    |         |
| AHQ-1-14 - , 5874           |                                                                                   | myosin, light polypeptide 9, regulatory; myosin regulatory light chain  | R.FTDEEVDEMYR.E         | 1450.50949 | 2        | 6.04E-06 | 0.94    | 3.59   | 1128.4   |         |
| gi 20127517 ref NP_009148.2 |                                                                                   | R.FTDEEVDEMYR.E                                                         | 1450.50949              | 2          | 2.59E-07 | 0.86     | 3.12    | 907.6  |          |         |
| AHQ-1-10, 3952              |                                                                                   | R.FTDEEVDEMYR.E                                                         | 1450.50949              | 1          | 1.50E-05 | 0.04     | 1.81    | 265.5  |          |         |
| gi 29568111 ref NP_006088.2 |                                                                                   | R.FTDEEVDEMYR.E                                                         | 1450.50949              | 2          | 6.37E-08 | 0.68     | 2.66    | 476.1  |          |         |
| AHQ-1-11, 2611 - 2686       |                                                                                   | R.FTDEEVDEMYR.E                                                         | 1450.50949              | 2          | 1.26E-05 | 0.88     | 3.30    | 734.2  |          |         |
| AHQ-1-11, 3350 - 3362       |                                                                                   | R.FTDEEVDEMYR.E                                                         | 1450.50949              | 2          | 8.65E-06 | 0.90     | 3.07    | 1322.2 |          |         |
| AHQ-1-11, 3354              |                                                                                   | K.GNFNHYVEFTR.I                                                         | 1247.34066              | 2          | 3.11E-05 | 0.82     | 2.93    | 765.3  |          |         |
| AHQ-1-11, 3367              |                                                                                   | K.GNFNHYVEFTR.I                                                         | 1247.34066              | 2          | 1.98E-06 | 0.93     | 3.74    | 893.3  |          |         |
| AHQ-1-12, 2737              |                                                                                   | K.GNFNHYVEFTR.I                                                         | 1247.34066              | 2          | 7.93E-05 | 0.76     | 2.79    | 520.1  |          |         |
| AHQ-1-12, 3446 - 3462       |                                                                                   | K.GNFNHYVEFTR.I                                                         | 1247.34066              | 2          | 8.89E-05 | 0.87     | 3.06    | 891.9  |          |         |
| AHQ-1-12, 3798              |                                                                                   | K.GNFNHYVEFTR.I                                                         | 1247.34066              | 2          | 1.48E-04 | 0.68     | 2.63    | 668.5  |          |         |
| AHQ-1-11, 3682 - 3710       |                                                                                   | K.GNFNHYVEFTR.I                                                         | 1247.34066              | 2          | 5.55E-07 | 0.87     | 3.14    | 890.0  |          |         |
| AHQ-1-11, 3783 - 3796       |                                                                                   | K.GNFNHYVEFTR.I                                                         | 1247.34066              | 2          | 3.97E-05 | 0.84     | 3.58    | 615.0  |          |         |
| AHQ-1-11, 3903              |                                                                                   | R.NAFACFDEEASGFHEDHLR.E                                                 | 2367.49548              | 2          | 6.40E-08 | 0.93     | 10.20   | 11.00  | 16832.2  |         |
| AHQ-1-12, 3734 - 3799       |                                                                                   | eukaryotic translation initiation factor 5A; eIF5A1; eIF5A [Homo sapien | R.EDLRLPEGLGKEIQK.Y     | 1970.17021 | 3        | 6.40E-08 | 0.93    | 4.01   | 1395.6   |         |
| AHQ-1-14 - , 3962           |                                                                                   | RAB11A, member RAS oncogene family; RAB 11A, member oncogene family [Ho | R.AQIWDTAGQER.Y         | 1275.35241 | 2        | 3.69E-04 | 0.90    | 2.94   | 1204.3   |         |
| AHQ-1-11, 5598              |                                                                                   | R.AQIWDTAGQER.Y                                                         | 1275.35241              | 2          | 2.48E-07 | 0.95     | 3.80    | 1370.4 |          |         |
| gi 45453545 ref NP_001961.1 |                                                                                   | R.DHADSNIIVMLVGNK.S                                                     | 1626.85974              | 2          | 4.60E-07 | 0.97     | 4.73    | 1832.3 |          |         |
| gi 4758984 ref NP_004654.1  |                                                                                   | R.DHADSNIIVMLVGNK.S                                                     | 1642.85914              | 2          | 7.90E-06 | 0.96     | 4.72    | 1609.6 |          |         |
| AHQ-1-12, 2802              |                                                                                   | R.GAVGALLVYDIAK.H                                                       | 1290.53317              | 2          | 1.58E-06 | 0.93     | 3.84    | 1291.5 |          |         |
| AHQ-1-11, 2726 - 2744       |                                                                                   | R.GAVGALLVYDIAK.H                                                       | 1290.53317              | 2          | 6.88E-08 | 0.98     | 5.99    | 1990.7 |          |         |
| AHQ-1-11, 4543 - 4622       |                                                                                   | K.HLYTENVER.W                                                           | 1161.24931              | 2          | 1.61E-06 | 0.78     | 2.58    | 563.2  |          |         |
| AHQ-1-11, 4054 - 4132       |                                                                                   | R.NEFNLESK.S                                                            | 981.04139               | 1          | 1.17E-04 | 0.57     | 2.83    | 326.9  |          |         |
| AHQ-1-14 - , 5172           |                                                                                   | K.STIGVEFATR.S                                                          | 1081.20410              | 2          | 1.24E-06 | 0.92     | 3.21    | 991.2  |          |         |
| AHQ-1-11, 4794              |                                                                                   | major vault protein [Homo sapiens]                                      | R.LAQDPPFLYPGEVLEK.D    | 1817.07418 | 2        | 6.97E-08 | 0.80    | 10.16  | 1.80     | 99326.3 |
| AHQ-1-11, 2054              |                                                                                   | R.LAQDPPFLYPGEVLEK.D                                                    | 1817.07418              | 2          | 6.97E-08 | 0.80     | 3.24    | 730.9  |          |         |
| AHQ-1-11, 2320              |                                                                                   | ubiquitin-conjugating enzyme E2N (UBC13 homolog, yeast); ubiquitin-conj | K.LELFLPEEYPM*AAPK.V    | 1765.06265 | 2        | 1.72E-04 | 0.76    | 3.71   | 391.1    |         |
| AHQ-1-11, 3016              |                                                                                   | K.LELFLPEEYPM*AAPK.V                                                    | 1765.06265              | 2          | 7.12E-08 | 0.85     | 4.11    | 593.0  |          |         |
| gi 19913412 ref NP_005106.2 |                                                                                   | K.LELFLPEEYPM*AAPK.V                                                    | 1765.06265              | 2          | 5.03E-04 | 0.47     | 3.03    | 382.8  |          |         |
| AHQ-1-12, 3517              |                                                                                   | R.LLAEPVPGIK.A                                                          | 1037.27750              | 2          | 1.35E-04 | 0.66     | 2.73    | 493.6  |          |         |
| AHQ-1-13 - , 3501           |                                                                                   | K.TNEAQAIETAR.A                                                         | 1204.27249              | 2          | 1.39E-06 | 0.92     | 3.96    | 1377.0 |          |         |
| AHQ-1-13 - , 3501           |                                                                                   | K.WSPALQIR.T                                                            | 971.13770               | 2          | 3.78E-05 | 0.78     | 2.94    | 538.8  |          |         |
| AHQ-1-12, 2202 - 2203       |                                                                                   | R.YFHVIAGPQDSPFEGGTFK.L                                                 | 2197.43341              | 3          | 7.98E-07 | 0.96     | 5.23    | 1699.1 |          |         |
| AHQ-1-12, 3517              |                                                                                   | R.YFHVIAGPQDSPFEGGTFK.L                                                 | 2197.43341              | 2          | 3.92E-05 | 0.95     | 4.54    | 1053.1 |          |         |
| AHQ-1-13 - , 5415           |                                                                                   | protein-tyrosine kinase fyn isoform a; proto-oncogene tyrosine-protein  | R.WTAPFAALYGR.F         | 1235.37302 | 2        | 7.16E-08 | 0.87    | 3.55   | 635.7    |         |
| AHQ-1-12, 5133              |                                                                                   | K.WTAPFAALYGR.F                                                         | 1235.37302              | 2          | 7.16E-08 | 0.87     | 3.55    | 635.7  |          |         |
| gi 4503823 ref NP_020208.1  |                                                                                   | tropomyosin 3 [Homo sapiens]                                            | R.724E-08               | 4.30       | 50.23    | 21.80    | 28222.6 |        |          |         |
| gi 22748619 ref NP_689476.1 |                                                                                   | R.433E-04                                                               | 0.94                    | 4.16       | -        | -        | 1392.0  |        |          |         |
| AHQ-1-9, 3771 - 3843        |                                                                                   | R.558E-05                                                               | 0.90                    | 3.52       | -        | -        | 980.3   |        |          |         |
| AHQ-1-10, 3159              |                                                                                   | R.156E-06                                                               | 0.95                    | 4.53       | -        | -        | 1435.0  |        |          |         |
| AHQ-1-9, 3446 - 3503        |                                                                                   | R.724E-08                                                               | 0.81                    | 2.72       | -        | -        | 904.5   |        |          |         |
| AHQ-1-9, 3786               |                                                                                   | R.633E-04                                                               | 0.58                    | 2.99       | -        | -        | 762.9   |        |          |         |
| AHQ-1-10, 2041 - 2117       |                                                                                   | R.205E-05                                                               | 0.69                    | 3.20       | -        | -        | 618.0   |        |          |         |
| AHQ-1-9, 1979 - 2050        |                                                                                   | heat shock 70kDa protein 1-like; heat shock 70kD protein-like 1 [Homo   | R.57E-08                | 0.97       | 10.22    | 2.20     | 70404.7 |        |          |         |
| gi 27436929 ref NP_005518.2 |                                                                                   | K.AKIHIDVLVGGSTR.I                                                      | 1466.71083              | 2          | 7.57E-08 | 0.97     | 4.43    | 1985.9 |          |         |
| AHQ-1-6, 3174               |                                                                                   | single-stranded DNA binding protein; single-stranded DNA-binding protei | R.770E-08               | 3.24       | 40.28    | 25.70    | 17259.5 |        |          |         |
| gi 4507231 ref NP_003134.1  |                                                                                   | R.DVAYQVVK.K                                                            | 986.10277               | 1          | 8.47E-04 | 0.49     | 2.16    | 717.8  |          |         |
| AHQ-1-13 - , 2473           |                                                                                   | R.DVAYQVVK.K                                                            | 986.10277               | 1          | 5.84E-05 | 0.47     | 1.96    | 728.6  |          |         |
| AHQ-1-13, 2530              |                                                                                   | K.NPVTIFSLATNEM*WR.S                                                    | 1796.04007              | 2          | 1.00E-04 | 0.92     | 3.95    | 927.7  |          |         |

|                             |                                                                             |            |   |          |      |        |       |         |
|-----------------------------|-----------------------------------------------------------------------------|------------|---|----------|------|--------|-------|---------|
| AHQ-1-13 - , 6824           | K.NPVTIFSLATNEMWR.S                                                         | 1780.04067 | 2 | 7.70E-08 | 0.98 | 5.60   | -     | 1896.7  |
| AHQ-1-13 - , 3304           | R.SGDSEVYQLGDVSOQ.T                                                         | 1612.67692 | 2 | 8.91E-07 | 0.93 | 3.86   | -     | 1003.4  |
| AHQ-1-13, 3231              | R.SGDSEVYQLGDVSOQ.T                                                         | 1612.67692 | 2 | 4.90E-07 | 0.87 | 3.74   | -     | 808.6   |
| gi 4503477 ref NP_001950.1  | eukaryotic translation elongation factor 1 beta 2; eukaryotic translati     |            |   | 7.85E-08 | 1.82 | 20.22  | 14.70 | 24763.6 |
| AHQ-1-9, 5762 - 5768        | K.SPAGLQVLDNDYLADK.S                                                        | 1604.78589 | 2 | 2.70E-05 | 0.89 | 3.72   | -     | 920.6   |
| AHQ-1-9, 5456 - 5522        | K.SPAGLQVLDNDYLADK.S                                                        | 1604.78589 | 2 | 5.97E-07 | 0.93 | 4.06   | -     | 924.0   |
| AHQ-1-9, 4602               | K.SPAGLQVLDNDYLADK.S                                                        | 1604.78589 | 2 | 7.85E-08 | 0.96 | 4.48   | -     | 1296.2  |
| AHQ-1-9, 5110               | K.SSILLDVKVPWDETDMAKL                                                       | 2064.30228 | 2 | 1.21E-04 | 0.85 | 3.88   | -     | 490.5   |
| gi 30153515 ref XP_293925.2 | similar to phosphoglycerate mutase (EC 5.4.2.1) B chain - rat [Homo sa      |            |   | 8.25E-08 | 0.90 | 10.19  | 2.70  | 57163.7 |
| AHQ-1-13 - , 6316           | R.ALPFWNNEIVPQIK.E                                                          | 1684.95898 | 2 | 8.25E-08 | 0.90 | 3.84   | -     | 565.4   |
| gi 5031677 ref NP_005681.1  | dynamitin 1-like protein isoform 3; dynamitin-like protein [Homo sapiens] [ |            |   | 8.40E-08 | 9.85 | 110.34 | 20.90 | 78066.0 |
| AHQ-1-6, 4800               | K.ALQASQIIAEIR.E                                                            | 1370.57991 | 2 | 2.83E-05 | 0.91 | 3.80   | -     | 1223.1  |
| AHQ-1-6, 2811               | R.CVVELVHEEMQR.I                                                            | 1431.62054 | 2 | 5.61E-05 | 0.82 | 3.17   | -     | 733.0   |
| AHQ-1-13, 5031              | K.DTLQSELVGLQYK.S                                                           | 1494.67144 | 2 | 8.40E-08 | 0.90 | 3.19   | -     | 1438.6  |
| AHQ-1-14, 6074              | K.DTLQSELVGLQYK.S                                                           | 1494.67144 | 2 | 5.65E-05 | 0.71 | 2.63   | -     | 893.5   |
| AHQ-1-6, 4448               | K.GHAVNLLDVPPVVAR.K                                                         | 1557.82197 | 2 | 6.39E-06 | 0.92 | 3.61   | -     | 1181.5  |
| AHQ-1-6, 6494               | K.IFSPNVNLTLDLPGM*TK.V                                                      | 2075.45768 | 2 | 7.11E-04 | 0.95 | 4.54   | -     | 1262.8  |
| AHQ-1-6, 7028 - 7034        | K.IFSPNVNLTLDLPGM*TK.V                                                      | 2059.45828 | 2 | 1.62E-05 | 0.93 | 4.40   | -     | 886.2   |
| AHQ-1-7, 7208               | K.IFSPNVNLTLDLPGM*TK.V                                                      | 2059.45828 | 2 | 8.42E-06 | 0.87 | 3.44   | -     | 804.9   |
| AHQ-1-7, 6646               | K.IFSPNVNLTLDLPGM*TK.V                                                      | 2075.45768 | 2 | 6.90E-06 | 0.69 | 2.83   | -     | 685.2   |
| AHQ-1-5, 7193               | K.IFSPNVNLTLDLPGM*TK.V                                                      | 2059.45828 | 2 | 9.28E-05 | 0.92 | 4.09   | -     | 981.3   |
| AHQ-1-6, 3383               | K.LGIGVNNR.S                                                                | 941.15305  | 2 | 1.56E-05 | 0.92 | 3.07   | -     | 1138.0  |
| AHQ-1-6, 7254 - 7255        | K.LQDVFNVTGADIQLPQIVVGTQSSGK.S                                              | 2928.32977 | 3 | 2.42E-06 | 0.97 | 6.78   | -     | 1746.6  |
| AHQ-1-14 - , 6155           | K.SLLDDLLTSEEDM*AQR.R                                                       | 1940.07638 | 2 | 9.24E-08 | 0.96 | 5.04   | -     | 1321.2  |
| AHQ-1-13 - , 6829 - 6901    | K.SLLDDLLTSEEDM*AQR.R                                                       | 1924.07698 | 2 | 1.81E-05 | 0.92 | 3.94   | -     | 990.0   |
| AHQ-1-6, 7230               | R.TLESVDPLGLLNTDILTAR.N                                                     | 2212.52928 | 2 | 5.50E-06 | 0.96 | 5.15   | -     | 1068.0  |
| gi 4758018 ref NP_004359.1  | calponin 2; Calonin 2 [Homo sapiens]                                        |            |   | 8.59E-08 | 1.88 | 20.22  | 9.10  | 33696.9 |
| AHQ-1-12, 2863 - 2865       | K.GLQSGVDIGVK.V                                                             | 1073.22510 | 2 | 1.09E-05 | 0.92 | 3.65   | -     | 1156.4  |
| AHQ-1-11, 5950 - 6024       | R.TWIEGLTGLSIGPDFQK.G                                                       | 1863.10294 | 2 | 2.41E-05 | 0.94 | 4.15   | -     | 1118.2  |
| AHQ-1-9, 6604               | R.TWIEGLTGLSIGPDFQK.G                                                       | 1863.10294 | 2 | 5.65E-06 | 0.95 | 3.55   | -     | 1637.1  |
| AHQ-1-12, 6146 - 6173       | R.TWIEGLTGLSIGPDFQK.G                                                       | 1863.10294 | 2 | 8.59E-08 | 0.96 | 4.03   | -     | 1637.3  |
| AHQ-1-12, 6270              | R.TWIEGLTGLSIGPDFQK.G                                                       | 1863.10294 | 2 | 6.90E-04 | 0.56 | 2.80   | -     | 424.6   |
| AHQ-1-13 - , 6449 - 6524    | R.TWIEGLTGLSIGPDFQK.G                                                       | 1863.10294 | 2 | 1.22E-05 | 0.95 | 4.26   | -     | 1149.6  |
| AHQ-1-14 - , 6195 - 6267    | R.TWIEGLTGLSIGPDFQK.G                                                       | 1863.10294 | 2 | 1.37E-06 | 0.96 | 4.39   | -     | 1293.6  |
| AHQ-1-1, 6573               | R.TWIEGLTGLSIGPDFQK.G                                                       | 1863.10294 | 2 | 2.97E-05 | 0.94 | 3.72   | -     | 1362.8  |
| gi 5453599 ref NP_006127.1  | capping protein (actin filament) muscle Z-line, alpha 2; F-actin cappin     |            |   | 8.74E-08 | 2.54 | 30.35  | 12.20 | 32949.8 |
| AHQ-1-9, 5279 - 5286        | K.FTITPSTTQVVGILK.I                                                         | 1605.90007 | 2 | 1.33E-04 | 0.92 | 4.27   | -     | 527.1   |
| AHQ-1-13 - , 5436 - 5504    | K.FTITPSTTQVVGILK.I                                                         | 1605.90007 | 2 | 1.19E-06 | 0.81 | 3.29   | -     | 428.9   |
| AHQ-1-9, 5379               | K.IDGQQTIIACIESHQFQAK.N                                                     | 2189.43441 | 2 | 8.74E-08 | 0.75 | 3.32   | -     | 504.1   |
| AHQ-1-9, 4855               | K.KIDGQQTIIACIESHQFQAK.N                                                    | 2317.60733 | 3 | 9.28E-08 | 0.98 | 6.96   | -     | 2682.1  |
| gi 10835242 ref NP_006249.1 | protein kinase, cGMP-dependent, type I; Protein kinase, cGMP-dependent      |            |   | 9.35E-08 | 0.93 | 10.19  | 2.50  | 77803.3 |
| AHQ-1-6, 6884               | K.LSDFNIDTLVGGVFGFR.V                                                       | 1781.98992 | 2 | 9.35E-08 | 0.93 | 3.90   | -     | 1044.9  |
| gi 7661922 ref NP_005814.1  | RAB21, member RAS oncogene family [Homo sapiens]                            |            |   | 1.02E-07 | 0.97 | 10.28  | 7.60  | 24347.4 |
| AHQ-1-10, 3999 - 4008       | R.HVSIQEAESYAESVGAQ.H                                                       | 1805.92351 | 2 | 1.02E-07 | 0.97 | 5.58   | -     | 1225.3  |
| gi 4504073 ref NP_000398.1  | glycoprotein Ib beta polypeptide precursor [Homo sapiens]                   |            |   | 1.05E-07 | 2.41 | 30.21  | 15.50 | 21716.6 |
| AHQ-1-1, 4907               | R.LLPLYLAEDELR.A                                                            | 1332.52691 | 2 | 1.05E-07 | 0.85 | 3.14   | -     | 545.3   |
| AHQ-1-3, 4869 - 4870        | R.LLPLYLAEDELR.A                                                            | 1332.52691 | 2 | 4.13E-06 | 0.77 | 3.06   | -     | 418.6   |
| AHQ-1-4, 4942               | R.LLPLYLAEDELR.A                                                            | 1332.52691 | 2 | 8.80E-07 | 0.81 | 3.03   | -     | 632.4   |
| AHQ-1-6, 4727 - 4738        | R.LLPLYLAEDELR.A                                                            | 1332.52691 | 2 | 8.46E-05 | 0.78 | 2.78   | -     | 590.2   |
| AHQ-1-8, 4699               | R.LLPLYLAEDELR.A                                                            | 1332.52691 | 2 | 2.74E-07 | 0.78 | 3.05   | -     | 608.4   |
| AHQ-1-9, 4666               | R.LLPLYLAEDELR.A                                                            | 1332.52691 | 2 | 2.32E-06 | 0.69 | 2.89   | -     | 330.2   |
| AHQ-1-13, 4557              | R.LLPLYLAEDELR.A                                                            | 1332.52691 | 2 | 5.41E-05 | 0.90 | 3.06   | -     | 783.7   |
| AHQ-1-10, 4259 - 4264       | R.LLPLYLAEDELR.A                                                            | 1332.52691 | 2 | 2.62E-05 | 0.74 | 2.62   | -     | 467.8   |
| AHQ-1-12, 4590              | R.LLPLYLAEDELR.A                                                            | 1332.52691 | 2 | 4.05E-05 | 0.69 | 2.62   | -     | 356.0   |
| AHQ-1-11, 4390 - 4422       | R.LLPLYLAEDELR.A                                                            | 1332.52691 | 2 | 2.78E-07 | 0.88 | 3.51   | -     | 467.8   |
| AHQ-1-10, 3980              | R.LSLTDPVLAER.A                                                             | 1214.39356 | 2 | 2.75E-04 | 0.90 | 3.30   | -     | 1287.4  |
| AHQ-1-11, 4083 - 4094       | R.LSLTDPVLAER.A                                                             | 1214.39356 | 2 | 2.99E-06 | 0.96 | 4.13   | -     | 1547.8  |
| AHQ-1-11, 2319              | R.TAHLGANPWPR.C                                                             | 1213.24913 | 2 | 2.68E-06 | 0.60 | 2.78   | -     | 458.4   |
| gi 29731325 ref XP_293023.1 | similar to peptidyl-Pro cis trans isomerase [Homo sapiens]                  |            |   | 1.11E-07 | 0.88 | 10.19  | 6.00  | 28867.8 |
| AHQ-1-13 - , 4231 - 4235    | K.AGPNTNGSOFFICTAK.T                                                        | 1714.88050 | 2 | 8.02E-06 | 0.74 | 3.30   | -     | 511.5   |
| AHQ-1-12, 4045 - 4046       | K.AGPNTNGSOFFICTAK.T                                                        | 1714.88050 | 2 | 1.11E-07 | 0.88 | 3.72   | -     | 644.5   |
| gi 30148346 ref XP_302059.1 | similar to MLRQ subunit of the NADH: ubiquinone oxidoreductase complex      |            |   | 1.14E-07 | 0.88 | 10.15  | 6.60  | 17253.8 |
| AHQ-1-14, 4233              | K.FYSVNVVDSYK.L                                                             | 1222.32788 | 1 | 2.30E-06 | 0.49 | 2.46   | -     | 547.4   |
| AHQ-1-14 - , 3403           | K.FYSVNVVDSYK.L                                                             | 1222.32788 | 2 | 1.14E-07 | 0.88 | 3.10   | -     | 646.5   |
| AHQ-1-14, 4232              | K.FYSVNVVDSYK.L                                                             | 1222.32788 | 2 | 2.14E-04 | 0.68 | 2.82   | -     | 405.1   |
| gi 28395033 ref NP_786886.1 | ras homolog gene family, member C; Aplysia RAS-related homolog 9 (onco      |            |   | 1.16E-07 | 5.31 | 60.22  | 44.00 | 22006.2 |
| AHQ-1-13 - , 4877 - 4887    | K.HFCPNVPIILVGNK.K                                                          | 1609.91693 | 2 | 6.35E-05 | 0.95 | 3.96   | -     | 1565.8  |
| AHQ-1-11, 4482              | K.HFCPNVPIILVGNK.K                                                          | 1609.91693 | 2 | 1.23E-04 | 0.95 | 3.63   | -     | 1439.4  |
| AHQ-1-10, 4316 - 4319       | K.HFCPNVPIILVGNK.K                                                          | 1609.91693 | 2 | 5.91E-04 | 0.97 | 4.31   | -     | 1627.4  |
| AHQ-1-10, 4000 - 4005       | K.HFCPNVPIILVGNK.D                                                          | 1738.08985 | 2 | 5.01E-06 | 0.85 | 3.44   | -     | 916.6   |
| AHQ-1-10, 4096              | R.ISAFYLECSAK.T                                                             | 1347.51850 | 2 | 4.93E-04 | 0.93 | 3.37   | -     | 1063.0  |
| AHQ-1-13 - , 6833           | R.LRPLSYPTDVTILM*CFSDSPDLENPEK.W                                            | 3483.90759 | 3 | 3.87E-04 | 0.87 | 4.23   | -     | 659.5   |
| AHQ-1-10, 2604              | K.LVIVGDGACGK.T                                                             | 1090.27572 | 1 | 1.16E-07 | 0.75 | 3.23   | -     | 533.1   |
| AHQ-1-10, 2603 - 2605       | K.LVIVGDGACGK.T                                                             | 1090.27572 | 2 | 1.05E-04 | 0.85 | 3.33   | -     | 816.3   |
| AHQ-1-10, 2599              | K.LVIVGDGACGK.T                                                             | 1090.27572 | 1 | 7.78E-05 | 0.53 | 2.04   | -     | 621.5   |
| AHQ-1-13 - , 5185 - 5212    | K.QVELALWDTAGQEDYDR.L                                                       | 2010.10662 | 2 | 4.35E-06 | 0.95 | 4.38   | -     | 1148.8  |
| AHQ-1-10, 4625              | K.QVELALWDTAGQEDYDR.L                                                       | 2010.10662 | 2 | 5.47E-04 | 0.94 | 3.88   | -     | 1261.6  |
| gi 28827809 ref NP_789797.1 | nucleoside diphosphate kinase B-like [Homo sapiens]                         |            |   | 1.17E-07 | 3.03 | 40.21  | 29.20 | 15529.0 |
| AHQ-1-12, 3317 - 3387       | R.GDFCQVGR.N                                                                | 1053.17404 | 2 | 1.46E-05 | 0.89 | 3.25   | -     | 993.5   |
| AHQ-1-12, 3321              | R.GDFCQVGR.N                                                                | 1053.17404 | 1 | 2.43E-04 | 0.34 | 1.82   | -     | 253.5   |
| AHQ-1-12, 2151              | R.NIHGSDSVKSAEK.E                                                           | 1485.62464 | 1 | 4.06E-06 | 0.56 | 3.09   | -     | 327.9   |
| AHQ-1-12, 2137              | R.NIHGSDSVKSAEK.E                                                           | 1485.62464 | 2 | 6.93E-06 | 0.63 | 3.43   | -     | 553.9   |
| AHQ-1-12, 2829 - 2906       | R.VMLGETNPADSKPGTIR.G                                                       | 1787.03151 | 2 | 1.61E-06 | 0.78 | 3.71   | -     | 535.8   |
| AHQ-1-12, 2830              | R.VMLGETNPADSKPGTIR.G                                                       | 1787.03151 | 3 | 7.97E-07 | 0.78 | 3.60   | -     | 562.1   |
| AHQ-1-12, 2649              | R.VMLGETNPADSKPGTIR.G                                                       | 1803.03091 | 2 | 1.32E-06 | 0.79 | 3.49   | -     | 666.3   |
| AHQ-1-12, 2722              | R.VMLGETNPADSKPGTIR.G                                                       | 1787.03151 | 2 | 3.77E-05 | 0.76 | 3.34   | -     | 565.2   |
| AHQ-1-12, 2650              | R.VMLGETNPADSKPGTIR.G                                                       | 1803.03091 | 3 | 1.17E-07 | 0.80 | 3.01   | -     | 739.1   |
| gi 4505735 ref NP_002611.1  | platelet factor 4 variant 1; Platelet factor 4, variant 1 (PF4-like) [H     |            |   | 1.20E-07 | 2.81 | 30.24  | 26.00 | 11552.6 |
| AHQ-1-14 - , 3884           | R.AEAEDDGLQCLCVK.T                                                          | 1739.86036 | 2 | 1.20E-07 | 0.97 | 4.81   | -     | 1816.4  |
| AHQ-1-14 - , 3767 - 3784    | R.AEAEDDGLQCLCVK.T                                                          | 1739.86036 | 2 | 2.27E-04 | 0.94 | 4.60   | -     | 752.9   |
| AHQ-1-14 - , 4942           | K.ICLDLQALLYK.K                                                             | 1351.63656 | 2 | 9.51E-04 | 0.89 | 3.54   | -     | 1145.9  |
| AHQ-1-14 - , 5834           | R.ICLDLQALLYK.K                                                             | 1479.80948 | 2 | 3.33E-04 | 0.94 | 4.21   | -     | 956.6   |
| gi 4507149 ref NP_000445.1  | superoxide dismutase 1, soluble (amyotrophic lateral sclerosis 1 (adult     |            |   | 1.20E-07 | 3.56 | 40.30  | 57.80 | 15935.7 |
| AHQ-1-12, 5231              | K.AVCVCLKGDGPPVQGIINFEQK.E                                                  | 2174.50602 | 2 | 2.85E-05 | 0.93 | 4.46   | -     | 901.4   |
| AHQ-1-11, 3911              | K.GDGPVQGIINFEQK.E                                                          | 1502.65366 | 2 | 2.38E-05 | 0.73 | 2.95   | -     | 697.8   |
| AHQ-1-12, 4810              | K.GLTEGLHGHHVHEFGDNTAGCTSAGPHFNPLSR.K                                       | 3522.76733 | 3 | 1.20E-07 | 0.95 | 4.82   | -     | 1479.5  |
| AHQ-1-12, 5778              | R.HVGDNLGNVTDKDGADVSIEDSVLSGDHCIIGR.T                                       | 3724.02282 | 3 | 1.55E-05 | 0.90 | 4.33   | -     | 827.9   |
| AHQ-1-11, 5587              | R.HVGDNLGNVTDKDGADVSIEDSVLSGDHCIIGR.T                                       | 3724.02282 | 3 | 3.95E-07 | 0.95 | 5.95   | -     | 991.1   |
| gi 450397 ref NP_001484.1   | GDP dissociation inhibitor 1; mental retardation, X-linked 41; mental r     |            |   | 1.21E-07 | 0.86 | 10.28  | 4.30  | 50582.4 |
| AHQ-1-7, 5450               | R.NPYYYGESSITPLEELYK.R                                                      | 2148.31110 | 2 | 1.05E-06 | 0.97 | 5.51   | -     | 1138.6  |
| AHQ-1-12, 5151              | R.NPYYYGESSITPLEELYK.R                                                      | 2148.31110 | 2 | 1.21E-07 | 0.86 | 3.83   | -     | 709.1   |
| AHQ-1-6, 5388               | R.NPYYYGESSITPLEELYK.R                                                      | 2148.31110 | 2 | 4.06E-05 | 0.93 | 4.49   | -     | 917.4   |
| gi 4503291 ref NP_001346.1  | D-dopachrome tautomerase [Homo sapiens]                                     |            |   | 1.37E-07 | 1.83 | 20.18  | 22.00 | 12711.7 |
| AHQ-1-14 - , 5624 - 5643    | R.FFLESWQIGK.I                                                              | 1352.56151 | 2 | 1.37E-07 | 0.90 | 2.99   | -     | 803.0   |
| AHQ-1-14, 4525              | R.LCAAAAASILGKPADR.V                                                        | 1515.76031 | 2 | 3.37E-05 | 0.92 | 3.68   | -     | 1217.3  |
| gi 29729950 ref XP_293759.1 | similar to Heat shock protein HSP 90-alpha (HSP 86) [Homo sapiens] [MA      |            |   | 1.40E-07 | 0.86 | 10.17  | 5.00  | 39776.4 |
| AHQ-1-5, 5113               | K.CLELFTELAEADKENYK.F                                                       | 2132.37640 | 2 | 1.40E-07 | 0.86 | 3.45   | -     | 963.9   |





|                             |                                                                         |            |   |          |      |       |       |          |
|-----------------------------|-------------------------------------------------------------------------|------------|---|----------|------|-------|-------|----------|
| AHQ-1-6, 4227               | R.DLQVKGESLEVIQTDDTK.V                                                  | 2217.41641 | 2 | 1.55E-05 | 0.88 | 4.09  | -     | 484.3    |
| gi15553127[ref NP_000180.2] | hexokinase 2, muscle [Homo sapiens]                                     |            |   | 4.16E-07 | 0.93 | 10.16 | 1.20  | 102379.3 |
| AHQ-1-4, 2379               | K.GAAM*VTAVYR.L                                                         | 1126.31148 | 2 | 4.16E-07 | 0.93 | 3.19  | -     | 1532.9   |
| gi14249382[ref NP_116139.1] | hypothetical protein MGC15429 [Homo sapiens]                            |            |   | 4.17E-07 | 1.87 | 20.19 | 11.00 | 22345.5  |
| AHQ-1-11, 3552              | R.AVAIDLPLGLGHSK.E                                                      | 1278.48248 | 2 | 1.06E-05 | 0.94 | 3.80  | -     | 1213.6   |
| AHQ-1-11, 4243              | R.FSVLLHGR.F                                                            | 1155.41731 | 2 | 4.17E-07 | 0.93 | 3.31  | -     | 1143.1   |
| gi10047092[ref NP_037391.1] | neuronal protein [Homo sapiens]                                         |            |   | 4.33E-07 | 0.94 | 10.19 | 5.00  | 31454.0  |
| AHQ-1-14-, 6022             | R.TTDFQTVDLWEGK.D                                                       | 1653.81378 | 2 | 6.52E-05 | 0.89 | 3.44  | -     | 1261.0   |
| AHQ-1-12, 5878              | R.TTDFQTVDLWEGK.D                                                       | 1653.81378 | 2 | 4.33E-07 | 0.94 | 3.89  | -     | 1180.6   |
| gi29727565[ref XP_291384.1] | similar to Cytochrome c, somatic [Homo sapiens]                         |            |   | 4.36E-07 | 1.96 | 20.31 | 16.20 | 11621.4  |
| AHQ-1-13-, 6556 - 6569      | K.GIIWGEDTLM*EYLENPK.K                                                  | 2025.26771 | 2 | 4.36E-07 | 0.98 | 5.62  | -     | 1762.9   |
| AHQ-1-13-, 6876             | K.GIIWGEDTLMEYLENPK.K                                                   | 2009.26831 | 2 | 5.73E-07 | 0.98 | 6.22  | -     | 1834.2   |
| AHQ-1-13, 6107 - 6112       | K.GIIWGEDTLM*EYLENPK.K                                                  | 2025.26771 | 2 | 1.42E-06 | 0.97 | 5.00  | -     | 1542.4   |
| gi4506505[ref NP_002916.1]  | regulator of G-protein signaling 10 [Homo sapiens]                      |            |   | 4.41E-07 | 1.35 | 20.18 | 16.20 | 19607.9  |
| AHQ-1-11, 4558              | K.LQDQIFNLMK.Y                                                          | 1250.49254 | 2 | 3.55E-04 | 0.78 | 3.66  | -     | 538.9    |
| AHQ-1-11, 5175              | K.WAASLENLLEDPEGVKR.F                                                   | 1928.13502 | 2 | 4.41E-07 | 0.57 | 3.36  | -     | 326.6    |
| gi12164318[ref NP_004028.3] | adenosine monophosphate deaminase 2 (isoform L) [Homo sapiens]          |            |   | 4.50E-07 | 1.62 | 20.18 | 3.50  | 100687.2 |
| AHQ-1-5, 6189               | K.CGVPFTDLLDAAK.S                                                       | 1408.60184 | 2 | 4.50E-07 | 0.80 | 3.06  | -     | 522.6    |
| AHQ-1-5, 5675               | R.SAPYEFPEESPQLEER.R                                                    | 2151.27185 | 2 | 1.37E-04 | 0.81 | 3.35  | -     | 466.8    |
| gi1798601[ref NP_005505.2]  | major histocompatibility complex, class I, B; HLA class I histocompati  |            |   | 4.56E-07 | 2.78 | 30.25 | 13.30 | 40459.8  |
| AHQ-1-8, 4867               | R.APWIEQEGPEYWDNR.N                                                     | 1776.88556 | 2 | 4.56E-07 | 0.91 | 3.97  | -     | 866.4    |
| AHQ-1-12, 4770              | R.APWIEQEGPEYWDNR.N                                                     | 1776.88556 | 2 | 5.11E-04 | 0.64 | 3.00  | -     | 597.1    |
| AHQ-1-9, 4875               | R.APWIEQEGPEYWDNR.N                                                     | 1776.88556 | 2 | 6.52E-06 | 0.94 | 3.87  | -     | 1342.0   |
| AHQ-1-14, 5774              | R.APWIEQEGPEYWDNR.N                                                     | 1776.88556 | 2 | 1.49E-05 | 0.72 | 3.11  | -     | 674.5    |
| AHQ-1-8, 5055 - 5088        | R.FISGVYVDQTQVFR.F                                                      | 1646.82447 | 2 | 5.10E-04 | 0.91 | 3.78  | -     | 1054.2   |
| AHQ-1-8, 4064               | R.GHDQYAYDGKDYIALNEDLR.S                                                | 2357.47731 | 3 | 2.03E-06 | 0.95 | 5.03  | -     | 1389.6   |
| gi17019375[ref NP_037373.1] | formin homology 2 domain containing 1; FH1/FH2 domain-containing protei |            |   | 4.65E-07 | 2.54 | 30.20 | 5.40  | 126496.5 |
| AHQ-1-6, 6988               | R.FGPGCATLWASLDPVSDTAR.L                                                | 2165.41131 | 2 | 4.65E-07 | 0.85 | 3.57  | -     | 764.0    |
| AHQ-1-6, 3927               | K.FSGVAGEAPSNPSVPAVSSGPR.G                                              | 2227.41945 | 2 | 3.16E-04 | 0.79 | 3.85  | -     | 310.4    |
| AHQ-1-8, 5972               | R.VQYLEDTPDFACANFPEPR.R                                                 | 2271.44761 | 2 | 1.98E-05 | 0.90 | 3.92  | -     | 861.7    |
| gi4502209[ref NP_001653.1]  | ADP-ribosylation factor 5 [Homo sapiens]                                |            |   | 4.79E-07 | 0.79 | 10.13 | 7.80  | 20529.5  |
| AHQ-1-11, 5079              | K.NICFTVWDDVGGQDK.I                                                     | 1640.79838 | 2 | 4.79E-07 | 0.79 | 2.55  | -     | 1078.8   |
| gi17019545[ref NP_037481.1] | secreted protein of unknown function [Homo sapiens]                     |            |   | 4.82E-07 | 0.74 | 10.17 | 8.70  | 18856.2  |
| AHQ-1-12, 3954              | R.YGEEEEQPIYLAVK.G                                                      | 1711.85009 | 2 | 4.82E-07 | 0.74 | 3.39  | -     | 513.9    |
| gi23110942[ref NP_002781.2] | proteasome alpha 5 subunit; proteasome component 5; macropain subunit   |            |   | 4.93E-07 | 1.79 | 20.20 | 12.90 | 26410.9  |
| AHQ-1-10, 3041              | R.AIGSASEGAQSSSLQEYVHK.S                                                | 1963.09463 | 2 | 4.93E-07 | 0.83 | 3.98  | -     | 531.7    |
| AHQ-1-10, 5188              | R.LFQVEYAIKAIK.L                                                        | 1424.66595 | 2 | 6.50E-07 | 0.96 | 3.72  | -     | 2086.0   |
| gi13376181[ref NP_079079.1] | hypothetical protein FLJ21665 [Homo sapiens]                            |            |   | 4.98E-07 | 0.63 | 10.15 | 3.80  | 49908.5  |
| AHQ-1-7, 5096               | R.SFGGGTSGGFTSLLM*ER.L                                                  | 1720.88522 | 2 | 4.98E-07 | 0.63 | 3.07  | -     | 577.9    |
| gi4557297[ref NP_000022.1]  | delta-aminolevulinic acid dehydratase; porphobilinogen synthase; aminol |            |   | 5.01E-07 | 0.93 | 10.22 | 5.80  | 36294.7  |
| AHQ-1-9, 5016 - 5047        | R.GSAADSEESPAIEAHLHR.K                                                  | 1967.12642 | 2 | 5.01E-07 | 0.93 | 4.34  | -     | 683.4    |
| gi7705819[ref NP_057181.1]  | HSPC039 protein [Homo sapiens]                                          |            |   | 5.05E-07 | 0.87 | 10.22 | 24.40 | 8968.7   |
| AHQ-1-14-, 5116             | K.NIWGWDQGGGGFGEPEGIK.S                                                 | 2033.18655 | 2 | 5.05E-07 | 0.87 | 3.84  | -     | 619.4    |
| AHQ-1-14, 5996              | K.NIWGWDQGGGGFGEPEGIK.S                                                 | 2033.18655 | 2 | 3.44E-06 | 0.89 | 4.32  | -     | 630.8    |
| gi4504505[ref NP_000405.1]  | hydroxysteroid (17-beta) dehydrogenase 4 [Homo sapiens]                 |            |   | 5.42E-07 | 1.78 | 20.20 | 3.90  | 79685.9  |
| AHQ-1-6, 2783               | R.ATSTATSGFAGAIQK.L                                                     | 1468.59408 | 2 | 1.18E-05 | 0.78 | 3.10  | -     | 703.8    |
| AHQ-1-5, 2749               | R.ATSTATSGFAGAIQK.L                                                     | 1468.59408 | 2 | 5.42E-07 | 0.82 | 3.24  | -     | 877.6    |
| AHQ-1-6, 3156               | R.VVLTGAGAGLGR.A                                                        | 1170.38715 | 2 | 9.30E-06 | 0.96 | 4.01  | -     | 1590.6   |
| gi4557697[ref NP_000412.1]  | keratin 10; Keratin-10 [Homo sapiens]                                   |            |   | 5.64E-07 | 2.63 | 30.20 | 10.30 | 57247.1  |
| AHQ-1-5, 2654               | R.ALEESNYELEGK.I                                                        | 1382.45482 | 2 | 1.36E-06 | 0.92 | 3.82  | -     | 1057.5   |
| AHQ-1-13-, 2824             | R.ALEESNYELEGK.I                                                        | 1382.45482 | 2 | 1.72E-04 | 0.69 | 2.94  | -     | 652.9    |
| AHQ-1-14-, 2762             | R.ALEESNYELEGK.I                                                        | 1382.45482 | 2 | 5.64E-07 | 0.93 | 3.67  | -     | 1278.6   |
| AHQ-1-1, 4349               | K.GSLGGGFSGGGSGGFSR.G                                                   | 1708.76962 | 2 | 7.57E-06 | 0.84 | 3.38  | -     | 646.7    |
| AHQ-1-14-, 5591             | R.NVSTGDDNVEM*NAAPGVDLTQLLNNM*R.N                                       | 2906.20003 | 3 | 9.38E-05 | 0.86 | 4.04  | -     | 975.5    |
| gi5453605[ref NP_006421.1]  | chaperonin containing TCP1, subunit 4 (delta); chaperonin containing t- |            |   | 5.69E-07 | 0.92 | 10.16 | 2.40  | 57838.8  |
| AHQ-1-7, 3648               | K.VIDPATATSDLR.D                                                        | 1358.52277 | 2 | 5.69E-07 | 0.92 | 3.07  | -     | 1123.7   |
| gi8923812[ref NP_060943.1]  | uncharacterized hypothalamus protein HT012 [Homo sapiens]               |            |   | 6.29E-07 | 0.91 | 10.18 | 8.60  | 14960.4  |
| AHQ-1-13-, 4248             | K.TLAFTSVDLTNK.A                                                        | 1310.47811 | 2 | 3.96E-06 | 0.93 | 3.62  | -     | 1030.8   |
| AHQ-1-13, 4068              | K.TLAFTSVDLTNK.A                                                        | 1310.47811 | 2 | 6.29E-07 | 0.91 | 2.79  | -     | 1398.3   |
| gi4502219[ref NP_001656.1]  | ras homolog gene family, member G (rho G); RhoG [Homo sapiens]          |            |   | 6.46E-07 | 1.24 | 20.17 | 18.80 | 21338.4  |
| AHQ-1-11, 4712              | K.EYIPTVFDNYSQAQSAVDGR.T                                                | 2133.25975 | 2 | 6.46E-07 | 0.80 | 3.35  | -     | 478.0    |
| AHQ-1-11, 4706              | R.TVNLNLWDTAGQEEYDR.L                                                   | 2025.12129 | 2 | 9.42E-04 | 0.44 | 2.63  | -     | 339.4    |
| gi30157434[ref XP_300550.1] | similar to cDNA sequence, BC023835 [Homo sapiens]                       |            |   | 6.85E-07 | 1.17 | 20.18 | 20.10 | 23169.2  |
| AHQ-1-11, 4512              | K.DSGACFSASEPDAHVVLVDR.H                                                | 2134.26934 | 2 | 4.65E-04 | 0.27 | 2.74  | -     | 198.5    |
| AHQ-1-11, 5595              | R.YHALLIPSCPGALTLASSGSLAR.I                                             | 2472.80246 | 3 | 6.85E-07 | 0.90 | 3.62  | -     | 1783.4   |
| gi30158489[ref XP_301421.1] | similar to Chloride intracellular channel protein 1 (Nuclear chloride   |            |   | 7.31E-07 | 1.26 | 30.23 | 11.60 | 28267.5  |
| AHQ-1-10, 5485 - 5539       | K.FLNGNELTLADCNLLPK.L                                                   | 1934.20276 | 2 | 1.89E-05 | 0.54 | 3.25  | -     | 576.1    |
| AHQ-1-13-, 6192             | K.FLNGNELTLADCNLLPK.L                                                   | 1934.20276 | 2 | 3.42E-05 | 0.90 | 4.63  | -     | 1204.9   |
| AHQ-1-12, 5550              | R.KFLNGNELTLADCNLLPK.L                                                  | 2062.37568 | 2 | 9.98E-04 | 0.58 | 3.57  | -     | 612.5    |
| AHQ-1-10, 2483              | K.NSNPALNDNLQK.G                                                        | 1328.41362 | 1 | 1.28E-04 | 0.16 | 2.21  | -     | 260.1    |
| AHQ-1-10, 2333              | K.NSNPALNDNLQK.G                                                        | 1328.41362 | 1 | 1.34E-04 | 0.09 | 2.36  | -     | 199.2    |
| AHQ-1-10, 2175              | K.NSNPALNDNLQK.G                                                        | 1328.41362 | 1 | 7.31E-07 | 0.13 | 2.06  | -     | 222.6    |
| gi13489091[ref NP_066949.1] | 3-mercaptopurinate sulfurtransferase [Homo sapiens]                     |            |   | 7.40E-07 | 3.37 | 40.31 | 24.90 | 33178.2  |
| AHQ-1-9, 3244               | R.AFGHHAASLDLGGLR.H                                                     | 1550.74638 | 2 | 6.87E-05 | 0.85 | 3.41  | -     | 926.8    |
| AHQ-1-9, 6710               | R.AGQPQLLDASWYLPK.L                                                     | 1801.07798 | 2 | 7.40E-07 | 0.97 | 4.87  | -     | 1870.5   |
| AHQ-1-9, 7071 - 7139        | R.DGIEPQHIGPTVNIPTDFLSQEGLEK.S                                          | 2912.19939 | 3 | 9.01E-04 | 0.96 | 6.27  | -     | 1230.2   |
| AHQ-1-9, 4779 - 4792        | R.HIPGAFFDIDQCSDR.T                                                     | 1850.98926 | 2 | 4.29E-05 | 0.59 | 2.58  | -     | 365.1    |
| gi4507207[ref NP_003121.1]  | sorcin; Sorcin (class 4 gene) [Homo sapiens]                            |            |   | 7.57E-07 | 0.94 | 10.24 | 10.10 | 21673.3  |
| AHQ-1-11, 4468 - 4470       | R.CLTQSGIAGGYPFNLETCL.R                                                 | 2275.54736 | 2 | 7.57E-07 | 0.94 | 4.83  | -     | 537.9    |
| gi24307939[ref NP_036205.1] | chaperonin containing TCP1, subunit 5 (epsilon) [Homo sapiens]          |            |   | 7.81E-07 | 1.45 | 20.16 | 4.40  | 59670.7  |
| AHQ-1-7, 4537               | K.IAIIPTCFEPPPKP.K                                                      | 1612.95750 | 2 | 9.77E-04 | 0.70 | 3.15  | -     | 401.1    |
| AHQ-1-7, 3318               | R.SLHDALCVIR.N                                                          | 1185.3874  | 2 | 7.81E-07 | 0.74 | 2.72  | -     | 650.4    |
| gi21314617[ref NP_000433.2] | platelet/endothelial cell adhesion molecule (CD31 antigen); platelet/e  |            |   | 7.91E-07 | 3.97 | 50.30 | 9.90  | 82449.6  |
| AHQ-1-3, 5995               | R.CESISGTLPISYQLLK.T                                                    | 1811.08954 | 2 | 4.94E-05 | 0.81 | 3.06  | -     | 432.0    |
| AHQ-1-4, 6103               | R.CESISGTLPISYQLLK.T                                                    | 1811.08954 | 2 | 1.37E-04 | 0.90 | 4.23  | -     | 489.2    |
| AHQ-1-1, 5948 - 5956        | R.CESISGTLPISYQLLK.T                                                    | 1811.08954 | 2 | 3.61E-04 | 0.73 | 3.20  | -     | 296.4    |
| AHQ-1-4, 6686               | K.CTIQVTHLAQEFPEIIQK.D                                                  | 2270.63371 | 2 | 2.74E-04 | 0.97 | 5.97  | -     | 1258.1   |
| AHQ-1-5, 3442               | K.EDTIVSQQDFTK.I                                                        | 1512.60049 | 2 | 5.38E-04 | 0.57 | 2.98  | -     | 371.6    |
| AHQ-1-4, 2491               | R.IISGIHMQTSSESTK.S                                                     | 1532.74472 | 2 | 7.91E-07 | 0.95 | 4.13  | -     | 977.3    |
| AHQ-1-5, 4127               | K.STESYFIPVIR.I                                                         | 1328.45199 | 2 | 4.71E-04 | 0.68 | 2.58  | -     | 498.4    |
| gi30147105[ref XP_210550.2] | similar to Chain , Aldose Reductase (E.C.1.1.1.21) Mutant With Tyr 48   |            |   | 7.92E-07 | 0.91 | 10.19 | 2.20  | 61339.9  |
| AHQ-1-5, 4271 - 4281        | K.ADLINNLGTIAK.S                                                        | 1243.43490 | 2 | 7.92E-07 | 0.91 | 3.80  | -     | 832.5    |
| AHQ-1-5, 4055               | K.ADLINNLGTIAK.S                                                        | 1243.43490 | 2 | 9.86E-06 | 0.86 | 3.54  | -     | 548.4    |
| gi45026293[ref NP_001760.1] | CD9 antigen; motility related protein; leukocyte antigen MIC3; antigen  |            |   | 8.22E-07 | 2.17 | 30.20 | 9.60  | 25419.9  |
| AHQ-1-11, 2228              | K.EVQEFYK.D                                                             | 943.03476  | 1 | 7.65E-04 | 0.57 | 2.93  | -     | 286.4    |
| AHQ-1-1, 2824               | K.EVQEFYKDYTNK.L                                                        | 1564.67709 | 2 | 2.84E-04 | 0.80 | 3.01  | -     | 816.7    |
| AHQ-1-10, 3163 - 3173       | K.KDVLTF7TVK.S                                                          | 1180.37558 | 2 | 6.86E-05 | 0.79 | 3.16  | -     | 691.0    |
| AHQ-1-9, 3176               | K.KDVLTF7TVK.S                                                          | 1180.37558 | 2 | 8.22E-07 | 0.79 | 2.85  | -     | 882.5    |
| AHQ-1-12, 3330              | K.KDVLTF7TVK.S                                                          | 1180.37558 | 2 | 5.12E-05 | 0.87 | 3.31  | -     | 882.1    |
| AHQ-1-1, 3600               | K.KDVLTF7TVK.S                                                          | 1180.37558 | 2 | 1.97E-05 | 0.92 | 3.43  | -     | 1159.6   |
| gi4507143[ref NP_003786.1]  | sorting nexin 3 isoform a; sorting nexin 3A [Homo sapiens]              |            |   | 8.25E-07 | 1.78 | 20.19 | 14.80 | 18762.2  |
| AHQ-1-12, 4886 - 4887       | R.GDDGIFDDFIEER.K                                                       | 1642.66158 | 2 | 8.25E-07 | 0.91 | 3.74  | -     | 963.2    |
| AHQ-1-12, 2759              | R.KQGLEQFINK.V                                                          | 1205.38836 | 2 | 8.40E-05 | 0.87 | 3.41  | -     | 895.9    |
| gi4503743[ref NP_002009.1]  | flightless I homolog [Homo sapiens]                                     |            |   | 8.28E-07 | 1.80 | 20.22 | 2.00  | 144750.1 |
|                             |                                                                         |            |   |          |      |       |       |          |

|                             |                                                                         |            |   |          |      |       |       |          |
|-----------------------------|-------------------------------------------------------------------------|------------|---|----------|------|-------|-------|----------|
| AHQ-1-9, 5847               | K.SHLPLALLPQTLDDQK.V                                                    | 1788.12388 | 2 | 2.41E-06 | 0.85 | 3.11  | -     | 773.2    |
| AHQ-1-9, 6752               | K.YFAEALGPLQSFQARPDLLINTYPK.S                                           | 2969.33891 | 3 | 8.32E-07 | 0.78 | 3.49  | -     | 472.3    |
| gi 20330805 ref NP_005263.1 | guanine nucleotide binding protein, alpha transducing activity polypep  |            |   | 8.46E-07 | 0.94 | 10.19 | 3.10  | 40175.6  |
| AHQ-1-9, 3143 - 3152        | K.LLLLGGAGESGK.S                                                        | 1058.25357 | 2 | 8.46E-07 | 0.94 | 3.79  | -     | 1329.2   |
| gi 4506193 ref NP_002784.1  | proteasome beta 1 subunit; proteasome subunit HCS; proteasome component |            |   | 8.50E-07 | 3.51 | 40.25 | 27.40 | 26489.2  |
| AHQ-1-11, 5408 - 5418       | K.AGGSASAMQLPLLDNQVGF.K.N                                               | 2005.28443 | 2 | 7.07E-04 | 0.88 | 4.20  | -     | 488.7    |
| AHQ-1-11, 6419              | R.FFPYVVYNIIGGLDEEGK.G                                                  | 2125.36396 | 2 | 1.40E-04 | 0.97 | 5.05  | -     | 1412.8   |
| AHQ-1-11, 3892              | K.GAVYVDFPVGSYQR.D                                                      | 1546.66500 | 2 | 2.70E-04 | 0.85 | 3.38  | -     | 735.9    |
| AHQ-1-11, 3435              | K.NMQNVHEHPLSLDR.A                                                      | 1652.85728 | 2 | 8.50E-07 | 0.80 | 3.64  | -     | 579.1    |
| gi 5902726 ref NP_005800.1  | peroxiredoxin 2; thioredoxin-dependent peroxide reductase 1 (thiol-spec |            |   | 8.55E-07 | 1.73 | 20.26 | 9.10  | 21856.8  |
| AHQ-1-11, 6299              | K.EGGLGPLNIPLLADVTR.R                                                   | 1736.00583 | 2 | 5.71E-04 | 0.77 | 2.95  | -     | 464.9    |
| AHQ-1-11, 5820              | R.KEGGLGPLNIPLLADVTR.R                                                  | 1864.17875 | 2 | 8.55E-07 | 0.97 | 5.26  | -     | 1109.8   |
| gi 9966825 ref NP_065089.1  | HEF like Protein [Homo sapiens]                                         |            |   | 8.67E-07 | 1.53 | 20.29 | 4.30  | 86696.2  |
| AHQ-1-13 - , 4333           | K.AISAFHGSLSSSQPAEITQSK.L                                               | 2260.48935 | 2 | 8.67E-07 | 0.97 | 5.86  | -     | 1580.6   |
| AHQ-1-13, 3457              | K.LVDTLCMETQER.D                                                        | 1496.68930 | 2 | 7.66E-04 | 0.56 | 2.66  | -     | 404.6    |
| gi 4759086 ref NP_004883.1  | vesicle trafficking protein sec22b [Homo sapiens]                       |            |   | 9.05E-07 | 2.73 | 30.22 | 20.00 | 24740.4  |
| AHQ-1-12, 2069              | R.DLQQYGSQAK.Q                                                          | 1209.29073 | 2 | 9.52E-04 | 0.93 | 3.39  | -     | 1256.5   |
| AHQ-1-12, 3921              | R.NLGSINTQDVQR.I                                                        | 1587.71696 | 2 | 9.05E-07 | 0.92 | 4.46  | -     | 823.3    |
| AHQ-1-12, 3973              | R.VADGLPLAASMQEEDQSGR.D                                                 | 1975.12722 | 2 | 1.88E-04 | 0.88 | 3.44  | -     | 747.5    |
| gi 14042953 ref NP_114420.1 | FKSG17 [Homo sapiens]                                                   |            |   | 9.67E-07 | 0.66 | 10.15 | 6.10  | 23305.9  |
| AHQ-1-11, 4507              | K.NILFVITKPDVYK.S                                                       | 1550.86611 | 2 | 9.67E-07 | 0.66 | 2.90  | -     | 651.6    |
| gi 13637631 ref XP_016625.1 | similar to voltage-dependent anion channel isoform 2 [Homo sapiens] [M  |            |   | 9.72E-07 | 1.29 | 20.21 | 11.30 | 31479.2  |
| AHQ-1-9, 4115 - 4183        | K.VNNSLLIGVYQTLRPGVK.L                                                  | 2104.39573 | 2 | 8.19E-04 | 0.33 | 2.72  | -     | 297.3    |
| AHQ-1-9, 4839               | K.YKWCEYGLTFTEK.W                                                       | 1726.92695 | 2 | 9.72E-07 | 0.97 | 4.29  | -     | 1479.9   |
| gi 4759044 ref NP_004841.1  | Rho-associated, coiled-coil containing protein kinase 2 [Homo sapiens]  |            |   | 9.80E-07 | 2.27 | 30.20 | 4.00  | 160883.4 |
| AHQ-1-3, 5218               | K.EFINLQSALESER.R                                                       | 1536.66842 | 2 | 9.80E-07 | 0.69 | 2.80  | -     | 758.8    |
| AHQ-1-3, 3725               | R.GAFGEVQLVR.H                                                          | 1076.23068 | 2 | 1.39E-04 | 0.82 | 2.96  | -     | 1150.3   |
| AHQ-1-3, 5427 - 5503        | R.SQLQALHIGLDSISGSPGDAEADDFPESR.L                                       | 3215.34459 | 3 | 2.70E-04 | 0.76 | 3.91  | -     | 808.3    |
| gi 5453714 ref NP_006448.1  | LIM protein (similar to rat protein kinase C-binding enigma) [Homo sapi |            |   | 1.01E-06 | 1.33 | 20.16 | 4.90  | 64027.9  |
| AHQ-1-13 - , 2049           | R.SAAAPKEPVPVQK.G                                                       | 1419.65094 | 2 | 5.74E-05 | 0.69 | 3.12  | -     | 481.8    |
| AHQ-1-13 - , 2951           | K.EVVKPVITSPAVSK.V                                                      | 1551.85241 | 2 | 1.01E-06 | 0.63 | 2.73  | -     | 322.2    |
| AHQ-1-13, 2933              | K.EVVKPVITSPAVSK.V                                                      | 1551.85241 | 2 | 3.48E-05 | 0.69 | 2.94  | -     | 310.7    |
| gi 19923457 ref NP_057447.2 | glycoprotein VI (platelet); platelet glycoprotein VI [Homo sapiens] [M  |            |   | 1.01E-06 | 0.92 | 10.20 | 3.20  | 67306.6  |
| AHQ-1-7, 5773               | K.PSLQALPSSLVPLEKPVTLR.C                                                | 2146.55880 | 2 | 4.39E-06 | 0.84 | 3.45  | -     | 555.9    |
| AHQ-1-7, 5756               | K.PSLQALPSSLVPLEKPVTLR.C                                                | 2146.55880 | 3 | 1.01E-06 | 0.92 | 4.05  | -     | 1177.1   |
| gi 20547107 ref XP_114482.1 | similar to HEAT SHOCK 70 KDA PROTEIN 4 (HEAT SHOCK 70-RELATED PROTEIN   |            |   | 1.01E-06 | 2.42 | 30.23 | 5.60  | 94330.9  |
| AHQ-1-4, 7038               | R.EFSITDVPVYPISLR.W                                                     | 1736.98906 | 2 | 7.10E-06 | 0.67 | 3.07  | -     | 317.4    |
| AHQ-1-4, 3318               | K.ELSTLNADAVTR.G                                                        | 1520.62416 | 2 | 6.29E-04 | 0.82 | 3.14  | -     | 670.0    |
| AHQ-1-4, 6814 - 6831        | K.SNLAYDIVQLTGLTGK.V                                                    | 1904.19651 | 2 | 1.01E-06 | 0.93 | 4.62  | -     | 781.8    |
| gi 4506675 ref NP_002941.1  | ribophorin I [Homo sapiens]                                             |            |   | 1.12E-06 | 0.93 | 10.21 | 2.80  | 68569.0  |
| AHQ-1-1, 5880               | R.FVDHVFDEQVIDSLTV.K.I                                                  | 1992.21748 | 2 | 1.12E-06 | 0.93 | 4.17  | -     | 829.5    |
| gi 11496891 ref NP_000662.2 | class III alcohol dehydrogenase 5 chi subunit; Alcohol dehydrogenase (  |            |   | 1.20E-06 | 0.95 | 10.26 | 5.90  | 39738.1  |
| AHQ-1-11, 4932 - 4963       | K.AAAVAWEAGKPLSIEIEVAPPK.A                                              | 2306.64276 | 2 | 2.72E-04 | 0.91 | 4.56  | -     | 546.3    |
| AHQ-1-9, 5200 - 5270        | K.AAAVAWEAGKPLSIEIEVAPPK.A                                              | 2306.64276 | 2 | 1.20E-06 | 0.95 | 5.13  | -     | 885.7    |
| gi 30147623 ref XP_293669.2 | similar to actinin, alpha 4 [Homo sapiens]                              |            |   | 1.22E-06 | 0.87 | 10.18 | 3.50  | 57794.4  |
| AHQ-1-5, 4250               | K.LSSGNPVTITVQIINSK.W                                                   | 1921.14079 | 2 | 1.22E-06 | 0.87 | 3.58  | -     | 724.0    |
| gi 5901922 ref NP_008996.1  | CDC37 homolog [Homo sapiens]                                            |            |   | 1.25E-06 | 0.91 | 10.21 | 5.60  | 44468.0  |
| AHQ-1-8, 6899               | R.LPGGLDPVVEYESPEELQK.C                                                 | 2270.52091 | 2 | 1.25E-06 | 0.91 | 4.25  | -     | 514.3    |
| gi 5454090 ref NP_006271.1  | signal sequence receptor, delta; translocon-associated protein delta [H |            |   | 1.26E-06 | 1.70 | 20.18 | 17.30 | 18998.5  |
| AHQ-1-12, 4725              | R.FDEESYSLLR.K                                                          | 1406.52121 | 2 | 1.26E-06 | 0.91 | 3.62  | -     | 917.4    |
| AHQ-1-12, 5991              | R.NNEDISIPFLRTVSDVDR.H                                                  | 2167.40715 | 3 | 1.58E-06 | 0.78 | 3.50  | -     | 689.3    |
| gi 4502171 ref NP_000476.1  | adenine phosphoribosyltransferase; AMP pyrophosphorylase; AMP diphospho |            |   | 1.26E-06 | 4.31 | 50.28 | 41.10 | 19607.6  |
| AHQ-1-11, 3666              | R.DISPLVKDPASFR.A                                                       | 1445.64525 | 2 | 5.60E-06 | 0.80 | 3.18  | -     | 569.6    |
| AHQ-1-11, 6506              | R.GFLFGPSLAQELGLGCVLIR.K                                                | 2149.54130 | 2 | 2.98E-06 | 0.98 | 5.70  | -     | 1753.0   |
| AHQ-1-11, 4907              | R.GKLPGLTWASYSLEYGK.A                                                   | 1968.24075 | 2 | 1.92E-05 | 0.81 | 3.26  | -     | 543.0    |
| AHQ-1-11, 3479              | R.IDYIAGLDSR.G                                                          | 1123.24098 | 2 | 1.37E-05 | 0.94 | 3.56  | -     | 1235.7   |
| AHQ-1-11, 5396 - 5402       | R.SFPDFPTPGVFR.D                                                        | 1466.66462 | 2 | 1.26E-06 | 0.78 | 2.76  | -     | 478.0    |
| gi 29737976 ref XP_290742.1 | similar to Phosphoribosylformylglycinamide synthase (FGAM synthase)     |            |   | 1.29E-06 | 0.68 | 10.18 | 2.10  | 144733.3 |
| AHQ-1-3, 7087               | R.LGGTALAQCSQLGHEPDLDPENLVR.A                                           | 3050.39201 | 3 | 1.29E-06 | 0.68 | 3.51  | -     | 403.5    |
| gi 30149460 ref XP_210540.2 | similar to Heat shock protein HSP 90-alpha (HSP 86) [Homo sapiens] [MA  |            |   | 1.34E-06 | 0.93 | 10.20 | 4.00  | 29287.8  |
| AHQ-1-5, 2202 - 2210        | K.HIYITGETK.D                                                           | 1225.37490 | 1 | 2.54E-04 | 0.81 | 2.63  | -     | 879.9    |
| AHQ-1-5, 2201               | K.HIYITGETK.D                                                           | 1225.37490 | 2 | 1.34E-06 | 0.93 | 3.19  | -     | 907.0    |
| gi 5453722 ref NP_006321.1  | lysophospholipase I; lysophospholipase 1; lysophospholipid-specific lys |            |   | 1.34E-06 | 1.71 | 20.21 | 12.60 | 24665.9  |
| AHQ-1-11, 2962              | K.ALIDQEVKNGIFSNR.I                                                     | 1654.84968 | 2 | 1.34E-06 | 0.74 | 2.71  | -     | 752.5    |
| AHQ-1-11, 6196              | K.LAGVTALSCWPLR.A                                                       | 1558.86992 | 2 | 1.19E-05 | 0.97 | 4.26  | -     | 1779.6   |
| gi 29788766 ref NP_064424.2 | tubulin, beta polypeptide 4, member Q [Homo sapiens]                    |            |   | 1.40E-06 | 2.28 | 30.31 | 11.10 | 48377.2  |
| AHQ-1-13 - , 4045           | R.AVLVDLEPGTM*DSVR.S                                                    | 1618.83435 | 2 | 2.69E-04 | 0.86 | 3.46  | -     | 533.0    |
| AHQ-1-14 - , 3939 - 4016    | R.AVLVDLEPGTM*DSVR.S                                                    | 1618.83435 | 2 | 2.56E-05 | 0.54 | 2.85  | -     | 317.4    |
| AHQ-1-9, 6335 - 6336        | K.EAESDCDCLQGLFQTHSLGGTGSGMGTLTLLSK.I                                   | 3315.65550 | 3 | 1.40E-06 | 0.76 | 3.90  | -     | 649.0    |
| AHQ-1-7, 5504 - 5513        | R.KEAESDCDCLQGLFQTHSLGGTGSGM*GTLTLLSK.I                                 | 3459.82781 | 3 | 4.04E-04 | 0.97 | 6.06  | -     | 1816.5   |
| gi 4505145 ref NP_002387.1  | malic enzyme 2, NAD(+)-dependent, mitochondrial; Malic enzyme, mitochon |            |   | 1.41E-06 | 2.69 | 30.20 | 6.30  | 65443.3  |
| AHQ-1-7, 3644               | K.ALTSQTLDEELAQQGR.L                                                    | 1632.75450 | 2 | 3.06E-04 | 0.89 | 3.91  | -     | 932.8    |
| AHQ-1-6, 3220               | R.HISDSVFLEAAK.A                                                        | 1317.47234 | 2 | 5.94E-06 | 0.94 | 3.74  | -     | 843.7    |
| AHQ-1-6, 2972               | K.IETQDIQALR.F                                                          | 1187.32821 | 2 | 1.41E-06 | 0.87 | 3.23  | -     | 1049.5   |
| gi 5729875 ref NP_006658.1  | progesterone receptor membrane component 1; progesterone binding protei |            |   | 1.45E-06 | 2.41 | 30.17 | 17.90 | 21671.0  |
| AHQ-1-11, 4343 - 4371       | K.FYGPPEGYVGFAGR.D                                                      | 1517.66849 | 2 | 4.41E-04 | 0.84 | 3.18  | -     | 749.0    |
| AHQ-1-11, 2818 - 2838       | R.GDQPAASGDDDEPPPLR.L                                                   | 2037.04410 | 2 | 3.47E-05 | 0.73 | 3.22  | -     | 295.7    |
| AHQ-1-11, 3854 - 3915       | R.KFYGPEGYPYGFVAGR.D                                                    | 1645.84140 | 2 | 1.45E-06 | 0.83 | 3.48  | -     | 606.3    |
| gi 4506045 ref NP_002718.1  | proteoglycan 1, secretory granule; Proteoglycan 1, secretory granule (p |            |   | 1.45E-06 | 2.79 | 30.20 | 17.10 | 17623.6  |
| AHQ-1-1, 2449               | R.CNPDSNSANCLEEK.G                                                      | 1640.68887 | 2 | 9.56E-06 | 0.91 | 3.48  | -     | 907.5    |
| AHQ-1-1, 4816 - 4821        | K.GPMFELLPGESNK.I                                                       | 1419.62807 | 2 | 1.45E-06 | 0.94 | 3.87  | -     | 1195.3   |
| AHQ-1-1, 4209 - 4212        | K.GPM*FELLPGESNK.I                                                      | 1435.62747 | 2 | 4.18E-06 | 0.94 | 4.07  | -     | 883.9    |
| gi 4506381 ref NP_002863.1  | ras-related C3 botulinum toxin substrate 2; Ras-related C3 botulinum to |            |   | 1.47E-06 | 1.71 | 20.20 | 7.80  | 21428.7  |
| AHQ-1-11, 3946              | K.KLAPITYPQGLALAK.E                                                     | 1584.92723 | 2 | 2.21E-05 | 0.90 | 3.93  | -     | 617.3    |
| AHQ-1-11, 4347 - 4348       | K.LAPITYPQGLALAK.E                                                      | 1456.75431 | 2 | 1.47E-06 | 0.81 | 2.71  | -     | 476.1    |
| gi 29731000 ref XP_291064.1 | similar to KIAA0540 protein [Homo sapiens]                              |            |   | 1.53E-06 | 1.71 | 20.23 | 2.10  | 224374.8 |
| AHQ-1-1, 3721               | K.LIVVAGQPSEVR.S                                                        | 1367.61917 | 2 | 1.53E-06 | 0.96 | 4.51  | -     | 1433.3   |
| AHQ-1-1, 6193               | R.VLNTSSLESATDEAGSPLAAAAAER.C                                           | 2716.89684 | 3 | 1.35E-04 | 0.75 | 3.31  | -     | 817.6    |
| gi 17402865 ref NP_003303.2 | thiosulfate sulfurtransferase; rhodanese [Homo sapiens]                 |            |   | 1.58E-06 | 2.56 | 30.20 | 14.80 | 33428.7  |
| AHQ-1-9, 4038               | R.FLGTPEPDVAVGLDSGHIR.G                                                 | 2011.18089 | 2 | 4.05E-05 | 0.84 | 3.72  | -     | 517.5    |
| AHQ-1-9, 3335               | K.KVDSLQPLIATCR.K                                                       | 1502.76154 | 2 | 4.79E-04 | 0.80 | 2.96  | -     | 694.8    |
| AHQ-1-9, 4716               | K.TYEQVLENLESK.R                                                        | 1453.57618 | 2 | 1.58E-06 | 0.92 | 4.06  | -     | 833.5    |
| gi 9845502 ref NP_002286.2  | laminin receptor 1; Laminin receptor-1 (67kD); laminin receptor 1 (67kD |            |   | 1.59E-06 | 0.83 | 10.16 | 5.10  | 32853.8  |
| AHQ-1-10, 5175              | R.FTPGFTFNQIAAFR.E                                                      | 1699.89060 | 2 | 1.59E-06 | 0.83 | 3.19  | -     | 444.4    |
| gi 29729857 ref XP_293567.1 | similar to 60 kDa heat shock protein, mitochondrial precursor (Hsp60)   |            |   | 1.62E-06 | 0.93 | 10.16 | 3.40  | 38427.8  |
| AHQ-1-14 - , 3583           | R.TVIEQSWGSPK.V                                                         | 1345.52569 | 2 | 5.62E-04 | 0.93 | 3.28  | -     | 1383.2   |
| AHQ-1-7, 3516               | R.TVIEQSWGSPK.V                                                         | 1345.52569 | 2 | 1.62E-06 | 0.93 | 3.00  | -     | 1546.3   |
| gi 5729991 ref NP_006494.1  | proteasome 26S ATPase subunit 4 isoform 1; protease 26S subunit 6; Tat- |            |   | 1.69E-06 | 0.88 | 10.17 | 2.90  | 47365.9  |
| AHQ-1-5, 3827               | R.GVLM*YGGPCGGK.T                                                       | 1253.47332 | 2 | 1.69E-06 | 0.88 | 3.35  | -     | 950.7    |
| gi 4504085 ref NP_000399.1  | glycerol-3-phosphate dehydrogenase 2 (mitochondrial) [Homo sapiens] [MA |            |   | 1.71E-06 | 4.44 | 50.21 | 10.30 | 80814.1  |
| AHQ-1-6, 3648               | R.CKDVLTGQEDVDR.A                                                       | 1568.73370 | 2 | 5.66E-06 | 0.89 | 3.34  | -     | 952.7    |
| AHQ-1-6, 6072 - 6082        | R.LAFLNVQAAEEALPR.I                                                     | 1642.88050 | 2 | 1.22E-04 | 0.89 | 3.82  | -     | 851.1    |
| AHQ-1-6, 5780</             |                                                                         |            |   |          |      |       |       |          |

|                             |                                                                         |            |   |          |      |       |       |          |
|-----------------------------|-------------------------------------------------------------------------|------------|---|----------|------|-------|-------|----------|
| AHQ-1-13- , 3424            | R.ALDNTNCFSTSEK.N                                                       | 1537.63010 | 2 | 1.74E-06 | 0.93 | 3.85  | -     | 1037.6   |
| AHQ-1-9, 6827               | R.LLAPSDSPEWLSFDVTVGVVR.Q                                               | 2189.45272 | 2 | 2.18E-05 | 0.90 | 4.06  | -     | 470.4    |
| AHQ-1-13- , 3611            | K.VEQLSNMIVR.S                                                          | 1189.41074 | 2 | 3.29E-04 | 0.95 | 4.30  | -     | 1325.9   |
| AHQ-1-13, 3509              | K.VEQLSNMIVR.S                                                          | 1189.41074 | 2 | 5.10E-06 | 0.91 | 3.50  | -     | 1206.7   |
| gi 4557797 ref NP_000268.1  | non-metastatic cells 1 protein [Homo sapiens]                           |            |   | 1.79E-06 | 2.59 | 30.16 | 20.40 | 17148.6  |
| AHQ-1-12, 4061              | K.DRPFAGLVK.Y                                                           | 1150.35439 | 2 | 1.61E-04 | 0.91 | 3.28  | -     | 1093.6   |
| AHQ-1-12, 2917              | R.GLVGEIKR.F                                                            | 985.20582  | 2 | 1.05E-04 | 0.87 | 2.56  | -     | 1062.4   |
| AHQ-1-14- , 3064            | R.TFIAIKPDGVQR.G                                                        | 1345.57205 | 2 | 1.79E-06 | 0.80 | 3.02  | -     | 781.1    |
| AHQ-1-12, 2949              | R.TFIAIKPDGVQR.G                                                        | 1345.57205 | 2 | 2.59E-05 | 0.85 | 3.14  | -     | 808.8    |
| gi 17450333 ref XP_060887.1 | similar to peptidyl-Pro cis trans isomerase [Homo sapiens]              |            |   | 1.89E-06 | 0.91 | 10.23 | 11.00 | 17503.9  |
| AHQ-1-12, 6417              | -M^VNPVTVDIADGKPLGR.V                                                   | 1946.26009 | 2 | 2.55E-04 | 0.93 | 4.47  | -     | 1033.5   |
| AHQ-1-13- , 6768            | -M^VNPVTVDIADGKPLGR.V                                                   | 1946.26009 | 2 | 1.42E-05 | 0.95 | 4.56  | -     | 1201.4   |
| AHQ-1-12, 6198 - 6261       | -M^VNPVTVDIADGKPLGR.V                                                   | 1946.26009 | 2 | 1.89E-06 | 0.91 | 3.65  | -     | 1028.7   |
| gi 19913414 ref NP_055018.2 | adaptor-related protein complex 2, alpha 1 subunit isoform 1; adaptor,  |            |   | 1.92E-06 | 0.59 | 20.17 | 3.90  | 107545.3 |
| AHQ-1-5, 5547 - 5551        | K.TSVQFNFSPTVHPGDLQQLAVQTK.R                                            | 2972.30119 | 3 | 1.01E-04 | 0.55 | 3.33  | -     | 525.7    |
| AHQ-1-12, 3757 - 3826       | R.YGGAPQALTLK.L                                                         | 1119.29547 | 1 | 1.92E-06 | 0.04 | 1.81  | -     | 297.6    |
| gi 4502297 ref NP_001678.1  | ATP synthase, H+ transporting, mitochondrial F1 complex, delta subunit  |            |   | 1.96E-06 | 1.82 | 20.16 | 13.70 | 17489.8  |
| AHQ-1-13, 2625              | K.AQAEVLGTADEATR.A                                                      | 1432.51860 | 1 | 7.36E-04 | 0.22 | 2.29  | -     | 208.4    |
| AHQ-1-13- , 2611            | K.AQAEVLGTADEATR.A                                                      | 1432.51860 | 1 | 2.72E-05 | 0.71 | 2.74  | -     | 417.1    |
| AHQ-1-13, 2621              | K.AQAEVLGTADEATR.A                                                      | 1432.51860 | 2 | 1.96E-06 | 0.92 | 3.29  | -     | 1150.6   |
| AHQ-1-13- , 2368            | R.IEANEALVK.A                                                           | 987.13221  | 2 | 2.94E-04 | 0.90 | 2.94  | -     | 891.4    |
| gi 13569962 ref NP_112243.1 | RAB1B, member RAS oncogene family; small GTP-binding protein [Homo sap  |            |   | 1.98E-06 | 2.43 | 30.29 | 18.90 | 22171.0  |
| AHQ-1-11, 4336              | R.GAHGIIIVYDVTDQESYANVK.Q                                               | 2279.49113 | 2 | 1.98E-06 | 0.98 | 5.83  | -     | 1912.9   |
| AHQ-1-11, 4435              | R.GAHGIIIVYDVTDQESYANVK.Q                                               | 2279.49113 | 2 | 2.58E-05 | 0.96 | 4.92  | -     | 1249.3   |
| AHQ-1-11, 2059 - 2096       | R.MPGGAASGGERP.NLK.I                                                    | 1442.62650 | 2 | 8.69E-04 | 0.48 | 2.70  | -     | 451.2    |
| AHQ-1-11, 6298 - 6302       | K.NATNVEQAFMTMAAEIK.K                                                   | 1870.14079 | 2 | 3.67E-06 | 0.97 | 5.29  | -     | 1729.8   |
| gi 15306356 ref XP_035638.2 | similar to interleukin 25; lymphocyte antigen 6 complex, locus E ligand |            |   | 2.05E-06 | 2.65 | 30.19 | 20.80 | 18795.1  |
| AHQ-1-13, 3473              | R.ESDVPKTEEFVTK.T                                                       | 1751.91253 | 2 | 6.39E-05 | 0.76 | 3.32  | -     | 462.2    |
| AHQ-1-12, 3465              | R.ESDVPKTEEFVTK.T                                                       | 1751.91253 | 2 | 2.05E-06 | 0.78 | 3.48  | -     | 384.5    |
| AHQ-1-13- , 3596            | R.GAEIYAMAYSK.A                                                         | 1333.49204 | 2 | 2.34E-04 | 0.94 | 3.85  | -     | 1361.3   |
| AHQ-1-13- , 4796            | K.SYLYFTQFK.A                                                           | 1197.36315 | 2 | 2.31E-05 | 0.93 | 3.55  | -     | 1121.3   |
| gi 8923579 ref NP_060377.1  | hypothetical protein FLJ20625 [Homo sapiens]                            |            |   | 2.05E-06 | 1.90 | 20.27 | 26.70 | 17744.7  |
| AHQ-1-12, 6174 - 6175       | K.LPPLPSLTSOPHQVLAASEPIFSDLQQVSR.I                                      | 3283.72259 | 3 | 1.88E-04 | 0.95 | 5.47  | -     | 1157.5   |
| AHQ-1-14- , 6250            | K.LPPLPSLTSOPHQVLAASEPIFSDLQQVSR.I                                      | 3283.72259 | 3 | 5.99E-04 | 0.94 | 5.38  | -     | 627.2    |
| AHQ-1-12, 5265              | R.TDEQALLSSILAK.T                                                       | 1389.57677 | 2 | 2.05E-06 | 0.95 | 4.33  | -     | 1219.9   |
| gi 6041669 ref NP_004538.2  | NADH dehydrogenase (ubiquinone) 1 beta subcomplex, 4, 15kDa; NADH dehyd |            |   | 2.10E-06 | 0.87 | 10.18 | 14.00 | 15208.5  |
| AHQ-1-13, 4691              | R.TLPETLDPAEYINISPETR.R                                                 | 2047.20831 | 2 | 2.10E-06 | 0.87 | 3.54  | -     | 545.3    |
| gi 4504045 ref NP_002063.1  | guanine nucleotide binding protein (G protein), q polypeptide [Homo sap |            |   | 2.13E-06 | 3.37 | 40.27 | 15.90 | 42142.8  |
| AHQ-1-9, 3183               | K.LLLLGTGESGK.S                                                         | 1088.27968 | 2 | 8.19E-04 | 0.82 | 3.37  | -     | 794.8    |
| AHQ-1-9, 4544 - 4592        | K.SLWNPQGIQECYDR.R                                                      | 1754.85835 | 2 | 2.13E-06 | 0.85 | 3.04  | -     | 903.7    |
| AHQ-1-9, 7228               | R.VPTTGIIEYFQLQSVIFR.M                                                  | 2196.53000 | 2 | 3.50E-04 | 0.96 | 5.37  | -     | 943.0    |
| AHQ-1-9, 4539               | K.VSAFENPNVDAIK.S                                                       | 1453.62101 | 2 | 4.75E-04 | 0.74 | 2.64  | -     | 817.7    |
| gi 4506765 ref NP_002952.1  | S100 calcium-binding protein A4; 18A2; 42A; S100 calcium-binding protei |            |   | 2.26E-06 | 0.96 | 20.16 | 18.80 | 11728.5  |
| AHQ-1-14- , 3514 - 3579     | K.ALDVMVSTFKH.Y                                                         | 1248.47665 | 2 | 2.26E-06 | 0.85 | 3.23  | -     | 870.0    |
| AHQ-1-14, 4718              | R.ELPSFLGR.R                                                            | 891.04613  | 1 | 7.06E-05 | 0.10 | 1.83  | -     | 132.9    |
| gi 4757952 ref NP_001782.1  | cell division cycle 42 isoform 1; cell division cycle 42 (GTP-binding p |            |   | 2.28E-06 | 3.54 | 40.26 | 25.70 | 21258.5  |
| AHQ-1-11, 2304              | K.CVVVGDGAVGK.T                                                         | 1062.22237 | 1 | 5.02E-04 | 0.77 | 2.61  | -     | 745.1    |
| AHQ-1-11, 2295 - 2298       | K.CVVVGDGAVGK.T                                                         | 1062.22237 | 2 | 6.76E-05 | 0.79 | 2.83  | -     | 853.5    |
| AHQ-1-11, 6300              | K.NVDFEAILAELEPPPEK.K                                                   | 1854.09282 | 3 | 2.28E-06 | 0.93 | 5.16  | -     | 912.8    |
| AHQ-1-11, 3790              | K.TCLLISYTNK.F                                                          | 1315.51795 | 2 | 1.03E-05 | 0.92 | 3.19  | -     | 1323.6   |
| AHQ-1-11, 2530              | K.YVECSALTQK.G                                                          | 1200.34381 | 2 | 8.38E-06 | 0.90 | 3.68  | -     | 602.1    |
| gi 10835049 ref NP_001655.1 | ras homolog gene family, member A; Aplysia ras-related homolog 12; Rho  |            |   | 2.36E-06 | 0.90 | 10.18 | 6.20  | 21768.0  |
| AHQ-1-13- , 3964            | R.IGAFGYMECSAK.T                                                        | 1335.53122 | 2 | 2.36E-06 | 0.90 | 3.54  | -     | 746.6    |
| AHQ-1-10, 3544              | R.IGAFGYMECSAK.T                                                        | 1335.53122 | 2 | 2.34E-05 | 0.57 | 2.80  | -     | 505.2    |
| gi 5803013 ref NP_006808.1  | endoplasmic reticulum protein 29 precursor; endoplasmic reticulum lumen |            |   | 2.39E-06 | 1.80 | 20.23 | 14.90 | 28993.2  |
| AHQ-1-10, 3787              | R.DGDFENPVPTGAVK.V                                                      | 1609.71786 | 2 | 2.39E-06 | 0.86 | 3.73  | -     | 605.1    |
| AHQ-1-10, 3655 - 3663       | R.DGDFENPVPTGAVK.V                                                      | 1609.71786 | 2 | 5.44E-06 | 0.83 | 3.61  | -     | 475.1    |
| AHQ-1-10, 6380              | K.GQGYYLGMPCGLPVYDALAGEFIR.A                                            | 2585.98267 | 2 | 3.16E-06 | 0.93 | 4.63  | -     | 615.6    |
| gi 1369868 ref NP_005947.2  | methylenetetrahydrofolate dehydrogenase (NADP+ dependent), methenyltet  |            |   | 2.40E-06 | 0.83 | 10.18 | 1.70  | 101530.5 |
| AHQ-1-5, 4407 - 4462        | K.YVVVTGITPTPLGEGK.S                                                    | 1631.89439 | 2 | 2.40E-06 | 0.83 | 3.61  | -     | 541.3    |
| gi 30148456 ref XP_293602.2 | similar to glutathione-S-transferase like; glutathione transferase ome  |            |   | 2.45E-06 | 0.91 | 10.18 | 3.90  | 29139.6  |
| AHQ-1-13- , 4800            | K.VPSLVGSFLR.T                                                          | 1075.28583 | 2 | 4.87E-05 | 0.91 | 3.62  | -     | 925.3    |
| AHQ-1-10, 4239              | K.VPSLVGSFLR.T                                                          | 1075.28583 | 2 | 2.45E-06 | 0.91 | 3.38  | -     | 1167.4   |
| gi 4758790 ref NP_004543.1  | NADH dehydrogenase (ubiquinone) Fe-S protein 5, 15kDa (NADH-coenzyme Q  |            |   | 2.48E-06 | 0.97 | 10.26 | 11.30 | 12517.4  |
| AHQ-1-13- , 6743            | K.IEYDDFVECLLR.Q                                                        | 1573.74872 | 2 | 2.48E-06 | 0.97 | 5.15  | -     | 1092.7   |
| AHQ-1-13, 6284              | K.IEYDDFVECLLR.Q                                                        | 1573.74872 | 2 | 3.12E-05 | 0.90 | 3.21  | -     | 1163.6   |
| gi 29729345 ref XP_290995.1 | similar to speckle-type POZ protein [Homo sapiens]                      |            |   | 2.54E-06 | 1.62 | 20.20 | 10.90 | 18703.4  |
| AHQ-1-3, 6146               | K.NRVEINDLDPEVFKEM^MR.F                                                 | 2252.55733 | 2 | 2.16E-04 | 0.67 | 3.08  | -     | 859.5    |
| AHQ-1-4, 6260 - 6274        | K.NRVEINDLDPEVFKEM^MR.F                                                 | 2252.55733 | 2 | 2.54E-06 | 0.74 | 3.63  | -     | 770.5    |
| AHQ-1-5, 6214               | K.NRVEINDLDPEVFKEM^MR.F                                                 | 2252.55733 | 2 | 6.13E-06 | 0.88 | 3.74  | -     | 811.0    |
| AHQ-1-6, 6107 - 6116        | K.NRVEINDLDPEVFKEM^MR.F                                                 | 2252.55733 | 2 | 2.64E-04 | 0.87 | 3.76  | -     | 887.1    |
| AHQ-1-1, 6163               | K.NRVEINDLDPEVFKEM^MR.F                                                 | 2252.55733 | 2 | 3.03E-04 | 0.79 | 4.02  | -     | 867.3    |
| gi 29727317 ref XP_298144.1 | hypothetical protein XP_298144 [Homo sapiens]                           |            |   | 2.64E-06 | 0.80 | 10.15 | 8.00  | 22108.6  |
| AHQ-1-4, 6688 - 6704        | K.GEYNLTLDTALTSNLK.T                                                    | 1753.93165 | 2 | 2.64E-06 | 0.80 | 3.03  | -     | 933.3    |
| gi 4503529 ref NP_001407.1  | eukaryotic translation initiation factor 4A, isoform 1 [Homo sapiens] [ |            |   | 2.68E-06 | 0.84 | 10.19 | 3.70  | 46153.7  |
| AHQ-1-8, 3879               | K.LQMEAPHIIVGTPGR.V                                                     | 1619.91357 | 2 | 2.68E-06 | 0.84 | 3.78  | -     | 677.0    |
| gi 4759342 ref NP_004808.1  | tight junction protein 2 (zona occludens 2); Friedreich ataxia region g |            |   | 2.80E-06 | 0.97 | 10.25 | 1.60  | 124661.6 |
| AHQ-1-7, 3769               | R.TFLRPSPEDEAIYGPNTK.M                                                  | 2036.23035 | 2 | 2.80E-06 | 0.97 | 4.98  | -     | 1543.2   |
| gi 4502861 ref NP_001275.1  | adaptor-related protein complex 3, sigma 1 subunit; clathrin-associated |            |   | 2.93E-06 | 0.94 | 10.20 | 7.80  | 21732.0  |
| AHQ-1-11, 3748              | K.FYQPSYSEDYQQIIR.E                                                     | 1917.06756 | 2 | 2.93E-06 | 0.94 | 4.08  | -     | 979.2    |
| gi 11496885 ref NP_005442.2 | enigma protein; LIM domain protein [Homo sapiens]                       |            |   | 2.96E-06 | 0.94 | 10.19 | 2.60  | 49844.4  |
| AHQ-1-11, 4576              | K.VVLEGPAPWGRF.L                                                        | 1328.54318 | 2 | 2.96E-06 | 0.94 | 3.83  | -     | 1233.3   |
| gi 30157216 ref XP_292133.2 | similar to genethonin 1 [Homo sapiens]                                  |            |   | 3.01E-06 | 1.08 | 20.19 | 4.50  | 39693.8  |
| AHQ-1-14, 5280              | K.PSDTIENVK.A                                                           | 1003.08850 | 1 | 4.49E-04 | 0.37 | 2.25  | -     | 455.7    |
| AHQ-1-5, 4582               | K.TITLEVKPSDITIENVK.A                                                   | 1788.03268 | 2 | 2.57E-05 | 0.57 | 3.00  | -     | 579.3    |
| AHQ-1-6, 4483               | K.TITLEVKPSDITIENVK.A                                                   | 1788.03268 | 2 | 9.20E-05 | 0.50 | 3.48  | -     | 396.2    |
| AHQ-1-9, 4414               | K.TITLEVKPSDITIENVK.A                                                   | 1788.03268 | 2 | 1.55E-04 | 0.25 | 2.53  | -     | 236.3    |
| AHQ-1-14, 5201 - 5277       | K.TITLEVKPSDITIENVK.A                                                   | 1788.03268 | 2 | 3.01E-06 | 0.71 | 3.74  | -     | 565.2    |
| AHQ-1-2, 4761               | K.TITLEVKPSDITIENVK.A                                                   | 1788.03268 | 2 | 5.12E-05 | 0.80 | 3.55  | -     | 789.8    |
| AHQ-1-1, 4637               | K.TITLEVKPSDITIENVK.A                                                   | 1788.03268 | 2 | 8.75E-05 | 0.37 | 2.58  | -     | 315.8    |
| gi 7658952 ref NP_055227.1  | calyculin binding protein [Homo sapiens]                                |            |   | 3.03E-06 | 0.86 | 10.19 | 10.10 | 26209.8  |
| AHQ-1-10, 4647              | K.IYITLTGVHQVPTENQVHFTR.S                                               | 2683.01488 | 3 | 3.03E-06 | 0.86 | 3.76  | -     | 986.0    |
| gi 7705632 ref NP_057152.1  | CGI-135 protein [Homo sapiens]                                          |            |   | 3.27E-06 | 0.93 | 10.21 | 7.20  | 16979.6  |
| AHQ-1-13- , 6777            | K.GIVLLELLPK.G                                                          | 1224.51463 | 2 | 5.10E-06 | 0.94 | 4.11  | -     | 1676.0   |
| AHQ-1-12, 6383              | K.GIVLLELLPK.G                                                          | 1224.51463 | 2 | 3.27E-06 | 0.93 | 3.24  | -     | 1745.3   |
| gi 5453998 ref NP_006382.1  | importin 7; RAN-binding protein 7 [Homo sapiens]                        |            |   | 3.31E-06 | 0.82 | 10.16 | 1.40  | 119515.7 |
| AHQ-1-4, 6927               | R.ENIVEAIHSPELIR.V                                                      | 1733.98994 | 2 | 3.31E-06 | 0.82 | 3.28  | -     | 725.4    |
| gi 19913373 ref NP_079536.2 | G6B protein isoform G6b-A precursor; G6B protein; immunoglobulin recep  |            |   | 3.36E-06 | 2.52 | 30.16 | 13.90 | 25002.6  |
| AHQ-1-12, 2510              | R.TVLHVLGDR.T                                                           | 1010.17224 | 2 | 3.36E-06 | 0.88 | 2.78  | -     | 1080.5   |
| AHQ-1-11, 2444              | R.TVLHVLGDR.T                                                           | 1010.17224 | 2 | 4.78E-05 | 0.94 | 3.13  | -     | 1478.9   |
| AHQ-1-12, 2643 - 2721       | R.VNLSCGGVSHPIR.W                                                       | 1397.58551 | 2 | 2.41E-05 | 0.89 | 2.93  | -     | 1271.6   |
| AHQ-1-11, 5018              | R.WVWAPSPACK.G                                                          | 1350.56891 | 2 | 2.39E-04 | 0.75 | 2.87  | -     | 531.2    |
| gi 6005786 ref NP_009214.1  | monoglyceride lipase; lysophospholipase-like [Homo sapiens]             |            |   | 3.38E-06 | 1.55 | 20.22 | 12.10 | 34293.2  |
| AHQ-1-13- , 6260            | K.LTVPFLLQGSADR.L                                                       | 1530.79329 | 2 | 3.38E-06 | 0.65 | 2.73  | -     | 410.3    |
| AHQ-1-14- , 6044 - 6046     | K.LTVPFLLQGSADR.L                                                       | 1530.79329 | 2 | 5.87E-05 | 0.77 | 3.20  | -     | 547.7    |
| AHQ-1-9, 6428               | R.TPQSIPLYQDLPLVNLADGQYLFCR.Y                                           | 2835.14314 | 2 | 6.45E-04 | 0.79 | 3.41  | -     | 504.4    |
| AHQ-1-9, 6407 - 6438        | R.TPQSIPLYQDLPLVNLADGQYLFCR.Y                                           | 2835.14314 | 3 | 1.11E-05 | 0.89 | 4.50  | -     | 621.3    |





|                             |                                                                         |            |   |  |  |          |      |       |       |          |
|-----------------------------|-------------------------------------------------------------------------|------------|---|--|--|----------|------|-------|-------|----------|
| gi 6005745 ref NP_009165.1  | dynactin 3 isoform 1; dynactin light chain [Homo sapiens]               |            |   |  |  | 6.51E-06 | 0.82 | 10.15 | 5.90  | 21119.3  |
| AHQ-1-11, 2816              | K.VQVALGNISGK.R                                                         | 1116.29312 | 2 |  |  | 6.51E-06 | 0.82 | 2.93  | -     | 671.4    |
| gi 29734141 ref XP_291117.1 | similar to succinate dehydrogenase flavoprotein subunit [Homo sapiens]  |            |   |  |  | 6.60E-06 | 0.05 | 10.09 | 8.90  | 16590.8  |
| AHQ-1-6, 2091               | R.KHTLSYVVDVGTGK.V                                                      | 1405.58112 | 1 |  |  | 6.60E-06 | 0.05 | 1.81  | -     | 327.2    |
| gi 4506407 ref NP_002873.1  | RAN binding protein 1 [Homo sapiens]                                    |            |   |  |  | 6.65E-06 | 0.88 | 10.18 | 5.50  | 23310.0  |
| AHQ-1-10, 4121              | K.TLEEDEEELFK.M                                                         | 1382.45159 | 2 |  |  | 6.65E-06 | 0.88 | 3.56  | -     | 646.8    |
| gi 13786129 ref NP_112586.1 | RAB33B, member RAS oncogene family; likely ortholog of mouse RAB33B [H] |            |   |  |  | 6.65E-06 | 0.35 | 10.16 | 4.80  | 25717.4  |
| AHQ-1-13, 3485              | K.IQLWDTAGQER.F                                                         | 1317.43243 | 2 |  |  | 9.63E-04 | 0.88 | 3.26  | -     | 792.9    |
| AHQ-1-14, 3667              | K.IQLWDTAGQER.F                                                         | 1317.43243 | 2 |  |  | 2.41E-05 | 0.90 | 3.14  | -     | 1023.9   |
| AHQ-1-11, 3439 - 3440       | K.IQLWDTAGQER.F                                                         | 1317.43243 | 1 |  |  | 6.65E-06 | 0.35 | 2.45  | -     | 261.6    |
| gi 29729329 ref XP_291459.1 | similar to Cofilin, non-muscle isoform (18 kDa phosphoprotein) (P18) [  |            |   |  |  | 6.88E-06 | 1.44 | 20.20 | 18.30 | 17172.9  |
| AHQ-1-12, 5509 - 5571       | K.EILVGDVGQTVNNLYATFVK.M                                                | 2181.47373 | 2 |  |  | 6.88E-06 | 0.92 | 4.09  | -     | 965.2    |
| AHQ-1-12, 2351              | K.NILEEGK.E                                                             | 916.05399  | 1 |  |  | 3.15E-04 | 0.52 | 2.67  | -     | 577.1    |
| AHQ-1-12, 2345 - 2409       | K.NILEEGK.E                                                             | 916.05399  | 1 |  |  | 2.37E-04 | 0.52 | 2.32  | -     | 435.6    |
| gi 7330335 ref NP_039234.1  | chloride intracellular channel 4; chloride intracellular channel 4 like |            |   |  |  | 7.05E-06 | 3.00 | 40.18 | 24.50 | 28771.9  |
| AHQ-1-10, 4424 - 4441       | R.DEFNTNCPDKEVEIAYSDVAK.R                                               | 2520.66487 | 2 |  |  | 1.16E-04 | 0.74 | 3.53  | -     | 416.0    |
| AHQ-1-10, 5393              | K.FLDGNEMTLADCNLLPK.L                                                   | 1953.22635 | 2 |  |  | 7.05E-06 | 0.69 | 3.18  | -     | 505.0    |
| AHQ-1-10, 5007              | R.KFLDGNEMTLADCNLLPK.L                                                  | 2081.39926 | 2 |  |  | 1.37E-05 | 0.83 | 3.65  | -     | 711.8    |
| AHQ-1-10, 5120              | K.LDEYLNPSLPDEIDENSMEDIK.F                                              | 2580.76043 | 2 |  |  | 2.02E-04 | 0.74 | 2.83  | -     | 530.4    |
| gi 19923233 ref NP_002970.2 | sterol carrier protein 2 [Homo sapiens]                                 |            |   |  |  | 7.25E-06 | 0.85 | 10.18 | 2.20  | 58993.3  |
| AHQ-1-13, 2771 - 2836       | K.LQNLQLQPGNAK.L                                                        | 1324.51124 | 2 |  |  | 7.25E-06 | 0.85 | 3.55  | -     | 811.6    |
| gi 4501867 ref NP_001089.1  | aconitase 2 [Homo sapiens]                                              |            |   |  |  | 7.40E-06 | 0.85 | 10.19 | 2.10  | 85424.8  |
| AHQ-1-5, 3434               | K.IVYGLHDDPASQEI.E.R                                                    | 1842.98698 | 2 |  |  | 7.40E-06 | 0.85 | 3.77  | -     | 644.6    |
| gi 21614520 ref NP_000393.2 | glucose-6-phosphate dehydrogenase [Homo sapiens]                        |            |   |  |  | 7.88E-06 | 2.49 | 30.23 | 9.10  | 59257.5  |
| AHQ-1-14, 5592              | R.DGLLPENTFVIGYAR.S                                                     | 1665.87093 | 2 |  |  | 1.18E-05 | 0.88 | 3.39  | -     | 717.6    |
| AHQ-1-7, 7096               | R.LFYALPPTVYEAATK.N                                                     | 1826.16735 | 2 |  |  | 7.88E-06 | 0.69 | 3.58  | -     | 256.5    |
| AHQ-1-7, 4473               | R.LQFHDVAGDIFHQQCK.R                                                    | 1945.14742 | 3 |  |  | 1.36E-05 | 0.92 | 4.53  | -     | 855.0    |
| AHQ-1-7, 4472               | R.LQFHDVAGDIFHQQCK.R                                                    | 1945.14742 | 2 |  |  | 1.62E-04 | 0.95 | 3.95  | -     | 1207.5   |
| gi 4505185 ref NP_002406.1  | macrophage migration inhibitory factor (glycosylation-inhibiting factor |            |   |  |  | 8.17E-06 | 0.96 | 10.21 | 7.80  | 12476.2  |
| AHQ-1-14, 4618 - 4630       | K.LLCCGLAER.L                                                           | 1046.26608 | 2 |  |  | 8.17E-06 | 0.96 | 4.29  | -     | 1328.8   |
| gi 5902134 ref NP_009005.1  | coronin, actin binding protein, 1A; coronin, actin-binding, 1A; coronin |            |   |  |  | 8.35E-06 | 5.26 | 60.24 | 14.30 | 51026.0  |
| AHQ-1-7, 1861 - 1866        | R.AAPEASGTPSSDAVSR.L                                                    | 1503.55369 | 2 |  |  | 1.25E-04 | 0.92 | 4.03  | -     | 717.9    |
| AHQ-1-7, 2045               | K.ADQCQYEDVR.V                                                          | 1157.19275 | 2 |  |  | 1.90E-04 | 0.84 | 2.86  | -     | 893.8    |
| AHQ-1-7, 4460               | R.DAGPLLIISK.D                                                          | 1027.23948 | 2 |  |  | 1.46E-05 | 0.88 | 3.01  | -     | 903.5    |
| AHQ-1-7, 4456               | R.DAGPLLIISK.D                                                          | 1027.23948 | 1 |  |  | 1.60E-04 | 0.32 | 2.27  | -     | 576.0    |
| AHQ-1-7, 2197               | R.KLQATVQELQK.R                                                         | 1286.50292 | 2 |  |  | 3.89E-04 | 0.92 | 3.81  | -     | 1325.7   |
| AHQ-1-7, 2441               | K.LQATVQELQK.R                                                          | 1158.33000 | 2 |  |  | 2.09E-05 | 0.77 | 3.06  | -     | 566.3    |
| AHQ-1-7, 7437               | R.YFEITSEAPFLHYLSMFSSK.E                                                | 2398.71748 | 3 |  |  | 2.48E-05 | 0.92 | 4.44  | -     | 838.2    |
| AHQ-1-7, 7436               | R.YFEITSEAPFLHYLSMFSSK.E                                                | 2398.71748 | 2 |  |  | 8.35E-06 | 0.91 | 4.78  | -     | 465.3    |
| gi 11321585 ref NP_002065.1 | guanine nucleotide-binding protein, beta-1 subunit; G protein, beta-1   |            |   |  |  | 8.37E-06 | 2.38 | 30.19 | 12.10 | 37376.8  |
| AHQ-1-9, 4963               | R.KACADATLSQITNNIDPVGR.I                                                | 2146.36794 | 2 |  |  | 8.37E-06 | 0.68 | 3.07  | -     | 444.4    |
| AHQ-1-9, 4247               | K.LIWDSYTTNK.V                                                          | 1354.53258 | 2 |  |  | 1.22E-04 | 0.84 | 3.14  | -     | 807.5    |
| AHQ-1-9, 1859               | R.LLVASQDQGL.L                                                          | 1018.14631 | 2 |  |  | 2.24E-05 | 0.87 | 2.88  | -     | 944.3    |
| gi 4506353 ref NP_002854.1  | phosphorylase, glycogen; liver (Hers disease, glycogen storage disease  |            |   |  |  | 8.61E-06 | 0.85 | 10.16 | 1.70  | 97147.8  |
| AHQ-1-5, 5673 - 5691        | K.LVIDIQDGNFFSPK.Q                                                      | 1593.80471 | 2 |  |  | 8.61E-06 | 0.85 | 3.15  | -     | 936.7    |
| gi 21450721 ref NP_659447.1 | hypothetical protein MGC26778 [Homo sapiens]                            |            |   |  |  | 8.81E-06 | 0.02 | 10.12 | 3.10  | 29454.0  |
| AHQ-1-14, 4064              | K.KAQEDYDR.Y                                                            | 1025.05426 | 1 |  |  | 8.81E-06 | 0.02 | 1.81  | -     | 70.1     |
| gi 27597085 ref NP_000357.3 | tropomyosin 1 (alpha) [Homo sapiens]                                    |            |   |  |  | 8.82E-06 | 2.44 | 30.17 | 8.50  | 32865.7  |
| AHQ-1-9, 3164               | R.KLVIESDLER.A                                                          | 1315.54103 | 1 |  |  | 2.89E-04 | 0.30 | 1.84  | -     | 379.0    |
| AHQ-1-9, 3150               | R.KLVIESDLER.A                                                          | 1315.54103 | 2 |  |  | 8.82E-06 | 0.88 | 3.24  | -     | 1004.1   |
| AHQ-1-10, 3541              | K.LVIESDLER.A                                                           | 1187.36811 | 2 |  |  | 2.05E-04 | 0.85 | 2.88  | -     | 936.6    |
| AHQ-1-10, 2049              | K.YSQKEDRYEIEEK.V                                                       | 1717.81473 | 2 |  |  | 2.10E-04 | 0.71 | 3.21  | -     | 351.4    |
| gi 30148492 ref XP_293610.2 | similar to Heat shock cognate 71 kDa protein [Homo sapiens]             |            |   |  |  | 8.94E-06 | 2.65 | 30.22 | 4.40  | 72113.4  |
| AHQ-1-6, 4342               | K.DAGTIAGLNVLR.I                                                        | 1200.37012 | 2 |  |  | 3.49E-04 | 0.93 | 3.63  | -     | 1224.6   |
| AHQ-1-10, 4285 - 4361       | R.IINEPTAAAIAYGLDK.K                                                    | 1660.89259 | 2 |  |  | 8.94E-06 | 0.80 | 3.49  | -     | 895.1    |
| AHQ-1-6, 4291 - 4302        | R.IINEPTAAAIAYGLDK.V                                                    | 1789.06550 | 3 |  |  | 1.69E-05 | 0.75 | 3.33  | -     | 530.2    |
| AHQ-1-7, 4377               | R.IINEPTAAAIAYGLDK.V                                                    | 1789.06550 | 2 |  |  | 3.11E-04 | 0.64 | 2.94  | -     | 422.3    |
| AHQ-1-7, 4386               | R.IINEPTAAAIAYGLDK.V                                                    | 1789.06550 | 3 |  |  | 3.63E-04 | 0.68 | 3.28  | -     | 384.1    |
| AHQ-1-6, 4287               | R.IINEPTAAAIAYGLDK.V                                                    | 1789.06550 | 2 |  |  | 4.03E-05 | 0.83 | 3.74  | -     | 693.4    |
| AHQ-1-6, 4232 - 4303        | R.IINEPTAAAIAYGLDK.V                                                    | 1789.06550 | 2 |  |  | 9.15E-06 | 0.92 | 4.44  | -     | 612.5    |
| gi 7705704 ref NP_057001.1  | glutathione S-transferase subunit 13 homolog [Homo sapiens]             |            |   |  |  | 8.95E-06 | 1.84 | 20.24 | 13.70 | 25496.7  |
| AHQ-1-11, 4392              | R.FLTAVNLEHPEMLEK.A                                                     | 1772.05845 | 2 |  |  | 2.84E-05 | 0.96 | 4.70  | -     | 1548.1   |
| AHQ-1-11, 4382              | R.NEDITEPQSLAAAEK.A                                                     | 1729.86695 | 2 |  |  | 8.95E-06 | 0.88 | 3.71  | -     | 613.3    |
| gi 4503141 ref NP_001805.1  | cathepsin C isoform a preproprotein; dipeptidyl-peptidase I; dipeptidyl |            |   |  |  | 9.04E-06 | 1.81 | 20.22 | 4.30  | 51841.5  |
| AHQ-1-14, 5427 - 5450       | R.GTDECAIESIAVAATPIPK.L                                                 | 1945.18072 | 2 |  |  | 9.04E-06 | 0.95 | 4.45  | -     | 1210.4   |
| AHQ-1-14, 5953              | R.RGTDECAIESIAVAATPIPK.L                                                | 2101.36707 | 2 |  |  | 7.26E-05 | 0.86 | 4.00  | -     | 606.1    |
| gi 14149777 ref NP_115500.1 | hypothetical protein DKFZp564D1378 [Homo sapiens]                       |            |   |  |  | 9.28E-06 | 0.96 | 10.26 | 8.10  | 28535.7  |
| AHQ-1-10, 6301 - 6373       | K.DGLALGPPFPVTALEYATDTK.A                                               | 2137.37459 | 2 |  |  | 9.28E-06 | 0.96 | 5.30  | -     | 968.1    |
| gi 21536449 ref NP_002613.2 | prefoldin 1; prefoldin subunit 1 [Homo sapiens]                         |            |   |  |  | 9.62E-06 | 0.97 | 10.22 | 9.00  | 14210.4  |
| AHQ-1-13, 3917              | K.LADIQEQLNR.T                                                          | 1313.48523 | 2 |  |  | 9.62E-06 | 0.97 | 4.35  | -     | 1992.5   |
| AHQ-1-13, 3783              | K.LADIQEQLNR.T                                                          | 1313.48523 | 2 |  |  | 8.40E-05 | 0.95 | 4.50  | -     | 1455.7   |
| gi 4506191 ref NP_002792.1  | proteasome beta 10 subunit proprotein; proteasome subunit MECL1; protea |            |   |  |  | 9.73E-06 | 0.90 | 10.22 | 7.30  | 28936.1  |
| AHQ-1-13, 6089 - 6095       | R.LPFTALGSGQDAALAVLEDR.F                                                | 2045.28192 | 2 |  |  | 4.14E-04 | 0.96 | 4.43  | -     | 1443.1   |
| AHQ-1-10, 5868              | R.LPFTALGSGQDAALAVLEDR.F                                                | 2045.28192 | 2 |  |  | 9.73E-06 | 0.90 | 3.72  | -     | 837.2    |
| gi 4505591 ref NP_002565.1  | peroxiredoxin 1; natural killer-enhancing factor A; proliferation-assoc |            |   |  |  | 9.73E-06 | 2.40 | 30.16 | 14.60 | 22110.2  |
| AHQ-1-11, 3782              | R.GLFIHDDK.G                                                            | 921.07223  | 1 |  |  | 6.70E-04 | 0.80 | 3.11  | -     | 1103.6   |
| AHQ-1-11, 3518 - 3543       | R.LVQAFQFTDK.H                                                          | 1197.36469 | 2 |  |  | 9.73E-06 | 0.89 | 3.09  | -     | 1066.8   |
| AHQ-1-11, 3363              | R.QITVNDLPVGR.S                                                         | 1212.38090 | 2 |  |  | 5.80E-04 | 0.71 | 3.00  | -     | 404.9    |
| gi 20270343 ref NP_620150.1 | hypothetical protein BC015408 [Homo sapiens]                            |            |   |  |  | 9.86E-06 | 0.88 | 10.22 | 12.40 | 21415.8  |
| AHQ-1-11, 5658 - 5662       | K.NELHNLLDKPQLQGIPVLVLGNK.R                                             | 2553.98492 | 3 |  |  | 9.86E-06 | 0.88 | 4.37  | -     | 343.3    |
| gi 20543399 ref XP_116396.1 | similar to peptidylprolyl isomerase A (cyclophilin A) [Homo sapiens] [  |            |   |  |  | 9.89E-06 | 0.86 | 10.17 | 5.00  | 19852.7  |
| AHQ-1-12, 4335 - 4398       | R.VSFKLFADK.F                                                           | 1055.25138 | 2 |  |  | 9.89E-06 | 0.86 | 3.48  | -     | 957.3    |
| gi 18558709 ref XP_087572.1 | similar to ba291L22.2 (similar to CDC10 (cell division cycle 10, S, ce  |            |   |  |  | 9.94E-06 | 0.96 | 10.18 | 10.90 | 9988.5   |
| AHQ-1-8, 3090               | K.FEDYLNRESR.V                                                          | 1244.29194 | 2 |  |  | 9.94E-06 | 0.96 | 3.58  | -     | 1711.8   |
| gi 4502211 ref NP_001654.1  | ADP-ribosylation factor 6 [Homo sapiens]                                |            |   |  |  | 1.00E-05 | 3.26 | 40.20 | 24.60 | 20082.0  |
| AHQ-1-12, 3998              | K.FNVVDVGGQDK.I                                                         | 1265.35598 | 2 |  |  | 1.00E-05 | 0.78 | 2.87  | -     | 862.2    |
| AHQ-1-12, 4193              | R.ILMGLDAAAGK.T                                                         | 1102.37299 | 2 |  |  | 1.59E-05 | 0.96 | 3.94  | -     | 1508.0   |
| AHQ-1-12, 3678              | R.ILM*GLDAAAGK.T                                                        | 1118.37239 | 2 |  |  | 1.90E-04 | 0.96 | 3.36  | -     | 1998.1   |
| AHQ-1-12, 5366              | K.LGQSVTTIPTVGFNVETVYK.N                                                | 2255.55261 | 2 |  |  | 1.07E-05 | 0.57 | 3.14  | -     | 170.5    |
| gi 4758038 ref NP_004246.1  | cytochrome c oxidase subunit Va precursor; cytochrome c oxidase polypep |            |   |  |  | 1.02E-05 | 1.25 | 20.21 | 20.70 | 16774.1  |
| AHQ-1-14, 5745              | K.GINTLVTYDMVPEPK.I                                                     | 1677.94342 | 2 |  |  | 4.87E-05 | 0.59 | 2.51  | -     | 764.4    |
| AHQ-1-13, 4677 - 4736       | K.GINTLVTYDMVPEPK.I                                                     | 1677.94342 | 2 |  |  | 7.85E-04 | 0.93 | 4.02  | -     | 1131.9   |
| AHQ-1-13, 5592              | R.WVTVYFNKPIDAWELR.K                                                    | 2054.29220 | 2 |  |  | 1.02E-05 | 0.66 | 3.20  | -     | 306.9    |
| gi 21361456 ref NP_055425.2 | alpha glucosidase II alpha subunit; likely ortholog of mouse G2an alph  |            |   |  |  | 1.02E-05 | 1.78 | 20.20 | 4.60  | 109437.2 |
| AHQ-1-4, 6655               | R.FSFGNTLVSSADPEGHFETPIWIER.V                                           | 3012.23437 | 3 |  |  | 9.23E-05 | 0.85 | 3.58  | -     | 964.9    |
| AHQ-1-5                     |                                                                         |            |   |  |  |          |      |       |       |          |









|                             |                                                                          |            |   |          |      |       |       |          |
|-----------------------------|--------------------------------------------------------------------------|------------|---|----------|------|-------|-------|----------|
| AHQ-1-2, 2579               | K.EEQVRLQAR.K                                                            | 1129.25198 | 1 | 4.51E-04 | 0.10 | 1.96  | -     | 127.9    |
| gi 29729703 ref XP_293563.1 | similar to huntingtin-associated protein interacting protein (duo) [Ho   |            |   | 4.59E-04 | 0.20 | 10.13 | 6.40  | 26758.5  |
| AHQ-1-14, -3936             | K.ETDEERLMDWEKVK.D                                                       | 1908.12238 | 2 | 4.59E-04 | 0.20 | 2.63  | -     | 259.6    |
| gi 17439599 ref XP_067423.1 | similar to desrin - pig [Homo sapiens]                                   |            |   | 4.71E-04 | 0.58 | 10.12 | 4.40  | 19819.2  |
| AHQ-1-12, 2338 - 2341       | K.CIVVEEGK.E                                                             | 949.10404  | 1 | 4.71E-04 | 0.58 | 2.46  | -     | 572.7    |
| gi 30155280 ref XP_294126.2 | similar to Keratin, type I cytoskeletal 18 (Cytokeratin 18) (K18) (CK    |            |   | 4.72E-04 | 0.22 | 10.15 | 7.90  | 36155.8  |
| AHQ-1-13, 4020 - 4024       | R.RTVQSLIEDLDMRNPKASLENSLR.E                                             | 2900.30469 | 3 | 4.72E-04 | 0.22 | 3.01  | -     | 221.4    |
| gi 30153966 ref XP_293932.2 | similar to hypothetical protein BC013073 [Homo sapiens]                  |            |   | 4.73E-04 | 0.66 | 10.18 | 9.00  | 21711.3  |
| AHQ-1-3, 4018               | R.MIFTLFTINVSKDIRHH                                                      | 2073.44997 | 2 | 4.73E-04 | 0.66 | 3.48  | -     | 321.9    |
| AHQ-1-6, 4096               | R.MIFTLFTINVSKDIRHH                                                      | 2073.44997 | 2 | 8.43E-04 | 0.39 | 3.05  | -     | 373.4    |
| AHQ-1-2, 4350               | R.MIFTLFTINVSKDIRHH                                                      | 2073.44997 | 3 | 5.20E-04 | 0.80 | 3.54  | -     | 1173.3   |
| gi 28373103 ref NP_005164.2 | sarco/endoplasmic reticulum Ca2+ -ATPase isoform a; ATPase, Ca(2+)-tra   |            |   | 4.76E-04 | 0.90 | 10.19 | 1.50  | 109255.5 |
| AHQ-1-1, 3792               | R.VDQSLTGESVSVTK.H                                                       | 1563.73208 | 2 | 4.76E-04 | 0.90 | 3.73  | -     | 773.5    |
| gi 25777600 ref NP_002798.2 | proteasome 26S non-ATPase subunit 1; 26S proteasome non-ATPase regulat   |            |   | 4.79E-04 | 0.93 | 10.20 | 2.20  | 105835.6 |
| AHQ-1-4, 5664               | R.TPEQCPSVLLSESYNPHV.R                                                   | 2401.63796 | 3 | 4.79E-04 | 0.93 | 4.03  | -     | 1964.5   |
| gi 21361741 ref NP_057569.2 | hypothetical protein HSPC228; My012 protein [Homo sapiens]               |            |   | 4.88E-04 | 0.63 | 10.15 | 6.50  | 33879.0  |
| AHQ-1-9, 5082               | K.YAGSALQYEDVSTAVQNLOK.A                                                 | 2186.36410 | 2 | 4.88E-04 | 0.63 | 2.96  | -     | 363.0    |
| gi 24475801 ref NP_054891.2 | phosphohistidine phosphatase; sex-regulated protein janus-a [Homo sapi   |            |   | 4.90E-04 | 0.87 | 10.20 | 16.80 | 13832.4  |
| AHQ-1-13, -4141             | K.HVYGYSMAYGPAQHAISTEK.I                                                 | 2324.60023 | 3 | 4.90E-04 | 0.87 | 4.04  | -     | 659.0    |
| gi 10835121 ref NP_000289.1 | pyruvate kinase, liver and RBC; Pyruvate kinase, liver and RBC type [H   |            |   | 4.90E-04 | 0.94 | 10.20 | 1.90  | 61829.8  |
| AHQ-1-7, 3708 - 3754        | R.GDLGIEPAEK.V                                                           | 1142.28420 | 2 | 4.90E-04 | 0.94 | 3.98  | -     | 1116.8   |
| gi 13027380 ref NP_055864.1 | amyotrophic lateral sclerosis 2 (juvenile) chromosome region, candidat   |            |   | 5.12E-04 | 0.70 | 10.17 | 2.30  | 101432.5 |
| AHQ-1-13, 4999 - 5056       | R.VEQMTKTYNDIDMVTHLLAER.D                                                | 2508.85682 | 3 | 5.12E-04 | 0.70 | 3.39  | -     | 754.7    |
| gi 4759080 ref NP_004159.1  | succinate dehydrogenase complex, subunit A, flavoprotein precursor; suc  |            |   | 5.57E-04 | 0.50 | 10.16 | 4.50  | 72689.1  |
| AHQ-1-6, 7082               | R.AGLPCQDLEFVQFHPPTGIYGAGLITEGCR.G                                       | 3371.76536 | 3 | 5.57E-04 | 0.50 | 3.12  | -     | 427.0    |
| gi 7661624 ref NP_056202.1  | preimplantation protein 3; likely ortholog of preimplantation protein 3  |            |   | 5.77E-04 | 0.50 | 10.14 | 7.20  | 22256.6  |
| AHQ-1-10, 3555              | K.ILEPPEQGDEGVWV.K                                                       | 1597.75022 | 2 | 5.77E-04 | 0.50 | 2.71  | -     | 216.5    |
| gi 6996010 ref NP_002038.1  | glycyl-tRNA synthetase; GlyRS; glycine tRNA ligase [Homo sapiens]        |            |   | 5.96E-04 | 1.18 | 20.18 | 5.70  | 77530.3  |
| AHQ-1-6, 6566               | K.SPITGNDLSPVFNLMFK.T                                                    | 2065.37824 | 2 | 5.96E-04 | 0.39 | 3.15  | -     | 245.3    |
| AHQ-1-6, 6883               | K.TLYVEEVVNPVIEPSFGLGR.I                                                 | 2219.52197 | 2 | 7.46E-04 | 0.79 | 3.60  | -     | 517.9    |
| gi 5174737 ref NP_006077.1  | tubulin, beta, 4 [Homo sapiens]                                          |            |   | 6.26E-04 | 0.70 | 10.16 | 3.30  | 50517.5  |
| AHQ-1-7, 4652 - 4654        | R.ALTVPELTQQM*FDAK.N                                                     | 1708.95749 | 2 | 6.26E-04 | 0.70 | 3.12  | -     | 425.6    |
| gi 30156349 ref XP_301652.1 | similar to Eukaryotic initiation factor 4A-II (eIF-4A-II) (eIF4A-II) [   |            |   | 6.33E-04 | 0.23 | 10.14 | 9.30  | 21450.7  |
| AHQ-1-8, 4379 - 4461        | K.M*HAADLTVSALRGDM*DEK.E                                                 | 1993.20912 | 2 | 6.33E-04 | 0.23 | 2.74  | -     | 340.6    |
| gi 4502417 ref NP_000703.1  | biiverdin reductase A [Homo sapiens]                                     |            |   | 6.43E-04 | 0.46 | 10.14 | 4.70  | 33488.3  |
| AHQ-1-9, 2911               | K.SGSLNVPVNVGNK.N                                                        | 1414.54642 | 2 | 6.43E-04 | 0.46 | 2.75  | -     | 234.0    |
| gi 6912396 ref NP_036335.1  | glyoxylate reductase/hydroxypyruvate reductase [Homo sapiens]            |            |   | 6.74E-04 | 0.67 | 10.18 | 5.50  | 35668.0  |
| AHQ-1-9, 4180               | R.AADCEVEQWDSDEPIPAK.E                                                   | 2062.15676 | 2 | 6.74E-04 | 0.67 | 2.82  | -     | 509.3    |
| gi 5902154 ref NP_008994.1  | vascular Rab-GAP/TBC-containing [Homo sapiens]                           |            |   | 6.74E-04 | 0.31 | 10.10 | 1.10  | 102670.6 |
| AHQ-1-4, 2795               | K.QM*IKDLAKEK.D                                                          | 1220.46471 | 1 | 6.74E-04 | 0.31 | 1.93  | -     | 628.4    |
| gi 4506077 ref NP_002734.1  | protein kinase C substrate 80K-H; glucosidase II, beta subunit; AGE-bin  |            |   | 6.80E-04 | 0.92 | 10.15 | 1.90  | 59290.6  |
| AHQ-1-5, 4167               | K.SLEDDQVEMLR.T                                                          | 1220.37847 | 2 | 6.80E-04 | 0.92 | 3.02  | -     | 1500.4   |
| gi 14249478 ref NP_116189.1 | hypothetical protein FLJ14525 [Homo sapiens]                             |            |   | 6.93E-04 | 0.08 | 10.14 | 2.40  | 36346.2  |
| AHQ-1-2, 1962 - 2030        | R.KIM*QDKEK.I                                                            | 1036.22824 | 1 | 6.93E-04 | 0.08 | 2.01  | -     | 289.7    |
| gi 30157774 ref XP_301845.1 | similar to Kunitz-type protease inhibitor 3 (HKIB9) [Homo sapiens] [MA   |            |   | 7.02E-04 | 0.41 | 10.15 | 12.00 | 24113.1  |
| AHQ-1-12, 5435 - 5498       | -MQLQASLSFLLILLTCLLELRSELAR.D                                            | 2921.51174 | 3 | 7.02E-04 | 0.41 | 3.04  | -     | 435.0    |
| gi 13385594 ref NP_085056.1 | cytochrome b5 outer mitochondrial membrane precursor; type 2 cyt-b5 [H   |            |   | 7.20E-04 | 0.83 | 10.17 | 23.30 | 16320.0  |
| AHQ-1-11, 5722              | R.FLNEHPGGEVLLQAGVDASESFEDVGHSSDAR.E                                     | 3629.75848 | 3 | 7.20E-04 | 0.83 | 3.45  | -     | 779.6    |
| gi 28872728 ref NP_002808.2 | proteasome 26S non-ATPase subunit 13 isoform 1; 26S proteasome subunit   |            |   | 7.50E-04 | 0.42 | 10.16 | 4.80  | 42912.8  |
| AHQ-1-9, 4996               | K.TAWGQPDLAANEQLLR.K                                                     | 1983.17391 | 2 | 7.50E-04 | 0.42 | 3.11  | -     | 230.9    |
| gi 13376539 ref NP_079295.1 | hypothetical protein FLJ13940 [Homo sapiens]                             |            |   | 7.61E-04 | 0.49 | 10.14 | 5.00  | 27546.1  |
| AHQ-1-11, 3862              | R.QIFPPEQLITGK.E                                                         | 1411.63050 | 2 | 7.61E-04 | 0.49 | 2.82  | -     | 161.2    |
| gi 11321611 ref NP_006868.1 | guanosine monophosphate reductase; guanine monophosphate reductase [Ho   |            |   | 7.68E-04 | 0.90 | 10.23 | 7.50  | 37414.6  |
| AHQ-1-9, 4174               | K.LFATNHPCEQLQNVAVSSGSGQNDLEK.M                                          | 2818.02614 | 3 | 7.68E-04 | 0.90 | 4.57  | -     | 1225.5   |
| gi 22059372 ref XP_113714.2 | similar to Density-regulated protein (DRP) (DRP1 protein) (Smooth musc   |            |   | 7.85E-04 | 0.49 | 10.15 | 8.60  | 22091.9  |
| AHQ-1-10, 4371              | K.WPEVDDDSIEDLGEVKK                                                      | 1975.09895 | 2 | 7.85E-04 | 0.49 | 2.93  | -     | 543.6    |
| gi 24432013 ref NP_078982.2 | hypothetical protein FLJ13479 [Homo sapiens]                             |            |   | 7.96E-04 | 0.01 | 10.10 | 1.50  | 67976.0  |
| AHQ-1-9, 2763               | K.AYAEKLDLR.N                                                            | 1079.23134 | 1 | 7.96E-04 | 0.01 | 2.03  | -     | 90.3     |
| gi 6912662 ref NP_036372.1  | sirtuin 4; sir2-like 4; sirtuin type 4; sirtuin silent mating type info  |            |   | 8.02E-04 | 0.47 | 10.16 | 8.60  | 35187.3  |
| AHQ-1-9, 5234               | K.AGSRRLTELHGCMRDVLCDCGEQTPR.G                                           | 3192.57848 | 3 | 8.02E-04 | 0.47 | 3.13  | -     | 476.4    |
| gi 29745994 ref XP_290546.1 | similar to KIAA0830 protein [Homo sapiens]                               |            |   | 8.03E-04 | 0.95 | 10.21 | 2.60  | 55016.4  |
| AHQ-1-9, 4200               | K.ILEVYNQIQDEER.M                                                        | 1585.74098 | 2 | 8.03E-04 | 0.95 | 4.26  | -     | 1288.2   |
| gi 20546215 ref XP_115639.1 | similar to leukocyte immunoglobulin-like receptor, subfamily B (with T   |            |   | 8.20E-04 | 0.31 | 10.14 | 4.70  | 42748.2  |
| AHQ-1-11, 4463 - 4476       | R.CSREVNSREDNVLYRVVK.P                                                   | 2225.47152 | 2 | 8.20E-04 | 0.31 | 2.74  | -     | 501.9    |
| gi 4504061 ref NP_002067.1  | glucosamine (N-acetyl)-6-sulfatase precursor; N-acetylglucosamine-6-sul  |            |   | 8.21E-04 | 0.30 | 10.14 | 3.30  | 62081.8  |
| AHQ-1-3, 5689 - 5761        | K.RWQTLTLLSVDLLVEKLVKR.L                                                 | 2199.58179 | 2 | 8.21E-04 | 0.30 | 2.66  | -     | 321.3    |
| gi 18588342 ref XP_085748.1 | similar to KIAA1039 protein [Homo sapiens]                               |            |   | 8.36E-04 | 0.65 | 10.14 | 14.40 | 10510.0  |
| AHQ-1-7, 3578               | K.LPFTDGDQAQLQR.K                                                        | 1489.61498 | 2 | 8.36E-04 | 0.65 | 2.79  | -     | 806.8    |
| gi 7662502 ref NP_054779.1  | MCT-1 protein [Homo sapiens]                                             |            |   | 8.37E-04 | 0.92 | 10.22 | 10.50 | 20555.2  |
| AHQ-1-11, 5014              | K.FVLSGANIMCPLTSPGAK.L                                                   | 1922.25862 | 2 | 8.37E-04 | 0.92 | 4.45  | -     | 747.3    |
| gi 5803003 ref NP_006720.1  | diaphanous 2 isoform 156 [Homo sapiens]                                  |            |   | 8.71E-04 | 0.63 | 10.17 | 1.60  | 125568.3 |
| AHQ-1-1, 5015               | K.TAREQYKELSTMHNNMMK.L                                                   | 2213.54787 | 3 | 8.71E-04 | 0.63 | 3.38  | -     | 764.9    |
| gi 6912324 ref NP_036266.1  | leiomodlin 1 (smooth muscle); thyroid and eye muscle autoantigen D1 (64k |            |   | 8.77E-04 | 0.38 | 10.13 | 3.00  | 63737.1  |
| AHQ-1-14, 6114 - 6186       | K.GEKKDLLEVPKAGAVAK.G                                                    | 1754.06430 | 2 | 8.77E-04 | 0.38 | 2.69  | -     | 557.0    |
| gi 21361547 ref NP_002930.2 | ribonuclease/angiogenin inhibitor; Placental ribonuclease inhibitor [H   |            |   | 8.83E-04 | 0.82 | 10.17 | 3.30  | 49973.3  |
| AHQ-1-7, 6921               | R.WPEVDDDSIEDLGEVKK                                                      | 1855.19360 | 2 | 8.83E-04 | 0.82 | 3.41  | -     | 432.4    |
| gi 4502167 ref NP_000475.1  | amyloid beta (A4) precursor protein (protease nexin-II, Alzheimer disea  |            |   | 8.87E-04 | 0.42 | 10.13 | 2.30  | 86942.8  |
| AHQ-1-4, 7012               | R.CLVGFEVSDALLVPDKCK.F                                                   | 2053.38561 | 2 | 8.87E-04 | 0.42 | 2.52  | -     | 557.7    |
| gi 4507947 ref NP_003671.1  | tyrosyl-tRNA synthetase; tyrosyl-tRNA synthetase; tyrosyl tRNA ligase [  |            |   | 8.94E-04 | 0.90 | 10.19 | 3.40  | 59143.5  |
| AHQ-1-7, 6225               | K.AFCPEGNVENNVLSFIK.H                                                    | 1997.21741 | 2 | 8.94E-04 | 0.90 | 3.87  | -     | 987.5    |
| gi 4506185 ref NP_002780.1  | proteasome alpha 4 subunit; proteasome component C9; proteasome subunit  |            |   | 9.35E-04 | 0.71 | 10.16 | 9.20  | 29483.6  |
| AHQ-1-10, 6091              | K.LNEDMACSVAGITSDANVLTNELR.L                                             | 2595.84629 | 2 | 9.35E-04 | 0.71 | 3.21  | -     | 467.2    |
| gi 11072091 ref NP_057736.2 | Crn, crooked neck-like 1; CGI-201 protein; crooked neck protein (crn);   |            |   | 9.61E-04 | 0.47 | 10.10 | 1.10  | 99200.7  |
| AHQ-1-4, 3214               | R.FVLVHPDVVK.N                                                           | 1054.26662 | 1 | 9.61E-04 | 0.47 | 1.82  | -     | 804.7    |

| Reference                  | Peptide                                     | MH+        | z | P (pro)  | Sf    | Score  | Coverage | MW       |
|----------------------------|---------------------------------------------|------------|---|----------|-------|--------|----------|----------|
| File, Scan(s)              |                                             |            |   | P (pep)  | Sf    | XC     |          | Sp       |
| gi 4507485 ref NP_003237.1 | thrombospondin 1 [Homo sapiens]             |            |   | 1.00E-30 | 31.15 | 370.29 | 32.80    | 129351.8 |
| AHQ-2-2, 4316 - 4386       | K.AGTLDLSLTVGK.Q                            | 1303.48711 | 2 | 8.12E-06 | 0.93  | 3.68   | -        | 1377.6   |
| AHQ-2-6, 2503              | R.AQLYDCEK.M                                | 1141.27636 | 1 | 2.19E-04 | 0.15  | 2.57   | -        | 218.1    |
| AHQ-2-3, 6700              | R.AQLYDCEKMEALDVPVQSVFTR.D                  | 2972.33983 | 3 | 6.44E-06 | 0.95  | 5.68   | -        | 899.4    |
| AHQ-2-10, 5959             | R.AQLYDCEKMEALDVPVQSVFTR.D                  | 2972.33983 | 2 | 5.61E-08 | 0.78  | 3.23   | -        | 496.8    |
| AHQ-2-2, 6745              | R.AQLYDCEKMEALDVPVQSVFTR.D                  | 2972.33983 | 3 | 2.18E-05 | 0.93  | 4.94   | -        | 1081.7   |
| AHQ-2-2, 7069              | R.AQLYDCEKMEALDVPVQSVFTR.D                  | 2972.33983 | 3 | 1.17E-05 | 0.94  | 5.06   | -        | 1038.1   |
| AHQ-2-4, 4244              | R.CENTDPGYNCLPCPPR.F                        | 1954.10800 | 2 | 4.82E-12 | 0.91  | 3.94   | -        | 551.4    |
| AHQ-2-3, 4060 - 4072       | R.CENTDPGYNCLPCPPR.F                        | 1954.10800 | 2 | 1.61E-04 | 0.80  | 3.09   | -        | 592.5    |
| AHQ-2-1, 4209              | R.CENTDPGYNCLPCPPR.F                        | 1954.10800 | 2 | 9.99E-06 | 0.71  | 3.26   | -        | 296.6    |
| AHQ-2-1, 3929              | R.CENTDPGYNCLPCPPR.F                        | 1954.10800 | 2 | 8.00E-06 | 0.83  | 3.20   | -        | 498.0    |
| AHQ-2-2, 3945 - 4017       | R.CENTDPGYNCLPCPPR.F                        | 1954.10800 | 2 | 8.39E-09 | 0.94  | 4.43   | -        | 735.7    |
| AHQ-2-2, 4096              | R.CENTDPGYNCLPCPPR.F                        | 1954.10800 | 2 | 2.55E-05 | 0.61  | 3.13   | -        | 276.5    |
| AHQ-2-4, 3354              | K.CNYLGHYSDFM*YR.C                          | 1693.84162 | 2 | 4.87E-05 | 0.93  | 3.43   | -        | 971.5    |
| AHQ-2-2, 3389 - 3392       | K.CNYLGHYSDFM*YR.C                          | 1693.84162 | 2 | 1.47E-04 | 0.92  | 3.78   | -        | 779.0    |
| AHQ-2-2, 3917              | K.CNYLGHYSDFM*YR.C                          | 1677.84222 | 2 | 3.51E-05 | 0.91  | 3.90   | -        | 635.4    |
| AHQ-2-4, 3872 - 3948       | K.CNYLGHYSDFM*YR.C                          | 1677.84222 | 2 | 5.43E-04 | 0.72  | 2.91   | -        | 742.7    |
| AHQ-2-4, 3477 - 3554       | K.DCVGDVTENGIQCNK.Q                         | 1654.75869 | 2 | 5.76E-05 | 0.87  | 3.22   | -        | 867.3    |
| AHQ-2-3, 3464 - 3467       | K.DCVGDVTENGIQCNK.Q                         | 1654.75869 | 2 | 9.38E-07 | 0.96  | 4.44   | -        | 1340.8   |
| AHQ-2-2, 3525              | K.DCVGDVTENGIQCNK.Q                         | 1654.75869 | 2 | 5.37E-06 | 0.94  | 3.91   | -        | 1192.7   |
| AHQ-2-4, 6610              | K.DDFDHDVSPDIDDICPENVDISETDFR.R             | 3183.22991 | 3 | 2.56E-04 | 0.73  | 3.58   | -        | 785.8    |
| AHQ-2-5, 2584              | K.DHSGGVFSVVSNGK.A                          | 1461.56164 | 2 | 5.86E-04 | 0.92  | 3.86   | -        | 925.3    |
| AHQ-2-6, 2521              | K.DHSGGVFSVVSNGK.A                          | 1461.56164 | 2 | 2.05E-04 | 0.77  | 2.69   | -        | 700.8    |
| AHQ-2-2, 2693              | K.DHSGGVFSVVSNGK.A                          | 1461.56164 | 2 | 8.23E-07 | 0.94  | 3.24   | -        | 1501.7   |
| AHQ-2-10, 2496             | K.DHSGGVFSVVSNGK.A                          | 1461.56164 | 2 | 2.93E-04 | 0.94  | 3.91   | -        | 1152.5   |
| AHQ-2-2, 2706              | K.DHSGGVFSVVSNGK.A                          | 1461.56164 | 1 | 2.18E-08 | 0.37  | 2.24   | -        | 344.3    |
| AHQ-2-4, 2653              | K.DHSGGVFSVVSNGK.A                          | 1461.56164 | 2 | 1.17E-08 | 0.95  | 4.12   | -        | 1147.7   |
| AHQ-2-1, 3189              | R.DNCQYVYNVDQR.D                            | 1575.64166 | 2 | 7.58E-07 | 0.92  | 4.39   | -        | 781.8    |
| AHQ-2-1, 3353              | R.DNCQYVYNVDQR.D                            | 1575.64166 | 2 | 5.51E-05 | 0.91  | 3.45   | -        | 1363.2   |
| AHQ-2-4, 3144              | R.DNCQYVYNVDQR.D                            | 1575.64166 | 2 | 2.03E-05 | 0.93  | 3.86   | -        | 1047.1   |
| AHQ-2-3, 3140              | R.DNCQYVYNVDQR.D                            | 1575.64166 | 2 | 1.47E-04 | 0.90  | 3.65   | -        | 948.7    |
| AHQ-2-2, 6294              | K.DSDGGRGDACKDDFDHDSVDPDIDDICPENVDISETDFR.R | 4418.43100 | 3 | 7.42E-09 | 0.74  | 4.05   | -        | 331.8    |
| AHQ-2-3, 4309 - 4363       | R.DTMDMGVGDQDCNCPLEHNPQLDSDSDR.I            | 3324.31882 | 3 | 7.78E-11 | 0.90  | 4.37   | -        | 665.2    |
| AHQ-2-2, 3972 - 4040       | R.DTMDMGVGDQDCNCPLEHNPQLDSDSDR.I            | 3340.31822 | 3 | 5.96E-13 | 0.91  | 4.57   | -        | 855.6    |
| AHQ-2-5, 4288              | R.DTMDMGVGDQDCNCPLEHNPQLDSDSDR.I            | 3324.31882 | 3 | 1.46E-05 | 0.88  | 4.49   | -        | 555.1    |
| AHQ-2-7, 4275              | R.DTMDMGVGDQDCNCPLEHNPQLDSDSDR.I            | 3324.31882 | 3 | 2.68E-05 | 0.86  | 4.36   | -        | 512.1    |
| AHQ-2-2, 4346 - 4417       | R.DTMDMGVGDQDCNCPLEHNPQLDSDSDR.I            | 3324.31882 | 3 | 1.16E-13 | 0.92  | 5.05   | -        | 570.8    |
| AHQ-2-4, 4234              | R.DTMDMGVGDQDCNCPLEHNPQLDSDSDR.I            | 3324.31882 | 3 | 3.39E-09 | 0.92  | 4.49   | -        | 836.3    |
| AHQ-2-4, 3932 - 4008       | R.DTMDMGVGDQDCNCPLEHNPQLDSDSDR.I            | 3340.31822 | 3 | 4.01E-08 | 0.81  | 3.58   | -        | 678.1    |
| AHQ-2-3, 3917 - 3973       | R.DTMDMGVGDQDCNCPLEHNPQLDSDSDR.I            | 3340.31822 | 3 | 2.62E-10 | 0.91  | 5.34   | -        | 523.3    |
| AHQ-2-2, 4108              | R.DTMDMGVGDQDCNCPLEHNPQLDSDSDR.I            | 3340.31822 | 3 | 3.07E-04 | 0.76  | 3.45   | -        | 608.5    |
| AHQ-2-4, 4320              | R.DTMDMGVGDQDCNCPLEHNPQLDSDSDR.I            | 3324.31882 | 3 | 1.47E-07 | 0.80  | 3.65   | -        | 449.2    |
| AHQ-2-1, 3889 - 3890       | R.DTMDMGVGDQDCNCPLEHNPQLDSDSDR.I            | 3340.31822 | 3 | 6.04E-09 | 0.91  | 4.54   | -        | 822.9    |
| AHQ-2-2, 4545              | R.DTMDMGVGDQDCNCPLEHNPQLDSDSDR.I            | 3324.31882 | 3 | 1.90E-07 | 0.75  | 3.40   | -        | 458.7    |
| AHQ-2-1, 4310              | R.DTMDMGVGDQDCNCPLEHNPQLDSDSDR.I            | 3324.31882 | 3 | 1.87E-05 | 0.73  | 3.48   | -        | 463.4    |
| AHQ-2-2, 3644              | K.FQDLVDAVR.A                               | 1063.18877 | 1 | 2.79E-04 | 0.24  | 2.03   | -        | 346.3    |
| AHQ-2-2, 3645              | K.FQDLVDAVR.A                               | 1063.18877 | 2 | 2.87E-06 | 0.94  | 3.39   | -        | 1279.7   |
| AHQ-2-1, 3782              | K.FQDLVDAVR.A                               | 1063.18877 | 2 | 1.23E-04 | 0.86  | 2.57   | -        | 998.3    |
| AHQ-2-6, 3346              | K.FQDLVDAVR.A                               | 1063.18877 | 2 | 1.61E-05 | 0.88  | 2.84   | -        | 1050.2   |
| AHQ-2-9, 3299              | K.FQDLVDAVR.A                               | 1063.18877 | 1 | 2.72E-05 | 0.24  | 2.07   | -        | 348.1    |
| AHQ-2-7, 2455              | R.FTGSOPFGQGVVEHATANK.Q                     | 1877.00666 | 2 | 1.20E-05 | 0.86  | 3.98   | -        | 431.7    |
| AHQ-2-1, 2962              | R.FTGSOPFGQGVVEHATANK.Q                     | 1877.00666 | 2 | 5.11E-09 | 0.81  | 3.79   | -        | 373.7    |
| AHQ-2-3, 2925              | R.FTGSOPFGQGVVEHATANK.Q                     | 1877.00666 | 2 | 3.31E-12 | 0.72  | 3.34   | -        | 409.8    |
| AHQ-2-2, 2833 - 2913       | R.FTGSOPFGQGVVEHATANK.Q                     | 1877.00666 | 2 | 2.22E-06 | 0.90  | 4.17   | -        | 513.9    |
| AHQ-2-2, 2734              | R.FTGSOPFGQGVVEHATANK.Q                     | 1877.00666 | 3 | 5.63E-04 | 0.60  | 3.25   | -        | 481.2    |
| AHQ-2-5, 2479              | R.FTGSOPFGQGVVEHATANK.Q                     | 1877.00666 | 2 | 4.36E-04 | 0.87  | 3.90   | -        | 542.3    |
| AHQ-2-3, 2831              | R.FTGSOPFGQGVVEHATANK.Q                     | 1877.00666 | 2 | 1.27E-07 | 0.78  | 3.67   | -        | 337.0    |
| AHQ-2-4, 2926              | R.FTGSOPFGQGVVEHATANK.Q                     | 1877.00666 | 2 | 2.94E-06 | 0.88  | 4.14   | -        | 452.8    |
| AHQ-2-4, 5689              | R.FVFGTTPEDILR.N                            | 1395.58470 | 2 | 3.47E-04 | 0.84  | 3.11   | -        | 708.8    |
| AHQ-2-4, 5697              | R.FVFGTTPEDILR.N                            | 1395.58470 | 1 | 4.07E-07 | 0.08  | 2.12   | -        | 88.6     |
| AHQ-2-9, 5330 - 5331       | R.FVFGTTPEDILR.N                            | 1395.58470 | 1 | 4.86E-06 | 0.03  | 1.95   | -        | 98.3     |
| AHQ-2-9, 5326 - 5334       | R.FVFGTTPEDILR.N                            | 1395.58470 | 2 | 6.40E-04 | 0.81  | 3.31   | -        | 697.9    |
| AHQ-2-3, 5660 - 5661       | R.FVFGTTPEDILR.N                            | 1395.58470 | 1 | 1.23E-04 | 0.12  | 2.06   | -        | 170.6    |
| AHQ-2-12, 5465             | R.FVFGTTPEDILR.N                            | 1395.58470 | 2 | 3.05E-04 | 0.89  | 2.80   | -        | 1036.5   |
| AHQ-2-5, 5417              | R.FVFGTTPEDILR.N                            | 1395.58470 | 1 | 2.77E-05 | 0.15  | 2.00   | -        | 132.9    |
| AHQ-2-5, 5420              | R.FVFGTTPEDILR.N                            | 1395.58470 | 1 | 2.45E-06 | 0.12  | 2.25   | -        | 69.2     |
| AHQ-2-6, 5337 - 5418       | R.FVFGTTPEDILR.N                            | 1395.58470 | 1 | 2.53E-04 | 0.08  | 2.04   | -        | 139.4    |
| AHQ-2-6, 4425 - 4433       | K.GGVNDNFQGVVQVLR.F                         | 1617.74799 | 2 | 3.27E-10 | 0.92  | 4.37   | -        | 868.7    |
| AHQ-2-5, 4245              | K.GGVNDNFQGVVQVLR.F                         | 1617.74799 | 2 | 4.16E-04 | 0.78  | 3.07   | -        | 642.9    |
| AHQ-2-2, 4829 - 4908       | K.GGVNDNFQGVVQVLR.F                         | 1617.74799 | 2 | 1.09E-05 | 0.95  | 4.79   | -        | 1083.8   |
| AHQ-2-2, 4725 - 4752       | K.GGVNDNFQGVVQVLR.F                         | 1617.74799 | 2 | 1.74E-05 | 0.89  | 4.11   | -        | 798.0    |
| AHQ-2-2, 4581              | K.GGVNDNFQGVVQVLR.F                         | 1617.74799 | 2 | 1.71E-04 | 0.91  | 3.91   | -        | 813.6    |
| AHQ-2-6, 4190 - 4191       | K.GGVNDNFQGVVQVLR.F                         | 1617.74799 | 2 | 1.44E-05 | 0.94  | 4.24   | -        | 1140.7   |
| AHQ-2-1, 4653              | K.GGVNDNFQGVVQVLR.F                         | 1617.74799 | 2 | 7.06E-05 | 0.83  | 3.75   | -        | 707.4    |
| AHQ-2-4, 4890              | K.GGVNDNFQGVVQVLR.F                         | 1617.74799 | 2 | 2.57E-08 | 0.91  | 4.21   | -        | 840.8    |
| AHQ-2-4, 4716 - 4746       | K.GGVNDNFQGVVQVLR.F                         | 1617.74799 | 2 | 5.10E-08 | 0.86  | 3.53   | -        | 776.9    |
| AHQ-2-4, 4625 - 4701       | K.GGVNDNFQGVVQVLR.F                         | 1617.74799 | 2 | 7.36E-07 | 0.81  | 3.37   | -        | 590.9    |
| AHQ-2-4, 4530              | K.GGVNDNFQGVVQVLR.F                         | 1617.74799 | 2 | 3.40E-05 | 0.81  | 3.25   | -        | 897.2    |
| AHQ-2-7, 4039 - 4111       | K.GGVNDNFQGVVQVLR.F                         | 1617.74799 | 2 | 2.46E-04 | 0.73  | 3.58   | -        | 408.4    |
| AHQ-2-10, 4327 - 4330      | K.GGVNDNFQGVVQVLR.F                         | 1617.74799 | 2 | 2.85E-07 | 0.91  | 4.18   | -        | 878.3    |
| AHQ-2-2, 4422              | K.GGVNDNFQGVVQVLR.F                         | 1617.74799 | 2 | 8.26E-05 | 0.72  | 3.29   | -        | 494.5    |
| AHQ-2-7, 4401 - 4413       | K.GGVNDNFQGVVQVLR.F                         | 1617.74799 | 2 | 2.01E-08 | 0.88  | 4.17   | -        | 770.3    |
| AHQ-2-10, 3898             | K.GGVNDNFQGVVQVLR.F                         | 1617.74799 | 2 | 1.85E-07 | 0.74  | 3.09   | -        | 686.3    |
| AHQ-2-1, 4749              | K.GGVNDNFQGVVQVLR.F                         | 1617.74799 | 2 | 8.96E-06 | 0.90  | 4.16   | -        | 717.7    |
| AHQ-2-3, 4887              | K.GGVNDNFQGVVQVLR.F                         | 1617.74799 | 2 | 1.59E-05 | 0.88  | 4.02   | -        | 728.1    |
| AHQ-2-8, 3943              | K.GGVNDNFQGVVQVLR.F                         | 1617.74799 | 2 | 2.90E-05 | 0.63  | 3.12   | -        | 497.8    |
| AHQ-2-5, 4493 - 4544       | K.GGVNDNFQGVVQVLR.F                         | 1617.74799 | 2 | 9.51E-05 | 0.89  | 4.04   | -        | 836.3    |
| AHQ-2-9, 4166 - 4174       | K.GGVNDNFQGVVQVLR.F                         | 1617.74799 | 2 | 2.12E-04 | 0.76  | 3.76   | -        | 470.6    |
| AHQ-2-9, 4408 - 4442       | K.GGVNDNFQGVVQVLR.F                         | 1617.74799 | 2 | 3.44E-05 | 0.92  | 4.02   | -        | 1089.1   |
| AHQ-2-3, 4707 - 4783       | K.GGVNDNFQGVVQVLR.F                         | 1617.74799 | 2 | 9.78E-10 | 0.93  | 4.36   | -        | 1019.6   |
| AHQ-2-10, 3990             | K.GGVNDNFQGVVQVLR.F                         | 1617.74799 | 2 | 8.60E-04 | 0.67  | 3.50   | -        | 529.9    |
| AHQ-2-3, 4391              | K.GGVNDNFQGVVQVLR.F                         | 1617.74799 | 2 | 1.55E-04 | 0.84  | 3.55   | -        | 904.9    |
| AHQ-2-5, 4664              | K.GGVNDNFQGVVQVLR.F                         | 1617.74799 | 2 | 1.85E-06 | 0.82  | 3.57   | -        | 652.4    |
| AHQ-2-3, 4543              | K.GGVNDNFQGVVQVLR.F                         | 1617.74799 | 2 | 1.28E-06 | 0.86  | 3.67   | -        | 719.2    |
| AHQ-2-10, 4162 - 4163      | K.GGVNDNFQGVVQVLR.F                         | 1617.74799 | 2 | 6.77E-11 | 0.90  | 4.28   | -        | 807.4    |
| AHQ-2-1, 2234 - 2253       | K.GPDPSSPAFR.I                              | 1031.10364 | 2 | 6.05E-05 | 0.70  | 2.91   | -        | 516.5    |
| AHQ-2-2, 2074              | K.GPDPSSPAFR.I                              | 1031.10364 | 2 | 1.20E-05 | 0.87  | 3.06   | -        | 686.1    |
| AHQ-2-5, 1857 - 1868       | K.GPDPSSPAFR.I                              | 1031.10364 | 2 | 8.55E-04 | 0.77  | 3.19   | -        | 409.9    |
| AHQ-2-6, 1855 - 1881       | K.GPDPSSPAFR.I                              | 1031.10364 | 2 | 8.98E-05 | 0.75  | 3.00   | -        | 455.9    |
| AHQ-2-3, 2004 - 2083       | K.GPDPSSPAFR.I                              | 1031.10364 | 2 | 1.79E-05 | 0.84  | 3.11   | -        | 570.4    |
| AHQ-2-11, 2104             | K.GPDPSSPAFR.I                              | 1031.10364 | 2 | 4.15E-04 | 0.79  | 3.04   | -        | 623.2    |
| AHQ-2-4, 2073              | K.GPDPSSPAFR.I                              | 1031.10364 | 2 | 2.09E-05 | 0.87  | 3.13   | -        | 683.1    |
| AHQ-2-10, 2648 - 2656      | R.GTLALER.K                                 | 873.03234  | 2 | 1.89E-04 | 0.88  | 3.05   | -        | 939.2    |
| AHQ-2-2, 2910              | R.GTLALER.K                                 | 873.03234  | 2 |          |       |        |          |          |

|                        |                            |            |   |          |      |      |   |        |
|------------------------|----------------------------|------------|---|----------|------|------|---|--------|
| AHQ-2-4, 2910          | R.GTLALER.K                | 873.03234  | 2 | 6.52E-04 | 0.93 | 3.49 | - | 1149.8 |
| AHQ-2-3, 2544 - 2608   | K.GTSQNDPNWVVR.H           | 1373.45608 | 2 | 6.47E-04 | 0.47 | 2.73 | - | 588.2  |
| AHQ-2-2, 2557 - 2586   | K.GTSQNDPNWVVR.H           | 1373.45608 | 2 | 1.69E-04 | 0.72 | 3.13 | - | 810.7  |
| AHQ-2-4, 2557 - 2566   | K.GTSQNDPNWVVR.H           | 1373.45608 | 2 | 4.16E-05 | 0.72 | 3.40 | - | 601.4  |
| AHQ-2-1, 2772          | K.GTSQNDPNWVVR.H           | 1373.45608 | 2 | 2.11E-04 | 0.48 | 2.53 | - | 608.8  |
| AHQ-2-13, 6260         | R.IEDANLIPPVDDKFQDLVDAVR.A | 2580.87450 | 3 | 6.37E-06 | 0.71 | 3.24 | - | 317.7  |
| AHQ-2-5, 6659 - 6660   | R.IEDANLIPPVDDKFQDLVDAVR.A | 2580.87450 | 2 | 2.55E-07 | 0.76 | 3.32 | - | 316.2  |
| AHQ-2-12, 6465 - 6539  | R.IEDANLIPPVDDKFQDLVDAVR.A | 2580.87450 | 2 | 1.23E-07 | 0.81 | 3.63 | - | 274.2  |
| AHQ-2-12, 6399 - 6462  | R.IEDANLIPPVDDKFQDLVDAVR.A | 2580.87450 | 3 | 2.21E-05 | 0.85 | 4.17 | - | 447.4  |
| AHQ-2-5, 6869          | R.IEDANLIPPVDDKFQDLVDAVR.A | 2580.87450 | 3 | 4.77E-04 | 0.84 | 4.02 | - | 416.7  |
| AHQ-2-2, 6960 - 7038   | R.IEDANLIPPVDDKFQDLVDAVR.A | 2580.87450 | 2 | 1.59E-05 | 0.54 | 2.77 | - | 235.2  |
| AHQ-2-13, 6261         | R.IEDANLIPPVDDKFQDLVDAVR.A | 2580.87450 | 2 | 1.46E-06 | 0.69 | 3.39 | - | 189.1  |
| AHQ-2-11, 6261 - 6304  | R.IEDANLIPPVDDKFQDLVDAVR.A | 2580.87450 | 2 | 8.26E-06 | 0.69 | 3.17 | - | 310.2  |
| AHQ-2-11, 6164 - 6184  | R.IEDANLIPPVDDKFQDLVDAVR.A | 2580.87450 | 3 | 1.14E-08 | 0.82 | 4.05 | - | 431.1  |
| AHQ-2-11, 6162 - 6170  | R.IEDANLIPPVDDKFQDLVDAVR.A | 2580.87450 | 2 | 3.80E-04 | 0.48 | 2.97 | - | 215.9  |
| AHQ-2-14-, 6304 - 6385 | R.IEDANLIPPVDDKFQDLVDAVR.A | 2580.87450 | 3 | 8.25E-07 | 0.76 | 3.12 | - | 630.2  |
| AHQ-2-3, 6983          | R.IEDANLIPPVDDKFQDLVDAVR.A | 2580.87450 | 3 | 4.57E-05 | 0.80 | 4.01 | - | 360.5  |
| AHQ-2-13-, 6445 - 6449 | R.IEDANLIPPVDDKFQDLVDAVR.A | 2580.87450 | 3 | 3.62E-07 | 0.67 | 3.04 | - | 448.4  |
| AHQ-2-10, 6124 - 6199  | R.IEDANLIPPVDDKFQDLVDAVR.A | 2580.87450 | 3 | 2.33E-07 | 0.82 | 4.13 | - | 334.7  |
| AHQ-2-10, 6042 - 6114  | R.IEDANLIPPVDDKFQDLVDAVR.A | 2580.87450 | 2 | 3.76E-05 | 0.63 | 3.29 | - | 186.2  |
| AHQ-2-10, 6038 - 6050  | R.IEDANLIPPVDDKFQDLVDAVR.A | 2580.87450 | 3 | 2.15E-10 | 0.88 | 4.28 | - | 444.6  |
| AHQ-2-3, 6791 - 6823   | R.IEDANLIPPVDDKFQDLVDAVR.A | 2580.87450 | 3 | 1.61E-06 | 0.68 | 3.45 | - | 418.4  |
| AHQ-2-3, 6932 - 6984   | R.IEDANLIPPVDDKFQDLVDAVR.A | 2580.87450 | 2 | 5.60E-06 | 0.58 | 2.57 | - | 316.2  |
| AHQ-2-1, 6273          | R.IEDANLIPPVDDKFQDLVDAVR.A | 2580.87450 | 3 | 3.56E-04 | 0.88 | 4.35 | - | 413.1  |
| AHQ-2-3, 6892          | R.IEDANLIPPVDDKFQDLVDAVR.A | 2580.87450 | 3 | 4.99E-11 | 0.80 | 3.66 | - | 423.5  |
| AHQ-2-6, 6393 - 6469   | R.IEDANLIPPVDDKFQDLVDAVR.A | 2580.87450 | 2 | 9.49E-06 | 0.34 | 2.55 | - | 164.4  |
| AHQ-2-9, 6736          | R.IEDANLIPPVDDKFQDLVDAVR.A | 2580.87450 | 3 | 7.11E-08 | 0.79 | 3.93 | - | 341.8  |
| AHQ-2-9, 6610 - 6612   | R.IEDANLIPPVDDKFQDLVDAVR.A | 2580.87450 | 2 | 3.81E-04 | 0.36 | 2.64 | - | 274.7  |
| AHQ-2-1, 6612          | R.IEDANLIPPVDDKFQDLVDAVR.A | 2580.87450 | 3 | 9.04E-05 | 0.71 | 3.40 | - | 333.2  |
| AHQ-2-1, 6722 - 6800   | R.IEDANLIPPVDDKFQDLVDAVR.A | 2580.87450 | 3 | 5.85E-08 | 0.87 | 4.14 | - | 462.9  |
| AHQ-2-1, 6736 - 6801   | R.IEDANLIPPVDDKFQDLVDAVR.A | 2580.87450 | 2 | 2.31E-05 | 0.55 | 2.87 | - | 245.3  |
| AHQ-2-1, 6865          | R.IEDANLIPPVDDKFQDLVDAVR.A | 2580.87450 | 3 | 5.94E-06 | 0.82 | 3.92 | - | 358.9  |
| AHQ-2-4, 6844 - 6848   | R.IEDANLIPPVDDKFQDLVDAVR.A | 2580.87450 | 3 | 3.27E-09 | 0.68 | 3.03 | - | 472.8  |
| AHQ-2-7, 6551          | R.IEDANLIPPVDDKFQDLVDAVR.A | 2580.87450 | 3 | 2.17E-08 | 0.72 | 3.47 | - | 356.4  |
| AHQ-2-2, 7041          | R.IEDANLIPPVDDKFQDLVDAVR.A | 2580.87450 | 3 | 1.93E-06 | 0.79 | 3.81 | - | 436.7  |
| AHQ-2-6, 6657          | R.IEDANLIPPVDDKFQDLVDAVR.A | 2580.87450 | 3 | 1.86E-04 | 0.69 | 3.22 | - | 353.2  |
| AHQ-2-6, 6497 - 6570   | R.IEDANLIPPVDDKFQDLVDAVR.A | 2580.87450 | 3 | 2.46E-08 | 0.86 | 4.46 | - | 338.3  |
| AHQ-2-2, 2309 - 2380   | K.IM*ADSGPIYDK.T           | 1226.38144 | 2 | 1.53E-04 | 0.76 | 3.37 | - | 415.5  |
| AHQ-2-8, 2250          | K.IMADSGPIYDK.T            | 1210.38204 | 2 | 7.99E-06 | 0.91 | 3.18 | - | 945.0  |
| AHQ-2-3, 2528          | K.IMADSGPIYDK.T            | 1210.38204 | 2 | 5.10E-06 | 0.92 | 3.59 | - | 720.0  |
| AHQ-2-2, 2542          | K.IMADSGPIYDK.T            | 1210.38204 | 2 | 2.21E-04 | 0.91 | 3.55 | - | 716.3  |
| AHQ-2-11, 2496         | K.IMADSGPIYDK.T            | 1210.38204 | 2 | 7.49E-04 | 0.85 | 3.11 | - | 668.4  |
| AHQ-2-4, 2536 - 2549   | K.IMADSGPIYDK.T            | 1210.38204 | 2 | 1.24E-04 | 0.88 | 3.27 | - | 623.0  |
| AHQ-2-6, 2379          | K.IMADSGPIYDK.T            | 1210.38204 | 1 | 8.26E-04 | 0.73 | 2.64 | - | 720.9  |
| AHQ-2-6, 2374          | K.IMADSGPIYDK.T            | 1210.38204 | 2 | 7.40E-05 | 0.93 | 3.68 | - | 879.4  |
| AHQ-2-12, 2542         | K.IMADSGPIYDK.T            | 1210.38204 | 2 | 3.45E-06 | 0.87 | 3.50 | - | 771.0  |
| AHQ-2-13, 2704 - 2715  | K.IMADSGPIYDK.T            | 1210.38204 | 2 | 6.07E-05 | 0.83 | 3.04 | - | 660.3  |
| AHQ-2-14-, 2263        | K.IM*ADSGPIYDK.T           | 1226.38144 | 2 | 9.36E-06 | 0.83 | 3.55 | - | 471.0  |
| AHQ-2-14-, 6687 - 6757 | R.IPESGGDVSVDIFELTGAAR.K   | 2196.35899 | 2 | 1.62E-08 | 0.97 | 5.74 | - | 1034.2 |
| AHQ-2-1, 7092          | R.IPESGGDVSVDIFELTGAAR.K   | 2196.35899 | 2 | 9.03E-13 | 0.97 | 5.68 | - | 1367.0 |
| AHQ-2-10, 6410 - 6471  | R.IPESGGDVSVDIFELTGAAR.K   | 2196.35899 | 2 | 2.03E-08 | 0.97 | 5.29 | - | 1243.5 |
| AHQ-2-10, 6550 - 6615  | R.IPESGGDVSVDIFELTGAAR.K   | 2196.35899 | 2 | 1.00E-30 | 0.97 | 5.38 | - | 1313.0 |
| AHQ-2-2, 7286 - 7352   | R.IPESGGDVSVDIFELTGAAR.K   | 2196.35899 | 2 | 3.43E-11 | 0.97 | 5.81 | - | 1285.4 |
| AHQ-2-3, 7217 - 7285   | R.IPESGGDVSVDIFELTGAAR.K   | 2196.35899 | 2 | 1.18E-06 | 0.96 | 5.28 | - | 988.8  |
| AHQ-2-3, 7353          | R.IPESGGDVSVDIFELTGAAR.K   | 2196.35899 | 2 | 5.82E-11 | 0.97 | 5.66 | - | 1425.2 |
| AHQ-2-3, 7437          | R.IPESGGDVSVDIFELTGAAR.K   | 2196.35899 | 2 | 1.38E-05 | 0.91 | 4.24 | - | 817.6  |
| AHQ-2-9, 7119 - 7186   | R.IPESGGDVSVDIFELTGAAR.K   | 2196.35899 | 2 | 8.74E-07 | 0.92 | 4.46 | - | 638.8  |
| AHQ-2-13, 6616         | R.IPESGGDVSVDIFELTGAAR.K   | 2196.35899 | 2 | 3.23E-10 | 0.96 | 5.38 | - | 1071.4 |
| AHQ-2-6, 7042          | R.IPESGGDVSVDIFELTGAAR.K   | 2196.35899 | 2 | 2.88E-05 | 0.92 | 4.20 | - | 829.5  |
| AHQ-2-6, 6901 - 6911   | R.IPESGGDVSVDIFELTGAAR.K   | 2196.35899 | 2 | 1.20E-12 | 0.95 | 5.11 | - | 947.8  |
| AHQ-2-9, 6996 - 6998   | R.IPESGGDVSVDIFELTGAAR.K   | 2196.35899 | 2 | 5.15E-05 | 0.94 | 4.77 | - | 903.4  |
| AHQ-2-4, 7273 - 7316   | R.IPESGGDVSVDIFELTGAAR.K   | 2196.35899 | 2 | 4.88E-14 | 0.96 | 5.62 | - | 862.8  |
| AHQ-2-11, 6509         | R.IPESGGDVSVDIFELTGAAR.K   | 2196.35899 | 2 | 1.05E-04 | 0.93 | 4.47 | - | 745.6  |
| AHQ-2-12, 6863         | R.IPESGGDVSVDIFELTGAAR.K   | 2196.35899 | 2 | 9.07E-08 | 0.93 | 4.97 | - | 856.9  |
| AHQ-2-4, 7378          | R.IPESGGDVSVDIFELTGAAR.K   | 2196.35899 | 2 | 6.93E-08 | 0.90 | 4.20 | - | 657.9  |
| AHQ-2-5, 7071 - 7135   | R.IPESGGDVSVDIFELTGAAR.K   | 2196.35899 | 2 | 1.51E-06 | 0.96 | 5.63 | - | 958.2  |
| AHQ-2-4, 7466          | R.IPESGGDVSVDIFELTGAAR.K   | 2196.35899 | 2 | 4.21E-08 | 0.85 | 3.58 | - | 711.0  |
| AHQ-2-2, 7425          | R.IPESGGDVSVDIFELTGAAR.K   | 2196.35899 | 2 | 6.99E-12 | 0.97 | 5.63 | - | 1199.5 |
| AHQ-2-4, 2214 - 2282   | R.KDHSQQVFSVVSNGK.A        | 1589.73455 | 2 | 1.48E-11 | 0.90 | 3.63 | - | 997.4  |
| AHQ-2-3, 2215 - 2289   | R.KDHSQQVFSVVSNGK.A        | 1589.73455 | 2 | 2.28E-08 | 0.90 | 3.70 | - | 966.2  |
| AHQ-2-2, 2230 - 2301   | R.KDHSQQVFSVVSNGK.A        | 1589.73455 | 2 | 6.86E-11 | 0.94 | 3.80 | - | 1347.8 |
| AHQ-2-1, 2438 - 2516   | R.KDHSQQVFSVVSNGK.A        | 1589.73455 | 2 | 1.50E-05 | 0.26 | 2.52 | - | 303.4  |
| AHQ-2-5, 2091          | R.KDHSQQVFSVVSNGK.A        | 1589.73455 | 2 | 1.05E-07 | 0.89 | 3.44 | - | 937.6  |
| AHQ-2-9, 2050 - 2127   | R.KDHSQQVFSVVSNGK.A        | 1589.73455 | 2 | 1.40E-06 | 0.77 | 2.94 | - | 796.0  |
| AHQ-2-2, 2322          | K.KIMADSGPIYDK.T           | 1338.55496 | 2 | 5.23E-08 | 0.93 | 4.03 | - | 849.7  |
| AHQ-2-4, 2341          | R.KVTEENKELANELR.R         | 1673.84976 | 2 | 6.71E-09 | 0.95 | 4.73 | - | 1416.0 |
| AHQ-2-5, 1956 - 2027   | R.KVTEENKELANELR.R         | 1673.84976 | 3 | 5.03E-09 | 0.78 | 3.19 | - | 818.8  |
| AHQ-2-3, 2233          | R.KVTEENKELANELR.R         | 1673.84976 | 2 | 4.76E-06 | 0.81 | 3.62 | - | 769.9  |
| AHQ-2-4, 2236 - 2237   | R.KVTEENKELANELR.R         | 1673.84976 | 2 | 3.80E-09 | 0.94 | 4.97 | - | 1112.4 |
| AHQ-2-2, 2368          | R.KVTEENKELANELR.R         | 1673.84976 | 2 | 4.86E-10 | 0.97 | 5.23 | - | 1684.3 |
| AHQ-2-6, 2031          | R.KVTEENKELANELR.R         | 1673.84976 | 2 | 4.07E-08 | 0.95 | 5.39 | - | 1105.5 |
| AHQ-2-5, 1964 - 2035   | R.KVTEENKELANELR.R         | 1673.84976 | 2 | 2.24E-06 | 0.93 | 4.71 | - | 1062.1 |
| AHQ-2-2, 1969          | R.KVTEENKELANELR.R         | 1673.84976 | 2 | 1.05E-08 | 0.88 | 3.68 | - | 843.5  |
| AHQ-2-6, 2171          | R.KVTEENKELANELR.R         | 1673.84976 | 2 | 2.92E-04 | 0.93 | 4.68 | - | 671.7  |
| AHQ-2-2, 2272          | R.KVTEENKELANELR.R         | 1673.84976 | 2 | 3.28E-08 | 0.94 | 5.04 | - | 1309.6 |
| AHQ-2-9, 2082          | R.KVTEENKELANELR.R         | 1673.84976 | 2 | 1.11E-08 | 0.94 | 4.84 | - | 1282.4 |
| AHQ-2-1, 2454          | R.KVTEENKELANELR.R         | 1673.84976 | 2 | 4.06E-10 | 0.95 | 5.19 | - | 1369.8 |
| AHQ-2-4, 1993          | R.KVTEENKELANELR.R         | 1673.84976 | 2 | 1.57E-09 | 0.94 | 4.33 | - | 1435.6 |
| AHQ-2-7, 1873 - 1951   | R.KVTEENKELANELR.R         | 1673.84976 | 2 | 7.50E-06 | 0.93 | 4.54 | - | 1023.0 |
| AHQ-2-3, 2345          | R.KVTEENKELANELR.R         | 1673.84976 | 2 | 1.24E-07 | 0.94 | 4.61 | - | 1228.6 |
| AHQ-2-1, 2637          | R.LCNSPSPQMNGKPCGEAR.E     | 2135.34557 | 2 | 1.98E-07 | 0.91 | 4.35 | - | 616.4  |
| AHQ-2-5, 2388          | R.LCNSPSPQMNGKPCGEAR.E     | 2135.34557 | 2 | 1.93E-06 | 0.93 | 4.87 | - | 636.9  |
| AHQ-2-3, 2513          | R.LCNSPSPQMNGKPCGEAR.E     | 2135.34557 | 2 | 2.72E-07 | 0.83 | 3.64 | - | 518.9  |
| AHQ-2-2, 2532          | R.LCNSPSPQMNGKPCGEAR.E     | 2135.34557 | 2 | 8.94E-05 | 0.82 | 3.73 | - | 557.0  |
| AHQ-2-3, 2148 - 2149   | R.LCNSPSPQMNGKPCGEAR.E     | 2151.34497 | 2 | 5.47E-06 | 0.87 | 3.71 | - | 533.6  |
| AHQ-2-4, 2149          | R.LCNSPSPQMNGKPCGEAR.E     | 2151.34497 | 2 | 9.06E-04 | 0.72 | 2.65 | - | 538.6  |
| AHQ-2-7, 5420 - 5421   | K.MENAELDVPIQSVFTR.D       | 1850.08607 | 2 | 9.21E-07 | 0.93 | 4.66 | - | 571.8  |
| AHQ-2-4, 5586          | K.M*ENAELDVPIQSVFTR.D      | 1866.08547 | 2 | 5.26E-05 | 0.40 | 2.58 | - | 274.2  |
| AHQ-2-2, 5964          | K.MENAELDVPIQSVFTR.D       | 1850.08607 | 2 | 1.94E-05 | 0.94 | 4.91 | - | 604.2  |
| AHQ-2-2, 5840          | K.MENAELDVPIQSVFTR.D       | 1850.08607 | 2 | 9.57E-10 | 0.95 | 4.87 | - | 654.4  |
| AHQ-2-3, 5811          | K.MENAELDVPIQSVFTR.D       | 1850.08607 | 2 | 2.36E-09 | 0.93 | 4.57 | - | 654.0  |
| AHQ-2-4, 5812 - 5813   | K.MENAELDVPIQSVFTR.D       | 1850.08607 | 2 | 3.57E-09 | 0.80 | 3.73 | - | 416.6  |
| AHQ-2-2, 5572          | K.M*ENAELDVPIQSVFTR.D      | 1866.08547 | 2 | 3.17E-09 | 0.94 | 4.86 | - | 734.4  |
| AHQ-2-6, 5219          | K.M*ENAELDVPIQSVFTR.D      | 1866.08547 | 2 | 9.12E-04 | 0.96 | 5.14 | - | 807.5  |
| AHQ-2-11, 5309         | K.MENAELDVPIQSVFTR.D       | 1850.08607 | 2 | 2.98E-05 | 0.87 | 3.87 | - | 456.5  |
| AHQ-2-5, 5519 - 5552   | K.MENAELDVPIQSVFTR.D       | 1850.08607 | 2 | 8.03E-10 | 0.92 | 4.50 | - | 521.0  |
| AHQ-2-3, 5544          | K.M*ENAELDVPIQSVFTR.D      | 1866.08547 | 2 | 6.73E-10 | 0.94 | 4.91 | - | 637.0  |



|                                                                                                     |                                   |            |   |          |       |        |       |         |
|-----------------------------------------------------------------------------------------------------|-----------------------------------|------------|---|----------|-------|--------|-------|---------|
| AHQ-2-4, 5946                                                                                       | K.MENAELDVPIQSVFTR.D              | 1850.08607 | 2 | 8.62E-07 | 0.87  | 3.61   | -     | 566.3   |
| AHQ-2-3, 3060 - 3067                                                                                | K.QVTSQYWDTPNTR.A                 | 1596.68241 | 2 | 5.34E-08 | 0.91  | 3.74   | -     | 953.6   |
| AHQ-2-5, 2831 - 2832                                                                                | K.QVTSQYWDTPNTR.A                 | 1596.68241 | 2 | 1.71E-06 | 0.84  | 3.48   | -     | 501.6   |
| AHQ-2-4, 3054 - 3056                                                                                | K.QVTSQYWDTPNTR.A                 | 1596.68241 | 2 | 9.16E-07 | 0.90  | 3.77   | -     | 670.8   |
| AHQ-2-2, 3076 - 3088                                                                                | K.QVTSQYWDTPNTR.A                 | 1596.68241 | 2 | 1.84E-06 | 0.93  | 3.85   | -     | 1019.7  |
| AHQ-2-11, 2941                                                                                      | K.QVTSQYWDTPNTR.A                 | 1596.68241 | 2 | 5.04E-08 | 0.89  | 3.76   | -     | 677.5   |
| AHQ-2-4, 2786                                                                                       | R.RPPLCYHNGVQYR.N                 | 1661.86889 | 2 | 1.50E-06 | 0.88  | 3.40   | -     | 642.5   |
| AHQ-2-2, 2526 - 2604                                                                                | R.RPPLCYHNGVQYR.N                 | 1661.86889 | 2 | 4.00E-04 | 0.64  | 3.05   | -     | 434.3   |
| AHQ-2-6, 2525                                                                                       | R.RPPLCYHNGVQYR.N                 | 1661.86889 | 2 | 1.75E-08 | 0.94  | 4.51   | -     | 822.5   |
| AHQ-2-4, 2684 - 2752                                                                                | R.RPPLCYHNGVQYR.N                 | 1661.86889 | 2 | 1.56E-06 | 0.91  | 3.81   | -     | 764.5   |
| AHQ-2-5, 2340                                                                                       | R.RPPLCYHNGVQYR.N                 | 1661.86889 | 2 | 4.96E-04 | 0.85  | 3.46   | -     | 555.4   |
| AHQ-2-2, 2717 - 2794                                                                                | R.RPPLCYHNGVQYR.N                 | 1661.86889 | 2 | 9.12E-07 | 0.91  | 3.96   | -     | 710.5   |
| AHQ-2-3, 2711 - 2785                                                                                | R.RPPLCYHNGVQYR.N                 | 1661.86889 | 2 | 1.03E-08 | 0.94  | 4.14   | -     | 737.1   |
| AHQ-2-2, 3906                                                                                       | K.SITLQVQEDR.A                    | 1208.34588 | 2 | 4.25E-06 | 0.94  | 3.70   | -     | 1384.1  |
| AHQ-2-3, 3853                                                                                       | K.SITLQVQEDR.A                    | 1208.34588 | 2 | 6.45E-06 | 0.92  | 3.58   | -     | 1107.7  |
| AHQ-2-6, 3563                                                                                       | K.SITLQVQEDR.A                    | 1208.34588 | 2 | 1.87E-06 | 0.86  | 2.71   | -     | 1017.1  |
| AHQ-2-12, 3747 - 3750                                                                               | K.SITLQVQEDR.A                    | 1208.34588 | 2 | 3.95E-05 | 0.90  | 3.25   | -     | 1129.2  |
| AHQ-2-4, 3840                                                                                       | K.SITLQVQEDR.A                    | 1208.34588 | 2 | 1.93E-05 | 0.93  | 3.38   | -     | 1283.5  |
| AHQ-2-1, 4020                                                                                       | K.SITLQVQEDR.A                    | 1208.34588 | 2 | 4.38E-04 | 0.90  | 3.46   | -     | 1158.6  |
| AHQ-2-5, 3647                                                                                       | K.SITLQVQEDR.A                    | 1208.34588 | 2 | 8.63E-07 | 0.90  | 3.02   | -     | 1145.3  |
| AHQ-2-10, 3460                                                                                      | K.SITLQVQEDR.A                    | 1208.34588 | 2 | 1.27E-06 | 0.88  | 3.08   | -     | 1089.2  |
| AHQ-2-2, 4013                                                                                       | K.SITLQVQEDR.A                    | 1208.34588 | 2 | 4.88E-07 | 0.86  | 2.58   | -     | 1063.0  |
| AHQ-2-5, 3100                                                                                       | R.TIVTLQDSIR.K                    | 1247.42355 | 2 | 9.57E-06 | 0.97  | 3.15   | -     | 2436.3  |
| AHQ-2-4, 4461 - 4533                                                                                | R.TIVTLQDSIR.K                    | 1247.42355 | 2 | 3.27E-06 | 0.96  | 3.70   | -     | 1619.6  |
| AHQ-2-1, 4628 - 4636                                                                                | R.TIVTLQDSIR.K                    | 1247.42355 | 2 | 5.86E-06 | 0.97  | 4.32   | -     | 1536.2  |
| AHQ-2-7, 4047                                                                                       | R.TIVTLQDSIR.K                    | 1247.42355 | 2 | 1.58E-06 | 0.96  | 3.57   | -     | 1650.1  |
| AHQ-2-5, 4135 - 4179                                                                                | R.TIVTLQDSIR.K                    | 1247.42355 | 2 | 3.27E-07 | 0.97  | 4.48   | -     | 1511.3  |
| AHQ-2-8, 3908                                                                                       | R.TIVTLQDSIR.K                    | 1247.42355 | 2 | 9.23E-07 | 0.97  | 3.76   | -     | 1907.7  |
| AHQ-2-2, 4524 - 4605                                                                                | R.TIVTLQDSIR.K                    | 1247.42355 | 2 | 7.81E-07 | 0.97  | 4.17   | -     | 1807.8  |
| AHQ-2-3, 4603                                                                                       | R.TIVTLQDSIR.K                    | 1247.42355 | 2 | 3.19E-07 | 0.95  | 3.62   | -     | 1551.7  |
| AHQ-2-6, 4110 - 4141                                                                                | R.TIVTLQDSIR.K                    | 1247.42355 | 2 | 1.35E-07 | 0.97  | 3.63   | -     | 2298.3  |
| AHQ-2-3, 4479 - 4485                                                                                | R.TIVTLQDSIR.K                    | 1247.42355 | 2 | 2.83E-07 | 0.97  | 4.39   | -     | 1552.9  |
| AHQ-2-9, 4108 - 4128                                                                                | R.TIVTLQDSIR.K                    | 1247.42355 | 2 | 7.23E-07 | 0.96  | 3.81   | -     | 1326.4  |
| AHQ-2-6, 4114                                                                                       | R.TIVTLQDSIR.K                    | 1247.42355 | 1 | 7.90E-04 | 0.22  | 2.02   | -     | 139.5   |
| AHQ-2-1, 6597                                                                                       | K.TKDLQAICGISCDELSSM*VLELR.G      | 2658.02070 | 3 | 5.26E-10 | 0.81  | 3.77   | -     | 898.2   |
| AHQ-2-6, 2267 - 2274                                                                                | K.VTEENKELANELR.R                 | 1545.67685 | 2 | 3.84E-05 | 0.90  | 4.04   | -     | 956.6   |
| AHQ-2-4, 2444                                                                                       | K.VTEENKELANELR.R                 | 1545.67685 | 2 | 8.93E-07 | 0.85  | 3.58   | -     | 951.5   |
| AHQ-2-7, 2215 - 2227                                                                                | K.VTEENKELANELR.R                 | 1545.67685 | 2 | 5.88E-04 | 0.68  | 3.33   | -     | 525.4   |
| AHQ-2-9, 2339                                                                                       | K.VTEENKELANELR.R                 | 1545.67685 | 2 | 1.47E-04 | 0.78  | 3.24   | -     | 786.7   |
| AHQ-2-5, 2267                                                                                       | K.VTEENKELANELR.R                 | 1545.67685 | 2 | 4.06E-08 | 0.93  | 3.93   | -     | 1308.9  |
| AHQ-2-1, 2673                                                                                       | K.VTEENKELANELR.R                 | 1545.67685 | 2 | 2.93E-06 | 0.87  | 3.48   | -     | 942.6   |
| AHQ-2-5, 2273                                                                                       | K.VTEENKELANELR.R                 | 1545.67685 | 3 | 4.87E-08 | 0.80  | 3.48   | -     | 807.2   |
| gj[4507729]ref[NP_001060.1] tubulin, beta polypeptide [Homo sapiens]                                |                                   |            |   | 1.00E-30 | 7.27  | 90.36  | 30.80 | 49906.7 |
| AHQ-2-11, 4684                                                                                      | R.AILVDLEPGTMDSVR.S               | 1616.86162 | 2 | 2.43E-04 | 0.62  | 2.71   | -     | 494.0   |
| AHQ-2-13, 3000                                                                                      | R.EIVHQIAGQCQNGIQAK.F             | 1825.03962 | 2 | 6.60E-04 | 0.66  | 2.58   | -     | 556.2   |
| AHQ-2-12, 2870                                                                                      | K.EVDEQMLNVQNK.N                  | 1447.59668 | 2 | 8.20E-04 | 0.87  | 3.35   | -     | 1150.8  |
| AHQ-2-7, 2691                                                                                       | K.EVDEQMLNVQNK.N                  | 1447.59668 | 1 | 5.86E-06 | 0.61  | 3.54   | -     | 281.8   |
| AHQ-2-7, 2687 - 2703                                                                                | K.EVDEQMLNVQNK.N                  | 1447.59668 | 2 | 6.05E-04 | 0.88  | 3.69   | -     | 1217.8  |
| AHQ-2-13-, 6419                                                                                     | K.GHYTEGAELVDSVLDVVR.K            | 1960.13388 | 2 | 1.78E-14 | 0.99  | 6.74   | -     | 3027.6  |
| AHQ-2-13, 6204                                                                                      | K.GHYTEGAELVDSVLDVVR.K            | 1960.13388 | 3 | 7.37E-04 | 0.92  | 4.58   | -     | 1162.3  |
| AHQ-2-7, 6236                                                                                       | K.GHYTEGAELVDSVLDVVR.K            | 1960.13388 | 2 | 1.36E-11 | 0.98  | 5.93   | -     | 2544.0  |
| AHQ-2-13, 6144 - 6203                                                                               | K.GHYTEGAELVDSVLDVVR.K            | 1960.13388 | 2 | 3.66E-11 | 0.97  | 5.56   | -     | 1656.4  |
| AHQ-2-7, 6180                                                                                       | K.GHYTEGAELVDSVLDVVR.K            | 1960.13388 | 3 | 5.31E-05 | 0.92  | 4.76   | -     | 1103.8  |
| AHQ-2-12, 6331                                                                                      | K.GHYTEGAELVDSVLDVVR.K            | 1960.13388 | 2 | 1.68E-07 | 0.98  | 6.29   | -     | 2617.9  |
| AHQ-2-14-, 6283                                                                                     | K.GHYTEGAELVDSVLDVVR.K            | 1960.13388 | 3 | 1.26E-04 | 0.87  | 3.78   | -     | 1057.1  |
| AHQ-2-11, 6049 - 6056                                                                               | K.GHYTEGAELVDSVLDVVR.K            | 1960.13388 | 2 | 1.37E-04 | 0.98  | 6.46   | -     | 2699.9  |
| AHQ-2-13, 6201                                                                                      | K.GHYTEGAELVDSVLDVVR.K            | 1960.13388 | 2 | 1.34E-09 | 0.99  | 6.52   | -     | 2791.4  |
| AHQ-2-10, 5886                                                                                      | K.GHYTEGAELVDSVLDVVR.K            | 1960.13388 | 2 | 1.75E-05 | 0.98  | 6.25   | -     | 2496.6  |
| AHQ-2-8, 6202                                                                                       | K.GHYTEGAELVDSVLDVVR.K            | 1960.13388 | 2 | 1.23E-05 | 0.97  | 4.52   | -     | 1787.2  |
| AHQ-2-14-, 6291                                                                                     | K.GHYTEGAELVDSVLDVVR.K            | 1960.13388 | 2 | 2.41E-06 | 0.98  | 6.31   | -     | 2951.5  |
| AHQ-2-9, 6262 - 6340                                                                                | K.GHYTEGAELVDSVLDVVR.K            | 1960.13388 | 2 | 2.77E-07 | 0.98  | 6.01   | -     | 1909.7  |
| AHQ-2-9, 6406                                                                                       | K.GHYTEGAELVDSVLDVVR.K            | 1960.13388 | 2 | 2.20E-07 | 0.98  | 5.92   | -     | 2358.1  |
| AHQ-2-12, 4509                                                                                      | R.ISEQFTAMFR.R                    | 1230.41818 | 2 | 1.44E-08 | 0.90  | 3.20   | -     | 1191.4  |
| AHQ-2-12, 4421 - 4435                                                                               | R.ISEQFTAMFR.R                    | 1230.41818 | 2 | 4.06E-05 | 0.68  | 3.07   | -     | 744.3   |
| AHQ-2-9, 7299                                                                                       | K.LTTPPTYGDLNHLVSVATMSGVTTCLR.F   | 2711.06527 | 3 | 6.67E-06 | 0.84  | 3.63   | -     | 930.0   |
| AHQ-2-7, 6327                                                                                       | K.LTTPPTYGDLNHLVSVATMSGVTTCLR.F   | 2711.06527 | 3 | 1.51E-05 | 0.84  | 4.00   | -     | 617.1   |
| AHQ-2-9, 7298 - 7300                                                                                | K.LTTPPTYGDLNHLVSVATMSGVTTCLR.F   | 2711.06527 | 2 | 8.29E-05 | 0.94  | 4.64   | -     | 904.1   |
| AHQ-2-8, 7263                                                                                       | K.LTTPPTYGDLNHLVSVATMSGVTTCLR.F   | 2711.06527 | 2 | 1.69E-05 | 0.92  | 4.53   | -     | 809.9   |
| AHQ-2-7, 7355 - 7425                                                                                | K.LTTPPTYGDLNHLVSVATMSGVTTCLR.F   | 2711.06527 | 2 | 7.89E-05 | 0.76  | 3.35   | -     | 569.4   |
| AHQ-2-10, 6651                                                                                      | K.LTTPPTYGDLNHLVSVATMSGVTTCLR.F   | 2711.06527 | 2 | 2.20E-04 | 0.73  | 3.55   | -     | 559.6   |
| AHQ-2-7, 7347 - 7419                                                                                | K.LTTPPTYGDLNHLVSVATMSGVTTCLR.F   | 2711.06527 | 3 | 4.35E-07 | 0.91  | 4.37   | -     | 1186.9  |
| AHQ-2-9, 6303 - 6384                                                                                | K.LTTPPTYGDLNHLVSVATMSGVTTCLR.F   | 2727.06467 | 2 | 1.98E-05 | 0.68  | 3.20   | -     | 520.1   |
| AHQ-2-12, 5473                                                                                      | K.NSSYFVFEWIPNNVK.T               | 1697.87148 | 2 | 5.10E-05 | 0.84  | 3.56   | -     | 623.0   |
| AHQ-2-7, 6245 - 6316                                                                                | K.NSSYFVFEWIPNNVK.T               | 1697.87148 | 2 | 1.71E-04 | 0.71  | 3.02   | -     | 773.8   |
| AHQ-2-13, 5549                                                                                      | K.NSSYFVFEWIPNNVK.T               | 1697.87148 | 2 | 6.95E-04 | 0.55  | 2.54   | -     | 574.0   |
| AHQ-2-7, 5271 - 5348                                                                                | K.NSSYFVFEWIPNNVK.T               | 1697.87148 | 2 | 1.64E-06 | 0.93  | 4.14   | -     | 913.1   |
| AHQ-2-12, 5583                                                                                      | K.NSSYFVFEWIPNNVK.T               | 1697.87148 | 2 | 3.40E-05 | 0.49  | 2.60   | -     | 449.3   |
| AHQ-2-9, 6570                                                                                       | R.SGPFQGIIFRPDNFVFGQSGAGNNWAK.G   | 2800.03898 | 3 | 1.03E-05 | 0.89  | 4.16   | -     | 911.6   |
| AHQ-2-9, 6572 - 6582                                                                                | R.SGPFQGIIFRPDNFVFGQSGAGNNWAK.G   | 2800.03898 | 2 | 7.81E-09 | 0.97  | 5.31   | -     | 1185.3  |
| AHQ-2-7, 6447 - 6517                                                                                | R.SGPFQGIIFRPDNFVFGQSGAGNNWAK.G   | 2800.03898 | 2 | 2.23E-07 | 0.97  | 5.78   | -     | 1098.4  |
| AHQ-2-12, 6342                                                                                      | R.SGPFQGIIFRPDNFVFGQSGAGNNWAK.G   | 2800.03898 | 2 | 4.18E-08 | 0.96  | 5.34   | -     | 1023.8  |
| AHQ-2-7, 6681 - 6749                                                                                | R.SGPFQGIIFRPDNFVFGQSGAGNNWAK.G   | 2800.03898 | 3 | 4.21E-07 | 0.94  | 5.28   | -     | 1098.4  |
| AHQ-2-7, 6384 - 6451                                                                                | R.SGPFQGIIFRPDNFVFGQSGAGNNWAK.G   | 2800.03898 | 3 | 3.56E-09 | 0.96  | 5.71   | -     | 1371.1  |
| AHQ-2-7, 6599 - 6667                                                                                | R.SGPFQGIIFRPDNFVFGQSGAGNNWAK.G   | 2800.03898 | 2 | 7.61E-08 | 0.95  | 5.28   | -     | 990.3   |
| AHQ-2-9, 6418                                                                                       | R.SGPFQGIIFRPDNFVFGQSGAGNNWAK.G   | 2800.03898 | 3 | 5.05E-05 | 0.87  | 4.01   | -     | 1028.7  |
| AHQ-2-7, 6307 - 6380                                                                                | R.SGPFQGIIFRPDNFVFGQSGAGNNWAK.G   | 2800.03898 | 2 | 9.48E-06 | 0.95  | 4.71   | -     | 1283.5  |
| AHQ-2-7, 6281 - 6352                                                                                | R.SGPFQGIIFRPDNFVFGQSGAGNNWAK.G   | 2800.03898 | 3 | 2.43E-05 | 0.97  | 7.10   | -     | 1325.6  |
| AHQ-2-13, 6239 - 6299                                                                               | R.SGPFQGIIFRPDNFVFGQSGAGNNWAK.G   | 2800.03898 | 3 | 1.74E-13 | 0.97  | 5.82   | -     | 1885.0  |
| AHQ-2-11, 6160                                                                                      | R.SGPFQGIIFRPDNFVFGQSGAGNNWAK.G   | 2800.03898 | 2 | 6.98E-08 | 0.89  | 4.35   | -     | 601.6   |
| AHQ-2-14-, 6249 - 6315                                                                              | R.SGPFQGIIFRPDNFVFGQSGAGNNWAK.G   | 2800.03898 | 3 | 1.00E-30 | 0.98  | 7.06   | -     | 2425.8  |
| AHQ-2-12, 6359 - 6438                                                                               | R.SGPFQGIIFRPDNFVFGQSGAGNNWAK.G   | 2800.03898 | 2 | 1.90E-04 | 0.90  | 4.21   | -     | 753.6   |
| AHQ-2-11, 6096 - 6165                                                                               | R.SGPFQGIIFRPDNFVFGQSGAGNNWAK.G   | 2800.03898 | 3 | 1.18E-13 | 0.98  | 7.13   | -     | 2018.8  |
| gj[21361399]ref[NP_055040.2] protein phosphatase 2 (formerly 2A), regulatory subunit A (PR 65), alp |                                   |            |   | 1.00E-30 | 0.99  | 10.38  | 3.90  | 65308.3 |
| AHQ-2-6, 7233                                                                                       | K.DNTIEHLLPLFLAQLKDECPEVR.L       | 2753.12348 | 3 | 1.00E-30 | 0.99  | 7.60   | -     | 3759.0  |
| gj[4501885]ref[NP_001092.1] beta actin; beta cytoskeletal actin [Homo sapiens]                      |                                   |            |   | 1.11E-16 | 13.78 | 150.46 | 36.80 | 41736.5 |
| AHQ-2-8, 6187                                                                                       | R.CPEALFQPSFLGM*ESCGIHETTFNSIMK.C | 3267.67588 | 3 | 6.87E-07 | 0.89  | 4.52   | -     | 607.8   |
| AHQ-2-14-, 6484 - 6544                                                                              | R.CPEALFQPSFLGM*ESCGIHETTFNSIMK.C | 3251.67648 | 3 | 1.92E-04 | 0.76  | 4.61   | -     | 521.2   |
| AHQ-2-13-, 6865 - 6907                                                                              | R.CPEALFQPSFLGM*ESCGIHETTFNSIMK.C | 3235.67708 | 3 | 6.61E-08 | 0.92  | 4.41   | -     | 736.7   |
| AHQ-2-13-, 6609 - 6669                                                                              | R.CPEALFQPSFLGM*ESCGIHETTFNSIMK.C | 3251.67648 | 3 | 6.23E-04 | 0.71  | 4.33   | -     | 448.1   |
| AHQ-2-1, 6962                                                                                       | R.CPEALFQPSFLGM*ESCGIHETTFNSIMK.C | 3251.67648 | 3 | 2.02E-04 | 0.80  | 3.73   | -     | 563.8   |
| AHQ-2-13-, 6310                                                                                     | R.CPEALFQPSFLGM*ESCGIHETTFNSIMK.C | 3267.67588 | 3 | 4.50E-07 | 0.88  | 4.08   | -     | 733.2   |
| AHQ-2-13, 6647                                                                                      | R.CPEALFQPSFLGM*ESCGIHETTFNSIMK.C | 3235.67708 | 3 | 6.35E-08 | 0.90  | 4.44   | -     | 619.4   |
| AHQ-2-13, 6439 - 6508                                                                               | R.CPEALFQPSFLGM*ESCGIHETTFNSIMK.C | 3251.67648 | 3 | 1.53E-05 | 0.81  | 4.19   | -     | 570.7   |
| AHQ-2-13, 6313 - 6381                                                                               | R.CPEALFQPSFLGM*ESCGIHETTFNSIMK.C | 3251.67648 | 3 | 6.18E-07 | 0.68  | 3.78   | -     | 510.5   |
| AHQ-2-13, 6159                                                                                      | R.CPEALFQPSFLGM*ESCGIHETTFNSIMK.C | 3267.67588 | 3 | 2.77E-05 | 0.78  | 3.47   | -     | 503.3   |
| AHQ-2-12, 6947 - 7013                                                                               | R.CPEALFQPSFLGM*ESCGIHETTFNSIMK.C | 3235.67708 | 3 | 1.79E-06 | 0.92  | 4.27   | -     | 1025.6  |
| AHQ-2-8, 6950 - 6984                                                                                | R.CPEALFQPSFLGM*ESCGIHETTFNSIMK.C | 3235.67708 | 3 | 1.20E-08 | 0.94  | 5.21   | -     | 1016.7  |

|                        |                                   |            |   |          |      |      |   |        |
|------------------------|-----------------------------------|------------|---|----------|------|------|---|--------|
| AHQ-2-3, 7333 - 7337   | R.CPEALFQPSFLGMESCGIHETTFNSIMK.C  | 3235.67708 | 3 | 5.20E-06 | 0.88 | 4.39 | - | 642.6  |
| AHQ-2-11, 6620 - 6669  | R.CPEALFQPSFLGMESCGIHETTFNSIMK.C  | 3235.67708 | 3 | 2.21E-09 | 0.93 | 4.85 | - | 690.0  |
| AHQ-2-11, 6249 - 6317  | R.CPEALFQPSFLGMESCGIHETTFNSIMK.C  | 3251.67648 | 3 | 7.60E-04 | 0.49 | 3.51 | - | 267.7  |
| AHQ-2-7, 7191          | R.CPEALFQPSFLGMESCGIHETTFNSIMK.C  | 3235.67708 | 3 | 1.39E-04 | 0.81 | 3.80 | - | 683.3  |
| AHQ-2-10, 6610         | R.CPEALFQPSFLGMESCGIHETTFNSIMK.C  | 3235.67708 | 3 | 3.41E-07 | 0.94 | 5.08 | - | 855.1  |
| AHQ-2-8, 6998          | R.CPEALFQPSFLGM*ESCGIHETTFNSIMK.C | 3251.67648 | 3 | 4.05E-04 | 0.47 | 3.17 | - | 437.1  |
| AHQ-2-8, 7047 - 7082   | R.CPEALFQPSFLGMESCGIHETTFNSIMK.C  | 3235.67708 | 3 | 6.27E-06 | 0.94 | 5.02 | - | 880.4  |
| AHQ-2-10, 6458 - 6520  | R.CPEALFQPSFLGMESCGIHETTFNSIMK.C  | 3235.67708 | 3 | 2.41E-04 | 0.91 | 4.63 | - | 916.4  |
| AHQ-2-8, 7154 - 7220   | R.CPEALFQPSFLGMESCGIHETTFNSIMK.C  | 3235.67708 | 3 | 1.07E-07 | 0.94 | 5.49 | - | 855.5  |
| AHQ-2-9, 7242 - 7311   | R.CPEALFQPSFLGMESCGIHETTFNSIMK.C  | 3235.67708 | 3 | 3.27E-07 | 0.92 | 5.01 | - | 580.6  |
| AHQ-2-9, 7139 - 7202   | R.CPEALFQPSFLGMESCGIHETTFNSIMK.C  | 3235.67708 | 3 | 5.86E-08 | 0.89 | 4.57 | - | 641.7  |
| AHQ-2-8, 7290 - 7359   | R.CPEALFQPSFLGMESCGIHETTFNSIMK.C  | 3235.67708 | 3 | 3.34E-10 | 0.96 | 5.66 | - | 1210.6 |
| AHQ-2-8, 7566 - 7586   | R.CPEALFQPSFLGMESCGIHETTFNSIMK.C  | 3235.67708 | 3 | 1.01E-06 | 0.96 | 5.99 | - | 928.6  |
| AHQ-2-8, 7426 - 7499   | R.CPEALFQPSFLGMESCGIHETTFNSIMK.C  | 3235.67708 | 3 | 5.28E-11 | 0.96 | 5.69 | - | 1091.8 |
| AHQ-2-8, 6730 - 6803   | R.CPEALFQPSFLGM*ESCGIHETTFNSIMK.C | 3251.67648 | 3 | 1.10E-06 | 0.83 | 4.49 | - | 653.4  |
| AHQ-2-8, 7419 - 7490   | K.EKLYVALDFEQEMATAASSSSLEK.S      | 2810.10410 | 2 | 1.63E-05 | 0.85 | 3.43 | - | 754.7  |
| AHQ-2-8, 7574          | K.EKLYVALDFEQEMATAASSSSLEK.S      | 2810.10410 | 3 | 7.76E-08 | 0.93 | 5.33 | - | 1028.0 |
| AHQ-2-8, 7283 - 7362   | K.EKLYVALDFEQEMATAASSSSLEK.S      | 2810.10410 | 3 | 3.59E-07 | 0.95 | 5.07 | - | 1438.9 |
| AHQ-2-8, 7282 - 7350   | K.EKLYVALDFEQEMATAASSSSLEK.S      | 2810.10410 | 2 | 1.43E-04 | 0.90 | 3.72 | - | 832.0  |
| AHQ-2-8, 7179 - 7251   | K.EKLYVALDFEQEMATAASSSSLEK.S      | 2810.10410 | 3 | 3.25E-05 | 0.93 | 5.29 | - | 1322.2 |
| AHQ-2-9, 7326 - 7334   | K.EKLYVALDFEQEMATAASSSSLEK.S      | 2810.10410 | 2 | 5.78E-08 | 0.91 | 4.42 | - | 779.3  |
| AHQ-2-8, 7135 - 7212   | K.EKLYVALDFEQEMATAASSSSLEK.S      | 2810.10410 | 2 | 2.30E-05 | 0.89 | 3.91 | - | 688.2  |
| AHQ-2-4, 7482          | K.EKLYVALDFEQEMATAASSSSLEK.S      | 2810.10410 | 2 | 7.46E-06 | 0.89 | 3.66 | - | 904.1  |
| AHQ-2-10, 6591 - 6659  | K.EKLYVALDFEQEMATAASSSSLEK.S      | 2810.10410 | 2 | 1.30E-04 | 0.90 | 4.29 | - | 636.3  |
| AHQ-2-10, 6699 - 6712  | K.EKLYVALDFEQEMATAASSSSLEK.S      | 2810.10410 | 2 | 5.09E-05 | 0.63 | 2.68 | - | 643.7  |
| AHQ-2-11, 6684 - 6689  | K.EKLYVALDFEQEMATAASSSSLEK.S      | 2810.10410 | 2 | 2.35E-07 | 0.95 | 4.73 | - | 1067.7 |
| AHQ-2-14-, 6820        | K.EKLYVALDFEQEMATAASSSSLEK.S      | 2810.10410 | 2 | 1.82E-04 | 0.51 | 2.53 | - | 287.3  |
| AHQ-2-8, 7432 - 7502   | K.EKLYVALDFEQEMATAASSSSLEK.S      | 2810.10410 | 3 | 4.35E-10 | 0.97 | 6.73 | - | 1343.0 |
| AHQ-2-8, 5784 - 5850   | K.EKLYVALDFEQEM*ATAASSSSLEK.S     | 2826.10350 | 3 | 1.32E-07 | 0.90 | 4.38 | - | 954.3  |
| AHQ-2-8, 5634 - 5703   | K.EKLYVALDFEQEM*ATAASSSSLEK.S     | 2826.10350 | 3 | 3.06E-04 | 0.88 | 4.17 | - | 1120.6 |
| AHQ-2-8, 5435 - 5504   | K.EKLYVALDFEQEM*ATAASSSSLEK.S     | 2826.10350 | 3 | 2.35E-05 | 0.70 | 3.12 | - | 892.2  |
| AHQ-2-8, 7150 - 7219   | R.FRCPALFQPSFLGMESCGIHETTFNSIMK.C | 3539.03813 | 3 | 1.89E-11 | 0.98 | 8.13 | - | 2448.3 |
| AHQ-2-10, 6378 - 6455  | R.FRCPALFQPSFLGMESCGIHETTFNSIMK.C | 3539.03813 | 3 | 2.02E-07 | 0.98 | 7.55 | - | 2016.5 |
| AHQ-2-10, 6560 - 6619  | R.FRCPALFQPSFLGMESCGIHETTFNSIMK.C | 3539.03813 | 3 | 4.72E-05 | 0.94 | 4.73 | - | 1157.9 |
| AHQ-2-8, 7286 - 7366   | R.FRCPALFQPSFLGMESCGIHETTFNSIMK.C | 3539.03813 | 3 | 4.01E-12 | 0.98 | 7.38 | - | 2161.4 |
| AHQ-2-8, 7046 - 7115   | R.FRCPALFQPSFLGMESCGIHETTFNSIMK.C | 3539.03813 | 3 | 2.12E-13 | 0.98 | 9.18 | - | 2466.9 |
| AHQ-2-8, 7435 - 7508   | R.FRCPALFQPSFLGMESCGIHETTFNSIMK.C | 3539.03813 | 3 | 3.79E-05 | 0.97 | 6.12 | - | 1464.4 |
| AHQ-2-8, 6850 - 6868   | R.FRCPALFQPSFLGMESCGIHETTFNSIMK.C | 3539.03813 | 3 | 6.81E-07 | 0.98 | 7.35 | - | 1924.3 |
| AHQ-2-8, 6934 - 7006   | R.FRCPALFQPSFLGMESCGIHETTFNSIMK.C | 3539.03813 | 3 | 2.26E-10 | 0.97 | 6.58 | - | 1407.4 |
| AHQ-2-8, 7559          | R.FRCPALFQPSFLGMESCGIHETTFNSIMK.C | 3539.03813 | 3 | 2.59E-04 | 0.92 | 5.01 | - | 854.7  |
| AHQ-2-5, 2247 - 2255   | R.GYSFTTTAER.E                    | 1133.19273 | 2 | 6.00E-05 | 0.92 | 3.39 | - | 1168.9 |
| AHQ-2-4, 2436          | R.GYSFTTTAER.E                    | 1133.19273 | 2 | 1.29E-04 | 0.91 | 3.13 | - | 1093.5 |
| AHQ-2-8, 2242 - 2258   | R.GYSFTTTAER.E                    | 1133.19273 | 2 | 1.49E-04 | 0.90 | 3.01 | - | 1110.4 |
| AHQ-2-7, 2201 - 2209   | R.GYSFTTTAER.E                    | 1133.19273 | 2 | 1.29E-04 | 0.93 | 3.52 | - | 1092.8 |
| AHQ-2-8, 2104 - 2188   | R.GYSFTTTAER.E                    | 1133.19273 | 2 | 3.75E-04 | 0.90 | 3.49 | - | 853.1  |
| AHQ-2-3, 2443 - 2444   | R.GYSFTTTAER.E                    | 1133.19273 | 2 | 1.31E-04 | 0.91 | 3.25 | - | 1089.4 |
| AHQ-2-14-, 2415 - 2416 | R.GYSFTTTAER.E                    | 1133.19273 | 2 | 4.87E-06 | 0.93 | 3.26 | - | 1027.1 |
| AHQ-2-10, 2266 - 2326  | R.GYSFTTTAER.E                    | 1133.19273 | 2 | 1.64E-04 | 0.92 | 3.50 | - | 1083.4 |
| AHQ-2-13-, 2529 - 2530 | R.GYSFTTTAER.E                    | 1133.19273 | 2 | 7.86E-06 | 0.92 | 3.19 | - | 1025.4 |
| AHQ-2-10, 4347 - 4358  | R.KDLYANTVLSGGTTPYGIADR.M         | 2344.62976 | 2 | 1.53E-04 | 0.96 | 4.62 | - | 1389.1 |
| AHQ-2-10, 4631         | R.KDLYANTVLSGGTTPYGIADR.M         | 2344.62976 | 2 | 3.94E-04 | 0.73 | 3.01 | - | 502.4  |
| AHQ-2-14-, 4255 - 4259 | R.KDLYANTVLSGGTTPYGIADR.M         | 2360.62916 | 2 | 4.02E-06 | 0.90 | 3.59 | - | 1036.3 |
| AHQ-2-14, 5725         | R.KDLYANTVLSGGTTPYGIADR.M         | 2344.62976 | 2 | 5.49E-04 | 0.84 | 3.11 | - | 958.9  |
| AHQ-2-11, 4130         | R.KDLYANTVLSGGTTPYGIADR.M         | 2360.62916 | 2 | 2.73E-09 | 0.93 | 3.63 | - | 1277.9 |
| AHQ-2-8, 4298          | R.KDLYANTVLSGGTTPYGIADR.M         | 2344.62976 | 3 | 4.40E-04 | 0.90 | 4.51 | - | 1002.9 |
| AHQ-2-8, 4295          | R.KDLYANTVLSGGTTPYGIADR.M         | 2344.62976 | 2 | 2.87E-06 | 0.95 | 4.43 | - | 1302.8 |
| AHQ-2-14-, 4752 - 4760 | R.KDLYANTVLSGGTTPYGIADR.M         | 2344.62976 | 2 | 6.41E-04 | 0.92 | 3.87 | - | 970.3  |
| AHQ-2-11, 4558         | R.KDLYANTVLSGGTTPYGIADR.M         | 2344.62976 | 2 | 1.91E-05 | 0.89 | 3.48 | - | 915.3  |
| AHQ-2-14, 5266 - 5329  | R.KDLYANTVLSGGTTPYGIADR.M         | 2360.62916 | 2 | 4.92E-05 | 0.94 | 4.59 | - | 867.9  |
| AHQ-2-14, 5830         | R.KDLYANTVLSGGTTPYGIADR.M         | 2344.62976 | 2 | 3.12E-05 | 0.96 | 4.53 | - | 1487.1 |
| AHQ-2-8, 7610 - 7611   | K.LCYVALDFEQEMATAASSSSLEK.S       | 2552.81665 | 3 | 6.25E-08 | 0.97 | 6.11 | - | 1902.5 |
| AHQ-2-8, 7472 - 7544   | K.LCYVALDFEQEMATAASSSSLEK.S       | 2552.81665 | 3 | 2.51E-08 | 0.97 | 6.18 | - | 1678.9 |
| AHQ-2-7, 5571 - 5583   | R.TTGIVMDSGGDVHTVPIYEGYALPHAILR.L | 3185.59928 | 3 | 4.99E-11 | 0.97 | 6.04 | - | 1719.6 |
| AHQ-2-6, 5839 - 5915   | R.TTGIVMDSGGDVHTVPIYEGYALPHAILR.L | 3185.59928 | 3 | 5.55E-16 | 0.96 | 5.63 | - | 1501.7 |
| AHQ-2-7, 5693 - 5767   | R.TTGIVMDSGGDVHTVPIYEGYALPHAILR.L | 3185.59928 | 3 | 4.03E-09 | 0.94 | 5.08 | - | 1390.9 |
| AHQ-2-1, 6209          | R.TTGIVMDSGGDVHTVPIYEGYALPHAILR.L | 3185.59928 | 3 | 6.94E-07 | 0.94 | 4.94 | - | 1276.5 |
| AHQ-2-6, 5477          | R.TTGIVMDSGGDVHTVPIYEGYALPHAILR.L | 3201.59868 | 3 | 6.67E-04 | 0.82 | 3.56 | - | 1111.3 |
| AHQ-2-6, 5379          | R.TTGIVMDSGGDVHTVPIYEGYALPHAILR.L | 3201.59868 | 3 | 2.74E-05 | 0.90 | 4.60 | - | 872.4  |
| AHQ-2-13-, 5815 - 5873 | R.TTGIVMDSGGDVHTVPIYEGYALPHAILR.L | 3185.59928 | 3 | 1.33E-09 | 0.97 | 5.84 | - | 1770.7 |
| AHQ-2-7, 5836          | R.TTGIVMDSGGDVHTVPIYEGYALPHAILR.L | 3185.59928 | 3 | 1.25E-09 | 0.97 | 5.90 | - | 1432.7 |
| AHQ-2-6, 5671 - 5685   | R.TTGIVMDSGGDVHTVPIYEGYALPHAILR.L | 3185.59928 | 3 | 1.08E-07 | 0.97 | 6.69 | - | 1383.7 |
| AHQ-2-1, 5874          | R.TTGIVMDSGGDVHTVPIYEGYALPHAILR.L | 3201.59868 | 3 | 1.67E-07 | 0.95 | 5.58 | - | 1105.1 |
| AHQ-2-5, 5893 - 5907   | R.TTGIVMDSGGDVHTVPIYEGYALPHAILR.L | 3185.59928 | 3 | 1.10E-13 | 0.97 | 5.99 | - | 1580.7 |
| AHQ-2-8, 5944          | R.TTGIVMDSGGDVHTVPIYEGYALPHAILR.L | 3185.59928 | 3 | 5.03E-10 | 0.97 | 6.15 | - | 1810.2 |
| AHQ-2-7, 5244 - 5255   | R.TTGIVMDSGGDVHTVPIYEGYALPHAILR.L | 3201.59868 | 3 | 2.78E-06 | 0.94 | 5.21 | - | 1231.5 |
| AHQ-2-13-, 5722 - 5749 | R.TTGIVMDSGGDVHTVPIYEGYALPHAILR.L | 3185.59928 | 3 | 1.46E-06 | 0.97 | 6.80 | - | 1756.9 |
| AHQ-2-13-, 5459 - 5538 | R.TTGIVMDSGGDVHTVPIYEGYALPHAILR.L | 3201.59868 | 3 | 2.53E-05 | 0.95 | 5.43 | - | 1168.6 |
| AHQ-2-9, 5295 - 5366   | R.TTGIVMDSGGDVHTVPIYEGYALPHAILR.L | 3201.59868 | 3 | 7.72E-06 | 0.96 | 6.32 | - | 1243.9 |
| AHQ-2-9, 5438 - 5507   | R.TTGIVMDSGGDVHTVPIYEGYALPHAILR.L | 3201.59868 | 3 | 3.86E-05 | 0.94 | 4.63 | - | 1284.4 |
| AHQ-2-9, 5576 - 5648   | R.TTGIVMDSGGDVHTVPIYEGYALPHAILR.L | 3185.59928 | 3 | 2.90E-13 | 0.97 | 6.20 | - | 1741.0 |
| AHQ-2-9, 5667 - 5699   | R.TTGIVMDSGGDVHTVPIYEGYALPHAILR.L | 3201.59868 | 3 | 8.76E-05 | 0.87 | 4.46 | - | 715.0  |
| AHQ-2-9, 5718 - 5786   | R.TTGIVMDSGGDVHTVPIYEGYALPHAILR.L | 3185.59928 | 3 | 1.48E-11 | 0.96 | 6.25 | - | 1187.2 |
| AHQ-2-9, 5807 - 5874   | R.TTGIVMDSGGDVHTVPIYEGYALPHAILR.L | 3185.59928 | 3 | 6.04E-09 | 0.97 | 6.18 | - | 1551.1 |
| AHQ-2-9, 5943          | R.TTGIVMDSGGDVHTVPIYEGYALPHAILR.L | 3185.59928 | 3 | 2.46E-09 | 0.97 | 6.00 | - | 1574.3 |
| AHQ-2-5, 5396          | R.TTGIVMDSGGDVHTVPIYEGYALPHAILR.L | 3201.59868 | 3 | 7.14E-07 | 0.94 | 5.08 | - | 1051.7 |
| AHQ-2-1, 6128          | R.TTGIVMDSGGDVHTVPIYEGYALPHAILR.L | 3185.59928 | 3 | 3.01E-06 | 0.97 | 6.06 | - | 1784.0 |
| AHQ-2-14, 6589         | R.TTGIVMDSGGDVHTVPIYEGYALPHAILR.L | 3201.59868 | 3 | 9.51E-08 | 0.95 | 5.18 | - | 1373.9 |
| AHQ-2-8, 5674 - 5738   | R.TTGIVMDSGGDVHTVPIYEGYALPHAILR.L | 3185.59928 | 3 | 9.99E-14 | 0.96 | 6.29 | - | 1198.7 |
| AHQ-2-14-, 5739 - 5803 | R.TTGIVMDSGGDVHTVPIYEGYALPHAILR.L | 3185.59928 | 3 | 1.18E-11 | 0.98 | 7.19 | - | 1671.7 |
| AHQ-2-8, 5583 - 5650   | R.TTGIVMDSGGDVHTVPIYEGYALPHAILR.L | 3201.59868 | 3 | 1.55E-04 | 0.75 | 4.17 | - | 692.5  |
| AHQ-2-8, 5530 - 5602   | R.TTGIVMDSGGDVHTVPIYEGYALPHAILR.L | 3185.59928 | 3 | 5.22E-14 | 0.97 | 6.15 | - | 1984.9 |
| AHQ-2-10, 5019 - 5084  | R.TTGIVMDSGGDVHTVPIYEGYALPHAILR.L | 3201.59868 | 3 | 1.78E-07 | 0.94 | 5.35 | - | 999.3  |
| AHQ-2-10, 5274 - 5338  | R.TTGIVMDSGGDVHTVPIYEGYALPHAILR.L | 3185.59928 | 3 | 6.91E-09 | 0.96 | 6.19 | - | 1251.5 |
| AHQ-2-10, 5362 - 5434  | R.TTGIVMDSGGDVHTVPIYEGYALPHAILR.L | 3185.59928 | 3 | 1.11E-16 | 0.98 | 6.77 | - | 1704.8 |
| AHQ-2-8, 5398 - 5470   | R.TTGIVMDSGGDVHTVPIYEGYALPHAILR.L | 3185.59928 | 3 | 5.67E-12 | 0.97 | 6.26 | - | 1660.9 |
| AHQ-2-8, 5367 - 5426   | R.TTGIVMDSGGDVHTVPIYEGYALPHAILR.L | 3201.59868 | 3 | 8.11E-05 | 0.91 | 4.46 | - | 915.2  |
| AHQ-2-8, 5231 - 5310   | R.TTGIVMDSGGDVHTVPIYEGYALPHAILR.L | 3185.59928 | 3 | 6.74E-12 | 0.97 | 6.46 | - | 1226.4 |
| AHQ-2-4, 6249 - 6252   | R.TTGIVMDSGGDVHTVPIYEGYALPHAILR.L | 3185.59928 | 3 | 8.19E-09 | 0.97 | 6.64 | - | 1356.3 |
| AHQ-2-4, 6088 - 6157   | R.TTGIVMDSGGDVHTVPIYEGYALPHAILR.L | 3185.59928 | 3 | 1.73E-08 | 0.96 | 5.49 | - | 1657.1 |
| AHQ-2-4, 5721          | R.TTGIVMDSGGDVHTVPIYEGYALPHAILR.L | 3201.59868 | 3 | 8.05E-05 | 0.95 | 5.48 | - | 1223.8 |
| AHQ-2-8, 5087 - 5170   | R.TTGIVMDSGGDVHTVPIYEGYALPHAILR.L | 3201.59868 | 3 | 1.80E-10 | 0.96 | 5.56 | - | 1546.1 |
| AHQ-2-8, 4943 - 5015   | R.TTGIVMDSGGDVHTVPIYEGYALPHAILR.L | 3201.59868 | 3 | 4.55E-08 | 0.97 | 6.19 | - | 1494.4 |
| AHQ-2-14-, 5416 - 5492 | R.TTGIVMDSGGDVHTVPIYEGYALPHAILR.L | 3201.59868 | 3 | 8.11E-10 | 0.96 | 5.85 | - | 1515.3 |
| AHQ-2-11, 5278 - 5329  | R.TTGIVMDSGGDVHTVPIYEGYALPHAILR.L | 3201.59868 | 3 | 2.45E-04 | 0.93 | 4.68 | - | 1331.8 |
| AHQ-2-11, 5536 - 5596  | R.TTGIVMDSGGDVHTVPIYEGYALPHAILR.L | 3185.59928 | 3 | 5.35E-13 | 0.98 | 6.04 | - | 2168.4 |
| AHQ-2-14-, 5556 - 5559 | R.TTGIVMDSGGDVHTVPIYEGYALPHAILR.L | 3201.59868 | 3 | 2.46E-10 | 0.96 | 5.51 | - | 1722.6 |
| AHQ-2-14-, 5717 - 5792 | R.TTGIVMDSGGDVHTVPIYEGYALPHAILR.L | 3201.59868 | 3 | 2.03E-04 | 0.78 | 3.95 | - | 548.6  |

|                           |                                                                         |            |   |          |        |         |       |          |
|---------------------------|-------------------------------------------------------------------------|------------|---|----------|--------|---------|-------|----------|
| AHQ-2-3, 6213             | R.TTGIVMDSGDGVTHTVPIYEGYALPHAILR.L                                      | 3185.59928 | 3 | 3.36E-11 | 0.97   | 6.38    | -     | 1316.5   |
| AHQ-2-2, 6049 - 6128      | R.TTGIVMDSGDGVTHTVPIYEGYALPHAILR.L                                      | 3185.59928 | 3 | 8.12E-04 | 0.91   | 4.38    | -     | 1231.7   |
| AHQ-2-2, 6241             | R.TTGIVMDSGDGVTHTVPIYEGYALPHAILR.L                                      | 3185.59928 | 3 | 8.02E-07 | 0.96   | 5.91    | -     | 1171.9   |
| AHQ-2-12, 5486            | R.TTGIVM*DSGDGVTHTVPIYEGYALPHAILR.L                                     | 3201.59868 | 3 | 1.73E-04 | 0.93   | 5.08    | -     | 767.7    |
| AHQ-2-12, 5574            | R.TTGIVM*DSGDGVTHTVPIYEGYALPHAILR.L                                     | 3201.59868 | 3 | 3.07E-05 | 0.93   | 5.14    | -     | 917.1    |
| AHQ-2-12, 5763            | R.TTGIVMDSGDGVTHTVPIYEGYALPHAILR.L                                      | 3185.59928 | 3 | 4.13E-05 | 0.83   | 3.91    | -     | 728.9    |
| AHQ-2-12, 5878 - 5959     | R.TTGIVMDSGDGVTHTVPIYEGYALPHAILR.L                                      | 3185.59928 | 3 | 8.15E-10 | 0.97   | 6.12    | -     | 1380.1   |
| AHQ-2-3, 6092             | R.TTGIVMDSGDGVTHTVPIYEGYALPHAILR.L                                      | 3185.59928 | 3 | 1.06E-09 | 0.97   | 6.13    | -     | 1624.9   |
| AHQ-2-5, 5713             | R.TTGIVMDSGDGVTHTVPIYEGYALPHAILR.L                                      | 3185.59928 | 3 | 2.51E-09 | 0.98   | 7.09    | -     | 1800.2   |
| AHQ-2-13, 5347            | R.TTGIVM*DSGDGVTHTVPIYEGYALPHAILR.L                                     | 3201.59868 | 3 | 2.62E-08 | 0.92   | 4.43    | -     | 1078.7   |
| AHQ-2-13, 5428            | R.TTGIVM*DSGDGVTHTVPIYEGYALPHAILR.L                                     | 3201.59868 | 3 | 2.52E-07 | 0.94   | 5.17    | -     | 1142.8   |
| AHQ-2-13, 5601            | R.TTGIVMDSGDGVTHTVPIYEGYALPHAILR.L                                      | 3185.59928 | 3 | 1.59E-09 | 0.96   | 5.30    | -     | 1644.3   |
| AHQ-2-13, 5725            | R.TTGIVMDSGDGVTHTVPIYEGYALPHAILR.L                                      | 3185.59928 | 3 | 3.23E-08 | 0.96   | 5.42    | -     | 1892.6   |
| AHQ-2-13, 5808            | R.TTGIVMDSGDGVTHTVPIYEGYALPHAILR.L                                      | 3185.59928 | 3 | 3.23E-06 | 0.96   | 5.02    | -     | 1539.0   |
| AHQ-2-3, 3935 - 3937      | R.VAPEEHPVLLTEAPLNPK.A                                                  | 1955.24351 | 2 | 7.18E-04 | 0.88   | 4.12    | -     | 559.4    |
| AHQ-2-13, 3920            | R.VAPEEHPVLLTEAPLNPK.A                                                  | 1955.24351 | 2 | 2.86E-06 | 0.93   | 4.34    | -     | 966.4    |
| AHQ-2-12, 3853            | R.VAPEEHPVLLTEAPLNPK.A                                                  | 1955.24351 | 2 | 8.25E-04 | 0.92   | 4.34    | -     | 750.1    |
| AHQ-2-12, 3718 - 3785     | R.VAPEEHPVLLTEAPLNPK.A                                                  | 1955.24351 | 2 | 4.09E-06 | 0.90   | 4.26    | -     | 691.0    |
| AHQ-2-14, 4794            | R.VAPEEHPVLLTEAPLNPK.A                                                  | 1955.24351 | 2 | 1.12E-04 | 0.94   | 4.52    | -     | 961.3    |
| AHQ-2-4, 3916 - 3984      | R.VAPEEHPVLLTEAPLNPK.A                                                  | 1955.24351 | 2 | 1.66E-04 | 0.85   | 3.94    | -     | 597.3    |
| AHQ-2-11, 3653            | R.VAPEEHPVLLTEAPLNPK.A                                                  | 1955.24351 | 2 | 2.51E-05 | 0.84   | 4.01    | -     | 492.0    |
| AHQ-2-8, 3296 - 3366      | R.VAPEEHPVLLTEAPLNPK.A                                                  | 1955.24351 | 2 | 9.07E-07 | 0.93   | 4.63    | -     | 801.4    |
| AHQ-2-5, 3591 - 3660      | R.VAPEEHPVLLTEAPLNPK.A                                                  | 1955.24351 | 2 | 6.26E-06 | 0.85   | 3.82    | -     | 575.1    |
| AHQ-2-5, 3597 - 3639      | R.VAPEEHPVLLTEAPLNPK.A                                                  | 1955.24351 | 3 | 7.90E-04 | 0.72   | 4.22    | -     | 498.7    |
| AHQ-2-13-, 3955 - 3969    | R.VAPEEHPVLLTEAPLNPK.A                                                  | 1955.24351 | 3 | 7.30E-05 | 0.85   | 4.75    | -     | 862.4    |
| AHQ-2-13-, 3958           | R.VAPEEHPVLLTEAPLNPK.A                                                  | 1955.24351 | 2 | 2.65E-04 | 0.87   | 4.07    | -     | 683.1    |
| AHQ-2-9, 3606             | R.VAPEEHPVLLTEAPLNPK.A                                                  | 1955.24351 | 2 | 1.91E-05 | 0.94   | 4.07    | -     | 1143.2   |
| AHQ-2-9, 3522 - 3590      | R.VAPEEHPVLLTEAPLNPK.A                                                  | 1955.24351 | 2 | 1.69E-04 | 0.91   | 4.26    | -     | 815.6    |
| AHQ-2-6, 3573             | R.VAPEEHPVLLTEAPLNPK.A                                                  | 1955.24351 | 2 | 3.49E-06 | 0.94   | 4.86    | -     | 768.9    |
| AHQ-2-2, 3964 - 4033      | R.VAPEEHPVLLTEAPLNPK.A                                                  | 1955.24351 | 3 | 9.99E-05 | 0.60   | 3.28    | -     | 577.7    |
| AHQ-2-7, 3456 - 3463      | R.VAPEEHPVLLTEAPLNPK.A                                                  | 1955.24351 | 2 | 6.34E-04 | 0.92   | 4.28    | -     | 794.0    |
| AHQ-2-8, 3067 - 3138      | R.VAPEEHPVLLTEAPLNPK.A                                                  | 1955.24351 | 3 | 8.06E-05 | 0.79   | 4.15    | -     | 794.0    |
| AHQ-2-8, 3170 - 3238      | R.VAPEEHPVLLTEAPLNPK.A                                                  | 1955.24351 | 3 | 1.31E-04 | 0.85   | 4.10    | -     | 875.8    |
| AHQ-2-8, 3194 - 3266      | R.VAPEEHPVLLTEAPLNPK.A                                                  | 1955.24351 | 2 | 1.73E-04 | 0.93   | 4.87    | -     | 813.6    |
| AHQ-2-8, 3768             | R.VAPEEHPVLLTEAPLNPK.A                                                  | 1955.24351 | 2 | 4.41E-06 | 0.92   | 4.51    | -     | 880.5    |
| AHQ-2-8, 3546             | R.VAPEEHPVLLTEAPLNPK.A                                                  | 1955.24351 | 2 | 1.25E-04 | 0.94   | 4.42    | -     | 1098.3   |
| AHQ-2-8, 3536 - 3616      | R.VAPEEHPVLLTEAPLNPK.A                                                  | 1955.24351 | 2 | 1.32E-04 | 0.95   | 4.98    | -     | 922.6    |
| AHQ-2-8, 3407 - 3478      | R.VAPEEHPVLLTEAPLNPK.A                                                  | 1955.24351 | 2 | 3.11E-06 | 0.94   | 5.05    | -     | 879.7    |
| AHQ-2-10, 3475 - 3542     | R.VAPEEHPVLLTEAPLNPK.A                                                  | 1955.24351 | 2 | 1.07E-10 | 0.94   | 4.54    | -     | 981.5    |
| AHQ-2-1, 4053 - 4132      | R.VAPEEHPVLLTEAPLNPK.A                                                  | 1955.24351 | 2 | 1.52E-04 | 0.93   | 4.57    | -     | 920.7    |
| AHQ-2-8, 2907             | R.VAPEEHPVLLTEAPLNPKANR.E                                               | 2296.61120 | 2 | 1.48E-05 | 0.95   | 4.87    | -     | 876.2    |
| gj4503571 ref NP_001419.1 | enolase 1; phosphopyruvate hydratase; MYC promoter-binding protein 1; n |            |   | 1.11E-16 | 11.77  | 150.34  | 44.90 | 47168.7  |
| AHQ-2-14-, 5300           | R.AAVPSGASTGIYEALR.D                                                    | 1806.00979 | 2 | 4.21E-11 | 0.94   | 4.58    | -     | 698.0    |
| AHQ-2-13-, 5343 - 5418    | R.AAVPSGASTGIYEALR.D                                                    | 1806.00979 | 2 | 2.28E-08 | 0.96   | 5.00    | -     | 811.0    |
| AHQ-2-11, 5098 - 5114     | R.AAVPSGASTGIYEALR.D                                                    | 1806.00979 | 2 | 3.59E-06 | 0.96   | 5.05    | -     | 831.3    |
| AHQ-2-12, 5345 - 5354     | R.AAVPSGASTGIYEALR.D                                                    | 1806.00979 | 2 | 4.55E-13 | 0.96   | 5.18    | -     | 911.7    |
| AHQ-2-8, 4868 - 4935      | R.AAVPSGASTGIYEALR.D                                                    | 1806.00979 | 2 | 1.11E-16 | 0.96   | 5.15    | -     | 947.8    |
| AHQ-2-14, 6454 - 6509     | R.AAVPSGASTGIYEALR.D                                                    | 1806.00979 | 2 | 1.90E-11 | 0.96   | 5.58    | -     | 567.8    |
| AHQ-2-13, 5247 - 5309     | R.AAVPSGASTGIYEALR.D                                                    | 1806.00979 | 2 | 2.71E-10 | 0.92   | 4.25    | -     | 535.7    |
| AHQ-2-9, 5175 - 5198      | R.AAVPSGASTGIYEALR.D                                                    | 1806.00979 | 2 | 7.29E-04 | 0.82   | 4.00    | -     | 370.3    |
| AHQ-2-7, 4540             | K.DATNVGDEGGFAPNILENKE                                                  | 1962.06350 | 2 | 8.75E-06 | 0.94   | 4.69    | -     | 801.8    |
| AHQ-2-8, 6062             | K.DATNVGDEGGFAPNILENKEGLELLK.T                                          | 2744.99178 | 3 | 3.45E-06 | 0.81   | 3.86    | -     | 1041.8   |
| AHQ-2-11, 6602            | K.DYPPVSIEDPFDQDDWGAWQK.F                                               | 2511.63977 | 2 | 1.17E-07 | 0.79   | 2.99    | -     | 677.4    |
| AHQ-2-8, 5898 - 5930      | K.FTASAGIQVGGDLTVTNPK.R                                                 | 2034.25590 | 2 | 7.80E-04 | 0.44   | 2.87    | -     | 327.8    |
| AHQ-2-13, 4239 - 4241     | R.GNPTVEVDLFTSK.G                                                       | 1407.55065 | 2 | 8.07E-04 | 0.68   | 3.18    | -     | 544.4    |
| AHQ-2-13-, 4286           | R.GNPTVEVDLFTSK.G                                                       | 1407.55065 | 1 | 2.31E-06 | 0.34   | 1.97    | -     | 641.7    |
| AHQ-2-13, 4240            | R.GNPTVEVDLFTSK.G                                                       | 1407.55065 | 1 | 1.29E-04 | 0.24   | 2.40    | -     | 481.2    |
| AHQ-2-8, 5940             | R.HIADLAGNSEVILPVPFVINGGSHAGNK.L                                        | 3013.35654 | 3 | 1.06E-13 | 0.95   | 5.41    | -     | 1400.7   |
| AHQ-2-9, 2091 - 2092      | R.IGAEVYHNLK.N                                                          | 1144.30502 | 2 | 4.48E-04 | 0.88   | 3.36    | -     | 1074.8   |
| AHQ-2-9, 7015             | K.LAMQEFMILPVGAAFR.E                                                    | 1909.30812 | 2 | 1.89E-05 | 0.93   | 4.09    | -     | 824.7    |
| AHQ-2-10, 6443            | K.LAMQEFMILPVGAAFR.E                                                    | 1909.30812 | 2 | 3.41E-05 | 0.94   | 4.41    | -     | 915.0    |
| AHQ-2-8, 6200             | K.LAMQEFM*ILPVGAAFR.E                                                   | 1925.30752 | 2 | 1.18E-05 | 0.86   | 4.83    | -     | 445.7    |
| AHQ-2-7, 6999             | K.LAMQEFMILPVGAAFR.E                                                    | 1909.30812 | 2 | 5.14E-06 | 0.93   | 3.84    | -     | 1006.0   |
| AHQ-2-8, 6822 - 6895      | K.LAMQEFMILPVGAAFR.E                                                    | 1909.30812 | 2 | 4.77E-10 | 0.97   | 6.32    | -     | 976.6    |
| AHQ-2-8, 5830             | K.LAM*QEFMILPVGAAFR.E                                                   | 1925.30752 | 2 | 7.17E-06 | 0.94   | 5.06    | -     | 1195.4   |
| AHQ-2-8, 6939 - 6951      | K.SFIKDYPPVSIEDPFDQDDWGAWQK.F                                           | 2987.22328 | 3 | 2.98E-06 | 0.98   | 6.86    | -     | 2364.9   |
| AHQ-2-8, 6930 - 6938      | K.SFIKDYPPVSIEDPFDQDDWGAWQK.F                                           | 2987.22328 | 2 | 9.56E-04 | 0.82   | 3.62    | -     | 586.7    |
| AHQ-2-7, 2017             | K.TIAPALVSK.K                                                           | 900.09769  | 1 | 9.31E-04 | 0.10   | 1.93    | -     | 322.9    |
| AHQ-2-8, 1940             | K.TIAPALVSK.K                                                           | 900.09769  | 1 | 1.29E-04 | 0.28   | 2.06    | -     | 387.9    |
| AHQ-2-7, 3504             | K.VNQIGSVTSLQACK.L                                                      | 1635.82159 | 2 | 4.54E-07 | 0.76   | 2.89    | -     | 723.7    |
| AHQ-2-13, 3808            | K.VNQIGSVTSLQACK.L                                                      | 1635.82159 | 2 | 3.20E-06 | 0.94   | 4.28    | -     | 882.1    |
| AHQ-2-7, 4755             | R.YISPDQLADLYK.S                                                        | 1426.59557 | 2 | 1.31E-08 | 0.85   | 3.33    | -     | 603.2    |
| AHQ-2-8, 4581 - 4589      | R.YISPDQLADLYK.S                                                        | 1426.59557 | 2 | 1.09E-06 | 0.93   | 3.80    | -     | 826.2    |
| gj4503745 ref NP_001447.1 | filamin 1 (actin-binding protein-280); filamin 1; filamin A, alpha (act |            |   | 2.22E-16 | 103.55 | 1210.34 | 56.40 | 280757.4 |
| AHQ-2-5, 5131 - 5203      | R.AEAGVPAEFSIWTR.E                                                      | 1534.69735 | 2 | 5.58E-07 | 0.76   | 3.68    | -     | 234.5    |
| AHQ-2-5, 2252             | K.AEISFEDR.K                                                            | 967.01472  | 2 | 9.16E-04 | 0.91   | 2.80    | -     | 1188.0   |
| AHQ-2-5, 2355 - 2357      | K.AFGPGLGGGAGSPAR.F                                                     | 1430.55077 | 2 | 2.16E-11 | 0.96   | 4.65    | -     | 1701.9   |
| AHQ-2-7, 2319             | K.AFGPGLGGGAGSPAR.F                                                     | 1430.55077 | 2 | 3.87E-04 | 0.90   | 3.07    | -     | 1419.9   |
| AHQ-2-4, 2532 - 2533      | K.AFGPGLGGGAGSPAR.F                                                     | 1430.55077 | 2 | 4.49E-07 | 0.95   | 4.40    | -     | 1340.0   |
| AHQ-2-2, 2528 - 2552      | K.AFGPGLGGGAGSPAR.F                                                     | 1430.55077 | 2 | 1.71E-10 | 0.95   | 3.40    | -     | 1472.1   |
| AHQ-2-4, 2548             | K.AFGPGLGGGAGSPAR.F                                                     | 1430.55077 | 1 | 2.75E-07 | 0.53   | 2.94    | -     | 178.1    |
| AHQ-2-6, 2377             | K.AFGPGLGGGAGSPAR.F                                                     | 1430.55077 | 2 | 3.53E-08 | 0.95   | 3.79    | -     | 1664.5   |
| AHQ-2-1, 2872             | K.AFGPGLGGGAGSPAR.F                                                     | 1430.55077 | 2 | 2.53E-06 | 0.94   | 3.77    | -     | 1182.4   |
| AHQ-2-3, 2536             | K.AFGPGLGGGAGSPAR.F                                                     | 1430.55077 | 1 | 3.28E-06 | 0.28   | 2.69    | -     | 218.7    |
| AHQ-2-1, 2706 - 2777      | K.AFGPGLGGGAGSPAR.F                                                     | 1430.55077 | 2 | 3.15E-08 | 0.95   | 3.36    | -     | 1626.9   |
| AHQ-2-1, 2713 - 2717      | K.AFGPGLGGGAGSPAR.F                                                     | 1430.55077 | 1 | 6.94E-05 | 0.04   | 1.94    | -     | 92.0     |
| AHQ-2-3, 2523 - 2552      | K.AFGPGLGGGAGSPAR.F                                                     | 1430.55077 | 2 | 3.67E-06 | 0.92   | 3.65    | -     | 1194.5   |
| AHQ-2-14-, 3323 - 3363    | K.AGNMMLLVGVHGR.P.T                                                     | 1435.68033 | 2 | 2.67E-06 | 0.87   | 3.70    | -     | 717.4    |
| AHQ-2-14, 3544 - 3614     | K.AGNMMLLVGVHGR.P.T                                                     | 1451.67973 | 2 | 1.47E-04 | 0.75   | 3.07    | -     | 669.9    |
| AHQ-2-14, 3761 - 3829     | K.AGNMMLLVGVHGR.P.T                                                     | 1451.67973 | 2 | 4.85E-06 | 0.70   | 2.70    | -     | 624.2    |
| AHQ-2-14-, 3032 - 3039    | K.AGNMMLLVGVHGR.P.T                                                     | 1435.68033 | 2 | 7.32E-06 | 0.81   | 3.14    | -     | 743.5    |
| AHQ-2-13-, 2729           | K.AGNMMLLVGVHGR.P.T                                                     | 1451.67973 | 2 | 6.73E-05 | 0.80   | 3.08    | -     | 887.0    |
| AHQ-2-14, 4353            | K.AGNMMLLVGVHGR.P.T                                                     | 1435.68033 | 2 | 1.34E-04 | 0.71   | 2.60    | -     | 721.4    |
| AHQ-2-14, 4314            | K.AGNMMLLVGVHGR.P.T                                                     | 1435.68033 | 3 | 5.67E-07 | 0.89   | 3.58    | -     | 1212.2   |
| AHQ-2-14-, 2764           | K.AGNMMLLVGVHGR.P.T                                                     | 1451.67973 | 3 | 2.65E-07 | 0.81   | 3.22    | -     | 1097.2   |
| AHQ-2-14, 4233 - 4300     | K.AGNMMLLVGVHGR.P.T                                                     | 1435.68033 | 2 | 2.16E-08 | 0.77   | 3.37    | -     | 519.7    |
| AHQ-2-14-, 2655 - 2733    | K.AGNMMLLVGVHGR.P.T                                                     | 1451.67973 | 2 | 9.38E-06 | 0.87   | 3.50    | -     | 871.2    |
| AHQ-2-14-, 3428 - 3499    | K.AGNMMLLVGVHGR.P.T                                                     | 1435.68033 | 2 | 9.45E-06 | 0.75   | 2.77    | -     | 714.0    |
| AHQ-2-14-, 2652 - 2729    | K.AGNMMLLVGVHGR.P.T                                                     | 1451.67973 | 3 | 4.42E-05 | 0.83   | 3.60    | -     | 1297.6   |
| AHQ-2-14, 4046            | K.AGNMMLLVGVHGR.P.T                                                     | 1435.68033 | 3 | 2.65E-07 | 0.93   | 4.03    | -     | 1548.2   |
| AHQ-2-4, 2188             | K.AGVAPLQVK.V                                                           | 883.07036  | 2 | 2.28E-05 | 0.78   | 2.73    | -     | 615.6    |
| AHQ-2-5, 1955             | K.AGVAPLQVK.V                                                           | 883.07036  | 2 | 8.19E-04 | 0.80   | 2.94    | -     | 650.9    |
| AHQ-2-2, 2157             | K.AGVAPLQVK.V                                                           | 883.07036  | 2 | 1.04E-05 | 0.79   | 2.76    | -     | 596.0    |
| AHQ-2-3, 2169 - 2172      | K.AGVAPLQVK.V                                                           | 883.07036  | 2 | 2.44E-04 | 0.68   | 2.82    | -     | 405.0    |
| AHQ-2-1, 2381             | K.AGVAPLQVK.V                                                           | 883.07036  | 2 | 1.89E-04 | 0.86   | 2.80    | -     | 716.7    |
| AHQ-2-2, 5194             | K.AHEPTYFTVDCAEAGQGDVSIQIK.C                                            | 2567.76960 | 2 | 4.81E-04 | 0.50   | 2.90    | -     | 284.0    |
| AHQ-2-2, 7677 - 7757      | K.AHEPTYFTVDCAEAGQGDVSIQIK.C                                            | 2567.76960 | 2 | 9.54E-04 | 0.92   | 3.60    | -     | 1246.2   |

|                      |                                   |            |   |          |      |      |   |        |
|----------------------|-----------------------------------|------------|---|----------|------|------|---|--------|
| AHQ-2-1, 7428        | K.AHEPTYFTVDCAEAGQGDVIGIK.C       | 2567.76960 | 3 | 1.62E-04 | 0.72 | 3.31 | - | 836.9  |
| AHQ-2-1, 7310 - 7372 | K.AHEPTYFTVDCAEAGQGDVIGIK.C       | 2567.76960 | 3 | 1.21E-05 | 0.96 | 5.09 | - | 1658.1 |
| AHQ-2-4, 2514 - 2516 | K.AHVVPFCFDASK.V                  | 1232.39073 | 2 | 1.10E-05 | 0.63 | 2.55 | - | 434.6  |
| AHQ-2-3, 2500        | K.AHVVPFCFDASK.V                  | 1232.39073 | 2 | 1.50E-04 | 0.63 | 2.54 | - | 690.8  |
| AHQ-2-2, 2509 - 2510 | K.AHVVPFCFDASK.V                  | 1232.39073 | 2 | 3.86E-06 | 0.89 | 3.10 | - | 922.3  |
| AHQ-2-5, 2324        | K.AHVVPFCFDASK.V                  | 1232.39073 | 2 | 8.49E-06 | 0.82 | 2.84 | - | 648.6  |
| AHQ-2-1, 2728 - 2785 | K.AHVVPFCFDASK.V                  | 1232.39073 | 2 | 4.24E-08 | 0.76 | 2.63 | - | 647.1  |
| AHQ-2-4, 6490 - 6572 | R.ALGALVDSAPGLCPDWDSWDASKPVTNAR.E | 3233.53437 | 3 | 5.29E-09 | 0.91 | 4.82 | - | 631.9  |
| AHQ-2-9, 6432        | R.ALGALVDSAPGLCPDWDSWDASKPVTNAR.E | 3233.53437 | 3 | 4.29E-05 | 0.90 | 4.68 | - | 643.4  |
| AHQ-2-7, 6243 - 6321 | R.ALGALVDSAPGLCPDWDSWDASKPVTNAR.E | 3233.53437 | 3 | 2.41E-07 | 0.94 | 5.65 | - | 604.5  |
| AHQ-2-2, 6512 - 6580 | R.ALGALVDSAPGLCPDWDSWDASKPVTNAR.E | 3233.53437 | 3 | 3.15E-12 | 0.93 | 5.42 | - | 624.9  |
| AHQ-2-3, 6587 - 6661 | R.ALGALVDSAPGLCPDWDSWDASKPVTNAR.E | 3233.53437 | 3 | 1.30E-11 | 0.94 | 5.30 | - | 815.1  |
| AHQ-2-3, 6429 - 6499 | R.ALGALVDSAPGLCPDWDSWDASKPVTNAR.E | 3233.53437 | 3 | 4.69E-11 | 0.89 | 4.61 | - | 682.8  |
| AHQ-2-3, 6312 - 6356 | R.ALGALVDSAPGLCPDWDSWDASKPVTNAR.E | 3233.53437 | 3 | 2.73E-04 | 0.70 | 3.31 | - | 665.7  |
| AHQ-2-10, 5778       | R.ALGALVDSAPGLCPDWDSWDASKPVTNAR.E | 3233.53437 | 3 | 7.16E-08 | 0.88 | 4.20 | - | 698.6  |
| AHQ-2-2, 6648 - 6720 | R.ALGALVDSAPGLCPDWDSWDASKPVTNAR.E | 3233.53437 | 3 | 2.22E-16 | 0.95 | 5.78 | - | 774.1  |
| AHQ-2-1, 6448 - 6516 | R.ALGALVDSAPGLCPDWDSWDASKPVTNAR.E | 3233.53437 | 3 | 1.38E-13 | 0.95 | 5.85 | - | 920.3  |
| AHQ-2-1, 6357        | R.ALGALVDSAPGLCPDWDSWDASKPVTNAR.E | 3233.53437 | 3 | 7.49E-08 | 0.84 | 3.92 | - | 773.0  |
| AHQ-2-1, 6222 - 6285 | R.ALGALVDSAPGLCPDWDSWDASKPVTNAR.E | 3233.53437 | 3 | 9.24E-06 | 0.85 | 4.24 | - | 623.3  |
| AHQ-2-2, 6362 - 6444 | R.ALGALVDSAPGLCPDWDSWDASKPVTNAR.E | 3233.53437 | 3 | 2.02E-04 | 0.93 | 5.29 | - | 756.6  |
| AHQ-2-8, 6096 - 6159 | R.ALGALVDSAPGLCPDWDSWDASKPVTNAR.E | 3233.53437 | 3 | 2.52E-08 | 0.84 | 3.99 | - | 541.6  |
| AHQ-2-5, 6205 - 6276 | R.ALGALVDSAPGLCPDWDSWDASKPVTNAR.E | 3233.53437 | 3 | 1.19E-08 | 0.85 | 4.34 | - | 544.5  |
| AHQ-2-5, 6473 - 6539 | R.ALGALVDSAPGLCPDWDSWDASKPVTNAR.E | 3233.53437 | 3 | 3.57E-09 | 0.90 | 4.60 | - | 572.6  |
| AHQ-2-5, 6575        | R.ALGALVDSAPGLCPDWDSWDASKPVTNAR.E | 3233.53437 | 3 | 2.30E-07 | 0.75 | 4.07 | - | 407.0  |
| AHQ-2-9, 6288        | R.ALGALVDSAPGLCPDWDSWDASKPVTNAR.E | 3233.53437 | 3 | 1.35E-09 | 0.92 | 5.28 | - | 648.2  |
| AHQ-2-2, 1474        | R.ALTTQTGGPHVK.A                  | 1109.26067 | 2 | 3.36E-04 | 0.85 | 3.29 | - | 750.9  |
| AHQ-2-9, 3036        | R.ANLPQSFQVDTSK.A                 | 1435.56409 | 2 | 3.28E-04 | 0.44 | 2.57 | - | 299.5  |
| AHQ-2-3, 3253 - 3265 | R.ANLPQSFQVDTSK.A                 | 1435.56409 | 2 | 5.58E-05 | 0.70 | 2.54 | - | 544.4  |
| AHQ-2-3, 3507        | R.ANLPQSFQVDTSK.A                 | 1435.56409 | 1 | 2.45E-06 | 0.45 | 2.36 | - | 520.4  |
| AHQ-2-1, 3608 - 3609 | R.ANLPQSFQVDTSK.A                 | 1435.56409 | 2 | 9.36E-06 | 0.70 | 3.39 | - | 364.9  |
| AHQ-2-7, 2969        | R.ANLPQSFQVDTSK.A                 | 1435.56409 | 1 | 9.71E-06 | 0.28 | 2.68 | - | 272.2  |
| AHQ-2-5, 3068        | R.ANLPQSFQVDTSK.A                 | 1435.56409 | 1 | 9.98E-08 | 0.65 | 3.02 | - | 393.1  |
| AHQ-2-6, 3245        | R.ANLPQSFQVDTSK.A                 | 1435.56409 | 1 | 3.96E-04 | 0.33 | 2.27 | - | 376.8  |
| AHQ-2-4, 3306        | R.ANLPQSFQVDTSK.A                 | 1435.56409 | 1 | 4.29E-08 | 0.61 | 2.97 | - | 349.3  |
| AHQ-2-8, 2863 - 2878 | R.ANLPQSFQVDTSK.A                 | 1435.56409 | 2 | 1.09E-08 | 0.89 | 3.62 | - | 592.8  |
| AHQ-2-5, 3051        | R.ANLPQSFQVDTSK.A                 | 1435.56409 | 2 | 4.59E-09 | 0.91 | 3.89 | - | 540.0  |
| AHQ-2-1, 3330 - 3412 | R.ANLPQSFQVDTSK.A                 | 1435.56409 | 2 | 1.09E-04 | 0.88 | 3.27 | - | 754.4  |
| AHQ-2-7, 2961 - 2984 | R.ANLPQSFQVDTSK.A                 | 1435.56409 | 2 | 4.74E-08 | 0.84 | 3.42 | - | 514.8  |
| AHQ-2-4, 3284        | R.ANLPQSFQVDTSK.A                 | 1435.56409 | 2 | 3.29E-10 | 0.82 | 3.11 | - | 549.2  |
| AHQ-2-6, 3042        | R.ANLPQSFQVDTSK.A                 | 1435.56409 | 2 | 3.09E-08 | 0.90 | 3.55 | - | 675.7  |
| AHQ-2-2, 3264        | R.ANLPQSFQVDTSK.A                 | 1435.56409 | 1 | 2.49E-07 | 0.65 | 3.21 | - | 380.1  |
| AHQ-2-1, 3450        | R.ANLPQSFQVDTSK.A                 | 1435.56409 | 1 | 5.65E-04 | 0.26 | 2.49 | - | 358.9  |
| AHQ-2-2, 4690 - 4760 | R.ANLPQSFQVDTSKAGVAPLQVK.V        | 2299.61185 | 2 | 3.36E-05 | 0.91 | 4.02 | - | 1055.9 |
| AHQ-2-1, 3568 - 3626 | R.APSVANVYVSHCDLSLK.I             | 1656.84249 | 2 | 9.59E-05 | 0.83 | 3.44 | - | 507.2  |
| AHQ-2-6, 3082        | R.APSVANVYVSHCDLSLK.I             | 1656.84249 | 2 | 1.65E-05 | 0.91 | 4.25 | - | 704.6  |
| AHQ-2-5, 3087 - 3101 | R.APSVANVYVSHCDLSLK.I             | 1656.84249 | 2 | 2.22E-04 | 0.95 | 5.01 | - | 846.6  |
| AHQ-2-1, 6116 - 6185 | K.ASGPGLNTTGPVAPSLPVEFTIDAK.D     | 2343.61826 | 3 | 6.89E-05 | 0.83 | 3.98 | - | 622.6  |
| AHQ-2-5, 1505        | K.ATCAPQHAGPAGPADASK.V            | 1791.92336 | 2 | 7.44E-05 | 0.88 | 3.71 | - | 668.2  |
| AHQ-2-1, 1946        | K.ATCAPQHAGPAGPADASK.V            | 1791.92336 | 2 | 5.65E-07 | 0.95 | 4.74 | - | 945.6  |
| AHQ-2-2, 3648 - 3718 | R.AWGPGLGEGVVVGK.S                | 1227.39403 | 2 | 3.21E-07 | 0.92 | 3.74 | - | 862.7  |
| AHQ-2-1, 3792 - 3862 | R.AWGPGLGEGVVVGK.S                | 1227.39403 | 2 | 4.54E-04 | 0.94 | 4.10 | - | 990.8  |
| AHQ-2-6, 3266 - 3341 | R.AWGPGLGEGVVVGK.S                | 1227.39403 | 2 | 1.19E-04 | 0.81 | 3.18 | - | 637.2  |
| AHQ-2-6, 3351        | R.AWGPGLGEGVVVGK.S                | 1227.39403 | 2 | 1.52E-06 | 0.81 | 3.13 | - | 774.7  |
| AHQ-2-3, 3623        | R.AWGPGLGEGVVVGK.S                | 1227.39403 | 2 | 9.20E-05 | 0.87 | 3.12 | - | 763.3  |
| AHQ-2-7, 3257        | R.AWGPGLGEGVVVGK.S                | 1227.39403 | 2 | 1.42E-06 | 0.82 | 2.91 | - | 770.1  |
| AHQ-2-2, 3653 - 3720 | R.AWGPGLGEGVVVGK.S                | 1227.39403 | 1 | 7.89E-06 | 0.73 | 2.96 | - | 676.9  |
| AHQ-2-4, 3644        | R.AWGPGLGEGVVVGK.S                | 1227.39403 | 2 | 4.18E-05 | 0.95 | 4.11 | - | 1086.8 |
| AHQ-2-5, 3352        | R.AWGPGLGEGVVVGK.S                | 1227.39403 | 2 | 2.17E-05 | 0.86 | 3.29 | - | 846.1  |
| AHQ-2-3, 3171 - 3188 | R.AYGPGEPTGNMVK.K                 | 1434.64274 | 2 | 5.52E-06 | 0.63 | 2.90 | - | 500.9  |
| AHQ-2-1, 2692 - 2725 | R.AYGPGEPTGNMVK.K                 | 1450.64214 | 2 | 1.62E-04 | 0.52 | 2.51 | - | 425.2  |
| AHQ-2-7, 2323 - 2372 | R.AYGPGEPTGNMVK.K                 | 1450.64214 | 2 | 3.38E-04 | 0.33 | 2.76 | - | 299.7  |
| AHQ-2-7, 2837        | R.AYGPGEPTGNMVK.K                 | 1434.64274 | 2 | 8.73E-04 | 0.57 | 2.54 | - | 435.9  |
| AHQ-2-2, 3470 - 3541 | R.AYGPGEPTGNMVK.K                 | 1434.64274 | 1 | 5.37E-05 | 0.31 | 2.81 | - | 380.2  |
| AHQ-2-5, 3143 - 3221 | R.AYGPGEPTGNMVK.K                 | 1434.64274 | 2 | 3.47E-05 | 0.81 | 2.95 | - | 544.9  |
| AHQ-2-5, 2916        | R.AYGPGEPTGNMVK.K                 | 1434.64274 | 2 | 6.17E-06 | 0.83 | 3.51 | - | 473.7  |
| AHQ-2-4, 3105 - 3178 | R.AYGPGEPTGNMVK.K                 | 1434.64274 | 1 | 2.92E-05 | 0.33 | 2.55 | - | 333.3  |
| AHQ-2-6, 2883 - 2931 | R.AYGPGEPTGNMVK.K                 | 1434.64274 | 2 | 7.77E-05 | 0.87 | 3.27 | - | 654.4  |
| AHQ-2-4, 3372 - 3444 | R.AYGPGEPTGNMVK.K                 | 1434.64274 | 2 | 9.57E-04 | 0.59 | 3.03 | - | 375.5  |
| AHQ-2-1, 3429 - 3508 | R.AYGPGEPTGNMVK.K                 | 1434.64274 | 2 | 4.76E-04 | 0.64 | 2.69 | - | 479.3  |
| AHQ-2-2, 2529 - 2538 | R.AYGPGEPTGNMVK.K                 | 1450.64214 | 2 | 9.11E-04 | 0.62 | 2.97 | - | 334.3  |
| AHQ-2-2, 2697 - 2742 | R.AYGPGEPTGNMVK.K                 | 1450.64214 | 2 | 8.04E-07 | 0.91 | 3.94 | - | 614.5  |
| AHQ-2-3, 3368 - 3443 | R.AYGPGEPTGNMVK.K                 | 1434.64274 | 2 | 3.20E-05 | 0.80 | 3.36 | - | 548.3  |
| AHQ-2-4, 6474 - 6545 | K.CAPGVVGAPEADIDFDIIR.N           | 2017.24863 | 2 | 2.94E-05 | 0.86 | 3.65 | - | 622.8  |
| AHQ-2-3, 6399 - 6467 | K.CAPGVVGAPEADIDFDIIR.N           | 2017.24863 | 2 | 3.44E-06 | 0.94 | 4.81 | - | 665.4  |
| AHQ-2-2, 6433 - 6445 | K.CAPGVVGAPEADIDFDIIR.N           | 2017.24863 | 2 | 2.89E-06 | 0.93 | 4.23 | - | 806.6  |
| AHQ-2-5, 6304 - 6323 | K.CAPGVVGAPEADIDFDIIR.N           | 2017.24863 | 2 | 1.15E-04 | 0.82 | 4.07 | - | 819.6  |
| AHQ-2-2, 6516        | K.CAPGVVGAPEADIDFDIIR.N           | 2017.24863 | 2 | 8.39E-08 | 0.90 | 3.66 | - | 673.9  |
| AHQ-2-6, 6154        | K.CAPGVVGAPEADIDFDIIR.N           | 2017.24863 | 2 | 2.21E-07 | 0.77 | 3.32 | - | 452.4  |
| AHQ-2-2, 6281 - 6292 | K.CAPGVVGAPEADIDFDIIR.N           | 2017.24863 | 2 | 2.01E-07 | 0.96 | 4.71 | - | 947.8  |
| AHQ-2-2, 6150        | K.CAPGVVGAPEADIDFDIIR.N           | 2017.24863 | 2 | 6.27E-05 | 0.82 | 3.27 | - | 576.3  |
| AHQ-2-3, 6412        | K.CAPGVVGAPEADIDFDIIR.N           | 2017.24863 | 3 | 1.10E-09 | 0.97 | 5.08 | - | 1684.2 |
| AHQ-2-1, 6328 - 6361 | K.CAPGVVGAPEADIDFDIIR.N           | 2017.24863 | 2 | 1.23E-05 | 0.93 | 4.35 | - | 684.0  |
| AHQ-2-3, 6424 - 6500 | K.CAPGVVGAPEADIDFDIIR.N           | 2017.24863 | 2 | 1.08E-07 | 0.85 | 3.74 | - | 458.6  |
| AHQ-2-3, 6489        | K.CAPGVVGAPEADIDFDIIR.N           | 2017.24863 | 2 | 2.72E-07 | 0.92 | 4.31 | - | 685.1  |
| AHQ-2-1, 6149        | K.CAPGVVGAPEADIDFDIIR.N           | 2017.24863 | 2 | 9.16E-06 | 0.80 | 3.06 | - | 621.9  |
| AHQ-2-1, 6338        | K.CAPGVVGAPEADIDFDIIR.N           | 2017.24863 | 3 | 3.14E-09 | 0.95 | 4.59 | - | 1372.4 |
| AHQ-2-2, 6452        | K.CAPGVVGAPEADIDFDIIR.N           | 2017.24863 | 3 | 1.10E-07 | 0.95 | 4.63 | - | 1573.3 |
| AHQ-2-3, 6241        | K.CAPGVVGAPEADIDFDIIR.N           | 2017.24863 | 2 | 1.68E-06 | 0.73 | 3.00 | - | 528.5  |
| AHQ-2-2, 7320 - 7393 | K.CAPGVVGAPEADIDFDIIRNDNDFTVK.Y   | 3052.31840 | 3 | 1.02E-05 | 0.73 | 3.62 | - | 422.3  |
| AHQ-2-2, 6725 - 6800 | K.CAPGVVGAPEADIDFDIIRNDNDFTVK.Y   | 3052.31840 | 3 | 2.39E-05 | 0.77 | 3.87 | - | 421.9  |
| AHQ-2-3, 6629 - 6711 | K.CAPGVVGAPEADIDFDIIRNDNDFTVK.Y   | 3052.31840 | 3 | 5.55E-06 | 0.85 | 4.44 | - | 419.8  |
| AHQ-2-3, 7272 - 7345 | K.CAPGVVGAPEADIDFDIIRNDNDFTVK.Y   | 3052.31840 | 3 | 7.21E-05 | 0.65 | 3.20 | - | 374.6  |
| AHQ-2-1, 6501 - 6576 | K.CAPGVVGAPEADIDFDIIRNDNDFTVK.Y   | 3052.31840 | 3 | 1.05E-04 | 0.74 | 3.80 | - | 540.9  |
| AHQ-2-2, 2928 - 2944 | K.CSGPGLSPGMVVR.A                 | 1219.41699 | 2 | 9.55E-07 | 0.77 | 3.09 | - | 556.5  |
| AHQ-2-5, 2755        | K.CSGPGLSPGMVVR.A                 | 1219.41699 | 2 | 8.47E-06 | 0.81 | 2.88 | - | 805.1  |
| AHQ-2-3, 2932 - 2935 | K.CSGPGLSPGMVVR.A                 | 1219.41699 | 2 | 1.18E-05 | 0.57 | 2.59 | - | 448.5  |
| AHQ-2-4, 5537 - 5544 | R.CSYQPTMEGVHTVHTFAGVPIPR.S       | 2686.06233 | 2 | 1.27E-11 | 0.97 | 5.17 | - | 1228.8 |
| AHQ-2-4, 5000 - 5036 | R.CSYQPTMEGVHTVHTFAGVPIPR.S       | 2702.06173 | 3 | 1.21E-06 | 0.88 | 4.37 | - | 544.2  |
| AHQ-2-1, 5097        | R.CSYQPTMEGVHTVHTFAGVPIPR.S       | 2702.06173 | 2 | 3.92E-05 | 0.68 | 2.59 | - | 405.2  |
| AHQ-2-1, 5017 - 5088 | R.CSYQPTMEGVHTVHTFAGVPIPR.S       | 2702.06173 | 3 | 4.19E-07 | 0.94 | 5.30 | - | 546.6  |
| AHQ-2-5, 5227 - 5235 | R.CSYQPTMEGVHTVHTFAGVPIPR.S       | 2686.06233 | 2 | 2.44E-10 | 0.97 | 5.21 | - | 1265.8 |
| AHQ-2-3, 5009 - 5031 | R.CSYQPTMEGVHTVHTFAGVPIPR.S       | 2702.06173 | 3 | 2.92E-05 | 0.87 | 4.61 | - | 402.5  |
| AHQ-2-5, 5224 - 5244 | R.CSYQPTMEGVHTVHTFAGVPIPR.S       | 2686.06233 | 3 | 8.83E-06 | 0.89 | 4.06 | - | 707.6  |
| AHQ-2-2, 5517 - 5589 | R.CSYQPTMEGVHTVHTFAGVPIPR.S       | 2686.06233 | 2 | 3.84E-13 | 0.97 | 5.33 | - | 1344.0 |
| AHQ-2-2, 5034        | R.CSYQPTMEGVHTVHTFAGVPIPR.S       | 2702.06173 | 2 | 8.03E-05 | 0.86 | 3.29 | - | 825.0  |
| AHQ-2-1, 5590 - 5661 | R.CSYQPTMEGVHTVHTFAGVPIPR.S       | 2686.06233 | 3 | 8.19E-10 | 0.82 | 3.59 | - | 709.9  |
| AHQ-2-5, 4732 - 4743 | R.CSYQPTMEGVHTVHTFAGVPIPR.S       | 2702.06173 | 2 | 1.25E-05 | 0.84 | 3.99 | - | 391.0  |

|                        |                                       |            |   |          |      |      |   |        |
|------------------------|---------------------------------------|------------|---|----------|------|------|---|--------|
| AHQ-2-3, 5015 - 5027   | R.CSYQPTM*EGVHTVHVTFAGVPIPR.S         | 2702.06173 | 2 | 9.01E-07 | 0.87 | 3.85 | - | 524.4  |
| AHQ-2-3, 4681 - 4721   | R.DAEMPATEKDLAEDAPWK.K                | 2018.19047 | 2 | 1.94E-05 | 0.93 | 3.87 | - | 1128.1 |
| AHQ-2-1, 4721          | R.DAEMPATEKDLAEDAPWK.K                | 2018.19047 | 2 | 4.81E-07 | 0.93 | 4.01 | - | 1042.7 |
| AHQ-2-5, 4439          | R.DAEMPATEKDLAEDAPWK.K                | 2018.19047 | 2 | 1.16E-04 | 0.89 | 3.64 | - | 981.3  |
| AHQ-2-1, 4117          | R.DAEM*PATEKDLAEDAPWK.K               | 2034.18987 | 2 | 7.35E-06 | 0.90 | 3.84 | - | 696.0  |
| AHQ-2-2, 4186          | R.DAEMPATEKDLAEDAPWK.K                | 2146.36338 | 3 | 3.92E-09 | 0.78 | 3.71 | - | 535.7  |
| AHQ-2-13, 3959         | K.DAGEGGLSLAIEGSPK.A                  | 1501.62084 | 2 | 2.37E-04 | 0.44 | 2.55 | - | 535.1  |
| AHQ-2-8, 3779          | K.DAGEGGLSLAIEGSPK.A                  | 1501.62084 | 2 | 1.34E-05 | 0.71 | 3.03 | - | 841.9  |
| AHQ-2-1, 4118 - 4189   | K.DAGEGGLSLAIEGSPK.A                  | 1501.62084 | 2 | 5.63E-06 | 0.96 | 4.83 | - | 1384.7 |
| AHQ-2-3, 4113          | K.DAGEGGLSLAIEGSPK.A                  | 1501.62084 | 2 | 3.53E-05 | 0.94 | 4.97 | - | 1181.7 |
| AHQ-2-2, 4170          | K.DAGEGGLSLAIEGSPK.A                  | 1501.62084 | 2 | 6.32E-04 | 0.85 | 3.44 | - | 962.8  |
| AHQ-2-12, 3971         | K.DAGEGGLSLAIEGSPK.A                  | 1501.62084 | 2 | 6.02E-05 | 0.87 | 3.55 | - | 964.0  |
| AHQ-2-4, 4076 - 4146   | K.DAGEGGLSLAIEGSPK.A                  | 1501.62084 | 2 | 3.60E-05 | 0.81 | 3.32 | - | 849.9  |
| AHQ-2-1, 5048          | K.DAGEGLLAVQITDPEGK.P                 | 1713.86752 | 2 | 4.99E-07 | 0.88 | 3.46 | - | 1050.1 |
| AHQ-2-6, 4102 - 4117   | K.DAGEGLLAVQITDPEGKPK.K               | 1939.15612 | 2 | 3.43E-05 | 0.93 | 4.08 | - | 1224.0 |
| AHQ-2-3, 4456 - 4527   | K.DAGEGLLAVQITDPEGKPK.K               | 1939.15612 | 2 | 3.89E-06 | 0.95 | 4.46 | - | 1280.1 |
| AHQ-2-3, 4461 - 4469   | K.DAGEGLLAVQITDPEGKPK.K               | 1939.15612 | 3 | 7.81E-10 | 0.93 | 4.16 | - | 1280.4 |
| AHQ-2-3, 4625 - 4699   | K.DAGEGLLAVQITDPEGKPK.K               | 1939.15612 | 2 | 8.81E-06 | 0.95 | 4.79 | - | 1195.6 |
| AHQ-2-4, 4426 - 4508   | K.DAGEGLLAVQITDPEGKPK.K               | 1939.15612 | 2 | 1.34E-08 | 0.96 | 4.95 | - | 1259.6 |
| AHQ-2-1, 4777 - 4796   | K.DAGEGLLAVQITDPEGKPK.K               | 1939.15612 | 2 | 6.00E-06 | 0.94 | 4.48 | - | 1190.5 |
| AHQ-2-2, 4612 - 4680   | K.DAGEGLLAVQITDPEGKPK.K               | 1939.15612 | 2 | 6.48E-10 | 0.94 | 4.44 | - | 1099.8 |
| AHQ-2-2, 4500 - 4569   | K.DAGEGLLAVQITDPEGKPK.K               | 1939.15612 | 3 | 7.12E-09 | 0.94 | 4.78 | - | 1264.5 |
| AHQ-2-2, 4882          | K.DAGEGLLAVQITDPEGKPK.K               | 1939.15612 | 2 | 4.02E-05 | 0.87 | 3.78 | - | 972.3  |
| AHQ-2-11, 4108         | K.DAGEGLLAVQITDPEGKPK.K               | 1939.15612 | 2 | 5.70E-07 | 0.96 | 4.85 | - | 1412.9 |
| AHQ-2-2, 4470 - 4541   | K.DAGEGLLAVQITDPEGKPK.K               | 1939.15612 | 2 | 2.37E-07 | 0.94 | 4.09 | - | 1330.8 |
| AHQ-2-1, 4513 - 4548   | K.DAGEGLLAVQITDPEGKPK.K               | 1939.15612 | 2 | 1.67E-07 | 0.90 | 3.72 | - | 1021.9 |
| AHQ-2-5, 4185 - 4188   | K.DAGEGLLAVQITDPEGKPK.K               | 1939.15612 | 2 | 2.90E-09 | 0.94 | 4.32 | - | 1257.7 |
| AHQ-2-7, 4065          | K.DAGEGLLAVQITDPEGKPK.K               | 1939.15612 | 2 | 2.65E-05 | 0.90 | 4.09 | - | 980.6  |
| AHQ-2-8, 3912          | K.DAGEGLLAVQITDPEGKPK.K               | 1939.15612 | 2 | 9.16E-06 | 0.89 | 3.73 | - | 1125.5 |
| AHQ-2-1, 4553 - 4626   | K.DAGEGLLAVQITDPEGKPK.K               | 1939.15612 | 3 | 2.94E-08 | 0.93 | 3.92 | - | 1298.3 |
| AHQ-2-2, 4748 - 4754   | K.DAGEGLLAVQITDPEGKPK.K               | 1939.15612 | 2 | 4.48E-06 | 0.93 | 4.35 | - | 1175.9 |
| AHQ-2-5, 4305          | K.DAGEGLLAVQITDPEGKPK.K               | 1939.15612 | 2 | 9.04E-06 | 0.73 | 2.84 | - | 847.7  |
| AHQ-2-4, 4448          | K.DAGEGLLAVQITDPEGKPK.K               | 1939.15612 | 3 | 4.79E-08 | 0.90 | 3.84 | - | 954.6  |
| AHQ-2-10, 3935         | K.DAGEGLLAVQITDPEGKPK.K               | 1939.15612 | 2 | 5.58E-05 | 0.86 | 3.89 | - | 822.5  |
| AHQ-2-1, 4616          | K.DAGEGLLAVQITDPEGKPK.K               | 1939.15612 | 2 | 4.59E-06 | 0.88 | 3.80 | - | 968.6  |
| AHQ-2-5, 4235          | R.DAGYGGLSLSIEGSPK.V                  | 1551.67986 | 2 | 4.60E-04 | 0.77 | 2.99 | - | 955.0  |
| AHQ-2-5, 4879          | R.DAGYGGLSLSIEGSPK.V                  | 1551.67986 | 2 | 4.79E-06 | 0.58 | 2.83 | - | 958.6  |
| AHQ-2-5, 4739 - 4809   | R.DAGYGGLSLSIEGSPK.V                  | 1551.67986 | 2 | 2.52E-05 | 0.70 | 3.36 | - | 708.8  |
| AHQ-2-1, 4688          | R.DAGYGGLSLSIEGSPK.V                  | 1551.67986 | 2 | 7.16E-08 | 0.91 | 3.51 | - | 1265.6 |
| AHQ-2-2, 1825          | R.DAPQDFHPPDR.V                       | 1198.22650 | 2 | 4.10E-07 | 0.54 | 2.64 | - | 446.9  |
| AHQ-2-1, 1973 - 2034   | R.DAPQDFHPPDR.V                       | 1198.22650 | 2 | 2.20E-05 | 0.56 | 2.68 | - | 455.6  |
| AHQ-2-3, 1695 - 1760   | R.DAPQDFHPPDR.V                       | 1198.22650 | 2 | 9.67E-08 | 0.59 | 2.51 | - | 680.5  |
| AHQ-2-2, 1692 - 1756   | R.DAPQDFHPPDR.V                       | 1198.22650 | 2 | 8.83E-06 | 0.46 | 2.67 | - | 537.5  |
| AHQ-2-5, 5060 - 5129   | K.DGSCGVAYV*QEPGDYEVSVK.F             | 2260.41990 | 2 | 1.84E-04 | 0.88 | 4.23 | - | 657.7  |
| AHQ-2-5, 4947 - 4989   | K.DGSCGVAYV*QEPGDYEVSVK.F             | 2260.41990 | 2 | 1.50E-08 | 0.79 | 4.11 | - | 410.4  |
| AHQ-2-4, 4992 - 5060   | K.DGSCGVAYV*QEPGDYEVSVK.F             | 2260.41990 | 2 | 5.35E-04 | 0.89 | 4.31 | - | 567.1  |
| AHQ-2-7, 5053          | K.DGSCGVAYV*QEPGDYEVSVK.F             | 2260.41990 | 2 | 1.89E-05 | 0.79 | 3.83 | - | 405.8  |
| AHQ-2-6, 4814 - 4891   | K.DGSCGVAYV*QEPGDYEVSVK.F             | 2260.41990 | 2 | 4.97E-06 | 0.93 | 4.94 | - | 756.0  |
| AHQ-2-10, 4536         | K.DGSCGVAYV*QEPGDYEVSVK.F             | 2260.41990 | 2 | 5.36E-04 | 0.86 | 3.88 | - | 492.0  |
| AHQ-2-14-, 2331        | K.DKGEYTLVVK.W                        | 1152.32223 | 1 | 1.54E-04 | 0.20 | 2.35 | - | 405.1  |
| AHQ-2-14-, 2345        | K.DKGEYTLVVK.W                        | 1152.32223 | 1 | 3.40E-04 | 0.43 | 2.46 | - | 503.5  |
| AHQ-2-14, 3368         | K.DKGEYTLVVK.W                        | 1152.32223 | 2 | 1.13E-04 | 0.72 | 2.81 | - | 502.2  |
| AHQ-2-5, 2135 - 2139   | K.DKGEYTLVVK.W                        | 1152.32223 | 2 | 7.09E-06 | 0.65 | 2.62 | - | 457.8  |
| AHQ-2-14, 3138 - 3424  | K.DKGEYTLVVK.W                        | 1152.32223 | 1 | 8.23E-04 | 0.17 | 2.19 | - | 402.7  |
| AHQ-2-14-, 2328 - 2397 | K.DKGEYTLVVK.W                        | 1152.32223 | 2 | 3.59E-06 | 0.79 | 2.86 | - | 700.8  |
| AHQ-2-14, 3248 - 3312  | K.DKGEYTLVVK.W                        | 1152.32223 | 2 | 1.97E-06 | 0.62 | 2.66 | - | 439.4  |
| AHQ-2-13-, 2415        | K.DKGEYTLVVK.W                        | 1152.32223 | 1 | 5.96E-04 | 0.12 | 1.81 | - | 386.1  |
| AHQ-2-4, 2348          | K.DKGEYTLVVK.W                        | 1152.32223 | 1 | 7.57E-07 | 0.54 | 2.80 | - | 511.9  |
| AHQ-2-14, 3588 - 3636  | K.DKGEYTLVVK.W                        | 1152.32223 | 2 | 4.58E-05 | 0.61 | 2.52 | - | 437.9  |
| AHQ-2-14, 3630         | K.DKGEYTLVVK.W                        | 1152.32223 | 1 | 8.66E-06 | 0.50 | 2.52 | - | 627.0  |
| AHQ-2-1, 3384          | K.DNNGTYSCSYVPR.K                     | 1591.64109 | 2 | 4.69E-06 | 0.83 | 3.04 | - | 909.4  |
| AHQ-2-4, 3080          | R.DVDIHDHNTYTVK.Y                     | 1785.89230 | 2 | 2.43E-06 | 0.94 | 4.43 | - | 947.6  |
| AHQ-2-4, 3000 - 3008   | R.DVDIHDHNTYTVK.Y                     | 1785.89230 | 3 | 2.91E-04 | 0.66 | 3.03 | - | 403.7  |
| AHQ-2-6, 2786          | R.DVDIHDHNTYTVK.Y                     | 1785.89230 | 2 | 9.98E-05 | 0.81 | 3.06 | - | 732.7  |
| AHQ-2-2, 3246          | R.DVDIHDHNTYTVK.Y                     | 1785.89230 | 2 | 7.81E-05 | 0.93 | 4.15 | - | 1072.5 |
| AHQ-2-4, 2941 - 3012   | R.DVDIHDHNTYTVK.Y                     | 1785.89230 | 2 | 1.47E-06 | 0.92 | 4.05 | - | 904.4  |
| AHQ-2-2, 3154          | R.DVDIHDHNTYTVK.Y                     | 1785.89230 | 2 | 1.02E-06 | 0.89 | 3.55 | - | 886.0  |
| AHQ-2-2, 3028 - 3084   | R.DVDIHDHNTYTVK.Y                     | 1785.89230 | 2 | 6.93E-10 | 0.97 | 4.93 | - | 1351.3 |
| AHQ-2-1, 3292 - 3365   | R.DVDIHDHNTYTVK.Y                     | 1785.89230 | 2 | 4.20E-06 | 0.72 | 3.02 | - | 411.4  |
| AHQ-2-2, 2942 - 3016   | R.DVDIHDHNTYTVK.Y                     | 1785.89230 | 2 | 1.19E-04 | 0.89 | 3.53 | - | 784.8  |
| AHQ-2-4, 3272          | R.DVDIHDHNTYTVK.Y                     | 1785.89230 | 2 | 9.85E-05 | 0.89 | 3.51 | - | 1067.7 |
| AHQ-2-3, 3267 - 3344   | R.DVDIHDHNTYTVK.Y                     | 1785.89230 | 2 | 4.49E-05 | 0.91 | 3.93 | - | 605.8  |
| AHQ-2-3, 3083          | R.DVDIHDHNTYTVK.Y                     | 1785.89230 | 2 | 6.47E-08 | 0.96 | 4.87 | - | 1134.3 |
| AHQ-2-1, 3157 - 3224   | R.DVDIHDHNTYTVK.Y                     | 1785.89230 | 2 | 4.96E-07 | 0.95 | 4.42 | - | 1247.8 |
| AHQ-2-3, 2940 - 3012   | R.DVDIHDHNTYTVK.Y                     | 1785.89230 | 2 | 1.06E-05 | 0.93 | 3.86 | - | 986.5  |
| AHQ-2-9, 3110          | R.EAGAGGLAIAIEGSPK.A                  | 1427.58510 | 1 | 2.72E-05 | 0.59 | 3.04 | - | 394.7  |
| AHQ-2-7, 3109          | R.EAGAGGLAIAIEGSPK.A                  | 1427.58510 | 2 | 3.02E-05 | 0.92 | 2.94 | - | 1743.7 |
| AHQ-2-1, 3513 - 3517   | R.EAGAGGLAIAIEGSPK.A                  | 1427.58510 | 2 | 1.15E-06 | 0.94 | 4.38 | - | 1098.0 |
| AHQ-2-6, 3127          | R.EAGAGGLAIAIEGSPK.A                  | 1427.58510 | 1 | 1.54E-08 | 0.65 | 3.36 | - | 315.9  |
| AHQ-2-5, 3172          | R.EAGAGGLAIAIEGSPK.A                  | 1427.58510 | 1 | 3.55E-08 | 0.79 | 3.42 | - | 412.3  |
| AHQ-2-5, 3164 - 3305   | R.EAGAGGLAIAIEGSPK.A                  | 1427.58510 | 1 | 6.87E-04 | 0.08 | 1.97 | - | 245.7  |
| AHQ-2-4, 3401 - 3408   | R.EAGAGGLAIAIEGSPK.A                  | 1427.58510 | 2 | 3.97E-05 | 0.96 | 4.50 | - | 1637.2 |
| AHQ-2-2, 3030          | R.EATTEFSVDAR.A                       | 1226.27493 | 2 | 5.40E-04 | 0.75 | 2.71 | - | 648.6  |
| AHQ-2-2, 2540 - 2609   | R.EATTEFSVDAR.A                       | 1226.27493 | 2 | 5.16E-06 | 0.87 | 3.42 | - | 807.3  |
| AHQ-2-5, 6391 - 6456   | R.EEGPYEVEVTDGVPVPGSPFFLEAVAPT.KPSK.V | 3487.85286 | 3 | 1.79E-06 | 0.88 | 4.05 | - | 733.2  |
| AHQ-2-3, 6483 - 6552   | R.EEGPYEVEVTDGVPVPGSPFFLEAVAPT.KPSK.V | 3487.85286 | 3 | 2.90E-08 | 0.96 | 6.30 | - | 690.4  |
| AHQ-2-2, 6493 - 6560   | R.EEGPYEVEVTDGVPVPGSPFFLEAVAPT.KPSK.V | 3487.85286 | 3 | 2.08E-10 | 0.96 | 6.06 | - | 948.7  |
| AHQ-2-2, 7241          | R.EEGPYEVEVTDGVPVPGSPFFLEAVAPT.KPSK.V | 3487.85286 | 3 | 9.94E-04 | 0.59 | 3.19 | - | 416.7  |
| AHQ-2-3, 6619 - 6688   | R.EEGPYEVEVTDGVPVPGSPFFLEAVAPT.KPSK.V | 3487.85286 | 3 | 2.70E-10 | 0.96 | 6.19 | - | 939.1  |
| AHQ-2-1, 6432 - 6512   | R.EEGPYEVEVTDGVPVPGSPFFLEAVAPT.KPSK.V | 3487.85286 | 3 | 2.68E-05 | 0.95 | 6.15 | - | 695.3  |
| AHQ-2-5, 6523          | R.EEGPYEVEVTDGVPVPGSPFFLEAVAPT.KPSK.V | 3487.85286 | 3 | 1.96E-09 | 0.94 | 5.61 | - | 687.7  |
| AHQ-2-6, 6301 - 6303   | R.EEGPYEVEVTDGVPVPGSPFFLEAVAPT.KPSK.V | 3487.85286 | 3 | 5.73E-07 | 0.93 | 5.23 | - | 763.8  |
| AHQ-2-2, 6696 - 6765   | R.EEGPYEVEVTDGVPVPGSPFFLEAVAPT.KPSK.V | 3487.85286 | 3 | 2.11E-08 | 0.94 | 5.18 | - | 826.6  |
| AHQ-2-1, 6572 - 6646   | R.EEGPYEVEVTDGVPVPGSPFFLEAVAPT.KPSK.V | 3487.85286 | 3 | 3.62E-07 | 0.90 | 4.73 | - | 586.2  |
| AHQ-2-2, 6593 - 6660   | R.EEGPYEVEVTDGVPVPGSPFFLEAVAPT.KPSK.V | 3487.85286 | 3 | 1.01E-07 | 0.94 | 5.56 | - | 824.0  |
| AHQ-2-4, 6696 - 6768   | R.EEGPYEVEVTDGVPVPGSPFFLEAVAPT.KPSK.V | 3487.85286 | 3 | 1.27E-08 | 0.92 | 5.34 | - | 520.5  |
| AHQ-2-4, 6552 - 6628   | R.EEGPYEVEVTDGVPVPGSPFFLEAVAPT.KPSK.V | 3487.85286 | 3 | 1.29E-09 | 0.94 | 5.96 | - | 665.1  |
| AHQ-2-1, 5301 - 5302   | R.EGYSISVLYGDEEVRP.S                  | 1911.05809 | 3 | 5.53E-07 | 0.96 | 4.81 | - | 1682.3 |
| AHQ-2-2, 4976          | R.EGYSISVLYGDEEVRP.S                  | 1911.05809 | 2 | 2.88E-07 | 0.86 | 3.76 | - | 739.5  |
| AHQ-2-1, 5230 - 5304   | R.EGYSISVLYGDEEVRP.S                  | 1911.05809 | 2 | 6.07E-08 | 0.93 | 4.08 | - | 1145.4 |
| AHQ-2-2, 5252 - 5280   | R.EGYSISVLYGDEEVRP.S                  | 1911.05809 | 2 | 8.43E-05 | 0.92 | 4.02 | - | 1190.9 |
| AHQ-2-8, 4773 - 4845   | R.EGYSISVLYGDEEVRP.S                  | 1911.05809 | 2 | 4.90E-06 | 0.93 | 4.23 | - | 778.4  |
| AHQ-2-1, 5332          | R.EGYSISVLYGDEEVRP.S                  | 1911.05809 | 2 | 5.78E-05 | 0.84 | 3.68 | - | 846.9  |
| AHQ-2-4, 5244 - 5313   | R.EGYSISVLYGDEEVRP.S                  | 1911.05809 | 2 | 1.42E-07 | 0.90 | 3.70 | - | 1145.3 |
| AHQ-2-5, 5068          | R.EGYSISVLYGDEEVRP.S                  | 1911.05809 | 2 | 9.15E-07 | 0.93 | 4.14 | - | 1047.5 |
| AHQ-2-6, 4962          | R.EGYSISVLYGDEEVRP.S                  | 1911.05809 | 2 | 1.08E-08 | 0.78 | 3.75 | - | 734.2  |
| AHQ-2-7, 4956          | R.EGYSISVLYGDEEVRP.S                  | 1911.05809 | 2 | 7.79E-09 | 0.93 | 4.45 | - | 1073.8 |

|                        |                                   |            |   |          |      |      |   |        |
|------------------------|-----------------------------------|------------|---|----------|------|------|---|--------|
| AHQ-2-9, 4978          | R.EGPYSISVLVGDDEEVR.S             | 1911.05809 | 2 | 7.90E-05 | 0.82 | 3.24 | - | 719.2  |
| AHQ-2-2, 5348 - 5352   | R.EGPYSISVLVGDDEEVR.S             | 1911.05809 | 2 | 3.88E-10 | 0.94 | 4.08 | - | 1321.0 |
| AHQ-2-1, 5368          | R.EGPYSISVLVGDDEEVR.S             | 1911.05809 | 2 | 3.27E-05 | 0.94 | 4.37 | - | 1038.3 |
| AHQ-2-3, 5220 - 5303   | R.EGPYSISVLVGDDEEVR.S             | 1911.05809 | 2 | 4.62E-08 | 0.96 | 4.93 | - | 1300.6 |
| AHQ-2-3, 4032 - 4033   | R.ENGVYLVLDV.K.F                  | 1150.30633 | 1 | 2.63E-06 | 0.18 | 2.34 | - | 167.0  |
| AHQ-2-6, 3781          | R.ENGVYLVLDV.K.F                  | 1150.30633 | 1 | 4.46E-04 | 0.14 | 1.90 | - | 264.5  |
| AHQ-2-5, 3847          | R.ENGVYLVLDV.K.F                  | 1150.30633 | 1 | 1.33E-04 | 0.21 | 2.12 | - | 286.1  |
| AHQ-2-5, 3701          | R.ENGVYLVLDV.K.F                  | 1150.30633 | 1 | 1.92E-04 | 0.16 | 2.28 | - | 290.0  |
| AHQ-2-5, 3241          | K.FADQHVPGSPFSVK.V                | 1516.68203 | 2 | 4.52E-04 | 0.48 | 2.57 | - | 314.7  |
| AHQ-2-1, 3616 - 3689   | K.FADQHVPGSPFSVK.V                | 1516.68203 | 2 | 3.00E-05 | 0.41 | 2.65 | - | 301.3  |
| AHQ-2-13-, 3417        | K.FADQHVPGSPFSVK.V                | 1516.68203 | 2 | 1.01E-05 | 0.73 | 2.88 | - | 470.5  |
| AHQ-2-7, 2991          | K.FADQHVPGSPFSVK.V                | 1516.68203 | 2 | 2.19E-06 | 0.53 | 2.86 | - | 323.6  |
| AHQ-2-2, 3466          | K.FADQHVPGSPFSVK.V                | 1516.68203 | 2 | 1.98E-06 | 0.87 | 3.41 | - | 642.4  |
| AHQ-2-8, 2872          | K.FADQHVPGSPFSVK.V                | 1516.68203 | 3 | 9.48E-06 | 0.90 | 3.72 | - | 1045.0 |
| AHQ-2-1, 3628          | K.FADQHVPGSPFSVK.V                | 1516.68203 | 3 | 1.25E-05 | 0.92 | 3.64 | - | 1356.9 |
| AHQ-2-6, 3107          | K.FADQHVPGSPFSVK.V                | 1516.68203 | 3 | 6.08E-05 | 0.92 | 4.03 | - | 1305.6 |
| AHQ-2-6, 3106          | K.FADQHVPGSPFSVK.V                | 1516.68203 | 2 | 2.35E-07 | 0.86 | 3.70 | - | 556.7  |
| AHQ-2-5, 3121 - 3131   | K.FADQHVPGSPFSVK.V                | 1516.68203 | 3 | 7.67E-08 | 0.95 | 4.41 | - | 1396.2 |
| AHQ-2-3, 3441          | K.FADQHVPGSPFSVK.V                | 1516.68203 | 2 | 2.63E-07 | 0.88 | 3.75 | - | 519.6  |
| AHQ-2-5, 3103 - 3171   | K.FADQHVPGSPFSVK.V                | 1516.68203 | 2 | 1.64E-05 | 0.79 | 3.39 | - | 500.4  |
| AHQ-2-1, 5800          | R.FGGEHVPNSPFQVLTALAGDQPSVQPPLR.S | 2947.25342 | 2 | 1.14E-08 | 0.96 | 5.38 | - | 1040.9 |
| AHQ-2-1, 5724 - 5788   | R.FGGEHVPNSPFQVLTALAGDQPSVQPPLR.S | 2947.25342 | 3 | 1.94E-08 | 0.93 | 5.09 | - | 782.9  |
| AHQ-2-1, 5856 - 5921   | R.FGGEHVPNSPFQVLTALAGDQPSVQPPLR.S | 2947.25342 | 3 | 2.15E-08 | 0.94 | 5.41 | - | 1053.1 |
| AHQ-2-1, 5910          | R.FGGEHVPNSPFQVLTALAGDQPSVQPPLR.S | 2947.25342 | 2 | 2.02E-05 | 0.95 | 5.22 | - | 720.7  |
| AHQ-2-8, 5103          | R.FGGEHVPNSPFQVLTALAGDQPSVQPPLR.S | 2947.25342 | 3 | 3.15E-06 | 0.97 | 5.55 | - | 1164.1 |
| AHQ-2-2, 5542          | R.FGGEHVPNSPFQVLTALAGDQPSVQPPLR.S | 2947.25342 | 3 | 2.29E-04 | 0.86 | 3.97 | - | 682.1  |
| AHQ-2-11, 5181         | R.FGGEHVPNSPFQVLTALAGDQPSVQPPLR.S | 2947.25342 | 3 | 1.04E-04 | 0.88 | 4.18 | - | 627.3  |
| AHQ-2-5, 5392          | R.FGGEHVPNSPFQVLTALAGDQPSVQPPLR.S | 2947.25342 | 3 | 3.93E-04 | 0.87 | 4.02 | - | 620.8  |
| AHQ-2-11, 5222         | R.FGGEHVPNSPFQVLTALAGDQPSVQPPLR.S | 2947.25342 | 2 | 5.42E-06 | 0.94 | 4.33 | - | 957.7  |
| AHQ-2-5, 5407          | R.FGGEHVPNSPFQVLTALAGDQPSVQPPLR.S | 2947.25342 | 2 | 5.02E-07 | 0.94 | 4.80 | - | 916.4  |
| AHQ-2-2, 5652 - 5720   | R.FGGEHVPNSPFQVLTALAGDQPSVQPPLR.S | 2947.25342 | 3 | 5.50E-09 | 0.93 | 5.16 | - | 751.4  |
| AHQ-2-2, 5654 - 5669   | R.FGGEHVPNSPFQVLTALAGDQPSVQPPLR.S | 2947.25342 | 2 | 4.50E-08 | 0.96 | 5.63 | - | 901.3  |
| AHQ-2-8, 5088 - 5107   | R.FGGEHVPNSPFQVLTALAGDQPSVQPPLR.S | 2947.25342 | 3 | 1.39E-05 | 0.93 | 4.65 | - | 997.4  |
| AHQ-2-9, 5335 - 5360   | R.FGGEHVPNSPFQVLTALAGDQPSVQPPLR.S | 2947.25342 | 3 | 7.53E-06 | 0.91 | 4.61 | - | 697.5  |
| AHQ-2-2, 5740 - 5808   | R.FGGEHVPNSPFQVLTALAGDQPSVQPPLR.S | 2947.25342 | 2 | 9.03E-07 | 0.95 | 5.52 | - | 846.9  |
| AHQ-2-6, 5346          | R.FGGEHVPNSPFQVLTALAGDQPSVQPPLR.S | 2947.25342 | 3 | 4.36E-08 | 0.92 | 4.42 | - | 924.0  |
| AHQ-2-13-, 5407 - 5421 | R.FGGEHVPNSPFQVLTALAGDQPSVQPPLR.S | 2947.25342 | 3 | 4.66E-10 | 0.93 | 4.94 | - | 788.9  |
| AHQ-2-2, 5789 - 5856   | R.FGGEHVPNSPFQVLTALAGDQPSVQPPLR.S | 2947.25342 | 3 | 3.38E-09 | 0.91 | 4.42 | - | 956.6  |
| AHQ-2-4, 5672 - 5746   | R.FGGEHVPNSPFQVLTALAGDQPSVQPPLR.S | 2947.25342 | 2 | 1.02E-05 | 0.96 | 5.57 | - | 1019.1 |
| AHQ-2-4, 5665 - 5693   | R.FGGEHVPNSPFQVLTALAGDQPSVQPPLR.S | 2947.25342 | 3 | 2.91E-06 | 0.92 | 5.13 | - | 658.6  |
| AHQ-2-2, 5870 - 5876   | R.FGGEHVPNSPFQVLTALAGDQPSVQPPLR.S | 2947.25342 | 2 | 7.58E-10 | 0.98 | 6.88 | - | 1290.0 |
| AHQ-2-3, 5640 - 5711   | R.FGGEHVPNSPFQVLTALAGDQPSVQPPLR.S | 2947.25342 | 2 | 6.04E-05 | 0.96 | 5.18 | - | 1354.5 |
| AHQ-2-3, 5656 - 5723   | R.FGGEHVPNSPFQVLTALAGDQPSVQPPLR.S | 2947.25342 | 3 | 4.01E-09 | 0.93 | 4.77 | - | 974.7  |
| AHQ-2-12, 5453         | R.FGGEHVPNSPFQVLTALAGDQPSVQPPLR.S | 2947.25342 | 2 | 1.14E-05 | 0.95 | 4.89 | - | 937.7  |
| AHQ-2-3, 5729          | R.FGGEHVPNSPFQVLTALAGDQPSVQPPLR.S | 2947.25342 | 2 | 1.10E-06 | 0.97 | 6.01 | - | 1008.8 |
| AHQ-2-3, 5779 - 5847   | R.FGGEHVPNSPFQVLTALAGDQPSVQPPLR.S | 2947.25342 | 2 | 6.70E-11 | 0.95 | 5.00 | - | 899.9  |
| AHQ-2-12, 5443         | R.FGGEHVPNSPFQVLTALAGDQPSVQPPLR.S | 2947.25342 | 3 | 3.59E-06 | 0.87 | 3.80 | - | 916.1  |
| AHQ-2-13, 5328         | R.FGGEHVPNSPFQVLTALAGDQPSVQPPLR.S | 2947.25342 | 2 | 8.21E-05 | 0.66 | 2.98 | - | 575.9  |
| AHQ-2-7, 5277 - 5283   | R.FGGEHVPNSPFQVLTALAGDQPSVQPPLR.S | 2947.25342 | 3 | 1.77E-06 | 0.93 | 4.86 | - | 941.1  |
| AHQ-2-7, 5288          | R.FGGEHVPNSPFQVLTALAGDQPSVQPPLR.S | 2947.25342 | 2 | 2.64E-06 | 0.95 | 5.13 | - | 919.1  |
| AHQ-2-5, 5075 - 5077   | K.FNEEHIPDSPFVVPASPSGDAR.R        | 2468.66280 | 2 | 2.29E-05 | 0.93 | 4.69 | - | 655.3  |
| AHQ-2-5, 3219          | K.FNGTHIPGSPFK.I                  | 1302.46259 | 2 | 2.08E-05 | 0.84 | 3.21 | - | 665.6  |
| AHQ-2-5, 3491 - 3495   | K.FNGTHIPGSPFK.I                  | 1302.46259 | 2 | 4.58E-06 | 0.85 | 3.29 | - | 708.1  |
| AHQ-2-3, 3829          | K.FNGTHIPGSPFK.I                  | 1302.46259 | 2 | 1.47E-04 | 0.78 | 3.26 | - | 449.1  |
| AHQ-2-6, 3362          | K.FNGTHIPGSPFK.I                  | 1302.46259 | 2 | 5.08E-04 | 0.80 | 2.85 | - | 724.4  |
| AHQ-2-1, 3953          | K.FNGTHIPGSPFK.I                  | 1302.46259 | 2 | 2.79E-04 | 0.61 | 2.55 | - | 536.1  |
| AHQ-2-5, 3672 - 3677   | K.FNGTHIPGSPFK.I                  | 1302.46259 | 1 | 1.33E-04 | 0.37 | 2.04 | - | 392.1  |
| AHQ-2-3, 2927 - 2933   | R.FVPAEMGTHTVSVK.Y                | 1503.74821 | 2 | 1.66E-11 | 0.92 | 3.84 | - | 777.6  |
| AHQ-2-7, 2500 - 2572   | R.FVPAEMGTHTVSVK.Y                | 1503.74821 | 2 | 1.39E-08 | 0.89 | 3.84 | - | 692.7  |
| AHQ-2-1, 2470          | R.FVPAEMGTHTVSVK.Y                | 1519.74761 | 2 | 2.92E-04 | 0.73 | 2.64 | - | 430.2  |
| AHQ-2-2, 2912          | R.FVPAEMGTHTVSVK.Y                | 1503.74821 | 2 | 2.71E-04 | 0.77 | 2.51 | - | 692.7  |
| AHQ-2-5, 2617          | R.FVPAEMGTHTVSVK.Y                | 1503.74821 | 2 | 4.49E-11 | 0.89 | 3.03 | - | 866.0  |
| AHQ-2-1, 3113          | R.FVPAEMGTHTVSVK.Y                | 1503.74821 | 2 | 9.05E-06 | 0.76 | 2.90 | - | 503.3  |
| AHQ-2-2, 6430          | R.GAGSYTIMVLFADQATPTSPIR.V        | 2313.61563 | 2 | 6.27E-04 | 0.60 | 3.11 | - | 266.2  |
| AHQ-2-3, 6952 - 7019   | R.GAGSYTIMVLFADQATPTSPIR.V        | 2297.61623 | 2 | 3.94E-04 | 0.76 | 3.98 | - | 571.5  |
| AHQ-2-2, 6278 - 6358   | R.GAGSYTIMVLFADQATPTSPIR.V        | 2313.61563 | 2 | 2.12E-05 | 0.83 | 4.27 | - | 723.2  |
| AHQ-2-2, 7057 - 7125   | R.GAGSYTIMVLFADQATPTSPIR.V        | 2297.61623 | 2 | 9.87E-05 | 0.93 | 4.32 | - | 845.3  |
| AHQ-2-2, 7197 - 7273   | R.GAGSYTIMVLFADQATPTSPIR.V        | 2297.61623 | 2 | 1.11E-04 | 0.72 | 3.42 | - | 437.7  |
| AHQ-2-2, 3341 - 3412   | R.GAGTGGLGLAVEGPPSEAK.M           | 1571.71430 | 2 | 1.32E-06 | 0.87 | 3.48 | - | 806.2  |
| AHQ-2-3, 3529          | R.GAGTGGLGLAVEGPPSEAK.M           | 1571.71430 | 2 | 7.34E-05 | 0.69 | 2.96 | - | 550.6  |
| AHQ-2-2, 3254 - 3325   | R.GAGTGGLGLAVEGPPSEAK.M           | 1571.71430 | 2 | 3.31E-06 | 0.88 | 3.80 | - | 731.5  |
| AHQ-2-2, 3768 - 3784   | R.GAGTGGLGLAVEGPPSEAK.M           | 1571.71430 | 2 | 5.19E-05 | 0.80 | 2.84 | - | 929.0  |
| AHQ-2-5, 3085          | R.GAGTGGLGLAVEGPPSEAK.M           | 1571.71430 | 2 | 6.92E-06 | 0.93 | 3.91 | - | 1057.5 |
| AHQ-2-1, 3552 - 3553   | R.GAGTGGLGLAVEGPPSEAK.M           | 1571.71430 | 2 | 1.04E-04 | 0.85 | 3.46 | - | 783.2  |
| AHQ-2-2, 3480 - 3553   | R.GAGTGGLGLAVEGPPSEAK.M           | 1571.71430 | 2 | 3.28E-05 | 0.85 | 3.85 | - | 828.6  |
| AHQ-2-4, 3344 - 3386   | R.GAGTGGLGLAVEGPPSEAK.M           | 1571.71430 | 2 | 2.21E-04 | 0.65 | 2.89 | - | 544.7  |
| AHQ-2-5, 3176          | R.GAGTGGLGLAVEGPPSEAK.M           | 1571.71430 | 2 | 2.97E-05 | 0.70 | 3.14 | - | 692.2  |
| AHQ-2-8, 2875          | R.GAGTGGLGLAVEGPPSEAK.M           | 1571.71430 | 2 | 4.31E-05 | 0.73 | 3.05 | - | 696.8  |
| AHQ-2-1, 3410 - 3481   | R.GAGTGGLGLAVEGPPSEAK.M           | 1571.71430 | 2 | 1.40E-04 | 0.89 | 3.58 | - | 803.6  |
| AHQ-2-3, 3327 - 3401   | R.GAGTGGLGLAVEGPPSEAK.M           | 1571.71430 | 2 | 7.25E-08 | 0.94 | 4.87 | - | 746.2  |
| AHQ-2-6, 3078 - 3085   | R.GAGTGGLGLAVEGPPSEAK.M           | 1571.71430 | 2 | 2.90E-05 | 0.83 | 3.47 | - | 693.9  |
| AHQ-2-2, 3597          | K.GKLDVQFSGLTG.G                  | 1293.49392 | 2 | 1.67E-04 | 0.91 | 3.59 | - | 860.0  |
| AHQ-2-2, 3286          | K.GKLDVQFSGLTG.G                  | 1293.49392 | 2 | 6.02E-05 | 0.95 | 3.82 | - | 1381.9 |
| AHQ-2-2, 3232 - 3374   | K.GKLDVQFSGLTG.G                  | 1293.49392 | 1 | 3.13E-06 | 0.59 | 3.04 | - | 432.3  |
| AHQ-2-2, 3284          | K.GKLDVQFSGLTG.G                  | 1293.49392 | 2 | 5.54E-05 | 0.96 | 4.08 | - | 1520.9 |
| AHQ-2-4, 3298 - 3314   | K.GKLDVQFSGLTG.G                  | 1293.49392 | 2 | 5.44E-04 | 0.91 | 3.50 | - | 930.5  |
| AHQ-2-3, 5084 - 5152   | K.GLVEPVDVVDNADGTQTVNYPVSR.E      | 2545.74387 | 2 | 2.14E-08 | 0.98 | 6.64 | - | 1294.7 |
| AHQ-2-1, 5034 - 5105   | K.GLVEPVDVVDNADGTQTVNYPVSR.E      | 2545.74387 | 2 | 3.50E-06 | 0.73 | 3.47 | - | 408.8  |
| AHQ-2-1, 5168 - 5244   | K.GLVEPVDVVDNADGTQTVNYPVSR.E      | 2545.74387 | 2 | 1.85E-10 | 0.96 | 5.42 | - | 1120.9 |
| AHQ-2-2, 5220 - 5293   | K.GLVEPVDVVDNADGTQTVNYPVSR.E      | 2545.74387 | 2 | 2.94E-06 | 0.97 | 5.81 | - | 1390.9 |
| AHQ-2-1, 6676 - 6678   | K.GLVEPVDVVDNADGTQTVNYPVSR.E      | 4437.77937 | 3 | 1.24E-10 | 0.95 | 5.53 | - | 900.3  |
| AHQ-2-1, 2292 - 2368   | K.GTVEPQLEAR.G                    | 1100.20741 | 2 | 1.36E-05 | 0.72 | 2.60 | - | 504.5  |
| AHQ-2-3, 2124          | K.GTVEPQLEAR.G                    | 1100.20741 | 2 | 3.22E-04 | 0.82 | 3.08 | - | 525.7  |
| AHQ-2-2, 2116 - 2132   | K.GTVEPQLEAR.G                    | 1100.20741 | 2 | 8.78E-05 | 0.84 | 3.05 | - | 585.1  |
| AHQ-2-6, 1925 - 1929   | K.GTVEPQLEAR.G                    | 1100.20741 | 2 | 4.16E-05 | 0.81 | 3.26 | - | 528.6  |
| AHQ-2-5, 1891 - 1907   | K.GTVEPQLEAR.G                    | 1100.20741 | 2 | 9.54E-04 | 0.76 | 2.58 | - | 711.8  |
| AHQ-2-2, 5628 - 5629   | K.HTAMVSWGVSIPNSPFR.V             | 1944.20601 | 2 | 1.19E-06 | 0.98 | 6.08 | - | 1290.8 |
| AHQ-2-1, 5388          | K.HTAMVSWGVSIPNSPFR.V             | 1960.20541 | 3 | 1.58E-04 | 0.71 | 3.83 | - | 455.4  |
| AHQ-2-3, 5327          | K.HTAMVSWGVSIPNSPFR.V             | 1960.20541 | 2 | 9.24E-05 | 0.93 | 4.12 | - | 1004.9 |
| AHQ-2-2, 5248          | K.HTAMVSWGVSIPNSPFR.V             | 1960.20541 | 3 | 1.40E-05 | 0.79 | 3.74 | - | 716.5  |
| AHQ-2-5, 4905          | K.HTAMVSWGVSIPNSPFR.V             | 1960.20541 | 2 | 6.82E-05 | 0.96 | 4.70 | - | 1356.6 |
| AHQ-2-2, 5849          | K.HTAMVSWGVSIPNSPFR.V             | 1944.20601 | 2 | 3.14E-09 | 0.94 | 4.56 | - | 915.7  |
| AHQ-2-3, 5599 - 5600   | K.HTAMVSWGVSIPNSPFR.V             | 1944.20601 | 2 | 7.04E-08 | 0.98 | 5.84 | - | 1651.9 |
| AHQ-2-4, 5184 - 5185   | K.HTAMVSWGVSIPNSPFR.V             | 1960.20541 | 2 | 1.82E-04 | 0.93 | 4.23 | - | 1020.9 |
| AHQ-2-1, 5778 - 5784   | K.HTAMVSWGVSIPNSPFR.V             | 1944.20601 | 2 | 2.67E-04 | 0.98 | 6.37 | - | 1163.6 |
| AHQ-2-2, 5333          | K.HTAMVSWGVSIPNSPFR.V             | 1960.20541 | 2 | 2.96E-05 | 0.89 | 3.35 | - | 953.5  |
| AHQ-2-3, 5215 - 5255   | K.HTAMVSWGVSIPNSPFR.V             | 1960.20541 | 2 | 8.70E-04 | 0.96 | 4.70 | - | 1282.0 |

|                       |                                 |            |   |          |      |      |   |        |
|-----------------------|---------------------------------|------------|---|----------|------|------|---|--------|
| AHQ-2-5, 5308         | K.HTAMVSWGVSIPNSPFR.V           | 1944.20601 | 2 | 6.34E-05 | 0.98 | 6.16 | - | 1344.8 |
| AHQ-2-3, 5236         | K.HTAMVSWGVSIPNSPFR.V           | 1960.20541 | 3 | 2.48E-04 | 0.67 | 3.29 | - | 655.8  |
| AHQ-2-2, 5237 - 5264  | K.HTAMVSWGVSIPNSPFR.V           | 1960.20541 | 2 | 3.22E-07 | 0.97 | 5.67 | - | 1275.1 |
| AHQ-2-4, 5622         | K.HTAMVSWGVSIPNSPFR.V           | 1944.20601 | 2 | 1.03E-07 | 0.95 | 4.49 | - | 994.6  |
| AHQ-2-11, 3970        | R.IANLQTDLSGGLR.L               | 1416.56231 | 2 | 5.20E-07 | 0.87 | 3.31 | - | 798.9  |
| AHQ-2-3, 3897 - 3907  | R.IANLQTDLSGGLR.L               | 1416.56231 | 2 | 5.18E-06 | 0.93 | 4.04 | - | 981.2  |
| AHQ-2-1, 4405 - 4472  | R.IANLQTDLSGGLR.L               | 1416.56231 | 2 | 7.47E-06 | 0.94 | 4.38 | - | 978.6  |
| AHQ-2-5, 3989 - 4015  | R.IANLQTDLSGGLR.L               | 1416.56231 | 2 | 9.29E-06 | 0.94 | 4.04 | - | 1172.5 |
| AHQ-2-2, 3920         | R.IANLQTDLSGGLR.L               | 1416.56231 | 2 | 7.16E-07 | 0.97 | 4.23 | - | 1657.7 |
| AHQ-2-2, 4008         | R.IANLQTDLSGGLR.L               | 1416.56231 | 2 | 3.06E-06 | 0.95 | 4.83 | - | 990.2  |
| AHQ-2-3, 3983         | R.IANLQTDLSGGLR.L               | 1416.56231 | 2 | 1.01E-05 | 0.94 | 4.69 | - | 838.1  |
| AHQ-2-12, 4119        | R.IANLQTDLSGGLR.L               | 1416.56231 | 2 | 1.18E-07 | 0.94 | 4.77 | - | 790.4  |
| AHQ-2-2, 4089 - 4162  | R.IANLQTDLSGGLR.L               | 1416.56231 | 2 | 4.43E-06 | 0.74 | 2.59 | - | 835.6  |
| AHQ-2-7, 3919 - 3935  | R.IANLQTDLSGGLR.L               | 1416.56231 | 2 | 6.32E-06 | 0.85 | 3.40 | - | 738.0  |
| AHQ-2-1, 4294         | R.IANLQTDLSGGLR.L               | 1416.56231 | 2 | 9.43E-07 | 0.90 | 3.90 | - | 785.7  |
| AHQ-2-2, 4281 - 4358  | R.IANLQTDLSGGLR.L               | 1416.56231 | 2 | 2.04E-06 | 0.95 | 4.31 | - | 1191.0 |
| AHQ-2-5, 3691         | R.IANLQTDLSGGLR.L               | 1416.56231 | 2 | 1.79E-05 | 0.92 | 3.33 | - | 1271.9 |
| AHQ-2-13, 4156        | R.IANLQTDLSGGLR.L               | 1416.56231 | 2 | 3.46E-06 | 0.93 | 3.56 | - | 1231.2 |
| AHQ-2-1, 4094         | R.IANLQTDLSGGLR.L               | 1416.56231 | 2 | 2.18E-06 | 0.95 | 4.13 | - | 1339.1 |
| AHQ-2-9, 3967         | R.IANLQTDLSGGLR.L               | 1416.56231 | 2 | 8.84E-05 | 0.94 | 4.07 | - | 1081.3 |
| AHQ-2-4, 3869 - 3905  | R.IANLQTDLSGGLR.L               | 1416.56231 | 2 | 2.52E-08 | 0.93 | 4.00 | - | 1064.4 |
| AHQ-2-9, 3646         | R.IANLQTDLSGGLR.L               | 1416.56231 | 2 | 3.66E-09 | 0.85 | 3.32 | - | 706.2  |
| AHQ-2-3, 4305 - 4307  | R.IANLQTDLSGGLR.L               | 1416.56231 | 1 | 9.12E-05 | 0.53 | 2.97 | - | 345.3  |
| AHQ-2-4, 4284         | R.IANLQTDLSGGLR.L               | 1416.56231 | 2 | 1.11E-04 | 0.87 | 3.16 | - | 879.8  |
| AHQ-2-1, 4000         | R.IANLQTDLSGGLR.L               | 1416.56231 | 2 | 1.15E-07 | 0.94 | 4.15 | - | 1103.7 |
| AHQ-2-1, 4546 - 4612  | R.IANLQTDLSGGLR.L               | 1416.56231 | 2 | 3.19E-07 | 0.92 | 3.43 | - | 1120.1 |
| AHQ-2-2, 4722         | R.IANLQTDLSGGLR.L               | 1416.56231 | 2 | 3.98E-06 | 0.96 | 4.47 | - | 1353.7 |
| AHQ-2-4, 4289 - 4290  | R.IANLQTDLSGGLR.L               | 1416.56231 | 1 | 4.34E-05 | 0.74 | 3.26 | - | 309.6  |
| AHQ-2-2, 4618         | R.IANLQTDLSGGLR.L               | 1416.56231 | 1 | 6.78E-05 | 0.37 | 2.09 | - | 326.3  |
| AHQ-2-2, 4598         | R.IANLQTDLSGGLR.L               | 1416.56231 | 2 | 1.61E-06 | 0.94 | 3.91 | - | 1340.9 |
| AHQ-2-4, 5685         | K.IPEISIQDMTAQVTSPPSGK.T        | 2003.26361 | 2 | 1.91E-08 | 0.97 | 4.80 | - | 1861.3 |
| AHQ-2-6, 5353         | K.IPEISIQDMTAQVTSPPSGK.T        | 2003.26361 | 2 | 1.60E-10 | 0.97 | 4.74 | - | 1914.8 |
| AHQ-2-6, 5369 - 5442  | K.IPEISIQDMTAQVTSPPSGK.T        | 2003.26361 | 2 | 2.78E-11 | 0.99 | 6.79 | - | 2256.6 |
| AHQ-2-13, 5325        | K.IPEISIQDMTAQVTSPPSGK.T        | 2003.26361 | 2 | 3.71E-08 | 0.97 | 5.01 | - | 1659.2 |
| AHQ-2-11, 5189        | K.IPEISIQDMTAQVTSPPSGK.T        | 2003.26361 | 2 | 4.97E-10 | 0.97 | 4.69 | - | 1665.8 |
| AHQ-2-5, 4815         | K.IPEISIQDMTAQVTSPPSGK.T        | 2003.26361 | 2 | 2.62E-09 | 0.97 | 4.86 | - | 1874.0 |
| AHQ-2-12, 5442 - 5449 | K.IPEISIQDMTAQVTSPPSGK.T        | 2003.26361 | 2 | 2.91E-12 | 0.98 | 5.88 | - | 1925.1 |
| AHQ-2-6, 3945         | K.IPEISIQDMTAQVTSPPSGK.T        | 2019.26301 | 2 | 1.22E-08 | 0.97 | 5.55 | - | 1395.1 |
| AHQ-2-1, 4285 - 4356  | K.IPEISIQDMTAQVTSPPSGK.T        | 2019.26301 | 2 | 8.23E-10 | 0.98 | 5.56 | - | 1952.6 |
| AHQ-2-13, 5430        | K.IPEISIQDMTAQVTSPPSGK.T        | 2003.26361 | 2 | 7.51E-05 | 0.96 | 5.45 | - | 1014.4 |
| AHQ-2-3, 5659 - 5728  | K.IPEISIQDMTAQVTSPPSGK.T        | 2003.26361 | 2 | 1.83E-06 | 0.94 | 4.28 | - | 1215.2 |
| AHQ-2-8, 5190         | K.IPEISIQDMTAQVTSPPSGK.T        | 2003.26361 | 2 | 8.63E-09 | 0.98 | 5.50 | - | 1705.4 |
| AHQ-2-7, 3923         | K.IPEISIQDMTAQVTSPPSGK.T        | 2019.26301 | 2 | 8.74E-07 | 0.95 | 4.55 | - | 1097.0 |
| AHQ-2-4, 4224         | K.IPEISIQDMTAQVTSPPSGK.T        | 2019.26301 | 2 | 2.57E-05 | 0.94 | 4.54 | - | 1040.1 |
| AHQ-2-14, 6444        | K.IPEISIQDMTAQVTSPPSGK.T        | 2003.26361 | 2 | 3.44E-04 | 0.97 | 4.98 | - | 1532.8 |
| AHQ-2-7, 5347 - 5356  | K.IPEISIQDMTAQVTSPPSGK.T        | 2003.26361 | 2 | 4.12E-09 | 0.98 | 5.63 | - | 1973.5 |
| AHQ-2-1, 5740         | K.IPEISIQDMTAQVTSPPSGK.T        | 2003.26361 | 2 | 8.01E-12 | 0.98 | 5.43 | - | 2033.0 |
| AHQ-2-1, 5760         | K.IPEISIQDMTAQVTSPPSGK.T        | 2003.26361 | 3 | 1.83E-05 | 0.88 | 4.09 | - | 924.3  |
| AHQ-2-5, 5589 - 5623  | K.IPEISIQDMTAQVTSPPSGK.T        | 2003.26361 | 2 | 9.93E-05 | 0.74 | 3.15 | - | 627.5  |
| AHQ-2-4, 2468         | K.IVGPSGAAVPCV.V                | 1157.36530 | 2 | 1.50E-08 | 0.70 | 2.60 | - | 574.7  |
| AHQ-2-3, 2464         | K.IVGPSGAAVPCV.V                | 1157.36530 | 2 | 2.17E-05 | 0.86 | 3.16 | - | 708.8  |
| AHQ-2-2, 2480         | K.IVGPSGAAVPCV.V                | 1157.36530 | 2 | 1.08E-08 | 0.92 | 3.45 | - | 940.3  |
| AHQ-2-1, 2621 - 2622  | K.IVGPSGAAVPCV.V                | 1157.36530 | 2 | 3.85E-07 | 0.88 | 3.38 | - | 689.6  |
| AHQ-2-5, 2327         | K.IVGPSGAAVPCV.V                | 1157.36530 | 2 | 2.92E-08 | 0.92 | 3.65 | - | 869.5  |
| AHQ-2-2, 2617         | K.IVGPSGAAVPCV.V                | 1157.36530 | 2 | 4.18E-09 | 0.92 | 3.67 | - | 985.3  |
| AHQ-2-2, 4268 - 4336  | K.IVGPSGAAVPCV.PKVEPLGADNSVVR.F | 2451.78478 | 3 | 5.14E-07 | 0.96 | 4.97 | - | 1703.6 |
| AHQ-2-3, 4264 - 4336  | K.IVGPSGAAVPCV.PKVEPLGADNSVVR.F | 2451.78478 | 2 | 2.08E-05 | 0.94 | 5.23 | - | 603.9  |
| AHQ-2-5, 3999         | K.IVGPSGAAVPCV.PKVEPLGADNSVVR.F | 2451.78478 | 3 | 3.22E-04 | 0.93 | 5.11 | - | 1175.3 |
| AHQ-2-5, 4119         | K.IVGPSGAAVPCV.PKVEPLGADNSVVR.F | 2451.78478 | 3 | 6.30E-07 | 0.94 | 4.56 | - | 1373.2 |
| AHQ-2-3, 4369 - 4443  | K.IVGPSGAAVPCV.PKVEPLGADNSVVR.F | 2451.78478 | 3 | 3.59E-04 | 0.72 | 3.35 | - | 640.2  |
| AHQ-2-2, 4404 - 4482  | K.IVGPSGAAVPCV.PKVEPLGADNSVVR.F | 2451.78478 | 3 | 1.53E-08 | 0.91 | 4.55 | - | 1017.5 |
| AHQ-2-1, 4348 - 4416  | K.IVGPSGAAVPCV.PKVEPLGADNSVVR.F | 2451.78478 | 3 | 3.79E-09 | 0.92 | 5.13 | - | 986.3  |
| AHQ-2-3, 4260 - 4331  | K.IVGPSGAAVPCV.PKVEPLGADNSVVR.F | 2451.78478 | 3 | 1.32E-07 | 0.91 | 4.08 | - | 1261.7 |
| AHQ-2-2, 4277 - 4348  | K.IVGPSGAAVPCV.PKVEPLGADNSVVR.F | 2451.78478 | 2 | 3.22E-07 | 0.90 | 4.41 | - | 492.4  |
| AHQ-2-2, 4421 - 4449  | K.IVGPSGAAVPCV.PKVEPLGADNSVVR.F | 2451.78478 | 2 | 1.23E-08 | 0.95 | 5.60 | - | 458.7  |
| AHQ-2-6, 3954 - 3957  | K.IVGPSGAAVPCV.PKVEPLGADNSVVR.F | 2451.78478 | 3 | 1.33E-06 | 0.97 | 5.38 | - | 1860.1 |
| AHQ-2-1, 4353 - 4421  | K.IVGPSGAAVPCV.PKVEPLGADNSVVR.F | 2451.78478 | 2 | 4.16E-06 | 0.95 | 5.06 | - | 704.9  |
| AHQ-2-5, 4263         | R.KDGSQVAVYVQEPGDYEVSVK.F       | 2388.59282 | 2 | 1.48E-07 | 0.73 | 3.40 | - | 519.6  |
| AHQ-2-1, 4545         | K.KNGQHVASSPIVVISQSEIGDASR.V    | 2577.83547 | 2 | 1.47E-04 | 0.81 | 3.01 | - | 651.4  |
| AHQ-2-5, 3840 - 3911  | K.KNGQHVASSPIVVISQSEIGDASR.V    | 2577.83547 | 3 | 1.94E-08 | 0.97 | 5.90 | - | 1860.8 |
| AHQ-2-1, 4544         | K.KNGQHVASSPIVVISQSEIGDASR.V    | 2577.83547 | 3 | 1.79E-09 | 0.96 | 5.15 | - | 1638.0 |
| AHQ-2-6, 3995 - 4006  | K.KNGQHVASSPIVVISQSEIGDASR.V    | 2577.83547 | 2 | 1.11E-04 | 0.80 | 3.30 | - | 531.6  |
| AHQ-2-1, 3708         | K.KTHIQDNHDGTYTVAYVPDVTGR.Y     | 2588.77367 | 2 | 1.41E-06 | 0.88 | 3.21 | - | 1080.4 |
| AHQ-2-3, 3263         | K.KTHIQDNHDGTYTVAYVPDVTGR.Y     | 2588.77367 | 3 | 2.43E-04 | 0.93 | 4.36 | - | 1167.2 |
| AHQ-2-5, 2987         | K.KTHIQDNHDGTYTVAYVPDVTGR.Y     | 2588.77367 | 3 | 7.64E-05 | 0.84 | 3.59 | - | 1004.1 |
| AHQ-2-4, 3402         | K.KTHIQDNHDGTYTVAYVPDVTGR.Y     | 2588.77367 | 3 | 1.23E-07 | 0.94 | 4.49 | - | 1318.9 |
| AHQ-2-2, 3390 - 3462  | K.KTHIQDNHDGTYTVAYVPDVTGR.Y     | 2588.77367 | 3 | 1.96E-07 | 0.93 | 4.63 | - | 1229.1 |
| AHQ-2-8, 2820         | K.KTHIQDNHDGTYTVAYVPDVTGR.Y     | 2588.77367 | 3 | 1.61E-04 | 0.86 | 3.72 | - | 819.4  |
| AHQ-2-1, 3661         | K.KTHIQDNHDGTYTVAYVPDVTGR.Y     | 2588.77367 | 3 | 3.24E-05 | 0.93 | 4.06 | - | 1133.4 |
| AHQ-2-2, 3233         | K.KTHIQDNHDGTYTVAYVPDVTGR.Y     | 2588.77367 | 3 | 8.25E-09 | 0.93 | 4.51 | - | 1167.3 |
| AHQ-2-1, 3540 - 3565  | K.KTHIQDNHDGTYTVAYVPDVTGR.Y     | 2588.77367 | 2 | 2.36E-05 | 0.94 | 4.58 | - | 888.9  |
| AHQ-2-1, 3506 - 3585  | K.KTHIQDNHDGTYTVAYVPDVTGR.Y     | 2588.77367 | 3 | 4.41E-09 | 0.93 | 4.40 | - | 1031.6 |
| AHQ-2-1, 4086         | K.LDVQFSLGTLK.G                 | 1108.26945 | 2 | 4.69E-05 | 0.88 | 3.28 | - | 826.2  |
| AHQ-2-1, 4092         | K.LDVQFSLGTLK.G                 | 1108.26945 | 1 | 7.73E-07 | 0.62 | 2.92 | - | 338.5  |
| AHQ-2-3, 3955         | K.LDVQFSLGTLK.G                 | 1108.26945 | 1 | 3.35E-05 | 0.31 | 2.43 | - | 266.3  |
| AHQ-2-4, 3934         | K.LDVQFSLGTLK.G                 | 1108.26945 | 2 | 7.61E-05 | 0.91 | 3.67 | - | 840.1  |
| AHQ-2-3, 3951         | K.LDVQFSLGTLK.G                 | 1108.26945 | 2 | 1.42E-05 | 0.93 | 4.01 | - | 825.2  |
| AHQ-2-2, 3985         | K.LDVQFSLGTLK.G                 | 1108.26945 | 1 | 3.86E-05 | 0.37 | 2.42 | - | 273.8  |
| AHQ-2-2, 3984 - 3994  | K.LDVQFSLGTLK.G                 | 1108.26945 | 2 | 8.39E-06 | 0.95 | 3.53 | - | 1569.9 |
| AHQ-2-2, 7149         | R.LLGIWQNKLPQLPITNFSR.D         | 2239.64761 | 2 | 1.60E-07 | 0.84 | 4.05 | - | 442.0  |
| AHQ-2-1, 5030 - 5100  | K.LPQLPITNFSR.D                 | 1286.50461 | 2 | 1.17E-04 | 0.90 | 3.04 | - | 900.5  |
| AHQ-2-6, 4573 - 4581  | K.LPQLPITNFSR.D                 | 1286.50461 | 2 | 9.06E-04 | 0.85 | 2.92 | - | 617.7  |
| AHQ-2-5, 4695         | K.LPQLPITNFSR.D                 | 1286.50461 | 2 | 5.30E-05 | 0.89 | 3.15 | - | 692.4  |
| AHQ-2-2, 4961 - 5033  | K.LPQLPITNFSR.D                 | 1286.50461 | 2 | 2.13E-08 | 0.92 | 3.48 | - | 783.1  |
| AHQ-2-2, 5285         | K.LPQLPITNFSR.D                 | 1286.50461 | 2 | 1.41E-07 | 0.89 | 3.20 | - | 786.5  |
| AHQ-2-2, 4940 - 5008  | K.LPQLPITNFSR.D                 | 1286.50461 | 2 | 1.13E-07 | 0.90 | 3.13 | - | 778.1  |
| AHQ-2-3, 5279         | K.LPQLPITNFSR.D                 | 1286.50461 | 2 | 7.42E-05 | 0.89 | 3.14 | - | 795.6  |
| AHQ-2-11, 4573        | K.LPQLPITNFSR.D                 | 1286.50461 | 2 | 9.93E-04 | 0.82 | 3.08 | - | 595.4  |
| AHQ-2-3, 5185         | K.LPQLPITNFSR.D                 | 1286.50461 | 2 | 5.72E-05 | 0.79 | 2.95 | - | 582.1  |
| AHQ-2-3, 4935 - 5007  | K.LPQLPITNFSR.D                 | 1286.50461 | 2 | 1.10E-05 | 0.92 | 3.23 | - | 902.2  |
| AHQ-2-2, 5618 - 5688  | K.LQVEPAVDTSGVQCYGPGIEGGGVFR.E  | 2766.03597 | 2 | 3.69E-07 | 0.94 | 4.98 | - | 777.3  |
| AHQ-2-3, 5699 - 5767  | K.LQVEPAVDTSGVQCYGPGIEGGGVFR.E  | 2766.03597 | 2 | 4.01E-06 | 0.95 | 5.11 | - | 760.6  |
| AHQ-2-2, 5637 - 5710  | K.LQVEPAVDTSGVQCYGPGIEGGGVFR.E  | 2766.03597 | 3 | 6.11E-15 | 0.98 | 6.33 | - | 2152.5 |
| AHQ-2-2, 5724 - 5792  | K.LQVEPAVDTSGVQCYGPGIEGGGVFR.E  | 2766.03597 | 2 | 6.24E-05 | 0.81 | 3.42 | - | 598.7  |
| AHQ-2-2, 5768 - 5837  | K.LQVEPAVDTSGVQCYGPGIEGGGVFR.E  | 2766.03597 | 2 | 7.57E-07 | 0.96 | 5.85 | - | 688.2  |
| AHQ-2-3, 5557 - 5628  | K.LQVEPAVDTSGVQCYGPGIEGGGVFR.E  | 2766.03597 | 2 | 5.34E-06 | 0.93 | 4.77 | - | 740.6  |
| AHQ-2-4, 5577 - 5652  | K.LQVEPAVDTSGVQCYGPGIEGGGVFR.E  | 2766.03597 | 2 | 6.41E-05 | 0.85 | 3.54 | - | 626.3  |

|                      |                                 |            |   |          |      |      |   |        |
|----------------------|---------------------------------|------------|---|----------|------|------|---|--------|
| AHQ-2-1, 5736 - 5808 | K.LQVEPAVDTSVGVQCYGPGIEGGGVFR.E | 2766.03597 | 2 | 5.14E-08 | 0.94 | 4.66 | - | 752.8  |
| AHQ-2-1, 5605 - 5673 | K.LQVEPAVDTSVGVQCYGPGIEGGGVFR.E | 2766.03597 | 2 | 4.31E-06 | 0.89 | 3.75 | - | 754.8  |
| AHQ-2-1, 5604 - 5676 | K.LQVEPAVDTSVGVQCYGPGIEGGGVFR.E | 2766.03597 | 3 | 4.05E-12 | 0.98 | 6.58 | - | 2509.8 |
| AHQ-2-6, 5318 - 5385 | K.LQVEPAVDTSVGVQCYGPGIEGGGVFR.E | 2766.03597 | 2 | 3.80E-07 | 0.97 | 5.68 | - | 990.6  |
| AHQ-2-2, 5776 - 5852 | K.LQVEPAVDTSVGVQCYGPGIEGGGVFR.E | 2766.03597 | 3 | 1.30E-09 | 0.96 | 5.26 | - | 1518.0 |
| AHQ-2-4, 5645 - 5720 | K.LQVEPAVDTSVGVQCYGPGIEGGGVFR.E | 2766.03597 | 2 | 1.34E-11 | 0.97 | 6.24 | - | 1165.1 |
| AHQ-2-2, 5860        | K.LQVEPAVDTSVGVQCYGPGIEGGGVFR.E | 2766.03597 | 2 | 2.66E-08 | 0.93 | 4.94 | - | 633.5  |
| AHQ-2-4, 5801        | K.LQVEPAVDTSVGVQCYGPGIEGGGVFR.E | 2766.03597 | 2 | 4.87E-05 | 0.75 | 3.11 | - | 504.7  |
| AHQ-2-8, 2279        | R.LRNGHVGISFVPPK.E              | 1424.67564 | 2 | 1.72E-05 | 0.74 | 2.87 | - | 434.6  |
| AHQ-2-5, 2643        | R.LRNGHVGISFVPPK.E              | 1424.67564 | 2 | 1.77E-04 | 0.78 | 2.69 | - | 651.5  |
| AHQ-2-5, 2547        | R.LRNGHVGISFVPPK.E              | 1424.67564 | 2 | 2.42E-04 | 0.78 | 2.96 | - | 740.1  |
| AHQ-2-4, 2993        | R.LRNGHVGISFVPPK.E              | 1424.67564 | 2 | 1.77E-04 | 0.75 | 2.74 | - | 809.8  |
| AHQ-2-1, 3125        | R.LRNGHVGISFVPPK.E              | 1424.67564 | 3 | 7.56E-05 | 0.87 | 3.21 | - | 1410.8 |
| AHQ-2-5, 2645        | R.LRNGHVGISFVPPK.E              | 1424.67564 | 3 | 3.03E-05 | 0.91 | 3.24 | - | 1694.8 |
| AHQ-2-1, 4204        | R.LSPFMADIR.D                   | 1050.25664 | 2 | 1.82E-04 | 0.67 | 2.70 | - | 378.2  |
| AHQ-2-6, 3110 - 3111 | R.LTVSSLQESGLK.V                | 1262.43499 | 2 | 9.52E-05 | 0.91 | 3.50 | - | 961.3  |
| AHQ-2-4, 3422 - 3428 | R.LTVSSLQESGLK.V                | 1262.43499 | 2 | 6.87E-05 | 0.84 | 3.30 | - | 681.3  |
| AHQ-2-8, 2887        | R.LTVSSLQESGLK.V                | 1262.43499 | 2 | 6.92E-05 | 0.84 | 3.02 | - | 794.3  |
| AHQ-2-7, 3012        | R.LTVSSLQESGLK.V                | 1262.43499 | 2 | 1.09E-04 | 0.90 | 3.30 | - | 969.0  |
| AHQ-2-11, 3873       | R.LVSNHSLHETSSVFVDSLTK.A        | 2201.42190 | 3 | 6.92E-10 | 0.97 | 5.05 | - | 1754.4 |
| AHQ-2-7, 3655        | R.LVSNHSLHETSSVFVDSLTK.A        | 2201.42190 | 3 | 1.77E-08 | 0.97 | 5.96 | - | 1482.9 |
| AHQ-2-7, 3651        | R.LVSNHSLHETSSVFVDSLTK.A        | 2201.42190 | 2 | 5.80E-06 | 0.96 | 5.02 | - | 1130.5 |
| AHQ-2-14-, 3980      | R.LVSNHSLHETSSVFVDSLTK.A        | 2201.42190 | 3 | 1.77E-07 | 0.97 | 5.49 | - | 1679.1 |
| AHQ-2-4, 4098 - 4101 | R.LVSNHSLHETSSVFVDSLTK.A        | 2201.42190 | 2 | 1.32E-07 | 0.97 | 5.59 | - | 1365.4 |
| AHQ-2-4, 4104 - 4105 | R.LVSNHSLHETSSVFVDSLTK.A        | 2201.42190 | 3 | 1.08E-06 | 0.93 | 4.19 | - | 1147.5 |
| AHQ-2-5, 3867 - 3944 | R.LVSNHSLHETSSVFVDSLTK.A        | 2201.42190 | 3 | 4.07E-05 | 0.96 | 4.77 | - | 1734.8 |
| AHQ-2-3, 4172        | R.LVSNHSLHETSSVFVDSLTK.A        | 2201.42190 | 2 | 3.06E-04 | 0.95 | 4.70 | - | 1242.8 |
| AHQ-2-3, 4167        | R.LVSNHSLHETSSVFVDSLTK.A        | 2201.42190 | 3 | 2.52E-08 | 0.97 | 4.52 | - | 2426.7 |
| AHQ-2-14, 5585       | R.LVSNHSLHETSSVFVDSLTK.A        | 2201.42190 | 2 | 2.12E-05 | 0.89 | 3.98 | - | 552.5  |
| AHQ-2-5, 4117 - 4183 | R.LVSNHSLHETSSVFVDSLTK.A        | 2201.42190 | 3 | 4.05E-09 | 0.98 | 5.49 | - | 2260.2 |
| AHQ-2-13-, 4139      | R.LVSNHSLHETSSVFVDSLTK.A        | 2201.42190 | 3 | 1.43E-05 | 0.95 | 4.89 | - | 1395.2 |
| AHQ-2-10, 3931       | R.LVSNHSLHETSSVFVDSLTK.A        | 2201.42190 | 2 | 1.40E-05 | 0.91 | 4.53 | - | 594.0  |
| AHQ-2-4, 4472 - 4474 | R.LVSNHSLHETSSVFVDSLTK.A        | 2201.42190 | 2 | 2.67E-08 | 0.97 | 5.39 | - | 1317.5 |
| AHQ-2-13, 4071       | R.LVSNHSLHETSSVFVDSLTK.A        | 2201.42190 | 2 | 2.97E-07 | 0.93 | 4.83 | - | 713.8  |
| AHQ-2-8, 3678        | R.LVSNHSLHETSSVFVDSLTK.A        | 2201.42190 | 2 | 3.78E-04 | 0.96 | 5.08 | - | 1108.0 |
| AHQ-2-14, 5322       | R.LVSNHSLHETSSVFVDSLTK.A        | 2201.42190 | 2 | 1.35E-06 | 0.93 | 4.21 | - | 956.5  |
| AHQ-2-7, 4024        | R.LVSNHSLHETSSVFVDSLTK.A        | 2201.42190 | 2 | 8.28E-08 | 0.94 | 4.77 | - | 714.3  |
| AHQ-2-5, 4120 - 4196 | R.LVSNHSLHETSSVFVDSLTK.A        | 2201.42190 | 2 | 3.05E-09 | 0.96 | 5.55 | - | 913.4  |
| AHQ-2-5, 3753 - 3835 | R.LVSNHSLHETSSVFVDSLTK.A        | 2201.42190 | 2 | 3.19E-08 | 0.97 | 6.15 | - | 1029.8 |
| AHQ-2-5, 3712 - 3784 | R.LVSNHSLHETSSVFVDSLTK.A        | 2201.42190 | 3 | 1.21E-11 | 0.97 | 5.82 | - | 1614.3 |
| AHQ-2-13, 4252       | R.LVSNHSLHETSSVFVDSLTK.A        | 2201.42190 | 2 | 2.62E-04 | 0.84 | 4.09 | - | 411.0  |
| AHQ-2-6, 4134        | R.LVSNHSLHETSSVFVDSLTK.A        | 2201.42190 | 2 | 6.43E-09 | 0.95 | 4.64 | - | 990.6  |
| AHQ-2-5, 4276        | R.LVSNHSLHETSSVFVDSLTK.A        | 2201.42190 | 2 | 2.19E-07 | 0.95 | 4.77 | - | 940.4  |
| AHQ-2-5, 3885        | R.LVSNHSLHETSSVFVDSLTK.A        | 2201.42190 | 2 | 1.85E-05 | 0.94 | 4.65 | - | 955.6  |
| AHQ-2-5, 4660 - 4735 | R.LVSNHSLHETSSVFVDSLTK.A        | 2201.42190 | 2 | 2.92E-04 | 0.87 | 4.05 | - | 516.3  |
| AHQ-2-1, 4652        | R.LVSNHSLHETSSVFVDSLTK.A        | 2201.42190 | 3 | 2.10E-07 | 0.92 | 4.27 | - | 1009.2 |
| AHQ-2-1, 4641        | R.LVSNHSLHETSSVFVDSLTK.A        | 2201.42190 | 2 | 9.16E-09 | 0.98 | 5.47 | - | 1818.7 |
| AHQ-2-6, 3763 - 3773 | R.LVSNHSLHETSSVFVDSLTK.A        | 2201.42190 | 3 | 2.36E-04 | 0.96 | 5.07 | - | 1517.3 |
| AHQ-2-1, 4350        | R.LVSNHSLHETSSVFVDSLTK.A        | 2201.42190 | 2 | 1.30E-04 | 0.98 | 5.61 | - | 1721.7 |
| AHQ-2-13-, 4137      | R.LVSNHSLHETSSVFVDSLTK.A        | 2201.42190 | 2 | 5.83E-05 | 0.97 | 5.61 | - | 1363.5 |
| AHQ-2-11, 3864       | R.LVSNHSLHETSSVFVDSLTK.A        | 2201.42190 | 2 | 4.16E-05 | 0.94 | 4.49 | - | 856.9  |
| AHQ-2-1, 4352 - 4368 | R.LVSNHSLHETSSVFVDSLTK.A        | 2201.42190 | 3 | 2.49E-06 | 0.97 | 5.66 | - | 1627.8 |
| AHQ-2-6, 3771        | R.LVSNHSLHETSSVFVDSLTK.A        | 2201.42190 | 2 | 7.29E-07 | 0.96 | 5.08 | - | 1205.1 |
| AHQ-2-5, 2383        | K.MDCQCEPEGYR.V                 | 1447.55375 | 1 | 1.84E-05 | 0.17 | 2.07 | - | 151.8  |
| AHQ-2-5, 2369        | K.MDCQCEPEGYR.V                 | 1447.55375 | 2 | 5.53E-04 | 0.85 | 2.95 | - | 802.7  |
| AHQ-2-4, 2482 - 2558 | K.MDCQCEPEGYR.V                 | 1447.55375 | 2 | 2.98E-04 | 0.86 | 2.96 | - | 827.9  |
| AHQ-2-6, 2358        | K.MDCQCEPEGYR.V                 | 1447.55375 | 2 | 7.95E-04 | 0.72 | 3.01 | - | 618.5  |
| AHQ-2-5, 2704        | R.NGHVGISFVPPK.E                | 1155.33104 | 1 | 6.28E-07 | 0.59 | 2.29 | - | 460.6  |
| AHQ-2-4, 4882        | K.NGOHVASSPIPVVISQSEIGDASR.V    | 2449.66256 | 2 | 5.81E-07 | 0.80 | 2.99 | - | 727.5  |
| AHQ-2-5, 4595 - 4603 | K.NGOHVASSPIPVVISQSEIGDASR.V    | 2449.66256 | 2 | 2.00E-04 | 0.91 | 3.84 | - | 590.7  |
| AHQ-2-1, 4922 - 4924 | K.NGOHVASSPIPVVISQSEIGDASR.V    | 2449.66256 | 2 | 4.98E-06 | 0.97 | 5.41 | - | 1290.9 |
| AHQ-2-5, 4792 - 4793 | K.NGOHVASSPIPVVISQSEIGDASR.V    | 2449.66256 | 2 | 3.60E-06 | 0.69 | 3.08 | - | 345.9  |
| AHQ-2-8, 4324        | K.NGOHVASSPIPVVISQSEIGDASR.V    | 2449.66256 | 2 | 1.32E-06 | 0.94 | 3.73 | - | 1540.5 |
| AHQ-2-2, 1774 - 1797 | K.RAEFTVETR.S                   | 1109.21754 | 2 | 2.86E-06 | 0.94 | 3.60 | - | 1052.7 |
| AHQ-2-1, 2106        | K.RAEFTVETR.S                   | 1109.21754 | 2 | 8.53E-06 | 0.94 | 3.23 | - | 1141.2 |
| AHQ-2-2, 1870        | K.RAEFTVETR.S                   | 1109.21754 | 2 | 9.48E-05 | 0.90 | 3.40 | - | 783.0  |
| AHQ-2-5, 2612 - 2615 | R.RAPSVANVGSCHDLSLK.I           | 1813.02884 | 2 | 7.00E-04 | 0.95 | 4.47 | - | 1272.7 |
| AHQ-2-1, 3984        | K.RIANLQTLSDGLR.L               | 1572.74866 | 2 | 1.36E-06 | 0.63 | 3.02 | - | 461.4  |
| AHQ-2-9, 2655        | R.RLTVSSLQESGLK.V               | 1418.62134 | 2 | 2.03E-04 | 0.97 | 4.69 | - | 1728.8 |
| AHQ-2-5, 2540 - 2616 | R.RLTVSSLQESGLK.V               | 1418.62134 | 2 | 1.78E-04 | 0.97 | 4.70 | - | 2080.6 |
| AHQ-2-7, 2536 - 2539 | R.RLTVSSLQESGLK.V               | 1418.62134 | 2 | 2.42E-04 | 0.95 | 4.40 | - | 1335.1 |
| AHQ-2-2, 2924        | R.RLTVSSLQESGLK.V               | 1418.62134 | 2 | 4.09E-05 | 0.95 | 4.40 | - | 1201.7 |
| AHQ-2-3, 2948        | R.RLTVSSLQESGLK.V               | 1418.62134 | 2 | 1.13E-05 | 0.97 | 4.57 | - | 2263.6 |
| AHQ-2-2, 7712 - 7780 | K.SADFVVEAIGDDVGLGFSVEGSPQAK.I  | 2696.90399 | 3 | 2.55E-05 | 0.96 | 5.76 | - | 1358.0 |
| AHQ-2-4, 3885 - 3956 | R.SAGQGEVLLVYVEDPAGHQEEAK.V     | 2314.45074 | 2 | 3.17E-06 | 0.87 | 3.98 | - | 557.4  |
| AHQ-2-8, 3503        | R.SAGQGEVLLVYVEDPAGHQEEAK.V     | 2314.45074 | 2 | 9.80E-11 | 0.86 | 4.14 | - | 477.8  |
| AHQ-2-7, 3537        | R.SAGQGEVLLVYVEDPAGHQEEAK.V     | 2314.45074 | 2 | 2.13E-07 | 0.91 | 4.48 | - | 489.7  |
| AHQ-2-2, 3921 - 3992 | R.SAGQGEVLLVYVEDPAGHQEEAK.V     | 2314.45074 | 3 | 5.93E-07 | 0.94 | 4.77 | - | 1212.2 |
| AHQ-2-2, 4202        | R.SAGQGEVLLVYVEDPAGHQEEAK.V     | 2314.45074 | 3 | 9.82E-10 | 0.93 | 4.15 | - | 1329.1 |
| AHQ-2-2, 4181 - 4258 | R.SAGQGEVLLVYVEDPAGHQEEAK.V     | 2314.45074 | 2 | 1.01E-06 | 0.94 | 4.99 | - | 637.1  |
| AHQ-2-2, 3910 - 3981 | R.SAGQGEVLLVYVEDPAGHQEEAK.V     | 2314.45074 | 2 | 6.92E-06 | 0.93 | 4.75 | - | 744.6  |
| AHQ-2-4, 3890        | R.SAGQGEVLLVYVEDPAGHQEEAK.V     | 2314.45074 | 2 | 1.69E-06 | 0.94 | 5.14 | - | 589.6  |
| AHQ-2-1, 4056 - 4136 | R.SAGQGEVLLVYVEDPAGHQEEAK.V     | 2314.45074 | 2 | 6.31E-06 | 0.94 | 5.05 | - | 865.6  |
| AHQ-2-2, 4062 - 4132 | R.SAGQGEVLLVYVEDPAGHQEEAK.V     | 2314.45074 | 3 | 1.17E-06 | 0.93 | 4.03 | - | 1419.4 |
| AHQ-2-1, 4054 - 4129 | R.SAGQGEVLLVYVEDPAGHQEEAK.V     | 2314.45074 | 3 | 4.00E-07 | 0.95 | 4.86 | - | 1406.5 |
| AHQ-2-2, 4052 - 4109 | R.SAGQGEVLLVYVEDPAGHQEEAK.V     | 2314.45074 | 2 | 7.65E-07 | 0.94 | 4.81 | - | 805.6  |
| AHQ-2-4, 3902 - 3909 | R.SAGQGEVLLVYVEDPAGHQEEAK.V     | 2314.45074 | 3 | 6.74E-09 | 0.91 | 4.14 | - | 1389.4 |
| AHQ-2-2, 4410        | R.SAGQGEVLLVYVEDPAGHQEEAK.V     | 2314.45074 | 2 | 8.81E-06 | 0.91 | 4.54 | - | 595.1  |
| AHQ-2-1, 4205 - 4222 | R.SAGQGEVLLVYVEDPAGHQEEAK.V     | 2314.45074 | 2 | 3.42E-07 | 0.93 | 4.96 | - | 673.2  |
| AHQ-2-3, 3901 - 3972 | R.SAGQGEVLLVYVEDPAGHQEEAK.V     | 2314.45074 | 3 | 4.27E-09 | 0.93 | 4.10 | - | 1343.2 |
| AHQ-2-3, 3903 - 3971 | R.SAGQGEVLLVYVEDPAGHQEEAK.V     | 2314.45074 | 2 | 2.41E-10 | 0.96 | 5.55 | - | 729.2  |
| AHQ-2-6, 3606 - 3637 | R.SAGQGEVLLVYVEDPAGHQEEAK.V     | 2314.45074 | 3 | 3.51E-07 | 0.90 | 4.29 | - | 1128.8 |
| AHQ-2-3, 4045        | R.SAGQGEVLLVYVEDPAGHQEEAK.V     | 2314.45074 | 2 | 2.77E-07 | 0.89 | 4.43 | - | 403.5  |
| AHQ-2-3, 4173        | R.SAGQGEVLLVYVEDPAGHQEEAK.V     | 2314.45074 | 2 | 1.46E-07 | 0.90 | 4.15 | - | 637.7  |
| AHQ-2-3, 4256        | R.SAGQGEVLLVYVEDPAGHQEEAK.V     | 2314.45074 | 2 | 1.54E-07 | 0.87 | 3.84 | - | 596.5  |
| AHQ-2-2, 3320 - 3388 | K.SPFEVYVDK.S                   | 1084.20321 | 1 | 9.91E-05 | 0.79 | 3.06 | - | 786.7  |
| AHQ-2-2, 3321 - 3400 | K.SPFEVYVDK.S                   | 1084.20321 | 2 | 8.23E-06 | 0.93 | 3.49 | - | 996.9  |
| AHQ-2-7, 3029        | K.SPFEVYVDK.S                   | 1084.20321 | 1 | 3.12E-06 | 0.81 | 3.03 | - | 717.7  |
| AHQ-2-3, 3337        | K.SPFEVYVDK.S                   | 1084.20321 | 1 | 1.25E-04 | 0.64 | 2.35 | - | 776.2  |
| AHQ-2-1, 3466 - 3492 | K.SPFEVYVDK.S                   | 1084.20321 | 2 | 7.36E-06 | 0.87 | 2.84 | - | 1017.6 |
| AHQ-2-1, 3485        | K.SPFEVYVDK.S                   | 1084.20321 | 1 | 9.71E-07 | 0.82 | 2.96 | - | 911.0  |
| AHQ-2-4, 3352        | K.SPFEVYVDK.S                   | 1084.20321 | 1 | 8.40E-05 | 0.35 | 2.20 | - | 728.6  |
| AHQ-2-3, 3343        | K.SPFEVYVDK.S                   | 1084.20321 | 2 | 3.10E-05 | 0.92 | 3.39 | - | 1080.1 |
| AHQ-2-4, 3362        | K.SPFEVYVDK.S                   | 1084.20321 | 1 | 5.72E-05 | 0.71 | 2.93 | - | 656.7  |
| AHQ-2-3, 3348        | K.SPFEVYVDK.S                   | 1084.20321 | 1 | 7.83E-06 | 0.78 | 3.04 | - | 745.5  |
| AHQ-2-4, 3364        | K.SPFEVYVDK.S                   | 1084.20321 | 2 | 2.66E-06 | 0.91 | 3.39 | - | 916.0  |
| AHQ-2-7, 3033        | K.SPFEVYVDK.S                   | 1084.20321 | 2 | 6.81E-06 | 0.92 | 3.12 | - | 1172.8 |



|                        |                             |            |   |          |      |      |   |        |
|------------------------|-----------------------------|------------|---|----------|------|------|---|--------|
| AHQ-2-2, 2968          | K.SPFEVYVDSQGDASK.V         | 1757.87886 | 2 | 1.42E-04 | 0.95 | 4.15 | - | 1349.9 |
| AHQ-2-1, 5096 - 5173   | K.SPFSVAV/PSLDLSK.I         | 1534.73557 | 2 | 1.26E-07 | 0.87 | 4.09 | - | 687.7  |
| AHQ-2-2, 5308          | K.SPFSVAV/PSLDLSK.I         | 1534.73557 | 2 | 1.52E-06 | 0.40 | 2.65 | - | 405.4  |
| AHQ-2-3, 5076 - 5125   | K.SPFSVAV/PSLDLSK.I         | 1534.73557 | 2 | 7.84E-06 | 0.79 | 3.49 | - | 522.0  |
| AHQ-2-4, 5068 - 5080   | K.SPFSVAV/PSLDLSK.I         | 1534.73557 | 2 | 9.52E-08 | 0.94 | 5.20 | - | 790.3  |
| AHQ-2-2, 4944 - 5014   | K.SPFSVAV/PSLDLSK.I         | 1534.73557 | 2 | 3.62E-04 | 0.83 | 3.49 | - | 563.2  |
| AHQ-2-6, 4791          | K.SPFSVAV/PSLDLSK.I         | 1534.73557 | 2 | 2.83E-06 | 0.93 | 4.23 | - | 1049.1 |
| AHQ-2-4, 4932          | K.SPFSVAV/PSLDLSK.I         | 1534.73557 | 2 | 1.13E-04 | 0.87 | 3.61 | - | 784.9  |
| AHQ-2-2, 5184 - 5200   | K.SPFSVAV/PSLDLSK.I         | 1534.73557 | 2 | 9.57E-07 | 0.94 | 4.65 | - | 942.9  |
| AHQ-2-2, 5097 - 5132   | K.SPFSVAV/PSLDLSK.I         | 1534.73557 | 2 | 3.03E-06 | 0.95 | 4.85 | - | 1080.6 |
| AHQ-2-5, 4871          | K.SPFSVAV/PSLDLSK.I         | 1534.73557 | 2 | 8.23E-06 | 0.90 | 3.55 | - | 948.9  |
| AHQ-2-2, 3552          | R.SPYT/VTGQACNPSACR.A       | 1871.04208 | 2 | 7.22E-07 | 0.91 | 4.43 | - | 538.1  |
| AHQ-2-7, 3217          | R.SPYT/VTGQACNPSACR.A       | 1871.04208 | 2 | 4.40E-05 | 0.81 | 3.76 | - | 472.1  |
| AHQ-2-5, 3285          | R.SPYT/VTGQACNPSACR.A       | 1871.04208 | 3 | 3.33E-04 | 0.88 | 3.86 | - | 875.2  |
| AHQ-2-4, 3430 - 3488   | R.SPYT/VTGQACNPSACR.A       | 1871.04208 | 2 | 1.92E-04 | 0.92 | 4.57 | - | 495.1  |
| AHQ-2-5, 3272          | R.SPYT/VTGQACNPSACR.A       | 1871.04208 | 2 | 6.12E-05 | 0.92 | 4.65 | - | 440.0  |
| AHQ-2-2, 3468 - 3536   | R.SPYT/VTGQACNPSACR.A       | 1871.04208 | 2 | 9.91E-07 | 0.91 | 4.57 | - | 427.0  |
| AHQ-2-1, 3525 - 3596   | R.SPYT/VTGQACNPSACR.A       | 1871.04208 | 2 | 4.93E-05 | 0.90 | 3.92 | - | 559.8  |
| AHQ-2-1, 3698          | R.SPYT/VTGQACNPSACR.A       | 1871.04208 | 2 | 3.57E-04 | 0.56 | 2.76 | - | 449.0  |
| AHQ-2-3, 3435 - 3515   | R.SPYT/VTGQACNPSACR.A       | 1871.04208 | 2 | 2.87E-06 | 0.88 | 4.21 | - | 415.6  |
| AHQ-2-6, 3235          | R.SPYT/VTGQACNPSACR.A       | 1871.04208 | 2 | 1.00E-05 | 0.91 | 4.20 | - | 470.5  |
| AHQ-2-3, 3480          | R.SPYT/VTGQACNPSACR.A       | 1871.04208 | 3 | 3.26E-04 | 0.92 | 4.21 | - | 1361.3 |
| AHQ-2-5, 3233 - 3303   | R.SPYT/VTGQACNPSACR.A       | 1871.04208 | 2 | 6.77E-04 | 0.58 | 2.94 | - | 319.8  |
| AHQ-2-2, 2674          | K.SQGDASKVTAQQGPLPSGNIANK.T | 2327.49419 | 2 | 1.50E-06 | 0.90 | 4.53 | - | 666.8  |
| AHQ-2-14-, 2092 - 2152 | K.SSFTVDCSK.A               | 1032.10676 | 1 | 7.17E-04 | 0.70 | 2.81 | - | 295.1  |
| AHQ-2-14-, 4569 - 4648 | K.SSFTVDCSKAGNMLLVGVHGPR.T  | 2448.76449 | 3 | 6.09E-05 | 0.70 | 3.16 | - | 790.7  |
| AHQ-2-2, 5065 - 5138   | R.TFSVWYVPEVTGTHK.V         | 1751.96228 | 3 | 1.25E-05 | 0.72 | 3.22 | - | 480.5  |
| AHQ-2-2, 5045 - 5124   | R.TFSVWYVPEVTGTHK.V         | 1751.96228 | 2 | 3.72E-07 | 0.85 | 3.74 | - | 462.0  |
| AHQ-2-5, 4704 - 4777   | R.TFSVWYVPEVTGTHK.V         | 1751.96228 | 2 | 9.36E-04 | 0.54 | 2.69 | - | 314.8  |
| AHQ-2-4, 2958          | K.TGVAVNKP/PAFTVDAK.H       | 1647.85391 | 3 | 4.87E-06 | 0.85 | 3.54 | - | 713.5  |
| AHQ-2-3, 2955          | K.TGVAVNKP/PAFTVDAK.H       | 1647.85391 | 3 | 6.27E-06 | 0.92 | 3.96 | - | 1015.1 |
| AHQ-2-2, 2861 - 2932   | K.TGVAVNKP/PAFTVDAK.H       | 1647.85391 | 2 | 6.43E-06 | 0.95 | 4.51 | - | 1069.3 |
| AHQ-2-1, 3142 - 3216   | K.TGVAVNKP/PAFTVDAK.H       | 1647.85391 | 3 | 2.11E-06 | 0.85 | 3.55 | - | 806.0  |
| AHQ-2-2, 2933          | K.TGVAVNKP/PAFTVDAK.H       | 1647.85391 | 3 | 2.21E-06 | 0.74 | 3.12 | - | 623.9  |
| AHQ-2-4, 2949          | K.TGVAVNKP/PAFTVDAK.H       | 1647.85391 | 2 | 6.93E-05 | 0.92 | 3.95 | - | 747.4  |
| AHQ-2-3, 2920 - 2991   | K.TGVAVNKP/PAFTVDAK.H       | 1647.85391 | 2 | 6.95E-06 | 0.90 | 4.32 | - | 541.2  |
| AHQ-2-2, 2673          | R.TGVELGK/PTHFTVNAK.A       | 1699.93205 | 3 | 6.77E-04 | 0.79 | 3.82 | - | 688.6  |
| AHQ-2-4, 2817          | R.TGVELGK/PTHFTVNAK.A       | 1699.93205 | 2 | 3.22E-04 | 0.90 | 3.73 | - | 799.1  |
| AHQ-2-3, 2679 - 2697   | R.TGVELGK/PTHFTVNAK.A       | 1699.93205 | 3 | 9.45E-06 | 0.52 | 3.30 | - | 484.6  |
| AHQ-2-2, 2704 - 2773   | R.TGVELGK/PTHFTVNAK.A       | 1699.93205 | 2 | 5.86E-04 | 0.92 | 4.20 | - | 650.6  |
| AHQ-2-1, 2940          | R.TGVELGK/PTHFTVNAK.A       | 1699.93205 | 2 | 7.22E-04 | 0.85 | 3.86 | - | 437.5  |
| AHQ-2-1, 3044 - 3112   | R.TGVELGK/PTHFTVNAK.A       | 1699.93205 | 2 | 3.57E-06 | 0.82 | 3.50 | - | 455.0  |
| AHQ-2-2, 2558 - 2636   | R.TGVELGK/PTHFTVNAK.A       | 1699.93205 | 2 | 3.04E-04 | 0.84 | 4.01 | - | 427.1  |
| AHQ-2-7, 2760 - 2831   | K.THEAIEVEGENHTY/CIR.F      | 2060.19046 | 3 | 5.12E-05 | 0.88 | 3.54 | - | 1214.8 |
| AHQ-2-7, 2755          | K.THEAIEVEGENHTY/CIR.F      | 2060.19046 | 2 | 2.74E-11 | 0.98 | 5.81 | - | 2375.2 |
| AHQ-2-4, 2948 - 3018   | K.THEAIEVEGENHTY/CIR.F      | 2060.19046 | 3 | 4.50E-07 | 0.90 | 3.79 | - | 1105.1 |
| AHQ-2-4, 2953 - 3028   | K.THEAIEVEGENHTY/CIR.F      | 2060.19046 | 2 | 2.00E-04 | 0.98 | 6.38 | - | 2488.8 |
| AHQ-2-5, 2811 - 2812   | K.THEAIEVEGENHTY/CIR.F      | 2060.19046 | 2 | 2.28E-12 | 0.98 | 5.85 | - | 2174.1 |
| AHQ-2-7, 2648          | K.THEAIEVEGENHTY/CIR.F      | 2060.19046 | 2 | 2.04E-05 | 0.98 | 5.34 | - | 1810.7 |
| AHQ-2-3, 3045          | K.THEAIEVEGENHTY/CIR.F      | 2060.19046 | 2 | 6.77E-14 | 0.98 | 5.69 | - | 2083.4 |
| AHQ-2-5, 2712          | K.THEAIEVEGENHTY/CIR.F      | 2060.19046 | 3 | 1.80E-05 | 0.93 | 4.12 | - | 1506.7 |
| AHQ-2-5, 2711          | K.THEAIEVEGENHTY/CIR.F      | 2060.19046 | 2 | 1.39E-06 | 0.98 | 5.61 | - | 1695.0 |
| AHQ-2-1, 3172 - 3246   | K.THEAIEVEGENHTY/CIR.F      | 2060.19046 | 3 | 4.20E-06 | 0.80 | 3.26 | - | 974.8  |
| AHQ-2-6, 2817 - 2821   | K.THEAIEVEGENHTY/CIR.F      | 2060.19046 | 2 | 3.57E-13 | 0.99 | 6.61 | - | 2548.9 |
| AHQ-2-1, 3301          | K.THEAIEVEGENHTY/CIR.F      | 2060.19046 | 2 | 9.27E-12 | 0.97 | 4.90 | - | 1691.2 |
| AHQ-2-1, 3873          | K.THQDNHGDGTYTVAYV/VDVTGR.Y | 2460.60076 | 2 | 4.85E-08 | 0.94 | 4.07 | - | 1053.6 |
| AHQ-2-14, 3840 - 3913  | R.TPCEEILYK.H               | 1090.27249 | 2 | 1.48E-04 | 0.80 | 2.77 | - | 722.1  |
| AHQ-2-13, 3088         | R.TPCEEILYK.H               | 1090.27249 | 2 | 9.29E-07 | 0.85 | 3.30 | - | 770.6  |
| AHQ-2-13-, 3045 - 3054 | R.TPCEEILYK.H               | 1090.27249 | 2 | 9.10E-06 | 0.77 | 2.85 | - | 742.4  |
| AHQ-2-4, 3092          | R.TPCEEILYK.H               | 1090.27249 | 2 | 2.08E-05 | 0.86 | 3.06 | - | 680.3  |
| AHQ-2-14-, 2967        | R.TPCEEILYK.H               | 1090.27249 | 2 | 7.79E-05 | 0.82 | 3.00 | - | 683.0  |
| AHQ-2-7, 2812          | R.TPCEEILYK.H               | 1090.27249 | 2 | 3.38E-05 | 0.85 | 2.99 | - | 758.4  |
| AHQ-2-14, 3937         | R.TPCEEILYK.H               | 1090.27249 | 1 | 3.43E-05 | 0.38 | 2.64 | - | 344.2  |
| AHQ-2-3, 3109          | R.TPCEEILYK.H               | 1090.27249 | 2 | 2.77E-05 | 0.90 | 3.35 | - | 872.6  |
| AHQ-2-10, 2811         | R.TPCEEILYK.H               | 1090.27249 | 2 | 2.47E-04 | 0.66 | 2.80 | - | 467.2  |
| AHQ-2-4, 3098          | R.TPCEEILYK.H               | 1090.27249 | 1 | 4.95E-04 | 0.56 | 3.05 | - | 393.8  |
| AHQ-2-14, 3976 - 4044  | R.TPCEEILYK.H               | 1090.27249 | 2 | 1.52E-05 | 0.70 | 2.90 | - | 505.0  |
| AHQ-2-11, 2972         | R.TPCEEILYK.H               | 1090.27249 | 2 | 1.75E-06 | 0.74 | 2.85 | - | 625.2  |
| AHQ-2-5, 2867          | R.TPCEEILYK.H               | 1090.27249 | 2 | 8.91E-07 | 0.83 | 2.98 | - | 617.3  |
| AHQ-2-6, 2871          | R.TPCEEILYK.H               | 1090.27249 | 2 | 5.23E-06 | 0.74 | 2.52 | - | 636.6  |
| AHQ-2-1, 3238          | R.TPCEEILYK.H               | 1090.27249 | 2 | 1.77E-05 | 0.78 | 2.64 | - | 652.9  |
| AHQ-2-6, 3033          | R.VANPSGNLTETYVQDR.G        | 1764.87462 | 2 | 2.35E-11 | 0.95 | 4.46 | - | 1160.3 |
| AHQ-2-1, 3221 - 3244   | R.VANPSGNLTETYVQDR.G        | 1764.87462 | 2 | 5.41E-11 | 0.93 | 3.99 | - | 911.0  |
| AHQ-2-2, 3593          | R.VANPSGNLTETYVQDR.G        | 1764.87462 | 2 | 1.85E-05 | 0.87 | 3.13 | - | 850.7  |
| AHQ-2-4, 3438 - 3509   | R.VANPSGNLTETYVQDR.G        | 1764.87462 | 2 | 4.24E-12 | 0.95 | 4.25 | - | 1128.2 |
| AHQ-2-4, 3242 - 3296   | R.VANPSGNLTETYVQDR.G        | 1764.87462 | 2 | 4.52E-08 | 0.92 | 4.17 | - | 718.3  |
| AHQ-2-3, 3152          | R.VANPSGNLTETYVQDR.G        | 1764.87462 | 2 | 6.41E-10 | 0.96 | 4.54 | - | 1195.2 |
| AHQ-2-2, 3242 - 3324   | R.VANPSGNLTETYVQDR.G        | 1764.87462 | 2 | 4.76E-11 | 0.95 | 4.73 | - | 987.6  |
| AHQ-2-2, 3090 - 3160   | R.VANPSGNLTETYVQDR.G        | 1764.87462 | 2 | 1.83E-10 | 0.92 | 3.82 | - | 881.7  |
| AHQ-2-6, 3211 - 3289   | R.VANPSGNLTETYVQDR.G        | 1764.87462 | 2 | 9.64E-05 | 0.88 | 3.90 | - | 650.7  |
| AHQ-2-3, 3240 - 3319   | R.VANPSGNLTETYVQDR.G        | 1764.87462 | 2 | 8.69E-11 | 0.96 | 4.82 | - | 997.5  |
| AHQ-2-5, 3063          | R.VANPSGNLTETYVQDR.G        | 1764.87462 | 2 | 1.96E-13 | 0.93 | 4.36 | - | 795.2  |
| AHQ-2-3, 3396 - 3469   | R.VANPSGNLTETYVQDR.G        | 1764.87462 | 2 | 7.65E-11 | 0.91 | 4.20 | - | 586.0  |
| AHQ-2-2, 3376 - 3448   | R.VANPSGNLTETYVQDR.G        | 1764.87462 | 2 | 4.17E-12 | 0.92 | 3.90 | - | 805.4  |
| AHQ-2-9, 3040          | R.VANPSGNLTETYVQDR.G        | 1764.87462 | 2 | 7.73E-07 | 0.84 | 3.71 | - | 495.2  |
| AHQ-2-1, 3380 - 3448   | R.VANPSGNLTETYVQDR.G        | 1764.87462 | 2 | 1.50E-11 | 0.91 | 4.05 | - | 664.9  |
| AHQ-2-7, 2971 - 2972   | R.VANPSGNLTETYVQDR.G        | 1764.87462 | 2 | 3.14E-07 | 0.94 | 4.50 | - | 905.1  |
| AHQ-2-1, 3537 - 3612   | R.VANPSGNLTETYVQDR.G        | 1764.87462 | 2 | 2.03E-11 | 0.98 | 5.86 | - | 1248.8 |
| AHQ-2-5, 2364          | K.VAQP/TITDNKDGTVTVR.Y      | 1816.00621 | 2 | 3.91E-04 | 0.85 | 3.63 | - | 606.3  |
| AHQ-2-6, 2595          | K.VAQP/TITDNKDGTVTVR.Y      | 1816.00621 | 2 | 7.80E-08 | 0.92 | 3.98 | - | 876.5  |
| AHQ-2-4, 2769          | K.VAQP/TITDNKDGTVTVR.Y      | 1816.00621 | 2 | 6.92E-05 | 0.83 | 3.42 | - | 589.1  |
| AHQ-2-10, 2534         | K.VAQP/TITDNKDGTVTVR.Y      | 1816.00621 | 2 | 2.06E-06 | 0.76 | 2.97 | - | 505.9  |
| AHQ-2-10, 2382 - 2451  | K.VAQP/TITDNKDGTVTVR.Y      | 1816.00621 | 2 | 5.33E-05 | 0.70 | 3.02 | - | 498.0  |
| AHQ-2-13-, 2626        | K.VAQP/TITDNKDGTVTVR.Y      | 1816.00621 | 2 | 2.03E-05 | 0.72 | 3.12 | - | 506.6  |
| AHQ-2-1, 2698          | K.VAQP/TITDNKDGTVTVR.Y      | 1816.00621 | 2 | 7.40E-05 | 0.79 | 3.27 | - | 616.6  |
| AHQ-2-13, 2861         | K.VAQP/TITDNKDGTVTVR.Y      | 1816.00621 | 2 | 1.93E-04 | 0.79 | 3.24 | - | 569.5  |
| AHQ-2-1, 2894          | K.VAQP/TITDNKDGTVTVR.Y      | 1816.00621 | 2 | 3.04E-06 | 0.89 | 3.63 | - | 860.0  |
| AHQ-2-9, 2603          | K.VAQP/TITDNKDGTVTVR.Y      | 1816.00621 | 2 | 9.36E-04 | 0.79 | 3.68 | - | 389.0  |
| AHQ-2-2, 2808 - 2809   | K.VAQP/TITDNKDGTVTVR.Y      | 1816.00621 | 2 | 6.52E-07 | 0.87 | 4.23 | - | 517.8  |
| AHQ-2-5, 2524 - 2539   | K.VAQP/TITDNKDGTVTVR.Y      | 1816.00621 | 2 | 9.94E-10 | 0.90 | 4.21 | - | 599.1  |
| AHQ-2-8, 2374          | K.VAQP/TITDNKDGTVTVR.Y      | 1816.00621 | 2 | 1.46E-05 | 0.57 | 2.79 | - | 330.1  |
| AHQ-2-4, 2534          | K.VAQP/TITDNKDGTVTVR.Y      | 1816.00621 | 2 | 3.40E-04 | 0.81 | 3.84 | - | 392.6  |
| AHQ-2-8, 2263          | K.VAQP/TITDNKDGTVTVR.Y      | 1816.00621 | 2 | 4.80E-05 | 0.84 | 3.46 | - | 615.1  |
| AHQ-2-7, 3536          | K.VDINTEDELDGTCR.V          | 1638.69283 | 2 | 5.62E-06 | 0.93 | 3.75 | - | 1138.3 |
| AHQ-2-1, 3542          | K.VDINTEDELDGTCR.V          | 1638.69283 | 2 | 5.80E-07 | 0.95 | 4.42 | - | 1091.8 |
| AHQ-2-1, 3436          | K.VDINTEDELDGTCR.V          | 1638.69283 | 2 | 3.11E-11 | 0.95 | 4.23 | - | 1284.3 |
| AHQ-2-5, 3559 - 3567   | K.VDINTEDELDGTCR.V          | 1638.69283 | 2 | 5.26E-06 | 0.94 | 4.58 | - | 925.1  |

|                       |                                           |            |   |          |      |      |   |        |
|-----------------------|-------------------------------------------|------------|---|----------|------|------|---|--------|
| AHQ-2-6, 3271         | K.VDINTEDLEDGTR.V                         | 1638.69283 | 2 | 1.11E-05 | 0.85 | 3.33 | - | 882.3  |
| AHQ-2-13, 3505 - 3569 | K.VDINTEDLEDGTR.V                         | 1638.69283 | 2 | 7.37E-07 | 0.82 | 3.56 | - | 904.9  |
| AHQ-2-4, 3442         | K.VDINTEDLEDGTR.V                         | 1638.69283 | 2 | 6.73E-05 | 0.63 | 2.90 | - | 514.0  |
| AHQ-2-6, 3363         | K.VDINTEDLEDGTR.V                         | 1638.69283 | 2 | 1.83E-04 | 0.81 | 2.85 | - | 955.9  |
| AHQ-2-3, 3679 - 3703  | K.VDINTEDLEDGTR.V                         | 1638.69283 | 2 | 1.80E-05 | 0.85 | 3.10 | - | 757.6  |
| AHQ-2-6, 3490         | K.VDINTEDLEDGTR.V                         | 1638.69283 | 2 | 5.97E-08 | 0.89 | 3.74 | - | 855.6  |
| AHQ-2-5, 3464 - 3473  | K.VDINTEDLEDGTR.V                         | 1638.69283 | 2 | 9.48E-09 | 0.94 | 4.27 | - | 1285.5 |
| AHQ-2-8, 3287         | K.VDINTEDLEDGTR.V                         | 1638.69283 | 2 | 7.05E-04 | 0.92 | 3.45 | - | 1374.0 |
| AHQ-2-1, 3721 - 3725  | K.VDINTEDLEDGTR.V                         | 1638.69283 | 2 | 3.60E-05 | 0.91 | 3.62 | - | 1155.1 |
| AHQ-2-12, 3554        | K.VDINTEDLEDGTR.V                         | 1638.69283 | 2 | 6.14E-08 | 0.91 | 3.54 | - | 876.2  |
| AHQ-2-1, 3838         | K.VDINTEDLEDGTR.V                         | 1638.69283 | 2 | 5.90E-08 | 0.93 | 3.52 | - | 1228.3 |
| AHQ-2-4, 3681         | K.VDINTEDLEDGTR.V                         | 1638.69283 | 2 | 4.30E-09 | 0.93 | 3.57 | - | 1313.3 |
| AHQ-2-5, 3349         | K.VDINTEDLEDGTR.V                         | 1638.69283 | 2 | 3.30E-07 | 0.80 | 2.99 | - | 779.6  |
| AHQ-2-3, 2451         | K.VDVGKDQEFVTK.S                          | 1365.51377 | 1 | 9.16E-06 | 0.39 | 2.72 | - | 282.8  |
| AHQ-2-2, 2460 - 2533  | K.VDVGKDQEFVTK.S                          | 1365.51377 | 2 | 1.80E-07 | 0.91 | 3.69 | - | 778.8  |
| AHQ-2-6, 2297         | K.VDVGKDQEFVTK.S                          | 1365.51377 | 2 | 2.02E-09 | 0.89 | 3.47 | - | 765.3  |
| AHQ-2-1, 2632 - 2633  | K.VDVGKDQEFVTK.S                          | 1365.51377 | 2 | 6.20E-08 | 0.88 | 3.36 | - | 674.8  |
| AHQ-2-2, 2466         | K.VDVGKDQEFVTK.S                          | 1365.51377 | 1 | 1.58E-04 | 0.59 | 3.34 | - | 334.2  |
| AHQ-2-5, 2279         | K.VDVGKDQEFVTK.S                          | 1365.51377 | 2 | 6.63E-08 | 0.92 | 3.58 | - | 824.5  |
| AHQ-2-1, 2800 - 2868  | K.VEPGLGADNSVVR.F                         | 1313.44209 | 2 | 2.26E-06 | 0.84 | 3.40 | - | 286.2  |
| AHQ-2-2, 2864 - 2866  | K.VEPGLGADNSVVR.F                         | 1313.44209 | 2 | 3.99E-08 | 0.86 | 3.23 | - | 477.6  |
| AHQ-2-4, 6604 - 6616  | K.VEYTPYEEGLHSVDVTDGSPVSPFPQVPVTEGCDPSR.V | 4300.57494 | 3 | 5.89E-06 | 0.89 | 4.62 | - | 594.2  |
| AHQ-2-4, 6482 - 6549  | K.VEYTPYEEGLHSVDVTDGSPVSPFPQVPVTEGCDPSR.V | 4300.57494 | 3 | 9.77E-04 | 0.51 | 3.29 | - | 389.8  |
| AHQ-2-1, 6488 - 6554  | K.VEYTPYEEGLHSVDVTDGSPVSPFPQVPVTEGCDPSR.V | 4300.57494 | 3 | 1.15E-04 | 0.88 | 4.65 | - | 593.8  |
| AHQ-2-5, 6463 - 6545  | K.VEYTPYEEGLHSVDVTDGSPVSPFPQVPVTEGCDPSR.V | 4300.57494 | 3 | 3.00E-05 | 0.92 | 5.13 | - | 694.3  |
| AHQ-2-3, 7528         | K.VGSAADIPINISSETDL.SLLTATVPPSGR.E        | 2895.25495 | 2 | 4.89E-08 | 0.93 | 4.71 | - | 733.2  |
| AHQ-2-3, 7531 - 7532  | K.VGSAADIPINISSETDL.SLLTATVPPSGR.E        | 2895.25495 | 3 | 5.15E-07 | 0.87 | 4.35 | - | 599.0  |
| AHQ-2-5, 7415         | K.VGSAADIPINISSETDL.SLLTATVPPSGR.E        | 2895.25495 | 2 | 4.82E-12 | 0.95 | 4.87 | - | 809.4  |
| AHQ-2-7, 7475         | K.VGSAADIPINISSETDL.SLLTATVPPSGR.E        | 2895.25495 | 2 | 1.17E-06 | 0.85 | 3.81 | - | 516.2  |
| AHQ-2-1, 7172 - 7237  | K.VGSAADIPINISSETDL.SLLTATVPPSGR.E        | 2895.25495 | 3 | 9.77E-04 | 0.66 | 3.10 | - | 562.9  |
| AHQ-2-6, 7219 - 7274  | K.VGSAADIPINISSETDL.SLLTATVPPSGR.E        | 2895.25495 | 2 | 2.65E-06 | 0.86 | 3.52 | - | 920.8  |
| AHQ-2-9, 7332 - 7402  | K.VGSAADIPINISSETDL.SLLTATVPPSGR.E        | 2895.25495 | 2 | 8.12E-07 | 0.90 | 4.37 | - | 488.9  |
| AHQ-2-1, 7168 - 7242  | K.VGSAADIPINISSETDL.SLLTATVPPSGR.E        | 2895.25495 | 2 | 2.00E-07 | 0.92 | 4.69 | - | 592.8  |
| AHQ-2-6, 4123         | K.VHSPSGALEECYVTEIDQDK.Y                  | 2279.42322 | 2 | 5.15E-05 | 0.95 | 4.98 | - | 963.4  |
| AHQ-2-4, 4478         | K.VHSPSGALEECYVTEIDQDK.Y                  | 2279.42322 | 2 | 3.25E-04 | 0.95 | 5.10 | - | 1076.5 |
| AHQ-2-1, 4580         | K.VHSPSGALEECYVTEIDQDK.Y                  | 2279.42322 | 2 | 1.21E-08 | 0.96 | 4.91 | - | 1305.3 |
| AHQ-2-5, 4189         | K.VHSPSGALEECYVTEIDQDK.Y                  | 2279.42322 | 2 | 8.88E-10 | 0.96 | 5.18 | - | 1428.8 |
| AHQ-2-7, 4075         | K.VHSPSGALEECYVTEIDQDK.Y                  | 2279.42322 | 2 | 4.03E-11 | 0.98 | 4.65 | - | 2160.6 |
| AHQ-2-8, 4255         | K.VHSPSGALEECYVTEIDQDKYAVR.F              | 2768.99349 | 3 | 8.09E-10 | 0.84 | 4.10 | - | 559.2  |
| AHQ-2-7, 4285 - 4356  | K.VHSPSGALEECYVTEIDQDKYAVR.F              | 2768.99349 | 3 | 4.39E-10 | 0.88 | 4.51 | - | 638.9  |
| AHQ-2-6, 4445         | K.VHSPSGALEECYVTEIDQDKYAVR.F              | 2768.99349 | 3 | 7.85E-07 | 0.93 | 4.88 | - | 938.6  |
| AHQ-2-5, 4471 - 4545  | K.VHSPSGALEECYVTEIDQDKYAVR.F              | 2768.99349 | 3 | 1.70E-08 | 0.93 | 5.33 | - | 627.9  |
| AHQ-2-1, 4918         | K.VHSPSGALEECYVTEIDQDKYAVR.F              | 2768.99349 | 2 | 2.56E-09 | 0.95 | 4.46 | - | 1551.4 |
| AHQ-2-1, 4912         | K.VHSPSGALEECYVTEIDQDKYAVR.F              | 2768.99349 | 3 | 4.21E-04 | 0.88 | 4.30 | - | 640.2  |
| AHQ-2-3, 4837         | K.VHSPSGALEECYVTEIDQDKYAVR.F              | 2768.99349 | 3 | 7.65E-09 | 0.85 | 4.42 | - | 437.5  |
| AHQ-2-11, 4444        | K.VHSPSGALEECYVTEIDQDKYAVR.F              | 2768.99349 | 3 | 7.12E-10 | 0.86 | 4.44 | - | 517.9  |
| AHQ-2-8, 4263         | K.VHSPSGALEECYVTEIDQDKYAVR.F              | 2768.99349 | 2 | 2.73E-08 | 0.92 | 3.89 | - | 1162.0 |
| AHQ-2-8, 3484         | K.VNQPASFAVSLNGAK.G                       | 1503.68480 | 2 | 1.43E-06 | 0.79 | 3.13 | - | 552.5  |
| AHQ-2-5, 3599 - 3668  | K.VNQPASFAVSLNGAK.G                       | 1503.68480 | 2 | 5.31E-07 | 0.83 | 3.24 | - | 491.8  |
| AHQ-2-4, 3844 - 3912  | K.VNQPASFAVSLNGAK.G                       | 1503.68480 | 2 | 1.02E-08 | 0.76 | 3.19 | - | 464.1  |
| AHQ-2-2, 3817 - 3889  | K.VNQPASFAVSLNGAK.G                       | 1503.68480 | 2 | 6.42E-05 | 0.86 | 3.40 | - | 692.2  |
| AHQ-2-7, 3531         | K.VNQPASFAVSLNGAK.G                       | 1503.68480 | 2 | 3.54E-07 | 0.89 | 3.82 | - | 633.9  |
| AHQ-2-7, 3436         | K.VNQPASFAVSLNGAK.G                       | 1503.68480 | 2 | 2.70E-08 | 0.79 | 3.53 | - | 434.8  |
| AHQ-2-5, 3456 - 3527  | K.VNQPASFAVSLNGAK.G                       | 1503.68480 | 2 | 2.96E-07 | 0.67 | 2.79 | - | 409.1  |
| AHQ-2-6, 3462 - 3542  | K.VNQPASFAVSLNGAK.G                       | 1503.68480 | 2 | 1.02E-07 | 0.93 | 4.03 | - | 678.9  |
| AHQ-2-8, 3356         | K.VNQPASFAVSLNGAK.G                       | 1503.68480 | 2 | 2.40E-04 | 0.93 | 4.13 | - | 694.9  |
| AHQ-2-1, 3952 - 4016  | K.VNQPASFAVSLNGAK.G                       | 1503.68480 | 2 | 5.13E-06 | 0.88 | 3.49 | - | 664.9  |
| AHQ-2-2, 1477 - 1490  | K.VPVHDVTDASK.V                           | 1168.28175 | 2 | 3.33E-07 | 0.95 | 3.61 | - | 1495.0 |
| AHQ-2-3, 1497         | K.VPVHDVTDASK.V                           | 1168.28175 | 2 | 9.94E-07 | 0.94 | 3.24 | - | 1249.3 |
| AHQ-2-1, 4288 - 4358  | R.VQVQDNQEGCPVEALVK.D                     | 1786.98493 | 2 | 8.89E-07 | 0.97 | 5.28 | - | 1598.4 |
| AHQ-2-4, 4170 - 4248  | R.VQVQDNQEGCPVEALVK.D                     | 1786.98493 | 2 | 4.01E-10 | 0.95 | 4.70 | - | 1068.6 |
| AHQ-2-3, 4195 - 4263  | R.VQVQDNQEGCPVEALVK.D                     | 1786.98493 | 2 | 6.07E-06 | 0.96 | 4.89 | - | 1363.4 |
| AHQ-2-5, 3948 - 3964  | R.VQVQDNQEGCPVEALVK.D                     | 1786.98493 | 2 | 3.89E-06 | 0.97 | 5.09 | - | 1468.5 |
| AHQ-2-2, 4444 - 4448  | R.VQVQDNQEGCPVEALVK.D                     | 1786.98493 | 2 | 9.23E-09 | 0.96 | 4.66 | - | 1807.8 |
| AHQ-2-2, 4304 - 4373  | R.VQVQDNQEGCPVEALVK.D                     | 1786.98493 | 2 | 8.03E-06 | 0.96 | 4.46 | - | 1399.1 |
| AHQ-2-6, 3893 - 3898  | R.VQVQDNQEGCPVEALVK.D                     | 1786.98493 | 2 | 2.77E-05 | 0.77 | 3.77 | - | 539.9  |
| AHQ-2-1, 4404 - 4428  | R.VQVQDNQEGCPVEALVK.D                     | 1786.98493 | 2 | 1.47E-10 | 0.94 | 4.97 | - | 956.1  |
| AHQ-2-2, 4221 - 4232  | R.VQVQDNQEGCPVEALVK.D                     | 1786.98493 | 2 | 5.48E-09 | 0.95 | 4.78 | - | 954.2  |
| AHQ-2-3, 4332         | R.VQVQDNQEGCPVEALVK.D                     | 1786.98493 | 2 | 7.22E-07 | 0.96 | 4.49 | - | 1741.0 |
| AHQ-2-2, 5584         | R.VQVQDNQEGCPVEALVKDNGNGTYSYVPR.K         | 3359.60342 | 3 | 1.44E-05 | 0.87 | 3.73 | - | 1011.6 |
| AHQ-2-4, 5524         | R.VQVQDNQEGCPVEALVKDNGNGTYSYVPR.K         | 3359.60342 | 3 | 1.33E-05 | 0.79 | 3.57 | - | 854.8  |
| AHQ-2-1, 5276 - 5346  | R.VQVQDNQEGCPVEALVKDNGNGTYSYVPR.K         | 3359.60342 | 3 | 5.67E-07 | 0.93 | 4.77 | - | 1418.0 |
| AHQ-2-2, 5312 - 5380  | R.VQVQDNQEGCPVEALVKDNGNGTYSYVPR.K         | 3359.60342 | 3 | 2.75E-12 | 0.90 | 4.42 | - | 1336.7 |
| AHQ-2-1, 5552         | R.VQVQDNQEGCPVEALVKDNGNGTYSYVPR.K         | 3359.60342 | 3 | 4.78E-04 | 0.92 | 4.09 | - | 1562.9 |
| AHQ-2-3, 5272         | R.VQVQDNQEGCPVEALVKDNGNGTYSYVPR.K         | 3359.60342 | 3 | 4.55E-14 | 0.94 | 4.56 | - | 1710.2 |
| AHQ-2-3, 5483 - 5551  | R.VQVQDNQEGCPVEALVKDNGNGTYSYVPR.K         | 3359.60342 | 3 | 1.70E-06 | 0.94 | 4.78 | - | 1743.6 |
| AHQ-2-5, 5319         | R.VQVQDNQEGCPVEALVKDNGNGTYSYVPR.K         | 3359.60342 | 3 | 3.60E-09 | 0.80 | 3.22 | - | 1111.4 |
| AHQ-2-7, 4217         | R.VSGQGLHEGHTFPAEFIIDTR.D                 | 2441.64058 | 3 | 2.24E-09 | 0.97 | 5.65 | - | 1514.9 |
| AHQ-2-13, 4639 - 4643 | R.VSGQGLHEGHTFPAEFIIDTR.D                 | 2441.64058 | 3 | 2.96E-10 | 0.95 | 5.55 | - | 1120.4 |
| AHQ-2-8, 3947         | R.VSGQGLHEGHTFPAEFIIDTR.D                 | 2441.64058 | 2 | 4.14E-10 | 0.95 | 5.17 | - | 811.4  |
| AHQ-2-13, 4737        | R.VSGQGLHEGHTFPAEFIIDTR.D                 | 2441.64058 | 3 | 4.35E-04 | 0.86 | 3.43 | - | 1003.2 |
| AHQ-2-8, 4235         | R.VSGQGLHEGHTFPAEFIIDTR.D                 | 2441.64058 | 3 | 1.39E-04 | 0.94 | 4.64 | - | 1199.4 |
| AHQ-2-5, 4361 - 4443  | R.VSGQGLHEGHTFPAEFIIDTR.D                 | 2441.64058 | 3 | 4.89E-11 | 0.96 | 5.40 | - | 1283.5 |
| AHQ-2-4, 4792 - 4804  | R.VSGQGLHEGHTFPAEFIIDTR.D                 | 2441.64058 | 3 | 3.05E-08 | 0.95 | 5.32 | - | 1318.7 |
| AHQ-2-1, 4960 - 5033  | R.VSGQGLHEGHTFPAEFIIDTR.D                 | 2441.64058 | 3 | 1.43E-04 | 0.90 | 4.31 | - | 745.3  |
| AHQ-2-6, 4373 - 4446  | R.VSGQGLHEGHTFPAEFIIDTR.D                 | 2441.64058 | 3 | 1.71E-09 | 0.97 | 6.15 | - | 1388.3 |
| AHQ-2-10, 4120        | R.VSGQGLHEGHTFPAEFIIDTR.D                 | 2441.64058 | 2 | 3.42E-04 | 0.84 | 3.40 | - | 345.4  |
| AHQ-2-8, 3946         | R.VSGQGLHEGHTFPAEFIIDTR.D                 | 2441.64058 | 3 | 1.49E-07 | 0.91 | 4.70 | - | 833.9  |
| AHQ-2-1, 4964         | R.VSGQGLHEGHTFPAEFIIDTR.D                 | 2441.64058 | 2 | 4.21E-05 | 0.94 | 4.04 | - | 1161.9 |
| AHQ-2-1, 2893 - 2934  | K.VTAQGPGLPESGNIANK.T                     | 1653.81855 | 2 | 7.83E-05 | 0.77 | 3.89 | - | 341.1  |
| AHQ-2-4, 2740         | K.VTAQGPGLPESGNIANK.T                     | 1653.81855 | 2 | 9.48E-07 | 0.91 | 3.74 | - | 882.6  |
| AHQ-2-3, 2753         | K.VTAQGPGLPESGNIANK.T                     | 1653.81855 | 2 | 2.69E-06 | 0.74 | 3.23 | - | 432.2  |
| AHQ-2-1, 2748 - 2816  | K.VTAQGPGLPESGNIANK.T                     | 1653.81855 | 2 | 8.70E-04 | 0.82 | 3.28 | - | 727.2  |
| AHQ-2-3, 2607 - 2675  | K.VTAQGPGLPESGNIANK.T                     | 1653.81855 | 2 | 2.39E-05 | 0.74 | 3.08 | - | 698.8  |
| AHQ-2-5, 2435 - 2481  | K.VTAQGPGLPESGNIANK.T                     | 1653.81855 | 2 | 3.57E-05 | 0.93 | 5.00 | - | 530.7  |
| AHQ-2-6, 2586         | K.VTAQGPGLPESGNIANK.T                     | 1653.81855 | 2 | 2.77E-05 | 0.85 | 3.86 | - | 503.8  |
| AHQ-2-6, 2471 - 2483  | K.VTAQGPGLPESGNIANK.T                     | 1653.81855 | 2 | 1.43E-04 | 0.78 | 3.43 | - | 423.8  |
| AHQ-2-8, 2290         | K.VTAQGPGLPESGNIANK.T                     | 1653.81855 | 2 | 1.66E-05 | 0.45 | 2.65 | - | 300.7  |
| AHQ-2-2, 2601 - 2613  | K.VTAQGPGLPESGNIANK.T                     | 1653.81855 | 2 | 7.83E-05 | 0.82 | 3.90 | - | 424.2  |
| AHQ-2-2, 2860         | K.VTAQGPGLPESGNIANK.T                     | 1653.81855 | 2 | 2.75E-11 | 0.91 | 3.92 | - | 624.0  |
| AHQ-2-5, 2579         | K.VTAQGPGLPESGNIANK.T                     | 1653.81855 | 2 | 6.45E-09 | 0.82 | 3.79 | - | 444.7  |
| AHQ-2-2, 2684 - 2776  | K.VTAQGPGLPESGNIANK.T                     | 1653.81855 | 2 | 6.12E-08 | 0.93 | 4.52 | - | 665.2  |
| AHQ-2-6, 2777         | K.VTVLFAQQHIAK.S                          | 1284.53185 | 2 | 8.91E-05 | 0.81 | 3.67 | - | 518.6  |
| AHQ-2-4, 3082         | K.VTVLFAQQHIAK.S                          | 1284.53185 | 1 | 8.38E-06 | 0.67 | 2.92 | - | 508.5  |
| AHQ-2-2, 2978 - 3049  | K.VTVLFAQQHIAK.S                          | 1284.53185 | 2 | 5.96E-07 | 0.92 | 3.87 | - | 904.9  |
| AHQ-2-7, 2627         | K.VTVLFAQQHIAK.S                          | 1284.53185 | 2 | 5.07E-05 | 0.83 | 3.29 | - | 689.8  |
| AHQ-2-5, 2695         | K.VTVLFAQQHIAK.S                          | 1284.53185 | 2 | 4.14E-06 | 0.92 | 3.95 | - | 871.8  |

|                        |                              |            |   |          |      |      |   |        |
|------------------------|------------------------------|------------|---|----------|------|------|---|--------|
| AHQ-2-4, 3033          | K.VTVLFAGQHIK.S              | 1284.53185 | 1 | 8.91E-05 | 0.29 | 1.81 | - | 443.4  |
| AHQ-2-4, 3037          | K.VTVLFAGQHIK.S              | 1284.53185 | 2 | 2.78E-07 | 0.76 | 3.27 | - | 544.8  |
| AHQ-2-3, 3043          | K.VTVLFAGQHIK.S              | 1284.53185 | 2 | 3.04E-04 | 0.69 | 3.02 | - | 501.5  |
| AHQ-2-1, 3316 - 3317   | K.VTVLFAGQHIK.S              | 1284.53185 | 2 | 6.00E-05 | 0.97 | 4.47 | - | 1489.0 |
| AHQ-2-4, 5194          | R.VTYCPTPEPGNYIIK.F          | 1884.14221 | 2 | 8.10E-04 | 0.84 | 3.29 | - | 594.9  |
| AHQ-2-9, 4930          | R.VTYCPTPEPGNYIIK.F          | 1884.14221 | 2 | 2.17E-04 | 0.65 | 3.19 | - | 295.6  |
| AHQ-2-6, 5066          | R.VTYCPTPEPGNYIIK.F          | 1884.14221 | 2 | 5.29E-05 | 0.60 | 2.80 | - | 290.3  |
| AHQ-2-8, 4739 - 4791   | R.VTYCPTPEPGNYIIK.F          | 1884.14221 | 2 | 1.16E-08 | 0.92 | 3.70 | - | 694.6  |
| AHQ-2-7, 4819 - 4887   | R.VTYCPTPEPGNYIIK.F          | 1884.14221 | 2 | 9.57E-10 | 0.92 | 4.46 | - | 499.9  |
| AHQ-2-5, 4835 - 4911   | R.VTYCPTPEPGNYIIK.F          | 1884.14221 | 2 | 1.18E-09 | 0.93 | 4.28 | - | 645.2  |
| AHQ-2-5, 5047          | R.VTYCPTPEPGNYIIK.F          | 1884.14221 | 2 | 2.52E-06 | 0.93 | 4.33 | - | 560.3  |
| AHQ-2-13-, 4899        | R.VTYCPTPEPGNYIIK.F          | 1884.14221 | 2 | 2.63E-05 | 0.67 | 3.39 | - | 251.6  |
| AHQ-2-2, 5240          | R.VTYCPTPEPGNYIIK.F          | 1884.14221 | 2 | 6.77E-04 | 0.79 | 2.82 | - | 509.8  |
| AHQ-2-5, 5169          | R.VTYCPTPEPGNYIIK.F          | 1884.14221 | 2 | 3.41E-05 | 0.73 | 3.16 | - | 217.2  |
| AHQ-2-1, 5073          | R.VTYCPTPEPGNYIIK.F          | 1884.14221 | 2 | 4.41E-06 | 0.86 | 3.59 | - | 602.8  |
| AHQ-2-5, 4933 - 5003   | R.VTYCPTPEPGNYIIK.F          | 1884.14221 | 2 | 6.25E-09 | 0.92 | 4.59 | - | 396.7  |
| AHQ-2-3, 5208          | R.VTYCPTPEPGNYIIK.F          | 1884.14221 | 2 | 1.27E-05 | 0.88 | 3.83 | - | 480.4  |
| AHQ-2-1, 5257          | R.VTYCPTPEPGNYIIK.F          | 1884.14221 | 2 | 2.83E-04 | 0.67 | 2.89 | - | 359.5  |
| AHQ-2-8, 4996          | R.VTYTPMAPGSYLSIK.Y          | 1742.07225 | 2 | 1.40E-05 | 0.82 | 3.11 | - | 730.5  |
| AHQ-2-5, 4831          | R.VTYTPM'APGSYLSIK.Y         | 1758.07165 | 2 | 2.35E-05 | 0.88 | 3.68 | - | 654.2  |
| AHQ-2-2, 5668          | R.VTYTPMAPGSYLSIK.Y          | 1742.07225 | 2 | 1.94E-04 | 0.67 | 2.86 | - | 555.8  |
| AHQ-2-14-, 5379 - 5403 | R.VTYTPMAPGSYLSIK.Y          | 1742.07225 | 2 | 1.22E-04 | 0.72 | 3.03 | - | 703.0  |
| AHQ-2-13, 5327         | R.VTYTPMAPGSYLSIK.Y          | 1742.07225 | 2 | 1.84E-04 | 0.72 | 2.96 | - | 522.3  |
| AHQ-2-7, 5191 - 5227   | R.VTYTPMAPGSYLSIK.Y          | 1742.07225 | 2 | 5.89E-05 | 0.73 | 3.25 | - | 486.8  |
| AHQ-2-3, 5639          | R.VTYTPMAPGSYLSIK.Y          | 1742.07225 | 2 | 4.06E-04 | 0.63 | 2.57 | - | 511.7  |
| AHQ-2-13-, 5426        | R.VTYTPMAPGSYLSIK.Y          | 1742.07225 | 2 | 2.99E-05 | 0.88 | 3.28 | - | 731.4  |
| AHQ-2-6, 4785          | R.VTYTPM'APGSYLSIK.Y         | 1758.07165 | 2 | 3.83E-05 | 0.71 | 3.12 | - | 387.7  |
| AHQ-2-11, 5156 - 5162  | R.VTYTPMAPGSYLSIK.Y          | 1742.07225 | 2 | 7.06E-04 | 0.81 | 3.43 | - | 481.9  |
| AHQ-2-10, 4915 - 4931  | R.VTYTPMAPGSYLSIK.Y          | 1742.07225 | 2 | 3.61E-04 | 0.79 | 3.45 | - | 588.3  |
| AHQ-2-10, 3022         | R.YAPSEAGLHEMDIR.Y           | 1589.75482 | 2 | 1.03E-04 | 0.81 | 3.29 | - | 657.6  |
| AHQ-2-1, 3526 - 3536   | R.YAPSEAGLHEMDIR.Y           | 1589.75482 | 2 | 2.07E-05 | 0.88 | 3.14 | - | 869.6  |
| AHQ-2-2, 3333 - 3361   | R.YAPSEAGLHEMDIR.Y           | 1589.75482 | 2 | 7.72E-05 | 0.41 | 2.50 | - | 385.1  |
| AHQ-2-13-, 3375 - 3381 | R.YAPSEAGLHEMDIR.Y           | 1589.75482 | 2 | 3.80E-05 | 0.91 | 3.59 | - | 946.0  |
| AHQ-2-3, 3336          | R.YAPSEAGLHEMDIR.Y           | 1589.75482 | 2 | 1.83E-05 | 0.85 | 3.01 | - | 748.8  |
| AHQ-2-4, 3336 - 3368   | R.YAPSEAGLHEMDIR.Y           | 1589.75482 | 2 | 2.71E-04 | 0.46 | 2.66 | - | 444.3  |
| AHQ-2-5, 2363          | R.YAPSEAGLHEM'DIR.Y          | 1605.75422 | 2 | 7.03E-04 | 0.79 | 3.04 | - | 688.9  |
| AHQ-2-5, 3015 - 3083   | R.YAPSEAGLHEMDIR.Y           | 1589.75482 | 2 | 2.10E-06 | 0.89 | 3.23 | - | 906.4  |
| AHQ-2-7, 2947          | R.YAPSEAGLHEMDIR.Y           | 1589.75482 | 2 | 9.96E-05 | 0.89 | 3.16 | - | 1096.4 |
| AHQ-2-6, 3974 - 4045   | K.YGGDEIFPSPYR.V             | 1401.50466 | 2 | 1.38E-04 | 0.75 | 2.85 | - | 603.6  |
| AHQ-2-12, 4185         | K.YGGDEIFPSPYR.V             | 1401.50466 | 2 | 1.93E-05 | 0.80 | 3.27 | - | 552.8  |
| AHQ-2-2, 4380          | K.YGGDEIFPSPYR.V             | 1401.50466 | 1 | 9.93E-04 | 0.27 | 2.34 | - | 385.2  |
| AHQ-2-10, 3887         | K.YGGDEIFPSPYR.V             | 1401.50466 | 1 | 3.07E-05 | 0.22 | 2.19 | - | 398.7  |
| AHQ-2-10, 3886         | K.YGGDEIFPSPYR.V             | 1401.50466 | 2 | 4.12E-04 | 0.70 | 3.48 | - | 443.3  |
| AHQ-2-9, 4054          | K.YGGDEIFPSPYR.V             | 1401.50466 | 2 | 2.32E-04 | 0.52 | 2.59 | - | 419.7  |
| AHQ-2-4, 4324 - 4393   | K.YGGDEIFPSPYR.V             | 1401.50466 | 2 | 5.67E-04 | 0.65 | 3.00 | - | 360.0  |
| AHQ-2-12, 4190 - 4193  | K.YGGDEIFPSPYR.V             | 1401.50466 | 1 | 1.28E-04 | 0.36 | 2.43 | - | 433.1  |
| AHQ-2-9, 2948          | K.YGGPYHIGGSPFK.A            | 1380.53182 | 2 | 9.93E-04 | 0.89 | 3.25 | - | 1138.5 |
| AHQ-2-7, 2763 - 2835   | K.YGGPYHIGGSPFK.A            | 1380.53182 | 2 | 5.55E-04 | 0.82 | 3.17 | - | 867.3  |
| AHQ-2-4, 3268          | K.YGGPYHIGGSPFK.A            | 1380.53182 | 1 | 4.04E-09 | 0.90 | 3.83 | - | 521.5  |
| AHQ-2-5, 2911 - 2984   | K.YGGPYHIGGSPFK.A            | 1380.53182 | 2 | 2.89E-07 | 0.96 | 4.60 | - | 1623.9 |
| AHQ-2-7, 2829          | K.YGGPYHIGGSPFK.A            | 1380.53182 | 1 | 2.00E-05 | 0.82 | 3.11 | - | 429.5  |
| AHQ-2-10, 2934         | K.YGGPYHIGGSPFK.A            | 1380.53182 | 2 | 7.92E-07 | 0.95 | 3.91 | - | 1568.8 |
| AHQ-2-5, 2919          | K.YGGPYHIGGSPFK.A            | 1380.53182 | 3 | 1.15E-05 | 0.87 | 3.98 | - | 617.3  |
| AHQ-2-1, 3461          | K.YGGPYHIGGSPFK.A            | 1380.53182 | 2 | 2.19E-05 | 0.96 | 3.99 | - | 1486.6 |
| AHQ-2-14-, 3277        | K.YGGPYHIGGSPFK.A            | 1380.53182 | 2 | 1.65E-07 | 0.97 | 4.75 | - | 1927.9 |
| AHQ-2-5, 2928          | K.YGGPYHIGGSPFK.A            | 1380.53182 | 1 | 1.33E-06 | 0.86 | 3.53 | - | 578.7  |
| AHQ-2-4, 3249          | K.YGGPYHIGGSPFK.A            | 1380.53182 | 2 | 7.24E-07 | 0.89 | 3.16 | - | 1213.9 |
| AHQ-2-13-, 3337 - 3347 | K.YGGPYHIGGSPFK.A            | 1380.53182 | 2 | 1.15E-05 | 0.95 | 4.07 | - | 1151.8 |
| AHQ-2-2, 2989 - 3062   | K.YGGQVPNFNSK.L              | 1291.43658 | 2 | 1.04E-05 | 0.84 | 3.60 | - | 374.2  |
| AHQ-2-1, 3121          | K.YGGQVPNFNSK.L              | 1291.43658 | 2 | 8.52E-05 | 0.93 | 3.51 | - | 782.3  |
| AHQ-2-4, 2989          | K.YGGQVPNFNSK.L              | 1291.43658 | 1 | 6.37E-04 | 0.34 | 2.52 | - | 219.5  |
| AHQ-2-4, 2984 - 3016   | K.YGGQVPNFNSK.L              | 1291.43658 | 2 | 8.06E-07 | 0.92 | 3.69 | - | 564.7  |
| AHQ-2-2, 3002          | K.YGGQVPNFNSK.L              | 1291.43658 | 1 | 3.14E-04 | 0.43 | 2.63 | - | 478.2  |
| AHQ-2-3, 2993          | K.YGGQVPNFNSK.L              | 1291.43658 | 1 | 1.25E-04 | 0.17 | 2.29 | - | 239.6  |
| AHQ-2-3, 2987 - 2992   | K.YGGQVPNFNSK.L              | 1291.43658 | 2 | 1.73E-05 | 0.90 | 3.28 | - | 560.3  |
| AHQ-2-3, 4297          | K.YKGQHVPGSFQFTVGPLGEGGAHK.V | 2596.88377 | 3 | 6.86E-08 | 0.90 | 4.79 | - | 798.2  |
| AHQ-2-7, 3667          | K.YKGQHVPGSFQFTVGPLGEGGAHK.V | 2596.88377 | 3 | 1.37E-06 | 0.87 | 4.06 | - | 762.2  |
| AHQ-2-6, 3829          | K.YKGQHVPGSFQFTVGPLGEGGAHK.V | 2596.88377 | 2 | 1.08E-06 | 0.90 | 4.44 | - | 372.9  |
| AHQ-2-6, 3826          | K.YKGQHVPGSFQFTVGPLGEGGAHK.V | 2596.88377 | 3 | 6.02E-09 | 0.95 | 5.57 | - | 1050.3 |
| AHQ-2-5, 3791 - 3865   | K.YKGQHVPGSFQFTVGPLGEGGAHK.V | 2596.88377 | 3 | 7.04E-07 | 0.91 | 4.50 | - | 819.0  |
| AHQ-2-5, 2475          | K.YNEQHVPGPSFTAR.V           | 1603.71978 | 2 | 5.57E-07 | 0.86 | 3.56 | - | 448.3  |
| AHQ-2-5, 2485 - 2489   | K.YNEQHVPGPSFTAR.V           | 1603.71978 | 3 | 4.68E-06 | 0.94 | 4.75 | - | 1151.2 |
| AHQ-2-5, 2792 - 2795   | K.YNEQHVPGPSFTAR.V           | 1603.71978 | 2 | 3.47E-09 | 0.91 | 3.46 | - | 798.7  |
| AHQ-2-9, 2531          | K.YNEQHVPGPSFTAR.V           | 1603.71978 | 2 | 1.42E-07 | 0.83 | 3.65 | - | 451.4  |
| AHQ-2-6, 2534          | K.YNEQHVPGPSFTAR.V           | 1603.71978 | 2 | 7.37E-06 | 0.75 | 2.99 | - | 471.6  |
| AHQ-2-6, 2545 - 2579   | K.YNEQHVPGPSFTAR.V           | 1603.71978 | 3 | 1.29E-04 | 0.89 | 3.91 | - | 912.8  |
| AHQ-2-4, 2701          | K.YNEQHVPGPSFTAR.V           | 1603.71978 | 2 | 1.16E-05 | 0.66 | 3.37 | - | 382.6  |
| AHQ-2-7, 2461          | K.YNEQHVPGPSFTAR.V           | 1603.71978 | 2 | 9.00E-04 | 0.35 | 2.58 | - | 232.2  |
| AHQ-2-1, 2932 - 2949   | K.YNEQHVPGPSFTAR.V           | 1603.71978 | 2 | 2.31E-05 | 0.88 | 3.35 | - | 608.5  |
| AHQ-2-10, 2502         | K.YNEQHVPGPSFTAR.V           | 1603.71978 | 2 | 2.41E-04 | 0.89 | 3.25 | - | 661.5  |
| AHQ-2-8, 2243 - 2291   | K.YNEQHVPGPSFTAR.V           | 1603.71978 | 2 | 1.09E-04 | 0.91 | 3.49 | - | 715.4  |
| AHQ-2-4, 3030          | K.YNEQHVPGPSFTAR.V           | 1603.71978 | 2 | 1.22E-05 | 0.81 | 3.17 | - | 444.1  |
| AHQ-2-3, 4632 - 4703   | K.YTPVQQGPVGVNNTYGGDPIPK.S   | 2287.55640 | 2 | 1.78E-07 | 0.89 | 4.10 | - | 527.1  |
| AHQ-2-3, 4771 - 4839   | K.YTPVQQGPVGVNNTYGGDPIPK.S   | 2287.55640 | 2 | 4.30E-08 | 0.93 | 4.64 | - | 700.2  |
| AHQ-2-7, 4340          | K.YTPVQQGPVGVNNTYGGDPIPK.S   | 2287.55640 | 2 | 6.96E-04 | 0.93 | 4.34 | - | 783.8  |
| AHQ-2-8, 4258          | K.YTPVQQGPVGVNNTYGGDPIPK.S   | 2287.55640 | 2 | 3.90E-07 | 0.80 | 3.59 | - | 368.6  |
| AHQ-2-6, 4406          | K.YTPVQQGPVGVNNTYGGDPIPK.S   | 2287.55640 | 2 | 2.71E-04 | 0.88 | 4.02 | - | 493.2  |
| AHQ-2-5, 4643          | K.YTPVQQGPVGVNNTYGGDPIPK.S   | 2287.55640 | 2 | 5.25E-05 | 0.92 | 3.92 | - | 773.9  |
| AHQ-2-1, 4558          | K.YTPVQQGPVGVNNTYGGDPIPK.S   | 2287.55640 | 2 | 1.51E-05 | 0.80 | 3.33 | - | 530.9  |
| AHQ-2-4, 4660 - 4677   | K.YTPVQQGPVGVNNTYGGDPIPK.S   | 2287.55640 | 2 | 1.07E-04 | 0.92 | 4.61 | - | 657.1  |
| AHQ-2-4, 4748 - 4749   | K.YTPVQQGPVGVNNTYGGDPIPK.S   | 2287.55640 | 2 | 2.49E-07 | 0.89 | 4.44 | - | 506.0  |
| AHQ-2-1, 4808 - 4881   | K.YTPVQQGPVGVNNTYGGDPIPK.S   | 2287.55640 | 2 | 5.01E-06 | 0.93 | 4.87 | - | 575.4  |
| AHQ-2-5, 4483 - 4499   | K.YTPVQQGPVGVNNTYGGDPIPK.S   | 2287.55640 | 2 | 3.76E-06 | 0.93 | 4.37 | - | 743.3  |
| AHQ-2-2, 4884 - 4901   | K.YTPVQQGPVGVNNTYGGDPIPK.S   | 2287.55640 | 2 | 5.57E-07 | 0.92 | 4.13 | - | 642.5  |
| AHQ-2-2, 4746 - 4816   | K.YTPVQQGPVGVNNTYGGDPIPK.S   | 2287.55640 | 2 | 2.11E-06 | 0.92 | 4.34 | - | 654.6  |
| AHQ-2-2, 4658 - 4728   | K.YTPVQQGPVGVNNTYGGDPIPK.S   | 2287.55640 | 2 | 1.91E-06 | 0.92 | 4.21 | - | 894.1  |
| AHQ-2-2, 4526 - 4532   | K.YTPVQQGPVGVNNTYGGDPIPK.S   | 2287.55640 | 2 | 1.58E-06 | 0.92 | 4.34 | - | 768.9  |
| AHQ-2-4, 4836          | K.YTPVQQGPVGVNNTYGGDPIPK.S   | 2287.55640 | 2 | 2.68E-07 | 0.89 | 3.98 | - | 586.3  |
| AHQ-2-3, 4492          | K.YTPVQQGPVGVNNTYGGDPIPK.S   | 2287.55640 | 2 | 1.13E-04 | 0.82 | 3.36 | - | 464.2  |
| AHQ-2-4, 6988          | R.YWPQEAAGEYAVHVLNCSIEDIR.L  | 2538.73318 | 2 | 3.75E-07 | 0.81 | 3.49 | - | 527.2  |
| AHQ-2-2, 6570 - 6640   | R.YWPQEAAGEYAVHVLNCSIEDIR.L  | 2538.73318 | 2 | 9.09E-09 | 0.95 | 3.92 | - | 1452.5 |
| AHQ-2-1, 7022          | R.YWPQEAAGEYAVHVLNCSIEDIR.L  | 2538.73318 | 2 | 7.80E-08 | 0.91 | 3.53 | - | 1115.4 |
| AHQ-2-1, 7013          | R.YWPQEAAGEYAVHVLNCSIEDIR.L  | 2538.73318 | 3 | 5.81E-10 | 0.72 | 3.05 | - | 448.4  |
| AHQ-2-1, 6854 - 6925   | R.YWPQEAAGEYAVHVLNCSIEDIR.L  | 2538.73318 | 2 | 5.88E-07 | 0.91 | 3.69 | - | 873.4  |
| AHQ-2-1, 6810 - 6876   | R.YWPQEAAGEYAVHVLNCSIEDIR.L  | 2538.73318 | 3 | 4.42E-09 | 0.85 | 3.33 | - | 559.7  |
| AHQ-2-1, 6506 - 6526   | R.YWPQEAAGEYAVHVLNCSIEDIR.L  | 2538.73318 | 3 | 6.42E-07 | 0.71 | 3.23 | - | 447.3  |
| AHQ-2-2, 6572 - 6645   | R.YWPQEAAGEYAVHVLNCSIEDIR.L  | 2538.73318 | 3 | 2.16E-12 | 0.81 | 3.53 | - | 582.8  |

|                               |                                     |            |   |          |        |         |       |          |
|-------------------------------|-------------------------------------|------------|---|----------|--------|---------|-------|----------|
| AHQ-2-2, 6945 - 6990          | R.YWPQEAAGEYAVHVLCSNSEDIR.L         | 2538.73318 | 2 | 3.44E-08 | 0.94   | 4.21    | -     | 889.8    |
| AHQ-2-2, 6957 - 7028          | R.YWPQEAAGEYAVHVLCSNSEDIR.L         | 2538.73318 | 3 | 9.20E-12 | 0.84   | 3.48    | -     | 490.7    |
| AHQ-2-5, 6767 - 6784          | R.YWPQEAAGEYAVHVLCSNSEDIR.L         | 2538.73318 | 2 | 1.53E-05 | 0.92   | 4.27    | -     | 726.9    |
| AHQ-2-2, 7004 - 7072          | R.YWPQEAAGEYAVHVLCSNSEDIR.L         | 2538.73318 | 3 | 1.45E-09 | 0.88   | 3.99    | -     | 514.9    |
| AHQ-2-3, 6899 - 6967          | R.YWPQEAAGEYAVHVLCSNSEDIR.L         | 2538.73318 | 2 | 3.00E-04 | 0.89   | 3.80    | -     | 704.0    |
| AHQ-2-3, 6889 - 6972          | R.YWPQEAAGEYAVHVLCSNSEDIR.L         | 2538.73318 | 3 | 1.69E-10 | 0.78   | 3.22    | -     | 567.0    |
| AHQ-2-4, 6626 - 6649          | R.YWPQEAAGEYAVHVLCSNSEDIR.L         | 2538.73318 | 2 | 4.69E-07 | 0.75   | 2.82    | -     | 662.8    |
| gjl16753233[ref][NP_006280.2] | tal1n 1 [Homo sapiens]              |            |   | 1.11E-15 | 118.32 | 1330.37 | 57.10 | 269665.3 |
| AHQ-2-1, 3198 - 3272          | K.AAAFEQEENETVVVK.E                 | 1664.79496 | 2 | 2.35E-04 | 0.89   | 3.79    | -     | 928.7    |
| AHQ-2-5, 3151                 | K.AAAFEQEENETVVVK.E                 | 1664.79496 | 2 | 4.99E-09 | 0.94   | 4.30    | -     | 1065.8   |
| AHQ-2-2, 3854                 | K.AAAFEQEENETVVVK.E                 | 1664.79496 | 2 | 5.44E-04 | 0.44   | 2.95    | -     | 390.1    |
| AHQ-2-2, 4010                 | K.AAAFEQEENETVVVK.E                 | 1664.79496 | 2 | 6.08E-05 | 0.84   | 3.84    | -     | 761.0    |
| AHQ-2-3, 3205                 | K.AAAFEQEENETVVVK.E                 | 1664.79496 | 2 | 8.46E-04 | 0.22   | 2.52    | -     | 361.7    |
| AHQ-2-1, 3473                 | K.AAAFEQEENETVVVK.E                 | 1664.79496 | 2 | 7.66E-08 | 0.90   | 3.73    | -     | 859.3    |
| AHQ-2-4, 3213 - 3220          | K.AAAFEQEENETVVVK.E                 | 1664.79496 | 2 | 2.70E-09 | 0.92   | 4.52    | -     | 927.1    |
| AHQ-2-4, 3365                 | K.AAAFEQEENETVVVK.E                 | 1664.79496 | 2 | 1.47E-08 | 0.87   | 3.83    | -     | 877.9    |
| AHQ-2-2, 3113 - 3193          | K.AAAFEQEENETVVVK.E                 | 1664.79496 | 2 | 2.71E-06 | 0.93   | 4.20    | -     | 1554.8   |
| AHQ-2-3, 2469                 | R.AAM*EPIVISA.K.T                   | 1146.38260 | 2 | 1.11E-05 | 0.80   | 2.69    | -     | 679.2    |
| AHQ-2-4, 3140                 | R.AAM*EPIVISA.K.T                   | 1130.38320 | 2 | 2.16E-05 | 0.85   | 2.53    | -     | 754.4    |
| AHQ-2-4, 2469                 | R.AAM*EPIVISA.K.T                   | 1146.38260 | 1 | 1.99E-04 | 0.50   | 2.35    | -     | 221.3    |
| AHQ-2-5, 2291                 | R.AAM*EPIVISA.K.T                   | 1146.38260 | 2 | 2.58E-06 | 0.84   | 2.99    | -     | 742.6    |
| AHQ-2-4, 2465                 | R.AAM*EPIVISA.K.T                   | 1146.38260 | 2 | 3.31E-05 | 0.89   | 2.75    | -     | 1156.6   |
| AHQ-2-3, 2467 - 2471          | R.AAM*EPIVISA.K.T                   | 1146.38260 | 1 | 4.00E-04 | 0.26   | 2.20    | -     | 190.1    |
| AHQ-2-1, 2678                 | R.AAM*EPIVISA.K.T                   | 1146.38260 | 2 | 1.82E-05 | 0.84   | 2.64    | -     | 832.6    |
| AHQ-2-1, 2693                 | R.AAM*EPIVISA.K.T                   | 1146.38260 | 1 | 1.65E-05 | 0.59   | 2.92    | -     | 265.0    |
| AHQ-2-10, 2824                | R.AAM*EPIVISA.K.T                   | 1130.38320 | 1 | 1.50E-04 | 0.33   | 1.97    | -     | 658.5    |
| AHQ-2-2, 2496                 | R.AAM*EPIVISA.K.T                   | 1146.38260 | 1 | 4.87E-05 | 0.46   | 2.81    | -     | 190.3    |
| AHQ-2-2, 2489                 | R.AAM*EPIVISA.K.T                   | 1146.38260 | 2 | 1.92E-07 | 0.92   | 3.07    | -     | 1126.8   |
| AHQ-2-2, 1833                 | K.ADAEGESDLENSR.K                   | 1393.35296 | 2 | 5.98E-08 | 0.74   | 2.83    | -     | 613.0    |
| AHQ-2-1, 2037                 | K.ADAEGESDLENSR.K                   | 1393.35296 | 2 | 5.30E-08 | 0.92   | 3.36    | -     | 1096.7   |
| AHQ-2-5, 2417 - 2419          | K.AGALQCSPSDAYTK.K                  | 1470.58689 | 2 | 2.33E-07 | 0.92   | 3.96    | -     | 825.6    |
| AHQ-2-2, 2594                 | K.AGALQCSPSDAYTK.K                  | 1470.58689 | 1 | 1.44E-05 | 0.82   | 3.90    | -     | 476.0    |
| AHQ-2-5, 2428                 | K.AGALQCSPSDAYTK.K                  | 1470.58689 | 1 | 2.76E-07 | 0.81   | 3.57    | -     | 472.8    |
| AHQ-2-4, 2565                 | K.AGALQCSPSDAYTK.K                  | 1470.58689 | 2 | 5.20E-07 | 0.93   | 3.72    | -     | 1010.1   |
| AHQ-2-6, 2426                 | K.AGALQCSPSDAYTK.K                  | 1470.58689 | 2 | 3.77E-06 | 0.90   | 3.59    | -     | 799.6    |
| AHQ-2-4, 2585                 | K.AGALQCSPSDAYTK.K                  | 1470.58689 | 1 | 3.34E-05 | 0.73   | 3.17    | -     | 492.3    |
| AHQ-2-1, 2710 - 2712          | K.AGALQCSPSDAYTK.K                  | 1470.58689 | 2 | 1.83E-06 | 0.93   | 4.19    | -     | 877.3    |
| AHQ-2-3, 2587                 | K.AGALQCSPSDAYTK.K                  | 1470.58689 | 1 | 9.53E-07 | 0.68   | 3.23    | -     | 378.0    |
| AHQ-2-1, 2526                 | K.AGALQCSPSDAYTK.K                  | 1470.58689 | 2 | 9.53E-05 | 0.83   | 3.18    | -     | 721.6    |
| AHQ-2-2, 2312                 | K.AGALQCSPSDAYTKK.E                 | 1598.75981 | 2 | 3.16E-04 | 0.89   | 3.72    | -     | 736.6    |
| AHQ-2-4, 2264 - 2281          | K.AGALQCSPSDAYTKK.E                 | 1598.75981 | 2 | 1.59E-04 | 0.79   | 3.25    | -     | 583.9    |
| AHQ-2-9, 6210                 | K.AGFLDLKDFPK.E                     | 1364.61374 | 2 | 4.53E-04 | 0.90   | 3.18    | -     | 1389.6   |
| AHQ-2-1, 4248                 | K.AIAVTVQEMVTK.S                    | 1290.55498 | 2 | 2.23E-06 | 0.96   | 4.27    | -     | 1329.8   |
| AHQ-2-2, 4041 - 4053          | K.AIAVTVQEMVTK.S                    | 1290.55498 | 2 | 1.19E-04 | 0.96   | 5.29    | -     | 1228.5   |
| AHQ-2-4, 3980 - 4000          | K.AIAVTVQEMVTK.S                    | 1290.55498 | 2 | 2.10E-09 | 0.96   | 5.04    | -     | 1121.8   |
| AHQ-2-1, 3028                 | K.AIAVTVQEM*VTK.S                   | 1306.55438 | 2 | 3.45E-05 | 0.91   | 3.60    | -     | 812.9    |
| AHQ-2-2, 4126 - 4196          | K.AIAVTVQEMVTK.S                    | 1290.55498 | 2 | 3.38E-09 | 0.94   | 4.12    | -     | 1221.2   |
| AHQ-2-3, 4005 - 4085          | K.AIAVTVQEMVTK.S                    | 1290.55498 | 2 | 5.38E-07 | 0.95   | 4.08    | -     | 1265.5   |
| AHQ-2-4, 2576 - 2582          | K.ALDGAFTEENR.A                     | 1223.27427 | 2 | 3.52E-07 | 0.94   | 3.92    | -     | 1228.7   |
| AHQ-2-3, 2441                 | K.ALDGAFTEENR.A                     | 1223.27427 | 2 | 5.66E-06 | 0.93   | 3.57    | -     | 1269.8   |
| AHQ-2-2, 2458 - 2465          | K.ALDGAFTEENR.A                     | 1223.27427 | 2 | 5.68E-06 | 0.95   | 3.98    | -     | 1758.7   |
| AHQ-2-5, 2401 - 2404          | K.ALDGAFTEENR.A                     | 1223.27427 | 1 | 6.87E-04 | 0.22   | 1.96    | -     | 233.6    |
| AHQ-2-4, 2440 - 2510          | K.ALDGAFTEENR.A                     | 1223.27427 | 2 | 4.84E-07 | 0.94   | 3.49    | -     | 1485.7   |
| AHQ-2-12, 3799                | K.ALDYYMLR.N                        | 1045.23686 | 2 | 1.55E-04 | 0.90   | 2.68    | -     | 1067.1   |
| AHQ-2-13, 3306                | K.ALDYYM*LR.N                       | 1061.23626 | 2 | 5.58E-06 | 0.82   | 2.55    | -     | 732.4    |
| AHQ-2-13, 3320                | K.ALDYYM*LR.N                       | 1061.23626 | 2 | 2.16E-06 | 0.92   | 3.03    | -     | 1056.2   |
| AHQ-2-13, 3952                | K.ALDYYMLR.N                        | 1045.23686 | 2 | 1.46E-06 | 0.95   | 4.13    | -     | 942.1    |
| AHQ-2-13, 3994 - 3999         | K.ALDYYMLR.N                        | 1045.23686 | 2 | 3.56E-07 | 0.93   | 3.70    | -     | 818.5    |
| AHQ-2-7, 1573                 | R.ALEATTEHIR.Q                      | 1141.25953 | 2 | 4.18E-05 | 0.93   | 3.51    | -     | 1428.0   |
| AHQ-2-5, 1559                 | R.ALEATTEHIR.Q                      | 1141.25953 | 2 | 5.35E-04 | 0.73   | 3.01    | -     | 742.6    |
| AHQ-2-2, 1724 - 1792          | R.ALEATTEHIR.Q                      | 1141.25953 | 2 | 1.38E-05 | 0.92   | 3.44    | -     | 1340.5   |
| AHQ-2-4, 1741 - 1806          | R.ALEATTEHIR.Q                      | 1141.25953 | 2 | 2.10E-06 | 0.88   | 2.73    | -     | 1309.1   |
| AHQ-2-1, 2077                 | R.ALEATTEHIR.Q                      | 1141.25953 | 1 | 3.85E-05 | 0.02   | 1.86    | -     | 193.4    |
| AHQ-2-1, 2062                 | R.ALEATTEHIR.Q                      | 1141.25953 | 2 | 5.63E-07 | 0.85   | 3.00    | -     | 1106.8   |
| AHQ-2-4, 3440                 | K.ALGDILISATK.A                     | 989.14811  | 2 | 6.11E-05 | 0.93   | 3.64    | -     | 912.2    |
| AHQ-2-2, 3433                 | K.ALGDILISATK.A                     | 989.14811  | 2 | 5.58E-05 | 0.90   | 4.01    | -     | 680.5    |
| AHQ-2-7, 3113                 | K.ALGDILISATK.A                     | 989.14811  | 2 | 3.40E-08 | 0.92   | 3.39    | -     | 902.8    |
| AHQ-2-5, 3199                 | K.ALGDILISATK.A                     | 989.14811  | 2 | 1.08E-06 | 0.91   | 3.58    | -     | 832.1    |
| AHQ-2-1, 3564                 | K.ALGDILISATK.A                     | 989.14811  | 2 | 5.31E-05 | 0.91   | 3.54    | -     | 798.4    |
| AHQ-2-6, 3178 - 3187          | K.ALGDILISATK.A                     | 989.14811  | 2 | 1.59E-07 | 0.95   | 4.41    | -     | 954.9    |
| AHQ-2-3, 3431 - 3432          | K.ALGDILISATK.A                     | 989.14811  | 2 | 3.08E-06 | 0.91   | 3.62    | -     | 763.8    |
| AHQ-2-1, 2729 - 2733          | K.ALSTDPAAPNLK.S                    | 1198.35099 | 2 | 4.82E-05 | 0.66   | 2.67    | -     | 480.4    |
| AHQ-2-4, 2485 - 2556          | K.ALSTDPAAPNLK.S                    | 1198.35099 | 2 | 1.48E-04 | 0.80   | 3.47    | -     | 577.2    |
| AHQ-2-2, 2553 - 2554          | K.ALSTDPAAPNLK.S                    | 1198.35099 | 2 | 1.24E-06 | 0.78   | 3.11    | -     | 610.8    |
| AHQ-2-5, 2377 - 2457          | K.ALSTDPAAPNLK.S                    | 1198.35099 | 2 | 4.91E-08 | 0.73   | 2.98    | -     | 613.4    |
| AHQ-2-6, 2389                 | K.ALSTDPAAPNLK.S                    | 1198.35099 | 2 | 7.72E-07 | 0.59   | 2.63    | -     | 581.8    |
| AHQ-2-3, 2548 - 2565          | K.ALSTDPAAPNLK.S                    | 1198.35099 | 2 | 3.93E-07 | 0.84   | 3.27    | -     | 775.7    |
| AHQ-2-13, 2653                | K.ALSTDPAAPNLK.S                    | 1198.35099 | 2 | 8.78E-05 | 0.69   | 2.73    | -     | 638.0    |
| AHQ-2-2, 3580                 | K.ALSTDPAAPNLKSQLAAAAA.A            | 1967.21592 | 2 | 1.09E-08 | 0.83   | 3.43    | -     | 506.0    |
| AHQ-2-3, 3555 - 3560          | K.ALSTDPAAPNLKSQLAAAAA.A            | 1967.21592 | 2 | 9.62E-06 | 0.91   | 3.93    | -     | 693.6    |
| AHQ-2-3, 6676 - 6744          | R.ANQAQIMACQSLGEPGCTQAQVLSAATIVAK.H | 3220.64522 | 3 | 4.16E-04 | 0.90   | 4.69    | -     | 833.0    |
| AHQ-2-2, 7384 - 7456          | R.ANQAQIMACQSLGEPGCTQAQVLSAATIVAK.H | 3220.64522 | 3 | 3.49E-06 | 0.91   | 4.89    | -     | 711.4    |
| AHQ-2-1, 6600 - 6673          | R.ANQAQIMACQSLGEPGCTQAQVLSAATIVAK.H | 3220.64522 | 3 | 6.55E-05 | 0.94   | 4.88    | -     | 1066.4   |
| AHQ-2-2, 6498                 | K.APGQLECEIAAALNSCLR.D              | 2077.32566 | 2 | 2.35E-09 | 0.97   | 4.82    | -     | 1445.7   |
| AHQ-2-4, 6534                 | K.APGQLECEIAAALNSCLR.D              | 2077.32566 | 2 | 1.70E-07 | 0.97   | 5.26    | -     | 1283.2   |
| AHQ-2-5, 6295                 | K.APGQLECEIAAALNSCLR.D              | 2077.32566 | 2 | 1.94E-07 | 0.98   | 5.98    | -     | 1546.8   |
| AHQ-2-4, 5782                 | K.APGQLECEIAAALNSCLR.D              | 2077.32566 | 2 | 3.78E-05 | 0.68   | 3.46    | -     | 434.7    |
| AHQ-2-3, 5763 - 5768          | K.APGQLECEIAAALNSCLR.D              | 2077.32566 | 2 | 1.65E-07 | 0.97   | 5.32    | -     | 1187.6   |
| AHQ-2-2, 5822                 | K.APGQLECEIAAALNSCLR.D              | 2077.32566 | 2 | 8.79E-09 | 0.96   | 4.61    | -     | 1446.7   |
| AHQ-2-1, 6424                 | K.APGQLECEIAAALNSCLR.D              | 2077.32566 | 2 | 1.48E-06 | 0.91   | 3.98    | -     | 1172.5   |
| AHQ-2-3, 6464                 | K.APGQLECEIAAALNSCLR.D              | 2077.32566 | 2 | 9.29E-05 | 0.96   | 4.85    | -     | 1196.7   |
| AHQ-2-1, 7002                 | K.AQEAACGPLEMSALSIVVQNLK.D          | 2391.66165 | 3 | 5.64E-06 | 0.96   | 5.38    | -     | 1257.6   |
| AHQ-2-2, 7177 - 7178          | K.AQEAACGPLEMSALSIVVQNLK.D          | 2391.66165 | 3 | 2.93E-11 | 0.96   | 5.19    | -     | 1853.4   |
| AHQ-2-5, 2624 - 2625          | K.ASAGPQLLVQSCK.A                   | 1457.67763 | 1 | 4.86E-04 | 0.25   | 2.07    | -     | 326.8    |
| AHQ-2-3, 2855 - 2895          | K.ASAGPQLLVQSCK.A                   | 1457.67763 | 2 | 1.03E-05 | 0.87   | 3.84    | -     | 406.7    |
| AHQ-2-2, 3118                 | K.ASAGPQLLVQSCK.A                   | 1457.67763 | 2 | 5.43E-09 | 0.77   | 2.88    | -     | 455.8    |
| AHQ-2-6, 2626 - 2677          | K.ASAGPQLLVQSCK.A                   | 1457.67763 | 2 | 2.40E-06 | 0.87   | 3.94    | -     | 481.7    |
| AHQ-2-7, 2568                 | K.ASAGPQLLVQSCK.A                   | 1457.67763 | 2 | 1.02E-09 | 0.82   | 3.70    | -     | 467.3    |
| AHQ-2-2, 2878                 | K.ASAGPQLLVQSCK.A                   | 1457.67763 | 1 | 1.45E-05 | 0.46   | 2.86    | -     | 403.2    |
| AHQ-2-2, 2846 - 2916          | K.ASAGPQLLVQSCK.A                   | 1457.67763 | 2 | 2.28E-09 | 0.90   | 4.32    | -     | 475.4    |
| AHQ-2-4, 2825 - 2896          | K.ASAGPQLLVQSCK.A                   | 1457.67763 | 2 | 1.24E-09 | 0.93   | 4.36    | -     | 690.3    |
| AHQ-2-4, 2872                 | K.ASAGPQLLVQSCK.A                   | 1457.67763 | 1 | 1.04E-05 | 0.59   | 3.04    | -     | 397.1    |
| AHQ-2-4, 3186                 | K.ASAGPQLLVQSCK.A                   | 1457.67763 | 2 | 1.95E-05 | 0.80   | 2.94    | -     | 575.5    |
| AHQ-2-7, 2577                 | K.ASAGPQLLVQSCK.A                   | 1457.67763 | 1 | 1.10E-13 | 0.75   | 3.48    | -     | 471.5    |
| AHQ-2-1, 3001 - 3076          | K.ASAGPQLLVQSCK.A                   | 1457.67763 | 2 | 3.17E-10 | 0.93   | 4.52    | -     | 583.6    |
| AHQ-2-6, 2673 - 2743          | K.ASAGPQLLVQSCK.A                   | 1457.67763 | 1 | 2.71E-05 | 0.11   | 2.07    | -     | 287.3    |
| AHQ-2-5, 2608 - 2623          | K.ASAGPQLLVQSCK.A                   | 1457.67763 | 2 | 6.52E-07 | 0.80   | 3.41    | -     | 361.1    |

|                       |                                         |            |   |          |      |      |   |        |
|-----------------------|-----------------------------------------|------------|---|----------|------|------|---|--------|
| AHQ-2-3, 4079         | K.ASVPTIQDQASAM*QLSQCAK.N               | 2152.39272 | 2 | 2.49E-04 | 0.65 | 3.20 | - | 338.3  |
| AHQ-2-4, 4352 - 4420  | K.ASVPTIQDQASAMQLSQCAK.N                | 2136.39332 | 2 | 3.11E-14 | 0.95 | 5.30 | - | 665.7  |
| AHQ-2-7, 4083         | K.ASVPTIQDQASAMQLSQCAK.N                | 2136.39332 | 2 | 5.43E-07 | 0.93 | 4.25 | - | 1018.3 |
| AHQ-2-2, 4412 - 4484  | K.ASVPTIQDQASAMQLSQCAK.N                | 2136.39332 | 2 | 1.68E-07 | 0.94 | 4.80 | - | 737.1  |
| AHQ-2-4, 4045 - 4049  | K.ASVPTIQDQASAM*QLSQCAK.N               | 2152.39272 | 2 | 1.40E-05 | 0.87 | 3.83 | - | 532.7  |
| AHQ-2-3, 4515 - 4592  | K.ASVPTIQDQASAMQLSQCAK.N                | 2136.39332 | 2 | 3.84E-08 | 0.96 | 5.10 | - | 857.8  |
| AHQ-2-5, 4187         | K.ASVPTIQDQASAMQLSQCAK.N                | 2136.39332 | 2 | 5.32E-06 | 0.92 | 3.97 | - | 934.7  |
| AHQ-2-4, 3764         | K.ASVPTIQDQASAM*QLSQCAK.N               | 2152.39272 | 2 | 3.13E-05 | 0.57 | 2.74 | - | 393.0  |
| AHQ-2-3, 4376 - 4447  | K.ASVPTIQDQASAMQLSQCAK.N                | 2136.39332 | 2 | 7.20E-09 | 0.92 | 4.48 | - | 657.4  |
| AHQ-2-6, 4258         | K.ASVPTIQDQASAMQLSQCAK.N                | 2136.39332 | 2 | 4.25E-04 | 0.81 | 3.71 | - | 447.2  |
| AHQ-2-2, 4548 - 4616  | K.ASVPTIQDQASAMQLSQCAK.N                | 2136.39332 | 2 | 1.36E-08 | 0.89 | 4.24 | - | 418.5  |
| AHQ-2-6, 4093         | K.ASVPTIQDQASAMQLSQCAK.N                | 2136.39332 | 2 | 1.13E-10 | 0.90 | 4.29 | - | 590.3  |
| AHQ-2-1, 4446 - 4460  | K.ASVPTIQDQASAMQLSQCAK.N                | 2136.39332 | 2 | 9.18E-05 | 0.89 | 4.01 | - | 575.1  |
| AHQ-2-5, 4343         | K.ASVPTIQDQASAMQLSQCAK.N                | 2136.39332 | 2 | 1.22E-09 | 0.82 | 3.75 | - | 385.9  |
| AHQ-2-6, 3530         | K.ASVPTIQDQASAM*QLSQCAK.N               | 2152.39272 | 2 | 1.63E-06 | 0.93 | 4.54 | - | 664.0  |
| AHQ-2-2, 3966 - 3973  | K.ASVPTIQDQASAM*QLSQCAK.N               | 2152.39272 | 2 | 8.29E-07 | 0.95 | 5.00 | - | 872.9  |
| AHQ-2-4, 4452 - 4520  | K.ASVPTIQDQASAMQLSQCAK.N                | 2136.39332 | 2 | 6.78E-07 | 0.87 | 4.10 | - | 521.2  |
| AHQ-2-1, 5150 - 5161  | K.AVAEQIPLLQGVGR.G                      | 1493.77619 | 2 | 2.54E-06 | 0.75 | 3.08 | - | 499.8  |
| AHQ-2-6, 4767         | K.AVAEQIPLLQGVGR.G                      | 1493.77619 | 1 | 5.94E-06 | 0.60 | 2.87 | - | 163.0  |
| AHQ-2-6, 4725         | K.AVAEQIPLLQGVGR.G                      | 1493.77619 | 2 | 2.46E-06 | 0.88 | 3.57 | - | 643.7  |
| AHQ-2-3, 5071         | K.AVAEQIPLLQGVGR.G                      | 1493.77619 | 1 | 8.65E-07 | 0.77 | 3.56 | - | 385.8  |
| AHQ-2-2, 5146         | K.AVAEQIPLLQGVGR.G                      | 1493.77619 | 3 | 6.34E-06 | 0.94 | 4.59 | - | 1492.9 |
| AHQ-2-4, 5078         | K.AVAEQIPLLQGVGR.G                      | 1493.77619 | 1 | 1.31E-06 | 0.43 | 3.23 | - | 145.5  |
| AHQ-2-4, 5044 - 5057  | K.AVAEQIPLLQGVGR.G                      | 1493.77619 | 2 | 8.21E-04 | 0.86 | 3.80 | - | 523.4  |
| AHQ-2-3, 5044 - 5119  | K.AVAEQIPLLQGVGR.G                      | 1493.77619 | 2 | 5.33E-07 | 0.92 | 4.27 | - | 675.8  |
| AHQ-2-5, 4773         | K.AVAEQIPLLQGVGR.G                      | 1493.77619 | 1 | 3.94E-07 | 0.41 | 2.70 | - | 189.5  |
| AHQ-2-2, 5077 - 5098  | K.AVAEQIPLLQGVGR.G                      | 1493.77619 | 2 | 1.19E-07 | 0.79 | 3.22 | - | 694.9  |
| AHQ-2-1, 4042         | K.AVASAAAALVLK.A                        | 1085.32216 | 2 | 7.22E-06 | 0.96 | 4.36 | - | 1352.0 |
| AHQ-2-2, 3902         | K.AVASAAAALVLK.A                        | 1085.32216 | 2 | 6.36E-08 | 0.97 | 4.24 | - | 1777.7 |
| AHQ-2-2, 4012         | K.AVASAAAALVLK.A                        | 1085.32216 | 2 | 1.39E-05 | 0.96 | 4.19 | - | 1720.7 |
| AHQ-2-1, 3914         | K.AVEGCVSASQAATEDGQLLR.G                | 2064.22056 | 2 | 6.66E-05 | 0.93 | 4.41 | - | 1054.9 |
| AHQ-2-2, 5006         | K.AVEGCVSASQAATEDGQLLR.G                | 2064.22056 | 2 | 3.75E-06 | 0.88 | 3.81 | - | 960.3  |
| AHQ-2-5, 4964         | K.AVEGCVSASQAATEDGQLLR.G                | 2064.22056 | 2 | 6.89E-04 | 0.46 | 2.77 | - | 591.9  |
| AHQ-2-2, 3957 - 4034  | K.AVEGCVSASQAATEDGQLLR.G                | 2064.22056 | 2 | 1.42E-08 | 0.95 | 4.13 | - | 1532.3 |
| AHQ-2-1, 4021         | K.AVEGCVSASQAATEDGQLLR.G                | 2064.22056 | 2 | 4.52E-07 | 0.79 | 3.36 | - | 940.2  |
| AHQ-2-2, 4265 - 4338  | K.AVEGCVSASQAATEDGQLLR.G                | 2064.22056 | 2 | 6.91E-06 | 0.92 | 4.49 | - | 903.8  |
| AHQ-2-2, 4838 - 4898  | K.AVEGCVSASQAATEDGQLLR.G                | 2064.22056 | 2 | 3.08E-06 | 0.94 | 4.33 | - | 1303.3 |
| AHQ-2-1, 4388         | K.AVEGCVSASQAATEDGQLLR.G                | 2064.22056 | 2 | 3.58E-04 | 0.95 | 4.59 | - | 1455.6 |
| AHQ-2-4, 4298         | K.AVEGCVSASQAATEDGQLLR.G                | 2064.22056 | 2 | 2.29E-04 | 0.77 | 3.37 | - | 732.1  |
| AHQ-2-3, 4163 - 4231  | K.AVEGCVSASQAATEDGQLLR.G                | 2064.22056 | 2 | 4.37E-06 | 0.81 | 3.63 | - | 739.9  |
| AHQ-2-2, 4409         | K.AVEGCVSASQAATEDGQLLR.G                | 2064.22056 | 2 | 1.13E-07 | 0.96 | 4.99 | - | 1477.7 |
| AHQ-2-1, 4213 - 4245  | K.AVEGCVSASQAATEDGQLLR.G                | 2064.22056 | 2 | 2.26E-07 | 0.92 | 3.94 | - | 1051.5 |
| AHQ-2-1, 4233         | K.AVEGCVSASQAATEDGQLLR.G                | 2064.22056 | 3 | 2.17E-05 | 0.87 | 3.80 | - | 1250.3 |
| AHQ-2-3, 7449 - 7459  | K.AVSSAIAQLLGEVAQGNENYAGIAAR.D          | 2574.83158 | 3 | 1.80E-08 | 0.97 | 5.78 | - | 2051.6 |
| AHQ-2-6, 6010 - 6021  | R.AVTDSINQLITMCTQQAPGQK.E               | 2306.60312 | 2 | 1.49E-06 | 0.86 | 4.14 | - | 589.3  |
| AHQ-2-3, 4911         | R.AVTDSINQLITMCTQQAPGQK.E               | 2306.60312 | 2 | 7.78E-06 | 0.72 | 3.66 | - | 384.9  |
| AHQ-2-1, 6216 - 6225  | R.AVTDSINQLITMCTQQAPGQK.E               | 2306.60312 | 2 | 1.87E-04 | 0.55 | 3.08 | - | 472.8  |
| AHQ-2-4, 4929         | R.AVTDSINQLITMCTQQAPGQK.E               | 2306.60312 | 2 | 1.52E-07 | 0.84 | 3.48 | - | 538.5  |
| AHQ-2-2, 5904         | R.AVTDSINQLITMCTQQAPGQK.E               | 2322.60252 | 2 | 7.05E-04 | 0.34 | 2.93 | - | 203.0  |
| AHQ-2-2, 4962         | R.AVTDSINQLITMCTQQAPGQK.E               | 2306.60312 | 2 | 1.03E-07 | 0.89 | 4.40 | - | 461.4  |
| AHQ-2-4, 5897 - 5904  | R.AVTDSINQLITMCTQQAPGQK.E               | 2322.60252 | 2 | 5.32E-04 | 0.63 | 3.23 | - | 286.3  |
| AHQ-2-1, 6304 - 6372  | R.AVTDSINQLITMCTQQAPGQK.ECDNALR.E       | 3166.51128 | 3 | 8.48E-09 | 0.92 | 4.77 | - | 982.6  |
| AHQ-2-7, 6077         | R.AVTDSINQLITMCTQQAPGQK.ECDNALR.E       | 3166.51128 | 3 | 5.16E-12 | 0.91 | 5.03 | - | 774.0  |
| AHQ-2-3, 6347 - 6415  | R.AVTDSINQLITMCTQQAPGQK.ECDNALR.E       | 3166.51128 | 3 | 2.27E-11 | 0.96 | 6.11 | - | 1183.0 |
| AHQ-2-1, 6004         | R.AVTDSINQLITMCTQQAPGQK.ECDNALR.E       | 3182.51068 | 3 | 2.84E-09 | 0.93 | 5.18 | - | 870.9  |
| AHQ-2-5, 6268         | R.AVTDSINQLITMCTQQAPGQK.ECDNALR.E       | 3166.51128 | 3 | 4.10E-10 | 0.95 | 5.24 | - | 1329.8 |
| AHQ-2-4, 6364 - 6432  | R.AVTDSINQLITMCTQQAPGQK.ECDNALR.E       | 3166.51128 | 3 | 2.81E-11 | 0.94 | 5.40 | - | 1085.9 |
| AHQ-2-2, 5173         | R.AVTDSINQLITMCTQQAPGQK.ECDNALR.E       | 3166.51128 | 3 | 8.90E-08 | 0.84 | 4.41 | - | 590.9  |
| AHQ-2-5, 6179         | R.AVTDSINQLITMCTQQAPGQK.ECDNALR.E       | 3166.51128 | 3 | 1.11E-15 | 0.93 | 4.77 | - | 1240.2 |
| AHQ-2-4, 6017 - 6032  | R.AVTDSINQLITMCTQQAPGQK.ECDNALR.E       | 3182.51068 | 3 | 6.38E-10 | 0.92 | 5.09 | - | 890.5  |
| AHQ-2-6, 6058         | R.AVTDSINQLITMCTQQAPGQK.ECDNALR.E       | 3166.51128 | 3 | 8.05E-10 | 0.92 | 4.54 | - | 1050.5 |
| AHQ-2-2, 7389 - 7402  | R.AVTDSINQLITMCTQQAPGQK.ECDNALRELETVR.E | 3894.32086 | 3 | 8.58E-04 | 0.51 | 3.54 | - | 227.4  |
| AHQ-2-2, 2416 - 2417  | R.CVSCPLPQGR.D                          | 1079.23309 | 2 | 1.75E-05 | 0.89 | 3.14 | - | 927.0  |
| AHQ-2-5, 2261 - 2263  | R.CVSCPLPQGR.D                          | 1079.23309 | 1 | 1.82E-05 | 0.29 | 2.19 | - | 117.8  |
| AHQ-2-2, 2406         | R.CVSCPLPQGR.D                          | 1079.23309 | 1 | 6.86E-04 | 0.08 | 1.88 | - | 146.7  |
| AHQ-2-3, 2380 - 2391  | R.CVSCPLPQGR.D                          | 1079.23309 | 2 | 9.92E-05 | 0.83 | 2.95 | - | 724.6  |
| AHQ-2-10, 3395        | R.DDLNGSHPVSFDK.A                       | 1544.64741 | 2 | 6.04E-08 | 0.96 | 3.95 | - | 1762.0 |
| AHQ-2-11, 3358        | R.DDLNGSHPVSFDK.A                       | 1544.64741 | 2 | 2.59E-04 | 0.59 | 2.55 | - | 604.3  |
| AHQ-2-10, 3227 - 3291 | R.DDLNGSHPVSFDK.A                       | 1544.64741 | 2 | 1.57E-07 | 0.87 | 3.66 | - | 890.3  |
| AHQ-2-7, 3455 - 3508  | R.DDLNGSHPVSFDK.A                       | 1544.64741 | 2 | 4.14E-11 | 0.92 | 3.83 | - | 1030.4 |
| AHQ-2-8, 3424         | R.DDLNGSHPVSFDK.A                       | 1544.64741 | 2 | 1.31E-07 | 0.90 | 3.59 | - | 977.8  |
| AHQ-2-7, 3323 - 3335  | R.DDLNGSHPVSFDK.A                       | 1544.64741 | 2 | 9.79E-10 | 0.94 | 3.97 | - | 1036.0 |
| AHQ-2-8, 3243         | R.DDLNGSHPVSFDK.A                       | 1544.64741 | 2 | 1.58E-07 | 0.91 | 3.77 | - | 910.4  |
| AHQ-2-1, 3694         | R.DDLNGSHPVSFDK.A                       | 1544.64741 | 2 | 7.21E-04 | 0.66 | 2.72 | - | 489.5  |
| AHQ-2-9, 3259 - 3330  | R.DDLNGSHPVSFDK.A                       | 1544.64741 | 2 | 3.51E-10 | 0.95 | 4.02 | - | 1318.7 |
| AHQ-2-7, 4783         | K.DHFGLEGDEESTMLEDSVSPK.K               | 2323.43307 | 2 | 4.93E-04 | 0.84 | 3.60 | - | 752.8  |
| AHQ-2-3, 5808 - 5875  | R.DKAPGQLECECTAIAALNSCLR.D              | 2320.58644 | 2 | 2.19E-09 | 0.79 | 3.34 | - | 833.6  |
| AHQ-2-3, 5491 - 5493  | R.DKAPGQLECECTAIAALNSCLR.D              | 2320.58644 | 2 | 1.14E-10 | 0.95 | 4.66 | - | 1161.1 |
| AHQ-2-7, 5960         | R.DKAPGQLECECTAIAALNSCLR.D              | 2320.58644 | 2 | 1.26E-11 | 0.87 | 4.05 | - | 608.1  |
| AHQ-2-4, 6013         | R.DKAPGQLECECTAIAALNSCLR.D              | 2320.58644 | 2 | 7.60E-04 | 0.82 | 3.34 | - | 622.1  |
| AHQ-2-1, 5512         | R.DKAPGQLECECTAIAALNSCLR.D              | 2320.58644 | 2 | 2.03E-05 | 0.91 | 4.40 | - | 809.2  |
| AHQ-2-6, 5953         | R.DKAPGQLECECTAIAALNSCLR.D              | 2320.58644 | 2 | 4.13E-09 | 0.96 | 4.96 | - | 1207.8 |
| AHQ-2-3, 6009         | R.DKAPGQLECECTAIAALNSCLR.D              | 2320.58644 | 2 | 1.17E-05 | 0.91 | 4.34 | - | 761.4  |
| AHQ-2-2, 5477 - 5549  | R.DKAPGQLECECTAIAALNSCLR.D              | 2320.58644 | 2 | 3.99E-11 | 0.93 | 4.11 | - | 950.7  |
| AHQ-2-1, 6232         | R.DKAPGQLECECTAIAALNSCLR.D              | 2320.58644 | 2 | 4.73E-10 | 0.92 | 4.29 | - | 609.4  |
| AHQ-2-9, 6024         | R.DKAPGQLECECTAIAALNSCLR.D              | 2320.58644 | 2 | 8.03E-08 | 0.91 | 4.11 | - | 872.2  |
| AHQ-2-4, 6310         | R.DKAPGQLECECTAIAALNSCLR.D              | 2320.58644 | 2 | 2.26E-08 | 0.96 | 5.30 | - | 855.6  |
| AHQ-2-2, 6042         | R.DKAPGQLECECTAIAALNSCLR.D              | 2320.58644 | 2 | 3.06E-06 | 0.91 | 4.02 | - | 894.0  |
| AHQ-2-3, 6255 - 6264  | R.DKAPGQLECECTAIAALNSCLR.D              | 2320.58644 | 2 | 2.09E-06 | 0.97 | 5.20 | - | 1383.3 |
| AHQ-2-4, 6565         | R.DKAPGQLECECTAIAALNSCLR.D              | 2320.58644 | 2 | 2.22E-15 | 0.93 | 4.37 | - | 920.6  |
| AHQ-2-1, 5853         | R.DKAPGQLECECTAIAALNSCLR.D              | 2320.58644 | 2 | 8.08E-07 | 0.88 | 3.63 | - | 890.1  |
| AHQ-2-2, 6304 - 6376  | R.DKAPGQLECECTAIAALNSCLR.D              | 2320.58644 | 2 | 1.57E-10 | 0.96 | 4.77 | - | 1175.3 |
| AHQ-2-5, 6068         | R.DKAPGQLECECTAIAALNSCLR.D              | 2320.58644 | 2 | 1.38E-07 | 0.94 | 4.67 | - | 978.3  |
| AHQ-2-5, 6325         | R.DKAPGQLECECTAIAALNSCLR.D              | 2320.58644 | 2 | 6.59E-10 | 0.94 | 4.74 | - | 842.9  |
| AHQ-2-3, 6417 - 6492  | R.DKAPGQLECECTAIAALNSCLR.D              | 2320.58644 | 2 | 4.05E-14 | 0.95 | 5.09 | - | 927.1  |
| AHQ-2-5, 5297         | R.DKAPGQLECECTAIAALNSCLR.D              | 2320.58644 | 2 | 2.78E-15 | 0.93 | 4.53 | - | 946.9  |
| AHQ-2-2, 6520         | R.DKAPGQLECECTAIAALNSCLR.D              | 2320.58644 | 2 | 6.02E-11 | 0.92 | 3.96 | - | 786.6  |
| AHQ-2-4, 6484         | R.DKAPGQLECECTAIAALNSCLR.D              | 2320.58644 | 2 | 4.25E-08 | 0.95 | 4.44 | - | 1004.8 |
| AHQ-2-4, 4848 - 4857  | R.DLDQASLAAVSQQLAPR.E                   | 1783.96422 | 2 | 2.33E-06 | 0.85 | 3.58 | - | 757.8  |
| AHQ-2-3, 5463 - 5535  | R.DLDQASLAAVSQQLAPR.E                   | 1783.96422 | 2 | 2.79E-04 | 0.93 | 4.74 | - | 647.5  |
| AHQ-2-2, 5506 - 5580  | R.DLDQASLAAVSQQLAPR.E                   | 1783.96422 | 2 | 2.31E-04 | 0.93 | 4.48 | - | 745.9  |
| AHQ-2-3, 5476         | R.DLDQASLAAVSQQLAPR.E                   | 1783.96422 | 3 | 7.10E-06 | 0.90 | 3.94 | - | 1596.8 |
| AHQ-2-2, 5528         | R.DLDQASLAAVSQQLAPR.E                   | 1783.96422 | 3 | 3.62E-07 | 0.96 | 4.88 | - | 1940.0 |
| AHQ-2-4, 5488 - 5568  | R.DLDQASLAAVSQQLAPR.E                   | 1783.96422 | 2 | 3.74E-09 | 0.96 | 4.63 | - | 1550.3 |
| AHQ-2-4, 5509         | R.DLDQASLAAVSQQLAPR.E                   | 1783.96422 | 3 | 1.35E-05 | 0.95 | 4.47 | - | 1984.8 |
| AHQ-2-11, 5032 - 5033 | R.DLDQASLAAVSQQLAPR.E                   | 1783.96422 | 2 | 3.48E-04 | 0.43 | 2.88 | - | 395.1  |
| AHQ-2-1, 5488 - 5493  | R.DLDQASLAAVSQQLAPR.E                   | 1783.96422 | 3 | 1.83E-06 | 0.93 | 4.58 | - | 1587.1 |

|                        |                                      |            |   |          |      |      |   |        |
|------------------------|--------------------------------------|------------|---|----------|------|------|---|--------|
| AHQ-2-5, 3227          | R.DPPSWSVLGHRSR.T                    | 1409.53156 | 3 | 9.41E-07 | 0.90 | 4.30 | - | 753.1  |
| AHQ-2-1, 3750          | R.DPPSWSVLGHRSR.T                    | 1409.53156 | 3 | 3.69E-07 | 0.84 | 3.66 | - | 577.9  |
| AHQ-2-2, 3526 - 3606   | R.DPPSWSVLGHRSR.T                    | 1409.53156 | 2 | 6.56E-08 | 0.90 | 3.13 | - | 633.2  |
| AHQ-2-4, 3524 - 3526   | R.DPPSWSVLGHRSR.T                    | 1409.53156 | 2 | 3.67E-10 | 0.95 | 3.97 | - | 881.3  |
| AHQ-2-2, 3545          | R.DPPSWSVLGHRSR.T                    | 1409.53156 | 3 | 3.61E-08 | 0.92 | 4.10 | - | 980.6  |
| AHQ-2-3, 3516 - 3539   | R.DPPSWSVLGHRSR.T                    | 1409.53156 | 2 | 4.08E-08 | 0.94 | 3.99 | - | 732.8  |
| AHQ-2-10, 4790         | R.DPVQLNLLVYQAR.D                    | 1529.76539 | 2 | 1.02E-06 | 0.96 | 4.04 | - | 1725.9 |
| AHQ-2-7, 5219          | R.DPVQLNLLVYQAR.D                    | 1529.76539 | 2 | 1.56E-05 | 0.96 | 3.63 | - | 2076.7 |
| AHQ-2-9, 5152          | R.DPVQLNLLVYQAR.D                    | 1529.76539 | 2 | 3.57E-06 | 0.91 | 3.76 | - | 1141.7 |
| AHQ-2-3, 2357          | K.EAAYHPEVAPDVR.L                    | 1454.56910 | 2 | 2.00E-04 | 0.89 | 2.77 | - | 1127.8 |
| AHQ-2-7, 2152          | K.EAAYHPEVAPDVR.L                    | 1454.56910 | 1 | 3.11E-05 | 0.50 | 2.19 | - | 292.4  |
| AHQ-2-4, 2352 - 2353   | K.EAAYHPEVAPDVR.L                    | 1454.56910 | 2 | 4.38E-06 | 0.78 | 3.02 | - | 622.9  |
| AHQ-2-4, 2362          | K.EAAYHPEVAPDVR.L                    | 1454.56910 | 1 | 3.63E-10 | 0.83 | 3.27 | - | 526.1  |
| AHQ-2-5, 2185          | K.EAAYHPEVAPDVR.L                    | 1454.56910 | 2 | 3.88E-05 | 0.73 | 2.66 | - | 734.3  |
| AHQ-2-8, 2088 - 2096   | K.EAAYHPEVAPDVR.L                    | 1454.56910 | 2 | 1.12E-08 | 0.85 | 3.08 | - | 868.8  |
| AHQ-2-1, 6245 - 6313   | K.EADESLNFFEEQILEAAK.S               | 1937.05072 | 2 | 1.50E-05 | 0.91 | 3.85 | - | 1316.4 |
| AHQ-2-10, 5518 - 5579  | K.EADESLNFFEEQILEAAK.S               | 1937.05072 | 2 | 8.77E-09 | 0.94 | 4.50 | - | 1302.6 |
| AHQ-2-14-, 5820        | K.EADESLNFFEEQILEAAK.S               | 1937.05072 | 2 | 5.94E-05 | 0.62 | 2.96 | - | 739.7  |
| AHQ-2-3, 6397 - 6471   | K.EADESLNFFEEQILEAAK.S               | 1937.05072 | 2 | 4.43E-07 | 0.83 | 3.65 | - | 925.7  |
| AHQ-2-5, 6052 - 6132   | K.EADESLNFFEEQILEAAK.S               | 1937.05072 | 2 | 4.24E-09 | 0.96 | 4.98 | - | 1282.8 |
| AHQ-2-4, 6254 - 6328   | K.EADESLNFFEEQILEAAK.S               | 1937.05072 | 2 | 6.38E-06 | 0.96 | 5.46 | - | 1309.1 |
| AHQ-2-9, 6151          | K.EADESLNFFEEQILEAAK.S               | 1937.05072 | 2 | 5.71E-06 | 0.72 | 3.01 | - | 618.1  |
| AHQ-2-6, 5914          | K.EADESLNFFEEQILEAAK.S               | 1937.05072 | 2 | 1.64E-06 | 0.82 | 3.50 | - | 853.2  |
| AHQ-2-9, 5999 - 6075   | K.EADESLNFFEEQILEAAK.S               | 1937.05072 | 2 | 3.28E-05 | 0.87 | 3.84 | - | 818.1  |
| AHQ-2-5, 6201          | K.EADESLNFFEEQILEAAK.S               | 1937.05072 | 2 | 9.68E-04 | 0.89 | 4.15 | - | 761.7  |
| AHQ-2-5, 6340          | K.EADESLNFFEEQILEAAK.S               | 1937.05072 | 2 | 3.55E-08 | 0.95 | 5.23 | - | 1056.5 |
| AHQ-2-6, 6029          | K.EADESLNFFEEQILEAAK.S               | 1937.05072 | 2 | 8.69E-07 | 0.97 | 4.75 | - | 1540.7 |
| AHQ-2-2, 6714 - 6786   | K.EADESLNFFEEQILEAAK.S               | 1937.05072 | 2 | 2.99E-04 | 0.28 | 2.58 | - | 424.5  |
| AHQ-2-3, 6715          | K.EADESLNFFEEQILEAAK.S               | 1937.05072 | 2 | 3.29E-04 | 0.62 | 3.74 | - | 361.4  |
| AHQ-2-4, 6788          | K.EADESLNFFEEQILEAAK.S               | 1937.05072 | 2 | 1.02E-04 | 0.79 | 3.55 | - | 559.6  |
| AHQ-2-11, 5636         | K.EADESLNFFEEQILEAAK.S               | 1937.05072 | 2 | 8.08E-05 | 0.91 | 3.92 | - | 1258.3 |
| AHQ-2-7, 6009          | K.EADESLNFFEEQILEAAK.S               | 1937.05072 | 2 | 2.67E-04 | 0.82 | 3.91 | - | 800.3  |
| AHQ-2-11, 5770 - 5789  | K.EADESLNFFEEQILEAAK.S               | 1937.05072 | 2 | 3.37E-04 | 0.69 | 3.03 | - | 795.1  |
| AHQ-2-2, 6252 - 6325   | K.EADESLNFFEEQILEAAK.S               | 1937.05072 | 2 | 1.35E-08 | 0.96 | 4.90 | - | 1465.1 |
| AHQ-2-1, 6122 - 6192   | K.EADESLNFFEEQILEAAK.S               | 1937.05072 | 2 | 7.74E-09 | 0.96 | 5.39 | - | 1393.6 |
| AHQ-2-2, 6344 - 6412   | K.EADESLNFFEEQILEAAK.S               | 1937.05072 | 2 | 7.91E-09 | 0.98 | 5.76 | - | 1782.2 |
| AHQ-2-2, 6484 - 6486   | K.EADESLNFFEEQILEAAK.S               | 1937.05072 | 2 | 3.45E-06 | 0.95 | 4.99 | - | 1350.2 |
| AHQ-2-4, 6396 - 6464   | K.EADESLNFFEEQILEAAK.S               | 1937.05072 | 2 | 5.42E-06 | 0.97 | 5.43 | - | 1710.8 |
| AHQ-2-3, 6208 - 6276   | K.EADESLNFFEEQILEAAK.S               | 1937.05072 | 2 | 7.28E-07 | 0.96 | 5.02 | - | 1615.1 |
| AHQ-2-4, 6018          | K.EADESLNFFEEQILEAAK.S               | 1937.05072 | 2 | 4.76E-05 | 0.91 | 4.50 | - | 771.7  |
| AHQ-2-3, 7561 - 7563   | R.ECANGYLELHDHVLTLQKPSPELK.Q         | 2883.30906 | 3 | 7.55E-10 | 0.96 | 5.10 | - | 1654.0 |
| AHQ-2-8, 7427          | R.ECANGYLELHDHVLTLQKPSPELK.Q         | 2883.30906 | 3 | 7.39E-06 | 0.81 | 3.24 | - | 991.5  |
| AHQ-2-2, 7606 - 7608   | R.ECANGYLELHDHVLTLQKPSPELK.Q         | 2883.30906 | 3 | 5.19E-12 | 0.96 | 5.43 | - | 1434.1 |
| AHQ-2-9, 7450          | R.ECANGYLELHDHVLTLQKPSPELK.Q         | 2883.30906 | 2 | 6.90E-09 | 0.88 | 3.66 | - | 790.7  |
| AHQ-2-4, 7620 - 7638   | R.ECANGYLELHDHVLTLQKPSPELK.Q         | 2883.30906 | 3 | 7.25E-11 | 0.97 | 5.87 | - | 1295.2 |
| AHQ-2-6, 7262 - 7263   | R.ECANGYLELHDHVLTLQKPSPELK.Q         | 2883.30906 | 3 | 6.67E-10 | 0.91 | 4.66 | - | 934.4  |
| AHQ-2-5, 7429 - 7509   | R.ECANGYLELHDHVLTLQKPSPELK.Q         | 2883.30906 | 2 | 2.94E-05 | 0.90 | 4.23 | - | 537.0  |
| AHQ-2-5, 7507          | R.ECANGYLELHDHVLTLQKPSPELK.Q         | 2883.30906 | 3 | 2.81E-12 | 0.96 | 5.91 | - | 1252.5 |
| AHQ-2-6, 7298 - 7318   | R.EGISQEAALHTQMLTAVQEISHLIEPLANAAR.A | 3372.79804 | 3 | 3.33E-15 | 0.97 | 6.23 | - | 1822.7 |
| AHQ-2-3, 7533 - 7607   | R.EGISQEAALHTQMLTAVQEISHLIEPLANAAR.A | 3372.79804 | 3 | 1.11E-09 | 0.95 | 5.84 | - | 860.3  |
| AHQ-2-3, 7627          | R.EGISQEAALHTQMLTAVQEISHLIEPLANAAR.A | 3372.79804 | 3 | 6.89E-07 | 0.96 | 5.86 | - | 1193.2 |
| AHQ-2-2, 7604 - 7674   | R.EGISQEAALHTQMLTAVQEISHLIEPLANAAR.A | 3372.79804 | 3 | 1.87E-10 | 0.93 | 5.05 | - | 979.4  |
| AHQ-2-1, 7274 - 7341   | R.EGISQEAALHTQMLTAVQEISHLIEPLANAAR.A | 3372.79804 | 3 | 7.54E-04 | 0.73 | 3.77 | - | 436.7  |
| AHQ-2-5, 7540 - 7600   | R.EGISQEAALHTQMLTAVQEISHLIEPLANAAR.A | 3372.79804 | 3 | 6.45E-07 | 0.97 | 5.06 | - | 2291.9 |
| AHQ-2-7, 7575          | R.EGISQEAALHTQMLTAVQEISHLIEPLANAAR.A | 3372.79804 | 3 | 1.92E-08 | 0.93 | 5.04 | - | 1199.3 |
| AHQ-2-9, 7515 - 7518   | R.EGISQEAALHTQMLTAVQEISHLIEPLANAAR.A | 3372.79804 | 3 | 4.44E-06 | 0.95 | 5.57 | - | 1295.1 |
| AHQ-2-4, 7618 - 7689   | R.EGISQEAALHTQMLTAVQEISHLIEPLANAAR.A | 3372.79804 | 3 | 1.39E-12 | 0.96 | 6.21 | - | 1258.4 |
| AHQ-2-5, 7427          | R.EGISQEAALHTQMLTAVQEISHLIEPLANAAR.A | 3388.79744 | 3 | 8.49E-06 | 0.91 | 4.47 | - | 863.2  |
| AHQ-2-4, 7516          | R.EGISQEAALHTQMLTAVQEISHLIEPLANAAR.A | 3388.79744 | 3 | 3.36E-04 | 0.88 | 4.44 | - | 742.7  |
| AHQ-2-2, 7469 - 7544   | R.EGISQEAALHTQMLTAVQEISHLIEPLANAAR.A | 3388.79744 | 3 | 1.85E-06 | 0.95 | 5.38 | - | 1131.9 |
| AHQ-2-8, 7486          | R.EGISQEAALHTQMLTAVQEISHLIEPLANAAR.A | 3372.79804 | 3 | 7.23E-08 | 0.95 | 5.19 | - | 1449.1 |
| AHQ-2-2, 7270 - 7349   | R.ELLENPVQINDM*SYFGCLDSVMENSK.V      | 3148.48814 | 3 | 2.53E-05 | 0.60 | 3.51 | - | 335.6  |
| AHQ-2-4, 7342 - 7409   | R.ELLENPVQINDM*SYFGCLDSVMENSK.V      | 3148.48814 | 3 | 2.52E-05 | 0.65 | 4.25 | - | 330.8  |
| AHQ-2-7, 2704          | R.ELMEEKKEEITGTLR.K                  | 1807.05950 | 2 | 2.53E-09 | 0.80 | 3.71 | - | 467.0  |
| AHQ-2-7, 2147          | R.ELM*EEKKEEITGTLR.K                 | 1823.05890 | 2 | 5.73E-04 | 0.36 | 2.52 | - | 266.9  |
| AHQ-2-7, 2613 - 2695   | R.EQGVVEEHETLLLR.R                   | 1553.69898 | 2 | 7.17E-04 | 0.85 | 3.75 | - | 455.8  |
| AHQ-2-7, 2860          | R.EQGVVEEHETLLLR.R                   | 1553.69898 | 2 | 8.57E-09 | 0.58 | 3.00 | - | 257.9  |
| AHQ-2-13-, 5557        | R.ERIEPAPGPPSDFGLFLSDDDPK.K          | 2571.77979 | 3 | 4.03E-12 | 0.98 | 6.95 | - | 1421.2 |
| AHQ-2-7, 5447          | R.ERIEPAPGPPSDFGLFLSDDDPK.K          | 2571.77979 | 3 | 3.81E-09 | 0.97 | 6.45 | - | 1515.4 |
| AHQ-2-13, 5436 - 5461  | R.ERIEPAPGPPSDFGLFLSDDDPK.K          | 2571.77979 | 3 | 9.29E-08 | 0.97 | 6.03 | - | 1684.0 |
| AHQ-2-13-, 5203 - 5205 | R.ERIEPAPGPPSDFGLFLSDDDPK.K          | 2699.95270 | 3 | 2.33E-11 | 0.98 | 6.46 | - | 1843.3 |
| AHQ-2-13, 5113         | R.ERIEPAPGPPSDFGLFLSDDDPK.K          | 2699.95270 | 3 | 6.96E-11 | 0.97 | 6.23 | - | 1832.3 |
| AHQ-2-7, 4903 - 4912   | R.ERIEPAPGPPSDFGLFLSDDDPK.K          | 2699.95270 | 3 | 5.63E-12 | 0.98 | 6.71 | - | 1951.4 |
| AHQ-2-4, 2278          | K.EVANSTANLVK.T                      | 1146.27608 | 2 | 2.75E-04 | 0.73 | 2.50 | - | 797.5  |
| AHQ-2-2, 2046          | K.EVANSTANLVK.T                      | 1146.27608 | 2 | 4.47E-04 | 0.85 | 2.73 | - | 1015.9 |
| AHQ-2-4, 2276          | K.EVANSTANLVK.T                      | 1146.27608 | 1 | 1.95E-04 | 0.25 | 1.89 | - | 279.4  |
| AHQ-2-3, 2048 - 2071   | K.EVANSTANLVK.T                      | 1146.27608 | 2 | 5.35E-04 | 0.74 | 3.09 | - | 677.4  |
| AHQ-2-8, 4340          | K.EVIGEWNLTKR.R                      | 1487.68214 | 2 | 5.54E-05 | 0.93 | 3.75 | - | 1522.4 |
| AHQ-2-7, 4457          | K.EVIGEWNLTKR.R                      | 1487.68214 | 1 | 1.79E-05 | 0.72 | 3.64 | - | 260.5  |
| AHQ-2-10, 4292         | K.EVIGEWNLTKR.R                      | 1487.68214 | 2 | 1.68E-05 | 0.76 | 3.11 | - | 725.9  |
| AHQ-2-12, 4709         | K.EVIGEWNLTKR.R                      | 1487.68214 | 2 | 2.44E-04 | 0.86 | 3.48 | - | 982.4  |
| AHQ-2-11, 4549         | K.EVIGEWNLTKR.R                      | 1487.68214 | 2 | 3.70E-07 | 0.84 | 3.24 | - | 873.0  |
| AHQ-2-7, 3748          | K.EVIGEWNLTKR.V                      | 1643.86849 | 2 | 5.29E-06 | 0.81 | 3.46 | - | 696.9  |
| AHQ-2-8, 2735          | K.FFYSDQNVDSR.D                      | 1378.42795 | 2 | 6.39E-06 | 0.86 | 2.94 | - | 838.7  |
| AHQ-2-7, 2872          | K.FFYSDQNVDSR.D                      | 1378.42795 | 2 | 3.37E-04 | 0.71 | 2.60 | - | 430.5  |
| AHQ-2-8, 5936          | K.FFYSDQNVDSRDPVQLNLLVYQAR.D         | 2889.17074 | 3 | 1.10E-10 | 0.97 | 5.91 | - | 1672.6 |
| AHQ-2-7, 5955 - 6025   | K.FFYSDQNVDSRDPVQLNLLVYQAR.D         | 2889.17074 | 3 | 3.82E-11 | 0.98 | 6.78 | - | 2150.9 |
| AHQ-2-2, 7792          | R.FGQDFSTFLEAGVEM*AGQAPSQEDR.A       | 2718.89325 | 3 | 1.37E-08 | 0.83 | 4.40 | - | 660.3  |
| AHQ-2-3, 6596 - 6665   | R.FGQDFSTFLEAGVEM*AGQAPSQEDR.A       | 2734.89265 | 2 | 1.09E-06 | 0.90 | 4.14 | - | 1046.1 |
| AHQ-2-3, 7651 - 7727   | R.FGQDFSTFLEAGVEM*AGQAPSQEDR.A       | 2718.89325 | 2 | 5.24E-09 | 0.88 | 3.16 | - | 1184.8 |
| AHQ-2-3, 7733          | R.FGQDFSTFLEAGVEM*AGQAPSQEDR.A       | 2718.89325 | 3 | 2.19E-05 | 0.78 | 3.77 | - | 609.4  |
| AHQ-2-4, 6664 - 6738   | R.FGQDFSTFLEAGVEM*AGQAPSQEDR.A       | 2734.89265 | 2 | 1.33E-07 | 0.86 | 3.74 | - | 888.4  |
| AHQ-2-1, 7145          | R.FGQDFSTFLEAGVEM*AGQAPSQEDR.A       | 2718.89325 | 2 | 2.11E-06 | 0.75 | 2.96 | - | 782.3  |
| AHQ-2-1, 6505          | R.FGQDFSTFLEAGVEM*AGQAPSQEDR.A       | 2734.89265 | 2 | 9.09E-07 | 0.92 | 4.38 | - | 952.2  |
| AHQ-2-1, 6497 - 6566   | R.FGQDFSTFLEAGVEM*AGQAPSQEDR.A       | 2734.89265 | 3 | 4.97E-08 | 0.92 | 5.09 | - | 684.0  |
| AHQ-2-2, 7482          | R.FGQDFSTFLEAGVEM*AGQAPSQEDR.A       | 2718.89325 | 2 | 6.51E-04 | 0.68 | 2.58 | - | 1002.1 |
| AHQ-2-2, 7497          | R.FGQDFSTFLEAGVEM*AGQAPSQEDR.A       | 2718.89325 | 3 | 8.42E-05 | 0.81 | 3.40 | - | 813.3  |
| AHQ-2-1, 2890          | K.FLPSLRDEH                          | 1243.35032 | 2 | 1.89E-07 | 0.62 | 2.50 | - | 310.2  |
| AHQ-2-5, 4903          | K.GLAGAVSELLR.S                      | 1086.26701 | 2 | 1.15E-06 | 0.98 | 5.11 | - | 2177.4 |
| AHQ-2-3, 5231          | K.GLAGAVSELLR.S                      | 1086.26701 | 2 | 3.76E-05 | 0.97 | 4.28 | - | 1864.9 |
| AHQ-2-2, 5265 - 5272   | K.GLAGAVSELLR.S                      | 1086.26701 | 2 | 1.72E-07 | 0.97 | 5.10 | - | 1793.0 |
| AHQ-2-8, 4599          | K.GLAGAVSELLR.S                      | 1086.26701 | 2 | 1.77E-06 | 0.98 | 5.21 | - | 2090.9 |
| AHQ-2-4, 5200          | K.GLAGAVSELLR.S                      | 1086.26701 | 2 | 2.08E-06 | 0.98 | 5.05 | - | 2326.4 |
| AHQ-2-6, 4878          | K.GLAGAVSELLR.S                      | 1086.26701 | 2 | 8.09E-07 | 0.98 | 5.09 | - | 2219.0 |
| AHQ-2-1, 5353          | K.GLAGAVSELLR.S                      | 1086.26701 | 2 | 7.23E-05 | 0.97 | 4.47 | - | 1728.0 |
| AHQ-2-9, 4831          | K.GLAGAVSELLR.S                      | 1086.26701 | 2 | 3.73E-06 | 0.98 | 5.04 | - | 2189.9 |
| AHQ-2-5, 6727 - 6799   | R.GSOAQDPSAQLALIAASQSFLOPQGGK.M      | 2756.02103 | 2 | 1.44E-04 | 0.96 | 5.62 | - | 825.9  |

|                        |                                    |            |   |          |      |      |   |        |
|------------------------|------------------------------------|------------|---|----------|------|------|---|--------|
| AHQ-2-2, 6972 - 7052   | R.GSOAQPPSPSAQLLALIAASQSFLOPQGGK.M | 2756.02103 | 2 | 1.30E-05 | 0.92 | 4.97 | - | 717.5  |
| AHQ-2-2, 7414          | R.GSOAQPPSPSAQLLALIAASQSFLOPQGGK.M | 2756.02103 | 2 | 3.55E-04 | 0.92 | 4.37 | - | 730.1  |
| AHQ-2-2, 7412 - 7420   | R.GSOAQPPSPSAQLLALIAASQSFLOPQGGK.M | 2756.02103 | 3 | 3.12E-07 | 0.93 | 4.85 | - | 1040.4 |
| AHQ-2-6, 6566 - 6633   | R.GSOAQPPSPSAQLLALIAASQSFLOPQGGK.M | 2756.02103 | 2 | 1.51E-06 | 0.95 | 5.50 | - | 782.8  |
| AHQ-2-4, 6948          | R.GSOAQPPSPSAQLLALIAASQSFLOPQGGK.M | 2756.02103 | 2 | 1.55E-07 | 0.94 | 5.69 | - | 707.9  |
| AHQ-2-3, 6869 - 6951   | R.GSOAQPPSPSAQLLALIAASQSFLOPQGGK.M | 2756.02103 | 2 | 3.11E-05 | 0.94 | 5.03 | - | 725.7  |
| AHQ-2-3, 7312 - 7335   | R.GSOAQPPSPSAQLLALIAASQSFLOPQGGK.M | 2756.02103 | 2 | 7.17E-05 | 0.88 | 4.18 | - | 581.3  |
| AHQ-2-2, 7256 - 7324   | R.GSOAQPPSPSAQLLALIAASQSFLOPQGGK.M | 2756.02103 | 2 | 1.28E-04 | 0.72 | 3.10 | - | 503.8  |
| AHQ-2-2, 6852 - 6928   | R.GSOAQPPSPSAQLLALIAASQSFLOPQGGK.M | 2756.02103 | 3 | 1.23E-05 | 0.92 | 4.90 | - | 868.0  |
| AHQ-2-1, 6817 - 6888   | R.GSOAQPPSPSAQLLALIAASQSFLOPQGGK.M | 2756.02103 | 3 | 5.06E-07 | 0.95 | 5.39 | - | 1052.9 |
| AHQ-2-6, 6506 - 6569   | R.GSOAQPPSPSAQLLALIAASQSFLOPQGGK.M | 2756.02103 | 2 | 4.86E-08 | 0.94 | 5.11 | - | 866.4  |
| AHQ-2-4, 6941 - 7012   | R.GSOAQPPSPSAQLLALIAASQSFLOPQGGK.M | 2756.02103 | 2 | 1.77E-07 | 0.96 | 5.52 | - | 1096.5 |
| AHQ-2-8, 6470 - 6479   | R.GSOAQPPSPSAQLLALIAASQSFLOPQGGK.M | 2756.02103 | 2 | 5.03E-05 | 0.92 | 4.47 | - | 729.6  |
| AHQ-2-2, 6988 - 6996   | R.GSOAQPPSPSAQLLALIAASQSFLOPQGGK.M | 2756.02103 | 3 | 3.00E-05 | 0.94 | 5.39 | - | 1041.9 |
| AHQ-2-7, 7611          | K.GTEWVDPEDPTVIAENELGAAAAIEAAAK.K  | 3053.32301 | 3 | 3.33E-11 | 0.97 | 6.31 | - | 1852.5 |
| AHQ-2-13-, 7101        | K.GTEWVDPEDPTVIAENELGAAAAIEAAAK.K  | 3053.32301 | 3 | 1.73E-05 | 0.96 | 5.25 | - | 1979.9 |
| AHQ-2-6, 7345 - 7346   | K.GTEWVDPEDPTVIAENELGAAAAIEAAAK.K  | 3053.32301 | 3 | 8.07E-11 | 0.96 | 5.96 | - | 1231.5 |
| AHQ-2-1, 7344          | K.GTEWVDPEDPTVIAENELGAAAAIEAAAK.K  | 3053.32301 | 3 | 1.33E-05 | 0.92 | 4.82 | - | 1061.0 |
| AHQ-2-5, 7603 - 7676   | K.GTEWVDPEDPTVIAENELGAAAAIEAAAK.K  | 3053.32301 | 3 | 1.15E-13 | 0.97 | 6.45 | - | 1851.6 |
| AHQ-2-4, 7560 - 7561   | R.GVAALTSDPVAQIVLDTASDVLDK.A       | 2470.75835 | 2 | 3.12E-08 | 0.97 | 6.46 | - | 969.8  |
| AHQ-2-1, 7228          | R.GVAALTSDPVAQIVLDTASDVLDK.A       | 2470.75835 | 3 | 1.07E-11 | 0.98 | 7.22 | - | 2782.6 |
| AHQ-2-2, 7556 - 7560   | R.GVAALTSDPVAQIVLDTASDVLDK.A       | 2470.75835 | 3 | 7.26E-04 | 0.98 | 6.40 | - | 3438.5 |
| AHQ-2-5, 5515 - 5517   | R.GVGAATAVTQALNELLOHVK.A           | 2092.38495 | 2 | 2.74E-07 | 0.95 | 5.16 | - | 972.1  |
| AHQ-2-9, 7454 - 7456   | R.GVGAATAVTQALNELLOHVK.A           | 2092.38495 | 2 | 6.15E-05 | 0.95 | 5.43 | - | 848.7  |
| AHQ-2-8, 7420          | R.GVGAATAVTQALNELLOHVK.A           | 2092.38495 | 3 | 2.13E-05 | 0.94 | 4.97 | - | 941.9  |
| AHQ-2-8, 7418          | R.GVGAATAVTQALNELLOHVK.A           | 2092.38495 | 2 | 2.62E-06 | 0.96 | 5.64 | - | 913.4  |
| AHQ-2-10, 6779         | R.GVGAATAVTQALNELLOHVK.A           | 2092.38495 | 2 | 8.23E-06 | 0.92 | 4.94 | - | 673.7  |
| AHQ-2-7, 7515          | R.GVGAATAVTQALNELLOHVK.A           | 2092.38495 | 3 | 8.92E-08 | 0.89 | 4.62 | - | 636.8  |
| AHQ-2-14-, 6905        | R.GVGAATAVTQALNELLOHVK.A           | 2092.38495 | 2 | 2.36E-06 | 0.94 | 5.41 | - | 843.6  |
| AHQ-2-5, 7504 - 7505   | R.GVGAATAVTQALNELLOHVK.A           | 2092.38495 | 2 | 3.07E-04 | 0.96 | 5.41 | - | 1184.6 |
| AHQ-2-3, 7568          | R.GVGAATAVTQALNELLOHVK.A           | 2092.38495 | 3 | 1.47E-05 | 0.89 | 3.36 | - | 1267.8 |
| AHQ-2-2, 7613 - 7614   | R.GVGAATAVTQALNELLOHVK.A           | 2092.38495 | 3 | 8.65E-10 | 0.96 | 5.58 | - | 1257.0 |
| AHQ-2-2, 7612          | R.GVGAATAVTQALNELLOHVK.A           | 2092.38495 | 2 | 1.13E-06 | 0.92 | 4.82 | - | 643.6  |
| AHQ-2-7, 7516 - 7517   | R.GVGAATAVTQALNELLOHVK.A           | 2092.38495 | 2 | 2.56E-05 | 0.93 | 5.42 | - | 746.8  |
| AHQ-2-1, 7288          | R.GVGAATAVTQALNELLOHVK.A           | 2092.38495 | 3 | 4.14E-07 | 0.86 | 3.92 | - | 930.5  |
| AHQ-2-1, 7289          | R.GVGAATAVTQALNELLOHVK.A           | 2092.38495 | 2 | 2.67E-08 | 0.95 | 5.48 | - | 1038.3 |
| AHQ-2-6, 7265 - 7266   | R.GVGAATAVTQALNELLOHVK.A           | 2092.38495 | 2 | 5.42E-09 | 0.96 | 5.57 | - | 1053.0 |
| AHQ-2-6, 7261          | R.GVGAATAVTQALNELLOHVK.A           | 2092.38495 | 3 | 3.64E-09 | 0.89 | 3.93 | - | 869.7  |
| AHQ-2-3, 5892          | R.GVGAATAVTQALNELLOHVK.A           | 2092.38495 | 2 | 7.03E-06 | 0.93 | 4.82 | - | 797.7  |
| AHQ-2-3, 7567 - 7569   | R.GVGAATAVTQALNELLOHVK.A           | 2092.38495 | 2 | 8.29E-06 | 0.93 | 4.99 | - | 759.1  |
| AHQ-2-4, 7616 - 7625   | R.GVGAATAVTQALNELLOHVK.A           | 2092.38495 | 2 | 4.44E-07 | 0.90 | 4.31 | - | 676.7  |
| AHQ-2-4, 7624 - 7629   | R.GVGAATAVTQALNELLOHVK.A           | 2092.38495 | 3 | 5.37E-07 | 0.93 | 4.40 | - | 1115.7 |
| AHQ-2-14-, 6904        | R.GVGAATAVTQALNELLOHVK.A           | 2092.38495 | 3 | 2.29E-06 | 0.95 | 4.94 | - | 1225.0 |
| AHQ-2-5, 7503          | R.GVGAATAVTQALNELLOHVK.A           | 2092.38495 | 3 | 1.15E-07 | 0.92 | 4.96 | - | 1147.7 |
| AHQ-2-3, 2292          | K.HRVQELGHGCAALVTK.A               | 1778.02933 | 2 | 9.17E-07 | 0.94 | 3.99 | - | 1248.0 |
| AHQ-2-13, 3333         | R.IGITNHDEYSLV.R.E                 | 1517.66833 | 2 | 3.37E-11 | 0.91 | 3.64 | - | 966.1  |
| AHQ-2-13-, 3327        | R.IGITNHDEYSLV.R.E                 | 1517.66833 | 3 | 6.58E-09 | 0.91 | 4.33 | - | 655.8  |
| AHQ-2-13-, 3761 - 3834 | R.IGITNHDEYSLV.R.E                 | 1517.66833 | 2 | 1.29E-06 | 0.81 | 3.57 | - | 527.8  |
| AHQ-2-7, 3252 - 3324   | R.IGITNHDEYSLV.R.E                 | 1517.66833 | 2 | 2.47E-04 | 0.87 | 3.21 | - | 1191.9 |
| AHQ-2-13-, 3310 - 3329 | R.IGITNHDEYSLV.R.E                 | 1517.66833 | 2 | 6.90E-06 | 0.95 | 4.06 | - | 1450.5 |
| AHQ-2-8, 3302          | R.IGITNHDEYSLV.R.E                 | 1517.66833 | 2 | 3.89E-06 | 0.85 | 3.07 | - | 857.1  |
| AHQ-2-7, 2852 - 2923   | R.IGITNHDEYSLV.R.E                 | 1517.66833 | 2 | 2.86E-05 | 0.93 | 3.86 | - | 1190.2 |
| AHQ-2-10, 2999         | R.IGITNHDEYSLV.R.E                 | 1517.66833 | 2 | 9.95E-05 | 0.91 | 3.74 | - | 1064.7 |
| AHQ-2-2, 5216 - 5226   | R.ILAQATSDLVNAIK.A                 | 1457.69748 | 2 | 1.90E-08 | 0.98 | 5.25 | - | 1990.5 |
| AHQ-2-5, 3965          | R.ILAQATSDLVNAIK.A                 | 1457.69748 | 2 | 1.38E-09 | 0.97 | 4.01 | - | 2108.9 |
| AHQ-2-2, 5229          | R.ILAQATSDLVNAIK.A                 | 1457.69748 | 1 | 1.57E-05 | 0.73 | 3.33 | - | 511.6  |
| AHQ-2-5, 4912 - 4983   | R.ILAQATSDLVNAIK.A                 | 1457.69748 | 2 | 2.11E-09 | 0.98 | 5.70 | - | 2170.3 |
| AHQ-2-5, 4929          | R.ILAQATSDLVNAIK.A                 | 1457.69748 | 1 | 6.27E-04 | 0.78 | 3.56 | - | 726.3  |
| AHQ-2-2, 4726          | R.ILAQATSDLVNAIK.A                 | 1457.69748 | 2 | 1.58E-08 | 0.98 | 5.59 | - | 2228.5 |
| AHQ-2-1, 4334 - 4354   | R.ILAQATSDLVNAIK.A                 | 1457.69748 | 2 | 3.80E-04 | 0.96 | 4.17 | - | 1787.8 |
| AHQ-2-2, 4542 - 4546   | R.ILAQATSDLVNAIK.A                 | 1457.69748 | 2 | 5.20E-08 | 0.95 | 4.04 | - | 1351.1 |
| AHQ-2-3, 4259          | R.ILAQATSDLVNAIK.A                 | 1457.69748 | 1 | 6.55E-05 | 0.15 | 1.84 | - | 486.4  |
| AHQ-2-9, 4830          | R.ILAQATSDLVNAIK.A                 | 1457.69748 | 2 | 4.98E-06 | 0.90 | 3.52 | - | 959.1  |
| AHQ-2-2, 4249 - 4256   | R.ILAQATSDLVNAIK.A                 | 1457.69748 | 2 | 7.92E-06 | 0.97 | 4.37 | - | 2258.0 |
| AHQ-2-8, 4607          | R.ILAQATSDLVNAIK.A                 | 1457.69748 | 2 | 4.53E-08 | 0.97 | 5.19 | - | 1651.4 |
| AHQ-2-4, 4206          | R.ILAQATSDLVNAIK.A                 | 1457.69748 | 2 | 2.82E-08 | 0.97 | 4.16 | - | 1864.6 |
| AHQ-2-14, 6148         | R.ILAQATSDLVNAIK.A                 | 1457.69748 | 2 | 7.38E-08 | 0.96 | 4.49 | - | 1522.9 |
| AHQ-2-6, 4849          | R.ILAQATSDLVNAIK.A                 | 1457.69748 | 2 | 4.74E-05 | 0.96 | 3.74 | - | 1821.9 |
| AHQ-2-7, 4795 - 4809   | R.ILAQATSDLVNAIK.A                 | 1457.69748 | 2 | 5.57E-08 | 0.98 | 4.77 | - | 1986.2 |
| AHQ-2-1, 5250          | R.ILAQATSDLVNAIK.A                 | 1457.69748 | 2 | 1.71E-07 | 0.95 | 4.07 | - | 1569.0 |
| AHQ-2-6, 3933          | R.ILAQATSDLVNAIK.A                 | 1457.69748 | 2 | 5.41E-09 | 0.96 | 4.00 | - | 1780.9 |
| AHQ-2-3, 4236 - 4243   | R.ILAQATSDLVNAIK.A                 | 1457.69748 | 2 | 2.56E-06 | 0.98 | 4.61 | - | 2288.6 |
| AHQ-2-4, 4498          | R.ILAQATSDLVNAIK.A                 | 1457.69748 | 2 | 1.70E-04 | 0.92 | 3.30 | - | 1365.1 |
| AHQ-2-3, 5175 - 5179   | R.ILAQATSDLVNAIK.A                 | 1457.69748 | 2 | 7.50E-07 | 0.97 | 5.39 | - | 1661.5 |
| AHQ-2-3, 5197          | R.ILAQATSDLVNAIK.A                 | 1457.69748 | 1 | 6.65E-06 | 0.78 | 3.97 | - | 440.9  |
| AHQ-2-1, 6264          | R.IPEAPAGPPSDFGLFLSDDPPK.K         | 2286.47890 | 2 | 3.54E-04 | 0.87 | 3.73 | - | 705.7  |
| AHQ-2-13, 5812 - 5871  | R.IPEAPAGPPSDFGLFLSDDPPK.K         | 2286.47890 | 2 | 1.93E-06 | 0.96 | 5.01 | - | 1353.2 |
| AHQ-2-8, 5900 - 5924   | R.IPEAPAGPPSDFGLFLSDDPPK.K         | 2286.47890 | 2 | 7.96E-04 | 0.89 | 4.09 | - | 667.8  |
| AHQ-2-7, 5951 - 5964   | R.IPEAPAGPPSDFGLFLSDDPPK.K         | 2286.47890 | 2 | 6.22E-05 | 0.92 | 4.43 | - | 694.3  |
| AHQ-2-14-, 5795 - 5865 | R.IPEAPAGPPSDFGLFLSDDPPK.K         | 2286.47890 | 2 | 5.66E-07 | 0.96 | 5.52 | - | 864.1  |
| AHQ-2-13-, 5403 - 5439 | R.IPEAPAGPPSDFGLFLSDDPPK.K         | 2414.65181 | 3 | 4.28E-13 | 0.94 | 4.36 | - | 1580.3 |
| AHQ-2-8, 4997 - 5069   | R.IPEAPAGPPSDFGLFLSDDPPK.G         | 2414.65181 | 3 | 2.16E-04 | 0.94 | 4.06 | - | 1655.3 |
| AHQ-2-13, 5379 - 5457  | R.IPEAPAGPPSDFGLFLSDDPPK.G         | 2414.65181 | 3 | 6.43E-04 | 0.77 | 3.35 | - | 1092.3 |
| AHQ-2-7, 5264 - 5343   | R.IPEAPAGPPSDFGLFLSDDPPK.G         | 2414.65181 | 3 | 1.77E-12 | 0.96 | 5.36 | - | 1177.7 |
| AHQ-2-14-, 5397 - 5417 | R.IPEAPAGPPSDFGLFLSDDPPK.G         | 2414.65181 | 3 | 3.94E-14 | 0.96 | 5.11 | - | 1529.4 |
| AHQ-2-13, 2881         | K.ISIGNVVK.T                       | 830.00746  | 2 | 7.06E-05 | 0.74 | 2.69 | - | 425.4  |
| AHQ-2-7, 1991          | K.KGIWLEAGK.A                      | 1002.19171 | 2 | 8.08E-05 | 0.90 | 3.70 | - | 912.1  |
| AHQ-2-1, 2650 - 2653   | K.LAQAAQSSVATITR.L                 | 1417.59344 | 2 | 1.67E-05 | 0.94 | 3.70 | - | 1338.9 |
| AHQ-2-9, 2503          | K.LAQAAQSSVATITR.L                 | 1417.59344 | 2 | 2.87E-08 | 0.93 | 3.62 | - | 1394.4 |
| AHQ-2-4, 2614          | K.LAQAAQSSVATITR.L                 | 1417.59344 | 1 | 5.45E-04 | 0.14 | 2.69 | - | 97.2   |
| AHQ-2-6, 2313          | K.LAQAAQSSVATITR.L                 | 1417.59344 | 2 | 2.68E-11 | 0.96 | 4.71 | - | 1278.3 |
| AHQ-2-11, 2601         | K.LAQAAQSSVATITR.L                 | 1417.59344 | 2 | 5.01E-08 | 0.94 | 3.59 | - | 1565.5 |
| AHQ-2-4, 2466          | K.LAQAAQSSVATITR.L                 | 1417.59344 | 2 | 1.46E-10 | 0.97 | 4.72 | - | 1761.5 |
| AHQ-2-2, 2620 - 2688   | K.LAQAAQSSVATITR.L                 | 1417.59344 | 2 | 1.23E-09 | 0.97 | 5.32 | - | 1615.3 |
| AHQ-2-2, 2485          | K.LAQAAQSSVATITR.L                 | 1417.59344 | 2 | 1.89E-07 | 0.96 | 4.60 | - | 1405.8 |
| AHQ-2-7, 2403 - 2408   | K.LAQAAQSSVATITR.L                 | 1417.59344 | 2 | 7.96E-08 | 0.97 | 4.99 | - | 1829.0 |
| AHQ-2-6, 2462 - 2465   | K.LAQAAQSSVATITR.L                 | 1417.59344 | 2 | 2.29E-07 | 0.97 | 5.18 | - | 1784.0 |
| AHQ-2-14-, 2651        | K.LAQAAQSSVATITR.L                 | 1417.59344 | 2 | 2.21E-09 | 0.91 | 3.27 | - | 1411.2 |
| AHQ-2-6, 2489          | K.LAQAAQSSVATITR.L                 | 1417.59344 | 1 | 2.39E-05 | 0.26 | 4.47 | - | 119.7  |
| AHQ-2-1, 2796          | K.LAQAAQSSVATITR.L                 | 1417.59344 | 2 | 7.79E-09 | 0.97 | 2.54 | - | 1710.6 |
| AHQ-2-3, 2456 - 2457   | K.LAQAAQSSVATITR.L                 | 1417.59344 | 2 | 1.26E-07 | 0.93 | 3.77 | - | 1304.0 |
| AHQ-2-10, 2454         | K.LAQAAQSSVATITR.L                 | 1417.59344 | 2 | 1.59E-06 | 0.94 | 3.51 | - | 1455.3 |
| AHQ-2-5, 2433 - 2443   | K.LAQAAQSSVATITR.L                 | 1417.59344 | 2 | 2.54E-09 | 0.97 | 4.70 | - | 1717.5 |
| AHQ-2-4, 2604 - 2610   | K.LAQAAQSSVATITR.L                 | 1417.59344 | 2 | 9.98E-10 | 0.97 | 4.65 | - | 1656.1 |
| AHQ-2-4, 3128 - 3164   | R.LASEAKPAVAANEIEIGSHIK.H          | 2236.46779 | 3 | 1.33E-09 | 0.95 | 4.99 | - | 1538.1 |
| AHQ-2-1, 3310 - 3357   | R.LASEAKPAVAANEIEIGSHIK.H          | 2236.46779 | 3 | 2.10E-05 | 0.97 | 5.78 | - | 1916.9 |
| AHQ-2-3, 3124          | R.LASEAKPAVAANEIEIGSHIK.H          | 2236.46779 | 3 | 1.87E-07 | 0.96 | 5.88 | - | 1468.3 |

|                       |                                      |            |   |          |      |      |   |        |
|-----------------------|--------------------------------------|------------|---|----------|------|------|---|--------|
| AHQ-2-3, 3120         | R.LASEAKPAVAANEENEEIGSHIK.H          | 2236.46779 | 2 | 2.06E-05 | 0.89 | 4.20 | - | 661.1  |
| AHQ-2-6, 2855 - 2869  | R.LASEAKPAVAANEENEEIGSHIK.H          | 2236.46779 | 3 | 3.96E-05 | 0.96 | 5.31 | - | 1615.9 |
| AHQ-2-3, 2937         | R.LASEAKPAVAANEENEEIGSHIK.H          | 2236.46779 | 2 | 1.98E-08 | 0.96 | 5.37 | - | 1111.2 |
| AHQ-2-2, 2934         | R.LASEAKPAVAANEENEEIGSHIK.H          | 2236.46779 | 2 | 1.35E-05 | 0.96 | 5.01 | - | 1131.9 |
| AHQ-2-9, 2851         | R.LASEAKPAVAANEENEEIGSHIK.H          | 2236.46779 | 2 | 1.27E-04 | 0.86 | 4.04 | - | 426.3  |
| AHQ-2-9, 2846         | R.LASEAKPAVAANEENEEIGSHIK.H          | 2236.46779 | 3 | 5.68E-06 | 0.85 | 3.89 | - | 911.5  |
| AHQ-2-2, 3128         | R.LASEAKPAVAANEENEEIGSHIK.H          | 2236.46779 | 2 | 6.84E-07 | 0.95 | 5.19 | - | 711.2  |
| AHQ-2-6, 2879         | R.LASEAKPAVAANEENEEIGSHIK.H          | 2236.46779 | 2 | 4.44E-06 | 0.92 | 4.76 | - | 553.9  |
| AHQ-2-5, 2839         | R.LASEAKPAVAANEENEEIGSHIK.H          | 2236.46779 | 2 | 1.14E-07 | 0.91 | 4.82 | - | 508.5  |
| AHQ-2-4, 3133         | R.LASEAKPAVAANEENEEIGSHIK.H          | 2236.46779 | 2 | 2.18E-06 | 0.95 | 4.98 | - | 729.6  |
| AHQ-2-13, 5124        | K.LGAASLGAEDPETQVVLINAVK.D           | 1996.48671 | 2 | 7.80E-05 | 0.85 | 3.71 | - | 793.9  |
| AHQ-2-7, 5117 - 5125  | K.LGAASLGAEDPETQVVLINAVK.D           | 1996.48671 | 2 | 1.62E-10 | 0.94 | 4.58 | - | 758.6  |
| AHQ-2-7, 5268 - 5272  | K.LGAASLGAEDPETQVVLINAVK.D           | 1996.48671 | 2 | 4.65E-06 | 0.97 | 5.58 | - | 1251.4 |
| AHQ-2-2, 5790 - 5865  | K.LGAASLGAEDPETQVVLINAVK.D           | 1996.48671 | 2 | 4.85E-07 | 0.96 | 5.06 | - | 1054.8 |
| AHQ-2-2, 5638 - 5641  | K.LGAASLGAEDPETQVVLINAVK.D           | 1996.48671 | 3 | 1.09E-11 | 0.98 | 6.84 | - | 2644.4 |
| AHQ-2-9, 5302         | K.LGAASLGAEDPETQVVLINAVK.D           | 1996.48671 | 2 | 2.88E-05 | 0.64 | 3.21 | - | 464.5  |
| AHQ-2-3, 5564 - 5643  | K.LGAASLGAEDPETQVVLINAVK.D           | 1996.48671 | 2 | 2.53E-07 | 0.97 | 5.22 | - | 1343.3 |
| AHQ-2-5, 5383 - 5453  | K.LGAASLGAEDPETQVVLINAVK.D           | 1996.48671 | 2 | 2.37E-04 | 0.96 | 5.23 | - | 1161.8 |
| AHQ-2-2, 5536 - 5610  | K.LGAASLGAEDPETQVVLINAVK.D           | 1996.48671 | 2 | 2.20E-08 | 0.97 | 5.23 | - | 1277.3 |
| AHQ-2-4, 5598 - 5676  | K.LGAASLGAEDPETQVVLINAVK.D           | 1996.48671 | 2 | 1.31E-06 | 0.97 | 5.56 | - | 1402.1 |
| AHQ-2-4, 5640 - 5662  | K.LGAASLGAEDPETQVVLINAVK.D           | 1996.48671 | 3 | 1.14E-04 | 0.96 | 4.45 | - | 2318.4 |
| AHQ-2-2, 5437 - 5465  | K.LGAASLGAEDPETQVVLINAVK.D           | 1996.48671 | 2 | 4.69E-08 | 0.91 | 4.13 | - | 736.4  |
| AHQ-2-1, 5857         | K.LGAASLGAEDPETQVVLINAVK.D           | 1996.48671 | 2 | 7.47E-04 | 0.90 | 4.32 | - | 628.9  |
| AHQ-2-5, 5225 - 5251  | K.LGAASLGAEDPETQVVLINAVK.D           | 1996.48671 | 2 | 5.65E-06 | 0.97 | 5.17 | - | 1443.8 |
| AHQ-2-4, 5748 - 5817  | K.LGAASLGAEDPETQVVLINAVK.D           | 1996.48671 | 2 | 9.23E-08 | 0.97 | 5.61 | - | 1443.6 |
| AHQ-2-3, 5615 - 5620  | K.LGAASLGAEDPETQVVLINAVK.D           | 1996.48671 | 3 | 1.22E-05 | 0.89 | 3.60 | - | 1376.2 |
| AHQ-2-1, 5700         | K.LGAASLGAEDPETQVVLINAVK.D           | 1996.48671 | 3 | 8.75E-06 | 0.95 | 4.63 | - | 1743.3 |
| AHQ-2-3, 5417 - 5487  | K.LGAASLGAEDPETQVVLINAVK.D           | 1996.48671 | 2 | 1.12E-06 | 0.92 | 4.51 | - | 742.1  |
| AHQ-2-1, 5541         | K.LGAASLGAEDPETQVVLINAVK.D           | 1996.48671 | 2 | 1.03E-06 | 0.94 | 4.33 | - | 1015.3 |
| AHQ-2-14, - 5116      | K.LGAASLGAEDPETQVVLINAVK.D           | 1996.48671 | 2 | 8.45E-08 | 0.93 | 4.49 | - | 930.8  |
| AHQ-2-3, 5841 - 5912  | K.LGAASLGAEDPETQVVLINAVK.D           | 1996.48671 | 2 | 1.77E-08 | 0.92 | 4.27 | - | 805.6  |
| AHQ-2-14, - 5296      | K.LGAASLGAEDPETQVVLINAVK.D           | 1996.48671 | 2 | 2.47E-04 | 0.95 | 4.72 | - | 999.6  |
| AHQ-2-1, 5688 - 5693  | K.LGAASLGAEDPETQVVLINAVK.D           | 1996.48671 | 2 | 5.22E-06 | 0.97 | 5.32 | - | 1350.3 |
| AHQ-2-6, 5303 - 5305  | K.LGAASLGAEDPETQVVLINAVK.D           | 1996.48671 | 2 | 3.74E-08 | 0.95 | 5.24 | - | 913.1  |
| AHQ-2-6, 5313 - 5325  | K.LGAASLGAEDPETQVVLINAVK.D           | 1996.48671 | 3 | 6.26E-06 | 0.90 | 4.42 | - | 1411.4 |
| AHQ-2-6, 5482         | K.LGAASLGAEDPETQVVLINAVK.D           | 1996.48671 | 2 | 8.38E-06 | 0.91 | 4.44 | - | 763.2  |
| AHQ-2-4, 5405 - 5457  | K.LGAASLGAEDPETQVVLINAVK.D           | 1996.48671 | 2 | 4.88E-10 | 0.97 | 5.22 | - | 1607.8 |
| AHQ-2-1, 4030         | K.LHTDDELNLWLDHGR.T                  | 1721.81153 | 3 | 9.26E-06 | 0.85 | 3.72 | - | 688.7  |
| AHQ-2-8, 3063         | K.LHTDDELNLWLDHGR.T                  | 1721.81153 | 3 | 2.24E-06 | 0.92 | 4.23 | - | 1171.8 |
| AHQ-2-9, 3354         | K.LHTDDELNLWLDHGR.T                  | 1721.81153 | 2 | 8.09E-06 | 0.95 | 4.08 | - | 1428.8 |
| AHQ-2-7, 3275 - 3343  | K.LHTDDELNLWLDHGR.T                  | 1721.81153 | 2 | 3.19E-06 | 0.97 | 4.72 | - | 1649.3 |
| AHQ-2-8, 3062         | K.LHTDDELNLWLDHGR.T                  | 1721.81153 | 2 | 5.36E-06 | 0.96 | 4.65 | - | 1428.0 |
| AHQ-2-7, 3327         | K.LHTDDELNLWLDHGR.T                  | 1721.81153 | 3 | 3.65E-04 | 0.86 | 3.25 | - | 1196.4 |
| AHQ-2-3, 4371 - 4439  | K.LLAALLEDEGGSGR.P                   | 1401.54764 | 2 | 1.32E-04 | 0.74 | 3.49 | - | 418.6  |
| AHQ-2-1, 4530         | K.LLAALLEDEGGSGR.P                   | 1401.54764 | 2 | 2.06E-11 | 0.97 | 4.56 | - | 1584.3 |
| AHQ-2-1, 5522         | K.LLAALLEDEGGSGRPLLOAAK.G            | 2123.43896 | 2 | 6.96E-09 | 0.98 | 6.31 | - | 1430.4 |
| AHQ-2-1, 5521 - 5528  | K.LLAALLEDEGGSGRPLLOAAK.G            | 2123.43896 | 3 | 5.88E-09 | 0.93 | 4.53 | - | 1302.0 |
| AHQ-2-3, 5256         | K.LLAALLEDEGGSGRPLLOAAK.G            | 2123.43896 | 2 | 3.17E-08 | 0.92 | 4.52 | - | 803.6  |
| AHQ-2-2, 5388 - 5413  | K.LLAALLEDEGGSGRPLLOAAK.G            | 2123.43896 | 3 | 4.22E-12 | 0.97 | 6.02 | - | 1660.5 |
| AHQ-2-8, 4609         | K.LLAALLEDEGGSGRPLLOAAK.G            | 2123.43896 | 3 | 1.40E-09 | 0.96 | 5.27 | - | 1671.1 |
| AHQ-2-12, 5209 - 5214 | K.LLAALLEDEGGSGRPLLOAAK.G            | 2123.43896 | 3 | 4.48E-05 | 0.95 | 4.73 | - | 1509.2 |
| AHQ-2-3, 5361         | K.LLAALLEDEGGSGRPLLOAAK.G            | 2123.43896 | 2 | 1.10E-09 | 0.98 | 6.46 | - | 1785.2 |
| AHQ-2-3, 5363         | K.LLAALLEDEGGSGRPLLOAAK.G            | 2123.43896 | 3 | 1.34E-07 | 0.96 | 4.91 | - | 1666.8 |
| AHQ-2-2, 5389         | K.LLAALLEDEGGSGRPLLOAAK.G            | 2123.43896 | 2 | 9.23E-11 | 0.97 | 6.04 | - | 1553.7 |
| AHQ-2-10, 4710        | K.LLAALLEDEGGSGRPLLOAAK.G            | 2123.43896 | 3 | 3.72E-05 | 0.92 | 4.86 | - | 868.2  |
| AHQ-2-8, 4608 - 4623  | K.LLAALLEDEGGSGRPLLOAAK.G            | 2123.43896 | 2 | 2.88E-10 | 0.98 | 6.85 | - | 1368.3 |
| AHQ-2-6, 5001         | K.LLAALLEDEGGSGRPLLOAAK.G            | 2123.43896 | 2 | 6.70E-05 | 0.90 | 4.21 | - | 754.0  |
| AHQ-2-9, 4982 - 4983  | K.LLAALLEDEGGSGRPLLOAAK.G            | 2123.43896 | 2 | 7.98E-09 | 0.98 | 6.65 | - | 1545.2 |
| AHQ-2-9, 4990         | K.LLAALLEDEGGSGRPLLOAAK.G            | 2123.43896 | 3 | 6.44E-08 | 0.95 | 5.24 | - | 1163.3 |
| AHQ-2-5, 5033 - 5103  | K.LLAALLEDEGGSGRPLLOAAK.G            | 2123.43896 | 2 | 7.72E-09 | 0.98 | 6.55 | - | 1411.4 |
| AHQ-2-5, 5027 - 5039  | K.LLAALLEDEGGSGRPLLOAAK.G            | 2123.43896 | 3 | 8.08E-09 | 0.95 | 5.06 | - | 1319.7 |
| AHQ-2-10, 4715        | K.LLAALLEDEGGSGRPLLOAAK.G            | 2123.43896 | 2 | 3.11E-07 | 0.96 | 5.53 | - | 1129.4 |
| AHQ-2-7, 4875 - 4885  | K.LLAALLEDEGGSGRPLLOAAK.G            | 2123.43896 | 2 | 9.57E-10 | 0.98 | 6.21 | - | 1563.0 |
| AHQ-2-4, 5236         | K.LLAALLEDEGGSGRPLLOAAK.G            | 2123.43896 | 2 | 3.93E-05 | 0.87 | 4.29 | - | 410.9  |
| AHQ-2-4, 5372 - 5376  | K.LLAALLEDEGGSGRPLLOAAK.G            | 2123.43896 | 2 | 4.78E-09 | 0.98 | 7.40 | - | 1348.3 |
| AHQ-2-4, 5360 - 5362  | K.LLAALLEDEGGSGRPLLOAAK.G            | 2123.43896 | 3 | 1.00E-10 | 0.96 | 5.23 | - | 1500.2 |
| AHQ-2-3, 5375         | K.LLAALLEDEGGSGRPLLOAAKGLAGAVSELLR.S | 3190.68337 | 3 | 1.59E-04 | 0.60 | 3.57 | - | 615.0  |
| AHQ-2-2, 5402         | K.LLAALLEDEGGSGRPLLOAAKGLAGAVSELLR.S | 3190.68337 | 3 | 5.30E-04 | 0.82 | 4.54 | - | 476.0  |
| AHQ-2-5, 5411         | R.LNEAAAQLNQAATELVQASR.G             | 2028.21299 | 2 | 5.69E-11 | 0.98 | 5.78 | - | 1864.5 |
| AHQ-2-2, 4558 - 4589  | R.LNEAAAQLNQAATELVQASR.G             | 2028.21299 | 2 | 2.20E-10 | 0.92 | 4.99 | - | 649.3  |
| AHQ-2-3, 6079 - 6084  | R.LNEAAAQLNQAATELVQASR.G             | 2028.21299 | 2 | 7.16E-12 | 0.98 | 5.69 | - | 2180.9 |
| AHQ-2-4, 5633 - 5704  | R.LNEAAAQLNQAATELVQASR.G             | 2028.21299 | 2 | 2.22E-09 | 0.98 | 5.92 | - | 2035.9 |
| AHQ-2-5, 5419 - 5424  | R.LNEAAAQLNQAATELVQASR.G             | 2028.21299 | 3 | 6.15E-05 | 0.98 | 5.88 | - | 2540.8 |
| AHQ-2-5, 5888         | R.LNEAAAQLNQAATELVQASR.G             | 2028.21299 | 2 | 3.78E-06 | 0.93 | 4.04 | - | 984.0  |
| AHQ-2-11, 5242        | R.LNEAAAQLNQAATELVQASR.G             | 2028.21299 | 2 | 4.13E-06 | 0.92 | 4.33 | - | 790.6  |
| AHQ-2-4, 5710 - 5733  | R.LNEAAAQLNQAATELVQASR.G             | 2028.21299 | 3 | 1.32E-06 | 0.98 | 5.74 | - | 3004.1 |
| AHQ-2-4, 4529 - 4570  | R.LNEAAAQLNQAATELVQASR.G             | 2028.21299 | 2 | 2.86E-13 | 0.97 | 5.41 | - | 1249.8 |
| AHQ-2-3, 5460         | R.LNEAAAQLNQAATELVQASR.G             | 2028.21299 | 2 | 7.21E-06 | 0.78 | 3.07 | - | 743.5  |
| AHQ-2-1, 5369         | R.LNEAAAQLNQAATELVQASR.G             | 2028.21299 | 2 | 4.87E-09 | 0.96 | 4.39 | - | 1678.7 |
| AHQ-2-3, 6401         | R.LNEAAAQLNQAATELVQASR.G             | 2028.21299 | 2 | 2.50E-09 | 0.91 | 4.13 | - | 740.6  |
| AHQ-2-8, 5111         | R.LNEAAAQLNQAATELVQASR.G             | 2028.21299 | 2 | 2.46E-07 | 0.96 | 4.59 | - | 1374.9 |
| AHQ-2-3, 5827         | R.LNEAAAQLNQAATELVQASR.G             | 2028.21299 | 2 | 8.17E-08 | 0.98 | 6.04 | - | 1795.6 |
| AHQ-2-9, 5374         | R.LNEAAAQLNQAATELVQASR.G             | 2028.21299 | 2 | 8.95E-13 | 0.98 | 6.15 | - | 1765.1 |
| AHQ-2-6, 5358 - 5373  | R.LNEAAAQLNQAATELVQASR.G             | 2028.21299 | 2 | 2.37E-11 | 0.98 | 5.75 | - | 1801.1 |
| AHQ-2-1, 5592         | R.LNEAAAQLNQAATELVQASR.G             | 2028.21299 | 2 | 2.66E-06 | 0.67 | 2.79 | - | 668.8  |
| AHQ-2-5, 4347         | R.LNEAAAQLNQAATELVQASR.G             | 2028.21299 | 2 | 5.64E-08 | 0.96 | 5.26 | - | 1081.1 |
| AHQ-2-3, 5739 - 5740  | R.LNEAAAQLNQAATELVQASR.G             | 2028.21299 | 2 | 1.42E-11 | 0.98 | 5.59 | - | 1816.1 |
| AHQ-2-4, 6093 - 6098  | R.LNEAAAQLNQAATELVQASR.G             | 2028.21299 | 2 | 3.26E-10 | 0.97 | 5.00 | - | 1632.2 |
| AHQ-2-6, 5775         | R.LNEAAAQLNQAATELVQASR.G             | 2028.21299 | 2 | 8.42E-09 | 0.95 | 4.96 | - | 994.2  |
| AHQ-2-3, 5676 - 5696  | R.LNEAAAQLNQAATELVQASR.G             | 2028.21299 | 3 | 1.14E-04 | 0.98 | 5.59 | - | 2692.2 |
| AHQ-2-1, 5694         | R.LNEAAAQLNQAATELVQASR.G             | 2028.21299 | 2 | 1.90E-04 | 0.94 | 4.31 | - | 900.0  |
| AHQ-2-1, 5804 - 5872  | R.LNEAAAQLNQAATELVQASR.G             | 2028.21299 | 2 | 8.91E-09 | 0.96 | 5.02 | - | 1352.1 |
| AHQ-2-1, 5810 - 5824  | R.LNEAAAQLNQAATELVQASR.G             | 2028.21299 | 3 | 6.21E-09 | 0.98 | 6.05 | - | 2302.0 |
| AHQ-2-5, 5785         | R.LNEAAAQLNQAATELVQASR.G             | 2028.21299 | 2 | 5.05E-13 | 0.98 | 5.50 | - | 1892.6 |
| AHQ-2-3, 5604 - 5675  | R.LNEAAAQLNQAATELVQASR.G             | 2028.21299 | 2 | 1.67E-11 | 0.98 | 5.97 | - | 1634.0 |
| AHQ-2-1, 6009         | R.LNEAAAQLNQAATELVQASR.G             | 2028.21299 | 2 | 7.21E-06 | 0.96 | 4.70 | - | 1331.7 |
| AHQ-2-2, 5514         | R.LNEAAAQLNQAATELVQASR.G             | 2028.21299 | 2 | 9.85E-08 | 0.94 | 4.37 | - | 1106.4 |
| AHQ-2-1, 6129 - 6137  | R.LNEAAAQLNQAATELVQASR.G             | 2028.21299 | 2 | 4.61E-14 | 0.98 | 6.08 | - | 2000.8 |
| AHQ-2-10, 5011 - 5012 | R.LNEAAAQLNQAATELVQASR.G             | 2028.21299 | 2 | 9.65E-09 | 0.96 | 4.16 | - | 1556.8 |
| AHQ-2-7, 5700         | R.LNEAAAQLNQAATELVQASR.G             | 2028.21299 | 2 | 4.86E-04 | 0.88 | 4.23 | - | 551.7  |
| AHQ-2-2, 5657 - 5701  | R.LNEAAAQLNQAATELVQASR.G             | 2028.21299 | 2 | 1.62E-09 | 0.97 | 5.82 | - | 1374.8 |
| AHQ-2-2, 6129         | R.LNEAAAQLNQAATELVQASR.G             | 2028.21299 | 3 | 4.87E-09 | 0.95 | 4.66 | - | 1820.0 |
| AHQ-2-2, 5713 - 5729  | R.LNEAAAQLNQAATELVQASR.G             | 2028.21299 | 3 | 1.36E-09 | 0.98 | 6.53 | - | 2105.4 |
| AHQ-2-2, 6120         | R.LNEAAAQLNQAATELVQASR.G             | 2028.21299 | 2 | 6.60E-09 | 0.97 | 5.10 | - | 1777.1 |
| AHQ-2-2, 5769 - 5845  | R.LNEAAAQLNQAATELVQASR.G             | 2028.21299 | 2 | 2.50E-08 | 0.97 | 5.73 | - | 1338.0 |
| AHQ-2-7, 5313         | R.LNEAAAQLNQAATELVQASR.G             | 2028.21299 | 2 | 5.97E-11 | 0.97 | 5.36 | - | 1474.9 |
| AHQ-2-2, 5916 - 5986  | R.LNEAAAQLNQAATELVQASR.G             | 2028.21299 | 2 | 2.77E-08 | 0.97 | 5.32 | - | 1409.9 |



|                        |                                           |            |   |          |      |      |   |        |
|------------------------|-------------------------------------------|------------|---|----------|------|------|---|--------|
| AHQ-2-1, 4590 - 4592   | R.LNEAAAGLNQAATELVQASR.G                  | 2028.21299 | 2 | 8.95E-10 | 0.95 | 5.03 | - | 846.9  |
| AHQ-2-3, 5928 - 5940   | R.LNEAAAGLNQAATELVQASR.G                  | 2028.21299 | 2 | 4.42E-09 | 0.98 | 5.99 | - | 1402.3 |
| AHQ-2-3, 5456          | R.LNEAAAGLNQAATELVQASRGTQDLAR.A           | 2867.12501 | 3 | 3.07E-06 | 0.69 | 3.47 | - | 747.8  |
| AHQ-2-4, 2040          | R.MATNAAAQNAIK.K                          | 1204.38227 | 2 | 4.40E-06 | 0.79 | 3.11 | - | 889.4  |
| AHQ-2-2, 2017          | R.MATNAAAQNAIK.K                          | 1204.38227 | 2 | 4.36E-06 | 0.87 | 3.57 | - | 837.4  |
| AHQ-2-2, 2102          | R.MATNAAAQNAIK.K                          | 1204.38227 | 2 | 2.27E-10 | 0.90 | 3.77 | - | 969.3  |
| AHQ-2-2, 4297          | R.M*VAATNNLCEAANAAVQGHASQEK.L             | 2574.79038 | 3 | 2.01E-05 | 0.93 | 5.11 | - | 762.7  |
| AHQ-2-2, 4182          | R.M*VAATNNLCEAANAAVQGHASQEK.L             | 2574.79038 | 3 | 7.20E-09 | 0.91 | 4.63 | - | 926.4  |
| AHQ-2-4, 4100          | R.M*VAATNNLCEAANAAVQGHASQEK.L             | 2574.79038 | 3 | 2.20E-09 | 0.84 | 3.89 | - | 713.6  |
| AHQ-2-2, 4477          | R.MVAATNNLCEAANAAVQGHASQEK.L              | 2558.79098 | 2 | 1.34E-07 | 0.86 | 3.41 | - | 811.1  |
| AHQ-2-2, 4488 - 4562   | R.MVAATNNLCEAANAAVQGHASQEK.L              | 2558.79098 | 3 | 7.03E-10 | 0.96 | 5.60 | - | 1528.3 |
| AHQ-2-1, 4257          | R.M*VAATNNLCEAANAAVQGHASQEK.L             | 2574.79038 | 3 | 1.21E-12 | 0.91 | 4.17 | - | 1045.7 |
| AHQ-2-4, 4305 - 4376   | R.MVAATNNLCEAANAAVQGHASQEK.L              | 2558.79098 | 3 | 4.16E-08 | 0.97 | 6.00 | - | 1641.4 |
| AHQ-2-6, 4050 - 4051   | R.MVAATNNLCEAANAAVQGHASQEK.L              | 2558.79098 | 3 | 8.61E-09 | 0.90 | 4.38 | - | 871.0  |
| AHQ-2-7, 3967 - 3987   | R.MVAATNNLCEAANAAVQGHASQEK.L              | 2558.79098 | 3 | 5.90E-06 | 0.91 | 4.48 | - | 908.5  |
| AHQ-2-7, 4133          | R.MVAATNNLCEAANAAVQGHASQEK.L              | 2558.79098 | 3 | 4.32E-06 | 0.77 | 3.47 | - | 520.2  |
| AHQ-2-5, 4064 - 4075   | R.MVAATNNLCEAANAAVQGHASQEK.L              | 2558.79098 | 3 | 6.06E-05 | 0.78 | 3.64 | - | 622.5  |
| AHQ-2-3, 4152 - 4153   | R.M*VAATNNLCEAANAAVQGHASQEK.L             | 2574.79038 | 3 | 7.24E-09 | 0.96 | 5.56 | - | 1308.2 |
| AHQ-2-3, 4339          | R.MVAATNNLCEAANAAVQGHASQEK.L              | 2558.79098 | 3 | 5.64E-08 | 0.85 | 3.72 | - | 884.3  |
| AHQ-2-10, 3695         | R.M*VAATNNLCEAANAAVQGHASQEK.L             | 2574.79038 | 3 | 1.09E-09 | 0.93 | 4.36 | - | 1106.9 |
| AHQ-2-1, 4385 - 4400   | R.M*VAATNNLCEAANAAVQGHASQEK.L             | 2574.79038 | 3 | 2.00E-05 | 0.63 | 3.17 | - | 566.5  |
| AHQ-2-3, 4368 - 4441   | R.MVAATNNLCEAANAAVQGHASQEK.L              | 2558.79098 | 2 | 6.52E-06 | 0.58 | 2.77 | - | 579.8  |
| AHQ-2-1, 4537 - 4540   | R.MVAATNNLCEAANAAVQGHASQEK.L              | 2558.79098 | 3 | 3.70E-06 | 0.94 | 4.69 | - | 1085.9 |
| AHQ-2-10, 3854 - 3914  | R.MVAATNNLCEAANAAVQGHASQEK.L              | 2558.79098 | 3 | 9.44E-07 | 0.94 | 4.66 | - | 1276.9 |
| AHQ-2-3, 4424 - 4425   | R.MVAATNNLCEAANAAVQGHASQEK.L              | 2558.79098 | 3 | 1.88E-05 | 0.72 | 3.38 | - | 667.1  |
| AHQ-2-10, 3991         | R.MVAATNNLCEAANAAVQGHASQEK.L              | 2558.79098 | 3 | 1.32E-09 | 0.71 | 3.58 | - | 607.3  |
| AHQ-2-8, 3848          | R.MVAATNNLCEAANAAVQGHASQEK.L              | 2558.79098 | 2 | 7.23E-08 | 0.90 | 4.05 | - | 646.7  |
| AHQ-2-8, 3840          | R.MVAATNNLCEAANAAVQGHASQEK.L              | 2558.79098 | 3 | 1.35E-07 | 0.82 | 3.61 | - | 905.4  |
| AHQ-2-4, 7236 - 7274   | K.MVGGIAQIIAAQEEMLR.K                     | 1831.19407 | 2 | 1.40E-06 | 0.96 | 4.43 | - | 1525.5 |
| AHQ-2-5, 7019          | K.MVGGIAQIIAAQEEMLR.K                     | 1831.19407 | 2 | 2.15E-08 | 0.98 | 5.09 | - | 2197.6 |
| AHQ-2-14-, 6567 - 6579 | K.MVGGIAQIIAAQEEMLR.K                     | 1831.19407 | 2 | 1.57E-04 | 0.71 | 3.43 | - | 533.3  |
| AHQ-2-2, 6501          | K.MVGGIAQIIAAQEEM*LR.K                    | 1847.19347 | 2 | 6.77E-04 | 0.91 | 3.53 | - | 1115.8 |
| AHQ-2-4, 6529          | K.MVGGIAQIIAAQEEM*LR.K                    | 1847.19347 | 2 | 1.19E-06 | 0.95 | 4.50 | - | 1365.9 |
| AHQ-2-6, 6849 - 6854   | K.MVGGIAQIIAAQEEMLR.K                     | 1831.19407 | 2 | 1.02E-13 | 0.98 | 6.09 | - | 1893.6 |
| AHQ-2-10, 6370         | K.MVGGIAQIIAAQEEMLR.K                     | 1831.19407 | 2 | 6.68E-09 | 0.97 | 5.46 | - | 1631.1 |
| AHQ-2-10, 5783         | K.MVGGIAQIIAAQEEM*LR.K                    | 1847.19347 | 2 | 2.07E-04 | 0.83 | 3.22 | - | 941.6  |
| AHQ-2-9, 6914 - 6978   | K.MVGGIAQIIAAQEEMLR.K                     | 1831.19407 | 2 | 2.31E-06 | 0.96 | 4.73 | - | 1317.7 |
| AHQ-2-7, 6893          | K.MVGGIAQIIAAQEEMLR.K                     | 1831.19407 | 2 | 2.38E-06 | 0.95 | 4.65 | - | 1415.9 |
| AHQ-2-4, 6229          | K.M*VGGIAQIIAAQEEM*LR.K                   | 1863.19287 | 2 | 1.58E-04 | 0.67 | 2.59 | - | 772.8  |
| AHQ-2-2, 6237 - 6238   | K.M*VGGIAQIIAAQEEM*LR.K                   | 1863.19287 | 2 | 8.36E-11 | 0.98 | 6.06 | - | 1643.6 |
| AHQ-2-3, 6228          | K.M*VGGIAQIIAAQEEM*LR.K                   | 1863.19287 | 2 | 1.38E-07 | 0.97 | 5.23 | - | 1400.7 |
| AHQ-2-13, 6359         | K.M*VGGIAQIIAAQEEMLR.K                    | 1847.19347 | 2 | 3.59E-05 | 0.96 | 4.78 | - | 1392.9 |
| AHQ-2-3, 7181 - 7192   | K.MVGGIAQIIAAQEEMLR.K                     | 1831.19407 | 2 | 2.44E-09 | 0.97 | 5.71 | - | 1492.0 |
| AHQ-2-1, 6816 - 6837   | K.M*VGGIAQIIAAQEEMLR.K                    | 1847.19347 | 2 | 4.17E-11 | 0.94 | 4.60 | - | 1022.9 |
| AHQ-2-14-, 6383 - 6428 | K.M*VGGIAQIIAAQEEMLR.K                    | 1847.19347 | 2 | 1.79E-05 | 0.97 | 5.09 | - | 1878.3 |
| AHQ-2-3, 6547          | K.MVGGIAQIIAAQEEM*LR.K                    | 1847.19347 | 2 | 1.98E-09 | 0.97 | 4.99 | - | 1598.9 |
| AHQ-2-2, 7248 - 7312   | K.MVGGIAQIIAAQEEMLR.K                     | 1831.19407 | 2 | 2.27E-06 | 0.97 | 5.64 | - | 1814.8 |
| AHQ-2-4, 6940 - 6950   | K.M*VGGIAQIIAAQEEMLR.K                    | 1847.19347 | 2 | 2.50E-04 | 0.98 | 6.05 | - | 2100.4 |
| AHQ-2-4, 6638          | K.MVGGIAQIIAAQEEMLR.K                     | 1959.36698 | 2 | 1.23E-04 | 0.93 | 4.61 | - | 753.0  |
| AHQ-2-7, 2095          | K.NCGQMSEIEAK.V                           | 1268.40005 | 2 | 8.94E-05 | 0.84 | 3.15 | - | 1028.7 |
| AHQ-2-3, 4521 - 4591   | K.NGNLPEFGDAISTASK.A                      | 1621.73018 | 2 | 1.85E-04 | 0.70 | 2.88 | - | 527.9  |
| AHQ-2-3, 4793          | K.NGNLPEFGDAISTASK.A                      | 1621.73018 | 2 | 1.40E-08 | 0.91 | 3.91 | - | 636.5  |
| AHQ-2-2, 4593          | K.NGNLPEFGDAISTASK.A                      | 1621.73018 | 2 | 2.06E-04 | 0.74 | 2.93 | - | 407.1  |
| AHQ-2-5, 4669 - 4745   | K.NGNLPEFGDAISTASK.A                      | 1621.73018 | 2 | 5.31E-10 | 0.85 | 3.66 | - | 472.3  |
| AHQ-2-4, 4788 - 4856   | K.NGNLPEFGDAISTASK.A                      | 1621.73018 | 2 | 5.78E-06 | 0.70 | 3.57 | - | 290.6  |
| AHQ-2-1, 4576          | K.NGNLPEFGDAISTASK.A                      | 1621.73018 | 2 | 6.78E-05 | 0.50 | 2.85 | - | 286.3  |
| AHQ-2-6, 4558 - 4578   | K.NGNLPEFGDAISTASK.A                      | 1621.73018 | 2 | 2.98E-07 | 0.82 | 3.39 | - | 489.2  |
| AHQ-2-1, 4344          | K.NLGTALAEALR.T                           | 1058.21367 | 2 | 3.18E-04 | 0.86 | 3.09 | - | 948.4  |
| AHQ-2-5, 3764          | K.NLGTALAEALR.T                           | 1058.21367 | 2 | 2.87E-04 | 0.82 | 2.81 | - | 828.7  |
| AHQ-2-4, 4093 - 4096   | K.NLGTALAEALR.T                           | 1058.21367 | 2 | 3.01E-06 | 0.83 | 3.41 | - | 828.8  |
| AHQ-2-1, 2833          | K.PAAVAEENEEIGSHIK.H                      | 1636.78798 | 3 | 3.06E-08 | 0.95 | 4.79 | - | 1481.6 |
| AHQ-2-1, 2829          | K.PAAVAEENEEIGSHIK.H                      | 1636.78798 | 2 | 9.55E-06 | 0.97 | 4.41 | - | 1848.3 |
| AHQ-2-4, 2584          | K.PAAVAEENEEIGSHIK.H                      | 1636.78798 | 2 | 1.48E-06 | 0.98 | 5.88 | - | 2076.7 |
| AHQ-2-2, 2592          | K.PAAVAEENEEIGSHIK.H                      | 1636.78798 | 2 | 1.73E-10 | 0.98 | 5.75 | - | 2273.0 |
| AHQ-2-4, 2588          | K.PAAVAEENEEIGSHIK.H                      | 1636.78798 | 3 | 2.12E-10 | 0.97 | 5.48 | - | 1829.0 |
| AHQ-2-3, 2599          | K.PAAVAEENEEIGSHIK.H                      | 1636.78798 | 3 | 7.35E-11 | 0.98 | 5.42 | - | 2300.9 |
| AHQ-2-6, 2407          | K.PAAVAEENEEIGSHIK.H                      | 1636.78798 | 2 | 4.16E-09 | 0.98 | 5.44 | - | 2304.0 |
| AHQ-2-2, 2593          | K.PAAVAEENEEIGSHIK.H                      | 1636.78798 | 3 | 1.43E-11 | 0.97 | 5.27 | - | 1703.6 |
| AHQ-2-5, 2385 - 2391   | K.PAAVAEENEEIGSHIK.H                      | 1636.78798 | 2 | 8.17E-05 | 0.98 | 5.55 | - | 1675.8 |
| AHQ-2-6, 2405          | K.PAAVAEENEEIGSHIK.H                      | 1636.78798 | 3 | 1.60E-07 | 0.95 | 4.50 | - | 1812.9 |
| AHQ-2-3, 2595          | K.PAAVAEENEEIGSHIK.H                      | 1636.78798 | 2 | 2.39E-07 | 0.98 | 5.69 | - | 1920.6 |
| AHQ-2-6, 2911          | K.QAAASATQITIAAAQHAASTPK.A                | 1996.17099 | 2 | 1.56E-05 | 0.92 | 4.54 | - | 719.8  |
| AHQ-2-2, 3413          | K.QAAASATQITIAAAQHAASTPK.A                | 1996.17099 | 2 | 1.10E-07 | 0.85 | 4.07 | - | 538.6  |
| AHQ-2-2, 3189          | K.QAAASATQITIAAAQHAASTPK.A                | 1996.17099 | 2 | 6.99E-05 | 0.90 | 4.44 | - | 540.6  |
| AHQ-2-5, 2887          | K.QAAASATQITIAAAQHAASTPK.A                | 1996.17099 | 2 | 1.93E-06 | 0.94 | 5.05 | - | 734.5  |
| AHQ-2-5, 2872 - 2883   | K.QAAASATQITIAAAQHAASTPK.A                | 1996.17099 | 3 | 9.21E-04 | 0.61 | 3.03 | - | 654.8  |
| AHQ-2-1, 3566          | K.QAAASATQITIAAAQHAASTPK.A                | 1996.17099 | 2 | 7.01E-06 | 0.90 | 4.21 | - | 700.8  |
| AHQ-2-7, 2803          | K.QAAASATQITIAAAQHAASTPK.A                | 1996.17099 | 2 | 2.72E-04 | 0.77 | 3.66 | - | 418.1  |
| AHQ-2-1, 3394          | K.QAAASATQITIAAAQHAASTPK.A                | 1996.17099 | 3 | 4.18E-06 | 0.83 | 3.66 | - | 820.1  |
| AHQ-2-1, 3392          | K.QAAASATQITIAAAQHAASTPK.A                | 1996.17099 | 2 | 4.17E-06 | 0.86 | 4.04 | - | 603.6  |
| AHQ-2-3, 3187          | K.QAAASATQITIAAAQHAASTPK.A                | 1996.17099 | 2 | 3.35E-06 | 0.85 | 4.11 | - | 559.3  |
| AHQ-2-4, 3388          | K.QAAASATQITIAAAQHAASTPK.A                | 1996.17099 | 2 | 3.41E-10 | 0.93 | 4.73 | - | 744.5  |
| AHQ-2-3, 3191          | K.QAAASATQITIAAAQHAASTPK.A                | 1996.17099 | 3 | 5.06E-04 | 0.84 | 3.86 | - | 782.1  |
| AHQ-2-3, 3384          | K.QAAASATQITIAAAQHAASTPK.A                | 1996.17099 | 2 | 5.32E-06 | 0.81 | 4.29 | - | 586.7  |
| AHQ-2-4, 3188 - 3190   | K.QAAASATQITIAAAQHAASTPK.A                | 1996.17099 | 2 | 5.19E-06 | 0.94 | 5.10 | - | 802.5  |
| AHQ-2-1, 3069          | R.QEDVIATANLSR.R                          | 1317.43074 | 2 | 5.69E-04 | 0.75 | 2.91 | - | 513.5  |
| AHQ-2-3, 4055 - 4133   | R.QELAVFCSPEPPAK.T                        | 1574.77985 | 2 | 4.12E-06 | 0.88 | 3.71 | - | 788.3  |
| AHQ-2-4, 4064 - 4072   | R.QELAVFCSPEPPAK.T                        | 1574.77985 | 2 | 1.44E-08 | 0.92 | 3.64 | - | 1076.6 |
| AHQ-2-1, 4106 - 4185   | R.QELAVFCSPEPPAK.T                        | 1574.77985 | 2 | 3.10E-05 | 0.74 | 2.97 | - | 701.4  |
| AHQ-2-5, 3763 - 3843   | R.QELAVFCSPEPPAK.T                        | 1574.77985 | 2 | 1.94E-06 | 0.88 | 3.34 | - | 781.2  |
| AHQ-2-2, 4088 - 4158   | R.QELAVFCSPEPPAK.T                        | 1574.77985 | 2 | 1.71E-05 | 0.92 | 4.05 | - | 805.8  |
| AHQ-2-8, 7406          | R.QNLQQAAGNVGQASGELLQIGESDTPHPFDALMLQAK.A | 4138.52644 | 3 | 1.35E-13 | 0.92 | 5.61 | - | 556.9  |
| AHQ-2-5, 7471 - 7473   | R.QNLQQAAGNVGQASGELLQIGESDTPHPFDALMLQAK.A | 4154.52584 | 3 | 1.13E-07 | 0.86 | 4.52 | - | 619.5  |
| AHQ-2-5, 7495          | R.QNLQQAAGNVGQASGELLQIGESDTPHPFDALMLQAK.A | 4138.52644 | 3 | 1.14E-10 | 0.97 | 6.85 | - | 1156.2 |
| AHQ-2-1, 7240          | R.QNLQQAAGNVGQASGELLQIGESDTPHPFDALMLQAK.A | 4154.52584 | 3 | 2.37E-06 | 0.83 | 4.16 | - | 594.8  |
| AHQ-2-2, 7576          | R.QNLQQAAGNVGQASGELLQIGESDTPHPFDALMLQAK.A | 4154.52584 | 3 | 1.27E-05 | 0.92 | 5.36 | - | 807.1  |
| AHQ-2-7, 7503          | R.QNLQQAAGNVGQASGELLQIGESDTPHPFDALMLQAK.A | 4138.52644 | 3 | 8.55E-07 | 0.92 | 5.34 | - | 518.4  |
| AHQ-2-2, 3856 - 3857   | K.QVAASTAQLLVACK.V                        | 1461.70942 | 2 | 1.77E-05 | 0.94 | 3.93 | - | 879.8  |
| AHQ-2-3, 3816 - 3817   | K.QVAASTAQLLVACK.V                        | 1461.70942 | 2 | 9.74E-08 | 0.94 | 4.21 | - | 738.2  |
| AHQ-2-2, 2453          | R.RAIADMLR.A                              | 946.15319  | 2 | 1.83E-05 | 0.84 | 2.89 | - | 743.3  |
| AHQ-2-3, 4951          | K.RVAGSVTELIQAAEAM*K.G                    | 1791.06327 | 2 | 2.64E-07 | 0.84 | 3.68 | - | 338.9  |
| AHQ-2-4, 6002 - 6005   | K.RVAGSVTELIQAAEAM.K.G                    | 1775.06387 | 2 | 1.20E-05 | 0.98 | 5.56 | - | 1950.3 |
| AHQ-2-1, 6142          | K.RVAGSVTELIQAAEAM.K.G                    | 1775.06387 | 2 | 6.35E-06 | 0.98 | 5.09 | - | 2215.8 |
| AHQ-2-1, 5085          | K.RVAGSVTELIQAAEAM*K.G                    | 1791.06327 | 2 | 4.78E-06 | 0.92 | 4.38 | - | 689.1  |
| AHQ-2-3, 5995          | K.RVAGSVTELIQAAEAM.K.G                    | 1775.06387 | 2 | 2.27E-06 | 0.97 | 5.20 | - | 1447.1 |
| AHQ-2-5, 5581          | K.RVAGSVTELIQAAEAM.K.G                    | 1775.06387 | 2 | 3.32E-09 | 0.98 | 5.70 | - | 1723.6 |
| AHQ-2-2, 6025          | K.RVAGSVTELIQAAEAM.K.G                    | 1775.06387 | 2 | 7.09E-07 | 0.98 | 6.13 | - | 2491.8 |

|                       |                                   |            |   |          |      |      |   |        |
|-----------------------|-----------------------------------|------------|---|----------|------|------|---|--------|
| AHQ-2-2, 2888         | K.SIAAATSALVK.A                   | 1032.21612 | 2 | 3.38E-04 | 0.91 | 3.51 | - | 995.7  |
| AHQ-2-3, 2896 - 2899  | K.SIAAATSALVK.A                   | 1032.21612 | 2 | 8.54E-04 | 0.87 | 3.16 | - | 802.5  |
| AHQ-2-4, 2870 - 2888  | K.SIAAATSALVK.A                   | 1032.21612 | 2 | 2.67E-04 | 0.83 | 3.01 | - | 702.3  |
| AHQ-2-6, 2667         | K.SIAAATSALVK.A                   | 1032.21612 | 2 | 5.57E-05 | 0.84 | 2.91 | - | 972.8  |
| AHQ-2-5, 2620         | K.SIAAATSALVK.A                   | 1032.21612 | 2 | 5.02E-05 | 0.87 | 3.01 | - | 987.6  |
| AHQ-2-7, 3603         | K.SKDFHGLEGDDEESTM*LEDSVSPK.K     | 2554.68304 | 3 | 2.02E-06 | 0.90 | 4.19 | - | 879.5  |
| AHQ-2-10, 3572        | K.SKDFHGLEGDDEESTM*LEDSVSPK.K     | 2554.68304 | 3 | 5.95E-04 | 0.68 | 3.02 | - | 874.2  |
| AHQ-2-7, 3985 - 4059  | K.SKDFHGLEGDDEESTM*LEDSVSPK.K     | 2538.68364 | 2 | 1.03E-09 | 0.89 | 3.89 | - | 664.2  |
| AHQ-2-7, 3988 - 4055  | K.SKDFHGLEGDDEESTM*LEDSVSPK.K     | 2538.68364 | 3 | 5.73E-07 | 0.97 | 5.57 | - | 1849.9 |
| AHQ-2-7, 4071         | K.SKDFHGLEGDDEESTM*LEDSVSPK.K     | 2538.68364 | 2 | 2.85E-06 | 0.81 | 2.99 | - | 882.5  |
| AHQ-2-5, 5352         | K.SNTSPEELGPLANQLTSDYGR.L         | 2250.36505 | 2 | 1.42E-07 | 0.94 | 4.74 | - | 638.9  |
| AHQ-2-3, 5647         | K.SNTSPEELGPLANQLTSDYGR.L         | 2250.36505 | 2 | 5.31E-07 | 0.90 | 4.15 | - | 489.3  |
| AHQ-2-2, 5370 - 5441  | K.SNTSPEELGPLANQLTSDYGR.L         | 2250.36505 | 2 | 6.89E-07 | 0.88 | 4.05 | - | 421.7  |
| AHQ-2-3, 4767         | K.SNTSPEELGPLANQLTSDYGR.L         | 2250.36505 | 2 | 5.44E-09 | 0.73 | 3.77 | - | 489.6  |
| AHQ-2-4, 5558 - 5594  | K.SNTSPEELGPLANQLTSDYGR.L         | 2250.36505 | 2 | 7.16E-05 | 0.51 | 2.58 | - | 246.5  |
| AHQ-2-5, 5491 - 5568  | K.SNTSPEELGPLANQLTSDYGR.L         | 2250.36505 | 2 | 1.03E-05 | 0.91 | 4.06 | - | 626.7  |
| AHQ-2-1, 4769 - 4842  | K.SNTSPEELGPLANQLTSDYGR.L         | 2250.36505 | 2 | 1.64E-06 | 0.92 | 4.22 | - | 719.4  |
| AHQ-2-2, 5050         | K.SNTSPEELGPLANQLTSDYGR.L         | 2250.36505 | 2 | 1.80E-08 | 0.89 | 4.32 | - | 573.7  |
| AHQ-2-3, 5431 - 5511  | K.SNTSPEELGPLANQLTSDYGR.L         | 2250.36505 | 2 | 2.84E-09 | 0.83 | 3.72 | - | 325.8  |
| AHQ-2-9, 5111         | K.SNTSPEELGPLANQLTSDYGR.L         | 2250.36505 | 2 | 4.22E-05 | 0.88 | 3.92 | - | 685.3  |
| AHQ-2-6, 4489 - 4498  | K.SNTSPEELGPLANQLTSDYGR.L         | 2250.36505 | 2 | 5.06E-09 | 0.84 | 3.79 | - | 484.6  |
| AHQ-2-4, 5354 - 5425  | K.SNTSPEELGPLANQLTSDYGR.L         | 2250.36505 | 2 | 2.07E-06 | 0.89 | 3.99 | - | 504.2  |
| AHQ-2-4, 4780         | K.SNTSPEELGPLANQLTSDYGR.L         | 2250.36505 | 2 | 1.87E-13 | 0.95 | 4.75 | - | 814.4  |
| AHQ-2-4, 5204         | K.SNTSPEELGPLANQLTSDYGR.L         | 2250.36505 | 2 | 1.32E-06 | 0.91 | 4.58 | - | 463.1  |
| AHQ-2-4, 5664 - 5666  | K.SNTSPEELGPLANQLTSDYGR.L         | 2250.36505 | 2 | 5.58E-07 | 0.88 | 4.09 | - | 493.2  |
| AHQ-2-1, 5598 - 5670  | K.SNTSPEELGPLANQLTSDYGR.L         | 2250.36505 | 2 | 5.20E-07 | 0.93 | 4.31 | - | 667.8  |
| AHQ-2-5, 4583 - 4584  | K.SNTSPEELGPLANQLTSDYGR.L         | 2250.36505 | 2 | 4.35E-11 | 0.94 | 4.47 | - | 843.1  |
| AHQ-2-3, 5187 - 5199  | K.SNTSPEELGPLANQLTSDYGR.L         | 2250.36505 | 2 | 7.84E-06 | 0.89 | 4.13 | - | 557.5  |
| AHQ-2-6, 5059 - 5130  | K.SNTSPEELGPLANQLTSDYGR.L         | 2250.36505 | 2 | 2.62E-07 | 0.87 | 3.67 | - | 643.0  |
| AHQ-2-2, 4808         | K.SNTSPEELGPLANQLTSDYGR.L         | 2250.36505 | 2 | 1.11E-07 | 0.85 | 3.75 | - | 379.7  |
| AHQ-2-3, 5335 - 5403  | K.SNTSPEELGPLANQLTSDYGR.L         | 2250.36505 | 2 | 1.26E-07 | 0.71 | 3.04 | - | 380.4  |
| AHQ-2-2, 5217 - 5234  | K.SNTSPEELGPLANQLTSDYGR.L         | 2250.36505 | 2 | 5.68E-06 | 0.81 | 3.71 | - | 389.5  |
| AHQ-2-6, 5407         | K.SNTSPEELGPLANQLTSDYGR.L         | 2250.36505 | 2 | 6.90E-06 | 0.82 | 3.20 | - | 625.6  |
| AHQ-2-1, 5452 - 5516  | K.SNTSPEELGPLANQLTSDYGR.L         | 2250.36505 | 2 | 1.09E-05 | 0.76 | 3.36 | - | 471.0  |
| AHQ-2-2, 5617 - 5693  | K.SNTSPEELGPLANQLTSDYGR.L         | 2250.36505 | 2 | 3.33E-07 | 0.92 | 4.22 | - | 644.1  |
| AHQ-2-5, 5163         | K.SNTSPEELGPLANQLTSDYGR.L         | 2250.36505 | 2 | 2.24E-07 | 0.89 | 3.86 | - | 619.4  |
| AHQ-2-6, 7183 - 7185  | R.TEDSGLQTQVIAAATQCALSTSQLVACTK.V | 3056.37009 | 3 | 1.11E-14 | 0.97 | 5.69 | - | 1833.9 |
| AHQ-2-2, 7472 - 7542  | R.TEDSGLQTQVIAAATQCALSTSQLVACTK.V | 3056.37009 | 3 | 8.79E-13 | 0.98 | 6.23 | - | 2128.7 |
| AHQ-2-1, 7250 - 7286  | R.TEDSGLQTQVIAAATQCALSTSQLVACTK.V | 3056.37009 | 3 | 5.43E-05 | 0.90 | 4.26 | - | 1192.1 |
| AHQ-2-7, 3843 - 3912  | K.TKEVIEQWNLN1K.R                 | 1716.95938 | 2 | 3.29E-06 | 0.96 | 4.85 | - | 1418.0 |
| AHQ-2-8, 3786         | K.TKEVIEQWNLN1K.R                 | 1716.95938 | 2 | 1.02E-05 | 0.93 | 4.58 | - | 1044.2 |
| AHQ-2-9, 3955         | K.TKEVIEQWNLN1K.R                 | 1716.95938 | 2 | 3.58E-06 | 0.96 | 4.69 | - | 1631.7 |
| AHQ-2-13, 4253 - 4257 | K.TKEVIEQWNLN1K.R                 | 1716.95938 | 2 | 1.37E-08 | 0.96 | 4.81 | - | 1476.4 |
| AHQ-2-7, 3857         | K.TKEVIEQWNLN1K.R                 | 1716.95938 | 3 | 4.75E-05 | 0.93 | 4.68 | - | 1175.8 |
| AHQ-2-9, 6422         | K.TLAESALQLLYTAK.E                | 1522.76793 | 2 | 3.78E-05 | 0.95 | 4.07 | - | 1242.4 |
| AHQ-2-2, 6668 - 6748  | K.TLAESALQLLYTAK.E                | 1522.76793 | 2 | 4.08E-08 | 0.97 | 5.25 | - | 1436.5 |
| AHQ-2-3, 6639 - 6707  | K.TLAESALQLLYTAK.E                | 1522.76793 | 2 | 6.76E-10 | 0.97 | 5.41 | - | 1388.8 |
| AHQ-2-2, 6838         | K.TLAESALQLLYTAK.E                | 1522.76793 | 2 | 4.84E-06 | 0.93 | 3.57 | - | 1047.3 |
| AHQ-2-4, 6712 - 6780  | K.TLAESALQLLYTAK.E                | 1522.76793 | 2 | 4.08E-11 | 0.97 | 4.91 | - | 1410.5 |
| AHQ-2-1, 6650 - 6654  | K.TLAESALQLLYTAK.E                | 1522.76793 | 2 | 7.81E-10 | 0.96 | 4.78 | - | 1039.5 |
| AHQ-2-10, 5915        | K.TLAESALQLLYTAK.E                | 1522.76793 | 2 | 8.83E-04 | 0.82 | 3.44 | - | 860.3  |
| AHQ-2-3, 6904         | K.TLAESALQLLYTAK.E                | 1522.76793 | 2 | 3.21E-07 | 0.94 | 4.16 | - | 1034.9 |
| AHQ-2-11, 6064        | K.TLAESALQLLYTAK.E                | 1522.76793 | 2 | 4.46E-04 | 0.92 | 3.87 | - | 861.4  |
| AHQ-2-5, 6411 - 6491  | K.TLAESALQLLYTAK.E                | 1522.76793 | 2 | 1.04E-05 | 0.97 | 4.82 | - | 1430.4 |
| AHQ-2-2, 2420         | K.TLSHPQQM*ALLDQTK.T              | 1727.96404 | 2 | 1.63E-05 | 0.89 | 3.71 | - | 582.7  |
| AHQ-2-2, 3134         | K.TLSHPQQMALLDQTK.T               | 1711.96464 | 3 | 4.26E-08 | 0.96 | 5.18 | - | 1801.4 |
| AHQ-2-3, 3125         | K.TLSHPQQMALLDQTK.T               | 1711.96464 | 3 | 2.30E-07 | 0.91 | 5.00 | - | 879.1  |
| AHQ-2-10, 2820        | K.TLSHPQQMALLDQTK.T               | 1711.96464 | 2 | 7.76E-04 | 0.78 | 3.28 | - | 394.1  |
| AHQ-2-4, 3124         | K.TLSHPQQMALLDQTK.T               | 1711.96464 | 2 | 1.34E-05 | 0.94 | 5.11 | - | 647.7  |
| AHQ-2-5, 2845         | K.TLSHPQQMALLDQTK.T               | 1711.96464 | 3 | 1.49E-05 | 0.91 | 4.50 | - | 990.4  |
| AHQ-2-2, 3125 - 3126  | K.TLSHPQQMALLDQTK.T               | 1711.96464 | 2 | 2.40E-04 | 0.95 | 5.08 | - | 735.3  |
| AHQ-2-1, 3369         | K.TLSHPQQMALLDQTK.T               | 1711.96464 | 3 | 4.75E-05 | 0.83 | 3.90 | - | 674.8  |
| AHQ-2-4, 3129         | K.TLSHPQQMALLDQTK.T               | 1711.96464 | 3 | 1.64E-07 | 0.93 | 4.93 | - | 997.6  |
| AHQ-2-9, 2850         | K.TLSHPQQMALLDQTK.T               | 1711.96464 | 2 | 6.67E-05 | 0.93 | 4.32 | - | 714.8  |
| AHQ-2-3, 3087 - 3155  | K.TLSHPQQMALLDQTK.T               | 1711.96464 | 2 | 2.30E-04 | 0.95 | 4.64 | - | 821.2  |
| AHQ-2-7, 2753 - 2792  | K.TLSHPQQMALLDQTK.T               | 1711.96464 | 2 | 2.55E-04 | 0.88 | 4.14 | - | 661.8  |
| AHQ-2-6, 2861         | K.TLSHPQQMALLDQTK.T               | 1711.96464 | 2 | 1.25E-04 | 0.95 | 4.46 | - | 871.1  |
| AHQ-2-5, 2835 - 2843  | K.TLSHPQQMALLDQTK.T               | 1711.96464 | 2 | 7.55E-04 | 0.96 | 4.92 | - | 829.3  |
| AHQ-2-5, 4085 - 4091  | K.TMLESAGGLIQTAR.A                | 1448.67095 | 2 | 9.01E-07 | 0.95 | 3.82 | - | 1833.3 |
| AHQ-2-4, 4349 - 4360  | K.TMLESAGGLIQTAR.A                | 1448.67095 | 2 | 3.77E-05 | 0.86 | 3.56 | - | 850.8  |
| AHQ-2-5, 3203         | K.TMLESAGGLIQTAR.A                | 1464.67035 | 2 | 2.32E-05 | 0.89 | 3.46 | - | 1174.0 |
| AHQ-2-2, 3493 - 3494  | K.TMLESAGGLIQTAR.A                | 1464.67035 | 2 | 1.17E-07 | 0.97 | 4.91 | - | 1655.7 |
| AHQ-2-3, 3468 - 3549  | K.TMLESAGGLIQTAR.A                | 1464.67035 | 2 | 5.67E-04 | 0.95 | 4.04 | - | 1468.5 |
| AHQ-2-6, 3173         | K.TMLESAGGLIQTAR.A                | 1464.67035 | 2 | 1.15E-05 | 0.90 | 3.27 | - | 1091.7 |
| AHQ-2-1, 3620         | K.TMLESAGGLIQTAR.A                | 1464.67035 | 2 | 1.71E-05 | 0.95 | 4.17 | - | 1463.2 |
| AHQ-2-2, 4514         | K.TMLESAGGLIQTAR.A                | 1448.67095 | 2 | 2.20E-05 | 0.93 | 3.65 | - | 1599.4 |
| AHQ-2-6, 4046         | K.TMLESAGGLIQTAR.A                | 1448.67095 | 2 | 7.51E-07 | 0.89 | 2.57 | - | 1765.1 |
| AHQ-2-1, 4418 - 4498  | K.TMLESAGGLIQTAR.A                | 1448.67095 | 2 | 1.92E-06 | 0.95 | 4.02 | - | 1843.7 |
| AHQ-2-2, 4428         | K.TMLESAGGLIQTAR.A                | 1448.67095 | 2 | 8.93E-07 | 0.77 | 3.10 | - | 1005.7 |
| AHQ-2-4, 4357         | K.TMLESAGGLIQTAR.A                | 1448.67095 | 1 | 6.37E-04 | 0.09 | 1.82 | - | 296.4  |
| AHQ-2-13, 4883        | K.TMQFEPSTMVYDADR.I               | 1838.07571 | 2 | 1.28E-05 | 0.92 | 4.52 | - | 608.1  |
| AHQ-2-7, 4679         | K.TMQFEPSTMVYDADR.I               | 1838.07571 | 2 | 4.70E-06 | 0.94 | 5.26 | - | 553.3  |
| AHQ-2-7, 3859         | K.TMQFEPSTMVYDADR.I               | 1854.07511 | 2 | 3.66E-04 | 0.82 | 3.30 | - | 471.3  |
| AHQ-2-12, 4838 - 4855 | K.TMQFEPSTMVYDADR.I               | 1838.07571 | 2 | 2.90E-04 | 0.89 | 4.41 | - | 499.4  |
| AHQ-2-13, 4235 - 4236 | K.TMQFEPSTMVYDADR.I               | 1854.07511 | 2 | 3.63E-06 | 0.93 | 4.64 | - | 738.2  |
| AHQ-2-7, 4116 - 4123  | K.TMQFEPSTMVYDADR.I               | 1854.07511 | 2 | 3.89E-06 | 0.95 | 4.92 | - | 678.7  |
| AHQ-2-14, 4837        | K.TMQFEPSTMVYDADR.I               | 1838.07571 | 2 | 1.24E-06 | 0.94 | 4.64 | - | 567.0  |
| AHQ-2-13, 4789 - 4795 | K.TMQFEPSTMVYDADR.I               | 1838.07571 | 2 | 6.65E-04 | 0.94 | 4.33 | - | 635.9  |
| AHQ-2-13, 4289        | K.TMQFEPSTMVYDADR.I               | 1854.07511 | 2 | 5.68E-06 | 0.91 | 4.64 | - | 658.6  |
| AHQ-2-13, 5394 - 5462 | K.TVTDMLMTICAR.I                  | 1413.71007 | 2 | 9.21E-04 | 0.86 | 3.24 | - | 804.3  |
| AHQ-2-7, 3533 - 3608  | K.TVTDMLMTICAR.I                  | 1445.70887 | 2 | 3.56E-06 | 0.91 | 3.16 | - | 1014.8 |
| AHQ-2-13, 3737 - 3801 | K.TVTDMLMTICAR.I                  | 1445.70887 | 2 | 1.53E-06 | 0.91 | 3.34 | - | 805.4  |
| AHQ-2-13, 5352        | K.TVTDMLMTICAR.I                  | 1413.71007 | 2 | 5.96E-05 | 0.86 | 2.62 | - | 1176.7 |
| AHQ-2-13, 3719 - 3784 | K.TVTDMLMTICAR.I                  | 1445.70887 | 2 | 7.71E-08 | 0.90 | 3.77 | - | 764.2  |
| AHQ-2-12, 5258        | K.TYGVSFVLV.K                     | 1161.37395 | 2 | 1.66E-06 | 0.75 | 2.71 | - | 627.3  |
| AHQ-2-7, 4923         | K.TYGVSFVLV.K                     | 1161.37395 | 2 | 2.83E-06 | 0.89 | 3.62 | - | 581.3  |
| AHQ-2-11, 5017        | K.TYGVSFVLV.K                     | 1161.37395 | 2 | 1.83E-04 | 0.78 | 2.62 | - | 681.8  |
| AHQ-2-9, 5132         | R.VAGSVTELIQAAEAM*K.G             | 1634.87692 | 2 | 1.86E-04 | 0.81 | 3.01 | - | 968.2  |
| AHQ-2-9, 6278 - 6306  | R.VAGSVTELIQAAEAM*K.G             | 1618.87752 | 2 | 7.78E-06 | 0.94 | 3.87 | - | 1428.5 |
| AHQ-2-3, 6553         | R.VAGSVTELIQAAEAM*K.G             | 1618.87752 | 2 | 6.03E-09 | 0.94 | 4.23 | - | 957.1  |
| AHQ-2-5, 6337 - 6355  | R.VAGSVTELIQAAEAM*K.G             | 1618.87752 | 2 | 3.89E-11 | 0.98 | 5.85 | - | 1625.3 |
| AHQ-2-13, 6132        | R.VAGSVTELIQAAEAM*K.G             | 1618.87752 | 2 | 8.18E-05 | 0.94 | 3.79 | - | 1535.7 |
| AHQ-2-1, 6573 - 6593  | R.VAGSVTELIQAAEAM*K.G             | 1618.87752 | 2 | 5.50E-11 | 0.98 | 6.07 | - | 2033.3 |
| AHQ-2-4, 6589 - 6666  | R.VAGSVTELIQAAEAM*K.G             | 1618.87752 | 2 | 3.58E-09 | 0.97 | 5.21 | - | 1452.4 |
| AHQ-2-3, 5408 - 5479  | R.VAGSVTELIQAAEAM*K.G             | 1634.87692 | 2 | 8.37E-06 | 0.97 | 4.66 | - | 1763.9 |
| AHQ-2-2, 5460 - 5496  | R.VAGSVTELIQAAEAM*K.G             | 1634.87692 | 2 | 9.45E-04 | 0.79 | 3.35 | - | 797.6  |
| AHQ-2-6, 6234 - 6238  | R.VAGSVTELIQAAEAM*K.G             | 1618.87752 | 2 | 7.93E-07 | 0.97 | 4.73 | - | 1730.5 |

|                       |                                   |            |   |          |      |      |   |        |
|-----------------------|-----------------------------------|------------|---|----------|------|------|---|--------|
| AHQ-2-2, 6526 - 6592  | R.VAGSVTELIQAAEAMK.G              | 1618.87752 | 2 | 1.10E-10 | 0.98 | 6.26 | - | 1684.1 |
| AHQ-2-2, 6781         | R.VAGSVTELIQAAEAMK.G              | 1618.87752 | 2 | 1.39E-08 | 0.95 | 4.13 | - | 1463.6 |
| AHQ-2-7, 6155         | R.VAGSVTELIQAAEAMK.G              | 1618.87752 | 2 | 1.39E-06 | 0.76 | 2.80 | - | 903.2  |
| AHQ-2-1, 6152 - 6217  | K.VGAIPANALDDGQWSQGLISAAR.M       | 2311.53959 | 2 | 1.05E-11 | 0.94 | 5.12 | - | 679.0  |
| AHQ-2-12, 5865 - 5875 | K.VGAIPANALDDGQWSQGLISAAR.M       | 2311.53959 | 2 | 8.52E-08 | 0.95 | 5.58 | - | 745.8  |
| AHQ-2-1, 6053 - 6082  | K.VGAIPANALDDGQWSQGLISAAR.M       | 2311.53959 | 2 | 1.74E-12 | 0.93 | 4.63 | - | 751.6  |
| AHQ-2-2, 5836         | K.VGAIPANALDDGQWSQGLISAAR.M       | 2311.53959 | 2 | 4.19E-07 | 0.90 | 4.32 | - | 594.2  |
| AHQ-2-1, 6254         | K.VGAIPANALDDGQWSQGLISAAR.M       | 2311.53959 | 2 | 4.99E-06 | 0.68 | 3.04 | - | 465.4  |
| AHQ-2-4, 5917 - 5988  | K.VGAIPANALDDGQWSQGLISAAR.M       | 2311.53959 | 2 | 3.79E-09 | 0.96 | 5.34 | - | 961.1  |
| AHQ-2-2, 5930 - 6000  | K.VGAIPANALDDGQWSQGLISAAR.M       | 2311.53959 | 2 | 5.64E-08 | 0.96 | 5.41 | - | 977.3  |
| AHQ-2-11, 5446        | K.VGAIPANALDDGQWSQGLISAAR.M       | 2311.53959 | 2 | 1.55E-06 | 0.92 | 4.29 | - | 789.0  |
| AHQ-2-3, 6075 - 6101  | K.VGAIPANALDDGQWSQGLISAAR.M       | 2311.53959 | 2 | 1.25E-10 | 0.95 | 4.79 | - | 1100.5 |
| AHQ-2-1, 5901 - 5965  | K.VGAIPANALDDGQWSQGLISAAR.M       | 2311.53959 | 2 | 2.11E-05 | 0.86 | 3.99 | - | 517.4  |
| AHQ-2-3, 6171 - 6243  | K.VGAIPANALDDGQWSQGLISAAR.M       | 2311.53959 | 2 | 1.42E-07 | 0.93 | 4.70 | - | 703.9  |
| AHQ-2-3, 5899 - 5967  | K.VGAIPANALDDGQWSQGLISAAR.M       | 2311.53959 | 2 | 1.66E-04 | 0.88 | 3.99 | - | 579.2  |
| AHQ-2-10, 5188 - 5262 | K.VGAIPANALDDGQWSQGLISAAR.M       | 2311.53959 | 2 | 3.75E-09 | 0.92 | 4.42 | - | 612.2  |
| AHQ-2-10, 5582 - 5654 | K.VGAIPANALDDGQWSQGLISAAR.M       | 2311.53959 | 2 | 2.22E-08 | 0.90 | 4.23 | - | 621.7  |
| AHQ-2-7, 5831         | K.VGAIPANALDDGQWSQGLISAAR.M       | 2311.53959 | 2 | 5.86E-09 | 0.91 | 4.34 | - | 585.2  |
| AHQ-2-11, 5540 - 5601 | K.VGAIPANALDDGQWSQGLISAAR.M       | 2311.53959 | 2 | 4.62E-12 | 0.98 | 6.23 | - | 1460.8 |
| AHQ-2-6, 5586 - 5633  | K.VGAIPANALDDGQWSQGLISAAR.M       | 2311.53959 | 2 | 1.42E-07 | 0.95 | 4.72 | - | 830.0  |
| AHQ-2-5, 5884 - 5951  | K.VGAIPANALDDGQWSQGLISAAR.M       | 2311.53959 | 2 | 2.08E-11 | 0.96 | 5.47 | - | 922.9  |
| AHQ-2-3, 5709 - 5787  | K.VGAIPANALDDGQWSQGLISAAR.M       | 2311.53959 | 2 | 3.63E-09 | 0.91 | 4.25 | - | 651.7  |
| AHQ-2-2, 6068 - 6136  | K.VGAIPANALDDGQWSQGLISAAR.M       | 2311.53959 | 2 | 1.57E-09 | 0.95 | 4.93 | - | 790.3  |
| AHQ-2-4, 6350 - 6429  | K.VGAIPANALDDGQWSQGLISAAR.M       | 2311.53959 | 2 | 3.37E-06 | 0.83 | 3.43 | - | 608.1  |
| AHQ-2-5, 6125 - 6133  | K.VGAIPANALDDGQWSQGLISAAR.M       | 2311.53959 | 2 | 3.76E-10 | 0.96 | 5.44 | - | 980.3  |
| AHQ-2-6, 5801 - 5853  | K.VGAIPANALDDGQWSQGLISAAR.M       | 2311.53959 | 2 | 8.39E-12 | 0.96 | 5.58 | - | 845.8  |
| AHQ-2-7, 5672 - 5680  | K.VGAIPANALDDGQWSQGLISAAR.M       | 2311.53959 | 2 | 2.12E-06 | 0.92 | 4.37 | - | 834.9  |
| AHQ-2-4, 6078 - 6149  | K.VGAIPANALDDGQWSQGLISAAR.M       | 2311.53959 | 2 | 1.41E-08 | 0.92 | 4.38 | - | 519.4  |
| AHQ-2-12, 5998        | K.VGAIPANALDDGQWSQGLISAAR.M       | 2311.53959 | 2 | 1.14E-10 | 0.93 | 3.82 | - | 953.3  |
| AHQ-2-2, 6172         | K.VGAIPANALDDGQWSQGLISAAR.M       | 2311.53959 | 2 | 1.29E-09 | 0.89 | 3.86 | - | 652.5  |
| AHQ-2-14-, 5769       | K.VGAIPANALDDGQWSQGLISAAR.M       | 2311.53959 | 2 | 2.58E-09 | 0.94 | 4.98 | - | 646.0  |
| AHQ-2-10, 5375 - 5439 | K.VGAIPANALDDGQWSQGLISAAR.M       | 2311.53959 | 2 | 1.60E-13 | 0.95 | 5.25 | - | 773.7  |
| AHQ-2-10, 5279        | K.VGAIPANALDDGQWSQGLISAAR.M       | 2311.53959 | 2 | 2.18E-06 | 0.94 | 4.65 | - | 842.3  |
| AHQ-2-9, 5887 - 5904  | K.VGAIPANALDDGQWSQGLISAAR.M       | 2311.53959 | 2 | 3.30E-08 | 0.97 | 5.21 | - | 1519.1 |
| AHQ-2-9, 5690         | K.VGAIPANALDDGQWSQGLISAAR.M       | 2311.53959 | 2 | 1.55E-08 | 0.95 | 4.78 | - | 1006.0 |
| AHQ-2-8, 5536         | K.VGAIPANALDDGQWSQGLISAAR.M       | 2311.53959 | 2 | 4.36E-07 | 0.82 | 3.61 | - | 559.8  |
| AHQ-2-8, 5680         | K.VGAIPANALDDGQWSQGLISAAR.M       | 2311.53959 | 2 | 7.22E-09 | 0.95 | 5.05 | - | 696.5  |
| AHQ-2-3, 5983         | K.VGAIPANALDDGQWSQGLISAAR.M       | 2311.53959 | 2 | 1.03E-06 | 0.96 | 5.23 | - | 940.8  |
| AHQ-2-1, 3976         | K.VGDDPAVWQLK.N                   | 1228.37879 | 2 | 6.73E-09 | 0.94 | 4.09 | - | 965.4  |
| AHQ-2-5, 3503         | K.VGDDPAVWQLK.N                   | 1228.37879 | 2 | 2.57E-08 | 0.91 | 3.71 | - | 885.0  |
| AHQ-2-7, 3424         | K.VGDDPAVWQLK.N                   | 1228.37879 | 2 | 5.71E-06 | 0.90 | 3.49 | - | 854.5  |
| AHQ-2-10, 3400        | K.VGDDPAVWQLK.N                   | 1228.37879 | 2 | 4.74E-07 | 0.85 | 3.25 | - | 664.2  |
| AHQ-2-2, 3844         | K.VGDDPAVWQLK.N                   | 1228.37879 | 2 | 7.73E-09 | 0.94 | 4.28 | - | 929.4  |
| AHQ-2-4, 3784         | K.VGDDPAVWQLK.N                   | 1228.37879 | 2 | 1.95E-09 | 0.90 | 3.29 | - | 832.8  |
| AHQ-2-2, 3804 - 3881  | K.VGDDPAVWQLK.N                   | 1228.37879 | 2 | 2.43E-08 | 0.93 | 4.17 | - | 799.7  |
| AHQ-2-6, 3491         | K.VGDDPAVWQLK.N                   | 1228.37879 | 2 | 6.32E-09 | 0.95 | 3.99 | - | 1057.0 |
| AHQ-2-2, 3192         | K.VGDDPAVWQLKNSAK.V               | 1628.81068 | 2 | 2.74E-08 | 0.79 | 3.39 | - | 682.9  |
| AHQ-2-4, 3182         | K.VGDDPAVWQLKNSAK.V               | 1628.81068 | 2 | 2.95E-11 | 0.80 | 3.34 | - | 583.2  |
| AHQ-2-3, 3091 - 3160  | K.VLGEAMTGISQNAK.N                | 1419.62961 | 1 | 2.28E-09 | 0.88 | 3.77 | - | 527.3  |
| AHQ-2-4, 3084 - 3165  | K.VLGEAMTGISQNAK.N                | 1419.62961 | 1 | 7.84E-05 | 0.49 | 2.38 | - | 370.1  |
| AHQ-2-2, 3092         | K.VLGEAMTGISQNAK.N                | 1419.62961 | 2 | 2.46E-10 | 0.98 | 4.92 | - | 2259.1 |
| AHQ-2-4, 3270         | K.VLGEAMTGISQNAK.N                | 1419.62961 | 2 | 3.30E-08 | 0.96 | 4.04 | - | 2056.1 |
| AHQ-2-1, 2460         | K.VLGEAMTGISQNAK.N                | 1435.62901 | 2 | 5.81E-05 | 0.92 | 3.92 | - | 934.8  |
| AHQ-2-2, 3108 - 3178  | K.VLGEAMTGISQNAK.N                | 1419.62961 | 1 | 9.19E-08 | 0.63 | 3.12 | - | 342.8  |
| AHQ-2-2, 2324 - 2396  | K.VLGEAMTGISQNAK.N                | 1435.62901 | 2 | 5.13E-06 | 0.97 | 5.06 | - | 1498.8 |
| AHQ-2-3, 3156         | K.VLGEAMTGISQNAK.N                | 1419.62961 | 2 | 3.03E-08 | 0.98 | 4.59 | - | 2529.5 |
| AHQ-2-6, 2859 - 2862  | K.VLGEAMTGISQNAK.N                | 1419.62961 | 2 | 1.62E-04 | 0.88 | 3.15 | - | 1078.9 |
| AHQ-2-5, 2859 - 2860  | K.VLGEAMTGISQNAK.N                | 1419.62961 | 2 | 9.35E-05 | 0.97 | 4.42 | - | 1702.0 |
| AHQ-2-3, 4920 - 4932  | K.VLGEAMTGISQNAKNGNLPFGDAISTASK.A | 3038.33659 | 3 | 5.89E-07 | 0.87 | 4.52 | - | 382.5  |
| AHQ-2-5, 5408 - 5445  | K.VLGEAMTGISQNAKNGNLPFGDAISTASK.A | 3022.33719 | 3 | 1.01E-09 | 0.84 | 3.92 | - | 613.7  |
| AHQ-2-1, 4954         | K.VLGEAMTGISQNAKNGNLPFGDAISTASK.A | 3038.33659 | 3 | 3.55E-05 | 0.89 | 4.39 | - | 669.1  |
| AHQ-2-3, 5497 - 5567  | K.VLGEAMTGISQNAKNGNLPFGDAISTASK.A | 3022.33719 | 3 | 8.12E-12 | 0.88 | 4.62 | - | 612.8  |
| AHQ-2-2, 5088         | K.VLGEAMTGISQNAKNGNLPFGDAISTASK.A | 3038.33659 | 3 | 2.03E-07 | 0.85 | 4.19 | - | 564.8  |
| AHQ-2-2, 5538 - 5608  | K.VLGEAMTGISQNAKNGNLPFGDAISTASK.A | 3022.33719 | 3 | 3.31E-04 | 0.89 | 4.78 | - | 686.0  |
| AHQ-2-3, 1848         | K.VLVQNAAGSQEK.L                  | 1244.37976 | 2 | 2.18E-04 | 0.79 | 2.99 | - | 682.8  |
| AHQ-2-3, 1661 - 1737  | K.VLVQNAAGSQEK.L                  | 1244.37976 | 2 | 5.68E-07 | 0.88 | 3.23 | - | 710.0  |
| AHQ-2-5, 1459         | K.VLVQNAAGSQEK.L                  | 1244.37976 | 2 | 1.10E-04 | 0.74 | 3.18 | - | 527.4  |
| AHQ-2-3, 1520 - 1579  | K.VLVQNAAGSQEK.L                  | 1244.37976 | 2 | 3.19E-04 | 0.91 | 3.49 | - | 964.9  |
| AHQ-2-1, 1786 - 1845  | K.VLVQNAAGSQEK.L                  | 1244.37976 | 2 | 4.43E-05 | 0.88 | 3.53 | - | 670.0  |
| AHQ-2-4, 1505 - 1577  | K.VLVQNAAGSQEK.L                  | 1244.37976 | 2 | 2.35E-08 | 0.93 | 3.51 | - | 1027.1 |
| AHQ-2-4, 1754         | K.VLVQNAAGSQEK.L                  | 1244.37976 | 2 | 1.87E-04 | 0.95 | 4.13 | - | 1203.2 |
| AHQ-2-6, 1486         | K.VLVQNAAGSQEK.L                  | 1244.37976 | 2 | 8.54E-07 | 0.83 | 3.41 | - | 577.2  |
| AHQ-2-2, 1661 - 1730  | K.VLVQNAAGSQEK.L                  | 1244.37976 | 2 | 1.75E-08 | 0.93 | 4.04 | - | 927.6  |
| AHQ-2-1, 1904         | K.VLVQNAAGSQEK.L                  | 1244.37976 | 2 | 5.71E-04 | 0.67 | 2.78 | - | 407.2  |
| AHQ-2-2, 1614         | K.VLVQNAAGSQEK.L                  | 1244.37976 | 1 | 2.87E-04 | 0.24 | 1.99 | - | 423.0  |
| AHQ-2-2, 1522 - 1592  | K.VLVQNAAGSQEK.L                  | 1244.37976 | 2 | 9.26E-05 | 0.88 | 3.49 | - | 892.3  |
| AHQ-2-4, 4737 - 4738  | K.VMVTNVTSLLK.T                   | 1205.49322 | 2 | 1.24E-05 | 0.92 | 4.36 | - | 741.3  |
| AHQ-2-3, 4759         | K.VMVTNVTSLLK.T                   | 1205.49322 | 2 | 7.13E-06 | 0.92 | 4.30 | - | 811.7  |
| AHQ-2-3, 4375         | K.VMVTNVTSLLK.T                   | 1221.49262 | 2 | 8.23E-05 | 0.79 | 3.13 | - | 679.9  |
| AHQ-2-5, 4367 - 4371  | K.VMVTNVTSLLK.T                   | 1205.49322 | 2 | 2.10E-06 | 0.93 | 4.28 | - | 928.5  |
| AHQ-2-1, 4896         | K.VMVTNVTSLLK.T                   | 1205.49322 | 2 | 2.80E-05 | 0.91 | 3.52 | - | 887.6  |
| AHQ-2-1, 4528         | K.VMVTNVTSLLK.T                   | 1221.49262 | 2 | 7.32E-04 | 0.86 | 3.41 | - | 718.0  |
| AHQ-2-5, 4019         | K.VMVTNVTSLLK.T                   | 1221.49262 | 2 | 2.22E-04 | 0.79 | 3.25 | - | 582.9  |
| AHQ-2-2, 4388 - 4389  | K.VMVTNVTSLLK.T                   | 1221.49262 | 2 | 7.40E-05 | 0.82 | 3.54 | - | 670.2  |
| AHQ-2-6, 4333         | K.VMVTNVTSLLK.T                   | 1205.49322 | 2 | 2.56E-04 | 0.88 | 3.79 | - | 605.1  |
| AHQ-2-2, 4772         | K.VMVTNVTSLLK.T                   | 1205.49322 | 2 | 2.24E-05 | 0.90 | 3.90 | - | 869.6  |
| AHQ-2-7, 4208         | K.VMVTNVTSLLK.T                   | 1205.49322 | 2 | 4.87E-05 | 0.87 | 3.55 | - | 784.5  |
| AHQ-2-4, 4341         | K.VMVTNVTSLLK.T                   | 1221.49262 | 2 | 1.61E-05 | 0.80 | 3.39 | - | 611.1  |
| AHQ-2-3, 2691 - 2693  | R.VOELGHGCAALVTK.A                | 1484.70307 | 2 | 9.01E-06 | 0.97 | 4.54 | - | 1764.3 |
| AHQ-2-2, 2705         | R.VOELGHGCAALVTK.A                | 1484.70307 | 1 | 1.72E-05 | 0.91 | 4.06 | - | 854.2  |
| AHQ-2-2, 2696 - 2708  | R.VOELGHGCAALVTK.A                | 1484.70307 | 2 | 1.90E-04 | 0.97 | 4.47 | - | 1592.1 |
| AHQ-2-3, 2703         | R.VOELGHGCAALVTK.A                | 1484.70307 | 1 | 4.40E-05 | 0.86 | 3.72 | - | 585.9  |
| AHQ-2-6, 2505         | R.VOELGHGCAALVTK.A                | 1484.70307 | 2 | 2.46E-04 | 0.95 | 4.01 | - | 1346.0 |
| AHQ-2-1, 2904         | R.VOELGHGCAALVTK.A                | 1484.70307 | 2 | 1.68E-09 | 0.97 | 5.65 | - | 1386.2 |
| AHQ-2-4, 2750         | R.VOELGHGCAALVTK.A                | 1484.70307 | 2 | 4.03E-04 | 0.95 | 4.11 | - | 1200.1 |
| AHQ-2-4, 2661 - 2672  | R.VOELGHGCAALVTK.A                | 1484.70307 | 2 | 1.20E-05 | 0.97 | 4.21 | - | 1701.8 |
| AHQ-2-3, 2511         | K.VSHVLAALQAGNR.G                 | 1336.52525 | 1 | 7.95E-05 | 0.85 | 3.47 | - | 513.7  |
| AHQ-2-3, 2512 - 2592  | K.VSHVLAALQAGNR.G                 | 1336.52525 | 2 | 3.20E-11 | 0.97 | 4.68 | - | 1792.2 |
| AHQ-2-7, 2276         | K.VSHVLAALQAGNR.G                 | 1336.52525 | 1 | 1.59E-05 | 0.72 | 3.11 | - | 378.8  |
| AHQ-2-2, 2520 - 2598  | K.VSHVLAALQAGNR.G                 | 1336.52525 | 1 | 4.92E-04 | 0.30 | 2.66 | - | 227.8  |
| AHQ-2-2, 2521 - 2522  | K.VSHVLAALQAGNR.G                 | 1336.52525 | 2 | 8.35E-11 | 0.97 | 5.15 | - | 1781.6 |
| AHQ-2-3, 2525         | K.VSHVLAALQAGNR.G                 | 1336.52525 | 1 | 4.19E-06 | 0.91 | 4.13 | - | 520.4  |
| AHQ-2-2, 2524         | K.VSHVLAALQAGNR.G                 | 1336.52525 | 1 | 5.20E-05 | 0.85 | 3.46 | - | 415.2  |
| AHQ-2-5, 2308         | K.VSHVLAALQAGNR.G                 | 1336.52525 | 1 | 8.32E-05 | 0.77 | 3.18 | - | 356.8  |
| AHQ-2-3, 2661         | K.VSHVLAALQAGNR.G                 | 1336.52525 | 1 | 1.73E-08 | 0.34 | 1.95 | - | 545.3  |
| AHQ-2-1, 2810         | K.VSHVLAALQAGNR.G                 | 1336.52525 | 1 | 3.86E-04 | 0.65 | 2.45 | - | 462.6  |
| AHQ-2-10, 2392        | K.VSHVLAALQAGNR.G                 | 1336.52525 | 1 | 8.38E-06 | 0.67 | 2.73 | - | 355.5  |

|                             |                                                                 |            |   |          |       |        |       |         |
|-----------------------------|-----------------------------------------------------------------|------------|---|----------|-------|--------|-------|---------|
| AHQ-2-5, 2325               | K.VSHVLAALQAGNR.G                                               | 1336.52525 | 1 | 1.06E-05 | 0.67  | 2.97   | -     | 214.9   |
| AHQ-2-4, 2638               | K.VSHVLAALQAGNR.G                                               | 1336.52525 | 2 | 1.26E-09 | 0.96  | 3.71   | -     | 1663.0  |
| AHQ-2-6, 2335 - 2339        | K.VSHVLAALQAGNR.G                                               | 1336.52525 | 2 | 1.24E-06 | 0.97  | 4.39   | -     | 1822.0  |
| AHQ-2-9, 2395               | K.VSHVLAALQAGNR.G                                               | 1336.52525 | 1 | 7.92E-04 | 0.51  | 2.51   | -     | 328.7   |
| AHQ-2-1, 2730 - 2809        | K.VSHVLAALQAGNR.G                                               | 1336.52525 | 2 | 8.00E-11 | 0.97  | 4.59   | -     | 1717.1  |
| AHQ-2-4, 2525 - 2526        | K.VSHVLAALQAGNR.G                                               | 1336.52525 | 1 | 1.03E-07 | 0.89  | 3.74   | -     | 570.2   |
| AHQ-2-5, 2307 - 2319        | K.VSHVLAALQAGNR.G                                               | 1336.52525 | 2 | 3.38E-09 | 0.98  | 5.17   | -     | 2143.9  |
| AHQ-2-5, 5747               | K.VSQM*QYFEPLTLAAVGAASK.T                                       | 2199.51253 | 2 | 1.86E-04 | 0.87  | 3.79   | -     | 683.5   |
| AHQ-2-11, 6352 - 6354       | K.VSQMAQYFEPLTLAAVGAASK.T                                       | 2183.51313 | 2 | 4.31E-04 | 0.96  | 5.21   | -     | 965.0   |
| AHQ-2-3, 6037 - 6107        | K.VSQM*QYFEPLTLAAVGAASK.T                                       | 2199.51253 | 2 | 6.37E-06 | 0.94  | 4.56   | -     | 887.0   |
| AHQ-2-3, 6068               | K.VSQM*QYFEPLTLAAVGAASK.T                                       | 2199.51253 | 3 | 3.31E-05 | 0.93  | 4.58   | -     | 1175.7  |
| AHQ-2-3, 6876               | K.VSQMAQYFEPLTLAAVGAASK.T                                       | 2183.51313 | 2 | 9.94E-06 | 0.93  | 4.64   | -     | 759.0   |
| AHQ-2-3, 6959 - 7027        | K.VSQMAQYFEPLTLAAVGAASK.T                                       | 2183.51313 | 2 | 2.92E-06 | 0.97  | 5.78   | -     | 1138.2  |
| AHQ-2-3, 6969 - 6989        | K.VSQMAQYFEPLTLAAVGAASK.T                                       | 2183.51313 | 3 | 4.08E-09 | 0.97  | 6.15   | -     | 1542.8  |
| AHQ-2-3, 7116               | K.VSQMAQYFEPLTLAAVGAASK.T                                       | 2183.51313 | 2 | 4.23E-10 | 0.96  | 5.42   | -     | 854.9   |
| AHQ-2-5, 6825 - 6835        | K.VSQMAQYFEPLTLAAVGAASK.T                                       | 2183.51313 | 2 | 6.59E-06 | 0.98  | 6.63   | -     | 1264.6  |
| AHQ-2-9, 6786               | K.VSQMAQYFEPLTLAAVGAASK.T                                       | 2183.51313 | 2 | 6.13E-05 | 0.85  | 3.60   | -     | 574.4   |
| AHQ-2-6, 5705               | K.VSQM*QYFEPLTLAAVGAASK.T                                       | 2199.51253 | 2 | 1.80E-08 | 0.95  | 4.51   | -     | 1257.4  |
| AHQ-2-6, 6645 - 6653        | K.VSQMAQYFEPLTLAAVGAASK.T                                       | 2183.51313 | 2 | 8.73E-07 | 0.96  | 5.43   | -     | 1061.9  |
| AHQ-2-10, 6214 - 6226       | K.VSQMAQYFEPLTLAAVGAASK.T                                       | 2183.51313 | 2 | 1.08E-07 | 0.97  | 5.47   | -     | 1157.5  |
| AHQ-2-4, 7177               | K.VSQMAQYFEPLTLAAVGAASK.T                                       | 2183.51313 | 2 | 1.30E-06 | 0.93  | 4.42   | -     | 875.0   |
| AHQ-2-4, 7040 - 7042        | K.VSQMAQYFEPLTLAAVGAASK.T                                       | 2183.51313 | 3 | 2.69E-09 | 0.96  | 5.03   | -     | 1581.8  |
| AHQ-2-4, 7036 - 7100        | K.VSQMAQYFEPLTLAAVGAASK.T                                       | 2183.51313 | 2 | 1.06E-07 | 0.96  | 5.56   | -     | 1106.0  |
| AHQ-2-4, 6953 - 7032        | K.VSQMAQYFEPLTLAAVGAASK.T                                       | 2183.51313 | 2 | 5.11E-07 | 0.97  | 5.63   | -     | 1278.3  |
| AHQ-2-2, 6096               | K.VSQM*QYFEPLTLAAVGAASK.T                                       | 2199.51253 | 2 | 8.45E-08 | 0.95  | 4.89   | -     | 1049.1  |
| AHQ-2-4, 6222               | K.VSQM*QYFEPLTLAAVGAASK.T                                       | 2199.51253 | 2 | 6.20E-07 | 0.95  | 4.58   | -     | 1232.6  |
| AHQ-2-4, 6072               | K.VSQM*QYFEPLTLAAVGAASK.T                                       | 2199.51253 | 2 | 1.53E-06 | 0.94  | 4.18   | -     | 1023.7  |
| AHQ-2-2, 6921               | K.VSQMAQYFEPLTLAAVGAASK.T                                       | 2183.51313 | 2 | 1.40E-07 | 0.93  | 4.82   | -     | 628.2   |
| AHQ-2-2, 7020 - 7089        | K.VSQMAQYFEPLTLAAVGAASK.T                                       | 2183.51313 | 2 | 1.90E-06 | 0.96  | 5.64   | -     | 882.1   |
| AHQ-2-2, 7188               | K.VSQMAQYFEPLTLAAVGAASK.T                                       | 2183.51313 | 2 | 3.75E-09 | 0.96  | 5.50   | -     | 931.2   |
| AHQ-2-1, 7034               | K.VSQMAQYFEPLTLAAVGAASK.T                                       | 2183.51313 | 2 | 1.94E-07 | 0.96  | 5.28   | -     | 805.8   |
| AHQ-2-4, 6006 - 6076        | K.VSQM*QYFEPLTLAAVGAASK.T                                       | 2199.51253 | 2 | 3.51E-07 | 0.94  | 4.66   | -     | 1004.8  |
| AHQ-2-13, 6662              | K.VSQMAQYFEPLTLAAVGAASK.T                                       | 2183.51313 | 2 | 8.68E-06 | 0.90  | 4.39   | -     | 555.0   |
| AHQ-2-1, 6924 - 6938        | K.VSQMAQYFEPLTLAAVGAASK.T                                       | 2183.51313 | 3 | 4.14E-07 | 0.97  | 5.72   | -     | 1785.2  |
| AHQ-2-8, 6528               | K.VSQMAQYFEPLTLAAVGAASK.T                                       | 2183.51313 | 2 | 8.70E-06 | 0.95  | 4.90   | -     | 825.0   |
| AHQ-2-7, 6675               | K.VSQMAQYFEPLTLAAVGAASK.T                                       | 2183.51313 | 2 | 3.98E-07 | 0.96  | 5.55   | -     | 818.9   |
| AHQ-2-1, 6860 - 6921        | K.VSQMAQYFEPLTLAAVGAASK.T                                       | 2183.51313 | 2 | 7.80E-07 | 0.95  | 4.67   | -     | 1040.2  |
| AHQ-2-1, 6048 - 6124        | K.VSQM*QYFEPLTLAAVGAASK.T                                       | 2199.51253 | 2 | 7.21E-05 | 0.85  | 3.94   | -     | 618.4   |
| AHQ-2-1, 6133               | K.VSQM*QYFEPLTLAAVGAASK.T                                       | 2199.51253 | 3 | 2.10E-10 | 0.96  | 4.91   | -     | 1635.6  |
| AHQ-2-7, 5639               | K.VSQM*QYFEPLTLAAVGAASK.T                                       | 2199.51253 | 2 | 1.39E-06 | 0.94  | 4.81   | -     | 729.6   |
| AHQ-2-12, 6667              | K.VSQMAQYFEPLTLAAVGAASK.T                                       | 2183.51313 | 2 | 9.69E-05 | 0.74  | 3.35   | -     | 425.1   |
| AHQ-2-4, 4664               | K.VVAPTISSPVCQEQVLEAGR.L                                        | 2142.41919 | 2 | 1.89E-05 | 0.93  | 4.76   | -     | 482.3   |
| AHQ-2-4, 4800 - 4825        | K.VVAPTISSPVCQEQVLEAGR.L                                        | 2142.41919 | 2 | 1.99E-06 | 0.96  | 5.26   | -     | 992.4   |
| AHQ-2-10, 4178 - 4246       | K.VVAPTISSPVCQEQVLEAGR.L                                        | 2142.41919 | 2 | 1.06E-05 | 0.90  | 4.04   | -     | 699.8   |
| AHQ-2-13, 4606              | K.VVAPTISSPVCQEQVLEAGR.L                                        | 2142.41919 | 2 | 4.00E-07 | 0.94  | 4.42   | -     | 749.7   |
| AHQ-2-8, 4262               | K.VVAPTISSPVCQEQVLEAGR.L                                        | 2142.41919 | 2 | 1.00E-07 | 0.92  | 4.71   | -     | 456.3   |
| AHQ-2-8, 4358 - 4427        | K.VVAPTISSPVCQEQVLEAGR.L                                        | 2142.41919 | 2 | 9.06E-07 | 0.94  | 5.10   | -     | 543.3   |
| AHQ-2-8, 4448               | K.VVAPTISSPVCQEQVLEAGR.L                                        | 2142.41919 | 3 | 8.70E-12 | 0.95  | 5.14   | -     | 1275.6  |
| AHQ-2-14, 5497              | K.VVAPTISSPVCQEQVLEAGR.L                                        | 2142.41919 | 2 | 7.62E-05 | 0.45  | 2.65   | -     | 400.4   |
| AHQ-2-1, 4980               | K.VVAPTISSPVCQEQVLEAGR.L                                        | 2142.41919 | 2 | 5.58E-05 | 0.82  | 3.66   | -     | 280.4   |
| AHQ-2-4, 4957               | K.VVAPTISSPVCQEQVLEAGR.L                                        | 2142.41919 | 2 | 1.21E-09 | 0.91  | 4.70   | -     | 400.2   |
| AHQ-2-1, 4812               | K.VVAPTISSPVCQEQVLEAGR.L                                        | 2142.41919 | 2 | 2.95E-06 | 0.96  | 5.17   | -     | 972.4   |
| AHQ-2-1, 4693               | K.VVAPTISSPVCQEQVLEAGR.L                                        | 2142.41919 | 2 | 4.47E-05 | 0.83  | 3.96   | -     | 278.4   |
| AHQ-2-14, 4572 - 4576       | K.VVAPTISSPVCQEQVLEAGR.L                                        | 2142.41919 | 2 | 2.22E-13 | 0.95  | 4.89   | -     | 789.4   |
| AHQ-2-3, 4668 - 4671        | K.VVAPTISSPVCQEQVLEAGR.L                                        | 2142.41919 | 2 | 1.02E-07 | 0.93  | 4.57   | -     | 513.4   |
| AHQ-2-6, 4501 - 4513        | K.VVAPTISSPVCQEQVLEAGR.L                                        | 2142.41919 | 2 | 1.41E-11 | 0.98  | 6.30   | -     | 1043.9  |
| AHQ-2-3, 4791 - 4860        | K.VVAPTISSPVCQEQVLEAGR.L                                        | 2142.41919 | 2 | 1.40E-05 | 0.95  | 5.07   | -     | 769.8   |
| AHQ-2-2, 4689               | K.VVAPTISSPVCQEQVLEAGR.L                                        | 2142.41919 | 2 | 2.78E-04 | 0.77  | 4.13   | -     | 166.7   |
| AHQ-2-5, 4485               | K.VVAPTISSPVCQEQVLEAGR.L                                        | 2142.41919 | 2 | 2.21E-05 | 0.88  | 4.46   | -     | 423.7   |
| AHQ-2-5, 4587 - 4600        | K.VVAPTISSPVCQEQVLEAGR.L                                        | 2142.41919 | 2 | 1.33E-08 | 0.97  | 5.85   | -     | 1079.4  |
| AHQ-2-2, 5001 - 5002        | K.VVAPTISSPVCQEQVLEAGR.L                                        | 2142.41919 | 2 | 9.66E-11 | 0.94  | 4.69   | -     | 775.1   |
| AHQ-2-3, 4953               | K.VVAPTISSPVCQEQVLEAGR.L                                        | 2142.41919 | 2 | 3.40E-06 | 0.85  | 3.54   | -     | 453.1   |
| AHQ-2-12, 4605              | K.VVAPTISSPVCQEQVLEAGR.L                                        | 2142.41919 | 2 | 6.56E-05 | 0.63  | 3.15   | -     | 318.3   |
| AHQ-2-2, 4824 - 4897        | K.VVAPTISSPVCQEQVLEAGR.L                                        | 2142.41919 | 2 | 2.17E-04 | 0.97  | 5.77   | -     | 901.4   |
| AHQ-2-7, 4475 - 4487        | K.VVAPTISSPVCQEQVLEAGR.L                                        | 2142.41919 | 2 | 2.02E-07 | 0.94  | 5.06   | -     | 732.2   |
| gi 21956645 ref NP_665807.1 | myotrophin; granule cell differentiation protein [Homo sapiens] |            |   | 1.11E-15 | 4.72  | 50.34  | 66.90 | 12894.7 |
| AHQ-2-14, 4531              | K.GADINAPDKKHITPLLSAVYEGHVSCKV.L                                | 3031.39193 | 3 | 7.13E-09 | 0.98  | 6.61   | -     | 1640.5  |
| AHQ-2-13, 4357              | K.GADINAPDKKHITPLLSAVYEGHVSCKV.L                                | 3031.39193 | 3 | 7.81E-07 | 0.97  | 6.06   | -     | 1765.6  |
| AHQ-2-14, 5752              | K.GADINAPDKKHITPLLSAVYEGHVSCKV.L                                | 3031.39193 | 3 | 4.36E-08 | 0.97  | 6.10   | -     | 1358.3  |
| AHQ-2-13, 3995 - 4069       | K.GPDGLTAFEATDNQAIK.A                                           | 1748.87196 | 2 | 2.80E-10 | 0.97  | 5.32   | -     | 1781.4  |
| AHQ-2-13, 4031 - 4111       | K.GPDGLTAFEATDNQAIK.A                                           | 1748.87196 | 2 | 1.11E-15 | 0.98  | 5.97   | -     | 1427.5  |
| AHQ-2-13, 3907 - 3967       | K.GPDGLTAFEATDNQAIK.A                                           | 1748.87196 | 2 | 4.18E-04 | 0.88  | 3.69   | -     | 918.9   |
| AHQ-2-14, 4084              | K.GPDGLTAFEATDNQAIK.A                                           | 1748.87196 | 2 | 3.86E-05 | 0.95  | 4.94   | -     | 1079.8  |
| AHQ-2-14, 4860 - 4934       | K.GPDGLTAFEATDNQAIK.A                                           | 1748.87196 | 2 | 2.78E-06 | 0.97  | 5.17   | -     | 1369.3  |
| AHQ-2-14, 4992 - 5060       | K.GPDGLTAFEATDNQAIK.A                                           | 1748.87196 | 2 | 6.72E-04 | 0.94  | 4.21   | -     | 1123.6  |
| AHQ-2-13, 4162              | K.GPDGLTAFEATDNQAIK.A                                           | 1748.87196 | 2 | 8.52E-09 | 0.97  | 5.41   | -     | 1373.1  |
| AHQ-2-13, 4023 - 4093       | K.GPDGLTAFEATDNQAIK.A                                           | 1748.87196 | 2 | 6.10E-07 | 0.97  | 5.27   | -     | 1512.6  |
| AHQ-2-14, 3876 - 3951       | K.GPDGLTAFEATDNQAIK.A                                           | 1748.87196 | 2 | 1.00E-09 | 0.98  | 5.91   | -     | 1845.8  |
| AHQ-2-13, 4090              | K.GPDGLTAFEATDNQAIK.A                                           | 1748.87196 | 3 | 1.99E-07 | 0.74  | 3.32   | -     | 795.2   |
| AHQ-2-13, 4003 - 4005       | K.HHITPLLSAVYEGHVSCKV.L                                         | 2149.45825 | 2 | 4.42E-05 | 0.97  | 5.13   | -     | 1168.4  |
| AHQ-2-13, 3999              | K.HHITPLLSAVYEGHVSCKV.L                                         | 2149.45825 | 3 | 4.56E-06 | 0.99  | 6.89   | -     | 3169.8  |
| AHQ-2-14, 5293 - 5365       | K.HHITPLLSAVYEGHVSCKV.L                                         | 2149.45825 | 3 | 7.76E-04 | 0.97  | 5.48   | -     | 1758.3  |
| AHQ-2-14, 6836 - 6843       | R.KPLHYAADCGLEILEFLLLK.G                                        | 2473.91510 | 3 | 3.38E-05 | 0.86  | 3.53   | -     | 1032.7  |
| AHQ-2-14, 3587              | K.NGDLDEVKDYVAK.G                                               | 1466.57496 | 2 | 5.42E-08 | 0.95  | 3.83   | -     | 1399.1  |
| AHQ-2-14, 3673              | K.NGDLDEVKDYVAK.G                                               | 1466.57496 | 2 | 1.15E-08 | 0.94  | 3.71   | -     | 1315.9  |
| AHQ-2-13, 3770              | K.NGDLDEVKDYVAK.G                                               | 1466.57496 | 2 | 3.00E-08 | 0.93  | 3.66   | -     | 1177.1  |
| AHQ-2-14, 4537              | K.NGDLDEVKDYVAK.G                                               | 1466.57496 | 2 | 5.53E-08 | 0.95  | 4.17   | -     | 1456.6  |
| AHQ-2-13, 3658              | K.NGDLDEVKDYVAK.G                                               | 1466.57496 | 2 | 1.58E-09 | 0.92  | 3.58   | -     | 1103.8  |
| AHQ-2-13, 3777              | K.NGDLDEVKDYVAK.G                                               | 1466.57496 | 1 | 1.30E-06 | 0.41  | 2.60   | -     | 269.5   |
| AHQ-2-13, 3751 - 3759       | K.NGDLDEVKDYVAK.G                                               | 1466.57496 | 2 | 4.93E-09 | 0.93  | 3.98   | -     | 1116.5  |
| gi 4504165 ref NP_000168.1  | gelsolin (amyloidosis, Finnish type); Gelsolin [Homo sapiens]   |            |   | 2.22E-15 | 21.02 | 230.37 | 35.30 | 85696.9 |
| AHQ-2-5, 3572               | K.AGALNSNDAFVLK.T                                               | 1320.47622 | 1 | 1.62E-07 | 0.40  | 2.42   | -     | 406.7   |
| AHQ-2-5, 3657 - 3727        | K.AGALNSNDAFVLK.T                                               | 1320.47622 | 1 | 2.61E-06 | 0.40  | 2.28   | -     | 414.7   |
| AHQ-2-5, 3509 - 3587        | K.AGALNSNDAFVLK.T                                               | 1320.47622 | 2 | 1.54E-06 | 0.87  | 3.74   | -     | 711.4   |
| AHQ-2-5, 3311 - 3347        | K.AGALNSNDAFVLK.T                                               | 1320.47622 | 2 | 2.11E-05 | 0.75  | 3.12   | -     | 619.0   |
| AHQ-2-5, 3663 - 3716        | K.AGALNSNDAFVLK.T                                               | 1320.47622 | 2 | 1.11E-07 | 0.88  | 3.49   | -     | 722.7   |
| AHQ-2-6, 3543               | K.AGALNSNDAFVLK.T                                               | 1320.47622 | 2 | 3.99E-04 | 0.91  | 3.67   | -     | 952.1   |
| AHQ-2-6, 3627               | K.AGALNSNDAFVLK.T                                               | 1320.47622 | 2 | 9.53E-05 | 0.40  | 3.00   | -     | 375.1   |
| AHQ-2-7, 3253               | K.AGALNSNDAFVLK.T                                               | 1320.47622 | 2 | 3.45E-06 | 0.78  | 3.26   | -     | 555.1   |
| AHQ-2-6, 5497 - 5501        | R.AQPVQVAEGSEPDGFWEALGGK.A                                      | 2273.44345 | 2 | 8.86E-08 | 0.96  | 5.69   | -     | 715.4   |
| AHQ-2-6, 5593 - 5673        | R.AQPVQVAEGSEPDGFWEALGGK.A                                      | 2273.44345 | 2 | 4.89E-07 | 0.95  | 5.20   | -     | 715.0   |
| AHQ-2-11, 5494              | R.AQPVQVAEGSEPDGFWEALGGK.A                                      | 2273.44345 | 2 | 1.02E-04 | 0.91  | 4.07   | -     | 662.8   |
| AHQ-2-5, 5575               | R.AQPVQVAEGSEPDGFWEALGGK.A                                      | 2273.44345 | 2 | 1.39E-04 | 0.93  | 4.78   | -     | 719.5   |
| AHQ-2-10, 5124 - 5126       | R.AQPVQVAEGSEPDGFWEALGGK.A                                      | 2273.44345 | 2 | 3.12E-05 | 0.94  | 5.06   | -     | 623.5   |
| AHQ-2-7, 5540               | R.AQPVQVAEGSEPDGFWEALGGK.A                                      | 2273.44345 | 2 | 4.62E-05 | 0.94  | 4.97   | -     | 635.4   |
| AHQ-2-9, 5680 - 5711        | R.AQPVQVAEGSEPDGFWEALGGK.A                                      | 2273.44345 | 2 | 1.04E-05 | 0.94  | 4.68   | -     | 695.9   |
| AHQ-2-5, 5715 - 5783        | R.AQPVQVAEGSEPDGFWEALGGK.A                                      | 2273.44345 | 2 | 2.09E-06 | 0.96  | 5.60   | -     | 850.4   |

|                                                                                                     |                                             |            |   |          |      |        |       |         |
|-----------------------------------------------------------------------------------------------------|---------------------------------------------|------------|---|----------|------|--------|-------|---------|
| AHQ-2-9, 5522                                                                                       | R.AQPVQVAEGSEPDGFWEALGGK.A                  | 2273.44345 | 2 | 3.73E-10 | 0.91 | 4.73   | -     | 464.4   |
| AHQ-2-5, 5900 - 5979                                                                                | R.AQPVQVAEGSEPDGFWEALGGK.A                  | 2273.44345 | 2 | 2.66E-06 | 0.97 | 6.26   | -     | 764.4   |
| AHQ-2-7, 5657 - 5723                                                                                | R.AQPVQVAEGSEPDGFWEALGGK.A                  | 2273.44345 | 2 | 3.68E-08 | 0.95 | 5.50   | -     | 563.2   |
| AHQ-2-1, 6058                                                                                       | R.AQPVQVAEGSEPDGFWEALGGK.A                  | 2273.44345 | 2 | 2.80E-04 | 0.75 | 3.67   | -     | 284.0   |
| AHQ-2-3, 6032                                                                                       | R.AQPVQVAEGSEPDGFWEALGGK.A                  | 2273.44345 | 2 | 3.40E-05 | 0.89 | 4.12   | -     | 619.5   |
| AHQ-2-10, 5260 - 5322                                                                               | R.AQPVQVAEGSEPDGFWEALGGK.A                  | 2273.44345 | 2 | 8.37E-07 | 0.93 | 4.86   | -     | 689.6   |
| AHQ-2-8, 5511 - 5590                                                                                | R.AQPVQVAEGSEPDGFWEALGGK.A                  | 2273.44345 | 2 | 9.55E-06 | 0.92 | 4.17   | -     | 765.3   |
| AHQ-2-5, 6047                                                                                       | R.AQPVQVAEGSEPDGFWEALGGK.A                  | 2273.44345 | 2 | 3.39E-08 | 0.96 | 5.40   | -     | 786.4   |
| AHQ-2-6, 5558                                                                                       | R.DPDQTDGLGLSYLSSHIANVER.V                  | 2388.53285 | 3 | 1.02E-05 | 0.94 | 4.41   | -     | 1305.9  |
| AHQ-2-5, 5641 - 5723                                                                                | R.DPDQTDGLGLSYLSSHIANVER.V                  | 2388.53285 | 3 | 1.50E-04 | 0.56 | 3.05   | -     | 337.4   |
| AHQ-2-5, 2136                                                                                       | K.DSQEKEEKEALTS.AK.R                        | 1666.72289 | 2 | 1.39E-07 | 0.84 | 3.30   | -     | 858.6   |
| AHQ-2-7, 1903                                                                                       | K.DSQEKEEKEALTS.AK.R                        | 1666.72289 | 2 | 2.50E-10 | 0.94 | 3.50   | -     | 1654.1  |
| AHQ-2-11, 2149                                                                                      | K.DSQEKEEKEALTS.AK.R                        | 1666.72289 | 2 | 1.35E-04 | 0.82 | 3.29   | -     | 884.7   |
| AHQ-2-9, 2034 - 2043                                                                                | K.DSQEKEEKEALTS.AK.R                        | 1666.72289 | 2 | 3.09E-05 | 0.88 | 3.39   | -     | 1344.9  |
| AHQ-2-5, 2043                                                                                       | K.DSQEKEEKEALTS.AK.R                        | 1666.72289 | 2 | 8.81E-04 | 0.91 | 3.74   | -     | 1201.0  |
| AHQ-2-13, 2311                                                                                      | K.DSQEKEEKEALTS.AK.R                        | 1666.72289 | 2 | 6.43E-05 | 0.87 | 3.59   | -     | 894.4   |
| AHQ-2-5, 1945                                                                                       | K.DSQEKEEKEALTS.AK.R                        | 1666.72289 | 3 | 4.70E-05 | 0.97 | 4.62   | -     | 2225.1  |
| AHQ-2-5, 1941 - 1968                                                                                | K.DSQEKEEKEALTS.AK.R                        | 1666.72289 | 2 | 1.24E-08 | 0.95 | 4.27   | -     | 1434.7  |
| AHQ-2-10, 2026                                                                                      | K.DSQEKEEKEALTS.AK.R                        | 1666.72289 | 2 | 1.25E-05 | 0.88 | 3.50   | -     | 1071.0  |
| AHQ-2-13-, 2205                                                                                     | K.DSQEKEEKEALTS.AK.R                        | 1666.72289 | 2 | 1.51E-07 | 0.96 | 4.24   | -     | 1709.7  |
| AHQ-2-13-, 2219                                                                                     | K.DSQEKEEKEALTS.AK.R                        | 1666.72289 | 3 | 3.58E-08 | 0.97 | 4.45   | -     | 2372.4  |
| AHQ-2-8, 1854                                                                                       | K.DSQEKEEKEALTS.AK.R                        | 1666.72289 | 2 | 9.00E-08 | 0.88 | 3.63   | -     | 1050.9  |
| AHQ-2-6, 1950                                                                                       | K.DSQEKEEKEALTS.AK.R                        | 1666.72289 | 3 | 1.72E-05 | 0.88 | 3.27   | -     | 1253.1  |
| AHQ-2-6, 1941                                                                                       | K.DSQEKEEKEALTS.AK.R                        | 1666.72289 | 2 | 3.89E-08 | 0.91 | 3.59   | -     | 1126.4  |
| AHQ-2-5, 6363 - 6369                                                                                | R.EVQGFESATFLGYFK.S                         | 1723.90570 | 2 | 7.65E-10 | 0.96 | 4.13   | -     | 1576.4  |
| AHQ-2-13, 6087 - 6156                                                                               | R.EVQGFESATFLGYFK.S                         | 1723.90570 | 2 | 4.96E-05 | 0.80 | 2.74   | -     | 1051.6  |
| AHQ-2-12, 6238                                                                                      | R.EVQGFESATFLGYFK.S                         | 1723.90570 | 2 | 8.87E-04 | 0.88 | 3.19   | -     | 1027.5  |
| AHQ-2-5, 6927                                                                                       | R.EVQGFESATFLGYFK.S                         | 1723.90570 | 2 | 2.02E-04 | 0.86 | 2.95   | -     | 912.6   |
| AHQ-2-5, 7065                                                                                       | R.EVQGFESATFLGYFK.S                         | 1723.90570 | 2 | 6.00E-07 | 0.88 | 3.28   | -     | 1036.0  |
| AHQ-2-13-, 6258 - 6331                                                                              | R.EVQGFESATFLGYFK.S                         | 1723.90570 | 2 | 4.91E-09 | 0.97 | 4.86   | -     | 1760.0  |
| AHQ-2-5, 2233                                                                                       | K.HVVPNEVVQOR.L                             | 1276.46981 | 1 | 2.20E-06 | 0.75 | 2.59   | -     | 640.6   |
| AHQ-2-6, 2022                                                                                       | K.HVVPNEVVQOR.L                             | 1276.46981 | 2 | 1.78E-06 | 0.84 | 3.12   | -     | 546.8   |
| AHQ-2-5, 2228                                                                                       | K.HVVPNEVVQOR.L                             | 1276.46981 | 2 | 1.35E-04 | 0.83 | 2.90   | -     | 572.7   |
| AHQ-2-7, 1952                                                                                       | K.HVVPNEVVQOR.L                             | 1276.46981 | 2 | 2.46E-07 | 0.86 | 3.02   | -     | 560.6   |
| AHQ-2-9, 2067                                                                                       | K.HVVPNEVVQOR.L                             | 1276.46981 | 2 | 1.15E-07 | 0.84 | 2.95   | -     | 470.7   |
| AHQ-2-11, 2204 - 2212                                                                               | K.HVVPNEVVQOR.L                             | 1276.46981 | 2 | 3.76E-06 | 0.94 | 3.51   | -     | 842.2   |
| AHQ-2-11, 2208 - 2210                                                                               | K.HVVPNEVVQOR.L                             | 1276.46981 | 1 | 5.46E-06 | 0.60 | 2.47   | -     | 427.3   |
| AHQ-2-5, 2019                                                                                       | K.HVVPNEVVQOR.L                             | 1276.46981 | 1 | 1.83E-06 | 0.27 | 2.53   | -     | 204.7   |
| AHQ-2-12, 2242 - 2243                                                                               | K.HVVPNEVVQOR.L                             | 1276.46981 | 1 | 9.70E-07 | 0.25 | 2.33   | -     | 261.4   |
| AHQ-2-12, 2237                                                                                      | K.HVVPNEVVQOR.L                             | 1276.46981 | 2 | 4.67E-06 | 0.92 | 3.50   | -     | 653.2   |
| AHQ-2-5, 2007 - 2076                                                                                | K.HVVPNEVVQOR.L                             | 1276.46981 | 2 | 1.69E-08 | 0.90 | 3.44   | -     | 545.2   |
| AHQ-2-5, 6864                                                                                       | R.IEGSNKVPVDPATYGGQFYGGDSYIILNYR.H          | 3401.72499 | 3 | 7.43E-04 | 0.78 | 3.66   | -     | 543.2   |
| AHQ-2-5, 6415 - 6431                                                                                | R.IEGSNKVPVDPATYGGQFYGGDSYIILNYR.H          | 3401.72499 | 3 | 3.62E-07 | 0.97 | 5.77   | -     | 1617.7  |
| AHQ-2-5, 5467 - 5535                                                                                | K.NWRDPDQTDGLGLSYLSSHIANVER.V               | 2845.03323 | 3 | 4.24E-09 | 0.97 | 7.01   | -     | 1209.9  |
| AHQ-2-6, 5445                                                                                       | K.NWRDPDQTDGLGLSYLSSHIANVER.V               | 2845.03323 | 3 | 7.20E-06 | 0.98 | 7.40   | -     | 2024.2  |
| AHQ-2-5, 6172 - 6183                                                                                | K.NWRDPDQTDGLGLSYLSSHIANVER.V               | 2845.03323 | 3 | 2.22E-15 | 0.95 | 5.56   | -     | 1046.1  |
| AHQ-2-5, 1760 - 1811                                                                                | K.PALPAGTETDAK.E                            | 1171.28241 | 2 | 1.92E-08 | 0.83 | 2.90   | -     | 512.6   |
| AHQ-2-5, 2269                                                                                       | K.PALPAGTETDAKEDAA.NR.K                     | 1827.93072 | 2 | 2.24E-08 | 0.81 | 3.58   | -     | 412.9   |
| AHQ-2-7, 2257                                                                                       | K.PALPAGTETDAKEDAA.NR.K                     | 1827.93072 | 2 | 3.78E-05 | 0.38 | 2.77   | -     | 123.6   |
| AHQ-2-5, 2080                                                                                       | K.PALPAGTETDAKEDAA.NR.L                     | 1956.10363 | 2 | 2.69E-04 | 0.86 | 3.61   | -     | 524.2   |
| AHQ-2-7, 4555                                                                                       | K.QTQVSVLPEGGGETPLFK.Q                      | 1831.05925 | 2 | 3.80E-05 | 0.76 | 3.38   | -     | 308.4   |
| AHQ-2-6, 4655                                                                                       | K.QTQVSVLPEGGGETPLFK.Q                      | 1831.05925 | 2 | 3.85E-07 | 0.93 | 4.35   | -     | 576.0   |
| AHQ-2-5, 4856                                                                                       | K.QTQVSVLPEGGGETPLFK.Q                      | 1831.05925 | 2 | 6.73E-06 | 0.84 | 3.45   | -     | 423.3   |
| AHQ-2-8, 4370                                                                                       | K.QTQVSVLPEGGGETPLFK.Q                      | 1831.05925 | 2 | 9.44E-04 | 0.82 | 3.24   | -     | 424.6   |
| AHQ-2-5, 4688 - 4763                                                                                | K.QTQVSVLPEGGGETPLFK.Q                      | 1831.05925 | 2 | 4.52E-05 | 0.87 | 3.85   | -     | 525.5   |
| AHQ-2-5, 2697                                                                                       | K.SEDCFILDHGK.D                             | 1322.42590 | 2 | 2.89E-06 | 0.95 | 3.71   | -     | 1519.9  |
| AHQ-2-7, 2661                                                                                       | K.SEDCFILDHGK.D                             | 1322.42590 | 2 | 1.54E-06 | 0.92 | 3.21   | -     | 1220.8  |
| AHQ-2-6, 2749                                                                                       | K.SEDCFILDHGK.D                             | 1322.42590 | 2 | 2.76E-06 | 0.96 | 3.58   | -     | 1707.3  |
| AHQ-2-5, 1881                                                                                       | K.TGAQELLR.V                                | 888.00387  | 2 | 2.33E-04 | 0.89 | 3.02   | -     | 1067.4  |
| AHQ-2-8, 3938                                                                                       | K.TPSAAYLWVGTGASEAEK.T                      | 1838.99510 | 2 | 6.63E-04 | 0.92 | 3.92   | -     | 986.7   |
| AHQ-2-5, 4252 - 4323                                                                                | K.TPSAAYLWVGTGASEAEK.T                      | 1838.99510 | 2 | 1.81E-10 | 0.98 | 5.17   | -     | 1734.4  |
| AHQ-2-5, 4693                                                                                       | K.TPSAAYLWVGTGASEAEK.T                      | 1838.99510 | 2 | 6.91E-05 | 0.78 | 3.02   | -     | 604.0   |
| AHQ-2-7, 4135                                                                                       | K.TPSAAYLWVGTGASEAEK.T                      | 1838.99510 | 2 | 2.04E-06 | 0.85 | 3.48   | -     | 837.3   |
| AHQ-2-6, 4371                                                                                       | K.TPSAAYLWVGTGASEAEK.T                      | 1838.99510 | 2 | 8.02E-05 | 0.59 | 2.79   | -     | 561.6   |
| AHQ-2-5, 4391 - 4469                                                                                | K.TPSAAYLWVGTGASEAEK.T                      | 1838.99510 | 2 | 1.66E-10 | 0.96 | 4.51   | -     | 1465.9  |
| AHQ-2-9, 4646                                                                                       | R.VHVEEETGEPEAMQLVLPK.P                     | 2151.42630 | 2 | 2.55E-04 | 0.96 | 4.78   | -     | 1103.5  |
| AHQ-2-5, 3541 - 3563                                                                                | R.VHVEEETGEPEAMQLVLPK.P                     | 2167.42570 | 2 | 1.14E-04 | 0.95 | 4.85   | -     | 1119.5  |
| AHQ-2-7, 4571                                                                                       | R.VHVEEETGEPEAMQLVLPK.P                     | 2151.42630 | 2 | 3.74E-06 | 0.94 | 4.43   | -     | 772.8   |
| AHQ-2-5, 4697 - 4767                                                                                | R.VHVEEETGEPEAMQLVLPK.P                     | 2151.42630 | 2 | 6.50E-06 | 0.97 | 5.40   | -     | 1211.2  |
| AHQ-2-5, 5071                                                                                       | R.VHVEEETGEPEAMQLVLPK.PALPAGTETDAK.E        | 3303.68611 | 3 | 7.23E-06 | 0.86 | 4.10   | -     | 653.0   |
| AHQ-2-6, 5013                                                                                       | R.VHVEEETGEPEAMQLVLPK.PALPAGTETDAK.E        | 3303.68611 | 3 | 2.34E-09 | 0.92 | 4.89   | -     | 718.5   |
| AHQ-2-8, 4813                                                                                       | R.VHVEEETGEPEAMQLVLPK.PALPAGTETDAK.E        | 3303.68611 | 3 | 1.00E-05 | 0.87 | 4.04   | -     | 607.9   |
| AHQ-2-5, 4147                                                                                       | R.VHVEEETGEPEAMQLVLPK.PALPAGTETDAK.E        | 3319.68551 | 3 | 1.24E-04 | 0.89 | 4.66   | -     | 694.3   |
| AHQ-2-5, 4821                                                                                       | R.VHVEEETGEPEAMQLVLPK.PALPAGTETDAKEDAA.NR.K | 3960.33442 | 3 | 9.41E-06 | 0.94 | 5.32   | -     | 1043.1  |
| AHQ-2-5, 3435                                                                                       | R.VPFDATLHTSTAM*AAQHGMDDDTGGQK.Q            | 2891.10081 | 3 | 9.38E-04 | 0.94 | 5.46   | -     | 1128.0  |
| AHQ-2-5, 3804                                                                                       | R.VPFDATLHTSTAM*AAQHGMDDDTGGQK.Q            | 2875.10141 | 3 | 1.20E-06 | 0.97 | 5.98   | -     | 1573.3  |
| AHQ-2-5, 6199 - 6267                                                                                | K.VSNGAGTMSVSLVADENPFAQGALK.S               | 2464.73740 | 2 | 2.01E-09 | 0.80 | 3.23   | -     | 691.6   |
| gi4503327[ref NP_000389.1] cytochrome b5 reductase membrane-bound isoform; diaphorase (NADH) [Homo  |                                             |            |   | 2.22E-15 | 7.72 | 90.29  | 42.20 | 34234.6 |
| AHQ-2-9, 5659 - 5732                                                                                | R.APEAWDYGGQFVNEEMIR.D                      | 2113.29517 | 2 | 1.02E-06 | 0.96 | 4.94   | -     | 1139.9  |
| AHQ-2-9, 5056 - 5058                                                                                | R.APEAWDYGGQFVNEEMIR.D                      | 2129.29457 | 2 | 6.94E-04 | 0.97 | 4.77   | -     | 1878.3  |
| AHQ-2-9, 4650                                                                                       | K.DILLRPELEELR.N                            | 1496.73370 | 2 | 4.01E-09 | 0.86 | 3.29   | -     | 884.6   |
| AHQ-2-9, 6116 - 6134                                                                                | R.FALPSPQHILGLPVGQHIYLSAR.I                 | 2515.94007 | 2 | 6.01E-05 | 0.89 | 4.37   | -     | 539.1   |
| AHQ-2-11, 5888 - 5913                                                                               | R.FALPSPQHILGLPVGQHIYLSAR.I                 | 2515.94007 | 3 | 8.25E-04 | 0.77 | 3.70   | -     | 756.6   |
| AHQ-2-12, 6146 - 6166                                                                               | R.FALPSPQHILGLPVGQHIYLSAR.I                 | 2515.94007 | 3 | 7.04E-09 | 0.95 | 5.33   | -     | 1151.8  |
| AHQ-2-9, 6115 - 6182                                                                                | R.FALPSPQHILGLPVGQHIYLSAR.I                 | 2515.94007 | 3 | 2.22E-15 | 0.97 | 5.88   | -     | 1844.5  |
| AHQ-2-9, 2707 - 2712                                                                                | R.GPSGLLVYQK.G                              | 1119.29547 | 1 | 1.35E-05 | 0.81 | 3.61   | -     | 381.4   |
| AHQ-2-9, 2732                                                                                       | R.GPSGLLVYQK.G                              | 1119.29547 | 2 | 3.02E-04 | 0.93 | 3.41   | -     | 1310.7  |
| AHQ-2-12, 6003                                                                                      | R.IDGNLVRPYPYTPISDDDKGFVDLVK.V              | 2977.35765 | 3 | 6.37E-05 | 0.49 | 3.12   | -     | 398.3   |
| AHQ-2-9, 6160 - 6239                                                                                | R.IDGNLVRPYPYTPISDDDKGFVDLVK.V              | 2977.35765 | 3 | 1.56E-05 | 0.93 | 5.49   | -     | 878.4   |
| AHQ-2-9, 6006 - 6076                                                                                | R.IDGNLVRPYPYTPISDDDKGFVDLVK.V              | 2977.35765 | 3 | 5.89E-05 | 0.95 | 5.38   | -     | 1508.5  |
| AHQ-2-9, 4479                                                                                       | R.STPAITLESPIKYL.R.L                        | 1902.18061 | 2 | 1.30E-08 | 0.88 | 4.13   | -     | 554.1   |
| AHQ-2-9, 5940 - 6008                                                                                | K.SVGMAGGTTIPMLQVIR.A                       | 1902.31543 | 2 | 1.23E-04 | 0.63 | 3.49   | -     | 538.6   |
| AHQ-2-9, 5010                                                                                       | K.SVGMAGGTTIPMLQVIR.A                       | 1918.31483 | 2 | 6.29E-06 | 0.71 | 3.24   | -     | 442.8   |
| gi21361657[ref NP_005304.3] glucose regulated protein, 58kDa; glucose regulated protein, 58kD [Homo |                                             |            |   | 3.33E-15 | 9.86 | 120.33 | 27.90 | 56782.0 |
| AHQ-2-7, 5839                                                                                       | R.ELSDFIYLRQ.E                              | 1371.52000 | 2 | 2.03E-06 | 0.97 | 4.39   | -     | 1588.1  |
| AHQ-2-7, 7283 - 7292                                                                                | K.FISDKDASIVGFFDDSFSEAHSEFLK.A              | 2940.16492 | 3 | 3.33E-15 | 0.98 | 6.59   | -     | 3103.6  |
| AHQ-2-10, 6632                                                                                      | K.FISDKDASIVGFFDDSFSEAHSEFLK.A              | 2940.16492 | 3 | 7.23E-06 | 0.89 | 4.84   | -     | 691.9   |
| AHQ-2-7, 4297                                                                                       | R.GFTIYFSPANIK.K                            | 1342.52349 | 1 | 6.18E-04 | 0.46 | 2.75   | -     | 504.8   |
| AHQ-2-7, 5607 - 5611                                                                                | R.KTFSHELSDFGLESTAGEIPVVAIR.T               | 2705.01562 | 3 | 3.13E-06 | 0.92 | 4.65   | -     | 1080.2  |
| AHQ-2-7, 2343                                                                                       | K.LNFAVASR.K                                | 878.01067  | 2 | 2.19E-04 | 0.80 | 2.93   | -     | 776.0   |
| AHQ-2-7, 1955                                                                                       | K.LSKDPNIVIAK.M                             | 1198.43727 | 2 | 1.02E-05 | 0.86 | 3.23   | -     | 935.5   |
| AHQ-2-7, 3269 - 3347                                                                                | K.MDATANDVSPSYEVR.G                         | 1665.80646 | 2 | 2.07E-04 | 0.84 | 3.86   | -     | 476.1   |
| AHQ-2-7, 2916                                                                                       | K.MDATANDVSPSYEVR.G                         | 1681.80586 | 2 | 4.52E-05 | 0.84 | 3.71   | -     | 397.0   |
| AHQ-2-7, 2131                                                                                       | K.SEPIDESNDGPV.K.V                          | 1369.45928 | 1 | 2.11E-04 | 0.47 | 2.59   | -     | 467.8   |
| AHQ-2-7, 1867                                                                                       | R.TADGIVSHLK.K                              | 1041.18311 | 2 | 8.95E-05 | 0.84 | 2.77   | -     | 919.1   |
| AHQ-2-9, 6354                                                                                       | K.TFSHELSDFGLESTAGEIPVVAIR.T                | 2576.84271 | 2 | 9.78E-08 | 0.97 | 4.93   | -     | 1659.8  |
| AHQ-2-7, 6263 - 6273                                                                                | K.TFSHELSDFGLESTAGEIPVVAIR.T                | 2576.84271 | 3 | 5.86E-05 | 0.89 | 4.33   | -     | 740.4   |

|                             |                                                                         |            |   |          |        |         |       |          |
|-----------------------------|-------------------------------------------------------------------------|------------|---|----------|--------|---------|-------|----------|
| AHQ-2-7, 2785 - 2799        | K.YGVSGYPTLKI                                                           | 1085.23435 | 2 | 6.17E-04 | 0.92   | 3.39    | -     | 666.1    |
| gi 22043610 ref XP_171081.1 | similar to ras-related C3 botulinum toxin substrate 1 isoform Rac1; rh  |            |   | 3.89E-15 | 2.86   | 40.26   | 21.40 | 21543.1  |
| AHQ-2-11, 2538              | R.AVLCPPPVK                                                             | 982.22199  | 1 | 1.97E-04 | 0.15   | 1.97    | -     | 289.5    |
| AHQ-2-11, 3732 - 3800       | K.KLTPITYPQGLAMAK.E                                                     | 1632.99216 | 2 | 9.79E-05 | 0.87   | 3.72    | -     | 591.4    |
| AHQ-2-11, 3714 - 3717       | K.LTPITYPQGLAM*AK.E                                                     | 1520.81864 | 2 | 7.99E-05 | 0.86   | 3.03    | -     | 553.3    |
| AHQ-2-11, 4702 - 4705       | K.PVNLGLWDTAGQEDYDR.L                                                   | 1950.05441 | 2 | 3.89E-15 | 0.98   | 5.26    | -     | 2272.8   |
| gi 4502295 ref NP_001677.1  | ATP synthase, H+ transporting, mitochondrial F1 complex, beta polypepti |            |   | 4.44E-15 | 10.95  | 120.33  | 38.40 | 57955.2  |
| AHQ-2-7, 2513               | K.AHGGYSVFAGVGER.T                                                      | 1407.51566 | 2 | 2.72E-08 | 0.80   | 2.97    | -     | 519.0    |
| AHQ-2-7, 5581 - 5596        | R.AIAELGIYVADPLDSTSR.I                                                  | 1989.21513 | 2 | 1.88E-07 | 0.90   | 4.03    | -     | 539.5    |
| AHQ-2-7, 7615               | R.DQEQDVLDFIDNIFR.F                                                     | 1923.11524 | 2 | 2.12E-10 | 0.96   | 5.51    | -     | 975.9    |
| AHQ-2-7, 6035               | R.FLSQPFQVAEFTGHMGK.L                                                   | 2024.33104 | 3 | 5.50E-08 | 0.76   | 3.86    | -     | 506.2    |
| AHQ-2-7, 6029 - 6107        | R.FLSQPFQVAEFTGHMGK.L                                                   | 2024.33104 | 2 | 3.06E-07 | 0.85   | 3.69    | -     | 605.0    |
| AHQ-2-7, 4252 - 4256        | R.FTQAGSEVSAALLGR.I                                                     | 1436.59522 | 2 | 1.72E-09 | 0.97   | 4.98    | -     | 1359.8   |
| AHQ-2-7, 7351               | K.GFQQLAGEYDHLPEQAFYM*VGPIEEAAVAK.A                                     | 3368.75991 | 3 | 4.44E-15 | 0.97   | 6.65    | -     | 1217.1   |
| AHQ-2-7, 3369               | R.IMDPNVIGSEHYDVAR.G                                                    | 1817.01617 | 2 | 1.75E-10 | 0.95   | 4.37    | -     | 1016.3   |
| AHQ-2-7, 3563 - 3573        | R.IMNVIGEPIDER.G                                                        | 1386.59962 | 2 | 3.43E-04 | 0.93   | 4.28    | -     | 979.8    |
| AHQ-2-7, 4563               | R.IPSAVGYQPTLATDMGTMQER.I                                               | 2267.56880 | 2 | 1.56E-05 | 0.88   | 4.20    | -     | 415.1    |
| AHQ-2-7, 3928 - 3943        | R.LVLEAVGLGEGSTVR.T                                                     | 1651.88893 | 2 | 6.42E-09 | 0.97   | 5.19    | -     | 1674.3   |
| AHQ-2-7, 5588 - 5589        | R.VALTGLTVAEYFR.D                                                       | 1440.66861 | 2 | 5.53E-05 | 0.91   | 3.19    | -     | 1301.6   |
| AHQ-2-7, 4495 - 4507        | K.VLDSGAPIKIPVGPETLGR.I                                                 | 1920.24231 | 2 | 8.79E-08 | 0.88   | 4.23    | -     | 362.2    |
| AHQ-2-7, 4496               | K.VLDSGAPIKIPVGPETLGR.I                                                 | 1920.24231 | 3 | 5.51E-09 | 0.94   | 4.45    | -     | 1519.2   |
| gi 4827056 ref NP_005103.1  | WD repeat-containing protein 1 isoform 2 [Homo sapiens]                 |            |   | 8.88E-15 | 11.37  | 130.38  | 45.90 | 58001.9  |
| AHQ-2-9, 4774               | K.AHDGGIYAIWSVSPDSTHLLSASGDK.T                                          | 2586.75455 | 2 | 4.13E-04 | 0.90   | 3.92    | -     | 808.6    |
| AHQ-2-6, 4813               | K.AHDGGIYAIWSVSPDSTHLLSASGDK.T                                          | 2586.75455 | 2 | 6.60E-09 | 0.96   | 5.39    | -     | 1170.0   |
| AHQ-2-6, 4997               | K.AHDGGIYAIWSVSPDSTHLLSASGDK.T                                          | 2586.75455 | 3 | 2.70E-04 | 0.95   | 5.41    | -     | 1016.3   |
| AHQ-2-10, 5288              | K.CFSIDNPGYEPVWAVHPGGDTVAIGGVDGNVR.L                                    | 3400.67708 | 3 | 5.72E-05 | 0.92   | 4.50    | -     | 731.9    |
| AHQ-2-6, 5769 - 5813        | K.CFSIDNPGYEPVWAVHPGGDTVAIGGVDGNVR.L                                    | 3400.67708 | 3 | 3.81E-11 | 0.94   | 5.37    | -     | 870.0    |
| AHQ-2-6, 5630 - 5701        | K.CFSIDNPGYEPVWAVHPGGDTVAIGGVDGNVR.L                                    | 3400.67708 | 3 | 8.88E-15 | 0.97   | 6.07    | -     | 1235.5   |
| AHQ-2-7, 5701               | K.CFSIDNPGYEPVWAVHPGGDTVAIGGVDGNVR.L                                    | 3400.67708 | 3 | 2.62E-09 | 0.71   | 3.48    | -     | 516.9    |
| AHQ-2-9, 5730               | K.CFSIDNPGYEPVWAVHPGGDTVAIGGVDGNVR.L                                    | 3400.67708 | 3 | 3.72E-09 | 0.95   | 5.06    | -     | 940.2    |
| AHQ-2-6, 7415 - 7437        | K.CVAVGPGGYAVVVICQIVLLK.D                                               | 2275.75982 | 2 | 1.91E-05 | 0.48   | 2.88    | -     | 370.7    |
| AHQ-2-10, 4319              | K.GPVTDVAYSHDGFLAVCDASK.V                                               | 2282.47194 | 2 | 9.73E-10 | 0.93   | 4.19    | -     | 1078.9   |
| AHQ-2-6, 4533 - 4601        | K.GPVTDVAYSHDGFLAVCDASK.V                                               | 2282.47194 | 2 | 1.46E-09 | 0.98   | 5.55    | -     | 1848.6   |
| AHQ-2-13, 2427              | K.IKIDIAWTEDESKR.I                                                      | 1462.63267 | 2 | 9.44E-06 | 0.90   | 3.61    | -     | 830.0    |
| AHQ-2-11, 5322              | R.LATGSDDNCAAFFEGPPFK.F                                                 | 2046.20216 | 2 | 1.11E-07 | 0.89   | 3.51    | -     | 932.1    |
| AHQ-2-6, 5457 - 5521        | R.LATGSDDNCAAFFEGPPFK.F                                                 | 2046.20216 | 2 | 3.78E-06 | 0.95   | 4.94    | -     | 1053.5   |
| AHQ-2-7, 5443               | R.LATGSDDNCAAFFEGPPFK.F                                                 | 2046.20216 | 2 | 8.25E-07 | 0.81   | 3.55    | -     | 846.5    |
| AHQ-2-6, 5829               | R.LATGSDDNCAAFFEGPPFK.F                                                 | 2046.20216 | 2 | 1.42E-08 | 0.79   | 3.31    | -     | 698.1    |
| AHQ-2-7, 3549               | R.LYSILGTTLKDDEGK.L                                                     | 1538.76736 | 2 | 3.27E-08 | 0.85   | 3.44    | -     | 740.3    |
| AHQ-2-6, 3631               | R.LYSILGTTLKDDEGK.L                                                     | 1538.76736 | 2 | 4.52E-06 | 0.86   | 3.29    | -     | 794.3    |
| AHQ-2-9, 3656               | R.LYSILGTTLKDDEGK.L                                                     | 1538.76736 | 2 | 4.09E-04 | 0.80   | 2.92    | -     | 820.2    |
| AHQ-2-6, 4947 - 5010        | R.MTVDESQGLISCSMDTTR.V                                                  | 2146.36365 | 2 | 2.69E-04 | 0.87   | 3.60    | -     | 791.2    |
| AHQ-2-6, 4375               | R.M*TVDESQGLISCSMDTTR.V                                                 | 2162.36305 | 2 | 5.68E-04 | 0.90   | 4.06    | -     | 605.4    |
| AHQ-2-6, 4033               | R.NIDNAPALADIYTEHAHQVWVAK.Y                                             | 2419.67805 | 3 | 9.64E-04 | 0.73   | 3.16    | -     | 409.5    |
| AHQ-2-13, 4227              | R.NIDNAPALADIYTEHAHQVWVAK.Y                                             | 2419.67805 | 2 | 2.69E-09 | 0.96   | 5.20    | -     | 1130.7   |
| AHQ-2-6, 1635               | K.SIQCLTVHKNGGK.S                                                       | 1443.65418 | 2 | 1.31E-04 | 0.81   | 3.61    | -     | 816.9    |
| AHQ-2-6, 3998               | K.SYIYSGSHDGHINYWSETGENDSFAGK.G                                         | 3138.17570 | 3 | 1.41E-11 | 0.98   | 7.58    | -     | 1743.0   |
| AHQ-2-6, 4125               | K.SYIYSGSHDGHINYWSETGENDSFAGK.G                                         | 3138.17570 | 3 | 6.34E-08 | 0.96   | 6.09    | -     | 1189.4   |
| AHQ-2-12, 3939              | K.YAPSGFYIASGDVSGK.L                                                    | 1619.75589 | 2 | 5.10E-05 | 0.87   | 3.32    | -     | 738.0    |
| AHQ-2-1, 4173               | K.YAPSGFYIASGDVSGK.L                                                    | 1619.75589 | 2 | 3.27E-06 | 0.76   | 3.10    | -     | 542.9    |
| AHQ-2-6, 3699 - 3769        | K.YAPSGFYIASGDVSGK.L                                                    | 1619.75589 | 2 | 6.66E-09 | 0.96   | 4.73    | -     | 920.4    |
| gi 4757810 ref NP_004037.1  | ATP synthase, H+ transporting, mitochondrial F1 complex, alpha subunit, |            |   | 8.88E-15 | 3.49   | 40.30   | 11.60 | 59750.3  |
| AHQ-2-7, 5361 - 5365        | K.FENAFLSHVVSQHQALLGTR.A                                                | 2368.67911 | 2 | 1.31E-08 | 0.93   | 4.49    | -     | 948.3    |
| AHQ-2-7, 5349 - 5352        | K.FENAFLSHVVSQHQALLGTR.A                                                | 2368.67911 | 3 | 8.88E-15 | 0.97   | 5.91    | -     | 1882.7   |
| AHQ-2-7, 6184               | K.GMSLNLEPDNVGVVWVGNL.L                                                 | 2105.35763 | 2 | 5.31E-04 | 0.87   | 4.49    | -     | 383.7    |
| AHQ-2-7, 3496 - 3499        | K.TGTAEISSILEER.I                                                       | 1424.55988 | 2 | 3.09E-04 | 0.91   | 3.20    | -     | 1546.3   |
| AHQ-2-7, 2816               | R.VLSIGDGIAR.V                                                          | 1001.16212 | 2 | 9.86E-05 | 0.73   | 2.72    | -     | 593.3    |
| gi 12667788 ref NP_002464.1 | myosin, heavy polypeptide 9, non-muscle [Homo sapiens]                  |            |   | 9.99E-15 | 109.21 | 1260.38 | 49.00 | 226529.8 |
| AHQ-2-3, 2488               | K.AKQTLNERGELANEV.K                                                     | 1930.10932 | 2 | 5.99E-05 | 0.95   | 4.87    | -     | 950.8    |
| AHQ-2-4, 1934               | R.ALEAEAEQK.A                                                           | 1049.18068 | 2 | 8.75E-06 | 0.90   | 3.44    | -     | 1008.0   |
| AHQ-2-3, 1911               | R.ALEAEAEQK.A                                                           | 1049.18068 | 2 | 3.03E-05 | 0.89   | 3.55    | -     | 728.9    |
| AHQ-2-2, 1777 - 1912        | R.ALEAEAEQK.A                                                           | 1049.18068 | 1 | 1.72E-04 | 0.27   | 2.17    | -     | 548.1    |
| AHQ-2-1, 3910 - 3912        | K.ALELDSNLYR.I                                                          | 1194.31920 | 1 | 2.43E-04 | 0.18   | 2.49    | -     | 283.9    |
| AHQ-2-4, 3745               | K.ALELDSNLYR.I                                                          | 1194.31920 | 2 | 1.46E-05 | 0.95   | 4.16    | -     | 1246.4   |
| AHQ-2-2, 3797               | K.ALELDSNLYR.I                                                          | 1194.31920 | 2 | 4.79E-06 | 0.94   | 3.71    | -     | 1337.6   |
| AHQ-2-6, 3469 - 3470        | K.ALELDSNLYR.I                                                          | 1194.31920 | 2 | 7.24E-07 | 0.90   | 3.44    | -     | 973.9    |
| AHQ-2-5, 3488               | K.ALELDSNLYR.I                                                          | 1194.31920 | 2 | 6.73E-07 | 0.96   | 4.09    | -     | 1458.6   |
| AHQ-2-3, 3747 - 3764        | K.ALELDSNLYR.I                                                          | 1194.31920 | 2 | 2.48E-06 | 0.95   | 4.02    | -     | 1174.6   |
| AHQ-2-1, 3908               | K.ALELDSNLYR.I                                                          | 1194.31920 | 2 | 6.39E-06 | 0.94   | 3.49    | -     | 1290.1   |
| AHQ-2-4, 2788               | R.ALEQQVEEMK.T                                                          | 1205.36380 | 2 | 4.95E-05 | 0.89   | 3.71    | -     | 1015.1   |
| AHQ-2-2, 2034               | R.ALEQQVEEMK.T                                                          | 1221.36320 | 2 | 4.61E-05 | 0.81   | 3.26    | -     | 898.3    |
| AHQ-2-4, 2054               | R.ALEQQVEEMK.T                                                          | 1221.36320 | 2 | 7.18E-04 | 0.74   | 2.81    | -     | 631.8    |
| AHQ-2-1, 2954               | R.ALEQQVEEMK.T                                                          | 1205.36380 | 2 | 4.54E-06 | 0.92   | 3.81    | -     | 1296.9   |
| AHQ-2-2, 2786 - 2796        | R.ALEQQVEEMK.T                                                          | 1205.36380 | 2 | 1.35E-07 | 0.93   | 3.99    | -     | 1056.1   |
| AHQ-2-1, 2196               | R.ALEQQVEEMK.T                                                          | 1221.36320 | 2 | 4.31E-06 | 0.83   | 3.55    | -     | 798.8    |
| AHQ-2-5, 2541               | R.ALEQQVEEMK.T                                                          | 1205.36380 | 2 | 2.86E-05 | 0.90   | 3.63    | -     | 1015.2   |
| AHQ-2-3, 2789               | R.ALEQQVEEMK.T                                                          | 1205.36380 | 2 | 4.35E-05 | 0.91   | 3.82    | -     | 1126.5   |
| AHQ-2-5, 7456               | R.ALEQQVEEMKTLQEELEDELQATEDAK.L                                         | 3149.38454 | 3 | 2.12E-07 | 0.96   | 5.75    | -     | 1239.8   |
| AHQ-2-6, 6401               | R.ALEQQVEEMKTLQEELEDELQATEDAK.L                                         | 3165.38394 | 3 | 1.11E-10 | 0.98   | 6.25    | -     | 2185.4   |
| AHQ-2-3, 6708 - 6712        | R.ALEQQVEEMKTLQEELEDELQATEDAK.L                                         | 3165.38394 | 3 | 2.07E-10 | 0.97   | 6.38    | -     | 1503.0   |
| AHQ-2-1, 6712 - 6713        | R.ALEQQVEEMKTLQEELEDELQATEDAK.L                                         | 3165.38394 | 3 | 1.45E-09 | 0.96   | 5.92    | -     | 1486.1   |
| AHQ-2-1, 6585 - 6649        | R.ALEQQVEEMKTLQEELEDELQATEDAK.L                                         | 3165.38394 | 3 | 4.07E-05 | 0.97   | 6.95    | -     | 1674.2   |
| AHQ-2-5, 6585               | R.ALEQQVEEMKTLQEELEDELQATEDAK.L                                         | 3165.38394 | 3 | 2.06E-07 | 0.96   | 5.81    | -     | 1518.2   |
| AHQ-2-2, 6764               | R.ALEQQVEEMKTLQEELEDELQATEDAK.L                                         | 3165.38394 | 3 | 2.62E-12 | 0.98   | 7.60    | -     | 1959.7   |
| AHQ-2-2, 7568 - 7570        | R.ALEQQVEEMKTLQEELEDELQATEDAK.L                                         | 3149.38454 | 3 | 7.41E-05 | 0.97   | 5.89    | -     | 1664.6   |
| AHQ-2-3, 7519               | R.ALEQQVEEMKTLQEELEDELQATEDAK.L                                         | 3149.38454 | 3 | 2.61E-05 | 0.96   | 6.27    | -     | 1270.0   |
| AHQ-2-6, 7214               | R.ALEQQVEEMKTLQEELEDELQATEDAK.L                                         | 3149.38454 | 3 | 1.89E-06 | 0.96   | 6.02    | -     | 1252.5   |
| AHQ-2-4, 7572               | R.ALEQQVEEMKTLQEELEDELQATEDAK.L                                         | 3149.38454 | 3 | 3.54E-08 | 0.97   | 5.62    | -     | 1939.6   |
| AHQ-2-2, 5320 - 5390        | K.ANLQIQDINTDLNLER.S                                                    | 1871.04187 | 2 | 5.81E-04 | 0.97   | 5.76    | -     | 1519.3   |
| AHQ-2-2, 5474 - 5544        | K.ANLQIQDINTDLNLER.S                                                    | 1871.04187 | 2 | 2.55E-11 | 0.97   | 5.49    | -     | 1442.9   |
| AHQ-2-1, 5037               | K.ANLQIQDINTDLNLER.S                                                    | 1871.04187 | 2 | 4.37E-06 | 0.97   | 5.53    | -     | 1233.2   |
| AHQ-2-9, 4968               | K.ANLQIQDINTDLNLER.S                                                    | 1871.04187 | 2 | 2.29E-07 | 0.96   | 4.98    | -     | 1401.2   |
| AHQ-2-2, 5210 - 5284        | K.ANLQIQDINTDLNLER.S                                                    | 1871.04187 | 2 | 3.26E-08 | 0.98   | 5.70    | -     | 1578.6   |
| AHQ-2-5, 5052 - 5061        | K.ANLQIQDINTDLNLER.S                                                    | 1871.04187 | 2 | 1.47E-06 | 0.97   | 5.66    | -     | 1544.5   |
| AHQ-2-2, 5084 - 5094        | K.ANLQIQDINTDLNLER.S                                                    | 1871.04187 | 2 | 1.20E-05 | 0.95   | 4.74    | -     | 835.5    |
| AHQ-2-2, 4992 - 5004        | K.ANLQIQDINTDLNLER.S                                                    | 1871.04187 | 2 | 2.58E-06 | 0.93   | 4.19    | -     | 1012.4   |
| AHQ-2-4, 5338               | K.ANLQIQDINTDLNLER.S                                                    | 1871.04187 | 2 | 1.25E-04 | 0.94   | 4.24    | -     | 1021.6   |
| AHQ-2-6, 4941               | K.ANLQIQDINTDLNLER.S                                                    | 1871.04187 | 2 | 1.30E-07 | 0.93   | 4.44    | -     | 968.1    |
| AHQ-2-3, 5039 - 5072        | K.ANLQIQDINTDLNLER.S                                                    | 1871.04187 | 2 | 1.69E-05 | 0.93   | 4.72    | -     | 765.6    |
| AHQ-2-1, 5268 - 5344        | K.ANLQIQDINTDLNLER.S                                                    | 1871.04187 | 2 | 1.13E-05 | 0.96   | 5.04    | -     | 1066.4   |
| AHQ-2-1, 5432               | K.ANLQIQDINTDLNLER.S                                                    | 1871.04187 | 2 | 2.03E-04 | 0.95   | 4.83    | -     | 1183.9   |
| AHQ-2-3, 5184 - 5259        | K.ANLQIQDINTDLNLER.S                                                    | 1871.04187 | 2 | 2.81E-06 | 0.97   | 5.28    | -     | 1527.5   |
| AHQ-2-3, 5324               | K.ANLQIQDINTDLNLER.S                                                    | 1871.04187 | 2 | 3.81E-08 | 0.94   | 4.61    | -     | 996.7    |
| AHQ-2-4, 5230 - 5245        | K.ANLQIQDINTDLNLER.S                                                    | 1871.04187 | 2 | 1.38E-04 | 0.97   |         |       |          |

|                      |                                |            |   |          |      |      |   |        |
|----------------------|--------------------------------|------------|---|----------|------|------|---|--------|
| AHQ-2-4, 2240        | K.SITALEAK.I                   | 904.04321  | 2 | 1.26E-06 | 0.94 | 3.21 | - | 1269.1 |
| AHQ-2-5, 2009 - 2012 | K.SITALEAK.I                   | 904.04321  | 2 | 5.72E-04 | 0.88 | 3.10 | - | 809.4  |
| AHQ-2-2, 2238        | K.SITALEAK.I                   | 904.04321  | 2 | 3.11E-05 | 0.92 | 2.85 | - | 1118.4 |
| AHQ-2-1, 2440 - 2466 | K.SITALEAK.I                   | 904.04321  | 2 | 9.65E-05 | 0.92 | 3.37 | - | 971.2  |
| AHQ-2-3, 2231        | K.SITALEAK.I                   | 904.04321  | 2 | 2.76E-06 | 0.91 | 2.91 | - | 970.8  |
| AHQ-2-6, 2023        | K.SITALEAK.I                   | 904.04321  | 2 | 9.37E-06 | 0.78 | 2.54 | - | 764.6  |
| AHQ-2-3, 1893 - 1901 | R.ASREILAQAK.E                 | 1216.36955 | 2 | 1.78E-04 | 0.95 | 3.59 | - | 1888.8 |
| AHQ-2-2, 1861 - 1930 | R.ASREILAQAK.E                 | 1216.36955 | 2 | 1.71E-06 | 0.94 | 3.79 | - | 1624.5 |
| AHQ-2-4, 1902        | R.ASREILAQAK.E                 | 1216.36955 | 2 | 3.22E-06 | 0.89 | 3.03 | - | 1292.9 |
| AHQ-2-2, 1906        | R.ASREILAQAK.E                 | 1216.36955 | 1 | 5.56E-04 | 0.58 | 1.97 | - | 385.7  |
| AHQ-2-1, 2129        | R.ASREILAQAK.E                 | 1216.36955 | 2 | 1.27E-05 | 0.92 | 3.75 | - | 1355.1 |
| AHQ-2-2, 3429        | R.DELADEIANSSGK.G              | 1349.38323 | 1 | 6.52E-08 | 0.51 | 2.30 | - | 437.7  |
| AHQ-2-3, 3391        | R.DELADEIANSSGK.G              | 1349.38323 | 1 | 8.76E-06 | 0.40 | 2.45 | - | 352.6  |
| AHQ-2-4, 3234        | R.DELADEIANSSGK.G              | 1349.38323 | 1 | 2.10E-05 | 0.07 | 1.83 | - | 275.3  |
| AHQ-2-4, 3241        | R.DELADEIANSSGK.G              | 1349.38323 | 2 | 2.25E-05 | 0.96 | 4.35 | - | 1633.2 |
| AHQ-2-2, 3208 - 3245 | R.DELADEIANSSGK.G              | 1349.38323 | 2 | 3.03E-07 | 0.93 | 3.17 | - | 1310.1 |
| AHQ-2-2, 2920        | R.DELADEIANSSGK.G              | 1349.38323 | 1 | 1.40E-07 | 0.64 | 2.43 | - | 487.6  |
| AHQ-2-3, 3229        | R.DELADEIANSSGK.G              | 1349.38323 | 2 | 3.20E-05 | 0.94 | 3.92 | - | 1138.6 |
| AHQ-2-1, 3281        | R.DELADEIANSSGK.G              | 1349.38323 | 2 | 5.29E-07 | 0.96 | 4.42 | - | 1528.3 |
| AHQ-2-1, 6972        | K.DFSALESQLQDQTQELLQEENR.Q     | 2494.61059 | 3 | 5.10E-07 | 0.98 | 6.56 | - | 1691.1 |
| AHQ-2-2, 7356 - 7422 | K.DFSALESQLQDQTQELLQEENR.Q     | 2494.61059 | 3 | 8.18E-05 | 0.85 | 3.85 | - | 1085.6 |
| AHQ-2-2, 7201 - 7268 | K.DFSALESQLQDQTQELLQEENR.Q     | 2494.61059 | 3 | 1.11E-10 | 0.98 | 6.29 | - | 2119.2 |
| AHQ-2-3, 7295        | K.DFSALESQLQDQTQELLQEENR.Q     | 2494.61059 | 3 | 9.16E-07 | 0.95 | 4.75 | - | 1635.6 |
| AHQ-2-3, 7131 - 7143 | K.DFSALESQLQDQTQELLQEENR.Q     | 2494.61059 | 3 | 3.65E-04 | 0.96 | 4.72 | - | 2147.4 |
| AHQ-2-3, 6872        | K.DFSALESQLQDQTQELLQEENR.Q     | 2494.61059 | 3 | 4.59E-04 | 0.89 | 4.24 | - | 736.6  |
| AHQ-2-4, 7192 - 7200 | K.DFSALESQLQDQTQELLQEENR.Q     | 2494.61059 | 3 | 4.40E-12 | 0.97 | 6.21 | - | 2214.1 |
| AHQ-2-1, 7096 - 7176 | K.DFSALESQLQDQTQELLQEENR.Q     | 2494.61059 | 3 | 7.32E-13 | 0.97 | 5.47 | - | 1962.2 |
| AHQ-2-5, 7043        | K.DFSALESQLQDQTQELLQEENR.Q     | 2494.61059 | 3 | 5.05E-14 | 0.98 | 6.26 | - | 2141.0 |
| AHQ-2-4, 7354        | K.DFSALESQLQDQTQELLQEENR.Q     | 2494.61059 | 3 | 5.96E-06 | 0.94 | 4.79 | - | 1575.9 |
| AHQ-2-2, 6762        | K.DFSALESQLQDQTQELLQEENRQK.L   | 2750.91328 | 2 | 3.66E-10 | 0.69 | 3.39 | - | 386.0  |
| AHQ-2-3, 6697 - 6716 | K.DFSALESQLQDQTQELLQEENRQK.L   | 2750.91328 | 3 | 2.32E-11 | 0.94 | 5.13 | - | 869.9  |
| AHQ-2-3, 6705        | K.DFSALESQLQDQTQELLQEENRQK.L   | 2750.91328 | 2 | 7.45E-05 | 0.86 | 3.73 | - | 568.2  |
| AHQ-2-2, 6756 - 6780 | K.DFSALESQLQDQTQELLQEENRQK.L   | 2750.91328 | 3 | 4.52E-11 | 0.87 | 4.25 | - | 682.8  |
| AHQ-2-3, 2021 - 2051 | K.DLEAHIDSANK.N                | 1213.27938 | 2 | 7.46E-07 | 0.97 | 4.21 | - | 1837.6 |
| AHQ-2-2, 2026 - 2101 | K.DLEAHIDSANK.N                | 1213.27938 | 2 | 6.52E-07 | 0.98 | 4.11 | - | 2515.5 |
| AHQ-2-2, 2024 - 2093 | K.DLEAHIDSANK.N                | 1213.27938 | 1 | 4.45E-04 | 0.53 | 2.00 | - | 709.5  |
| AHQ-2-4, 2032        | K.DLEAHIDSANK.N                | 1213.27938 | 2 | 7.82E-08 | 0.98 | 3.93 | - | 2675.0 |
| AHQ-2-1, 2216        | K.DLEAHIDSANK.N                | 1213.27938 | 2 | 2.50E-06 | 0.98 | 4.39 | - | 2492.6 |
| AHQ-2-3, 2431        | K.DLEAHIDSANKNRDEAIK.Q         | 2040.18063 | 2 | 7.77E-05 | 0.90 | 4.39 | - | 699.9  |
| AHQ-2-2, 2581        | K.DLEAHIDSANKNRDEAIK.Q         | 2040.18063 | 2 | 4.94E-07 | 0.95 | 4.97 | - | 1011.3 |
| AHQ-2-2, 2442 - 2449 | K.DLEAHIDSANKNRDEAIK.Q         | 2040.18063 | 2 | 1.87E-04 | 0.95 | 4.94 | - | 934.1  |
| AHQ-2-4, 2230        | K.DLEGLSOR.H                   | 917.98683  | 2 | 2.79E-04 | 0.79 | 2.68 | - | 905.3  |
| AHQ-2-1, 7185        | R.DLGEELKALELTDLDSTAAQQLR.S    | 3019.21860 | 3 | 4.06E-12 | 0.98 | 6.47 | - | 2559.3 |
| AHQ-2-5, 7571        | R.DLGEELKALELTDLDSTAAQQLR.S    | 3019.21860 | 3 | 7.49E-10 | 0.97 | 6.30 | - | 1859.9 |
| AHQ-2-1, 7290        | R.DLGEELKALELTDLDSTAAQQLR.S    | 3019.21860 | 3 | 1.96E-05 | 0.85 | 3.87 | - | 1136.4 |
| AHQ-2-7, 7579        | R.DLGEELKALELTDLDSTAAQQLR.S    | 3019.21860 | 3 | 1.54E-08 | 0.96 | 4.86 | - | 1887.5 |
| AHQ-2-2, 7508        | R.DLGEELKALELTDLDSTAAQQLR.S    | 3019.21860 | 3 | 1.17E-14 | 0.98 | 7.05 | - | 2181.7 |
| AHQ-2-6, 7317        | R.DLGEELKALELTDLDSTAAQQLR.S    | 3019.21860 | 3 | 1.77E-11 | 0.97 | 5.48 | - | 1974.4 |
| AHQ-2-3, 7584 - 7621 | R.DLGEELKALELTDLDSTAAQQLR.S    | 3019.21860 | 3 | 3.97E-11 | 0.96 | 5.97 | - | 1141.4 |
| AHQ-2-2, 7740        | R.DLGEELKALELTDLDSTAAQQLR.S    | 3019.21860 | 3 | 3.07E-07 | 0.95 | 5.43 | - | 1500.2 |
| AHQ-2-2, 7632 - 7666 | R.DLGEELKALELTDLDSTAAQQLR.S    | 3019.21860 | 3 | 1.20E-13 | 0.97 | 6.19 | - | 1809.2 |
| AHQ-2-3, 5359        | K.DMFQETMEAMR.I                | 1389.60414 | 1 | 7.53E-05 | 0.48 | 2.63 | - | 258.7  |
| AHQ-2-2, 3434 - 3454 | K.DVLLQVDDER.R                 | 1202.29650 | 2 | 8.87E-07 | 0.91 | 3.27 | - | 1289.5 |
| AHQ-2-1, 3432        | K.DVLLQVDDER.R                 | 1202.29650 | 2 | 1.82E-04 | 0.88 | 3.00 | - | 1142.9 |
| AHQ-2-4, 2813        | K.DVLLQVDDERR.N                | 1358.48286 | 2 | 6.14E-04 | 0.49 | 2.90 | - | 546.6  |
| AHQ-2-6, 2627        | K.DVLLQVDDERR.N                | 1358.48286 | 2 | 4.91E-04 | 0.61 | 2.71 | - | 584.1  |
| AHQ-2-1, 2054        | R.EEILAQAK.E                   | 902.02731  | 1 | 2.45E-05 | 0.11 | 1.94 | - | 234.8  |
| AHQ-2-5, 2665 - 2740 | R.ELEADATADAMNR.E              | 1566.63006 | 2 | 4.26E-06 | 0.88 | 3.32 | - | 1055.7 |
| AHQ-2-11, 2770       | R.ELEADATADAMNR.E              | 1566.63006 | 2 | 5.19E-05 | 0.48 | 2.76 | - | 333.3  |
| AHQ-2-4, 2860 - 2934 | R.ELEADATADAMNR.E              | 1566.63006 | 2 | 2.74E-10 | 0.94 | 4.42 | - | 1008.5 |
| AHQ-2-6, 2643 - 2717 | R.ELEADATADAMNR.E              | 1566.63006 | 2 | 1.24E-05 | 0.76 | 3.05 | - | 884.4  |
| AHQ-2-2, 2877        | R.ELEADATADAMNR.E              | 1566.63006 | 2 | 3.47E-06 | 0.94 | 3.69 | - | 1385.1 |
| AHQ-2-3, 2861 - 2867 | R.ELEADATADAMNR.E              | 1566.63006 | 2 | 1.97E-08 | 0.96 | 5.18 | - | 1275.7 |
| AHQ-2-2, 3834        | R.ELEADATADAMNREVSSLK.N        | 2210.36264 | 2 | 1.47E-04 | 0.81 | 3.31 | - | 596.9  |
| AHQ-2-3, 5571        | R.ELESQISELQEDLESER.A          | 2035.10956 | 2 | 3.37E-06 | 0.84 | 3.27 | - | 625.4  |
| AHQ-2-4, 6037 - 6112 | R.ELESQISELQEDLESER.A          | 2035.10956 | 2 | 2.31E-04 | 0.90 | 3.92 | - | 974.1  |
| AHQ-2-4, 6366 - 6436 | R.ELESQISELQEDLESER.A          | 2035.10956 | 2 | 4.83E-05 | 0.83 | 3.64 | - | 651.7  |
| AHQ-2-2, 5614 - 5616 | R.ELESQISELQEDLESER.A          | 2035.10956 | 2 | 6.43E-10 | 0.95 | 4.72 | - | 1043.6 |
| AHQ-2-6, 5710        | R.ELESQISELQEDLESER.A          | 2035.10956 | 2 | 9.47E-06 | 0.82 | 3.22 | - | 920.2  |
| AHQ-2-4, 5982 - 6048 | R.ELESQISELQEDLESER.A          | 2035.10956 | 3 | 1.12E-05 | 0.97 | 5.96 | - | 2013.2 |
| AHQ-2-3, 6033        | R.ELESQISELQEDLESER.A          | 2035.10956 | 3 | 2.38E-08 | 0.98 | 6.03 | - | 2019.5 |
| AHQ-2-3, 6083        | R.ELESQISELQEDLESER.A          | 2035.10956 | 2 | 7.23E-06 | 0.87 | 3.92 | - | 780.1  |
| AHQ-2-3, 6375        | R.ELESQISELQEDLESER.A          | 2035.10956 | 2 | 7.50E-10 | 0.91 | 4.17 | - | 833.6  |
| AHQ-2-3, 6475        | R.ELESQISELQEDLESER.A          | 2035.10956 | 2 | 2.00E-04 | 0.96 | 4.72 | - | 1586.9 |
| AHQ-2-2, 6070 - 6085 | R.ELESQISELQEDLESER.A          | 2035.10956 | 2 | 1.72E-05 | 0.96 | 5.29 | - | 1123.0 |
| AHQ-2-1, 5628        | R.ELESQISELQEDLESER.A          | 2035.10956 | 2 | 3.01E-07 | 0.90 | 4.04 | - | 653.3  |
| AHQ-2-1, 5945 - 6018 | R.ELESQISELQEDLESER.A          | 2035.10956 | 2 | 4.89E-07 | 0.94 | 4.67 | - | 1101.6 |
| AHQ-2-2, 6080 - 6094 | R.ELESQISELQEDLESER.A          | 2035.10956 | 3 | 2.92E-11 | 0.98 | 6.16 | - | 2178.6 |
| AHQ-2-2, 6428 - 6429 | R.ELESQISELQEDLESER.A          | 2035.10956 | 2 | 2.18E-06 | 0.97 | 5.12 | - | 1448.5 |
| AHQ-2-3, 6031 - 6059 | R.ELESQISELQEDLESER.A          | 2035.10956 | 2 | 3.12E-07 | 0.97 | 5.59 | - | 1121.1 |
| AHQ-2-3, 2485        | R.EMAELEDER.K                  | 1251.30306 | 2 | 4.01E-04 | 0.76 | 2.73 | - | 755.4  |
| AHQ-2-5, 1883        | R.EMAELEDER.K                  | 1379.47597 | 2 | 5.83E-05 | 0.85 | 3.05 | - | 1025.2 |
| AHQ-2-2, 2096        | R.EMAELEDER.K                  | 1379.47597 | 2 | 1.15E-04 | 0.92 | 3.37 | - | 1371.3 |
| AHQ-2-1, 2272        | R.EMAELEDER.K                  | 1379.47597 | 2 | 1.82E-04 | 0.92 | 3.61 | - | 1170.4 |
| AHQ-2-3, 2092        | R.EMAELEDER.K                  | 1379.47597 | 2 | 2.66E-04 | 0.84 | 2.87 | - | 1022.3 |
| AHQ-2-1, 4685        | K.EQADFAIEALAK.A               | 1306.44632 | 2 | 7.26E-04 | 0.78 | 2.94 | - | 615.6  |
| AHQ-2-2, 4570 - 4640 | K.EQADFAIEALAK.A               | 1306.44632 | 1 | 1.22E-07 | 0.36 | 2.91 | - | 278.6  |
| AHQ-2-2, 2325        | R.EQLEEEEEAKHNLEK.Q            | 1855.93770 | 2 | 1.98E-04 | 0.91 | 4.37 | - | 666.6  |
| AHQ-2-4, 2292        | R.EQLEEEEEAKHNLEK.Q            | 1855.93770 | 2 | 5.04E-05 | 0.88 | 3.93 | - | 722.2  |
| AHQ-2-1, 2484        | R.EQLEEEEEAKHNLEK.Q            | 1855.93770 | 2 | 2.24E-09 | 0.92 | 3.99 | - | 1017.3 |
| AHQ-2-6, 2157        | R.EQLEEEEEAKHNLEK.Q            | 1855.93770 | 2 | 7.57E-07 | 0.82 | 3.66 | - | 440.1  |
| AHQ-2-3, 2299        | R.EQLEEEEEAKHNLEK.Q            | 1855.93770 | 2 | 1.94E-04 | 0.83 | 3.74 | - | 525.3  |
| AHQ-2-5, 2143        | R.EQLEEEEEAKHNLEK.Q            | 1855.93770 | 2 | 6.72E-05 | 0.88 | 4.39 | - | 436.2  |
| AHQ-2-2, 3405 - 3478 | R.FLSNGHYTIPGQDQKDMFQETMEAMR.I | 1641.80946 | 2 | 1.72E-10 | 0.91 | 3.84 | - | 696.8  |
| AHQ-2-5, 5848        | R.FLSNGHYTIPGQDQKDMFQETMEAMR.I | 3012.39100 | 3 | 1.32E-06 | 0.91 | 4.60 | - | 712.1  |
| AHQ-2-2, 6148        | R.FLSNGHYTIPGQDQKDMFQETMEAMR.I | 3012.39100 | 3 | 7.31E-07 | 0.93 | 5.62 | - | 611.0  |
| AHQ-2-2, 5289 - 5357 | R.FLSNGHYTIPGQDQKDMFQETMEAMR.I | 3028.39040 | 3 | 1.57E-04 | 0.69 | 4.40 | - | 471.4  |
| AHQ-2-6, 5781        | R.FLSNGHYTIPGQDQKDMFQETMEAMR.I | 3012.39100 | 3 | 7.33E-05 | 0.87 | 4.29 | - | 806.7  |
| AHQ-2-7, 5752        | R.FLSNGHYTIPGQDQKDMFQETMEAMR.I | 3012.39100 | 3 | 1.32E-04 | 0.66 | 3.63 | - | 418.3  |
| AHQ-2-3, 6135        | R.FLSNGHYTIPGQDQKDMFQETMEAMR.I | 3012.39100 | 3 | 1.66E-05 | 0.93 | 4.83 | - | 814.4  |
| AHQ-2-6, 3298        | K.FVSELWK.D                    | 909.06314  | 1 | 2.02E-04 | 0.37 | 1.97 | - | 739.3  |
| AHQ-2-2, 4270        | R.GDLPVVPVPR.R                 | 1000.17581 | 2 | 2.09E-04 | 0.78 | 2.58 | - | 822.4  |
| AHQ-2-3, 4252        | R.GDLPVVPVPR.R                 | 1000.17581 | 2 | 1.91E-04 | 0.65 | 2.82 | - | 597.3  |
| AHQ-2-1, 2512        | K.HEAMITDLEER.L                | 1360.47586 | 2 | 9.93E-04 | 0.94 | 3.58 | - | 1194.1 |
| AHQ-2-2, 2721        | K.HEAMITDLEER.L                | 1344.47646 | 2 | 2.27E-05 | 0.90 | 3.22 | - | 790.9  |
| AHQ-2-1, 2960        | K.HEAMITDLEER.L                | 1344.47646 | 2 | 2.30E-08 | 0.97 | 4.46 | - | 1577.7 |
| AHQ-2-3, 2724 - 2725 | K.HEAMITDLEER.L                | 1344.47646 | 2 | 6.34E-04 | 0.94 | 3.53 | - | 1090.5 |

|                        |                           |            |   |          |      |      |   |        |
|------------------------|---------------------------|------------|---|----------|------|------|---|--------|
| AHQ-2-5, 3157 - 3205   | R.HEMPPHYAITDTAYR.S       | 1916.14944 | 2 | 8.31E-05 | 0.92 | 3.99 | - | 833.8  |
| AHQ-2-10, 3115         | R.HEMPPHYAITDTAYR.S       | 1916.14944 | 3 | 1.60E-05 | 0.97 | 3.89 | - | 2517.2 |
| AHQ-2-2, 3170 - 3244   | R.HEMPPHYAITDTAYR.S       | 1932.14884 | 3 | 2.84E-04 | 0.95 | 4.05 | - | 1931.7 |
| AHQ-2-10, 2870         | R.HEMPPHYAITDTAYR.S       | 1932.14884 | 2 | 3.67E-04 | 0.56 | 2.55 | - | 415.1  |
| AHQ-2-5, 2861          | R.HEMPPHYAITDTAYR.S       | 1932.14884 | 2 | 6.17E-04 | 0.86 | 3.10 | - | 706.2  |
| AHQ-2-10, 3112         | R.HEMPPHYAITDTAYR.S       | 1916.14944 | 2 | 2.46E-05 | 0.91 | 3.95 | - | 789.2  |
| AHQ-2-2, 3492 - 3565   | R.HEMPPHYAITDTAYR.S       | 1916.14944 | 2 | 2.15E-06 | 0.93 | 3.84 | - | 814.6  |
| AHQ-2-2, 3497          | R.HEMPPHYAITDTAYR.S       | 1916.14944 | 3 | 2.21E-09 | 0.98 | 4.62 | - | 3259.0 |
| AHQ-2-3, 3652          | R.HEMPPHYAITDTAYR.S       | 1916.14944 | 3 | 7.28E-04 | 0.85 | 3.32 | - | 998.5  |
| AHQ-2-1, 3790          | R.HEMPPHYAITDTAYR.S       | 1916.14944 | 2 | 1.36E-04 | 0.71 | 3.35 | - | 548.8  |
| AHQ-2-1, 3406          | R.HEMPPHYAITDTAYR.S       | 1932.14884 | 3 | 5.29E-07 | 0.95 | 4.46 | - | 1761.6 |
| AHQ-2-4, 3174          | R.HEMPPHYAITDTAYR.S       | 1932.14884 | 3 | 9.46E-07 | 0.97 | 5.03 | - | 1793.0 |
| AHQ-2-6, 2897          | R.HEMPPHYAITDTAYR.S       | 1932.14884 | 3 | 6.66E-06 | 0.97 | 5.14 | - | 1942.9 |
| AHQ-2-3, 3177          | R.HEMPPHYAITDTAYR.S       | 1932.14884 | 3 | 2.55E-06 | 0.97 | 5.05 | - | 2197.7 |
| AHQ-2-2, 3582          | R.HEMPPHYAITDTAYR.S       | 1916.14944 | 3 | 1.57E-08 | 0.98 | 5.24 | - | 3224.8 |
| AHQ-2-2, 3636 - 3637   | R.HEMPPHYAITDTAYR.S       | 1916.14944 | 2 | 1.27E-04 | 0.93 | 3.91 | - | 846.9  |
| AHQ-2-2, 3664          | R.HEMPPHYAITDTAYR.S       | 1916.14944 | 3 | 2.88E-08 | 0.97 | 5.22 | - | 1830.0 |
| AHQ-2-4, 3177          | R.HEMPPHYAITDTAYR.S       | 1932.14884 | 2 | 4.21E-04 | 0.83 | 3.20 | - | 555.8  |
| AHQ-2-3, 3476 - 3556   | R.HEMPPHYAITDTAYR.S       | 1916.14944 | 2 | 3.32E-08 | 0.87 | 3.56 | - | 743.1  |
| AHQ-2-6, 3143          | R.HEMPPHYAITDTAYR.S       | 1916.14944 | 3 | 2.62E-10 | 0.98 | 5.42 | - | 2630.5 |
| AHQ-2-2, 4588          | K.HSQAVEELAEQLEQTK.R      | 1840.96940 | 3 | 2.28E-04 | 0.96 | 5.22 | - | 1546.1 |
| AHQ-2-4, 4532          | K.HSQAVEELAEQLEQTK.R      | 1840.96940 | 2 | 5.58E-11 | 0.98 | 6.16 | - | 1842.4 |
| AHQ-2-3, 4540 - 4615   | K.HSQAVEELAEQLEQTK.R      | 1840.96940 | 2 | 1.87E-09 | 0.98 | 5.94 | - | 2390.4 |
| AHQ-2-1, 4702          | K.HSQAVEELAEQLEQTK.R      | 1840.96940 | 2 | 2.72E-09 | 0.98 | 5.94 | - | 1743.1 |
| AHQ-2-2, 4580 - 4653   | K.HSQAVEELAEQLEQTK.R      | 1840.96940 | 2 | 6.99E-12 | 0.98 | 6.65 | - | 2276.1 |
| AHQ-2-1, 4706          | K.HSQAVEELAEQLEQTK.R      | 1840.96940 | 3 | 1.31E-05 | 0.97 | 5.08 | - | 2147.2 |
| AHQ-2-5, 4153 - 4223   | K.HSQAVEELAEQLEQTK.R      | 1840.96940 | 2 | 2.12E-09 | 0.94 | 4.25 | - | 1244.1 |
| AHQ-2-3, 4545 - 4561   | K.HSQAVEELAEQLEQTK.R      | 1840.96940 | 3 | 4.68E-08 | 0.97 | 5.52 | - | 2163.4 |
| AHQ-2-5, 3708          | K.HSQAVEELAEQLEQTKR.V     | 1997.15575 | 2 | 3.18E-09 | 0.99 | 7.27 | - | 2804.4 |
| AHQ-2-5, 3692          | K.HSQAVEELAEQLEQTKR.V     | 1997.15575 | 3 | 1.90E-08 | 0.98 | 6.40 | - | 2377.6 |
| AHQ-2-4, 4040 - 4057   | K.HSQAVEELAEQLEQTKR.V     | 1997.15575 | 3 | 7.27E-07 | 0.98 | 6.83 | - | 1951.0 |
| AHQ-2-1, 4318          | K.HSQAVEELAEQLEQTKR.V     | 1997.15575 | 2 | 4.49E-09 | 0.98 | 6.29 | - | 2620.5 |
| AHQ-2-4, 4041          | K.HSQAVEELAEQLEQTKR.V     | 1997.15575 | 2 | 8.86E-08 | 0.98 | 6.75 | - | 2218.7 |
| AHQ-2-1, 4309          | K.HSQAVEELAEQLEQTKR.V     | 1997.15575 | 3 | 1.55E-05 | 0.97 | 5.84 | - | 1703.7 |
| AHQ-2-3, 4053          | K.HSQAVEELAEQLEQTKR.V     | 1997.15575 | 2 | 2.30E-08 | 0.99 | 6.93 | - | 2772.8 |
| AHQ-2-6, 3729          | K.HSQAVEELAEQLEQTKR.V     | 1997.15575 | 3 | 8.91E-06 | 0.93 | 4.73 | - | 1069.4 |
| AHQ-2-2, 4073 - 4146   | K.HSQAVEELAEQLEQTKR.V     | 1997.15575 | 2 | 9.67E-11 | 0.98 | 5.77 | - | 1945.4 |
| AHQ-2-2, 4076 - 4154   | K.HSQAVEELAEQLEQTKR.V     | 1997.15575 | 3 | 1.03E-08 | 0.98 | 7.09 | - | 2020.3 |
| AHQ-2-1, 3869 - 3940   | R.IAEFTTNLTETEEEEK.S      | 1654.75371 | 2 | 8.41E-09 | 0.97 | 5.01 | - | 1850.7 |
| AHQ-2-1, 4010 - 4082   | R.IAEFTTNLTETEEEEK.S      | 1654.75371 | 2 | 3.01E-08 | 0.97 | 5.00 | - | 1760.2 |
| AHQ-2-2, 4184          | R.IAEFTTNLTETEEEEK.S      | 1654.75371 | 2 | 4.84E-07 | 0.95 | 4.12 | - | 1304.0 |
| AHQ-2-2, 4036 - 4105   | R.IAEFTTNLTETEEEEK.S      | 1654.75371 | 2 | 4.12E-10 | 0.97 | 4.75 | - | 2172.6 |
| AHQ-2-2, 4284 - 4354   | R.IAEFTTNLTETEEEEK.S      | 1654.75371 | 2 | 5.81E-05 | 0.87 | 3.56 | - | 729.0  |
| AHQ-2-5, 3436 - 3516   | R.IAEFTTNLTETEEEEK.S      | 1654.75371 | 2 | 1.42E-10 | 0.97 | 4.58 | - | 2148.8 |
| AHQ-2-3, 4364          | R.IAEFTTNLTETEEEEK.S      | 1654.75371 | 2 | 1.24E-05 | 0.60 | 2.75 | - | 854.7  |
| AHQ-2-4, 4106          | R.IAEFTTNLTETEEEEK.S      | 1654.75371 | 2 | 9.77E-06 | 0.77 | 2.95 | - | 611.3  |
| AHQ-2-2, 3908 - 3976   | R.IAEFTTNLTETEEEEK.S      | 1654.75371 | 2 | 1.79E-10 | 0.97 | 4.93 | - | 1794.1 |
| AHQ-2-7, 3447          | R.IAEFTTNLTETEEEEK.S      | 1654.75371 | 2 | 2.70E-05 | 0.91 | 3.01 | - | 1269.0 |
| AHQ-2-4, 3828 - 3906   | R.IAEFTTNLTETEEEEK.S      | 1654.75371 | 2 | 1.82E-07 | 0.90 | 2.86 | - | 1484.0 |
| AHQ-2-3, 4221 - 4291   | R.IAEFTTNLTETEEEEK.S      | 1654.75371 | 2 | 5.36E-04 | 0.84 | 3.26 | - | 904.5  |
| AHQ-2-4, 3728 - 3796   | R.IAEFTTNLTETEEEEK.S      | 1654.75371 | 2 | 2.61E-10 | 0.96 | 4.29 | - | 1717.7 |
| AHQ-2-3, 4035 - 4103   | R.IAEFTTNLTETEEEEK.S      | 1654.75371 | 2 | 2.65E-09 | 0.97 | 4.69 | - | 1780.3 |
| AHQ-2-3, 3919 - 3967   | R.IAEFTTNLTETEEEEK.S      | 1654.75371 | 2 | 1.83E-08 | 0.98 | 5.06 | - | 2000.8 |
| AHQ-2-2, 3794 - 3864   | R.IAEFTTNLTETEEEEK.S      | 1654.75371 | 2 | 3.71E-10 | 0.97 | 5.24 | - | 1871.6 |
| AHQ-2-3, 3851 - 3892   | R.IAEFTTNLTETEEEEK.S      | 1654.75371 | 2 | 2.96E-09 | 0.96 | 4.97 | - | 1570.9 |
| AHQ-2-3, 3712 - 3792   | R.IAEFTTNLTETEEEEK.S      | 1654.75371 | 2 | 1.24E-09 | 0.96 | 4.62 | - | 1650.9 |
| AHQ-2-4, 3900 - 3977   | R.IAEFTTNLTETEEEEK.S      | 1654.75371 | 2 | 1.26E-09 | 0.97 | 4.54 | - | 1819.5 |
| AHQ-2-2, 3298          | R.IAEFTTNLTETEEEEKSK.S    | 1870.00428 | 2 | 9.73E-10 | 0.82 | 3.57 | - | 686.7  |
| AHQ-2-3, 3315          | R.IAEFTTNLTETEEEEKSK.S    | 1870.00428 | 2 | 5.59E-04 | 0.81 | 3.59 | - | 645.9  |
| AHQ-2-4, 3332          | R.IAEFTTNLTETEEEEKSK.S    | 1870.00428 | 2 | 6.00E-05 | 0.67 | 3.16 | - | 468.3  |
| AHQ-2-2, 5418 - 5501   | R.IAQLEELAEQNGTELINDR.L   | 2473.58969 | 3 | 4.88E-08 | 0.65 | 3.24 | - | 408.4  |
| AHQ-2-3, 5721          | R.IAQLEELAEQNGTELINDR.L.K | 2714.92085 | 3 | 9.11E-06 | 0.91 | 4.79 | - | 871.8  |
| AHQ-2-1, 5718 - 5754   | R.IAQLEELAEQNGTELINDR.L.K | 2714.92085 | 3 | 3.16E-06 | 0.83 | 3.35 | - | 910.0  |
| AHQ-2-1, 3625          | K.IAQLEEQLDNETK.E         | 1531.64695 | 2 | 7.34E-07 | 0.91 | 3.65 | - | 1165.4 |
| AHQ-2-3, 3364          | K.IAQLEEQLDNETK.E         | 1531.64695 | 2 | 1.22E-05 | 0.92 | 3.45 | - | 1333.0 |
| AHQ-2-2, 3825 - 3848   | K.IAQLEEQLDNETK.E         | 1531.64695 | 2 | 1.53E-07 | 0.94 | 4.50 | - | 855.2  |
| AHQ-2-5, 3045          | K.IAQLEEQLDNETK.E         | 1531.64695 | 2 | 1.42E-07 | 0.83 | 3.26 | - | 721.7  |
| AHQ-2-7, 3067          | K.IAQLEEQLDNETK.E         | 1531.64695 | 2 | 3.28E-06 | 0.94 | 3.89 | - | 1359.1 |
| AHQ-2-3, 3449          | K.IAQLEEQLDNETK.E         | 1531.64695 | 2 | 9.34E-05 | 0.84 | 3.33 | - | 999.1  |
| AHQ-2-6, 2990          | K.IAQLEEQLDNETK.E         | 1531.64695 | 2 | 3.77E-07 | 0.44 | 2.61 | - | 406.6  |
| AHQ-2-2, 2926          | K.IAQLEEQLDNETK.E         | 1531.64695 | 2 | 7.90E-09 | 0.95 | 4.14 | - | 1300.3 |
| AHQ-2-11, 3194         | K.IAQLEEQLDNETK.E         | 1531.64695 | 2 | 2.38E-08 | 0.95 | 3.98 | - | 1306.9 |
| AHQ-2-2, 3110 - 3184   | K.IAQLEEQLDNETK.E         | 1531.64695 | 2 | 1.20E-09 | 0.97 | 4.76 | - | 2038.2 |
| AHQ-2-1, 3465 - 3494   | K.IAQLEEQLDNETK.E         | 1531.64695 | 2 | 1.47E-09 | 0.97 | 4.55 | - | 1925.4 |
| AHQ-2-4, 3173          | K.IAQLEEQLDNETK.E         | 1531.64695 | 2 | 3.11E-08 | 0.96 | 4.60 | - | 1583.3 |
| AHQ-2-10, 3062         | K.IAQLEEQLDNETK.E         | 1531.64695 | 2 | 5.51E-09 | 0.96 | 4.90 | - | 1365.3 |
| AHQ-2-2, 3529          | K.IAQLEEQLDNETK.E         | 1531.64695 | 2 | 7.87E-08 | 0.95 | 4.60 | - | 1360.6 |
| AHQ-2-6, 3113          | K.IAQLEEQLDNETK.E         | 1531.64695 | 2 | 9.57E-05 | 0.97 | 4.75 | - | 1905.7 |
| AHQ-2-9, 3048 - 3106   | K.IAQLEEQLDNETK.E         | 1531.64695 | 2 | 2.93E-05 | 0.96 | 3.84 | - | 1784.0 |
| AHQ-2-4, 3373          | K.IAQLEEQLDNETK.E         | 1531.64695 | 2 | 1.65E-07 | 0.95 | 3.82 | - | 1667.8 |
| AHQ-2-2, 3386 - 3457   | K.IAQLEEQLDNETK.E         | 1531.64695 | 2 | 5.74E-08 | 0.94 | 4.06 | - | 1381.5 |
| AHQ-2-3, 3097 - 3167   | K.IAQLEEQLDNETK.E         | 1531.64695 | 2 | 1.87E-07 | 0.97 | 5.01 | - | 1586.5 |
| AHQ-2-2, 3033 - 3065   | K.IAQLEEQLDNETKER.Q       | 1816.94784 | 2 | 7.36E-09 | 0.95 | 4.26 | - | 1110.2 |
| AHQ-2-2, 3489 - 3558   | K.IAQLEEQLDNETKER.Q       | 1816.94784 | 2 | 5.66E-09 | 0.96 | 4.77 | - | 1338.7 |
| AHQ-2-2, 3486          | K.IAQLEEQLDNETKER.Q       | 1816.94784 | 3 | 5.42E-06 | 0.69 | 3.41 | - | 438.1  |
| AHQ-2-2, 5976          | R.IIGLDQVAGMSETALPGAFK.T  | 2035.35041 | 2 | 2.01E-04 | 0.95 | 5.16 | - | 838.9  |
| AHQ-2-5, 6695 - 6700   | R.IIGLDQVAGMSETALPGAFK.T  | 2019.35101 | 2 | 1.56E-05 | 0.96 | 5.01 | - | 1131.5 |
| AHQ-2-8, 6458          | R.IIGLDQVAGMSETALPGAFK.T  | 2019.35101 | 2 | 4.67E-09 | 0.96 | 5.03 | - | 1100.2 |
| AHQ-2-4, 5473 - 5513   | R.IIGLDQVAGMSETALPGAFK.T  | 2035.35041 | 2 | 1.09E-05 | 0.84 | 3.86 | - | 654.6  |
| AHQ-2-1, 5500          | R.IIGLDQVAGMSETALPGAFK.T  | 2035.35041 | 2 | 8.51E-07 | 0.95 | 4.33 | - | 1156.8 |
| AHQ-2-3, 6804 - 6815   | R.IIGLDQVAGMSETALPGAFK.T  | 2019.35101 | 2 | 5.42E-06 | 0.97 | 5.66 | - | 1478.9 |
| AHQ-2-1, 6728 - 6746   | R.IIGLDQVAGMSETALPGAFK.T  | 2019.35101 | 3 | 8.40E-04 | 0.96 | 5.75 | - | 1056.5 |
| AHQ-2-3, 5453          | R.IIGLDQVAGMSETALPGAFK.T  | 2035.35041 | 2 | 1.88E-07 | 0.96 | 4.94 | - | 1036.8 |
| AHQ-2-2, 5492          | R.IIGLDQVAGMSETALPGAFK.T  | 2035.35041 | 2 | 1.02E-05 | 0.94 | 4.23 | - | 1051.3 |
| AHQ-2-1, 6720 - 6789   | R.IIGLDQVAGMSETALPGAFK.T  | 2019.35101 | 2 | 1.38E-05 | 0.95 | 5.23 | - | 881.7  |
| AHQ-2-6, 6495 - 6527   | R.IIGLDQVAGMSETALPGAFK.T  | 2019.35101 | 2 | 5.77E-07 | 0.97 | 5.62 | - | 1223.1 |
| AHQ-2-1, 6121          | R.IIGLDQVAGMSETALPGAFK.T  | 2019.35101 | 2 | 1.64E-04 | 0.94 | 4.69 | - | 870.0  |
| AHQ-2-2, 6848 - 6870   | R.IIGLDQVAGMSETALPGAFK.T  | 2019.35101 | 3 | 4.82E-04 | 0.94 | 5.43 | - | 895.6  |
| AHQ-2-4, 6837 - 6904   | R.IIGLDQVAGMSETALPGAFK.T  | 2019.35101 | 2 | 3.70E-09 | 0.96 | 5.20 | - | 1215.2 |
| AHQ-2-14-, 6285 - 6324 | R.IIGLDQVAGMSETALPGAFK.T  | 2019.35101 | 2 | 1.80E-04 | 0.97 | 5.46 | - | 1250.2 |
| AHQ-2-13, 6277         | R.IIGLDQVAGMSETALPGAFK.T  | 2019.35101 | 2 | 5.85E-04 | 0.94 | 4.85 | - | 740.1  |
| AHQ-2-7, 6607          | R.IIGLDQVAGMSETALPGAFK.T  | 2019.35101 | 2 | 1.50E-05 | 0.97 | 5.40 | - | 1289.3 |
| AHQ-2-3, 4804          | R.IM*GIPPEEQMGLLR.V       | 1632.92766 | 2 | 5.35E-04 | 0.66 | 2.70 | - | 619.0  |
| AHQ-2-6, 4411 - 4454   | R.IM*GIPPEEQMGLLR.V       | 1632.92766 | 2 | 6.39E-04 | 0.85 | 3.20 | - | 611.7  |
| AHQ-2-1, 5497          | R.IMGIPPEEQMGLLR.V        | 1616.92826 | 2 | 1.09E-04 | 0.54 | 2.54 | - | 297.7  |
| AHQ-2-4, 5417          | R.IMGIPPEEQMGLLR.V        | 1616.92826 | 2 | 6.52E-06 | 0.89 | 4.01 | - | 387.3  |
| AHQ-2-8, 4893 - 4965   | R.IMGIPPEEQMGLLR.V        | 1616.92826 | 2 | 3.44E-06 | 0.92 | 3.90 | - | 607.0  |



|                       |                             |            |   |          |      |      |   |        |
|-----------------------|-----------------------------|------------|---|----------|------|------|---|--------|
| AHQ-2-2, 4724 - 4800  | R.IMGPEEEQMGLLR.V           | 1632.92766 | 2 | 4.66E-04 | 0.86 | 3.84 | - | 515.9  |
| AHQ-2-2, 6021         | K.IRELESQISELOEDLESER.A     | 2304.45416 | 2 | 1.76E-04 | 0.98 | 6.55 | - | 1169.6 |
| AHQ-2-3, 5889 - 5968  | K.IRELESQISELOEDLESER.A     | 2304.45416 | 2 | 7.27E-08 | 0.98 | 6.43 | - | 1315.9 |
| AHQ-2-3, 5976 - 6016  | K.IRELESQISELOEDLESER.A     | 2304.45416 | 3 | 2.00E-10 | 0.98 | 6.64 | - | 2072.4 |
| AHQ-2-1, 6050         | K.IRELESQISELOEDLESER.A     | 2304.45416 | 2 | 2.08E-05 | 0.98 | 6.87 | - | 1408.7 |
| AHQ-2-6, 5619         | K.IRELESQISELOEDLESER.A     | 2304.45416 | 3 | 1.45E-07 | 0.97 | 5.83 | - | 2189.8 |
| AHQ-2-6, 5618         | K.IRELESQISELOEDLESER.A     | 2304.45416 | 2 | 4.89E-06 | 0.98 | 6.18 | - | 1753.2 |
| AHQ-2-4, 5993 - 6004  | K.IRELESQISELOEDLESER.A     | 2304.45416 | 3 | 8.42E-08 | 0.98 | 6.82 | - | 1774.7 |
| AHQ-2-5, 5653 - 5671  | K.IRELESQISELOEDLESER.A     | 2304.45416 | 2 | 1.47E-05 | 0.98 | 6.93 | - | 1762.2 |
| AHQ-2-3, 6039         | K.IRELESQISELOEDLESER.A     | 2304.45416 | 2 | 7.53E-07 | 0.98 | 6.21 | - | 1086.3 |
| AHQ-2-4, 5985         | K.IRELESQISELOEDLESER.A     | 2304.45416 | 2 | 2.56E-05 | 0.98 | 6.85 | - | 1818.7 |
| AHQ-2-2, 6024 - 6030  | K.IRELESQISELOEDLESER.A     | 2304.45416 | 3 | 1.92E-08 | 0.97 | 6.01 | - | 1569.2 |
| AHQ-2-1, 6052         | K.IRELESQISELOEDLESER.A     | 2304.45416 | 3 | 6.46E-09 | 0.98 | 6.41 | - | 2003.4 |
| AHQ-2-3, 4624 - 4636  | K.KANLQIDQINTDLNLER.S       | 1999.21478 | 3 | 1.61E-06 | 0.91 | 4.50 | - | 1175.6 |
| AHQ-2-3, 4616         | K.KANLQIDQINTDLNLER.S       | 1999.21478 | 2 | 5.46E-06 | 0.97 | 6.12 | - | 1394.5 |
| AHQ-2-6, 4230 - 4237  | K.KANLQIDQINTDLNLER.S       | 1999.21478 | 2 | 8.08E-05 | 0.98 | 5.97 | - | 2118.8 |
| AHQ-2-5, 4283         | K.KANLQIDQINTDLNLER.S       | 1999.21478 | 2 | 1.94E-05 | 0.98 | 6.77 | - | 1456.7 |
| AHQ-2-2, 4845 - 4921  | K.KANLQIDQINTDLNLER.S       | 1999.21478 | 2 | 9.99E-15 | 0.98 | 6.08 | - | 2021.2 |
| AHQ-2-2, 4494         | K.KANLQIDQINTDLNLER.S       | 1999.21478 | 2 | 2.83E-06 | 0.95 | 5.19 | - | 945.7  |
| AHQ-2-3, 4380 - 4453  | K.KANLQIDQINTDLNLER.S       | 1999.21478 | 2 | 5.77E-06 | 0.97 | 6.07 | - | 1279.2 |
| AHQ-2-3, 4811         | K.KANLQIDQINTDLNLER.S       | 1999.21478 | 2 | 1.42E-04 | 0.97 | 5.42 | - | 1463.2 |
| AHQ-2-3, 4909         | K.KANLQIDQINTDLNLER.S       | 1999.21478 | 2 | 1.45E-06 | 0.93 | 4.62 | - | 794.9  |
| AHQ-2-2, 4721         | K.KANLQIDQINTDLNLER.S       | 1999.21478 | 2 | 1.23E-07 | 0.97 | 5.76 | - | 1371.0 |
| AHQ-2-9, 4179         | K.KANLQIDQINTDLNLER.S       | 1999.21478 | 2 | 2.27E-06 | 0.96 | 5.05 | - | 1326.5 |
| AHQ-2-2, 4654         | K.KANLQIDQINTDLNLER.S       | 1999.21478 | 3 | 1.60E-04 | 0.91 | 4.20 | - | 1322.9 |
| AHQ-2-1, 4720         | K.KANLQIDQINTDLNLER.S       | 1999.21478 | 3 | 9.84E-04 | 0.89 | 4.16 | - | 1084.9 |
| AHQ-2-2, 4638 - 4652  | K.KANLQIDQINTDLNLER.S       | 1999.21478 | 2 | 1.98E-10 | 0.98 | 5.96 | - | 1555.8 |
| AHQ-2-1, 2642         | R.KKVEAQLQELQVK.F           | 1541.81761 | 2 | 5.75E-08 | 0.97 | 5.10 | - | 1443.0 |
| AHQ-2-4, 2389         | R.KKVEAQLQELQVK.F           | 1541.81761 | 2 | 3.94E-04 | 0.97 | 5.01 | - | 1914.5 |
| AHQ-2-2, 2408 - 2410  | R.KKVEAQLQELQVK.F           | 1541.81761 | 2 | 3.12E-08 | 0.97 | 5.01 | - | 1509.0 |
| AHQ-2-3, 3643         | K.KLEEEQIILEDQNK.L          | 1891.08992 | 2 | 5.53E-04 | 0.92 | 4.51 | - | 700.5  |
| AHQ-2-4, 3534         | K.KLEEEQIILEDQNK.L          | 1891.08992 | 2 | 3.19E-11 | 0.98 | 6.11 | - | 1933.9 |
| AHQ-2-2, 3766         | K.KLEEEQIILEDQNK.L          | 1891.08992 | 2 | 3.87E-06 | 0.98 | 5.99 | - | 1861.4 |
| AHQ-2-1, 3696 - 3697  | K.KLEEEQIILEDQNK.L          | 1891.08992 | 3 | 1.06E-06 | 0.90 | 4.39 | - | 1074.8 |
| AHQ-2-1, 3684         | K.KLEEEQIILEDQNK.L          | 1891.08992 | 2 | 3.84E-09 | 0.98 | 5.74 | - | 2208.5 |
| AHQ-2-1, 3518 - 3588  | K.KLEEEQIILEDQNK.L          | 1891.08992 | 2 | 4.39E-04 | 0.96 | 5.04 | - | 1494.0 |
| AHQ-2-3, 3565 - 3633  | K.KLEEEQIILEDQNK.L          | 1891.08992 | 3 | 1.38E-04 | 0.92 | 4.09 | - | 1345.8 |
| AHQ-2-3, 3776         | K.KLEEEQIILEDQNK.L          | 1891.08992 | 2 | 2.12E-04 | 0.97 | 5.54 | - | 1673.1 |
| AHQ-2-2, 3678         | K.KLEEEQIILEDQNK.L          | 1891.08992 | 2 | 6.14E-05 | 0.85 | 3.39 | - | 683.6  |
| AHQ-2-3, 3531 - 3608  | K.KLEEEQIILEDQNK.L          | 1891.08992 | 2 | 2.09E-11 | 0.97 | 5.63 | - | 1604.2 |
| AHQ-2-3, 3416 - 3436  | K.KLEEEQIILEDQNK.L          | 1891.08992 | 3 | 6.21E-06 | 0.90 | 4.54 | - | 1240.7 |
| AHQ-2-2, 3581 - 3652  | K.KLEEEQIILEDQNK.L          | 1891.08992 | 2 | 4.92E-11 | 0.98 | 6.33 | - | 1550.7 |
| AHQ-2-3, 7364 - 7391  | R.KLEGDSTDLSQIAELQAQIAELK.M | 2616.86032 | 3 | 7.48E-10 | 0.88 | 4.59 | - | 791.0  |
| AHQ-2-3, 7367 - 7431  | R.KLEGDSTDLSQIAELQAQIAELK.M | 2616.86032 | 2 | 3.01E-07 | 0.97 | 5.53 | - | 1192.2 |
| AHQ-2-6, 7067         | R.KLEGDSTDLSQIAELQAQIAELK.M | 2616.86032 | 3 | 1.73E-09 | 0.91 | 5.00 | - | 814.9  |
| AHQ-2-1, 7149 - 7225  | R.KLEGDSTDLSQIAELQAQIAELK.M | 2616.86032 | 2 | 6.49E-08 | 0.97 | 6.47 | - | 1151.3 |
| AHQ-2-1, 7073 - 7148  | R.KLEGDSTDLSQIAELQAQIAELK.M | 2616.86032 | 3 | 4.28E-06 | 0.92 | 4.86 | - | 926.0  |
| AHQ-2-4, 7382 - 7440  | R.KLEGDSTDLSQIAELQAQIAELK.M | 2616.86032 | 2 | 4.74E-06 | 0.97 | 5.68 | - | 1486.4 |
| AHQ-2-5, 7264 - 7265  | R.KLEGDSTDLSQIAELQAQIAELK.M | 2616.86032 | 3 | 4.64E-06 | 0.90 | 5.06 | - | 1016.7 |
| AHQ-2-4, 7424 - 7494  | R.KLEGDSTDLSQIAELQAQIAELK.M | 2616.86032 | 3 | 3.98E-06 | 0.95 | 5.51 | - | 1047.0 |
| AHQ-2-4, 7492 - 7556  | R.KLEGDSTDLSQIAELQAQIAELK.M | 2616.86032 | 2 | 1.92E-05 | 0.92 | 4.78 | - | 621.1  |
| AHQ-2-5, 7263         | R.KLEGDSTDLSQIAELQAQIAELK.M | 2616.86032 | 2 | 6.87E-08 | 0.96 | 5.63 | - | 1304.6 |
| AHQ-2-2, 7436         | R.KLEGDSTDLSQIAELQAQIAELK.M | 2616.86032 | 2 | 3.75E-08 | 0.97 | 6.53 | - | 1234.0 |
| AHQ-2-6, 2383         | K.KLVWVPSDK.S               | 1072.28194 | 2 | 1.06E-05 | 0.77 | 2.69 | - | 736.5  |
| AHQ-2-2, 2568         | K.KLVWVPSDK.S               | 1072.28194 | 2 | 2.64E-04 | 0.83 | 3.03 | - | 896.5  |
| AHQ-2-3, 2564         | K.KLVWVPSDK.S               | 1072.28194 | 1 | 8.42E-04 | 0.52 | 2.58 | - | 484.4  |
| AHQ-2-5, 2341         | K.KLVWVPSDK.S               | 1072.28194 | 2 | 7.57E-05 | 0.69 | 2.71 | - | 711.4  |
| AHQ-2-4, 3588         | K.KMEDSVGCLETAEEVK.R        | 1827.02450 | 2 | 1.75E-06 | 0.82 | 3.69 | - | 793.1  |
| AHQ-2-2, 3204         | K.KMEDSVGCLETAEEVK.R        | 1983.21085 | 3 | 2.11E-06 | 0.93 | 4.77 | - | 919.1  |
| AHQ-2-2, 3197         | K.KMEDSVGCLETAEEVK.R        | 1983.21085 | 2 | 4.51E-07 | 0.92 | 3.65 | - | 1117.5 |
| AHQ-2-2, 2817         | K.KM*EDSVGCLETAEEVK.R       | 1999.21025 | 2 | 2.20E-06 | 0.89 | 3.87 | - | 843.1  |
| AHQ-2-2, 2805         | K.KM*EDSVGCLETAEEVK.R       | 1999.21025 | 3 | 3.91E-06 | 0.92 | 4.55 | - | 891.6  |
| AHQ-2-4, 3208         | K.KMEDSVGCLETAEEVK.R        | 1983.21085 | 2 | 1.35E-05 | 0.96 | 4.52 | - | 1601.6 |
| AHQ-2-3, 3200         | K.KMEDSVGCLETAEEVK.R        | 1983.21085 | 2 | 2.19E-09 | 0.97 | 5.16 | - | 1752.2 |
| AHQ-2-5, 2529         | K.KM*EDSVGCLETAEEVK.R       | 1999.21025 | 3 | 2.62E-04 | 0.94 | 5.01 | - | 831.4  |
| AHQ-2-6, 2947         | K.KMEDSVGCLETAEEVK.R        | 1983.21085 | 3 | 1.41E-08 | 0.88 | 4.04 | - | 778.1  |
| AHQ-2-1, 3388         | K.KMEDSVGCLETAEEVK.R        | 1983.21085 | 3 | 1.07E-09 | 0.91 | 4.37 | - | 1019.7 |
| AHQ-2-1, 3000         | K.KM*EDSVGCLETAEEVK.R       | 1999.21025 | 3 | 5.62E-04 | 0.93 | 4.54 | - | 1114.6 |
| AHQ-2-3, 2816         | K.KM*EDSVGCLETAEEVK.R       | 1999.21025 | 2 | 3.22E-04 | 0.72 | 3.60 | - | 268.0  |
| AHQ-2-2, 4964         | K.KM*QNIQELEEQLLEEEESAR.Q   | 2478.63294 | 2 | 2.53E-04 | 0.52 | 2.80 | - | 292.5  |
| AHQ-2-3, 5379 - 5404  | K.KMQQNIQELEEQLLEEEESAR.Q   | 2462.63354 | 2 | 1.33E-05 | 0.91 | 4.14 | - | 1059.2 |
| AHQ-2-1, 5578         | K.KMQQNIQELEEQLLEEEESAR.Q   | 2462.63354 | 2 | 5.04E-05 | 0.87 | 3.87 | - | 704.9  |
| AHQ-2-2, 5428         | K.KMQQNIQELEEQLLEEEESAR.Q   | 2462.63354 | 2 | 2.94E-05 | 0.96 | 5.52 | - | 1162.5 |
| AHQ-2-3, 4919         | K.KM*QNIQELEEQLLEEEESAR.Q   | 2478.63294 | 2 | 7.74E-04 | 0.63 | 2.99 | - | 348.3  |
| AHQ-2-1, 5013         | K.KM*QNIQELEEQLLEEEESAR.Q   | 2478.63294 | 2 | 6.47E-06 | 0.58 | 2.83 | - | 380.1  |
| AHQ-2-3, 4923         | K.KM*QNIQELEEQLLEEEESAR.Q   | 2478.63294 | 3 | 2.24E-04 | 0.85 | 3.92 | - | 1004.9 |
| AHQ-2-4, 4922         | K.KM*QNIQELEEQLLEEEESAR.Q   | 2478.63294 | 2 | 1.67E-09 | 0.51 | 3.00 | - | 381.7  |
| AHQ-2-4, 4065 - 4080  | K.KQELEIEICHDLAR.V          | 1771.93036 | 3 | 9.81E-06 | 0.97 | 5.26 | - | 2036.8 |
| AHQ-2-1, 4264 - 4273  | K.KQELEIEICHDLAR.V          | 1771.93036 | 3 | 5.72E-04 | 0.97 | 5.77 | - | 1930.4 |
| AHQ-2-6, 3759         | K.KQELEIEICHDLAR.V          | 1771.93036 | 2 | 6.24E-04 | 0.98 | 5.09 | - | 2702.2 |
| AHQ-2-4, 4048 - 4053  | K.KQELEIEICHDLAR.V          | 1771.93036 | 2 | 3.86E-04 | 0.97 | 4.64 | - | 2430.9 |
| AHQ-2-7, 3661         | K.KQELEIEICHDLAR.V          | 1771.93036 | 2 | 2.53E-04 | 0.97 | 5.04 | - | 2065.9 |
| AHQ-2-8, 3690         | K.KQELEIEICHDLAR.V          | 1771.93036 | 2 | 6.93E-04 | 0.96 | 4.84 | - | 1703.7 |
| AHQ-2-11, 3857 - 3920 | K.KQELEIEICHDLAR.V          | 1771.93036 | 2 | 3.10E-04 | 0.70 | 3.13 | - | 595.5  |
| AHQ-2-1, 3037         | K.KVEAQLQELQVK.F            | 1413.64470 | 3 | 4.68E-06 | 0.81 | 3.66 | - | 1038.4 |
| AHQ-2-4, 2705         | K.KVEAQLQELQVK.F            | 1413.64470 | 2 | 1.07E-05 | 0.97 | 5.05 | - | 1757.4 |
| AHQ-2-1, 3032         | K.KVEAQLQELQVK.F            | 1413.64470 | 2 | 1.12E-07 | 0.95 | 4.39 | - | 1316.6 |
| AHQ-2-5, 2492         | K.KVEAQLQELQVK.F            | 1413.64470 | 2 | 1.04E-07 | 0.97 | 4.88 | - | 1857.5 |
| AHQ-2-6, 2565         | K.KVEAQLQELQVK.F            | 1413.64470 | 2 | 3.89E-07 | 0.97 | 4.97 | - | 1430.6 |
| AHQ-2-3, 2743 - 2745  | K.KVEAQLQELQVK.F            | 1413.64470 | 2 | 1.43E-04 | 0.98 | 5.52 | - | 2061.0 |
| AHQ-2-3, 2761         | K.KVEAQLQELQVK.F            | 1413.64470 | 1 | 1.52E-04 | 0.60 | 3.18 | - | 388.9  |
| AHQ-2-2, 2753         | K.KVEAQLQELQVK.F            | 1413.64470 | 2 | 1.64E-06 | 0.96 | 5.03 | - | 1319.4 |
| AHQ-2-2, 2761         | K.KVEAQLQELQVK.F            | 1413.64470 | 1 | 3.93E-06 | 0.56 | 2.98 | - | 384.6  |
| AHQ-2-2, 3570         | K.KVIQYLAYVASSHK.S          | 1607.87775 | 2 | 1.06E-08 | 0.97 | 4.73 | - | 1494.9 |
| AHQ-2-6, 3182         | K.KVIQYLAYVASSHK.S          | 1607.87775 | 2 | 9.80E-04 | 0.92 | 3.60 | - | 1012.4 |
| AHQ-2-2, 3970 - 3996  | K.LEEEQIILEDQNK.L           | 1762.91700 | 2 | 4.04E-10 | 0.97 | 5.83 | - | 1233.5 |
| AHQ-2-1, 3948 - 4022  | K.LEEEQIILEDQNK.L           | 1762.91700 | 2 | 1.23E-08 | 0.96 | 5.24 | - | 1237.0 |
| AHQ-2-1, 4038         | K.LEEEQIILEDQNK.L           | 1762.91700 | 2 | 1.03E-07 | 0.94 | 3.81 | - | 1181.4 |
| AHQ-2-2, 3888         | K.LEEEQIILEDQNK.L           | 1762.91700 | 2 | 1.45E-07 | 0.95 | 4.56 | - | 1355.3 |
| AHQ-2-3, 3961 - 4008  | K.LEEEQIILEDQNK.L           | 1762.91700 | 2 | 3.67E-08 | 0.97 | 4.58 | - | 1473.3 |
| AHQ-2-4, 3850         | K.LEEEQIILEDQNK.L           | 1762.91700 | 2 | 4.09E-07 | 0.93 | 4.16 | - | 936.0  |
| AHQ-2-2, 4065 - 4136  | K.LEEEQIILEDQNK.L           | 1762.91700 | 2 | 1.22E-09 | 0.97 | 5.46 | - | 1438.5 |
| AHQ-2-1, 7208         | K.LEGSDTDLSDQIAELQAQIAELK.M | 2488.68740 | 2 | 1.66E-12 | 0.97 | 5.49 | - | 1298.9 |
| AHQ-2-4, 7548 - 7549  | K.LEGSDTDLSDQIAELQAQIAELK.M | 2488.68740 | 2 | 2.33E-07 | 0.91 | 3.81 | - | 846.8  |
| AHQ-2-3, 7487 - 7489  | K.LEGSDTDLSDQIAELQAQIAELK.M | 2488.68740 | 2 | 5.07E-10 | 0.97 | 6.14 | - | 1277.0 |
| AHQ-2-1, 7212         | K.LEGSDTDLSDQIAELQAQIAELK.M | 2488.68740 | 3 | 5.22E-06 | 0.77 | 4.16 | - | 628.8  |
| AHQ-2-1, 3653         | R.LEVNLQAMK.A               | 1046.26630 | 2 | 7.45E-05 | 0.90 | 3.52 | - | 780.2  |

|                       |                             |            |   |          |      |      |   |        |
|-----------------------|-----------------------------|------------|---|----------|------|------|---|--------|
| AHQ-2-3, 2483         | R.LEVNLQAM*K.A              | 1062.26570 | 2 | 9.18E-04 | 0.81 | 2.88 | - | 644.8  |
| AHQ-2-4, 2472         | R.LEVNLQAM*K.A              | 1062.26570 | 1 | 1.58E-04 | 0.14 | 1.80 | - | 80.2   |
| AHQ-2-3, 3448         | R.LEVNLQAMK.A               | 1046.26630 | 2 | 1.19E-04 | 0.90 | 3.59 | - | 666.5  |
| AHQ-2-1, 2660 - 2677  | R.LEVNLQAM*K.A              | 1062.26570 | 2 | 1.59E-05 | 0.76 | 2.77 | - | 538.9  |
| AHQ-2-4, 3453         | R.LEVNLQAMK.A               | 1046.26630 | 2 | 5.62E-06 | 0.85 | 3.06 | - | 770.8  |
| AHQ-2-5, 3148         | R.LEVNLQAMK.A               | 1046.26630 | 2 | 1.56E-04 | 0.69 | 2.72 | - | 586.1  |
| AHQ-2-1, 3660         | R.LEVNLQAMK.A               | 1046.26630 | 1 | 2.69E-04 | 0.65 | 2.72 | - | 646.7  |
| AHQ-2-2, 3441 - 3444  | R.LEVNLQAMK.A               | 1046.26630 | 2 | 9.64E-06 | 0.88 | 3.60 | - | 621.7  |
| AHQ-2-4, 3382         | K.LKDVLLQVDDER.R            | 1443.62767 | 2 | 8.14E-09 | 0.94 | 3.44 | - | 1544.0 |
| AHQ-2-4, 3398         | K.LKDVLLQVDDER.R            | 1443.62767 | 1 | 1.02E-05 | 0.66 | 3.20 | - | 405.4  |
| AHQ-2-2, 3377         | K.LKDVLLQVDDER.R            | 1443.62767 | 2 | 2.65E-09 | 0.95 | 4.00 | - | 1567.6 |
| AHQ-2-1, 3621 - 3673  | K.LKDVLLQVDDER.R            | 1443.62767 | 2 | 1.93E-09 | 0.92 | 3.75 | - | 1184.3 |
| AHQ-2-3, 3373         | K.LKDVLLQVDDER.R            | 1443.62767 | 2 | 1.05E-07 | 0.95 | 3.72 | - | 1558.3 |
| AHQ-2-2, 3272         | K.LKDVLLQVDDER.R            | 1443.62767 | 2 | 5.59E-07 | 0.95 | 3.63 | - | 1823.9 |
| AHQ-2-6, 2654         | K.LKDVLLQVDDERR.N           | 1599.81402 | 2 | 2.73E-04 | 0.88 | 3.35 | - | 1066.4 |
| AHQ-2-2, 2900         | K.LKDVLLQVDDERR.N           | 1599.81402 | 2 | 5.21E-05 | 0.88 | 3.60 | - | 951.6  |
| AHQ-2-3, 2915 - 2916  | K.LKDVLLQVDDERR.N           | 1599.81402 | 2 | 3.05E-06 | 0.93 | 4.02 | - | 1273.5 |
| AHQ-2-6, 2655         | K.LKDVLLQVDDERR.N           | 1599.81402 | 3 | 5.37E-07 | 0.93 | 3.99 | - | 1179.0 |
| AHQ-2-4, 2836 - 2904  | K.LKDVLLQVDDERR.N           | 1599.81402 | 2 | 3.03E-04 | 0.90 | 3.18 | - | 1266.3 |
| AHQ-2-3, 2683         | K.LKNKHEAMITLEER.L          | 1828.08363 | 2 | 1.83E-05 | 0.91 | 3.65 | - | 1030.6 |
| AHQ-2-3, 5616 - 5689  | R.LQVELDLLVLDLHDQR.Q        | 1951.12699 | 2 | 1.76E-05 | 0.90 | 4.12 | - | 733.9  |
| AHQ-2-5, 5939 - 6011  | R.LQVELDLLVLDLHDQR.Q        | 1951.12699 | 3 | 1.13E-05 | 0.86 | 4.52 | - | 631.4  |
| AHQ-2-1, 5845         | R.LQVELDLLVLDLHDQR.Q        | 1951.12699 | 2 | 7.07E-05 | 0.85 | 3.57 | - | 795.0  |
| AHQ-2-2, 6236 - 6316  | R.LQVELDLLVLDLHDQR.Q        | 1951.12699 | 3 | 4.33E-05 | 0.93 | 5.02 | - | 802.6  |
| AHQ-2-2, 6345         | R.LQVELDLLVLDLHDQR.Q        | 1951.12699 | 2 | 3.73E-10 | 0.97 | 5.48 | - | 1240.2 |
| AHQ-2-6, 5885 - 5951  | R.LQVELDLLVLDLHDQR.Q        | 1951.12699 | 2 | 3.22E-10 | 0.97 | 5.43 | - | 1338.9 |
| AHQ-2-1, 6284 - 6325  | R.LQVELDLLVLDLHDQR.Q        | 1951.12699 | 3 | 1.50E-06 | 0.82 | 3.75 | - | 660.9  |
| AHQ-2-1, 6286 - 6289  | R.LQVELDLLVLDLHDQR.Q        | 1951.12699 | 2 | 8.80E-12 | 0.98 | 5.37 | - | 1998.0 |
| AHQ-2-4, 6245 - 6256  | R.LQVELDLLVLDLHDQR.Q        | 1951.12699 | 3 | 3.84E-05 | 0.89 | 4.20 | - | 705.8  |
| AHQ-2-4, 6238 - 6312  | R.LQVELDLLVLDLHDQR.Q        | 1951.12699 | 2 | 6.34E-11 | 0.97 | 5.01 | - | 1901.9 |
| AHQ-2-3, 6319         | R.LQVELDLLVLDLHDQR.Q        | 1951.12699 | 2 | 3.04E-06 | 0.96 | 5.15 | - | 1189.0 |
| AHQ-2-5, 5927 - 6008  | R.LQVELDLLVLDLHDQR.Q        | 1951.12699 | 2 | 5.00E-10 | 0.98 | 5.63 | - | 1688.4 |
| AHQ-2-2, 5732         | R.LQVELDLLVLDLHDQR.Q        | 1951.12699 | 2 | 2.93E-07 | 0.95 | 4.85 | - | 1183.8 |
| AHQ-2-2, 6197 - 6276  | R.LQVELDLLVLDLHDQR.Q        | 1951.12699 | 2 | 3.32E-09 | 0.96 | 5.13 | - | 1406.2 |
| AHQ-2-3, 6400 - 6419  | R.LQVELDLLVLDLHDQR.Q        | 1951.12699 | 2 | 8.46E-07 | 0.98 | 5.12 | - | 2053.9 |
| AHQ-2-3, 6176 - 6247  | R.LQVELDLLVLDLHDQR.Q        | 1951.12699 | 2 | 4.00E-11 | 0.97 | 4.99 | - | 1456.6 |
| AHQ-2-2, 5966 - 6032  | K.LQVELDNVTGLLSQSDSK.S      | 1947.13342 | 2 | 9.84E-07 | 0.96 | 5.34 | - | 1155.9 |
| AHQ-2-4, 5970 - 6040  | K.LQVELDNVTGLLSQSDSK.S      | 1947.13342 | 2 | 8.38E-07 | 0.97 | 5.45 | - | 1467.8 |
| AHQ-2-2, 6982         | K.LQVELDNVTGLLSQSDSK.S      | 1947.13342 | 2 | 4.62E-06 | 0.92 | 4.02 | - | 980.6  |
| AHQ-2-3, 6167 - 6239  | K.LQVELDNVTGLLSQSDSK.S      | 1947.13342 | 2 | 2.34E-08 | 0.97 | 6.11 | - | 1182.7 |
| AHQ-2-2, 6209 - 6280  | K.LQVELDNVTGLLSQSDSK.S      | 1947.13342 | 2 | 1.19E-13 | 0.98 | 6.84 | - | 1341.7 |
| AHQ-2-5, 5781 - 5851  | K.LQVELDNVTGLLSQSDSK.S      | 1947.13342 | 2 | 1.12E-07 | 0.97 | 5.46 | - | 1614.2 |
| AHQ-2-3, 6309 - 6329  | K.LQVELDNVTGLLSQSDSK.S      | 1947.13342 | 2 | 9.25E-07 | 0.97 | 5.06 | - | 1367.9 |
| AHQ-2-3, 6019 - 6096  | K.LQVELDNVTGLLSQSDSK.S      | 1947.13342 | 2 | 9.91E-08 | 0.98 | 6.01 | - | 1584.5 |
| AHQ-2-4, 6244         | K.LQVELDNVTGLLSQSDSK.S      | 1947.13342 | 2 | 5.96E-05 | 0.96 | 4.84 | - | 1227.5 |
| AHQ-2-1, 5649         | K.LQVELDNVTGLLSQSDSK.S      | 1947.13342 | 2 | 1.46E-04 | 0.97 | 5.69 | - | 1349.5 |
| AHQ-2-4, 6325 - 6394  | K.LQVELDNVTGLLSQSDSK.S      | 1947.13342 | 2 | 2.24E-05 | 0.87 | 3.98 | - | 544.9  |
| AHQ-2-3, 6403         | K.LQVELDNVTGLLSQSDSK.S      | 1947.13342 | 2 | 1.53E-12 | 0.97 | 5.41 | - | 1190.9 |
| AHQ-2-1, 5952 - 6032  | K.LQVELDNVTGLLSQSDSK.S      | 1947.13342 | 2 | 3.35E-07 | 0.98 | 5.80 | - | 1692.0 |
| AHQ-2-3, 6532         | K.LQVELDNVTGLLSQSDSK.S      | 1947.13342 | 2 | 1.75E-08 | 0.96 | 5.21 | - | 992.5  |
| AHQ-2-5, 6031         | K.LQVELDNVTGLLSQSDSK.S      | 1947.13342 | 2 | 7.18E-05 | 0.96 | 4.89 | - | 1131.2 |
| AHQ-2-2, 6100         | K.LQVELDNVTGLLSQSDSK.S      | 1947.13342 | 2 | 4.57E-11 | 0.97 | 6.47 | - | 1230.3 |
| AHQ-2-2, 6072 - 6140  | K.LQVELDNVTGLLSQSDSK.S      | 1947.13342 | 2 | 5.56E-07 | 0.98 | 5.92 | - | 1546.7 |
| AHQ-2-2, 7346         | K.LQVELDNVTGLLSQSDSK.S      | 1947.13342 | 2 | 7.77E-05 | 0.93 | 4.10 | - | 1006.8 |
| AHQ-2-2, 6348 - 6418  | K.LQVELDNVTGLLSQSDSK.S      | 1947.13342 | 2 | 5.59E-10 | 0.98 | 6.16 | - | 1976.0 |
| AHQ-2-2, 7092         | K.LQVELDNVTGLLSQSDSK.S      | 1947.13342 | 2 | 1.74E-08 | 0.96 | 5.61 | - | 1099.2 |
| AHQ-2-3, 7383         | K.LQVELDNVTGLLSQSDSK.S      | 1947.13342 | 2 | 1.67E-05 | 0.65 | 3.05 | - | 555.2  |
| AHQ-2-2, 6448         | K.LQVELDNVTGLLSQSDSK.S      | 1947.13342 | 2 | 1.45E-09 | 0.96 | 5.21 | - | 1125.7 |
| AHQ-2-4, 6110 - 6158  | K.LQVELDNVTGLLSQSDSK.S      | 1947.13342 | 2 | 5.18E-05 | 0.95 | 5.31 | - | 848.1  |
| AHQ-2-4, 6478         | K.LQVELDNVTGLLSQSDSK.S      | 1947.13342 | 2 | 1.44E-07 | 0.97 | 4.90 | - | 1385.1 |
| AHQ-2-1, 6100         | K.LQVELDNVTGLLSQSDSK.S      | 1947.13342 | 2 | 1.44E-07 | 0.97 | 5.84 | - | 1106.8 |
| AHQ-2-3, 6995         | K.LQVELDNVTGLLSQSDSK.S      | 1947.13342 | 2 | 8.86E-06 | 0.88 | 4.21 | - | 566.0  |
| AHQ-2-1, 6204         | K.LQVELDNVTGLLSQSDSK.S      | 1947.13342 | 2 | 1.88E-06 | 0.94 | 4.52 | - | 937.5  |
| AHQ-2-2, 6542         | K.LQVELDNVTGLLSQSDSK.S      | 1947.13342 | 2 | 6.65E-11 | 0.97 | 5.29 | - | 1208.6 |
| AHQ-2-3, 5901 - 5975  | K.LQVELDNVTGLLSQSDSK.S      | 1947.13342 | 2 | 4.24E-11 | 0.98 | 6.58 | - | 1454.3 |
| AHQ-2-3, 5192 - 5195  | R.LTEMETLQSQLMAEK.L         | 1753.03211 | 2 | 8.84E-09 | 0.98 | 5.44 | - | 1860.7 |
| AHQ-2-2, 5232         | R.LTEMETLQSQLMAEK.L         | 1753.03211 | 2 | 3.40E-08 | 0.97 | 5.59 | - | 1709.2 |
| AHQ-2-3, 5205         | R.LTEM*ETLQSQLM*AEK.L       | 1785.03091 | 2 | 2.24E-05 | 0.90 | 3.50 | - | 1099.3 |
| AHQ-2-2, 5349 - 5366  | R.LTEMETLQSQLMAEK.L         | 1753.03211 | 2 | 1.34E-04 | 0.94 | 3.76 | - | 1508.6 |
| AHQ-2-4, 4630 - 4662  | R.LTEMETLQSQLM*AEK.L        | 1769.03151 | 2 | 1.66E-06 | 0.93 | 3.81 | - | 1117.6 |
| AHQ-2-3, 4039 - 4081  | R.LTEM*ETLQSQLMAEK.L        | 1769.03151 | 2 | 6.18E-05 | 0.96 | 4.07 | - | 2004.9 |
| AHQ-2-2, 5149 - 5228  | R.LTEMETLQSQLMAEK.L         | 1753.03211 | 2 | 2.37E-06 | 0.94 | 4.31 | - | 1211.2 |
| AHQ-2-2, 4085 - 4156  | R.LTEM*ETLQSQLMAEK.L        | 1769.03151 | 2 | 4.58E-06 | 0.96 | 3.66 | - | 2294.6 |
| AHQ-2-1, 5288         | R.LTEMETLQSQLMAEK.L         | 1753.03211 | 2 | 6.74E-06 | 0.96 | 4.53 | - | 1510.2 |
| AHQ-2-1, 3666         | R.LTEM*ETLQSQLM*AEK.L       | 1785.03091 | 2 | 2.15E-04 | 0.89 | 3.39 | - | 1089.1 |
| AHQ-2-4, 5180         | R.LTEMETLQSQLMAEK.L         | 1753.03211 | 2 | 1.30E-05 | 0.96 | 4.86 | - | 1522.7 |
| AHQ-2-1, 7028         | K.LTKDFSALESQDQTQELLQEENR.Q | 2837.04608 | 3 | 3.03E-08 | 0.95 | 4.90 | - | 1592.4 |
| AHQ-2-5, 2785         | K.LVWVPSDK.S                | 944.10903  | 1 | 7.66E-04 | 0.33 | 2.07 | - | 394.3  |
| AHQ-2-3, 3985         | K.MEDSVGCLETAEEVK.R         | 1698.85159 | 2 | 3.25E-06 | 0.82 | 3.29 | - | 716.8  |
| AHQ-2-2, 4025         | K.MEDSVGCLETAEEVK.R         | 1698.85159 | 2 | 1.49E-04 | 0.74 | 3.03 | - | 580.6  |
| AHQ-2-2, 3198         | K.M*EDSVGCLETAEEVKR.K       | 1871.03734 | 2 | 1.60E-07 | 0.92 | 3.99 | - | 772.8  |
| AHQ-2-3, 3528         | K.MEDSVGCLETAEEVKR.K        | 1855.03794 | 2 | 7.52E-05 | 0.76 | 3.28 | - | 458.9  |
| AHQ-2-4, 3530         | K.MEDSVGCLETAEEVKR.K        | 1855.03794 | 2 | 6.61E-08 | 0.91 | 3.96 | - | 768.6  |
| AHQ-2-2, 3562 - 3568  | K.MEDSVGCLETAEEVKR.K        | 1855.03794 | 3 | 7.09E-08 | 0.73 | 3.09 | - | 735.5  |
| AHQ-2-6, 3250         | K.MEDSVGCLETAEEVKR.K        | 1855.03794 | 2 | 7.76E-05 | 0.44 | 2.63 | - | 289.8  |
| AHQ-2-2, 3554 - 3572  | K.MEDSVGCLETAEEVKR.K        | 1855.03794 | 2 | 2.14E-07 | 0.72 | 3.29 | - | 461.7  |
| AHQ-2-2, 5733 - 5801  | K.MQQNIQEELEQLLEEEESAR.Q    | 2334.46063 | 3 | 7.08E-08 | 0.82 | 4.09 | - | 514.0  |
| AHQ-2-14-, 5192       | K.NFINNPLAQADWAAK.K         | 1673.85315 | 2 | 1.83E-09 | 0.93 | 4.49 | - | 851.7  |
| AHQ-2-5, 5167 - 5193  | K.NFINNPLAQADWAAK.K         | 1673.85315 | 2 | 4.57E-06 | 0.96 | 4.82 | - | 1209.7 |
| AHQ-2-1, 5525         | K.NFINNPLAQADWAAK.K         | 1673.85315 | 2 | 1.93E-04 | 0.93 | 3.98 | - | 942.2  |
| AHQ-2-13, 5116 - 5191 | K.NFINNPLAQADWAAK.K         | 1673.85315 | 2 | 7.59E-06 | 0.95 | 5.05 | - | 881.8  |
| AHQ-2-14, 6344        | K.NFINNPLAQADWAAK.K         | 1673.85315 | 2 | 1.50E-06 | 0.93 | 4.60 | - | 819.3  |
| AHQ-2-10, 4711 - 4779 | K.NFINNPLAQADWAAK.K         | 1673.85315 | 2 | 7.52E-04 | 0.91 | 4.05 | - | 988.6  |
| AHQ-2-3, 6144         | K.NFINNPLAQADWAAK.K         | 1673.85315 | 2 | 7.74E-08 | 0.92 | 4.40 | - | 747.7  |
| AHQ-2-11, 4997        | K.NFINNPLAQADWAAK.K         | 1673.85315 | 2 | 1.76E-08 | 0.94 | 4.61 | - | 851.6  |
| AHQ-2-7, 5027         | K.NFINNPLAQADWAAK.K         | 1673.85315 | 2 | 1.14E-10 | 0.94 | 4.36 | - | 1003.0 |
| AHQ-2-3, 5415 - 5416  | K.NFINNPLAQADWAAK.K         | 1673.85315 | 2 | 2.06E-08 | 0.96 | 4.97 | - | 1270.6 |
| AHQ-2-10, 4798        | K.NFINNPLAQADWAAK.K         | 1673.85315 | 2 | 4.73E-06 | 0.93 | 3.91 | - | 1062.2 |
| AHQ-2-9, 5098         | K.NFINNPLAQADWAAK.K         | 1673.85315 | 2 | 2.19E-10 | 0.94 | 4.61 | - | 990.4  |
| AHQ-2-12, 5238        | K.NFINNPLAQADWAAK.K         | 1673.85315 | 2 | 3.48E-07 | 0.87 | 3.49 | - | 827.5  |
| AHQ-2-2, 6160         | K.NFINNPLAQADWAAK.K         | 1673.85315 | 2 | 1.67E-06 | 0.92 | 4.07 | - | 856.6  |
| AHQ-2-4, 5430         | K.NFINNPLAQADWAAK.K         | 1673.85315 | 2 | 6.66E-05 | 0.91 | 3.72 | - | 1015.6 |
| AHQ-2-1, 6068         | K.NFINNPLAQADWAAK.K         | 1673.85315 | 2 | 6.98E-07 | 0.94 | 4.15 | - | 1161.7 |
| AHQ-2-4, 6164         | K.NFINNPLAQADWAAK.K         | 1673.85315 | 2 | 2.55E-07 | 0.95 | 4.34 | - | 1357.7 |
| AHQ-2-6, 5081 - 5089  | K.NFINNPLAQADWAAK.K         | 1673.85315 | 2 | 2.42E-05 | 0.94 | 4.50 | - | 1013.1 |
| AHQ-2-2, 5433         | K.NFINNPLAQADWAAK.K         | 1673.85315 | 2 | 3.73E-06 | 0.96 | 5.18 | - | 1102.1 |
| AHQ-2-3, 2908         | K.NKHEAMITLEER.L            | 1586.75247 | 2 | 1.81E-10 | 0.93 | 3.61 | - | 1252.1 |

|                       |                               |            |   |          |      |      |   |        |
|-----------------------|-------------------------------|------------|---|----------|------|------|---|--------|
| AHQ-2-4, 2382 - 2384  | K.NKHEAMITDLEER.L             | 1586.75247 | 2 | 4.69E-06 | 0.94 | 3.70 | - | 1204.5 |
| AHQ-2-3, 2053         | K.NKHEAMITDLEER.L             | 1602.75187 | 2 | 4.07E-04 | 0.90 | 3.86 | - | 820.7  |
| AHQ-2-5, 2191         | K.NKHEAMITDLEER.L             | 1586.75247 | 2 | 9.01E-10 | 0.94 | 3.79 | - | 1346.3 |
| AHQ-2-3, 2383         | K.NKHEAMITDLEER.L             | 1586.75247 | 2 | 3.52E-11 | 0.94 | 3.77 | - | 1284.4 |
| AHQ-2-2, 2404 - 2405  | K.NKHEAMITDLEER.L             | 1586.75247 | 2 | 7.84E-09 | 0.95 | 3.80 | - | 1358.2 |
| AHQ-2-1, 2644         | K.NKHEAMITDLEER.L             | 1586.75247 | 2 | 1.56E-05 | 0.96 | 3.70 | - | 1473.3 |
| AHQ-2-2, 5294 - 5365  | K.NLPIYSEEIVEM*YK.G           | 1744.98660 | 2 | 5.56E-06 | 0.94 | 4.58 | - | 924.3  |
| AHQ-2-1, 5986         | K.NLPIYSEEIVEM*YK.G           | 1728.98720 | 2 | 3.83E-06 | 0.88 | 3.46 | - | 607.6  |
| AHQ-2-4, 5278 - 5288  | K.NLPIYSEEIVEM*YK.G           | 1744.98660 | 2 | 6.80E-06 | 0.95 | 4.41 | - | 1033.0 |
| AHQ-2-3, 5273 - 5299  | K.NLPIYSEEIVEM*YK.G           | 1744.98660 | 2 | 1.35E-06 | 0.93 | 3.97 | - | 929.6  |
| AHQ-2-13, 5544        | K.NLPIYSEEIVEM*YK.G           | 1728.98720 | 2 | 1.65E-05 | 0.90 | 3.83 | - | 596.8  |
| AHQ-2-12, 5670        | K.NLPIYSEEIVEM*YK.G           | 1728.98720 | 2 | 3.30E-07 | 0.90 | 3.42 | - | 796.4  |
| AHQ-2-2, 5933 - 6004  | K.NLPIYSEEIVEM*YK.G           | 1728.98720 | 2 | 1.15E-09 | 0.94 | 4.64 | - | 635.7  |
| AHQ-2-11, 5421 - 5422 | K.NLPIYSEEIVEM*YK.G           | 1728.98720 | 2 | 7.26E-07 | 0.92 | 4.22 | - | 719.1  |
| AHQ-2-3, 5908 - 5939  | K.NLPIYSEEIVEM*YK.G           | 1728.98720 | 2 | 2.71E-07 | 0.93 | 4.63 | - | 634.4  |
| AHQ-2-7, 5484         | K.NLPIYSEEIVEM*YK.G           | 1728.98720 | 2 | 2.14E-04 | 0.88 | 3.60 | - | 625.1  |
| AHQ-2-10, 5162        | K.NLPIYSEEIVEM*YK.G           | 1728.98720 | 2 | 1.80E-05 | 0.92 | 4.05 | - | 617.4  |
| AHQ-2-3, 5896 - 5964  | K.NMDPLNDNIATLLHQSSDK.F       | 2127.32169 | 2 | 1.68E-04 | 0.92 | 4.55 | - | 720.4  |
| AHQ-2-7, 5169         | K.NMDPLNDNIATLLHQSSDK.F       | 2127.32169 | 2 | 7.02E-04 | 0.89 | 3.68 | - | 1034.9 |
| AHQ-2-2, 5141         | K.NM*DPLNDNIATLLHQSSDK.F      | 2143.32109 | 2 | 5.11E-06 | 0.91 | 4.03 | - | 862.5  |
| AHQ-2-6, 5253         | K.NMDPLNDNIATLLHQSSDK.F       | 2127.32169 | 2 | 4.97E-07 | 0.86 | 3.93 | - | 638.8  |
| AHQ-2-5, 5311 - 5312  | K.NMDPLNDNIATLLHQSSDK.F       | 2127.32169 | 2 | 2.95E-08 | 0.94 | 4.88 | - | 748.3  |
| AHQ-2-2, 5604         | K.NMDPLNDNIATLLHQSSDK.F       | 2127.32169 | 2 | 1.43E-04 | 0.77 | 3.45 | - | 560.4  |
| AHQ-2-1, 5752         | K.NMDPLNDNIATLLHQSSDK.F       | 2127.32169 | 2 | 1.02E-06 | 0.91 | 4.25 | - | 711.6  |
| AHQ-2-4, 5098         | K.NM*DPLNDNIATLLHQSSDK.F      | 2143.32109 | 2 | 2.25E-05 | 0.63 | 2.79 | - | 660.1  |
| AHQ-2-2, 5620 - 5621  | K.NMDPLNDNIATLLHQSSDK.F       | 2127.32169 | 3 | 4.08E-09 | 0.82 | 3.65 | - | 511.8  |
| AHQ-2-3, 5585         | K.NMDPLNDNIATLLHQSSDK.F       | 2127.32169 | 2 | 8.07E-07 | 0.90 | 4.31 | - | 710.0  |
| AHQ-2-3, 5237         | K.NM*DPLNDNIATLLHQSSDK.F      | 2143.32109 | 2 | 2.89E-09 | 0.60 | 2.89 | - | 495.4  |
| AHQ-2-3, 6211         | K.NMDPLNDNIATLLHQSSDK.F       | 2127.32169 | 2 | 5.31E-04 | 0.66 | 2.92 | - | 450.7  |
| AHQ-2-3, 5743         | K.NMDPLNDNIATLLHQSSDK.F       | 2127.32169 | 2 | 3.49E-07 | 0.91 | 4.03 | - | 773.8  |
| AHQ-2-1, 5209         | K.NM*DPLNDNIATLLHQSSDK.F      | 2143.32109 | 3 | 2.62E-06 | 0.81 | 3.01 | - | 982.5  |
| AHQ-2-2, 5144         | K.NM*DPLNDNIATLLHQSSDK.F      | 2143.32109 | 3 | 8.52E-09 | 0.86 | 3.73 | - | 659.4  |
| AHQ-2-4, 5605 - 5624  | K.NMDPLNDNIATLLHQSSDK.F       | 2127.32169 | 2 | 2.95E-06 | 0.93 | 4.92 | - | 729.1  |
| AHQ-2-4, 5617         | K.NMDPLNDNIATLLHQSSDK.F       | 2127.32169 | 3 | 3.92E-08 | 0.77 | 3.34 | - | 393.2  |
| AHQ-2-1, 5136 - 5217  | K.NM*DPLNDNIATLLHQSSDK.F      | 2143.32109 | 2 | 8.40E-05 | 0.73 | 3.14 | - | 934.7  |
| AHQ-2-2, 5929         | K.NMDPLNDNIATLLHQSSDK.F       | 2127.32169 | 2 | 1.27E-07 | 0.93 | 4.58 | - | 778.1  |
| AHQ-2-2, 5760 - 5781  | K.NMDPLNDNIATLLHQSSDK.F       | 2127.32169 | 2 | 2.60E-07 | 0.94 | 4.71 | - | 904.9  |
| AHQ-2-3, 5100         | K.NM*DPLNDNIATLLHQSSDK.F      | 2143.32109 | 2 | 8.95E-04 | 0.74 | 2.73 | - | 854.3  |
| AHQ-2-2, 5261         | K.NM*DPLNDNIATLLHQSSDK.F      | 2143.32109 | 2 | 1.20E-08 | 0.92 | 3.63 | - | 1103.6 |
| AHQ-2-3, 7603         | K.PAGPPGIALLDDEECWFPK.A       | 2112.43315 | 2 | 4.15E-06 | 0.98 | 5.69 | - | 2107.6 |
| AHQ-2-2, 7648         | K.PAGPPGIALLDDEECWFPK.A       | 2112.43315 | 2 | 5.31E-06 | 0.98 | 6.05 | - | 1543.0 |
| AHQ-2-2, 3068 - 3136  | R.QAQQRDELADAEIANSSGK.G       | 2090.15168 | 2 | 3.42E-06 | 0.94 | 4.16 | - | 1029.8 |
| AHQ-2-4, 2770 - 2810  | R.QAQQRDELADAEIANSSGK.G       | 2090.15168 | 2 | 2.02E-04 | 0.21 | 2.77 | - | 160.6  |
| AHQ-2-1, 3294 - 3302  | R.QAQQRDELADAEIANSSGK.G       | 2090.15168 | 3 | 9.73E-04 | 0.93 | 4.44 | - | 1264.6 |
| AHQ-2-3, 3211         | R.QAQQRDELADAEIANSSGK.G       | 2090.15168 | 2 | 4.45E-05 | 0.87 | 4.35 | - | 316.4  |
| AHQ-2-5, 2885         | R.QAQQRDELADAEIANSSGK.G       | 2090.15168 | 2 | 1.46E-04 | 0.79 | 3.90 | - | 360.4  |
| AHQ-2-3, 2771         | R.QAQQRDELADAEIANSSGK.G       | 2090.15168 | 2 | 8.50E-04 | 0.29 | 2.98 | - | 160.0  |
| AHQ-2-2, 3220         | R.QAQQRDELADAEIANSSGK.G       | 2090.15168 | 3 | 1.35E-04 | 0.73 | 3.32 | - | 646.4  |
| AHQ-2-6, 2885         | R.QAQQRDELADAEIANSSGK.G       | 2090.15168 | 2 | 3.06E-04 | 0.78 | 3.99 | - | 351.7  |
| AHQ-2-2, 3213         | R.QAQQRDELADAEIANSSGK.G       | 2090.15168 | 2 | 1.82E-05 | 0.86 | 3.78 | - | 499.4  |
| AHQ-2-2, 4646         | K.QELEEEICHDLEAR.V            | 1643.75744 | 2 | 2.43E-06 | 0.84 | 3.76 | - | 466.3  |
| AHQ-2-2, 2186         | K.QIATLHAQVADM*K.K            | 1442.66637 | 2 | 4.22E-04 | 0.49 | 2.81 | - | 216.9  |
| AHQ-2-4, 2628         | K.QIATLHAQVADM*K.K            | 1426.66697 | 2 | 1.20E-04 | 0.78 | 2.80 | - | 567.8  |
| AHQ-2-2, 1946         | R.QLEEAEEEEAQR.A              | 1332.35590 | 2 | 8.16E-07 | 0.73 | 2.97 | - | 550.3  |
| AHQ-2-3, 1933         | R.QLEEAEEEEAQR.A              | 1332.35590 | 2 | 1.14E-04 | 0.66 | 2.89 | - | 575.9  |
| AHQ-2-1, 2104         | R.QLEEAEEEEAQR.A              | 1332.35590 | 2 | 4.04E-06 | 0.64 | 3.10 | - | 441.3  |
| AHQ-2-2, 2432         | R.QLEEAEEEEAQR.A              | 1361.55016 | 2 | 9.79E-04 | 0.90 | 3.41 | - | 1009.2 |
| AHQ-2-3, 3407         | R.RGDLPFVVPV.R                | 1156.36217 | 2 | 9.84E-07 | 0.92 | 3.56 | - | 1028.3 |
| AHQ-2-12, 3295        | R.RGDLPFVVPV.R                | 1156.36217 | 2 | 2.05E-05 | 0.90 | 3.39 | - | 956.9  |
| AHQ-2-10, 3080        | R.RGDLPFVVPV.R                | 1156.36217 | 2 | 7.18E-04 | 0.89 | 3.09 | - | 1106.2 |
| AHQ-2-11, 3286        | R.RGDLPFVVPV.R                | 1156.36217 | 2 | 9.38E-06 | 0.94 | 3.67 | - | 1319.5 |
| AHQ-2-5, 3057 - 3067  | R.RGDLPFVVPV.R                | 1156.36217 | 2 | 6.25E-05 | 0.93 | 3.52 | - | 1154.7 |
| AHQ-2-4, 3346 - 3424  | R.RGDLPFVVPV.R                | 1156.36217 | 2 | 3.71E-07 | 0.96 | 4.29 | - | 1272.9 |
| AHQ-2-1, 3712         | R.RGDLPFVVPV.R                | 1156.36217 | 2 | 2.46E-06 | 0.94 | 3.27 | - | 1564.1 |
| AHQ-2-2, 3340 - 3409  | R.RGDLPFVVPV.R                | 1156.36217 | 2 | 2.94E-05 | 0.95 | 3.74 | - | 1433.9 |
| AHQ-2-6, 3109         | R.RGDLPFVVPV.R                | 1156.36217 | 2 | 1.18E-05 | 0.92 | 3.65 | - | 924.1  |
| AHQ-2-1, 6944         | R.RKLEGDSTDLSDQIAELQAIAELK.M  | 2773.04667 | 3 | 1.54E-05 | 0.96 | 6.31 | - | 1392.5 |
| AHQ-2-2, 6997 - 7064  | R.RKLEGDSTDLSDQIAELQAIAELK.M  | 2773.04667 | 3 | 1.39E-11 | 0.96 | 5.67 | - | 1487.2 |
| AHQ-2-3, 6968         | R.RKLEGDSTDLSDQIAELQAIAELK.M  | 2773.04667 | 3 | 5.85E-08 | 0.96 | 6.18 | - | 1295.8 |
| AHQ-2-3, 7049         | R.RKLEGDSTDLSDQIAELQAIAELK.M  | 2773.04667 | 3 | 8.13E-05 | 0.93 | 5.01 | - | 1161.6 |
| AHQ-2-4, 7048         | R.RKLEGDSTDLSDQIAELQAIAELK.M  | 2773.04667 | 3 | 8.33E-10 | 0.98 | 7.42 | - | 1597.8 |
| AHQ-2-2, 2816         | K.RQAQQRDELADAEIANSSGK.G      | 2246.33803 | 3 | 2.29E-05 | 0.92 | 4.05 | - | 1122.2 |
| AHQ-2-11, 1970        | K.RQLEEAEEEEAQR.A             | 1488.54225 | 2 | 2.09E-04 | 0.92 | 4.89 | - | 939.0  |
| AHQ-2-2, 1829         | K.RQLEEAEEEEAQR.A             | 1488.54225 | 2 | 3.37E-04 | 0.97 | 4.95 | - | 2527.2 |
| AHQ-2-3, 1852         | K.RQLEEAEEEEAQR.A             | 1488.54225 | 2 | 1.27E-06 | 0.96 | 4.87 | - | 1910.2 |
| AHQ-2-1, 6490         | K.SGFEPASLKEEVGEEAIVLVENGKK.V | 2790.07246 | 3 | 4.68E-11 | 0.92 | 4.60 | - | 909.4  |
| AHQ-2-14-, 5909       | K.SGFEPASLKEEVGEEAIVLVENGKK.V | 2790.07246 | 3 | 2.55E-11 | 0.96 | 5.42 | - | 1207.9 |
| AHQ-2-1, 6394         | K.SGFEPASLKEEVGEEAIVLVENGKK.V | 2790.07246 | 3 | 1.46E-09 | 0.91 | 4.58 | - | 930.7  |
| AHQ-2-3, 6371         | K.SGFEPASLKEEVGEEAIVLVENGKK.V | 2790.07246 | 3 | 1.25E-06 | 0.91 | 4.52 | - | 926.0  |
| AHQ-2-2, 6825         | K.SGFEPASLKEEVGEEAIVLVENGKK.V | 2790.07246 | 3 | 7.87E-08 | 0.96 | 5.61 | - | 1425.4 |
| AHQ-2-2, 7081         | K.SGFEPASLKEEVGEEAIVLVENGKK.V | 2790.07246 | 3 | 3.22E-10 | 0.95 | 5.11 | - | 1275.0 |
| AHQ-2-2, 6372 - 6405  | K.SGFEPASLKEEVGEEAIVLVENGKK.V | 2790.07246 | 3 | 1.03E-09 | 0.95 | 5.43 | - | 1131.1 |
| AHQ-2-2, 6917         | K.SGFEPASLKEEVGEEAIVLVENGKK.V | 2790.07246 | 3 | 8.36E-08 | 0.90 | 4.30 | - | 931.3  |
| AHQ-2-1, 4889 - 4969  | K.SM*EAEM*IQLEELAAAER.A       | 2082.29944 | 2 | 3.32E-11 | 0.98 | 5.26 | - | 1855.1 |
| AHQ-2-2, 5081         | K.SM*EAEM*IQLEELAAAER.A       | 2082.29944 | 2 | 1.99E-04 | 0.94 | 4.57 | - | 1125.4 |
| AHQ-2-1, 6973         | K.SMEAEMIQLEELAAAER.A         | 2050.30064 | 3 | 8.67E-07 | 0.96 | 5.31 | - | 1622.8 |
| AHQ-2-2, 7496         | K.SMEAEMIQLEELAAAER.A         | 2050.30064 | 2 | 1.71E-08 | 0.97 | 5.11 | - | 1512.7 |
| AHQ-2-3, 7069         | K.SMEAEMIQLEELAAAER.A         | 2050.30064 | 3 | 2.11E-04 | 0.92 | 4.74 | - | 1067.4 |
| AHQ-2-2, 7269 - 7336  | K.SMEAEMIQLEELAAAER.A         | 2050.30064 | 2 | 2.49E-05 | 0.89 | 3.84 | - | 1040.1 |
| AHQ-2-4, 7142         | K.SMEAEMIQLEELAAAER.A         | 2050.30064 | 3 | 1.62E-07 | 0.94 | 4.87 | - | 1677.2 |
| AHQ-2-4, 4868 - 4874  | K.SM*EAEM*IQLEELAAAER.A       | 2082.29944 | 2 | 2.70E-07 | 0.97 | 4.89 | - | 1722.4 |
| AHQ-2-6, 6735 - 6758  | K.SMEAEMIQLEELAAAER.A         | 2050.30064 | 2 | 9.84E-05 | 0.96 | 5.18 | - | 1648.1 |
| AHQ-2-2, 7161         | K.SM*EAEM*IQLEELAAAER.A       | 2082.29944 | 2 | 1.25E-06 | 0.97 | 5.40 | - | 1844.9 |
| AHQ-2-3, 5880 - 5955  | K.SM*EAEMIQLEELAAAER.A        | 2066.30004 | 2 | 7.33E-08 | 0.94 | 4.97 | - | 1660.7 |
| AHQ-2-3, 5948 - 6028  | K.SM*EAEMIQLEELAAAER.A        | 2066.30004 | 2 | 9.08E-07 | 0.95 | 4.43 | - | 1839.6 |
| AHQ-2-2, 6076 - 6081  | K.SM*EAEMIQLEELAAAER.A        | 2066.30004 | 2 | 3.40E-04 | 0.88 | 4.41 | - | 916.1  |
| AHQ-2-3, 6993 - 7065  | K.SMEAEMIQLEELAAAER.A         | 2050.30064 | 2 | 6.98E-06 | 0.98 | 6.23 | - | 1778.9 |
| AHQ-2-4, 7124 - 7128  | K.SMEAEMIQLEELAAAER.A         | 2050.30064 | 2 | 2.32E-06 | 0.97 | 5.51 | - | 1897.3 |
| AHQ-2-5, 6923 - 6931  | K.SMEAEMIQLEELAAAER.A         | 2050.30064 | 2 | 6.78E-06 | 0.97 | 5.44 | - | 1759.2 |
| AHQ-2-2, 7132 - 7200  | K.SMEAEMIQLEELAAAER.A         | 2050.30064 | 2 | 2.08E-09 | 0.97 | 6.08 | - | 1421.8 |
| AHQ-2-2, 7144 - 7145  | K.SMEAEMIQLEELAAAER.A         | 2050.30064 | 3 | 1.57E-05 | 0.97 | 5.56 | - | 2108.5 |
| AHQ-2-5, 3264         | R.SMMQDRDQDSILCTGESGAGK.T     | 2302.50687 | 2 | 5.23E-05 | 0.96 | 5.64 | - | 1057.0 |
| AHQ-2-3, 2952 - 2953  | R.SMM*QDRDQDSILCTGESGAGK.T    | 2318.50627 | 2 | 9.24E-04 | 0.88 | 3.86 | - | 729.1  |
| AHQ-2-3, 3488         | R.SMMQDRDQDSILCTGESGAGK.T     | 2302.50687 | 2 | 1.39E-04 | 0.94 | 4.80 | - | 1164.5 |
| AHQ-2-9, 3210         | R.SMMQDRDQDSILCTGESGAGK.T     | 2302.50687 | 2 | 3.48E-05 | 0.93 | 4.78 | - | 862.9  |
| AHQ-2-4, 3497         | R.SMMQDRDQDSILCTGESGAGK.T     | 2302.50687 | 2 | 7.31E-05 | 0.98 | 5.73 | - | 1652.6 |
| AHQ-2-2, 3504         | R.SMMQDRDQDSILCTGESGAGK.T     | 2302.50687 | 2 | 6.34E-05 | 0.96 | 5.90 | - | 1082.5 |

|                       |                           |            |   |          |      |      |   |        |
|-----------------------|---------------------------|------------|---|----------|------|------|---|--------|
| AHQ-2-6, 3241         | R.SMMQDREDQSLCTGESGAGK.T  | 2302.50687 | 2 | 2.63E-04 | 0.96 | 5.43 | - | 949.7  |
| AHQ-2-2, 3685 - 3761  | K.TDLLLEPYNK.Y            | 1206.36989 | 2 | 4.98E-05 | 0.92 | 4.09 | - | 1066.6 |
| AHQ-2-2, 3694 - 3753  | K.TDLLLEPYNK.Y            | 1206.36989 | 1 | 8.96E-04 | 0.06 | 2.13 | - | 215.8  |
| AHQ-2-1, 3844         | K.TDLLLEPYNK.Y            | 1206.36989 | 2 | 4.79E-06 | 0.93 | 3.87 | - | 1248.5 |
| AHQ-2-5, 3408 - 3424  | K.TDLLLEPYNK.Y            | 1206.36989 | 2 | 2.30E-05 | 0.86 | 3.35 | - | 946.5  |
| AHQ-2-4, 3696         | K.TDLLLEPYNK.Y            | 1206.36989 | 2 | 1.95E-06 | 0.92 | 4.03 | - | 968.4  |
| AHQ-2-6, 3381 - 3382  | K.TDLLLEPYNK.Y            | 1206.36989 | 2 | 9.73E-06 | 0.84 | 3.42 | - | 852.1  |
| AHQ-2-3, 3676         | K.TDLLLEPYNK.Y            | 1206.36989 | 2 | 2.78E-04 | 0.87 | 3.22 | - | 1229.6 |
| AHQ-2-2, 3884         | K.TDLLLEPYNK.Y.F          | 1525.73037 | 2 | 6.76E-05 | 0.94 | 4.18 | - | 1104.6 |
| AHQ-2-4, 4476         | K.TELEDTLDDSTAAQQELR.S    | 1921.00969 | 2 | 5.43E-06 | 0.94 | 3.75 | - | 1873.5 |
| AHQ-2-5, 4301         | K.TELEDTLDDSTAAQQELR.S    | 1921.00969 | 2 | 2.45E-05 | 0.84 | 3.22 | - | 1354.8 |
| AHQ-2-1, 4488         | K.TELEDTLDDSTAAQQELR.S    | 1921.00969 | 2 | 6.27E-10 | 0.97 | 4.84 | - | 1590.7 |
| AHQ-2-2, 4517 - 4518  | K.TELEDTLDDSTAAQQELR.S    | 1921.00969 | 2 | 1.80E-07 | 0.93 | 4.06 | - | 1049.5 |
| AHQ-2-2, 3104         | R.TEMEDLMSKK.D            | 1171.32449 | 2 | 3.41E-05 | 0.89 | 3.58 | - | 821.5  |
| AHQ-2-3, 3076 - 3085  | R.TEMEDLMSKK.D            | 1171.32449 | 2 | 2.46E-04 | 0.91 | 3.54 | - | 833.1  |
| AHQ-2-1, 3209         | R.TEMEDLMSKK.D            | 1171.32449 | 2 | 2.62E-06 | 0.82 | 2.63 | - | 780.7  |
| AHQ-2-1, 2584         | R.TEMEDLM'SSKDDVVGK.S     | 1701.85566 | 2 | 8.33E-05 | 0.70 | 3.03 | - | 574.0  |
| AHQ-2-2, 3358         | R.TEMEDLMSKKDDVVGK.S      | 1685.85626 | 2 | 4.19E-06 | 0.90 | 3.69 | - | 1036.0 |
| AHQ-2-5, 3137         | R.TEMEDLMSKKDDVVGK.S      | 1685.85626 | 2 | 2.19E-08 | 0.74 | 3.11 | - | 748.5  |
| AHQ-2-1, 3457         | R.TEMEDLMSKKDDVVGK.S      | 1685.85626 | 2 | 5.50E-06 | 0.85 | 3.23 | - | 985.3  |
| AHQ-2-4, 3350         | R.TEMEDLMSKKDDVVGK.S      | 1685.85626 | 2 | 9.72E-06 | 0.75 | 3.19 | - | 691.3  |
| AHQ-2-3, 3340         | R.TEMEDLMSKKDDVVGK.S      | 1685.85626 | 2 | 3.16E-05 | 0.91 | 3.92 | - | 873.1  |
| AHQ-2-2, 7257         | R.TFHIFYLLSGAGEHLK.T      | 1997.28378 | 2 | 4.01E-04 | 0.90 | 4.04 | - | 738.1  |
| AHQ-2-3, 6693 - 6761  | R.TFHIFYLLSGAGEHLK.T      | 1997.28378 | 2 | 2.65E-04 | 0.95 | 4.58 | - | 1163.4 |
| AHQ-2-5, 6243 - 6308  | R.TFHIFYLLSGAGEHLK.T      | 1997.28378 | 2 | 3.84E-08 | 0.97 | 5.19 | - | 1661.7 |
| AHQ-2-7, 6019         | R.TFHIFYLLSGAGEHLK.T      | 1997.28378 | 2 | 8.33E-05 | 0.97 | 5.06 | - | 1421.0 |
| AHQ-2-3, 6601         | R.TFHIFYLLSGAGEHLK.T      | 1997.28378 | 2 | 9.83E-06 | 0.97 | 5.15 | - | 1599.6 |
| AHQ-2-2, 6558 - 6638  | R.TFHIFYLLSGAGEHLK.T      | 1997.28378 | 2 | 1.73E-05 | 0.98 | 6.33 | - | 1954.6 |
| AHQ-2-5, 6252         | R.TFHIFYLLSGAGEHLK.T      | 1997.28378 | 3 | 1.10E-06 | 0.95 | 4.80 | - | 1343.6 |
| AHQ-2-2, 6569         | R.TFHIFYLLSGAGEHLK.T      | 1997.28378 | 3 | 3.75E-08 | 0.92 | 4.25 | - | 1145.5 |
| AHQ-2-6, 6241         | R.TFHIFYLLSGAGEHLK.T      | 1997.28378 | 3 | 1.57E-08 | 0.96 | 5.07 | - | 1484.3 |
| AHQ-2-7, 6023         | R.TFHIFYLLSGAGEHLK.T      | 1997.28378 | 3 | 2.15E-05 | 0.96 | 5.48 | - | 1454.1 |
| AHQ-2-2, 6817         | R.TFHIFYLLSGAGEHLK.T      | 1997.28378 | 2 | 6.36E-06 | 0.97 | 4.96 | - | 1690.5 |
| AHQ-2-4, 3626         | K.TLEEEAKTHEAQIQEMR.Q     | 2044.23269 | 2 | 3.80E-04 | 0.94 | 4.36 | - | 907.1  |
| AHQ-2-2, 3733         | K.TLEEEAKTHEAQIQEMR.Q     | 2044.23269 | 2 | 1.24E-04 | 0.96 | 4.54 | - | 1347.5 |
| AHQ-2-4, 1730         | K.VAAYDKLEK.T             | 1037.19123 | 2 | 7.40E-06 | 0.65 | 2.74 | - | 470.9  |
| AHQ-2-5, 2979         | K.VEAQLQELQVK.F           | 1285.47179 | 2 | 1.05E-04 | 0.94 | 3.74 | - | 1498.7 |
| AHQ-2-2, 3225         | K.VEAQLQELQVK.F           | 1285.47179 | 2 | 6.37E-05 | 0.96 | 4.32 | - | 1500.1 |
| AHQ-2-4, 3229         | K.VEAQLQELQVK.F           | 1285.47179 | 2 | 1.62E-05 | 0.94 | 3.82 | - | 1214.6 |
| AHQ-2-1, 3404         | K.VEAQLQELQVK.F           | 1285.47179 | 2 | 4.47E-06 | 0.95 | 4.00 | - | 1476.3 |
| AHQ-2-4, 3240         | K.VEAQLQELQVK.F           | 1285.47179 | 1 | 2.07E-04 | 0.53 | 2.92 | - | 474.4  |
| AHQ-2-3, 3227         | K.VEAQLQELQVK.F           | 1285.47179 | 2 | 2.47E-05 | 0.94 | 4.15 | - | 1240.3 |
| AHQ-2-6, 5773         | K.VEDMAELTCLNEASVLHNLK.E  | 2288.58457 | 2 | 2.58E-06 | 0.94 | 4.77 | - | 648.7  |
| AHQ-2-11, 5584 - 5585 | K.VEDMAELTCLNEASVLHNLK.E  | 2288.58457 | 2 | 4.57E-09 | 0.95 | 4.89 | - | 821.9  |
| AHQ-2-3, 6137         | K.VEDMAELTCLNEASVLHNLK.E  | 2288.58457 | 3 | 1.01E-07 | 0.86 | 3.91 | - | 695.1  |
| AHQ-2-3, 6139         | K.VEDMAELTCLNEASVLHNLK.E  | 2288.58457 | 2 | 7.63E-12 | 0.88 | 3.98 | - | 604.2  |
| AHQ-2-10, 4766        | K.VEDM'AELTCLNEASVLHNLK.E | 2304.58397 | 3 | 5.19E-06 | 0.94 | 4.56 | - | 1222.9 |
| AHQ-2-5, 5768 - 5784  | K.VEDMAELTCLNEASVLHNLK.E  | 2288.58457 | 2 | 3.41E-06 | 0.89 | 3.98 | - | 724.7  |
| AHQ-2-12, 5838        | K.VEDMAELTCLNEASVLHNLK.E  | 2288.58457 | 2 | 1.21E-08 | 0.65 | 3.58 | - | 306.0  |
| AHQ-2-2, 6394         | K.VEDMAELTCLNEASVLHNLK.E  | 2288.58457 | 3 | 8.80E-10 | 0.83 | 3.82 | - | 699.7  |
| AHQ-2-5, 5152         | K.VEDM'AELTCLNEASVLHNLK.E | 2304.58397 | 2 | 1.02E-09 | 0.79 | 3.73 | - | 493.5  |
| AHQ-2-9, 5766         | K.VEDMAELTCLNEASVLHNLK.E  | 2288.58457 | 2 | 1.07E-07 | 0.74 | 3.58 | - | 335.4  |
| AHQ-2-10, 5364        | K.VEDMAELTCLNEASVLHNLK.E  | 2288.58457 | 2 | 8.82E-09 | 0.91 | 4.29 | - | 740.2  |
| AHQ-2-13, 5639        | K.VEDMAELTCLNEASVLHNLK.E  | 2288.58457 | 2 | 4.25E-09 | 0.87 | 3.84 | - | 573.7  |
| AHQ-2-1, 6157 - 6161  | K.VEDMAELTCLNEASVLHNLK.E  | 2288.58457 | 2 | 8.73E-11 | 0.96 | 5.18 | - | 940.1  |
| AHQ-2-2, 6141         | K.VEDMAELTCLNEASVLHNLK.E  | 2288.58457 | 3 | 2.39E-08 | 0.88 | 4.44 | - | 617.5  |
| AHQ-2-1, 5548         | K.VEDM'AELTCLNEASVLHNLK.E | 2304.58397 | 2 | 7.41E-13 | 0.94 | 4.79 | - | 770.5  |
| AHQ-2-10, 4756        | K.VEDM'AELTCLNEASVLHNLK.E | 2304.58397 | 2 | 6.79E-13 | 0.92 | 3.97 | - | 982.4  |
| AHQ-2-13, 5250        | K.VEDM'AELTCLNEASVLHNLK.E | 2304.58397 | 2 | 5.65E-04 | 0.68 | 3.29 | - | 523.1  |
| AHQ-2-10, 5368        | K.VEDMAELTCLNEASVLHNLK.E  | 2288.58457 | 3 | 2.21E-07 | 0.85 | 3.82 | - | 716.1  |
| AHQ-2-2, 6410         | K.VEDMAELTCLNEASVLHNLK.E  | 2288.58457 | 2 | 2.20E-12 | 0.87 | 4.12 | - | 566.2  |
| AHQ-2-2, 5417 - 5452  | K.VEDM'AELTCLNEASVLHNLK.E | 2304.58397 | 3 | 3.27E-10 | 0.96 | 5.86 | - | 1255.7 |
| AHQ-2-7, 5691         | K.VEDMAELTCLNEASVLHNLK.E  | 2288.58457 | 2 | 7.74E-12 | 0.93 | 4.25 | - | 730.6  |
| AHQ-2-6, 5061         | K.VEDM'AELTCLNEASVLHNLK.E | 2304.58397 | 2 | 6.07E-08 | 0.88 | 4.16 | - | 567.0  |
| AHQ-2-9, 5062         | K.VEDM'AELTCLNEASVLHNLK.E | 2304.58397 | 2 | 4.39E-05 | 0.57 | 3.05 | - | 294.4  |
| AHQ-2-6, 5751         | K.VEDMAELTCLNEASVLHNLK.E  | 2288.58457 | 3 | 8.01E-07 | 0.83 | 3.71 | - | 763.4  |
| AHQ-2-2, 5382 - 5416  | K.VEDM'AELTCLNEASVLHNLK.E | 2304.58397 | 2 | 1.06E-09 | 0.91 | 4.25 | - | 732.2  |
| AHQ-2-4, 6144 - 6150  | K.VEDMAELTCLNEASVLHNLK.E  | 2288.58457 | 3 | 6.74E-09 | 0.94 | 4.71 | - | 998.6  |
| AHQ-2-4, 6140 - 6156  | K.VEDMAELTCLNEASVLHNLK.E  | 2288.58457 | 2 | 7.19E-10 | 0.94 | 4.95 | - | 687.3  |
| AHQ-2-8, 5515 - 5582  | K.VEDMAELTCLNEASVLHNLK.E  | 2288.58457 | 2 | 1.76E-07 | 0.95 | 4.40 | - | 1023.2 |
| AHQ-2-2, 6142 - 6217  | K.VEDMAELTCLNEASVLHNLK.E  | 2288.58457 | 2 | 1.94E-10 | 0.94 | 4.95 | - | 725.5  |
| AHQ-2-1, 6102 - 6168  | K.VEDMAELTCLNEASVLHNLK.E  | 2288.58457 | 3 | 7.34E-07 | 0.87 | 3.99 | - | 618.4  |
| AHQ-2-1, 5658         | K.VEDM'AELTCLNEASVLHNLK.E | 2304.58397 | 3 | 3.59E-09 | 0.87 | 3.69 | - | 1007.2 |
| AHQ-2-1, 2089         | R.VEEEEEERQCQLQAEK.K      | 1916.01642 | 3 | 3.77E-04 | 0.84 | 4.05 | - | 759.6  |
| AHQ-2-4, 1908         | R.VEEEEEERQCQLQAEK.K      | 1916.01642 | 2 | 8.64E-05 | 0.84 | 3.39 | - | 996.7  |
| AHQ-2-3, 1907         | R.VEEEEEERQCQLQAEK.K      | 1916.01642 | 3 | 8.11E-05 | 0.80 | 3.66 | - | 592.5  |
| AHQ-2-2, 3924         | K.VIQYLAYVASSHK.S         | 1479.70484 | 3 | 7.03E-05 | 0.87 | 3.78 | - | 803.6  |
| AHQ-2-1, 4121         | K.VIQYLAYVASSHK.S         | 1479.70484 | 3 | 2.06E-06 | 0.81 | 3.75 | - | 474.8  |
| AHQ-2-4, 3886         | K.VIQYLAYVASSHK.S         | 1479.70484 | 3 | 1.97E-07 | 0.86 | 3.82 | - | 674.4  |
| AHQ-2-3, 3879         | K.VIQYLAYVASSHK.S         | 1479.70484 | 2 | 1.02E-05 | 0.75 | 2.92 | - | 736.4  |
| AHQ-2-7, 3387         | K.VIQYLAYVASSHK.S         | 1479.70484 | 2 | 7.44E-05 | 0.91 | 3.17 | - | 1061.9 |
| AHQ-2-1, 4112 - 4128  | K.VIQYLAYVASSHK.S         | 1479.70484 | 2 | 6.19E-07 | 0.94 | 3.88 | - | 1250.7 |
| AHQ-2-2, 3909         | K.VIQYLAYVASSHK.S         | 1479.70484 | 2 | 4.99E-08 | 0.94 | 4.05 | - | 1097.1 |
| AHQ-2-5, 3499         | K.VIQYLAYVASSHK.S         | 1479.70484 | 3 | 2.49E-05 | 0.83 | 3.71 | - | 552.2  |
| AHQ-2-5, 3496         | K.VIQYLAYVASSHK.S         | 1479.70484 | 2 | 5.10E-04 | 0.94 | 4.08 | - | 1288.2 |
| AHQ-2-8, 3068         | K.VIQYLAYVASSHK.S         | 1479.70484 | 2 | 9.87E-06 | 0.95 | 3.95 | - | 1131.7 |
| AHQ-2-10, 3431        | K.VIQYLAYVASSHK.S         | 1479.70484 | 2 | 7.49E-09 | 0.93 | 4.03 | - | 1094.3 |
| AHQ-2-4, 6732 - 6804  | R.VISGVLLQGNIVFK.K        | 1487.81155 | 2 | 5.28E-09 | 0.97 | 5.16 | - | 1701.4 |
| AHQ-2-7, 6239 - 6319  | R.VISGVLLQGNIVFK.K        | 1487.81155 | 2 | 1.12E-08 | 0.96 | 4.53 | - | 1453.3 |
| AHQ-2-3, 6664 - 6731  | R.VISGVLLQGNIVFK.K        | 1487.81155 | 2 | 6.90E-08 | 0.97 | 4.50 | - | 1981.1 |
| AHQ-2-6, 6346 - 6413  | R.VISGVLLQGNIVFK.K        | 1487.81155 | 2 | 2.11E-07 | 0.97 | 5.44 | - | 1775.3 |
| AHQ-2-5, 6420 - 6488  | R.VISGVLLQGNIVFK.K        | 1487.81155 | 2 | 2.95E-05 | 0.95 | 3.65 | - | 1502.5 |
| AHQ-2-2, 6673 - 6744  | R.VISGVLLQGNIVFK.K        | 1487.81155 | 2 | 3.52E-09 | 0.98 | 5.64 | - | 1820.7 |
| AHQ-2-2, 6772 - 6842  | R.VISGVLLQGNIVFK.K        | 1487.81155 | 2 | 8.63E-09 | 0.97 | 5.08 | - | 1635.7 |
| AHQ-2-5, 6435 - 6444  | R.VISGVLLQGNIVFK.K        | 1487.81155 | 1 | 6.49E-04 | 0.54 | 3.07 | - | 510.7  |
| AHQ-2-2, 6857         | R.VISGVLLQGNIVFK.K        | 1487.81155 | 2 | 4.56E-04 | 0.86 | 2.52 | - | 1187.5 |
| AHQ-2-10, 5919        | R.VISGVLLQGNIVFK.K        | 1487.81155 | 2 | 9.20E-07 | 0.92 | 3.67 | - | 1155.9 |
| AHQ-2-3, 6681         | R.VISGVLLQGNIVFK.K        | 1487.81155 | 1 | 2.69E-04 | 0.67 | 3.22 | - | 673.1  |
| AHQ-2-6, 4561 - 4569  | K.VSHLLGINVDFTR.G         | 1572.79026 | 2 | 3.60E-11 | 0.97 | 5.33 | - | 1326.3 |
| AHQ-2-5, 4608         | K.VSHLLGINVDFTR.G         | 1572.79026 | 2 | 1.35E-08 | 0.95 | 4.16 | - | 1424.7 |
| AHQ-2-7, 4429 - 4500  | K.VSHLLGINVDFTR.G         | 1572.79026 | 2 | 2.41E-04 | 0.86 | 3.42 | - | 792.3  |
| AHQ-2-1, 5054 - 5094  | K.VSHLLGINVDFTR.G         | 1572.79026 | 2 | 3.16E-10 | 0.97 | 4.47 | - | 1600.3 |
| AHQ-2-1, 5101         | K.VSHLLGINVDFTR.G         | 1572.79026 | 3 | 7.28E-07 | 0.89 | 3.66 | - | 1084.6 |
| AHQ-2-4, 4958 - 4960  | K.VSHLLGINVDFTR.G         | 1572.79026 | 2 | 2.68E-10 | 0.96 | 4.60 | - | 1449.5 |
| AHQ-2-2, 4942 - 5012  | K.VSHLLGINVDFTR.G         | 1572.79026 | 2 | 5.73E-12 | 0.95 | 4.17 | - | 1242.2 |
| AHQ-2-3, 4964         | K.VSHLLGINVDFTR.G         | 1572.79026 | 2 | 5.34E-11 | 0.95 | 4.21 | - | 1437.6 |
| AHQ-2-5, 2753         | R.VVFQEFR.Q               | 925.06580  | 2 | 8.12E-05 | 0.80 | 2.54 | - | 536.1  |

|                             |                                                                         |            |   |          |       |        |       |         |
|-----------------------------|-------------------------------------------------------------------------|------------|---|----------|-------|--------|-------|---------|
| AHQ-2-1, 3270               | R.VVFQEF.R                                                              | 925.06580  | 2 | 2.57E-04 | 0.68  | 2.56   | -     | 546.4   |
| AHQ-2-2, 4044 - 4056        | R.YEILTPNSIFP.K                                                         | 1275.47536 | 2 | 3.16E-07 | 0.93  | 3.99   | -     | 977.6   |
| AHQ-2-2, 4172               | R.YEILTPNSIFP.K                                                         | 1275.47536 | 2 | 3.22E-05 | 0.80  | 2.80   | -     | 939.3   |
| AHQ-2-3, 4283 - 4285        | R.YEILTPNSIFP.K                                                         | 1275.47536 | 1 | 8.40E-04 | 0.36  | 2.17   | -     | 644.1   |
| AHQ-2-3, 4268               | R.YEILTPNSIFP.K                                                         | 1275.47536 | 2 | 1.64E-04 | 0.85  | 3.00   | -     | 743.8   |
| AHQ-2-3, 4019               | R.YEILTPNSIFP.K                                                         | 1275.47536 | 2 | 4.23E-06 | 0.90  | 3.44   | -     | 1143.6  |
| AHQ-2-4, 4009               | R.YEILTPNSIFP.K                                                         | 1275.47536 | 2 | 1.39E-05 | 0.78  | 3.13   | -     | 659.3   |
| AHQ-2-1, 4077 - 4158        | R.YEILTPNSIFP.K                                                         | 1275.47536 | 2 | 3.99E-05 | 0.84  | 2.97   | -     | 825.2   |
| AHQ-2-1, 4225               | R.YEILTPNSIFP.K                                                         | 1275.47536 | 2 | 1.64E-04 | 0.92  | 3.57   | -     | 1001.7  |
| AHQ-2-2, 6357 - 6369        | K.YLYVDKNFINNPLAQADWAAK.K                                               | 2455.75199 | 3 | 2.97E-07 | 0.96  | 5.02   | -     | 1701.8  |
| AHQ-2-10, 5590              | K.YLYVDKNFINNPLAQADWAAK.K                                               | 2455.75199 | 2 | 7.36E-08 | 0.77  | 3.22   | -     | 529.3   |
| gi 30159830 ref XP_002246.1 | similar to HSPC280 [Homo sapiens]                                       |            |   | 1.17E-14 | 1.95  | 20.30  | 3.90  | 45644.4 |
| AHQ-2-13, 6799              | K.CANLFEALVGT.LK.A                                                      | 1437.68632 | 2 | 8.46E-09 | 0.98  | 6.05   | -     | 1854.5  |
| AHQ-2-14-, 6861             | K.CANLFEALVGT.LK.A                                                      | 1437.68632 | 2 | 1.25E-06 | 0.97  | 5.39   | -     | 1363.7  |
| AHQ-2-14-, 6808 - 6817      | R.DDKCANLFEALVGT.LK.A                                                   | 1796.03496 | 2 | 2.83E-10 | 0.96  | 4.79   | -     | 1277.6  |
| AHQ-2-14-, 6811 - 6812      | R.DDKCANLFEALVGT.LK.A                                                   | 1796.03496 | 3 | 1.21E-04 | 0.95  | 4.28   | -     | 2137.2  |
| AHQ-2-13-, 6955             | R.DDKCANLFEALVGT.LK.A                                                   | 1796.03496 | 2 | 9.88E-14 | 0.96  | 4.50   | -     | 1404.3  |
| AHQ-2-13, 6735 - 6736       | R.DDKCANLFEALVGT.LK.A                                                   | 1796.03496 | 2 | 1.17E-14 | 0.96  | 4.94   | -     | 1285.9  |
| gi 4507521 ref NP_001055.1  | transketolase [Homo sapiens]                                            |            |   | 1.28E-14 | 1.42  | 20.20  | 5.90  | 67877.3 |
| AHQ-2-6, 4597               | K.ILATPPQEDAPSVDIANIR.M                                                 | 2021.26036 | 2 | 1.28E-14 | 0.89  | 3.97   | -     | 429.0   |
| AHQ-2-6, 3689 - 3702        | R.SVPTSTVFYPSDGVATEK.A                                                  | 1886.04854 | 2 | 1.74E-06 | 0.53  | 2.65   | -     | 220.2   |
| gi 4885609 ref NP_005408.1  | v-src sarcoma (Schmidt-Ruppin A-2) viral oncogene homolog; Protooncogen |            |   | 1.78E-14 | 4.56  | 50.37  | 20.10 | 59834.4 |
| AHQ-2-7, 7007               | R.AGPLAGGVTTFVALYDYER.S.T                                               | 2088.30526 | 2 | 4.65E-05 | 0.84  | 3.65   | -     | 530.0   |
| AHQ-2-7, 7543               | R.KEPEERPTFEYLQAFLEDYFTSTEPQYQPGENL                                     | 3998.26826 | 3 | 4.53E-09 | 0.90  | 5.16   | -     | 352.2   |
| AHQ-2-7, 7523               | R.LPQLVDMAAQIASGMAYVER.M                                                | 2164.53485 | 2 | 1.78E-14 | 0.99  | 7.30   | -     | 4979.6  |
| AHQ-2-7, 6323               | R.MPCPECPGENSELHDLMLCQCWR.K                                             | 2608.97680 | 3 | 6.47E-12 | 0.90  | 4.23   | -     | 588.1   |
| AHQ-2-7, 6303               | R.TQFNLSLQVLVAYYSK.H                                                    | 1790.99681 | 2 | 4.95E-08 | 0.97  | 4.95   | -     | 1359.8  |
| AHQ-2-7, 6204 - 6217        | R.TQFNLSLQVLVAYYSK.H                                                    | 1790.99681 | 2 | 2.27E-10 | 0.93  | 3.81   | -     | 1066.3  |
| gi 4501881 ref NP_001091.1  | alpha 1 actin precursor; alpha skeletal muscle actin [Homo sapiens] [MA |            |   | 1.83E-14 | 15.20 | 200.27 | 46.70 | 42050.8 |
| AHQ-2-13, 2043 - 2100       | K.AGFAGDDAPR.A                                                          | 977.01283  | 2 | 5.43E-04 | 0.90  | 3.16   | -     | 1265.0  |
| AHQ-2-8, 1594 - 1619        | K.AGFAGDDAPR.A                                                          | 977.01283  | 2 | 2.51E-04 | 0.92  | 3.61   | -     | 1099.4  |
| AHQ-2-12, 1901 - 1974       | K.AGFAGDDAPR.A                                                          | 977.01283  | 2 | 1.02E-04 | 0.87  | 3.09   | -     | 969.3   |
| AHQ-2-12, 1755 - 1834       | K.AGFAGDDAPR.A                                                          | 977.01283  | 2 | 1.08E-06 | 0.92  | 3.53   | -     | 1158.5  |
| AHQ-2-8, 1687 - 1762        | K.AGFAGDDAPR.A                                                          | 977.01283  | 2 | 3.89E-04 | 0.88  | 3.19   | -     | 1053.0  |
| AHQ-2-13-, 1925             | K.AGFAGDDAPR.A                                                          | 977.01283  | 2 | 4.77E-04 | 0.88  | 3.31   | -     | 986.7   |
| AHQ-2-8, 1449 - 1524        | K.AGFAGDDAPR.A                                                          | 977.01283  | 2 | 3.83E-07 | 0.88  | 3.48   | -     | 882.4   |
| AHQ-2-13-, 3541 - 3557      | R.AVFPISVIGR.P.H                                                        | 946.12815  | 2 | 2.38E-04 | 0.83  | 2.66   | -     | 727.3   |
| AHQ-2-8, 2742 - 2747        | R.AVFPISVIGR.P.H                                                        | 1199.43018 | 2 | 2.01E-04 | 0.70  | 2.69   | -     | 626.3   |
| AHQ-2-8, 2559 - 2610        | R.AVFPISVIGR.P.H                                                        | 1199.43018 | 2 | 1.94E-06 | 0.74  | 3.00   | -     | 533.7   |
| AHQ-2-8, 2344 - 2414        | R.AVFPISVIGR.P.H                                                        | 1199.43018 | 2 | 6.67E-04 | 0.56  | 2.57   | -     | 380.9   |
| AHQ-2-8, 2463 - 2534        | R.AVFPISVIGR.P.H                                                        | 1199.43018 | 2 | 5.75E-04 | 0.57  | 2.84   | -     | 365.3   |
| AHQ-2-9, 2822 - 2823        | R.AVFPISVIGR.P.H                                                        | 1199.43018 | 2 | 2.96E-05 | 0.60  | 2.65   | -     | 524.8   |
| AHQ-2-9, 3675               | R.DLTDYLM.K.I                                                           | 1015.16266 | 1 | 2.58E-04 | 0.25  | 2.52   | -     | 97.8    |
| AHQ-2-9, 4418               | R.DLTDYLM.K.I                                                           | 999.16326  | 1 | 4.72E-04 | 0.43  | 2.71   | -     | 294.0   |
| AHQ-2-7, 4424               | R.DLTDYLM.K.I                                                           | 999.16326  | 1 | 4.32E-05 | 0.39  | 2.47   | -     | 383.9   |
| AHQ-2-13, 4308 - 4384       | R.DLTDYLM.K.I                                                           | 999.16326  | 1 | 5.67E-05 | 0.46  | 2.13   | -     | 681.4   |
| AHQ-2-9, 4430               | R.DLTDYLM.K.I                                                           | 999.16326  | 2 | 9.76E-04 | 0.69  | 2.79   | -     | 392.9   |
| AHQ-2-11, 4285              | R.DLTDYLM.K.I                                                           | 999.16326  | 2 | 7.02E-04 | 0.63  | 2.62   | -     | 406.6   |
| AHQ-2-8, 4043               | R.DLTDYLM.K.I                                                           | 999.16326  | 1 | 4.54E-04 | 0.40  | 2.77   | -     | 322.7   |
| AHQ-2-8, 4346 - 4416        | R.DLTDYLM.K.I                                                           | 999.16326  | 2 | 3.09E-04 | 0.86  | 3.10   | -     | 483.4   |
| AHQ-2-8, 3606               | R.DLTDYLM.K.I                                                           | 1015.16266 | 1 | 1.90E-05 | 0.49  | 2.35   | -     | 173.4   |
| AHQ-2-5, 4495               | R.DLTDYLM.K.I                                                           | 999.16326  | 1 | 8.81E-06 | 0.63  | 2.19   | -     | 721.9   |
| AHQ-2-10, 3518              | R.DLTDYLM.K.I                                                           | 1015.16266 | 1 | 6.23E-04 | 0.18  | 1.92   | -     | 122.1   |
| AHQ-2-10, 3522 - 3534       | R.DLTDYLM.K.I                                                           | 1015.16266 | 2 | 8.39E-04 | 0.83  | 3.20   | -     | 471.5   |
| AHQ-2-10, 4122 - 4172       | R.DLTDYLM.K.I                                                           | 999.16326  | 2 | 9.28E-04 | 0.69  | 2.90   | -     | 375.2   |
| AHQ-2-8, 4331 - 4461        | R.DLTDYLM.K.I                                                           | 999.16326  | 1 | 1.26E-05 | 0.69  | 2.97   | -     | 645.9   |
| AHQ-2-8, 3822               | R.DLTDYLM.K.I                                                           | 999.16326  | 1 | 8.47E-04 | 0.45  | 1.89   | -     | 483.5   |
| AHQ-2-13, 3781              | R.DLTDYLM.K.I                                                           | 1015.16266 | 1 | 3.90E-04 | 0.21  | 2.11   | -     | 99.9    |
| AHQ-2-10, 4999              | K.DLYANNVMSGGTTMYPGIADR.M                                               | 2247.49444 | 2 | 3.47E-07 | 0.50  | 2.87   | -     | 517.4   |
| AHQ-2-8, 1480               | K.DSYVGDEAQS.K.R                                                        | 1199.20634 | 1 | 7.37E-04 | 0.76  | 2.82   | -     | 539.2   |
| AHQ-2-13-, 1718             | K.DSYVGDEAQS.K.R                                                        | 1199.20634 | 1 | 4.81E-06 | 0.30  | 1.94   | -     | 431.9   |
| AHQ-2-12, 1587 - 1649       | K.DSYVGDEAQS.K.R                                                        | 1199.20634 | 2 | 1.04E-05 | 0.82  | 3.21   | -     | 585.8   |
| AHQ-2-8, 1453               | K.DSYVGDEAQS.K.R                                                        | 1355.39270 | 2 | 1.07E-06 | 0.53  | 2.52   | -     | 551.8   |
| AHQ-2-13, 2919 - 2992       | K.EITALAPSTM.K.I                                                        | 1162.38206 | 2 | 3.77E-04 | 0.72  | 2.73   | -     | 532.0   |
| AHQ-2-9, 2586 - 2730        | K.EITALAPSTM.K.I                                                        | 1162.38206 | 1 | 2.22E-04 | 0.40  | 2.34   | -     | 294.6   |
| AHQ-2-4, 2901               | K.EITALAPSTM.K.I                                                        | 1162.38206 | 1 | 2.09E-05 | 0.19  | 1.98   | -     | 277.6   |
| AHQ-2-7, 2599               | K.EITALAPSTM.K.I                                                        | 1162.38206 | 1 | 1.27E-05 | 0.25  | 2.24   | -     | 277.4   |
| AHQ-2-8, 1956 - 2026        | K.EITALAPSTM.K.I                                                        | 1178.38146 | 2 | 1.55E-06 | 0.89  | 3.24   | -     | 840.2   |
| AHQ-2-14, 3740 - 3864       | K.EITALAPSTM.K.I                                                        | 1162.38206 | 1 | 4.72E-06 | 0.43  | 2.38   | -     | 309.7   |
| AHQ-2-8, 2330 - 2399        | K.EITALAPSTM.K.I                                                        | 1162.38206 | 2 | 1.69E-04 | 0.74  | 2.78   | -     | 526.2   |
| AHQ-2-14, 3176 - 3217       | K.EITALAPSTM.K.I                                                        | 1178.38146 | 2 | 7.43E-04 | 0.71  | 2.66   | -     | 659.4   |
| AHQ-2-10, 2171 - 2244       | K.EITALAPSTM.K.I                                                        | 1178.38146 | 2 | 3.56E-04 | 0.80  | 2.89   | -     | 688.5   |
| AHQ-2-10, 2566 - 2643       | K.EITALAPSTM.K.I                                                        | 1162.38206 | 2 | 5.02E-04 | 0.77  | 2.63   | -     | 589.9   |
| AHQ-2-10, 2607 - 2674       | K.EITALAPSTM.K.I                                                        | 1162.38206 | 1 | 1.05E-04 | 0.31  | 2.66   | -     | 221.9   |
| AHQ-2-12, 2858 - 2859       | K.EITALAPSTM.K.I                                                        | 1162.38206 | 2 | 8.24E-05 | 0.83  | 3.05   | -     | 588.1   |
| AHQ-2-8, 2732 - 2734        | K.EITALAPSTM.K.I                                                        | 1162.38206 | 1 | 8.37E-05 | 0.24  | 2.35   | -     | 166.8   |
| AHQ-2-14-, 2275 - 2343      | K.EITALAPSTM.K.I                                                        | 1178.38146 | 2 | 1.04E-06 | 0.90  | 3.14   | -     | 1045.3  |
| AHQ-2-11, 2809              | K.EITALAPSTM.K.I                                                        | 1162.38206 | 1 | 7.06E-06 | 0.33  | 2.21   | -     | 310.0   |
| AHQ-2-8, 2814               | K.EITALAPSTM.K.I                                                        | 1162.38206 | 2 | 2.72E-04 | 0.72  | 2.55   | -     | 593.7   |
| AHQ-2-14-, 2763 - 2833      | K.EITALAPSTM.K.I                                                        | 1162.38206 | 2 | 1.88E-04 | 0.81  | 3.21   | -     | 525.1   |
| AHQ-2-5, 2647               | K.EITALAPSTM.K.I                                                        | 1162.38206 | 1 | 4.34E-04 | 0.20  | 2.12   | -     | 258.1   |
| AHQ-2-12, 2783 - 2857       | K.EITALAPSTM.K.I                                                        | 1162.38206 | 1 | 5.38E-05 | 0.58  | 2.33   | -     | 421.7   |
| AHQ-2-8, 7271 - 7342        | K.EKLCYVALDFENEM*ATAASSSSLEK.S                                          | 2812.07683 | 2 | 1.06E-04 | 0.59  | 3.45   | -     | 361.1   |
| AHQ-2-8, 7535 - 7572        | K.EKLCYVALDFENEM*ATAASSSSLEK.S                                          | 2812.07683 | 3 | 4.66E-05 | 0.87  | 3.88   | -     | 760.2   |
| AHQ-2-8, 1532 - 1602        | R.HQGVMVGMGQK.D                                                         | 1172.40691 | 2 | 3.34E-04 | 0.89  | 3.57   | -     | 618.0   |
| AHQ-2-8, 2778 - 2852        | K.IWHHTFYNELR.V                                                         | 1516.88695 | 2 | 3.56E-08 | 0.90  | 3.49   | -     | 886.9   |
| AHQ-2-3, 2900               | K.IWHHTFYNELR.V                                                         | 1516.88695 | 2 | 6.08E-04 | 0.69  | 2.51   | -     | 582.2   |
| AHQ-2-6, 2629               | K.IWHHTFYNELR.V                                                         | 1516.88695 | 2 | 3.84E-06 | 0.77  | 3.16   | -     | 899.4   |
| AHQ-2-8, 2542 - 2614        | K.IWHHTFYNELR.V                                                         | 1516.88695 | 2 | 8.47E-10 | 0.94  | 4.17   | -     | 1001.1  |
| AHQ-2-12, 3017              | K.IWHHTFYNELR.V                                                         | 1516.88695 | 3 | 9.70E-06 | 0.92  | 3.53   | -     | 1706.9  |
| AHQ-2-10, 2539 - 2582       | K.IWHHTFYNELR.V                                                         | 1516.88695 | 2 | 2.96E-05 | 0.89  | 3.16   | -     | 934.1   |
| AHQ-2-2, 2881               | K.IWHHTFYNELR.V                                                         | 1516.88695 | 2 | 1.03E-05 | 0.58  | 3.02   | -     | 529.7   |
| AHQ-2-9, 2946               | K.IWHHTFYNELR.V                                                         | 1516.88695 | 2 | 1.88E-06 | 0.78  | 2.86   | -     | 752.5   |
| AHQ-2-12, 3142              | K.IWHHTFYNELR.V                                                         | 1516.88695 | 2 | 4.86E-09 | 0.94  | 3.36   | -     | 1299.2  |
| AHQ-2-8, 2208 - 2278        | K.IWHHTFYNELR.V                                                         | 1516.88695 | 2 | 1.87E-04 | 0.73  | 2.90   | -     | 601.5   |
| AHQ-2-13, 3044              | K.IWHHTFYNELR.V                                                         | 1516.88695 | 2 | 2.13E-05 | 0.76  | 3.22   | -     | 802.6   |
| AHQ-2-4, 2866               | K.IWHHTFYNELR.V                                                         | 1516.88695 | 2 | 3.08E-04 | 0.70  | 2.78   | -     | 564.7   |
| AHQ-2-12, 2829 - 2897       | K.IWHHTFYNELR.V                                                         | 1516.88695 | 3 | 1.98E-05 | 0.92  | 4.33   | -     | 1530.8  |
| AHQ-2-9, 2574 - 2646        | K.IWHHTFYNELR.V                                                         | 1516.88695 | 2 | 5.38E-07 | 0.89  | 4.22   | -     | 963.3   |
| AHQ-2-8, 2346 - 2415        | K.IWHHTFYNELR.V                                                         | 1516.88695 | 2 | 2.17E-06 | 0.87  | 3.55   | -     | 919.2   |
| AHQ-2-13-, 3006             | K.IWHHTFYNELR.V                                                         | 1516.88695 | 2 | 5.32E-06 | 0.89  | 3.11   | -     | 837.6   |
| AHQ-2-8, 4991 - 5059        | R.LDLAGRDLTDYLMK.I                                                      | 1624.88375 | 2 | 5.55E-05 | 0.89  | 3.73   | -     | 866.3   |
| AHQ-2-9, 5196               | R.LDLAGRDLTDYLMK.I                                                      | 1624.88375 | 2 | 1.91E-04 | 0.82  | 3.17   | -     | 628.4   |
| AHQ-2-8, 5004 - 5081        | K.SYELPDGQVITIGNER.F                                                    | 1791.93998 | 2 | 3.24E-06 | 0.96  | 4.99   | -     | 1219.3  |
| AHQ-2-8, 5150 - 5151        | K.SYELPDGQVITIGNER.F                                                    | 1791.93998 | 2 | 1.18E-08 | 0.96  | 4.51   | -     | 1338.6  |
| AHQ-2-14, 6138              | K.SYELPDGQVITIGNER.F                                                    | 1791.93998 | 2 | 3.06E-05 | 0.91  | 3.29   | -     | 911.0   |
| AHQ-2-8, 4851 - 4923        | K.SYELPDGQVITIGNER.F                                                    | 1791.93998 | 2 | 4.39E-11 | 0.97  | 5.02   | -     | 1247.9  |

|                             |                                            |            |   |          |      |        |       |          |
|-----------------------------|--------------------------------------------|------------|---|----------|------|--------|-------|----------|
| AHQ-2-1, 4697               | K.SYELPDGQVITIGNER.F                       | 1791.93998 | 2 | 3.76E-05 | 0.90 | 3.98   | -     | 663.9    |
| AHQ-2-8, 4735 - 4803        | K.SYELPDGQVITIGNER.F                       | 1791.93998 | 2 | 8.18E-13 | 0.95 | 4.54   | -     | 1105.0   |
| AHQ-2-3, 5344               | K.SYELPDGQVITIGNER.F                       | 1791.93998 | 2 | 3.91E-07 | 0.85 | 3.63   | -     | 556.0    |
| AHQ-2-8, 4729               | K.SYELPDGQVITIGNER.F                       | 1791.93998 | 3 | 1.15E-09 | 0.96 | 4.81   | -     | 1877.4   |
| AHQ-2-8, 4705 - 4783        | K.SYELPDGQVITIGNER.F                       | 1791.93998 | 2 | 1.62E-11 | 0.96 | 4.72   | -     | 1060.2   |
| AHQ-2-9, 4331 - 4410        | K.SYELPDGQVITIGNER.F                       | 1791.93998 | 2 | 5.40E-05 | 0.68 | 2.81   | -     | 510.9    |
| AHQ-2-3, 5153 - 5160        | K.SYELPDGQVITIGNER.F                       | 1791.93998 | 2 | 1.18E-07 | 0.96 | 4.80   | -     | 1115.9   |
| AHQ-2-3, 4769 - 4772        | K.SYELPDGQVITIGNER.F                       | 1791.93998 | 2 | 1.81E-08 | 0.93 | 4.23   | -     | 880.0    |
| AHQ-2-13, 5036 - 5095       | K.SYELPDGQVITIGNER.F                       | 1791.93998 | 2 | 6.50E-06 | 0.95 | 4.11   | -     | 1168.4   |
| AHQ-2-9, 4478 - 4528        | K.SYELPDGQVITIGNER.F                       | 1791.93998 | 2 | 8.05E-10 | 0.93 | 4.19   | -     | 992.0    |
| AHQ-2-13, 4869 - 4895       | K.SYELPDGQVITIGNER.F                       | 1791.93998 | 2 | 8.91E-07 | 0.96 | 4.84   | -     | 956.2    |
| AHQ-2-9, 4607               | K.SYELPDGQVITIGNER.F                       | 1791.93998 | 2 | 7.64E-10 | 0.91 | 3.90   | -     | 797.7    |
| AHQ-2-9, 4698 - 4708        | K.SYELPDGQVITIGNER.F                       | 1791.93998 | 2 | 7.57E-09 | 0.95 | 3.88   | -     | 1446.9   |
| AHQ-2-9, 4794 - 4862        | K.SYELPDGQVITIGNER.F                       | 1791.93998 | 2 | 1.83E-14 | 0.97 | 5.22   | -     | 1397.2   |
| AHQ-2-9, 5036 - 5106        | K.SYELPDGQVITIGNER.F                       | 1791.93998 | 2 | 3.57E-04 | 0.86 | 3.68   | -     | 661.2    |
| AHQ-2-9, 5144 - 5218        | K.SYELPDGQVITIGNER.F                       | 1791.93998 | 2 | 4.09E-12 | 0.95 | 4.28   | -     | 1268.1   |
| AHQ-2-14, 5956 - 6033       | K.SYELPDGQVITIGNER.F                       | 1791.93998 | 2 | 2.02E-04 | 0.92 | 4.22   | -     | 869.4    |
| AHQ-2-8, 4641               | K.SYELPDGQVITIGNER.F                       | 1791.93998 | 3 | 1.81E-06 | 0.95 | 4.61   | -     | 1606.6   |
| AHQ-2-8, 4603 - 4671        | K.SYELPDGQVITIGNER.F                       | 1791.93998 | 2 | 1.05E-11 | 0.97 | 5.33   | -     | 1224.4   |
| AHQ-2-8, 4516 - 4587        | K.SYELPDGQVITIGNER.F                       | 1791.93998 | 2 | 4.55E-11 | 0.96 | 5.18   | -     | 1099.5   |
| AHQ-2-8, 4366 - 4447        | K.SYELPDGQVITIGNER.F                       | 1791.93998 | 2 | 6.27E-13 | 0.96 | 4.46   | -     | 1223.5   |
| AHQ-2-3, 4680               | K.SYELPDGQVITIGNER.F                       | 1791.93998 | 2 | 8.11E-06 | 0.85 | 3.35   | -     | 627.4    |
| AHQ-2-4, 4666               | K.SYELPDGQVITIGNER.F                       | 1791.93998 | 2 | 2.35E-07 | 0.95 | 4.36   | -     | 955.0    |
| AHQ-2-13, 4504              | K.SYELPDGQVITIGNER.F                       | 1791.93998 | 2 | 1.53E-11 | 0.94 | 4.30   | -     | 957.8    |
| AHQ-2-10, 4104 - 4114       | K.SYELPDGQVITIGNER.F                       | 1791.93998 | 2 | 1.61E-04 | 0.86 | 3.50   | -     | 577.1    |
| AHQ-2-4, 4778 - 4784        | K.SYELPDGQVITIGNER.F                       | 1791.93998 | 2 | 1.66E-08 | 0.95 | 4.09   | -     | 1149.4   |
| AHQ-2-10, 4191 - 4202       | K.SYELPDGQVITIGNER.F                       | 1791.93998 | 2 | 1.78E-07 | 0.94 | 4.58   | -     | 900.2    |
| AHQ-2-10, 4302 - 4374       | K.SYELPDGQVITIGNER.F                       | 1791.93998 | 2 | 2.49E-10 | 0.94 | 4.10   | -     | 1146.6   |
| AHQ-2-10, 4515 - 4579       | K.SYELPDGQVITIGNER.F                       | 1791.93998 | 2 | 1.38E-08 | 0.95 | 4.71   | -     | 1037.6   |
| AHQ-2-10, 4750 - 4830       | K.SYELPDGQVITIGNER.F                       | 1791.93998 | 2 | 4.92E-04 | 0.76 | 3.09   | -     | 531.1    |
| AHQ-2-2, 5198               | K.SYELPDGQVITIGNER.F                       | 1791.93998 | 2 | 8.21E-06 | 0.90 | 3.54   | -     | 914.5    |
| AHQ-2-13-, 5129 - 5193      | K.SYELPDGQVITIGNER.F                       | 1791.93998 | 2 | 1.88E-13 | 0.97 | 5.10   | -     | 1370.7   |
| AHQ-2-2, 4818               | K.SYELPDGQVITIGNER.F                       | 1791.93998 | 2 | 2.72E-10 | 0.91 | 3.83   | -     | 829.4    |
| AHQ-2-8, 4226 - 4306        | K.SYELPDGQVITIGNER.F                       | 1791.93998 | 2 | 7.03E-11 | 0.96 | 4.82   | -     | 1122.7   |
| AHQ-2-11, 4306 - 4380       | K.SYELPDGQVITIGNER.F                       | 1791.93998 | 2 | 8.65E-10 | 0.90 | 3.93   | -     | 742.8    |
| AHQ-2-11, 4525              | K.SYELPDGQVITIGNER.F                       | 1791.93998 | 2 | 5.69E-11 | 0.95 | 4.44   | -     | 1072.9   |
| AHQ-2-11, 4697 - 4768       | K.SYELPDGQVITIGNER.F                       | 1791.93998 | 2 | 2.76E-12 | 0.92 | 4.22   | -     | 752.6    |
| AHQ-2-11, 4912 - 4990       | K.SYELPDGQVITIGNER.F                       | 1791.93998 | 2 | 1.68E-11 | 0.94 | 3.94   | -     | 1041.9   |
| AHQ-2-4, 5429               | K.SYELPDGQVITIGNER.F                       | 1791.93998 | 2 | 9.41E-09 | 0.93 | 4.16   | -     | 930.0    |
| AHQ-2-1, 5373 - 5441        | K.SYELPDGQVITIGNER.F                       | 1791.93998 | 2 | 3.80E-09 | 0.95 | 4.59   | -     | 1042.3   |
| AHQ-2-1, 5181 - 5197        | K.SYELPDGQVITIGNER.F                       | 1791.93998 | 2 | 2.54E-09 | 0.94 | 4.32   | -     | 953.4    |
| AHQ-2-13-, 4959 - 4981      | K.SYELPDGQVITIGNER.F                       | 1791.93998 | 2 | 4.30E-05 | 0.83 | 3.19   | -     | 863.1    |
| AHQ-2-5, 4563               | K.SYELPDGQVITIGNER.F                       | 1791.93998 | 2 | 5.55E-10 | 0.78 | 3.46   | -     | 533.2    |
| AHQ-2-6, 4471               | K.SYELPDGQVITIGNER.F                       | 1791.93998 | 2 | 3.71E-04 | 0.69 | 2.66   | -     | 460.2    |
| AHQ-2-6, 4838 - 4850        | K.SYELPDGQVITIGNER.F                       | 1791.93998 | 2 | 8.86E-07 | 0.83 | 3.15   | -     | 674.2    |
| AHQ-2-6, 5134 - 5138        | K.SYELPDGQVITIGNER.F                       | 1791.93998 | 2 | 2.45E-05 | 0.76 | 3.11   | -     | 569.7    |
| AHQ-2-1, 4790               | K.SYELPDGQVITIGNER.F                       | 1791.93998 | 2 | 1.55E-08 | 0.90 | 3.59   | -     | 786.2    |
| AHQ-2-13-, 4565             | K.SYELPDGQVITIGNER.F                       | 1791.93998 | 2 | 1.41E-09 | 0.94 | 4.02   | -     | 957.0    |
| AHQ-2-12, 4570              | K.SYELPDGQVITIGNER.F                       | 1791.93998 | 2 | 3.19E-07 | 0.87 | 3.40   | -     | 770.5    |
| AHQ-2-12, 4718              | K.SYELPDGQVITIGNER.F                       | 1791.93998 | 2 | 4.36E-12 | 0.93 | 4.06   | -     | 924.9    |
| AHQ-2-7, 5059 - 5075        | K.SYELPDGQVITIGNER.F                       | 1791.93998 | 2 | 2.05E-04 | 0.84 | 3.12   | -     | 857.6    |
| AHQ-2-12, 4930 - 4993       | K.SYELPDGQVITIGNER.F                       | 1791.93998 | 2 | 2.61E-13 | 0.96 | 4.77   | -     | 1082.6   |
| AHQ-2-12, 5111 - 5181       | K.SYELPDGQVITIGNER.F                       | 1791.93998 | 2 | 6.22E-08 | 0.93 | 4.53   | -     | 746.1    |
| AHQ-2-9, 4315 - 4394        | K.SYELPDGQVITIGNER.F                       | 1791.93998 | 2 | 8.52E-07 | 0.89 | 3.64   | -     | 755.3    |
| AHQ-2-14-, 4916             | K.SYELPDGQVITIGNER.F                       | 1791.93998 | 2 | 4.80E-06 | 0.91 | 3.88   | -     | 972.6    |
| AHQ-2-9, 3434 - 3502        | R.VAPEEHPTLLTEAPLNPK.A                     | 1957.21627 | 2 | 8.33E-04 | 0.89 | 4.22   | -     | 596.8    |
| AHQ-2-8, 3142 - 3215        | R.VAPEEHPTLLTEAPLNPK.A                     | 1957.21627 | 2 | 1.20E-04 | 0.85 | 3.67   | -     | 642.5    |
| AHQ-2-11, 4242              | K.YPIEHGIITNWDDMEK.I                       | 1962.17174 | 2 | 2.00E-04 | 0.85 | 3.88   | -     | 655.7    |
| AHQ-2-10, 4006 - 4039       | K.YPIEHGIITNWDDMEK.I                       | 1962.17174 | 2 | 1.11E-04 | 0.87 | 3.75   | -     | 792.2    |
| AHQ-2-9, 4548 - 4566        | K.YPIEHGIITNWDDMEK.I                       | 1962.17174 | 2 | 1.34E-04 | 0.90 | 4.52   | -     | 725.7    |
| AHQ-2-9, 4463 - 4474        | K.YPIEHGIITNWDDMEK.I                       | 1962.17174 | 2 | 1.44E-06 | 0.91 | 4.47   | -     | 575.8    |
| AHQ-2-9, 4139 - 4210        | K.YPIEHGIITNWDDMEK.I                       | 1962.17174 | 2 | 5.72E-04 | 0.89 | 4.34   | -     | 668.3    |
| AHQ-2-12, 4151              | K.YPIEHGIITNWDDMEK.I                       | 1962.17174 | 2 | 8.86E-04 | 0.78 | 3.88   | -     | 607.0    |
| AHQ-2-14, 5698              | K.YPIEHGIITNWDDMEK.I                       | 1962.17174 | 2 | 7.04E-04 | 0.43 | 2.88   | -     | 535.7    |
| AHQ-2-2, 4684               | K.YPIEHGIITNWDDMEK.I                       | 1962.17174 | 2 | 9.41E-04 | 0.81 | 3.64   | -     | 692.9    |
| AHQ-2-3, 4648               | K.YPIEHGIITNWDDMEK.I                       | 1962.17174 | 2 | 3.09E-04 | 0.73 | 3.44   | -     | 666.2    |
| AHQ-2-8, 4777               | K.YPIEHGIITNWDDMEK.I                       | 1962.17174 | 2 | 2.64E-08 | 0.91 | 4.46   | -     | 683.2    |
| AHQ-2-8, 4322               | K.YPIEHGIITNWDDMEK.I                       | 1962.17174 | 2 | 5.27E-04 | 0.91 | 4.38   | -     | 698.4    |
| AHQ-2-8, 3519 - 3563        | K.YPIEHGIITNWDDMEK.I                       | 1978.17114 | 3 | 7.28E-04 | 0.78 | 3.29   | -     | 918.4    |
| AHQ-2-12, 4085              | K.YPIEHGIITNWDDMEK.I                       | 1978.17114 | 2 | 7.05E-05 | 0.78 | 3.30   | -     | 562.9    |
| AHQ-2-13-, 4454 - 4526      | K.YPIEHGIITNWDDMEK.I                       | 1962.17174 | 2 | 2.70E-06 | 0.88 | 4.10   | -     | 713.9    |
| AHQ-2-13-, 4457             | K.YPIEHGIITNWDDMEK.I                       | 1962.17174 | 2 | 3.70E-04 | 0.83 | 3.97   | -     | 576.2    |
| AHQ-2-7, 4172               | K.YPIEHGIITNWDDMEK.I                       | 1962.17174 | 2 | 1.44E-04 | 0.84 | 3.70   | -     | 709.6    |
| AHQ-2-13-, 4671             | K.YPIEHGIITNWDDMEK.I                       | 1962.17174 | 2 | 5.30E-08 | 0.83 | 3.63   | -     | 632.7    |
| AHQ-2-5, 4299               | K.YPIEHGIITNWDDMEK.I                       | 1962.17174 | 2 | 7.85E-05 | 0.79 | 3.27   | -     | 662.1    |
| AHQ-2-4, 4814               | K.YPIEHGIITNWDDMEK.I                       | 1962.17174 | 2 | 7.29E-04 | 0.37 | 2.65   | -     | 525.6    |
| AHQ-2-12, 4735              | K.YPIEHGIITNWDDMEK.I                       | 1962.17174 | 2 | 1.31E-04 | 0.87 | 3.96   | -     | 648.1    |
| AHQ-2-8, 6512 - 6578        | K.YPIEHGIITNWDDMEKIWHHTFYNELR.V            | 3459.83609 | 3 | 1.14E-07 | 0.92 | 5.03   | -     | 721.3    |
| AHQ-2-8, 5200 - 5204        | K.YPIEHGIITNWDDMEKIWHHTFYNELR.V            | 3475.83549 | 3 | 2.89E-06 | 0.93 | 5.11   | -     | 855.7    |
| gi 27500274 ref XP_113950.3 | similar to Munc13-4 protein [Homo sapiens] |            |   | 1.89E-14 | 9.17 | 120.33 | 17.60 | 123281.1 |
| AHQ-2-5, 7631               | K.AFGELCPNTAPLPQLVTEALQTGTTEWFHLK.Q        | 3472.91108 | 3 | 1.35E-11 | 0.74 | 3.49   | -     | 442.7    |
| AHQ-2-6, 7373               | K.AFGELCPNTAPLPQLVTEALQTGTTEWFHLK.Q        | 3472.91108 | 3 | 9.41E-09 | 0.80 | 3.93   | -     | 339.9    |
| AHQ-2-4, 6670               | R.ALLYEDALTYVLR.L                          | 1677.92484 | 2 | 1.04E-11 | 0.95 | 4.37   | -     | 1236.4   |
| AHQ-2-4, 4988 - 4993        | R.AVQM*DELVPLGELTK.H                       | 1659.92638 | 2 | 1.52E-05 | 0.78 | 2.96   | -     | 719.4    |
| AHQ-2-4, 2424               | R.DLELQAASSR.E                             | 1090.16939 | 1 | 6.59E-04 | 0.10 | 1.84   | -     | 257.8    |
| AHQ-2-4, 3417 - 3434        | R.EVPLSGSEEPGEVPPQTR.L                     | 1868.97961 | 2 | 8.41E-04 | 0.55 | 2.78   | -     | 321.1    |
| AHQ-2-4, 4754               | K.HSTSAVDLSTCFQAISHTAR.Q                   | 2191.36726 | 3 | 1.89E-14 | 0.98 | 6.19   | -     | 2344.4   |
| AHQ-2-5, 4344               | K.HSTSAVDLSTCFQAISHTAR.Q                   | 2191.36726 | 3 | 1.99E-07 | 0.96 | 5.35   | -     | 1262.8   |
| AHQ-2-4, 3517 - 3532        | R.IQQQAETTSEELGAVTVK.A                     | 1933.10674 | 2 | 7.70E-11 | 0.98 | 6.58   | -     | 1572.0   |
| AHQ-2-4, 3520               | K.LGELTDLHGLR.R                            | 1224.39168 | 2 | 4.54E-04 | 0.87 | 3.20   | -     | 1088.4   |
| AHQ-2-4, 3349               | R.LGHPENPHVTEASELLR.Y                      | 1900.08490 | 2 | 5.78E-04 | 0.72 | 3.10   | -     | 489.6    |
| AHQ-2-4, 5610               | K.LPAQLAWALEQR.V                           | 1525.73360 | 2 | 1.70E-09 | 0.96 | 4.15   | -     | 1431.6   |
| AHQ-2-4, 4169               | R.SVFPPLSVSDSPAR.L                         | 1362.51311 | 2 | 5.69E-06 | 0.76 | 2.63   | -     | 858.0    |
| AHQ-2-4, 6480               | R.WFQPAIPSWLQK.T                           | 1501.75533 | 2 | 1.05E-05 | 0.79 | 3.14   | -     | 516.7    |
| gi 4505879 ref NP_002655.1  | pleckstrin; p47 [Homo sapiens]             |            |   | 2.94E-14 | 9.70 | 120.41 | 44.30 | 40082.5  |
| AHQ-2-1, 6069               | R.EDPAYLHYDYPAGAEDPLGAIHLR.G               | 2684.89982 | 3 | 6.82E-06 | 0.96 | 5.95   | -     | 1241.5   |
| AHQ-2-13, 5573              | R.EDPAYLHYDYPAGAEDPLGAIHLR.G               | 2684.89982 | 2 | 2.72E-06 | 0.78 | 3.20   | -     | 600.8    |
| AHQ-2-12, 5718 - 5721       | R.EDPAYLHYDYPAGAEDPLGAIHLR.G               | 2684.89982 | 3 | 1.17E-09 | 0.96 | 5.88   | -     | 1451.9   |
| AHQ-2-11, 5468 - 5470       | R.EDPAYLHYDYPAGAEDPLGAIHLR.G               | 2684.89982 | 3 | 9.46E-09 | 0.95 | 5.66   | -     | 1516.2   |
| AHQ-2-13-, 5662 - 5673      | R.EDPAYLHYDYPAGAEDPLGAIHLR.G               | 2684.89982 | 3 | 1.28E-09 | 0.97 | 6.64   | -     | 1779.8   |
| AHQ-2-13, 5563 - 5577       | R.EDPAYLHYDYPAGAEDPLGAIHLR.G               | 2684.89982 | 3 | 3.39E-08 | 0.98 | 6.89   | -     | 1834.9   |
| AHQ-2-8, 5442               | R.EDPAYLHYDYPAGAEDPLGAIHLR.G               | 2684.89982 | 3 | 7.11E-12 | 0.97 | 6.48   | -     | 1687.3   |
| AHQ-2-8, 5448               | R.EDPAYLHYDYPAGAEDPLGAIHLR.G               | 2684.89982 | 2 | 1.47E-05 | 0.84 | 3.54   | -     | 569.3    |
| AHQ-2-14-, 5652             | R.EDPAYLHYDYPAGAEDPLGAIHLR.G               | 2684.89982 | 3 | 6.80E-09 | 0.95 | 5.52   | -     | 1090.9   |
| AHQ-2-12, 2451              | R.GCVVTSVESNSNGR.K                         | 1467.54464 | 2 | 5.50E-06 | 0.88 | 3.33   | -     | 1081.4   |
| AHQ-2-8, 2339               | R.GCVVTSVESNSNGR.K                         | 1467.54464 | 2 | 2.94E-06 | 0.92 | 3.42   | -     | 1296.0   |
| AHQ-2-11, 2442              | R.GCVVTSVESNSNGR.K                         | 1467.54464 | 2 | 7.57E-04 | 0.90 | 2.92   | -     | 1605.0   |

|                            |                                                                         |            |   |          |       |        |       |         |
|----------------------------|-------------------------------------------------------------------------|------------|---|----------|-------|--------|-------|---------|
| AHQ-2-13-, 2463 - 2513     | R.GCVVTSVESNSNGR.K                                                      | 1467.54464 | 2 | 1.04E-05 | 0.92  | 3.87   | -     | 1184.9  |
| AHQ-2-8, 2156 - 2232       | R.GCVVTSVESNSNGR.K.S                                                    | 1595.71755 | 2 | 3.32E-05 | 0.85  | 3.24   | -     | 1149.0  |
| AHQ-2-8, 2844              | K.GSTLTSPCQDFGK.R                                                       | 1399.50867 | 1 | 9.36E-06 | 0.07  | 2.07   | -     | 204.7   |
| AHQ-2-8, 2288 - 2302       | K.GSTLTSPCQDFGK.R.M                                                     | 1555.69502 | 2 | 3.82E-07 | 0.40  | 2.66   | -     | 322.6   |
| AHQ-2-13-, 2865 - 2875     | K.GSTLTSPCQDFGK.R.M                                                     | 1555.69502 | 2 | 7.79E-04 | 0.66  | 3.11   | -     | 370.3   |
| AHQ-2-8, 7367 - 7444       | K.IFNHCFGTGNCVIDWLVSNQSVR.N                                             | 2669.97641 | 2 | 6.90E-07 | 0.98  | 5.72   | -     | 1805.1  |
| AHQ-2-10, 6535             | K.IFNHCFGTGNCVIDWLVSNQSVR.N                                             | 2669.97641 | 2 | 9.65E-10 | 0.97  | 5.00   | -     | 1425.2  |
| AHQ-2-9, 7272 - 7351       | K.IFNHCFGTGNCVIDWLVSNQSVR.N                                             | 2669.97641 | 2 | 2.21E-04 | 0.95  | 4.77   | -     | 1193.6  |
| AHQ-2-8, 7050 - 7055       | K.IFNHCFGTGNCVIDWLVSNQSVR.N                                             | 2669.97641 | 2 | 3.23E-12 | 0.98  | 6.39   | -     | 1803.4  |
| AHQ-2-8, 7224 - 7295       | K.IFNHCFGTGNCVIDWLVSNQSVR.N                                             | 2669.97641 | 2 | 5.70E-08 | 0.98  | 6.44   | -     | 1793.2  |
| AHQ-2-13-, 7061            | R.KSEENLFEIITAEDEVHYFLQAATPK.E                                          | 3024.32650 | 3 | 6.35E-08 | 0.98  | 7.68   | -     | 2039.8  |
| AHQ-2-10, 6795             | R.KSEENLFEIITAEDEVHYFLQAATPK.E                                          | 3024.32650 | 3 | 6.31E-08 | 0.98  | 7.80   | -     | 2794.7  |
| AHQ-2-8, 7452 - 7526       | R.KSEENLFEIITAEDEVHYFLQAATPK.E                                          | 3024.32650 | 3 | 3.30E-06 | 0.99  | 8.20   | -     | 3635.1  |
| AHQ-2-9, 7478 - 7479       | R.KSEENLFEIITAEDEVHYFLQAATPK.E                                          | 3024.32650 | 3 | 2.60E-06 | 0.98  | 7.82   | -     | 2629.7  |
| AHQ-2-14-, 6915            | R.KSEENLFEIITAEDEVHYFLQAATPK.E                                          | 3024.32650 | 3 | 2.94E-14 | 0.99  | 7.89   | -     | 3063.0  |
| AHQ-2-12, 7194 - 7263      | R.KSEENLFEIITAEDEVHYFLQAATPK.E                                          | 3024.32650 | 3 | 9.18E-12 | 0.98  | 6.64   | -     | 2062.7  |
| AHQ-2-10, 6162             | R.LPETIDLGAALYSMK.D                                                     | 1664.98779 | 2 | 2.89E-05 | 0.95  | 4.48   | -     | 1321.3  |
| AHQ-2-12, 6567 - 6585      | R.LPETIDLGAALYSMK.D                                                     | 1664.98779 | 2 | 1.29E-06 | 0.97  | 4.37   | -     | 2018.7  |
| AHQ-2-9, 6734 - 6760       | R.LPETIDLGAALYSMK.D                                                     | 1664.98779 | 2 | 1.58E-05 | 0.97  | 4.09   | -     | 1936.0  |
| AHQ-2-8, 6618 - 6686       | R.LPETIDLGAALYSMK.D                                                     | 1664.98779 | 2 | 7.65E-05 | 0.97  | 3.90   | -     | 1863.5  |
| AHQ-2-8, 6531 - 6598       | R.LPETIDLGAALYSMK.D                                                     | 1664.98779 | 2 | 7.47E-06 | 0.98  | 4.40   | -     | 2673.0  |
| AHQ-2-12, 5799 - 5801      | R.LPETIDLGAALYSM*K.D                                                    | 1680.98719 | 2 | 1.67E-06 | 0.95  | 4.73   | -     | 997.5   |
| AHQ-2-8, 6018 - 6019       | R.NRQEGLMIASSLNENGYLQAPGDMK.S                                           | 2824.18382 | 3 | 5.51E-05 | 0.94  | 4.95   | -     | 1049.1  |
| AHQ-2-8, 5946 - 5986       | R.NRQEGLMIASSLNENGYLQAPGDMK.S                                           | 2824.18382 | 2 | 2.41E-04 | 0.97  | 5.60   | -     | 1654.7  |
| AHQ-2-8, 6132              | R.NRQEGLMIASSLNENGYLQAPGDMK.S                                           | 2824.18382 | 2 | 8.84E-05 | 0.91  | 4.29   | -     | 668.0   |
| AHQ-2-8, 5856 - 5882       | R.NRQEGLMIASSLNENGYLQAPGDMK.S                                           | 2824.18382 | 2 | 1.59E-07 | 0.89  | 4.09   | -     | 672.0   |
| AHQ-2-8, 5886 - 5951       | R.NRQEGLMIASSLNENGYLQAPGDMK.S                                           | 2824.18382 | 3 | 9.57E-04 | 0.86  | 4.28   | -     | 514.0   |
| AHQ-2-9, 6166              | R.NRQEGLMIASSLNENGYLQAPGDMK.S                                           | 2824.18382 | 2 | 2.63E-05 | 0.92  | 4.46   | -     | 536.5   |
| AHQ-2-10, 4107             | K.QQDHFQAAFLFLEER.D                                                     | 1766.89390 | 2 | 1.07E-10 | 0.80  | 3.36   | -     | 254.4   |
| AHQ-2-8, 3970 - 3972       | K.QQDHFQAAFLFLEER.D                                                     | 1766.89390 | 2 | 4.77E-07 | 0.86  | 3.49   | -     | 295.0   |
| AHQ-2-11, 4381             | K.QQDHFQAAFLFLEER.D                                                     | 1766.89390 | 2 | 4.69E-05 | 0.72  | 3.26   | -     | 169.8   |
| AHQ-2-12, 4515             | K.QQDHFQAAFLFLEER.D                                                     | 1766.89390 | 2 | 4.95E-10 | 0.83  | 3.24   | -     | 244.0   |
| AHQ-2-12, 7255             | K.SSEENLFEIITAEDEVHYFLQAATPK.E                                          | 2896.15359 | 2 | 5.60E-07 | 0.88  | 4.39   | -     | 554.9   |
| AHQ-2-12, 7253 - 7254      | K.SSEENLFEIITAEDEVHYFLQAATPK.E                                          | 2896.15359 | 3 | 1.72E-09 | 0.91  | 5.18   | -     | 779.7   |
| AHQ-2-10, 6871             | K.SSEENLFEIITAEDEVHYFLQAATPK.E                                          | 2896.15359 | 3 | 9.75E-09 | 0.93  | 5.16   | -     | 818.1   |
| AHQ-2-10, 6870             | K.SSEENLFEIITAEDEVHYFLQAATPK.E                                          | 2896.15359 | 2 | 1.49E-05 | 0.88  | 4.68   | -     | 490.2   |
| AHQ-2-9, 7544 - 7610       | K.SSEENLFEIITAEDEVHYFLQAATPK.E                                          | 2896.15359 | 2 | 3.43E-05 | 0.73  | 3.96   | -     | 312.2   |
| AHQ-2-8, 7615              | K.SSEENLFEIITAEDEVHYFLQAATPK.E                                          | 2896.15359 | 2 | 1.48E-09 | 0.56  | 2.87   | -     | 459.4   |
| AHQ-2-13-, 7102 - 7106     | K.SSEENLFEIITAEDEVHYFLQAATPK.E                                          | 2896.15359 | 3 | 7.46E-07 | 0.93  | 4.99   | -     | 1158.4  |
| AHQ-2-8, 7560              | K.SSEENLFEIITAEDEVHYFLQAATPK.E                                          | 2896.15359 | 3 | 2.98E-11 | 0.91  | 4.06   | -     | 1230.0  |
| AHQ-2-8, 7474 - 7543       | K.SSEENLFEIITAEDEVHYFLQAATPK.E                                          | 2896.15359 | 2 | 3.48E-04 | 0.27  | 2.53   | -     | 389.2   |
| AHQ-2-14-, 6960            | K.SSEENLFEIITAEDEVHYFLQAATPK.E                                          | 2896.15359 | 3 | 5.91E-10 | 0.85  | 3.99   | -     | 769.6   |
| gi4505839 ref NP_002645.1  | pyruvate kinase, muscle; Pyruvate kinase-3; Thyroid hormone-binding pro |            |   | 3.00E-14 | 14.83 | 160.36 | 40.90 | 57913.6 |
| AHQ-2-7, 6127 - 6137       | R.AGKPVICATQMLESMIK.K                                                   | 1879.29869 | 3 | 2.03E-06 | 0.95  | 4.47   | -     | 1732.7  |
| AHQ-2-9, 6290              | R.AGKPVICATQMLESMIK.K                                                   | 1879.29869 | 2 | 6.44E-04 | 0.91  | 3.56   | -     | 875.8   |
| AHQ-2-7, 6119 - 6128       | R.AGKPVICATQMLESMIK.K                                                   | 1879.29869 | 2 | 7.60E-06 | 0.95  | 4.73   | -     | 950.7   |
| AHQ-2-7, 7567              | K.FGVEQDVMVFASFIR.K                                                     | 1861.11055 | 2 | 6.58E-10 | 0.96  | 4.82   | -     | 1342.1  |
| AHQ-2-7, 7477              | K.FGVEQDVMVFASFIR.K                                                     | 1877.10995 | 2 | 3.82E-08 | 0.96  | 4.59   | -     | 1193.7  |
| AHQ-2-7, 4877 - 4880       | K.GADFLVTEVENGGSLGSK.K                                                  | 1780.91396 | 2 | 1.53E-10 | 0.95  | 4.72   | -     | 1310.7  |
| AHQ-2-7, 5123              | K.GADFLVTEVENGGSLGSK.K                                                  | 1780.91396 | 2 | 5.88E-06 | 0.97  | 4.96   | -     | 1402.4  |
| AHQ-2-7, 2512              | K.GDYPLEAVR.M                                                           | 1020.12076 | 2 | 1.59E-05 | 0.78  | 2.73   | -     | 705.7   |
| AHQ-2-7, 6908 - 6972       | R.GIFPVLCKDPQEAWAEDVDR.L.V                                              | 2559.87857 | 3 | 3.69E-11 | 0.97  | 5.81   | -     | 2010.1  |
| AHQ-2-11, 6386 - 6393      | R.GIFPVLCKDPQEAWAEDVDR.L.V                                              | 2559.87857 | 3 | 2.30E-06 | 0.96  | 3.97   | -     | 2564.0  |
| AHQ-2-9, 6880              | R.GIFPVLCKDPQEAWAEDVDR.L.V                                              | 2559.87857 | 3 | 2.01E-06 | 0.93  | 4.45   | -     | 1215.8  |
| AHQ-2-7, 6815 - 6887       | R.GIFPVLCKDPQEAWAEDVDR.L.V                                              | 2559.87857 | 3 | 7.84E-11 | 0.98  | 6.08   | -     | 2153.5  |
| AHQ-2-7, 6811 - 6879       | R.GIFPVLCKDPQEAWAEDVDR.L.V                                              | 2559.87857 | 2 | 1.73E-05 | 0.95  | 4.48   | -     | 1153.7  |
| AHQ-2-9, 6870              | R.GIFPVLCKDPQEAWAEDVDR.L.V                                              | 2559.87857 | 2 | 8.16E-09 | 0.92  | 4.15   | -     | 666.2   |
| AHQ-2-11, 6389 - 6394      | R.GIFPVLCKDPQEAWAEDVDR.L.V                                              | 2559.87857 | 2 | 6.62E-06 | 0.93  | 4.47   | -     | 810.4   |
| AHQ-2-13-, 6717            | R.GIFPVLCKDPQEAWAEDVDR.L.V                                              | 2559.87857 | 3 | 3.00E-14 | 0.98  | 6.14   | -     | 2377.6  |
| AHQ-2-1, 4926              | K.GVNLPGAADVLPVASEK.D                                                   | 1637.85902 | 2 | 1.55E-04 | 0.87  | 4.08   | -     | 409.6   |
| AHQ-2-7, 2891 - 2893       | K.ITLDNAYMEK.C                                                          | 1198.37126 | 2 | 2.18E-06 | 0.86  | 3.47   | -     | 617.4   |
| AHQ-2-7, 3816              | K.KGVNLPGAADVLPVASEK.D                                                  | 1766.03194 | 3 | 1.04E-06 | 0.90  | 4.22   | -     | 1008.9  |
| AHQ-2-9, 3879 - 3927       | K.KGVNLPGAADVLPVASEK.D                                                  | 1766.03194 | 2 | 2.10E-04 | 0.96  | 5.05   | -     | 1100.1  |
| AHQ-2-7, 3805              | K.KGVNLPGAADVLPVASEK.D                                                  | 1766.03194 | 2 | 2.84E-08 | 0.97  | 5.84   | -     | 983.5   |
| AHQ-2-7, 5036              | K.KGVNLPGAADVLPVASEKIDQLK.F                                             | 2478.82685 | 3 | 2.36E-09 | 0.98  | 7.22   | -     | 2147.9  |
| AHQ-2-7, 5413              | R.LAPITSDPTEATAVGAVEASF.K.C                                             | 2176.40912 | 2 | 1.95E-08 | 0.96  | 4.83   | -     | 1346.7  |
| AHQ-2-7, 6215              | R.LAPITSDPTEATAVGAVEASF.K.C                                             | 2176.40912 | 2 | 3.20E-07 | 0.96  | 4.73   | -     | 1291.5  |
| AHQ-2-7, 6300 - 6368       | R.LAPITSDPTEATAVGAVEASF.K.C                                             | 2176.40912 | 2 | 1.72E-10 | 0.97  | 5.31   | -     | 1235.5  |
| AHQ-2-11, 5580             | R.LAPITSDPTEATAVGAVEASF.K.C                                             | 2176.40912 | 2 | 8.94E-05 | 0.92  | 4.26   | -     | 781.4   |
| AHQ-2-7, 6071 - 6141       | R.LAPITSDPTEATAVGAVEASF.K.C                                             | 2176.40912 | 2 | 6.87E-09 | 0.97  | 6.06   | -     | 1138.6  |
| AHQ-2-7, 6637 - 6712       | R.LAPITSDPTEATAVGAVEASF.K.C                                             | 2176.40912 | 2 | 5.72E-06 | 0.94  | 4.75   | -     | 742.7   |
| AHQ-2-1, 6118              | R.LAPITSDPTEATAVGAVEASF.K.C                                             | 2176.40912 | 2 | 1.11E-08 | 0.94  | 4.53   | -     | 870.3   |
| AHQ-2-7, 5935 - 6004       | R.LAPITSDPTEATAVGAVEASF.K.C                                             | 2176.40912 | 2 | 1.20E-04 | 0.98  | 6.38   | -     | 1262.7  |
| AHQ-2-7, 6881              | R.LAPITSDPTEATAVGAVEASF.K.C                                             | 2176.40912 | 2 | 1.18E-05 | 0.92  | 3.69   | -     | 1019.9  |
| AHQ-2-9, 5855 - 5923       | R.LAPITSDPTEATAVGAVEASF.K.C                                             | 2176.40912 | 2 | 9.13E-04 | 0.67  | 2.97   | -     | 527.4   |
| AHQ-2-7, 7228 - 7300       | R.LAPITSDPTEATAVGAVEASF.K.C                                             | 2176.40912 | 2 | 4.71E-06 | 0.96  | 4.95   | -     | 960.1   |
| AHQ-2-7, 6441              | R.LAPITSDPTEATAVGAVEASF.K.C                                             | 2176.40912 | 2 | 9.54E-07 | 0.91  | 3.63   | -     | 997.4   |
| AHQ-2-7, 5828 - 5895       | R.LAPITSDPTEATAVGAVEASF.K.C                                             | 2176.40912 | 2 | 1.81E-11 | 0.97  | 5.87   | -     | 1153.7  |
| AHQ-2-7, 6552              | R.LAPITSDPTEATAVGAVEASF.K.C                                             | 2176.40912 | 2 | 4.14E-04 | 0.92  | 4.00   | -     | 880.6   |
| AHQ-2-7, 7321              | R.LAPITSDPTEATAVGAVEASF.K.C                                             | 2176.40912 | 2 | 2.53E-04 | 0.82  | 3.69   | -     | 618.2   |
| AHQ-2-7, 3172 - 3185       | R.LDIDSPITAR.N                                                          | 1198.35099 | 2 | 3.12E-05 | 0.89  | 3.38   | -     | 879.5   |
| AHQ-2-7, 2003 - 2075       | R.LNFSHGTHEYHAETIK.N                                                    | 1885.02879 | 2 | 2.96E-06 | 0.86  | 3.58   | -     | 655.8   |
| AHQ-2-7, 3143 - 3160       | R.NTGIICTIGPASR.S                                                       | 1361.54994 | 2 | 1.47E-06 | 0.96  | 4.80   | -     | 1287.4  |
| AHQ-2-13-, 3446 - 3450     | R.NTGIICTIGPASR.S                                                       | 1361.54994 | 2 | 1.27E-04 | 0.93  | 3.67   | -     | 1018.3  |
| AHQ-2-11, 3292             | R.NTGIICTIGPASR.S                                                       | 1361.54994 | 2 | 3.91E-05 | 0.93  | 4.03   | -     | 1082.0  |
| AHQ-2-13, 3465             | R.NTGIICTIGPASR.S                                                       | 1361.54994 | 2 | 2.64E-05 | 0.89  | 3.53   | -     | 953.4   |
| AHQ-2-7, 3963 - 3983       | R.NTGIICTIGPASR.S                                                       | 1361.54994 | 2 | 4.47E-04 | 0.92  | 3.37   | -     | 1362.4  |
| AHQ-2-7, 5017 - 5029       | R.RFDEILEASDGIMVAR.G                                                    | 1823.06385 | 2 | 6.42E-12 | 0.97  | 5.22   | -     | 1498.6  |
| AHQ-2-7, 5392 - 5467       | R.TATESFASDPILYRPVAVALDTK.G                                             | 2466.77140 | 3 | 1.48E-04 | 0.78  | 3.17   | -     | 800.4   |
| AHQ-2-12, 5759 - 5829      | R.TATESFASDPILYRPVAVALDTK.G                                             | 2466.77140 | 2 | 2.70E-04 | 0.42  | 3.17   | -     | 175.1   |
| AHQ-2-13-, 5649 - 5717     | R.TATESFASDPILYRPVAVALDTK.G                                             | 2466.77140 | 3 | 6.20E-05 | 0.88  | 3.78   | -     | 1161.2  |
| AHQ-2-7, 5535 - 5537       | R.TATESFASDPILYRPVAVALDTK.G                                             | 2466.77140 | 3 | 2.38E-07 | 0.91  | 4.08   | -     | 1020.9  |
| AHQ-2-7, 5483 - 5551       | R.TATESFASDPILYRPVAVALDTK.G                                             | 2466.77140 | 2 | 9.30E-05 | 0.90  | 4.24   | -     | 427.4   |
| gi21361670 ref NP_054782.2 | src homology 3 domain-containing protein HIP-55; HIP-55 protein [Homo   |            |   | 3.55E-14 | 1.50  | 20.25  | 8.80  | 48294.0 |
| AHQ-2-13-, 6509            | R.GYGPDGHFGM*FPANYVELIE                                                 | 2230.44050 | 2 | 6.86E-04 | 0.53  | 3.06   | -     | 178.0   |
| AHQ-2-12, 5518             | K.SPTDWALFTYEGNSDIR.V                                                   | 2087.19108 | 2 | 3.55E-14 | 0.97  | 4.76   | -     | 1362.3  |
| gi4885387 ref NP_005318.1  | L-3-hydroxyacyl-Coenzyme A dehydrogenase, short chain; L-3-hydroxyacyl- |            |   | 4.05E-14 | 0.95  | 10.28  | 9.60  | 34286.3 |
| AHQ-2-9, 7558              | K.TLSTIATSDAASVHSTDLVVVAIVENLK.V                                        | 3086.43759 | 3 | 4.05E-14 | 0.95  | 5.67   | -     | 1083.7  |
| gi4507953 ref NP_003397.1  | tyrosine 3/tryptophan 5-monoxygenase activation protein, zeta polypep   |            |   | 5.55E-14 | 9.23  | 110.28 | 46.90 | 27744.9 |
| AHQ-2-10, 6818             | R.EKIELELRDINDVLSLLEK.F                                                 | 2419.73463 | 2 | 3.13E-04 | 0.59  | 3.89   | -     | 321.9   |
| AHQ-2-10, 3134 - 3247      | K.FLIPNASQAESK.V                                                        | 1305.46156 | 1 | 4.03E-06 | 0.50  | 2.48   | -     | 451.7   |
| AHQ-2-10, 2912 - 2974      | K.FLIPNASQAESK.V                                                        | 1305.46156 | 1 | 8.24E-05 | 0.37  | 2.16   | -     | 454.9   |
| AHQ-2-9, 2983 - 3008       | K.FLIPNASQAESK.V                                                        | 1305.46156 | 2 | 1.83E-04 | 0.62  | 2.59   | -     | 397.4   |
| AHQ-2-9, 2986              | K.FLIPNASQAESK.V                                                        | 1305.46156 | 1 | 1.20E-06 | 0.64  | 2.77   | -     | 455.6   |
| AHQ-2-10, 2911 - 2975      | K.FLIPNASQAESK.V                                                        | 1305.46156 | 2 | 2.37E-06 | 0.78  | 2.81   | -     | 435.7   |
| AHQ-2-10, 3620             | K.FLIPNASQAESK.V                                                        | 1305.46156 | 1 | 4.30E-06 | 0.27  | 1.90   | -     | 491.2   |
| AHQ-2-12, 3135 - 3143      | K.FLIPNASQAESK.V                                                        | 1305.46156 | 2 | 7.54E-07 | 0.59  | 2.64   | -     | 430.2   |

|                             |                                                                         |            |   |          |      |      |   |        |
|-----------------------------|-------------------------------------------------------------------------|------------|---|----------|------|------|---|--------|
| AHQ-2-10, 3356              | K.FLIPNASQAESK.V                                                        | 1305.46156 | 1 | 1.21E-06 | 0.27 | 1.80 | - | 491.6  |
| AHQ-2-10, 5892              | K.IETELRDCINDVLSLEK.F                                                   | 2162.44718 | 3 | 4.06E-08 | 0.91 | 4.19 | - | 1120.5 |
| AHQ-2-9, 7458               | K.IETELRDCINDVLSLEK.F                                                   | 2162.44718 | 2 | 4.51E-05 | 0.95 | 4.70 | - | 1179.6 |
| AHQ-2-10, 6791 - 6799       | R.LGLALNFVVFYIEILNSPEK.A                                                | 2318.65200 | 2 | 2.21E-05 | 0.85 | 4.35 | - | 361.9  |
| AHQ-2-13-, 2307             | K.SVTEQGAELSNEER.N                                                      | 1549.57922 | 2 | 2.41E-07 | 0.91 | 3.60 | - | 1063.8 |
| AHQ-2-9, 2151 - 2199        | K.SVTEQGAELSNEER.N                                                      | 1549.57922 | 2 | 1.65E-08 | 0.95 | 4.10 | - | 1528.5 |
| AHQ-2-14-, 2259 - 2320      | K.SVTEQGAELSNEER.N                                                      | 1549.57922 | 2 | 5.35E-09 | 0.95 | 4.67 | - | 1272.8 |
| AHQ-2-10, 2108 - 2178       | K.SVTEQGAELSNEER.N                                                      | 1549.57922 | 2 | 1.09E-07 | 0.93 | 3.68 | - | 1265.8 |
| AHQ-2-1, 2425               | K.SVTEQGAELSNEER.N                                                      | 1549.57922 | 2 | 2.51E-05 | 0.85 | 2.93 | - | 1141.3 |
| AHQ-2-10, 4166              | K.SVTEQGAELSNEERNLLSVAYK.N                                              | 2438.63331 | 2 | 3.44E-05 | 0.71 | 3.26 | - | 333.5  |
| AHQ-2-11, 6736              | K.TAFDEAIAELDTLSEESYK.D                                                 | 2133.25160 | 2 | 3.98E-10 | 0.96 | 5.31 | - | 931.0  |
| AHQ-2-10, 5474 - 5476       | K.TAFDEAIAELDTLSEESYK.D                                                 | 2133.25160 | 2 | 5.40E-07 | 0.96 | 4.47 | - | 1490.7 |
| AHQ-2-13-, 6957             | K.TAFDEAIAELDTLSEESYK.D                                                 | 2133.25160 | 2 | 1.52E-06 | 0.96 | 5.22 | - | 1409.8 |
| AHQ-2-10, 5899              | K.TAFDEAIAELDTLSEESYK.D                                                 | 2133.25160 | 2 | 9.79E-08 | 0.57 | 3.34 | - | 404.1  |
| AHQ-2-10, 6682              | K.TAFDEAIAELDTLSEESYK.D                                                 | 2133.25160 | 2 | 7.83E-09 | 0.96 | 4.79 | - | 1244.7 |
| AHQ-2-10, 6688 - 6690       | K.TAFDEAIAELDTLSEESYK.D                                                 | 2133.25160 | 3 | 2.12E-06 | 0.94 | 4.41 | - | 1270.2 |
| AHQ-2-13, 6739              | K.TAFDEAIAELDTLSEESYK.D                                                 | 2133.25160 | 2 | 1.94E-10 | 0.97 | 5.51 | - | 1252.8 |
| AHQ-2-12, 7077 - 7081       | K.TAFDEAIAELDTLSEESYK.D                                                 | 2133.25160 | 2 | 3.86E-08 | 0.97 | 5.57 | - | 1515.6 |
| AHQ-2-14-, 6815 - 6816      | K.TAFDEAIAELDTLSEESYK.D                                                 | 2133.25160 | 2 | 5.28E-07 | 0.97 | 5.49 | - | 1575.4 |
| AHQ-2-9, 7526 - 7598        | K.TAFDEAIAELDTLSEESYKDSLIM*QLLR.D                                       | 3320.66704 | 3 | 2.25E-08 | 0.91 | 4.81 | - | 914.1  |
| AHQ-2-10, 6820 - 6854       | K.TAFDEAIAELDTLSEESYKDSLIM*QLLR.D                                       | 3320.66704 | 3 | 4.77E-11 | 0.89 | 4.36 | - | 832.0  |
| AHQ-2-10, 6878 - 6879       | K.TAFDEAIAELDTLSEESYKDSLIM*QLLR.D                                       | 3304.66764 | 3 | 5.55E-14 | 0.94 | 5.08 | - | 1047.8 |
| AHQ-2-13-, 2299             | R.YLAEVAAGDDK.K                                                         | 1152.23595 | 1 | 1.02E-05 | 0.33 | 1.92 | - | 769.6  |
| AHQ-2-10, 2116              | R.YLAEVAAGDDK.K                                                         | 1152.23595 | 1 | 1.54E-06 | 0.88 | 2.44 | - | 1713.8 |
| AHQ-2-10, 1743 - 1810       | R.YLAEVAAGDDK.K                                                         | 1280.40887 | 1 | 8.90E-04 | 0.86 | 3.84 | - | 680.5  |
| AHQ-2-13, 2171              | R.YLAEVAAGDDK.K                                                         | 1280.40887 | 2 | 3.21E-04 | 0.87 | 3.02 | - | 1117.3 |
| AHQ-2-10, 1732 - 1806       | R.YLAEVAAGDDK.K                                                         | 1280.40887 | 2 | 4.06E-05 | 0.96 | 3.95 | - | 1674.1 |
| AHQ-2-13-, 2037             | R.YLAEVAAGDDK.K                                                         | 1280.40887 | 2 | 2.15E-04 | 0.96 | 3.63 | - | 1833.4 |
| AHQ-2-12, 1957              | R.YLAEVAAGDDK.K                                                         | 1280.40887 | 2 | 3.24E-07 | 0.96 | 3.53 | - | 2027.3 |
| AHQ-2-11, 1972 - 1980       | R.YLAEVAAGDDK.K                                                         | 1280.40887 | 2 | 2.94E-04 | 0.96 | 3.68 | - | 1878.2 |
| AHQ-2-10, 1851              | R.YLAEVAAGDDK.K                                                         | 1280.40887 | 2 | 7.70E-05 | 0.96 | 3.96 | - | 2041.4 |
| AHQ-2-9, 1682 - 1706        | R.YLAEVAAGDDK.K                                                         | 1280.40887 | 2 | 7.50E-07 | 0.91 | 3.11 | - | 1365.8 |
| AHQ-2-10, 1812              | R.YLAEVAAGDDK.K                                                         | 1280.40887 | 3 | 1.55E-06 | 0.91 | 3.33 | - | 1197.9 |
| gi 17986260 ref NP_524147.1 | smooth muscle and non-muscle myosin alkali light chain isoform 2 [Homo  |            |   |          |      |      |   |        |
| AHQ-2-12, 5726 - 5802       | K.M*TEEEVEM*LVAGHEDSNGCINYEELVR.M                                       | 3188.42436 | 3 | 2.83E-06 | 0.96 | 5.40 | - | 1749.3 |
| AHQ-2-12, 5874 - 5953       | K.M*TEEEVEM*LVAGHEDSNGCINYEELVR.M                                       | 3172.42496 | 3 | 8.29E-05 | 0.45 | 3.60 | - | 324.4  |
| AHQ-2-12, 6018 - 6067       | K.M*TEEEVEM*LVAGHEDSNGCINYEELVR.M                                       | 3172.42496 | 3 | 2.58E-06 | 0.86 | 4.21 | - | 912.9  |
| AHQ-2-12, 6133 - 6199       | K.M*TEEEVEM*LVAGHEDSNGCINYEELVR.M                                       | 3172.42496 | 3 | 5.99E-10 | 0.95 | 7.08 | - | 1404.4 |
| AHQ-2-12, 6262 - 6326       | K.M*TEEEVEM*LVAGHEDSNGCINYEELVR.M                                       | 3172.42496 | 3 | 2.20E-04 | 0.84 | 4.70 | - | 1088.2 |
| AHQ-2-12, 6329 - 6405       | K.M*TEEEVEM*LVAGHEDSNGCINYEELVR.M                                       | 3156.42556 | 3 | 4.39E-10 | 0.98 | 7.21 | - | 2947.0 |
| AHQ-2-12, 6346 - 6426       | K.M*TEEEVEM*LVAGHEDSNGCINYEELVR.M                                       | 3172.42496 | 3 | 7.61E-14 | 0.74 | 3.43 | - | 636.5  |
| AHQ-2-12, 6414 - 6481       | K.M*TEEEVEM*LVAGHEDSNGCINYEELVR.M                                       | 3156.42556 | 3 | 2.77E-04 | 0.98 | 6.17 | - | 2657.7 |
| AHQ-2-12, 6489 - 6551       | K.M*TEEEVEM*LVAGHEDSNGCINYEELVR.M                                       | 3172.42496 | 3 | 2.43E-06 | 0.89 | 5.21 | - | 772.9  |
| AHQ-2-12, 7178 - 7242       | K.M*TEEEVEM*LVAGHEDSNGCINYEELVR.M                                       | 3172.42496 | 3 | 4.74E-08 | 0.71 | 3.50 | - | 570.8  |
| AHQ-2-12, 7297              | K.M*TEEEVEM*LVAGHEDSNGCINYEELVR.M                                       | 3156.42556 | 3 | 2.85E-05 | 0.96 | 5.01 | - | 1716.8 |
| AHQ-2-12, 7311              | K.M*TEEEVEM*LVAGHEDSNGCINYEELVR.M                                       | 3172.42496 | 3 | 3.05E-07 | 0.77 | 4.23 | - | 638.9  |
| AHQ-2-14, 6552 - 6610       | K.M*TEEEVEM*LVAGHEDSNGCINYEELVR.M                                       | 3188.42436 | 3 | 1.47E-07 | 0.94 | 4.42 | - | 1572.8 |
| AHQ-2-14-, 5595             | K.M*TEEEVEM*LVAGHEDSNGCINYEELVR.M                                       | 3188.42436 | 3 | 1.64E-12 | 0.96 | 6.10 | - | 1292.2 |
| AHQ-2-14-, 5741 - 5817      | K.M*TEEEVEM*LVAGHEDSNGCINYEELVR.M                                       | 3172.42496 | 3 | 9.57E-08 | 0.84 | 5.08 | - | 693.1  |
| AHQ-2-14-, 5895 - 5928      | K.M*TEEEVEM*LVAGHEDSNGCINYEELVR.M                                       | 3172.42496 | 3 | 1.64E-05 | 0.72 | 4.43 | - | 568.4  |
| AHQ-2-14-, 5985 - 5992      | K.M*TEEEVEM*LVAGHEDSNGCINYEELVR.M                                       | 3172.42496 | 3 | 2.28E-04 | 0.80 | 4.33 | - | 862.9  |
| gi 27498267 ref XP_209737.1 | similar to tyrosine 3/tryptophan 5-monooxygenase activation protein,    |            |   |          |      |      |   |        |
| AHQ-2-10, 5720 - 5782       | R.DICNDVLSLEK.F                                                         | 1420.61093 | 1 | 2.04E-06 | 0.79 | 2.79 | - | 823.8  |
| AHQ-2-14-, 5933 - 6003      | R.DICNDVLSLEK.F                                                         | 1420.61093 | 2 | 6.79E-05 | 0.83 | 2.79 | - | 1043.1 |
| AHQ-2-11, 5869              | R.DICNDVLSLEK.F                                                         | 1420.61093 | 1 | 1.71E-07 | 0.36 | 2.03 | - | 643.0  |
| AHQ-2-10, 6686 - 6758       | R.DICNDVLSLEK.F                                                         | 1420.61093 | 1 | 4.42E-04 | 0.88 | 3.56 | - | 765.0  |
| AHQ-2-9, 6304               | R.DICNDVLSLEK.F                                                         | 1420.61093 | 1 | 6.94E-12 | 0.39 | 1.88 | - | 700.5  |
| AHQ-2-9, 6312               | R.DICNDVLSLEK.F                                                         | 1420.61093 | 2 | 1.22E-04 | 0.96 | 3.97 | - | 1577.0 |
| AHQ-2-9, 6316               | R.DICNDVLSLEK.F                                                         | 1420.61093 | 1 | 2.33E-05 | 0.55 | 2.21 | - | 737.8  |
| AHQ-2-9, 7371               | R.DICNDVLSLEK.F                                                         | 1420.61093 | 1 | 1.34E-07 | 0.85 | 3.48 | - | 701.2  |
| AHQ-2-9, 7374               | R.DICNDVLSLEK.F                                                         | 1420.61093 | 2 | 1.72E-06 | 0.97 | 5.01 | - | 1714.5 |
| AHQ-2-10, 6147              | R.DICNDVLSLEK.F                                                         | 1420.61093 | 2 | 1.31E-06 | 0.94 | 3.76 | - | 1973.1 |
| AHQ-2-10, 5766              | R.DICNDVLSLEK.F                                                         | 1420.61093 | 2 | 1.26E-05 | 0.87 | 3.43 | - | 972.8  |
| AHQ-2-10, 5764              | R.DICNDVLSLEK.F                                                         | 1420.61093 | 1 | 5.23E-09 | 0.82 | 3.28 | - | 801.0  |
| AHQ-2-14-, 6819 - 6832      | R.DICNDVLSLEK.F                                                         | 1420.61093 | 2 | 1.39E-06 | 0.96 | 4.29 | - | 1703.4 |
| AHQ-2-10, 1607 - 1666       | R.EKIQTEL.R.D                                                           | 1017.16155 | 1 | 1.70E-04 | 0.08 | 2.03 | - | 98.3   |
| AHQ-2-10, 4795 - 4858       | K.GIVDQSQQAQYQEAFAISK.K                                                 | 2042.19176 | 2 | 6.75E-10 | 0.98 | 5.60 | - | 1751.4 |
| AHQ-2-10, 4870              | K.GIVDQSQQAQYQEAFAISK.K                                                 | 2042.19176 | 3 | 3.14E-06 | 0.98 | 6.39 | - | 2301.0 |
| AHQ-2-10, 4918 - 4998       | K.GIVDQSQQAQYQEAFAISK.K                                                 | 2042.19176 | 2 | 1.12E-09 | 0.98 | 5.79 | - | 1672.0 |
| AHQ-2-10, 5058 - 5122       | K.GIVDQSQQAQYQEAFAISK.K                                                 | 2042.19176 | 2 | 1.27E-12 | 0.98 | 6.07 | - | 1588.2 |
| AHQ-2-10, 5186 - 5264       | K.GIVDQSQQAQYQEAFAISK.K                                                 | 2042.19176 | 2 | 8.95E-06 | 0.97 | 5.13 | - | 1208.1 |
| AHQ-2-10, 5326 - 5386       | K.GIVDQSQQAQYQEAFAISK.K                                                 | 2042.19176 | 2 | 8.16E-14 | 0.98 | 5.63 | - | 2265.2 |
| AHQ-2-10, 5451 - 5530       | K.GIVDQSQQAQYQEAFAISK.K                                                 | 2042.19176 | 2 | 4.04E-10 | 0.96 | 5.21 | - | 1190.7 |
| AHQ-2-10, 5592 - 5660       | K.GIVDQSQQAQYQEAFAISK.K                                                 | 2042.19176 | 2 | 1.10E-07 | 0.97 | 5.36 | - | 1259.0 |
| AHQ-2-10, 4404 - 4466       | K.GIVDQSQQAQYQEAFAISK.K                                                 | 2042.19176 | 2 | 1.54E-10 | 0.97 | 5.49 | - | 1625.0 |
| AHQ-2-5, 5348               | K.GIVDQSQQAQYQEAFAISK.K                                                 | 2042.19176 | 2 | 8.48E-06 | 0.93 | 4.35 | - | 1094.2 |
| AHQ-2-14-, 5131 - 5139      | K.GIVDQSQQAQYQEAFAISK.K                                                 | 2042.19176 | 2 | 1.05E-07 | 0.98 | 6.45 | - | 1938.6 |
| AHQ-2-10, 4550              | K.GIVDQSQQAQYQEAFAISK.K                                                 | 2042.19176 | 2 | 1.19E-10 | 0.98 | 5.15 | - | 1754.3 |
| AHQ-2-10, 6179 - 6248       | K.GIVDQSQQAQYQEAFAISK.K                                                 | 2042.19176 | 2 | 4.15E-05 | 0.94 | 4.17 | - | 1062.3 |
| AHQ-2-10, 6238 - 6316       | K.GIVDQSQQAQYQEAFAISK.K                                                 | 2042.19176 | 2 | 3.91E-08 | 0.97 | 5.51 | - | 1465.2 |
| AHQ-2-10, 6380              | K.GIVDQSQQAQYQEAFAISK.K                                                 | 2042.19176 | 2 | 1.28E-07 | 0.92 | 3.60 | - | 1152.9 |
| AHQ-2-10, 6475              | K.GIVDQSQQAQYQEAFAISK.K                                                 | 2042.19176 | 2 | 1.49E-08 | 0.95 | 4.53 | - | 1017.1 |
| AHQ-2-10, 6595 - 6599       | K.GIVDQSQQAQYQEAFAISK.K                                                 | 2042.19176 | 2 | 2.30E-06 | 0.88 | 4.09 | - | 555.7  |
| AHQ-2-9, 5250 - 5251        | K.GIVDQSQQAQYQEAFAISK.K                                                 | 2042.19176 | 2 | 4.35E-09 | 0.97 | 5.47 | - | 1320.5 |
| AHQ-2-11, 4644              | K.GIVDQSQQAQYQEAFAISK.K                                                 | 2042.19176 | 2 | 1.13E-07 | 0.96 | 5.09 | - | 1165.1 |
| AHQ-2-11, 5012              | K.GIVDQSQQAQYQEAFAISK.K                                                 | 2042.19176 | 2 | 2.86E-06 | 0.97 | 5.33 | - | 1491.7 |
| AHQ-2-11, 5221 - 5273       | K.GIVDQSQQAQYQEAFAISK.K                                                 | 2042.19176 | 2 | 3.22E-06 | 0.91 | 4.39 | - | 690.7  |
| AHQ-2-9, 4888               | K.GIVDQSQQAQYQEAFAISK.K                                                 | 2042.19176 | 2 | 2.40E-06 | 0.91 | 4.40 | - | 725.6  |
| AHQ-2-12, 5245              | K.GIVDQSQQAQYQEAFAISK.K                                                 | 2042.19176 | 2 | 7.89E-09 | 0.98 | 5.73 | - | 1719.4 |
| AHQ-2-13, 5079 - 5128       | K.GIVDQSQQAQYQEAFAISK.K                                                 | 2042.19176 | 2 | 2.29E-11 | 0.97 | 5.35 | - | 1540.2 |
| AHQ-2-13, 5145              | K.GIVDQSQQAQYQEAFAISK.K                                                 | 2042.19176 | 3 | 7.50E-08 | 0.98 | 6.09 | - | 2512.7 |
| AHQ-2-14, 6120 - 6128       | K.GIVDQSQQAQYQEAFAISK.K                                                 | 2042.19176 | 2 | 2.81E-08 | 0.97 | 5.25 | - | 1613.4 |
| AHQ-2-13-, 5201             | K.GIVDQSQQAQYQEAFAISK.K                                                 | 2042.19176 | 2 | 5.70E-07 | 0.95 | 4.62 | - | 1159.1 |
| AHQ-2-13-, 5219 - 5299      | K.GIVDQSQQAQYQEAFAISK.K                                                 | 2042.19176 | 3 | 1.25E-05 | 0.93 | 3.83 | - | 1290.1 |
| AHQ-2-1, 5501               | K.GIVDQSQQAQYQEAFAISK.K                                                 | 2042.19176 | 2 | 1.83E-07 | 0.94 | 4.52 | - | 990.5  |
| AHQ-2-10, 4259              | K.GIVDQSQQAQYQEAFAISK.K                                                 | 2170.36467 | 3 | 3.20E-08 | 0.92 | 4.81 | - | 1380.5 |
| AHQ-2-10, 4250              | K.GIVDQSQQAQYQEAFAISK.K                                                 | 2170.36467 | 2 | 1.26E-04 | 0.98 | 5.97 | - | 2223.3 |
| gi 4505733 ref NP_002610.1  | platelet factor 4 (chemokine (C-X-C motif) ligand 4); platelet factor 4 |            |   |          |      |      |   |        |
| AHQ-2-14, 5400 - 5460       | K.AGPHCPTAQLIATLK.N                                                     | 1579.84600 | 2 | 3.21E-04 | 0.84 | 3.64 | - | 620.5  |
| AHQ-2-13-, 4143 - 4209      | K.AGPHCPTAQLIATLK.N                                                     | 1579.84600 | 3 | 3.80E-04 | 0.84 | 3.80 | - | 998.4  |
| AHQ-2-13-, 4302 - 4366      | K.AGPHCPTAQLIATLK.N                                                     | 1579.84600 | 2 | 3.75E-06 | 0.90 | 4.22 | - | 761.3  |
| AHQ-2-14-, 3997 - 4080      | K.AGPHCPTAQLIATLK.N                                                     | 1579.84600 | 2 | 6.40E-10 | 0.91 | 3.71 | - | 813.7  |
| AHQ-2-13, 4127              | K.AGPHCPTAQLIATLK.N                                                     | 1579.84600 | 2 | 3.75E-05 | 0.89 | 3.88 | - | 719.5  |
| AHQ-2-14-, 3999 - 4077      | K.AGPHCPTAQLIATLK.N                                                     | 1579.84600 | 3 | 9.05E-05 | 0.83 | 3.85 | - | 847.2  |
| AHQ-2-14-, 4152 - 4215      | K.AGPHCPTAQLIATLK.N                                                     | 1579.84600 | 2 | 4.72E-08 | 0.92 | 3.90 | - | 777.6  |
| AHQ-2-14-, 4243             | K.AGPHCPTAQLIATLK.N                                                     | 1579.84600 | 3 | 4.17E-04 | 0.91 | 4.32 | - | 1328.7 |
| AHQ-2-14, 5280 - 5361       | K.AGPHCPTAQLIATLK.N                                                     | 1579.84600 | 3 | 4.47E-04 | 0.72 | 3.51 | - | 772.4  |



|                            |                                                                         |            |   |          |       |        |       |         |
|----------------------------|-------------------------------------------------------------------------|------------|---|----------|-------|--------|-------|---------|
| AHQ-2-14, 5272             | K.AGPHCPTAQLIATLK.N                                                     | 1579.84600 | 2 | 2.47E-06 | 0.83  | 3.26   | -     | 632.0   |
| AHQ-2-14, 5265 - 5338      | K.AGPHCPTAQLIATLK.N                                                     | 1579.84600 | 2 | 1.42E-07 | 0.93  | 4.59   | -     | 681.2   |
| AHQ-2-13-, 4174 - 4210     | K.AGPHCPTAQLIATLK.N                                                     | 1579.84600 | 2 | 4.16E-07 | 0.89  | 3.82   | -     | 736.7   |
| AHQ-2-14, 5024 - 5028      | K.AGPHCPTAQLIATLK.N                                                     | 1579.84600 | 2 | 2.50E-09 | 0.92  | 4.13   | -     | 694.7   |
| AHQ-2-14, 4989             | K.AGPHCPTAQLIATLKNGR.K                                                  | 1907.18700 | 2 | 5.14E-09 | 0.96  | 4.85   | -     | 1300.1  |
| AHQ-2-14, 4941 - 5000      | K.AGPHCPTAQLIATLKNGR.K                                                  | 1907.18700 | 3 | 3.18E-10 | 0.98  | 5.41   | -     | 3098.8  |
| AHQ-2-14, 5153 - 5226      | K.AGPHCPTAQLIATLKNGR.K                                                  | 1907.18700 | 2 | 3.69E-06 | 0.94  | 4.32   | -     | 923.9   |
| AHQ-2-14, 4866 - 4938      | K.AGPHCPTAQLIATLKNGR.K                                                  | 1907.18700 | 2 | 5.70E-05 | 0.92  | 4.11   | -     | 751.4   |
| AHQ-2-14, 4781             | K.AGPHCPTAQLIATLKNGR.K                                                  | 1907.18700 | 2 | 6.80E-04 | 0.93  | 4.02   | -     | 1046.9  |
| AHQ-2-13-, 4113            | K.AGPHCPTAQLIATLKNGR.K                                                  | 1907.18700 | 2 | 2.11E-07 | 0.95  | 3.80   | -     | 1165.9  |
| AHQ-2-13-, 4081 - 4109     | K.AGPHCPTAQLIATLKNGR.K                                                  | 1907.18700 | 3 | 5.86E-08 | 0.98  | 5.32   | -     | 2619.1  |
| AHQ-2-14-, 3936            | K.AGPHCPTAQLIATLKNGR.K                                                  | 1907.18700 | 2 | 3.94E-12 | 0.95  | 4.72   | -     | 1002.5  |
| AHQ-2-14-, 3915            | K.AGPHCPTAQLIATLKNGR.K                                                  | 1907.18700 | 3 | 1.01E-09 | 0.95  | 4.50   | -     | 1827.2  |
| AHQ-2-13, 4045             | K.AGPHCPTAQLIATLKNGR.K                                                  | 1907.18700 | 2 | 8.22E-14 | 0.94  | 4.49   | -     | 972.0   |
| AHQ-2-14, 5213 - 5217      | K.AGPHCPTAQLIATLKNGR.K                                                  | 1907.18700 | 3 | 5.33E-09 | 0.98  | 5.32   | -     | 2457.9  |
| AHQ-2-14-, 2545 - 2615     | R.HITSLEVIK.A                                                           | 1040.23825 | 2 | 1.63E-04 | 0.90  | 3.65   | -     | 523.1   |
| AHQ-2-14, 3380 - 3690      | R.HITSLEVIK.A                                                           | 1040.23825 | 1 | 7.67E-04 | 0.26  | 2.03   | -     | 367.1   |
| AHQ-2-12, 2447             | R.HITSLEVIK.A                                                           | 1040.23825 | 2 | 8.27E-06 | 0.81  | 2.66   | -     | 625.7   |
| AHQ-2-13, 2639 - 2667      | R.HITSLEVIK.A                                                           | 1040.23825 | 2 | 2.48E-04 | 0.89  | 3.24   | -     | 693.3   |
| AHQ-2-13-, 2537 - 2607     | R.HITSLEVIK.A                                                           | 1040.23825 | 2 | 5.13E-06 | 0.91  | 3.26   | -     | 646.8   |
| AHQ-2-14, 3381 - 3441      | R.HITSLEVIK.A                                                           | 1040.23825 | 2 | 7.40E-04 | 0.81  | 2.92   | -     | 580.8   |
| AHQ-2-14, 3500 - 3562      | R.HITSLEVIK.A                                                           | 1040.23825 | 2 | 1.51E-04 | 0.76  | 2.91   | -     | 414.5   |
| AHQ-2-14-, 2391            | R.HITSLEVIK.A                                                           | 1040.23825 | 1 | 2.36E-05 | 0.40  | 2.22   | -     | 431.8   |
| AHQ-2-14-, 2387 - 2411     | R.HITSLEVIK.A                                                           | 1040.23825 | 2 | 4.16E-06 | 0.89  | 3.33   | -     | 617.8   |
| AHQ-2-14-, 2457 - 2535     | R.HITSLEVIK.A                                                           | 1040.23825 | 2 | 1.64E-06 | 0.93  | 4.01   | -     | 663.7   |
| AHQ-2-14, 6080 - 6140      | K.ICLDLQAPLYK.K                                                         | 1335.59400 | 2 | 5.80E-05 | 0.96  | 4.25   | -     | 1753.6  |
| AHQ-2-13, 4939 - 4951      | K.ICLDLQAPLYK.K                                                         | 1335.59400 | 2 | 1.70E-05 | 0.97  | 4.07   | -     | 1916.1  |
| AHQ-2-13-, 5013 - 5015     | K.ICLDLQAPLYK.K                                                         | 1335.59400 | 2 | 1.98E-06 | 0.97  | 4.64   | -     | 2104.2  |
| AHQ-2-14-, 4923 - 4936     | K.ICLDLQAPLYK.K                                                         | 1335.59400 | 2 | 3.23E-06 | 0.97  | 4.40   | -     | 2089.6  |
| AHQ-2-14-, 4929            | K.ICLDLQAPLYK.K                                                         | 1335.59400 | 1 | 1.37E-04 | 0.66  | 2.64   | -     | 649.4   |
| AHQ-2-14, 6093 - 6154      | K.ICLDLQAPLYK.K                                                         | 1335.59400 | 1 | 1.57E-05 | 0.70  | 2.97   | -     | 596.4   |
| AHQ-2-14, 6281             | K.ICLDLQAPLYK.K                                                         | 1335.59400 | 2 | 5.70E-04 | 0.75  | 3.21   | -     | 681.5   |
| AHQ-2-14-, 5148            | K.ICLDLQAPLYK.K                                                         | 1335.59400 | 2 | 2.66E-05 | 0.94  | 4.02   | -     | 1348.9  |
| AHQ-2-13-, 4477            | R.KICLDLQAPLYK.K                                                        | 1463.76691 | 3 | 4.98E-05 | 0.90  | 3.48   | -     | 1572.4  |
| AHQ-2-13-, 4473 - 4481     | R.KICLDLQAPLYK.K                                                        | 1463.76691 | 2 | 5.43E-09 | 0.98  | 5.07   | -     | 1930.6  |
| AHQ-2-14, 5965             | R.KICLDLQAPLYK.K                                                        | 1463.76691 | 2 | 1.15E-06 | 0.96  | 4.40   | -     | 1417.9  |
| AHQ-2-14, 5772 - 5773      | R.KICLDLQAPLYK.K                                                        | 1463.76691 | 2 | 5.43E-06 | 0.97  | 4.61   | -     | 1605.8  |
| AHQ-2-14, 5648 - 5708      | R.KICLDLQAPLYK.K                                                        | 1463.76691 | 2 | 2.34E-06 | 0.97  | 4.41   | -     | 1870.1  |
| AHQ-2-14, 5482 - 5560      | R.KICLDLQAPLYK.K                                                        | 1463.76691 | 2 | 3.11E-06 | 0.95  | 4.16   | -     | 1305.7  |
| AHQ-2-14-, 4295            | R.KICLDLQAPLYK.K                                                        | 1463.76691 | 2 | 1.06E-05 | 0.93  | 3.83   | -     | 1137.0  |
| AHQ-2-14-, 4435 - 4500     | R.KICLDLQAPLYK.K                                                        | 1463.76691 | 2 | 2.08E-05 | 0.97  | 4.73   | -     | 1582.7  |
| AHQ-2-14-, 4441 - 4507     | R.KICLDLQAPLYK.K                                                        | 1463.76691 | 3 | 8.81E-04 | 0.87  | 3.98   | -     | 1282.9  |
| AHQ-2-14-, 4563 - 4627     | R.KICLDLQAPLYK.K                                                        | 1463.76691 | 2 | 1.50E-04 | 0.95  | 4.72   | -     | 1117.7  |
| AHQ-2-13, 4415             | R.KICLDLQAPLYK.K                                                        | 1463.76691 | 2 | 1.55E-06 | 0.95  | 4.19   | -     | 1261.4  |
| AHQ-2-12, 4454 - 4477      | R.KICLDLQAPLYK.K                                                        | 1463.76691 | 2 | 2.21E-07 | 0.93  | 3.77   | -     | 1107.2  |
| AHQ-2-13-, 4478            | R.KICLDLQAPLYK.K                                                        | 1463.76691 | 1 | 8.98E-06 | 0.82  | 3.47   | -     | 672.7   |
| gi4507949 ref NP_003395.1  | tyrosine 3-monooxygenase/tryptophan 5-monooxygenase activation protein, |            |   | 1.17E-13 | 4.56  | 50.28  | 31.70 | 28082.2 |
| AHQ-2-10, 6875             | K.IEAELQDICNDVLELLDK.Y                                                  | 2132.37471 | 2 | 8.95E-08 | 0.96  | 5.61   | -     | 1133.0  |
| AHQ-2-10, 4074             | K.QTTVNSNQYQAEAFISK.K                                                   | 2160.28351 | 2 | 1.09E-05 | 0.81  | 3.61   | -     | 447.7   |
| AHQ-2-13-, 6813            | K.TAFDEAIAELDTLNEESYK.D                                                 | 2160.27705 | 2 | 5.23E-07 | 0.93  | 4.42   | -     | 946.0   |
| AHQ-2-10, 6200             | K.TAFDEAIAELDTLNEESYK.D                                                 | 2160.27705 | 2 | 1.00E-05 | 0.77  | 3.58   | -     | 515.7   |
| AHQ-2-14-, 6844 - 6903     | K.TAFDEAIAELDTLNEESYK.D                                                 | 2160.27705 | 2 | 1.44E-04 | 0.86  | 4.05   | -     | 593.9   |
| AHQ-2-14-, 6675 - 6744     | K.TAFDEAIAELDTLNEESYK.D                                                 | 2160.27705 | 2 | 1.19E-05 | 0.95  | 4.96   | -     | 783.9   |
| AHQ-2-10, 6419             | K.TAFDEAIAELDTLNEESYK.D                                                 | 2160.27705 | 2 | 3.50E-04 | 0.96  | 4.74   | -     | 1451.5  |
| AHQ-2-10, 6874 - 6876      | K.TAFDEAIAELDTLNEESYKDTSLIM*QLLR.D                                      | 3347.69249 | 3 | 1.17E-13 | 0.94  | 5.09   | -     | 1044.2  |
| AHQ-2-10, 2732             | K.YLIPNATOPESK.V                                                        | 1361.52512 | 1 | 7.50E-05 | 0.67  | 2.29   | -     | 749.8   |
| AHQ-2-10, 2618 - 2628      | K.YLIPNATOPESK.V                                                        | 1361.52512 | 2 | 3.13E-06 | 0.92  | 3.62   | -     | 827.0   |
| AHQ-2-10, 2823             | K.YLIPNATOPESK.V                                                        | 1361.52512 | 1 | 2.92E-05 | 0.77  | 2.49   | -     | 915.7   |
| gi5031987 ref NP_005720.1  | peptidylprolyl isomerase F (cyclophilin F) [Homo sapiens]               |            |   | 1.23E-13 | 4.87  | 60.31  | 41.50 | 22040.1 |
| AHQ-2-12, 3727             | R.FPDENFTLK.H                                                           | 1111.22866 | 2 | 1.55E-05 | 0.63  | 2.66   | -     | 606.5   |
| AHQ-2-12, 3817             | R.FPDENFTLK.H                                                           | 1111.22866 | 2 | 4.89E-04 | 0.81  | 2.61   | -     | 874.6   |
| AHQ-2-12, 4081             | R.FPDENFTLK.H                                                           | 1111.22866 | 1 | 2.11E-04 | 0.17  | 2.07   | -     | 226.8   |
| AHQ-2-12, 5178 - 5241      | K.GSGDPSSSSSSGNPLVLDVDANGKPLGR.V                                        | 2834.99028 | 3 | 1.23E-13 | 0.91  | 4.54   | -     | 945.2   |
| AHQ-2-12, 5195 - 5265      | K.GSGDPSSSSSSGNPLVLDVDANGKPLGR.V                                        | 2834.99028 | 2 | 1.01E-06 | 0.52  | 2.58   | -     | 292.3   |
| AHQ-2-12, 6046 - 6111      | K.HVGPVGLSMANAGPNTNGSQFFICTIK.T                                         | 2820.19665 | 2 | 1.44E-06 | 0.90  | 4.35   | -     | 649.1   |
| AHQ-2-14-, 5321            | K.HVGPVGLSM*ANAGPNTNGSQFFICTIK.T                                        | 2836.19605 | 3 | 7.52E-06 | 0.92  | 4.95   | -     | 775.9   |
| AHQ-2-11, 5684             | K.HVGPVGLSMANAGPNTNGSQFFICTIK.T                                         | 2820.19665 | 2 | 2.90E-05 | 0.90  | 4.73   | -     | 450.3   |
| AHQ-2-12, 5373 - 5375      | K.HVGPVGLSM*ANAGPNTNGSQFFICTIK.T                                        | 2836.19605 | 2 | 2.74E-05 | 0.91  | 4.85   | -     | 384.9   |
| AHQ-2-12, 5374 - 5398      | K.HVGPVGLSM*ANAGPNTNGSQFFICTIK.T                                        | 2836.19605 | 3 | 1.65E-05 | 0.94  | 4.66   | -     | 1483.4  |
| AHQ-2-12, 5525             | K.HVGPVGLSM*ANAGPNTNGSQFFICTIK.T                                        | 2836.19605 | 2 | 1.07E-04 | 0.67  | 3.02   | -     | 326.8   |
| AHQ-2-12, 5909 - 5973      | K.HVGPVGLSMANAGPNTNGSQFFICTIK.T                                         | 2820.19665 | 2 | 1.50E-07 | 0.93  | 4.78   | -     | 577.5   |
| AHQ-2-12, 5918 - 5983      | K.HVGPVGLSMANAGPNTNGSQFFICTIK.T                                         | 2820.19665 | 3 | 1.26E-06 | 0.97  | 6.14   | -     | 1742.4  |
| AHQ-2-14-, 5857            | K.HVGPVGLSMANAGPNTNGSQFFICTIK.T                                         | 2820.19665 | 3 | 2.56E-08 | 0.94  | 4.98   | -     | 1351.8  |
| AHQ-2-12, 4023             | R.VIPSFMCQAQDFTNHNGTGK.S                                                | 2256.46118 | 2 | 2.58E-05 | 0.65  | 2.87   | -     | 141.1   |
| AHQ-2-12, 4651 - 4723      | R.VIPSFMCQAQDFTNHNGTGK.S                                                | 2240.46178 | 2 | 1.71E-05 | 0.83  | 3.73   | -     | 463.7   |
| gi4505257 ref NP_002435.1  | moesin [Homo sapiens]                                                   |            |   | 1.42E-13 | 7.53  | 90.29  | 23.10 | 67819.5 |
| AHQ-2-6, 2283              | K.ALTSELANAR.D                                                          | 1046.15975 | 2 | 2.09E-05 | 0.93  | 3.24   | -     | 1192.8  |
| AHQ-2-6, 3921              | R.EDAVLEYLK.I                                                           | 1080.21287 | 1 | 8.46E-05 | 0.41  | 2.71   | -     | 253.0   |
| AHQ-2-7, 7456              | K.EGILNDDIYCPPEAVLLASYAVQSK.Y                                           | 2869.19288 | 2 | 9.73E-05 | 0.49  | 2.89   | -     | 255.5   |
| AHQ-2-10, 6658             | K.FYPEDVSEELIQDITQR.L                                                   | 2083.24065 | 2 | 3.31E-08 | 0.97  | 5.00   | -     | 1980.1  |
| AHQ-2-9, 7306              | K.FYPEDVSEELIQDITQR.L                                                   | 2083.24065 | 2 | 1.09E-09 | 0.95  | 4.57   | -     | 1181.7  |
| AHQ-2-11, 6710             | K.FYPEDVSEELIQDITQR.L                                                   | 2083.24065 | 2 | 1.77E-04 | 0.85  | 3.58   | -     | 710.9   |
| AHQ-2-6, 7133 - 7151       | K.FYPEDVSEELIQDITQR.L                                                   | 2083.24065 | 2 | 2.72E-11 | 0.96  | 5.20   | -     | 1181.4  |
| AHQ-2-7, 7361              | K.FYPEDVSEELIQDITQR.L                                                   | 2083.24065 | 2 | 7.28E-11 | 0.97  | 5.71   | -     | 1101.1  |
| AHQ-2-13, 6720             | K.FYPEDVSEELIQDITQR.L                                                   | 2083.24065 | 2 | 9.16E-11 | 0.97  | 5.22   | -     | 1243.6  |
| AHQ-2-6, 5486              | K.IAQDLEM*YGVNYFSIK.N                                                   | 1908.16395 | 2 | 4.36E-09 | 0.97  | 4.81   | -     | 1801.8  |
| AHQ-2-6, 1995              | R.ISQLEMAR.Q                                                            | 948.12272  | 2 | 1.42E-04 | 0.87  | 2.78   | -     | 1168.8  |
| AHQ-2-6, 4477              | K.KTQEQLALEMAELTAR.I                                                    | 1833.10018 | 2 | 3.98E-07 | 0.97  | 4.77   | -     | 1510.0  |
| AHQ-2-6, 3457              | K.TAMSTPHVAEPAENEQDEQDENGAEASADLR.A                                     | 3314.36856 | 3 | 1.42E-13 | 0.94  | 5.21   | -     | 1314.3  |
| AHQ-2-6, 3310 - 3385       | K.TAMSTPHVAEPAENEQDEQDENGAEASADLR.A                                     | 3314.36856 | 3 | 4.99E-09 | 0.93  | 4.89   | -     | 1148.8  |
| AHQ-2-6, 5185 - 5194       | K.TQEQLALEMAELTAR.I                                                     | 1704.92727 | 2 | 1.02E-10 | 0.98  | 5.59   | -     | 2047.5  |
| AHQ-2-7, 5148              | K.TQEQLALEMAELTAR.I                                                     | 1704.92727 | 2 | 3.74E-04 | 0.72  | 2.71   | -     | 714.7   |
| gi13994151 ref NP_066272.1 | PDZ and LIM domain 1 (elfin); carboxy terminal LIM domain protein 1 [H  |            |   | 1.55E-13 | 15.15 | 200.26 | 55.00 | 36071.5 |
| AHQ-2-14-, 6625            | K.AALANLCIGDVITAIDGENTSNM*THLEAQRN.I                                    | 3331.63807 | 3 | 3.51E-07 | 0.80  | 4.25   | -     | 424.7   |
| AHQ-2-14-, 6375 - 6451     | K.AALANLCIGDVITAIDGENTSNM*THLEAQRN.I                                    | 3315.63867 | 3 | 3.27E-09 | 0.93  | 4.98   | -     | 976.0   |
| AHQ-2-13-, 6917            | K.AALANLCIGDVITAIDGENTSNM*THLEAQRN.I                                    | 3315.63867 | 3 | 1.55E-13 | 0.92  | 4.91   | -     | 621.3   |
| AHQ-2-13, 6697             | K.AALANLCIGDVITAIDGENTSNM*THLEAQRN.I                                    | 3315.63867 | 3 | 2.04E-08 | 0.89  | 4.42   | -     | 667.1   |
| AHQ-2-13-, 6775 - 6810     | K.AALANLCIGDVITAIDGENTSNM*THLEAQRN.I                                    | 3331.63807 | 3 | 4.71E-06 | 0.79  | 3.86   | -     | 519.8   |
| AHQ-2-12, 7022             | K.AALANLCIGDVITAIDGENTSNM*THLEAQRN.I                                    | 3315.63867 | 3 | 1.07E-11 | 0.88  | 4.40   | -     | 622.3   |
| AHQ-2-14-, 6165            | K.AALANLCIGDVITAIDGENTSNM*THLEAQRN.I                                    | 3331.63807 | 3 | 6.52E-05 | 0.92  | 4.69   | -     | 791.3   |
| AHQ-2-14-, 6024 - 6100     | K.AALANLCIGDVITAIDGENTSNM*THLEAQRN.I                                    | 3331.63807 | 3 | 6.75E-07 | 0.87  | 4.28   | -     | 472.1   |
| AHQ-2-12, 6765             | K.AALANLCIGDVITAIDGENTSNM*THLEAQRN.I                                    | 3331.63807 | 3 | 1.84E-08 | 0.74  | 3.68   | -     | 305.8   |
| AHQ-2-13, 6557             | K.AALANLCIGDVITAIDGENTSNM*THLEAQRN.I                                    | 3331.63807 | 3 | 2.42E-04 | 0.80  | 3.90   | -     | 418.4   |
| AHQ-2-13-, 4490            | K.CGTGIVGVFVK.L                                                         | 1138.36198 | 2 | 6.06E-04 | 0.95  | 3.73   | -     | 1354.1  |
| AHQ-2-13, 4456             | K.CGTGIVGVFVK.L                                                         | 1138.36198 | 2 | 1.61E-04 | 0.92  | 3.24   | -     | 1123.0  |
| AHQ-2-14-, 4455            | K.CGTGIVGVFVK.L                                                         | 1138.36198 | 2 | 1.31E-04 | 0.94  | 3.12   | -     | 1456.3  |
| AHQ-2-14-, 3611 - 3619     | K.DFEQPLAISR.V                                                          | 1176.30388 | 1 | 6.36E-07 | 0.56  | 2.29   | -     | 345.2   |

|                              |                                                                         |            |   |          |      |        |       |         |
|------------------------------|-------------------------------------------------------------------------|------------|---|----------|------|--------|-------|---------|
| AHQ-2-12, 3610               | K.DFEQPLAISR.V                                                          | 1176.30388 | 2 | 3.08E-04 | 0.85 | 3.05   | -     | 844.6   |
| AHQ-2-13, 3700               | K.DFEQPLAISR.V                                                          | 1176.30388 | 2 | 2.05E-05 | 0.84 | 3.08   | -     | 799.9   |
| AHQ-2-14-, 3616 - 3617       | K.DFEQPLAISR.V                                                          | 1176.30388 | 2 | 7.50E-04 | 0.90 | 3.39   | -     | 1183.0  |
| AHQ-2-13, 3413               | K.GCTDNLTLTVAR.S                                                        | 1322.47058 | 2 | 4.31E-04 | 0.78 | 3.25   | -     | 593.9   |
| AHQ-2-13-, 3387              | K.GCTDNLTLTVAR.S                                                        | 1322.47058 | 2 | 3.70E-06 | 0.84 | 3.64   | -     | 701.6   |
| AHQ-2-14-, 3360              | K.GCTDNLTLTVAR.S                                                        | 1322.47058 | 2 | 1.19E-04 | 0.84 | 3.53   | -     | 629.8   |
| AHQ-2-12, 3997 - 4066        | K.GHFFVEDQIYCEK.H                                                       | 1673.82684 | 2 | 2.25E-04 | 0.95 | 4.50   | -     | 1000.0  |
| AHQ-2-13, 4025 - 4029        | K.GHFFVEDQIYCEK.H                                                       | 1673.82684 | 2 | 3.60E-05 | 0.96 | 4.40   | -     | 1454.8  |
| AHQ-2-14, 4910 - 4985        | K.GHFFVEDQIYCEK.H                                                       | 1673.82684 | 2 | 8.58E-06 | 0.93 | 3.55   | -     | 912.1   |
| AHQ-2-13-, 4077              | K.GHFFVEDQIYCEK.H                                                       | 1673.82684 | 2 | 4.51E-05 | 0.97 | 4.24   | -     | 1669.3  |
| AHQ-2-13-, 2999 - 3003       | R.HPECVVCTDCGNTLK.Q                                                     | 1858.02023 | 2 | 9.24E-04 | 0.93 | 3.77   | -     | 789.3   |
| AHQ-2-12, 2970               | R.HPECVVCTDCGNTLK.Q                                                     | 1858.02023 | 2 | 7.21E-05 | 0.81 | 2.90   | -     | 601.5   |
| AHQ-2-13, 2728               | R.HRHPECVVCTDCGNTLK.Q                                                   | 2151.34648 | 2 | 7.10E-06 | 0.82 | 3.49   | -     | 419.7   |
| AHQ-2-13-, 2671              | R.HRHPECVVCTDCGNTLK.Q                                                   | 2151.34648 | 3 | 1.17E-05 | 0.93 | 4.67   | -     | 911.9   |
| AHQ-2-11, 3022               | R.IKGGTDNLTLTVAR.S                                                      | 1563.80174 | 2 | 1.44E-08 | 0.93 | 3.33   | -     | 1175.4  |
| AHQ-2-14, 4033 - 4085        | R.IKGGTDNLTLTVAR.S                                                      | 1563.80174 | 2 | 5.11E-04 | 0.90 | 3.22   | -     | 1074.2  |
| AHQ-2-14, 3905 - 3956        | R.IKGGTDNLTLTVAR.S                                                      | 1563.80174 | 2 | 1.04E-07 | 0.91 | 3.31   | -     | 1075.5  |
| AHQ-2-13-, 3073              | R.IKGGTDNLTLTVAR.S                                                      | 1563.80174 | 2 | 1.23E-10 | 0.94 | 4.39   | -     | 897.8   |
| AHQ-2-12, 3057               | R.IKGGTDNLTLTVAR.S                                                      | 1563.80174 | 2 | 1.10E-11 | 0.86 | 3.06   | -     | 829.6   |
| AHQ-2-14-, 3033              | R.IKGGTDNLTLTVAR.S                                                      | 1563.80174 | 3 | 6.73E-04 | 0.92 | 4.25   | -     | 1549.3  |
| AHQ-2-14-, 3031 - 3043       | R.IKGGTDNLTLTVAR.S                                                      | 1563.80174 | 2 | 1.20E-10 | 0.96 | 4.98   | -     | 1046.1  |
| AHQ-2-13, 3111 - 3112        | R.IKGGTDNLTLTVAR.S                                                      | 1563.80174 | 2 | 1.76E-07 | 0.86 | 3.42   | -     | 752.6   |
| AHQ-2-13-, 5302              | K.LPMCDKCGTGIVGVFVK.L                                                   | 1884.27358 | 3 | 8.88E-07 | 0.60 | 3.32   | -     | 530.2   |
| AHQ-2-12, 4781 - 4807        | K.LPM*CDKCGTGIVGVFVK.L                                                  | 1900.27298 | 2 | 7.67E-05 | 0.80 | 2.98   | -     | 604.0   |
| AHQ-2-14-, 5248              | K.LPMCDKCGTGIVGVFVK.L                                                   | 1884.27358 | 3 | 7.17E-06 | 0.80 | 3.83   | -     | 525.9   |
| AHQ-2-13, 3803               | R.LVGGKDFEQPLAISR.V                                                     | 1630.86972 | 2 | 1.00E-04 | 0.94 | 4.60   | -     | 913.9   |
| AHQ-2-14-, 3724              | R.LVGGKDFEQPLAISR.V                                                     | 1630.86972 | 2 | 4.24E-08 | 0.97 | 5.19   | -     | 1746.7  |
| AHQ-2-14, 4589 - 4658        | R.LVGGKDFEQPLAISR.V                                                     | 1630.86972 | 2 | 1.60E-06 | 0.89 | 3.85   | -     | 904.1   |
| AHQ-2-13, 4079               | K.MNLASEPEQVHLHIGSAHNR.S                                                | 2104.33619 | 2 | 4.46E-05 | 0.89 | 4.08   | -     | 623.8   |
| AHQ-2-13-, 3523              | K.M*NLASEPEQVHLHIGSAHNR.S                                               | 2120.33559 | 3 | 1.97E-10 | 0.64 | 3.22   | -     | 532.8   |
| AHQ-2-12, 6771 - 6790        | K.QSTSLVFLVQELIESEEK.G                                                  | 1981.18977 | 2 | 5.50E-09 | 0.96 | 4.98   | -     | 1215.5  |
| AHQ-2-13, 6573 - 6576        | K.QSTSLVFLVQELIESEEK.G                                                  | 1981.18977 | 2 | 7.66E-10 | 0.97 | 4.73   | -     | 1818.8  |
| AHQ-2-13-, 6778              | K.QSTSLVFLVQELIESEEK.G                                                  | 1981.18977 | 2 | 4.30E-07 | 0.96 | 4.62   | -     | 1401.4  |
| AHQ-2-13, 6095               | K.QSTSLVFLVQELIESEEEKGDPNKPSGFR.S                                       | 3037.32681 | 3 | 5.91E-05 | 0.88 | 4.28   | -     | 647.1   |
| AHQ-2-13-, 6273 - 6275       | K.QSTSLVFLVQELIESEEEKGDPNKPSGFR.S                                       | 3037.32681 | 3 | 2.22E-07 | 0.66 | 3.35   | -     | 488.2   |
| AHQ-2-12, 2365 - 2371        | R.SAM*PFTASPASSTTAR.V                                                   | 1599.74799 | 2 | 5.44E-04 | 0.77 | 3.08   | -     | 637.4   |
| AHQ-2-13, 3035               | R.SAMPFTASPASSTTAR.V                                                    | 1583.74859 | 2 | 3.59E-07 | 0.23 | 2.51   | -     | 234.0   |
| AHQ-2-12, 4813 - 4883        | R.VTPPEGEYVVTVFPK                                                       | 1662.90695 | 2 | 4.65E-04 | 0.30 | 2.62   | -     | 111.4   |
| AHQ-2-13-, 3061 - 3071       | K.VWSPVLVTEEGKR.H                                                       | 1401.59247 | 2 | 5.39E-07 | 0.81 | 2.67   | -     | 766.7   |
| AHQ-2-14-, 2979              | K.VWSPVLVTEEGKR.H                                                       | 1401.59247 | 2 | 6.24E-08 | 0.90 | 2.68   | -     | 1197.6  |
| AHQ-2-13, 3095               | K.VWSPVLVTEEGKR.H                                                       | 1401.59247 | 2 | 5.10E-07 | 0.55 | 2.53   | -     | 551.3   |
| gj[5729770]ref[NP_000382.3]  | ceroid-lipofuscinosis, neuronal 2, late infantile (Jansky-Bielschowsky) |            |   | 1.73E-13 | 1.91 | 20.32  | 7.30  | 61247.6 |
| AHQ-2-8, 2615                | R.LFGNGFAHQASVAR.V                                                      | 1475.63637 | 2 | 2.98E-06 | 0.93 | 4.24   | -     | 1116.0  |
| AHQ-2-8, 7410 - 7412         | R.VPIPVVSGTASSTPVFGGILSLINEHR.I                                         | 2836.23725 | 3 | 1.73E-13 | 0.98 | 6.41   | -     | 1688.0  |
| gj[7669492]ref[NP_002037.2]  | glyceraldehyde-3-phosphate dehydrogenase [Homo sapiens]                 |            |   | 2.12E-13 | 9.27 | 120.36 | 48.40 | 36053.0 |
| AHQ-2-11, 3485               | R.GALQNIIPASTGAAK.A                                                     | 1412.61680 | 1 | 5.89E-08 | 0.76 | 3.39   | -     | 522.7   |
| AHQ-2-9, 3290 - 3358         | R.GALQNIIPASTGAAK.A                                                     | 1412.61680 | 1 | 1.37E-06 | 0.64 | 3.38   | -     | 284.2   |
| AHQ-2-9, 7218 - 7291         | K.GILGYTEHQVSSDFNSDTHSSTFDAGAGIALNDHFVK.L                               | 4039.28524 | 3 | 6.17E-09 | 0.96 | 6.37   | -     | 1207.8  |
| AHQ-2-9, 6254 - 6327         | K.GILGYTEHQVSSDFNSDTHSSTFDAGAGIALNDHFVK.L                               | 4039.28524 | 3 | 3.46E-05 | 0.90 | 4.82   | -     | 814.5   |
| AHQ-2-9, 4260                | K.RVIISAPADAPMFVGMVNHK.Y                                                | 2370.78022 | 3 | 5.97E-06 | 0.91 | 4.36   | -     | 994.6   |
| AHQ-2-9, 7530 - 7531         | K.VDIVAINDFIDLNMYMVM*FYQYDSTHGK.F                                       | 3326.74330 | 3 | 2.87E-05 | 0.61 | 4.07   | -     | 262.5   |
| AHQ-2-10, 6662               | K.VIHDNFGIVEGLMTTVHAITATQK.T                                            | 2596.98694 | 3 | 5.01E-12 | 0.95 | 6.50   | -     | 1441.2  |
| AHQ-2-11, 6720 - 6724        | K.VIHDNFGIVEGLMTTVHAITATQK.T                                            | 2596.98694 | 3 | 2.12E-13 | 0.97 | 7.11   | -     | 2408.2  |
| AHQ-2-9, 7294 - 7372         | K.VIHDNFGIVEGLMTTVHAITATQK.T                                            | 2596.98694 | 2 | 3.99E-04 | 0.93 | 4.44   | -     | 940.9   |
| AHQ-2-9, 7286                | K.VIHDNFGIVEGLMTTVHAITATQK.T                                            | 2596.98694 | 2 | 3.22E-07 | 0.97 | 6.49   | -     | 1653.7  |
| AHQ-2-11, 6721 - 6722        | K.VIHDNFGIVEGLMTTVHAITATQK.T                                            | 2596.98694 | 2 | 3.93E-07 | 0.97 | 7.16   | -     | 1781.4  |
| AHQ-2-9, 6416 - 6474         | K.VIHDNFGIVEGLM*TTVHAITATQK.T                                           | 2612.98634 | 2 | 6.84E-04 | 0.92 | 4.11   | -     | 777.0   |
| AHQ-2-9, 6466 - 6534         | K.VIHDNFGIVEGLM*TTVHAITATQK.T                                           | 2612.98634 | 3 | 6.69E-13 | 0.98 | 6.56   | -     | 1849.5  |
| AHQ-2-9, 7268 - 7338         | K.VIHDNFGIVEGLMTTVHAITATQK.T                                            | 2596.98694 | 3 | 1.12E-11 | 0.92 | 5.38   | -     | 1396.3  |
| AHQ-2-10, 6666               | K.VIHDNFGIVEGLMTTVHAITATQK.T                                            | 2596.98694 | 2 | 1.63E-05 | 0.97 | 5.64   | -     | 2279.0  |
| AHQ-2-9, 6607 - 6660         | K.VIHDNFGIVEGLM*TTVHAITATQK.T                                           | 2612.98634 | 3 | 1.15E-07 | 0.97 | 6.20   | -     | 1494.0  |
| AHQ-2-10, 4799 - 4800        | R.VIISAPSADAPMFVGMVNHK.Y                                                | 2214.59387 | 2 | 4.98E-08 | 0.61 | 2.97   | -     | 346.9   |
| AHQ-2-10, 4524               | R.VIISAPSADAPMFVGMVNHK.Y                                                | 2214.59387 | 2 | 1.60E-05 | 0.74 | 3.32   | -     | 293.5   |
| AHQ-2-10, 4328               | R.VIISAPSADAPMFVGMVNHK.Y                                                | 2230.59327 | 2 | 9.96E-05 | 0.37 | 2.94   | -     | 237.4   |
| AHQ-2-12, 5261               | R.VIISAPSADAPMFVGMVNHK.Y                                                | 2214.59387 | 2 | 5.44E-08 | 0.35 | 2.63   | -     | 309.8   |
| AHQ-2-12, 5067               | R.VIISAPSADAPMFVGMVNHK.Y                                                | 2214.59387 | 2 | 6.67E-09 | 0.69 | 3.14   | -     | 400.3   |
| AHQ-2-9, 4454 - 4462         | R.VIISAPSADAPMFVGMVNHK.Y                                                | 2230.59327 | 2 | 9.21E-05 | 0.48 | 3.23   | -     | 472.1   |
| AHQ-2-9, 5050                | R.VIISAPSADAPMFVGMVNHK.Y                                                | 2214.59387 | 2 | 3.99E-04 | 0.81 | 3.55   | -     | 550.3   |
| AHQ-2-9, 4787 - 4790         | R.VIISAPSADAPMFVGMVNHK.Y                                                | 2214.59387 | 2 | 2.08E-05 | 0.88 | 3.76   | -     | 611.5   |
| AHQ-2-9, 3802 - 3810         | R.VPTANVSVVDLTCR.L                                                      | 1532.74450 | 2 | 1.01E-07 | 0.90 | 3.52   | -     | 961.3   |
| AHQ-2-12, 4097 - 4166        | R.VPTANVSVVDLTCR.L                                                      | 1532.74450 | 2 | 2.71E-09 | 0.94 | 4.02   | -     | 1145.0  |
| AHQ-2-9, 4736                | R.VPTANVSVVDLTCR.L                                                      | 1532.74450 | 2 | 3.52E-04 | 0.87 | 2.86   | -     | 849.9   |
| AHQ-2-11, 3934 - 3960        | R.VPTANVSVVDLTCR.L                                                      | 1532.74450 | 2 | 3.65E-09 | 0.92 | 3.62   | -     | 911.8   |
| AHQ-2-9, 4070 - 4144         | R.VPTANVSVVDLTCR.L                                                      | 1532.74450 | 2 | 9.09E-09 | 0.94 | 4.16   | -     | 1014.6  |
| AHQ-2-10, 3770 - 3834        | R.VPTANVSVVDLTCR.L                                                      | 1532.74450 | 2 | 3.40E-07 | 0.93 | 3.78   | -     | 883.5   |
| AHQ-2-13, 4125 - 4141        | R.VPTANVSVVDLTCR.L                                                      | 1532.74450 | 2 | 1.10E-07 | 0.95 | 4.05   | -     | 1020.7  |
| AHQ-2-14, 4998               | R.VPTANVSVVDLTCR.L                                                      | 1532.74450 | 2 | 1.29E-10 | 0.94 | 4.08   | -     | 979.6   |
| AHQ-2-13-, 4163              | R.VPTANVSVVDLTCR.L                                                      | 1532.74450 | 2 | 7.06E-09 | 0.96 | 4.49   | -     | 1290.7  |
| AHQ-2-9, 3956 - 4002         | R.VPTANVSVVDLTCR.L                                                      | 1532.74450 | 2 | 4.52E-07 | 0.87 | 3.24   | -     | 819.2   |
| AHQ-2-9, 4162 - 4232         | R.VPTANVSVVDLTCR.L                                                      | 1532.74450 | 2 | 2.53E-10 | 0.89 | 3.51   | -     | 706.6   |
| AHQ-2-9, 7578                | K.WGDAGAEYVVESTGVFTTMEK.A                                               | 2278.48027 | 2 | 6.28E-07 | 0.92 | 4.51   | -     | 707.1   |
| AHQ-2-9, 7551                | K.WGDAGAEYVVESTGVFTTMEK.A                                               | 2294.47967 | 2 | 1.62E-06 | 0.64 | 3.01   | -     | 441.2   |
| AHQ-2-9, 7436 - 7508         | K.WGDAGAEYVVESTGVFTTMEK.A                                               | 2278.48027 | 2 | 2.13E-08 | 0.96 | 4.40   | -     | 1308.0  |
| AHQ-2-9, 7287 - 7363         | K.WGDAGAEYVVESTGVFTTMEK.A                                               | 2278.48027 | 2 | 9.18E-06 | 0.89 | 4.03   | -     | 629.6   |
| AHQ-2-9, 6519 - 6591         | K.WGDAGAEYVVESTGVFTTMEK.A                                               | 2278.48027 | 2 | 2.34E-06 | 0.90 | 4.29   | -     | 695.2   |
| AHQ-2-9, 6603 - 6672         | K.WGDAGAEYVVESTGVFTTMEK.A                                               | 2278.48027 | 2 | 8.01E-06 | 0.95 | 5.07   | -     | 851.0   |
| AHQ-2-9, 7171 - 7219         | K.WGDAGAEYVVESTGVFTTMEK.A                                               | 2278.48027 | 2 | 7.37E-05 | 0.91 | 4.45   | -     | 686.7   |
| AHQ-2-12, 6313               | K.WGDAGAEYVVESTGVFTTMEK.A                                               | 2278.48027 | 2 | 1.01E-05 | 0.87 | 4.22   | -     | 543.7   |
| AHQ-2-9, 7036 - 7103         | K.WGDAGAEYVVESTGVFTTMEK.A                                               | 2278.48027 | 2 | 5.18E-08 | 0.95 | 4.70   | -     | 999.4   |
| AHQ-2-13, 6080 - 6104        | K.WGDAGAEYVVESTGVFTTMEK.A                                               | 2278.48027 | 2 | 1.66E-05 | 0.89 | 3.68   | -     | 832.1   |
| AHQ-2-13, 6175 - 6237        | K.WGDAGAEYVVESTGVFTTMEK.A                                               | 2278.48027 | 2 | 4.21E-07 | 0.86 | 3.89   | -     | 557.8   |
| AHQ-2-9, 6954                | K.WGDAGAEYVVESTGVFTTMEK.A                                               | 2278.48027 | 2 | 1.06E-07 | 0.90 | 3.86   | -     | 775.0   |
| AHQ-2-9, 6747 - 6815         | K.WGDAGAEYVVESTGVFTTMEK.A                                               | 2278.48027 | 2 | 4.82E-05 | 0.96 | 4.30   | -     | 1370.6  |
| AHQ-2-13-, 5679              | K.WGDAGAEYVVESTGVFTTMEK.A                                               | 2294.47967 | 2 | 3.67E-04 | 0.92 | 4.05   | -     | 921.9   |
| AHQ-2-13-, 6245 - 6311       | K.WGDAGAEYVVESTGVFTTMEK.A                                               | 2278.48027 | 2 | 2.79E-05 | 0.95 | 4.62   | -     | 1077.5  |
| AHQ-2-13-, 6382 - 6434       | K.WGDAGAEYVVESTGVFTTMEK.A                                               | 2278.48027 | 2 | 4.27E-08 | 0.90 | 4.03   | -     | 728.1   |
| gj[4506353]ref[NP_002854.1]  | phosphorylase, glycogen; liver (Hers disease, glycogen storage disease) |            |   | 2.13E-13 | 2.22 | 30.27  | 7.30  | 97147.8 |
| AHQ-2-5, 4808                | K.EYAQNIWNVESDCLK.I                                                     | 1806.95311 | 2 | 1.04E-04 | 0.46 | 2.74   | -     | 456.9   |
| AHQ-2-5, 7431 - 7432         | R.GAGTVFADFPDQVAILQNDTHPALAIPELMR.I                                     | 3309.74040 | 3 | 2.13E-13 | 0.84 | 4.17   | -     | 473.8   |
| AHQ-2-5, 6508                | R.WLLCNPLAELIAEK.I                                                      | 1842.19160 | 2 | 8.19E-10 | 0.92 | 4.55   | -     | 1016.4  |
| gj[27498332]ref[XP_212565.1] | similar to tubulin, beta 5 [Homo sapiens]                               |            |   | 2.14E-13 | 4.34 | 50.29  | 9.90  | 49670.5 |
| AHQ-2-9, 5556 - 5558         | R.ALTVELTQQVFDK.N                                                       | 1660.89259 | 2 | 9.03E-04 | 0.83 | 3.57   | -     | 412.8   |
| AHQ-2-11, 5449               | R.ALTVELTQQVFDK.N                                                       | 1660.89259 | 2 | 1.55E-04 | 0.64 | 2.66   | -     | 322.1   |
| AHQ-2-7, 3256                | R.IM*NTFSVPSPK.V                                                        | 1336.58217 | 2 | 3.48E-04 | 0.88 | 3.41   | -     | 708.1   |
| AHQ-2-7, 3503 - 3519         | R.IMNTFSVPSPK.V                                                         | 1320.58277 | 2 | 3.74E-04 | 0.97 | 3.79   | -     | 2236.7  |
| AHQ-2-7, 6983                | K.M*AVTFIGNSTAIQELFK.R                                                  | 1887.18942 | 2 | 2.14E-13 | 0.96 | 4.87   | -     | 866.0   |
| AHQ-2-12, 6805               | K.MAVTFIGNSTAIQELFK.R                                                   | 1871.19002 | 2 | 4.19E-05 | 0.95 | 4.29   | -     | 1191.0  |

|                            |                                                  |            |   |          |       |        |       |          |
|----------------------------|--------------------------------------------------|------------|---|----------|-------|--------|-------|----------|
| AHQ-2-13, 6575             | K.M*AVTFIGNSTAIQELFK.R                           | 1887.18942 | 2 | 5.33E-13 | 0.95  | 4.49   | -     | 955.8    |
| AHQ-2-14-, 6289 - 6351     | K.M*AVTFIGNSTAIQELFK.R                           | 1887.18942 | 2 | 2.09E-11 | 0.97  | 5.76   | -     | 1363.2   |
| AHQ-2-14-, 6517 - 6533     | K.M*AVTFIGNSTAIQELFK.R                           | 1887.18942 | 2 | 2.11E-07 | 0.95  | 4.43   | -     | 1190.4   |
| AHQ-2-14-, 6631 - 6639     | K.M*AVTFIGNSTAIQELFK.R                           | 1887.18942 | 2 | 1.70E-07 | 0.98  | 5.40   | -     | 1551.4   |
| AHQ-2-7, 7348              | K.MAVTFIGNSTAIQELFK.R                            | 1871.19002 | 2 | 9.45E-07 | 0.90  | 3.98   | -     | 674.9    |
| gi 5453595 ref NP_006358.1 | adenyl cyclase-associated protein [Homo sapiens] |            |   | 2.59E-13 | 10.05 | 130.31 | 35.60 | 51672.7  |
| AHQ-2-10, 2567 - 2570      | R.ALLVTASQCQQPAENK.L                             | 1759.96271 | 2 | 8.93E-04 | 0.95  | 4.69   | -     | 1030.4   |
| AHQ-2-9, 2630              | R.ALLVTASQCQQPAENK.L                             | 1759.96271 | 2 | 1.08E-07 | 0.90  | 3.92   | -     | 790.3    |
| AHQ-2-7, 2535 - 2547       | R.ALLVTASQCQQPAENK.L                             | 1759.96271 | 2 | 5.76E-05 | 0.97  | 5.38   | -     | 1206.5   |
| AHQ-2-13, 2867             | R.ALLVTASQCQQPAENK.L                             | 1759.96271 | 2 | 4.33E-05 | 0.93  | 3.98   | -     | 1021.9   |
| AHQ-2-7, 6641              | R.ALLVTASQCQQPAENK.LSDLLAPISEQIK.E               | 3168.60826 | 3 | 2.40E-10 | 0.94  | 4.98   | -     | 1149.9   |
| AHQ-2-7, 3295 - 3308       | K.EMNDAAAMFYTNR.V                                | 1463.62130 | 2 | 2.25E-04 | 0.34  | 2.58   | -     | 334.2    |
| AHQ-2-7, 1891              | K.KEPAVLELEGKK.W                                 | 1341.57848 | 1 | 4.87E-04 | 0.42  | 2.36   | -     | 318.1    |
| AHQ-2-7, 7673              | K.LGLVFDVVGIVEIINSK.D                            | 1931.26186 | 2 | 2.59E-13 | 0.98  | 6.26   | -     | 1385.7   |
| AHQ-2-13-, 5107            | K.LSDLLAPISEQIK.E                                | 1427.66814 | 2 | 5.53E-04 | 0.92  | 3.15   | -     | 1135.7   |
| AHQ-2-7, 4843 - 4921       | K.LSDLLAPISEQIK.E                                | 1427.66814 | 2 | 4.22E-05 | 0.86  | 3.52   | -     | 821.0    |
| AHQ-2-7, 4851              | K.LSDLLAPISEQIK.E                                | 1427.66814 | 1 | 1.11E-05 | 0.57  | 2.72   | -     | 546.6    |
| AHQ-2-12, 5090             | K.LSDLLAPISEQIK.E                                | 1427.66814 | 2 | 2.41E-05 | 0.69  | 2.85   | -     | 676.9    |
| AHQ-2-11, 4849             | K.LSDLLAPISEQIK.E                                | 1427.66814 | 2 | 2.61E-04 | 0.84  | 3.14   | -     | 796.2    |
| AHQ-2-9, 4907              | K.LSDLLAPISEQIK.E                                | 1427.66814 | 1 | 1.62E-07 | 0.55  | 2.93   | -     | 434.9    |
| AHQ-2-9, 4900 - 4904       | K.LSDLLAPISEQIK.E                                | 1427.66814 | 2 | 5.80E-07 | 0.90  | 4.07   | -     | 720.2    |
| AHQ-2-14-, 3007 - 3013     | K.NSLDCEIVSAK.S                                  | 1237.36245 | 2 | 1.21E-06 | 0.88  | 3.17   | -     | 902.1    |
| AHQ-2-7, 3528              | K.NSLDCEIVSAK.S                                  | 1237.36245 | 1 | 7.60E-05 | 0.29  | 2.05   | -     | 304.1    |
| AHQ-2-11, 3428             | K.NSLDCEIVSAK.S                                  | 1237.36245 | 1 | 3.46E-05 | 0.29  | 2.05   | -     | 412.4    |
| AHQ-2-8, 4308              | R.SALFAQINQGESITHALK.H                           | 1929.16615 | 3 | 5.48E-06 | 0.73  | 3.47   | -     | 552.3    |
| AHQ-2-7, 4369 - 4440       | R.SALFAQINQGESITHALK.H                           | 1929.16615 | 2 | 1.92E-09 | 0.94  | 5.07   | -     | 729.8    |
| AHQ-2-9, 4515 - 4535       | R.SALFAQINQGESITHALK.H                           | 1929.16615 | 2 | 2.20E-07 | 0.93  | 4.93   | -     | 882.7    |
| AHQ-2-8, 4299              | R.SALFAQINQGESITHALK.H                           | 1929.16615 | 2 | 4.62E-05 | 0.90  | 4.46   | -     | 556.0    |
| AHQ-2-7, 1761 - 1767       | R.SGPKPFSAPKQTPSPSPK.R                           | 1839.08461 | 2 | 5.91E-04 | 0.75  | 3.37   | -     | 596.8    |
| AHQ-2-14-, 6640            | K.SSEMNVLIPTTEGGDFNEFPVPEQFK.T                   | 2813.08809 | 2 | 1.19E-06 | 0.85  | 4.00   | -     | 279.3    |
| AHQ-2-14-, 6292            | K.SSEMNVLIPTTEGGDFNEFPVPEQFK.T                   | 2829.08749 | 2 | 7.82E-04 | 0.64  | 3.29   | -     | 189.9    |
| AHQ-2-7, 6856 - 6936       | K.SSEMNVLIPTTEGGDFNEFPVPEQFK.T                   | 2813.08809 | 2 | 2.33E-04 | 0.92  | 4.37   | -     | 364.9    |
| AHQ-2-14-, 6176            | K.SSEMNVLIPTTEGGDFNEFPVPEQFK.T                   | 2829.08749 | 2 | 1.03E-06 | 0.82  | 3.79   | -     | 274.9    |
| AHQ-2-14-, 6071 - 6075     | K.SSEMNVLIPTTEGGDFNEFPVPEQFK.T                   | 2829.08749 | 2 | 8.98E-05 | 0.82  | 3.91   | -     | 246.4    |
| AHQ-2-7, 6751 - 6767       | K.SSEMNVLIPTTEGGDFNEFPVPEQFK.T                   | 2813.08809 | 2 | 4.95E-07 | 0.54  | 3.02   | -     | 221.2    |
| AHQ-2-14-, 6512 - 6515     | K.SSEMNVLIPTTEGGDFNEFPVPEQFK.T                   | 2813.08809 | 2 | 1.33E-08 | 0.95  | 5.28   | -     | 529.6    |
| AHQ-2-7, 6421 - 6493       | K.SSEMNVLIPTTEGGDFNEFPVPEQFK.T                   | 2829.08749 | 2 | 1.14E-04 | 0.32  | 2.78   | -     | 123.1    |
| AHQ-2-13, 6476 - 6479      | K.SSEMNVLIPTTEGGDFNEFPVPEQFK.T                   | 2813.08809 | 2 | 1.64E-05 | 0.60  | 3.22   | -     | 184.9    |
| AHQ-2-11, 6045             | K.SSEMNVLIPTTEGGDFNEFPVPEQFK.T                   | 2829.08749 | 2 | 9.68E-05 | 0.40  | 2.67   | -     | 182.3    |
| AHQ-2-11, 6297 - 6373      | K.SSEMNVLIPTTEGGDFNEFPVPEQFK.T                   | 2813.08809 | 2 | 8.29E-06 | 0.71  | 3.08   | -     | 397.9    |
| AHQ-2-14-, 6424            | K.SSEMNVLIPTTEGGDFNEFPVPEQFK.T                   | 2813.08809 | 2 | 5.31E-08 | 0.74  | 3.38   | -     | 263.1    |
| AHQ-2-12, 4814             | R.VENQENYVSNLVIETELK.Q                           | 2074.23206 | 2 | 5.16E-06 | 0.92  | 4.35   | -     | 684.2    |
| AHQ-2-7, 4827              | R.VENQENYVSNLVIETELK.Q                           | 2074.23206 | 2 | 3.73E-07 | 0.91  | 4.33   | -     | 653.2    |
| AHQ-2-13, 4767 - 4773      | R.VENQENYVSNLVIETELK.Q                           | 2074.23206 | 2 | 7.78E-07 | 0.90  | 3.99   | -     | 817.2    |
| AHQ-2-11, 4864             | R.VENQENYVSNLVIETELK.Q                           | 2074.23206 | 2 | 2.38E-09 | 0.94  | 4.77   | -     | 892.2    |
| AHQ-2-13-, 4861            | R.VENQENYVSNLVIETELK.Q                           | 2074.23206 | 2 | 1.42E-07 | 0.92  | 4.71   | -     | 624.6    |
| AHQ-2-7, 4580 - 4652       | R.VENQENYVSNLVIETELK.Q                           | 2074.23206 | 2 | 3.65E-08 | 0.95  | 5.00   | -     | 774.4    |
| AHQ-2-11, 4608             | R.VENQENYVSNLVIETELK.Q                           | 2074.23206 | 2 | 5.44E-09 | 0.93  | 4.90   | -     | 624.8    |
| AHQ-2-14-, 4803            | R.VENQENYVSNLVIETELK.Q                           | 2074.23206 | 2 | 1.07E-07 | 0.97  | 5.87   | -     | 1159.5   |
| AHQ-2-10, 4412             | R.VENQENYVSNLVIETELK.Q                           | 2074.23206 | 2 | 1.37E-07 | 0.94  | 4.69   | -     | 999.4    |
| AHQ-2-10, 4398             | R.VENQENYVSNLVIETELK.Q                           | 2074.23206 | 2 | 2.68E-04 | 0.92  | 4.05   | -     | 860.3    |
| AHQ-2-8, 4507              | R.VENQENYVSNLVIETELK.Q                           | 2074.23206 | 2 | 2.60E-08 | 0.94  | 4.70   | -     | 768.3    |
| AHQ-2-7, 4984 - 5057       | R.VENQENYVSNLVIETELK.Q                           | 2074.23206 | 2 | 4.20E-08 | 0.91  | 4.66   | -     | 593.2    |
| AHQ-2-9, 4676              | R.VENQENYVSNLVIETELK.Q                           | 2074.23206 | 2 | 2.93E-04 | 0.92  | 4.16   | -     | 719.9    |
| AHQ-2-7, 2163 - 2243       | K.VPTISINK.T                                     | 872.04435  | 1 | 7.67E-06 | 0.64  | 3.12   | -     | 360.9    |
| gi 4501891 ref NP_001093.1 | actinin, alpha 1 [Homo sapiens]                  |            |   | 2.93E-13 | 36.65 | 410.33 | 46.30 | 103056.9 |
| AHQ-2-4, 5534              | K.AGTQIENIEEDFRDGLK.L                            | 1936.06918 | 2 | 4.30E-05 | 0.70  | 3.46   | -     | 296.8    |
| AHQ-2-10, 4836             | K.AGTQIENIEEDFRDGLK.L                            | 1936.06918 | 2 | 5.20E-06 | 0.82  | 4.02   | -     | 907.4    |
| AHQ-2-5, 4629              | K.AGTQIENIEEDFRDGLK.L                            | 1936.06918 | 2 | 2.61E-05 | 0.89  | 4.69   | -     | 1039.8   |
| AHQ-2-11, 5088 - 5090      | K.AGTQIENIEEDFRDGLK.L                            | 1936.06918 | 2 | 5.99E-05 | 0.89  | 4.91   | -     | 877.5    |
| AHQ-2-1, 5697              | K.AGTQIENIEEDFRDGLK.L                            | 1936.06918 | 2 | 3.88E-05 | 0.43  | 3.24   | -     | 462.5    |
| AHQ-2-9, 5159              | K.AGTQIENIEEDFRDGLK.L                            | 1936.06918 | 2 | 7.14E-05 | 0.57  | 3.77   | -     | 345.6    |
| AHQ-2-5, 5223              | K.AGTQIENIEEDFRDGLK.L                            | 1936.06918 | 2 | 3.15E-04 | 0.79  | 3.98   | -     | 820.1    |
| AHQ-2-9, 4594              | K.AGTQIENIEEDFRDGLK.L                            | 1936.06918 | 2 | 9.40E-04 | 0.50  | 2.70   | -     | 316.0    |
| AHQ-2-6, 5181              | K.AGTQIENIEEDFRDGLK.L                            | 1936.06918 | 2 | 4.22E-06 | 0.80  | 4.39   | -     | 630.1    |
| AHQ-2-5, 5403              | K.AIMTYVSSFYHAFSGAQK.A                           | 2025.27263 | 2 | 1.07E-06 | 0.82  | 3.71   | -     | 502.3    |
| AHQ-2-9, 6438 - 6510       | K.AIMTYVSSFYHAFSGAQK.A                           | 2009.27323 | 2 | 7.75E-04 | 0.66  | 3.23   | -     | 327.8    |
| AHQ-2-5, 6407 - 6480       | K.AIMTYVSSFYHAFSGAQK.A                           | 2009.27323 | 2 | 5.89E-09 | 0.93  | 4.66   | -     | 772.7    |
| AHQ-2-6, 6406              | K.AIMTYVSSFYHAFSGAQK.A                           | 2009.27323 | 2 | 2.20E-04 | 0.77  | 3.70   | -     | 412.9    |
| AHQ-2-5, 2963              | R.ASFNFHFRDRHSGTLPPEEFK.A                        | 2292.40855 | 2 | 4.68E-04 | 0.92  | 3.75   | -     | 1194.9   |
| AHQ-2-5, 3240 - 3317       | R.ASFNFHFRDRHSGTLPPEEFK.A                        | 2292.40855 | 2 | 4.60E-04 | 0.70  | 2.67   | -     | 584.2    |
| AHQ-2-5, 2964 - 2972       | R.ASFNFHFRDRHSGTLPPEEFK.A                        | 2292.40855 | 3 | 4.88E-05 | 0.97  | 4.73   | -     | 2593.0   |
| AHQ-2-5, 1895              | K.KASIHEAWTDGK.E                                 | 1215.29697 | 2 | 3.94E-05 | 0.79  | 3.04   | -     | 882.2    |
| AHQ-2-5, 1803 - 1880       | K.KASIHEAWTDGK.E                                 | 1215.29697 | 2 | 5.19E-05 | 0.87  | 3.08   | -     | 1025.9   |
| AHQ-2-1, 5936              | K.DDPLTNLNTAFDVAEK.Y                             | 1763.88340 | 2 | 8.44E-07 | 0.81  | 3.46   | -     | 656.7    |
| AHQ-2-5, 5775 - 5855       | K.DDPLTNLNTAFDVAEK.Y                             | 1763.88340 | 2 | 1.82E-12 | 0.96  | 4.94   | -     | 1363.8   |
| AHQ-2-5, 6145              | K.DDPLTNLNTAFDVAEK.Y                             | 1763.88340 | 2 | 9.69E-13 | 0.96  | 4.73   | -     | 1124.8   |
| AHQ-2-6, 5646              | K.DDPLTNLNTAFDVAEK.Y                             | 1763.88340 | 2 | 1.64E-10 | 0.96  | 5.03   | -     | 997.5    |
| AHQ-2-4, 5978 - 5984       | K.DDPLTNLNTAFDVAEK.Y                             | 1763.88340 | 2 | 3.89E-10 | 0.95  | 4.84   | -     | 1241.7   |
| AHQ-2-5, 4781 - 4855       | K.DGLGFCALIHR.H                                  | 1260.44730 | 2 | 4.97E-05 | 0.89  | 2.91   | -     | 1292.0   |
| AHQ-2-5, 5113              | K.DGLGFCALIHR.H                                  | 1260.44730 | 2 | 1.83E-06 | 0.92  | 2.79   | -     | 1428.4   |
| AHQ-2-5, 2225 - 2227       | R.DHSGTLGPEEFK.A                                 | 1317.38606 | 1 | 2.75E-06 | 0.63  | 2.80   | -     | 385.6    |
| AHQ-2-6, 2239              | R.DHSGTLGPEEFK.A                                 | 1317.38606 | 2 | 3.22E-05 | 0.87  | 3.31   | -     | 753.3    |
| AHQ-2-5, 2223              | R.DHSGTLGPEEFK.A                                 | 1317.38606 | 2 | 3.91E-04 | 0.91  | 3.49   | -     | 893.3    |
| AHQ-2-6, 3607              | K.DYETATLSSEIK.A                                 | 1270.36761 | 2 | 1.53E-04 | 0.77  | 2.53   | -     | 843.2    |
| AHQ-2-4, 4621              | R.ETADTDTADQVMASFK.I                             | 1730.83208 | 2 | 1.53E-07 | 0.86  | 3.40   | -     | 737.5    |
| AHQ-2-3, 4628 - 4635       | R.ETADTDTADQVMASFK.I                             | 1730.83208 | 2 | 8.67E-09 | 0.95  | 4.23   | -     | 1185.3   |
| AHQ-2-9, 4362 - 4376       | R.ETADTDTADQVMASFK.I                             | 1730.83208 | 2 | 2.30E-07 | 0.77  | 3.71   | -     | 476.9    |
| AHQ-2-11, 4237 - 4309      | R.ETADTDTADQVMASFK.I                             | 1730.83208 | 2 | 5.66E-09 | 0.88  | 3.51   | -     | 860.8    |
| AHQ-2-5, 3116 - 3195       | R.ETADTDTADQVM*ASFK.I                            | 1746.83148 | 2 | 8.42E-06 | 0.94  | 4.13   | -     | 1114.2   |
| AHQ-2-2, 4674              | R.ETADTDTADQVMASFK.I                             | 1730.83208 | 2 | 3.89E-04 | 0.79  | 2.86   | -     | 678.1    |
| AHQ-2-13, 4361             | R.ETADTDTADQVMASFK.I                             | 1730.83208 | 2 | 2.07E-04 | 0.65  | 2.92   | -     | 643.1    |
| AHQ-2-13-, 4430            | R.ETADTDTADQVMASFK.I                             | 1730.83208 | 2 | 2.58E-06 | 0.95  | 3.95   | -     | 1396.0   |
| AHQ-2-6, 4337              | R.ETADTDTADQVMASFK.I                             | 1730.83208 | 2 | 1.60E-05 | 0.96  | 4.26   | -     | 1575.6   |
| AHQ-2-1, 4650              | R.ETADTDTADQVMASFK.I                             | 1730.83208 | 2 | 1.26E-05 | 0.83  | 3.31   | -     | 812.7    |
| AHQ-2-5, 4399 - 4473       | R.ETADTDTADQVMASFK.I                             | 1730.83208 | 2 | 1.42E-05 | 0.94  | 3.65   | -     | 1635.3   |
| AHQ-2-5, 2685              | K.GISQEQMNEFR.A                                  | 1339.45991 | 1 | 6.28E-04 | 0.40  | 2.41   | -     | 176.5    |
| AHQ-2-6, 2721              | K.GISQEQMNEFR.A                                  | 1339.45991 | 2 | 2.34E-04 | 0.76  | 2.89   | -     | 738.3    |
| AHQ-2-5, 2675              | K.GISQEQMNEFR.A                                  | 1339.45991 | 1 | 7.37E-04 | 0.11  | 2.12   | -     | 146.8    |
| AHQ-2-9, 2735              | K.GISQEQMNEFR.A                                  | 1339.45991 | 2 | 2.66E-06 | 0.75  | 2.70   | -     | 730.8    |
| AHQ-2-5, 2673 - 2681       | K.GISQEQMNEFR.A                                  | 1339.45991 | 2 | 4.37E-08 | 0.89  | 3.77   | -     | 801.0    |
| AHQ-2-11, 2845             | K.GISQEQMNEFR.A                                  | 1339.45991 | 2 | 2.92E-05 | 0.85  | 3.31   | -     | 816.7    |
| AHQ-2-4, 2016              | R.HRPELIDYGGK.L                                  | 1228.38202 | 2 | 1.77E-04 | 0.89  | 3.46   | -     | 609.5    |
| AHQ-2-5, 1716              | R.HRPELIDYGGK.L                                  | 1228.38202 | 2 | 2.74E-04 | 0.88  | 3.26   | -     | 564.5    |
| AHQ-2-5, 1723              | R.HRPELIDYGGK.L                                  | 1228.38202 | 3 | 1.13E-04 | 0.88  | 3.46   | -     | 801.7    |
| AHQ-2-6, 4853 - 4854       | K.ICDQWDNLGALTQK.R                               | 1663.83349 | 2 | 2.00E-08 | 0.97  | 4.81   | -     | 2339.9   |
| AHQ-2-5, 4877 - 4955       | K.ICDQWDNLGALTQK.R                               | 1663.83349 | 2 | 8.16E-06 | 0.97  | 5.24   | -     | 1948.6   |

|                        |                                 |            |   |          |      |      |   |        |
|------------------------|---------------------------------|------------|---|----------|------|------|---|--------|
| AHQ-2-7, 4872 - 4881   | K.ICDQDWNLGLALTQK.R             | 1663.83349 | 2 | 3.35E-05 | 0.93 | 3.42 | - | 1742.6 |
| AHQ-2-3, 5149 - 5155   | K.ICDQDWNLGLALTQK.R             | 1663.83349 | 2 | 3.53E-06 | 0.97 | 4.95 | - | 1758.9 |
| AHQ-2-4, 5141 - 5145   | K.ICDQDWNLGLALTQK.R             | 1663.83349 | 2 | 9.41E-07 | 0.97 | 4.91 | - | 1914.0 |
| AHQ-2-1, 5144          | K.ICDQDWNLGLALTQK.R             | 1663.83349 | 2 | 3.25E-07 | 0.93 | 3.89 | - | 1503.0 |
| AHQ-2-5, 5388          | K.ICDQDWNLGLALTQK.R             | 1663.83349 | 2 | 9.58E-08 | 0.97 | 4.11 | - | 2084.3 |
| AHQ-2-5, 4644          | K.ICDQDWNLGLALTQK.R             | 1663.83349 | 2 | 9.11E-08 | 0.93 | 4.58 | - | 994.2  |
| AHQ-2-5, 5800 - 5872   | K.IDQLEGDHQIQEALIFDNK.H         | 2340.57447 | 3 | 7.63E-12 | 0.97 | 6.02 | - | 1873.4 |
| AHQ-2-4, 6160          | K.IDQLEGDHQIQEALIFDNK.H         | 2340.57447 | 3 | 8.05E-05 | 0.90 | 3.95 | - | 1113.8 |
| AHQ-2-6, 5793 - 5794   | K.IDQLEGDHQIQEALIFDNK.H         | 2340.57447 | 3 | 4.51E-07 | 0.96 | 5.48 | - | 1376.1 |
| AHQ-2-5, 6032 - 6103   | K.IDQLEGDHQIQEALIFDNK.H         | 2340.57447 | 3 | 1.30E-04 | 0.93 | 4.54 | - | 1362.1 |
| AHQ-2-5, 3941          | K.ILAGDKNYITMDEL.R              | 1753.01353 | 2 | 2.89E-07 | 0.95 | 4.36 | - | 1286.4 |
| AHQ-2-5, 3947 - 3955   | K.ILAGDKNYITMDEL.R              | 1753.01353 | 3 | 4.21E-05 | 0.92 | 4.62 | - | 820.9  |
| AHQ-2-5, 3248          | K.ILAGDKNYITMDEL.R              | 1769.01293 | 2 | 4.29E-05 | 0.91 | 4.38 | - | 522.7  |
| AHQ-2-5, 2561          | R.IMSIVPNR.L                    | 1045.23840 | 2 | 1.48E-04 | 0.80 | 3.12 | - | 623.3  |
| AHQ-2-5, 4807 - 4833   | R.ISIEMHGTLEDQLSHLR.Q           | 1980.23497 | 2 | 3.00E-04 | 0.94 | 4.07 | - | 1477.8 |
| AHQ-2-5, 4799 - 4868   | R.ISIEMHGTLEDQLSHLR.Q           | 1980.23497 | 3 | 3.11E-09 | 0.96 | 5.05 | - | 1738.7 |
| AHQ-2-5, 4089          | R.ISIEMHGTLEDQLSHLR.Q           | 1996.23437 | 2 | 3.70E-08 | 0.79 | 3.45 | - | 432.0  |
| AHQ-2-5, 4784          | K.IVQTYHVNMGAGTNPYTTITPQEINGK.W | 2892.23635 | 3 | 1.31E-07 | 0.77 | 3.86 | - | 352.0  |
| AHQ-2-5, 4548 - 4549   | K.IVQTYHVNMGAGTNPYTTITPQEINGK.W | 2892.23635 | 2 | 1.68E-07 | 0.95 | 4.86 | - | 957.7  |
| AHQ-2-5, 4789 - 4797   | K.IVQTYHVNMGAGTNPYTTITPQEINGK.W | 2892.23635 | 2 | 1.03E-05 | 0.85 | 3.94 | - | 524.5  |
| AHQ-2-5, 4640 - 4712   | K.IVQTYHVNMGAGTNPYTTITPQEINGK.W | 2892.23635 | 3 | 2.84E-04 | 0.75 | 3.69 | - | 550.7  |
| AHQ-2-5, 4659          | K.IVQTYHVNMGAGTNPYTTITPQEINGK.W | 2892.23635 | 2 | 1.04E-08 | 0.95 | 4.84 | - | 940.6  |
| AHQ-2-5, 4547 - 4568   | R.KAGTQIENIEEDFRDGLK.L          | 2064.24210 | 3 | 5.48E-05 | 0.95 | 6.56 | - | 1037.7 |
| AHQ-2-11, 4624         | R.KAGTQIENIEEDFRDGLK.L          | 2064.24210 | 3 | 9.37E-05 | 0.76 | 4.11 | - | 732.1  |
| AHQ-2-5, 4520 - 4575   | R.KAGTQIENIEEDFRDGLK.L          | 2064.24210 | 2 | 3.33E-04 | 0.90 | 4.82 | - | 1038.2 |
| AHQ-2-4, 5041          | R.KDDPLTNLNTAFDVAEK.Y           | 1892.05631 | 2 | 1.37E-06 | 0.95 | 4.83 | - | 1050.1 |
| AHQ-2-5, 4761 - 4771   | R.KDDPLTNLNTAFDVAEK.Y           | 1892.05631 | 2 | 5.93E-06 | 0.97 | 5.32 | - | 1335.0 |
| AHQ-2-5, 5001          | R.KDDPLTNLNTAFDVAEK.Y           | 1892.05631 | 2 | 7.16E-05 | 0.97 | 5.53 | - | 1387.9 |
| AHQ-2-4, 4336 - 4398   | R.KQFGAQAQNVIGPWQTK.M           | 1887.17410 | 2 | 1.88E-04 | 0.85 | 3.46 | - | 755.3  |
| AHQ-2-6, 4025          | R.KQFGAQAQNVIGPWQTK.M           | 1887.17410 | 2 | 3.24E-04 | 0.94 | 4.37 | - | 1144.9 |
| AHQ-2-5, 4044 - 4051   | R.KQFGAQAQNVIGPWQTK.M           | 1887.17410 | 2 | 5.83E-06 | 0.93 | 4.36 | - | 979.9  |
| AHQ-2-6, 3001          | R.LAILGHNHNEVSK.I               | 1294.52505 | 2 | 2.09E-05 | 0.93 | 3.74 | - | 985.5  |
| AHQ-2-5, 3315          | R.LAILGHNHNEVSK.I               | 1294.52505 | 2 | 6.07E-07 | 0.92 | 3.32 | - | 1118.3 |
| AHQ-2-5, 2933 - 3003   | R.LAILGHNHNEVSK.I               | 1294.52505 | 2 | 2.33E-07 | 0.92 | 3.40 | - | 1005.7 |
| AHQ-2-5, 2943          | R.LAILGHNHNEVSK.I               | 1294.52505 | 3 | 2.15E-04 | 0.64 | 3.09 | - | 570.0  |
| AHQ-2-5, 2957          | R.LAILGHNHNEVSK.I               | 1294.52505 | 1 | 7.34E-06 | 0.71 | 3.15 | - | 423.8  |
| AHQ-2-5, 3521          | R.LAILGHNHNEVSK.I               | 1294.52505 | 1 | 2.32E-05 | 0.48 | 2.10 | - | 499.9  |
| AHQ-2-5, 5948 - 6019   | K.LASDLLEWIR.R                  | 1216.41115 | 2 | 7.57E-08 | 0.98 | 4.93 | - | 2339.4 |
| AHQ-2-4, 6313          | K.LASDLLEWIR.R                  | 1216.41115 | 2 | 5.05E-08 | 0.96 | 3.87 | - | 1490.0 |
| AHQ-2-5, 6056          | K.LASDLLEWIR.R                  | 1216.41115 | 2 | 2.16E-08 | 0.97 | 4.38 | - | 2093.9 |
| AHQ-2-7, 5921 - 5928   | K.LASDLLEWIR.R                  | 1216.41115 | 2 | 3.01E-06 | 0.96 | 4.20 | - | 1530.4 |
| AHQ-2-1, 6340 - 6344   | K.LASDLLEWIR.R                  | 1216.41115 | 2 | 2.11E-07 | 0.97 | 4.48 | - | 1804.7 |
| AHQ-2-6, 5905 - 5909   | K.LASDLLEWIR.R                  | 1216.41115 | 2 | 9.24E-08 | 0.97 | 4.27 | - | 2212.6 |
| AHQ-2-4, 6924          | K.LLETIDQLYLEYAK.R              | 1712.96427 | 2 | 3.25E-08 | 0.97 | 4.58 | - | 1691.9 |
| AHQ-2-1, 6776          | K.LLETIDQLYLEYAK.R              | 1712.96427 | 2 | 1.55E-07 | 0.96 | 4.53 | - | 1335.3 |
| AHQ-2-2, 6909 - 6976   | K.LLETIDQLYLEYAK.R              | 1712.96427 | 2 | 1.36E-04 | 0.95 | 4.03 | - | 1191.2 |
| AHQ-2-5, 6717 - 6791   | K.LLETIDQLYLEYAK.R              | 1712.96427 | 2 | 2.17E-08 | 0.98 | 5.96 | - | 1412.2 |
| AHQ-2-5, 7105          | K.LLETIDQLYLEYAK.R              | 1712.96427 | 2 | 2.50E-06 | 0.92 | 3.69 | - | 1081.4 |
| AHQ-2-3, 6860          | K.LLETIDQLYLEYAK.R              | 1712.96427 | 2 | 7.19E-04 | 0.94 | 3.68 | - | 1212.8 |
| AHQ-2-5, 5405          | K.LLETIDQLYLEYAK.R              | 1712.96427 | 2 | 1.54E-06 | 0.94 | 4.18 | - | 760.2  |
| AHQ-2-7, 6644 - 6653   | K.LLETIDQLYLEYAK.R              | 1712.96427 | 2 | 1.13E-05 | 0.95 | 3.95 | - | 1370.7 |
| AHQ-2-5, 6955 - 7023   | K.LLETIDQLYLEYAK.R              | 1712.96427 | 2 | 1.21E-06 | 0.97 | 4.85 | - | 1447.9 |
| AHQ-2-14-, 6407 - 6419 | K.LLETIDQLYLEYAK.R              | 1712.96427 | 2 | 1.36E-05 | 0.95 | 4.12 | - | 1302.5 |
| AHQ-2-5, 6811 - 6875   | K.LLETIDQLYLEYAK.R              | 1712.96427 | 2 | 1.43E-04 | 0.93 | 3.46 | - | 1186.8 |
| AHQ-2-6, 6529 - 6597   | K.LLETIDQLYLEYAK.R              | 1712.96427 | 2 | 4.22E-09 | 0.97 | 5.01 | - | 1415.5 |
| AHQ-2-6, 2330 - 2354   | R.LSNRPAFMPSEGR.M               | 1462.65941 | 2 | 3.54E-04 | 0.87 | 3.52 | - | 735.9  |
| AHQ-2-1, 3784          | K.M*LD AEDIVGTARPDEK.A          | 1776.94709 | 2 | 7.83E-05 | 0.88 | 3.74 | - | 725.2  |
| AHQ-2-5, 3779 - 3807   | K.M*LD AEDIVGTARPDEK.A          | 1760.94769 | 3 | 8.63E-05 | 0.79 | 3.70 | - | 678.8  |
| AHQ-2-5, 3775 - 3776   | K.M*LD AEDIVGTARPDEK.A          | 1760.94769 | 2 | 1.99E-08 | 0.94 | 4.58 | - | 995.2  |
| AHQ-2-7, 3692          | K.M*LD AEDIVGTARPDEK.A          | 1760.94769 | 2 | 9.87E-05 | 0.83 | 3.60 | - | 678.1  |
| AHQ-2-8, 3686          | K.M*LD AEDIVGTARPDEK.A          | 1760.94769 | 3 | 5.49E-08 | 0.77 | 3.59 | - | 485.5  |
| AHQ-2-6, 3753          | K.M*LD AEDIVGTARPDEK.A          | 1760.94769 | 3 | 1.27E-04 | 0.85 | 3.56 | - | 766.6  |
| AHQ-2-6, 3719 - 3766   | K.M*LD AEDIVGTARPDEK.A          | 1760.94769 | 2 | 1.20E-06 | 0.94 | 4.62 | - | 1071.0 |
| AHQ-2-5, 3355          | K.M*LD AEDIVGTARPDEK.A          | 1776.94709 | 2 | 7.79E-05 | 0.86 | 3.83 | - | 586.1  |
| AHQ-2-9, 3758          | K.M*LD AEDIVGTARPDEK.A          | 1760.94769 | 2 | 4.89E-04 | 0.87 | 3.68 | - | 742.3  |
| AHQ-2-4, 4025          | K.M*LD AEDIVGTARPDEK.A          | 1760.94769 | 2 | 5.95E-06 | 0.89 | 3.71 | - | 900.3  |
| AHQ-2-4, 3620          | K.M*LD AEDIVGTARPDEK.A          | 1776.94709 | 2 | 2.77E-04 | 0.93 | 4.02 | - | 998.0  |
| AHQ-2-8, 3683          | K.M*LD AEDIVGTARPDEK.A          | 1760.94769 | 2 | 2.22E-05 | 0.88 | 4.26 | - | 806.1  |
| AHQ-2-6, 5166 - 5245   | R.M*VSDINNAWGCLEQVEK.G          | 2011.22273 | 2 | 6.36E-05 | 0.69 | 2.87 | - | 656.5  |
| AHQ-2-7, 5555 - 5557   | R.MVSDINNAWGCLEQVEK.G           | 1995.22333 | 2 | 1.80E-06 | 0.93 | 4.27 | - | 901.4  |
| AHQ-2-4, 5912          | R.MVSDINNAWGCLEQVEK.G           | 1995.22333 | 2 | 4.27E-05 | 0.80 | 3.25 | - | 760.2  |
| AHQ-2-5, 6159          | R.MVSDINNAWGCLEQVEK.G           | 1995.22333 | 2 | 2.12E-10 | 0.96 | 4.83 | - | 1258.3 |
| AHQ-2-5, 5988          | R.MVSDINNAWGCLEQVEK.G           | 1995.22333 | 2 | 2.36E-07 | 0.94 | 4.30 | - | 1055.5 |
| AHQ-2-6, 5795          | R.MVSDINNAWGCLEQVEK.G           | 1995.22333 | 2 | 1.36E-05 | 0.96 | 4.57 | - | 1217.2 |
| AHQ-2-5, 5876          | R.MVSDINNAWGCLEQVEK.G           | 1995.22333 | 2 | 2.17E-08 | 0.98 | 5.25 | - | 2166.7 |
| AHQ-2-5, 5617          | R.MVSDINNAWGCLEQVEK.G           | 1995.22333 | 2 | 7.62E-11 | 0.98 | 6.10 | - | 1273.4 |
| AHQ-2-6, 5071          | R.M*VSDINNAWGCLEQVEK.G          | 2011.22273 | 2 | 8.16E-08 | 0.95 | 4.42 | - | 906.9  |
| AHQ-2-5, 5560 - 5580   | R.M*VSDINNAWGCLEQVEK.G          | 2011.22273 | 2 | 7.19E-08 | 0.94 | 4.59 | - | 978.4  |
| AHQ-2-5, 5300 - 5327   | R.M*VSDINNAWGCLEQVEK.G          | 2011.22273 | 2 | 1.09E-08 | 0.97 | 5.15 | - | 1608.7 |
| AHQ-2-6, 5533          | R.MVSDINNAWGCLEQVEK.G           | 1995.22333 | 2 | 3.66E-08 | 0.96 | 4.74 | - | 1446.7 |
| AHQ-2-5, 5176 - 5180   | R.M*VSDINNAWGCLEQVEK.G          | 2011.22273 | 2 | 1.08E-06 | 0.93 | 4.66 | - | 674.6  |
| AHQ-2-6, 5405 - 5471   | R.MVSDINNAWGCLEQVEK.G           | 1995.22333 | 2 | 1.23E-07 | 0.97 | 4.93 | - | 1771.8 |
| AHQ-2-6, 5323          | R.MVSDINNAWGCLEQVEK.G           | 1995.22333 | 2 | 9.18E-11 | 0.95 | 4.55 | - | 1140.8 |
| AHQ-2-3, 5887 - 5893   | R.MVSDINNAWGCLEQVEK.G           | 1995.22333 | 2 | 2.61E-04 | 0.95 | 4.71 | - | 856.6  |
| AHQ-2-9, 4388          | K.NVNIQNFHISWK.D                | 1500.88583 | 2 | 6.69E-04 | 0.91 | 3.57 | - | 987.4  |
| AHQ-2-5, 3460          | K.NYITMDEL.R                    | 1155.30648 | 2 | 8.59E-04 | 0.75 | 3.02 | - | 570.3  |
| AHQ-2-5, 4941 - 5011   | R.QFGAQAQNVIGPWQTK.M            | 1759.00118 | 2 | 4.28E-05 | 0.83 | 3.43 | - | 652.8  |
| AHQ-2-5, 2629 - 2631   | R.QKDYETATLSEIK.A               | 1526.67030 | 2 | 1.46E-05 | 0.66 | 3.42 | - | 298.4  |
| AHQ-2-3, 4011 - 4020   | R.TINEVENQILTR.D                | 1430.58898 | 2 | 7.90E-06 | 0.87 | 3.71 | - | 876.6  |
| AHQ-2-4, 3997          | R.TINEVENQILTR.D                | 1430.58898 | 2 | 2.56E-05 | 0.93 | 4.16 | - | 1181.1 |
| AHQ-2-6, 3726 - 3731   | R.TINEVENQILTR.D                | 1430.58898 | 2 | 9.70E-08 | 0.86 | 3.72 | - | 889.5  |
| AHQ-2-2, 4050          | R.TINEVENQILTR.D                | 1430.58898 | 2 | 2.43E-06 | 0.81 | 3.41 | - | 704.6  |
| AHQ-2-5, 3728 - 3743   | R.TINEVENQILTR.D                | 1430.58898 | 2 | 1.59E-06 | 0.92 | 4.02 | - | 995.4  |
| AHQ-2-10, 3606 - 3631  | R.TINEVENQILTR.D                | 1430.58898 | 2 | 2.65E-05 | 0.88 | 3.50 | - | 1024.6 |
| AHQ-2-5, 3936 - 4007   | R.TINEVENQILTR.D                | 1430.58898 | 1 | 4.46E-06 | 0.29 | 2.07 | - | 262.0  |
| AHQ-2-5, 3400 - 3428   | R.TINEVENQILTR.D                | 1430.58898 | 2 | 2.65E-04 | 0.73 | 3.29 | - | 465.9  |
| AHQ-2-7, 3672          | R.TINEVENQILTR.D                | 1430.58898 | 2 | 4.48E-04 | 0.81 | 3.13 | - | 751.5  |
| AHQ-2-5, 3737          | R.TINEVENQILTR.D                | 1430.58898 | 1 | 4.83E-04 | 0.14 | 2.30 | - | 148.4  |
| AHQ-2-5, 7091 - 7156   | R.VEQIAIAQELNELDYDPSVSNAR.C     | 2810.02233 | 3 | 8.62E-05 | 0.97 | 6.14 | - | 1856.0 |
| AHQ-2-1, 7108          | R.VEQIAIAQELNELDYDPSVSNAR.C     | 2810.02233 | 3 | 8.72E-08 | 0.96 | 5.74 | - | 1309.1 |
| AHQ-2-5, 7219 - 7223   | R.VEQIAIAQELNELDYDPSVSNAR.C     | 2810.02233 | 3 | 2.64E-05 | 0.94 | 4.91 | - | 1397.2 |
| AHQ-2-7, 6548          | R.VGWEQLLTIAR.T                 | 1387.60894 | 2 | 6.37E-06 | 0.93 | 4.15 | - | 1121.3 |
| AHQ-2-1, 6904          | R.VGWEQLLTIAR.T                 | 1387.60894 | 2 | 8.08E-07 | 0.90 | 3.77 | - | 894.6  |
| AHQ-2-5, 6647 - 6725   | R.VGWEQLLTIAR.T                 | 1387.60894 | 2 | 4.59E-07 | 0.97 | 4.97 | - | 1704.7 |
| AHQ-2-6, 6571 - 6591   | R.VGWEQLLTIAR.T                 | 1387.60894 | 2 | 1.66E-06 | 0.95 | 3.81 | - | 1618.7 |
| AHQ-2-11, 6306 - 6322  | R.VGWEQLLTIAR.T                 | 1387.60894 | 2 | 1.85E-06 | 0.95 | 3.98 | - | 1299.1 |
| AHQ-2-2, 7005 - 7006   | R.VGWEQLLTIAR.T                 | 1387.60894 | 2 | 3.42E-08 | 0.96 | 4.78 | - | 1509.8 |

|                            |                                                                         |            |   |          |      |       |       |         |
|----------------------------|-------------------------------------------------------------------------|------------|---|----------|------|-------|-------|---------|
| AHQ-2-4, 7000              | R.VGWQQLTTIAR.T                                                         | 1387.60894 | 2 | 9.39E-08 | 0.95 | 3.88  | -     | 1419.4  |
| AHQ-2-10, 6139             | R.VGWQQLTTIAR.T                                                         | 1387.60894 | 2 | 3.18E-06 | 0.88 | 3.28  | -     | 1112.8  |
| AHQ-2-9, 6678 - 6690       | R.VGWQQLTTIAR.T                                                         | 1387.60894 | 2 | 2.90E-07 | 0.96 | 4.69  | -     | 1438.2  |
| AHQ-2-3, 6949              | R.VGWQQLTTIAR.T                                                         | 1387.60894 | 2 | 3.52E-07 | 0.94 | 3.76  | -     | 1393.9  |
| AHQ-2-14-, 6507            | R.VGWQQLTTIAR.T                                                         | 1387.60894 | 2 | 1.66E-06 | 0.93 | 3.55  | -     | 1376.7  |
| AHQ-2-5, 4231 - 4300       | K.VLAVNQENQQLMEDIYK.L                                                   | 2053.23635 | 2 | 1.08E-06 | 0.94 | 5.04  | -     | 801.7   |
| AHQ-2-5, 4541 - 4612       | K.VLAVNQENQQLMEDIYK.L                                                   | 2053.23635 | 2 | 2.93E-13 | 0.97 | 5.71  | -     | 1283.8  |
| AHQ-2-5, 4176              | K.VLAVNQENQQLMEDIYK.L                                                   | 2053.23635 | 3 | 5.90E-11 | 0.93 | 4.51  | -     | 1038.2  |
| AHQ-2-6, 4465              | K.VLAVNQENQQLMEDIYK.L                                                   | 2053.23635 | 2 | 4.38E-09 | 0.95 | 4.56  | -     | 1082.6  |
| AHQ-2-3, 4431              | K.VLAVNQENQQLMEDIYK.L                                                   | 2053.23635 | 2 | 5.30E-06 | 0.88 | 3.78  | -     | 889.4   |
| AHQ-2-9, 4098 - 4176       | K.VLAVNQENQQLMEDIYK.L                                                   | 2053.23635 | 2 | 5.31E-06 | 0.85 | 3.78  | -     | 626.4   |
| AHQ-2-6, 4087              | K.VLAVNQENQQLMEDIYK.L                                                   | 2053.23635 | 2 | 2.98E-08 | 0.96 | 5.45  | -     | 928.0   |
| AHQ-2-5, 4093 - 4163       | K.VLAVNQENQQLMEDIYK.L                                                   | 2053.23635 | 2 | 1.15E-06 | 0.95 | 5.09  | -     | 877.8   |
| AHQ-2-2, 4485              | K.VLAVNQENQQLMEDIYK.L                                                   | 2053.23635 | 2 | 1.30E-07 | 0.93 | 4.39  | -     | 1133.9  |
| AHQ-2-6, 3419 - 3426       | K.VLAVNQENQQLMEDIYK.L                                                   | 2069.23575 | 2 | 1.76E-06 | 0.96 | 4.98  | -     | 1169.6  |
| AHQ-2-8, 3892              | K.VLAVNQENQQLMEDIYK.L                                                   | 2053.23635 | 2 | 9.04E-09 | 0.95 | 5.05  | -     | 1068.2  |
| AHQ-2-5, 3417 - 3431       | K.VLAVNQENQQLMEDIYK.L                                                   | 2069.23575 | 2 | 1.12E-07 | 0.97 | 5.56  | -     | 1337.4  |
| AHQ-2-5, 3665              | K.VLAVNQENQQLMEDIYK.L                                                   | 2069.23575 | 2 | 2.45E-08 | 0.95 | 4.41  | -     | 1049.2  |
| AHQ-2-1, 4500              | K.VLAVNQENQQLMEDIYK.L                                                   | 2053.23635 | 2 | 7.51E-06 | 0.97 | 5.10  | -     | 1500.7  |
| AHQ-2-5, 4377 - 4447       | K.VLAVNQENQQLMEDIYK.L                                                   | 2053.23635 | 2 | 2.83E-09 | 0.97 | 5.49  | -     | 1673.4  |
| gj 4505981 ref NP_002695.1 | pro-platelet basic protein (includes platelet basic protein, bet; Pro-p |            |   | 3.11E-13 | 7.76 | 90.33 | 40.60 | 13894.1 |
| AHQ-2-14-, 5097 - 5173     | K.EESLDSLYAELR.C                                                        | 1540.61070 | 2 | 6.17E-04 | 0.58 | 2.96  | -     | 504.4   |
| AHQ-2-14-, 4771 - 4839     | K.EESLDSLYAELR.C                                                        | 1540.61070 | 2 | 1.02E-07 | 0.94 | 4.14  | -     | 986.4   |
| AHQ-2-14, 5833 - 5896      | K.EESLDSLYAELR.C                                                        | 1540.61070 | 2 | 2.59E-07 | 0.95 | 4.01  | -     | 1181.5  |
| AHQ-2-14-, 4428            | K.EESLDSLYAELR.C                                                        | 1540.61070 | 2 | 1.29E-06 | 0.75 | 2.98  | -     | 389.2   |
| AHQ-2-14-, 4431 - 4495     | K.GKEESLDSLYAELR.C                                                      | 1725.83517 | 2 | 1.75E-10 | 0.98 | 5.62  | -     | 2889.5  |
| AHQ-2-14-, 4560 - 4623     | K.GKEESLDSLYAELR.C                                                      | 1725.83517 | 2 | 4.94E-12 | 0.98 | 4.82  | -     | 2295.6  |
| AHQ-2-13, 4173 - 4175      | K.GKEESLDSLYAELR.C                                                      | 1725.83517 | 2 | 6.76E-11 | 0.98 | 5.87  | -     | 2484.8  |
| AHQ-2-13, 4184             | K.GKEESLDSLYAELR.C                                                      | 1725.83517 | 3 | 1.43E-04 | 0.91 | 4.28  | -     | 1013.3  |
| AHQ-2-14-, 4373 - 4436     | K.GKEESLDSLYAELR.C                                                      | 1725.83517 | 3 | 1.35E-04 | 0.88 | 3.91  | -     | 955.3   |
| AHQ-2-14-, 4304            | K.GKEESLDSLYAELR.C                                                      | 1725.83517 | 2 | 2.07E-11 | 0.98 | 5.60  | -     | 2745.5  |
| AHQ-2-14-, 4289 - 4368     | K.GKEESLDSLYAELR.C                                                      | 1725.83517 | 2 | 2.19E-11 | 0.99 | 6.47  | -     | 2861.7  |
| AHQ-2-14-, 4219 - 4279     | K.GKEESLDSLYAELR.C                                                      | 1725.83517 | 3 | 1.32E-04 | 0.92 | 4.50  | -     | 1138.6  |
| AHQ-2-14-, 4176 - 4240     | K.GKEESLDSLYAELR.C                                                      | 1725.83517 | 2 | 3.11E-13 | 0.98 | 5.13  | -     | 2478.0  |
| AHQ-2-14-, 4104 - 4163     | K.GKEESLDSLYAELR.C                                                      | 1725.83517 | 3 | 1.55E-07 | 0.94 | 4.77  | -     | 1426.9  |
| AHQ-2-14-, 4688            | K.GKEESLDSLYAELR.C                                                      | 1725.83517 | 2 | 9.89E-08 | 0.97 | 4.88  | -     | 2183.8  |
| AHQ-2-14-, 3971 - 4041     | K.GKEESLDSLYAELR.C                                                      | 1725.83517 | 3 | 5.06E-08 | 0.93 | 4.83  | -     | 1159.3  |
| AHQ-2-14-, 3895 - 3975     | K.GKEESLDSLYAELR.C                                                      | 1725.83517 | 2 | 3.31E-12 | 0.98 | 6.54  | -     | 2565.3  |
| AHQ-2-14-, 3879 - 3955     | K.GKEESLDSLYAELR.C                                                      | 1725.83517 | 3 | 2.54E-05 | 0.92 | 5.17  | -     | 757.3   |
| AHQ-2-14-, 3864 - 3903     | K.GKEESLDSLYAELR.C                                                      | 1725.83517 | 2 | 5.28E-11 | 0.97 | 5.05  | -     | 1751.5  |
| AHQ-2-13-, 4242 - 4247     | K.GKEESLDSLYAELR.C                                                      | 1725.83517 | 3 | 9.23E-10 | 0.91 | 4.58  | -     | 955.1   |
| AHQ-2-13-, 4239            | K.GKEESLDSLYAELR.C                                                      | 1725.83517 | 2 | 1.40E-11 | 0.98 | 5.60  | -     | 2349.5  |
| AHQ-2-13-, 4029            | K.GKEESLDSLYAELR.C                                                      | 1725.83517 | 2 | 3.85E-07 | 0.95 | 4.42  | -     | 1261.7  |
| AHQ-2-14, 6458             | K.GKEESLDSLYAELR.C                                                      | 1725.83517 | 2 | 3.16E-07 | 0.92 | 3.90  | -     | 1185.3  |
| AHQ-2-14, 6188 - 6244      | K.GKEESLDSLYAELR.C                                                      | 1725.83517 | 2 | 3.43E-05 | 0.97 | 4.95  | -     | 1865.1  |
| AHQ-2-14, 6089 - 6166      | K.GKEESLDSLYAELR.C                                                      | 1725.83517 | 2 | 3.08E-04 | 0.97 | 5.16  | -     | 1764.0  |
| AHQ-2-14, 6040 - 6101      | K.GKEESLDSLYAELR.C                                                      | 1725.83517 | 2 | 1.25E-05 | 0.97 | 4.16  | -     | 2571.2  |
| AHQ-2-14, 5937 - 6009      | K.GKEESLDSLYAELR.C                                                      | 1725.83517 | 2 | 1.02E-06 | 0.97 | 4.71  | -     | 2062.1  |
| AHQ-2-14-, 4044 - 4115     | K.GKEESLDSLYAELR.C                                                      | 1725.83517 | 2 | 2.16E-11 | 0.98 | 5.53  | -     | 2304.4  |
| AHQ-2-14, 5805 - 5854      | K.GKEESLDSLYAELR.C                                                      | 1725.83517 | 2 | 3.12E-09 | 0.98 | 5.19  | -     | 2453.6  |
| AHQ-2-14, 5672 - 5732      | K.GKEESLDSLYAELR.C                                                      | 1725.83517 | 2 | 2.59E-07 | 0.98 | 5.11  | -     | 2403.4  |
| AHQ-2-14, 5556 - 5612      | K.GKEESLDSLYAELR.C                                                      | 1725.83517 | 2 | 5.45E-12 | 0.98 | 5.16  | -     | 2737.1  |
| AHQ-2-14, 5469             | K.GKEESLDSLYAELR.C                                                      | 1725.83517 | 3 | 5.18E-04 | 0.79 | 3.71  | -     | 827.1   |
| AHQ-2-14, 4816 - 4876      | K.GKEESLDSLYAELR.C                                                      | 1725.83517 | 2 | 5.12E-09 | 0.98 | 5.45  | -     | 1880.9  |
| AHQ-2-14, 4828 - 4896      | K.GKEESLDSLYAELR.C                                                      | 1725.83517 | 3 | 3.14E-06 | 0.91 | 4.08  | -     | 1064.2  |
| AHQ-2-14, 5412 - 5492      | K.GKEESLDSLYAELR.C                                                      | 1725.83517 | 2 | 4.23E-09 | 0.98 | 6.04  | -     | 2277.3  |
| AHQ-2-14, 4936 - 5001      | K.GKEESLDSLYAELR.C                                                      | 1725.83517 | 2 | 2.51E-10 | 0.98 | 5.43  | -     | 2225.4  |
| AHQ-2-14, 4958 - 5036      | K.GKEESLDSLYAELR.C                                                      | 1725.83517 | 3 | 6.83E-04 | 0.85 | 3.85  | -     | 892.4   |
| AHQ-2-14, 5333 - 5401      | K.GKEESLDSLYAELR.C                                                      | 1725.83517 | 3 | 2.08E-05 | 0.87 | 4.12  | -     | 829.1   |
| AHQ-2-14, 5324 - 5388      | K.GKEESLDSLYAELR.C                                                      | 1725.83517 | 2 | 6.15E-10 | 0.98 | 5.10  | -     | 2716.9  |
| AHQ-2-14, 5062 - 5129      | K.GKEESLDSLYAELR.C                                                      | 1725.83517 | 3 | 1.89E-05 | 0.87 | 4.01  | -     | 1135.7  |
| AHQ-2-14, 5064 - 5137      | K.GKEESLDSLYAELR.C                                                      | 1725.83517 | 2 | 8.69E-09 | 0.98 | 5.88  | -     | 2398.0  |
| AHQ-2-14, 5277 - 5340      | K.GKEESLDSLYAELR.C                                                      | 1725.83517 | 3 | 4.30E-05 | 0.95 | 4.45  | -     | 1631.8  |
| AHQ-2-14, 5200 - 5281      | K.GKEESLDSLYAELR.C                                                      | 1725.83517 | 2 | 1.98E-08 | 0.98 | 5.44  | -     | 2463.3  |
| AHQ-2-14, 5192 - 5268      | K.GKEESLDSLYAELR.C                                                      | 1725.83517 | 3 | 2.54E-04 | 0.94 | 4.86  | -     | 1352.2  |
| AHQ-2-14, 5177 - 5249      | K.GTHCNQVEVIATLK.D                                                      | 1571.78073 | 2 | 3.08E-08 | 0.95 | 3.46  | -     | 1819.4  |
| AHQ-2-14-, 4799 - 4871     | K.GTHCNQVEVIATLK.D                                                      | 1571.78073 | 2 | 9.22E-05 | 0.92 | 4.04  | -     | 852.0   |
| AHQ-2-13, 3300 - 3376      | K.GTHCNQVEVIATLK.D                                                      | 1571.78073 | 2 | 5.30E-05 | 0.83 | 3.37  | -     | 600.4   |
| AHQ-2-14, 5312 - 5378      | K.GTHCNQVEVIATLK.D                                                      | 1571.78073 | 2 | 7.65E-06 | 0.92 | 3.88  | -     | 1047.8  |
| AHQ-2-14, 5050 - 5117      | K.GTHCNQVEVIATLK.D                                                      | 1571.78073 | 2 | 1.68E-05 | 0.97 | 4.83  | -     | 1666.5  |
| AHQ-2-14, 4970             | K.GTHCNQVEVIATLK.D                                                      | 1571.78073 | 3 | 8.53E-05 | 0.71 | 3.55  | -     | 947.9   |
| AHQ-2-14, 4916 - 4961      | K.GTHCNQVEVIATLK.D                                                      | 1571.78073 | 2 | 2.32E-06 | 0.96 | 4.56  | -     | 1458.8  |
| AHQ-2-14, 5440 - 5510      | K.GTHCNQVEVIATLK.D                                                      | 1571.78073 | 2 | 1.53E-05 | 0.96 | 4.62  | -     | 1317.7  |
| AHQ-2-14, 4796 - 4857      | K.GTHCNQVEVIATLK.D                                                      | 1571.78073 | 2 | 1.13E-09 | 0.96 | 4.65  | -     | 1342.7  |
| AHQ-2-14, 5552 - 5617      | K.GTHCNQVEVIATLK.D                                                      | 1571.78073 | 2 | 3.02E-06 | 0.93 | 3.91  | -     | 1237.4  |
| AHQ-2-14, 4660 - 4740      | K.GTHCNQVEVIATLK.D                                                      | 1571.78073 | 2 | 2.10E-11 | 0.97 | 4.86  | -     | 1501.8  |
| AHQ-2-14-, 4601            | K.GTHCNQVEVIATLK.D                                                      | 1571.78073 | 2 | 3.93E-05 | 0.96 | 3.92  | -     | 1720.0  |
| AHQ-2-14, 5681             | K.GTHCNQVEVIATLK.D                                                      | 1571.78073 | 2 | 1.47E-04 | 0.94 | 4.39  | -     | 899.2   |
| AHQ-2-14, 4536 - 4616      | K.GTHCNQVEVIATLK.D                                                      | 1571.78073 | 2 | 2.57E-08 | 0.98 | 5.39  | -     | 1700.5  |
| AHQ-2-14, 5822 - 5846      | K.GTHCNQVEVIATLK.D                                                      | 1571.78073 | 2 | 9.67E-06 | 0.95 | 4.24  | -     | 1364.0  |
| AHQ-2-14-, 3403 - 3476     | K.GTHCNQVEVIATLK.D                                                      | 1571.78073 | 2 | 7.15E-07 | 0.97 | 4.96  | -     | 1611.7  |
| AHQ-2-14, 4469 - 4540      | K.GTHCNQVEVIATLK.D                                                      | 1571.78073 | 2 | 5.01E-09 | 0.97 | 4.83  | -     | 1956.1  |
| AHQ-2-14, 5982 - 6045      | K.GTHCNQVEVIATLK.D                                                      | 1571.78073 | 2 | 4.72E-09 | 0.96 | 4.58  | -     | 1504.6  |
| AHQ-2-14, 4356 - 4420      | K.GTHCNQVEVIATLK.D                                                      | 1571.78073 | 2 | 2.10E-08 | 0.97 | 4.49  | -     | 2149.0  |
| AHQ-2-13, 3420             | K.GTHCNQVEVIATLK.D                                                      | 1571.78073 | 2 | 2.24E-04 | 0.94 | 3.83  | -     | 1365.0  |
| AHQ-2-14, 4224 - 4292      | K.GTHCNQVEVIATLK.D                                                      | 1571.78073 | 2 | 1.05E-07 | 0.97 | 4.79  | -     | 1420.7  |
| AHQ-2-14, 6304 - 6320      | K.GTHCNQVEVIATLK.D                                                      | 1571.78073 | 2 | 7.96E-04 | 0.87 | 3.24  | -     | 1089.0  |
| AHQ-2-14-, 3531 - 3552     | K.GTHCNQVEVIATLK.D                                                      | 1571.78073 | 2 | 3.57E-09 | 0.98 | 5.22  | -     | 1808.7  |
| AHQ-2-14, 6480             | K.GTHCNQVEVIATLK.D                                                      | 1571.78073 | 2 | 5.60E-04 | 0.89 | 3.68  | -     | 850.1   |
| AHQ-2-13, 3504             | K.GTHCNQVEVIATLK.D                                                      | 1571.78073 | 2 | 3.10E-06 | 0.92 | 4.08  | -     | 1026.5  |
| AHQ-2-14-, 4393 - 4460     | K.GTHCNQVEVIATLK.D                                                      | 1571.78073 | 2 | 8.36E-12 | 0.96 | 4.82  | -     | 1422.4  |
| AHQ-2-14-, 4247 - 4311     | K.GTHCNQVEVIATLK.D                                                      | 1571.78073 | 2 | 2.05E-06 | 0.98 | 5.33  | -     | 1706.0  |
| AHQ-2-14-, 4119 - 4184     | K.GTHCNQVEVIATLK.D                                                      | 1571.78073 | 2 | 2.53E-09 | 0.97 | 4.91  | -     | 1480.6  |
| AHQ-2-13-, 3358            | K.GTHCNQVEVIATLK.D                                                      | 1571.78073 | 2 | 1.35E-07 | 0.94 | 3.97  | -     | 1187.0  |
| AHQ-2-13-, 3491            | K.GTHCNQVEVIATLK.D                                                      | 1571.78073 | 2 | 1.01E-06 | 0.95 | 4.30  | -     | 1211.2  |
| AHQ-2-14-, 3269 - 3340     | K.GTHCNQVEVIATLK.D                                                      | 1571.78073 | 2 | 5.33E-08 | 0.98 | 4.90  | -     | 1918.2  |
| AHQ-2-14-, 3987 - 4059     | K.GTHCNQVEVIATLK.D                                                      | 1571.78073 | 2 | 1.23E-07 | 0.97 | 5.31  | -     | 1575.3  |
| AHQ-2-14-, 3615 - 3695     | K.GTHCNQVEVIATLK.D                                                      | 1571.78073 | 2 | 4.72E-09 | 0.98 | 5.05  | -     | 2059.1  |
| AHQ-2-14-, 3623 - 3701     | K.GTHCNQVEVIATLK.D                                                      | 1571.78073 | 3 | 1.12E-04 | 0.94 | 4.30  | -     | 1572.4  |
| AHQ-2-14-, 3763 - 3840     | K.GTHCNQVEVIATLK.D                                                      | 1571.78073 | 2 | 5.62E-10 | 0.98 | 5.54  | -     | 2048.8  |
| AHQ-2-14, 4084 - 4156      | K.GTHCNQVEVIATLK.D                                                      | 1571.78073 | 2 | 1.50E-05 | 0.97 | 4.64  | -     | 1865.2  |
| AHQ-2-14-, 3855 - 3921     | K.GTHCNQVEVIATLK.D                                                      | 1571.78073 | 2 | 5.63E-07 | 0.97 | 4.62  | -     | 1735.9  |
| AHQ-2-14-, 3387 - 3464     | K.GTHCNQVEVIATLK.D                                                      | 1571.78073 | 3 | 9.93E-04 | 0.90 | 4.39  | -     | 1100.6  |
| AHQ-2-14-, 3628            | K.GTHCNQVEVIATLKDGR.K                                                   | 1900.10650 | 3 | 6.33E-07 | 0.94 | 4.35  | -     | 1282.0  |
| AHQ-2-14-, 2935 - 3012     | K.GTHCNQVEVIATLKDGR.K                                                   | 1900.10650 | 3 | 1.85E-09 | 0.95 | 4.76  | -     | 1206.8  |
| AHQ-2-14-, 2940 - 3021     | K.GTHCNQVEVIATLKDGR.K                                                   | 1900.10650 | 2 | 2.10E-08 | 0.98 | 5.20  | -     | 1871.3  |
| AHQ-2-14, 4010 - 4076      | K.GTHCNQVEVIATLKDGR.K                                                   | 1900.10650 | 3 | 1.79E-07 | 0.92 | 4.01  | -     | 905.6   |

|                            |                                                                             |            |   |          |       |        |       |         |
|----------------------------|-----------------------------------------------------------------------------|------------|---|----------|-------|--------|-------|---------|
| AHQ-2-14, 3802 - 3869      | K.GTHCNQVEVIATLKDGR.K                                                       | 1900.10650 | 3 | 3.19E-04 | 0.86  | 3.60   | -     | 705.1   |
| AHQ-2-14, 4161             | K.GTHCNQVEVIATLKDGR.K                                                       | 1900.10650 | 3 | 1.17E-06 | 0.96  | 5.31   | -     | 1321.5  |
| AHQ-2-14, 4168             | K.GTHCNQVEVIATLKDGR.K                                                       | 1900.10650 | 2 | 8.08E-10 | 0.97  | 4.90   | -     | 1653.0  |
| AHQ-2-14, 4533             | K.GTHCNQVEVIATLKDGR.K                                                       | 1900.10650 | 3 | 9.52E-07 | 0.76  | 3.19   | -     | 795.1   |
| AHQ-2-14-, 3335            | K.GTHCNQVEVIATLKDGR.K                                                       | 1900.10650 | 3 | 1.00E-05 | 0.87  | 3.90   | -     | 750.4   |
| AHQ-2-14, 4069             | K.GTHCNQVEVIATLKDGR.K                                                       | 1900.10650 | 2 | 6.52E-07 | 0.96  | 5.04   | -     | 1113.0  |
| AHQ-2-14-, 2676            | K.GTHCNQVEVIATLKDGRK.I                                                      | 2028.27941 | 2 | 7.61E-05 | 0.94  | 4.82   | -     | 710.4   |
| AHQ-2-14-, 2668 - 2677     | K.GTHCNQVEVIATLKDGRK.I                                                      | 2028.27941 | 3 | 6.29E-04 | 0.89  | 3.91   | -     | 1100.8  |
| AHQ-2-13, 2932             | K.ICLDPDAPR.I                                                               | 1058.19059 | 2 | 1.12E-05 | 0.77  | 2.83   | -     | 811.7   |
| AHQ-2-13-, 2873 - 2877     | K.ICLDPDAPR.I                                                               | 1058.19059 | 2 | 2.38E-04 | 0.79  | 2.98   | -     | 830.5   |
| AHQ-2-14, 3669 - 3734      | K.ICLDPDAPR.I                                                               | 1058.19059 | 2 | 2.54E-05 | 0.79  | 2.90   | -     | 908.5   |
| AHQ-2-14-, 2916 - 2917     | K.ICLDPDAPR.I                                                               | 1058.19059 | 2 | 1.41E-04 | 0.87  | 3.02   | -     | 1078.0  |
| AHQ-2-14-, 2771 - 2820     | K.ICLDPDAPR.I                                                               | 1058.19059 | 2 | 6.68E-04 | 0.88  | 3.03   | -     | 993.1   |
| AHQ-2-14, 3013 - 3068      | R.KICLDPDAPR.I                                                              | 1186.36350 | 2 | 8.83E-06 | 0.63  | 2.89   | -     | 522.4   |
| AHQ-2-13-, 2567 - 2614     | R.KICLDPDAPR.I                                                              | 1186.36350 | 2 | 1.95E-06 | 0.92  | 3.39   | -     | 1010.5  |
| AHQ-2-14-, 2573            | R.KICLDPDAPR.I                                                              | 1186.36350 | 2 | 5.97E-04 | 0.86  | 3.18   | -     | 858.6   |
| AHQ-2-14-, 2445 - 2511     | R.KICLDPDAPR.I                                                              | 1186.36350 | 2 | 3.06E-05 | 0.85  | 3.15   | -     | 809.6   |
| AHQ-2-14, 3220 - 3282      | R.KICLDPDAPR.I                                                              | 1186.36350 | 2 | 2.60E-05 | 0.82  | 3.01   | -     | 895.9   |
| AHQ-2-14, 3340 - 3400      | R.KICLDPDAPR.I                                                              | 1186.36350 | 2 | 2.19E-05 | 0.87  | 3.66   | -     | 707.0   |
| AHQ-2-14, 3762 - 3825      | R.KICLDPDAPR.I                                                              | 1186.36350 | 2 | 1.62E-04 | 0.76  | 3.11   | -     | 754.5   |
| AHQ-2-14, 3674 - 3676      | R.KICLDPDAPR.I                                                              | 1186.36350 | 2 | 5.56E-05 | 0.67  | 2.87   | -     | 527.7   |
| AHQ-2-13, 2663             | R.KICLDPDAPR.I                                                              | 1186.36350 | 2 | 2.94E-06 | 0.84  | 3.33   | -     | 785.8   |
| AHQ-2-14, 1789             | K.KLAGDESAD                                                                 | 905.92969  | 1 | 8.57E-04 | 0.39  | 1.98   | -     | 441.5   |
| AHQ-2-14, 4118 - 4188      | K.NIQSLEVIK.G                                                               | 1101.27845 | 2 | 2.85E-06 | 0.94  | 3.86   | -     | 1110.6  |
| AHQ-2-13-, 3313            | K.NIQSLEVIK.G                                                               | 1101.27845 | 2 | 2.23E-06 | 0.86  | 3.56   | -     | 704.3   |
| AHQ-2-14, 4090 - 4164      | K.NIQSLEVIK.G                                                               | 1101.27845 | 2 | 1.52E-05 | 0.85  | 3.50   | -     | 653.4   |
| AHQ-2-14-, 3081 - 3143     | K.NIQSLEVIK.G                                                               | 1101.27845 | 2 | 6.21E-06 | 0.87  | 3.51   | -     | 728.7   |
| AHQ-2-14-, 4180            | K.NIQSLEVIK.G                                                               | 1101.27845 | 2 | 1.50E-04 | 0.93  | 3.10   | -     | 1538.2  |
| AHQ-2-13-, 3321            | K.NIQSLEVIK.G                                                               | 1101.27845 | 1 | 7.56E-04 | 0.36  | 2.58   | -     | 207.0   |
| AHQ-2-14-, 3111 - 3171     | K.NIQSLEVIK.G                                                               | 1101.27845 | 2 | 9.60E-06 | 0.86  | 3.63   | -     | 653.9   |
| AHQ-2-14-, 3289 - 3351     | K.NIQSLEVIK.G                                                               | 1101.27845 | 2 | 2.70E-06 | 0.91  | 3.87   | -     | 821.1   |
| AHQ-2-14, 4252 - 4320      | K.NIQSLEVIK.G                                                               | 1101.27845 | 2 | 1.78E-06 | 0.87  | 3.71   | -     | 629.4   |
| AHQ-2-13, 3340             | K.NIQSLEVIK.G                                                               | 1101.27845 | 2 | 8.14E-06 | 0.85  | 3.33   | -     | 762.9   |
| AHQ-2-14, 4618 - 4682      | K.NIQSLEVIK.G                                                               | 1101.27845 | 2 | 3.30E-04 | 0.83  | 3.26   | -     | 757.6   |
| AHQ-2-14, 5140 - 5205      | K.NIQSLEVIK.G                                                               | 1101.27845 | 1 | 8.95E-04 | 0.71  | 2.59   | -     | 653.4   |
| AHQ-2-14-, 3416 - 3483     | K.NIQSLEVIK.G                                                               | 1101.27845 | 2 | 3.82E-04 | 0.86  | 3.29   | -     | 758.1   |
| AHQ-2-14, 5141 - 5214      | K.NIQSLEVIK.G                                                               | 1101.27845 | 2 | 9.03E-05 | 0.84  | 3.08   | -     | 992.0   |
| AHQ-2-14-, 3331            | K.NIQSLEVIK.G                                                               | 1101.27845 | 2 | 1.06E-06 | 0.89  | 3.68   | -     | 777.4   |
| gi 4506877 ref NP_002996.1 | selectin P precursor; Selectin P (granulocyte membrane protein, 140kD;      |            |   | 3.18E-13 | 5.28  | 60.32  | 11.10 | 90844.7 |
| AHQ-2-3, 4760 - 4761       | K.CPELFAPEQGLSDCSDTR.G                                                      | 2085.21515 | 2 | 3.18E-13 | 0.94  | 4.44   | -     | 787.4   |
| AHQ-2-2, 4810 - 4868       | K.CPELFAPEQGLSDCSDTR.G                                                      | 2085.21515 | 2 | 3.17E-06 | 0.94  | 4.36   | -     | 802.2   |
| AHQ-2-3, 6089              | K.LECLASGIWTKNPPQCLAAQCPPLK.I                                               | 2857.31818 | 3 | 3.55E-04 | 0.73  | 3.23   | -     | 966.7   |
| AHQ-2-3, 6308              | K.LECLASGIWTKNPPQCLAAQCPPLKIPER.G                                           | 3352.89300 | 3 | 1.13E-05 | 0.97  | 6.47   | -     | 1317.1  |
| AHQ-2-2, 3081              | R.PSGQWTAVTPACR.A                                                           | 1432.58672 | 2 | 1.15E-07 | 0.95  | 4.06   | -     | 1131.9  |
| AHQ-2-3, 5077              | K.STCQFCDEGYSLSGPER.L                                                       | 2109.23671 | 2 | 6.89E-08 | 0.91  | 3.73   | -     | 973.0   |
| AHQ-2-2, 5126              | K.STCQFCDEGYSLSGPER.L                                                       | 2109.23671 | 2 | 3.43E-08 | 0.86  | 3.63   | -     | 680.3   |
| AHQ-2-1, 5052              | K.STCQFCDEGYSLSGPER.L                                                       | 2109.23671 | 2 | 1.15E-06 | 0.93  | 4.53   | -     | 853.8   |
| AHQ-2-4, 5092              | K.STCQFCDEGYSLSGPER.L                                                       | 2109.23671 | 2 | 4.06E-08 | 0.91  | 4.02   | -     | 798.4   |
| AHQ-2-3, 6508              | K.VLPYSSYYWIGIR.K                                                           | 1781.04522 | 2 | 7.75E-08 | 0.83  | 3.64   | -     | 463.2   |
| gi 5031635 ref NP_005498.1 | cofilin 1 (non-muscle) [Homo sapiens]                                       |            |   | 3.53E-13 | 10.16 | 110.39 | 59.60 | 18502.4 |
| AHQ-2-13, 3495 - 3499      | K.AVLFCLSEDKK.N                                                             | 1311.52930 | 2 | 5.41E-05 | 0.54  | 2.60   | -     | 499.5   |
| AHQ-2-13-, 3493 - 3494     | K.AVLFCLSEDKK.N                                                             | 1311.52930 | 2 | 8.21E-07 | 0.88  | 3.13   | -     | 832.6   |
| AHQ-2-12, 3297 - 3366      | K.AVLFCLSEDKK.N                                                             | 1311.52930 | 2 | 8.75E-05 | 0.88  | 2.97   | -     | 799.2   |
| AHQ-2-12, 7090             | K.EDLVFIFWAPESAPLK.S                                                        | 1863.14454 | 2 | 3.78E-06 | 0.96  | 4.35   | -     | 1482.8  |
| AHQ-2-13, 5607             | K.EILVGDVGGQVDDPYATFVK.M                                                    | 2167.40069 | 2 | 8.88E-09 | 0.97  | 5.10   | -     | 1345.4  |
| AHQ-2-11, 5533             | K.EILVGDVGGQVDDPYATFVK.M                                                    | 2167.40069 | 2 | 1.01E-05 | 0.96  | 4.82   | -     | 1219.7  |
| AHQ-2-12, 5867 - 5933      | K.EILVGDVGGQVDDPYATFVK.M                                                    | 2167.40069 | 2 | 3.53E-13 | 0.97  | 5.48   | -     | 1251.6  |
| AHQ-2-12, 5730 - 5798      | K.EILVGDVGGQVDDPYATFVK.M                                                    | 2167.40069 | 2 | 1.76E-12 | 0.98  | 5.78   | -     | 1630.3  |
| AHQ-2-13-, 5706 - 5737     | K.EILVGDVGGQVDDPYATFVK.M                                                    | 2167.40069 | 2 | 9.53E-07 | 0.97  | 5.60   | -     | 1449.3  |
| AHQ-2-12, 5506             | K.EILVGDVGGQVDDPYATFVK.M                                                    | 2167.40069 | 2 | 1.14E-06 | 0.88  | 3.63   | -     | 911.6   |
| AHQ-2-14-, 5683 - 5684     | K.EILVGDVGGQVDDPYATFVK.M                                                    | 2167.40069 | 2 | 8.41E-08 | 0.97  | 5.99   | -     | 1266.5  |
| AHQ-2-12, 5622 - 5695      | K.EILVGDVGGQVDDPYATFVK.M                                                    | 2167.40069 | 2 | 7.69E-08 | 0.97  | 5.14   | -     | 1327.6  |
| AHQ-2-12, 6055 - 6117      | K.ESKKEIDLVFIFWAPESAPLK.S                                                   | 2335.68256 | 3 | 6.45E-04 | 0.85  | 4.14   | -     | 672.1   |
| AHQ-2-12, 2317 - 2382      | K.HELQANCYEEVKDR.C                                                          | 1792.90812 | 3 | 2.70E-12 | 0.98  | 5.83   | -     | 2182.8  |
| AHQ-2-12, 2415 - 2494      | K.HELQANCYEEVKDR.C                                                          | 1792.90812 | 2 | 9.87E-04 | 0.63  | 3.20   | -     | 169.5   |
| AHQ-2-13-, 2449            | K.HELQANCYEEVKDR.C                                                          | 1792.90812 | 2 | 5.13E-04 | 0.95  | 4.07   | -     | 1328.6  |
| AHQ-2-13-, 2446            | K.HELQANCYEEVKDR.C                                                          | 1792.90812 | 3 | 6.11E-07 | 0.95  | 4.84   | -     | 1397.2  |
| AHQ-2-12, 2274 - 2342      | K.HELQANCYEEVKDR.C                                                          | 1792.90812 | 2 | 1.78E-10 | 0.98  | 5.45   | -     | 1959.9  |
| AHQ-2-12, 2805             | K.KAVLFLCLSEDKK.N                                                           | 1439.70221 | 1 | 3.69E-07 | 0.66  | 3.08   | -     | 391.4   |
| AHQ-2-12, 2797             | K.KAVLFLCLSEDKK.N                                                           | 1439.70221 | 1 | 1.18E-05 | 0.48  | 2.45   | -     | 609.1   |
| AHQ-2-12, 6726             | K.KEDLVFIFWAPESAPLK.S                                                       | 1991.31745 | 2 | 8.87E-06 | 0.91  | 4.10   | -     | 856.1   |
| AHQ-2-14-, 6467            | K.KEDLVFIFWAPESAPLK.S                                                       | 1991.31745 | 2 | 2.11E-08 | 0.96  | 4.69   | -     | 1212.0  |
| AHQ-2-13-, 6618            | K.KEDLVFIFWAPESAPLK.S                                                       | 1991.31745 | 3 | 2.80E-06 | 0.97  | 5.86   | -     | 1459.8  |
| AHQ-2-11, 6278 - 6356      | K.KEDLVFIFWAPESAPLK.S                                                       | 1991.31745 | 2 | 2.21E-04 | 0.93  | 4.31   | -     | 789.3   |
| AHQ-2-13-, 6605            | K.KEDLVFIFWAPESAPLK.S                                                       | 1991.31745 | 2 | 5.38E-07 | 0.97  | 5.91   | -     | 1491.9  |
| AHQ-2-13, 6379             | K.KEDLVFIFWAPESAPLK.S                                                       | 1991.31745 | 2 | 5.79E-04 | 0.96  | 4.71   | -     | 1125.3  |
| AHQ-2-12, 6666             | K.KEDLVFIFWAPESAPLK.S                                                       | 1991.31745 | 3 | 8.36E-05 | 0.95  | 5.21   | -     | 1132.7  |
| AHQ-2-12, 6493 - 6553      | K.KEDLVFIFWAPESAPLK.S                                                       | 1991.31745 | 2 | 1.35E-10 | 0.98  | 5.50   | -     | 1719.4  |
| AHQ-2-12, 6494 - 6570      | K.KEDLVFIFWAPESAPLK.S                                                       | 1991.31745 | 3 | 1.37E-09 | 0.97  | 5.70   | -     | 1603.9  |
| AHQ-2-12, 6581 - 6657      | K.KEDLVFIFWAPESAPLK.S                                                       | 1991.31745 | 2 | 4.76E-09 | 0.98  | 5.69   | -     | 1601.4  |
| AHQ-2-12, 6626             | K.KEDLVFIFWAPESAPLK.S                                                       | 1991.31745 | 2 | 2.88E-09 | 0.97  | 5.65   | -     | 1366.0  |
| AHQ-2-12, 6586 - 6593      | K.KNILEEGKELVGDVGGQVDDPYATFVK.M                                             | 3192.60499 | 3 | 6.49E-09 | 0.98  | 7.79   | -     | 2450.0  |
| AHQ-2-12, 4029             | K.LGGSAVISLEGKPL                                                            | 1341.57848 | 2 | 5.49E-08 | 0.95  | 3.95   | -     | 1589.3  |
| AHQ-2-12, 5058 - 5121      | K.LGGSAVISLEGKPL                                                            | 1341.57848 | 2 | 2.60E-04 | 0.90  | 3.61   | -     | 833.8   |
| AHQ-2-12, 4331 - 4405      | K.LGGSAVISLEGKPL                                                            | 1341.57848 | 2 | 2.10E-06 | 0.96  | 4.29   | -     | 1401.0  |
| AHQ-2-12, 4961             | K.LGGSAVISLEGKPL                                                            | 1341.57848 | 2 | 9.08E-06 | 0.93  | 3.84   | -     | 1153.6  |
| AHQ-2-12, 4469 - 4545      | K.LGGSAVISLEGKPL                                                            | 1341.57848 | 2 | 2.54E-10 | 0.97  | 5.35   | -     | 1264.2  |
| AHQ-2-12, 4822 - 4894      | K.LGGSAVISLEGKPL                                                            | 1341.57848 | 2 | 8.51E-07 | 0.95  | 4.72   | -     | 1073.3  |
| AHQ-2-12, 4705 - 4773      | K.LGGSAVISLEGKPL                                                            | 1341.57848 | 2 | 7.20E-07 | 0.97  | 5.35   | -     | 1292.6  |
| AHQ-2-12, 4566 - 4637      | K.LGGSAVISLEGKPL                                                            | 1341.57848 | 2 | 4.66E-06 | 0.96  | 5.01   | -     | 1289.8  |
| AHQ-2-13, 6619             | K.NIILEEGKELVGDVGGQVDDPYATFVK.M                                             | 3064.43208 | 3 | 6.92E-08 | 0.97  | 7.08   | -     | 1598.1  |
| AHQ-2-12, 7217 - 7281      | K.NIILEEGKELVGDVGGQVDDPYATFVK.M                                             | 3064.43208 | 3 | 3.42E-09 | 0.98  | 7.15   | -     | 1564.4  |
| AHQ-2-12, 6949 - 7005      | K.NIILEEGKELVGDVGGQVDDPYATFVK.M                                             | 3064.43208 | 3 | 4.62E-11 | 0.98  | 7.07   | -     | 2027.6  |
| AHQ-2-1, 7113 - 7126       | K.NIILEEGKELVGDVGGQVDDPYATFVK.M                                             | 3064.43208 | 3 | 9.99E-04 | 0.88  | 3.72   | -     | 1120.0  |
| AHQ-2-13-, 6837 - 6838     | K.NIILEEGKELVGDVGGQVDDPYATFVK.M                                             | 3064.43208 | 3 | 2.49E-11 | 0.98  | 7.85   | -     | 1614.7  |
| AHQ-2-11, 6545 - 6612      | K.NIILEEGKELVGDVGGQVDDPYATFVK.M                                             | 3064.43208 | 3 | 2.90E-07 | 0.94  | 4.99   | -     | 1238.9  |
| AHQ-2-14-, 6691 - 6763     | K.NIILEEGKELVGDVGGQVDDPYATFVK.M                                             | 3064.43208 | 3 | 1.24E-09 | 0.96  | 5.45   | -     | 1367.2  |
| AHQ-2-12, 3118 - 3181      | R.YALYDATYETK.E                                                             | 1338.44364 | 1 | 7.39E-07 | 0.63  | 2.95   | -     | 342.5   |
| AHQ-2-12, 3117 - 3153      | R.YALYDATYETK.E                                                             | 1338.44364 | 2 | 4.77E-08 | 0.95  | 3.54   | -     | 1189.7  |
| AHQ-2-12, 3085 - 3158      | R.YALYDATYETK.E                                                             | 1338.44364 | 2 | 1.51E-07 | 0.92  | 3.40   | -     | 973.6   |
| AHQ-2-12, 3346             | R.YALYDATYETK.E                                                             | 1338.44364 | 2 | 2.27E-06 | 0.90  | 2.80   | -     | 1062.9  |
| AHQ-2-13, 3295             | R.YALYDATYETK.E                                                             | 1338.44364 | 1 | 2.03E-07 | 0.53  | 2.65   | -     | 328.4   |
| gi 4758638 ref NP_004896.1 | peroxiredoxin 6; antioxidant protein 2; non-selenium glutathione peroxidase |            |   | 3.73E-13 | 8.23  | 110.29 | 48.20 | 25034.8 |
| AHQ-2-10, 4035             | K.DGDSVM*VLPITPEEAAK.K                                                      | 1847.03409 | 2 | 6.55E-06 | 0.56  | 2.91   | -     | 440.2   |
| AHQ-2-10, 2588 - 2590      | K.DINAYNCEETK.L                                                             | 1584.64363 | 2 | 9.73E-05 | 0.88  | 3.39   | -     | 878.9   |
| AHQ-2-10, 2483 - 2487      | K.DINAYNCEETK.L                                                             | 1584.64363 | 2 | 1.17E-06 | 0.89  | 3.69   | -     | 721.7   |
| AHQ-2-10, 5354             | K.DINAYNCEETKLPPIIDDR.N                                                     | 2651.88650 | 3 | 6.66E-05 | 0.87  | 3.74   | -     | 881.5   |

|                             |                                                                        |            |   |          |       |        |       |          |
|-----------------------------|------------------------------------------------------------------------|------------|---|----------|-------|--------|-------|----------|
| AHQ-2-10, 5454              | K.DINAYNCEEPTKLPFPIIDDR.N                                              | 2651.88650 | 2 | 6.31E-05 | 0.31  | 2.58   | -     | 213.0    |
| AHQ-2-10, 5819 - 5895       | R.ELAILLGMLDPAEKDEK.G                                                  | 1886.19976 | 2 | 2.71E-04 | 0.93  | 4.14   | -     | 977.9    |
| AHQ-2-12, 6257              | R.ELAILLGMLDPAEKDEK.G                                                  | 1886.19976 | 2 | 7.20E-05 | 0.79  | 3.38   | -     | 596.0    |
| AHQ-2-10, 5699 - 5758       | R.ELAILLGMLDPAEKDEK.G                                                  | 1886.19976 | 2 | 3.43E-06 | 0.96  | 4.78   | -     | 1197.6   |
| AHQ-2-10, 5998              | R.FHDFLGDSDWGLF SHPR.D                                                 | 2032.24831 | 3 | 4.49E-09 | 0.96  | 4.91   | -     | 1462.5   |
| AHQ-2-10, 5995 - 6059       | R.FHDFLGDSDWGLF SHPR.D                                                 | 2032.24831 | 2 | 1.13E-05 | 0.98  | 5.66   | -     | 2124.4   |
| AHQ-2-10, 6122              | R.FHDFLGDSDWGLF SHPR.D                                                 | 2032.24831 | 2 | 4.26E-06 | 0.97  | 5.22   | -     | 1462.8   |
| AHQ-2-14-, 5968             | K.LIALSIDSVEDHLAWSK.D                                                  | 1898.14883 | 2 | 3.73E-13 | 0.98  | 5.34   | -     | 2020.7   |
| AHQ-2-10, 5572 - 5647       | K.LIALSIDSVEDHLAWSK.D                                                  | 1898.14883 | 2 | 1.30E-08 | 0.97  | 4.83   | -     | 1607.3   |
| AHQ-2-14-, 5979             | K.LIALSIDSVEDHLAWSK.D                                                  | 1898.14883 | 3 | 9.04E-05 | 0.36  | 3.09   | -     | 213.3    |
| AHQ-2-10, 5747              | K.LIALSIDSVEDHLAWSK.D                                                  | 1898.14883 | 2 | 4.63E-04 | 0.85  | 3.26   | -     | 805.2    |
| AHQ-2-10, 4143 - 4154       | K.LPFPPIIDDR.N                                                         | 1086.26548 | 2 | 3.46E-05 | 0.91  | 3.26   | -     | 825.4    |
| AHQ-2-10, 5311              | R.VATPVDWKDGDSDVMVLPITPEEEAK.K                                         | 2728.06777 | 2 | 4.48E-04 | 0.82  | 4.05   | -     | 399.3    |
| AHQ-2-10, 5214 - 5287       | R.VATPVDWKDGDSDVMVLPITPEEEAK.K                                         | 2728.06777 | 2 | 1.22E-04 | 0.65  | 2.97   | -     | 429.7    |
| AHQ-2-10, 4735 - 4803       | R.VATPVDWKDGDSDVM*VLPITPEEEAK.K                                        | 2744.06717 | 3 | 2.63E-04 | 0.35  | 3.02   | -     | 205.3    |
| AHQ-2-10, 3482 - 3484       | R.VVVFVFGPDK.K                                                         | 1008.19471 | 1 | 1.36E-04 | 0.58  | 2.10   | -     | 776.6    |
| AHQ-2-10, 3502              | R.VVVFVFGPDK.K                                                         | 1008.19471 | 2 | 3.25E-07 | 0.80  | 2.71   | -     | 602.8    |
| AHQ-2-10, 2682              | R.VVVFVFGPDK.L                                                         | 1136.36763 | 2 | 2.34E-05 | 0.88  | 3.18   | -     | 890.4    |
| gl 10863977 ref NP_067000.1 | LSM2 homolog, U6 small nuclear RNA associated; U6 snRNA-associated Sm- |            |   | 3.96E-13 | 1.68  | 20.26  | 40.00 | 10834.5  |
| AHQ-2-14-, 6707             | K.NDLSICGTLHSVDQYLNLIK.L                                               | 2192.43507 | 2 | 2.27E-07 | 0.94  | 4.38   | -     | 999.4    |
| AHQ-2-14-, 6709             | K.NDLSICGTLHSVDQYLNLIK.L                                               | 2192.43507 | 3 | 1.24E-07 | 0.76  | 3.47   | -     | 478.4    |
| AHQ-2-14-, 5420 - 5423      | R.YVQLPADEVDTQLLQDAAR.K                                                | 2146.34311 | 2 | 4.36E-09 | 0.97  | 5.26   | -     | 1459.9   |
| AHQ-2-14, 6508              | R.YVQLPADEVDTQLLQDAAR.K                                                | 2146.34311 | 2 | 3.96E-13 | 0.93  | 3.91   | -     | 1268.2   |
| AHQ-2-14, 6249              | R.YVQLPADEVDTQLLQDAAR.K                                                | 2146.34311 | 2 | 8.62E-05 | 0.57  | 2.61   | -     | 525.3    |
| gl 24431935 ref NP_065393.1 | reticulin 4; neuroendocrine-specific protein C like (foccen) [Homo sap |            |   | 4.87E-13 | 0.97  | 10.30  | 2.80  | 129930.3 |
| AHQ-2-14-, 6089             | K.YQFVREPEDEEEEEDEDELEEVLEVER.K                                        | 4189.14063 | 3 | 4.87E-13 | 0.97  | 6.06   | -     | 1640.6   |
| gl 13562114 ref NP_110400.1 | beta tubulin 1, class VI [Homo sapiens]                                |            |   | 5.25E-13 | 20.69 | 230.36 | 57.40 | 50326.6  |
| AHQ-2-1, 6625               | R.ALSVAELTQQMFDAR.N                                                    | 1680.90740 | 2 | 1.80E-04 | 0.93  | 4.00   | -     | 1221.2   |
| AHQ-2-10, 5863              | R.ALSVAELTQQMFDAR.N                                                    | 1680.90740 | 2 | 6.94E-05 | 0.93  | 4.18   | -     | 1450.3   |
| AHQ-2-9, 6334               | R.ALSVAELTQQMFDAR.N                                                    | 1680.90740 | 2 | 7.00E-08 | 0.94  | 4.34   | -     | 1194.1   |
| AHQ-2-14-, 6225 - 6295      | R.ALSVAELTQQMFDAR.N                                                    | 1680.90740 | 2 | 1.16E-04 | 0.82  | 2.99   | -     | 1045.2   |
| AHQ-2-9, 4567 - 4568        | R.ALSVAELTQQMFDAR.N                                                    | 1696.90680 | 2 | 1.86E-05 | 0.90  | 3.81   | -     | 994.0    |
| AHQ-2-8, 6170 - 6188        | R.ALSVAELTQQMFDAR.N                                                    | 1680.90740 | 2 | 3.04E-06 | 0.96  | 4.86   | -     | 1450.7   |
| AHQ-2-13, 6169 - 6179       | R.ALSVAELTQQMFDAR.N                                                    | 1680.90740 | 2 | 4.48E-05 | 0.97  | 5.25   | -     | 1849.3   |
| AHQ-2-11, 6008 - 6028       | R.ALSVAELTQQMFDAR.N                                                    | 1680.90740 | 2 | 1.77E-06 | 0.94  | 4.65   | -     | 1094.5   |
| AHQ-2-14, 4969 - 5029       | R.AVLVLEPDTMDSIR.S                                                     | 1632.86102 | 2 | 6.36E-04 | 0.53  | 2.74   | -     | 444.2    |
| AHQ-2-7, 4687 - 4767        | R.AVLVLEPDTMDSIR.S                                                     | 1616.86162 | 2 | 8.52E-08 | 0.90  | 4.59   | -     | 590.7    |
| AHQ-2-14-, 4692             | R.AVLVLEPDTMDSIR.S                                                     | 1616.86162 | 2 | 7.03E-06 | 0.86  | 3.44   | -     | 621.6    |
| AHQ-2-12, 4965              | R.AVLVLEPDTMDSIR.S                                                     | 1616.86162 | 2 | 2.14E-05 | 0.81  | 3.45   | -     | 656.1    |
| AHQ-2-14, 4869 - 4933       | R.EIVHIQIQCQCNGIQAQK.F                                                 | 1867.11965 | 2 | 7.79E-05 | 0.71  | 3.59   | -     | 431.5    |
| AHQ-2-7, 3539 - 3541        | R.EIVHIQIQCQCNGIQAQK.F                                                 | 1867.11965 | 2 | 7.97E-04 | 0.94  | 4.31   | -     | 1100.4   |
| AHQ-2-13, 3981              | R.EIVHIQIQCQCNGIQAQK.F                                                 | 1867.11965 | 2 | 4.16E-07 | 0.91  | 4.14   | -     | 726.0    |
| AHQ-2-14-, 3781 - 3784      | R.EIVHIQIQCQCNGIQAQK.F                                                 | 1867.11965 | 2 | 2.20E-08 | 0.95  | 5.44   | -     | 809.7    |
| AHQ-2-12, 3734              | R.EIVHIQIQCQCNGIQAQK.F                                                 | 1867.11965 | 2 | 3.11E-04 | 0.80  | 3.39   | -     | 419.2    |
| AHQ-2-9, 2984 - 3054        | K.EVDQQLLSVQTR.N                                                       | 1416.56231 | 2 | 8.75E-04 | 0.74  | 3.22   | -     | 540.5    |
| AHQ-2-8, 2908 - 2979        | K.EVDQQLLSVQTR.N                                                       | 1416.56231 | 1 | 7.17E-04 | 0.12  | 1.82   | -     | 119.4    |
| AHQ-2-10, 3012              | K.EVDQQLLSVQTR.N                                                       | 1416.56231 | 2 | 2.45E-04 | 0.92  | 3.83   | -     | 1059.9   |
| AHQ-2-13-, 3206 - 3270      | K.EVDQQLLSVQTR.N                                                       | 1416.56231 | 2 | 6.87E-04 | 0.85  | 3.42   | -     | 806.2    |
| AHQ-2-7, 5287 - 5301        | K.FWEMIGEEHGIDLAGSDR.G                                                 | 2063.23616 | 2 | 9.83E-05 | 0.71  | 3.35   | -     | 326.8    |
| AHQ-2-7, 5136 - 5216        | K.FWEMIGEEHGIDLAGSDR.G                                                 | 2063.23616 | 2 | 1.56E-04 | 0.83  | 3.61   | -     | 470.2    |
| AHQ-2-7, 5453               | K.FWEMIGEEHGIDLAGSDR.G                                                 | 2063.23616 | 2 | 1.50E-05 | 0.48  | 2.62   | -     | 311.5    |
| AHQ-2-14, 5821              | K.FWEMIGEEHGIDLAGSDR.G                                                 | 2079.23556 | 2 | 2.93E-06 | 0.93  | 3.69   | -     | 896.3    |
| AHQ-2-12, 5179 - 5246       | K.FWEMIGEEHGIDLAGSDR.G                                                 | 2063.23616 | 2 | 4.06E-08 | 0.97  | 5.99   | -     | 1514.3   |
| AHQ-2-14, 6337 - 6406       | K.FWEMIGEEHGIDLAGSDR.G                                                 | 2063.23616 | 2 | 2.26E-11 | 0.97  | 5.00   | -     | 1748.9   |
| AHQ-2-13-, 5279             | K.FWEMIGEEHGIDLAGSDR.G                                                 | 2063.23616 | 3 | 1.82E-09 | 0.95  | 4.18   | -     | 1477.6   |
| AHQ-2-14-, 5191             | K.FWEMIGEEHGIDLAGSDR.G                                                 | 2063.23616 | 2 | 1.27E-09 | 0.98  | 6.57   | -     | 2014.3   |
| AHQ-2-14-, 5195 - 5276      | K.FWEMIGEEHGIDLAGSDR.G                                                 | 2063.23616 | 3 | 1.25E-09 | 0.96  | 5.13   | -     | 1408.4   |
| AHQ-2-13, 5176              | K.FWEMIGEEHGIDLAGSDR.G                                                 | 2063.23616 | 2 | 2.12E-07 | 0.98  | 5.72   | -     | 1697.3   |
| AHQ-2-13-, 5269             | K.FWEMIGEEHGIDLAGSDR.G                                                 | 2063.23616 | 2 | 1.67E-05 | 0.91  | 3.87   | -     | 849.4    |
| AHQ-2-7, 5552               | K.FWEMIGEEHGIDLAGSDR.G                                                 | 2063.23616 | 2 | 3.43E-07 | 0.95  | 4.07   | -     | 1384.9   |
| AHQ-2-8, 6650 - 6728        | K.GHYTEGAEALIENLVLEVR.H                                                | 2029.23935 | 2 | 3.39E-06 | 0.98  | 6.02   | -     | 2442.6   |
| AHQ-2-12, 6833              | K.GHYTEGAEALIENLVLEVR.H                                                | 2029.23935 | 2 | 3.98E-06 | 0.98  | 6.37   | -     | 2489.4   |
| AHQ-2-12, 6814 - 6815       | K.GHYTEGAEALIENLVLEVR.H                                                | 2029.23935 | 3 | 2.96E-05 | 0.94  | 5.20   | -     | 1457.0   |
| AHQ-2-12, 6778 - 6813       | K.GHYTEGAEALIENLVLEVR.H                                                | 2029.23935 | 2 | 1.62E-06 | 0.98  | 6.36   | -     | 2400.9   |
| AHQ-2-4, 7280               | K.GHYTEGAEALIENLVLEVR.H                                                | 2029.23935 | 2 | 1.26E-04 | 0.94  | 4.02   | -     | 1623.5   |
| AHQ-2-13, 6621              | K.GHYTEGAEALIENLVLEVR.H                                                | 2029.23935 | 2 | 5.22E-05 | 0.97  | 5.57   | -     | 1643.2   |
| AHQ-2-9, 6950               | K.GHYTEGAEALIENLVLEVR.H                                                | 2029.23935 | 2 | 9.65E-07 | 0.99  | 7.03   | -     | 2474.5   |
| AHQ-2-7, 6775 - 6851        | K.GHYTEGAEALIENLVLEVR.H                                                | 2029.23935 | 3 | 7.72E-04 | 0.85  | 4.40   | -     | 1044.8   |
| AHQ-2-7, 6772 - 6855        | K.GHYTEGAEALIENLVLEVR.H                                                | 2029.23935 | 2 | 5.88E-12 | 0.98  | 6.61   | -     | 2573.9   |
| AHQ-2-11, 6506              | K.GHYTEGAEALIENLVLEVR.H                                                | 2029.23935 | 3 | 1.85E-07 | 0.93  | 4.35   | -     | 1960.1   |
| AHQ-2-13-, 6850             | K.GHYTEGAEALIENLVLEVR.H                                                | 2029.23935 | 2 | 5.25E-13 | 0.98  | 7.25   | -     | 2187.3   |
| AHQ-2-11, 6504              | K.GHYTEGAEALIENLVLEVR.H                                                | 2029.23935 | 2 | 5.38E-10 | 0.98  | 6.58   | -     | 2630.7   |
| AHQ-2-1, 7134               | K.GHYTEGAEALIENLVLEVR.H                                                | 2029.23935 | 2 | 3.73E-06 | 0.97  | 5.46   | -     | 1673.6   |
| AHQ-2-10, 6350              | K.GHYTEGAEALIENLVLEVR.H                                                | 2029.23935 | 2 | 6.01E-08 | 0.98  | 5.56   | -     | 2349.6   |
| AHQ-2-13, 6635              | K.GHYTEGAEALIENLVLEVR.H                                                | 2029.23935 | 3 | 4.10E-04 | 0.88  | 4.16   | -     | 1423.2   |
| AHQ-2-14-, 6703             | K.GHYTEGAEALIENLVLEVR.H                                                | 2029.23935 | 3 | 1.18E-04 | 0.89  | 4.80   | -     | 1219.3   |
| AHQ-2-14-, 6443 - 6459      | R.GLSM*AATFIGNNTAIQEIFN.R.V                                            | 2285.56551 | 2 | 6.75E-09 | 0.92  | 4.49   | -     | 811.0    |
| AHQ-2-7, 7420               | R.GLSM*AATFIGNNTAIQEIFN.R.V                                            | 2269.56611 | 2 | 2.84E-06 | 0.93  | 4.76   | -     | 839.9    |
| AHQ-2-7, 6659 - 6697        | R.GLSM*AATFIGNNTAIQEIFN.R.V                                            | 2285.56551 | 2 | 5.26E-09 | 0.92  | 4.26   | -     | 810.0    |
| AHQ-2-13-, 6594             | R.GLSM*AATFIGNNTAIQEIFN.R.V                                            | 2285.56551 | 2 | 9.45E-06 | 0.93  | 4.61   | -     | 740.2    |
| AHQ-2-13, 6391              | R.GLSM*AATFIGNNTAIQEIFN.R.V                                            | 2285.56551 | 2 | 1.33E-05 | 0.91  | 4.54   | -     | 681.6    |
| AHQ-2-11, 6036              | R.HESESCDCLQGFIHVHSLGGGTGSGMGLTLMNK.I                                  | 3511.88634 | 3 | 2.80E-10 | 0.96  | 5.30   | -     | 1656.1   |
| AHQ-2-7, 3495 - 3524        | R.IMNSFSVMPSPK.V                                                       | 1338.62160 | 2 | 1.38E-06 | 0.91  | 3.59   | -     | 1430.3   |
| AHQ-2-7, 3760               | R.IMNSFSVMPSPK.V                                                       | 1338.62160 | 2 | 2.52E-06 | 0.92  | 3.42   | -     | 816.4    |
| AHQ-2-7, 3892               | R.IMNSFSVMPSPK.V                                                       | 1338.62160 | 2 | 6.15E-07 | 0.95  | 3.80   | -     | 1448.4   |
| AHQ-2-7, 2736               | R.IMNSFSVM*PSPK.V                                                      | 1354.62100 | 2 | 5.27E-04 | 0.81  | 3.29   | -     | 783.8    |
| AHQ-2-14, 3914 - 3988       | R.ISVYYNEAYGR.K                                                        | 1335.44622 | 2 | 3.34E-09 | 0.91  | 3.14   | -     | 1002.7   |
| AHQ-2-14-, 3219             | R.ISVYYNEAYGR.K                                                        | 1335.44622 | 2 | 3.74E-07 | 0.95  | 3.23   | -     | 1484.6   |
| AHQ-2-14-, 3055 - 3056      | R.ISVYYNEAYGR.K                                                        | 1335.44622 | 2 | 3.45E-06 | 0.92  | 3.22   | -     | 1185.5   |
| AHQ-2-13-, 3253             | R.ISVYYNEAYGR.K                                                        | 1335.44622 | 2 | 2.99E-06 | 0.95  | 3.41   | -     | 1419.9   |
| AHQ-2-14, 4020              | R.ISVYYNEAYGR.K                                                        | 1335.44622 | 2 | 8.27E-06 | 0.90  | 2.89   | -     | 907.8    |
| AHQ-2-7, 2895 - 2897        | R.ISVYYNEAYGR.K                                                        | 1335.44622 | 2 | 1.09E-07 | 0.95  | 3.40   | -     | 1344.7   |
| AHQ-2-13, 3264 - 3273       | R.ISVYYNEAYGR.K                                                        | 1335.44622 | 2 | 2.26E-05 | 0.71  | 2.52   | -     | 767.9    |
| AHQ-2-12, 5174              | K.LGALFQPDPSFVHGNSSGAGNNWAK.G                                          | 2388.58260 | 2 | 2.11E-06 | 0.83  | 3.36   | -     | 813.5    |
| AHQ-2-13, 5117 - 5184       | K.LGALFQPDPSFVHGNSSGAGNNWAK.G                                          | 2388.58260 | 2 | 4.08E-07 | 0.87  | 3.66   | -     | 785.5    |
| AHQ-2-7, 4688               | K.LGALFQPDPSFVHGNSSGAGNNWAK.G                                          | 2388.58260 | 3 | 3.32E-10 | 0.83  | 3.45   | -     | 803.7    |
| AHQ-2-13-, 5185 - 5197      | K.LGALFQPDPSFVHGNSSGAGNNWAK.G                                          | 2388.58260 | 3 | 9.80E-10 | 0.74  | 3.62   | -     | 545.6    |
| AHQ-2-7, 4811               | R.LHFFM*PGFAPLTAQGSQQYR.A                                              | 2313.62224 | 2 | 1.14E-07 | 0.97  | 5.17   | -     | 1075.7   |
| AHQ-2-11, 5588              | R.LHFFM*PGFAPLTAQGSQQYR.A                                              | 2297.62284 | 2 | 5.61E-04 | 0.97  | 4.99   | -     | 1108.2   |
| AHQ-2-9, 4903 - 4918        | R.LHFFM*PGFAPLTAQGSQQYR.A                                              | 2313.62224 | 2 | 4.16E-06 | 0.97  | 5.78   | -     | 937.4    |
| AHQ-2-8, 5263               | R.LHFFM*PGFAPLTAQGSQQYR.A                                              | 2297.62284 | 2 | 3.41E-06 | 0.96  | 5.38   | -     | 807.1    |
| AHQ-2-12, 5861              | R.LHFFM*PGFAPLTAQGSQQYR.A                                              | 2297.62284 | 3 | 1.34E-06 | 0.93  | 4.55   | -     | 1238.4   |
| AHQ-2-10, 5267              | R.LHFFM*PGFAPLTAQGSQQYR.A                                              | 2297.62284 | 2 | 3.70E-08 | 0.97  | 5.53   | -     | 850.5    |
| AHQ-2-11, 4950              | R.LHFFM*PGFAPLTAQGSQQYR.A                                              | 2313.62224 | 2 | 2.79E-06 | 0.97  | 5.03   | -     | 1221.6   |
| AHQ-2-9, 5598 - 5603        | R.LHFFM*PGFAPLTAQGSQQYR.A                                              | 2297.62284 | 2 | 3.98E-05 | 0.96  | 5.02   | -     | 804.3    |
| AHQ-2-12, 5862              | R.LHFFM*PGFAPLTAQGSQQYR.A                                              | 2297.62284 | 2 | 1.95E-07 | 0.96  | 5.40   | -     | 727.1    |
| AHQ-2-9, 7414               | K.LTTPYGDNLHLVSLTMSGITSLR.F                                            | 2693.06979 | 3 | 7.90E-08 | 0.96  | 5.82   | -     | 1259.6   |

|                             |                                          |            |   |          |       |        |       |         |
|-----------------------------|------------------------------------------|------------|---|----------|-------|--------|-------|---------|
| AHQ-2-7, 7433 - 7509        | K.LTTPPTYGDLNHLVSLTMSGITSLR.F            | 2693.06979 | 2 | 6.86E-08 | 0.93  | 4.08   | -     | 948.2   |
| AHQ-2-7, 7479 - 7480        | K.LTTPPTYGDLNHLVSLTMSGITSLR.F            | 2693.06979 | 3 | 4.55E-08 | 0.96  | 5.53   | -     | 1573.2  |
| AHQ-2-4, 7597               | K.LTTPPTYGDLNHLVSLTMSGITSLR.F            | 2693.06979 | 3 | 8.42E-06 | 0.93  | 4.78   | -     | 1147.8  |
| AHQ-2-14-, 5879             | K.LTTPPTYGDLNHLVSLTM*SGITSLR.F           | 2709.06919 | 3 | 1.71E-06 | 0.89  | 4.06   | -     | 846.4   |
| AHQ-2-14-, 6647             | K.LTTPPTYGDLNHLVSLTMSGITSLR.F            | 2693.06979 | 3 | 3.45E-07 | 0.84  | 4.03   | -     | 643.0   |
| AHQ-2-9, 7335 - 7410        | K.LTTPPTYGDLNHLVSLTMSGITSLR.F            | 2693.06979 | 2 | 1.37E-06 | 0.83  | 3.87   | -     | 463.5   |
| AHQ-2-8, 6806               | K.LTTPPTYGDLNHLVSLTMSGITSLR.F            | 2693.06979 | 2 | 2.36E-05 | 0.89  | 3.83   | -     | 893.9   |
| AHQ-2-8, 7387 - 7388        | K.LTTPPTYGDLNHLVSLTMSGITSLR.F            | 2693.06979 | 2 | 3.84E-08 | 0.95  | 5.45   | -     | 795.3   |
| AHQ-2-10, 6356 - 6360       | K.LTTPPTYGDLNHLVSLTMSGITSLR.F            | 2693.06979 | 2 | 2.16E-07 | 0.76  | 3.47   | -     | 476.1   |
| AHQ-2-14-, 6612 - 6681      | K.LTTPPTYGDLNHLVSLTM*SGITSLR.F           | 2709.06919 | 3 | 5.56E-06 | 0.94  | 5.33   | -     | 1181.6  |
| AHQ-2-9, 6895 - 6960        | K.LTTPPTYGDLNHLVSLTM*SGITSLR.F           | 2709.06919 | 3 | 5.27E-04 | 0.92  | 4.62   | -     | 986.2   |
| AHQ-2-12, 7143              | K.LTTPPTYGDLNHLVSLTMSGITSLR.F            | 2693.06979 | 2 | 1.42E-06 | 0.93  | 4.46   | -     | 813.3   |
| AHQ-2-10, 6680 - 6744       | K.LTTPPTYGDLNHLVSLTMSGITSLR.F            | 2693.06979 | 3 | 1.31E-06 | 0.92  | 4.65   | -     | 1008.4  |
| AHQ-2-7, 6981               | K.LTTPPTYGDLNHLVSLTMSGITSLR.F            | 2693.06979 | 3 | 2.79E-05 | 0.95  | 5.31   | -     | 1216.3  |
| AHQ-2-9, 6956               | K.LTTPPTYGDLNHLVSLTMSGITSLR.F            | 2693.06979 | 3 | 7.22E-09 | 0.85  | 4.14   | -     | 564.1   |
| AHQ-2-10, 6742              | K.LTTPPTYGDLNHLVSLTMSGITSLR.F            | 2693.06979 | 2 | 1.06E-06 | 0.95  | 4.86   | -     | 1065.9  |
| AHQ-2-7, 6099 - 6103        | R.NSSCFVFWIPNNVK.V                       | 1695.87718 | 2 | 3.59E-04 | 0.90  | 4.14   | -     | 840.3   |
| AHQ-2-11, 5108              | R.NSSCFVFWIPNNVK.V                       | 1695.87718 | 2 | 4.08E-04 | 0.89  | 3.92   | -     | 672.2   |
| AHQ-2-12, 2955              | R.VSEHFSAMFK.R                           | 1183.36152 | 2 | 5.09E-07 | 0.89  | 3.07   | -     | 1010.6  |
| AHQ-2-9, 5170               | R.YLTVACIFR.G                            | 1144.36822 | 2 | 5.48E-05 | 0.87  | 2.74   | -     | 841.9   |
| AHQ-2-13, 5259              | R.YLTVACIFR.G                            | 1144.36822 | 2 | 8.56E-04 | 0.87  | 3.02   | -     | 784.0   |
| AHQ-2-7, 5097               | R.YLTVACIFR.G                            | 1144.36822 | 2 | 8.10E-05 | 0.76  | 2.70   | -     | 609.2   |
| gi 28626504 ref NP_113659.3 | UNC-112 related protein 2 [Homo sapiens] |            |   | 5.57E-13 | 24.84 | 290.35 | 56.60 | 75429.7 |
| AHQ-2-6, 2933 - 2969        | K.AGDALWLR.F                             | 902.03223  | 2 | 3.61E-04 | 0.92  | 3.82   | -     | 1132.9  |
| AHQ-2-13, 6455              | R.ARGEELDEDLFLQLTGGHEAF                  | 2348.51032 | 2 | 7.68E-06 | 0.90  | 3.77   | -     | 850.8   |
| AHQ-2-11, 6345 - 6346       | R.ARGEELDEDLFLQLTGGHEAF                  | 2348.51032 | 2 | 5.75E-09 | 0.81  | 3.83   | -     | 570.5   |
| AHQ-2-12, 6643              | R.ARGEELDEDLFLQLTGGHEAF                  | 2348.51032 | 2 | 6.82E-10 | 0.88  | 3.62   | -     | 791.5   |
| AHQ-2-10, 6232              | R.ARGEELDEDLFLQLTGGHEAF                  | 2348.51032 | 2 | 1.44E-07 | 0.79  | 3.44   | -     | 594.3   |
| AHQ-2-14-, 6529             | R.ARGEELDEDLFLQLTGGHEAF                  | 2348.51032 | 2 | 3.21E-08 | 0.96  | 4.79   | -     | 1516.2  |
| AHQ-2-9, 6744 - 6826        | R.ASFSOPLFOAAVAICR.L                     | 1768.02967 | 2 | 3.19E-07 | 0.96  | 4.96   | -     | 864.5   |
| AHQ-2-1, 6996               | R.ASFSOPLFOAAVAICR.L                     | 1768.02967 | 2 | 4.56E-05 | 0.88  | 3.61   | -     | 681.2   |
| AHQ-2-9, 6890 - 6891        | R.ASFSOPLFOAAVAICR.L                     | 1768.02967 | 2 | 1.33E-06 | 0.95  | 4.66   | -     | 958.2   |
| AHQ-2-6, 6698               | R.ASFSOPLFOAAVAICR.L                     | 1768.02967 | 3 | 6.84E-07 | 0.93  | 4.41   | -     | 1044.0  |
| AHQ-2-6, 6627 - 6649        | R.ASFSOPLFOAAVAICR.L                     | 1768.02967 | 2 | 5.95E-04 | 0.95  | 4.68   | -     | 814.2   |
| AHQ-2-12, 6722              | R.ASFSOPLFOAAVAICR.L                     | 1768.02967 | 2 | 2.69E-07 | 0.94  | 4.28   | -     | 914.1   |
| AHQ-2-6, 6973               | R.ASFSOPLFOAAVAICR.L                     | 1768.02967 | 2 | 3.74E-05 | 0.91  | 3.94   | -     | 628.8   |
| AHQ-2-3, 7073               | R.ASFSOPLFOAAVAICR.L                     | 1768.02967 | 2 | 8.14E-07 | 0.96  | 4.91   | -     | 1001.9  |
| AHQ-2-8, 6587               | R.ASFSOPLFOAAVAICR.L                     | 1768.02967 | 2 | 5.33E-05 | 0.92  | 3.33   | -     | 1091.6  |
| AHQ-2-5, 6903               | R.ASFSOPLFOAAVAICR.L                     | 1768.02967 | 2 | 8.42E-05 | 0.95  | 4.42   | -     | 1154.1  |
| AHQ-2-7, 6724 - 6735        | R.ASFSOPLFOAAVAICR.L                     | 1768.02967 | 2 | 8.08E-07 | 0.96  | 5.13   | -     | 1016.7  |
| AHQ-2-4, 7132               | R.ASFSOPLFOAAVAICR.L                     | 1768.02967 | 2 | 1.63E-05 | 0.92  | 3.83   | -     | 782.6   |
| AHQ-2-13, 6528              | R.ASFSOPLFOAAVAICR.L                     | 1768.02967 | 2 | 2.13E-08 | 0.80  | 2.94   | -     | 489.7   |
| AHQ-2-11, 6396 - 6476       | R.ASFSOPLFOAAVAICR.L                     | 1768.02967 | 2 | 7.24E-04 | 0.89  | 3.50   | -     | 828.5   |
| AHQ-2-6, 6713 - 6774        | R.ASFSOPLFOAAVAICR.L                     | 1768.02967 | 2 | 1.02E-05 | 0.96  | 5.57   | -     | 904.0   |
| AHQ-2-11, 3452              | K.EKEPEEELYDLSK.V                        | 1609.71294 | 2 | 8.81E-06 | 0.84  | 3.68   | -     | 489.8   |
| AHQ-2-6, 3282 - 3354        | K.EKEPEEELYDLSK.V                        | 1609.71294 | 2 | 9.89E-09 | 0.89  | 3.83   | -     | 528.9   |
| AHQ-2-1, 3840 - 3841        | K.EKEPEEELYDLSK.V                        | 1609.71294 | 2 | 4.48E-05 | 0.74  | 3.28   | -     | 391.4   |
| AHQ-2-9, 3303 - 3336        | K.EKEPEEELYDLSK.V                        | 1609.71294 | 2 | 1.58E-04 | 0.85  | 3.25   | -     | 647.8   |
| AHQ-2-10, 3294              | K.EKEPEEELYDLSK.V                        | 1609.71294 | 2 | 1.21E-06 | 0.80  | 3.32   | -     | 445.8   |
| AHQ-2-6, 3425               | K.EKEPEEELYDLSK.V                        | 1609.71294 | 2 | 1.69E-05 | 0.74  | 3.19   | -     | 429.7   |
| AHQ-2-9, 7128               | R.FIQAWQSLPDFGISYVM*VR.F                 | 2274.62593 | 2 | 9.60E-08 | 0.92  | 4.46   | -     | 542.1   |
| AHQ-2-9, 7362               | R.FIQAWQSLPDFGISYVM*VR.F                 | 2258.62653 | 2 | 2.28E-05 | 0.94  | 5.08   | -     | 667.7   |
| AHQ-2-12, 6921 - 6922       | R.FIQAWQSLPDFGISYVM*VR.F                 | 2274.62593 | 2 | 3.10E-06 | 0.93  | 4.77   | -     | 606.1   |
| AHQ-2-13, 6659              | R.FIQAWQSLPDFGISYVM*VR.F                 | 2274.62593 | 2 | 1.14E-04 | 0.88  | 4.15   | -     | 514.1   |
| AHQ-2-12, 3195 - 3198       | K.GCEVVPDNNVSGQK.F                       | 1489.63335 | 1 | 2.02E-05 | 0.70  | 2.36   | -     | 752.2   |
| AHQ-2-9, 3071               | K.GCEVVPDNNVSGQK.F                       | 1489.63335 | 1 | 3.46E-10 | 0.89  | 3.91   | -     | 856.9   |
| AHQ-2-12, 3189 - 3194       | K.GCEVVPDNNVSGQK.F                       | 1489.63335 | 2 | 2.50E-05 | 0.68  | 2.59   | -     | 630.5   |
| AHQ-2-13, 6711              | R.GEELDEDLFLQLTGGHEAF                    | 2121.24574 | 2 | 1.52E-06 | 0.89  | 4.19   | -     | 759.1   |
| AHQ-2-14-, 6713 - 6787      | R.GEELDEDLFLQLTGGHEAF                    | 2121.24574 | 2 | 6.33E-06 | 0.92  | 4.13   | -     | 1074.4  |
| AHQ-2-6, 7150               | R.GEELDEDLFLQLTGGHEAF                    | 2121.24574 | 2 | 3.94E-06 | 0.80  | 3.55   | -     | 565.3   |
| AHQ-2-12, 7047 - 7115       | R.GEELDEDLFLQLTGGHEAF                    | 2121.24574 | 2 | 1.33E-05 | 0.73  | 3.23   | -     | 658.3   |
| AHQ-2-6, 3765 - 3786        | R.GMPAHFSDSAQTEACYHMLSR.P                | 2398.64117 | 3 | 6.15E-06 | 0.95  | 5.42   | -     | 875.3   |
| AHQ-2-10, 3562              | R.IDLAVGDVVK.T                           | 1029.21223 | 1 | 3.40E-04 | 0.57  | 2.15   | -     | 636.3   |
| AHQ-2-13, 3885              | R.IDLAVGDVVK.T                           | 1029.21223 | 2 | 1.08E-04 | 0.93  | 3.65   | -     | 1275.2  |
| AHQ-2-13-, 3910             | R.IDLAVGDVVK.T                           | 1029.21223 | 1 | 4.44E-05 | 0.64  | 2.61   | -     | 582.4   |
| AHQ-2-7, 3629               | R.IDLAVGDVVK.T                           | 1029.21223 | 1 | 7.50E-04 | 0.20  | 2.38   | -     | 204.6   |
| AHQ-2-6, 3635 - 3705        | R.IDLAVGDVVK.T                           | 1029.21223 | 1 | 4.38E-04 | 0.22  | 2.27   | -     | 193.8   |
| AHQ-2-12, 3773              | R.IDLAVGDVVK.T                           | 1029.21223 | 1 | 7.74E-04 | 0.28  | 2.12   | -     | 516.5   |
| AHQ-2-6, 3621 - 3697        | R.IDLAVGDVVK.T                           | 1029.21223 | 2 | 3.45E-04 | 0.90  | 3.81   | -     | 918.2   |
| AHQ-2-6, 3625 - 3693        | R.IDLAVGDVVK.T                           | 1029.21223 | 1 | 2.85E-04 | 0.22  | 1.91   | -     | 488.9   |
| AHQ-2-12, 3781              | R.IDLAVGDVVK.T                           | 1029.21223 | 1 | 2.62E-04 | 0.63  | 2.83   | -     | 511.7   |
| AHQ-2-12, 4437 - 4447       | R.ILEAHQNVQLSLAEACL.R.F                  | 2105.38372 | 2 | 5.49E-08 | 0.99  | 6.99   | -     | 2278.1  |
| AHQ-2-12, 4434              | R.ILEAHQNVQLSLAEACL.R.F                  | 2105.38372 | 3 | 1.18E-06 | 0.96  | 5.31   | -     | 1846.4  |
| AHQ-2-6, 4253 - 4321        | R.ILEAHQNVQLSLAEACL.R.F                  | 2105.38372 | 2 | 7.49E-09 | 0.98  | 6.82   | -     | 2138.3  |
| AHQ-2-6, 4247 - 4319        | R.ILEAHQNVQLSLAEACL.R.F                  | 2105.38372 | 3 | 5.09E-07 | 0.94  | 5.58   | -     | 1158.9  |
| AHQ-2-1, 4766               | R.ILEAHQNVQLSLAEACL.R.F                  | 2105.38372 | 2 | 1.36E-11 | 0.98  | 5.59   | -     | 1992.0  |
| AHQ-2-9, 4375               | R.ILEAHQNVQLSLAEACL.R.F                  | 2105.38372 | 2 | 1.00E-04 | 0.96  | 4.92   | -     | 1503.5  |
| AHQ-2-2, 4694               | R.ILEAHQNVQLSLAEACL.R.F                  | 2105.38372 | 2 | 5.57E-13 | 0.98  | 6.59   | -     | 1781.4  |
| AHQ-2-9, 4223 - 4302        | R.ILEAHQNVQLSLAEACL.R.F                  | 2105.38372 | 2 | 2.79E-12 | 0.98  | 7.01   | -     | 2046.0  |
| AHQ-2-11, 4249              | R.ILEAHQNVQLSLAEACL.R.F                  | 2105.38372 | 2 | 1.83E-07 | 0.98  | 6.47   | -     | 2525.1  |
| AHQ-2-13-, 4463             | R.ILEAHQNVQLSLAEACL.R.F                  | 2105.38372 | 2 | 8.01E-05 | 0.98  | 6.03   | -     | 1485.5  |
| AHQ-2-3, 4663               | R.ILEAHQNVQLSLAEACL.R.F                  | 2105.38372 | 2 | 1.45E-05 | 0.97  | 4.79   | -     | 1670.2  |
| AHQ-2-13, 4401              | R.ILEAHQNVQLSLAEACL.R.F                  | 2105.38372 | 2 | 6.07E-08 | 0.97  | 5.10   | -     | 1913.5  |
| AHQ-2-4, 4657               | R.ILEAHQNVQLSLAEACL.R.F                  | 2105.38372 | 2 | 8.35E-11 | 0.98  | 5.61   | -     | 1549.0  |
| AHQ-2-7, 4179               | R.ILEAHQNVQLSLAEACL.R.F                  | 2105.38372 | 2 | 1.73E-06 | 0.98  | 6.48   | -     | 1909.8  |
| AHQ-2-6, 4397               | R.ILEAHQNVQLSLAEACL.R.F                  | 2105.38372 | 2 | 9.64E-12 | 0.98  | 5.93   | -     | 1911.5  |
| AHQ-2-13, 2724 - 2783       | R.KDEILGIANNR.L                          | 1243.39499 | 2 | 1.54E-05 | 0.96  | 3.96   | -     | 1452.3  |
| AHQ-2-6, 2305               | R.KDEILGIANNR.L                          | 1243.39499 | 1 | 1.32E-05 | 0.47  | 2.23   | -     | 292.0   |
| AHQ-2-9, 2355               | R.KDEILGIANNR.L                          | 1243.39499 | 2 | 2.09E-04 | 0.89  | 3.52   | -     | 893.1   |
| AHQ-2-6, 2301               | R.KDEILGIANNR.L                          | 1243.39499 | 2 | 5.33E-04 | 0.95  | 3.87   | -     | 1342.8  |
| AHQ-2-9, 2352               | R.KDEILGIANNR.L                          | 1243.39499 | 1 | 1.84E-04 | 0.29  | 2.05   | -     | 231.6   |
| AHQ-2-13-, 2659 - 2669      | R.KDEILGIANNR.L                          | 1243.39499 | 1 | 3.83E-05 | 0.58  | 2.24   | -     | 381.8   |
| AHQ-2-13-, 2658 - 2665      | R.KDEILGIANNR.L                          | 1243.39499 | 2 | 6.27E-04 | 0.92  | 3.65   | -     | 1046.2  |
| AHQ-2-12, 2525 - 2593       | R.KDEILGIANNR.L                          | 1243.39499 | 1 | 6.52E-09 | 0.62  | 2.38   | -     | 372.4   |
| AHQ-2-6, 2393 - 2395        | R.KDEILGIANNR.L                          | 1243.39499 | 2 | 1.47E-07 | 0.90  | 3.58   | -     | 1161.1  |
| AHQ-2-6, 3645 - 3646        | R.KQDWSHDHAIWWEQK.R                      | 1858.00504 | 3 | 9.39E-04 | 0.70  | 3.43   | -     | 721.4   |
| AHQ-2-6, 3669 - 3677        | R.KQDWSHDHAIWWEQK.R                      | 1858.00504 | 2 | 2.51E-04 | 0.90  | 4.15   | -     | 909.6   |
| AHQ-2-6, 6666 - 6737        | K.LEGSAPTDVLDSLTTIPELK.D                 | 2100.35256 | 2 | 1.02E-07 | 0.95  | 4.65   | -     | 1010.3  |
| AHQ-2-7, 6780               | K.LEGSAPTDVLDSLTTIPELK.D                 | 2100.35256 | 2 | 2.25E-06 | 0.86  | 3.84   | -     | 620.8   |
| AHQ-2-1, 6857 - 6937        | K.LEGSAPTDVLDSLTTIPELK.D                 | 2100.35256 | 2 | 6.32E-07 | 0.85  | 3.52   | -     | 742.9   |
| AHQ-2-14-, 6536             | K.LEGSAPTDVLDSLTTIPELK.D                 | 2100.35256 | 2 | 1.73E-04 | 0.87  | 3.94   | -     | 555.7   |
| AHQ-2-10, 6224 - 6264       | K.LEGSAPTDVLDSLTTIPELK.D                 | 2100.35256 | 2 | 9.02E-05 | 0.90  | 4.33   | -     | 593.5   |
| AHQ-2-8, 6648               | K.LEGSAPTDVLDSLTTIPELK.D                 | 2100.35256 | 2 | 8.68E-05 | 0.90  | 4.15   | -     | 620.7   |
| AHQ-2-6, 5599 - 5601        | K.LEGSAPTDVLDSLTTIPELK.D                 | 2100.35256 | 2 | 1.28E-06 | 0.95  | 4.59   | -     | 1095.7  |
| AHQ-2-6, 6253 - 6255        | K.LEGSAPTDVLDSLTTIPELK.D                 | 2100.35256 | 2 | 1.65E-07 | 0.94  | 4.84   | -     | 753.0   |
| AHQ-2-6, 6387 - 6454        | K.LEGSAPTDVLDSLTTIPELK.D                 | 2100.35256 | 2 | 3.43E-05 | 0.72  | 3.27   | -     | 603.6   |
| AHQ-2-9, 6840               | K.LEGSAPTDVLDSLTTIPELK.D                 | 2100.35256 | 2 | 4.32E-06 | 0.88  | 4.07   | -     | 528.6   |



|                                                                                             |                                     |            |   |          |      |        |       |          |
|---------------------------------------------------------------------------------------------|-------------------------------------|------------|---|----------|------|--------|-------|----------|
| AHQ-2-6, 6554                                                                               | K.LEGSAPTDVLDLSLTIPELK.D            | 2100.35256 | 2 | 2.49E-06 | 0.92 | 3.94   | -     | 968.3    |
| AHQ-2-6, 6141 - 6153                                                                        | K.LEGSAPTDVLDLSLTIPELKDHLR.I        | 2621.92493 | 3 | 9.15E-11 | 0.93 | 5.24   | -     | 693.7    |
| AHQ-2-11, 4648                                                                              | K.LLVPSPEGM*SEIYLR.C                | 1721.01141 | 2 | 7.81E-07 | 0.51 | 2.64   | -     | 174.9    |
| AHQ-2-1, 5062                                                                               | K.LLVPSPEGM*SEIYLR.C                | 1721.01141 | 2 | 4.42E-04 | 0.37 | 2.61   | -     | 182.1    |
| AHQ-2-6, 5421                                                                               | K.LLVPSPEGMSEIYLR.C                 | 1705.01201 | 2 | 9.57E-07 | 0.63 | 2.61   | -     | 443.2    |
| AHQ-2-11, 5574 - 5576                                                                       | K.LLVPSPEGMSEIYLR.C                 | 1705.01201 | 2 | 5.01E-08 | 0.78 | 3.19   | -     | 361.4    |
| AHQ-2-6, 5721 - 5785                                                                        | K.LLVPSPEGMSEIYLR.C                 | 1705.01201 | 2 | 2.21E-10 | 0.88 | 3.36   | -     | 599.2    |
| AHQ-2-13, 5653                                                                              | K.LLVPSPEGMSEIYLR.C                 | 1705.01201 | 2 | 1.98E-05 | 0.66 | 2.75   | -     | 352.0    |
| AHQ-2-14-, 5776                                                                             | K.LLVPSPEGMSEIYLR.C                 | 1705.01201 | 2 | 2.77E-08 | 0.72 | 2.76   | -     | 320.4    |
| AHQ-2-6, 6913 - 6982                                                                        | K.LSQSGEVGEPAGTDPGLDDLDVALSNLEVK.L  | 3027.24073 | 3 | 9.78E-06 | 0.95 | 5.21   | -     | 1482.5   |
| AHQ-2-7, 7068                                                                               | K.LSQSGEVGEPAGTDPGLDDLDVALSNLEVK.L  | 3027.24073 | 3 | 4.19E-05 | 0.94 | 4.50   | -     | 1501.2   |
| AHQ-2-6, 7005                                                                               | K.LSQSGEVGEPAGTDPGLDDLDVALSNLEVK.L  | 3027.24073 | 3 | 7.70E-07 | 0.91 | 4.30   | -     | 1102.2   |
| AHQ-2-7, 2056 - 2077                                                                        | R.LTQLYEQAR.W                       | 1122.25622 | 2 | 1.24E-06 | 0.91 | 3.35   | -     | 1307.9   |
| AHQ-2-12, 2298                                                                              | R.LTQLYEQAR.W                       | 1122.25622 | 2 | 8.15E-07 | 0.81 | 3.28   | -     | 938.0    |
| AHQ-2-13-, 2338                                                                             | R.LTQLYEQAR.W                       | 1122.25622 | 2 | 4.94E-05 | 0.84 | 3.51   | -     | 892.2    |
| AHQ-2-6, 2089 - 2165                                                                        | R.LTQLYEQAR.W                       | 1122.25622 | 2 | 5.01E-06 | 0.89 | 3.79   | -     | 884.1    |
| AHQ-2-9, 2140                                                                               | R.LTQLYEQAR.W                       | 1122.25622 | 2 | 8.72E-04 | 0.89 | 3.21   | -     | 1134.4   |
| AHQ-2-6, 4837                                                                               | R.QWLLQTHWTLDK.Y                    | 1569.78807 | 2 | 6.50E-05 | 0.31 | 2.70   | -     | 200.4    |
| AHQ-2-14-, 3979 - 3992                                                                      | K.SQDEAPGDPIQQLNLK.G                | 1753.89174 | 2 | 6.66E-08 | 0.90 | 4.16   | -     | 575.5    |
| AHQ-2-6, 3882 - 3949                                                                        | K.SQDEAPGDPIQQLNLK.G                | 1753.89174 | 2 | 6.29E-07 | 0.88 | 4.37   | -     | 447.3    |
| AHQ-2-11, 3853 - 3912                                                                       | K.SQDEAPGDPIQQLNLK.G                | 1753.89174 | 2 | 9.39E-05 | 0.86 | 3.72   | -     | 577.3    |
| AHQ-2-13, 4083 - 4087                                                                       | K.SQDEAPGDPIQQLNLK.G                | 1753.89174 | 2 | 1.01E-04 | 0.85 | 3.44   | -     | 620.7    |
| AHQ-2-6, 5343                                                                               | K.SQDEAPGDPIQQLNLKGCCEVVPDNNVSGQK.F | 3224.50249 | 3 | 2.17E-07 | 0.86 | 4.45   | -     | 611.4    |
| AHQ-2-11, 4202                                                                              | K.TASGDYIDSSWELR.V                  | 1600.66783 | 2 | 9.20E-07 | 0.89 | 3.50   | -     | 750.7    |
| AHQ-2-9, 4256 - 4295                                                                        | K.TASGDYIDSSWELR.V                  | 1600.66783 | 2 | 2.12E-06 | 0.91 | 3.52   | -     | 953.9    |
| AHQ-2-6, 4229 - 4297                                                                        | K.TASGDYIDSSWELR.V                  | 1600.66783 | 2 | 4.21E-11 | 0.96 | 4.72   | -     | 1077.2   |
| AHQ-2-11, 3645                                                                              | R.TGSGGPGNHPHGPDAEGLNPLYGLVAPR.F    | 2783.95312 | 3 | 5.63E-04 | 0.96 | 5.86   | -     | 1382.1   |
| AHQ-2-6, 3678 - 3754                                                                        | R.TGSGGPGNHPHGPDAEGLNPLYGLVAPR.F    | 2783.95312 | 2 | 3.10E-04 | 0.84 | 3.97   | -     | 488.3    |
| AHQ-2-6, 3755 - 3831                                                                        | R.TGSGGPGNHPHGPDAEGLNPLYGLVAPR.F    | 2783.95312 | 3 | 3.74E-04 | 0.96 | 5.54   | -     | 1565.0   |
| AHQ-2-6, 3541 - 3562                                                                        | R.TGSGGPGNHPHGPDAEGLNPLYGLVAPR.F    | 2783.95312 | 2 | 8.19E-04 | 0.92 | 4.56   | -     | 796.6    |
| AHQ-2-6, 3534 - 3602                                                                        | R.TGSGGPGNHPHGPDAEGLNPLYGLVAPR.F    | 2783.95312 | 3 | 7.92E-12 | 0.95 | 5.79   | -     | 1055.3   |
| AHQ-2-10, 3532                                                                              | R.TGSGGPGNHPHGPDAEGLNPLYGLVAPR.F    | 2783.95312 | 2 | 3.42E-04 | 0.90 | 4.07   | -     | 651.4    |
| AHQ-2-9, 3559 - 3636                                                                        | R.TGSGGPGNHPHGPDAEGLNPLYGLVAPR.F    | 2783.95312 | 2 | 2.47E-05 | 0.91 | 4.79   | -     | 472.2    |
| AHQ-2-4, 3920                                                                               | R.TGSGGPGNHPHGPDAEGLNPLYGLVAPR.F    | 2783.95312 | 3 | 9.74E-04 | 0.96 | 5.73   | -     | 1569.8   |
| AHQ-2-11, 3652                                                                              | R.TGSGGPGNHPHGPDAEGLNPLYGLVAPR.F    | 2783.95312 | 2 | 2.64E-06 | 0.94 | 5.09   | -     | 739.9    |
| AHQ-2-8, 3774 - 3851                                                                        | R.VFVGEEDEPEAESVTLR.V               | 1777.91007 | 2 | 1.63E-04 | 0.91 | 4.18   | -     | 942.4    |
| AHQ-2-1, 4236 - 4244                                                                        | R.VFVGEEDEPEAESVTLR.V               | 1777.91007 | 2 | 1.67E-08 | 0.95 | 4.28   | -     | 1286.6   |
| AHQ-2-2, 4144 - 4212                                                                        | R.VFVGEEDEPEAESVTLR.V               | 1777.91007 | 2 | 4.21E-10 | 0.95 | 5.03   | -     | 1221.8   |
| AHQ-2-14, 4830 - 4909                                                                       | R.VFVGEEDEPEAESVTLR.V               | 1777.91007 | 2 | 1.35E-05 | 0.94 | 4.20   | -     | 1313.1   |
| AHQ-2-7, 3856                                                                               | R.VFVGEEDEPEAESVTLR.V               | 1777.91007 | 2 | 1.61E-07 | 0.91 | 3.60   | -     | 1160.2   |
| AHQ-2-4, 4133 - 4152                                                                        | R.VFVGEEDEPEAESVTLR.V               | 1777.91007 | 2 | 6.75E-10 | 0.96 | 4.21   | -     | 1579.2   |
| AHQ-2-10, 3734                                                                              | R.VFVGEEDEPEAESVTLR.V               | 1777.91007 | 2 | 1.04E-06 | 0.89 | 3.99   | -     | 851.8    |
| AHQ-2-14-, 3920 - 3923                                                                      | R.VFVGEEDEPEAESVTLR.V               | 1777.91007 | 2 | 1.87E-09 | 0.96 | 4.18   | -     | 1727.2   |
| AHQ-2-12, 4019 - 4021                                                                       | R.VFVGEEDEPEAESVTLR.V               | 1777.91007 | 2 | 1.94E-07 | 0.96 | 4.74   | -     | 1181.5   |
| AHQ-2-13, 4004                                                                              | R.VFVGEEDEPEAESVTLR.V               | 1777.91007 | 2 | 1.06E-08 | 0.92 | 4.07   | -     | 1049.2   |
| AHQ-2-11, 3860                                                                              | R.VFVGEEDEPEAESVTLR.V               | 1777.91007 | 2 | 1.53E-08 | 0.95 | 4.31   | -     | 1417.3   |
| AHQ-2-3, 4171                                                                               | R.VFVGEEDEPEAESVTLR.V               | 1777.91007 | 2 | 4.00E-11 | 0.97 | 5.03   | -     | 1406.3   |
| AHQ-2-13-, 4034                                                                             | R.VFVGEEDEPEAESVTLR.V               | 1777.91007 | 2 | 1.80E-10 | 0.94 | 4.35   | -     | 1243.6   |
| AHQ-2-9, 3863 - 3943                                                                        | R.VFVGEEDEPEAESVTLR.V               | 1777.91007 | 2 | 2.81E-06 | 0.94 | 4.13   | -     | 1334.9   |
| AHQ-2-6, 3861 - 3930                                                                        | R.VFVGEEDEPEAESVTLR.V               | 1777.91007 | 2 | 9.65E-11 | 0.97 | 5.07   | -     | 1400.3   |
| AHQ-2-5, 3937                                                                               | R.VFVGEEDEPEAESVTLR.V               | 1777.91007 | 2 | 1.68E-06 | 0.96 | 4.54   | -     | 1466.2   |
| AHQ-2-13, 2889                                                                              | R.VTGESHIGVLLK.I                    | 1310.52448 | 2 | 3.31E-07 | 0.96 | 3.97   | -     | 1935.8   |
| AHQ-2-11, 2669 - 2737                                                                       | R.VTGESHIGVLLK.I                    | 1310.52448 | 2 | 3.77E-04 | 0.77 | 3.04   | -     | 923.9    |
| AHQ-2-9, 2487                                                                               | R.VTGESHIGVLLK.I                    | 1310.52448 | 1 | 2.59E-08 | 0.84 | 3.12   | -     | 852.6    |
| AHQ-2-13-, 2835                                                                             | R.VTGESHIGVLLK.I                    | 1310.52448 | 1 | 2.01E-04 | 0.35 | 2.69   | -     | 338.2    |
| AHQ-2-13-, 2833                                                                             | R.VTGESHIGVLLK.I                    | 1310.52448 | 2 | 3.76E-07 | 0.96 | 4.52   | -     | 1634.8   |
| AHQ-2-1, 2953                                                                               | R.VTGESHIGVLLK.I                    | 1310.52448 | 2 | 1.19E-06 | 0.96 | 3.83   | -     | 1896.5   |
| AHQ-2-6, 2461                                                                               | R.VTGESHIGVLLK.I                    | 1310.52448 | 1 | 4.67E-08 | 0.84 | 3.44   | -     | 703.3    |
| AHQ-2-6, 2453                                                                               | R.VTGESHIGVLLK.I                    | 1310.52448 | 2 | 1.51E-07 | 0.95 | 4.17   | -     | 1524.2   |
| AHQ-2-9, 2478 - 2486                                                                        | R.VTGESHIGVLLK.I                    | 1310.52448 | 2 | 4.58E-07 | 0.96 | 4.16   | -     | 1744.9   |
| AHQ-2-7, 2379                                                                               | R.VTGESHIGVLLK.I                    | 1310.52448 | 2 | 4.34E-08 | 0.93 | 4.04   | -     | 1322.2   |
| AHQ-2-12, 2714                                                                              | R.VTGESHIGVLLK.I                    | 1310.52448 | 2 | 1.31E-07 | 0.87 | 3.45   | -     | 1144.7   |
| AHQ-2-14-, 2743 - 2744                                                                      | R.VTGESHIGVLLK.I                    | 1310.52448 | 2 | 2.28E-09 | 0.98 | 4.64   | -     | 2316.6   |
| AHQ-2-5, 4696                                                                               | K.VVLAGGVAPALFR.G                   | 1270.54832 | 2 | 7.96E-08 | 0.97 | 4.84   | -     | 1811.2   |
| AHQ-2-1, 5121                                                                               | K.VVLAGGVAPALFR.G                   | 1270.54832 | 2 | 1.01E-07 | 0.98 | 5.26   | -     | 2067.4   |
| AHQ-2-9, 4648                                                                               | K.VVLAGGVAPALFR.G                   | 1270.54832 | 2 | 4.26E-06 | 0.89 | 2.99   | -     | 1433.8   |
| AHQ-2-9, 4588                                                                               | K.VVLAGGVAPALFR.G                   | 1270.54832 | 1 | 6.40E-04 | 0.63 | 3.13   | -     | 154.7    |
| AHQ-2-3, 5036                                                                               | K.VVLAGGVAPALFR.G                   | 1270.54832 | 2 | 8.93E-06 | 0.94 | 3.73   | -     | 1406.0   |
| AHQ-2-11, 4630                                                                              | K.VVLAGGVAPALFR.G                   | 1270.54832 | 2 | 5.01E-07 | 0.96 | 4.60   | -     | 1423.7   |
| AHQ-2-6, 4593 - 4673                                                                        | K.VVLAGGVAPALFR.G                   | 1270.54832 | 2 | 1.82E-08 | 0.97 | 5.04   | -     | 1849.4   |
| AHQ-2-6, 4611                                                                               | K.VVLAGGVAPALFR.G                   | 1270.54832 | 1 | 7.67E-05 | 0.21 | 1.95   | -     | 116.3    |
| AHQ-2-7, 4493                                                                               | K.VVLAGGVAPALFR.G                   | 1270.54832 | 2 | 1.88E-08 | 0.97 | 4.86   | -     | 1674.1   |
| AHQ-2-10, 4366                                                                              | K.VVLAGGVAPALFR.G                   | 1270.54832 | 2 | 2.99E-07 | 0.95 | 4.12   | -     | 1452.3   |
| AHQ-2-6, 2282                                                                               | K.YGILADAR.L                        | 878.99544  | 2 | 2.74E-05 | 0.94 | 3.74   | -     | 1146.1   |
| AHQ-2-7, 5217                                                                               | K.YYSFFLDLPK.T                      | 1295.42046 | 2 | 5.47E-05 | 0.93 | 3.21   | -     | 942.3    |
| AHQ-2-6, 5226                                                                               | K.YYSFFLDLPK.T                      | 1295.42046 | 2 | 1.68E-04 | 0.87 | 3.92   | -     | 798.5    |
| AHQ-2-9, 5227                                                                               | K.YYSFFLDLPK.T                      | 1295.42046 | 2 | 1.84E-06 | 0.81 | 3.50   | -     | 648.3    |
| gi 5031857 ref NP_005557.1  lactate dehydrogenase A [Homo sapiens]                          |                                     |            |   | 5.59E-13 | 4.49 | 60.28  | 24.70 | 36688.5  |
| AHQ-2-13, 6651                                                                              | K.DLADELALVDIEDK.L                  | 1658.82864 | 2 | 1.62E-10 | 0.97 | 5.29   | -     | 1370.3   |
| AHQ-2-9, 7156 - 7236                                                                        | K.DLADELALVDIEDK.L                  | 1658.82864 | 2 | 5.59E-13 | 0.97 | 5.12   | -     | 1751.1   |
| AHQ-2-13-, 6861                                                                             | K.DLADELALVDIEDK.L                  | 1658.82864 | 2 | 5.90E-11 | 0.97 | 5.69   | -     | 1327.0   |
| AHQ-2-14-, 6717 - 6727                                                                      | K.DLADELALVDIEDK.L                  | 1658.82864 | 2 | 5.41E-05 | 0.90 | 3.16   | -     | 1569.1   |
| AHQ-2-9, 7383                                                                               | K.DLADELALVDIEDK.L                  | 1900.15980 | 2 | 2.72E-07 | 0.96 | 4.93   | -     | 1662.9   |
| AHQ-2-9, 4770                                                                               | K.DQLIYNLKEEQTPQNK.I                | 2075.30802 | 2 | 3.59E-06 | 0.93 | 4.49   | -     | 1413.1   |
| AHQ-2-9, 7419                                                                               | K.GLYGKDDVFLSVPICLQNGISDLVK.V       | 2923.37318 | 2 | 6.73E-07 | 0.88 | 4.65   | -     | 339.1    |
| AHQ-2-9, 3128                                                                               | K.QVVESAYEVIK.L                     | 1265.43734 | 2 | 7.66E-04 | 0.59 | 2.71   | -     | 337.5    |
| AHQ-2-11, 2069 - 2072                                                                       | K.VTLTSEEAR.L                       | 1135.20693 | 2 | 1.52E-04 | 0.85 | 2.79   | -     | 979.2    |
| AHQ-2-11, 2073 - 2074                                                                       | K.VTLTSEEAR.L                       | 1135.20693 | 1 | 4.05E-06 | 0.15 | 2.20   | -     | 161.8    |
| gi 21361478 ref NP_055944.2  septin 6 isoform B; septin 2 [Homo sapiens]                    |                                     |            |   | 6.53E-13 | 3.80 | 40.33  | 15.90 | 49716.3  |
| AHQ-2-7, 3781                                                                               | K.FEGEPATHTQPGVQLQNSNTYDLQESNVR.L   | 3147.31508 | 3 | 6.53E-13 | 0.98 | 6.64   | -     | 1909.6   |
| AHQ-2-7, 2673                                                                               | R.KTAAELLQSQSSQAGGSQTLK.R           | 2104.30776 | 2 | 5.46E-04 | 0.91 | 4.21   | -     | 631.0    |
| AHQ-2-7, 2879 - 2880                                                                        | K.TAAELLQSQSSQAGGSQTLK.R            | 1976.13485 | 2 | 1.25E-08 | 0.96 | 4.81   | -     | 1320.2   |
| AHQ-2-7, 4876                                                                               | R.TVPLAGHVGFDSLQDLVKNK.S            | 2108.38284 | 2 | 6.46E-07 | 0.96 | 5.21   | -     | 1011.5   |
| gi 13124879 ref NP_002465.1  smooth muscle myosin heavy chain 11 isoform SM1 [Homo sapiens] |                                     |            |   | 8.93E-13 | 9.68 | 110.39 | 6.10  | 227336.7 |
| AHQ-2-3, 4949                                                                               | R.DLGEELALK.T                       | 1117.23151 | 2 | 1.78E-04 | 0.94 | 3.95   | -     | 1089.3   |
| AHQ-2-2, 4986                                                                               | R.DLGEELALK.T                       | 1117.23151 | 2 | 4.61E-05 | 0.90 | 3.42   | -     | 921.8    |
| AHQ-2-3, 4948                                                                               | R.DLGEELALK.T                       | 1117.23151 | 1 | 3.00E-04 | 0.32 | 2.72   | -     | 354.2    |
| AHQ-2-6, 2610                                                                               | R.EDQSILCTGESGAGK.T                 | 1553.63107 | 2 | 5.41E-04 | 0.66 | 3.09   | -     | 413.1    |
| AHQ-2-3, 2764                                                                               | R.EDQSILCTGESGAGK.T                 | 1553.63107 | 2 | 2.17E-04 | 0.90 | 3.80   | -     | 839.3    |
| AHQ-2-3, 2801                                                                               | K.FDQLLAEK.N                        | 1093.21165 | 1 | 1.48E-06 | 0.64 | 2.47   | -     | 660.4    |
| AHQ-2-2, 2810                                                                               | K.FDQLLAEK.N                        | 1093.21165 | 1 | 4.37E-05 | 0.69 | 2.67   | -     | 755.9    |
| AHQ-2-2, 2804                                                                               | K.FDQLLAEK.N                        | 1093.21165 | 2 | 1.69E-05 | 0.92 | 3.24   | -     | 1487.8   |
| AHQ-2-3, 2796                                                                               | K.FDQLLAEK.N                        | 1093.21165 | 2 | 1.61E-05 | 0.93 | 3.09   | -     | 1569.4   |
| AHQ-2-1, 2977                                                                               | K.FDQLLAEK.N                        | 1093.21165 | 2 | 1.24E-04 | 0.93 | 3.18   | -     | 1522.2   |
| AHQ-2-4, 2332                                                                               | K.KEEELQAALAR.L                     | 1258.40643 | 2 | 4.40E-04 | 0.93 | 3.40   | -     | 1591.0   |
| AHQ-2-2, 2349                                                                               | K.KEEELQAALAR.L                     | 1258.40643 | 2 | 7.10E-05 | 0.86 | 3.53   | -     | 971.6    |
| AHQ-2-3, 2324 - 2335                                                                        | K.KEEELQAALAR.L                     | 1258.40643 | 2 | 3.28E-04 | 0.76 | 3.08   | -     | 855.6    |

|                           |                                                                         |            |   |          |       |        |       |         |
|---------------------------|-------------------------------------------------------------------------|------------|---|----------|-------|--------|-------|---------|
| AHQ-2-1, 2564             | K.KEEELQAALAR.L                                                         | 1258.40643 | 3 | 1.49E-05 | 0.90  | 3.64   | -     | 1465.1  |
| AHQ-2-6, 2454             | R.KFDQLLAEK.N                                                           | 1221.38456 | 2 | 6.46E-04 | 0.87  | 3.12   | -     | 1131.2  |
| AHQ-2-5, 2423             | R.KFDQLLAEK.N                                                           | 1221.38456 | 1 | 2.22E-05 | 0.31  | 1.99   | -     | 542.2   |
| AHQ-2-6, 2414 - 2447      | R.KFDQLLAEK.N                                                           | 1221.38456 | 1 | 4.50E-04 | 0.19  | 1.81   | -     | 218.5   |
| AHQ-2-2, 2576 - 2628      | R.KFDQLLAEK.N                                                           | 1221.38456 | 2 | 1.97E-05 | 0.92  | 3.26   | -     | 1274.8  |
| AHQ-2-3, 2627             | R.KFDQLLAEK.N                                                           | 1221.38456 | 2 | 5.51E-04 | 0.81  | 3.26   | -     | 820.5   |
| AHQ-2-2, 5386 - 5392      | K.LQQLFNHTM*FILEQEEYQR.E                                                | 2484.77198 | 3 | 5.35E-12 | 0.99  | 7.79   | -     | 3672.9  |
| AHQ-2-2, 5384 - 5385      | K.LQQLFNHTM*FILEQEEYQR.E                                                | 2484.77198 | 2 | 4.22E-07 | 0.93  | 4.62   | -     | 642.5   |
| AHQ-2-5, 5788 - 5868      | K.LQQLFNHTM*FILEQEEYQR.E                                                | 2468.77258 | 2 | 4.12E-08 | 0.89  | 3.26   | -     | 1133.5  |
| AHQ-2-4, 6186             | K.LQQLFNHTM*FILEQEEYQR.E                                                | 2468.77258 | 2 | 1.39E-07 | 0.96  | 4.30   | -     | 1672.3  |
| AHQ-2-4, 6185             | K.LQQLFNHTM*FILEQEEYQR.E                                                | 2468.77258 | 3 | 5.24E-10 | 0.98  | 6.08   | -     | 2523.6  |
| AHQ-2-2, 6180             | K.LQQLFNHTM*FILEQEEYQR.E                                                | 2468.77258 | 2 | 1.96E-08 | 0.94  | 4.03   | -     | 1406.0  |
| AHQ-2-2, 6184 - 6188      | K.LQQLFNHTM*FILEQEEYQR.E                                                | 2468.77258 | 3 | 2.44E-11 | 0.98  | 6.45   | -     | 2786.2  |
| AHQ-2-2, 6270             | K.LQQLFNHTM*FILEQEEYQR.E                                                | 2468.77258 | 3 | 2.29E-12 | 0.98  | 6.47   | -     | 2733.8  |
| AHQ-2-2, 6290 - 6370      | K.LQQLFNHTM*FILEQEEYQR.E                                                | 2468.77258 | 2 | 2.93E-09 | 0.98  | 5.89   | -     | 1842.8  |
| AHQ-2-5, 5792             | K.LQQLFNHTM*FILEQEEYQR.E                                                | 2468.77258 | 3 | 5.96E-06 | 0.97  | 4.54   | -     | 2616.9  |
| AHQ-2-2, 6450 - 6521      | K.LQQLFNHTM*FILEQEEYQR.E                                                | 2468.77258 | 2 | 7.15E-09 | 0.98  | 5.70   | -     | 2034.3  |
| AHQ-2-2, 6506             | K.LQQLFNHTM*FILEQEEYQR.E                                                | 2468.77258 | 3 | 2.32E-09 | 0.98  | 5.48   | -     | 2685.3  |
| AHQ-2-3, 5348             | K.LQQLFNHTM*FILEQEEYQR.E                                                | 2484.77198 | 3 | 3.68E-07 | 0.98  | 6.43   | -     | 2249.0  |
| AHQ-2-5, 5983 - 6027      | K.LQQLFNHTM*FILEQEEYQR.E                                                | 2468.77258 | 3 | 9.87E-11 | 0.97  | 5.50   | -     | 1755.7  |
| AHQ-2-1, 5430 - 5498      | K.LQQLFNHTM*FILEQEEYQR.E                                                | 2484.77198 | 3 | 3.80E-10 | 0.98  | 6.48   | -     | 3212.2  |
| AHQ-2-3, 5343             | K.LQQLFNHTM*FILEQEEYQR.E                                                | 2484.77198 | 2 | 8.41E-04 | 0.85  | 3.44   | -     | 834.2   |
| AHQ-2-5, 6219             | K.LQQLFNHTM*FILEQEEYQR.E                                                | 2468.77258 | 2 | 5.23E-04 | 0.83  | 3.47   | -     | 809.4   |
| AHQ-2-1, 6229 - 6250      | K.LQQLFNHTM*FILEQEEYQR.E                                                | 2468.77258 | 3 | 1.02E-11 | 0.98  | 5.90   | -     | 2586.4  |
| AHQ-2-1, 5745             | K.LQQLFNHTM*FILEQEEYQR.E                                                | 2484.77198 | 3 | 3.94E-09 | 0.93  | 4.62   | -     | 1374.9  |
| AHQ-2-2, 5502             | K.LQQLFNHTM*FILEQEEYQR.E                                                | 2484.77198 | 3 | 3.14E-10 | 0.98  | 6.21   | -     | 2073.1  |
| AHQ-2-3, 2572 - 2659      | R.NCAAYLK.L                                                             | 840.96726  | 1 | 7.70E-04 | 0.60  | 2.19   | -     | 616.2   |
| AHQ-2-1, 2421             | R.NCAAYLK.L                                                             | 840.96726  | 1 | 4.94E-04 | 0.72  | 1.87   | -     | 996.7   |
| AHQ-2-2, 1618             | R.NTDQASMPDNTAAQK.V                                                     | 1592.67074 | 2 | 2.28E-04 | 0.81  | 3.75   | -     | 429.9   |
| AHQ-2-2, 6573             | K.LLQANPILEAFGNAK.T                                                     | 1727.98540 | 2 | 5.82E-06 | 0.92  | 4.02   | -     | 836.8   |
| AHQ-2-9, 6080 - 6146      | K.LLQANPILEAFGNAK.T                                                     | 1727.98540 | 2 | 1.95E-05 | 0.88  | 3.71   | -     | 665.8   |
| AHQ-2-3, 6416 - 6431      | K.LLQANPILEAFGNAK.T                                                     | 1727.98540 | 2 | 1.52E-06 | 0.94  | 4.27   | -     | 808.4   |
| AHQ-2-3, 6575             | K.LLQANPILEAFGNAK.T                                                     | 1727.98540 | 2 | 5.16E-10 | 0.96  | 4.43   | -     | 1120.0  |
| AHQ-2-2, 6354 - 6432      | K.LLQANPILEAFGNAK.T                                                     | 1727.98540 | 2 | 1.95E-08 | 0.96  | 4.70   | -     | 1033.3  |
| AHQ-2-7, 5992 - 5997      | K.LLQANPILEAFGNAK.T                                                     | 1727.98540 | 2 | 5.39E-07 | 0.94  | 4.14   | -     | 927.6   |
| AHQ-2-6, 6077             | K.LLQANPILEAFGNAK.T                                                     | 1727.98540 | 2 | 2.12E-08 | 0.96  | 4.77   | -     | 1078.5  |
| AHQ-2-5, 6352             | K.LLQANPILEAFGNAK.T                                                     | 1727.98540 | 2 | 4.04E-10 | 0.95  | 4.45   | -     | 1035.0  |
| AHQ-2-1, 6396 - 6476      | K.LLQANPILEAFGNAK.T                                                     | 1727.98540 | 2 | 9.52E-07 | 0.94  | 4.42   | -     | 877.8   |
| AHQ-2-4, 6450 - 6465      | K.LLQANPILEAFGNAK.T                                                     | 1727.98540 | 2 | 1.02E-07 | 0.95  | 4.72   | -     | 925.6   |
| AHQ-2-5, 6109 - 6119      | K.LLQANPILEAFGNAK.T                                                     | 1727.98540 | 2 | 1.94E-07 | 0.96  | 4.87   | -     | 1103.5  |
| AHQ-2-1, 6582             | K.LLQANPILEAFGNAK.T                                                     | 1727.98540 | 2 | 2.15E-08 | 0.89  | 4.07   | -     | 583.6   |
| AHQ-2-9, 6223 - 6296      | K.LLQANPILEAFGNAK.T                                                     | 1727.98540 | 2 | 1.46E-05 | 0.55  | 2.69   | -     | 460.5   |
| AHQ-2-2, 4166             | K.TLQEELEDELOATEDAK.L                                                   | 1963.04334 | 2 | 1.54E-06 | 0.93  | 4.34   | -     | 985.2   |
| AHQ-2-5, 5651 - 5668      | K.TLQEELEDELOATEDAK.L                                                   | 1963.04334 | 2 | 6.78E-06 | 0.98  | 6.13   | -     | 1926.0  |
| AHQ-2-2, 5924 - 5996      | K.TLQEELEDELOATEDAK.L                                                   | 1963.04334 | 2 | 1.30E-09 | 0.98  | 6.91   | -     | 2060.3  |
| AHQ-2-2, 5948             | K.TLQEELEDELOATEDAK.L                                                   | 1963.04334 | 3 | 1.53E-05 | 0.96  | 5.74   | -     | 1213.1  |
| AHQ-2-2, 6145 - 6213      | K.TLQEELEDELOATEDAK.L                                                   | 1963.04334 | 2 | 8.91E-05 | 0.91  | 4.05   | -     | 849.7   |
| AHQ-2-1, 6112             | K.TLQEELEDELOATEDAK.L                                                   | 1963.04334 | 2 | 8.93E-13 | 0.98  | 5.90   | -     | 1809.3  |
| AHQ-2-1, 5928             | K.TLQEELEDELOATEDAK.L                                                   | 1963.04334 | 3 | 1.44E-09 | 0.96  | 5.62   | -     | 1448.5  |
| AHQ-2-1, 5924             | K.TLQEELEDELOATEDAK.L                                                   | 1963.04334 | 2 | 5.15E-06 | 0.98  | 4.88   | -     | 2195.2  |
| AHQ-2-6, 5565 - 5566      | K.TLQEELEDELOATEDAK.L                                                   | 1963.04334 | 2 | 1.08E-06 | 0.98  | 5.98   | -     | 2223.6  |
| AHQ-2-4, 5885 - 5956      | K.TLQEELEDELOATEDAK.L                                                   | 1963.04334 | 2 | 1.60E-09 | 0.99  | 7.39   | -     | 2442.5  |
| AHQ-2-7, 5625             | K.TLQEELEDELOATEDAK.L                                                   | 1963.04334 | 2 | 4.01E-11 | 0.98  | 6.37   | -     | 2566.8  |
| AHQ-2-4, 4117             | K.TLQEELEDELOATEDAK.L                                                   | 1963.04334 | 2 | 1.27E-04 | 0.85  | 3.42   | -     | 769.8   |
| AHQ-2-3, 5904             | K.TLQEELEDELOATEDAK.L                                                   | 1963.04334 | 3 | 1.68E-06 | 0.97  | 6.00   | -     | 1283.3  |
| AHQ-2-3, 4132             | K.TLQEELEDELOATEDAK.L                                                   | 1963.04334 | 2 | 3.75E-05 | 0.97  | 5.53   | -     | 1712.2  |
| gi4557305 ref NP_000025.1 | aldolase A; fructose-bisphosphate aldolase; Aldolase A, fructose-bispho |            |   | 9.87E-13 | 8.68  | 100.28 | 47.30 | 39419.7 |
| AHQ-2-9, 2056             | R.ALANSACQK.Y                                                           | 1134.28859 | 2 | 1.64E-04 | 0.81  | 2.80   | -     | 849.4   |
| AHQ-2-8, 3880             | K.ALSDHIYLEGTLKPKNMVTPGHACTQK.F                                         | 3134.57879 | 3 | 1.10E-06 | 0.96  | 5.59   | -     | 1283.8  |
| AHQ-2-8, 3790             | K.ALSDHIYLEGTLKPKNMVTPGHACTQK.F                                         | 3134.57879 | 3 | 2.38E-09 | 0.94  | 5.59   | -     | 709.0   |
| AHQ-2-9, 6098 - 6103      | K.CPLLKWPWALTSYGR.A                                                     | 1811.13929 | 2 | 2.69E-04 | 0.93  | 4.42   | -     | 641.1   |
| AHQ-2-8, 5974 - 6044      | K.CPLLKWPWALTSYGR.A                                                     | 1811.13929 | 2 | 7.10E-06 | 0.94  | 4.55   | -     | 712.9   |
| AHQ-2-9, 4106             | K.FSHEEIAMATVTLR.R                                                      | 1676.91875 | 2 | 9.87E-13 | 0.97  | 5.14   | -     | 1455.0  |
| AHQ-2-8, 3883             | K.FSHEEIAMATVTLR.R                                                      | 1676.91875 | 2 | 5.56E-11 | 0.90  | 3.82   | -     | 1073.6  |
| AHQ-2-11, 2821            | K.GILAADESTGSIK.R                                                       | 1333.47008 | 2 | 4.08E-06 | 0.95  | 3.54   | -     | 1612.3  |
| AHQ-2-8, 2543 - 2586      | K.GILAADESTGSIK.R                                                       | 1333.47008 | 2 | 7.30E-10 | 0.97  | 4.99   | -     | 1435.9  |
| AHQ-2-9, 2720             | K.GILAADESTGSIK.R                                                       | 1333.47008 | 1 | 2.62E-04 | 0.40  | 2.72   | -     | 292.8   |
| AHQ-2-12, 2861            | K.GILAADESTGSIK.R                                                       | 1333.47008 | 2 | 2.12E-07 | 0.94  | 3.86   | -     | 1219.9  |
| AHQ-2-9, 4250             | K.GVVPVPLAGTNGETTQGLDGLSER.C                                            | 2273.44329 | 2 | 3.02E-06 | 0.65  | 3.77   | -     | 469.9   |
| AHQ-2-9, 5264             | K.IGEHTPSALAIMENANVLAR.Y                                                | 2108.40788 | 2 | 9.13E-05 | 0.96  | 4.99   | -     | 951.8   |
| AHQ-2-10, 4944            | K.IGEHTPSALAIMENANVLAR.Y                                                | 2108.40788 | 2 | 2.21E-04 | 0.80  | 3.56   | -     | 551.2   |
| AHQ-2-8, 4975 - 5003      | K.IGEHTPSALAIMENANVLAR.Y                                                | 2108.40788 | 2 | 1.08E-04 | 0.95  | 4.86   | -     | 868.6   |
| AHQ-2-9, 4966             | K.IGEHTPSALAIMENANVLAR.Y                                                | 2108.40788 | 2 | 2.16E-08 | 0.93  | 4.32   | -     | 880.3   |
| AHQ-2-8, 6206 - 6275      | R.VNPGICGGVILFHETLYQK.A                                                 | 2090.43072 | 2 | 9.27E-08 | 0.93  | 4.29   | -     | 805.8   |
| AHQ-2-9, 5720             | R.YASICQQNGIVPIPEILPDGDHDLKR.C                                          | 3179.54969 | 3 | 4.11E-04 | 0.69  | 3.66   | -     | 250.8   |
| AHQ-2-8, 4218 - 4288      | K.YTPSGQAGAAASELFSVNHAY                                                 | 2229.34753 | 2 | 3.96E-06 | 0.84  | 3.97   | -     | 408.6   |
| gi2053366 ref XP_053177.4 | similar to Tubulin alpha-3/alpha-7 chain (Alpha-tubulin 3/7) [Homo sap  |            |   | 1.44E-12 | 2.78  | 30.23  | 9.60  | 49858.2 |
| AHQ-2-7, 2847             | K.DVNAAIATIK.T                                                          | 1016.17355 | 2 | 1.20E-05 | 0.94  | 4.01   | -     | 1199.5  |
| AHQ-2-7, 3060             | K.DVNAAIATIK.T                                                          | 1016.17355 | 1 | 1.20E-05 | 0.25  | 1.98   | -     | 378.0   |
| AHQ-2-7, 3163             | K.DVNAAIATIK.T                                                          | 1016.17355 | 1 | 4.22E-04 | 0.46  | 2.07   | -     | 629.7   |
| AHQ-2-1, 5526             | K.TIGGGDDSFNTFFSETGAGK.H                                                | 2009.07549 | 2 | 5.18E-06 | 0.52  | 2.68   | -     | 409.4   |
| AHQ-2-7, 4864             | K.TIGGGDDSFNTFFSETGAGK.H                                                | 2009.07549 | 2 | 1.44E-12 | 0.89  | 4.27   | -     | 413.5   |
| AHQ-2-7, 5000             | K.TIGGGDDSFNTFFSETGAGK.H                                                | 2009.07549 | 2 | 1.15E-07 | 0.89  | 4.11   | -     | 578.8   |
| AHQ-2-7, 5151 - 5225      | K.TIGGGDDSFNTFFSETGAGK.H                                                | 2009.07549 | 2 | 1.52E-07 | 0.94  | 4.55   | -     | 1007.6  |
| AHQ-2-7, 5307 - 5372      | K.TIGGGDDSFNTFFSETGAGK.H                                                | 2009.07549 | 2 | 1.03E-05 | 0.82  | 3.79   | -     | 490.3   |
| AHQ-2-7, 5375 - 5445      | K.TIGGGDDSFNTFFSETGAGK.H                                                | 2009.07549 | 2 | 1.09E-04 | 0.72  | 3.18   | -     | 428.4   |
| AHQ-2-13-, 5270 - 5274    | K.TIGGGDDSFNTFFSETGAGK.H                                                | 2009.07549 | 2 | 4.96E-08 | 0.91  | 4.20   | -     | 694.4   |
| AHQ-2-9, 5162             | K.TIGGGDDSFNTFFSETGAGK.H                                                | 2009.07549 | 2 | 1.15E-06 | 0.83  | 3.72   | -     | 492.5   |
| AHQ-2-11, 5009 - 5080     | K.TIGGGDDSFNTFFSETGAGK.H                                                | 2009.07549 | 2 | 6.54E-10 | 0.93  | 4.49   | -     | 777.2   |
| AHQ-2-12, 5249 - 5257     | K.TIGGGDDSFNTFFSETGAGK.H                                                | 2009.07549 | 2 | 3.96E-08 | 0.90  | 3.63   | -     | 861.2   |
| AHQ-2-13-, 4877           | K.TIGGGDDSFNTFFSETGAGK.H                                                | 2009.07549 | 2 | 9.76E-08 | 0.67  | 3.43   | -     | 312.5   |
| AHQ-2-13, 5175            | K.TIGGGDDSFNTFFSETGAGK.H                                                | 2009.07549 | 2 | 6.80E-08 | 0.58  | 3.10   | -     | 294.6   |
| AHQ-2-14, 5856            | K.TIGGGDDSFNTFFSETGAGK.H                                                | 2009.07549 | 2 | 1.73E-08 | 0.82  | 3.86   | -     | 367.4   |
| AHQ-2-14, 6205 - 6265     | K.TIGGGDDSFNTFFSETGAGK.H                                                | 2009.07549 | 2 | 1.17E-07 | 0.92  | 4.12   | -     | 803.2   |
| AHQ-2-14, 6324            | K.TIGGGDDSFNTFFSETGAGK.H                                                | 2009.07549 | 2 | 1.42E-08 | 0.93  | 4.49   | -     | 849.4   |
| AHQ-2-14, 6516            | K.TIGGGDDSFNTFFSETGAGK.H                                                | 2009.07549 | 2 | 4.71E-09 | 0.96  | 4.60   | -     | 1433.0  |
| AHQ-2-14-, 5167 - 5215    | K.TIGGGDDSFNTFFSETGAGK.H                                                | 2009.07549 | 2 | 3.62E-06 | 0.93  | 4.52   | -     | 761.9   |
| AHQ-2-7, 5739 - 5740      | R.TIQFVDWCPTGFK.V                                                       | 1600.81899 | 2 | 2.75E-06 | 0.94  | 4.56   | -     | 784.5   |
| AHQ-2-12, 5742 - 5809     | R.TIQFVDWCPTGFK.V                                                       | 1600.81899 | 2 | 9.38E-06 | 0.67  | 3.00   | -     | 478.9   |
| gi4758606 ref NP_004508.1 | integrin-linked kinase [Homo sapiens]                                   |            |   | 1.57E-12 | 12.11 | 140.27 | 31.90 | 51418.9 |
| AHQ-2-13-, 5710           | R.EVPPADLSNMIEGMK.V                                                     | 1681.95558 | 2 | 3.83E-04 | 0.91  | 3.64   | -     | 545.8   |
| AHQ-2-13, 5612 - 5689     | R.EVPPADLSNMIEGMK.V                                                     | 1681.95558 | 2 | 4.16E-06 | 0.91  | 4.13   | -     | 555.9   |
| AHQ-2-7, 4125 - 4195      | R.EVPPADLSNMIEGMK.V                                                     | 1713.95438 | 2 | 3.96E-05 | 0.70  | 2.89   | -     | 489.0   |
| AHQ-2-11, 5464 - 5532     | R.EVPPADLSNMIEGMK.V                                                     | 1681.95558 | 2 | 1.38E-05 | 0.88  | 4.39   | -     | 579.0   |
| AHQ-2-7, 4244 - 4279      | K.FDM*IVPILEK.M                                                         | 1221.49108 | 2 | 4.76E-05 | 0.85  | 2.76   | -     | 749.1   |
| AHQ-2-10, 5164            | K.FDMIVPILEK.M                                                          | 1205.49168 | 2 | 8.38E-04 | 0.65  | 2.51   | -     | 619.2   |
| AHQ-2-11, 2068 - 2077     | R.GDTPPLHLAASHGHR.D                                                     | 1584.67809 | 2 | 1.23E-07 | 0.93  | 3.95   | -     | 1069.2  |

|                                                                        |                                       |            |   |          |      |      |   |        |
|------------------------------------------------------------------------|---------------------------------------|------------|---|----------|------|------|---|--------|
| AHQ-2-7, 1651 - 1672                                                   | R.GDDTPLHLAASHGHR.D                   | 1584.67809 | 2 | 3.42E-09 | 0.93 | 3.93 | - | 1099.2 |
| AHQ-2-10, 1899 - 1903                                                  | R.GDDTPLHLAASHGHR.D                   | 1584.67809 | 2 | 4.12E-07 | 0.92 | 3.86 | - | 1047.8 |
| AHQ-2-9, 5722                                                          | R.GMAFLHTLEPLIPR.H                    | 1595.93361 | 2 | 1.61E-05 | 0.91 | 3.66 | - | 915.1  |
| AHQ-2-7, 4744                                                          | R.GM*AFHLTLEPLIPR.H                   | 1611.93301 | 2 | 2.12E-05 | 0.90 | 3.54 | - | 869.8  |
| AHQ-2-7, 5649                                                          | R.GMAFLHTLEPLIPR.H                    | 1595.93361 | 3 | 9.44E-08 | 0.88 | 3.35 | - | 1247.5 |
| AHQ-2-10, 4660                                                         | R.GM*AFHLTLEPLIPR.H                   | 1611.93301 | 2 | 8.30E-05 | 0.87 | 3.48 | - | 619.0  |
| AHQ-2-11, 4969                                                         | R.GM*AFHLTLEPLIPR.H                   | 1611.93301 | 2 | 2.94E-05 | 0.89 | 3.48 | - | 773.6  |
| AHQ-2-7, 1928 - 1936                                                   | K.LNENHSGELWK.G                       | 1327.42732 | 2 | 2.28E-07 | 0.92 | 3.57 | - | 1292.8 |
| AHQ-2-9, 6123                                                          | R.LWLDNTENDLNQGGDDHGFSPHWACR.E        | 3113.28217 | 3 | 1.19E-04 | 0.80 | 3.44 | - | 1133.5 |
| AHQ-2-7, 6048 - 6117                                                   | R.LWLDNTENDLNQGGDDHGFSPHWACR.E        | 3113.28217 | 3 | 1.05E-05 | 0.95 | 5.35 | - | 1173.0 |
| AHQ-2-11, 5796                                                         | R.LWLDNTENDLNQGGDDHGFSPHWACR.E        | 3113.28217 | 3 | 1.57E-12 | 0.93 | 4.54 | - | 1259.7 |
| AHQ-2-14-, 5963 - 5973                                                 | R.LWLDNTENDLNQGGDDHGFSPHWACR.E        | 3113.28217 | 3 | 1.20E-09 | 0.95 | 5.48 | - | 1174.6 |
| AHQ-2-11, 4146                                                         | R.M*YAPAWVAPEALQK.K                   | 1591.85542 | 2 | 1.67E-04 | 0.91 | 3.38 | - | 830.2  |
| AHQ-2-10, 3891 - 3956                                                  | R.M*YAPAWVAPEALQK.K                   | 1591.85542 | 2 | 6.69E-05 | 0.89 | 3.37 | - | 637.0  |
| AHQ-2-11, 4568 - 4576                                                  | R.MYAPAWVAPEALQK.K                    | 1575.85602 | 2 | 8.29E-08 | 0.96 | 4.39 | - | 1070.3 |
| AHQ-2-13-, 4805 - 4806                                                 | R.MYAPAWVAPEALQK.K                    | 1575.85602 | 2 | 1.78E-06 | 0.94 | 3.72 | - | 1197.3 |
| AHQ-2-13-, 4301                                                        | R.M*YAPAWVAPEALQK.K                   | 1591.85542 | 2 | 2.56E-05 | 0.87 | 3.45 | - | 730.0  |
| AHQ-2-10, 4338                                                         | R.MYAPAWVAPEALQK.K                    | 1575.85602 | 2 | 2.48E-05 | 0.91 | 3.48 | - | 781.2  |
| AHQ-2-12, 4294                                                         | R.M*YAPAWVAPEALQK.K                   | 1591.85542 | 2 | 4.75E-04 | 0.61 | 2.55 | - | 441.8  |
| AHQ-2-13, 4255                                                         | R.M*YAPAWVAPEALQK.K                   | 1591.85542 | 2 | 6.33E-05 | 0.87 | 3.21 | - | 852.2  |
| AHQ-2-11, 4014                                                         | R.SAVVEMLIM*R.G                       | 1165.45256 | 2 | 1.81E-04 | 0.90 | 3.06 | - | 1388.4 |
| AHQ-2-7, 4232 - 4307                                                   | K.VALEGLRPTIPPGISPHVCK.L              | 2143.53829 | 2 | 5.05E-09 | 0.96 | 5.02 | - | 920.4  |
| AHQ-2-7, 4227                                                          | K.VALEGLRPTIPPGISPHVCK.L              | 2143.53829 | 3 | 8.90E-10 | 0.90 | 4.11 | - | 845.0  |
| AHQ-2-11, 4385 - 4414                                                  | K.VALEGLRPTIPPGISPHVCK.L              | 2143.53829 | 2 | 5.86E-04 | 0.74 | 3.67 | - | 512.2  |
| AHQ-2-7, 2688                                                          | R.WQGNDIVVK.V                         | 1059.20012 | 1 | 9.76E-05 | 0.79 | 2.46 | - | 1005.6 |
| gl4504745[ref][NP_000410.1] integrin alpha 2b precursor [Homo sapiens] |                                       |            |   |          |      |      |   |        |
| AHQ-2-4, 1737                                                          | R.AEAQVELR.G                          | 916.01408  | 2 | 1.06E-04 | 0.91 | 2.97 | - | 1311.3 |
| AHQ-2-13-, 5307                                                        | R.AEGGQCP.SLLFDLR.D                   | 1564.74505 | 2 | 9.94E-05 | 0.83 | 3.12 | - | 810.7  |
| AHQ-2-13, 5207                                                         | R.AEGGQCP.SLLFDLR.D                   | 1564.74505 | 2 | 8.54E-05 | 0.77 | 3.00 | - | 572.2  |
| AHQ-2-1, 5485 - 5556                                                   | R.AEGGQCP.SLLFDLR.D                   | 1564.74505 | 2 | 1.04E-07 | 0.94 | 4.50 | - | 838.2  |
| AHQ-2-11, 5020 - 5028                                                  | R.AEGGQCP.SLLFDLR.D                   | 1564.74505 | 2 | 1.00E-07 | 0.94 | 3.60 | - | 1189.0 |
| AHQ-2-1, 5561                                                          | R.AEGGQCP.SLLFDLR.D                   | 1564.74505 | 2 | 7.23E-04 | 0.83 | 2.71 | - | 821.0  |
| AHQ-2-10, 4814                                                         | R.AEGGQCP.SLLFDLR.D                   | 1564.74505 | 2 | 1.00E-09 | 0.96 | 4.85 | - | 1009.6 |
| AHQ-2-4, 5653                                                          | R.AEGGQCP.SLLFDLR.D                   | 1564.74505 | 2 | 1.04E-11 | 0.95 | 4.00 | - | 1344.6 |
| AHQ-2-9, 5156                                                          | R.AEGGQCP.SLLFDLR.D                   | 1564.74505 | 2 | 3.90E-04 | 0.85 | 3.61 | - | 533.6  |
| AHQ-2-4, 5512                                                          | R.AEGGQCP.SLLFDLR.D                   | 1564.74505 | 2 | 6.33E-07 | 0.94 | 4.39 | - | 971.1  |
| AHQ-2-4, 5130                                                          | R.AEGGQCP.SLLFDLR.D                   | 1564.74505 | 2 | 3.94E-04 | 0.86 | 3.36 | - | 932.3  |
| AHQ-2-7, 5121                                                          | R.AEGGQCP.SLLFDLR.D                   | 1564.74505 | 2 | 3.17E-07 | 0.95 | 4.39 | - | 1113.6 |
| AHQ-2-4, 5426 - 5496                                                   | R.AEGGQCP.SLLFDLR.D                   | 1564.74505 | 2 | 1.48E-08 | 0.96 | 5.15 | - | 1051.9 |
| AHQ-2-6, 5129 - 5137                                                   | R.AEGGQCP.SLLFDLR.D                   | 1564.74505 | 2 | 3.45E-05 | 0.93 | 3.93 | - | 860.6  |
| AHQ-2-5, 5140 - 5220                                                   | R.AEGGQCP.SLLFDLR.D                   | 1564.74505 | 2 | 1.24E-07 | 0.95 | 4.36 | - | 996.6  |
| AHQ-2-4, 5065                                                          | R.AEGGQCP.SLLFDLR.D                   | 2066.23814 | 3 | 1.67E-05 | 0.73 | 3.16 | - | 719.4  |
| AHQ-2-4, 4946                                                          | R.AEGGQCP.SLLFDLR.D                   | 2066.23814 | 3 | 5.33E-06 | 0.75 | 3.42 | - | 824.7  |
| AHQ-2-4, 4934                                                          | R.AEGGQCP.SLLFDLR.D                   | 2066.23814 | 2 | 5.10E-04 | 0.83 | 3.53 | - | 807.7  |
| AHQ-2-6, 2562                                                          | R.ALSNVGFER.L                         | 1122.21308 | 2 | 1.42E-06 | 0.86 | 3.17 | - | 874.4  |
| AHQ-2-4, 2709 - 2780                                                   | R.ALSNVGFER.L                         | 1122.21308 | 1 | 1.96E-04 | 0.14 | 2.38 | - | 137.9  |
| AHQ-2-4, 2712 - 2781                                                   | R.ALSNVGFER.L                         | 1122.21308 | 2 | 2.69E-06 | 0.90 | 3.65 | - | 935.3  |
| AHQ-2-4, 2716 - 2785                                                   | R.ALSNVGFER.L                         | 1122.21308 | 1 | 1.88E-05 | 0.30 | 2.63 | - | 98.5   |
| AHQ-2-4, 2808                                                          | R.ALSNVGFER.L                         | 1122.21308 | 2 | 4.00E-06 | 0.69 | 2.89 | - | 639.0  |
| AHQ-2-6, 2561                                                          | R.ALSNVGFER.L                         | 1122.21308 | 1 | 2.88E-06 | 0.19 | 2.06 | - | 192.2  |
| AHQ-2-5, 2519                                                          | R.ALSNVGFER.L                         | 1122.21308 | 1 | 2.96E-04 | 0.14 | 2.17 | - | 132.0  |
| AHQ-2-5, 2520                                                          | R.ALSNVGFER.L                         | 1122.21308 | 2 | 4.81E-06 | 0.77 | 2.70 | - | 893.8  |
| AHQ-2-4, 3132                                                          | R.ALSNVGFER.L                         | 1122.21308 | 1 | 4.43E-04 | 0.30 | 2.59 | - | 279.6  |
| AHQ-2-5, 2523                                                          | R.ALSNVGFER.L                         | 1122.21308 | 1 | 9.36E-04 | 0.08 | 1.81 | - | 54.0   |
| AHQ-2-7, 2492                                                          | R.ALSNVGFER.L                         | 1122.21308 | 2 | 7.33E-07 | 0.85 | 3.21 | - | 790.1  |
| AHQ-2-1, 2948                                                          | R.ALSNVGFER.L                         | 1122.21308 | 2 | 2.85E-05 | 0.83 | 3.10 | - | 686.7  |
| AHQ-2-4, 5440                                                          | K.ASVQLVQD.SLNPAVK.S                  | 1682.94293 | 2 | 4.33E-05 | 0.87 | 4.02 | - | 627.7  |
| AHQ-2-4, 5280 - 5348                                                   | K.ASVQLVQD.SLNPAVK.S                  | 1682.94293 | 2 | 2.49E-06 | 0.92 | 4.81 | - | 660.8  |
| AHQ-2-4, 5144 - 5212                                                   | K.ASVQLVQD.SLNPAVK.S                  | 1682.94293 | 2 | 2.41E-04 | 0.86 | 3.87 | - | 898.4  |
| AHQ-2-4, 3224                                                          | R.DETRNVSQTLQTFK.A                    | 1724.85363 | 2 | 3.67E-06 | 0.73 | 2.90 | - | 586.0  |
| AHQ-2-4, 3004                                                          | R.DETRNVSQTLQTFK.A                    | 1724.85363 | 2 | 4.16E-07 | 0.84 | 3.43 | - | 968.8  |
| AHQ-2-3, 4047 - 4048                                                   | R.DGYNDIAVAAPYGGPSGR.G                | 1780.87574 | 2 | 1.41E-05 | 0.71 | 3.41 | - | 520.3  |
| AHQ-2-5, 3891 - 3892                                                   | R.DGYNDIAVAAPYGGPSGR.G                | 1780.87574 | 2 | 1.46E-06 | 0.94 | 5.17 | - | 753.7  |
| AHQ-2-6, 3813 - 3881                                                   | R.DGYNDIAVAAPYGGPSGR.G                | 1780.87574 | 2 | 2.30E-04 | 0.71 | 3.54 | - | 468.5  |
| AHQ-2-4, 4013 - 4033                                                   | R.DGYNDIAVAAPYGGPSGR.G                | 1780.87574 | 2 | 1.38E-06 | 0.86 | 3.85 | - | 739.4  |
| AHQ-2-4, 4225                                                          | R.DGYNDIAVAAPYGGPSGR.G                | 1780.87574 | 2 | 2.28E-07 | 0.91 | 4.18 | - | 765.3  |
| AHQ-2-4, 4578 - 4581                                                   | R.FGSAIAPL.GD.LDR.D                   | 1332.48700 | 2 | 3.20E-06 | 0.91 | 3.59 | - | 1102.2 |
| AHQ-2-7, 4191                                                          | R.FGSAIAPL.GD.LDR.D                   | 1332.48700 | 2 | 2.06E-04 | 0.84 | 2.69 | - | 883.9  |
| AHQ-2-4, 4586                                                          | R.FGSAIAPL.GD.LDR.D                   | 1332.48700 | 1 | 3.98E-06 | 0.80 | 3.18 | - | 499.4  |
| AHQ-2-4, 6014 - 6084                                                   | R.FGSAIAPL.GD.LDRDGYNDIAVAAPYGGPSGR.G | 3094.34015 | 3 | 2.41E-07 | 0.94 | 5.38 | - | 864.0  |
| AHQ-2-4, 6153 - 6224                                                   | R.FGSAIAPL.GD.LDRDGYNDIAVAAPYGGPSGR.G | 3094.34015 | 3 | 2.50E-06 | 0.92 | 5.34 | - | 865.8  |
| AHQ-2-4, 6292 - 6360                                                   | R.FGSAIAPL.GD.LDRDGYNDIAVAAPYGGPSGR.G | 3094.34015 | 3 | 1.62E-04 | 0.87 | 4.34 | - | 798.1  |
| AHQ-2-5, 6055 - 6085                                                   | R.FGSAIAPL.GD.LDRDGYNDIAVAAPYGGPSGR.G | 3094.34015 | 3 | 2.83E-07 | 0.90 | 4.50 | - | 797.4  |
| AHQ-2-5, 5887 - 5957                                                   | R.FGSAIAPL.GD.LDRDGYNDIAVAAPYGGPSGR.G | 3094.34015 | 3 | 3.78E-11 | 0.93 | 4.12 | - | 1416.1 |
| AHQ-2-4, 5889 - 5957                                                   | R.FGSAIAPL.GD.LDRDGYNDIAVAAPYGGPSGR.G | 3094.34015 | 3 | 2.50E-05 | 0.90 | 4.87 | - | 575.6  |
| AHQ-2-6, 5731 - 5797                                                   | R.FGSAIAPL.GD.LDRDGYNDIAVAAPYGGPSGR.G | 3094.34015 | 3 | 2.16E-06 | 0.91 | 4.87 | - | 878.1  |
| AHQ-2-7, 5732 - 5811                                                   | R.FGSAIAPL.GD.LDRDGYNDIAVAAPYGGPSGR.G | 3094.34015 | 3 | 6.46E-05 | 0.93 | 4.94 | - | 942.6  |
| AHQ-2-1, 6025 - 6080                                                   | R.FGSAIAPL.GD.LDRDGYNDIAVAAPYGGPSGR.G | 3094.34015 | 3 | 3.75E-07 | 0.87 | 4.54 | - | 685.2  |
| AHQ-2-5, 5804 - 5873                                                   | R.FGSAIAPL.GD.LDRDGYNDIAVAAPYGGPSGR.G | 3094.34015 | 3 | 8.35E-11 | 0.91 | 4.59 | - | 907.3  |
| AHQ-2-4, 6826 - 6870                                                   | R.GAVDIDDNGYPLIVGAYGANQVAVYR.A        | 2827.05458 | 2 | 1.02E-05 | 0.92 | 4.75 | - | 522.2  |
| AHQ-2-4, 7037 - 7114                                                   | R.GAVDIDDNGYPLIVGAYGANQVAVYR.A        | 2827.05458 | 2 | 3.42E-08 | 0.94 | 5.54 | - | 479.8  |
| AHQ-2-4, 7256 - 7324                                                   | R.GAVDIDDNGYPLIVGAYGANQVAVYR.A        | 2827.05458 | 2 | 1.13E-06 | 0.86 | 3.72 | - | 476.1  |
| AHQ-2-4, 7532 - 7601                                                   | R.GAVDIDDNGYPLIVGAYGANQVAVYR.A        | 2827.05458 | 2 | 7.28E-04 | 0.85 | 3.43 | - | 714.1  |
| AHQ-2-4, 7392 - 7461                                                   | R.GAVDIDDNGYPLIVGAYGANQVAVYR.A        | 2827.05458 | 2 | 6.31E-09 | 0.95 | 5.06 | - | 705.0  |
| AHQ-2-4, 6585 - 6653                                                   | R.GAVDIDDNGYPLIVGAYGANQVAVYR.A        | 2827.05458 | 2 | 2.32E-07 | 0.90 | 4.78 | - | 549.6  |
| AHQ-2-4, 6937 - 6969                                                   | R.GAVDIDDNGYPLIVGAYGANQVAVYR.A        | 2827.05458 | 2 | 2.00E-07 | 0.94 | 5.07 | - | 495.4  |
| AHQ-2-10, 4500 - 4571                                                  | R.GEAQVWTQLLR.A                       | 1301.47614 | 2 | 3.59E-05 | 0.93 | 3.81 | - | 1147.1 |
| AHQ-2-10, 4822                                                         | R.GEAQVWTQLLR.A                       | 1301.47614 | 1 | 8.19E-04 | 0.09 | 2.01 | - | 210.1  |
| AHQ-2-1, 5341 - 5348                                                   | R.GEAQVWTQLLR.A                       | 1301.47614 | 2 | 7.36E-05 | 0.94 | 3.80 | - | 1359.4 |
| AHQ-2-10, 4498 - 4595                                                  | R.GEAQVWTQLLR.A                       | 1301.47614 | 1 | 2.57E-05 | 0.17 | 2.35 | - | 168.2  |
| AHQ-2-11, 4777                                                         | R.GEAQVWTQLLR.A                       | 1301.47614 | 2 | 3.76E-07 | 0.88 | 3.68 | - | 771.7  |
| AHQ-2-4, 5470 - 5549                                                   | R.GNSFPASLVVAAEEGER.E                 | 1733.86053 | 2 | 5.87E-07 | 0.94 | 4.74 | - | 948.3  |
| AHQ-2-4, 5722 - 5792                                                   | R.GNSFPASLVVAAEEGER.E                 | 1733.86053 | 2 | 1.17E-09 | 0.96 | 5.09 | - | 1200.7 |
| AHQ-2-4, 5878 - 5949                                                   | R.GNSFPASLVVAAEEGER.E                 | 1733.86053 | 2 | 1.58E-04 | 0.82 | 3.10 | - | 880.0  |
| AHQ-2-4, 6016                                                          | R.GNSFPASLVVAAEEGER.E                 | 1733.86053 | 2 | 2.97E-12 | 0.90 | 4.22 | - | 747.4  |
| AHQ-2-4, 5621 - 5696                                                   | R.GNSFPASLVVAAEEGER.E                 | 1733.86053 | 2 | 6.12E-09 | 0.92 | 4.67 | - | 742.3  |
| AHQ-2-4, 5385 - 5456                                                   | R.GNSFPASLVVAAEEGER.E                 | 1733.86053 | 2 | 1.56E-04 | 0.89 | 3.97 | - | 691.2  |
| AHQ-2-4, 6146                                                          | R.GNSFPASLVVAAEEGER.E                 | 1733.86053 | 2 | 1.82E-06 | 0.73 | 2.94 | - | 676.1  |
| AHQ-2-4, 6554 - 6625                                                   | R.GNSFPASLVVAAEEGEREQNSLDSWGP.K.V     | 2976.16043 | 3 | 6.73E-08 | 0.80 | 3.94 | - | 384.9  |
| AHQ-2-4, 6662 - 6702                                                   | R.GNSFPASLVVAAEEGEREQNSLDSWGP.K.V     | 2976.16043 | 2 | 8.26E-05 | 0.72 | 3.26 | - | 554.8  |
| AHQ-2-4, 6785 - 6856                                                   | R.GNSFPASLVVAAEEGEREQNSLDSWGP.K.V     | 2976.16043 | 3 | 6.75E-08 | 0.75 | 3.97 | - | 391.8  |
| AHQ-2-4, 7092 - 7169                                                   | R.GNSFPASLVVAAEEGEREQNSLDSWGP.K.V     | 2976.16043 | 3 | 1.31E-10 | 0.87 | 4.60 | - | 481.5  |
| AHQ-2-4, 6888 - 6913                                                   | R.GNSFPASLVVAAEEGEREQNSLDSWGP.K.V     | 2976.16043 | 2 | 3.04E-05 | 0.52 | 3.15 | - | 260.6  |
| AHQ-2-4, 5201 - 5272                                                   | R.GPHALGAP.SLLLTGTQLYGR.F             | 2023.32431 | 2 | 1.22E-05 | 0.97 | 6.00 | - | 1202.5 |
| AHQ-2-4, 5205 - 5285                                                   | R.GPHALGAP.SLLLTGTQLYGR.F             | 2023.32431 | 3 | 7.91E-04 | 0.91 | 3.86 | - | 1320.9 |
| AHQ-2-1, 5517                                                          | R.GPHALGAP.SLLLTGTQLYGR.F             | 2023.32431 | 2 | 2.72E-04 | 0.95 | 5.06 | - | 891.2  |
| AHQ-2-6, 4913 - 4938                                                   | R.GPHALGAP.SLLLTGTQLYGR.F             | 2023.32431 | 3 | 2.77E-04 | 0.85 | 3.63 | - | 1017.7 |

|                        |                                |            |   |          |      |      |   |        |
|------------------------|--------------------------------|------------|---|----------|------|------|---|--------|
| AHQ-2-6, 4918 - 4919   | R.GPHALGAPSLLLTGTQLYGR.F       | 2023.32431 | 2 | 9.46E-06 | 0.98 | 6.42 | - | 1111.8 |
| AHQ-2-7, 4709          | R.GPHALGAPSLLLTGTQLYGR.F       | 2023.32431 | 2 | 9.09E-06 | 0.97 | 5.37 | - | 1098.6 |
| AHQ-2-4, 5320 - 5388   | R.GPHALGAPSLLLTGTQLYGR.F       | 2023.32431 | 2 | 1.97E-05 | 0.96 | 5.17 | - | 911.8  |
| AHQ-2-7, 4711          | R.GPHALGAPSLLLTGTQLYGR.F       | 2023.32431 | 3 | 1.16E-05 | 0.87 | 4.11 | - | 860.6  |
| AHQ-2-4, 5358          | R.GPHALGAPSLLLTGTQLYGR.F       | 2023.32431 | 3 | 5.62E-05 | 0.90 | 3.81 | - | 1287.9 |
| AHQ-2-5, 4860 - 4932   | R.GPHALGAPSLLLTGTQLYGR.F       | 2023.32431 | 2 | 4.68E-06 | 0.96 | 5.10 | - | 1068.3 |
| AHQ-2-3, 5317 - 5325   | R.GPHALGAPSLLLTGTQLYGR.F       | 2023.32431 | 2 | 2.52E-05 | 0.95 | 5.18 | - | 724.5  |
| AHQ-2-4, 5406 - 5477   | R.GQVLVFLGGQSEGLR.S            | 1503.72793 | 2 | 2.34E-05 | 0.88 | 2.95 | - | 1251.1 |
| AHQ-2-4, 5264 - 5334   | R.GQVLVFLGGQSEGLR.S            | 1503.72793 | 2 | 1.20E-08 | 0.97 | 4.51 | - | 1622.5 |
| AHQ-2-3, 5172          | R.GQVLVFLGGQSEGLR.S            | 1503.72793 | 2 | 3.51E-07 | 0.95 | 3.79 | - | 1509.4 |
| AHQ-2-4, 5120 - 5196   | R.GQVLVFLGGQSEGLR.S            | 1503.72793 | 2 | 5.78E-08 | 0.97 | 5.31 | - | 1685.8 |
| AHQ-2-5, 4108          | R.HDLLVGAPLYMESR.A             | 1601.85188 | 2 | 1.46E-06 | 0.92 | 3.41 | - | 1306.4 |
| AHQ-2-6, 4099 - 4153   | R.HDLLVGAPLYMESR.A             | 1601.85188 | 2 | 2.18E-04 | 0.83 | 3.44 | - | 691.0  |
| AHQ-2-4, 3829 - 3861   | R.HDLLVGAPLYM*ESR.A            | 1617.85128 | 2 | 2.29E-06 | 0.97 | 4.60 | - | 1828.2 |
| AHQ-2-4, 4416 - 4484   | R.HDLLVGAPLYMESR.A             | 1601.85188 | 2 | 6.25E-06 | 0.96 | 4.80 | - | 1312.9 |
| AHQ-2-5, 3267 - 3276   | K.HSPICHTTMAFLR.D              | 1572.83705 | 2 | 6.31E-08 | 0.67 | 2.71 | - | 343.2  |
| AHQ-2-4, 2966          | K.HSPICHTTMAFLR.D              | 1588.83645 | 2 | 4.61E-04 | 0.77 | 2.71 | - | 612.5  |
| AHQ-2-5, 4159 - 4160   | K.IVLLDVPVR.A                  | 1024.28196 | 2 | 1.64E-04 | 0.95 | 3.97 | - | 1360.4 |
| AHQ-2-4, 4424 - 4497   | K.IVLLDVPVR.A                  | 1024.28196 | 2 | 3.23E-04 | 0.90 | 3.96 | - | 830.9  |
| AHQ-2-12, 4327         | K.IVLLDVPVR.A                  | 1024.28196 | 2 | 1.50E-04 | 0.88 | 3.33 | - | 835.4  |
| AHQ-2-6, 4107          | K.IVLLDVPVR.A                  | 1024.28196 | 2 | 2.90E-04 | 0.88 | 3.22 | - | 902.4  |
| AHQ-2-3, 4505          | K.IVLLDVPVR.A                  | 1024.28196 | 2 | 9.94E-05 | 0.93 | 3.68 | - | 1024.4 |
| AHQ-2-11, 4162         | K.IVLLDVPVR.A                  | 1024.28196 | 2 | 2.68E-04 | 0.88 | 3.28 | - | 801.5  |
| AHQ-2-4, 4566 - 4585   | R.IYVENDFSWDK.R                | 1416.51610 | 2 | 4.40E-07 | 0.92 | 3.91 | - | 737.4  |
| AHQ-2-4, 4569 - 4577   | R.IYVENDFSWDK.R                | 1416.51610 | 1 | 7.52E-06 | 0.27 | 2.07 | - | 386.3  |
| AHQ-2-4, 3925 - 3998   | R.IYVENDFSWDK.R.Y              | 1572.70245 | 2 | 7.03E-06 | 0.95 | 4.17 | - | 1467.2 |
| AHQ-2-4, 4308          | R.IYVENDFSWDK.R.Y              | 1572.70245 | 2 | 7.50E-05 | 0.69 | 3.04 | - | 862.2  |
| AHQ-2-4, 4213          | R.IYVENDFSWDK.R.Y              | 1572.70245 | 2 | 4.57E-07 | 0.85 | 3.69 | - | 699.7  |
| AHQ-2-10, 6499         | R.LQDPVLVSCDSAPCTVVQCDLQEMAR.G | 2996.36144 | 2 | 8.61E-04 | 0.72 | 3.26 | - | 242.5  |
| AHQ-2-10, 6363 - 6434  | R.LQDPVLVSCDSAPCTVVQCDLQEMAR.G | 2996.36144 | 2 | 1.85E-05 | 0.88 | 3.84 | - | 521.9  |
| AHQ-2-4, 4652          | K.LSLNAELQLDR.Q                | 1272.43310 | 2 | 3.25E-08 | 0.92 | 3.88 | - | 912.6  |
| AHQ-2-4, 5177          | K.LSLNAELQLDR.Q                | 1272.43310 | 2 | 2.25E-06 | 0.96 | 3.75 | - | 1815.0 |
| AHQ-2-4, 4777 - 4854   | K.LSLNAELQLDR.Q                | 1272.43310 | 2 | 1.10E-06 | 0.90 | 3.30 | - | 1002.8 |
| AHQ-2-11, 2112         | R.NRPPLEEDDEEGE                | 1529.50164 | 2 | 2.14E-09 | 0.91 | 3.28 | - | 1021.2 |
| AHQ-2-11, 2706         | R.NVGSQTLQTFK.A                | 1223.36055 | 2 | 3.41E-04 | 0.92 | 3.60 | - | 733.4  |
| AHQ-2-4, 3262          | R.NVGSQTLQTFK.A                | 1223.36055 | 1 | 7.68E-06 | 0.13 | 2.07 | - | 163.2  |
| AHQ-2-6, 2547          | R.NVGSQTLQTFK.A                | 1223.36055 | 2 | 2.34E-07 | 0.88 | 3.22 | - | 612.7  |
| AHQ-2-4, 2950 - 2954   | R.NVGSQTLQTFK.A                | 1223.36055 | 1 | 5.93E-05 | 0.17 | 2.33 | - | 170.1  |
| AHQ-2-12, 2742         | R.NVGSQTLQTFK.A                | 1223.36055 | 2 | 7.07E-04 | 0.83 | 3.03 | - | 468.7  |
| AHQ-2-4, 2692 - 2766   | R.NVGSQTLQTFK.A                | 1223.36055 | 2 | 5.10E-04 | 0.90 | 3.80 | - | 516.8  |
| AHQ-2-7, 5812          | R.SRPSQVLDSPFPPTGSAFGFSR.G     | 2354.60606 | 3 | 3.98E-05 | 0.97 | 5.22 | - | 2055.9 |
| AHQ-2-3, 6283          | R.SRPSQVLDSPFPPTGSAFGFSR.G     | 2354.60606 | 3 | 2.88E-06 | 0.89 | 4.30 | - | 1134.6 |
| AHQ-2-4, 5925          | R.SRPSQVLDSPFPPTGSAFGFSR.G     | 2354.60606 | 3 | 1.58E-10 | 0.97 | 6.24 | - | 1805.8 |
| AHQ-2-4, 6062 - 6136   | R.SRPSQVLDSPFPPTGSAFGFSR.G     | 2354.60606 | 3 | 5.50E-09 | 0.92 | 6.40 | - | 1281.4 |
| AHQ-2-1, 6326          | R.SRPSQVLDSPFPPTGSAFGFSR.G     | 2354.60606 | 3 | 9.18E-12 | 0.96 | 5.55 | - | 1240.1 |
| AHQ-2-4, 6284 - 6352   | R.SRPSQVLDSPFPPTGSAFGFSR.G     | 2354.60606 | 2 | 1.06E-07 | 0.95 | 4.99 | - | 708.9  |
| AHQ-2-14-, 5917        | R.SRPSQVLDSPFPPTGSAFGFSR.G     | 2354.60606 | 3 | 9.22E-07 | 0.94 | 4.90 | - | 1111.5 |
| AHQ-2-5, 5899 - 5967   | R.SRPSQVLDSPFPPTGSAFGFSR.G     | 2354.60606 | 3 | 1.67E-10 | 0.95 | 5.56 | - | 1494.4 |
| AHQ-2-6, 5867 - 5933   | R.SRPSQVLDSPFPPTGSAFGFSR.G     | 2354.60606 | 3 | 2.44E-04 | 0.97 | 6.32 | - | 1415.2 |
| AHQ-2-4, 6137 - 6213   | R.SRPSQVLDSPFPPTGSAFGFSR.G     | 2354.60606 | 2 | 7.30E-05 | 0.85 | 3.74 | - | 528.5  |
| AHQ-2-4, 6348 - 6417   | R.SRPSQVLDSPFPPTGSAFGFSR.G     | 2354.60606 | 3 | 4.02E-08 | 0.98 | 7.03 | - | 1607.2 |
| AHQ-2-4, 6209 - 6281   | R.SRPSQVLDSPFPPTGSAFGFSR.G     | 2354.60606 | 3 | 1.19E-09 | 0.97 | 6.46 | - | 1508.6 |
| AHQ-2-6, 5877 - 5945   | R.SRPSQVLDSPFPPTGSAFGFSR.G     | 2354.60606 | 2 | 7.51E-07 | 0.84 | 3.59 | - | 614.6  |
| AHQ-2-3, 3759          | K.TEEAEKTPVGSCLAQPESEGR.R      | 2295.46902 | 2 | 2.90E-05 | 0.90 | 4.37 | - | 615.3  |
| AHQ-2-4, 3652 - 3721   | K.TEEAEKTPVGSCLAQPESEGR.R      | 2295.46902 | 2 | 2.28E-06 | 0.92 | 4.18 | - | 632.0  |
| AHQ-2-11, 3510         | K.TEEAEKTPVGSCLAQPESEGR.R      | 2295.46902 | 2 | 2.61E-04 | 0.84 | 4.05 | - | 414.9  |
| AHQ-2-7, 3407          | K.TEEAEKTPVGSCLAQPESEGR.R      | 2295.46902 | 2 | 2.72E-07 | 0.93 | 4.60 | - | 614.9  |
| AHQ-2-5, 3472 - 3481   | K.TEEAEKTPVGSCLAQPESEGR.R      | 2295.46902 | 2 | 7.94E-06 | 0.94 | 4.89 | - | 568.0  |
| AHQ-2-6, 3433          | K.TEEAEKTPVGSCLAQPESEGR.R      | 2295.46902 | 2 | 4.51E-05 | 0.88 | 4.13 | - | 527.8  |
| AHQ-2-4, 3877          | K.TEEAEKTPVGSCLAQPESEGR.R      | 2295.46902 | 2 | 6.07E-11 | 0.90 | 3.95 | - | 581.1  |
| AHQ-2-11, 5266 - 5333  | R.TLPGSQEETGGVFLCPWR.A         | 2036.25364 | 2 | 2.82E-04 | 0.92 | 4.44 | - | 999.2  |
| AHQ-2-5, 5555          | R.TLPGSQEETGGVFLCPWR.A         | 2036.25364 | 2 | 8.54E-06 | 0.88 | 3.82 | - | 714.2  |
| AHQ-2-7, 5385 - 5465   | R.TLPGSQEETGGVFLCPWR.A         | 2036.25364 | 2 | 7.31E-10 | 0.93 | 4.28 | - | 787.9  |
| AHQ-2-7, 5475          | R.TLPGSQEETGGVFLCPWR.A         | 2036.25364 | 2 | 2.07E-07 | 0.96 | 5.30 | - | 1021.4 |
| AHQ-2-4, 5972 - 6000   | R.TLPGSQEETGGVFLCPWR.A         | 2036.25364 | 2 | 2.09E-05 | 0.43 | 2.91 | - | 301.0  |
| AHQ-2-1, 5841 - 5908   | R.TLPGSQEETGGVFLCPWR.A         | 2036.25364 | 2 | 2.12E-06 | 0.93 | 4.37 | - | 839.9  |
| AHQ-2-3, 5828 - 5836   | R.TLPGSQEETGGVFLCPWR.A         | 2036.25364 | 2 | 1.66E-07 | 0.66 | 3.29 | - | 672.8  |
| AHQ-2-6, 5479 - 5511   | R.TLPGSQEETGGVFLCPWR.A         | 2036.25364 | 2 | 6.97E-05 | 0.91 | 4.17 | - | 768.1  |
| AHQ-2-10, 5106         | R.TLPGSQEETGGVFLCPWR.A         | 2036.25364 | 2 | 4.40E-05 | 0.95 | 4.77 | - | 1019.5 |
| AHQ-2-13-, 5562 - 5565 | R.TLPGSQEETGGVFLCPWR.A         | 2036.25364 | 2 | 2.24E-10 | 0.97 | 6.03 | - | 1215.4 |
| AHQ-2-9, 5495          | R.TLPGSQEETGGVFLCPWR.A         | 2036.25364 | 2 | 1.46E-05 | 0.83 | 3.67 | - | 611.4  |
| AHQ-2-4, 5900 - 5966   | R.TLPGSQEETGGVFLCPWR.A         | 2036.25364 | 2 | 3.87E-07 | 0.94 | 4.65 | - | 948.6  |
| AHQ-2-4, 5757 - 5833   | R.TLPGSQEETGGVFLCPWR.A         | 2036.25364 | 2 | 5.32E-07 | 0.96 | 5.25 | - | 1155.0 |
| AHQ-2-4, 5838          | R.TLPGSQEETGGVFLCPWR.A         | 2036.25364 | 3 | 4.13E-04 | 0.94 | 4.80 | - | 1329.1 |
| AHQ-2-12, 5571 - 5581  | R.TLPGSQEETGGVFLCPWR.A         | 2036.25364 | 2 | 3.56E-07 | 0.94 | 4.74 | - | 836.7  |
| AHQ-2-6, 3527          | K.TPVGSCFLAQPESEGR.R           | 1607.76993 | 2 | 3.03E-07 | 0.92 | 3.86 | - | 831.4  |
| AHQ-2-11, 3560 - 3564  | K.TPVGSCFLAQPESEGR.R           | 1607.76993 | 2 | 1.58E-05 | 0.91 | 4.12 | - | 604.1  |
| AHQ-2-5, 3575          | K.TPVGSCFLAQPESEGR.R           | 1607.76993 | 2 | 4.63E-06 | 0.86 | 3.05 | - | 928.1  |
| AHQ-2-4, 3964          | K.TPVGSCFLAQPESEGR.R           | 1607.76993 | 2 | 4.05E-07 | 0.92 | 3.89 | - | 802.1  |
| AHQ-2-1, 3933 - 3937   | K.TPVGSCFLAQPESEGR.R           | 1607.76993 | 2 | 1.47E-06 | 0.83 | 3.76 | - | 643.2  |
| AHQ-2-7, 3509          | K.TPVGSCFLAQPESEGR.R           | 1607.76993 | 2 | 4.18E-06 | 0.87 | 4.14 | - | 592.4  |
| AHQ-2-4, 3780 - 3814   | K.TPVGSCFLAQPESEGR.R           | 1607.76993 | 2 | 2.28E-04 | 0.85 | 3.53 | - | 637.7  |
| AHQ-2-10, 3426         | K.TPVGSCFLAQPESEGR.R           | 1607.76993 | 2 | 1.68E-05 | 0.89 | 3.70 | - | 723.8  |
| AHQ-2-4, 3665 - 3690   | K.TPVGSCFLAQPESEGR.R           | 1607.76993 | 2 | 7.39E-05 | 0.72 | 3.02 | - | 730.7  |
| AHQ-2-4, 6384          | K.TPVSCFNIQMCVGTGHNIPQK.L      | 2462.81122 | 3 | 8.01E-08 | 0.96 | 5.27 | - | 1347.6 |
| AHQ-2-4, 5273 - 5346   | K.TPVSCFNIQMCVGTGHNIPQK.L      | 2462.81122 | 3 | 6.68E-07 | 0.98 | 6.54 | - | 1882.8 |
| AHQ-2-4, 4916          | K.TPVSCFNIQMCVGTGHNIPQK.L      | 2462.81122 | 3 | 1.35E-04 | 0.97 | 4.79 | - | 2019.0 |
| AHQ-2-4, 5413 - 5494   | K.TPVSCFNIQMCVGTGHNIPQK.L      | 2462.81122 | 3 | 5.71E-10 | 0.96 | 5.29 | - | 1499.2 |
| AHQ-2-4, 4646          | K.TPVSCFNIQMCVGTGHNIPQK.L      | 2478.81062 | 2 | 1.62E-06 | 0.86 | 3.34 | - | 947.5  |
| AHQ-2-4, 6125          | K.TPVSCFNIQMCVGTGHNIPQK.L      | 2462.81122 | 3 | 2.01E-06 | 0.92 | 4.57 | - | 1022.9 |
| AHQ-2-5, 4420          | K.TPVSCFNIQMCVGTGHNIPQK.L      | 2478.81062 | 3 | 7.86E-04 | 0.91 | 3.89 | - | 1242.0 |
| AHQ-2-4, 5932          | K.TPVSCFNIQMCVGTGHNIPQK.L      | 2462.81122 | 3 | 4.70E-04 | 0.82 | 3.34 | - | 886.3  |
| AHQ-2-4, 4741          | K.TPVSCFNIQMCVGTGHNIPQK.L      | 2478.81062 | 3 | 1.62E-10 | 0.96 | 4.55 | - | 1873.3 |
| AHQ-2-4, 4632 - 4640   | K.TPVSCFNIQMCVGTGHNIPQK.L      | 2478.81062 | 3 | 4.14E-06 | 0.96 | 5.27 | - | 1319.4 |
| AHQ-2-5, 2293          | R.VAIVVGAPR.T                  | 882.08560  | 2 | 5.09E-06 | 0.86 | 2.83 | - | 979.0  |
| AHQ-2-4, 2478 - 2496   | R.VAIVVGAPR.T                  | 882.08560  | 2 | 8.33E-06 | 0.94 | 3.69 | - | 1400.5 |
| AHQ-2-7, 2253          | R.VAIVVGAPR.T                  | 882.08560  | 2 | 2.27E-05 | 0.90 | 3.43 | - | 949.1  |
| AHQ-2-13-, 2627        | R.VAIVVGAPR.T                  | 882.08560  | 2 | 3.10E-06 | 0.91 | 3.09 | - | 1163.7 |
| AHQ-2-4, 6476 - 6514   | R.VLLLGSQQAQTLLNLDLGGK.H       | 1999.29783 | 2 | 4.61E-07 | 0.96 | 5.55 | - | 1234.1 |
| AHQ-2-4, 6724 - 6793   | R.VLLLGSQQAQTLLNLDLGGK.H       | 1999.29783 | 2 | 1.05E-07 | 0.98 | 6.02 | - | 1851.4 |
| AHQ-2-4, 6876 - 6944   | R.VLLLGSQQAQTLLNLDLGGK.H       | 1999.29783 | 2 | 3.40E-08 | 0.98 | 6.49 | - | 2093.7 |
| AHQ-2-4, 7013 - 7069   | R.VLLLGSQQAQTLLNLDLGGK.H       | 1999.29783 | 2 | 9.97E-08 | 0.98 | 5.95 | - | 1800.6 |
| AHQ-2-4, 6009          | R.VLLLGSQQAQTLLNLDLGGK.H       | 1999.29783 | 2 | 5.11E-09 | 0.98 | 6.57 | - | 1910.0 |
| AHQ-2-4, 7238 - 7266   | R.VLLLGSQQAQTLLNLDLGGK.H       | 1999.29783 | 2 | 1.35E-08 | 0.98 | 6.48 | - | 2054.9 |
| AHQ-2-4, 7298 - 7372   | R.VLLLGSQQAQTLLNLDLGGK.H       | 1999.29783 | 2 | 6.65E-10 | 0.97 | 5.85 | - | 1620.9 |
| AHQ-2-4, 6332 - 6408   | R.VLLLGSQQAQTLLNLDLGGK.H       | 1999.29783 | 2 | 5.65E-08 | 0.98 | 6.18 | - | 1549.1 |
| AHQ-2-4, 7446 - 7456   | R.VLLLGSQQAQTLLNLDLGGK.H       | 1999.29783 | 2 | 1.08E-11 | 0.94 | 4.72 | - | 1058.0 |

|                             |                                                                        |            |   |          |       |        |       |         |
|-----------------------------|------------------------------------------------------------------------|------------|---|----------|-------|--------|-------|---------|
| AHQ-2-4, 7533 - 7606        | R.VLLLSGQQAGTTLNLDLGGK.H                                               | 1999.29783 | 2 | 1.28E-07 | 0.98  | 5.91   | -     | 1615.6  |
| AHQ-2-4, 7685 - 7757        | R.VLLLSGQQAGTTLNLDLGGK.H                                               | 1999.29783 | 2 | 1.85E-12 | 0.98  | 6.38   | -     | 1717.4  |
| AHQ-2-5, 6188               | R.VLLLSGQQAGTTLNLDLGGK.H                                               | 1999.29783 | 2 | 5.50E-04 | 0.66  | 3.40   | -     | 381.3   |
| AHQ-2-4, 6241 - 6261        | R.VLLLSGQQAGTTLNLDLGGK.H                                               | 1999.29783 | 2 | 4.59E-08 | 0.98  | 6.11   | -     | 1932.0  |
| AHQ-2-4, 7136 - 7201        | R.VLLLSGQQAGTTLNLDLGGK.H                                               | 1999.29783 | 2 | 1.43E-09 | 0.98  | 6.10   | -     | 1401.5  |
| AHQ-2-4, 6096 - 6166        | R.VLLLSGQQAGTTLNLDLGGK.H                                               | 1999.29783 | 2 | 1.16E-05 | 0.97  | 5.23   | -     | 1729.2  |
| AHQ-2-5, 3940 - 3977        | R.VVLCELGNPMK.K                                                        | 1261.53692 | 2 | 4.47E-06 | 0.93  | 3.99   | -     | 925.4   |
| AHQ-2-4, 3341 - 3370        | R.VVLCELGNPMK.K                                                        | 1277.53632 | 2 | 7.85E-07 | 0.95  | 3.86   | -     | 1364.9  |
| AHQ-2-4, 4188 - 4189        | R.VVLCELGNPMK.K                                                        | 1261.53692 | 2 | 1.71E-06 | 0.96  | 4.50   | -     | 1268.7  |
| AHQ-2-5, 3283               | R.VVLCELGNPMK.N                                                        | 1389.70984 | 2 | 5.68E-05 | 0.88  | 2.97   | -     | 1097.1  |
| AHQ-2-4, 3568               | R.VVLCELGNPMK.N                                                        | 1389.70984 | 2 | 2.71E-05 | 0.74  | 2.81   | -     | 628.2   |
| AHQ-2-5, 3863 - 3873        | R.VYFLQPR.G                                                            | 1036.25129 | 2 | 2.11E-05 | 0.94  | 3.90   | -     | 1192.2  |
| AHQ-2-4, 4145 - 4216        | R.VYFLQPR.G                                                            | 1036.25129 | 2 | 1.70E-05 | 0.94  | 3.64   | -     | 1096.8  |
| gj 4503715 ref NP_000500.1  | fibrinogen, gamma chain isoform gamma-A precursor [Homo sapiens]       |            |   | 1.97E-12 | 10.87 | 130.29 | 44.60 | 49481.2 |
| AHQ-2-7, 4385 - 4467        | K.AIQLTYNPEDESSKPNMIDAATLK.S                                           | 2521.82886 | 2 | 3.09E-06 | 0.87  | 4.38   | -     | 350.4   |
| AHQ-2-5, 4551 - 4580        | K.AIQLTYNPEDESSKPNMIDAATLK.S                                           | 2521.82886 | 3 | 1.64E-04 | 0.71  | 3.42   | -     | 357.3   |
| AHQ-2-9, 4490               | K.AIQLTYNPEDESSKPNMIDAATLK.S                                           | 2521.82886 | 2 | 1.68E-05 | 0.75  | 3.80   | -     | 294.6   |
| AHQ-2-7, 4535 - 4604        | K.AIQLTYNPEDESSKPNMIDAATLK.S                                           | 2521.82886 | 2 | 2.69E-06 | 0.91  | 4.72   | -     | 635.0   |
| AHQ-2-7, 4393 - 4463        | K.AIQLTYNPEDESSKPNMIDAATLK.S                                           | 2521.82886 | 3 | 1.71E-05 | 0.90  | 4.31   | -     | 746.7   |
| AHQ-2-5, 5779               | K.ASTPNGYDNGIIVATWK.T                                                  | 1895.06358 | 2 | 2.98E-05 | 0.67  | 2.96   | -     | 354.8   |
| AHQ-2-1, 5825 - 5888        | K.ASTPNGYDNGIIVATWK.T                                                  | 1895.06358 | 2 | 4.49E-04 | 0.75  | 3.35   | -     | 463.9   |
| AHQ-2-1, 5982               | K.ASTPNGYDNGIIVATWK.T                                                  | 1895.06358 | 2 | 1.10E-10 | 0.65  | 2.73   | -     | 385.2   |
| AHQ-2-14, 5445 - 5512       | K.ASTPNGYDNGIIVATWK.T                                                  | 1895.06358 | 2 | 1.72E-06 | 0.89  | 3.44   | -     | 726.5   |
| AHQ-2-13, 5641              | K.ASTPNGYDNGIIVATWK.T                                                  | 1895.06358 | 2 | 1.74E-07 | 0.52  | 2.98   | -     | 378.9   |
| AHQ-2-7, 5655 - 5724        | K.ASTPNGYDNGIIVATWK.T                                                  | 1895.06358 | 2 | 3.38E-11 | 0.65  | 3.05   | -     | 479.8   |
| AHQ-2-5, 5588               | K.ASTPNGYDNGIIVATWK.T                                                  | 1895.06358 | 2 | 2.01E-05 | 0.39  | 2.60   | -     | 350.2   |
| AHQ-2-7, 2413 - 2491        | K.CHAGHLNGVYYQGGTYSK.A                                                 | 2014.16662 | 2 | 2.13E-11 | 0.97  | 5.58   | -     | 1307.3  |
| AHQ-2-2, 2678               | K.CHAGHLNGVYYQGGTYSK.A                                                 | 2014.16662 | 2 | 2.11E-07 | 0.96  | 4.70   | -     | 1084.3  |
| AHQ-2-7, 2437               | K.CHAGHLNGVYYQGGTYSK.A                                                 | 2014.16662 | 3 | 9.68E-08 | 0.97  | 5.53   | -     | 1805.9  |
| AHQ-2-13, 2717              | K.CHAGHLNGVYYQGGTYSK.A                                                 | 2014.16662 | 2 | 2.08E-11 | 0.97  | 5.30   | -     | 1165.1  |
| AHQ-2-4, 2646               | K.CHAGHLNGVYYQGGTYSK.A                                                 | 2014.16662 | 2 | 3.34E-08 | 0.92  | 3.94   | -     | 988.2   |
| AHQ-2-9, 2506               | K.CHAGHLNGVYYQGGTYSK.A                                                 | 2014.16662 | 2 | 1.97E-04 | 0.81  | 3.72   | -     | 433.1   |
| AHQ-2-13, 2769 - 2773       | K.CHAGHLNGVYYQGGTYSK.A                                                 | 2014.16662 | 2 | 4.47E-05 | 0.94  | 4.54   | -     | 756.0   |
| AHQ-2-1, 2838               | K.CHAGHLNGVYYQGGTYSK.A                                                 | 2014.16662 | 2 | 7.73E-07 | 0.95  | 4.70   | -     | 776.4   |
| AHQ-2-9, 5254               | K.EGFGHLSPTGTTTFWLGNEK.I                                               | 2208.37146 | 2 | 2.68E-05 | 0.81  | 3.97   | -     | 338.8   |
| AHQ-2-8, 4856               | K.EGFGHLSPTGTTTFWLGNEK.I                                               | 2208.37146 | 2 | 5.33E-06 | 0.95  | 4.62   | -     | 1018.8  |
| AHQ-2-1, 5609 - 5629        | K.EGFGHLSPTGTTTFWLGNEK.I                                               | 2208.37146 | 3 | 2.22E-04 | 0.95  | 4.08   | -     | 2123.0  |
| AHQ-2-11, 5006              | K.EGFGHLSPTGTTTFWLGNEK.I                                               | 2208.37146 | 2 | 3.84E-04 | 0.85  | 3.73   | -     | 418.1   |
| AHQ-2-3, 5439               | K.EGFGHLSPTGTTTFWLGNEK.I                                               | 2208.37146 | 2 | 4.44E-04 | 0.86  | 3.76   | -     | 555.7   |
| AHQ-2-5, 5155               | K.EGFGHLSPTGTTTFWLGNEK.I                                               | 2208.37146 | 2 | 9.93E-06 | 0.93  | 4.39   | -     | 650.9   |
| AHQ-2-5, 5156               | K.EGFGHLSPTGTTTFWLGNEK.I                                               | 2208.37146 | 3 | 3.09E-05 | 0.93  | 4.55   | -     | 1392.3  |
| AHQ-2-5, 5279               | K.EGFGHLSPTGTTTFWLGNEK.I                                               | 2208.37146 | 2 | 1.61E-06 | 0.84  | 3.93   | -     | 444.3   |
| AHQ-2-1, 5704 - 5725        | K.EGFGHLSPTGTTTFWLGNEK.I                                               | 2208.37146 | 2 | 8.64E-06 | 0.73  | 3.34   | -     | 438.0   |
| AHQ-2-4, 5613               | K.EGFGHLSPTGTTTFWLGNEK.I                                               | 2208.37146 | 2 | 1.14E-08 | 0.93  | 3.77   | -     | 1155.2  |
| AHQ-2-7, 5223 - 5297        | K.EGFGHLSPTGTTTFWLGNEK.I                                               | 2208.37146 | 2 | 2.31E-06 | 0.94  | 4.78   | -     | 854.1   |
| AHQ-2-6, 5078               | K.EGFGHLSPTGTTTFWLGNEK.I                                               | 2208.37146 | 2 | 4.60E-04 | 0.94  | 4.57   | -     | 847.7   |
| AHQ-2-7, 5080 - 5152        | K.EGFGHLSPTGTTTFWLGNEK.I                                               | 2208.37146 | 2 | 2.31E-08 | 0.93  | 4.58   | -     | 738.8   |
| AHQ-2-7, 4968 - 5035        | K.EGFGHLSPTGTTTFWLGNEK.I                                               | 2208.37146 | 2 | 3.12E-05 | 0.96  | 5.48   | -     | 689.7   |
| AHQ-2-2, 5493               | K.EGFGHLSPTGTTTFWLGNEK.I                                               | 2208.37146 | 2 | 1.01E-07 | 0.94  | 4.69   | -     | 847.7   |
| AHQ-2-11, 6381 - 6461       | R.FGSYPTTCGIADFLSTYQTK.V                                               | 2420.65656 | 2 | 7.08E-04 | 0.87  | 3.77   | -     | 594.8   |
| AHQ-2-7, 6901 - 6971        | R.FGSYPTTCGIADFLSTYQTK.V                                               | 2420.65656 | 2 | 2.41E-04 | 0.77  | 3.27   | -     | 556.8   |
| AHQ-2-12, 6701 - 6769       | R.FGSYPTTCGIADFLSTYQTK.V                                               | 2420.65656 | 2 | 5.80E-10 | 0.92  | 4.49   | -     | 799.3   |
| AHQ-2-12, 6706              | R.FGSYPTTCGIADFLSTYQTK.V                                               | 2420.65656 | 3 | 2.49E-06 | 0.78  | 3.60   | -     | 844.4   |
| AHQ-2-14, 6543              | R.FGSYPTTCGIADFLSTYQTK.V                                               | 2420.65656 | 2 | 4.67E-05 | 0.54  | 2.91   | -     | 346.8   |
| AHQ-2-4, 4650 - 4720        | K.IHLISTQSAIPIALR.V                                                    | 1683.97576 | 2 | 4.52E-09 | 0.96  | 5.07   | -     | 1124.4  |
| AHQ-2-9, 4222 - 4230        | K.IHLISTQSAIPIALR.V                                                    | 1683.97576 | 2 | 6.44E-06 | 0.97  | 4.91   | -     | 1435.0  |
| AHQ-2-7, 4103 - 4171        | K.IHLISTQSAIPIALR.V                                                    | 1683.97576 | 2 | 1.97E-12 | 0.97  | 5.79   | -     | 1406.1  |
| AHQ-2-3, 4743               | K.IHLISTQSAIPIALR.V                                                    | 1683.97576 | 2 | 4.71E-06 | 0.96  | 4.64   | -     | 1106.0  |
| AHQ-2-8, 3936               | K.IHLISTQSAIPIALR.V                                                    | 1683.97576 | 2 | 2.24E-07 | 0.97  | 4.71   | -     | 1394.4  |
| AHQ-2-10, 4096              | K.IHLISTQSAIPIALR.V                                                    | 1683.97576 | 2 | 5.13E-07 | 0.93  | 3.60   | -     | 980.8   |
| AHQ-2-2, 4673 - 4753        | K.IHLISTQSAIPIALR.V                                                    | 1683.97576 | 2 | 1.16E-07 | 0.97  | 4.91   | -     | 1251.9  |
| AHQ-2-5, 4332               | K.IHLISTQSAIPIALR.V                                                    | 1683.97576 | 2 | 1.74E-08 | 0.97  | 4.72   | -     | 1474.1  |
| AHQ-2-5, 4345               | K.IHLISTQSAIPIALR.V                                                    | 1683.97576 | 3 | 1.54E-04 | 0.57  | 3.09   | -     | 555.0   |
| AHQ-2-13, 2101 - 2105       | R.LTIEGQQHHLLGGAK.Q                                                    | 1546.71290 | 2 | 1.11E-08 | 0.95  | 4.17   | -     | 1357.6  |
| AHQ-2-7, 1597 - 1603        | R.LTIEGQQHHLLGGAK.Q                                                    | 1546.71290 | 2 | 1.09E-07 | 0.92  | 3.54   | -     | 1415.9  |
| AHQ-2-7, 1691 - 1756        | R.LTIEGQQHHLLGGAK.Q                                                    | 1546.71290 | 2 | 3.44E-07 | 0.94  | 3.88   | -     | 1493.7  |
| AHQ-2-10, 1859              | R.LTIEGQQHHLLGGAK.Q                                                    | 1546.71290 | 2 | 3.79E-07 | 0.55  | 2.61   | -     | 416.5   |
| AHQ-2-11, 2030              | R.LTIEGQQHHLLGGAK.Q                                                    | 1546.71290 | 2 | 7.14E-06 | 0.86  | 3.26   | -     | 854.9   |
| AHQ-2-12, 2007              | R.LTIEGQQHHLLGGAK.Q                                                    | 1546.71290 | 2 | 1.66E-07 | 0.88  | 3.71   | -     | 776.7   |
| AHQ-2-4, 1966               | R.LTIEGQQHHLLGGAK.Q                                                    | 1546.71290 | 2 | 1.26E-04 | 0.85  | 3.05   | -     | 882.3   |
| AHQ-2-14, 2085              | R.LTIEGQQHHLLGGAK.Q                                                    | 1546.71290 | 2 | 2.34E-09 | 0.96  | 4.46   | -     | 1074.6  |
| AHQ-2-7, 2637               | R.TSTADYAMFK.V                                                         | 1135.27203 | 1 | 4.84E-05 | 0.12  | 2.08   | -     | 235.1   |
| AHQ-2-9, 3763 - 3770        | K.VAQLAQCQCEPKDVTQIHDITGK.D                                            | 2772.06211 | 3 | 4.34E-05 | 0.94  | 4.97   | -     | 1189.9  |
| AHQ-2-7, 3713 - 3752        | K.VAQLAQCQCEPKDVTQIHDITGK.D                                            | 2772.06211 | 3 | 3.86E-04 | 0.91  | 4.36   | -     | 782.4   |
| AHQ-2-7, 3715 - 3716        | K.VAQLAQCQCEPKDVTQIHDITGK.D                                            | 2772.06211 | 2 | 6.47E-04 | 0.60  | 2.99   | -     | 205.3   |
| AHQ-2-4, 4044               | K.VAQLAQCQCEPKDVTQIHDITGK.D                                            | 2772.06211 | 3 | 5.88E-04 | 0.91  | 4.64   | -     | 802.7   |
| AHQ-2-1, 4162               | K.VAQLAQCQCEPKDVTQIHDITGK.D                                            | 2772.06211 | 3 | 4.44E-05 | 0.89  | 4.32   | -     | 850.9   |
| AHQ-2-8, 3691               | K.VAQLAQCQCEPKDVTQIHDITGK.D                                            | 2772.06211 | 3 | 4.96E-06 | 0.73  | 3.50   | -     | 590.6   |
| AHQ-2-8, 3695               | K.VAQLAQCQCEPKDVTQIHDITGK.D                                            | 2772.06211 | 2 | 2.62E-04 | 0.27  | 2.54   | -     | 192.2   |
| AHQ-2-10, 3815              | K.VAQLAQCQCEPKDVTQIHDITGKDCQDIANK.G                                    | 3718.05993 | 3 | 1.51E-05 | 0.94  | 5.05   | -     | 1310.0  |
| AHQ-2-1, 4380               | K.VAQLAQCQCEPKDVTQIHDITGKDCQDIANK.G                                    | 3718.05993 | 3 | 9.41E-10 | 0.94  | 5.59   | -     | 1012.9  |
| AHQ-2-7, 3899 - 3925        | K.VAQLAQCQCEPKDVTQIHDITGKDCQDIANK.G                                    | 3718.05993 | 3 | 2.90E-04 | 0.95  | 5.24   | -     | 1536.8  |
| AHQ-2-8, 3826               | K.VAQLAQCQCEPKDVTQIHDITGKDCQDIANK.G                                    | 3718.05993 | 3 | 4.83E-04 | 0.86  | 4.32   | -     | 730.4   |
| AHQ-2-5, 3111 - 3180        | R.VELEDWNGR.T                                                          | 1118.18129 | 2 | 6.72E-05 | 0.86  | 2.66   | -     | 1022.9  |
| AHQ-2-8, 3000               | R.VELEDWNGR.T                                                          | 1118.18129 | 2 | 1.81E-04 | 0.88  | 2.91   | -     | 1193.6  |
| AHQ-2-7, 3079               | R.VELEDWNGR.T                                                          | 1118.18129 | 2 | 6.26E-07 | 0.90  | 3.07   | -     | 1158.2  |
| AHQ-2-12, 2919              | K.YEASILTHDSSIR.Y                                                      | 1492.61564 | 2 | 5.54E-06 | 0.86  | 2.93   | -     | 846.0   |
| AHQ-2-12, 2922              | K.YEASILTHDSSIR.Y                                                      | 1492.61564 | 1 | 3.64E-04 | 0.61  | 2.81   | -     | 336.1   |
| AHQ-2-11, 2888              | K.YEASILTHDSSIR.Y                                                      | 1492.61564 | 2 | 1.64E-05 | 0.78  | 2.99   | -     | 537.9   |
| AHQ-2-5, 2663 - 2671        | K.YEASILTHDSSIR.Y                                                      | 1492.61564 | 2 | 2.69E-05 | 0.91  | 3.83   | -     | 819.7   |
| AHQ-2-2, 2937               | K.YEASILTHDSSIR.Y                                                      | 1492.61564 | 2 | 3.60E-05 | 0.50  | 2.62   | -     | 399.2   |
| AHQ-2-6, 2727               | K.YEASILTHDSSIR.Y                                                      | 1492.61564 | 2 | 1.08E-04 | 0.73  | 2.62   | -     | 585.6   |
| AHQ-2-9, 2692 - 2710        | K.YEASILTHDSSIR.Y                                                      | 1492.61564 | 2 | 1.03E-06 | 0.93  | 3.82   | -     | 986.1   |
| AHQ-2-7, 2564 - 2635        | K.YEASILTHDSSIR.Y                                                      | 1492.61564 | 2 | 5.54E-06 | 0.89  | 3.65   | -     | 705.2   |
| AHQ-2-12, 2911              | K.YEASILTHDSSIR.Y                                                      | 1492.61564 | 2 | 1.19E-05 | 0.83  | 3.49   | -     | 490.8   |
| AHQ-2-3, 2889 - 2949        | K.YEASILTHDSSIR.Y                                                      | 1492.61564 | 2 | 2.16E-05 | 0.82  | 3.01   | -     | 650.4   |
| AHQ-2-1, 2896 - 2908        | R.YLQEIYNSNNQK.I                                                       | 1514.62131 | 2 | 1.66E-06 | 0.94  | 4.45   | -     | 1227.3  |
| gj 11386183 ref NP_008921.1 | WAS protein family, member 2; suppressor of cyclic-AMP receptor (WASP- |            |   | 1.99E-12 | 1.82  | 20.31  | 7.60  | 54283.7 |
| AHQ-2-10, 3660              | K.VTQLDPKKEEESLQGINTR.K                                                | 2157.36743 | 2 | 1.23E-06 | 0.84  | 3.73   | -     | 483.1   |
| AHQ-2-14, 6841              | K.YAEDIFGELFTQANTFASR.V                                                | 2181.34601 | 2 | 1.99E-12 | 0.98  | 6.20   | -     | 2134.1  |
| gj 4506925 ref NP_003013.1  | SH3 domain binding glutamic acid-rich protein like; SH3-binding domain |            |   | 2.00E-12 | 3.83  | 40.33  | 64.00 | 12774.2 |
| AHQ-2-13, 5897 - 5956       | R.ENNAVYAFGLTAPPGSK.E                                                  | 1850.06426 | 2 | 4.89E-04 | 0.84  | 4.25   | -     | 407.1   |
| AHQ-2-13, 6425 - 6489       | R.ENNAVYAFGLTAPPGSK.E                                                  | 1850.06426 | 2 | 6.40E-08 | 0.93  | 4.13   | -     | 920.6   |
| AHQ-2-13, 4873 - 4941       | R.ENVPENSRPATGYPLPPQIFNESQYR.G                                         | 3005.24660 | 3 | 3.47E-06 | 0.89  | 3.99   | -     | 1010.9  |
| AHQ-2-13, 5004 - 5067       | R.ENVPENSRPATGYPLPPQIFNESQYR.G                                         | 3005.24660 | 3 | 5.44E-09 | 0.96  | 5.92   | -     | 1159.5  |
| AHQ-2-13, 5265              | R.ENVPENSRPATGYPLPPQIFNESQYR.G                                         | 3005.24660 | 3 | 7.32E-11 | 0.92  | 4.71   | -     | 868.9   |
| AHQ-2-13, 5173 - 5241       | R.ENVPENSRPATGYPLPPQIFNESQYR.G                                         | 3005.24660 | 3 | 6.91E-09 | 0.97  | 6.36   | -     | 1380.2  |

|                             |                                                                         |            |   |          |       |        |       |         |
|-----------------------------|-------------------------------------------------------------------------|------------|---|----------|-------|--------|-------|---------|
| AHQ-2-13-, 5081 - 5149      | R.ENVPENSRPATGYLPPQIFNESQYR.G                                           | 3005.24660 | 3 | 2.00E-12 | 0.97  | 6.60   | -     | 1195.5  |
| AHQ-2-13-, 4983 - 5014      | R.ENVPENSRPATGYLPPQIFNESQYR.G                                           | 3005.24660 | 3 | 2.31E-12 | 0.96  | 6.18   | -     | 1074.3  |
| AHQ-2-13, 2768 - 2831       | K.IGFEEKIDIAANEENRK.W                                                   | 1864.00620 | 2 | 6.14E-05 | 0.97  | 4.70   | -     | 2029.1  |
| AHQ-2-13, 2433 - 2443       | R.VYIASSSGSTAIA.K                                                       | 1284.44065 | 2 | 7.77E-05 | 0.96  | 4.43   | -     | 1985.5  |
| AHQ-2-13, 2435              | R.VYIASSSGSTAIA.K                                                       | 1284.44065 | 1 | 8.97E-04 | 0.10  | 2.04   | -     | 226.4   |
| gj 45759212 ref NP_004598.1 | beta-tubulin cofactor A [Homo sapiens]                                  |            |   | 2.10E-12 | 0.97  | 10.31  | 16.70 | 12854.8 |
| AHQ-2-13, 3365              | R.ILENEKDLLEAEYKEAR.L                                                   | 2209.35284 | 2 | 8.61E-06 | 0.97  | 5.10   | -     | 1468.2  |
| AHQ-2-13-, 3359             | R.ILENEKDLLEAEYKEAR.L                                                   | 2209.35284 | 2 | 3.12E-05 | 0.89  | 3.77   | -     | 684.5   |
| AHQ-2-13, 3359              | R.ILENEKDLLEAEYKEAR.L                                                   | 2209.35284 | 3 | 2.10E-12 | 0.97  | 6.28   | -     | 1427.2  |
| gj 4557677 ref NP_000203.1  | integrin beta chain, beta 3 precursor; platelet glycoprotein IIIa precu |            |   | 2.24E-12 | 19.39 | 230.29 | 32.50 | 87185.6 |
| AHQ-2-3, 2864 - 2873        | R.AKWDTANNPLYK.E                                                        | 1421.58225 | 2 | 7.24E-07 | 0.89  | 3.83   | -     | 671.5   |
| AHQ-2-3, 2868               | R.AKWDTANNPLYK.E                                                        | 1421.58225 | 1 | 6.15E-05 | 0.74  | 3.31   | -     | 443.2   |
| AHQ-2-6, 2834               | R.AKWDTANNPLYK.E                                                        | 1421.58225 | 1 | 5.44E-04 | 0.30  | 2.00   | -     | 322.4   |
| AHQ-2-1, 3097               | R.AKWDTANNPLYK.E                                                        | 1421.58225 | 2 | 1.49E-09 | 0.91  | 3.25   | -     | 862.5   |
| AHQ-2-4, 5600               | R.CDLKENLLKDNCAPIESIEFPVSEAR.V                                          | 2938.23689 | 2 | 4.53E-06 | 0.89  | 4.49   | -     | 421.4   |
| AHQ-2-3, 5461 - 5531        | R.CDLKENLLKDNCAPIESIEFPVSEAR.V                                          | 2938.23689 | 3 | 3.30E-04 | 0.92  | 4.57   | -     | 962.5   |
| AHQ-2-3, 5459 - 5516        | R.CDLKENLLKDNCAPIESIEFPVSEAR.V                                          | 2938.23689 | 2 | 1.06E-06 | 0.71  | 3.29   | -     | 591.3   |
| AHQ-2-5, 5303               | R.CDLKENLLKDNCAPIESIEFPVSEAR.V                                          | 2938.23689 | 3 | 3.86E-04 | 0.92  | 4.43   | -     | 829.6   |
| AHQ-2-4, 5542 - 5552        | R.CDLKENLLKDNCAPIESIEFPVSEAR.V                                          | 2938.23689 | 3 | 6.66E-05 | 0.94  | 5.21   | -     | 1067.9  |
| AHQ-2-3, 5608               | R.CDLKENLLKDNCAPIESIEFPVSEAR.V                                          | 2938.23689 | 3 | 3.56E-04 | 0.87  | 4.04   | -     | 1008.3  |
| AHQ-2-2, 4582               | R.CPGWLGWSQCCESEEDYRPSQQDECSPR.E                                        | 3380.49342 | 3 | 4.35E-07 | 0.87  | 4.09   | -     | 716.1   |
| AHQ-2-1, 4508 - 4512        | R.CPGWLGWSQCCESEEDYRPSQQDECSPR.E                                        | 3380.49342 | 3 | 4.40E-08 | 0.76  | 3.51   | -     | 398.7   |
| AHQ-2-3, 4468 - 4539        | R.CPGWLGWSQCCESEEDYRPSQQDECSPR.E                                        | 3380.49342 | 3 | 1.86E-07 | 0.73  | 3.47   | -     | 579.1   |
| AHQ-2-4, 4522 - 4602        | R.CPGWLGWSQCCESEEDYRPSQQDECSPR.E                                        | 3380.49342 | 3 | 2.22E-06 | 0.89  | 4.55   | -     | 503.9   |
| AHQ-2-6, 4298               | R.CPGWLGWSQCCESEEDYRPSQQDECSPR.E                                        | 3380.49342 | 3 | 2.63E-04 | 0.73  | 3.56   | -     | 410.9   |
| AHQ-2-5, 4411               | R.CPGWLGWSQCCESEEDYRPSQQDECSPR.E                                        | 3380.49342 | 3 | 2.24E-12 | 0.67  | 3.23   | -     | 405.6   |
| AHQ-2-1, 6045 - 6078        | R.DAPEGGFDAIMQATVCDEK.I                                                 | 2056.21716 | 2 | 1.04E-06 | 0.93  | 4.51   | -     | 770.9   |
| AHQ-2-1, 4620 - 4634        | R.DAPEGGFDAIMQATVCDEK.I                                                 | 2072.21656 | 2 | 5.34E-08 | 0.95  | 4.84   | -     | 790.6   |
| AHQ-2-4, 4698 - 4761        | R.DAPEGGFDAIMQATVCDEK.I                                                 | 2072.21656 | 2 | 5.26E-05 | 0.85  | 3.44   | -     | 709.2   |
| AHQ-2-3, 7303               | R.DAPEGGFDAIMQATVCDEK.I                                                 | 2056.21716 | 2 | 8.25E-05 | 0.84  | 3.44   | -     | 470.8   |
| AHQ-2-3, 4643 - 4716        | R.DAPEGGFDAIMQATVCDEK.I                                                 | 2072.21656 | 2 | 6.76E-06 | 0.93  | 4.64   | -     | 724.5   |
| AHQ-2-3, 7087               | R.DAPEGGFDAIMQATVCDEK.I                                                 | 2056.21716 | 2 | 4.71E-07 | 0.68  | 2.94   | -     | 475.2   |
| AHQ-2-3, 6863               | R.DAPEGGFDAIMQATVCDEK.I                                                 | 2056.21716 | 2 | 3.27E-09 | 0.90  | 4.01   | -     | 558.8   |
| AHQ-2-3, 6579 - 6651        | R.DAPEGGFDAIMQATVCDEK.I                                                 | 2056.21716 | 2 | 3.89E-06 | 0.96  | 5.14   | -     | 1110.3  |
| AHQ-2-3, 6439 - 6511        | R.DAPEGGFDAIMQATVCDEK.I                                                 | 2056.21716 | 2 | 2.36E-04 | 0.95  | 4.80   | -     | 1148.1  |
| AHQ-2-3, 6296 - 6368        | R.DAPEGGFDAIMQATVCDEK.I                                                 | 2056.21716 | 2 | 2.76E-07 | 0.96  | 5.66   | -     | 851.6   |
| AHQ-2-3, 6156 - 6224        | R.DAPEGGFDAIMQATVCDEK.I                                                 | 2056.21716 | 2 | 9.14E-08 | 0.94  | 4.60   | -     | 898.9   |
| AHQ-2-4, 5104               | K.DDLWSIQNLGKTL.L                                                       | 1390.52332 | 1 | 4.96E-04 | 0.53  | 2.76   | -     | 366.7   |
| AHQ-2-5, 4920 - 4921        | K.DDLWSIQNLGKTL.L                                                       | 1390.52332 | 1 | 1.28E-06 | 0.15  | 1.93   | -     | 272.8   |
| AHQ-2-3, 5080 - 5099        | K.DDLWSIQNLGKTL.L                                                       | 1390.52332 | 2 | 1.30E-05 | 0.94  | 4.57   | -     | 871.1   |
| AHQ-2-6, 4835               | K.DDLWSIQNLGKTL.L                                                       | 1390.52332 | 1 | 5.51E-08 | 0.54  | 2.47   | -     | 445.0   |
| AHQ-2-3, 5088               | K.DDLWSIQNLGKTL.L                                                       | 1390.52332 | 1 | 7.12E-07 | 0.74  | 2.90   | -     | 560.0   |
| AHQ-2-9, 4378               | K.DNCAPIESIEFPVSEAR.V                                                   | 1822.93099 | 2 | 1.50E-04 | 0.76  | 3.05   | -     | 696.2   |
| AHQ-2-6, 4342 - 4354        | K.DNCAPIESIEFPVSEAR.V                                                   | 1822.93099 | 2 | 2.48E-05 | 0.88  | 3.52   | -     | 853.6   |
| AHQ-2-3, 4785               | K.DNCAPIESIEFPVSEAR.V                                                   | 1822.93099 | 2 | 1.22E-08 | 0.93  | 3.58   | -     | 1470.0  |
| AHQ-2-7, 4372               | K.DNCAPIESIEFPVSEAR.V                                                   | 1822.93099 | 2 | 1.58E-05 | 0.36  | 2.56   | -     | 374.6   |
| AHQ-2-3, 4519 - 4587        | K.DNCAPIESIEFPVSEAR.V                                                   | 1822.93099 | 2 | 4.40E-06 | 0.75  | 2.85   | -     | 798.9   |
| AHQ-2-4, 4596 - 4616        | K.DNCAPIESIEFPVSEAR.V                                                   | 1822.93099 | 2 | 6.92E-07 | 0.93  | 3.71   | -     | 1215.1  |
| AHQ-2-1, 3464               | K.EATSTFTNITYR.G                                                        | 1404.50685 | 2 | 5.83E-07 | 0.83  | 2.87   | -     | 755.2   |
| AHQ-2-4, 3342               | K.EATSTFTNITYR.G                                                        | 1404.50685 | 2 | 7.41E-07 | 0.68  | 2.77   | -     | 572.6   |
| AHQ-2-3, 3325               | K.EATSTFTNITYR.G                                                        | 1404.50685 | 2 | 7.74E-07 | 0.70  | 2.86   | -     | 480.6   |
| AHQ-2-3, 2260 - 2283        | R.FQYEDSSGK.S                                                           | 1224.25749 | 2 | 4.19E-06 | 0.72  | 2.72   | -     | 500.5   |
| AHQ-2-3, 3819               | R.GECLCGQCVCHSSDFGK.I                                                   | 2006.16137 | 2 | 1.29E-05 | 0.63  | 2.79   | -     | 528.5   |
| AHQ-2-4, 3669 - 3749        | R.GECLCGQCVCHSSDFGK.I                                                   | 2006.16137 | 2 | 1.76E-07 | 0.96  | 4.20   | -     | 1719.1  |
| AHQ-2-6, 3467               | R.GECLCGQCVCHSSDFGK.I                                                   | 2006.16137 | 2 | 3.50E-05 | 0.97  | 4.46   | -     | 1607.8  |
| AHQ-2-1, 3736               | R.GECLCGQCVCHSSDFGK.I                                                   | 2006.16137 | 2 | 9.91E-06 | 0.87  | 3.50   | -     | 884.2   |
| AHQ-2-5, 3524 - 3531        | R.GECLCGQCVCHSSDFGK.I                                                   | 2006.16137 | 2 | 5.20E-07 | 0.94  | 3.81   | -     | 1557.6  |
| AHQ-2-3, 3735               | R.GECLCGQCVCHSSDFGK.I                                                   | 2006.16137 | 2 | 2.36E-07 | 0.89  | 3.72   | -     | 1066.3  |
| AHQ-2-3, 3672 - 3687        | R.GECLCGQCVCHSSDFGK.I                                                   | 2006.16137 | 3 | 3.48E-09 | 0.83  | 3.35   | -     | 776.0   |
| AHQ-2-3, 3587 - 3665        | R.GECLCGQCVCHSSDFGK.I                                                   | 2006.16137 | 2 | 3.07E-05 | 0.91  | 4.20   | -     | 907.6   |
| AHQ-2-2, 3742 - 3790        | R.GECLCGQCVCHSSDFGK.I                                                   | 2006.16137 | 2 | 1.68E-07 | 0.89  | 3.78   | -     | 864.3   |
| AHQ-2-5, 1577               | K.GSGDSSQVTVQSPQR.I                                                     | 1533.58302 | 2 | 7.80E-04 | 0.72  | 3.20   | -     | 822.8   |
| AHQ-2-4, 1716 - 1780        | K.GSGDSSQVTVQSPQR.I                                                     | 1533.58302 | 2 | 5.69E-04 | 0.79  | 3.13   | -     | 801.6   |
| AHQ-2-7, 1581               | K.GSGDSSQVTVQSPQR.I                                                     | 1533.58302 | 2 | 1.35E-04 | 0.53  | 2.84   | -     | 664.7   |
| AHQ-2-7, 2336 - 2349        | K.HVLTLDQVTR.F                                                          | 1283.45912 | 2 | 2.21E-07 | 0.92  | 3.38   | -     | 692.6   |
| AHQ-2-4, 2561               | K.HVLTLDQVTR.F                                                          | 1283.45912 | 2 | 5.26E-07 | 0.90  | 3.60   | -     | 605.4   |
| AHQ-2-6, 2385               | K.HVLTLDQVTR.F                                                          | 1283.45912 | 2 | 2.67E-07 | 0.92  | 3.88   | -     | 680.6   |
| AHQ-2-3, 2624               | K.HVLTLDQVTR.F                                                          | 1283.45912 | 2 | 8.62E-04 | 0.77  | 2.58   | -     | 573.9   |
| AHQ-2-3, 2540 - 2551        | K.HVLTLDQVTR.F                                                          | 1283.45912 | 2 | 6.93E-06 | 0.90  | 3.67   | -     | 511.8   |
| AHQ-2-4, 2573               | K.HVLTLDQVTR.F                                                          | 1283.45912 | 1 | 4.03E-06 | 0.63  | 3.02   | -     | 289.7   |
| AHQ-2-5, 2371               | K.HVLTLDQVTR.F                                                          | 1283.45912 | 2 | 2.40E-09 | 0.94  | 3.64   | -     | 900.1   |
| AHQ-2-1, 2738 - 2808        | K.HVLTLDQVTR.F                                                          | 1283.45912 | 2 | 1.40E-08 | 0.89  | 2.94   | -     | 756.9   |
| AHQ-2-3, 4997               | K.IGDTVSFSIEAK.V                                                        | 1267.41009 | 2 | 1.10E-06 | 0.93  | 3.20   | -     | 1096.0  |
| AHQ-2-3, 4287 - 4355        | R.NDASHLLVFTTDAK.T                                                      | 1532.67977 | 2 | 1.05E-04 | 0.75  | 2.70   | -     | 536.9   |
| AHQ-2-5, 3501               | R.NDASHLLVFTTDAK.T                                                      | 1532.67977 | 2 | 2.13E-08 | 0.97  | 4.35   | -     | 1660.3  |
| AHQ-2-3, 4459 - 4532        | R.NDASHLLVFTTDAK.T                                                      | 1532.67977 | 2 | 9.17E-10 | 0.97  | 4.69   | -     | 1412.4  |
| AHQ-2-6, 3454 - 3525        | R.NDASHLLVFTTDAK.T                                                      | 1532.67977 | 2 | 1.13E-09 | 0.96  | 4.46   | -     | 1496.1  |
| AHQ-2-7, 3403               | R.NDASHLLVFTTDAK.T                                                      | 1532.67977 | 2 | 4.74E-07 | 0.89  | 3.74   | -     | 830.3   |
| AHQ-2-3, 3540 - 3557        | R.NDASHLLVFTTDAK.T                                                      | 1532.67977 | 2 | 7.01E-08 | 0.87  | 3.75   | -     | 858.6   |
| AHQ-2-1, 4060 - 4125        | R.NDASHLLVFTTDAK.T                                                      | 1532.67977 | 2 | 6.84E-05 | 0.87  | 3.34   | -     | 887.7   |
| AHQ-2-3, 3788 - 3864        | R.NDASHLLVFTTDAK.T                                                      | 1532.67977 | 2 | 5.44E-09 | 0.98  | 5.49   | -     | 1697.8  |
| AHQ-2-3, 3771 - 3847        | R.NDASHLLVFTTDAK.T                                                      | 1532.67977 | 2 | 2.34E-10 | 0.97  | 5.19   | -     | 1551.3  |
| AHQ-2-1, 4554               | R.NDASHLLVFTTDAK.T                                                      | 1532.67977 | 2 | 2.00E-10 | 0.95  | 4.28   | -     | 1249.6  |
| AHQ-2-3, 3861               | R.NDASHLLVFTTDAK.T                                                      | 1532.67977 | 3 | 1.01E-09 | 0.95  | 4.58   | -     | 1402.1  |
| AHQ-2-4, 3845               | R.NDASHLLVFTTDAK.T                                                      | 1532.67977 | 2 | 9.22E-09 | 0.97  | 4.78   | -     | 1545.6  |
| AHQ-2-4, 4454 - 4492        | R.NDASHLLVFTTDAK.T                                                      | 1532.67977 | 2 | 6.82E-09 | 0.94  | 4.28   | -     | 1083.6  |
| AHQ-2-4, 3230 - 3257        | K.SFTIKPVGFK.D                                                          | 1124.35685 | 2 | 1.97E-05 | 0.88  | 2.87   | -     | 1221.0  |
| AHQ-2-3, 3215               | K.SFTIKPVGFK.D                                                          | 1124.35685 | 1 | 4.11E-04 | 0.37  | 2.47   | -     | 573.9   |
| AHQ-2-1, 4574               | K.SILYVVEPECPK.G                                                        | 1564.78173 | 2 | 1.04E-04 | 0.83  | 2.85   | -     | 864.1   |
| AHQ-2-3, 4499 - 4508        | K.SILYVVEPECPK.G                                                        | 1564.78173 | 2 | 1.28E-05 | 0.95  | 3.48   | -     | 1572.7  |
| AHQ-2-4, 3714               | R.TDTCMSSNGLLCSGR.G                                                     | 1661.81786 | 2 | 6.53E-07 | 0.69  | 3.08   | -     | 891.0   |
| AHQ-2-3, 3827               | R.TDTCMSSNGLLCSGR.G                                                     | 1661.81786 | 2 | 2.82E-07 | 0.72  | 2.52   | -     | 834.6   |
| AHQ-2-4, 2978 - 2981        | R.TDTCMSSNGLLCSGR.G                                                     | 1677.81726 | 2 | 4.04E-07 | 0.75  | 3.07   | -     | 399.4   |
| AHQ-2-4, 2876               | R.TDTCMSSNGLLCSGR.G                                                     | 1677.81726 | 2 | 6.69E-08 | 0.94  | 3.79   | -     | 1311.9  |
| AHQ-2-1, 2885               | R.TDTCMSSNGLLCSGR.G                                                     | 1677.81726 | 2 | 7.34E-08 | 0.96  | 3.95   | -     | 1897.0  |
| AHQ-2-1, 2984               | R.TDTCMSSNGLLCSGR.G                                                     | 1677.81726 | 2 | 2.09E-06 | 0.88  | 3.38   | -     | 789.7   |
| AHQ-2-5, 3545               | R.TDTCMSSNGLLCSGR.G                                                     | 1661.81786 | 2 | 4.69E-07 | 0.92  | 3.59   | -     | 1026.7  |
| AHQ-2-5, 3651               | R.TDTCMSSNGLLCSGR.G                                                     | 1661.81786 | 2 | 2.35E-08 | 0.86  | 3.32   | -     | 1048.4  |
| AHQ-2-2, 3778               | R.TDTCMSSNGLLCSGR.G                                                     | 1661.81786 | 2 | 1.94E-07 | 0.77  | 2.71   | -     | 893.5   |
| AHQ-2-1, 3722 - 3768        | R.TDTCMSSNGLLCSGR.G                                                     | 1661.81786 | 2 | 5.90E-06 | 0.83  | 2.85   | -     | 942.5   |
| AHQ-2-1, 3622               | R.TDTCMSSNGLLCSGR.G                                                     | 1661.81786 | 2 | 7.64E-10 | 0.91  | 3.53   | -     | 947.5   |
| AHQ-2-3, 2957 - 3037        | R.TDTCMSSNGLLCSGR.G                                                     | 1677.81726 | 2 | 2.33E-07 | 0.87  | 3.46   | -     | 1103.2  |
| AHQ-2-3, 2871 - 2881        | R.TDTCMSSNGLLCSGR.G                                                     | 1677.81726 | 2 | 1.12E-10 | 0.96  | 3.59   | -     | 1714.3  |
| AHQ-2-3, 1763 - 1837        | R.VLEDRPLSDK.G                                                          | 1172.31354 | 2 | 7.00E-04 | 0.88  | 3.29   | -     | 930.2   |
| AHQ-2-7, 2495 - 2551        | R.VLEDRPLSDKSGDSSQVTVQSPQR.I                                            | 2686.87396 | 3 | 1.28E-07 | 0.90  | 3.80   | -     | 1309.9  |
| AHQ-2-1, 2869               | R.VLEDRPLSDKSGDSSQVTVQSPQR.I                                            | 2686.87396 | 3 | 1.07E-04 | 0.90  | 4.14   | -     | 1106.6  |
| AHQ-2-3, 2680 - 2755        | R.VLEDRPLSDKSGDSSQVTVQSPQR.I                                            | 2686.87396 | 3 | 2.09E-09 | 0.96  | 5.44   | -     | 1599.0  |

|                             |                                                                         |            |   |          |      |       |       |          |
|-----------------------------|-------------------------------------------------------------------------|------------|---|----------|------|-------|-------|----------|
| AHQ-2-3, 3264 - 3268        | K.WDTANNPLYK.E                                                          | 1222.33111 | 2 | 3.03E-06 | 0.76 | 3.36  | -     | 463.2    |
| AHQ-2-1, 3776               | K.YCECDDFSCVR.Y                                                         | 1514.59674 | 2 | 9.60E-07 | 0.95 | 3.61  | -     | 1190.7   |
| AHQ-2-2, 3842               | K.YCECDDFSCVR.Y                                                         | 1514.59674 | 2 | 1.49E-09 | 0.91 | 3.52  | -     | 975.4    |
| AHQ-2-3, 3763               | K.YCECDDFSCVR.Y                                                         | 1514.59674 | 2 | 4.98E-07 | 0.91 | 3.44  | -     | 990.2    |
| AHQ-2-4, 3768 - 3774        | K.YCECDDFSCVR.Y                                                         | 1514.59674 | 2 | 7.30E-05 | 0.85 | 2.59  | -     | 1044.0   |
| AHQ-2-1, 2382               | R.YCRDEIESVK.E                                                          | 1300.42023 | 2 | 3.30E-05 | 0.87 | 3.29  | -     | 1002.6   |
| AHQ-2-4, 2229 - 2232        | R.YCRDEIESVK.E                                                          | 1300.42023 | 2 | 8.40E-05 | 0.90 | 3.05  | -     | 1173.3   |
| gi 10346135 ref NP_055083.1 | microtubule-associated protein, RP/EB family, member 2; T-cell activat  |            |   | 2.35E-12 | 1.94 | 20.27 | 9.80  | 37031.1  |
| AHQ-2-13, 6680              | R.FQDNLDLFIQWFK.K                                                       | 1601.78539 | 2 | 1.15E-07 | 0.96 | 4.46  | -     | 1284.0   |
| AHQ-2-9, 7118 - 7122        | R.FQDNLDLFIQWFK.K                                                       | 1601.78539 | 2 | 3.52E-08 | 0.97 | 4.59  | -     | 1356.8   |
| AHQ-2-12, 6946 - 6950       | R.FQDNLDLFIQWFK.K                                                       | 1601.78539 | 2 | 5.20E-07 | 0.96 | 4.28  | -     | 1266.6   |
| AHQ-2-13-, 6903             | R.FQDNLDLFIQWFK.K                                                       | 1601.78539 | 2 | 2.51E-10 | 0.97 | 5.16  | -     | 1426.5   |
| AHQ-2-12, 4953              | K.SDKKLETVQVQLNEQVHSLK.L                                                | 2325.56134 | 3 | 3.30E-08 | 0.94 | 4.92  | -     | 1171.6   |
| AHQ-2-9, 4686 - 4694        | K.SDKKLETVQVQLNEQVHSLK.L                                                | 2325.56134 | 2 | 2.35E-12 | 0.97 | 5.30  | -     | 1277.3   |
| AHQ-2-9, 4684 - 4688        | K.SDKKLETVQVQLNEQVHSLK.L                                                | 2325.56134 | 3 | 2.14E-09 | 0.94 | 4.96  | -     | 1141.1   |
| gi 4507767 ref NP_003326.1  | ubiquitin-activating enzyme E1-like; Ubiquitin-activating enzyme-2; ubi |            |   | 3.29E-12 | 4.18 | 50.24 | 10.10 | 111719.5 |
| AHQ-2-4, 5030 - 5101        | K.FOHLHGRPPQWDPVDAETVGLAR.D                                             | 2824.14835 | 3 | 6.84E-05 | 0.83 | 3.59  | -     | 670.4    |
| AHQ-2-4, 7496               | R.GLNPDQVIPLTYPLDPTTEHIIYGNDFSR.V                                       | 3434.79811 | 3 | 1.45E-07 | 0.67 | 3.43  | -     | 291.8    |
| AHQ-2-5, 7376               | R.GLNPDQVIPLTYPLDPTTEHIIYGNDFSR.V                                       | 3434.79811 | 3 | 3.10E-05 | 0.75 | 3.62  | -     | 308.6    |
| AHQ-2-4, 4757               | R.VLVSGLQGLGAEVAK.N                                                     | 1441.69805 | 2 | 3.29E-12 | 0.98 | 4.70  | -     | 2313.3   |
| AHQ-2-4, 4316               | R.VTELVQQLTQGAQAPGQR.V                                                  | 1894.12181 | 2 | 8.12E-04 | 0.82 | 3.75  | -     | 539.9    |
| AHQ-2-4, 4124 - 4136        | R.YFPSTAEHTLQAPW.H                                                      | 1707.86959 | 2 | 5.66E-10 | 0.88 | 3.86  | -     | 671.9    |
| gi 23510338 ref NP_003325.2 | ubiquitin-activating enzyme E1; A1S9T and BN75 temperature sensitivity  |            |   | 3.43E-12 | 6.96 | 80.28 | 11.80 | 117848.1 |
| AHQ-2-4, 6693 - 6700        | R.AAVATFLQSVQVPEFTPK.S                                                  | 1934.22430 | 2 | 2.71E-04 | 0.67 | 2.93  | -     | 522.3    |
| AHQ-2-4, 4682 - 4693        | R.ALPAVQNNLDEDLIR.K                                                     | 1810.00167 | 2 | 3.43E-12 | 0.96 | 5.63  | -     | 750.6    |
| AHQ-2-4, 3682 - 3689        | K.DNPGVVTCLDEAR.H                                                       | 1447.55333 | 2 | 8.18E-04 | 0.90 | 3.49  | -     | 855.3    |
| AHQ-2-4, 2308               | R.KPLESGTLGK.G                                                          | 1244.46280 | 2 | 1.83E-06 | 0.92 | 3.31  | -     | 1205.8   |
| AHQ-2-4, 5474               | R.LAGTOPLEVLAVQ.R.S                                                     | 1624.86348 | 2 | 4.33E-04 | 0.84 | 3.32  | -     | 616.6    |
| AHQ-2-4, 6124               | R.NEEDAELVALAQAVNAR.A                                                   | 1885.02541 | 2 | 1.35E-06 | 0.95 | 4.18  | -     | 1651.6   |
| AHQ-2-5, 6667               | K.SLVSALAEPDFVTFDAK.F                                                   | 1910.15638 | 2 | 3.29E-05 | 0.92 | 4.25  | -     | 620.8    |
| AHQ-2-4, 4201               | R.YDGGVAVFGSDLQK.L                                                      | 1656.77453 | 2 | 1.09E-04 | 0.80 | 3.11  | -     | 736.9    |
| gi 29739414 ref XP_294015.1 | similar to Glyceraldehyde 3-phosphate dehydrogenase, liver (GAPDH) [Ho  |            |   | 3.62E-12 | 3.72 | 40.24 | 17.70 | 26917.5  |
| AHQ-2-11, 3868              | K.IISNASCCTNCLAPLAK.V                                                   | 1837.10868 | 2 | 3.57E-05 | 0.84 | 3.72  | -     | 1019.3   |
| AHQ-2-11, 4190              | K.IISNASCCTNCLAPLAK.V                                                   | 1837.10868 | 2 | 1.01E-04 | 0.46 | 2.68  | -     | 676.6    |
| AHQ-2-10, 3699 - 3759       | K.IISNASCCTNCLAPLAK.V                                                   | 1837.10868 | 2 | 1.44E-05 | 0.73 | 3.09  | -     | 1025.7   |
| AHQ-2-12, 4035              | K.IISNASCCTNCLAPLAK.V                                                   | 1837.10868 | 2 | 3.09E-06 | 0.90 | 3.96  | -     | 1188.8   |
| AHQ-2-9, 5090 - 5160        | K.LISWYDNFEGYSNR.V                                                      | 1764.87478 | 2 | 3.62E-12 | 0.96 | 3.92  | -     | 1343.8   |
| AHQ-2-9, 5236               | K.LISWYDNFEGYSNR.V                                                      | 1764.87478 | 2 | 1.05E-06 | 0.92 | 4.12  | -     | 850.4    |
| AHQ-2-9, 5323               | K.LISWYDNFEGYSNR.V                                                      | 1764.87478 | 2 | 3.53E-05 | 0.67 | 2.90  | -     | 501.3    |
| AHQ-2-9, 4735               | K.LISWYDNFEGYSNR.V                                                      | 1764.87478 | 2 | 1.33E-06 | 0.79 | 2.98  | -     | 610.6    |
| AHQ-2-10, 4658              | K.LISWYDNFEGYSNR.V                                                      | 1764.87478 | 2 | 3.38E-09 | 0.92 | 3.94  | -     | 852.1    |
| AHQ-2-10, 4748              | K.LISWYDNFEGYSNR.V                                                      | 1764.87478 | 2 | 1.06E-06 | 0.94 | 4.20  | -     | 1085.6   |
| AHQ-2-14-, 5031 - 5035      | K.LISWYDNFEGYSNR.V                                                      | 1764.87478 | 2 | 3.34E-09 | 0.96 | 4.77  | -     | 1286.2   |
| AHQ-2-13-, 5085             | K.LISWYDNFEGYSNR.V                                                      | 1764.87478 | 2 | 1.24E-11 | 0.95 | 4.24  | -     | 1053.0   |
| AHQ-2-11, 4806 - 4868       | K.LISWYDNFEGYSNR.V                                                      | 1764.87478 | 2 | 1.08E-08 | 0.95 | 4.07  | -     | 1230.9   |
| AHQ-2-11, 4933 - 4998       | K.LISWYDNFEGYSNR.V                                                      | 1764.87478 | 2 | 1.11E-05 | 0.84 | 3.07  | -     | 662.1    |
| AHQ-2-9, 4950 - 5018        | K.LISWYDNFEGYSNR.V                                                      | 1764.87478 | 2 | 3.61E-09 | 0.96 | 4.53  | -     | 1368.2   |
| AHQ-2-12, 5070              | K.LISWYDNFEGYSNR.V                                                      | 1764.87478 | 2 | 4.54E-07 | 0.94 | 3.71  | -     | 1217.6   |
| AHQ-2-13, 4987 - 4988       | K.LISWYDNFEGYSNR.V                                                      | 1764.87478 | 2 | 1.27E-06 | 0.95 | 4.20  | -     | 1297.1   |
| AHQ-2-14, 6212 - 6278       | K.LISWYDNFEGYSNR.V                                                      | 1764.87478 | 2 | 4.97E-08 | 0.96 | 4.22  | -     | 1600.0   |
| AHQ-2-9, 2579               | R.VVDLMAHMASKE                                                          | 1202.47292 | 2 | 1.85E-06 | 0.97 | 4.05  | -     | 1604.6   |
| AHQ-2-9, 2719 - 2790        | R.VVDLMAHMASKE                                                          | 1331.58746 | 2 | 8.16E-05 | 0.90 | 3.42  | -     | 1196.1   |
| gi 5729997 ref NP_004154.2  | RAB27B, member RAS oncogene family [Homo sapiens]                       |            |   | 4.10E-12 | 4.59 | 50.23 | 29.80 | 24607.7  |
| AHQ-2-10, 6303 - 6367       | K.AVETLLDLIMK.R                                                         | 1246.54211 | 2 | 7.02E-04 | 0.72 | 3.03  | -     | 623.2    |
| AHQ-2-11, 5598              | K.AVETLLDLIMK.R                                                         | 1262.54151 | 2 | 1.10E-05 | 0.90 | 3.68  | -     | 796.2    |
| AHQ-2-11, 6540              | K.AVETLLDLIMK.R                                                         | 1246.54211 | 2 | 7.10E-07 | 0.94 | 3.96  | -     | 1206.3   |
| AHQ-2-10, 5358              | K.AVETLLDLIMK.R                                                         | 1262.54151 | 2 | 4.25E-05 | 0.93 | 3.74  | -     | 1221.0   |
| AHQ-2-11, 6254 - 6257       | R.NWMSQLQANAYCENPDIVLIGNK.A                                             | 2680.99772 | 2 | 3.64E-05 | 0.92 | 3.99  | -     | 845.3    |
| AHQ-2-10, 5970              | R.NWMSQLQANAYCENPDIVLIGNK.A                                             | 2680.99772 | 2 | 3.05E-06 | 0.85 | 3.51  | -     | 602.4    |
| AHQ-2-11, 3469              | K.VHLQLWDTAQGER.F                                                       | 1553.70390 | 2 | 4.10E-12 | 0.96 | 4.21  | -     | 1307.6   |
| AHQ-2-10, 3255              | K.VHLQLWDTAQGER.F                                                       | 1553.70390 | 2 | 8.92E-11 | 0.95 | 4.24  | -     | 1194.8   |
| AHQ-2-10, 4186 - 4263       | K.YGIPYFETSAATGQNVK.A                                                   | 1976.13177 | 2 | 4.62E-09 | 0.94 | 4.21  | -     | 895.6    |
| AHQ-2-11, 4329 - 4396       | K.YGIPYFETSAATGQNVK.A                                                   | 1976.13177 | 2 | 4.23E-08 | 0.97 | 4.65  | -     | 1506.0   |
| AHQ-2-10, 4326 - 4391       | K.YGIPYFETSAATGQNVK.A                                                   | 1976.13177 | 2 | 3.53E-07 | 0.69 | 3.60  | -     | 540.3    |
| gi 4758086 ref NP_004069.1  | cysteine and glycine-rich protein 1; cysteine-rich protein; LIM-domain  |            |   | 4.34E-12 | 6.01 | 70.26 | 46.10 | 20567.3  |
| AHQ-2-11, 4173              | K.GFGFGGQAGALVHSE                                                       | 1434.53788 | 2 | 2.21E-06 | 0.91 | 3.12  | -     | 1118.0   |
| AHQ-2-13, 4228 - 4237       | K.GFGFGGQAGALVHSE                                                       | 1434.53788 | 2 | 4.82E-07 | 0.95 | 4.17  | -     | 1187.8   |
| AHQ-2-13-, 4279             | K.GFGFGGQAGALVHSE                                                       | 1434.53788 | 2 | 2.33E-05 | 0.94 | 3.67  | -     | 1235.8   |
| AHQ-2-11, 4060 - 4086       | K.GFGFGGQAGALVHSE                                                       | 1434.53788 | 2 | 6.83E-05 | 0.93 | 3.87  | -     | 934.3    |
| AHQ-2-11, 3209 - 3217       | K.GLESTTLADKDGIEYCK.G                                                   | 1902.06957 | 3 | 5.53E-06 | 0.85 | 3.92  | -     | 773.0    |
| AHQ-2-12, 3279              | K.GLESTTLADKDGIEYCK.G                                                   | 1902.06957 | 2 | 9.15E-06 | 0.96 | 5.23  | -     | 877.7    |
| AHQ-2-13, 3371              | K.GLESTTLADKDGIEYCK.G                                                   | 1902.06957 | 2 | 4.36E-10 | 0.95 | 4.66  | -     | 1151.8   |
| AHQ-2-13-, 3369             | K.GLESTTLADKDGIEYCK.G                                                   | 1902.06957 | 2 | 2.13E-08 | 0.95 | 4.75  | -     | 1042.0   |
| AHQ-2-11, 3160 - 3220       | K.GLESTTLADKDGIEYCK.G                                                   | 1902.06957 | 2 | 7.15E-09 | 0.94 | 4.96  | -     | 882.5    |
| AHQ-2-11, 2477              | K.GYGYGGGAGTLSTDK.G                                                     | 1475.54194 | 2 | 1.96E-04 | 0.87 | 3.40  | -     | 766.1    |
| AHQ-2-12, 3519              | K.GYGYGGGAGTLSTDKGESLGIK.H                                              | 2160.32665 | 3 | 1.40E-08 | 0.88 | 4.07  | -     | 596.4    |
| AHQ-2-12, 3521              | K.GYGYGGGAGTLSTDKGESLGIK.H                                              | 2160.32665 | 2 | 4.68E-09 | 0.94 | 4.78  | -     | 958.7    |
| AHQ-2-13-, 3698             | K.GYGYGGGAGTLSTDKGESLGIK.H                                              | 2160.32665 | 2 | 4.34E-12 | 0.87 | 4.63  | -     | 462.8    |
| AHQ-2-11, 3409 - 3474       | K.GYGYGGGAGTLSTDKGESLGIK.H                                              | 2160.32665 | 2 | 2.55E-06 | 0.85 | 4.02  | -     | 564.3    |
| AHQ-2-13, 3640              | K.GYGYGGGAGTLSTDKGESLGIK.H                                              | 2160.32665 | 2 | 4.93E-06 | 0.90 | 3.84  | -     | 806.4    |
| AHQ-2-10, 3276              | K.GYGYGGGAGTLSTDKGESLGIK.H                                              | 2160.32665 | 2 | 1.53E-08 | 0.66 | 3.30  | -     | 324.6    |
| AHQ-2-11, 2922              | K.KNLDSTTAVVHGEEIYCK.S                                                  | 2066.27805 | 2 | 5.70E-04 | 0.56 | 2.51  | -     | 313.8    |
| AHQ-2-11, 3380 - 3457       | K.KNLDSTTAVVHGEEIYCK.S                                                  | 1938.10514 | 2 | 5.17E-10 | 0.96 | 5.13  | -     | 1106.1   |
| AHQ-2-11, 3882              | K.TVYFAEEVQCEGNSFHK.S                                                   | 2047.19015 | 2 | 1.24E-04 | 0.84 | 3.63  | -     | 551.0    |
| gi 4506413 ref NP_002875.1  | RAP1A, member of RAS oncogene family; RAS-related protein RAP1A [Homo s |            |   | 4.87E-12 | 7.01 | 80.29 | 33.20 | 20987.1  |
| AHQ-2-11, 1854              | K.CDELEDER.V                                                            | 937.95183  | 2 | 3.97E-04 | 0.76 | 2.67  | -     | 729.5    |
| AHQ-2-11, 2408 - 2412       | K.CDELEDERVVGK.E                                                        | 1321.43945 | 2 | 8.40E-05 | 0.89 | 3.45  | -     | 1124.7   |
| AHQ-2-10, 6578              | K.INVNEIFYDLVR.Q                                                        | 1495.70427 | 2 | 1.04E-08 | 0.94 | 4.28  | -     | 1018.8   |
| AHQ-2-14-, 6767 - 6839      | K.INVNEIFYDLVR.Q                                                        | 1495.70427 | 2 | 1.07E-09 | 0.95 | 5.21  | -     | 1019.5   |
| AHQ-2-11, 6566 - 6648       | K.INVNEIFYDLVR.Q                                                        | 1495.70427 | 2 | 1.17E-09 | 0.96 | 5.04  | -     | 1278.6   |
| AHQ-2-14-, 6771             | K.INVNEIFYDLVR.Q                                                        | 1495.70427 | 1 | 4.21E-06 | 0.23 | 2.69  | -     | 209.9    |
| AHQ-2-14-, 6637             | K.INVNEIFYDLVR.Q                                                        | 1495.70427 | 2 | 2.73E-08 | 0.95 | 4.50  | -     | 1338.8   |
| AHQ-2-11, 6576 - 6640       | K.INVNEIFYDLVR.Q                                                        | 1495.70427 | 1 | 2.65E-06 | 0.30 | 3.14  | -     | 218.2    |
| AHQ-2-13-, 6919             | K.INVNEIFYDLVR.Q                                                        | 1495.70427 | 1 | 8.60E-07 | 0.08 | 1.85  | -     | 78.7     |
| AHQ-2-13-, 6918             | K.INVNEIFYDLVR.Q                                                        | 1495.70427 | 2 | 4.93E-08 | 0.94 | 4.83  | -     | 894.9    |
| AHQ-2-13, 6700 - 6701       | K.INVNEIFYDLVR.Q                                                        | 1495.70427 | 2 | 2.12E-07 | 0.95 | 4.92  | -     | 1061.7   |
| AHQ-2-11, 6010              | K.INVNEIFYDLVR.Q                                                        | 1495.70427 | 1 | 2.46E-04 | 0.41 | 2.69  | -     | 270.0    |
| AHQ-2-11, 5686 - 5748       | K.INVNEIFYDLVR.Q                                                        | 1495.70427 | 2 | 2.40E-06 | 0.92 | 3.99  | -     | 1095.0   |
| AHQ-2-11, 5692              | K.INVNEIFYDLVR.Q                                                        | 1495.70427 | 1 | 1.10E-04 | 0.07 | 1.96  | -     | 127.6    |
| AHQ-2-11, 6685 - 6749       | K.INVNEIFYDLVR.Q                                                        | 1495.70427 | 2 | 3.52E-08 | 0.94 | 4.65  | -     | 1065.7   |
| AHQ-2-11, 6584 - 6636       | K.INVNEIFYDLVR.Q                                                        | 1495.70427 | 1 | 3.15E-04 | 0.18 | 3.10  | -     | 141.7    |
| AHQ-2-11, 6004              | K.INVNEIFYDLVR.Q                                                        | 1495.70427 | 2 | 1.78E-07 | 0.95 | 5.13  | -     | 829.1    |
| AHQ-2-11, 6425              | K.INVNEIFYDLVR.Q                                                        | 1495.70427 | 2 | 1.43E-08 | 0.94 | 4.20  | -     | 1346.9   |
| AHQ-2-10, 2494              | K.LVLVLSGGVVGK.S                                                        | 986.19059  | 2 | 1.34E-05 | 0.80 | 3.18  | -     | 752.1    |
| AHQ-2-11, 2573 - 2624       | K.LVLVLSGGVVGK.S                                                        | 986.19059  | 2 | 2.12E-08 | 0.92 | 3.68  | -     | 1009.7   |
| AHQ-2-13, 2827              | K.LVLVLSGGVVGK.S                                                        | 986.19059  | 2 | 2.73E-04 | 0.92 | 3.27  | -     | 1230.5   |
| AHQ-2-10, 2479              | K.LVLVLSGGVVGK.S                                                        | 986.19059  | 1 | 5.15E-05 | 0.81 | 3.01  | -     | 541.1    |

|                              |                                                                         |            |   |          |       |        |       |          |
|------------------------------|-------------------------------------------------------------------------|------------|---|----------|-------|--------|-------|----------|
| AHQ-2-11, 6202 - 6268        | K.SALTVQFVQGFIFVEK.Y                                                    | 1666.94196 | 2 | 8.00E-05 | 0.97  | 5.31   | -     | 1630.4   |
| AHQ-2-11, 6464 - 6525        | K.SALTVQFVQGFIFVEK.Y                                                    | 1666.94196 | 2 | 5.04E-05 | 0.94  | 3.85   | -     | 1450.9   |
| AHQ-2-11, 6529 - 6594        | K.SALTVQFVQGFIFVEK.Y                                                    | 1666.94196 | 2 | 1.42E-04 | 0.97  | 5.45   | -     | 1690.4   |
| AHQ-2-11, 6148 - 6208        | K.SALTVQFVQGFIFVEK.Y                                                    | 1666.94196 | 2 | 6.30E-06 | 0.97  | 4.86   | -     | 2070.1   |
| AHQ-2-11, 6328 - 6404        | K.SALTVQFVQGFIFVEK.Y                                                    | 1666.94196 | 2 | 6.16E-06 | 0.97  | 5.71   | -     | 1851.3   |
| AHQ-2-11, 5664               | K.SALTVQFVQGFIFVEK.Y                                                    | 1666.94196 | 2 | 1.85E-06 | 0.85  | 3.43   | -     | 730.7    |
| AHQ-2-11, 6654 - 6712        | K.SALTVQFVQGFIFVEK.Y                                                    | 1666.94196 | 2 | 6.11E-04 | 0.95  | 4.81   | -     | 1303.6   |
| AHQ-2-11, 6874 - 6949        | K.SALTVQFVQGFIFVEK.Y                                                    | 1666.94196 | 2 | 1.47E-04 | 0.96  | 4.68   | -     | 1737.4   |
| AHQ-2-11, 5698               | K.SKINNVNEIFYDLVR.Q                                                     | 1710.95483 | 2 | 5.58E-08 | 0.93  | 4.05   | -     | 1128.2   |
| AHQ-2-11, 5917 - 5918        | K.SKINNVNEIFYDLVR.Q                                                     | 1710.95483 | 2 | 7.91E-12 | 0.96  | 4.66   | -     | 1281.0   |
| AHQ-2-11, 6132 - 6206        | K.SKINNVNEIFYDLVR.Q                                                     | 1710.95483 | 2 | 5.18E-09 | 0.91  | 4.03   | -     | 831.2    |
| AHQ-2-11, 5240 - 5265        | K.SKINNVNEIFYDLVR.Q                                                     | 1710.95483 | 2 | 1.25E-07 | 0.86  | 3.47   | -     | 697.1    |
| AHQ-2-14-, 6193 - 6212       | K.SKINNVNEIFYDLVR.Q                                                     | 1710.95483 | 3 | 4.64E-04 | 0.83  | 3.88   | -     | 958.0    |
| AHQ-2-11, 5082 - 5084        | K.SKINNVNEIFYDLVR.Q                                                     | 1710.95483 | 2 | 1.40E-09 | 0.89  | 4.17   | -     | 636.6    |
| AHQ-2-14-, 6191              | K.SKINNVNEIFYDLVR.Q                                                     | 1710.95483 | 2 | 4.87E-12 | 0.96  | 4.86   | -     | 1175.2   |
| AHQ-2-13-, 2818 - 2821       | K.YDPTIEDSYR.K                                                          | 1259.30338 | 2 | 6.30E-07 | 0.85  | 3.19   | -     | 350.8    |
| AHQ-2-11, 2677 - 2745        | K.YDPTIEDSYR.K                                                          | 1259.30338 | 2 | 1.41E-05 | 0.85  | 2.73   | -     | 459.0    |
| AHQ-2-11, 2532               | K.YDPTIEDSYR.K                                                          | 1259.30338 | 2 | 9.88E-07 | 0.87  | 2.89   | -     | 542.4    |
| AHQ-2-13, 2875               | K.YDPTIEDSYR.K                                                          | 1259.30338 | 2 | 1.52E-04 | 0.77  | 2.66   | -     | 417.3    |
| AHQ-2-11, 2301 - 2330        | K.YDPTIEDSYR.K                                                          | 1387.47629 | 2 | 1.88E-06 | 0.82  | 3.04   | -     | 444.6    |
| gj17986273[ref][NP_524144.1] | fast skeletal myosin alkali light chain 1 isoform 1f; A1 catalytic; A2  |            |   | 5.26E-12 | 0.96  | 10.23  | 8.20  | 21145.0  |
| AHQ-2-13, 3356               | R.VFDKEGNGTVMGAELR.H                                                    | 1723.93228 | 2 | 6.35E-09 | 0.93  | 3.78   | -     | 1063.0   |
| AHQ-2-13-, 3345 - 3353       | R.VFDKEGNGTVMGAELR.H                                                    | 1723.93228 | 2 | 5.26E-12 | 0.96  | 4.59   | -     | 1274.8   |
| AHQ-2-12, 3305 - 3374        | R.VFDKEGNGTVMGAELR.H                                                    | 1723.93228 | 2 | 5.24E-06 | 0.93  | 3.84   | -     | 1127.6   |
| gj5031855[ref][NP_005556.1]  | lymphocyte cytosolic protein 2; SH2 domain-containing leukocyte protein |            |   | 5.41E-12 | 2.84  | 30.28  | 8.30  | 60187.8  |
| AHQ-2-12, 4154               | K.ESQVYLLGTGLR.G                                                        | 1336.51879 | 2 | 2.64E-05 | 0.90  | 3.69   | -     | 1293.3   |
| AHQ-2-14-, 6823              | R.GKEDFLVSDIIDYFR.K                                                     | 1905.09669 | 2 | 5.41E-12 | 0.98  | 5.64   | -     | 2364.7   |
| AHQ-2-10, 6580               | R.SEVLGWDPDSLADYFK.K                                                    | 1842.98222 | 2 | 3.16E-07 | 0.95  | 4.44   | -     | 1011.8   |
| gj4504349[ref][NP_000509.1]  | beta globin [Homo sapiens]                                              |            |   | 6.03E-12 | 9.86  | 110.28 | 67.30 | 15998.3  |
| AHQ-2-14-, 5640              | R.FFESFGDLSTPDAVMGNPK.V                                                 | 2060.27218 | 2 | 1.94E-06 | 0.94  | 4.51   | -     | 880.3    |
| AHQ-2-13-, 5823              | R.FFESFGDLSTPDAVMGNPK.V                                                 | 2060.27218 | 2 | 2.92E-05 | 0.77  | 2.93   | -     | 824.1    |
| AHQ-2-13-, 5639 - 5665       | R.FFESFGDLSTPDAVMGNPK.V                                                 | 2060.27218 | 2 | 3.85E-06 | 0.95  | 4.81   | -     | 953.3    |
| AHQ-2-13-, 5125              | R.FFESFGDLSTPDAVMGNPK.V                                                 | 2076.27158 | 2 | 1.97E-07 | 0.85  | 4.06   | -     | 404.7    |
| AHQ-2-14-, 5055              | R.FFESFGDLSTPDAVMGNPK.V                                                 | 2076.27158 | 2 | 7.15E-09 | 0.89  | 4.00   | -     | 706.0    |
| AHQ-2-14, 6153 - 6232        | R.FFESFGDLSTPDAVMGNPK.V                                                 | 2076.27158 | 2 | 8.14E-04 | 0.70  | 3.47   | -     | 451.3    |
| AHQ-2-13, 4960 - 5035        | R.FFESFGDLSTPDAVMGNPK.V                                                 | 2076.27158 | 2 | 5.75E-06 | 0.90  | 4.27   | -     | 539.0    |
| AHQ-2-13, 5536 - 5599        | R.FFESFGDLSTPDAVMGNPK.V                                                 | 2060.27218 | 2 | 1.83E-05 | 0.89  | 4.07   | -     | 711.7    |
| AHQ-2-13, 5380               | R.FFESFGDLSTPDAVMGNPK.V                                                 | 2060.27218 | 2 | 1.47E-05 | 0.88  | 3.87   | -     | 728.2    |
| AHQ-2-13, 5043               | R.FFESFGDLSTPDAVMGNPK.V                                                 | 2076.27158 | 3 | 3.38E-07 | 0.95  | 4.75   | -     | 1501.2   |
| AHQ-2-13, 3509               | K.GTFATISELHCDK.L                                                       | 1480.62492 | 2 | 7.47E-08 | 0.72  | 3.25   | -     | 338.4    |
| AHQ-2-13-, 3505              | K.GTFATISELHCDK.L                                                       | 1480.62492 | 2 | 1.12E-05 | 0.82  | 3.73   | -     | 515.3    |
| AHQ-2-13, 5001               | K.GTFATISELHCDKLVDPENFR.L                                               | 2588.83687 | 3 | 2.58E-09 | 0.93  | 4.69   | -     | 942.3    |
| AHQ-2-13, 5011               | K.GTFATISELHCDKLVDPENFR.L                                               | 2588.83687 | 2 | 1.98E-05 | 0.90  | 4.13   | -     | 414.9    |
| AHQ-2-13-, 5055 - 5121       | K.GTFATISELHCDKLVDPENFR.L                                               | 2588.83687 | 3 | 5.44E-09 | 0.89  | 3.86   | -     | 1099.2   |
| AHQ-2-13-, 5119              | K.GTFATISELHCDKLVDPENFR.L                                               | 2588.83687 | 2 | 8.58E-09 | 0.89  | 3.82   | -     | 636.6    |
| AHQ-2-13-, 4867              | K.KVLGAFSDGLAHLNLIK.G                                                   | 1799.06362 | 3 | 6.15E-09 | 0.97  | 5.62   | -     | 1570.5   |
| AHQ-2-13-, 2758              | K.LHVDPENFR.L                                                           | 1127.23455 | 2 | 3.44E-04 | 0.78  | 2.50   | -     | 931.8    |
| AHQ-2-13, 6459               | R.LLGNVLVCLLAHFFGK.E                                                    | 1779.14197 | 3 | 6.12E-08 | 0.84  | 3.80   | -     | 529.4    |
| AHQ-2-13, 3441               | K.SAVTALWGK.V                                                           | 933.08624  | 2 | 5.41E-04 | 0.92  | 2.65   | -     | 1251.6   |
| AHQ-2-14, 6349               | K.VLGFASDGLAHLNLIK.G                                                    | 1670.89071 | 2 | 9.82E-05 | 0.92  | 3.88   | -     | 1228.5   |
| AHQ-2-13, 5069 - 5131        | K.VLGFASDGLAHLNLIK.G                                                    | 1670.89071 | 2 | 2.58E-10 | 0.96  | 5.17   | -     | 1269.0   |
| AHQ-2-13-, 4973 - 5041       | K.VLGFASDGLAHLNLIK.G                                                    | 1670.89071 | 2 | 1.60E-08 | 0.95  | 4.66   | -     | 1186.9   |
| AHQ-2-13-, 5042              | K.VLGFASDGLAHLNLIK.G                                                    | 1670.89071 | 3 | 1.74E-09 | 0.87  | 3.53   | -     | 768.0    |
| AHQ-2-13, 4907 - 4931        | K.VLGFASDGLAHLNLIK.G                                                    | 1670.89071 | 2 | 7.73E-07 | 0.96  | 5.30   | -     | 1227.4   |
| AHQ-2-13, 5105 - 5107        | K.VLGFASDGLAHLNLIK.G                                                    | 1670.89071 | 3 | 8.37E-08 | 0.87  | 3.79   | -     | 702.2    |
| AHQ-2-13-, 5217              | K.VLGFASDGLAHLNLIK.G                                                    | 1670.89071 | 3 | 4.45E-07 | 0.84  | 3.13   | -     | 603.2    |
| AHQ-2-13-, 5209 - 5277       | K.VLGFASDGLAHLNLIK.G                                                    | 1670.89071 | 2 | 6.03E-12 | 0.96  | 5.53   | -     | 1422.4   |
| AHQ-2-13-, 3238 - 3269       | K.VNVDEVGGEALGR.L                                                       | 1315.41484 | 1 | 4.98E-06 | 0.65  | 2.95   | -     | 333.9    |
| AHQ-2-13, 3287               | K.VNVDEVGGEALGR.L                                                       | 1315.41484 | 1 | 9.63E-05 | 0.78  | 3.33   | -     | 439.7    |
| AHQ-2-13, 3281 - 3284        | K.VNVDEVGGEALGR.L                                                       | 1315.41484 | 2 | 4.38E-06 | 0.96  | 4.57   | -     | 1601.6   |
| AHQ-2-14-, 3243 - 3245       | K.VNVDEVGGEALGR.L                                                       | 1315.41484 | 2 | 8.18E-07 | 0.97  | 4.58   | -     | 2112.5   |
| AHQ-2-13-, 3265 - 3266       | K.VNVDEVGGEALGR.L                                                       | 1315.41484 | 2 | 1.87E-04 | 0.96  | 4.38   | -     | 1459.3   |
| AHQ-2-13-, 2662              | K.VVAGVANALAHK.Y                                                        | 1150.35593 | 2 | 2.17E-09 | 0.96  | 3.95   | -     | 1649.5   |
| AHQ-2-13, 2271               | K.VVAGVANALAHK.Y                                                        | 1150.35593 | 2 | 1.33E-04 | 0.86  | 2.96   | -     | 961.7    |
| gj4507877[ref][NP_003364.1]  | vinculin isoform VCL [Homo sapiens]                                     |            |   | 6.61E-12 | 53.03 | 630.31 | 49.80 | 116721.6 |
| AHQ-2-10, 3296 - 3306        | K.AGEVINQPMMAAR.Q                                                       | 1519.83932 | 2 | 5.22E-04 | 0.91  | 4.02   | -     | 819.1    |
| AHQ-2-4, 3693                | K.AGEVINQPMMAAR.Q                                                       | 1519.83932 | 2 | 1.25E-06 | 0.95  | 4.66   | -     | 1089.0   |
| AHQ-2-12, 7213               | K.AIPDLTAPVAAVQAAVSNLVR.V                                               | 2077.41342 | 2 | 1.11E-08 | 0.95  | 4.37   | -     | 988.2    |
| AHQ-2-11, 6777 - 6856        | K.AIPDLTAPVAAVQAAVSNLVR.V                                               | 2077.41342 | 2 | 1.52E-11 | 0.97  | 4.96   | -     | 1260.6   |
| AHQ-2-10, 6819 - 6822        | K.AIPDLTAPVAAVQAAVSNLVR.V                                               | 2077.41342 | 2 | 1.34E-06 | 0.97  | 5.74   | -     | 1308.0   |
| AHQ-2-13, 6877               | K.AIPDLTAPVAAVQAAVSNLVR.V                                               | 2077.41342 | 2 | 3.84E-08 | 0.97  | 5.52   | -     | 1266.8   |
| AHQ-2-13-, 7073              | K.AIPDLTAPVAAVQAAVSNLVR.V                                               | 2077.41342 | 2 | 4.52E-06 | 0.96  | 5.22   | -     | 864.8    |
| AHQ-2-1, 7314                | K.AIPDLTAPVAAVQAAVSNLVR.V                                               | 2077.41342 | 2 | 2.90E-08 | 0.96  | 4.51   | -     | 1101.5   |
| AHQ-2-9, 7498 - 7503         | K.AIPDLTAPVAAVQAAVSNLVR.V                                               | 2077.41342 | 2 | 2.46E-07 | 0.97  | 5.11   | -     | 1216.8   |
| AHQ-2-8, 7467 - 7468         | K.AIPDLTAPVAAVQAAVSNLVR.V                                               | 2077.41342 | 2 | 4.48E-05 | 0.97  | 5.68   | -     | 1126.0   |
| AHQ-2-7, 7544 - 7559         | K.AIPDLTAPVAAVQAAVSNLVR.V                                               | 2077.41342 | 2 | 1.06E-07 | 0.93  | 4.35   | -     | 741.2    |
| AHQ-2-3, 7609 - 7689         | K.AIPDLTAPVAAVQAAVSNLVR.V                                               | 2077.41342 | 2 | 3.54E-09 | 0.96  | 5.23   | -     | 1006.8   |
| AHQ-2-6, 7227 - 7306         | K.AIPDLTAPVAAVQAAVSNLVR.V                                               | 2077.41342 | 2 | 3.54E-11 | 0.97  | 4.99   | -     | 1446.5   |
| AHQ-2-4, 7512 - 7589         | K.AIPDLTAPVAAVQAAVSNLVR.V                                               | 2077.41342 | 2 | 6.16E-06 | 0.87  | 3.77   | -     | 679.2    |
| AHQ-2-5, 7639                | K.AIPDLTAPVAAVQAAVSNLVR.V                                               | 2077.41342 | 2 | 2.53E-09 | 0.88  | 3.64   | -     | 744.8    |
| AHQ-2-5, 7548                | K.AIPDLTAPVAAVQAAVSNLVR.V                                               | 2077.41342 | 2 | 6.61E-12 | 0.97  | 5.44   | -     | 1261.9   |
| AHQ-2-4, 7662                | K.AIPDLTAPVAAVQAAVSNLVR.V                                               | 2077.41342 | 2 | 2.97E-06 | 0.97  | 5.05   | -     | 1183.5   |
| AHQ-2-14-, 6925 - 6927       | K.AIPDLTAPVAAVQAAVSNLVR.V                                               | 2077.41342 | 2 | 8.35E-10 | 0.98  | 5.88   | -     | 1275.4   |
| AHQ-2-7, 2965 - 2973         | R.ALASQLQDSLK.D                                                         | 1174.32943 | 2 | 7.45E-04 | 0.83  | 2.91   | -     | 839.3    |
| AHQ-2-6, 3037                | R.ALASQLQDSLK.D                                                         | 1174.32943 | 2 | 2.05E-04 | 0.84  | 3.09   | -     | 844.2    |
| AHQ-2-5, 3035 - 3047         | R.ALASQLQDSLK.D                                                         | 1174.32943 | 2 | 8.83E-05 | 0.95  | 3.78   | -     | 1436.9   |
| AHQ-2-4, 3289 - 3361         | R.ALASQLQDSLK.D                                                         | 1174.32943 | 2 | 5.12E-04 | 0.88  | 3.22   | -     | 952.3    |
| AHQ-2-4, 3801                | K.AQVVSQGLDLVTAK.V                                                      | 1458.64233 | 1 | 7.34E-06 | 0.71  | 2.94   | -     | 591.6    |
| AHQ-2-6, 3281                | K.AQVVSQGLDLVTAK.V                                                      | 1458.64233 | 1 | 1.83E-05 | 0.64  | 3.76   | -     | 294.8    |
| AHQ-2-6, 3203 - 3269         | K.AQVVSQGLDLVTAK.V                                                      | 1458.64233 | 2 | 2.22E-08 | 0.96  | 4.26   | -     | 1570.9   |
| AHQ-2-1, 3760                | K.AQVVSQGLDLVTAK.V                                                      | 1458.64233 | 2 | 4.59E-05 | 0.94  | 3.91   | -     | 1064.8   |
| AHQ-2-3, 3513 - 3593         | K.AQVVSQGLDLVTAK.V                                                      | 1458.64233 | 2 | 5.15E-04 | 0.95  | 3.77   | -     | 1533.1   |
| AHQ-2-4, 3561                | K.AQVVSQGLDLVTAK.V                                                      | 1458.64233 | 1 | 5.49E-04 | 0.63  | 3.25   | -     | 397.6    |
| AHQ-2-4, 3513 - 3585         | K.AQVVSQGLDLVTAK.V                                                      | 1458.64233 | 2 | 2.25E-09 | 0.96  | 4.71   | -     | 1431.4   |
| AHQ-2-7, 3183 - 3195         | K.AQVVSQGLDLVTAK.V                                                      | 1458.64233 | 2 | 2.14E-10 | 0.97  | 4.71   | -     | 1478.7   |
| AHQ-2-8, 3008                | K.AQVVSQGLDLVTAK.V                                                      | 1458.64233 | 2 | 7.37E-11 | 0.96  | 4.41   | -     | 1307.5   |
| AHQ-2-9, 3224                | K.AQVVSQGLDLVTAK.V                                                      | 1458.64233 | 2 | 7.05E-05 | 0.84  | 3.24   | -     | 790.2    |
| AHQ-2-2, 3556 - 3624         | K.AQVVSQGLDLVTAK.V                                                      | 1458.64233 | 2 | 6.39E-04 | 0.95  | 4.45   | -     | 1205.4   |
| AHQ-2-5, 3280                | K.AQVVSQGLDLVTAK.V                                                      | 1458.64233 | 1 | 4.29E-04 | 0.28  | 2.67   | -     | 256.0    |
| AHQ-2-7, 2211                | K.AVAGNISDPGLQK.S                                                       | 1270.41721 | 2 | 2.94E-05 | 0.87  | 3.45   | -     | 682.1    |
| AHQ-2-5, 2251                | K.AVAGNISDPGLQK.S                                                       | 1270.41721 | 2 | 6.60E-07 | 0.90  | 3.55   | -     | 774.0    |
| AHQ-2-6, 2255                | K.AVAGNISDPGLQK.S                                                       | 1270.41721 | 2 | 8.62E-07 | 0.87  | 3.66   | -     | 713.3    |
| AHQ-2-3, 2424                | K.AVAGNISDPGLQK.S                                                       | 1270.41721 | 2 | 3.57E-05 | 0.82  | 3.37   | -     | 643.8    |
| AHQ-2-5, 2259                | K.AVAGNISDPGLQK.S                                                       | 1270.41721 | 1 | 4.19E-05 | 0.53  | 3.20   | -     | 305.8    |
| AHQ-2-4, 2529                | K.AVAGNISDPGLQK.S                                                       | 1270.41721 | 2 | 8.83E-04 | 0.82  | 3.47   | -     | 589.0    |
| AHQ-2-4, 2416                | K.AVAGNISDPGLQK.S                                                       | 1270.41721 | 2 | 3.74E-05 | 0.90  | 3.61   | -     | 812.8    |
| AHQ-2-8, 2135                | K.AVAGNISDPGLQK.S                                                       | 1270.41721 | 2 | 2.28E-04 | 0.86  | 3.30   | -     | 716.4    |



|                       |                                       |            |   |          |      |      |   |        |
|-----------------------|---------------------------------------|------------|---|----------|------|------|---|--------|
| AHQ-2-6, 2261         | K.AVAGNISDPGLQK.S                     | 1270.41721 | 1 | 5.34E-06 | 0.68 | 2.81 | - | 435.1  |
| AHQ-2-3, 6197         | K.CDRVDQLTAQLADLAAR.G                 | 1918.12182 | 2 | 6.85E-05 | 0.92 | 3.69 | - | 1129.7 |
| AHQ-2-4, 6201 - 6272  | K.CDRVDQLTAQLADLAAR.G                 | 1918.12182 | 2 | 6.64E-06 | 0.92 | 4.04 | - | 937.5  |
| AHQ-2-6, 5861 - 5862  | K.CDRVDQLTAQLADLAAR.G                 | 1918.12182 | 2 | 3.33E-04 | 0.79 | 3.29 | - | 694.0  |
| AHQ-2-4, 6228         | K.CDRVDQLTAQLADLAAR.G                 | 1918.12182 | 3 | 4.77E-07 | 0.93 | 4.81 | - | 1315.5 |
| AHQ-2-1, 6166         | K.CDRVDQLTAQLADLAAR.G                 | 1918.12182 | 2 | 2.12E-06 | 0.84 | 3.50 | - | 758.2  |
| AHQ-2-4, 6448         | K.CDRVDQLTAQLADLAAR.G                 | 1918.12182 | 2 | 6.06E-05 | 0.76 | 3.05 | - | 719.9  |
| AHQ-2-6, 5874 - 5882  | K.CDRVDQLTAQLADLAAR.G                 | 1918.12182 | 3 | 2.05E-05 | 0.88 | 4.50 | - | 988.8  |
| AHQ-2-5, 5991         | K.CDRVDQLTAQLADLAAR.G                 | 1918.12182 | 3 | 1.82E-07 | 0.92 | 4.31 | - | 1425.1 |
| AHQ-2-1, 6169         | K.CDRVDQLTAQLADLAAR.G                 | 1918.12182 | 3 | 5.89E-05 | 0.91 | 4.64 | - | 1016.1 |
| AHQ-2-4, 2233 - 2309  | R.DPSASPGDAGEQAIR.Q                   | 1471.51169 | 2 | 7.68E-08 | 0.94 | 4.48 | - | 756.7  |
| AHQ-2-7, 2187         | R.DPSASPGDAGEQAIR.Q                   | 1471.51169 | 2 | 3.08E-06 | 0.90 | 3.76 | - | 682.2  |
| AHQ-2-5, 2195 - 2209  | R.DPSASPGDAGEQAIR.Q                   | 1471.51169 | 2 | 4.41E-09 | 0.94 | 4.22 | - | 942.2  |
| AHQ-2-1, 2416 - 2426  | R.DPSASPGDAGEQAIR.Q                   | 1471.51169 | 2 | 4.28E-07 | 0.88 | 3.55 | - | 720.7  |
| AHQ-2-3, 2328         | R.DPSASPGDAGEQAIR.Q                   | 1471.51169 | 2 | 1.10E-08 | 0.92 | 3.65 | - | 861.9  |
| AHQ-2-6, 2185         | R.DPSASPGDAGEQAIR.Q                   | 1471.51169 | 2 | 6.89E-07 | 0.93 | 4.55 | - | 650.3  |
| AHQ-2-4, 2316 - 2320  | R.DPSASPGDAGEQAIR.Q                   | 1471.51169 | 2 | 2.66E-08 | 0.91 | 3.24 | - | 895.1  |
| AHQ-2-5, 4504         | K.ELLPVLISAM*K.I                      | 1230.54265 | 2 | 3.32E-04 | 0.89 | 3.31 | - | 916.4  |
| AHQ-2-4, 6068 - 6085  | K.ELLPVLISAM.K.I                      | 1214.54325 | 2 | 1.73E-04 | 0.81 | 3.09 | - | 601.4  |
| AHQ-2-4, 4833         | K.ELLPVLISAM*K.I                      | 1230.54265 | 2 | 1.59E-06 | 0.86 | 3.40 | - | 847.3  |
| AHQ-2-5, 5695         | K.ELLPVLISAM.K.I                      | 1214.54325 | 2 | 5.53E-05 | 0.82 | 3.27 | - | 601.5  |
| AHQ-2-10, 2466        | R.ELTPQVVSAAR.I                       | 1171.32878 | 2 | 4.77E-04 | 0.87 | 2.57 | - | 1099.1 |
| AHQ-2-11, 2960        | K.ETVQTTEDQILK.R                      | 1405.53306 | 2 | 3.47E-05 | 0.71 | 3.43 | - | 403.5  |
| AHQ-2-5, 2875         | K.ETVQTTEDQILK.R                      | 1405.53306 | 1 | 1.80E-04 | 0.13 | 2.44 | - | 145.4  |
| AHQ-2-4, 2916         | K.ETVQTTEDQILK.R.D                    | 1561.71942 | 2 | 2.83E-05 | 0.67 | 2.74 | - | 601.3  |
| AHQ-2-11, 2797 - 2874 | K.ETVQTTEDQILK.R.D                    | 1561.71942 | 2 | 2.25E-04 | 0.54 | 3.03 | - | 373.3  |
| AHQ-2-7, 2624         | K.ETVQTTEDQILK.R.D                    | 1561.71942 | 2 | 2.95E-04 | 0.62 | 2.84 | - | 544.1  |
| AHQ-2-5, 2660         | K.ETVQTTEDQILK.R.D                    | 1561.71942 | 2 | 3.81E-04 | 0.71 | 2.64 | - | 673.4  |
| AHQ-2-3, 2936         | K.ETVQTTEDQILK.R.D                    | 1561.71942 | 2 | 9.10E-08 | 0.66 | 2.74 | - | 632.4  |
| AHQ-2-4, 7749 - 7769  | R.GILSGTSDLLLTFDEAEVR.K               | 2037.25656 | 2 | 5.67E-05 | 0.80 | 3.96 | - | 460.1  |
| AHQ-2-5, 7297 - 7365  | R.GILSGTSDLLLTFDEAEVR.K               | 2037.25656 | 2 | 7.88E-07 | 0.98 | 6.26 | - | 1266.1 |
| AHQ-2-1, 7164 - 7166  | R.GILSGTSDLLLTFDEAEVR.K               | 2037.25656 | 2 | 1.16E-06 | 0.93 | 4.21 | - | 1033.0 |
| AHQ-2-11, 6676 - 6745 | R.GILSGTSDLLLTFDEAEVR.K               | 2037.25656 | 2 | 4.86E-04 | 0.89 | 3.99 | - | 881.7  |
| AHQ-2-4, 7368 - 7444  | R.GILSGTSDLLLTFDEAEVR.K               | 2037.25656 | 2 | 1.41E-09 | 0.97 | 5.64 | - | 1032.0 |
| AHQ-2-5, 6627 - 6644  | R.GILSGTSDLLLTFDEAEVR.K.I             | 2165.42947 | 2 | 6.58E-05 | 0.82 | 3.38 | - | 632.7  |
| AHQ-2-3, 6825         | R.GILSGTSDLLLTFDEAEVR.K.I             | 2165.42947 | 2 | 2.88E-05 | 0.72 | 3.44 | - | 474.9  |
| AHQ-2-4, 6874 - 6880  | R.GILSGTSDLLLTFDEAEVR.K.I             | 2165.42947 | 2 | 1.07E-07 | 0.93 | 4.11 | - | 1093.8 |
| AHQ-2-4, 1929 - 2065  | K.GNDIIAAAK.R                         | 872.98920  | 1 | 1.50E-05 | 0.39 | 2.01 | - | 472.5  |
| AHQ-2-4, 1998         | K.GNDIIAAAK.R                         | 872.98920  | 1 | 6.91E-05 | 0.23 | 1.95 | - | 486.6  |
| AHQ-2-5, 3313         | K.GWLRDPSASPGDAGEQAIR.Q               | 1984.11876 | 2 | 1.27E-04 | 0.88 | 4.15 | - | 675.5  |
| AHQ-2-4, 3572         | K.GWLRDPSASPGDAGEQAIR.Q               | 1984.11876 | 3 | 2.06E-09 | 0.93 | 4.46 | - | 1492.2 |
| AHQ-2-4, 3564 - 3580  | K.GWLRDPSASPGDAGEQAIR.Q               | 1984.11876 | 2 | 4.10E-04 | 0.86 | 4.08 | - | 652.0  |
| AHQ-2-4, 2142         | K.IAELCDDPKER.D                       | 1347.47690 | 2 | 8.77E-05 | 0.75 | 3.05 | - | 575.0  |
| AHQ-2-5, 1932         | K.IAELCDDPKER.D                       | 1347.47690 | 2 | 1.24E-04 | 0.89 | 3.26 | - | 1011.8 |
| AHQ-2-5, 3212         | K.IAELCDDPKERDILLR.S                  | 1960.15548 | 3 | 2.87E-07 | 0.90 | 3.79 | - | 1338.5 |
| AHQ-2-4, 3468         | K.IAELCDDPKERDILLR.S                  | 1960.15548 | 3 | 2.45E-04 | 0.86 | 3.10 | - | 1290.1 |
| AHQ-2-5, 3211         | K.IAELCDDPKERDILLR.S                  | 1960.15548 | 2 | 1.55E-04 | 0.65 | 3.01 | - | 543.1  |
| AHQ-2-13, 3084        | R.IPTISTQLK.I                         | 1001.20202 | 2 | 2.61E-04 | 0.68 | 2.59 | - | 636.0  |
| AHQ-2-4, 2014         | R.KIAELCDDPKER.D                      | 1475.64981 | 2 | 6.04E-06 | 0.91 | 3.06 | - | 1272.7 |
| AHQ-2-4, 3136 - 3210  | R.KIAELCDDPKERDILLR.S                 | 2088.32839 | 3 | 4.23E-04 | 0.74 | 3.24 | - | 555.4  |
| AHQ-2-4, 4512         | K.KIDAAQNWLADPNNGGPEGEQIR.G           | 2509.67332 | 2 | 1.46E-09 | 0.90 | 4.17 | - | 607.0  |
| AHQ-2-5, 4191 - 4244  | K.KIDAAQNWLADPNNGGPEGEQIR.G           | 2509.67332 | 3 | 4.03E-05 | 0.94 | 5.45 | - | 994.4  |
| AHQ-2-4, 4429 - 4444  | K.KIDAAQNWLADPNNGGPEGEQIR.G           | 2509.67332 | 2 | 5.64E-04 | 0.67 | 3.01 | - | 392.5  |
| AHQ-2-6, 4071 - 4145  | K.KIDAAQNWLADPNNGGPEGEQIR.G           | 2509.67332 | 3 | 2.14E-05 | 0.92 | 4.23 | - | 1398.5 |
| AHQ-2-5, 2544         | R.LANVM*GYPYR.Q                       | 1168.41500 | 2 | 1.76E-04 | 0.71 | 2.70 | - | 700.1  |
| AHQ-2-4, 2824         | R.LANVM*MGYPYR.Q                      | 1168.41500 | 2 | 8.54E-04 | 0.86 | 3.65 | - | 910.5  |
| AHQ-2-6, 3053         | R.LANVM*GYPYR.Q                       | 1152.41560 | 2 | 3.06E-04 | 0.90 | 3.42 | - | 950.4  |
| AHQ-2-6, 2625         | R.LANVM*MGYPYR.Q                      | 1168.41500 | 2 | 8.48E-05 | 0.87 | 3.18 | - | 1004.5 |
| AHQ-2-5, 3027         | R.LANVM*GYPYR.Q                       | 1152.41560 | 2 | 2.15E-04 | 0.90 | 3.89 | - | 695.1  |
| AHQ-2-5, 2980 - 2983  | K.LLVAATAPPDAPNRE.E                   | 1477.69048 | 2 | 8.61E-04 | 0.92 | 4.46 | - | 573.4  |
| AHQ-2-4, 4541         | K.LLVAATAPPDAPNRE.EVFER.A             | 2382.61458 | 2 | 8.76E-05 | 0.83 | 3.58 | - | 419.8  |
| AHQ-2-4, 4597 - 4668  | R.LTDELAPPKPLPEGEVPPRPPPEEKDEEFPEQK.A | 4028.46845 | 3 | 4.96E-07 | 0.82 | 3.94 | - | 651.0  |
| AHQ-2-4, 4736         | R.LTDELAPPKPLPEGEVPPRPPPEEKDEEFPEQK.A | 4028.46845 | 3 | 5.65E-05 | 0.84 | 4.05 | - | 494.8  |
| AHQ-2-5, 4372 - 4385  | R.LTDELAPPKPLPEGEVPPRPPPEEKDEEFPEQK.A | 4028.46845 | 3 | 1.68E-04 | 0.79 | 4.11 | - | 542.7  |
| AHQ-2-4, 3750 - 3820  | K.LVQAAQM*LQSDPYSVPAR.D               | 1991.25773 | 2 | 1.11E-09 | 0.94 | 4.76 | - | 633.4  |
| AHQ-2-6, 3535         | K.LVQAAQM*LQSDPYSVPAR.D               | 1991.25773 | 2 | 1.91E-07 | 0.94 | 4.89 | - | 706.6  |
| AHQ-2-5, 3555         | K.LVQAAQM*LQSDPYSVPAR.D               | 1991.25773 | 2 | 8.47E-05 | 0.67 | 3.15 | - | 451.7  |
| AHQ-2-4, 4684 - 4753  | K.LVQAAQM*LQSDPYSVPAR.D               | 1991.25773 | 2 | 8.96E-07 | 0.91 | 4.37 | - | 673.4  |
| AHQ-2-4, 4706         | K.LVQAAQM*LQSDPYSVPAR.D               | 1991.25773 | 3 | 1.21E-04 | 0.80 | 3.07 | - | 1031.9 |
| AHQ-2-7, 4293 - 4303  | K.LVQAAQM*LQSDPYSVPAR.D               | 1991.25773 | 2 | 3.99E-06 | 0.84 | 4.06 | - | 601.2  |
| AHQ-2-7, 3487         | K.LVQAAQM*LQSDPYSVPAR.D               | 1991.25773 | 2 | 4.28E-04 | 0.87 | 3.61 | - | 783.3  |
| AHQ-2-12, 4202        | R.MALLMAEMSR.L                        | 1153.46531 | 2 | 1.52E-07 | 0.96 | 4.52 | - | 1772.0 |
| AHQ-2-12, 2167        | R.M*ALLM*AE*SR.L                      | 1201.46351 | 2 | 5.19E-04 | 0.87 | 2.90 | - | 878.4  |
| AHQ-2-4, 4353         | R.MALLMAEMSR.L                        | 1153.46531 | 2 | 9.43E-08 | 0.96 | 4.65 | - | 1548.0 |
| AHQ-2-6, 3947         | K.MLGQMTDQVADLR.A                     | 1478.72055 | 2 | 2.22E-07 | 0.96 | 4.95 | - | 1512.4 |
| AHQ-2-4, 3781         | K.M*LGQM*TDQVADLR.A                   | 1494.71995 | 2 | 2.02E-06 | 0.70 | 2.52 | - | 652.7  |
| AHQ-2-5, 3987         | K.M*LGQM*TDQVADLR.A                   | 1510.71935 | 2 | 9.38E-05 | 0.93 | 3.52 | - | 1519.1 |
| AHQ-2-4, 3297         | K.MLGQM*TDQVADLR.A                    | 1494.71995 | 2 | 3.45E-06 | 0.92 | 3.85 | - | 1453.4 |
| AHQ-2-4, 4233 - 4236  | K.MLGQMTDQVADLR.A                     | 1478.72055 | 2 | 4.85E-10 | 0.97 | 4.95 | - | 1638.2 |
| AHQ-2-7, 3907         | K.MLGQMTDQVADLR.A                     | 1478.72055 | 2 | 1.26E-07 | 0.90 | 2.91 | - | 1693.0 |
| AHQ-2-5, 3084         | K.MLGQM*TDQVADLR.A                    | 1494.71995 | 2 | 8.54E-07 | 0.93 | 3.86 | - | 1522.2 |
| AHQ-2-8, 3811 - 3814  | K.MLGQMTDQVADLR.A                     | 1478.72055 | 2 | 1.84E-08 | 0.97 | 4.93 | - | 1876.3 |
| AHQ-2-9, 3951         | K.MLGQMTDQVADLR.A                     | 1478.72055 | 2 | 2.67E-06 | 0.91 | 3.29 | - | 1267.0 |
| AHQ-2-4, 2865         | K.M*LGQM*TDQVADLR.A                   | 1510.71935 | 2 | 8.97E-04 | 0.96 | 3.81 | - | 1966.1 |
| AHQ-2-6, 3062         | K.MLGQM*TDQVADLR.A                    | 1494.71995 | 2 | 3.65E-04 | 0.73 | 2.87 | - | 827.7  |
| AHQ-2-4, 4253         | K.M*LGQM*TDQVADLR.A                   | 1510.71935 | 2 | 2.41E-05 | 0.94 | 3.68 | - | 1347.3 |
| AHQ-2-3, 4272         | K.MLGQMTDQVADLR.A                     | 1478.72055 | 2 | 4.15E-08 | 0.96 | 4.61 | - | 1725.6 |
| AHQ-2-5, 3979 - 3983  | K.MLGQMTDQVADLR.A                     | 1478.72055 | 2 | 1.47E-06 | 0.97 | 4.70 | - | 1911.4 |
| AHQ-2-4, 3101 - 3104  | K.M*SAEINEIR.V                        | 1192.36823 | 2 | 9.40E-06 | 0.93 | 3.59 | - | 1116.5 |
| AHQ-2-4, 3441         | K.MSAEINEIR.V                         | 1176.36883 | 2 | 1.88E-04 | 0.86 | 2.67 | - | 949.4  |
| AHQ-2-5, 3504         | K.MSAEINEIR.V                         | 1176.36883 | 2 | 1.52E-04 | 0.81 | 3.02 | - | 800.8  |
| AHQ-2-5, 2848         | K.M*TLGVDEAIDTK.S                     | 1309.46876 | 2 | 1.13E-07 | 0.96 | 3.84 | - | 1726.7 |
| AHQ-2-4, 3593 - 3594  | K.MTGLVDEAIDTK.S                      | 1293.46936 | 1 | 1.40E-04 | 0.34 | 2.19 | - | 356.0  |
| AHQ-2-4, 3086         | K.M*TLGVDEAIDTK.S                     | 1309.46876 | 2 | 3.20E-07 | 0.96 | 3.99 | - | 1535.7 |
| AHQ-2-6, 3314         | K.MTGLVDEAIDTK.S                      | 1293.46936 | 2 | 2.20E-07 | 0.97 | 4.03 | - | 1663.6 |
| AHQ-2-6, 2863         | K.M*TLGVDEAIDTK.S                     | 1309.46876 | 2 | 6.83E-06 | 0.89 | 3.05 | - | 1119.2 |
| AHQ-2-5, 4041 - 4113  | K.MTGLVDEAIDTK.S                      | 1293.46936 | 2 | 4.91E-04 | 0.80 | 2.63 | - | 942.9  |
| AHQ-2-6, 2659         | R.NPQNQAAYEHFETMK.N                   | 1737.87437 | 3 | 6.16E-07 | 0.68 | 3.05 | - | 475.9  |
| AHQ-2-6, 2646 - 2651  | R.NPQNQAAYEHFETMK.N                   | 1737.87437 | 2 | 7.19E-05 | 0.89 | 3.90 | - | 520.7  |
| AHQ-2-5, 2576         | R.NPQNQAAYEHFETMK.N                   | 1737.87437 | 2 | 1.20E-06 | 0.90 | 3.70 | - | 812.1  |
| AHQ-2-4, 2381         | R.NPQNQAAYEHFETMK.N                   | 1753.87377 | 2 | 4.21E-04 | 0.88 | 3.71 | - | 582.9  |
| AHQ-2-4, 2886         | R.NPQNQAAYEHFETMK.N                   | 1737.87437 | 2 | 2.41E-05 | 0.93 | 3.82 | - | 1043.5 |
| AHQ-2-5, 2577 - 2589  | R.NPQNQAAYEHFETMK.N                   | 1737.87437 | 3 | 1.53E-05 | 0.77 | 3.30 | - | 731.0  |
| AHQ-2-5, 2648         | K.NQWIDNVEK.M                         | 1146.23464 | 1 | 2.96E-04 | 0.62 | 2.84 | - | 273.5  |
| AHQ-2-6, 2671 - 2686  | K.NQWIDNVEK.M                         | 1146.23464 | 1 | 1.93E-06 | 0.26 | 2.22 | - | 225.9  |
| AHQ-2-4, 2720 - 2800  | K.QVATALQNLQTK.T                      | 1315.50112 | 2 | 6.63E-05 | 0.89 | 3.76 | - | 515.1  |
| AHQ-2-7, 2489 - 2505  | K.QVATALQNLQTK.T                      | 1315.50112 | 2 | 4.80E-06 | 0.85 | 3.03 | - | 657.9  |

|                            |                                                                          |            |   |          |       |        |       |          |
|----------------------------|--------------------------------------------------------------------------|------------|---|----------|-------|--------|-------|----------|
| AHQ-2-4, 3416              | R.SLGEISALTSK.L                                                          | 1106.25186 | 1 | 3.17E-09 | 0.68  | 3.35   | -     | 297.3    |
| AHQ-2-7, 3048              | R.SLGEISALTSK.L                                                          | 1106.25186 | 1 | 3.96E-06 | 0.33  | 2.49   | -     | 170.7    |
| AHQ-2-1, 3646              | R.SLGEISALTSK.L                                                          | 1106.25186 | 2 | 1.78E-04 | 0.81  | 2.68   | -     | 693.1    |
| AHQ-2-7, 3039              | R.SLGEISALTSK.L                                                          | 1106.25186 | 2 | 2.37E-04 | 0.90  | 3.41   | -     | 728.0    |
| AHQ-2-6, 3150              | R.SLGEISALTSK.L                                                          | 1106.25186 | 1 | 1.92E-06 | 0.63  | 3.02   | -     | 183.5    |
| AHQ-2-6, 3130 - 3149       | R.SLGEISALTSK.L                                                          | 1106.25186 | 2 | 3.39E-06 | 0.93  | 3.60   | -     | 929.3    |
| AHQ-2-8, 2842              | K.SLLDASEEAIK.D                                                          | 1304.47187 | 2 | 3.34E-05 | 0.80  | 2.83   | -     | 745.4    |
| AHQ-2-4, 3276 - 3281       | K.SLLDASEEAIK.D                                                          | 1304.47187 | 2 | 4.02E-05 | 0.89  | 3.13   | -     | 1017.7   |
| AHQ-2-5, 3007 - 3008       | K.SLLDASEEAIK.D                                                          | 1304.47187 | 2 | 3.33E-06 | 0.79  | 2.89   | -     | 751.0    |
| AHQ-2-4, 2244 - 2312       | K.STVEGIQASVK.T                                                          | 1119.25064 | 2 | 3.21E-06 | 0.88  | 2.86   | -     | 1065.0   |
| AHQ-2-5, 2120              | K.STVEGIQASVK.T                                                          | 1119.25064 | 1 | 2.48E-05 | 0.15  | 2.11   | -     | 103.5    |
| AHQ-2-5, 2112 - 2119       | K.STVEGIQASVK.T                                                          | 1119.25064 | 2 | 1.26E-06 | 0.91  | 3.41   | -     | 928.6    |
| AHQ-2-4, 2392 - 2397       | R.TDAGFTLR.W                                                             | 880.96819  | 2 | 8.53E-05 | 0.84  | 2.52   | -     | 873.3    |
| AHQ-2-7, 7501              | R.TIESILEPVAQQISHLVMHEEGEVDGK.A                                          | 3103.49334 | 3 | 1.05E-06 | 0.74  | 3.59   | -     | 495.7    |
| AHQ-2-11, 6809 - 6814      | R.TIESILEPVAQQISHLVMHEEGEVDGK.A                                          | 3103.49334 | 3 | 6.71E-09 | 0.85  | 4.10   | -     | 620.8    |
| AHQ-2-14-, 6789 - 6860     | R.TIESILEPVAQQISHLVM*HEEGEVDGK.A                                         | 3119.49274 | 3 | 1.60E-05 | 0.68  | 3.52   | -     | 261.7    |
| AHQ-2-5, 7487              | R.TIESILEPVAQQISHLVMHEEGEVDGK.A                                          | 3103.49334 | 3 | 2.59E-06 | 0.82  | 3.79   | -     | 457.7    |
| AHQ-2-3, 7411              | R.TNISDEESEQATEMLVHNAQNLMSQVK.E                                          | 3048.31017 | 3 | 8.52E-04 | 0.66  | 3.12   | -     | 641.9    |
| AHQ-2-4, 7460 - 7477       | R.TNISDEESEQATEMLVHNAQNLMSQVK.E                                          | 3048.31017 | 3 | 4.65E-06 | 0.88  | 4.64   | -     | 551.5    |
| AHQ-2-12, 5930 - 6009      | R.TNISDEESEQATEMLVHNAQNLMSQVK.E                                          | 3064.30957 | 3 | 9.84E-08 | 0.94  | 5.31   | -     | 940.7    |
| AHQ-2-12, 5533 - 5597      | R.TNISDEESEQATEMLVHNAQNLMSQVK.E                                          | 3080.30897 | 3 | 4.78E-06 | 0.59  | 3.02   | -     | 607.7    |
| AHQ-2-4, 7105 - 7172       | R.TNISDEESEQATEMLVHNAQNLMSQVK.E                                          | 3064.30957 | 3 | 5.99E-04 | 0.63  | 3.39   | -     | 639.2    |
| AHQ-2-12, 5149 - 5182      | R.TNISDEESEQATEMLVHNAQNLMSQVK.E                                          | 3064.30957 | 3 | 1.22E-06 | 0.88  | 4.78   | -     | 655.4    |
| AHQ-2-4, 5380              | R.TNISDEESEQATEMLVHNAQNLMSQVK.E                                          | 3064.30957 | 3 | 6.25E-04 | 0.72  | 3.25   | -     | 713.4    |
| AHQ-2-12, 6001             | R.TNISDEESEQATEMLVHNAQNLMSQVK.E                                          | 3048.31017 | 3 | 5.70E-05 | 0.84  | 3.91   | -     | 544.2    |
| AHQ-2-6, 7093 - 7094       | R.TNISDEESEQATEMLVHNAQNLMSQVK.E                                          | 3048.31017 | 3 | 2.91E-10 | 0.90  | 4.80   | -     | 574.4    |
| AHQ-2-12, 6993             | R.TNISDEESEQATEMLVHNAQNLMSQVK.E                                          | 3048.31017 | 3 | 2.52E-09 | 0.88  | 4.75   | -     | 439.4    |
| AHQ-2-12, 5945             | R.TNISDEESEQATEMLVHNAQNLMSQVK.E                                          | 3064.30957 | 3 | 6.28E-06 | 0.77  | 3.94   | -     | 488.9    |
| AHQ-2-12, 6663 - 6725      | R.TNISDEESEQATEMLVHNAQNLMSQVK.E                                          | 3064.30957 | 3 | 1.00E-05 | 0.88  | 5.15   | -     | 652.3    |
| AHQ-2-4, 7374 - 7393       | R.TNISDEESEQATEMLVHNAQNLMSQVK.E                                          | 3048.31017 | 3 | 6.60E-04 | 0.69  | 3.78   | -     | 391.4    |
| AHQ-2-10, 5635             | R.TNISDEESEQATEMLVHNAQNLMSQVK.E                                          | 3048.31017 | 3 | 1.01E-07 | 0.64  | 3.29   | -     | 464.0    |
| AHQ-2-10, 6590             | R.TNISDEESEQATEMLVHNAQNLMSQVK.E                                          | 3048.31017 | 3 | 8.04E-05 | 0.92  | 4.49   | -     | 1001.5   |
| AHQ-2-10, 2926             | R.TNLLQVCER.I                                                            | 1134.28859 | 1 | 1.52E-05 | 0.34  | 2.34   | -     | 66.0     |
| AHQ-2-4, 3148 - 3217       | R.TNLLQVCER.I                                                            | 1134.28859 | 2 | 2.02E-05 | 0.92  | 3.38   | -     | 1231.4   |
| AHQ-2-12, 3101             | R.TNLLQVCER.I                                                            | 1134.28859 | 2 | 7.02E-06 | 0.87  | 3.29   | -     | 925.3    |
| AHQ-2-12, 4931             | K.VAM*ANIOPQM*LAVGATSIAR.R                                               | 2075.44278 | 2 | 3.15E-05 | 0.47  | 2.94   | -     | 365.8    |
| AHQ-2-5, 5965 - 6023       | K.VAMANIOPQMLVAGATSIAR.R                                                 | 2043.44398 | 3 | 1.89E-04 | 0.94  | 4.71   | -     | 1439.3   |
| AHQ-2-4, 5786              | K.VAMANIOPQM*LAVGATSIAR.R                                                | 2059.44338 | 3 | 2.18E-05 | 0.93  | 4.94   | -     | 1470.7   |
| AHQ-2-6, 5881 - 5950       | K.VAMANIOPQMLVAGATSIAR.R                                                 | 2043.44398 | 2 | 3.99E-05 | 0.89  | 4.30   | -     | 599.2    |
| AHQ-2-5, 5931 - 5999       | K.VAMANIOPQMLVAGATSIAR.R                                                 | 2043.44398 | 2 | 7.59E-05 | 0.96  | 5.27   | -     | 885.7    |
| AHQ-2-5, 4987              | R.VDQLTAQLADLAAR.G                                                       | 1485.66778 | 2 | 6.14E-06 | 0.94  | 2.81   | -     | 2229.1   |
| AHQ-2-5, 4940 - 4993       | R.VDQLTAQLADLAAR.G                                                       | 1485.66778 | 1 | 5.66E-07 | 0.81  | 3.18   | -     | 400.4    |
| AHQ-2-5, 5296 - 5367       | R.VLQLTSWDEDAWASK.D                                                      | 1749.90156 | 2 | 8.27E-09 | 0.96  | 4.63   | -     | 1384.0   |
| AHQ-2-1, 5692              | R.VLQLTSWDEDAWASK.D                                                      | 1749.90156 | 2 | 1.41E-05 | 0.92  | 3.65   | -     | 889.3    |
| AHQ-2-6, 5270 - 5281       | R.VLQLTSWDEDAWASK.D                                                      | 1749.90156 | 2 | 2.11E-09 | 0.97  | 4.70   | -     | 1396.4   |
| AHQ-2-5, 5429              | R.VLQLTSWDEDAWASK.D                                                      | 1749.90156 | 2 | 2.94E-04 | 0.75  | 2.84   | -     | 718.5    |
| AHQ-2-2, 5649              | R.VLQLTSWDEDAWASK.D                                                      | 1749.90156 | 2 | 1.03E-08 | 0.94  | 4.29   | -     | 1045.8   |
| AHQ-2-4, 5608 - 5690       | R.VLQLTSWDEDAWASK.D                                                      | 1749.90156 | 2 | 1.10E-08 | 0.96  | 5.09   | -     | 1168.5   |
| AHQ-2-3, 5595 - 5597       | R.VLQLTSWDEDAWASK.D                                                      | 1749.90156 | 2 | 5.11E-07 | 0.95  | 4.44   | -     | 1058.4   |
| AHQ-2-4, 2372              | R.VMLVNSM*NTVK.E                                                         | 1252.53021 | 2 | 4.35E-04 | 0.95  | 3.79   | -     | 1159.0   |
| AHQ-2-5, 2863              | R.VMLVNSMNTVK.E                                                          | 1236.53081 | 2 | 4.18E-05 | 0.95  | 3.68   | -     | 1344.5   |
| AHQ-2-5, 2995              | R.VMLVNSMNTVK.E                                                          | 1236.53081 | 2 | 3.68E-05 | 0.92  | 3.41   | -     | 1120.1   |
| AHQ-2-4, 3145              | R.VMLVNSMNTVK.E                                                          | 1236.53081 | 2 | 5.10E-04 | 0.93  | 3.47   | -     | 1237.8   |
| AHQ-2-5, 2689 - 2703       | R.WIDNPTVDDR.G                                                           | 1231.29640 | 2 | 3.17E-05 | 0.93  | 3.59   | -     | 1190.6   |
| AHQ-2-6, 2701              | R.WIDNPTVDDR.G                                                           | 1231.29640 | 2 | 2.34E-04 | 0.96  | 4.18   | -     | 1409.3   |
| gi4505735 ref NP_002611.1  | platelet factor 4 variant 1; Platelet factor 4, variant 1 (PF4-like) [H] |            |   | 6.69E-12 | 1.92  | 20.25  | 26.00 | 11552.6  |
| AHQ-2-14-, 3843 - 3911     | R.AEAEEEDGDLQCLCVK.T                                                     | 1739.86036 | 2 | 6.69E-12 | 0.96  | 4.91   | -     | 1356.0   |
| AHQ-2-14-, 3752            | R.AEAEEEDGDLQCLCVK.T                                                     | 1739.86036 | 2 | 6.37E-06 | 0.92  | 3.44   | -     | 1024.4   |
| AHQ-2-14-, 5861            | R.KICLDLQALLYK.K                                                         | 1479.80948 | 2 | 2.29E-04 | 0.96  | 4.68   | -     | 1124.4   |
| gi4758012 ref NP_004850.1  | clathrin heavy chain; clathrin, heavy polypeptide-like 2 [Homo sapiens]  |            |   | 6.73E-12 | 23.66 | 260.32 | 25.60 | 191612.6 |
| AHQ-2-3, 6853              | K.ADDPSSYMEVQQAANTSGNWEELVK.Y                                            | 2741.92512 | 2 | 6.55E-07 | 0.92  | 4.52   | -     | 692.2    |
| AHQ-2-3, 7599 - 7600       | K.AFMATDLPLNELIELLEK.I                                                   | 1948.26956 | 2 | 7.93E-04 | 0.93  | 4.81   | -     | 551.1    |
| AHQ-2-3, 4488              | R.ALEHFTLDYDIK.R                                                         | 1465.63179 | 2 | 6.83E-06 | 0.93  | 3.66   | -     | 1097.9   |
| AHQ-2-1, 7308              | R.FQSVPAOPGGTSPLLQYFILLDQGLNK.Y                                          | 3189.60926 | 3 | 1.54E-07 | 0.87  | 4.48   | -     | 638.7    |
| AHQ-2-3, 7596 - 7601       | R.FQSVPAOPGGTSPLLQYFILLDQGLNK.Y                                          | 3189.60926 | 3 | 5.48E-05 | 0.91  | 5.03   | -     | 792.1    |
| AHQ-2-3, 4961              | R.GQFSTDELVAEVEKR.R                                                      | 1552.66462 | 2 | 2.99E-04 | 0.87  | 5.07   | -     | 915.7    |
| AHQ-2-4, 4830 - 4844       | R.GQFSTDELVAEVEKR.N                                                      | 1708.85097 | 2 | 9.83E-09 | 0.93  | 3.99   | -     | 1081.5   |
| AHQ-2-3, 4827              | R.GQFSTDELVAEVEKR.N                                                      | 1708.85097 | 2 | 8.45E-09 | 0.95  | 3.83   | -     | 1585.8   |
| AHQ-2-3, 3207              | K.HDVVFLITK.Y                                                            | 1072.28194 | 2 | 4.10E-07 | 0.94  | 3.20   | -     | 1181.5   |
| AHQ-2-3, 3208              | K.HDVVFLITK.Y                                                            | 1072.28194 | 1 | 1.62E-04 | 0.59  | 2.19   | -     | 680.2    |
| AHQ-2-3, 5396 - 5413       | R.ISGETIFVTPAHEATAGIIVNR.K                                               | 2354.64751 | 3 | 2.42E-08 | 0.94  | 4.62   | -     | 1101.8   |
| AHQ-2-3, 3568              | K.IVLDNSVFSFHR.N                                                         | 1416.56400 | 2 | 5.01E-07 | 0.88  | 3.25   | -     | 1055.1   |
| AHQ-2-3, 7309              | R.KFDVNTSAVQLVIEHIGNLDR.A                                                | 2369.66218 | 3 | 6.73E-12 | 0.98  | 6.12   | -     | 2796.5   |
| AHQ-2-3, 3500 - 3503       | R.KFNALPQAGNYSEAAK.V                                                     | 1759.94281 | 2 | 3.87E-07 | 0.98  | 5.79   | -     | 1885.1   |
| AHQ-2-3, 4551              | R.LASTLVHLGEYQAAVDGAR.K                                                  | 1972.19103 | 2 | 1.91E-06 | 0.93  | 3.99   | -     | 1180.1   |
| AHQ-2-4, 4560              | R.LASTLVHLGEYQAAVDGAR.K                                                  | 1972.19103 | 2 | 9.72E-05 | 0.94  | 4.67   | -     | 1004.9   |
| AHQ-2-1, 4692              | R.LASTLVHLGEYQAAVDGAR.K                                                  | 1972.19103 | 2 | 2.06E-06 | 0.93  | 4.43   | -     | 949.5    |
| AHQ-2-3, 4381              | K.LHIEVGTPTGNQPPFK.K                                                     | 1946.23831 | 2 | 1.52E-04 | 0.91  | 4.09   | -     | 633.7    |
| AHQ-2-3, 7420              | R.LLEMLMHPAQVADAILGNQMFTHYDR.A                                           | 3130.61385 | 3 | 9.90E-10 | 0.98  | 6.48   | -     | 2002.2   |
| AHQ-2-3, 3737              | K.LLNNVSNFGR.L                                                           | 1297.44435 | 2 | 7.15E-08 | 0.91  | 3.34   | -     | 970.7    |
| AHQ-2-1, 6953              | R.LPVVIGGLLDVDCSESVIK.N                                                  | 2043.36744 | 2 | 4.61E-05 | 0.92  | 4.29   | -     | 723.6    |
| AHQ-2-3, 7205 - 7267       | R.LPVVIGGLLDVDCSESVIK.N                                                  | 2043.36744 | 2 | 7.31E-07 | 0.98  | 5.76   | -     | 1693.9   |
| AHQ-2-3, 6456              | R.NLQNLILLTAIK.A                                                         | 1354.66353 | 2 | 4.83E-04 | 0.97  | 5.15   | -     | 1791.4   |
| AHQ-2-3, 4361              | R.NNLGAEELFAR.K                                                          | 1305.42165 | 2 | 1.96E-06 | 0.89  | 3.36   | -     | 894.5    |
| AHQ-2-3, 2356              | K.RDPHLACVAYER.G                                                         | 1488.65351 | 2 | 2.70E-04 | 0.78  | 2.92   | -     | 521.1    |
| AHQ-2-3, 7128 - 7129       | R.RPLDQVQQTALSETQDPPEEVSVTVK.A                                           | 2883.20103 | 2 | 1.35E-05 | 0.93  | 5.24   | -     | 477.9    |
| AHQ-2-5, 6999              | R.RPLDQVQQTALSETQDPPEEVSVTVK.A                                           | 2883.20103 | 3 | 5.57E-04 | 0.81  | 3.87   | -     | 810.5    |
| AHQ-2-3, 7105 - 7112       | R.RPLDQVQQTALSETQDPPEEVSVTVK.A                                           | 2883.20103 | 3 | 1.90E-05 | 0.94  | 4.93   | -     | 1097.0   |
| AHQ-2-4, 5164              | R.TSIDAYDNFNISLAQR.L                                                     | 1944.04818 | 2 | 2.09E-08 | 0.91  | 4.17   | -     | 530.5    |
| AHQ-2-1, 5180              | R.TSIDAYDNFNISLAQR.L                                                     | 1944.04818 | 2 | 1.70E-07 | 0.97  | 5.44   | -     | 1773.5   |
| AHQ-2-3, 7253              | K.VGYTDPWFILLR.N                                                         | 1480.73443 | 2 | 7.41E-08 | 0.69  | 2.79   | -     | 448.4    |
| AHQ-2-3, 3095              | K.VIQCFEATGQVQK.I                                                        | 1509.70940 | 2 | 1.09E-06 | 0.96  | 4.05   | -     | 1744.4   |
| AHQ-2-3, 3423 - 3493       | K.VSQPIEGHAASFAQFK.M                                                     | 1717.90593 | 2 | 4.53E-04 | 0.67  | 2.99   | -     | 710.8    |
| AHQ-2-3, 5016              | K.WLKEDKLECSSEELGDLVK.S                                                  | 2193.45974 | 2 | 2.32E-09 | 0.98  | 5.61   | -     | 2202.0   |
| AHQ-2-3, 7523              | K.YHEQLSTQSLIELFESFK.S                                                   | 2200.43237 | 2 | 9.81E-07 | 0.98  | 5.60   | -     | 1873.2   |
| gi21464101 ref NP_036611.2 | tyrosine 3-monooxygenase/tryptophan 5-monooxygenase activation protein   |            |   | 8.16E-12 | 5.03  | 70.26  | 44.90 | 28302.4  |
| AHQ-2-10, 6930             | K.ELEAVCDVLSLLDNYLIK.N                                                   | 2237.55566 | 2 | 6.46E-09 | 0.96  | 5.21   | -     | 1096.9   |
| AHQ-2-10, 6668             | R.LGLALNYSVYFYEIQNAPEAQCACHLAK.T                                         | 3015.38773 | 3 | 8.16E-12 | 0.92  | 4.97   | -     | 682.6    |
| AHQ-2-10, 3870             | R.NLLSVAYKNVVGAR.R                                                       | 1504.75906 | 2 | 3.43E-06 | 0.95  | 3.52   | -     | 1720.8   |
| AHQ-2-9, 3796              | R.NLLSVAYKNVVGAR.R                                                       | 1504.75906 | 2 | 4.21E-04 | 0.92  | 3.72   | -     | 1097.1   |
| AHQ-2-10, 2790             | K.NVTELNEPLSNEER.N                                                       | 1644.72215 | 2 | 1.22E-05 | 0.91  | 3.77   | -     | 771.9    |
| AHQ-2-10, 2915             | K.NVTELNEPLSNEER.N                                                       | 1644.72215 | 2 | 4.10E-06 | 0.76  | 3.28   | -     | 524.1    |
| AHQ-2-10, 6567             | K.TAFDDAIAELDTLNEDSYK.D                                                  | 2132.22370 | 2 | 3.29E-04 | 0.79  | 3.62   | -     | 574.4    |
| AHQ-2-14-, 6521 - 6585     | K.TAFDDAIAELDTLNEDSYK.D                                                  | 2132.22370 | 2 | 1.21E-07 | 0.68  | 2.84   | -     | 765.0    |
| AHQ-2-10, 6126             | K.TAFDDAIAELDTLNEDSYK.D                                                  | 2132.22370 | 2 | 1.20E-05 | 0.78  | 3.66   | -     | 595.7    |
| AHQ-2-10, 6258 - 6330      | K.TAFDDAIAELDTLNEDSYK.D                                                  | 2132.22370 | 2 | 4.22E-08 | 0.95  | 4.44   | -     | 1173.3   |
| AHQ-2-10, 6334             | K.TAFDDAIAELDTLNEDSYK.D                                                  | 2132.22370 | 3 | 1.91E-06 | 0.76  | 3.52   | -     | 711.7    |

|                             |                                                                          |            |   |          |          |        |        |          |          |
|-----------------------------|--------------------------------------------------------------------------|------------|---|----------|----------|--------|--------|----------|----------|
| AHQ-2-14-, 6548 - 6583      | K.TAFDDAIAELDTLNEDSYK.D                                                  | 2132.22370 | 2 | 3.89E-07 | 0.97     | 5.00   | -      | 1303.6   |          |
| AHQ-2-10, 2138              | R.YDDMAAAMK.N                                                            | 1016.17419 | 1 | 1.11E-05 | 0.27     | 2.21   | -      | 340.2    |          |
| AHQ-2-10, 2082              | R.YLAEVATGEK.R                                                           | 1081.20087 | 1 | 1.98E-05 | 0.21     | 2.11   | -      | 459.3    |          |
| AHQ-2-10, 2084              | R.YLAEVATGEK.R                                                           | 1081.20087 | 2 | 8.09E-05 | 0.90     | 3.38   | -      | 891.2    |          |
| AHQ-2-10, 2090              | R.YLAEVATGEK.R                                                           | 1081.20087 | 1 | 1.77E-04 | 0.41     | 2.41   | -      | 278.3    |          |
| gi 4504391 ref NP_000179.1  | hexokinase 1 isoform HKI; brain form hexokinase [Homo sapiens]           |            |   |          | 11.01    | 120.25 | 15.50  | 102502.4 |          |
| AHQ-2-4, 6378 - 6457        | R.AILQQLGLNSTCDDSLVK.T                                                   | 2090.38419 | 2 | 4.13E-11 | 0.93     | 4.46   | -      | 725.1    |          |
| AHQ-2-4, 4525 - 4538        | K.ATDCVGHVVVTLR.D                                                        | 1557.75406 | 2 | 8.74E-12 | 0.92     | 3.53   | -      | 949.5    |          |
| AHQ-2-4, 2669 - 2749        | K.FLSQIESDR.L                                                            | 1095.18763 | 2 | 8.72E-05 | 0.87     | 3.47   | -      | 724.5    |          |
| AHQ-2-4, 3221               | K.GAALITAVGVR.L                                                          | 1028.23070 | 2 | 1.24E-06 | 0.96     | 4.25   | -      | 1796.7   |          |
| AHQ-2-4, 5809               | K.GDFIALDLGGSSFR.I                                                       | 1455.59700 | 2 | 8.78E-12 | 0.98     | 4.96   | -      | 2145.6   |          |
| AHQ-2-4, 2162               | R.HIDLVEGDEGR.M                                                          | 1240.30483 | 2 | 2.57E-07 | 0.97     | 4.75   | -      | 1437.2   |          |
| AHQ-2-4, 5561               | K.KLPVGFTFSPCCQSK.I                                                      | 1873.16425 | 2 | 3.18E-07 | 0.91     | 3.77   | -      | 949.2    |          |
| AHQ-2-4, 6181 - 6182        | K.LPVGFTFSPCCQSK.I                                                       | 1744.99134 | 2 | 6.57E-07 | 0.94     | 4.10   | -      | 1042.4   |          |
| AHQ-2-4, 6021               | R.LSDETLIDIMTR.F                                                         | 1407.61560 | 2 | 3.18E-08 | 0.95     | 4.05   | -      | 1199.0   |          |
| AHQ-2-4, 2729 - 2801        | R.LVNEYSLNAGK.Q                                                          | 1208.34588 | 2 | 3.26E-07 | 0.72     | 3.10   | -      | 705.8    |          |
| AHQ-2-4, 7521               | R.SANLVAATLGAJLNR.L                                                      | 1484.72615 | 2 | 1.24E-07 | 0.95     | 4.93   | -      | 1090.6   |          |
| AHQ-2-4, 6416               | R.TPDGTENGDFLALDLGGTNR.V                                                 | 2211.33051 | 2 | 1.04E-08 | 0.92     | 4.58   | -      | 663.1    |          |
| gi 9910542 ref NP_064535.1  | SAR1a gene homolog 1; SAR1 protein [Homo sapiens]                        |            |   |          | 8.98E-12 | 4.46   | 50.31  | 46.00    | 22366.6  |
| AHQ-2-11, 3620              | R.EIFGLYQTTGK.G                                                          | 1314.46845 | 1 | 4.12E-05 | 0.66     | 3.05   | -      | 283.2    |          |
| AHQ-2-11, 6081              | R.LGQHVPYLTHTSEELIAGMTFTTDLGGHEQAR.R                                     | 3694.08659 | 3 | 8.98E-12 | 0.96     | 6.10   | -      | 1057.5   |          |
| AHQ-2-11, 3654              | K.LREIFGLYQTTGK.G                                                        | 1583.81305 | 2 | 1.06E-06 | 0.96     | 4.52   | -      | 1230.8   |          |
| AHQ-2-11, 6424              | K.NYLPAINGVFLVDCADHSR.L                                                  | 2276.56690 | 2 | 3.33E-09 | 0.95     | 4.39   | -      | 1151.0   |          |
| AHQ-2-11, 6560 - 6621       | K.VELNALM*TDEITISNVPIILGNK.I                                             | 2514.92088 | 2 | 5.88E-04 | 0.93     | 4.37   | -      | 888.9    |          |
| gi 4507907 ref NP_000543.1  | von Willebrand factor precursor; Coagulation factor VIII VWF (von Wille) |            |   |          | 9.27E-12 | 30.36  | 340.33 | 14.60    | 309296.7 |
| AHQ-2-1, 5082               | K.AFVLSSVDELEQQR.D                                                       | 1621.77332 | 2 | 1.85E-06 | 0.88     | 3.39   | -      | 1085.0   |          |
| AHQ-2-1, 4036               | K.AHLLSLVDVM*QR.E                                                        | 1398.65673 | 2 | 1.32E-09 | 0.95     | 3.62   | -      | 1709.2   |          |
| AHQ-2-1, 5038               | K.AHLLSLVDVM*QR.E                                                        | 1382.65733 | 2 | 6.13E-09 | 0.95     | 4.00   | -      | 1443.6   |          |
| AHQ-2-1, 3081 - 3161        | K.APTCGLCEVAR.L                                                          | 1236.40097 | 2 | 8.42E-05 | 0.88     | 2.92   | -      | 895.9    |          |
| AHQ-2-1, 4324               | R.CLPTACTIQLR.G                                                          | 1335.57568 | 2 | 1.43E-04 | 0.54     | 2.63   | -      | 494.7    |          |
| AHQ-2-1, 5220               | R.EGGPSQIGDALGFAVR.Y                                                     | 1574.71988 | 2 | 1.41E-08 | 0.72     | 2.92   | -      | 649.0    |          |
| AHQ-2-1, 4696               | R.EGGPSQIGDALGFAVR.Y                                                     | 1574.71988 | 2 | 1.38E-06 | 0.69     | 3.05   | -      | 639.5    |          |
| AHQ-2-1, 4888               | R.EQAPNLVYM*VTGNPASDEIK.R                                                | 2193.42002 | 2 | 6.98E-09 | 0.89     | 4.08   | -      | 486.7    |          |
| AHQ-2-1, 5813 - 5880        | R.EQAPNLVYM*VTGNPASDEIK.R                                                | 2177.42062 | 2 | 4.53E-04 | 0.82     | 3.54   | -      | 445.8    |          |
| AHQ-2-1, 4226               | K.EQDLEVLHNGACSPGAR.Q                                                    | 1968.13770 | 2 | 6.80E-10 | 0.87     | 3.81   | -      | 562.7    |          |
| AHQ-2-1, 4525 - 4598        | K.EQDLEVLHNGACSPGAR.Q                                                    | 1968.13770 | 2 | 8.11E-05 | 0.81     | 3.77   | -      | 566.6    |          |
| AHQ-2-1, 2420               | R.GLRPSCPNSQSPVK.V                                                       | 1528.71594 | 2 | 3.61E-05 | 0.73     | 3.47   | -      | 499.7    |          |
| AHQ-2-1, 6433               | R.IEDLPTMTVLGNSFLHK.L                                                    | 1916.23079 | 2 | 6.47E-06 | 0.96     | 5.20   | -      | 1021.2   |          |
| AHQ-2-1, 6426               | R.IEDLPTMTVLGNSFLHK.L                                                    | 1916.23079 | 3 | 2.19E-04 | 0.63     | 3.26   | -      | 451.3    |          |
| AHQ-2-1, 5260 - 5290        | R.IEDLPTMTVLGNSFLHK.L                                                    | 1932.23019 | 2 | 5.48E-07 | 0.83     | 3.66   | -      | 668.6    |          |
| AHQ-2-2, 7564               | R.IGWPNAPILIQDFELPR.E                                                    | 2081.40223 | 2 | 2.19E-06 | 0.91     | 4.07   | -      | 599.1    |          |
| AHQ-2-1, 7120               | R.IGWPNAPILIQDFELPR.E                                                    | 2081.40223 | 2 | 1.11E-08 | 0.92     | 4.57   | -      | 732.5    |          |
| AHQ-2-1, 7234 - 7312        | R.IGWPNAPILIQDFELPR.E                                                    | 2081.40223 | 2 | 2.49E-08 | 0.95     | 4.67   | -      | 888.3    |          |
| AHQ-2-1, 2684               | R.ILAGPAGDSNVVK.L                                                        | 1241.41901 | 2 | 2.46E-07 | 0.95     | 3.56   | -      | 1390.5   |          |
| AHQ-2-1, 2773               | R.ILAGPAGDSNVVK.L                                                        | 1241.41901 | 2 | 9.55E-05 | 0.70     | 2.78   | -      | 680.0    |          |
| AHQ-2-3, 2504               | R.ILAGPAGDSNVVK.L                                                        | 1241.41901 | 2 | 2.40E-06 | 0.80     | 2.89   | -      | 705.4    |          |
| AHQ-2-1, 3876 - 3880        | R.ILTSDFVQDCNK.L                                                         | 1441.58869 | 2 | 4.21E-07 | 0.96     | 4.64   | -      | 1155.6   |          |
| AHQ-2-2, 3818               | R.ILTSDFVQDCNK.L                                                         | 1441.58869 | 2 | 6.04E-08 | 0.86     | 3.22   | -      | 872.3    |          |
| AHQ-2-1, 5988 - 6005        | R.LPGDIQVPIGVGPNANVQELER.I                                               | 2415.73085 | 3 | 2.38E-05 | 0.95     | 4.87   | -      | 1575.5   |          |
| AHQ-2-1, 4329 - 4330        | R.LSEAEFEVLK.A                                                           | 1165.31777 | 2 | 7.18E-08 | 0.95     | 3.99   | -      | 1257.0   |          |
| AHQ-2-1, 4272 - 4293        | K.LTGSQSVLFLQNK.E                                                        | 1518.71629 | 2 | 1.40E-06 | 0.95     | 4.34   | -      | 1276.0   |          |
| AHQ-2-1, 5798 - 5869        | K.RLPGDIQVPIGVGPNANVQELER.I                                              | 2571.91720 | 3 | 4.37E-04 | 0.97     | 5.57   | -      | 2164.3   |          |
| AHQ-2-2, 5600               | K.RLPGDIQVPIGVGPNANVQELER.I                                              | 2571.91720 | 3 | 1.95E-06 | 0.97     | 5.50   | -      | 1914.5   |          |
| AHQ-2-1, 5654 - 5730        | K.RLPGDIQVPIGVGPNANVQELER.I                                              | 2571.91720 | 3 | 5.59E-09 | 0.98     | 6.54   | -      | 1902.6   |          |
| AHQ-2-1, 4072               | R.SGFTYVVLHEGECGR.C                                                      | 1774.91285 | 2 | 3.23E-11 | 0.94     | 3.62   | -      | 1416.7   |          |
| AHQ-2-1, 2524 - 2534        | R.SKEFM*EEVIR.M                                                          | 1412.59390 | 2 | 1.94E-05 | 0.92     | 3.28   | -      | 1144.2   |          |
| AHQ-2-1, 3456 - 3470        | R.SKEFM*EEVIR.M                                                          | 1396.59450 | 2 | 7.21E-07 | 0.92     | 3.53   | -      | 1087.9   |          |
| AHQ-2-3, 5032 - 5112        | K.SVGSQWASPENPCLINECVR.V                                                 | 2306.51832 | 2 | 3.25E-05 | 0.82     | 3.63   | -      | 396.8    |          |
| AHQ-2-2, 5158               | K.SVGSQWASPENPCLINECVR.V                                                 | 2306.51832 | 2 | 1.99E-05 | 0.87     | 4.02   | -      | 425.6    |          |
| AHQ-2-1, 5093               | K.SVGSQWASPENPCLINECVR.V                                                 | 2306.51832 | 2 | 6.58E-05 | 0.91     | 4.16   | -      | 588.2    |          |
| AHQ-2-1, 4998 - 5021        | K.SVGSQWASPENPCLINECVR.V                                                 | 2306.51832 | 2 | 1.18E-06 | 0.89     | 3.86   | -      | 707.0    |          |
| AHQ-2-1, 5790 - 5837        | K.TYGLCGICDENGANDFM*LR.D                                                 | 2225.42231 | 2 | 3.77E-10 | 0.95     | 4.52   | -      | 1128.6   |          |
| AHQ-2-1, 6241 - 6242        | K.TYGLCGICDENGANDFMLR.D                                                  | 2209.42291 | 2 | 1.09E-06 | 0.94     | 4.37   | -      | 927.4    |          |
| AHQ-2-1, 4613               | K.VIVIPVGIQPHANKL.Q                                                      | 1527.87891 | 3 | 1.41E-04 | 0.68     | 3.23   | -      | 486.4    |          |
| AHQ-2-1, 4609 - 4621        | K.VIVIPVGIQPHANKL.Q                                                      | 1527.87891 | 2 | 5.66E-07 | 0.91     | 4.09   | -      | 652.9    |          |
| AHQ-2-1, 2408 - 2476        | R.VKEEVIQGR.N                                                            | 1276.46658 | 2 | 1.93E-07 | 0.85     | 3.00   | -      | 799.8    |          |
| AHQ-2-1, 4744               | R.VTVFPIQIDR.Y                                                           | 1174.37426 | 2 | 3.49E-04 | 0.93     | 3.61   | -      | 1129.4   |          |
| AHQ-2-1, 3633               | R.WTQPCVCTGSSTR.H                                                        | 1575.72645 | 2 | 2.38E-07 | 0.87     | 2.93   | -      | 814.1    |          |
| AHQ-2-3, 2841               | K.YAGSQVASTSEVLK.Y                                                       | 1440.58064 | 2 | 9.40E-06 | 0.96     | 4.36   | -      | 1332.6   |          |
| AHQ-2-1, 3010               | K.YAGSQVASTSEVLK.Y                                                       | 1440.58064 | 1 | 6.65E-06 | 0.81     | 3.11   | -      | 792.4    |          |
| AHQ-2-2, 2852               | K.YAGSQVASTSEVLK.Y                                                       | 1440.58064 | 2 | 1.31E-04 | 0.96     | 4.23   | -      | 1181.1   |          |
| AHQ-2-1, 2993 - 2994        | K.YAGSQVASTSEVLK.Y                                                       | 1440.58064 | 2 | 1.27E-07 | 0.94     | 4.38   | -      | 866.5    |          |
| AHQ-2-3, 7500               | R.YFTFSGICQYLLAR.D                                                       | 1741.00269 | 2 | 1.09E-06 | 0.94     | 4.41   | -      | 851.3    |          |
| AHQ-2-1, 6848               | K.YLFPGEQCYVVLVDYCGSNPGTFR.I                                             | 2874.15305 | 2 | 9.27E-12 | 0.88     | 3.78   | -      | 753.4    |          |
| AHQ-2-1, 6782 - 6836        | K.YLFPGEQCYVVLVDYCGSNPGTFR.I                                             | 2874.15305 | 3 | 2.13E-08 | 0.86     | 3.71   | -      | 1336.9   |          |
| AHQ-2-2, 3257               | R.YLSDHSLVLSQGDR.E                                                       | 1624.73576 | 2 | 1.78E-09 | 0.97     | 4.86   | -      | 1836.0   |          |
| AHQ-2-1, 3452               | R.YLSDHSLVLSQGDR.E                                                       | 1624.73576 | 2 | 1.85E-09 | 0.94     | 3.98   | -      | 1453.4   |          |
| AHQ-2-1, 6172               | K.YTLFQIFSK.I                                                            | 1147.34728 | 2 | 1.10E-08 | 0.93     | 3.18   | -      | 1091.9   |          |
| gi 9507215 ref NP_061816.1  | tubulin, alpha-like 2; tubulin, alpha 8 [Homo sapiens]                   |            |   |          | 9.36E-12 | 3.71   | 40.23  | 10.90    | 50093.2  |
| AHQ-2-14-, 5289             | R.AVMIDLEPTVDEVR.A                                                       | 1686.95185 | 2 | 8.48E-10 | 0.95     | 4.27   | -      | 1436.8   |          |
| AHQ-2-14, 6029              | R.AVM*IDLEPTVDEVR.A                                                      | 1702.95125 | 2 | 2.70E-05 | 0.90     | 3.69   | -      | 1060.6   |          |
| AHQ-2-7, 5291               | R.IHFPLVYAPISAEK.A                                                       | 1800.13312 | 2 | 6.73E-07 | 0.93     | 4.08   | -      | 715.4    |          |
| AHQ-2-14, 6325 - 6396       | K.INDDSSFTTFFSETGNKG.H                                                   | 1996.03358 | 2 | 1.20E-10 | 0.47     | 2.55   | -      | 170.6    |          |
| AHQ-2-14-, 5308             | K.INDDSSFTTFFSETGNKG.H                                                   | 1996.03358 | 2 | 9.36E-12 | 0.93     | 4.67   | -      | 697.8    |          |
| AHQ-2-13, 5293              | K.INDDSSFTTFFSETGNKG.H                                                   | 1996.03358 | 2 | 3.06E-07 | 0.75     | 3.75   | -      | 397.3    |          |
| gi 29741246 ref XP_294070.1 | similar to Glyceroldehyde 3-phosphate dehydrogenase, liver (GAPDH) [Ho]  |            |   |          | 9.77E-12 | 4.26   | 50.25  | 14.60    | 35032.0  |
| AHQ-2-9, 5291               | K.AENGLVINGNPITIFQER.D                                                   | 2114.39062 | 2 | 1.01E-07 | 0.70     | 3.07   | -      | 466.5    |          |
| AHQ-2-9, 5471               | K.AENGLVINGNPITIFQER.D                                                   | 2114.39062 | 2 | 6.09E-06 | 0.67     | 3.29   | -      | 483.6    |          |
| AHQ-2-13, 5295              | K.AENGLVINGNPITIFQER.D                                                   | 2114.39062 | 2 | 5.97E-07 | 0.40     | 3.16   | -      | 363.6    |          |
| AHQ-2-9, 5706 - 5779        | K.LVINGNPITIFQER.D                                                       | 1614.87029 | 2 | 6.84E-09 | 0.96     | 4.64   | -      | 1258.9   |          |
| AHQ-2-14-, 5632 - 5705      | K.LVINGNPITIFQER.D                                                       | 1614.87029 | 2 | 1.28E-09 | 0.95     | 4.23   | -      | 1112.7   |          |
| AHQ-2-10, 5230              | K.LVINGNPITIFQER.D                                                       | 1614.87029 | 2 | 1.46E-05 | 0.82     | 2.77   | -      | 1063.2   |          |
| AHQ-2-9, 5550 - 5623        | K.LVINGNPITIFQER.D                                                       | 1614.87029 | 2 | 2.91E-10 | 0.92     | 3.92   | -      | 947.8    |          |
| AHQ-2-10, 5328              | K.LVINGNPITIFQER.D                                                       | 1614.87029 | 2 | 3.14E-11 | 0.94     | 3.52   | -      | 1516.3   |          |
| AHQ-2-13, 5652              | K.LVINGNPITIFQER.D                                                       | 1614.87029 | 2 | 1.25E-07 | 0.86     | 2.99   | -      | 812.8    |          |
| AHQ-2-12, 5711 - 5786       | K.LVINGNPITIFQER.D                                                       | 1614.87029 | 2 | 1.20E-09 | 0.92     | 3.42   | -      | 1120.1   |          |
| AHQ-2-13, 5525 - 5587       | K.LVINGNPITIFQER.D                                                       | 1614.87029 | 2 | 9.77E-12 | 0.92     | 3.63   | -      | 1028.7   |          |
| AHQ-2-9, 5112 - 5182        | K.LVINGNPITIFQERDPSK.I                                                   | 2042.32440 | 2 | 2.15E-08 | 0.86     | 3.46   | -      | 616.3    |          |
| AHQ-2-9, 6398               | K.LVHDFNGVIGGLMTTVAITATQK.T                                              | 2596.04531 | 3 | 1.99E-04 | 0.94     | 4.95   | -      | 1868.1   |          |
| AHQ-2-14-, 6825             | K.LVHDFNGVIGGLMTTVAITATQK.T                                              | 2596.04531 | 3 | 7.04E-09 | 0.90     | 4.77   | -      | 1403.6   |          |
| AHQ-2-10, 5962 - 6040       | K.LVHDFNGVIGGLMTTVAITATQK.T                                              | 2612.04471 | 3 | 1.30E-05 | 0.88     | 5.01   | -      | 1100.4   |          |
| gi 18104967 ref NP_000953.2 | prostaglandin-endoperoxide synthase 1 isoform 1 precursor; prostaglandin |            |   |          | 1.00E-11 | 6.22   | 70.28  | 20.20    | 68686.0  |
| AHQ-2-6, 3730 - 3738        | K.AEHPYTWGDEQLQFQTR.L                                                    | 1917.02765 | 2 | 6.00E-05 | 0.95     | 4.46   | -      | 859.0    |          |
| AHQ-2-7, 3637               | K.AEHPYTWGDEQLQFQTR.L                                                    | 1917.02765 | 2 | 4.77E-07 | 0.91     | 3.80   | -      | 807.3    |          |
| AHQ-2-6, 3651 - 3653        | K.ALGHGVDLGHYGDNLER.Q                                                    | 1937.10524 | 3 | 2.87E-07 | 0.92     | 3.89   | -      | 1187.6   |          |
| AHQ-2-6, 3642 - 3663        | K.ALGHGVDLGHYGDNLER.Q                                                    | 1937.10524 | 2 | 1.00E-11 | 0.97     | 5.46   | -      | 1576.7   |          |
| AHQ-2-6, 4945               | R.FGMKPYTSFQELVGEK.E                                                     | 1862.13845 | 2 | 1.24E-06 | 0.91     | 3.84   | -      | 513.0    |          |

|                             |                                                                         |            |   |          |       |        |       |         |
|-----------------------------|-------------------------------------------------------------------------|------------|---|----------|-------|--------|-------|---------|
| AHQ-2-6, 7025 - 7090        | K.GLLGNPICSPYWKPFSTFGGVEGVFNIVK.T                                       | 3069.47853 | 3 | 1.15E-08 | 0.85  | 4.33   | -     | 419.1   |
| AHQ-2-6, 6935 - 7013        | K.GLLGNPICSPYWKPFSTFGGVEGVFNIVK.T                                       | 3069.47853 | 3 | 1.39E-07 | 0.81  | 4.27   | -     | 495.6   |
| AHQ-2-6, 3090               | R.VPDASQDDGPAVERPSTEL                                                   | 1984.06747 | 2 | 4.34E-05 | 0.76  | 2.61   | -     | 768.6   |
| AHQ-2-6, 3193 - 3267        | R.VPDASQDDGPAVERPSTEL                                                   | 1984.06747 | 2 | 9.93E-05 | 0.92  | 2.49   | -     | 888.7   |
| AHQ-2-6, 5802               | K.YQLVDGEMYPSPVEEAPVLMHYPR.G                                            | 2822.20799 | 3 | 1.35E-09 | 0.95  | 5.62   | -     | 818.9   |
| AHQ-2-6, 5298               | K.YQLVDGEMYPSPVEEAPVLMHYPR.G                                            | 2838.20739 | 3 | 2.80E-11 | 0.87  | 4.16   | -     | 643.9   |
| gi 10835002 ref NP_001166.1 | Rho GDP dissociation inhibitor (GDI) beta; Ly-GDI [Homo sapiens]        |            |   | 1.22E-11 | 5.38  | 60.24  | 47.30 | 22987.8 |
| AHQ-2-10, 2303              | K.APEPHVEEDDDDELDSK.L                                                   | 1940.90995 | 2 | 2.14E-07 | 0.94  | 4.14   | -     | 1126.4  |
| AHQ-2-10, 2263 - 2324       | K.APEPHVEEDDDDELDSK.L                                                   | 1940.90995 | 3 | 1.22E-11 | 0.95  | 4.29   | -     | 1745.3  |
| AHQ-2-13-, 5638             | K.ATFMVGSYGRPEEYEFLLTPVEEAPK.G                                          | 2962.27864 | 3 | 1.63E-04 | 0.88  | 3.98   | -     | 826.1   |
| AHQ-2-12, 5891              | K.ATFMVGSYGRPEEYEFLLTPVEEAPK.G                                          | 2946.27924 | 3 | 1.71E-04 | 0.81  | 3.96   | -     | 435.8   |
| AHQ-2-10, 5154 - 5172       | K.ATFMVGSYGRPEEYEFLLTPVEEAPK.G                                          | 2962.27864 | 3 | 5.64E-08 | 0.92  | 4.77   | -     | 847.7   |
| AHQ-2-10, 5394 - 5458       | K.ATFMVGSYGRPEEYEFLLTPVEEAPK.G                                          | 2946.27924 | 3 | 7.41E-04 | 0.67  | 3.35   | -     | 520.4   |
| AHQ-2-10, 5435 - 5502       | K.ATFMVGSYGRPEEYEFLLTPVEEAPK.G                                          | 2946.27924 | 2 | 4.02E-04 | 0.65  | 3.00   | -     | 422.7   |
| AHQ-2-14-, 5607             | K.ATFMVGSYGRPEEYEFLLTPVEEAPK.G                                          | 2962.27864 | 3 | 6.08E-05 | 0.83  | 4.03   | -     | 825.4   |
| AHQ-2-10, 2904              | K.ELQEMDKDDESILK.Y                                                      | 1693.85489 | 2 | 3.86E-05 | 0.89  | 4.21   | -     | 804.3   |
| AHQ-2-11, 6465              | R.LTLVCESAPGPITMDLTGDLEALKK.E                                           | 2675.11274 | 3 | 3.82E-05 | 0.52  | 3.22   | -     | 295.5   |
| AHQ-2-10, 6343 - 6423       | R.LTLVCESAPGPITMDLTGDLEALKK.E                                           | 2675.11274 | 3 | 4.16E-08 | 0.84  | 4.15   | -     | 627.4   |
| AHQ-2-10, 3068 - 3119       | K.TLLGDGPPVTDPKA                                                        | 1312.49400 | 2 | 5.53E-10 | 0.97  | 4.33   | -     | 1753.2  |
| gi 13775198 ref NP_112576.1 | SH3 domain binding glutamic acid-rich protein like 3; SH3BGLR3-like pr  |            |   | 1.26E-11 | 5.04  | 60.29  | 35.50 | 10437.7 |
| AHQ-2-14-, 4748             | R.IYQLVDISQDNALR.D                                                      | 1776.97168 | 2 | 1.26E-11 | 0.98  | 4.83   | -     | 2260.5  |
| AHQ-2-13-, 4893             | R.IYQLVDISQDNALR.D                                                      | 1776.97168 | 2 | 1.33E-10 | 0.98  | 5.18   | -     | 2065.1  |
| AHQ-2-14, 5800              | R.IYQLVDISQDNALR.D                                                      | 1776.97168 | 2 | 1.68E-10 | 0.98  | 5.26   | -     | 2056.3  |
| AHQ-2-13-, 4826 - 4898      | R.IYQLVDISQDNALR.D                                                      | 1776.97168 | 2 | 7.83E-08 | 0.95  | 4.53   | -     | 1527.7  |
| AHQ-2-13, 4843 - 4868       | R.IYQLVDISQDNALR.D                                                      | 1776.97168 | 2 | 2.78E-09 | 0.95  | 5.17   | -     | 1333.2  |
| AHQ-2-13-, 4802             | R.IYQLVDISQDNALR.D                                                      | 1776.97168 | 3 | 2.19E-07 | 0.96  | 5.77   | -     | 1986.2  |
| AHQ-2-13, 4707 - 4779       | R.IYQLVDISQDNALR.D                                                      | 1776.97168 | 2 | 1.24E-10 | 0.98  | 5.83   | -     | 1721.2  |
| AHQ-2-13-, 4713 - 4779      | R.IYQLVDISQDNALR.D                                                      | 1776.97168 | 2 | 2.55E-10 | 0.98  | 5.83   | -     | 2052.8  |
| AHQ-2-13, 5063 - 5144       | R.IYQLVDISQDNALRDEM.R.A                                                 | 2308.55751 | 3 | 2.12E-07 | 0.80  | 3.65   | -     | 550.7   |
| AHQ-2-13-, 4845 - 4851      | R.IYQLVDISQDNALRDEM.R.A                                                 | 2308.55751 | 3 | 5.55E-04 | 0.78  | 3.26   | -     | 772.8   |
| AHQ-2-13, 4937 - 4999       | R.IYQLVDISQDNALRDEM.R.A                                                 | 2308.55751 | 3 | 4.38E-09 | 0.83  | 3.44   | -     | 623.4   |
| AHQ-2-14-, 4456 - 4529      | R.IYQLVDISQDNALRDEM.R.A                                                 | 2324.55691 | 3 | 6.60E-04 | 0.81  | 3.62   | -     | 441.0   |
| AHQ-2-13-, 4513 - 4577      | R.IYQLVDISQDNALRDEM.R.A                                                 | 2324.55691 | 3 | 1.08E-04 | 0.79  | 3.54   | -     | 470.0   |
| AHQ-2-13-, 5043 - 5109      | R.IYQLVDISQDNALRDEM.R.A                                                 | 2308.55751 | 3 | 6.93E-06 | 0.80  | 3.17   | -     | 654.8   |
| AHQ-2-13-, 4274             | R.IYQLVDISQDNALRDEM.R.A                                                 | 2324.55691 | 3 | 3.65E-04 | 0.82  | 3.32   | -     | 535.9   |
| AHQ-2-13-, 5045 - 5111      | R.IYQLVDISQDNALRDEM.R.A                                                 | 2308.55751 | 2 | 3.36E-04 | 0.92  | 4.29   | -     | 665.8   |
| AHQ-2-13-, 4298             | K.RIQYQLVDISQDNALR.D                                                    | 1933.15803 | 2 | 2.02E-08 | 0.97  | 5.45   | -     | 1070.8  |
| AHQ-2-13, 4244              | K.RIQYQLVDISQDNALR.D                                                    | 1933.15803 | 2 | 4.42E-07 | 0.96  | 4.71   | -     | 1085.6  |
| AHQ-2-13-, 1841 - 1855      | R.VYSTSVTGSR.E                                                          | 1057.13940 | 2 | 2.56E-07 | 0.91  | 3.23   | -     | 1144.6  |
| AHQ-2-13-, 1589 - 1649      | R.VYSTSVTGSR.E                                                          | 1057.13940 | 2 | 8.29E-06 | 0.88  | 2.98   | -     | 1034.1  |
| AHQ-2-13-, 1543 - 1969      | R.VYSTSVTGSR.E                                                          | 1057.13940 | 1 | 3.66E-04 | 0.09  | 1.85   | -     | 72.1    |
| AHQ-2-13-, 1930 - 1974      | R.VYSTSVTGSR.E                                                          | 1057.13940 | 2 | 4.79E-05 | 0.90  | 3.25   | -     | 1013.1  |
| AHQ-2-13, 2083 - 2145       | R.VYSTSVTGSR.E                                                          | 1057.13940 | 2 | 6.75E-07 | 0.75  | 2.80   | -     | 743.4   |
| AHQ-2-13, 1939 - 2005       | R.VYSTSVTGSR.E                                                          | 1057.13940 | 2 | 9.95E-06 | 0.89  | 3.30   | -     | 914.5   |
| AHQ-2-13, 1887 - 1987       | R.VYSTSVTGSR.E                                                          | 1057.13940 | 1 | 4.26E-05 | 0.24  | 2.38   | -     | 71.1    |
| AHQ-2-13-, 1709 - 1770      | R.VYSTSVTGSR.E                                                          | 1057.13940 | 2 | 1.38E-05 | 0.93  | 3.26   | -     | 1261.5  |
| AHQ-2-13, 1827 - 2279       | R.VYSTSVTGSR.E                                                          | 1057.13940 | 1 | 8.25E-04 | 0.02  | 1.91   | -     | 41.7    |
| AHQ-2-13, 2335              | R.VYSTSVTGSREIK.S                                                       | 1427.58510 | 2 | 2.90E-05 | 0.57  | 2.53   | -     | 641.6   |
| AHQ-2-13-, 2225             | R.VYSTSVTGSREIK.S                                                       | 1427.58510 | 2 | 8.76E-07 | 0.56  | 2.95   | -     | 507.5   |
| gi 4503689 ref NP_000499.1  | fibrinogen, alpha chain isoform alpha-E preproprotein [Homo sapiens] [M |            |   | 1.38E-11 | 18.48 | 220.27 | 29.10 | 94972.5 |
| AHQ-2-6, 5849 - 5854        | K.DSDWPFCSDDEDWNYK.C                                                    | 1965.98609 | 2 | 4.10E-06 | 0.94  | 4.21   | -     | 737.5   |
| AHQ-2-7, 6017               | K.DSDWPFCSDDEDWNYK.C                                                    | 1965.98609 | 2 | 2.37E-05 | 0.91  | 3.27   | -     | 713.9   |
| AHQ-2-9, 5555               | K.DSHSLTTNIMEILR.G                                                      | 1630.84839 | 2 | 2.82E-05 | 0.95  | 3.99   | -     | 1300.5  |
| AHQ-2-10, 4455              | K.DSHSLTTNIMEILR.G                                                      | 1646.84779 | 2 | 4.02E-06 | 0.86  | 3.35   | -     | 801.1   |
| AHQ-2-1, 5193               | K.DSHSLTTNIMEILR.G                                                      | 1646.84779 | 2 | 8.98E-04 | 0.90  | 3.18   | -     | 1261.6  |
| AHQ-2-7, 5495               | K.DSHSLTTNIMEILR.G                                                      | 1630.84839 | 2 | 1.14E-04 | 0.85  | 2.70   | -     | 1057.4  |
| AHQ-2-12, 5771              | K.DSHSLTTNIMEILR.G                                                      | 1630.84839 | 2 | 2.62E-05 | 0.96  | 4.00   | -     | 1573.3  |
| AHQ-2-10, 5216 - 5252       | K.DSHSLTTNIMEILR.G                                                      | 1630.84839 | 2 | 6.74E-07 | 0.95  | 4.07   | -     | 1178.2  |
| AHQ-2-11, 5501 - 5506       | K.DSHSLTTNIMEILR.G                                                      | 1630.84839 | 2 | 5.29E-04 | 0.82  | 3.51   | -     | 533.6   |
| AHQ-2-13, 2403              | K.ESSSHHPGIAEFFPSR.G                                                    | 1638.72252 | 2 | 9.57E-05 | 0.78  | 3.27   | -     | 404.9   |
| AHQ-2-13, 2696              | R.EVDLKDYEQQK.Q                                                         | 1510.58460 | 2 | 2.69E-06 | 0.74  | 2.73   | -     | 693.2   |
| AHQ-2-1, 2694               | R.EVDLKDYEQQK.Q                                                         | 1510.58460 | 2 | 3.19E-07 | 0.66  | 2.85   | -     | 585.7   |
| AHQ-2-6, 2365               | R.EVDLKDYEQQK.Q                                                         | 1510.58460 | 2 | 6.22E-08 | 0.93  | 3.89   | -     | 1023.3  |
| AHQ-2-5, 2360               | R.EVDLKDYEQQK.Q                                                         | 1510.58460 | 2 | 4.61E-05 | 0.81  | 2.82   | -     | 681.1   |
| AHQ-2-9, 2420               | R.EVDLKDYEQQK.Q                                                         | 1510.58460 | 2 | 1.08E-06 | 0.78  | 2.90   | -     | 666.8   |
| AHQ-2-7, 2331               | R.EVDLKDYEQQK.Q                                                         | 1510.58460 | 2 | 2.78E-05 | 0.77  | 3.09   | -     | 574.2   |
| AHQ-2-8, 2247 - 2255        | R.EVDLKDYEQQK.Q                                                         | 1510.58460 | 2 | 2.66E-07 | 0.88  | 3.47   | -     | 863.5   |
| AHQ-2-13-, 2630             | R.EVDLKDYEQQK.Q                                                         | 1510.58460 | 2 | 5.65E-09 | 0.90  | 3.32   | -     | 906.9   |
| AHQ-2-13, 6527              | K.EVVTSEDGSDCPAAMDGLTSLGIGTLDGFR.H                                      | 3131.34937 | 3 | 7.43E-06 | 0.72  | 3.24   | -     | 760.4   |
| AHQ-2-13, 6279 - 6285       | K.EVVTSEDGSDCPAAMDGLTSLGIGTLDGFR.H                                      | 3131.34937 | 3 | 2.66E-08 | 0.94  | 3.39   | -     | 958.3   |
| AHQ-2-1, 6721               | K.EVVTSEDGSDCPAAMDGLTSLGIGTLDGFR.H                                      | 3131.34937 | 3 | 3.50E-09 | 0.88  | 4.23   | -     | 956.9   |
| AHQ-2-11, 6212              | K.EVVTSEDGSDCPAAMDGLTSLGIGTLDGFR.H                                      | 3131.34937 | 3 | 2.07E-05 | 0.91  | 4.63   | -     | 1015.4  |
| AHQ-2-1, 6581 - 6606        | K.EVVTSEDGSDCPAAMDGLTSLGIGTLDGFR.H                                      | 3147.34877 | 3 | 1.10E-04 | 0.91  | 4.83   | -     | 640.6   |
| AHQ-2-7, 6752               | K.EVVTSEDGSDCPAAMDGLTSLGIGTLDGFR.H                                      | 3131.34937 | 3 | 3.17E-05 | 0.68  | 3.21   | -     | 742.2   |
| AHQ-2-7, 1495 - 1501        | R.GGSTSYGTGSETESPR.N                                                    | 1573.55765 | 2 | 3.64E-05 | 0.76  | 3.61   | -     | 338.4   |
| AHQ-2-1, 1886               | R.GGSTSYGTGSETESPR.N                                                    | 1573.55765 | 2 | 7.37E-07 | 0.76  | 3.61   | -     | 664.0   |
| AHQ-2-4, 4961 - 4974        | K.GLIDEVNDQFTNR.I                                                       | 1521.61384 | 2 | 6.18E-07 | 0.95  | 4.35   | -     | 1089.9  |
| AHQ-2-10, 4548              | K.GLIDEVNDQFTNR.I                                                       | 1521.61384 | 2 | 2.00E-07 | 0.72  | 2.51   | -     | 830.9   |
| AHQ-2-10, 4414 - 4426       | K.GLIDEVNDQFTNR.I                                                       | 1521.61384 | 2 | 5.54E-08 | 0.93  | 4.22   | -     | 925.5   |
| AHQ-2-12, 4758              | K.GLIDEVNDQFTNR.I                                                       | 1521.61384 | 2 | 2.54E-08 | 0.93  | 4.33   | -     | 807.8   |
| AHQ-2-9, 4627 - 4704        | K.GLIDEVNDQFTNR.I                                                       | 1521.61384 | 2 | 1.11E-06 | 0.74  | 3.19   | -     | 713.9   |
| AHQ-2-9, 5167               | K.GLIDEVNDQFTNR.I                                                       | 1521.61384 | 2 | 2.03E-08 | 0.86  | 3.45   | -     | 876.0   |
| AHQ-2-5, 4785 - 4788        | K.GLIDEVNDQFTNR.I                                                       | 1521.61384 | 2 | 6.35E-05 | 0.92  | 3.64   | -     | 1100.9  |
| AHQ-2-1, 4937 - 4940        | K.GLIDEVNDQFTNR.I                                                       | 1521.61384 | 2 | 1.70E-09 | 0.94  | 4.11   | -     | 960.4   |
| AHQ-2-6, 4671 - 4687        | K.GLIDEVNDQFTNR.I                                                       | 1521.61384 | 2 | 1.34E-09 | 0.92  | 3.84   | -     | 860.9   |
| AHQ-2-2, 5016               | K.GLIDEVNDQFTNR.I                                                       | 1521.61384 | 2 | 9.20E-11 | 0.91  | 3.78   | -     | 883.2   |
| AHQ-2-11, 4524 - 4585       | K.GLIDEVNDQFTNR.I                                                       | 1521.61384 | 2 | 1.46E-08 | 0.85  | 2.83   | -     | 997.1   |
| AHQ-2-3, 4971               | K.GLIDEVNDQFTNR.I                                                       | 1521.61384 | 2 | 1.39E-09 | 0.90  | 3.18   | -     | 901.0   |
| AHQ-2-8, 4571 - 4579        | K.GLIDEVNDQFTNR.I                                                       | 1521.61384 | 2 | 4.56E-08 | 0.92  | 4.12   | -     | 863.0   |
| AHQ-2-8, 4124               | K.GLIDEVNDQFTNR.I                                                       | 1521.61384 | 2 | 2.37E-05 | 0.87  | 3.02   | -     | 712.2   |
| AHQ-2-7, 4703               | K.GLIDEVNDQFTNR.I                                                       | 1521.61384 | 2 | 2.47E-07 | 0.82  | 3.26   | -     | 753.1   |
| AHQ-2-4, 2145 - 2150        | R.GSESGIFTN.K.E                                                         | 1141.21317 | 1 | 7.56E-04 | 0.51  | 2.22   | -     | 426.0   |
| AHQ-2-13, 2383              | R.GSESGIFTN.K.E                                                         | 1141.21317 | 2 | 4.29E-04 | 0.75  | 2.97   | -     | 577.2   |
| AHQ-2-6, 1910               | R.GSESGIFTN.K.E                                                         | 1141.21317 | 1 | 1.56E-04 | 0.20  | 2.09   | -     | 255.8   |
| AHQ-2-6, 1918               | R.GSESGIFTN.K.E                                                         | 1141.21317 | 1 | 8.48E-06 | 0.57  | 2.61   | -     | 388.8   |
| AHQ-2-13-, 2262             | R.GSESGIFTN.K.E                                                         | 1141.21317 | 1 | 1.77E-05 | 0.58  | 2.88   | -     | 313.1   |
| AHQ-2-13-, 3053             | R.HRPDEAAFFDTASTGK.T                                                    | 1594.66329 | 2 | 3.38E-06 | 0.85  | 3.81   | -     | 461.3   |
| AHQ-2-13, 2669              | R.HRPDEAAFFDTASTGK.T                                                    | 1887.98954 | 2 | 2.45E-04 | 0.91  | 3.79   | -     | 819.3   |
| AHQ-2-4, 2404               | R.HRPDEAAFFDTASTGK.T                                                    | 1887.98954 | 2 | 8.91E-05 | 0.85  | 3.61   | -     | 313.7   |
| AHQ-2-7, 2168               | R.HRPDEAAFFDTASTGK.T                                                    | 1887.98954 | 3 | 7.11E-07 | 0.97  | 4.99   | -     | 2083.1  |
| AHQ-2-6, 2158 - 2230        | R.HRPDEAAFFDTASTGK.T                                                    | 1887.98954 | 3 | 1.55E-04 | 0.95  | 4.71   | -     | 1518.9  |
| AHQ-2-5, 2221               | R.HRPDEAAFFDTASTGK.T                                                    | 1887.98954 | 2 | 7.63E-06 | 0.94  | 4.49   | -     | 844.3   |
| AHQ-2-13-, 2594             | R.HRPDEAAFFDTASTGK.T                                                    | 1887.98954 | 2 | 2.24E-05 | 0.95  | 5.01   | -     | 864.0   |
| AHQ-2-9, 2258               | R.HRPDEAAFFDTASTGK.T                                                    | 1887.98954 | 2 | 1.90E-04 | 0.96  | 4.42   | -     | 1420.0  |
| AHQ-2-13-, 2613             | R.HRPDEAAFFDTASTGK.T                                                    | 1887.98954 | 3 | 2.65E-06 | 0.97  | 4.99   | -     | 2382.7  |
| AHQ-2-13, 2691              | R.HRPDEAAFFDTASTGK.T                                                    | 1887.98954 | 3 | 8.78E-07 | 0.94  | 4.19   | -     | 1518.9  |
| AHQ-2-11, 2414              | R.HRPDEAAFFDTASTGK.T                                                    | 1887.98954 | 2 | 1.41E-05 | 0.96  | 4.86   | -     | 1139.8  |

|                             |                                                     |            |   |          |       |        |       |         |
|-----------------------------|-----------------------------------------------------|------------|---|----------|-------|--------|-------|---------|
| AHQ-2-10, 2256              | R.HRHPDEAAFFDTASTGK.T                               | 1887.98954 | 2 | 4.39E-05 | 0.95  | 4.28   | -     | 1163.2  |
| AHQ-2-9, 3123               | K.M*KPVPDLVPGNFK.S                                  | 1458.75054 | 2 | 4.91E-07 | 0.84  | 3.39   | -     | 571.9   |
| AHQ-2-10, 3144 - 3159       | K.M*KPVPDLVPGNFK.S                                  | 1458.75054 | 2 | 1.54E-04 | 0.63  | 3.07   | -     | 358.0   |
| AHQ-2-10, 3594              | K.MKPVPDLVPGNFK.S                                   | 1442.75114 | 2 | 1.94E-04 | 0.80  | 3.15   | -     | 469.0   |
| AHQ-2-9, 5127               | K.NNKDSHSLTTNIMEILR.G                               | 1987.22751 | 2 | 1.31E-05 | 0.86  | 3.97   | -     | 688.2   |
| AHQ-2-9, 5020               | K.NNKDSHSLTTNIMEILR.G                               | 1987.22751 | 2 | 4.81E-06 | 0.95  | 4.36   | -     | 1109.3  |
| AHQ-2-4, 2133               | R.NPSSAGSWNSGSSGPGSTGNR.N                           | 1964.94443 | 2 | 6.75E-06 | 0.88  | 3.73   | -     | 551.9   |
| AHQ-2-6, 1938               | R.NPSSAGSWNSGSSGPGSTGNR.N                           | 1964.94443 | 2 | 6.05E-06 | 0.84  | 3.08   | -     | 692.9   |
| AHQ-2-7, 2031               | R.NPSSAGSWNSGSSGPGSTGNR.N                           | 1964.94443 | 2 | 1.01E-09 | 0.92  | 4.58   | -     | 558.4   |
| AHQ-2-9, 2123               | R.NPSSAGSWNSGSSGPGSTGNR.N                           | 1964.94443 | 2 | 1.20E-06 | 0.90  | 3.70   | -     | 759.9   |
| AHQ-2-7, 1876               | R.NPSSAGSWNSGSSGPGSTGNR.N                           | 1964.94443 | 2 | 6.70E-11 | 0.96  | 4.76   | -     | 1106.5  |
| AHQ-2-1, 2282               | R.NPSSAGSWNSGSSGPGSTGNR.N                           | 1964.94443 | 2 | 3.13E-05 | 0.43  | 3.02   | -     | 289.8   |
| AHQ-2-9, 2518               | K.NSLFEYQK.N                                        | 1029.12765 | 1 | 3.83E-04 | 0.28  | 2.65   | -     | 199.4   |
| AHQ-2-8, 1816 - 1820        | R.PGSTGTWNPSSER.G                                   | 1433.46515 | 2 | 1.83E-06 | 0.86  | 3.86   | -     | 502.2   |
| AHQ-2-7, 1857               | R.PGSTGTWNPSSER.G                                   | 1433.46515 | 2 | 9.74E-05 | 0.67  | 3.21   | -     | 490.4   |
| AHQ-2-11, 2150              | R.PGSTGTWNPSSER.G                                   | 1433.46515 | 2 | 3.26E-04 | 0.66  | 2.84   | -     | 623.6   |
| AHQ-2-6, 1930 - 1934        | R.PGSTGTWNPSSER.G                                   | 1433.46515 | 2 | 3.98E-09 | 0.78  | 3.20   | -     | 396.7   |
| AHQ-2-7, 4683               | R.PNNPDWGTFFEEVSGNVSPGTR.R                          | 2261.34962 | 2 | 1.73E-07 | 0.95  | 4.91   | -     | 979.6   |
| AHQ-2-7, 4665 - 4668        | R.PNNPDWGTFFEEVSGNVSPGTR.R                          | 2261.34962 | 2 | 1.73E-06 | 0.89  | 3.59   | -     | 906.5   |
| AHQ-2-11, 4610 - 4649       | R.PNNPDWGTFFEEVSGNVSPGTR.R                          | 2261.34962 | 2 | 1.46E-07 | 0.90  | 4.25   | -     | 666.7   |
| AHQ-2-10, 4435              | R.PNNPDWGTFFEEVSGNVSPGTR.R                          | 2261.34962 | 2 | 9.22E-07 | 0.82  | 3.64   | -     | 576.7   |
| AHQ-2-6, 4637 - 4703        | R.PNNPDWGTFFEEVSGNVSPGTR.R                          | 2261.34962 | 2 | 1.03E-04 | 0.79  | 3.47   | -     | 357.2   |
| AHQ-2-13, 6813 - 6875       | K.TPPGFFSPMLGEFVSETESR.G                            | 2266.51432 | 2 | 3.26E-05 | 0.78  | 3.51   | -     | 340.1   |
| AHQ-2-13-, 7015 - 7085      | K.TPPGFFSPMLGEFVSETESR.G                            | 2266.51432 | 2 | 2.80E-08 | 0.90  | 4.45   | -     | 382.2   |
| AHQ-2-2, 7313               | K.TPPGFFSPMLGEFVSETESR.G                            | 2282.51372 | 2 | 9.62E-04 | 0.47  | 2.92   | -     | 202.2   |
| AHQ-2-10, 6747              | K.TPPGFFSPMLGEFVSETESR.G                            | 2266.51432 | 2 | 3.45E-07 | 0.82  | 3.67   | -     | 358.9   |
| AHQ-2-3, 7543 - 7545        | K.TPPGFFSPMLGEFVSETESR.G                            | 2266.51432 | 2 | 2.10E-06 | 0.87  | 4.06   | -     | 351.6   |
| AHQ-2-4, 7604               | K.TPPGFFSPMLGEFVSETESR.G                            | 2266.51432 | 2 | 1.13E-06 | 0.83  | 3.33   | -     | 505.4   |
| AHQ-2-2, 7598               | K.TPPGFFSPMLGEFVSETESR.G                            | 2266.51432 | 2 | 2.33E-08 | 0.88  | 3.89   | -     | 434.1   |
| AHQ-2-6, 7203 - 7237        | K.TPPGFFSPMLGEFVSETESR.G                            | 2266.51432 | 2 | 6.97E-07 | 0.82  | 3.37   | -     | 390.5   |
| AHQ-2-9, 7380 - 7420        | K.TPPGFFSPMLGEFVSETESR.G                            | 2266.51432 | 2 | 3.88E-04 | 0.62  | 2.82   | -     | 292.2   |
| AHQ-2-1, 7086               | K.TPPGFFSPMLGEFVSETESR.G                            | 2282.51372 | 2 | 2.99E-04 | 0.52  | 2.74   | -     | 163.9   |
| AHQ-2-7, 7483               | K.TPPGFFSPMLGEFVSETESR.G                            | 2266.51432 | 2 | 2.39E-06 | 0.84  | 3.76   | -     | 287.9   |
| AHQ-2-11, 6426 - 6493       | K.TPPGFFSPMLGEFVSETESR.G                            | 2282.51372 | 2 | 8.01E-05 | 0.48  | 3.00   | -     | 107.9   |
| AHQ-2-11, 6792 - 6793       | K.TPPGFFSPMLGEFVSETESR.G                            | 2266.51432 | 2 | 1.38E-11 | 0.93  | 4.88   | -     | 531.1   |
| AHQ-2-13-, 6827 - 6829      | K.TPPGFFSPMLGEFVSETESR.G                            | 2282.51372 | 2 | 5.89E-07 | 0.87  | 4.37   | -     | 219.7   |
| AHQ-2-9, 6992 - 6994        | K.TPPGFFSPMLGEFVSETESR.G                            | 2282.51372 | 2 | 7.40E-04 | 0.75  | 3.33   | -     | 303.7   |
| AHQ-2-1, 7260 - 7261        | K.TPPGFFSPMLGEFVSETESR.G                            | 2266.51432 | 2 | 1.34E-05 | 0.86  | 3.63   | -     | 472.6   |
| AHQ-2-12, 6837              | K.TPPGFFSPMLGEFVSETESR.G                            | 2282.51372 | 2 | 1.38E-05 | 0.77  | 3.51   | -     | 184.5   |
| AHQ-2-12, 7147 - 7153       | K.TPPGFFSPMLGEFVSETESR.G                            | 2266.51432 | 2 | 2.82E-04 | 0.86  | 3.86   | -     | 471.7   |
| AHQ-2-5, 7079               | K.TPPGFFSPMLGEFVSETESR.G                            | 2282.51372 | 2 | 5.10E-04 | 0.67  | 2.90   | -     | 221.9   |
| AHQ-2-12, 2254 - 2334       | K.VQHIQLLQK.N                                       | 1107.33106 | 1 | 4.15E-04 | 0.48  | 2.61   | -     | 499.5   |
| AHQ-2-13, 2451              | K.VQHIQLLQK.N                                       | 1107.33106 | 1 | 5.72E-04 | 0.61  | 2.47   | -     | 647.3   |
| AHQ-2-11, 2242              | K.VQHIQLLQK.N                                       | 1107.33106 | 1 | 1.16E-04 | 0.36  | 2.33   | -     | 584.5   |
| AHQ-2-10, 2059              | K.VQHIQLLQK.N                                       | 1107.33106 | 1 | 3.51E-04 | 0.65  | 2.57   | -     | 600.3   |
| AHQ-2-10, 2056              | K.VQHIQLLQK.N                                       | 1107.33106 | 2 | 1.89E-04 | 0.83  | 3.00   | -     | 820.9   |
| AHQ-2-9, 2040 - 2046        | K.VQHIQLLQK.N                                       | 1107.33106 | 2 | 4.51E-06 | 0.90  | 3.25   | -     | 813.2   |
| AHQ-2-9, 2038               | K.VQHIQLLQK.N                                       | 1107.33106 | 1 | 8.36E-04 | 0.48  | 2.84   | -     | 426.2   |
| AHQ-2-8, 1842               | K.VQHIQLLQK.N                                       | 1107.33106 | 1 | 5.72E-04 | 0.67  | 2.77   | -     | 540.7   |
| AHQ-2-8, 1834               | K.VQHIQLLQK.N                                       | 1107.33106 | 1 | 3.26E-04 | 0.66  | 2.63   | -     | 641.1   |
| AHQ-2-13-, 2343             | K.VQHIQLLQK.N                                       | 1107.33106 | 1 | 4.88E-04 | 0.29  | 2.48   | -     | 441.2   |
| AHQ-2-7, 1904               | K.VQHIQLLQK.N                                       | 1107.33106 | 2 | 5.70E-04 | 0.76  | 2.79   | -     | 618.1   |
| AHQ-2-5, 1987               | K.VQHIQLLQK.N                                       | 1107.33106 | 1 | 4.89E-04 | 0.32  | 2.37   | -     | 489.8   |
| AHQ-2-4, 2248 - 2253        | K.VQHIQLLQK.N                                       | 1107.33106 | 1 | 8.47E-04 | 0.72  | 2.65   | -     | 667.2   |
| AHQ-2-2, 2261               | K.VQHIQLLQK.N                                       | 1107.33106 | 1 | 1.89E-04 | 0.06  | 2.05   | -     | 407.2   |
| AHQ-2-1, 2492               | K.VQHIQLLQK.N                                       | 1107.33106 | 1 | 3.40E-04 | 0.62  | 2.51   | -     | 662.2   |
| AHQ-2-9, 2030 - 2099        | K.VQHIQLLQK.N                                       | 1107.33106 | 1 | 1.42E-04 | 0.27  | 2.19   | -     | 540.3   |
| gi 21419203 ref NP_705935.1 | tropomyosin 3 [Homo sapiens]                        |            |   | 1.53E-11 | 5.55  | 60.27  | 20.20 | 29032.5 |
| AHQ-2-9, 2202               | R.AREQAAEVALSNLR.R                                  | 1544.65218 | 2 | 1.95E-04 | 0.98  | 5.46   | -     | 3011.3  |
| AHQ-2-9, 3391               | R.IQLVEEELDR.A                                      | 1244.37653 | 2 | 5.15E-07 | 0.90  | 3.44   | -     | 974.0   |
| AHQ-2-10, 3354 - 3355       | R.IQLVEEELDR.A                                      | 1244.37653 | 2 | 4.36E-06 | 0.84  | 3.33   | -     | 811.1   |
| AHQ-2-10, 2571              | K.IQVLQQQADDAEER.A                                  | 1643.73738 | 2 | 1.53E-11 | 0.97  | 4.70   | -     | 1659.5  |
| AHQ-2-9, 2638               | K.IQVLQQQADDAEER.A                                  | 1643.73738 | 2 | 3.62E-06 | 0.97  | 4.70   | -     | 1842.6  |
| AHQ-2-10, 2312              | R.KIQLVQQQADDAEER.A                                 | 1771.91030 | 2 | 2.07E-06 | 0.98  | 5.05   | -     | 2107.0  |
| AHQ-2-9, 2332               | R.KIQLVQQQADDAEER.A                                 | 1771.91030 | 2 | 7.98E-07 | 0.97  | 5.16   | -     | 1416.7  |
| AHQ-2-10, 2983              | R.RIQLVEEELDR.A                                     | 1400.56288 | 2 | 1.45E-07 | 0.96  | 4.21   | -     | 1295.8  |
| AHQ-2-9, 2966               | R.RIQLVEEELDR.A                                     | 1400.56288 | 2 | 4.50E-08 | 0.98  | 4.72   | -     | 2021.1  |
| AHQ-2-9, 2894               | K.TIDDELKLC.C                                       | 1190.32563 | 2 | 4.63E-06 | 0.77  | 3.06   | -     | 536.8   |
| gi 11761631 ref NP_005132.1 | fibrinogen, beta chain preproprotein [Homo sapiens] |            |   | 1.65E-11 | 21.63 | 260.29 | 49.30 | 55901.8 |
| AHQ-2-7, 2193 - 2195        | K.AHYGGFTVQNEANK.Y                                  | 1536.63020 | 2 | 5.03E-08 | 0.94  | 4.17   | -     | 1148.3  |
| AHQ-2-6, 2077 - 2078        | K.AHYGGFTVQNEANK.Y                                  | 1536.63020 | 2 | 1.91E-07 | 0.95  | 4.52   | -     | 1296.9  |
| AHQ-2-7, 1983 - 1985        | K.AHYGGFTVQNEANK.Y                                  | 1536.63020 | 2 | 6.16E-09 | 0.90  | 3.79   | -     | 905.7   |
| AHQ-2-11, 4001 - 4017       | K.DNENVVNEYSSELEK.H                                 | 1769.80167 | 2 | 2.17E-06 | 0.93  | 4.54   | -     | 1009.2  |
| AHQ-2-4, 4332               | K.DNENVVNEYSSELEK.H                                 | 1769.80167 | 2 | 2.94E-05 | 0.84  | 3.46   | -     | 741.5   |
| AHQ-2-1, 4381               | K.DNENVVNEYSSELEK.H                                 | 1769.80167 | 2 | 1.71E-10 | 0.93  | 3.90   | -     | 1094.2  |
| AHQ-2-7, 4072 - 4079        | K.DNENVVNEYSSELEK.H                                 | 1769.80167 | 2 | 2.66E-08 | 0.92  | 4.11   | -     | 808.2   |
| AHQ-2-7, 4365               | K.DNENVVNEYSSELEK.H                                 | 1769.80167 | 2 | 4.88E-05 | 0.61  | 3.00   | -     | 621.9   |
| AHQ-2-7, 4452               | K.DNENVVNEYSSELEK.H                                 | 1769.80167 | 2 | 1.41E-08 | 0.88  | 3.72   | -     | 802.4   |
| AHQ-2-12, 4165              | K.DNENVVNEYSSELEK.H                                 | 1769.80167 | 2 | 2.88E-04 | 0.70  | 3.24   | -     | 540.1   |
| AHQ-2-6, 4363               | K.DNENVVNEYSSELEK.H                                 | 1769.80167 | 2 | 1.80E-05 | 0.90  | 3.89   | -     | 703.2   |
| AHQ-2-6, 4063 - 4077        | K.DNENVVNEYSSELEK.H                                 | 1769.80167 | 2 | 5.42E-08 | 0.92  | 4.29   | -     | 841.8   |
| AHQ-2-9, 4096               | K.DNENVVNEYSSELEK.H                                 | 1769.80167 | 2 | 1.21E-05 | 0.86  | 3.42   | -     | 829.3   |
| AHQ-2-7, 3359 - 3439        | K.DNENVVNEYSSELEK.H                                 | 1769.80167 | 2 | 4.95E-07 | 0.76  | 3.73   | -     | 475.9   |
| AHQ-2-7, 3381               | K.EDGGGWVYNR.C                                      | 1240.26508 | 2 | 1.78E-04 | 0.57  | 2.76   | -     | 402.7   |
| AHQ-2-6, 3413               | K.EDGGGWVYNR.C                                      | 1240.26508 | 2 | 3.62E-07 | 0.80  | 2.94   | -     | 470.8   |
| AHQ-2-6, 3137 - 3142        | R.EEAPSLRPAPPPISGGGYR.A                             | 1952.15981 | 3 | 2.28E-05 | 0.76  | 3.07   | -     | 695.5   |
| AHQ-2-10, 3099              | R.EEAPSLRPAPPPISGGGYR.A                             | 1952.15981 | 2 | 7.61E-05 | 0.27  | 2.73   | -     | 143.1   |
| AHQ-2-6, 3141 - 3153        | R.EEAPSLRPAPPPISGGGYR.A                             | 1952.15981 | 2 | 1.34E-05 | 0.15  | 2.53   | -     | 180.5   |
| AHQ-2-6, 3867 - 3869        | K.GGETSEMYLIQPDSSVKPYR.V                            | 2258.49373 | 2 | 1.61E-04 | 0.88  | 4.30   | -     | 561.6   |
| AHQ-2-7, 3320               | K.GGETSEM*YLIQPDSSVKPYR.V                           | 2274.49313 | 2 | 7.44E-07 | 0.67  | 3.37   | -     | 389.1   |
| AHQ-2-7, 3815               | K.GGETSEMYLIQPDSSVKPYR.V                            | 2258.49373 | 2 | 9.72E-06 | 0.82  | 3.66   | -     | 454.6   |
| AHQ-2-8, 3755               | K.GGETSEMYLIQPDSSVKPYR.V                            | 2258.49373 | 2 | 1.53E-04 | 0.82  | 3.87   | -     | 483.5   |
| AHQ-2-8, 3759               | K.GGETSEMYLIQPDSSVKPYR.V                            | 2258.49373 | 3 | 4.66E-09 | 0.86  | 3.81   | -     | 950.9   |
| AHQ-2-7, 3819               | K.GGETSEMYLIQPDSSVKPYR.V                            | 2258.49373 | 3 | 4.18E-05 | 0.71  | 3.16   | -     | 624.0   |
| AHQ-2-9, 3859 - 3862        | K.GGETSEMYLIQPDSSVKPYR.V                            | 2258.49373 | 2 | 1.02E-06 | 0.93  | 4.51   | -     | 754.0   |
| AHQ-2-7, 4044 - 4107        | K.HGTDDGVVMMNWK.G                                   | 1545.70374 | 2 | 6.44E-06 | 0.94  | 4.34   | -     | 964.0   |
| AHQ-2-10, 3872 - 3920       | K.HGTDDGVVMMNWK.G                                   | 1545.70374 | 2 | 8.35E-09 | 0.95  | 3.92   | -     | 1359.3  |
| AHQ-2-6, 3219 - 3290        | K.HGTDDGVVMM*NNWK.G                                 | 1561.70314 | 2 | 7.96E-05 | 0.95  | 3.75   | -     | 1404.5  |
| AHQ-2-7, 3880 - 3956        | K.HGTDDGVVMMNWK.G                                   | 1545.70374 | 2 | 1.68E-08 | 0.98  | 5.63   | -     | 1329.2  |
| AHQ-2-6, 3939 - 3975        | K.HGTDDGVVMMNWK.G                                   | 1545.70374 | 2 | 2.15E-08 | 0.98  | 5.03   | -     | 1798.0  |
| AHQ-2-12, 3251              | K.IRPFPPQQ                                          | 1033.20750 | 2 | 2.08E-04 | 0.62  | 2.53   | -     | 504.6   |
| AHQ-2-7, 6237 - 6309        | R.KAPDAGGCLHADPDLGLVCPCTGQLQALLQERPIR.N             | 4089.58482 | 3 | 1.46E-04 | 0.81  | 4.10   | -     | 350.3   |
| AHQ-2-8, 3031               | R.KGGETSEMYLIQPDSSVKPYR.V                           | 2386.66664 | 2 | 7.48E-06 | 0.96  | 5.80   | -     | 1032.1  |
| AHQ-2-9, 3279               | R.KGGETSEMYLIQPDSSVKPYR.V                           | 2386.66664 | 3 | 4.17E-04 | 0.84  | 4.13   | -     | 641.9   |
| AHQ-2-8, 3027 - 3028        | R.KGGETSEMYLIQPDSSVKPYR.V                           | 2386.66664 | 3 | 5.89E-10 | 0.93  | 5.16   | -     | 730.4   |
| AHQ-2-6, 2953               | R.KGGETSEM*YLIQPDSSVKPYR.V                          | 2402.66604 | 3 | 5.60E-04 | 0.83  | 3.68   | -     | 881.6   |
| AHQ-2-6, 3373 - 3386        | R.KGGETSEMYLIQPDSSVKPYR.V                           | 2386.66664 | 3 | 1.65E-11 | 0.91  | 4.88   | -     | 683.1   |

|                            |                                                 |            |   |          |       |        |       |          |
|----------------------------|-------------------------------------------------|------------|---|----------|-------|--------|-------|----------|
| AHQ-2-7, 3241 - 3311       | R.KGGETSEMIYLIQPDSSVKPYR.V                      | 2386.66664 | 3 | 4.36E-05 | 0.91  | 4.69   | -     | 674.2    |
| AHQ-2-11, 6118             | R.M*GPTLEMIEMEDWK.G                             | 1708.97776 | 2 | 1.08E-05 | 0.87  | 3.34   | -     | 946.6    |
| AHQ-2-9, 7052              | R.MGPTLEMIEMEDWK.G                              | 1692.97836 | 2 | 5.41E-05 | 0.83  | 3.33   | -     | 672.8    |
| AHQ-2-10, 5947             | R.M*GPTLEMIEMEDWK.G                             | 1708.97776 | 2 | 8.60E-04 | 0.83  | 3.36   | -     | 627.6    |
| AHQ-2-10, 6479             | R.MGPTLEMIEMEDWK.G                              | 1692.97836 | 2 | 2.09E-06 | 0.95  | 4.57   | -     | 1178.0   |
| AHQ-2-6, 6955 - 6965       | R.MGPTLEMIEMEDWK.G                              | 1692.97836 | 2 | 1.35E-07 | 0.96  | 4.85   | -     | 1353.1   |
| AHQ-2-11, 6549 - 6558      | R.MGPTLEMIEMEDWK.G                              | 1692.97836 | 2 | 1.84E-04 | 0.96  | 4.79   | -     | 1271.3   |
| AHQ-2-11, 5109             | R.MGPTLEMIEM*EDWK.G                             | 1708.97776 | 2 | 2.06E-04 | 0.87  | 3.74   | -     | 743.1    |
| AHQ-2-7, 7131              | R.MGPTLEMIEMEDWK.G                              | 1692.97836 | 2 | 4.00E-06 | 0.90  | 3.36   | -     | 1094.1   |
| AHQ-2-7, 7037 - 7099       | R.MGPTLEMIEMEDWK.G                              | 1692.97836 | 2 | 4.67E-08 | 0.96  | 5.16   | -     | 1181.7   |
| AHQ-2-7, 6388 - 6403       | R.M*GPTLEMIEMEDWK.G                             | 1708.97776 | 2 | 1.30E-06 | 0.93  | 3.47   | -     | 1244.3   |
| AHQ-2-6, 5243              | R.MGPTLEMIEM*EDWK.G                             | 1708.97776 | 2 | 6.38E-05 | 0.93  | 4.36   | -     | 708.8    |
| AHQ-2-7, 6165              | R.MGPTLEMIEMEDWKGD.K.V                          | 1993.29069 | 3 | 1.21E-05 | 0.67  | 3.16   | -     | 592.3    |
| AHQ-2-7, 6171              | R.MGPTLEMIEMEDWKGD.K.V                          | 1993.29069 | 2 | 1.20E-08 | 0.93  | 4.08   | -     | 1079.0   |
| AHQ-2-7, 5163              | K.NYCGLPGEYWLGNDK.I                             | 1787.92994 | 2 | 6.45E-10 | 0.93  | 4.49   | -     | 448.3    |
| AHQ-2-11, 5013             | K.NYCGLPGEYWLGNDK.I                             | 1787.92994 | 2 | 5.34E-04 | 0.87  | 3.82   | -     | 435.9    |
| AHQ-2-6, 5985              | K.NYCGLPGEYWLGNDKISQLTR.M                       | 2486.74455 | 2 | 9.84E-09 | 0.80  | 3.43   | -     | 387.2    |
| AHQ-2-6, 5990              | K.NYCGLPGEYWLGNDKISQLTR.M                       | 2486.74455 | 3 | 4.70E-08 | 0.81  | 3.59   | -     | 392.6    |
| AHQ-2-7, 2591              | R.SILENLR.S                                     | 844.97899  | 2 | 9.01E-04 | 0.81  | 2.61   | -     | 893.4    |
| AHQ-2-8, 3672 - 3694       | R.TPCTVSNIPVSVGK.E                              | 1621.85811 | 2 | 3.00E-05 | 0.86  | 3.54   | -     | 735.6    |
| AHQ-2-6, 3701              | R.TPCTVSNIPVSVGK.E                              | 1621.85811 | 2 | 3.72E-04 | 0.90  | 4.10   | -     | 626.7    |
| AHQ-2-6, 4867 - 4869       | R.TPCTVSNIPVSVGKECEEIIR.K                       | 2552.88440 | 2 | 1.53E-08 | 0.93  | 4.74   | -     | 550.0    |
| AHQ-2-7, 4805 - 4883       | R.TPCTVSNIPVSVGKECEEIIR.K                       | 2552.88440 | 3 | 1.01E-09 | 0.93  | 4.49   | -     | 1327.8   |
| AHQ-2-7, 5047              | R.TPCTVSNIPVSVGKECEEIIR.K                       | 2552.88440 | 3 | 2.39E-05 | 0.86  | 3.95   | -     | 833.9    |
| AHQ-2-9, 4912              | R.TPCTVSNIPVSVGKECEEIIR.K                       | 2552.88440 | 3 | 1.20E-04 | 0.67  | 3.25   | -     | 767.2    |
| AHQ-2-7, 4964              | R.TPCTVSNIPVSVGKECEEIIR.K                       | 2552.88440 | 3 | 4.13E-04 | 0.84  | 3.63   | -     | 1130.4   |
| AHQ-2-6, 4486 - 4525       | R.VYCDMNTENGGWTVIQNR.Q                          | 2159.34553 | 2 | 3.60E-08 | 0.96  | 4.64   | -     | 1204.8   |
| AHQ-2-7, 4081              | R.VYCDM*NTENGGWTVIQNR.Q                         | 2175.34493 | 2 | 2.59E-05 | 0.93  | 4.20   | -     | 958.5    |
| AHQ-2-8, 4488 - 4500       | R.VYCDMNTENGGWTVIQNR.Q                          | 2159.34553 | 2 | 1.26E-10 | 0.97  | 4.78   | -     | 1590.2   |
| AHQ-2-6, 4594 - 4595       | R.VYCDMNTENGGWTVIQNR.Q                          | 2159.34553 | 2 | 1.48E-08 | 0.92  | 3.92   | -     | 942.8    |
| AHQ-2-7, 4693              | R.VYCDMNTENGGWTVIQNR.Q                          | 2159.34553 | 2 | 1.13E-04 | 0.87  | 3.70   | -     | 819.1    |
| AHQ-2-7, 3981              | R.VYCDM*NTENGGWTVIQNR.Q                         | 2175.34493 | 2 | 1.82E-04 | 0.96  | 4.68   | -     | 1318.3   |
| AHQ-2-6, 4001              | R.VYCDM*NTENGGWTVIQNR.Q                         | 2175.34493 | 2 | 7.57E-06 | 0.95  | 4.40   | -     | 1219.6   |
| AHQ-2-9, 4563              | R.VYCDMNTENGGWTVIQNR.Q                          | 2159.34553 | 2 | 5.95E-07 | 0.94  | 4.77   | -     | 866.2    |
| AHQ-2-7, 4548 - 4623       | R.VYCDMNTENGGWTVIQNR.Q                          | 2159.34553 | 2 | 1.21E-07 | 0.94  | 4.74   | -     | 1042.0   |
| AHQ-2-7, 1695              | K.YQISVKN.Y                                     | 851.96999  | 1 | 1.85E-04 | 0.36  | 2.70   | -     | 339.3    |
| AHQ-2-7, 4960 - 5041       | R.YYWGGQYTWDM.AK.H                              | 1669.84009 | 2 | 1.71E-08 | 0.95  | 4.10   | -     | 1077.5   |
| AHQ-2-7, 4288              | R.YYWGGQYTWDM*AK.H                              | 1685.83949 | 2 | 2.44E-06 | 0.94  | 3.66   | -     | 967.2    |
| AHQ-2-11, 4354 - 4370      | R.YYWGGQYTWDM*AK.H                              | 1685.83949 | 2 | 2.10E-05 | 0.87  | 2.90   | -     | 972.6    |
| AHQ-2-11, 4897             | R.YYWGGQYTWDM.AK.H                              | 1669.84009 | 2 | 8.09E-07 | 0.95  | 3.77   | -     | 1331.5   |
| AHQ-2-6, 4994 - 4995       | R.YYWGGQYTWDM.AK.H                              | 1669.84009 | 2 | 2.90E-06 | 0.95  | 3.89   | -     | 1337.0   |
| AHQ-2-6, 4382              | R.YYWGGQYTWDM*AK.H                              | 1685.83949 | 2 | 1.96E-05 | 0.96  | 4.08   | -     | 1337.1   |
| AHQ-2-12, 5113             | R.YYWGGQYTWDM.AK.H                              | 1669.84009 | 2 | 1.51E-06 | 0.95  | 3.76   | -     | 1318.1   |
| AHQ-2-14, 5588 - 5660      | R.YYWGGQYTWDM*AK.H                              | 1685.83949 | 2 | 2.36E-05 | 0.91  | 3.37   | -     | 819.8    |
| AHQ-2-14, 6257             | R.YYWGGQYTWDM.AK.H                              | 1669.84009 | 2 | 5.51E-08 | 0.95  | 3.43   | -     | 1395.6   |
| AHQ-2-14, 4544 - 4600      | R.YYWGGQYTWDM*AK.H                              | 1685.83949 | 2 | 4.05E-05 | 0.96  | 4.34   | -     | 1073.0   |
| gi 4501893 ref NP_001094.1 | actinin, alpha 2 [Homo sapiens]                 |            |   | 1.69E-11 | 9.72  | 120.24 | 12.40 | 103853.1 |
| AHQ-2-5, 4319              | K.AGTQIENIEDFR.N                                | 1522.59861 | 2 | 1.70E-05 | 0.93  | 4.78   | -     | 1007.1   |
| AHQ-2-5, 4264 - 4335       | K.AGTQIENIEDFR.N                                | 1522.59861 | 2 | 1.37E-05 | 0.87  | 3.76   | -     | 827.7    |
| AHQ-2-5, 5057 - 5127       | K.CQLEINFNTLQTK.L                               | 1610.81373 | 2 | 1.51E-06 | 0.96  | 4.57   | -     | 1320.0   |
| AHQ-2-6, 4939 - 5006       | K.CQLEINFNTLQTK.L                               | 1610.81373 | 2 | 4.23E-07 | 0.92  | 4.34   | -     | 914.9    |
| AHQ-2-5, 5299 - 5371       | K.CQLEINFNTLQTK.L                               | 1610.81373 | 2 | 8.87E-06 | 0.94  | 4.03   | -     | 1244.3   |
| AHQ-2-4, 4329              | R.FAIQDISVEETS.AK.E                             | 1538.68108 | 2 | 1.50E-10 | 0.93  | 3.37   | -     | 1178.7   |
| AHQ-2-13, 4217 - 4222      | R.FAIQDISVEETS.AK.E                             | 1538.68108 | 2 | 4.90E-04 | 0.85  | 3.34   | -     | 858.5    |
| AHQ-2-11, 4016 - 4040      | R.FAIQDISVEETS.AK.E                             | 1538.68108 | 2 | 3.75E-06 | 0.95  | 3.75   | -     | 1514.2   |
| AHQ-2-1, 4434              | R.FAIQDISVEETS.AK.E                             | 1538.68108 | 2 | 4.03E-05 | 0.69  | 2.71   | -     | 594.2    |
| AHQ-2-6, 3950 - 4026       | R.FAIQDISVEETS.AK.E                             | 1538.68108 | 2 | 3.77E-10 | 0.84  | 3.06   | -     | 946.6    |
| AHQ-2-5, 6065 - 6148       | K.GYEEWLLNEIR.R                                 | 1422.56701 | 2 | 5.92E-06 | 0.95  | 4.24   | -     | 1438.0   |
| AHQ-2-1, 6277              | K.GYEEWLLNEIR.R                                 | 1422.56701 | 2 | 1.09E-06 | 0.93  | 4.25   | -     | 1162.5   |
| AHQ-2-6, 5977 - 6054       | K.GYEEWLLNEIR.R                                 | 1422.56701 | 1 | 3.86E-05 | 0.41  | 2.84   | -     | 109.4    |
| AHQ-2-6, 5347 - 5362       | K.GYEEWLLNEIR.R                                 | 1422.56701 | 1 | 1.64E-04 | 0.42  | 2.49   | -     | 410.9    |
| AHQ-2-4, 6365              | K.GYEEWLLNEIR.R                                 | 1422.56701 | 2 | 8.29E-05 | 0.95  | 3.96   | -     | 1483.2   |
| AHQ-2-5, 6261              | K.GYEEWLLNEIR.R                                 | 1422.56701 | 1 | 5.69E-05 | 0.27  | 2.32   | -     | 311.8    |
| AHQ-2-5, 6071 - 6140       | K.GYEEWLLNEIR.R                                 | 1422.56701 | 1 | 2.25E-10 | 0.37  | 2.61   | -     | 134.3    |
| AHQ-2-5, 6064 - 6131       | K.GYEEWLLNEIR.R                                 | 1422.56701 | 1 | 6.94E-05 | 0.34  | 2.56   | -     | 246.9    |
| AHQ-2-5, 1976              | K.HEAFESDLAAHQDR.V                              | 1626.66861 | 2 | 2.20E-09 | 0.97  | 4.79   | -     | 1823.6   |
| AHQ-2-5, 2265              | R.ISNRPAFMPSEGG.M                               | 1434.64597 | 2 | 5.18E-07 | 0.81  | 3.25   | -     | 693.5    |
| AHQ-2-5, 3569              | R.KAGTQIENIEDFR.N                               | 1650.77152 | 2 | 1.36E-05 | 0.96  | 4.85   | -     | 1178.1   |
| AHQ-2-5, 4257              | R.KAGTQIENIEDFRNGLK.L                           | 2063.25733 | 2 | 7.21E-04 | 0.77  | 3.60   | -     | 707.4    |
| AHQ-2-5, 1611 - 1643       | R.KHEAFESDLAAHQDR.V                             | 1754.84152 | 2 | 1.81E-09 | 0.95  | 4.32   | -     | 1099.8   |
| AHQ-2-6, 1670              | R.KHEAFESDLAAHQDR.V                             | 1754.84152 | 2 | 5.59E-09 | 0.97  | 4.86   | -     | 1797.2   |
| AHQ-2-5, 1620              | R.KHEAFESDLAAHQDR.V                             | 1754.84152 | 3 | 1.69E-11 | 0.90  | 4.40   | -     | 892.8    |
| AHQ-2-11, 2950             | R.KTFTAWCNSHLR.K                                | 1522.71309 | 2 | 2.95E-06 | 0.43  | 2.70   | -     | 344.8    |
| AHQ-2-5, 2493              | R.KTFTAWCNSHLR.K                                | 1522.71309 | 2 | 3.08E-06 | 0.70  | 3.27   | -     | 363.7    |
| AHQ-2-5, 4476 - 4507       | K.LVLSIGAEIVDGNVK.M                             | 1543.74400 | 2 | 3.85E-07 | 0.89  | 3.35   | -     | 944.2    |
| AHQ-2-5, 4731 - 4812       | K.LVLSIGAEIVDGNVK.M                             | 1543.74400 | 2 | 4.85E-08 | 0.97  | 4.49   | -     | 1636.3   |
| AHQ-2-5, 4116              | K.LVLSIGAEIVDGNVK.M                             | 1543.74400 | 2 | 1.16E-04 | 0.94  | 3.87   | -     | 1224.7   |
| AHQ-2-5, 4588 - 4663       | K.LVLSIGAEIVDGNVK.M                             | 1543.74400 | 2 | 1.91E-06 | 0.93  | 3.69   | -     | 1106.7   |
| AHQ-2-5, 3388              | K.TFTAWCNSHLR.K                                 | 1394.54018 | 2 | 2.22E-07 | 0.81  | 2.94   | -     | 727.2    |
| gi 4507357 ref NP_003555.1 | transgelin 2; SM22-alpha homolog [Homo sapiens] |            |   | 1.73E-11 | 15.40 | 190.28 | 88.40 | 22391.3  |
| AHQ-2-11, 5745 - 5805      | R.DDGLFSGDPNWFPPK.K                             | 1595.69288 | 2 | 2.16E-05 | 0.90  | 3.14   | -     | 1117.9   |
| AHQ-2-12, 6017 - 6097      | R.DDGLFSGDPNWFPPK.K                             | 1595.69288 | 2 | 1.06E-06 | 0.97  | 4.86   | -     | 1430.8   |
| AHQ-2-12, 6162             | R.DDGLFSGDPNWFPPK.K                             | 1595.69288 | 2 | 8.27E-08 | 0.96  | 4.40   | -     | 1429.1   |
| AHQ-2-11, 5992             | R.DDGLFSGDPNWFPPK.K                             | 1595.69288 | 2 | 1.20E-08 | 0.95  | 4.23   | -     | 1232.0   |
| AHQ-2-11, 5865 - 5880      | R.DDGLFSGDPNWFPPK.K                             | 1595.69288 | 2 | 1.91E-07 | 0.97  | 4.72   | -     | 1566.8   |
| AHQ-2-11, 5652 - 5721      | R.DDGLFSGDPNWFPPK.K                             | 1595.69288 | 2 | 2.81E-05 | 0.97  | 4.50   | -     | 1589.5   |
| AHQ-2-12, 5887 - 5967      | R.DDGLFSGDPNWFPPK.K                             | 1595.69288 | 2 | 8.53E-07 | 0.94  | 4.00   | -     | 1146.8   |
| AHQ-2-13, 5732 - 5792      | R.DDGLFSGDPNWFPPK.K                             | 1595.69288 | 2 | 3.13E-05 | 0.87  | 3.28   | -     | 949.3    |
| AHQ-2-13, 5869             | R.DDGLFSGDPNWFPPK.K                             | 1595.69288 | 2 | 3.33E-04 | 0.89  | 3.05   | -     | 972.0    |
| AHQ-2-13, 6207             | K.DGTVLCELINALYPEGQAPVK.K                       | 2289.59066 | 2 | 2.29E-04 | 0.83  | 3.78   | -     | 579.1    |
| AHQ-2-11, 6862             | K.DGTVLCELINALYPEGQAPVK.K                       | 2289.59066 | 3 | 6.97E-05 | 0.91  | 4.12   | -     | 1231.9   |
| AHQ-2-11, 6106 - 6128      | K.DGTVLCELINALYPEGQAPVK.K                       | 2289.59066 | 2 | 6.53E-06 | 0.93  | 4.64   | -     | 676.1    |
| AHQ-2-12, 7197 - 7199      | K.DGTVLCELINALYPEGQAPVK.K                       | 2289.59066 | 2 | 1.91E-05 | 0.91  | 4.42   | -     | 658.3    |
| AHQ-2-13, 6366             | K.DGTVLCELINALYPEGQAPVK.K                       | 2289.59066 | 2 | 2.27E-09 | 0.94  | 4.98   | -     | 698.0    |
| AHQ-2-12, 6401 - 6463      | K.DGTVLCELINALYPEGQAPVK.K                       | 2289.59066 | 2 | 8.98E-05 | 0.90  | 4.20   | -     | 608.2    |
| AHQ-2-13, 6863             | K.DGTVLCELINALYPEGQAPVK.K                       | 2289.59066 | 2 | 8.62E-04 | 0.88  | 4.27   | -     | 571.2    |
| AHQ-2-11, 6324 - 6348      | K.DGTVLCELINALYPEGQAPVK.K                       | 2289.59066 | 2 | 1.43E-04 | 0.63  | 3.18   | -     | 485.2    |
| AHQ-2-11, 5530 - 5592      | K.DGTVLCELINALYPEGQAPVK.K                       | 2417.76357 | 3 | 5.32E-09 | 0.87  | 3.94   | -     | 1072.6   |
| AHQ-2-14, 6867             | K.DGTVLCELINALYPEGQAPVK.K                       | 2417.76357 | 3 | 3.26E-08 | 0.83  | 3.91   | -     | 651.4    |
| AHQ-2-11, 5801             | K.DGTVLCELINALYPEGQAPVK.K                       | 2417.76357 | 3 | 6.04E-06 | 0.45  | 2.60   | -     | 463.4    |
| AHQ-2-12, 5841 - 5843      | K.DGTVLCELINALYPEGQAPVK.K                       | 2417.76357 | 2 | 8.67E-07 | 0.84  | 3.60   | -     | 630.9    |
| AHQ-2-13, 6812             | K.DGTVLCELINALYPEGQAPVK.K                       | 2417.76357 | 2 | 9.73E-07 | 0.84  | 4.11   | -     | 522.4    |
| AHQ-2-13, 6811             | K.DGTVLCELINALYPEGQAPVK.K                       | 2417.76357 | 3 | 2.09E-09 | 0.90  | 4.56   | -     | 795.0    |
| AHQ-2-13, 7014             | K.DGTVLCELINALYPEGQAPVK.K                       | 2417.76357 | 3 | 3.80E-08 | 0.85  | 3.72   | -     | 1083.7   |
| AHQ-2-11, 5570             | K.DGTVLCELINALYPEGQAPVK.K                       | 2417.76357 | 2 | 3.24E-06 | 0.68  | 2.87   | -     | 513.2    |
| AHQ-2-13, 7018             | K.DGTVLCELINALYPEGQAPVK.K                       | 2417.76357 | 2 | 1.10E-08 | 0.78  | 3.86   | -     | 559.7    |
| AHQ-2-12, 7129 - 7145      | K.DGTVLCELINALYPEGQAPVK.K                       | 2417.76357 | 3 | 3.22E-09 | 0.91  | 4.34   | -     | 833.7    |

|                             |                                                                         |            |   |          |      |        |       |         |
|-----------------------------|-------------------------------------------------------------------------|------------|---|----------|------|--------|-------|---------|
| AHQ-2-12, 5845              | K.DGTVLCELINALYPEGQAPVKK.I                                              | 2417.76357 | 3 | 9.60E-05 | 0.78 | 3.22   | -     | 937.9   |
| AHQ-2-11, 6784              | K.DGTVLCELINALYPEGQAPVKK.I                                              | 2417.76357 | 2 | 7.32E-06 | 0.83 | 4.23   | -     | 568.2   |
| AHQ-2-11, 6790              | K.DGTVLCELINALYPEGQAPVKK.I                                              | 2417.76357 | 3 | 2.37E-08 | 0.93 | 4.54   | -     | 1071.4  |
| AHQ-2-12, 4542              | R.ENFNQNLK.D                                                            | 1079.18989 | 1 | 4.57E-04 | 0.07 | 2.00   | -     | 142.8   |
| AHQ-2-12, 2406              | K.ENPRNFSNDNLQLEQK.N                                                    | 1776.84549 | 2 | 4.53E-05 | 0.87 | 3.38   | -     | 662.4   |
| AHQ-2-11, 2382              | K.ENPRNFSNDNLQLEQK.N                                                    | 1776.84549 | 2 | 3.32E-05 | 0.61 | 2.69   | -     | 663.7   |
| AHQ-2-11, 2610              | R.GASQAGMTGYGMPR.Q                                                      | 1384.56732 | 2 | 2.48E-06 | 0.92 | 3.47   | -     | 1211.0  |
| AHQ-2-11, 1905              | R.GPAYGLSR.E                                                            | 820.91599  | 2 | 1.77E-04 | 0.91 | 2.99   | -     | 1170.3  |
| AHQ-2-12, 1833 - 1893       | R.GPAYGLSR.E                                                            | 820.91599  | 2 | 2.76E-05 | 0.90 | 3.23   | -     | 855.9   |
| AHQ-2-12, 2078 - 2081       | R.GPAYGLSREVQQK.I                                                       | 1433.59456 | 2 | 5.64E-05 | 0.93 | 4.17   | -     | 1302.5  |
| AHQ-2-11, 2426              | K.IQASTMAFK.Q                                                           | 997.19374  | 1 | 8.91E-04 | 0.68 | 2.48   | -     | 678.0   |
| AHQ-2-12, 2170 - 2174       | K.KIQASTMAFK.Q                                                          | 1125.36665 | 2 | 1.14E-04 | 0.81 | 3.10   | -     | 815.4   |
| AHQ-2-11, 2157              | K.KIQASTMAFK.Q                                                          | 1125.36665 | 2 | 6.15E-05 | 0.88 | 3.24   | -     | 981.1   |
| AHQ-2-11, 2564              | R.NFSDNQLQLEQK.N                                                        | 1280.32582 | 1 | 6.61E-05 | 0.15 | 1.82   | -     | 212.1   |
| AHQ-2-12, 2586              | R.NFSDNQLQLEQK.N                                                        | 1280.32582 | 2 | 4.29E-04 | 0.77 | 2.76   | -     | 967.2   |
| AHQ-2-12, 2583              | R.NFSDNQLQLEQK.N                                                        | 1280.32582 | 1 | 3.68E-07 | 0.14 | 2.14   | -     | 307.8   |
| AHQ-2-12, 2177 - 2202       | R.NFSDNQLQLEQK.N                                                        | 1280.32582 | 2 | 2.40E-05 | 0.83 | 3.54   | -     | 625.8   |
| AHQ-2-11, 2396              | R.NFSDNQLQLEQK.N                                                        | 1280.32582 | 1 | 1.35E-05 | 0.43 | 2.09   | -     | 459.6   |
| AHQ-2-11, 2297              | R.NFSDNQLQLEQK.N                                                        | 1280.32582 | 1 | 1.64E-05 | 0.20 | 2.24   | -     | 228.8   |
| AHQ-2-12, 2293              | R.NFSDNQLQLEQK.N                                                        | 1280.32582 | 1 | 3.92E-08 | 0.28 | 2.39   | -     | 214.9   |
| AHQ-2-13, 2356              | R.NFSDNQLQLEQK.N                                                        | 1280.32582 | 2 | 1.87E-05 | 0.72 | 3.25   | -     | 518.8   |
| AHQ-2-11, 2262 - 2264       | K.NVIGLQM*GTNR.G                                                        | 1219.39691 | 2 | 1.71E-05 | 0.94 | 4.03   | -     | 1052.7  |
| AHQ-2-12, 4906              | K.QM*EQISQFLQAAER.Y                                                     | 1695.87890 | 2 | 4.91E-04 | 0.88 | 3.68   | -     | 751.8   |
| AHQ-2-13-, 5509             | K.QMEQISQFLQAAER.Y                                                      | 1679.87950 | 2 | 3.25E-04 | 0.96 | 4.93   | -     | 1223.5  |
| AHQ-2-11, 5236 - 5269       | K.QMEQISQFLQAAER.Y                                                      | 1679.87950 | 2 | 4.32E-08 | 0.96 | 5.02   | -     | 1197.2  |
| AHQ-2-11, 5249              | K.QMEQISQFLQAAER.Y                                                      | 1679.87950 | 3 | 2.19E-04 | 0.97 | 4.69   | -     | 2374.6  |
| AHQ-2-14-, 4816 - 4817      | K.QM*EQISQFLQAAER.Y                                                     | 1695.87890 | 2 | 5.92E-04 | 0.89 | 4.05   | -     | 669.4   |
| AHQ-2-14-, 5461             | K.QMEQISQFLQAAER.Y                                                      | 1679.87950 | 2 | 1.06E-04 | 0.94 | 4.14   | -     | 1057.5  |
| AHQ-2-11, 4577 - 4613       | K.QM*EQISQFLQAAER.Y                                                     | 1695.87890 | 2 | 9.67E-04 | 0.55 | 2.64   | -     | 426.5   |
| AHQ-2-13, 5395              | K.QMEQISQFLQAAER.Y                                                      | 1679.87950 | 2 | 1.96E-05 | 0.94 | 4.07   | -     | 1051.1  |
| AHQ-2-12, 5509              | K.QMEQISQFLQAAER.Y                                                      | 1679.87950 | 3 | 3.22E-07 | 0.98 | 4.89   | -     | 3133.3  |
| AHQ-2-13-, 7081             | K.QYDADLEQIQLWITTCQR.K                                                  | 2396.66131 | 3 | 1.72E-07 | 0.96 | 5.29   | -     | 2109.4  |
| AHQ-2-12, 7234              | K.QYDADLEQIQLWITTCQR.K                                                  | 2396.66131 | 3 | 5.84E-04 | 0.90 | 3.80   | -     | 1169.6  |
| AHQ-2-11, 4638              | R.TLMNLGGLAVAR.D                                                        | 1216.47932 | 2 | 1.88E-04 | 0.93 | 3.70   | -     | 1526.8  |
| AHQ-2-12, 3545 - 3574       | R.TLM*NLGGLAVAR.D                                                       | 1232.47872 | 2 | 5.03E-04 | 0.92 | 4.23   | -     | 897.7   |
| AHQ-2-12, 4417 - 4450       | R.TLMNLGGLAVAR.D                                                        | 1216.47932 | 2 | 5.66E-07 | 0.94 | 4.30   | -     | 1160.7  |
| AHQ-2-13, 3553              | R.TLM*NLGGLAVAR.D                                                       | 1232.47872 | 2 | 8.50E-04 | 0.94 | 3.75   | -     | 1295.6  |
| AHQ-2-13, 4440 - 4443       | R.TLMNLGGLAVAR.D                                                        | 1216.47932 | 2 | 3.81E-06 | 0.91 | 4.25   | -     | 822.1   |
| AHQ-2-14-, 4509             | R.TLMNLGGLAVAR.D                                                        | 1216.47932 | 2 | 1.38E-06 | 0.93 | 3.71   | -     | 1281.0  |
| AHQ-2-12, 4841              | R.TLMNLGGLAVAR.D                                                        | 1216.47932 | 2 | 7.86E-05 | 0.94 | 3.73   | -     | 1553.9  |
| AHQ-2-11, 4277 - 4340       | R.TLMNLGGLAVAR.D                                                        | 1216.47932 | 2 | 9.47E-04 | 0.93 | 4.02   | -     | 1206.6  |
| AHQ-2-11, 3880              | R.TLM*NLGGLAVAR.D                                                       | 1232.47872 | 2 | 1.47E-05 | 0.88 | 3.50   | -     | 856.9   |
| AHQ-2-13-, 4495 - 4497      | R.TLMNLGGLAVAR.D                                                        | 1216.47932 | 2 | 1.42E-06 | 0.93 | 4.22   | -     | 1089.0  |
| AHQ-2-12, 4521              | R.TLMNLGGLAVAR.D                                                        | 1216.47932 | 2 | 4.09E-06 | 0.74 | 2.94   | -     | 765.9   |
| AHQ-2-12, 6810 - 6825       | R.YGINTTDFIQTVDLWEGK.N                                                  | 2101.30080 | 2 | 2.24E-10 | 0.95 | 4.47   | -     | 1046.2  |
| AHQ-2-14-, 6721 - 6791      | R.YGINTTDFIQTVDLWEGK.N                                                  | 2101.30080 | 2 | 1.02E-09 | 0.97 | 5.58   | -     | 1503.5  |
| AHQ-2-13, 6669 - 6744       | R.YGINTTDFIQTVDLWEGK.N                                                  | 2101.30080 | 2 | 8.01E-11 | 0.97 | 5.39   | -     | 1302.0  |
| AHQ-2-11, 6456 - 6490       | R.YGINTTDFIQTVDLWEGK.N                                                  | 2101.30080 | 2 | 1.86E-09 | 0.97 | 4.46   | -     | 1990.2  |
| AHQ-2-11, 6638 - 6696       | R.YGINTTDFIQTVDLWEGK.N                                                  | 2101.30080 | 2 | 1.03E-08 | 0.97 | 5.62   | -     | 1386.3  |
| AHQ-2-13-, 6933             | R.YGINTTDFIQTVDLWEGK.N                                                  | 2101.30080 | 2 | 2.65E-07 | 0.97 | 5.30   | -     | 1630.7  |
| AHQ-2-11, 6740              | R.YGINTTDFIQTVDLWEGK.N                                                  | 2101.30080 | 2 | 1.73E-11 | 0.97 | 5.51   | -     | 1073.4  |
| AHQ-2-11, 6916 - 6938       | R.YGINTTDFIQTVDLWEGK.N                                                  | 2101.30080 | 2 | 2.80E-07 | 0.91 | 3.98   | -     | 1023.0  |
| AHQ-2-12, 7305 - 7313       | R.YGINTTDFIQTVDLWEGK.N                                                  | 2101.30080 | 2 | 3.06E-11 | 0.88 | 3.77   | -     | 764.0   |
| AHQ-2-12, 7029 - 7103       | R.YGINTTDFIQTVDLWEGK.N                                                  | 2101.30080 | 2 | 6.50E-10 | 0.96 | 5.46   | -     | 972.1   |
| AHQ-2-12, 7170 - 7245       | R.YGINTTDFIQTVDLWEGK.N                                                  | 2101.30080 | 2 | 1.28E-09 | 0.93 | 4.08   | -     | 900.2   |
| AHQ-2-11, 6264 - 6338       | R.YGINTTDFIQTVDLWEGK.N                                                  | 2101.30080 | 2 | 9.32E-07 | 0.97 | 4.85   | -     | 1527.4  |
| AHQ-2-12, 6967              | R.YGINTTDFIQTVDLWEGKNMACVQR.T                                           | 2962.30673 | 3 | 8.86E-08 | 0.90 | 4.17   | -     | 975.9   |
| AHQ-2-12, 7021              | R.YGINTTDFIQTVDLWEGKNMACVQR.T                                           | 2962.30673 | 2 | 1.91E-09 | 0.82 | 3.72   | -     | 469.5   |
| gi 5453740 ref NP_006462.1  | myosin regulatory light chain MRCL3; myosin, light polypeptide, regulat |            |   | 1.78E-11 | 6.08 | 70.28  | 33.30 | 19794.0 |
| AHQ-2-11, 6125 - 6192       | R.ATSNVFMFDQSQIQEFK.E                                                   | 2092.31741 | 2 | 3.94E-07 | 0.96 | 4.94   | -     | 1307.5  |
| AHQ-2-14-, 5459             | R.ATSNVFMFDQSQIQEFK.E                                                   | 2108.31681 | 2 | 2.20E-11 | 0.96 | 4.66   | -     | 1427.2  |
| AHQ-2-14, 6572 - 6597       | R.ATSNVFMFDQSQIQEFK.E                                                   | 2108.31681 | 2 | 5.63E-06 | 0.80 | 3.47   | -     | 759.2   |
| AHQ-2-13, 6129              | R.ATSNVFMFDQSQIQEFK.E                                                   | 2092.31741 | 2 | 3.46E-07 | 0.92 | 3.92   | -     | 1005.6  |
| AHQ-2-12, 5522 - 5538       | R.ATSNVFMFDQSQIQEFK.E                                                   | 2108.31681 | 2 | 1.94E-09 | 0.96 | 4.97   | -     | 1190.2  |
| AHQ-2-11, 6370              | R.ATSNVFMFDQSQIQEFK.E                                                   | 2092.31741 | 2 | 4.80E-05 | 0.94 | 4.45   | -     | 905.2   |
| AHQ-2-14-, 6179 - 6180      | R.ATSNVFMFDQSQIQEFK.E                                                   | 2092.31741 | 2 | 2.14E-10 | 0.98 | 5.44   | -     | 1644.8  |
| AHQ-2-11, 5224 - 5284       | R.ATSNVFMFDQSQIQEFK.E                                                   | 2108.31681 | 2 | 1.32E-05 | 0.97 | 5.08   | -     | 1320.4  |
| AHQ-2-11, 6001 - 6002       | R.ATSNVFMFDQSQIQEFK.E                                                   | 2092.31741 | 3 | 6.93E-05 | 0.87 | 3.79   | -     | 981.2   |
| AHQ-2-11, 5996 - 6065       | R.ATSNVFMFDQSQIQEFK.E                                                   | 2092.31741 | 2 | 4.19E-05 | 0.96 | 4.66   | -     | 1556.0  |
| AHQ-2-11, 5976 - 5982       | R.ATSNVFMFDQSQIQEFK.E                                                   | 2092.31741 | 2 | 1.07E-05 | 0.94 | 4.45   | -     | 686.8   |
| AHQ-2-11, 5932              | R.DGFIDKEDLHMDLASLGK.N                                                  | 2005.23806 | 2 | 3.41E-05 | 0.84 | 3.36   | -     | 750.6   |
| AHQ-2-11, 5813 - 5820       | R.DGFIDKEDLHMDLASLGK.N                                                  | 2005.23806 | 3 | 4.61E-09 | 0.95 | 4.51   | -     | 1554.4  |
| AHQ-2-11, 5809              | R.DGFIDKEDLHMDLASLGK.N                                                  | 2005.23806 | 2 | 1.08E-06 | 0.97 | 5.01   | -     | 1615.9  |
| AHQ-2-11, 5660 - 5685       | R.DGFIDKEDLHMDLASLGK.N                                                  | 2005.23806 | 2 | 1.78E-11 | 0.97 | 5.60   | -     | 1527.1  |
| AHQ-2-11, 5196              | R.DGFIDKEDLHMDLASLGK.N                                                  | 2005.23806 | 2 | 3.51E-07 | 0.75 | 3.42   | -     | 776.9   |
| AHQ-2-14-, 5860 - 5924      | R.DGFIDKEDLHMDLASLGK.N                                                  | 2005.23806 | 2 | 3.46E-11 | 0.97 | 5.01   | -     | 1257.1  |
| AHQ-2-11, 4405              | R.DGFIDKEDLHMDLASLGK.N                                                  | 2021.23746 | 2 | 3.58E-05 | 0.97 | 5.30   | -     | 1045.6  |
| AHQ-2-13-, 6038             | R.DGFIDKEDLHMDLASLGK.N                                                  | 2005.23806 | 2 | 3.17E-05 | 0.93 | 5.95   | -     | 1129.2  |
| AHQ-2-13, 5883              | R.DGFIDKEDLHMDLASLGK.N                                                  | 2005.23806 | 2 | 1.03E-07 | 0.95 | 4.48   | -     | 1242.7  |
| AHQ-2-12, 5993 - 6071       | R.DGFIDKEDLHMDLASLGK.N                                                  | 2005.23806 | 2 | 3.73E-07 | 0.98 | 5.15   | -     | 1943.2  |
| AHQ-2-12, 5994 - 5999       | R.DGFIDKEDLHMDLASLGK.N                                                  | 2005.23806 | 3 | 1.22E-09 | 0.92 | 3.76   | -     | 1514.9  |
| AHQ-2-11, 6141 - 6221       | K.EAFNMIDQNRDGFIDKEDLHMDLASLGK.N                                        | 3224.57104 | 3 | 6.21E-05 | 0.92 | 5.09   | -     | 884.7   |
| AHQ-2-11, 4198 - 4256       | K.GNFNIEFTR.I                                                           | 1261.36733 | 2 | 8.05E-05 | 0.77 | 3.16   | -     | 797.8   |
| AHQ-2-11, 3988 - 4048       | K.GNFNIEFTR.I                                                           | 1261.36733 | 2 | 1.61E-05 | 0.84 | 3.18   | -     | 840.6   |
| AHQ-2-13-, 4273             | K.GNFNIEFTR.I                                                           | 1261.36733 | 2 | 1.47E-04 | 0.76 | 2.94   | -     | 682.5   |
| AHQ-2-12, 4178              | K.GNFNIEFTR.I                                                           | 1261.36733 | 2 | 3.96E-05 | 0.87 | 3.59   | -     | 829.3   |
| AHQ-2-11, 4246 - 4248       | K.GNFNIEFTR.I                                                           | 1261.36733 | 1 | 3.23E-06 | 0.37 | 2.74   | -     | 396.1   |
| AHQ-2-13, 4217              | K.GNFNIEFTR.I                                                           | 1261.36733 | 2 | 3.88E-05 | 0.78 | 3.22   | -     | 709.3   |
| AHQ-2-11, 3364              | K.KGNFNIEFTR.I                                                          | 1389.54025 | 2 | 6.03E-07 | 0.92 | 3.65   | -     | 992.3   |
| AHQ-2-11, 3846              | K.KGNFNIEFTR.I                                                          | 1389.54025 | 2 | 1.21E-04 | 0.83 | 3.16   | -     | 703.8   |
| gi 21361755 ref NP_004090.3 | stomatin; erythrocyte membrane protein band 7.2 (stomatin) [Homo sapie  |            |   | 1.84E-11 | 9.01 | 100.34 | 46.20 | 31708.5 |
| AHQ-2-10, 3803 - 3824       | K.EASM*VITESPAALQLR.Y                                                   | 1732.98059 | 2 | 4.49E-06 | 0.57 | 2.51   | -     | 750.8   |
| AHQ-2-1, 4936               | K.EASM*VITESPAALQLR.Y                                                   | 1716.98119 | 2 | 2.64E-05 | 0.92 | 4.06   | -     | 971.3   |
| AHQ-2-14-, 4699             | K.EASM*VITESPAALQLR.Y                                                   | 1716.98119 | 2 | 2.18E-09 | 0.80 | 3.52   | -     | 867.6   |
| AHQ-2-12, 4686              | K.EASM*VITESPAALQLR.Y                                                   | 1716.98119 | 2 | 5.28E-07 | 0.36 | 2.84   | -     | 464.9   |
| AHQ-2-1, 4369               | K.EASM*VITESPAALQLR.Y                                                   | 1732.98059 | 2 | 6.06E-07 | 0.86 | 3.33   | -     | 794.2   |
| AHQ-2-14, 5777              | K.EASM*VITESPAALQLR.Y                                                   | 1716.98119 | 2 | 4.73E-06 | 0.71 | 3.06   | -     | 539.0   |
| AHQ-2-13, 4648              | K.EASM*VITESPAALQLR.Y                                                   | 1716.98119 | 2 | 1.46E-05 | 0.72 | 3.13   | -     | 810.3   |
| AHQ-2-9, 4555 - 4570        | K.EASM*VITESPAALQLR.Y                                                   | 1716.98119 | 2 | 1.39E-06 | 0.65 | 2.69   | -     | 769.8   |
| AHQ-2-9, 7406               | K.GPGLFFILPCTDSFIK.V                                                    | 1814.13672 | 2 | 6.04E-04 | 0.95 | 4.69   | -     | 882.1   |
| AHQ-2-2, 7585               | K.GPGLFFILPCTDSFIK.V                                                    | 1814.13672 | 2 | 6.28E-06 | 0.93 | 4.54   | -     | 660.4   |
| AHQ-2-10, 6730              | K.GPGLFFILPCTDSFIK.V                                                    | 1814.13672 | 2 | 1.71E-06 | 0.96 | 4.94   | -     | 946.3   |
| AHQ-2-1, 2480               | R.LLAQTTLR.N                                                            | 916.10035  | 2 | 3.46E-05 | 0.84 | 3.33   | -     | 527.7   |
| AHQ-2-1, 7190               | K.NLSQILSDREEIAHNMQSTLDDATDAWGK.V                                       | 3373.65339 | 3 | 3.93E-09 | 0.85 | 4.22   | -     | 769.2   |
| AHQ-2-1, 6212 - 6290        | K.NLSQILSDREEIAHNM*QSTLDDATDAWGK.V                                      | 3389.65279 | 3 | 5.14E-05 | 0.97 | 5.44   | -     | 2523.3  |
| AHQ-2-10, 6646              | K.NLSQILSDREEIAHNMQSTLDDATDAWGK.V                                       | 3373.65339 | 3 | 6.22E-07 | 0.97 | 5.77   | -     | 1970.2  |
| AHQ-2-9, 7302               | K.NLSQILSDREEIAHNMQSTLDDATDAWGK.V                                       | 3373.65339 | 3 | 6.19E-07 | 0.98 | 6.80   | -     | 1661.3  |

|                                                                   |                                    |            |   |          |       |        |       |         |
|-------------------------------------------------------------------|------------------------------------|------------|---|----------|-------|--------|-------|---------|
| AHQ-2-9, 7554                                                     | K.NSTIVFPLPIDMLQGIIQAK.H           | 2128.56375 | 2 | 7.16E-04 | 0.75  | 3.45   | -     | 400.7   |
| AHQ-2-14-, 6968                                                   | K.NSTIVFPLPIDMLQGIIQAK.H           | 2128.56375 | 2 | 2.51E-04 | 0.71  | 3.13   | -     | 395.2   |
| AHQ-2-13-, 7109                                                   | K.NSTIVFPLPIDMLQGIIQAK.H           | 2128.56375 | 2 | 1.14E-04 | 0.85  | 4.04   | -     | 493.4   |
| AHQ-2-12, 7262                                                    | K.NSTIVFPLPIDMLQGIIQAK.H           | 2128.56375 | 2 | 6.06E-04 | 0.81  | 3.52   | -     | 565.9   |
| AHQ-2-13-, 2235                                                   | K.VIAAEGEMNASR.A                   | 1248.39191 | 2 | 2.63E-09 | 0.96  | 4.05   | -     | 1537.6  |
| AHQ-2-1, 2338                                                     | K.VIAAEGEMNASR.A                   | 1248.39191 | 2 | 7.83E-10 | 0.97  | 4.23   | -     | 1734.0  |
| AHQ-2-10, 3712 - 3716                                             | R.VQNTLAVANITNADSATR.L             | 1931.09731 | 2 | 8.24E-07 | 0.96  | 5.66   | -     | 716.2   |
| AHQ-2-10, 4127 - 4199                                             | R.VQNTLAVANITNADSATR.L             | 1931.09731 | 2 | 5.01E-06 | 0.94  | 4.75   | -     | 723.9   |
| AHQ-2-10, 3624                                                    | R.VQNTLAVANITNADSATR.L             | 1931.09731 | 2 | 1.11E-07 | 0.90  | 4.77   | -     | 419.0   |
| AHQ-2-10, 3519 - 3554                                             | R.VQNTLAVANITNADSATR.L             | 1931.09731 | 2 | 3.31E-05 | 0.82  | 3.84   | -     | 375.4   |
| AHQ-2-1, 4709 - 4712                                              | R.VQNTLAVANITNADSATR.L             | 1931.09731 | 2 | 2.07E-10 | 0.92  | 4.41   | -     | 664.9   |
| AHQ-2-1, 4414                                                     | R.VQNTLAVANITNADSATR.L             | 1931.09731 | 2 | 4.91E-07 | 0.85  | 3.96   | -     | 462.0   |
| AHQ-2-1, 3960                                                     | R.VQNTLAVANITNADSATR.L             | 1931.09731 | 2 | 8.53E-10 | 0.93  | 4.48   | -     | 761.2   |
| AHQ-2-1, 4306                                                     | R.VQNTLAVANITNADSATR.L             | 1931.09731 | 2 | 2.74E-05 | 0.74  | 3.14   | -     | 505.5   |
| AHQ-2-1, 4201                                                     | R.VQNTLAVANITNADSATR.L             | 1931.09731 | 2 | 1.84E-11 | 0.96  | 5.18   | -     | 1169.5  |
| AHQ-2-1, 4045 - 4064                                              | R.VQNTLAVANITNADSATR.L             | 1931.09731 | 2 | 1.56E-09 | 0.97  | 5.54   | -     | 1463.9  |
| AHQ-2-1, 4037 - 4040                                              | R.YLQTLTTIAAEK.N                   | 1352.55813 | 2 | 4.59E-05 | 0.94  | 4.27   | -     | 1232.5  |
| AHQ-2-13, 3851                                                    | R.YLQTLTTIAAEK.N                   | 1352.55813 | 2 | 8.01E-05 | 0.93  | 3.38   | -     | 1300.1  |
| AHQ-2-10, 3454                                                    | R.YLQTLTTIAAEK.N                   | 1352.55813 | 2 | 6.82E-04 | 0.92  | 3.63   | -     | 1162.2  |
| AHQ-2-13-, 3885                                                   | R.YLQTLTTIAAEK.N                   | 1352.55813 | 2 | 6.98E-08 | 0.94  | 3.32   | -     | 1477.0  |
| gi 4826898 ref NP_005013.1  profilin 1, profilin-1 [Homo sapiens] |                                    |            |   | 1.88E-11 | 16.99 | 200.30 | 75.00 | 15054.2 |
| AHQ-2-12, 1735                                                    | K.CYEM'ASHLR.R                     | 1184.32794 | 2 | 2.96E-04 | 0.92  | 2.60   | -     | 1695.0  |
| AHQ-2-12, 2305                                                    | K.CYEM'ASHLR.R                     | 1168.32854 | 2 | 2.38E-04 | 0.77  | 2.53   | -     | 1019.9  |
| AHQ-2-13-, 1607 - 1666                                            | K.CYEM'ASHLR.R                     | 1184.32794 | 2 | 1.85E-05 | 0.90  | 2.91   | -     | 1351.8  |
| AHQ-2-13-, 1754 - 1813                                            | K.CYEM'ASHLR.R                     | 1184.32794 | 2 | 1.37E-04 | 0.89  | 2.99   | -     | 1153.6  |
| AHQ-2-13-, 1873 - 1895                                            | K.CYEM'ASHLR.R                     | 1184.32794 | 2 | 1.39E-04 | 0.89  | 3.02   | -     | 1177.3  |
| AHQ-2-13-, 1961 - 2023                                            | K.CYEM'ASHLR.R                     | 1184.32794 | 2 | 2.89E-05 | 0.80  | 2.79   | -     | 850.4   |
| AHQ-2-13-, 2281 - 2354                                            | K.CYEM'ASHLR.R                     | 1168.32854 | 2 | 1.04E-04 | 0.95  | 3.28   | -     | 1781.1  |
| AHQ-2-13-, 2413 - 2485                                            | K.CYEM'ASHLR.R                     | 1168.32854 | 2 | 2.70E-05 | 0.97  | 3.74   | -     | 2150.0  |
| AHQ-2-13-, 2425                                                   | K.CYEM'ASHLR.R                     | 1168.32854 | 2 | 4.42E-04 | 0.94  | 3.29   | -     | 1392.9  |
| AHQ-2-13-, 2701                                                   | K.CYEM'ASHLR.R                     | 1168.32854 | 2 | 5.98E-04 | 0.94  | 3.52   | -     | 1469.8  |
| AHQ-2-13, 2389 - 2459                                             | K.CYEM'ASHLR.R                     | 1168.32854 | 2 | 1.54E-04 | 0.95  | 3.21   | -     | 2003.0  |
| AHQ-2-13, 2523 - 2587                                             | K.CYEM'ASHLR.R                     | 1168.32854 | 2 | 1.80E-04 | 0.92  | 2.80   | -     | 1661.1  |
| AHQ-2-13, 1951 - 2028                                             | K.CYEM'ASHLR.R                     | 1184.32794 | 2 | 1.89E-04 | 0.94  | 3.07   | -     | 1593.3  |
| AHQ-2-13-, 4263                                                   | K.DRSSFYVNGTLGGQK.C                | 1742.91379 | 3 | 6.21E-07 | 0.95  | 4.54   | -     | 1688.7  |
| AHQ-2-13-, 4265                                                   | K.DRSSFYVNGTLGGQK.C                | 1742.91379 | 2 | 1.88E-11 | 0.97  | 5.42   | -     | 1146.1  |
| AHQ-2-13, 4075 - 4139                                             | K.DRSSFYVNGTLGGQK.C                | 1742.91379 | 2 | 5.29E-09 | 0.96  | 5.16   | -     | 1062.7  |
| AHQ-2-13, 4201                                                    | K.DRSSFYVNGTLGGQK.C                | 1742.91379 | 2 | 6.33E-05 | 0.92  | 3.76   | -     | 906.1   |
| AHQ-2-13-, 4123 - 4126                                            | K.DRSSFYVNGTLGGQK.C                | 1742.91379 | 3 | 1.45E-05 | 0.83  | 3.54   | -     | 954.1   |
| AHQ-2-13-, 4121 - 4197                                            | K.DRSSFYVNGTLGGQK.C                | 1742.91379 | 2 | 1.95E-10 | 0.97  | 5.73   | -     | 1047.7  |
| AHQ-2-12, 5633 - 5699                                             | R.DSLLQDGFESMDLR.T                 | 1626.77023 | 2 | 1.38E-09 | 0.97  | 4.54   | -     | 1932.2  |
| AHQ-2-12, 5810 - 5818                                             | R.DSLLQDGFESMDLR.T                 | 1626.77023 | 2 | 2.48E-09 | 0.97  | 5.13   | -     | 1794.5  |
| AHQ-2-13-, 5633 - 5701                                            | R.DSLLQDGFESMDLR.T                 | 1626.77023 | 2 | 3.36E-10 | 0.98  | 5.31   | -     | 2089.7  |
| AHQ-2-13-, 5585 - 5653                                            | R.DSLLQDGFESMDLR.T                 | 1626.77023 | 2 | 4.32E-10 | 0.98  | 5.39   | -     | 2309.3  |
| AHQ-2-13-, 5502 - 5578                                            | R.DSLLQDGFESMDLR.T                 | 1642.76963 | 2 | 7.45E-04 | 0.92  | 3.42   | -     | 1517.5  |
| AHQ-2-12, 5905 - 5971                                             | R.DSLLQDGFESMDLR.T                 | 1626.77023 | 2 | 1.72E-06 | 0.95  | 3.99   | -     | 1730.1  |
| AHQ-2-12, 6039                                                    | R.DSLLQDGFESMDLR.T                 | 1626.77023 | 2 | 8.69E-05 | 0.95  | 4.37   | -     | 1333.4  |
| AHQ-2-13-, 5449 - 5517                                            | R.DSLLQDGFESMDLR.T                 | 1626.77023 | 2 | 1.44E-10 | 0.97  | 4.81   | -     | 2045.3  |
| AHQ-2-12, 6237 - 6310                                             | R.DSLLQDGFESMDLR.T                 | 1626.77023 | 2 | 5.68E-05 | 0.90  | 3.83   | -     | 912.7   |
| AHQ-2-12, 5498 - 5561                                             | R.DSLLQDGFESMDLR.T                 | 1626.77023 | 2 | 1.11E-08 | 0.93  | 3.72   | -     | 1121.8  |
| AHQ-2-13-, 5893 - 5953                                            | R.DSLLQDGFESMDLR.T                 | 1626.77023 | 2 | 2.38E-06 | 0.90  | 2.85   | -     | 1271.9  |
| AHQ-2-12, 5365 - 5433                                             | R.DSLLQDGFESMDLR.T                 | 1626.77023 | 2 | 1.13E-09 | 0.95  | 4.42   | -     | 1340.3  |
| AHQ-2-13-, 5409                                                   | R.DSLLQDGFESMDLR.T                 | 1642.76963 | 2 | 5.16E-04 | 0.92  | 3.48   | -     | 1143.5  |
| AHQ-2-13-, 5310 - 5381                                            | R.DSLLQDGFESMDLR.T                 | 1626.77023 | 2 | 1.00E-09 | 0.97  | 4.93   | -     | 1548.2  |
| AHQ-2-13-, 5065 - 5083                                            | R.DSLLQDGFESMDLR.T                 | 1642.76963 | 2 | 1.12E-05 | 0.92  | 3.48   | -     | 1484.5  |
| AHQ-2-13-, 4922 - 4947                                            | R.DSLLQDGFESMDLR.T                 | 1642.76963 | 2 | 1.54E-07 | 0.98  | 4.53   | -     | 2548.1  |
| AHQ-2-13-, 4821 - 4874                                            | R.DSLLQDGFESMDLR.T                 | 1642.76963 | 2 | 1.91E-07 | 0.97  | 5.10   | -     | 1710.0  |
| AHQ-2-13-, 4689 - 4757                                            | R.DSLLQDGFESMDLR.T                 | 1642.76963 | 2 | 5.53E-11 | 0.96  | 4.49   | -     | 1674.6  |
| AHQ-2-13-, 4566 - 4626                                            | R.DSLLQDGFESMDLR.T                 | 1642.76963 | 2 | 1.95E-10 | 0.95  | 4.52   | -     | 1236.3  |
| AHQ-2-13-, 4467                                                   | R.DSLLQDGFESMDLR.T                 | 1642.76963 | 2 | 1.14E-04 | 0.93  | 3.96   | -     | 1030.4  |
| AHQ-2-12, 5275 - 5282                                             | R.DSLLQDGFESMDLR.T                 | 1626.77023 | 2 | 3.32E-06 | 0.90  | 3.73   | -     | 831.2   |
| AHQ-2-12, 4743 - 4769                                             | R.DSLLQDGFESMDLR.T                 | 1642.76963 | 2 | 1.81E-04 | 0.77  | 2.64   | -     | 907.8   |
| AHQ-2-12, 4617 - 4625                                             | R.DSLLQDGFESMDLR.T                 | 1642.76963 | 2 | 9.90E-06 | 0.93  | 4.14   | -     | 1197.7  |
| AHQ-2-13, 6183 - 6243                                             | R.DSLLQDGFESMDLR.T                 | 1626.77023 | 2 | 5.56E-09 | 0.97  | 4.49   | -     | 1960.1  |
| AHQ-2-13-, 5979 - 6050                                            | R.DSLLQDGFESMDLR.T                 | 1626.77023 | 2 | 3.65E-06 | 0.95  | 3.65   | -     | 1805.2  |
| AHQ-2-13, 6049 - 6107                                             | R.DSLLQDGFESMDLR.T                 | 1626.77023 | 2 | 1.19E-08 | 0.96  | 4.19   | -     | 2194.0  |
| AHQ-2-13, 5933 - 5997                                             | R.DSLLQDGFESMDLR.T                 | 1626.77023 | 2 | 3.67E-08 | 0.96  | 4.03   | -     | 1744.7  |
| AHQ-2-13, 5799 - 5859                                             | R.DSLLQDGFESMDLR.T                 | 1626.77023 | 2 | 1.79E-08 | 0.96  | 4.14   | -     | 1778.2  |
| AHQ-2-13, 6900                                                    | R.DSLLQDGFESMDLR.T                 | 1626.77023 | 2 | 1.21E-07 | 0.95  | 3.53   | -     | 1995.8  |
| AHQ-2-14, 5662 - 5712                                             | R.DSLLQDGFESMDLR.T                 | 1642.76963 | 2 | 8.34E-05 | 0.96  | 3.87   | -     | 1957.8  |
| AHQ-2-13, 6429                                                    | R.DSLLQDGFESMDLR.T                 | 1626.77023 | 2 | 1.29E-04 | 0.93  | 3.80   | -     | 1436.2  |
| AHQ-2-13-, 6113 - 6177                                            | R.DSLLQDGFESMDLR.T                 | 1626.77023 | 2 | 2.97E-09 | 0.98  | 4.85   | -     | 2374.1  |
| AHQ-2-13-, 6209 - 6274                                            | R.DSLLQDGFESMDLR.T                 | 1626.77023 | 2 | 3.87E-07 | 0.96  | 3.27   | -     | 2485.5  |
| AHQ-2-14, 6505 - 6564                                             | R.DSLLQDGFESMDLR.T                 | 1642.76963 | 2 | 8.74E-05 | 0.92  | 3.33   | -     | 1361.4  |
| AHQ-2-13-, 6341 - 6406                                            | R.DSLLQDGFESMDLR.T                 | 1626.77023 | 2 | 2.80E-04 | 0.97  | 4.96   | -     | 2037.2  |
| AHQ-2-13, 5580 - 5643                                             | R.DSLLQDGFESMDLR.T                 | 1626.77023 | 2 | 2.21E-08 | 0.97  | 4.74   | -     | 1873.9  |
| AHQ-2-13, 5451 - 5516                                             | R.DSLLQDGFESMDLR.T                 | 1626.77023 | 2 | 1.81E-09 | 0.97  | 5.00   | -     | 1898.5  |
| AHQ-2-13-, 6682                                                   | R.DSLLQDGFESMDLR.T                 | 1626.77023 | 2 | 2.27E-09 | 0.94  | 3.71   | -     | 1430.4  |
| AHQ-2-13, 4508 - 4627                                             | R.DSLLQDGFESMDLR.T                 | 1642.76963 | 2 | 2.85E-08 | 0.93  | 4.02   | -     | 1234.4  |
| AHQ-2-14-, 4588                                                   | R.DSLLQDGFESMDLR.T                 | 1642.76963 | 2 | 9.70E-09 | 0.91  | 3.60   | -     | 1107.0  |
| AHQ-2-14-, 4705                                                   | R.DSLLQDGFESMDLR.T                 | 1642.76963 | 2 | 6.10E-08 | 0.96  | 4.33   | -     | 1470.7  |
| AHQ-2-13, 4691 - 4759                                             | R.DSLLQDGFESMDLR.T                 | 1642.76963 | 2 | 4.71E-08 | 0.95  | 3.68   | -     | 1796.1  |
| AHQ-2-13, 4824 - 4887                                             | R.DSLLQDGFESMDLR.T                 | 1642.76963 | 2 | 1.85E-07 | 0.96  | 4.16   | -     | 1635.1  |
| AHQ-2-14, 6512 - 6584                                             | R.DSLLQDGFESMDLR.T                 | 1626.77023 | 2 | 3.02E-08 | 0.92  | 3.28   | -     | 1544.8  |
| AHQ-2-13, 5245 - 5255                                             | R.DSLLQDGFESMDLR.T                 | 1642.76963 | 2 | 9.33E-07 | 0.92  | 3.79   | -     | 1202.5  |
| AHQ-2-13, 5323 - 5387                                             | R.DSLLQDGFESMDLR.T                 | 1626.77023 | 2 | 8.50E-09 | 0.96  | 4.20   | -     | 1447.2  |
| AHQ-2-14-, 5264 - 5341                                            | R.DSLLQDGFESMDLR.T                 | 1626.77023 | 2 | 7.25E-09 | 0.97  | 4.96   | -     | 1479.8  |
| AHQ-2-14-, 5444 - 5513                                            | R.DSLLQDGFESMDLR.T                 | 1626.77023 | 2 | 1.17E-06 | 0.97  | 4.35   | -     | 1809.1  |
| AHQ-2-13, 4896                                                    | R.DSLLQDGFESMDLR.T                 | 1856.04748 | 2 | 2.71E-05 | 0.52  | 2.84   | -     | 332.6   |
| AHQ-2-12, 3573 - 3654                                             | K.DSPSVWAAV/PKG.T                  | 1214.35211 | 2 | 2.83E-06 | 0.88  | 3.29   | -     | 885.2   |
| AHQ-2-12, 3854                                                    | K.DSPSVWAAV/PKG.T                  | 1214.35211 | 2 | 2.82E-07 | 0.80  | 2.50   | -     | 1099.2  |
| AHQ-2-13-, 3349 - 3374                                            | K.DSPSVWAAV/PKG.T                  | 1214.35211 | 2 | 9.07E-06 | 0.85  | 2.73   | -     | 1177.3  |
| AHQ-2-13-, 3529 - 3598                                            | K.DSPSVWAAV/PKG.T                  | 1214.35211 | 2 | 4.95E-05 | 0.89  | 3.54   | -     | 944.5   |
| AHQ-2-13, 3677 - 3753                                             | K.DSPSVWAAV/PKG.T                  | 1214.35211 | 2 | 1.76E-05 | 0.84  | 2.99   | -     | 935.3   |
| AHQ-2-13-, 3625 - 3706                                            | K.DSPSVWAAV/PKG.T                  | 1214.35211 | 2 | 1.63E-07 | 0.91  | 3.75   | -     | 985.8   |
| AHQ-2-13, 3392                                                    | K.DSPSVWAAV/PKG.T                  | 1214.35211 | 2 | 3.17E-05 | 0.86  | 3.13   | -     | 1039.2  |
| AHQ-2-13, 3548 - 3731                                             | K.DSPSVWAAV/PKG.T                  | 1214.35211 | 1 | 4.46E-04 | 0.13  | 2.01   | -     | 446.2   |
| AHQ-2-13, 3547 - 3616                                             | K.DSPSVWAAV/PKG.T                  | 1214.35211 | 2 | 1.29E-05 | 0.87  | 3.26   | -     | 1066.8  |
| AHQ-2-13, 3860 - 3921                                             | K.DSPSVWAAV/PKG.T                  | 1214.35211 | 2 | 8.19E-04 | 0.87  | 2.81   | -     | 1079.7  |
| AHQ-2-13, 6652                                                    | K.DSPSVWAAV/PKGT/VNITPAE/VGLV/GK.D | 2840.26581 | 3 | 3.78E-06 | 0.95  | 5.40   | -     | 1399.2  |
| AHQ-2-13, 6504                                                    | K.DSPSVWAAV/PKGT/VNITPAE/VGLV/GK.D | 2840.26581 | 2 | 1.88E-04 | 0.56  | 3.27   | -     | 211.7   |
| AHQ-2-13, 6489 - 6492                                             | K.DSPSVWAAV/PKGT/VNITPAE/VGLV/GK.D | 2840.26581 | 3 | 1.21E-09 | 0.89  | 4.34   | -     | 1298.1  |
| AHQ-2-13-, 1538 - 1713                                            | K.EGVHGGLINK.K                     | 1024.15577 | 1 | 3.42E-04 | 0.43  | 2.03   | -     | 200.3   |
| AHQ-2-13-, 2153                                                   | K.KCYEM'ASHLR.R                    | 1296.50145 | 3 | 1.18E-06 | 0.95  | 4.05   | -     | 2020.1  |
| AHQ-2-13-, 2155 - 2158                                            | K.KCYEM'ASHLR.R                    | 1296.50145 | 1 | 4.23E-04 | 0.24  | 1.95   | -     | 272.3   |
| AHQ-2-13-, 2154                                                   | K.KCYEM'ASHLR.R                    | 1296.50145 | 2 | 2.09E-06 | 0.96  | 3.22   | -     | 2103.2  |
| AHQ-2-14, 5313                                                    | R.SSFYVNGTLGGQK.C                  | 1471.63957 | 2 | 5.86E-05 | 0.88  | 3.51   | -     | 670.3   |



|                            |                                                                         |            |   |          |      |       |       |          |
|----------------------------|-------------------------------------------------------------------------|------------|---|----------|------|-------|-------|----------|
| AHQ-2-14, 5328             | R.SSFYVNGLTGGQK.C                                                       | 1471.63957 | 1 | 1.43E-10 | 0.47 | 2.46  | -     | 388.6    |
| AHQ-2-14, 5630 - 5689      | R.SSFYVNGLTGGQK.C                                                       | 1471.63957 | 2 | 2.38E-09 | 0.96 | 4.29  | -     | 1309.2   |
| AHQ-2-13-, 4597 - 4657     | R.SSFYVNGLTGGQK.C                                                       | 1471.63957 | 2 | 1.48E-07 | 0.97 | 4.54  | -     | 1586.5   |
| AHQ-2-12, 4305             | R.SSFYVNGLTGGQK.C                                                       | 1471.63957 | 2 | 4.60E-05 | 0.92 | 3.87  | -     | 816.6    |
| AHQ-2-13-, 4471 - 4537     | R.SSFYVNGLTGGQK.C                                                       | 1471.63957 | 2 | 3.33E-08 | 0.97 | 4.67  | -     | 1270.2   |
| AHQ-2-12, 4306 - 4309      | R.SSFYVNGLTGGQK.C                                                       | 1471.63957 | 1 | 1.81E-09 | 0.43 | 2.95  | -     | 394.7    |
| AHQ-2-13, 4249 - 4311      | R.SSFYVNGLTGGQK.C                                                       | 1471.63957 | 2 | 1.96E-07 | 0.93 | 3.86  | -     | 889.5    |
| AHQ-2-14-, 4213 - 4293     | R.SSFYVNGLTGGQK.C                                                       | 1471.63957 | 1 | 2.64E-04 | 0.67 | 2.60  | -     | 551.1    |
| AHQ-2-13, 4564             | R.SSFYVNGLTGGQK.C                                                       | 1471.63957 | 1 | 1.71E-04 | 0.62 | 2.47  | -     | 534.9    |
| AHQ-2-13, 4563 - 4629      | R.SSFYVNGLTGGQK.C                                                       | 1471.63957 | 2 | 3.15E-07 | 0.86 | 3.11  | -     | 748.4    |
| AHQ-2-12, 4466 - 4601      | R.SSFYVNGLTGGQK.C                                                       | 1471.63957 | 1 | 4.97E-09 | 0.37 | 2.61  | -     | 324.7    |
| AHQ-2-13-, 4305 - 4373     | R.SSFYVNGLTGGQK.C                                                       | 1471.63957 | 2 | 5.14E-08 | 0.93 | 4.13  | -     | 728.2    |
| AHQ-2-14-, 4505 - 4571     | R.SSFYVNGLTGGQK.C                                                       | 1471.63957 | 1 | 1.89E-04 | 0.56 | 2.35  | -     | 508.4    |
| AHQ-2-13, 4471 - 4539      | R.SSFYVNGLTGGQK.C                                                       | 1471.63957 | 2 | 3.56E-10 | 0.96 | 4.55  | -     | 1069.3   |
| AHQ-2-13, 4332 - 4404      | R.SSFYVNGLTGGQK.C                                                       | 1471.63957 | 2 | 1.02E-05 | 0.84 | 3.05  | -     | 682.0    |
| AHQ-2-13, 4261 - 4628      | R.SSFYVNGLTGGQK.C                                                       | 1471.63957 | 1 | 8.45E-09 | 0.48 | 2.72  | -     | 368.0    |
| AHQ-2-13, 4259 - 4315      | R.SSFYVNGLTGGQK.C                                                       | 1471.63957 | 1 | 1.65E-06 | 0.60 | 2.84  | -     | 478.6    |
| AHQ-2-13-, 4307 - 4694     | R.SSFYVNGLTGGQK.C                                                       | 1471.63957 | 1 | 3.08E-07 | 0.44 | 2.85  | -     | 354.3    |
| AHQ-2-14-, 4508 - 4575     | R.SSFYVNGLTGGQK.C                                                       | 1471.63957 | 2 | 5.07E-09 | 0.96 | 4.48  | -     | 1210.3   |
| AHQ-2-12, 4463 - 4533      | R.SSFYVNGLTGGQK.C                                                       | 1471.63957 | 2 | 3.03E-09 | 0.96 | 4.79  | -     | 1193.9   |
| AHQ-2-13, 3317 - 3379      | K.STGGAPTFNVTYK.T                                                       | 1380.52843 | 2 | 1.91E-05 | 0.84 | 3.27  | -     | 630.1    |
| AHQ-2-13-, 2934 - 3001     | K.STGGAPTFNVTYK.T                                                       | 1380.52843 | 2 | 2.16E-06 | 0.88 | 3.79  | -     | 510.4    |
| AHQ-2-13, 3087 - 3168      | K.STGGAPTFNVTYK.T                                                       | 1380.52843 | 2 | 1.47E-06 | 0.72 | 2.99  | -     | 424.1    |
| AHQ-2-13-, 3010 - 3293     | K.STGGAPTFNVTYK.T                                                       | 1380.52843 | 1 | 8.64E-04 | 0.35 | 2.66  | -     | 288.5    |
| AHQ-2-13-, 3069 - 3137     | K.STGGAPTFNVTYK.T                                                       | 1380.52843 | 2 | 3.33E-08 | 0.85 | 3.03  | -     | 518.6    |
| AHQ-2-13-, 3201 - 3267     | K.STGGAPTFNVTYK.T                                                       | 1380.52843 | 2 | 6.12E-07 | 0.86 | 3.45  | -     | 473.0    |
| AHQ-2-12, 2913 - 3033      | K.STGGAPTFNVTYK.T                                                       | 1380.52843 | 1 | 4.43E-05 | 0.17 | 1.92  | -     | 412.7    |
| AHQ-2-14-, 3023 - 3025     | K.STGGAPTFNVTYK.T                                                       | 1380.52843 | 2 | 1.89E-05 | 0.73 | 2.68  | -     | 424.3    |
| AHQ-2-13, 3051 - 3315      | K.STGGAPTFNVTYK.T                                                       | 1380.52843 | 1 | 4.21E-04 | 0.41 | 2.72  | -     | 297.2    |
| AHQ-2-13, 3216 - 3297      | K.STGGAPTFNVTYK.T                                                       | 1380.52843 | 2 | 9.80E-05 | 0.89 | 3.37  | -     | 549.1    |
| AHQ-2-14, 3933 - 3957      | K.STGGAPTFNVTYK.T                                                       | 1380.52843 | 2 | 1.70E-04 | 0.66 | 2.81  | -     | 374.7    |
| AHQ-2-13, 2997 - 3059      | K.STGGAPTFNVTYK.T                                                       | 1380.52843 | 2 | 1.92E-08 | 0.89 | 3.78  | -     | 539.7    |
| AHQ-2-12, 3035             | K.STGGAPTFNVTYK.T                                                       | 1380.52843 | 2 | 1.09E-04 | 0.84 | 3.18  | -     | 480.7    |
| AHQ-2-12, 2942             | K.STGGAPTFNVTYKTDK.T                                                    | 1724.89354 | 2 | 4.32E-05 | 0.88 | 3.22  | -     | 843.1    |
| AHQ-2-13, 2895             | K.STGGAPTFNVTYKTDK.T                                                    | 1724.89354 | 2 | 1.47E-06 | 0.89 | 3.62  | -     | 653.3    |
| AHQ-2-13-, 2847 - 2854     | K.TDKTLVLLMGK.E                                                         | 1235.51929 | 2 | 1.66E-06 | 0.94 | 4.13  | -     | 1056.0   |
| AHQ-2-13-, 3533 - 3613     | K.TDKTLVLLMGK.E                                                         | 1219.51989 | 2 | 1.07E-06 | 0.95 | 4.13  | -     | 1314.6   |
| AHQ-2-13, 3541 - 3620      | K.TDKTLVLLMGK.E                                                         | 1219.51989 | 2 | 1.81E-06 | 0.95 | 4.02  | -     | 1310.8   |
| AHQ-2-13-, 6681 - 6693     | K.TFVNITPAEYVGLVGD.K                                                    | 1644.93630 | 2 | 4.96E-04 | 0.92 | 3.98  | -     | 909.7    |
| AHQ-2-13-, 5997 - 6069     | K.TFVNITPAEYVGLVGD.K                                                    | 1644.93630 | 2 | 7.68E-07 | 0.95 | 4.88  | -     | 1062.4   |
| AHQ-2-13, 5424 - 5503      | K.TFVNITPAEYVGLVGD.K                                                    | 1644.93630 | 2 | 2.00E-04 | 0.76 | 3.62  | -     | 572.9    |
| AHQ-2-13, 5644 - 5723      | K.TFVNITPAEYVGLVGD.K                                                    | 1644.93630 | 2 | 2.94E-06 | 0.95 | 4.75  | -     | 944.6    |
| AHQ-2-13, 5685 - 5749      | K.TFVNITPAEYVGLVGD.K                                                    | 1644.93630 | 3 | 1.46E-07 | 0.95 | 4.81  | -     | 1448.8   |
| AHQ-2-13, 5783 - 5843      | K.TFVNITPAEYVGLVGD.K                                                    | 1644.93630 | 2 | 3.90E-07 | 0.94 | 4.72  | -     | 884.8    |
| AHQ-2-13, 5895 - 5957      | K.TFVNITPAEYVGLVGD.K                                                    | 1644.93630 | 2 | 1.56E-04 | 0.82 | 3.33  | -     | 547.9    |
| AHQ-2-13, 5971 - 6023      | K.TFVNITPAEYVGLVGD.K                                                    | 1644.93630 | 2 | 5.78E-05 | 0.85 | 3.78  | -     | 799.5    |
| AHQ-2-13-, 5923            | K.TFVNITPAEYVGLVGD.K                                                    | 1644.93630 | 3 | 2.73E-07 | 0.98 | 5.93  | -     | 1981.4   |
| AHQ-2-13-, 5870 - 5935     | K.TFVNITPAEYVGLVGD.K                                                    | 1644.93630 | 2 | 2.19E-05 | 0.92 | 4.11  | -     | 928.3    |
| AHQ-2-13-, 5793 - 5818     | K.TFVNITPAEYVGLVGD.K                                                    | 1644.93630 | 3 | 1.32E-08 | 0.97 | 6.09  | -     | 1503.6   |
| AHQ-2-13-, 5781 - 5849     | K.TFVNITPAEYVGLVGD.K                                                    | 1644.93630 | 2 | 5.03E-07 | 0.95 | 4.32  | -     | 1042.3   |
| AHQ-2-12, 6073             | K.TFVNITPAEYVGLVGD.K                                                    | 1644.93630 | 2 | 3.63E-04 | 0.87 | 3.58  | -     | 612.7    |
| AHQ-2-12, 5897 - 5899      | K.TFVNITPAEYVGLVGD.K                                                    | 1644.93630 | 3 | 2.37E-08 | 0.96 | 5.23  | -     | 1340.6   |
| AHQ-2-12, 5885 - 5962      | K.TFVNITPAEYVGLVGD.K                                                    | 1644.93630 | 2 | 1.66E-05 | 0.89 | 3.92  | -     | 734.5    |
| AHQ-2-12, 5850 - 5921      | K.TFVNITPAEYVGLVGD.K                                                    | 1644.93630 | 2 | 4.48E-05 | 0.88 | 3.76  | -     | 674.1    |
| AHQ-2-14-, 5859            | K.TFVNITPAEYVGLVGD.K                                                    | 1644.93630 | 2 | 1.02E-04 | 0.91 | 4.11  | -     | 734.8    |
| AHQ-2-13, 5345 - 5353      | K.TFVNITPAEYVGLVGD.R.S                                                  | 1916.21052 | 3 | 1.72E-04 | 0.73 | 3.82  | -     | 505.2    |
| AHQ-2-13, 5336 - 5399      | K.TFVNITPAEYVGLVGD.R.S                                                  | 1916.21052 | 2 | 4.90E-07 | 0.92 | 4.50  | -     | 576.2    |
| AHQ-2-12, 5469             | K.TFVNITPAEYVGLVGD.R.S                                                  | 1916.21052 | 2 | 3.01E-06 | 0.85 | 3.90  | -     | 476.5    |
| AHQ-2-13-, 5438            | K.TFVNITPAEYVGLVGD.R.S                                                  | 1916.21052 | 2 | 4.88E-08 | 0.90 | 4.38  | -     | 627.3    |
| AHQ-2-13, 2731 - 2800      | R.TKSTGGAPTFNVTYK.T                                                     | 1609.80568 | 2 | 3.94E-04 | 0.95 | 4.34  | -     | 1092.0   |
| AHQ-2-13, 3349             | R.TKSTGGAPTFNVTYK.T                                                     | 1609.80568 | 2 | 4.97E-05 | 0.50 | 2.63  | -     | 271.6    |
| AHQ-2-13-, 2746 - 2795     | R.TKSTGGAPTFNVTYK.T                                                     | 1609.80568 | 2 | 2.07E-04 | 0.95 | 4.25  | -     | 946.8    |
| AHQ-2-13-, 2753 - 2785     | R.TKSTGGAPTFNVTYK.T                                                     | 1609.80568 | 3 | 4.60E-04 | 0.83 | 3.72  | -     | 789.6    |
| AHQ-2-13, 2839             | R.TKSTGGAPTFNVTYK.T                                                     | 1609.80568 | 3 | 1.57E-05 | 0.84 | 3.62  | -     | 932.3    |
| AHQ-2-13, 2859 - 2860      | R.TKSTGGAPTFNVTYK.T                                                     | 1609.80568 | 2 | 7.72E-06 | 0.92 | 3.72  | -     | 757.6    |
| AHQ-2-13, 3716             | K.TLVLLMGK.E                                                            | 875.15478  | 2 | 1.26E-05 | 0.85 | 2.66  | -     | 787.5    |
| AHQ-2-13-, 3005            | K.TLVLLMGK.E                                                            | 891.15418  | 2 | 1.17E-05 | 0.75 | 2.75  | -     | 728.8    |
| AHQ-2-13-, 2907 - 2977     | K.TLVLLMGK.E                                                            | 891.15418  | 2 | 4.39E-04 | 0.78 | 2.60  | -     | 600.2    |
| AHQ-2-13, 3587 - 3655      | K.TLVLLMGK.E                                                            | 875.15478  | 2 | 3.64E-05 | 0.88 | 3.19  | -     | 601.3    |
| AHQ-2-13-, 3701 - 3771     | K.TLVLLMGK.E                                                            | 875.15478  | 2 | 3.35E-05 | 0.89 | 3.37  | -     | 626.9    |
| AHQ-2-12, 3557             | K.TLVLLMGK.E                                                            | 875.15478  | 1 | 7.70E-05 | 0.40 | 2.14  | -     | 556.7    |
| AHQ-2-13-, 3578            | K.TLVLLMGK.E                                                            | 875.15478  | 1 | 8.91E-05 | 0.20 | 2.32  | -     | 224.2    |
| AHQ-2-13, 2960 - 3023      | K.TLVLLMGK.E                                                            | 891.15418  | 2 | 2.82E-04 | 0.81 | 2.63  | -     | 882.8    |
| AHQ-2-12, 2831             | K.TLVLLMGK.E                                                            | 891.15418  | 2 | 5.93E-04 | 0.86 | 2.61  | -     | 762.5    |
| AHQ-2-13-, 3574 - 3637     | K.TLVLLMGK.E                                                            | 875.15478  | 2 | 8.45E-06 | 0.85 | 2.79  | -     | 619.8    |
| gi 4759082 ref NP_004648.1 | serum deprivation response protein; serum deprivation response; phospho |            |   | 1.93E-11 | 4.42 | 50.27 | 13.60 | 47172.9  |
| AHQ-2-11, 6282             | R.DNSQVNAVTVLTLDDK.L                                                    | 1730.94122 | 2 | 7.37E-04 | 0.95 | 4.25  | -     | 1643.6   |
| AHQ-2-14-, 6268 - 6331     | R.DNSQVNAVTVLTLDDK.L                                                    | 1730.94122 | 2 | 2.57E-11 | 0.96 | 3.90  | -     | 1803.5   |
| AHQ-2-13-, 6426 - 6461     | R.DNSQVNAVTVLTLDDK.L                                                    | 1730.94122 | 2 | 1.75E-09 | 0.97 | 5.15  | -     | 1808.2   |
| AHQ-2-13, 6360             | R.DNSQVNAVTVLTLDDK.L                                                    | 1730.94122 | 2 | 1.06E-05 | 0.85 | 3.46  | -     | 877.9    |
| AHQ-2-13, 6264 - 6283      | R.DNSQVNAVTVLTLDDK.L                                                    | 1730.94122 | 2 | 5.28E-08 | 0.98 | 5.41  | -     | 1728.1   |
| AHQ-2-9, 6575 - 6646       | R.DNSQVNAVTVLTLDDK.L                                                    | 1730.94122 | 2 | 1.93E-05 | 0.97 | 4.75  | -     | 1771.9   |
| AHQ-2-12, 6369 - 6437      | R.DNSQVNAVTVLTLDDK.L                                                    | 1730.94122 | 2 | 5.04E-07 | 0.96 | 4.58  | -     | 1354.2   |
| AHQ-2-14-, 6384 - 6436     | R.DNSQVNAVTVLTLDDK.L                                                    | 1730.94122 | 2 | 3.09E-04 | 0.89 | 3.53  | -     | 1309.5   |
| AHQ-2-11, 6168             | R.DNSQVNAVTVLTLDDK.L                                                    | 1730.94122 | 2 | 1.75E-07 | 0.97 | 5.07  | -     | 1897.8   |
| AHQ-2-11, 6077 - 6156      | R.DNSQVNAVTVLTLDDK.L                                                    | 1730.94122 | 2 | 1.14E-09 | 0.96 | 5.10  | -     | 1159.9   |
| AHQ-2-11, 3356 - 3404      | K.LVNMMLDAVQENQHK.M                                                     | 1639.85851 | 2 | 8.49E-08 | 0.92 | 3.91  | -     | 1187.8   |
| AHQ-2-12, 3443             | K.LVNMMLDAVQENQHK.M                                                     | 1639.85851 | 2 | 9.10E-05 | 0.85 | 3.56  | -     | 813.8    |
| AHQ-2-11, 2089             | K.RLENNHAQLLR.R                                                         | 1364.53869 | 2 | 4.01E-06 | 0.83 | 2.86  | -     | 874.5    |
| AHQ-2-13-, 3386            | R.SDGPVPQPAVLQVHQTS                                                     | 1778.90130 | 2 | 3.95E-04 | 0.75 | 2.83  | -     | 612.6    |
| AHQ-2-12, 6169 - 6234      | K.VLIFQEENEIPASVFK.Q                                                    | 1963.26241 | 2 | 1.19E-07 | 0.96 | 5.21  | -     | 829.1    |
| AHQ-2-10, 5750             | K.VLIFQEENEIPASVFK.Q                                                    | 1963.26241 | 2 | 8.16E-06 | 0.89 | 3.78  | -     | 612.4    |
| AHQ-2-13, 6047             | K.VLIFQEENEIPASVFK.Q                                                    | 1963.26241 | 2 | 1.92E-10 | 0.96 | 5.44  | -     | 912.4    |
| AHQ-2-9, 6546              | K.VLIFQEENEIPASVFK.Q                                                    | 1963.26241 | 2 | 1.72E-08 | 0.96 | 4.92  | -     | 1190.1   |
| AHQ-2-9, 6394 - 6475       | K.VLIFQEENEIPASVFK.Q                                                    | 1963.26241 | 2 | 2.79E-08 | 0.93 | 4.59  | -     | 826.0    |
| AHQ-2-11, 5886 - 5928      | K.VLIFQEENEIPASVFK.Q                                                    | 1963.26241 | 2 | 6.97E-07 | 0.96 | 4.90  | -     | 1186.2   |
| AHQ-2-13-, 6213            | K.VLIFQEENEIPASVFK.Q                                                    | 1963.26241 | 2 | 5.32E-04 | 0.96 | 5.40  | -     | 1036.0   |
| AHQ-2-9, 6159 - 6236       | K.VLIFQEENEIPASVFK.Q                                                    | 1963.26241 | 2 | 2.80E-08 | 0.96 | 5.43  | -     | 827.9    |
| AHQ-2-14-, 6017 - 6091     | K.VLIFQEENEIPASVFK.Q                                                    | 1963.26241 | 2 | 1.93E-11 | 0.95 | 5.18  | -     | 892.3    |
| AHQ-2-8, 6114 - 6131       | K.VLIFQEENEIPASVFK.Q                                                    | 1963.26241 | 2 | 2.43E-06 | 0.95 | 4.80  | -     | 1056.1   |
| AHQ-2-6, 6205              | K.VLIFQEENEIPASVFK.Q                                                    | 1963.26241 | 2 | 8.67E-08 | 0.94 | 4.78  | -     | 819.6    |
| gi 5901944 ref NP_008977.1 | elastin microfibril interface located protein; TNF? elastin microfibril |            |   | 1.94E-11 | 4.45 | 50.27 | 9.40  | 106694.7 |
| AHQ-2-3, 3553              | R.APAPASAPPGPSEELLR.Q                                                   | 1660.85268 | 2 | 9.57E-10 | 0.71 | 3.27  | -     | 328.6    |
| AHQ-2-4, 3565 - 3638       | R.APAPASAPPGPSEELLR.Q                                                   | 1660.85268 | 2 | 2.91E-07 | 0.76 | 3.22  | -     | 351.7    |
| AHQ-2-3, 3033              | R.GTELGAAGGGHPPGYTSLASR.L                                               | 2142.27464 | 2 | 1.35E-08 | 0.88 | 4.61  | -     | 320.2    |
| AHQ-2-4, 3013              | R.GTELGAAGGGHPPGYTSLASR.L                                               | 2142.27464 | 2 | 6.08E-06 | 0.58 | 3.06  | -     | 304.1    |
| AHQ-2-3, 3611              | R.LDTVAGLQGLR.E                                                         | 1200.37012 | 2 | 4.29E-06 | 0.97 | 4.53  | -     | 1590.4   |

|                             |                                                                         |            |   |          |       |        |       |         |
|-----------------------------|-------------------------------------------------------------------------|------------|---|----------|-------|--------|-------|---------|
| AHQ-2-4, 2762               | R.LVGSGLHTVEAAGEAR.Q                                                    | 1567.72888 | 2 | 1.66E-06 | 0.89  | 3.52   | -     | 995.5   |
| AHQ-2-3, 2765               | R.LVGSGLHTVEAAGEAR.Q                                                    | 1567.72888 | 2 | 1.94E-11 | 0.93  | 3.66   | -     | 1297.4  |
| AHQ-2-3, 3711               | R.PARPNLSGSSAGSPLSGLGEGPGESEK.V                                         | 2596.74928 | 3 | 3.02E-07 | 0.96  | 5.42   | -     | 1274.3  |
| gi 5729877 ref NP_006588.1  | heat shock 70kDa protein 8 isoform 1; heat shock cognate protein, 71-kD |            |   | 2.04E-11 | 11.87 | 130.27 | 21.10 | 70897.6 |
| AHQ-2-6, 4227               | R.ARFEELNADLFR.G                                                        | 1481.63768 | 2 | 3.77E-08 | 0.94  | 3.90   | -     | 1020.2  |
| AHQ-2-6, 4146               | R.ARFEELNADLFR.G                                                        | 1481.63768 | 3 | 1.54E-04 | 0.93  | 4.29   | -     | 1201.1  |
| AHQ-2-6, 4559               | R.FEELNADLFR.G                                                          | 1254.37310 | 2 | 3.91E-07 | 0.93  | 3.38   | -     | 1236.4  |
| AHQ-2-6, 5186               | K.GPAVGDIDLGTTSYSCVGVFQHGK.V                                            | 2265.53088 | 3 | 2.04E-11 | 0.90  | 4.33   | -     | 1023.5  |
| AHQ-2-6, 5182 - 5205        | K.GPAVGDIDLGTTSYSCVGVFQHGK.V                                            | 2265.53088 | 2 | 1.80E-07 | 0.97  | 5.32   | -     | 1449.8  |
| AHQ-2-6, 5535               | K.ILDKNEIINWLDK.N                                                       | 1776.04688 | 2 | 1.25E-07 | 0.96  | 5.04   | -     | 1499.3  |
| AHQ-2-6, 3259               | K.LDKSQIHDLVVGSTR.I                                                     | 1839.08615 | 2 | 1.09E-04 | 0.85  | 3.63   | -     | 633.6   |
| AHQ-2-6, 2719               | R.M*VNHFAIEFK.R                                                         | 1252.46696 | 2 | 5.55E-05 | 0.91  | 2.86   | -     | 1117.3  |
| AHQ-2-6, 3722               | K.NQVAMNPTNTVFDK.R                                                      | 1650.83816 | 2 | 2.06E-04 | 0.87  | 3.50   | -     | 738.4   |
| AHQ-2-6, 2765               | K.NQVAM*NPNTVFDK.R                                                      | 1666.83756 | 2 | 1.07E-05 | 0.95  | 4.51   | -     | 1084.5  |
| AHQ-2-6, 3993               | K.NQVAMNPTNTVFDK.R                                                      | 1650.83816 | 2 | 3.59E-07 | 0.90  | 4.39   | -     | 558.8   |
| AHQ-2-6, 3821 - 3865        | K.NSLESYAFNMK.A                                                         | 1304.45393 | 2 | 1.87E-05 | 0.86  | 3.36   | -     | 772.7   |
| AHQ-2-6, 3074               | K.NSLESYAFNM*K.A                                                        | 1320.45333 | 2 | 1.21E-05 | 0.78  | 2.75   | -     | 664.7   |
| AHQ-2-6, 2415               | R.RFDDAVVQSDMK.H                                                        | 1411.56603 | 2 | 4.76E-06 | 0.95  | 4.42   | -     | 1320.9  |
| AHQ-2-13, 2765              | R.RFDDAVVQSDMK.H                                                        | 1411.56603 | 2 | 9.18E-05 | 0.92  | 3.61   | -     | 1179.8  |
| AHQ-2-6, 6834 - 6905        | K.SINPDEAVYGAAVQAAILSGDK.S                                              | 2261.47411 | 2 | 6.78E-10 | 0.96  | 5.39   | -     | 1043.7  |
| AHQ-2-6, 6951 - 6987        | K.SINPDEAVYGAAVQAAILSGDK.S                                              | 2261.47411 | 2 | 4.65E-04 | 0.84  | 3.40   | -     | 581.5   |
| AHQ-2-7, 7003               | K.SINPDEAVYGAAVQAAILSGDK.S                                              | 2261.47411 | 2 | 1.09E-08 | 0.96  | 4.97   | -     | 1021.4  |
| AHQ-2-7, 2660               | K.SQIHDLVVGSTR.I                                                        | 1482.66712 | 2 | 1.92E-08 | 0.97  | 4.25   | -     | 1812.0  |
| AHQ-2-6, 2751               | K.SQIHDLVVGSTR.I                                                        | 1482.66712 | 2 | 3.72E-10 | 0.97  | 4.50   | -     | 2004.5  |
| AHQ-2-6, 2761               | K.SQIHDLVVGSTR.I                                                        | 1482.66712 | 1 | 9.36E-09 | 0.85  | 3.63   | -     | 392.4   |
| gi 4502027 ref NP_000468.1  | albumin precursor; PRO0883 protein [Homo sapiens]                       |            |   | 2.13E-11 | 20.89 | 250.36 | 48.30 | 69366.4 |
| AHQ-2-5, 2347 - 2348        | K.AAFTECCQAADK.A                                                        | 1374.47927 | 2 | 4.75E-05 | 0.87  | 3.31   | -     | 794.5   |
| AHQ-2-5, 5527 - 5528        | K.AVMDDFAAFVEK.C                                                        | 1343.53006 | 2 | 2.60E-07 | 0.97  | 4.54   | -     | 1509.6  |
| AHQ-2-6, 5429 - 5430        | K.AVMDDFAAFVEK.C                                                        | 1343.53006 | 2 | 1.01E-08 | 0.97  | 4.25   | -     | 1836.4  |
| AHQ-2-12, 5531              | K.AVMDDFAAFVEK.C                                                        | 1343.53006 | 2 | 7.50E-05 | 0.83  | 3.02   | -     | 784.0   |
| AHQ-2-5, 5541               | K.AVMDDFAAFVEK.C                                                        | 1343.53006 | 1 | 1.74E-06 | 0.87  | 3.63   | -     | 900.0   |
| AHQ-2-14-, 5448             | K.AVMDDFAAFVEK.C                                                        | 1343.53006 | 2 | 1.13E-09 | 0.96  | 4.00   | -     | 1783.9  |
| AHQ-2-6, 2298 - 2314        | K.CCTESLVNR.R                                                           | 1141.25805 | 2 | 4.33E-05 | 0.85  | 2.79   | -     | 1035.9  |
| AHQ-2-5, 2335               | K.CCTESLVNR.R                                                           | 1141.25805 | 1 | 7.95E-06 | 0.25  | 2.00   | -     | 126.0   |
| AHQ-2-5, 2328               | K.CCTESLVNR.R                                                           | 1141.25805 | 2 | 3.83E-05 | 0.84  | 2.68   | -     | 1028.4  |
| AHQ-2-6, 2537               | R.ETYGEMADCCAQ.Q                                                        | 1437.55563 | 2 | 2.34E-05 | 0.51  | 2.94   | -     | 355.0   |
| AHQ-2-5, 2353               | R.FKDLGEENFK.A                                                          | 1227.34766 | 1 | 5.92E-04 | 0.27  | 1.85   | -     | 492.8   |
| AHQ-2-6, 2357 - 2362        | R.FKDLGEENFK.A                                                          | 1227.34766 | 2 | 9.91E-06 | 0.79  | 3.15   | -     | 675.8   |
| AHQ-2-13-, 2698 - 2707      | R.FKDLGEENFK.A                                                          | 1227.34766 | 2 | 1.50E-04 | 0.78  | 2.94   | -     | 646.4   |
| AHQ-2-5, 2275 - 2351        | R.FKDLGEENFK.A                                                          | 1227.34766 | 2 | 4.15E-06 | 0.83  | 3.17   | -     | 714.3   |
| AHQ-2-5, 2596               | K.FQNALVLR.Y                                                            | 961.14282  | 2 | 3.09E-05 | 0.84  | 2.71   | -     | 947.1   |
| AHQ-2-5, 2260               | K.KQTALVELK.H                                                           | 1129.37494 | 2 | 2.56E-05 | 0.81  | 3.01   | -     | 766.7   |
| AHQ-2-5, 3209 - 3215        | K.KVPQVSTPTLVEVSR.N                                                     | 1640.90605 | 2 | 3.41E-07 | 0.89  | 3.83   | -     | 648.6   |
| AHQ-2-10, 3156 - 3162       | K.KVPQVSTPTLVEVSR.N                                                     | 1640.90605 | 2 | 1.54E-06 | 0.89  | 3.53   | -     | 625.9   |
| AHQ-2-6, 3151 - 3233        | K.KVPQVSTPTLVEVSR.N                                                     | 1640.90605 | 2 | 6.16E-09 | 0.93  | 3.71   | -     | 1066.7  |
| AHQ-2-7, 3072               | K.KVPQVSTPTLVEVSR.N                                                     | 1640.90605 | 2 | 3.62E-07 | 0.86  | 3.28   | -     | 630.8   |
| AHQ-2-2, 3610               | K.KVPQVSTPTLVEVSR.N                                                     | 1640.90605 | 2 | 6.11E-09 | 0.80  | 3.13   | -     | 552.5   |
| AHQ-2-4, 3470 - 3545        | K.KVPQVSTPTLVEVSR.N                                                     | 1640.90605 | 2 | 3.64E-05 | 0.55  | 2.95   | -     | 491.8   |
| AHQ-2-8, 2915               | K.KVPQVSTPTLVEVSR.N                                                     | 1640.90605 | 2 | 4.70E-06 | 0.52  | 2.73   | -     | 443.5   |
| AHQ-2-3, 3559               | K.KVPQVSTPTLVEVSR.N                                                     | 1640.90605 | 2 | 1.39E-09 | 0.82  | 2.99   | -     | 721.6   |
| AHQ-2-6, 2985 - 3051        | K.LVNEVTEFAK.T                                                          | 1150.30633 | 2 | 2.63E-07 | 0.77  | 3.06   | -     | 520.6   |
| AHQ-2-1, 3449               | K.LVNEVTEFAK.T                                                          | 1150.30633 | 2 | 2.16E-06 | 0.84  | 3.64   | -     | 507.7   |
| AHQ-2-6, 5605               | R.LVRPEVDVMCTAFHDNEETFLK.K                                              | 2652.98428 | 3 | 7.27E-06 | 0.97  | 5.74   | -     | 1719.8  |
| AHQ-2-5, 5640               | R.LVRPEVDVMCTAFHDNEETFLK.K                                              | 2652.98428 | 3 | 1.50E-06 | 0.98  | 7.13   | -     | 2273.8  |
| AHQ-2-5, 5253               | R.LVRPEVDVMCTAFHDNEETFLK.K                                              | 2781.15719 | 3 | 1.77E-08 | 0.97  | 6.57   | -     | 1148.2  |
| AHQ-2-5, 5019               | K.QNCELFLQEGEYK.F                                                       | 1659.79847 | 2 | 5.15E-05 | 0.48  | 2.50   | -     | 374.3   |
| AHQ-2-6, 3630               | R.RHPDYSVVLLLR.L                                                        | 1468.72842 | 2 | 4.28E-07 | 0.93  | 3.51   | -     | 1021.6  |
| AHQ-2-5, 3609 - 3621        | R.RHPDYSVVLLLR.L                                                        | 1468.72842 | 2 | 8.71E-05 | 0.94  | 3.60   | -     | 1189.6  |
| AHQ-2-6, 5742               | R.RHPYFAPELLFFAK.R                                                      | 1900.21293 | 2 | 4.51E-11 | 0.98  | 4.85   | -     | 2456.0  |
| AHQ-2-5, 5633               | R.RHPYFAPELLFFAK.R                                                      | 1900.21293 | 3 | 4.24E-10 | 0.97  | 6.04   | -     | 1954.3  |
| AHQ-2-5, 5631               | R.RHPYFAPELLFFAK.R                                                      | 1900.21293 | 2 | 2.54E-06 | 0.98  | 5.78   | -     | 2733.8  |
| AHQ-2-6, 7174               | K.RMP*CAEDYLSVVLNQLCVLHEK.T                                             | 2694.10110 | 3 | 8.96E-04 | 0.95  | 5.63   | -     | 1113.2  |
| AHQ-2-6, 7213               | K.RMP*CAEDYLSVVLNQLCVLHEK.T                                             | 2678.10170 | 3 | 3.82E-08 | 0.97  | 6.21   | -     | 1828.1  |
| AHQ-2-5, 7420               | K.RMP*CAEDYLSVVLNQLCVLHEK.T                                             | 2694.10110 | 3 | 3.76E-05 | 0.96  | 6.09   | -     | 1284.8  |
| AHQ-2-5, 7455 - 7457        | K.RMP*CAEDYLSVVLNQLCVLHEK.T                                             | 2678.10170 | 3 | 1.20E-05 | 0.98  | 6.47   | -     | 1924.1  |
| AHQ-2-7, 4523               | R.RPCFSALEVDETYVPK.E                                                    | 1913.14041 | 2 | 2.01E-04 | 0.89  | 3.81   | -     | 611.4   |
| AHQ-2-1, 4994               | R.RPCFSALEVDETYVPK.E                                                    | 1913.14041 | 2 | 2.98E-08 | 0.84  | 3.85   | -     | 542.1   |
| AHQ-2-5, 4636               | R.RPCFSALEVDETYVPK.E                                                    | 1913.14041 | 2 | 5.15E-06 | 0.91  | 4.37   | -     | 645.3   |
| AHQ-2-6, 6349 - 6357        | K.SHCIAEVNDEM*PADLPSLAADFVESK.D                                         | 2993.22637 | 3 | 1.06E-05 | 0.92  | 5.30   | -     | 598.5   |
| AHQ-2-7, 7025 - 7043        | K.SHCIAEVNDEM*PADLPSLAADFVESK.D                                         | 2977.22697 | 3 | 1.52E-04 | 0.95  | 5.77   | -     | 756.2   |
| AHQ-2-6, 6893 - 6963        | K.SHCIAEVNDEM*PADLPSLAADFVESK.D                                         | 2977.22697 | 2 | 5.02E-08 | 0.96  | 5.29   | -     | 966.2   |
| AHQ-2-5, 7059 - 7124        | K.SHCIAEVNDEM*PADLPSLAADFVESK.D                                         | 2977.22697 | 3 | 2.13E-11 | 0.96  | 6.10   | -     | 975.7   |
| AHQ-2-5, 7061               | K.SHCIAEVNDEM*PADLPSLAADFVESK.D                                         | 2977.22697 | 2 | 3.57E-05 | 0.94  | 4.82   | -     | 847.8   |
| AHQ-2-6, 6859 - 6922        | K.SHCIAEVNDEM*PADLPSLAADFVESK.D                                         | 2977.22697 | 3 | 2.08E-07 | 0.95  | 5.43   | -     | 939.5   |
| AHQ-2-5, 2248               | K.SLHTLFGDK.L                                                           | 1018.14800 | 1 | 3.46E-05 | 0.63  | 2.53   | -     | 489.3   |
| AHQ-2-7, 2196               | K.SLHTLFGDK.L                                                           | 1018.14800 | 1 | 2.11E-04 | 0.55  | 2.34   | -     | 505.6   |
| AHQ-2-6, 4846               | K.SLHTLFGDKLCTVATLR.E                                                   | 1934.24913 | 3 | 9.95E-08 | 0.86  | 3.65   | -     | 822.9   |
| AHQ-2-6, 4855               | K.SLHTLFGDKLCTVATLR.E                                                   | 1934.24913 | 2 | 7.39E-06 | 0.93  | 4.28   | -     | 870.8   |
| AHQ-2-6, 5683 - 5765        | K.VFDEFKPLVEEPQNLK.Q                                                    | 2046.35142 | 2 | 2.36E-04 | 0.87  | 4.44   | -     | 449.0   |
| AHQ-2-6, 5711 - 5778        | K.VFDEFKPLVEEPQNLK.Q                                                    | 2046.35142 | 3 | 2.20E-06 | 0.95  | 4.38   | -     | 1467.1  |
| AHQ-2-1, 6126               | K.VFDEFKPLVEEPQNLK.Q                                                    | 2046.35142 | 3 | 2.30E-07 | 0.97  | 5.06   | -     | 1530.8  |
| AHQ-2-5, 5971               | K.VFDEFKPLVEEPQNLK.Q                                                    | 2046.35142 | 2 | 5.83E-05 | 0.73  | 3.60   | -     | 413.3   |
| AHQ-2-5, 5795 - 5805        | K.VFDEFKPLVEEPQNLK.Q                                                    | 2046.35142 | 3 | 5.33E-06 | 0.95  | 4.41   | -     | 1581.9  |
| AHQ-2-5, 5787 - 5864        | K.VFDEFKPLVEEPQNLK.Q                                                    | 2046.35142 | 2 | 3.23E-05 | 0.94  | 4.54   | -     | 626.2   |
| AHQ-2-9, 5776 - 5854        | K.VFDEFKPLVEEPQNLK.Q                                                    | 2046.35142 | 2 | 6.92E-05 | 0.90  | 4.40   | -     | 443.2   |
| AHQ-2-3, 6108               | K.VFDEFKPLVEEPQNLK.Q                                                    | 2046.35142 | 2 | 3.42E-04 | 0.89  | 4.00   | -     | 555.2   |
| AHQ-2-4, 6109               | K.VFDEFKPLVEEPQNLK.Q                                                    | 2046.35142 | 2 | 7.24E-04 | 0.66  | 3.20   | -     | 297.6   |
| AHQ-2-6, 5562               | K.VFDEFKPLVEEPQNLK.Q                                                    | 2046.35142 | 3 | 2.59E-06 | 0.90  | 4.13   | -     | 1055.6  |
| AHQ-2-7, 5711 - 5712        | K.VFDEFKPLVEEPQNLK.Q                                                    | 2046.35142 | 2 | 3.22E-05 | 0.85  | 4.44   | -     | 371.7   |
| AHQ-2-1, 6120               | K.VFDEFKPLVEEPQNLK.Q                                                    | 2046.35142 | 2 | 3.58E-06 | 0.91  | 4.30   | -     | 466.9   |
| AHQ-2-5, 3528               | K.VHTECCHGDLLECCADDRADLAK.Y                                             | 2589.77855 | 3 | 1.32E-04 | 0.94  | 5.40   | -     | 826.7   |
| AHQ-2-5, 3759 - 3760        | K.VPQVSTPTLVEVSR.N                                                      | 1512.73313 | 2 | 2.92E-04 | 0.88  | 3.21   | -     | 894.7   |
| AHQ-2-10, 3610              | K.VPQVSTPTLVEVSR.N                                                      | 1512.73313 | 2 | 1.56E-04 | 0.56  | 2.54   | -     | 595.5   |
| AHQ-2-6, 3725 - 3751        | K.VPQVSTPTLVEVSR.N                                                      | 1512.73313 | 2 | 1.61E-07 | 0.91  | 3.93   | -     | 810.2   |
| AHQ-2-6, 2177 - 2181        | K.YICENQDSISSK.L                                                        | 1445.53420 | 2 | 9.41E-07 | 0.95  | 4.81   | -     | 735.5   |
| AHQ-2-5, 2201               | K.YICENQDSISSK.L                                                        | 1445.53420 | 1 | 9.02E-07 | 0.44  | 2.74   | -     | 323.9   |
| AHQ-2-1, 2452               | K.YICENQDSISSK.L                                                        | 1445.53420 | 1 | 8.51E-04 | 0.05  | 1.96   | -     | 183.0   |
| AHQ-2-1, 2449               | K.YICENQDSISSK.L                                                        | 1445.53420 | 2 | 4.98E-07 | 0.93  | 3.99   | -     | 759.1   |
| gi 30151108 ref XP_301187.1 | similar to actin beta, cytoskeletal - Kenyan clawed frog [Homo sapiens] |            |   | 2.28E-11 | 2.61  | 30.34  | 13.10 | 32164.8 |
| AHQ-2-1, 5056               | K.DLYANTVLSGGTTM*YPGIADR.M                                              | 2232.45624 | 2 | 1.24E-05 | 0.95  | 4.15   | -     | 1166.9  |
| AHQ-2-1, 5584               | K.DLYANTVLSGGTTM*YPGIADR.M                                              | 2216.45684 | 2 | 5.16E-07 | 0.91  | 4.46   | -     | 670.4   |
| AHQ-2-2, 5286 - 5317        | K.DLYANTVLSGGTTM*YPGIADR.M                                              | 2232.45624 | 2 | 3.00E-04 | 0.91  | 4.40   | -     | 727.1   |
| AHQ-2-2, 5846               | K.DLYANTVLSGGTTM*YPGIADR.M                                              | 2216.45684 | 2 | 1.42E-04 | 0.67  | 3.08   | -     | 495.9   |
| AHQ-2-3, 5135               | K.DLYANTVLSGGTTM*YPGIADR.M                                              | 2232.45624 | 2 | 2.90E-06 | 0.85  | 3.58   | -     | 541.9   |
| AHQ-2-3, 5788               | K.DLYANTVLSGGTTM*YPGIADR.M                                              | 2216.45684 | 2 | 4.41E-04 | 0.92  | 4.84   | -     | 723.7   |
| AHQ-2-4, 5140               | K.DLYANTVLSGGTTM*YPGIADR.M                                              | 2232.45624 | 2 | 1.46E-07 | 0.93  | 4.48   | -     | 757.5   |
| AHQ-2-4, 5632 - 5644        | K.DLYANTVLSGGTTM*YPGIADR.M                                              | 2216.45684 | 2 | 5.30E-07 | 0.74  | 3.47   | -     | 543.1   |

|                            |                                                                         |            |   |          |      |       |       |          |
|----------------------------|-------------------------------------------------------------------------|------------|---|----------|------|-------|-------|----------|
| AHQ-2-5, 5497              | K.DLYANTVLSGGTTMYPGIADR.M                                               | 2216.45684 | 2 | 1.84E-07 | 0.92 | 4.64  | -     | 796.8    |
| AHQ-2-6, 5002 - 5003       | K.DLYANTVLSGGTTMYPGIADR.M                                               | 2232.45624 | 2 | 5.23E-06 | 0.92 | 4.21  | -     | 812.3    |
| AHQ-2-6, 5342              | K.DLYANTVLSGGTTMYPGIADR.M                                               | 2216.45684 | 2 | 6.06E-05 | 0.91 | 4.28  | -     | 913.0    |
| AHQ-2-14-, 5523 - 5587     | K.DLYANTVLSGGTTMYPGIADR.M                                               | 2216.45684 | 2 | 1.25E-05 | 0.92 | 4.21  | -     | 893.2    |
| AHQ-2-8, 4724              | K.DLYANTVLSGGTTMYPGIADR.M                                               | 2232.45624 | 2 | 3.42E-08 | 0.89 | 4.53  | -     | 515.4    |
| AHQ-2-8, 4824 - 4903       | K.DLYANTVLSGGTTMYPGIADR.M                                               | 2232.45624 | 2 | 2.88E-05 | 0.97 | 5.57  | -     | 1114.7   |
| AHQ-2-8, 4915 - 4987       | K.DLYANTVLSGGTTMYPGIADR.M                                               | 2232.45624 | 2 | 1.52E-05 | 0.96 | 5.14  | -     | 932.1    |
| AHQ-2-8, 5055 - 5126       | K.DLYANTVLSGGTTMYPGIADR.M                                               | 2232.45624 | 2 | 2.15E-09 | 0.96 | 4.98  | -     | 1082.7   |
| AHQ-2-8, 5159 - 5232       | K.DLYANTVLSGGTTMYPGIADR.M                                               | 2232.45624 | 2 | 2.13E-04 | 0.79 | 3.51  | -     | 599.2    |
| AHQ-2-8, 5234 - 5302       | K.DLYANTVLSGGTTMYPGIADR.M                                               | 2216.45684 | 2 | 1.24E-04 | 0.98 | 6.86  | -     | 1120.3   |
| AHQ-2-8, 5331 - 5399       | K.DLYANTVLSGGTTMYPGIADR.M                                               | 2216.45684 | 2 | 9.70E-06 | 0.87 | 3.67  | -     | 718.0    |
| AHQ-2-8, 5427 - 5498       | K.DLYANTVLSGGTTMYPGIADR.M                                               | 2216.45684 | 2 | 7.23E-07 | 0.85 | 3.69  | -     | 634.8    |
| AHQ-2-8, 5447 - 5514       | K.DLYANTVLSGGTTMYPGIADR.M                                               | 2232.45624 | 2 | 4.11E-04 | 0.93 | 4.46  | -     | 858.6    |
| AHQ-2-8, 5656 - 5722       | K.DLYANTVLSGGTTMYPGIADR.M                                               | 2216.45684 | 2 | 4.50E-05 | 0.91 | 4.44  | -     | 623.7    |
| AHQ-2-8, 5747 - 5826       | K.DLYANTVLSGGTTMYPGIADR.M                                               | 2216.45684 | 2 | 2.21E-05 | 0.93 | 4.51  | -     | 773.8    |
| AHQ-2-8, 5878 - 5958       | K.DLYANTVLSGGTTMYPGIADR.M                                               | 2216.45684 | 2 | 5.28E-06 | 0.97 | 5.83  | -     | 1110.6   |
| AHQ-2-8, 6026 - 6107       | K.DLYANTVLSGGTTMYPGIADR.M                                               | 2216.45684 | 2 | 2.28E-04 | 0.97 | 5.86  | -     | 1125.3   |
| AHQ-2-8, 6174 - 6244       | K.DLYANTVLSGGTTMYPGIADR.M                                               | 2216.45684 | 2 | 2.99E-06 | 0.95 | 5.02  | -     | 834.2    |
| AHQ-2-8, 6307 - 6371       | K.DLYANTVLSGGTTMYPGIADR.M                                               | 2216.45684 | 2 | 3.03E-04 | 0.97 | 5.81  | -     | 918.2    |
| AHQ-2-8, 6438 - 6506       | K.DLYANTVLSGGTTMYPGIADR.M                                               | 2216.45684 | 2 | 2.22E-05 | 0.95 | 5.23  | -     | 828.9    |
| AHQ-2-8, 6575 - 6642       | K.DLYANTVLSGGTTMYPGIADR.M                                               | 2216.45684 | 2 | 8.17E-05 | 0.95 | 4.75  | -     | 1034.5   |
| AHQ-2-8, 6710 - 6790       | K.DLYANTVLSGGTTMYPGIADR.M                                               | 2216.45684 | 2 | 9.23E-05 | 0.94 | 4.83  | -     | 832.1    |
| AHQ-2-8, 6848 - 6920       | K.DLYANTVLSGGTTMYPGIADR.M                                               | 2216.45684 | 2 | 3.58E-06 | 0.96 | 5.73  | -     | 855.2    |
| AHQ-2-8, 7252 - 7323       | K.DLYANTVLSGGTTMYPGIADR.M                                               | 2216.45684 | 2 | 9.57E-04 | 0.92 | 4.90  | -     | 553.2    |
| AHQ-2-9, 4951 - 4952       | K.DLYANTVLSGGTTMYPGIADR.M                                               | 2232.45624 | 2 | 6.79E-05 | 0.95 | 5.02  | -     | 1056.4   |
| AHQ-2-9, 5034 - 5108       | K.DLYANTVLSGGTTMYPGIADR.M                                               | 2232.45624 | 2 | 1.61E-05 | 0.94 | 4.50  | -     | 934.2    |
| AHQ-2-9, 5394              | K.DLYANTVLSGGTTMYPGIADR.M                                               | 2216.45684 | 2 | 3.17E-05 | 0.89 | 4.29  | -     | 695.7    |
| AHQ-2-9, 6294 - 6366       | K.DLYANTVLSGGTTMYPGIADR.M                                               | 2216.45684 | 2 | 1.80E-07 | 0.83 | 3.77  | -     | 515.9    |
| AHQ-2-10, 4583 - 4664      | K.DLYANTVLSGGTTMYPGIADR.M                                               | 2232.45624 | 2 | 3.71E-08 | 0.94 | 4.99  | -     | 780.4    |
| AHQ-2-10, 4722 - 4786      | K.DLYANTVLSGGTTMYPGIADR.M                                               | 2232.45624 | 2 | 2.24E-04 | 0.96 | 4.94  | -     | 1008.7   |
| AHQ-2-10, 4979 - 4994      | K.DLYANTVLSGGTTMYPGIADR.M                                               | 2216.45684 | 2 | 9.99E-06 | 0.97 | 5.63  | -     | 1328.6   |
| AHQ-2-10, 5098 - 5166      | K.DLYANTVLSGGTTMYPGIADR.M                                               | 2216.45684 | 2 | 5.56E-07 | 0.96 | 5.30  | -     | 884.2    |
| AHQ-2-10, 5351 - 5414      | K.DLYANTVLSGGTTMYPGIADR.M                                               | 2216.45684 | 2 | 3.44E-04 | 0.96 | 4.92  | -     | 1237.4   |
| AHQ-2-10, 5478 - 5547      | K.DLYANTVLSGGTTMYPGIADR.M                                               | 2216.45684 | 2 | 2.12E-04 | 0.77 | 3.68  | -     | 500.8    |
| AHQ-2-10, 6131             | K.DLYANTVLSGGTTMYPGIADR.M                                               | 2216.45684 | 2 | 7.76E-06 | 0.82 | 3.74  | -     | 635.8    |
| AHQ-2-11, 4704             | K.DLYANTVLSGGTTMYPGIADR.M                                               | 2232.45624 | 2 | 4.15E-11 | 0.97 | 5.75  | -     | 1014.5   |
| AHQ-2-11, 4810 - 4829      | K.DLYANTVLSGGTTMYPGIADR.M                                               | 2232.45624 | 2 | 2.35E-04 | 0.79 | 3.38  | -     | 546.0    |
| AHQ-2-11, 5005             | K.DLYANTVLSGGTTMYPGIADR.M                                               | 2232.45624 | 2 | 1.01E-05 | 0.90 | 4.37  | -     | 602.7    |
| AHQ-2-11, 5116             | K.DLYANTVLSGGTTMYPGIADR.M                                               | 2216.45684 | 2 | 5.65E-08 | 0.95 | 4.53  | -     | 1111.9   |
| AHQ-2-11, 5262 - 5330      | K.DLYANTVLSGGTTMYPGIADR.M                                               | 2216.45684 | 2 | 2.25E-06 | 0.93 | 4.57  | -     | 780.5    |
| AHQ-2-12, 4925 - 4926      | K.DLYANTVLSGGTTMYPGIADR.M                                               | 2232.45624 | 2 | 2.36E-09 | 0.97 | 5.64  | -     | 1413.6   |
| AHQ-2-12, 5351             | K.DLYANTVLSGGTTMYPGIADR.M                                               | 2216.45684 | 2 | 2.28E-11 | 0.96 | 5.18  | -     | 1305.8   |
| AHQ-2-12, 5501 - 5566      | K.DLYANTVLSGGTTMYPGIADR.M                                               | 2216.45684 | 2 | 6.07E-04 | 0.92 | 4.35  | -     | 812.4    |
| AHQ-2-13, 4787 - 4849      | K.DLYANTVLSGGTTMYPGIADR.M                                               | 2232.45624 | 2 | 1.74E-08 | 0.96 | 5.38  | -     | 1065.2   |
| AHQ-2-13, 4871 - 4935      | K.DLYANTVLSGGTTMYPGIADR.M                                               | 2232.45624 | 2 | 1.09E-05 | 0.96 | 5.18  | -     | 1166.1   |
| AHQ-2-13, 5000 - 5073      | K.DLYANTVLSGGTTMYPGIADR.M                                               | 2232.45624 | 2 | 1.89E-05 | 0.93 | 4.18  | -     | 961.1    |
| AHQ-2-13, 5139 - 5200      | K.DLYANTVLSGGTTMYPGIADR.M                                               | 2232.45624 | 2 | 3.64E-07 | 0.90 | 4.33  | -     | 769.5    |
| AHQ-2-13, 5161 - 5231      | K.DLYANTVLSGGTTMYPGIADR.M                                               | 2216.45684 | 2 | 1.14E-06 | 0.95 | 4.78  | -     | 1092.4   |
| AHQ-2-13, 5559 - 5624      | K.DLYANTVLSGGTTMYPGIADR.M                                               | 2216.45684 | 2 | 4.96E-04 | 0.94 | 5.01  | -     | 701.6    |
| AHQ-2-14, 5668 - 5728      | K.DLYANTVLSGGTTMYPGIADR.M                                               | 2232.45624 | 2 | 2.62E-09 | 0.96 | 4.79  | -     | 1252.0   |
| AHQ-2-14, 5944 - 6006      | K.DLYANTVLSGGTTMYPGIADR.M                                               | 2232.45624 | 2 | 3.26E-05 | 0.97 | 5.01  | -     | 1486.5   |
| AHQ-2-14, 6068 - 6141      | K.DLYANTVLSGGTTMYPGIADR.M                                               | 2232.45624 | 2 | 4.22E-05 | 0.95 | 5.17  | -     | 897.6    |
| AHQ-2-14, 6144 - 6184      | K.DLYANTVLSGGTTMYPGIADR.M                                               | 2216.45684 | 2 | 3.17E-07 | 0.97 | 5.91  | -     | 1248.3   |
| AHQ-2-14, 6200 - 6268      | K.DLYANTVLSGGTTMYPGIADR.M                                               | 2232.45624 | 2 | 3.03E-06 | 0.94 | 4.52  | -     | 969.1    |
| AHQ-2-14, 6248 - 6312      | K.DLYANTVLSGGTTMYPGIADR.M                                               | 2216.45684 | 2 | 3.69E-05 | 0.94 | 4.76  | -     | 923.1    |
| AHQ-2-14, 6373 - 6436      | K.DLYANTVLSGGTTMYPGIADR.M                                               | 2216.45684 | 2 | 2.43E-04 | 0.96 | 5.93  | -     | 1011.3   |
| AHQ-2-14, 6590 - 6609      | K.DLYANTVLSGGTTMYPGIADR.M                                               | 2232.45624 | 2 | 2.36E-08 | 0.97 | 5.17  | -     | 1379.6   |
| AHQ-2-13-, 4942 - 5009     | K.DLYANTVLSGGTTMYPGIADR.M                                               | 2232.45624 | 2 | 1.11E-05 | 0.96 | 5.44  | -     | 1081.9   |
| AHQ-2-13-, 5049            | K.DLYANTVLSGGTTMYPGIADR.M                                               | 2232.45624 | 2 | 8.29E-05 | 0.84 | 3.52  | -     | 753.3    |
| AHQ-2-13-, 5135 - 5181     | K.DLYANTVLSGGTTMYPGIADR.M                                               | 2232.45624 | 2 | 2.50E-04 | 0.92 | 4.45  | -     | 822.9    |
| AHQ-2-13-, 5243 - 5313     | K.DLYANTVLSGGTTMYPGIADR.M                                               | 2216.45684 | 2 | 5.35E-05 | 0.95 | 5.12  | -     | 963.0    |
| AHQ-2-13-, 5386 - 5453     | K.DLYANTVLSGGTTMYPGIADR.M                                               | 2216.45684 | 2 | 8.38E-05 | 0.96 | 5.80  | -     | 928.3    |
| AHQ-2-13-, 5518 - 5594     | K.DLYANTVLSGGTTMYPGIADR.M                                               | 2216.45684 | 2 | 9.96E-04 | 0.95 | 5.41  | -     | 835.3    |
| AHQ-2-13-, 5658 - 5667     | K.DLYANTVLSGGTTMYPGIADR.M                                               | 2216.45684 | 2 | 1.71E-05 | 0.96 | 5.25  | -     | 884.8    |
| AHQ-2-13-, 5811 - 5874     | K.DLYANTVLSGGTTMYPGIADR.M                                               | 2216.45684 | 2 | 9.92E-06 | 0.94 | 4.82  | -     | 780.5    |
| AHQ-2-13-, 5951 - 6025     | K.DLYANTVLSGGTTMYPGIADR.M                                               | 2216.45684 | 2 | 6.53E-04 | 0.91 | 4.07  | -     | 790.5    |
| AHQ-2-14-, 4677 - 4744     | K.DLYANTVLSGGTTMYPGIADR.M                                               | 2232.45624 | 2 | 3.81E-06 | 0.93 | 4.51  | -     | 836.3    |
| AHQ-2-14-, 4851 - 4915     | K.DLYANTVLSGGTTMYPGIADR.M                                               | 2232.45624 | 2 | 4.95E-05 | 0.96 | 5.06  | -     | 1086.9   |
| AHQ-2-14-, 4980 - 5044     | K.DLYANTVLSGGTTMYPGIADR.M                                               | 2232.45624 | 2 | 5.09E-05 | 0.95 | 5.26  | -     | 795.6    |
| AHQ-2-14-, 5083 - 5145     | K.DLYANTVLSGGTTMYPGIADR.M                                               | 2232.45624 | 2 | 4.61E-08 | 0.96 | 5.30  | -     | 896.2    |
| AHQ-2-14-, 5143 - 5211     | K.DLYANTVLSGGTTMYPGIADR.M                                               | 2216.45684 | 2 | 2.35E-11 | 0.97 | 6.08  | -     | 1439.6   |
| AHQ-2-14-, 5212 - 5213     | K.DLYANTVLSGGTTMYPGIADR.M                                               | 2232.45624 | 2 | 5.30E-04 | 0.88 | 3.78  | -     | 819.6    |
| AHQ-2-14-, 5255 - 5333     | K.DLYANTVLSGGTTMYPGIADR.M                                               | 2216.45684 | 2 | 2.72E-05 | 0.97 | 5.27  | -     | 1272.5   |
| AHQ-2-14-, 5395 - 5467     | K.DLYANTVLSGGTTMYPGIADR.M                                               | 2216.45684 | 2 | 2.75E-05 | 0.96 | 5.58  | -     | 889.5    |
| AHQ-2-14-, 5656            | K.DLYANTVLSGGTTMYPGIADR.M                                               | 2216.45684 | 2 | 7.53E-07 | 0.93 | 4.44  | -     | 970.7    |
| AHQ-2-8, 3534 - 3602       | K.YPIEHSITNWDDM*EK.I                                                    | 2008.19724 | 2 | 6.24E-04 | 0.67 | 2.88  | -     | 425.1    |
| gi 5729887 ref NP_006624.1 | IQ motif containing GTPase activating protein 2 [Homo sapiens]          |            |   | 2.31E-11 | 5.41 | 60.29 | 7.00  | 180611.0 |
| AHQ-2-6, 5530              | K.GVLLDIDDLQTNQFK.N                                                     | 1719.91690 | 2 | 3.98E-06 | 0.85 | 3.14  | -     | 846.6    |
| AHQ-2-3, 5883              | K.GVLLDIDDLQTNQFK.N                                                     | 1719.91690 | 2 | 2.31E-11 | 0.98 | 5.83  | -     | 1673.2   |
| AHQ-2-3, 5992              | K.LGIAPQIDLLGK.V                                                        | 1366.63117 | 2 | 4.19E-05 | 0.81 | 3.20  | -     | 436.7    |
| AHQ-2-6, 5609              | K.LGIAPQIDLLGK.V                                                        | 1366.63117 | 1 | 2.22E-04 | 0.14 | 1.99  | -     | 291.3    |
| AHQ-2-4, 4989              | K.LPYDVTTTEQALTYPEVK.N                                                  | 1968.19269 | 2 | 2.95E-08 | 0.95 | 4.41  | -     | 1530.2   |
| AHQ-2-3, 4989              | K.LPYDVTTTEQALTYPEVK.N                                                  | 1968.19269 | 2 | 3.75E-10 | 0.97 | 4.68  | -     | 1684.4   |
| AHQ-2-3, 6159              | R.NPNAVLTLVDDNLAPEYQK.E                                                 | 2115.32901 | 2 | 3.67E-04 | 0.87 | 3.67  | -     | 548.3    |
| AHQ-2-3, 7135              | R.NQPGNTLLEILTPATAQQEVDHATDMVSR.A                                       | 3268.51558 | 3 | 9.82E-06 | 0.83 | 3.85  | -     | 533.8    |
| AHQ-2-5, 6992              | R.NQPGNTLLEILTPATAQQEVDHATDMVSR.A                                       | 3268.51558 | 3 | 2.77E-04 | 0.71 | 3.23  | -     | 503.7    |
| AHQ-2-6, 6827              | R.NQPGNTLLEILTPATAQQEVDHATDMVSR.A                                       | 3268.51558 | 3 | 1.53E-07 | 0.82 | 3.87  | -     | 506.1    |
| AHQ-2-4, 4304              | K.VDQVQDVTGNPTVIK.M                                                     | 1726.95257 | 2 | 5.76E-06 | 0.91 | 3.86  | -     | 1169.8   |
| AHQ-2-3, 4313              | K.VDQVQDVTGNPTVIK.M                                                     | 1726.95257 | 2 | 3.06E-08 | 0.96 | 4.91  | -     | 1385.5   |
| gi 4502985 ref NP_001854.1 | cytochrome c oxidase subunit Vlb; human cytochrome oxidase subunit Vlb  |            |   | 2.36E-11 | 0.93 | 10.22 | 20.90 | 10192.3  |
| AHQ-2-14-, 6223            | R.VYQSLCPTSVDWDEQR.A                                                    | 2272.43560 | 2 | 2.36E-11 | 0.93 | 4.43  | -     | 868.5    |
| gi 4504523 ref NP_002148.1 | heat shock 10kDa protein 1 (chaperonin 10); heat shock 10kD protein 1 ( |            |   | 2.40E-11 | 1.84 | 20.20 | 25.50 | 10931.6  |
| AHQ-2-14-, 2720 - 2732     | K.VLQATVVAVGSGSK.G                                                      | 1316.52902 | 2 | 1.44E-09 | 0.96 | 3.50  | -     | 1879.8   |
| AHQ-2-14, 3660             | K.VLQATVVAVGSGSK.G                                                      | 1316.52902 | 2 | 1.66E-05 | 0.91 | 3.73  | -     | 849.5    |
| AHQ-2-14-, 5020 - 5027     | K.VVLDKDYFLFR.D                                                         | 1530.74861 | 2 | 1.66E-10 | 0.94 | 4.00  | -     | 964.5    |
| AHQ-2-14, 6260             | K.VVLDKDYFLFR.D                                                         | 1530.74861 | 2 | 2.40E-11 | 0.88 | 3.16  | -     | 972.7    |
| gi 7661818 ref NP_054900.1 | HSPC159 protein [Homo sapiens]                                          |            |   | 2.61E-11 | 3.80 | 50.24 | 43.60 | 19011.6  |
| AHQ-2-13-, 6889 - 6890     | R.GEEQSAIPYFFPIPDQPFV.V                                                 | 2239.47029 | 2 | 4.82E-07 | 0.89 | 4.53  | -     | 340.8    |
| AHQ-2-13, 6671             | R.GEEQSAIPYFFPIPDQPFV.V                                                 | 2239.47029 | 2 | 9.91E-05 | 0.90 | 4.06  | -     | 454.4    |
| AHQ-2-11, 6617 - 6628      | R.GEEQSAIPYFFPIPDQPFV.V                                                 | 2239.47029 | 2 | 9.10E-06 | 0.91 | 4.35  | -     | 463.5    |
| AHQ-2-14-, 6747            | R.GEEQSAIPYFFPIPDQPFV.V                                                 | 2239.47029 | 2 | 5.71E-06 | 0.90 | 4.36  | -     | 394.9    |
| AHQ-2-11, 2492 - 2502      | K.INGDLQITK.L                                                           | 1002.14688 | 1 | 1.85E-04 | 0.32 | 2.05  | -     | 393.4    |
| AHQ-2-13, 3711             | R.IQTLASIDTIK.I                                                         | 1203.41068 | 2 | 5.01E-04 | 0.70 | 2.88  | -     | 469.0    |
| AHQ-2-13-, 3722 - 3795     | R.IQTLASIDTIK.I                                                         | 1203.41068 | 2 | 7.84E-04 | 0.71 | 2.71  | -     | 599.6    |
| AHQ-2-11, 4886 - 4952      | K.LDDGHLNNSLSPVQADVYFPR.L                                               | 2445.62923 | 2 | 2.61E-11 | 0.95 | 4.86  | -     | 1366.3   |
| AHQ-2-11, 4892             | K.LDDGHLNNSLSPVQADVYFPR.L                                               | 2445.62923 | 3 | 6.09E-07 | 0.92 | 4.60  | -     | 1102.2   |
| AHQ-2-11, 4737             | K.LDDGHLNNSLSPVQADVYFPR.L                                               | 2445.62923 | 2 | 1.34E-07 | 0.92 | 4.73  | -     | 829.0    |

|                             |                                                                         |            |   |          |       |        |       |         |
|-----------------------------|-------------------------------------------------------------------------|------------|---|----------|-------|--------|-------|---------|
| AHQ-2-11, 4993 - 5073       | K.LDDGHLNNSLSSPVQADVYFRL                                                | 2445.62923 | 3 | 7.46E-05 | 0.69  | 3.22   | -     | 825.7   |
| AHQ-2-13, 4881              | R.VFVDGHQLDFDYHR.I                                                      | 1780.96540 | 2 | 1.52E-05 | 0.97  | 4.65   | -     | 1682.6  |
| AHQ-2-11, 4678 - 4742       | R.VFVDGHQLDFDYHR.I                                                      | 1780.96540 | 2 | 3.81E-11 | 0.94  | 4.40   | -     | 1089.2  |
| AHQ-2-12, 4885              | R.VFVDGHQLDFDYHR.I                                                      | 1780.96540 | 2 | 1.46E-10 | 0.96  | 4.74   | -     | 1318.4  |
| gi 6005846 ref NP_009215.1  | PTK9L protein tyrosine kinase 9-like (A6-related protein); protein tyro |            |   | 2.73E-11 | 5.51  | 60.28  | 29.80 | 39547.7 |
| AHQ-2-12, 6690              | R.AVLPLLDAQQPCYLLYR.L                                                   | 2035.39506 | 3 | 5.14E-10 | 0.94  | 4.42   | -     | 1254.7  |
| AHQ-2-12, 6681              | R.AVLPLLDAQQPCYLLYR.L                                                   | 2035.39506 | 2 | 8.15E-06 | 0.95  | 4.64   | -     | 897.0   |
| AHQ-2-12, 6594              | R.AVLPLLDAQQPCYLLYR.L                                                   | 2035.39506 | 2 | 5.16E-06 | 0.85  | 3.59   | -     | 516.5   |
| AHQ-2-13, 6472 - 6484       | R.AVLPLLDAQQPCYLLYR.L                                                   | 2035.39506 | 2 | 2.73E-11 | 0.96  | 5.35   | -     | 954.2   |
| AHQ-2-12, 3183              | K.DDLDFAGYQK.H                                                          | 1144.21551 | 1 | 6.52E-06 | 0.68  | 2.54   | -     | 523.4   |
| AHQ-2-10, 3862 - 3863       | R.ETIELVHTEPTDVAQLPSR.V                                                 | 2136.34822 | 2 | 3.33E-05 | 0.91  | 4.66   | -     | 700.4   |
| AHQ-2-11, 4020 - 4022       | R.ETIELVHTEPTDVAQLPSR.V                                                 | 2136.34822 | 2 | 5.23E-06 | 0.95  | 4.83   | -     | 940.7   |
| AHQ-2-11, 4188 - 4189       | K.HQTLQGLAFPLQPEAQR.A                                                   | 1935.17562 | 2 | 9.76E-11 | 0.98  | 5.35   | -     | 1418.2  |
| AHQ-2-10, 3976              | K.HQTLQGLAFPLQPEAQR.A                                                   | 1935.17562 | 2 | 3.17E-10 | 0.97  | 4.60   | -     | 1665.3  |
| AHQ-2-11, 6178              | K.KIEIGDGAELTAFLYDEVHPK.Q                                               | 2475.73515 | 3 | 1.22E-10 | 0.97  | 5.59   | -     | 1735.5  |
| AHQ-2-12, 4789 - 4826       | K.VVIEDEQLVLGASQEPVGR.W                                                 | 2039.27568 | 2 | 2.52E-07 | 0.97  | 4.74   | -     | 2028.3  |
| gi 5174727 ref NP_005989.1  | chaperonin containing TCP1, subunit 3 (gamma); TCP1 (t-complex-1) ring  |            |   | 3.08E-11 | 3.70  | 40.22  | 9.20  | 60330.4 |
| AHQ-2-6, 3553               | R.AVAQALEVIPR.T                                                         | 1167.38326 | 2 | 7.78E-05 | 0.95  | 4.37   | -     | 1370.3  |
| AHQ-2-6, 4353               | K.IPGGIIEDSCVLR.G                                                       | 1430.65218 | 2 | 3.08E-11 | 0.94  | 4.21   | -     | 1191.6  |
| AHQ-2-6, 2638               | R.TLIQCGASTIR.L                                                         | 1335.51249 | 2 | 2.77E-04 | 0.88  | 3.45   | -     | 821.0   |
| AHQ-2-6, 5389               | R.WSSLACIALDAVK.M                                                       | 1549.77353 | 2 | 1.71E-06 | 0.93  | 3.71   | -     | 1188.0  |
| gi 7661678 ref NP_056461.1  | RAP1B, member of RAS oncogene family; K-REV; RAS-related protein RAP1B  |            |   | 3.39E-11 | 11.06 | 120.27 | 35.90 | 20824.7 |
| AHQ-2-11, 4258 - 4260       | K.DTDDVPMILVGNK.C                                                       | 1417.61048 | 1 | 6.81E-05 | 0.31  | 2.63   | -     | 489.6   |
| AHQ-2-11, 4257              | K.DTDDVPMILVGNK.C                                                       | 1417.61048 | 2 | 7.01E-08 | 0.94  | 3.85   | -     | 948.5   |
| AHQ-2-11, 6686              | R.KQVEVDAQQCMLEILDAGTEQFTAMR.D                                          | 3115.50608 | 3 | 2.16E-05 | 0.67  | 3.25   | -     | 661.1   |
| AHQ-2-14, 6313              | R.KQVEVDAQQCM*LEILDAGTEQFTAM*R.D                                        | 3147.50488 | 3 | 7.22E-04 | 0.90  | 4.16   | -     | 1142.5  |
| AHQ-2-11, 6437 - 6452       | R.KQVEVDAQQCMLEILDAGTEQFTAMR.D                                          | 3131.50548 | 3 | 6.69E-09 | 0.94  | 4.72   | -     | 1629.4  |
| AHQ-2-11, 5117              | R.KQVEVDAQQCM*LEILDAGTEQFTAM*R.D                                        | 3147.50488 | 3 | 3.51E-09 | 0.93  | 4.65   | -     | 961.0   |
| AHQ-2-14-, 5280             | R.KQVEVDAQQCMLEILDAGTEQFTAMR.D                                          | 3147.50488 | 3 | 1.51E-08 | 0.83  | 3.39   | -     | 974.3   |
| AHQ-2-13-, 6925             | R.KQVEVDAQQCMLEILDAGTEQFTAMR.D                                          | 3115.50608 | 3 | 8.49E-08 | 0.92  | 4.99   | -     | 818.2   |
| AHQ-2-11, 5553              | R.KQVEVDAQQCMLEILDAGTEQFTAMR.D                                          | 3131.50548 | 3 | 1.76E-04 | 0.93  | 4.54   | -     | 1295.3  |
| AHQ-2-11, 6770 - 6776       | K.QVEVDAQQCMLEILDAGTEQFTAMR.D                                           | 2987.33317 | 2 | 1.50E-07 | 0.89  | 4.49   | -     | 453.2   |
| AHQ-2-11, 4036 - 4102       | R.QWNNAFLSSAK.S                                                         | 1556.68148 | 2 | 1.04E-06 | 0.61  | 2.73   | -     | 246.3   |
| AHQ-2-11, 3893 - 3973       | R.QWNNAFLSSAK.S                                                         | 1556.68148 | 2 | 7.21E-07 | 0.80  | 3.81   | -     | 220.4   |
| AHQ-2-11, 3801              | R.QWNNAFLSSAK.S                                                         | 1556.68148 | 2 | 1.38E-05 | 0.74  | 3.23   | -     | 275.4   |
| AHQ-2-14-, 3811 - 3823      | R.VKDTDVPMILVGNK.C                                                      | 1644.91497 | 2 | 2.53E-06 | 0.93  | 3.27   | -     | 1484.9  |
| AHQ-2-13-, 3905             | R.VKDTDVPMILVGNK.C                                                      | 1644.91497 | 3 | 9.13E-05 | 0.95  | 4.28   | -     | 1849.5  |
| AHQ-2-11, 3729 - 3758       | R.VKDTDVPMILVGNK.C                                                      | 1644.91497 | 2 | 7.77E-09 | 0.98  | 5.36   | -     | 2089.7  |
| AHQ-2-11, 3576 - 3578       | R.VKDTDVPMILVGNK.C                                                      | 1644.91497 | 3 | 8.89E-04 | 0.97  | 5.23   | -     | 2422.7  |
| AHQ-2-11, 3141 - 3200       | R.VKDTDVPMILVGNK.C                                                      | 1660.91437 | 2 | 6.76E-04 | 0.95  | 4.54   | -     | 1121.5  |
| AHQ-2-11, 3533 - 3596       | R.VKDTDVPMILVGNK.C                                                      | 1644.91497 | 2 | 2.11E-04 | 0.97  | 4.36   | -     | 1911.7  |
| AHQ-2-13, 3864              | R.VKDTDVPMILVGNK.C                                                      | 1644.91497 | 2 | 6.61E-08 | 0.97  | 5.03   | -     | 1836.0  |
| AHQ-2-13-, 3902 - 3907      | R.VKDTDVPMILVGNK.C                                                      | 1644.91497 | 2 | 4.41E-07 | 0.97  | 4.62   | -     | 1976.2  |
| AHQ-2-11, 4505 - 4554       | R.VKDTDVPMILVGNKCDLEDER.V                                               | 2563.84420 | 3 | 5.80E-10 | 0.97  | 5.38   | -     | 2296.6  |
| AHQ-2-14-, 4580 - 4587      | R.VKDTDVPMILVGNKCDLEDER.V                                               | 2563.84420 | 3 | 3.02E-08 | 0.93  | 4.17   | -     | 1428.1  |
| AHQ-2-11, 4422 - 4490       | R.VKDTDVPMILVGNKCDLEDER.V                                               | 2563.84420 | 2 | 1.03E-08 | 0.92  | 3.98   | -     | 918.6   |
| AHQ-2-12, 4478              | R.VKDTDVPMILVGNKCDLEDER.V                                               | 2563.84420 | 3 | 5.80E-05 | 0.84  | 3.62   | -     | 812.3   |
| AHQ-2-12, 4631              | R.VKDTDVPMILVGNKCDLEDER.V                                               | 2563.84420 | 3 | 3.39E-11 | 0.92  | 4.85   | -     | 847.1   |
| AHQ-2-11, 4373 - 4436       | R.VKDTDVPMILVGNKCDLEDER.V                                               | 2563.84420 | 3 | 1.19E-04 | 0.91  | 4.79   | -     | 990.9   |
| AHQ-2-13, 4481              | R.VKDTDVPMILVGNKCDLEDER.V                                               | 2563.84420 | 3 | 4.13E-04 | 0.86  | 3.85   | -     | 957.1   |
| AHQ-2-13, 4601              | R.VKDTDVPMILVGNKCDLEDER.V                                               | 2563.84420 | 3 | 1.37E-05 | 0.82  | 3.30   | -     | 1173.1  |
| AHQ-2-11, 4302              | R.VKDTDVPM*ILVGNKCDLEDER.V                                              | 2579.84360 | 3 | 6.95E-04 | 0.70  | 3.47   | -     | 637.8   |
| AHQ-2-11, 4268 - 4333       | R.VKDTDVPMILVGNKCDLEDER.V                                               | 2563.84420 | 2 | 2.02E-04 | 0.93  | 4.53   | -     | 711.8   |
| AHQ-2-11, 4229 - 4308       | R.VKDTDVPMILVGNKCDLEDER.V                                               | 2563.84420 | 3 | 4.62E-08 | 0.92  | 5.12   | -     | 753.1   |
| AHQ-2-13-, 4559             | R.VKDTDVPMILVGNKCDLEDER.V                                               | 2563.84420 | 3 | 4.06E-06 | 0.92  | 4.93   | -     | 1026.2  |
| AHQ-2-11, 4070 - 4145       | R.VKDTDVPM*ILVGNKCDLEDER.V                                              | 2579.84360 | 3 | 1.27E-08 | 0.95  | 5.07   | -     | 1242.4  |
| AHQ-2-11, 3948              | R.VKDTDVPM*ILVGNKCDLEDER.V                                              | 2579.84360 | 2 | 2.56E-04 | 0.44  | 2.76   | -     | 340.6   |
| AHQ-2-11, 4574              | R.VKDTDVPMILVGNKCDLEDERVVGK.E                                           | 2947.33182 | 3 | 1.68E-08 | 0.92  | 4.33   | -     | 1508.6  |
| AHQ-2-11, 4429              | R.VKDTDVPMILVGNKCDLEDERVVGK.E                                           | 2947.33182 | 3 | 7.01E-05 | 0.93  | 5.24   | -     | 1180.7  |
| gi 4502219 ref NP_001656.1  | ras homolog gene family, member G (rho G); RhoG [Homo sapiens]          |            |   | 3.51E-11 | 1.87  | 20.20  | 18.80 | 21338.4 |
| AHQ-2-11, 4869              | K.EYIPTYFDNYSQAQVAVDGR.T                                                | 2133.25975 | 2 | 3.51E-11 | 0.93  | 3.89   | -     | 904.9   |
| AHQ-2-11, 4820              | R.TVNLNLWDTAGQEEYDR.L                                                   | 2025.12129 | 2 | 6.85E-08 | 0.94  | 4.06   | -     | 1463.9  |
| gi 10835187 ref NP_000627.1 | superoxide dismutase 2, mitochondrial [Homo sapiens]                    |            |   | 3.70E-11 | 4.36  | 50.23  | 39.60 | 24733.0 |
| AHQ-2-13-, 6309 - 6315      | K.AIWNVINWENVTYR.Y                                                      | 1744.93137 | 2 | 3.92E-11 | 0.96  | 4.69   | -     | 1426.6  |
| AHQ-2-13, 6127              | K.AIWNVINWENVTYR.Y                                                      | 1744.93137 | 2 | 9.69E-08 | 0.90  | 4.22   | -     | 720.4   |
| AHQ-2-11, 6289              | K.AIWNVINWENVTYR.Y                                                      | 1744.93137 | 2 | 3.70E-11 | 0.93  | 3.63   | -     | 1181.3  |
| AHQ-2-11, 6012              | K.AIWNVINWENVTYR.Y                                                      | 1744.93137 | 2 | 2.04E-06 | 0.89  | 3.12   | -     | 1072.3  |
| AHQ-2-11, 5885 - 5954       | K.AIWNVINWENVTYR.Y                                                      | 1744.93137 | 2 | 2.42E-07 | 0.90  | 3.87   | -     | 726.0   |
| AHQ-2-14-, 6171             | K.AIWNVINWENVTYR.Y                                                      | 1744.93137 | 2 | 1.28E-06 | 0.94  | 3.88   | -     | 1146.8  |
| AHQ-2-11, 4493 - 4516       | K.FNGGGHINHSIFWTLNLSPNGGGEPK.G                                          | 2638.83761 | 2 | 3.09E-07 | 0.87  | 3.94   | -     | 552.5   |
| AHQ-2-11, 4389              | K.FNGGGHINHSIFWTLNLSPNGGGEPK.G                                          | 2638.83761 | 2 | 4.45E-09 | 0.91  | 4.62   | -     | 647.2   |
| AHQ-2-11, 3748 - 3808       | K.GDVTAAQIALQPALK.F                                                     | 1425.65548 | 2 | 1.04E-04 | 0.86  | 3.50   | -     | 899.1   |
| AHQ-2-11, 3720              | K.GDVTAAQIALQPALK.F                                                     | 1425.65548 | 1 | 3.36E-06 | 0.80  | 3.33   | -     | 858.6   |
| AHQ-2-11, 3657 - 3724       | K.GDVTAAQIALQPALK.F                                                     | 1425.65548 | 2 | 4.84E-06 | 0.77  | 3.50   | -     | 585.4   |
| AHQ-2-11, 3804              | K.GDVTAAQIALQPALK.F                                                     | 1425.65548 | 1 | 2.41E-06 | 0.80  | 3.42   | -     | 852.4   |
| AHQ-2-11, 2293              | K.HHAAYVNNLNVTTEK.Y                                                     | 1739.86999 | 3 | 7.92E-06 | 0.95  | 4.44   | -     | 2010.9  |
| AHQ-2-11, 2205              | K.HHAAYVNNLNVTTEK.Y                                                     | 1739.86999 | 3 | 1.29E-04 | 0.94  | 4.39   | -     | 1578.4  |
| AHQ-2-11, 2292 - 2369       | K.HHAAYVNNLNVTTEK.Y                                                     | 1739.86999 | 2 | 8.01E-07 | 0.93  | 3.99   | -     | 1031.5  |
| AHQ-2-11, 2198              | K.HHAAYVNNLNVTTEK.Y                                                     | 1739.86999 | 2 | 2.00E-07 | 0.93  | 4.22   | -     | 815.2   |
| AHQ-2-11, 6893 - 6973       | K.LTAASVGVQGSQGWLGFNK.E                                                 | 2036.27841 | 2 | 6.80E-06 | 0.78  | 3.47   | -     | 619.1   |
| gi 4507651 ref NP_003281.1  | tropomyosin 4 [Homo sapiens]                                            |            |   | 3.92E-11 | 4.49  | 50.27  | 20.20 | 28521.6 |
| AHQ-2-9, 3896 - 3968        | R.AEVSELKCGDLEELK.N                                                     | 1851.02256 | 2 | 3.12E-07 | 0.91  | 4.12   | -     | 837.9   |
| AHQ-2-9, 3895 - 3966        | R.AEVSELKCGDLEELK.N                                                     | 1851.02256 | 2 | 3.39E-06 | 0.94  | 4.46   | -     | 982.8   |
| AHQ-2-9, 6031               | R.AEVSELKCGDLEELKNVTNLLK.S                                              | 2634.89893 | 3 | 3.92E-11 | 0.95  | 5.43   | -     | 1344.0  |
| AHQ-2-9, 1620               | R.EKAEGDVAALNR.R                                                        | 1273.37796 | 2 | 1.17E-05 | 0.73  | 2.76   | -     | 681.8   |
| AHQ-2-9, 2454 - 2483        | K.IQALQQQADEAEDR.A                                                      | 1615.68404 | 2 | 6.04E-11 | 0.97  | 4.73   | -     | 1638.3  |
| AHQ-2-11, 2508              | K.IQALQQQADEAEDR.A                                                      | 1615.68404 | 2 | 1.40E-04 | 0.97  | 3.61   | -     | 2466.9  |
| AHQ-2-9, 2592               | K.IQALQQQADEAEDR.A                                                      | 1615.68404 | 2 | 3.79E-06 | 0.80  | 2.84   | -     | 488.7   |
| AHQ-2-10, 2214              | R.KIQALQQQADEAEDR.A                                                     | 1743.85695 | 2 | 4.73E-07 | 0.93  | 4.29   | -     | 1185.2  |
| AHQ-2-9, 2230               | R.KIQALQQQADEAEDR.A                                                     | 1743.85695 | 3 | 3.86E-04 | 0.58  | 3.14   | -     | 589.1   |
| AHQ-2-9, 2351               | R.KIQALQQQADEAEDR.A                                                     | 1743.85695 | 2 | 5.45E-04 | 0.91  | 3.33   | -     | 1320.5  |
| gi 17986258 ref NP_066299.2 | smooth muscle and non-muscle myosin alkali light chain isoform 1 [Homo  |            |   | 4.01E-11 | 7.16  | 80.28  | 37.10 | 16930.0 |
| AHQ-2-12, 4293 - 4310       | K.DQGTEDYVEGLR.V                                                        | 1545.58904 | 2 | 1.28E-05 | 0.93  | 3.55   | -     | 1101.4  |
| AHQ-2-12, 3858 - 3927       | K.EAFQFDR.T                                                             | 1026.12699 | 2 | 6.25E-04 | 0.73  | 2.87   | -     | 640.6   |
| AHQ-2-13, 2371              | R.HVLVTLGEK.M                                                           | 996.18547  | 2 | 3.73E-05 | 0.86  | 2.78   | -     | 779.9   |
| AHQ-2-13-, 2237             | R.HVLVTLGEK.M                                                           | 996.18547  | 2 | 4.46E-06 | 0.90  | 3.39   | -     | 718.2   |
| AHQ-2-14-, 2207             | R.HVLVTLGEK.M                                                           | 996.18547  | 2 | 7.56E-07 | 0.90  | 3.31   | -     | 683.0   |
| AHQ-2-14-, 2208 - 2209      | R.HVLVTLGEK.M                                                           | 996.18547  | 1 | 3.81E-04 | 0.71  | 3.01   | -     | 430.1   |
| AHQ-2-12, 2193              | R.HVLVTLGEK.M                                                           | 996.18547  | 2 | 2.60E-06 | 0.85  | 2.84   | -     | 695.3   |
| AHQ-2-12, 2105 - 2169       | R.HVLVTLGEK.M                                                           | 996.18547  | 1 | 3.47E-05 | 0.62  | 2.92   | -     | 538.7   |
| AHQ-2-13, 2376              | R.HVLVTLGEK.M                                                           | 996.18547  | 1 | 1.05E-05 | 0.66  | 2.85   | -     | 582.1   |
| AHQ-2-12, 2102 - 2166       | R.HVLVTLGEK.M                                                           | 996.18547  | 2 | 3.28E-06 | 0.88  | 3.50   | -     | 588.0   |
| AHQ-2-12, 3763 - 3770       | K.NKDDQGTEDYVEGLR.V                                                     | 1787.86505 | 3 | 2.53E-04 | 0.53  | 3.08   | -     | 624.1   |
| AHQ-2-12, 4171              | K.NKDDQGTEDYVEGLR.V                                                     | 1787.86505 | 2 | 7.01E-06 | 0.75  | 3.07   | -     | 717.2   |
| AHQ-2-12, 3743 - 3823       | K.NKDDQGTEDYVEGLR.V                                                     | 1787.86505 | 2 | 2.24E-08 | 0.86  | 3.68   | -     | 708.1   |
| AHQ-2-14-, 3709             | K.NKDDQGTEDYVEGLR.V                                                     | 1787.86505 | 2 | 5.23E-09 | 0.92  | 4.13   | -     | 982.4   |
| AHQ-2-12, 3601 - 3669       | K.NKDDQGTEDYVEGLR.V                                                     | 1787.86505 | 3 | 5.21E-06 | 0.95  | 4.90   | -     | 1296.1  |

|                             |                                                                          |            |   |          |       |        |       |          |
|-----------------------------|--------------------------------------------------------------------------|------------|---|----------|-------|--------|-------|----------|
| AHQ-2-12, 3598 - 3673       | K.NKDQGTEDYVEGLR.V                                                       | 1787.86505 | 2 | 4.16E-09 | 0.95  | 4.03   | -     | 1490.9   |
| AHQ-2-13-, 3813 - 3819      | K.NKDQGTEDYVEGLR.V                                                       | 1787.86505 | 2 | 1.36E-10 | 0.89  | 3.87   | -     | 779.0    |
| AHQ-2-14-, 3711 - 3716      | K.NKDQGTEDYVEGLR.V                                                       | 1787.86505 | 3 | 1.42E-05 | 0.93  | 5.01   | -     | 991.2    |
| AHQ-2-14-, 3988             | K.NKDQGTEDYVEGLR.V                                                       | 1787.86505 | 2 | 2.98E-08 | 0.80  | 3.17   | -     | 782.0    |
| AHQ-2-12, 3995 - 4065       | K.NKDQGTEDYVEGLR.V                                                       | 1787.86505 | 2 | 1.43E-08 | 0.94  | 4.22   | -     | 1175.0   |
| AHQ-2-13, 3752 - 3775       | K.NKDQGTEDYVEGLR.V                                                       | 1787.86505 | 2 | 6.77E-08 | 0.93  | 4.23   | -     | 928.1    |
| AHQ-2-14, 4805              | K.NKDQGTEDYVEGLR.V                                                       | 1787.86505 | 2 | 3.58E-05 | 0.81  | 3.54   | -     | 900.2    |
| AHQ-2-14, 4594              | K.NKDQGTEDYVEGLR.V                                                       | 1787.86505 | 3 | 1.05E-06 | 0.87  | 4.19   | -     | 881.1    |
| AHQ-2-14, 4592              | K.NKDQGTEDYVEGLR.V                                                       | 1787.86505 | 2 | 1.56E-10 | 0.91  | 3.71   | -     | 1067.7   |
| AHQ-2-12, 3165 - 3234       | R.VFDKEGNGTVMGAEIR.H                                                     | 1723.93228 | 2 | 2.26E-10 | 0.94  | 4.21   | -     | 1036.7   |
| AHQ-2-14-, 3305             | R.VFDKEGNGTVMGAEIR.H                                                     | 1723.93228 | 2 | 4.01E-11 | 0.96  | 4.46   | -     | 1553.3   |
| AHQ-2-12, 3246 - 3254       | R.VFDKEGNGTVMGAEIR.H                                                     | 1739.93168 | 2 | 1.65E-06 | 0.89  | 4.02   | -     | 870.6    |
| AHQ-2-12, 6973 - 7042       | K.VLDFEHFLPMLQTVAK.N                                                     | 1889.25017 | 2 | 6.76E-07 | 0.95  | 4.97   | -     | 918.9    |
| AHQ-2-13-, 6482             | K.VLDFEHFLPMLQTVAK.N                                                     | 1905.24957 | 3 | 9.10E-06 | 0.88  | 3.77   | -     | 861.6    |
| AHQ-2-13-, 6922 - 6923      | K.VLDFEHFLPMLQTVAK.N                                                     | 1889.25017 | 2 | 3.16E-04 | 0.96  | 5.20   | -     | 960.2    |
| AHQ-2-12, 6975 - 6987       | K.VLDFEHFLPMLQTVAK.N                                                     | 1889.25017 | 3 | 1.24E-05 | 0.96  | 5.07   | -     | 1385.9   |
| AHQ-2-12, 6651              | K.VLDFEHFLPMLQTVAK.N                                                     | 1905.24957 | 2 | 6.12E-06 | 0.88  | 3.71   | -     | 655.8    |
| AHQ-2-12, 6378 - 6449       | K.VLDFEHFLPMLQTVAK.N                                                     | 1905.24957 | 3 | 5.56E-06 | 0.86  | 3.61   | -     | 833.4    |
| AHQ-2-13, 6256              | K.VLDFEHFLPMLQTVAK.N                                                     | 1905.24957 | 2 | 3.12E-06 | 0.90  | 4.06   | -     | 655.2    |
| AHQ-2-12, 6366 - 6429       | K.VLDFEHFLPMLQTVAK.N                                                     | 1905.24957 | 2 | 4.52E-06 | 0.91  | 4.28   | -     | 694.1    |
| AHQ-2-13-, 6927             | K.VLDFEHFLPMLQTVAK.N                                                     | 1889.25017 | 3 | 2.07E-05 | 0.92  | 4.06   | -     | 1606.0   |
| AHQ-2-13, 6699              | K.VLDFEHFLPMLQTVAK.N                                                     | 1889.25017 | 2 | 1.17E-06 | 0.91  | 4.20   | -     | 658.8    |
| AHQ-2-14-, 6312 - 6328      | K.VLDFEHFLPMLQTVAK.N                                                     | 1905.24957 | 3 | 1.20E-04 | 0.78  | 3.38   | -     | 914.2    |
| AHQ-2-14-, 6316             | K.VLDFEHFLPMLQTVAK.N                                                     | 1905.24957 | 2 | 4.82E-04 | 0.92  | 4.19   | -     | 731.5    |
| AHQ-2-14-, 6776 - 6777      | K.VLDFEHFLPMLQTVAK.N                                                     | 1889.25017 | 2 | 4.71E-06 | 0.97  | 5.52   | -     | 1488.6   |
| AHQ-2-14-, 6779 - 6780      | K.VLDFEHFLPMLQTVAK.N                                                     | 1889.25017 | 3 | 1.14E-05 | 0.96  | 4.78   | -     | 1708.3   |
| gj 6857820 ref NP_005019.2  | phosphatidylinositol-4-phosphate 5-kinase type II alpha; 1-phosphatidy   |            |   | 4.25E-11 | 2.74  | 30.24  | 11.30 | 46224.3  |
| AHQ-2-7, 4559               | R.FGIDDQDFQNSLTR.S                                                       | 1656.73462 | 2 | 3.71E-06 | 0.88  | 3.88   | -     | 982.4    |
| AHQ-2-7, 2449               | K.HGAGAEISTVNPQYQSK.R                                                    | 1788.89618 | 2 | 4.68E-10 | 0.97  | 4.89   | -     | 2082.4   |
| AHQ-2-7, 3947               | K.TITSEDAVEMHNILK.K                                                      | 1701.92338 | 2 | 4.25E-11 | 0.89  | 4.04   | -     | 741.1    |
| gj 4757826 ref NP_004039.1  | beta-2-microglobulin [Homo sapiens]                                      |            |   | 4.87E-11 | 3.13  | 40.24  | 38.70 | 13714.5  |
| AHQ-2-14-, 6653 - 6720      | K.SNFINLCYVSGFHPSDIEVDLLK.N                                              | 2556.83155 | 3 | 3.25E-06 | 0.78  | 3.66   | -     | 642.3    |
| AHQ-2-14-, 6519 - 6581      | K.SNFINLCYVSGFHPSDIEVDLLK.N                                              | 2556.83155 | 2 | 2.49E-09 | 0.80  | 3.98   | -     | 356.9    |
| AHQ-2-14-, 6716             | K.SNFINLCYVSGFHPSDIEVDLLK.N                                              | 2556.83155 | 2 | 5.02E-06 | 0.93  | 4.73   | -     | 750.1    |
| AHQ-2-14-, 6491             | K.SNFINLCYVSGFHPSDIEVDLLKNGER.I                                          | 3013.28710 | 3 | 4.87E-11 | 0.89  | 4.41   | -     | 962.8    |
| AHQ-2-14-, 6255 - 6257      | K.SNFINLCYVSGFHPSDIEVDLLKNGER.I                                          | 3013.28710 | 3 | 4.70E-08 | 0.85  | 4.05   | -     | 429.6    |
| AHQ-2-14, 3076              | K.VEHSDLSFSK.D                                                           | 1149.23530 | 1 | 4.29E-04 | 0.35  | 2.38   | -     | 415.3    |
| AHQ-2-14-, 2059 - 2061      | K.VEHSDLSFSK.D                                                           | 1149.23530 | 1 | 3.06E-04 | 0.86  | 3.33   | -     | 650.5    |
| AHQ-2-14-, 1723             | R.VNHVTLSPQK.I                                                           | 1123.28735 | 1 | 6.53E-04 | 0.23  | 2.26   | -     | 173.1    |
| AHQ-2-14-, 1848             | R.VNHVTLSPQK.I                                                           | 1123.28735 | 1 | 4.10E-04 | 0.27  | 2.09   | -     | 243.5    |
| AHQ-2-14-, 1961 - 2037      | R.VNHVTLSPQK.I                                                           | 1123.28735 | 1 | 1.75E-06 | 0.58  | 2.73   | -     | 338.7    |
| gj 27480104 ref XP_208215.1 | similar to triosephosphate isomerase 1 [Homo sapiens]                    |            |   | 5.13E-11 | 3.55  | 40.27  | 17.30 | 26942.6  |
| AHQ-2-10, 2686              | R.HVFGESDELIGQK.V                                                        | 1459.58565 | 1 | 3.52E-06 | 0.91  | 3.87   | -     | 798.5    |
| AHQ-2-10, 2676 - 2678       | R.HVFGESDELIGQK.V                                                        | 1459.58565 | 2 | 5.13E-11 | 0.97  | 5.19   | -     | 1038.2   |
| AHQ-2-10, 2679              | R.HVFGESDELIGQK.V                                                        | 1459.58565 | 1 | 9.63E-07 | 0.87  | 3.44   | -     | 882.7    |
| AHQ-2-11, 2900              | R.HVFGESDELIGQK.V                                                        | 1459.58565 | 2 | 2.27E-08 | 0.92  | 4.17   | -     | 535.9    |
| AHQ-2-10, 2506 - 2518       | R.IIYGGSVTGATCK.E                                                        | 1328.51672 | 2 | 4.78E-05 | 0.80  | 2.98   | -     | 538.5    |
| AHQ-2-10, 2378              | R.RHVFGESDELIGQK.V                                                       | 1615.77200 | 2 | 2.00E-09 | 0.98  | 5.40   | -     | 2427.4   |
| AHQ-2-10, 3440 - 3514       | K.VTNGAFTGEISPGM*IK.D                                                    | 1638.86726 | 2 | 4.93E-05 | 0.80  | 3.08   | -     | 902.7    |
| gj 5031677 ref NP_005681.1  | dynamin 1-like protein isoform 3; dynamin-like protein [Homo sapiens] [  |            |   | 5.49E-11 | 7.36  | 90.28  | 18.50 | 78060.6  |
| AHQ-2-14-, 4833             | K.ALQGASQIAEIR.E                                                         | 1370.57991 | 2 | 3.62E-08 | 0.96  | 4.50   | -     | 1740.5   |
| AHQ-2-14, 6032              | K.ALQGASQIAEIR.E                                                         | 1370.57991 | 2 | 5.78E-08 | 0.95  | 4.05   | -     | 1828.3   |
| AHQ-2-14, 6293 - 6296       | K.DTLQSELVGLQYK.S                                                        | 1494.67144 | 2 | 6.64E-05 | 0.89  | 3.12   | -     | 1041.1   |
| AHQ-2-13, 5187              | K.DTLQSELVGLQYK.S                                                        | 1494.67144 | 2 | 1.78E-06 | 0.94  | 4.02   | -     | 1400.2   |
| AHQ-2-14-, 5199 - 5200      | K.DTLQSELVGLQYK.S                                                        | 1494.67144 | 1 | 1.59E-04 | 0.58  | 2.82   | -     | 371.3    |
| AHQ-2-6, 6941               | K.IFSPNVNLLTVLPLGPM*TK.V                                                 | 2059.45828 | 2 | 9.48E-04 | 0.61  | 2.51   | -     | 646.6    |
| AHQ-2-6, 6399               | K.IFSPNVNLLTVLPLGPM*TK.V                                                 | 2075.45768 | 2 | 9.21E-06 | 0.87  | 3.69   | -     | 833.2    |
| AHQ-2-5, 7161               | K.IFSPNVNLLTVLPLGPM*TK.V                                                 | 2059.45828 | 2 | 1.61E-06 | 0.76  | 3.00   | -     | 744.0    |
| AHQ-2-6, 7250 - 7251        | K.LQDVFNTVQADIIQLPQIVVGTQSSGK.S                                          | 2928.32977 | 2 | 1.94E-06 | 0.63  | 3.44   | -     | 234.4    |
| AHQ-2-6, 6155               | K.LYTFDFEIRQEIENETER.I                                                   | 2301.40883 | 2 | 1.66E-04 | 0.32  | 2.53   | -     | 365.1    |
| AHQ-2-13, 6755 - 6756       | K.SSLDLLLTSSEDM*QQR.R                                                    | 1924.07698 | 2 | 1.55E-04 | 0.88  | 4.31   | -     | 645.6    |
| AHQ-2-14-, 6229 - 6235      | K.SSLDLLLTSSEDM*QQR.R                                                    | 1940.07638 | 2 | 5.49E-11 | 0.97  | 5.68   | -     | 1343.2   |
| AHQ-2-14-, 6827 - 6887      | K.SSLDLLLTSSEDM*QQR.R                                                    | 1924.07698 | 2 | 1.76E-06 | 0.95  | 5.21   | -     | 966.6    |
| AHQ-2-7, 7471               | R.TLESVDPLGLNTIDILTAIR.N                                                 | 2212.52928 | 2 | 9.10E-05 | 0.95  | 4.52   | -     | 1146.0   |
| gj 6598323 ref NP_001485.2  | GDP dissociation inhibitor 2; rab GDP-dissociation inhibitor, beta [Homo |            |   | 5.58E-11 | 1.95  | 20.32  | 8.50  | 50662.9  |
| AHQ-2-8, 6763               | K.SPYLYPLYLGLGELPQGFAR.L                                                 | 2142.44089 | 2 | 5.82E-08 | 0.96  | 4.98   | -     | 987.1    |
| AHQ-2-10, 6379              | K.SPYLYPLYLGLGELPQGFAR.L                                                 | 2142.44089 | 2 | 8.54E-07 | 0.95  | 5.06   | -     | 754.2    |
| AHQ-2-9, 6966               | K.SPYLYPLYLGLGELPQGFAR.L                                                 | 2142.44089 | 2 | 5.92E-05 | 0.97  | 5.43   | -     | 1163.9   |
| AHQ-2-7, 6925 - 6947        | K.SPYLYPLYLGLGELPQGFAR.L                                                 | 2142.44089 | 2 | 8.65E-05 | 0.97  | 5.55   | -     | 1111.4   |
| AHQ-2-8, 7454               | K.VPSTAEALASSLMGLFEK.R                                                   | 1981.25641 | 2 | 5.58E-11 | 0.98  | 6.38   | -     | 1685.5   |
| gj 7656991 ref NP_055140.1  | coronin, actin binding protein, 1C; coronin, actin-binding protein, 1C;  |            |   | 6.27E-11 | 6.23  | 70.28  | 22.40 | 53248.7  |
| AHQ-2-6, 5859 - 5897        | R.AIFLDGNVFTTFSR.M                                                       | 1716.91793 | 2 | 1.87E-06 | 0.98  | 5.02   | -     | 2162.8   |
| AHQ-2-6, 3706               | K.CDLISIPK.K                                                             | 947.13128  | 2 | 1.86E-04 | 0.83  | 3.02   | -     | 814.5    |
| AHQ-2-7, 2888 - 2892        | R.KCEPIIMTVPR.K                                                          | 1345.65706 | 2 | 2.83E-04 | 0.86  | 3.34   | -     | 704.8    |
| AHQ-2-6, 3017 - 3021        | R.KCEPIIMTVPR.K                                                          | 1345.65706 | 2 | 1.68E-06 | 0.91  | 3.66   | -     | 891.9    |
| AHQ-2-7, 7391               | R.KSDLFQDDLYPDTAGPEAALEAEWFEGK.N                                         | 3273.46087 | 3 | 2.20E-08 | 0.96  | 5.60   | -     | 1575.4   |
| AHQ-2-9, 7323               | R.KSDLFQDDLYPDTAGPEAALEAEWFEGK.N                                         | 3273.46087 | 3 | 4.43E-08 | 0.96  | 5.52   | -     | 1323.2   |
| AHQ-2-7, 3632               | K.NADPILISLK.H                                                           | 1084.29103 | 1 | 4.45E-04 | 0.12  | 1.91   | -     | 304.6    |
| AHQ-2-6, 3707               | K.NADPILISLK.H                                                           | 1084.29103 | 1 | 4.38E-04 | 0.10  | 1.90   | -     | 272.5    |
| AHQ-2-6, 3714               | K.NADPILISLK.H                                                           | 1084.29103 | 2 | 8.39E-06 | 0.72  | 2.60   | -     | 522.9    |
| AHQ-2-6, 2201               | K.SIKDTICNQDER.I                                                         | 1480.58332 | 2 | 2.50E-06 | 0.90  | 2.81   | -     | 1486.4   |
| AHQ-2-7, 6028               | R.YFEITDESPYVHYLNTFSSK.E                                                 | 2441.63258 | 3 | 6.27E-11 | 0.92  | 4.46   | -     | 874.7    |
| AHQ-2-6, 6073               | R.YFEITDESPYVHYLNTFSSK.E                                                 | 2441.63258 | 3 | 1.19E-10 | 0.93  | 3.92   | -     | 1095.3   |
| AHQ-2-6, 6074 - 6085        | R.YFEITDESPYVHYLNTFSSK.E                                                 | 2441.63258 | 2 | 3.81E-08 | 0.95  | 4.49   | -     | 1160.0   |
| AHQ-2-7, 6024 - 6027        | R.YFEITDESPYVHYLNTFSSK.E                                                 | 2441.63258 | 2 | 5.59E-06 | 0.92  | 4.05   | -     | 856.2    |
| AHQ-2-10, 5659              | R.YFEITDESPYVHYLNTFSSK.E                                                 | 2441.63258 | 2 | 3.38E-04 | 0.94  | 4.13   | -     | 1120.1   |
| gj 4557731 ref NP_000618.1  | latent transforming growth factor beta binding protein 1 precursor [Homo |            |   | 6.98E-11 | 14.22 | 170.32 | 19.20 | 152790.9 |
| AHQ-2-2, 3764               | R.ASLGDDHCEDINECLEDK.S                                                   | 2065.13910 | 2 | 3.37E-05 | 0.96  | 4.94   | -     | 1579.7   |
| AHQ-2-1, 3797               | R.ASLGDDHCEDINECLEDK.S                                                   | 2065.13910 | 2 | 6.85E-05 | 0.97  | 5.69   | -     | 1538.7   |
| AHQ-2-3, 3699 - 3708        | R.ASLGDDHCEDINECLEDK.S                                                   | 2065.13910 | 2 | 6.98E-11 | 0.98  | 6.32   | -     | 2172.3   |
| AHQ-2-1, 3793               | R.ASLGDDHCEDINECLEDK.S                                                   | 2065.13910 | 3 | 4.07E-07 | 0.90  | 4.12   | -     | 1112.3   |
| AHQ-2-1, 2892               | R.CFQETIGSQCGK.A                                                         | 1417.54728 | 2 | 5.09E-04 | 0.83  | 2.87   | -     | 899.9    |
| AHQ-2-1, 6716               | K.CLCLPGVYVPSDKPNYCTPLNTALNLEK.D                                         | 3142.56947 | 3 | 9.46E-04 | 0.84  | 3.98   | -     | 507.6    |
| AHQ-2-1, 3710               | R.CTCGGGYQLSAAKQCEIDECQHR.H                                              | 3035.18500 | 3 | 2.42E-09 | 0.88  | 4.41   | -     | 714.9    |
| AHQ-2-3, 4253               | K.CVDIDECTQVQHLCSQGR.C                                                   | 2209.38110 | 2 | 7.11E-04 | 0.89  | 3.90   | -     | 700.0    |
| AHQ-2-1, 4256               | K.CVDIDECTQVQHLCSQGR.C                                                   | 2209.38110 | 2 | 3.02E-06 | 0.97  | 5.08   | -     | 1501.6   |
| AHQ-2-3, 2059               | K.DQCEIDECQHR.H                                                          | 1607.61898 | 2 | 7.00E-04 | 0.69  | 2.74   | -     | 488.8    |
| AHQ-2-1, 2173 - 2174        | K.DQCEIDECQHR.H                                                          | 1607.61898 | 2 | 7.09E-06 | 0.84  | 3.45   | -     | 651.8    |
| AHQ-2-1, 3298               | K.EAQPQQSQVSYQGLPVQK.T                                                   | 1945.12244 | 2 | 8.41E-04 | 0.93  | 3.87   | -     | 907.4    |
| AHQ-2-1, 3638               | K.EAQPQQSQVSYQGLPVQK.T                                                   | 1945.12244 | 2 | 7.89E-06 | 0.78  | 3.20   | -     | 672.7    |
| AHQ-2-1, 3460               | K.EAQPQQSQVSYQGLPVQK.T                                                   | 1945.12244 | 2 | 1.35E-08 | 0.91  | 4.09   | -     | 662.6    |
| AHQ-2-1, 4052               | K.KEEPVEALTSFR.E                                                         | 1278.39297 | 2 | 6.02E-05 | 0.70  | 2.77   | -     | 492.8    |
| AHQ-2-1, 3601               | K.EICPGMGYTVSGVHR.R                                                      | 1721.93967 | 2 | 3.95E-04 | 0.62  | 2.72   | -     | 661.8    |
| AHQ-2-1, 2876               | K.GFVPAAGESSSEAGGENYK.D                                                  | 1786.83392 | 2 | 2.00E-05 | 0.93  | 4.27   | -     | 789.7    |
| AHQ-2-4, 5744               | R.GRCEIDECCLNPSTCPDEQCVNSPGSYQCVCTEGFR.G                                 | 4402.64921 | 3 | 1.35E-04 | 0.75  | 3.72   | -     | 462.1    |
| AHQ-2-3, 5715 - 5720        | R.GRCEIDECCLNPSTCPDEQCVNSPGSYQCVCTEGFR.G                                 | 4402.64921 | 3 | 1.76E-06 | 0.91  | 4.72   | -     | 867.9    |
| AHQ-2-1, 2224               | K.HPPEASQDHLQVSR.I                                                       | 1585.74913 | 3 | 8.93E-09 | 0.66  | 3.13   | -     | 533.7    |

|                             |                                                                        |            |   |          |       |        |       |         |
|-----------------------------|------------------------------------------------------------------------|------------|---|----------|-------|--------|-------|---------|
| AHQ-2-1, 3102               | K.LCQIPVHGASVPK.L                                                      | 1407.66344 | 2 | 7.52E-04 | 0.83  | 3.51   | -     | 421.6   |
| AHQ-2-1, 3702               | R.NTEGSFQCVCDQGYR.A                                                    | 1823.89914 | 2 | 2.32E-06 | 0.93  | 4.35   | -     | 679.0   |
| AHQ-2-1, 2980               | R.TSTDLVDVDDQPK.E                                                      | 1433.50014 | 2 | 1.51E-06 | 0.88  | 3.27   | -     | 943.8   |
| AHQ-2-4, 2590               | R.TSTDLVDVDDQPK.EEK.K                                                  | 1819.90213 | 2 | 2.67E-04 | 0.76  | 3.31   | -     | 805.6   |
| AHQ-2-1, 3700               | R.YTICICYGYR.F                                                         | 1387.51964 | 2 | 5.31E-04 | 0.74  | 3.01   | -     | 405.2   |
| gi 4502549 ref NP_001734.1  | calmodulin 2 (phosphorylase kinase, delta); phosphorylase kinase delta |            |   | 7.54E-11 | 2.59  | 30.24  | 29.50 | 16837.5 |
| AHQ-2-11, 3949 - 4012       | K.EAFSLFDKDGDDGTTTK.E                                                  | 1845.98441 | 2 | 4.17E-05 | 0.89  | 4.07   | -     | 729.0   |
| AHQ-2-12, 4113 - 4181       | K.EAFSLFDKDGDDGTTTK.E                                                  | 1845.98441 | 2 | 7.20E-10 | 0.95  | 3.81   | -     | 1384.4  |
| AHQ-2-12, 4249              | K.EAFSLFDKDGDDGTTTK.E                                                  | 1845.98441 | 2 | 2.85E-07 | 0.93  | 4.20   | -     | 1005.8  |
| AHQ-2-13, 4085 - 4165       | K.EAFSLFDKDGDDGTTTK.E                                                  | 1845.98441 | 2 | 1.64E-05 | 0.74  | 3.22   | -     | 476.4   |
| AHQ-2-12, 1630              | K.MKDTDSEEEI.R                                                         | 1353.43852 | 2 | 2.05E-05 | 0.68  | 2.71   | -     | 546.1   |
| AHQ-2-12, 3933 - 4007       | R.VFDKDGNGYISAAELR.H                                                   | 1755.90933 | 2 | 9.57E-06 | 0.92  | 4.00   | -     | 1160.1  |
| AHQ-2-12, 3802 - 3835       | R.VFDKDGNGYISAAELR.H                                                   | 1755.90933 | 3 | 1.77E-06 | 0.88  | 3.76   | -     | 1023.7  |
| AHQ-2-12, 3798 - 3866       | R.VFDKDGNGYISAAELR.H                                                   | 1755.90933 | 2 | 7.54E-11 | 0.96  | 4.85   | -     | 1380.7  |
| AHQ-2-13, 3867              | R.VFDKDGNGYISAAELR.H                                                   | 1755.90933 | 2 | 9.57E-08 | 0.91  | 3.67   | -     | 810.6   |
| AHQ-2-11, 3621 - 3689       | R.VFDKDGNGYISAAELR.H                                                   | 1755.90933 | 2 | 4.80E-06 | 0.87  | 3.43   | -     | 827.2   |
| gi 17921989 ref NP_005991.1 | tubulin, alpha 1; testis-specific alpha tubulin; tubulin alpha-1 chain |            |   | 8.92E-11 | 14.03 | 170.28 | 45.10 | 49924.1 |
| AHQ-2-7, 6369 - 6377        | R.AFVHWYVGEEMEEGFSEAR.E                                                | 2331.50495 | 2 | 1.01E-04 | 0.93  | 3.69   | -     | 1066.6  |
| AHQ-2-12, 4623              | R.AFVHWYVGEEMEEGFSEAR.E                                                | 2347.50435 | 3 | 3.43E-06 | 0.97  | 5.38   | -     | 1787.4  |
| AHQ-2-12, 5202              | R.AFVHWYVGEEMEEGFSEAR.E                                                | 2331.50495 | 2 | 2.19E-08 | 0.90  | 3.55   | -     | 805.9   |
| AHQ-2-13, 5181              | R.AFVHWYVGEEMEEGFSEAR.E                                                | 2331.50495 | 2 | 4.97E-07 | 0.94  | 4.10   | -     | 1130.8  |
| AHQ-2-12, 6121 - 6187       | R.AVCMLSNTTAAIEAWAR.L                                                  | 1867.13992 | 2 | 1.84E-07 | 0.92  | 3.96   | -     | 1333.5  |
| AHQ-2-12, 5595 - 5599       | R.AVCMLSNTTAAIEAWAR.L                                                  | 1883.13932 | 2 | 9.27E-07 | 0.88  | 3.33   | -     | 999.0   |
| AHQ-2-14-, 6044             | R.AVCMLSNTTAAIEAWAR.L                                                  | 1867.13992 | 2 | 1.07E-06 | 0.95  | 4.37   | -     | 1361.5  |
| AHQ-2-13-, 5225 - 5293      | R.AVCMLSNTTAAIEAWAR.L                                                  | 1883.13932 | 2 | 6.55E-06 | 0.94  | 4.58   | -     | 1125.8  |
| AHQ-2-7, 6281 - 6352        | R.AVCMLSNTTAAIEAWAR.L                                                  | 1867.13992 | 2 | 2.22E-06 | 0.95  | 5.09   | -     | 1305.9  |
| AHQ-2-13-, 6297 - 6365      | R.AVCMLSNTTAAIEAWAR.L                                                  | 1867.13992 | 2 | 1.69E-04 | 0.95  | 4.06   | -     | 1502.0  |
| AHQ-2-13-, 5309 - 5378      | R.AVCMLSNTTAAIEAWAR.L                                                  | 1883.13932 | 2 | 4.57E-05 | 0.83  | 3.17   | -     | 1201.2  |
| AHQ-2-7, 6681 - 6749        | R.AVCMLSNTTAAIEAWAR.L                                                  | 1867.13992 | 2 | 5.94E-06 | 0.87  | 4.16   | -     | 923.9   |
| AHQ-2-7, 5181 - 5253        | R.AVCMLSNTTAAIEAWAR.L                                                  | 1883.13932 | 2 | 4.95E-05 | 0.86  | 3.58   | -     | 1065.6  |
| AHQ-2-7, 6833               | R.AVCMLSNTTAAIEAWAR.L                                                  | 1867.13992 | 2 | 3.35E-04 | 0.85  | 3.47   | -     | 928.1   |
| AHQ-2-13-, 6149 - 6157      | R.AVCMLSNTTAAIEAWAR.L                                                  | 1867.13992 | 2 | 4.90E-06 | 0.94  | 4.77   | -     | 988.8   |
| AHQ-2-13, 5987 - 6063       | R.AVCMLSNTTAAIEAWAR.L                                                  | 1867.13992 | 2 | 7.64E-10 | 0.91  | 4.08   | -     | 930.0   |
| AHQ-2-14, 6332              | R.AVCMLSNTTAAIEAWAR.L                                                  | 1883.13932 | 2 | 5.24E-04 | 0.94  | 3.89   | -     | 1208.0  |
| AHQ-2-11, 5941              | R.AVCMLSNTTAAIEAWAR.L                                                  | 1867.13992 | 2 | 2.88E-06 | 0.82  | 3.64   | -     | 758.6   |
| AHQ-2-13, 5167 - 5227       | R.AVCMLSNTTAAIEAWAR.L                                                  | 1883.13932 | 2 | 2.98E-04 | 0.88  | 3.49   | -     | 833.8   |
| AHQ-2-7, 6181               | R.AVFVDELEPTVIDEIR.N                                                   | 1716.95615 | 2 | 4.15E-07 | 0.93  | 3.92   | -     | 1465.6  |
| AHQ-2-7, 6041 - 6111        | R.AVFVDELEPTVIDEIR.N                                                   | 1716.95615 | 2 | 1.90E-07 | 0.97  | 2.99   | -     | 981.0   |
| AHQ-2-13-, 6173 - 6175      | R.AVFVDELEPTVIDEIR.N                                                   | 1716.95615 | 2 | 1.04E-05 | 0.90  | 3.64   | -     | 1336.6  |
| AHQ-2-12, 6150 - 6157       | R.AVFVDELEPTVIDEIR.N                                                   | 1716.95615 | 2 | 5.31E-08 | 0.90  | 3.53   | -     | 1203.9  |
| AHQ-2-7, 6199 - 6203        | R.AVFVDELEPTVIDEIRNGPYR.Q                                              | 2304.58696 | 2 | 1.46E-04 | 0.36  | 2.70   | -     | 167.7   |
| AHQ-2-7, 5263               | K.AYHQLSVAEITNACFEPANQMVK.C                                            | 2753.06070 | 2 | 3.31E-05 | 0.68  | 2.79   | -     | 614.4   |
| AHQ-2-7, 3377               | K.DVNAIAIAIK.T                                                         | 986.14745  | 1 | 1.44E-04 | 0.90  | 3.18   | -     | 1131.8  |
| AHQ-2-11, 3288              | K.DVNAIAIAIK.T                                                         | 986.14745  | 1 | 1.47E-04 | 0.43  | 1.88   | -     | 714.4   |
| AHQ-2-12, 3037              | K.DVNAIAIAIK.T                                                         | 986.14745  | 1 | 1.13E-07 | 0.87  | 2.43   | -     | 1368.1  |
| AHQ-2-12, 3359              | K.DVNAIAIAIK.T                                                         | 986.14745  | 2 | 3.86E-06 | 0.91  | 3.60   | -     | 1076.2  |
| AHQ-2-7, 3023               | K.FDLMYAK.R                                                            | 888.06574  | 1 | 6.33E-04 | 0.51  | 2.45   | -     | 415.7   |
| AHQ-2-13, 3428              | K.FDLMYAK.R                                                            | 888.06574  | 2 | 2.69E-04 | 0.83  | 2.57   | -     | 864.1   |
| AHQ-2-12, 3258              | K.FDLMYAK.R                                                            | 888.06574  | 2 | 6.24E-04 | 0.82  | 2.82   | -     | 686.7   |
| AHQ-2-12, 5093 - 5173       | R.IHFPLATYAPVISA.EK.A                                                  | 1758.05310 | 2 | 3.91E-04 | 0.60  | 3.19   | -     | 340.2   |
| AHQ-2-7, 4636 - 4708        | R.IHFPLATYAPVISA.EK.A                                                  | 1758.05310 | 2 | 2.21E-04 | 0.94  | 4.01   | -     | 793.6   |
| AHQ-2-11, 4896              | R.IHFPLATYAPVISA.EK.A                                                  | 1758.05310 | 2 | 2.43E-07 | 0.89  | 3.85   | -     | 493.1   |
| AHQ-2-9, 4767 - 4839        | R.IHFPLATYAPVISA.EK.A                                                  | 1758.05310 | 2 | 4.67E-06 | 0.96  | 4.62   | -     | 896.9   |
| AHQ-2-7, 4779 - 4780        | R.IHFPLATYAPVISA.EK.A                                                  | 1758.05310 | 2 | 1.78E-06 | 0.96  | 4.56   | -     | 976.5   |
| AHQ-2-10, 4627 - 4702       | R.IHFPLATYAPVISA.EK.A                                                  | 1758.05310 | 2 | 3.10E-05 | 0.90  | 3.81   | -     | 637.8   |
| AHQ-2-7, 6935               | R.LISQIVSSITASLR.F                                                     | 1488.75471 | 2 | 8.92E-11 | 0.97  | 4.79   | -     | 1248.9  |
| AHQ-2-9, 6995               | R.LISQIVSSITASLR.F                                                     | 1488.75471 | 2 | 1.22E-08 | 0.94  | 4.11   | -     | 1117.5  |
| AHQ-2-7, 7031 - 7095        | R.LISQIVSSITASLR.F                                                     | 1488.75471 | 2 | 9.20E-08 | 0.94  | 4.67   | -     | 860.0   |
| AHQ-2-7, 7159 - 7239        | R.LISQIVSSITASLR.F                                                     | 1488.75471 | 2 | 8.73E-08 | 0.94  | 3.48   | -     | 1245.3  |
| AHQ-2-14-, 6697 - 6699      | R.LISQIVSSITASLR.F                                                     | 1488.75471 | 2 | 3.13E-08 | 0.97  | 5.51   | -     | 1313.3  |
| AHQ-2-13, 3443 - 3455       | R.NLDIERPTYTLNLR.L                                                     | 1719.88022 | 2 | 7.87E-08 | 0.67  | 3.15   | -     | 435.7   |
| AHQ-2-4, 3502 - 3512        | R.NLDIERPTYTLNLR.L                                                     | 1719.88022 | 2 | 3.65E-05 | 0.37  | 3.26   | -     | 249.1   |
| AHQ-2-13-, 3447 - 3453      | R.NLDIERPTYTLNLR.L                                                     | 1719.88022 | 2 | 6.98E-06 | 0.46  | 2.96   | -     | 290.3   |
| AHQ-2-9, 3148               | R.NLDIERPTYTLNLR.L                                                     | 1719.88022 | 2 | 5.83E-04 | 0.47  | 2.65   | -     | 437.2   |
| AHQ-2-8, 2922               | R.NLDIERPTYTLNLR.L                                                     | 1719.88022 | 2 | 9.58E-04 | 0.74  | 3.18   | -     | 481.1   |
| AHQ-2-5, 3232               | R.NLDIERPTYTLNLR.L                                                     | 1719.88022 | 2 | 7.75E-10 | 0.54  | 2.90   | -     | 314.3   |
| AHQ-2-6, 3214               | R.NLDIERPTYTLNLR.L                                                     | 1719.88022 | 2 | 5.67E-04 | 0.32  | 2.97   | -     | 298.2   |
| AHQ-2-7, 3083 - 3151        | R.NLDIERPTYTLNLR.L                                                     | 1719.88022 | 2 | 4.95E-04 | 0.65  | 3.59   | -     | 427.4   |
| AHQ-2-12, 3361              | R.NLDIERPTYTLNLR.L                                                     | 1719.88022 | 2 | 4.06E-06 | 0.55  | 3.33   | -     | 285.6   |
| AHQ-2-10, 3131              | R.NLDIERPTYTLNLR.L                                                     | 1719.88022 | 2 | 7.38E-04 | 0.61  | 3.21   | -     | 405.7   |
| AHQ-2-13-, 5725 - 5726      | R.SIQFVDWCPTGFK.V                                                      | 1586.79232 | 2 | 9.81E-07 | 0.89  | 3.00   | -     | 854.8   |
| AHQ-2-3, 6067               | R.SIQFVDWCPTGFK.V                                                      | 1586.79232 | 2 | 4.33E-04 | 0.86  | 3.25   | -     | 808.8   |
| AHQ-2-12, 5769 - 5791       | R.SIQFVDWCPTGFK.V                                                      | 1586.79232 | 2 | 4.43E-04 | 0.90  | 3.15   | -     | 1029.6  |
| AHQ-2-1, 6110               | R.SIQFVDWCPTGFK.V                                                      | 1586.79232 | 2 | 9.01E-06 | 0.93  | 3.47   | -     | 1073.3  |
| AHQ-2-7, 5868 - 5943        | K.TIGGGDDSFTHFFCETGAGK.H                                               | 2070.17889 | 2 | 2.00E-10 | 0.94  | 4.62   | -     | 809.7   |
| AHQ-2-9, 5794               | K.TIGGGDDSFTHFFCETGAGK.H                                               | 2070.17889 | 2 | 4.43E-09 | 0.79  | 3.28   | -     | 584.2   |
| AHQ-2-7, 5760 - 5799        | K.TIGGGDDSFTHFFCETGAGK.H                                               | 2070.17889 | 2 | 8.09E-10 | 0.89  | 4.02   | -     | 618.6   |
| AHQ-2-13-, 5650 - 5689      | K.TIGGGDDSFTHFFCETGAGK.H                                               | 2070.17889 | 2 | 1.26E-07 | 0.89  | 3.94   | -     | 585.2   |
| AHQ-2-14-, 5655             | K.TIGGGDDSFTHFFCETGAGK.H                                               | 2070.17889 | 2 | 3.00E-10 | 0.93  | 4.61   | -     | 680.6   |
| AHQ-2-4, 6038               | K.TIGGGDDSFTHFFCETGAGK.H                                               | 2070.17889 | 2 | 2.17E-06 | 0.35  | 2.65   | -     | 199.0   |
| AHQ-2-7, 5963 - 6037        | K.TIGGGDDSFTHFFCETGAGK.H                                               | 2070.17889 | 2 | 2.39E-08 | 0.94  | 4.17   | -     | 1093.6  |
| AHQ-2-10, 5344 - 5350       | K.TIGGGDDSFTHFFCETGAGK.H                                               | 2070.17889 | 2 | 2.83E-07 | 0.92  | 4.32   | -     | 519.3   |
| AHQ-2-13, 5551 - 5591       | K.TIGGGDDSFTHFFCETGAGK.H                                               | 2070.17889 | 2 | 6.90E-07 | 0.66  | 3.15   | -     | 424.2   |
| AHQ-2-1, 6034               | K.TIGGGDDSFTHFFCETGAGK.H                                               | 2070.17889 | 2 | 9.14E-06 | 0.50  | 2.68   | -     | 426.6   |
| AHQ-2-13, 4355 - 4408       | K.VGINYQPPTVPPGGDLAK.V                                                 | 1826.08584 | 2 | 7.81E-08 | 0.86  | 3.76   | -     | 459.5   |
| AHQ-2-12, 4569              | K.VGINYQPPTVPPGGDLAK.V                                                 | 1826.08584 | 2 | 2.22E-08 | 0.78  | 3.32   | -     | 370.9   |
| AHQ-2-2, 4692               | K.VGINYQPPTVPPGGDLAK.V                                                 | 1826.08584 | 2 | 9.55E-06 | 0.35  | 2.68   | -     | 185.7   |
| AHQ-2-12, 4430 - 4502       | K.VGINYQPPTVPPGGDLAK.V                                                 | 1826.08584 | 2 | 5.01E-05 | 0.83  | 3.33   | -     | 507.1   |
| AHQ-2-14, 5377 - 5452       | K.VGINYQPPTVPPGGDLAK.V                                                 | 1826.08584 | 2 | 3.93E-04 | 0.45  | 3.09   | -     | 180.4   |
| AHQ-2-3, 4669               | K.VGINYQPPTVPPGGDLAK.V                                                 | 1826.08584 | 2 | 5.36E-05 | 0.66  | 3.47   | -     | 293.0   |
| AHQ-2-11, 4266 - 4334       | K.VGINYQPPTVPPGGDLAK.V                                                 | 1826.08584 | 2 | 4.90E-06 | 0.74  | 3.04   | -     | 367.1   |
| AHQ-2-13-, 4417 - 4423      | K.VGINYQPPTVPPGGDLAK.V                                                 | 1826.08584 | 2 | 2.47E-04 | 0.92  | 4.42   | -     | 527.3   |
| AHQ-2-13-, 4499             | K.VGINYQPPTVPPGGDLAK.V                                                 | 1826.08584 | 2 | 4.82E-04 | 0.78  | 3.39   | -     | 396.0   |
| AHQ-2-9, 4488 - 4498        | K.VGINYQPPTVPPGGDLAK.V                                                 | 1826.08584 | 2 | 8.21E-08 | 0.55  | 2.95   | -     | 256.8   |
| AHQ-2-6, 4362               | K.VGINYQPPTVPPGGDLAK.V                                                 | 1826.08584 | 2 | 3.50E-06 | 0.60  | 3.97   | -     | 235.0   |
| AHQ-2-7, 4513               | K.VGINYQPPTVPPGGDLAK.V                                                 | 1826.08584 | 2 | 9.06E-04 | 0.54  | 2.75   | -     | 300.2   |
| AHQ-2-7, 4212 - 4291        | K.VGINYQPPTVPPGGDLAK.V                                                 | 1826.08584 | 2 | 3.03E-07 | 0.90  | 4.13   | -     | 455.6   |
| AHQ-2-7, 4360 - 4431        | K.VGINYQPPTVPPGGDLAK.V                                                 | 1826.08584 | 2 | 2.56E-06 | 0.88  | 4.17   | -     | 361.9   |
| AHQ-2-13, 4480              | K.VGINYQPPTVPPGGDLAK.V                                                 | 1826.08584 | 2 | 1.19E-06 | 0.66  | 2.77   | -     | 446.3   |
| AHQ-2-12, 3978              | K.YM'ACCLLYR.G                                                         | 1268.50804 | 2 | 9.69E-04 | 0.78  | 3.23   | -     | 475.5   |
| AHQ-2-12, 4462              | K.YM'ACCLLYR.G                                                         | 1252.50864 | 2 | 1.34E-05 | 0.96  | 3.64   | -     | 1194.0  |
| AHQ-2-9, 4406               | K.YM'ACCLLYR.G                                                         | 1252.50864 | 1 | 8.00E-04 | 0.50  | 2.49   | -     | 357.8   |
| AHQ-2-7, 4364 - 4371        | K.YM'ACCLLYR.G                                                         | 1252.50864 | 2 | 1.07E-05 | 0.96  | 3.84   | -     | 1237.4  |
| gi 4502201 ref NP_001649.1  | ADP-ribosylation factor 1 [Homo sapiens]                               |            |   | 9.06E-11 | 9.93  | 110.30 | 54.70 | 20696.6 |
| AHQ-2-12, 4681              | R.DAVLLVFANK.Q                                                         | 1090.29726 | 2 | 1.76E-06 | 0.96  | 4.28   | -     | 1678.9  |
| AHQ-2-12, 4803 - 4830       | R.DAVLLVFANK.Q                                                         | 1090.29726 | 1 | 4.92E-04 | 0.85  | 3.31   | -     | 833.8   |
| AHQ-2-12, 4663 - 4738       | R.DAVLLVFANK.Q                                                         | 1090.29726 | 1 | 1.67E-04 | 0.72  | 2.73   | -     | 677.6   |

|                            |                                                                         |            |   |          |      |       |       |         |
|----------------------------|-------------------------------------------------------------------------|------------|---|----------|------|-------|-------|---------|
| AHQ-2-12, 6285             | R.DAVLLVFANKQDLPNAMNAEITDK.L                                            | 2703.06468 | 2 | 8.63E-07 | 0.91 | 4.54  | -     | 661.9   |
| AHQ-2-12, 4911             | R.HYFQNTQGLFVVDSDNDR.E                                                  | 2154.32702 | 2 | 8.16E-08 | 0.98 | 5.95  | -     | 2171.7  |
| AHQ-2-12, 5318             | R.HYFQNTQGLFVVDSDNDR.E                                                  | 2154.32702 | 2 | 9.06E-11 | 0.97 | 5.42  | -     | 1572.6  |
| AHQ-2-12, 5402 - 5451      | R.HYFQNTQGLFVVDSDNDR.E                                                  | 2154.32702 | 2 | 9.43E-06 | 0.98 | 5.88  | -     | 2093.5  |
| AHQ-2-12, 5602 - 5673      | R.HYFQNTQGLFVVDSDNDR.E                                                  | 2154.32702 | 2 | 1.28E-08 | 0.95 | 5.03  | -     | 769.9   |
| AHQ-2-12, 4999             | R.HYFQNTQGLFVVDSDNDR.E                                                  | 2154.32702 | 2 | 5.41E-06 | 0.98 | 5.90  | -     | 1877.9  |
| AHQ-2-12, 5094 - 5166      | R.HYFQNTQGLFVVDSDNDR.E                                                  | 2154.32702 | 2 | 8.56E-07 | 0.98 | 6.01  | -     | 1996.0  |
| AHQ-2-12, 4899 - 4971      | R.HYFQNTQGLFVVDSDNDRER.V                                                | 2439.62792 | 3 | 3.42E-05 | 0.93 | 5.26  | -     | 846.0   |
| AHQ-2-12, 4362             | R.HYFQNTQGLFVVDSDNDRER.V                                                | 2439.62792 | 3 | 2.77E-06 | 0.84 | 3.82  | -     | 469.3   |
| AHQ-2-12, 4507 - 4573      | R.HYFQNTQGLFVVDSDNDRER.V                                                | 2439.62792 | 3 | 1.37E-06 | 0.80 | 3.92  | -     | 449.4   |
| AHQ-2-12, 5057             | R.HYFQNTQGLFVVDSDNDRER.V                                                | 2439.62792 | 3 | 4.19E-06 | 0.91 | 4.16  | -     | 1023.1  |
| AHQ-2-12, 3090             | R.ILM*VGLDAAGK.T                                                        | 1104.34572 | 2 | 8.68E-07 | 0.95 | 3.46  | -     | 1705.1  |
| AHQ-2-11, 3541             | R.ILMVGLDAAGK.T                                                         | 1088.34632 | 2 | 3.24E-05 | 0.94 | 3.11  | -     | 1368.7  |
| AHQ-2-12, 3659 - 3725      | R.ILMVGLDAAGK.T                                                         | 1088.34632 | 2 | 4.16E-04 | 0.95 | 3.50  | -     | 1565.8  |
| AHQ-2-12, 3683             | R.ILMVGLDAAGK.T                                                         | 1088.34632 | 1 | 4.16E-04 | 0.74 | 2.86  | -     | 711.0   |
| AHQ-2-12, 6537 - 6601      | K.LGEIVTTIPTIGFNVETVEYK.N                                               | 2324.65485 | 3 | 1.84E-04 | 0.91 | 4.28  | -     | 1004.7  |
| AHQ-2-13-, 6517 - 6519     | K.LGEIVTTIPTIGFNVETVEYK.N                                               | 2324.65485 | 2 | 6.49E-04 | 0.92 | 4.73  | -     | 311.1   |
| AHQ-2-12, 6727 - 6803      | K.LGEIVTTIPTIGFNVETVEYK.N                                               | 2324.65485 | 2 | 7.05E-06 | 0.45 | 2.99  | -     | 164.8   |
| AHQ-2-14-, 6379            | K.LGEIVTTIPTIGFNVETVEYK.N                                               | 2324.65485 | 2 | 2.89E-06 | 0.76 | 3.65  | -     | 264.9   |
| AHQ-2-11, 6353             | K.LGEIVTTIPTIGFNVETVEYK.N                                               | 2324.65485 | 2 | 2.21E-05 | 0.44 | 3.02  | -     | 159.8   |
| AHQ-2-11, 6232 - 6293      | K.LGEIVTTIPTIGFNVETVEYK.N                                               | 2324.65485 | 2 | 9.03E-08 | 0.64 | 3.35  | -     | 172.5   |
| AHQ-2-12, 6475 - 6545      | K.LGEIVTTIPTIGFNVETVEYK.N                                               | 2324.65485 | 2 | 4.61E-04 | 0.82 | 3.75  | -     | 279.7   |
| AHQ-2-12, 2545             | R.MLAEDEL.R.D                                                           | 977.11769  | 2 | 1.70E-04 | 0.92 | 3.43  | -     | 1040.3  |
| AHQ-2-12, 7067             | R.M*LAEDEL.RD.VLVFANK.Q                                                 | 2064.39175 | 3 | 1.36E-08 | 0.95 | 4.65  | -     | 1813.7  |
| AHQ-2-13-, 5183            | K.NISFTYVDVGGGDK.I                                                      | 1566.89621 | 2 | 2.92E-05 | 0.92 | 3.55  | -     | 1044.7  |
| AHQ-2-12, 5137 - 5206      | K.NISFTYVDVGGGDK.I                                                      | 1566.89621 | 2 | 7.64E-09 | 0.96 | 4.89  | -     | 903.7   |
| AHQ-2-14-, 5109 - 5112     | K.NISFTYVDVGGGDK.I                                                      | 1566.89621 | 2 | 1.53E-04 | 0.87 | 3.55  | -     | 792.9   |
| AHQ-2-12, 4794 - 4809      | K.NISFTYVDVGGGDK.I                                                      | 1566.89621 | 2 | 2.10E-04 | 0.39 | 2.67  | -     | 354.9   |
| AHQ-2-12, 3675 - 3749      | K.QDLPNAMNAEITDK.L                                                      | 1631.79001 | 2 | 3.33E-07 | 0.92 | 3.87  | -     | 964.3   |
| gi4885063 ref NP_005156.1  | aldolase C, fructose-bisphosphate; Aldolase C, fructose-bisphosphatase  |            |   | 9.34E-11 | 1.76 | 20.29 | 7.10  | 39455.6 |
| AHQ-2-8, 4271 - 4348       | K.GVVPLAGTDGTTTTQGLDGLSER.C                                             | 2274.42806 | 2 | 9.34E-11 | 0.80 | 5.00  | -     | 520.0   |
| AHQ-2-8, 4449 - 4515       | K.GVVPLAGTDGTTTTQGLDGLSER.C                                             | 2274.42806 | 2 | 1.93E-10 | 0.95 | 4.95  | -     | 720.1   |
| AHQ-2-9, 4504 - 4546       | K.GVVPLAGTDGTTTTQGLDGLSER.C                                             | 2274.42806 | 2 | 1.05E-06 | 0.78 | 4.61  | -     | 513.1   |
| AHQ-2-9, 4634              | K.GVVPLAGTDGTTTTQGLDGLSER.C                                             | 2274.42806 | 2 | 8.55E-09 | 0.85 | 4.73  | -     | 884.0   |
| AHQ-2-10, 4340             | K.GVVPLAGTDGTTTTQGLDGLSER.C                                             | 2274.42806 | 2 | 9.96E-07 | 0.85 | 4.94  | -     | 724.2   |
| AHQ-2-12, 4349             | K.GVVPLAGTDGTTTTQGLDGLSER.C                                             | 2274.42806 | 2 | 1.79E-06 | 0.69 | 3.95  | -     | 619.6   |
| AHQ-2-12, 4693             | K.GVVPLAGTDGTTTTQGLDGLSER.C                                             | 2274.42806 | 2 | 3.62E-10 | 0.69 | 4.21  | -     | 445.0   |
| AHQ-2-8, 4127 - 4199       | K.VDKGVVPLAGTDGTTTTQGLDGLSER.C                                          | 2616.82041 | 3 | 7.32E-10 | 0.96 | 5.77  | -     | 1083.4  |
| gi7705704 ref NP_057001.1  | glutathione S-transferase subunit 13 homolog [Homo sapiens]             |            |   | 1.03E-10 | 5.53 | 60.25 | 35.80 | 25496.7 |
| AHQ-2-11, 3270 - 3334      | K.AGMSAEOAQLLEK.I                                                       | 1433.61314 | 2 | 1.64E-05 | 0.92 | 4.17  | -     | 1334.2  |
| AHQ-2-11, 2557             | K.AGM*SAEOAQLLEK.I                                                      | 1449.61254 | 2 | 1.28E-04 | 0.92 | 3.68  | -     | 1241.5  |
| AHQ-2-11, 4440             | R.FLTAVNLEHPEMLEK.A                                                     | 1772.05845 | 2 | 4.78E-06 | 0.94 | 4.84  | -     | 942.5   |
| AHQ-2-11, 4793             | R.MELLAHLLEK.W                                                          | 1254.52433 | 2 | 2.12E-05 | 0.93 | 3.58  | -     | 1235.5  |
| AHQ-2-11, 4445 - 4494      | R.NEDITEPQSLAAAEK.A                                                     | 1729.86695 | 2 | 1.03E-10 | 0.88 | 3.60  | -     | 645.2   |
| AHQ-2-11, 5741             | R.YGAFGLPITVAHVVDGQTHMLFGSDR.M                                          | 2691.01737 | 3 | 7.48E-08 | 0.93 | 5.01  | -     | 757.3   |
| gi5453607 ref NP_006420.1  | chaperonin containing TCP1, subunit 7 (eta); chaperonin containing t-co |            |   | 1.10E-10 | 2.73 | 30.24 | 11.20 | 59366.3 |
| AHQ-2-14-, 6909            | R.INALTAASAAALIVSVDETIKNPR.S                                            | 2659.00999 | 3 | 1.10E-10 | 0.92 | 4.57  | -     | 984.5   |
| AHQ-2-7, 5008              | K.LPIGDVATQYFADR.D                                                      | 1566.73935 | 2 | 5.66E-05 | 0.85 | 2.73  | -     | 1070.2  |
| AHQ-2-7, 7175              | K.SQDAIEVGDGTTSVTLAAEFLK.Q                                              | 2253.44875 | 2 | 3.62E-05 | 0.95 | 4.76  | -     | 971.8   |
| gi4557705 ref NP_000217.1  | keratin 9 [Homo sapiens]                                                |            |   | 1.12E-10 | 5.50 | 60.32 | 20.30 | 61986.9 |
| AHQ-2-5, 6531 - 6547       | K.DIENQYETQIQIEHEVSSSGQEVQSSAK.E                                        | 3266.38667 | 3 | 7.51E-07 | 0.97 | 5.37  | -     | 2390.0  |
| AHQ-2-14-, 6219            | K.DIENQYETQIQIEHEVSSSGQEVQSSAK.E                                        | 3266.38667 | 3 | 1.12E-10 | 0.95 | 4.89  | -     | 1877.8  |
| AHQ-2-5, 4472              | K.EIETYHNLLEGGQDFESSGAGK.I                                              | 2511.59648 | 3 | 4.63E-09 | 0.96 | 5.47  | -     | 1803.5  |
| AHQ-2-5, 5093              | R.HGVQEELIEELQSLK.K                                                     | 1839.03978 | 2 | 2.25E-07 | 0.98 | 6.43  | -     | 2179.0  |
| AHQ-2-5, 7367 - 7369       | K.NYSPYYNTIDDLKQIVDLTVGNKK.T                                            | 2904.13412 | 3 | 2.02E-09 | 0.87 | 4.50  | -     | 473.6   |
| AHQ-2-5, 7368              | K.NYSPYYNTIDDLKQIVDLTVGNKK.T                                            | 2904.13412 | 2 | 1.53E-07 | 0.87 | 4.05  | -     | 577.9   |
| AHQ-2-5, 6587              | K.SDLEMQYETLQEELMALKK.N                                                 | 2300.63547 | 3 | 4.64E-08 | 0.75 | 3.31  | -     | 556.3   |
| AHQ-2-5, 6569 - 6584       | K.SDLEMQYETLQEELMALKK.N                                                 | 2300.63547 | 2 | 2.43E-05 | 0.85 | 3.97  | -     | 536.2   |
| AHQ-2-5, 2804 - 2805       | K.VQALEEANNLLENK.I                                                      | 1587.67060 | 2 | 3.07E-09 | 0.98 | 5.74  | -     | 1789.2  |
| gi7705296 ref NP_057271.1  | bridging integrator 2; bridging integrator-2; breast cancer associated  |            |   | 1.12E-10 | 5.96 | 70.25 | 21.60 | 61746.8 |
| AHQ-2-13, 5947             | K.AIVWNNDLLWEDYEEL.L                                                    | 2038.20157 | 2 | 8.20E-09 | 0.88 | 3.88  | -     | 676.2   |
| AHQ-2-10, 5808 - 5880      | K.AIVWNNDLLWEDYEEL.L                                                    | 2038.20157 | 2 | 5.80E-07 | 0.90 | 3.78  | -     | 954.7   |
| AHQ-2-10, 5674 - 5746      | K.AIVWNNDLLWEDYEEL.L                                                    | 2038.20157 | 2 | 1.12E-10 | 0.96 | 4.82  | -     | 1398.5  |
| AHQ-2-10, 6778 - 6850      | K.AQTVFEDLNQELLELPILYNSR.I                                              | 2736.02649 | 2 | 4.20E-06 | 0.93 | 4.99  | -     | 759.2   |
| AHQ-2-10, 6843 - 6851      | K.AQTVFEDLNQELLELPILYNSR.I                                              | 2736.02649 | 3 | 5.81E-05 | 0.65 | 3.54  | -     | 374.4   |
| AHQ-2-10, 2522             | R.FEQSASNFYQQQAEGHK.L                                                   | 2000.07352 | 2 | 2.09E-06 | 0.96 | 4.72  | -     | 1340.2  |
| AHQ-2-14-, 6587 - 6589     | R.IGCVYTFIQNISNL.R.D                                                    | 1800.07167 | 2 | 4.63E-05 | 0.96 | 5.09  | -     | 1037.3  |
| AHQ-2-10, 6342             | R.IGCVYTFIQNISNL.R.D                                                    | 1800.07167 | 2 | 2.21E-05 | 0.86 | 3.66  | -     | 735.7   |
| AHQ-2-9, 6902 - 6919       | R.IGCVYTFIQNISNL.R.D                                                    | 1800.07167 | 2 | 1.33E-05 | 0.90 | 3.89  | -     | 761.5   |
| AHQ-2-10, 6102             | R.IGCVYTFIQNISNL.R.D                                                    | 1800.07167 | 2 | 7.37E-04 | 0.50 | 2.65  | -     | 190.3   |
| AHQ-2-12, 6751             | R.IGCVYTFIQNISNL.R.D                                                    | 1800.07167 | 2 | 5.13E-05 | 0.76 | 3.60  | -     | 509.4   |
| AHQ-2-10, 2559             | K.LNHNLYEVMK.L                                                          | 1348.55307 | 2 | 3.93E-08 | 0.79 | 2.94  | -     | 859.1   |
| AHQ-2-7, 4008              | R.TATVSSPLTSPSTPSLTK.S                                                  | 1976.21467 | 2 | 1.75E-05 | 0.72 | 3.37  | -     | 559.4   |
| AHQ-2-10, 4630             | R.VSETLQEIYSESWDGHEELK.A                                                | 2380.50595 | 2 | 2.04E-05 | 0.69 | 3.45  | -     | 374.2   |
| gi5902134 ref NP_009005.1  | coronin, actin binding protein, 1A; coronin, actin-binding, 1A; coronin |            |   | 1.14E-10 | 3.75 | 40.28 | 16.30 | 51026.0 |
| AHQ-2-7, 4145              | R.DAGPLLSL.K.D                                                          | 1027.23948 | 2 | 3.18E-05 | 0.92 | 3.07  | -     | 1159.1  |
| AHQ-2-7, 7080 - 7148       | R.KSDLFQEDLYPPTAGPDPALTAEEWLGG.R.D                                      | 3175.44994 | 3 | 1.07E-09 | 0.95 | 5.54  | -     | 532.4   |
| AHQ-2-1, 7133              | R.KSDLFQEDLYPPTAGPDPALTAEEWLGG.R.D                                      | 3175.44994 | 3 | 3.23E-04 | 0.77 | 3.54  | -     | 353.9   |
| AHQ-2-7, 3999 - 4012       | R.VSQTTWDSGFCAVNP.K.F                                                   | 1798.95426 | 2 | 2.01E-06 | 0.93 | 4.42  | -     | 976.9   |
| AHQ-2-7, 7467              | R.YFEITSEAPFLHYLSMFSSK.E                                                | 2398.71748 | 3 | 1.14E-10 | 0.96 | 5.32  | -     | 1175.3  |
| gi20070125 ref NP_000909.2 | prolyl 4-hydroxylase, beta subunit; v-erb-a avian erythroblastic leuke  |            |   | 1.20E-10 | 3.95 | 50.28 | 16.30 | 57115.9 |
| AHQ-2-7, 4715              | K.HNQLPLVIEFTQAPK.I                                                     | 1966.22639 | 2 | 1.19E-06 | 0.91 | 4.35  | -     | 660.1   |
| AHQ-2-7, 2359              | K.LGETYKHENHIVIAK.M                                                     | 1730.94291 | 2 | 5.70E-04 | 0.86 | 3.38  | -     | 761.2   |
| AHQ-2-13, 5656 - 5903      | K.QPVKVLVGK.N                                                           | 968.21840  | 1 | 2.86E-04 | 0.37 | 2.16  | -     | 472.6   |
| AHQ-2-7, 7709              | R.TGPAATTLPDGAAAESLVESSEVAVIGFFK.D                                      | 2937.24716 | 3 | 1.20E-10 | 0.93 | 4.87  | -     | 1084.6  |
| AHQ-2-7, 7601              | R.TGPAATTLPDGAAAESLVESSEVAVIGFFK.D                                      | 2937.24716 | 3 | 3.61E-06 | 0.97 | 5.53  | -     | 2512.2  |
| AHQ-2-7, 3757              | K.YQLDKDGVVLF.K.K                                                       | 1425.65394 | 2 | 2.90E-05 | 0.88 | 3.98  | -     | 774.1   |
| gi4758970 ref NP_004150.1  | proteasome beta 8 subunit isoform E1 proprotein; proteasome subunit, be |            |   | 1.43E-10 | 2.57 | 30.21 | 14.70 | 29769.4 |
| AHQ-2-11, 2400             | K.FQHGVIAA.VD.SR.A                                                      | 1300.44824 | 1 | 9.02E-08 | 0.67 | 2.45  | -     | 395.8   |
| AHQ-2-11, 2300             | K.KGPGLYYVDEHGR.L                                                       | 1592.73690 | 2 | 1.44E-07 | 0.96 | 4.23  | -     | 1406.4  |
| AHQ-2-11, 4008             | K.VESTDVSDDLHQYR.E                                                      | 1662.78230 | 2 | 1.43E-10 | 0.94 | 3.99  | -     | 1299.4  |
| gi4503821 ref NP_001456.1  | FYN binding protein (FYB-120/130); FYN-binding protein (FYB-120/130) [H |            |   | 1.44E-10 | 0.95 | 10.25 | 2.60  | 85450.5 |
| AHQ-2-12, 4177             | R.DLVKPGESLEVIQTTDDTK.V                                                 | 2217.41641 | 2 | 1.44E-10 | 0.95 | 4.97  | -     | 576.7   |
| AHQ-2-13, 4152             | R.DLVKPGESLEVIQTTDDTK.V                                                 | 2217.41641 | 2 | 1.00E-07 | 0.95 | 4.95  | -     | 788.2   |
| AHQ-2-10, 3874             | R.DLVKPGESLEVIQTTDDTK.V                                                 | 2217.41641 | 2 | 2.80E-09 | 0.92 | 4.32  | -     | 566.7   |
| gi20357552 ref NP_005222.2 | cortactin isoform a; oncogene EMS1 [Homo sapiens]                       |            |   | 1.45E-10 | 2.63 | 30.21 | 7.10  | 61585.7 |
| AHQ-2-12, 3999             | R.LPSSPVYEDAAAFK.A                                                      | 1511.65733 | 2 | 1.25E-04 | 0.60 | 2.72  | -     | 455.8   |
| AHQ-2-11, 3852 - 3905      | R.LPSSPVYEDAAAFK.A                                                      | 1511.65733 | 2 | 9.22E-05 | 0.92 | 3.20  | -     | 982.7   |
| AHQ-2-13, 3099 - 3164      | R.VDQSAVGFYEQGK.T                                                       | 1428.52841 | 2 | 5.06E-05 | 0.77 | 2.84  | -     | 799.3   |
| AHQ-2-12, 5377 - 5381      | R.YGLFPANYELR.Q                                                         | 1442.64306 | 2 | 1.45E-10 | 0.94 | 4.11  | -     | 776.2   |
| gi4507231 ref NP_003134.1  | single-stranded DNA binding protein; single-stranded DNA-binding protei |            |   | 1.77E-10 | 3.54 | 40.23 | 32.40 | 17259.5 |
| AHQ-2-13, 5943             | K.NPVTIFSLANEM*WR.S                                                     | 1796.04007 | 2 | 1.77E-10 | 0.93 | 4.34  | -     | 855.8   |
| AHQ-2-13, 6631             | K.NPVTIFSLANEM*WR.S                                                     | 1780.04067 | 2 | 1.50E-05 | 0.97 | 4.60  | -     | 1963.7  |
| AHQ-2-13, 6029 - 6100      | R.QATTIADNIFLSDQTK.E                                                    | 1993.24692 | 2 | 8.01E-04 | 0.68 | 3.19  | -     | 490.8   |
| AHQ-2-13-, 3213            | R.SGDSEVYQLGDVVSQK.T                                                    | 1612.67692 | 2 | 8.86E-07 | 0.95 | 4.61  | -     | 1049.9  |
| AHQ-2-13, 3228             | R.SGDSEVYQLGDVVSQK.T                                                    | 1612.67692 | 2 | 9.11E-07 | 0.90 | 4.01  | -     | 855.9   |
| gi4502051 ref NP_000688.1  | arachidonate 12-lipoxygenase; 12(S)-lipoxygenase [Homo sapiens]         |            |   | 1.82E-10 | 5.71 | 70.23 | 16.10 | 75721.8 |

|                             |                                                                         |            |   |          |      |        |       |          |
|-----------------------------|-------------------------------------------------------------------------|------------|---|----------|------|--------|-------|----------|
| AHQ-2-6, 4877               | R.AAAQLTYCSLPPDDLADR.G                                                  | 2140.33708 | 2 | 8.87E-10 | 0.92 | 4.53   | -     | 443.2    |
| AHQ-2-6, 2045               | K.AVSTGGGGHVQLLR.R                                                      | 1352.52468 | 2 | 6.69E-09 | 0.87 | 3.53   | -     | 904.7    |
| AHQ-2-6, 5289               | R.GLLGLP.GALY.AHDALR.L                                                  | 1637.90708 | 2 | 1.82E-10 | 0.92 | 3.64   | -     | 774.7    |
| AHQ-2-6, 5162               | R.ITVQGGP.GACAEVAFPCYR.W                                                | 1999.25659 | 2 | 1.46E-07 | 0.88 | 3.81   | -     | 951.0    |
| AHQ-2-6, 4467               | R.LPGDNALDMFQK.H                                                        | 1349.53784 | 2 | 3.62E-08 | 0.92 | 3.84   | -     | 828.0    |
| AHQ-2-6, 3901 - 3902        | R.TQLISDGGIFDK.A                                                        | 1294.43554 | 1 | 2.43E-04 | 0.58 | 2.18   | -     | 920.3    |
| AHQ-2-6, 4933               | R.WVQGEDILSLPEGTAR.L                                                    | 1771.95190 | 2 | 6.92E-05 | 0.63 | 2.88   | -     | 491.7    |
| gi 4508047 ref NP_003452.1  | zyxin [Homo sapiens]                                                    |            |   | 1.82E-10 | 2.46 | 30.27  | 8.90  | 61277.0  |
| AHQ-2-8, 7340               | K.EVEELEQLTQQLMQDMHPQR.Q                                                | 2612.87876 | 3 | 1.82E-10 | 0.87 | 3.86   | -     | 1230.1   |
| AHQ-2-9, 7367               | K.EVEELEQLTQQLMQDMHPQR.Q                                                | 2612.87876 | 2 | 7.44E-07 | 0.92 | 4.51   | -     | 593.2    |
| AHQ-2-8, 7338 - 7402        | K.EVEELEQLTQQLMQDMHPQR.Q                                                | 2612.87876 | 2 | 1.71E-07 | 0.91 | 4.45   | -     | 608.1    |
| AHQ-2-9, 1959               | K.FGPVVPKPK.V                                                           | 1040.28308 | 1 | 6.34E-04 | 0.62 | 2.27   | -     | 676.6    |
| AHQ-2-9, 7539               | K.VSSIDLEIDSLSLDDMTK.N                                                  | 2182.43225 | 2 | 1.78E-06 | 0.97 | 5.50   | -     | 1095.5   |
| gi 5803201 ref NP_006818.1  | transmembrane trafficking protein [Homo sapiens]                        |            |   | 1.87E-10 | 3.83 | 50.28  | 17.40 | 24975.8  |
| AHQ-2-11, 2314              | K.ITDSAGHILYSK.E                                                        | 1305.46156 | 1 | 4.49E-04 | 0.65 | 1.85   | -     | 1002.8   |
| AHQ-2-11, 2313              | K.ITDSAGHILYSK.E                                                        | 1305.46156 | 2 | 8.92E-09 | 0.96 | 4.55   | -     | 1424.3   |
| AHQ-2-11, 6209 - 6220       | R.LEDLSSEIVNDFAYMK.K                                                    | 1875.08916 | 2 | 7.26E-07 | 0.95 | 4.82   | -     | 1005.0   |
| AHQ-2-11, 2902 - 2904       | K.LKPLEVELR.R                                                           | 1097.33294 | 1 | 1.05E-05 | 0.06 | 2.22   | -     | 126.8    |
| AHQ-2-11, 6090              | R.RLEDLSSEIVNDFAYMK.K                                                   | 2031.27552 | 2 | 8.05E-08 | 0.98 | 5.59   | -     | 2091.4   |
| AHQ-2-11, 5414              | R.RLEDLSSEIVNDFAYM*K.K                                                  | 2047.27492 | 2 | 4.04E-04 | 0.88 | 3.54   | -     | 765.7    |
| AHQ-2-11, 4989              | R.RLEDLSSEIVNDFAYMK.K                                                   | 2031.27552 | 2 | 1.87E-10 | 0.97 | 4.90   | -     | 1799.8   |
| gi 21618359 ref NP_004095.3 | fatty acid synthase [Homo sapiens]                                      |            |   | 1.88E-10 | 5.69 | 70.24  | 4.60  | 273262.0 |
| AHQ-2-1, 4250               | K.CTVFHGAQVDEAF.R.Y                                                     | 1638.78572 | 2 | 2.64E-07 | 0.73 | 2.68   | -     | 864.7    |
| AHQ-2-1, 4246               | R.FPQLDSTSFANSR.D                                                       | 1470.56853 | 2 | 5.28E-08 | 0.90 | 3.65   | -     | 882.8    |
| AHQ-2-1, 6224               | R.LFDHPESPPTNPTEPLFLAQAEVYK.E                                           | 2842.15075 | 3 | 1.88E-10 | 0.93 | 4.71   | -     | 1090.0   |
| AHQ-2-1, 6628               | R.LHLSGIDANPNALFPVVEFPAPR.G                                             | 2473.81368 | 3 | 4.77E-04 | 0.79 | 3.58   | -     | 618.2    |
| AHQ-2-3, 7121 - 7193        | K.LPEPDLSSGLLSDPALK.A                                                   | 1779.06739 | 2 | 3.41E-04 | 0.94 | 3.69   | -     | 1495.8   |
| AHQ-2-1, 7033               | K.LPEPDLSSGLLSDPALK.A                                                   | 1779.06739 | 2 | 7.88E-06 | 0.97 | 4.34   | -     | 1646.4   |
| AHQ-2-1, 3832               | R.LQVVDQPLPVR.G                                                         | 1264.49894 | 2 | 2.68E-05 | 0.84 | 3.23   | -     | 1083.5   |
| AHQ-2-1, 3950               | K.VLQGDVLM*NVYR.D                                                       | 1423.86306 | 2 | 3.75E-04 | 0.52 | 2.77   | -     | 579.1    |
| gi 4507207 ref NP_003121.1  | sorcin; Sorcin (class 4 gene) [Homo sapiens]                            |            |   | 1.89E-10 | 0.93 | 10.23  | 10.10 | 21673.3  |
| AHQ-2-11, 4501 - 4578       | R.CLTSQGIAGGYKPFNLETCL.R                                                | 2275.54736 | 2 | 1.89E-10 | 0.93 | 4.54   | -     | 555.6    |
| gi 4504041 ref NP_002061.1  | guanine nucleotide binding protein (G protein), alpha inhibiting activi |            |   | 1.94E-10 | 1.79 | 20.25  | 9.90  | 40450.7  |
| AHQ-2-9, 5811               | R.EYQLNSAAAYLNDLDR.I                                                    | 2078.18096 | 2 | 1.94E-10 | 0.89 | 3.94   | -     | 837.9    |
| AHQ-2-14, 6136              | K.ITHSPLTICFPEYTGANK.Y                                                  | 2051.30821 | 2 | 1.59E-05 | 0.90 | 4.18   | -     | 489.9    |
| gi 4759300 ref NP_004772.1  | vesicle-associated membrane protein 3 (cellubrevin); vesicle-associated |            |   | 1.98E-10 | 3.82 | 40.31  | 40.00 | 11309.0  |
| AHQ-2-13, 3646              | R.ADALQAQASQFETSAAK.L                                                   | 1666.77095 | 2 | 3.19E-08 | 0.94 | 4.15   | -     | 1048.0   |
| AHQ-2-14, 3556              | R.ADALQAQASQFETSAAK.L                                                   | 1666.77095 | 2 | 8.55E-10 | 0.95 | 4.37   | -     | 1128.6   |
| AHQ-2-13, 3786              | R.LQQTQNVQDEVVDIMR.V                                                    | 1933.13344 | 2 | 3.59E-07 | 0.98 | 6.26   | -     | 1604.3   |
| AHQ-2-13, 4971              | R.LQQTQNVQDEVVDIMR.V                                                    | 1917.13404 | 2 | 7.27E-08 | 0.97 | 5.40   | -     | 1720.9   |
| AHQ-2-13, 4879              | R.LQQTQNVQDEVVDIMR.V                                                    | 1917.13404 | 2 | 1.98E-10 | 0.97 | 5.23   | -     | 1371.2   |
| AHQ-2-13, 4673 - 4681       | K.LSELDLRADALQAQASQFETSAAK.L                                            | 2495.64172 | 3 | 2.86E-05 | 0.92 | 4.45   | -     | 1368.7   |
| gi 29730023 ref XP_291482.1 | similar to 78 kDa glucose-regulated protein precursor (GRP 78) [Immun   |            |   | 1.98E-10 | 4.51 | 50.23  | 13.30 | 63563.0  |
| AHQ-2-6, 4605 - 4669        | R.IINKPTAAAIYGLDK.R                                                     | 1659.95097 | 2 | 6.18E-09 | 0.87 | 4.03   | -     | 875.3    |
| AHQ-2-6, 3205               | K.KKELEEIVQPIISK.L                                                      | 1654.97263 | 2 | 3.51E-08 | 0.96 | 4.60   | -     | 1466.0   |
| AHQ-2-6, 3323 - 3405        | K.LYGSAGPPPTGEEDTAEKDEL                                                 | 2177.26447 | 2 | 8.52E-06 | 0.92 | 4.27   | -     | 729.4    |
| AHQ-2-6, 3833               | R.NELSEYAYS.LK.N                                                        | 1317.42597 | 2 | 5.12E-04 | 0.85 | 3.20   | -     | 733.5    |
| AHQ-2-6, 5525 - 5529        | K.TFAPKIESAMVLTK.M                                                      | 1536.86124 | 2 | 1.98E-10 | 0.92 | 4.37   | -     | 1281.7   |
| gi 10716563 ref NP_001737.1 | calnexin [Homo sapiens]                                                 |            |   | 2.06E-10 | 4.53 | 50.21  | 12.30 | 67567.8  |
| AHQ-2-5, 2204               | K.AEEDILNR.S                                                            | 1089.13826 | 2 | 2.37E-04 | 0.93 | 3.06   | -     | 1799.2   |
| AHQ-2-1, 5200               | K.APVPTGEVYFADSFDR.G                                                    | 1771.90722 | 2 | 2.61E-07 | 0.78 | 3.05   | -     | 562.1    |
| AHQ-2-6, 4833               | K.APVPTGEVYFADSFDR.G                                                    | 1771.90722 | 2 | 1.25E-04 | 0.88 | 3.02   | -     | 1109.5   |
| AHQ-2-5, 4895 - 4969        | K.APVPTGEVYFADSFDR.G                                                    | 1771.90722 | 2 | 2.06E-10 | 0.93 | 4.15   | -     | 1119.9   |
| AHQ-2-5, 4193               | R.CESAPGCGVWQRPVIDNPNYK.G                                               | 2450.69236 | 2 | 3.48E-05 | 0.79 | 3.00   | -     | 634.8    |
| AHQ-2-9, 6211               | R.KIPNPDFEDELPEFR.M                                                     | 1865.07739 | 2 | 1.89E-04 | 0.88 | 3.88   | -     | 661.3    |
| AHQ-2-6, 6183               | R.KIPNPDFEDELPEFR.M                                                     | 1865.07739 | 2 | 3.49E-06 | 0.87 | 3.20   | -     | 770.3    |
| AHQ-2-5, 6235 - 6307        | R.KIPNPDFEDELPEFR.M                                                     | 1865.07739 | 2 | 1.28E-06 | 0.93 | 3.61   | -     | 1091.2   |
| AHQ-2-5, 3271 - 3340        | K.TPELNLDDQHFDK.T                                                       | 1457.56976 | 2 | 1.05E-05 | 0.94 | 3.95   | -     | 1512.6   |
| gi 4507677 ref NP_003290.1  | tumor rejection antigen (gp96) 1; Tumor rejection antigen-1 (gp96); glu |            |   | 2.25E-10 | 6.14 | 80.30  | 14.40 | 92468.2  |
| AHQ-2-5, 2297 - 2301        | K.DISTNYASQK.K                                                          | 1290.36061 | 1 | 2.25E-10 | 0.37 | 2.26   | -     | 345.0    |
| AHQ-2-5, 6396               | R.EAVEKEFPELLNWMK.D                                                     | 1864.15434 | 2 | 2.70E-04 | 0.94 | 4.48   | -     | 991.6    |
| AHQ-2-6, 3685               | R.FQSSHPTDITSLDQYVER.M                                                  | 2261.39276 | 3 | 1.37E-04 | 0.97 | 5.45   | -     | 2403.4   |
| AHQ-2-6, 3691               | R.FQSSHPTDITSLDQYVER.M                                                  | 2261.39276 | 2 | 1.12E-06 | 0.79 | 3.39   | -     | 609.3    |
| AHQ-2-5, 3655 - 3659        | R.FQSSHPTDITSLDQYVER.M                                                  | 2261.39276 | 2 | 1.21E-04 | 0.93 | 4.43   | -     | 962.4    |
| AHQ-2-5, 6980 - 7041        | K.GYEVVLYTEPVDEYCIQALPEFDGKR.F                                          | 3107.43557 | 3 | 1.11E-05 | 0.87 | 4.40   | -     | 603.7    |
| AHQ-2-5, 6260               | K.KYSQFINFPYVWSSK.T                                                     | 2008.30657 | 2 | 2.15E-09 | 0.98 | 5.21   | -     | 1865.4   |
| AHQ-2-5, 5329               | R.LISLTDENALSGNEELTVK.I                                                 | 2047.24975 | 2 | 6.73E-06 | 0.84 | 3.33   | -     | 486.5    |
| AHQ-2-5, 3273               | R.LSLNIDPPDAK.V                                                         | 1086.22065 | 1 | 4.56E-05 | 0.38 | 2.24   | -     | 561.9    |
| AHQ-2-5, 6940 - 7007        | K.KYSQFINFPYVWSSK.T                                                     | 1880.13366 | 2 | 1.56E-04 | 0.98 | 5.95   | -     | 1445.3   |
| gi 4504345 ref NP_000508.1  | alpha 2 globin [Homo sapiens]                                           |            |   | 2.31E-10 | 2.83 | 30.30  | 30.30 | 15257.4  |
| AHQ-2-13, 4247              | K.FLASVSTVLTSK.Y                                                        | 1253.46970 | 2 | 2.42E-06 | 0.90 | 3.38   | -     | 1124.7   |
| AHQ-2-13, 4293              | K.FLASVSTVLTSK.Y                                                        | 1253.46970 | 2 | 3.92E-06 | 0.92 | 3.46   | -     | 1286.8   |
| AHQ-2-13, 4063 - 4073       | K.TYFPHFDLSHSGAQQV.K                                                    | 1835.01138 | 2 | 5.03E-10 | 0.96 | 5.09   | -     | 1160.3   |
| AHQ-2-13, 3992 - 4007       | K.TYFPHFDLSHSGAQQV.K                                                    | 1835.01138 | 2 | 2.75E-06 | 0.95 | 4.14   | -     | 1205.9   |
| AHQ-2-13, 2539 - 2558       | K.VGAHAGEYGAALER.M                                                      | 1530.62397 | 2 | 5.46E-09 | 0.96 | 3.93   | -     | 1671.0   |
| AHQ-2-13, 2604 - 2609       | K.VGAHAGEYGAALER.M                                                      | 1530.62397 | 2 | 2.31E-10 | 0.97 | 4.15   | -     | 1815.0   |
| gi 12408656 ref NP_005177.2 | calpain 1, large subunit; calpain, large polypeptide L1; calcium-activ  |            |   | 2.59E-10 | 8.22 | 100.26 | 19.90 | 81889.4  |
| AHQ-2-6, 6702 - 6717        | R.DMETIGFAYVEVPELVGQPAVHLK.R                                            | 2741.15451 | 3 | 2.59E-10 | 0.87 | 4.20   | -     | 775.0    |
| AHQ-2-6, 6001               | R.FRLPPGEYVVVSTFEPNKEGDFVLR.F                                           | 2994.39160 | 3 | 1.99E-04 | 0.94 | 5.26   | -     | 1024.4   |
| AHQ-2-6, 4097 - 4109        | R.KAPSDLYQILK.A                                                         | 1389.66474 | 2 | 4.01E-08 | 0.93 | 4.16   | -     | 834.0    |
| AHQ-2-10, 3992              | R.KAPSDLYQILK.A                                                         | 1389.66474 | 2 | 8.31E-05 | 0.80 | 2.97   | -     | 639.5    |
| AHQ-2-6, 5645               | R.LPPGEYVVVSTFEPNKEGDFVLR.F                                             | 2691.03055 | 3 | 3.19E-07 | 0.77 | 3.68   | -     | 527.7    |
| AHQ-2-6, 6433               | K.LVVFVHSAEGNEFWALLEK.A                                                 | 2177.44364 | 2 | 9.69E-06 | 0.96 | 4.82   | -     | 1355.4   |
| AHQ-2-6, 5073               | R.NYPATFVWVNPQFK.I                                                      | 1612.81141 | 2 | 3.96E-05 | 0.92 | 3.82   | -     | 926.4    |
| AHQ-2-6, 4335 - 4345        | K.RPTELLSNPQFIVDGATR.T                                                  | 2015.25904 | 3 | 6.52E-07 | 0.94 | 4.98   | -     | 1254.4   |
| AHQ-2-6, 2837 - 2842        | R.SEQFINLR.E                                                            | 1007.12521 | 1 | 4.65E-04 | 0.26 | 2.20   | -     | 128.5    |
| AHQ-2-6, 4161               | K.WNTTLYEGTWR.R                                                         | 1427.54534 | 2 | 5.81E-04 | 0.75 | 2.64   | -     | 652.6    |
| AHQ-2-6, 3123 - 3129        | K.YLGDQYQLR.V                                                           | 1285.38720 | 2 | 3.60E-06 | 0.88 | 3.11   | -     | 690.2    |
| gi 27477800 ref XP_208313.1 | similar to tropomyosin 4 [Homo sapiens]                                 |            |   | 2.76E-10 | 0.95 | 10.25  | 10.10 | 18426.7  |
| AHQ-2-9, 5234 - 5312        | K.CGDLEELKKNVTNLLK.S                                                    | 1878.05124 | 2 | 8.17E-07 | 0.92 | 4.32   | -     | 1053.4   |
| AHQ-2-9, 5506 - 5578        | K.CGDLEELKKNVTNLLK.S                                                    | 1878.05124 | 2 | 1.17E-07 | 0.80 | 3.72   | -     | 648.4    |
| AHQ-2-9, 5590 - 5652        | K.CGDLEELKKNVTNLLK.S                                                    | 1878.05124 | 2 | 2.76E-10 | 0.95 | 4.52   | -     | 1406.7   |
| AHQ-2-9, 4606 - 4614        | K.CGDLEELKKNVTNLLK.S                                                    | 1878.05124 | 2 | 1.11E-08 | 0.97 | 5.06   | -     | 1673.5   |
| gi 4757812 ref NP_004880.1  | ATP synthase, H+ transporting, mitochondrial F0 complex, subunit f, iso |            |   | 3.07E-10 | 2.63 | 30.20  | 25.50 | 10917.8  |
| AHQ-2-13, 6125 - 6139       | R.DFSPSGIFGAFQR.G                                                       | 1429.56124 | 2 | 2.96E-08 | 0.94 | 4.10   | -     | 1153.2   |
| AHQ-2-13, 5969 - 5975       | R.DFSPSGIFGAFQR.G                                                       | 1429.56124 | 2 | 5.35E-09 | 0.93 | 3.61   | -     | 1182.9   |
| AHQ-2-14, 6007              | R.DFSPSGIFGAFQR.G                                                       | 1429.56124 | 2 | 3.07E-10 | 0.93 | 3.57   | -     | 1048.0   |
| AHQ-2-13, 6118              | K.LGELPWSWILMR.D                                                        | 1315.60936 | 2 | 4.91E-08 | 0.92 | 3.85   | -     | 743.1    |
| AHQ-2-13, 5606 - 5611       | K.LGELPWSWILMR.D                                                        | 1331.60876 | 2 | 5.97E-06 | 0.89 | 3.63   | -     | 529.7    |
| AHQ-2-14, 5551              | K.LGELPWSWILMR.D                                                        | 1331.60876 | 2 | 3.63E-06 | 0.89 | 3.29   | -     | 661.8    |
| AHQ-2-13, 5948              | K.LGELPWSWILMR.D                                                        | 1315.60936 | 2 | 1.71E-04 | 0.90 | 3.58   | -     | 686.0    |
| AHQ-2-13, 5496              | K.LGELPWSWILMR.D                                                        | 1331.60876 | 2 | 5.74E-07 | 0.78 | 3.13   | -     | 464.9    |
| AHQ-2-14, 6023              | K.LGELPWSWILMR.D                                                        | 1315.60936 | 2 | 2.84E-05 | 0.92 | 3.69   | -     | 783.0    |
| gi 7657124 ref NP_055165.1  | TNF-induced protein [Homo sapiens]                                      |            |   | 3.13E-10 | 0.91 | 10.21  | 10.50 | 22047.4  |
| AHQ-2-12, 7174 - 7241       |                                                                         |            |   |          |      |        |       |          |





|                             |                                                                          |            |   |          |       |        |       |          |
|-----------------------------|--------------------------------------------------------------------------|------------|---|----------|-------|--------|-------|----------|
| AHQ-2-13-, 4250             | K.EGMNIVEAMER.F                                                          | 1279.46942 | 2 | 9.43E-04 | 0.59  | 2.81   | -     | 486.9    |
| AHQ-2-12, 4045 - 4046       | K.FEDENFLIK.H                                                            | 1155.28144 | 2 | 2.88E-05 | 0.84  | 3.37   | -     | 610.9    |
| AHQ-2-12, 4162              | K.FEDENFLIK.H                                                            | 1155.28144 | 1 | 5.72E-04 | 0.71  | 2.52   | -     | 1024.0   |
| AHQ-2-12, 3946              | K.ITIADCQGLE                                                             | 1121.24345 | 1 | 2.76E-04 | 0.46  | 2.31   | -     | 393.4    |
| AHQ-2-12, 3454              | K.KITIADCQGLE                                                            | 1249.41637 | 2 | 1.22E-06 | 0.88  | 3.91   | -     | 980.0    |
| AHQ-2-13-, 3378             | K.KITIADCQGLE                                                            | 1249.41637 | 2 | 4.37E-06 | 0.89  | 3.45   | -     | 787.3    |
| AHQ-2-12, 3277 - 3345       | K.KITIADCQGLE                                                            | 1249.41637 | 2 | 1.34E-07 | 0.69  | 3.33   | -     | 662.9    |
| AHQ-2-14, 5936 - 5997       | K.SIYGEKFEDENFILK.H                                                      | 1833.03047 | 2 | 5.31E-04 | 0.86  | 3.86   | -     | 733.7    |
| AHQ-2-13, 4649              | K.SIYGEKFEDENFILK.H                                                      | 1833.03047 | 2 | 8.99E-04 | 0.95  | 4.73   | -     | 1106.7   |
| AHQ-2-14-, 4757             | K.SIYGEKFEDENFILK.H                                                      | 1833.03047 | 2 | 3.27E-09 | 0.94  | 4.63   | -     | 1106.8   |
| AHQ-2-12, 4741 - 4811       | K.SIYGEKFEDENFILK.H                                                      | 1833.03047 | 2 | 3.69E-09 | 0.95  | 4.35   | -     | 1347.2   |
| AHQ-2-12, 4649 - 4670       | K.SIYGEKFEDENFILK.H                                                      | 1833.03047 | 2 | 5.75E-10 | 0.96  | 4.78   | -     | 1268.7   |
| AHQ-2-12, 3567              | K.VKEGMNIVEAMER.F                                                        | 1506.77390 | 2 | 1.69E-05 | 0.95  | 4.37   | -     | 1608.2   |
| AHQ-2-12, 4382              | R.VSFELFADK.V                                                            | 1056.19300 | 2 | 2.05E-05 | 0.83  | 3.17   | -     | 854.1    |
| AHQ-2-12, 4511              | R.VSFELFADK.V                                                            | 1056.19300 | 1 | 1.39E-04 | 0.46  | 2.60   | -     | 581.1    |
| AHQ-2-12, 4517              | R.VSFELFADK.V                                                            | 1056.19300 | 2 | 9.94E-06 | 0.95  | 3.96   | -     | 1087.1   |
| AHQ-2-12, 4514              | R.VSFELFADKVPK.T                                                         | 1380.61317 | 2 | 5.25E-07 | 0.89  | 3.98   | -     | 893.6    |
| AHQ-2-12, 4302              | R.VSFELFADKVPK.T                                                         | 1380.61317 | 2 | 9.31E-07 | 0.88  | 3.77   | -     | 885.5    |
| gi 7705501 ref NP_057546.1  | hypothetical protein HSPC194 [Homo sapiens]                              |            |   | 5.93E-10 | 1.84  | 20.22  | 41.10 | 11564.5  |
| AHQ-2-14-, 6947             | K.AGSVPSLAAGLLFGLAGLGLGAYQLSQDPR.N                                       | 2818.17710 | 2 | 1.07E-04 | 0.88  | 4.33   | -     | 622.3    |
| AHQ-2-14-, 5971             | K.FM*PAGLIAGASLLM*VAK.V                                                  | 1723.13705 | 2 | 5.93E-10 | 0.97  | 4.43   | -     | 2003.2   |
| gi 4557419 ref NP_000063.1  | CD36 antigen (collagen type I receptor, thrombospondin receptor); CD36   |            |   | 5.96E-10 | 2.66  | 30.25  | 10.20 | 53052.1  |
| AHQ-2-1, 4929               | K.AFASPVENPDNYCFCTEK.I                                                   | 2152.30319 | 2 | 2.28E-06 | 0.74  | 3.43   | -     | 382.0    |
| AHQ-2-5, 5488               | K.SQVLFSSDICR.S                                                          | 1588.76661 | 2 | 5.96E-10 | 0.95  | 3.98   | -     | 1410.5   |
| AHQ-2-5, 7341 - 7343        | R.TYLDIOPITGTLQFAK.R                                                     | 1957.25787 | 2 | 1.88E-08 | 0.97  | 5.05   | -     | 1461.9   |
| gi 4557297 ref NP_000022.1  | delta-aminolevulinic acid dehydratase; porphobilinogen synthase; aminol  |            |   | 6.20E-10 | 1.73  | 20.21  | 10.00 | 36294.7  |
| AHQ-2-9, 4843               | R.GSAADSEESPAIEAIHLR.K                                                   | 1967.12642 | 2 | 2.97E-08 | 0.93  | 4.11   | -     | 906.5    |
| AHQ-2-9, 4866               | R.GSAADSEESPAIEAIHLR.K                                                   | 1967.12642 | 3 | 6.20E-10 | 0.86  | 3.68   | -     | 884.1    |
| AHQ-2-9, 4683               | R.LEEMRLPLVEGLR.C                                                        | 1684.98233 | 2 | 1.70E-04 | 0.87  | 3.36   | -     | 1046.8   |
| gi 4757786 ref NP_004306.1  | N-acylsphingosine amidohydrolase (acid ceramidase) 1; N-acylsphingosine  |            |   | 6.21E-10 | 0.98  | 10.28  | 4.30  | 44649.3  |
| AHQ-2-13-, 6718 - 6785      | K.LPGLLGNFPFPFEEMK.G                                                     | 1876.16512 | 2 | 3.90E-04 | 0.92  | 3.32   | -     | 1211.3   |
| AHQ-2-14-, 6513 - 6576      | K.LPGLLGNFPFPFEEMK.G                                                     | 1876.16512 | 2 | 6.21E-10 | 0.98  | 5.58   | -     | 1613.2   |
| AHQ-2-13, 6437 - 6499       | K.LPGLLGNFPFPFEEMK.G                                                     | 1876.16512 | 2 | 6.65E-07 | 0.97  | 4.76   | -     | 1608.2   |
| gi 4504515 ref NP_002146.1  | heat shock 70kDa protein 6 (HSP70B); heat shock 70kDa protein 6 (HSP70B) |            |   | 6.28E-10 | 4.62  | 60.23  | 10.70 | 70853.4  |
| AHQ-2-6, 2229               | K.ATAGDTHLGGEDFDNR.L                                                     | 1676.68279 | 3 | 6.24E-07 | 0.64  | 3.02   | -     | 338.8    |
| AHQ-2-6, 2233               | K.ATAGDTHLGGEDFDNR.L                                                     | 1676.68279 | 2 | 6.32E-10 | 0.95  | 4.63   | -     | 1197.3   |
| AHQ-2-7, 4655               | R.IINEPTAAIAIYGLDR.R                                                     | 1688.90603 | 2 | 3.51E-06 | 0.92  | 3.24   | -     | 1271.2   |
| AHQ-2-6, 4753 - 4771        | R.IINEPTAAIAIYGLDR.R                                                     | 1688.90603 | 2 | 6.28E-10 | 0.95  | 4.67   | -     | 1000.3   |
| AHQ-2-6, 4341               | K.LLQDFFNK.E                                                             | 1082.23369 | 2 | 8.39E-04 | 0.87  | 2.59   | -     | 886.6    |
| AHQ-2-6, 4206 - 4277        | K.LLQDFFNKELN.K                                                          | 1566.78249 | 2 | 5.13E-04 | 0.95  | 3.84   | -     | 1750.7   |
| AHQ-2-13-, 3457 - 3463      | R.TTPSYVAFTDTER.L                                                        | 1488.58062 | 2 | 3.23E-07 | 0.78  | 3.11   | -     | 584.3    |
| AHQ-2-13, 3467              | R.TTPSYVAFTDTER.L                                                        | 1488.58062 | 2 | 1.78E-04 | 0.87  | 2.79   | -     | 922.1    |
| AHQ-2-12, 3370              | R.TTPSYVAFTDTER.L                                                        | 1488.58062 | 2 | 6.40E-07 | 0.81  | 2.64   | -     | 676.3    |
| AHQ-2-6, 1985 - 2053        | R.VEILANDQGNR.T                                                          | 1229.32518 | 2 | 2.84E-04 | 0.94  | 3.94   | -     | 1330.0   |
| AHQ-2-6, 1989 - 2058        | R.VEILANDQGNR.T                                                          | 1229.32518 | 1 | 2.50E-04 | 0.12  | 1.90   | -     | 237.7    |
| gi 4758018 ref NP_004359.1  | calponin 2; Calonin 2 [Homo sapiens]                                     |            |   | 6.48E-10 | 2.77  | 30.27  | 12.60 | 33696.9  |
| AHQ-2-12, 5155              | K.DGTILTCLMKN.L                                                          | 1267.49833 | 2 | 7.78E-04 | 0.88  | 3.35   | -     | 947.4    |
| AHQ-2-12, 2786              | K.GLQSGVDIGVK.Y                                                          | 1073.22510 | 2 | 1.85E-06 | 0.92  | 3.35   | -     | 1178.1   |
| AHQ-2-13-, 2861             | K.GLQSGVDIGVK.Y                                                          | 1073.22510 | 2 | 4.14E-05 | 0.91  | 2.87   | -     | 1471.6   |
| AHQ-2-10, 6028 - 6096       | R.TWIEGLTGLSIGPDFQK.G                                                    | 1863.10294 | 2 | 2.11E-06 | 0.74  | 3.18   | -     | 337.5    |
| AHQ-2-12, 6466 - 6525       | R.TWIEGLTGLSIGPDFQK.G                                                    | 1863.10294 | 2 | 6.48E-10 | 0.97  | 4.62   | -     | 1720.9   |
| AHQ-2-12, 6591              | R.TWIEGLTGLSIGPDFQK.G                                                    | 1863.10294 | 2 | 9.67E-05 | 0.79  | 2.87   | -     | 953.9    |
| AHQ-2-13, 6311 - 6315       | R.TWIEGLTGLSIGPDFQK.G                                                    | 1863.10294 | 2 | 3.30E-09 | 0.97  | 5.30   | -     | 1334.3   |
| AHQ-2-13, 6415 - 6480       | R.TWIEGLTGLSIGPDFQK.G                                                    | 1863.10294 | 2 | 1.40E-04 | 0.45  | 2.71   | -     | 588.5    |
| AHQ-2-1, 6770 - 6838        | R.TWIEGLTGLSIGPDFQK.G                                                    | 1863.10294 | 2 | 9.86E-06 | 0.94  | 3.99   | -     | 1170.3   |
| AHQ-2-13-, 6422 - 6494      | R.TWIEGLTGLSIGPDFQK.G                                                    | 1863.10294 | 2 | 2.05E-09 | 0.97  | 5.44   | -     | 1418.0   |
| AHQ-2-14-, 6360             | R.TWIEGLTGLSIGPDFQK.G                                                    | 1863.10294 | 2 | 2.30E-05 | 0.96  | 4.31   | -     | 1447.9   |
| gi 27478749 ref XP_208411.1 | similar to L-lactate dehydrogenase A chain (LDH-A) (LDH muscle subunit   |            |   | 6.81E-10 | 1.79  | 20.29  | 13.40 | 25625.5  |
| AHQ-2-9, 4446               | K.GEMMDLQHGLFLR.T                                                        | 1634.90537 | 2 | 1.30E-09 | 0.83  | 3.80   | -     | 688.8    |
| AHQ-2-9, 7474               | K.LLIVSNPVDILTYVAWK.I                                                    | 1945.33337 | 2 | 6.81E-10 | 0.96  | 5.90   | -     | 913.9    |
| gi 7657056 ref NP_055415.1  | EH-domain containing 3; EH domain containing 3 [Homo sapiens]            |            |   | 7.28E-10 | 5.66  | 60.30  | 20.20 | 60886.7  |
| AHQ-2-7, 5517               | R.FHEFHSPALDADFNDKPMVLLVQYSTGK.T                                         | 3394.75749 | 3 | 3.08E-08 | 0.94  | 5.11   | -     | 843.2    |
| AHQ-2-10, 6774 - 6775       | R.FVCAQLPNPVLESISVIDTPGILSGEK.Q                                          | 2886.30971 | 2 | 3.12E-04 | 0.92  | 4.50   | -     | 927.8    |
| AHQ-2-7, 7519               | R.FVCAQLPNPVLESISVIDTPGILSGEK.Q                                          | 2886.30971 | 2 | 1.13E-05 | 0.95  | 4.86   | -     | 1034.5   |
| AHQ-2-8, 7423               | R.FVCAQLPNPVLESISVIDTPGILSGEK.Q                                          | 2886.30971 | 2 | 7.28E-10 | 0.97  | 6.04   | -     | 1454.3   |
| AHQ-2-13, 5303              | K.LADIDKIDGM*LDDEDEFALANHLIK.V                                           | 2589.86003 | 3 | 6.75E-06 | 0.94  | 4.60   | -     | 1434.0   |
| AHQ-2-13, 5625 - 5693       | K.LADIDKIDGM*LDDEDEFALANHLIK.V                                           | 2573.86063 | 3 | 1.25E-06 | 0.96  | 4.60   | -     | 2116.1   |
| AHQ-2-7, 5936               | R.VYIGSFWSHPLIPDNR.K                                                     | 2015.30234 | 2 | 1.64E-04 | 0.94  | 4.13   | -     | 1106.0   |
| AHQ-2-8, 4501               | R.YLLEQDFPQMR.I                                                          | 1369.57075 | 2 | 4.97E-05 | 0.92  | 3.43   | -     | 1430.2   |
| AHQ-2-13-, 4855             | R.YLLEQDFPQMR.I                                                          | 1369.57075 | 2 | 2.42E-04 | 0.84  | 3.47   | -     | 1011.1   |
| AHQ-2-8, 4508               | R.YLLEQDFPQMR.I                                                          | 1369.57075 | 1 | 2.67E-04 | 0.29  | 2.11   | -     | 271.6    |
| gi 16975484 ref NP_056057.1 | centaurin delta 2 isoform b; ARF-GAP, RHO-GAP, ankyrin repeat, and ple   |            |   | 8.11E-10 | 0.82  | 10.17  | 1.20  | 136262.7 |
| AHQ-2-3, 5169               | R.AVFPEGPCEELQLR.K                                                       | 1743.96175 | 2 | 8.11E-10 | 0.82  | 3.35   | -     | 461.7    |
| gi 4758038 ref NP_004246.1  | cytochrome c oxidase subunit Va precursor; cytochrome c oxidase polypep  |            |   | 8.83E-10 | 1.81  | 20.28  | 30.00 | 16774.1  |
| AHQ-2-13, 6731 - 6807       | K.EIYPYVQELRPTLNELGISTPEELGLDKV                                          | 3430.88913 | 3 | 8.83E-10 | 0.94  | 5.53   | -     | 708.8    |
| AHQ-2-13-, 6950             | K.EIYPYVQELRPTLNELGISTPEELGLDKV                                          | 3430.88913 | 3 | 1.59E-08 | 0.91  | 4.24   | -     | 1127.4   |
| AHQ-2-14-, 6868 - 6936      | K.EIYPYVQELRPTLNELGISTPEELGLDKV                                          | 3430.88913 | 3 | 1.77E-04 | 0.87  | 4.47   | -     | 544.8    |
| AHQ-2-13, 4207              | K.GINTLVTYDM*VPEPK.I                                                     | 1693.94282 | 2 | 1.36E-04 | 0.87  | 3.07   | -     | 1246.8   |
| gi 4504077 ref NP_000165.1  | glycoprotein IX (platelet) [Homo sapiens]                                |            |   | 8.95E-10 | 5.03  | 60.22  | 30.50 | 19046.0  |
| AHQ-2-11, 4076              | R.ALETM*GLWVDCR.G                                                        | 1468.68075 | 2 | 5.86E-04 | 0.89  | 3.10   | -     | 1099.0   |
| AHQ-2-11, 4902              | R.ALETMGLWVDCR.G                                                         | 1452.68135 | 2 | 1.47E-06 | 0.93  | 3.55   | -     | 1034.8   |
| AHQ-2-14, 3538 - 3596       | R.CASPSLAAHGPLGR.L                                                       | 1395.56962 | 2 | 7.56E-06 | 0.77  | 2.87   | -     | 791.8    |
| AHQ-2-12, 2610              | R.CASPSLAAHGPLGR.L                                                       | 1395.56962 | 2 | 2.56E-09 | 0.93  | 3.71   | -     | 1249.8   |
| AHQ-2-14-, 2660             | R.CASPSLAAHGPLGR.L                                                       | 1395.56962 | 2 | 4.08E-08 | 0.85  | 2.79   | -     | 940.4    |
| AHQ-2-11, 2614              | R.CASPSLAAHGPLGR.L                                                       | 1395.56962 | 1 | 6.67E-08 | 0.67  | 3.39   | -     | 215.3    |
| AHQ-2-11, 2572              | R.CASPSLAAHGPLGR.L                                                       | 1395.56962 | 2 | 8.95E-10 | 0.93  | 3.49   | -     | 1082.6   |
| AHQ-2-11, 3201 - 3265       | R.GHGLTALPALPAR.T                                                        | 1274.49706 | 2 | 5.59E-05 | 0.94  | 4.06   | -     | 780.0    |
| AHQ-2-11, 5229              | R.LWLEDRTPEALLQVR.C                                                      | 1840.11574 | 2 | 9.45E-04 | 0.90  | 4.35   | -     | 641.0    |
| AHQ-2-11, 3060              | R.TPEALLQVR.C                                                            | 1027.19957 | 1 | 3.37E-06 | 0.44  | 2.35   | -     | 167.5    |
| AHQ-2-11, 3057              | R.TPEALLQVR.C                                                            | 1027.19957 | 2 | 4.58E-05 | 0.94  | 3.73   | -     | 1261.4   |
| AHQ-2-14-, 3071             | R.TPEALLQVR.C                                                            | 1027.19957 | 2 | 4.46E-05 | 0.96  | 3.24   | -     | 1787.2   |
| AHQ-2-12, 3082              | R.TPEALLQVR.C                                                            | 1027.19957 | 2 | 2.99E-05 | 0.90  | 2.95   | -     | 993.1    |
| gi 6681259 ref NP_031377.1  | multimerin [Homo sapiens]                                                |            |   | 9.17E-10 | 17.27 | 190.33 | 21.60 | 138070.8 |
| AHQ-2-1, 2522               | R.AEQQSLIHTNOAESHTAVGR.G                                                 | 2306.43830 | 2 | 1.46E-04 | 0.77  | 3.36   | -     | 520.9    |
| AHQ-2-3, 2259               | R.AEQQSLIHTNOAESHTAVGR.G                                                 | 2306.43830 | 2 | 6.09E-06 | 0.94  | 5.05   | -     | 742.5    |
| AHQ-2-3, 2351               | R.AEQQSLIHTNOAESHTAVGR.G                                                 | 2306.43830 | 2 | 2.67E-05 | 0.89  | 3.96   | -     | 892.4    |
| AHQ-2-2, 2293               | R.AEQQSLIHTNOAESHTAVGR.G                                                 | 2306.43830 | 2 | 3.44E-05 | 0.91  | 4.93   | -     | 495.0    |
| AHQ-2-3, 2261               | R.AEQQSLIHTNOAESHTAVGR.G                                                 | 2306.43830 | 3 | 5.16E-04 | 0.95  | 4.78   | -     | 1693.7   |
| AHQ-2-3, 7405 - 7412        | K.CTSDMETILTPIPFHR.L                                                     | 2098.38838 | 3 | 2.11E-05 | 0.91  | 4.57   | -     | 801.9    |
| AHQ-2-3, 7397 - 7407        | K.CTSDMETILTPIPFHR.L                                                     | 2098.38838 | 2 | 3.57E-04 | 0.90  | 3.88   | -     | 834.7    |
| AHQ-2-3, 4140               | R.DQALQLQVLSNR.F                                                         | 1385.55144 | 2 | 2.32E-06 | 0.96  | 3.88   | -     | 2203.7   |
| AHQ-2-10, 5850 - 5851       | K.FPPVTTFSGYLLYR.T                                                       | 1661.92388 | 2 | 3.11E-05 | 0.93  | 4.09   | -     | 725.5    |
| AHQ-2-14-, 6196             | K.FPPVTTFSGYLLYR.T                                                       | 1661.92388 | 2 | 7.61E-07 | 0.93  | 3.92   | -     | 670.0    |
| AHQ-2-3, 5971 - 6004        | K.FVLVQENRPTLTDIVELR.N                                                   | 2143.47187 | 2 | 4.64E-04 | 0.78  | 3.88   | -     | 574.3    |
| AHQ-2-4, 6008               | K.FVLVQENRPTLTDIVELR.N                                                   | 2143.47187 | 3 | 4.01E-07 | 0.92  | 4.23   | -     | 896.7    |
| AHQ-2-3, 5979               | K.FVLVQENRPTLTDIVELR.N                                                   | 2143.47187 | 3 | 1.92E-06 | 0.94  | 4.16   | -     | 1254.2   |
| AHQ-2-6, 5989               | K.GLTEFVEPIQIK.T                                                         | 1487.76518 | 2 | 8.16E-05 | 0.82  | 3.01   | -     | 841.1    |

|                             |                                                                                                                           |            |   |          |      |       |       |         |
|-----------------------------|---------------------------------------------------------------------------------------------------------------------------|------------|---|----------|------|-------|-------|---------|
| AHQ-2-1, 6312               | K.GLTEFVEPIQIK.T                                                                                                          | 1487.76518 | 2 | 1.75E-06 | 0.92 | 4.34  | -     | 825.6   |
| AHQ-2-3, 6288 - 6355        | K.GLTEFVEPIQIK.T                                                                                                          | 1487.76518 | 2 | 2.47E-04 | 0.93 | 3.48  | -     | 1275.4  |
| AHQ-2-3, 6311               | K.GLTEFVEPIQIK.T                                                                                                          | 1487.76518 | 1 | 1.02E-04 | 0.58 | 3.18  | -     | 524.2   |
| AHQ-2-3, 3748               | K.HSLPDIQLLQK.G                                                                                                           | 1292.50915 | 2 | 2.05E-09 | 0.93 | 3.49  | -     | 1041.9  |
| AHQ-2-1, 4017 - 4028        | K.HSLPDIQLLQK.G                                                                                                           | 1292.50915 | 2 | 2.59E-06 | 0.94 | 3.53  | -     | 1066.2  |
| AHQ-2-4, 3769               | K.HSLPDIQLLQK.G                                                                                                           | 1292.50915 | 2 | 4.42E-06 | 0.50 | 2.68  | -     | 516.0   |
| AHQ-2-2, 3816               | K.HSLPDIQLLQK.G                                                                                                           | 1292.50915 | 2 | 9.49E-04 | 0.93 | 3.37  | -     | 1010.2  |
| AHQ-2-3, 6195               | K.IENLTSAVNSLNFIIK.E                                                                                                      | 1777.05472 | 2 | 4.00E-05 | 0.96 | 5.42  | -     | 972.5   |
| AHQ-2-3, 5209 - 5224        | K.IFQNDM*QETVAQLFK.T                                                                                                      | 1829.06683 | 2 | 3.20E-07 | 0.95 | 4.19  | -     | 1372.6  |
| AHQ-2-5, 6571               | K.IFQNDM*QETVAQLFK.T                                                                                                      | 1813.06743 | 2 | 2.17E-05 | 0.96 | 4.16  | -     | 1741.6  |
| AHQ-2-3, 6771 - 6844        | K.IFQNDM*QETVAQLFK.T                                                                                                      | 1813.06743 | 2 | 1.42E-08 | 0.97 | 5.05  | -     | 1885.4  |
| AHQ-2-3, 6909               | K.IFQNDM*QETVAQLFK.T                                                                                                      | 1813.06743 | 2 | 3.28E-08 | 0.96 | 4.53  | -     | 1586.2  |
| AHQ-2-3, 5457               | K.IFQNDM*QETVAQLFK.T                                                                                                      | 1829.06683 | 2 | 2.42E-08 | 0.92 | 4.09  | -     | 910.8   |
| AHQ-2-10, 3544 - 3546       | K.LAFESENINSEIHCDR.V                                                                                                      | 1936.04933 | 2 | 8.80E-06 | 0.92 | 4.42  | -     | 539.9   |
| AHQ-2-3, 2735               | K.LKEVHEQLLSTEQVSDQK.N                                                                                                    | 2112.32666 | 2 | 5.29E-06 | 0.97 | 5.49  | -     | 1335.3  |
| AHQ-2-1, 2970               | K.LKEVHEQLLSTEQVSDQK.N                                                                                                    | 2112.32666 | 2 | 1.69E-06 | 0.96 | 4.96  | -     | 1010.2  |
| AHQ-2-5, 2507               | K.LKEVHEQLLSTEQVSDQK.N                                                                                                    | 2112.32666 | 2 | 2.47E-08 | 0.97 | 5.94  | -     | 1259.9  |
| AHQ-2-4, 2741               | K.LKEVHEQLLSTEQVSDQK.N                                                                                                    | 2112.32666 | 2 | 1.15E-06 | 0.97 | 5.91  | -     | 1019.6  |
| AHQ-2-3, 2740               | K.LKEVHEQLLSTEQVSDQK.N                                                                                                    | 2112.32666 | 3 | 2.43E-07 | 0.96 | 5.14  | -     | 1865.4  |
| AHQ-2-11, 3593              | K.LVEENALAPDFSK.G                                                                                                         | 1433.58810 | 2 | 9.37E-04 | 0.86 | 3.44  | -     | 770.6   |
| AHQ-2-10, 3439 - 3442       | K.LVEENALAPDFSK.G                                                                                                         | 1433.58810 | 1 | 1.40E-04 | 0.13 | 2.16  | -     | 353.2   |
| AHQ-2-10, 3423 - 3430       | K.LVEENALAPDFSK.G                                                                                                         | 1433.58810 | 2 | 7.57E-06 | 0.94 | 3.74  | -     | 1065.3  |
| AHQ-2-3, 7571               | K.M*SEQLNDLTYDMEILQPLLEQASLR.Q                                                                                            | 3025.40122 | 3 | 1.12E-06 | 0.96 | 6.50  | -     | 1587.4  |
| AHQ-2-3, 1971 - 1984        | K.QTHLEGALEQEHRS.S                                                                                                        | 1635.72018 | 2 | 5.14E-05 | 0.50 | 2.62  | -     | 279.6   |
| AHQ-2-3, 7483               | K.TM*TIINNAIDFIQDNYALK.E                                                                                                  | 2215.51196 | 2 | 9.17E-10 | 0.94 | 4.95  | -     | 963.2   |
| AHQ-2-4, 7605               | K.TMTIINNAIDFIQDNYALK.E                                                                                                   | 2199.51256 | 2 | 3.97E-08 | 0.89 | 4.05  | -     | 837.5   |
| AHQ-2-3, 3403               | K.TVSSLESDLESTR.Q                                                                                                         | 1424.49324 | 2 | 1.89E-05 | 0.86 | 2.88  | -     | 1105.0  |
| AHQ-2-3, 3417               | K.TVSSLESDLESTR.Q                                                                                                         | 1424.49324 | 1 | 1.17E-04 | 0.22 | 2.36  | -     | 157.8   |
| AHQ-2-1, 3576               | K.TVSSLESDLESTR.Q                                                                                                         | 1424.49324 | 2 | 8.42E-05 | 0.45 | 2.93  | -     | 381.7   |
| AHQ-2-3, 4017               | R.YNFVLQVAK.T                                                                                                             | 1082.27683 | 2 | 4.68E-05 | 0.92 | 3.05  | -     | 1019.4  |
| gi 5902128 ref NP_008880.1  | syntaxin binding protein 2; Hunc18b [Homo sapiens]                                                                        |            |   | 9.25E-10 | 7.13 | 80.32 | 21.40 | 66438.1 |
| AHQ-2-6, 6293               | K.AAHIFFTDTCPPEPLFSELGR.S                                                                                                 | 2310.57011 | 2 | 1.91E-07 | 0.98 | 6.44  | -     | 1964.5  |
| AHQ-2-6, 6295 - 6309        | K.AAHIFFTDTCPPEPLFSELGR.S                                                                                                 | 2310.57011 | 3 | 6.34E-07 | 0.94 | 4.57  | -     | 1207.5  |
| AHQ-2-6, 6590 - 6601        | R.EPIPSLEAIYLLSPTK.S                                                                                                      | 1901.18939 | 2 | 7.00E-06 | 0.95 | 4.71  | -     | 910.7   |
| AHQ-2-6, 2906 - 2907        | R.KGPEDTAQLAHAVLAK.L                                                                                                      | 1649.87303 | 3 | 1.76E-08 | 0.96 | 4.71  | -     | 1672.9  |
| AHQ-2-6, 2903               | R.KGPEDTAQLAHAVLAK.L                                                                                                      | 1649.87303 | 2 | 9.25E-10 | 0.95 | 4.04  | -     | 1477.8  |
| AHQ-2-6, 2129               | K.LIQHANVQAHSLLIR.N                                                                                                       | 1687.92773 | 2 | 4.60E-06 | 0.92 | 3.74  | -     | 1099.1  |
| AHQ-2-6, 6345 - 6358        | K.LIVPVLDDAAPPAYDK.I                                                                                                      | 1698.03911 | 2 | 1.11E-05 | 0.98 | 5.08  | -     | 1929.2  |
| AHQ-2-6, 3055               | R.NLEQLGGTVTNPGSGTSSR.L                                                                                                   | 1933.02693 | 2 | 5.38E-05 | 0.92 | 4.12  | -     | 837.1   |
| AHQ-2-6, 5410               | R.NLWPFVSDPAPTASSQAASAR.F                                                                                                 | 2273.48981 | 2 | 1.03E-04 | 0.71 | 3.27  | -     | 405.2   |
| AHQ-2-6, 5865 - 5923        | R.REPIPSLEAIYLLSPTK.S                                                                                                     | 2057.37574 | 2 | 2.21E-05 | 0.98 | 6.03  | -     | 1608.6  |
| AHQ-2-6, 5866               | R.REPIPSLEAIYLLSPTK.S                                                                                                     | 2057.37574 | 3 | 1.24E-05 | 0.72 | 3.25  | -     | 710.6   |
| gi 12707570 ref NP_004083.2 | mitochondrial short-chain enoyl-coenzyme A hydratase 1 precursor [Homo sapiens]                                           |            |   | 9.41E-10 | 0.97 | 10.26 | 5.90  | 31371.2 |
| AHQ-2-10, 6787              | K.ICPVETLVEAIIQCAEK.I                                                                                                     | 1992.25744 | 2 | 9.41E-10 | 0.97 | 5.24  | -     | 1309.0  |
| gi 29740995 ref XP_291768.1 | similar to Proteasome activator complex subunit 2 (Proteasome activator complex subunit 2) [Homo sapiens]                 |            |   | 9.54E-10 | 0.98 | 10.29 | 9.60  | 19192.6 |
| AHQ-2-10, 6482 - 6483       | R.AFYAELYHIISNLEK.T                                                                                                       | 1899.13528 | 2 | 9.54E-10 | 0.98 | 5.75  | -     | 1787.0  |
| gi 4885413 ref NP_005331.1  | histidine triad nucleotide binding protein 1; Histidine triad nucleotide binding protein 1 [Homo sapiens]                 |            |   | 9.74E-10 | 4.60 | 50.30 | 71.40 | 13801.8 |
| AHQ-2-13, 2705              | K.AQVARPGGDTIFGK.I                                                                                                        | 1417.59513 | 2 | 1.57E-04 | 0.92 | 3.73  | -     | 1234.0  |
| AHQ-2-13, 2763              | K.AQVARPGGDTIFGK.I                                                                                                        | 1417.59513 | 2 | 1.76E-04 | 0.81 | 3.30  | -     | 895.9   |
| AHQ-2-13, 5621              | R.CLAFHDISPQAPTHFLVIPK.K                                                                                                  | 2293.67220 | 2 | 8.02E-04 | 0.81 | 3.57  | -     | 731.5   |
| AHQ-2-13, 5618              | R.CLAFHDISPQAPTHFLVIPK.K                                                                                                  | 2293.67220 | 3 | 1.44E-06 | 0.94 | 4.49  | -     | 1148.5  |
| AHQ-2-13, 6041 - 6109       | K.IIFEDDRCLAFHDISPQAPTHFLVIPK.K                                                                                           | 3182.64001 | 3 | 3.03E-06 | 0.92 | 4.92  | -     | 1172.5  |
| AHQ-2-13, 5543              | K.KHISQISVAEDDDSLGLHLMIVGK.K                                                                                              | 2736.09467 | 3 | 2.06E-06 | 0.98 | 6.05  | -     | 2255.4  |
| AHQ-2-13, 3898              | R.MVVNEGSDGGQSVYHVHLVLLVGG.R                                                                                              | 2548.82255 | 3 | 9.74E-10 | 0.85 | 3.84  | -     | 793.0   |
| gi 6912494 ref NP_036457.1  | microtubule-associated protein, RP/EB family, member 1; ADENOMATOUS POLYMERIZATION-INDUCIBLE PHOSPHATASE 1 [Homo sapiens] |            |   | 1.02E-09 | 3.12 | 40.24 | 15.30 | 29998.9 |
| AHQ-2-12, 3990              | K.FFDANYDGKDYDPAAR.K                                                                                                      | 1965.06754 | 2 | 5.69E-05 | 0.85 | 3.57  | -     | 557.6   |
| AHQ-2-12, 6686 - 6689       | K.FQDNFEFVQWFK.K                                                                                                          | 1635.80184 | 2 | 1.02E-09 | 0.97 | 4.82  | -     | 1419.8  |
| AHQ-2-12, 6819              | K.FQDNFEFVQWFK.K                                                                                                          | 1635.80184 | 2 | 6.86E-07 | 0.96 | 4.02  | -     | 1320.0  |
| AHQ-2-12, 6175              | K.GKFQDNFEFVQWFK.K                                                                                                        | 1821.02630 | 2 | 1.96E-04 | 0.96 | 4.59  | -     | 1270.2  |
| AHQ-2-13, 2709              | K.LEHEYIQNF.K                                                                                                             | 1321.46268 | 2 | 9.03E-04 | 0.67 | 2.58  | -     | 951.4   |
| AHQ-2-12, 2563              | K.LEHEYIQNF.K                                                                                                             | 1321.46268 | 1 | 1.01E-05 | 0.34 | 2.14  | -     | 553.1   |
| gi 29568111 ref NP_006088.2 | myosin, light polypeptide 9, regulatory; myosin regulatory light chain 9 [Homo sapiens]                                   |            |   | 1.07E-09 | 3.13 | 40.22 | 18.00 | 19827.1 |
| AHQ-2-11, 3352              | R.FTDEEVDEMYR.E                                                                                                           | 1434.51009 | 1 | 2.09E-07 | 0.47 | 2.18  | -     | 470.5   |
| AHQ-2-11, 3366              | R.FTDEEVDEMYR.E                                                                                                           | 1434.51009 | 1 | 8.48E-05 | 0.33 | 2.31  | -     | 347.2   |
| AHQ-2-11, 2658              | R.FTDEEVDEMYR.E                                                                                                           | 1450.50949 | 2 | 7.24E-06 | 0.94 | 3.45  | -     | 1257.9  |
| AHQ-2-11, 3640 - 3704       | K.GNFNRYVEFTR.I                                                                                                           | 1247.34066 | 2 | 1.24E-05 | 0.84 | 3.34  | -     | 792.5   |
| AHQ-2-11, 3674              | K.GNFNRYVEFTR.I                                                                                                           | 1247.34066 | 2 | 2.14E-05 | 0.86 | 3.19  | -     | 708.0   |
| AHQ-2-11, 3820              | K.GNFNRYVEFTR.I                                                                                                           | 1247.34066 | 2 | 7.66E-04 | 0.73 | 2.75  | -     | 515.4   |
| AHQ-2-11, 3925              | K.GNFNRYVEFTR.I                                                                                                           | 1247.34066 | 2 | 1.71E-04 | 0.92 | 3.77  | -     | 907.8   |
| AHQ-2-11, 4129              | K.GNFNRYVEFTR.I                                                                                                           | 1247.34066 | 1 | 5.78E-06 | 0.21 | 1.85  | -     | 221.1   |
| AHQ-2-13, 3935 - 3978       | K.GNFNRYVEFTR.I                                                                                                           | 1247.34066 | 2 | 1.83E-05 | 0.88 | 3.18  | -     | 914.8   |
| AHQ-2-12, 3766              | K.GNFNRYVEFTR.I                                                                                                           | 1247.34066 | 2 | 2.83E-07 | 0.78 | 2.95  | -     | 614.3   |
| AHQ-2-14, 3867              | K.GNFNRYVEFTR.I                                                                                                           | 1247.34066 | 2 | 4.18E-05 | 0.84 | 2.97  | -     | 909.8   |
| AHQ-2-11, 5726 - 5765       | R.NAFACFDEASGFIIHEDHLR.E                                                                                                  | 2367.49548 | 2 | 1.07E-09 | 0.94 | 4.38  | -     | 1036.3  |
| gi 17986283 ref NP_006000.2 | tubulin, alpha 3; tubulin, alpha, brain-specific; hum-a-tub1; hum-a-tubulin [Homo sapiens]                                |            |   | 1.07E-09 | 0.96 | 10.29 | 3.30  | 50135.3 |
| AHQ-2-1, 6081 - 6089        | R.AVFVDLEPTVIDEVR.T                                                                                                       | 1702.92947 | 2 | 4.26E-06 | 0.88 | 4.05  | -     | 737.9   |
| AHQ-2-3, 6047               | R.AVFVDLEPTVIDEVR.T                                                                                                       | 1702.92947 | 2 | 6.39E-07 | 0.72 | 3.70  | -     | 502.2   |
| AHQ-2-4, 6056               | R.AVFVDLEPTVIDEVR.T                                                                                                       | 1702.92947 | 2 | 6.69E-09 | 0.94 | 4.53  | -     | 1002.4  |
| AHQ-2-6, 5686 - 5743        | R.AVFVDLEPTVIDEVR.T                                                                                                       | 1702.92947 | 2 | 1.07E-05 | 0.89 | 4.16  | -     | 726.1   |
| AHQ-2-7, 5315               | R.AVFVDLEPTVIDEVR.T                                                                                                       | 1702.92947 | 2 | 7.35E-05 | 0.89 | 3.36  | -     | 888.3   |
| AHQ-2-7, 5605 - 5675        | R.AVFVDLEPTVIDEVR.T                                                                                                       | 1702.92947 | 2 | 1.07E-09 | 0.96 | 5.73  | -     | 1039.3  |
| AHQ-2-10, 5270 - 5291       | R.AVFVDLEPTVIDEVR.T                                                                                                       | 1702.92947 | 2 | 4.25E-08 | 0.96 | 5.17  | -     | 1265.0  |
| AHQ-2-11, 5492              | R.AVFVDLEPTVIDEVR.T                                                                                                       | 1702.92947 | 2 | 1.28E-06 | 0.91 | 4.36  | -     | 868.5   |
| AHQ-2-12, 5767 - 5846       | R.AVFVDLEPTVIDEVR.T                                                                                                       | 1702.92947 | 2 | 3.80E-04 | 0.51 | 2.84  | -     | 299.1   |
| AHQ-2-13, 5605              | R.AVFVDLEPTVIDEVR.T                                                                                                       | 1702.92947 | 2 | 5.86E-06 | 0.84 | 4.11  | -     | 498.3   |
| AHQ-2-13, 5705              | R.AVFVDLEPTVIDEVR.T                                                                                                       | 1702.92947 | 2 | 3.51E-07 | 0.94 | 4.95  | -     | 887.9   |
| AHQ-2-14, 5671 - 5749       | R.AVFVDLEPTVIDEVR.T                                                                                                       | 1702.92947 | 2 | 6.78E-09 | 0.96 | 5.21  | -     | 987.3   |
| gi 23110944 ref NP_002782.1 | proteasome alpha 6 subunit; prosomal P27K protein; proteasome subunit 6 [Homo sapiens]                                    |            |   | 1.09E-09 | 0.87 | 10.17 | 4.90  | 27399.3 |
| AHQ-2-10, 4034 - 4036       | K.LLDSSTVTHLKF.I                                                                                                          | 1361.56825 | 2 | 1.09E-09 | 0.87 | 3.38  | -     | 704.4   |
| gi 5032161 ref NP_005639.1  | elongin C; transcription elongation factor B (SIII), polypeptide 1 (15kDa) [Homo sapiens]                                 |            |   | 1.13E-09 | 2.50 | 30.24 | 28.60 | 12473.1 |
| AHQ-2-13, 4634              | K.AM*LSGPGQFAENETNEVNF.R                                                                                                  | 2228.38455 | 2 | 2.24E-06 | 0.74 | 3.20  | -     | 787.2   |
| AHQ-2-13, 4935              | K.AM*LSGPGQFAENETNEVNF.R                                                                                                  | 2212.38515 | 2 | 1.13E-09 | 0.95 | 4.74  | -     | 1282.4  |
| AHQ-2-13, 3041              | K.LISSDGHFIVK.R                                                                                                           | 1345.52569 | 2 | 4.63E-06 | 0.81 | 3.17  | -     | 616.8   |
| AHQ-2-13, 3077              | K.LISSDGHFIVK.R                                                                                                           | 1345.52569 | 2 | 1.62E-04 | 0.75 | 2.90  | -     | 646.5   |
| gi 4507109 ref NP_000336.1  | alpha-synuclein isoform NACP140; non A4 component of amyloid precursor protein [Homo sapiens]                             |            |   | 1.14E-09 | 5.18 | 60.29 | 45.70 | 14460.1 |
| AHQ-2-12, 2118 - 2119       | K.EGVVHGATVAEK.T                                                                                                          | 1296.45466 | 2 | 7.81E-07 | 0.91 | 3.47  | -     | 957.2   |
| AHQ-2-13, 4715 - 4718       | K.EQVTNVGGAVVTGVTAAQK.T                                                                                                   | 1929.16446 | 2 | 6.72E-09 | 0.96 | 5.36  | -     | 873.0   |
| AHQ-2-14, 5685              | K.EQVTNVGGAVVTGVTAAQK.T                                                                                                   | 1929.16446 | 2 | 7.45E-08 | 0.95 | 4.86  | -     | 1200.3  |
| AHQ-2-14, 4695              | K.EQVTNVGGAVVTGVTAAQK.T                                                                                                   | 1929.16446 | 2 | 1.35E-07 | 0.94 | 4.87  | -     | 773.4   |
| AHQ-2-14, 4640 - 4708       | K.EQVTNVGGAVVTGVTAAQK.T                                                                                                   | 1929.16446 | 3 | 1.31E-05 | 0.91 | 4.25  | -     | 1195.7  |
| AHQ-2-13, 4719              | K.EQVTNVGGAVVTGVTAAQK.T                                                                                                   | 1929.16446 | 3 | 7.58E-04 | 0.97 | 5.50  | -     | 1724.2  |
| AHQ-2-12, 4699              | K.EQVTNVGGAVVTGVTAAQK.T                                                                                                   | 1929.16446 | 2 | 3.39E-07 | 0.95 | 5.23  | -     | 907.4   |
| AHQ-2-12, 4939              | K.EQVTNVGGAVVTGVTAAQK.T                                                                                                   | 1929.16446 | 2 | 2.88E-07 | 0.90 | 4.07  | -     | 563.6   |
| AHQ-2-13, 4633              | K.EQVTNVGGAVVTGVTAAQK.T                                                                                                   | 1929.16446 | 2 | 6.93E-06 | 0.95 | 4.91  | -     | 1042.7  |
| AHQ-2-12, 1993              | K.TKEGVLYVGSK.T                                                                                                           | 1181.36357 | 2 | 1.22E-05 | 0.77 | 2.71  | -     | 618.9   |
| AHQ-2-12, 1989              | K.TKEGVVHGATVAEK.T                                                                                                        | 1525.73191 | 3 | 5.21E-04 | 0.92 | 3.97  | -     | 1177.7  |
| AHQ-2-14, 2052              | K.TKEGVVHGATVAEK.T                                                                                                        | 1525.73191 | 2 | 1.08E-06 | 0.96 | 4.44  | -     | 1462.6  |

|                             |                                                                         |            |   |          |      |        |       |          |
|-----------------------------|-------------------------------------------------------------------------|------------|---|----------|------|--------|-------|----------|
| AHQ-2-12, 1985              | K.TKEGVVHGAVTVAEK.T                                                     | 1525.73191 | 2 | 2.83E-06 | 0.94 | 3.95   | -     | 1298.1   |
| AHQ-2-14, 5386 - 5409       | K.TKEQVTVNGGAVVTGVTAVAQK.T                                              | 2158.44170 | 3 | 7.41E-04 | 0.85 | 3.77   | -     | 1288.5   |
| AHQ-2-14, 5393              | K.TKEQVTVNGGAVVTGVTAVAQK.T                                              | 2158.44170 | 2 | 1.88E-06 | 0.97 | 5.80   | -     | 1296.0   |
| AHQ-2-13, 4209              | K.TKEQVTVNGGAVVTGVTAVAQK.T                                              | 2158.44170 | 2 | 1.77E-05 | 0.95 | 4.63   | -     | 1189.1   |
| AHQ-2-14-, 4207 - 4223      | K.TKEQVTVNGGAVVTGVTAVAQK.T                                              | 2158.44170 | 3 | 4.35E-04 | 0.77 | 3.50   | -     | 931.6    |
| AHQ-2-14-, 4231             | K.TKEQVTVNGGAVVTGVTAVAQK.T                                              | 2158.44170 | 2 | 1.14E-09 | 0.97 | 5.17   | -     | 1380.7   |
| AHQ-2-12, 4209 - 4214       | K.TKEQVTVNGGAVVTGVTAVAQK.T                                              | 2158.44170 | 3 | 7.51E-05 | 0.91 | 4.57   | -     | 1391.5   |
| AHQ-2-13-, 4211             | K.TVEGAGSIAAATGFVK.K                                                    | 1479.66001 | 1 | 3.68E-04 | 0.37 | 2.66   | -     | 257.5    |
| AHQ-2-13, 4171              | K.TVEGAGSIAAATGFVK.K                                                    | 1479.66001 | 1 | 9.02E-06 | 0.61 | 3.08   | -     | 444.8    |
| AHQ-2-13, 4159              | K.TVEGAGSIAAATGFVK.K                                                    | 1479.66001 | 2 | 8.07E-05 | 0.49 | 2.65   | -     | 543.0    |
| AHQ-2-12, 4158              | K.TVEGAGSIAAATGFVK.K                                                    | 1479.66001 | 1 | 7.28E-05 | 0.34 | 2.73   | -     | 333.4    |
| AHQ-2-14, 5025              | K.TVEGAGSIAAATGFVK.K                                                    | 1479.66001 | 2 | 7.07E-04 | 0.67 | 2.50   | -     | 876.0    |
| gi 21361741 ref NP_057569.2 | hypothetical protein HSPC228; My012 protein [Homo sapiens]              |            |   | 1.14E-09 | 0.37 | 10.14  | 6.50  | 33879.0  |
| AHQ-2-9, 5040               | K.YAGSALQYEDVSTAVQNLQK.A                                                | 2186.36410 | 2 | 1.14E-09 | 0.37 | 2.86   | -     | 419.3    |
| gi 12025678 ref NP_004915.2 | actinin, alpha 4 [Homo sapiens]                                         |            |   | 1.15E-09 | 8.27 | 100.26 | 15.80 | 104853.3 |
| AHQ-2-5, 4049               | K.DGLAFNALIHR.H                                                         | 1227.39726 | 2 | 3.10E-08 | 0.86 | 2.99   | -     | 939.7    |
| AHQ-2-5, 4685               | R.ETTTDTADQVIAFK.V                                                      | 1742.81936 | 2 | 2.10E-05 | 0.94 | 3.96   | -     | 1467.7   |
| AHQ-2-14, 5658 - 5733       | R.ETTTDTADQVIAFK.V                                                      | 1742.81936 | 2 | 2.45E-05 | 0.79 | 3.35   | -     | 441.0    |
| AHQ-2-5, 2719 - 2723        | K.GISGEQMQEFR.A                                                         | 1353.48658 | 2 | 8.61E-07 | 0.79 | 3.02   | -     | 1094.7   |
| AHQ-2-5, 3816 - 3819        | R.M*APYQGPDAVPGALDYK.S                                                  | 1810.02037 | 2 | 1.29E-07 | 0.94 | 3.82   | -     | 1222.1   |
| AHQ-2-5, 4088               | R.MAPYQGPDAVPGALDYK.S                                                   | 1794.02097 | 2 | 3.94E-07 | 0.93 | 3.80   | -     | 1192.2   |
| AHQ-2-5, 4009               | K.MLDAEDIVNTARPEK.A                                                     | 1817.99924 | 2 | 1.98E-06 | 0.76 | 3.50   | -     | 579.8    |
| AHQ-2-5, 4509 - 4523        | R.QFASQANVVGPIWQTK.M                                                    | 1775.00061 | 2 | 1.15E-09 | 0.89 | 4.12   | -     | 490.6    |
| AHQ-2-1, 6788               | R.VEQIAIAQELNELDYDHSNVNTR.C                                             | 2907.09810 | 3 | 6.77E-04 | 0.64 | 3.31   | -     | 479.9    |
| AHQ-2-5, 3627               | K.VLAGDKNFITAEELR.R                                                     | 1676.89525 | 2 | 7.94E-06 | 0.85 | 4.15   | -     | 593.9    |
| AHQ-2-5, 3455 - 3463        | K.VLAVNQENHELMEDYEK.L                                                   | 2062.24648 | 2 | 4.50E-05 | 0.94 | 5.10   | -     | 577.7    |
| AHQ-2-5, 3459               | K.VLAVNQENHELMEDYEK.L                                                   | 2062.24648 | 3 | 5.20E-08 | 0.66 | 3.05   | -     | 413.2    |
| gi 4506505 ref NP_002916.1  | regulator of G-protein signaling 10 [Homo sapiens]                      |            |   | 1.18E-09 | 2.70 | 30.22  | 23.40 | 19609.9  |
| AHQ-2-11, 3518 - 3524       | K.LIEEPHPLMFKQ.L                                                        | 1482.77213 | 2 | 4.46E-06 | 0.94 | 4.30   | -     | 886.3    |
| AHQ-2-11, 4628 - 4629       | K.LQDQIFNLMK.Y                                                          | 1250.49254 | 2 | 6.52E-05 | 0.89 | 3.65   | -     | 732.7    |
| AHQ-2-11, 5292 - 5308       | K.WAASLENLEDEPVGKR.F                                                    | 1928.13502 | 2 | 1.18E-09 | 0.87 | 4.45   | -     | 484.2    |
| gi 10834976 ref NP_000572.1 | glutathione peroxidase 1 [Homo sapiens]                                 |            |   | 1.18E-09 | 8.06 | 90.30  | 58.70 | 21909.0  |
| AHQ-2-11, 5345              | K.CEVNAGAGAPLFLAE.R                                                     | 1760.99723 | 2 | 1.18E-09 | 0.93 | 4.08   | -     | 1026.9   |
| AHQ-2-11, 2738 - 2818       | R.DYTMNLELR.R                                                           | 1298.40778 | 2 | 1.52E-05 | 0.83 | 3.10   | -     | 816.1    |
| AHQ-2-11, 3968              | K.FLVGPDVPLR.L                                                          | 1170.38561 | 2 | 8.48E-06 | 0.94 | 3.61   | -     | 1302.8   |
| AHQ-2-11, 4846 - 4917       | R.GLVVLGFPNCQFHQENAK.N                                                  | 2117.37312 | 2 | 6.26E-05 | 0.81 | 3.73   | -     | 386.8    |
| AHQ-2-11, 5938 - 6018       | R.GLVVLGFPNCQFHQENAKNEEILSLK.Y                                          | 3158.53371 | 3 | 9.80E-07 | 0.88 | 4.58   | -     | 604.9    |
| AHQ-2-14, 4825              | R.PLAGEPVSLSGLR.G                                                       | 1353.54935 | 2 | 6.49E-06 | 0.93 | 3.92   | -     | 837.1    |
| AHQ-2-11, 3646 - 3725       | R.PLAGEPVSLSGLR.G                                                       | 1353.54935 | 2 | 8.24E-07 | 0.95 | 4.13   | -     | 1332.3   |
| AHQ-2-10, 3608 - 3619       | R.PLAGEPVSLSGLR.G                                                       | 1353.54935 | 2 | 1.87E-06 | 0.94 | 4.10   | -     | 980.5    |
| AHQ-2-11, 6737              | R.RFQTDIEPDIALLSQGPSA                                                   | 2462.71807 | 2 | 3.10E-07 | 0.95 | 4.77   | -     | 1102.5   |
| AHQ-2-11, 4865              | K.YVRPGGGFEPNFM*LFK.C                                                   | 2005.28455 | 3 | 7.76E-04 | 0.81 | 3.71   | -     | 763.2    |
| AHQ-2-11, 5126              | K.YVRPGGGFEPNFM*LFK.C                                                   | 1989.28515 | 3 | 9.28E-08 | 0.95 | 4.47   | -     | 1561.5   |
| AHQ-2-11, 5124 - 5125       | K.YVRPGGGFEPNFM*LFK.C                                                   | 1989.28515 | 2 | 9.65E-05 | 0.98 | 6.01   | -     | 2762.1   |
| AHQ-2-11, 5234              | K.YVRPGGGFEPNFM*LFK.C                                                   | 1989.28515 | 2 | 2.05E-05 | 0.94 | 4.29   | -     | 832.5    |
| gi 4557395 ref NP_000058.1  | carbonic anhydrase II; carbonic dehydratase II; carbonic dehydratase;   |            |   | 1.20E-09 | 4.66 | 60.25  | 28.80 | 29245.8  |
| AHQ-2-10, 6650              | K.AVQPPDLAVLGLFK.V                                                      | 1669.98899 | 2 | 1.19E-05 | 0.95 | 4.55   | -     | 724.1    |
| AHQ-2-10, 2048 - 2052       | K.GGPLDGTGR.L                                                           | 936.00385  | 1 | 1.69E-04 | 0.08 | 1.97   | -     | 144.7    |
| AHQ-2-10, 3963              | R.ILNNGHAFNVFDDSDQK.A                                                   | 2064.15751 | 2 | 3.07E-07 | 0.96 | 4.96   | -     | 1197.7   |
| AHQ-2-10, 3852              | R.ILNNGHAFNVFDDSDQK.A                                                   | 2064.15751 | 2 | 3.50E-06 | 0.76 | 3.61   | -     | 388.6    |
| AHQ-2-10, 3071              | K.SADFTNFPDR.G                                                          | 1170.21306 | 2 | 1.24E-07 | 0.86 | 3.36   | -     | 775.5    |
| AHQ-2-10, 3483              | K.VVDVLSIK.T                                                            | 988.16011  | 2 | 3.08E-04 | 0.84 | 3.49   | -     | 467.7    |
| AHQ-2-10, 3146              | K.YAAELHLVHWNTK.Y                                                       | 1582.78684 | 2 | 1.20E-09 | 0.98 | 4.21   | -     | 2631.7   |
| gi 6005942 ref NP_009057.1  | valosin-containing protein; yeast Cdc48p homolog; transitional endoplas |            |   | 1.34E-09 | 9.63 | 110.28 | 21.50 | 89321.3  |
| AHQ-2-5, 3525 - 3539        | R.ELQELVQPVVEHPDK.F                                                     | 1825.01157 | 2 | 6.03E-04 | 0.90 | 3.86   | -     | 905.6    |
| AHQ-2-5, 3379               | R.GILYGGPPTGK.T                                                         | 1173.38627 | 2 | 1.23E-04 | 0.84 | 3.42   | -     | 891.3    |
| AHQ-2-5, 6857               | R.IVSQLTLMDGLK.Q                                                        | 1431.76657 | 2 | 5.91E-05 | 0.81 | 3.00   | -     | 780.3    |
| AHQ-2-5, 2988               | R.KYEMFAQTQQSR.G                                                        | 1630.85008 | 2 | 8.24E-08 | 0.97 | 5.02   | -     | 1808.7   |
| AHQ-2-5, 2705               | R.LEILQIHTK.N                                                           | 1095.31705 | 1 | 1.43E-05 | 0.58 | 2.44   | -     | 372.4    |
| AHQ-2-5, 5181               | R.LIVDEAINEDNSVVSLSQPK.M                                                | 2171.39088 | 2 | 3.05E-07 | 0.97 | 5.53   | -     | 1350.1   |
| AHQ-2-5, 4795               | K.MTNGFSGADLTEICQR.A                                                    | 1801.97996 | 2 | 2.78E-09 | 0.90 | 3.57   | -     | 1049.0   |
| AHQ-2-5, 7483 - 7484        | K.NAPAIIFIDELAIPK.R                                                     | 1812.09907 | 2 | 2.04E-08 | 0.96 | 5.43   | -     | 1269.0   |
| AHQ-2-5, 4324               | R.QTNPSAMEVEEDDPVEIR.R                                                  | 2157.30143 | 2 | 3.36E-07 | 0.95 | 4.58   | -     | 1362.0   |
| AHQ-2-5, 4885               | K.VVEIDPSPYCVIAPDTVIHCEGEPIKR.E                                         | 3085.45473 | 3 | 1.34E-09 | 0.83 | 3.86   | -     | 615.2    |
| AHQ-2-5, 3244 - 3252        | R.WALSQSNPSALR.E                                                        | 1330.47434 | 2 | 5.21E-05 | 0.92 | 3.67   | -     | 1161.4   |
| gi 21624607 ref NP_066972.1 | coactosin-like 1 [Homo sapiens]                                         |            |   | 1.35E-09 | 4.06 | 60.30  | 31.70 | 15949.9  |
| AHQ-2-13-, 2218             | R.AAYNLVR.D                                                             | 806.93245  | 2 | 5.88E-04 | 0.91 | 2.74   | -     | 1110.2   |
| AHQ-2-12, 5966              | R.DDGSAVIWWTFK.Y                                                        | 1338.49001 | 1 | 1.11E-05 | 0.43 | 2.44   | -     | 488.6    |
| AHQ-2-13, 2244              | K.EVVQNFAK.E                                                            | 935.05900  | 1 | 7.76E-05 | 0.02 | 2.15   | -     | 87.3     |
| AHQ-2-13-, 2082 - 2151      | K.EVVQNFAK.E                                                            | 935.05900  | 1 | 5.43E-05 | 0.22 | 2.52   | -     | 138.7    |
| AHQ-2-13, 6737              | K.FALITWIGENVGLQR.A                                                     | 1805.06986 | 2 | 1.35E-09 | 0.98 | 6.05   | -     | 2532.9   |
| AHQ-2-12, 7053 - 7058       | K.FALITWIGENVGLQR.A                                                     | 1805.06986 | 2 | 7.15E-05 | 0.98 | 5.71   | -     | 2586.2   |
| AHQ-2-12, 2670              | R.KLEEDFIK.S                                                            | 1151.29110 | 2 | 4.78E-04 | 0.80 | 2.90   | -     | 791.0    |
| AHQ-2-12, 5421 - 5487       | K.YDGSITVPEGQEAQYHQFIQQCTDDVRL                                          | 3116.27790 | 3 | 7.61E-08 | 0.71 | 3.43   | -     | 385.2    |
| gi 21361322 ref NP_006078.2 | tubulin, beta, 5 [Homo sapiens]                                         |            |   | 1.48E-09 | 2.44 | 30.25  | 13.70 | 49585.5  |
| AHQ-2-7, 2807               | R.EIVHQAQCQGNQIGAK.F                                                    | 1825.03962 | 2 | 1.48E-09 | 0.94 | 4.15   | -     | 1128.0   |
| AHQ-2-9, 2740               | R.EIVHQAQCQGNQIGAK.F                                                    | 1825.03962 | 2 | 7.15E-04 | 0.72 | 3.07   | -     | 594.6    |
| AHQ-2-7, 2647               | R.EIVHQAQCQGNQIGAK.F                                                    | 1825.03962 | 2 | 1.92E-06 | 0.95 | 4.60   | -     | 1160.4   |
| AHQ-2-7, 5359               | K.FWEVISDEHGIDPTGTYHGDSDLQLER.I                                         | 3118.27220 | 3 | 1.88E-04 | 0.92 | 5.09   | -     | 918.3    |
| AHQ-2-12, 6459 - 6461       | K.M*AATFIGNSTAIQELFK.R                                                  | 1859.13607 | 2 | 2.88E-04 | 0.53 | 3.10   | -     | 584.1    |
| AHQ-2-7, 6973               | K.M*AATFIGNSTAIQELFK.R                                                  | 1859.13607 | 2 | 5.28E-05 | 0.59 | 3.53   | -     | 516.7    |
| gi 13569962 ref NP_112243.1 | RAB1B, member RAS oncogene family; small GTP-binding protein [Homo sap  |            |   | 1.48E-09 | 3.63 | 40.33  | 18.90 | 22171.0  |
| AHQ-2-11, 4541              | R.GAHGIIVYDVTDOESYANVK.Q                                                | 2279.49113 | 2 | 1.47E-08 | 0.98 | 5.49   | -     | 1941.9   |
| AHQ-2-11, 4410 - 4478       | R.GAHGIIVYDVTDOESYANVK.Q                                                | 2279.49113 | 2 | 2.32E-09 | 0.98 | 6.51   | -     | 1917.9   |
| AHQ-2-11, 6494 - 6553       | K.NATNVEQAFMTMAAEIK.K                                                   | 1870.14079 | 2 | 1.48E-09 | 0.97 | 5.24   | -     | 1276.6   |
| AHQ-2-11, 6658              | K.NATNVEQAFMTMAAEIK.K                                                   | 1886.14019 | 2 | 5.74E-06 | 0.93 | 5.00   | -     | 1296.8   |
| AHQ-2-11, 6785 - 6786       | K.NATNVEQAFMTMAAEIK.K                                                   | 1870.14079 | 2 | 4.04E-08 | 0.96 | 4.96   | -     | 1276.9   |
| AHQ-2-11, 5061              | K.NATNVEQAFMTMAAEIK.K                                                   | 1902.13959 | 2 | 5.46E-06 | 0.75 | 3.27   | -     | 845.0    |
| gi 5031593 ref NP_005708.1  | actin related protein 2/3 complex subunit 5; Arp2/3 protein complex sub |            |   | 1.48E-09 | 4.55 | 50.27  | 30.50 | 16320.3  |
| AHQ-2-12, 2909              | K.ALAAGVGSIVR.V                                                         | 1071.25558 | 2 | 3.00E-07 | 0.97 | 4.75   | -     | 1929.7   |
| AHQ-2-14-, 2939             | K.ALAAGVGSIVR.V                                                         | 1071.25558 | 2 | 1.37E-06 | 0.95 | 3.83   | -     | 1610.3   |
| AHQ-2-12, 3542 - 3614       | K.AVQSLDKNGVDLLM*K.Y                                                    | 1647.91883 | 2 | 2.34E-05 | 0.85 | 3.90   | -     | 505.2    |
| AHQ-2-12, 4069 - 4137       | K.AVQSLDKNGVDLLM*K.Y                                                    | 1631.91943 | 2 | 1.48E-09 | 0.98 | 5.45   | -     | 1871.9   |
| AHQ-2-12, 4591              | K.GFESPDSNNSAMLLQWHEK.A                                                 | 2164.34049 | 2 | 1.56E-07 | 0.93 | 4.43   | -     | 886.9    |
| AHQ-2-12, 4783 - 4806       | K.GFESPDSNNSAMLLQWHEK.A                                                 | 2164.34049 | 2 | 1.56E-07 | 0.83 | 4.11   | -     | 633.3    |
| AHQ-2-12, 4791              | K.GFESPDSNNSAMLLQWHEK.A                                                 | 2164.34049 | 3 | 2.10E-04 | 0.61 | 3.06   | -     | 368.1    |
| AHQ-2-12, 4271              | K.GFESPDSNNSAMLLQWHEK.A                                                 | 2180.33989 | 2 | 8.56E-05 | 0.92 | 4.29   | -     | 758.3    |
| AHQ-2-12, 4174              | K.GFESPDSNNSAMLLQWHEK.A                                                 | 2180.33989 | 2 | 6.80E-06 | 0.92 | 3.57   | -     | 1069.9   |
| gi 4504183 ref NP_000843.1  | glutathione transferase; deafness, X-linked 7; fatty acid ethyl ester s |            |   | 1.61E-09 | 5.26 | 60.25  | 51.90 | 23355.7  |
| AHQ-2-11, 5268              | K.ALPGQLKPPETLLSQNQGK.T                                                 | 2127.42930 | 2 | 7.61E-09 | 0.79 | 3.35   | -     | 514.9    |
| AHQ-2-13, 5331 - 5340       | K.ALPGQLKPPETLLSQNQGK.T                                                 | 2127.42930 | 2 | 4.64E-06 | 0.62 | 3.10   | -     | 281.7    |
| AHQ-2-10, 4874              | K.ALPGQLKPPETLLSQNQGK.T                                                 | 2127.42930 | 2 | 2.67E-07 | 0.81 | 3.34   | -     | 454.2    |
| AHQ-2-11, 5142 - 5206       | K.ALPGQLKPPETLLSQNQGK.T                                                 | 2127.42930 | 2 | 2.86E-05 | 0.84 | 3.70   | -     | 337.0    |
| AHQ-2-11, 3020 - 3094       | K.ASCLYGQLPK.F                                                          | 1138.31884 | 2 | 9.35E-05 |      |        |       |          |

|                             |                                                                         |            |   |          |      |       |       |          |
|-----------------------------|-------------------------------------------------------------------------|------------|---|----------|------|-------|-------|----------|
| AHQ-2-13, 6363 - 6367       | K.DQQAALVDMVNDGVEDLR.C                                                  | 2118.26843 | 2 | 3.24E-08 | 0.94 | 4.95  | -     | 814.8    |
| AHQ-2-10, 6187              | K.DQQAALVDMVNDGVEDLR.C                                                  | 2118.26843 | 2 | 7.47E-04 | 0.90 | 4.05  | -     | 745.7    |
| AHQ-2-14-, 6441             | K.DQQAALVDMVNDGVEDLR.C                                                  | 2118.26843 | 2 | 4.43E-06 | 0.95 | 4.79  | -     | 894.8    |
| AHQ-2-11, 6041              | K.DQQAALVDMVNDGVEDLR.C                                                  | 2118.26843 | 2 | 7.20E-04 | 0.95 | 4.67  | -     | 1234.1   |
| AHQ-2-11, 4944              | K.FQDGDLLYQSNITLR.H                                                     | 1885.06701 | 2 | 1.61E-09 | 0.91 | 4.17  | -     | 826.9    |
| AHQ-2-11, 4840              | K.FQDGDLLYQSNITLR.H                                                     | 1885.06701 | 2 | 1.21E-08 | 0.95 | 5.02  | -     | 753.1    |
| AHQ-2-11, 4720 - 4780       | K.FQDGDLLYQSNITLR.H                                                     | 1885.06701 | 2 | 1.08E-04 | 0.92 | 4.23  | -     | 800.3    |
| AHQ-2-14-, 4981             | K.FQDGDLLYQSNITLR.H                                                     | 1885.06701 | 2 | 7.81E-04 | 0.83 | 3.71  | -     | 547.7    |
| AHQ-2-14, 6062              | K.FQDGDLLYQSNITLR.H                                                     | 1885.06701 | 2 | 1.37E-06 | 0.83 | 3.51  | -     | 714.6    |
| AHQ-2-10, 4622 - 4688       | K.FQDGDLLYQSNITLR.H                                                     | 1885.06701 | 2 | 3.40E-07 | 0.94 | 4.93  | -     | 838.7    |
| AHQ-2-11, 6196 - 6269       | R.MLLADQGGQSWKEEVTVETWQEGSLK.A                                          | 2993.33745 | 3 | 1.26E-05 | 0.85 | 4.61  | -     | 665.3    |
| AHQ-2-11, 4546              | K.YISLIYTYEAGKDDYVK.A                                                   | 2156.37637 | 2 | 4.12E-04 | 0.85 | 3.73  | -     | 618.1    |
| AHQ-2-10, 4183              | K.YISLIYTYEAGKDDYVK.A                                                   | 2156.37637 | 2 | 3.32E-07 | 0.85 | 3.83  | -     | 621.6    |
| gi 4507645 ref NP_000356.1  | triosephosphate isomerase 1 [Homo sapiens]                              |            |   | 1.69E-09 | 4.58 | 50.33 | 32.90 | 26669.3  |
| AHQ-2-10, 6612              | K.ELASQPDVDFLGGASLKPFEVDIINAK.Q                                         | 3031.40532 | 3 | 1.69E-09 | 0.76 | 3.79  | -     | 218.0    |
| AHQ-2-10, 3998              | R.KQSLGELIGLTLNAAK.V                                                    | 1543.79037 | 2 | 1.02E-05 | 0.96 | 4.18  | -     | 1809.5   |
| AHQ-2-10, 3760              | R.KQSLGELIGLTLNAAK.V                                                    | 1543.79037 | 2 | 1.49E-04 | 0.94 | 4.03  | -     | 1169.9   |
| AHQ-2-10, 4852              | K.QSLGELIGLTLNAAK.V                                                     | 1415.61746 | 2 | 3.27E-04 | 0.90 | 3.54  | -     | 1013.1   |
| AHQ-2-10, 4942 - 5022       | K.VAHALAEGLVACIGEK.L                                                    | 1810.10800 | 2 | 6.70E-06 | 0.99 | 6.67  | -     | 3106.5   |
| AHQ-2-10, 5108 - 5175       | K.VPADTEVVCAPPYIDFAR.Q                                                  | 2194.44943 | 2 | 1.79E-04 | 0.97 | 5.42  | -     | 1030.2   |
| gi 4502491 ref NP_001203.1  | complement component 1, q subcomponent binding protein precursor; hlyau |            |   | 1.72E-09 | 0.87 | 10.20 | 5.00  | 31362.0  |
| AHQ-2-9, 5352               | K.AFVDFLSDEIKKEER.K                                                     | 1698.85455 | 2 | 1.72E-09 | 0.87 | 3.46  | -     | 951.1    |
| gi 4503423 ref NP_001939.1  | dUTP pyrophosphatase [Homo sapiens]                                     |            |   | 1.77E-09 | 0.95 | 10.22 | 10.40 | 17748.0  |
| AHQ-2-11, 5458              | R.IFYPEIEEVALDDTER.G                                                    | 2068.22598 | 2 | 1.77E-09 | 0.95 | 4.40  | -     | 1135.5   |
| gi 25188179 ref NP_005653.3 | voltage-dependent anion channel 3 [Homo sapiens]                        |            |   | 1.79E-09 | 2.33 | 30.21 | 16.30 | 30658.4  |
| AHQ-2-10, 4624 - 4648       | K.LTLDTIFVPNTGK.K                                                       | 1419.64771 | 2 | 1.92E-05 | 0.91 | 3.62  | -     | 848.5    |
| AHQ-2-10, 4619              | K.LTLDTIFVPNTGK.K                                                       | 1419.64771 | 1 | 1.04E-05 | 0.75 | 2.87  | -     | 583.2    |
| AHQ-2-11, 4856              | K.LTLDTIFVPNTGK.K                                                       | 1419.64771 | 2 | 1.32E-05 | 0.85 | 3.09  | -     | 820.5    |
| AHQ-2-9, 4154 - 4234        | K.VNNSASLIGLGYTQTLRPGVK.L                                               | 2102.42298 | 2 | 1.44E-06 | 0.88 | 4.30  | -     | 801.7    |
| AHQ-2-10, 4026 - 4028       | K.VNNSASLIGLGYTQTLRPGVK.L                                               | 2102.42298 | 3 | 6.38E-06 | 0.76 | 3.48  | -     | 664.8    |
| AHQ-2-14, 5690              | K.VNNSASLIGLGYTQTLRPGVK.L                                               | 2102.42298 | 2 | 1.52E-08 | 0.70 | 3.61  | -     | 447.0    |
| AHQ-2-10, 4410              | K.VNNSASLIGLGYTQTLRPGVK.L                                               | 2102.42298 | 2 | 2.72E-09 | 0.65 | 3.38  | -     | 365.4    |
| AHQ-2-10, 4022              | K.VNNSASLIGLGYTQTLRPGVK.L                                               | 2102.42298 | 2 | 2.13E-08 | 0.87 | 3.90  | -     | 637.5    |
| AHQ-2-9, 4674 - 4678        | K.VNNSASLIGLGYTQTLRPGVK.L                                               | 2102.42298 | 2 | 8.74E-07 | 0.67 | 3.14  | -     | 379.9    |
| AHQ-2-10, 4196              | K.VNNSASLIGLGYTQTLRPGVK.L                                               | 2102.42298 | 2 | 1.17E-05 | 0.71 | 2.93  | -     | 655.1    |
| AHQ-2-9, 3640               | K.YKVCNYGLTFTQK.W                                                       | 1623.85410 | 2 | 1.39E-05 | 0.95 | 4.14  | -     | 1142.4   |
| AHQ-2-10, 3564              | K.YKVCNYGLTFTQK.W                                                       | 1623.85410 | 2 | 1.79E-09 | 0.93 | 4.12  | -     | 1006.3   |
| gi 5803181 ref NP_006810.1  | stress-induced-phosphoprotein 1 (Hsp70/Hsp90-organizing protein) [Homo  |            |   | 1.81E-09 | 0.93 | 10.23 | 3.50  | 62638.9  |
| AHQ-2-6, 6485               | K.ALSVGNIDDLQCYSEAIK.L                                                  | 2069.27871 | 2 | 1.81E-09 | 0.93 | 4.38  | -     | 785.9    |
| AHQ-2-14-, 6348             | K.ALSVGNIDDLQCYSEAIK.L                                                  | 2069.27871 | 2 | 8.50E-07 | 0.92 | 4.40  | -     | 690.6    |
| AHQ-2-6, 6402 - 6478        | K.ALSVGNIDDLQCYSEAIK.L                                                  | 2069.27871 | 2 | 1.16E-08 | 0.94 | 4.64  | -     | 876.8    |
| gi 4503609 ref NP_001976.1  | electron-transfer-flavoprotein, beta polypeptide; electron-transferring |            |   | 1.86E-09 | 1.91 | 20.23 | 12.50 | 27843.4  |
| AHQ-2-10, 4776              | K.HSMNPFCEIAVEAVR.L                                                     | 1891.11834 | 2 | 1.86E-09 | 0.96 | 4.59  | -     | 1246.2   |
| AHQ-2-10, 4188              | K.IEVKPGDGLVDTLSK.L                                                     | 1684.95560 | 2 | 4.51E-07 | 0.94 | 4.12  | -     | 853.0    |
| gi 5031595 ref NP_005709.1  | actin related protein 2/3 complex subunit 4; Arp2/3 protein complex sub |            |   | 1.95E-09 | 5.17 | 60.35 | 42.90 | 19666.9  |
| AHQ-2-12, 4333              | R.AENFFILR.R                                                            | 1010.17070 | 2 | 5.60E-04 | 0.97 | 4.18  | -     | 1810.6   |
| AHQ-2-11, 6357              | R.ATLQAAALCLENFSSQVVER.H                                                | 2138.38741 | 2 | 1.92E-04 | 0.41 | 2.66  | -     | 420.9    |
| AHQ-2-11, 4105              | K.ELLQLPVTISR.N                                                         | 1269.51549 | 1 | 7.13E-04 | 0.44 | 2.47  | -     | 171.7    |
| AHQ-2-12, 4273 - 4281       | K.ELLQLPVTISR.N                                                         | 1269.51549 | 2 | 8.42E-05 | 0.92 | 3.90  | -     | 846.6    |
| AHQ-2-11, 5849              | R.KPVEGYDISFLTNFHTEQMYK.H                                               | 2662.01271 | 3 | 5.29E-08 | 0.98 | 7.04  | -     | 2055.4   |
| AHQ-2-12, 5741              | R.RKPVVEGYDISFLTNFHTEQMYK.H                                             | 2818.19906 | 3 | 1.13E-04 | 0.97 | 6.68  | -     | 1510.5   |
| AHQ-2-12, 3191              | K.VLIEGINSVR.V                                                          | 1187.37134 | 2 | 1.95E-09 | 0.92 | 3.34  | -     | 1144.0   |
| AHQ-2-12, 3109              | K.VLIEGINSVR.V                                                          | 1187.37134 | 2 | 1.12E-08 | 0.90 | 3.07  | -     | 1083.9   |
| AHQ-2-11, 3062              | K.VLIEGINSVR.V                                                          | 1187.37134 | 2 | 2.17E-07 | 0.93 | 3.30  | -     | 1153.3   |
| gi 21361198 ref NP_000286.2 | serine (or cysteine) proteinase inhibitor, clade A (alpha-1) antiprotei |            |   | 1.95E-09 | 1.93 | 20.27 | 7.90  | 46722.2  |
| AHQ-2-7, 3189 - 3263        | K.LQHLLENLTHDIITK.F                                                     | 1805.02503 | 2 | 1.07E-08 | 0.97 | 5.37  | -     | 1650.3   |
| AHQ-2-7, 4543 - 4611        | K.VFSGADLSGVTTEAPLK.L                                                   | 1835.00476 | 2 | 1.95E-09 | 0.95 | 4.60  | -     | 1084.0   |
| gi 5031571 ref NP_005713.1  | actin-related protein 2; ARP2 (actin-related protein 2, yeast) homolog  |            |   | 2.13E-09 | 6.88 | 80.23 | 24.10 | 44760.5  |
| AHQ-2-8, 3583 - 3655        | K.DLMVDEASELR.S                                                         | 1335.46633 | 2 | 8.36E-08 | 0.83 | 3.13  | -     | 779.1    |
| AHQ-2-8, 2838               | R.GYAFNHSADFVTR.M                                                       | 1614.69943 | 2 | 2.13E-09 | 0.93 | 3.95  | -     | 1016.1   |
| AHQ-2-8, 3475               | K.HIVLSGGSTMYPLPSRL                                                     | 1773.04967 | 2 | 2.83E-04 | 0.97 | 4.58  | -     | 1584.6   |
| AHQ-2-8, 3794               | K.HLWYDTFGPEK.L                                                         | 1393.52736 | 2 | 1.99E-06 | 0.90 | 3.68  | -     | 626.8    |
| AHQ-2-8, 3796 - 3798        | K.HLWYDTFGPEK.L                                                         | 1393.52736 | 1 | 4.64E-04 | 0.68 | 2.80  | -     | 672.5    |
| AHQ-2-8, 2544               | R.KVVVCDNGTGFVK.C                                                       | 1424.64764 | 2 | 1.39E-04 | 0.89 | 3.64  | -     | 960.7    |
| AHQ-2-8, 3642               | K.LCYVGYNIEQEQK.L                                                       | 1645.81494 | 2 | 3.38E-07 | 0.96 | 3.77  | -     | 1514.5   |
| AHQ-2-8, 4809               | R.SMLEVNYPMENGVIR.N                                                     | 1753.03703 | 2 | 4.61E-05 | 0.79 | 3.21  | -     | 553.8    |
| AHQ-2-8, 3004               | K.VVVCNDGTGFVK.C                                                        | 1296.47472 | 2 | 1.79E-06 | 0.61 | 2.61  | -     | 384.5    |
| gi 13518026 ref NP_004978.2 | LIM and senescent cell antigen-like domains 1 [Homo sapiens]            |            |   | 2.17E-09 | 1.92 | 20.24 | 7.70  | 37251.2  |
| AHQ-2-8, 4164 - 4166        | K.CHAIDEQPLIFK.N                                                        | 1585.84900 | 2 | 7.63E-09 | 0.94 | 4.78  | -     | 1060.0   |
| AHQ-2-11, 4361              | K.CHAIDEQPLIFK.N                                                        | 1585.84900 | 2 | 1.07E-04 | 0.94 | 4.07  | -     | 1381.5   |
| AHQ-2-9, 4358 - 4370        | K.CHAIDEQPLIFK.N                                                        | 1585.84900 | 2 | 5.58E-05 | 0.94 | 4.20  | -     | 1282.1   |
| AHQ-2-10, 4112              | K.CHAIDEQPLIFK.N                                                        | 1585.84900 | 2 | 6.97E-05 | 0.96 | 4.67  | -     | 1390.6   |
| AHQ-2-8, 3111 - 3127        | R.VIEGDVVSNLNK.A                                                        | 1244.41966 | 2 | 1.81E-08 | 0.96 | 4.15  | -     | 1286.9   |
| AHQ-2-11, 3384              | R.VIEGDVVSNLNK.A                                                        | 1244.41966 | 2 | 2.91E-07 | 0.95 | 4.12  | -     | 1206.5   |
| AHQ-2-9, 3295               | R.VIEGDVVSNLNK.A                                                        | 1244.41966 | 1 | 2.45E-05 | 0.41 | 2.82  | -     | 328.1    |
| AHQ-2-9, 3286               | R.VIEGDVVSNLNK.A                                                        | 1244.41966 | 2 | 6.40E-09 | 0.96 | 4.49  | -     | 1343.3   |
| AHQ-2-13-, 3498 - 3575      | R.VIEGDVVSNLNK.A                                                        | 1244.41966 | 2 | 1.39E-08 | 0.96 | 4.48  | -     | 1193.7   |
| AHQ-2-14-, 3521             | R.VIEGDVVSNLNK.A                                                        | 1244.41966 | 2 | 2.17E-09 | 0.97 | 4.85  | -     | 1680.5   |
| gi 4503747 ref NP_001448.1  | filamin B, beta (actin binding protein 278); beta filamin; filamin 1 (a |            |   | 2.33E-09 | 4.75 | 60.26 | 1.70  | 278191.4 |
| AHQ-2-2, 3712               | K.DLAEDAPWK.K                                                           | 1045.12708 | 2 | 5.07E-04 | 0.89 | 3.43  | -     | 909.8    |
| AHQ-2-1, 3737 - 3738        | K.DLAEDAPWK.K                                                           | 1045.12708 | 2 | 3.03E-04 | 0.87 | 3.38  | -     | 753.3    |
| AHQ-2-3, 3648               | K.DLAEDAPWK.K                                                           | 1045.12708 | 1 | 4.43E-05 | 0.49 | 2.01  | -     | 662.8    |
| AHQ-2-5, 3445               | K.DLAEDAPWK.K                                                           | 1045.12708 | 1 | 3.24E-06 | 0.31 | 2.07  | -     | 502.8    |
| AHQ-2-4, 3650               | K.DLAEDAPWK.K                                                           | 1045.12708 | 1 | 1.15E-04 | 0.29 | 2.00  | -     | 483.0    |
| AHQ-2-2, 3706               | K.DLAEDAPWK.K                                                           | 1045.12708 | 1 | 1.17E-05 | 0.48 | 2.44  | -     | 501.1    |
| AHQ-2-2, 2896               | K.DLAEDAPWK.K                                                           | 1173.29999 | 2 | 1.89E-04 | 0.76 | 2.88  | -     | 882.0    |
| AHQ-2-1, 3084 - 3085        | K.DLAEDAPWK.K                                                           | 1173.29999 | 2 | 6.35E-04 | 0.57 | 2.78  | -     | 669.4    |
| AHQ-2-11, 6024              | R.LIALLEVLVSNK.R                                                        | 1227.51852 | 2 | 5.68E-08 | 0.96 | 4.87  | -     | 1046.3   |
| AHQ-2-1, 6657 - 6658        | R.LIALLEVLVSNK.R                                                        | 1227.51852 | 2 | 9.63E-07 | 0.97 | 4.54  | -     | 1545.7   |
| AHQ-2-6, 6281               | R.LIALLEVLVSNK.R                                                        | 1227.51852 | 2 | 2.33E-09 | 0.98 | 4.98  | -     | 1723.2   |
| AHQ-2-3, 6616               | R.LIALLEVLVSNK.R                                                        | 1227.51852 | 2 | 3.98E-06 | 0.97 | 4.68  | -     | 1499.8   |
| AHQ-2-2, 6604 - 6672        | R.LIALLEVLVSNK.R                                                        | 1227.51852 | 2 | 2.03E-06 | 0.97 | 4.36  | -     | 1375.1   |
| AHQ-2-5, 6311 - 6381        | R.LIALLEVLVSNK.R                                                        | 1227.51852 | 2 | 8.01E-07 | 0.97 | 5.15  | -     | 1280.1   |
| AHQ-2-4, 6672 - 6680        | R.LIALLEVLVSNK.R                                                        | 1227.51852 | 2 | 1.02E-08 | 0.97 | 4.82  | -     | 1341.0   |
| AHQ-2-2, 3596 - 3604        | R.LLQWLNK.I                                                             | 972.16560  | 2 | 4.22E-04 | 0.85 | 3.30  | -     | 655.5    |
| AHQ-2-1, 6653               | R.QM*QLENVSVALEFLDR.E                                                   | 1909.15348 | 2 | 1.81E-08 | 0.94 | 4.34  | -     | 1311.5   |
| AHQ-2-2, 6757 - 6829        | R.QM*QLENVSVALEFLDR.E                                                   | 1909.15348 | 2 | 5.37E-04 | 0.92 | 3.97  | -     | 848.4    |
| AHQ-2-2, 7380               | R.QM*QLENVSVALEFLDR.E                                                   | 1893.15408 | 2 | 1.53E-04 | 0.91 | 3.88  | -     | 899.6    |
| gi 4507725 ref NP_000362.1  | transthyretin (prealbumin, amyloidosis type I); Transthyretin (prealbum |            |   | 2.35E-09 | 3.75 | 40.33 | 36.70 | 15886.9  |
| AHQ-2-13-, 3870             | K.AADDTWEPFASGK.T                                                       | 1395.45529 | 2 | 6.74E-09 | 0.92 | 4.12  | -     | 782.3    |
| AHQ-2-13, 3839              | K.AADDTWEPFASGK.T                                                       | 1395.45529 | 2 | 4.75E-08 | 0.92 | 3.51  | -     | 1055.7   |
| AHQ-2-12, 3729              | K.AADDTWEPFASGK.T                                                       | 1395.45529 | 2 | 5.74E-06 | 0.67 | 2.85  | -     | 498.2    |
| AHQ-2-13-, 4067 - 4075      | R.GSPAINVAHVFR.K                                                        | 1367.58095 | 2 | 1.58E-08 | 0.96 | 4.54  | -     | 1439.9   |
| AHQ-2-13, 4013 - 4016       | R.GSPAINVAHVFR.K                                                        | 1367.58095 | 2 | 8.33E-09 | 0.96 | 4.52  | -     | 1246.1   |
| AHQ-2-13, 5460              | K.TSESGELHGLTTEEFVVEGIYK.V                                              | 2456.60073 | 2 | 1.31E-07 | 0.92 | 4.43  | -     | 808.0    |
| AHQ-2-13-, 5601 - 5603      | K.TSESGELHGLTTEEFVVEGIYK.V                                              | 2456.60073 | 3 | 3.47E-09 | 0.98 | 6.66  | -     | 2523.4   |
| AHQ-2-12, 5577              | K.TSESGELHGLTTEEFVVEGIYK.V                                              | 2456.60073 | 2 | 2.96E-07 | 0.93 | 4.33  | -     | 889.4    |

|                              |                                                                         |            |   |          |       |        |       |          |
|------------------------------|-------------------------------------------------------------------------|------------|---|----------|-------|--------|-------|----------|
| AHQ-2-13, 5453               | K.TSESGELHGLTTEEEFVEGIYK.V                                              | 2456.60073 | 3 | 6.79E-04 | 0.85  | 3.15   | -     | 1568.8   |
| AHQ-2-12, 5582               | K.TSESGELHGLTTEEEFVEGIYK.V                                              | 2456.60073 | 3 | 2.35E-09 | 0.97  | 5.79   | -     | 1797.4   |
| AHQ-2-13-, 5609 - 5677       | K.TSESGELHGLTTEEEFVEGIYK.V                                              | 2456.60073 | 2 | 1.73E-06 | 0.97  | 5.35   | -     | 1514.5   |
| AHQ-2-13, 6384               | K.TSESGELHGLTTEEEFVEGIYKVEIDTK.S                                        | 3142.37019 | 3 | 9.96E-06 | 0.90  | 4.91   | -     | 536.6    |
| gi 4758442 ref NP_004115.1.1 | glia maturation factor, beta [Homo sapiens]                             |            |   | 2.36E-09 | 1.76  | 20.25  | 35.20 | 16713.1  |
| AHQ-2-12, 6218 - 6291        | R.LVVLEDELEGISPDDELKDELPQR.Q                                            | 2638.90589 | 3 | 1.05E-05 | 0.93  | 4.90   | -     | 1095.0   |
| AHQ-2-12, 6865 - 6931        | R.VSYPLCFIFSSPVGCKPEQQMMYAGSK.N                                         | 3115.61257 | 3 | 2.36E-09 | 0.84  | 4.16   | -     | 414.2    |
| gi 5453832 ref NP_006380.1   | oxygen regulated protein precursor; oxygen regulated protein (150kD) [H |            |   | 2.38E-09 | 2.85  | 30.31  | 5.30  | 111334.8 |
| AHQ-2-3, 6405                | K.NINADEAAMGAUVQAALSK.A                                                 | 2080.30817 | 2 | 6.59E-07 | 0.97  | 6.28   | -     | 958.8    |
| AHQ-2-3, 6861                | R.VEFEELCADLFR.V                                                        | 1658.81048 | 2 | 2.38E-09 | 0.95  | 4.19   | -     | 1139.5   |
| AHQ-2-3, 6768                | K.VLQLINDNTATLSYGVFR.R                                                  | 2096.37206 | 2 | 1.85E-07 | 0.93  | 3.69   | -     | 1051.9   |
| gi 4503631 ref NP_000120.1   | coagulation factor XIII A1 subunit precursor; Coagulation factor XIII,  |            |   | 2.60E-09 | 17.27 | 210.27 | 32.50 | 83232.8  |
| AHQ-2-5, 5539 - 5616         | R.AVPPNNSNAEEDDLPVLELQGVVPR.G                                           | 2603.82656 | 2 | 1.80E-08 | 0.70  | 3.38   | -     | 224.7    |
| AHQ-2-5, 5399 - 5471         | R.AVPPNNSNAEEDDLPVLELQGVVPR.G                                           | 2603.82656 | 2 | 1.31E-07 | 0.59  | 2.89   | -     | 228.8    |
| AHQ-2-5, 2095 - 2096         | R.CGPAVQAIK.H                                                           | 1032.19627 | 2 | 2.81E-04 | 0.87  | 3.08   | -     | 853.9    |
| AHQ-2-6, 2386                | R.CLGIPAR.I                                                             | 787.95073  | 1 | 2.80E-04 | 0.43  | 2.19   | -     | 209.2    |
| AHQ-2-5, 2305                | K.DGTHVVENVVATHIGK.L                                                    | 1692.81163 | 2 | 2.60E-09 | 0.94  | 4.08   | -     | 1144.1   |
| AHQ-2-6, 2321                | K.DGTHVVENVVATHIGK.L                                                    | 1692.81163 | 2 | 9.02E-09 | 0.95  | 3.86   | -     | 1388.1   |
| AHQ-2-9, 2372                | K.DGTHVVENVVATHIGK.L                                                    | 1692.81163 | 2 | 4.89E-05 | 0.93  | 4.12   | -     | 1021.3   |
| AHQ-2-11, 4216               | R.EIRPNSTVQWEEVCRPVWSGHR.K                                              | 2724.99524 | 3 | 1.36E-04 | 0.59  | 3.27   | -     | 338.1    |
| AHQ-2-5, 4445                | R.EIRPNSTVQWEEVCRPVWSGHR.K                                              | 2724.99524 | 3 | 2.81E-04 | 0.78  | 3.29   | -     | 652.6    |
| AHQ-2-5, 4175                | R.EIRPNSTVQWEEVCRPVWSGHR.K                                              | 2724.99524 | 3 | 9.59E-04 | 0.89  | 4.36   | -     | 681.5    |
| AHQ-2-11, 5493 - 5509        | K.ETFDVTLPLSFK.K                                                        | 1526.71190 | 2 | 4.88E-06 | 0.90  | 3.67   | -     | 853.1    |
| AHQ-2-6, 5669 - 5677         | K.ETFDVTLPLSFK.K                                                        | 1526.71190 | 2 | 2.11E-06 | 0.82  | 3.05   | -     | 762.1    |
| AHQ-2-5, 5751 - 5823         | K.ETFDVTLPLSFK.K                                                        | 1526.71190 | 2 | 2.24E-08 | 0.89  | 3.78   | -     | 836.9    |
| AHQ-2-5, 4817                | K.ETFDVTLPLSFK.K                                                        | 1654.88482 | 2 | 4.26E-04 | 0.37  | 2.69   | -     | 349.5    |
| AHQ-2-7, 5391 - 5441         | K.GTYIPVPISELQSGK.W                                                     | 1688.94594 | 2 | 6.42E-06 | 0.65  | 3.19   | -     | 263.4    |
| AHQ-2-9, 5463 - 5478         | K.GTYIPVPISELQSGK.W                                                     | 1688.94594 | 2 | 3.93E-05 | 0.81  | 3.54   | -     | 391.5    |
| AHQ-2-5, 5523 - 5543         | K.GTYIPVPISELQSGK.W                                                     | 1688.94594 | 2 | 5.94E-04 | 0.86  | 3.64   | -     | 493.7    |
| AHQ-2-9, 7063                | R.GVNLQEFLNVTSVHLFK.E                                                   | 1946.23831 | 2 | 6.26E-08 | 0.95  | 4.41   | -     | 1357.5   |
| AHQ-2-9, 7076                | R.GVNLQEFLNVTSVHLFK.E                                                   | 1946.23831 | 3 | 1.56E-07 | 0.85  | 4.03   | -     | 703.9    |
| AHQ-2-10, 6495 - 6575        | R.GVNLQEFLNVTSVHLFK.E                                                   | 1946.23831 | 2 | 3.82E-05 | 0.91  | 4.32   | -     | 861.5    |
| AHQ-2-8, 6844                | R.GVNLQEFLNVTSVHLFK.E                                                   | 1946.23831 | 2 | 2.09E-06 | 0.94  | 4.34   | -     | 1150.5   |
| AHQ-2-7, 7036                | R.GVNLQEFLNVTSVHLFK.E                                                   | 1946.23831 | 2 | 7.74E-08 | 0.97  | 5.02   | -     | 1522.6   |
| AHQ-2-5, 7108 - 7125         | R.GVNLQEFLNVTSVHLFK.E                                                   | 1946.23831 | 2 | 8.75E-08 | 0.95  | 5.00   | -     | 1085.3   |
| AHQ-2-5, 7127 - 7164         | R.GVNLQEFLNVTSVHLFK.E                                                   | 1946.23831 | 3 | 8.27E-08 | 0.88  | 3.90   | -     | 900.5    |
| AHQ-2-5, 7191 - 7256         | R.GVNLQEFLNVTSVHLFK.E                                                   | 1946.23831 | 2 | 2.23E-08 | 0.96  | 4.60   | -     | 1379.8   |
| AHQ-2-5, 7324                | R.GVNLQEFLNVTSVHLFK.E                                                   | 1946.23831 | 2 | 2.91E-07 | 0.94  | 4.88   | -     | 838.0    |
| AHQ-2-14-, 6755              | R.GVNLQEFLNVTSVHLFK.E                                                   | 1946.23831 | 2 | 9.58E-07 | 0.96  | 5.00   | -     | 1300.6   |
| AHQ-2-11, 6565               | R.GVNLQEFLNVTSVHLFK.E                                                   | 1946.23831 | 2 | 1.35E-07 | 0.97  | 5.04   | -     | 1431.3   |
| AHQ-2-13, 6673               | R.GVNLQEFLNVTSVHLFK.E                                                   | 1946.23831 | 2 | 1.79E-08 | 0.97  | 5.24   | -     | 1310.8   |
| AHQ-2-13-, 6901              | R.GVNLQEFLNVTSVHLFK.E                                                   | 1946.23831 | 2 | 1.41E-07 | 0.97  | 4.48   | -     | 1590.0   |
| AHQ-2-6, 6989                | R.GVNLQEFLNVTSVHLFK.E                                                   | 1946.23831 | 3 | 3.16E-09 | 0.89  | 4.24   | -     | 731.3    |
| AHQ-2-2, 7437                | R.GVNLQEFLNVTSVHLFK.E                                                   | 1946.23831 | 2 | 1.18E-06 | 0.90  | 3.86   | -     | 882.3    |
| AHQ-2-6, 6978                | R.GVNLQEFLNVTSVHLFK.E                                                   | 1946.23831 | 2 | 8.78E-07 | 0.95  | 4.70   | -     | 1107.0   |
| AHQ-2-5, 3833                | R.HVYGEGLDVIQQR.R                                                       | 1457.61612 | 2 | 5.54E-05 | 0.80  | 2.93   | -     | 573.2    |
| AHQ-2-6, 1917                | K.KDGHVENVVATHIGK.L                                                     | 1820.98455 | 2 | 9.20E-08 | 0.95  | 4.50   | -     | 1362.3   |
| AHQ-2-5, 2100                | K.KDGHVENVVATHIGK.L                                                     | 1820.98455 | 3 | 6.44E-06 | 0.95  | 4.86   | -     | 1605.4   |
| AHQ-2-5, 1903                | K.KDGHVENVVATHIGK.L                                                     | 1820.98455 | 2 | 2.89E-07 | 0.96  | 4.18   | -     | 1656.0   |
| AHQ-2-5, 2367                | R.KLIASMSDSL.R.H                                                        | 1308.53039 | 2 | 3.36E-09 | 0.96  | 4.23   | -     | 1420.7   |
| AHQ-2-6, 4510 - 4527         | R.LALETALMYGAK.K                                                        | 1281.54655 | 2 | 6.99E-07 | 0.97  | 4.04   | -     | 1762.9   |
| AHQ-2-5, 2749 - 2829         | K.LIASMSDSL.R.H                                                         | 1180.35748 | 2 | 2.45E-05 | 0.95  | 3.80   | -     | 1196.8   |
| AHQ-2-5, 5473                | R.MYVAVWTPYGVLR.T                                                       | 1571.86734 | 2 | 1.03E-05 | 0.97  | 5.12   | -     | 1150.7   |
| AHQ-2-5, 6093 - 6160         | R.MYVAVWTPYGVLR.T                                                       | 1555.86794 | 2 | 1.07E-06 | 0.95  | 4.34   | -     | 998.6    |
| AHQ-2-6, 5441 - 5446         | R.MYVAVWTPYGVLR.T                                                       | 1571.86734 | 2 | 2.13E-04 | 0.93  | 3.58   | -     | 944.9    |
| AHQ-2-6, 6046 - 6053         | R.MYVAVWTPYGVLR.T                                                       | 1555.86794 | 2 | 3.04E-08 | 0.95  | 4.10   | -     | 1100.7   |
| AHQ-2-7, 6725                | R.NPETDYILFNWPCEDDAVYLDNEKER.E                                          | 3349.53903 | 3 | 4.37E-04 | 0.70  | 3.07   | -     | 868.5    |
| AHQ-2-5, 6979                | R.NPETDYILFNWPCEDDAVYLDNEKER.E                                          | 3349.53903 | 3 | 4.62E-07 | 0.88  | 4.22   | -     | 564.7    |
| AHQ-2-5, 6819                | R.NPETDYILFNWPCEDDAVYLDNEKER.E                                          | 3349.53903 | 3 | 9.09E-09 | 0.94  | 5.48   | -     | 841.5    |
| AHQ-2-5, 3329 - 3332         | R.NVWVHLDGPGVTR.P                                                       | 1450.62682 | 2 | 3.15E-04 | 0.68  | 2.63   | -     | 817.2    |
| AHQ-2-5, 3297                | R.NVWVHLDGPGVTRPMK.D                                                    | 1807.11248 | 2 | 8.39E-06 | 0.94  | 4.56   | -     | 883.5    |
| AHQ-2-5, 4637                | R.SNVDMDFEVENAVLKG.K                                                    | 1783.93809 | 2 | 1.27E-08 | 0.96  | 4.62   | -     | 1715.2   |
| AHQ-2-11, 5486               | K.STVLTPIEIIIK.V                                                        | 1327.63485 | 2 | 1.93E-07 | 0.89  | 3.38   | -     | 1142.7   |
| AHQ-2-9, 5580                | K.STVLTPIEIIIK.V                                                        | 1327.63485 | 2 | 5.16E-04 | 0.83  | 2.81   | -     | 1157.5   |
| AHQ-2-8, 5275                | K.STVLTPIEIIIK.V                                                        | 1327.63485 | 2 | 8.06E-04 | 0.92  | 3.52   | -     | 1290.3   |
| gi 15147250 ref NP_150281.1  | protein phosphatase 1, regulatory (inhibitor) subunit 14A; 17-kDa PKC-  |            |   | 2.66E-09 | 0.85  | 10.23  | 10.90 | 16692.9  |
| AHQ-2-12, 6919               | K.SCGKPVDFIQELAK.L                                                      | 1836.09909 | 2 | 2.66E-09 | 0.85  | 4.55   | -     | 503.4    |
| gi 4505989 ref NP_000299.1   | protective protein for beta-galactosidase; Protective protein for beta- |            |   | 2.68E-09 | 1.73  | 20.21  | 6.90  | 54495.8  |
| AHQ-2-10, 5068               | K.CNFYDNKDLCEVTNLQEVAR.I                                                | 2491.69642 | 2 | 1.54E-05 | 0.75  | 2.77   | -     | 873.4    |
| AHQ-2-12, 3494 - 3507        | K.YGDSGEQIAGFVK.E                                                       | 1371.47686 | 2 | 2.68E-09 | 0.98  | 4.14   | -     | 2739.3   |
| AHQ-2-11, 3400               | K.YGDSGEQIAGFVK.E                                                       | 1371.47686 | 2 | 5.32E-06 | 0.97  | 3.97   | -     | 2410.8   |
| gi 5803227 ref NP_006817.1   | tyrosine 3/tryptophan 5 - monoxygenase activation protein, theta polype |            |   | 2.68E-09 | 3.63  | 40.26  | 23.30 | 27764.1  |
| AHQ-2-12, 2210               | K.AVTEQGAELSNEER.N                                                      | 1533.57979 | 2 | 2.18E-06 | 0.80  | 3.48   | -     | 721.0    |
| AHQ-2-10, 2086               | K.AVTEQGAELSNEER.N                                                      | 1533.57979 | 2 | 2.68E-09 | 0.96  | 5.02   | -     | 1292.1   |
| AHQ-2-10, 6663               | R.SICTTVLELDDK.Y                                                        | 1393.62862 | 2 | 9.15E-09 | 0.94  | 4.46   | -     | 878.8    |
| AHQ-2-10, 6411               | K.TAFDEAIAELDTLNEDSYK.D                                                 | 2146.25037 | 2 | 1.47E-08 | 0.96  | 5.15   | -     | 1365.0   |
| AHQ-2-14-, 6664              | K.TAFDEAIAELDTLNEDSYK.D                                                 | 2146.25037 | 2 | 5.89E-07 | 0.94  | 4.81   | -     | 834.4    |
| AHQ-2-10, 2574               | K.YLIANATNPESK.V                                                        | 1321.46099 | 1 | 3.53E-09 | 0.77  | 2.61   | -     | 808.5    |
| AHQ-2-10, 2435               | K.YLIANATNPESK.V                                                        | 1321.46099 | 2 | 5.57E-06 | 0.96  | 3.79   | -     | 1723.0   |
| gi 13489087 ref NP_109591.1  | serine (or cysteine) proteinase inhibitor, clade B (ovalbumin), member  |            |   | 2.69E-09 | 1.78  | 20.20  | 8.70  | 42741.5  |
| AHQ-2-9, 3892                | K.TYGADLASVDFQHASEDAR.K                                                 | 2054.11949 | 2 | 1.36E-07 | 0.89  | 3.27   | -     | 942.9    |
| AHQ-2-11, 3896               | K.TYGADLASVDFQHASEDAR.K                                                 | 2054.11949 | 2 | 2.69E-09 | 0.92  | 4.01   | -     | 858.7    |
| AHQ-2-13, 4051               | K.TYGADLASVDFQHASEDAR.K                                                 | 2054.11949 | 2 | 1.12E-06 | 0.77  | 3.15   | -     | 275.1    |
| AHQ-2-13-, 4107              | K.TYGADLASVDFQHASEDAR.K                                                 | 2054.11949 | 2 | 3.87E-06 | 0.72  | 3.41   | -     | 374.8    |
| AHQ-2-8, 3758                | K.TYGADLASVDFQHASEDAR.K                                                 | 2054.11949 | 2 | 2.57E-05 | 0.79  | 3.18   | -     | 648.5    |
| AHQ-2-13, 6133               | K.TYNFLPEFLVSTQK.T                                                      | 1687.91650 | 2 | 7.49E-06 | 0.86  | 3.74   | -     | 453.3    |
| gi 7706497 ref NP_057392.1   | UMP-CMP kinase [Homo sapiens]                                           |            |   | 2.77E-09 | 2.82  | 30.27  | 20.20 | 25854.7  |
| AHQ-2-11, 5953               | R.IQTYLQSTKPIIDLYEEMGK.V                                                | 2371.73502 | 3 | 4.54E-04 | 0.74  | 3.32   | -     | 695.6    |
| AHQ-2-11, 5948 - 5949        | R.IQTYLQSTKPIIDLYEEMGK.V                                                | 2371.73502 | 2 | 4.30E-07 | 0.96  | 5.46   | -     | 802.4    |
| AHQ-2-11, 2501               | R.KNPDQYGGELIIEK.Y                                                      | 1521.65375 | 2 | 8.97E-05 | 0.89  | 3.62   | -     | 914.1    |
| AHQ-2-11, 3649               | K.YGYTHLSAAGELLR.D                                                      | 1480.64969 | 2 | 2.77E-09 | 0.96  | 4.02   | -     | 1673.1   |
| gi 4507951 ref NP_003396.1   | tyrosine 3/tryptophan 5 - monoxygenase activation protein, eta polypept |            |   | 2.81E-09 | 5.31  | 60.22  | 34.10 | 28218.5  |
| AHQ-2-13-, 2958              | K.AVTELNEPLSNEDR.N                                                      | 1587.67060 | 2 | 1.01E-08 | 0.89  | 3.89   | -     | 643.0    |
| AHQ-2-13, 3007               | K.AVTELNEPLSNEDR.N                                                      | 1587.67060 | 2 | 6.02E-09 | 0.93  | 4.12   | -     | 781.8    |
| AHQ-2-10, 2694               | K.AVTELNEPLSNEDR.N                                                      | 1587.67060 | 2 | 6.80E-06 | 0.94  | 4.38   | -     | 895.1    |
| AHQ-2-10, 6622               | K.ELETVCNDVLSLDDK.F                                                     | 1749.96137 | 2 | 4.48E-06 | 0.75  | 3.54   | -     | 513.8    |
| AHQ-2-13, 6708               | K.ELETVCNDVLSLDDK.F                                                     | 1749.96137 | 2 | 9.89E-09 | 0.89  | 3.97   | -     | 670.6    |
| AHQ-2-14-, 6784              | K.ELETVCNDVLSLDDK.F                                                     | 1749.96137 | 2 | 4.26E-07 | 0.91  | 4.05   | -     | 706.6    |
| AHQ-2-14-, 5981              | K.ELETVCNDVLSLDDK.F                                                     | 1749.96137 | 2 | 5.70E-07 | 0.86  | 3.50   | -     | 564.0    |
| AHQ-2-10, 3888               | K.FLIKNCDFQYESK.V                                                       | 1808.00430 | 2 | 5.40E-04 | 0.89  | 3.60   | -     | 787.8    |
| AHQ-2-10, 2556               | K.NSVVEASEAAYK.E                                                        | 1268.35495 | 1 | 4.48E-04 | 0.51  | 2.02   | -     | 528.8    |
| AHQ-2-10, 2350               | K.NSVVEASEAAYK.E                                                        | 1268.35495 | 2 | 2.81E-09 | 0.95  | 4.26   | -     | 1021.8   |
| AHQ-2-10, 2346 - 2354        | K.NSVVEASEAAYK.E                                                        | 1268.35495 | 1 | 1.37E-04 | 0.20  | 2.01   | -     | 276.5    |
| AHQ-2-10, 2772               | K.NSVVEASEAAYK.E                                                        | 1268.35495 | 1 | 3.29E-04 | 0.21  | 2.17   | -     | 253.0    |
| AHQ-2-14-, 6113              | K.QAFDDAIAELDTLNEDSYK.D                                                 | 2159.24915 |   |          |       |        |       |          |

|                             |                                                                         |            |   |          |       |        |       |          |
|-----------------------------|-------------------------------------------------------------------------|------------|---|----------|-------|--------|-------|----------|
| AHQ-2-10, 1986              | R.YLAEVASGEK.K                                                          | 1067.17419 | 2 | 4.22E-06 | 0.86  | 3.15   | -     | 945.5    |
| gi 4502695 ref NP_001779.1  | cell division cycle 10; cell division cycle 10 (homolog to CDC10 of S.c |            |   | 2.94E-09 | 2.45  | 30.25  | 13.60 | 48786.6  |
| AHQ-2-8, 3708               | K.IYFEPTEDEEENKLVK.K                                                    | 2099.23685 | 2 | 2.69E-04 | 0.71  | 3.33   | -     | 348.7    |
| AHQ-2-13, 5393              | K.NLEGGYVGFANLPNQVYR.K                                                  | 1955.16216 | 2 | 8.38E-05 | 0.91  | 4.21   | -     | 729.8    |
| AHQ-2-14-, 5393 - 5465      | K.NLEGGYVGFANLPNQVYR.K                                                  | 1955.16216 | 2 | 4.93E-07 | 0.91  | 3.92   | -     | 882.7    |
| AHQ-2-13-, 5494             | K.NLEGGYVGFANLPNQVYR.K                                                  | 1955.16216 | 2 | 4.25E-07 | 0.95  | 4.87   | -     | 977.2    |
| AHQ-2-8, 5220               | K.NLEGGYVGFANLPNQVYR.K                                                  | 1955.16216 | 2 | 1.82E-08 | 0.95  | 5.08   | -     | 1086.5   |
| AHQ-2-14-, 6299             | K.STLINSFLFDLYSPEYPPGSHR.I                                              | 2608.88640 | 3 | 3.33E-09 | 0.63  | 3.08   | -     | 315.8    |
| AHQ-2-14-, 6531             | K.STLINSFLFDLYSPEYPPGSHR.I                                              | 2608.88640 | 3 | 2.94E-09 | 0.78  | 3.35   | -     | 629.2    |
| AHQ-2-13, 6468              | K.STLINSFLFDLYSPEYPPGSHR.I                                              | 2608.88640 | 3 | 7.05E-04 | 0.53  | 3.13   | -     | 453.2    |
| gi 6912638 ref NP_036557.1  | ras suppressor protein 1 [Homo sapiens]                                 |            |   | 2.97E-09 | 6.21  | 80.29  | 48.70 | 31540.1  |
| AHQ-2-12, 7181 - 7185       | K.AENNPWVTPIADQFLGVSHVFEYR.S                                            | 3032.35678 | 3 | 7.70E-08 | 0.81  | 3.69   | -     | 503.4    |
| AHQ-2-10, 5900 - 5958       | R.ALYLSDNDFEILPPDIGK.L                                                  | 2021.25559 | 2 | 2.06E-07 | 0.95  | 4.89   | -     | 587.5    |
| AHQ-2-10, 6010 - 6071       | R.ALYLSDNDFEILPPDIGK.L                                                  | 2021.25559 | 2 | 2.97E-09 | 0.87  | 4.03   | -     | 464.7    |
| AHQ-2-10, 1474 - 1536       | K.ELHIQGNR.L                                                            | 967.06432  | 1 | 2.08E-04 | 0.17  | 2.48   | -     | 136.0    |
| AHQ-2-14-, 6877             | R.GISNM*LDVNGFLTSLHITQLVLSHKN.L                                         | 2869.28903 | 3 | 5.83E-04 | 0.80  | 3.73   | -     | 708.7    |
| AHQ-2-10, 6754              | R.GISNMLDVNGFLTSLHITQLVLSHKN.L                                          | 2853.28963 | 2 | 4.42E-08 | 0.82  | 3.89   | -     | 314.6    |
| AHQ-2-10, 5507 - 5576       | K.LQLSLRDNLDLSPK.E                                                      | 1839.16919 | 2 | 6.16E-08 | 0.95  | 5.06   | -     | 1562.1   |
| AHQ-2-10, 5408 - 5431       | K.LQLSLRDNLDLSPK.E                                                      | 1839.16919 | 2 | 3.78E-09 | 0.95  | 4.93   | -     | 1538.4   |
| AHQ-2-10, 5536 - 5598       | R.LTVLPPPELGNLDLTGQK.Q                                                  | 1809.09672 | 2 | 5.70E-06 | 0.94  | 4.46   | -     | 768.4    |
| AHQ-2-11, 5669 - 5728       | R.LTVLPPPELGNLDLTGQK.Q                                                  | 1809.09672 | 2 | 8.69E-07 | 0.91  | 4.17   | -     | 602.1    |
| AHQ-2-10, 5594              | R.LTVLPPPELGNLDLTGQK.Q                                                  | 1809.09672 | 3 | 8.03E-07 | 0.96  | 5.83   | -     | 1156.0   |
| AHQ-2-10, 5658 - 5727       | R.LTVLPPPELGNLDLTGQK.Q                                                  | 1809.09672 | 2 | 3.96E-05 | 0.92  | 4.06   | -     | 595.6    |
| AHQ-2-12, 6013 - 6078       | R.LTVLPPPELGNLDLTGQK.Q                                                  | 1809.09672 | 2 | 2.83E-07 | 0.88  | 3.68   | -     | 551.5    |
| AHQ-2-14-, 5896 - 5969      | R.LTVLPPPELGNLDLTGQK.Q                                                  | 1809.09672 | 2 | 2.29E-04 | 0.87  | 4.01   | -     | 456.6    |
| AHQ-2-11, 6764 - 6766       | K.NLEVLNFFNNQIEELPTQISSLQK.L                                            | 2820.14663 | 2 | 7.80E-09 | 0.90  | 4.60   | -     | 606.0    |
| AHQ-2-14-, 6873 - 6943      | K.NLEVLNFFNNQIEELPTQISSLQK.L                                            | 2820.14663 | 3 | 3.33E-05 | 0.90  | 5.00   | -     | 550.1    |
| AHQ-2-10, 6648 - 6719       | K.NLEVLNFFNNQIEELPTQISSLQK.L                                            | 2820.14663 | 2 | 4.99E-08 | 0.87  | 4.48   | -     | 390.3    |
| gi 21735621 ref NP_005909.2 | mitochondrial malate dehydrogenase precursor [Homo sapiens]             |            |   | 3.20E-09 | 5.00  | 60.27  | 32.50 | 35503.0  |
| AHQ-2-9, 6462 - 6482        | K.GYLGPEQLPDCLKGCDDVVIPAGVPR.K                                          | 2813.24211 | 3 | 6.91E-04 | 0.78  | 4.06   | -     | 512.2    |
| AHQ-2-9, 6467               | K.GYLGPEQLPDCLKGCDDVVIPAGVPR.K                                          | 2813.24211 | 2 | 2.25E-07 | 0.90  | 4.69   | -     | 376.8    |
| AHQ-2-13, 6123              | K.GYLGPEQLPDCLKGCDDVVIPAGVPR.K                                          | 2813.24211 | 3 | 2.36E-04 | 0.63  | 3.35   | -     | 493.8    |
| AHQ-2-9, 5560               | R.LTYLIDIAHTPGVAADLSHIETK.A                                             | 2366.65506 | 3 | 7.56E-09 | 0.96  | 5.49   | -     | 1424.9   |
| AHQ-2-9, 5554               | R.LTYLIDIAHTPGVAADLSHIETK.A                                             | 2366.65506 | 2 | 2.96E-06 | 0.56  | 2.76   | -     | 324.9    |
| AHQ-2-11, 5389              | K.SQETECTYFSTPLLLGK.K                                                   | 1976.19328 | 2 | 1.18E-07 | 0.96  | 4.84   | -     | 1112.4   |
| AHQ-2-9, 5527               | K.SQETECTYFSTPLLLGK.K                                                   | 1976.19328 | 2 | 2.54E-04 | 0.92  | 3.81   | -     | 1117.7   |
| AHQ-2-9, 6779 - 6782        | K.VAVLGASGGIQQPLSLLLK.N                                                 | 1794.17156 | 2 | 2.05E-04 | 0.96  | 5.35   | -     | 1036.2   |
| AHQ-2-9, 4986               | K.VDFPDQDLTALTRG.I                                                      | 1561.72111 | 2 | 3.20E-09 | 0.81  | 2.75   | -     | 963.7    |
| AHQ-2-9, 2284               | R.VNVPVIGGHAGK.T                                                        | 1148.34004 | 1 | 1.80E-05 | 0.42  | 2.29   | -     | 429.5    |
| gi 4557675 ref NP_000201.1  | integrin alpha chain, alpha 6 [Homo sapiens]                            |            |   | 3.26E-09 | 3.35  | 40.26  | 5.00  | 11950.9  |
| AHQ-2-4, 6025               | K.DFHYVFGAPGTYNWK.G                                                     | 1916.12609 | 2 | 1.46E-07 | 0.97  | 4.84   | -     | 1538.9   |
| AHQ-2-4, 3456 - 3464        | K.FGSCQQGVAATFTK.D                                                      | 1503.66172 | 2 | 3.26E-09 | 0.95  | 4.01   | -     | 1212.9   |
| AHQ-2-4, 3574               | K.FSYLPIQK.G                                                            | 996.18393  | 1 | 4.58E-04 | 0.50  | 2.07   | -     | 645.5    |
| AHQ-2-4, 4912               | R.IEDDMGGDWSFCDDR.L                                                     | 1876.91588 | 2 | 2.01E-04 | 0.94  | 3.56   | -     | 1452.9   |
| gi 18860900 ref NP_002834.2 | protein tyrosine phosphatase, receptor type, J precursor; protein tyro  |            |   | 3.30E-09 | 13.37 | 150.25 | 16.60 | 145926.2 |
| AHQ-2-1, 3505               | R.AGSPTAPVHDESLVGPVDPSSGQQR.D                                           | 2576.71806 | 2 | 2.67E-07 | 0.84  | 3.53   | -     | 557.1    |
| AHQ-2-1, 5976 - 5993        | K.AVISPTNVLTKW.S                                                        | 1529.80530 | 2 | 3.04E-04 | 0.88  | 3.33   | -     | 674.0    |
| AHQ-2-1, 4476               | K.AYAVILTTGEAGHPSADVLK.Y                                                | 2014.26782 | 3 | 3.30E-09 | 0.97  | 5.01   | -     | 1831.7   |
| AHQ-2-1, 5108               | R.DTEVLVGLGEPGTR.Y                                                      | 1499.69122 | 2 | 8.77E-04 | 0.65  | 2.86   | -     | 632.5    |
| AHQ-2-1, 2813 - 2820        | K.FSGFEASHGPK.A                                                         | 1277.40900 | 2 | 4.32E-07 | 0.90  | 3.51   | -     | 851.6    |
| AHQ-2-1, 5366               | K.GLIDGAEYSVFSR.Y                                                       | 1501.62253 | 2 | 6.77E-09 | 0.88  | 3.18   | -     | 1159.7   |
| AHQ-2-1, 4885               | K.GLIDGAEYSVFSR.Y                                                       | 1501.62253 | 2 | 3.07E-07 | 0.89  | 3.31   | -     | 973.2    |
| AHQ-2-1, 3977               | K.KDFIATQGPLPNTLK.D                                                     | 1643.90840 | 2 | 6.03E-06 | 0.95  | 4.23   | -     | 1403.7   |
| AHQ-2-1, 5041               | K.SFCTDPASMA*ASFDCEVWP.K.E                                              | 2167.37954 | 2 | 5.68E-05 | 0.94  | 4.27   | -     | 942.1    |
| AHQ-2-1, 5890               | K.SFCTDPASMA*ASFDCEVWP.K.E                                              | 2151.38014 | 2 | 7.96E-04 | 0.87  | 3.72   | -     | 631.6    |
| AHQ-2-1, 5468               | K.SPDGASYYVHLVIESK.H                                                    | 1895.05866 | 2 | 1.21E-08 | 0.95  | 4.79   | -     | 1153.7   |
| AHQ-2-1, 2754               | K.TKGDPLGTEGGLDASNTER.S                                                 | 1918.99702 | 2 | 7.65E-07 | 0.93  | 4.48   | -     | 847.6    |
| AHQ-2-1, 3741               | K.TPSSTGSPVFDI.K.A                                                      | 1433.58810 | 2 | 7.44E-05 | 0.87  | 3.15   | -     | 1000.3   |
| AHQ-2-1, 4560               | R.VENFEAYFK.K                                                           | 1147.26100 | 2 | 1.33E-05 | 0.93  | 3.93   | -     | 748.8    |
| AHQ-2-1, 4384               | K.VITEPIPVSDLR.V                                                        | 1339.56259 | 2 | 2.17E-05 | 0.87  | 3.50   | -     | 623.1    |
| AHQ-2-1, 3920               | R.VLLESIGSHEELTQDSR.L                                                   | 1914.06352 | 2 | 5.68E-09 | 0.93  | 4.35   | -     | 883.5    |
| AHQ-2-1, 3926               | R.VLLESIGSHEELTQDSR.L                                                   | 1914.06352 | 3 | 2.66E-06 | 0.92  | 4.18   | -     | 971.2    |
| AHQ-2-1, 4004               | R.VLLESIGSHEELTQDSR.L                                                   | 1914.06352 | 2 | 7.15E-04 | 0.77  | 3.03   | -     | 670.9    |
| gi 8922673 ref NP_060692.1  | parvin, alpha; alpha-parvin; actopaxin [Homo sapiens]                   |            |   | 3.31E-09 | 1.74  | 20.21  | 5.60  | 42243.4  |
| AHQ-2-13, 4647 - 4725       | R.DAFDTLFDHAPDK.L                                                       | 1492.57096 | 2 | 1.92E-07 | 0.94  | 4.02   | -     | 1067.2   |
| AHQ-2-9, 4519               | R.DAFDTLFDHAPDK.L                                                       | 1492.57096 | 2 | 3.31E-09 | 0.96  | 4.27   | -     | 1422.8   |
| AHQ-2-9, 4526               | R.DAFDTLFDHAPDK.L                                                       | 1492.57096 | 1 | 3.11E-08 | 0.87  | 3.79   | -     | 592.3    |
| AHQ-2-13-, 4726             | R.DAFDTLFDHAPDK.L                                                       | 1492.57096 | 2 | 6.42E-09 | 0.95  | 4.06   | -     | 1520.2   |
| AHQ-2-13-, 4190             | R.VLYNLFYK.Y                                                            | 998.19983  | 2 | 2.95E-04 | 0.81  | 2.80   | -     | 463.5    |
| AHQ-2-9, 3854               | R.VLYNLFYK.Y                                                            | 998.19983  | 1 | 3.65E-04 | 0.34  | 2.32   | -     | 397.2    |
| AHQ-2-9, 3718               | R.VLYNLFYK.Y                                                            | 998.19983  | 2 | 3.22E-05 | 0.78  | 2.69   | -     | 435.9    |
| gi 4504743 ref NP_002194.1  | integrin alpha 2 precursor; Integrin, alpha-2 (CD49B; alpha-2 subunit o |            |   | 3.44E-09 | 3.96  | 50.24  | 7.40  | 129294.4 |
| AHQ-2-3, 4661               | K.EKNPLMLYTGQVTDK.A                                                     | 1737.99886 | 2 | 1.03E-04 | 0.36  | 2.66   | -     | 317.5    |
| AHQ-2-3, 6851               | K.GNWLVLGSPWGFENR.M                                                     | 1917.11562 | 2 | 1.27E-04 | 0.91  | 4.22   | -     | 662.3    |
| AHQ-2-4, 4876               | K.KGILGQHFLEGGEGIENTR.F                                                 | 2224.46193 | 2 | 1.73E-06 | 0.95  | 4.81   | -     | 813.3    |
| AHQ-2-3, 3312               | K.TQVGLIYANNPR.V                                                        | 1474.64668 | 2 | 9.58E-06 | 0.90  | 3.03   | -     | 1303.8   |
| AHQ-2-4, 5304               | R.VDISLENPGTSPALEAYSETAK.V                                              | 2293.46974 | 2 | 3.44E-09 | 0.84  | 3.41   | -     | 698.3    |
| AHQ-2-3, 5288               | R.VDISLENPGTSPALEAYSETAK.V                                              | 2293.46974 | 2 | 1.91E-04 | 0.92  | 4.17   | -     | 803.3    |
| gi 4507143 ref NP_003786.1  | sorting nexin 3 isoform a; sorting nexin 3A [Homo sapiens]              |            |   | 3.70E-09 | 1.86  | 20.22  | 16.70 | 18762.2  |
| AHQ-2-12, 4594              | R.CLHM*FLQDEIIDK.S                                                      | 1679.93944 | 2 | 3.39E-04 | 0.91  | 3.73   | -     | 1259.3   |
| AHQ-2-12, 5117 - 5119       | R.GDDGIFDDNFIEER.K                                                      | 1642.66158 | 2 | 3.70E-09 | 0.95  | 4.49   | -     | 1081.3   |
| gi 20070156 ref NP_003565.2 | vessicle-associated membrane protein (VAMP)-associated protein of 33 k  |            |   | 3.76E-09 | 1.86  | 20.19  | 5.80  | 27317.4  |
| AHQ-2-12, 4267              | K.FKGFPTDVVTTNLK.L                                                      | 1567.81039 | 2 | 3.75E-04 | 0.91  | 3.42   | -     | 1070.1   |
| AHQ-2-12, 4098 - 4105       | K.GPFTDVVTTNLK.L                                                        | 1292.46278 | 2 | 3.76E-09 | 0.95  | 3.82   | -     | 1561.4   |
| gi 14149734 ref NP_065174.1 | coronin, actin binding protein, 1B [Homo sapiens]                       |            |   | 4.17E-09 | 0.95  | 10.27  | 5.90  | 54234.4  |
| AHQ-2-7, 7101               | R.KSDLFQDDLYPDATGPEAALEAEWVSGR.D                                        | 3211.39431 | 3 | 2.70E-07 | 0.93  | 4.82   | -     | 1011.5   |
| AHQ-2-6, 6967 - 6986        | R.KSDLFQDDLYPDATGPEAALEAEWVSGR.D                                        | 3211.39431 | 3 | 4.17E-09 | 0.95  | 5.49   | -     | 1226.1   |
| gi 29727565 ref XP_291384.1 | similar to Cytochrome c, somatic [Homo sapiens]                         |            |   | 4.20E-09 | 3.62  | 40.29  | 17.10 | 11621.4  |
| AHQ-2-13, 6344 - 6423       | K.GIIVGEDTLM*EYLENPK.K                                                  | 2025.26771 | 2 | 1.53E-04 | 0.96  | 4.41   | -     | 1645.1   |
| AHQ-2-13-, 6946             | K.GIIVGEDTLM*EYLENPK.K                                                  | 2009.26831 | 2 | 7.59E-07 | 0.97  | 5.77   | -     | 1792.2   |
| AHQ-2-13-, 6746             | K.GIIVGEDTLM*EYLENPK.K                                                  | 2137.44123 | 2 | 4.20E-09 | 0.97  | 4.82   | -     | 1492.7   |
| AHQ-2-13-, 6751             | K.GIIVGEDTLM*EYLENPK.K                                                  | 2137.44123 | 3 | 2.39E-07 | 0.72  | 3.20   | -     | 439.7    |
| AHQ-2-13, 6523              | K.GIIVGEDTLM*EYLENPK.K                                                  | 2137.44123 | 2 | 6.39E-05 | 0.92  | 4.22   | -     | 754.6    |
| AHQ-2-13, 5981              | K.GIIVGEDTLM*EYLENPK.K                                                  | 2153.44063 | 2 | 3.23E-06 | 0.72  | 3.34   | -     | 501.0    |
| gi 7657486 ref NP_055217.1  | low molecular mass ubiquinone-binding protein [Homo sapiens]            |            |   | 4.55E-09 | 0.95  | 10.21  | 14.00 | 11316.3  |
| AHQ-2-14-, 3871             | R.HVISYSLSPFEQR.A                                                       | 1563.73870 | 2 | 4.55E-09 | 0.95  | 4.25   | -     | 1067.1   |
| gi 4502013 ref NP_001616.1  | adenylate kinase 2 isoform a; adenylate kinase, mitochondrial; adenylat |            |   | 4.76E-09 | 3.65  | 40.29  | 34.70 | 26477.6  |
| AHQ-2-10, 6814 - 6815       | R.GHSAIDASQTPDVFASILAAFSK.A                                             | 2546.85974 | 2 | 3.09E-04 | 0.97  | 5.81   | -     | 1435.4   |
| AHQ-2-10, 3632              | R.LQAYHTQTTPLIEYYR.K                                                    | 1998.22695 | 3 | 2.22E-06 | 0.61  | 3.42   | -     | 666.3    |
| AHQ-2-10, 3618              | R.LQAYHTQTTPLIEYYR.K                                                    | 1998.22695 | 2 | 7.51E-08 | 0.97  | 5.25   | -     | 1724.3   |
| AHQ-2-10, 5670              | K.NLETPLCKNGFLDGFPR.T                                                   | 2093.39146 | 2 | 4.76E-09 | 0.82  | 3.29   | -     | 653.0    |
| AHQ-2-10, 3807              | R.SYHEFNPPKPKMKDDITGEPLIR.R                                             | 2844.14855 | 2 | 5.43E-04 | 0.89  | 3.66   | -     | 736.3    |
| gi 29742827 ref XP_294099.1 | similar to myosin:SUBUNIT=regulatory light chain [Homo sapiens]         |            |   | 5.08E-09 | 2.63  | 30.22  | 14.20 | 17094.0  |
| AHQ-2-11, 2890              | K.EAFNM*IDQ                                                             |            |   |          |       |        |       |          |

|                             |                                                                         |            |   |          |      |       |       |          |
|-----------------------------|-------------------------------------------------------------------------|------------|---|----------|------|-------|-------|----------|
| AHQ-2-11, 3636 - 3712       | R.FTDEEVDLYR.E                                                          | 1416.47127 | 2 | 2.18E-08 | 0.97 | 4.37  | -     | 1989.9   |
| AHQ-2-11, 3716 - 3780       | R.FTDEEVDLYR.E                                                          | 1416.47127 | 1 | 4.48E-07 | 0.32 | 1.89  | -     | 491.8    |
| AHQ-2-11, 3722 - 3784       | R.FTDEEVDLYR.E                                                          | 1416.47127 | 1 | 1.50E-08 | 0.42 | 2.32  | -     | 369.8    |
| AHQ-2-11, 3792              | R.FTDEEVDLYR.E                                                          | 1416.47127 | 2 | 5.08E-09 | 0.97 | 4.44  | -     | 1794.9   |
| AHQ-2-10, 3630              | R.FTDEEVDLYR.E                                                          | 1416.47127 | 2 | 3.12E-04 | 0.92 | 3.51  | -     | 802.0    |
| AHQ-2-12, 3849 - 3850       | R.FTDEEVDLYR.E                                                          | 1416.47127 | 2 | 4.78E-07 | 0.96 | 4.19  | -     | 1563.1   |
| AHQ-2-13, 3828 - 3899       | R.FTDEEVDLYR.E                                                          | 1416.47127 | 2 | 5.51E-06 | 0.93 | 2.92  | -     | 1580.2   |
| AHQ-2-14, 4754              | R.FTDEEVDLYR.E                                                          | 1416.47127 | 2 | 7.07E-09 | 0.96 | 3.99  | -     | 1625.0   |
| AHQ-2-13-, 3937 - 3942      | R.FTDEEVDLYR.E                                                          | 1416.47127 | 2 | 1.23E-07 | 0.97 | 3.99  | -     | 1896.2   |
| AHQ-2-14-, 3839             | R.FTDEEVDLYR.E                                                          | 1416.47127 | 2 | 4.85E-07 | 0.96 | 4.02  | -     | 1469.3   |
| AHQ-2-14-, 3845             | R.FTDEEVDLYR.E                                                          | 1416.47127 | 1 | 7.34E-07 | 0.29 | 1.94  | -     | 283.7    |
| gi 9966825 ref NP_065089.1  | HEF like Protein [Homo sapiens]                                         |            |   | 5.08E-09 | 1.89 | 20.28 | 4.30  | 86696.2  |
| AHQ-2-13-, 4233             | K.AISAFHGLSSSQPAEIIQSK.L                                                | 2260.48935 | 2 | 1.75E-07 | 0.97 | 5.50  | -     | 1530.1   |
| AHQ-2-13-, 3454             | K.LVDTLTLCMETQER.D                                                      | 1496.68930 | 2 | 5.08E-09 | 0.92 | 3.60  | -     | 877.3    |
| gi 14149680 ref NP_056107.1 | KIAA0747 protein [Homo sapiens]                                         |            |   | 5.28E-09 | 2.71 | 30.19 | 4.30  | 122855.6 |
| AHQ-2-12, 5591              | R.FEWELPLDEAQR.R                                                        | 1533.66622 | 2 | 5.28E-09 | 0.88 | 3.56  | -     | 596.9    |
| AHQ-2-7, 7067               | R.LLVPLVPLDQVAQLR.S                                                     | 1790.13977 | 2 | 1.99E-07 | 0.90 | 3.66  | -     | 617.0    |
| AHQ-2-6, 6998               | R.LLVPLVPLDQVAQLR.S                                                     | 1790.13977 | 2 | 5.21E-07 | 0.86 | 3.38  | -     | 532.1    |
| AHQ-2-4, 7384               | R.LLVPLVPLDQVAQLR.S                                                     | 1790.13977 | 2 | 1.01E-06 | 0.70 | 2.65  | -     | 451.8    |
| AHQ-2-12, 4022              | R.LTHVDSPLLEAPAGPLGQVK.L                                                | 1930.19405 | 2 | 2.39E-04 | 0.93 | 3.89  | -     | 1141.9   |
| gi 4506405 ref NP_002872.1  | v-ral simian leukemia viral oncogene homolog B; RAS-like protein B; GTP |            |   | 5.40E-09 | 2.82 | 30.28 | 15.50 | 23408.4  |
| AHQ-2-10, 3560              | K.AEEDKIPLLVGNK.S                                                       | 1525.77182 | 2 | 2.21E-07 | 0.90 | 3.40  | -     | 864.5    |
| AHQ-2-10, 3322              | R.SKAEWGVQYVYVTSAK.T                                                    | 1812.95765 | 3 | 3.08E-07 | 0.94 | 4.04  | -     | 1147.8   |
| AHQ-2-10, 3303              | R.SKAEWGVQYVYVTSAK.T                                                    | 1812.95765 | 2 | 5.40E-09 | 0.98 | 5.61  | -     | 1698.4   |
| AHQ-2-10, 3152              | R.VKAEEDKIPLLVGNK.S                                                     | 1753.07630 | 2 | 6.40E-05 | 0.95 | 4.87  | -     | 927.7    |
| gi 5031931 ref NP_005585.1  | nascent-polypeptide-associated complex alpha polypeptide [Homo sapiens] |            |   | 5.64E-09 | 0.94 | 10.20 | 6.50  | 23383.7  |
| AHQ-2-13, 4035              | K.SPASDTYIVFGEAK.I                                                      | 1485.61987 | 2 | 5.64E-09 | 0.94 | 4.07  | -     | 1076.5   |
| gi 4507789 ref NP_003338.1  | ubiquitin-conjugating enzyme E2L 3 [Homo sapiens]                       |            |   | 5.69E-09 | 0.93 | 10.19 | 9.70  | 1786.5   |
| AHQ-2-12, 5279 - 5299       | R.IEINFPAEYFPKPK.I                                                      | 1791.08155 | 3 | 5.69E-09 | 0.93 | 3.87  | -     | 1345.4   |
| AHQ-2-12, 5217 - 5294       | R.IEINFPAEYFPKPK.I                                                      | 1791.08155 | 2 | 2.29E-06 | 0.80 | 3.65  | -     | 581.7    |
| gi 21361785 ref NP_543010.2 | histidyl-tRNA synthetase 2; histidyl-tRNA synthetase; bA379J5.3; chrom  |            |   | 5.94E-09 | 0.98 | 10.30 | 12.70 | 24013.4  |
| AHQ-2-10, 6635              | K.GNKPDPFHLMPTQAEFGYNSFLQLR.K                                           | 3141.46192 | 3 | 5.94E-09 | 0.98 | 6.09  | -     | 2102.2   |
| gi 4758460 ref NP_004479.1  | glycoprotein V (platelet) [Homo sapiens]                                |            |   | 6.02E-09 | 2.95 | 40.27 | 14.80 | 60958.9  |
| AHQ-2-5, 5487               | R.CAGPGAGHAGLPLWALPGGDAECPGPR.G                                         | 2587.87539 | 3 | 3.63E-05 | 0.78 | 4.10  | -     | 594.2    |
| AHQ-2-1, 5861               | R.CAGPGAGHAGLPLWALPGGDAECPGPR.G                                         | 2587.87539 | 3 | 5.84E-05 | 0.75 | 3.87  | -     | 532.1    |
| AHQ-2-5, 4611               | R.GVLQSQSFGMTVLQR.L                                                     | 1738.99008 | 2 | 2.19E-06 | 0.96 | 4.25  | -     | 1895.0   |
| AHQ-2-5, 3732               | R.LTEVLLGHNSWR.C                                                        | 1425.61726 | 1 | 4.06E-05 | 0.25 | 2.16  | -     | 201.3    |
| AHQ-2-5, 7575 - 7616        | K.LVNLQELALNQQLDFLPSALFTNLENL.K.L                                       | 3314.77659 | 3 | 6.02E-09 | 0.95 | 5.33  | -     | 1353.9   |
| gi 17149842 ref NP_004461.2 | FK506-binding protein 2 precursor; FK506-binding protein 2 (13kD); pep  |            |   | 6.04E-09 | 2.25 | 30.18 | 19.00 | 15649.2  |
| AHQ-2-13-, 5058             | K.GWDQGLGMCEGEK.R                                                       | 1581.75275 | 2 | 1.89E-07 | 0.86 | 3.24  | -     | 869.8    |
| AHQ-2-13-, 4469             | K.GWDQGLGMCEGEK.R                                                       | 1737.93910 | 2 | 6.13E-04 | 0.60 | 2.80  | -     | 384.9    |
| AHQ-2-13-, 4229 - 4241      | K.LVIPSELGYGER.G                                                        | 1333.51491 | 2 | 6.04E-09 | 0.78 | 2.76  | -     | 519.2    |
| AHQ-2-13, 4183              | K.LVIPSELGYGER.G                                                        | 1333.51491 | 2 | 2.32E-07 | 0.73 | 2.90  | -     | 399.9    |
| gi 4502565 ref NP_001740.1  | calpain, small subunit 1; calpain, small polypeptide; calcium-dependent |            |   | 6.05E-09 | 2.59 | 30.23 | 10.80 | 28315.5  |
| AHQ-2-12, 2874              | K.TDGFIDTCR.S                                                           | 1143.20921 | 2 | 4.77E-04 | 0.73 | 3.04  | -     | 412.2    |
| AHQ-2-12, 6785              | R.YSDESGNMDFDNFISCLVR.L                                                 | 2287.42568 | 2 | 6.05E-09 | 0.93 | 4.53  | -     | 1133.3   |
| AHQ-2-12, 7061              | R.YSDESGNMDFDNFISCLVR.L                                                 | 2271.42628 | 2 | 3.60E-08 | 0.93 | 4.52  | -     | 933.3    |
| AHQ-2-13, 6588              | R.YSDESGNMDFDNFISCLVR.L                                                 | 2287.42568 | 2 | 1.38E-04 | 0.74 | 3.16  | -     | 588.0    |
| AHQ-2-14-, 6596 - 6663      | R.YSDESGNMDFDNFISCLVR.L                                                 | 2287.42568 | 2 | 2.68E-08 | 0.87 | 3.82  | -     | 808.1    |
| AHQ-2-11, 6473              | R.YSDESGNMDFDNFISCLVR.L                                                 | 2287.42568 | 2 | 2.93E-05 | 0.81 | 3.56  | -     | 610.3    |
| gi 4504521 ref NP_002147.1  | heat shock 60kDa protein 1 (chaperonin); mitochondrial matrix protein P |            |   | 6.11E-09 | 2.73 | 40.31 | 12.90 | 61024.2  |
| AHQ-2-14-, 6907             | R.ALM*LGQVLDLADAVAVTMGPK.G                                              | 2130.55828 | 2 | 6.11E-09 | 0.98 | 6.22  | -     | 2455.4   |
| AHQ-2-7, 3871 - 3876        | R.GYSPYFINTSK.G                                                         | 1390.56492 | 1 | 2.60E-05 | 0.22 | 2.22  | -     | 290.4    |
| AHQ-2-14-, 6979 - 6980      | R.TALLDAAGVASLTLAEVVVTEIPKEEK.D                                         | 2870.28530 | 3 | 3.25E-04 | 0.68 | 3.32  | -     | 546.0    |
| AHQ-2-7, 5643               | K.TLNDELEIEGMMK.F                                                       | 1505.71604 | 2 | 4.60E-04 | 0.84 | 3.34  | -     | 712.7    |
| gi 2956810 ref NP_006467.3  | ATP synthase, H+ transporting, mitochondrial F0 complex, subunit g; AT  |            |   | 6.15E-09 | 3.28 | 40.21 | 23.30 | 11400.3  |
| AHQ-2-14-, 4525             | R.LATFWYAK.V                                                            | 1163.34840 | 2 | 2.42E-06 | 0.74 | 2.57  | -     | 450.5    |
| AHQ-2-14, 4566              | K.TPALVNAAVTYSK.P                                                       | 1335.53080 | 2 | 1.52E-05 | 0.84 | 3.33  | -     | 726.3    |
| AHQ-2-14-, 3659             | K.TPALVNAAVTYSK.P                                                       | 1335.53080 | 2 | 6.15E-09 | 0.97 | 4.28  | -     | 1717.6   |
| AHQ-2-14, 4504              | K.TPALVNAAVTYSKPR.L                                                     | 1588.83283 | 3 | 4.56E-04 | 0.88 | 3.43  | -     | 1318.6   |
| AHQ-2-14, 5292 - 5364       | K.VELVPTPAEIPR.A                                                        | 1418.66294 | 2 | 8.10E-04 | 0.70 | 2.59  | -     | 449.7    |
| gi 4503725 ref NP_000792.1  | FK506-binding protein 1A; FK506-binding protein                         |            |   | 6.15E-09 | 3.75 | 40.29 | 29.60 | 11950.6  |
| AHQ-2-13, 3380              | R.GQTCVVHYTGMLDGGK.F                                                    | 1925.17623 | 2 | 1.28E-04 | 0.90 | 3.96  | -     | 808.1    |
| AHQ-2-13, 3924 - 3993       | R.GWEEGVAQMSVQGR.A                                                      | 1534.67926 | 2 | 1.20E-05 | 0.93 | 4.18  | -     | 1142.5   |
| AHQ-2-13-, 3954 - 4027      | R.GWEEGVAQMSVQGR.A                                                      | 1534.67926 | 2 | 1.40E-04 | 0.60 | 2.72  | -     | 842.9    |
| AHQ-2-13, 3403 - 3408       | K.RGQTCVVHYTGMLDGGK.K                                                   | 1953.18967 | 2 | 3.62E-08 | 0.98 | 5.85  | -     | 1856.1   |
| AHQ-2-13-, 3407 - 3411      | K.RGQTCVVHYTGMLDGGK.K                                                   | 1953.18967 | 2 | 3.47E-08 | 0.98 | 5.81  | -     | 1710.1   |
| AHQ-2-13-, 2987             | K.RGQTCVVHYTGMLDGGK.F                                                   | 2081.36259 | 3 | 6.15E-09 | 0.94 | 4.44  | -     | 1275.3   |
| AHQ-2-13, 3021              | K.RGQTCVVHYTGMLDGGK.F                                                   | 2081.36259 | 2 | 8.24E-05 | 0.96 | 4.47  | -     | 1463.7   |
| AHQ-2-13, 2923              | K.RGQTCVVHYTGMLDGGK.F                                                   | 2081.36259 | 2 | 9.73E-04 | 0.94 | 4.62  | -     | 814.0    |
| gi 21314617 ref NP_000433.2 | platelet/endothelial cell adhesion molecule (CD31 antigen); platelet/e  |            |   | 6.27E-09 | 7.60 | 90.31 | 17.60 | 82449.6  |
| AHQ-2-5, 5919               | R.CESISGTLPLISYLLK.T                                                    | 1811.08954 | 2 | 4.15E-06 | 0.93 | 4.24  | -     | 685.8    |
| AHQ-2-4, 6752               | K.CTIQVTHLAQEFPEIIQK.D                                                  | 2270.63371 | 2 | 2.18E-07 | 0.98 | 6.14  | -     | 1604.8   |
| AHQ-2-3, 6701               | K.CTIQVTHLAQEFPEIIQK.D                                                  | 2270.63371 | 2 | 5.82E-06 | 0.95 | 4.17  | -     | 1227.3   |
| AHQ-2-4, 6533 - 6548        | R.DQNFVILEFPVEEQDR.V                                                    | 1979.13566 | 2 | 9.25E-04 | 0.38 | 2.71  | -     | 381.8    |
| AHQ-2-5, 6351               | R.DQNFVILEFPVEEQDR.V                                                    | 1979.13566 | 2 | 3.14E-04 | 0.93 | 4.78  | -     | 865.2    |
| AHQ-2-6, 6191               | R.DQNFVILEFPVEEQDR.V                                                    | 1979.13566 | 2 | 2.00E-04 | 0.30 | 2.54  | -     | 241.0    |
| AHQ-2-4, 3489               | K.EDTIVSQDFTK.I                                                         | 1512.60049 | 2 | 2.43E-04 | 0.90 | 3.82  | -     | 560.1    |
| AHQ-2-4, 2361 - 2365        | R.IISGIHQMTSESTK.S                                                      | 1532.74472 | 2 | 1.86E-08 | 0.96 | 4.40  | -     | 1190.3   |
| AHQ-2-4, 4269               | R.ISYDAQFEVIK.G                                                         | 1313.48046 | 2 | 7.10E-06 | 0.87 | 3.33  | -     | 709.8    |
| AHQ-2-4, 3266               | K.SDSGTICTAGIDK.V                                                       | 1489.58698 | 2 | 8.73E-05 | 0.91 | 3.91  | -     | 904.9    |
| AHQ-2-4, 4085 - 4162        | K.STESYFIPEVR.I                                                         | 1328.45199 | 2 | 3.68E-04 | 0.84 | 3.23  | -     | 743.5    |
| AHQ-2-3, 5667               | K.VIAPVDEVQISILSSK.V                                                    | 1698.98227 | 2 | 8.19E-07 | 0.84 | 3.34  | -     | 443.4    |
| AHQ-2-4, 5677 - 5684        | K.VIAPVDEVQISILSSK.V                                                    | 1698.98227 | 2 | 6.27E-09 | 0.91 | 3.82  | -     | 682.1    |
| gi 4503823 ref NP_002028.1  | protein-tyrosine kinase fyn isoform a; proto-oncogene tyrosine-protein  |            |   | 6.29E-09 | 0.90 | 10.18 | 2.00  | 60761.5  |
| AHQ-2-7, 3409 - 3413        | K.WTAPAEALYGR.F                                                         | 1235.37302 | 2 | 6.29E-09 | 0.90 | 3.64  | -     | 633.0    |
| gi 18543899 ref XP_086916.1 | similar to Phosphatidylethanolamine-binding protein (PEBP) (Prostatic   |            |   | 6.51E-09 | 0.95 | 10.22 | 8.00  | 21265.8  |
| AHQ-2-11, 3229 - 3230       | K.NRPTISIWGDLDSGK.L                                                     | 1633.74419 | 2 | 6.51E-09 | 0.95 | 4.30  | -     | 1080.2   |
| gi 30150271 ref XP_292964.2 | similar to Heat shock protein HSP 90-beta (HSP 84) (Tumor specific tra  |            |   | 6.67E-09 | 0.92 | 10.21 | 4.10  | 47348.8  |
| AHQ-2-5, 4667               | K.CLELFSLEAEDKKNYK.F                                                    | 2117.40810 | 2 | 6.67E-09 | 0.92 | 4.23  | -     | 1518.2   |
| gi 5031597 ref NP_005710.1  | actin related protein 2/3 complex subunit 3; ARP2/3 protein complex sub |            |   | 6.77E-09 | 2.37 | 30.27 | 23.60 | 20546.5  |
| AHQ-2-11, 6398 - 6408       | K.DTDIVDEAIYFFK.A                                                       | 1592.72721 | 2 | 1.39E-08 | 0.97 | 5.11  | -     | 1444.5   |
| AHQ-2-12, 6729 - 6730       | K.DTDIVDEAIYFFK.A                                                       | 1592.72721 | 2 | 6.77E-09 | 0.98 | 5.30  | -     | 1674.0   |
| AHQ-2-13-, 6709             | K.DTDIVDEAIYFFK.A                                                       | 1592.72721 | 2 | 2.02E-06 | 0.94 | 3.40  | -     | 1561.6   |
| AHQ-2-13, 6517              | K.DTDIVDEAIYFFK.A                                                       | 1592.72721 | 2 | 4.17E-05 | 0.95 | 4.93  | -     | 867.8    |
| AHQ-2-14-, 6568 - 6571      | K.DTDIVDEAIYFFK.A                                                       | 1592.72721 | 2 | 1.84E-05 | 0.88 | 2.55  | -     | 1367.4   |
| AHQ-2-12, 7123              | K.EM*YTLGITNPIPGEPGLNIAIAK.P                                            | 2871.29861 | 2 | 1.99E-04 | 0.47 | 2.76  | -     | 176.5    |
| AHQ-2-11, 5824 - 5828       | R.ETKDTDIVDEAIYFFK.A                                                    | 1951.11899 | 2 | 4.11E-08 | 0.93 | 4.27  | -     | 900.9    |
| gi 4758504 ref NP_004484.1  | hydroxacyl-Coenzyme A dehydrogenase, type II [Homo sapiens]             |            |   | 7.01E-09 | 3.44 | 40.23 | 26.40 | 26922.9  |
| AHQ-2-10, 6806              | R.LGDPAEYAHLVQAIENPFLNGEVIR.L                                           | 2880.24689 | 2 | 7.01E-09 | 0.82 | 3.48  | -     | 616.2    |
| AHQ-2-10, 4747              | R.LVGGQASAVLLDPLNSGGGAQAQ.K                                             | 2196.44680 | 2 | 4.59E-05 | 0.87 | 4.07  | -     | 693.3    |
| AHQ-2-10, 6463 - 6470       | R.VMTIAPGLFGTLLTSLPEK.V                                                 | 2086.52363 | 2 | 3.52E-05 | 0.87 | 3.72  | -     | 673.6    |
| AHQ-2-10, 6098              | R.VM*TIAPGLFGTLLTSLPEK.V                                                | 2102.52303 | 2 | 3.72E-06 | 0.88 | 4.35  | -     | 401.6    |
| gi 4758756 ref NP_004528.1  | nucleosome assembly protein 1-like 1; HSP22-like protein interacting pr |            |   | 7.68E-09 | 3.59 | 40.27 | 14.60 | 45373.8  |
| AHQ-2-7, 7275               | K.GIPEFWLTVFK.N                                                         | 1337.58999 | 2 | 7.68E-09 | 0.75 | 2.99  | -     | 239.4    |
| AHQ-2-7, 5523               | R.LDGLVETPTGYIESLPR.V                                                   | 1861.08535 | 2 | 6.70E-07 | 0.95 | 4.52  | -     | 1022.2   |
| AHQ-2-7, 5609               | R.LDGLVETPTGYIESLPR.V                                                   | 1861.08535 | 2 | 2.85E-04 | 0.87 | 3.67  | -     | 652.9    |



|                            |                                                                             |            |   |          |      |        |       |         |
|----------------------------|-----------------------------------------------------------------------------|------------|---|----------|------|--------|-------|---------|
| AHQ-2-7, 5337 - 5351       | K.NVDLSSDMVQEHDEPILK.H                                                      | 2096.34751 | 2 | 8.65E-08 | 0.97 | 5.40   | -     | 1394.4  |
| AHQ-2-7, 4589              | K.YAVLYOPLFDK.R                                                             | 1357.57807 | 2 | 3.53E-07 | 0.92 | 3.16   | -     | 1143.0  |
| AHQ-2-7, 4508 - 4585       | K.YAVLYOPLFDK.R                                                             | 1357.57807 | 1 | 8.70E-04 | 0.58 | 2.62   | -     | 601.2   |
| gi4505763 ref NP_000282.1  | phosphoglycerate kinase 1 [Homo sapiens]                                    |            |   | 8.22E-09 | 7.67 | 100.28 | 42.20 | 44614.4 |
| AHQ-2-8, 5586              | K.ACANPAAGSVILLENLR.F                                                       | 1771.03187 | 2 | 2.65E-06 | 0.95 | 4.77   | -     | 1092.5  |
| AHQ-2-11, 5562 - 5641      | K.ACANPAAGSVILLENLR.F                                                       | 1771.03187 | 2 | 2.02E-06 | 0.96 | 4.62   | -     | 1508.3  |
| AHQ-2-10, 4938             | K.ALESPERPFALILGGAK.V                                                       | 1770.06542 | 2 | 5.19E-07 | 0.95 | 4.63   | -     | 1125.7  |
| AHQ-2-11, 5253             | K.ALESPERPFALILGGAK.V                                                       | 1770.06542 | 2 | 1.32E-04 | 0.88 | 3.83   | -     | 1135.4  |
| AHQ-2-8, 4924              | K.ALESPERPFALILGGAK.V                                                       | 1770.06542 | 2 | 4.98E-06 | 0.96 | 4.94   | -     | 1527.1  |
| AHQ-2-8, 4932              | K.ALESPERPFALILGGAK.V                                                       | 1770.06542 | 2 | 8.22E-09 | 0.97 | 5.19   | -     | 1762.0  |
| AHQ-2-9, 5255              | K.ALESPERPFALILGGAK.V                                                       | 1770.06542 | 2 | 6.52E-06 | 0.95 | 4.58   | -     | 1395.1  |
| AHQ-2-8, 4496              | K.DVFLKDCVGPVEK.A                                                           | 1750.00620 | 2 | 7.56E-08 | 0.92 | 3.75   | -     | 1035.4  |
| AHQ-2-8, 4495              | K.DVFLKDCVGPVEK.A                                                           | 1750.00620 | 2 | 1.95E-06 | 0.97 | 5.16   | -     | 1373.6  |
| AHQ-2-11, 5198             | K.ITLPVDFVADKFDENAK.T                                                       | 2024.25948 | 2 | 2.55E-05 | 0.51 | 2.77   | -     | 400.0   |
| AHQ-2-8, 5216              | K.SVVLMSHLRPGDVPMPDKYSLEPVAELK.S                                            | 3265.83562 | 3 | 2.33E-06 | 0.96 | 5.54   | -     | 1692.0  |
| AHQ-2-8, 4547              | K.TGQATVASGIPAGWMLDCGPESKK.Y                                                | 2607.90190 | 3 | 4.09E-05 | 0.83 | 3.85   | -     | 487.2   |
| AHQ-2-8, 4993              | K.VLNNMEIGSLFDEEGAK.I                                                       | 1968.17459 | 2 | 1.61E-04 | 0.74 | 3.67   | -     | 296.3   |
| AHQ-2-8, 5315 - 5316       | K.VLPGVDALSNL                                                               | 1098.27456 | 1 | 8.89E-04 | 0.27 | 1.89   | -     | 340.8   |
| AHQ-2-8, 3834              | K.WNTEDKVSHTVSTGGGASLLELLEK.V                                               | 2515.71777 | 2 | 8.31E-04 | 0.73 | 3.01   | -     | 697.5   |
| AHQ-2-13-, 4291 - 4294     | K.YSLEPVAELK.S                                                              | 1248.44991 | 2 | 1.28E-06 | 0.78 | 2.66   | -     | 716.6   |
| gi20127528 ref NP_037459.2 | parvin, beta; CGI-56 protein; beta-parvin [Homo sapiens]                    |            |   | 8.59E-09 | 4.74 | 60.28  | 27.20 | 41714.0 |
| AHQ-2-9, 3130 - 3134       | K.ARPEDVVDLNLK.S                                                            | 1369.54878 | 1 | 5.13E-07 | 0.27 | 2.65   | -     | 192.8   |
| AHQ-2-9, 3131              | K.ARPEDVVDLNLK.S                                                            | 1369.54878 | 2 | 2.75E-05 | 0.91 | 4.32   | -     | 806.9   |
| AHQ-2-13, 3468             | K.ARPEDVVDLNLK.S                                                            | 1369.54878 | 2 | 8.94E-05 | 0.93 | 4.60   | -     | 777.1   |
| AHQ-2-11, 3297             | K.ARPEDVVDLNLK.S                                                            | 1369.54878 | 2 | 4.73E-05 | 0.91 | 3.47   | -     | 961.7   |
| AHQ-2-13-, 3413 - 3482     | K.ARPEDVVDLNLK.S                                                            | 1369.54878 | 2 | 5.24E-06 | 0.88 | 3.80   | -     | 622.8   |
| AHQ-2-9, 5311              | R.DAFDTLFDHAPDKLSVVK.K                                                      | 2019.24293 | 2 | 9.57E-05 | 0.84 | 4.00   | -     | 500.2   |
| AHQ-2-1, 3989              | K.LNVAEVTQSEIGQK.Q                                                          | 1516.67865 | 2 | 3.41E-06 | 0.94 | 4.60   | -     | 802.2   |
| AHQ-2-13, 3807             | K.LNVAEVTQSEIGQK.Q                                                          | 1516.67865 | 2 | 3.91E-06 | 0.90 | 4.00   | -     | 824.4   |
| AHQ-2-9, 4559              | K.NAINSPMALVDVHPEDTQLEENER.T                                                | 3036.23445 | 3 | 4.06E-08 | 0.78 | 3.64   | -     | 422.4   |
| AHQ-2-9, 3731              | K.QLEEDLYDGGVQLK.L                                                          | 1678.82164 | 2 | 4.06E-04 | 0.73 | 3.14   | -     | 780.9   |
| AHQ-2-9, 3938 - 3939       | K.QLEEDLYDGGVQLK.L                                                          | 1678.82164 | 2 | 1.61E-06 | 0.95 | 4.45   | -     | 1086.6  |
| AHQ-2-9, 7354 - 7364       | K.VLLDWINDVLEER.I                                                           | 1713.95549 | 2 | 8.59E-09 | 0.97 | 5.65   | -     | 1370.2  |
| AHQ-2-9, 6579              | K.VLLDWINDVLEER.I                                                           | 1713.95549 | 2 | 3.95E-06 | 0.79 | 3.40   | -     | 607.0   |
| gi28827809 ref NP_789797.1 | nucleoside diphosphate kinase B-like [Homo sapiens]                         |            |   | 8.67E-09 | 5.25 | 60.26  | 43.10 | 15529.0 |
| AHQ-2-12, 3357 - 3367      | R.GDFCIQVR.N                                                                | 1053.17404 | 2 | 2.37E-05 | 0.88 | 3.35   | -     | 1016.5  |
| AHQ-2-12, 2057             | R.NIIHSDSVKSAEK.E                                                           | 1485.62464 | 1 | 7.62E-08 | 0.81 | 3.53   | -     | 659.0   |
| AHQ-2-12, 2049             | R.NIIHSDSVKSAEK.E                                                           | 1485.62464 | 2 | 1.88E-07 | 0.88 | 4.14   | -     | 986.7   |
| AHQ-2-12, 2751             | R.VMLGETNPADSKPGTIR.G                                                       | 1787.03151 | 2 | 4.32E-08 | 0.81 | 3.86   | -     | 478.4   |
| AHQ-2-12, 2566             | R.VM*LGETNPADSKPGTIR.G                                                      | 1803.03091 | 2 | 7.52E-05 | 0.84 | 3.34   | -     | 716.1   |
| AHQ-2-12, 7109             | K.YM*NSGPVAMVWGLNVVK.T                                                      | 2110.48562 | 2 | 8.67E-09 | 0.96 | 5.27   | -     | 1220.3  |
| AHQ-2-12, 7106 - 7134      | K.YMNSGPVAMVWGLNVVK.T                                                       | 2094.48622 | 2 | 1.28E-05 | 0.94 | 4.88   | -     | 576.6   |
| gi5902016 ref NP_008939.1  | reticulin 4; neuroendocrine-specific protein C like (foocen) [Homo sapiens] |            |   | 8.76E-09 | 1.72 | 20.18  | 14.10 | 22395.3 |
| AHQ-2-1, 3174              | R.HQAQIDHYLGLANK.N                                                          | 1608.78270 | 2 | 3.54E-04 | 0.91 | 3.65   | -     | 837.4   |
| AHQ-2-1, 3038              | K.YSNSALGHVNTKCT.E                                                          | 1565.73305 | 2 | 8.76E-09 | 0.82 | 3.15   | -     | 715.1   |
| gi5803225 ref NP_006752.1  | tyrosine 3/tryptophan 5-monooxygenase activation protein, epsilon poly      |            |   | 1.01E-08 | 3.32 | 40.25  | 20.40 | 29173.7 |
| AHQ-2-13-, 6842 - 6849     | K.AAFDDAIAELDTLSEESYK.D                                                     | 2089.19882 | 2 | 5.73E-07 | 0.96 | 4.97   | -     | 1215.8  |
| AHQ-2-9, 7070 - 7078       | K.AAFDDAIAELDTLSEESYK.D                                                     | 2089.19882 | 2 | 4.07E-04 | 0.93 | 4.42   | -     | 849.0   |
| AHQ-2-13, 6627             | K.AAFDDAIAELDTLSEESYK.D                                                     | 2089.19882 | 2 | 3.17E-07 | 0.93 | 3.52   | -     | 1297.6  |
| AHQ-2-14-, 6629 - 6708     | K.AAFDDAIAELDTLSEESYK.D                                                     | 2089.19882 | 2 | 1.01E-08 | 0.95 | 4.53   | -     | 1249.5  |
| AHQ-2-10, 6898 - 6962      | K.AAFDDAIAELDTLSEESYKDTLIMQLLR.D                                            | 3260.61486 | 3 | 5.62E-08 | 0.91 | 4.72   | -     | 801.2   |
| AHQ-2-9, 2370              | K.EAAENSLVAYK.A                                                             | 1195.30397 | 2 | 4.91E-06 | 0.76 | 3.15   | -     | 546.8   |
| AHQ-2-9, 1552              | K.HLIPAANTGESK.V                                                            | 1238.37521 | 2 | 6.99E-04 | 0.71 | 2.61   | -     | 576.8   |
| gi13899317 ref NP_113657.1 | SH3 domain binding glutamic acid-rich protein like 2 [Homo sapiens] [M]     |            |   | 1.02E-08 | 4.31 | 50.92  | 72.00 | 12326.0 |
| AHQ-2-14-, 5479 - 5484     | K.ESNTVFSFLGLKPR.L                                                          | 1595.82383 | 2 | 5.55E-08 | 0.67 | 3.10   | -     | 359.4   |
| AHQ-2-13, 5392 - 5443      | K.ESNTVFSFLGLKPR.L                                                          | 1595.82383 | 2 | 4.32E-06 | 0.90 | 3.78   | -     | 745.9   |
| AHQ-2-14, 6081             | R.FLEANKIEFEEDVITM*SEEQR.Q                                                  | 2574.80223 | 2 | 8.02E-04 | 0.78 | 3.26   | -     | 685.7   |
| AHQ-2-14-, 5071 - 5075     | R.FLEANKIEFEEDVITM*SEEQR.Q                                                  | 2574.80223 | 3 | 1.02E-08 | 0.90 | 4.03   | -     | 1260.6  |
| AHQ-2-13-, 3830            | K.KPTQGNPLPPIQFNGDR.Y                                                       | 1880.09682 | 2 | 2.69E-06 | 0.90 | 3.78   | -     | 786.5   |
| AHQ-2-13-, 6034            | K.KPTQGNPLPPIQFNGDR.Y                                                       | 3380.64432 | 3 | 3.96E-04 | 0.74 | 3.35   | -     | 692.7   |
| AHQ-2-13-, 5903 - 5966     | K.KPTQGNPLPPIQFNGDR.Y                                                       | 3380.64432 | 3 | 1.84E-06 | 0.88 | 4.36   | -     | 729.8   |
| AHQ-2-13, 5739 - 5801      | K.KPTQGNPLPPIQFNGDR.Y                                                       | 3380.64432 | 3 | 1.67E-05 | 0.86 | 4.40   | -     | 923.0   |
| AHQ-2-14-, 5871 - 5937     | K.KPTQGNPLPPIQFNGDR.Y                                                       | 3380.64432 | 3 | 1.59E-04 | 0.85 | 4.43   | -     | 686.0   |
| AHQ-2-14, 5601 - 5604      | R.VFIASSSGFVAIK.R                                                           | 1326.56551 | 2 | 1.11E-06 | 0.97 | 4.35   | -     | 2021.9  |
| AHQ-2-14-, 4555 - 4629     | R.VFIASSSGFVAIK.R                                                           | 1326.56551 | 2 | 2.99E-05 | 0.95 | 3.17   | -     | 2063.4  |
| gi30150022 ref XP_300862.1 | similar to beta-tubulin 4Q [Homo sapiens]                                   |            |   | 1.10E-08 | 6.54 | 70.29  | 22.50 | 33545.2 |
| AHQ-2-11, 5970             | K.EAESCDCLQGFQLTHSLGGTSGMGTLLISK.I                                          | 3315.65550 | 3 | 9.68E-07 | 0.94 | 4.66   | -     | 1666.0  |
| AHQ-2-7, 6267 - 6337       | K.EAESCDCLQGFQLTHSLGGTSGMGTLLISK.I                                          | 3315.65550 | 3 | 1.29E-08 | 0.95 | 5.38   | -     | 998.0   |
| AHQ-2-13-, 3403            | R.FPGQLNADLR.K                                                              | 1131.26634 | 2 | 3.35E-05 | 0.68 | 2.51   | -     | 694.2   |
| AHQ-2-8, 2882 - 2959       | R.FPGQLNADLR.K                                                              | 1131.26634 | 2 | 4.72E-04 | 0.88 | 2.91   | -     | 978.2   |
| AHQ-2-7, 3133              | R.FPGQLNADLR.K                                                              | 1131.26634 | 2 | 1.27E-05 | 0.89 | 2.82   | -     | 1048.7  |
| AHQ-2-7, 2995 - 3063       | R.FPGQLNADLR.K                                                              | 1131.26634 | 2 | 8.36E-04 | 0.85 | 3.06   | -     | 686.4   |
| AHQ-2-7, 5800 - 5804       | R.KEAESCDCLQGFQLTHSLGGTSGMGTLLISK.I                                         | 3443.82841 | 3 | 1.10E-08 | 0.97 | 5.75   | -     | 2083.2  |
| AHQ-2-7, 3419 - 3432       | R.KLAVNMVFPFR.L                                                             | 1272.58771 | 2 | 2.26E-05 | 0.95 | 4.32   | -     | 1167.9  |
| AHQ-2-7, 4140 - 4216       | K.LAVNMVFPFR.L                                                              | 1144.41480 | 2 | 2.06E-06 | 0.92 | 3.57   | -     | 823.2   |
| AHQ-2-8, 3975              | K.LAVNMVFPFR.L                                                              | 1144.41480 | 2 | 4.75E-06 | 0.95 | 3.77   | -     | 948.4   |
| AHQ-2-9, 4212              | K.LAVNMVFPFR.L                                                              | 1144.41480 | 2 | 7.49E-04 | 0.89 | 3.06   | -     | 732.6   |
| AHQ-2-13-, 4486            | K.LAVNMVFPFR.L                                                              | 1144.41480 | 2 | 2.76E-06 | 0.69 | 2.57   | -     | 648.7   |
| AHQ-2-10, 4072             | K.LAVNMVFPFR.L                                                              | 1144.41480 | 2 | 1.63E-06 | 0.93 | 4.10   | -     | 890.1   |
| AHQ-2-11, 4272             | K.LAVNMVFPFR.L                                                              | 1144.41480 | 2 | 2.15E-06 | 0.88 | 3.41   | -     | 663.9   |
| AHQ-2-7, 3460              | K.LAVNMVFPFR.L                                                              | 1160.41420 | 2 | 3.80E-04 | 0.93 | 3.88   | -     | 965.9   |
| AHQ-2-9, 5523              | R.LHFFMPGFAPLTSR.G                                                          | 1621.92962 | 2 | 2.59E-04 | 0.88 | 3.31   | -     | 635.6   |
| AHQ-2-7, 5405 - 5407       | R.LHFFMPGFAPLTSR.G                                                          | 1621.92962 | 2 | 1.86E-06 | 0.92 | 3.47   | -     | 881.2   |
| gi21361553 ref NP_003168.2 | spleen tyrosine kinase [Homo sapiens]                                       |            |   | 1.10E-08 | 0.79 | 10.26  | 2.00  | 72065.7 |
| AHQ-2-13, 4476             | K.TGPFEDLKENLR.E                                                            | 1532.72291 | 2 | 1.10E-08 | 0.79 | 3.29   | -     | 693.1   |
| gi4506005 ref NP_002700.1  | protein phosphatase 1, catalytic subunit, beta isoform [Homo sapiens] [     |            |   | 1.10E-08 | 4.11 | 50.27  | 24.20 | 37186.6 |
| AHQ-2-9, 3703              | R.AHVVVEDGVEFFAK.R                                                          | 1640.77679 | 2 | 1.37E-04 | 0.92 | 3.54   | -     | 1021.7  |
| AHQ-2-13, 6787             | R.EIFLSQPIILLEAPLK.I                                                        | 1954.33857 | 2 | 1.71E-06 | 0.95 | 5.04   | -     | 686.6   |
| AHQ-2-9, 7387 - 7388       | R.EIFLSQPIILLEAPLK.I                                                        | 1954.33857 | 2 | 1.10E-08 | 0.95 | 5.32   | -     | 749.5   |
| AHQ-2-9, 5212 - 5222       | K.IFCHGGLSPDLQSMQIR.R                                                       | 2251.54930 | 2 | 3.93E-07 | 0.97 | 4.83   | -     | 1653.8  |
| AHQ-2-9, 4759 - 4760       | K.IKYPENFLLR.G                                                              | 1440.71344 | 2 | 5.50E-04 | 0.30 | 2.72   | -     | 246.0   |
| AHQ-2-9, 7310              | K.TFTDCFNCLPIAIVDEK.I                                                       | 2117.38502 | 2 | 2.41E-07 | 0.97 | 5.25   | -     | 1137.4  |
| gi11496885 ref NP_005442.2 | enigma protein; LIM domain protein [Homo sapiens]                           |            |   | 1.13E-08 | 3.61 | 40.25  | 16.40 | 49844.4 |
| AHQ-2-13, 6205             | K.AAQAGVAVGDWVLSIDGENAGSLTHIEAQNK.I                                         | 3123.37980 | 3 | 1.64E-04 | 0.81 | 4.20   | -     | 549.5   |
| AHQ-2-14-, 6263            | K.AAQAGVAVGDWVLSIDGENAGSLTHIEAQNK.I                                         | 3123.37980 | 3 | 1.13E-08 | 0.91 | 4.82   | -     | 619.6   |
| AHQ-2-10, 3396             | K.VLEEGGVFEK.G                                                              | 1284.39598 | 2 | 2.38E-08 | 0.77 | 3.06   | -     | 642.6   |
| AHQ-2-14-, 4887            | K.VVLEGPAPWGR.L                                                             | 1328.54318 | 2 | 6.47E-08 | 0.96 | 3.77   | -     | 1752.0  |
| AHQ-2-14, 6185             | K.VVLEGPAPWGR.L                                                             | 1328.54318 | 2 | 3.19E-07 | 0.93 | 3.50   | -     | 1099.0  |
| AHQ-2-13-, 4917            | K.VVLEGPAPWGR.L                                                             | 1328.54318 | 2 | 9.45E-07 | 0.92 | 3.86   | -     | 886.6   |
| AHQ-2-11, 4657             | K.VVLEGPAPWGR.L                                                             | 1328.54318 | 2 | 2.34E-05 | 0.92 | 3.51   | -     | 1104.0  |
| AHQ-2-9, 4464 - 4466       | R.YLVALGHAYHPEEFVCSQCCK.V                                                   | 2468.74928 | 2 | 1.15E-07 | 0.97 | 4.97   | -     | 1384.3  |
| AHQ-2-9, 4468              | R.YLVALGHAYHPEEFVCSQCCK.V                                                   | 2468.74928 | 3 | 1.86E-04 | 0.96 | 4.97   | -     | 1479.5  |
| gi28178832 ref NP_002159.2 | isocitrate dehydrogenase 2 (NADP+), mitochondrial precursor; isocitrat      |            |   | 1.18E-08 | 4.54 | 50.24  | 15.00 | 50909.0 |
| AHQ-2-8, 3767              | K.DLAGCICHLNSNVK.L                                                          | 1385.57150 | 2 | 2.47E-06 | 0.97 | 4.10   | -     | 1914.2  |
| AHQ-2-8, 1862 - 1          |                                                                             |            |   |          |      |        |       |         |

|                             |                                                                         |            |   |          |       |        |       |          |
|-----------------------------|-------------------------------------------------------------------------|------------|---|----------|-------|--------|-------|----------|
| AHQ-2-8, 1620               | K.TIEEAHAHGTVTR.H                                                       | 1356.46696 | 2 | 4.11E-04 | 0.78  | 3.03   | -     | 685.0    |
| gi 4758988 ref NP_004152.1  | RAB1A, member RAS oncogene family; RAB1, member RAS oncogene family [Ho |            |   | 1.20E-08 | 4.05  | 50.24  | 35.60 | 22677.6  |
| AHQ-2-14-, 6236 - 6261      | K.EFADSLGIPFLETSAK.N                                                    | 1725.91990 | 2 | 1.46E-05 | 0.61  | 3.27   | -     | 354.6    |
| AHQ-2-11, 6076 - 6085       | K.EFADSLGIPFLETSAK.N                                                    | 1725.91990 | 2 | 1.16E-04 | 0.80  | 3.59   | -     | 592.4    |
| AHQ-2-12, 6362              | K.EFADSLGIPFLETSAK.N                                                    | 1725.91990 | 2 | 7.01E-05 | 0.72  | 3.58   | -     | 431.0    |
| AHQ-2-11, 5989 - 6048       | K.EFADSLGIPFLETSAK.N                                                    | 1725.91990 | 2 | 6.48E-05 | 0.72  | 3.73   | -     | 403.3    |
| AHQ-2-11, 5908              | K.EFADSLGIPFLETSAK.N                                                    | 1725.91990 | 2 | 7.24E-05 | 0.62  | 2.74   | -     | 385.4    |
| AHQ-2-11, 5973 - 6052       | R.FADDTYTESYISTIGVDFK.I                                                 | 2173.31742 | 2 | 2.09E-07 | 0.97  | 4.85   | -     | 1619.9   |
| AHQ-2-11, 5866 - 5930       | R.FADDTYTESYISTIGVDFK.I                                                 | 2173.31742 | 2 | 1.46E-06 | 0.88  | 3.24   | -     | 1005.2   |
| AHQ-2-11, 5561 - 5634       | R.FADDTYTESYISTIGVDFK.I                                                 | 2173.31742 | 2 | 2.07E-08 | 0.97  | 4.37   | -     | 1666.4   |
| AHQ-2-14-, 6040 - 6105      | R.FADDTYTESYISTIGVDFK.I                                                 | 2173.31742 | 2 | 1.20E-08 | 0.91  | 3.55   | -     | 986.9    |
| AHQ-2-11, 6112 - 6172       | R.FADDTYTESYISTIGVDFK.I                                                 | 2173.31742 | 2 | 4.29E-08 | 0.95  | 4.35   | -     | 1007.5   |
| AHQ-2-11, 6241 - 6316       | R.FADDTYTESYISTIGVDFK.I                                                 | 2173.31742 | 2 | 5.83E-06 | 0.94  | 4.15   | -     | 1040.2   |
| AHQ-2-11, 6842 - 6913       | R.FADDTYTESYISTIGVDFK.I                                                 | 2173.31742 | 2 | 2.08E-06 | 0.93  | 3.76   | -     | 1075.2   |
| AHQ-2-11, 6976              | R.FADDTYTESYISTIGVDFK.I                                                 | 2173.31742 | 2 | 2.86E-07 | 0.94  | 4.61   | -     | 938.6    |
| AHQ-2-14-, 5904 - 5977      | R.FADDTYTESYISTIGVDFK.I                                                 | 2173.31742 | 2 | 3.59E-08 | 0.94  | 4.02   | -     | 1291.4   |
| AHQ-2-13, 6025              | R.FADDTYTESYISTIGVDFK.I                                                 | 2173.31742 | 2 | 4.54E-05 | 0.69  | 3.21   | -     | 636.1    |
| AHQ-2-11, 5037              | R.GAHGIIVVYDVTQESFNKK.Q                                                 | 2306.51658 | 2 | 1.18E-04 | 0.91  | 4.08   | -     | 744.6    |
| AHQ-2-11, 4794              | K.NATNVEQSFMTM*AAEIK.K                                                  | 1902.13962 | 2 | 2.86E-04 | 0.79  | 3.67   | -     | 814.1    |
| AHQ-2-11, 6032              | K.NATNVEQSFMTMAAEIK.K                                                   | 1886.14022 | 2 | 7.20E-06 | 0.83  | 3.92   | -     | 944.5    |
| gi 4503971 ref NP_001484.1  | GDP dissociation inhibitor 1; mental retardation, X-linked 41; mental r |            |   | 1.26E-08 | 3.56  | 40.27  | 14.80 | 50582.4  |
| AHQ-2-7, 4151               | R.FOLLEGPPESMGR.G                                                       | 1461.66818 | 2 | 9.71E-05 | 0.89  | 3.96   | -     | 908.5    |
| AHQ-2-7, 5160               | R.NPYYGGESSITPLEELYK.R                                                  | 2148.31110 | 2 | 8.10E-06 | 0.79  | 3.44   | -     | 585.8    |
| AHQ-2-6, 5217 - 5218        | R.NPYYGGESSITPLEELYK.R                                                  | 2148.31110 | 2 | 1.35E-04 | 0.96  | 5.44   | -     | 965.4    |
| AHQ-2-6, 4274               | R.TDDYLDQPCLETVNR.I                                                     | 1840.94632 | 2 | 1.26E-08 | 0.90  | 4.32   | -     | 626.8    |
| AHQ-2-7, 7235               | K.VPSTETALASNLGMFEEK.R                                                  | 2056.34679 | 2 | 4.81E-08 | 0.97  | 5.15   | -     | 1191.0   |
| AHQ-2-6, 7114               | K.VPSTETALASNLGMFEEK.R                                                  | 2056.34679 | 2 | 3.51E-08 | 0.97  | 4.90   | -     | 1764.8   |
| gi 4505585 ref NP_002563.1  | platelet-activating factor acetylhydrolase, isoform Ib, beta subunit 30 |            |   | 1.33E-08 | 1.80  | 20.22  | 17.00 | 25569.1  |
| AHQ-2-10, 5584 - 5587       | R.ELFSPHLHALNFQIGGDTTR.H                                                | 2046.27160 | 2 | 1.49E-05 | 0.83  | 3.50   | -     | 611.4    |
| AHQ-2-10, 6598              | K.ICKPLHELMQLLEETPEEK.Q                                                 | 2452.87287 | 2 | 1.33E-08 | 0.96  | 4.46   | -     | 1883.6   |
| gi 5453760 ref NP_006147.1  | neural precursor cell expressed, developmentally down-regulated 8 [Homo |            |   | 1.36E-08 | 0.86  | 10.17  | 17.30 | 9071.5   |
| AHQ-2-14-, 3675             | K.EIIDIEPDKVER.I                                                        | 1686.84208 | 2 | 1.36E-08 | 0.86  | 3.39   | -     | 821.6    |
| gi 6679056 ref NP_031387.1  | nidogen 2 (osteonidogen); nidogen 2 [Homo sapiens]                      |            |   | 1.39E-08 | 0.77  | 10.18  | 2.10  | 151153.0 |
| AHQ-2-1, 6780 - 6809        | R.AGLELGAEPETIVNSGLISPEGLADHIR.R                                        | 2973.32740 | 3 | 1.39E-08 | 0.77  | 3.70   | -     | 682.6    |
| gi 21361547 ref NP_002930.2 | ribonuclease/angiogenin inhibitor; Placental ribonuclease inhibitor [H  |            |   | 1.42E-08 | 0.90  | 10.20  | 3.30  | 49973.3  |
| AHQ-2-14-, 6503             | R.WAELLPLLCQCVVR.L                                                      | 1855.19360 | 2 | 1.42E-08 | 0.90  | 4.04   | -     | 544.5    |
| gi 22042381 ref XP_065237.3 | similar to FKSG30 [Homo sapiens]                                        |            |   | 1.42E-08 | 1.59  | 20.19  | 8.30  | 42016.0  |
| AHQ-2-14-, 2301 - 2324      | K.QEYDESGPSIVHR.K                                                       | 1517.58206 | 2 | 2.12E-04 | 0.59  | 2.66   | -     | 342.2    |
| AHQ-2-13-, 2893             | K.QEYDESGPSIVHR.K                                                       | 1517.58206 | 2 | 1.96E-04 | 0.35  | 2.74   | -     | 476.1    |
| AHQ-2-13-, 2377 - 2443      | K.QEYDESGPSIVHR.K                                                       | 1517.58206 | 2 | 4.88E-08 | 0.87  | 3.42   | -     | 527.6    |
| AHQ-2-13, 2477              | K.QEYDESGPSIVHR.K                                                       | 1517.58206 | 2 | 1.42E-08 | 0.79  | 3.20   | -     | 399.9    |
| AHQ-2-8, 2022 - 2090        | K.QEYDESGPSIVHR.K                                                       | 1517.58206 | 2 | 1.44E-07 | 0.56  | 2.63   | -     | 290.6    |
| AHQ-2-9, 3435 - 3514        | R.VAPEEHPIITLAPLNPK.A                                                   | 1969.27019 | 2 | 1.07E-04 | 0.65  | 3.14   | -     | 428.4    |
| AHQ-2-8, 3219 - 3286        | R.VAPEEHPIITLAPLNPK.A                                                   | 1969.27019 | 2 | 1.35E-04 | 0.61  | 3.17   | -     | 385.3    |
| AHQ-2-8, 3098 - 3140        | R.VAPEEHPIITLAPLNPK.A                                                   | 1969.27019 | 2 | 1.22E-05 | 0.79  | 3.65   | -     | 485.9    |
| gi 4505705 ref NP_003759.1  | phosphoprotein enriched in astrocytes 15; Phosphoprotein enriched in as |            |   | 1.50E-08 | 0.88  | 10.21  | 13.10 | 15040.0  |
| AHQ-2-12, 6109 - 6177       | K.LDKDNLSYIEHIFEISR.R                                                   | 2093.32504 | 2 | 1.50E-08 | 0.88  | 4.25   | -     | 591.2    |
| gi 4504483 ref NP_000185.1  | hypoxanthine phosphoribosyltransferase 1 [Homo sapiens]                 |            |   | 1.61E-08 | 1.90  | 20.33  | 21.10 | 24579.2  |
| AHQ-2-10, 6623              | R.SPGVVIDDEPGYDLDFCIPNHYAEDLER.V                                        | 3438.67572 | 3 | 1.61E-08 | 0.96  | 6.57   | -     | 793.2    |
| AHQ-2-10, 4422              | R.SVGYKPDFVGFEPDK.F                                                     | 1799.01571 | 2 | 1.30E-07 | 0.93  | 4.50   | -     | 738.4    |
| gi 28077085 ref NP_004559.3 | serine (or cysteine) proteinase inhibitor, clade B (ovalbumin), member  |            |   | 1.62E-08 | 0.92  | 10.22  | 5.30  | 42586.7  |
| AHQ-2-9, 4624               | K.SGGGGDIHQGFQSLLETVNK.T                                                | 2045.19887 | 2 | 1.62E-08 | 0.92  | 4.48   | -     | 849.8    |
| AHQ-2-8, 4371               | K.SGGGGDIHQGFQSLLETVNK.T                                                | 2045.19887 | 2 | 1.57E-04 | 0.82  | 3.50   | -     | 873.5    |
| gi 6005854 ref NP_009204.1  | repressor of estrogen receptor activity; B-cell associated protein [Hom |            |   | 1.65E-08 | 1.86  | 20.24  | 10.70 | 33296.1  |
| AHQ-2-9, 7182 - 7235        | R.IPWQYPIIVDIR.A                                                        | 1725.02480 | 2 | 1.10E-04 | 0.95  | 3.82   | -     | 1459.0   |
| AHQ-2-9, 6743               | R.IYLTADNLVNLQDESFT.R.G                                                 | 2226.47137 | 2 | 1.65E-08 | 0.91  | 4.75   | -     | 579.0    |
| gi 4507295 ref NP_003560.1  | syntaxin 7 [Homo sapiens]                                               |            |   | 1.69E-08 | 0.91  | 10.20  | 5.70  | 29845.3  |
| AHQ-2-13-, 3366             | R.TLNQLGTPQDPSPELR.Q                                                    | 1669.81798 | 2 | 1.76E-07 | 0.85  | 3.41   | -     | 538.0    |
| AHQ-2-13, 3385 - 3391       | R.TLNQLGTPQDPSPELR.Q                                                    | 1669.81798 | 2 | 1.69E-08 | 0.91  | 4.02   | -     | 724.8    |
| gi 4758790 ref NP_004543.1  | NADH dehydrogenase (ubiquinone) Fe-S protein 5, 15kDa (NADH-coenzyme Q  |            |   | 1.69E-08 | 2.57  | 30.23  | 34.90 | 12517.4  |
| AHQ-2-13-, 3827             | K.EWIECAHGIYTR.A                                                        | 1593.74495 | 2 | 7.43E-07 | 0.84  | 2.97   | -     | 684.8    |
| AHQ-2-13-, 6761             | K.IEYDDFVECLLR.Q                                                        | 1573.74872 | 2 | 2.69E-07 | 0.96  | 4.66   | -     | 910.4    |
| AHQ-2-13, 6552              | K.IEYDDFVECLLR.Q                                                        | 1573.74872 | 2 | 1.69E-08 | 0.88  | 3.31   | -     | 809.8    |
| AHQ-2-13-, 3897             | R.WLTIQSGEOPYK.M                                                        | 1450.62036 | 2 | 1.82E-04 | 0.85  | 3.56   | -     | 728.4    |
| gi 27436929 ref NP_005518.2 | heat shock 70kDa protein 1-like; heat shock 70kD protein-like 1 [Homo   |            |   | 1.73E-08 | 0.97  | 10.21  | 2.20  | 70404.7  |
| AHQ-2-6, 2927               | K.AKHIDIVLVGGSTR.I                                                      | 1466.71083 | 2 | 1.73E-08 | 0.97  | 4.12   | -     | 2243.4   |
| gi 4557032 ref NP_002291.1  | lactate dehydrogenase B [Homo sapiens]                                  |            |   | 1.74E-08 | 11.71 | 160.29 | 43.70 | 36638.3  |
| AHQ-2-13-, 4554             | K.FIIPQIVK.Y                                                            | 958.22198  | 1 | 4.10E-04 | 0.28  | 2.02   | -     | 430.5    |
| AHQ-2-9, 4084               | K.GEM*MDLQHGSLFLQTPK.I                                                  | 1949.24111 | 2 | 4.22E-04 | 0.67  | 3.61   | -     | 687.0    |
| AHQ-2-9, 4654               | K.GEMMDLQHGSLFLQTPK.I                                                   | 1933.24171 | 2 | 9.28E-06 | 0.95  | 4.64   | -     | 941.7    |
| AHQ-2-9, 2212               | R.GLTSVINQK.L                                                           | 960.10999  | 2 | 2.28E-04 | 0.60  | 2.57   | -     | 536.1    |
| AHQ-2-14-, 2380             | R.GLTSVINQK.L                                                           | 960.10999  | 2 | 9.43E-05 | 0.51  | 2.59   | -     | 325.3    |
| AHQ-2-9, 7407 - 7464        | K.GMYGIENEVFLSLPCILNAR.G                                                | 2298.66742 | 2 | 6.28E-06 | 0.77  | 3.74   | -     | 412.1    |
| AHQ-2-9, 1600               | R.IHPYSTMVK.G                                                           | 1012.25154 | 1 | 1.57E-05 | 0.13  | 2.29   | -     | 212.9    |
| AHQ-2-9, 7611               | K.ITVVGVGVGMACAISILGK.S                                                 | 1975.40611 | 2 | 6.63E-04 | 0.92  | 4.25   | -     | 687.0    |
| AHQ-2-13, 2248              | K.IVADKQSVTANSK.I                                                       | 1511.65887 | 2 | 6.80E-06 | 0.93  | 3.67   | -     | 1225.1   |
| AHQ-2-9, 1982               | K.IVADKQSVTANSK.I                                                       | 1511.65887 | 2 | 8.10E-05 | 0.87  | 3.62   | -     | 749.7    |
| AHQ-2-13-, 2127             | K.IVADKQSVTANSK.I                                                       | 1511.65887 | 2 | 9.09E-07 | 0.90  | 3.09   | -     | 948.8    |
| AHQ-2-13-, 2611             | K.IVVVTAGVR.Q                                                           | 914.12760  | 2 | 2.38E-07 | 0.89  | 3.43   | -     | 818.5    |
| AHQ-2-14-, 3511             | K.LIAPVAEEEEATVPNNK.I                                                   | 1695.89534 | 2 | 4.68E-05 | 0.91  | 3.61   | -     | 1031.1   |
| AHQ-2-14-, 3597             | K.LIAPVAEEEEATVPNNK.I                                                   | 1695.89534 | 2 | 2.50E-06 | 0.70  | 2.69   | -     | 626.7    |
| AHQ-2-14-, 3313 - 3385      | K.LIAPVAEEEEATVPNNK.I                                                   | 1695.89534 | 2 | 8.01E-04 | 0.93  | 3.86   | -     | 1009.6   |
| AHQ-2-9, 1922               | K.LKDDVEAQLK.K                                                          | 1159.31477 | 2 | 4.01E-05 | 0.69  | 2.61   | -     | 489.7    |
| AHQ-2-9, 3826               | K.LKGGEM*MDLQHGSLFLQTPK.I                                               | 2190.57228 | 3 | 8.92E-04 | 0.69  | 3.93   | -     | 495.7    |
| AHQ-2-11, 3713              | K.MVVESAYEVK.L                                                          | 1268.50463 | 2 | 8.48E-05 | 0.94  | 3.95   | -     | 1086.0   |
| AHQ-2-9, 3664 - 3668        | K.MVVESAYEVK.L                                                          | 1268.50463 | 2 | 1.46E-07 | 0.93  | 4.01   | -     | 985.5    |
| AHQ-2-10, 3592              | K.MVVESAYEVK.L                                                          | 1268.50463 | 2 | 1.48E-07 | 0.92  | 3.48   | -     | 1160.4   |
| AHQ-2-14-, 3853             | K.MVVESAYEVK.L                                                          | 1268.50463 | 2 | 4.73E-06 | 0.92  | 3.39   | -     | 923.3    |
| AHQ-2-9, 3378               | K.SADTLWDIQK.D                                                          | 1177.28864 | 2 | 7.51E-07 | 0.77  | 3.04   | -     | 683.2    |
| AHQ-2-13-, 6821 - 6830      | K.SLADELALVDVLEDK.L                                                     | 1630.81843 | 2 | 1.74E-08 | 0.97  | 5.75   | -     | 1370.0   |
| AHQ-2-14-, 6600 - 6671      | K.SLADELALVDVLEDK.L                                                     | 1630.81843 | 2 | 1.69E-04 | 0.91  | 4.04   | -     | 864.6    |
| AHQ-2-9, 7104 - 7176        | K.SLADELALVDVLEDK.L                                                     | 1630.81843 | 2 | 2.04E-05 | 0.94  | 3.92   | -     | 1370.7   |
| AHQ-2-9, 7014 - 7026        | K.SLADELALVDVLEDK.L                                                     | 1630.81843 | 2 | 3.05E-08 | 0.97  | 5.18   | -     | 1520.7   |
| AHQ-2-10, 6436              | K.SLADELALVDVLEDK.L                                                     | 1630.81843 | 2 | 1.26E-04 | 0.94  | 4.79   | -     | 1070.8   |
| AHQ-2-11, 6508              | K.SLADELALVDVLEDK.L                                                     | 1630.81843 | 2 | 8.25E-04 | 0.89  | 3.52   | -     | 832.9    |
| AHQ-2-13, 6612              | K.SLADELALVDVLEDK.L                                                     | 1630.81843 | 2 | 3.21E-07 | 0.96  | 4.37   | -     | 1578.3   |
| AHQ-2-14-, 6805             | K.SLADELALVDVLEDKL.K.G                                                  | 1872.14959 | 2 | 2.97E-05 | 0.96  | 4.57   | -     | 1665.5   |
| AHQ-2-9, 7266 - 7315        | K.SLADELALVDVLEDKL.K.G                                                  | 1872.14959 | 2 | 1.22E-06 | 0.94  | 3.92   | -     | 1415.8   |
| gi 19923142 ref NP_002256.2 | karyopherin beta 1; nuclear factor p97; importin B; importin beta-1 s   |            |   | 1.78E-08 | 3.39  | 40.21  | 7.90  | 97169.7  |
| AHQ-2-5, 6877               | R.AAVENLPTFLVLSR.V                                                      | 1659.90783 | 2 | 3.56E-04 | 0.75  | 2.98   | -     | 354.3    |
| AHQ-2-5, 7452 - 7453        | K.GALQVLPILTQTTLTK.Q                                                    | 1760.11044 | 2 | 1.84E-06 | 0.80  | 3.77   | -     | 453.0    |
| AHQ-2-5, 7672               | R.IQFNLDLQSLCATLQNVLR.K                                                 | 2248.58813 | 2 | 3.27E-07 | 0.89  | 4.14   | -     | 880.1    |
| AHQ-2-5, 6315               | K.YLEVVLNLTQQAQAQVQDK.S                                                 | 2148.40214 | 2 | 1.78E-08 | 0.95  | 3.85   | -     | 2159.4   |
| gi 5031573 ref NP_005712.1  | ARP3 actin-related protein 3 homolog; ARP3 (actin-related protein 3, ye |            |   |          |       |        |       |          |

|                             |                                                                          |            |   |          |      |       |       |          |
|-----------------------------|--------------------------------------------------------------------------|------------|---|----------|------|-------|-------|----------|
| AHQ-2-7, 5803 - 5877        | K.GVDDLDFFIGDEAIEKPTYATK.W                                               | 2445.66268 | 2 | 1.04E-05 | 0.76 | 2.94  | -     | 868.2    |
| AHQ-2-7, 4189 - 4260        | R.HGIVEDWDLMER.F                                                         | 1500.66127 | 2 | 4.43E-06 | 0.90 | 3.27  | -     | 1090.0   |
| AHQ-2-7, 2112               | R.HNPFVFGVM'S                                                            | 1004.14480 | 1 | 9.69E-05 | 0.31 | 1.83  | -     | 293.1    |
| AHQ-2-7, 6516               | K.LGYAGNTEPQFIIPSCIAIK.E                                                 | 2194.53570 | 2 | 2.35E-06 | 0.88 | 3.87  | -     | 765.3    |
| AHQ-2-7, 6395 - 6407        | K.LGYAGNTEPQFIIPSCIAIK.E                                                 | 2194.53570 | 2 | 1.88E-08 | 0.93 | 4.79  | -     | 575.2    |
| AHQ-2-12, 6245 - 6259       | K.LGYAGNTEPQFIIPSCIAIK.E                                                 | 2194.53570 | 2 | 2.02E-04 | 0.73 | 3.55  | -     | 423.1    |
| AHQ-2-10, 5818              | K.LGYAGNTEPQFIIPSCIAIK.E                                                 | 2194.53570 | 2 | 5.09E-04 | 0.68 | 3.57  | -     | 341.1    |
| AHQ-2-13, 6088              | K.LGYAGNTEPQFIIPSCIAIK.E                                                 | 2194.53570 | 2 | 4.42E-04 | 0.44 | 3.25  | -     | 271.9    |
| AHQ-2-9, 3576               | R.LPACVVDCTGTYTK.L                                                       | 1543.74421 | 2 | 3.28E-04 | 0.91 | 3.59  | -     | 975.7    |
| AHQ-2-7, 3669               | K.NIVLSGGSTMFR.D                                                         | 1282.49463 | 2 | 1.25E-06 | 0.94 | 3.91  | -     | 1387.5   |
| AHQ-2-13, 4055              | K.NIVLSGGSTMFR.D                                                         | 1282.49463 | 2 | 6.45E-04 | 0.87 | 2.99  | -     | 1371.6   |
| AHQ-2-9, 6692               | R.TLTGTVIDSGDGVTHVIPVAEGYVIGSCIK.H                                       | 3061.45302 | 3 | 7.38E-04 | 0.90 | 4.30  | -     | 1006.2   |
| AHQ-2-8, 6492               | R.TLTGTVIDSGDGVTHVIPVAEGYVIGSCIK.H                                       | 3061.45302 | 3 | 2.52E-04 | 0.83 | 3.80  | -     | 801.9    |
| AHQ-2-7, 6768               | R.TLTGTVIDSGDGVTHVIPVAEGYVIGSCIK.H                                       | 3061.45302 | 3 | 1.18E-04 | 0.94 | 4.83  | -     | 1228.1   |
| gi 21389549 ref NP_653263.1 | hypothetical protein MG26605 [Homo sapiens]                              |            |   | 2.00E-08 | 1.59 | 20.22 | 14.90 | 26927.8  |
| AHQ-2-10, 5203              | R.AITVFPDGLHLFQVEYAQEAQV.K                                               | 2450.73052 | 3 | 6.56E-05 | 0.66 | 3.06  | -     | 556.0    |
| AHQ-2-10, 4370 - 4371       | K.LTVDEPVTVEYITR.F                                                       | 1635.83990 | 2 | 2.00E-08 | 0.93 | 4.25  | -     | 749.4    |
| gi 4557361 ref NP_001187.1  | BH3 interacting domain death agonist; BH3-interacting domain death agon  |            |   | 2.02E-08 | 2.87 | 30.30 | 29.70 | 21996.4  |
| AHQ-2-11, 6861              | R.DLATALEQLLQAYPR.D                                                      | 1702.93270 | 2 | 3.67E-08 | 0.96 | 4.81  | -     | 1138.5   |
| AHQ-2-11, 6037              | R.DVFTTNTVNFQNLNR.T                                                      | 1819.01348 | 2 | 7.01E-04 | 0.95 | 4.45  | -     | 1406.4   |
| AHQ-2-11, 6124 - 6129       | R.ELDALGHLELPLAPQWEGYDELQTDGNR.S                                         | 3167.38790 | 3 | 2.02E-08 | 0.96 | 5.92  | -     | 1328.1   |
| gi 4758208 ref NP_004081.1  | dual specificity phosphatase 3; vaccinia virus phosphatase VH1-related;  |            |   | 2.17E-08 | 4.11 | 50.25 | 38.90 | 20478.2  |
| AHQ-2-11, 4168              | R.AADFIQDQALQK.N                                                         | 1291.43488 | 1 | 7.25E-05 | 0.41 | 3.09  | -     | 511.3    |
| AHQ-2-11, 4152              | R.AADFIQDQALQK.N                                                         | 1291.43488 | 2 | 5.66E-04 | 0.90 | 3.82  | -     | 922.0    |
| AHQ-2-11, 5369              | K.ANDTQEFNLSAYFER.A                                                      | 1805.88207 | 2 | 2.65E-07 | 0.89 | 3.63  | -     | 933.9    |
| AHQ-2-11, 5912 - 5952       | R.EIGPNDGFLAQLCQLNDR.L                                                   | 2062.24949 | 2 | 2.17E-08 | 0.94 | 4.97  | -     | 860.7    |
| AHQ-2-11, 6097              | R.EIGPNDGFLAQLCQLNDR.L                                                   | 2062.24949 | 2 | 4.36E-05 | 0.61 | 3.11  | -     | 422.5    |
| AHQ-2-11, 3616              | R.IYVGNASVAQDIPK.L                                                       | 1475.67136 | 2 | 1.02E-05 | 0.96 | 4.77  | -     | 1434.7   |
| AHQ-2-11, 4046 - 4049       | R.IYVGNASVAQDIPK.L                                                       | 1475.67136 | 2 | 4.20E-08 | 0.96 | 4.18  | -     | 1594.5   |
| AHQ-2-11, 3266              | K.LGITHVLNAEGR.S                                                         | 1351.53669 | 2 | 1.04E-06 | 0.91 | 3.24  | -     | 1256.6   |
| AHQ-2-11, 3277              | K.LGITHVLNAEGR.S                                                         | 1351.53669 | 1 | 9.57E-05 | 0.50 | 2.48  | -     | 467.3    |
| gi 5802974 ref NP_006784.1  | peroxiredoxin 3; antioxidant protein 1; thioredoxin-dependent peroxide   |            |   | 2.21E-08 | 4.92 | 60.29 | 36.70 | 27692.5  |
| AHQ-2-10, 4223              | K.AFYQYVETHEGVECPANWTPDSTIKPSPAASK.E                                     | 3388.70790 | 3 | 2.21E-08 | 0.96 | 5.73  | -     | 1246.3   |
| AHQ-2-11, 3937              | K.DLSLDDFK.G                                                             | 953.02795  | 1 | 1.17E-05 | 0.46 | 2.15  | -     | 519.1    |
| AHQ-2-10, 5116              | R.DYGVLLLEGSLALR.G                                                       | 1463.66058 | 1 | 2.81E-04 | 0.06 | 2.10  | -     | 152.8    |
| AHQ-2-11, 5312              | R.DYGVLLLEGSLALR.G                                                       | 1463.66058 | 2 | 6.21E-07 | 0.96 | 3.90  | -     | 1895.8   |
| AHQ-2-11, 5485              | R.GLFIIDPNGVIK.H                                                         | 1286.54452 | 1 | 2.64E-05 | 0.40 | 2.16  | -     | 521.8    |
| AHQ-2-11, 5342              | R.GLFIIDPNGVIK.H                                                         | 1286.54452 | 2 | 9.99E-06 | 0.72 | 2.61  | -     | 858.0    |
| AHQ-2-10, 2662              | K.HLSVNDLPLVGR.S                                                         | 1207.36435 | 2 | 7.58E-07 | 0.90 | 3.30  | -     | 780.0    |
| AHQ-2-10, 4882              | R.KNGGLGHMNIALLSDLTK.Q                                                   | 1883.20557 | 2 | 1.74E-04 | 0.93 | 4.25  | -     | 827.3    |
| gi 5453599 ref NP_006127.1  | capping protein (actin filament) muscle Z-line, alpha 2; F-actin capping |            |   | 2.23E-08 | 2.70 | 30.26 | 18.90 | 32948.9  |
| AHQ-2-9, 4630               | R.EGAAHFAQYVNLDDQFTFVK.I                                                 | 2108.29826 | 2 | 3.98E-05 | 0.93 | 4.26  | -     | 924.7    |
| AHQ-2-9, 5171 - 5186        | K.FTITPSTTQVVGLK.I                                                       | 1605.90007 | 2 | 2.23E-08 | 0.81 | 3.28  | -     | 472.1    |
| AHQ-2-9, 4700               | K.KIDGQQTIIACIESHQFQAK.N                                                 | 2317.60733 | 2 | 1.74E-05 | 0.95 | 5.22  | -     | 743.7    |
| gi 5453555 ref NP_006316.1  | ras-related nuclear protein [Homo sapiens]                               |            |   | 2.23E-08 | 1.71 | 20.20 | 14.80 | 24422.9  |
| AHQ-2-10, 5250 - 5258       | K.SNYNFEKPFWLAR.K                                                        | 1786.02509 | 2 | 2.23E-08 | 0.90 | 3.98  | -     | 620.5    |
| AHQ-2-10, 3970 - 3994       | K.YVATLVGEVHPLVVFHTNR.G                                                  | 2053.35211 | 2 | 2.05E-06 | 0.81 | 3.70  | -     | 419.5    |
| gi 16933567 ref NP_005361.2 | mel transforming oncogene; ras-associated protein RAB8 [Homo sapiens]    |            |   | 2.43E-08 | 0.88 | 10.19 | 6.80  | 23668.1  |
| AHQ-2-11, 5680              | K.ANINVENAFFTLAR.D                                                       | 1580.76926 | 2 | 6.88E-05 | 0.89 | 3.52  | -     | 925.3    |
| AHQ-2-11, 5049              | K.ANINVENAFFTLAR.D                                                       | 1580.76926 | 2 | 2.43E-08 | 0.88 | 3.72  | -     | 805.6    |
| gi 27597085 ref NP_000357.3 | tropomyosin 1 (alpha) [Homo sapiens]                                     |            |   | 2.50E-08 | 2.71 | 30.24 | 16.90 | 32865.7  |
| AHQ-2-9, 2835               | K.ALMAAEDKYSKEDRYEEIEK.V                                                 | 2547.78004 | 2 | 2.50E-08 | 0.85 | 3.61  | -     | 835.5    |
| AHQ-2-9, 2864               | R.AQKDEEKMEIQEIQLK.E                                                     | 1961.22673 | 2 | 2.67E-05 | 0.95 | 4.76  | -     | 1173.3   |
| AHQ-2-10, 2955              | R.KLVIIESDLER.A                                                          | 1315.54103 | 1 | 2.14E-04 | 0.14 | 2.00  | -     | 202.7    |
| AHQ-2-9, 2958 - 2979        | R.KLVIIESDLER.A                                                          | 1315.54103 | 2 | 5.51E-05 | 0.91 | 3.84  | -     | 1047.8   |
| gi 4507649 ref NP_003280.1  | tropomyosin 2 (beta) [Homo sapiens]                                      |            |   | 2.66E-08 | 0.93 | 10.19 | 4.60  | 32989.6  |
| AHQ-2-9, 2588               | K.ATDAEADVASLNR.R                                                        | 1333.38703 | 2 | 2.66E-08 | 0.93 | 3.77  | -     | 1371.4   |
| gi 4826643 ref NP_005130.1  | annexin A3; Annexin III (lipocortin III); annexin III (lipocortin III,   |            |   | 2.67E-08 | 0.91 | 10.21 | 5.00  | 36375.0  |
| AHQ-2-9, 6074               | K.GAGTNEDALIELLTR.T                                                      | 1674.83453 | 2 | 2.67E-08 | 0.91 | 4.26  | -     | 908.3    |
| gi 13385594 ref NP_085056.1 | cytochrome b5 outer mitochondrial membrane precursor; type 2 cyt-b5 [H   |            |   | 2.69E-08 | 0.86 | 10.22 | 23.30 | 16332.0  |
| AHQ-2-11, 5934              | R.FLNEHPGSEVLELQAGVDASESFEDVGHSSDAR.E                                    | 3629.75848 | 3 | 2.69E-08 | 0.86 | 4.32  | -     | 604.6    |
| gi 4505813 ref NP_003737.1  | cytoplasmic dynein light polypeptide; dynein, cytoplasmic, light chain   |            |   | 2.74E-08 | 2.74 | 40.17 | 49.40 | 10365.8  |
| AHQ-2-14, 5373              | K.NADMSEEMQDSDVECATQALEK.Y                                               | 2532.67934 | 2 | 5.60E-04 | 0.58 | 3.10  | -     | 556.4    |
| AHQ-2-14, 5010              | K.NADMSEEMQDSDVECATQALEK.Y                                               | 2532.67934 | 2 | 7.57E-06 | 0.46 | 3.23  | -     | 481.2    |
| AHQ-2-14, 2273              | R.NFGSYVTHETK.H                                                          | 1283.37131 | 2 | 1.09E-06 | 0.86 | 3.29  | -     | 708.8    |
| AHQ-2-14, 3567 - 3568       | K.YNPTWHICVGR.N                                                          | 1404.57820 | 2 | 2.74E-08 | 0.84 | 3.46  | -     | 399.4    |
| AHQ-2-13, 3514              | K.YNPTWHICVGR.N                                                          | 1404.57820 | 2 | 1.97E-05 | 0.83 | 3.40  | -     | 527.2    |
| gi 4504071 ref NP_000164.1  | platelet glycoprotein Ib alpha polypeptide precursor [Homo sapiens] [MA  |            |   | 2.96E-08 | 4.53 | 50.23 | 9.40  | 68955.0  |
| AHQ-2-1, 5176               | R.GLGLQELYLK.G                                                           | 1263.46458 | 2 | 2.43E-05 | 0.94 | 4.10  | -     | 1346.2   |
| AHQ-2-4, 5090               | R.GLGLQELYLK.G                                                           | 1263.46458 | 2 | 3.67E-04 | 0.95 | 4.52  | -     | 1252.8   |
| AHQ-2-3, 5091 - 5095        | R.GLGLQELYLK.G                                                           | 1263.46458 | 2 | 2.79E-05 | 0.94 | 4.24  | -     | 1144.5   |
| AHQ-2-3, 4192               | R.GQDLLSTVSIR.Y                                                          | 1189.34410 | 2 | 6.02E-07 | 0.96 | 4.46  | -     | 1308.0   |
| AHQ-2-4, 4173               | R.GQDLLSTVSIR.Y                                                          | 1189.34410 | 2 | 2.96E-08 | 0.96 | 3.97  | -     | 1635.6   |
| AHQ-2-12, 4047              | R.GQDLLSTVSIR.Y                                                          | 1189.34410 | 2 | 6.74E-08 | 0.96 | 4.42  | -     | 1377.6   |
| AHQ-2-1, 4312 - 4316        | R.GQDLLSTVSIR.Y                                                          | 1189.34410 | 2 | 1.30E-07 | 0.96 | 4.54  | -     | 1397.6   |
| AHQ-2-14, 5009              | R.GQDLLSTVSIR.Y                                                          | 1189.34410 | 2 | 2.85E-04 | 0.86 | 2.71  | -     | 1057.3   |
| AHQ-2-4, 1973 - 1976        | R.GVLQGHLESSR.N                                                          | 1183.29965 | 1 | 2.32E-04 | 0.25 | 2.43  | -     | 358.6    |
| AHQ-2-3, 1955 - 1987        | R.GVLQGHLESSR.N                                                          | 1183.29965 | 2 | 3.85E-05 | 0.89 | 3.46  | -     | 843.9    |
| AHQ-2-4, 1964 - 1970        | R.GVLQGHLESSR.N                                                          | 1183.29965 | 2 | 2.38E-05 | 0.88 | 3.03  | -     | 998.7    |
| AHQ-2-3, 3607 - 3609        | R.LTLQNLDRCELT.K                                                         | 1605.83862 | 2 | 2.16E-05 | 0.79 | 3.84  | -     | 606.1    |
| AHQ-2-4, 3616 - 3628        | R.LTLQNLDRCELT.K                                                         | 1605.83862 | 2 | 2.92E-04 | 0.86 | 4.08  | -     | 703.3    |
| AHQ-2-4, 5364               | R.WLDQNAENVVYWK.Q                                                        | 1665.82948 | 2 | 3.73E-04 | 0.68 | 2.69  | -     | 463.6    |
| AHQ-2-3, 5019               | R.WLDQNAENVVYWK.Q                                                        | 1665.82948 | 2 | 6.00E-08 | 0.94 | 3.93  | -     | 1217.1   |
| AHQ-2-3, 5347               | R.WLDQNAENVVYWK.Q                                                        | 1665.82948 | 2 | 4.36E-08 | 0.96 | 3.88  | -     | 1603.6   |
| gi 4758076 ref NP_004068.1  | citrate synthase precursor; Citrate synthase, mitochondrial [Homo sapie  |            |   | 2.99E-08 | 1.77 | 20.19 | 5.80  | 51706.2  |
| AHQ-2-8, 4499 - 4504        | K.GLVYETSVLDPDEGIR.F                                                     | 1763.92654 | 2 | 2.99E-08 | 0.87 | 3.70  | -     | 667.4    |
| AHQ-2-8, 3048 - 3056        | K.IVPNVILLEQGGK.A                                                        | 1210.44805 | 2 | 5.36E-06 | 0.90 | 3.17  | -     | 593.8    |
| gi 4885183 ref NP_005210.1  | diaphanous 1; deafness, autosomal dominant 1; hDia1 [Homo sapiens] [MAS  |            |   | 2.99E-08 | 1.80 | 20.25 | 3.10  | 138977.7 |
| AHQ-2-3, 6748               | K.LQFSEQVENIKPEIVSVAACEELR.K                                             | 2892.23121 | 3 | 3.88E-05 | 0.87 | 3.75  | -     | 1300.3   |
| AHQ-2-4, 5394               | K.LVAEDLSQDCFWTK.V                                                       | 1713.88927 | 2 | 6.00E-07 | 0.95 | 4.09  | -     | 1127.6   |
| AHQ-2-3, 5364               | K.LVAEDLSQDCFWTK.V                                                       | 1713.88927 | 2 | 2.99E-08 | 0.92 | 3.88  | -     | 944.6    |
| gi 6912240 ref NP_036227.1  | adaptor-related protein complex 3, mu 1 subunit; mu-adaptin 3A; AP-3 ad  |            |   | 3.24E-08 | 0.90 | 10.20 | 5.50  | 46938.9  |
| AHQ-2-10, 4434              | K.GLVNLQSGAPKPEENPSLNIQFK.I                                              | 2481.78929 | 2 | 3.24E-08 | 0.90 | 4.10  | -     | 659.6    |
| gi 4557597 ref NP_001449.1  | gamma filamin; filamin 2; filamin C, gamma (actin-binding protein-280);  |            |   | 3.29E-08 | 1.76 | 30.28 | 1.70  | 288897.4 |
| AHQ-2-1, 4826 - 4836        | R.GQHVPGPSPFQFTVGPLGEGGAHK.V                                             | 2305.53673 | 2 | 1.24E-04 | 0.95 | 5.70  | -     | 546.8    |
| AHQ-2-4, 4608 - 4613        | R.GQHVPGPSPFQFTVGPLGEGGAHK.V                                             | 2305.53673 | 3 | 1.26E-07 | 0.83 | 4.07  | -     | 391.1    |
| AHQ-2-6, 4165               | R.GQHVPGPSPFQFTVGPLGEGGAHK.V                                             | 2305.53673 | 2 | 6.09E-05 | 0.88 | 4.36  | -     | 363.0    |
| AHQ-2-3, 4660               | R.GQHVPGPSPFQFTVGPLGEGGAHK.V                                             | 2305.53673 | 3 | 1.39E-05 | 0.89 | 4.47  | -     | 608.9    |
| AHQ-2-5, 4136 - 4213        | R.GQHVPGPSPFQFTVGPLGEGGAHK.V                                             | 2305.53673 | 2 | 4.35E-05 | 0.94 | 5.49  | -     | 453.7    |
| AHQ-2-2, 1705 - 1760        | K.IECDKGDGSCDVR.Y                                                        | 1628.67809 | 2 | 3.29E-08 | 0.87 | 3.00  | -     | 942.6    |
| AHQ-2-1, 1993               | K.IECDKGDGSCDVR.Y                                                        | 1628.67809 | 2 | 3.38E-04 | 0.86 | 3.35  | -     | 829.5    |
| AHQ-2-2, 1793 - 2009        | K.NDNMTFTVK.Y                                                            | 1054.09237 | 1 | 2.79E-04 | 0.06 | 1.96  | -     | 165.8    |
| gi 11321601 ref NP_002618.1 | phosphofructokinase, platelet; Phosphofruvctokinase, platelet type [Hom  |            |   | 3.43E-08 | 3.66 | 40.29 | 8.80  | 85595.6  |
| AHQ-2-5, 3200 - 3207        | R.DLQSNVEHLETK.M                                                         | 1          |   |          |      |       |       |          |



|                             |                                                                                 |            |   |          |      |        |       |          |
|-----------------------------|---------------------------------------------------------------------------------|------------|---|----------|------|--------|-------|----------|
| AHQ-2-8, 3178               | R.DGEDQTDDELVELVETRPAGDGTQK.W                                                   | 2638.69666 | 3 | 5.38E-06 | 0.62 | 3.18   | -     | 477.3    |
| AHQ-2-8, 3171               | R.DGEDQTDDELVELVETRPAGDGTQK.W                                                   | 2638.69666 | 2 | 9.92E-06 | 0.68 | 3.84   | -     | 376.5    |
| AHQ-2-14-, 5008             | R.FIAVYVDDTQFV.R.F                                                              | 1630.82504 | 2 | 1.18E-06 | 0.92 | 3.57   | -     | 1249.1   |
| AHQ-2-14, 6130 - 6208       | R.FIAVYVDDTQFV.R.F                                                              | 1630.82504 | 2 | 2.78E-04 | 0.93 | 3.08   | -     | 1534.2   |
| AHQ-2-8, 2902 - 2916        | K.WAAVVVPSGEEQ.R.Y                                                              | 1428.57478 | 2 | 2.39E-04 | 0.95 | 3.98   | -     | 1182.1   |
| AHQ-2-8, 1858               | R.YLENGKETLQR.T                                                                 | 1351.49032 | 2 | 6.15E-05 | 0.66 | 2.57   | -     | 721.8    |
| AHQ-2-8, 2754               | R.YTCHVQHEGLPKPLTR.W                                                            | 2051.35781 | 3 | 4.80E-08 | 0.94 | 4.68   | -     | 1908.2   |
| gi 4758950 ref NP_000933.1  | peptidylprolyl isomerase B (cyclophilin B) [Homo sapiens]                       |            |   | 4.92E-08 | 7.72 | 90.24  | 39.80 | 23742.4  |
| AHQ-2-12, 4231 - 4287       | K.DFMIQGGDFTR.G                                                                 | 1287.42660 | 2 | 3.17E-04 | 0.81 | 2.95   | -     | 891.9    |
| AHQ-2-11, 2852              | R.DKPLKDVIIADCGK.I                                                              | 1573.83653 | 3 | 1.01E-05 | 0.95 | 4.71   | -     | 1740.5   |
| AHQ-2-11, 2830              | R.DKPLKDVIIADCGK.I                                                              | 1573.83653 | 2 | 4.92E-08 | 0.93 | 3.57   | -     | 1147.6   |
| AHQ-2-12, 4453              | K.DTNGSQFFITVTK.T                                                               | 1458.59766 | 2 | 1.95E-04 | 0.86 | 2.99   | -     | 1039.2   |
| AHQ-2-13-, 4438             | K.DTNGSQFFITVTK.T                                                               | 1458.59766 | 2 | 1.04E-06 | 0.84 | 3.09   | -     | 826.3    |
| AHQ-2-11, 4201 - 4270       | K.DTNGSQFFITVTK.T                                                               | 1458.59766 | 1 | 6.84E-05 | 0.17 | 2.28   | -     | 349.7    |
| AHQ-2-12, 4449              | K.DTNGSQFFITVTK.T                                                               | 1458.59766 | 1 | 5.18E-06 | 0.07 | 1.86   | -     | 207.9    |
| AHQ-2-11, 2388              | K.DVIIADCGK.I                                                                   | 992.12891  | 1 | 4.17E-07 | 0.45 | 2.11   | -     | 544.8    |
| AHQ-2-12, 2426              | K.DVIIADCGK.I                                                                   | 992.12891  | 1 | 3.38E-05 | 0.71 | 2.14   | -     | 814.7    |
| AHQ-2-12, 3003              | K.HYGP6W5MANAGK.D                                                               | 1475.65664 | 2 | 9.79E-08 | 0.96 | 4.70   | -     | 1063.5   |
| AHQ-2-12, 3042 - 3049       | K.IEVEKPFIAK.E                                                                  | 1245.49240 | 2 | 6.50E-05 | 0.86 | 3.32   | -     | 860.1    |
| AHQ-2-11, 3004 - 3074       | K.IEVEKPFIAK.E                                                                  | 1245.49240 | 2 | 1.28E-05 | 0.93 | 3.61   | -     | 1484.6   |
| AHQ-2-11, 3193              | K.IEVEKPFIAK.E                                                                  | 1374.60693 | 2 | 6.67E-04 | 0.97 | 4.39   | -     | 2010.5   |
| AHQ-2-12, 4366              | K.TVDNFVALATGEK.G                                                               | 1365.51377 | 2 | 5.15E-06 | 0.93 | 4.04   | -     | 995.7    |
| AHQ-2-12, 4371              | K.TVDNFVALATGEK.G                                                               | 1365.51377 | 1 | 2.72E-06 | 0.06 | 2.13   | -     | 273.0    |
| AHQ-2-12, 4350 - 4353       | K.TVDNFVALATGEK.G                                                               | 1365.51377 | 2 | 3.19E-04 | 0.91 | 3.78   | -     | 786.6    |
| AHQ-2-11, 4240              | K.TVDNFVALATGEK.G                                                               | 1365.51377 | 1 | 1.31E-05 | 0.46 | 3.00   | -     | 329.7    |
| AHQ-2-11, 4594 - 4666       | K.TVDNFVALATGEK.G                                                               | 1365.51377 | 2 | 5.51E-07 | 0.90 | 3.36   | -     | 790.2    |
| AHQ-2-14-, 4361             | K.TVDNFVALATGEK.G                                                               | 1365.51377 | 2 | 1.25E-04 | 0.76 | 3.00   | -     | 603.8    |
| AHQ-2-11, 2838 - 2913       | K.VLEGMVVTR.K                                                                   | 1032.23962 | 2 | 3.11E-05 | 0.93 | 3.45   | -     | 1211.9   |
| gi 5174539 ref NP_005908.1  | cytosolic malate dehydrogenase; soluble malate dehydrogenase [Homo sapiens]     |            |   | 5.03E-08 | 2.29 | 30.20  | 12.00 | 36425.9  |
| AHQ-2-13-, 2994             | K.DVIATDKEDVAFK.D                                                               | 1451.60343 | 2 | 5.03E-08 | 0.95 | 3.90   | -     | 1619.9   |
| AHQ-2-9, 5142               | K.EVGYVEALKDDSWLK.G                                                             | 1752.94535 | 2 | 7.14E-05 | 0.83 | 3.28   | -     | 857.4    |
| AHQ-2-9, 4632               | K.FVEGLPINDFSR.E                                                                | 1394.55680 | 1 | 8.95E-05 | 0.50 | 2.82   | -     | 279.3    |
| gi 22538814 ref NP_002976.2 | small inducible cytokine A5 precursor; T-cell specific protein p288; T          |            |   | 5.32E-08 | 1.41 | 20.20  | 20.90 | 9989.6   |
| AHQ-2-14-, 3772 - 3780      | K.CSNPAVVFTR.K                                                                  | 1251.43718 | 2 | 5.32E-08 | 0.93 | 3.99   | -     | 779.1    |
| AHQ-2-14-, 2271             | K.EYFYTSQK.C                                                                    | 995.06653  | 1 | 2.16E-04 | 0.48 | 2.25   | -     | 253.9    |
| gi 6912238 ref NP_036226.1  | peroxiredoxin 5; antioxidant enzyme B166 [Homo sapiens]                         |            |   | 6.64E-08 | 6.43 | 70.27  | 44.90 | 22026.2  |
| AHQ-2-12, 7069              | K.ETDLLLLDDSLVSIHG.R                                                            | 1908.09888 | 2 | 8.49E-08 | 0.97 | 5.39   | -     | 1416.7   |
| AHQ-2-12, 3906 - 3982       | R.FSMVVQDGIWK.A                                                                 | 1223.46709 | 2 | 4.13E-06 | 0.95 | 4.10   | -     | 1302.6   |
| AHQ-2-12, 4683              | K.KGVLFGVPGAFPTGCKS.T                                                           | 1724.01680 | 2 | 6.64E-08 | 0.94 | 4.28   | -     | 908.6    |
| AHQ-2-13-, 3490 - 3525      | R.LLADPTGAFGK.E                                                                 | 1090.25413 | 2 | 1.22E-04 | 0.79 | 2.59   | -     | 797.7    |
| AHQ-2-12, 4206              | K.THLPGFVEQAEALK.A                                                              | 1540.74504 | 3 | 5.02E-05 | 0.94 | 3.97   | -     | 2161.2   |
| AHQ-2-12, 4886 - 4967       | K.VGDAIPAVEVFEPEGPNK.V                                                          | 1829.00022 | 2 | 5.30E-07 | 0.94 | 4.67   | -     | 565.3    |
| AHQ-2-12, 4765 - 4777       | K.VNLAELFK.G                                                                    | 934.11414  | 2 | 8.05E-05 | 0.90 | 3.38   | -     | 764.4    |
| gi 5031985 ref NP_005787.1  | nuclear transport factor 2; placental protein 15 [Homo sapiens]                 |            |   | 6.72E-08 | 3.95 | 50.30  | 63.00 | 14478.4  |
| AHQ-2-14-, 6128             | K.ADEDPIMGFHQMLLK.N                                                             | 1893.21919 | 3 | 1.92E-05 | 0.60 | 3.21   | -     | 450.1    |
| AHQ-2-14-, 6107 - 6119      | K.IQHSITAQDHOPTDSCIIISMVVGQLK.A                                                 | 3006.40418 | 3 | 1.39E-07 | 0.97 | 5.90   | -     | 1857.0   |
| AHQ-2-14-, 5387 - 5391      | K.NINDAWVCTNDMFR.L                                                              | 1757.92888 | 2 | 6.72E-08 | 0.97 | 4.98   | -     | 1178.4   |
| AHQ-2-14, 5550              | K.NINDAWVCTNDM*FR.L                                                             | 1773.92828 | 2 | 1.77E-05 | 0.46 | 2.89   | -     | 381.1    |
| AHQ-2-14-, 6445 - 6468      | R.TQLGAIYIDASCLTWEQQQFQK.A                                                      | 2616.88699 | 2 | 1.54E-07 | 0.95 | 4.76   | -     | 999.1    |
| gi 14211923 ref NP_115982.1 | PKC1-1-related HIT protein [Homo sapiens]                                       |            |   | 7.12E-08 | 3.50 | 40.25  | 41.70 | 17161.6  |
| AHQ-2-13-, 3277             | K.AQAQATPGGAATPFR.I                                                             | 1573.73512 | 2 | 6.26E-07 | 0.93 | 4.33   | -     | 565.4    |
| AHQ-2-13, 4753              | R.DVAPQAPVHFLVPIK.K                                                             | 1631.94245 | 2 | 9.11E-04 | 0.79 | 3.30   | -     | 575.6    |
| AHQ-2-13-, 6318             | R.ISQAEEDQQLLGHLLVAK.Q                                                          | 2235.52293 | 2 | 1.12E-05 | 0.95 | 4.92   | -     | 1278.1   |
| AHQ-2-13-, 6247 - 6314      | R.ISQAEEDQQLLGHLLVAK.Q                                                          | 2235.52293 | 3 | 7.12E-08 | 0.88 | 3.99   | -     | 975.6    |
| AHQ-2-13, 6119              | R.ISQAEEDQQLLGHLLVAK.Q                                                          | 2235.52293 | 2 | 8.12E-07 | 0.93 | 4.42   | -     | 1150.9   |
| AHQ-2-13-, 6333 - 6398      | K.SLPADILYDQCCLVFR.D                                                            | 2069.32354 | 2 | 4.50E-04 | 0.92 | 3.70   | -     | 1054.7   |
| AHQ-2-13, 6172              | K.SLPADILYDQCCLVFR.D                                                            | 2069.32354 | 2 | 2.96E-05 | 0.90 | 3.90   | -     | 825.1    |
| gi 4507745 ref NP_003320.1  | thioredoxin [Homo sapiens]                                                      |            |   | 7.73E-08 | 0.94 | 10.19  | 12.40 | 11693.3  |
| AHQ-2-14, 4769 - 4784       | K.TAFQALDAAGDK.L                                                                | 1337.41728 | 2 | 4.20E-07 | 0.77 | 3.00   | -     | 918.0    |
| AHQ-2-13-, 2809             | K.TAFQALDAAGDK.L                                                                | 1337.41728 | 2 | 2.02E-05 | 0.76 | 2.62   | -     | 1161.1   |
| AHQ-2-13-, 3837 - 3909      | K.TAFQALDAAGDK.L                                                                | 1337.41728 | 2 | 2.30E-06 | 0.93 | 3.49   | -     | 1682.1   |
| AHQ-2-13-, 3914 - 3930      | K.TAFQALDAAGDK.L                                                                | 1337.41728 | 1 | 7.54E-05 | 0.49 | 2.22   | -     | 888.7    |
| AHQ-2-14-, 3815 - 3816      | K.TAFQALDAAGDK.L                                                                | 1337.41728 | 2 | 7.73E-08 | 0.94 | 3.72   | -     | 1429.5   |
| AHQ-2-14-, 3820 - 3896      | K.TAFQALDAAGDK.L                                                                | 1337.41728 | 1 | 6.68E-07 | 0.75 | 2.84   | -     | 829.2    |
| AHQ-2-13, 3863              | K.TAFQALDAAGDK.L                                                                | 1337.41728 | 2 | 1.14E-06 | 0.93 | 3.29   | -     | 1477.0   |
| gi 4505759 ref NP_002622.1  | phosphogluconate dehydrogenase; 6-phosphogluconate dehydrogenase [Homo sapiens] |            |   | 8.12E-08 | 3.73 | 40.33  | 15.50 | 53151.7  |
| AHQ-2-8, 2923               | R.HEMLPASLIQAQR.D                                                               | 1494.74454 | 2 | 2.05E-04 | 0.88 | 3.10   | -     | 753.2    |
| AHQ-2-8, 6563               | K.IKDAFDRNPQLQLLDDFFK.S                                                         | 2552.86598 | 3 | 1.36E-05 | 0.94 | 4.88   | -     | 1151.4   |
| AHQ-2-8, 6208               | K.LVPLLDTDGIIDGNSSEYR.D                                                         | 2161.39768 | 2 | 3.54E-07 | 0.91 | 4.28   | -     | 958.2    |
| AHQ-2-7, 6304               | K.LVPLLDTDGIIDGNSSEYR.D                                                         | 2161.39768 | 2 | 8.12E-08 | 0.98 | 6.56   | -     | 1979.8   |
| AHQ-2-8, 4223 - 4224        | K.VGTGPECCDWWGDEGAGHFVK.M                                                       | 2280.43619 | 3 | 1.48E-06 | 0.92 | 4.72   | -     | 697.7    |
| AHQ-2-8, 4222               | K.VGTGPECCDWWGDEGAGHFVK.M                                                       | 2280.43619 | 2 | 3.43E-05 | 0.46 | 2.57   | -     | 349.3    |
| gi 4557801 ref NP_000261.1  | purine nucleoside phosphorylase [Homo sapiens]                                  |            |   | 8.16E-08 | 8.01 | 100.33 | 46.70 | 32147.7  |
| AHQ-2-9, 1478               | K.ANHEEYLAAGK.Q                                                                 | 1139.24364 | 1 | 8.29E-05 | 0.39 | 2.52   | -     | 381.9    |
| AHQ-2-9, 4298 - 4303        | R.FHMYEGYPLWK.V                                                                 | 1471.70636 | 1 | 7.16E-05 | 0.62 | 2.55   | -     | 716.1    |
| AHQ-2-9, 4299               | R.FHMYEGYPLWK.V                                                                 | 1471.70636 | 2 | 1.82E-04 | 0.92 | 3.14   | -     | 1175.1   |
| AHQ-2-13-, 3993 - 4066      | K.HRPQVAICGSLGLLTDK.L                                                           | 1981.26589 | 3 | 8.16E-08 | 0.98 | 5.51   | -     | 2889.7   |
| AHQ-2-13, 4023 - 4039       | K.HRPQVAICGSLGLLTDK.L                                                           | 1981.26589 | 2 | 1.41E-06 | 0.93 | 4.19   | -     | 992.9    |
| AHQ-2-13-, 4082             | K.HRPQVAICGSLGLLTDK.L                                                           | 1981.26589 | 2 | 1.04E-06 | 0.91 | 4.07   | -     | 712.8    |
| AHQ-2-13, 6867              | K.LEQFVSILMASIPLDK.A                                                            | 1902.28716 | 2 | 2.36E-06 | 0.94 | 4.60   | -     | 846.9    |
| AHQ-2-13-, 7058 - 7135      | K.LEQFVSILMASIPLDK.A                                                            | 1902.28716 | 2 | 9.01E-04 | 0.93 | 4.35   | -     | 725.1    |
| AHQ-2-9, 7483 - 7484        | K.LEQFVSILMASIPLDK.A                                                            | 1902.28716 | 2 | 7.35E-06 | 0.96 | 5.05   | -     | 1082.0   |
| AHQ-2-9, 4126               | K.LGADAVGM*STVPEVIVAR.H                                                         | 1802.08606 | 2 | 2.09E-07 | 0.91 | 3.71   | -     | 817.2    |
| AHQ-2-13-, 4243 - 4246      | K.LGADAVGM*STVPEVIVAR.H                                                         | 1802.08606 | 2 | 1.31E-06 | 0.94 | 4.62   | -     | 832.8    |
| AHQ-2-13, 4855 - 4920       | K.LGADAVGM*STVPEVIVAR.H                                                         | 1786.08666 | 2 | 4.24E-04 | 0.55 | 2.91   | -     | 774.3    |
| AHQ-2-11, 4096              | K.LGADAVGM*STVPEVIVAR.H                                                         | 1802.08606 | 2 | 1.60E-04 | 0.89 | 3.79   | -     | 859.8    |
| AHQ-2-13, 5851 - 5853       | K.LTQAQIFDYSEIPNFR.S                                                            | 2040.26383 | 2 | 9.01E-07 | 0.90 | 4.46   | -     | 555.3    |
| AHQ-2-13-, 5987             | K.LTQAQIFDYSEIPNFR.S                                                            | 2040.26383 | 2 | 1.03E-05 | 0.94 | 4.54   | -     | 807.1    |
| AHQ-2-9, 6034 - 6060        | K.LTQAQIFDYSEIPNFR.S                                                            | 2040.26383 | 2 | 1.09E-04 | 0.91 | 4.54   | -     | 477.2    |
| AHQ-2-9, 4792               | R.VFGFSLITNK.V                                                                  | 1126.32960 | 2 | 3.94E-05 | 0.93 | 3.81   | -     | 768.5    |
| AHQ-2-9, 5986 - 5995        | R.VFHLLGVDLTVVNAAGLNP.K.F                                                       | 2236.59890 | 2 | 6.10E-06 | 0.99 | 6.67   | -     | 3631.5   |
| AHQ-2-9, 6095               | R.VFHLLGVDLTVVNAAGLNP.K.F                                                       | 2236.59890 | 2 | 4.31E-07 | 0.92 | 4.04   | -     | 1058.0   |
| AHQ-2-9, 3371 - 3380        | K.VIMDYESLEK.A                                                                  | 1227.40938 | 2 | 3.57E-05 | 0.87 | 3.37   | -     | 501.2    |
| gi 30147105 ref NP_116262.2 | nm23-phosphorylated unknown substrate; SH3 domain-containing 70 kDa pr          |            |   | 8.26E-08 | 2.56 | 30.22  | 5.70  | 72695.6  |
| AHQ-2-6, 6658               | K.LGCDVWATIFSR.D                                                                | 1426.62208 | 2 | 8.26E-08 | 0.93 | 3.42   | -     | 1304.0   |
| AHQ-2-6, 6066               | R.RPYEDQGLGETTPLTIICQPMQPLR.V                                                   | 2916.32264 | 3 | 1.45E-04 | 0.90 | 4.41   | -     | 768.2    |
| AHQ-2-6, 5295               | R.RPYEDQGLGETTPLTIICQPM*QPLR.V                                                  | 2932.32204 | 3 | 1.25E-04 | 0.73 | 4.05   | -     | 557.1    |
| gi 30147105 ref XP_210550.2 | similar to Chain , Aldose Reductase (E.C.1.1.1.21) Mutant With Tyr 48           |            |   | 8.40E-08 | 0.92 | 10.21  | 2.20  | 61339.9  |
| AHQ-2-5, 4033               | K.ADLINNLGTIAK.S                                                                | 1243.43490 | 2 | 8.40E-08 | 0.92 | 4.14   | -     | 997.8    |
| AHQ-2-6, 4003               | K.ADLINNLGTIAK.S                                                                | 1243.43490 | 2 | 9.11E-05 | 0.87 | 3.08   | -     | 885.0    |
| AHQ-2-5, 3896               | K.ADLINNLGTIAK.S                                                                | 1243.43490 | 2 | 7.68E-04 | 0.81 | 3.38   | -     | 408.8    |
| gi 4503743 ref NP_002009.1  | flightless I homolog [Homo sapiens]                                             |            |   | 8.75E-08 | 2.65 | 30.23  | 4.50  | 144750.1 |
| AHQ-2-4, 3185               | K.AVQGAQPSLVIQIR.T                                                              | 1559.75158 | 2 | 4.46E-07 | 0.92 | 3.76   | -     | 817.5    |
| AHQ-2-3, 7323               | R.TQSNLPTSEGLSNLADVDLSCNDLTR.V                                                  | 2936.15611 | 2 | 1.62E-05 | 0.77 | 3.13   | -     | 674.1    |
| AHQ-2-3, 6871               | K.VGLGLGYLELPQINYK.L                                                            | 1778.08432 | 2 | 8.75E-08 | 0.96 | 4.66   | -     | 1318.6   |
| gi 4502097 ref NP_001142.1  | solute carrier family 25 (mitochondrial carrier; adenine nucleotide tra         |            |   | 9.02E-08 | 0.80 | 10.17  | 4.00  | 33148.4  |
| AHQ-2-10, 5271              | R.YFPTQALNFAFK.D                                                                | 1447.66130 | 1 | 9.02E-08 | 0.80 | 3.29   | -     | 594.0    |

|                             |                                                                         |            |   |          |      |       |       |          |
|-----------------------------|-------------------------------------------------------------------------|------------|---|----------|------|-------|-------|----------|
| AHQ-2-10, 5266 - 5275       | R.YFPQTALNFAFK.D                                                        | 1447.66130 | 2 | 4.42E-06 | 0.86 | 3.40  | -     | 546.9    |
| gi 5802966 ref NP_006861.1  | desmin (actin depolymerizing factor); desmin [Homo sapiens]             |            |   | 9.11E-08 | 2.72 | 30.22 | 24.80 | 18505.6  |
| AHQ-2-12, 1875 - 1907       | K.HECQANGPEDLNR.A                                                       | 1541.58530 | 2 | 1.47E-05 | 0.92 | 4.05  | -     | 858.5    |
| AHQ-2-12, 7065 - 7125       | R.KHEELMFLWAPELAPLK.S                                                   | 2063.49022 | 2 | 1.05E-04 | 0.91 | 4.39  | -     | 837.5    |
| AHQ-2-13-, 3857 - 3881      | R.YALYDASFETK.E                                                         | 1308.41754 | 2 | 9.11E-08 | 0.88 | 2.99  | -     | 979.6    |
| AHQ-2-12, 3714 - 3733       | R.YALYDASFETK.E                                                         | 1308.41754 | 2 | 1.79E-06 | 0.95 | 3.83  | -     | 1201.6   |
| gi 30160191 ref XP_294035.2 | similar to Pyruvate kinase, M1 isozyme (Pyruvate kinase muscle isozyme  |            |   | 9.24E-08 | 0.70 | 10.16 | 2.80  | 50222.2  |
| AHQ-2-7, 5184               | K.IYVDDGLISLQVK.Q                                                       | 1463.70048 | 1 | 9.24E-08 | 0.70 | 3.17  | -     | 618.2    |
| AHQ-2-7, 5112 - 5188        | K.IYVDDGLISLQVK.Q                                                       | 1463.70048 | 2 | 3.72E-06 | 0.91 | 2.84  | -     | 1607.1   |
| gi 16950601 ref NP_005956.2 | myosin light chain kinase isoform 6; myosin light chain kinase [Homo s  |            |   | 9.35E-08 | 2.78 | 30.20 | 3.20  | 110074.8 |
| AHQ-2-12, 2523              | R.DLEWVEGSAAR.F                                                         | 1146.23295 | 2 | 4.86E-06 | 0.92 | 4.02  | -     | 1168.9   |
| AHQ-2-6, 3429 - 3430        | K.LVQCVDFAEEK.A                                                         | 1339.49637 | 2 | 8.70E-04 | 0.92 | 2.91  | -     | 1221.2   |
| AHQ-2-6, 3329               | K.VSDFYDIEER.L                                                          | 1273.33005 | 2 | 9.35E-08 | 0.94 | 3.30  | -     | 1215.4   |
| gi 19913373 ref NP_079536.2 | G6B protein isoform G6b-A precursor; G6B protein; immunoglobulin recep  |            |   | 9.44E-08 | 1.82 | 20.21 | 9.30  | 25002.6  |
| AHQ-2-11, 2365              | R.TVLHVLGDR.T                                                           | 1010.17224 | 2 | 6.07E-05 | 0.88 | 2.86  | -     | 1301.2   |
| AHQ-2-12, 2391              | R.TVLHVLGDR.T                                                           | 1010.17224 | 2 | 5.01E-04 | 0.92 | 3.31  | -     | 1399.1   |
| AHQ-2-12, 2394              | R.TVLHVLGDR.T                                                           | 1010.17224 | 1 | 8.47E-04 | 0.64 | 2.19  | -     | 606.3    |
| AHQ-2-10, 2187              | R.TVLHVLGDR.T                                                           | 1010.17224 | 1 | 6.03E-04 | 0.57 | 2.28  | -     | 486.0    |
| AHQ-2-12, 2574              | R.VNLSCGVSHPIR.W                                                        | 1397.58551 | 2 | 9.44E-08 | 0.94 | 4.22  | -     | 1399.5   |
| gi 18104989 ref NP_002822.2 | protein tyrosine phosphatase, non-receptor type 6 isoform 1; protein-t  |            |   | 9.44E-08 | 2.67 | 30.19 | 7.10  | 67560.7  |
| AHQ-2-6, 5893               | K.AGFWEFESLQK.Q                                                         | 1471.59489 | 2 | 2.17E-06 | 0.94 | 3.72  | -     | 1543.0   |
| AHQ-2-14, 6066              | R.DLSGLDAETLLK.G                                                        | 1275.43053 | 2 | 9.44E-08 | 0.94 | 3.61  | -     | 1539.4   |
| AHQ-2-6, 3030               | R.WYHGHMSGQAETLLQAK.G                                                   | 2015.24110 | 2 | 7.87E-07 | 0.79 | 3.87  | -     | 557.3    |
| gi 9966867 ref NP_065123.1  | eIF-5A2 protein; eIF5AII [Homo sapiens]                                 |            |   | 9.60E-08 | 2.66 | 30.30 | 19.60 | 16793.1  |
| AHQ-2-12, 3631 - 3638       | K.KYEDICPSTHNMMDVPMK.R                                                  | 2163.41723 | 3 | 3.63E-06 | 0.97 | 6.00  | -     | 1676.2   |
| AHQ-2-12, 4823 - 4825       | K.VHLVDIIFTGK.K                                                         | 1299.54329 | 1 | 9.60E-08 | 0.93 | 3.67  | -     | 1142.2   |
| AHQ-2-12, 4821              | K.VHLVDIIFTGK.K                                                         | 1299.54329 | 2 | 4.04E-07 | 0.93 | 3.40  | -     | 1254.4   |
| AHQ-2-11, 4656              | K.VHLVDIIFTGK.K                                                         | 1299.54329 | 2 | 9.32E-05 | 0.91 | 3.32  | -     | 1185.8   |
| AHQ-2-12, 3973              | K.YEDICPSTHNMMDVPMK.R                                                   | 2035.24432 | 2 | 1.36E-04 | 0.75 | 3.45  | -     | 560.1    |
| gi 4503377 ref NP_001377.1  | dihydropyrimidinase-like 2; collapsin response mediator protein hCRMP-2 |            |   | 9.93E-08 | 2.32 | 30.19 | 8.00  | 62293.3  |
| AHQ-2-7, 5521               | R.FQMPDQGMSTADDFQGT.K.A                                                 | 2152.34998 | 2 | 8.20E-04 | 0.82 | 2.77  | -     | 1006.3   |
| AHQ-2-7, 2540               | R.GSPLVVISQGK.I                                                         | 1085.27902 | 1 | 9.93E-08 | 0.59 | 2.46  | -     | 621.3    |
| AHQ-2-7, 3031               | K.IVLEDGT.LHVTGSGR.Y                                                    | 1683.84465 | 2 | 9.66E-06 | 0.91 | 3.87  | -     | 860.5    |
| gi 4506417 ref NP_002877.1  | RAP2B, member of RAS oncogene family [Homo sapiens]                     |            |   | 1.01E-07 | 3.98 | 50.21 | 37.20 | 20494.2  |
| AHQ-2-11, 6062 - 6073       | K.ASVDELFAEIVR.Q                                                        | 1349.51434 | 2 | 1.01E-07 | 0.95 | 4.08  | -     | 1338.8   |
| AHQ-2-11, 6752              | K.EIEVDSPPSVLEILDTAGTEQFASMR.D                                          | 2826.08347 | 2 | 1.76E-05 | 0.79 | 3.76  | -     | 425.4    |
| AHQ-2-11, 3033              | R.VPMILVGNK.V                                                           | 971.24256  | 2 | 4.23E-06 | 0.92 | 2.95  | -     | 982.1    |
| AHQ-2-11, 2304              | K.VVVLGSGGVGK.S                                                         | 972.16391  | 1 | 2.82E-04 | 0.50 | 2.28  | -     | 552.0    |
| AHQ-2-11, 4138              | K.YDPTIEDFYR.K                                                          | 1319.40042 | 2 | 3.16E-05 | 0.82 | 2.59  | -     | 470.2    |
| gi 5453605 ref NP_006421.1  | chaperonin containing TCP1, subunit 4 (delta); chaperonin containing t- |            |   | 1.02E-07 | 1.89 | 20.23 | 4.80  | 57838.8  |
| AHQ-2-7, 6536               | R.DALSDLHFLNK.M                                                         | 1457.65603 | 2 | 1.02E-07 | 0.97 | 4.51  | -     | 2145.6   |
| AHQ-2-7, 3356               | K.VIDPATATSVDLR.D                                                       | 1358.52277 | 2 | 1.40E-05 | 0.92 | 3.38  | -     | 1066.7   |
| gi 4757768 ref NP_004300.1  | Rho GDP dissociation inhibitor (GDI) alpha [Homo sapiens]               |            |   | 1.07E-07 | 3.67 | 40.24 | 22.50 | 23206.9  |
| AHQ-2-12, 4658 - 4674       | R.AEEYEFLLPVEEAPK.G                                                     | 1752.89898 | 2 | 3.28E-06 | 0.91 | 4.26  | -     | 743.3    |
| AHQ-2-10, 4262 - 4267       | R.AEEYEFLLPVEEAPK.G                                                     | 1752.89898 | 2 | 1.39E-05 | 0.92 | 3.84  | -     | 984.5    |
| AHQ-2-10, 2810              | K.IDKTDYVMVGSYGR.A                                                      | 1602.79350 | 2 | 5.53E-06 | 0.91 | 3.32  | -     | 1296.0   |
| AHQ-2-10, 3556              | K.SIQEIQLDKDDESLR.K                                                     | 1919.03693 | 2 | 1.07E-07 | 0.95 | 4.81  | -     | 943.0    |
| AHQ-2-10, 3098 - 3104       | K.SIQEIQLDKDDESLR.Y                                                     | 2047.20984 | 3 | 1.02E-06 | 0.86 | 4.09  | -     | 786.2    |
| AHQ-2-10, 3084 - 3102       | K.SIQEIQLDKDDESLR.Y                                                     | 2047.20984 | 2 | 4.60E-07 | 0.90 | 4.45  | -     | 646.8    |
| gi 7657431 ref NP_055205.1  | EBNA-2 co-activator (100kD) [Homo sapiens]                              |            |   | 1.08E-07 | 0.88 | 10.22 | 2.40  | 99689.7  |
| AHQ-2-5, 6572 - 6580        | R.NLPLGVQGEFPEEATLFTK.E                                                 | 2307.54125 | 2 | 2.24E-06 | 0.92 | 4.35  | -     | 550.5    |
| AHQ-2-6, 6405               | R.NLPLGVQGEFPEEATLFTK.E                                                 | 2307.54125 | 2 | 1.08E-07 | 0.88 | 3.74  | -     | 600.3    |
| AHQ-2-4, 6772               | R.NLPLGVQGEFPEEATLFTK.E                                                 | 2307.54125 | 2 | 8.17E-06 | 0.89 | 4.33  | -     | 425.9    |
| gi 19913426 ref NP_001683.2 | ATPase, H+ transporting, lysosomal 56/58kD, V1 subunit B, isoform 1; A  |            |   | 1.09E-07 | 0.91 | 10.21 | 3.90  | 56832.7  |
| AHQ-2-7, 5409               | K.IPIFSAAGLPHNIAAQCIR.Q                                                 | 2180.51549 | 3 | 1.09E-07 | 0.91 | 4.17  | -     | 907.2    |
| gi 13129150 ref NP_005339.1 | heat shock 90kDa protein 1, alpha; heat shock 90kD protein 1, alpha [H  |            |   | 1.18E-07 | 3.51 | 40.25 | 6.10  | 84659.1  |
| AHQ-2-5, 2684               | K.ELHNLINPKQDR.T                                                        | 1590.80882 | 2 | 7.17E-04 | 0.92 | 3.81  | -     | 787.1    |
| AHQ-2-6, 2218               | K.FYEQFSK.N                                                             | 949.04099  | 1 | 4.69E-04 | 0.45 | 2.30  | -     | 279.3    |
| AHQ-2-5, 2203               | K.FYEQFSK.N                                                             | 949.04099  | 1 | 4.40E-04 | 0.77 | 2.53  | -     | 676.8    |
| AHQ-2-5, 4012               | R.NPDDITNEEYGEFYK.S                                                     | 1834.87381 | 2 | 3.26E-06 | 0.95 | 4.94  | -     | 843.7    |
| AHQ-2-6, 3951               | R.NPDDITNEEYGEFYK.S                                                     | 1834.87381 | 2 | 1.18E-07 | 0.97 | 5.00  | -     | 1213.4   |
| AHQ-2-5, 3749               | R.RAPFDLFENR.K                                                          | 1265.40235 | 2 | 4.25E-06 | 0.86 | 3.48  | -     | 634.3    |
| gi 4505753 ref NP_002620.1  | phosphoglycerate mutase 1 (brain); Phosphoglycerate mutase A, nonmuscle |            |   | 1.19E-07 | 4.51 | 60.24 | 28.30 | 28803.7  |
| AHQ-2-10, 3696              | R.FSGWYDADLSPAGHEEAK.R                                                  | 1981.06697 | 2 | 2.35E-07 | 0.93 | 4.18  | -     | 1020.1   |
| AHQ-2-10, 3304              | R.FSGWYDADLSPAGHEEAK.R                                                  | 2137.25332 | 2 | 1.19E-07 | 0.96 | 4.87  | -     | 1088.1   |
| AHQ-2-10, 1852              | R.HYGGTLGNK.A                                                           | 1060.18811 | 1 | 8.33E-04 | 0.68 | 2.80  | -     | 395.6    |
| AHQ-2-10, 3795 - 3860       | R.RSYDVPPPMPDPHPFYSNISK.D                                               | 2574.85201 | 3 | 2.62E-05 | 0.71 | 3.08  | -     | 656.0    |
| AHQ-2-10, 4130              | R.SYDVPPPMPDPHPFYSNISK.D                                                | 2418.66566 | 2 | 2.78E-05 | 0.36 | 2.79  | -     | 253.4    |
| AHQ-2-10, 4695              | R.YADLTEDQLPSCSKLDTIAR.A                                                | 2427.62735 | 3 | 9.19E-06 | 0.86 | 3.44  | -     | 892.3    |
| gi 8923812 ref NP_060943.1  | uncharacterized hypothalamus protein HT012 [Homo sapiens]               |            |   | 1.21E-07 | 0.93 | 10.18 | 8.60  | 14960.4  |
| AHQ-2-13-, 4166             | K.LLAFTSVLDTLNK.A                                                       | 1310.47811 | 2 | 1.21E-07 | 0.93 | 3.63  | -     | 1211.6   |
| gi 4507171 ref NP_003109.1  | secreted protein, acidic, cysteine-rich (osteonectin); Osteonectin (sec |            |   | 1.22E-07 | 2.18 | 30.20 | 9.90  | 34632.0  |
| AHQ-2-9, 2882               | R.LEAGDHPVELLAR.D                                                       | 1420.59579 | 2 | 1.04E-06 | 0.96 | 4.06  | -     | 1498.2   |
| AHQ-2-8, 2244 - 2307        | K.RLEAGDHPVELLAR.D                                                      | 1576.78214 | 2 | 2.10E-07 | 0.78 | 3.46  | -     | 427.9    |
| AHQ-2-11, 6186              | K.YIPPCLDSELTFFPLR.M                                                    | 1952.21655 | 2 | 1.22E-07 | 0.44 | 2.94  | -     | 123.8    |
| AHQ-2-9, 6616 - 6622        | K.YIPPCLDSELTFFPLR.M                                                    | 1952.21655 | 2 | 2.55E-06 | 0.64 | 2.67  | -     | 280.6    |
| gi 11993943 ref NP_055419.1 | Tax interaction protein 1 [Homo sapiens]                                |            |   | 1.24E-07 | 0.95 | 10.21 | 13.70 | 13734.6  |
| AHQ-2-13-, 4167             | R.VSEGGPAEIAGLQIGDK.I                                                   | 1641.80454 | 2 | 1.24E-07 | 0.95 | 4.12  | -     | 1504.0   |
| AHQ-2-13, 4121 - 4195       | R.VSEGGPAEIAGLQIGDK.I                                                   | 1641.80454 | 2 | 2.01E-06 | 0.94 | 3.66  | -     | 1415.9   |
| gi 7657313 ref NP_055277.1  | Lsm1 protein [Homo sapiens]                                             |            |   | 1.24E-07 | 0.86 | 10.21 | 12.00 | 15179.3  |
| AHQ-2-12, 5955 - 6034       | R.SIDQFANLVHLQTVR.I                                                     | 1871.08670 | 2 | 1.24E-07 | 0.86 | 4.17  | -     | 555.2    |
| gi 4757766 ref NP_004299.1  | Rho GTPase activating protein 1; RhoGAP; p50rhoGAP; CDC42 GTPase-activa |            |   | 1.25E-07 | 3.33 | 40.23 | 11.40 | 50435.4  |
| AHQ-2-7, 6247               | K.FLLDHQGLFSPDPDPSGL                                                    | 1970.17037 | 2 | 4.49E-07 | 0.85 | 3.60  | -     | 704.2    |
| AHQ-2-11, 3965              | K.NPEQEPIPIVLR.E                                                        | 1405.62426 | 2 | 4.60E-07 | 0.89 | 3.36  | -     | 974.1    |
| AHQ-2-8, 6120               | R.VPATLQVLQTLPEENYQVLR.F                                                | 2312.65053 | 2 | 4.23E-04 | 0.64 | 2.85  | -     | 484.4    |
| AHQ-2-11, 5926              | R.VPATLQVLQTLPEENYQVLR.F                                                | 2312.65053 | 2 | 1.25E-07 | 0.93 | 4.63  | -     | 806.7    |
| AHQ-2-7, 6172               | R.VPATLQVLQTLPEENYQVLR.F                                                | 2312.65053 | 2 | 6.34E-04 | 0.68 | 3.06  | -     | 513.2    |
| AHQ-2-11, 6678              | K.YNMGLPVDPQYNELHLPVILK.T                                               | 2691.09719 | 3 | 5.13E-05 | 0.66 | 3.08  | -     | 258.5    |
| gi 30148346 ref XP_302059.1 | similar to MLRQ subunit of the NADH: ubiquinone oxidoreductase complex  |            |   | 1.30E-07 | 0.32 | 10.11 | 6.60  | 17253.8  |
| AHQ-2-14-, 3349 - 3376      | K.FYSYVNDYSK.L                                                          | 1222.32788 | 1 | 1.30E-07 | 0.32 | 2.19  | -     | 246.1    |
| gi 5902090 ref NP_008862.1  | solute carrier family 2 (facilitated glucose transporter), member 3; GL |            |   | 1.40E-07 | 0.83 | 10.18 | 3.00  | 53924.0  |
| AHQ-2-1, 5361               | R.LWGTQDVSQDIQEMK.D                                                     | 1778.96471 | 2 | 1.40E-07 | 0.83 | 3.51  | -     | 481.6    |
| gi 7661922 ref NP_055814.1  | RAB21, member RAS oncogene family [Homo sapiens]                        |            |   | 1.45E-07 | 0.96 | 10.25 | 7.60  | 24347.4  |
| AHQ-2-10, 3946              | R.HVSIQEAESYASVGAH.H                                                    | 1805.92351 | 2 | 1.45E-07 | 0.96 | 5.06  | -     | 1244.7   |
| gi 8923541 ref NP_060357.1  | hypothetical protein FLJ20580 [Homo sapiens]                            |            |   | 1.52E-07 | 0.92 | 10.21 | 10.00 | 18048.3  |
| AHQ-2-10, 4110              | K.AQESVGIYEVTHQFVK.C                                                    | 1836.03759 | 2 | 1.52E-07 | 0.92 | 4.24  | -     | 823.7    |
| gi 4502021 ref NP_003680.1  | aldo-keto reductase family 7, member A2 (aflatoxin aldehyde reductase); |            |   | 1.55E-07 | 0.81 | 10.17 | 5.80  | 36648.3  |
| AHQ-2-9, 3694               | K.ALQAAYGASAPSVTSAALR.W                                                 | 1806.01302 | 2 | 1.55E-07 | 0.81 | 3.34  | -     | 685.8    |
| gi 10337595 ref NP_066283.1 | protein phosphatase 1A isoform 1; protein phosphatase 2C alpha isoform  |            |   | 1.64E-07 | 0.89 | 10.19 | 4.70  | 42447.5  |
| AHQ-2-7, 3401               | K.GPTEQLVSPPEVHDIER.S                                                   | 2033.18486 | 3 | 1.64E-07 | 0.89 | 3.85  | -     | 1097.9   |
| gi 4505621 ref NP_002558.1  | prostatic binding protein; phosphatidylethanolamine binding protein [Ho |            |   | 1.67E-07 | 1.91 | 20.24 | 20.30 | 21056.6  |
| AHQ-2-11, 4916              | R.APVAGTCYQAEWDDYVPLK.L                                                 | 2072.23961 | 2 | 6.31E-05 | 0.96 | 4.46  | -     | 1273.5   |
| AHQ-2-11, 4262              | K.GNDISSGTVLSDYVGSPPK.G                                                 | 1951.08062 | 2 | 1.67E-07 | 0.95 |       |       |          |



|                             |                                                                          |            |   |          |      |       |       |          |
|-----------------------------|--------------------------------------------------------------------------|------------|---|----------|------|-------|-------|----------|
| AHQ-2-10_5130 - 5131        | R.TLYDFPNDNAEDLPFK.K                                                     | 1842.98222 | 2 | 2.92E-07 | 0.85 | 3.63  | -     | 529.1    |
| AHQ-2-10_5020 - 5023        | R.YSPSPMGVSAPNLP.TAEDNLEYVR.T                                            | 2705.98075 | 2 | 3.30E-07 | 0.91 | 4.65  | -     | 451.5    |
| gi 4507149 ref NP_000445.1  | superoxide dismutase 1, soluble (amyotrophic lateral sclerosis 1 (adult  |            |   | 3.01E-07 | 3.27 | 40.29 | 57.80 | 15935.7  |
| AHQ-2-12_5378 - 5386        | K.AVCYLVKGDGPVQGINFEQK.E                                                 | 2174.50602 | 2 | 4.46E-05 | 0.97 | 5.55  | -     | 1289.5   |
| AHQ-2-12_4561               | K.GDGPVQGINFEQK.E                                                        | 1502.65366 | 2 | 3.01E-07 | 0.69 | 3.33  | -     | 522.4    |
| AHQ-2-12_4338 - 4357        | K.GDGPVQGINFEQK.E                                                        | 1502.65366 | 2 | 1.20E-05 | 0.36 | 2.67  | -     | 499.0    |
| AHQ-2-12_4887               | K.GLTEGLHGHHVHEFGDNTAGCTSAGPHFNPLSR.K                                    | 3522.76733 | 3 | 3.14E-04 | 0.96 | 5.39  | -     | 1514.2   |
| AHQ-2-11_4664               | K.GLTEGLHGHHVHEFGDNTAGCTSAGPHFNPLSR.K                                    | 3522.76733 | 3 | 1.29E-05 | 0.96 | 5.71  | -     | 1550.3   |
| AHQ-2-13_5913               | R.HVGDGLNVNADKDGADVDSIEDSVISLGDHDCIIGR.T                                 | 3724.02282 | 3 | 9.38E-06 | 0.65 | 3.18  | -     | 547.0    |
| gi 10880989 ref NP_067075.1 | RAB18, member RAS oncogene family; RAB18 small GTPase [Homo sapiens] [   |            |   | 3.04E-07 | 1.81 | 20.21 | 14.10 | 22976.9  |
| AHQ-2-11_6180               | K.LDNWLNLELEYCTR.N                                                       | 1828.98037 | 2 | 6.51E-06 | 0.88 | 3.61  | -     | 729.5    |
| AHQ-2-11_5768 - 5769        | K.TCDGVQCAFEELEVK.I                                                      | 1787.94661 | 2 | 3.04E-07 | 0.92 | 4.29  | -     | 920.4    |
| gi 4502107 ref NP_001145.1  | annexin V; endonexin II; anchoring CII; lipocortin V; placental anticoag |            |   | 3.15E-07 | 1.87 | 20.21 | 9.10  | 35936.5  |
| AHQ-2-9_6714                | R.DLLDDLKSELTKG.F                                                        | 1447.61309 | 2 | 3.15E-07 | 0.94 | 3.93  | -     | 1153.3   |
| AHQ-2-9_7030 - 7048         | K.LGLTDEESILTLTSR.S                                                      | 1705.88853 | 2 | 3.65E-06 | 0.93 | 4.19  | -     | 945.7    |
| gi 4504073 ref NP_000398.1  | glycoprotein lb beta polypeptide precursor [Homo sapiens]                |            |   | 3.16E-07 | 2.54 | 30.21 | 15.50 | 21717.6  |
| AHQ-2-1_4957                | R.LLPYLAEDELR.A                                                          | 1332.52691 | 2 | 4.83E-07 | 0.78 | 2.95  | -     | 478.2    |
| AHQ-2-5_4597                | R.LLPYLAEDELR.A                                                          | 1332.52691 | 2 | 2.79E-05 | 0.80 | 2.68  | -     | 611.7    |
| AHQ-2-6_4537                | R.LLPYLAEDELR.A                                                          | 1332.52691 | 2 | 6.44E-07 | 0.88 | 3.51  | -     | 613.6    |
| AHQ-2-13_4668               | R.LLPYLAEDELR.A                                                          | 1332.52691 | 2 | 2.37E-05 | 0.89 | 2.83  | -     | 883.2    |
| AHQ-2-10_4234 - 4266        | R.LLPYLAEDELR.A                                                          | 1332.52691 | 2 | 1.78E-06 | 0.88 | 3.16  | -     | 609.1    |
| AHQ-2-10_4252               | R.LLPYLAEDELR.A                                                          | 1332.52691 | 1 | 8.21E-06 | 0.48 | 3.28  | -     | 176.2    |
| AHQ-2-12_4682               | R.LLPYLAEDELR.A                                                          | 1332.52691 | 2 | 1.07E-05 | 0.73 | 2.71  | -     | 351.9    |
| AHQ-2-11_4484               | R.LLPYLAEDELR.A                                                          | 1332.52691 | 1 | 8.79E-04 | 0.70 | 3.01  | -     | 438.9    |
| AHQ-2-13_4741               | R.LLPYLAEDELR.A                                                          | 1332.52691 | 2 | 2.94E-06 | 0.81 | 2.85  | -     | 557.2    |
| AHQ-2-11_4121 - 4124        | R.LSLTDLPLVAER.A                                                         | 1214.39356 | 2 | 3.16E-07 | 0.94 | 4.25  | -     | 1080.5   |
| AHQ-2-10_2074               | R.TAHLGANPWR.C                                                           | 1123.24913 | 2 | 5.09E-05 | 0.82 | 2.91  | -     | 707.4    |
| gi 4557703 ref NP_000414.1  | keratin 2a [Homo sapiens]                                                |            |   | 3.28E-07 | 2.30 | 30.26 | 10.50 | 65864.9  |
| AHQ-2-14_6635               | R.FGGFGGPGGGVGLGGPGGGVGGIHEVSNQSLQLP.NVK.V                               | 4094.54151 | 3 | 3.32E-05 | 0.93 | 5.05  | -     | 1188.4   |
| AHQ-2-14_2931 - 2933        | R.FLEQQNQVLQTK.W                                                         | 1476.65935 | 2 | 3.28E-07 | 0.97 | 5.15  | -     | 2319.0   |
| AHQ-2-4_3014                | R.FLEQQNQVLQTK.W                                                         | 1476.65935 | 2 | 2.41E-04 | 0.59 | 2.74  | -     | 477.1    |
| AHQ-2-1_3154                | R.FLEQQNQVLQTK.W                                                         | 1476.65935 | 2 | 1.26E-05 | 0.78 | 2.96  | -     | 1041.6   |
| AHQ-2-14_5905               | K.VDLLNQIEFLK.V                                                          | 1461.68459 | 2 | 6.01E-04 | 0.40 | 2.65  | -     | 412.0    |
| gi 9910280 ref NP_064505.1  | UDP-glucose ceramide glucosyltransferase-like 1; UDP-glucose:glycoprote  |            |   | 3.29E-07 | 2.14 | 30.26 | 4.10  | 177187.7 |
| AHQ-2-5_6924                | R.AVYLGLPHDQDVVEYIMNQPNV.VPR.I                                           | 2997.37416 | 2 | 4.13E-05 | 0.80 | 3.23  | -     | 486.7    |
| AHQ-2-3_7605                | R.IIGPLEDSLFLNQDDFHLEENILK.T                                             | 2927.29710 | 3 | 1.92E-04 | 0.70 | 3.08  | -     | 715.0    |
| AHQ-2-3_4687                | R.IVPEWQDYDQEI.K                                                         | 1663.80866 | 2 | 3.29E-07 | 0.63 | 2.94  | -     | 289.0    |
| gi 30148456 ref XP_293602.2 | similar to glutathione-S-transferase like; glutathione transferase ome   |            |   | 3.31E-07 | 0.91 | 10.17 | 3.90  | 29139.6  |
| AHQ-2-11_4433               | K.VPSLVGSFLR.T                                                           | 1075.28583 | 2 | 3.31E-07 | 0.91 | 3.09  | -     | 1144.2   |
| AHQ-2-10_4136 - 4138        | K.VPSLVGSFLR.T                                                           | 1075.28583 | 2 | 1.46E-05 | 0.94 | 3.33  | -     | 1318.7   |
| gi 29729616 ref XP_292963.1 | similar to peptidylprolyl isomerase A (cyclophilin A) [Homo sapiens] [   |            |   | 3.36E-07 | 1.86 | 20.28 | 16.40 | 18025.4  |
| AHQ-2-12_4919 - 4945        | K.HTGP GILSM*ANAGPNTNGS OFFICTAK.S                                       | 2810.11545 | 3 | 6.05E-06 | 0.93 | 5.05  | -     | 1167.5   |
| AHQ-2-12_5009 - 5089        | K.HTGP GILSM*ANAGPNTNGS OFFICTAK.S                                       | 2810.11545 | 3 | 7.54E-06 | 0.91 | 4.96  | -     | 973.0    |
| AHQ-2-12_5066 - 5129        | K.HTGP GILSM*ANAGPNTNGS OFFICTAK.S                                       | 2810.11545 | 2 | 4.04E-04 | 0.85 | 4.16  | -     | 592.5    |
| AHQ-2-12_5541 - 5621        | K.HTGP GILSMANAGPNTNGS OFFICTAK.S                                        | 2794.11605 | 2 | 2.29E-05 | 0.93 | 4.53  | -     | 734.3    |
| AHQ-2-12_5629 - 5701        | K.HTGP GILSMANAGPNTNGS OFFICTAK.S                                        | 2794.11605 | 3 | 9.74E-05 | 0.93 | 5.04  | -     | 1225.8   |
| AHQ-2-12_5853 - 5931        | K.HTGP GILSMANAGPNTNGS OFFICTAK.S                                        | 2794.11605 | 2 | 2.66E-06 | 0.82 | 3.11  | -     | 943.5    |
| AHQ-2-13_4880               | K.HTGP GILSM*ANAGPNTNGS OFFICTAK.S                                       | 2810.11545 | 3 | 4.24E-06 | 0.91 | 4.50  | -     | 1088.6   |
| AHQ-2-13_4888               | K.HTGP GILSM*ANAGPNTNGS OFFICTAK.S                                       | 2810.11545 | 2 | 1.78E-04 | 0.62 | 3.25  | -     | 313.9    |
| AHQ-2-13_5005               | K.HTGP GILSM*ANAGPNTNGS OFFICTAK.S                                       | 2810.11545 | 3 | 7.10E-04 | 0.73 | 3.49  | -     | 673.2    |
| AHQ-2-13_4953               | K.HTGP GILSM*ANAGPNTNGS OFFICTAK.S                                       | 2810.11545 | 3 | 3.78E-06 | 0.92 | 4.62  | -     | 1086.9   |
| AHQ-2-13_5554 - 5587        | K.HTGP GILSMANAGPNTNGS OFFICTAK.S                                        | 2794.11605 | 3 | 3.36E-07 | 0.94 | 5.66  | -     | 1300.7   |
| gi 20149594 ref NP_031381.2 | heat shock 90kDa protein 1, beta; heat shock 90kDa protein 1, beta; Heat |            |   | 3.42E-07 | 3.61 | 40.25 | 7.30  | 83263.6  |
| AHQ-2-14_3019               | R.ELISNASDALDK.I                                                         | 1276.37539 | 2 | 9.02E-04 | 0.66 | 3.06  | -     | 432.7    |
| AHQ-2-5_2959 - 2971         | R.ELISNASDALDK.I                                                         | 1276.37539 | 2 | 7.72E-07 | 0.87 | 3.31  | -     | 761.8    |
| AHQ-2-5_4107 - 4121         | R.NPDDITQEYEFYK.S                                                        | 1848.90048 | 2 | 3.42E-07 | 0.97 | 4.95  | -     | 1358.8   |
| AHQ-2-5_3731 - 3733         | K.SLTNDWEDHLAVK.H                                                        | 1528.64798 | 2 | 3.83E-06 | 0.84 | 3.29  | -     | 1017.0   |
| AHQ-2-5_4105                | R.TLTLVDTGIMTK.A                                                         | 1350.60718 | 2 | 4.97E-06 | 0.94 | 3.70  | -     | 1103.2   |
| gi 16933542 ref NP_002017.1 | fibronectin 1 isoform 1 preproprotein; cold-insoluble globulin [Homo s   |            |   | 3.75E-07 | 6.26 | 90.20 | 6.70  | 259222.8 |
| AHQ-2-1_6274                | K.FTQVTP TSLSAQWTPPNVLTGYR.V                                             | 2693.99453 | 2 | 6.18E-06 | 0.69 | 3.47  | -     | 297.6    |
| AHQ-2-1_2780                | R.GDSPASSKPIINRYR.T                                                      | 1592.73521 | 2 | 1.57E-04 | 0.41 | 2.55  | -     | 244.2    |
| AHQ-2-1_4601                | R.ITYGETGGNSPVQEFVPGSK.S                                                 | 2169.33354 | 2 | 1.03E-06 | 0.83 | 3.94  | -     | 422.6    |
| AHQ-2-1_5126                | R.NLQPASEYTVLSVAIK.G                                                     | 1733.98671 | 2 | 1.05E-05 | 0.81 | 2.88  | -     | 484.2    |
| AHQ-2-2_6400                | R.NTFAEVTVGLSPGVYTFYK.V                                                  | 1995.21983 | 2 | 6.12E-05 | 0.64 | 2.86  | -     | 423.1    |
| AHQ-2-1_6796                | R.NTFAEVTVGLSPGVYTFYK.V                                                  | 1995.21983 | 2 | 1.99E-04 | 0.71 | 3.29  | -     | 448.7    |
| AHQ-2-1_4892                | R.SSPVVIDASTAIDAPS.NLR.F                                                 | 1914.10666 | 2 | 5.09E-04 | 0.91 | 4.03  | -     | 961.4    |
| AHQ-2-1_3482                | R.VPGTSTATLTLGLTR.G                                                      | 1462.63098 | 2 | 2.07E-06 | 0.77 | 2.92  | -     | 664.5    |
| AHQ-2-1_7160                | R.VTWAPPPSIDLTLNVLVR.Y                                                   | 1927.23500 | 2 | 3.75E-07 | 0.89 | 3.32  | -     | 647.9    |
| AHQ-2-2_7448                | R.VTWAPPPSIDLTLNVLVR.Y                                                   | 1927.23500 | 2 | 9.37E-07 | 0.86 | 3.34  | -     | 518.2    |
| AHQ-2-1_3946                | K.WLPSSSPVVTGYR.V                                                        | 1350.50402 | 2 | 8.97E-04 | 0.32 | 2.65  | -     | 233.7    |
| gi 4506185 ref NP_002780.1  | proteasome alpha 4 subunit; proteasome component C9; proteasome subunit  |            |   | 3.75E-07 | 1.87 | 20.25 | 12.30 | 29483.6  |
| AHQ-2-10_4444               | K.LLDEVFFSEK.I                                                           | 1227.38757 | 2 | 3.75E-07 | 0.94 | 3.52  | -     | 918.9    |
| AHQ-2-10_6738 - 6739        | R.YLLQYQEPIPEQLVTLALCDIK.Q                                               | 2698.10465 | 2 | 2.26E-06 | 0.93 | 4.93  | -     | 590.2    |
| gi 7705849 ref NP_057215.1  | ras-related GTP-binding protein RAB10; ras-related GTP-binding protein   |            |   | 3.85E-07 | 1.85 | 30.24 | 15.50 | 22540.8  |
| AHQ-2-14_6463               | K.AFLTLAEDILR.K                                                          | 1262.47982 | 2 | 1.01E-06 | 0.95 | 4.22  | -     | 1557.7   |
| AHQ-2-11_6236 - 6244        | K.AFLTLAEDILR.K                                                          | 1262.47982 | 2 | 3.85E-07 | 0.96 | 4.88  | -     | 1393.2   |
| AHQ-2-10_6092               | K.AFLTLAEDILR.K                                                          | 1262.47982 | 2 | 4.89E-07 | 0.94 | 3.92  | -     | 1397.0   |
| AHQ-2-11_2996 - 3012        | K.KTYDLLFK.L                                                             | 1028.22593 | 2 | 3.00E-04 | 0.72 | 2.68  | -     | 544.5    |
| AHQ-2-11_1960               | R.NIDEHANEDVER.M                                                         | 1441.44245 | 1 | 2.05E-06 | 0.18 | 2.32  | -     | 168.4    |
| AHQ-2-11_1826               | R.NIDEHANEDVER.M                                                         | 1441.44245 | 1 | 3.35E-04 | 0.63 | 2.77  | -     | 307.9    |
| AHQ-2-11_1792               | R.NIDEHANEDVER.M                                                         | 1441.44245 | 2 | 5.16E-04 | 0.66 | 2.86  | -     | 550.1    |
| gi 22060072 ref XP_088293.2 | similar to cytochrome c [Homo sapiens]                                   |            |   | 3.86E-07 | 1.98 | 30.18 | 24.80 | 11887.8  |
| AHQ-2-13_4267               | R.ADLIAYLK.K                                                             | 907.08869  | 2 | 4.09E-04 | 0.91 | 3.43  | -     | 961.7    |
| AHQ-2-13_4220               | R.ADLIAYLK.K                                                             | 907.08869  | 2 | 1.09E-04 | 0.83 | 2.74  | -     | 802.5    |
| AHQ-2-13_2956               | K.M*IFVGIK.K                                                             | 824.06630  | 1 | 5.94E-04 | 0.23 | 1.91  | -     | 174.8    |
| AHQ-2-13_3519               | K.TGPNLHGLFGR.K                                                          | 1169.31780 | 1 | 2.69E-05 | 0.37 | 2.24  | -     | 162.6    |
| AHQ-2-13_3513 - 3518        | K.TGPNLHGLFGR.K                                                          | 1169.31780 | 2 | 9.04E-07 | 0.92 | 3.64  | -     | 820.4    |
| AHQ-2-13_3513 - 3515        | K.TGPNLHGLFGR.K                                                          | 1169.31780 | 2 | 3.86E-07 | 0.92 | 3.49  | -     | 813.9    |
| gi 29727317 ref XP_298144.1 | hypothetical protein XP_298144 [Homo sapiens]                            |            |   | 3.87E-07 | 1.04 | 20.16 | 15.90 | 22108.6  |
| AHQ-2-7_5201                | K.CAAM*SKVLTAMPNM*GK.A                                                   | 1744.11508 | 2 | 4.14E-04 | 0.26 | 2.67  | -     | 252.5    |
| AHQ-2-5_6477                | K.GEYNLTLDTALTSNLK.T                                                     | 1753.93165 | 2 | 1.21E-06 | 0.78 | 3.00  | -     | 1074.4   |
| AHQ-2-4_6753                | K.GEYNLTLDTALTSNLK.T                                                     | 1753.93165 | 2 | 3.87E-07 | 0.78 | 3.24  | -     | 779.4    |
| gi 20149637 ref NP_057526.2 | type 1 tumor necrosis factor receptor shedding aminopeptidase regulato   |            |   | 4.07E-07 | 0.79 | 10.13 | 1.40  | 107761.4 |
| AHQ-2-4_3194                | R.ILASTQFEPTAAR.M                                                        | 1405.58112 | 2 | 4.07E-07 | 0.79 | 2.66  | -     | 929.7    |
| gi 5453722 ref NP_006321.1  | lysophospholipase I; lysophospholipase 1; lysophospholipid-specific lys  |            |   | 4.11E-07 | 2.66 | 30.22 | 16.50 | 24669.5  |
| AHQ-2-11_2716 - 2750        | R.ASFPGPIGGANR.D                                                         | 1272.39489 | 2 | 4.11E-07 | 0.82 | 3.22  | -     | 520.6    |
| AHQ-2-11_6438 - 6442        | K.LAGVTALSCWPLR.A                                                        | 1558.86992 | 2 | 6.50E-04 | 0.96 | 4.48  | -     | 1255.7   |
| AHQ-2-11_3493               | K.TLVNPNANVTFFK.T                                                        | 1204.40037 | 2 | 5.95E-05 | 0.88 | 3.56  | -     | 599.9    |
| gi 4758906 ref NP_004146.1  | serine (or cysteine) proteinase inhibitor, clade B (ovalbumin), member   |            |   | 4.21E-07 | 0.88 | 10.17 | 3.20  | 42403.4  |
| AHQ-2-8_2894                | R.HLGVDAFQQGK.A                                                          | 1313.48692 | 2 | 4.21E-07 | 0.88 | 3.27  | -     | 865.9    |
| gi 5803187 ref NP_006746.1  | transaldolase 1; dihydroxyacetone transferase; glycero transferase [H    |            |   | 4.24E-07 | 0.95 | 10.20 | 3.30  | 37539.9  |
| AHQ-2-9_3667                | K.LLLELLQDNAL.L                                                          | 1214.39356 | 2 | 4.24E-07 | 0.95 | 3.98  | -     | 1229.6   |
| AHQ-2-9_3658 - 3659         | K.LLLELLQDNAL.L                                                          | 1214.39356 | 1 | 9.67E-05 | 0.34 | 2.22  | -     | 462.6    |
| gi 5031973 ref NP_005733.1  | protein disulfide isomerase-related protein [Homo sapiens]               |            |   | 4.39E-07 | 4.42 | 50.22 | 21.80 | 48121.0  |
| AHQ-2-7_7367 - 7369         | R.DGELPVEDDIDLSVLEDDLKGDDEL                                              | 2759.86565 | 2 | 6.88E-05 | 0.90 | 3.88  | -     | 881.5    |
| AHQ-2-7_3695 - 3764         | R.GSTAPVGGGAFTIVER.E                                                     | 1616.79990 | 2 | 4.39E-07 | 0.84 | 3.23  | -     | 888.0    |
| AHQ-2-7_4641 - 4644         | K.LAAVDATVNVQLASR.Y                                                      | 1528.73579 | 2 | 4.51E-06 | 0.94 | 3.68  | -     | 1532.4   |



|                             |                                                                         |            |   |          |      |       |       |          |
|-----------------------------|-------------------------------------------------------------------------|------------|---|----------|------|-------|-------|----------|
| AHQ-2-7, 6151 - 6152        | R.TGEAIVDAALSALR.Q                                                      | 1387.56411 | 2 | 2.78E-06 | 0.97 | 4.40  | -     | 1958.5   |
| AHQ-2-7, 3367 - 3397        | K.VGAVDADKHHSLGGQYGVQGFPTIK.I                                           | 2582.85541 | 2 | 1.49E-06 | 0.76 | 3.39  | -     | 389.5    |
| gi 4502171 ref NP_000476.1  | adenine phosphoribosyltransferase; AMP pyrophosphorylase; AMP diphospho |            |   | 4.90E-07 | 3.45 | 40.23 | 30.00 | 19607.6  |
| AHQ-2-11, 3672              | R.DISPLVKDPASFR.A                                                       | 1445.64525 | 2 | 1.38E-05 | 0.78 | 3.19  | -     | 541.6    |
| AHQ-2-11, 4985              | R.GKLPGPTLWVASYSLYEGK.A                                                 | 1968.24075 | 2 | 3.34E-05 | 0.94 | 4.65  | -     | 771.2    |
| AHQ-2-11, 3497 - 3500       | R.IDYIAGLDSR.G                                                          | 1123.24098 | 2 | 4.90E-07 | 0.96 | 4.04  | -     | 1689.1   |
| AHQ-2-11, 5548 - 5614       | R.SFPDPFPTGVVFR.D                                                       | 1466.66462 | 2 | 1.43E-04 | 0.76 | 3.03  | -     | 506.8    |
| gi 7330335 ref NP_039234.1  | chloride intracellular channel 4; chloride intracellular channel 4 like |            |   | 4.91E-07 | 3.34 | 40.26 | 28.90 | 28771.9  |
| AHQ-2-10, 2862              | K.AGSDGESIGNCPFSQR.L                                                    | 1683.73852 | 2 | 4.91E-07 | 0.91 | 3.92  | -     | 782.3    |
| AHQ-2-10, 5580 - 5588       | K.FLDGNEMTLADCNLLPK.L                                                   | 1953.22635 | 2 | 7.86E-06 | 0.90 | 3.84  | -     | 975.9    |
| AHQ-2-10, 5318              | K.LDEYLNPLPDEIDENSMEDIK.F                                               | 2580.76043 | 2 | 7.47E-04 | 0.56 | 2.78  | -     | 566.6    |
| AHQ-2-10, 6726 - 6798       | K.TDVNKIEEFLVCPPK.Y                                                     | 2162.44564 | 2 | 6.15E-07 | 0.96 | 5.18  | -     | 1084.0   |
| gi 4504505 ref NP_000405.1  | hydroxysteroid (17-beta) dehydrogenase 4 [Homo sapiens]                 |            |   | 4.94E-07 | 0.90 | 10.19 | 2.20  | 79685.9  |
| AHQ-2-6, 2590               | R.ATSTATSGFAGAIGQK.L                                                    | 1468.59408 | 2 | 4.94E-07 | 0.90 | 3.71  | -     | 1165.7   |
| gi 27500115 ref XP_208901.1 | similar to ubiquitin-conjugating enzyme E2M; UBC12 homolog, yeast [Horn |            |   | 4.95E-07 | 0.82 | 10.16 | 8.70  | 20964.0  |
| AHQ-2-11, 5968 - 6042       | K.TCDISFSDPDLNFK.L                                                      | 1889.02935 | 2 | 4.95E-07 | 0.82 | 3.18  | -     | 632.4    |
| gi 5729875 ref NP_006658.1  | progesterone receptor membrane component 1; progesterone binding protei |            |   | 4.99E-07 | 2.27 | 30.23 | 11.80 | 21671.0  |
| AHQ-2-10, 4236 - 4239       | K.FYGPPEGPYGVFAGR.D                                                     | 1517.66849 | 2 | 1.67E-06 | 0.96 | 4.57  | -     | 1392.6   |
| AHQ-2-10, 2536              | R.ILMAINGK.V                                                            | 860.10021  | 1 | 6.99E-05 | 0.35 | 1.88  | -     | 599.8    |
| AHQ-2-11, 3921              | R.KFYGPPEGPYGVFAGR.D                                                    | 1645.84140 | 2 | 5.26E-05 | 0.92 | 3.39  | -     | 1182.0   |
| AHQ-2-10, 3746              | R.KFYGPPEGPYGVFAGR.D                                                    | 1645.84140 | 2 | 4.99E-07 | 0.96 | 4.35  | -     | 1316.8   |
| gi 5454152 ref NP_006285.1  | ubiquinol-cytochrome c reductase binding protein [Homo sapiens]         |            |   | 5.03E-07 | 0.98 | 10.26 | 11.70 | 13530.4  |
| AHQ-2-13, 5289 - 5290       | K.YEEENFYLEPYLK.E                                                       | 1737.88601 | 2 | 5.03E-07 | 0.98 | 5.28  | -     | 2166.6   |
| AHQ-2-13, 5183              | K.YEEENFYLEPYLK.E                                                       | 1737.88601 | 2 | 5.52E-04 | 0.96 | 4.51  | -     | 1353.0   |
| gi 27481323 ref XP_208234.1 | similar to inactive progesterone receptor, 23 kD; likely ortholog of m  |            |   | 5.41E-07 | 0.97 | 20.15 | 15.60 | 18694.3  |
| AHQ-2-11, 6122              | K.LNWLSVDFNWK.D                                                         | 1536.71494 | 2 | 6.33E-06 | 0.80 | 3.03  | -     | 604.1    |
| AHQ-2-11, 4413              | K.LTFSCLGSDDNFK.H                                                       | 1447.59493 | 1 | 5.41E-07 | 0.17 | 1.88  | -     | 276.7    |
| AHQ-2-11, 4400 - 4448       | K.LTFSCLGSDDNFK.H                                                       | 1447.59493 | 2 | 2.22E-04 | 0.79 | 2.56  | -     | 873.1    |
| gi 4503785 ref NP_000135.1  | frataxin; Friedreich ataxia (frataxin) [Homo sapiens]                   |            |   | 5.46E-07 | 0.96 | 10.22 | 5.70  | 23218.1  |
| AHQ-2-13, 3818              | K.LGGDLGTYVINK.Q                                                        | 1250.42590 | 2 | 5.46E-07 | 0.96 | 4.37  | -     | 1218.1   |
| gi 5729804 ref NP_006694.1  | nudix (nucleoside diphosphate linked moiety X)-type motif 3; diphosphoi |            |   | 5.66E-07 | 0.57 | 10.16 | 11.60 | 19470.8  |
| AHQ-2-11, 4356              | R.WIVPGGGM*EPEEPPSVAAR.E                                                | 2127.36326 | 2 | 5.66E-07 | 0.57 | 3.07  | -     | 164.1    |
| gi 13489091 ref NP_066949.1 | 3-mercaptopyruvate sulfurtransferase [Homo sapiens]                     |            |   | 5.78E-07 | 0.97 | 10.26 | 5.40  | 33178.2  |
| AHQ-2-9, 6772               | R.AGQPLQLLDDASWYLPK.L                                                   | 1801.07798 | 2 | 1.31E-04 | 0.93 | 3.70  | -     | 1337.7   |
| AHQ-2-9, 6680 - 6754        | R.AGQPLQLLDDASWYLPK.L                                                   | 1801.07798 | 2 | 5.78E-07 | 0.97 | 4.54  | -     | 2133.6   |
| gi 4826848 ref NP_004991.1  | NADH dehydrogenase (ubiquinone) 1 alpha subcomplex, 5; NADH dehydrogena |            |   | 5.90E-07 | 0.83 | 10.29 | 13.80 | 13458.6  |
| AHQ-2-13, 3748              | K.TTGLVGLAVCNTPHER.L                                                    | 1726.93595 | 2 | 5.90E-07 | 0.83 | 3.46  | -     | 717.4    |
| gi 5032041 ref NP_005605.1  | Ras homolog enriched in brain 2 [Homo sapiens]                          |            |   | 5.97E-07 | 0.95 | 10.24 | 8.70  | 20497.4  |
| AHQ-2-12, 5030 - 5107       | K.LALAESWNAAFLESSAK.E                                                   | 1695.85389 | 2 | 5.97E-07 | 0.95 | 4.84  | -     | 973.4    |
| gi 7705819 ref NP_057181.1  | HSPC039 protein [Homo sapiens]                                          |            |   | 6.00E-07 | 0.95 | 10.25 | 24.40 | 8968.7   |
| AHQ-2-14, 5117              | K.NIGWGTDDQGGGEGEPPGK.S                                                 | 2033.18655 | 2 | 6.00E-07 | 0.95 | 5.00  | -     | 1110.2   |
| AHQ-2-14, 6221              | K.NIGWGTDDQGGGEGEPPGK.S                                                 | 2033.18655 | 2 | 7.63E-05 | 0.76 | 3.35  | -     | 546.2    |
| gi 22267436 ref NP_056284.1 | DKFZp564D177 protein [Homo sapiens]                                     |            |   | 6.01E-07 | 0.95 | 10.18 | 5.30  | 28464.6  |
| AHQ-2-10, 3896              | R.VHVLWVWNESADSR.A                                                      | 1599.73113 | 2 | 6.01E-07 | 0.95 | 3.52  | -     | 1610.3   |
| gi 17318569 ref NP_006112.2 | keratin 1; Keratin-1; cytokeratin 1; hair alpha protein [Homo sapiens]  |            |   | 6.17E-07 | 3.89 | 50.22 | 9.50  | 60666.3  |
| AHQ-2-5, 2775               | R.DYQELMNTK.L                                                           | 1142.26457 | 1 | 2.58E-04 | 0.66 | 2.38  | -     | 498.0    |
| AHQ-2-5, 6253 - 6272        | R.SLDLDSIAEVK.A                                                         | 1303.48388 | 2 | 6.17E-07 | 0.96 | 4.31  | -     | 1553.9   |
| AHQ-2-14, 6060 - 6061       | R.SLDLDSIAEVK.A                                                         | 1303.48388 | 2 | 2.31E-06 | 0.95 | 4.36  | -     | 1305.8   |
| AHQ-2-5, 6619               | R.THNLEPYFESFINNLR.R                                                    | 1995.18315 | 2 | 1.27E-05 | 0.91 | 4.12  | -     | 541.2    |
| AHQ-2-5, 2224               | R.TNAENEFVTKK.D                                                         | 1394.55511 | 2 | 2.42E-05 | 0.53 | 2.29  | -     | 407.6    |
| AHQ-2-14, 5670              | K.WELLQQVDTSTR.T                                                        | 1476.61621 | 2 | 5.47E-06 | 0.83 | 2.66  | -     | 1131.8   |
| gi 21618338 ref NP_003141.2 | signal transducer and activator of transcription 3 isoform 2; acute-ph  |            |   | 6.19E-07 | 1.51 | 20.16 | 5.20  | 87980.2  |
| AHQ-2-6, 3427               | R.FLQESNVLYQHNL.R                                                       | 1761.96193 | 2 | 6.19E-07 | 0.76 | 3.13  | -     | 741.0    |
| AHQ-2-6, 2841               | R.LLQTAATAAQGGQANHPHTAAVVTEK.Q                                          | 2577.83547 | 3 | 9.66E-04 | 0.75 | 3.25  | -     | 543.8    |
| gi 21614499 ref NP_003370.2 | villin 2; Villin-2; cytovillin [Homo sapiens]                           |            |   | 6.26E-07 | 1.91 | 20.22 | 3.20  | 69412.3  |
| AHQ-2-7, 4084               | K.APDVFVYAPR.L                                                          | 1183.33971 | 2 | 3.82E-06 | 0.97 | 3.22  | -     | 2000.6   |
| AHQ-2-6, 4155 - 4158        | K.APDVFVYAPR.L                                                          | 1183.33971 | 2 | 6.26E-07 | 0.97 | 4.50  | -     | 1577.0   |
| AHQ-2-6, 4950 - 4963        | K.IGFFWSEIR.N                                                           | 1105.27049 | 2 | 1.01E-04 | 0.93 | 3.26  | -     | 1111.1   |
| gi 27544939 ref NP_060932.2 | uncharacterized hematopoietic stem/progenitor cells protein MDS027 [Ho  |            |   | 6.26E-07 | 0.95 | 10.23 | 17.30 | 8744.9   |
| AHQ-2-14, 5667              | K.IADFLNSFDMSCR.S                                                       | 1577.76410 | 2 | 6.26E-07 | 0.95 | 4.52  | -     | 1220.9   |
| AHQ-2-14, 5303              | K.IADFLNSFDMSCR.S                                                       | 1577.76410 | 2 | 4.06E-04 | 0.92 | 3.19  | -     | 1038.0   |
| gi 4757952 ref NP_001782.1  | cell division cycle 42 isoform 1; cell division cycle 42 (GTP-binding p |            |   | 6.30E-07 | 4.24 | 50.28 | 31.40 | 21258.5  |
| AHQ-2-11, 2273              | K.CVVVGGDAVVGK.T                                                        | 1062.22237 | 1 | 1.44E-04 | 0.86 | 2.87  | -     | 1004.1   |
| AHQ-2-11, 2272              | K.CVVVGGDAVVGK.T                                                        | 1062.22237 | 2 | 3.90E-05 | 0.86 | 2.91  | -     | 1186.4   |
| AHQ-2-11, 6573 - 6577       | K.NVFDIALEALEPPEPK.K                                                    | 1854.09282 | 3 | 6.30E-07 | 0.96 | 5.69  | -     | 1271.8   |
| AHQ-2-11, 3821 - 3840       | K.TCLLSYTTNNK.F                                                         | 1315.51795 | 2 | 2.64E-05 | 0.83 | 2.73  | -     | 1254.4   |
| AHQ-2-11, 2457              | K.WVPEITHHCPK.T                                                         | 1405.60610 | 1 | 7.69E-07 | 0.71 | 3.40  | -     | 440.2    |
| AHQ-2-11, 2478 - 2486       | K.YVECSALTK.Q                                                           | 1200.34381 | 2 | 1.47E-05 | 0.88 | 3.81  | -     | 477.2    |
| gi 4507793 ref NP_003339.1  | ubiquitin-conjugating enzyme E2N (UBC13 homolog, yeast); ubiquitin-conj |            |   | 6.35E-07 | 3.34 | 40.24 | 30.30 | 17137.7  |
| AHQ-2-12, 5873              | K.LELFLPEEYPMAPK.V                                                      | 1749.06325 | 2 | 6.35E-07 | 0.87 | 4.17  | -     | 607.3    |
| AHQ-2-12, 5355 - 5379       | K.LELFLPEEYPM*AAPK.V                                                    | 1765.06265 | 2 | 1.94E-04 | 0.76 | 3.85  | -     | 326.0    |
| AHQ-2-12, 2126              | K.TNEAQAIETAR.A                                                         | 1204.27249 | 2 | 3.73E-04 | 0.75 | 2.79  | -     | 998.8    |
| AHQ-2-12, 5273              | R.YFHVVIAGPQDQSPFEGGTFK.L                                               | 2197.43341 | 2 | 8.78E-05 | 0.97 | 4.73  | -     | 1492.8   |
| gi 4502285 ref NP_001672.1  | ATPase, Ca++ transporting, cardiac muscle, slow twitch 2 isoform 2; ATP |            |   | 6.48E-07 | 0.92 | 10.21 | 1.50  | 109690.3 |
| AHQ-2-1, 4868               | K.VGEATETALTCLVEK.M                                                     | 1622.81958 | 2 | 6.48E-07 | 0.92 | 4.12  | -     | 847.5    |
| gi 18570595 ref XP_095590.1 | similar to myosin regulatory light chain [Homo sapiens]                 |            |   | 6.68E-07 | 0.91 | 10.18 | 0.00  | 13951.5  |
| AHQ-2-11, 3041 - 3108       | K.LNGTDPEDVIR.H                                                         | 1229.32195 | 2 | 3.67E-05 | 0.93 | 3.00  | -     | 1461.9   |
| AHQ-2-12, 3159              | K.LNGTDPEDVIR.H                                                         | 1229.32195 | 2 | 3.32E-06 | 0.91 | 3.33  | -     | 1030.8   |
| AHQ-2-13, 3221              | K.LNGTDPEDVIR.H                                                         | 1229.32195 | 2 | 5.58E-04 | 0.85 | 3.38  | -     | 714.8    |
| AHQ-2-11, 2952              | K.LNGTDPEDVIR.H                                                         | 1229.32195 | 2 | 6.68E-07 | 0.91 | 3.51  | -     | 1075.7   |
| gi 7657548 ref NP_055378.1  | spondyloepiphyseal dysplasia, late; sedlin [Homo sapiens]               |            |   | 6.70E-07 | 0.72 | 10.16 | 10.00 | 16444.6  |
| AHQ-2-13, 5072 - 5080       | K.FSMNPFYEPNSPIR.S                                                      | 1699.91087 | 2 | 6.70E-07 | 0.72 | 3.25  | -     | 519.2    |
| gi 14745898 ref XP_016144.2 | similar to tyrosine 3-monooxygenase/tryptophan 5-monooxygenase activat  |            |   | 6.77E-07 | 0.96 | 10.23 | 7.50  | 18201.0  |
| AHQ-2-11, 6541 - 6542       | K.LLCCDILDVLDK.N                                                        | 1479.74157 | 2 | 6.77E-07 | 0.96 | 4.61  | -     | 1074.9   |
| AHQ-2-10, 6478              | K.LLCCDILDVLDK.N                                                        | 1479.74157 | 2 | 7.45E-07 | 0.96 | 4.48  | -     | 1055.7   |
| gi 20551618 ref XP_167021.1 | similar to calponin 2; Calonin 2 [Homo sapiens]                         |            |   | 6.89E-07 | 1.64 | 20.22 | 3.70  | 47327.9  |
| AHQ-2-12, 5274 - 5341       | R.SM*QNWHQLENLSNFIK.A                                                   | 2006.23095 | 2 | 1.67E-06 | 0.82 | 3.75  | -     | 497.4    |
| AHQ-2-12, 5682              | R.SMQNWHQLENLSNFIK.A                                                    | 1990.23155 | 2 | 1.19E-04 | 0.93 | 4.26  | -     | 885.9    |
| AHQ-2-13, 5572              | R.SMQNWHQLENLSNFIK.A                                                    | 1990.23155 | 2 | 6.89E-07 | 0.82 | 3.60  | -     | 635.1    |
| AHQ-2-13, 5702              | R.SMQNWHQLENLSNFIK.A                                                    | 1990.23155 | 2 | 8.43E-05 | 0.94 | 4.38  | -     | 1187.9   |
| AHQ-2-11, 5453              | R.SMQNWHQLENLSNFIK.A                                                    | 1990.23155 | 2 | 4.21E-04 | 0.95 | 4.35  | -     | 1206.5   |
| gi 5453597 ref NP_006126.1  | F-actin capping protein alpha-1 subunit; Cap Z [Homo sapiens]           |            |   | 7.00E-07 | 2.59 | 40.20 | 22.00 | 32922.5  |
| AHQ-2-9, 4723 - 4731        | K.FITHAPPGEFNEVFNDR.L                                                   | 2090.28294 | 2 | 1.62E-05 | 0.79 | 3.48  | -     | 342.9    |
| AHQ-2-10, 4896              | K.FTITPPTAVVGVVK.I                                                      | 1571.88532 | 2 | 5.08E-06 | 0.51 | 2.73  | -     | 184.7    |
| AHQ-2-9, 4480               | R.LLLNNDNLLR.E                                                          | 1198.39736 | 2 | 2.28E-04 | 0.48 | 2.58  | -     | 386.8    |
| AHQ-2-9, 3876               | R.LLLNNDNLLR.E                                                          | 1198.39736 | 2 | 7.51E-04 | 0.84 | 3.80  | -     | 702.4    |
| AHQ-2-9, 5403               | K.TIDGQQTIIACIESHQFPK.N                                                 | 2316.57620 | 3 | 7.00E-07 | 0.81 | 4.04  | -     | 320.2    |
| AHQ-2-10, 5040              | K.TIDGQQTIIACIESHQFPK.N                                                 | 2316.57620 | 2 | 1.50E-06 | 0.63 | 2.96  | -     | 303.1    |
| AHQ-2-9, 5398 - 5466        | K.TIDGQQTIIACIESHQFPK.N                                                 | 2316.57620 | 2 | 3.31E-06 | 0.81 | 3.85  | -     | 347.2    |
| gi 11496277 ref NP_068805.1 | mitogen-activated protein kinase 1 interacting protein 1; MEK p         |            |   | 7.01E-07 | 1.89 | 20.29 | 35.50 | 13622.6  |
| AHQ-2-14, 6556 - 6569       | K.SIICYNTYQVQVFN.R                                                      | 2070.31322 | 2 | 7.01E-07 | 0.94 | 4.52  | -     | 1074.5   |
| AHQ-2-14, 5243              | K.VANDNAPHEALRPGFLSTFALATDQGSK.L                                        | 2929.19327 | 3 | 2.02E-05 | 0.96 | 5.77  | -     | 1095.8   |
| gi 4502693 ref NP_001760.1  | CD9 antigen; motility related protein; leukocyte antigen MIC3; antigen  |            |   | 7.09E-07 | 3.03 | 40.31 | 24.10 | 25415.9  |
| AHQ-2-11, 6805              | K.AIHYALNCCGLAGGVEQFISDICPK.K                                           | 2798.16446 | 3 | 1.34E-06 | 0.91 | 4.36  | -     | 810.5    |
| AHQ-2-11, 6806 - 6810       | K.AIHYALNCCGLAGGVEQFISDICPK.K                                           | 2798.16446 | 2 | 7.09E-07 | 0.98 | 6.17  | -     | 1810.1   |
| AHQ-2-11, 2168              | K.EVGEFYK.D                                                             | 943.03476  | 1 | 4.80E-04 | 0.30 | 2.37  | -     | 234.4    |
| AHQ-2-11, 3137 - 3174       | K.KDVLETFVTK.S                                                          | 1180.37558 | 2 | 2.27E-04 | 0.90 | 3.61  | -     | 922.4    |

|                             |                                                                          |            |   |          |      |       |       |          |
|-----------------------------|--------------------------------------------------------------------------|------------|---|----------|------|-------|-------|----------|
| AHQ-2-13-, 3383             | K.KDVLETFVK.S                                                            | 1180.37558 | 2 | 2.29E-05 | 0.84 | 2.89  | -     | 783.9    |
| AHQ-2-11, 3132 - 3192       | K.KDVLETFVK.S                                                            | 1180.37558 | 1 | 3.21E-05 | 0.38 | 1.90  | -     | 500.6    |
| AHQ-2-10, 2962              | K.KDVLETFVK.S                                                            | 1180.37558 | 2 | 3.10E-05 | 0.91 | 3.42  | -     | 1035.6   |
| AHQ-2-1, 3541 - 3549        | K.KDVLETFVK.S                                                            | 1180.37558 | 2 | 5.24E-06 | 0.89 | 3.31  | -     | 922.9    |
| AHQ-2-13, 3389              | K.KDVLETFVK.S                                                            | 1180.37558 | 2 | 1.27E-06 | 0.81 | 3.15  | -     | 735.6    |
| AHQ-2-11, 3685              | K.SCPDAIKEVFNK.F                                                         | 1524.67770 | 2 | 1.23E-04 | 0.95 | 3.86  | -     | 1319.9   |
| gi 10835035 ref NP_003157.1 | sulfotransferase family, cytosolic, 1A, phenol-preferring, member 3; t   |            |   | 7.60E-07 | 1.84 | 30.19 | 20.70 | 34196.0  |
| AHQ-2-9, 5640               | K.SHLPLALLPQTLLDQK.V                                                     | 1788.12388 | 2 | 1.67E-04 | 0.91 | 3.85  | -     | 862.6    |
| AHQ-2-9, 5382 - 5450        | R.VPFLVNDPGEPSGLET.LK.D                                                  | 2042.27480 | 2 | 6.75E-04 | 0.25 | 3.10  | -     | 243.6    |
| AHQ-2-9, 6814               | K.YFAEALGPLQSFQARPDLLINTYPK.S                                            | 2969.33891 | 3 | 7.60E-07 | 0.68 | 3.38  | -     | 327.7    |
| gi 45062025 ref NP_000936.1 | protein phosphatase 3, regulatory subunit B, alpha isoform 1; protein p  |            |   | 7.69E-07 | 0.79 | 10.14 | 11.80 | 19299.8  |
| AHQ-2-12, 5963              | R.IYDMDKDGYISNGELFQVLK.M                                                 | 2349.64477 | 2 | 7.69E-07 | 0.79 | 2.81  | -     | 737.4    |
| gi 4505591 ref NP_002565.1  | peroxiredoxin 1; natural killer-enhancing factor A; proliferation-assoc  |            |   | 8.04E-07 | 4.17 | 60.23 | 45.70 | 22110.2  |
| AHQ-2-10, 3622              | R.GLFIIDDK.G                                                             | 921.07223  | 1 | 2.19E-04 | 0.63 | 2.57  | -     | 947.9    |
| AHQ-2-11, 2966              | K.HGEVCPAGWKPGSDTIKPDVQK.S                                               | 2408.67532 | 2 | 6.32E-06 | 0.25 | 3.19  | -     | 115.2    |
| AHQ-2-11, 5457              | K.LNCQVIGASVDSHFCHLAWVNTPK.K                                             | 2757.09720 | 3 | 3.27E-04 | 0.62 | 3.46  | -     | 447.7    |
| AHQ-2-11, 3492 - 3536       | R.LVQAFQFTDK.H                                                           | 1197.36469 | 2 | 8.04E-07 | 0.92 | 3.43  | -     | 1049.3   |
| AHQ-2-11, 4758              | K.QGGLGPMNIPVLVSDPK.R                                                    | 1623.89899 | 2 | 1.08E-05 | 0.92 | 3.87  | -     | 958.9    |
| AHQ-2-11, 3365 - 3368       | R.QITVNDLVPVGR.S                                                         | 1212.38090 | 2 | 5.18E-06 | 0.83 | 3.33  | -     | 481.5    |
| gi 5453970 ref NP_006245.1  | protein kinase C, delta [Homo sapiens]                                   |            |   | 8.18E-07 | 0.86 | 10.16 | 1.80  | 77476.6  |
| AHQ-2-6, 3905               | K.LLAEALNQVTR.A                                                          | 1356.55324 | 2 | 8.18E-07 | 0.86 | 3.28  | -     | 941.1    |
| gi 4506077 ref NP_002734.1  | protein kinase C substrate 80K-H; glucosidase II, beta subunit; AGE-bin  |            |   | 8.22E-07 | 1.82 | 20.17 | 4.40  | 59290.6  |
| AHQ-2-5, 2976               | K.AAQEQELAAADAFK.E                                                       | 1449.54763 | 2 | 8.22E-07 | 0.92 | 3.41  | -     | 1245.6   |
| AHQ-2-5, 3177               | K.LWEEGLAAAK.A                                                           | 1159.31646 | 2 | 3.94E-05 | 0.91 | 3.50  | -     | 780.5    |
| gi 20452464 ref NP_620411.1 | similar to endothelial cell-selective adhesion molecule; likely orthol   |            |   | 8.28E-07 | 0.94 | 10.23 | 6.70  | 41208.1  |
| AHQ-2-7, 3813               | R.LPTTDGAHPQIPISPIGGVSSGLSR.M                                            | 2529.79081 | 3 | 8.28E-07 | 0.94 | 4.61  | -     | 1504.2   |
| gi 5453998 ref NP_006382.1  | importin 7; RAN-binding protein 7 [Homo sapiens]                         |            |   | 8.30E-07 | 0.90 | 10.20 | 1.40  | 119517.5 |
| AHQ-2-4, 6997               | R.ENIVEAIHSEPLIR.V                                                       | 1733.98994 | 2 | 8.30E-07 | 0.90 | 4.07  | -     | 789.2    |
| gi 7661624 ref NP_056202.1  | preimplantation protein 3; likely ortholog of preimplantation protein 3  |            |   | 8.49E-07 | 0.64 | 10.14 | 7.20  | 22256.6  |
| AHQ-2-10, 3622              | K.ILEPPEGQDEGVWK.Y                                                       | 1597.75022 | 2 | 8.49E-07 | 0.64 | 2.76  | -     | 555.9    |
| gi 6715607 ref NP_000175.1  | G-gamma globin [Homo sapiens]                                            |            |   | 8.81E-07 | 0.92 | 10.18 | 6.80  | 16126.3  |
| AHQ-2-13-, 4921 - 4925      | R.LLVVYPWTR.F                                                            | 1275.52342 | 2 | 6.84E-06 | 0.90 | 3.38  | -     | 966.1    |
| AHQ-2-14, 6261              | R.LLVVYPWTR.F                                                            | 1275.52342 | 2 | 8.81E-07 | 0.92 | 3.59  | -     | 1029.0   |
| gi 20539300 ref XP_088391.4 | similar to tropomyosin 4 [Homo sapiens]                                  |            |   | 8.87E-07 | 1.87 | 20.20 | 6.90  | 18592.1  |
| AHQ-2-9, 3215 - 3250        | R.KLVILEGELER.A                                                          | 1299.54160 | 1 | 3.98E-04 | 0.34 | 2.09  | -     | 441.3    |
| AHQ-2-9, 3344               | R.KLVILEGELER.A                                                          | 1299.54160 | 2 | 1.39E-04 | 0.92 | 3.92  | -     | 1108.8   |
| AHQ-2-9, 3214 - 3218        | R.KLVILEGELER.A                                                          | 1299.54160 | 2 | 7.14E-04 | 0.88 | 3.16  | -     | 1229.2   |
| AHQ-2-9, 3944               | R.KLVILEGELER.A                                                          | 1171.36868 | 2 | 8.87E-07 | 0.95 | 3.77  | -     | 1693.8   |
| gi 4504973 ref NP_002292.1  | lactate dehydrogenase C [Homo sapiens]                                   |            |   | 9.00E-07 | 0.82 | 10.18 | 3.60  | 36311.0  |
| AHQ-2-11, 2372              | R.VIGSGCNLDSAR.F                                                         | 1250.36445 | 2 | 1.07E-06 | 0.84 | 3.54  | -     | 506.8    |
| AHQ-2-9, 2310               | R.VIGSGCNLDSAR.F                                                         | 1250.36445 | 2 | 9.00E-07 | 0.82 | 3.35  | -     | 465.8    |
| gi 5902726 ref NP_005800.1  | peroxiredoxin 2; thioredoxin-dependent peroxide reductase 1 (thiol-spec  |            |   | 9.08E-07 | 1.90 | 20.30 | 9.10  | 21856.8  |
| AHQ-2-11, 6568              | K.EGGLGPLNILLADVTR.R                                                     | 1736.00583 | 2 | 1.48E-06 | 0.92 | 4.34  | -     | 667.5    |
| AHQ-2-11, 5990 - 5998       | R.KEGGLGPLNILLADVTR.R                                                    | 1864.17875 | 2 | 9.08E-07 | 0.97 | 5.94  | -     | 1279.9   |
| gi 29732788 ref XP_297707.1 | hypothetical protein XP_297707 [Homo sapiens]                            |            |   | 9.30E-07 | 0.58 | 10.16 | 5.70  | 55232.0  |
| AHQ-2-9, 5056 - 5058        | R.KYEPSLSTAMLLKHSGEVQHKLSTTAVVR.T                                        | 3196.66997 | 3 | 9.30E-07 | 0.58 | 3.22  | -     | 477.2    |
| gi 5123454 ref NP_005336.2  | heat shock 70kDa protein 1A; heat shock 70kD protein 1A; heat shock-ind  |            |   | 9.31E-07 | 4.35 | 50.32 | 16.10 | 70037.7  |
| AHQ-2-6, 5435               | K.AAAIGIDLGTITYSCVGVFQHGK.V                                              | 2267.54677 | 2 | 1.88E-04 | 0.85 | 3.86  | -     | 607.4    |
| AHQ-2-6, 4733               | K.DAGVIAGLNVLR.I                                                         | 1198.39736 | 2 | 4.68E-06 | 0.95 | 3.00  | -     | 1981.2   |
| AHQ-2-6, 6233               | K.ELEQVCNPIISGLYQAGGPGPGGGAQPK.G                                         | 3058.37100 | 3 | 9.31E-07 | 0.98 | 6.35  | -     | 1993.9   |
| AHQ-2-13, 3809              | K.NQVALNPQNTVFDAR.R                                                      | 1659.82478 | 2 | 3.30E-04 | 0.37 | 2.54  | -     | 503.3    |
| AHQ-2-6, 3506 - 3511        | K.NQVALNPQNTVFDAR.R                                                      | 1659.82478 | 2 | 6.83E-05 | 0.94 | 4.52  | -     | 739.8    |
| AHQ-2-6, 7167               | K.SINPDEAVAYGAQAAILMGDK.S                                                | 2305.59353 | 2 | 4.17E-04 | 0.63 | 2.69  | -     | 547.5    |
| gi 30147623 ref XP_293669.2 | similar to actinin, alpha 4 [Homo sapiens]                               |            |   | 9.66E-07 | 0.83 | 10.22 | 3.50  | 57794.4  |
| AHQ-2-5, 4052               | K.LSGSNPYTTVTPQIISK.W                                                    | 1921.14079 | 2 | 9.66E-07 | 0.83 | 3.45  | -     | 663.8    |
| AHQ-2-6, 3934               | K.LSGSNPYTTVTPQIISK.W                                                    | 1921.14079 | 2 | 2.93E-05 | 0.50 | 2.69  | -     | 466.8    |
| AHQ-2-5, 3908 - 3980        | K.LSGSNPYTTVTPQIISK.W                                                    | 1921.14079 | 2 | 4.39E-05 | 0.88 | 4.34  | -     | 739.5    |
| gi 8922712 ref NP_060713.1  | hypothetical protein FLJ10849 [Homo sapiens]                             |            |   | 9.66E-07 | 2.69 | 30.19 | 9.10  | 49397.9  |
| AHQ-2-7, 2327               | K.AAAQLLQSQAAQQSGAQQT.K                                                  | 1958.12276 | 2 | 2.02E-06 | 0.91 | 3.75  | -     | 964.3    |
| AHQ-2-7, 2453               | K.RNEFLGELQK.K                                                           | 1234.38656 | 2 | 1.23E-04 | 0.94 | 3.65  | -     | 1361.5   |
| AHQ-2-7, 2084               | R.SYELQESNVR.L                                                           | 1225.29016 | 2 | 9.66E-07 | 0.84 | 2.93  | -     | 972.6    |
| gi 18201905 ref NP_000166.2 | glucose phosphate isomerase; neuroleukin; glucose-6-phosphate isomerases |            |   | 9.69E-07 | 4.41 | 60.27 | 17.40 | 63146.7  |
| AHQ-2-7, 1665               | K.HFVALSTNTTK.V                                                          | 1219.37190 | 1 | 1.81E-04 | 0.64 | 2.12  | -     | 511.7    |
| AHQ-2-7, 2769               | K.NLVTEDEVMR.M                                                           | 1077.23726 | 1 | 5.12E-05 | 0.15 | 1.91  | -     | 179.1    |
| AHQ-2-7, 2719               | K.TFTTQETITNAETAK.E                                                      | 1656.77283 | 2 | 9.69E-07 | 0.91 | 3.84  | -     | 939.3    |
| AHQ-2-7, 6021               | K.TLAQLNPESSLFIASK.T                                                     | 1833.11828 | 2 | 3.21E-06 | 0.86 | 3.75  | -     | 550.3    |
| AHQ-2-7, 5400 - 5479        | R.VDHQTGPVWVWGPVGTNGQHFYQLIHQGT.K.M                                      | 3317.61777 | 3 | 1.33E-04 | 0.95 | 5.35  | -     | 1241.5   |
| AHQ-2-7, 2968               | K.VFEGNRPNTSIVFTK.L                                                      | 1709.92693 | 2 | 1.12E-06 | 0.90 | 3.91  | -     | 956.3    |
| gi 17450333 ref XP_060887.1 | similar to peptidyl-Pro cis trans isomerase [Homo sapiens]               |            |   | 1.01E-06 | 0.95 | 10.22 | 11.00 | 17503.9  |
| AHQ-2-12, 6787 - 6854       | -M^VNPTVFDAVDGKPLGR.V                                                    | 1946.26009 | 2 | 1.01E-06 | 0.95 | 4.32  | -     | 1307.7   |
| AHQ-2-12, 6915              | -M^VNPTVFDAVDGKPLGR.V                                                    | 1946.26009 | 2 | 1.34E-05 | 0.84 | 3.54  | -     | 862.8    |
| AHQ-2-12, 6569 - 6633       | -M^VNPTVFDAVDGKPLGR.V                                                    | 1946.26009 | 2 | 7.53E-06 | 0.92 | 4.13  | -     | 931.3    |
| gi 21361565 ref NP_001679.2 | ATP synthase, H+ transporting, mitochondrial F0 complex, subunit b, is   |            |   | 1.02E-06 | 1.75 | 20.21 | 9.00  | 28908.4  |
| AHQ-2-11, 2829              | R.HYLFVQNR.N                                                             | 1078.20513 | 2 | 1.02E-06 | 0.83 | 2.84  | -     | 854.7    |
| AHQ-2-13-, 7083             | R.YGLIPEEFFQFLYPK.T                                                      | 1892.18434 | 2 | 3.05E-04 | 0.71 | 2.91  | -     | 338.2    |
| AHQ-2-11, 6872              | R.YGLIPEEFFQFLYPK.T                                                      | 1892.18434 | 2 | 3.69E-05 | 0.92 | 4.16  | -     | 430.3    |
| gi 4506365 ref NP_002856.1  | RAB2, member RAS oncogene family [Homo sapiens]                          |            |   | 1.03E-06 | 2.12 | 30.22 | 16.50 | 23545.4  |
| AHQ-2-11, 4274 - 4293       | K.LQIWDTAGQESFR.S                                                        | 1551.68478 | 2 | 1.03E-06 | 0.96 | 4.34  | -     | 1588.8   |
| AHQ-2-11, 4184              | K.SCLLLQFTDKR.F                                                          | 1382.61075 | 2 | 3.38E-04 | 0.71 | 3.02  | -     | 661.7    |
| AHQ-2-11, 3376              | K.YIIIGDTGVGK.S                                                          | 1136.32280 | 1 | 2.51E-04 | 0.45 | 2.46  | -     | 499.0    |
| gi 21361122 ref NP_001440.2 | four and a half LIM domains 1; Four-and-a-half LIM domains 1 [Homo sap   |            |   | 1.13E-06 | 4.09 | 50.23 | 21.80 | 31894.7  |
| AHQ-2-12, 2427              | K.AIVAGDQNVYK.G                                                          | 1307.43431 | 2 | 7.11E-05 | 0.79 | 2.98  | -     | 633.5    |
| AHQ-2-11, 2390              | K.AIVAGDQNVYK.G                                                          | 1307.43431 | 2 | 2.84E-04 | 0.89 | 3.59  | -     | 876.6    |
| AHQ-2-9, 2996 - 3067        | K.CLHPLANETFYAK.D                                                        | 1501.73210 | 2 | 9.24E-06 | 0.91 | 3.96  | -     | 524.1    |
| AHQ-2-9, 3620 - 3695        | R.FVFHQEQVYCPDCAK.K                                                      | 1931.13758 | 2 | 1.29E-05 | 0.96 | 4.64  | -     | 988.9    |
| AHQ-2-13-, 3874             | R.FVFHQEQVYCPDCAK.K                                                      | 1931.13758 | 2 | 9.47E-06 | 0.96 | 4.00  | -     | 1583.1   |
| AHQ-2-10, 2800 - 2879       | K.GEDFYCVTCHETK.F                                                        | 1648.75260 | 2 | 6.71E-06 | 0.86 | 3.32  | -     | 713.6    |
| AHQ-2-9, 2926               | K.GEDFYCVTCHETK.F                                                        | 1648.75260 | 2 | 1.13E-06 | 0.91 | 3.33  | -     | 912.1    |
| AHQ-2-9, 2131               | K.NPITGFGK.G                                                             | 833.95467  | 1 | 2.26E-06 | 0.53 | 2.33  | -     | 292.7    |
| gi 4506677 ref NP_002942.1  | ribophorin II [Homo sapiens]                                             |            |   | 1.20E-06 | 1.77 | 20.21 | 5.50  | 69301.6  |
| AHQ-2-1, 5124               | R.LQVTVNLSQPLTQATVK.L                                                    | 1841.14195 | 2 | 1.20E-06 | 0.92 | 4.26  | -     | 761.7    |
| AHQ-2-1, 6773               | K.TSFTPGVDVFLNFM^NVK.F                                                   | 2062.33118 | 2 | 9.67E-05 | 0.84 | 3.66  | -     | 547.4    |
| gi 28395033 ref NP_786886.1 | ras homolog gene family, member C; Aplysia RAS-related homolog 9 (onco   |            |   | 1.21E-06 | 4.47 | 50.23 | 29.00 | 22006.2  |
| AHQ-2-10, 4238 - 4258       | K.HFCPNVPIILVGNK.K                                                       | 1609.91693 | 2 | 1.21E-06 | 0.97 | 4.67  | -     | 1913.1   |
| AHQ-2-10, 3762 - 3764       | K.HFCPNVPIILVGNK.K                                                       | 1738.08985 | 2 | 6.95E-06 | 0.97 | 4.64  | -     | 1427.2   |
| AHQ-2-10, 6586              | R.LRPLSYPTDVLVILM^CFSIDSPDLENIPK.W                                       | 3483.90759 | 3 | 4.95E-04 | 0.92 | 4.59  | -     | 961.1    |
| AHQ-2-10, 6678              | R.LRPLSYPTDVLVILM^CFSIDSPDLENIPK.W                                       | 3467.90819 | 3 | 5.70E-05 | 0.84 | 4.05  | -     | 655.9    |
| AHQ-2-10, 2498              | K.LVIVGDGAGCK.T                                                          | 1090.27572 | 2 | 2.30E-05 | 0.76 | 2.98  | -     | 787.4    |
| AHQ-2-10, 2495              | K.LVIVGDGAGCK.T                                                          | 1090.27572 | 1 | 7.45E-04 | 0.62 | 2.11  | -     | 772.9    |
| gi 4504085 ref NP_000399.1  | glycerol-3-phosphate dehydrogenase 2 (mitochondrial) [Homo sapiens] [MA  |            |   | 1.25E-06 | 1.81 | 20.22 | 4.00  | 80814.1  |
| AHQ-2-6, 3458               | R.CKDVLTKGEQFVDR.A                                                       | 1568.73370 | 2 | 1.25E-06 | 0.95 | 4.28  | -     | 1408.1   |
| AHQ-2-6, 6170 - 6243        | R.YGAATANYMEVVSLLK.K                                                     | 1731.00632 | 2 | 2.18E-04 | 0.85 | 3.57  | -     | 968.0    |
| gi 15306356 ref XP_035638.2 | similar to interleukin 25; lymphocyte antigen 6 complex, locus E ligan   |            |   | 1.28E-06 | 1.79 | 20.18 | 13.90 | 18795.1  |
| AHQ-2-13-, 3473             | R.ESDVPKTEEFVTK.T                                                        | 1751.91253 | 2 | 1.28E-06 | 0.86 | 3.50  | -     | 619.8    |
| AHQ-2-13, 3475              | R.ESDVPKTEEFVTK.T                                                        | 1751.91253 | 2 | 1.43E-06 | 0.77 | 3.08  | -     | 629.1    |
| AHQ-2-12, 3389              | R.ESDVPKTEEFVTK.T                                                        | 1751.91253 | 2 | 1.94E-06 | 0.89 | 3.62  | -     | 707.9    |
| AHQ-2-12, 4610              | K.SYLYFTQFK.A                                                            | 1197.36315 | 2 | 4.35E-06 | 0.93 | 3.21  | -     | 1258.8   |

|                             |                                                                         |            |   |          |      |       |       |          |
|-----------------------------|-------------------------------------------------------------------------|------------|---|----------|------|-------|-------|----------|
| gi 7657649 ref NP_055362.1  | tropomodulin 3 (ubiquitous) [Homo sapiens]                              |            |   | 1.31E-06 | 0.96 | 10.24 | 5.40  | 39594.5  |
| AHQ-2-11, 5052              | K.YKDLEDELLGNLSETELK.Q                                                  | 2225.39217 | 2 | 1.31E-06 | 0.96 | 4.70  | -     | 1210.2   |
| gi 4503291 ref NP_001346.1  | D-dopachrome tautomerase [Homo sapiens]                                 |            |   | 1.32E-06 | 0.88 | 10.18 | 9.30  | 12711.7  |
| AHQ-2-14-, 5639             | R.FFPLESWQIGK.I                                                         | 1352.56151 | 2 | 1.32E-06 | 0.88 | 3.40  | -     | 558.1    |
| gi 4557871 ref NP_001054.1  | transferrin [Homo sapiens]                                              |            |   | 1.33E-06 | 0.86 | 10.22 | 2.70  | 77049.5  |
| AHQ-2-5, 7344 - 7419        | R.SAGWNIPGLLYCDLPEPR.K                                                  | 2173.47658 | 2 | 1.33E-06 | 0.86 | 4.37  | -     | 441.8    |
| gi 20070272 ref NP_057110.2 | androgen-regulated short-chain dehydrogenase/reductase 1; prostate sh   |            |   | 1.36E-06 | 2.12 | 30.19 | 15.40 | 35414.1  |
| AHQ-2-13, 3735              | K.GSGVTYVHPGTQSELV.R.H                                                  | 2075.26811 | 2 | 1.36E-06 | 0.74 | 3.10  | -     | 490.1    |
| AHQ-2-9, 3272               | K.GSGVTYVHPGTQSELV.R.H                                                  | 2075.26811 | 2 | 7.31E-06 | 0.90 | 3.86  | -     | 744.6    |
| AHQ-2-9, 3779               | K.MLSSGVCTSTVQLPGK.V                                                    | 1666.94223 | 2 | 1.76E-04 | 0.80 | 3.33  | -     | 657.2    |
| AHQ-2-13-, 2633 - 2643      | K.VVVVTGANTGIGK.E                                                       | 1215.42469 | 2 | 2.23E-04 | 0.58 | 3.04  | -     | 495.3    |
| AHQ-2-13, 2712              | K.VVVVTGANTGIGK.E                                                       | 1215.42469 | 2 | 3.83E-04 | 0.86 | 3.01  | -     | 947.8    |
| gi 4758030 ref NP_004362.1  | coatamer protein complex, subunit alpha; alpha coat protein; xenin [Hom |            |   | 1.40E-06 | 0.50 | 10.13 | 1.20  | 138330.6 |
| AHQ-2-14, 6025              | R.VTTVTEIGKDVIGLR.I                                                     | 1601.86982 | 2 | 1.40E-06 | 0.50 | 2.63  | -     | 318.2    |
| gi 30148492 ref XP_293610.2 | similar to Heat shock cognate 71 kDa protein [Homo sapiens]             |            |   | 1.40E-06 | 2.68 | 30.22 | 4.40  | 72113.4  |
| AHQ-2-6, 4185               | K.DAGTIAGLNVLR.I                                                        | 1200.37012 | 2 | 1.29E-04 | 0.94 | 3.29  | -     | 1489.0   |
| AHQ-2-7, 4541               | R.IINEPTAAAIYGLDK.K                                                     | 1660.89259 | 2 | 1.01E-05 | 0.81 | 3.79  | -     | 885.5    |
| AHQ-2-9, 4618               | R.IINEPTAAAIYGLDK.K                                                     | 1660.89259 | 2 | 1.49E-04 | 0.47 | 2.99  | -     | 361.4    |
| AHQ-2-10, 4376 - 4384       | R.IINEPTAAAIYGLDK.K                                                     | 1660.89259 | 2 | 1.29E-05 | 0.89 | 3.97  | -     | 629.9    |
| AHQ-2-6, 4023               | R.IINEPTAAAIYGLDK.K                                                     | 1789.06550 | 2 | 1.40E-06 | 0.93 | 4.36  | -     | 758.6    |
| gi 4502905 ref NP_001822.1  | clusterin; complement-associated protein SP-40 [Homo sapiens]           |            |   | 1.44E-06 | 2.64 | 40.28 | 15.10 | 52494.3  |
| AHQ-2-9, 5871               | R.ASSIIDELFQDR.F                                                        | 1394.51197 | 1 | 2.51E-05 | 0.07 | 2.37  | -     | 165.0    |
| AHQ-2-9, 2875               | R.EILSVCDCSTNPNPQAK.L                                                   | 1764.89299 | 2 | 4.43E-04 | 0.77 | 3.21  | -     | 634.3    |
| AHQ-2-8, 2792               | R.EILSVCDCSTNPNPQAK.L                                                   | 1764.89299 | 2 | 6.19E-04 | 0.49 | 2.66  | -     | 443.4    |
| AHQ-2-11, 5276              | K.LFSDSDPITVTPVVEVSR.K                                                  | 1875.11203 | 2 | 4.97E-05 | 0.84 | 3.56  | -     | 922.2    |
| AHQ-2-11, 3392              | R.VTTVASHTSDSDVPSGVTEVVVK.L                                             | 2315.52008 | 2 | 1.44E-06 | 0.96 | 5.70  | -     | 912.8    |
| AHQ-2-9, 3234               | R.VTTVASHTSDSDVPSGVTEVVVK.L                                             | 2315.52008 | 2 | 3.40E-05 | 0.95 | 4.79  | -     | 1123.8   |
| gi 21361619 ref NP_061882.2 | TOLLIP protein; Toll-interacting protein [Homo sapiens]                 |            |   | 1.50E-06 | 1.76 | 20.20 | 9.90  | 30281.6  |
| AHQ-2-11, 5554 - 5629       | R.GPVYIGELPQDFLR.I                                                      | 1604.83072 | 2 | 1.50E-06 | 0.92 | 4.08  | -     | 959.0    |
| AHQ-2-11, 5637              | R.GPVYIGELPQDFLR.I                                                      | 1604.83072 | 2 | 1.87E-06 | 0.95 | 4.04  | -     | 1409.4   |
| AHQ-2-11, 4740 - 4745       | R.IAWTHITIPESLR.Q                                                       | 1537.78752 | 2 | 5.90E-05 | 0.83 | 3.47  | -     | 626.3    |
| gi 4505145 ref NP_002387.1  | malic enzyme 2, NAD(+)-dependent, mitochondrial; Malic enzyme, mitochon |            |   | 1.59E-06 | 2.64 | 30.25 | 8.90  | 65443.3  |
| AHQ-2-6, 2967               | R.HISDSVFLAAKA.A                                                        | 1317.47234 | 2 | 1.88E-05 | 0.84 | 3.43  | -     | 479.3    |
| AHQ-2-6, 2799               | K.IEQDQIQLR.F                                                           | 1187.32821 | 2 | 1.59E-06 | 0.91 | 3.59  | -     | 1006.2   |
| AHQ-2-6, 7217 - 7287        | R.ILQDDIESLMPVIVYTPVGLACSQYGHIFR.R                                      | 3439.94604 | 3 | 3.71E-06 | 0.90 | 5.07  | -     | 493.7    |
| gi 17444699 ref XP_017966.4 | similar to Retulipin protein 3 (Neuroendocrine-specific protein-like 2  |            |   | 1.60E-06 | 0.90 | 10.16 | 4.70  | 25522.7  |
| AHQ-2-1, 2901 - 2905        | K.TQIDHYVGIAR.H                                                         | 1273.42279 | 2 | 1.60E-06 | 0.90 | 3.25  | -     | 1055.7   |
| gi 30149460 ref XP_210540.2 | similar to Heat shock protein HSP 90-alpha (HSP 86) [Homo sapiens] [MA  |            |   | 1.61E-06 | 1.70 | 20.17 | 11.10 | 29287.8  |
| AHQ-2-5, 1979               | K.EGLELPEDEEKKQKQEEK.K                                                  | 2188.33193 | 2 | 1.30E-04 | 0.83 | 3.46  | -     | 712.0    |
| AHQ-2-5, 1996               | K.HIYYITGETK.D                                                          | 1225.37490 | 2 | 1.61E-06 | 0.87 | 3.08  | -     | 673.3    |
| gi 5729873 ref NP_006656.1  | heparanase; heparanase-1 [Homo sapiens]                                 |            |   | 1.62E-06 | 1.78 | 20.19 | 4.20  | 61176.4  |
| AHQ-2-14-, 4999             | K.TDFLIFDPK.K                                                           | 1096.25713 | 1 | 1.29E-04 | 0.37 | 2.20  | -     | 468.3    |
| AHQ-2-14-, 5005             | K.TDFLIFDPK.K                                                           | 1096.25713 | 2 | 1.62E-06 | 0.94 | 3.81  | -     | 1369.8   |
| AHQ-2-7, 3296 - 3301        | K.YLLRPLGPHGLLSK.S                                                      | 1564.89924 | 2 | 9.10E-04 | 0.83 | 2.89  | -     | 931.1    |
| gi 29736026 ref XP_085123.3 | similar to Ras-related protein Rab-15 [Homo sapiens]                    |            |   | 1.67E-06 | 0.35 | 10.18 | 5.30  | 23517.8  |
| AHQ-2-13-, 3470 - 3489      | R.IQIWDTAGQER.Y                                                         | 1317.43243 | 2 | 1.53E-05 | 0.92 | 3.61  | -     | 952.8    |
| AHQ-2-10, 3160              | R.IQIWDTAGQER.Y                                                         | 1317.43243 | 1 | 1.67E-06 | 0.35 | 2.83  | -     | 234.8    |
| gi 4505775 ref NP_002626.1  | phosphate carrier precursor isoform 1b; phosphate carrier, mitochondria |            |   | 1.73E-06 | 0.81 | 10.18 | 7.50  | 39958.5  |
| AHQ-2-9, 7403 - 7404        | K.YYALCGFGVLLSCGLTHTAVVPLDLVK.C                                         | 2914.38804 | 2 | 1.73E-06 | 0.81 | 3.65  | -     | 605.2    |
| gi 5803013 ref NP_006808.1  | endoplasmic reticulum protein 29 precursor; endoplasmic reticulum lumen |            |   | 1.74E-06 | 2.19 | 30.20 | 15.30 | 28993.2  |
| AHQ-2-10, 3864 - 3868       | R.DGDFENPVYTVGAVK.V                                                     | 1609.71786 | 2 | 7.48E-04 | 0.32 | 2.75  | -     | 437.6    |
| AHQ-2-10, 3727              | K.ILDQGEDFPASEMTR.I                                                     | 1709.85924 | 2 | 3.98E-05 | 0.94 | 4.06  | -     | 980.0    |
| AHQ-2-10, 4476              | K.SLNILTFQK.K                                                           | 1135.33804 | 2 | 1.74E-06 | 0.92 | 3.33  | -     | 1321.6   |
| gi 29742410 ref XP_291183.1 | similar to TREM-like transcript 1 [Homo sapiens]                        |            |   | 1.79E-06 | 0.72 | 10.21 | 5.10  | 32678.3  |
| AHQ-2-10, 4027              | R.FLPEGCOPLVSSAVDR.R                                                    | 1776.99174 | 2 | 8.45E-06 | 0.74 | 3.21  | -     | 348.7    |
| AHQ-2-11, 4205              | R.FLPEGCOPLVSSAVDR.R                                                    | 1776.99174 | 2 | 1.79E-06 | 0.72 | 2.94  | -     | 384.9    |
| AHQ-2-13-, 4230 - 4238      | R.FLPEGCOPLVSSAVDR.R                                                    | 1776.99174 | 2 | 5.87E-06 | 0.89 | 4.22  | -     | 472.5    |
| AHQ-2-9, 4288               | R.FLPEGCOPLVSSAVDR.R                                                    | 1776.99174 | 2 | 2.21E-04 | 0.51 | 3.10  | -     | 135.1    |
| gi 5803135 ref NP_006852.1  | RAB35, member RAS oncogene family; ras-related protein rab-1c (GTP-bind |            |   | 1.81E-06 | 0.88 | 10.18 | 5.50  | 23025.1  |
| AHQ-2-13-, 3814 - 3829      | K.LLIIGDSGVGK.S                                                         | 1072.28025 | 2 | 5.65E-05 | 0.89 | 3.49  | -     | 1052.4   |
| AHQ-2-10, 3406              | K.LLIIGDSGVGK.S                                                         | 1072.28025 | 2 | 1.81E-06 | 0.88 | 3.38  | -     | 902.6    |
| gi 7706244 ref NP_057005.1  | divalent cation tolerant protein CUTA [Homo sapiens]                    |            |   | 1.82E-06 | 0.97 | 10.34 | 17.30 | 16832.5  |
| AHQ-2-13, 6773              | R.SVHPYEAIEVIALPVEQGNFPYQLQWVR.Q                                        | 3142.55428 | 3 | 1.82E-06 | 0.97 | 6.78  | -     | 1780.9   |
| gi 18375652 ref NP_002826.2 | protein tyrosine phosphatase, non-receptor type 12; protein-tyrosine p  |            |   | 1.87E-06 | 0.93 | 10.22 | 2.10  | 88119.9  |
| AHQ-2-9, 7195               | R.YWPLYGEDPITFAPFK.I                                                    | 1945.20411 | 2 | 4.27E-04 | 0.76 | 3.46  | -     | 329.3    |
| AHQ-2-7, 7128 - 7192        | R.YWPLYGEDPITFAPFK.I                                                    | 1945.20411 | 2 | 1.87E-06 | 0.93 | 4.37  | -     | 661.7    |
| gi 7019485 ref NP_037364.1  | programmed cell death 6; apoptosis-linked gene 2 [Homo sapiens]         |            |   | 1.89E-06 | 1.68 | 20.18 | 20.90 | 21868.3  |
| AHQ-2-11, 5445              | K.AGVNFSFTGVVWK.Y                                                       | 1442.59992 | 2 | 1.89E-06 | 0.90 | 3.56  | -     | 1055.0   |
| AHQ-2-11, 6524              | R.SGVISDTLQQLASNGTWPFPNPTV.R.S                                          | 2919.19515 | 2 | 2.38E-06 | 0.78 | 3.52  | -     | 541.8    |
| gi 5174613 ref NP_005960.1  | nucleosome assembly protein 1-like 4; nucleosome assembly protein 2 [Ho |            |   | 1.89E-06 | 0.95 | 10.17 | 2.70  | 42823.1  |
| AHQ-2-7, 2619               | K.FYEEVHDLER.K                                                          | 1337.41897 | 2 | 1.89E-06 | 0.95 | 3.40  | -     | 1659.1   |
| gi 4506205 ref NP_002791.1  | proteasome beta 9 subunit isoform 1 proprotein; proteasome subunit, bet |            |   | 1.96E-06 | 0.93 | 10.16 | 5.50  | 23264.2  |
| AHQ-2-11, 4417              | R.FTTDAIALAMSR.D                                                        | 1297.50607 | 2 | 1.96E-06 | 0.93 | 3.30  | -     | 1431.5   |
| gi 18201911 ref NP_000629.2 | vitronectin precursor; serum spreading factor; somatomedin B; compleme  |            |   | 2.06E-06 | 0.94 | 10.21 | 3.10  | 54335.4  |
| AHQ-2-13-, 5713 - 5715      | R.SIAQYWLGCAPAGHL                                                       | 1671.90045 | 2 | 2.06E-06 | 0.94 | 4.17  | -     | 968.9    |
| AHQ-2-13, 5603              | R.SIAQYWLGCAPAGHL                                                       | 1671.90045 | 2 | 1.97E-04 | 0.77 | 2.88  | -     | 616.2    |
| gi 22748619 ref NP_689476.1 | tropomyosin 3 [Homo sapiens]                                            |            |   | 2.07E-06 | 1.82 | 20.25 | 11.10 | 28222.6  |
| AHQ-2-9, 3634               | R.ALKDEEKMLQEIQLK.E                                                     | 1946.25520 | 2 | 2.07E-06 | 0.95 | 4.92  | -     | 1238.0   |
| AHQ-2-9, 3011 - 3078        | R.KLVIIEGDLER.T                                                         | 1285.51492 | 2 | 1.47E-04 | 0.87 | 3.40  | -     | 873.6    |
| gi 27413156 ref NP_000338.2 | spectrin, beta, erythrocytic (includes spherocytosis, clinical type I)  |            |   | 2.09E-06 | 0.90 | 10.21 | 1.40  | 246320.0 |
| AHQ-2-2, 7465               | R.DASVAEAWLIAQEPYLAGSDFGHTVDSVEK.L                                      | 3207.44880 | 3 | 2.09E-06 | 0.90 | 4.12  | -     | 1098.5   |
| gi 4506363 ref NP_002861.1  | RAB13, member RAS oncogene family; RAS-associated protein RAB13 [Homo s |            |   | 2.12E-06 | 1.74 | 20.19 | 10.80 | 22774.0  |
| AHQ-2-11, 3550              | K.LLLIGDSGVGK.T                                                         | 1072.28025 | 1 | 2.90E-05 | 0.82 | 3.19  | -     | 626.9    |
| AHQ-2-13, 3792              | K.LLLIGDSGVGK.T                                                         | 1072.28025 | 2 | 3.69E-04 | 0.89 | 3.35  | -     | 964.8    |
| AHQ-2-14-, 3755             | K.LLLIGDSGVGK.T                                                         | 1072.28025 | 2 | 2.12E-06 | 0.93 | 3.75  | -     | 1259.1   |
| AHQ-2-11, 2930              | K.LQVWDTAGQER.F                                                         | 1303.40576 | 2 | 5.05E-05 | 0.81 | 3.15  | -     | 812.2    |
| gi 4503359 ref NP_003965.1  | docking protein 2, 56kD [Homo sapiens]                                  |            |   | 2.13E-06 | 1.52 | 20.14 | 6.30  | 45547.8  |
| AHQ-2-13, 4000              | R.FGASLYGGSDCALAR.L                                                     | 1546.68659 | 2 | 2.13E-06 | 0.62 | 2.73  | -     | 621.7    |
| AHQ-2-13-, 3915             | R.LYLLAAPAER.G                                                          | 1188.40094 | 2 | 5.08E-04 | 0.90 | 2.89  | -     | 1186.2   |
| gi 4759342 ref NP_004808.1  | tight junction protein 2 (zona occludens 2); Friedreich ataxia region g |            |   | 2.15E-06 | 0.76 | 10.19 | 2.90  | 124661.6 |
| AHQ-2-13, 6296              | R.DNPFHENGTSIVISDVLPGPADGLLQENDR.V                                      | 3407.60319 | 3 | 2.15E-06 | 0.76 | 3.89  | -     | 663.7    |
| gi 7706675 ref NP_057661.1  | RAB6B, member RAS oncogene family; small GTPase RAB6B [Homo sapiens] [M |            |   | 2.15E-06 | 2.74 | 40.24 | 23.10 | 23461.5  |
| AHQ-2-11, 4600              | R.GSDVIMLVGNK.T                                                         | 1246.50220 | 2 | 9.59E-06 | 0.96 | 4.15  | -     | 1961.4   |
| AHQ-2-11, 3425              | R.LQLWDTAGQER.F                                                         | 1317.43243 | 1 | 8.52E-05 | 0.20 | 2.55  | -     | 217.9    |
| AHQ-2-12, 3315 - 3394       | R.LQLWDTAGQER.F                                                         | 1317.43243 | 2 | 2.45E-04 | 0.62 | 2.54  | -     | 595.2    |
| AHQ-2-11, 3489              | K.LVFLDGEQSVGK.T                                                        | 1177.37492 | 2 | 8.48E-05 | 0.94 | 3.60  | -     | 1242.9   |
| AHQ-2-11, 3000              | R.VASALPMGVNVEK.S                                                       | 1473.67727 | 1 | 2.15E-06 | 0.64 | 3.56  | -     | 307.5    |
| gi 30154095 ref XP_293967.2 | similar to gamma actin-like protein [Homo sapiens]                      |            |   | 2.15E-06 | 1.41 | 20.20 | 12.20 | 19259.0  |
| AHQ-2-8, 5073               | K.DLYSTVLSSGGTTM*YPGIADR.M                                              | 2235.45690 | 2 | 2.13E-04 | 0.37 | 2.80  | -     | 334.7    |
| AHQ-2-8, 5208               | K.DLYSTVLSSGGTTM*YPGIADR.M                                              | 2235.45690 | 2 | 3.31E-04 | 0.31 | 2.70  | -     | 257.0    |
| AHQ-2-10, 4680 - 4694       | K.DLYSTVLSSGGTTM*YPGIADR.M                                              | 2235.45690 | 2 | 5.29E-05 | 0.37 | 2.75  | -     | 376.9    |
| AHQ-2-13, 4911 - 4919       | K.DLYSTVLSSGGTTM*YPGIADR.M                                              | 2235.45690 | 2 | 3.62E-05 | 0.33 | 2.73  | -     | 306.8    |
| AHQ-2-13, 5213              | K.DLYSTVLSSGGTTM*YPGIADR.M                                              | 2219.45750 | 2 | 6.74E-05 | 0.63 | 2.70  |       |          |

|                             |                                                                         |            |   |          |      |       |       |          |
|-----------------------------|-------------------------------------------------------------------------|------------|---|----------|------|-------|-------|----------|
| AHQ-2-13-, 4847             | K.DLYTSTVLSSGGTTM*YPGIADR.M                                             | 2235.45690 | 2 | 7.68E-06 | 0.80 | 3.53  | -     | 602.6    |
| AHQ-2-13-, 4950 - 5018      | K.DLYTSTVLSSGGTTM*YPGIADR.M                                             | 2235.45690 | 2 | 3.87E-04 | 0.69 | 3.21  | -     | 484.1    |
| AHQ-2-13-, 5177             | K.DLYTSTVLSSGGTTM*YPGIADR.M                                             | 2235.45690 | 2 | 2.25E-05 | 0.82 | 3.11  | -     | 886.2    |
| AHQ-2-13-, 5273             | K.DLYTSTVLSSGGTTM*YPGIADR.M                                             | 2219.45750 | 2 | 1.79E-04 | 0.75 | 3.59  | -     | 420.8    |
| AHQ-2-14-, 4775 - 4843      | K.DLYTSTVLSSGGTTM*YPGIADR.M                                             | 2235.45690 | 2 | 1.00E-04 | 0.74 | 3.20  | -     | 730.6    |
| AHQ-2-14-, 4907 - 4979      | K.DLYTSTVLSSGGTTM*YPGIADR.M                                             | 2235.45690 | 2 | 1.21E-04 | 0.35 | 3.02  | -     | 363.5    |
| AHQ-2-14-, 5096 - 5111      | K.DLYTSTVLSSGGTTM*YPGIADR.M                                             | 2235.45690 | 2 | 2.15E-06 | 0.56 | 3.05  | -     | 400.1    |
| gi 19923437 ref NP_057366.2 | adenylate kinase 3 alpha like [Homo sapiens]                            |            |   | 2.15E-06 | 1.79 | 20.22 | 12.80 | 25565.2  |
| AHQ-2-10, 3038              | K.AYEDQTKPVLEYYQK.K                                                     | 1876.05535 | 2 | 1.09E-04 | 0.92 | 4.36  | -     | 613.9    |
| AHQ-2-10, 6246 - 6286       | K.NLTQYSWLLDGFPR.T                                                      | 1710.91339 | 2 | 2.15E-06 | 0.87 | 3.20  | -     | 1180.3   |
| gi 5453603 ref NP_006422.1  | chaperonin containing TCP1, subunit 2 (beta); chaperonin containing I-c |            |   | 2.18E-06 | 3.63 | 40.20 | 11.40 | 57487.9  |
| AHQ-2-7, 2856               | R.EALLSSAVDHGSDVK.F                                                     | 1657.76083 | 2 | 8.35E-06 | 0.90 | 4.03  | -     | 886.8    |
| AHQ-2-7, 2919               | R.GATQQLDEAER.S                                                         | 1331.41427 | 2 | 2.18E-06 | 0.91 | 3.77  | -     | 1136.4   |
| AHQ-2-7, 5433               | K.LGGSALDSYLDGFLDKK.I                                                   | 2042.27480 | 2 | 9.27E-05 | 0.92 | 3.69  | -     | 1091.2   |
| AHQ-2-7, 5481 - 5545        | R.SLHDALCVLAQTVK.D                                                      | 1556.80920 | 2 | 3.87E-06 | 0.90 | 3.27  | -     | 1047.5   |
| gi 4759270 ref NP_004613.1  | translin; recombination hotspot associated factor; recombination hotspo |            |   | 2.19E-06 | 1.84 | 20.23 | 15.80 | 26182.8  |
| AHQ-2-10, 5059 - 5134       | R.EILTLQQVHQGAGFQDIPK.R                                                 | 2165.47753 | 2 | 2.76E-05 | 0.87 | 4.10  | -     | 540.5    |
| AHQ-2-10, 6079              | R.PLHISTFINELDSGFR.L                                                    | 1847.06360 | 2 | 2.19E-06 | 0.97 | 4.61  | -     | 1797.2   |
| gi 4503481 ref NP_001395.1  | eukaryotic translation elongation factor 1 gamma; elongation factor 1-g |            |   | 2.25E-06 | 1.68 | 20.20 | 8.20  | 50118.5  |
| AHQ-2-12, 7026              | R.GQELAFPLSPDWQVDYESYTW.R.K                                             | 2688.88693 | 2 | 1.26E-04 | 0.79 | 3.33  | -     | 383.5    |
| AHQ-2-12, 2571              | R.KLDPGSEETQTLV.R.E                                                     | 1573.73020 | 2 | 2.25E-06 | 0.89 | 4.00  | -     | 546.1    |
| gi 4504351 ref NP_000510.1  | delta globin [Homo sapiens]                                             |            |   | 2.27E-06 | 0.93 | 10.19 | 12.90 | 16055.4  |
| AHQ-2-13-, 5626             | R.FFESFGDLSPPDAVMGNPK.V                                                 | 2046.24551 | 2 | 2.27E-06 | 0.93 | 3.83  | -     | 1245.9   |
| AHQ-2-13, 5449 - 5528       | R.FFESFGDLSPPDAVMGNPK.V                                                 | 2046.24551 | 2 | 8.73E-04 | 0.85 | 3.32  | -     | 1030.6   |
| gi 24308263 ref NP_067045.1 | Tcd37 homolog; prune [Homo sapiens]                                     |            |   | 2.33E-06 | 0.97 | 10.25 | 3.80  | 50199.3  |
| AHQ-2-7, 7660               | K.LLPLLEALSAYDFSMK.I                                                    | 1940.29226 | 2 | 2.33E-06 | 0.97 | 5.02  | -     | 1760.3   |
| gi 4504045 ref NP_002063.1  | guanine nucleotide binding protein (G protein), q polypeptide [Homo sap |            |   | 2.39E-06 | 1.66 | 20.24 | 9.50  | 42142.8  |
| AHQ-2-8, 3850               | R.VADPAYLPTQQDVL.R.V                                                    | 1686.89014 | 2 | 2.39E-06 | 0.71 | 3.05  | -     | 504.6    |
| AHQ-2-9, 7386 - 7390        | R.VPTTGIIYPPFDLQSVIF.R.M                                                | 2196.53000 | 2 | 7.66E-04 | 0.94 | 4.77  | -     | 691.4    |
| AHQ-2-8, 7355               | R.VPTTGIIYPPFDLQSVIF.R.M                                                | 2196.53000 | 2 | 1.89E-05 | 0.95 | 4.72  | -     | 980.9    |
| gi 4758792 ref NP_004544.1  | NADH dehydrogenase (ubiquinone) Fe-S protein 6, 13kDa (NADH-coenzyme Q  |            |   | 2.44E-06 | 0.59 | 10.13 | 9.70  | 13711.5  |
| AHQ-2-13-, 3931             | K.TGTGCGYGLQFR.Q                                                        | 1422.56875 | 2 | 2.44E-06 | 0.59 | 2.62  | -     | 665.0    |
| gi 6680033 ref NP_031379.1  | guanine nucleotide binding protein (G protein) alpha 12 [Homo sapiens]  |            |   | 2.45E-06 | 0.61 | 10.13 | 2.90  | 44250.9  |
| AHQ-2-9, 2971               | K.ILLGAGESGK.S                                                          | 1058.25357 | 1 | 2.95E-04 | 0.66 | 2.57  | -     | 622.1    |
| AHQ-2-8, 2807               | K.ILLGAGESGK.S                                                          | 1058.25357 | 1 | 2.45E-06 | 0.61 | 2.60  | -     | 503.6    |
| gi 30149013 ref XP_302138.1 | similar to alpha tubulin [Homo sapiens]                                 |            |   | 2.46E-06 | 0.85 | 10.14 | 4.60  | 22444.5  |
| AHQ-2-13, 4989              | R.EIINLVLD.R.I                                                          | 1085.27902 | 1 | 1.63E-04 | 0.13 | 2.08  | -     | 134.3    |
| AHQ-2-14-, 5011             | R.EIINLVLD.R.I                                                          | 1085.27902 | 2 | 3.82E-04 | 0.76 | 2.66  | -     | 852.9    |
| AHQ-2-7, 4932 - 4936        | R.EIINLVLD.R.I                                                          | 1085.27902 | 2 | 2.46E-06 | 0.85 | 2.89  | -     | 1050.7   |
| gi 4502011 ref NP_000467.1  | adenylate kinase 1 [Homo sapiens]                                       |            |   | 2.61E-06 | 3.97 | 50.31 | 35.10 | 21634.7  |
| AHQ-2-11, 6554 - 6557       | K.GQLVPLETVLDM*LR.D                                                     | 1600.90530 | 2 | 6.61E-04 | 0.92 | 4.61  | -     | 486.2    |
| AHQ-2-11, 5644              | R.IGQPTLLLYVDAGPETMTQR.L                                                | 2204.53234 | 2 | 3.00E-06 | 0.95 | 4.46  | -     | 1087.9   |
| AHQ-2-11, 5148              | R.IGQPTLLLYVDAGPETM*QR.L                                                | 2220.53174 | 2 | 2.61E-06 | 0.86 | 4.13  | -     | 595.4    |
| AHQ-2-11, 3346              | K.IIFVVGPGSGK.G                                                         | 1131.34939 | 1 | 3.52E-04 | 0.75 | 2.46  | -     | 934.2    |
| AHQ-2-11, 6321 - 6390       | K.VNAEGSVDSVFSQVCTHLDAK                                                 | 2378.60116 | 2 | 4.40E-04 | 0.49 | 2.88  | -     | 381.4    |
| gi 5453714 ref NP_006448.1  | LIM protein (similar to rat protein kinase C-binding enigma) [Homo sapi |            |   | 2.64E-06 | 0.79 | 10.16 | 2.50  | 64027.9  |
| AHQ-2-13-, 2829 - 2894      | K.EVVKPVPITSPAVSK.V                                                     | 1551.85241 | 2 | 2.64E-06 | 0.79 | 3.10  | -     | 371.5    |
| AHQ-2-13, 2888 - 2937       | K.EVVKPVPITSPAVSK.V                                                     | 1551.85241 | 2 | 8.52E-05 | 0.68 | 3.02  | -     | 262.1    |
| gi 4506181 ref NP_002778.1  | proteasome alpha 2 subunit; proteasome subunit HC3; proteasome componen |            |   | 2.84E-06 | 1.18 | 20.22 | 15.40 | 25898.4  |
| AHQ-2-10, 4490              | R.GYSFSLTTFSPSGK.L                                                      | 1479.61533 | 1 | 7.54E-04 | 0.26 | 2.42  | -     | 284.4    |
| AHQ-2-10, 4812              | R.KLAQGYLYVQEPIPTALQVR.V                                                | 2651.05593 | 2 | 2.84E-06 | 0.92 | 4.43  | -     | 674.9    |
| gi 4506359 ref NP_000311.1  | quinoid dihydropteridine reductase; dihydropteridine reductase [Homo sa |            |   | 2.87E-06 | 0.98 | 10.26 | 7.00  | 25803.4  |
| AHQ-2-10, 3280              | K.NRPSGSLQIVVTEGR.T                                                     | 1801.98277 | 2 | 2.87E-06 | 0.98 | 5.12  | -     | 1874.6   |
| gi 4757714 ref NP_004291.1  | acid phosphatase 1 isoform c; acid phosphatase of erythrocyte; red cell |            |   | 3.29E-06 | 0.64 | 10.18 | 5.70  | 18042.4  |
| AHQ-2-11, 3112              | R.SPIAEAVFR.K                                                           | 990.13779  | 1 | 3.29E-06 | 0.64 | 2.29  | -     | 413.1    |
| gi 21361456 ref NP_055425.2 | alpha glucosidase II alpha subunit; likely ortholog of mouse G2an alph  |            |   | 3.37E-06 | 3.33 | 40.20 | 7.20  | 109437.2 |
| AHQ-2-5, 5947               | K.HHGPQTLPLVTLSSIPVQR.G                                                 | 2391.75581 | 2 | 4.49E-06 | 0.76 | 3.03  | -     | 646.8    |
| AHQ-2-5, 4280               | R.LSFDHPDTPSVLVL.R.K                                                    | 1741.96893 | 2 | 4.91E-04 | 0.84 | 3.72  | -     | 519.6    |
| AHQ-2-5, 3629               | K.MMDYLQSGGTPQTDV.R.W                                                   | 1929.12196 | 2 | 3.37E-06 | 0.94 | 4.10  | -     | 1097.2   |
| AHQ-2-4, 3893               | R.VVIAGAKPAAVVLQTK.G                                                    | 1665.05702 | 2 | 6.35E-04 | 0.79 | 3.35  | -     | 652.3    |
| gi 4506285 ref NP_003470.1  | protein tyrosine phosphatase type IVA, member 2 isoform 1; protein tyro |            |   | 3.41E-06 | 0.88 | 10.17 | 8.40  | 19127.1  |
| AHQ-2-11, 2837 - 2897       | R.FLITHNPATLNK.F                                                        | 1584.80104 | 2 | 3.41E-06 | 0.88 | 3.30  | -     | 1159.4   |
| gi 20127408 ref NP_000173.2 | hydroxacyl dehydrogenase, subunit A; trifunctional protein, alpha sub   |            |   | 3.56E-06 | 3.63 | 50.21 | 12.70 | 82999.1  |
| AHQ-2-6, 6475               | R.DSIFSNLTGQLDYQGF.E.K                                                  | 2063.20943 | 2 | 1.10E-04 | 0.92 | 4.15  | -     | 915.8    |
| AHQ-2-6, 2481               | K.DTSAVAVGLQ.K                                                          | 1119.25064 | 1 | 5.72E-05 | 0.18 | 2.21  | -     | 367.7    |
| AHQ-2-6, 6621 - 6629        | K.EVEAVIPDHCFASNTSALPISIEIAVSK.R                                        | 3071.44790 | 3 | 3.10E-04 | 0.79 | 3.91  | -     | 440.7    |
| AHQ-2-6, 2975               | K.TGIEQSSDAGYLCE.SQK.F                                                  | 1844.93497 | 2 | 3.56E-06 | 0.93 | 4.15  | -     | 880.0    |
| AHQ-2-6, 6045               | K.TVLGTPEVLLGALPGAGGTQR.L                                               | 2008.30795 | 3 | 1.49E-04 | 0.81 | 3.45  | -     | 948.4    |
| gi 9845511 ref NP_008839.2  | ras-related C3 botulinum toxin substrate 1 isoform Rac1; rho family, sm |            |   | 3.95E-06 | 0.96 | 10.21 | 5.20  | 21450.0  |
| AHQ-2-11, 3052              | K.YLECSALTQR.G                                                          | 1242.38392 | 2 | 3.95E-06 | 0.96 | 4.18  | -     | 1668.5   |
| gi 8923579 ref NP_060377.1  | hypothetical protein FLJ20625 [Homo sapiens]                            |            |   | 4.01E-06 | 1.84 | 20.27 | 26.70 | 17744.7  |
| AHQ-2-13, 6301              | K.LPPLPSTSQPHQVLASEPIPSDLQVSR.I                                         | 3283.72259 | 3 | 7.24E-04 | 0.87 | 4.25  | -     | 626.1    |
| AHQ-2-14-, 6339             | K.LPPLPSTSQPHQVLASEPIPSDLQVSR.I                                         | 3283.72259 | 3 | 6.89E-04 | 0.93 | 5.38  | -     | 718.7    |
| AHQ-2-12, 5445              | R.TDEQALLSILAK.T                                                        | 1389.57677 | 2 | 4.01E-06 | 0.91 | 3.19  | -     | 1195.8   |
| gi 29736622 ref XP_293924.1 | similar to cytoplasmic beta-actin [Homo sapiens]                        |            |   | 4.02E-06 | 1.87 | 20.24 | 13.60 | 42002.9  |
| AHQ-2-8, 7187               | R.FRCPEAIFQPSFLGIESSGHIHTTFNSIMK.C                                      | 3446.89713 | 3 | 5.02E-05 | 0.93 | 4.78  | -     | 1168.7   |
| AHQ-2-8, 3762               | R.VAPDEHPILLTEAPLNPKIN.R.E                                              | 2338.69122 | 3 | 4.02E-06 | 0.94 | 4.71  | -     | 1399.8   |
| gi 22063113 ref XP_171447.1 | similar to elongin B; transcription elongation factor B (SIII), polype  |            |   | 4.36E-06 | 1.30 | 20.16 | 21.20 | 13156.8  |
| AHQ-2-12, 3470              | R.PQAPATVGLAF.R.A                                                       | 1228.42516 | 2 | 4.36E-06 | 0.88 | 3.20  | -     | 742.6    |
| AHQ-2-12, 4897              | K.TLGECEGFTSQTRPQAPATVGLAF.R.A                                          | 2638.94056 | 2 | 6.63E-05 | 0.41 | 2.82  | -     | 241.3    |
| gi 27482573 ref XP_208709.1 | similar to Ubiquitin-conjugating enzyme E2-18 kDa Ubch7 (Ubiquitin-pro  |            |   | 4.49E-06 | 0.96 | 10.27 | 11.70 | 17875.4  |
| AHQ-2-12, 4917              | K.GQVCLPVISAENWKPATK.T                                                  | 2000.30757 | 2 | 4.49E-06 | 0.96 | 5.38  | -     | 878.0    |
| gi 25306267 ref NP_001700.2 | brain-derived neurotrophic factor isoform a preproprotein [Homo sapien  |            |   | 4.58E-06 | 1.68 | 20.20 | 6.10  | 27817.8  |
| AHQ-2-13-, 2858             | K.TAVDM*SGGTVTVLEK.V                                                    | 1524.71933 | 2 | 4.58E-06 | 0.73 | 2.59  | -     | 1013.9   |
| AHQ-2-13-, 3754 - 3758      | K.TAVDM*SGGTVTVLEK.V                                                    | 1508.71993 | 2 | 7.97E-04 | 0.80 | 3.34  | -     | 841.4    |
| AHQ-2-13, 3740 - 3743       | K.TAVDM*SGGTVTVLEK.V                                                    | 1508.71993 | 2 | 8.34E-05 | 0.95 | 3.91  | -     | 1659.7   |
| gi 4505395 ref NP_002499.1  | nidogen (entactin); Nidogen; nidogen (entactin) [Homo sapiens]          |            |   | 4.59E-06 | 0.95 | 10.18 | 0.90  | 136488.3 |
| AHQ-2-3, 4536               | R.VLFETDLV.NPR.G                                                        | 1303.48880 | 2 | 4.59E-06 | 0.95 | 3.56  | -     | 1467.7   |
| gi 5031569 ref NP_005727.1  | ARP1 actin-related protein 1 homolog A, centractin alpha; ARP1 (actin-r |            |   | 4.59E-06 | 0.93 | 10.23 | 5.90  | 42613.4  |
| AHQ-2-8, 5052               | K.DQLQTFSEEHPLVLLTEAPLNPR.K                                             | 2535.79382 | 2 | 4.59E-06 | 0.93 | 4.42  | -     | 748.7    |
| gi 19923262 ref NP_004153.2 | RAB5A, member RAS oncogene family; RAS-associated protein RAB5A [Homo   |            |   | 4.76E-06 | 1.84 | 20.19 | 10.20 | 23658.5  |
| AHQ-2-10, 3691              | K.FEIVDTAGQER.Y                                                         | 1352.43364 | 2 | 4.37E-05 | 0.93 | 3.80  | -     | 1250.9   |
| AHQ-2-10, 3204 - 3206       | K.LVLLGESAVGK.S                                                         | 1086.30692 | 2 | 4.76E-06 | 0.90 | 3.53  | -     | 1143.8   |
| gi 8393638 ref NP_058642.1  | F11 receptor isoform a precursor; platelet F11 receptor; platelet adhes |            |   | 5.09E-06 | 0.68 | 10.13 | 3.70  | 32582.9  |
| AHQ-2-12, 5326              | R.VTFLPTGITFK.S                                                         | 1224.47318 | 2 | 5.09E-06 | 0.68 | 2.55  | -     | 374.5    |
| gi 4557251 ref NP_001101.1  | a disintegrin and metalloprotease domain 10 [Homo sapiens]              |            |   | 5.12E-06 | 0.87 | 10.17 | 2.00  | 84141.7  |
| AHQ-2-5, 4676               | K.AIDTYQTDFSGIR.N                                                       | 1701.85844 | 2 | 5.12E-06 | 0.87 | 3.31  | -     | 869.0    |
| gi 20149570 ref NP_005816.2 | RAS guanyl releasing protein 2 isoform 1; calcium and diacylglycerol-r  |            |   | 5.28E-06 | 0.80 | 10.14 | 2.80  | 75547.0  |
| AHQ-2-7, 6844               | K.LWEGLTVELTATGNYGNYR.R                                                 | 2158.35558 | 2 | 5.28E-06 | 0.80 | 2.76  | -     | 1014.2   |
| gi 6005786 ref NP_009214.1  | monoglyceride lipase; lysophospholipase-like [Homo sapiens]             |            |   | 5.49E-06 | 3.47 | 40.26 | 19.20 | 34292.3  |
| AHQ-2-9, 1966               | K.ALIFVSHGAGEHSGR.Y                                                     | 1538.69246 | 2 | 5.49E-06 | 0.95 | 4.20  | -     | 1159.4   |
| AHQ-2-14-, 6103             | K.LTVPFLLLLQGSADR.L                                                     | 1530.79329 | 2 | 5.48E-04 | 0.70 | 2.88  | -     | 491.7    |
| AHQ-2-9, 6430               | R.TPQSIPIQDLPHLVNADGQYVLCR.Y                                            | 2835.14314 | 3 | 4.62E-04 | 0.87 | 4.46  | -     | 400.1    |
| AHQ-2-9, 7346               | K.VLNLVLPNLSLPGIDSSVLSR.N                                               | 2207.59900 | 2 | 5.03E-04 | 0.95 | 5.20  | -     | 718.2    |
| gi 8922601 ref NP_060654.1  | hypothetical protein FLJ10702 [Homo sapiens]                            |            |   | 6.17E-06 | 1.04 | 20.18 | 13.40 | 21538.9  |
| AHQ-2-11, 2597 - 2629       | R.DLPNALDEK.Q                                                           | 1015.09928 | 1 | 3.53E-04 | 0.20 | 1.83  | -     | 463.5    |
| AHQ-2-11, 5433              | R.GVNAIVYMDAADREK.I                                                     | 1766.01230 | 2 | 6.17E-06 | 0.83 | 3.56  | -     | 677.3    |



|                             |                                                                         |            |   |          |      |       |       |          |
|-----------------------------|-------------------------------------------------------------------------|------------|---|----------|------|-------|-------|----------|
| AHQ-2-10, 3846              | R.VKEDENVPFLVLGNGKS                                                     | 1701.94471 | 2 | 1.27E-05 | 0.93 | 4.81  | -     | 773.2    |
| gi 29725611 ref NP_066954.2 | regulatory subunit PR 53 of protein phosphatase 2A isoform b; phospho   |            |   | 1.29E-05 | 0.93 | 10.24 | 9.00  | 36775.0  |
| AHQ-2-9, 7382               | K.LDEEAEALVAVVPTHLAAAVPEVAVYLK.E                                        | 3063.49045 | 3 | 1.29E-05 | 0.93 | 4.73  | -     | 1360.3   |
| gi 4503643 ref NP_000121.1  | coagulation factor V precursor; labile factor; factor V Leiden [Homo sa |            |   | 1.37E-05 | 2.52 | 30.21 | 2.00  | 251716.5 |
| AHQ-2-6, 2847               | K.EVIITGIQTQGA.H                                                        | 1358.56590 | 2 | 9.19E-05 | 0.83 | 3.14  | -     | 767.3    |
| AHQ-2-1, 3265               | K.EVIITGIQTQGA.H                                                        | 1358.56590 | 2 | 7.73E-05 | 0.86 | 3.60  | -     | 880.9    |
| AHQ-2-3, 4983 - 5043        | R.GEYEEHGLGILGPIR.A                                                     | 1696.92816 | 2 | 1.28E-04 | 0.91 | 3.81  | -     | 1065.1   |
| AHQ-2-6, 4681               | R.GEYEEHGLGILGPIR.A                                                     | 1696.92816 | 2 | 1.37E-05 | 0.72 | 3.16  | -     | 582.4    |
| AHQ-2-3, 3709               | K.LSEGAASYLDHPTFAEK.M                                                   | 1765.90099 | 2 | 9.61E-04 | 0.93 | 4.10  | -     | 1202.0   |
| gi 4502989 ref NP_001856.1  | cytochrome c oxidase subunit VIIa polypeptide 2 (liver) precursor; hepa |            |   | 1.39E-05 | 0.89 | 10.18 | 15.70 | 9395.9   |
| AHQ-2-14-, 5319 - 5339      | K.LFQEDDEIPLYL.K                                                        | 1623.82758 | 2 | 1.39E-05 | 0.89 | 3.62  | -     | 1098.0   |
| AHQ-2-14, 6485 - 6561       | K.LFQEDDEIPLYL.K                                                        | 1623.82758 | 2 | 5.42E-05 | 0.94 | 3.60  | -     | 1539.8   |
| gi 6552299 ref NP_009225.1  | breast cancer 1, early onset; breast-ovarian cancer, included [Homo sap |            |   | 1.42E-05 | 0.33 | 10.19 | 1.60  | 207718.7 |
| AHQ-2-10, 6783              | K.TPEM*INQGTNTQEQNGQVM*NITNSGHENK.T                                     | 3248.42306 | 3 | 1.42E-05 | 0.33 | 3.75  | -     | 261.7    |
| gi 7662651 ref NP_054778.1  | RGC32 protein [Homo sapiens]                                            |            |   | 1.42E-05 | 0.89 | 10.16 | 9.40  | 12924.1  |
| AHQ-2-12, 5353              | K.ELEAFIADLKD.T                                                         | 1264.40621 | 2 | 1.42E-05 | 0.89 | 3.17  | -     | 998.9    |
| gi 24475861 ref NP_054891.2 | phosphohistidine phosphatase; sex-regulated protein janus-a [Homo sapi  |            |   | 1.47E-05 | 0.93 | 10.16 | 8.80  | 13832.4  |
| AHQ-2-13-, 3009 - 3079      | K.WAEYHADIYDK.V                                                         | 1411.49955 | 2 | 1.47E-05 | 0.93 | 3.25  | -     | 1168.3   |
| gi 22538465 ref NP_002786.2 | proteasome beta 3 subunit; proteasome theta chain; proteasome chain 13  |            |   | 1.50E-05 | 0.94 | 10.20 | 7.80  | 22948.8  |
| AHQ-2-10, 4844              | R.FGPPYTEPVVAGLDPK.T                                                    | 1768.00162 | 2 | 3.26E-05 | 0.88 | 3.20  | -     | 891.3    |
| AHQ-2-10, 4840              | R.FGPPYTEPVVAGLDPK.T                                                    | 1768.00162 | 2 | 1.50E-05 | 0.94 | 4.08  | -     | 1031.8   |
| gi 29729345 ref XP_290995.1 | similar to speckle-type POZ protein [Homo sapiens]                      |            |   | 1.53E-05 | 1.53 | 20.19 | 10.90 | 18703.4  |
| AHQ-2-2, 6258 - 6341        | K.NRVEINDLDPEVFKE.MR.F                                                  | 2252.55733 | 2 | 1.53E-05 | 0.74 | 3.71  | -     | 772.1    |
| AHQ-2-3, 6232 - 6304        | K.NRVEINDLDPEVFKE.MR.R.F                                                | 2252.55733 | 2 | 9.30E-05 | 0.79 | 3.75  | -     | 911.7    |
| AHQ-2-1, 6288               | K.NRVEINDLDPEVFKE.MR.F                                                  | 2252.55733 | 2 | 6.73E-05 | 0.80 | 3.33  | -     | 705.0    |
| gi 18640750 ref NP_570138.1 | regulator of G-protein signalling 18; regulator of G-protein signaling  |            |   | 1.58E-05 | 0.88 | 10.21 | 8.90  | 27582.0  |
| AHQ-2-11, 4110              | K.EVITNSITQPTLHSDFAAQS.RV                                               | 2316.51300 | 2 | 1.58E-05 | 0.88 | 4.27  | -     | 357.2    |
| gi 4502553 ref NP_003647.1  | calcium/calmodulin-dependent protein kinase I [Homo sapiens]            |            |   | 1.75E-05 | 0.94 | 10.27 | 5.40  | 41336.9  |
| AHQ-2-9, 4940 - 4944        | R.FTCEALQLHPWIAGDGTALDK.N                                               | 2303.53598 | 2 | 1.75E-05 | 0.94 | 5.38  | -     | 657.8    |
| gi 24308400 ref NP_612366.1 | hypothetical protein BC010682 [Homo sapiens]                            |            |   | 1.75E-05 | 1.08 | 20.16 | 10.30 | 39866.2  |
| AHQ-2-9, 6664               | R.CQFTLKPISDSVGVFLR.Q                                                   | 1969.29348 | 2 | 1.42E-04 | 0.54 | 2.87  | -     | 258.7    |
| AHQ-2-9, 7016               | K.TLVQQLYTLTGKQHLN.K.E                                                  | 2332.66190 | 3 | 1.75E-05 | 0.54 | 3.25  | -     | 393.4    |
| gi 10835049 ref NP_001655.1 | ras homolog gene family, member A; Aplysia ras-related homolog 12; Rho  |            |   | 1.76E-05 | 0.95 | 10.17 | 6.20  | 21768.0  |
| AHQ-2-10, 3515              | R.IGAFGYMECSAK.T                                                        | 1335.53122 | 2 | 1.76E-05 | 0.95 | 3.39  | -     | 1274.1   |
| gi 13786129 ref NP_112586.1 | RAB33B, member RAS oncogene family; likely ortholog of mouse RAB33b [H  |            |   | 1.79E-05 | 0.90 | 10.17 | 4.80  | 25717.4  |
| AHQ-2-11, 3257 - 3320       | K.IQLVDTAGGER.F                                                         | 1317.43243 | 2 | 2.65E-05 | 0.81 | 3.21  | -     | 680.7    |
| AHQ-2-14-, 3465 - 3468      | K.IQLVDTAGGER.F                                                         | 1317.43243 | 2 | 1.79E-05 | 0.90 | 3.43  | -     | 809.6    |
| AHQ-2-10, 3100 - 3174       | K.IQLVDTAGGER.F                                                         | 1317.43243 | 2 | 4.70E-04 | 0.91 | 3.23  | -     | 1053.2   |
| gi 4557377 ref NP_000052.1  | Bruton agammaglobulinemia tyrosine kinase [Homo sapiens]                |            |   | 1.88E-05 | 0.97 | 10.24 | 2.60  | 76280.8  |
| AHQ-2-6, 3414               | R.HYVVMSTPQSQYYLAEK.H                                                   | 2075.28663 | 2 | 1.88E-05 | 0.97 | 4.74  | -     | 1140.5   |
| gi 4504107 ref NP_002076.1  | glutathione peroxidase 4; phospholipid hydroperoxidase; sperm nucleus g |            |   | 1.92E-05 | 0.68 | 10.16 | 0.00  | 22137.7  |
| AHQ-2-11, 3878 - 3881       | R.YGFMEEPLVIEK.D                                                        | 1405.64130 | 2 | 1.92E-05 | 0.68 | 3.21  | -     | 432.1    |
| gi 8922804 ref NP_060760.1  | hypothetical protein FLJ10983 [Homo sapiens]                            |            |   | 1.93E-05 | 0.93 | 10.23 | 2.90  | 68268.9  |
| AHQ-2-6, 7189               | K.ELNELVSAIEEHFFQPQK.Y                                                  | 2159.38348 | 2 | 1.93E-05 | 0.93 | 4.69  | -     | 744.6    |
| gi 11128019 ref NP_061820.1 | cytochrome c [Homo sapiens]                                             |            |   | 1.93E-05 | 0.90 | 10.16 | 13.30 | 11748.7  |
| AHQ-2-13-, 2139             | K.TGAPGYSYTAANK.N                                                       | 1429.51641 | 2 | 1.93E-05 | 0.90 | 3.29  | -     | 759.4    |
| gi 12545410 ref NP_031394.1 | RAS p21 protein activator 3; GTPase activating protein III; Ins(1,3,4,  |            |   | 1.93E-05 | 0.88 | 10.20 | 1.90  | 95912.5  |
| AHQ-2-5, 6447               | K.SLCPFYGEDFYCEIPR.S                                                    | 2056.26024 | 2 | 1.93E-05 | 0.88 | 3.53  | -     | 767.7    |
| gi 5454028 ref NP_006261.1  | related RAS viral (-ras) oncogene homolog; Oncogene RRAS [Homo sapiens] |            |   | 1.98E-05 | 0.94 | 10.24 | 9.20  | 23480.3  |
| AHQ-2-10, 2874              | R.SEASAFGASHHVAYFEASAK.L                                                | 2068.19099 | 2 | 1.98E-05 | 0.94 | 4.79  | -     | 684.1    |
| gi 6912586 ref NP_036220.1  | 6-phosphogluconolactonase [Homo sapiens]                                |            |   | 2.00E-05 | 2.24 | 30.23 | 24.00 | 27546.7  |
| AHQ-2-10, 3926              | R.ILEDQEEENPLPAALVQPHHTGK.L                                             | 2300.55348 | 2 | 2.00E-05 | 0.87 | 4.12  | -     | 495.5    |
| AHQ-2-10, 2371              | K.IVAFISDSPPQPR.V                                                       | 1602.85951 | 2 | 5.67E-04 | 0.48 | 2.57  | -     | 435.8    |
| AHQ-2-10, 6307 - 6308       | R.LPIFESQVITINPELVVEEAAEYAK.K                                           | 2867.19683 | 2 | 1.71E-04 | 0.88 | 4.63  | -     | 492.3    |
| gi 2978786 ref NP_064424.2  | tubulin, beta polypeptide 4, member Q [Homo sapiens]                    |            |   | 2.03E-05 | 1.31 | 20.19 | 10.90 | 48377.2  |
| AHQ-2-13-, 3977             | R.AVLVDLEPGTM*DSVR.S                                                    | 1618.83435 | 2 | 4.21E-04 | 0.70 | 3.35  | -     | 349.5    |
| AHQ-2-13, 4893              | R.AVLVDLEPGTM*DSVR.S                                                    | 1618.83435 | 2 | 1.94E-04 | 0.49 | 2.72  | -     | 370.9    |
| AHQ-2-13-, 6241 - 6242      | K.EAEASCDLQGFQLTHSLGGGTSGMGMTLLSK.I                                     | 3315.65550 | 3 | 2.03E-05 | 0.82 | 3.60  | -     | 1101.4   |
| gi 15149476 ref NP_002878.2 | arginyl-tRNA synthetase [Homo sapiens]                                  |            |   | 2.08E-05 | 0.75 | 10.14 | 2.30  | 75378.5  |
| AHQ-2-6, 6193               | K.IVFPVPCGSPIPLTVK.S                                                    | 1645.04263 | 2 | 2.08E-05 | 0.75 | 2.79  | -     | 679.0    |
| gi 5730118 ref NP_006514.1  | X-prolyl aminopeptidase (aminopeptidase P) 1, soluble; X-prolyl aminope |            |   | 2.12E-05 | 1.72 | 20.20 | 4.80  | 69858.4  |
| AHQ-2-6, 6209 - 6277        | R.GSLTFEPFLTLVPIQTK.M                                                   | 1745.05263 | 2 | 2.12E-05 | 0.86 | 3.93  | -     | 482.6    |
| AHQ-2-6, 6117               | R.VGVDPILPIDTYWVK.K                                                     | 1616.88141 | 2 | 1.91E-04 | 0.86 | 3.44  | -     | 602.0    |
| gi 4758158 ref NP_004395.1  | neural precursor cell expressed, developmentally down-regulated 5 [Homo |            |   | 2.20E-05 | 0.62 | 10.17 | 4.40  | 41487.2  |
| AHQ-2-9, 7008 - 7010        | K.STLNSLFLDTLYPER.V                                                     | 1883.13416 | 2 | 2.20E-05 | 0.62 | 3.16  | -     | 604.7    |
| gi 8922671 ref NP_060691.1  | chromosome 2 open reading frame 6 [Homo sapiens]                        |            |   | 2.35E-05 | 0.67 | 10.15 | 5.10  | 25007.5  |
| AHQ-2-11, 4877              | R.ELAPLQELIEK.L                                                         | 1283.49580 | 2 | 2.35E-05 | 0.67 | 2.83  | -     | 451.6    |
| gi 30147857 ref XP_293007.2 | similar to peptidylprolyl isomerase A (cyclophilin A) [Homo sapiens] [  |            |   | 2.35E-05 | 0.30 | 10.10 | 5.90  | 20789.6  |
| AHQ-2-12, 3282 - 3349       | K.KITADCGQLQ                                                            | 1248.43160 | 1 | 2.35E-05 | 0.30 | 2.01  | -     | 469.6    |
| gi 5453710 ref NP_006139.1  | LIM and SH3 protein 1; Lasp-1 [Homo sapiens]                            |            |   | 2.46E-05 | 0.74 | 10.16 | 5.00  | 29717.0  |
| AHQ-2-12, 3941              | K.GFSVADTPQLQR.I                                                        | 1419.56466 | 2 | 2.46E-05 | 0.74 | 2.94  | -     | 785.7    |
| AHQ-2-12, 3967              | K.GFSVADTPQLQR.I                                                        | 1419.56466 | 1 | 4.09E-04 | 0.17 | 2.32  | -     | 173.3    |
| AHQ-2-13, 3972 - 3980       | K.GFSVADTPQLQR.I                                                        | 1419.56466 | 2 | 5.28E-04 | 0.80 | 3.12  | -     | 889.6    |
| AHQ-2-11, 3809              | K.GFSVADTPQLQR.I                                                        | 1419.56466 | 1 | 3.76E-04 | 0.22 | 2.19  | -     | 262.6    |
| gi 20532885 ref XP_086931.2 | similar to epsilon isoform of 14-3-3 protein [Homo sapiens]             |            |   | 2.52E-05 | 0.90 | 10.20 | 4.70  | 29380.0  |
| AHQ-2-9, 7096               | K.LICCDILDVLK.H                                                         | 1479.74157 | 1 | 8.54E-05 | 0.60 | 3.26  | -     | 620.3    |
| AHQ-2-10, 6484              | K.LICCDILDVLK.H                                                         | 1479.74157 | 1 | 3.44E-05 | 0.91 | 3.99  | -     | 884.8    |
| AHQ-2-9, 7082               | K.LICCDILDVLK.H                                                         | 1479.74157 | 2 | 2.52E-05 | 0.90 | 3.23  | -     | 798.4    |
| gi 29746056 ref XP_296036.1 | hypothetical protein XP_296036 [Homo sapiens]                           |            |   | 2.57E-05 | 0.46 | 10.13 | 7.70  | 21908.1  |
| AHQ-2-6, 3890               | K.MKRLFIPENSTGNQR.E                                                     | 1792.05622 | 2 | 2.57E-05 | 0.46 | 2.57  | -     | 664.1    |
| gi 30157216 ref XP_292133.2 | similar to genethonin 1 [Homo sapiens]                                  |            |   | 2.62E-05 | 0.73 | 10.20 | 4.50  | 39693.8  |
| AHQ-2-5, 4407               | K.TITLEVKPSDTIENVK.A                                                    | 1788.03268 | 2 | 4.79E-04 | 0.61 | 3.81  | -     | 396.5    |
| AHQ-2-10, 4068              | K.TITLEVKPSDTIENVK.A                                                    | 1788.03268 | 2 | 4.57E-04 | 0.35 | 2.92  | -     | 276.0    |
| AHQ-2-13, 4371              | K.TITLEVKPSDTIENVK.A                                                    | 1788.03268 | 2 | 7.04E-04 | 0.60 | 3.41  | -     | 435.0    |
| AHQ-2-14, 5017              | K.TITLEVKPSDTIENVK.A                                                    | 1788.03268 | 2 | 6.54E-05 | 0.22 | 2.57  | -     | 305.3    |
| AHQ-2-14, 5432 - 5496       | K.TITLEVKPSDTIENVK.A                                                    | 1788.03268 | 2 | 2.62E-05 | 0.73 | 3.87  | -     | 577.1    |
| AHQ-2-14-, 4280             | K.TITLEVKPSDTIENVK.A                                                    | 1788.03268 | 2 | 5.25E-05 | 0.74 | 3.84  | -     | 548.4    |
| AHQ-2-14-, 4476             | K.TITLEVKPSDTIENVK.A                                                    | 1788.03268 | 2 | 4.17E-05 | 0.73 | 3.48  | -     | 546.2    |
| AHQ-2-1, 4704               | K.TITLEVKPSDTIENVK.A                                                    | 1788.03268 | 2 | 4.83E-04 | 0.61 | 3.50  | -     | 492.4    |
| gi 21361416 ref NP_036382.2 | related RAS viral (-ras) oncogene homolog 2; oncogene TC21 [Homo sapi   |            |   | 2.63E-05 | 0.58 | 10.13 | 7.80  | 23399.4  |
| AHQ-2-10, 4936              | R.LDLIDTAGQEEFGAMR.E                                                    | 1766.95393 | 2 | 2.63E-05 | 0.58 | 2.59  | -     | 629.0    |
| gi 5803009 ref NP_006786.1  | EH-domain containing 1; homolog of Drosophila past; EH domain containin |            |   | 2.64E-05 | 1.75 | 20.22 | 7.10  | 60844.7  |
| AHQ-2-7, 7533               | R.FMCAQLPNNVLDISIIDTPGILSGEK.Q                                          | 2918.37521 | 2 | 1.60E-04 | 0.87 | 3.96  | -     | 695.1    |
| AHQ-2-7, 2985               | R.HLIEQDFPGMGR.I                                                        | 1343.53652 | 2 | 2.64E-05 | 0.88 | 3.21  | -     | 825.2    |
| gi 11072091 ref NP_057736.2 | Cm, crooked neck-like 1; CGI-201 protein; crooked neck protein (crm);   |            |   | 2.82E-05 | 0.55 | 10.12 | 1.10  | 99200.7  |
| AHQ-2-1, 3250               | R.FVLVHPDVK.N                                                           | 1054.26662 | 1 | 2.82E-05 | 0.55 | 2.35  | -     | 649.2    |
| gi 22749499 ref NP_689979.1 | hypothetical protein MGC40107 [Homo sapiens]                            |            |   | 2.85E-05 | 0.96 | 10.27 | 24.80 | 11741.6  |
| AHQ-2-14-, 5681 - 5696      | R.LGALSGAAALGFASYGAHGAQFPDAYGK.E                                        | 2669.93152 | 3 | 2.85E-05 | 0.96 | 5.43  | -     | 1431.1   |
| gi 18105037 ref NP_004709.2 | cytochrome c oxidase subunit VIIa polypeptide 2 like; estrogen recepto  |            |   | 2.95E-05 | 0.85 | 10.30 | 28.90 | 12614.6  |
| AHQ-2-14-, 6120 - 6136      | K.LAGAWASEAYSQGLKPVVSTEAPPIIFATPTK.L                                    | 3399.87995 | 3 | 7.03E-04 | 0.95 | 5.90  | -     | 876.7    |
| AHQ-2-13, 6103              | K.LAGAWASEAYSQGLKPVVSTEAPPIIFATPTK.L                                    | 3399.87995 | 3 | 2.95E-05 | 0.85 | 3.97  | -     | 602.0    |
| gi 16904381 ref NP_006717.1 | LPS-responsive vesicle trafficking, beach and anchor containing; vesic  |            |   | 3.54E-05 | 1.36 | 20.15 | 1.50  | 31958.3  |
| AHQ-2                       |                                                                         |            |   |          |      |       |       |          |

|                             |                                                                              |            |   |          |      |       |       |          |
|-----------------------------|------------------------------------------------------------------------------|------------|---|----------|------|-------|-------|----------|
| AHQ-2-12, 4505              | K.SEDFSLPAYMDR.R                                                             | 1431.55257 | 2 | 3.66E-05 | 0.60 | 2.87  | -     | 376.9    |
| gi 455773 ref NP_000248.1   | myosin, heavy polypeptide 7, cardiac muscle, beta [Homo sapiens]             |            |   | 3.66E-05 | 1.29 | 20.17 | 1.20  | 223110.8 |
| AHQ-2-5, 3183               | R.CNGVLEIGR.I                                                                | 1019.15759 | 2 | 1.07E-04 | 0.63 | 2.93  | -     | 426.6    |
| AHQ-2-3, 3492               | R.CNGVLEIGR.I                                                                | 1019.15759 | 2 | 1.05E-04 | 0.90 | 2.94  | -     | 896.2    |
| AHQ-2-3, 4240               | R.IEELEEELESERTAR.A                                                          | 1833.93203 | 2 | 3.66E-05 | 0.39 | 2.71  | -     | 655.9    |
| gi 5803121 ref NP_006801.1  | for protein disulfide isomerase-related [Homo sapiens]                       |            |   | 3.68E-05 | 0.86 | 10.15 | 2.30  | 59594.0  |
| AHQ-2-7, 2845               | K.GPPLWEEDPGAK.D                                                             | 1296.40999 | 2 | 3.68E-05 | 0.86 | 3.04  | -     | 858.3    |
| gi 4502205 ref NP_001651.1  | ADP-ribosylation factor 4 [Homo sapiens]                                     |            |   | 3.72E-05 | 1.67 | 20.19 | 13.30 | 20510.6  |
| AHQ-2-11, 2438              | R.IQEVADLQK.M                                                                | 1173.29830 | 2 | 2.44E-04 | 0.80 | 3.06  | -     | 758.2    |
| AHQ-2-11, 5338 - 5349       | K.NICFTVVDVGGQDR.I                                                           | 1668.81182 | 2 | 3.72E-05 | 0.87 | 3.78  | -     | 733.7    |
| gi 13027638 ref NP_006750.2 | UDP-glucose pyrophosphorylase 2; UTP-glucose-1-phosphate uridylyltransferase |            |   | 3.79E-05 | 0.92 | 10.16 | 2.40  | 56964.9  |
| AHQ-2-7, 3949               | K.SFENSLGINVPR.S                                                             | 1333.47500 | 2 | 3.79E-05 | 0.92 | 3.10  | -     | 1335.6   |
| gi 21361409 ref NP_036515.2 | osteoclast stimulating factor 1 [Homo sapiens]                               |            |   | 3.85E-05 | 0.70 | 10.17 | 8.80  | 24063.9  |
| AHQ-2-10, 6335              | K.DIVEMLFTQPNIELNQQNK.L                                                      | 2275.56743 | 2 | 3.85E-05 | 0.70 | 3.33  | -     | 339.4    |
| gi 4505417 ref NP_000895.1  | NAD(P)H dehydrogenase, quinone 2; NAD(P)H menadiene oxidoreductase-1, d      |            |   | 3.91E-05 | 0.61 | 10.14 | 7.80  | 25952.4  |
| AHQ-2-10, 4807              | K.VLAPQISFAPAIASEEER.K                                                       | 1987.19924 | 2 | 3.91E-05 | 0.61 | 2.73  | -     | 551.2    |
| gi 21264318 ref NP_004028.3 | adenosine monophosphate deaminase 2 (isoform L) [Homo sapiens]               |            |   | 3.91E-05 | 0.80 | 10.17 | 2.00  | 100687.2 |
| AHQ-2-5, 5533               | R.SAPYEFPEESPIEQLEER.R                                                       | 2151.27185 | 2 | 3.91E-05 | 0.80 | 3.49  | -     | 458.5    |
| gi 21536449 ref NP_002613.2 | prefoldin 1; prefoldin subunit 1 [Homo sapiens]                              |            |   | 3.94E-05 | 0.12 | 10.20 | 9.00  | 14210.4  |
| AHQ-2-13-, 3849 - 3850      | K.LADIQIEQLNR.T                                                              | 1313.48523 | 2 | 2.99E-04 | 0.95 | 3.98  | -     | 1556.8   |
| AHQ-2-13, 3831              | K.LADIQIEQLNR.T                                                              | 1313.48523 | 1 | 3.94E-05 | 0.12 | 1.82  | -     | 290.4    |
| gi 18491024 ref NP_005691.2 | dipeptidylpeptidase III isoform 1; dipeptidylpeptidase III [Homo sapiens]    |            |   | 3.98E-05 | 0.94 | 10.20 | 2.30  | 82588.6  |
| AHQ-2-6, 4549               | K.LAQDFLDLSQNL.SAYNTR.L                                                      | 1957.09009 | 2 | 3.98E-05 | 0.94 | 4.05  | -     | 1345.1   |
| gi 5454170 ref NP_006393.1  | hepatitis B virus x-interacting protein; hepatitis B virus x-interactin      |            |   | 3.98E-05 | 1.57 | 20.19 | 44.00 | 963.9    |
| AHQ-2-14, 5666              | R.GTSLSDHAGVIVLAQQAAL.L                                                      | 1996.21090 | 2 | 3.98E-05 | 0.70 | 3.00  | -     | 740.0    |
| AHQ-2-14-, 5948 - 5983      | K.NPSIVGLVCTDSQGLNLGCR.G                                                     | 2163.41855 | 2 | 4.75E-05 | 0.87 | 3.71  | -     | 692.3    |
| gi 13027380 ref NP_055864.1 | amyotrophic lateral sclerosis 2 (juvenile) chromosome region, candidat       |            |   | 3.98E-05 | 0.77 | 10.19 | 2.30  | 101432.5 |
| AHQ-2-13-, 5209 - 5277      | R.VYVQTKYNYNDIMVTHLLAER.D                                                    | 2508.85682 | 3 | 3.98E-05 | 0.77 | 3.73  | -     | 904.3    |
| gi 14780596 ref XP_033004.1 | hypothetical protein BC005107 [Homo sapiens]                                 |            |   | 3.99E-05 | 0.24 | 10.14 | 5.00  | 18127.9  |
| AHQ-2-2, 1674 - 1877        | R.EQIIAKAK.A                                                                 | 901.08569  | 1 | 7.17E-05 | 0.45 | 2.68  | -     | 327.1    |
| AHQ-2-2, 1986               | R.EQIIAKAK.A                                                                 | 901.08569  | 1 | 3.99E-05 | 0.24 | 2.50  | -     | 243.6    |
| AHQ-2-3, 1673 - 1883        | R.EQIIAKAK.A                                                                 | 901.08569  | 1 | 3.85E-04 | 0.52 | 2.72  | -     | 343.7    |
| AHQ-2-1, 1920 - 2057        | R.EQIIAKAK.A                                                                 | 901.08569  | 1 | 2.91E-04 | 0.33 | 2.74  | -     | 288.0    |
| gi 4506765 ref NP_002952.1  | S100 calcium-binding protein A4; 18A2; 42A; S100 calcium-binding protei      |            |   | 4.01E-05 | 1.75 | 20.17 | 10.90 | 11728.5  |
| AHQ-2-14-, 3372             | K.ALDVMVSTFHK.Y                                                              | 1248.47665 | 2 | 4.01E-05 | 0.85 | 2.99  | -     | 938.0    |
| AHQ-2-14-, 2795             | K.ALDVMVSTFHK.Y                                                              | 1264.47605 | 2 | 3.43E-04 | 0.90 | 3.49  | -     | 982.6    |
| gi 16753212 ref NP_003921.2 | src family associated phosphoprotein 2; src kinase-associated phosphop       |            |   | 4.03E-05 | 0.86 | 10.17 | 2.80  | 41216.5  |
| AHQ-2-12, 3038              | K.RGDVIVLSK.E                                                                | 1164.37938 | 2 | 4.03E-05 | 0.86 | 3.32  | -     | 1006.1   |
| gi 4506193 ref NP_002784.1  | proteasome beta 1 subunit; proteasome subunit HC5; proteasome component      |            |   | 4.06E-05 | 1.82 | 20.24 | 13.70 | 26489.2  |
| AHQ-2-11, 2942              | K.NM*QNVHEVPLSLDR.A                                                          | 1668.85668 | 2 | 1.14E-04 | 0.88 | 3.43  | -     | 995.5    |
| AHQ-2-11, 6613              | R.RFFPYYYNIIGGLDEEGK.G                                                       | 2281.55031 | 2 | 4.06E-05 | 0.95 | 4.74  | -     | 1129.1   |
| gi 4505409 ref NP_002503.1  | non-metastatic cells 2, protein (NM23B) expressed in; Non-metastatic ce      |            |   | 4.12E-05 | 0.86 | 10.25 | 9.90  | 17297.9  |
| AHQ-2-14-, 6163             | K.EISLWFKPEELVDYK.S                                                          | 1897.15929 | 2 | 4.12E-05 | 0.86 | 3.57  | -     | 649.2    |
| AHQ-2-12, 6182 - 6250       | K.EISLWFKPEELVDYK.S                                                          | 1897.15929 | 2 | 8.54E-05 | 0.97 | 4.97  | -     | 1369.9   |
| gi 5454090 ref NP_006271.1  | signal sequence receptor, delta; translocon-associated protein delta [H      |            |   | 4.15E-05 | 1.48 | 20.16 | 17.30 | 18998.5  |
| AHQ-2-12, 4913              | R.FFDEESYLLR.K                                                               | 1406.52121 | 2 | 1.54E-04 | 0.84 | 3.19  | -     | 802.4    |
| AHQ-2-12, 6258              | R.NNEDISIPPLFTVSVDRH.G                                                       | 2167.40715 | 3 | 4.15E-05 | 0.64 | 3.03  | -     | 535.6    |
| gi 7019375 ref NP_037373.1  | formin homology 2 domain containing 1; FH1/FH2 domain-containing protei      |            |   | 4.34E-05 | 0.93 | 10.23 | 1.60  | 126496.5 |
| AHQ-2-7, 5845 - 5856        | R.VQYLEDTPFCANFPPEPR.R                                                       | 2271.44761 | 2 | 4.34E-05 | 0.93 | 4.58  | -     | 1007.9   |
| gi 19923750 ref NP_002858.2 | RAB3B, member RAS oncogene family; Brain antigen RAB3B [Homo sapiens]        |            |   | 4.46E-05 | 0.88 | 10.17 | 5.00  | 24757.7  |
| AHQ-2-13, 3476              | K.LQIWDTAGOER.Y                                                              | 1317.43243 | 1 | 1.07E-04 | 0.15 | 2.11  | -     | 333.2    |
| AHQ-2-13, 3483              | K.LQIWDTAGOER.Y                                                              | 1317.43243 | 2 | 4.46E-05 | 0.88 | 3.34  | -     | 800.7    |
| AHQ-2-11, 3345 - 3420       | K.LQIWDTAGOER.Y                                                              | 1317.43243 | 2 | 4.90E-05 | 0.84 | 3.23  | -     | 675.5    |
| gi 10800412 ref NP_036458.2 | microtubule-associated protein, RP/EB family, member 3; APC binding pr       |            |   | 4.67E-05 | 0.42 | 10.15 | 3.60  | 31982.0  |
| AHQ-2-9, 1970               | K.LEHEYIHFV.F                                                                | 1330.47280 | 1 | 4.67E-05 | 0.42 | 1.81  | -     | 584.7    |
| gi 30149221 ref XP_291446.2 | similar to Heat shock cognate 71 kDa protein [Homo sapiens]                  |            |   | 4.70E-05 | 0.91 | 10.19 | 3.90  | 45688.5  |
| AHQ-2-6, 2205               | R.STAGDTHLGGEDFDNR.M                                                         | 1692.68222 | 2 | 4.70E-05 | 0.91 | 3.81  | -     | 1033.9   |
| gi 27764873 ref NP_057070.2 | cytokine receptor-like factor 3; cytokine receptor-like molecule 9; cy       |            |   | 4.80E-05 | 0.94 | 10.22 | 3.20  | 49737.6  |
| AHQ-2-7, 3085               | K.LIEHGNTAEDLVR.E                                                            | 1566.74089 | 2 | 4.80E-05 | 0.94 | 3.61  | -     | 1305.2   |
| gi 29747201 ref XP_290702.1 | similar to My016 protein [Homo sapiens]                                      |            |   | 4.88E-05 | 0.89 | 10.21 | 10.50 | 16932.3  |
| AHQ-2-14-, 3500             | R.DLEAEHVEVEDTTLNR.C                                                         | 1870.95236 | 3 | 6.39E-04 | 0.93 | 4.02  | -     | 1508.6   |
| AHQ-2-14-, 3497             | R.DLEAEHVEVEDTTLNR.C                                                         | 1870.95236 | 2 | 4.88E-05 | 0.89 | 4.17  | -     | 739.8    |
| gi 13637631 ref XP_016625.1 | similar to voltage-dependent anion channel isoform 2 [Homo sapiens] [M       |            |   | 4.99E-05 | 0.91 | 10.16 | 4.40  | 31479.2  |
| AHQ-2-9, 4679 - 4711        | K.YKWCEYGLTFTEK.W                                                            | 1726.92965 | 2 | 4.99E-05 | 0.91 | 3.16  | -     | 992.0    |
| gi 6005902 ref NP_009043.1  | thrombospondin 3 [Homo sapiens]                                              |            |   | 5.12E-05 | 0.64 | 10.14 | 0.70  | 104200.6 |
| AHQ-2-3, 4679               | R.FYVVMWK.Q                                                                  | 973.21547  | 1 | 2.19E-04 | 0.75 | 2.16  | -     | 1013.4   |
| AHQ-2-4, 4665               | R.FYVVMWK.Q                                                                  | 973.21547  | 1 | 1.33E-04 | 0.75 | 2.31  | -     | 895.9    |
| AHQ-2-5, 4303               | R.FYVVMWK.Q                                                                  | 973.21547  | 1 | 4.07E-04 | 0.64 | 2.13  | -     | 755.8    |
| AHQ-2-6, 4265               | R.FYVVMWK.Q                                                                  | 973.21547  | 1 | 7.88E-04 | 0.73 | 2.30  | -     | 840.0    |
| AHQ-2-7, 4097 - 4143        | R.FYVVMWK.Q                                                                  | 973.21547  | 1 | 3.27E-04 | 0.65 | 2.04  | -     | 771.1    |
| AHQ-2-10, 4082              | R.FYVVMWK.Q                                                                  | 973.21547  | 1 | 5.12E-05 | 0.64 | 1.98  | -     | 916.4    |
| AHQ-2-1, 4866               | R.FYVVMWK.Q                                                                  | 973.21547  | 1 | 9.53E-04 | 0.82 | 2.46  | -     | 970.2    |
| gi 19923748 ref NP_001924.2 | dihydropyrimidinase S-succinyltransferase (E2 component of 2-oxo-glutarat    |            |   | 5.18E-05 | 0.95 | 10.26 | 4.60  | 48755.0  |
| AHQ-2-7, 5980 - 6016        | K.ASAFALQEQPVVNAVIDDTK.E                                                     | 2218.44924 | 2 | 5.18E-05 | 0.95 | 5.21  | -     | 962.5    |
| gi 4507913 ref NP_003922.1  | WAS protein family, member 1; WASP family Verprolin-homologous protein;      |            |   | 5.48E-05 | 0.90 | 10.16 | 1.60  | 61625.0  |
| AHQ-2-11, 2529 - 2540       | R.SVLEAIRK.G                                                                 | 1029.25860 | 2 | 5.48E-05 | 0.90 | 3.20  | -     | 1290.6   |
| gi 11321585 ref NP_002065.1 | guanine nucleotide-binding protein, beta-1 subunit; G protein, beta-1        |            |   | 5.48E-05 | 0.75 | 10.17 | 5.90  | 37378.6  |
| AHQ-2-9, 4726               | R.KACADATLSQITNNIDPVGR.I                                                     | 2146.36794 | 2 | 5.48E-05 | 0.75 | 3.36  | -     | 384.6    |
| gi 30152366 ref XP_294234.2 | similar to chromosome condensation-related SMC-associated protein 1 [H       |            |   | 5.52E-05 | 0.32 | 10.16 | 2.90  | 52674.0  |
| AHQ-2-1, 2837 - 2878        | R.VLREEQEHTKDPK.E                                                            | 1737.93868 | 2 | 5.52E-05 | 0.32 | 3.17  | -     | 175.6    |
| gi 9910470 ref NP_064542.1  | otraplin precursor; fibrocyte-derived protein; melanoma inhibitory act       |            |   | 5.63E-05 | 0.13 | 10.10 | 7.00  | 14332.3  |
| AHQ-2-8, 2815 - 2824        | K.GQIYVYSK.L                                                                 | 1086.22234 | 1 | 5.63E-05 | 0.13 | 2.03  | -     | 308.2    |
| gi 4503477 ref NP_001950.1  | eukaryotic translation elongation factor 1 beta 2; eukaryotic translati      |            |   | 5.89E-05 | 0.85 | 10.20 | 8.00  | 24763.6  |
| AHQ-2-9, 5024               | K.SSILLDKVPWDEETDMAK.L                                                       | 2064.30228 | 2 | 5.89E-05 | 0.85 | 4.03  | -     | 406.4    |
| gi 6005727 ref NP_006576.1  | chaperonin containing TCP1, subunit 8 (theta); T-complex protein 1, the      |            |   | 5.94E-05 | 1.43 | 20.16 | 5.30  | 59662.4  |
| AHQ-2-7, 2983               | R.KAHEILPNLVCCSAK.N                                                          | 1743.04172 | 2 | 3.13E-04 | 0.66 | 2.72  | -     | 688.1    |
| AHQ-2-7, 3104 - 3107        | R.LVPGGGATEIELAK.Q                                                           | 1355.56202 | 2 | 5.94E-05 | 0.77 | 3.03  | -     | 385.8    |
| gi 14589893 ref NP_001785.2 | cadherin 4, type 1 preproprotein; cadherin 4, R-cadherin (retinal); R-       |            |   | 6.00E-05 | 0.67 | 10.18 | 2.00  | 100279.9 |
| AHQ-2-1, 4933               | K.VENPIDLYIYVIDM*NDNR.P                                                      | 2213.45293 | 2 | 6.00E-05 | 0.67 | 3.63  | -     | 450.1    |
| gi 30153966 ref XP_293932.2 | similar to hypothetical protein BC013073 [Homo sapiens]                      |            |   | 6.29E-05 | 0.59 | 10.19 | 9.00  | 21711.3  |
| AHQ-2-2, 4060 - 4130        | R.MIFLFTINVSQDIRHH                                                           | 2073.44997 | 2 | 9.51E-05 | 0.77 | 3.72  | -     | 546.3    |
| AHQ-2-2, 4264               | R.MIFLFTINVSQDIRHH                                                           | 2073.44997 | 2 | 6.85E-04 | 0.63 | 3.13  | -     | 535.3    |
| AHQ-2-2, 4278 - 4353        | R.MIFLFTINVSQDIRHH                                                           | 2073.44997 | 2 | 5.56E-04 | 0.65 | 3.71  | -     | 330.1    |
| AHQ-2-3, 3731               | R.MIFLFTINVSQDIRHH                                                           | 2073.44997 | 2 | 7.29E-04 | 0.37 | 2.83  | -     | 344.2    |
| AHQ-2-3, 4227 - 4247        | R.MIFLFTINVSQDIRHH                                                           | 2073.44997 | 2 | 9.46E-04 | 0.62 | 3.31  | -     | 436.8    |
| AHQ-2-4, 4006               | R.MIFLFTINVSQDIRHH                                                           | 2073.44997 | 2 | 6.29E-05 | 0.59 | 3.13  | -     | 377.7    |
| AHQ-2-6, 3961               | R.MIFLFTINVSQDIRHH                                                           | 2073.44997 | 2 | 8.34E-04 | 0.42 | 3.17  | -     | 339.8    |
| AHQ-2-1, 4270 - 4341        | R.MIFLFTINVSQDIRHH                                                           | 2073.44997 | 2 | 1.45E-04 | 0.67 | 3.57  | -     | 442.4    |
| gi 30159103 ref NP_296859.2 | hypothetical protein XP_296859 [Homo sapiens]                                |            |   | 6.47E-05 | 0.52 | 10.13 | 6.40  | 31013.7  |
| AHQ-2-5, 7387               | R.FLRHPWLEAGAAALRGEK.L                                                       | 2023.32923 | 2 | 6.47E-05 | 0.52 | 2.55  | -     | 435.9    |
| gi 5803167 ref NP_006793.1  | splicing factor 3a, subunit 3, 60kDa; pre-mRNA splicing factor SF3a (60      |            |   | 6.56E-05 | 0.41 | 10.15 | 4.40  | 58848.5  |
| AHQ-2-8, 6091               | R.TRAMQDRYMEVSGNLRDLDDK.D                                                    | 2677.95567 | 3 | 6.56E-05 | 0.41 | 3.02  | -     | 235.7    |
| gi 10864055 ref NP_067069.1 | megakaryocyte-enhanced                                                       |            |   |          |      |       |       |          |

|                             |                                                                         |  |            |   |          |      |       |       |          |
|-----------------------------|-------------------------------------------------------------------------|--|------------|---|----------|------|-------|-------|----------|
| AHQ-2-10, 1999 - 2000       | K.LLLQVQHASK.Q                                                          |  | 1137.35716 | 1 | 6.78E-05 | 0.54 | 2.37  | -     | 489.4    |
| gi 4501859 ref NP_001600.1  | acyl-Coenzyme A dehydrogenase, short/branched chain precursor [Homo sap |  |            |   | 6.79E-05 | 0.88 | 10.19 | 5.10  | 47485.1  |
| AHQ-2-8, 6612               | R.LFDQGLQHQVAHVATQLEAAR.L                                               |  | 2480.76631 | 3 | 6.79E-05 | 0.88 | 3.78  | -     | 803.9    |
| gi 30151001 ref XP_170195.2 | similar to ADP/ATP carrier protein, fibroblast isoform (ADP/ATP transl  |  |            |   | 7.00E-05 | 0.86 | 10.16 | 2.60  | 46759.8  |
| AHQ-2-10, 3428 - 3446       | R.AAYFGIYDTAK.G                                                         |  | 1220.35512 | 2 | 7.00E-05 | 0.86 | 3.18  | -     | 835.8    |
| gi 6681764 ref NP_004993.1  | NADH dehydrogenase (ubiquinone) 1 alpha subcomplex, 9, 39kDa; NADH dehy |  |            |   | 7.15E-05 | 0.79 | 10.18 | 4.50  | 42509.3  |
| AHQ-2-9, 6218               | R.DAFFEAIIVKPSDIFGR.E                                                   |  | 1876.14485 | 2 | 7.15E-05 | 0.79 | 3.50  | -     | 634.2    |
| gi 5453854 ref NP_006187.1  | poly(rC) binding protein 1; heterogenous nuclear ribonucleoprotein X; p |  |            |   | 7.93E-05 | 0.64 | 10.16 | 3.90  | 37525.7  |
| AHQ-2-10, 3726              | R.LVVPATQCCGSLIGK.G                                                     |  | 1444.72199 | 2 | 7.93E-05 | 0.64 | 3.18  | -     | 259.3    |
| gi 21361427 ref NP_055182.2 | hypothetical protein, estradiol-induced [Homo sapiens]                  |  |            |   | 8.48E-05 | 0.94 | 10.23 | 8.90  | 21551.0  |
| AHQ-2-13-, 5723 - 5727      | K.EDEIPETVSLMMLDAAK.N                                                   |  | 1891.08690 | 2 | 8.48E-05 | 0.94 | 4.54  | -     | 669.7    |
| AHQ-2-13, 5631 - 5641       | K.EDEIPETVSLMMLDAAK.N                                                   |  | 1891.08690 | 2 | 6.61E-04 | 0.90 | 4.32  | -     | 478.5    |
| gi 18104998 ref NP_001119.2 | adaptor-related protein complex 1, gamma 1 subunit; gamma adaptin; cla  |  |            |   | 8.55E-05 | 0.92 | 10.22 | 3.30  | 91679.3  |
| AHQ-2-13, 6759              | K.TFQLQLLSPSSIVPAFNTGTITQVIK.V                                          |  | 2892.33903 | 3 | 8.55E-05 | 0.92 | 4.44  | -     | 1281.2   |
| gi 8393147 ref NP_058625.1  | chloride intracellular channel 5 [Homo sapiens]                         |  |            |   | 8.82E-05 | 0.93 | 10.22 | 7.20  | 28109.7  |
| AHQ-2-10, 5378              | R.KFLDGDDELTDACNLLPK.L                                                  |  | 2064.34520 | 2 | 8.82E-05 | 0.93 | 4.33  | -     | 916.9    |
| gi 20543399 ref XP_116396.1 | similar to peptidylprolyl isomerase A (cyclophilin A) [Homo sapiens] [  |  |            |   | 9.15E-05 | 0.78 | 10.12 | 5.00  | 19852.7  |
| AHQ-2-12, 4375 - 4589       | R.VSFKLFDK.F                                                            |  | 1055.25138 | 1 | 9.15E-05 | 0.78 | 2.43  | -     | 1199.0   |
| gi 19923231 ref NP_002860.2 | RAB6A, member RAS oncogene family; Oncogene RAB6; RAB6, member RAS onc  |  |            |   | 1.02E-04 | 0.66 | 10.14 | 6.70  | 23548.6  |
| AHQ-2-11, 2850              | R.VAAALPQMESTQDR.S                                                      |  | 1446.61192 | 2 | 1.02E-04 | 0.66 | 2.79  | -     | 349.8    |
| gi 4507249 ref NP_003464.1  | signal transducing adaptor molecule 1; signal transducing adaptor molec |  |            |   | 1.03E-04 | 0.65 | 10.15 | 5.00  | 59179.3  |
| AHQ-2-14-, 6132             | K.GETHGAGIGLFPNFTADLTAPEPMIK.T                                          |  | 2920.24330 | 3 | 1.03E-04 | 0.65 | 3.08  | -     | 642.8    |
| gi 5729991 ref NP_006494.1  | proteasome 26S ATPase subunit 4 isoform 1; protease 26S subunit 6; Tat- |  |            |   | 1.03E-04 | 0.90 | 10.17 | 2.90  | 47365.9  |
| AHQ-2-5, 3589               | R.GVLMYGPCCGCK.T                                                        |  | 1253.47332 | 2 | 1.03E-04 | 0.90 | 3.42  | -     | 984.7    |
| gi 10190678 ref NP_065691.1 | RP42 homolog; squamous cell carcinoma-related oncogene [Homo sapiens]   |  |            |   | 1.05E-04 | 0.89 | 10.20 | 6.60  | 30124.1  |
| AHQ-2-10, 5911 - 5928       | K.LDVATDNFFQNPPLYR.E                                                    |  | 2056.26326 | 2 | 1.05E-04 | 0.89 | 4.05  | -     | 843.1    |
| gi 4758330 ref NP_004448.1  | long-chain fatty-acyl-Coenzyme A ligase 3; lignoceroyl-CoA synthase [Ho |  |            |   | 1.06E-04 | 0.65 | 10.15 | 2.50  | 80345.5  |
| AHQ-2-5, 6116               | R.LSPEWPTPETGLVTDFAK.L                                                  |  | 1989.21359 | 2 | 1.06E-04 | 0.65 | 3.04  | -     | 395.7    |
| gi 20547107 ref XP_114482.1 | similar to HEAT SHOCK 70 KDA PROTEIN 4 (HEAT SHOCK 70-RELATED PROTEIN   |  |            |   | 1.07E-04 | 1.88 | 20.27 | 4.40  | 94330.3  |
| AHQ-2-4, 5589               | K.KPVVDCVSVVPCFYDAER.R                                                  |  | 2244.53004 | 2 | 1.07E-04 | 0.92 | 4.15  | -     | 672.3    |
| AHQ-2-4, 6892 - 6894        | K.SNLAYDIVQLPTGLTGIK.V                                                  |  | 1904.19651 | 2 | 7.26E-04 | 0.96 | 5.43  | -     | 936.3    |
| gi 4885417 ref NP_005330.1  | huntingtin interacting protein 2; ubiquitin-conjugating enzyme E2-25 KD |  |            |   | 1.08E-04 | 0.96 | 10.21 | 9.00  | 22406.5  |
| AHQ-2-11, 3666              | R.LWAHVYAGAPVSSPEYTK.K                                                  |  | 1977.20773 | 2 | 1.08E-04 | 0.96 | 4.25  | -     | 1531.2   |
| gi 11559923 ref NP_071496.1 | eukaryotic translation initiation factor 4H isoform 1 [Homo sapiens] [  |  |            |   | 1.12E-04 | 0.89 | 10.23 | 11.70 | 27384.8  |
| AHQ-2-11, 6844 - 6912       | K.ELPTPEPYTYVGNLFPNFVQQDIDAFK.D                                         |  | 3211.56532 | 3 | 1.12E-04 | 0.89 | 4.57  | -     | 863.9    |
| gi 14765644 ref XP_037574.1 | similar to PTP-L1-associated RhoGAP 1 [Homo sapiens]                    |  |            |   | 1.16E-04 | 0.94 | 10.29 | 2.90  | 124613.7 |
| AHQ-2-13, 6892 - 6893       | R.SPLTAASGELPTEGAGDPVVEDISHLADVAR.F                                     |  | 3286.59214 | 3 | 1.16E-04 | 0.94 | 5.76  | -     | 717.3    |
| gi 27363461 ref NP_057153.8 | mitochondria-associated GM-CSF signaling molecule [Homo sapiens]        |  |            |   | 1.20E-04 | 0.92 | 10.24 | 18.40 | 13824.6  |
| AHQ-2-13, 6136              | R.SAASNLSLGLSLQEAQILNVSK.L                                              |  | 2330.58112 | 2 | 1.20E-04 | 0.92 | 4.86  | -     | 612.3    |
| gi 18765729 ref NP_003816.2 | synaptosomal-associated protein 23 isoform SNAP23A; synaptosomal-assoc  |  |            |   | 1.22E-04 | 1.28 | 20.19 | 11.40 | 23353.9  |
| AHQ-2-10, 2391              | R.IEGLDQINK.D                                                           |  | 1159.27163 | 1 | 4.26E-04 | 0.37 | 2.31  | -     | 614.8    |
| AHQ-2-10, 4103              | R.I.LGLAIESQDAGIK.T                                                     |  | 1428.65614 | 2 | 1.22E-04 | 0.91 | 3.64  | -     | 985.4    |
| gi 19923534 ref NP_060988.2 | MCM10 minichromosome maintenance deficient 10; homolog of yeast MCM10   |  |            |   | 1.23E-04 | 0.60 | 10.15 | 2.10  | 96134.1  |
| AHQ-2-13-, 6609 - 6669      | R.EQLAYLESEEFQKILKAK.S                                                  |  | 2168.47496 | 2 | 1.23E-04 | 0.60 | 3.06  | -     | 243.1    |
| AHQ-2-8, 7534               | R.EQLAYLESEEFQKILKAK.S                                                  |  | 2168.47496 | 2 | 5.38E-04 | 0.29 | 2.53  | -     | 162.0    |
| gi 4502601 ref NP_001227.1  | carbonyl reductase 3; carbonyl reductase (NADPH) 3 [Homo sapiens]       |  |            |   | 1.24E-04 | 0.97 | 10.25 | 5.80  | 30850.1  |
| AHQ-2-9, 3160 - 3163        | R.GQAQVQQLQAEGLSPR.F                                                    |  | 1653.82178 | 2 | 1.24E-04 | 0.97 | 4.92  | -     | 1578.4   |
| gi 5031611 ref NP_005859.1  | BET1 homolog; Golgi vesicular membrane trafficking protein p18; Betp h  |  |            |   | 1.26E-04 | 0.71 | 10.16 | 15.30 | 13289.4  |
| AHQ-2-13-, 4846             | K.LLAEM'DSQDFSTTGFGLGK.T                                                |  | 1977.18145 | 2 | 1.26E-04 | 0.71 | 3.22  | -     | 216.6    |
| gi 5453559 ref NP_006347.1  | ATP synthase, H+ transporting, mitochondrial F0 complex, subunit d; ATP |  |            |   | 1.30E-04 | 0.75 | 10.19 | 8.10  | 18491.1  |
| AHQ-2-11, 4182              | K.KYYPWPHQPIENL                                                         |  | 1685.90553 | 2 | 1.30E-04 | 0.75 | 2.92  | -     | 600.6    |
| gi 22065448 ref XP_084610.2 | similar to tubulin alpha-1 chain - Chinese hamster [Homo sapiens] [MAS  |  |            |   | 1.34E-04 | 0.76 | 10.17 | 2.40  | 41009.4  |
| AHQ-2-13, 4985              | K.EIIDLVLDR.I                                                           |  | 1086.26378 | 2 | 1.34E-04 | 0.76 | 2.87  | -     | 829.9    |
| AHQ-2-14, 6270 - 6272       | K.EIIDLVLDR.I                                                           |  | 1086.26378 | 2 | 3.23E-04 | 0.80 | 3.31  | -     | 800.2    |
| AHQ-2-13-, 5070             | K.EIIDLVLDR.I                                                           |  | 1086.26378 | 2 | 3.71E-04 | 0.85 | 3.38  | -     | 823.4    |
| AHQ-2-11, 4828              | K.EIIDLVLDR.I                                                           |  | 1086.26378 | 2 | 2.09E-04 | 0.73 | 2.82  | -     | 756.8    |
| gi 17440821 ref XP_060398.1 | similar to peptidylprolyl isomerase A (cyclophilin A) [Homo sapiens] [  |  |            |   | 1.36E-04 | 0.40 | 10.13 | 2.90  | 26761.9  |
| AHQ-2-12, 2266              | K.TEWLGDGK.H                                                            |  | 848.92297  | 1 | 1.36E-04 | 0.40 | 2.34  | -     | 494.1    |
| AHQ-2-12, 2265              | K.TEWLGDGK.H                                                            |  | 848.92297  | 2 | 6.34E-04 | 0.71 | 2.52  | -     | 582.3    |
| gi 14043026 ref NP_003752.2 | vesicle-associated membrane protein 8; endobrevin [Homo sapiens]        |  |            |   | 1.38E-04 | 0.92 | 10.17 | 14.00 | 11438.2  |
| AHQ-2-13-, 2462             | R.NKTEDELEATSEHFK.T                                                     |  | 1649.74039 | 3 | 1.38E-04 | 0.92 | 3.47  | -     | 1620.4   |
| AHQ-2-13, 2548              | R.NKTEDELEATSEHFK.T                                                     |  | 1649.74039 | 2 | 3.76E-04 | 0.65 | 2.51  | -     | 418.5    |
| gi 5453704 ref NP_006398.1  | cytoskeleton related vitamin A responsive protein; glutamate transporte |  |            |   | 1.40E-04 | 0.88 | 10.20 | 10.10 | 21614.6  |
| AHQ-2-1, 6125               | R.TPM*GIVLDALQQEEGINR.L                                                 |  | 2130.36546 | 2 | 1.40E-04 | 0.88 | 4.09  | -     | 767.0    |
| gi 4503141 ref NP_001805.1  | cathepsin C isoform a preproprotein; dipeptidyl-peptidase 1; dipeptidyl |  |            |   | 1.42E-04 | 1.87 | 20.28 | 4.30  | 51841.5  |
| AHQ-2-14-, 5463             | R.GTDECAIESIAVAATPIPK.L                                                 |  | 1945.18072 | 2 | 2.64E-04 | 0.90 | 3.49  | -     | 1152.3   |
| AHQ-2-14-, 5029             | R.RGTDECAIESIAVAATPIPK.L                                                |  | 2101.36707 | 2 | 1.42E-04 | 0.97 | 5.62  | -     | 1485.2   |
| AHQ-2-14, 6186              | R.RGTDECAIESIAVAATPIPK.L                                                |  | 2101.36707 | 2 | 2.89E-04 | 0.95 | 4.69  | -     | 1045.3   |
| gi 21359896 ref NP_009177.2 | kelch-like 2, Mayven; mayven; kelch (Drosophila)-like 2 (Mayven) [Homo  |  |            |   | 1.42E-04 | 0.04 | 10.14 | 1.70  | 66075.5  |
| AHQ-2-12, 2929 - 2930       | K.KAFKVMNELR.S                                                          |  | 1236.51223 | 1 | 1.42E-04 | 0.04 | 1.94  | -     | 98.2     |
| gi 4758440 ref NP_004868.1  | glia maturation factor, gamma [Homo sapiens]                            |  |            |   | 1.43E-04 | 0.93 | 10.21 | 9.20  | 16801.2  |
| AHQ-2-12, 4311 - 4381       | R.TTDDLTEAWLQEK.L                                                       |  | 1550.64872 | 2 | 1.43E-04 | 0.93 | 4.30  | -     | 1261.5   |
| gi 4506045 ref NP_002718.1  | proteoglycan 1, secretory granule; Proteoglycan 1, secretory granule (p |  |            |   | 1.45E-04 | 0.93 | 10.19 | 8.20  | 17623.6  |
| AHQ-2-1, 4877               | K.GPMFELLPGESNK.I                                                       |  | 1419.62807 | 2 | 1.45E-04 | 0.93 | 3.74  | -     | 1136.2   |
| gi 14150155 ref NP_115729.1 | hypothetical protein MGC10540 [Homo sapiens]                            |  |            |   | 1.45E-04 | 0.95 | 10.20 | 8.00  | 20747.6  |
| AHQ-2-11, 5626              | R.FPPFFTLQPNVDR.T.R                                                     |  | 1679.89929 | 2 | 1.45E-04 | 0.95 | 4.01  | -     | 1434.5   |
| gi 20373153 ref NP_115997.4 | myosin XVIIIb; myosin 18B [Homo sapiens]                                |  |            |   | 1.47E-04 | 0.89 | 10.21 | 0.70  | 285231.7 |
| AHQ-2-13, 6629              | R.ITAALQQLTMLLEKSRVAR.Q                                                 |  | 2030.42494 | 2 | 1.47E-04 | 0.89 | 4.12  | -     | 1173.8   |
| gi 8922974 ref NP_060849.1  | hypothetical protein FLJ11280 [Homo sapiens]                            |  |            |   | 1.56E-04 | 0.41 | 10.15 | 7.30  | 36538.0  |
| AHQ-2-9, 6715               | K.EVITSDLEMLHNLGCLLSIKPQEK.S                                            |  | 2728.13573 | 3 | 1.56E-04 | 0.41 | 3.04  | -     | 463.1    |
| gi 13376539 ref NP_079295.1 | hypothetical protein FLJ13940 [Homo sapiens]                            |  |            |   | 1.58E-04 | 0.68 | 10.17 | 0.00  | 27546.1  |
| AHQ-2-11, 3849              | R.QIFHPQLITGK.E                                                         |  | 1411.63050 | 2 | 1.58E-04 | 0.68 | 2.97  | -     | 259.3    |
| gi 17482508 ref XP_058957.1 | similar to QIL1 [Homo sapiens]                                          |  |            |   | 1.61E-04 | 0.93 | 10.22 | 18.60 | 13087.2  |
| AHQ-2-14-, 5753             | K.GSVAGGAVLYVYDQELLGSPDK.S                                              |  | 2239.46691 | 2 | 1.61E-04 | 0.93 | 4.43  | -     | 902.6    |
| gi 7661728 ref NP_054736.1  | HSPC003 protein [Homo sapiens]                                          |  |            |   | 1.64E-04 | 0.83 | 10.19 | 14.40 | 13507.4  |
| AHQ-2-14-, 6616 - 6617      | K.AQALVQVLEELPTQVAAS                                                    |  | 1932.16358 | 2 | 1.64E-04 | 0.83 | 3.81  | -     | 376.7    |
| gi 15718761 ref NP_004976.2 | c-K-ras2 protein isoform b; Kirsten rat sarcoma-2 viral (v-Ki-ras2) on  |  |            |   | 1.66E-04 | 0.89 | 10.17 | 8.00  | 21424.4  |
| AHQ-2-11, 3661 - 3626       | R.VKDSEDVPM*VLVGNK.C                                                    |  | 1646.88770 | 2 | 1.66E-04 | 0.89 | 3.45  | -     | 1309.8   |
| gi 29150259 ref NP_803875.1 | fibrocystin 1; polycystic kidney and hepatic disease-like 1 [Homo sapi  |  |            |   | 1.67E-04 | 1.68 | 20.18 | 0.70  | 465745.4 |
| AHQ-2-1, 3870               | R.IDGEPCCGQGNPVEK.W                                                     |  | 1688.83981 | 2 | 3.32E-04 | 0.80 | 3.43  | -     | 524.6    |
| AHQ-2-1, 4865               | R.IEYEVFVHAGQAFR.L                                                      |  | 1666.86061 | 2 | 1.67E-04 | 0.88 | 3.05  | -     | 1051.7   |
| gi 4557471 ref NP_001274.1  | adaptor-related protein complex 1, sigma 1 subunit isoform 1; clathrin- |  |            |   | 1.68E-04 | 0.97 | 10.26 | 10.10 | 18732.9  |
| AHQ-2-12, 3593              | K.AIEQADLLQEEDESPR.S                                                    |  | 1843.92692 | 2 | 1.68E-04 | 0.97 | 5.11  | -     | 1693.6   |
| gi 4885235 ref NP_005239.1  | Gardner-Rasheed feline sarcoma viral (v-fgr) oncogene homolog; Gardn    |  |            |   | 1.69E-04 | 0.78 | 10.19 | 3.80  | 59478.3  |
| AHQ-2-7, 5460               | K.TLKPGTMSPKAFLEEAQVMK.L                                                |  | 2207.64277 | 2 | 1.69E-04 | 0.78 | 3.87  | -     | 870.1    |
| gi 24497435 ref NP_002796.4 | proteasome 26S ATPase subunit 5; thyroid receptor interactor 1; protea  |  |            |   | 1.72E-04 | 0.92 | 10.20 | 5.20  | 45625.7  |
| A                           |                                                                         |  |            |   |          |      |       |       |          |



|                             |                                                                          |            |   |            |      |       |       |          |
|-----------------------------|--------------------------------------------------------------------------|------------|---|------------|------|-------|-------|----------|
| AHQ-2-13, 5815 - 5816       | K.DSTLIMQLLR.D                                                           | 1190.43864 | 2 | 1.89E-04   | 0.93 | 3.84  | -     | 1403.7   |
| gi 29730632 ref XP_293786.1 | similar to RAN, member RAS oncogene family [Homo sapiens]                |            |   | 1.90E-04   | 0.52 | 10.10 | 7.70  | 16426.8  |
| AHQ-2-10, 2230              | K.LVLVGGGGTGK.T                                                          | 1016.17355 | 1 | 1.90E-04   | 0.52 | 2.06  | -     | 481.4    |
| gi 5729779 ref NP_006701.1  | COP9 homolog [Homo sapiens]                                              |            |   | 1.92E-04   | 0.84 | 10.18 | 6.70  | 23225.5  |
| AHQ-2-11, 3389 - 3464       | K.GILEQQVQADSTTR.M                                                       | 1562.66596 | 2 | 1.92E-04   | 0.84 | 3.53  | -     | 664.7    |
| gi 4759302 ref NP_004729.1  | VAMP (vesicle-associated membrane protein)-associated protein B and C;   |            |   | 1.96E-04   | 0.51 | 10.15 | 5.80  | 27228.2  |
| AHQ-2-12, 3395 - 3407       | K.QEVLVSLLEPQHELF.F                                                      | 1649.86980 | 2 | 1.96E-04   | 0.51 | 2.90  | -     | 471.9    |
| gi 4758986 ref NP_004209.1  | RAB11B, member RAS oncogene family; RAB11B, member of RAS oncogene fami  |            |   | 2.07E-04   | 0.24 | 10.12 | 3.70  | 24573.4  |
| AHQ-2-10, 3858              | K.NILTEYR.I                                                              | 1022.17979 | 1 | 2.07E-04   | 0.24 | 2.47  | -     | 164.6    |
| gi 18087855 ref NP_542408.1 | dynein light chain 2 [Homo sapiens]                                      |            |   | 2.08E-04   | 0.46 | 10.12 | 7.90  | 10349.8  |
| AHQ-2-14-, 2925 - 2995      | K.DIAAYIK.K                                                              | 793.93045  | 1 | 2.08E-04   | 0.46 | 2.31  | -     | 322.3    |
| gi 4504375 ref NP_000177.1  | H factor 1 (complement); H factor-1 (complement) [Homo sapiens]          |            |   | 2.12E-04   | 0.22 | 10.13 | 1.10  | 139124.7 |
| AHQ-2-7, 3673               | K.SCDIPVFM*NARTK.N                                                       | 1556.78953 | 2 | 2.12E-04   | 0.22 | 2.51  | -     | 306.5    |
| gi 4506675 ref NP_002941.1  | ribophorin I [Homo sapiens]                                              |            |   | 2.21E-04   | 0.87 | 10.19 | 4.10  | 68569.0  |
| AHQ-2-1, 6989 - 7048        | K.THYIVGNLPSYEYLYNLGDQYALK.M                                             | 2999.32033 | 3 | 2.21E-04   | 0.87 | 3.85  | -     | 847.4    |
| gi 13259510 ref NP_004073.2 | dynactin 1 isoform 1; dynactin 1 (p150, Glued (Drosophila) homolog); p   |            |   | 2.42E-04   | 0.87 | 10.17 | 1.00  | 141693.7 |
| AHQ-2-11, 3705              | K.YFTCDEGHGIFVR.Q                                                        | 1602.75184 | 2 | 2.42E-04   | 0.87 | 3.33  | -     | 901.2    |
| gi 27481006 ref XP_117198.2 | hypothetical protein XP_117198 [Homo sapiens]                            |            |   | 2.45E-04   | 0.28 | 20.13 | 0.90  | 251738.6 |
| AHQ-2-4, 3228               | K.EDELQEM*MM*VK.D                                                        | 1284.43954 | 1 | 2.45E-04   | 0.19 | 1.97  | -     | 457.8    |
| AHQ-2-7, 3228               | K.ESKSNKGISK.T                                                           | 1078.20175 | 1 | 2.62E-04   | 0.09 | 2.13  | -     | 310.1    |
| gi 29729329 ref NP_291459.1 | similar to Cofilin, non-muscle isoform (18 kDa phosphoprotein) (P18) [   |            |   | 2.46E-04   | 0.37 | 10.16 | 5.20  | 17172.9  |
| AHQ-2-12, 2261              | K.NIILEEGK.E                                                             | 916.05399  | 1 | 2.46E-04   | 0.67 | 3.14  | -     | 576.5    |
| AHQ-2-13-, 2337             | K.NIILEEGK.E                                                             | 916.05399  | 1 | 2.46E-04   | 0.37 | 2.25  | -     | 417.4    |
| AHQ-2-12, 2253 - 2393       | K.NIILEEGK.E                                                             | 916.05399  | 1 | 2.46E-04   | 0.34 | 2.20  | -     | 378.7    |
| gi 4758476 ref NP_004801.1  | GRB2-related adaptor protein 2; growth factor receptor-bound protein 2-  |            |   | 2.50E-04   | 0.42 | 10.15 | 3.00  | 37909.9  |
| AHQ-2-11, 2117              | R.HQAEINLMGK.E                                                           | 1141.32617 | 1 | 2.50E-04   | 0.42 | 2.44  | -     | 424.7    |
| gi 5453629 ref NP_006391.1  | dynactin 2; dynactin complex 50 kD subunit; dynamitin; 50 kD dynein-ass  |            |   | 2.52E-04   | 1.61 | 20.23 | 8.10  | 44819.3  |
| AHQ-2-12, 5310              | K.LLGPDAAINLTPDGALAK.R                                                   | 1866.10514 | 2 | 2.52E-04   | 0.68 | 3.03  | -     | 530.0    |
| AHQ-2-9, 4146               | R.LLHEVEQLTTEVEK.I                                                       | 1668.86989 | 2 | 2.52E-04   | 0.93 | 4.21  | -     | 1146.5   |
| gi 4758032 ref NP_004757.1  | coatamer protein complex, subunit beta 2 (beta prime); coatamer binding  |            |   | 2.55E-04   | 0.92 | 10.23 | 2.10  | 102486.5 |
| AHQ-2-5, 6481 - 6557        | K.AAESLADPTYEYENLFPGLK.E                                                 | 2066.25322 | 2 | 2.55E-04   | 0.92 | 4.61  | -     | 562.8    |
| gi 8923932 ref NP_060935.1  | uncharacterized hematopoietic stem/progenitor cells protein MDS030 [Hom  |            |   | 2.62E-04   | 0.92 | 10.19 | 8.80  | 17229.3  |
| AHQ-2-12, 2710              | R.MKGEAEDILETEK.S                                                        | 1493.66212 | 2 | 2.62E-04   | 0.92 | 3.86  | -     | 912.1    |
| gi 4507797 ref NP_003341.1  | ubiquitin-conjugating enzyme E2 variant 2; 1 alpha,25-dihydroxyvitamin   |            |   | 2.72E-04   | 0.92 | 10.19 | 6.90  | 16362.7  |
| AHQ-2-12, 2990              | R.LLEEELEGK.G                                                            | 1188.30974 | 2 | 2.72E-04   | 0.92 | 3.89  | -     | 1153.4   |
| gi 4757818 ref NP_004879.1  | ATPase, H+ transporting, lysosomal, V1 subunit G isoform 1; vacuolar H ( |            |   | 2.80E-04   | 0.93 | 10.20 | 9.30  | 13757.4  |
| AHQ-2-13-, 2769             | K.EEAQAEIEQYR.L                                                          | 1366.41548 | 2 | 2.80E-04   | 0.93 | 4.03  | -     | 1057.7   |
| gi 29734916 ref XP_294215.1 | similar to argininosuccinate synthetase [Homo sapiens]                   |            |   | 2.81E-04   | 0.68 | 10.17 | 3.80  | 48038.6  |
| AHQ-2-9, 5263               | K.EQGYDVTAYLANIGQK.E                                                     | 1770.92077 | 2 | 2.81E-04   | 0.68 | 3.45  | -     | 562.6    |
| gi 30152971 ref XP_301494.1 | similar to RIKEN cDNA C730036D15 [Homo sapiens]                          |            |   | 2.81E-04   | 0.73 | 10.18 | 10.70 | 31692.4  |
| AHQ-2-8, 5815 - 5888        | R.PISTSSFFSQKAATLVTPTKGLADKCLDMK.A                                       | 3346.86046 | 3 | 2.81E-04   | 0.73 | 3.65  | -     | 646.8    |
| gi 4505881 ref NP_000292.1  | plasminogen [Homo sapiens]                                               |            |   | 3.02E-04   | 0.89 | 10.20 | 2.10  | 90568.6  |
| AHQ-2-4, 4078               | R.NPDDGVGGPWCYTTNPR.K                                                    | 1907.99768 | 2 | 3.02E-04   | 0.89 | 4.07  | -     | 667.4    |
| gi 14165439 ref NP_002131.2 | heterogeneous nuclear ribonucleoprotein K isoform a; dC-stretch bindin   |            |   | 3.04E-04   | 0.74 | 10.17 | 4.10  | 51029.7  |
| AHQ-2-14, 6165              | R.GSYGDGLGPIITQVTIPK.D                                                   | 1918.18004 | 2 | 3.04E-04   | 0.74 | 3.46  | -     | 402.9    |
| gi 30155919 ref XP_292814.2 | similar to zinc finger protein 433 [Homo sapiens]                        |            |   | 3.11E-04   | 0.47 | 10.14 | 1.60  | 108732.0 |
| AHQ-2-14-, 4753 - 4829      | K.KCQCGKGFNPLPSIR.Y                                                      | 1755.01259 | 2 | 3.11E-04   | 0.47 | 2.87  | -     | 623.6    |
| gi 4505127 ref NP_000520.1  | melanocortin 2 receptor; Melanocortin-2 receptor (ACTH receptor); melan  |            |   | 3.21E-04   | 0.35 | 10.13 | 3.40  | 33926.5  |
| AHQ-2-12, 5187 - 5193       | K.ILENILILR.N                                                            | 1210.53432 | 1 | 3.21E-04   | 0.35 | 2.58  | -     | 247.1    |
| gi 29731000 ref XP_291064.1 | similar to KIAA0540 protein [Homo sapiens]                               |            |   | 3.34E-04   | 0.91 | 10.20 | 1.40  | 224374.8 |
| AHQ-2-1, 6377               | R.VLNTSSLESATDEAGSPLAAAAAAA.A.C                                          | 2716.89684 | 3 | 3.34E-04   | 0.91 | 4.05  | -     | 1434.8   |
| gi 4506427 ref NP_002880.1  | retinoic acid receptor responder (tazarotene induced) 2 [Homo sapiens]   |            |   | 3.39E-04   | 0.32 | 10.13 | 7.40  | 18617.5  |
| AHQ-2-12, 3402              | R.LVHCPPIETQVLR.E                                                        | 1466.73089 | 1 | 3.39E-04   | 0.32 | 2.42  | -     | 347.6    |
| gi 4507657 ref NP_003282.1  | tripeptidyl peptidase II [Homo sapiens]                                  |            |   | 3.40E-04   | 1.86 | 20.23 | 4.00  | 138447.8 |
| AHQ-2-3, 4908               | R.DPVQVAAPSDHGVGIEVPFENTENSEK.I                                          | 2964.14642 | 3 | 3.40E-04   | 0.91 | 4.25  | -     | 1038.6   |
| AHQ-2-3, 4676               | K.IVDIITGGSDVNTATEVPEFK.D                                                | 2259.45273 | 2 | 3.40E-04   | 0.94 | 4.60  | -     | 979.8    |
| gi 4506311 ref NP_002831.1  | protein tyrosine phosphatase, receptor type, F isoform 1 precursor; pro  |            |   | 3.46E-04   | 0.46 | 10.15 | 2.00  | 211842.5 |
| AHQ-2-7, 6463               | R.TGEQAPSSPPRRVQARMLASASTMLVQWPEPEEINGLVR.G                              | 4204.74426 | 3 | 3.46E-04   | 0.46 | 3.08  | -     | 264.6    |
| gi 10835242 ref NP_006249.1 | protein kinase, cGMP-dependent, type I; Protein kinase, cGMP-dependent   |            |   | 3.50E-04   | 0.93 | 10.20 | 2.50  | 77803.3  |
| AHQ-2-6, 6797               | K.LSDFNIDTLGVGGFGR.V                                                     | 1781.98992 | 2 | 3.50E-04   | 0.93 | 3.93  | -     | 958.6    |
| gi 13376689 ref NP_079390.1 | hypothetical protein FLJ13615 [Homo sapiens]                             |            |   | 3.63E-04   | 0.22 | 10.10 | 2.30  | 67925.5  |
| AHQ-2-9, 4382               | R.LDLKKNSNGSR.K                                                          | 1447.62278 | 1 | 3.63E-04   | 0.22 | 2.05  | -     | 537.0    |
| gi 28373103 ref NP_005164.2 | sarco/endoplasmic reticulum Ca2+ -ATPase isoform a; ATPase, Ca(2+)-tra   |            |   | 3.67E-04   | 0.84 | 10.17 | 2.10  | 109255.5 |
| AHQ-2-11, 5961              | R.DIVPGDIVEVAVGDKVPADLR.L                                                | 2178.47138 | 2 | 3.67E-04   | 0.84 | 3.37  | -     | 658.0    |
| gi 10835121 ref NP_000289.1 | pyruvate kinase, liver and RBC; Pyruvate kinase, liver and RBC type [H   |            |   | 3.72E-04   | 0.82 | 10.15 | 1.90  | 61829.8  |
| AHQ-2-7, 3393 - 3417        | R.GDLGIEIPEAK.V                                                          | 1142.28420 | 2 | 3.72E-04   | 0.82 | 2.95  | -     | 870.9    |
| AHQ-2-7, 3389 - 3391        | R.GDLGIEIPEAK.V                                                          | 1142.28420 | 1 | 3.72E-04   | 0.50 | 2.28  | -     | 565.8    |
| gi 4507795 ref NP_003340.1  | ubiquitin-conjugating enzyme E2 variant 1 isoform b; DNA-binding protei  |            |   | 3.75E-04   | 0.65 | 10.15 | 4.10  | 25796.6  |
| AHQ-2-12, 3362 - 3363       | K.YPEAPPFVR.F                                                            | 1076.22914 | 2 | 3.75E-04   | 0.65 | 2.95  | -     | 418.4    |
| gi 13375985 ref NP_078975.1 | hypothetical protein FLJ14007 [Homo sapiens]                             |            |   | 3.77E-04   | 0.23 | 10.12 | 4.90  | 30753.1  |
| AHQ-2-9, 4392               | K.RWVGAKNSETA.A.K                                                        | 1447.62447 | 1 | 3.77E-04   | 0.23 | 2.36  | -     | 390.6    |
| gi 18254478 ref NP_543152.1 | dual specificity phosphatase 19; protein phosphatase; stress-activated   |            |   | 3.88E-04   | 0.01 | 10.13 | 5.50  | 24194.3  |
| AHQ-2-7, 4943               | R.KQCRVTTTLTGK.K                                                         | 1394.62307 | 1 | 3.88E-04   | 0.01 | 1.83  | -     | 183.8    |
| gi 21614520 ref NP_000393.2 | glucose-6-phosphate dehydrogenase [Homo sapiens]                         |            |   | 3.93E-04   | 0.53 | 10.13 | 3.10  | 59257.4  |
| AHQ-2-7, 6897 - 6911        | R.LFYLALPPTVYEAATK.N                                                     | 1826.16735 | 2 | 3.93E-04   | 0.53 | 2.57  | -     | 361.4    |
| gi 4506381 ref NP_002863.1  | ras-related C3 botulinum toxin substrate 2; Ras-related C3 botulinum to  |            |   | 3.97E-04   | 1.44 | 20.20 | 12.00 | 21428.7  |
| AHQ-2-11, 2088              | R.AVLCPQPTR.Q                                                            | 1043.22229 | 2 | 3.97E-04   | 0.64 | 2.81  | -     | 517.4    |
| AHQ-2-11, 2700 - 2705       | R.HHCPSTPIILVGTK.L                                                       | 1561.83067 | 2 | 3.99E-04   | 0.80 | 2.96  | -     | 571.6    |
| gi 4507879 ref NP_003365.1  | voltage-dependent anion channel 1 [Homo sapiens]                         |            |   | 4.01E-04   | 0.36 | 10.14 | 7.10  | 30772.3  |
| AHQ-2-9, 4579               | K.VNNSLILGLVYQTLKPGIK.L                                                  | 2104.43564 | 2 | 4.01E-04   | 0.36 | 2.74  | -     | 298.9    |
| gi 4557797 ref NP_000260.1  | non-metastatic cells 1 protein [Homo sapiens]                            |            |   | 4.02E-04   | 0.79 | 10.17 | 0.00  | 17148.6  |
| AHQ-2-12, 2893              | R.TFIAIKPDGVQR.G                                                         | 1345.57205 | 2 | 4.02E-04   | 0.79 | 3.23  | -     | 481.7    |
| AHQ-2-12, 2882 - 2950       | R.TFIAIKPDGVQR.G                                                         | 1345.57205 | 2 | 4.02E-04   | 0.85 | 3.31  | -     | 722.2    |
| gi 4827050 ref NP_005142.1  | ubiquitin specific protease 14 [Homo sapiens]                            |            |   | 4.04E-04   | 1.66 | 20.18 | 6.30  | 56068.8  |
| AHQ-2-7, 4001               | K.AQLFALTGVQPAR.Q                                                        | 1372.59750 | 2 | 4.04E-04   | 0.85 | 3.23  | -     | 1045.2   |
| AHQ-2-7, 7311               | K.FPLMLDMYELCTPELQEK.M                                                   | 2259.64823 | 2 | 4.04E-04   | 0.81 | 3.51  | -     | 642.5    |
| gi 24308201 ref NP_065392.1 | chromosome 20 open reading frame 3; chromosome 20open reading frame 3    |            |   | 4.20E-04   | 0.79 | 10.14 | 2.90  | 46480.1  |
| AHQ-2-8, 2995               | K.LLLSSETPIEGK.N                                                         | 1287.48445 | 2 | 4.20E-04   | 0.79 | 2.79  | -     | 692.6    |
| gi 28461290 ref NP_443728.2 | TRALPUSH; no opposite paired repeat protein [Homo sapiens]               |            |   | 4.31E-04   | 0.42 | 10.15 | 0.40  | 240073.5 |
| AHQ-2-7, 3464               | K.KKPQVNAK.D                                                             | 913.09970  | 1 | 4.31E-04   | 0.42 | 2.82  | -     | 393.9    |
| gi 4506237 ref NP_002809.1  | proteasome (prosome, macropain) activator subunit 2 (PA28 beta); Protea  |            |   | 4.47E-04   | 0.94 | 10.22 | 6.70  | 27348.4  |
| AHQ-2-10, 6618              | K.VLSLLALVKPEVWTLK.E                                                     | 1810.25573 | 2 | 4.47E-04   | 0.94 | 4.49  | -     | 946.4    |
| gi 4557241 ref NP_001095.1  | skeletal muscle specific actinin, alpha 3 [Homo sapiens]                 |            |   | 4.62E-04   | 0.54 | 10.15 | 0.90  | 103293.7 |
| AHQ-2-5, 2587               | K.ALDFIAK.G                                                              | 865.00867  | 1 | 4.62E-04   | 0.45 | 2.67  | -     | 690.8    |
| AHQ-2-5, 2588               | K.ALDFIAK.G                                                              | 865.00867  | 2 | 4.62E-04   | 0.86 | 3.04  | -     | 565.0    |
| AHQ-2-11, 2834              | K.ALDFIAK.G                                                              | 865.00867  | 1 | 4.62E-04   | 0.54 | 2.40  | -     | 669.1    |
| AHQ-2-5, 2580 - 2651        | K.ALDFIAK.G                                                              | 865.00867  | 1 | 4.62E-04   | 0.36 | 1.81  | -     | 792.0    |
| gi 5729980 ref NP_006547.1  | phosphomevalonate kinase [Homo sapiens]                                  |            |   | 4.64E-04   | 1.36 | 20.21 | 13.50 | 21994.8  |
| AHQ-2-11, 2634 - 2681       | K.EQYAEHGLNFQR.L                                                         | 1620.70720 | 2 | 4.89E-04   | 0.45 | 2.76  | -     | 275.1    |
| AHQ-2-11, 6629              | R.LEEQLNIEFIR.S                                                          | 1646.86592 | 2 | 4.64E-04   | 0.90 | 4.16  | -     | 897.8    |
| gi 4505237 ref NP_002427.1  | palmitoylated membrane protein 1; membrane protein, palmitoylated 1 (55  |            |   | 4.75E-04   | 0.40 | 10.19 | 2.10  | 52296.2  |
| AHQ-2-9, 1936               | K.NALLSQNPEK.F                                                           | 1114.23409 | 1 | 4.75E-04</ |      |       |       |          |

|                             |                                                                         |            |   |          |      |       |       |          |
|-----------------------------|-------------------------------------------------------------------------|------------|---|----------|------|-------|-------|----------|
| AHQ-2-12, 6535 - 6602       | R.KVVILSQDRFYK.V                                                        | 1496.77853 | 1 | 5.31E-04 | 0.17 | 2.20  | -     | 334.1    |
| gi 22065231 ref XP_035037.2 | similar to MEGF7 [Homo sapiens]                                         |            |   | 5.33E-04 | 0.46 | 10.15 | 2.10  | 171294.3 |
| AHQ-2-9, 5430               | R.TVLWENLDRPRDIVVEPM*GGYMYWTDWGASPK.I                                   | 3913.43248 | 3 | 5.33E-04 | 0.46 | 3.04  | -     | 240.1    |
| gi 21361687 ref NP_060521.2 | hypothetical protein FLJ10300 [Homo sapiens]                            |            |   | 5.44E-04 | 0.25 | 10.13 | 2.70  | 60917.0  |
| AHQ-2-4, 3705 - 3709        | K.RRWAAPVEDECNRLR.L                                                     | 1930.14076 | 2 | 5.44E-04 | 0.25 | 2.62  | -     | 366.7    |
| gi 4501889 ref NP_001806.1  | actin, gamma 2 propeptide; actin, alpha-3 [Homo sapiens]                |            |   | 5.55E-04 | 0.28 | 10.15 | 5.60  | 41876.7  |
| AHQ-2-8, 5307 - 5375        | K.DLYANNVLSGGTMM*YPGIADR.M                                              | 2245.45502 | 2 | 5.55E-04 | 0.28 | 2.78  | -     | 282.4    |
| gi 4506985 ref NP_003043.1  | solute carrier family 34 (sodium phosphate), member 1; solute carrier f |            |   | 5.56E-04 | 0.19 | 10.09 | 1.90  | 68937.5  |
| AHQ-2-10, 5742              | K.MLNLSLKGQVAK.V                                                        | 1302.61212 | 1 | 5.56E-04 | 0.19 | 1.82  | -     | 460.2    |
| gi 17486695 ref XP_066916.1 | similar to cytosolic malate dehydrogenase [Homo sapiens]                |            |   | 5.57E-04 | 0.22 | 10.12 | 4.40  | 17725.8  |
| AHQ-2-10, 2462              | K.YVIAADK.E                                                             | 779.90377  | 1 | 5.57E-04 | 0.22 | 2.03  | -     | 395.9    |
| gi 21618342 ref NP_003143.2 | signal transducer and activator of transcription 5A; signal transducer  |            |   | 5.60E-04 | 0.74 | 10.14 | 1.50  | 90646.4  |
| AHQ-2-5, 3479               | K.HLQINQTFEELR.L                                                        | 1528.69435 | 2 | 5.60E-04 | 0.74 | 2.78  | -     | 329.0    |
| gi 15100168 ref NP_150094.1 | CUB and Sushi multiple domains 1 [Homo sapiens]                         |            |   | 5.69E-04 | 0.43 | 10.16 | 0.70  | 382827.5 |
| AHQ-2-2, 3221 - 3262        | R.LLSLSGSHSGETLPLATSNQILLR.F                                            | 2595.93384 | 3 | 5.69E-04 | 0.43 | 3.23  | -     | 294.6    |
| gi 20270259 ref NP_620061.1 | phosphoglycerate kinase 2; phosphoglycerate kinase 1, pseudogene 2 [Ho  |            |   | 5.69E-04 | 0.25 | 10.14 | 1.90  | 44895.0  |
| AHQ-2-8, 2870               | R.VDFNVPMK.K                                                            | 950.13707  | 1 | 5.69E-04 | 0.25 | 1.98  | -     | 393.3    |
| gi 6715568 ref NP_000935.1  | protein phosphatase 3 (formerly 2B), catalytic subunit, alpha isoform ( |            |   | 5.71E-04 | 1.47 | 20.17 | 8.30  | 58687.5  |
| AHQ-2-7, 7356               | R.FKEPPAYGPMCDILWSDPLEDFGNEK.T                                          | 3058.38651 | 3 | 5.99E-04 | 0.67 | 3.34  | -     | 814.2    |
| AHQ-2-7, 4657               | K.GLTPGTMLPSGVLSSGK.Q                                                   | 1572.85198 | 2 | 5.71E-04 | 0.80 | 3.29  | -     | 552.7    |
| gi 6005717 ref NP_009031.1  | ATP synthase, H+ transporting, mitochondrial F0 complex, subunit e; ATP |            |   | 5.96E-04 | 0.18 | 10.13 | 14.50 | 7933.1   |
| AHQ-2-14-, 2919             | R.ELAEDDSILK                                                            | 1133.23094 | 1 | 5.96E-04 | 0.18 | 2.34  | -     | 164.3    |
| gi 8393120 ref NP_059139.1  | polymerase (DNA directed), epsilon 3 (p17 subunit); histone fold protei |            |   | 6.18E-04 | 0.42 | 10.15 | 12.20 | 16859.5  |
| AHQ-2-10, 4219              | K.TLNASDVLISAM*EEM*EFQR.F                                               | 2104.30511 | 3 | 6.18E-04 | 0.42 | 3.09  | -     | 381.8    |
| gi 4507303 ref NP_001045.1  | sulfotransferase family, cytosolic, 1A, phenol-preferring, member 2; th |            |   | 6.30E-04 | 0.83 | 10.20 | 8.80  | 34310.4  |
| AHQ-2-9, 6858 - 6868        | K.YFAEALGPLQSFQARPDLLISTYPK.S                                           | 2942.31346 | 2 | 6.30E-04 | 0.83 | 3.92  | -     | 376.8    |
| gi 4504111 ref NP_002077.1  | growth factor receptor-bound protein 2 [Homo sapiens]                   |            |   | 6.32E-04 | 0.11 | 10.15 | 6.50  | 25206.2  |
| AHQ-2-10, 3279              | R.ESESAPGDFSLSVK.F                                                      | 1453.53305 | 1 | 6.32E-04 | 0.11 | 2.24  | -     | 137.2    |
| gi 4503101 ref NP_001312.1  | cysteine and glycine-rich protein 2; LIM domain only 5, smooth muscle;  |            |   | 6.34E-04 | 0.77 | 10.18 | 9.30  | 20953.8  |
| AHQ-2-13, 3377              | K.GYGGQGGATLNM*DRGER.F                                                  | 1919.02542 | 2 | 6.34E-04 | 0.77 | 3.12  | -     | 636.7    |
| gi 4502501 ref NP_000583.1  | complement component 4B proprotein [Homo sapiens]                       |            |   | 6.42E-04 | 0.01 | 10.13 | 0.50  | 192795.6 |
| AHQ-2-8, 4600 - 4605        | K.KSCGLHQLLR.G                                                          | 1085.26240 | 1 | 6.42E-04 | 0.01 | 1.91  | -     | 50.3     |
| gi 13775186 ref NP_112567.1 | ring finger protein 17 isoform long [Homo sapiens]                      |            |   | 6.61E-04 | 0.67 | 10.16 | 1.70  | 73736.0  |
| AHQ-2-14-, 5433             | K.TADQLTTGLER.S                                                         | 1205.30039 | 2 | 6.61E-04 | 0.67 | 3.10  | -     | 768.2    |
| gi 21359960 ref NP_112186.2 | hypothetical protein PRTD-NY3 [Homo sapiens]                            |            |   | 6.84E-04 | 0.13 | 10.13 | 2.70  | 74412.9  |
| AHQ-2-14, 4952              | K.GVM*LSHDNITWIAGAVTK.D                                                 | 1930.21753 | 2 | 6.84E-04 | 0.13 | 2.52  | -     | 134.0    |
| gi 19424120 ref NP_061846.2 | dolichyl-phosphate mannosyltransferase polypeptide 3 isoform 1; prosti  |            |   | 6.92E-04 | 0.80 | 10.16 | 8.20  | 13276.6  |
| AHQ-2-14-, 2164             | R.ELQSQIQEAR.A                                                          | 1202.29973 | 2 | 6.92E-04 | 0.80 | 3.15  | -     | 794.1    |
| gi 29743324 ref XP_293276.1 | similar to Heat shock 27 kDa protein (HSP 27) (Stress-responsive prot   |            |   | 6.98E-04 | 0.94 | 10.33 | 16.00 | 21244.7  |
| AHQ-2-14-, 5285 - 5361      | R.KYTLPPGVDPKTKVSSLSPEGLTVEAPM*PK.L                                     | 3244.70168 | 3 | 6.98E-04 | 0.94 | 6.53  | -     | 1267.5   |
| gi 5453545 ref NP_006454.1  | associated molecule with the SH3 domain of STAM [Homo sapiens]          |            |   | 7.02E-04 | 0.16 | 10.14 | 6.40  | 48076.6  |
| AHQ-2-13, 6317              | R.SLKPGLSNSSEIPTIDGLRHVVVPGR.L                                          | 2801.19445 | 2 | 7.02E-04 | 0.16 | 2.73  | -     | 140.8    |
| gi 4502879 ref NP_003268.1  | transmembrane protein claudin 5; androgen withdrawal and apoptosis indu |            |   | 7.06E-04 | 0.83 | 10.13 | 5.50  | 23147.3  |
| AHQ-2-11, 3210              | R.EFYDPSVPVVSQK.Y                                                       | 1396.52632 | 2 | 7.06E-04 | 0.83 | 2.69  | -     | 748.6    |
| gi 23065535 ref NP_690007.1 | hypoxia-inducible factor-3 alpha isoform a; inhibitory PAS domain prot  |            |   | 7.10E-04 | 0.28 | 10.13 | 1.90  | 72404.1  |
| AHQ-2-12, 2483              | -MDWQDDHRTTELR.K                                                        | 1675.80781 | 2 | 7.10E-04 | 0.28 | 2.69  | -     | 319.7    |
| gi 11321581 ref NP_003840.1 | succinate-CoA ligase, GDP-forming, alpha subunit [Homo sapiens]         |            |   | 7.22E-04 | 0.88 | 10.16 | 4.80  | 35059.2  |
| AHQ-2-8, 3711               | R.LIGNPCPGVINGPECK.I                                                    | 1727.98391 | 2 | 7.22E-04 | 0.88 | 3.21  | -     | 787.4    |
| gi 30150448 ref XP_293066.2 | similar to Stress-70 protein, mitochondrial precursor (75 kDa glucose   |            |   | 7.41E-04 | 0.95 | 10.18 | 2.90  | 58788.2  |
| AHQ-2-6, 4493               | R.VINEPTAAALYGLDK.S                                                     | 1646.86592 | 2 | 7.41E-04 | 0.95 | 3.63  | -     | 1402.7   |
| gi 21361621 ref NP_002624.2 | phosphoglucomutase 1 [Homo sapiens]                                     |            |   | 7.53E-04 | 0.91 | 10.19 | 4.40  | 61448.7  |
| AHQ-2-13-, 7105             | K.VFQSSANYANFIQSIISTVEPAQR.Q                                            | 2801.06026 | 3 | 7.53E-04 | 0.91 | 3.79  | -     | 1308.3   |
| gi 29742841 ref XP_294103.1 | similar to 60S ribosomal protein L35 [Homo sapiens]                     |            |   | 7.61E-04 | 0.85 | 10.14 | 7.40  | 11374.4  |
| AHQ-2-5, 1875               | K.TQENLR.K                                                              | 888.99186  | 2 | 7.61E-04 | 0.85 | 2.86  | -     | 887.8    |
| gi 4506243 ref NP_002810.1  | polypyrimidine tract-binding protein 1 isoform a; RNA-binding protein;  |            |   | 7.66E-04 | 0.85 | 10.20 | 4.10  | 59632.7  |
| AHQ-2-10, 6160 - 6231       | R.IAIPGLAGAGNSVLLVSNLNPFR.V                                             | 2276.62142 | 2 | 7.66E-04 | 0.85 | 3.90  | -     | 434.0    |
| gi 17440554 ref NP_067503.1 | similar to peptidyl-Pro cis trans isomerase [Homo sapiens]              |            |   | 8.00E-04 | 0.80 | 10.16 | 7.90  | 18110.6  |
| AHQ-2-12, 2817              | R.VKEGM*DIVAEAMER.F                                                     | 1523.75807 | 2 | 8.00E-04 | 0.80 | 3.14  | -     | 727.3    |
| gi 6912324 ref NP_036266.1  | leiominin 1 (smooth muscle); thyroid and eye muscle autoantigen D1 (64k |            |   | 8.14E-04 | 0.46 | 10.17 | 3.00  | 63737.1  |
| AHQ-2-14, 6382 - 6413       | K.GEKKDLLEVPKAGAVAK.G                                                   | 1754.06430 | 2 | 8.14E-04 | 0.46 | 3.34  | -     | 459.0    |
| gi 21450838 ref NP_659501.1 | hypothetical protein MGC2793 [Homo sapiens]                             |            |   | 8.19E-04 | 0.24 | 10.12 | 2.50  | 41506.7  |
| AHQ-2-10, 2702 - 2768       | R.EIQITLKK.D                                                            | 1030.24336 | 1 | 8.19E-04 | 0.24 | 2.39  | -     | 142.1    |
| gi 29734552 ref NP_291269.1 | similar to KIAA1875 protein [Homo sapiens]                              |            |   | 8.33E-04 | 0.50 | 10.14 | 1.70  | 93320.7  |
| AHQ-2-13-, 4786             | R.M*LAPKRSWGTPQLR.L                                                     | 1657.96500 | 2 | 8.33E-04 | 0.50 | 2.75  | -     | 659.5    |
| gi 4502643 ref NP_001753.1  | chaperonin containing TCP1, subunit 6A (zeta 1); chaperonin containing  |            |   | 8.51E-04 | 0.42 | 10.20 | 3.00  | 58023.9  |
| AHQ-2-7, 4757 - 4803        | K.VLAQNSGFDLQETLVK.I                                                    | 1762.98491 | 2 | 8.51E-04 | 0.42 | 2.55  | -     | 554.8    |
| gi 29743107 ref XP_297088.1 | hypothetical protein XP_297088 [Homo sapiens]                           |            |   | 8.60E-04 | 0.18 | 10.11 | 1.90  | 59382.3  |
| AHQ-2-11, 3009 - 3082       | R.HSTQNKVDTR.K                                                          | 1186.26040 | 1 | 8.60E-04 | 0.18 | 2.15  | -     | 275.6    |
| gi 29732368 ref XP_297653.1 | hypothetical protein XP_297653 [Homo sapiens]                           |            |   | 8.63E-04 | 0.20 | 10.15 | 2.40  | 79792.2  |
| AHQ-2-2, 4122               | R.QGAM*TRQLQGQEEETVM*K.R                                                | 1968.20280 | 2 | 8.63E-04 | 0.20 | 2.53  | -     | 369.1    |
| gi 29730163 ref XP_297463.1 | hypothetical protein XP_297463 [Homo sapiens]                           |            |   | 8.72E-04 | 0.31 | 10.09 | 5.10  | 21238.0  |
| AHQ-2-9, 5026 - 5027        | R.M*RDWEELLER.A                                                         | 1393.55068 | 1 | 8.72E-04 | 0.31 | 1.82  | -     | 604.0    |
| gi 6912532 ref NP_036473.1  | G protein-binding protein CRFG; GTP-binding protein [Homo sapiens] [MAS |            |   | 8.97E-04 | 0.55 | 10.18 | 3.30  | 73832.8  |
| AHQ-2-5, 4023 - 4031        | K.VKFTQQNYHDRLSQILTFDPK.L                                               | 2579.89466 | 3 | 8.97E-04 | 0.55 | 3.67  | -     | 445.6    |
| gi 19923178 ref NP_003669.2 | chromosome 22 open reading frame 19; gene from NF2/meningioma region o  |            |   | 8.98E-04 | 0.78 | 10.15 | 2.30  | 78521.4  |
| AHQ-2-14-, 6855             | R.ECLSNKEKILKEIEVK.K                                                    | 1962.29756 | 2 | 8.98E-04 | 0.78 | 2.93  | -     | 841.0    |
| gi 17439599 ref XP_067423.1 | similar to destrin - pig [Homo sapiens]                                 |            |   | 9.16E-04 | 0.77 | 10.12 | 4.40  | 19819.2  |
| AHQ-2-12, 2301              | K.CIIVEEGK.E                                                            | 949.10404  | 1 | 9.16E-04 | 0.77 | 2.49  | -     | 884.7    |
| gi 5174427 ref NP_006085.1  | deleted in liver cancer 1; ortholog of mouse Arhgap7; START domain cont |            |   | 9.22E-04 | 0.18 | 10.11 | 0.90  | 122815.9 |
| AHQ-2-9, 2675               | K.ELSSFSFSMK.G                                                          | 1163.32538 | 1 | 9.22E-04 | 0.18 | 2.25  | -     | 212.3    |
| gi 7661602 ref NP_056230.1  | DKFZP564B167 protein [Homo sapiens]                                     |            |   | 9.31E-04 | 0.77 | 10.17 | 9.40  | 14278.8  |
| AHQ-2-13, 2233              | K.LRRLYNHPAGPR.T                                                        | 1391.60574 | 2 | 9.31E-04 | 0.77 | 2.95  | -     | 602.0    |
| gi 5174525 ref NP_005900.1  | microtubule-associated protein 1B isoform 1 [Homo sapiens]              |            |   | 9.39E-04 | 0.35 | 10.13 | 0.60  | 270617.4 |
| AHQ-2-4, 3946 - 3986        | K.ESVEKAAKPTTTPEVK.A                                                    | 1715.92656 | 2 | 9.39E-04 | 0.35 | 2.62  | -     | 551.8    |
| gi 4506801 ref NP_003460.1  | secretogranin II precursor; Chromogranin C (secretogranin II); secretin |            |   | 9.62E-04 | 0.15 | 10.14 | 2.80  | 70868.2  |
| AHQ-2-8, 4239 - 4310        | R.DSKENIGKNEQINDEM*K.R                                                  | 2009.14194 | 2 | 9.62E-04 | 0.15 | 2.78  | -     | 198.3    |
| gi 4503179 ref NP_003602.1  | oral-facial-digital syndrome 1; chromosome X open reading frame 5; oral |            |   | 9.75E-04 | 0.17 | 10.14 | 0.00  | 116670.5 |
| AHQ-2-5, 5961 - 6037        | K.KEELNQSVMR.V                                                          | 1217.31440 | 1 | 9.75E-04 | 0.17 | 2.11  | -     | 301.0    |
| gi 18079216 ref NP_065815.1 | CASK-interacting protein 1 [Homo sapiens]                               |            |   | 9.83E-04 | 0.15 | 10.16 | 1.30  | 149812.6 |
| AHQ-2-6, 7191 - 7198        | R.PGSPQALGGPHGAPATAK.V                                                  | 1711.90292 | 2 | 9.83E-04 | 0.15 | 2.57  | -     | 328.7    |
| gi 18379346 ref NP_055793.1 | VPS10 domain receptor protein SORCS 3 [Homo sapiens]                    |            |   | 9.84E-04 | 0.07 | 10.12 | 1.00  | 135754.0 |
| AHQ-2-6, 4781               | R.GIPAPAKLGGAR.R                                                        | 1108.31905 | 1 | 9.84E-04 | 0.07 | 1.84  | -     | 227.9    |
| gi 13325064 ref NP_001399.1 | cadherin EGF LAG seven-pass G-type receptor 2; EGF-like-domain, multi   |            |   | 9.93E-04 | 0.11 | 10.13 | 0.70  | 317449.8 |
| AHQ-2-9, 5190 - 5267        | R.GNELSLVLLNASTGELKLSR.A                                                | 2115.41683 | 2 | 9.93E-04 | 0.11 | 2.62  | -     | 216.8    |

| Reference                 | Peptide                                   | MH+        | z | P (pro)  | Sf    | Score  | Coverage | MW       |
|---------------------------|-------------------------------------------|------------|---|----------|-------|--------|----------|----------|
| File, Scan(s)             |                                           |            |   | P (pep)  | Xc    |        |          | Sp       |
| gi4507485 ref NP_003237.1 | thrombospondin 1 [Homo sapiens]           |            |   | 1.00E-30 | 29.99 | 350.33 | 30.40    | 129351.8 |
| AHQ-3-2, 6755 - 6778      | R.AQLYIDCEKMEKNAELDVIQSVFTR.D             | 2972.33983 | 3 | 6.21E-06 | 0.93  | 5.07   | -        | 930.7    |
| AHQ-3-10, 5799            | R.AQLYIDCEKMEKNAELDVIQSVFTR.D             | 2972.33983 | 2 | 4.41E-05 | 0.80  | 3.55   | -        | 506.8    |
| AHQ-3-1, 4040 - 4068      | R.CENTDPGYNCLPCPPR.F                      | 1954.10800 | 2 | 1.85E-04 | 0.87  | 3.65   | -        | 547.4    |
| AHQ-3-2, 4097 - 4150      | R.CENTDPGYNCLPCPPR.F                      | 1954.10800 | 2 | 6.98E-04 | 0.73  | 3.22   | -        | 345.3    |
| AHQ-3-5, 3909 - 3917      | R.CENTDPGYNCLPCPPR.F                      | 1954.10800 | 2 | 1.74E-08 | 0.87  | 3.52   | -        | 545.6    |
| AHQ-3-4, 4017             | R.CENTDPGYNCLPCPPR.F                      | 1954.10800 | 2 | 1.43E-04 | 0.86  | 3.65   | -        | 521.0    |
| AHQ-3-2, 4279             | R.CENTDPGYNCLPCPPR.F                      | 1954.10800 | 2 | 1.27E-06 | 0.89  | 3.44   | -        | 648.3    |
| AHQ-3-1, 3940             | R.CENTDPGYNCLPCPPR.F                      | 1954.10800 | 2 | 2.23E-09 | 0.93  | 4.38   | -        | 758.6    |
| AHQ-3-2, 3394 - 3395      | K.CNYLGHYSDDPM*YR.C                       | 1693.84162 | 2 | 6.93E-05 | 0.93  | 3.72   | -        | 793.6    |
| AHQ-3-2, 3946             | K.CNYLGHYSDDPM*YR.C                       | 1677.84222 | 2 | 1.75E-06 | 0.94  | 4.05   | -        | 931.9    |
| AHQ-3-3, 3356             | K.CNYLGHYSDDPM*YR.C                       | 1693.84162 | 2 | 5.06E-04 | 0.93  | 3.42   | -        | 1129.3   |
| AHQ-3-4, 3316             | K.CNYLGHYSDDPM*YR.C                       | 1693.84162 | 2 | 2.75E-04 | 0.93  | 3.54   | -        | 990.0    |
| AHQ-3-3, 3884             | K.CNYLGHYSDDPM*YR.C                       | 1677.84222 | 2 | 4.28E-06 | 0.95  | 3.95   | -        | 930.3    |
| AHQ-3-4, 3450             | K.DCVGDVTENQICNK.Q                        | 1654.75869 | 2 | 1.03E-04 | 0.80  | 3.74   | -        | 494.9    |
| AHQ-3-1, 3449 - 3450      | K.DCVGDVTENQICNK.Q                        | 1654.75869 | 2 | 5.04E-06 | 0.93  | 4.27   | -        | 975.6    |
| AHQ-3-2, 3531             | K.DCVGDVTENQICNK.Q                        | 1654.75869 | 2 | 2.92E-04 | 0.95  | 4.25   | -        | 1377.4   |
| AHQ-3-3, 3466 - 3473      | K.DCVGDVTENQICNK.Q                        | 1654.75869 | 2 | 3.90E-05 | 0.97  | 4.95   | -        | 1487.4   |
| AHQ-3-4, 6545             | K.DDFDHDSDVPDIDDICPENVDISDFR.R            | 3183.22991 | 3 | 9.15E-04 | 0.84  | 4.00   | -        | 682.6    |
| AHQ-3-11, 2599            | K.DHSGQVFSVSNKGA                          | 1461.56164 | 2 | 2.02E-09 | 0.94  | 4.10   | -        | 1031.6   |
| AHQ-3-10, 2536            | K.DHSGQVFSVSNKGA                          | 1461.56164 | 1 | 1.22E-06 | 0.43  | 2.07   | -        | 476.9    |
| AHQ-3-2, 2698             | K.DHSGQVFSVSNKGA                          | 1461.56164 | 2 | 9.68E-06 | 0.91  | 3.13   | -        | 1129.5   |
| AHQ-3-5, 2540             | K.DHSGQVFSVSNKGA                          | 1461.56164 | 2 | 1.04E-06 | 0.95  | 3.47   | -        | 1523.0   |
| AHQ-3-10, 2588            | K.DHSGQVFSVSNKGA                          | 1461.56164 | 2 | 1.39E-06 | 0.95  | 3.79   | -        | 1225.4   |
| AHQ-3-9, 2497             | K.DHSGQVFSVSNKGA                          | 1461.56164 | 1 | 3.77E-06 | 0.07  | 1.85   | -        | 247.6    |
| AHQ-3-3, 3126 - 3128      | R.DNCQYVYVNDQR.D                          | 1575.64166 | 2 | 2.37E-05 | 0.90  | 4.00   | -        | 814.2    |
| AHQ-3-1, 3361             | R.DNCQYVYVNDQR.D                          | 1575.64166 | 2 | 1.67E-05 | 0.90  | 3.55   | -        | 1134.4   |
| AHQ-3-5, 3031             | R.DNCQYVYVNDQR.D                          | 1575.64166 | 2 | 2.58E-04 | 0.89  | 3.59   | -        | 911.7    |
| AHQ-3-4, 3117             | R.DNCQYVYVNDQR.D                          | 1575.64166 | 2 | 9.94E-05 | 0.80  | 3.33   | -        | 759.7    |
| AHQ-3-3, 6174 - 6248      | K.DSDGDRGRGACKDDFDHDSVPDIDDICPENVDISDFR.R | 4418.43100 | 3 | 4.72E-05 | 0.81  | 4.07   | -        | 517.6    |
| AHQ-3-2, 6237 - 6307      | K.DSDGDRGRGACKDDFDHDSVPDIDDICPENVDISDFR.R | 4418.43100 | 3 | 6.68E-06 | 0.96  | 5.92   | -        | 1105.0   |
| AHQ-3-2, 4255 - 4335      | R.DTDMGVDGQDCDNCPLHNPDLQDSDSDR.I          | 3324.31882 | 3 | 2.25E-07 | 0.88  | 4.11   | -        | 618.0    |
| AHQ-3-2, 4139             | R.DTDM*DGVDGQDCDNCPLHNPDLQDSDSDR.I        | 3340.31822 | 3 | 1.03E-07 | 0.87  | 4.41   | -        | 691.4    |
| AHQ-3-4, 3910             | R.DTDM*DGVDGQDCDNCPLHNPDLQDSDSDR.I        | 3340.31822 | 3 | 2.16E-08 | 0.89  | 4.21   | -        | 758.1    |
| AHQ-3-3, 3910             | R.DTDM*DGVDGQDCDNCPLHNPDLQDSDSDR.I        | 3340.31822 | 3 | 3.64E-04 | 0.74  | 3.52   | -        | 589.7    |
| AHQ-3-2, 3981             | R.DTDM*DGVDGQDCDNCPLHNPDLQDSDSDR.I        | 3340.31822 | 3 | 1.60E-09 | 0.87  | 4.18   | -        | 606.3    |
| AHQ-3-1, 3905 - 3976      | R.DTDM*DGVDGQDCDNCPLHNPDLQDSDSDR.I        | 3340.31822 | 3 | 1.00E-30 | 0.90  | 4.50   | -        | 830.5    |
| AHQ-3-6, 3787             | R.DTDM*DGVDGQDCDNCPLHNPDLQDSDSDR.I        | 3340.31822 | 3 | 2.23E-09 | 0.84  | 3.93   | -        | 802.2    |
| AHQ-3-1, 4318             | R.DTDMGVDGQDCDNCPLHNPDLQDSDSDR.I          | 3324.31882 | 3 | 2.83E-04 | 0.90  | 4.48   | -        | 624.7    |
| AHQ-3-2, 4405             | R.DTDMGVDGQDCDNCPLHNPDLQDSDSDR.I          | 3324.31882 | 3 | 7.28E-12 | 0.88  | 4.53   | -        | 497.6    |
| AHQ-3-4, 4310             | R.DTDMGVDGQDCDNCPLHNPDLQDSDSDR.I          | 3324.31882 | 3 | 5.03E-11 | 0.95  | 5.41   | -        | 802.4    |
| AHQ-3-2, 3671             | K.FQDLVDVAVR.A                            | 1063.18877 | 2 | 1.37E-06 | 0.90  | 3.15   | -        | 1001.5   |
| AHQ-3-10, 3254            | K.FQDLVDVAVR.A                            | 1063.18877 | 1 | 7.83E-06 | 0.42  | 2.25   | -        | 357.5    |
| AHQ-3-1, 2984             | R.FTGSQPFQGGVEHATANK.Q                    | 1877.00666 | 3 | 5.48E-04 | 0.83  | 3.60   | -        | 550.6    |
| AHQ-3-2, 2770 - 2847      | R.FTGSQPFQGGVEHATANK.Q                    | 1877.00666 | 2 | 2.06E-08 | 0.85  | 4.41   | -        | 343.6    |
| AHQ-3-1, 2970             | R.FTGSQPFQGGVEHATANK.Q                    | 1877.00666 | 2 | 7.21E-05 | 0.83  | 3.96   | -        | 353.9    |
| AHQ-3-4, 2792             | R.FTGSQPFQGGVEHATANK.Q                    | 1877.00666 | 2 | 7.11E-06 | 0.88  | 3.68   | -        | 845.1    |
| AHQ-3-4, 2922             | R.FTGSQPFQGGVEHATANK.Q                    | 1877.00666 | 2 | 5.79E-07 | 0.79  | 3.30   | -        | 505.6    |
| AHQ-3-2, 2922             | R.FTGSQPFQGGVEHATANK.Q                    | 1877.00666 | 2 | 1.25E-05 | 0.83  | 3.78   | -        | 410.2    |
| AHQ-3-6, 2547             | R.FTGSQPFQGGVEHATANK.Q                    | 1877.00666 | 2 | 1.65E-04 | 0.62  | 2.98   | -        | 345.5    |
| AHQ-3-4, 5638             | R.FVFGTTPEDILR.N                          | 1395.58470 | 1 | 4.67E-06 | 0.18  | 2.47   | -        | 113.1    |
| AHQ-3-10, 4874 - 4934     | R.FVFGTTPEDILR.N                          | 1395.58470 | 1 | 8.81E-05 | 0.09  | 1.83   | -        | 139.1    |
| AHQ-3-1, 5790 - 5864      | R.FVFGTTPEDILR.N                          | 1395.58470 | 1 | 6.88E-06 | 0.02  | 1.83   | -        | 93.6     |
| AHQ-3-3, 5669             | R.FVFGTTPEDILR.N                          | 1395.58470 | 1 | 4.49E-06 | 0.17  | 2.61   | -        | 127.0    |
| AHQ-3-9, 5021             | R.FVFGTTPEDILR.N                          | 1395.58470 | 1 | 5.55E-07 | 0.12  | 2.42   | -        | 68.3     |
| AHQ-3-6, 5377 - 5378      | R.FVFGTTPEDILR.N                          | 1395.58470 | 1 | 2.99E-04 | 0.06  | 2.03   | -        | 115.6    |
| AHQ-3-10, 4891            | R.FVFGTTPEDILR.N                          | 1395.58470 | 1 | 4.37E-07 | 0.34  | 2.94   | -        | 135.1    |
| AHQ-3-12, 5400            | R.FVFGTTPEDILR.N                          | 1395.58470 | 2 | 9.42E-04 | 0.75  | 2.90   | -        | 419.8    |
| AHQ-3-5, 5445             | R.FVFGTTPEDILR.N                          | 1395.58470 | 1 | 1.44E-04 | 0.08  | 2.02   | -        | 111.1    |
| AHQ-3-5, 5449             | R.FVFGTTPEDILR.N                          | 1395.58470 | 1 | 1.63E-06 | 0.27  | 2.52   | -        | 93.8     |
| AHQ-3-2, 4989 - 5045      | K.GGVNDNFQGVQLQNVF.F                      | 1617.74799 | 2 | 4.11E-07 | 0.88  | 3.63   | -        | 949.7    |
| AHQ-3-2, 4902             | K.GGVNDNFQGVQLQNVF.F                      | 1617.74799 | 2 | 1.12E-04 | 0.91  | 4.19   | -        | 916.2    |
| AHQ-3-2, 4735 - 4810      | K.GGVNDNFQGVQLQNVF.F                      | 1617.74799 | 2 | 8.25E-07 | 0.91  | 3.94   | -        | 774.5    |
| AHQ-3-6, 4163 - 4233      | K.GGVNDNFQGVQLQNVF.F                      | 1617.74799 | 2 | 3.77E-06 | 0.88  | 4.21   | -        | 537.0    |
| AHQ-3-5, 4519 - 4588      | K.GGVNDNFQGVQLQNVF.F                      | 1617.74799 | 2 | 2.22E-06 | 0.88  | 3.96   | -        | 836.0    |
| AHQ-3-2, 4594             | K.GGVNDNFQGVQLQNVF.F                      | 1617.74799 | 2 | 2.34E-09 | 0.89  | 4.30   | -        | 691.9    |
| AHQ-3-7, 4052 - 4132      | K.GGVNDNFQGVQLQNVF.F                      | 1617.74799 | 2 | 2.18E-05 | 0.87  | 4.30   | -        | 629.1    |
| AHQ-3-6, 4589             | K.GGVNDNFQGVQLQNVF.F                      | 1617.74799 | 2 | 4.37E-05 | 0.70  | 2.93   | -        | 651.4    |
| AHQ-3-10, 3982 - 4048     | K.GGVNDNFQGVQLQNVF.F                      | 1617.74799 | 2 | 1.14E-04 | 0.61  | 3.24   | -        | 427.6    |
| AHQ-3-10, 4114 - 4188     | K.GGVNDNFQGVQLQNVF.F                      | 1617.74799 | 2 | 2.46E-08 | 0.92  | 4.27   | -        | 909.1    |
| AHQ-3-9, 4171             | K.GGVNDNFQGVQLQNVF.F                      | 1617.74799 | 2 | 7.33E-09 | 0.90  | 3.99   | -        | 829.5    |
| AHQ-3-7, 4387             | K.GGVNDNFQGVQLQNVF.F                      | 1617.74799 | 2 | 2.04E-04 | 0.87  | 3.64   | -        | 836.2    |
| AHQ-3-4, 4829             | K.GGVNDNFQGVQLQNVF.F                      | 1617.74799 | 2 | 3.31E-08 | 0.95  | 4.34   | -        | 1477.1   |
| AHQ-3-4, 4582 - 4652      | K.GGVNDNFQGVQLQNVF.F                      | 1617.74799 | 2 | 1.71E-10 | 0.91  | 3.67   | -        | 1025.3   |
| AHQ-3-11, 4142            | K.GGVNDNFQGVQLQNVF.F                      | 1617.74799 | 2 | 7.22E-06 | 0.83  | 3.46   | -        | 650.9    |
| AHQ-3-9, 3940             | K.GGVNDNFQGVQLQNVF.F                      | 1617.74799 | 2 | 3.23E-04 | 0.56  | 2.83   | -        | 515.2    |
| AHQ-3-1, 4680 - 4749      | K.GGVNDNFQGVQLQNVF.F                      | 1617.74799 | 2 | 3.46E-08 | 0.87  | 3.75   | -        | 819.3    |
| AHQ-3-1, 4660             | K.GGVNDNFQGVQLQNVF.F                      | 1617.74799 | 2 | 2.03E-04 | 0.89  | 3.98   | -        | 794.0    |
| AHQ-3-10, 4267            | K.GGVNDNFQGVQLQNVF.F                      | 1617.74799 | 2 | 8.14E-09 | 0.91  | 4.04   | -        | 851.9    |
| AHQ-3-9, 3851 - 3927      | K.GGVNDNFQGVQLQNVF.F                      | 1617.74799 | 2 | 1.12E-04 | 0.88  | 3.85   | -        | 692.5    |
| AHQ-3-5, 4296             | K.GGVNDNFQGVQLQNVF.F                      | 1617.74799 | 2 | 1.68E-04 | 0.89  | 4.28   | -        | 691.3    |
| AHQ-3-6, 4375 - 4445      | K.GGVNDNFQGVQLQNVF.F                      | 1617.74799 | 2 | 2.81E-08 | 0.94  | 4.58   | -        | 1108.7   |
| AHQ-3-6, 4071             | K.GGVNDNFQGVQLQNVF.F                      | 1617.74799 | 2 | 1.37E-06 | 0.70  | 3.11   | -        | 566.6    |
| AHQ-3-3, 4390             | K.GGVNDNFQGVQLQNVF.F                      | 1617.74799 | 2 | 6.79E-05 | 0.78  | 3.84   | -        | 484.1    |
| AHQ-3-11, 4075 - 4147     | K.GGVNDNFQGVQLQNVF.F                      | 1617.74799 | 2 | 5.39E-04 | 0.57  | 2.96   | -        | 426.9    |
| AHQ-3-3, 4552 - 4553      | K.GGVNDNFQGVQLQNVF.F                      | 1617.74799 | 2 | 2.24E-04 | 0.94  | 4.45   | -        | 1030.2   |
| AHQ-3-3, 4704 - 4784      | K.GGVNDNFQGVQLQNVF.F                      | 1617.74799 | 2 | 1.58E-04 | 0.90  | 4.03   | -        | 776.3    |
| AHQ-3-3, 4880 - 4896      | K.GGVNDNFQGVQLQNVF.F                      | 1617.74799 | 2 | 6.80E-07 | 0.94  | 4.34   | -        | 1155.7   |
| AHQ-3-10, 3896 - 3904     | K.GGVNDNFQGVQLQNVF.F                      | 1617.74799 | 2 | 6.99E-07 | 0.82  | 3.44   | -        | 827.0    |
| AHQ-3-2, 2081 - 2105      | K.GPDPSSPAFR.I                            | 1031.10364 | 2 | 2.11E-04 | 0.83  | 3.21   | -        | 573.9    |
| AHQ-3-10, 2010            | K.GPDPSSPAFR.I                            | 1031.10364 | 2 | 6.94E-04 | 0.77  | 3.04   | -        | 560.2    |
| AHQ-3-3, 2082             | K.GPDPSSPAFR.I                            | 1031.10364 | 2 | 1.17E-04 | 0.78  | 3.04   | -        | 528.0    |
| AHQ-3-1, 2253             | K.GPDPSSPAFR.I                            | 1031.10364 | 2 | 1.24E-05 | 0.78  | 2.71   | -        | 582.2    |
| AHQ-3-4, 2098             | K.GPDPSSPAFR.I                            | 1031.10364 | 2 | 4.56E-05 | 0.65  | 2.85   | -        | 451.3    |
| AHQ-3-6, 2709             | R.GTLLALER.K                              | 873.03234  | 2 | 2.13E-04 | 0.92  | 3.43   | -        | 1160.0   |
| AHQ-3-3, 2952             | R.GTLLALER.K                              | 873.03234  | 2 | 3.66E-04 | 0.90  | 3.11   | -        | 1029.6   |
| AHQ-3-2, 2933             | R.GTLLALER.K                              | 873.03234  | 2 | 5.39E-04 | 0.89  | 3.46   | -        | 969.7    |
| AHQ-3-1, 3194             | R.GTLLALER.K                              | 873.03234  | 2 | 5.15E-04 | 0.87  | 3.01   | -        | 849.8    |
| AHQ-3-2, 2585             | K.GTSQNDPNVWVVR.H                         | 1373.45608 | 1 | 9.00E-04 | 0.09  | 1.89   | -        | 117.0    |
| AHQ-3-12, 6334            | R.IEDANLIPVDDKFKQDLVDVAVR.A               | 2580.87450 | 2 | 4.02E-08 | 0.76  | 3.40   | -        | 254.4    |
| AHQ-3-11, 6239            | R.IEDANLIPVDDKFKQDLVDVAVR.A               | 2580.87450 | 3 | 5.08E-05 | 0.80  | 3.83   | -        | 339.7    |
| AHQ-3-11, 6098 - 6174     | R.IEDANLIPVDDKFKQDLVDVAVR.A               | 2580.87450 | 2 | 2.91E-04 | 0.67  | 3.19   | -        | 222.7    |
| AHQ-3-11, 6095            | R.IEDANLIPVDDKFKQDLVDVAVR.A               | 2580.87450 | 3 | 1.30E-10 | 0.65  | 3.39   | -        | 451.9    |
| AHQ-3-13, 6346 - 6365     | R.IEDANLIPVDDKFKQDLVDVAVR.A               |            |   |          |       |        |          |          |

|                        |                             |            |   |          |      |      |   |        |
|------------------------|-----------------------------|------------|---|----------|------|------|---|--------|
| AHQ-3-13-, 6319 - 6331 | R.IEDANLIPVDDKFDQDLVDVAVR.A | 2580.87450 | 3 | 2.28E-09 | 0.70 | 3.04 | - | 478.2  |
| AHQ-3-1, 6733 - 6776   | R.IEDANLIPVDDKFDQDLVDVAVR.A | 2580.87450 | 3 | 1.27E-10 | 0.76 | 3.34 | - | 538.6  |
| AHQ-3-1, 6744 - 6764   | R.IEDANLIPVDDKFDQDLVDVAVR.A | 2580.87450 | 2 | 7.76E-05 | 0.55 | 2.92 | - | 202.5  |
| AHQ-3-1, 6880          | R.IEDANLIPVDDKFDQDLVDVAVR.A | 2580.87450 | 3 | 3.07E-07 | 0.63 | 3.23 | - | 315.0  |
| AHQ-3-9, 6209 - 6216   | R.IEDANLIPVDDKFDQDLVDVAVR.A | 2580.87450 | 3 | 2.97E-06 | 0.82 | 4.13 | - | 446.1  |
| AHQ-3-8, 6275          | R.IEDANLIPVDDKFDQDLVDVAVR.A | 2580.87450 | 2 | 2.66E-06 | 0.72 | 3.20 | - | 213.8  |
| AHQ-3-14-, 6252        | R.IEDANLIPVDDKFDQDLVDVAVR.A | 2580.87450 | 2 | 2.32E-04 | 0.71 | 3.17 | - | 258.5  |
| AHQ-3-7, 6483          | R.IEDANLIPVDDKFDQDLVDVAVR.A | 2580.87450 | 2 | 1.20E-04 | 0.72 | 3.38 | - | 233.0  |
| AHQ-3-7, 6479 - 6510   | R.IEDANLIPVDDKFDQDLVDVAVR.A | 2580.87450 | 3 | 1.34E-06 | 0.79 | 3.60 | - | 357.9  |
| AHQ-3-6, 6511 - 6539   | R.IEDANLIPVDDKFDQDLVDVAVR.A | 2580.87450 | 3 | 6.36E-09 | 0.73 | 3.65 | - | 330.4  |
| AHQ-3-3, 6777          | R.IEDANLIPVDDKFDQDLVDVAVR.A | 2580.87450 | 2 | 3.20E-05 | 0.33 | 2.61 | - | 143.6  |
| AHQ-3-10, 5875 - 5934  | R.IEDANLIPVDDKFDQDLVDVAVR.A | 2580.87450 | 2 | 8.26E-06 | 0.41 | 2.94 | - | 173.5  |
| AHQ-3-3, 6965 - 6972   | R.IEDANLIPVDDKFDQDLVDVAVR.A | 2580.87450 | 3 | 4.58E-07 | 0.76 | 3.27 | - | 412.5  |
| AHQ-3-5, 6657 - 6663   | R.IEDANLIPVDDKFDQDLVDVAVR.A | 2580.87450 | 2 | 8.26E-06 | 0.70 | 3.36 | - | 254.0  |
| AHQ-3-4, 6730 - 6801   | R.IEDANLIPVDDKFDQDLVDVAVR.A | 2580.87450 | 2 | 1.82E-08 | 0.82 | 3.78 | - | 296.9  |
| AHQ-3-4, 6784 - 6785   | R.IEDANLIPVDDKFDQDLVDVAVR.A | 2580.87450 | 3 | 9.36E-08 | 0.85 | 3.83 | - | 465.8  |
| AHQ-3-2, 6845 - 6915   | R.IEDANLIPVDDKFDQDLVDVAVR.A | 2580.87450 | 3 | 5.06E-11 | 0.75 | 3.64 | - | 433.2  |
| AHQ-3-2, 6982 - 7053   | R.IEDANLIPVDDKFDQDLVDVAVR.A | 2580.87450 | 3 | 4.29E-08 | 0.63 | 3.18 | - | 342.9  |
| AHQ-3-2, 6995 - 7051   | R.IEDANLIPVDDKFDQDLVDVAVR.A | 2580.87450 | 2 | 5.25E-06 | 0.71 | 2.99 | - | 431.4  |
| AHQ-3-6, 2386          | K.IMADSGPIYDK.T             | 1210.38204 | 2 | 4.65E-06 | 0.88 | 3.31 | - | 653.1  |
| AHQ-3-2, 2303          | K.IM*ADSGPIYDK.T            | 1226.38144 | 2 | 1.99E-04 | 0.84 | 3.21 | - | 654.6  |
| AHQ-3-14-, 2561 - 2571 | K.IMADSGPIYDK.T             | 1210.38204 | 2 | 1.12E-05 | 0.90 | 3.66 | - | 874.2  |
| AHQ-3-12, 2234 - 2274  | K.IM*ADSGPIYDK.T            | 1226.38144 | 2 | 7.94E-04 | 0.52 | 2.56 | - | 404.6  |
| AHQ-3-2, 2551          | K.IMADSGPIYDK.T             | 1210.38204 | 2 | 3.07E-05 | 0.95 | 3.95 | - | 1004.6 |
| AHQ-3-12, 2559         | K.IMADSGPIYDK.T             | 1210.38204 | 2 | 1.59E-06 | 0.93 | 3.94 | - | 846.6  |
| AHQ-3-13-, 2630        | K.IMADSGPIYDK.T             | 1210.38204 | 2 | 3.79E-06 | 0.76 | 2.94 | - | 596.5  |
| AHQ-3-13, 2615 - 2670  | K.IMADSGPIYDK.T             | 1210.38204 | 2 | 5.25E-04 | 0.58 | 2.69 | - | 653.1  |
| AHQ-3-11, 2455         | K.IMADSGPIYDK.T             | 1210.38204 | 2 | 7.22E-04 | 0.76 | 2.97 | - | 474.1  |
| AHQ-3-4, 7208 - 7286   | R.IPESGGDINSVDFIFELTGAAR.K  | 2196.35899 | 2 | 8.65E-07 | 0.97 | 5.79 | - | 1116.4 |
| AHQ-3-13, 6723         | R.IPESGGDINSVDFIFELTGAAR.K  | 2196.35899 | 2 | 7.18E-10 | 0.97 | 5.66 | - | 1151.8 |
| AHQ-3-6, 6913          | R.IPESGGDINSVDFIFELTGAAR.K  | 2196.35899 | 2 | 2.93E-09 | 0.97 | 5.58 | - | 1134.3 |
| AHQ-3-2, 7281 - 7345   | R.IPESGGDINSVDFIFELTGAAR.K  | 2196.35899 | 2 | 8.04E-10 | 0.97 | 5.12 | - | 1234.6 |
| AHQ-3-6, 7073 - 7142   | R.IPESGGDINSVDFIFELTGAAR.K  | 2196.35899 | 2 | 7.12E-10 | 0.97 | 5.66 | - | 1261.7 |
| AHQ-3-5, 7065 - 7075   | R.IPESGGDINSVDFIFELTGAAR.K  | 2196.35899 | 2 | 4.37E-09 | 0.96 | 5.27 | - | 1078.8 |
| AHQ-3-5, 7164 - 7231   | R.IPESGGDINSVDFIFELTGAAR.K  | 2196.35899 | 2 | 6.85E-09 | 0.96 | 4.99 | - | 1321.9 |
| AHQ-3-3, 7256 - 7328   | R.IPESGGDINSVDFIFELTGAAR.K  | 2196.35899 | 2 | 5.14E-11 | 0.97 | 5.73 | - | 1040.7 |
| AHQ-3-2, 7417          | R.IPESGGDINSVDFIFELTGAAR.K  | 2196.35899 | 2 | 2.31E-10 | 0.97 | 5.71 | - | 1138.3 |
| AHQ-3-11, 6571         | R.IPESGGDINSVDFIFELTGAAR.K  | 2196.35899 | 2 | 1.85E-05 | 0.88 | 4.01 | - | 525.7  |
| AHQ-3-14-, 6592 - 6660 | R.IPESGGDINSVDFIFELTGAAR.K  | 2196.35899 | 2 | 1.08E-11 | 0.98 | 6.54 | - | 1819.4 |
| AHQ-3-11, 6440 - 6511  | R.IPESGGDINSVDFIFELTGAAR.K  | 2196.35899 | 2 | 1.46E-08 | 0.97 | 5.67 | - | 1230.3 |
| AHQ-3-3, 7192 - 7265   | R.IPESGGDINSVDFIFELTGAAR.K  | 2196.35899 | 2 | 1.59E-09 | 0.97 | 5.48 | - | 1354.7 |
| AHQ-3-9, 6564 - 6576   | R.IPESGGDINSVDFIFELTGAAR.K  | 2196.35899 | 2 | 7.21E-11 | 0.96 | 5.51 | - | 822.6  |
| AHQ-3-4, 7362          | R.IPESGGDINSVDFIFELTGAAR.K  | 2196.35899 | 2 | 1.27E-06 | 0.95 | 5.28 | - | 770.0  |
| AHQ-3-10, 6384         | R.IPESGGDINSVDFIFELTGAAR.K  | 2196.35899 | 2 | 4.60E-13 | 0.95 | 5.03 | - | 917.0  |
| AHQ-3-10, 6240 - 6307  | R.IPESGGDINSVDFIFELTGAAR.K  | 2196.35899 | 2 | 8.04E-10 | 0.97 | 5.87 | - | 1161.7 |
| AHQ-3-1, 7105 - 7168   | R.IPESGGDINSVDFIFELTGAAR.K  | 2196.35899 | 2 | 2.50E-12 | 0.98 | 6.05 | - | 1782.6 |
| AHQ-3-9, 6676 - 6741   | R.IPESGGDINSVDFIFELTGAAR.K  | 2196.35899 | 2 | 1.33E-06 | 0.87 | 3.89 | - | 473.3  |
| AHQ-3-6, 6930 - 7009   | R.IPESGGDINSVDFIFELTGAAR.K  | 2196.35899 | 2 | 2.03E-10 | 0.97 | 5.90 | - | 1264.5 |
| AHQ-3-1, 2488          | R.KDHSQQVFSVSNKGK.A         | 1589.73455 | 2 | 2.06E-07 | 0.90 | 3.34 | - | 1068.9 |
| AHQ-3-4, 2229          | R.KDHSQQVFSVSNKGK.A         | 1589.73455 | 2 | 4.08E-06 | 0.88 | 3.44 | - | 938.0  |
| AHQ-3-6, 2018          | R.KDHSQQVFSVSNKGK.A         | 1589.73455 | 2 | 1.12E-11 | 0.82 | 3.46 | - | 777.7  |
| AHQ-3-5, 2040          | R.KDHSQQVFSVSNKGK.A         | 1589.73455 | 2 | 6.81E-08 | 0.94 | 4.06 | - | 1294.1 |
| AHQ-3-2, 2314          | R.KDHSQQVFSVSNKGK.A         | 1589.73455 | 2 | 5.37E-09 | 0.90 | 3.74 | - | 1062.6 |
| AHQ-3-7, 1936          | R.KDHSQQVFSVSNKGK.A         | 1589.73455 | 2 | 5.39E-09 | 0.57 | 2.57 | - | 624.1  |
| AHQ-3-12, 2314         | R.KDHSQQVFSVSNKGK.A         | 1589.73455 | 2 | 1.45E-04 | 0.59 | 2.86 | - | 261.7  |
| AHQ-3-13, 2381         | R.KDHSQQVFSVSNKGK.A         | 1589.73455 | 2 | 1.04E-06 | 0.90 | 3.84 | - | 971.5  |
| AHQ-3-10, 2103 - 2174  | R.KDHSQQVFSVSNKGK.A         | 1589.73455 | 2 | 3.72E-13 | 0.91 | 3.59 | - | 1113.0 |
| AHQ-3-2, 2322          | K.KIMADSGPIYDK.T            | 1338.55496 | 2 | 4.82E-07 | 0.94 | 4.17 | - | 933.8  |
| AHQ-3-2, 1981 - 1990   | K.KIM*ADSGPIYDK.T           | 1354.55436 | 2 | 5.64E-04 | 0.94 | 3.95 | - | 1125.2 |
| AHQ-3-1, 2456          | R.KVTEENKELANELR.R          | 1673.84976 | 2 | 1.61E-06 | 0.93 | 4.05 | - | 1515.5 |
| AHQ-3-3, 1989          | R.KVTEENKELANELR.R          | 1673.84976 | 2 | 2.14E-07 | 0.94 | 4.18 | - | 1482.0 |
| AHQ-3-4, 2013          | R.KVTEENKELANELR.R          | 1673.84976 | 2 | 5.40E-06 | 0.89 | 4.00 | - | 960.5  |
| AHQ-3-6, 2049 - 2059   | R.KVTEENKELANELR.R          | 1673.84976 | 2 | 2.22E-08 | 0.94 | 5.22 | - | 1116.8 |
| AHQ-3-4, 2257          | R.KVTEENKELANELR.R          | 1673.84976 | 3 | 8.30E-05 | 0.75 | 3.43 | - | 768.0  |
| AHQ-3-5, 1759          | R.KVTEENKELANELR.R          | 1673.84976 | 2 | 7.94E-05 | 0.89 | 3.91 | - | 907.2  |
| AHQ-3-2, 2379          | R.KVTEENKELANELR.R          | 1673.84976 | 2 | 6.37E-10 | 0.96 | 5.11 | - | 1416.4 |
| AHQ-3-5, 2099          | R.KVTEENKELANELR.R          | 1673.84976 | 3 | 1.79E-06 | 0.77 | 3.80 | - | 683.9  |
| AHQ-3-3, 2358          | R.KVTEENKELANELR.R          | 1673.84976 | 2 | 4.22E-06 | 0.95 | 4.52 | - | 1549.6 |
| AHQ-3-3, 2245          | R.KVTEENKELANELR.R          | 1673.84976 | 2 | 2.68E-06 | 0.92 | 4.55 | - | 1158.4 |
| AHQ-3-2, 2274 - 2305   | R.KVTEENKELANELR.R          | 1673.84976 | 2 | 3.24E-09 | 0.94 | 4.54 | - | 1323.5 |
| AHQ-3-2, 2283          | R.KVTEENKELANELR.R          | 1673.84976 | 3 | 4.04E-07 | 0.86 | 3.91 | - | 959.1  |
| AHQ-3-4, 2144 - 2158   | R.LCNSPSPQM*NGKPCGEAR.E     | 2151.34497 | 2 | 7.46E-05 | 0.85 | 3.39 | - | 579.2  |
| AHQ-3-5, 2420          | R.LCNSPSPQMNGKPCGEAR.E      | 2135.34557 | 2 | 2.35E-04 | 0.84 | 4.04 | - | 529.9  |
| AHQ-3-4, 2150          | R.LCNSPSPQM*NGKPCGEAR.E     | 2151.34497 | 3 | 5.97E-05 | 0.79 | 3.72 | - | 701.1  |
| AHQ-3-3, 2501 - 2506   | R.LCNSPSPQMNGKPCGEAR.E      | 2135.34557 | 2 | 4.83E-06 | 0.88 | 4.06 | - | 479.5  |
| AHQ-3-2, 2166          | R.LCNSPSPQM*NGKPCGEAR.E     | 2151.34497 | 2 | 5.29E-05 | 0.66 | 3.14 | - | 293.1  |
| AHQ-3-2, 2535          | R.LCNSPSPQMNGKPCGEAR.E      | 2135.34557 | 2 | 1.75E-05 | 0.82 | 3.74 | - | 445.8  |
| AHQ-3-4, 2496          | R.LCNSPSPQMNGKPCGEAR.E      | 2135.34557 | 2 | 4.05E-06 | 0.88 | 3.79 | - | 571.1  |
| AHQ-3-6, 5479          | K.MENAEALDVPQISVFTR.D       | 1850.08607 | 2 | 1.60E-04 | 0.86 | 3.51 | - | 561.7  |
| AHQ-3-9, 5068 - 5135   | K.MENAEALDVPQISVFTR.D       | 1850.08607 | 2 | 3.01E-05 | 0.72 | 3.04 | - | 508.4  |
| AHQ-3-6, 5621          | K.MENAEALDVPQISVFTR.D       | 1850.08607 | 2 | 7.69E-08 | 0.76 | 3.38 | - | 456.9  |
| AHQ-3-2, 5951          | K.MENAEALDVPQISVFTR.D       | 1850.08607 | 2 | 1.31E-04 | 0.39 | 2.52 | - | 269.8  |
| AHQ-3-4, 5744 - 5745   | K.MENAEALDVPQISVFTR.D       | 1850.08607 | 2 | 1.62E-07 | 0.91 | 4.67 | - | 942.9  |
| AHQ-3-3, 5545 - 5556   | K.M*ENAEALDVPQISVFTR.D      | 1866.08547 | 2 | 9.23E-08 | 0.95 | 4.41 | - | 415.7  |
| AHQ-3-6, 5422 - 5493   | K.MENAEALDVPQISVFTR.D       | 1850.08607 | 2 | 3.66E-04 | 0.92 | 4.16 | - | 607.4  |
| AHQ-3-1, 5889          | K.MENAEALDVPQISVFTR.D       | 1850.08607 | 2 | 4.00E-06 | 0.86 | 3.75 | - | 430.0  |
| AHQ-3-2, 5590 - 5597   | K.M*ENAEALDVPQISVFTR.D      | 1866.08547 | 2 | 3.49E-10 | 0.96 | 5.22 | - | 958.9  |
| AHQ-3-4, 5512          | K.M*ENAEALDVPQISVFTR.D      | 1866.08547 | 2 | 9.56E-09 | 0.84 | 3.81 | - | 612.1  |
| AHQ-3-6, 5242          | K.M*ENAEALDVPQISVFTR.D      | 1866.08547 | 2 | 4.92E-04 | 0.87 | 3.65 | - | 568.9  |
| AHQ-3-10, 5130         | K.MENAEALDVPQISVFTR.D       | 1850.08607 | 2 | 8.81E-05 | 0.85 | 3.44 | - | 511.2  |
| AHQ-3-3, 5808 - 5828   | K.MENAEALDVPQISVFTR.D       | 1850.08607 | 2 | 8.44E-07 | 0.92 | 4.64 | - | 499.9  |
| AHQ-3-5, 5544          | K.MENAEALDVPQISVFTR.D       | 1850.08607 | 2 | 1.31E-04 | 0.79 | 3.08 | - | 560.9  |
| AHQ-3-2, 3089          | K.QVTQSYWDTNTPTR.A          | 1596.68241 | 2 | 3.46E-08 | 0.91 | 4.21 | - | 717.7  |
| AHQ-3-5, 2875          | K.QVTQSYWDTNTPTR.A          | 1596.68241 | 2 | 2.00E-06 | 0.78 | 3.20 | - | 471.5  |
| AHQ-3-3, 3069          | K.QVTQSYWDTNTPTR.A          | 1596.68241 | 2 | 3.02E-05 | 0.82 | 3.56 | - | 420.7  |
| AHQ-3-1, 3236          | K.QVTQSYWDTNTPTR.A          | 1596.68241 | 2 | 2.01E-07 | 0.80 | 3.27 | - | 476.8  |
| AHQ-3-11, 2894         | K.QVTQSYWDTNTPTR.A          | 1596.68241 | 2 | 2.15E-06 | 0.63 | 2.68 | - | 444.2  |
| AHQ-3-4, 3024          | K.QVTQSYWDTNTPTR.A          | 1596.68241 | 2 | 6.97E-07 | 0.87 | 3.29 | - | 737.3  |
| AHQ-3-3, 2725 - 2798   | R.RPPLCYHNGVQYR.N           | 1661.86889 | 2 | 1.23E-06 | 0.95 | 3.81 | - | 1175.2 |
| AHQ-3-6, 2574 - 2594   | R.RPPLCYHNGVQYR.N           | 1661.86889 | 3 | 3.33E-05 | 0.95 | 3.89 | - | 1767.0 |
| AHQ-3-2, 2783          | R.RPPLCYHNGVQYR.N           | 1661.86889 | 2 | 5.15E-05 | 0.88 | 3.47 | - | 663.3  |
| AHQ-3-6, 3571          | K.SITLQVQEDR.A              | 1208.34588 | 2 | 6.99E-05 | 0.91 | 2.80 | - | 1484.9 |
| AHQ-3-2, 3861 - 3921   | K.SITLQVQEDR.A              | 1208.34588 | 2 | 3.23E-07 | 0.92 | 3.35 | - | 1255.7 |
| AHQ-3-3, 3858          | K.SITLQVQEDR.A              | 1208.34588 | 2 | 1.74E-06 | 0.94 | 3.59 | - | 1339.2 |
| AHQ-3-10, 3464         | K.SITLQVQEDR.A              | 1208.34588 | 2 | 1.36E-07 | 0.94 | 3.64 | - | 1497.1 |
| AHQ-3-1, 4021          | K.SITLQVQEDR.A              | 1208.34588 | 2 | 2.41E-05 | 0.95 | 3.64 | - | 1530.8 |
| AHQ-3-7, 4066 - 4072   | R.TIVTTLQDSIR.K             | 1247.42355 | 2 | 9.01E-07 | 0.97 | 3.90 | - | 1790.4 |

|                              |                                                                          |            |   |          |        |         |       |          |
|------------------------------|--------------------------------------------------------------------------|------------|---|----------|--------|---------|-------|----------|
| AHQ-3-12, 4292               | R.TIVTTLQDSIR.K                                                          | 1247.42355 | 2 | 2.21E-07 | 0.94   | 3.82    | -     | 1123.2   |
| AHQ-3-2, 4534 - 4606         | R.TIVTTLQDSIR.K                                                          | 1247.42355 | 2 | 7.71E-05 | 0.95   | 3.78    | -     | 1421.1   |
| AHQ-3-1, 3458                | R.TIVTTLQDSIR.K                                                          | 1247.42355 | 2 | 5.97E-04 | 0.94   | 3.33    | -     | 1499.7   |
| AHQ-3-8, 3864                | R.TIVTTLQDSIR.K                                                          | 1247.42355 | 2 | 1.25E-07 | 0.93   | 3.19    | -     | 1340.2   |
| AHQ-3-3, 4494 - 4501         | R.TIVTTLQDSIR.K                                                          | 1247.42355 | 2 | 6.01E-07 | 0.97   | 4.09    | -     | 1639.5   |
| AHQ-3-6, 4126 - 4149         | R.TIVTTLQDSIR.K                                                          | 1247.42355 | 2 | 1.06E-05 | 0.97   | 4.05    | -     | 2182.2   |
| AHQ-3-5, 4196 - 4204         | R.TIVTTLQDSIR.K                                                          | 1247.42355 | 2 | 1.71E-05 | 0.97   | 4.26    | -     | 2011.9   |
| AHQ-3-1, 4628 - 4636         | R.TIVTTLQDSIR.K                                                          | 1247.42355 | 2 | 1.05E-06 | 0.96   | 3.81    | -     | 1602.7   |
| AHQ-3-9, 3879                | R.TIVTTLQDSIR.K                                                          | 1247.42355 | 2 | 1.08E-05 | 0.95   | 3.88    | -     | 1445.9   |
| AHQ-3-7, 2244 - 2246         | K.VTEENKELANELR.R                                                        | 1545.67685 | 2 | 1.33E-09 | 0.91   | 4.02    | -     | 853.7    |
| AHQ-3-1, 2681                | K.VTEENKELANELR.R                                                        | 1545.67685 | 2 | 8.16E-07 | 0.77   | 3.26    | -     | 630.5    |
| AHQ-3-6, 2290                | K.VTEENKELANELR.R                                                        | 1545.67685 | 2 | 1.80E-08 | 0.88   | 3.60    | -     | 923.0    |
| gj4507729[ref][NP_001060.1]  | tubulin, beta polypeptide [Homo sapiens]                                 |            |   | 1.00E-30 | 8.71   | 100.36  | 34.60 | 49906.7  |
| AHQ-3-14-, 4827 - 4851       | R.AILVDLEPGTMSVRS.S                                                      | 1616.86162 | 2 | 3.70E-06 | 0.89   | 3.68    | -     | 670.1    |
| AHQ-3-7, 2811                | R.EIVHIQAGCGNQIGAK.F                                                     | 1825.03962 | 2 | 1.01E-06 | 0.95   | 4.64    | -     | 1195.4   |
| AHQ-3-11, 2823               | R.EIVHIQAGCGNQIGAK.F                                                     | 1825.03962 | 2 | 2.46E-04 | 0.88   | 3.35    | -     | 911.8    |
| AHQ-3-7, 2703                | K.EVDEQMLNVQNK.N                                                         | 1447.59668 | 1 | 9.08E-09 | 0.62   | 3.44    | -     | 254.8    |
| AHQ-3-7, 2702                | K.EVDEQMLNVQNK.N                                                         | 1447.59668 | 2 | 5.54E-05 | 0.92   | 3.90    | -     | 1036.7   |
| AHQ-3-14-, 6188              | K.GHYTEGAEALVDSVLDVVR.K                                                  | 1960.13388 | 3 | 2.48E-04 | 0.84   | 3.67    | -     | 1103.5   |
| AHQ-3-14-, 6193 - 6195       | K.GHYTEGAEALVDSVLDVVR.K                                                  | 1960.13388 | 2 | 4.05E-13 | 0.99   | 6.96    | -     | 2947.9   |
| AHQ-3-7, 6162 - 6230         | K.GHYTEGAEALVDSVLDVVR.K                                                  | 1960.13388 | 2 | 1.65E-08 | 0.99   | 6.88    | -     | 3091.6   |
| AHQ-3-7, 6166 - 6238         | K.GHYTEGAEALVDSVLDVVR.K                                                  | 1960.13388 | 3 | 6.70E-05 | 0.92   | 5.19    | -     | 1026.0   |
| AHQ-3-11, 5990               | K.GHYTEGAEALVDSVLDVVR.K                                                  | 1960.13388 | 2 | 3.93E-05 | 0.99   | 6.68    | -     | 3046.4   |
| AHQ-3-13-, 6298              | K.GHYTEGAEALVDSVLDVVR.K                                                  | 1960.13388 | 3 | 9.51E-04 | 0.88   | 3.86    | -     | 1193.3   |
| AHQ-3-9, 5915 - 5944         | K.GHYTEGAEALVDSVLDVVR.K                                                  | 1960.13388 | 2 | 7.60E-05 | 0.97   | 5.19    | -     | 1803.9   |
| AHQ-3-12, 6180 - 6219        | K.GHYTEGAEALVDSVLDVVR.K                                                  | 1960.13388 | 2 | 4.15E-13 | 0.98   | 6.33    | -     | 2642.1   |
| AHQ-3-13-, 6297              | K.GHYTEGAEALVDSVLDVVR.K                                                  | 1960.13388 | 2 | 6.64E-09 | 0.99   | 7.19    | -     | 3475.8   |
| AHQ-3-13, 6282               | K.GHYTEGAEALVDSVLDVVR.K                                                  | 1960.13388 | 2 | 6.61E-14 | 0.99   | 6.98    | -     | 2813.3   |
| AHQ-3-13, 6281               | K.GHYTEGAEALVDSVLDVVR.K                                                  | 1960.13388 | 3 | 3.55E-05 | 0.62   | 3.14    | -     | 728.3    |
| AHQ-3-10, 5778               | K.GHYTEGAEALVDSVLDVVR.K                                                  | 1960.13388 | 2 | 2.84E-07 | 0.98   | 5.87    | -     | 2760.6   |
| AHQ-3-13, 3685 - 3735        | R.ISEQFTAM*FR.R                                                          | 1246.41758 | 2 | 9.52E-06 | 0.72   | 2.89    | -     | 648.1    |
| AHQ-3-7, 7198 - 7246         | K.LTTPTYGDLNHLVSATMSGVTTCLR.F                                            | 2711.06527 | 2 | 1.95E-11 | 0.93   | 4.74    | -     | 616.7    |
| AHQ-3-7, 7234                | K.LTTPTYGDLNHLVSATMSGVTTCLR.F                                            | 2711.06527 | 3 | 2.40E-08 | 0.89   | 4.40    | -     | 967.3    |
| AHQ-3-8, 7112                | K.LTTPTYGDLNHLVSATMSGVTTCLR.F                                            | 2711.06527 | 3 | 1.30E-06 | 0.94   | 4.13    | -     | 1669.0   |
| AHQ-3-7, 6262                | K.LTTPTYGDLNHLVSATMSGVTTCLR.F                                            | 2711.06527 | 3 | 3.20E-11 | 0.72   | 3.30    | -     | 674.8    |
| AHQ-3-9, 5956 - 5960         | K.LTTPTYGDLNHLVSATMSGVTTCLR.F                                            | 2711.06527 | 2 | 3.79E-04 | 0.40   | 2.53    | -     | 366.3    |
| AHQ-3-7, 6187                | K.LTTPTYGDLNHLVSATMSGVTTCLR.F                                            | 2727.06467 | 3 | 8.47E-06 | 0.85   | 3.56    | -     | 879.0    |
| AHQ-3-7, 6099 - 6104         | K.LTTPTYGDLNHLVSATMSGVTTCLR.F                                            | 2727.06467 | 3 | 8.22E-05 | 0.88   | 4.22    | -     | 894.6    |
| AHQ-3-9, 6869 - 6875         | K.LTTPTYGDLNHLVSATMSGVTTCLR.F                                            | 2711.06527 | 3 | 1.45E-04 | 0.89   | 4.51    | -     | 887.8    |
| AHQ-3-7, 6258                | K.LTTPTYGDLNHLVSATMSGVTTCLR.F                                            | 2711.06527 | 2 | 8.47E-07 | 0.89   | 4.17    | -     | 679.6    |
| AHQ-3-14-, 5983              | K.M*SATFIGNSTAIQELFK.R                                                   | 1875.13550 | 2 | 7.88E-06 | 0.19   | 2.66    | -     | 297.7    |
| AHQ-3-7, 6554 - 6555         | K.M*SATFIGNSTAIQELFK.R                                                   | 1875.13550 | 2 | 1.45E-10 | 0.91   | 4.79    | -     | 1100.4   |
| AHQ-3-12, 6004 - 6072        | K.M*SATFIGNSTAIQELFK.R                                                   | 1875.13550 | 2 | 1.84E-05 | 0.66   | 3.30    | -     | 736.4    |
| AHQ-3-7, 5996                | K.M*SATFIGNSTAIQELFK.R                                                   | 1875.13550 | 2 | 2.25E-07 | 0.75   | 3.50    | -     | 885.6    |
| AHQ-3-12, 5422 - 5471        | K.NSSYFVVEIWPNNV.K                                                       | 1697.87148 | 2 | 1.53E-04 | 0.89   | 4.26    | -     | 743.3    |
| AHQ-3-11, 6084               | R.SGPF GQIFRPDNFVFGQSGAGNNWAK.G                                          | 2800.03898 | 3 | 2.18E-09 | 0.97   | 5.81    | -     | 2069.7   |
| AHQ-3-11, 6083               | R.SGPF GQIFRPDNFVFGQSGAGNNWAK.G                                          | 2800.03898 | 2 | 8.00E-08 | 0.96   | 5.29    | -     | 919.0    |
| AHQ-3-9, 6123 - 6161         | R.SGPF GQIFRPDNFVFGQSGAGNNWAK.G                                          | 2800.03898 | 2 | 4.68E-08 | 0.92   | 4.19    | -     | 869.2    |
| AHQ-3-12, 6130 - 6200        | R.SGPF GQIFRPDNFVFGQSGAGNNWAK.G                                          | 2800.03898 | 3 | 4.59E-04 | 0.67   | 3.62    | -     | 781.9    |
| AHQ-3-10, 5866               | R.SGPF GQIFRPDNFVFGQSGAGNNWAK.G                                          | 2800.03898 | 2 | 2.81E-07 | 0.90   | 4.41    | -     | 618.3    |
| AHQ-3-12, 6320               | R.SGPF GQIFRPDNFVFGQSGAGNNWAK.G                                          | 2800.03898 | 2 | 1.06E-06 | 0.95   | 5.20    | -     | 694.7    |
| AHQ-3-7, 6528 - 6542         | R.SGPF GQIFRPDNFVFGQSGAGNNWAK.G                                          | 2800.03898 | 2 | 6.42E-06 | 0.93   | 4.67    | -     | 666.3    |
| AHQ-3-13, 6270 - 6341        | R.SGPF GQIFRPDNFVFGQSGAGNNWAK.G                                          | 2800.03898 | 2 | 2.20E-05 | 0.91   | 4.24    | -     | 751.5    |
| AHQ-3-7, 6434 - 6502         | R.SGPF GQIFRPDNFVFGQSGAGNNWAK.G                                          | 2800.03898 | 3 | 5.85E-12 | 0.95   | 6.07    | -     | 979.7    |
| AHQ-3-7, 6387 - 6450         | R.SGPF GQIFRPDNFVFGQSGAGNNWAK.G                                          | 2800.03898 | 2 | 1.64E-05 | 0.93   | 4.88    | -     | 692.7    |
| AHQ-3-13, 6309 - 6377        | R.SGPF GQIFRPDNFVFGQSGAGNNWAK.G                                          | 2800.03898 | 3 | 4.89E-07 | 0.94   | 5.36    | -     | 1155.8   |
| AHQ-3-7, 6338 - 6406         | R.SGPF GQIFRPDNFVFGQSGAGNNWAK.G                                          | 2800.03898 | 3 | 3.90E-12 | 0.98   | 6.93    | -     | 1851.5   |
| AHQ-3-7, 6240 - 6314         | R.SGPF GQIFRPDNFVFGQSGAGNNWAK.G                                          | 2800.03898 | 2 | 3.06E-04 | 0.95   | 5.21    | -     | 671.2    |
| AHQ-3-9, 6007                | R.SGPF GQIFRPDNFVFGQSGAGNNWAK.G                                          | 2800.03898 | 2 | 5.05E-04 | 0.93   | 4.57    | -     | 899.0    |
| AHQ-3-3, 6768                | R.SGPF GQIFRPDNFVFGQSGAGNNWAK.G                                          | 2800.03898 | 3 | 1.23E-06 | 0.84   | 4.08    | -     | 643.1    |
| AHQ-3-14-, 6156 - 6223       | R.SGPF GQIFRPDNFVFGQSGAGNNWAK.G                                          | 2800.03898 | 3 | 1.00E-30 | 0.98   | 7.22    | -     | 1814.5   |
| AHQ-3-14-, 6169 - 6229       | R.SGPF GQIFRPDNFVFGQSGAGNNWAK.G                                          | 2800.03898 | 2 | 3.72E-06 | 0.95   | 4.95    | -     | 1021.9   |
| AHQ-3-4, 6781                | R.SGPF GQIFRPDNFVFGQSGAGNNWAK.G                                          | 2800.03898 | 2 | 4.74E-05 | 0.74   | 3.59    | -     | 401.0    |
| AHQ-3-9, 6153                | R.SGPF GQIFRPDNFVFGQSGAGNNWAK.G                                          | 2800.03898 | 3 | 1.02E-08 | 0.95   | 5.23    | -     | 1388.3   |
| AHQ-3-14-, 6297 - 6375       | R.SGPF GQIFRPDNFVFGQSGAGNNWAK.G                                          | 2800.03898 | 3 | 5.81E-05 | 0.95   | 5.86    | -     | 1227.9   |
| gj4504517[ref][NP_001531.1]  | heat shock 27kDa protein 1; heat shock 27kD protein 1 [Homo sapiens] [M] |            |   | 1.00E-30 | 7.02   | 90.33   | 60.00 | 22782.3  |
| AHQ-3-13, 2521               | K.DGVVEITGK.H                                                            | 918.02674  | 1 | 4.03E-04 | 0.30   | 2.16    | -     | 298.8    |
| AHQ-3-13-, 2267              | K.DGVVEITGK.H                                                            | 918.02674  | 1 | 9.76E-06 | 0.19   | 2.06    | -     | 408.6    |
| AHQ-3-11, 5426 - 5487        | R.KYTLPPGVDPQTQSSSLSPGELTVEAPMPK.L                                       | 3228.65914 | 3 | 2.92E-06 | 0.95   | 6.59    | -     | 1551.8   |
| AHQ-3-11, 4728 - 4730        | K.LATQSNIEITPVTFFESR.A                                                   | 1907.11412 | 2 | 7.21E-10 | 0.88   | 3.91    | -     | 461.1    |
| AHQ-3-13-, 4781 - 4849       | K.LATQSNIEITPVTFFESR.A                                                   | 1907.11412 | 2 | 2.82E-04 | 0.19   | 2.67    | -     | 193.1    |
| AHQ-3-11, 4594               | K.LATQSNIEITPVTFFESR.A                                                   | 1907.11412 | 2 | 1.02E-04 | 0.56   | 2.81    | -     | 240.2    |
| AHQ-3-14-, 4760 - 4767       | K.LATQSNIEITPVTFFESR.A                                                   | 1907.11412 | 2 | 7.48E-04 | 0.68   | 3.36    | -     | 235.6    |
| AHQ-3-11, 4432 - 4439        | R.LFDQAFGLPR.L                                                           | 1164.33793 | 2 | 1.52E-07 | 0.97   | 4.37    | -     | 1585.5   |
| AHQ-3-10, 4254               | R.LFDQAFGLPR.L                                                           | 1164.33793 | 2 | 1.13E-06 | 0.97   | 4.14    | -     | 1759.3   |
| AHQ-3-10, 6242 - 6256        | R.LPEEWSQWLGGSSWPGYVR.P                                                  | 2235.44173 | 2 | 3.13E-07 | 0.95   | 4.61    | -     | 975.5    |
| AHQ-3-11, 6428 - 6508        | R.LPEEWSQWLGGSSWPGYVR.P                                                  | 2235.44173 | 2 | 5.87E-07 | 0.94   | 4.09    | -     | 1031.6   |
| AHQ-3-10, 6442 - 6443        | R.LPEEWSQWLGGSSWPGYVRPLPPAAIESPAVAAPAYSRA                                | 4095.56787 | 3 | 1.00E-30 | 0.97   | 6.33    | -     | 1193.9   |
| AHQ-3-11, 6596 - 6634        | R.LPEEWSQWLGGSSWPGYVRPLPPAAIESPAVAAPAYSRA                                | 4095.56787 | 3 | 1.00E-30 | 0.97   | 5.89    | -     | 1417.6   |
| AHQ-3-14-, 6709              | R.LPEEWSQWLGGSSWPGYVRPLPPAAIESPAVAAPAYSRA                                | 4095.56787 | 3 | 8.92E-05 | 0.82   | 3.68    | -     | 497.8    |
| AHQ-3-11, 3983               | R.PLPPAAIESPAVAAPAYSRA                                                   | 1879.14874 | 2 | 9.38E-10 | 0.96   | 4.81    | -     | 933.3    |
| AHQ-3-10, 3828 - 3839        | R.PLPPAAIESPAVAAPAYSRA                                                   | 1879.14874 | 2 | 9.65E-12 | 0.93   | 4.33    | -     | 648.7    |
| AHQ-3-11, 1775               | K.KTDGVEITGK.H                                                           | 1147.30399 | 1 | 8.04E-04 | 0.23   | 2.07    | -     | 367.4    |
| AHQ-3-13, 4854 - 4929        | R.VSLDVNHAFDELTVK.T                                                      | 1784.99058 | 2 | 1.88E-08 | 0.94   | 4.33    | -     | 1008.7   |
| AHQ-3-14, 5699 - 5700        | R.VSLDVNHAFDELTVK.T                                                      | 1784.99058 | 2 | 3.52E-10 | 0.97   | 5.51    | -     | 1281.3   |
| AHQ-3-11, 4444 - 4506        | R.VSLDVNHAFDELTVK.T                                                      | 1784.99058 | 2 | 8.17E-09 | 0.96   | 4.84    | -     | 1128.5   |
| AHQ-3-13-, 4603 - 4614       | R.VSLDVNHAFDELTVK.T                                                      | 1784.99058 | 2 | 3.64E-10 | 0.97   | 5.35    | -     | 1568.1   |
| AHQ-3-13, 4621               | R.VSLDVNHAFDELTVK.T                                                      | 1784.99058 | 3 | 1.58E-07 | 0.79   | 3.65    | -     | 525.6    |
| AHQ-3-13, 4595               | R.VSLDVNHAFDELTVK.T                                                      | 1784.99058 | 2 | 6.95E-09 | 0.94   | 4.26    | -     | 1253.5   |
| AHQ-3-14-, 4564 - 4635       | R.VSLDVNHAFDELTVK.T                                                      | 1784.99058 | 2 | 7.00E-05 | 0.95   | 5.05    | -     | 998.0    |
| AHQ-3-14-, 4591 - 4639       | R.VSLDVNHAFDELTVK.T                                                      | 1784.99058 | 3 | 1.53E-05 | 0.67   | 3.26    | -     | 408.2    |
| AHQ-3-10, 4240               | R.VSLDVNHAFDELTVK.T                                                      | 1784.99058 | 2 | 1.48E-05 | 0.89   | 3.67    | -     | 818.7    |
| AHQ-3-11, 4630               | R.VSLDVNHAFDELTVK.T                                                      | 1784.99058 | 2 | 1.77E-07 | 0.89   | 4.04    | -     | 889.7    |
| gj4507149[ref][NP_000445.1]  | superoxide dismutase 1, soluble (amyotrophic lateral sclerosis 1 (adult  |            |   | 1.00E-30 | 4.69   | 50.42   | 57.80 | 15935.7  |
| AHQ-3-12, 5327               | K.AVCVLKGDGPPVQGIINFEQK.E                                                | 2174.50602 | 2 | 3.78E-07 | 0.96   | 5.07    | -     | 996.7    |
| AHQ-3-11, 5070               | K.AVCVLKGDGPPVQGIINFEQK.E                                                | 2174.50602 | 2 | 2.80E-07 | 0.95   | 4.68    | -     | 952.9    |
| AHQ-3-12, 4340 - 4354        | K.GDGPVQGIINFEQK.E                                                       | 1502.65366 | 2 | 3.95E-07 | 0.85   | 3.31    | -     | 687.5    |
| AHQ-3-12, 4483 - 4496        | K.GDGPVQGIINFEQK.E                                                       | 1502.65366 | 2 | 1.87E-05 | 0.71   | 3.17    | -     | 505.1    |
| AHQ-3-12, 4851 - 4875        | K.GLTEGLHGFGVHFEGDNTAGCTSAGPHFNPLSR.K                                    | 3522.76733 | 3 | 9.44E-13 | 0.98   | 8.37    | -     | 2732.0   |
| AHQ-3-12, 2055 - 2060        | R.HVGDGLGNVTADK.D                                                        | 1226.32129 | 2 | 5.17E-06 | 0.93   | 3.96    | -     | 709.6    |
| AHQ-3-11, 5726 - 5730        | R.HVGDGLGNVTADKDGADVADVSISLGDHCIIGR.T                                    | 3724.02282 | 3 | 1.00E-30 | 0.98   | 8.42    | -     | 1675.4   |
| gj5729770[ref][NP_000382.3]  | ceroid-lipofuscinosis, neuronal 2, late infantile (Jansky-Bielschowsky   |            |   | 1.00E-30 | 1.88   | 20.31   | 7.30  | 61247.6  |
| AHQ-3-8, 2574 - 2581         | R.LFGGNFAHQASAVR.V                                                       | 1475.63637 | 2 | 5.46E-04 | 0.90   | 3.89    | -     | 712.5    |
| AHQ-3-8, 7252                | R.VPIPWVSGTSA23725                                                       | 2836.23725 | 3 | 1.00E-30 | 0.97   | 6.14    | -     | 1977.3   |
| gj16753233[ref][NP_006280.2] | talin 1 [Homo sapiens]                                                   |            |   | 5.55E-16 | 110.44 | 1270.39 | 56.60 | 269665.3 |
| AHQ-3-1, 3284                | K.AAAFEQENETVVVK.E                                                       | 1664.79496 | 2 | 2.66E-05 | 0.85   | 3.60    | -     | 939.4    |
| AHQ-3-1, 3482 - 3541         | K.AAAFEQENETVVVK.E                                                       | 1664.79496 | 2 | 2.85E-05 | 0.84   | 3.74    | -     | 755.0    |

|                       |                                      |            |   |          |      |      |   |        |
|-----------------------|--------------------------------------|------------|---|----------|------|------|---|--------|
| AHQ-3-1, 3621         | K.AAAFEQEENETVVVK.E                  | 1664.79496 | 2 | 4.63E-05 | 0.87 | 3.75 | - | 777.4  |
| AHQ-3-2, 3343 - 3413  | K.AAAFEQEENETVVVK.E                  | 1664.79496 | 2 | 1.93E-07 | 0.92 | 4.64 | - | 893.5  |
| AHQ-3-13, 3187        | K.AAAFEQEENETVVVK.E                  | 1664.79496 | 2 | 3.85E-05 | 0.55 | 2.79 | - | 347.3  |
| AHQ-3-1, 2692         | R.AAM*EPIVISAK.T                     | 1146.38260 | 2 | 1.05E-05 | 0.72 | 2.68 | - | 613.8  |
| AHQ-3-5, 2335         | R.AAM*EPIVISAK.T                     | 1146.38260 | 1 | 1.30E-04 | 0.52 | 2.34 | - | 258.8  |
| AHQ-3-5, 2943 - 2948  | R.AAMEPISAK.T                        | 1130.38320 | 2 | 1.67E-04 | 0.65 | 2.70 | - | 414.8  |
| AHQ-3-6, 2902         | R.AAMEPISAK.T                        | 1130.38320 | 2 | 3.31E-04 | 0.56 | 2.66 | - | 357.0  |
| AHQ-3-3, 2482 - 2486  | R.AAM*EPIVISAK.T                     | 1146.38260 | 2 | 1.08E-05 | 0.87 | 3.03 | - | 823.9  |
| AHQ-3-3, 2480         | R.AAM*EPIVISAK.T                     | 1146.38260 | 1 | 9.24E-05 | 0.23 | 2.36 | - | 125.0  |
| AHQ-3-2, 2485 - 2502  | R.AAM*EPIVISAK.T                     | 1146.38260 | 1 | 9.64E-04 | 0.11 | 1.84 | - | 158.2  |
| AHQ-3-2, 2490         | R.AAM*EPIVISAK.T                     | 1146.38260 | 2 | 8.72E-06 | 0.88 | 3.00 | - | 919.9  |
| AHQ-3-4, 2466         | R.AAM*EPIVISAK.T                     | 1146.38260 | 2 | 4.10E-07 | 0.87 | 2.89 | - | 835.0  |
| AHQ-3-2, 1835         | K.ADAEGESDLENSR.K                    | 1393.35296 | 2 | 1.67E-06 | 0.87 | 3.35 | - | 759.8  |
| AHQ-3-4, 1901         | K.ADAEGESDLENSR.K                    | 1393.35296 | 2 | 2.39E-06 | 0.91 | 3.56 | - | 1017.5 |
| AHQ-3-5, 1693         | K.ADAEGESDLENSR.K                    | 1393.35296 | 2 | 6.35E-04 | 0.86 | 3.07 | - | 850.6  |
| AHQ-3-4, 2562         | K.AGALQCSPSDAYTK.K                   | 1470.58689 | 2 | 7.75E-04 | 0.92 | 3.56 | - | 887.0  |
| AHQ-3-3, 2580         | K.AGALQCSPSDAYTK.K                   | 1470.58689 | 2 | 1.65E-06 | 0.83 | 3.57 | - | 610.6  |
| AHQ-3-3, 2589         | K.AGALQCSPSDAYTK.K                   | 1470.58689 | 1 | 8.29E-05 | 0.78 | 3.87 | - | 471.5  |
| AHQ-3-4, 2558 - 2564  | K.AGALQCSPSDAYTK.K                   | 1470.58689 | 1 | 4.51E-05 | 0.83 | 3.01 | - | 761.8  |
| AHQ-3-1, 2453         | K.AGALQCSPSDAYTKK.E                  | 1598.75981 | 2 | 6.13E-05 | 0.72 | 3.10 | - | 513.7  |
| AHQ-3-7, 6039         | K.AGFLLDKDFLPK.E                     | 1364.61374 | 2 | 4.04E-04 | 0.92 | 3.83 | - | 1270.3 |
| AHQ-3-4, 4050         | K.AIAVTVQEMVTK.S                     | 1290.55498 | 2 | 1.90E-04 | 0.84 | 2.89 | - | 792.6  |
| AHQ-3-2, 4065         | K.AIAVTVQEMVTK.S                     | 1290.55498 | 2 | 6.67E-06 | 0.96 | 4.73 | - | 1075.7 |
| AHQ-3-1, 4210         | K.AIAVTVQEMVTK.S                     | 1290.55498 | 2 | 5.17E-05 | 0.94 | 3.77 | - | 1236.2 |
| AHQ-3-3, 4014 - 4022  | K.AIAVTVQEMVTK.S                     | 1290.55498 | 2 | 4.57E-04 | 0.95 | 4.45 | - | 1181.5 |
| AHQ-3-2, 4157 - 4158  | K.AIAVTVQEMVTK.S                     | 1290.55498 | 2 | 3.47E-04 | 0.92 | 3.56 | - | 1284.4 |
| AHQ-3-4, 3932         | K.AIAVTVQEMVTK.S                     | 1290.55498 | 2 | 1.21E-04 | 0.89 | 3.39 | - | 1047.3 |
| AHQ-3-1, 3029         | K.AIAVTVQEM*VTK.S                    | 1306.55438 | 2 | 5.52E-05 | 0.94 | 3.73 | - | 1142.0 |
| AHQ-3-2, 2461 - 2462  | K.ALDGAFTEENR.A                      | 1223.27427 | 2 | 6.63E-05 | 0.95 | 3.69 | - | 1423.2 |
| AHQ-3-1, 2589         | K.ALDGAFTEENR.A                      | 1223.27427 | 2 | 1.91E-07 | 0.94 | 3.50 | - | 1436.9 |
| AHQ-3-4, 2445         | K.ALDGAFTEENR.A                      | 1223.27427 | 2 | 1.52E-06 | 0.92 | 3.40 | - | 1301.8 |
| AHQ-3-3, 2445         | K.ALDGAFTEENR.A                      | 1223.27427 | 2 | 3.64E-06 | 0.94 | 3.69 | - | 1424.3 |
| AHQ-3-4, 2566 - 2568  | K.ALDGAFTEENR.A                      | 1223.27427 | 2 | 8.91E-06 | 0.94 | 3.72 | - | 1413.7 |
| AHQ-3-1, 2746         | K.ALDGAFTEENR.A                      | 1223.27427 | 2 | 5.29E-07 | 0.93 | 3.54 | - | 1534.3 |
| AHQ-3-7, 3602         | K.ALDYYMLR.N                         | 1045.23686 | 2 | 8.42E-05 | 0.92 | 3.04 | - | 1003.6 |
| AHQ-3-13, 3918 - 3921 | K.ALDYYMLR.N                         | 1045.23686 | 1 | 2.23E-04 | 0.32 | 1.95 | - | 258.8  |
| AHQ-3-13-, 3935       | K.ALDYYMLR.N                         | 1045.23686 | 2 | 2.50E-06 | 0.93 | 3.28 | - | 928.9  |
| AHQ-3-7, 4210         | K.ALDYYMLRNGDMEYR.K                  | 2012.25579 | 2 | 6.45E-04 | 0.54 | 2.70 | - | 514.3  |
| AHQ-3-3, 1801 - 1874  | R.ALEATTEHIR.Q                       | 1141.25953 | 2 | 2.25E-05 | 0.66 | 2.73 | - | 728.4  |
| AHQ-3-2, 1738 - 1805  | R.ALEATTEHIR.Q                       | 1141.25953 | 1 | 4.36E-05 | 0.07 | 2.04 | - | 251.0  |
| AHQ-3-5, 1616         | R.ALEATTEHIR.Q                       | 1141.25953 | 2 | 4.71E-04 | 0.85 | 3.26 | - | 951.1  |
| AHQ-3-1, 3565         | K.ALGDILISATK.A                      | 989.14811  | 2 | 2.05E-04 | 0.93 | 3.34 | - | 947.1  |
| AHQ-3-5, 3243         | K.ALGDILISATK.A                      | 989.14811  | 2 | 7.60E-07 | 0.92 | 4.02 | - | 713.2  |
| AHQ-3-7, 3127         | K.ALGDILISATK.A                      | 989.14811  | 2 | 2.45E-04 | 0.82 | 2.65 | - | 729.0  |
| AHQ-3-2, 3447         | K.ALGDILISATK.A                      | 989.14811  | 2 | 8.98E-07 | 0.91 | 3.73 | - | 829.4  |
| AHQ-3-4, 3408         | K.ALGDILISATK.A                      | 989.14811  | 2 | 6.20E-06 | 0.94 | 3.65 | - | 958.2  |
| AHQ-3-3, 3440         | K.ALGDILISATK.A                      | 989.14811  | 2 | 2.92E-06 | 0.88 | 3.18 | - | 777.9  |
| AHQ-3-6, 3189         | K.ALGDILISATK.A                      | 989.14811  | 2 | 6.43E-07 | 0.92 | 3.57 | - | 859.9  |
| AHQ-3-7, 2358         | K.ALSTDPAAPNLK.S                     | 1198.35099 | 2 | 3.87E-06 | 0.72 | 2.82 | - | 727.4  |
| AHQ-3-1, 2733         | K.ALSTDPAAPNLK.S                     | 1198.35099 | 2 | 3.62E-07 | 0.79 | 3.02 | - | 620.7  |
| AHQ-3-3, 2550         | K.ALSTDPAAPNLK.S                     | 1198.35099 | 2 | 1.27E-06 | 0.65 | 2.73 | - | 604.2  |
| AHQ-3-6, 2406 - 2410  | K.ALSTDPAAPNLK.S                     | 1198.35099 | 2 | 1.57E-06 | 0.77 | 3.06 | - | 618.0  |
| AHQ-3-2, 2557 - 2566  | K.ALSTDPAAPNLK.S                     | 1198.35099 | 2 | 1.29E-07 | 0.82 | 3.44 | - | 593.6  |
| AHQ-3-3, 3568         | K.ALSTDPAAPNLKSQAAAAA.R              | 1967.21592 | 2 | 6.86E-08 | 0.80 | 3.33 | - | 469.6  |
| AHQ-3-2, 7750         | R.ANQAIQMACQSLGEPGCTQAOVLSAATIVAK.H  | 3220.64522 | 3 | 7.59E-04 | 0.92 | 5.08 | - | 844.2  |
| AHQ-3-1, 6232 - 6304  | R.ANQAIQM*ACQSLGEPGCTQAOVLSAATIVAK.H | 3236.64462 | 3 | 1.72E-04 | 0.88 | 4.53 | - | 817.5  |
| AHQ-3-1, 6450         | K.APGQLECEETAIAALNSCLR.D             | 2077.32566 | 2 | 1.21E-04 | 0.72 | 2.85 | - | 604.8  |
| AHQ-3-2, 6515         | K.APGQLECEETAIAALNSCLR.D             | 2077.32566 | 2 | 4.57E-07 | 0.95 | 4.80 | - | 1164.0 |
| AHQ-3-3, 6448         | K.APGQLECEETAIAALNSCLR.D             | 2077.32566 | 2 | 1.94E-07 | 0.96 | 4.31 | - | 1518.8 |
| AHQ-3-3, 6721         | K.APGQLECEETAIAALNSCLR.D             | 2077.32566 | 2 | 2.99E-10 | 0.93 | 4.11 | - | 821.8  |
| AHQ-3-3, 5758         | K.APGQLECEETAIAALNSCLR.D             | 2077.32566 | 2 | 5.15E-08 | 0.95 | 4.42 | - | 1119.8 |
| AHQ-3-4, 6461         | K.APGQLECEETAIAALNSCLR.D             | 2077.32566 | 2 | 1.64E-07 | 0.96 | 5.04 | - | 1253.4 |
| AHQ-3-2, 5821 - 5826  | K.APGQLECEETAIAALNSCLR.D             | 2077.32566 | 2 | 6.03E-09 | 0.97 | 4.65 | - | 1483.2 |
| AHQ-3-1, 6676         | K.APGQLECEETAIAALNSCLR.D             | 2077.32566 | 2 | 1.13E-05 | 0.56 | 3.24 | - | 482.7  |
| AHQ-3-2, 7178         | K.AQEACGPLEMDSALSVVQNLK.E.D          | 2391.66165 | 3 | 5.62E-04 | 0.91 | 4.42 | - | 1227.5 |
| AHQ-3-1, 6169         | K.AQEACGPLEM*DSALSVVQNLK.E.D         | 2407.66105 | 3 | 1.77E-04 | 0.89 | 4.51 | - | 856.5  |
| AHQ-3-3, 7085 - 7089  | K.AQEACGPLEMDSALSVVQNLK.E.D          | 2391.66165 | 3 | 1.09E-05 | 0.96 | 5.05 | - | 1997.5 |
| AHQ-3-4, 7096 - 7097  | K.AQEACGPLEMDSALSVVQNLK.E.D          | 2391.66165 | 3 | 1.36E-04 | 0.96 | 5.39 | - | 1629.4 |
| AHQ-3-1, 7004         | K.AQEACGPLEMDSALSVVQNLK.E.D          | 2391.66165 | 2 | 3.60E-06 | 0.77 | 3.14 | - | 768.6  |
| AHQ-3-1, 7012         | K.AQEACGPLEMDSALSVVQNLK.E.D          | 2391.66165 | 3 | 9.31E-06 | 0.96 | 5.15 | - | 1639.9 |
| AHQ-3-3, 7084         | K.AQEACGPLEMDSALSVVQNLK.E.D          | 2391.66165 | 2 | 1.24E-04 | 0.77 | 3.17 | - | 601.0  |
| AHQ-3-5, 2684         | K.ASAGPQPLLVQSKC.A                   | 1457.67763 | 1 | 8.13E-10 | 0.67 | 3.65 | - | 342.2  |
| AHQ-3-6, 2691         | K.ASAGPQPLLVQSKC.A                   | 1457.67763 | 1 | 1.00E-06 | 0.58 | 3.08 | - | 377.7  |
| AHQ-3-2, 2879 - 2883  | K.ASAGPQPLLVQSKC.A                   | 1457.67763 | 1 | 7.86E-04 | 0.17 | 2.13 | - | 465.2  |
| AHQ-3-4, 2810         | K.ASAGPQPLLVQSKC.A                   | 1457.67763 | 2 | 4.94E-05 | 0.81 | 3.45 | - | 392.2  |
| AHQ-3-3, 2864         | K.ASAGPQPLLVQSKC.A                   | 1457.67763 | 2 | 3.82E-05 | 0.86 | 3.39 | - | 506.4  |
| AHQ-3-2, 2859 - 2937  | K.ASAGPQPLLVQSKC.A                   | 1457.67763 | 2 | 2.22E-06 | 0.86 | 3.47 | - | 456.5  |
| AHQ-3-4, 2834         | K.ASAGPQPLLVQSKC.A                   | 1457.67763 | 1 | 3.16E-07 | 0.65 | 3.44 | - | 383.9  |
| AHQ-3-1, 3014 - 3084  | K.ASAGPQPLLVQSKC.A                   | 1457.67763 | 2 | 5.85E-07 | 0.83 | 3.26 | - | 453.9  |
| AHQ-3-1, 3073 - 3078  | K.ASAGPQPLLVQSKC.A                   | 1457.67763 | 1 | 2.90E-05 | 0.19 | 2.22 | - | 403.6  |
| AHQ-3-3, 2886         | K.ASAGPQPLLVQSKC.A                   | 1457.67763 | 1 | 1.84E-05 | 0.65 | 3.10 | - | 457.3  |
| AHQ-3-5, 2644 - 2715  | K.ASAGPQPLLVQSKC.A                   | 1457.67763 | 2 | 1.11E-05 | 0.65 | 2.85 | - | 371.6  |
| AHQ-3-7, 2528 - 2584  | K.ASAGPQPLLVQSKC.A                   | 1457.67763 | 2 | 8.44E-04 | 0.43 | 2.67 | - | 356.9  |
| AHQ-3-3, 4605         | K.ASVPTIQDQASAMQLSQCAK.N             | 2136.39332 | 2 | 2.07E-09 | 0.91 | 4.19 | - | 659.9  |
| AHQ-3-3, 4881         | K.ASVPTIQDQASAMQLSQCAK.N             | 2136.39332 | 2 | 4.74E-08 | 0.84 | 3.83 | - | 418.2  |
| AHQ-3-2, 4938         | K.ASVPTIQDQASAMQLSQCAK.N             | 2136.39332 | 2 | 1.40E-11 | 0.83 | 3.75 | - | 401.4  |
| AHQ-3-7, 4079         | K.ASVPTIQDQASAMQLSQCAK.N             | 2136.39332 | 2 | 4.99E-05 | 0.90 | 4.62 | - | 494.7  |
| AHQ-3-1, 4454         | K.ASVPTIQDQASAMQLSQCAK.N             | 2136.39332 | 2 | 1.59E-04 | 0.70 | 2.80 | - | 641.9  |
| AHQ-3-3, 4389 - 4461  | K.ASVPTIQDQASAMQLSQCAK.N             | 2136.39332 | 2 | 3.48E-06 | 0.82 | 3.84 | - | 404.0  |
| AHQ-3-2, 4425 - 4493  | K.ASVPTIQDQASAMQLSQCAK.N             | 2136.39332 | 2 | 1.87E-06 | 0.96 | 4.77 | - | 1321.2 |
| AHQ-3-2, 4561 - 4629  | K.ASVPTIQDQASAMQLSQCAK.N             | 2136.39332 | 2 | 9.54E-10 | 0.96 | 5.51 | - | 736.5  |
| AHQ-3-3, 3776         | K.ASVPTIQDQASAM*QLSQCAK.N            | 2152.39272 | 2 | 1.08E-04 | 0.92 | 3.97 | - | 1082.8 |
| AHQ-3-4, 4325 - 4396  | K.ASVPTIQDQASAMQLSQCAK.N             | 2136.39332 | 2 | 8.17E-04 | 0.85 | 3.55 | - | 541.6  |
| AHQ-3-4, 4464         | K.ASVPTIQDQASAMQLSQCAK.N             | 2136.39332 | 2 | 6.45E-06 | 0.90 | 4.05 | - | 713.9  |
| AHQ-3-2, 3633         | K.ASVPTIQDQASAM*QLSQCAK.N            | 2152.39272 | 2 | 5.11E-05 | 0.70 | 2.89 | - | 455.9  |
| AHQ-3-6, 4107         | K.ASVPTIQDQASAMQLSQCAK.N             | 2136.39332 | 2 | 1.37E-08 | 0.87 | 3.82 | - | 588.9  |
| AHQ-3-2, 3983 - 3990  | K.ASVPTIQDQASAM*QLSQCAK.N            | 2152.39272 | 2 | 1.82E-05 | 0.95 | 4.77 | - | 858.2  |
| AHQ-3-2, 4093         | K.ASVPTIQDQASAM*QLSQCAK.N            | 2152.39272 | 2 | 7.94E-06 | 0.83 | 3.80 | - | 380.0  |
| AHQ-3-5, 4376         | K.ASVPTIQDQASAMQLSQCAK.N             | 2136.39332 | 2 | 1.41E-05 | 0.75 | 3.69 | - | 376.0  |
| AHQ-3-5, 4203         | K.ASVPTIQDQASAMQLSQCAK.N             | 2136.39332 | 2 | 1.49E-04 | 0.88 | 3.84 | - | 539.7  |
| AHQ-3-5, 3599         | K.ASVPTIQDQASAM*QLSQCAK.N            | 2152.39272 | 2 | 5.14E-06 | 0.72 | 3.23 | - | 342.1  |
| AHQ-3-6, 3538         | K.ASVPTIQDQASAM*QLSQCAK.N            | 2152.39272 | 2 | 6.08E-07 | 0.85 | 3.51 | - | 615.6  |
| AHQ-3-1, 3857 - 3872  | K.ASVPTIQDQASAM*QLSQCAK.N            | 2152.39272 | 2 | 1.29E-04 | 0.87 | 3.72 | - | 548.5  |
| AHQ-3-3, 5058 - 5076  | K.AVAEQIPLLVQGV.R.G                  | 1493.77619 | 2 | 1.94E-08 | 0.93 | 4.56 | - | 719.7  |
| AHQ-3-4, 4985 - 5013  | K.AVAEQIPLLVQGV.R.G                  | 1493.77619 | 2 | 4.50E-11 | 0.93 | 4.49 | - | 703.5  |
| AHQ-3-2, 5007 - 5085  | K.AVAEQIPLLVQGV.R.G                  | 1493.77619 | 2 | 1.33E-04 | 0.90 | 4.10 | - | 632.8  |
| AHQ-3-5, 4815         | K.AVAEQIPLLVQGV.R.G                  | 1493.77619 | 1 | 2.81E-04 | 0.43 | 2.79 | - | 324.5  |

|                       |                                    |            |   |          |      |      |   |        |
|-----------------------|------------------------------------|------------|---|----------|------|------|---|--------|
| AHQ-3-5, 4829         | K.AVAEQIPLLVQGV.R.G                | 1493.77619 | 1 | 1.12E-08 | 0.34 | 2.35 | - | 158.6  |
| AHQ-3-2, 5394         | K.AVAEQIPLLVQGV.R.G                | 1493.77619 | 2 | 5.08E-04 | 0.74 | 2.77 | - | 716.6  |
| AHQ-3-5, 4803 - 4873  | K.AVAEQIPLLVQGV.R.G                | 1493.77619 | 2 | 1.03E-05 | 0.83 | 3.50 | - | 537.8  |
| AHQ-3-3, 5064 - 5066  | K.AVAEQIPLLVQGV.R.G                | 1493.77619 | 1 | 3.85E-04 | 0.54 | 3.14 | - | 374.9  |
| AHQ-3-2, 3917         | K.AVASAAAALV.LK.A                  | 1085.32216 | 2 | 4.28E-05 | 0.96 | 4.27 | - | 1577.6 |
| AHQ-3-1, 4046         | K.AVASAAAALV.LK.A                  | 1085.32216 | 2 | 1.10E-05 | 0.95 | 4.22 | - | 1347.6 |
| AHQ-3-2, 4985 - 5055  | K.AVEGCVSASQAATEDGQLLR.G           | 2064.22056 | 2 | 1.79E-06 | 0.93 | 4.25 | - | 1032.0 |
| AHQ-3-2, 4369 - 4399  | K.AVEGCVSASQAATEDGQLLR.G           | 2064.22056 | 2 | 3.76E-06 | 0.89 | 3.80 | - | 1052.2 |
| AHQ-3-2, 3963         | K.AVEGCVSASQAATEDGQLLR.G           | 2064.22056 | 2 | 2.28E-05 | 0.87 | 3.91 | - | 770.8  |
| AHQ-3-1, 4216 - 4292  | K.AVEGCVSASQAATEDGQLLR.G           | 2064.22056 | 2 | 2.81E-06 | 0.66 | 2.94 | - | 1047.1 |
| AHQ-3-2, 4455 - 4475  | K.AVEGCVSASQAATEDGQLLR.G           | 2064.22056 | 2 | 1.71E-06 | 0.95 | 4.57 | - | 1361.9 |
| AHQ-3-2, 4265 - 4298  | K.AVEGCVSASQAATEDGQLLR.G           | 2064.22056 | 2 | 6.98E-07 | 0.94 | 4.77 | - | 1164.3 |
| AHQ-3-4, 4244         | K.AVEGCVSASQAATEDGQLLR.G           | 2064.22056 | 2 | 4.23E-08 | 0.59 | 2.87 | - | 670.7  |
| AHQ-3-1, 3992         | K.AVEGCVSASQAATEDGQLLR.G           | 2064.22056 | 2 | 8.64E-05 | 0.96 | 4.61 | - | 1522.2 |
| AHQ-3-1, 4233         | K.AVEGCVSASQAATEDGQLLR.G           | 2064.22056 | 3 | 5.45E-07 | 0.90 | 3.80 | - | 1354.2 |
| AHQ-3-6, 7201 - 7206  | K.AVSSAIAQLLGEVAQQNENYAGIAAR.D     | 2574.83158 | 3 | 1.52E-13 | 0.97 | 5.59 | - | 1594.6 |
| AHQ-3-3, 7414 - 7416  | K.AVSSAIAQLLGEVAQQNENYAGIAAR.D     | 2574.83158 | 3 | 4.97E-07 | 0.96 | 4.91 | - | 1856.4 |
| AHQ-3-1, 5877 - 5886  | R.AVTDSINQLITM*CTQQAPGQK.E         | 2322.60252 | 2 | 5.61E-04 | 0.88 | 4.48 | - | 486.9  |
| AHQ-3-4, 4873         | R.AVTDSINQLITM*CTQQAPGQK.E         | 2306.60312 | 2 | 6.09E-06 | 0.58 | 2.96 | - | 308.6  |
| AHQ-3-2, 5921         | R.AVTDSINQLITM*CTQQAPGQK.E         | 2322.60252 | 2 | 8.72E-06 | 0.82 | 3.73 | - | 459.4  |
| AHQ-3-6, 6037         | R.AVTDSINQLITM*CTQQAPGQK.E         | 2306.60312 | 2 | 2.41E-04 | 0.74 | 3.66 | - | 479.1  |
| AHQ-3-2, 4894 - 4965  | R.AVTDSINQLITM*CTQQAPGQK.E         | 2306.60312 | 2 | 2.44E-09 | 0.86 | 4.08 | - | 393.5  |
| AHQ-3-3, 5804 - 5873  | R.AVTDSINQLITM*CTQQAPGQK.E         | 2322.60252 | 2 | 2.18E-04 | 0.56 | 3.70 | - | 397.5  |
| AHQ-3-3, 4912         | R.AVTDSINQLITM*CTQQAPGQK.E         | 2306.60312 | 2 | 6.92E-08 | 0.78 | 3.90 | - | 398.3  |
| AHQ-3-1, 6012 - 6090  | R.AVTDSINQLITM*CTQQAPGQK.ECDNALR.E | 3182.51068 | 3 | 1.86E-07 | 0.93 | 5.29 | - | 887.1  |
| AHQ-3-5, 6327         | R.AVTDSINQLITM*CTQQAPGQK.ECDNALR.E | 3166.51128 | 3 | 9.20E-13 | 0.92 | 4.73 | - | 1123.5 |
| AHQ-3-2, 6065         | R.AVTDSINQLITM*CTQQAPGQK.ECDNALR.E | 3182.51068 | 3 | 8.52E-10 | 0.95 | 5.07 | - | 1272.7 |
| AHQ-3-4, 5890 - 5952  | R.AVTDSINQLITM*CTQQAPGQK.ECDNALR.E | 3182.51068 | 3 | 1.93E-05 | 0.93 | 5.40 | - | 961.3  |
| AHQ-3-3, 6340 - 6422  | R.AVTDSINQLITM*CTQQAPGQK.ECDNALR.E | 3166.51128 | 3 | 1.22E-11 | 0.94 | 5.24 | - | 915.2  |
| AHQ-3-4, 6294 - 6364  | R.AVTDSINQLITM*CTQQAPGQK.ECDNALR.E | 3166.51128 | 3 | 8.68E-09 | 0.90 | 4.30 | - | 946.0  |
| AHQ-3-1, 6302 - 6346  | R.AVTDSINQLITM*CTQQAPGQK.ECDNALR.E | 3166.51128 | 3 | 4.97E-11 | 0.86 | 4.04 | - | 706.4  |
| AHQ-3-5, 6219         | R.AVTDSINQLITM*CTQQAPGQK.ECDNALR.E | 3166.51128 | 3 | 5.95E-08 | 0.87 | 4.50 | - | 839.6  |
| AHQ-3-3, 2385         | R.CVSLCPGQR.D                      | 1079.23309 | 1 | 5.70E-04 | 0.10 | 2.11 | - | 89.2   |
| AHQ-3-5, 2285 - 2291  | R.CVSLCPGQR.D                      | 1079.23309 | 1 | 6.14E-04 | 0.15 | 1.97 | - | 93.6   |
| AHQ-3-4, 2380         | R.CVSLCPGQR.D                      | 1079.23309 | 1 | 7.70E-05 | 0.43 | 2.02 | - | 222.6  |
| AHQ-3-10, 3403 - 3404 | R.DDILNGSHIPV.SFDK.A               | 1544.64741 | 2 | 8.80E-06 | 0.89 | 3.75 | - | 791.8  |
| AHQ-3-9, 3139         | R.DDILNGSHIPV.SFDK.A               | 1544.64741 | 2 | 9.56E-09 | 0.91 | 3.90 | - | 877.7  |
| AHQ-3-10, 3234 - 3239 | R.DDILNGSHIPV.SFDK.A               | 1544.64741 | 2 | 1.02E-09 | 0.85 | 3.30 | - | 724.6  |
| AHQ-3-7, 3448 - 3463  | R.DDILNGSHIPV.SFDK.A               | 1544.64741 | 2 | 7.31E-09 | 0.93 | 4.22 | - | 1053.6 |
| AHQ-3-7, 3314 - 3322  | R.DDILNGSHIPV.SFDK.A               | 1544.64741 | 2 | 9.61E-09 | 0.95 | 4.18 | - | 1199.2 |
| AHQ-3-4, 3541         | R.DDILNGSHIPV.SFDK.A               | 1544.64741 | 2 | 7.98E-07 | 0.72 | 3.13 | - | 553.3  |
| AHQ-3-2, 6458 - 6529  | R.DKAPGQLECETAAIAALNSCLR.D         | 2320.58644 | 2 | 2.16E-12 | 0.97 | 5.10 | - | 1460.9 |
| AHQ-3-2, 6318 - 6326  | R.DKAPGQLECETAAIAALNSCLR.D         | 2320.58644 | 3 | 2.16E-06 | 0.84 | 4.24 | - | 1027.8 |
| AHQ-3-2, 5471 - 5541  | R.DKAPGQLECETAAIAALNSCLR.D         | 2320.58644 | 2 | 4.33E-09 | 0.90 | 4.30 | - | 775.3  |
| AHQ-3-6, 5981 - 6050  | R.DKAPGQLECETAAIAALNSCLR.D         | 2320.58644 | 2 | 1.06E-07 | 0.91 | 3.80 | - | 889.7  |
| AHQ-3-2, 6537         | R.DKAPGQLECETAAIAALNSCLR.D         | 2320.58644 | 3 | 6.18E-04 | 0.68 | 3.74 | - | 634.7  |
| AHQ-3-3, 5382 - 5454  | R.DKAPGQLECETAAIAALNSCLR.D         | 2320.58644 | 2 | 9.13E-06 | 0.86 | 3.45 | - | 980.7  |
| AHQ-3-2, 5979 - 6053  | R.DKAPGQLECETAAIAALNSCLR.D         | 2320.58644 | 2 | 8.51E-10 | 0.93 | 4.19 | - | 1000.0 |
| AHQ-3-4, 5366 - 5437  | R.DKAPGQLECETAAIAALNSCLR.D         | 2320.58644 | 2 | 4.42E-11 | 0.93 | 4.09 | - | 1235.8 |
| AHQ-3-3, 6249 - 6274  | R.DKAPGQLECETAAIAALNSCLR.D         | 2320.58644 | 2 | 5.29E-07 | 0.93 | 4.15 | - | 992.7  |
| AHQ-3-3, 6005         | R.DKAPGQLECETAAIAALNSCLR.D         | 2320.58644 | 2 | 2.29E-04 | 0.78 | 2.96 | - | 759.6  |
| AHQ-3-5, 6403         | R.DKAPGQLECETAAIAALNSCLR.D         | 2320.58644 | 2 | 7.22E-15 | 0.91 | 3.71 | - | 1003.1 |
| AHQ-3-4, 6225 - 6292  | R.DKAPGQLECETAAIAALNSCLR.D         | 2320.58644 | 2 | 2.68E-12 | 0.93 | 4.45 | - | 676.8  |
| AHQ-3-4, 6244         | R.DKAPGQLECETAAIAALNSCLR.D         | 2320.58644 | 2 | 4.74E-08 | 0.85 | 3.57 | - | 619.9  |
| AHQ-3-9, 5643         | R.DKAPGQLECETAAIAALNSCLR.D         | 2320.58644 | 2 | 5.50E-08 | 0.89 | 3.55 | - | 1010.9 |
| AHQ-3-5, 6115 - 6124  | R.DKAPGQLECETAAIAALNSCLR.D         | 2320.58644 | 3 | 2.20E-04 | 0.85 | 3.75 | - | 1120.6 |
| AHQ-3-5, 6107         | R.DKAPGQLECETAAIAALNSCLR.D         | 2320.58644 | 2 | 9.60E-12 | 0.96 | 4.98 | - | 1126.0 |
| AHQ-3-3, 6372         | R.DKAPGQLECETAAIAALNSCLR.D         | 2320.58644 | 2 | 1.82E-06 | 0.76 | 3.35 | - | 636.5  |
| AHQ-3-2, 5870 - 5937  | R.DKAPGQLECETAAIAALNSCLR.D         | 2320.58644 | 2 | 3.90E-10 | 0.94 | 4.37 | - | 1173.3 |
| AHQ-3-1, 5517         | R.DKAPGQLECETAAIAALNSCLR.D         | 2320.58644 | 2 | 1.74E-09 | 0.91 | 4.15 | - | 908.8  |
| AHQ-3-4, 6410 - 6488  | R.DKAPGQLECETAAIAALNSCLR.D         | 2320.58644 | 2 | 2.40E-11 | 0.97 | 5.21 | - | 1226.9 |
| AHQ-3-3, 6481         | R.DKAPGQLECETAAIAALNSCLR.D         | 2320.58644 | 2 | 1.35E-09 | 0.72 | 2.98 | - | 517.6  |
| AHQ-3-1, 6241         | R.DKAPGQLECETAAIAALNSCLR.D         | 2320.58644 | 2 | 9.89E-08 | 0.96 | 4.78 | - | 1027.4 |
| AHQ-3-5, 5308         | R.DKAPGQLECETAAIAALNSCLR.D         | 2320.58644 | 2 | 4.79E-11 | 0.93 | 4.22 | - | 975.8  |
| AHQ-3-2, 5594         | R.DLDQASLAAYSQQLAPR.E              | 1783.96422 | 2 | 3.27E-06 | 0.90 | 3.95 | - | 1108.2 |
| AHQ-3-3, 5413 - 5472  | R.DLDQASLAAYSQQLAPR.E              | 1783.96422 | 2 | 2.54E-07 | 0.90 | 3.25 | - | 1291.2 |
| AHQ-3-2, 5542         | R.DLDQASLAAYSQQLAPR.E              | 1783.96422 | 3 | 2.71E-08 | 0.94 | 4.25 | - | 1796.5 |
| AHQ-3-4, 5516 - 5590  | R.DLDQASLAAYSQQLAPR.E              | 1783.96422 | 2 | 2.07E-10 | 0.85 | 3.27 | - | 1295.6 |
| AHQ-3-2, 5486 - 5523  | R.DLDQASLAAYSQQLAPR.E              | 1783.96422 | 2 | 1.42E-04 | 0.94 | 4.45 | - | 1123.3 |
| AHQ-3-4, 5398 - 5468  | R.DLDQASLAAYSQQLAPR.E              | 1783.96422 | 2 | 7.28E-07 | 0.97 | 5.64 | - | 1042.8 |
| AHQ-3-1, 5494         | R.DLDQASLAAYSQQLAPR.E              | 1783.96422 | 3 | 1.16E-06 | 0.91 | 4.70 | - | 1406.5 |
| AHQ-3-3, 5489         | R.DLDQASLAAYSQQLAPR.E              | 1783.96422 | 3 | 2.70E-07 | 0.90 | 3.89 | - | 1685.7 |
| AHQ-3-1, 3737         | R.DPPSWSVLAGHSR.T                  | 1409.53156 | 3 | 2.30E-06 | 0.84 | 3.43 | - | 741.6  |
| AHQ-3-6, 3219 - 3221  | R.DPPSWSVLAGHSR.T                  | 1409.53156 | 2 | 3.48E-06 | 0.84 | 3.46 | - | 485.0  |
| AHQ-3-3, 3528 - 3561  | R.DPPSWSVLAGHSR.T                  | 1409.53156 | 2 | 2.38E-08 | 0.87 | 3.12 | - | 462.7  |
| AHQ-3-1, 3729         | R.DPPSWSVLAGHSR.T                  | 1409.53156 | 2 | 6.26E-10 | 0.86 | 3.34 | - | 484.1  |
| AHQ-3-2, 3553 - 3599  | R.DPPSWSVLAGHSR.T                  | 1409.53156 | 2 | 9.30E-11 | 0.92 | 3.73 | - | 654.4  |
| AHQ-3-4, 3482         | R.DPPSWSVLAGHSR.T                  | 1409.53156 | 2 | 7.52E-07 | 0.84 | 2.81 | - | 585.3  |
| AHQ-3-10, 4715        | R.DPVQLNLLYQAR.D                   | 1529.76539 | 2 | 9.13E-08 | 0.97 | 5.34 | - | 1496.7 |
| AHQ-3-7, 5128 - 5206  | R.DPVQLNLLYQAR.D                   | 1529.76539 | 2 | 7.34E-06 | 0.96 | 4.26 | - | 1705.7 |
| AHQ-3-9, 4861         | R.DPVQLNLLYQAR.D                   | 1529.76539 | 2 | 2.88E-04 | 0.93 | 4.34 | - | 1110.6 |
| AHQ-3-2, 2381         | K.EAAYHPEVAPDVR.L                  | 1454.56910 | 1 | 1.73E-05 | 0.20 | 1.88 | - | 252.3  |
| AHQ-3-3, 2369 - 2370  | K.EAAYHPEVAPDVR.L                  | 1454.56910 | 1 | 1.26E-04 | 0.76 | 2.88 | - | 574.8  |
| AHQ-3-4, 2353         | K.EAAYHPEVAPDVR.L                  | 1454.56910 | 1 | 2.85E-04 | 0.13 | 1.90 | - | 242.0  |
| AHQ-3-4, 2356         | K.EAAYHPEVAPDVR.L                  | 1454.56910 | 1 | 1.34E-07 | 0.56 | 2.48 | - | 347.0  |
| AHQ-3-4, 2350 - 2352  | K.EAAYHPEVAPDVR.L                  | 1454.56910 | 2 | 2.73E-06 | 0.81 | 2.83 | - | 786.8  |
| AHQ-3-2, 2390         | K.EAAYHPEVAPDVR.L                  | 1454.56910 | 1 | 9.59E-10 | 0.86 | 3.40 | - | 485.1  |
| AHQ-3-4, 6181 - 6252  | K.EADESLNFEQIILAAK.S               | 1937.05072 | 2 | 4.32E-05 | 0.95 | 4.72 | - | 1299.2 |
| AHQ-3-3, 6205 - 6276  | K.EADESLNFEQIILAAK.S               | 1937.05072 | 2 | 4.93E-09 | 0.97 | 5.23 | - | 1498.9 |
| AHQ-3-4, 5948         | K.EADESLNFEQIILAAK.S               | 1937.05072 | 2 | 1.82E-06 | 0.92 | 4.28 | - | 976.0  |
| AHQ-3-4, 6320 - 6388  | K.EADESLNFEQIILAAK.S               | 1937.05072 | 2 | 2.08E-08 | 0.95 | 4.74 | - | 1099.6 |
| AHQ-3-3, 6345 - 6392  | K.EADESLNFEQIILAAK.S               | 1937.05072 | 2 | 3.71E-05 | 0.97 | 5.29 | - | 1619.6 |
| AHQ-3-2, 6635         | K.EADESLNFEQIILAAK.S               | 1937.05072 | 2 | 6.04E-08 | 0.96 | 4.78 | - | 1205.6 |
| AHQ-3-2, 6743 - 6781  | K.EADESLNFEQIILAAK.S               | 1937.05072 | 2 | 9.35E-05 | 0.62 | 3.28 | - | 555.0  |
| AHQ-3-2, 6855         | K.EADESLNFEQIILAAK.S               | 1937.05072 | 2 | 6.48E-05 | 0.95 | 4.40 | - | 1268.5 |
| AHQ-3-3, 6461         | K.EADESLNFEQIILAAK.S               | 1937.05072 | 2 | 4.39E-05 | 0.84 | 3.64 | - | 784.1  |
| AHQ-3-2, 7334         | K.EADESLNFEQIILAAK.S               | 1937.05072 | 2 | 1.11E-05 | 0.48 | 2.89 | - | 547.1  |
| AHQ-3-2, 6145 - 6198  | K.EADESLNFEQIILAAK.S               | 1937.05072 | 2 | 4.07E-06 | 0.91 | 4.61 | - | 953.9  |
| AHQ-3-1, 6329 - 6398  | K.EADESLNFEQIILAAK.S               | 1937.05072 | 2 | 1.21E-05 | 0.94 | 5.11 | - | 848.6  |
| AHQ-3-1, 6181 - 6248  | K.EADESLNFEQIILAAK.S               | 1937.05072 | 2 | 2.16E-08 | 0.97 | 5.29 | - | 1587.8 |
| AHQ-3-5, 6152         | K.EADESLNFEQIILAAK.S               | 1937.05072 | 2 | 1.57E-05 | 0.95 | 4.70 | - | 1361.0 |
| AHQ-3-5, 6297         | K.EADESLNFEQIILAAK.S               | 1937.05072 | 2 | 3.55E-08 | 0.94 | 4.12 | - | 1419.9 |
| AHQ-3-9, 5631         | K.EADESLNFEQIILAAK.S               | 1937.05072 | 2 | 1.17E-09 | 0.94 | 4.18 | - | 1494.0 |
| AHQ-3-1, 5908 - 5968  | K.EADESLNFEQIILAAK.S               | 1937.05072 | 2 | 5.24E-04 | 0.48 | 2.69 | - | 485.5  |
| AHQ-3-2, 6246 - 6313  | K.EADESLNFEQIILAAK.S               | 1937.05072 | 2 | 2.98E-08 | 0.97 | 5.59 | - | 1779.9 |
| AHQ-3-2, 7801         | K.EADESLNFEQIILAAK.S               | 1937.05072 | 2 | 2.45E-06 | 0.70 | 3.05 | - | 635.8  |
| AHQ-3-2, 6269         | K.EADESLNFEQIILAAK.S               | 1937.05072 | 2 | 1.86E-05 | 0.92 | 4.85 | - | 960.2  |

|                        |                                      |            |   |          |      |      |   |        |
|------------------------|--------------------------------------|------------|---|----------|------|------|---|--------|
| AHQ-3-14-, 5752        | K.EADESLNFEEQILEAAK.S                | 1937.05072 | 2 | 6.44E-07 | 0.96 | 5.50 | - | 1290.5 |
| AHQ-3-2, 6382 - 6453   | K.EADESLNFEEQILEAAK.S                | 1937.05072 | 2 | 3.43E-09 | 0.97 | 5.93 | - | 1278.9 |
| AHQ-3-6, 6031          | K.EADESLNFEEQILEAAK.S                | 1937.05072 | 2 | 1.02E-04 | 0.88 | 3.79 | - | 1013.2 |
| AHQ-3-4, 6412 - 6480   | K.EADESLNFEEQILEAAK.S                | 1937.05072 | 2 | 1.94E-05 | 0.82 | 3.52 | - | 734.7  |
| AHQ-3-2, 6489 - 6561   | K.EADESLNFEEQILEAAK.S                | 1937.05072 | 2 | 6.23E-10 | 0.96 | 4.88 | - | 1484.9 |
| AHQ-3-6, 7313          | R.ECANGYLELLDHVLLTLQKPSPELK.Q        | 2883.30906 | 3 | 3.85E-06 | 0.95 | 4.91 | - | 1181.2 |
| AHQ-3-2, 7617          | R.ECANGYLELLDHVLLTLQKPSPELK.Q        | 2883.30906 | 2 | 8.22E-06 | 0.85 | 3.73 | - | 547.1  |
| AHQ-3-9, 7008          | R.ECANGYLELLDHVLLTLQKPSPELK.Q        | 2883.30906 | 2 | 3.24E-04 | 0.69 | 3.55 | - | 441.7  |
| AHQ-3-5, 7503          | R.ECANGYLELLDHVLLTLQKPSPELK.Q        | 2883.30906 | 3 | 9.83E-14 | 0.96 | 5.77 | - | 1268.3 |
| AHQ-3-2, 7609          | R.ECANGYLELLDHVLLTLQKPSPELK.Q        | 2883.30906 | 3 | 2.43E-08 | 0.93 | 4.98 | - | 1194.1 |
| AHQ-3-4, 7548 - 7554   | R.ECANGYLELLDHVLLTLQKPSPELK.Q        | 2883.30906 | 3 | 9.92E-08 | 0.96 | 5.73 | - | 1451.1 |
| AHQ-3-3, 7528          | R.ECANGYLELLDHVLLTLQKPSPELK.Q        | 2883.30906 | 3 | 2.25E-08 | 0.94 | 5.15 | - | 1165.3 |
| AHQ-3-6, 7315 - 7327   | R.ECANGYLELLDHVLLTLQKPSPELK.Q        | 2883.30906 | 2 | 1.96E-04 | 0.86 | 3.75 | - | 721.9  |
| AHQ-3-3, 7521 - 7592   | R.EGISQEALHTQMLTAVQEISHLIEPLANAAR.A  | 3372.79804 | 3 | 2.66E-08 | 0.96 | 6.01 | - | 1264.5 |
| AHQ-3-4, 7545 - 7616   | R.EGISQEALHTQMLTAVQEISHLIEPLANAAR.A  | 3372.79804 | 3 | 2.46E-04 | 0.94 | 5.37 | - | 1087.1 |
| AHQ-3-7, 7446 - 7448   | R.EGISQEALHTQMLTAVQEISHLIEPLANAAR.A  | 3372.79804 | 3 | 2.05E-12 | 0.95 | 5.90 | - | 1154.6 |
| AHQ-3-3, 7420          | R.EGISQEALHTQM*LTAVQEISHLIEPLANAAR.A | 3388.79744 | 3 | 9.52E-07 | 0.96 | 5.87 | - | 1341.7 |
| AHQ-3-1, 7357          | R.EGISQEALHTQMLTAVQEISHLIEPLANAAR.A  | 3372.79804 | 3 | 1.73E-10 | 0.96 | 5.79 | - | 1762.5 |
| AHQ-3-10, 6635         | R.EGISQEALHTQMLTAVQEISHLIEPLANAAR.A  | 3372.79804 | 3 | 4.63E-07 | 0.82 | 4.03 | - | 908.1  |
| AHQ-3-11, 6808         | R.EGISQEALHTQMLTAVQEISHLIEPLANAAR.A  | 3372.79804 | 3 | 5.76E-05 | 0.96 | 5.34 | - | 1580.6 |
| AHQ-3-6, 7370          | R.EGISQEALHTQMLTAVQEISHLIEPLANAAR.A  | 3372.79804 | 3 | 8.85E-07 | 0.95 | 5.52 | - | 1281.8 |
| AHQ-3-2, 7509          | R.EGISQEALHTQM*LTAVQEISHLIEPLANAAR.A | 3388.79744 | 3 | 7.77E-08 | 0.92 | 4.60 | - | 1050.2 |
| AHQ-3-2, 7605 - 7678   | R.EGISQEALHTQMLTAVQEISHLIEPLANAAR.A  | 3372.79804 | 3 | 1.01E-05 | 0.93 | 5.02 | - | 1085.7 |
| AHQ-3-5, 7527          | R.EGISQEALHTQMLTAVQEISHLIEPLANAAR.A  | 3372.79804 | 3 | 1.87E-07 | 0.93 | 5.04 | - | 970.7  |
| AHQ-3-5, 7367 - 7412   | R.EGISQEALHTQM*LTAVQEISHLIEPLANAAR.A | 3388.79744 | 3 | 4.29E-06 | 0.95 | 5.26 | - | 1210.2 |
| AHQ-3-4, 7436 - 7480   | R.EGISQEALHTQM*LTAVQEISHLIEPLANAAR.A | 3388.79744 | 3 | 4.22E-06 | 0.97 | 6.41 | - | 1236.6 |
| AHQ-3-2, 7239 - 7305   | R.ELLENVPVOPINDMSYFGCLDSVM*ENSK.V    | 3148.48814 | 3 | 9.65E-05 | 0.76 | 3.89 | - | 389.1  |
| AHQ-3-11, 2898         | R.EQGVVEEHTLLLR.R                    | 1553.69898 | 2 | 7.28E-04 | 0.50 | 2.74 | - | 278.9  |
| AHQ-3-7, 2714 - 2790   | R.EQGVVEEHTLLLR.R                    | 1553.69898 | 2 | 4.85E-09 | 0.87 | 3.17 | - | 665.2  |
| AHQ-3-8, 2570 - 2636   | R.EQGVVEEHTLLLR.R                    | 1553.69898 | 2 | 1.63E-07 | 0.63 | 2.90 | - | 271.1  |
| AHQ-3-1, 3252          | R.EQGVVEEHTLLLR.R                    | 1553.69898 | 2 | 1.58E-04 | 0.74 | 3.00 | - | 509.8  |
| AHQ-3-7, 5414          | R.ERIEAPAGPPSDFGLFLSDDDPK.K          | 2571.77979 | 3 | 3.12E-07 | 0.97 | 6.54 | - | 1303.2 |
| AHQ-3-13-, 5478 - 5494 | R.ERIEAPAGPPSDFGLFLSDDDPK.K          | 2571.77979 | 3 | 1.07E-12 | 0.98 | 6.69 | - | 1956.8 |
| AHQ-3-13, 5495 - 5509  | R.ERIEAPAGPPSDFGLFLSDDDPK.K          | 2571.77979 | 3 | 5.40E-11 | 0.96 | 5.65 | - | 1377.1 |
| AHQ-3-14-, 5487        | R.ERIEAPAGPPSDFGLFLSDDDPK.K          | 2571.77979 | 3 | 4.60E-08 | 0.98 | 6.42 | - | 1963.5 |
| AHQ-3-14-, 5083        | R.ERIEAPAGPPSDFGLFLSDDDPK.K          | 2699.95270 | 3 | 1.47E-06 | 0.98 | 6.75 | - | 1726.3 |
| AHQ-3-13-, 5121        | R.ERIEAPAGPPSDFGLFLSDDDPK.K          | 2699.95270 | 3 | 3.83E-09 | 0.98 | 6.76 | - | 2165.6 |
| AHQ-3-13, 5143 - 5154  | R.ERIEAPAGPPSDFGLFLSDDDPK.K          | 2699.95270 | 3 | 5.27E-13 | 0.98 | 6.38 | - | 2535.6 |
| AHQ-3-7, 4908 - 4930   | R.ERIEAPAGPPSDFGLFLSDDDPK.K          | 2699.95270 | 3 | 1.23E-08 | 0.98 | 7.81 | - | 1875.9 |
| AHQ-3-8, 4720          | R.ERIEAPAGPPSDFGLFLSDDDPK.K          | 2699.95270 | 3 | 4.73E-04 | 0.97 | 5.63 | - | 1909.6 |
| AHQ-3-3, 2282          | K.EVANSTANLVK.T                      | 1146.27608 | 1 | 1.99E-04 | 0.13 | 2.27 | - | 201.3  |
| AHQ-3-4, 2177          | K.EVANSTANLVK.T                      | 1146.27608 | 1 | 2.12E-04 | 0.19 | 2.03 | - | 217.7  |
| AHQ-3-4, 2292          | K.EVANSTANLVK.T                      | 1146.27608 | 1 | 8.06E-07 | 0.30 | 2.30 | - | 193.3  |
| AHQ-3-1, 2310          | K.EVANSTANLVK.T                      | 1146.27608 | 1 | 9.83E-05 | 0.07 | 2.10 | - | 132.2  |
| AHQ-3-7, 4470          | K.EVIQEWNLTK.NR                      | 1487.68214 | 1 | 5.37E-04 | 0.71 | 3.71 | - | 244.1  |
| AHQ-3-13, 4591 - 4669  | K.EVIQEWNLTK.NR                      | 1487.68214 | 2 | 6.00E-05 | 0.54 | 2.76 | - | 549.2  |
| AHQ-3-11, 4491 - 4510  | K.EVIQEWNLTK.NR                      | 1487.68214 | 2 | 5.62E-06 | 0.67 | 2.98 | - | 680.5  |
| AHQ-3-7, 4458 - 4478   | K.EVIQEWNLTK.NR                      | 1487.68214 | 2 | 6.86E-07 | 0.91 | 3.94 | - | 1153.2 |
| AHQ-3-7, 3799          | K.EVIQEWNLTK.NR.W                    | 1643.86849 | 2 | 3.49E-05 | 0.71 | 3.07 | - | 520.4  |
| AHQ-3-7, 2782          | K.FFYSDQNVDSDR.D                     | 1378.42795 | 1 | 2.26E-04 | 0.34 | 2.45 | - | 192.7  |
| AHQ-3-7, 2775 - 2778   | K.FFYSDQNVDSDR.D                     | 1378.42795 | 2 | 7.42E-09 | 0.92 | 3.72 | - | 1028.7 |
| AHQ-3-9, 2680          | K.FFYSDQNVDSDR.D                     | 1378.42795 | 2 | 4.17E-04 | 0.90 | 2.83 | - | 1261.8 |
| AHQ-3-8, 2706          | K.FFYSDQNVDSDR.D                     | 1378.42795 | 2 | 1.23E-05 | 0.91 | 3.24 | - | 1125.9 |
| AHQ-3-7, 5915 - 5943   | K.FFYSDQNVDSDRDPVQLNLLVQAR.D         | 2889.17074 | 3 | 6.77E-09 | 0.95 | 4.73 | - | 1154.9 |
| AHQ-3-7, 6014          | K.FFYSDQNVDSDRDPVQLNLLVQAR.D         | 2889.17074 | 3 | 1.30E-08 | 0.97 | 5.45 | - | 2064.5 |
| AHQ-3-1, 6500 - 6580   | R.FGQDFSTFLEAGVEM*AGQAPSQEDR.A       | 2734.89265 | 3 | 4.16E-09 | 0.92 | 5.51 | - | 595.2  |
| AHQ-3-5, 7557          | R.FGQDFSTFLEAGVEM*AGQAPSQEDR.A       | 2718.89325 | 2 | 3.01E-04 | 0.42 | 2.83 | - | 310.5  |
| AHQ-3-3, 6573 - 6645   | R.FGQDFSTFLEAGVEM*AGQAPSQEDR.A       | 2734.89265 | 2 | 2.77E-05 | 0.84 | 3.58 | - | 804.8  |
| AHQ-3-3, 6576 - 6644   | R.FGQDFSTFLEAGVEM*AGQAPSQEDR.A       | 2734.89265 | 3 | 5.78E-08 | 0.92 | 4.69 | - | 758.4  |
| AHQ-3-2, 6647 - 6714   | R.FGQDFSTFLEAGVEM*AGQAPSQEDR.A       | 2734.89265 | 3 | 3.08E-10 | 0.95 | 5.35 | - | 1101.6 |
| AHQ-3-2, 7479          | R.FGQDFSTFLEAGVEM*AGQAPSQEDR.A       | 2718.89325 | 3 | 7.53E-06 | 0.56 | 3.27 | - | 546.5  |
| AHQ-3-2, 6642 - 6721   | R.FGQDFSTFLEAGVEM*AGQAPSQEDR.A       | 2734.89265 | 2 | 4.48E-06 | 0.86 | 3.70 | - | 898.2  |
| AHQ-3-1, 2901          | K.FLPSLRDEH                          | 1243.35032 | 2 | 5.54E-06 | 0.55 | 2.67 | - | 375.8  |
| AHQ-3-3, 5246 - 5252   | K.GLAGAVSELLR.S                      | 1086.26701 | 2 | 8.50E-06 | 0.98 | 5.12 | - | 2012.1 |
| AHQ-3-8, 4520          | K.GLAGAVSELLR.S                      | 1086.26701 | 2 | 1.29E-04 | 0.97 | 5.06 | - | 1923.7 |
| AHQ-3-4, 5138          | K.GLAGAVSELLR.S                      | 1086.26701 | 2 | 1.47E-06 | 0.98 | 5.32 | - | 2081.3 |
| AHQ-3-7, 4735          | K.GLAGAVSELLR.S                      | 1086.26701 | 2 | 1.32E-06 | 0.97 | 4.23 | - | 1926.8 |
| AHQ-3-5, 4961 - 4991   | K.GLAGAVSELLR.S                      | 1086.26701 | 2 | 4.18E-07 | 0.98 | 5.16 | - | 1956.7 |
| AHQ-3-2, 5265          | K.GLAGAVSELLR.S                      | 1086.26701 | 2 | 2.11E-05 | 0.97 | 4.79 | - | 1814.2 |
| AHQ-3-6, 4902          | K.GLAGAVSELLR.S                      | 1086.26701 | 2 | 1.69E-06 | 0.98 | 5.29 | - | 1966.0 |
| AHQ-3-1, 5353 - 5386   | K.GLAGAVSELLR.S                      | 1086.26701 | 2 | 3.94E-06 | 0.98 | 5.21 | - | 2014.6 |
| AHQ-3-2, 7410          | R.GSQAQPDSPSAQLALIAASQSFLOPGGK.M     | 2756.02103 | 2 | 1.13E-08 | 0.94 | 5.11 | - | 700.0  |
| AHQ-3-2, 7355 - 7422   | R.GSQAQPDSPSAQLALIAASQSFLOPGGK.M     | 2756.02103 | 3 | 2.17E-08 | 0.79 | 3.68 | - | 770.9  |
| AHQ-3-4, 6866 - 6944   | R.GSQAQPDSPSAQLALIAASQSFLOPGGK.M     | 2756.02103 | 2 | 7.50E-05 | 0.94 | 5.33 | - | 629.2  |
| AHQ-3-4, 6869 - 6945   | R.GSQAQPDSPSAQLALIAASQSFLOPGGK.M     | 2756.02103 | 3 | 3.81E-08 | 0.91 | 4.83 | - | 869.8  |
| AHQ-3-2, 7233 - 7311   | R.GSQAQPDSPSAQLALIAASQSFLOPGGK.M     | 2756.02103 | 2 | 3.98E-07 | 0.92 | 4.84 | - | 723.5  |
| AHQ-3-3, 7206 - 7212   | R.GSQAQPDSPSAQLALIAASQSFLOPGGK.M     | 2756.02103 | 2 | 1.68E-07 | 0.82 | 3.82 | - | 398.8  |
| AHQ-3-6, 6593 - 6657   | R.GSQAQPDSPSAQLALIAASQSFLOPGGK.M     | 2756.02103 | 3 | 1.05E-05 | 0.88 | 4.40 | - | 738.6  |
| AHQ-3-11, 6208         | R.GSQAQPDSPSAQLALIAASQSFLOPGGK.M     | 2756.02103 | 2 | 1.28E-04 | 0.83 | 3.81 | - | 519.6  |
| AHQ-3-2, 7005 - 7073   | R.GSQAQPDSPSAQLALIAASQSFLOPGGK.M     | 2756.02103 | 3 | 2.15E-05 | 0.93 | 4.76 | - | 1109.1 |
| AHQ-3-2, 6993 - 7074   | R.GSQAQPDSPSAQLALIAASQSFLOPGGK.M     | 2756.02103 | 2 | 7.09E-07 | 0.97 | 6.25 | - | 1115.5 |
| AHQ-3-1, 6825 - 6893   | R.GSQAQPDSPSAQLALIAASQSFLOPGGK.M     | 2756.02103 | 2 | 1.44E-04 | 0.85 | 4.00 | - | 650.3  |
| AHQ-3-1, 6584          | R.GSQAQPDSPSAQLALIAASQSFLOPGGK.M     | 2756.02103 | 3 | 7.52E-07 | 0.52 | 3.49 | - | 577.8  |
| AHQ-3-1, 6884 - 6950   | R.GSQAQPDSPSAQLALIAASQSFLOPGGK.M     | 2756.02103 | 3 | 1.28E-04 | 0.83 | 4.37 | - | 492.8  |
| AHQ-3-5, 6717 - 6783   | R.GSQAQPDSPSAQLALIAASQSFLOPGGK.M     | 2756.02103 | 2 | 2.39E-04 | 0.88 | 4.09 | - | 633.3  |
| AHQ-3-3, 7312          | R.GSQAQPDSPSAQLALIAASQSFLOPGGK.M     | 2756.02103 | 2 | 2.43E-05 | 0.90 | 3.93 | - | 844.8  |
| AHQ-3-2, 6867 - 6937   | R.GSQAQPDSPSAQLALIAASQSFLOPGGK.M     | 2756.02103 | 3 | 6.15E-06 | 0.90 | 4.30 | - | 895.9  |
| AHQ-3-2, 6861 - 6926   | R.GSQAQPDSPSAQLALIAASQSFLOPGGK.M     | 2756.02103 | 2 | 2.88E-04 | 0.92 | 3.87 | - | 1040.5 |
| AHQ-3-3, 7316          | R.GSQAQPDSPSAQLALIAASQSFLOPGGK.M     | 2756.02103 | 3 | 1.18E-07 | 0.75 | 3.58 | - | 692.6  |
| AHQ-3-5, 6731 - 6805   | R.GSQAQPDSPSAQLALIAASQSFLOPGGK.M     | 2756.02103 | 3 | 1.19E-04 | 0.91 | 4.23 | - | 1143.6 |
| AHQ-3-10, 6662         | K.GTEWVDPEDPTVIAENELLGAAAAIEAAK.K    | 3053.32301 | 3 | 7.61E-07 | 0.97 | 6.10 | - | 1665.0 |
| AHQ-3-7, 7482 - 7483   | K.GTEWVDPEDPTVIAENELLGAAAAIEAAK.K    | 3053.32301 | 3 | 8.33E-15 | 0.97 | 6.67 | - | 1423.1 |
| AHQ-3-2, 7713 - 7789   | K.GTEWVDPEDPTVIAENELLGAAAAIEAAK.K    | 3053.32301 | 3 | 1.54E-04 | 0.87 | 3.78 | - | 1561.2 |
| AHQ-3-1, 7376          | K.GTEWVDPEDPTVIAENELLGAAAAIEAAK.K    | 3053.32301 | 3 | 6.00E-14 | 0.96 | 5.87 | - | 1375.6 |
| AHQ-3-4, 7602 - 7640   | K.GTEWVDPEDPTVIAENELLGAAAAIEAAK.K    | 3053.32301 | 3 | 7.08E-11 | 0.95 | 5.27 | - | 1518.8 |
| AHQ-3-6, 7401 - 7474   | K.GTEWVDPEDPTVIAENELLGAAAAIEAAK.K    | 3053.32301 | 3 | 1.34E-11 | 0.96 | 5.84 | - | 1457.9 |
| AHQ-3-3, 7472 - 7476   | R.GVAALTSDPVAVQAIIVLDTASDVLDK.A      | 2470.75835 | 3 | 2.61E-11 | 0.98 | 6.59 | - | 3054.4 |
| AHQ-3-4, 7492 - 7493   | R.GVAALTSDPVAVQAIIVLDTASDVLDK.A      | 2470.75835 | 3 | 1.31E-09 | 0.98 | 7.13 | - | 2905.4 |
| AHQ-3-1, 7256          | R.GVAALTSDPVAVQAIIVLDTASDVLDK.A      | 2470.75835 | 3 | 2.44E-04 | 0.89 | 4.27 | - | 1009.9 |
| AHQ-3-5, 7429 - 7435   | R.GVAALTSDPVAVQAIIVLDTASDVLDK.A      | 2470.75835 | 3 | 5.02E-06 | 0.95 | 4.97 | - | 1522.1 |
| AHQ-3-2, 7559 - 7563   | R.GVAALTSDPVAVQAIIVLDTASDVLDK.A      | 2470.75835 | 3 | 6.88E-14 | 0.97 | 6.27 | - | 1534.7 |
| AHQ-3-8, 7260 - 7261   | R.GVGAATAVTQALNELLQHV.KA             | 2092.38495 | 3 | 7.73E-08 | 0.93 | 4.69 | - | 1088.5 |
| AHQ-3-2, 7614          | R.GVGAATAVTQALNELLQHV.KA             | 2092.38495 | 3 | 4.62E-07 | 0.95 | 5.04 | - | 1169.0 |
| AHQ-3-3, 5900          | R.GVGAATAVTQALNELLQHV.KA             | 2092.38495 | 2 | 5.17E-06 | 0.88 | 3.84 | - | 806.9  |
| AHQ-3-11, 6758         | R.GVGAATAVTQALNELLQHV.KA             | 2092.38495 | 2 | 4.64E-06 | 0.86 | 4.30 | - | 670.6  |
| AHQ-3-2, 7537 - 7613   | R.GVGAATAVTQALNELLQHV.KA             | 2092.38495 | 2 | 5.05E-07 | 0.93 | 4.88 | - | 718.9  |
| AHQ-3-5, 5553          | R.GVGAATAVTQALNELLQHV.KA             | 2092.38495 | 2 | 1.94E-05 | 0.88 | 4.27 | - | 803.9  |



|                        |                             |            |   |          |      |      |   |        |
|------------------------|-----------------------------|------------|---|----------|------|------|---|--------|
| AHQ-3-2, 5930          | R.GVGAATAVTQALNELLQHVH.K.A  | 2092.38495 | 2 | 2.59E-08 | 0.93 | 4.98 | - | 726.8  |
| AHQ-3-5, 7491          | R.GVGAATAVTQALNELLQHVH.K.A  | 2092.38495 | 3 | 3.53E-08 | 0.92 | 4.29 | - | 1226.0 |
| AHQ-3-7, 7386          | R.GVGAATAVTQALNELLQHVH.K.A  | 2092.38495 | 2 | 1.17E-06 | 0.91 | 4.56 | - | 820.6  |
| AHQ-3-9, 7011 - 7013   | R.GVGAATAVTQALNELLQHVH.K.A  | 2092.38495 | 2 | 5.20E-04 | 0.93 | 5.04 | - | 675.3  |
| AHQ-3-1, 7317          | R.GVGAATAVTQALNELLQHVH.K.A  | 2092.38495 | 2 | 1.39E-05 | 0.93 | 5.17 | - | 687.7  |
| AHQ-3-3, 7533 - 7534   | R.GVGAATAVTQALNELLQHVH.K.A  | 2092.38495 | 3 | 8.42E-07 | 0.95 | 4.78 | - | 1227.7 |
| AHQ-3-4, 7552          | R.GVGAATAVTQALNELLQHVH.K.A  | 2092.38495 | 3 | 8.91E-05 | 0.88 | 3.98 | - | 827.2  |
| AHQ-3-1, 6030          | R.GVGAATAVTQALNELLQHVH.K.A  | 2092.38495 | 3 | 2.43E-04 | 0.90 | 4.14 | - | 939.1  |
| AHQ-3-1, 7316          | R.GVGAATAVTQALNELLQHVH.K.A  | 2092.38495 | 3 | 5.69E-06 | 0.84 | 3.36 | - | 899.3  |
| AHQ-3-7, 7387          | R.GVGAATAVTQALNELLQHVH.K.A  | 2092.38495 | 3 | 6.59E-09 | 0.94 | 4.79 | - | 1072.6 |
| AHQ-3-3, 7532          | R.GVGAATAVTQALNELLQHVH.K.A  | 2092.38495 | 2 | 1.74E-07 | 0.97 | 6.01 | - | 1139.7 |
| AHQ-3-4, 5816          | R.GVGAATAVTQALNELLQHVH.K.A  | 2092.38495 | 2 | 6.54E-05 | 0.81 | 4.05 | - | 483.4  |
| AHQ-3-6, 7317 - 7318   | R.GVGAATAVTQALNELLQHVH.K.A  | 2092.38495 | 3 | 1.88E-07 | 0.94 | 4.82 | - | 1229.7 |
| AHQ-3-6, 7314          | R.GVGAATAVTQALNELLQHVH.K.A  | 2092.38495 | 2 | 1.80E-05 | 0.94 | 5.50 | - | 744.2  |
| AHQ-3-6, 5550          | R.GVGAATAVTQALNELLQHVH.K.A  | 2092.38495 | 2 | 1.12E-07 | 0.94 | 4.64 | - | 868.8  |
| AHQ-3-5, 7487          | R.GVGAATAVTQALNELLQHVH.K.A  | 2092.38495 | 2 | 9.05E-06 | 0.96 | 5.65 | - | 976.9  |
| AHQ-3-14-, 6829        | R.GVGAATAVTQALNELLQHVH.K.A  | 2092.38495 | 2 | 5.35E-05 | 0.96 | 5.62 | - | 1033.3 |
| AHQ-3-13-, 3302        | R.IGITNHDEYSLVR.E           | 1517.66833 | 2 | 5.59E-08 | 0.95 | 4.15 | - | 1274.7 |
| AHQ-3-10, 3048         | R.IGITNHDEYSLVR.E           | 1517.66833 | 2 | 1.39E-08 | 0.91 | 3.06 | - | 1179.7 |
| AHQ-3-4, 3232          | R.IGITNHDEYSLVR.E           | 1517.66833 | 2 | 1.81E-04 | 0.52 | 2.65 | - | 724.6  |
| AHQ-3-13-, 3697        | R.IGITNHDEYSLVR.E           | 1517.66833 | 2 | 1.92E-08 | 0.89 | 3.53 | - | 738.0  |
| AHQ-3-10, 3360         | R.IGITNHDEYSLVR.E           | 1517.66833 | 2 | 3.91E-05 | 0.90 | 3.40 | - | 1016.3 |
| AHQ-3-7, 2934          | R.IGITNHDEYSLVR.E           | 1517.66833 | 3 | 8.29E-08 | 0.85 | 3.54 | - | 696.2  |
| AHQ-3-7, 3272 - 3350   | R.IGITNHDEYSLVR.E           | 1517.66833 | 2 | 4.14E-09 | 0.94 | 3.60 | - | 1505.7 |
| AHQ-3-7, 3411          | R.IGITNHDEYSLVR.E           | 1517.66833 | 3 | 1.95E-06 | 0.61 | 3.14 | - | 487.2  |
| AHQ-3-13, 3298 - 3327  | R.IGITNHDEYSLVR.E           | 1517.66833 | 2 | 8.89E-08 | 0.95 | 4.15 | - | 1383.9 |
| AHQ-3-13, 3689         | R.IGITNHDEYSLVR.E           | 1517.66833 | 2 | 2.12E-05 | 0.92 | 3.66 | - | 981.7  |
| AHQ-3-7, 4774 - 4783   | R.ILAAQATSDLVNAIK.A         | 1457.69748 | 2 | 4.09E-06 | 0.96 | 4.16 | - | 1648.6 |
| AHQ-3-6, 4870 - 4877   | R.ILAAQATSDLVNAIK.A         | 1457.69748 | 2 | 1.10E-08 | 0.97 | 4.79 | - | 1525.9 |
| AHQ-3-6, 3931          | R.ILAAQATSDLVNAIK.A         | 1457.69748 | 2 | 4.64E-06 | 0.97 | 4.69 | - | 1625.0 |
| AHQ-3-2, 4530          | R.ILAAQATSDLVNAIK.A         | 1457.69748 | 2 | 3.38E-06 | 0.97 | 4.50 | - | 2094.9 |
| AHQ-3-3, 4236          | R.ILAAQATSDLVNAIK.A         | 1457.69748 | 2 | 3.98E-07 | 0.97 | 4.26 | - | 2000.3 |
| AHQ-3-2, 4635          | R.ILAAQATSDLVNAIK.A         | 1457.69748 | 2 | 1.02E-08 | 0.96 | 4.44 | - | 1270.2 |
| AHQ-3-2, 4257 - 4262   | R.ILAAQATSDLVNAIK.A         | 1457.69748 | 2 | 2.15E-06 | 0.96 | 4.30 | - | 1587.9 |
| AHQ-3-2, 4734          | R.ILAAQATSDLVNAIK.A         | 1457.69748 | 2 | 1.71E-06 | 0.97 | 4.57 | - | 1687.0 |
| AHQ-3-4, 4153          | R.ILAAQATSDLVNAIK.A         | 1457.69748 | 2 | 6.46E-06 | 0.97 | 4.56 | - | 1846.9 |
| AHQ-3-5, 4955          | R.ILAAQATSDLVNAIK.A         | 1457.69748 | 2 | 5.49E-08 | 0.96 | 4.57 | - | 1513.3 |
| AHQ-3-4, 4162          | R.ILAAQATSDLVNAIK.A         | 1457.69748 | 1 | 3.11E-05 | 0.69 | 2.59 | - | 695.8  |
| AHQ-3-1, 4328          | R.ILAAQATSDLVNAIK.A         | 1457.69748 | 2 | 8.60E-08 | 0.75 | 2.75 | - | 917.6  |
| AHQ-3-8, 4519          | R.ILAAQATSDLVNAIK.A         | 1457.69748 | 2 | 3.07E-09 | 0.96 | 4.45 | - | 1597.4 |
| AHQ-3-2, 5225          | R.ILAAQATSDLVNAIK.A         | 1457.69748 | 1 | 1.60E-05 | 0.79 | 3.61 | - | 560.7  |
| AHQ-3-4, 5084 - 5104   | R.ILAAQATSDLVNAIK.A         | 1457.69748 | 2 | 9.06E-04 | 0.93 | 3.07 | - | 1391.4 |
| AHQ-3-4, 5100          | R.ILAAQATSDLVNAIK.A         | 1457.69748 | 1 | 1.77E-04 | 0.84 | 3.66 | - | 707.0  |
| AHQ-3-1, 4585          | R.ILAAQATSDLVNAIK.A         | 1457.69748 | 2 | 1.83E-05 | 0.72 | 2.56 | - | 886.6  |
| AHQ-3-7, 3887          | R.ILAAQATSDLVNAIK.A         | 1457.69748 | 2 | 3.12E-07 | 0.87 | 3.18 | - | 1079.2 |
| AHQ-3-2, 5171 - 5251   | R.ILAAQATSDLVNAIK.A         | 1457.69748 | 2 | 1.79E-09 | 0.97 | 5.36 | - | 1536.5 |
| AHQ-3-5, 4973          | R.ILAAQATSDLVNAIK.A         | 1457.69748 | 1 | 1.49E-04 | 0.82 | 3.68 | - | 751.1  |
| AHQ-3-3, 5184          | R.ILAAQATSDLVNAIK.A         | 1457.69748 | 2 | 1.26E-11 | 0.97 | 4.96 | - | 1835.9 |
| AHQ-3-3, 5201          | R.ILAAQATSDLVNAIK.A         | 1457.69748 | 1 | 8.00E-04 | 0.70 | 2.97 | - | 538.1  |
| AHQ-3-14, 6017         | R.ILAAQATSDLVNAIK.A         | 1457.69748 | 2 | 2.88E-04 | 0.92 | 3.70 | - | 1079.6 |
| AHQ-3-1, 5244          | R.ILAAQATSDLVNAIK.A         | 1457.69748 | 2 | 1.44E-08 | 0.98 | 5.10 | - | 2325.4 |
| AHQ-3-13, 5882 - 5885  | R.IPEAPAGPPSDFGLFLSDDDPK.K  | 2286.47890 | 2 | 1.18E-04 | 0.95 | 5.32 | - | 817.5  |
| AHQ-3-1, 6266          | R.IPEAPAGPPSDFGLFLSDDDPK.K  | 2286.47890 | 2 | 5.07E-04 | 0.82 | 3.43 | - | 495.0  |
| AHQ-3-13-, 5786 - 5855 | R.IPEAPAGPPSDFGLFLSDDDPK.K  | 2286.47890 | 2 | 8.88E-06 | 0.98 | 5.68 | - | 1476.0 |
| AHQ-3-12, 5872         | R.IPEAPAGPPSDFGLFLSDDDPK.K  | 2286.47890 | 2 | 5.09E-05 | 0.90 | 4.33 | - | 633.9  |
| AHQ-3-14-, 5785        | R.IPEAPAGPPSDFGLFLSDDDPK.K  | 2286.47890 | 2 | 4.13E-04 | 0.95 | 4.62 | - | 906.0  |
| AHQ-3-10, 5371 - 5450  | R.IPEAPAGPPSDFGLFLSDDDPK.K  | 2286.47890 | 2 | 9.75E-05 | 0.92 | 4.08 | - | 859.7  |
| AHQ-3-7, 5902 - 5966   | R.IPEAPAGPPSDFGLFLSDDDPK.K  | 2286.47890 | 2 | 1.87E-06 | 0.95 | 4.77 | - | 939.8  |
| AHQ-3-13-, 5329 - 5393 | R.IPEAPAGPPSDFGLFLSDDDPK.K  | 2414.65181 | 3 | 1.07E-11 | 0.94 | 5.00 | - | 1361.9 |
| AHQ-3-12, 5408 - 5487  | R.IPEAPAGPPSDFGLFLSDDDPK.K  | 2414.65181 | 3 | 7.66E-08 | 0.89 | 3.76 | - | 1448.6 |
| AHQ-3-11, 5156         | R.IPEAPAGPPSDFGLFLSDDDPK.K  | 2414.65181 | 3 | 8.67E-13 | 0.95 | 4.83 | - | 1435.6 |
| AHQ-3-14-, 5343 - 5408 | R.IPEAPAGPPSDFGLFLSDDDPK.K  | 2414.65181 | 3 | 3.88E-05 | 0.97 | 5.52 | - | 2118.4 |
| AHQ-3-13, 5409 - 5437  | R.IPEAPAGPPSDFGLFLSDDDPK.K  | 2414.65181 | 3 | 6.18E-05 | 0.93 | 4.18 | - | 1694.7 |
| AHQ-3-7, 5263 - 5292   | R.IPEAPAGPPSDFGLFLSDDDPK.K  | 2414.65181 | 3 | 5.20E-09 | 0.97 | 5.60 | - | 1905.3 |
| AHQ-3-7, 1476          | K.KEEITGLTR.K               | 1047.18765 | 1 | 6.46E-05 | 0.28 | 2.24 | - | 350.9  |
| AHQ-3-7, 2024          | K.KGIWLEAGK.A               | 1002.19171 | 2 | 1.11E-04 | 0.88 | 3.33 | - | 794.3  |
| AHQ-3-7, 2367          | R.KIFQAHKCCGQMSIEAK.V       | 2121.42671 | 2 | 8.44E-05 | 0.87 | 3.99 | - | 775.0  |
| AHQ-3-4, 1456          | K.KLEQLKPR.A                | 1012.23127 | 1 | 5.55E-04 | 0.16 | 2.22 | - | 195.0  |
| AHQ-3-1, 2808 - 2824   | K.LAQAAQSSVATITR.L          | 1417.59344 | 2 | 7.56E-11 | 0.94 | 4.09 | - | 1345.5 |
| AHQ-3-3, 2632 - 2633   | K.LAQAAQSSVATITR.L          | 1417.59344 | 2 | 2.59E-10 | 0.98 | 5.39 | - | 2014.8 |
| AHQ-3-12, 2683 - 2762  | K.LAQAAQSSVATITR.L          | 1417.59344 | 2 | 1.28E-09 | 0.96 | 3.85 | - | 1680.6 |
| AHQ-3-6, 2471          | K.LAQAAQSSVATITR.L          | 1417.59344 | 2 | 2.63E-07 | 0.98 | 5.09 | - | 1741.9 |
| AHQ-3-3, 2637          | K.LAQAAQSSVATITR.L          | 1417.59344 | 1 | 1.65E-05 | 0.52 | 3.37 | - | 159.2  |
| AHQ-3-8, 2268          | K.LAQAAQSSVATITR.L          | 1417.59344 | 2 | 3.83E-07 | 0.96 | 4.56 | - | 1370.6 |
| AHQ-3-10, 2504         | K.LAQAAQSSVATITR.L          | 1417.59344 | 2 | 2.32E-04 | 0.83 | 3.31 | - | 715.0  |
| AHQ-3-11, 2572         | K.LAQAAQSSVATITR.L          | 1417.59344 | 2 | 2.28E-09 | 0.95 | 3.54 | - | 1742.2 |
| AHQ-3-6, 2478          | K.LAQAAQSSVATITR.L          | 1417.59344 | 1 | 3.96E-04 | 0.25 | 2.66 | - | 159.4  |
| AHQ-3-7, 2282          | K.LAQAAQSSVATITR.L          | 1417.59344 | 2 | 5.17E-06 | 0.93 | 4.03 | - | 1137.9 |
| AHQ-3-14-, 2641 - 2648 | K.LAQAAQSSVATITR.L          | 1417.59344 | 2 | 5.23E-06 | 0.92 | 2.89 | - | 1336.9 |
| AHQ-3-2, 2630 - 2702   | K.LAQAAQSSVATITR.L          | 1417.59344 | 2 | 8.66E-14 | 0.97 | 5.58 | - | 1465.5 |
| AHQ-3-5, 2483 - 2551   | K.LAQAAQSSVATITR.L          | 1417.59344 | 2 | 4.37E-05 | 0.97 | 4.57 | - | 1715.4 |
| AHQ-3-4, 2596 - 2598   | K.LAQAAQSSVATITR.L          | 1417.59344 | 2 | 5.39E-11 | 0.98 | 5.28 | - | 1731.9 |
| AHQ-3-7, 2415 - 2486   | K.LAQAAQSSVATITR.L          | 1417.59344 | 2 | 8.43E-04 | 0.86 | 3.67 | - | 888.4  |
| AHQ-3-4, 2901          | R.LASEAKPAVAEAENEIEIGSHIK.H | 2236.46779 | 2 | 4.34E-09 | 0.95 | 4.73 | - | 1042.1 |
| AHQ-3-4, 3084 - 3106   | R.LASEAKPAVAEAENEIEIGSHIK.H | 2236.46779 | 3 | 7.67E-13 | 0.98 | 6.71 | - | 2822.5 |
| AHQ-3-4, 3089          | R.LASEAKPAVAEAENEIEIGSHIK.H | 2236.46779 | 2 | 4.14E-07 | 0.90 | 4.35 | - | 480.4  |
| AHQ-3-2, 3498          | R.LASEAKPAVAEAENEIEIGSHIK.H | 2236.46779 | 3 | 2.05E-09 | 0.93 | 4.67 | - | 1717.2 |
| AHQ-3-5, 2899          | R.LASEAKPAVAEAENEIEIGSHIK.H | 2236.46779 | 2 | 1.51E-06 | 0.95 | 4.97 | - | 809.4  |
| AHQ-3-3, 2932          | R.LASEAKPAVAEAENEIEIGSHIK.H | 2236.46779 | 2 | 1.50E-07 | 0.93 | 4.43 | - | 913.2  |
| AHQ-3-9, 2699          | R.LASEAKPAVAEAENEIEIGSHIK.H | 2236.46779 | 3 | 1.80E-06 | 0.89 | 4.26 | - | 874.2  |
| AHQ-3-2, 3151          | R.LASEAKPAVAEAENEIEIGSHIK.H | 2236.46779 | 2 | 2.52E-10 | 0.96 | 5.74 | - | 854.9  |
| AHQ-3-2, 2947          | R.LASEAKPAVAEAENEIEIGSHIK.H | 2236.46779 | 2 | 8.46E-04 | 0.96 | 5.06 | - | 1190.3 |
| AHQ-3-6, 2883          | R.LASEAKPAVAEAENEIEIGSHIK.H | 2236.46779 | 3 | 1.03E-09 | 0.97 | 6.06 | - | 1716.6 |
| AHQ-3-1, 3358          | R.LASEAKPAVAEAENEIEIGSHIK.H | 2236.46779 | 2 | 7.43E-05 | 0.89 | 4.12 | - | 479.8  |
| AHQ-3-6, 2895          | R.LASEAKPAVAEAENEIEIGSHIK.H | 2236.46779 | 2 | 2.91E-06 | 0.94 | 4.45 | - | 795.1  |
| AHQ-3-3, 3142          | R.LASEAKPAVAEAENEIEIGSHIK.H | 2236.46779 | 2 | 1.66E-05 | 0.96 | 5.26 | - | 919.2  |
| AHQ-3-3, 3144          | R.LASEAKPAVAEAENEIEIGSHIK.H | 2236.46779 | 3 | 6.12E-06 | 0.96 | 5.64 | - | 1594.8 |
| AHQ-3-1, 3357 - 3390   | R.LASEAKPAVAEAENEIEIGSHIK.H | 2236.46779 | 3 | 4.30E-07 | 0.94 | 4.84 | - | 1428.3 |
| AHQ-3-7, 2739 - 2814   | R.LASEAKPAVAEAENEIEIGSHIK.H | 2236.46779 | 3 | 1.78E-04 | 0.95 | 4.37 | - | 1854.9 |
| AHQ-3-5, 2897          | R.LASEAKPAVAEAENEIEIGSHIK.H | 2236.46779 | 3 | 1.70E-09 | 0.96 | 5.84 | - | 1526.7 |
| AHQ-3-2, 5423 - 5497   | K.LGAASLGAEDPETQVVLINAVK.D  | 2196.48671 | 2 | 4.13E-11 | 0.96 | 5.11 | - | 1210.4 |
| AHQ-3-7, 5431          | K.LGAASLGAEDPETQVVLINAVK.D  | 2196.48671 | 2 | 1.89E-06 | 0.92 | 4.55 | - | 748.5  |
| AHQ-3-2, 5779 - 5798   | K.LGAASLGAEDPETQVVLINAVK.D  | 2196.48671 | 2 | 4.39E-04 | 0.96 | 5.05 | - | 1255.4 |
| AHQ-3-2, 5863 - 5869   | K.LGAASLGAEDPETQVVLINAVK.D  | 2196.48671 | 2 | 2.16E-14 | 0.97 | 5.52 | - | 1357.6 |
| AHQ-3-6, 5509          | K.LGAASLGAEDPETQVVLINAVK.D  | 2196.48671 | 2 | 7.56E-07 | 0.94 | 4.51 | - | 1043.7 |
| AHQ-3-3, 5657 - 5733   | K.LGAASLGAEDPETQVVLINAVK.D  | 2196.48671 | 2 | 1.23E-04 | 0.95 | 4.78 | - | 1087.8 |
| AHQ-3-1, 5849 - 5870   | K.LGAASLGAEDPETQVVLINAVK.D  | 2196.48671 | 2 | 5.01E-06 | 0.94 | 4.24 | - | 1056.4 |

|                       |                                     |            |   |          |      |      |   |        |
|-----------------------|-------------------------------------|------------|---|----------|------|------|---|--------|
| AHQ-3-6, 5329 - 5361  | K.LGAASLGAEDPETQVVLINAVK.D          | 2196.48671 | 2 | 1.80E-07 | 0.96 | 5.13 | - | 1152.1 |
| AHQ-3-2, 5457         | K.LGAASLGAEDPETQVVLINAVK.D          | 2196.48671 | 2 | 3.85E-05 | 0.94 | 4.74 | - | 1013.1 |
| AHQ-3-6, 5099 - 5165  | K.LGAASLGAEDPETQVVLINAVK.D          | 2196.48671 | 2 | 5.11E-07 | 0.93 | 4.25 | - | 913.5  |
| AHQ-3-2, 5645         | K.LGAASLGAEDPETQVVLINAVK.D          | 2196.48671 | 3 | 7.54E-09 | 0.97 | 5.52 | - | 2395.2 |
| AHQ-3-3, 5506 - 5585  | K.LGAASLGAEDPETQVVLINAVK.D          | 2196.48671 | 2 | 7.39E-06 | 0.96 | 5.16 | - | 1207.2 |
| AHQ-3-5, 5588         | K.LGAASLGAEDPETQVVLINAVK.D          | 2196.48671 | 2 | 1.35E-08 | 0.96 | 5.00 | - | 1151.1 |
| AHQ-3-2, 5975 - 6047  | K.LGAASLGAEDPETQVVLINAVK.D          | 2196.48671 | 2 | 2.65E-07 | 0.93 | 4.68 | - | 737.4  |
| AHQ-3-2, 5589 - 5657  | K.LGAASLGAEDPETQVVLINAVK.D          | 2196.48671 | 2 | 3.80E-10 | 0.96 | 4.98 | - | 1162.3 |
| AHQ-3-4, 5344 - 5412  | K.LGAASLGAEDPETQVVLINAVK.D          | 2196.48671 | 2 | 3.96E-10 | 0.97 | 5.51 | - | 1622.8 |
| AHQ-3-5, 5415         | K.LGAASLGAEDPETQVVLINAVK.D          | 2196.48671 | 2 | 3.09E-05 | 0.96 | 5.45 | - | 1079.8 |
| AHQ-3-1, 5700 - 5709  | K.LGAASLGAEDPETQVVLINAVK.D          | 2196.48671 | 3 | 3.18E-05 | 0.92 | 3.78 | - | 1602.7 |
| AHQ-3-1, 5442 - 5509  | K.LGAASLGAEDPETQVVLINAVK.D          | 2196.48671 | 2 | 6.93E-13 | 0.93 | 4.45 | - | 853.7  |
| AHQ-3-10, 4864        | K.LGAASLGAEDPETQVVLINAVK.D          | 2196.48671 | 2 | 9.20E-05 | 0.94 | 4.44 | - | 922.3  |
| AHQ-3-2, 6058 - 6131  | K.LGAASLGAEDPETQVVLINAVK.D          | 2196.48671 | 2 | 7.67E-04 | 0.70 | 3.25 | - | 479.6  |
| AHQ-3-4, 5820         | K.LGAASLGAEDPETQVVLINAVK.D          | 2196.48671 | 2 | 8.35E-05 | 0.82 | 3.88 | - | 430.0  |
| AHQ-3-5, 5260 - 5333  | K.LGAASLGAEDPETQVVLINAVK.D          | 2196.48671 | 2 | 7.11E-10 | 0.97 | 5.53 | - | 1116.1 |
| AHQ-3-14-, 5251       | K.LGAASLGAEDPETQVVLINAVK.D          | 2196.48671 | 2 | 4.64E-04 | 0.92 | 4.31 | - | 958.4  |
| AHQ-3-4, 5541 - 5576  | K.LGAASLGAEDPETQVVLINAVK.D          | 2196.48671 | 2 | 3.43E-08 | 0.97 | 5.69 | - | 1439.5 |
| AHQ-3-4, 5454         | K.LGAASLGAEDPETQVVLINAVK.D          | 2196.48671 | 2 | 2.23E-07 | 0.94 | 4.60 | - | 978.1  |
| AHQ-3-1, 5690 - 5704  | K.LGAASLGAEDPETQVVLINAVK.D          | 2196.48671 | 2 | 1.90E-04 | 0.96 | 4.81 | - | 1089.3 |
| AHQ-3-7, 5094         | K.LGAASLGAEDPETQVVLINAVK.D          | 2196.48671 | 2 | 4.17E-07 | 0.91 | 4.00 | - | 833.5  |
| AHQ-3-7, 5262         | K.LGAASLGAEDPETQVVLINAVK.D          | 2196.48671 | 2 | 5.60E-06 | 0.95 | 4.82 | - | 927.6  |
| AHQ-3-5, 5385 - 5455  | K.LGAASLGAEDPETQVVLINAVK.D          | 2196.48671 | 2 | 1.09E-04 | 0.97 | 5.22 | - | 1356.6 |
| AHQ-3-3, 5422 - 5492  | K.LGAASLGAEDPETQVVLINAVK.D          | 2196.48671 | 2 | 8.72E-08 | 0.96 | 5.10 | - | 1011.6 |
| AHQ-3-3, 5797 - 5821  | K.LGAASLGAEDPETQVVLINAVK.D          | 2196.48671 | 2 | 3.55E-10 | 0.95 | 4.58 | - | 1091.7 |
| AHQ-3-7, 3368 - 3438  | K.LHTDDELNWLHDHGR.T                 | 1721.81153 | 3 | 9.21E-04 | 0.81 | 3.81 | - | 532.3  |
| AHQ-3-9, 3172 - 3176  | K.LHTDDELNWLHDHGR.T                 | 1721.81153 | 2 | 1.74E-06 | 0.98 | 5.36 | - | 2226.1 |
| AHQ-3-10, 3331 - 3408 | K.LHTDDELNWLHDHGR.T                 | 1721.81153 | 2 | 1.19E-04 | 0.95 | 4.65 | - | 1154.5 |
| AHQ-3-1, 4541         | K.LLAALLEDEGGSGR.P                  | 1401.54764 | 2 | 1.31E-04 | 0.98 | 4.46 | - | 2388.7 |
| AHQ-3-1, 5512 - 5581  | K.LLAALLEDEGGSGRPLQAAK.G            | 2123.43896 | 3 | 4.62E-06 | 0.96 | 5.90 | - | 1174.9 |
| AHQ-3-4, 5302         | K.LLAALLEDEGGSGRPLQAAK.G            | 2123.43896 | 3 | 8.24E-08 | 0.96 | 5.30 | - | 1594.4 |
| AHQ-3-4, 5300         | K.LLAALLEDEGGSGRPLQAAK.G            | 2123.43896 | 2 | 1.71E-08 | 0.97 | 5.76 | - | 1292.0 |
| AHQ-3-5, 5095 - 5137  | K.LLAALLEDEGGSGRPLQAAK.G            | 2123.43896 | 2 | 1.14E-08 | 0.98 | 6.58 | - | 1455.8 |
| AHQ-3-9, 4696         | K.LLAALLEDEGGSGRPLQAAK.G            | 2123.43896 | 3 | 1.05E-09 | 0.94 | 4.60 | - | 1131.8 |
| AHQ-3-9, 4685         | K.LLAALLEDEGGSGRPLQAAK.G            | 2123.43896 | 2 | 8.90E-07 | 0.97 | 5.75 | - | 1496.5 |
| AHQ-3-7, 4892         | K.LLAALLEDEGGSGRPLQAAK.G            | 2123.43896 | 2 | 1.87E-08 | 0.98 | 6.36 | - | 2348.3 |
| AHQ-3-2, 5273         | K.LLAALLEDEGGSGRPLQAAK.G            | 2123.43896 | 2 | 1.16E-05 | 0.91 | 4.42 | - | 522.3  |
| AHQ-3-12, 5158 - 5159 | K.LLAALLEDEGGSGRPLQAAK.G            | 2123.43896 | 3 | 4.84E-08 | 0.97 | 5.35 | - | 1548.3 |
| AHQ-3-6, 5037 - 5039  | K.LLAALLEDEGGSGRPLQAAK.G            | 2123.43896 | 3 | 1.44E-06 | 0.96 | 5.02 | - | 1648.5 |
| AHQ-3-6, 5038 - 5049  | K.LLAALLEDEGGSGRPLQAAK.G            | 2123.43896 | 2 | 1.58E-10 | 0.98 | 6.86 | - | 1546.6 |
| AHQ-3-3, 5376         | K.LLAALLEDEGGSGRPLQAAK.G            | 2123.43896 | 3 | 3.73E-07 | 0.95 | 5.46 | - | 1309.7 |
| AHQ-3-10, 4666 - 4668 | K.LLAALLEDEGGSGRPLQAAK.G            | 2123.43896 | 2 | 1.39E-08 | 0.98 | 6.64 | - | 1458.7 |
| AHQ-3-8, 4531         | K.LLAALLEDEGGSGRPLQAAK.G            | 2123.43896 | 3 | 9.35E-08 | 0.97 | 5.74 | - | 1826.1 |
| AHQ-3-1, 5516         | K.LLAALLEDEGGSGRPLQAAK.G            | 2123.43896 | 2 | 3.11E-14 | 0.98 | 6.82 | - | 1818.3 |
| AHQ-3-2, 5401         | K.LLAALLEDEGGSGRPLQAAK.G            | 2123.43896 | 2 | 1.42E-08 | 0.98 | 6.46 | - | 1700.7 |
| AHQ-3-2, 5398 - 5433  | K.LLAALLEDEGGSGRPLQAAK.G            | 2123.43896 | 3 | 1.31E-07 | 0.97 | 5.99 | - | 1429.8 |
| AHQ-3-3, 5372         | K.LLAALLEDEGGSGRPLQAAK.G            | 2123.43896 | 2 | 7.26E-09 | 0.97 | 5.71 | - | 1346.2 |
| AHQ-3-12, 5162        | K.LLAALLEDEGGSGRPLQAAK.G            | 2123.43896 | 2 | 4.77E-04 | 0.97 | 5.67 | - | 1619.1 |
| AHQ-3-11, 4842 - 4914 | K.LLAALLEDEGGSGRPLQAAK.G            | 2123.43896 | 2 | 7.23E-06 | 0.96 | 5.45 | - | 1079.5 |
| AHQ-3-8, 4529 - 4544  | K.LLAALLEDEGGSGRPLQAAK.G            | 2123.43896 | 2 | 2.85E-10 | 0.98 | 6.70 | - | 1288.9 |
| AHQ-3-5, 5152         | K.LLAALLEDEGGSGRPLQAAKGLAGAVSELLR.S | 3190.68337 | 3 | 1.03E-04 | 0.69 | 3.77 | - | 466.7  |
| AHQ-3-3, 5381         | K.LLAALLEDEGGSGRPLQAAKGLAGAVSELLR.S | 3190.68337 | 3 | 3.26E-07 | 0.84 | 4.68 | - | 615.6  |
| AHQ-3-2, 5406         | K.LLAALLEDEGGSGRPLQAAKGLAGAVSELLR.S | 3190.68337 | 3 | 2.06E-07 | 0.66 | 3.61 | - | 605.1  |
| AHQ-3-4, 4137 - 4209  | R.LLSDSLPPSTGTFQEAQSR.L             | 2035.20076 | 2 | 2.11E-07 | 0.87 | 4.01 | - | 362.2  |
| AHQ-3-1, 4400 - 4468  | R.LLSDSLPPSTGTFQEAQSR.L             | 2035.20076 | 2 | 2.32E-09 | 0.93 | 4.21 | - | 607.3  |
| AHQ-3-2, 4413 - 4481  | R.LLSDSLPPSTGTFQEAQSR.L             | 2035.20076 | 2 | 1.22E-08 | 0.80 | 3.72 | - | 256.7  |
| AHQ-3-4, 4280 - 4348  | R.LLSDSLPPSTGTFQEAQSR.L             | 2035.20076 | 2 | 1.66E-05 | 0.83 | 3.62 | - | 388.7  |
| AHQ-3-3, 4424 - 4496  | R.LLSDSLPPSTGTFQEAQSR.L             | 2035.20076 | 2 | 4.54E-04 | 0.92 | 4.73 | - | 399.3  |
| AHQ-3-2, 4550 - 4621  | R.LLSDSLPPSTGTFQEAQSR.L             | 2035.20076 | 2 | 5.95E-06 | 0.79 | 3.78 | - | 246.2  |
| AHQ-3-7, 3924         | R.LLSDSLPPSTGTFQEAQSR.L             | 2035.20076 | 2 | 6.70E-04 | 0.67 | 3.07 | - | 231.5  |
| AHQ-3-2, 4277 - 4345  | R.LLSDSLPPSTGTFQEAQSR.L             | 2035.20076 | 2 | 2.59E-10 | 0.86 | 3.74 | - | 363.8  |
| AHQ-3-2, 4183 - 4254  | R.LLSDSLPPSTGTFQEAQSR.L             | 2035.20076 | 2 | 6.26E-13 | 0.94 | 4.93 | - | 420.4  |
| AHQ-3-5, 3969 - 4021  | R.LLSDSLPPSTGTFQEAQSR.L             | 2035.20076 | 2 | 1.32E-04 | 0.85 | 3.66 | - | 364.9  |
| AHQ-3-1, 4260 - 4332  | R.LLSDSLPPSTGTFQEAQSR.L             | 2035.20076 | 2 | 1.40E-04 | 0.89 | 3.84 | - | 478.4  |
| AHQ-3-3, 4288 - 4356  | R.LLSDSLPPSTGTFQEAQSR.L             | 2035.20076 | 2 | 2.99E-09 | 0.87 | 4.03 | - | 413.9  |
| AHQ-3-1, 4484 - 4553  | R.LLSDSLPPSTGTFQEAQSR.L             | 2035.20076 | 2 | 2.81E-05 | 0.70 | 2.99 | - | 317.9  |
| AHQ-3-1, 5814         | R.LNEAAAAGLNQAATLVQASR.G            | 2028.21299 | 3 | 2.01E-07 | 0.97 | 5.71 | - | 2127.3 |
| AHQ-3-5, 5921         | R.LNEAAAAGLNQAATLVQASR.G            | 2028.21299 | 2 | 6.97E-07 | 0.90 | 4.62 | - | 611.4  |
| AHQ-3-5, 5832         | R.LNEAAAAGLNQAATLVQASR.G            | 2028.21299 | 2 | 7.39E-09 | 0.98 | 5.72 | - | 1720.2 |
| AHQ-3-5, 5687         | R.LNEAAAAGLNQAATLVQASR.G            | 2028.21299 | 2 | 2.52E-06 | 0.93 | 4.27 | - | 934.8  |
| AHQ-3-7, 5318         | R.LNEAAAAGLNQAATLVQASR.G            | 2028.21299 | 2 | 4.51E-09 | 0.98 | 6.16 | - | 1591.7 |
| AHQ-3-11, 5158        | R.LNEAAAAGLNQAATLVQASR.G            | 2028.21299 | 2 | 2.01E-04 | 0.93 | 4.31 | - | 919.0  |
| AHQ-3-5, 5599         | R.LNEAAAAGLNQAATLVQASR.G            | 2028.21299 | 2 | 9.22E-08 | 0.95 | 4.41 | - | 1203.7 |
| AHQ-3-1, 6142         | R.LNEAAAAGLNQAATLVQASR.G            | 2028.21299 | 2 | 2.81E-13 | 0.97 | 5.25 | - | 1626.3 |
| AHQ-3-2, 5649 - 5717  | R.LNEAAAAGLNQAATLVQASR.G            | 2028.21299 | 2 | 1.77E-12 | 0.98 | 6.31 | - | 1563.4 |
| AHQ-3-9, 5040         | R.LNEAAAAGLNQAATLVQASR.G            | 2028.21299 | 2 | 1.07E-06 | 0.79 | 3.56 | - | 560.0  |
| AHQ-3-9, 5520         | R.LNEAAAAGLNQAATLVQASR.G            | 2028.21299 | 2 | 4.26E-04 | 0.45 | 2.79 | - | 345.7  |
| AHQ-3-2, 5874 - 5894  | R.LNEAAAAGLNQAATLVQASR.G            | 2028.21299 | 2 | 4.52E-13 | 0.98 | 5.23 | - | 2061.3 |
| AHQ-3-1, 5801 - 5840  | R.LNEAAAAGLNQAATLVQASR.G            | 2028.21299 | 2 | 1.57E-07 | 0.98 | 5.71 | - | 2086.3 |
| AHQ-3-2, 5977         | R.LNEAAAAGLNQAATLVQASR.G            | 2028.21299 | 2 | 1.85E-11 | 0.98 | 5.94 | - | 1507.8 |
| AHQ-3-1, 5590         | R.LNEAAAAGLNQAATLVQASR.G            | 2028.21299 | 2 | 1.35E-08 | 0.95 | 4.53 | - | 1226.0 |
| AHQ-3-4, 4493 - 4496  | R.LNEAAAAGLNQAATLVQASR.G            | 2028.21299 | 2 | 3.42E-11 | 0.97 | 5.46 | - | 1135.9 |
| AHQ-3-3, 4482 - 4560  | R.LNEAAAAGLNQAATLVQASR.G            | 2028.21299 | 2 | 1.03E-13 | 0.97 | 5.45 | - | 1364.8 |
| AHQ-3-2, 5522         | R.LNEAAAAGLNQAATLVQASR.G            | 2028.21299 | 2 | 5.21E-10 | 0.97 | 5.69 | - | 1387.3 |
| AHQ-3-2, 5303         | R.LNEAAAAGLNQAATLVQASR.G            | 2028.21299 | 2 | 2.74E-05 | 0.68 | 3.12 | - | 452.1  |
| AHQ-3-2, 6121         | R.LNEAAAAGLNQAATLVQASR.G            | 2028.21299 | 2 | 2.23E-12 | 0.97 | 5.23 | - | 1418.2 |
| AHQ-3-4, 5629 - 5706  | R.LNEAAAAGLNQAATLVQASR.G            | 2028.21299 | 2 | 1.03E-07 | 0.96 | 4.76 | - | 1635.9 |
| AHQ-3-4, 5654         | R.LNEAAAAGLNQAATLVQASR.G            | 2028.21299 | 3 | 6.86E-04 | 0.97 | 5.11 | - | 2155.7 |
| AHQ-3-5, 5252         | R.LNEAAAAGLNQAATLVQASR.G            | 2028.21299 | 2 | 8.27E-08 | 0.95 | 4.36 | - | 1456.7 |
| AHQ-3-3, 6076 - 6080  | R.LNEAAAAGLNQAATLVQASR.G            | 2028.21299 | 2 | 1.26E-12 | 0.95 | 4.48 | - | 1039.3 |
| AHQ-3-3, 5672 - 5740  | R.LNEAAAAGLNQAATLVQASR.G            | 2028.21299 | 2 | 1.65E-09 | 0.98 | 6.21 | - | 1467.4 |
| AHQ-3-2, 5714 - 5783  | R.LNEAAAAGLNQAATLVQASR.G            | 2028.21299 | 3 | 3.97E-10 | 0.97 | 5.61 | - | 1737.0 |
| AHQ-3-2, 5769         | R.LNEAAAAGLNQAATLVQASR.G            | 2028.21299 | 2 | 1.11E-07 | 0.97 | 5.76 | - | 1313.1 |
| AHQ-3-4, 5876         | R.LNEAAAAGLNQAATLVQASR.G            | 2028.21299 | 2 | 2.37E-10 | 0.97 | 5.35 | - | 1377.3 |
| AHQ-3-6, 4295         | R.LNEAAAAGLNQAATLVQASR.G            | 2028.21299 | 2 | 2.90E-05 | 0.46 | 2.81 | - | 283.2  |
| AHQ-3-2, 6127         | R.LNEAAAAGLNQAATLVQASR.G            | 2028.21299 | 3 | 2.45E-05 | 0.95 | 4.97 | - | 1585.2 |
| AHQ-3-1, 5912         | R.LNEAAAAGLNQAATLVQASR.G            | 2028.21299 | 2 | 5.73E-10 | 0.96 | 4.60 | - | 1695.6 |
| AHQ-3-13, 5423        | R.LNEAAAAGLNQAATLVQASR.G            | 2028.21299 | 2 | 1.24E-04 | 0.93 | 4.16 | - | 922.7  |
| AHQ-3-2, 4593 - 4673  | R.LNEAAAAGLNQAATLVQASR.G            | 2028.21299 | 2 | 4.58E-09 | 0.89 | 4.22 | - | 593.3  |
| AHQ-3-6, 5401 - 5413  | R.LNEAAAAGLNQAATLVQASR.G            | 2028.21299 | 2 | 5.80E-10 | 0.98 | 5.96 | - | 1728.4 |
| AHQ-3-5, 4365 - 4444  | R.LNEAAAAGLNQAATLVQASR.G            | 2028.21299 | 2 | 1.87E-05 | 0.93 | 4.29 | - | 857.4  |
| AHQ-3-3, 5928         | R.LNEAAAAGLNQAATLVQASR.G            | 2028.21299 | 2 | 1.23E-08 | 0.95 | 4.97 | - | 981.6  |
| AHQ-3-3, 5824         | R.LNEAAAAGLNQAATLVQASR.G            | 2028.21299 | 2 | 2.70E-08 | 0.97 | 5.44 | - | 1552.3 |
| AHQ-3-5, 5447         | R.LNEAAAAGLNQAATLVQASR.G            | 2028.21299 | 2 | 7.92E-10 | 0.98 | 6.23 | - | 1574.7 |
| AHQ-3-14, 6313        | R.LNEAAAAGLNQAATLVQASR.G            | 2028.21299 | 2 | 6.26E-06 | 0.95 | 4.39 | - | 1236.0 |
| AHQ-3-2, 1846 - 1922  | R.MATNAAAQNAIK.K                    | 1204.38227 | 2 | 2.73E-04 | 0.81 | 3.45 | - | 649.2  |
| AHQ-3-2, 1685 - 1741  | R.MATNAAAQNAIK.K                    | 1204.38227 | 2 | 6.15E-05 | 0.63 | 2.94 | - | 718.4  |

|                      |                                            |            |   |          |      |      |   |        |
|----------------------|--------------------------------------------|------------|---|----------|------|------|---|--------|
| AHQ-3-3, 1885        | R.MATNAAQNAIK.K                            | 1204.38227 | 2 | 7.47E-06 | 0.58 | 2.67 | - | 695.7  |
| AHQ-3-5, 4111 - 4143 | R.MVAAATNNLCEAANAAVQGHASQEK.L              | 2558.79098 | 3 | 2.97E-10 | 0.96 | 4.91 | - | 1839.0 |
| AHQ-3-7, 3766        | R.MVAAATNNLCEAANAAVQGHASQEK.L              | 2574.79038 | 3 | 3.11E-04 | 0.79 | 3.48 | - | 946.8  |
| AHQ-3-8, 3790        | R.MVAAATNNLCEAANAAVQGHASQEK.L              | 2558.79098 | 3 | 1.17E-06 | 0.86 | 3.82 | - | 959.5  |
| AHQ-3-4, 4242 - 4312 | R.MVAAATNNLCEAANAAVQGHASQEK.L              | 2558.79098 | 3 | 8.64E-05 | 0.95 | 5.54 | - | 1350.5 |
| AHQ-3-4, 4053 - 4056 | R.MVAAATNNLCEAANAAVQGHASQEK.L              | 2574.79038 | 2 | 8.90E-07 | 0.69 | 3.30 | - | 346.9  |
| AHQ-3-5, 3879        | R.MVAAATNNLCEAANAAVQGHASQEK.L              | 2574.79038 | 3 | 3.39E-11 | 0.87 | 4.03 | - | 865.0  |
| AHQ-3-3, 4069 - 4148 | R.MVAAATNNLCEAANAAVQGHASQEK.L              | 2574.79038 | 3 | 3.00E-08 | 0.93 | 5.09 | - | 822.5  |
| AHQ-3-1, 4266        | R.MVAAATNNLCEAANAAVQGHASQEK.L              | 2574.79038 | 3 | 2.47E-07 | 0.94 | 5.08 | - | 1107.4 |
| AHQ-3-9, 3832        | R.MVAAATNNLCEAANAAVQGHASQEK.L              | 2558.79098 | 3 | 6.24E-05 | 0.73 | 3.36 | - | 730.3  |
| AHQ-3-2, 4190 - 4209 | R.MVAAATNNLCEAANAAVQGHASQEK.L              | 2574.79038 | 3 | 2.93E-08 | 0.96 | 5.66 | - | 1349.5 |
| AHQ-3-2, 4191 - 4201 | R.MVAAATNNLCEAANAAVQGHASQEK.L              | 2574.79038 | 2 | 3.11E-05 | 0.76 | 3.33 | - | 452.2  |
| AHQ-3-6, 3817        | R.MVAAATNNLCEAANAAVQGHASQEK.L              | 2574.79038 | 3 | 5.85E-11 | 0.93 | 4.90 | - | 841.1  |
| AHQ-3-2, 4397 - 4402 | R.MVAAATNNLCEAANAAVQGHASQEK.L              | 2558.79098 | 3 | 1.00E-06 | 0.92 | 4.40 | - | 1035.1 |
| AHQ-3-1, 4182 - 4185 | R.MVAAATNNLCEAANAAVQGHASQEK.L              | 2574.79038 | 3 | 3.50E-10 | 0.91 | 4.39 | - | 1002.5 |
| AHQ-3-6, 4061        | R.MVAAATNNLCEAANAAVQGHASQEK.L              | 2558.79098 | 3 | 4.29E-07 | 0.89 | 4.34 | - | 696.2  |
| AHQ-3-2, 4675        | R.MVAAATNNLCEAANAAVQGHASQEK.L              | 2558.79098 | 3 | 3.09E-04 | 0.85 | 3.69 | - | 1005.3 |
| AHQ-3-2, 4433 - 4501 | R.MVAAATNNLCEAANAAVQGHASQEK.L              | 2558.79098 | 2 | 5.80E-06 | 0.65 | 2.87 | - | 747.9  |
| AHQ-3-2, 4482 - 4495 | R.MVAAATNNLCEAANAAVQGHASQEK.L              | 2558.79098 | 3 | 4.58E-04 | 0.86 | 4.40 | - | 656.0  |
| AHQ-3-3, 4546        | R.MVAAATNNLCEAANAAVQGHASQEK.L              | 2558.79098 | 3 | 1.23E-04 | 0.78 | 3.23 | - | 1143.8 |
| AHQ-3-2, 4587 - 4661 | R.MVAAATNNLCEAANAAVQGHASQEK.L              | 2558.79098 | 3 | 4.67E-08 | 0.92 | 4.30 | - | 1078.2 |
| AHQ-3-1, 6824 - 6840 | K.MVGGIAQIIAAQEEMLR.K                      | 1847.19347 | 2 | 2.40E-06 | 0.95 | 4.77 | - | 1238.7 |
| AHQ-3-4, 6066 - 6138 | K.MVGGIAQIIAAQEEMLR.K                      | 1863.19287 | 2 | 2.74E-04 | 0.96 | 4.71 | - | 1515.8 |
| AHQ-3-3, 7154 - 7162 | K.MVGGIAQIIAAQEEMLR.K                      | 1831.19407 | 2 | 3.08E-06 | 0.97 | 5.12 | - | 1491.9 |
| AHQ-3-4, 7164        | K.MVGGIAQIIAAQEEMLR.K                      | 1831.19407 | 2 | 1.67E-10 | 0.97 | 4.97 | - | 1543.8 |
| AHQ-3-6, 6883        | K.MVGGIAQIIAAQEEMLR.K                      | 1831.19407 | 2 | 7.85E-07 | 0.98 | 5.48 | - | 1979.9 |
| AHQ-3-3, 6546        | K.MVGGIAQIIAAQEEMLR.K                      | 1847.19347 | 2 | 5.37E-11 | 0.95 | 4.66 | - | 1398.1 |
| AHQ-3-2, 6178 - 6243 | K.MVGGIAQIIAAQEEMLR.K                      | 1863.19287 | 2 | 1.88E-09 | 0.97 | 5.40 | - | 1699.1 |
| AHQ-3-2, 6894 - 6943 | K.MVGGIAQIIAAQEEMLR.K                      | 1847.19347 | 2 | 3.68E-05 | 0.97 | 5.11 | - | 1424.8 |
| AHQ-3-14-, 6488      | K.MVGGIAQIIAAQEEMLR.K                      | 1831.19407 | 2 | 8.22E-04 | 0.52 | 2.79 | - | 475.2  |
| AHQ-3-7, 6800        | K.MVGGIAQIIAAQEEMLR.K                      | 1831.19407 | 2 | 4.66E-09 | 0.96 | 4.97 | - | 1382.5 |
| AHQ-3-1, 6174 - 6190 | K.MVGGIAQIIAAQEEMLR.K                      | 1863.19287 | 2 | 2.77E-05 | 0.97 | 4.90 | - | 1523.9 |
| AHQ-3-2, 7246 - 7322 | K.MVGGIAQIIAAQEEMLR.K                      | 1831.19407 | 2 | 2.29E-12 | 0.98 | 5.98 | - | 1659.6 |
| AHQ-3-7, 6484        | K.MVGGIAQIIAAQEEMLR.K                      | 1847.19347 | 2 | 5.52E-04 | 0.88 | 3.61 | - | 1086.6 |
| AHQ-3-5, 7029 - 7032 | K.MVGGIAQIIAAQEEMLR.K                      | 1831.19407 | 2 | 1.91E-07 | 0.97 | 5.77 | - | 1520.5 |
| AHQ-3-3, 6458        | K.MVGGIAQIIAAQEEMLR.K                      | 1847.19347 | 2 | 2.57E-04 | 0.94 | 4.29 | - | 1155.4 |
| AHQ-3-3, 6820 - 6874 | K.MVGGIAQIIAAQEEMLR.K                      | 1847.19347 | 2 | 7.22E-06 | 0.97 | 5.10 | - | 1953.5 |
| AHQ-3-4, 6860 - 6872 | K.MVGGIAQIIAAQEEMLR.K                      | 1847.19347 | 2 | 4.63E-06 | 0.98 | 5.44 | - | 2122.9 |
| AHQ-3-9, 6528 - 6540 | K.MVGGIAQIIAAQEEMLR.K                      | 1831.19407 | 2 | 4.47E-08 | 0.97 | 4.85 | - | 1498.1 |
| AHQ-3-3, 6234 - 6237 | K.MVGGIAQIIAAQEEMLR.K                      | 1863.19287 | 2 | 6.62E-07 | 0.98 | 5.68 | - | 2146.1 |
| AHQ-3-1, 6270 - 6341 | K.MVGGIAQIIAAQEEMLR.K                      | 1863.19287 | 2 | 7.68E-08 | 0.98 | 5.56 | - | 1662.1 |
| AHQ-3-10, 6215       | K.MVGGIAQIIAAQEEMLR.K                      | 1831.19407 | 2 | 3.30E-07 | 0.97 | 4.85 | - | 1701.8 |
| AHQ-3-7, 2662        | K.NCGQMSIEIAK.V                            | 1268.40005 | 1 | 4.32E-05 | 0.35 | 2.20 | - | 403.9  |
| AHQ-3-7, 2668        | K.NCGQMSIEIAK.V                            | 1268.40005 | 2 | 3.30E-06 | 0.79 | 2.92 | - | 876.8  |
| AHQ-3-4, 4733 - 4804 | K.NGNLPEFFGDAISTASK.A                      | 1621.73018 | 2 | 8.45E-08 | 0.48 | 2.74 | - | 317.8  |
| AHQ-3-2, 4713        | K.NGNLPEFFGDAISTASK.A                      | 1621.73018 | 2 | 2.07E-05 | 0.78 | 3.32 | - | 406.8  |
| AHQ-3-1, 4774 - 4784 | K.NGNLPEFFGDAISTASK.A                      | 1621.73018 | 2 | 4.38E-07 | 0.91 | 4.55 | - | 542.8  |
| AHQ-3-3, 4780        | K.NGNLPEFFGDAISTASK.A                      | 1621.73018 | 2 | 5.02E-08 | 0.94 | 4.13 | - | 916.1  |
| AHQ-3-2, 4818 - 4890 | K.NGNLPEFFGDAISTASK.A                      | 1621.73018 | 2 | 3.30E-07 | 0.81 | 3.71 | - | 332.1  |
| AHQ-3-2, 4169 - 4173 | K.NLGTALAEELR.T                            | 1058.21367 | 2 | 7.89E-04 | 0.89 | 3.36 | - | 983.4  |
| AHQ-3-1, 4348 - 4361 | K.NLGTALAEELR.T                            | 1058.21367 | 2 | 6.99E-04 | 0.91 | 3.60 | - | 995.2  |
| AHQ-3-6, 3805        | K.NLGTALAEELR.T                            | 1058.21367 | 2 | 5.41E-06 | 0.83 | 2.95 | - | 771.9  |
| AHQ-3-5, 3836        | K.NLGTALAEELR.T                            | 1058.21367 | 2 | 1.01E-05 | 0.88 | 3.34 | - | 841.3  |
| AHQ-3-4, 2577        | K.PAAVAENEEIGSHIK.H                        | 1636.78798 | 2 | 7.37E-09 | 0.97 | 5.51 | - | 1636.3 |
| AHQ-3-2, 2609        | K.PAAVAENEEIGSHIK.H                        | 1636.78798 | 2 | 1.32E-05 | 0.98 | 5.14 | - | 2186.3 |
| AHQ-3-6, 2425 - 2426 | K.PAAVAENEEIGSHIK.H                        | 1636.78798 | 2 | 1.08E-10 | 0.98 | 6.12 | - | 1627.0 |
| AHQ-3-2, 2881        | K.PAAVAENEEIGSHIK.H                        | 1636.78798 | 2 | 7.55E-08 | 0.95 | 3.48 | - | 1715.7 |
| AHQ-3-5, 2443        | K.PAAVAENEEIGSHIK.H                        | 1636.78798 | 3 | 1.21E-10 | 0.97 | 5.33 | - | 1641.8 |
| AHQ-3-1, 2762 - 2842 | K.PAAVAENEEIGSHIK.H                        | 1636.78798 | 2 | 6.12E-07 | 0.98 | 5.41 | - | 1915.0 |
| AHQ-3-4, 2588        | K.PAAVAENEEIGSHIK.H                        | 1636.78798 | 3 | 1.65E-08 | 0.98 | 5.92 | - | 2035.2 |
| AHQ-3-7, 2374        | K.PAAVAENEEIGSHIK.H                        | 1636.78798 | 2 | 6.42E-05 | 0.96 | 4.92 | - | 1327.8 |
| AHQ-3-3, 2612 - 2624 | K.PAAVAENEEIGSHIK.H                        | 1636.78798 | 2 | 1.98E-04 | 0.97 | 4.64 | - | 1378.8 |
| AHQ-3-5, 2440        | K.PAAVAENEEIGSHIK.H                        | 1636.78798 | 2 | 1.02E-06 | 0.96 | 5.03 | - | 1249.1 |
| AHQ-3-3, 2616        | K.PAAVAENEEIGSHIK.H                        | 1636.78798 | 3 | 9.65E-08 | 0.96 | 4.84 | - | 1610.3 |
| AHQ-3-2, 3217        | K.QAAASATQIIAAQHAASTPK.A                   | 1996.17099 | 2 | 2.17E-08 | 0.92 | 4.41 | - | 765.8  |
| AHQ-3-3, 3204 - 3213 | K.QAAASATQIIAAQHAASTPK.A                   | 1996.17099 | 3 | 1.71E-05 | 0.82 | 3.36 | - | 957.4  |
| AHQ-3-1, 3389        | K.QAAASATQIIAAQHAASTPK.A                   | 1996.17099 | 2 | 4.26E-06 | 0.86 | 3.70 | - | 677.5  |
| AHQ-3-2, 3430        | K.QAAASATQIIAAQHAASTPK.A                   | 1996.17099 | 2 | 1.12E-07 | 0.92 | 4.31 | - | 851.5  |
| AHQ-3-6, 2925        | K.QAAASATQIIAAQHAASTPK.A                   | 1996.17099 | 3 | 1.34E-05 | 0.82 | 3.39 | - | 604.7  |
| AHQ-3-2, 3442        | K.QAAASATQIIAAQHAASTPK.A                   | 1996.17099 | 3 | 8.21E-05 | 0.67 | 3.00 | - | 862.5  |
| AHQ-3-3, 3404 - 3406 | K.QAAASATQIIAAQHAASTPK.A                   | 1996.17099 | 2 | 1.85E-06 | 0.91 | 4.42 | - | 726.9  |
| AHQ-3-3, 3200        | K.QAAASATQIIAAQHAASTPK.A                   | 1996.17099 | 2 | 3.42E-07 | 0.71 | 3.56 | - | 444.9  |
| AHQ-3-5, 2939        | K.QAAASATQIIAAQHAASTPK.A                   | 1996.17099 | 2 | 5.75E-06 | 0.84 | 4.01 | - | 445.0  |
| AHQ-3-4, 3136 - 3140 | K.QAAASATQIIAAQHAASTPK.A                   | 1996.17099 | 2 | 1.81E-08 | 0.93 | 4.82 | - | 740.2  |
| AHQ-3-13-, 3973      | R.QELAVFCSPPEPAK.T                         | 1574.77985 | 2 | 2.67E-05 | 0.71 | 2.55 | - | 586.4  |
| AHQ-3-1, 4193        | R.QELAVFCSPPEPAK.T                         | 1574.77985 | 2 | 5.13E-05 | 0.87 | 2.81 | - | 1087.0 |
| AHQ-3-3, 4054 - 4125 | R.QELAVFCSPPEPAK.T                         | 1574.77985 | 2 | 7.70E-04 | 0.92 | 3.38 | - | 1099.0 |
| AHQ-3-2, 4101 - 4105 | R.QELAVFCSPPEPAK.T                         | 1574.77985 | 2 | 5.12E-07 | 0.94 | 4.25 | - | 1038.4 |
| AHQ-3-5, 3867        | R.QELAVFCSPPEPAK.T                         | 1574.77985 | 2 | 3.74E-07 | 0.87 | 2.90 | - | 995.6  |
| AHQ-3-5, 7455        | R.QNLLQAAGNVGQASGELLQQIGESDTPHFQDALMQLAK.A | 4138.52644 | 3 | 2.36E-04 | 0.87 | 4.23 | - | 716.7  |
| AHQ-3-4, 7537        | R.QNLLQAAGNVGQASGELLQQIGESDTPHFQDALMQLAK.A | 4138.52644 | 3 | 9.45E-11 | 0.94 | 5.54 | - | 769.1  |
| AHQ-3-8, 7243        | R.QNLLQAAGNVGQASGELLQQIGESDTPHFQDALMQLAK.A | 4138.52644 | 3 | 2.48E-08 | 0.89 | 4.88 | - | 566.6  |
| AHQ-3-3, 7492        | R.QNLLQAAGNVGQASGELLQQIGESDTPHFQDALMQLAK.A | 4138.52644 | 3 | 8.56E-10 | 0.90 | 4.67 | - | 779.1  |
| AHQ-3-7, 7374        | R.QNLLQAAGNVGQASGELLQQIGESDTPHFQDALMQLAK.A | 4138.52644 | 3 | 2.93E-05 | 0.89 | 4.63 | - | 583.4  |
| AHQ-3-2, 7581        | R.QNLLQAAGNVGQASGELLQQIGESDTPHFQDALMQLAK.A | 4138.52644 | 3 | 9.09E-07 | 0.90 | 4.57 | - | 918.7  |
| AHQ-3-6, 7221 - 7302 | R.QNLLQAAGNVGQASGELLQQIGESDTPHFQDALMQLAK.A | 4138.52644 | 3 | 2.59E-08 | 0.92 | 5.10 | - | 665.3  |
| AHQ-3-4, 7516        | R.QNLLQAAGNVGQASGELLQQIGESDTPHFQDALMQLAK.A | 4138.52644 | 3 | 3.58E-09 | 0.89 | 4.11 | - | 959.2  |
| AHQ-3-5, 7479        | R.QNLLQAAGNVGQASGELLQQIGESDTPHFQDALMQLAK.A | 4138.52644 | 3 | 1.55E-11 | 0.96 | 6.08 | - | 930.6  |
| AHQ-3-2, 3869 - 3922 | K.QVAASTAQLLVACK.V                         | 1461.70942 | 2 | 2.57E-10 | 0.87 | 3.79 | - | 567.6  |
| AHQ-3-3, 3813 - 3826 | K.QVAASTAQLLVACK.V                         | 1461.70942 | 2 | 1.45E-04 | 0.92 | 3.86 | - | 700.8  |
| AHQ-3-1, 3968 - 3973 | K.QVAASTAQLLVACK.V                         | 1461.70942 | 2 | 2.27E-05 | 0.82 | 2.95 | - | 783.0  |
| AHQ-3-2, 6026        | K.RVAGSVTELIQAAEAMK.G                      | 1775.06387 | 2 | 6.41E-06 | 0.98 | 6.28 | - | 2199.2 |
| AHQ-3-3, 5996        | K.RVAGSVTELIQAAEAMK.G                      | 1775.06387 | 2 | 2.79E-05 | 0.98 | 5.69 | - | 2275.0 |
| AHQ-3-3, 4996        | K.RVAGSVTELIQAAEAMK.G                      | 1791.06327 | 2 | 4.19E-06 | 0.66 | 3.71 | - | 222.8  |
| AHQ-3-4, 5912        | K.RVAGSVTELIQAAEAMK.G                      | 1775.06387 | 2 | 1.40E-06 | 0.98 | 5.32 | - | 2089.5 |
| AHQ-3-5, 5637        | K.RVAGSVTELIQAAEAMK.G                      | 1775.06387 | 2 | 9.55E-07 | 0.98 | 5.89 | - | 2645.3 |
| AHQ-3-2, 4954 - 5025 | K.RVAGSVTELIQAAEAMK.G                      | 1791.06327 | 2 | 5.25E-06 | 0.91 | 4.26 | - | 541.1  |
| AHQ-3-2, 2901        | K.SIAAATSALVK.A                            | 1032.21612 | 2 | 7.87E-05 | 0.90 | 3.15 | - | 945.7  |
| AHQ-3-1, 3140 - 3141 | K.SIAAATSALVK.A                            | 1032.21612 | 2 | 2.09E-04 | 0.92 | 3.55 | - | 1014.8 |
| AHQ-3-7, 3623        | K.SKDFHGLEGDEESTMLEDVSPK.K                 | 2558.68364 | 3 | 4.04E-07 | 0.93 | 4.76 | - | 1357.0 |
| AHQ-3-7, 4074 - 4082 | K.SKDFHGLEGDEESTMLEDVSPK.K                 | 2538.68364 | 3 | 8.15E-10 | 0.97 | 5.99 | - | 1953.9 |
| AHQ-3-7, 4084 - 4107 | K.SKDFHGLEGDEESTMLEDVSPK.K                 | 2538.68364 | 2 | 8.53E-05 | 0.89 | 4.48 | - | 472.7  |
| AHQ-3-6, 5090 - 5093 | K.SNTSPEELGPLANQLTSDYGR.L                  | 2250.36505 | 2 | 3.67E-06 | 0.91 | 3.93 | - | 711.2  |
| AHQ-3-4, 5316 - 5388 | K.SNTSPEELGPLANQLTSDYGR.L                  | 2250.36505 | 2 | 2.94E-07 | 0.92 | 4.06 | - | 690.2  |
| AHQ-3-1, 4780        | K.SNTSPEELGPLANQLTSDYGR.L                  | 2250.36505 | 2 | 5.03E-06 | 0.87 | 3.78 | - | 478.3  |
| AHQ-3-5, 5357 - 5376 | K.SNTSPEELGPLANQLTSDYGR.L                  | 2250.36505 | 2 | 2.68E-08 | 0.90 | 4.40 | - | 432.8  |
| AHQ-3-3, 5517 - 5534 | K.SNTSPEELGPLANQLTSDYGR.L                  | 2250.36505 | 2 | 3.21E-04 | 0.77 | 3.56 | - | 364.9  |

|                       |                                    |            |   |          |      |      |   |        |
|-----------------------|------------------------------------|------------|---|----------|------|------|---|--------|
| AHQ-3-5, 4599 - 4600  | K.SNTSPEELGPLANQLTSDYGR.L          | 2250.36505 | 2 | 1.50E-09 | 0.95 | 4.88 | - | 931.4  |
| AHQ-3-2, 5217         | K.SNTSPEELGPLANQLTSDYGR.L          | 2250.36505 | 2 | 1.51E-05 | 0.79 | 3.48 | - | 404.2  |
| AHQ-3-4, 5597 - 5674  | K.SNTSPEELGPLANQLTSDYGR.L          | 2250.36505 | 2 | 5.86E-08 | 0.91 | 4.21 | - | 606.9  |
| AHQ-3-4, 5238 - 5317  | K.SNTSPEELGPLANQLTSDYGR.L          | 2250.36505 | 2 | 5.75E-06 | 0.66 | 3.27 | - | 241.3  |
| AHQ-3-6, 4501         | K.SNTSPEELGPLANQLTSDYGR.L          | 2250.36505 | 2 | 6.51E-07 | 0.84 | 3.50 | - | 538.9  |
| AHQ-3-3, 5617         | K.SNTSPEELGPLANQLTSDYGR.L          | 2250.36505 | 2 | 3.83E-06 | 0.80 | 3.82 | - | 353.8  |
| AHQ-3-2, 4805 - 4806  | K.SNTSPEELGPLANQLTSDYGR.L          | 2250.36505 | 2 | 6.10E-07 | 0.91 | 4.35 | - | 522.8  |
| AHQ-3-4, 5153         | K.SNTSPEELGPLANQLTSDYGR.L          | 2250.36505 | 2 | 3.76E-06 | 0.81 | 3.29 | - | 603.1  |
| AHQ-3-3, 5432         | K.SNTSPEELGPLANQLTSDYGR.L          | 2250.36505 | 2 | 4.53E-07 | 0.82 | 3.62 | - | 348.3  |
| AHQ-3-4, 4952         | K.SNTSPEELGPLANQLTSDYGR.L          | 2250.36505 | 2 | 4.48E-05 | 0.78 | 3.33 | - | 592.3  |
| AHQ-3-4, 4716         | K.SNTSPEELGPLANQLTSDYGR.L          | 2250.36505 | 2 | 2.89E-07 | 0.84 | 3.51 | - | 508.9  |
| AHQ-3-2, 5377 - 5453  | K.SNTSPEELGPLANQLTSDYGR.L          | 2250.36505 | 2 | 4.82E-06 | 0.91 | 4.36 | - | 591.8  |
| AHQ-3-3, 5208 - 5221  | K.SNTSPEELGPLANQLTSDYGR.L          | 2250.36505 | 2 | 1.39E-05 | 0.77 | 3.67 | - | 349.0  |
| AHQ-3-5, 5184 - 5191  | K.SNTSPEELGPLANQLTSDYGR.L          | 2250.36505 | 2 | 1.24E-08 | 0.92 | 4.39 | - | 558.2  |
| AHQ-3-2, 5051         | K.SNTSPEELGPLANQLTSDYGR.L          | 2250.36505 | 2 | 1.65E-07 | 0.84 | 3.83 | - | 367.4  |
| AHQ-3-3, 4764 - 4772  | K.SNTSPEELGPLANQLTSDYGR.L          | 2250.36505 | 2 | 6.26E-07 | 0.92 | 4.41 | - | 643.9  |
| AHQ-3-2, 5738         | K.SNTSPEELGPLANQLTSDYGR.L          | 2250.36505 | 2 | 1.41E-05 | 0.86 | 3.73 | - | 437.1  |
| AHQ-3-1, 5646         | K.SNTSPEELGPLANQLTSDYGR.L          | 2250.36505 | 2 | 1.72E-06 | 0.86 | 3.89 | - | 476.3  |
| AHQ-3-2, 5510 - 5582  | K.SNTSPEELGPLANQLTSDYGR.L          | 2250.36505 | 2 | 1.78E-04 | 0.65 | 3.05 | - | 358.9  |
| AHQ-3-7, 5043         | K.SNTSPEELGPLANQLTSDYGR.L          | 2250.36505 | 2 | 1.28E-06 | 0.64 | 2.99 | - | 405.3  |
| AHQ-3-1, 5421 - 5488  | K.SNTSPEELGPLANQLTSDYGR.L          | 2250.36505 | 2 | 7.52E-05 | 0.78 | 3.33 | - | 426.7  |
| AHQ-3-1, 5554 - 5636  | K.SNTSPEELGPLANQLTSDYGR.L          | 2250.36505 | 2 | 1.64E-07 | 0.82 | 3.39 | - | 427.3  |
| AHQ-3-3, 5340 - 5416  | K.SNTSPEELGPLANQLTSDYGR.L          | 2250.36505 | 2 | 4.15E-07 | 0.90 | 4.24 | - | 481.0  |
| AHQ-3-7, 7302 - 7303  | R.TEDSGLQTVQVIAAATQCALSTSQLVACTK.V | 3056.37009 | 3 | 5.00E-13 | 0.97 | 6.05 | - | 1637.8 |
| AHQ-3-13, 6807 - 6875 | R.TEDSGLQTVQVIAAATQCALSTSQLVACTK.V | 3056.37009 | 3 | 1.46E-05 | 0.90 | 3.93 | - | 1255.8 |
| AHQ-3-2, 7541 - 7550  | R.TEDSGLQTVQVIAAATQCALSTSQLVACTK.V | 3056.37009 | 3 | 2.22E-15 | 0.97 | 6.00 | - | 1727.7 |
| AHQ-3-5, 7411 - 7419  | R.TEDSGLQTVQVIAAATQCALSTSQLVACTK.V | 3056.37009 | 3 | 2.36E-11 | 0.97 | 5.92 | - | 1811.6 |
| AHQ-3-3, 7380 - 7457  | R.TEDSGLQTVQVIAAATQCALSTSQLVACTK.V | 3056.37009 | 3 | 1.31E-12 | 0.98 | 6.48 | - | 1884.2 |
| AHQ-3-12, 4226        | K.TKEVIQEWNLINIK.R                 | 1716.95938 | 2 | 3.62E-08 | 0.94 | 3.92 | - | 1257.5 |
| AHQ-3-10, 3898        | K.TKEVIQEWNLINIK.R                 | 1716.95938 | 2 | 2.45E-06 | 0.96 | 4.34 | - | 1843.2 |
| AHQ-3-13, 4227        | K.TKEVIQEWNLINIK.R                 | 1716.95938 | 2 | 1.03E-08 | 0.95 | 4.14 | - | 1460.5 |
| AHQ-3-12, 4231        | K.TKEVIQEWNLINIK.R                 | 1716.95938 | 3 | 7.82E-06 | 0.94 | 4.28 | - | 1460.3 |
| AHQ-3-11, 4026        | K.TKEVIQEWNLINIK.R                 | 1716.95938 | 2 | 3.02E-04 | 0.96 | 4.48 | - | 1572.7 |
| AHQ-3-7, 3902 - 3904  | K.TKEVIQEWNLINIK.R                 | 1716.95938 | 3 | 3.10E-07 | 0.96 | 4.98 | - | 1630.7 |
| AHQ-3-8, 3680 - 3746  | K.TKEVIQEWNLINIK.R                 | 1716.95938 | 2 | 5.21E-08 | 0.96 | 4.48 | - | 1474.5 |
| AHQ-3-1, 6644 - 6710  | K.TLAESALQLLYTAK.E                 | 1522.76793 | 2 | 3.72E-05 | 0.97 | 4.94 | - | 1491.0 |
| AHQ-3-3, 6716         | K.TLAESALQLLYTAK.E                 | 1522.76793 | 2 | 8.54E-05 | 0.95 | 4.42 | - | 1085.3 |
| AHQ-3-3, 6632 - 6700  | K.TLAESALQLLYTAK.E                 | 1522.76793 | 2 | 3.41E-08 | 0.97 | 4.96 | - | 1259.2 |
| AHQ-3-4, 6644 - 6716  | K.TLAESALQLLYTAK.E                 | 1522.76793 | 2 | 4.02E-07 | 0.97 | 4.85 | - | 1504.2 |
| AHQ-3-2, 6685 - 6757  | K.TLAESALQLLYTAK.E                 | 1522.76793 | 2 | 9.33E-09 | 0.96 | 4.81 | - | 1184.7 |
| AHQ-3-1, 6852         | K.TLAESALQLLYTAK.E                 | 1522.76793 | 2 | 8.56E-04 | 0.87 | 3.05 | - | 970.4  |
| AHQ-3-11, 6010        | K.TLAESALQLLYTAK.E                 | 1522.76793 | 2 | 2.40E-06 | 0.92 | 3.92 | - | 909.2  |
| AHQ-3-13, 6303        | K.TLAESALQLLYTAK.E                 | 1522.76793 | 2 | 1.73E-05 | 0.92 | 3.45 | - | 939.3  |
| AHQ-3-9, 6011         | K.TLAESALQLLYTAK.E                 | 1522.76793 | 2 | 2.42E-06 | 0.88 | 3.74 | - | 678.9  |
| AHQ-3-2, 6825 - 6842  | K.TLAESALQLLYTAK.E                 | 1522.76793 | 2 | 6.93E-04 | 0.96 | 4.46 | - | 1112.2 |
| AHQ-3-4, 3046 - 3122  | K.TLSHPQQMALLDQTK.T                | 1711.96464 | 2 | 1.72E-05 | 0.97 | 5.54 | - | 1010.4 |
| AHQ-3-1, 3362 - 3369  | K.TLSHPQQMALLDQTK.T                | 1711.96464 | 2 | 4.01E-06 | 0.93 | 4.42 | - | 685.8  |
| AHQ-3-5, 2895         | K.TLSHPQQMALLDQTK.T                | 1711.96464 | 2 | 7.37E-05 | 0.96 | 5.08 | - | 990.0  |
| AHQ-3-3, 3154         | K.TLSHPQQMALLDQTK.T                | 1711.96464 | 3 | 4.61E-08 | 0.95 | 4.71 | - | 1884.4 |
| AHQ-3-3, 3060 - 3134  | K.TLSHPQQMALLDQTK.T                | 1711.96464 | 2 | 2.12E-08 | 0.93 | 4.35 | - | 680.3  |
| AHQ-3-6, 2873         | K.TLSHPQQMALLDQTK.T                | 1711.96464 | 2 | 3.43E-07 | 0.95 | 4.88 | - | 929.9  |
| AHQ-3-2, 3149         | K.TLSHPQQMALLDQTK.T                | 1711.96464 | 2 | 3.07E-06 | 0.93 | 4.42 | - | 705.7  |
| AHQ-3-1, 3384         | K.TLSHPQQMALLDQTK.T                | 1711.96464 | 3 | 6.36E-04 | 0.95 | 4.71 | - | 1591.6 |
| AHQ-3-2, 4427 - 4453  | K.TMLESAGGLIQTAR.A                 | 1448.67095 | 1 | 3.83E-04 | 0.19 | 2.32 | - | 196.4  |
| AHQ-3-6, 4069         | K.TMLESAGGLIQTAR.A                 | 1448.67095 | 2 | 2.92E-10 | 0.92 | 3.80 | - | 1522.4 |
| AHQ-3-3, 3481 - 3557  | K.TMLESAGGLIQTAR.A                 | 1464.67035 | 2 | 5.58E-07 | 0.95 | 4.78 | - | 1193.0 |
| AHQ-3-5, 3245         | K.TMLESAGGLIQTAR.A                 | 1464.67035 | 2 | 1.96E-05 | 0.97 | 4.26 | - | 1958.8 |
| AHQ-3-2, 3513 - 3514  | K.TMLESAGGLIQTAR.A                 | 1464.67035 | 2 | 4.37E-08 | 0.98 | 5.01 | - | 2043.2 |
| AHQ-3-5, 4132 - 4147  | K.TMLESAGGLIQTAR.A                 | 1448.67095 | 2 | 3.15E-07 | 0.93 | 3.76 | - | 1526.7 |
| AHQ-3-1, 3625 - 3642  | K.TMLESAGGLIQTAR.A                 | 1464.67035 | 2 | 2.85E-08 | 0.95 | 4.08 | - | 1314.4 |
| AHQ-3-4, 4285 - 4289  | K.TMLESAGGLIQTAR.A                 | 1448.67095 | 2 | 3.56E-07 | 0.82 | 3.39 | - | 716.2  |
| AHQ-3-1, 4418 - 4493  | K.TMLESAGGLIQTAR.A                 | 1448.67095 | 2 | 1.89E-07 | 0.94 | 4.16 | - | 1466.1 |
| AHQ-3-3, 4402         | K.TMLESAGGLIQTAR.A                 | 1448.67095 | 1 | 1.23E-06 | 0.11 | 2.08 | - | 242.9  |
| AHQ-3-3, 4388 - 4408  | K.TMLESAGGLIQTAR.A                 | 1448.67095 | 2 | 2.06E-06 | 0.92 | 3.72 | - | 1524.4 |
| AHQ-3-4, 3438 - 3440  | K.TMLESAGGLIQTAR.A                 | 1464.67035 | 2 | 4.75E-09 | 0.98 | 5.33 | - | 1830.7 |
| AHQ-3-2, 4503         | K.TMLESAGGLIQTAR.A                 | 1448.67095 | 2 | 1.11E-05 | 0.89 | 3.09 | - | 1709.3 |
| AHQ-3-13, 4221        | K.TMLESAGGLIQTAR.A                 | 1854.07511 | 2 | 8.36E-05 | 0.92 | 4.20 | - | 715.5  |
| AHQ-3-13, 4791        | K.TMQFEPSTMVYDAGR.I                | 1838.07571 | 2 | 3.80E-05 | 0.89 | 4.22 | - | 571.1  |
| AHQ-3-13, 4789        | K.TMQFEPSTMVYDAGR.I                | 1838.07571 | 2 | 6.76E-04 | 0.88 | 3.58 | - | 582.0  |
| AHQ-3-14, 5203        | K.TMQFEPSTMVYDAGR.I                | 1854.07511 | 2 | 4.81E-04 | 0.91 | 4.14 | - | 754.1  |
| AHQ-3-13, 3999        | K.TMQFEPSTMVYDAGR.I                | 1854.07511 | 2 | 3.97E-04 | 0.84 | 3.64 | - | 382.9  |
| AHQ-3-8, 4452         | K.TMQFEPSTMVYDAGR.I                | 1838.07571 | 2 | 2.46E-04 | 0.85 | 3.98 | - | 474.1  |
| AHQ-3-13, 4213        | K.TMQFEPSTMVYDAGR.I                | 1854.07511 | 2 | 4.23E-06 | 0.89 | 3.57 | - | 664.7  |
| AHQ-3-13, 3673 - 3741 | K.TVTDMLM*TICAR.I                  | 1445.70887 | 2 | 9.01E-04 | 0.88 | 3.21 | - | 831.5  |
| AHQ-3-13, 3682 - 3746 | K.TVTDMLM*TICAR.I                  | 1445.70887 | 2 | 5.99E-05 | 0.82 | 3.10 | - | 609.8  |
| AHQ-3-13, 5334 - 5401 | K.TVTDMLM*TICAR.I                  | 1413.71007 | 2 | 2.13E-05 | 0.61 | 2.66 | - | 479.6  |
| AHQ-3-7, 4927         | K.TYGVSFLLVK.E                     | 1161.37395 | 2 | 1.54E-07 | 0.88 | 3.24 | - | 688.1  |
| AHQ-3-11, 4963        | K.TYGVSFLLVK.E                     | 1161.37395 | 2 | 5.64E-06 | 0.91 | 3.97 | - | 663.0  |
| AHQ-3-7, 5010         | K.TYGVSFLLVK.E                     | 1161.37395 | 2 | 1.55E-05 | 0.91 | 3.56 | - | 746.1  |
| AHQ-3-12, 5214        | K.TYGVSFLLVK.E                     | 1161.37395 | 2 | 2.01E-07 | 0.85 | 3.26 | - | 570.4  |
| AHQ-3-5, 6401 - 6428  | R.VAGSVTELIQAAEAMK.G               | 1618.87752 | 2 | 6.64E-07 | 0.97 | 4.48 | - | 1581.6 |
| AHQ-3-4, 6552 - 6568  | R.VAGSVTELIQAAEAMK.G               | 1618.87752 | 2 | 8.68E-09 | 0.96 | 4.39 | - | 1494.1 |
| AHQ-3-2, 5469 - 5537  | R.VAGSVTELIQAAEAMK.G               | 1634.87692 | 2 | 5.17E-08 | 0.97 | 5.44 | - | 1622.6 |
| AHQ-3-2, 6779         | R.VAGSVTELIQAAEAMK.G               | 1618.87752 | 2 | 3.12E-04 | 0.96 | 4.21 | - | 1634.5 |
| AHQ-3-1, 6561 - 6569  | R.VAGSVTELIQAAEAMK.G               | 1618.87752 | 2 | 4.45E-08 | 0.96 | 4.83 | - | 1224.5 |
| AHQ-3-4, 5385 - 5456  | R.VAGSVTELIQAAEAMK.G               | 1634.87692 | 2 | 7.15E-06 | 0.96 | 4.94 | - | 1339.3 |
| AHQ-3-3, 5437 - 5510  | R.VAGSVTELIQAAEAMK.G               | 1634.87692 | 2 | 3.57E-06 | 0.91 | 3.90 | - | 1077.1 |
| AHQ-3-9, 5887 - 5893  | R.VAGSVTELIQAAEAMK.G               | 1618.87752 | 2 | 1.81E-07 | 0.95 | 4.58 | - | 1247.1 |
| AHQ-3-1, 5582         | R.VAGSVTELIQAAEAMK.G               | 1634.87692 | 3 | 3.12E-05 | 0.96 | 5.59 | - | 1566.2 |
| AHQ-3-2, 6539 - 6614  | R.VAGSVTELIQAAEAMK.G               | 1618.87752 | 2 | 6.86E-09 | 0.98 | 6.14 | - | 1465.6 |
| AHQ-3-3, 6500 - 6568  | R.VAGSVTELIQAAEAMK.G               | 1618.87752 | 2 | 2.04E-09 | 0.98 | 5.72 | - | 1627.2 |
| AHQ-3-10, 5691 - 5695 | R.VAGSVTELIQAAEAMK.G               | 1618.87752 | 2 | 1.26E-08 | 0.91 | 4.07 | - | 954.1  |
| AHQ-3-1, 5566         | R.VAGSVTELIQAAEAMK.G               | 1634.87692 | 2 | 2.45E-05 | 0.81 | 2.80 | - | 847.9  |
| AHQ-3-7, 6139         | R.VAGSVTELIQAAEAMK.G               | 1618.87752 | 2 | 2.82E-08 | 0.98 | 4.69 | - | 2249.7 |
| AHQ-3-3, 6132 - 6164  | K.VGAIPANALDDGQWSOGLISAAR.M        | 2311.53959 | 2 | 1.33E-09 | 0.94 | 5.11 | - | 863.4  |
| AHQ-3-3, 5988 - 6064  | K.VGAIPANALDDGQWSOGLISAAR.M        | 2311.53959 | 2 | 1.52E-06 | 0.88 | 4.19 | - | 669.1  |
| AHQ-3-10, 5287 - 5322 | K.VGAIPANALDDGQWSOGLISAAR.M        | 2311.53959 | 2 | 4.11E-09 | 0.95 | 5.12 | - | 711.5  |
| AHQ-3-10, 5107 - 5170 | K.VGAIPANALDDGQWSOGLISAAR.M        | 2311.53959 | 2 | 5.59E-05 | 0.91 | 4.57 | - | 753.9  |
| AHQ-3-3, 5852 - 5920  | K.VGAIPANALDDGQWSOGLISAAR.M        | 2311.53959 | 2 | 3.84E-06 | 0.53 | 3.17 | - | 276.8  |
| AHQ-3-11, 5542        | K.VGAIPANALDDGQWSOGLISAAR.M        | 2311.53959 | 2 | 1.05E-08 | 0.96 | 5.41 | - | 1058.2 |
| AHQ-3-12, 5870        | K.VGAIPANALDDGQWSOGLISAAR.M        | 2311.53959 | 2 | 2.00E-07 | 0.93 | 4.23 | - | 884.9  |
| AHQ-3-5, 5775 - 5788  | K.VGAIPANALDDGQWSOGLISAAR.M        | 2311.53959 | 2 | 8.11E-06 | 0.92 | 4.40 | - | 773.4  |
| AHQ-3-5, 5963 - 5984  | K.VGAIPANALDDGQWSOGLISAAR.M        | 2311.53959 | 2 | 4.13E-11 | 0.97 | 5.45 | - | 994.3  |
| AHQ-3-1, 6150         | K.VGAIPANALDDGQWSOGLISAAR.M        | 2311.53959 | 2 | 3.21E-05 | 0.88 | 3.86 | - | 517.7  |
| AHQ-3-5, 6159 - 6160  | K.VGAIPANALDDGQWSOGLISAAR.M        | 2311.53959 | 2 | 4.65E-11 | 0.96 | 5.01 | - | 1011.2 |
| AHQ-3-9, 5465 - 5532  | K.VGAIPANALDDGQWSOGLISAAR.M        | 2311.53959 | 2 | 7.03E-09 | 0.95 | 5.30 | - | 596.0  |
| AHQ-3-1, 6068 - 6148  | K.VGAIPANALDDGQWSOGLISAAR.M        | 2311.53959 | 2 | 4.56E-10 | 0.92 | 4.13 | - | 705.1  |

|                      |                             |            |   |          |      |      |   |        |
|----------------------|-----------------------------|------------|---|----------|------|------|---|--------|
| AHQ-3-6, 5837 - 5877 | K.VGAIPANALDDGQWSQGLISAAR.M | 2311.53959 | 2 | 5.55E-16 | 0.96 | 5.22 | - | 729.3  |
| AHQ-3-1, 5921 - 5988 | K.VGAIPANALDDGQWSQGLISAAR.M | 2311.53959 | 2 | 5.06E-07 | 0.95 | 5.08 | - | 849.4  |
| AHQ-3-8, 5593        | K.VGAIPANALDDGQWSQGLISAAR.M | 2311.53959 | 2 | 3.46E-11 | 0.95 | 4.89 | - | 834.0  |
| AHQ-3-13, 5763       | K.VGAIPANALDDGQWSQGLISAAR.M | 2311.53959 | 2 | 5.80E-05 | 0.52 | 2.85 | - | 385.5  |
| AHQ-3-2, 5827 - 5897 | K.VGAIPANALDDGQWSQGLISAAR.M | 2311.53959 | 2 | 7.91E-07 | 0.93 | 4.52 | - | 845.3  |
| AHQ-3-2, 5970 - 6015 | K.VGAIPANALDDGQWSQGLISAAR.M | 2311.53959 | 2 | 3.88E-10 | 0.97 | 5.67 | - | 1365.8 |
| AHQ-3-7, 5638        | K.VGAIPANALDDGQWSQGLISAAR.M | 2311.53959 | 2 | 7.04E-09 | 0.90 | 4.33 | - | 659.0  |
| AHQ-3-7, 5803 - 5826 | K.VGAIPANALDDGQWSQGLISAAR.M | 2311.53959 | 2 | 3.05E-11 | 0.97 | 5.61 | - | 1082.9 |
| AHQ-3-2, 6093 - 6161 | K.VGAIPANALDDGQWSQGLISAAR.M | 2311.53959 | 2 | 3.58E-09 | 0.93 | 4.41 | - | 857.8  |
| AHQ-3-14-, 5701      | K.VGAIPANALDDGQWSQGLISAAR.M | 2311.53959 | 2 | 2.65E-05 | 0.94 | 4.29 | - | 945.9  |
| AHQ-3-7, 5952        | K.VGAIPANALDDGQWSQGLISAAR.M | 2311.53959 | 2 | 2.49E-05 | 0.85 | 3.23 | - | 700.1  |
| AHQ-3-4, 5721        | K.VGAIPANALDDGQWSQGLISAAR.M | 2311.53959 | 2 | 4.44E-04 | 0.84 | 3.95 | - | 568.1  |
| AHQ-3-6, 5669        | K.VGAIPANALDDGQWSQGLISAAR.M | 2311.53959 | 2 | 3.84E-05 | 0.73 | 3.13 | - | 346.3  |
| AHQ-3-11, 5386       | K.VGAIPANALDDGQWSQGLISAAR.M | 2311.53959 | 2 | 3.25E-04 | 0.81 | 3.60 | - | 387.6  |
| AHQ-3-4, 5802 - 5872 | K.VGAIPANALDDGQWSQGLISAAR.M | 2311.53959 | 2 | 7.08E-10 | 0.94 | 4.13 | - | 1126.6 |
| AHQ-3-4, 5873 - 5941 | K.VGAIPANALDDGQWSQGLISAAR.M | 2311.53959 | 2 | 2.32E-06 | 0.49 | 2.77 | - | 237.2  |
| AHQ-3-4, 5965 - 6037 | K.VGAIPANALDDGQWSQGLISAAR.M | 2311.53959 | 2 | 2.81E-05 | 0.91 | 4.51 | - | 593.6  |
| AHQ-3-4, 6108        | K.VGAIPANALDDGQWSQGLISAAR.M | 2311.53959 | 2 | 8.62E-09 | 0.97 | 5.79 | - | 813.2  |
| AHQ-3-3, 3810 - 3820 | K.VGDDPAVWLK.N              | 1228.37879 | 2 | 1.31E-08 | 0.93 | 4.10 | - | 870.0  |
| AHQ-3-4, 3741 - 3752 | K.VGDDPAVWLK.N              | 1228.37879 | 2 | 1.39E-06 | 0.92 | 3.82 | - | 796.6  |
| AHQ-3-1, 3981        | K.VGDDPAVWLK.N              | 1228.37879 | 2 | 4.85E-08 | 0.93 | 4.03 | - | 811.2  |
| AHQ-3-6, 3509        | K.VGDDPAVWLK.N              | 1228.37879 | 2 | 2.27E-07 | 0.88 | 3.39 | - | 778.3  |
| AHQ-3-5, 3548 - 3576 | K.VGDDPAVWLK.N              | 1228.37879 | 2 | 1.43E-07 | 0.93 | 3.72 | - | 842.1  |
| AHQ-3-2, 3850        | K.VGDDPAVWLK.N              | 1228.37879 | 2 | 1.09E-07 | 0.91 | 3.69 | - | 838.6  |
| AHQ-3-3, 3278 - 3286 | K.VLGEAMTGISQNAK.N          | 1419.62961 | 2 | 4.57E-04 | 0.80 | 2.65 | - | 935.0  |
| AHQ-3-2, 2325 - 2399 | K.VLGEAMTGISQNAK.N          | 1435.62901 | 2 | 6.37E-06 | 0.96 | 4.73 | - | 1160.2 |
| AHQ-3-2, 3099 - 3178 | K.VLGEAMTGISQNAK.N          | 1419.62961 | 2 | 6.85E-11 | 0.98 | 5.13 | - | 1808.3 |
| AHQ-3-1, 3260        | K.VLGEAMTGISQNAK.N          | 1419.62961 | 2 | 1.94E-10 | 0.97 | 4.32 | - | 2161.7 |
| AHQ-3-3, 3104        | K.VLGEAMTGISQNAK.N          | 1419.62961 | 1 | 1.44E-06 | 0.74 | 3.07 | - | 358.3  |
| AHQ-3-1, 2465 - 2477 | K.VLGEAMTGISQNAK.N          | 1435.62901 | 2 | 1.52E-05 | 0.96 | 4.12 | - | 1467.3 |
| AHQ-3-3, 2305 - 2377 | K.VLGEAMTGISQNAK.N          | 1435.62901 | 2 | 2.77E-04 | 0.97 | 4.56 | - | 1456.8 |
| AHQ-3-4, 3048 - 3126 | K.VLGEAMTGISQNAK.N          | 1419.62961 | 2 | 1.28E-08 | 0.98 | 5.07 | - | 2101.3 |
| AHQ-3-4, 3049 - 3134 | K.VLGEAMTGISQNAK.N          | 1419.62961 | 1 | 1.58E-04 | 0.42 | 2.23 | - | 367.4  |
| AHQ-3-3, 2314        | K.VLGEAMTGISQNAK.N          | 1435.62901 | 1 | 2.29E-05 | 0.14 | 2.04 | - | 135.5  |
| AHQ-3-2, 3119        | K.VLGEAMTGISQNAK.N          | 1419.62961 | 1 | 3.69E-06 | 0.76 | 3.38 | - | 334.3  |
| AHQ-3-2, 3270        | K.VLGEAMTGISQNAK.N          | 1419.62961 | 2 | 3.36E-09 | 0.98 | 4.49 | - | 2051.1 |
| AHQ-3-4, 2293 - 2310 | K.VLGEAMTGISQNAK.N          | 1435.62901 | 2 | 8.34E-05 | 0.92 | 3.96 | - | 1054.5 |
| AHQ-3-5, 2196 - 2205 | K.VLGEAMTGISQNAK.N          | 1435.62901 | 2 | 1.95E-06 | 0.98 | 5.30 | - | 1830.1 |
| AHQ-3-2, 4970        | K.VLGEAMTGISQNAK.N          | 3038.33659 | 3 | 1.73E-04 | 0.73 | 3.97 | - | 463.3  |
| AHQ-3-3, 5013 - 5060 | K.VLGEAMTGISQNAK.N          | 3038.33659 | 3 | 2.68E-05 | 0.70 | 3.51 | - | 543.2  |
| AHQ-3-1, 5577        | K.VLGEAMTGISQNAK.N          | 3022.33719 | 3 | 4.24E-05 | 0.88 | 4.21 | - | 696.7  |
| AHQ-3-1, 4969 - 5042 | K.VLGEAMTGISQNAK.N          | 3038.33659 | 3 | 4.43E-08 | 0.90 | 5.08 | - | 449.4  |
| AHQ-3-6, 1458 - 1490 | K.VLVQNAAGSQEK.L            | 1244.37976 | 2 | 1.45E-05 | 0.67 | 2.91 | - | 562.9  |
| AHQ-3-4, 1568 - 1574 | K.VLVQNAAGSQEK.L            | 1244.37976 | 2 | 2.39E-09 | 0.92 | 3.61 | - | 1001.9 |
| AHQ-3-2, 1719        | K.VLVQNAAGSQEK.L            | 1244.37976 | 2 | 4.93E-08 | 0.84 | 3.15 | - | 692.2  |
| AHQ-3-3, 1680 - 1754 | K.VLVQNAAGSQEK.L            | 1244.37976 | 2 | 1.23E-07 | 0.84 | 3.16 | - | 802.6  |
| AHQ-3-2, 1494 - 1563 | K.VLVQNAAGSQEK.L            | 1244.37976 | 2 | 1.02E-06 | 0.89 | 3.69 | - | 794.3  |
| AHQ-3-5, 1472        | K.VLVQNAAGSQEK.L            | 1244.37976 | 2 | 6.11E-07 | 0.92 | 3.29 | - | 1119.1 |
| AHQ-3-3, 1558        | K.VLVQNAAGSQEK.L            | 1244.37976 | 1 | 2.44E-05 | 0.44 | 2.82 | - | 294.9  |
| AHQ-3-4, 1773        | K.VLVQNAAGSQEK.L            | 1244.37976 | 1 | 5.61E-08 | 0.58 | 2.37 | - | 498.5  |
| AHQ-3-2, 1566 - 1733 | K.VLVQNAAGSQEK.L            | 1244.37976 | 1 | 6.13E-05 | 0.38 | 2.61 | - | 284.0  |
| AHQ-3-4, 1548 - 1684 | K.VLVQNAAGSQEK.L            | 1244.37976 | 1 | 1.20E-05 | 0.36 | 2.61 | - | 240.3  |
| AHQ-3-3, 1546 - 1608 | K.VLVQNAAGSQEK.L            | 1244.37976 | 2 | 6.06E-06 | 0.87 | 3.26 | - | 769.3  |
| AHQ-3-2, 1631 - 1645 | K.VLVQNAAGSQEK.L            | 1244.37976 | 2 | 7.55E-08 | 0.85 | 3.53 | - | 603.2  |
| AHQ-3-5, 4431        | K.VMVTNVTSLK.T              | 1205.49322 | 2 | 4.69E-06 | 0.89 | 3.85 | - | 849.1  |
| AHQ-3-2, 4401 - 4403 | K.VM*VTNVTSLK.T             | 1221.49262 | 2 | 1.53E-04 | 0.84 | 3.82 | - | 626.3  |
| AHQ-3-6, 4361        | K.VMVTNVTSLK.T              | 1205.49322 | 2 | 3.12E-06 | 0.95 | 4.25 | - | 1065.1 |
| AHQ-3-1, 4529 - 4533 | K.VM*VTNVTSLK.T             | 1221.49262 | 2 | 5.83E-04 | 0.79 | 3.22 | - | 623.8  |
| AHQ-3-6, 4017        | K.VM*VTNVTSLK.T             | 1221.49262 | 2 | 2.62E-04 | 0.66 | 2.57 | - | 612.3  |
| AHQ-3-4, 4268        | K.VM*VTNVTSLK.T             | 1221.49262 | 2 | 3.70E-05 | 0.84 | 3.33 | - | 633.8  |
| AHQ-3-4, 4654 - 4657 | K.VMVTNVTSLK.T              | 1205.49322 | 2 | 7.72E-07 | 0.91 | 4.28 | - | 668.6  |
| AHQ-3-3, 4380        | K.VM*VTNVTSLK.T             | 1221.49262 | 2 | 2.29E-04 | 0.74 | 3.08 | - | 759.2  |
| AHQ-3-1, 4904        | K.VMVTNVTSLK.T              | 1205.49322 | 2 | 3.24E-04 | 0.89 | 3.60 | - | 732.9  |
| AHQ-3-7, 4238 - 4252 | K.VMVTNVTSLK.T              | 1205.49322 | 2 | 5.57E-07 | 0.88 | 3.68 | - | 622.2  |
| AHQ-3-2, 4781        | K.VMVTNVTSLK.T              | 1205.49322 | 2 | 1.26E-07 | 0.90 | 4.18 | - | 706.1  |
| AHQ-3-3, 4774 - 4806 | K.VMVTNVTSLK.T              | 1205.49322 | 2 | 2.42E-04 | 0.88 | 3.94 | - | 670.6  |
| AHQ-3-5, 4084        | K.VM*VTNVTSLK.T             | 1221.49262 | 2 | 4.22E-04 | 0.82 | 3.33 | - | 605.3  |
| AHQ-3-4, 2649        | R.VQELGHGCAALVT.K.A         | 1484.70307 | 2 | 3.20E-07 | 0.95 | 4.56 | - | 1011.9 |
| AHQ-3-6, 2517        | R.VQELGHGCAALVT.K.A         | 1484.70307 | 2 | 3.13E-04 | 0.97 | 4.00 | - | 1780.7 |
| AHQ-3-5, 2524        | R.VQELGHGCAALVT.K.A         | 1484.70307 | 1 | 2.38E-07 | 0.88 | 3.66 | - | 641.4  |
| AHQ-3-1, 2913        | R.VQELGHGCAALVT.K.A         | 1484.70307 | 2 | 2.66E-06 | 0.97 | 4.88 | - | 1383.5 |
| AHQ-3-3, 2701        | R.VQELGHGCAALVT.K.A         | 1484.70307 | 2 | 1.25E-04 | 0.94 | 4.61 | - | 901.9  |
| AHQ-3-3, 2708        | R.VQELGHGCAALVT.K.A         | 1484.70307 | 1 | 1.29E-05 | 0.89 | 3.68 | - | 736.2  |
| AHQ-3-2, 2737        | R.VQELGHGCAALVT.K.A         | 1484.70307 | 1 | 2.61E-10 | 0.86 | 3.58 | - | 655.0  |
| AHQ-3-7, 2466        | R.VQELGHGCAALVT.K.A         | 1484.70307 | 2 | 1.87E-04 | 0.94 | 4.11 | - | 1289.7 |
| AHQ-3-2, 2711 - 2715 | R.VQELGHGCAALVT.K.A         | 1484.70307 | 2 | 1.97E-04 | 0.96 | 4.13 | - | 1528.7 |
| AHQ-3-4, 2660        | R.VQELGHGCAALVT.K.A         | 1484.70307 | 1 | 3.46E-10 | 0.88 | 3.85 | - | 617.6  |
| AHQ-3-5, 2515        | R.VQELGHGCAALVT.K.A         | 1484.70307 | 2 | 3.41E-05 | 0.98 | 5.10 | - | 2076.8 |
| AHQ-3-2, 2539        | K.VSHVLAALQAGNR.G           | 1336.52525 | 1 | 2.15E-06 | 0.88 | 3.93 | - | 428.5  |
| AHQ-3-7, 2311        | K.VSHVLAALQAGNR.G           | 1336.52525 | 2 | 4.80E-05 | 0.96 | 3.95 | - | 1612.7 |
| AHQ-3-3, 2689        | K.VSHVLAALQAGNR.G           | 1336.52525 | 2 | 5.03E-10 | 0.97 | 4.08 | - | 1840.1 |
| AHQ-3-6, 2358        | K.VSHVLAALQAGNR.G           | 1336.52525 | 1 | 2.11E-04 | 0.77 | 2.98 | - | 427.9  |
| AHQ-3-3, 2534        | K.VSHVLAALQAGNR.G           | 1336.52525 | 1 | 2.89E-06 | 0.88 | 3.72 | - | 442.3  |
| AHQ-3-3, 2528 - 2600 | K.VSHVLAALQAGNR.G           | 1336.52525 | 1 | 1.97E-04 | 0.39 | 2.47 | - | 284.5  |
| AHQ-3-5, 2361        | K.VSHVLAALQAGNR.G           | 1336.52525 | 2 | 2.05E-09 | 0.98 | 4.95 | - | 2113.9 |
| AHQ-3-2, 2538 - 2542 | K.VSHVLAALQAGNR.G           | 1336.52525 | 2 | 2.03E-09 | 0.97 | 4.96 | - | 1832.6 |
| AHQ-3-4, 2516        | K.VSHVLAALQAGNR.G           | 1336.52525 | 1 | 1.40E-07 | 0.84 | 3.45 | - | 442.3  |
| AHQ-3-5, 2359        | K.VSHVLAALQAGNR.G           | 1336.52525 | 1 | 7.74E-08 | 0.81 | 2.99 | - | 485.0  |
| AHQ-3-1, 2821        | K.VSHVLAALQAGNR.G           | 1336.52525 | 1 | 5.34E-08 | 0.79 | 3.13 | - | 405.8  |
| AHQ-3-4, 2638        | K.VSHVLAALQAGNR.G           | 1336.52525 | 1 | 1.02E-08 | 0.66 | 2.18 | - | 500.9  |
| AHQ-3-1, 2822        | K.VSHVLAALQAGNR.G           | 1336.52525 | 2 | 1.33E-08 | 0.96 | 4.40 | - | 1310.3 |
| AHQ-3-11, 6274       | K.VSQMAQYFPELTLAAVGAASK.T   | 2183.51313 | 2 | 1.85E-04 | 0.77 | 3.29 | - | 503.2  |
| AHQ-3-11, 5500       | K.VSQM*AQYFPELTLAAVGAASK.T  | 2199.51253 | 2 | 4.83E-05 | 0.85 | 3.29 | - | 868.6  |
| AHQ-3-4, 6132 - 6142 | K.VSQM*AQYFPELTLAAVGAASK.T  | 2199.51253 | 2 | 2.19E-06 | 0.96 | 5.26 | - | 966.3  |
| AHQ-3-4, 6972        | K.VSQMAQYFPELTLAAVGAASK.T   | 2183.51313 | 3 | 1.37E-10 | 0.93 | 4.59 | - | 1297.4 |
| AHQ-3-4, 7102        | K.VSQMAQYFPELTLAAVGAASK.T   | 2183.51313 | 2 | 5.42E-08 | 0.94 | 4.92 | - | 633.1  |
| AHQ-3-8, 6420        | K.VSQMAQYFPELTLAAVGAASK.T   | 2183.51313 | 2 | 1.43E-05 | 0.96 | 4.97 | - | 1152.6 |
| AHQ-3-4, 6878        | K.VSQMAQYFPELTLAAVGAASK.T   | 2183.51313 | 2 | 2.11E-05 | 0.96 | 5.24 | - | 1127.2 |
| AHQ-3-7, 5618        | K.VSQM*AQYFPELTLAAVGAASK.T  | 2199.51253 | 2 | 4.96E-06 | 0.96 | 4.82 | - | 1249.2 |
| AHQ-3-2, 6101 - 6125 | K.VSQM*AQYFPELTLAAVGAASK.T  | 2199.51253 | 2 | 1.82E-07 | 0.97 | 5.50 | - | 1306.8 |
| AHQ-3-9, 6369        | K.VSQMAQYFPELTLAAVGAASK.T   | 2183.51313 | 2 | 1.88E-05 | 0.79 | 3.64 | - | 397.5  |
| AHQ-3-6, 6678        | K.VSQMAQYFPELTLAAVGAASK.T   | 2183.51313 | 2 | 1.46E-04 | 0.95 | 4.67 | - | 996.0  |
| AHQ-3-13-, 6546      | K.VSQMAQYFPELTLAAVGAASK.T   | 2183.51313 | 2 | 2.99E-04 | 0.50 | 3.00 | - | 391.4  |
| AHQ-3-14-, 6428      | K.VSQMAQYFPELTLAAVGAASK.T   | 2183.51313 | 2 | 2.61E-05 | 0.97 | 6.19 | - | 1062.7 |
| AHQ-3-12, 6528       | K.VSQMAQYFPELTLAAVGAASK.T   | 2183.51313 | 2 | 1.34E-04 | 0.86 | 3.75 | - | 664.0  |
| AHQ-3-6, 5694 - 5761 | K.VSQM*AQYFPELTLAAVGAASK.T  | 2199.51253 | 2 | 1.11E-08 | 0.94 | 4.40 | - | 1143.7 |
| AHQ-3-2, 7169 - 7238 | K.VSQMAQYFPELTLAAVGAASK.T   | 2183.51313 | 2 | 3.05E-05 | 0.90 | 4.46 | - | 593.2  |

|                             |                                                                         |            |   |          |        |         |       |          |
|-----------------------------|-------------------------------------------------------------------------|------------|---|----------|--------|---------|-------|----------|
| AHQ-3-1, 6245 - 6262        | K.VSQM*QYFPEPLTAAVGAASK.T                                               | 2199.51253 | 2 | 2.08E-06 | 0.87   | 3.64    | -     | 643.0    |
| AHQ-3-5, 5796               | K.VSQM*QYFPEPLTAAVGAASK.T                                               | 2199.51253 | 2 | 2.99E-04 | 0.85   | 3.35    | -     | 964.4    |
| AHQ-3-3, 6001 - 6072        | K.VSQM*QYFPEPLTAAVGAASK.T                                               | 2199.51253 | 2 | 5.50E-06 | 0.95   | 5.08    | -     | 995.7    |
| AHQ-3-2, 7034               | K.VSQM*QYFPEPLTAAVGAASK.T                                               | 2183.51313 | 3 | 2.89E-06 | 0.84   | 3.35    | -     | 1156.7   |
| AHQ-3-7, 6626 - 6630        | K.VSQM*QYFPEPLTAAVGAASK.T                                               | 2183.51313 | 2 | 1.26E-04 | 0.97   | 6.27    | -     | 1125.1   |
| AHQ-3-3, 7142 - 7210        | K.VSQM*QYFPEPLTAAVGAASK.T                                               | 2183.51313 | 2 | 9.33E-05 | 0.92   | 4.29    | -     | 703.3    |
| AHQ-3-4, 5957 - 6028        | K.VSQM*QYFPEPLTAAVGAASK.T                                               | 2199.51253 | 2 | 1.13E-05 | 0.95   | 4.88    | -     | 995.6    |
| AHQ-3-10, 6066 - 6070       | K.VSQM*QYFPEPLTAAVGAASK.T                                               | 2183.51313 | 2 | 6.40E-05 | 0.91   | 4.15    | -     | 936.5    |
| AHQ-3-1, 6138               | K.VSQM*QYFPEPLTAAVGAASK.T                                               | 2199.51253 | 3 | 9.70E-08 | 0.97   | 5.87    | -     | 2036.3   |
| AHQ-3-2, 7031 - 7102        | K.VSQM*QYFPEPLTAAVGAASK.T                                               | 2183.51313 | 2 | 9.60E-05 | 0.97   | 5.44    | -     | 1137.5   |
| AHQ-3-3, 7016 - 7092        | K.VSQM*QYFPEPLTAAVGAASK.T                                               | 2183.51313 | 2 | 1.36E-07 | 0.96   | 5.69    | -     | 883.4    |
| AHQ-3-3, 6953               | K.VSQM*QYFPEPLTAAVGAASK.T                                               | 2183.51313 | 3 | 9.97E-06 | 0.82   | 3.43    | -     | 1002.0   |
| AHQ-3-1, 6925               | K.VSQM*QYFPEPLTAAVGAASK.T                                               | 2183.51313 | 2 | 1.63E-04 | 0.93   | 4.66    | -     | 739.5    |
| AHQ-3-5, 6839 - 6840        | K.VSQM*QYFPEPLTAAVGAASK.T                                               | 2183.51313 | 2 | 1.86E-06 | 0.97   | 6.09    | -     | 882.3    |
| AHQ-3-2, 6939               | K.VSQM*QYFPEPLTAAVGAASK.T                                               | 2183.51313 | 2 | 6.39E-08 | 0.87   | 4.02    | -     | 579.4    |
| AHQ-3-1, 7041               | K.VSQM*QYFPEPLTAAVGAASK.T                                               | 2183.51313 | 2 | 1.78E-07 | 0.97   | 5.20    | -     | 1173.6   |
| AHQ-3-4, 6965 - 7032        | K.VSQM*QYFPEPLTAAVGAASK.T                                               | 2183.51313 | 2 | 3.53E-07 | 0.96   | 5.02    | -     | 1082.2   |
| AHQ-3-3, 6869 - 6949        | K.VSQM*QYFPEPLTAAVGAASK.T                                               | 2183.51313 | 2 | 5.30E-05 | 0.97   | 6.03    | -     | 881.5    |
| AHQ-3-2, 6238               | K.VSQM*QYFPEPLTAAVGAASK.T                                               | 2199.51253 | 2 | 5.49E-04 | 0.87   | 3.42    | -     | 790.7    |
| AHQ-3-1, 4993               | K.VVAPTSSPVCQEQLVEAGR.L                                                 | 2142.41919 | 2 | 8.60E-09 | 0.80   | 3.43    | -     | 392.9    |
| AHQ-3-13, 4522              | K.VVAPTSSPVCQEQLVEAGR.L                                                 | 2142.41919 | 2 | 9.59E-07 | 0.95   | 5.00    | -     | 661.9    |
| AHQ-3-5, 4965               | K.VVAPTSSPVCQEQLVEAGR.L                                                 | 2142.41919 | 2 | 2.06E-05 | 0.76   | 3.46    | -     | 409.4    |
| AHQ-3-1, 4820               | K.VVAPTSSPVCQEQLVEAGR.L                                                 | 2142.41919 | 2 | 4.34E-08 | 0.95   | 5.03    | -     | 617.8    |
| AHQ-3-5, 4705               | K.VVAPTSSPVCQEQLVEAGR.L                                                 | 2142.41919 | 2 | 2.32E-05 | 0.74   | 3.51    | -     | 315.2    |
| AHQ-3-5, 4604 - 4623        | K.VVAPTSSPVCQEQLVEAGR.L                                                 | 2142.41919 | 2 | 4.23E-11 | 0.96   | 5.40    | -     | 847.6    |
| AHQ-3-12, 4546 - 4620       | K.VVAPTSSPVCQEQLVEAGR.L                                                 | 2142.41919 | 2 | 2.43E-05 | 0.95   | 5.02    | -     | 819.5    |
| AHQ-3-3, 4672               | K.VVAPTSSPVCQEQLVEAGR.L                                                 | 2142.41919 | 2 | 7.87E-07 | 0.94   | 4.49    | -     | 658.4    |
| AHQ-3-3, 4788 - 4789        | K.VVAPTSSPVCQEQLVEAGR.L                                                 | 2142.41919 | 2 | 3.22E-06 | 0.91   | 4.87    | -     | 390.2    |
| AHQ-3-3, 4966               | K.VVAPTSSPVCQEQLVEAGR.L                                                 | 2142.41919 | 2 | 9.41E-11 | 0.93   | 4.64    | -     | 669.2    |
| AHQ-3-3, 5116 - 5124        | K.VVAPTSSPVCQEQLVEAGR.L                                                 | 2142.41919 | 2 | 1.04E-06 | 0.75   | 4.13    | -     | 354.6    |
| AHQ-3-2, 5001 - 5079        | K.VVAPTSSPVCQEQLVEAGR.L                                                 | 2142.41919 | 2 | 6.11E-15 | 0.83   | 4.02    | -     | 394.1    |
| AHQ-3-5, 4504 - 4505        | K.VVAPTSSPVCQEQLVEAGR.L                                                 | 2142.41919 | 2 | 5.27E-06 | 0.95   | 5.33    | -     | 580.4    |
| AHQ-3-6, 4402               | K.VVAPTSSPVCQEQLVEAGR.L                                                 | 2142.41919 | 2 | 5.65E-07 | 0.91   | 4.44    | -     | 569.6    |
| AHQ-3-2, 4914               | K.VVAPTSSPVCQEQLVEAGR.L                                                 | 2142.41919 | 2 | 2.41E-05 | 0.94   | 5.06    | -     | 828.7    |
| AHQ-3-1, 4701               | K.VVAPTSSPVCQEQLVEAGR.L                                                 | 2142.41919 | 2 | 1.96E-05 | 0.90   | 4.50    | -     | 349.8    |
| AHQ-3-14-, 4437 - 4491      | K.VVAPTSSPVCQEQLVEAGR.L                                                 | 2142.41919 | 2 | 1.72E-12 | 0.95   | 4.82    | -     | 999.8    |
| AHQ-3-2, 4822 - 4839        | K.VVAPTSSPVCQEQLVEAGR.L                                                 | 2142.41919 | 2 | 1.31E-05 | 0.90   | 4.51    | -     | 439.6    |
| AHQ-3-7, 4450 - 4492        | K.VVAPTSSPVCQEQLVEAGR.L                                                 | 2142.41919 | 2 | 4.49E-04 | 0.67   | 3.28    | -     | 437.5    |
| AHQ-3-2, 4689 - 4701        | K.VVAPTSSPVCQEQLVEAGR.L                                                 | 2142.41919 | 2 | 1.06E-05 | 0.90   | 4.39    | -     | 413.7    |
| AHQ-3-4, 4530 - 4609        | K.VVAPTSSPVCQEQLVEAGR.L                                                 | 2142.41919 | 2 | 1.39E-05 | 0.92   | 4.77    | -     | 466.5    |
| AHQ-3-8, 4357               | K.VVAPTSSPVCQEQLVEAGR.L                                                 | 2142.41919 | 3 | 3.03E-05 | 0.89   | 4.44    | -     | 849.5    |
| AHQ-3-8, 4347               | K.VVAPTSSPVCQEQLVEAGR.L                                                 | 2142.41919 | 2 | 2.16E-07 | 0.92   | 4.25    | -     | 659.2    |
| AHQ-3-6, 4509 - 4517        | K.VVAPTSSPVCQEQLVEAGR.L                                                 | 2142.41919 | 2 | 9.72E-08 | 0.96   | 5.35    | -     | 944.8    |
| AHQ-3-8, 4173               | K.VVAPTSSPVCQEQLVEAGR.L                                                 | 2142.41919 | 2 | 3.41E-04 | 0.88   | 4.25    | -     | 412.8    |
| AHQ-3-4, 4740               | K.VVAPTSSPVCQEQLVEAGR.L                                                 | 2142.41919 | 2 | 1.53E-10 | 0.97   | 5.29    | -     | 1060.2   |
| AHQ-3-14, 5443              | K.VVAPTSSPVCQEQLVEAGR.L                                                 | 2142.41919 | 2 | 2.95E-09 | 0.93   | 4.69    | -     | 641.1    |
| gi 4885387 ref NP_005318.1  | L-3-hydroxyacyl-Coenzyme A dehydrogenase, short chain; L-3-hydroxyacyl- |            |   | 1.11E-15 | 0.96   | 10.27   | 9.60  | 34286.3  |
| AHQ-3-9, 7115               | K.TLSTIATSTDAASVHSTDLVVEAIVENLK.V                                       | 3086.43759 | 3 | 1.11E-15 | 0.96   | 5.30    | -     | 1389.8   |
| gi 12667788 ref NP_002464.1 | myosin, heavy polypeptide 9, non-muscle [Homo sapiens]                  |            |   | 3.89E-15 | 105.73 | 1200.38 | 47.60 | 226529.8 |
| AHQ-3-3, 1925               | R.ALEEAEMQK.A                                                           | 1049.18068 | 1 | 7.69E-05 | 0.77   | 3.36    | -     | 622.5    |
| AHQ-3-4, 1930               | R.ALEEAEMQK.A                                                           | 1049.18068 | 1 | 2.70E-05 | 0.38   | 2.14    | -     | 565.0    |
| AHQ-3-2, 1862 - 1942        | R.ALEEAEMQK.A                                                           | 1049.18068 | 2 | 6.03E-05 | 0.87   | 3.39    | -     | 728.6    |
| AHQ-3-2, 3925               | K.ALELDSNLYR.I                                                          | 1194.31920 | 2 | 7.58E-06 | 0.91   | 3.13    | -     | 1244.7   |
| AHQ-3-3, 3750 - 3753        | K.ALELDSNLYR.I                                                          | 1194.31920 | 2 | 3.11E-07 | 0.92   | 3.87    | -     | 1036.1   |
| AHQ-3-4, 3704               | K.ALELDSNLYR.I                                                          | 1194.31920 | 2 | 4.19E-06 | 0.93   | 3.75    | -     | 1117.6   |
| AHQ-3-2, 3814 - 3829        | K.ALELDSNLYR.I                                                          | 1194.31920 | 2 | 4.80E-06 | 0.95   | 4.07    | -     | 1311.5   |
| AHQ-3-5, 3525               | K.ALELDSNLYR.I                                                          | 1194.31920 | 2 | 4.37E-06 | 0.94   | 3.65    | -     | 1378.5   |
| AHQ-3-6, 3487               | K.ALELDSNLYR.I                                                          | 1194.31920 | 2 | 2.58E-06 | 0.89   | 2.96    | -     | 1135.2   |
| AHQ-3-6, 3481               | K.ALELDSNLYR.I                                                          | 1194.31920 | 1 | 5.40E-07 | 0.19   | 1.86    | -     | 299.0    |
| AHQ-3-3, 3732 - 3801        | K.ALELDSNLYR.I                                                          | 1194.31920 | 1 | 4.53E-04 | 0.30   | 2.56    | -     | 223.4    |
| AHQ-3-2, 2803               | R.ALEQQVEEMK.T                                                          | 1205.36380 | 2 | 5.77E-07 | 0.89   | 3.30    | -     | 1152.0   |
| AHQ-3-3, 2793 - 2801        | R.ALEQQVEEMK.T                                                          | 1205.36380 | 2 | 2.31E-05 | 0.92   | 3.94    | -     | 1095.9   |
| AHQ-3-4, 2772               | R.ALEQQVEEMK.T                                                          | 1205.36380 | 2 | 8.97E-05 | 0.88   | 3.52    | -     | 939.7    |
| AHQ-3-5, 2595 - 2613        | R.ALEQQVEEMK.T                                                          | 1205.36380 | 2 | 2.32E-05 | 0.88   | 3.41    | -     | 920.5    |
| AHQ-3-6, 2606               | R.ALEQQVEEMK.T                                                          | 1205.36380 | 2 | 7.55E-06 | 0.88   | 3.22    | -     | 1038.4   |
| AHQ-3-1, 2969 - 2980        | R.ALEQQVEEMK.T                                                          | 1205.36380 | 2 | 2.67E-05 | 0.92   | 3.78    | -     | 1135.7   |
| AHQ-3-3, 2041               | R.ALEQQVEEMK.T                                                          | 1221.36320 | 2 | 9.26E-06 | 0.82   | 2.95    | -     | 920.4    |
| AHQ-3-3, 7484               | R.ALEQQVEEMKTLQEELEDELQATEDAK.L                                         | 3149.38454 | 3 | 1.14E-08 | 0.96   | 5.82    | -     | 1500.9   |
| AHQ-3-1, 6645 - 6708        | R.ALEQQVEEMKTLQEELEDELQATEDAK.L                                         | 3165.38394 | 3 | 5.62E-09 | 0.97   | 6.43    | -     | 1786.1   |
| AHQ-3-5, 7444               | R.ALEQQVEEMKTLQEELEDELQATEDAK.L                                         | 3149.38454 | 3 | 9.28E-08 | 0.97   | 5.96    | -     | 1709.2   |
| AHQ-3-2, 6766 - 6841        | R.ALEQQVEEMKTLQEELEDELQATEDAK.L                                         | 3165.38394 | 3 | 6.11E-15 | 0.98   | 7.16    | -     | 2221.3   |
| AHQ-3-3, 6685 - 6765        | R.ALEQQVEEMKTLQEELEDELQATEDAK.L                                         | 3165.38394 | 3 | 1.40E-08 | 0.96   | 6.50    | -     | 1267.6   |
| AHQ-3-1, 7264               | R.ALEQQVEEMKTLQEELEDELQATEDAK.L                                         | 3149.38454 | 3 | 4.67E-08 | 0.95   | 5.34    | -     | 1513.7   |
| AHQ-3-1, 6896 - 6930        | R.ALEQQVEEMKTLQEELEDELQATEDAK.L                                         | 3165.38394 | 3 | 9.19E-12 | 0.96   | 5.21    | -     | 1472.4   |
| AHQ-3-4, 7504               | R.ALEQQVEEMKTLQEELEDELQATEDAK.L                                         | 3149.38454 | 3 | 1.64E-10 | 0.97   | 5.72    | -     | 1812.6   |
| AHQ-3-6, 7265               | R.ALEQQVEEMKTLQEELEDELQATEDAK.L                                         | 3149.38454 | 3 | 5.13E-09 | 0.95   | 5.36    | -     | 1292.3   |
| AHQ-3-3, 5032               | K.ANLQIDQINTDLNLER.S                                                    | 1871.04187 | 2 | 1.21E-07 | 0.86   | 3.88    | -     | 646.5    |
| AHQ-3-6, 4962               | K.ANLQIDQINTDLNLER.S                                                    | 1871.04187 | 2 | 4.67E-05 | 0.89   | 3.78    | -     | 879.1    |
| AHQ-3-2, 5495 - 5570        | K.ANLQIDQINTDLNLER.S                                                    | 1871.04187 | 2 | 3.62E-05 | 0.95   | 4.62    | -     | 1121.4   |
| AHQ-3-1, 5529               | K.ANLQIDQINTDLNLER.S                                                    | 1871.04187 | 2 | 6.95E-06 | 0.94   | 4.59    | -     | 918.6    |
| AHQ-3-3, 5480               | K.ANLQIDQINTDLNLER.S                                                    | 1871.04187 | 2 | 2.30E-07 | 0.96   | 5.09    | -     | 1169.0   |
| AHQ-3-7, 4903               | K.ANLQIDQINTDLNLER.S                                                    | 1871.04187 | 2 | 3.22E-05 | 0.96   | 4.97    | -     | 1455.6   |
| AHQ-3-3, 5176 - 5245        | K.ANLQIDQINTDLNLER.S                                                    | 1871.04187 | 2 | 1.57E-05 | 0.97   | 5.35    | -     | 1333.6   |
| AHQ-3-1, 5349 - 5425        | K.ANLQIDQINTDLNLER.S                                                    | 1871.04187 | 2 | 6.89E-11 | 0.95   | 5.11    | -     | 1054.1   |
| AHQ-3-2, 5349 - 5417        | K.ANLQIDQINTDLNLER.S                                                    | 1871.04187 | 2 | 5.38E-06 | 0.97   | 5.47    | -     | 1424.9   |
| AHQ-3-10, 4584              | K.ANLQIDQINTDLNLER.S                                                    | 1871.04187 | 2 | 3.34E-07 | 0.96   | 5.17    | -     | 1353.0   |
| AHQ-3-2, 5219 - 5289        | K.ANLQIDQINTDLNLER.S                                                    | 1871.04187 | 2 | 4.83E-08 | 0.98   | 5.93    | -     | 1393.5   |
| AHQ-3-9, 4665               | K.ANLQIDQINTDLNLER.S                                                    | 1871.04187 | 2 | 5.95E-07 | 0.96   | 4.97    | -     | 1211.2   |
| AHQ-3-2, 5089 - 5119        | K.ANLQIDQINTDLNLER.S                                                    | 1871.04187 | 2 | 2.28E-06 | 0.96   | 5.49    | -     | 1021.0   |
| AHQ-3-3, 5296 - 5368        | K.ANLQIDQINTDLNLER.S                                                    | 1871.04187 | 2 | 1.26E-06 | 0.98   | 5.65    | -     | 1688.8   |
| AHQ-3-2, 2255 - 2266        | K.ASITALEAK.I                                                           | 904.04321  | 2 | 1.67E-04 | 0.93   | 3.39    | -     | 1080.4   |
| AHQ-3-1, 2446               | K.ASITALEAK.I                                                           | 904.04321  | 2 | 6.84E-07 | 0.92   | 3.25    | -     | 1011.6   |
| AHQ-3-5, 2064               | K.ASITALEAK.I                                                           | 904.04321  | 2 | 4.63E-06 | 0.90   | 3.17    | -     | 930.0    |
| AHQ-3-5, 1695               | R.ASREEILAQAK.E                                                         | 1216.36955 | 2 | 4.66E-04 | 0.83   | 3.08    | -     | 1055.3   |
| AHQ-3-3, 1905               | R.ASREEILAQAK.E                                                         | 1216.36955 | 2 | 2.80E-06 | 0.93   | 3.52    | -     | 1548.7   |
| AHQ-3-2, 1883 - 1953        | R.ASREEILAQAK.E                                                         | 1216.36955 | 2 | 1.12E-05 | 0.93   | 3.33    | -     | 1611.5   |
| AHQ-3-4, 1953               | R.ASREEILAQAK.E                                                         | 1216.36955 | 2 | 2.74E-06 | 0.87   | 3.02    | -     | 1326.5   |
| AHQ-3-1, 2158               | R.ASREEILAQAK.E                                                         | 1216.36955 | 2 | 5.47E-05 | 0.94   | 3.43    | -     | 1780.7   |
| AHQ-3-1, 3290               | R.DELADEIANSSGK.G                                                       | 1349.38323 | 2 | 9.40E-08 | 0.94   | 4.00    | -     | 1296.5   |
| AHQ-3-2, 3247               | R.DELADEIANSSGK.G                                                       | 1349.38323 | 2 | 7.23E-06 | 0.96   | 4.62    | -     | 1306.9   |
| AHQ-3-3, 3226               | R.DELADEIANSSGK.G                                                       | 1349.38323 | 2 | 1.61E-06 | 0.93   | 3.70    | -     | 1266.8   |
| AHQ-3-6, 2782               | R.DELADEIANSSGK.G                                                       | 1349.38323 | 1 | 1.63E-05 | 0.28   | 1.99    | -     | 407.7    |
| AHQ-3-2, 3434               | R.DELADEIANSSGK.G                                                       | 1349.38323 | 2 | 8.65E-06 | 0.93   | 3.22    | -     | 1436.7   |
| AHQ-3-2, 3431               | R.DELADEIANSSGK.G                                                       | 1349.38323 | 1 | 3.10E-09 | 0.83   | 3.12    | -     | 648.2    |
| AHQ-3-2, 2914               | R.DELADEIANSSGK.G                                                       | 1349.38323 | 1 | 1.25E-09 | 0.65   | 2.29    | -     | 611.7    |
| AHQ-3-3, 2878               | R.DELADEIANSSGK.G                                                       | 1349.38323 | 1 | 2.85E-05 | 0.72   | 2.89    | -     | 489.5    |
| AHQ-3-3, 3224               | R.DELADEIANSSGK.G                                                       | 1349.38323 | 1 | 4.15E-06 | 0.34   | 1.90    | -     | 444.2    |

|                      |                                |            |   |          |      |      |   |        |
|----------------------|--------------------------------|------------|---|----------|------|------|---|--------|
| AHQ-3-1, 7118        | K.DFSALESQLODQELLQOENR.Q       | 2494.61059 | 3 | 3.64E-04 | 0.91 | 4.08 | - | 1371.7 |
| AHQ-3-4, 7128 - 7144 | K.DFSALESQLODQELLQOENR.Q       | 2494.61059 | 3 | 7.93E-08 | 0.96 | 5.56 | - | 1712.0 |
| AHQ-3-3, 7276        | K.DFSALESQLODQELLQOENR.Q       | 2494.61059 | 3 | 1.64E-06 | 0.92 | 4.32 | - | 1380.6 |
| AHQ-3-6, 6881        | K.DFSALESQLODQELLQOENR.Q       | 2494.61059 | 3 | 4.14E-12 | 0.97 | 6.27 | - | 1503.3 |
| AHQ-3-2, 7362 - 7369 | K.DFSALESQLODQELLQOENR.Q       | 2494.61059 | 3 | 2.27E-07 | 0.94 | 5.01 | - | 1016.2 |
| AHQ-3-2, 7199 - 7235 | K.DFSALESQLODQELLQOENR.Q       | 2494.61059 | 3 | 2.20E-11 | 0.98 | 6.78 | - | 2380.9 |
| AHQ-3-5, 7031        | K.DFSALESQLODQELLQOENR.Q       | 2494.61059 | 3 | 1.48E-05 | 0.96 | 4.99 | - | 1594.8 |
| AHQ-3-3, 7108 - 7138 | K.DFSALESQLODQELLQOENR.Q       | 2494.61059 | 3 | 8.38E-04 | 0.77 | 3.20 | - | 1135.4 |
| AHQ-3-3, 6676        | K.DFSALESQLODQELLQOENRQK.L     | 2750.91328 | 3 | 4.68E-08 | 0.77 | 3.59 | - | 549.9  |
| AHQ-3-3, 6688        | K.DFSALESQLODQELLQOENRQK.L     | 2750.91328 | 2 | 8.08E-08 | 0.84 | 3.62 | - | 390.9  |
| AHQ-3-1, 6558 - 6624 | K.DFSALESQLODQELLQOENRQK.L     | 2750.91328 | 3 | 4.87E-09 | 0.86 | 4.14 | - | 573.3  |
| AHQ-3-4, 6610 - 6690 | K.DFSALESQLODQELLQOENRQK.L     | 2750.91328 | 3 | 1.27E-07 | 0.85 | 4.34 | - | 568.2  |
| AHQ-3-2, 6769        | K.DFSALESQLODQELLQOENRQK.L     | 2750.91328 | 2 | 9.23E-11 | 0.76 | 3.62 | - | 328.6  |
| AHQ-3-2, 6759        | K.DFSALESQLODQELLQOENRQK.L     | 2750.91328 | 3 | 1.51E-10 | 0.68 | 3.31 | - | 527.1  |
| AHQ-3-2, 2045        | K.DLEAHIDSANK.N                | 1213.27938 | 2 | 1.45E-06 | 0.98 | 4.61 | - | 3186.1 |
| AHQ-3-1, 2245        | K.DLEAHIDSANK.N                | 1213.27938 | 2 | 3.22E-06 | 0.97 | 4.25 | - | 2505.5 |
| AHQ-3-3, 2050        | K.DLEAHIDSANK.N                | 1213.27938 | 2 | 2.46E-06 | 0.98 | 4.62 | - | 2524.4 |
| AHQ-3-2, 2451        | K.DLEAHIDSANKNRDEAIK.Q         | 2040.18063 | 2 | 1.01E-04 | 0.92 | 4.31 | - | 833.6  |
| AHQ-3-2, 7741        | R.DLGEELALKTELEDLTDSTAAQQELR.S | 3019.21860 | 3 | 6.37E-08 | 0.97 | 5.46 | - | 2267.3 |
| AHQ-3-2, 7633        | R.DLGEELALKTELEDLTDSTAAQQELR.S | 3019.21860 | 3 | 4.52E-12 | 0.97 | 6.12 | - | 1619.0 |
| AHQ-3-6, 7369        | R.DLGEELALKTELEDLTDSTAAQQELR.S | 3019.21860 | 3 | 1.18E-10 | 0.97 | 6.06 | - | 2175.2 |
| AHQ-3-4, 7572 - 7614 | R.DLGEELALKTELEDLTDSTAAQQELR.S | 3019.21860 | 3 | 1.48E-10 | 0.97 | 5.69 | - | 1960.5 |
| AHQ-3-7, 7450        | R.DLGEELALKTELEDLTDSTAAQQELR.S | 3019.21860 | 3 | 1.56E-05 | 0.93 | 4.40 | - | 1378.6 |
| AHQ-3-5, 7551        | R.DLGEELALKTELEDLTDSTAAQQELR.S | 3019.21860 | 3 | 4.05E-10 | 0.97 | 5.80 | - | 2286.0 |
| AHQ-3-1, 3436        | K.DVLLQVDDER.R                 | 1202.29650 | 2 | 2.40E-05 | 0.85 | 2.93 | - | 837.7  |
| AHQ-3-2, 3455        | K.DVLLQVDDER.R                 | 1202.29650 | 1 | 1.47E-07 | 0.26 | 2.00 | - | 301.3  |
| AHQ-3-2, 3458        | K.DVLLQVDDER.R                 | 1202.29650 | 2 | 5.46E-07 | 0.92 | 3.29 | - | 1355.0 |
| AHQ-3-1, 3001 - 3005 | K.DVLLQVDDERR.N                | 1358.48286 | 2 | 1.71E-05 | 0.80 | 3.01 | - | 1027.1 |
| AHQ-3-3, 2848        | K.DVLLQVDDERR.N                | 1358.48286 | 2 | 5.17E-04 | 0.52 | 3.06 | - | 451.7  |
| AHQ-3-2, 1655 - 1806 | R.EEILAAQAK.E                  | 902.02731  | 1 | 1.30E-04 | 0.60 | 2.88 | - | 280.5  |
| AHQ-3-6, 2717        | R.ELEDATETADAMNR.E             | 1566.63006 | 2 | 2.52E-07 | 0.91 | 3.37 | - | 1388.5 |
| AHQ-3-4, 2848 - 2908 | R.ELEDATETADAMNR.E             | 1566.63006 | 2 | 1.77E-09 | 0.94 | 4.21 | - | 1043.3 |
| AHQ-3-3, 2858        | R.ELEDATETADAMNR.E             | 1566.63006 | 2 | 2.00E-05 | 0.92 | 3.64 | - | 1163.0 |
| AHQ-3-2, 2877        | R.ELEDATETADAMNR.E             | 1566.63006 | 2 | 4.76E-10 | 0.92 | 3.69 | - | 1112.3 |
| AHQ-3-5, 2763        | R.ELEDATETADAMNR.E             | 1566.63006 | 2 | 2.16E-06 | 0.89 | 3.64 | - | 942.5  |
| AHQ-3-1, 2370        | R.ELEDATETADAM*NR.E            | 1582.62946 | 2 | 9.90E-07 | 0.84 | 3.50 | - | 687.9  |
| AHQ-3-4, 5917 - 5988 | R.ELESISELQEDLESER.A           | 2035.10956 | 2 | 2.72E-06 | 0.95 | 4.82 | - | 1324.3 |
| AHQ-3-5, 5859 - 5879 | R.ELESISELQEDLESER.A           | 2035.10956 | 2 | 2.30E-04 | 0.91 | 3.92 | - | 907.0  |
| AHQ-3-3, 6046        | R.ELESISELQEDLESER.A           | 2035.10956 | 3 | 2.27E-08 | 0.98 | 6.11 | - | 2476.9 |
| AHQ-3-9, 5459        | R.ELESISELQEDLESER.A           | 2035.10956 | 2 | 4.88E-04 | 0.85 | 3.78 | - | 492.7  |
| AHQ-3-7, 5736        | R.ELESISELQEDLESER.A           | 2035.10956 | 2 | 1.70E-07 | 0.95 | 4.43 | - | 1024.0 |
| AHQ-3-3, 6593 - 6660 | R.ELESISELQEDLESER.A           | 2035.10956 | 2 | 7.67E-05 | 0.83 | 3.60 | - | 348.4  |
| AHQ-3-3, 6360        | R.ELESISELQEDLESER.A           | 2035.10956 | 2 | 1.13E-04 | 0.71 | 2.85 | - | 736.1  |
| AHQ-3-2, 6077        | R.ELESISELQEDLESER.A           | 2035.10956 | 3 | 1.49E-06 | 0.97 | 5.37 | - | 1911.0 |
| AHQ-3-2, 6521        | R.ELESISELQEDLESER.A           | 2035.10956 | 2 | 9.06E-08 | 0.95 | 4.35 | - | 1335.8 |
| AHQ-3-1, 6044        | R.ELESISELQEDLESER.A           | 2035.10956 | 3 | 4.03E-07 | 0.97 | 5.33 | - | 2147.2 |
| AHQ-3-1, 6014 - 6058 | R.ELESISELQEDLESER.A           | 2035.10956 | 2 | 1.30E-04 | 0.90 | 3.51 | - | 1049.2 |
| AHQ-3-3, 6020 - 6049 | R.ELESISELQEDLESER.A           | 2035.10956 | 2 | 4.61E-07 | 0.94 | 4.43 | - | 1100.9 |
| AHQ-3-2, 5622        | R.ELESISELQEDLESER.A           | 2035.10956 | 2 | 9.25E-07 | 0.93 | 4.64 | - | 770.5  |
| AHQ-3-1, 6313        | R.ELESISELQEDLESER.A           | 2035.10956 | 2 | 1.08E-07 | 0.92 | 4.08 | - | 944.8  |
| AHQ-3-2, 6089 - 6122 | R.ELESISELQEDLESER.A           | 2035.10956 | 2 | 6.73E-08 | 0.93 | 4.23 | - | 1002.5 |
| AHQ-3-1, 5630        | R.ELESISELQEDLESER.A           | 2035.10956 | 2 | 2.84E-06 | 0.89 | 3.90 | - | 781.5  |
| AHQ-3-2, 6431        | R.ELESISELQEDLESER.A           | 2035.10956 | 2 | 8.70E-07 | 0.97 | 5.40 | - | 1281.5 |
| AHQ-3-3, 2492        | R.EMEALELEDER.K                | 1251.30306 | 2 | 5.25E-04 | 0.75 | 2.70 | - | 755.3  |
| AHQ-3-5, 1933        | R.EMEALELEDER.Q                | 1379.47597 | 2 | 9.43E-06 | 0.79 | 2.72 | - | 976.1  |
| AHQ-3-2, 4649 - 4674 | K.EQADFAIALER.A                | 1306.44632 | 2 | 6.78E-04 | 0.84 | 2.99 | - | 637.1  |
| AHQ-3-3, 2338        | R.EQEVNLIK.K                   | 973.10554  | 1 | 6.38E-04 | 0.14 | 2.28 | - | 174.7  |
| AHQ-3-5, 2183        | R.EQLEEEEEAKHNLEK.Q            | 1855.93770 | 2 | 1.48E-06 | 0.87 | 4.26 | - | 506.9  |
| AHQ-3-6, 2159 - 2162 | R.EQLEEEEEAKHNLEK.Q            | 1855.93770 | 2 | 9.04E-04 | 0.92 | 4.12 | - | 865.0  |
| AHQ-3-1, 2494        | R.EQLEEEEEAKHNLEK.Q            | 1855.93770 | 2 | 1.66E-05 | 0.87 | 3.98 | - | 618.9  |
| AHQ-3-4, 2297        | R.EQLEEEEEAKHNLEK.Q            | 1855.93770 | 2 | 8.30E-04 | 0.83 | 3.75 | - | 550.3  |
| AHQ-3-2, 3501        | R.FLSNGHVITPQQQDK.D            | 1641.80946 | 2 | 1.54E-04 | 0.90 | 3.65 | - | 854.3  |
| AHQ-3-3, 3472        | R.FLSNGHVITPQQQDK.D            | 1641.80946 | 2 | 2.53E-09 | 0.93 | 3.70 | - | 1142.4 |
| AHQ-3-3, 6136        | R.FLSNGHVITPQQQDKDMFQETMEAMR.I | 3012.39100 | 3 | 3.56E-05 | 0.94 | 5.38 | - | 994.6  |
| AHQ-3-4, 6053        | R.FLSNGHVITPQQQDKDMFQETMEAMR.I | 3012.39100 | 3 | 7.15E-04 | 0.87 | 4.23 | - | 639.2  |
| AHQ-3-3, 3608        | K.FVSELWK.D                    | 909.06314  | 1 | 3.92E-04 | 0.33 | 2.32 | - | 505.8  |
| AHQ-3-1, 2977        | K.HEAMITDLEER.L                | 1344.47646 | 2 | 1.10E-07 | 0.97 | 4.12 | - | 1488.1 |
| AHQ-3-2, 2755 - 2761 | K.HEAMITDLEER.L                | 1344.47646 | 2 | 6.27E-09 | 0.96 | 3.97 | - | 1319.7 |
| AHQ-3-1, 2522        | K.HEAMITDLEER.L                | 1360.47586 | 2 | 7.01E-04 | 0.96 | 4.04 | - | 1395.3 |
| AHQ-3-3, 2740 - 2742 | K.HEAMITDLEER.L                | 1344.47646 | 2 | 1.87E-04 | 0.95 | 3.80 | - | 1115.9 |
| AHQ-3-3, 3497 - 3537 | R.HEMPPHYAITDTAYR.S            | 1916.14944 | 2 | 3.67E-05 | 0.87 | 3.54 | - | 610.6  |
| AHQ-3-3, 3538        | R.HEMPPHYAITDTAYR.S            | 1916.14944 | 3 | 4.63E-04 | 0.97 | 3.92 | - | 2626.2 |
| AHQ-3-2, 3589        | R.HEMPPHYAITDTAYR.S            | 1916.14944 | 3 | 4.96E-11 | 0.98 | 5.58 | - | 2774.2 |
| AHQ-3-2, 3506 - 3587 | R.HEMPPHYAITDTAYR.S            | 1916.14944 | 2 | 4.87E-06 | 0.95 | 3.78 | - | 1169.2 |
| AHQ-3-10, 2904       | R.HEMPPHYAITDTAYR.S            | 1932.14884 | 2 | 3.86E-04 | 0.79 | 2.83 | - | 540.4  |
| AHQ-3-1, 3836        | R.HEMPPHYAITDTAYR.S            | 1916.14944 | 3 | 7.52E-04 | 0.91 | 4.01 | - | 1458.5 |
| AHQ-3-4, 3128        | R.HEMPPHYAITDTAYR.S            | 1932.14884 | 2 | 6.86E-06 | 0.80 | 2.88 | - | 627.8  |
| AHQ-3-3, 3194        | R.HEMPPHYAITDTAYR.S            | 1932.14884 | 3 | 9.57E-08 | 0.95 | 4.36 | - | 1381.4 |
| AHQ-3-1, 3398        | R.HEMPPHYAITDTAYR.S            | 1932.14884 | 2 | 2.18E-05 | 0.90 | 3.34 | - | 787.2  |
| AHQ-3-10, 3159       | R.HEMPPHYAITDTAYR.S            | 1916.14944 | 2 | 5.16E-05 | 0.89 | 3.66 | - | 596.2  |
| AHQ-3-2, 3183 - 3257 | R.HEMPPHYAITDTAYR.S            | 1932.14884 | 3 | 2.62E-06 | 0.96 | 4.11 | - | 1883.9 |
| AHQ-3-5, 2933 - 2941 | R.HEMPPHYAITDTAYR.S            | 1932.14884 | 3 | 2.81E-05 | 0.96 | 4.95 | - | 1516.4 |
| AHQ-3-1, 3329 - 3401 | R.HEMPPHYAITDTAYR.S            | 1932.14884 | 3 | 1.13E-04 | 0.94 | 4.13 | - | 1619.2 |
| AHQ-3-6, 2910        | R.HEMPPHYAITDTAYR.S            | 1932.14884 | 3 | 1.28E-05 | 0.97 | 4.62 | - | 1892.3 |
| AHQ-3-2, 3659 - 3661 | R.HEMPPHYAITDTAYR.S            | 1916.14944 | 2 | 5.03E-06 | 0.90 | 3.51 | - | 751.7  |
| AHQ-3-6, 4181 - 4234 | K.HSQAVEELAEQLEQTK.R           | 1840.96940 | 2 | 1.39E-04 | 0.91 | 4.18 | - | 1307.8 |
| AHQ-3-4, 4482        | K.HSQAVEELAEQLEQTK.R           | 1840.96940 | 3 | 1.85E-06 | 0.94 | 4.98 | - | 1395.8 |
| AHQ-3-4, 4461        | K.HSQAVEELAEQLEQTK.R           | 1840.96940 | 2 | 4.97E-06 | 0.98 | 5.64 | - | 2093.1 |
| AHQ-3-2, 4597 - 4665 | K.HSQAVEELAEQLEQTK.R           | 1840.96940 | 2 | 4.99E-09 | 0.98 | 5.41 | - | 2086.4 |
| AHQ-3-3, 4561 - 4633 | K.HSQAVEELAEQLEQTK.R           | 1840.96940 | 2 | 1.13E-10 | 0.98 | 6.28 | - | 2384.9 |
| AHQ-3-3, 4572        | K.HSQAVEELAEQLEQTK.R           | 1840.96940 | 3 | 2.16E-07 | 0.96 | 4.85 | - | 1994.8 |
| AHQ-3-2, 4899        | K.HSQAVEELAEQLEQTK.R           | 1840.96940 | 2 | 3.50E-07 | 0.96 | 4.40 | - | 1544.6 |
| AHQ-3-3, 4853        | K.HSQAVEELAEQLEQTK.R           | 1840.96940 | 2 | 4.67E-08 | 0.98 | 4.72 | - | 2715.1 |
| AHQ-3-1, 4714        | K.HSQAVEELAEQLEQTK.R           | 1840.96940 | 3 | 6.24E-07 | 0.97 | 5.16 | - | 2509.6 |
| AHQ-3-1, 4706        | K.HSQAVEELAEQLEQTK.R           | 1840.96940 | 2 | 1.21E-04 | 0.93 | 4.31 | - | 1109.5 |
| AHQ-3-5, 4187 - 4260 | K.HSQAVEELAEQLEQTK.R           | 1840.96940 | 2 | 4.89E-07 | 0.93 | 4.26 | - | 1404.7 |
| AHQ-3-2, 4599 - 4605 | K.HSQAVEELAEQLEQTK.R           | 1840.96940 | 3 | 7.77E-07 | 0.96 | 5.24 | - | 1656.2 |
| AHQ-3-1, 4316        | K.HSQAVEELAEQLEQTKR.V          | 1997.15575 | 3 | 9.53E-05 | 0.97 | 5.76 | - | 1760.4 |
| AHQ-3-3, 4062        | K.HSQAVEELAEQLEQTKR.V          | 1997.15575 | 2 | 5.43E-11 | 0.98 | 6.31 | - | 2233.8 |
| AHQ-3-4, 3988        | K.HSQAVEELAEQLEQTKR.V          | 1997.15575 | 2 | 2.13E-10 | 0.98 | 6.52 | - | 2056.1 |
| AHQ-3-7, 3680        | K.HSQAVEELAEQLEQTKR.V          | 1997.15575 | 3 | 2.29E-06 | 0.98 | 5.92 | - | 1963.7 |
| AHQ-3-4, 3989        | K.HSQAVEELAEQLEQTKR.V          | 1997.15575 | 3 | 5.15E-06 | 0.97 | 5.74 | - | 1698.5 |
| AHQ-3-2, 4110        | K.HSQAVEELAEQLEQTKR.V          | 1997.15575 | 2 | 5.50E-14 | 0.99 | 7.25 | - | 3194.7 |
| AHQ-3-2, 4109        | K.HSQAVEELAEQLEQTKR.V          | 1997.15575 | 3 | 3.19E-06 | 0.98 | 6.83 | - | 2024.5 |
| AHQ-3-3, 4060 - 4072 | K.HSQAVEELAEQLEQTKR.V          | 1997.15575 | 3 | 5.78E-13 | 0.98 | 6.79 | - | 1696.6 |
| AHQ-3-6, 3765        | K.HSQAVEELAEQLEQTKR.V          | 1997.15575 | 3 | 6.42E-05 | 0.97 | 5.87 | - | 1618.1 |
| AHQ-3-1, 4317        | K.HSQAVEELAEQLEQTKR.V          | 1997.15575 | 2 | 2.71E-13 | 0.98 | 5.77 | - | 1850.0 |

|                      |                           |            |   |          |      |      |   |        |
|----------------------|---------------------------|------------|---|----------|------|------|---|--------|
| AHQ-3-5, 3769        | K.HSQAVEELAEQLEQTKR.V     | 1997.15575 | 3 | 6.12E-06 | 0.96 | 5.52 | - | 1253.4 |
| AHQ-3-5, 3776 - 3777 | K.HSQAVEELAEQLEQTKR.V     | 1997.15575 | 2 | 1.17E-13 | 0.98 | 6.62 | - | 2374.7 |
| AHQ-3-2, 4882 - 4957 | R.IAEFTTNLTETEEK.S        | 1654.75371 | 2 | 3.55E-04 | 0.49 | 2.81 | - | 655.1  |
| AHQ-3-7, 3470        | R.IAEFTTNLTETEEK.S        | 1654.75371 | 2 | 6.11E-06 | 0.85 | 3.07 | - | 1278.3 |
| AHQ-3-4, 3680 - 3756 | R.IAEFTTNLTETEEK.S        | 1654.75371 | 2 | 1.76E-09 | 0.96 | 4.42 | - | 1739.2 |
| AHQ-3-5, 3537 - 3608 | R.IAEFTTNLTETEEK.S        | 1654.75371 | 2 | 1.53E-05 | 0.96 | 4.09 | - | 1839.2 |
| AHQ-3-3, 4020 - 4097 | R.IAEFTTNLTETEEK.S        | 1654.75371 | 2 | 4.95E-08 | 0.96 | 4.57 | - | 1962.0 |
| AHQ-3-4, 3838        | R.IAEFTTNLTETEEK.S        | 1654.75371 | 2 | 2.89E-05 | 0.64 | 2.92 | - | 619.2  |
| AHQ-3-2, 3809 - 3877 | R.IAEFTTNLTETEEK.S        | 1654.75371 | 2 | 7.19E-11 | 0.97 | 5.19 | - | 2005.6 |
| AHQ-3-1, 3869 - 3944 | R.IAEFTTNLTETEEK.S        | 1654.75371 | 2 | 7.60E-07 | 0.97 | 5.00 | - | 2002.0 |
| AHQ-3-3, 3734 - 3804 | R.IAEFTTNLTETEEK.S        | 1654.75371 | 2 | 1.25E-06 | 0.97 | 4.93 | - | 1701.2 |
| AHQ-3-1, 4012 - 4088 | R.IAEFTTNLTETEEK.S        | 1654.75371 | 2 | 3.60E-07 | 0.97 | 4.76 | - | 1954.8 |
| AHQ-3-2, 4114 - 4185 | R.IAEFTTNLTETEEK.S        | 1654.75371 | 2 | 1.71E-08 | 0.96 | 4.58 | - | 1806.0 |
| AHQ-3-2, 3945 - 3975 | R.IAEFTTNLTETEEK.S        | 1654.75371 | 2 | 2.45E-06 | 0.96 | 4.42 | - | 1782.8 |
| AHQ-3-6, 3486        | R.IAEFTTNLTETEEK.S        | 1654.75371 | 2 | 1.61E-09 | 0.97 | 4.78 | - | 2078.1 |
| AHQ-3-2, 4387 - 4415 | R.IAEFTTNLTETEEK.S        | 1654.75371 | 2 | 2.41E-04 | 0.92 | 3.08 | - | 1341.9 |
| AHQ-3-2, 4022 - 4045 | R.IAEFTTNLTETEEK.S        | 1654.75371 | 2 | 1.71E-10 | 0.97 | 5.23 | - | 1832.1 |
| AHQ-3-3, 3872 - 3949 | R.IAEFTTNLTETEEK.S        | 1654.75371 | 2 | 1.28E-07 | 0.97 | 4.69 | - | 2303.9 |
| AHQ-3-1, 4160        | R.IAEFTTNLTETEEK.S        | 1654.75371 | 2 | 2.76E-04 | 0.80 | 3.19 | - | 919.4  |
| AHQ-3-1, 4014        | R.IAEFTTNLTETEEK.S        | 1654.75371 | 2 | 2.48E-06 | 0.83 | 3.03 | - | 1251.9 |
| AHQ-3-2, 4294        | R.IAEFTTNLTETEEK.S        | 1654.75371 | 2 | 2.49E-05 | 0.92 | 3.61 | - | 1319.2 |
| AHQ-3-3, 3330        | R.IAEFTTNLTETEEKSK.S      | 1870.00428 | 2 | 6.20E-08 | 0.86 | 3.80 | - | 772.5  |
| AHQ-3-4, 3289        | R.IAEFTTNLTETEEKSK.S      | 1870.00428 | 2 | 4.35E-06 | 0.78 | 3.06 | - | 769.9  |
| AHQ-3-2, 3321 - 3327 | R.IAEFTTNLTETEEKSK.S      | 1870.00428 | 2 | 1.70E-09 | 0.89 | 4.15 | - | 706.7  |
| AHQ-3-2, 5789 - 5795 | R.IAQLEEELEEEGNTLINDRLK.K | 2714.92085 | 2 | 1.54E-08 | 0.95 | 4.60 | - | 1243.3 |
| AHQ-3-1, 5721        | R.IAQLEEELEEEGNTLINDRLK.K | 2714.92085 | 2 | 2.95E-07 | 0.86 | 3.73 | - | 639.4  |
| AHQ-3-6, 3117        | K.IAQLEEQDNETK.E          | 1531.64695 | 2 | 1.03E-09 | 0.97 | 4.88 | - | 1757.3 |
| AHQ-3-5, 3167 - 3172 | K.IAQLEEQDNETK.E          | 1531.64695 | 2 | 1.98E-04 | 0.89 | 3.59 | - | 917.5  |
| AHQ-3-1, 3620 - 3698 | K.IAQLEEQDNETK.E          | 1531.64695 | 2 | 7.95E-04 | 0.96 | 4.32 | - | 1532.8 |
| AHQ-3-2, 2927        | K.IAQLEEQDNETK.E          | 1531.64695 | 2 | 2.17E-08 | 0.96 | 4.72 | - | 1230.1 |
| AHQ-3-3, 3169        | K.IAQLEEQDNETK.E          | 1531.64695 | 2 | 1.05E-05 | 0.96 | 4.66 | - | 1622.3 |
| AHQ-3-7, 3084        | K.IAQLEEQDNETK.E          | 1531.64695 | 2 | 2.11E-09 | 0.97 | 4.79 | - | 1708.6 |
| AHQ-3-3, 2922        | K.IAQLEEQDNETK.E          | 1531.64695 | 2 | 2.61E-05 | 0.85 | 2.74 | - | 1232.0 |
| AHQ-3-3, 3368 - 3372 | K.IAQLEEQDNETK.E          | 1531.64695 | 2 | 6.84E-05 | 0.92 | 3.33 | - | 1536.7 |
| AHQ-3-2, 3550 - 3551 | K.IAQLEEQDNETK.E          | 1531.64695 | 2 | 4.99E-10 | 0.96 | 4.94 | - | 1445.5 |
| AHQ-3-4, 3334        | K.IAQLEEQDNETK.E          | 1531.64695 | 2 | 3.15E-07 | 0.96 | 4.18 | - | 1761.7 |
| AHQ-3-6, 2982        | K.IAQLEEQDNETK.E          | 1531.64695 | 2 | 2.13E-06 | 0.57 | 2.90 | - | 296.4  |
| AHQ-3-1, 3472        | K.IAQLEEQDNETK.E          | 1531.64695 | 2 | 2.70E-06 | 0.92 | 3.53 | - | 1234.0 |
| AHQ-3-1, 3920        | K.IAQLEEQDNETK.E          | 1531.64695 | 2 | 1.28E-07 | 0.80 | 3.18 | - | 573.0  |
| AHQ-3-1, 3249        | K.IAQLEEQDNETK.E          | 1531.64695 | 2 | 1.24E-06 | 0.95 | 4.36 | - | 1506.5 |
| AHQ-3-9, 2933        | K.IAQLEEQDNETK.E          | 1531.64695 | 2 | 1.02E-10 | 0.96 | 4.63 | - | 1601.4 |
| AHQ-3-1, 3037        | K.IAQLEEQDNETK.E          | 1531.64695 | 2 | 1.07E-05 | 0.93 | 3.71 | - | 1266.5 |
| AHQ-3-11, 3154       | K.IAQLEEQDNETK.E          | 1531.64695 | 2 | 1.03E-04 | 0.94 | 3.65 | - | 1555.4 |
| AHQ-3-10, 3078       | K.IAQLEEQDNETK.E          | 1531.64695 | 2 | 1.55E-04 | 0.92 | 3.56 | - | 1137.6 |
| AHQ-3-2, 3114 - 3189 | K.IAQLEEQDNETK.E          | 1531.64695 | 2 | 4.87E-08 | 0.97 | 5.11 | - | 1769.0 |
| AHQ-3-2, 3505        | K.IAQLEEQDNETKER.Q        | 1816.94784 | 2 | 1.58E-08 | 0.96 | 4.95 | - | 1282.1 |
| AHQ-3-1, 3189 - 3192 | K.IAQLEEQDNETKER.Q        | 1816.94784 | 2 | 8.30E-07 | 0.75 | 3.22 | - | 748.5  |
| AHQ-3-3, 3465        | K.IAQLEEQDNETKER.Q        | 1816.94784 | 2 | 8.19E-09 | 0.93 | 4.63 | - | 904.7  |
| AHQ-3-2, 3333        | K.IAQLEEQDNETKER.Q        | 1816.94784 | 2 | 7.91E-05 | 0.36 | 2.88 | - | 347.7  |
| AHQ-3-2, 6142 - 6209 | R.IIGLDQVAGMSETALPGAFK.T  | 2019.35101 | 2 | 1.07E-05 | 0.96 | 4.96 | - | 1037.5 |
| AHQ-3-2, 6837 - 6910 | R.IIGLDQVAGMSETALPGAFK.T  | 2019.35101 | 2 | 1.07E-08 | 0.97 | 5.13 | - | 1459.2 |
| AHQ-3-1, 6745        | R.IIGLDQVAGMSETALPGAFK.T  | 2019.35101 | 3 | 2.61E-04 | 0.91 | 4.61 | - | 962.1  |
| AHQ-3-3, 6166 - 6169 | R.IIGLDQVAGMSETALPGAFK.T  | 2019.35101 | 2 | 1.57E-04 | 0.94 | 4.42 | - | 963.7  |
| AHQ-3-5, 6691 - 6693 | R.IIGLDQVAGMSETALPGAFK.T  | 2019.35101 | 2 | 5.05E-06 | 0.97 | 5.32 | - | 1327.2 |
| AHQ-3-6, 5646        | R.IIGLDQVAGMSETALPGAFK.T  | 2035.35041 | 2 | 6.22E-06 | 0.94 | 4.47 | - | 846.3  |
| AHQ-3-1, 6732        | R.IIGLDQVAGMSETALPGAFK.T  | 2019.35101 | 2 | 1.19E-04 | 0.96 | 4.59 | - | 1341.3 |
| AHQ-3-3, 5936        | R.IIGLDQVAGMSETALPGAFK.T  | 2035.35041 | 2 | 3.66E-04 | 0.90 | 4.00 | - | 633.5  |
| AHQ-3-3, 6788 - 6856 | R.IIGLDQVAGMSETALPGAFK.T  | 2019.35101 | 2 | 2.47E-05 | 0.95 | 4.52 | - | 1226.7 |
| AHQ-3-3, 5452        | R.IIGLDQVAGMSETALPGAFK.T  | 2035.35041 | 2 | 4.57E-04 | 0.83 | 3.54 | - | 549.1  |
| AHQ-3-6, 6465 - 6545 | R.IIGLDQVAGMSETALPGAFK.T  | 2019.35101 | 2 | 3.09E-09 | 0.97 | 5.76 | - | 1329.9 |
| AHQ-3-14, 6347       | R.IIGLDQVAGMSETALPGAFK.T  | 2035.35041 | 2 | 1.56E-04 | 0.93 | 4.52 | - | 681.5  |
| AHQ-3-13, 6367       | R.IIGLDQVAGMSETALPGAFK.T  | 2019.35101 | 2 | 3.14E-04 | 0.89 | 4.12 | - | 640.3  |
| AHQ-3-2, 5505        | R.IIGLDQVAGMSETALPGAFK.T  | 2035.35041 | 2 | 1.57E-06 | 0.96 | 5.05 | - | 1126.6 |
| AHQ-3-4, 6765 - 6833 | R.IIGLDQVAGMSETALPGAFK.T  | 2019.35101 | 2 | 3.69E-05 | 0.97 | 5.39 | - | 1208.5 |
| AHQ-3-1, 5873 - 5944 | R.IIGLDQVAGMSETALPGAFK.T  | 2035.35041 | 2 | 2.35E-04 | 0.86 | 4.26 | - | 552.7  |
| AHQ-3-7, 6534 - 6535 | R.IIGLDQVAGMSETALPGAFK.T  | 2019.35101 | 2 | 4.88E-06 | 0.97 | 5.59 | - | 1455.3 |
| AHQ-3-6, 6549 - 6550 | R.IIGLDQVAGMSETALPGAFK.T  | 2019.35101 | 2 | 1.54E-06 | 0.97 | 5.62 | - | 1302.2 |
| AHQ-3-1, 5496 - 5500 | R.IMGPIEEQMGLLR.V         | 1616.92826 | 2 | 5.19E-08 | 0.88 | 4.20 | - | 387.7  |
| AHQ-3-6, 4414 - 4481 | R.IMGPIEEQMGLLR.V         | 1632.92766 | 2 | 2.53E-06 | 0.85 | 3.67 | - | 667.4  |
| AHQ-3-7, 5006 - 5074 | R.IMGPIEEQMGLLR.V         | 1616.92826 | 2 | 5.53E-04 | 0.35 | 2.63 | - | 236.9  |
| AHQ-3-7, 4392        | R.IMGPIEEQMGLLR.V         | 1632.92766 | 2 | 1.35E-05 | 0.94 | 4.04 | - | 1012.3 |
| AHQ-3-2, 4053 - 4055 | R.IMGPIEEQMGLLR.V         | 1648.92706 | 2 | 4.37E-04 | 0.94 | 4.53 | - | 919.2  |
| AHQ-3-7, 3702        | R.IMGPIEEQMGLLR.V         | 1648.92706 | 2 | 6.58E-05 | 0.75 | 3.32 | - | 511.4  |
| AHQ-3-5, 5219 - 5220 | R.IMGPIEEQMGLLR.V         | 1616.92826 | 2 | 2.36E-08 | 0.84 | 3.25 | - | 487.3  |
| AHQ-3-3, 4013        | R.IMGPIEEQMGLLR.V         | 1648.92706 | 2 | 8.20E-05 | 0.78 | 3.23 | - | 524.6  |
| AHQ-3-3, 5412 - 5430 | R.IMGPIEEQMGLLR.V         | 1616.92826 | 2 | 1.25E-04 | 0.67 | 2.92 | - | 302.7  |
| AHQ-3-2, 4821        | R.IMGPIEEQMGLLR.V         | 1632.92766 | 2 | 1.43E-08 | 0.93 | 3.62 | - | 905.9  |
| AHQ-3-2, 4731 - 4811 | R.IMGPIEEQMGLLR.V         | 1632.92766 | 2 | 2.23E-06 | 0.92 | 4.04 | - | 626.4  |
| AHQ-3-5, 4571 - 4643 | R.IMGPIEEQMGLLR.V         | 1632.92766 | 2 | 1.03E-06 | 0.81 | 3.44 | - | 619.9  |
| AHQ-3-3, 5972        | K.IRELESQISELQEDLESER.A   | 2304.45416 | 2 | 1.06E-06 | 0.98 | 6.57 | - | 1653.3 |
| AHQ-3-3, 5477        | K.IRELESQISELQEDLESER.A   | 2304.45416 | 2 | 5.98E-04 | 0.63 | 2.65 | - | 517.6  |
| AHQ-3-4, 5905 - 5906 | K.IRELESQISELQEDLESER.A   | 2304.45416 | 2 | 6.16E-12 | 0.98 | 6.93 | - | 1610.8 |
| AHQ-3-6, 5662        | K.IRELESQISELQEDLESER.A   | 2304.45416 | 3 | 7.65E-10 | 0.97 | 5.47 | - | 2231.4 |
| AHQ-3-3, 5970 - 5984 | K.IRELESQISELQEDLESER.A   | 2304.45416 | 3 | 1.05E-06 | 0.97 | 5.71 | - | 1647.2 |
| AHQ-3-5, 5632 - 5695 | K.IRELESQISELQEDLESER.A   | 2304.45416 | 2 | 6.86E-05 | 0.98 | 5.67 | - | 1323.6 |
| AHQ-3-2, 6014        | K.IRELESQISELQEDLESER.A   | 2304.45416 | 3 | 9.07E-12 | 0.98 | 6.23 | - | 2373.7 |
| AHQ-3-7, 5564        | K.IRELESQISELQEDLESER.A   | 2304.45416 | 3 | 9.58E-04 | 0.90 | 3.72 | - | 1496.5 |
| AHQ-3-1, 6053 - 6062 | K.IRELESQISELQEDLESER.A   | 2304.45416 | 3 | 1.15E-08 | 0.97 | 5.98 | - | 1904.5 |
| AHQ-3-1, 6054 - 6057 | K.IRELESQISELQEDLESER.A   | 2304.45416 | 2 | 2.89E-07 | 0.98 | 7.19 | - | 1412.8 |
| AHQ-3-2, 6013 - 6079 | K.IRELESQISELQEDLESER.A   | 2304.45416 | 2 | 2.71E-07 | 0.99 | 7.59 | - | 2539.1 |
| AHQ-3-4, 5910 - 5924 | K.IRELESQISELQEDLESER.A   | 2304.45416 | 3 | 1.78E-10 | 0.98 | 6.08 | - | 2144.7 |
| AHQ-3-2, 4657 - 4729 | K.KANLQIQDINTDLNLER.S     | 1999.21478 | 2 | 4.34E-07 | 0.98 | 5.94 | - | 1533.1 |
| AHQ-3-3, 4468        | K.KANLQIQDINTDLNLER.S     | 1999.21478 | 2 | 1.69E-05 | 0.93 | 4.61 | - | 840.3  |
| AHQ-3-3, 4630 - 4708 | K.KANLQIQDINTDLNLER.S     | 1999.21478 | 2 | 4.97E-05 | 0.98 | 5.76 | - | 1810.5 |
| AHQ-3-6, 4250        | K.KANLQIQDINTDLNLER.S     | 1999.21478 | 2 | 1.82E-08 | 0.98 | 5.76 | - | 1934.0 |
| AHQ-3-2, 4445 - 4507 | K.KANLQIQDINTDLNLER.S     | 1999.21478 | 2 | 3.36E-05 | 0.94 | 4.74 | - | 750.2  |
| AHQ-3-2, 4518        | K.KANLQIQDINTDLNLER.S     | 1999.21478 | 2 | 1.97E-05 | 0.91 | 4.84 | - | 723.3  |
| AHQ-3-5, 4335        | K.KANLQIQDINTDLNLER.S     | 1999.21478 | 2 | 3.50E-06 | 0.97 | 5.97 | - | 1229.7 |
| AHQ-3-2, 5039        | K.KANLQIQDINTDLNLER.S     | 1999.21478 | 2 | 1.38E-07 | 0.96 | 5.01 | - | 1345.4 |
| AHQ-3-2, 4851        | K.KANLQIQDINTDLNLER.S     | 1999.21478 | 2 | 4.89E-08 | 0.97 | 5.87 | - | 1529.4 |
| AHQ-3-2, 4666        | K.KANLQIQDINTDLNLER.S     | 1999.21478 | 3 | 7.25E-05 | 0.93 | 4.86 | - | 1158.7 |
| AHQ-3-1, 4549        | K.KANLQIQDINTDLNLER.S     | 1999.21478 | 2 | 2.45E-05 | 0.94 | 4.60 | - | 1053.5 |
| AHQ-3-3, 4744        | K.KANLQIQDINTDLNLER.S     | 1999.21478 | 2 | 3.08E-06 | 0.90 | 4.60 | - | 575.7  |
| AHQ-3-1, 4902        | K.KANLQIQDINTDLNLER.S     | 1999.21478 | 2 | 5.35E-06 | 0.97 | 5.66 | - | 1189.3 |
| AHQ-3-3, 4814 - 4830 | K.KANLQIQDINTDLNLER.S     | 1999.21478 | 2 | 1.13E-07 | 0.95 | 4.86 | - | 1129.4 |
| AHQ-3-2, 2707        | K.KKMEDSVGCLTEAEVK.R      | 1971.19681 | 2 | 7.32E-05 | 0.91 | 3.53 | - | 1131.7 |
| AHQ-3-6, 2237        | R.KKVEAQLQELQVK.F         | 1541.81761 | 2 | 1.08E-06 | 0.96 | 5.11 | - | 1120.8 |



|                      |                             |            |   |          |      |      |   |        |
|----------------------|-----------------------------|------------|---|----------|------|------|---|--------|
| AHQ-3-4, 2388        | R.KKVEAQLQELQVK.F           | 1541.81761 | 2 | 7.69E-06 | 0.98 | 5.38 | - | 2056.2 |
| AHQ-3-2, 2417 - 2437 | R.KKVEAQLQELQVK.F           | 1541.81761 | 2 | 8.62E-08 | 0.98 | 5.57 | - | 1734.6 |
| AHQ-3-3, 2409 - 2428 | R.KKVEAQLQELQVK.F           | 1541.81761 | 2 | 5.99E-08 | 0.97 | 5.29 | - | 1577.4 |
| AHQ-3-5, 2239 - 2247 | R.KKVEAQLQELQVK.F           | 1541.81761 | 2 | 1.33E-07 | 0.98 | 5.02 | - | 2178.4 |
| AHQ-3-4, 3370        | K.KLEEEQIILEDQNK.L          | 1891.08992 | 2 | 9.04E-05 | 0.98 | 5.78 | - | 1749.1 |
| AHQ-3-3, 3520 - 3588 | K.KLEEEQIILEDQNK.L          | 1891.08992 | 2 | 1.39E-12 | 0.98 | 5.48 | - | 1783.5 |
| AHQ-3-3, 3657 - 3660 | K.KLEEEQIILEDQNK.L          | 1891.08992 | 2 | 1.92E-04 | 0.92 | 4.09 | - | 525.0  |
| AHQ-3-2, 3698 - 3778 | K.KLEEEQIILEDQNK.L          | 1891.08992 | 2 | 6.38E-08 | 0.97 | 5.11 | - | 1000.3 |
| AHQ-3-2, 3545 - 3613 | K.KLEEEQIILEDQNK.L          | 1891.08992 | 2 | 2.46E-10 | 0.98 | 6.11 | - | 2123.8 |
| AHQ-3-6, 3150        | K.KLEEEQIILEDQNK.L          | 1891.08992 | 2 | 2.08E-04 | 0.97 | 4.86 | - | 1536.8 |
| AHQ-3-2, 3474        | K.KLEEEQIILEDQNK.L          | 1891.08992 | 3 | 5.99E-07 | 0.95 | 5.04 | - | 1534.8 |
| AHQ-3-1, 3684        | K.KLEEEQIILEDQNK.L          | 1891.08992 | 2 | 1.92E-08 | 0.98 | 5.42 | - | 1957.6 |
| AHQ-3-2, 3407 - 3477 | K.KLEEEQIILEDQNK.L          | 1891.08992 | 2 | 7.38E-06 | 0.98 | 6.08 | - | 2124.8 |
| AHQ-3-3, 3417        | K.KLEEEQIILEDQNK.L          | 1891.08992 | 2 | 9.77E-11 | 0.97 | 5.55 | - | 1612.4 |
| AHQ-3-4, 3485 - 3516 | K.KLEEEQIILEDQNK.L          | 1891.08992 | 2 | 8.73E-07 | 0.98 | 6.00 | - | 1926.9 |
| AHQ-3-1, 4049        | K.KLEEEQIILEDQNK.LAK.E      | 2203.49930 | 3 | 6.47E-05 | 0.95 | 4.61 | - | 1513.0 |
| AHQ-3-5, 7252 - 7267 | R.KLEGDSTDLSDQIAELQAIAELK.M | 2616.86032 | 2 | 1.79E-06 | 0.96 | 5.02 | - | 1587.6 |
| AHQ-3-4, 7356 - 7365 | R.KLEGDSTDLSDQIAELQAIAELK.M | 2616.86032 | 3 | 2.17E-07 | 0.89 | 5.04 | - | 681.1  |
| AHQ-3-1, 7172        | R.KLEGDSTDLSDQIAELQAIAELK.M | 2616.86032 | 3 | 2.67E-09 | 0.90 | 4.76 | - | 802.2  |
| AHQ-3-4, 7352 - 7420 | R.KLEGDSTDLSDQIAELQAIAELK.M | 2616.86032 | 2 | 1.17E-08 | 0.95 | 4.79 | - | 1139.6 |
| AHQ-3-2, 7441 - 7518 | R.KLEGDSTDLSDQIAELQAIAELK.M | 2616.86032 | 2 | 5.15E-07 | 0.97 | 6.62 | - | 1121.3 |
| AHQ-3-3, 7336 - 7400 | R.KLEGDSTDLSDQIAELQAIAELK.M | 2616.86032 | 2 | 6.42E-08 | 0.97 | 6.38 | - | 1364.3 |
| AHQ-3-2, 7435 - 7439 | R.KLEGDSTDLSDQIAELQAIAELK.M | 2616.86032 | 3 | 1.16E-07 | 0.93 | 5.81 | - | 848.3  |
| AHQ-3-6, 7109 - 7115 | R.KLEGDSTDLSDQIAELQAIAELK.M | 2616.86032 | 3 | 4.23E-05 | 0.91 | 4.64 | - | 1019.0 |
| AHQ-3-6, 7114        | R.KLEGDSTDLSDQIAELQAIAELK.M | 2616.86032 | 2 | 5.53E-05 | 0.97 | 5.32 | - | 1322.3 |
| AHQ-3-3, 7337 - 7348 | R.KLEGDSTDLSDQIAELQAIAELK.M | 2616.86032 | 3 | 1.27E-05 | 0.86 | 4.87 | - | 698.9  |
| AHQ-3-2, 2578        | K.KLVWVPSDK.S               | 1072.28194 | 1 | 5.19E-05 | 0.61 | 2.79 | - | 510.5  |
| AHQ-3-10, 2487       | K.KLVWVPSDK.S               | 1072.28194 | 2 | 3.21E-04 | 0.64 | 2.84 | - | 536.7  |
| AHQ-3-4, 2584        | K.KLVWVPSDK.S               | 1072.28194 | 1 | 8.44E-05 | 0.76 | 2.67 | - | 674.0  |
| AHQ-3-2, 2594        | K.KLVWVPSDK.S               | 1072.28194 | 2 | 5.46E-04 | 0.84 | 3.19 | - | 780.2  |
| AHQ-3-13, 2783       | K.KLVWVPSDK.S               | 1072.28194 | 1 | 3.19E-05 | 0.60 | 2.75 | - | 506.0  |
| AHQ-3-3, 3113        | K.KM*EDSVGCLETAEEVK.R       | 1843.02390 | 2 | 6.49E-05 | 0.76 | 2.69 | - | 903.9  |
| AHQ-3-2, 3129        | K.KM*EDSVGCLETAEEVK.R       | 1843.02390 | 2 | 1.11E-06 | 0.86 | 3.17 | - | 869.7  |
| AHQ-3-3, 3600        | K.KMEDSVGCLETAEEVK.R        | 1827.02450 | 2 | 4.14E-06 | 0.96 | 4.65 | - | 1467.5 |
| AHQ-3-3, 2816        | K.KM*EDSVGCLETAEEVK.R.K     | 1999.21025 | 2 | 3.08E-05 | 0.86 | 3.24 | - | 841.6  |
| AHQ-3-2, 2825        | K.KM*EDSVGCLETAEEVK.R.K     | 1999.21025 | 3 | 2.26E-05 | 0.95 | 5.08 | - | 1320.8 |
| AHQ-3-1, 3012        | K.KM*EDSVGCLETAEEVK.R.K     | 1999.21025 | 2 | 4.17E-04 | 0.57 | 3.01 | - | 468.8  |
| AHQ-3-1, 3385        | K.KMEDSVGCLETAEEVK.R.K      | 1983.21085 | 3 | 8.02E-11 | 0.94 | 4.98 | - | 969.8  |
| AHQ-3-3, 3220        | K.KMEDSVGCLETAEEVK.R.K      | 1983.21085 | 3 | 4.81E-06 | 0.96 | 5.04 | - | 1729.6 |
| AHQ-3-2, 3221        | K.KMEDSVGCLETAEEVK.R.K      | 1983.21085 | 2 | 1.36E-07 | 0.96 | 4.72 | - | 1526.2 |
| AHQ-3-2, 3227        | K.KMEDSVGCLETAEEVK.R.K      | 1983.21085 | 3 | 3.21E-10 | 0.97 | 6.66 | - | 1376.0 |
| AHQ-3-2, 2815 - 2827 | K.KM*EDSVGCLETAEEVK.R.K     | 1999.21025 | 2 | 2.66E-04 | 0.87 | 3.74 | - | 569.4  |
| AHQ-3-3, 5405        | K.KMQNQIIELEEQLEEEESAR.Q    | 2462.63354 | 2 | 3.10E-05 | 0.95 | 4.62 | - | 1031.7 |
| AHQ-3-1, 5568 - 5573 | K.KMQNQIIELEEQLEEEESAR.Q    | 2462.63354 | 2 | 1.45E-04 | 0.97 | 5.60 | - | 1399.1 |
| AHQ-3-2, 4981        | K.KM*QQNIQLEEQLEEEESAR.Q    | 2478.63294 | 3 | 1.17E-04 | 0.91 | 4.62 | - | 925.9  |
| AHQ-3-3, 4940        | K.KM*QQNIQLEEQLEEEESAR.Q    | 2478.63294 | 3 | 5.56E-08 | 0.90 | 4.32 | - | 1153.9 |
| AHQ-3-1, 5014        | K.KM*QQNIQLEEQLEEEESAR.Q    | 2478.63294 | 2 | 2.26E-06 | 0.90 | 4.36 | - | 574.7  |
| AHQ-3-4, 4016        | K.KQLEEEICHOLEAR.V          | 1771.93036 | 3 | 3.23E-04 | 0.93 | 4.46 | - | 1403.6 |
| AHQ-3-7, 3719        | K.KQLEEEICHOLEAR.V          | 1771.93036 | 2 | 6.73E-05 | 0.92 | 3.72 | - | 1524.7 |
| AHQ-3-2, 4135 - 4189 | K.KQLEEEICHOLEAR.V          | 1771.93036 | 2 | 1.59E-05 | 0.97 | 5.52 | - | 1837.5 |
| AHQ-3-5, 3815 - 3816 | K.KQLEEEICHOLEAR.V          | 1771.93036 | 2 | 1.52E-07 | 0.96 | 5.08 | - | 1674.8 |
| AHQ-3-4, 3993 - 4029 | K.KQLEEEICHOLEAR.V          | 1771.93036 | 2 | 2.45E-05 | 0.95 | 4.69 | - | 1674.8 |
| AHQ-3-2, 4134 - 4205 | K.KQLEEEICHOLEAR.V          | 1771.93036 | 3 | 1.81E-06 | 0.96 | 5.42 | - | 1886.8 |
| AHQ-3-2, 4374        | K.KQLEEEICHOLEAR.V          | 1771.93036 | 2 | 1.30E-10 | 0.94 | 3.97 | - | 1453.4 |
| AHQ-3-1, 4272        | K.KQLEEEICHOLEAR.V          | 1771.93036 | 3 | 8.84E-04 | 0.93 | 4.90 | - | 1056.5 |
| AHQ-3-2, 2769        | K.KVEAQLQELQVK.F            | 1413.64470 | 2 | 9.68E-06 | 0.97 | 5.00 | - | 1543.5 |
| AHQ-3-3, 2764 - 2765 | K.KVEAQLQELQVK.F            | 1413.64470 | 2 | 2.90E-06 | 0.97 | 5.15 | - | 1652.7 |
| AHQ-3-4, 2705        | K.KVEAQLQELQVK.F            | 1413.64470 | 2 | 3.12E-07 | 0.97 | 4.90 | - | 1685.7 |
| AHQ-3-6, 2575        | K.KVEAQLQELQVK.F            | 1413.64470 | 2 | 5.23E-07 | 0.95 | 4.40 | - | 1386.5 |
| AHQ-3-3, 2777        | K.KVEAQLQELQVK.F            | 1413.64470 | 1 | 1.71E-05 | 0.65 | 2.93 | - | 460.2  |
| AHQ-3-5, 2561        | K.KVEAQLQELQVK.F            | 1413.64470 | 2 | 1.08E-04 | 0.95 | 4.32 | - | 1527.5 |
| AHQ-3-2, 3614        | K.KVIQYIAYVASSHK.S          | 1607.87775 | 2 | 8.49E-10 | 0.98 | 5.64 | - | 2485.4 |
| AHQ-3-2, 4070        | K.LEEEQIILEDQNK.L           | 1762.91700 | 2 | 1.37E-07 | 0.96 | 5.02 | - | 1174.2 |
| AHQ-3-3, 3932 - 4000 | K.LEEEQIILEDQNK.L           | 1762.91700 | 2 | 1.00E-07 | 0.94 | 4.44 | - | 1005.9 |
| AHQ-3-1, 4032        | K.LEEEQIILEDQNK.L           | 1762.91700 | 2 | 1.36E-08 | 0.95 | 4.72 | - | 1006.6 |
| AHQ-3-4, 3809        | K.LEEEQIILEDQNK.L           | 1762.91700 | 2 | 7.78E-05 | 0.89 | 3.57 | - | 914.3  |
| AHQ-3-3, 3850        | K.LEEEQIILEDQNK.L           | 1762.91700 | 2 | 3.93E-09 | 0.95 | 4.47 | - | 1323.6 |
| AHQ-3-1, 3949 - 3960 | K.LEEEQIILEDQNK.L           | 1762.91700 | 2 | 1.01E-08 | 0.96 | 5.10 | - | 1327.5 |
| AHQ-3-2, 3978        | K.LEEEQIILEDQNK.L           | 1762.91700 | 2 | 5.72E-09 | 0.94 | 4.71 | - | 893.3  |
| AHQ-3-1, 7237        | K.LEGDSTDLSDQIAELQAIAELK.M  | 2488.68740 | 3 | 1.02E-06 | 0.96 | 5.48 | - | 1551.1 |
| AHQ-3-4, 7473        | K.LEGDSTDLSDQIAELQAIAELK.M  | 2488.68740 | 2 | 5.13E-11 | 0.97 | 6.22 | - | 1260.6 |
| AHQ-3-2, 7545        | K.LEGDSTDLSDQIAELQAIAELK.M  | 2488.68740 | 2 | 4.85E-05 | 0.56 | 2.88 | - | 448.5  |
| AHQ-3-1, 3662        | R.LEVNLQAMK.A               | 1046.26630 | 2 | 7.77E-04 | 0.91 | 3.71 | - | 754.6  |
| AHQ-3-2, 3473        | R.LEVNLQAMK.A               | 1046.26630 | 2 | 7.77E-04 | 0.83 | 3.10 | - | 548.3  |
| AHQ-3-1, 2677        | R.LEVNLQAMK.A               | 1062.26570 | 2 | 9.11E-05 | 0.82 | 3.16 | - | 564.6  |
| AHQ-3-4, 3685        | R.LEVNLQAMK.A               | 1046.26630 | 1 | 3.40E-04 | 0.09 | 2.05 | - | 218.7  |
| AHQ-3-2, 3802        | R.LEVNLQAMK.A               | 1046.26630 | 1 | 1.13E-05 | 0.47 | 2.34 | - | 522.4  |
| AHQ-3-5, 3125        | K.LKDVLLQVDDER.R            | 1443.62767 | 2 | 8.15E-05 | 0.87 | 2.98 | - | 1032.7 |
| AHQ-3-2, 3319 - 3399 | K.LKDVLLQVDDER.R            | 1443.62767 | 2 | 8.31E-08 | 0.97 | 4.70 | - | 1775.4 |
| AHQ-3-1, 3618 - 3690 | K.LKDVLLQVDDER.R            | 1443.62767 | 2 | 5.39E-06 | 0.88 | 3.58 | - | 968.2  |
| AHQ-3-3, 3401 - 3405 | K.LKDVLLQVDDER.R            | 1443.62767 | 2 | 1.46E-08 | 0.95 | 3.81 | - | 1582.8 |
| AHQ-3-3, 2925 - 2926 | K.LKDVLLQVDDERR.N           | 1599.81402 | 2 | 8.08E-05 | 0.89 | 3.72 | - | 959.4  |
| AHQ-3-2, 2917 - 2918 | K.LKDVLLQVDDERR.N           | 1599.81402 | 2 | 7.07E-05 | 0.96 | 4.57 | - | 1562.7 |
| AHQ-3-4, 2877        | K.LKDVLLQVDDERR.N           | 1599.81402 | 2 | 3.92E-05 | 0.74 | 3.23 | - | 790.6  |
| AHQ-3-1, 3148        | K.LKDVLLQVDDERR.N           | 1599.81402 | 2 | 1.49E-05 | 0.95 | 3.86 | - | 1885.7 |
| AHQ-3-2, 7717 - 7781 | K.LLQEQQLQAETELCAEAEELR.A   | 2503.72536 | 3 | 3.06E-04 | 0.90 | 4.36 | - | 1024.8 |
| AHQ-3-1, 7458        | K.LLQEQQLQAETELCAEAEELR.A   | 2503.72536 | 2 | 4.95E-07 | 0.90 | 3.71 | - | 681.6  |
| AHQ-3-2, 6470 - 6474 | R.LQQELDDLLVDLDHQ.R.Q       | 1951.12699 | 2 | 1.08E-08 | 0.86 | 3.73 | - | 934.7  |
| AHQ-3-6, 5945        | R.LQQELDDLLVDLDHQ.R.Q       | 1951.12699 | 2 | 2.09E-10 | 0.97 | 5.25 | - | 1788.3 |
| AHQ-3-4, 6152 - 6165 | R.LQQELDDLLVDLDHQ.R.Q       | 1951.12699 | 2 | 5.55E-08 | 0.97 | 5.04 | - | 1815.9 |
| AHQ-3-5, 6003 - 6023 | R.LQQELDDLLVDLDHQ.R.Q       | 1951.12699 | 3 | 4.29E-05 | 0.95 | 5.24 | - | 1032.6 |
| AHQ-3-2, 5729        | R.LQQELDDLLVDLDHQ.R.Q       | 1951.12699 | 2 | 6.29E-10 | 0.96 | 4.57 | - | 1364.2 |
| AHQ-3-2, 6354        | R.LQQELDDLLVDLDHQ.R.Q       | 1951.12699 | 3 | 8.96E-05 | 0.91 | 4.03 | - | 1043.1 |
| AHQ-3-6, 5942        | R.LQQELDDLLVDLDHQ.R.Q       | 1951.12699 | 3 | 1.24E-07 | 0.88 | 4.15 | - | 768.6  |
| AHQ-3-5, 5997 - 6069 | R.LQQELDDLLVDLDHQ.R.Q       | 1951.12699 | 2 | 1.60E-10 | 0.97 | 5.32 | - | 1431.2 |
| AHQ-3-4, 6156        | R.LQQELDDLLVDLDHQ.R.Q       | 1951.12699 | 3 | 2.01E-04 | 0.83 | 3.91 | - | 583.8  |
| AHQ-3-2, 6349        | R.LQQELDDLLVDLDHQ.R.Q       | 1951.12699 | 2 | 2.67E-06 | 0.96 | 4.70 | - | 1534.9 |
| AHQ-3-2, 6249 - 6317 | R.LQQELDDLLVDLDHQ.R.Q       | 1951.12699 | 3 | 1.42E-06 | 0.91 | 4.37 | - | 755.2  |
| AHQ-3-1, 5136        | R.LQQELDDLLVDLDHQ.R.Q       | 1951.12699 | 2 | 8.04E-10 | 0.92 | 3.71 | - | 1203.9 |
| AHQ-3-1, 6289        | R.LQQELDDLLVDLDHQ.R.Q       | 1951.12699 | 2 | 7.66E-10 | 0.96 | 5.39 | - | 1226.9 |
| AHQ-3-5, 6087        | R.LQQELDDLLVDLDHQ.R.Q       | 1951.12699 | 2 | 1.51E-06 | 0.91 | 4.32 | - | 962.7  |
| AHQ-3-3, 6170 - 6241 | R.LQQELDDLLVDLDHQ.R.Q       | 1951.12699 | 2 | 6.60E-12 | 0.96 | 5.15 | - | 1229.3 |
| AHQ-3-2, 6214 - 6281 | R.LQQELDDLLVDLDHQ.R.Q       | 1951.12699 | 2 | 1.11E-09 | 0.97 | 5.49 | - | 1435.9 |
| AHQ-3-3, 5698        | R.LQQELDDLLVDLDHQ.R.Q       | 1951.12699 | 2 | 1.76E-07 | 0.94 | 4.41 | - | 956.1  |
| AHQ-3-3, 5882 - 5956 | K.LQVELDNVTGLLSQSDSK.S      | 1947.13342 | 2 | 3.26E-10 | 0.97 | 5.64 | - | 1633.9 |
| AHQ-3-1, 5654 - 5656 | K.LQVELDNVTGLLSQSDSK.S      | 1947.13342 | 2 | 2.47E-09 | 0.97 | 5.59 | - | 1383.0 |
| AHQ-3-1, 5973 - 6042 | K.LQVELDNVTGLLSQSDSK.S      | 1947.13342 | 2 | 4.94E-10 | 0.98 | 6.32 | - | 2312.5 |

|                       |                          |            |   |          |      |      |   |        |
|-----------------------|--------------------------|------------|---|----------|------|------|---|--------|
| AHQ-3-2, 5925 - 5994  | K.LQVELDNVTGLLSQSDSK.S   | 1947.13342 | 2 | 1.14E-06 | 0.96 | 5.20 | - | 1282.3 |
| AHQ-3-3, 5948 - 6025  | K.LQVELDNVTGLLSQSDSK.S   | 1947.13342 | 2 | 6.87E-12 | 0.97 | 6.09 | - | 1232.8 |
| AHQ-3-2, 6062 - 6134  | K.LQVELDNVTGLLSQSDSK.S   | 1947.13342 | 2 | 1.06E-08 | 0.98 | 6.77 | - | 1754.8 |
| AHQ-3-2, 6325 - 6338  | K.LQVELDNVTGLLSQSDSK.S   | 1947.13342 | 2 | 6.40E-05 | 0.91 | 4.07 | - | 860.6  |
| AHQ-3-2, 6409 - 6478  | K.LQVELDNVTGLLSQSDSK.S   | 1947.13342 | 2 | 1.23E-11 | 0.95 | 5.32 | - | 835.5  |
| AHQ-3-4, 6017 - 6085  | K.LQVELDNVTGLLSQSDSK.S   | 1947.13342 | 2 | 1.62E-07 | 0.96 | 5.43 | - | 983.4  |
| AHQ-3-1, 6108         | K.LQVELDNVTGLLSQSDSK.S   | 1947.13342 | 2 | 6.70E-08 | 0.97 | 5.67 | - | 1334.0 |
| AHQ-3-3, 6092 - 6160  | K.LQVELDNVTGLLSQSDSK.S   | 1947.13342 | 2 | 1.90E-07 | 0.97 | 6.33 | - | 1192.9 |
| AHQ-3-1, 6254         | K.LQVELDNVTGLLSQSDSK.S   | 1947.13342 | 2 | 3.89E-15 | 0.96 | 4.67 | - | 1365.9 |
| AHQ-3-2, 6205 - 6277  | K.LQVELDNVTGLLSQSDSK.S   | 1947.13342 | 2 | 1.77E-04 | 0.89 | 3.60 | - | 996.3  |
| AHQ-3-3, 6501         | K.LQVELDNVTGLLSQSDSK.S   | 1947.13342 | 2 | 2.07E-06 | 0.95 | 4.81 | - | 965.0  |
| AHQ-3-2, 6746         | K.LQVELDNVTGLLSQSDSK.S   | 1947.13342 | 2 | 6.52E-04 | 0.96 | 5.48 | - | 1172.5 |
| AHQ-3-4, 5896 - 5936  | K.LQVELDNVTGLLSQSDSK.S   | 1947.13342 | 2 | 6.90E-11 | 0.97 | 5.62 | - | 1488.8 |
| AHQ-3-5, 5812 - 5857  | K.LQVELDNVTGLLSQSDSK.S   | 1947.13342 | 2 | 2.57E-06 | 0.96 | 5.19 | - | 1101.8 |
| AHQ-3-3, 6228 - 6301  | K.LQVELDNVTGLLSQSDSK.S   | 1947.13342 | 2 | 4.77E-08 | 0.97 | 6.19 | - | 1277.8 |
| AHQ-3-3, 6314 - 6382  | K.LQVELDNVTGLLSQSDSK.S   | 1947.13342 | 2 | 3.85E-06 | 0.96 | 5.07 | - | 1162.8 |
| AHQ-3-5, 6240         | K.LQVELDNVTGLLSQSDSK.S   | 1947.13342 | 2 | 4.96E-06 | 0.95 | 5.29 | - | 939.8  |
| AHQ-3-2, 7273 - 7350  | K.LQVELDNVTGLLSQSDSK.S   | 1947.13342 | 2 | 9.92E-08 | 0.97 | 5.50 | - | 1231.4 |
| AHQ-3-2, 3627         | R.LTEM*ETLQSQLM*AEK.L    | 1785.03091 | 2 | 1.15E-05 | 0.94 | 4.06 | - | 1251.7 |
| AHQ-3-2, 3730         | R.LTEM*ETLQSQLM*AEK.L    | 1785.03091 | 2 | 3.66E-04 | 0.93 | 4.45 | - | 944.5  |
| AHQ-3-2, 4681         | R.LTEM*ETLQSQLM*AEK.L    | 1769.03151 | 2 | 1.73E-04 | 0.93 | 4.12 | - | 1151.1 |
| AHQ-3-3, 3501 - 3574  | R.LTEM*ETLQSQLM*AEK.L    | 1785.03091 | 2 | 7.41E-04 | 0.94 | 4.17 | - | 1162.3 |
| AHQ-3-2, 4794 - 4866  | R.LTEM*ETLQSQLM*AEK.L    | 1769.03151 | 2 | 5.14E-06 | 0.88 | 3.02 | - | 1402.6 |
| AHQ-3-1, 4705 - 4776  | R.LTEM*ETLQSQLM*AEK.L    | 1769.03151 | 2 | 7.24E-04 | 0.93 | 3.96 | - | 1249.4 |
| AHQ-3-3, 4636 - 4637  | R.LTEM*ETLQSQLM*AEK.L    | 1769.03151 | 2 | 1.69E-05 | 0.90 | 3.86 | - | 882.8  |
| AHQ-3-3, 5200 - 5216  | R.LTEM*ETLQSQLM*AEK.L    | 1753.03211 | 2 | 5.99E-06 | 0.96 | 5.05 | - | 1396.4 |
| AHQ-3-1, 4181 - 4254  | R.LTEM*ETLQSQLM*AEK.L    | 1769.03151 | 2 | 1.17E-04 | 0.95 | 4.16 | - | 1603.3 |
| AHQ-3-1, 3732         | R.LTEM*ETLQSQLM*AEK.L    | 1785.03091 | 2 | 3.82E-04 | 0.91 | 3.66 | - | 943.0  |
| AHQ-3-2, 4035         | K.MEDSVGCLETAEEVK.R      | 1698.85159 | 2 | 7.70E-07 | 0.94 | 4.53 | - | 844.9  |
| AHQ-3-3, 3980         | K.MEDSVGCLETAEEVK.R      | 1698.85159 | 2 | 5.23E-04 | 0.86 | 3.31 | - | 575.2  |
| AHQ-3-2, 3581         | K.MEDSVGCLETAEEVK.R      | 1855.03794 | 2 | 7.32E-07 | 0.82 | 3.54 | - | 462.6  |
| AHQ-3-3, 3544         | K.MEDSVGCLETAEEVK.R      | 1855.03794 | 2 | 7.09E-07 | 0.83 | 3.53 | - | 573.7  |
| AHQ-3-2, 3590         | K.MEDSVGCLETAEEVK.R      | 1855.03794 | 3 | 1.09E-07 | 0.82 | 3.89 | - | 466.5  |
| AHQ-3-1, 3605 - 3678  | K.MEDSVGCLETAEEVK.R      | 1855.03794 | 2 | 1.44E-04 | 0.34 | 2.55 | - | 448.0  |
| AHQ-3-2, 3214         | K.M*EDSVGCLETAEEVK.R     | 1871.03734 | 2 | 1.10E-11 | 0.94 | 4.26 | - | 771.9  |
| AHQ-3-2, 5737 - 5809  | K.MQQNIQELLEEESAR.Q      | 2334.46063 | 3 | 2.64E-08 | 0.89 | 3.84 | - | 1162.5 |
| AHQ-3-13, 5111 - 5181 | K.NFINNPLAQADWAAK.K      | 1673.85315 | 2 | 4.31E-05 | 0.90 | 3.63 | - | 1020.9 |
| AHQ-3-3, 5425         | K.NFINNPLAQADWAAK.K      | 1673.85315 | 2 | 1.25E-05 | 0.95 | 4.67 | - | 1118.6 |
| AHQ-3-1, 5526 - 5548  | K.NFINNPLAQADWAAK.K      | 1673.85315 | 2 | 1.27E-06 | 0.96 | 5.07 | - | 1230.8 |
| AHQ-3-14, 6168        | K.NFINNPLAQADWAAK.K      | 1673.85315 | 2 | 8.07E-07 | 0.95 | 4.65 | - | 1016.6 |
| AHQ-3-10, 4718        | K.NFINNPLAQADWAAK.K      | 1673.85315 | 2 | 4.15E-05 | 0.93 | 4.12 | - | 938.6  |
| AHQ-3-9, 4793 - 4803  | K.NFINNPLAQADWAAK.K      | 1673.85315 | 2 | 1.01E-05 | 0.93 | 4.47 | - | 942.4  |
| AHQ-3-2, 6170         | K.NFINNPLAQADWAAK.K      | 1673.85315 | 2 | 8.80E-07 | 0.94 | 4.47 | - | 905.5  |
| AHQ-3-2, 5627         | K.NFINNPLAQADWAAK.K      | 1673.85315 | 2 | 4.77E-08 | 0.87 | 3.96 | - | 651.2  |
| AHQ-3-4, 5372         | K.NFINNPLAQADWAAK.K      | 1673.85315 | 2 | 1.19E-05 | 0.94 | 4.50 | - | 1067.0 |
| AHQ-3-1, 6084         | K.NFINNPLAQADWAAK.K      | 1673.85315 | 2 | 1.06E-06 | 0.95 | 4.80 | - | 1028.7 |
| AHQ-3-3, 6138         | K.NFINNPLAQADWAAK.K      | 1673.85315 | 2 | 2.98E-08 | 0.91 | 4.24 | - | 795.4  |
| AHQ-3-5, 5207         | K.NFINNPLAQADWAAK.K      | 1673.85315 | 2 | 2.08E-05 | 0.95 | 4.29 | - | 1130.3 |
| AHQ-3-2, 5449 - 5454  | K.NFINNPLAQADWAAK.K      | 1673.85315 | 2 | 4.00E-07 | 0.95 | 4.58 | - | 1021.3 |
| AHQ-3-7, 5030         | K.NFINNPLAQADWAAK.K      | 1673.85315 | 2 | 1.67E-08 | 0.92 | 3.94 | - | 1055.8 |
| AHQ-3-6, 5110 - 5142  | K.NFINNPLAQADWAAK.K      | 1673.85315 | 2 | 3.69E-05 | 0.92 | 4.01 | - | 884.1  |
| AHQ-3-1, 2654         | K.NKHEAMITDLEER.L        | 1586.75247 | 2 | 2.14E-08 | 0.91 | 3.59 | - | 918.8  |
| AHQ-3-2, 2414         | K.NKHEAMITDLEER.L        | 1586.75247 | 2 | 3.08E-09 | 0.93 | 4.10 | - | 1242.7 |
| AHQ-3-2, 2115         | K.NKHEAMITDLEER.L        | 1602.75187 | 3 | 2.92E-04 | 0.94 | 4.12 | - | 1463.2 |
| AHQ-3-3, 2400         | K.NKHEAMITDLEER.L        | 1586.75247 | 2 | 1.45E-06 | 0.93 | 3.63 | - | 1169.7 |
| AHQ-3-4, 2385 - 2386  | K.NKHEAMITDLEER.L        | 1586.75247 | 2 | 1.42E-08 | 0.94 | 4.03 | - | 1275.9 |
| AHQ-3-2, 2423         | K.NKHEAMITDLEER.L        | 1602.75187 | 2 | 1.91E-04 | 0.87 | 3.29 | - | 886.5  |
| AHQ-3-1, 5365 - 5368  | K.NLPIYSEIIVEM*YK.G      | 1744.98660 | 2 | 4.59E-08 | 0.93 | 4.41 | - | 659.6  |
| AHQ-3-11, 5354        | K.NLPIYSEIIVEM*YK.G      | 1728.98720 | 2 | 2.65E-05 | 0.85 | 3.08 | - | 623.0  |
| AHQ-3-2, 5938 - 5957  | K.NLPIYSEIIVEM*YK.G      | 1728.98720 | 2 | 7.72E-07 | 0.94 | 4.24 | - | 834.1  |
| AHQ-3-5, 5049 - 5071  | K.NLPIYSEIIVEM*YK.G      | 1744.98660 | 2 | 3.46E-06 | 0.92 | 3.55 | - | 856.1  |
| AHQ-3-2, 5293 - 5362  | K.NLPIYSEIIVEM*YK.G      | 1744.98660 | 2 | 5.99E-07 | 0.96 | 4.56 | - | 1110.9 |
| AHQ-3-4, 5213 - 5224  | K.NLPIYSEIIVEM*YK.G      | 1744.98660 | 2 | 5.57E-04 | 0.89 | 3.61 | - | 685.5  |
| AHQ-3-1, 5997         | K.NLPIYSEIIVEM*YK.G      | 1728.98720 | 2 | 8.04E-06 | 0.89 | 3.51 | - | 604.4  |
| AHQ-3-5, 5639 - 5661  | K.NLPIYSEIIVEM*YK.G      | 1728.98720 | 2 | 1.98E-05 | 0.86 | 3.05 | - | 711.7  |
| AHQ-3-3, 5908 - 5916  | K.NLPIYSEIIVEM*YK.G      | 1728.98720 | 2 | 5.12E-05 | 0.94 | 4.63 | - | 906.9  |
| AHQ-3-7, 5475         | K.NLPIYSEIIVEM*YK.G      | 1728.98720 | 2 | 2.28E-04 | 0.73 | 2.69 | - | 480.2  |
| AHQ-3-4, 5852 - 5893  | K.NLPIYSEIIVEM*YK.G      | 1728.98720 | 2 | 6.01E-04 | 0.70 | 2.68 | - | 469.3  |
| AHQ-3-6, 5583 - 5590  | K.NLPIYSEIIVEM*YK.G      | 1728.98720 | 2 | 1.11E-05 | 0.95 | 4.58 | - | 833.0  |
| AHQ-3-2, 5635         | K.NMDPLNDNIATLLHQSSDK.F  | 2127.32169 | 3 | 6.21E-07 | 0.87 | 4.04 | - | 534.7  |
| AHQ-3-1, 5761         | K.NMDPLNDNIATLLHQSSDK.F  | 2127.32169 | 2 | 1.03E-06 | 0.80 | 4.01 | - | 423.3  |
| AHQ-3-5, 5352         | K.NMDPLNDNIATLLHQSSDK.F  | 2127.32169 | 2 | 4.80E-04 | 0.92 | 3.94 | - | 992.6  |
| AHQ-3-4, 5028         | K.NM*DPLNDNIATLLHQSSDK.F | 2143.32109 | 2 | 6.21E-06 | 0.91 | 3.78 | - | 973.1  |
| AHQ-3-1, 5217         | K.NM*DPLNDNIATLLHQSSDK.F | 2143.32109 | 3 | 9.44E-09 | 0.92 | 4.34 | - | 1148.8 |
| AHQ-3-2, 5149         | K.NM*DPLNDNIATLLHQSSDK.F | 2143.32109 | 2 | 1.43E-04 | 0.93 | 3.89 | - | 1167.4 |
| AHQ-3-3, 5229         | K.NM*DPLNDNIATLLHQSSDK.F | 2143.32109 | 2 | 1.05E-04 | 0.92 | 3.81 | - | 1142.2 |
| AHQ-3-3, 5598 - 5610  | K.NMDPLNDNIATLLHQSSDK.F  | 2127.32169 | 2 | 5.09E-05 | 0.88 | 3.95 | - | 654.3  |
| AHQ-3-2, 5775         | K.NMDPLNDNIATLLHQSSDK.F  | 2127.32169 | 2 | 4.23E-06 | 0.93 | 4.15 | - | 854.7  |
| AHQ-3-3, 5897         | K.NMDPLNDNIATLLHQSSDK.F  | 2127.32169 | 2 | 3.28E-07 | 0.86 | 3.84 | - | 555.6  |
| AHQ-3-2, 5625         | K.NMDPLNDNIATLLHQSSDK.F  | 2127.32169 | 2 | 3.47E-05 | 0.84 | 3.96 | - | 633.8  |
| AHQ-3-6, 5231 - 5305  | K.NMDPLNDNIATLLHQSSDK.F  | 2127.32169 | 2 | 1.31E-06 | 0.87 | 4.05 | - | 650.4  |
| AHQ-3-2, 5150 - 5174  | K.NM*DPLNDNIATLLHQSSDK.F | 2143.32109 | 3 | 1.86E-06 | 0.74 | 3.22 | - | 685.6  |
| AHQ-3-3, 7570         | K.PAGPPGILALLDEECWFPK.A  | 2112.43315 | 2 | 8.27E-07 | 0.97 | 5.38 | - | 1607.8 |
| AHQ-3-1, 7338         | K.PAGPPGILALLDEECWFPK.A  | 2112.43315 | 2 | 1.50E-09 | 0.98 | 6.29 | - | 2154.6 |
| AHQ-3-2, 7653         | K.PAGPPGILALLDEECWFPK.A  | 2112.43315 | 2 | 6.45E-06 | 0.98 | 6.30 | - | 2726.2 |
| AHQ-3-2, 3230         | R.QAQQERDELADAIANSSGK.G  | 2090.15168 | 2 | 6.00E-06 | 0.86 | 3.71 | - | 735.3  |
| AHQ-3-2, 2799 - 2843  | R.QAQQERDELADAIANSSGK.G  | 2090.15168 | 2 | 4.77E-04 | 0.64 | 3.60 | - | 193.2  |
| AHQ-3-1, 2905         | R.QAQQERDELADAIANSSGK.G  | 2090.15168 | 2 | 6.76E-06 | 0.44 | 2.80 | - | 386.3  |
| AHQ-3-1, 3302 - 3376  | R.QAQQERDELADAIANSSGK.G  | 2090.15168 | 2 | 6.79E-05 | 0.93 | 4.79 | - | 569.3  |
| AHQ-3-2, 4662         | K.QELEIEICHDLAAR.V       | 1643.75744 | 2 | 9.06E-07 | 0.81 | 3.32 | - | 556.8  |
| AHQ-3-3, 4620         | K.QELEIEICHDLAAR.V       | 1643.75744 | 2 | 2.60E-05 | 0.58 | 2.99 | - | 366.2  |
| AHQ-3-4, 2618         | K.QIATLHAQVADM*K.K       | 1426.66697 | 2 | 2.05E-04 | 0.59 | 2.71 | - | 176.5  |
| AHQ-3-3, 2162 - 2165  | K.QIATLHAQVADM*K.K       | 1442.66637 | 2 | 3.61E-05 | 0.88 | 3.77 | - | 609.2  |
| AHQ-3-2, 1949         | R.QLEEAEEEAQR.A          | 1332.35590 | 2 | 5.15E-05 | 0.64 | 2.63 | - | 503.6  |
| AHQ-3-9, 2892         | R.RGDLPFVPR.R            | 1156.36217 | 2 | 5.04E-06 | 0.93 | 3.33 | - | 1241.8 |
| AHQ-3-6, 3061 - 3133  | R.RGDLPFVPR.R            | 1156.36217 | 2 | 9.23E-07 | 0.92 | 3.62 | - | 1069.5 |
| AHQ-3-6, 3118         | R.RGDLPFVPR.R            | 1156.36217 | 2 | 9.99E-05 | 0.89 | 3.20 | - | 790.3  |
| AHQ-3-3, 3433         | R.RGDLPFVPR.R            | 1156.36217 | 1 | 4.93E-04 | 0.19 | 1.83 | - | 180.4  |
| AHQ-3-11, 3242        | R.RGDLPFVPR.R            | 1156.36217 | 2 | 1.77E-04 | 0.87 | 3.22 | - | 1017.3 |
| AHQ-3-3, 3429 - 3437  | R.RGDLPFVPR.R            | 1156.36217 | 2 | 1.59E-06 | 0.95 | 4.13 | - | 1308.9 |
| AHQ-3-4, 3369         | R.RGDLPFVPR.R            | 1156.36217 | 2 | 5.48E-06 | 0.93 | 3.54 | - | 1129.4 |
| AHQ-3-2, 3373 - 3449  | R.RGDLPFVPR.R            | 1156.36217 | 2 | 3.40E-06 | 0.96 | 3.96 | - | 1706.8 |
| AHQ-3-5, 3147 - 3169  | R.RGDLPFVPR.R            | 1156.36217 | 2 | 5.05E-07 | 0.95 | 4.04 | - | 1266.2 |
| AHQ-3-1, 3712         | R.RGDLPFVPR.R            | 1156.36217 | 2 | 2.97E-07 | 0.92 | 3.15 | - | 1408.5 |
| AHQ-3-3, 6945 - 6994  | R.RKLEGDSTLSDQIAELQAIK.M | 2773.04667 | 3 | 7.80E-07 | 0.93 | 5.50 | - | 1164.7 |
| AHQ-3-1, 6944 - 6973  | R.RKLEGDSTLSDQIAELQAIK.M | 2773.04667 | 3 | 1.34E-06 | 0.97 | 6.24 | - | 1712.4 |
| AHQ-3-1, 6958         | R.RKLEGDSTLSDQIAELQAIK.M | 2773.04667 | 2 | 2.88E-04 | 0.81 | 3.71 | - | 537.6  |

|                        |                               |            |   |          |      |      |   |        |
|------------------------|-------------------------------|------------|---|----------|------|------|---|--------|
| AHQ-3-2, 7069          | R.RKLEGDSTLSDQIAELQAIK.M      | 2773.04667 | 3 | 1.25E-06 | 0.98 | 6.67 | - | 2177.1 |
| AHQ-3-4, 6982          | R.RKLEGDSTLSDQIAELQAIK.M      | 2773.04667 | 3 | 1.43E-06 | 0.97 | 6.41 | - | 1364.9 |
| AHQ-3-2, 2830          | K.RQAQQRDELADIEANSSGK.G       | 2246.33803 | 2 | 1.96E-04 | 0.82 | 3.95 | - | 335.7  |
| AHQ-3-2, 1839          | K.RQLEEEAEEDAAR.A             | 1488.54225 | 2 | 1.41E-05 | 0.96 | 4.75 | - | 1473.7 |
| AHQ-3-2, 7390          | K.SGFEPASLKEEVGEEAIVLVEVGGK.V | 2790.07246 | 3 | 1.68E-05 | 0.80 | 3.62 | - | 705.2  |
| AHQ-3-2, 7298          | K.SGFEPASLKEEVGEEAIVLVEVGGK.V | 2790.07246 | 3 | 5.88E-08 | 0.94 | 4.44 | - | 1733.2 |
| AHQ-3-2, 6485 - 6501   | K.SGFEPASLKEEVGEEAIVLVEVGGK.V | 2790.07246 | 3 | 2.09E-07 | 0.95 | 5.00 | - | 1390.8 |
| AHQ-3-2, 6342 - 6413   | K.SGFEPASLKEEVGEEAIVLVEVGGK.V | 2790.07246 | 3 | 8.15E-08 | 0.81 | 3.86 | - | 633.7  |
| AHQ-3-14-, 6000        | K.SGFEPASLKEEVGEEAIVLVEVGGK.V | 2790.07246 | 3 | 5.72E-08 | 0.88 | 4.30 | - | 610.9  |
| AHQ-3-5, 6369          | K.SGFEPASLKEEVGEEAIVLVEVGGK.V | 2790.07246 | 3 | 1.14E-05 | 0.79 | 3.87 | - | 568.4  |
| AHQ-3-1, 6404          | K.SGFEPASLKEEVGEEAIVLVEVGGK.V | 2790.07246 | 3 | 5.35E-08 | 0.91 | 4.12 | - | 1238.0 |
| AHQ-3-6, 6198          | K.SGFEPASLKEEVGEEAIVLVEVGGK.V | 2790.07246 | 3 | 6.41E-09 | 0.92 | 4.27 | - | 943.4  |
| AHQ-3-3, 6444          | K.SGFEPASLKEEVGEEAIVLVEVGGK.V | 2790.07246 | 3 | 8.31E-06 | 0.88 | 4.26 | - | 758.3  |
| AHQ-3-2, 7083 - 7149   | K.SMEAEMIQLEELAAAER.A         | 2050.30064 | 2 | 3.76E-10 | 0.98 | 6.47 | - | 1658.7 |
| AHQ-3-3, 7040 - 7066   | K.SMEAEMIQLEELAAAER.A         | 2050.30064 | 2 | 6.71E-04 | 0.84 | 3.43 | - | 1091.3 |
| AHQ-3-3, 7052          | K.SMEAEMIQLEELAAAER.A         | 2050.30064 | 3 | 1.08E-05 | 0.94 | 4.81 | - | 1382.2 |
| AHQ-3-5, 6924 - 6932   | K.SMEAEMIQLEELAAAER.A         | 2050.30064 | 2 | 8.39E-07 | 0.95 | 4.18 | - | 1830.4 |
| AHQ-3-2, 4885 - 4917   | K.SM*EAEM*IQLEELAAAER.A       | 2082.29944 | 2 | 6.14E-08 | 0.98 | 5.83 | - | 2272.4 |
| AHQ-3-1, 5018          | K.SM*EAEM*IQLEELAAAER.A       | 2082.29944 | 2 | 3.63E-07 | 0.96 | 4.85 | - | 1356.6 |
| AHQ-3-4, 7053          | K.SMEAEMIQLEELAAAER.A         | 2050.30064 | 2 | 7.84E-06 | 0.94 | 4.27 | - | 1273.5 |
| AHQ-3-1, 4893 - 4922   | K.SM*EAEM*IQLEELAAAER.A       | 2082.29944 | 2 | 5.94E-11 | 0.98 | 5.70 | - | 1831.7 |
| AHQ-3-2, 7245          | K.SMEAEMIQLEELAAAER.A         | 2050.30064 | 2 | 1.13E-06 | 0.97 | 5.36 | - | 1491.5 |
| AHQ-3-2, 7146 - 7165   | K.SMEAEMIQLEELAAAER.A         | 2050.30064 | 3 | 7.30E-04 | 0.97 | 5.70 | - | 2300.4 |
| AHQ-3-2, 4987          | K.SM*EAEM*IQLEELAAAER.A       | 2082.29944 | 2 | 1.54E-05 | 0.89 | 3.86 | - | 994.1  |
| AHQ-3-2, 5186          | K.SM*EAEM*IQLEELAAAER.A       | 2082.29944 | 2 | 4.40E-07 | 0.95 | 4.22 | - | 1429.4 |
| AHQ-3-2, 5799          | K.SMEAEM*IQLEELAAAER.A        | 2066.30004 | 2 | 5.76E-05 | 0.80 | 3.18 | - | 1146.2 |
| AHQ-3-6, 6775 - 6793   | K.SMEAEMIQLEELAAAER.A         | 2050.30064 | 2 | 7.53E-08 | 0.97 | 5.13 | - | 1908.1 |
| AHQ-3-2, 5971 - 6042   | K.SM*EAEMIQLEELAAAER.A        | 2066.30004 | 2 | 1.23E-04 | 0.54 | 3.25 | - | 641.2  |
| AHQ-3-1, 7002          | K.SMEAEMIQLEELAAAER.A         | 2050.30064 | 3 | 3.04E-05 | 0.95 | 4.59 | - | 1680.5 |
| AHQ-3-2, 7114 - 7181   | K.SMEAEMIQLEELAAAER.A         | 2050.30064 | 2 | 1.12E-05 | 0.97 | 5.87 | - | 1486.4 |
| AHQ-3-3, 5957 - 6026   | K.SM*EAEMIQLEELAAAER.A        | 2066.30004 | 2 | 2.24E-06 | 0.92 | 4.21 | - | 1516.1 |
| AHQ-3-4, 4809          | K.SM*EAEM*IQLEELAAAER.A       | 2082.29944 | 2 | 7.57E-06 | 0.90 | 4.28 | - | 814.6  |
| AHQ-3-6, 3239          | R.SMMQDRDQSILCTGESGAGK.T      | 2302.50687 | 2 | 1.59E-06 | 0.97 | 5.53 | - | 1578.6 |
| AHQ-3-5, 3297          | R.SMMQDRDQSILCTGESGAGK.T      | 2302.50687 | 2 | 1.64E-05 | 0.96 | 4.92 | - | 1798.4 |
| AHQ-3-7, 3215          | R.SMMQDRDQSILCTGESGAGK.T      | 2302.50687 | 2 | 3.68E-05 | 0.92 | 4.35 | - | 972.5  |
| AHQ-3-10, 3171         | R.SMMQDRDQSILCTGESGAGK.T      | 2302.50687 | 2 | 3.21E-07 | 0.97 | 5.73 | - | 1779.8 |
| AHQ-3-2, 3526          | R.SMMQDRDQSILCTGESGAGK.T      | 2302.50687 | 2 | 2.36E-10 | 0.98 | 6.82 | - | 1620.0 |
| AHQ-3-4, 3453          | R.SMMQDRDQSILCTGESGAGK.T      | 2302.50687 | 2 | 4.37E-05 | 0.97 | 5.80 | - | 1594.1 |
| AHQ-3-5, 3299          | R.SMMQDRDQSILCTGESGAGK.T      | 2302.50687 | 2 | 4.01E-06 | 0.95 | 4.45 | - | 1325.4 |
| AHQ-3-1, 3850 - 3852   | K.TDLLLEPYNK.Y                | 1206.36989 | 1 | 5.80E-05 | 0.31 | 2.31 | - | 405.0  |
| AHQ-3-3, 3685 - 3697   | K.TDLLLEPYNK.Y                | 1206.36989 | 2 | 4.66E-04 | 0.94 | 3.89 | - | 1298.4 |
| AHQ-3-4, 3656          | K.TDLLLEPYNK.Y                | 1206.36989 | 2 | 1.01E-06 | 0.94 | 3.86 | - | 1389.5 |
| AHQ-3-1, 3845          | K.TDLLLEPYNK.Y                | 1206.36989 | 2 | 8.68E-06 | 0.88 | 3.41 | - | 997.1  |
| AHQ-3-7, 3326          | K.TDLLLEPYNK.Y                | 1206.36989 | 2 | 2.19E-05 | 0.71 | 2.69 | - | 949.3  |
| AHQ-3-6, 3390 - 3409   | K.TDLLLEPYNK.Y                | 1206.36989 | 2 | 1.00E-04 | 0.92 | 3.69 | - | 1168.7 |
| AHQ-3-2, 3703 - 3774   | K.TDLLLEPYNK.Y                | 1206.36989 | 2 | 3.76E-05 | 0.94 | 4.26 | - | 1083.9 |
| AHQ-3-5, 3448 - 3464   | K.TDLLLEPYNK.Y                | 1206.36989 | 2 | 5.97E-04 | 0.85 | 3.54 | - | 895.4  |
| AHQ-3-2, 3894 - 3897   | K.TDLLLEPYNK.Y                | 1206.36989 | 2 | 6.52E-07 | 0.83 | 3.42 | - | 735.7  |
| AHQ-3-5, 4316          | K.TELEDTLDSTAAQQLR.S          | 1921.00969 | 2 | 1.18E-05 | 0.88 | 3.51 | - | 1240.6 |
| AHQ-3-2, 4521 - 4525   | K.TELEDTLDSTAAQQLR.S          | 1921.00969 | 2 | 8.57E-06 | 0.74 | 3.02 | - | 1015.2 |
| AHQ-3-1, 4494 - 4500   | K.TELEDTLDSTAAQQLR.S          | 1921.00969 | 2 | 9.84E-12 | 0.97 | 4.88 | - | 1905.6 |
| AHQ-3-2, 3111          | R.TEMEDLMSSK.D                | 1171.32449 | 2 | 1.84E-06 | 0.91 | 3.35 | - | 772.8  |
| AHQ-3-2, 3382          | R.TEMEDLMSSKDDV.GK.S          | 1685.85626 | 2 | 1.71E-08 | 0.91 | 3.71 | - | 1067.7 |
| AHQ-3-3, 3349 - 3353   | R.TEMEDLMSSKDDV.GK.S          | 1685.85626 | 2 | 1.42E-04 | 0.85 | 3.25 | - | 1043.8 |
| AHQ-3-4, 3317          | R.TEMEDLMSSKDDV.GK.S          | 1685.85626 | 2 | 1.53E-07 | 0.87 | 3.45 | - | 1026.1 |
| AHQ-3-2, 3131          | R.TEMEDLMSSKDDV.GK.S          | 1685.85626 | 2 | 7.16E-04 | 0.87 | 3.54 | - | 947.0  |
| AHQ-3-2, 6571          | R.TFHIFYLLSGAGEHLK.T          | 1997.28378 | 2 | 1.95E-06 | 0.95 | 4.59 | - | 1127.9 |
| AHQ-3-7, 6035          | R.TFHIFYLLSGAGEHLK.T          | 1997.28378 | 2 | 4.40E-06 | 0.97 | 5.04 | - | 1626.9 |
| AHQ-3-6, 6286 - 6297   | R.TFHIFYLLSGAGEHLK.T          | 1997.28378 | 2 | 1.70E-06 | 0.98 | 5.87 | - | 2155.7 |
| AHQ-3-2, 6594          | R.TFHIFYLLSGAGEHLK.T          | 1997.28378 | 3 | 8.74E-11 | 0.97 | 5.45 | - | 1639.1 |
| AHQ-3-4, 6626 - 6704   | R.TFHIFYLLSGAGEHLK.T          | 1997.28378 | 2 | 1.90E-06 | 0.87 | 3.90 | - | 1209.5 |
| AHQ-3-2, 6667 - 6731   | R.TFHIFYLLSGAGEHLK.T          | 1997.28378 | 2 | 1.48E-05 | 0.98 | 5.48 | - | 1931.5 |
| AHQ-3-5, 6335          | R.TFHIFYLLSGAGEHLK.T          | 1997.28378 | 3 | 1.15E-12 | 0.95 | 4.69 | - | 1312.8 |
| AHQ-3-3, 6597 - 6630   | R.TFHIFYLLSGAGEHLK.T          | 1997.28378 | 2 | 3.13E-07 | 0.98 | 5.43 | - | 1987.4 |
| AHQ-3-2, 7250          | R.TFHIFYLLSGAGEHLK.T          | 1997.28378 | 2 | 4.97E-06 | 0.94 | 4.05 | - | 1126.1 |
| AHQ-3-3, 6604          | R.TFHIFYLLSGAGEHLK.T          | 1997.28378 | 3 | 1.24E-08 | 0.96 | 5.10 | - | 1303.4 |
| AHQ-3-7, 6044          | R.TFHIFYLLSGAGEHLK.T          | 1997.28378 | 3 | 1.00E-07 | 0.97 | 5.37 | - | 1642.7 |
| AHQ-3-5, 3027          | K.VEAQLQELQVK.F               | 1285.47179 | 2 | 3.16E-05 | 0.95 | 4.16 | - | 1308.2 |
| AHQ-3-6, 2997          | K.VEAQLQELQVK.F               | 1285.47179 | 2 | 5.94E-05 | 0.89 | 3.24 | - | 1164.7 |
| AHQ-3-4, 3189 - 3197   | K.VEAQLQELQVK.F               | 1285.47179 | 2 | 3.89E-05 | 0.95 | 4.10 | - | 1370.2 |
| AHQ-3-2, 3245          | K.VEAQLQELQVK.F               | 1285.47179 | 2 | 2.27E-05 | 0.95 | 4.49 | - | 1362.6 |
| AHQ-3-3, 3232          | K.VEAQLQELQVK.F               | 1285.47179 | 2 | 1.83E-05 | 0.95 | 4.30 | - | 1277.4 |
| AHQ-3-6, 5089 - 5102   | K.VEDM*ALTECLNEASVLHNLK.E     | 2304.58397 | 2 | 1.75E-06 | 0.86 | 4.03 | - | 715.3  |
| AHQ-3-6, 5091 - 5167   | K.VEDM*ALTECLNEASVLHNLK.E     | 2304.58397 | 3 | 3.52E-09 | 0.94 | 5.18 | - | 1264.7 |
| AHQ-3-5, 6195 - 6273   | K.VEDMAELTCLNEASVLHNLK.E      | 2288.58457 | 2 | 6.97E-04 | 0.87 | 3.55 | - | 711.7  |
| AHQ-3-5, 5847 - 5868   | K.VEDMAELTCLNEASVLHNLK.E      | 2288.58457 | 3 | 6.24E-04 | 0.92 | 4.44 | - | 995.6  |
| AHQ-3-9, 5361 - 5431   | K.VEDMAELTCLNEASVLHNLK.E      | 2288.58457 | 2 | 2.25E-05 | 0.58 | 3.04 | - | 384.0  |
| AHQ-3-10, 5298         | K.VEDMAELTCLNEASVLHNLK.E      | 2288.58457 | 3 | 1.99E-10 | 0.88 | 4.03 | - | 716.6  |
| AHQ-3-1, 5522 - 5542   | K.VEDM*ALTECLNEASVLHNLK.E     | 2304.58397 | 2 | 1.17E-07 | 0.94 | 4.35 | - | 916.3  |
| AHQ-3-6, 5731 - 5801   | K.VEDMAELTCLNEASVLHNLK.E      | 2288.58457 | 2 | 1.20E-08 | 0.80 | 3.87 | - | 363.9  |
| AHQ-3-6, 5791          | K.VEDMAELTCLNEASVLHNLK.E      | 2288.58457 | 3 | 2.63E-06 | 0.87 | 4.12 | - | 781.0  |
| AHQ-3-5, 5952          | K.VEDMAELTCLNEASVLHNLK.E      | 2288.58457 | 2 | 6.25E-10 | 0.91 | 4.48 | - | 676.4  |
| AHQ-3-10, 5282         | K.VEDMAELTCLNEASVLHNLK.E      | 2288.58457 | 2 | 2.25E-04 | 0.90 | 4.05 | - | 713.7  |
| AHQ-3-2, 6157 - 6158   | K.VEDMAELTCLNEASVLHNLK.E      | 2288.58457 | 3 | 1.13E-07 | 0.90 | 4.42 | - | 786.5  |
| AHQ-3-3, 5338 - 5408   | K.VEDM*ALTECLNEASVLHNLK.E     | 2304.58397 | 2 | 3.09E-07 | 0.90 | 3.96 | - | 802.5  |
| AHQ-3-10, 5514         | K.VEDMAELTCLNEASVLHNLK.E      | 2288.58457 | 2 | 1.94E-10 | 0.93 | 4.16 | - | 835.9  |
| AHQ-3-2, 6151 - 6169   | K.VEDMAELTCLNEASVLHNLK.E      | 2288.58457 | 2 | 1.01E-11 | 0.95 | 4.86 | - | 1028.7 |
| AHQ-3-4, 5358          | K.VEDM*ALTECLNEASVLHNLK.E     | 2304.58397 | 2 | 3.89E-05 | 0.91 | 4.05 | - | 944.1  |
| AHQ-3-5, 5789 - 5855   | K.VEDMAELTCLNEASVLHNLK.E      | 2288.58457 | 2 | 1.42E-09 | 0.94 | 4.33 | - | 812.1  |
| AHQ-3-4, 6050          | K.VEDMAELTCLNEASVLHNLK.E      | 2288.58457 | 2 | 2.86E-08 | 0.94 | 4.49 | - | 867.1  |
| AHQ-3-2, 5390 - 5425   | K.VEDM*ALTECLNEASVLHNLK.E     | 2304.58397 | 2 | 1.86E-04 | 0.73 | 3.41 | - | 510.7  |
| AHQ-3-7, 5707          | K.VEDMAELTCLNEASVLHNLK.E      | 2288.58457 | 2 | 8.36E-08 | 0.89 | 3.83 | - | 842.3  |
| AHQ-3-4, 6070          | K.VEDMAELTCLNEASVLHNLK.E      | 2288.58457 | 3 | 3.45E-08 | 0.69 | 3.15 | - | 499.2  |
| AHQ-3-3, 5409 - 5436   | K.VEDM*ALTECLNEASVLHNLK.E     | 2304.58397 | 3 | 4.46E-05 | 0.94 | 4.73 | - | 1419.5 |
| AHQ-3-3, 6140          | K.VEDMAELTCLNEASVLHNLK.E      | 2288.58457 | 2 | 5.96E-08 | 0.91 | 4.13 | - | 701.0  |
| AHQ-3-13-, 5151        | K.VEDM*ALTECLNEASVLHNLK.E     | 2304.58397 | 2 | 6.95E-06 | 0.91 | 3.89 | - | 873.7  |
| AHQ-3-5, 5176 - 5249   | K.VEDM*ALTECLNEASVLHNLK.E     | 2304.58397 | 2 | 6.23E-07 | 0.89 | 3.89 | - | 610.6  |
| AHQ-3-13-, 5597 - 5662 | K.VEDMAELTCLNEASVLHNLK.E      | 2288.58457 | 2 | 2.68E-08 | 0.91 | 4.09 | - | 771.5  |
| AHQ-3-13, 5162 - 5217  | K.VEDM*ALTECLNEASVLHNLK.E     | 2304.58397 | 3 | 1.02E-05 | 0.74 | 3.14 | - | 599.7  |
| AHQ-3-3, 6146          | K.VEDMAELTCLNEASVLHNLK.E      | 2288.58457 | 3 | 3.29E-08 | 0.92 | 4.48 | - | 904.9  |
| AHQ-3-3, 6368          | K.VEDMAELTCLNEASVLHNLK.E      | 2288.58457 | 2 | 1.05E-11 | 0.76 | 3.63 | - | 446.2  |
| AHQ-3-10, 4699 - 4712  | K.VEDM*ALTECLNEASVLHNLK.E     | 2304.58397 | 2 | 8.88E-09 | 0.95 | 4.78 | - | 1089.7 |
| AHQ-3-2, 1887 - 1963   | R.VEEEEERCOHLQAEK.K           | 1916.01642 | 2 | 3.74E-04 | 0.81 | 3.40 | - | 822.7  |
| AHQ-3-1, 2120 - 2122   | R.VEEEEERCOHLQAEK.K           | 1916.01642 | 2 | 6.06E-04 | 0.91 | 3.87 | - | 1057.3 |
| AHQ-3-2, 4033          | K.VIQYLAVASSHK.S              | 1479.70484 | 2 | 2.22E-05 | 0.91 | 3.48 | - | 1105.7 |
| AHQ-3-4, 3829          | K.VIQYLAVASSHK.S              | 1479.70484 | 2 | 2.75E-04 | 0.94 | 3.85 | - | 1206.0 |
| AHQ-3-7, 3436 - 3442   | K.VIQYLAVASSHK.S              | 1479.70484 | 2 | 1.78E-04 | 0.94 | 3.71 | - | 1191.2 |

|                             |                                                                        |            |   |          |       |        |       |         |
|-----------------------------|------------------------------------------------------------------------|------------|---|----------|-------|--------|-------|---------|
| AHQ-3-2, 3953               | K.VIQYLAYASSHK.S                                                       | 1479.70484 | 3 | 9.93E-05 | 0.72  | 3.34   | -     | 564.0   |
| AHQ-3-2, 3937 - 3939        | K.VIQYLAYASSHK.S                                                       | 1479.70484 | 2 | 2.08E-05 | 0.96  | 4.18   | -     | 1440.6  |
| AHQ-3-1, 4124               | K.VIQYLAYASSHK.S                                                       | 1479.70484 | 2 | 1.97E-04 | 0.94  | 3.82   | -     | 1355.1  |
| AHQ-3-6, 6385 - 6405        | R.VISGVLQGNVFK.K                                                       | 1487.81155 | 2 | 3.70E-05 | 0.96  | 4.21   | -     | 1723.0  |
| AHQ-3-4, 6689 - 6764        | R.VISGVLQGNVFK.K                                                       | 1487.81155 | 1 | 1.04E-06 | 0.81  | 3.58   | -     | 573.1   |
| AHQ-3-2, 6587               | R.VISGVLQGNVFK.K                                                       | 1487.81155 | 2 | 2.31E-08 | 0.97  | 4.81   | -     | 1431.8  |
| AHQ-3-7, 6134 - 6210        | R.VISGVLQGNVFK.K                                                       | 1487.81155 | 2 | 2.16E-05 | 0.97  | 4.22   | -     | 1810.2  |
| AHQ-3-2, 6694 - 6761        | R.VISGVLQGNVFK.K                                                       | 1487.81155 | 2 | 2.56E-08 | 0.97  | 4.94   | -     | 1840.4  |
| AHQ-3-2, 6715 - 6807        | R.VISGVLQGNVFK.K                                                       | 1487.81155 | 1 | 2.03E-06 | 0.68  | 3.53   | -     | 445.0   |
| AHQ-3-4, 6661 - 6734        | R.VISGVLQGNVFK.K                                                       | 1487.81155 | 2 | 1.20E-05 | 0.97  | 5.27   | -     | 1703.3  |
| AHQ-3-13, 6310 - 6318       | R.VISGVLQGNVFK.K                                                       | 1487.81155 | 2 | 6.51E-05 | 0.96  | 4.15   | -     | 1637.4  |
| AHQ-3-2, 6829               | R.VISGVLQGNVFK.K                                                       | 1487.81155 | 2 | 3.35E-09 | 0.97  | 4.95   | -     | 1935.8  |
| AHQ-3-1, 6684               | R.VISGVLQGNVFK.K                                                       | 1487.81155 | 1 | 1.34E-06 | 0.25  | 2.56   | -     | 388.3   |
| AHQ-3-12, 6255              | R.VISGVLQGNVFK.K                                                       | 1487.81155 | 2 | 1.95E-08 | 0.97  | 4.83   | -     | 1521.3  |
| AHQ-3-1, 6668 - 6696        | R.VISGVLQGNVFK.K                                                       | 1487.81155 | 2 | 1.36E-06 | 0.68  | 2.50   | -     | 568.4   |
| AHQ-3-1, 6578               | R.VISGVLQGNVFK.K                                                       | 1487.81155 | 2 | 1.30E-08 | 0.94  | 4.49   | -     | 869.2   |
| AHQ-3-5, 6505 - 6507        | R.VISGVLQGNVFK.K                                                       | 1487.81155 | 2 | 2.23E-07 | 0.93  | 3.43   | -     | 1187.2  |
| AHQ-3-5, 6516               | R.VISGVLQGNVFK.K                                                       | 1487.81155 | 1 | 3.06E-04 | 0.66  | 3.35   | -     | 401.2   |
| AHQ-3-5, 6603               | R.VISGVLQGNVFK.K                                                       | 1487.81155 | 2 | 1.10E-06 | 0.93  | 3.23   | -     | 1570.0  |
| AHQ-3-5, 6607               | R.VISGVLQGNVFK.K                                                       | 1487.81155 | 1 | 2.71E-05 | 0.74  | 3.40   | -     | 455.9   |
| AHQ-3-2, 6958               | R.VISGVLQGNVFK.K                                                       | 1487.81155 | 2 | 3.88E-05 | 0.96  | 3.94   | -     | 1442.9  |
| AHQ-3-1, 6008 - 6086        | R.VISGVLQGNVFK.E                                                       | 1615.98446 | 2 | 5.47E-04 | 0.88  | 3.70   | -     | 1085.9  |
| AHQ-3-1, 6085               | R.VISGVLQGNVFK.E                                                       | 1615.98446 | 2 | 1.08E-05 | 0.95  | 4.91   | -     | 1030.1  |
| AHQ-3-3, 4988 - 5037        | K.VSHLLGINVDFTR.G                                                      | 1572.79026 | 2 | 3.55E-07 | 0.96  | 4.47   | -     | 1388.9  |
| AHQ-3-4, 4854 - 4912        | K.VSHLLGINVDFTR.G                                                      | 1572.79026 | 2 | 1.64E-08 | 0.94  | 4.11   | -     | 1311.4  |
| AHQ-3-2, 4949 - 5017        | K.VSHLLGINVDFTR.G                                                      | 1572.79026 | 2 | 3.04E-08 | 0.96  | 4.74   | -     | 1275.9  |
| AHQ-3-1, 5053 - 5125        | K.VSHLLGINVDFTR.G                                                      | 1572.79026 | 2 | 4.15E-11 | 0.96  | 4.85   | -     | 1319.4  |
| AHQ-3-10, 4348              | K.VSHLLGINVDFTR.G                                                      | 1572.79026 | 2 | 1.11E-06 | 0.70  | 2.64   | -     | 748.1   |
| AHQ-3-1, 5114               | K.VSHLLGINVDFTR.G                                                      | 1572.79026 | 3 | 2.90E-04 | 0.85  | 3.42   | -     | 1056.7  |
| AHQ-3-2, 5331               | K.VSHLLGINVDFTR.G                                                      | 1572.79026 | 2 | 3.44E-04 | 0.92  | 3.63   | -     | 1091.9  |
| AHQ-3-6, 4587 - 4614        | K.VSHLLGINVDFTR.G                                                      | 1572.79026 | 2 | 2.11E-09 | 0.96  | 4.46   | -     | 1442.7  |
| AHQ-3-7, 4452               | K.VSHLLGINVDFTR.G                                                      | 1572.79026 | 2 | 2.55E-08 | 0.96  | 4.13   | -     | 1429.4  |
| AHQ-3-5, 4659 - 4669        | K.VSHLLGINVDFTR.G                                                      | 1572.79026 | 2 | 2.74E-10 | 0.96  | 5.03   | -     | 1209.5  |
| AHQ-3-2, 3017 - 3085        | R.VVFQEFR.Q                                                            | 925.06580  | 2 | 8.92E-05 | 0.70  | 2.68   | -     | 503.9   |
| AHQ-3-1, 3276               | R.VVFQEFR.Q                                                            | 925.06580  | 2 | 1.74E-05 | 0.74  | 2.76   | -     | 537.7   |
| AHQ-3-3, 4012 - 4044        | R.YEILTPNSIP.G                                                         | 1275.47536 | 2 | 5.28E-08 | 0.92  | 3.75   | -     | 1130.9  |
| AHQ-3-2, 4063 - 4102        | R.YEILTPNSIP.G                                                         | 1275.47536 | 2 | 4.54E-06 | 0.95  | 3.83   | -     | 1317.9  |
| AHQ-3-4, 3965 - 3973        | R.YEILTPNSIP.G                                                         | 1275.47536 | 2 | 1.49E-04 | 0.91  | 3.35   | -     | 1061.2  |
| AHQ-3-1, 4142 - 4217        | R.YEILTPNSIP.G                                                         | 1275.47536 | 2 | 6.20E-04 | 0.88  | 3.61   | -     | 957.2   |
| AHQ-3-3, 4017 - 4018        | R.YEILTPNSIP.G                                                         | 1275.47536 | 1 | 7.60E-06 | 0.65  | 2.64   | -     | 543.2   |
| AHQ-3-2, 6401               | K.VLYDKNFINNLAQADWAAK.K                                                | 2455.75199 | 3 | 9.28E-05 | 0.89  | 3.93   | -     | 1075.3  |
| gj 17986260 ref NP_524147.1 | smooth muscle and non-muscle myosin alkali light chain isoform 2 [Homo |            |   | 5.55E-15 | 3.74  | 40.30  | 23.30 | 12969.7 |
| AHQ-3-12, 5602 - 5676       | K.M*TEEEVEMLVAGHEDSNGCINYEELVR.M                                       | 3188.42436 | 3 | 1.34E-11 | 0.94  | 4.84   | -     | 1304.5  |
| AHQ-3-12, 5819 - 5899       | K.M*TEEEVEMLVAGHEDSNGCINYEELVR.M                                       | 3172.42496 | 3 | 1.55E-08 | 0.90  | 4.95   | -     | 1108.5  |
| AHQ-3-12, 5947 - 6026       | K.M*TEEEVEMLVAGHEDSNGCINYEELVR.M                                       | 3172.42496 | 3 | 4.70E-07 | 0.92  | 5.62   | -     | 1285.8  |
| AHQ-3-12, 6056 - 6118       | K.M*TEEEVEMLVAGHEDSNGCINYEELVR.M                                       | 3172.42496 | 3 | 3.75E-07 | 0.79  | 4.78   | -     | 612.6   |
| AHQ-3-12, 6286              | K.M*TEEEVEMLVAGHEDSNGCINYEELVR.M                                       | 3156.42556 | 3 | 1.00E-04 | 0.96  | 4.99   | -     | 1946.5  |
| AHQ-3-12, 6494              | K.M*TEEEVEMLVAGHEDSNGCINYEELVR.M                                       | 3156.42556 | 3 | 1.84E-04 | 0.81  | 3.82   | -     | 694.0   |
| AHQ-3-12, 7068              | K.M*TEEEVEMLVAGHEDSNGCINYEELVR.M                                       | 3172.42496 | 3 | 3.90E-05 | 0.55  | 3.52   | -     | 440.9   |
| AHQ-3-13, - 6009            | K.M*TEEEVEMLVAGHEDSNGCINYEELVR.M                                       | 3172.42496 | 3 | 1.78E-06 | 0.95  | 5.70   | -     | 1691.3  |
| AHQ-3-14, - 5531 - 5597     | K.M*TEEEVEMLVAGHEDSNGCINYEELVR.M                                       | 3188.42436 | 3 | 7.01E-07 | 0.97  | 5.55   | -     | 1831.9  |
| AHQ-3-14, - 5908 - 5921     | K.M*TEEEVEMLVAGHEDSNGCINYEELVR.M                                       | 3172.42496 | 3 | 5.55E-15 | 0.93  | 5.98   | -     | 1114.2  |
| gj 4501885 ref NP_001092.1  | beta actin; beta cytoskeletal actin [Homo sapiens]                     |            |   | 6.66E-15 | 13.00 | 150.42 | 36.00 | 41736.5 |
| AHQ-3-8, 7265 - 7336        | R.CPEALFQPSFLGMESCGIHETTFNSIMK.C                                       | 3235.67708 | 3 | 4.29E-13 | 0.94  | 5.14   | -     | 827.6   |
| AHQ-3-8, 6603 - 6679        | R.CPEALFQPSFLGMESCGIHETTFNSIMK.C                                       | 3251.67648 | 3 | 6.05E-05 | 0.78  | 4.88   | -     | 453.0   |
| AHQ-3-13, - 6707 - 6758     | R.CPEALFQPSFLGMESCGIHETTFNSIMK.C                                       | 3235.67708 | 3 | 6.66E-15 | 0.94  | 4.98   | -     | 973.3   |
| AHQ-3-13, - 6587 - 6650     | R.CPEALFQPSFLGMESCGIHETTFNSIMK.C                                       | 3251.67648 | 3 | 2.83E-05 | 0.71  | 3.88   | -     | 471.9   |
| AHQ-3-13, - 6373 - 6399     | R.CPEALFQPSFLGMESCGIHETTFNSIMK.C                                       | 3251.67648 | 3 | 4.20E-06 | 0.82  | 4.18   | -     | 637.7   |
| AHQ-3-13, - 6047 - 6113     | R.CPEALFQPSFLGMESCGIHETTFNSIMK.C                                       | 3267.67588 | 3 | 1.55E-08 | 0.92  | 4.90   | -     | 573.6   |
| AHQ-3-8, 6368 - 6401        | R.CPEALFQPSFLGMESCGIHETTFNSIMK.C                                       | 3251.67648 | 3 | 1.48E-04 | 0.84  | 4.93   | -     | 412.8   |
| AHQ-3-8, 6193 - 6255        | R.CPEALFQPSFLGMESCGIHETTFNSIMK.C                                       | 3267.67588 | 3 | 8.72E-04 | 0.76  | 3.33   | -     | 492.3   |
| AHQ-3-13, 6758 - 6827       | R.CPEALFQPSFLGMESCGIHETTFNSIMK.C                                       | 3235.67708 | 3 | 5.12E-07 | 0.91  | 4.40   | -     | 792.2   |
| AHQ-3-13, 6217              | R.CPEALFQPSFLGMESCGIHETTFNSIMK.C                                       | 3267.67588 | 3 | 1.65E-05 | 0.84  | 4.03   | -     | 454.0   |
| AHQ-3-8, 6800 - 6868        | R.CPEALFQPSFLGMESCGIHETTFNSIMK.C                                       | 3235.67708 | 3 | 2.37E-04 | 0.90  | 4.70   | -     | 829.8   |
| AHQ-3-13, 6062 - 6085       | R.CPEALFQPSFLGMESCGIHETTFNSIMK.C                                       | 3267.67588 | 3 | 4.13E-06 | 0.94  | 5.14   | -     | 767.6   |
| AHQ-3-8, 6827 - 6899        | R.CPEALFQPSFLGMESCGIHETTFNSIMK.C                                       | 3251.67648 | 3 | 7.20E-07 | 0.63  | 3.88   | -     | 320.0   |
| AHQ-3-8, 6913 - 6979        | R.CPEALFQPSFLGMESCGIHETTFNSIMK.C                                       | 3235.67708 | 3 | 3.18E-07 | 0.92  | 4.86   | -     | 814.0   |
| AHQ-3-8, 7043 - 7119        | R.CPEALFQPSFLGMESCGIHETTFNSIMK.C                                       | 3235.67708 | 3 | 1.15E-13 | 0.93  | 5.18   | -     | 618.5   |
| AHQ-3-4, 7320 - 7396        | R.CPEALFQPSFLGMESCGIHETTFNSIMK.C                                       | 3235.67708 | 3 | 1.68E-05 | 0.91  | 4.64   | -     | 769.2   |
| AHQ-3-8, 7175 - 7244        | R.CPEALFQPSFLGMESCGIHETTFNSIMK.C                                       | 3235.67708 | 3 | 3.00E-11 | 0.93  | 5.23   | -     | 614.9   |
| AHQ-3-8, 7403               | R.CPEALFQPSFLGMESCGIHETTFNSIMK.C                                       | 3235.67708 | 3 | 2.11E-14 | 0.95  | 5.35   | -     | 986.5   |
| AHQ-3-10, 6346 - 6414       | R.CPEALFQPSFLGMESCGIHETTFNSIMK.C                                       | 3235.67708 | 3 | 2.27E-09 | 0.94  | 4.84   | -     | 983.6   |
| AHQ-3-8, 6651 - 6719        | R.CPEALFQPSFLGMESCGIHETTFNSIMK.C                                       | 3267.67588 | 3 | 6.21E-04 | 0.64  | 3.48   | -     | 240.3   |
| AHQ-3-9, 6713 - 6781        | R.CPEALFQPSFLGMESCGIHETTFNSIMK.C                                       | 3235.67708 | 3 | 1.24E-10 | 0.91  | 4.71   | -     | 759.8   |
| AHQ-3-10, 5647 - 5702       | R.CPEALFQPSFLGMESCGIHETTFNSIMK.C                                       | 3267.67588 | 3 | 8.45E-06 | 0.78  | 3.84   | -     | 558.9   |
| AHQ-3-8, 6992 - 7008        | K.EKLCYVALDFEQEMATAASSSSLEK.S                                          | 2810.10410 | 3 | 5.90E-04 | 0.78  | 3.98   | -     | 678.9   |
| AHQ-3-8, 7075 - 7117        | K.EKLCYVALDFEQEMATAASSSSLEK.S                                          | 2810.10410 | 3 | 6.94E-07 | 0.85  | 4.48   | -     | 743.3   |
| AHQ-3-8, 7088 - 7109        | K.EKLCYVALDFEQEMATAASSSSLEK.S                                          | 2810.10410 | 2 | 1.38E-06 | 0.95  | 5.53   | -     | 914.0   |
| AHQ-3-8, 5592 - 5659        | K.EKLCYVALDFEQEMATAASSSSLEK.S                                          | 2826.10350 | 3 | 3.22E-06 | 0.83  | 3.86   | -     | 760.5   |
| AHQ-3-9, 6899               | K.EKLCYVALDFEQEMATAASSSSLEK.S                                          | 2810.10410 | 2 | 1.75E-04 | 0.85  | 3.64   | -     | 824.2   |
| AHQ-3-9, 6764 - 6833        | K.EKLCYVALDFEQEMATAASSSSLEK.S                                          | 2810.10410 | 2 | 4.16E-08 | 0.87  | 3.26   | -     | 966.2   |
| AHQ-3-8, 7155 - 7223        | K.EKLCYVALDFEQEMATAASSSSLEK.S                                          | 2810.10410 | 2 | 1.26E-05 | 0.89  | 3.68   | -     | 879.4   |
| AHQ-3-8, 7171 - 7187        | K.EKLCYVALDFEQEMATAASSSSLEK.S                                          | 2810.10410 | 3 | 9.34E-08 | 0.92  | 4.61   | -     | 1365.6  |
| AHQ-3-8, 11, 6618           | K.EKLCYVALDFEQEMATAASSSSLEK.S                                          | 2810.10410 | 2 | 2.52E-06 | 0.80  | 3.18   | -     | 684.0   |
| AHQ-3-10, 6432              | K.EKLCYVALDFEQEMATAASSSSLEK.S                                          | 2810.10410 | 3 | 3.00E-06 | 0.87  | 3.93   | -     | 974.6   |
| AHQ-3-8, 7255 - 7323        | K.EKLCYVALDFEQEMATAASSSSLEK.S                                          | 2810.10410 | 2 | 6.69E-05 | 0.86  | 3.41   | -     | 760.7   |
| AHQ-3-10, 6430 - 6495       | K.EKLCYVALDFEQEMATAASSSSLEK.S                                          | 2810.10410 | 2 | 6.09E-05 | 0.93  | 4.34   | -     | 871.3   |
| AHQ-3-8, 7391               | K.EKLCYVALDFEQEMATAASSSSLEK.S                                          | 2810.10410 | 2 | 3.14E-04 | 0.79  | 3.23   | -     | 626.0   |
| AHQ-3-8, 7347 - 7420        | K.EKLCYVALDFEQEMATAASSSSLEK.S                                          | 2810.10410 | 3 | 1.66E-07 | 0.95  | 5.91   | -     | 1076.8  |
| AHQ-3-8, 7256 - 7279        | K.EKLCYVALDFEQEMATAASSSSLEK.S                                          | 2810.10410 | 3 | 7.02E-06 | 0.89  | 4.95   | -     | 862.5   |
| AHQ-3-8, 7296 - 7363        | K.EKLCYVALDFEQEMATAASSSSLEK.S                                          | 2810.10410 | 2 | 2.09E-08 | 0.91  | 4.39   | -     | 922.6   |
| AHQ-3-8, 5360 - 5423        | K.EKLCYVALDFEQEMATAASSSSLEK.S                                          | 2826.10350 | 3 | 4.47E-09 | 0.83  | 3.75   | -     | 955.0   |
| AHQ-3-8, 5288 - 5339        | K.EKLCYVALDFEQEMATAASSSSLEK.S                                          | 2826.10350 | 3 | 3.31E-07 | 0.87  | 3.58   | -     | 1153.7  |
| AHQ-3-8, 7321 - 7339        | R.FRCPEALFQPSFLGMESCGIHETTFNSIMK.C                                     | 3539.03813 | 3 | 6.72E-04 | 0.80  | 3.19   | -     | 612.3   |
| AHQ-3-8, 7407 - 7408        | R.FRCPEALFQPSFLGMESCGIHETTFNSIMK.C                                     | 3539.03813 | 3 | 3.11E-04 | 0.69  | 3.08   | -     | 320.4   |
| AHQ-3-8, 7180 - 7251        | R.FRCPEALFQPSFLGMESCGIHETTFNSIMK.C                                     | 3539.03813 | 3 | 9.51E-05 | 0.89  | 4.42   | -     | 726.9   |
| AHQ-3-10, 6296 - 6326       | R.FRCPEALFQPSFLGMESCGIHETTFNSIMK.C                                     | 3539.03813 | 3 | 3.79E-07 | 0.98  | 6.86   | -     | 1512.9  |
| AHQ-3-8, 6811 - 6891        | R.FRCPEALFQPSFLGMESCGIHETTFNSIMK.C                                     | 3539.03813 | 3 | 5.44E-14 | 0.99  | 8.34   | -     | 2596.3  |
| AHQ-3-10, 6170 - 6232       | R.FRCPEALFQPSFLGMESCGIHETTFNSIMK.C                                     | 3539.03813 | 3 | 4.63E-06 | 0.97  | 6.95   | -     | 1423.3  |
| AHQ-3-8, 6683 - 6749        | R.FRCPEALFQPSFLGMESCGIHETTFNSIMK.C                                     | 3539.03813 | 3 | 1.03E-12 | 0.97  | 6.64   | -     | 1150.3  |
| AHQ-3-10, 6095              | R.FRCPEALFQPSFLGMESCGIHETTFNSIMK.C                                     | 3555.03753 | 3 | 1.40E-05 | 0.83  | 3.72   | -     | 778.5   |
| AHQ-3-8, 7273               | R.FRCPEALFQPSFLGMESCGIHETTFNSIMK.C                                     | 3555.03753 | 3 | 2.39E-04 | 0.75  | 3.86   | -     | 396.2   |
| AHQ-3-10, 5839 - 5912       | R.FRCPEALFQPSFLGMESCGIHETTFNSIMK.C                                     | 3555.03753 | 3 | 3.85E-04 | 0.51  | 3.20   | -     | 405.7   |
| AHQ-3-11, 2362 - 2363       | R.GYSFTTAAER.E                                                         | 1133.19273 | 2 | 7.49E-04 | 0.88  | 3.22   | -     | 834.2   |
| AHQ-3-1, 2624               | R.GYSFTTAAER.E                                                         | 1133.19273 | 2 | 2.35E-05 | 0.86  | 2.94   | -     | 894.6   |
| AHQ-3-8, 2002 - 2074        | R.GYSFTTAAER.E                                                         | 1133.19273 | 2 | 2.70E-04 | 0.79  | 2.69   | -     | 672.1   |
| AHQ-3-13, 2571 - 2577       | R.GYSFTTAAER.E                                                         | 1133.19273 | 2 | 8.03E-05 | 0.89  | 3.15   | -     | 892.6   |

|                              |                                                                         |            |   |          |      |       |      |          |
|------------------------------|-------------------------------------------------------------------------|------------|---|----------|------|-------|------|----------|
| AHQ-3-9, 2195 - 2256         | R.GYSFTTAAER.E                                                          | 1133.19273 | 2 | 2.67E-04 | 0.86 | 3.17  | -    | 702.8    |
| AHQ-3-7, 2218                | R.GYSFTTAAER.E                                                          | 1133.19273 | 2 | 1.25E-04 | 0.92 | 3.18  | -    | 1046.1   |
| AHQ-3-4, 2436                | R.GYSFTTAAER.E                                                          | 1133.19273 | 2 | 5.73E-04 | 0.90 | 3.08  | -    | 1039.9   |
| AHQ-3-10, 2318 - 2378        | R.GYSFTTAAER.E                                                          | 1133.19273 | 2 | 1.55E-04 | 0.95 | 3.27  | -    | 1286.1   |
| AHQ-3-13-, 2529 - 2554       | R.GYSFTTAAER.E                                                          | 1133.19273 | 2 | 8.37E-04 | 0.91 | 3.14  | -    | 997.0    |
| AHQ-3-3, 2449                | R.GYSFTTAAER.E                                                          | 1133.19273 | 2 | 1.25E-04 | 0.92 | 3.18  | -    | 1144.9   |
| AHQ-3-14-, 2415              | R.GYSFTTAAER.E                                                          | 1133.19273 | 2 | 7.62E-05 | 0.95 | 3.21  | -    | 1278.5   |
| AHQ-3-8, 2289                | R.GYSFTTAAER.E                                                          | 1133.19273 | 2 | 9.84E-05 | 0.84 | 2.58  | -    | 1220.5   |
| AHQ-3-13, 4201               | R.KDLYANTVLSGGTTM*YPGIADR.M                                             | 2360.62916 | 2 | 1.43E-04 | 0.88 | 3.88  | -    | 919.3    |
| AHQ-3-11, 4520               | R.KDLYANTVLSGGTTM*YPGIADR.M                                             | 2344.62976 | 2 | 4.65E-07 | 0.94 | 4.04  | -    | 1215.6   |
| AHQ-3-14, 5752               | R.KDLYANTVLSGGTTM*YPGIADR.M                                             | 2344.62976 | 2 | 5.19E-04 | 0.94 | 4.28  | -    | 978.0    |
| AHQ-3-10, 4303               | R.KDLYANTVLSGGTTM*YPGIADR.M                                             | 2344.62976 | 2 | 3.59E-08 | 0.88 | 3.47  | -    | 749.2    |
| AHQ-3-12, 4719               | R.KDLYANTVLSGGTTM*YPGIADR.M                                             | 2344.62976 | 2 | 3.20E-06 | 0.93 | 3.76  | -    | 1140.0   |
| AHQ-3-13-, 4213 - 4229       | R.KDLYANTVLSGGTTM*YPGIADR.M                                             | 2360.62916 | 3 | 2.09E-09 | 0.91 | 4.30  | -    | 1126.8   |
| AHQ-3-14-, 4199 - 4219       | R.KDLYANTVLSGGTTM*YPGIADR.M                                             | 2360.62916 | 3 | 3.97E-04 | 0.80 | 4.30  | -    | 534.5    |
| AHQ-3-8, 3856 - 3857         | R.KDLYANTVLSGGTTM*YPGIADR.M                                             | 2360.62916 | 3 | 8.06E-08 | 0.97 | 6.09  | -    | 1417.3   |
| AHQ-3-8, 4153                | R.KDLYANTVLSGGTTM*YPGIADR.M                                             | 2360.62916 | 3 | 1.22E-04 | 0.76 | 3.44  | -    | 585.0    |
| AHQ-3-8, 4208 - 4217         | R.KDLYANTVLSGGTTM*YPGIADR.M                                             | 2344.62976 | 2 | 4.25E-07 | 0.89 | 3.28  | -    | 1080.3   |
| AHQ-3-8, 4685                | R.KDLYANTVLSGGTTM*YPGIADR.M                                             | 2344.62976 | 3 | 2.11E-04 | 0.89 | 4.75  | -    | 833.7    |
| AHQ-3-8, 4377 - 4399         | R.KDLYANTVLSGGTTM*YPGIADR.M                                             | 2344.62976 | 3 | 1.24E-04 | 0.95 | 5.60  | -    | 1098.1   |
| AHQ-3-8, 7293 - 7371         | K.LCYVALDFEQEMATAASSSSLEK.S                                             | 2552.81665 | 3 | 9.58E-09 | 0.96 | 6.19  | -    | 1755.9   |
| AHQ-3-8, 7387 - 7388         | K.LCYVALDFEQEMATAASSSSLEK.S                                             | 2552.81665 | 2 | 1.15E-06 | 0.96 | 5.52  | -    | 1742.5   |
| AHQ-3-14-, 5367 - 5447       | R.TTGIVM*DSGDGVTHTVPIYEGYALPHAILR.L                                     | 3201.59868 | 3 | 1.48E-07 | 0.95 | 5.60  | -    | 959.6    |
| AHQ-3-8, 5115 - 5183         | R.TTGIVM*DSGDGVTHTVPIYEGYALPHAILR.L                                     | 3201.59868 | 3 | 5.99E-08 | 0.95 | 5.68  | -    | 1093.4   |
| AHQ-3-8, 5001 - 5071         | R.TTGIVM*DSGDGVTHTVPIYEGYALPHAILR.L                                     | 3201.59868 | 3 | 1.28E-09 | 0.96 | 5.88  | -    | 1335.5   |
| AHQ-3-1, 5802 - 5869         | R.TTGIVM*DSGDGVTHTVPIYEGYALPHAILR.L                                     | 3201.59868 | 3 | 7.36E-06 | 0.87 | 4.27  | -    | 784.9    |
| AHQ-3-1, 5936                | R.TTGIVM*DSGDGVTHTVPIYEGYALPHAILR.L                                     | 3201.59868 | 3 | 8.76E-06 | 0.91 | 5.14  | -    | 1002.5   |
| AHQ-3-1, 6146 - 6225         | R.TTGIVM*DSGDGVTHTVPIYEGYALPHAILR.L                                     | 3185.59928 | 3 | 2.10E-10 | 0.95 | 5.10  | -    | 1416.4   |
| AHQ-3-8, 4863 - 4931         | R.TTGIVM*DSGDGVTHTVPIYEGYALPHAILR.L                                     | 3201.59868 | 3 | 1.18E-09 | 0.96 | 5.89  | -    | 1535.2   |
| AHQ-3-8, 5109 - 5179         | R.TTGIVM*DSGDGVTHTVPIYEGYALPHAILR.L                                     | 3185.59928 | 3 | 9.76E-07 | 0.96 | 5.34  | -    | 1620.7   |
| AHQ-3-2, 6063 - 6141         | R.TTGIVM*DSGDGVTHTVPIYEGYALPHAILR.L                                     | 3185.59928 | 3 | 3.65E-07 | 0.94 | 4.86  | -    | 1217.1   |
| AHQ-3-13-, 5805 - 5866       | R.TTGIVM*DSGDGVTHTVPIYEGYALPHAILR.L                                     | 3185.59928 | 3 | 3.32E-09 | 0.97 | 5.41  | -    | 2104.0   |
| AHQ-3-13-, 5642              | R.TTGIVM*DSGDGVTHTVPIYEGYALPHAILR.L                                     | 3185.59928 | 3 | 1.02E-05 | 0.94 | 5.59  | -    | 1042.9   |
| AHQ-3-7, 5787 - 5854         | R.TTGIVM*DSGDGVTHTVPIYEGYALPHAILR.L                                     | 3185.59928 | 3 | 1.00E-11 | 0.97 | 5.91  | -    | 1738.3   |
| AHQ-3-13-, 5467              | R.TTGIVM*DSGDGVTHTVPIYEGYALPHAILR.L                                     | 3201.59868 | 3 | 2.02E-10 | 0.95 | 5.05  | -    | 1358.0   |
| AHQ-3-13-, 5373              | R.TTGIVM*DSGDGVTHTVPIYEGYALPHAILR.L                                     | 3201.59868 | 3 | 8.63E-06 | 0.96 | 5.81  | -    | 1316.3   |
| AHQ-3-8, 5247 - 5315         | R.TTGIVM*DSGDGVTHTVPIYEGYALPHAILR.L                                     | 3185.59928 | 3 | 4.16E-10 | 0.97 | 6.53  | -    | 1418.9   |
| AHQ-3-9, 4928 - 4995         | R.TTGIVM*DSGDGVTHTVPIYEGYALPHAILR.L                                     | 3201.59868 | 3 | 8.38E-06 | 0.96 | 5.57  | -    | 1185.9   |
| AHQ-3-9, 5039 - 5107         | R.TTGIVM*DSGDGVTHTVPIYEGYALPHAILR.L                                     | 3201.59868 | 3 | 4.79E-07 | 0.96 | 5.87  | -    | 1332.9   |
| AHQ-3-9, 5193 - 5263         | R.TTGIVM*DSGDGVTHTVPIYEGYALPHAILR.L                                     | 3185.59928 | 3 | 9.69E-12 | 0.97 | 5.96  | -    | 1535.5   |
| AHQ-3-8, 5403 - 5471         | R.TTGIVM*DSGDGVTHTVPIYEGYALPHAILR.L                                     | 3201.59868 | 3 | 7.78E-05 | 0.86 | 4.24  | -    | 895.6    |
| AHQ-3-9, 5415 - 5440         | R.TTGIVM*DSGDGVTHTVPIYEGYALPHAILR.L                                     | 3185.59928 | 3 | 1.82E-10 | 0.98 | 6.38  | -    | 1819.7   |
| AHQ-3-9, 5507 - 5527         | R.TTGIVM*DSGDGVTHTVPIYEGYALPHAILR.L                                     | 3185.59928 | 3 | 1.07E-10 | 0.97 | 6.03  | -    | 1693.5   |
| AHQ-3-9, 5591                | R.TTGIVM*DSGDGVTHTVPIYEGYALPHAILR.L                                     | 3185.59928 | 3 | 9.32E-10 | 0.97 | 6.22  | -    | 1759.1   |
| AHQ-3-7, 5578                | R.TTGIVM*DSGDGVTHTVPIYEGYALPHAILR.L                                     | 3185.59928 | 3 | 2.76E-07 | 0.94 | 5.47  | -    | 881.3    |
| AHQ-3-7, 5266 - 5307         | R.TTGIVM*DSGDGVTHTVPIYEGYALPHAILR.L                                     | 3201.59868 | 3 | 5.27E-06 | 0.94 | 4.99  | -    | 1149.6   |
| AHQ-3-3, 5705 - 5776         | R.TTGIVM*DSGDGVTHTVPIYEGYALPHAILR.L                                     | 3201.59868 | 3 | 7.52E-07 | 0.91 | 4.82  | -    | 829.2    |
| AHQ-3-6, 5879 - 5959         | R.TTGIVM*DSGDGVTHTVPIYEGYALPHAILR.L                                     | 3185.59928 | 3 | 6.08E-07 | 0.96 | 5.87  | -    | 942.6    |
| AHQ-3-8, 5483 - 5503         | R.TTGIVM*DSGDGVTHTVPIYEGYALPHAILR.L                                     | 3185.59928 | 3 | 3.76E-12 | 0.98 | 7.50  | -    | 1498.9   |
| AHQ-3-10, 4931 - 4991        | R.TTGIVM*DSGDGVTHTVPIYEGYALPHAILR.L                                     | 3201.59868 | 3 | 1.96E-09 | 0.97 | 6.07  | -    | 1030.7   |
| AHQ-3-10, 4990 - 5068        | R.TTGIVM*DSGDGVTHTVPIYEGYALPHAILR.L                                     | 3201.59868 | 3 | 2.19E-07 | 0.97 | 6.22  | -    | 1386.3   |
| AHQ-3-10, 5178 - 5226        | R.TTGIVM*DSGDGVTHTVPIYEGYALPHAILR.L                                     | 3185.59928 | 3 | 1.04E-08 | 0.98 | 6.37  | -    | 2357.8   |
| AHQ-3-10, 5194 - 5254        | R.TTGIVM*DSGDGVTHTVPIYEGYALPHAILR.L                                     | 3201.59868 | 3 | 8.95E-04 | 0.75 | 3.80  | -    | 676.8    |
| AHQ-3-10, 5286 - 5346        | R.TTGIVM*DSGDGVTHTVPIYEGYALPHAILR.L                                     | 3185.59928 | 3 | 3.29E-10 | 0.98 | 6.59  | -    | 2140.4   |
| AHQ-3-10, 5408               | R.TTGIVM*DSGDGVTHTVPIYEGYALPHAILR.L                                     | 3185.59928 | 3 | 6.58E-12 | 0.96 | 5.35  | -    | 1470.6   |
| AHQ-3-6, 5706 - 5717         | R.TTGIVM*DSGDGVTHTVPIYEGYALPHAILR.L                                     | 3185.59928 | 3 | 8.87E-11 | 0.96 | 5.52  | -    | 1500.3   |
| AHQ-3-6, 5503 - 5527         | R.TTGIVM*DSGDGVTHTVPIYEGYALPHAILR.L                                     | 3201.59868 | 3 | 4.76E-06 | 0.84 | 4.03  | -    | 969.0    |
| AHQ-3-6, 5393 - 5405         | R.TTGIVM*DSGDGVTHTVPIYEGYALPHAILR.L                                     | 3201.59868 | 3 | 6.64E-07 | 0.95 | 5.73  | -    | 1147.1   |
| AHQ-3-14, 6387               | R.TTGIVM*DSGDGVTHTVPIYEGYALPHAILR.L                                     | 3201.59868 | 3 | 7.04E-08 | 0.96 | 6.04  | -    | 1375.9   |
| AHQ-3-5, 6060                | R.TTGIVM*DSGDGVTHTVPIYEGYALPHAILR.L                                     | 3185.59928 | 3 | 5.79E-04 | 0.94 | 4.60  | -    | 1488.1   |
| AHQ-3-5, 5960                | R.TTGIVM*DSGDGVTHTVPIYEGYALPHAILR.L                                     | 3185.59928 | 3 | 1.16E-06 | 0.96 | 5.83  | -    | 1295.6   |
| AHQ-3-5, 5764 - 5784         | R.TTGIVM*DSGDGVTHTVPIYEGYALPHAILR.L                                     | 3185.59928 | 3 | 7.94E-09 | 0.98 | 6.66  | -    | 1919.7   |
| AHQ-3-5, 5431                | R.TTGIVM*DSGDGVTHTVPIYEGYALPHAILR.L                                     | 3201.59868 | 3 | 4.97E-09 | 0.97 | 5.97  | -    | 1433.5   |
| AHQ-3-4, 6113 - 6188         | R.TTGIVM*DSGDGVTHTVPIYEGYALPHAILR.L                                     | 3185.59928 | 3 | 1.41E-08 | 0.97 | 5.65  | -    | 1817.7   |
| AHQ-3-8, 5567 - 5636         | R.TTGIVM*DSGDGVTHTVPIYEGYALPHAILR.L                                     | 3185.59928 | 3 | 7.27E-14 | 0.98 | 6.72  | -    | 1615.2   |
| AHQ-3-8, 5700 - 5765         | R.TTGIVM*DSGDGVTHTVPIYEGYALPHAILR.L                                     | 3185.59928 | 3 | 5.46E-09 | 0.96 | 5.66  | -    | 1545.1   |
| AHQ-3-11, 5170               | R.TTGIVM*DSGDGVTHTVPIYEGYALPHAILR.L                                     | 3201.59868 | 3 | 4.66E-07 | 0.96 | 5.70  | -    | 1578.6   |
| AHQ-3-11, 5470 - 5546        | R.TTGIVM*DSGDGVTHTVPIYEGYALPHAILR.L                                     | 3185.59928 | 3 | 4.83E-11 | 0.96 | 5.57  | -    | 1504.8   |
| AHQ-3-11, 5608               | R.TTGIVM*DSGDGVTHTVPIYEGYALPHAILR.L                                     | 3185.59928 | 3 | 8.17E-05 | 0.94 | 5.06  | -    | 1069.5   |
| AHQ-3-4, 5976 - 6029         | R.TTGIVM*DSGDGVTHTVPIYEGYALPHAILR.L                                     | 3185.59928 | 3 | 1.96E-09 | 0.97 | 6.84  | -    | 1672.3   |
| AHQ-3-3, 5844                | R.TTGIVM*DSGDGVTHTVPIYEGYALPHAILR.L                                     | 3201.59868 | 3 | 7.73E-06 | 0.60 | 3.21  | -    | 455.0    |
| AHQ-3-3, 6209                | R.TTGIVM*DSGDGVTHTVPIYEGYALPHAILR.L                                     | 3185.59928 | 3 | 7.08E-08 | 0.97 | 6.10  | -    | 1251.4   |
| AHQ-3-9, 5279 - 5347         | R.TTGIVM*DSGDGVTHTVPIYEGYALPHAILR.L                                     | 3185.59928 | 3 | 6.72E-11 | 0.97 | 6.16  | -    | 1409.7   |
| AHQ-3-12, 5432 - 5506        | R.TTGIVM*DSGDGVTHTVPIYEGYALPHAILR.L                                     | 3201.59868 | 3 | 4.29E-08 | 0.92 | 4.73  | -    | 983.4    |
| AHQ-3-12, 5704 - 5780        | R.TTGIVM*DSGDGVTHTVPIYEGYALPHAILR.L                                     | 3185.59928 | 3 | 1.56E-05 | 0.97 | 6.06  | -    | 1809.2   |
| AHQ-3-4, 5788                | R.TTGIVM*DSGDGVTHTVPIYEGYALPHAILR.L                                     | 3201.59868 | 3 | 2.24E-06 | 0.89 | 4.34  | -    | 1057.7   |
| AHQ-3-8, 5836                | R.TTGIVM*DSGDGVTHTVPIYEGYALPHAILR.L                                     | 3185.59928 | 3 | 9.66E-08 | 0.95 | 5.23  | -    | 1256.8   |
| AHQ-3-13, 5397 - 5477        | R.TTGIVM*DSGDGVTHTVPIYEGYALPHAILR.L                                     | 3201.59868 | 3 | 2.58E-05 | 0.96 | 5.70  | -    | 1442.5   |
| AHQ-3-13, 5803               | R.TTGIVM*DSGDGVTHTVPIYEGYALPHAILR.L                                     | 3185.59928 | 3 | 1.06E-07 | 0.93 | 4.51  | -    | 1221.3   |
| AHQ-3-4, 5646 - 5717         | R.TTGIVM*DSGDGVTHTVPIYEGYALPHAILR.L                                     | 3201.59868 | 3 | 5.70E-08 | 0.97 | 6.16  | -    | 1207.4   |
| AHQ-3-14-, 5647 - 5716       | R.TTGIVM*DSGDGVTHTVPIYEGYALPHAILR.L                                     | 3185.59928 | 3 | 6.16E-14 | 0.97 | 6.33  | -    | 1589.7   |
| AHQ-3-12, 3750 - 3775        | R.VAPEEHPVLLTEAPLNPK.A                                                  | 1955.24351 | 3 | 4.95E-04 | 0.51 | 3.09  | -    | 495.4    |
| AHQ-3-14, 4771               | R.VAPEEHPVLLTEAPLNPK.A                                                  | 1955.24351 | 2 | 1.18E-04 | 0.93 | 4.63  | -    | 825.0    |
| AHQ-3-11, 3626 - 3634        | R.VAPEEHPVLLTEAPLNPK.A                                                  | 1955.24351 | 3 | 5.84E-04 | 0.56 | 3.21  | -    | 419.5    |
| AHQ-3-6, 3599                | R.VAPEEHPVLLTEAPLNPK.A                                                  | 1955.24351 | 2 | 1.85E-05 | 0.94 | 4.67  | -    | 824.8    |
| AHQ-3-7, 3502 - 3570         | R.VAPEEHPVLLTEAPLNPK.A                                                  | 1955.24351 | 2 | 1.64E-05 | 0.90 | 4.18  | -    | 707.2    |
| AHQ-3-13-, 3891 - 3897       | R.VAPEEHPVLLTEAPLNPK.A                                                  | 1955.24351 | 2 | 6.48E-08 | 0.93 | 4.39  | -    | 1060.3   |
| AHQ-3-9, 3391                | R.VAPEEHPVLLTEAPLNPK.A                                                  | 1955.24351 | 2 | 7.71E-05 | 0.85 | 3.82  | -    | 514.9    |
| AHQ-3-9, 3363 - 3427         | R.VAPEEHPVLLTEAPLNPK.A                                                  | 1955.24351 | 2 | 1.06E-04 | 0.93 | 4.49  | -    | 931.5    |
| AHQ-3-9, 3247 - 3327         | R.VAPEEHPVLLTEAPLNPK.A                                                  | 1955.24351 | 2 | 6.65E-06 | 0.94 | 4.83  | -    | 972.8    |
| AHQ-3-8, 3112 - 3188         | R.VAPEEHPVLLTEAPLNPK.A                                                  | 1955.24351 | 2 | 1.59E-04 | 0.93 | 4.59  | -    | 884.9    |
| AHQ-3-8, 3120 - 3145         | R.VAPEEHPVLLTEAPLNPK.A                                                  | 1955.24351 | 3 | 4.42E-04 | 0.49 | 3.32  | -    | 517.3    |
| AHQ-3-8, 3204 - 3268         | R.VAPEEHPVLLTEAPLNPK.A                                                  | 1955.24351 | 2 | 6.43E-08 | 0.92 | 4.04  | -    | 1031.3   |
| AHQ-3-8, 3212 - 3280         | R.VAPEEHPVLLTEAPLNPK.A                                                  | 1955.24351 | 3 | 9.13E-04 | 0.80 | 4.45  | -    | 865.9    |
| AHQ-3-8, 3292 - 3360         | R.VAPEEHPVLLTEAPLNPK.A                                                  | 1955.24351 | 2 | 3.01E-06 | 0.94 | 4.78  | -    | 919.9    |
| AHQ-3-8, 3424 - 3500         | R.VAPEEHPVLLTEAPLNPK.A                                                  | 1955.24351 | 2 | 5.36E-07 | 0.92 | 4.54  | -    | 814.9    |
| AHQ-3-1, 4136                | R.VAPEEHPVLLTEAPLNPK.A                                                  | 1955.24351 | 2 | 8.08E-05 | 0.91 | 4.15  | -    | 801.7    |
| AHQ-3-14-, 3812              | R.VAPEEHPVLLTEAPLNPK.A                                                  | 1955.24351 | 2 | 3.80E-04 | 0.86 | 3.37  | -    | 698.4    |
| AHQ-3-8, 3492 - 3569         | R.VAPEEHPVLLTEAPLNPK.A                                                  | 1955.24351 | 2 | 8.73E-08 | 0.91 | 4.34  | -    | 793.0    |
| AHQ-3-8, 3662 - 3714         | R.VAPEEHPVLLTEAPLNPK.A                                                  | 1955.24351 | 2 | 4.01E-04 | 0.90 | 4.33  | -    | 812.9    |
| AHQ-3-12, 3774 - 3842        | R.VAPEEHPVLLTEAPLNPK.A                                                  | 1955.24351 | 2 | 1.34E-04 | 0.93 | 4.60  | -    | 839.4    |
| gi 213613991 ref NP_055040.2 | protein phosphatase 2 (formerly 2A), regulatory subunit A (PR 65), alp  |            |   | 6.66E-15 | 1.79 | 20.38 | 7.10 | 65308.3  |
| AHQ-3-6, 7282                | K.DNTIEHLLPLFLAQLKDECEPVR.L                                             | 2753.12348 | 3 | 6.66E-15 | 0.99 | 7.58  | -    | 4081.7   |
| AHQ-3-6, 5793                | K.SEIIPMFNSLNASDEQDSVR.L                                                | 2139.32924 | 2 | 6.86E-04 | 0.80 | 3.62  | -    | 632.0    |
| gi 4557597 ref NP_001449.1   | gamma filamin; filamin 2; filamin C, gamma (actin-binding protein-280); |            |   | 7.77E-15 | 2.41 | 40.30 | 2.50 | 288897.4 |
| AHQ-3-1, 3509 - 3529         | R.GAGTGGLGLAIEGSPSEAK.M                                                 | 1585.74098 | 2 | 5.93E-04 | 0.55 | 3.13  | -    | 329.4    |
| AHQ-3-7, 4004 - 4076         | R.GQHVPSPQFTVGPLGEGGAHK.V                                               | 2305.53673 | 3 | 7.06E-04 | 0.92 | 4.51  | -    | 822.1    |

|                           |                                                                         |            |   |          |        |         |       |          |
|---------------------------|-------------------------------------------------------------------------|------------|---|----------|--------|---------|-------|----------|
| AHQ-3-1, 4817             | R.GQHVPSPFQFTVGPLGEGGAHK.V                                              | 2305.53673 | 3 | 2.01E-05 | 0.73   | 3.75    | -     | 349.5    |
| AHQ-3-1, 4824             | R.GQHVPSPFQFTVGPLGEGGAHK.V                                              | 2305.53673 | 2 | 1.15E-05 | 0.89   | 4.37    | -     | 394.0    |
| AHQ-3-6, 4109 - 4182      | R.GQHVPSPFQFTVGPLGEGGAHK.V                                              | 2305.53673 | 3 | 7.35E-06 | 0.93   | 4.90    | -     | 787.2    |
| AHQ-3-2, 4617 - 4694      | R.GQHVPSPFQFTVGPLGEGGAHK.V                                              | 2305.53673 | 2 | 5.23E-04 | 0.88   | 4.18    | -     | 438.0    |
| AHQ-3-3, 4680 - 4758      | R.GQHVPSPFQFTVGPLGEGGAHK.V                                              | 2305.53673 | 2 | 6.09E-06 | 0.88   | 4.12    | -     | 463.8    |
| AHQ-3-5, 4235 - 4255      | R.GQHVPSPFQFTVGPLGEGGAHK.V                                              | 2305.53673 | 2 | 7.77E-15 | 0.95   | 5.58    | -     | 529.9    |
| AHQ-3-4, 4500             | R.GQHVPSPFQFTVGPLGEGGAHK.V                                              | 2305.53673 | 2 | 1.07E-08 | 0.90   | 4.54    | -     | 387.0    |
| AHQ-3-4, 4502             | R.GQHVPSPFQFTVGPLGEGGAHK.V                                              | 2305.53673 | 3 | 7.83E-07 | 0.81   | 4.14    | -     | 401.6    |
| AHQ-3-6, 4183 - 4189      | R.GQHVPSPFQFTVGPLGEGGAHK.V                                              | 2305.53673 | 2 | 2.77E-04 | 0.96   | 5.93    | -     | 538.0    |
| AHQ-3-2, 1710 - 1791      | K.IECCDDKGDGSCDVR.Y                                                     | 1628.67809 | 2 | 8.28E-05 | 0.87   | 3.19    | -     | 979.4    |
| AHQ-3-1, 2026             | K.IECCDDKGDGSCDVR.Y                                                     | 1628.67809 | 2 | 5.20E-05 | 0.80   | 3.12    | -     | 723.7    |
| AHQ-3-4, 4260 - 4264      | K.YGGDEIPYSPFR.I                                                        | 1401.50466 | 1 | 3.51E-04 | 0.12   | 2.16    | -     | 239.5    |
| gj4503745]refNP_001447.1] | filamin 1 (actin-binding protein-280); filamin 1; filamin A, alpha (act |            |   | 8.33E-15 | 100.37 | 1200.37 | 55.60 | 280757.4 |
| AHQ-3-6, 2261             | K.AEISFEDR.K                                                            | 967.01472  | 2 | 9.51E-04 | 0.91   | 2.81    | -     | 1276.6   |
| AHQ-3-6, 2389             | K.AFGPGLQGGGAGSPAR.F                                                    | 1430.55077 | 2 | 1.90E-05 | 0.95   | 3.63    | -     | 1759.0   |
| AHQ-3-4, 2538             | K.AFGPGLQGGGAGSPAR.F                                                    | 1430.55077 | 1 | 4.96E-04 | 0.35   | 2.99    | -     | 112.7    |
| AHQ-3-4, 2520             | K.AFGPGLQGGGAGSPAR.F                                                    | 1430.55077 | 2 | 2.69E-04 | 0.91   | 3.23    | -     | 1327.0   |
| AHQ-3-2, 2710             | K.AFGPGLQGGGAGSPAR.F                                                    | 1430.55077 | 1 | 6.23E-04 | 0.30   | 2.22    | -     | 232.5    |
| AHQ-3-3, 2696 - 2734      | K.AFGPGLQGGGAGSPAR.F                                                    | 1430.55077 | 2 | 1.74E-06 | 0.93   | 3.47    | -     | 1561.1   |
| AHQ-3-5, 2404             | K.AFGPGLQGGGAGSPAR.F                                                    | 1430.55077 | 2 | 2.33E-07 | 0.87   | 3.25    | -     | 1036.8   |
| AHQ-3-3, 2530             | K.AFGPGLQGGGAGSPAR.F                                                    | 1430.55077 | 2 | 8.34E-08 | 0.89   | 2.68    | -     | 1246.2   |
| AHQ-3-3, 2541             | K.AFGPGLQGGGAGSPAR.F                                                    | 1430.55077 | 1 | 4.40E-07 | 0.75   | 3.54    | -     | 187.9    |
| AHQ-3-1, 2718 - 2788      | K.AFGPGLQGGGAGSPAR.F                                                    | 1430.55077 | 2 | 5.41E-04 | 0.90   | 2.98    | -     | 1291.4   |
| AHQ-3-1, 2880             | K.AFGPGLQGGGAGSPAR.F                                                    | 1430.55077 | 2 | 1.28E-05 | 0.91   | 3.13    | -     | 1089.3   |
| AHQ-3-2, 2541 - 2611      | K.AFGPGLQGGGAGSPAR.F                                                    | 1430.55077 | 2 | 2.39E-05 | 0.90   | 2.90    | -     | 1224.6   |
| AHQ-3-14, 3651 - 3711     | K.AGNM*LLVGVHGPR.T                                                      | 1451.67973 | 2 | 7.34E-06 | 0.76   | 3.00    | -     | 677.9    |
| AHQ-3-14-, 2635 - 2653    | K.AGNM*LLVGVHGPR.T                                                      | 1451.67973 | 3 | 1.70E-04 | 0.88   | 3.70    | -     | 1292.6   |
| AHQ-3-14, 3588            | K.AGNM*LLVGVHGPR.T                                                      | 1451.67973 | 3 | 3.90E-04 | 0.85   | 3.12    | -     | 1238.3   |
| AHQ-3-14, 3509 - 3587     | K.AGNM*LLVGVHGPR.T                                                      | 1451.67973 | 2 | 2.13E-04 | 0.76   | 3.16    | -     | 719.7    |
| AHQ-3-14-, 2636 - 2647    | K.AGNM*LLVGVHGPR.T                                                      | 1451.67973 | 2 | 1.67E-05 | 0.92   | 3.72    | -     | 944.6    |
| AHQ-3-14-, 2717           | K.AGNM*LLVGVHGPR.T                                                      | 1451.67973 | 3 | 2.59E-08 | 0.85   | 3.27    | -     | 1153.0   |
| AHQ-3-14-, 2720 - 2759    | K.AGNM*LLVGVHGPR.T                                                      | 1451.67973 | 2 | 1.27E-04 | 0.82   | 3.28    | -     | 598.6    |
| AHQ-3-14-, 3019 - 3055    | K.AGNM*LLVGVHGPR.T                                                      | 1435.68033 | 3 | 3.80E-07 | 0.87   | 3.42    | -     | 1254.2   |
| AHQ-3-14-, 3303 - 3365    | K.AGNM*LLVGVHGPR.T                                                      | 1435.68033 | 2 | 3.37E-07 | 0.83   | 3.22    | -     | 656.2    |
| AHQ-3-14-, 3308           | K.AGNM*LLVGVHGPR.T                                                      | 1435.68033 | 3 | 1.44E-05 | 0.85   | 3.20    | -     | 1280.0   |
| AHQ-3-14, 4296 - 4359     | K.AGNM*LLVGVHGPR.T                                                      | 1435.68033 | 2 | 4.49E-07 | 0.82   | 3.38    | -     | 711.5    |
| AHQ-3-1, 1824 - 1889      | R.AGQSAAGAAPPGGVDTR.D                                                   | 1443.50471 | 2 | 9.65E-04 | 0.60   | 2.97    | -     | 426.1    |
| AHQ-3-2, 2170             | K.AGVAPLQVK.V                                                           | 883.07036  | 2 | 2.86E-05 | 0.82   | 2.80    | -     | 649.7    |
| AHQ-3-1, 2392             | K.AGVAPLQVK.V                                                           | 883.07036  | 2 | 1.09E-05 | 0.84   | 2.97    | -     | 603.3    |
| AHQ-3-2, 7715 - 7782      | K.AHEPTYFTVDCAEAGGQDVSIGIK.C                                            | 2567.76960 | 3 | 2.37E-09 | 0.97   | 5.36    | -     | 1878.5   |
| AHQ-3-1, 7346 - 7409      | K.AHEPTYFTVDCAEAGGQDVSIGIK.C                                            | 2567.76960 | 3 | 3.37E-05 | 0.93   | 4.84    | -     | 1130.4   |
| AHQ-3-1, 7466 - 7468      | K.AHEPTYFTVDCAEAGGQDVSIGIK.C                                            | 2567.76960 | 3 | 8.77E-05 | 0.93   | 4.73    | -     | 1362.5   |
| AHQ-3-2, 2626             | K.AHVVPFCFASK.V                                                         | 1232.39073 | 1 | 1.09E-04 | 0.68   | 2.75    | -     | 499.6    |
| AHQ-3-7, 6319             | R.ALGALVDSACAPGLCPDWSDWASKPVTNAR.E                                      | 3233.53437 | 3 | 2.77E-10 | 0.90   | 4.35    | -     | 966.0    |
| AHQ-3-5, 6332 - 6408      | R.ALGALVDSACAPGLCPDWSDWASKPVTNAR.E                                      | 3233.53437 | 3 | 9.29E-13 | 0.92   | 4.88    | -     | 592.8    |
| AHQ-3-5, 6231             | R.ALGALVDSACAPGLCPDWSDWASKPVTNAR.E                                      | 3233.53437 | 3 | 1.19E-12 | 0.93   | 5.33    | -     | 574.7    |
| AHQ-3-2, 6385 - 6455      | R.ALGALVDSACAPGLCPDWSDWASKPVTNAR.E                                      | 3233.53437 | 3 | 1.69E-11 | 0.93   | 5.36    | -     | 699.0    |
| AHQ-3-7, 6186             | R.ALGALVDSACAPGLCPDWSDWASKPVTNAR.E                                      | 3233.53437 | 3 | 3.05E-08 | 0.94   | 5.40    | -     | 720.9    |
| AHQ-3-2, 6622 - 6689      | R.ALGALVDSACAPGLCPDWSDWASKPVTNAR.E                                      | 3233.53437 | 3 | 2.99E-11 | 0.92   | 4.81    | -     | 953.7    |
| AHQ-3-9, 5891             | R.ALGALVDSACAPGLCPDWSDWASKPVTNAR.E                                      | 3233.53437 | 3 | 5.08E-05 | 0.82   | 3.87    | -     | 626.0    |
| AHQ-3-2, 6763 - 6833      | R.ALGALVDSACAPGLCPDWSDWASKPVTNAR.E                                      | 3233.53437 | 3 | 5.03E-07 | 0.61   | 3.52    | -     | 359.2    |
| AHQ-3-4, 6577 - 6654      | R.ALGALVDSACAPGLCPDWSDWASKPVTNAR.E                                      | 3233.53437 | 3 | 4.50E-04 | 0.87   | 4.42    | -     | 444.2    |
| AHQ-3-4, 6426 - 6505      | R.ALGALVDSACAPGLCPDWSDWASKPVTNAR.E                                      | 3233.53437 | 3 | 1.96E-11 | 0.93   | 4.40    | -     | 822.3    |
| AHQ-3-6, 6350             | R.ALGALVDSACAPGLCPDWSDWASKPVTNAR.E                                      | 3233.53437 | 3 | 7.61E-09 | 0.95   | 5.29    | -     | 861.2    |
| AHQ-3-4, 6318 - 6350      | R.ALGALVDSACAPGLCPDWSDWASKPVTNAR.E                                      | 3233.53437 | 3 | 1.87E-04 | 0.71   | 3.56    | -     | 488.6    |
| AHQ-3-9, 6053             | R.ALGALVDSACAPGLCPDWSDWASKPVTNAR.E                                      | 3233.53437 | 3 | 6.70E-10 | 0.80   | 3.91    | -     | 482.1    |
| AHQ-3-1, 6593 - 6621      | R.ALGALVDSACAPGLCPDWSDWASKPVTNAR.E                                      | 3233.53437 | 3 | 5.24E-06 | 0.79   | 4.07    | -     | 437.9    |
| AHQ-3-2, 6469 - 6545      | R.ALGALVDSACAPGLCPDWSDWASKPVTNAR.E                                      | 3233.53437 | 3 | 7.07E-11 | 0.95   | 5.74    | -     | 936.9    |
| AHQ-3-3, 6413 - 6488      | R.ALGALVDSACAPGLCPDWSDWASKPVTNAR.E                                      | 3233.53437 | 3 | 3.79E-08 | 0.94   | 5.26    | -     | 809.4    |
| AHQ-3-1, 6452 - 6528      | R.ALGALVDSACAPGLCPDWSDWASKPVTNAR.E                                      | 3233.53437 | 3 | 1.36E-11 | 0.97   | 7.18    | -     | 1302.4   |
| AHQ-3-6, 6239             | R.ALGALVDSACAPGLCPDWSDWASKPVTNAR.E                                      | 3233.53437 | 3 | 2.61E-12 | 0.92   | 5.13    | -     | 487.8    |
| AHQ-3-3, 6572 - 6646      | R.ALGALVDSACAPGLCPDWSDWASKPVTNAR.E                                      | 3233.53437 | 3 | 1.04E-05 | 0.92   | 4.86    | -     | 935.2    |
| AHQ-3-1, 6324 - 6388      | R.ALGALVDSACAPGLCPDWSDWASKPVTNAR.E                                      | 3233.53437 | 3 | 1.09E-08 | 0.92   | 4.47    | -     | 772.4    |
| AHQ-3-2, 1450             | R.ALTQTGGPHVK.A                                                         | 1109.26067 | 1 | 1.34E-04 | 0.13   | 1.95    | -     | 267.4    |
| AHQ-3-7, 2982             | R.ANLPQSFQVDTSK.A                                                       | 1435.56409 | 2 | 4.13E-07 | 0.79   | 2.70    | -     | 510.8    |
| AHQ-3-4, 3245             | R.ANLPQSFQVDTSK.A                                                       | 1435.56409 | 2 | 3.57E-04 | 0.71   | 2.91    | -     | 398.2    |
| AHQ-3-1, 3337 - 3412      | R.ANLPQSFQVDTSK.A                                                       | 1435.56409 | 2 | 2.64E-06 | 0.78   | 3.03    | -     | 540.4    |
| AHQ-3-1, 3426             | R.ANLPQSFQVDTSK.A                                                       | 1435.56409 | 1 | 8.14E-09 | 0.50   | 2.81    | -     | 319.1    |
| AHQ-3-2, 3273 - 3342      | R.ANLPQSFQVDTSK.A                                                       | 1435.56409 | 2 | 1.29E-08 | 0.89   | 3.92    | -     | 465.6    |
| AHQ-3-5, 3083             | R.ANLPQSFQVDTSK.A                                                       | 1435.56409 | 2 | 1.98E-04 | 0.76   | 2.85    | -     | 483.1    |
| AHQ-3-2, 3274             | R.ANLPQSFQVDTSK.A                                                       | 1435.56409 | 1 | 2.24E-05 | 0.14   | 2.13    | -     | 340.6    |
| AHQ-3-3, 3513             | R.ANLPQSFQVDTSK.A                                                       | 1435.56409 | 1 | 4.08E-08 | 0.49   | 2.66    | -     | 514.7    |
| AHQ-3-2, 3279             | R.ANLPQSFQVDTSK.A                                                       | 1435.56409 | 1 | 3.78E-06 | 0.59   | 2.87    | -     | 406.3    |
| AHQ-3-2, 3419             | R.ANLPQSFQVDTSK.A                                                       | 1435.56409 | 1 | 3.90E-05 | 0.72   | 2.70    | -     | 649.9    |
| AHQ-3-2, 3547             | R.ANLPQSFQVDTSK.A                                                       | 1435.56409 | 1 | 7.59E-08 | 0.44   | 3.09    | -     | 347.3    |
| AHQ-3-3, 3274 - 3284      | R.ANLPQSFQVDTSK.A                                                       | 1435.56409 | 2 | 1.66E-11 | 0.86   | 3.43    | -     | 446.5    |
| AHQ-3-1, 3612             | R.ANLPQSFQVDTSK.A                                                       | 1435.56409 | 2 | 4.68E-08 | 0.63   | 2.64    | -     | 370.2    |
| AHQ-3-3, 4681 - 4682      | R.ANLPQSFQVDTSKAGVAPLQVK.V                                              | 2299.61185 | 2 | 4.55E-04 | 0.92   | 4.05    | -     | 829.4    |
| AHQ-3-2, 4702 - 4775      | R.ANLPQSFQVDTSKAGVAPLQVK.V                                              | 2299.61185 | 2 | 1.34E-04 | 0.94   | 5.41    | -     | 719.3    |
| AHQ-3-2, 4699             | R.ANLPQSFQVDTSKAGVAPLQVK.V                                              | 2299.61185 | 3 | 1.88E-04 | 0.65   | 3.00    | -     | 415.0    |
| AHQ-3-5, 3143             | R.APSVANVGSCHDLSLK.I                                                    | 1656.84249 | 2 | 7.13E-06 | 0.91   | 3.93    | -     | 762.9    |
| AHQ-3-4, 3341             | R.APSVANVGSCHDLSLK.I                                                    | 1656.84249 | 2 | 1.45E-10 | 0.94   | 4.57    | -     | 601.7    |
| AHQ-3-5, 1524             | K.ATCAPQHAGPGGPADASK.V                                                  | 1791.92336 | 2 | 4.97E-04 | 0.94   | 4.80    | -     | 669.1    |
| AHQ-3-1, 1989             | K.ATCAPQHAGPGGPADASK.V                                                  | 1791.92336 | 2 | 3.17E-04 | 0.67   | 2.92    | -     | 426.9    |
| AHQ-3-3, 3632 - 3642      | R.AWGPGLGEGVVGK.S                                                       | 1227.39403 | 2 | 1.28E-06 | 0.93   | 3.90    | -     | 1018.7   |
| AHQ-3-6, 3353             | R.AWGPGLGEGVVGK.S                                                       | 1227.39403 | 2 | 1.88E-04 | 0.93   | 3.79    | -     | 917.4    |
| AHQ-3-1, 3797 - 3820      | R.AWGPGLGEGVVGK.S                                                       | 1227.39403 | 2 | 4.11E-06 | 0.93   | 3.84    | -     | 1082.2   |
| AHQ-3-5, 3396 - 3401      | R.AWGPGLGEGVVGK.S                                                       | 1227.39403 | 2 | 3.63E-05 | 0.89   | 3.28    | -     | 752.6    |
| AHQ-3-2, 3670 - 3749      | R.AWGPGLGEGVVGK.S                                                       | 1227.39403 | 2 | 1.74E-07 | 0.92   | 4.07    | -     | 839.1    |
| AHQ-3-4, 3606             | R.AWGPGLGEGVVGK.S                                                       | 1227.39403 | 2 | 5.71E-04 | 0.89   | 3.71    | -     | 777.5    |
| AHQ-3-3, 3188             | R.AYGPGEPTGNMVK.K                                                       | 1434.64274 | 1 | 2.58E-04 | 0.37   | 2.99    | -     | 328.4    |
| AHQ-3-2, 2537 - 2565      | R.AYGPGEPTGNMVK.K                                                       | 1450.64214 | 2 | 9.76E-05 | 0.79   | 2.83    | -     | 673.0    |
| AHQ-3-3, 3370 - 3450      | R.AYGPGEPTGNMVK.K                                                       | 1434.64274 | 2 | 4.79E-04 | 0.71   | 2.96    | -     | 524.0    |
| AHQ-3-3, 3381 - 3454      | R.AYGPGEPTGNMVK.K                                                       | 1434.64274 | 1 | 1.19E-04 | 0.40   | 2.24    | -     | 477.4    |
| AHQ-3-3, 3461             | R.AYGPGEPTGNMVK.K                                                       | 1434.64274 | 2 | 6.11E-07 | 0.61   | 2.75    | -     | 537.6    |
| AHQ-3-2, 3191             | R.AYGPGEPTGNMVK.K                                                       | 1434.64274 | 1 | 5.22E-04 | 0.78   | 3.27    | -     | 479.4    |
| AHQ-3-6, 2397             | R.AYGPGEPTGNMVK.K                                                       | 1450.64214 | 2 | 8.61E-04 | 0.59   | 3.04    | -     | 328.5    |
| AHQ-3-5, 6347             | K.CAPGVVGAPEADIDFIIIR.N                                                 | 2017.24863 | 2 | 2.00E-09 | 0.88   | 4.18    | -     | 658.7    |
| AHQ-3-3, 6389 - 6469      | K.CAPGVVGAPEADIDFIIIR.N                                                 | 2017.24863 | 2 | 1.24E-05 | 0.91   | 4.37    | -     | 529.9    |
| AHQ-3-3, 6410             | K.CAPGVVGAPEADIDFIIIR.N                                                 | 2017.24863 | 3 | 2.73E-09 | 0.94   | 4.49    | -     | 1328.9   |
| AHQ-3-2, 6283             | K.CAPGVVGAPEADIDFIIIR.N                                                 | 2017.24863 | 2 | 5.53E-06 | 0.95   | 4.92    | -     | 826.7    |
| AHQ-3-3, 6217             | K.CAPGVVGAPEADIDFIIIR.N                                                 | 2017.24863 | 2 | 1.18E-05 | 0.81   | 3.52    | -     | 496.2    |
| AHQ-3-2, 6445 - 6514      | K.CAPGVVGAPEADIDFIIIR.N                                                 | 2017.24863 | 2 | 1.64E-07 | 0.95   | 4.95    | -     | 890.9    |
| AHQ-3-3, 6542             | K.CAPGVVGAPEADIDFIIIR.N                                                 | 2017.24863 | 2 | 9.20E-05 | 0.79   | 3.45    | -     | 398.8    |
| AHQ-3-4, 6402 - 6472      | K.CAPGVVGAPEADIDFIIIR.N                                                 | 2017.24863 | 2 | 7.76E-07 | 0.87   | 3.87    | -     | 589.6    |
| AHQ-3-2, 6585             | K.CAPGVVGAPEADIDFIIIR.N                                                 | 2017.24863 | 2 | 4.48E-04 | 0.84   | 4.36    | -     | 344.6    |
| AHQ-3-11, 5768 - 5779     | K.CAPGVVGAPEADIDFIIIR.N                                                 | 2017.24863 | 2 | 3.72E-04 | 0.50   | 2.87    | -     | 365.9    |

|                        |                                       |            |   |          |      |      |   |        |
|------------------------|---------------------------------------|------------|---|----------|------|------|---|--------|
| AHQ-3-2, 6463          | K.CAPGVVGPAAEADIDFDIIR.N              | 2017.24863 | 3 | 1.04E-10 | 0.96 | 4.87 | - | 1438.3 |
| AHQ-3-1, 6353          | K.CAPGVVGPAAEADIDFDIIR.N              | 2017.24863 | 3 | 4.23E-10 | 0.97 | 5.17 | - | 1685.7 |
| AHQ-3-1, 6332 - 6396   | K.CAPGVVGPAAEADIDFDIIR.N              | 2017.24863 | 2 | 6.10E-06 | 0.96 | 4.92 | - | 908.3  |
| AHQ-3-3, 6662          | K.CAPGVVGPAAEADIDFDIIR.N              | 2017.24863 | 2 | 3.56E-04 | 0.50 | 3.02 | - | 372.4  |
| AHQ-3-1, 6514 - 6582   | K.CAPGVVGPAAEADIDFDIIRNDNTFTVK.Y      | 3052.31840 | 3 | 4.52E-06 | 0.88 | 4.00 | - | 695.7  |
| AHQ-3-3, 7262 - 7297   | K.CAPGVVGPAAEADIDFDIIRNDNTFTVK.Y      | 3052.31840 | 3 | 4.73E-04 | 0.60 | 3.20 | - | 399.0  |
| AHQ-3-2, 6814 - 6889   | K.CAPGVVGPAAEADIDFDIIRNDNTFTVK.Y      | 3052.31840 | 3 | 1.85E-05 | 0.74 | 4.04 | - | 441.0  |
| AHQ-3-4, 2920 - 2921   | K.CSGPGLSPGMV.R.A                     | 1219.41699 | 2 | 3.58E-04 | 0.56 | 2.53 | - | 456.1  |
| AHQ-3-2, 2938 - 2959   | K.CSGPGLSPGMV.R.A                     | 1219.41699 | 2 | 5.41E-05 | 0.74 | 2.83 | - | 454.1  |
| AHQ-3-5, 5268          | R.CSYQPTMEGVHTVHVTFAGVPPIR.S          | 2686.06233 | 2 | 6.08E-06 | 0.94 | 4.23 | - | 1098.7 |
| AHQ-3-5, 4784          | R.CSYQPTMEGVHTVHVTFAGVPPIR.S          | 2702.06173 | 2 | 3.03E-05 | 0.81 | 3.18 | - | 435.1  |
| AHQ-3-3, 5478 - 5528   | R.CSYQPTMEGVHTVHVTFAGVPPIR.S          | 2686.06233 | 3 | 4.91E-08 | 0.87 | 4.02 | - | 608.7  |
| AHQ-3-1, 5097 - 5106   | R.CSYQPTMEGVHTVHVTFAGVPPIR.S          | 2702.06173 | 3 | 2.94E-05 | 0.92 | 4.51 | - | 664.8  |
| AHQ-3-1, 5102 - 5104   | R.CSYQPTMEGVHTVHVTFAGVPPIR.S          | 2702.06173 | 2 | 4.23E-08 | 0.88 | 4.01 | - | 583.1  |
| AHQ-3-4, 5490          | R.CSYQPTMEGVHTVHVTFAGVPPIR.S          | 2686.06233 | 2 | 4.43E-05 | 0.85 | 2.87 | - | 1027.8 |
| AHQ-3-5, 4768 - 4787   | R.CSYQPTMEGVHTVHVTFAGVPPIR.S          | 2702.06173 | 3 | 6.91E-05 | 0.44 | 3.50 | - | 134.0  |
| AHQ-3-3, 5516 - 5536   | R.CSYQPTMEGVHTVHVTFAGVPPIR.S          | 2686.06233 | 2 | 3.28E-09 | 0.95 | 4.41 | - | 1104.1 |
| AHQ-3-2, 5581          | R.CSYQPTMEGVHTVHVTFAGVPPIR.S          | 2686.06233 | 3 | 3.50E-14 | 0.93 | 4.75 | - | 595.7  |
| AHQ-3-2, 5550          | R.CSYQPTMEGVHTVHVTFAGVPPIR.S          | 2686.06233 | 2 | 5.02E-10 | 0.94 | 4.16 | - | 1143.5 |
| AHQ-3-3, 5021 - 5025   | R.CSYQPTMEGVHTVHVTFAGVPPIR.S          | 2702.06173 | 3 | 1.83E-05 | 0.92 | 4.81 | - | 614.5  |
| AHQ-3-2, 5037 - 5111   | R.CSYQPTMEGVHTVHVTFAGVPPIR.S          | 2702.06173 | 3 | 2.82E-05 | 0.86 | 3.83 | - | 764.8  |
| AHQ-3-5, 5267          | R.CSYQPTMEGVHTVHVTFAGVPPIR.S          | 2686.06233 | 3 | 6.48E-05 | 0.90 | 3.94 | - | 1142.9 |
| AHQ-3-2, 5493 - 5513   | R.CSYQPTMEGVHTVHVTFAGVPPIR.S          | 2686.06233 | 3 | 1.14E-05 | 0.68 | 3.12 | - | 523.2  |
| AHQ-3-1, 4134          | R.DAEM*PATEKDLAEDAPWK.K               | 2034.18987 | 2 | 5.19E-05 | 0.86 | 3.37 | - | 666.0  |
| AHQ-3-1, 4720          | R.DAEM*PATEKDLAEDAPWK.K               | 2018.19047 | 2 | 1.93E-05 | 0.74 | 3.46 | - | 613.2  |
| AHQ-3-13, 3929         | K.DAGEGGLSLAIEGPK.S.A                 | 1501.62084 | 2 | 7.10E-06 | 0.92 | 3.56 | - | 1246.5 |
| AHQ-3-1, 4258          | K.DAGEGGLSLAIEGPK.S.A                 | 1501.62084 | 2 | 4.87E-06 | 0.92 | 4.31 | - | 876.3  |
| AHQ-3-10, 3663         | K.DAGEGGLSLAIEGPK.S.A                 | 1501.62084 | 2 | 4.02E-06 | 0.82 | 3.20 | - | 927.6  |
| AHQ-3-3, 4090          | K.DAGEGGLSLAIEGPK.S.A                 | 1501.62084 | 2 | 7.61E-06 | 0.84 | 3.87 | - | 788.6  |
| AHQ-3-5, 3932 - 4003   | K.DAGEGGLSLAIEGPK.S.A                 | 1501.62084 | 2 | 1.76E-06 | 0.93 | 4.11 | - | 1217.6 |
| AHQ-3-1, 4118 - 4188   | K.DAGEGGLSLAIEGPK.S.A                 | 1501.62084 | 2 | 1.13E-05 | 0.80 | 3.18 | - | 793.8  |
| AHQ-3-1, 4382          | K.DAGEGGLSLAIEGPK.S.A                 | 1501.62084 | 2 | 2.85E-06 | 0.64 | 2.91 | - | 674.6  |
| AHQ-3-2, 4161 - 4223   | K.DAGEGGLSLAIEGPK.S.A                 | 1501.62084 | 2 | 7.31E-05 | 0.67 | 3.04 | - | 677.6  |
| AHQ-3-2, 5158 - 5191   | K.DAGEGGLAVQITDPEGK.P                 | 1713.86752 | 2 | 1.88E-05 | 0.91 | 3.52 | - | 1308.8 |
| AHQ-3-1, 5062 - 5065   | K.DAGEGGLAVQITDPEGK.P                 | 1713.86752 | 2 | 1.14E-09 | 0.93 | 4.32 | - | 1148.9 |
| AHQ-3-5, 4279          | K.DAGEGGLAVQITDPEGKPK.K               | 1939.15612 | 2 | 3.33E-04 | 0.93 | 4.29 | - | 979.1  |
| AHQ-3-2, 4598 - 4671   | K.DAGEGGLAVQITDPEGKPK.K               | 1939.15612 | 2 | 1.46E-09 | 0.95 | 4.19 | - | 1445.3 |
| AHQ-3-3, 4473 - 4545   | K.DAGEGGLAVQITDPEGKPK.K               | 1939.15612 | 3 | 8.63E-08 | 0.92 | 4.25 | - | 1046.3 |
| AHQ-3-1, 4781          | K.DAGEGGLAVQITDPEGKPK.K               | 1939.15612 | 2 | 1.68E-07 | 0.92 | 4.07 | - | 994.7  |
| AHQ-3-3, 4562          | K.DAGEGGLAVQITDPEGKPK.K               | 1939.15612 | 2 | 1.85E-09 | 0.90 | 4.04 | - | 945.9  |
| AHQ-3-2, 4517 - 4585   | K.DAGEGGLAVQITDPEGKPK.K               | 1939.15612 | 3 | 2.03E-09 | 0.91 | 4.03 | - | 1107.5 |
| AHQ-3-8, 3858 - 3869   | K.DAGEGGLAVQITDPEGKPK.K               | 1939.15612 | 2 | 1.28E-06 | 0.95 | 4.49 | - | 1263.9 |
| AHQ-3-3, 4462 - 4533   | K.DAGEGGLAVQITDPEGKPK.K               | 1939.15612 | 2 | 9.83E-07 | 0.95 | 4.48 | - | 1163.3 |
| AHQ-3-11, 4067         | K.DAGEGGLAVQITDPEGKPK.K               | 1939.15612 | 2 | 1.21E-05 | 0.89 | 4.14 | - | 795.3  |
| AHQ-3-1, 4569 - 4645   | K.DAGEGGLAVQITDPEGKPK.K               | 1939.15612 | 3 | 5.10E-08 | 0.76 | 3.38 | - | 760.0  |
| AHQ-3-3, 4661 - 4732   | K.DAGEGGLAVQITDPEGKPK.K               | 1939.15612 | 2 | 6.82E-05 | 0.85 | 3.55 | - | 866.5  |
| AHQ-3-4, 4352 - 4432   | K.DAGEGGLAVQITDPEGKPK.K               | 1939.15612 | 2 | 5.57E-07 | 0.92 | 3.96 | - | 1108.5 |
| AHQ-3-1, 4554 - 4632   | K.DAGEGGLAVQITDPEGKPK.K               | 1939.15612 | 2 | 2.61E-06 | 0.95 | 4.48 | - | 1267.1 |
| AHQ-3-7, 4056          | K.DAGEGGLAVQITDPEGKPK.K               | 1939.15612 | 2 | 1.19E-05 | 0.94 | 4.55 | - | 1085.3 |
| AHQ-3-2, 5050          | K.DAGEGGLAVQITDPEGKPK.K               | 1939.15612 | 2 | 6.06E-06 | 0.74 | 2.70 | - | 1096.7 |
| AHQ-3-2, 4741 - 4819   | K.DAGEGGLAVQITDPEGKPK.K               | 1939.15612 | 2 | 8.14E-11 | 0.97 | 5.14 | - | 1521.1 |
| AHQ-3-9, 3880          | K.DAGEGGLAVQITDPEGKPK.K               | 1939.15612 | 2 | 4.68E-05 | 0.92 | 4.09 | - | 1197.0 |
| AHQ-3-5, 4136 - 4208   | K.DAGEGGLAVQITDPEGKPK.K               | 1939.15612 | 2 | 1.30E-04 | 0.59 | 3.18 | - | 553.5  |
| AHQ-3-2, 4898          | K.DAGEGGLAVQITDPEGKPK.K               | 1939.15612 | 2 | 3.84E-04 | 0.94 | 3.90 | - | 1367.6 |
| AHQ-3-3, 4894          | K.DAGEGGLAVQITDPEGKPK.K               | 1939.15612 | 2 | 4.91E-04 | 0.53 | 2.62 | - | 493.4  |
| AHQ-3-2, 4477 - 4549   | K.DAGEGGLAVQITDPEGKPK.K               | 1939.15612 | 2 | 1.25E-08 | 0.91 | 3.81 | - | 1106.6 |
| AHQ-3-1, 4806          | R.DAGYGGGLSLAIEGPK.S.V                | 1551.67986 | 2 | 1.16E-05 | 0.76 | 3.28 | - | 676.2  |
| AHQ-3-4, 4785          | R.DAGYGGGLSLAIEGPK.S.V                | 1551.67986 | 2 | 7.67E-04 | 0.43 | 2.54 | - | 529.7  |
| AHQ-3-5, 4851          | R.DAGYGGGLSLAIEGPK.S.V                | 1551.67986 | 2 | 6.73E-08 | 0.93 | 3.74 | - | 1304.0 |
| AHQ-3-5, 4655 - 4724   | R.DAGYGGGLSLAIEGPK.S.V                | 1551.67986 | 2 | 8.87E-07 | 0.83 | 3.47 | - | 937.6  |
| AHQ-3-1, 4704          | R.DAGYGGGLSLAIEGPK.S.V                | 1551.67986 | 2 | 7.91E-12 | 0.97 | 5.21 | - | 1302.9 |
| AHQ-3-5, 4556 - 4628   | R.DAGYGGGLSLAIEGPK.S.V                | 1551.67986 | 2 | 1.99E-09 | 0.96 | 5.09 | - | 1359.2 |
| AHQ-3-3, 4757          | R.DAGYGGGLSLAIEGPK.S.V                | 1551.67986 | 2 | 7.72E-05 | 0.76 | 3.07 | - | 914.9  |
| AHQ-3-1, 2033          | R.DAPQDFHPR.V                         | 1198.22650 | 2 | 3.10E-05 | 0.62 | 2.95 | - | 407.9  |
| AHQ-3-2, 1681 - 1722   | R.DAPQDFHPR.V                         | 1198.22650 | 2 | 2.84E-07 | 0.69 | 2.87 | - | 561.6  |
| AHQ-3-2, 1790          | R.DAPQDFHPR.V                         | 1198.22650 | 2 | 6.47E-08 | 0.77 | 3.13 | - | 481.3  |
| AHQ-3-3, 1702 - 1769   | R.DAPQDFHPR.V                         | 1198.22650 | 2 | 2.64E-07 | 0.34 | 2.52 | - | 407.3  |
| AHQ-3-1, 5194          | K.DGSCGVAVVQEPGDYEVSVK.F              | 2260.41990 | 2 | 1.36E-04 | 0.64 | 3.41 | - | 374.4  |
| AHQ-3-7, 4866 - 4879   | K.DGSCGVAVVQEPGDYEVSVK.F              | 2260.41990 | 2 | 4.48E-05 | 0.91 | 4.66 | - | 525.4  |
| AHQ-3-1, 4988          | K.DGSCGVAVVQEPGDYEVSVK.F              | 2260.41990 | 2 | 5.13E-06 | 0.86 | 4.29 | - | 524.8  |
| AHQ-3-5, 5112 - 5145   | K.DGSCGVAVVQEPGDYEVSVK.F              | 2260.41990 | 2 | 4.01E-05 | 0.84 | 3.72 | - | 567.3  |
| AHQ-3-6, 4829 - 4903   | K.DGSCGVAVVQEPGDYEVSVK.F              | 2260.41990 | 2 | 3.08E-05 | 0.90 | 4.70 | - | 505.6  |
| AHQ-3-14-, 2339 - 2417 | K.DKGEYTLVVK.W                        | 1152.32223 | 2 | 1.68E-06 | 0.79 | 2.79 | - | 651.9  |
| AHQ-3-14, 3272 - 3332  | K.DKGEYTLVVK.W                        | 1152.32223 | 2 | 1.55E-06 | 0.67 | 2.78 | - | 507.0  |
| AHQ-3-4, 2345 - 2346   | K.DKGEYTLVVK.W                        | 1152.32223 | 2 | 2.54E-06 | 0.86 | 2.59 | - | 845.2  |
| AHQ-3-4, 2344 - 2360   | K.DKGEYTLVVK.W                        | 1152.32223 | 1 | 3.70E-05 | 0.24 | 2.40 | - | 399.3  |
| AHQ-3-14-, 2340 - 2360 | K.DKGEYTLVVK.W                        | 1152.32223 | 1 | 1.56E-06 | 0.27 | 2.63 | - | 349.6  |
| AHQ-3-14, 3233 - 3413  | K.DKGEYTLVVK.W                        | 1152.32223 | 1 | 3.29E-04 | 0.14 | 2.27 | - | 332.7  |
| AHQ-3-2, 3502          | K.DNNGNTYSYCSYVPR.K                   | 1591.64109 | 2 | 1.95E-05 | 0.75 | 3.05 | - | 709.9  |
| AHQ-3-3, 3185 - 3234   | R.DVDIIDHHNDNTYVK.Y                   | 1785.89230 | 2 | 6.51E-06 | 0.74 | 3.35 | - | 278.8  |
| AHQ-3-2, 3289 - 3367   | R.DVDIIDHHNDNTYVK.Y                   | 1785.89230 | 2 | 2.60E-04 | 0.85 | 3.54 | - | 681.9  |
| AHQ-3-2, 3037 - 3105   | R.DVDIIDHHNDNTYVK.Y                   | 1785.89230 | 2 | 3.94E-06 | 0.96 | 4.75 | - | 1319.6 |
| AHQ-3-3, 3077 - 3149   | R.DVDIIDHHNDNTYVK.Y                   | 1785.89230 | 2 | 1.44E-07 | 0.93 | 3.91 | - | 1209.1 |
| AHQ-3-3, 2944 - 3016   | R.DVDIIDHHNDNTYVK.Y                   | 1785.89230 | 2 | 2.42E-04 | 0.89 | 3.90 | - | 725.7  |
| AHQ-3-4, 2934 - 2990   | R.DVDIIDHHNDNTYVK.Y                   | 1785.89230 | 2 | 2.85E-04 | 0.77 | 2.91 | - | 806.7  |
| AHQ-3-3, 3020          | R.DVDIIDHHNDNTYVK.Y                   | 1785.89230 | 3 | 4.67E-06 | 0.66 | 3.31 | - | 405.2  |
| AHQ-3-2, 3143 - 3215   | R.DVDIIDHHNDNTYVK.Y                   | 1785.89230 | 2 | 2.35E-07 | 0.88 | 3.76 | - | 626.3  |
| AHQ-3-1, 3188 - 3258   | R.DVDIIDHHNDNTYVK.Y                   | 1785.89230 | 2 | 8.57E-04 | 0.93 | 3.81 | - | 1096.7 |
| AHQ-3-6, 2797          | R.DVDIIDHHNDNTYVK.Y                   | 1785.89230 | 2 | 2.98E-05 | 0.71 | 2.89 | - | 343.1  |
| AHQ-3-4, 3352          | R.EAGAGGLAIAIEGPK.S.A                 | 1427.58510 | 1 | 5.21E-06 | 0.82 | 3.81 | - | 372.5  |
| AHQ-3-5, 3207          | R.EAGAGGLAIAIEGPK.S.A                 | 1427.58510 | 1 | 7.06E-06 | 0.81 | 3.38 | - | 451.8  |
| AHQ-3-1, 3517 - 3597   | R.EAGAGGLAIAIEGPK.S.A                 | 1427.58510 | 2 | 7.21E-08 | 0.96 | 4.63 | - | 1404.4 |
| AHQ-3-7, 3107 - 3179   | R.EAGAGGLAIAIEGPK.S.A                 | 1427.58510 | 1 | 6.01E-06 | 0.63 | 3.27 | - | 285.6  |
| AHQ-3-2, 3465 - 3467   | R.EAGAGGLAIAIEGPK.S.A                 | 1427.58510 | 2 | 1.73E-04 | 0.80 | 3.07 | - | 912.6  |
| AHQ-3-6, 3142          | R.EAGAGGLAIAIEGPK.S.A                 | 1427.58510 | 1 | 8.48E-07 | 0.60 | 3.07 | - | 285.9  |
| AHQ-3-13-, 3362        | R.EAGAGGLAIAIEGPK.S.A                 | 1427.58510 | 2 | 3.17E-05 | 0.91 | 3.32 | - | 1273.9 |
| AHQ-3-3, 2533          | R.EATTEFSVDAR.A                       | 1226.27493 | 2 | 3.77E-04 | 0.69 | 2.62 | - | 680.8  |
| AHQ-3-2, 2550 - 2622   | R.EATTEFSVDAR.A                       | 1226.27493 | 2 | 6.62E-05 | 0.88 | 3.47 | - | 923.4  |
| AHQ-3-2, 6643 - 6709   | R.EEGPYEVEVTDGVPVPGSPFFLEAVAPTKPK.S.V | 3487.85286 | 3 | 2.62E-07 | 0.94 | 5.51 | - | 754.1  |
| AHQ-3-2, 6785 - 6858   | R.EEGPYEVEVTDGVPVPGSPFFLEAVAPTKPK.S.V | 3487.85286 | 3 | 9.69E-12 | 0.96 | 6.39 | - | 990.4  |
| AHQ-3-4, 6489 - 6557   | R.EEGPYEVEVTDGVPVPGSPFFLEAVAPTKPK.S.V | 3487.85286 | 3 | 2.64E-04 | 0.92 | 5.29 | - | 420.1  |
| AHQ-3-5, 6411 - 6487   | R.EEGPYEVEVTDGVPVPGSPFFLEAVAPTKPK.S.V | 3487.85286 | 3 | 7.31E-11 | 0.97 | 6.64 | - | 957.1  |
| AHQ-3-6, 6342 - 6371   | R.EEGPYEVEVTDGVPVPGSPFFLEAVAPTKPK.S.V | 3487.85286 | 3 | 9.92E-10 | 0.95 | 6.11 | - | 668.5  |
| AHQ-3-1, 6436 - 6504   | R.EEGPYEVEVTDGVPVPGSPFFLEAVAPTKPK.S.V | 3487.85286 | 3 | 2.08E-09 | 0.91 | 4.59 | - | 814.5  |
| AHQ-3-3, 6613 - 6681   | R.EEGPYEVEVTDGVPVPGSPFFLEAVAPTKPK.S.V | 3487.85286 | 3 | 5.74E-07 | 0.93 | 5.06 | - | 864.9  |
| AHQ-3-7, 6250 - 6311   | R.EEGPYEVEVTDGVPVPGSPFFLEAVAPTKPK.S.V | 3487.85286 | 3 | 1.41E-06 | 0.76 | 3.70 | - | 451.3  |
| AHQ-3-3, 6468 - 6548   | R.EEGPYEVEVTDGVPVPGSPFFLEAVAPTKPK.S.V | 3487.85286 | 3 | 3.17E-09 | 0.93 | 5.52 | - | 672.4  |

|                       |                                   |            |   |          |      |      |   |        |
|-----------------------|-----------------------------------|------------|---|----------|------|------|---|--------|
| AHQ-3-1, 5166 - 5236  | R.EGPYISISVLYGDEEIVPR.S           | 1911.05809 | 2 | 9.92E-10 | 0.87 | 3.76 | - | 1132.6 |
| AHQ-3-9, 4676 - 4679  | R.EGPYISISVLYGDEEIVPR.S           | 1911.05809 | 2 | 8.17E-07 | 0.88 | 3.76 | - | 658.2  |
| AHQ-3-2, 4991         | R.EGPYISISVLYGDEEIVPR.S           | 1911.05809 | 2 | 3.56E-06 | 0.81 | 3.31 | - | 646.1  |
| AHQ-3-2, 5393         | R.EGPYISISVLYGDEEIVPR.S           | 1911.05809 | 2 | 6.86E-11 | 0.92 | 3.53 | - | 1124.1 |
| AHQ-3-6, 4977         | R.EGPYISISVLYGDEEIVPR.S           | 1911.05809 | 2 | 9.40E-07 | 0.83 | 3.62 | - | 737.3  |
| AHQ-3-7, 4918         | R.EGPYISISVLYGDEEIVPR.S           | 1911.05809 | 2 | 1.78E-06 | 0.29 | 2.58 | - | 349.8  |
| AHQ-3-2, 5253 - 5325  | R.EGPYISISVLYGDEEIVPR.S           | 1911.05809 | 2 | 3.10E-09 | 0.95 | 4.33 | - | 1001.9 |
| AHQ-3-1, 5304 - 5374  | R.EGPYISISVLYGDEEIVPR.S           | 1911.05809 | 2 | 1.38E-10 | 0.93 | 4.30 | - | 1232.1 |
| AHQ-3-5, 5092         | R.EGPYISISVLYGDEEIVPR.S           | 1911.05809 | 2 | 6.03E-06 | 0.88 | 3.91 | - | 775.4  |
| AHQ-3-8, 4695 - 4743  | R.EGPYISISVLYGDEEIVPR.S           | 1911.05809 | 2 | 3.37E-04 | 0.76 | 3.09 | - | 629.3  |
| AHQ-3-3, 5224 - 5292  | R.EGPYISISVLYGDEEIVPR.S           | 1911.05809 | 2 | 7.60E-08 | 0.92 | 4.29 | - | 963.8  |
| AHQ-3-5, 3733 - 3741  | R.ENGVLIDVK.F                     | 1150.30633 | 1 | 8.74E-04 | 0.23 | 2.42 | - | 301.1  |
| AHQ-3-4, 3969         | R.ENGVLIDVK.F                     | 1150.30633 | 1 | 3.35E-04 | 0.22 | 2.16 | - | 246.9  |
| AHQ-3-7, 3679 - 3750  | R.ENGVLIDVK.F                     | 1150.30633 | 1 | 1.93E-04 | 0.24 | 2.32 | - | 257.1  |
| AHQ-3-6, 3794         | R.ENGVLIDVK.F                     | 1150.30633 | 1 | 7.45E-05 | 0.24 | 2.33 | - | 309.8  |
| AHQ-3-2, 4089         | R.ENGVLIDVK.F                     | 1150.30633 | 1 | 5.32E-04 | 0.45 | 2.32 | - | 409.7  |
| AHQ-3-5, 1437         | K.ETGEHLVHV.K                     | 1149.28166 | 1 | 1.87E-05 | 0.37 | 2.09 | - | 242.8  |
| AHQ-3-5, 3159 - 3179  | K.FADQHVPGSPFVK.V                 | 1516.68203 | 2 | 5.98E-06 | 0.54 | 3.06 | - | 508.8  |
| AHQ-3-1, 3616         | K.FADQHVPGSPFVK.V                 | 1516.68203 | 2 | 3.27E-08 | 0.84 | 2.56 | - | 803.7  |
| AHQ-3-12, 3348        | K.FADQHVPGSPFVK.V                 | 1516.68203 | 2 | 7.68E-08 | 0.82 | 3.08 | - | 503.5  |
| AHQ-3-5, 3168 - 3185  | K.FADQHVPGSPFVK.V                 | 1516.68203 | 3 | 6.68E-05 | 0.94 | 4.21 | - | 1284.1 |
| AHQ-3-1, 3633         | K.FADQHVPGSPFVK.V                 | 1516.68203 | 3 | 2.77E-06 | 0.90 | 3.64 | - | 1191.2 |
| AHQ-3-13, 3407 - 3411 | K.FADQHVPGSPFVK.V                 | 1516.68203 | 2 | 4.01E-05 | 0.82 | 3.51 | - | 489.2  |
| AHQ-3-6, 3119         | K.FADQHVPGSPFVK.V                 | 1516.68203 | 2 | 4.49E-07 | 0.53 | 2.56 | - | 318.2  |
| AHQ-3-5, 3283         | K.FADQHVPGSPFVK.V                 | 1516.68203 | 2 | 4.72E-04 | 0.77 | 3.05 | - | 516.8  |
| AHQ-3-4, 3376         | K.FADQHVPGSPFVK.V                 | 1516.68203 | 2 | 1.73E-04 | 0.63 | 2.84 | - | 385.0  |
| AHQ-3-2, 3478         | K.FADQHVPGSPFVK.V                 | 1516.68203 | 2 | 2.68E-09 | 0.86 | 3.47 | - | 564.9  |
| AHQ-3-2, 5745 - 5817  | R.FGGEHVPNSPFQVTLALAGDQPSVQPPLR.S | 2947.25342 | 2 | 3.28E-05 | 0.96 | 5.57 | - | 1022.7 |
| AHQ-3-2, 5697 - 5765  | R.FGGEHVPNSPFQVTLALAGDQPSVQPPLR.S | 2947.25342 | 3 | 6.25E-07 | 0.89 | 4.24 | - | 827.1  |
| AHQ-3-2, 5659 - 5734  | R.FGGEHVPNSPFQVTLALAGDQPSVQPPLR.S | 2947.25342 | 2 | 2.13E-10 | 0.98 | 6.75 | - | 1508.6 |
| AHQ-3-1, 5812 - 5878  | R.FGGEHVPNSPFQVTLALAGDQPSVQPPLR.S | 2947.25342 | 3 | 1.73E-11 | 0.95 | 5.32 | - | 980.1  |
| AHQ-3-4, 5616 - 5685  | R.FGGEHVPNSPFQVTLALAGDQPSVQPPLR.S | 2947.25342 | 2 | 1.54E-09 | 0.97 | 5.75 | - | 1503.7 |
| AHQ-3-12, 5370 - 5398 | R.FGGEHVPNSPFQVTLALAGDQPSVQPPLR.S | 2947.25342 | 3 | 1.17E-04 | 0.93 | 4.61 | - | 1117.0 |
| AHQ-3-1, 5777 - 5796  | R.FGGEHVPNSPFQVTLALAGDQPSVQPPLR.S | 2947.25342 | 2 | 2.16E-06 | 0.97 | 6.25 | - | 1104.6 |
| AHQ-3-4, 5704 - 5772  | R.FGGEHVPNSPFQVTLALAGDQPSVQPPLR.S | 2947.25342 | 2 | 3.93E-06 | 0.96 | 4.98 | - | 1099.1 |
| AHQ-3-12, 5390        | R.FGGEHVPNSPFQVTLALAGDQPSVQPPLR.S | 2947.25342 | 2 | 6.44E-06 | 0.96 | 5.05 | - | 1055.8 |
| AHQ-3-2, 5833 - 5913  | R.FGGEHVPNSPFQVTLALAGDQPSVQPPLR.S | 2947.25342 | 3 | 7.01E-10 | 0.94 | 4.70 | - | 1426.0 |
| AHQ-3-1, 5916         | R.FGGEHVPNSPFQVTLALAGDQPSVQPPLR.S | 2947.25342 | 2 | 4.71E-08 | 0.97 | 5.66 | - | 1334.0 |
| AHQ-3-12, 5500        | R.FGGEHVPNSPFQVTLALAGDQPSVQPPLR.S | 2947.25342 | 3 | 1.09E-05 | 0.86 | 4.34 | - | 580.9  |
| AHQ-3-4, 5612 - 5688  | R.FGGEHVPNSPFQVTLALAGDQPSVQPPLR.S | 2947.25342 | 3 | 4.13E-07 | 0.91 | 4.74 | - | 778.7  |
| AHQ-3-9, 5025         | R.FGGEHVPNSPFQVTLALAGDQPSVQPPLR.S | 2947.25342 | 3 | 5.72E-07 | 0.89 | 4.26 | - | 852.5  |
| AHQ-3-11, 5136 - 5152 | R.FGGEHVPNSPFQVTLALAGDQPSVQPPLR.S | 2947.25342 | 3 | 6.53E-05 | 0.88 | 4.24 | - | 783.8  |
| AHQ-3-3, 5741         | R.FGGEHVPNSPFQVTLALAGDQPSVQPPLR.S | 2947.25342 | 2 | 6.02E-05 | 0.97 | 5.34 | - | 1291.6 |
| AHQ-3-3, 5658 - 5732  | R.FGGEHVPNSPFQVTLALAGDQPSVQPPLR.S | 2947.25342 | 2 | 3.77E-10 | 0.98 | 7.03 | - | 1309.4 |
| AHQ-3-3, 5640 - 5721  | R.FGGEHVPNSPFQVTLALAGDQPSVQPPLR.S | 2947.25342 | 3 | 3.42E-06 | 0.91 | 4.79 | - | 727.1  |
| AHQ-3-5, 5428         | R.FGGEHVPNSPFQVTLALAGDQPSVQPPLR.S | 2947.25342 | 3 | 1.61E-08 | 0.93 | 4.89 | - | 925.9  |
| AHQ-3-7, 5278 - 5280  | R.FGGEHVPNSPFQVTLALAGDQPSVQPPLR.S | 2947.25342 | 2 | 4.63E-04 | 0.94 | 4.29 | - | 1009.3 |
| AHQ-3-5, 5601         | R.FGGEHVPNSPFQVTLALAGDQPSVQPPLR.S | 2947.25342 | 2 | 1.26E-06 | 0.85 | 3.51 | - | 602.9  |
| AHQ-3-9, 5019         | R.FGGEHVPNSPFQVTLALAGDQPSVQPPLR.S | 2947.25342 | 2 | 1.40E-04 | 0.96 | 4.72 | - | 1298.2 |
| AHQ-3-13, 5291 - 5363 | R.FGGEHVPNSPFQVTLALAGDQPSVQPPLR.S | 2947.25342 | 3 | 1.62E-08 | 0.79 | 3.94 | - | 424.0  |
| AHQ-3-2, 5885         | R.FGGEHVPNSPFQVTLALAGDQPSVQPPLR.S | 2947.25342 | 2 | 3.63E-12 | 0.96 | 5.68 | - | 848.9  |
| AHQ-3-3, 5829         | R.FGGEHVPNSPFQVTLALAGDQPSVQPPLR.S | 2947.25342 | 2 | 3.98E-04 | 0.94 | 4.38 | - | 942.5  |
| AHQ-3-4, 5194 - 5264  | K.FNEEHIPDPSPFVVPVAPSPGDAR.R      | 2468.66280 | 2 | 1.23E-09 | 0.95 | 5.42 | - | 717.1  |
| AHQ-3-5, 5233 - 5287  | K.FNEEHIPDPSPFVVPVAPSPGDAR.R      | 2468.66280 | 3 | 3.06E-06 | 0.69 | 3.13 | - | 768.6  |
| AHQ-3-6, 4959         | K.FNEEHIPDPSPFVVPVAPSPGDAR.R      | 2468.66280 | 2 | 4.77E-04 | 0.83 | 3.81 | - | 499.1  |
| AHQ-3-5, 5033 - 5104  | K.FNEEHIPDPSPFVVPVAPSPGDAR.R      | 2468.66280 | 2 | 6.92E-09 | 0.94 | 5.49 | - | 512.9  |
| AHQ-3-5, 3436         | K.FNGTHIPGSPFK.I                  | 1302.46259 | 2 | 6.61E-04 | 0.80 | 3.06 | - | 602.7  |
| AHQ-3-1, 3854         | K.FNGTHIPGSPFK.I                  | 1302.46259 | 2 | 4.44E-05 | 0.82 | 3.06 | - | 664.9  |
| AHQ-3-1, 3962 - 3965  | K.FNGTHIPGSPFK.I                  | 1302.46259 | 2 | 6.30E-06 | 0.60 | 3.01 | - | 321.9  |
| AHQ-3-4, 3904         | K.FNGTHIPGSPFK.I                  | 1302.46259 | 1 | 1.96E-04 | 0.32 | 2.06 | - | 370.0  |
| AHQ-3-5, 3529         | K.FNGTHIPGSPFK.I                  | 1302.46259 | 2 | 1.26E-05 | 0.91 | 3.79 | - | 772.8  |
| AHQ-3-7, 3312         | K.FNGTHIPGSPFK.I                  | 1302.46259 | 2 | 2.56E-04 | 0.83 | 3.04 | - | 733.2  |
| AHQ-3-7, 3647         | K.FNGTHIPGSPFK.I                  | 1302.46259 | 2 | 2.00E-07 | 0.67 | 2.70 | - | 470.0  |
| AHQ-3-5, 2688         | R.FVPAEMGHTHTVSVK.Y               | 1503.74821 | 2 | 9.24E-06 | 0.87 | 3.24 | - | 644.8  |
| AHQ-3-6, 2697         | R.FVPAEMGHTHTVSVK.Y               | 1503.74821 | 2 | 3.59E-07 | 0.89 | 3.79 | - | 653.2  |
| AHQ-3-1, 3124         | R.FVPAEMGHTHTVSVK.Y               | 1503.74821 | 2 | 2.60E-10 | 0.92 | 3.42 | - | 719.7  |
| AHQ-3-2, 2315         | R.FVPAEM*GHTHTVSVK.Y              | 1519.74761 | 2 | 8.43E-04 | 0.75 | 3.23 | - | 289.5  |
| AHQ-3-4, 2878 - 2952  | R.FVPAEMGHTHTVSVK.Y               | 1503.74821 | 2 | 4.45E-08 | 0.86 | 3.83 | - | 537.5  |
| AHQ-3-3, 6928 - 6997  | R.GAGSYTIM*VLFADQATPTSPIR.V       | 2297.61623 | 2 | 1.22E-04 | 0.74 | 3.51 | - | 566.6  |
| AHQ-3-2, 6441         | R.GAGSYTIM*VLFADQATPTSPIR.V       | 2313.61563 | 2 | 3.45E-06 | 0.89 | 4.03 | - | 609.9  |
| AHQ-3-2, 6297 - 6373  | R.GAGSYTIM*VLFADQATPTSPIR.V       | 2313.61563 | 2 | 2.22E-04 | 0.86 | 3.99 | - | 644.0  |
| AHQ-3-1, 3417 - 3488  | R.GAGTGLGLLAVGEPSEAK.M            | 1571.71430 | 2 | 8.87E-06 | 0.78 | 3.03 | - | 717.2  |
| AHQ-3-2, 3919         | R.GAGTGLGLLAVGEPSEAK.M            | 1571.71430 | 2 | 2.06E-09 | 0.36 | 2.68 | - | 256.5  |
| AHQ-3-9, 2880         | R.GAGTGLGLLAVGEPSEAK.M            | 1571.71430 | 2 | 5.32E-05 | 0.59 | 2.96 | - | 476.5  |
| AHQ-3-4, 3300         | R.GAGTGLGLLAVGEPSEAK.M            | 1571.71430 | 2 | 1.52E-04 | 0.79 | 3.37 | - | 568.7  |
| AHQ-3-3, 3432         | R.GAGTGLGLLAVGEPSEAK.M            | 1571.71430 | 2 | 5.77E-05 | 0.78 | 3.60 | - | 593.1  |
| AHQ-3-5, 3135 - 3139  | R.GAGTGLGLLAVGEPSEAK.M            | 1571.71430 | 2 | 6.17E-04 | 0.82 | 3.31 | - | 682.5  |
| AHQ-3-3, 3340 - 3364  | R.GAGTGLGLLAVGEPSEAK.M            | 1571.71430 | 2 | 4.22E-07 | 0.86 | 3.33 | - | 860.8  |
| AHQ-3-7, 3010 - 3015  | R.GAGTGLGLLAVGEPSEAK.M            | 1571.71430 | 2 | 6.42E-06 | 0.92 | 4.00 | - | 786.5  |
| AHQ-3-2, 3285 - 3353  | R.GAGTGLGLLAVGEPSEAK.M            | 1571.71430 | 2 | 7.83E-05 | 0.77 | 3.41 | - | 588.6  |
| AHQ-3-2, 3489 - 3563  | R.GAGTGLGLLAVGEPSEAK.M            | 1571.71430 | 2 | 2.80E-07 | 0.70 | 2.69 | - | 797.6  |
| AHQ-3-1, 3484 - 3557  | R.GAGTGLGLLAVGEPSEAK.M            | 1571.71430 | 2 | 2.35E-06 | 0.93 | 4.06 | - | 908.3  |
| AHQ-3-6, 3086         | R.GAGTGLGLLAVGEPSEAK.M            | 1571.71430 | 2 | 2.20E-06 | 0.88 | 3.69 | - | 685.8  |
| AHQ-3-3, 3337         | K.GKLDVQFSGTLK.G                  | 1293.49392 | 2 | 3.67E-04 | 0.93 | 3.75 | - | 1091.0 |
| AHQ-3-3, 3422         | K.GKLDVQFSGTLK.G                  | 1293.49392 | 1 | 9.84E-04 | 0.70 | 2.79 | - | 552.4  |
| AHQ-3-4, 3282         | K.GKLDVQFSGTLK.G                  | 1293.49392 | 2 | 1.04E-04 | 0.93 | 3.80 | - | 1018.6 |
| AHQ-3-2, 3658         | K.GKLDVQFSGTLK.G                  | 1293.49392 | 1 | 6.83E-04 | 0.21 | 2.20 | - | 296.5  |
| AHQ-3-1, 5169 - 5196  | K.GLVEPVDVVDNADGTQTVNYVPSR.E      | 2545.74387 | 2 | 8.33E-15 | 0.98 | 6.48 | - | 1565.0 |
| AHQ-3-1, 4968 - 5040  | K.GLVEPVDVVDNADGTQTVNYVPSR.E      | 2545.74387 | 2 | 1.07E-08 | 0.94 | 5.30 | - | 804.4  |
| AHQ-3-3, 5196 - 5264  | K.GLVEPVDVVDNADGTQTVNYVPSR.E      | 2545.74387 | 2 | 6.88E-05 | 0.60 | 2.63 | - | 599.1  |
| AHQ-3-2, 5094 - 5162  | K.GLVEPVDVVDNADGTQTVNYVPSR.E      | 2545.74387 | 2 | 4.54E-08 | 0.98 | 6.62 | - | 1302.9 |
| AHQ-3-2, 5233 - 5373  | K.GLVEPVDVVDNADGTQTVNYVPSR.E      | 2545.74387 | 2 | 8.53E-07 | 0.94 | 5.16 | - | 996.0  |
| AHQ-3-2, 6798 - 6823  | K.GLVEPVDVVDNADGTQTVNYVPSR.E      | 4437.77937 | 3 | 4.94E-06 | 0.73 | 3.26 | - | 516.3  |
| AHQ-3-1, 6681         | K.GLVEPVDVVDNADGTQTVNYVPSR.E      | 4437.77937 | 3 | 4.47E-09 | 0.94 | 4.92 | - | 1026.8 |
| AHQ-3-3, 2132 - 2133  | K.GTVEPQLAR.G                     | 1100.20741 | 2 | 3.57E-04 | 0.62 | 2.93 | - | 384.4  |
| AHQ-3-2, 2129         | K.GTVEPQLAR.G                     | 1100.20741 | 1 | 8.49E-06 | 0.09 | 2.08 | - | 203.4  |
| AHQ-3-2, 2125         | K.GTVEPQLAR.G                     | 1100.20741 | 2 | 2.40E-06 | 0.73 | 3.15 | - | 461.5  |
| AHQ-3-1, 2304         | K.GTVEPQLAR.G                     | 1100.20741 | 2 | 5.47E-06 | 0.78 | 2.81 | - | 589.7  |
| AHQ-3-1, 5778 - 5786  | K.HTAMVSWGVSIPNSPFR.V             | 1944.20601 | 2 | 5.34E-07 | 0.97 | 5.40 | - | 1316.8 |
| AHQ-3-4, 5561 - 5565  | K.HTAMVSWGVSIPNSPFR.V             | 1944.20601 | 2 | 3.56E-06 | 0.97 | 5.29 | - | 1270.6 |
| AHQ-3-2, 5535 - 5607  | K.HTAM*VSWGVSIPNSPFR.V            | 1960.20541 | 2 | 1.19E-07 | 0.94 | 4.13 | - | 1338.2 |
| AHQ-3-3, 5226 - 5305  | K.HTAM*VSWGVSIPNSPFR.V            | 1960.20541 | 2 | 4.88E-05 | 0.93 | 3.93 | - | 1062.6 |
| AHQ-3-3, 5240         | K.HTAM*VSWGVSIPNSPFR.V            | 1960.20541 | 3 | 2.17E-04 | 0.69 | 3.73 | - | 451.8  |
| AHQ-3-2, 5638 - 5703  | K.HTAMVSWGVSIPNSPFR.V             | 1944.20601 | 2 | 1.02E-06 | 0.98 | 5.49 | - | 1654.9 |
| AHQ-3-2, 5647         | K.HTAMVSWGVSIPNSPFR.V             | 1944.20601 | 3 | 3.56E-04 | 0.69 | 3.70 | - | 481.5  |
| AHQ-3-1, 5373 - 5384  | K.HTAM*VSWGVSIPNSPFR.V            | 1960.20541 | 2 | 2.27E-06 | 0.96 | 5.06 | - | 1115.2 |
| AHQ-3-2, 5243 - 5314  | K.HTAM*VSWGVSIPNSPFR.V            | 1960.20541 | 2 | 1.57E-04 | 0.97 | 5.35 | - | 1147.9 |



|                       |                                |            |   |          |      |      |   |        |
|-----------------------|--------------------------------|------------|---|----------|------|------|---|--------|
| AHQ-3-5, 4956         | K.HTAM*VSWGVSIPNSPFR.V         | 1960.20541 | 2 | 2.21E-04 | 0.95 | 4.32 | - | 1057.5 |
| AHQ-3-2, 5035         | K.HTAM*VSWGVSIPNSPFR.V         | 1960.20541 | 2 | 3.11E-04 | 0.97 | 4.47 | - | 1847.6 |
| AHQ-3-4, 5117         | K.HTAM*VSWGVSIPNSPFR.V         | 1960.20541 | 2 | 2.71E-04 | 0.94 | 4.38 | - | 1016.2 |
| AHQ-3-3, 5606 - 5616  | K.HTAMVSWGVSIPNSPFR.V          | 1944.20601 | 2 | 6.41E-05 | 0.96 | 4.99 | - | 1150.3 |
| AHQ-3-1, 5380         | K.HTAM*VSWGVSIPNSPFR.V         | 1960.20541 | 3 | 3.31E-04 | 0.82 | 3.87 | - | 958.6  |
| AHQ-3-3, 4300 - 4377  | R.IANLQDLSGDGLR.L              | 1416.56231 | 2 | 9.03E-04 | 0.96 | 4.37 | - | 1242.8 |
| AHQ-3-1, 4758         | R.IANLQDLSGDGLR.L              | 1416.56231 | 2 | 9.08E-04 | 0.39 | 2.57 | - | 262.4  |
| AHQ-3-7, 3936         | R.IANLQDLSGDGLR.L              | 1416.56231 | 2 | 7.02E-08 | 0.92 | 3.88 | - | 899.4  |
| AHQ-3-11, 3922        | R.IANLQDLSGDGLR.L              | 1416.56231 | 2 | 6.19E-08 | 0.93 | 4.15 | - | 990.8  |
| AHQ-3-3, 4314         | R.IANLQDLSGDGLR.L              | 1416.56231 | 1 | 1.27E-04 | 0.39 | 2.96 | - | 216.7  |
| AHQ-3-2, 3933 - 3959  | R.IANLQDLSGDGLR.L              | 1416.56231 | 2 | 5.69E-05 | 0.92 | 4.01 | - | 957.1  |
| AHQ-3-1, 4408 - 4476  | R.IANLQDLSGDGLR.L              | 1416.56231 | 2 | 8.31E-05 | 0.85 | 3.39 | - | 820.1  |
| AHQ-3-5, 4052         | R.IANLQDLSGDGLR.L              | 1416.56231 | 1 | 1.16E-04 | 0.50 | 2.91 | - | 315.6  |
| AHQ-3-13, 4133 - 4143 | R.IANLQDLSGDGLR.L              | 1416.56231 | 2 | 3.83E-05 | 0.96 | 4.49 | - | 1254.9 |
| AHQ-3-4, 4241         | R.IANLQDLSGDGLR.L              | 1416.56231 | 1 | 7.88E-04 | 0.61 | 3.08 | - | 363.4  |
| AHQ-3-2, 4497 - 4577  | R.IANLQDLSGDGLR.L              | 1416.56231 | 2 | 5.10E-08 | 0.93 | 3.42 | - | 1147.4 |
| AHQ-3-2, 4267 - 4338  | R.IANLQDLSGDGLR.L              | 1416.56231 | 2 | 4.94E-08 | 0.95 | 4.42 | - | 1142.7 |
| AHQ-3-14, 5009        | R.IANLQDLSGDGLR.L              | 1416.56231 | 2 | 2.92E-08 | 0.88 | 3.60 | - | 816.6  |
| AHQ-3-10, 3831 - 3855 | R.IANLQDLSGDGLR.L              | 1416.56231 | 2 | 2.41E-05 | 0.92 | 3.85 | - | 965.9  |
| AHQ-3-2, 4029 - 4031  | R.IANLQDLSGDGLR.L              | 1416.56231 | 2 | 1.99E-09 | 0.96 | 4.28 | - | 1248.9 |
| AHQ-3-1, 4106         | R.IANLQDLSGDGLR.L              | 1416.56231 | 2 | 7.43E-08 | 0.90 | 4.20 | - | 660.3  |
| AHQ-3-13-, 4150       | R.IANLQDLSGDGLR.L              | 1416.56231 | 2 | 1.78E-04 | 0.88 | 3.17 | - | 1095.3 |
| AHQ-3-5, 4047         | R.IANLQDLSGDGLR.L              | 1416.56231 | 2 | 9.11E-06 | 0.95 | 4.05 | - | 1312.2 |
| AHQ-3-9, 3747 - 3753  | R.IANLQDLSGDGLR.L              | 1416.56231 | 2 | 5.88E-08 | 0.94 | 4.54 | - | 933.5  |
| AHQ-3-4, 3850         | R.IANLQDLSGDGLR.L              | 1416.56231 | 2 | 6.47E-09 | 0.94 | 4.05 | - | 1101.1 |
| AHQ-3-1, 4001 - 4025  | R.IANLQDLSGDGLR.L              | 1416.56231 | 2 | 9.03E-06 | 0.94 | 3.87 | - | 1261.8 |
| AHQ-3-3, 3986         | R.IANLQDLSGDGLR.L              | 1416.56231 | 2 | 4.82E-06 | 0.88 | 3.64 | - | 653.6  |
| AHQ-3-1, 4414         | R.IANLQDLSGDGLR.L              | 1416.56231 | 1 | 5.24E-04 | 0.47 | 2.88 | - | 220.8  |
| AHQ-3-4, 4224         | R.IANLQDLSGDGLR.L              | 1416.56231 | 2 | 2.90E-07 | 0.93 | 3.80 | - | 1022.6 |
| AHQ-3-1, 4604 - 4608  | R.IANLQDLSGDGLR.L              | 1416.56231 | 2 | 2.58E-07 | 0.95 | 4.00 | - | 1284.2 |
| AHQ-3-12, 4095        | R.IANLQDLSGDGLR.L              | 1416.56231 | 2 | 1.66E-09 | 0.96 | 4.64 | - | 1138.4 |
| AHQ-3-3, 4550         | R.IANLQDLSGDGLR.L              | 1416.56231 | 2 | 1.01E-06 | 0.93 | 3.78 | - | 1203.6 |
| AHQ-3-6, 3989 - 3994  | R.IANLQDLSGDGLR.L              | 1416.56231 | 2 | 1.87E-08 | 0.93 | 3.95 | - | 1101.4 |
| AHQ-3-5, 5452 - 5531  | K.IPEISIQDMTAQVTPSPGK.T        | 2003.26361 | 2 | 4.56E-05 | 0.96 | 4.69 | - | 1043.0 |
| AHQ-3-6, 5381         | K.IPEISIQDMTAQVTPSPGK.T        | 2003.26361 | 2 | 5.88E-07 | 0.94 | 5.08 | - | 768.9  |
| AHQ-3-5, 4023 - 4068  | K.IPEISIQDM*TAQVTPSPGK.T       | 2019.26301 | 2 | 2.25E-07 | 0.97 | 5.10 | - | 1890.3 |
| AHQ-3-7, 3922 - 3923  | K.IPEISIQDM*TAQVTPSPGK.T       | 2019.26301 | 2 | 6.24E-05 | 0.97 | 5.28 | - | 1596.8 |
| AHQ-3-1, 5736 - 5785  | K.IPEISIQDMTAQVTPSPGK.T        | 2003.26361 | 2 | 1.37E-04 | 0.96 | 4.57 | - | 1430.6 |
| AHQ-3-1, 4341         | K.IPEISIQDM*TAQVTPSPGK.T       | 2019.26301 | 3 | 6.58E-05 | 0.72 | 3.10 | - | 810.4  |
| AHQ-3-5, 5475         | K.IPEISIQDMTAQVTPSPGK.T        | 2003.26361 | 3 | 4.75E-06 | 0.85 | 4.20 | - | 779.1  |
| AHQ-3-6, 5415         | K.IPEISIQDMTAQVTPSPGK.T        | 2003.26361 | 3 | 6.02E-05 | 0.87 | 3.81 | - | 929.5  |
| AHQ-3-4, 5624 - 5692  | K.IPEISIQDMTAQVTPSPGK.T        | 2003.26361 | 2 | 8.01E-11 | 0.98 | 6.00 | - | 2132.4 |
| AHQ-3-5, 4847         | K.IPEISIQDMTAQVTPSPGK.T        | 2003.26361 | 2 | 6.78E-05 | 0.85 | 3.21 | - | 943.6  |
| AHQ-3-4, 4160 - 4230  | K.IPEISIQDM*TAQVTPSPGK.T       | 2019.26301 | 2 | 7.17E-06 | 0.96 | 5.61 | - | 1230.0 |
| AHQ-3-7, 5323 - 5326  | K.IPEISIQDMTAQVTPSPGK.T        | 2003.26361 | 2 | 1.02E-10 | 0.97 | 5.25 | - | 1553.9 |
| AHQ-3-2, 4270         | K.IPEISIQDM*TAQVTPSPGK.T       | 2019.26301 | 2 | 3.66E-07 | 0.94 | 3.95 | - | 1106.8 |
| AHQ-3-3, 5661         | K.IPEISIQDMTAQVTPSPGK.T        | 2003.26361 | 2 | 8.27E-10 | 0.95 | 4.64 | - | 1033.2 |
| AHQ-3-1, 4288 - 4356  | K.IPEISIQDM*TAQVTPSPGK.T       | 2019.26301 | 2 | 8.05E-06 | 0.97 | 5.32 | - | 1703.2 |
| AHQ-3-6, 3963 - 3967  | K.IPEISIQDM*TAQVTPSPGK.T       | 2019.26301 | 2 | 7.95E-07 | 0.98 | 4.93 | - | 2167.2 |
| AHQ-3-3, 4230         | K.IPEISIQDM*TAQVTPSPGK.T       | 2019.26301 | 2 | 5.66E-07 | 0.97 | 4.91 | - | 1475.3 |
| AHQ-3-2, 2486         | K.IVGPSSGAAPVCK.V              | 1157.36530 | 2 | 3.61E-06 | 0.92 | 3.66 | - | 950.9  |
| AHQ-3-3, 2476 - 2496  | K.IVGPSSGAAPVCK.V              | 1157.36530 | 2 | 1.96E-10 | 0.93 | 4.29 | - | 736.1  |
| AHQ-3-1, 2632         | K.IVGPSSGAAPVCK.V              | 1157.36530 | 2 | 2.43E-05 | 0.90 | 3.68 | - | 880.4  |
| AHQ-3-4, 2473         | K.IVGPSSGAAPVCK.V              | 1157.36530 | 2 | 4.74E-05 | 0.88 | 3.59 | - | 669.9  |
| AHQ-3-1, 4360         | K.IVGPSSGAAPVCKVEPGLGADNSVVR.F | 2451.78478 | 2 | 3.01E-05 | 0.91 | 4.62 | - | 352.3  |
| AHQ-3-3, 4264 - 4336  | K.IVGPSSGAAPVCKVEPGLGADNSVVR.F | 2451.78478 | 2 | 7.55E-07 | 0.93 | 4.97 | - | 498.2  |
| AHQ-3-3, 4345 - 4420  | K.IVGPSSGAAPVCKVEPGLGADNSVVR.F | 2451.78478 | 3 | 2.21E-06 | 0.96 | 5.10 | - | 1349.4 |
| AHQ-3-1, 4352 - 4424  | K.IVGPSSGAAPVCKVEPGLGADNSVVR.F | 2451.78478 | 3 | 3.45E-11 | 0.93 | 4.99 | - | 1331.6 |
| AHQ-3-2, 4423         | K.IVGPSSGAAPVCKVEPGLGADNSVVR.F | 2451.78478 | 2 | 2.23E-05 | 0.81 | 3.15 | - | 600.9  |
| AHQ-3-3, 4254 - 4276  | K.IVGPSSGAAPVCKVEPGLGADNSVVR.F | 2451.78478 | 3 | 2.69E-11 | 0.96 | 5.64 | - | 1225.2 |
| AHQ-3-5, 4149         | K.IVGPSSGAAPVCKVEPGLGADNSVVR.F | 2451.78478 | 3 | 1.29E-04 | 0.91 | 4.06 | - | 1041.9 |
| AHQ-3-2, 4274 - 4353  | K.IVGPSSGAAPVCKVEPGLGADNSVVR.F | 2451.78478 | 3 | 1.64E-08 | 0.93 | 4.78 | - | 1247.0 |
| AHQ-3-1, 4469         | K.IVGPSSGAAPVCKVEPGLGADNSVVR.F | 2451.78478 | 2 | 1.54E-05 | 0.88 | 3.85 | - | 577.3  |
| AHQ-3-6, 3973         | K.IVGPSSGAAPVCKVEPGLGADNSVVR.F | 2451.78478 | 3 | 1.32E-04 | 0.92 | 4.25 | - | 1462.5 |
| AHQ-3-2, 4362 - 4429  | K.IVGPSSGAAPVCKVEPGLGADNSVVR.F | 2451.78478 | 3 | 9.40E-10 | 0.92 | 4.67 | - | 1067.8 |
| AHQ-3-2, 4281 - 4350  | K.IVGPSSGAAPVCKVEPGLGADNSVVR.F | 2451.78478 | 2 | 6.74E-06 | 0.83 | 3.71 | - | 411.0  |
| AHQ-3-4, 4194 - 4276  | K.IVGPSSGAAPVCKVEPGLGADNSVVR.F | 2451.78478 | 3 | 5.91E-05 | 0.90 | 4.36 | - | 1085.8 |
| AHQ-3-4, 4196         | K.IVGPSSGAAPVCKVEPGLGADNSVVR.F | 2451.78478 | 2 | 2.04E-07 | 0.87 | 4.00 | - | 415.5  |
| AHQ-3-5, 4044         | K.IVGPSSGAAPVCKVEPGLGADNSVVR.F | 2451.78478 | 3 | 1.07E-06 | 0.93 | 4.75 | - | 1296.3 |
| AHQ-3-1, 4558 - 4637  | R.KDGCSCGVAYVQEPGDYEVSVK.F     | 2388.59282 | 2 | 6.60E-07 | 0.94 | 4.52 | - | 1028.2 |
| AHQ-3-5, 4399         | R.KDGCSCGVAYVQEPGDYEVSVK.F     | 2388.59282 | 2 | 5.42E-04 | 0.51 | 3.16 | - | 564.0  |
| AHQ-3-5, 4280 - 4295  | R.KDGCSCGVAYVQEPGDYEVSVK.F     | 2388.59282 | 2 | 2.31E-04 | 0.89 | 4.13 | - | 686.7  |
| AHQ-3-5, 3956 - 3968  | K.KNGQHVASSPIPVVISQSEIGDASR.V  | 2577.83547 | 2 | 1.54E-05 | 0.93 | 4.73 | - | 658.4  |
| AHQ-3-6, 4025 - 4029  | K.KNGQHVASSPIPVVISQSEIGDASR.V  | 2577.83547 | 2 | 4.49E-06 | 0.89 | 4.34 | - | 522.8  |
| AHQ-3-5, 4075 - 4087  | K.KNGQHVASSPIPVVISQSEIGDASR.V  | 2577.83547 | 3 | 2.34E-11 | 0.98 | 7.40 | - | 2107.9 |
| AHQ-3-9, 3763         | K.KNGQHVASSPIPVVISQSEIGDASR.V  | 2577.83547 | 2 | 2.08E-05 | 0.82 | 3.38 | - | 488.9  |
| AHQ-3-8, 3760         | K.KNGQHVASSPIPVVISQSEIGDASR.V  | 2577.83547 | 2 | 1.68E-06 | 0.86 | 3.61 | - | 627.4  |
| AHQ-3-2, 4461         | K.KNGQHVASSPIPVVISQSEIGDASR.V  | 2577.83547 | 3 | 9.59E-09 | 0.95 | 5.02 | - | 1709.5 |
| AHQ-3-5, 4181         | K.KNGQHVASSPIPVVISQSEIGDASR.V  | 2577.83547 | 3 | 5.07E-05 | 0.93 | 4.42 | - | 1673.9 |
| AHQ-3-1, 4480 - 4552  | K.KNGQHVASSPIPVVISQSEIGDASR.V  | 2577.83547 | 3 | 4.31E-08 | 0.97 | 5.75 | - | 1897.3 |
| AHQ-3-1, 4592         | K.KNGQHVASSPIPVVISQSEIGDASR.V  | 2577.83547 | 3 | 1.81E-12 | 0.95 | 4.98 | - | 1431.7 |
| AHQ-3-1, 4486 - 4556  | K.KNGQHVASSPIPVVISQSEIGDASR.V  | 2577.83547 | 2 | 4.29E-06 | 0.73 | 3.26 | - | 404.1  |
| AHQ-3-4, 4205 - 4288  | K.KNGQHVASSPIPVVISQSEIGDASR.V  | 2577.83547 | 3 | 7.16E-07 | 0.96 | 5.84 | - | 1601.5 |
| AHQ-3-2, 3393 - 3462  | K.KTHIQDNDHGGTYTVAYVPDVTGR.Y   | 2588.77367 | 3 | 2.59E-08 | 0.96 | 5.60 | - | 1467.4 |
| AHQ-3-6, 3025         | K.KTHIQDNDHGGTYTVAYVPDVTGR.Y   | 2588.77367 | 3 | 6.34E-07 | 0.85 | 3.76 | - | 741.9  |
| AHQ-3-2, 3411 - 3482  | K.KTHIQDNDHGGTYTVAYVPDVTGR.Y   | 2588.77367 | 2 | 5.56E-05 | 0.96 | 5.39 | - | 1024.8 |
| AHQ-3-3, 3290 - 3369  | K.KTHIQDNDHGGTYTVAYVPDVTGR.Y   | 2588.77367 | 2 | 4.94E-04 | 0.94 | 4.89 | - | 687.7  |
| AHQ-3-2, 3638         | K.KTHIQDNDHGGTYTVAYVPDVTGR.Y   | 2588.77367 | 3 | 1.10E-06 | 0.89 | 3.89 | - | 1050.5 |
| AHQ-3-3, 3302 - 3382  | K.KTHIQDNDHGGTYTVAYVPDVTGR.Y   | 2588.77367 | 3 | 2.77E-04 | 0.84 | 3.61 | - | 916.5  |
| AHQ-3-1, 3661 - 3730  | K.KTHIQDNDHGGTYTVAYVPDVTGR.Y   | 2588.77367 | 3 | 5.37E-08 | 0.96 | 4.71 | - | 1758.4 |
| AHQ-3-2, 3262 - 3305  | K.KTHIQDNDHGGTYTVAYVPDVTGR.Y   | 2588.77367 | 3 | 1.06E-06 | 0.92 | 4.51 | - | 1209.9 |
| AHQ-3-3, 3442 - 3516  | K.KTHIQDNDHGGTYTVAYVPDVTGR.Y   | 2588.77367 | 2 | 2.39E-04 | 0.88 | 4.13 | - | 483.5  |
| AHQ-3-4, 3442         | K.KTHIQDNDHGGTYTVAYVPDVTGR.Y   | 2588.77367 | 2 | 5.22E-04 | 0.39 | 2.56 | - | 263.3  |
| AHQ-3-1, 3546         | K.KTHIQDNDHGGTYTVAYVPDVTGR.Y   | 2588.77367 | 2 | 7.09E-07 | 0.96 | 5.06 | - | 1010.3 |
| AHQ-3-1, 3544         | K.KTHIQDNDHGGTYTVAYVPDVTGR.Y   | 2588.77367 | 3 | 6.43E-08 | 0.92 | 4.16 | - | 1087.0 |
| AHQ-3-1, 3550         | K.KTHIQDNDHGGTYTVAYVPDVTGR.Y   | 2588.77367 | 2 | 5.40E-04 | 0.75 | 3.19 | - | 462.9  |
| AHQ-3-4, 3896         | K.LDVQFSGLT.K.G                | 1108.26945 | 1 | 5.04E-06 | 0.31 | 2.14 | - | 342.4  |
| AHQ-3-2, 3993 - 4062  | K.LDVQFSGLT.K.G                | 1108.26945 | 1 | 1.63E-06 | 0.10 | 1.91 | - | 298.1  |
| AHQ-3-2, 4003         | K.LDVQFSGLT.K.G                | 1108.26945 | 1 | 1.09E-04 | 0.17 | 2.10 | - | 217.5  |
| AHQ-3-2, 3995         | K.LDVQFSGLT.K.G                | 1108.26945 | 2 | 5.39E-06 | 0.94 | 3.90 | - | 1113.4 |
| AHQ-3-3, 3960         | K.LDVQFSGLT.K.G                | 1108.26945 | 1 | 1.19E-05 | 0.19 | 2.31 | - | 190.4  |
| AHQ-3-3, 3957         | K.LDVQFSGLT.K.G                | 1108.26945 | 2 | 3.66E-05 | 0.86 | 3.09 | - | 912.4  |
| AHQ-3-3, 3945         | K.LDVQFSGLT.K.G                | 1108.26945 | 1 | 3.63E-04 | 0.11 | 2.04 | - | 201.2  |
| AHQ-3-1, 4093         | K.LDVQFSGLT.K.G                | 1108.26945 | 2 | 2.03E-06 | 0.94 | 3.81 | - | 1065.2 |
| AHQ-3-2, 7150         | R.LLWQIKNLQPLPITNFSR.D         | 2239.64761 | 3 | 4.41E-04 | 0.96 | 5.27 | - | 1335.0 |
| AHQ-3-2, 7162         | R.LLWQIKNLQPLPITNFSR.D         | 2239.64761 | 2 | 7.82E-05 | 0.83 | 4.11 | - | 393.4  |
| AHQ-3-2, 4969         | K.LPQLPITNFSR.D                | 1286.50461 | 1 | 6.22E-07 | 0.77 | 2.94 | - | 265.2  |

|                       |                                  |            |   |          |      |      |   |        |
|-----------------------|----------------------------------|------------|---|----------|------|------|---|--------|
| AHQ-3-6, 4597 - 4607  | K.LPQLPITNFSR.D                  | 1286.50461 | 2 | 3.24E-05 | 0.76 | 2.93 | - | 480.6  |
| AHQ-3-2, 5299         | K.LPQLPITNFSR.D                  | 1286.50461 | 1 | 4.55E-05 | 0.22 | 1.82 | - | 233.2  |
| AHQ-3-1, 5048 - 5050  | K.LPQLPITNFSR.D                  | 1286.50461 | 2 | 2.93E-05 | 0.88 | 3.16 | - | 693.1  |
| AHQ-3-2, 5294         | K.LPQLPITNFSR.D                  | 1286.50461 | 2 | 1.50E-06 | 0.85 | 2.95 | - | 692.0  |
| AHQ-3-4, 4886         | K.LPQLPITNFSR.D                  | 1286.50461 | 2 | 5.30E-05 | 0.77 | 2.98 | - | 538.6  |
| AHQ-3-2, 4950 - 5021  | K.LPQLPITNFSR.D                  | 1286.50461 | 2 | 8.61E-06 | 0.82 | 2.87 | - | 553.0  |
| AHQ-3-9, 4291 - 4299  | K.LPQLPITNFSR.D                  | 1286.50461 | 2 | 5.48E-06 | 0.78 | 2.87 | - | 498.0  |
| AHQ-3-3, 4960         | K.LPQLPITNFSR.D                  | 1286.50461 | 2 | 9.98E-07 | 0.92 | 3.16 | - | 826.3  |
| AHQ-3-1, 5312         | K.LPQLPITNFSR.D                  | 1286.50461 | 2 | 4.89E-07 | 0.72 | 2.72 | - | 536.7  |
| AHQ-3-2, 5206         | K.LPQLPITNFSR.D                  | 1286.50461 | 2 | 1.62E-04 | 0.54 | 2.54 | - | 356.9  |
| AHQ-3-5, 5105         | K.LPQLPITNFSR.D                  | 1286.50461 | 2 | 3.96E-05 | 0.82 | 2.90 | - | 647.8  |
| AHQ-3-3, 5736 - 5788  | K.LQVEPAVDTSVGVCYGP GIEGQGVFR.E  | 2766.03597 | 2 | 7.33E-09 | 0.91 | 4.29 | - | 635.5  |
| AHQ-3-3, 5688         | K.LQVEPAVDTSVGVCYGP GIEGQGVFR.E  | 2766.03597 | 3 | 2.94E-08 | 0.98 | 6.63 | - | 1786.5 |
| AHQ-3-5, 5503 - 5516  | K.LQVEPAVDTSVGVCYGP GIEGQGVFR.E  | 2766.03597 | 3 | 2.52E-06 | 0.96 | 4.93 | - | 1561.3 |
| AHQ-3-12, 5331        | K.LQVEPAVDTSVGVCYGP GIEGQGVFR.E  | 2766.03597 | 2 | 3.31E-09 | 0.95 | 4.47 | - | 1028.7 |
| AHQ-3-2, 5746 - 5813  | K.LQVEPAVDTSVGVCYGP GIEGQGVFR.E  | 2766.03597 | 2 | 1.82E-07 | 0.92 | 4.43 | - | 667.4  |
| AHQ-3-2, 5642 - 5723  | K.LQVEPAVDTSVGVCYGP GIEGQGVFR.E  | 2766.03597 | 3 | 1.48E-09 | 0.98 | 7.00 | - | 2428.4 |
| AHQ-3-2, 5623 - 5693  | K.LQVEPAVDTSVGVCYGP GIEGQGVFR.E  | 2766.03597 | 2 | 8.15E-09 | 0.96 | 5.73 | - | 920.8  |
| AHQ-3-1, 5613 - 5692  | K.LQVEPAVDTSVGVCYGP GIEGQGVFR.E  | 2766.03597 | 3 | 2.93E-11 | 0.97 | 6.33 | - | 1776.2 |
| AHQ-3-3, 5586 - 5664  | K.LQVEPAVDTSVGVCYGP GIEGQGVFR.E  | 2766.03597 | 2 | 2.43E-06 | 0.97 | 5.81 | - | 904.8  |
| AHQ-3-1, 5580 - 5648  | K.LQVEPAVDTSVGVCYGP GIEGQGVFR.E  | 2766.03597 | 2 | 5.83E-07 | 0.90 | 3.61 | - | 962.0  |
| AHQ-3-4, 5621 - 5622  | K.LQVEPAVDTSVGVCYGP GIEGQGVFR.E  | 2766.03597 | 3 | 4.91E-05 | 0.79 | 3.60 | - | 605.9  |
| AHQ-3-4, 2822         | R.LRNHGVHSIFVFK.E                | 1424.67564 | 2 | 4.78E-04 | 0.86 | 3.35 | - | 730.9  |
| AHQ-3-5, 2616         | R.LRNHGVHSIFVFK.E                | 1424.67564 | 2 | 1.55E-04 | 0.80 | 2.81 | - | 727.6  |
| AHQ-3-1, 3133         | R.LRNHGVHSIFVFK.E                | 1424.67564 | 2 | 2.11E-05 | 0.82 | 2.95 | - | 750.4  |
| AHQ-3-1, 3490 - 3496  | R.LSPFM*ADIR.D                   | 1066.25604 | 2 | 6.70E-04 | 0.78 | 2.63 | - | 598.0  |
| AHQ-3-2, 4049 - 4057  | R.LSPFMADIR.D                    | 1050.25664 | 2 | 4.45E-04 | 0.77 | 2.79 | - | 393.9  |
| AHQ-3-6, 3121         | R.LTVSSLQESGLK.V                 | 1262.43499 | 2 | 9.66E-06 | 0.70 | 2.57 | - | 694.7  |
| AHQ-3-4, 3356 - 3388  | R.LTVSSLQESGLK.V                 | 1262.43499 | 2 | 9.80E-07 | 0.90 | 3.37 | - | 898.3  |
| AHQ-3-7, 3707         | R.LVSNHSLHETSSVFDLSLK.A          | 2201.42190 | 3 | 1.40E-04 | 0.96 | 4.82 | - | 1639.6 |
| AHQ-3-7, 3703 - 3706  | R.LVSNHSLHETSSVFDLSLK.A          | 2201.42190 | 2 | 4.02E-04 | 0.98 | 5.86 | - | 1384.2 |
| AHQ-3-6, 4155 - 4161  | R.LVSNHSLHETSSVFDLSLK.A          | 2201.42190 | 2 | 1.10E-07 | 0.95 | 4.71 | - | 1011.5 |
| AHQ-3-1, 4662         | R.LVSNHSLHETSSVFDLSLK.A          | 2201.42190 | 3 | 1.57E-08 | 0.95 | 4.99 | - | 1411.8 |
| AHQ-3-1, 4649 - 4665  | R.LVSNHSLHETSSVFDLSLK.A          | 2201.42190 | 2 | 4.12E-09 | 0.96 | 5.28 | - | 1128.8 |
| AHQ-3-6, 3790         | R.LVSNHSLHETSSVFDLSLK.A          | 2201.42190 | 3 | 2.75E-06 | 0.97 | 5.93 | - | 1807.7 |
| AHQ-3-3, 4185         | R.LVSNHSLHETSSVFDLSLK.A          | 2201.42190 | 2 | 1.78E-05 | 0.95 | 4.84 | - | 1133.5 |
| AHQ-3-13-, 4081       | R.LVSNHSLHETSSVFDLSLK.A          | 2201.42190 | 3 | 1.34E-07 | 0.96 | 4.99 | - | 1735.2 |
| AHQ-3-8, 3645         | R.LVSNHSLHETSSVFDLSLK.A          | 2201.42190 | 2 | 4.22E-06 | 0.95 | 4.61 | - | 1075.4 |
| AHQ-3-4, 4034 - 4041  | R.LVSNHSLHETSSVFDLSLK.A          | 2201.42190 | 3 | 7.13E-09 | 0.98 | 6.17 | - | 1861.7 |
| AHQ-3-7, 4038         | R.LVSNHSLHETSSVFDLSLK.A          | 2201.42190 | 2 | 8.31E-06 | 0.95 | 5.00 | - | 1024.3 |
| AHQ-3-10, 3708        | R.LVSNHSLHETSSVFDLSLK.A          | 2201.42190 | 2 | 1.21E-06 | 0.91 | 4.24 | - | 697.4  |
| AHQ-3-5, 3699         | R.LVSNHSLHETSSVFDLSLK.A          | 2201.42190 | 2 | 7.20E-06 | 0.90 | 3.97 | - | 751.2  |
| AHQ-3-11, 3819        | R.LVSNHSLHETSSVFDLSLK.A          | 2201.42190 | 2 | 6.08E-06 | 0.90 | 4.12 | - | 457.5  |
| AHQ-3-4, 4026         | R.LVSNHSLHETSSVFDLSLK.A          | 2201.42190 | 2 | 7.90E-04 | 0.91 | 4.18 | - | 457.5  |
| AHQ-3-5, 3767 - 3820  | R.LVSNHSLHETSSVFDLSLK.A          | 2201.42190 | 3 | 5.73E-04 | 0.97 | 4.95 | - | 1980.8 |
| AHQ-3-11, 3830        | R.LVSNHSLHETSSVFDLSLK.A          | 2201.42190 | 3 | 2.97E-06 | 0.94 | 4.50 | - | 1335.1 |
| AHQ-3-5, 3819 - 3892  | R.LVSNHSLHETSSVFDLSLK.A          | 2201.42190 | 2 | 8.76E-06 | 0.98 | 5.71 | - | 1858.1 |
| AHQ-3-5, 3893         | R.LVSNHSLHETSSVFDLSLK.A          | 2201.42190 | 3 | 7.11E-07 | 0.97 | 4.70 | - | 2179.5 |
| AHQ-3-11, 4111        | R.LVSNHSLHETSSVFDLSLK.A          | 2201.42190 | 3 | 9.14E-05 | 0.64 | 3.22 | - | 568.9  |
| AHQ-3-13, 4057        | R.LVSNHSLHETSSVFDLSLK.A          | 2201.42190 | 2 | 9.65E-06 | 0.95 | 5.30 | - | 873.1  |
| AHQ-3-1, 4344         | R.LVSNHSLHETSSVFDLSLK.A          | 2201.42190 | 2 | 8.84E-08 | 0.97 | 5.43 | - | 1529.0 |
| AHQ-3-5, 4299         | R.LVSNHSLHETSSVFDLSLK.A          | 2201.42190 | 3 | 8.99E-06 | 0.83 | 3.20 | - | 844.4  |
| AHQ-3-1, 4354         | R.LVSNHSLHETSSVFDLSLK.A          | 2201.42190 | 3 | 1.13E-04 | 0.96 | 4.55 | - | 1710.3 |
| AHQ-3-2, 4213 - 4215  | R.LVSNHSLHETSSVFDLSLK.A          | 2201.42190 | 2 | 1.50E-07 | 0.98 | 6.34 | - | 2129.5 |
| AHQ-3-14-, 3931       | R.LVSNHSLHETSSVFDLSLK.A          | 2201.42190 | 3 | 6.49E-08 | 0.96 | 4.79 | - | 1608.9 |
| AHQ-3-14-, 4271       | R.LVSNHSLHETSSVFDLSLK.A          | 2201.42190 | 2 | 2.44E-05 | 0.93 | 4.31 | - | 730.9  |
| AHQ-3-5, 4168 - 4240  | R.LVSNHSLHETSSVFDLSLK.A          | 2201.42190 | 2 | 5.41E-08 | 0.98 | 5.68 | - | 1820.1 |
| AHQ-3-13, 4058        | R.LVSNHSLHETSSVFDLSLK.A          | 2201.42190 | 3 | 3.22E-04 | 0.94 | 4.26 | - | 1186.5 |
| AHQ-3-6, 3781         | R.LVSNHSLHETSSVFDLSLK.A          | 2201.42190 | 2 | 2.67E-07 | 0.96 | 4.87 | - | 1327.7 |
| AHQ-3-4, 4404 - 4481  | R.LVSNHSLHETSSVFDLSLK.A          | 2201.42190 | 2 | 9.19E-13 | 0.96 | 5.65 | - | 863.0  |
| AHQ-3-14, 5280        | R.LVSNHSLHETSSVFDLSLK.A          | 2201.42190 | 3 | 6.85E-08 | 0.97 | 4.95 | - | 1878.7 |
| AHQ-3-3, 4540         | R.LVSNHSLHETSSVFDLSLK.A          | 2201.42190 | 2 | 6.04E-08 | 0.95 | 4.35 | - | 1167.4 |
| AHQ-3-14, 5424 - 5492 | R.LVSYSLK.D                      | 1086.30538 | 2 | 9.00E-04 | 0.47 | 2.91 | - | 266.4  |
| AHQ-3-6, 2359 - 2395  | K.MDCQCEPEGR.V                   | 1447.55375 | 2 | 6.17E-06 | 0.86 | 3.47 | - | 698.0  |
| AHQ-3-5, 2971         | R.NGHVHSIFVFK.E                  | 1155.33104 | 1 | 3.52E-04 | 0.31 | 2.13 | - | 381.6  |
| AHQ-3-4, 2970         | R.NGHVHSIFVFK.E                  | 1155.33104 | 1 | 8.29E-07 | 0.70 | 2.46 | - | 499.9  |
| AHQ-3-4, 3172         | R.NGHVHSIFVFK.E                  | 1155.33104 | 1 | 8.79E-05 | 0.28 | 2.17 | - | 381.9  |
| AHQ-3-5, 2768         | R.NGHVHSIFVFK.E                  | 1155.33104 | 1 | 1.63E-06 | 0.61 | 2.61 | - | 421.8  |
| AHQ-3-5, 4617 - 4631  | K.NGQHVASSPPIVVISQSEIGDASR.V     | 2449.66256 | 2 | 8.24E-09 | 0.94 | 4.17 | - | 944.9  |
| AHQ-3-4, 4812         | K.NGQHVASSPPIVVISQSEIGDASR.V     | 2449.66256 | 2 | 1.16E-04 | 0.95 | 4.04 | - | 1310.4 |
| AHQ-3-1, 4929         | K.NGQHVASSPPIVVISQSEIGDASR.V     | 2449.66256 | 2 | 5.60E-05 | 0.95 | 4.29 | - | 1076.1 |
| AHQ-3-2, 1811 - 1879  | K.RAEFTVETR.S                    | 1109.21754 | 2 | 5.87E-07 | 0.92 | 3.30 | - | 935.1  |
| AHQ-3-1, 2146         | K.RAEFTVETR.S                    | 1109.21754 | 2 | 2.87E-06 | 0.96 | 3.73 | - | 1258.8 |
| AHQ-3-1, 3146         | R.RAPSVANVGSCHDSLK.I             | 1813.02884 | 2 | 9.16E-05 | 0.96 | 4.95 | - | 1097.5 |
| AHQ-3-7, 2572         | R.RLTVSSLQESGLK.V                | 1418.62134 | 2 | 3.58E-04 | 0.92 | 3.98 | - | 993.4  |
| AHQ-3-3, 2953         | R.RLTVSSLQESGLK.V                | 1418.62134 | 2 | 5.22E-04 | 0.97 | 4.72 | - | 2067.8 |
| AHQ-3-1, 7334 - 7416  | K.SADFVVEAIGDDVGT LFGSVEGSPQAK.I | 2696.90399 | 2 | 9.23E-08 | 0.89 | 4.16 | - | 948.1  |
| AHQ-3-3, 7681         | K.SADFVVEAIGDDVGT LFGSVEGSPQAK.I | 2696.90399 | 3 | 1.52E-05 | 0.79 | 3.45 | - | 822.8  |
| AHQ-3-1, 7440         | K.SADFVVEAIGDDVGT LFGSVEGSPQAK.I | 2696.90399 | 2 | 2.83E-04 | 0.92 | 3.84 | - | 1334.8 |
| AHQ-3-2, 7686 - 7755  | K.SADFVVEAIGDDVGT LFGSVEGSPQAK.I | 2696.90399 | 3 | 3.78E-04 | 0.82 | 4.23 | - | 551.9  |
| AHQ-3-1, 7345 - 7408  | K.SADFVVEAIGDDVGT LFGSVEGSPQAK.I | 2696.90399 | 3 | 4.74E-06 | 0.92 | 4.76 | - | 1099.7 |
| AHQ-3-2, 3941 - 4009  | R.SAGQGEVLVYEDPAGHQEEAK.V        | 2314.45074 | 2 | 3.46E-06 | 0.87 | 4.33 | - | 516.5  |
| AHQ-3-3, 3870 - 3942  | R.SAGQGEVLVYEDPAGHQEEAK.V        | 2314.45074 | 3 | 1.67E-04 | 0.84 | 3.99 | - | 792.3  |
| AHQ-3-2, 3949 - 4021  | R.SAGQGEVLVYEDPAGHQEEAK.V        | 2314.45074 | 3 | 5.43E-07 | 0.92 | 4.45 | - | 947.5  |
| AHQ-3-1, 4101 - 4128  | R.SAGQGEVLVYEDPAGHQEEAK.V        | 2314.45074 | 2 | 2.81E-06 | 0.92 | 4.86 | - | 515.3  |
| AHQ-3-2, 4103         | R.SAGQGEVLVYEDPAGHQEEAK.V        | 2314.45074 | 3 | 1.53E-06 | 0.85 | 3.53 | - | 906.2  |
| AHQ-3-2, 4193         | R.SAGQGEVLVYEDPAGHQEEAK.V        | 2314.45074 | 3 | 5.09E-08 | 0.92 | 4.43 | - | 876.8  |
| AHQ-3-4, 3834 - 3916  | R.SAGQGEVLVYEDPAGHQEEAK.V        | 2314.45074 | 2 | 1.17E-07 | 0.87 | 3.98 | - | 706.3  |
| AHQ-3-2, 4411 - 4483  | R.SAGQGEVLVYEDPAGHQEEAK.V        | 2314.45074 | 2 | 3.40E-07 | 0.87 | 4.19 | - | 664.4  |
| AHQ-3-2, 4567         | R.SAGQGEVLVYEDPAGHQEEAK.V        | 2314.45074 | 2 | 7.00E-06 | 0.80 | 3.75 | - | 444.3  |
| AHQ-3-1, 4060 - 4082  | R.SAGQGEVLVYEDPAGHQEEAK.V        | 2314.45074 | 3 | 7.91E-07 | 0.93 | 4.43 | - | 1080.8 |
| AHQ-3-4, 4010         | R.SAGQGEVLVYEDPAGHQEEAK.V        | 2314.45074 | 2 | 7.08E-04 | 0.23 | 2.76 | - | 263.7  |
| AHQ-3-7, 3550         | R.SAGQGEVLVYEDPAGHQEEAK.V        | 2314.45074 | 2 | 2.85E-05 | 0.93 | 4.67 | - | 713.4  |
| AHQ-3-8, 3418         | R.SAGQGEVLVYEDPAGHQEEAK.V        | 2314.45074 | 2 | 3.98E-05 | 0.71 | 3.59 | - | 297.3  |
| AHQ-3-1, 4294         | R.SAGQGEVLVYEDPAGHQEEAK.V        | 2314.45074 | 2 | 1.95E-05 | 0.92 | 4.77 | - | 554.5  |
| AHQ-3-5, 3755         | R.SAGQGEVLVYEDPAGHQEEAK.V        | 2314.45074 | 2 | 1.07E-05 | 0.86 | 3.85 | - | 628.7  |
| AHQ-3-5, 3665         | R.SAGQGEVLVYEDPAGHQEEAK.V        | 2314.45074 | 2 | 3.96E-07 | 0.92 | 4.77 | - | 641.9  |
| AHQ-3-6, 3626 - 3641  | R.SAGQGEVLVYEDPAGHQEEAK.V        | 2314.45074 | 2 | 7.42E-11 | 0.92 | 4.63 | - | 591.5  |
| AHQ-3-5, 3589 - 3664  | R.SAGQGEVLVYEDPAGHQEEAK.V        | 2314.45074 | 3 | 1.54E-07 | 0.84 | 3.51 | - | 813.1  |
| AHQ-3-3, 3896 - 3976  | R.SAGQGEVLVYEDPAGHQEEAK.V        | 2314.45074 | 2 | 1.08E-06 | 0.94 | 4.94 | - | 643.8  |
| AHQ-3-2, 4218 - 4291  | R.SAGQGEVLVYEDPAGHQEEAK.V        | 2314.45074 | 2 | 4.31E-07 | 0.95 | 5.27 | - | 837.4  |
| AHQ-3-4, 3868         | R.SAGQGEVLVYEDPAGHQEEAK.V        | 2314.45074 | 3 | 4.13E-09 | 0.92 | 3.92 | - | 1360.6 |
| AHQ-3-3, 4049 - 4056  | R.SAGQGEVLVYEDPAGHQEEAK.V        | 2314.45074 | 2 | 1.39E-06 | 0.96 | 5.55 | - | 851.0  |
| AHQ-3-3, 4177         | R.SAGQGEVLVYEDPAGHQEEAK.V        | 2314.45074 | 2 | 3.61E-04 | 0.88 | 3.96 | - | 593.3  |
| AHQ-3-6, 3639         | R.SAGQGEVLVYEDPAGHQEEAK.V        | 2314.45074 | 3 | 2.11E-06 | 0.88 | 3.80 | - | 1063.8 |
| AHQ-3-2, 4077 - 4146  | R.SAGQGEVLVYEDPAGHQEEAK.V        | 2314.45074 | 2 | 1.13E-05 | 0.94 | 4.74 | - | 714.6  |
| AHQ-3-1, 4129 - 4200  | R.SAGQGEVLVYEDPAGHQEEAK.V        | 2314.45074 | 2 | 8.75E-08 | 0.88 | 4.26 | - | 605.1  |

|                        |                              |            |   |          |      |      |   |        |
|------------------------|------------------------------|------------|---|----------|------|------|---|--------|
| AHQ-3-5, 3849          | R.SAGQGEVLVYVEDPAGHQEEAK.V   | 2314.45074 | 2 | 3.66E-07 | 0.82 | 3.57 | - | 505.5  |
| AHQ-3-3, 3350          | K.SPFEVYVDK.S                | 1084.20321 | 1 | 1.50E-05 | 0.69 | 2.79 | - | 598.3  |
| AHQ-3-1, 3489          | K.SPFEVYVDK.S                | 1084.20321 | 1 | 2.95E-05 | 0.82 | 2.99 | - | 952.2  |
| AHQ-3-5, 3151          | K.SPFEVYVDK.S                | 1084.20321 | 2 | 7.69E-06 | 0.89 | 2.97 | - | 985.8  |
| AHQ-3-4, 3322          | K.SPFEVYVDK.S                | 1084.20321 | 1 | 4.40E-05 | 0.83 | 3.35 | - | 819.0  |
| AHQ-3-2, 3338 - 3409   | K.SPFEVYVDK.S                | 1084.20321 | 2 | 6.61E-06 | 0.93 | 3.24 | - | 1211.0 |
| AHQ-3-3, 3357          | K.SPFEVYVDK.S                | 1084.20321 | 2 | 6.81E-06 | 0.92 | 3.31 | - | 1028.3 |
| AHQ-3-7, 3030 - 3035   | K.SPFEVYVDK.S                | 1084.20321 | 1 | 1.20E-05 | 0.49 | 2.33 | - | 554.8  |
| AHQ-3-2, 3271 - 3483   | K.SPFEVYVDK.S                | 1084.20321 | 1 | 4.47E-04 | 0.73 | 2.49 | - | 903.3  |
| AHQ-3-1, 3481          | K.SPFEVYVDK.S                | 1084.20321 | 2 | 1.15E-06 | 0.90 | 2.94 | - | 1054.9 |
| AHQ-3-4, 3332          | K.SPFEVYVDK.S                | 1084.20321 | 2 | 8.86E-06 | 0.92 | 3.33 | - | 1079.0 |
| AHQ-3-4, 2961          | K.SPFEVYVDKSGGDASK.V         | 1757.87886 | 2 | 6.43E-04 | 0.69 | 2.83 | - | 497.9  |
| AHQ-3-6, 4810          | K.SPFSVAVSPSLDLK.I           | 1534.73557 | 2 | 4.36E-04 | 0.84 | 2.94 | - | 907.1  |
| AHQ-3-1, 4977 - 4997   | K.SPFSVAVSPSLDLK.I           | 1534.73557 | 2 | 3.26E-04 | 0.76 | 3.20 | - | 677.0  |
| AHQ-3-5, 4911          | K.SPFSVAVSPSLDLK.I           | 1534.73557 | 2 | 4.39E-05 | 0.92 | 3.95 | - | 1090.9 |
| AHQ-3-1, 5109 - 5145   | K.SPFSVAVSPSLDLK.I           | 1534.73557 | 2 | 3.10E-05 | 0.88 | 3.48 | - | 1029.4 |
| AHQ-3-2, 5118 - 5201   | K.SPFSVAVSPSLDLK.I           | 1534.73557 | 2 | 2.19E-06 | 0.94 | 4.66 | - | 953.6  |
| AHQ-3-2, 4951          | K.SPFSVAVSPSLDLK.I           | 1534.73557 | 2 | 5.93E-08 | 0.88 | 3.42 | - | 920.8  |
| AHQ-3-4, 5014 - 5036   | K.SPFSVAVSPSLDLK.I           | 1534.73557 | 2 | 3.67E-05 | 0.93 | 4.20 | - | 1025.4 |
| AHQ-3-3, 5073 - 5148   | K.SPFSVAVSPSLDLK.I           | 1534.73557 | 2 | 4.46E-06 | 0.92 | 4.36 | - | 788.5  |
| AHQ-3-2, 5189          | K.SPFSVAVSPSLDLK.I.V         | 1776.06673 | 2 | 4.86E-05 | 0.29 | 2.56 | - | 447.0  |
| AHQ-3-2, 3457 - 3525   | R.SPYTVTGGACNPSACR.A         | 1871.04208 | 2 | 2.19E-04 | 0.91 | 4.70 | - | 443.8  |
| AHQ-3-6, 3241          | R.SPYTVTGGACNPSACR.A         | 1871.04208 | 2 | 1.89E-04 | 0.86 | 3.59 | - | 596.3  |
| AHQ-3-3, 3645          | R.SPYTVTGGACNPSACR.A         | 1871.04208 | 2 | 9.95E-06 | 0.72 | 2.95 | - | 626.9  |
| AHQ-3-7, 3224          | R.SPYTVTGGACNPSACR.A         | 1871.04208 | 2 | 4.19E-04 | 0.90 | 4.05 | - | 582.5  |
| AHQ-3-2, 3645 - 3725   | R.SPYTVTGGACNPSACR.A         | 1871.04208 | 2 | 2.66E-04 | 0.79 | 3.69 | - | 347.1  |
| AHQ-3-5, 3255 - 3324   | R.SPYTVTGGACNPSACR.A         | 1871.04208 | 2 | 5.30E-05 | 0.87 | 3.98 | - | 461.2  |
| AHQ-3-4, 3373 - 3444   | R.SPYTVTGGACNPSACR.A         | 1871.04208 | 2 | 8.01E-04 | 0.87 | 3.66 | - | 560.3  |
| AHQ-3-3, 3438 - 3517   | R.SPYTVTGGACNPSACR.A         | 1871.04208 | 2 | 2.41E-04 | 0.92 | 4.21 | - | 559.3  |
| AHQ-3-1, 3521 - 3596   | R.SPYTVTGGACNPSACR.A         | 1871.04208 | 2 | 2.91E-07 | 0.87 | 3.90 | - | 546.2  |
| AHQ-3-2, 2679          | K.SQGDASKVTAQGGPLEPSGNIANK.T | 2327.49419 | 2 | 1.01E-06 | 0.90 | 4.51 | - | 651.4  |
| AHQ-3-2, 5049 - 5117   | R.TFSVWYVPEVTGTHK.V          | 1751.96228 | 2 | 1.04E-04 | 0.75 | 3.48 | - | 319.2  |
| AHQ-3-3, 2964          | K.TGVAVNKPAAEFTVDAK.H        | 1647.85391 | 3 | 7.32E-09 | 0.90 | 3.72 | - | 845.2  |
| AHQ-3-4, 2945          | K.TGVAVNKPAAEFTVDAK.H        | 1647.85391 | 3 | 8.90E-07 | 1.04 | 3.95 | - | 1014.9 |
| AHQ-3-7, 2671          | K.TGVAVNKPAAEFTVDAK.H        | 1647.85391 | 2 | 2.59E-04 | 0.90 | 3.74 | - | 817.1  |
| AHQ-3-2, 2954          | K.TGVAVNKPAAEFTVDAK.H        | 1647.85391 | 3 | 2.27E-05 | 0.92 | 3.67 | - | 1365.9 |
| AHQ-3-5, 2775          | K.TGVAVNKPAAEFTVDAK.H        | 1647.85391 | 3 | 6.21E-06 | 0.80 | 3.13 | - | 840.2  |
| AHQ-3-6, 2749          | K.TGVAVNKPAAEFTVDAK.H        | 1647.85391 | 2 | 2.08E-05 | 0.90 | 4.32 | - | 561.3  |
| AHQ-3-1, 3157 - 3226   | K.TGVAVNKPAAEFTVDAK.H        | 1647.85391 | 3 | 9.65E-05 | 0.70 | 3.15 | - | 571.9  |
| AHQ-3-5, 2609          | R.TGVELGKPTHFTVNAK.A         | 1699.93205 | 2 | 4.55E-05 | 0.88 | 3.44 | - | 787.8  |
| AHQ-3-1, 2953          | R.TGVELGKPTHFTVNAK.A         | 1699.93205 | 3 | 2.93E-05 | 0.59 | 3.23 | - | 548.7  |
| AHQ-3-4, 2641 - 2642   | R.TGVELGKPTHFTVNAK.A         | 1699.93205 | 2 | 9.87E-06 | 0.93 | 4.46 | - | 609.6  |
| AHQ-3-5, 2485          | R.TGVELGKPTHFTVNAK.A         | 1699.93205 | 2 | 5.75E-05 | 0.94 | 4.28 | - | 917.1  |
| AHQ-3-3, 2688 - 2706   | R.TGVELGKPTHFTVNAK.A         | 1699.93205 | 2 | 2.76E-04 | 0.90 | 3.86 | - | 704.9  |
| AHQ-3-3, 2774 - 2844   | R.TGVELGKPTHFTVNAK.A         | 1699.93205 | 2 | 4.97E-05 | 0.91 | 3.62 | - | 869.3  |
| AHQ-3-2, 2657 - 2725   | R.TGVELGKPTHFTVNAK.A         | 1699.93205 | 2 | 3.63E-04 | 0.91 | 3.96 | - | 691.9  |
| AHQ-3-6, 2746          | K.THEAEIVEGENHTYICIR.F       | 2060.19046 | 3 | 1.11E-10 | 0.94 | 4.64 | - | 1047.2 |
| AHQ-3-5, 2848          | K.THEAEIVEGENHTYICIR.F       | 2060.19046 | 2 | 1.57E-11 | 0.98 | 5.38 | - | 2462.2 |
| AHQ-3-5, 2753          | K.THEAEIVEGENHTYICIR.F       | 2060.19046 | 3 | 1.28E-04 | 0.88 | 3.63 | - | 971.4  |
| AHQ-3-3, 3050 - 3052   | K.THEAEIVEGENHTYICIR.F       | 2060.19046 | 2 | 5.22E-12 | 0.98 | 5.54 | - | 1782.7 |
| AHQ-3-5, 2764 - 2840   | K.THEAEIVEGENHTYICIR.F       | 2060.19046 | 2 | 6.76E-09 | 0.98 | 5.82 | - | 1725.2 |
| AHQ-3-7, 2690          | K.THEAEIVEGENHTYICIR.F       | 2060.19046 | 3 | 1.57E-05 | 0.93 | 4.02 | - | 1214.9 |
| AHQ-3-7, 2692 - 2772   | K.THEAEIVEGENHTYICIR.F       | 2060.19046 | 2 | 8.47E-05 | 0.98 | 5.32 | - | 1793.9 |
| AHQ-3-7, 2780 - 2855   | K.THEAEIVEGENHTYICIR.F       | 2060.19046 | 3 | 5.85E-04 | 0.84 | 3.41 | - | 951.2  |
| AHQ-3-6, 2822 - 2823   | K.THEAEIVEGENHTYICIR.F       | 2060.19046 | 2 | 3.74E-12 | 0.99 | 6.46 | - | 2705.3 |
| AHQ-3-6, 2829          | K.THEAEIVEGENHTYICIR.F       | 2060.19046 | 3 | 6.46E-05 | 0.94 | 4.75 | - | 1129.3 |
| AHQ-3-5, 2929          | K.THEAEIVEGENHTYICIR.F       | 2060.19046 | 2 | 4.87E-07 | 0.95 | 4.43 | - | 717.1  |
| AHQ-3-2, 3078          | K.THEAEIVEGENHTYICIR.F       | 2060.19046 | 2 | 6.95E-07 | 0.97 | 4.76 | - | 1783.5 |
| AHQ-3-1, 3161 - 3190   | K.THEAEIVEGENHTYICIR.F       | 2060.19046 | 3 | 5.69E-05 | 0.94 | 4.42 | - | 1241.3 |
| AHQ-3-1, 3238 - 3308   | K.THEAEIVEGENHTYICIR.F       | 2060.19046 | 2 | 9.44E-15 | 0.98 | 5.84 | - | 2169.3 |
| AHQ-3-1, 3870          | K.THIQDNHDGTYTVAVVPDVTGR.Y   | 2460.60076 | 2 | 9.04E-06 | 0.88 | 3.72 | - | 661.5  |
| AHQ-3-2, 4014          | K.THIQDNHDGTYTVAVVPDVTGR.Y   | 2460.60076 | 3 | 2.51E-08 | 0.90 | 3.98 | - | 858.4  |
| AHQ-3-14-, 2929 - 2991 | R.TPCEEILVK.H                | 1090.27249 | 2 | 2.42E-05 | 0.89 | 3.49 | - | 739.3  |
| AHQ-3-14, 3932 - 3935  | R.TPCEEILVK.H                | 1090.27249 | 1 | 5.27E-04 | 0.50 | 2.85 | - | 495.3  |
| AHQ-3-5, 2911          | R.TPCEEILVK.H                | 1090.27249 | 2 | 1.44E-04 | 0.85 | 2.90 | - | 676.6  |
| AHQ-3-14, 3856 - 3923  | R.TPCEEILVK.H                | 1090.27249 | 2 | 1.06E-05 | 0.76 | 2.85 | - | 653.7  |
| AHQ-3-4, 3058          | R.TPCEEILVK.H                | 1090.27249 | 2 | 5.58E-07 | 0.83 | 3.21 | - | 669.2  |
| AHQ-3-14-, 2953 - 2995 | R.TPCEEILVK.H                | 1090.27249 | 1 | 3.90E-04 | 0.57 | 2.56 | - | 414.1  |
| AHQ-3-13-, 3034 - 3038 | R.TPCEEILVK.H                | 1090.27249 | 2 | 4.51E-06 | 0.83 | 3.18 | - | 696.4  |
| AHQ-3-14, 4025 - 4088  | R.TPCEEILVK.H                | 1090.27249 | 2 | 9.75E-06 | 0.80 | 2.59 | - | 841.8  |
| AHQ-3-6, 2877          | R.TPCEEILVK.H                | 1090.27249 | 2 | 3.78E-05 | 0.87 | 2.95 | - | 762.6  |
| AHQ-3-4, 3060          | R.TPCEEILVK.H                | 1090.27249 | 1 | 1.35E-05 | 0.65 | 2.82 | - | 587.5  |
| AHQ-3-13, 3057         | R.TPCEEILVK.H                | 1090.27249 | 2 | 1.26E-06 | 0.86 | 3.10 | - | 667.7  |
| AHQ-3-5, 3341          | R.VANPSGNLTETYVQDR.G         | 1764.87462 | 2 | 2.68E-11 | 0.95 | 4.40 | - | 1252.3 |
| AHQ-3-7, 2995 - 2998   | R.VANPSGNLTETYVQDR.G         | 1764.87462 | 2 | 2.36E-11 | 0.96 | 4.47 | - | 1133.7 |
| AHQ-3-3, 3477          | R.VANPSGNLTETYVQDR.G         | 1764.87462 | 2 | 6.53E-04 | 0.51 | 2.84 | - | 376.4  |
| AHQ-3-5, 3041 - 3115   | R.VANPSGNLTETYVQDR.G         | 1764.87462 | 2 | 5.27E-07 | 0.90 | 3.98 | - | 687.0  |
| AHQ-3-3, 3160          | R.VANPSGNLTETYVQDR.G         | 1764.87462 | 2 | 1.00E-07 | 0.65 | 2.61 | - | 587.1  |
| AHQ-3-6, 3031 - 3038   | R.VANPSGNLTETYVQDR.G         | 1764.87462 | 2 | 6.11E-07 | 0.91 | 4.26 | - | 758.2  |
| AHQ-3-1, 3640          | R.VANPSGNLTETYVQDR.G         | 1764.87462 | 2 | 7.04E-10 | 0.96 | 4.60 | - | 1102.6 |
| AHQ-3-2, 3259 - 3341   | R.VANPSGNLTETYVQDR.G         | 1764.87462 | 2 | 2.06E-12 | 0.95 | 4.57 | - | 1077.9 |
| AHQ-3-4, 3188 - 3261   | R.VANPSGNLTETYVQDR.G         | 1764.87462 | 2 | 2.39E-13 | 0.93 | 4.32 | - | 812.9  |
| AHQ-3-1, 3540 - 3610   | R.VANPSGNLTETYVQDR.G         | 1764.87462 | 2 | 3.59E-10 | 0.94 | 4.46 | - | 1007.1 |
| AHQ-3-1, 3372 - 3440   | R.VANPSGNLTETYVQDR.G         | 1764.87462 | 2 | 9.73E-10 | 0.87 | 3.63 | - | 611.2  |
| AHQ-3-2, 3354          | R.VANPSGNLTETYVQDR.G         | 1764.87462 | 3 | 9.01E-04 | 0.92 | 4.04 | - | 1326.4 |
| AHQ-3-3, 3393 - 3464   | R.VANPSGNLTETYVQDR.G         | 1764.87462 | 2 | 3.52E-09 | 0.95 | 5.32 | - | 748.1  |
| AHQ-3-6, 3254          | R.VANPSGNLTETYVQDR.G         | 1764.87462 | 2 | 8.14E-12 | 0.88 | 3.89 | - | 779.8  |
| AHQ-3-2, 3163          | R.VANPSGNLTETYVQDR.G         | 1764.87462 | 2 | 2.80E-09 | 0.94 | 4.13 | - | 979.7  |
| AHQ-3-4, 3396 - 3465   | R.VANPSGNLTETYVQDR.G         | 1764.87462 | 2 | 4.05E-13 | 0.91 | 3.79 | - | 954.5  |
| AHQ-3-1, 3225          | R.VANPSGNLTETYVQDR.G         | 1764.87462 | 2 | 6.51E-04 | 0.54 | 2.77 | - | 380.5  |
| AHQ-3-2, 3410 - 3423   | R.VANPSGNLTETYVQDR.G         | 1764.87462 | 2 | 1.39E-13 | 0.96 | 5.08 | - | 983.9  |
| AHQ-3-3, 3248 - 3316   | R.VANPSGNLTETYVQDR.G         | 1764.87462 | 2 | 1.94E-12 | 0.94 | 4.15 | - | 960.0  |
| AHQ-3-2, 2806          | K.VAOPTITDNDKDGTVTVR.Y       | 1816.00621 | 2 | 7.65E-05 | 0.88 | 3.92 | - | 576.3  |
| AHQ-3-1, 2850 - 2914   | K.VAOPTITDNDKDGTVTVR.Y       | 1816.00621 | 2 | 1.63E-07 | 0.84 | 3.55 | - | 613.6  |
| AHQ-3-5, 2516 - 2580   | K.VAOPTITDNDKDGTVTVR.Y       | 1816.00621 | 2 | 1.91E-07 | 0.86 | 4.03 | - | 526.4  |
| AHQ-3-8, 2354          | K.VAOPTITDNDKDGTVTVR.Y       | 1816.00621 | 2 | 9.47E-04 | 0.80 | 3.11 | - | 511.2  |
| AHQ-3-8, 2245          | K.VAOPTITDNDKDGTVTVR.Y       | 1816.00621 | 2 | 2.90E-05 | 0.88 | 3.92 | - | 571.7  |
| AHQ-3-5, 2603          | K.VAOPTITDNDKDGTVTVR.Y       | 1816.00621 | 2 | 3.70E-06 | 0.84 | 3.49 | - | 510.5  |
| AHQ-3-13-, 2614        | K.VAOPTITDNDKDGTVTVR.Y       | 1816.00621 | 2 | 1.81E-04 | 0.76 | 3.39 | - | 309.2  |
| AHQ-3-5, 2409 - 2435   | K.VAOPTITDNDKDGTVTVR.Y       | 1816.00621 | 2 | 2.88E-04 | 0.82 | 3.33 | - | 614.3  |
| AHQ-3-4, 2521 - 2529   | K.VAOPTITDNDKDGTVTVR.Y       | 1816.00621 | 2 | 1.11E-04 | 0.95 | 4.27 | - | 1189.7 |
| AHQ-3-13-, 2787        | K.VAOPTITDNDKDGTVTVR.Y       | 1816.00621 | 2 | 5.46E-07 | 0.72 | 3.22 | - | 449.0  |
| AHQ-3-3, 2796          | K.VAOPTITDNDKDGTVTVR.Y       | 1816.00621 | 2 | 5.91E-05 | 0.87 | 3.78 | - | 662.0  |
| AHQ-3-10, 2582         | K.VAOPTITDNDKDGTVTVR.Y       | 1816.00621 | 2 | 7.11E-05 | 0.85 | 3.68 | - | 458.7  |
| AHQ-3-6, 2603          | K.VAOPTITDNDKDGTVTVR.Y       | 1816.00621 | 2 | 2.77E-04 | 0.78 | 3.72 | - | 343.2  |
| AHQ-3-4, 2745 - 2752   | K.VAOPTITDNDKDGTVTVR.Y       | 1816.00621 | 2 | 2.00E-07 | 0.91 | 4.14 | - | 760.8  |
| AHQ-3-1, 3444 - 3445   | K.VDINTEBLEDGTCR.V           | 1638.69283 | 2 | 2.23E-09 | 0.95 | 4.32 | - | 1260.8 |

|                       |                                              |            |   |          |      |      |   |        |
|-----------------------|----------------------------------------------|------------|---|----------|------|------|---|--------|
| AHQ-3-2, 3746         | K.VDINTEDELEDGTCR.V                          | 1638.69283 | 2 | 1.19E-06 | 0.93 | 3.96 | - | 1192.6 |
| AHQ-3-8, 3397         | K.VDINTEDELEDGTCR.V                          | 1638.69283 | 2 | 7.42E-06 | 0.71 | 3.20 | - | 777.9  |
| AHQ-3-5, 3443 - 3451  | K.VDINTEDELEDGTCR.V                          | 1638.69283 | 2 | 1.26E-05 | 0.93 | 4.27 | - | 1029.5 |
| AHQ-3-4, 3640 - 3645  | K.VDINTEDELEDGTCR.V                          | 1638.69283 | 2 | 4.17E-05 | 0.95 | 4.29 | - | 1300.6 |
| AHQ-3-1, 3728         | K.VDINTEDELEDGTCR.V                          | 1638.69283 | 2 | 5.12E-07 | 0.91 | 3.80 | - | 973.0  |
| AHQ-3-5, 3559         | K.VDINTEDELEDGTCR.V                          | 1638.69283 | 2 | 5.35E-08 | 0.94 | 3.79 | - | 1165.1 |
| AHQ-3-1, 3832         | K.VDINTEDELEDGTCR.V                          | 1638.69283 | 2 | 1.65E-07 | 0.86 | 3.05 | - | 846.0  |
| AHQ-3-6, 3485         | K.VDINTEDELEDGTCR.V                          | 1638.69283 | 2 | 9.37E-06 | 0.87 | 3.08 | - | 1042.0 |
| AHQ-3-6, 3667         | K.VDINTEDELEDGTCR.V                          | 1638.69283 | 2 | 2.77E-07 | 0.61 | 2.61 | - | 533.5  |
| AHQ-3-3, 3682         | K.VDINTEDELEDGTCR.V                          | 1638.69283 | 2 | 2.83E-06 | 0.85 | 3.03 | - | 877.0  |
| AHQ-3-7, 3494         | K.VDINTEDELEDGTCR.V                          | 1638.69283 | 2 | 3.33E-07 | 0.90 | 3.46 | - | 911.4  |
| AHQ-3-1, 3538 - 3549  | K.VDINTEDELEDGTCR.V                          | 1638.69283 | 2 | 2.42E-05 | 0.84 | 3.50 | - | 824.4  |
| AHQ-3-5, 3748         | K.VDINTEDELEDGTCR.V                          | 1638.69283 | 2 | 6.41E-08 | 0.92 | 3.52 | - | 1077.6 |
| AHQ-3-2, 2473         | K.VDVGKDQEFVTK.S                             | 1365.51377 | 1 | 7.65E-06 | 0.49 | 3.05 | - | 297.1  |
| AHQ-3-1, 2644 - 2684  | K.VDVGKDQEFVTK.S                             | 1365.51377 | 2 | 1.68E-07 | 0.84 | 3.46 | - | 538.1  |
| AHQ-3-1, 2670         | K.VDVGKDQEFVTK.S                             | 1365.51377 | 1 | 9.00E-04 | 0.38 | 2.90 | - | 335.9  |
| AHQ-3-3, 2384 - 2460  | K.VDVGKDQEFVTK.S                             | 1365.51377 | 2 | 6.10E-08 | 0.92 | 3.63 | - | 890.5  |
| AHQ-3-2, 2466 - 2489  | K.VDVGKDQEFVTK.S                             | 1365.51377 | 2 | 6.34E-07 | 0.90 | 3.59 | - | 812.6  |
| AHQ-3-7, 2258         | K.VDVGKDQEFVTK.S                             | 1365.51377 | 2 | 3.49E-04 | 0.75 | 2.97 | - | 603.6  |
| AHQ-3-6, 2310         | K.VDVGKDQEFVTK.S                             | 1365.51377 | 2 | 6.21E-08 | 0.81 | 3.49 | - | 478.8  |
| AHQ-3-3, 2458         | K.VDVGKDQEFVTK.S                             | 1365.51377 | 1 | 4.67E-06 | 0.59 | 3.14 | - | 383.8  |
| AHQ-3-4, 2453         | K.VDVGKDQEFVTK.S                             | 1365.51377 | 1 | 6.48E-04 | 0.41 | 3.00 | - | 326.0  |
| AHQ-3-1, 2813 - 2884  | K.VEPGLGADNSVVR.F                            | 1313.44209 | 2 | 8.40E-06 | 0.82 | 3.35 | - | 407.5  |
| AHQ-3-2, 2793 - 2873  | K.VEPGLGADNSVVR.F                            | 1313.44209 | 2 | 1.43E-05 | 0.55 | 2.63 | - | 297.9  |
| AHQ-3-4, 2626 - 2630  | K.VEPGLGADNSVVR.F                            | 1313.44209 | 2 | 2.56E-05 | 0.70 | 2.78 | - | 245.5  |
| AHQ-3-3, 2645 - 2681  | K.VEPGLGADNSVVR.F                            | 1313.44209 | 2 | 1.14E-05 | 0.72 | 2.62 | - | 282.7  |
| AHQ-3-3, 6600 - 6605  | K.VEYTPYEEGLHSVDVTDYDGGSPVSSPFQVPVTEGCDPSR.V | 4300.57494 | 3 | 1.67E-05 | 0.85 | 4.31 | - | 535.2  |
| AHQ-3-3, 6453 - 6532  | K.VEYTPYEEGLHSVDVTDYDGGSPVSSPFQVPVTEGCDPSR.V | 4300.57494 | 3 | 9.02E-07 | 0.93 | 5.69 | - | 602.7  |
| AHQ-3-4, 6556         | K.VEYTPYEEGLHSVDVTDYDGGSPVSSPFQVPVTEGCDPSR.V | 4300.57494 | 3 | 2.94E-05 | 0.92 | 5.19 | - | 781.9  |
| AHQ-3-6, 6237 - 6313  | K.VEYTPYEEGLHSVDVTDYDGGSPVSSPFQVPVTEGCDPSR.V | 4300.57494 | 3 | 5.50E-04 | 0.93 | 5.49 | - | 589.3  |
| AHQ-3-1, 6540         | K.VEYTPYEEGLHSVDVTDYDGGSPVSSPFQVPVTEGCDPSR.V | 4300.57494 | 3 | 1.51E-06 | 0.57 | 3.01 | - | 438.7  |
| AHQ-3-2, 6573 - 6641  | K.VEYTPYEEGLHSVDVTDYDGGSPVSSPFQVPVTEGCDPSR.V | 4300.57494 | 3 | 8.03E-06 | 0.95 | 6.11 | - | 952.2  |
| AHQ-3-1, 7272         | K.VGSAADIPINISSETDLSLLTATWPPSGR.E            | 2895.25495 | 2 | 1.49E-06 | 0.93 | 4.88 | - | 632.1  |
| AHQ-3-2, 7583         | K.VGSAADIPINISSETDLSLLTATWPPSGR.E            | 2895.25495 | 2 | 6.01E-07 | 0.96 | 5.28 | - | 1050.2 |
| AHQ-3-3, 7490 - 7502  | K.VGSAADIPINISSETDLSLLTATWPPSGR.E            | 2895.25495 | 2 | 2.72E-06 | 0.94 | 4.85 | - | 758.5  |
| AHQ-3-5, 4211 - 4281  | K.VHSPSGALEECYVTEIDQDK.Y                     | 2279.42322 | 2 | 1.04E-05 | 0.96 | 5.27 | - | 1382.4 |
| AHQ-3-4, 4402         | K.VHSPSGALEECYVTEIDQDK.Y                     | 2279.42322 | 2 | 4.69E-07 | 0.92 | 3.97 | - | 946.2  |
| AHQ-3-9, 3891         | K.VHSPSGALEECYVTEIDQDK.Y                     | 2279.42322 | 2 | 1.16E-06 | 0.95 | 4.20 | - | 1360.0 |
| AHQ-3-6, 4137         | K.VHSPSGALEECYVTEIDQDK.Y                     | 2279.42322 | 2 | 1.08E-09 | 0.97 | 5.47 | - | 1617.7 |
| AHQ-3-3, 4500 - 4520  | K.VHSPSGALEECYVTEIDQDK.Y                     | 2279.42322 | 2 | 9.09E-08 | 0.94 | 4.00 | - | 1053.6 |
| AHQ-3-7, 4086 - 4099  | K.VHSPSGALEECYVTEIDQDK.Y                     | 2279.42322 | 2 | 6.87E-08 | 0.93 | 4.18 | - | 1067.0 |
| AHQ-3-4, 4737 - 4742  | K.VHSPSGALEECYVTEIDQDKYAVR.F                 | 2768.99349 | 3 | 2.71E-11 | 0.95 | 5.92 | - | 698.8  |
| AHQ-3-6, 4457         | K.VHSPSGALEECYVTEIDQDKYAVR.F                 | 2768.99349 | 3 | 1.19E-11 | 0.86 | 3.94 | - | 517.7  |
| AHQ-3-1, 4917 - 4953  | K.VHSPSGALEECYVTEIDQDKYAVR.F                 | 2768.99349 | 3 | 1.62E-08 | 0.87 | 4.11 | - | 640.6  |
| AHQ-3-7, 4303 - 4375  | K.VHSPSGALEECYVTEIDQDKYAVR.F                 | 2768.99349 | 3 | 4.07E-09 | 0.81 | 4.16 | - | 424.6  |
| AHQ-3-4, 4824         | K.VHSPSGALEECYVTEIDQDKYAVR.F                 | 2768.99349 | 3 | 7.91E-08 | 0.81 | 3.66 | - | 497.6  |
| AHQ-3-6, 4465 - 4478  | K.VHSPSGALEECYVTEIDQDKYAVR.F                 | 2768.99349 | 3 | 3.62E-07 | 0.53 | 2.87 | - | 576.6  |
| AHQ-3-8, 4168         | K.VHSPSGALEECYVTEIDQDKYAVR.F                 | 2768.99349 | 3 | 3.43E-06 | 0.93 | 5.43 | - | 515.2  |
| AHQ-3-3, 4852         | K.VHSPSGALEECYVTEIDQDKYAVR.F                 | 2768.99349 | 3 | 4.24E-13 | 0.93 | 4.85 | - | 715.3  |
| AHQ-3-1, 4920         | K.VHSPSGALEECYVTEIDQDKYAVR.F                 | 2768.99349 | 3 | 3.24E-07 | 0.90 | 4.07 | - | 1007.6 |
| AHQ-3-7, 4370 - 4371  | K.VHSPSGALEECYVTEIDQDKYAVR.F                 | 2768.99349 | 3 | 1.46E-07 | 0.92 | 4.47 | - | 1039.9 |
| AHQ-3-5, 4525         | K.VHSPSGALEECYVTEIDQDKYAVR.F                 | 2768.99349 | 3 | 1.32E-09 | 0.93 | 4.16 | - | 1333.5 |
| AHQ-3-5, 4516 - 4589  | K.VHSPSGALEECYVTEIDQDKYAVR.F                 | 2768.99349 | 3 | 3.45E-11 | 0.92 | 4.47 | - | 618.1  |
| AHQ-3-6, 3621         | K.VNQPASFAVSLNGAK.G                          | 1503.68480 | 2 | 1.60E-09 | 0.81 | 3.61 | - | 332.6  |
| AHQ-3-8, 3422         | K.VNQPASFAVSLNGAK.G                          | 1503.68480 | 2 | 1.54E-07 | 0.80 | 3.21 | - | 371.6  |
| AHQ-3-1, 3878 - 3957  | K.VNQPASFAVSLNGAK.G                          | 1503.68480 | 2 | 5.41E-10 | 0.90 | 3.99 | - | 654.8  |
| AHQ-3-6, 3477 - 3550  | K.VNQPASFAVSLNGAK.G                          | 1503.68480 | 2 | 2.51E-07 | 0.90 | 3.65 | - | 719.9  |
| AHQ-3-5, 3635 - 3707  | K.VNQPASFAVSLNGAK.G                          | 1503.68480 | 2 | 9.49E-06 | 0.89 | 3.50 | - | 614.1  |
| AHQ-3-7, 3446 - 3447  | K.VNQPASFAVSLNGAK.G                          | 1503.68480 | 2 | 5.72E-07 | 0.84 | 3.15 | - | 612.6  |
| AHQ-3-4, 3688 - 3700  | K.VNQPASFAVSLNGAK.G                          | 1503.68480 | 2 | 3.87E-07 | 0.78 | 3.24 | - | 632.4  |
| AHQ-3-4, 3793 - 3801  | K.VNQPASFAVSLNGAK.G                          | 1503.68480 | 2 | 7.29E-06 | 0.59 | 2.62 | - | 436.6  |
| AHQ-3-7, 3546         | K.VNQPASFAVSLNGAK.G                          | 1503.68480 | 2 | 3.04E-06 | 0.86 | 3.62 | - | 384.9  |
| AHQ-3-5, 3241         | K.VNQPASFAVSLNGAK.G                          | 1503.68480 | 2 | 1.01E-06 | 0.68 | 2.89 | - | 506.0  |
| AHQ-3-3, 3770 - 3842  | K.VNQPASFAVSLNGAK.G                          | 1503.68480 | 2 | 6.23E-05 | 0.85 | 3.50 | - | 449.5  |
| AHQ-3-3, 1493         | K.VPVHDTVDAK.V                               | 1168.28175 | 2 | 3.48E-06 | 0.94 | 2.99 | - | 1580.8 |
| AHQ-3-2, 1457         | K.VPVHDTVDAK.V                               | 1168.28175 | 2 | 1.52E-06 | 0.95 | 3.23 | - | 1602.8 |
| AHQ-3-3, 1460 - 1464  | K.VPVHDTVDAK.V                               | 1168.28175 | 1 | 6.39E-04 | 0.33 | 2.07 | - | 469.1  |
| AHQ-3-4, 4248 - 4294  | R.VQVQDNEGCPVEALVK.D                         | 1786.98493 | 2 | 4.57E-04 | 0.96 | 4.47 | - | 1581.8 |
| AHQ-3-2, 4153 - 4234  | R.VQVQDNEGCPVEALVK.D                         | 1786.98493 | 2 | 2.42E-08 | 0.95 | 4.73 | - | 1042.0 |
| AHQ-3-2, 4310         | R.VQVQDNEGCPVEALVK.D                         | 1786.98493 | 2 | 3.49E-06 | 0.95 | 4.51 | - | 1241.6 |
| AHQ-3-2, 4395         | R.VQVQDNEGCPVEALVK.D                         | 1786.98493 | 2 | 1.08E-04 | 0.75 | 3.27 | - | 671.1  |
| AHQ-3-4, 4120         | R.VQVQDNEGCPVEALVK.D                         | 1786.98493 | 2 | 1.10E-07 | 0.95 | 4.70 | - | 1186.9 |
| AHQ-3-3, 4188 - 4257  | R.VQVQDNEGCPVEALVK.D                         | 1786.98493 | 2 | 2.07E-06 | 0.97 | 5.50 | - | 1322.7 |
| AHQ-3-1, 4286         | R.VQVQDNEGCPVEALVK.D                         | 1786.98493 | 2 | 3.56E-07 | 0.94 | 4.33 | - | 1102.0 |
| AHQ-3-1, 4398 - 4421  | R.VQVQDNEGCPVEALVK.D                         | 1786.98493 | 2 | 9.71E-11 | 0.94 | 4.45 | - | 977.3  |
| AHQ-3-2, 5446         | R.VQVQDNEGCPVEALVKDNGNGTYSYVPR.K             | 3359.60342 | 3 | 1.63E-05 | 0.93 | 4.83 | - | 1238.8 |
| AHQ-3-2, 5305 - 5374  | R.VQVQDNEGCPVEALVKDNGNGTYSYVPR.K             | 3359.60342 | 3 | 7.41E-10 | 0.97 | 5.48 | - | 1875.3 |
| AHQ-3-5, 5247         | R.VQVQDNEGCPVEALVKDNGNGTYSYVPR.K             | 3359.60342 | 3 | 8.81E-08 | 0.89 | 4.14 | - | 1154.7 |
| AHQ-3-1, 5269 - 5332  | R.VQVQDNEGCPVEALVKDNGNGTYSYVPR.K             | 3359.60342 | 3 | 4.66E-09 | 0.94 | 4.59 | - | 1761.9 |
| AHQ-3-1, 5400 - 5468  | R.VQVQDNEGCPVEALVKDNGNGTYSYVPR.K             | 3359.60342 | 3 | 1.20E-05 | 0.90 | 4.49 | - | 818.3  |
| AHQ-3-1, 5621         | R.VQVQDNEGCPVEALVKDNGNGTYSYVPR.K             | 3359.60342 | 3 | 3.18E-04 | 0.88 | 3.72 | - | 1159.9 |
| AHQ-3-3, 5269         | R.VQVQDNEGCPVEALVKDNGNGTYSYVPR.K             | 3359.60342 | 3 | 7.20E-08 | 0.91 | 4.14 | - | 1499.4 |
| AHQ-3-2, 5546 - 5615  | R.VQVQDNEGCPVEALVKDNGNGTYSYVPR.K             | 3359.60342 | 3 | 4.31E-04 | 0.74 | 3.53 | - | 820.2  |
| AHQ-3-13, 4623 - 4629 | R.VSGQGLHEGHTFPEAFIHDR.D                     | 2441.64058 | 3 | 9.12E-07 | 0.91 | 4.64 | - | 827.4  |
| AHQ-3-13, 4622        | R.VSGQGLHEGHTFPEAFIHDR.D                     | 2441.64058 | 3 | 4.08E-06 | 0.94 | 4.85 | - | 675.7  |
| AHQ-3-2, 4834         | R.VSGQGLHEGHTFPEAFIHDR.D                     | 2441.64058 | 3 | 7.63E-04 | 0.87 | 3.74 | - | 841.5  |
| AHQ-3-3, 4797 - 4873  | R.VSGQGLHEGHTFPEAFIHDR.D                     | 2441.64058 | 3 | 3.55E-07 | 0.95 | 5.33 | - | 1006.9 |
| AHQ-3-1, 4964         | R.VSGQGLHEGHTFPEAFIHDR.D                     | 2441.64058 | 2 | 4.99E-06 | 0.87 | 4.25 | - | 620.8  |
| AHQ-3-5, 4423 - 4492  | R.VSGQGLHEGHTFPEAFIHDR.D                     | 2441.64058 | 2 | 5.14E-11 | 0.96 | 5.72 | - | 952.7  |
| AHQ-3-5, 4425 - 4495  | R.VSGQGLHEGHTFPEAFIHDR.D                     | 2441.64058 | 3 | 8.00E-09 | 0.94 | 4.64 | - | 1171.5 |
| AHQ-3-1, 4965 - 5034  | R.VSGQGLHEGHTFPEAFIHDR.D                     | 2441.64058 | 3 | 1.31E-04 | 0.96 | 5.99 | - | 1126.6 |
| AHQ-3-6, 4403         | R.VSGQGLHEGHTFPEAFIHDR.D                     | 2441.64058 | 3 | 3.81E-07 | 0.95 | 4.81 | - | 1507.7 |
| AHQ-3-8, 3918         | R.VSGQGLHEGHTFPEAFIHDR.D                     | 2441.64058 | 3 | 4.18E-09 | 0.94 | 4.92 | - | 1034.9 |
| AHQ-3-12, 4626 - 4628 | R.VSGQGLHEGHTFPEAFIHDR.D                     | 2441.64058 | 2 | 5.47E-05 | 0.93 | 4.81 | - | 720.5  |
| AHQ-3-4, 4705 - 4720  | R.VSGQGLHEGHTFPEAFIHDR.D                     | 2441.64058 | 3 | 2.64E-05 | 0.96 | 5.36 | - | 1133.3 |
| AHQ-3-11, 4375        | R.VSGQGLHEGHTFPEAFIHDR.D                     | 2441.64058 | 3 | 2.96E-06 | 0.91 | 4.16 | - | 1054.3 |
| AHQ-3-7, 4250         | R.VSGQGLHEGHTFPEAFIHDR.D                     | 2441.64058 | 3 | 2.91E-10 | 0.92 | 4.52 | - | 886.4  |
| AHQ-3-6, 2479         | K.VTAQGGPLEPSGNIAK.T                         | 1653.81855 | 2 | 2.30E-04 | 0.57 | 2.74 | - | 513.0  |
| AHQ-3-6, 2589         | K.VTAQGGPLEPSGNIAK.T                         | 1653.81855 | 2 | 3.26E-06 | 0.76 | 3.60 | - | 341.9  |
| AHQ-3-5, 2560 - 2631  | K.VTAQGGPLEPSGNIAK.T                         | 1653.81855 | 2 | 9.58E-05 | 0.78 | 3.53 | - | 448.8  |
| AHQ-3-2, 2753 - 2821  | K.VTAQGGPLEPSGNIAK.T                         | 1653.81855 | 2 | 2.31E-06 | 0.91 | 4.64 | - | 478.9  |
| AHQ-3-4, 2718         | K.VTAQGGPLEPSGNIAK.T                         | 1653.81855 | 2 | 2.15E-07 | 0.87 | 3.94 | - | 624.0  |
| AHQ-3-2, 2615 - 2685  | K.VTAQGGPLEPSGNIAK.T                         | 1653.81855 | 2 | 7.48E-04 | 0.90 | 4.30 | - | 595.8  |
| AHQ-3-3, 2614 - 2661  | K.VTAQGGPLEPSGNIAK.T                         | 1653.81855 | 2 | 4.41E-05 | 0.66 | 3.13 | - | 464.4  |
| AHQ-3-3, 2785         | K.VTAQGGPLEPSGNIAK.T                         | 1653.81855 | 2 | 4.12E-05 | 0.90 | 4.37 | - | 602.3  |
| AHQ-3-5, 2465 - 2488  | K.VTAQGGPLEPSGNIAK.T                         | 1653.81855 | 2 | 1.34E-05 | 0.79 | 3.99 | - | 387.1  |
| AHQ-3-4, 2601         | K.VTAQGGPLEPSGNIAK.T                         | 1653.81855 | 2 | 5.22E-06 | 0.72 | 3.25 | - | 410.3  |

|                        |                              |            |   |          |      |      |   |        |
|------------------------|------------------------------|------------|---|----------|------|------|---|--------|
| AHQ-3-1, 3324 - 3404   | K.VTVLFAGQHIK.S              | 1284.53185 | 2 | 3.01E-06 | 0.85 | 3.46 | - | 786.1  |
| AHQ-3-2, 3095          | K.VTVLFAGQHIK.S              | 1284.53185 | 1 | 9.06E-04 | 0.39 | 2.90 | - | 331.9  |
| AHQ-3-5, 2783 - 2787   | K.VTVLFAGQHIK.S              | 1284.53185 | 2 | 6.78E-06 | 0.93 | 3.80 | - | 876.8  |
| AHQ-3-2, 3014          | K.VTVLFAGQHIK.S              | 1284.53185 | 1 | 1.30E-04 | 0.35 | 2.59 | - | 357.1  |
| AHQ-3-2, 3009 - 3077   | K.VTVLFAGQHIK.S              | 1284.53185 | 1 | 9.76E-04 | 0.20 | 1.92 | - | 486.6  |
| AHQ-3-4, 3001          | K.VTVLFAGQHIK.S              | 1284.53185 | 2 | 5.25E-08 | 0.88 | 3.23 | - | 797.5  |
| AHQ-3-6, 2798 - 2801   | K.VTVLFAGQHIK.S              | 1284.53185 | 2 | 3.77E-05 | 0.90 | 4.00 | - | 646.1  |
| AHQ-3-2, 3010 - 3081   | K.VTVLFAGQHIK.S              | 1284.53185 | 2 | 6.71E-07 | 0.94 | 4.27 | - | 1020.0 |
| AHQ-3-7, 4771 - 4844   | R.VTYCPTPEPGNYIINIK.F        | 1884.14221 | 2 | 5.58E-05 | 0.94 | 4.40 | - | 584.5  |
| AHQ-3-1, 5396 - 5409   | R.VTYCPTPEPGNYIINIK.F        | 1884.14221 | 2 | 4.00E-06 | 0.79 | 3.18 | - | 474.8  |
| AHQ-3-8, 4649 - 4699   | R.VTYCPTPEPGNYIINIK.F        | 1884.14221 | 2 | 6.47E-04 | 0.89 | 3.90 | - | 473.4  |
| AHQ-3-3, 5212          | R.VTYCPTPEPGNYIINIK.F        | 1884.14221 | 2 | 1.96E-06 | 0.85 | 3.65 | - | 432.7  |
| AHQ-3-5, 5007 - 5019   | R.VTYCPTPEPGNYIINIK.F        | 1884.14221 | 2 | 8.57E-06 | 0.65 | 3.03 | - | 292.2  |
| AHQ-3-5, 5167          | R.VTYCPTPEPGNYIINIK.F        | 1884.14221 | 2 | 6.75E-06 | 0.82 | 3.25 | - | 501.9  |
| AHQ-3-4, 5337          | R.VTYCPTPEPGNYIINIK.F        | 1884.14221 | 2 | 8.11E-06 | 0.79 | 3.65 | - | 352.3  |
| AHQ-3-2, 5238          | R.VTYCPTPEPGNYIINIK.F        | 1884.14221 | 2 | 7.87E-04 | 0.77 | 3.48 | - | 338.2  |
| AHQ-3-4, 5133          | R.VTYCPTPEPGNYIINIK.F        | 1884.14221 | 2 | 2.55E-04 | 0.78 | 3.32 | - | 351.9  |
| AHQ-3-14-, 5332 - 5335 | R.VTYTPMAPGSYLISIK.Y         | 1742.07225 | 2 | 4.17E-04 | 0.79 | 3.12 | - | 680.0  |
| AHQ-3-14-, 4845 - 4864 | R.VTYTPMAPGSYLISIK.Y         | 1758.07165 | 2 | 5.44E-04 | 0.89 | 3.98 | - | 581.5  |
| AHQ-3-10, 4436 - 4439  | R.VTYTPMAPGSYLISIK.Y         | 1758.07165 | 2 | 7.66E-06 | 0.62 | 2.73 | - | 397.5  |
| AHQ-3-4, 5592          | R.VTYTPMAPGSYLISIK.Y         | 1742.07225 | 2 | 6.80E-04 | 0.91 | 3.65 | - | 920.1  |
| AHQ-3-5, 5407          | R.VTYTPMAPGSYLISIK.Y         | 1742.07225 | 2 | 4.48E-05 | 0.91 | 3.78 | - | 976.5  |
| AHQ-3-5, 5321 - 5399   | R.VTYTPMAPGSYLISIK.Y         | 1742.07225 | 2 | 7.33E-04 | 0.91 | 3.96 | - | 788.6  |
| AHQ-3-13-, 5341        | R.VTYTPMAPGSYLISIK.Y         | 1742.07225 | 2 | 8.85E-04 | 0.88 | 3.23 | - | 846.1  |
| AHQ-3-6, 4814          | R.VTYTPMAPGSYLISIK.Y         | 1758.07165 | 2 | 6.61E-05 | 0.66 | 3.10 | - | 261.9  |
| AHQ-3-3, 5644          | R.VTYTPMAPGSYLISIK.Y         | 1742.07225 | 2 | 7.05E-06 | 0.74 | 3.02 | - | 399.8  |
| AHQ-3-6, 5325 - 5349   | R.VTYTPMAPGSYLISIK.Y         | 1742.07225 | 2 | 3.73E-04 | 0.73 | 3.15 | - | 558.9  |
| AHQ-3-5, 4883 - 4927   | R.VTYTPMAPGSYLISIK.Y         | 1758.07165 | 2 | 6.06E-05 | 0.63 | 2.65 | - | 408.8  |
| AHQ-3-13, 4894 - 4895  | R.VTYTPMAPGSYLISIK.Y         | 1758.07165 | 2 | 6.96E-05 | 0.53 | 2.58 | - | 261.6  |
| AHQ-3-9, 4944 - 4948   | R.VTYTPMAPGSYLISIK.Y         | 1742.07225 | 2 | 4.80E-05 | 0.59 | 2.99 | - | 342.7  |
| AHQ-3-7, 2987 - 2988   | R.YAPSEAGLHEM.DIR.Y          | 1589.75482 | 2 | 1.17E-06 | 0.90 | 3.34 | - | 1146.9 |
| AHQ-3-1, 3534          | R.YAPSEAGLHEM.DIR.Y          | 1589.75482 | 2 | 1.91E-06 | 0.92 | 3.24 | - | 1061.8 |
| AHQ-3-1, 2752          | R.YAPSEAGLHEM.DIR.Y          | 1605.75422 | 2 | 6.86E-05 | 0.74 | 2.94 | - | 727.7  |
| AHQ-3-6, 3049          | R.YAPSEAGLHEM.DIR.Y          | 1589.75482 | 2 | 6.35E-04 | 0.71 | 2.70 | - | 579.1  |
| AHQ-3-10, 3058         | R.YAPSEAGLHEM.DIR.Y          | 1589.75482 | 2 | 1.14E-04 | 0.90 | 3.20 | - | 911.1  |
| AHQ-3-5, 3036 - 3091   | R.YAPSEAGLHEM.DIR.Y          | 1589.75482 | 2 | 5.36E-04 | 0.91 | 3.69 | - | 959.1  |
| AHQ-3-7, 2362          | R.YAPSEAGLHEM.DIR.Y          | 1605.75422 | 2 | 8.05E-05 | 0.58 | 2.57 | - | 542.0  |
| AHQ-3-3, 4349          | K.YGGDEIPFSPYR.V             | 1401.50466 | 1 | 3.79E-06 | 0.42 | 2.59 | - | 486.8  |
| AHQ-3-3, 4337 - 4370   | K.YGGDEIPFSPYR.V             | 1401.50466 | 2 | 6.98E-05 | 0.72 | 3.16 | - | 466.8  |
| AHQ-3-4, 4265 - 4340   | K.YGGDEIPFSPYR.V             | 1401.50466 | 2 | 1.12E-04 | 0.51 | 2.61 | - | 377.5  |
| AHQ-3-2, 4373 - 4441   | K.YGGDEIPFSPYR.V             | 1401.50466 | 2 | 7.86E-06 | 0.81 | 3.40 | - | 581.0  |
| AHQ-3-1, 4432 - 4460   | K.YGGDEIPFSPYR.V             | 1401.50466 | 2 | 6.83E-06 | 0.85 | 3.30 | - | 734.5  |
| AHQ-3-2, 4377 - 4449   | K.YGGDEIPFSPYR.V             | 1401.50466 | 1 | 1.18E-06 | 0.34 | 2.34 | - | 516.5  |
| AHQ-3-12, 4154         | K.YGGDEIPFSPYR.V             | 1401.50466 | 1 | 1.10E-04 | 0.54 | 2.52 | - | 610.3  |
| AHQ-3-5, 4124          | K.YGGDEIPFSPYR.V             | 1401.50466 | 1 | 1.08E-04 | 0.24 | 2.01 | - | 359.2  |
| AHQ-3-10, 3878 - 3882  | K.YGGDEIPFSPYR.V             | 1401.50466 | 1 | 4.20E-04 | 0.28 | 2.18 | - | 377.3  |
| AHQ-3-1, 4449          | K.YGGDEIPFSPYR.V             | 1401.50466 | 1 | 1.50E-05 | 0.24 | 2.45 | - | 345.6  |
| AHQ-3-5, 2973 - 2975   | K.YGGPYHIGGSPFK.A            | 1380.53182 | 2 | 1.82E-09 | 0.97 | 4.41 | - | 1812.9 |
| AHQ-3-3, 3265 - 3273   | K.YGGPYHIGGSPFK.A            | 1380.53182 | 2 | 1.75E-05 | 0.97 | 4.86 | - | 1549.3 |
| AHQ-3-1, 3469          | K.YGGPYHIGGSPFK.A            | 1380.53182 | 2 | 4.42E-06 | 0.96 | 4.35 | - | 1699.3 |
| AHQ-3-11, 3062         | K.YGGPYHIGGSPFK.A            | 1380.53182 | 2 | 3.83E-09 | 0.97 | 4.27 | - | 1931.3 |
| AHQ-3-7, 2882 - 2922   | K.YGGPYHIGGSPFK.A            | 1380.53182 | 2 | 1.20E-05 | 0.95 | 3.75 | - | 1362.3 |
| AHQ-3-4, 3213          | K.YGGPYHIGGSPFK.A            | 1380.53182 | 1 | 1.13E-07 | 0.77 | 3.33 | - | 383.5  |
| AHQ-3-5, 2991          | K.YGGPYHIGGSPFK.A            | 1380.53182 | 3 | 1.38E-04 | 0.64 | 3.08 | - | 347.1  |
| AHQ-3-2, 3267          | K.YGGPYHIGGSPFK.A            | 1380.53182 | 2 | 6.53E-05 | 0.96 | 4.23 | - | 1555.6 |
| AHQ-3-5, 2992          | K.YGGPYHIGGSPFK.A            | 1380.53182 | 1 | 1.12E-05 | 0.82 | 3.44 | - | 432.1  |
| AHQ-3-4, 3208 - 3209   | K.YGGPYHIGGSPFK.A            | 1380.53182 | 2 | 6.43E-10 | 0.98 | 4.91 | - | 2014.3 |
| AHQ-3-1, 3132 - 3204   | K.YGGQPVNPFPSK.L             | 1291.43658 | 2 | 1.67E-06 | 0.94 | 4.04 | - | 731.3  |
| AHQ-3-2, 3069 - 3147   | K.YGGQPVNPFPSK.L             | 1291.43658 | 1 | 1.19E-04 | 0.45 | 2.71 | - | 262.4  |
| AHQ-3-1, 3156          | K.YGGQPVNPFPSK.L             | 1291.43658 | 1 | 1.49E-06 | 0.37 | 2.51 | - | 233.8  |
| AHQ-3-3, 2990          | K.YGGQPVNPFPSK.L             | 1291.43658 | 2 | 3.49E-05 | 0.86 | 3.56 | - | 367.8  |
| AHQ-3-2, 3002 - 3073   | K.YGGQPVNPFPSK.L             | 1291.43658 | 2 | 4.41E-07 | 0.93 | 3.40 | - | 698.0  |
| AHQ-3-4, 2957 - 2964   | K.YGGQPVNPFPSK.L             | 1291.43658 | 2 | 1.62E-05 | 0.82 | 3.25 | - | 376.6  |
| AHQ-3-2, 3145          | K.YGGQPVNPFPSK.L             | 1291.43658 | 2 | 1.05E-04 | 0.87 | 3.65 | - | 434.0  |
| AHQ-3-6, 3850          | K.YKGQHPVGSFQFTVGLPGEAGAHK.V | 2598.88377 | 3 | 8.52E-04 | 0.88 | 3.79 | - | 1015.6 |
| AHQ-3-5, 3825 - 3900   | K.YKGQHPVGSFQFTVGLPGEAGAHK.V | 2598.88377 | 3 | 7.33E-06 | 0.70 | 3.20 | - | 658.2  |
| AHQ-3-6, 3851 - 3862   | K.YKGQHPVGSFQFTVGLPGEAGAHK.V | 2598.88377 | 2 | 2.25E-06 | 0.80 | 3.74 | - | 280.8  |
| AHQ-3-7, 3754 - 3787   | K.YKGQHPVGSFQFTVGLPGEAGAHK.V | 2598.88377 | 3 | 2.68E-05 | 0.91 | 4.22 | - | 922.8  |
| AHQ-3-3, 4317          | K.YKGQHPVGSFQFTVGLPGEAGAHK.V | 2598.88377 | 3 | 1.71E-07 | 0.87 | 3.78 | - | 1213.4 |
| AHQ-3-1, 4521 - 4540   | K.YKGQHPVGSFQFTVGLPGEAGAHK.V | 2598.88377 | 3 | 1.37E-04 | 0.79 | 3.49 | - | 854.8  |
| AHQ-3-13, 2838         | K.YNEQHVPSPFTAR.V            | 1603.71978 | 2 | 8.75E-05 | 0.77 | 2.86 | - | 402.7  |
| AHQ-3-5, 2843 - 2852   | K.YNEQHVPSPFTAR.V            | 1603.71978 | 2 | 1.35E-07 | 0.89 | 3.93 | - | 435.0  |
| AHQ-3-5, 2535          | K.YNEQHVPSPFTAR.V            | 1603.71978 | 3 | 5.62E-09 | 0.93 | 4.51 | - | 1349.2 |
| AHQ-3-5, 2531          | K.YNEQHVPSPFTAR.V            | 1603.71978 | 2 | 6.16E-06 | 0.86 | 3.42 | - | 488.9  |
| AHQ-3-4, 2678          | K.YNEQHVPSPFTAR.V            | 1603.71978 | 2 | 2.72E-06 | 0.76 | 2.79 | - | 441.2  |
| AHQ-3-2, 2754          | K.YNEQHVPSPFTAR.V            | 1603.71978 | 2 | 2.82E-06 | 0.81 | 3.28 | - | 395.4  |
| AHQ-3-4, 2988 - 2989   | K.YNEQHVPSPFTAR.V            | 1603.71978 | 2 | 1.75E-05 | 0.78 | 3.12 | - | 487.5  |
| AHQ-3-6, 2545          | K.YNEQHVPSPFTAR.V            | 1603.71978 | 2 | 9.84E-05 | 0.86 | 3.18 | - | 500.5  |
| AHQ-3-7, 2483          | K.YNEQHVPSPFTAR.V            | 1603.71978 | 2 | 8.06E-04 | 0.61 | 3.21 | - | 302.5  |
| AHQ-3-10, 2570         | K.YNEQHVPSPFTAR.V            | 1603.71978 | 2 | 2.87E-09 | 0.88 | 3.36 | - | 570.2  |
| AHQ-3-8, 2280          | K.YNEQHVPSPFTAR.V            | 1603.71978 | 3 | 5.41E-06 | 0.90 | 3.72 | - | 1190.2 |
| AHQ-3-9, 2423          | K.YNEQHVPSPFTAR.V            | 1603.71978 | 2 | 5.52E-04 | 0.42 | 2.55 | - | 284.3  |
| AHQ-3-2, 3083          | K.YNEQHVPSPFTAR.V            | 1603.71978 | 2 | 3.95E-04 | 0.68 | 2.98 | - | 363.1  |
| AHQ-3-2, 4542          | K.YTPVQQGPVGNVNTYGGDPPIK.S   | 2287.55640 | 2 | 6.89E-06 | 0.82 | 3.44 | - | 451.2  |
| AHQ-3-2, 4669 - 4715   | K.YTPVQQGPVGNVNTYGGDPPIK.S   | 2287.55640 | 2 | 1.12E-07 | 0.94 | 4.47 | - | 1049.3 |
| AHQ-3-7, 4338          | K.YTPVQQGPVGNVNTYGGDPPIK.S   | 2287.55640 | 2 | 5.04E-06 | 0.89 | 3.89 | - | 619.9  |
| AHQ-3-2, 4785          | K.YTPVQQGPVGNVNTYGGDPPIK.S   | 2287.55640 | 2 | 8.49E-08 | 0.94 | 4.77 | - | 835.0  |
| AHQ-3-2, 4869 - 4937   | K.YTPVQQGPVGNVNTYGGDPPIK.S   | 2287.55640 | 2 | 7.45E-11 | 0.94 | 4.84 | - | 709.7  |
| AHQ-3-4, 4594 - 4620   | K.YTPVQQGPVGNVNTYGGDPPIK.S   | 2287.55640 | 2 | 2.86E-06 | 0.93 | 4.62 | - | 814.8  |
| AHQ-3-4, 4688 - 4768   | K.YTPVQQGPVGNVNTYGGDPPIK.S   | 2287.55640 | 2 | 7.13E-06 | 0.94 | 4.30 | - | 883.7  |
| AHQ-3-5, 4503 - 4523   | K.YTPVQQGPVGNVNTYGGDPPIK.S   | 2287.55640 | 2 | 2.78E-05 | 0.94 | 4.60 | - | 767.2  |
| AHQ-3-3, 4498          | K.YTPVQQGPVGNVNTYGGDPPIK.S   | 2287.55640 | 2 | 1.46E-06 | 0.88 | 3.82 | - | 714.4  |
| AHQ-3-4, 4836          | K.YTPVQQGPVGNVNTYGGDPPIK.S   | 2287.55640 | 2 | 6.33E-04 | 0.43 | 2.74 | - | 330.3  |
| AHQ-3-6, 4409 - 4438   | K.YTPVQQGPVGNVNTYGGDPPIK.S   | 2287.55640 | 2 | 8.85E-06 | 0.89 | 4.27 | - | 434.6  |
| AHQ-3-9, 4123          | K.YTPVQQGPVGNVNTYGGDPPIK.S   | 2287.55640 | 2 | 6.69E-07 | 0.90 | 4.41 | - | 461.8  |
| AHQ-3-3, 4768 - 4840   | K.YTPVQQGPVGNVNTYGGDPPIK.S   | 2287.55640 | 2 | 1.46E-07 | 0.94 | 4.73 | - | 668.8  |
| AHQ-3-1, 4848          | K.YTPVQQGPVGNVNTYGGDPPIK.S   | 2287.55640 | 2 | 1.99E-05 | 0.90 | 4.21 | - | 582.1  |
| AHQ-3-3, 4954 - 5034   | K.YTPVQQGPVGNVNTYGGDPPIK.S   | 2287.55640 | 2 | 8.25E-05 | 0.57 | 2.96 | - | 361.0  |
| AHQ-3-1, 4681 - 4752   | K.YTPVQQGPVGNVNTYGGDPPIK.S   | 2287.55640 | 2 | 5.70E-07 | 0.94 | 4.62 | - | 699.6  |
| AHQ-3-3, 4629 - 4700   | K.YTPVQQGPVGNVNTYGGDPPIK.S   | 2287.55640 | 2 | 5.02E-06 | 0.87 | 3.95 | - | 574.4  |
| AHQ-3-3, 6892 - 6913   | R.YWPQAGEYAHVHLCSNEDIR.L     | 2538.73318 | 3 | 6.07E-07 | 0.64 | 3.17 | - | 386.0  |
| AHQ-3-1, 7050 - 7062   | R.YWPQAGEYAHVHLCSNEDIR.L     | 2538.73318 | 2 | 5.20E-08 | 0.82 | 3.06 | - | 552.8  |
| AHQ-3-1, 6861 - 6929   | R.YWPQAGEYAHVHLCSNEDIR.L     | 2538.73318 | 2 | 5.42E-08 | 0.94 | 4.67 | - | 778.8  |
| AHQ-3-4, 6576          | R.YWPQAGEYAHVHLCSNEDIR.L     | 2538.73318 | 2 | 1.09E-06 | 0.84 | 3.18 | - | 899.5  |
| AHQ-3-2, 7119 - 7198   | R.YWPQAGEYAHVHLCSNEDIR.L     | 2538.73318 | 2 | 7.54E-10 | 0.93 | 4.51 | - | 856.8  |
| AHQ-3-2, 6967 - 7050   | R.YWPQAGEYAHVHLCSNEDIR.L     | 2538.73318 | 2 | 1.06E-06 | 0.96 | 5.14 | - | 938.7  |
| AHQ-3-4, 6914 - 6966   | R.YWPQAGEYAHVHLCSNEDIR.L     | 2538.73318 | 2 | 6.30E-04 | 0.86 | 3.54 | - | 741.3  |

|                            |                                            |            |   |          |       |        |       |          |
|----------------------------|--------------------------------------------|------------|---|----------|-------|--------|-------|----------|
| AHQ-3-3, 6901              | R.YWPQAGEYAVHVLCSNSEDIR.L                  | 2538.73318 | 2 | 8.78E-06 | 0.60  | 2.78   | -     | 432.3    |
| AHQ-3-2, 6959 - 7030       | R.YWPQAGEYAVHVLCSNSEDIR.L                  | 2538.73318 | 3 | 6.64E-05 | 0.82  | 3.50   | -     | 530.3    |
| AHQ-3-2, 6819              | R.YWPQAGEYAVHVLCSNSEDIR.L                  | 2538.73318 | 3 | 3.08E-09 | 0.73  | 3.36   | -     | 480.3    |
| AHQ-3-2, 6589 - 6605       | R.YWPQAGEYAVHVLCSNSEDIR.L                  | 2538.73318 | 2 | 7.20E-08 | 0.93  | 4.61   | -     | 1072.8   |
| AHQ-3-3, 6528 - 6566       | R.YWPQAGEYAVHVLCSNSEDIR.L                  | 2538.73318 | 2 | 6.38E-08 | 0.66  | 2.54   | -     | 607.7    |
| gi 4504745 ref NP_000410.1 | integrin alpha 2b precursor [Homo sapiens] |            |   | 8.33E-15 | 30.83 | 360.38 | 41.50 | 113374.2 |
| AHQ-3-4, 5376 - 5452       | R.AEGGQCPSSLFDLDR.D                        | 1564.74505 | 2 | 5.12E-09 | 0.96  | 5.06   | -     | 998.3    |
| AHQ-3-13-, 5195            | R.AEGGQCPSSLFDLDR.D                        | 1564.74505 | 2 | 3.12E-04 | 0.80  | 3.07   | -     | 696.4    |
| AHQ-3-5, 5200 - 5253       | R.AEGGQCPSSLFDLDR.D                        | 1564.74505 | 2 | 2.98E-06 | 0.95  | 4.40   | -     | 980.2    |
| AHQ-3-3, 5464              | R.AEGGQCPSSLFDLDR.D                        | 1564.74505 | 2 | 4.24E-07 | 0.89  | 3.43   | -     | 898.0    |
| AHQ-3-1, 5481 - 5550       | R.AEGGQCPSSLFDLDR.D                        | 1564.74505 | 2 | 1.73E-06 | 0.90  | 3.45   | -     | 834.6    |
| AHQ-3-10, 4762             | R.AEGGQCPSSLFDLDR.D                        | 1564.74505 | 2 | 9.64E-08 | 0.92  | 4.01   | -     | 840.0    |
| AHQ-3-13, 5179 - 5225      | R.AEGGQCPSSLFDLDR.D                        | 1564.74505 | 2 | 1.59E-05 | 0.94  | 3.72   | -     | 1006.5   |
| AHQ-3-4, 5589              | R.AEGGQCPSSLFDLDR.D                        | 1564.74505 | 2 | 1.08E-05 | 0.95  | 4.27   | -     | 1032.2   |
| AHQ-3-6, 5123 - 5153       | R.AEGGQCPSSLFDLDR.D                        | 1564.74505 | 2 | 5.50E-05 | 0.83  | 2.93   | -     | 763.0    |
| AHQ-3-5, 2567              | R.ALSNVEGFER.L                             | 1122.21308 | 2 | 3.20E-05 | 0.90  | 3.13   | -     | 1055.2   |
| AHQ-3-3, 2762              | R.ALSNVEGFER.L                             | 1122.21308 | 2 | 3.13E-04 | 0.86  | 2.96   | -     | 793.0    |
| AHQ-3-4, 2701              | R.ALSNVEGFER.L                             | 1122.21308 | 2 | 4.82E-06 | 0.92  | 3.50   | -     | 1193.2   |
| AHQ-3-4, 2798              | R.ALSNVEGFER.L                             | 1122.21308 | 2 | 5.68E-05 | 0.80  | 2.71   | -     | 817.5    |
| AHQ-3-1, 2965              | R.ALSNVEGFER.L                             | 1122.21308 | 2 | 7.30E-07 | 0.82  | 3.09   | -     | 725.1    |
| AHQ-3-7, 2511              | R.ALSNVEGFER.L                             | 1122.21308 | 2 | 6.85E-07 | 0.86  | 3.17   | -     | 957.3    |
| AHQ-3-6, 2569              | R.ALSNVEGFER.L                             | 1122.21308 | 2 | 7.26E-06 | 0.87  | 3.00   | -     | 1140.7   |
| AHQ-3-4, 5374 - 5453       | K.ASVQLLVQDSLNPVAVK.S                      | 1682.94293 | 2 | 2.03E-04 | 0.87  | 3.95   | -     | 728.8    |
| AHQ-3-4, 5088 - 5164       | K.ASVQLLVQDSLNPVAVK.S                      | 1682.94293 | 2 | 8.57E-06 | 0.94  | 4.91   | -     | 938.5    |
| AHQ-3-4, 5526 - 5601       | K.ASVQLLVQDSLNPVAVK.S                      | 1682.94293 | 2 | 7.32E-04 | 0.82  | 3.58   | -     | 733.7    |
| AHQ-3-4, 5232 - 5301       | K.ASVQLLVQDSLNPVAVK.S                      | 1682.94293 | 2 | 2.31E-05 | 0.90  | 4.39   | -     | 611.7    |
| AHQ-3-4, 2980              | R.DETRNVGSTLQTFK.A                         | 1724.85363 | 2 | 7.44E-05 | 0.90  | 3.91   | -     | 1052.8   |
| AHQ-3-4, 3185              | R.DETRNVGSTLQTFK.A                         | 1724.85363 | 2 | 1.02E-04 | 0.56  | 2.65   | -     | 460.3    |
| AHQ-3-6, 3813 - 3893       | R.DGYNDIAVAAPYGGPSGR.G                     | 1780.87574 | 2 | 4.51E-06 | 0.83  | 4.01   | -     | 605.7    |
| AHQ-3-4, 4181              | R.DGYNDIAVAAPYGGPSGR.G                     | 1780.87574 | 2 | 9.81E-06 | 0.84  | 3.65   | -     | 570.3    |
| AHQ-3-5, 3903 - 3911       | R.DGYNDIAVAAPYGGPSGR.G                     | 1780.87574 | 2 | 4.52E-11 | 0.93  | 4.70   | -     | 733.2    |
| AHQ-3-4, 3976 - 4024       | R.DGYNDIAVAAPYGGPSGR.G                     | 1780.87574 | 2 | 2.27E-04 | 0.63  | 3.17   | -     | 689.2    |
| AHQ-3-4, 2829              | R.EQNSLDSWGPV.V                            | 1261.32250 | 1 | 1.16E-05 | 0.05  | 2.04   | -     | 96.1     |
| AHQ-3-4, 4509 - 4536       | R.FGSAIPLGDLDR.D                           | 1332.48700 | 2 | 9.86E-05 | 0.91  | 3.27   | -     | 1074.9   |
| AHQ-3-5, 4364              | R.FGSAIPLGDLDR.D                           | 1332.48700 | 2 | 4.05E-07 | 0.88  | 3.07   | -     | 1039.1   |
| AHQ-3-4, 5860 - 5933       | R.FGSAIPLGDLDRDGYNDIAVAAPYGGPSGR.G         | 3094.34015 | 3 | 2.43E-10 | 0.92  | 4.98   | -     | 737.8    |
| AHQ-3-3, 6057 - 6078       | R.FGSAIPLGDLDRDGYNDIAVAAPYGGPSGR.G         | 3094.34015 | 3 | 4.07E-05 | 0.76  | 3.17   | -     | 653.6    |
| AHQ-3-4, 6116 - 6184       | R.FGSAIPLGDLDRDGYNDIAVAAPYGGPSGR.G         | 3094.34015 | 3 | 7.34E-09 | 0.87  | 4.14   | -     | 941.1    |
| AHQ-3-5, 5911 - 5975       | R.FGSAIPLGDLDRDGYNDIAVAAPYGGPSGR.G         | 3094.34015 | 3 | 1.44E-05 | 0.94  | 5.23   | -     | 884.4    |
| AHQ-3-6, 5757 - 5825       | R.FGSAIPLGDLDRDGYNDIAVAAPYGGPSGR.G         | 3094.34015 | 3 | 5.35E-07 | 0.84  | 4.20   | -     | 778.1    |
| AHQ-3-6, 5667 - 5741       | R.FGSAIPLGDLDRDGYNDIAVAAPYGGPSGR.G         | 3094.34015 | 3 | 4.68E-08 | 0.92  | 4.41   | -     | 953.8    |
| AHQ-3-4, 5996 - 6046       | R.FGSAIPLGDLDRDGYNDIAVAAPYGGPSGR.G         | 3094.34015 | 3 | 3.85E-09 | 0.93  | 5.95   | -     | 811.9    |
| AHQ-3-4, 7016 - 7080       | R.GAVDIDDNGYPDLVIGAYGANQVAVYR.A            | 2827.05458 | 2 | 4.58E-09 | 0.96  | 5.61   | -     | 653.7    |
| AHQ-3-4, 6590 - 6660       | R.GAVDIDDNGYPDLVIGAYGANQVAVYR.A            | 2827.05458 | 2 | 8.98E-04 | 0.96  | 5.72   | -     | 687.9    |
| AHQ-3-4, 7120 - 7184       | R.GAVDIDDNGYPDLVIGAYGANQVAVYR.A            | 2827.05458 | 2 | 1.19E-06 | 0.96  | 5.02   | -     | 909.1    |
| AHQ-3-4, 7249 - 7316       | R.GAVDIDDNGYPDLVIGAYGANQVAVYR.A            | 2827.05458 | 2 | 2.09E-08 | 0.97  | 5.68   | -     | 862.2    |
| AHQ-3-4, 7384 - 7460       | R.GAVDIDDNGYPDLVIGAYGANQVAVYR.A            | 2827.05458 | 2 | 2.34E-06 | 0.93  | 4.66   | -     | 722.2    |
| AHQ-3-4, 6452 - 6521       | R.GAVDIDDNGYPDLVIGAYGANQVAVYR.A            | 2827.05458 | 2 | 4.42E-04 | 0.67  | 3.31   | -     | 215.1    |
| AHQ-3-4, 7629 - 7697       | R.GAVDIDDNGYPDLVIGAYGANQVAVYR.A            | 2827.05458 | 2 | 7.30E-05 | 0.93  | 4.88   | -     | 462.3    |
| AHQ-3-4, 7530 - 7558       | R.GAVDIDDNGYPDLVIGAYGANQVAVYR.A            | 2827.05458 | 2 | 4.82E-05 | 0.94  | 5.29   | -     | 576.8    |
| AHQ-3-4, 6877 - 6952       | R.GAVDIDDNGYPDLVIGAYGANQVAVYR.A            | 2827.05458 | 2 | 1.45E-05 | 0.95  | 5.11   | -     | 676.2    |
| AHQ-3-11, 4719 - 4727      | R.GEAQVWTLQLR.A                            | 1301.47614 | 2 | 1.38E-06 | 0.92  | 3.86   | -     | 946.0    |
| AHQ-3-1, 5344              | R.GEAQVWTLQLR.A                            | 1301.47614 | 2 | 2.50E-05 | 0.86  | 3.09   | -     | 894.3    |
| AHQ-3-10, 4467             | R.GEAQVWTLQLR.A                            | 1301.47614 | 2 | 2.92E-06 | 0.95  | 4.27   | -     | 1045.5   |
| AHQ-3-12, 5008             | R.GEAQVWTLQLR.A                            | 1301.47614 | 2 | 7.89E-06 | 0.92  | 3.56   | -     | 961.9    |
| AHQ-3-4, 5656 - 5728       | R.GNSFPASLVAAEEGER.E                       | 1733.86053 | 2 | 3.03E-09 | 0.93  | 4.35   | -     | 924.8    |
| AHQ-3-4, 5792 - 5868       | R.GNSFPASLVAAEEGER.E                       | 1733.86053 | 2 | 1.69E-07 | 0.88  | 3.86   | -     | 702.8    |
| AHQ-3-4, 5508 - 5577       | R.GNSFPASLVAAEEGER.E                       | 1733.86053 | 2 | 1.71E-06 | 0.91  | 3.69   | -     | 900.5    |
| AHQ-3-4, 5420 - 5488       | R.GNSFPASLVAAEEGER.E                       | 1733.86053 | 2 | 6.57E-08 | 0.90  | 4.35   | -     | 629.6    |
| AHQ-3-4, 5944              | R.GNSFPASLVAAEEGER.E                       | 1733.86053 | 2 | 1.03E-08 | 0.89  | 3.91   | -     | 791.9    |
| AHQ-3-4, 5313 - 5349       | R.GNSFPASLVAAEEGER.E                       | 1733.86053 | 2 | 1.63E-07 | 0.88  | 4.08   | -     | 699.0    |
| AHQ-3-3, 5857              | R.GNSFPASLVAAEEGER.E                       | 1733.86053 | 2 | 1.00E-05 | 0.83  | 3.52   | -     | 627.5    |
| AHQ-3-4, 6852 - 6894       | R.GNSFPASLVAAEEGEREQNSLDSWGPV.V            | 2976.16043 | 3 | 6.68E-08 | 0.50  | 3.12   | -     | 351.3    |
| AHQ-3-4, 6665 - 6692       | R.GNSFPASLVAAEEGEREQNSLDSWGPV.V            | 2976.16043 | 3 | 5.88E-11 | 0.88  | 4.42   | -     | 521.3    |
| AHQ-3-4, 6761 - 6762       | R.GNSFPASLVAAEEGEREQNSLDSWGPV.V            | 2976.16043 | 3 | 1.26E-08 | 0.83  | 3.78   | -     | 600.4    |
| AHQ-3-4, 5240              | R.GPHALGAPSLLLTGTQLYGR.F                   | 2023.32431 | 3 | 7.11E-05 | 0.92  | 3.94   | -     | 1034.0   |
| AHQ-3-3, 5329 - 5378       | R.GPHALGAPSLLLTGTQLYGR.F                   | 2023.32431 | 3 | 8.80E-04 | 0.71  | 3.19   | -     | 655.4    |
| AHQ-3-2, 5371              | R.GPHALGAPSLLLTGTQLYGR.F                   | 2023.32431 | 2 | 2.58E-04 | 0.84  | 4.04   | -     | 390.5    |
| AHQ-3-7, 4742              | R.GPHALGAPSLLLTGTQLYGR.F                   | 2023.32431 | 2 | 8.74E-07 | 0.95  | 5.18   | -     | 739.0    |
| AHQ-3-4, 5152 - 5233       | R.GPHALGAPSLLLTGTQLYGR.F                   | 2023.32431 | 3 | 7.07E-06 | 0.82  | 3.52   | -     | 843.6    |
| AHQ-3-4, 5142 - 5212       | R.GPHALGAPSLLLTGTQLYGR.F                   | 2023.32431 | 2 | 6.39E-06 | 0.97  | 5.82   | -     | 1150.7   |
| AHQ-3-4, 5442              | R.GPHALGAPSLLLTGTQLYGR.F                   | 2023.32431 | 2 | 2.99E-07 | 0.81  | 3.53   | -     | 545.8    |
| AHQ-3-7, 4740              | R.GPHALGAPSLLLTGTQLYGR.F                   | 2023.32431 | 3 | 9.47E-06 | 0.77  | 3.03   | -     | 1007.5   |
| AHQ-3-5, 5008 - 5020       | R.GPHALGAPSLLLTGTQLYGR.F                   | 2023.32431 | 3 | 1.02E-04 | 0.93  | 4.15   | -     | 1202.2   |
| AHQ-3-4, 5038              | R.GPHALGAPSLLLTGTQLYGR.F                   | 2023.32431 | 2 | 2.87E-08 | 0.92  | 4.15   | -     | 731.1    |
| AHQ-3-3, 5242 - 5322       | R.GPHALGAPSLLLTGTQLYGR.F                   | 2023.32431 | 2 | 9.90E-06 | 0.93  | 5.04   | -     | 450.1    |
| AHQ-3-5, 5001              | R.GPHALGAPSLLLTGTQLYGR.F                   | 2023.32431 | 2 | 1.13E-05 | 0.96  | 5.10   | -     | 876.6    |
| AHQ-3-1, 5504              | R.GPHALGAPSLLLTGTQLYGR.F                   | 2023.32431 | 3 | 3.49E-04 | 0.81  | 3.58   | -     | 838.9    |
| AHQ-3-6, 4947              | R.GPHALGAPSLLLTGTQLYGR.F                   | 2023.32431 | 3 | 3.20E-04 | 0.90  | 4.05   | -     | 1240.9   |
| AHQ-3-6, 4941 - 4949       | R.GPHALGAPSLLLTGTQLYGR.F                   | 2023.32431 | 2 | 1.81E-07 | 0.97  | 5.92   | -     | 969.8    |
| AHQ-3-1, 5493              | R.GPHALGAPSLLLTGTQLYGR.F                   | 2023.32431 | 2 | 7.36E-04 | 0.79  | 3.62   | -     | 391.3    |
| AHQ-3-4, 5228 - 5298       | R.GPHALGAPSLLLTGTQLYGR.F                   | 2023.32431 | 2 | 9.50E-10 | 0.98  | 6.05   | -     | 1456.0   |
| AHQ-3-3, 5332 - 5346       | R.GPHALGAPSLLLTGTQLYGR.F                   | 2023.32431 | 2 | 6.68E-06 | 0.97  | 5.23   | -     | 1141.3   |
| AHQ-3-4, 5269 - 5312       | R.GQVLVFLGQSEGLR.S                         | 1503.72793 | 2 | 1.11E-04 | 0.88  | 3.25   | -     | 1125.9   |
| AHQ-3-4, 5504 - 5538       | R.GQVLVFLGQSEGLR.S                         | 1503.72793 | 2 | 1.59E-04 | 0.86  | 3.43   | -     | 702.3    |
| AHQ-3-4, 5188              | R.GQVLVFLGQSEGLR.S                         | 1503.72793 | 2 | 4.08E-08 | 0.96  | 4.82   | -     | 1362.0   |
| AHQ-3-5, 4176              | R.HDLLVGAPLYMESR.A                         | 1601.85188 | 2 | 5.90E-08 | 0.97  | 4.45   | -     | 1664.0   |
| AHQ-3-4, 4353 - 4429       | R.HDLLVGAPLYMESR.A                         | 1601.85188 | 2 | 2.15E-07 | 0.95  | 4.21   | -     | 1258.5   |
| AHQ-3-5, 3332              | K.HSPICHTTMAFLR.D                          | 1572.83705 | 2 | 5.73E-05 | 0.73  | 2.76   | -     | 496.2    |
| AHQ-3-6, 4129              | K.IVLLDVPVR.A                              | 1024.28196 | 2 | 4.54E-05 | 0.90  | 3.69   | -     | 932.4    |
| AHQ-3-4, 4362 - 4437       | K.IVLLDVPVR.A                              | 1024.28196 | 2 | 1.08E-04 | 0.91  | 3.58   | -     | 927.9    |
| AHQ-3-1, 4685              | K.IVLLDVPVR.A                              | 1024.28196 | 2 | 2.54E-04 | 0.92  | 3.77   | -     | 930.3    |
| AHQ-3-12, 4324             | K.IVLLDVPVR.A                              | 1024.28196 | 2 | 1.87E-05 | 0.90  | 3.50   | -     | 823.0    |
| AHQ-3-4, 4520              | R.IYVENDFSWDK.R                            | 1416.51610 | 1 | 5.96E-06 | 0.34  | 2.09   | -     | 496.0    |
| AHQ-3-4, 4060              | R.IYVENDFSWDK.R                            | 1572.70245 | 2 | 7.73E-07 | 0.94  | 3.70   | -     | 1167.4   |
| AHQ-3-4, 4226 - 4270       | R.IYVENDFSWDK.R                            | 1572.70245 | 2 | 1.92E-06 | 0.83  | 2.95   | -     | 921.2    |
| AHQ-3-10, 6334             | R.LQDPVLVSCDSAPCTVVQCQDLQEMAR.G            | 2996.36144 | 2 | 1.87E-04 | 0.86  | 3.96   | -     | 389.6    |
| AHQ-3-10, 6171 - 6250      | R.LQDPVLVSCDSAPCTVVQCQDLQEMAR.G            | 2996.36144 | 2 | 2.57E-08 | 0.94  | 5.06   | -     | 369.6    |
| AHQ-3-4, 4926              | K.LSLNAELQLDR.Q                            | 1272.43310 | 1 | 1.50E-04 | 0.10  | 2.05   | -     | 300.2    |
| AHQ-3-4, 4605              | K.LSLNAELQLDR.Q                            | 1272.43310 | 2 | 3.81E-07 | 0.80  | 3.21   | -     | 696.4    |
| AHQ-3-10, 2036 - 2095      | R.NRPPLEEDDEEGE                            | 1529.50164 | 2 | 1.65E-04 | 0.73  | 2.55   | -     | 939.6    |
| AHQ-3-11, 2059 - 2132      | R.NRPPLEEDDEEGE                            | 1529.50164 | 2 | 2.11E-08 | 0.85  | 3.04   | -     | 862.8    |
| AHQ-3-7, 2492              | R.NVGSQTLQTFK.A                            | 1223.36055 | 2 | 6.46E-07 | 0.92  | 3.48   | -     | 798.0    |
| AHQ-3-4, 3217              | R.NVGSQTLQTFK.A                            | 1223.36055 | 1 | 3.31E-07 | 0.27  | 2.20   | -     | 283.5    |
| AHQ-3-12, 2776             | R.NVGSQTLQTFK.A                            | 1223.36055 | 2 | 2.08E-04 | 0.78  | 2.97   | -     | 440.0    |
| AHQ-3-4, 2681 - 2761       | R.NVGSQTLQTFK.A                            | 1223.36055 | 2 | 8.70E-04 | 0.87  | 3.44   | -     | 670.5    |
| AHQ-3-4, 7546              | R.QGLGASVSVSWDVIVACAPWQHWNVLEK.T           | 3139.53208 | 3 | 3.67E-07 | 0.91  | 4.90   | -     | 649.6    |

|                           |                                                         |            |   |          |      |        |       |         |
|---------------------------|---------------------------------------------------------|------------|---|----------|------|--------|-------|---------|
| AHQ-3-3, 6277             | R.SRPSQVLDSPPFTGSAFGFSLR.G                              | 2354.60606 | 3 | 6.86E-05 | 0.96 | 5.46   | -     | 1439.4  |
| AHQ-3-5, 5980 - 5981      | R.SRPSQVLDSPPFTGSAFGFSLR.G                              | 2354.60606 | 3 | 2.74E-11 | 0.98 | 7.42   | -     | 1502.3  |
| AHQ-3-6, 5921 - 5993      | R.SRPSQVLDSPPFTGSAFGFSLR.G                              | 2354.60606 | 3 | 8.33E-15 | 0.96 | 5.96   | -     | 1249.0  |
| AHQ-3-4, 6129 - 6276      | R.SRPSQVLDSPPFTGSAFGFSLR.G                              | 2354.60606 | 3 | 7.35E-11 | 0.98 | 7.53   | -     | 1615.1  |
| AHQ-3-4, 6212 - 6284      | R.SRPSQVLDSPPFTGSAFGFSLR.G                              | 2354.60606 | 2 | 7.32E-09 | 0.97 | 6.12   | -     | 704.8   |
| AHQ-3-1, 6321 - 6340      | R.SRPSQVLDSPPFTGSAFGFSLR.G                              | 2354.60606 | 3 | 1.02E-11 | 0.97 | 5.91   | -     | 1641.7  |
| AHQ-3-4, 5856             | R.SRPSQVLDSPPFTGSAFGFSLR.G                              | 2354.60606 | 3 | 1.72E-04 | 0.96 | 5.90   | -     | 1614.4  |
| AHQ-3-4, 6346             | R.SRPSQVLDSPPFTGSAFGFSLR.G                              | 2354.60606 | 3 | 1.61E-06 | 0.93 | 4.55   | -     | 1378.8  |
| AHQ-3-14-, 5844           | R.SRPSQVLDSPPFTGSAFGFSLR.G                              | 2354.60606 | 3 | 5.90E-07 | 0.91 | 4.43   | -     | 1273.9  |
| AHQ-3-4, 3830             | K.TEEAEKTPVGSCLFAQPESGR.R                               | 2295.46902 | 2 | 3.55E-09 | 0.80 | 3.72   | -     | 380.2   |
| AHQ-3-6, 3458             | K.TEEAEKTPVGSCLFAQPESGR.R                               | 2295.46902 | 2 | 2.55E-04 | 0.93 | 4.26   | -     | 819.5   |
| AHQ-3-4, 3621 - 3692      | K.TEEAEKTPVGSCLFAQPESGR.R                               | 2295.46902 | 2 | 1.21E-06 | 0.95 | 4.73   | -     | 694.0   |
| AHQ-3-11, 3478 - 3482     | K.TEEAEKTPVGSCLFAQPESGR.R                               | 2295.46902 | 2 | 1.47E-06 | 0.92 | 4.62   | -     | 468.0   |
| AHQ-3-5, 3511 - 3513      | K.TEEAEKTPVGSCLFAQPESGR.R                               | 2295.46902 | 2 | 6.13E-05 | 0.96 | 5.06   | -     | 857.5   |
| AHQ-3-3, 3744 - 3749      | K.TEEAEKTPVGSCLFAQPESGR.R                               | 2295.46902 | 2 | 3.09E-07 | 0.91 | 4.03   | -     | 638.4   |
| AHQ-3-12, 5494            | R.TLGPSQEETGGVFLCPWR.A                                  | 2036.25364 | 2 | 1.12E-07 | 0.94 | 4.26   | -     | 1105.0  |
| AHQ-3-6, 5517 - 5541      | R.TLGPSQEETGGVFLCPWR.A                                  | 2036.25364 | 2 | 2.44E-09 | 0.95 | 4.37   | -     | 1053.2  |
| AHQ-3-4, 5666 - 5736      | R.TLGPSQEETGGVFLCPWR.A                                  | 2036.25364 | 2 | 3.03E-08 | 0.88 | 4.03   | -     | 521.6   |
| AHQ-3-11, 5274            | R.TLGPSQEETGGVFLCPWR.A                                  | 2036.25364 | 2 | 4.22E-08 | 0.84 | 3.55   | -     | 683.4   |
| AHQ-3-3, 5790 - 5848      | R.TLGPSQEETGGVFLCPWR.A                                  | 2036.25364 | 2 | 1.26E-06 | 0.94 | 4.49   | -     | 977.1   |
| AHQ-3-4, 5776 - 5848      | R.TLGPSQEETGGVFLCPWR.A                                  | 2036.25364 | 2 | 2.64E-08 | 0.91 | 4.14   | -     | 823.9   |
| AHQ-3-2, 5851 - 5922      | R.TLGPSQEETGGVFLCPWR.A                                  | 2036.25364 | 2 | 2.09E-06 | 0.79 | 3.39   | -     | 805.0   |
| AHQ-3-4, 5804             | R.TLGPSQEETGGVFLCPWR.A                                  | 2036.25364 | 2 | 1.46E-05 | 0.94 | 4.97   | -     | 787.3   |
| AHQ-3-5, 5591 - 5607      | R.TLGPSQEETGGVFLCPWR.A                                  | 2036.25364 | 2 | 3.70E-05 | 0.97 | 5.57   | -     | 1102.1  |
| AHQ-3-10, 5030 - 5032     | R.TLGPSQEETGGVFLCPWR.A                                  | 2036.25364 | 2 | 1.77E-05 | 0.97 | 5.57   | -     | 1049.8  |
| AHQ-3-13, 5493 - 5566     | R.TLGPSQEETGGVFLCPWR.A                                  | 2036.25364 | 2 | 7.91E-06 | 0.84 | 3.89   | -     | 617.8   |
| AHQ-3-7, 5435 - 5439      | R.TLGPSQEETGGVFLCPWR.A                                  | 2036.25364 | 2 | 2.99E-07 | 0.97 | 5.31   | -     | 1144.8  |
| AHQ-3-9, 5168             | R.TLGPSQEETGGVFLCPWR.A                                  | 2036.25364 | 2 | 3.49E-08 | 0.96 | 4.82   | -     | 1208.4  |
| AHQ-3-13-, 5470 - 5471    | R.TLGPSQEETGGVFLCPWR.A                                  | 2036.25364 | 2 | 3.02E-05 | 0.97 | 5.25   | -     | 1274.5  |
| AHQ-3-1, 3933             | K.TPVGSCLFAQPESGR.R                                     | 1607.76993 | 2 | 1.49E-06 | 0.76 | 3.53   | -     | 577.5   |
| AHQ-3-10, 3424            | K.TPVGSCLFAQPESGR.R                                     | 1607.76993 | 2 | 8.91E-05 | 0.94 | 3.85   | -     | 1044.3  |
| AHQ-3-4, 3742 - 3748      | K.TPVGSCLFAQPESGR.R                                     | 1607.76993 | 2 | 9.50E-08 | 0.97 | 4.95   | -     | 1318.7  |
| AHQ-3-4, 3922             | K.TPVGSCLFAQPESGR.R                                     | 1607.76993 | 2 | 4.10E-08 | 0.93 | 4.17   | -     | 883.1   |
| AHQ-3-11, 3527            | K.TPVGSCLFAQPESGR.R                                     | 1607.76993 | 2 | 4.16E-08 | 0.89 | 3.81   | -     | 686.2   |
| AHQ-3-3, 3806             | K.TPVGSCLFAQPESGR.R                                     | 1607.76993 | 2 | 1.15E-04 | 0.92 | 3.82   | -     | 985.4   |
| AHQ-3-5, 3612             | K.TPVGSCLFAQPESGR.R                                     | 1607.76993 | 2 | 2.91E-07 | 0.95 | 4.16   | -     | 1036.2  |
| AHQ-3-7, 3516 - 3518      | K.TPVGSCLFAQPESGR.R                                     | 1607.76993 | 2 | 1.54E-05 | 0.93 | 3.95   | -     | 857.2   |
| AHQ-3-4, 5200 - 5268      | K.TPVSCFNMQMCGVATGHNIPQK.L                              | 2462.81122 | 3 | 1.23E-09 | 0.96 | 5.39   | -     | 1254.8  |
| AHQ-3-4, 4689             | K.TPVSCFNMQMCGVATGHNIPQK.L                              | 2478.81062 | 3 | 1.75E-06 | 0.89 | 3.85   | -     | 978.5   |
| AHQ-3-4, 4569             | K.TPVSCFNMQMCGVATGHNIPQK.L                              | 2478.81062 | 3 | 5.61E-14 | 0.94 | 5.02   | -     | 1047.8  |
| AHQ-3-4, 6312             | K.TPVSCFNMQMCGVATGHNIPQK.L                              | 2462.81122 | 3 | 5.60E-04 | 0.90 | 4.07   | -     | 872.3   |
| AHQ-3-4, 5336 - 5409      | K.TPVSCFNMQMCGVATGHNIPQK.L                              | 2462.81122 | 3 | 7.36E-04 | 0.71 | 3.52   | -     | 757.8   |
| AHQ-3-4, 5509             | K.TPVSCFNMQMCGVATGHNIPQK.L                              | 2462.81122 | 3 | 5.23E-04 | 0.96 | 4.89   | -     | 1581.7  |
| AHQ-3-3, 2513             | R.VAIVVGAPR.T                                           | 882.08560  | 2 | 2.52E-06 | 0.93 | 3.49   | -     | 1128.1  |
| AHQ-3-5, 2349             | R.VAIVVGAPR.T                                           | 882.08560  | 2 | 3.70E-05 | 0.95 | 3.70   | -     | 1382.7  |
| AHQ-3-4, 2476 - 2480      | R.VAIVVGAPR.T                                           | 882.08560  | 2 | 1.98E-05 | 0.94 | 3.58   | -     | 1418.9  |
| AHQ-3-13-, 2607           | R.VAIVVGAPR.T                                           | 882.08560  | 2 | 5.75E-05 | 0.92 | 3.24   | -     | 1176.7  |
| AHQ-3-4, 6100 - 6172      | R.VLLGSSQOAGTTLNLDLGGK.H                                | 1999.29783 | 2 | 6.74E-06 | 0.98 | 6.59   | -     | 1783.6  |
| AHQ-3-4, 7256 - 7321      | R.VLLGSSQOAGTTLNLDLGGK.H                                | 1999.29783 | 2 | 3.15E-07 | 0.98 | 6.10   | -     | 1881.6  |
| AHQ-3-4, 6101             | R.VLLGSSQOAGTTLNLDLGGK.H                                | 1999.29783 | 2 | 5.80E-07 | 0.92 | 3.89   | -     | 1350.4  |
| AHQ-3-4, 6240 - 6321      | R.VLLGSSQOAGTTLNLDLGGK.H                                | 1999.29783 | 2 | 1.70E-08 | 0.98 | 5.81   | -     | 1890.5  |
| AHQ-3-4, 7126 - 7192      | R.VLLGSSQOAGTTLNLDLGGK.H                                | 1999.29783 | 2 | 5.97E-09 | 0.97 | 5.75   | -     | 1587.8  |
| AHQ-3-4, 6996 - 7060      | R.VLLGSSQOAGTTLNLDLGGK.H                                | 1999.29783 | 2 | 1.01E-08 | 0.98 | 6.20   | -     | 1974.2  |
| AHQ-3-5, 6229 - 6249      | R.VLLGSSQOAGTTLNLDLGGK.H                                | 1999.29783 | 2 | 6.77E-04 | 0.95 | 4.44   | -     | 1229.0  |
| AHQ-3-4, 5953 - 6030      | R.VLLGSSQOAGTTLNLDLGGK.H                                | 1999.29783 | 2 | 9.74E-07 | 0.96 | 5.05   | -     | 1202.8  |
| AHQ-3-4, 6368 - 6437      | R.VLLGSSQOAGTTLNLDLGGK.H                                | 1999.29783 | 2 | 4.07E-12 | 0.98 | 6.19   | -     | 1801.7  |
| AHQ-3-4, 7645 - 7714      | R.VLLGSSQOAGTTLNLDLGGK.H                                | 1999.29783 | 2 | 3.84E-07 | 0.98 | 6.56   | -     | 1732.4  |
| AHQ-3-4, 6733 - 6788      | R.VLLGSSQOAGTTLNLDLGGK.H                                | 1999.29783 | 2 | 5.52E-11 | 0.97 | 5.40   | -     | 1266.2  |
| AHQ-3-4, 6856 - 6930      | R.VLLGSSQOAGTTLNLDLGGK.H                                | 1999.29783 | 2 | 9.58E-10 | 0.97 | 5.78   | -     | 1376.5  |
| AHQ-3-4, 6596 - 6664      | R.VLLGSSQOAGTTLNLDLGGK.H                                | 1999.29783 | 2 | 1.11E-05 | 0.96 | 5.53   | -     | 1204.2  |
| AHQ-3-5, 3993 - 4008      | R.VVLCELGNPMK.K                                         | 1261.53692 | 2 | 1.05E-04 | 0.94 | 3.84   | -     | 1266.3  |
| AHQ-3-4, 3305             | R.VVLCELGNPMK.K                                         | 1277.53632 | 2 | 6.51E-06 | 0.91 | 3.58   | -     | 1076.0  |
| AHQ-3-6, 3921             | R.VVLCELGNPMK.K                                         | 1261.53692 | 2 | 9.41E-05 | 0.94 | 3.63   | -     | 1299.8  |
| AHQ-3-4, 4140 - 4144      | R.VVLCELGNPMK.K                                         | 1261.53692 | 2 | 8.38E-08 | 0.95 | 4.04   | -     | 1195.4  |
| AHQ-3-5, 3164             | R.VVLCELGNPMK.K                                         | 1277.53632 | 2 | 5.84E-05 | 0.82 | 2.62   | -     | 922.3   |
| AHQ-3-4, 3530             | R.VVLCELGNPMK.N                                         | 1389.70984 | 2 | 7.89E-06 | 0.85 | 3.01   | -     | 941.8   |
| AHQ-3-6, 3894             | R.VYFLQPR.G                                             | 1036.25129 | 2 | 6.82E-06 | 0.92 | 3.39   | -     | 1212.5  |
| AHQ-3-5, 3931 - 3940      | R.VYFLQPR.G                                             | 1036.25129 | 2 | 3.09E-05 | 0.94 | 3.85   | -     | 1251.3  |
| AHQ-3-4, 4128             | R.VYFLQPR.G                                             | 1036.25129 | 2 | 5.09E-06 | 0.95 | 3.81   | -     | 1110.9  |
| g 7669492 ref NP_002037.2 | glyceraldehyde-3-phosphate dehydrogenase [Homo sapiens] |            |   | 9.99E-15 | 8.74 | 110.41 | 40.00 | 36053.0 |
| AHQ-3-10, 3346            | R.GALQNIIPASTGAAK.A                                     | 1412.61680 | 1 | 1.02E-07 | 0.87 | 4.09   | -     | 467.4   |
| AHQ-3-9, 3091 - 3235      | R.GALQNIIPASTGAAK.A                                     | 1412.61680 | 1 | 2.31E-04 | 0.53 | 3.01   | -     | 360.3   |
| AHQ-3-9, 3109 - 3175      | R.GALQNIIPASTGAAK.A                                     | 1412.61680 | 1 | 1.07E-06 | 0.84 | 3.84   | -     | 558.3   |
| AHQ-3-11, 3486            | R.GALQNIIPASTGAAK.A                                     | 1412.61680 | 2 | 5.32E-04 | 0.57 | 3.70   | -     | 290.0   |
| AHQ-3-11, 3459            | R.GALQNIIPASTGAAK.A                                     | 1412.61680 | 1 | 3.17E-08 | 0.66 | 3.40   | -     | 352.6   |
| AHQ-3-9, 3491             | R.GALQNIIPASTGAAK.A                                     | 1412.61680 | 1 | 2.13E-04 | 0.17 | 2.15   | -     | 168.7   |
| AHQ-3-9, 6635 - 6703      | K.GILGYTEHQVSSDFNSDTHSSTFDAGAGIALNDHFVK.L               | 4039.28524 | 3 | 3.73E-04 | 0.90 | 4.37   | -     | 1156.5  |
| AHQ-3-9, 6852 - 6901      | K.GILGYTEHQVSSDFNSDTHSSTFDAGAGIALNDHFVK.L               | 4039.28524 | 3 | 2.45E-06 | 0.68 | 3.14   | -     | 642.1   |
| AHQ-3-9, 3625             | K.RVIISAPSADAPMFVM*GVNHEK.Y                             | 2386.77962 | 3 | 1.12E-04 | 0.92 | 4.61   | -     | 1148.0  |
| AHQ-3-9, 6856 - 6932      | K.VIHDNFGIVEGLMTTVHAITATQK.T                            | 2596.98694 | 2 | 1.32E-07 | 0.98 | 6.66   | -     | 2002.3  |
| AHQ-3-10, 6466            | K.VIHDNFGIVEGLMTTVHAITATQK.T                            | 2596.98694 | 3 | 3.31E-07 | 0.95 | 5.10   | -     | 925.2   |
| AHQ-3-9, 6855 - 6928      | K.VIHDNFGIVEGLMTTVHAITATQK.T                            | 2596.98694 | 3 | 9.99E-15 | 0.97 | 8.15   | -     | 2226.4  |
| AHQ-3-9, 6192 - 6272      | K.VIHDNFGIVEGLMTTVHAITATQK.T                            | 2612.98634 | 3 | 3.70E-05 | 0.95 | 4.92   | -     | 1119.2  |
| AHQ-3-9, 6047 - 6112      | K.VIHDNFGIVEGLMTTVHAITATQK.T                            | 2612.98634 | 2 | 7.80E-06 | 0.96 | 6.42   | -     | 1472.5  |
| AHQ-3-9, 6040 - 6119      | K.VIHDNFGIVEGLMTTVHAITATQK.T                            | 2612.98634 | 3 | 4.66E-14 | 0.98 | 6.00   | -     | 1875.4  |
| AHQ-3-10, 6396 - 6467     | K.VIHDNFGIVEGLMTTVHAITATQK.T                            | 2596.98694 | 2 | 2.38E-08 | 0.97 | 6.16   | -     | 2039.4  |
| AHQ-3-10, 4720 - 4727     | R.VIISAPSADAPMFVM*GVNHEK.Y                              | 2214.59387 | 2 | 2.10E-12 | 0.88 | 3.77   | -     | 555.7   |
| AHQ-3-9, 4279             | R.VIISAPSADAPMFVM*GVNHEK.Y                              | 2230.59327 | 2 | 1.43E-08 | 0.69 | 3.42   | -     | 551.2   |
| AHQ-3-9, 4749 - 4824      | R.VIISAPSADAPMFVM*GVNHEK.Y                              | 2214.59387 | 2 | 3.15E-13 | 0.85 | 3.63   | -     | 517.4   |
| AHQ-3-9, 4184             | R.VIISAPSADAPMFVM*GVNHEK.Y                              | 2230.59327 | 2 | 2.28E-06 | 0.37 | 3.10   | -     | 405.5   |
| AHQ-3-13, 4106            | R.VPTANVSVDLTCR.L                                       | 1532.74450 | 2 | 3.63E-08 | 0.95 | 4.30   | -     | 1170.4  |
| AHQ-3-12, 4107            | R.VPTANVSVDLTCR.L                                       | 1532.74450 | 2 | 1.39E-09 | 0.94 | 4.12   | -     | 1084.8  |
| AHQ-3-11, 3930 - 3996     | R.VPTANVSVDLTCR.L                                       | 1532.74450 | 2 | 1.40E-08 | 0.94 | 4.00   | -     | 1068.8  |
| AHQ-3-9, 4181 - 4185      | R.VPTANVSVDLTCR.L                                       | 1532.74450 | 2 | 2.84E-07 | 0.89 | 3.43   | -     | 872.4   |
| AHQ-3-14-, 4005           | R.VPTANVSVDLTCR.L                                       | 1532.74450 | 2 | 1.99E-07 | 0.96 | 4.61   | -     | 1254.7  |
| AHQ-3-14, 4921 - 4972     | R.VPTANVSVDLTCR.L                                       | 1532.74450 | 2 | 2.10E-04 | 0.68 | 2.86   | -     | 591.3   |
| AHQ-3-9, 3961 - 3988      | R.VPTANVSVDLTCR.L                                       | 1532.74450 | 2 | 2.19E-10 | 0.92 | 3.94   | -     | 845.3   |
| AHQ-3-9, 3901             | R.VPTANVSVDLTCR.L                                       | 1532.74450 | 2 | 9.82E-05 | 0.84 | 3.19   | -     | 749.8   |
| AHQ-3-11, 3748            | R.VPTANVSVDLTCR.L                                       | 1532.74450 | 2 | 1.08E-06 | 0.80 | 2.89   | -     | 780.1   |
| AHQ-3-9, 3725 - 3831      | R.VPTANVSVDLTCR.L                                       | 1532.74450 | 2 | 1.68E-08 | 0.94 | 3.88   | -     | 1027.3  |
| AHQ-3-9, 3575             | R.VPTANVSVDLTCR.L                                       | 1532.74450 | 2 | 6.57E-07 | 0.95 | 4.09   | -     | 1158.5  |
| AHQ-3-6, 4019             | R.VPTANVSVDLTCR.L                                       | 1532.74450 | 2 | 1.78E-05 | 0.78 | 2.58   | -     | 684.9   |
| AHQ-3-10, 3818 - 3886     | R.VPTANVSVDLTCR.L                                       | 1532.74450 | 2 | 2.31E-08 | 0.67 | 2.98   | -     | 475.0   |
| AHQ-3-13-, 4111 - 4114    | R.VPTANVSVDLTCR.L                                       | 1532.74450 | 2 | 5.50E-08 | 0.96 | 4.89   | -     | 1057.1  |
| AHQ-3-9, 4061             | R.VPTANVSVDLTCR.L                                       | 1532.74450 | 2 | 1.23E-08 | 0.93 | 4.14   | -     | 1028.5  |
| AHQ-3-1, 4404             | R.VPTANVSVDLTCR.L                                       | 1532.74450 | 2 | 3.40E-04 | 0.71 | 2.91   | -     | 694.7   |
| AHQ-3-9, 7204             | K.WGDAGAEYVVESTGVFTTMEK.A                               | 2278.48027 | 2 | 2.49E-06 | 0.94 | 4.88   | -     | 794.3   |

|                             |                                                                                   |            |   |          |       |        |       |         |
|-----------------------------|-----------------------------------------------------------------------------------|------------|---|----------|-------|--------|-------|---------|
| AHQ-3-9, 7067 - 7139        | K.WGDAGAEYVVESTGVFTTMEK.A                                                         | 2278.48027 | 2 | 9.14E-09 | 0.95  | 4.75   | -     | 990.8   |
| AHQ-3-9, 6917 - 6999        | K.WGDAGAEYVVESTGVFTTMEK.A                                                         | 2278.48027 | 2 | 1.00E-09 | 0.94  | 4.05   | -     | 1159.6  |
| AHQ-3-9, 6516 - 6584        | K.WGDAGAEYVVESTGVFTTMEK.A                                                         | 2278.48027 | 2 | 2.66E-08 | 0.90  | 3.88   | -     | 697.1   |
| AHQ-3-9, 6348 - 6425        | K.WGDAGAEYVVESTGVFTTMEK.A                                                         | 2278.48027 | 2 | 1.58E-05 | 0.88  | 3.73   | -     | 855.0   |
| AHQ-3-9, 6200               | K.WGDAGAEYVVESTGVFTTMEK.A                                                         | 2294.47967 | 2 | 9.43E-07 | 0.75  | 3.20   | -     | 545.3   |
| AHQ-3-13, 6214 - 6290       | K.WGDAGAEYVVESTGVFTTMEK.A                                                         | 2278.48027 | 2 | 1.91E-07 | 0.94  | 4.32   | -     | 847.6   |
| AHQ-3-9, 6175 - 6240        | K.WGDAGAEYVVESTGVFTTMEK.A                                                         | 2278.48027 | 2 | 3.56E-05 | 0.89  | 3.89   | -     | 719.0   |
| AHQ-3-9, 6045 - 6115        | K.WGDAGAEYVVESTGVFTTMEK.A                                                         | 2278.48027 | 2 | 4.79E-05 | 0.85  | 3.78   | -     | 503.2   |
| AHQ-3-13, 6061 - 6138       | K.WGDAGAEYVVESTGVFTTMEK.A                                                         | 2278.48027 | 2 | 1.50E-05 | 0.95  | 4.72   | -     | 988.3   |
| AHQ-3-13, 6211 - 6281       | K.WGDAGAEYVVESTGVFTTMEK.A                                                         | 2278.48027 | 2 | 3.92E-09 | 0.96  | 5.07   | -     | 946.3   |
| AHQ-3-9, 6665 - 6727        | K.WGDAGAEYVVESTGVFTTMEK.A                                                         | 2278.48027 | 2 | 5.44E-06 | 0.86  | 4.15   | -     | 416.2   |
| gj 4505257 ref NP_002435.1  | moesin [Homo sapiens]                                                             |            |   | 1.17E-14 | 10.28 | 110.32 | 23.70 | 67819.5 |
| AHQ-3-6, 2298 - 2303        | K.ALTSSELANAR.D                                                                   | 1046.15975 | 2 | 9.89E-06 | 0.92  | 3.66   | -     | 813.4   |
| AHQ-3-6, 7257 - 7258        | K.EGILNDDIYCPPEAVLLASAVQSK.Y                                                      | 2869.19288 | 3 | 2.10E-08 | 0.94  | 5.13   | -     | 1236.7  |
| AHQ-3-6, 7254               | K.EGILNDDIYCPPEAVLLASAVQSK.Y                                                      | 2869.19288 | 2 | 6.12E-05 | 0.74  | 3.52   | -     | 258.9   |
| AHQ-3-6, 6279               | R.EVWFFGLQYQDTK.G                                                                 | 1661.83760 | 2 | 1.60E-06 | 0.92  | 3.48   | -     | 1025.5  |
| AHQ-3-10, 6460              | K.FYPEDVSEELIQDITQR.L                                                             | 2083.24065 | 2 | 2.25E-08 | 0.95  | 4.44   | -     | 1009.4  |
| AHQ-3-6, 7191               | K.FYPEDVSEELIQDITQR.L                                                             | 2083.24065 | 3 | 5.51E-11 | 0.96  | 5.20   | -     | 1172.4  |
| AHQ-3-6, 7173               | K.FYPEDVSEELIQDITQR.L                                                             | 2083.24065 | 2 | 1.70E-08 | 0.96  | 4.87   | -     | 1124.2  |
| AHQ-3-14, 6716              | K.FYPEDVSEELIQDITQR.L                                                             | 2083.24065 | 2 | 2.38E-07 | 0.96  | 4.76   | -     | 1089.1  |
| AHQ-3-9, 6876 - 6880        | K.FYPEDVSEELIQDITQR.L                                                             | 2083.24065 | 2 | 6.20E-06 | 0.90  | 3.98   | -     | 806.8   |
| AHQ-3-6, 5521               | K.IAQDLEM*YGVNYSIK.N                                                              | 1908.16395 | 2 | 3.05E-05 | 0.88  | 3.16   | -     | 1028.5  |
| AHQ-3-6, 2009               | R.ISQLEMAR.Q                                                                      | 948.12272  | 2 | 1.70E-04 | 0.91  | 2.68   | -     | 1415.0  |
| AHQ-3-6, 3362               | K.KTQEQLALEM*EALTR.I                                                              | 1849.09958 | 2 | 3.44E-05 | 0.95  | 4.16   | -     | 974.7   |
| AHQ-3-6, 4505               | K.KTQEQLALEM*EALTR.I                                                              | 1833.10018 | 2 | 2.00E-04 | 0.98  | 4.84   | -     | 2327.0  |
| AHQ-3-6, 3269 - 3319        | K.TAM*STPHVAEPAENEQDEQDENGAEASADLR.A                                              | 3314.36856 | 3 | 2.46E-10 | 0.88  | 4.45   | -     | 737.9   |
| AHQ-3-6, 3107               | K.TAM*STPHVAEPAENEQDEQDENGAEASADLR.A                                              | 3330.36796 | 3 | 1.17E-14 | 0.98  | 6.32   | -     | 2285.9  |
| AHQ-3-6, 3389 - 3418        | K.TAM*STPHVAEPAENEQDEQDENGAEASADLR.A                                              | 3314.36856 | 3 | 3.52E-10 | 0.95  | 5.10   | -     | 1601.2  |
| AHQ-3-6, 5217               | K.TQEQLALEM*EALTR.I                                                               | 1704.92727 | 2 | 2.01E-09 | 0.98  | 5.37   | -     | 2211.4  |
| gj 4757826 ref NP_004039.1  | beta-2-microglobulin [Homo sapiens]                                               |            |   | 1.17E-14 | 3.33  | 40.25  | 38.70 | 13714.5 |
| AHQ-3-14, 6569 - 6636       | K.SNFLNCYSGFHPDSIEVDLLK.N                                                         | 2556.83155 | 3 | 6.53E-08 | 0.90  | 5.07   | -     | 481.9   |
| AHQ-3-14, 6429              | K.SNFLNCYSGFHPDSIEVDLLK.N                                                         | 2556.83155 | 2 | 1.84E-07 | 0.88  | 4.16   | -     | 487.3   |
| AHQ-3-14, 6171              | K.SNFLNCYSGFHPDSIEVDLLKNGER.I                                                     | 3013.28710 | 3 | 4.91E-07 | 0.53  | 3.11   | -     | 431.9   |
| AHQ-3-14, 6329 - 6403       | K.SNFLNCYSGFHPDSIEVDLLKNGER.I                                                     | 3013.28710 | 3 | 1.17E-14 | 0.88  | 4.26   | -     | 793.6   |
| AHQ-3-14, 6593              | K.SNFLNCYSGFHPDSIEVDLLKNGER.I                                                     | 3013.28710 | 3 | 3.64E-10 | 0.81  | 3.74   | -     | 779.7   |
| AHQ-3-14, 2069              | K.VEHSDFSFSK.D                                                                    | 1149.23530 | 1 | 1.08E-04 | 0.79  | 3.37   | -     | 492.6   |
| AHQ-3-14, 2019 - 2075       | K.VEHSDFSFSK.D                                                                    | 1149.23530 | 1 | 1.57E-06 | 0.79  | 3.10   | -     | 533.2   |
| AHQ-3-14, 2071              | K.VEHSDFSFSK.D                                                                    | 1149.23530 | 2 | 7.08E-06 | 0.80  | 3.01   | -     | 679.4   |
| AHQ-3-14, 1835 - 1909       | R.VNHVTLSPK.I                                                                     | 1123.28735 | 1 | 2.79E-06 | 0.76  | 2.83   | -     | 379.4   |
| gj 6598323 ref NP_001485.2  | GDP dissociation inhibitor 2; rab GDP-dissociation inhibitor, beta [Homo sapiens] |            |   | 1.22E-14 | 5.69  | 60.34  | 25.20 | 50662.9 |
| AHQ-3-7, 7252               | K.KFDLGDQVDFDTHALALYR.T                                                           | 2280.56709 | 3 | 1.22E-14 | 0.99  | 6.85   | -     | 2931.2  |
| AHQ-3-7, 7180 - 7250        | K.KFDLGDQVDFDTHALALYR.T                                                           | 2280.56709 | 2 | 2.23E-07 | 0.97  | 5.20   | -     | 1536.8  |
| AHQ-3-7, 5628               | R.KSDIYVCMISFANVAQGGK.Y                                                           | 2241.57596 | 2 | 2.03E-05 | 0.88  | 3.38   | -     | 929.9   |
| AHQ-3-7, 5255               | R.NPYYGESASITPLEDLYK.R                                                            | 2118.28499 | 2 | 1.51E-09 | 0.86  | 4.96   | -     | 1254.6  |
| AHQ-3-6, 6838 - 6909        | K.SPYLYPLGLGELPQGFAR.L                                                            | 2142.44089 | 2 | 6.54E-07 | 0.97  | 5.74   | -     | 1125.1  |
| AHQ-3-7, 6826               | K.SPYLYPLGLGELPQGFAR.L                                                            | 2142.44089 | 2 | 5.50E-08 | 0.96  | 4.91   | -     | 946.9   |
| AHQ-3-9, 6531               | K.SPYLYPLGLGELPQGFAR.L                                                            | 2142.44089 | 2 | 1.72E-04 | 0.95  | 4.55   | -     | 887.0   |
| AHQ-3-10, 6214              | K.SPYLYPLGLGELPQGFAR.L                                                            | 2142.44089 | 2 | 5.15E-06 | 0.97  | 5.48   | -     | 1262.7  |
| AHQ-3-7, 4030               | R.TDDYLDQPCYETINR.I                                                               | 1904.98887 | 2 | 2.18E-07 | 0.92  | 4.23   | -     | 547.0   |
| AHQ-3-7, 7419               | K.VPSTEAELASSLMGLFEK.R                                                            | 1981.25641 | 2 | 5.29E-09 | 0.98  | 6.50   | -     | 1752.2  |
| gj 28626504 ref NP_113659.3 | UNC-112 related protein 2 [Homo sapiens]                                          |            |   | 1.33E-14 | 25.82 | 300.35 | 59.90 | 75429.7 |
| AHQ-3-6, 2949 - 2950        | K.AGDALWLR.F                                                                      | 902.03223  | 2 | 4.69E-04 | 0.93  | 3.97   | -     | 1448.6  |
| AHQ-3-12, 6499              | R.ARGEELEDLFLQLTGGHEAF                                                            | 2348.51032 | 2 | 2.29E-05 | 0.89  | 3.70   | -     | 877.8   |
| AHQ-3-14, 6425              | R.ARGEELEDLFLQLTGGHEAF                                                            | 2348.51032 | 2 | 2.33E-12 | 0.96  | 4.68   | -     | 1451.9  |
| AHQ-3-13, 6537              | R.ARGEELEDLFLQLTGGHEAF                                                            | 2348.51032 | 2 | 5.97E-07 | 0.91  | 3.98   | -     | 1057.6  |
| AHQ-3-6, 6679 - 6755        | R.ARGEELEDLFLQLTGGHEAF                                                            | 2348.51032 | 2 | 2.44E-08 | 0.95  | 4.44   | -     | 1449.5  |
| AHQ-3-13, 6614              | R.ASFSQLPQAVAAICR.L                                                               | 1768.02967 | 2 | 3.40E-05 | 0.92  | 4.07   | -     | 739.2   |
| AHQ-3-6, 6722               | R.ASFSQLPQAVAAICR.L                                                               | 1768.02967 | 3 | 7.33E-04 | 0.93  | 4.38   | -     | 1130.7  |
| AHQ-3-6, 6677 - 6753        | R.ASFSQLPQAVAAICR.L                                                               | 1768.02967 | 2 | 3.69E-08 | 0.96  | 5.07   | -     | 886.4   |
| AHQ-3-6, 6811 - 6817        | R.ASFSQLPQAVAAICR.L                                                               | 1768.02967 | 2 | 1.28E-10 | 0.96  | 4.81   | -     | 915.5   |
| AHQ-3-6, 6990 - 7019        | R.ASFSQLPQAVAAICR.L                                                               | 1768.02967 | 2 | 5.00E-08 | 0.94  | 4.40   | -     | 844.1   |
| AHQ-3-12, 6583              | R.ASFSQLPQAVAAICR.L                                                               | 1768.02967 | 2 | 4.47E-06 | 0.89  | 3.61   | -     | 693.3   |
| AHQ-3-2, 7139               | R.ASFSQLPQAVAAICR.L                                                               | 1768.02967 | 2 | 4.20E-07 | 0.92  | 4.22   | -     | 700.5   |
| AHQ-3-4, 7057               | R.ASFSQLPQAVAAICR.L                                                               | 1768.02967 | 2 | 1.89E-08 | 0.92  | 3.98   | -     | 751.3   |
| AHQ-3-5, 6907               | R.ASFSQLPQAVAAICR.L                                                               | 1768.02967 | 2 | 3.77E-05 | 0.91  | 3.81   | -     | 771.4   |
| AHQ-3-1, 7008               | R.ASFSQLPQAVAAICR.L                                                               | 1768.02967 | 2 | 1.19E-08 | 0.94  | 4.11   | -     | 860.0   |
| AHQ-3-11, 6314 - 6395       | R.ASFSQLPQAVAAICR.L                                                               | 1768.02967 | 2 | 3.15E-06 | 0.90  | 3.86   | -     | 692.3   |
| AHQ-3-3, 7038               | R.ASFSQLPQAVAAICR.L                                                               | 1768.02967 | 2 | 2.53E-06 | 0.93  | 4.27   | -     | 789.9   |
| AHQ-3-9, 6459               | R.ASFSQLPQAVAAICR.L                                                               | 1768.02967 | 2 | 1.44E-06 | 0.92  | 3.62   | -     | 900.5   |
| AHQ-3-7, 6672               | R.ASFSQLPQAVAAICR.L                                                               | 1768.02967 | 2 | 3.72E-05 | 0.91  | 3.59   | -     | 993.2   |
| AHQ-3-10, 6103 - 6115       | R.ASFSQLPQAVAAICR.L                                                               | 1768.02967 | 2 | 5.58E-06 | 0.94  | 4.65   | -     | 789.1   |
| AHQ-3-9, 6317 - 6397        | R.ASFSQLPQAVAAICR.L                                                               | 1768.02967 | 2 | 4.89E-05 | 0.90  | 3.52   | -     | 810.6   |
| AHQ-3-11, 3380              | K.EKEPEEELYDLSK.V                                                                 | 1609.71294 | 2 | 4.22E-08 | 0.79  | 3.15   | -     | 406.6   |
| AHQ-3-6, 3347 - 3421        | K.EKEPEEELYDLSK.V                                                                 | 1609.71294 | 2 | 1.33E-10 | 0.92  | 3.99   | -     | 595.1   |
| AHQ-3-9, 3124               | K.EKEPEEELYDLSK.V                                                                 | 1609.71294 | 2 | 3.53E-05 | 0.91  | 4.07   | -     | 639.6   |
| AHQ-3-9, 6853 - 6927        | R.FIQAWQSLPFDGISYVM*VR.F                                                          | 2258.62653 | 2 | 7.03E-06 | 0.89  | 4.79   | -     | 400.4   |
| AHQ-3-13, 6717 - 6719       | R.FIQAWQSLPFDGISYVM*VR.F                                                          | 2274.62593 | 2 | 1.68E-06 | 0.96  | 6.01   | -     | 587.8   |
| AHQ-3-11, 6548              | R.FIQAWQSLPFDGISYVM*VR.F                                                          | 2274.62593 | 2 | 5.76E-06 | 0.84  | 4.35   | -     | 275.1   |
| AHQ-3-13, 6769 - 6771       | R.FIQAWQSLPFDGISYVM*VR.F                                                          | 2274.62593 | 2 | 5.12E-06 | 0.96  | 5.69   | -     | 572.7   |
| AHQ-3-6, 7238               | R.FIQAWQSLPFDGISYVM*VR.F                                                          | 2258.62653 | 2 | 1.96E-04 | 0.94  | 4.96   | -     | 698.6   |
| AHQ-3-14, 6651              | R.FIQAWQSLPFDGISYVM*VR.F                                                          | 2274.62593 | 2 | 4.40E-05 | 0.92  | 4.69   | -     | 552.2   |
| AHQ-3-6, 7038 - 7103        | R.FIQAWQSLPFDGISYVM*VR.F                                                          | 2274.62593 | 2 | 1.77E-04 | 0.94  | 5.07   | -     | 542.7   |
| AHQ-3-1, 7165               | R.FIQAWQSLPFDGISYVM*VR.F                                                          | 2274.62593 | 2 | 8.18E-04 | 0.64  | 3.27   | -     | 245.7   |
| AHQ-3-12, 6766              | R.FIQAWQSLPFDGISYVM*VR.F                                                          | 2274.62593 | 2 | 2.71E-04 | 0.86  | 4.13   | -     | 372.8   |
| AHQ-3-6, 2999 - 3071        | K.GCEVVPDYNVSGQK.F                                                                | 1489.63335 | 2 | 6.47E-05 | 0.80  | 2.71   | -     | 826.7   |
| AHQ-3-7, 3044               | K.GCEVVPDYNVSGQK.F                                                                | 1489.63335 | 2 | 5.19E-04 | 0.78  | 2.69   | -     | 694.5   |
| AHQ-3-11, 3110              | K.GCEVVPDYNVSGQK.F                                                                | 1489.63335 | 1 | 5.82E-04 | 0.62  | 2.11   | -     | 896.7   |
| AHQ-3-6, 3078               | K.GCEVVPDYNVSGQK.F                                                                | 1489.63335 | 1 | 7.22E-09 | 0.92  | 3.80   | -     | 1073.7  |
| AHQ-3-13, 6831 - 6834       | R.GEELEDLFLQLTGGHEAF                                                              | 2121.24574 | 2 | 4.65E-07 | 0.91  | 4.34   | -     | 862.8   |
| AHQ-3-13, 6767              | R.GEELEDLFLQLTGGHEAF                                                              | 2121.24574 | 2 | 6.52E-04 | 0.75  | 3.19   | -     | 683.9   |
| AHQ-3-6, 7147 - 7177        | R.GEELEDLFLQLTGGHEAF                                                              | 2121.24574 | 2 | 3.13E-08 | 0.97  | 5.03   | -     | 1371.2  |
| AHQ-3-14, 6704 - 6707       | R.GEELEDLFLQLTGGHEAF                                                              | 2121.24574 | 2 | 4.97E-07 | 0.96  | 5.20   | -     | 1246.5  |
| AHQ-3-12, 6862              | R.GEELEDLFLQLTGGHEAF                                                              | 2121.24574 | 2 | 9.08E-04 | 0.83  | 3.51   | -     | 757.7   |
| AHQ-3-6, 2835               | R.GM*PAHFSDSAQTEACYHM*LSR.P                                                       | 2430.63997 | 3 | 1.59E-05 | 0.94  | 4.45   | -     | 1502.8  |
| AHQ-3-11, 3650              | R.IDLAVGDVVK.T                                                                    | 1029.21223 | 1 | 4.24E-04 | 0.11  | 2.02   | -     | 347.5   |
| AHQ-3-10, 3546              | R.IDLAVGDVVK.T                                                                    | 1029.21223 | 1 | 7.97E-04 | 0.23  | 1.97   | -     | 419.6   |
| AHQ-3-13, 3853              | R.IDLAVGDVVK.T                                                                    | 1029.21223 | 1 | 3.02E-04 | 0.66  | 2.31   | -     | 648.8   |
| AHQ-3-13, 3858              | R.IDLAVGDVVK.T                                                                    | 1029.21223 | 1 | 5.21E-04 | 0.62  | 3.03   | -     | 398.7   |
| AHQ-3-9, 3448               | R.IDLAVGDVVK.T                                                                    | 1029.21223 | 1 | 3.28E-04 | 0.16  | 2.39   | -     | 234.0   |
| AHQ-3-1, 4096               | R.IDLAVGDVVK.T                                                                    | 1029.21223 | 1 | 6.53E-04 | 0.20  | 1.99   | -     | 594.2   |
| AHQ-3-1, 4769               | R.ILEAHQNVQLSLAEALR.F                                                             | 2105.38372 | 2 | 9.15E-12 | 0.97  | 5.78   | -     | 1500.6  |
| AHQ-3-5, 4384 - 4455        | R.ILEAHQNVQLSLAEALR.F                                                             | 2105.38372 | 2 | 1.87E-07 | 0.98  | 6.97   | -     | 1715.7  |
| AHQ-3-4, 4581               | R.ILEAHQNVQLSLAEALR.F                                                             | 2105.38372 | 2 | 1.37E-07 | 0.98  | 6.09   | -     | 2621.6  |
| AHQ-3-6, 4265 - 4334        | R.ILEAHQNVQLSLAEALR.F                                                             | 2105.38372 | 2 | 3.77E-12 | 0.98  | 6.46   | -     | 1824.4  |
| AHQ-3-14, 5565              | R.ILEAHQNVQLSLAEALR.F                                                             | 2105.38372 | 2 | 2.05E-11 | 0.98  | 5.93   | -     | 1862.2  |
| AHQ-3-6, 4446               | R.ILEAHQNVQLSLAEALR.F                                                             | 2105.38372 | 2 | 5.65E-10 | 0.98  | 6.60   | -     | 2355.4  |
| AHQ-3-9, 3945 - 4016        | R.ILEAHQNVQLSLAEALR.F                                                             | 2105.38372 | 2 | 1.86E-06 | 0.97  | 6.01   | -     | 1520.9  |



|                        |                                    |            |   |          |      |      |   |        |
|------------------------|------------------------------------|------------|---|----------|------|------|---|--------|
| AHQ-3-6, 4547          | R.ILEAHQNVQLSLAEALR.F              | 2105.38372 | 2 | 8.06E-11 | 0.98 | 6.62 | - | 2422.9 |
| AHQ-3-11, 4210         | R.ILEAHQNVQLSLAEALR.F              | 2105.38372 | 2 | 8.05E-07 | 0.98 | 5.72 | - | 1612.2 |
| AHQ-3-13, 4386         | R.ILEAHQNVQLSLAEALR.F              | 2105.38372 | 2 | 4.34E-06 | 0.97 | 5.49 | - | 1432.5 |
| AHQ-3-3, 4677          | R.ILEAHQNVQLSLAEALR.F              | 2105.38372 | 2 | 1.33E-14 | 0.98 | 6.05 | - | 1524.3 |
| AHQ-3-12, 4418         | R.ILEAHQNVQLSLAEALR.F              | 2105.38372 | 3 | 4.46E-05 | 0.77 | 3.62 | - | 941.1  |
| AHQ-3-12, 4411 - 4479  | R.ILEAHQNVQLSLAEALR.F              | 2105.38372 | 2 | 2.35E-05 | 0.96 | 5.10 | - | 1240.7 |
| AHQ-3-12, 2550         | R.KDEILGIANNR.L                    | 1243.39499 | 2 | 9.19E-05 | 0.88 | 3.44 | - | 906.9  |
| AHQ-3-6, 2555 - 2561   | R.KDEILGIANNR.L                    | 1243.39499 | 1 | 1.09E-08 | 0.44 | 2.11 | - | 416.6  |
| AHQ-3-13, 2674 - 2733  | R.KDEILGIANNR.L                    | 1243.39499 | 2 | 5.30E-05 | 0.95 | 3.99 | - | 1450.1 |
| AHQ-3-13, 2679         | R.KDEILGIANNR.L                    | 1243.39499 | 1 | 3.64E-05 | 0.62 | 2.56 | - | 349.2  |
| AHQ-3-9, 2267          | R.KDEILGIANNR.L                    | 1243.39499 | 2 | 2.75E-06 | 0.93 | 3.95 | - | 1049.9 |
| AHQ-3-6, 2326 - 2403   | R.KDEILGIANNR.L                    | 1243.39499 | 1 | 1.48E-06 | 0.50 | 2.27 | - | 312.4  |
| AHQ-3-10, 2420         | R.KDEILGIANNR.L                    | 1243.39499 | 2 | 1.87E-04 | 0.88 | 3.32 | - | 937.0  |
| AHQ-3-13-, 2645 - 2710 | R.KDEILGIANNR.L                    | 1243.39499 | 2 | 5.55E-05 | 0.94 | 3.90 | - | 1270.5 |
| AHQ-3-13-, 2822        | R.KDEILGIANNR.L                    | 1243.39499 | 2 | 3.54E-04 | 0.67 | 2.72 | - | 1003.9 |
| AHQ-3-6, 2325 - 2329   | R.KDEILGIANNR.L                    | 1243.39499 | 2 | 7.10E-06 | 0.93 | 3.61 | - | 1234.4 |
| AHQ-3-6, 3702          | R.KQDWSHDHAIWWEQK.R                | 1858.00504 | 3 | 2.06E-06 | 0.92 | 4.33 | - | 1180.7 |
| AHQ-3-6, 3622 - 3701   | R.KQDWSHDHAIWWEQK.R                | 1858.00504 | 2 | 6.39E-05 | 0.88 | 3.73 | - | 867.6  |
| AHQ-3-7, 3662          | R.KQDWSHDHAIWWEQK.R                | 1858.00504 | 2 | 8.57E-07 | 0.95 | 4.48 | - | 1087.7 |
| AHQ-3-6, 3715 - 3795   | R.KQDWSHDHAIWWEQK.R                | 1858.00504 | 2 | 8.99E-05 | 0.78 | 3.12 | - | 908.5  |
| AHQ-3-9, 3453          | R.KQDWSHDHAIWWEQK.R                | 1858.00504 | 2 | 4.59E-05 | 0.95 | 4.44 | - | 1313.3 |
| AHQ-3-6, 6597          | K.LEGSAPTVDLDSLTTIPELK.D           | 2100.35256 | 2 | 8.64E-05 | 0.85 | 3.76 | - | 597.3  |
| AHQ-3-6, 5625          | K.LEGSAPTVDLDSLTTIPELK.D           | 2100.35256 | 2 | 4.91E-06 | 0.90 | 4.38 | - | 526.2  |
| AHQ-3-6, 6294 - 6311   | K.LEGSAPTVDLDSLTTIPELK.D           | 2100.35256 | 2 | 1.39E-09 | 0.95 | 4.71 | - | 939.8  |
| AHQ-3-14-, 6452        | K.LEGSAPTVDLDSLTTIPELK.D           | 2100.35256 | 2 | 2.51E-06 | 0.71 | 3.49 | - | 476.1  |
| AHQ-3-13, 6570 - 6634  | K.LEGSAPTVDLDSLTTIPELK.D           | 2100.35256 | 2 | 9.12E-04 | 0.63 | 2.93 | - | 405.9  |
| AHQ-3-6, 6431 - 6501   | K.LEGSAPTVDLDSLTTIPELK.D           | 2100.35256 | 2 | 5.65E-05 | 0.89 | 3.70 | - | 712.1  |
| AHQ-3-4, 7044          | K.LEGSAPTVDLDSLTTIPELK.D           | 2100.35256 | 2 | 1.10E-04 | 0.88 | 4.34 | - | 583.0  |
| AHQ-3-5, 6915          | K.LEGSAPTVDLDSLTTIPELK.D           | 2100.35256 | 2 | 8.82E-04 | 0.43 | 2.73 | - | 282.0  |
| AHQ-3-9, 6419          | K.LEGSAPTVDLDSLTTIPELK.D           | 2100.35256 | 2 | 3.48E-04 | 0.91 | 3.95 | - | 848.8  |
| AHQ-3-3, 6982 - 7048   | K.LEGSAPTVDLDSLTTIPELK.D           | 2100.35256 | 2 | 5.26E-04 | 0.85 | 3.90 | - | 427.4  |
| AHQ-3-6, 6709 - 6789   | K.LEGSAPTVDLDSLTTIPELK.D           | 2100.35256 | 2 | 1.32E-06 | 0.95 | 4.88 | - | 934.2  |
| AHQ-3-8, 6511          | K.LEGSAPTVDLDSLTTIPELK.D           | 2100.35256 | 2 | 3.87E-07 | 0.68 | 3.05 | - | 443.0  |
| AHQ-3-7, 6695 - 6702   | K.LEGSAPTVDLDSLTTIPELK.D           | 2100.35256 | 2 | 1.90E-06 | 0.93 | 5.05 | - | 601.5  |
| AHQ-3-6, 6377          | K.LEGSAPTVDLDSLTTIPELK.D           | 2621.92493 | 3 | 1.67E-07 | 0.71 | 3.19 | - | 422.1  |
| AHQ-3-1, 6194          | K.LLVPSPEGMSEIYLR.C                | 1705.01201 | 2 | 1.02E-04 | 0.46 | 2.52 | - | 283.6  |
| AHQ-3-6, 5457          | K.LLVPSPEGMSEIYLR.C                | 1705.01201 | 2 | 7.02E-07 | 0.61 | 2.56 | - | 515.1  |
| AHQ-3-11, 5531         | K.LLVPSPEGMSEIYLR.C                | 1705.01201 | 2 | 3.40E-09 | 0.65 | 2.50 | - | 515.9  |
| AHQ-3-6, 5753 - 5821   | K.LLVPSPEGMSEIYLR.C                | 1705.01201 | 2 | 2.07E-09 | 0.56 | 2.73 | - | 266.0  |
| AHQ-3-12, 4771 - 4842  | K.LLVPSPEGMSEIYLR.C                | 1721.01141 | 2 | 6.22E-11 | 0.65 | 2.51 | - | 341.5  |
| AHQ-3-13-, 6697        | K.LSQSGEVGEPAGTDPGLDDLDVALSNLEVK.L | 3027.24073 | 3 | 1.05E-07 | 0.81 | 3.21 | - | 1102.8 |
| AHQ-3-6, 7111 - 7129   | K.LSQSGEVGEPAGTDPGLDDLDVALSNLEVK.L | 3027.24073 | 3 | 4.43E-04 | 0.84 | 3.79 | - | 1070.3 |
| AHQ-3-6, 6927 - 7006   | K.LSQSGEVGEPAGTDPGLDDLDVALSNLEVK.L | 3027.24073 | 3 | 3.40E-11 | 0.96 | 5.22 | - | 1537.3 |
| AHQ-3-1, 7128 - 7140   | K.LSQSGEVGEPAGTDPGLDDLDVALSNLEVK.L | 3027.24073 | 3 | 4.96E-07 | 0.93 | 4.52 | - | 1247.0 |
| AHQ-3-6, 6382 - 6401   | K.LSQSGEVGEPAGTDPGLDDLDVALSNLEVK.L | 3027.24073 | 3 | 7.24E-04 | 0.51 | 3.18 | - | 482.7  |
| AHQ-3-4, 7252          | K.LSQSGEVGEPAGTDPGLDDLDVALSNLEVK.L | 3027.24073 | 3 | 5.39E-05 | 0.89 | 4.29 | - | 916.4  |
| AHQ-3-6, 2101 - 2109   | R.LTQLYEQAR.W                      | 1122.25622 | 2 | 3.96E-06 | 0.95 | 4.04 | - | 1442.8 |
| AHQ-3-9, 2071          | R.LTQLYEQAR.W                      | 1122.25622 | 2 | 4.51E-05 | 0.88 | 3.25 | - | 1097.7 |
| AHQ-3-6, 2203          | R.LTQLYEQAR.W                      | 1122.25622 | 2 | 5.53E-05 | 0.91 | 2.75 | - | 1304.6 |
| AHQ-3-6, 4867          | R.QWLLQTHWTLDK.Y                   | 1569.78807 | 2 | 1.12E-05 | 0.54 | 2.88 | - | 202.7  |
| AHQ-3-13-, 4065        | K.SQDEAPGDPQIQLNLK.G               | 1753.89174 | 2 | 9.23E-09 | 0.90 | 3.67 | - | 707.2  |
| AHQ-3-1, 4330          | K.SQDEAPGDPQIQLNLK.G               | 1753.89174 | 2 | 9.25E-06 | 0.87 | 3.85 | - | 463.6  |
| AHQ-3-11, 3868 - 3938  | K.SQDEAPGDPQIQLNLK.G               | 1753.89174 | 2 | 6.35E-09 | 0.91 | 4.50 | - | 530.1  |
| AHQ-3-7, 3867 - 3882   | K.SQDEAPGDPQIQLNLK.G               | 1753.89174 | 2 | 1.45E-04 | 0.76 | 3.96 | - | 280.6  |
| AHQ-3-6, 3975 - 4051   | K.SQDEAPGDPQIQLNLK.G               | 1753.89174 | 2 | 4.96E-08 | 0.85 | 3.55 | - | 493.3  |
| AHQ-3-12, 4042         | K.SQDEAPGDPQIQLNLK.G               | 1753.89174 | 2 | 1.10E-05 | 0.51 | 2.62 | - | 316.9  |
| AHQ-3-6, 3891 - 3905   | K.SQDEAPGDPQIQLNLK.G               | 1753.89174 | 2 | 5.10E-09 | 0.84 | 3.77 | - | 447.7  |
| AHQ-3-6, 4493 - 4494   | K.TASGDYIDSSWELR.V                 | 1600.66783 | 2 | 2.63E-05 | 0.73 | 2.64 | - | 770.3  |
| AHQ-3-11, 4148         | K.TASGDYIDSSWELR.V                 | 1600.66783 | 2 | 2.72E-05 | 0.76 | 3.19 | - | 515.6  |
| AHQ-3-14-, 4265 - 4293 | K.TASGDYIDSSWELR.V                 | 1600.66783 | 2 | 7.95E-10 | 0.92 | 3.79 | - | 1199.2 |
| AHQ-3-9, 4000 - 4069   | K.TASGDYIDSSWELR.V                 | 1600.66783 | 2 | 4.02E-05 | 0.76 | 2.97 | - | 566.3  |
| AHQ-3-6, 4314 - 4325   | K.TASGDYIDSSWELR.V                 | 1600.66783 | 2 | 7.32E-10 | 0.96 | 4.70 | - | 1036.4 |
| AHQ-3-6, 4167 - 4242   | K.TASGDYIDSSWELR.V                 | 1600.66783 | 2 | 1.61E-11 | 0.96 | 4.71 | - | 1080.9 |
| AHQ-3-4, 3865          | R.TGSGGPNHPHGPDSAEGLNPNYGLVAPR.F   | 2783.95312 | 2 | 9.46E-04 | 0.65 | 3.16 | - | 416.0  |
| AHQ-3-10, 3542         | R.TGSGGPNHPHGPDSAEGLNPNYGLVAPR.F   | 2783.95312 | 2 | 2.44E-04 | 0.89 | 4.16 | - | 654.1  |
| AHQ-3-6, 3566 - 3618   | R.TGSGGPNHPHGPDSAEGLNPNYGLVAPR.F   | 2783.95312 | 2 | 3.53E-05 | 0.93 | 4.50 | - | 774.3  |
| AHQ-3-3, 3937          | R.TGSGGPNHPHGPDSAEGLNPNYGLVAPR.F   | 2783.95312 | 3 | 2.08E-05 | 0.96 | 6.16 | - | 952.9  |
| AHQ-3-6, 3695          | R.TGSGGPNHPHGPDSAEGLNPNYGLVAPR.F   | 2783.95312 | 2 | 7.92E-04 | 0.63 | 3.01 | - | 310.4  |
| AHQ-3-11, 3618         | R.TGSGGPNHPHGPDSAEGLNPNYGLVAPR.F   | 2783.95312 | 3 | 1.34E-06 | 0.96 | 5.75 | - | 1245.4 |
| AHQ-3-11, 3627         | R.TGSGGPNHPHGPDSAEGLNPNYGLVAPR.F   | 2783.95312 | 2 | 1.94E-04 | 0.89 | 4.35 | - | 552.7  |
| AHQ-3-6, 3565 - 3645   | R.TGSGGPNHPHGPDSAEGLNPNYGLVAPR.F   | 2783.95312 | 3 | 7.09E-04 | 0.97 | 6.81 | - | 1305.7 |
| AHQ-3-6, 7382          | R.TMADSSYSEVQAILAFLSLQR.T          | 2432.73531 | 3 | 2.07E-07 | 0.96 | 5.58 | - | 1533.0 |
| AHQ-3-6, 7366          | R.TMADSSYSEVQAILAFLSLQR.T          | 2448.73471 | 3 | 8.07E-07 | 0.95 | 4.97 | - | 1474.4 |
| AHQ-3-12, 3974         | R.VFVGEEDPEAESVTLR.V               | 1777.91007 | 2 | 1.78E-05 | 0.88 | 3.82 | - | 819.2  |
| AHQ-3-5, 3971          | R.VFVGEEDPEAESVTLR.V               | 1777.91007 | 2 | 3.17E-12 | 0.97 | 4.93 | - | 1631.7 |
| AHQ-3-13-, 3981 - 3994 | R.VFVGEEDPEAESVTLR.V               | 1777.91007 | 2 | 6.22E-08 | 0.93 | 4.35 | - | 1222.1 |
| AHQ-3-9, 3727 - 3797   | R.VFVGEEDPEAESVTLR.V               | 1777.91007 | 2 | 2.22E-05 | 0.73 | 2.99 | - | 709.3  |
| AHQ-3-10, 3718         | R.VFVGEEDPEAESVTLR.V               | 1777.91007 | 2 | 9.39E-06 | 0.94 | 4.25 | - | 1323.5 |
| AHQ-3-6, 3873 - 3942   | R.VFVGEEDPEAESVTLR.V               | 1777.91007 | 2 | 5.22E-10 | 0.95 | 4.82 | - | 1360.1 |
| AHQ-3-2, 4211          | R.VFVGEEDPEAESVTLR.V               | 1777.91007 | 2 | 2.99E-05 | 0.84 | 3.21 | - | 955.2  |
| AHQ-3-14, 4804 - 4841  | R.VFVGEEDPEAESVTLR.V               | 1777.91007 | 2 | 3.59E-07 | 0.88 | 3.74 | - | 961.7  |
| AHQ-3-8, 3713          | R.VFVGEEDPEAESVTLR.V               | 1777.91007 | 2 | 8.92E-07 | 0.88 | 3.89 | - | 844.1  |
| AHQ-3-13, 3977 - 3982  | R.VFVGEEDPEAESVTLR.V               | 1777.91007 | 2 | 1.83E-09 | 0.93 | 4.16 | - | 991.4  |
| AHQ-3-4, 4105 - 4113   | R.VFVGEEDPEAESVTLR.V               | 1777.91007 | 2 | 1.72E-07 | 0.95 | 4.56 | - | 1138.1 |
| AHQ-3-9, 3585 - 3652   | R.VFVGEEDPEAESVTLR.V               | 1777.91007 | 2 | 3.09E-06 | 0.89 | 3.96 | - | 887.1  |
| AHQ-3-11, 3823 - 3826  | R.VFVGEEDPEAESVTLR.V               | 1777.91007 | 2 | 6.43E-10 | 0.95 | 4.85 | - | 1489.4 |
| AHQ-3-14-, 3871        | R.VFVGEEDPEAESVTLR.V               | 1777.91007 | 2 | 4.48E-10 | 0.92 | 3.93 | - | 1194.9 |
| AHQ-3-12, 2752         | R.VTGESHGGVLLK.I                   | 1310.52448 | 2 | 4.99E-08 | 0.55 | 2.93 | - | 801.0  |
| AHQ-3-11, 2636 - 2684  | R.VTGESHGGVLLK.I                   | 1310.52448 | 1 | 8.52E-06 | 0.76 | 2.72 | - | 816.0  |
| AHQ-3-11, 2632         | R.VTGESHGGVLLK.I                   | 1310.52448 | 2 | 9.23E-09 | 0.92 | 4.09 | - | 1066.2 |
| AHQ-3-6, 2549          | R.VTGESHGGVLLK.I                   | 1310.52448 | 2 | 2.54E-04 | 0.90 | 3.01 | - | 1489.5 |
| AHQ-3-6, 2469          | R.VTGESHGGVLLK.I                   | 1310.52448 | 1 | 9.08E-08 | 0.62 | 2.92 | - | 449.8  |
| AHQ-3-9, 2380          | R.VTGESHGGVLLK.I                   | 1310.52448 | 1 | 2.75E-05 | 0.72 | 2.98 | - | 720.6  |
| AHQ-3-9, 2376          | R.VTGESHGGVLLK.I                   | 1310.52448 | 2 | 1.62E-07 | 0.97 | 4.37 | - | 1986.3 |
| AHQ-3-6, 2465 - 2477   | R.VTGESHGGVLLK.I                   | 1310.52448 | 2 | 3.75E-08 | 0.96 | 4.44 | - | 1517.3 |
| AHQ-3-7, 2407          | R.VTGESHGGVLLK.I                   | 1310.52448 | 2 | 1.69E-06 | 0.97 | 4.07 | - | 1971.1 |
| AHQ-3-13-, 2810        | R.VTGESHGGVLLK.I                   | 1310.52448 | 2 | 2.00E-05 | 0.79 | 2.70 | - | 1011.8 |
| AHQ-3-14-, 2729        | R.VTGESHGGVLLK.I                   | 1310.52448 | 2 | 1.39E-06 | 0.92 | 3.11 | - | 1524.5 |
| AHQ-3-1, 2964          | R.VTGESHGGVLLK.I                   | 1310.52448 | 2 | 1.84E-10 | 0.96 | 4.32 | - | 1512.6 |
| AHQ-3-7, 4515          | K.VVLGAGVAPALFR.G                  | 1270.54832 | 2 | 7.66E-08 | 0.97 | 4.63 | - | 1994.2 |
| AHQ-3-1, 5134          | K.VVLGAGVAPALFR.G                  | 1270.54832 | 2 | 2.50E-07 | 0.95 | 4.19 | - | 1391.4 |
| AHQ-3-6, 4669 - 4739   | K.VVLGAGVAPALFR.G                  | 1270.54832 | 2 | 2.34E-07 | 0.97 | 5.10 | - | 1686.2 |
| AHQ-3-6, 4621 - 4689   | K.VVLGAGVAPALFR.G                  | 1270.54832 | 1 | 9.65E-04 | 0.42 | 2.11 | - | 156.5  |
| AHQ-3-6, 4617 - 4685   | K.VVLGAGVAPALFR.G                  | 1270.54832 | 2 | 6.19E-09 | 0.96 | 5.04 | - | 1507.8 |
| AHQ-3-9, 4308 - 4319   | K.VVLGAGVAPALFR.G                  | 1270.54832 | 2 | 4.43E-07 | 0.97 | 4.84 | - | 1725.1 |
| AHQ-3-5, 4756          | K.VVLGAGVAPALFR.G                  | 1270.54832 | 2 | 3.22E-09 | 0.97 | 4.80 | - | 1572.6 |
| AHQ-3-3, 5033          | K.VVLGAGVAPALFR.G                  | 1270.54832 | 2 | 7.96E-08 | 0.94 | 4.17 | - | 1317.6 |

|                            |                                                                         |            |   |          |       |        |       |         |
|----------------------------|-------------------------------------------------------------------------|------------|---|----------|-------|--------|-------|---------|
| AHQ-3-6, 2297              | K.YGILADAR.L                                                            | 878.99544  | 2 | 6.49E-04 | 0.92  | 3.23   | -     | 1286.6  |
| AHQ-3-6, 5254 - 5257       | K.YYSFFDLDPK.T                                                          | 1295.42046 | 2 | 1.17E-05 | 0.86  | 3.64   | -     | 700.4   |
| AHQ-3-1, 5738              | K.YYSFFDLDPK.T                                                          | 1295.42046 | 2 | 6.66E-06 | 0.55  | 3.16   | -     | 485.3   |
| gi 4827056 ref NP_005103.1 | WD repeat-containing protein 1 isoform 2 [Homo sapiens]                 |            |   | 1.50E-14 | 11.63 | 140.33 | 42.30 | 58009.9 |
| AHQ-3-6, 4834 - 4835       | K.AHDGGYAIISWSPDSTHLLSASGDK.T                                           | 2586.75455 | 2 | 1.70E-05 | 0.93  | 4.36   | -     | 874.9   |
| AHQ-3-6, 5795 - 5869       | K.CFSIDNPGYEPEVAVVHPGGDTVAIGGVDGNVR.L                                   | 3400.67708 | 3 | 2.33E-11 | 0.92  | 4.98   | -     | 732.7   |
| AHQ-3-7, 5654 - 5658       | K.CFSIDNPGYEPEVAVVHPGGDTVAIGGVDGNVR.L                                   | 3400.67708 | 3 | 1.50E-14 | 0.94  | 4.82   | -     | 1003.2  |
| AHQ-3-9, 5372              | K.CFSIDNPGYEPEVAVVHPGGDTVAIGGVDGNVR.L                                   | 3400.67708 | 3 | 1.64E-12 | 0.94  | 4.70   | -     | 1027.6  |
| AHQ-3-10, 5168             | K.CFSIDNPGYEPEVAVVHPGGDTVAIGGVDGNVR.L                                   | 3400.67708 | 3 | 8.53E-12 | 0.94  | 5.41   | -     | 869.9   |
| AHQ-3-6, 5615 - 5658       | K.CFSIDNPGYEPEVAVVHPGGDTVAIGGVDGNVR.L                                   | 3400.67708 | 3 | 1.50E-12 | 0.85  | 3.58   | -     | 932.8   |
| AHQ-3-6, 5561              | K.FGAVFLWDSGSSVGEITGHNK.V                                               | 2209.40259 | 3 | 2.85E-05 | 0.80  | 3.75   | -     | 698.5   |
| AHQ-3-6, 5573              | K.FGAVFLWDSGSSVGEITGHNK.V                                               | 2209.40259 | 2 | 2.03E-08 | 0.92  | 4.00   | -     | 714.6   |
| AHQ-3-10, 4278 - 4279      | K.GPVTDVAYSHDGAFLAVCDASK.V                                              | 2282.47194 | 2 | 4.67E-05 | 0.96  | 4.62   | -     | 1183.5  |
| AHQ-3-12, 4667             | K.GPVTDVAYSHDGAFLAVCDASK.V                                              | 2282.47194 | 2 | 2.61E-05 | 0.97  | 5.34   | -     | 1706.9  |
| AHQ-3-6, 4533 - 4602       | K.GPVTDVAYSHDGAFLAVCDASK.V                                              | 2282.47194 | 2 | 3.48E-07 | 0.98  | 5.57   | -     | 1692.7  |
| AHQ-3-6, 4699              | K.GPVTDVAYSHDGAFLAVCDASK.V                                              | 2282.47194 | 2 | 1.24E-06 | 0.90  | 3.75   | -     | 954.9   |
| AHQ-3-9, 4305              | K.GPVTDVAYSHDGAFLAVCDASK.V                                              | 2282.47194 | 2 | 1.43E-04 | 0.90  | 3.70   | -     | 970.0   |
| AHQ-3-6, 2311              | K.IKDIAWTEDSK.R                                                         | 1306.44632 | 2 | 9.05E-07 | 0.91  | 3.89   | -     | 807.7   |
| AHQ-3-6, 2014              | K.IKDIAWTEDSK.R                                                         | 1462.63267 | 2 | 3.29E-06 | 0.89  | 3.60   | -     | 1095.4  |
| AHQ-3-6, 5569 - 5643       | R.LATGSDDNCAAFFEGPPFK.F                                                 | 2046.20216 | 2 | 1.04E-08 | 0.94  | 4.91   | -     | 1071.9  |
| AHQ-3-3, 5793              | R.LATGSDDNCAAFFEGPPFK.F                                                 | 2046.20216 | 2 | 1.33E-05 | 0.69  | 3.29   | -     | 871.1   |
| AHQ-3-6, 5454 - 5501       | R.LATGSDDNCAAFFEGPPFK.F                                                 | 2046.20216 | 2 | 7.88E-09 | 0.95  | 4.87   | -     | 1150.5  |
| AHQ-3-11, 5208 - 5260      | R.LATGSDDNCAAFFEGPPFK.F                                                 | 2046.20216 | 2 | 8.65E-07 | 0.78  | 3.49   | -     | 650.4   |
| AHQ-3-7, 3632              | R.LYSILGTTLLKDEGK.L                                                     | 1538.76736 | 2 | 9.71E-04 | 0.82  | 3.07   | -     | 926.7   |
| AHQ-3-6, 3657              | R.LYSILGTTLLKDEGK.L                                                     | 1538.76736 | 2 | 1.82E-09 | 0.85  | 3.63   | -     | 717.2   |
| AHQ-3-6, 4955              | R.MTVDESGQLISCSMDTTR.V                                                  | 2146.36365 | 2 | 3.47E-07 | 0.81  | 3.67   | -     | 522.2   |
| AHQ-3-6, 4057 - 4087       | R.NIDNPALADITYTEAHQVVAK.Y                                               | 2419.67805 | 3 | 9.08E-05 | 0.63  | 3.19   | -     | 291.0   |
| AHQ-3-13, 4211             | R.NIDNPALADITYTEAHQVVAK.Y                                               | 2419.67805 | 2 | 5.07E-05 | 0.58  | 2.53   | -     | 531.2   |
| AHQ-3-6, 4011              | K.SYIYSGSHDGHINYWDSSETGENDSFAGK.G                                       | 3138.17570 | 3 | 3.14E-06 | 0.98  | 6.56   | -     | 1967.5  |
| AHQ-3-6, 4131              | K.SYIYSGSHDGHINYWDSSETGENDSFAGK.G                                       | 3138.17570 | 3 | 1.67E-14 | 0.97  | 6.21   | -     | 1502.7  |
| AHQ-3-6, 2086 - 2158       | K.VINSVDIK.Q                                                            | 888.04378  | 1 | 6.63E-05 | 0.32  | 2.31   | -     | 403.7   |
| AHQ-3-6, 3829              | K.YAPSGFYASGDVSGK.L                                                     | 1619.75589 | 2 | 1.23E-08 | 0.91  | 3.86   | -     | 671.3   |
| AHQ-3-1, 4190              | K.YAPSGFYASGDVSGK.L                                                     | 1619.75589 | 2 | 1.39E-09 | 0.92  | 4.07   | -     | 673.3   |
| AHQ-3-11, 3760             | K.YAPSGFYASGDVSGK.L                                                     | 1619.75589 | 2 | 1.14E-08 | 0.91  | 3.90   | -     | 637.7   |
| AHQ-3-13-, 2842            | K.YEYQPFAGK.I                                                           | 1103.20822 | 2 | 1.22E-05 | 0.58  | 2.67   | -     | 489.2   |
| AHQ-3-13, 2869             | K.YEYQPFAGK.I                                                           | 1103.20822 | 2 | 2.03E-07 | 0.66  | 2.51   | -     | 623.8   |
| gi 4507953 ref NP_003397.1 | tyrosine 3/tryptophan 5-monoxygenase activation protein, zeta polypep   |            |   | 1.78E-14 | 8.46  | 110.31 | 46.90 | 27744.9 |
| AHQ-3-10, 5664 - 5679      | R.EKIETLRDIDCNVLSLLEK.F                                                 | 2419.73463 | 2 | 1.10E-04 | 0.23  | 2.84   | -     | 194.5   |
| AHQ-3-11, 3067 - 3082      | K.FLIPNASQAESK.V                                                        | 1305.46156 | 2 | 5.35E-05 | 0.74  | 3.00   | -     | 398.9   |
| AHQ-3-10, 3166 - 3351      | K.FLIPNASQAESK.V                                                        | 1305.46156 | 1 | 2.47E-05 | 0.62  | 2.63   | -     | 449.7   |
| AHQ-3-9, 2825              | K.FLIPNASQAESK.V                                                        | 1305.46156 | 1 | 1.15E-06 | 0.39  | 2.59   | -     | 361.3   |
| AHQ-3-9, 2824              | K.FLIPNASQAESK.V                                                        | 1305.46156 | 2 | 6.32E-06 | 0.73  | 2.53   | -     | 561.7   |
| AHQ-3-10, 2934 - 2998      | K.FLIPNASQAESK.V                                                        | 1305.46156 | 2 | 3.03E-06 | 0.77  | 2.78   | -     | 498.2   |
| AHQ-3-10, 6522             | K.IETELRDICNDVLSLLEK.F                                                  | 2162.44718 | 2 | 3.69E-07 | 0.93  | 4.87   | -     | 805.4   |
| AHQ-3-9, 7015              | K.IETELRDICNDVLSLLEK.F                                                  | 2162.44718 | 2 | 7.38E-06 | 0.92  | 4.57   | -     | 1439.8  |
| AHQ-3-10, 5754 - 5812      | K.IETELRDICNDVLSLLEK.F                                                  | 2162.44718 | 2 | 1.32E-09 | 0.96  | 5.15   | -     | 1110.6  |
| AHQ-3-10, 6583             | R.LGLALNFSVIFYEILNSPEK.A                                                | 2318.65200 | 2 | 2.84E-08 | 0.84  | 4.32   | -     | 432.5   |
| AHQ-3-13, 2362             | K.SVTEQGAELSNEER.N                                                      | 1549.57922 | 2 | 1.89E-07 | 0.92  | 4.05   | -     | 1055.7  |
| AHQ-3-14, 3005 - 3064      | K.SVTEQGAELSNEER.N                                                      | 1549.57922 | 2 | 7.16E-04 | 0.23  | 2.50   | -     | 305.4   |
| AHQ-3-10, 2246             | K.SVTEQGAELSNEER.N                                                      | 1549.57922 | 2 | 2.45E-07 | 0.84  | 3.33   | -     | 1059.5  |
| AHQ-3-10, 2154 - 2218      | K.SVTEQGAELSNEER.N                                                      | 1549.57922 | 2 | 1.84E-09 | 0.97  | 4.79   | -     | 1768.4  |
| AHQ-3-13-, 2318            | K.SVTEQGAELSNEER.N                                                      | 1549.57922 | 2 | 1.77E-09 | 0.92  | 3.40   | -     | 1417.1  |
| AHQ-3-14-, 2191 - 2260     | K.SVTEQGAELSNEER.N                                                      | 1549.57922 | 2 | 3.37E-13 | 0.96  | 4.48   | -     | 1666.2  |
| AHQ-3-12, 2288             | K.SVTEQGAELSNEER.N                                                      | 1549.57922 | 2 | 1.17E-05 | 0.91  | 3.56   | -     | 1331.3  |
| AHQ-3-10, 4550 - 4562      | K.SVTEQGAELSNEER.NL5VAYK.N                                              | 2438.63331 | 2 | 2.72E-05 | 0.82  | 3.74   | -     | 609.4   |
| AHQ-3-10, 6422 - 6483      | K.TAFDEAIAELDTLSEESYK.D                                                 | 2133.25160 | 2 | 8.95E-07 | 0.97  | 5.80   | -     | 1406.3  |
| AHQ-3-9, 6915              | K.TAFDEAIAELDTLSEESYK.D                                                 | 2133.25160 | 2 | 3.07E-06 | 0.97  | 5.86   | -     | 1108.7  |
| AHQ-3-14-, 6735            | K.TAFDEAIAELDTLSEESYK.D                                                 | 2133.25160 | 2 | 3.10E-08 | 0.98  | 6.14   | -     | 1331.6  |
| AHQ-3-13-, 6790            | K.TAFDEAIAELDTLSEESYK.D                                                 | 2133.25160 | 3 | 1.32E-04 | 0.96  | 5.65   | -     | 1166.8  |
| AHQ-3-13-, 6789            | K.TAFDEAIAELDTLSEESYK.D                                                 | 2133.25160 | 2 | 2.11E-06 | 0.97  | 5.23   | -     | 1260.0  |
| AHQ-3-13, 6865             | K.TAFDEAIAELDTLSEESYK.D                                                 | 2133.25160 | 2 | 1.45E-07 | 0.97  | 5.79   | -     | 1362.9  |
| AHQ-3-11, 6670 - 6672      | K.TAFDEAIAELDTLSEESYK.D                                                 | 2133.25160 | 2 | 1.16E-09 | 0.97  | 5.37   | -     | 1190.2  |
| AHQ-3-9, 7159              | K.TAFDEAIAELDTLSEESYK.DSTLIM*QLLR.D                                     | 3320.66704 | 3 | 1.78E-14 | 0.95  | 5.48   | -     | 1289.4  |
| AHQ-3-10, 6602 - 6680      | K.TAFDEAIAELDTLSEESYK.DSTLIM*QLLR.D                                     | 3304.66764 | 3 | 1.27E-12 | 0.95  | 5.12   | -     | 1289.4  |
| AHQ-3-10, 6706 - 6707      | K.TAFDEAIAELDTLSEESYK.DSTLIM*QLLR.D                                     | 3320.66704 | 3 | 1.53E-13 | 0.96  | 5.74   | -     | 1434.5  |
| AHQ-3-10, 2399 - 2460      | R.YDDMAACMK.S                                                           | 1106.27579 | 1 | 1.62E-05 | 0.44  | 2.04   | -     | 435.3   |
| AHQ-3-13-, 2019 - 2034     | R.YLAEVAAAGDDKK.G                                                       | 1280.40887 | 2 | 2.83E-05 | 0.95  | 3.37   | -     | 1723.5  |
| AHQ-3-10, 1806 - 1866      | R.YLAEVAAAGDDKK.G                                                       | 1280.40887 | 2 | 3.08E-05 | 0.96  | 3.76   | -     | 1701.6  |
| AHQ-3-11, 1879 - 1900      | R.YLAEVAAAGDDKK.G                                                       | 1280.40887 | 2 | 2.06E-06 | 0.94  | 3.69   | -     | 1341.9  |
| AHQ-3-13, 2102             | R.YLAEVAAAGDDKK.G                                                       | 1280.40887 | 2 | 1.05E-04 | 0.85  | 3.04   | -     | 1022.9  |
| gi 4885609 ref NP_005408.1 | v-src sarcoma (Schmidt-Ruppin A-2) viral oncogene homolog; Protooncogen |            |   | 1.78E-14 | 4.24  | 50.35  | 15.90 | 59834.4 |
| AHQ-3-7, 6902              | R.AGPLAGGVTTFVALYDYESR.T                                                | 2088.30526 | 2 | 4.19E-04 | 0.83  | 3.59   | -     | 714.4   |
| AHQ-3-7, 3888 - 3934       | K.LFGGFNSSDTVTSPOR.A                                                    | 1713.82931 | 2 | 2.63E-05 | 0.88  | 3.51   | -     | 924.8   |
| AHQ-3-7, 3598              | K.LFGGFNSSDTVTSPOR.A                                                    | 1713.82931 | 2 | 1.52E-04 | 0.85  | 2.90   | -     | 944.8   |
| AHQ-3-7, 2294              | R.LLLNAENPR.G                                                           | 1040.19834 | 2 | 2.58E-04 | 0.85  | 2.91   | -     | 814.0   |
| AHQ-3-7, 7395              | R.LPQLVDMAAQIASGMAYVER.M                                                | 2164.53485 | 2 | 1.78E-14 | 0.99  | 7.04   | -     | 4800.5  |
| AHQ-3-7, 4639              | K.TLKPQGTMSPEAFLEAQVVMK.K                                               | 2223.59904 | 2 | 1.99E-04 | 0.68  | 3.50   | -     | 658.6   |
| gi 4502051 ref NP_000688.1 | arachidonate 12-lipoxygenase; 12(S)-lipoxygenase [Homo sapiens]         |            |   | 1.94E-14 | 5.49  | 60.34  | 13.60 | 75721.8 |
| AHQ-3-6, 2054              | K.AVSTGGGGHVLQLLR.R                                                     | 1352.52468 | 2 | 1.70E-06 | 0.76  | 3.02   | -     | 770.8   |
| AHQ-3-6, 3013 - 3094       | R.EITEVGLCQAQDR.G                                                       | 1520.64745 | 2 | 1.53E-07 | 0.96  | 4.89   | -     | 923.0   |
| AHQ-3-6, 7205              | R.GEEEFHDVAEDLGLLQFVR.L                                                 | 2448.58352 | 2 | 1.94E-14 | 0.98  | 6.83   | -     | 1267.5  |
| AHQ-3-6, 5171              | R.ITVQGGPACAEVAFPCYR.W                                                  | 1999.25659 | 2 | 1.57E-05 | 0.92  | 3.68   | -     | 1324.3  |
| AHQ-3-6, 4482              | R.LPGDNALDMFQK.H                                                        | 1349.53784 | 2 | 1.78E-07 | 0.95  | 3.97   | -     | 1350.4  |
| AHQ-3-6, 3911              | R.TQLISDGGIFDK.A                                                        | 1294.43554 | 2 | 1.83E-06 | 0.92  | 3.41   | -     | 1274.3  |
| gi 4826898 ref NP_005013.1 | profilin 1; profilin-1 [Homo sapiens]                                   |            |   | 2.16E-14 | 16.22 | 180.30 | 70.70 | 15054.2 |
| AHQ-3-13, 5582 - 5649      | K.CSVIRDSLLQDGEFSMDLR.T                                                 | 2243.50389 | 3 | 3.65E-05 | 0.91  | 3.89   | -     | 1239.8  |
| AHQ-3-13, 5027 - 5054      | K.CSVIRDSLLQDGEFSMDLR.T                                                 | 2259.50329 | 3 | 5.32E-05 | 0.94  | 4.80   | -     | 1481.7  |
| AHQ-3-13-, 4923 - 5005     | K.CSVIRDSLLQDGEFSMDLR.T                                                 | 2259.50329 | 3 | 1.69E-07 | 0.96  | 5.25   | -     | 1690.0  |
| AHQ-3-13, 1957 - 2018      | K.CYEM*ASHLR.R                                                          | 1184.32794 | 2 | 5.51E-05 | 0.92  | 3.12   | -     | 1301.9  |
| AHQ-3-13, 2347 - 2413      | K.CYEM*ASHLR.R                                                          | 1168.32854 | 2 | 4.66E-04 | 0.96  | 3.22   | -     | 2063.5  |
| AHQ-3-13-, 1597 - 1659     | K.CYEM*ASHLR.R                                                          | 1184.32794 | 2 | 3.93E-06 | 0.92  | 3.04   | -     | 1208.9  |
| AHQ-3-13-, 1717 - 1793     | K.CYEM*ASHLR.R                                                          | 1184.32794 | 2 | 2.64E-04 | 0.90  | 3.04   | -     | 1255.9  |
| AHQ-3-13-, 1853 - 1913     | K.CYEM*ASHLR.R                                                          | 1184.32794 | 2 | 8.15E-06 | 0.91  | 3.37   | -     | 1185.2  |
| AHQ-3-13-, 1949 - 2023     | K.CYEM*ASHLR.R                                                          | 1184.32794 | 2 | 1.12E-04 | 0.85  | 2.88   | -     | 1074.4  |
| AHQ-3-13-, 2402 - 2465     | K.CYEM*ASHLR.R                                                          | 1168.32854 | 2 | 1.84E-04 | 0.95  | 3.51   | -     | 1542.3  |
| AHQ-3-13-, 2429            | K.CYEM*ASHLR.R                                                          | 1168.32854 | 2 | 4.81E-05 | 0.97  | 3.88   | -     | 2137.6  |
| AHQ-3-12, 1786             | K.CYEM*ASHLR.R                                                          | 1184.32794 | 2 | 2.64E-04 | 0.78  | 2.50   | -     | 1003.3  |
| AHQ-3-13, 1866 - 1925      | K.CYEM*ASHLR.R                                                          | 1184.32794 | 2 | 3.27E-05 | 0.89  | 3.28   | -     | 923.2   |
| AHQ-3-13, 4185             | K.DRSSFYVNLTLGGQK.C                                                     | 1742.91379 | 2 | 1.87E-10 | 0.97  | 5.34   | -     | 1285.5  |
| AHQ-3-13, 4053 - 4123      | K.DRSSFYVNLTLGGQK.C                                                     | 1742.91379 | 2 | 3.38E-10 | 0.96  | 5.29   | -     | 1153.3  |
| AHQ-3-13-, 4077            | K.DRSSFYVNLTLGGQK.C                                                     | 1742.91379 | 2 | 2.16E-14 | 0.98  | 5.85   | -     | 1388.0  |
| AHQ-3-12, 5415 - 5479      | R.DSLLQDGEFSMDLR.T                                                      | 1626.77023 | 2 | 3.87E-07 | 0.95  | 4.36   | -     | 1357.5  |
| AHQ-3-14-, 5161 - 5227     | R.DSLLQDGEFSMDLR.T                                                      | 1626.77023 | 2 | 1.50E-05 | 0.96  | 4.37   | -     | 1600.5  |
| AHQ-3-12, 5542 - 5620      | R.DSLLQDGEFSMDLR.T                                                      | 1626.77023 | 2 | 3.69E-05 | 0.95  | 3.89   | -     | 1461.2  |
| AHQ-3-12, 5688 - 5750      | R.DSLLQDGEFSMDLR.T                                                      | 1626.77023 | 2 | 2.55E-04 | 0.96  | 4.60   | -     | 1396.2  |
| AHQ-3-13-, 4721 - 4795     | R.DSLLQDGEFSMDLR.T                                                      | 1642.76963 | 2 | 3.05E-08 | 0.94  | 3.72   | -     | 1557.8  |
| AHQ-3-12, 5816 - 5891      | R.DSLLQDGEFSMDLR.T                                                      | 1626.77023 | 2 | 6.82E-07 | 0.76  | 3.37   | -     | 546.5   |

|                        |                                 |            |   |          |      |      |   |        |
|------------------------|---------------------------------|------------|---|----------|------|------|---|--------|
| AHQ-3-13-, 4653        | R.DSLLODGEFSM*DLR.T             | 1642.76963 | 3 | 3.49E-07 | 0.98 | 5.60 | - | 2420.5 |
| AHQ-3-12, 5271 - 5346  | R.DSLLODGEFSMDLR.T              | 1626.77023 | 2 | 3.86E-09 | 0.96 | 4.79 | - | 1312.7 |
| AHQ-3-13-, 4867 - 4926 | R.DSLLODGEFSM*DLR.T             | 1642.76963 | 2 | 1.87E-07 | 0.96 | 4.37 | - | 1980.8 |
| AHQ-3-12, 4662 - 4696  | R.DSLLODGEFSM*DLR.T             | 1642.76963 | 2 | 1.49E-06 | 0.88 | 2.95 | - | 1251.0 |
| AHQ-3-14-, 4612        | R.DSLLODGEFSM*DLR.T             | 1642.76963 | 2 | 2.27E-09 | 0.96 | 3.68 | - | 1810.1 |
| AHQ-3-12, 4558         | R.DSLLODGEFSM*DLR.T             | 1642.76963 | 2 | 4.27E-06 | 0.92 | 3.57 | - | 1100.0 |
| AHQ-3-13-, 4469 - 4533 | R.DSLLODGEFSM*DLR.T             | 1642.76963 | 2 | 4.69E-09 | 0.96 | 5.11 | - | 1214.5 |
| AHQ-3-13-, 4363        | R.DSLLODGEFSM*DLR.T             | 1642.76963 | 2 | 5.78E-05 | 0.64 | 2.60 | - | 761.7  |
| AHQ-3-13-, 5653 - 5713 | R.DSLLODGEFSMDLR.T              | 1626.77023 | 2 | 1.39E-04 | 0.92 | 3.53 | - | 1340.1 |
| AHQ-3-13-, 6101 - 6123 | R.DSLLODGEFSMDLR.T              | 1626.77023 | 2 | 1.93E-06 | 0.97 | 4.69 | - | 2263.7 |
| AHQ-3-13-, 4995 - 5070 | R.DSLLODGEFSM*DLR.T             | 1642.76963 | 2 | 7.78E-07 | 0.70 | 2.76 | - | 1084.6 |
| AHQ-3-13-, 5115        | R.DSLLODGEFSM*DLR.T             | 1626.77023 | 2 | 1.27E-11 | 0.96 | 4.41 | - | 1496.3 |
| AHQ-3-13-, 5211 - 5274 | R.DSLLODGEFSMDLR.T              | 1626.77023 | 2 | 2.61E-10 | 0.97 | 4.84 | - | 1496.5 |
| AHQ-3-13-, 6038        | R.DSLLODGEFSMDLR.T              | 1626.77023 | 2 | 3.05E-05 | 0.93 | 3.05 | - | 1775.2 |
| AHQ-3-14-, 5376 - 5455 | R.DSLLODGEFSMDLR.T              | 1626.77023 | 2 | 4.13E-09 | 0.97 | 4.36 | - | 2202.8 |
| AHQ-3-13-, 5414 - 5479 | R.DSLLODGEFSM*DLR.T             | 1642.76963 | 2 | 4.00E-04 | 0.77 | 3.01 | - | 956.6  |
| AHQ-3-14-, 4487        | R.DSLLODGEFSM*DLR.T             | 1642.76963 | 2 | 1.64E-04 | 0.93 | 3.26 | - | 1361.2 |
| AHQ-3-14, 6315         | R.DSLLODGEFSMDLR.T              | 1626.77023 | 2 | 1.18E-10 | 0.97 | 4.20 | - | 2197.9 |
| AHQ-3-14, 5592 - 5652  | R.DSLLODGEFSM*DLR.T             | 1642.76963 | 2 | 1.18E-07 | 0.95 | 4.03 | - | 1749.2 |
| AHQ-3-14, 5445 - 5509  | R.DSLLODGEFSM*DLR.T             | 1642.76963 | 2 | 7.36E-06 | 0.73 | 3.08 | - | 736.2  |
| AHQ-3-13, 6130 - 6198  | R.DSLLODGEFSMDLR.T              | 1626.77023 | 2 | 3.60E-09 | 0.96 | 4.25 | - | 1807.5 |
| AHQ-3-13-, 5429 - 5501 | R.DSLLODGEFSMDLR.T              | 1626.77023 | 2 | 1.36E-10 | 0.98 | 4.91 | - | 2128.5 |
| AHQ-3-13-, 5521 - 5587 | R.DSLLODGEFSMDLR.T              | 1626.77023 | 2 | 3.51E-09 | 0.97 | 4.92 | - | 1756.1 |
| AHQ-3-13, 6001 - 6065  | R.DSLLODGEFSMDLR.T              | 1626.77023 | 2 | 1.11E-07 | 0.95 | 3.95 | - | 1693.6 |
| AHQ-3-13-, 5893 - 5974 | R.DSLLODGEFSMDLR.T              | 1626.77023 | 2 | 3.93E-10 | 0.98 | 5.10 | - | 2352.5 |
| AHQ-3-13, 4385         | R.DSLLODGEFSM*DLR.T             | 1642.76963 | 2 | 4.52E-04 | 0.94 | 4.04 | - | 1418.3 |
| AHQ-3-13, 4471 - 4534  | R.DSLLODGEFSM*DLR.T             | 1642.76963 | 2 | 2.68E-08 | 0.93 | 3.62 | - | 1069.7 |
| AHQ-3-13, 5637 - 5705  | R.DSLLODGEFSM*DLR.T             | 1626.77023 | 2 | 4.58E-10 | 0.97 | 4.63 | - | 2042.3 |
| AHQ-3-13, 4597 - 4665  | R.DSLLODGEFSM*DLR.T             | 1642.76963 | 2 | 1.35E-07 | 0.96 | 4.89 | - | 1607.0 |
| AHQ-3-13, 4666 - 4729  | R.DSLLODGEFSM*DLR.T             | 1642.76963 | 2 | 6.50E-09 | 0.95 | 4.20 | - | 1627.2 |
| AHQ-3-13, 4793 - 4861  | R.DSLLODGEFSM*DLR.T             | 1642.76963 | 2 | 2.36E-09 | 0.96 | 4.28 | - | 1893.4 |
| AHQ-3-13, 4930 - 4997  | R.DSLLODGEFSM*DLR.T             | 1642.76963 | 2 | 3.77E-10 | 0.96 | 4.34 | - | 1627.5 |
| AHQ-3-13-, 4531 - 4593 | R.DSLLODGEFSM*DLR.T             | 1642.76963 | 2 | 4.07E-10 | 0.97 | 4.99 | - | 1929.7 |
| AHQ-3-13, 5161         | R.DSLLODGEFSMDLR.T              | 1626.77023 | 2 | 8.11E-08 | 0.94 | 3.95 | - | 1296.2 |
| AHQ-3-13, 5261 - 5325  | R.DSLLODGEFSMDLR.T              | 1626.77023 | 2 | 3.40E-04 | 0.95 | 3.98 | - | 1492.7 |
| AHQ-3-13, 6702         | R.DSLLODGEFSMDLR.T              | 1626.77023 | 2 | 3.60E-04 | 0.87 | 3.38 | - | 1041.8 |
| AHQ-3-13, 5389 - 5461  | R.DSLLODGEFSMDLR.T              | 1626.77023 | 2 | 4.58E-09 | 0.97 | 4.81 | - | 2112.5 |
| AHQ-3-13, 5505 - 5573  | R.DSLLODGEFSMDLR.T              | 1626.77023 | 2 | 1.30E-09 | 0.98 | 5.70 | - | 2157.9 |
| AHQ-3-13-, 3497 - 3530 | K.DSPSVWAAVPGK.T                | 1214.35211 | 2 | 2.20E-07 | 0.88 | 2.84 | - | 972.9  |
| AHQ-3-13-, 3593 - 3667 | K.DSPSVWAAVPGK.T                | 1214.35211 | 2 | 2.41E-07 | 0.90 | 3.64 | - | 950.6  |
| AHQ-3-13, 3353 - 3361  | K.DSPSVWAAVPGK.T                | 1214.35211 | 2 | 6.73E-05 | 0.87 | 3.09 | - | 1062.9 |
| AHQ-3-13, 3519 - 3589  | K.DSPSVWAAVPGK.T                | 1214.35211 | 2 | 2.96E-05 | 0.89 | 3.54 | - | 922.0  |
| AHQ-3-13, 3525 - 3649  | K.DSPSVWAAVPGK.T                | 1214.35211 | 1 | 2.98E-07 | 0.23 | 2.52 | - | 369.8  |
| AHQ-3-12, 3554 - 3620  | K.DSPSVWAAVPGK.T                | 1214.35211 | 2 | 6.05E-04 | 0.79 | 2.91 | - | 961.2  |
| AHQ-3-12, 3555         | K.DSPSVWAAVPGK.T                | 1214.35211 | 1 | 6.67E-04 | 0.56 | 2.68 | - | 651.3  |
| AHQ-3-13, 3613 - 3686  | K.DSPSVWAAVPGK.T                | 1214.35211 | 2 | 6.11E-08 | 0.87 | 3.04 | - | 1022.2 |
| AHQ-3-13-, 3501 - 3626 | K.DSPSVWAAVPGK.T                | 1214.35211 | 1 | 5.81E-05 | 0.34 | 2.46 | - | 367.6  |
| AHQ-3-13, 3738         | K.DSPSVWAAVPGK.T                | 1214.35211 | 2 | 1.64E-04 | 0.82 | 2.93 | - | 1046.1 |
| AHQ-3-13, 3833         | K.DSPSVWAAVPGK.T                | 1214.35211 | 2 | 5.25E-05 | 0.91 | 3.29 | - | 1130.2 |
| AHQ-3-13-, 6557        | K.DSPSVWAAVPGKTFVNITPAEVLGVGK.D | 2840.26581 | 3 | 2.82E-10 | 0.95 | 4.36 | - | 2033.7 |
| AHQ-3-12, 4447 - 4518  | R.SSFYVNGTLGGQK.C               | 1471.63957 | 1 | 5.08E-06 | 0.38 | 2.94 | - | 320.3  |
| AHQ-3-14, 5255         | R.SSFYVNGTLGGQK.C               | 1471.63957 | 2 | 7.16E-06 | 0.91 | 3.85 | - | 742.9  |
| AHQ-3-14, 5263         | R.SSFYVNGTLGGQK.C               | 1471.63957 | 1 | 9.19E-08 | 0.28 | 2.18 | - | 302.6  |
| AHQ-3-13, 4233 - 4293  | R.SSFYVNGTLGGQK.C               | 1471.63957 | 2 | 3.56E-08 | 0.94 | 4.17 | - | 808.7  |
| AHQ-3-12, 4288         | R.SSFYVNGTLGGQK.C               | 1471.63957 | 1 | 1.45E-07 | 0.26 | 2.04 | - | 388.4  |
| AHQ-3-12, 4282 - 4287  | R.SSFYVNGTLGGQK.C               | 1471.63957 | 2 | 7.04E-09 | 0.95 | 4.37 | - | 978.8  |
| AHQ-3-13-, 4241 - 4602 | R.SSFYVNGTLGGQK.C               | 1471.63957 | 1 | 2.61E-07 | 0.70 | 3.17 | - | 360.0  |
| AHQ-3-12, 4522         | R.SSFYVNGTLGGQK.C               | 1471.63957 | 2 | 2.36E-05 | 0.94 | 3.65 | - | 1229.0 |
| AHQ-3-13, 4234 - 4593  | R.SSFYVNGTLGGQK.C               | 1471.63957 | 1 | 9.47E-09 | 0.70 | 3.20 | - | 377.3  |
| AHQ-3-13, 4481 - 4545  | R.SSFYVNGTLGGQK.C               | 1471.63957 | 2 | 8.34E-05 | 0.97 | 4.49 | - | 1597.6 |
| AHQ-3-13-, 4333 - 4394 | R.SSFYVNGTLGGQK.C               | 1471.63957 | 2 | 6.23E-08 | 0.93 | 3.86 | - | 869.6  |
| AHQ-3-13-, 4237 - 4303 | R.SSFYVNGTLGGQK.C               | 1471.63957 | 2 | 4.99E-09 | 0.94 | 4.44 | - | 765.8  |
| AHQ-3-14-, 4252        | R.SSFYVNGTLGGQK.C               | 1471.63957 | 1 | 3.81E-09 | 0.53 | 2.38 | - | 383.8  |
| AHQ-3-12, 4663         | R.SSFYVNGTLGGQK.C               | 1471.63957 | 1 | 4.89E-05 | 0.22 | 2.05 | - | 356.2  |
| AHQ-3-13-, 4783        | R.SSFYVNGTLGGQK.C               | 1471.63957 | 1 | 6.28E-05 | 0.09 | 1.96 | - | 264.8  |
| AHQ-3-14-, 4419 - 4499 | R.SSFYVNGTLGGQK.C               | 1471.63957 | 1 | 3.30E-07 | 0.33 | 2.09 | - | 397.5  |
| AHQ-3-12, 4408 - 4455  | R.SSFYVNGTLGGQK.C               | 1471.63957 | 2 | 9.39E-05 | 0.94 | 4.27 | - | 1041.5 |
| AHQ-3-14-, 4495 - 4513 | R.SSFYVNGTLGGQK.C               | 1471.63957 | 2 | 1.16E-08 | 0.97 | 4.21 | - | 1612.3 |
| AHQ-3-13-, 4461 - 4537 | R.SSFYVNGTLGGQK.C               | 1471.63957 | 2 | 1.50E-07 | 0.97 | 4.99 | - | 1404.3 |
| AHQ-3-14-, 4453        | R.SSFYVNGTLGGQK.C               | 1471.63957 | 1 | 1.16E-05 | 0.25 | 2.07 | - | 316.7  |
| AHQ-3-14-, 4401        | R.SSFYVNGTLGGQK.C               | 1471.63957 | 2 | 2.22E-06 | 0.91 | 3.10 | - | 1271.7 |
| AHQ-3-14-, 3013        | K.STGGAPTFNVTVK.T               | 1380.52843 | 1 | 1.23E-04 | 0.63 | 2.72 | - | 482.3  |
| AHQ-3-13-, 3161 - 3185 | K.STGGAPTFNVTVK.T               | 1380.52843 | 2 | 3.53E-05 | 0.79 | 3.26 | - | 374.4  |
| AHQ-3-13-, 3037 - 3118 | K.STGGAPTFNVTVK.T               | 1380.52843 | 2 | 4.02E-06 | 0.72 | 2.95 | - | 414.8  |
| AHQ-3-13-, 3001 - 3269 | K.STGGAPTFNVTVK.T               | 1380.52843 | 1 | 1.95E-05 | 0.59 | 2.90 | - | 359.7  |
| AHQ-3-13-, 2922        | K.STGGAPTFNVTVK.T               | 1380.52843 | 2 | 3.02E-05 | 0.76 | 2.78 | - | 443.5  |
| AHQ-3-13-, 2921 - 2986 | K.STGGAPTFNVTVK.T               | 1380.52843 | 2 | 3.22E-10 | 0.92 | 4.27 | - | 572.7  |
| AHQ-3-13, 3026 - 3198  | K.STGGAPTFNVTVK.T               | 1380.52843 | 1 | 1.90E-04 | 0.59 | 2.77 | - | 381.6  |
| AHQ-3-13, 2950 - 3013  | K.STGGAPTFNVTVK.T               | 1380.52843 | 2 | 3.56E-04 | 0.83 | 3.18 | - | 550.8  |
| AHQ-3-13, 3063 - 3129  | K.STGGAPTFNVTVK.T               | 1380.52843 | 2 | 1.59E-08 | 0.87 | 3.32 | - | 631.2  |
| AHQ-3-12, 3050 - 3051  | K.STGGAPTFNVTVK.T               | 1380.52843 | 2 | 2.52E-06 | 0.87 | 3.19 | - | 575.1  |
| AHQ-3-13, 3166 - 3246  | K.STGGAPTFNVTVK.T               | 1380.52843 | 2 | 2.32E-10 | 0.87 | 3.78 | - | 492.8  |
| AHQ-3-13-, 2834 - 2843 | K.STGGAPTFNVTVKTDK.T            | 1724.89354 | 2 | 9.79E-07 | 0.82 | 3.58 | - | 454.2  |
| AHQ-3-13, 2846         | K.STGGAPTFNVTVKTDK.T            | 1724.89354 | 2 | 7.57E-04 | 0.73 | 2.69 | - | 483.9  |
| AHQ-3-13-, 2991        | K.STGGAPTFNVTVKTDK.T            | 1724.89354 | 2 | 3.31E-05 | 0.90 | 4.05 | - | 652.0  |
| AHQ-3-13, 3014         | K.STGGAPTFNVTVKTDK.T            | 1724.89354 | 2 | 1.67E-06 | 0.87 | 3.61 | - | 521.1  |
| AHQ-3-13-, 2829 - 2831 | K.TDKTLVLLM*GK.E                | 1235.51929 | 2 | 3.80E-05 | 0.92 | 3.59 | - | 1032.2 |
| AHQ-3-13, 3521 - 3590  | K.TDKTLVLLM*GK.E                | 1219.51989 | 2 | 3.70E-06 | 0.93 | 3.51 | - | 1229.9 |
| AHQ-3-13-, 3505 - 3571 | K.TDKTLVLLM*GK.E                | 1219.51989 | 2 | 6.18E-07 | 0.94 | 4.35 | - | 1080.6 |
| AHQ-3-12, 5863 - 5926  | K.TFVNITPAEVLGVGK.D             | 1644.93630 | 2 | 4.01E-08 | 0.89 | 4.19 | - | 673.4  |
| AHQ-3-12, 5739 - 5802  | K.TFVNITPAEVLGVGK.D             | 1644.93630 | 2 | 9.83E-06 | 0.95 | 4.70 | - | 1054.9 |
| AHQ-3-11, 5598 - 5600  | K.TFVNITPAEVLGVGK.D             | 1644.93630 | 2 | 9.65E-05 | 0.61 | 2.94 | - | 538.6  |
| AHQ-3-13, 6093 - 6159  | K.TFVNITPAEVLGVGK.D             | 1644.93630 | 2 | 1.12E-04 | 0.88 | 4.12 | - | 596.3  |
| AHQ-3-13, 5953 - 6017  | K.TFVNITPAEVLGVGK.D             | 1644.93630 | 2 | 1.22E-09 | 0.93 | 4.20 | - | 979.3  |
| AHQ-3-13, 5854         | K.TFVNITPAEVLGVGK.D             | 1644.93630 | 3 | 7.12E-09 | 0.97 | 5.12 | - | 1806.7 |
| AHQ-3-13, 5845 - 5909  | K.TFVNITPAEVLGVGK.D             | 1644.93630 | 2 | 4.42E-07 | 0.95 | 4.31 | - | 1060.3 |
| AHQ-3-13, 5751 - 5787  | K.TFVNITPAEVLGVGK.D             | 1644.93630 | 3 | 4.47E-09 | 0.97 | 5.53 | - | 1645.4 |
| AHQ-3-13-, 5477        | K.TFVNITPAEVLGVGK.D             | 1644.93630 | 2 | 5.02E-05 | 0.93 | 3.75 | - | 1074.8 |
| AHQ-3-13, 5745         | K.TFVNITPAEVLGVGK.D             | 1644.93630 | 2 | 1.48E-05 | 0.94 | 4.48 | - | 828.6  |
| AHQ-3-14-, 5677 - 5756 | K.TFVNITPAEVLGVGK.D             | 1644.93630 | 2 | 1.70E-04 | 0.92 | 3.93 | - | 830.1  |
| AHQ-3-13-, 5698        | K.TFVNITPAEVLGVGK.D             | 1644.93630 | 3 | 1.00E-08 | 0.97 | 6.03 | - | 1583.1 |
| AHQ-3-13-, 5761 - 5841 | K.TFVNITPAEVLGVGK.D             | 1644.93630 | 2 | 1.21E-07 | 0.93 | 4.00 | - | 1008.8 |
| AHQ-3-13-, 5785        | K.TFVNITPAEVLGVGK.D             | 1644.93630 | 3 | 1.43E-07 | 0.95 | 5.02 | - | 1129.2 |
| AHQ-3-13-, 5889 - 5957 | K.TFVNITPAEVLGVGK.D             | 1644.93630 | 2 | 5.13E-10 | 0.95 | 4.48 | - | 972.5  |
| AHQ-3-13, 5711 - 5782  | K.TFVNITPAEVLGVGK.D             | 1644.93630 | 2 | 7.63E-04 | 0.86 | 3.79 | - | 842.7  |
| AHQ-3-13-, 6021 - 6025 | K.TFVNITPAEVLGVGK.D             | 1644.93630 | 2 | 1.78E-06 | 0.93 | 4.45 | - | 1027.9 |
| AHQ-3-14-, 5920        | K.TFVNITPAEVLGVGK.D             | 1644.93630 | 2 | 7.67E-04 | 0.92 | 3.42 | - | 1240.1 |

|                             |                                                                         |            |   |          |      |        |       |         |
|-----------------------------|-------------------------------------------------------------------------|------------|---|----------|------|--------|-------|---------|
| AHQ-3-12, 5424              | K.TFVNITPAEVGVLVGKDR.S                                                  | 1916.21052 | 2 | 6.66E-07 | 0.91 | 4.17   | -     | 694.6   |
| AHQ-3-13-, 6217             | K.TFVNITPAEVGVLVGKDR.S                                                  | 1916.21052 | 2 | 6.82E-06 | 0.56 | 2.83   | -     | 742.3   |
| AHQ-3-13-, 5367 - 5446      | K.TFVNITPAEVGVLVGKDR.S                                                  | 1916.21052 | 2 | 1.76E-09 | 0.91 | 4.25   | -     | 743.7   |
| AHQ-3-13, 5383 - 5386       | K.TFVNITPAEVGVLVGKDR.S                                                  | 1916.21052 | 3 | 2.14E-05 | 0.59 | 3.18   | -     | 550.7   |
| AHQ-3-13, 5393 - 5466       | K.TFVNITPAEVGVLVGKDR.S                                                  | 1916.21052 | 2 | 2.01E-08 | 0.90 | 4.22   | -     | 678.7   |
| AHQ-3-13-, 2699 - 2761      | R.TKSTGGAPTFNVTVTK.T                                                    | 1609.80568 | 2 | 7.30E-05 | 0.96 | 4.66   | -     | 956.4   |
| AHQ-3-13-, 3303             | R.TKSTGGAPTFNVTVTK.T                                                    | 1609.80568 | 2 | 4.52E-04 | 0.74 | 2.67   | -     | 448.5   |
| AHQ-3-12, 2680              | R.TKSTGGAPTFNVTVTK.T                                                    | 1609.80568 | 2 | 9.98E-05 | 0.92 | 3.91   | -     | 894.5   |
| AHQ-3-13, 2726 - 2790       | R.TKSTGGAPTFNVTVTK.T                                                    | 1609.80568 | 2 | 2.38E-10 | 0.96 | 5.35   | -     | 961.0   |
| AHQ-3-13, 2817              | R.TKSTGGAPTFNVTVTK.T                                                    | 1609.80568 | 2 | 6.21E-05 | 0.94 | 4.47   | -     | 927.9   |
| AHQ-3-13-, 3714 - 3757      | K.TLVLLMGK.E                                                            | 875.15478  | 2 | 6.10E-06 | 0.86 | 3.28   | -     | 487.0   |
| AHQ-3-12, 3596              | K.TLVLLMGK.E                                                            | 875.15478  | 1 | 1.13E-04 | 0.21 | 2.36   | -     | 255.1   |
| AHQ-3-13-, 3563 - 3637      | K.TLVLLMGK.E                                                            | 875.15478  | 2 | 1.43E-05 | 0.78 | 3.27   | -     | 492.7   |
| AHQ-3-13, 3665 - 3727       | K.TLVLLMGK.E                                                            | 875.15478  | 2 | 7.31E-06 | 0.83 | 2.92   | -     | 538.2   |
| AHQ-3-13, 3579 - 3643       | K.TLVLLMGK.E                                                            | 875.15478  | 2 | 1.26E-05 | 0.72 | 2.81   | -     | 468.3   |
| gi 21361755 ref NP_004090.3 | stomatin; erythrocyte membrane protein band 7.2 (stomatin) [Homo sapie  |            |   | 4.33E-14 | 9.73 | 110.36 | 46.20 | 31708.5 |
| AHQ-3-14-, 4607             | K.EASMVITESPAALQLR.Y                                                    | 1716.98119 | 2 | 1.45E-04 | 0.67 | 2.97   | -     | 735.5   |
| AHQ-3-13, 4627              | K.EASMVITESPAALQLR.Y                                                    | 1716.98119 | 2 | 4.03E-05 | 0.83 | 3.41   | -     | 759.1   |
| AHQ-3-1, 4948 - 4949        | K.EASMVITESPAALQLR.Y                                                    | 1716.98119 | 2 | 8.83E-05 | 0.93 | 4.78   | -     | 1033.1  |
| AHQ-3-13-, 4098             | K.EASMVITESPAALQLR.Y                                                    | 1732.98059 | 2 | 3.62E-05 | 0.92 | 4.20   | -     | 1014.8  |
| AHQ-3-9, 4284 - 4285        | K.EASMVITESPAALQLR.Y                                                    | 1716.98119 | 2 | 9.06E-04 | 0.84 | 3.45   | -     | 915.6   |
| AHQ-3-1, 4376               | K.EASMVITESPAALQLR.Y                                                    | 1732.98059 | 2 | 7.92E-04 | 0.89 | 3.91   | -     | 796.7   |
| AHQ-3-13-, 6842             | K.GPGLFFILPCTDSFIK.V                                                    | 1814.13672 | 2 | 2.87E-04 | 0.91 | 3.73   | -     | 760.3   |
| AHQ-3-9, 6963               | K.GPGLFFILPCTDSFIK.V                                                    | 1814.13672 | 2 | 3.72E-05 | 0.93 | 4.56   | -     | 729.4   |
| AHQ-3-13, 6934              | K.GPGLFFILPCTDSFIK.V                                                    | 1814.13672 | 2 | 8.89E-04 | 0.46 | 2.55   | -     | 351.1   |
| AHQ-3-1, 7280               | K.GPGLFFILPCTDSFIK.V                                                    | 1814.13672 | 2 | 3.16E-04 | 0.95 | 4.50   | -     | 928.1   |
| AHQ-3-1, 2486               | R.LLAQTLTLR.N                                                           | 916.10035  | 2 | 8.88E-05 | 0.58 | 2.56   | -     | 392.3   |
| AHQ-3-1, 6277 - 6325        | K.NLSQILSDREEIAHNM*QSTLDDATDAWGK.V                                      | 3389.65279 | 3 | 3.74E-05 | 0.94 | 4.72   | -     | 1531.9  |
| AHQ-3-9, 6872               | K.NLSQILSDREEIAHNM*QSTLDDATDAWGK.V                                      | 3373.65339 | 3 | 4.50E-06 | 0.96 | 6.08   | -     | 1256.6  |
| AHQ-3-10, 5495              | K.NLSQILSDREEIAHNM*QSTLDDATDAWGK.V                                      | 3389.65279 | 3 | 3.38E-05 | 0.96 | 4.95   | -     | 2327.4  |
| AHQ-3-1, 7210 - 7282        | K.NLSQILSDREEIAHNM*QSTLDDATDAWGK.V                                      | 3373.65339 | 3 | 2.27E-11 | 0.98 | 7.18   | -     | 1943.1  |
| AHQ-3-10, 6451              | K.NLSQILSDREEIAHNM*QSTLDDATDAWGK.V                                      | 3373.65339 | 3 | 3.78E-09 | 0.97 | 6.71   | -     | 1168.9  |
| AHQ-3-10, 6667              | K.NSTIVFPLPIDMLQGIIGAK.H                                                | 2128.56375 | 2 | 4.35E-04 | 0.87 | 4.04   | -     | 482.6   |
| AHQ-3-1, 7420               | K.NSTIVFPLPIDMLQGIIGAK.H                                                | 2128.56375 | 2 | 6.01E-06 | 0.86 | 3.63   | -     | 517.8   |
| AHQ-3-13, 6955              | K.NSTIVFPLPIDMLQGIIGAK.H                                                | 2144.56315 | 2 | 9.55E-06 | 0.79 | 3.37   | -     | 368.4   |
| AHQ-3-1, 2341               | K.VIAAEGEMNASR.A                                                        | 1248.39191 | 2 | 1.09E-08 | 0.97 | 4.31   | -     | 1810.2  |
| AHQ-3-10, 3888              | R.VQNATLAVANITNADSATR.L                                                 | 1931.09731 | 2 | 3.59E-08 | 0.91 | 4.32   | -     | 707.2   |
| AHQ-3-1, 3913 - 3980        | R.VQNATLAVANITNADSATR.L                                                 | 1931.09731 | 2 | 8.57E-12 | 0.95 | 4.78   | -     | 1052.3  |
| AHQ-3-1, 4052 - 4064        | R.VQNATLAVANITNADSATR.L                                                 | 1931.09731 | 2 | 4.33E-14 | 0.97 | 5.83   | -     | 1281.9  |
| AHQ-3-10, 3666              | R.VQNATLAVANITNADSATR.L                                                 | 1931.09731 | 2 | 2.93E-09 | 0.94 | 4.38   | -     | 927.2   |
| AHQ-3-1, 4713               | R.VQNATLAVANITNADSATR.L                                                 | 1931.09731 | 2 | 4.94E-09 | 0.94 | 3.97   | -     | 1048.9  |
| AHQ-3-1, 4166 - 4245        | R.VQNATLAVANITNADSATR.L                                                 | 1931.09731 | 2 | 4.34E-12 | 0.97 | 5.12   | -     | 1169.3  |
| AHQ-3-10, 3570 - 3571       | R.VQNATLAVANITNADSATR.L                                                 | 1931.09731 | 2 | 1.12E-05 | 0.91 | 3.62   | -     | 1116.6  |
| AHQ-3-12, 3667 - 3740       | R.YLQTLTIAAEK.N                                                         | 1352.55813 | 2 | 1.55E-04 | 0.76 | 2.54   | -     | 875.5   |
| AHQ-3-14-, 3744             | R.YLQTLTIAAEK.N                                                         | 1352.55813 | 2 | 2.91E-07 | 0.92 | 3.54   | -     | 1206.0  |
| AHQ-3-13, 3822              | R.YLQTLTIAAEK.N                                                         | 1352.55813 | 2 | 2.38E-04 | 0.94 | 4.18   | -     | 1037.3  |
| AHQ-3-13-, 3833             | R.YLQTLTIAAEK.N                                                         | 1352.55813 | 2 | 2.82E-07 | 0.94 | 3.63   | -     | 1343.5  |
| gi 4757810 ref NP_004037.1  | ATP synthase, H+ transporting, mitochondrial F1 complex, alpha subunit, |            |   | 6.27E-14 | 5.32 | 60.30  | 16.30 | 59750.5 |
| AHQ-3-11, 5328 - 5402       | K.FENAFLSHVVSQHQALLGTIR.A                                               | 2368.67911 | 2 | 9.13E-04 | 0.76 | 3.31   | -     | 470.7   |
| AHQ-3-7, 5375 - 5400        | K.FENAFLSHVVSQHQALLGTIR.A                                               | 2368.67911 | 3 | 6.27E-14 | 0.98 | 5.91   | -     | 2146.2  |
| AHQ-3-7, 6103               | K.GMSLNLEPDNVGVVVFQNDK.L                                                | 2105.35763 | 2 | 1.10E-08 | 0.89 | 4.40   | -     | 424.6   |
| AHQ-3-7, 3066 - 3134        | K.HALIYDLSK.Q                                                           | 1288.47413 | 2 | 6.01E-06 | 0.86 | 3.00   | -     | 782.6   |
| AHQ-3-7, 3664 - 3712        | R.LIGADTSVDLEETGR.V                                                     | 1576.68772 | 2 | 4.65E-06 | 0.89 | 3.80   | -     | 816.5   |
| AHQ-3-7, 2322               | K.TGTAEM*SSILEER.I                                                      | 1440.55928 | 2 | 8.16E-06 | 0.86 | 3.32   | -     | 855.4   |
| AHQ-3-7, 2838               | R.VLSIGDIAR.V                                                           | 1001.16212 | 2 | 8.12E-04 | 0.84 | 2.63   | -     | 789.9   |
| gi 6857820 ref NP_005019.2  | phosphatidylinositol-4-phosphate 5-kinase type II alpha; 1-phosphatidyl |            |   | 7.83E-14 | 1.82 | 20.33  | 7.60  | 46224.3 |
| AHQ-3-7, 4531               | R.FGIDDQDFQNSLTR.S                                                      | 1656.73462 | 2 | 1.02E-07 | 0.93 | 4.41   | -     | 1227.9  |
| AHQ-3-7, 2470 - 2479        | K.HGAGAIEISTVNPQYQSK.R                                                  | 1788.89618 | 2 | 7.83E-14 | 0.98 | 6.55   | -     | 2174.5  |
| gi 4505879 ref NP_002655.1  | pleckstrin; p47 [Homo sapiens]                                          |            |   | 8.22E-14 | 9.09 | 110.40 | 45.40 | 40062.5 |
| AHQ-3-1, 6081               | R.EDPAYLHYDDPAGAEDPLGAIHLR.G                                            | 2684.89982 | 3 | 5.51E-05 | 0.95 | 5.37   | -     | 1108.3  |
| AHQ-3-10, 5176              | R.EDPAYLHYDDPAGAEDPLGAIHLR.G                                            | 2684.89982 | 3 | 3.28E-08 | 0.98 | 6.03   | -     | 2895.6  |
| AHQ-3-13, 5621              | R.EDPAYLHYDDPAGAEDPLGAIHLR.G                                            | 2684.89982 | 3 | 9.81E-10 | 0.97 | 6.26   | -     | 1551.8  |
| AHQ-3-12, 5611              | R.EDPAYLHYDDPAGAEDPLGAIHLR.G                                            | 2684.89982 | 3 | 2.97E-05 | 0.97 | 6.06   | -     | 1626.2  |
| AHQ-3-9, 5312 - 5339        | R.EDPAYLHYDDPAGAEDPLGAIHLR.G                                            | 2684.89982 | 3 | 4.14E-05 | 0.86 | 3.99   | -     | 786.3   |
| AHQ-3-8, 5351               | R.EDPAYLHYDDPAGAEDPLGAIHLR.G                                            | 2684.89982 | 3 | 2.60E-04 | 0.95 | 6.00   | -     | 1009.2  |
| AHQ-3-13-, 5578             | R.EDPAYLHYDDPAGAEDPLGAIHLR.G                                            | 2684.89982 | 3 | 3.63E-05 | 0.96 | 5.80   | -     | 1394.2  |
| AHQ-3-8, 2296               | R.GCVVTSVSNNGR.K                                                        | 1467.54464 | 2 | 2.33E-06 | 0.86 | 3.11   | -     | 1097.4  |
| AHQ-3-13-, 2447 - 2510      | R.GCVVTSVSNNGR.K                                                        | 1467.54464 | 2 | 2.79E-05 | 0.89 | 3.64   | -     | 1117.4  |
| AHQ-3-12, 2434              | R.GCVVTSVSNNGR.K                                                        | 1467.54464 | 2 | 1.84E-07 | 0.86 | 3.56   | -     | 790.6   |
| AHQ-3-8, 2282 - 2285        | K.GSTLTSPPQDFGKR.M                                                      | 1555.69502 | 2 | 1.67E-07 | 0.57 | 2.93   | -     | 300.6   |
| AHQ-3-10, 6356              | K.IFNHCFTGNCVIDWLVSNQSVR.N                                              | 2669.97641 | 2 | 5.21E-11 | 0.98 | 6.04   | -     | 1662.9  |
| AHQ-3-8, 7079 - 7147        | K.IFNHCFTGNCVIDWLVSNQSVR.N                                              | 2669.97641 | 2 | 2.65E-09 | 0.97 | 6.18   | -     | 1280.5  |
| AHQ-3-8, 6907 - 6912        | K.IFNHCFTGNCVIDWLVSNQSVR.N                                              | 2669.97641 | 2 | 8.41E-12 | 0.98 | 6.55   | -     | 1694.4  |
| AHQ-3-11, 6543              | K.IFNHCFTGNCVIDWLVSNQSVR.N                                              | 2669.97641 | 2 | 1.54E-04 | 0.76 | 3.52   | -     | 412.3   |
| AHQ-3-8, 7291 - 7368        | R.KSEENLFEIITADEVHYFLQAATPK.E                                           | 3024.32650 | 3 | 2.42E-08 | 0.99 | 7.61   | -     | 2940.9  |
| AHQ-3-13, 7005              | R.KSEENLFEIITADEVHYFLQAATPK.E                                           | 3024.32650 | 3 | 1.29E-08 | 0.98 | 6.97   | -     | 2478.7  |
| AHQ-3-13-, 6886 - 6954      | R.KSEENLFEIITADEVHYFLQAATPK.E                                           | 3024.32650 | 3 | 1.86E-12 | 0.98 | 7.28   | -     | 2334.6  |
| AHQ-3-7, 7411               | R.KSEENLFEIITADEVHYFLQAATPK.E                                           | 3024.32650 | 3 | 4.28E-08 | 0.98 | 7.11   | -     | 2231.9  |
| AHQ-3-10, 6591              | R.KSEENLFEIITADEVHYFLQAATPK.E                                           | 3024.32650 | 3 | 1.11E-13 | 0.98 | 7.95   | -     | 2717.0  |
| AHQ-3-9, 7035               | R.KSEENLFEIITADEVHYFLQAATPK.E                                           | 3024.32650 | 3 | 1.56E-08 | 0.98 | 7.06   | -     | 2098.8  |
| AHQ-3-12, 7010 - 7090       | R.KSEENLFEIITADEVHYFLQAATPK.E                                           | 3024.32650 | 3 | 6.17E-10 | 0.98 | 8.01   | -     | 2505.3  |
| AHQ-3-9, 6324               | R.LPETIDLGALYSMK.D                                                      | 1664.98779 | 2 | 6.44E-06 | 0.97 | 4.27   | -     | 1898.4  |
| AHQ-3-8, 5464 - 5480        | R.LPETIDLGALYSMK.D                                                      | 1680.98719 | 2 | 1.16E-05 | 0.95 | 4.75   | -     | 1017.6  |
| AHQ-3-8, 6528 - 6596        | R.LPETIDLGALYSMK.D                                                      | 1664.98779 | 2 | 1.78E-06 | 0.97 | 4.41   | -     | 2431.7  |
| AHQ-3-10, 6003              | R.LPETIDLGALYSMK.D                                                      | 1664.98779 | 2 | 4.11E-06 | 0.96 | 4.20   | -     | 1566.3  |
| AHQ-3-12, 6427 - 6492       | R.LPETIDLGALYSMK.D                                                      | 1664.98779 | 2 | 6.71E-05 | 0.98 | 5.20   | -     | 2238.8  |
| AHQ-3-13, 5702 - 5758       | R.LPETIDLGALYSMK.D                                                      | 1680.98719 | 2 | 2.07E-04 | 0.95 | 4.70   | -     | 1063.0  |
| AHQ-3-12, 5260 - 5295       | R.LPETIDLGALYSMK*KDTEK.G                                                | 2154.46684 | 3 | 1.49E-04 | 0.83 | 3.74   | -     | 662.4   |
| AHQ-3-8, 5867               | R.NRQEGMIASSLLNEGVLQPAQDMSK.S                                           | 2824.18382 | 2 | 2.28E-06 | 0.98 | 6.26   | -     | 2764.7  |
| AHQ-3-8, 6449               | R.NRQEGMIASSLLNEGVLQPAQDMSK.S                                           | 2824.18382 | 2 | 1.39E-06 | 0.38 | 2.56   | -     | 246.6   |
| AHQ-3-10, 5576              | R.NRQEGMIASSLLNEGVLQPAQDMSK.S                                           | 2824.18382 | 2 | 1.39E-04 | 0.95 | 4.61   | -     | 1212.4  |
| AHQ-3-11, 4316              | K.QQDHFHQAALFEER.D                                                      | 1766.89390 | 2 | 9.27E-04 | 0.40 | 2.58   | -     | 126.9   |
| AHQ-3-12, 4507 - 4584       | K.QQDHFHQAALFEER.D                                                      | 1766.89390 | 2 | 2.74E-09 | 0.74 | 3.02   | -     | 207.5   |
| AHQ-3-8, 4156               | K.QQDHFHQAALFEER.D                                                      | 1766.89390 | 2 | 4.56E-10 | 0.67 | 2.65   | -     | 187.3   |
| AHQ-3-10, 6660              | K.SEEENLFEIITADEVHYFLQAATPK.E                                           | 2896.15359 | 3 | 1.75E-10 | 0.85 | 3.47   | -     | 934.7   |
| AHQ-3-11, 6834              | K.SEEENLFEIITADEVHYFLQAATPK.E                                           | 2896.15359 | 3 | 3.00E-11 | 0.83 | 3.82   | -     | 860.5   |
| AHQ-3-12, 7060              | K.SEEENLFEIITADEVHYFLQAATPK.E                                           | 2896.15359 | 3 | 8.22E-14 | 0.92 | 4.43   | -     | 976.8   |
| AHQ-3-13-, 6930             | K.SEEENLFEIITADEVHYFLQAATPK.E                                           | 2896.15359 | 3 | 4.09E-09 | 0.92 | 4.84   | -     | 831.9   |
| AHQ-3-14-, 6880             | K.SEEENLFEIITADEVHYFLQAATPK.E                                           | 2896.15359 | 3 | 1.81E-08 | 0.69 | 3.44   | -     | 458.9   |
| gi 27498332 ref XP_212565.1 | similar to tubulin, beta 5 [Homo sapiens]                               |            |   | 1.43E-13 | 4.71 | 50.27  | 9.90  | 49670.5 |
| AHQ-3-11, 5399 - 5403       | R.ALTVPCLTQQVFDK.N                                                      | 1660.89259 | 2 | 2.46E-04 | 0.88 | 3.82   | -     | 497.4   |
| AHQ-3-8, 5209 - 5224        | R.ALTVPCLTQQVFDK.N                                                      | 1660.89259 | 2 | 5.55E-11 | 0.92 | 4.30   | -     | 466.2   |
| AHQ-3-1, 6074               | R.ALTVPCLTQQVFDK.N                                                      | 1660.89259 | 2 | 1.58E-04 | 0.58 | 2.56   | -     | 365.7   |
| AHQ-3-11, 3223              | R.IM*NTFSVVPSPK.V                                                       | 1336.58217 | 2 | 6.60E-04 | 0.91 | 3.51   | -     | 929.9   |
| AHQ-3-7, 3530 - 3604        | R.IMNTFSVVPSPK.V                                                        | 1320.58277 | 2 | 1.13E-06 | 0.96 | 4.48   | -     | 1608.4  |
| AHQ-3-7, 7000 - 7016        | K.MAVTFIGNSTAIQELFK.R                                                   | 1871.19002 | 2 | 7.20E-07 | 0.96 | 5.33   | -     | 1251.8  |
| AHQ-3-7, 7118               | K.MAVTFIGNSTAIQELFK.R                                                   | 1871.19002 | 2 | 2.24E-08 | 0.95 | 4.44   | -     | 971.6   |

|                             |                                                                |            |   |          |       |        |       |          |
|-----------------------------|----------------------------------------------------------------|------------|---|----------|-------|--------|-------|----------|
| AHQ-3-7, 7227               | K.MAVTFIGNSTAIQELFK.R                                          | 1871.19002 | 2 | 1.80E-06 | 0.96  | 5.15   | -     | 867.0    |
| AHQ-3-7, 6918               | K.MAVTFIGNSTAIQELFK.R                                          | 1871.19002 | 2 | 3.51E-05 | 0.95  | 4.42   | -     | 1211.7   |
| AHQ-3-7, 6879 - 6882        | K.M*AVTFIGNSTAIQELFK.R                                         | 1887.18942 | 2 | 1.43E-13 | 0.97  | 5.02   | -     | 1196.9   |
| AHQ-3-1, 7048               | K.M*AVTFIGNSTAIQELFK.R                                         | 1887.18942 | 2 | 4.79E-12 | 0.96  | 4.83   | -     | 1128.0   |
| AHQ-3-11, 6404              | K.M*AVTFIGNSTAIQELFK.R                                         | 1887.18942 | 2 | 3.22E-08 | 0.82  | 3.76   | -     | 518.4    |
| AHQ-3-12, 6720              | K.MAVTFIGNSTAIQELFK.R                                          | 1871.19002 | 2 | 4.70E-04 | 0.78  | 3.39   | -     | 959.2    |
| AHQ-3-13, 6350 - 6431       | K.M*AVTFIGNSTAIQELFK.R                                         | 1887.18942 | 2 | 1.27E-04 | 0.93  | 4.56   | -     | 657.7    |
| AHQ-3-13, 6665 - 6673       | K.M*AVTFIGNSTAIQELFK.R                                         | 1887.18942 | 2 | 1.64E-10 | 0.96  | 4.75   | -     | 1117.8   |
| AHQ-3-13, 6733 - 6798       | K.MAVTFIGNSTAIQELFK.R                                          | 1871.19002 | 2 | 7.91E-04 | 0.81  | 3.06   | -     | 918.2    |
| AHQ-3-13-, 6341 - 6422      | K.M*AVTFIGNSTAIQELFK.R                                         | 1887.18942 | 2 | 5.62E-07 | 0.96  | 4.72   | -     | 1108.9   |
| AHQ-3-13-, 6665 - 6677      | K.MAVTFIGNSTAIQELFK.R                                          | 1871.19002 | 2 | 6.75E-07 | 0.93  | 3.88   | -     | 1232.1   |
| AHQ-3-14-, 6536             | K.M*AVTFIGNSTAIQELFK.R                                         | 1887.18942 | 2 | 3.24E-13 | 0.95  | 4.72   | -     | 815.8    |
| gj 13124879 ref NP_002465.1 | smooth muscle myosin heavy chain 11 isoform SM1 [Homo sapiens] |            |   | 1.51E-13 | 7.86  | 100.36 | 5.30  | 227336.7 |
| AHQ-3-2, 4998               | R.DLGEELALK.T                                                  | 1117.23151 | 2 | 9.59E-05 | 0.92  | 3.71   | -     | 904.9    |
| AHQ-3-3, 4946               | R.DLGEELALK.T                                                  | 1117.23151 | 2 | 1.85E-04 | 0.93  | 3.64   | -     | 862.2    |
| AHQ-3-3, 4953               | R.DLGEELALK.T                                                  | 1117.23151 | 1 | 2.58E-05 | 0.15  | 2.23   | -     | 345.2    |
| AHQ-3-1, 4970               | R.DLGEELALK.T                                                  | 1117.23151 | 2 | 6.21E-07 | 0.92  | 3.77   | -     | 907.5    |
| AHQ-3-2, 4994               | R.DLGEELALK.T                                                  | 1117.23151 | 1 | 1.44E-05 | 0.16  | 2.26   | -     | 388.2    |
| AHQ-3-6, 2611 - 2613        | R.EDQSILCTGESGAGK.T                                            | 1553.63107 | 2 | 1.46E-05 | 0.74  | 3.44   | -     | 479.5    |
| AHQ-3-4, 2748               | R.EDQSILCTGESGAGK.T                                            | 1553.63107 | 2 | 5.62E-04 | 0.54  | 2.63   | -     | 462.1    |
| AHQ-3-2, 2777               | R.EDQSILCTGESGAGK.T                                            | 1553.63107 | 2 | 6.11E-04 | 0.87  | 4.14   | -     | 507.3    |
| AHQ-3-2, 2801               | K.FDQLLAEEK.N                                                  | 1093.21165 | 1 | 3.39E-05 | 0.51  | 1.97   | -     | 803.3    |
| AHQ-3-2, 2810               | K.FDQLLAEEK.N                                                  | 1093.21165 | 1 | 1.28E-05 | 0.58  | 2.54   | -     | 619.2    |
| AHQ-3-3, 2804               | K.FDQLLAEEK.N                                                  | 1093.21165 | 1 | 1.30E-05 | 0.66  | 2.70   | -     | 622.8    |
| AHQ-3-1, 2990 - 2993        | K.FDQLLAEEK.N                                                  | 1093.21165 | 1 | 5.28E-04 | 0.70  | 2.36   | -     | 1155.3   |
| AHQ-3-4, 2778               | K.FDQLLAEEK.N                                                  | 1093.21165 | 1 | 2.10E-04 | 0.72  | 2.62   | -     | 840.6    |
| AHQ-3-1, 2998               | K.FDQLLAEEK.N                                                  | 1093.21165 | 2 | 4.78E-07 | 0.87  | 2.97   | -     | 1161.1   |
| AHQ-3-4, 2334 - 2337        | K.KEEELQAALAR.L                                                | 1258.40643 | 2 | 9.66E-04 | 0.92  | 3.36   | -     | 1494.0   |
| AHQ-3-5, 2203               | K.KEEELQAALAR.L                                                | 1258.40643 | 1 | 9.42E-07 | 0.27  | 1.89   | -     | 504.8    |
| AHQ-3-5, 2197               | K.KEEELQAALAR.L                                                | 1258.40643 | 2 | 8.68E-06 | 0.92  | 3.52   | -     | 1376.7   |
| AHQ-3-3, 2570 - 2648        | R.KFDQLLAEEK.N                                                 | 1221.38456 | 2 | 5.12E-06 | 0.88  | 2.86   | -     | 1265.4   |
| AHQ-3-2, 2577 - 2645        | R.KFDQLLAEEK.N                                                 | 1221.38456 | 1 | 9.33E-04 | 0.34  | 2.24   | -     | 432.6    |
| AHQ-3-2, 2582 - 2654        | R.KFDQLLAEEK.N                                                 | 1221.38456 | 2 | 2.44E-05 | 0.87  | 3.22   | -     | 960.9    |
| AHQ-3-1, 2896               | R.KFDQLLAEEK.N                                                 | 1221.38456 | 2 | 4.60E-04 | 0.89  | 3.31   | -     | 1110.5   |
| AHQ-3-2, 5387               | K.LQQLFNHTM*FILEQEEYQR.E                                       | 2484.77198 | 2 | 3.48E-04 | 0.77  | 2.97   | -     | 762.5    |
| AHQ-3-2, 5518 - 5521        | K.LQQLFNHTM*FILEQEEYQR.E                                       | 2484.77198 | 2 | 1.34E-08 | 0.96  | 5.11   | -     | 1025.3   |
| AHQ-3-2, 5633               | K.LQQLFNHTM*FILEQEEYQR.E                                       | 2484.77198 | 2 | 8.55E-04 | 0.70  | 2.60   | -     | 584.9    |
| AHQ-3-1, 5480               | K.LQQLFNHTM*FILEQEEYQR.E                                       | 2484.77198 | 3 | 1.01E-05 | 0.97  | 5.45   | -     | 1928.9   |
| AHQ-3-3, 5360 - 5370        | K.LQQLFNHTM*FILEQEEYQR.E                                       | 2484.77198 | 3 | 7.82E-06 | 0.98  | 5.47   | -     | 2744.3   |
| AHQ-3-5, 5848 - 5853        | K.LQQLFNHTM*FILEQEEYQR.E                                       | 2468.77258 | 2 | 1.10E-09 | 0.98  | 6.14   | -     | 1728.0   |
| AHQ-3-5, 6223               | K.LQQLFNHTM*FILEQEEYQR.E                                       | 2468.77258 | 3 | 4.43E-04 | 0.81  | 3.87   | -     | 565.2    |
| AHQ-3-2, 6194 - 6219        | K.LQQLFNHTM*FILEQEEYQR.E                                       | 2468.77258 | 2 | 8.48E-09 | 0.99  | 6.58   | -     | 2531.2   |
| AHQ-3-2, 6289 - 6359        | K.LQQLFNHTM*FILEQEEYQR.E                                       | 2468.77258 | 2 | 6.71E-11 | 0.98  | 6.29   | -     | 1577.0   |
| AHQ-3-3, 6190               | K.LQQLFNHTM*FILEQEEYQR.E                                       | 2468.77258 | 3 | 1.11E-10 | 0.98  | 7.03   | -     | 2446.7   |
| AHQ-3-2, 6523               | K.LQQLFNHTM*FILEQEEYQR.E                                       | 2468.77258 | 2 | 1.62E-10 | 0.93  | 3.58   | -     | 1324.0   |
| AHQ-3-2, 6530               | K.LQQLFNHTM*FILEQEEYQR.E                                       | 2468.77258 | 3 | 1.51E-13 | 0.97  | 6.07   | -     | 2293.6   |
| AHQ-3-3, 6184 - 6252        | K.LQQLFNHTM*FILEQEEYQR.E                                       | 2468.77258 | 2 | 1.01E-04 | 0.93  | 3.73   | -     | 1399.8   |
| AHQ-3-3, 6356               | K.LQQLFNHTM*FILEQEEYQR.E                                       | 2484.77198 | 2 | 3.38E-04 | 0.64  | 2.67   | -     | 515.8    |
| AHQ-3-5, 6252 - 6320        | K.LQQLFNHTM*FILEQEEYQR.E                                       | 2468.77258 | 2 | 3.16E-05 | 0.94  | 4.06   | -     | 1363.2   |
| AHQ-3-1, 6250               | K.LQQLFNHTM*FILEQEEYQR.E                                       | 2468.77258 | 3 | 6.63E-06 | 0.97  | 5.64   | -     | 2077.3   |
| AHQ-3-2, 5389               | K.LQQLFNHTM*FILEQEEYQR.E                                       | 2484.77198 | 3 | 3.43E-09 | 0.98  | 6.84   | -     | 2109.3   |
| AHQ-3-1, 5593               | K.LQQLFNHTM*FILEQEEYQR.E                                       | 2484.77198 | 2 | 1.25E-05 | 0.68  | 2.90   | -     | 538.4    |
| AHQ-3-3, 5482               | K.LQQLFNHTM*FILEQEEYQR.E                                       | 2484.77198 | 3 | 1.49E-09 | 0.97  | 5.41   | -     | 1721.9   |
| AHQ-3-2, 2581               | R.NCAAYLK.L                                                    | 840.96726  | 1 | 8.21E-04 | 0.84  | 2.66   | -     | 852.6    |
| AHQ-3-3, 1938 - 2017        | R.NCAAYLK.L                                                    | 840.96726  | 1 | 7.06E-04 | 0.34  | 2.20   | -     | 379.2    |
| AHQ-3-9, 5727               | K.QLLQANPILEAFGNAK.T                                           | 1727.98540 | 2 | 3.78E-04 | 0.81  | 3.36   | -     | 619.9    |
| AHQ-3-6, 6111               | K.QLLQANPILEAFGNAK.T                                           | 1727.98540 | 2 | 6.74E-08 | 0.94  | 4.13   | -     | 956.9    |
| AHQ-3-1, 6334 - 6405        | K.QLLQANPILEAFGNAK.T                                           | 1727.98540 | 2 | 1.99E-07 | 0.95  | 3.73   | -     | 1442.1   |
| AHQ-3-2, 6597               | K.QLLQANPILEAFGNAK.T                                           | 1727.98540 | 2 | 2.10E-12 | 0.93  | 4.37   | -     | 823.2    |
| AHQ-3-2, 6379 - 6450        | K.QLLQANPILEAFGNAK.T                                           | 1727.98540 | 2 | 3.17E-10 | 0.96  | 4.89   | -     | 1002.8   |
| AHQ-3-3, 6412               | K.QLLQANPILEAFGNAK.T                                           | 1727.98540 | 2 | 1.63E-04 | 0.95  | 4.25   | -     | 988.9    |
| AHQ-3-3, 6570               | K.QLLQANPILEAFGNAK.T                                           | 1727.98540 | 2 | 5.25E-09 | 0.94  | 4.41   | -     | 860.0    |
| AHQ-3-1, 6474               | K.QLLQANPILEAFGNAK.T                                           | 1727.98540 | 2 | 4.38E-05 | 0.91  | 3.79   | -     | 716.1    |
| AHQ-3-5, 6179 - 6247        | K.QLLQANPILEAFGNAK.T                                           | 1727.98540 | 2 | 6.80E-09 | 0.96  | 4.45   | -     | 1169.4   |
| AHQ-3-1, 6581               | K.QLLQANPILEAFGNAK.T                                           | 1727.98540 | 2 | 2.37E-06 | 0.94  | 4.33   | -     | 849.3    |
| AHQ-3-4, 6574 - 6645        | K.QLLQANPILEAFGNAK.T                                           | 1727.98540 | 2 | 1.14E-04 | 0.91  | 3.81   | -     | 937.3    |
| AHQ-3-4, 6392 - 6398        | K.QLLQANPILEAFGNAK.T                                           | 1727.98540 | 2 | 1.36E-06 | 0.94  | 4.71   | -     | 726.3    |
| AHQ-3-7, 5990               | K.QLLQANPILEAFGNAK.T                                           | 1727.98540 | 2 | 6.93E-04 | 0.87  | 2.92   | -     | 879.4    |
| AHQ-3-2, 5933 - 6005        | K.TQLEELDELQATEDAK.L                                           | 1963.04334 | 2 | 1.02E-07 | 0.98  | 6.49   | -     | 2078.2   |
| AHQ-3-2, 4166               | K.TQLEELDELQATEDAK.L                                           | 1963.04334 | 2 | 2.85E-11 | 0.97  | 5.60   | -     | 1379.8   |
| AHQ-3-5, 5652 - 5723        | K.TQLEELDELQATEDAK.L                                           | 1963.04334 | 2 | 1.95E-08 | 0.98  | 6.39   | -     | 1835.1   |
| AHQ-3-2, 5947 - 5961        | K.TQLEELDELQATEDAK.L                                           | 1963.04334 | 3 | 1.60E-04 | 0.96  | 5.53   | -     | 1139.9   |
| AHQ-3-2, 6078               | K.TQLEELDELQATEDAK.L                                           | 1963.04334 | 2 | 7.04E-05 | 0.89  | 3.93   | -     | 598.9    |
| AHQ-3-2, 6165               | K.TQLEELDELQATEDAK.L                                           | 1963.04334 | 2 | 6.17E-06 | 0.96  | 4.77   | -     | 1447.1   |
| AHQ-3-3, 6130 - 6142        | K.TQLEELDELQATEDAK.L                                           | 1963.04334 | 2 | 1.34E-07 | 0.92  | 4.30   | -     | 809.5    |
| AHQ-3-1, 5934               | K.TQLEELDELQATEDAK.L                                           | 1963.04334 | 3 | 6.19E-07 | 0.96  | 5.12   | -     | 1394.9   |
| AHQ-3-6, 5605 - 5613        | K.TQLEELDELQATEDAK.L                                           | 1963.04334 | 2 | 3.41E-07 | 0.99  | 7.27   | -     | 2441.4   |
| AHQ-3-3, 5896               | K.TQLEELDELQATEDAK.L                                           | 1963.04334 | 3 | 1.47E-04 | 0.90  | 3.99   | -     | 1019.8   |
| AHQ-3-7, 5590               | K.TQLEELDELQATEDAK.L                                           | 1963.04334 | 2 | 1.60E-09 | 0.97  | 5.71   | -     | 1398.9   |
| AHQ-3-4, 5844               | K.TQLEELDELQATEDAK.L                                           | 1963.04334 | 2 | 4.56E-05 | 0.95  | 4.91   | -     | 1208.3   |
| AHQ-3-3, 5880 - 5958        | K.TQLEELDELQATEDAK.L                                           | 1963.04334 | 2 | 6.56E-07 | 0.96  | 4.78   | -     | 1513.5   |
| gj 11761631 ref NP_005132.1 | fibrinogen, beta chain preproprotein [Homo sapiens]            |            |   | 1.62E-13 | 23.15 | 270.26 | 48.30 | 55901.8  |
| AHQ-3-6, 2085 - 2091        | K.AHYGGFTVQNEANK.Y                                             | 1536.63020 | 2 | 3.61E-06 | 0.92  | 4.40   | -     | 923.9    |
| AHQ-3-6, 2253               | K.AHYGGFTVQNEANK.Y                                             | 1536.63020 | 2 | 1.56E-06 | 0.95  | 4.21   | -     | 1339.8   |
| AHQ-3-7, 2216               | K.AHYGGFTVQNEANK.Y                                             | 1536.63020 | 2 | 6.31E-08 | 0.89  | 3.54   | -     | 806.9    |
| AHQ-3-7, 2019               | K.AHYGGFTVQNEANK.Y                                             | 1536.63020 | 2 | 1.53E-04 | 0.90  | 3.73   | -     | 928.9    |
| AHQ-3-13, 4109              | K.DNENVVNEYSSELEK.H                                            | 1769.80167 | 2 | 1.61E-04 | 0.75  | 3.24   | -     | 710.0    |
| AHQ-3-7, 3395               | K.DNENVVNEYSSELEK.H                                            | 1769.80167 | 2 | 9.47E-09 | 0.77  | 3.36   | -     | 558.5    |
| AHQ-3-11, 3954 - 3970       | K.DNENVVNEYSSELEK.H                                            | 1769.80167 | 2 | 8.49E-05 | 0.80  | 3.36   | -     | 868.4    |
| AHQ-3-7, 4043 - 4059        | K.DNENVVNEYSSELEK.H                                            | 1769.80167 | 2 | 6.06E-04 | 0.82  | 4.17   | -     | 452.9    |
| AHQ-3-9, 3856 - 3857        | K.DNENVVNEYSSELEK.H                                            | 1769.80167 | 2 | 1.23E-05 | 0.91  | 4.28   | -     | 691.8    |
| AHQ-3-6, 4339               | K.DNENVVNEYSSELEK.H                                            | 1769.80167 | 2 | 1.63E-04 | 0.59  | 3.02   | -     | 526.8    |
| AHQ-3-6, 4070 - 4093        | K.DNENVVNEYSSELEK.H                                            | 1769.80167 | 2 | 1.68E-09 | 0.94  | 4.58   | -     | 1020.2   |
| AHQ-3-1, 4377               | K.DNENVVNEYSSELEK.H                                            | 1769.80167 | 2 | 3.57E-06 | 0.93  | 4.08   | -     | 1055.7   |
| AHQ-3-6, 3413               | K.EDGGGWVYNNR.C                                                | 1240.26508 | 2 | 1.45E-04 | 0.73  | 2.74   | -     | 493.6    |
| AHQ-3-6, 3151 - 3191        | R.EEAPSLRPAPPISGGGYR.A                                         | 1952.15981 | 2 | 4.79E-06 | 0.18  | 2.57   | -     | 217.6    |
| AHQ-3-7, 3083 - 3090        | R.EEAPSLRPAPPISGGGYR.A                                         | 1952.15981 | 3 | 9.09E-04 | 0.82  | 3.69   | -     | 637.0    |
| AHQ-3-7, 3358 - 3359        | K.GGETSEM*YLIQPDSSVKPYR.V                                      | 2274.49313 | 2 | 6.37E-06 | 0.77  | 3.81   | -     | 320.7    |
| AHQ-3-8, 3704               | K.GGETSEM*YLIQPDSSVKPYR.V                                      | 2258.49373 | 2 | 3.31E-06 | 0.86  | 3.65   | -     | 678.8    |
| AHQ-3-6, 3427               | K.GGETSEM*YLIQPDSSVKPYR.V                                      | 2274.49313 | 2 | 4.31E-05 | 0.75  | 3.45   | -     | 444.0    |
| AHQ-3-6, 3878               | K.GGETSEM*YLIQPDSSVKPYR.V                                      | 2258.49373 | 2 | 2.53E-04 | 0.87  | 4.17   | -     | 562.3    |
| AHQ-3-9, 3635 - 3639        | K.GGETSEM*YLIQPDSSVKPYR.V                                      | 2258.49373 | 2 | 9.10E-08 | 0.89  | 4.07   | -     | 716.2    |
| AHQ-3-7, 3839 - 3856        | K.GGETSEM*YLIQPDSSVKPYR.V                                      | 2258.49373 | 2 | 1.78E-04 | 0.87  | 3.83   | -     | 588.8    |
| AHQ-3-6, 3879 - 3947        | K.GGETSEM*YLIQPDSSVKPYR.V                                      | 2258.49373 | 3 | 3.00E-07 | 0.87  | 3.87   | -     | 1021.0   |
| AHQ-3-6, 4194               | K.HGTDGDDVVMWVWV.G                                             | 1545.70374 | 2 | 1.49E-06 | 0.97  | 4.41   | -     | 1546.5   |
| AHQ-3-6, 3993 - 3997        | K.HGTDGDDVVMWVWV.G                                             | 1545.70374 | 2 | 6.07E-12 | 0.97  | 4.90   | -     | 1618.2   |
| AHQ-3-7, 3154               | K.HGTDGDDVVMWVWV.G                                             | 1561.70314 | 2 | 1.92E-04 | 0.98  | 5.25   | -     | 2064.6   |

|                             |                                                                         |            |   |          |       |        |       |          |
|-----------------------------|-------------------------------------------------------------------------|------------|---|----------|-------|--------|-------|----------|
| AHQ-3-6, 3225               | K.HGTDGQVWVM* <i>NWK.G</i>                                              | 1561.70314 | 2 | 1.47E-05 | 0.94  | 4.18   | -     | 1123.1   |
| AHQ-3-7, 3916               | K.HGTDGQVWVM* <i>NWK.G</i>                                              | 1545.70374 | 2 | 1.19E-07 | 0.90  | 3.70   | -     | 839.6    |
| AHQ-3-11, 3998              | K.HGTDGQVWVM* <i>NWK.G</i>                                              | 1545.70374 | 2 | 2.06E-04 | 0.96  | 3.98   | -     | 1804.4   |
| AHQ-3-8, 3770 - 3845        | K.HGTDGQVWVM* <i>NWK.G</i>                                              | 1545.70374 | 2 | 9.07E-10 | 0.97  | 4.52   | -     | 1267.0   |
| AHQ-3-6, 6317               | R.KAPDAGGCLHADPDLGVLCPGQGLQEQALLQQRPIR.N                                | 4089.58482 | 3 | 3.00E-05 | 0.80  | 3.90   | -     | 297.9    |
| AHQ-3-6, 3186               | R.KGGETSEMYLIQPDSSVK.P                                                  | 1970.19049 | 2 | 1.70E-04 | 0.89  | 3.96   | -     | 755.2    |
| AHQ-3-7, 3302               | R.KGGETSEMYLIQPDSSVKPYR.V                                               | 2386.66664 | 3 | 1.27E-05 | 0.91  | 4.65   | -     | 703.8    |
| AHQ-3-6, 3323 - 3395        | R.KGGETSEMYLIQPDSSVKPYR.V                                               | 2386.66664 | 3 | 4.00E-08 | 0.82  | 4.24   | -     | 429.5    |
| AHQ-3-8, 2981               | R.KGGETSEMYLIQPDSSVKPYR.V                                               | 2386.66664 | 3 | 1.39E-04 | 0.92  | 4.49   | -     | 956.2    |
| AHQ-3-6, 3387               | R.KGGETSEMYLIQPDSSVKPYR.V                                               | 2386.66664 | 2 | 2.73E-07 | 0.95  | 5.19   | -     | 961.3    |
| AHQ-3-6, 2519 - 2529        | K.KREEAPSLRPAPPISGGYR.A                                                 | 2236.51908 | 3 | 8.76E-08 | 0.87  | 3.46   | -     | 1195.9   |
| AHQ-3-6, 6957               | R.MGPTELLIEMEDWK.G                                                      | 1692.97836 | 2 | 9.36E-06 | 0.89  | 3.46   | -     | 1095.3   |
| AHQ-3-10, 6312              | R.MGPTELLIEMEDWK.G                                                      | 1692.97836 | 2 | 5.82E-05 | 0.91  | 3.69   | -     | 1219.4   |
| AHQ-3-11, 6474              | R.MGPTELLIEMEDWK.G                                                      | 1692.97836 | 2 | 5.49E-06 | 0.95  | 4.41   | -     | 1226.8   |
| AHQ-3-6, 5227 - 5294        | R.MGPTELLIEM*EDWK.G                                                     | 1708.97776 | 2 | 3.59E-04 | 0.89  | 3.82   | -     | 720.5    |
| AHQ-3-7, 4647               | R.M*GPTELLIEM*EDWK.G                                                    | 1724.97716 | 2 | 2.75E-05 | 0.92  | 4.27   | -     | 652.7    |
| AHQ-3-7, 6950 - 6962        | R.MGPTELLIEMEDWK.G                                                      | 1692.97836 | 2 | 4.94E-05 | 0.96  | 4.56   | -     | 1435.3   |
| AHQ-3-7, 6342               | R.M*GPTELLIEMEDWK.G                                                     | 1708.97776 | 2 | 6.96E-09 | 0.95  | 4.47   | -     | 1285.9   |
| AHQ-3-6, 6433 - 6438        | R.M*GPTELLIEMEDWK.G                                                     | 1708.97776 | 2 | 5.73E-07 | 0.97  | 5.16   | -     | 1664.2   |
| AHQ-3-6, 5674               | R.M*GPTELLIEMEDWKGD.K.V                                                 | 2009.29009 | 2 | 1.96E-04 | 0.81  | 3.82   | -     | 377.8    |
| AHQ-3-6, 5301 - 5317        | K.NYCGLPGEYWLGNDK.I                                                     | 1787.92994 | 2 | 1.03E-09 | 0.91  | 4.13   | -     | 388.2    |
| AHQ-3-7, 5288 - 5368        | K.NYCGLPGEYWLGNDK.I                                                     | 1787.92994 | 2 | 3.54E-07 | 0.91  | 3.94   | -     | 490.0    |
| AHQ-3-6, 5826               | K.NYCGLPGEYWLGNDK.I                                                     | 1787.92994 | 2 | 6.60E-09 | 0.90  | 3.95   | -     | 472.8    |
| AHQ-3-6, 5166 - 5245        | K.NYCGLPGEYWLGNDK.I                                                     | 1787.92994 | 2 | 1.79E-06 | 0.86  | 4.12   | -     | 320.7    |
| AHQ-3-7, 5946 - 5948        | K.NYCGLPGEYWLGNDKISQLTR.M                                               | 2486.74455 | 2 | 2.72E-06 | 0.88  | 4.32   | -     | 457.5    |
| AHQ-3-6, 6001               | K.NYCGLPGEYWLGNDKISQLTR.M                                               | 2486.74455 | 2 | 9.32E-09 | 0.85  | 3.71   | -     | 436.2    |
| AHQ-3-6, 2813 - 2893        | K.REEAPSLRPAPPISGGYR.A                                                  | 2108.34617 | 3 | 6.80E-06 | 0.96  | 4.50   | -     | 1862.0   |
| AHQ-3-7, 2736               | K.REEAPSLRPAPPISGGYR.A                                                  | 2108.34617 | 3 | 5.03E-07 | 0.96  | 4.80   | -     | 1692.4   |
| AHQ-3-6, 4722               | R.TMTHNGMFFSTYDR.D                                                      | 1822.05792 | 2 | 3.23E-04 | 0.91  | 3.57   | -     | 926.3    |
| AHQ-3-6, 3709 - 3761        | R.TPCTVSCNIPVVSQK.E                                                     | 1621.85811 | 2 | 1.23E-05 | 0.91  | 3.81   | -     | 813.1    |
| AHQ-3-8, 3604               | R.TPCTVSCNIPVVSQK.E                                                     | 1621.85811 | 2 | 3.79E-05 | 0.81  | 3.37   | -     | 535.5    |
| AHQ-3-7, 3670 - 3698        | R.TPCTVSCNIPVVSQK.E                                                     | 1621.85811 | 2 | 1.22E-08 | 0.62  | 2.61   | -     | 422.1    |
| AHQ-3-7, 4811               | R.TPCTVSCNIPVVSQKCEEIIIR.K                                              | 2552.88440 | 2 | 4.43E-05 | 0.47  | 2.73   | -     | 289.5    |
| AHQ-3-7, 4939 - 4966        | R.TPCTVSCNIPVVSQKCEEIIIR.K                                              | 2552.88440 | 3 | 5.99E-04 | 0.75  | 3.38   | -     | 808.0    |
| AHQ-3-7, 4784 - 4856        | R.TPCTVSCNIPVVSQKCEEIIIR.K                                              | 2552.88440 | 3 | 6.55E-13 | 0.93  | 4.36   | -     | 1277.7   |
| AHQ-3-8, 4665               | R.TPCTVSCNIPVVSQKCEEIIIR.K                                              | 2552.88440 | 2 | 1.43E-04 | 0.48  | 2.58   | -     | 340.5    |
| AHQ-3-6, 4871 - 4942        | R.TPCTVSCNIPVVSQKCEEIIIR.K                                              | 2552.88440 | 2 | 1.08E-06 | 0.61  | 2.92   | -     | 330.2    |
| AHQ-3-6, 4874 - 4919        | R.TPCTVSCNIPVVSQKCEEIIIR.K                                              | 2552.88440 | 3 | 1.62E-13 | 0.94  | 4.52   | -     | 1300.1   |
| AHQ-3-6, 4969               | R.TPCTVSCNIPVVSQKCEEIIIR.K                                              | 2552.88440 | 3 | 8.29E-09 | 0.95  | 4.64   | -     | 1459.1   |
| AHQ-3-7, 4672 - 4676        | R.TPCTVSCNIPVVSQKCEEIIIR.K                                              | 2552.88440 | 3 | 1.79E-04 | 0.81  | 3.25   | -     | 867.3    |
| AHQ-3-8, 4660 - 4673        | R.TPCTVSCNIPVVSQKCEEIIIR.K                                              | 2552.88440 | 3 | 7.55E-10 | 0.94  | 4.74   | -     | 1229.8   |
| AHQ-3-6, 4762               | R.TPCTVSCNIPVVSQKCEEIIIR.K                                              | 2552.88440 | 3 | 1.01E-07 | 0.94  | 5.02   | -     | 1191.9   |
| AHQ-3-8, 4397               | R.VYCDMNTENGWTVIQNR.Q                                                   | 2159.34553 | 2 | 1.50E-10 | 0.94  | 4.68   | -     | 967.1    |
| AHQ-3-6, 4111 - 4186        | R.VYCDMNTENGWTVIQNR.Q                                                   | 2175.34493 | 2 | 5.71E-05 | 0.79  | 3.59   | -     | 470.5    |
| AHQ-3-7, 4675               | R.VYCDMNTENGWTVIQNR.Q                                                   | 2159.34553 | 2 | 9.15E-07 | 0.95  | 4.40   | -     | 1206.6   |
| AHQ-3-7, 4506 - 4574        | R.VYCDMNTENGWTVIQNR.Q                                                   | 2159.34553 | 2 | 4.99E-07 | 0.96  | 4.69   | -     | 1290.6   |
| AHQ-3-9, 3749               | R.VYCDMNTENGWTVIQNR.Q                                                   | 2175.34493 | 2 | 5.54E-06 | 0.70  | 3.34   | -     | 394.5    |
| AHQ-3-6, 4661 - 4695        | R.VYCDMNTENGWTVIQNR.Q                                                   | 2159.34553 | 2 | 9.82E-09 | 0.96  | 5.03   | -     | 1252.2   |
| AHQ-3-9, 4272 - 4281        | R.VYCDMNTENGWTVIQNR.Q                                                   | 2159.34553 | 2 | 5.97E-06 | 0.94  | 4.47   | -     | 908.2    |
| AHQ-3-6, 4525 - 4594        | R.VYCDMNTENGWTVIQNR.Q                                                   | 2159.34553 | 2 | 2.75E-11 | 0.95  | 4.29   | -     | 1201.1   |
| AHQ-3-7, 3943 - 4011        | R.VYCDMNTENGWTVIQNR.Q                                                   | 2175.34493 | 2 | 2.85E-08 | 0.91  | 4.11   | -     | 730.7    |
| AHQ-3-11, 4822 - 4832       | R.YYWGQYTWDM*AK.H                                                       | 1669.84009 | 2 | 1.12E-07 | 0.92  | 3.37   | -     | 986.3    |
| AHQ-3-7, 4298               | R.YYWGQYTWDM*AK.H                                                       | 1685.83949 | 2 | 4.24E-04 | 0.76  | 2.74   | -     | 737.6    |
| AHQ-3-12, 4452              | R.YYWGQYTWDM*AK.H                                                       | 1685.83949 | 2 | 8.79E-05 | 0.89  | 3.04   | -     | 1106.5   |
| AHQ-3-12, 5052              | R.YYWGQYTWDM*AK.H                                                       | 1669.84009 | 2 | 4.38E-04 | 0.89  | 3.48   | -     | 882.6    |
| AHQ-3-6, 5013 - 5025        | R.YYWGQYTWDM*AK.H                                                       | 1669.84009 | 2 | 1.46E-06 | 0.96  | 4.44   | -     | 1158.4   |
| AHQ-3-14, 5579 - 5656       | R.YYWGQYTWDM*AK.H                                                       | 1685.83949 | 2 | 1.85E-09 | 0.98  | 4.51   | -     | 1878.4   |
| AHQ-3-14-, 4455 - 4489      | R.YYWGQYTWDM*AK.H                                                       | 1685.83949 | 2 | 1.07E-05 | 0.97  | 4.46   | -     | 1436.0   |
| AHQ-3-6, 4379               | R.YYWGQYTWDM*AK.H                                                       | 1685.83949 | 2 | 4.33E-06 | 0.94  | 3.71   | -     | 988.4    |
| gi 29741246 ref XP_294070.1 | similar to Glyceraldehyde 3-phosphate dehydrogenase, liver (GAPDH) [Ho  |            |   | 1.75E-13 | 4.34  | 50.31  | 14.60 | 35302.0  |
| AHQ-3-13-, 5299 - 5323      | K.AENGLKLVINGNPITIFQER.D                                                | 2114.39062 | 2 | 1.58E-07 | 0.72  | 3.57   | -     | 389.6    |
| AHQ-3-9, 5219 - 5291        | K.LVINGNPITIFQER.D                                                      | 1614.87029 | 2 | 3.18E-09 | 0.93  | 4.08   | -     | 1012.1   |
| AHQ-3-9, 5307 - 5387        | K.LVINGNPITIFQER.D                                                      | 1614.87029 | 2 | 4.48E-09 | 0.94  | 3.94   | -     | 974.3    |
| AHQ-3-13-, 5581 - 5657      | K.LVINGNPITIFQER.D                                                      | 1614.87029 | 2 | 1.15E-10 | 0.95  | 4.36   | -     | 1222.7   |
| AHQ-3-10, 5159 - 5235       | K.LVINGNPITIFQER.D                                                      | 1614.87029 | 2 | 8.13E-04 | 0.62  | 2.63   | -     | 667.3    |
| AHQ-3-11, 5336 - 5406       | K.LVINGNPITIFQER.D                                                      | 1614.87029 | 2 | 5.69E-04 | 0.77  | 2.86   | -     | 796.5    |
| AHQ-3-14-, 5581 - 5648      | K.LVINGNPITIFQER.D                                                      | 1614.87029 | 2 | 1.75E-13 | 0.95  | 3.98   | -     | 1404.2   |
| AHQ-3-13, 5693              | K.LVINGNPITIFQER.D                                                      | 1614.87029 | 2 | 5.55E-11 | 0.93  | 3.75   | -     | 1023.4   |
| AHQ-3-12, 5746              | K.LVINGNPITIFQER.D                                                      | 1614.87029 | 2 | 2.50E-07 | 0.88  | 3.69   | -     | 674.8    |
| AHQ-3-12, 5619 - 5684       | K.LVINGNPITIFQER.D                                                      | 1614.87029 | 2 | 4.65E-09 | 0.93  | 3.72   | -     | 1010.1   |
| AHQ-3-13, 5559 - 5625       | K.LVINGNPITIFQER.D                                                      | 1614.87029 | 2 | 1.02E-10 | 0.93  | 3.67   | -     | 983.1    |
| AHQ-3-9, 4819 - 4889        | K.LVINGNPITIFQERDPSK.I                                                  | 2042.32440 | 2 | 2.14E-07 | 0.84  | 3.75   | -     | 584.7    |
| AHQ-3-11, 6091              | K.VLHDFGIVKGLM*TTVHAITATQK.T                                            | 2612.04471 | 2 | 2.85E-05 | 0.87  | 4.45   | -     | 1067.8   |
| AHQ-3-9, 5968 - 6048        | K.VLHDFGIVKGLM*TTVHAITATQK.T                                            | 2612.04471 | 2 | 1.20E-04 | 0.89  | 4.07   | -     | 975.9    |
| AHQ-3-11, 6654              | K.VLHDFGIVKGLM*TTVHAITATQK.T                                            | 2596.04531 | 3 | 1.09E-10 | 0.95  | 6.22   | -     | 1548.3   |
| AHQ-3-11, 6650              | K.VLHDFGIVKGLM*TTVHAITATQK.T                                            | 2596.04531 | 2 | 1.12E-05 | 0.91  | 3.98   | -     | 1537.3   |
| gi 4557305 ref NP_000025.1  | aldolase A; fructose-bisphosphate aldolase; Aldolase A, fructose-bispho |            |   | 1.93E-13 | 8.86  | 100.26 | 50.30 | 39419.7  |
| AHQ-3-8, 3749               | K.ALSDDHHIYLEGTLTKPNMVTGPHACTQK.F                                       | 3134.57879 | 3 | 9.04E-07 | 0.96  | 5.30   | -     | 1365.4   |
| AHQ-3-9, 5661 - 5723        | K.CPLLKPWALTFYSYGR.A                                                    | 1811.13929 | 2 | 1.34E-05 | 0.60  | 3.05   | -     | 303.5    |
| AHQ-3-11, 5772 - 5803       | K.CPLLKPWALTFYSYGR.A                                                    | 1811.13929 | 2 | 1.76E-06 | 0.75  | 3.11   | -     | 374.1    |
| AHQ-3-8, 5851 - 5920        | K.CPLLKPWALTFYSYGR.A                                                    | 1811.13929 | 2 | 5.78E-05 | 0.66  | 3.07   | -     | 399.5    |
| AHQ-3-8, 3840               | K.FSHEEIAMATVTLALR.R                                                    | 1676.91875 | 2 | 1.05E-08 | 0.95  | 4.12   | -     | 1491.4   |
| AHQ-3-9, 3889               | K.FSHEEIAMATVTLALR.R                                                    | 1676.91875 | 2 | 4.22E-09 | 0.96  | 4.55   | -     | 1325.2   |
| AHQ-3-8, 2549               | K.GILAADESTGSIAR.R                                                      | 1333.47008 | 1 | 3.69E-06 | 0.58  | 2.91   | -     | 388.0    |
| AHQ-3-9, 2588               | K.GILAADESTGSIAR.R                                                      | 1333.47008 | 2 | 1.67E-04 | 0.93  | 3.39   | -     | 1321.9   |
| AHQ-3-13-, 2870 - 2871      | K.GILAADESTGSIAR.R                                                      | 1333.47008 | 2 | 3.09E-11 | 0.97  | 4.15   | -     | 1750.4   |
| AHQ-3-8, 2505 - 2548        | K.GILAADESTGSIAR.R                                                      | 1333.47008 | 2 | 7.29E-10 | 0.97  | 4.77   | -     | 1686.7   |
| AHQ-3-13, 2902              | K.GILAADESTGSIAR.R                                                      | 1333.47008 | 2 | 4.05E-11 | 0.97  | 4.78   | -     | 1857.3   |
| AHQ-3-9, 4339               | K.GVVPLAGTNGETTQGLDGLSER.C                                              | 2273.44329 | 2 | 4.61E-12 | 0.74  | 4.39   | -     | 525.2    |
| AHQ-3-8, 4360 - 4427        | K.GVVPLAGTNGETTQGLDGLSER.C                                              | 2273.44329 | 2 | 2.18E-13 | 0.81  | 4.88   | -     | 544.4    |
| AHQ-3-10, 4272 - 4275       | K.GVVPLAGTNGETTQGLDGLSER.C                                              | 2273.44329 | 2 | 4.52E-07 | 0.66  | 4.36   | -     | 274.1    |
| AHQ-3-9, 4005 - 4077        | K.GVVPLAGTNGETTQGLDGLSER.C                                              | 2273.44329 | 2 | 1.64E-06 | 0.78  | 4.27   | -     | 587.9    |
| AHQ-3-9, 4177 - 4249        | K.GVVPLAGTNGETTQGLDGLSER.C                                              | 2273.44329 | 2 | 8.41E-09 | 0.74  | 4.27   | -     | 438.3    |
| AHQ-3-8, 4892               | K.IGEHTPSALAIMENANVLR.Y                                                 | 2108.40788 | 2 | 6.34E-07 | 0.94  | 4.72   | -     | 803.7    |
| AHQ-3-9, 4667 - 4677        | K.IGEHTPSALAIMENANVLR.Y                                                 | 2108.40788 | 2 | 2.00E-06 | 0.92  | 4.09   | -     | 782.2    |
| AHQ-3-9, 4959 - 4968        | K.IGEHTPSALAIMENANVLR.Y                                                 | 2108.40788 | 2 | 1.03E-06 | 0.95  | 4.68   | -     | 827.3    |
| AHQ-3-8, 4559               | K.IGEHTPSALAIMENANVLR.Y                                                 | 2108.40788 | 2 | 1.93E-13 | 0.97  | 5.02   | -     | 1404.4   |
| AHQ-3-8, 6084               | R.VNPGIGGVILFHETLYQK.A                                                  | 2090.43072 | 2 | 3.57E-05 | 0.91  | 3.88   | -     | 748.7    |
| AHQ-3-8, 5875 - 5884        | R.YASICQQNGIVPIVEPEILPDGDHDLK.R                                         | 3023.36334 | 3 | 1.05E-05 | 0.86  | 4.76   | -     | 496.8    |
| AHQ-3-11, 5356              | R.YASICQQNGIVPIVEPEILPDGDHDLK.R                                         | 3179.54969 | 3 | 9.79E-05 | 0.81  | 3.98   | -     | 557.4    |
| AHQ-3-8, 5976               | K.YTPSGQAGAAASESLFVSNHAY                                                | 2229.34753 | 2 | 4.59E-07 | 0.83  | 3.52   | -     | 492.8    |
| AHQ-3-8, 4361               | K.YTPSGQAGAAASESLFVSNHAY                                                | 2229.34753 | 2 | 4.75E-12 | 0.87  | 3.80   | -     | 724.5    |
| AHQ-3-8, 4588               | K.YTPSGQAGAAASESLFVSNHAY                                                | 2229.34753 | 2 | 1.77E-04 | 0.69  | 2.82   | -     | 481.5    |
| AHQ-3-8, 4132 - 4205        | K.YTPSGQAGAAASESLFVSNHAY                                                | 2229.34753 | 2 | 2.35E-07 | 0.92  | 4.51   | -     | 713.1    |
| AHQ-3-8, 5825               | K.YTPSGQAGAAASESLFVSNHAY                                                | 2229.34753 | 2 | 6.88E-04 | 0.34  | 2.58   | -     | 346.0    |
| AHQ-3-9, 4063               | K.YTPSGQAGAAASESLFVSNHAY                                                | 2229.34753 | 2 | 2.34E-05 | 0.58  | 2.67   | -     | 414.5    |
| gi 4501891 ref NP_001093.1  | actinin, alpha 1 [Homo sapiens]                                         |            |   | 2.93E-13 | 42.36 | 480.33 | 53.40 | 103056.9 |

|                       |                                              |            |   |          |      |      |   |        |
|-----------------------|----------------------------------------------|------------|---|----------|------|------|---|--------|
| AHQ-3-6, 7409         | R.AAPFNWMM*EGAMEDLQDTFIVHTIEEIQGLTTAHEQFK.A  | 4380.81962 | 3 | 1.36E-04 | 0.84 | 4.73 | - | 856.3  |
| AHQ-3-5, 7665 - 7667  | R.AAPFNWMM*EGAMEDLQDTFIVHTIEEIQGLTTAHEQFK.A  | 4364.82022 | 3 | 9.74E-11 | 0.95 | 6.21 | - | 1048.7 |
| AHQ-3-5, 7588 - 7609  | R.AAPFNWMM*EGAM*EDLQDTFIVHTIEEIQGLTTAHEQFK.A | 4380.81962 | 3 | 1.10E-07 | 0.87 | 5.60 | - | 902.7  |
| AHQ-3-6, 5215         | K.AGTQIENIEEDFRDGLK.L                        | 1936.06918 | 2 | 2.47E-05 | 0.70 | 3.61 | - | 782.1  |
| AHQ-3-5, 5257 - 5263  | K.AGTQIENIEEDFRDGLK.L                        | 1936.06918 | 2 | 1.22E-05 | 0.78 | 4.36 | - | 709.4  |
| AHQ-3-12, 5268        | K.AGTQIENIEEDFRDGLK.L                        | 1936.06918 | 2 | 1.01E-06 | 0.69 | 4.05 | - | 593.2  |
| AHQ-3-9, 4843 - 4849  | K.AGTQIENIEEDFRDGLK.L                        | 1936.06918 | 2 | 3.42E-04 | 0.42 | 3.50 | - | 245.8  |
| AHQ-3-9, 6023         | K.AIMTYVSSFYHAFSGAQK.A                       | 2009.27323 | 2 | 3.24E-07 | 0.88 | 3.89 | - | 625.1  |
| AHQ-3-5, 5433 - 5435  | K.AIM*TYVSSFYHAFSGAQK.A                      | 2025.27263 | 2 | 9.77E-08 | 0.93 | 4.56 | - | 763.0  |
| AHQ-3-6, 6439 - 6490  | K.AIMTYVSSFYHAFSGAQK.A                       | 2009.27323 | 2 | 3.44E-06 | 0.95 | 4.96 | - | 756.7  |
| AHQ-3-7, 6288         | K.AIMTYVSSFYHAFSGAQK.A                       | 2009.27323 | 2 | 1.00E-05 | 0.52 | 2.53 | - | 502.2  |
| AHQ-3-5, 6517 - 6585  | K.AIMTYVSSFYHAFSGAQK.A                       | 2009.27323 | 2 | 1.42E-07 | 0.96 | 5.05 | - | 992.0  |
| AHQ-3-5, 3287 - 3288  | R.ASFNFHFRDRHSGTLGPPEEFK.A                   | 2292.40855 | 2 | 1.23E-04 | 0.68 | 2.74 | - | 514.6  |
| AHQ-3-5, 3023         | R.ASFNFHFRDRHSGTLGPPEEFK.A                   | 2292.40855 | 3 | 1.49E-05 | 0.96 | 4.31 | - | 2219.3 |
| AHQ-3-6, 3003         | R.ASFNFHFRDRHSGTLGPPEEFK.A                   | 2292.40855 | 2 | 7.41E-04 | 0.81 | 3.26 | - | 691.9  |
| AHQ-3-4, 3229         | R.ASFNFHFRDRHSGTLGPPEEFK.A                   | 2292.40855 | 2 | 2.74E-04 | 0.71 | 3.19 | - | 397.8  |
| AHQ-3-5, 3293         | R.ASFNFHFRDRHSGTLGPPEEFK.A                   | 2292.40855 | 3 | 3.00E-05 | 0.93 | 4.04 | - | 1782.7 |
| AHQ-3-5, 1935         | K.ASIHEAWTDGK.E                              | 1215.29697 | 1 | 7.05E-07 | 0.74 | 3.01 | - | 547.8  |
| AHQ-3-5, 1869 - 1939  | K.ASIHEAWTDGK.E                              | 1215.29697 | 2 | 1.64E-04 | 0.92 | 3.57 | - | 1022.7 |
| AHQ-3-6, 1925         | K.ASIHEAWTDGK.E                              | 1215.29697 | 2 | 2.64E-09 | 0.64 | 2.57 | - | 724.6  |
| AHQ-3-6, 1922 - 1926  | K.ASIHEAWTDGK.E                              | 1215.29697 | 1 | 7.09E-06 | 0.39 | 2.00 | - | 619.4  |
| AHQ-3-5, 4995         | R.CQKICDQWDLNIGALTOQK.R                      | 2081.31600 | 2 | 1.47E-09 | 0.84 | 3.61 | - | 649.8  |
| AHQ-3-3, 5946         | K.DDPLTLNLTAFDVAEK.Y                         | 1763.88340 | 2 | 9.07E-06 | 0.88 | 3.67 | - | 860.2  |
| AHQ-3-5, 5271         | K.DDPLTLNLTAFDVAEK.Y                         | 1763.88340 | 2 | 3.24E-06 | 0.88 | 3.73 | - | 786.6  |
| AHQ-3-5, 5901         | K.DDPLTLNLTAFDVAEK.Y                         | 1763.88340 | 2 | 1.43E-05 | 0.88 | 3.52 | - | 886.5  |
| AHQ-3-5, 5791 - 5863  | K.DDPLTLNLTAFDVAEK.Y                         | 1763.88340 | 2 | 9.81E-11 | 0.97 | 5.44 | - | 1416.9 |
| AHQ-3-5, 6156 - 6157  | K.DDPLTLNLTAFDVAEK.Y                         | 1763.88340 | 2 | 1.02E-11 | 0.97 | 4.82 | - | 1496.8 |
| AHQ-3-6, 5671         | K.DDPLTLNLTAFDVAEK.Y                         | 1763.88340 | 2 | 7.02E-07 | 0.94 | 4.78 | - | 899.1  |
| AHQ-3-1, 5945         | K.DDPLTLNLTAFDVAEK.Y                         | 1763.88340 | 2 | 6.04E-06 | 0.74 | 3.18 | - | 504.1  |
| AHQ-3-4, 5901         | K.DDPLTLNLTAFDVAEK.Y                         | 1763.88340 | 2 | 1.61E-06 | 0.92 | 3.70 | - | 1052.4 |
| AHQ-3-6, 4794         | K.DGLGFCALIHR.H                              | 1260.44730 | 2 | 6.06E-09 | 0.93 | 2.88 | - | 1601.3 |
| AHQ-3-5, 4932         | K.DGLGFCALIHR.H                              | 1260.44730 | 2 | 1.33E-06 | 0.92 | 3.09 | - | 1234.5 |
| AHQ-3-5, 2273         | R.DHSGTLGPPEEFK.A                            | 1317.38606 | 1 | 5.06E-04 | 0.60 | 2.95 | - | 325.5  |
| AHQ-3-6, 2262         | R.DHSGTLGPPEEFK.A                            | 1317.38606 | 2 | 9.07E-05 | 0.92 | 3.23 | - | 985.3  |
| AHQ-3-5, 2269 - 2281  | R.DHSGTLGPPEEFK.A                            | 1317.38606 | 2 | 6.50E-05 | 0.92 | 3.47 | - | 924.2  |
| AHQ-3-5, 3671         | K.DYETATLSEIK.A                              | 1270.36761 | 2 | 6.24E-06 | 0.94 | 3.61 | - | 1289.4 |
| AHQ-3-4, 3486 - 3560  | R.ELPPDQAEYCIAR.M                            | 1563.71392 | 2 | 1.41E-05 | 0.55 | 2.86 | - | 318.9  |
| AHQ-3-5, 3471 - 3539  | R.ELPPDQAEYCIAR.M                            | 1563.71392 | 2 | 8.71E-08 | 0.65 | 2.60 | - | 224.4  |
| AHQ-3-13, 4331 - 4337 | R.ETADTDADQVMASFK.I                          | 1730.83208 | 2 | 7.62E-04 | 0.85 | 3.20 | - | 823.1  |
| AHQ-3-5, 4557         | R.ETADTDADQVMASFK.I                          | 1730.83208 | 2 | 2.84E-04 | 0.68 | 2.68 | - | 640.1  |
| AHQ-3-5, 4411 - 4436  | R.ETADTDADQVMASFK.I                          | 1730.83208 | 2 | 8.32E-11 | 0.95 | 4.14 | - | 1296.6 |
| AHQ-3-6, 4345 - 4362  | R.ETADTDADQVMASFK.I                          | 1730.83208 | 2 | 1.04E-06 | 0.96 | 4.50 | - | 1471.8 |
| AHQ-3-13, 4354        | R.ETADTDADQVMASFK.I                          | 1730.83208 | 2 | 4.24E-09 | 0.92 | 3.72 | - | 1194.7 |
| AHQ-3-4, 4565 - 4577  | R.ETADTDADQVMASFK.I                          | 1730.83208 | 2 | 4.66E-08 | 0.96 | 4.64 | - | 1225.8 |
| AHQ-3-11, 4192 - 4262 | R.ETADTDADQVMASFK.I                          | 1730.83208 | 2 | 1.04E-06 | 0.74 | 2.80 | - | 673.1  |
| AHQ-3-3, 4634         | R.ETADTDADQVMASFK.I                          | 1730.83208 | 2 | 1.76E-05 | 0.92 | 3.76 | - | 1030.6 |
| AHQ-3-14, 3949        | R.ETADTDADQVM*ASF.K.I                        | 1746.83148 | 2 | 5.08E-05 | 0.50 | 2.87 | - | 180.5  |
| AHQ-3-13, 3203        | R.ETADTDADQVM*ASF.K.I                        | 1746.83148 | 2 | 9.43E-09 | 0.96 | 5.11 | - | 1036.0 |
| AHQ-3-5, 2723 - 2724  | K.GISQEQQMNEFR.A                             | 1339.45991 | 2 | 3.60E-07 | 0.90 | 3.22 | - | 947.9  |
| AHQ-3-4, 2202         | K.GISQEQQMNEFR.A                             | 1355.45931 | 2 | 4.51E-05 | 0.76 | 3.01 | - | 655.8  |
| AHQ-3-6, 2734         | K.GISQEQQMNEFR.A                             | 1339.45991 | 2 | 1.02E-05 | 0.86 | 3.03 | - | 902.0  |
| AHQ-3-1, 2365         | K.GISQEQQMNEFR.A                             | 1355.45931 | 2 | 1.57E-06 | 0.88 | 3.35 | - | 891.4  |
| AHQ-3-5, 2493         | K.GISQEQQMNEFR.A                             | 1339.45991 | 2 | 7.05E-05 | 0.78 | 2.99 | - | 660.7  |
| AHQ-3-5, 1784         | R.HRPELIDYGK.L                               | 1228.38202 | 2 | 3.16E-04 | 0.85 | 3.41 | - | 555.3  |
| AHQ-3-4, 2049 - 2056  | R.HRPELIDYGK.L                               | 1228.38202 | 2 | 3.05E-04 | 0.92 | 3.81 | - | 645.3  |
| AHQ-3-6, 4869 - 4873  | K.ICDQWDLNIGALTOQK.R                         | 1663.83349 | 2 | 6.38E-07 | 0.97 | 4.63 | - | 2065.0 |
| AHQ-3-5, 4660 - 4668  | K.ICDQWDLNIGALTOQK.R                         | 1663.83349 | 2 | 5.08E-06 | 0.95 | 4.49 | - | 1089.0 |
| AHQ-3-5, 4899 - 4967  | K.ICDQWDLNIGALTOQK.R                         | 1663.83349 | 2 | 7.69E-06 | 0.98 | 5.29 | - | 2440.0 |
| AHQ-3-3, 5129 - 5156  | K.ICDQWDLNIGALTOQK.R                         | 1663.83349 | 2 | 7.31E-07 | 0.97 | 4.42 | - | 2233.3 |
| AHQ-3-7, 4826         | K.ICDQWDLNIGALTOQK.R                         | 1663.83349 | 2 | 6.44E-05 | 0.74 | 2.91 | - | 1052.6 |
| AHQ-3-4, 5076         | K.ICDQWDLNIGALTOQK.R                         | 1663.83349 | 2 | 3.68E-07 | 0.97 | 4.75 | - | 2267.2 |
| AHQ-3-6, 5842 - 5853  | K.IDQLEGDHQLIQEALIFDNK.H                     | 2340.57447 | 3 | 1.35E-09 | 0.97 | 5.87 | - | 1649.1 |
| AHQ-3-4, 6072         | K.IDQLEGDHQLIQEALIFDNK.H                     | 2340.57447 | 3 | 1.91E-09 | 0.97 | 5.27 | - | 2048.8 |
| AHQ-3-5, 5849 - 5915  | K.IDQLEGDHQLIQEALIFDNK.H                     | 2340.57447 | 2 | 1.13E-07 | 0.98 | 6.70 | - | 1177.8 |
| AHQ-3-5, 5856 - 5929  | K.IDQLEGDHQLIQEALIFDNK.H                     | 2340.57447 | 3 | 6.41E-07 | 0.96 | 5.46 | - | 1768.2 |
| AHQ-3-5, 3227 - 3292  | K.ILAGDKNYITM*DEL.R.R                        | 1769.01293 | 2 | 5.41E-04 | 0.90 | 4.08 | - | 633.4  |
| AHQ-3-6, 3271         | K.ILAGDKNYITM*DEL.R.R                        | 1769.01293 | 2 | 2.38E-04 | 0.65 | 3.51 | - | 353.8  |
| AHQ-3-5, 3984 - 3991  | K.ILAGDKNYITM*DEL.R.R                        | 1753.01353 | 2 | 7.39E-11 | 0.96 | 5.02 | - | 1247.0 |
| AHQ-3-5, 2611 - 2619  | R.IMSIVDPNR.L                                | 1045.23840 | 2 | 1.81E-04 | 0.87 | 3.41 | - | 746.2  |
| AHQ-3-6, 4807         | R.ISIEMHGTLEDQLSHLR.Q                        | 1980.23497 | 2 | 3.05E-07 | 0.59 | 2.59 | - | 839.5  |
| AHQ-3-5, 4852 - 4923  | R.ISIEMHGTLEDQLSHLR.Q                        | 1980.23497 | 2 | 7.56E-09 | 0.94 | 4.71 | - | 978.9  |
| AHQ-3-5, 4155         | R.ISIEM*HGTLEDQLSHLR.Q                       | 1996.23437 | 2 | 5.45E-08 | 0.89 | 4.29 | - | 450.0  |
| AHQ-3-5, 4015 - 4055  | K.IVQTYHYVNM*AGTNPYYTITPQEINGK.W             | 2908.23575 | 3 | 1.18E-04 | 0.82 | 3.92 | - | 586.1  |
| AHQ-3-5, 4704         | K.IVQTYHYVNM*AGTNPYYTITPQEINGK.W             | 2892.23635 | 2 | 9.99E-05 | 0.80 | 3.78 | - | 443.5  |
| AHQ-3-5, 4579 - 4583  | K.IVQTYHYVNM*AGTNPYYTITPQEINGK.W             | 2892.23635 | 2 | 6.29E-10 | 0.96 | 5.26 | - | 1159.9 |
| AHQ-3-5, 4607         | R.KAGTYHENIEEDFRDGLK.L                       | 2064.24210 | 3 | 6.97E-06 | 0.93 | 5.94 | - | 1161.6 |
| AHQ-3-1, 5137         | R.KDDPLTLNLTAFDVAEK.Y                        | 1892.05631 | 2 | 2.61E-07 | 0.95 | 4.78 | - | 1153.8 |
| AHQ-3-5, 4807         | R.KDDPLTLNLTAFDVAEK.Y                        | 1892.05631 | 2 | 6.95E-08 | 0.95 | 4.53 | - | 964.6  |
| AHQ-3-4, 4972         | R.KDDPLTLNLTAFDVAEK.Y                        | 1892.05631 | 2 | 9.83E-09 | 0.95 | 4.75 | - | 1069.0 |
| AHQ-3-8, 4461         | R.KDDPLTLNLTAFDVAEK.Y                        | 1892.05631 | 2 | 4.20E-06 | 0.95 | 4.45 | - | 1051.0 |
| AHQ-3-6, 4761         | R.KDDPLTLNLTAFDVAEK.Y                        | 1892.05631 | 2 | 3.22E-06 | 0.97 | 5.22 | - | 1282.4 |
| AHQ-3-5, 4827 - 4895  | R.KDDPLTLNLTAFDVAEK.Y                        | 1892.05631 | 2 | 8.00E-13 | 0.97 | 6.18 | - | 1217.9 |
| AHQ-3-4, 4258 - 4328  | R.KQFGAQQANVIGPWIQTK.M                       | 1887.17410 | 2 | 5.98E-04 | 0.94 | 4.02 | - | 1194.6 |
| AHQ-3-5, 4039 - 4107  | R.KQFGAQQANVIGPWIQTK.M                       | 1887.17410 | 2 | 5.16E-05 | 0.89 | 4.06 | - | 823.5  |
| AHQ-3-5, 3509 - 3580  | R.LAILGIHNEVSK.I                             | 1294.52505 | 2 | 2.98E-04 | 0.93 | 3.14 | - | 1141.2 |
| AHQ-3-5, 3011 - 3081  | R.LAILGIHNEVSK.I                             | 1294.52505 | 1 | 1.04E-04 | 0.25 | 1.95 | - | 355.3  |
| AHQ-3-6, 2889 - 3030  | R.LAILGIHNEVSK.I                             | 1294.52505 | 1 | 1.22E-04 | 0.74 | 3.31 | - | 381.3  |
| AHQ-3-6, 3009 - 3017  | R.LAILGIHNEVSK.I                             | 1294.52505 | 2 | 2.23E-08 | 0.95 | 4.00 | - | 1136.5 |
| AHQ-3-7, 2912         | R.LAILGIHNEVSK.I                             | 1294.52505 | 2 | 1.65E-04 | 0.80 | 2.61 | - | 828.6  |
| AHQ-3-5, 3008 - 3079  | R.LAILGIHNEVSK.I                             | 1294.52505 | 2 | 7.26E-07 | 0.91 | 3.80 | - | 874.0  |
| AHQ-3-4, 3246         | R.LAILGIHNEVSK.I                             | 1294.52505 | 2 | 3.59E-07 | 0.96 | 4.38 | - | 1311.8 |
| AHQ-3-1, 6344         | K.LASDLLEWIR.R                               | 1216.41115 | 2 | 5.64E-07 | 0.97 | 4.40 | - | 1910.1 |
| AHQ-3-5, 6007 - 6077  | K.LASDLLEWIR.R                               | 1216.41115 | 2 | 3.47E-08 | 0.98 | 4.71 | - | 2383.8 |
| AHQ-3-4, 6220         | K.LASDLLEWIR.R                               | 1216.41115 | 2 | 1.50E-06 | 0.96 | 3.88 | - | 1748.8 |
| AHQ-3-6, 5953         | K.LASDLLEWIR.R                               | 1216.41115 | 2 | 3.31E-07 | 0.96 | 3.90 | - | 1761.5 |
| AHQ-3-1, 6706 - 6782  | K.LLETIDQLYLEYAK.R                           | 1712.96427 | 2 | 2.28E-08 | 0.94 | 3.98 | - | 1191.2 |
| AHQ-3-5, 5437         | K.LLETIDQLYLEYAK.R                           | 1712.96427 | 2 | 1.69E-08 | 0.93 | 4.04 | - | 877.8  |
| AHQ-3-3, 6850         | K.LLETIDQLYLEYAK.R                           | 1712.96427 | 2 | 7.62E-07 | 0.93 | 4.16 | - | 866.8  |
| AHQ-3-5, 6936         | K.LLETIDQLYLEYAK.R                           | 1712.96427 | 2 | 6.39E-07 | 0.97 | 4.62 | - | 1339.2 |
| AHQ-3-5, 6793 - 6867  | K.LLETIDQLYLEYAK.R                           | 1712.96427 | 2 | 2.02E-05 | 0.97 | 4.98 | - | 1206.0 |
| AHQ-3-5, 6708 - 6727  | K.LLETIDQLYLEYAK.R                           | 1712.96427 | 2 | 4.22E-09 | 0.97 | 5.15 | - | 1377.8 |
| AHQ-3-4, 6848         | K.LLETIDQLYLEYAK.R                           | 1712.96427 | 2 | 2.97E-07 | 0.97 | 5.08 | - | 1241.6 |
| AHQ-3-7, 6567         | K.LLETIDQLYLEYAK.R                           | 1712.96427 | 2 | 2.01E-04 | 0.95 | 3.69 | - | 1404.0 |
| AHQ-3-6, 6577 - 6641  | K.LLETIDQLYLEYAK.R                           | 1712.96427 | 2 | 5.53E-07 | 0.96 | 4.58 | - | 1308.7 |
| AHQ-3-5, 7025 - 7101  | K.LLETIDQLYLEYAK.R                           | 1712.96427 | 2 | 2.35E-07 | 0.94 | 3.89 | - | 1310.4 |
| AHQ-3-5, 1923         | R.LSNRPAPM*PSEGR.M                           | 1478.65881 | 3 | 1.90E-05 | 0.82 | 3.56 | - | 880.4  |
| AHQ-3-5, 3817         | K.MLDAEDIVGARPDEKA                           | 1760.94769 | 2 | 9.48E-05 | 0.86 | 3.66 | - | 874.9  |

|                            |                                                                         |            |   |          |       |        |       |         |
|----------------------------|-------------------------------------------------------------------------|------------|---|----------|-------|--------|-------|---------|
| AHQ-3-6, 3762              | K.MLDAEDIVGTARPDEK.A                                                    | 1760.94769 | 2 | 8.90E-06 | 0.85  | 3.83   | -     | 825.5   |
| AHQ-3-5, 3821              | K.MLDAEDIVGTARPDEK.A                                                    | 1760.94769 | 3 | 5.95E-06 | 0.89  | 4.23   | -     | 795.1   |
| AHQ-3-4, 3568 - 3570       | K.M*LDAEDIVGTARPDEK.A                                                   | 1776.94709 | 2 | 5.15E-04 | 0.89  | 3.51   | -     | 831.1   |
| AHQ-3-7, 3722              | K.MLDAEDIVGTARPDEK.A                                                    | 1760.94769 | 2 | 2.20E-05 | 0.84  | 3.35   | -     | 1030.9  |
| AHQ-3-4, 3972              | K.MLDAEDIVGTARPDEK.A                                                    | 1760.94769 | 2 | 2.66E-05 | 0.91  | 4.06   | -     | 1075.9  |
| AHQ-3-5, 3391              | K.M*LDAEDIVGTARPDEK.A                                                   | 1776.94709 | 2 | 8.69E-04 | 0.87  | 4.08   | -     | 556.3   |
| AHQ-3-6, 3345 - 3346       | K.M*LDAEDIVGTARPDEK.A                                                   | 1776.94709 | 2 | 6.40E-04 | 0.94  | 4.51   | -     | 872.4   |
| AHQ-3-1, 3774              | K.M*LDAEDIVGTARPDEK.A                                                   | 1776.94709 | 2 | 4.53E-06 | 0.84  | 3.58   | -     | 634.3   |
| AHQ-3-1, 3790              | K.M*LDAEDIVGTARPDEK.A                                                   | 1776.94709 | 3 | 2.13E-04 | 0.74  | 3.20   | -     | 904.5   |
| AHQ-3-8, 3630 - 3633       | K.MLDAEDIVGTARPDEK.A                                                    | 1760.94769 | 2 | 1.45E-06 | 0.93  | 4.39   | -     | 1019.6  |
| AHQ-3-8, 3636              | K.MLDAEDIVGTARPDEK.A                                                    | 1760.94769 | 3 | 3.09E-06 | 0.66  | 3.23   | -     | 554.7   |
| AHQ-3-9, 3469 - 3535       | K.MLDAEDIVGTARPDEK.A                                                    | 1760.94769 | 2 | 3.75E-04 | 0.82  | 3.38   | -     | 761.4   |
| AHQ-3-5, 6176              | R.MVSDINNAWGCLQVEK.G                                                    | 1995.22333 | 2 | 8.00E-06 | 0.91  | 3.77   | -     | 1014.3  |
| AHQ-3-1, 5642              | R.M*VSDINNAWGCLQVEK.G                                                   | 2011.22273 | 2 | 1.56E-09 | 0.95  | 4.50   | -     | 1061.5  |
| AHQ-3-5, 6032              | R.MVSDINNAWGCLQVEK.G                                                    | 1995.22333 | 2 | 2.65E-10 | 0.97  | 5.13   | -     | 1590.5  |
| AHQ-3-5, 5301 - 5371       | R.M*VSDINNAWGCLQVEK.G                                                   | 2011.22273 | 2 | 1.18E-10 | 0.98  | 5.89   | -     | 1595.2  |
| AHQ-3-5, 5448              | R.MVSDINNAWGCLQVEK.G                                                    | 1995.22333 | 2 | 1.43E-04 | 0.93  | 4.07   | -     | 980.9   |
| AHQ-3-5, 5777              | R.M*VSDINNAWGCLQVEK.G                                                   | 2011.22273 | 2 | 1.49E-05 | 0.90  | 3.76   | -     | 714.8   |
| AHQ-3-4, 5836 - 5838       | R.MVSDINNAWGCLQVEK.G                                                    | 1995.22333 | 2 | 3.59E-05 | 0.92  | 4.31   | -     | 900.4   |
| AHQ-3-6, 5839              | R.MVSDINNAWGCLQVEK.G                                                    | 1995.22333 | 2 | 8.80E-08 | 0.85  | 3.28   | -     | 981.4   |
| AHQ-3-6, 5582              | R.MVSDINNAWGCLQVEK.G                                                    | 1995.22333 | 2 | 2.17E-05 | 0.93  | 4.39   | -     | 806.2   |
| AHQ-3-6, 5518              | R.M*VSDINNAWGCLQVEK.G                                                   | 2011.22273 | 2 | 4.92E-07 | 0.86  | 3.48   | -     | 935.4   |
| AHQ-3-6, 5494 - 5513       | R.MVSDINNAWGCLQVEK.G                                                    | 1995.22333 | 2 | 2.66E-07 | 0.96  | 4.69   | -     | 1453.7  |
| AHQ-3-5, 5667              | R.MVSDINNAWGCLQVEK.G                                                    | 1995.22333 | 2 | 2.58E-08 | 0.97  | 5.53   | -     | 1513.6  |
| AHQ-3-6, 5350              | R.MVSDINNAWGCLQVEK.G                                                    | 1995.22333 | 2 | 2.24E-10 | 0.96  | 4.29   | -     | 1697.4  |
| AHQ-3-6, 5281              | R.M*VSDINNAWGCLQVEK.G                                                   | 2011.22273 | 2 | 2.58E-04 | 0.58  | 3.03   | -     | 543.5   |
| AHQ-3-5, 5453              | R.M*VSDINNAWGCLQVEK.G                                                   | 2011.22273 | 2 | 2.82E-04 | 0.47  | 2.64   | -     | 400.9   |
| AHQ-3-5, 5587 - 5613       | R.M*VSDINNAWGCLQVEK.G                                                   | 2011.22273 | 2 | 1.05E-10 | 0.97  | 5.32   | -     | 1294.9  |
| AHQ-3-4, 5524              | R.M*VSDINNAWGCLQVEK.G                                                   | 2011.22273 | 2 | 5.40E-04 | 0.85  | 3.97   | -     | 610.2   |
| AHQ-3-3, 5885              | R.MVSDINNAWGCLQVEK.G                                                    | 1995.22333 | 2 | 9.40E-06 | 0.84  | 3.33   | -     | 798.8   |
| AHQ-3-5, 5560 - 5596       | R.MVSDINNAWGCLQVEK.G                                                    | 1995.22333 | 2 | 5.47E-08 | 0.93  | 4.09   | -     | 1233.1  |
| AHQ-3-5, 5188 - 5216       | R.M*VSDINNAWGCLQVEK.G                                                   | 2011.22273 | 2 | 8.29E-07 | 0.94  | 4.43   | -     | 930.4   |
| AHQ-3-6, 4466              | K.NVNIQNFHISWK.D                                                        | 1500.68583 | 2 | 2.03E-08 | 0.96  | 4.11   | -     | 1389.5  |
| AHQ-3-5, 4463 - 4536       | K.NVNIQNFHISWK.D                                                        | 1500.68583 | 2 | 1.09E-07 | 0.96  | 4.46   | -     | 1333.4  |
| AHQ-3-4, 4780              | K.NVNIQNFHISWK.D                                                        | 1500.68583 | 2 | 1.93E-04 | 0.95  | 4.27   | -     | 1243.8  |
| AHQ-3-5, 4800              | K.NVNIQNFHISWK.D                                                        | 1500.68583 | 2 | 9.30E-06 | 0.96  | 4.10   | -     | 1319.4  |
| AHQ-3-10, 4211             | K.NVNIQNFHISWK.D                                                        | 1500.68583 | 2 | 1.12E-04 | 0.90  | 3.47   | -     | 959.4   |
| AHQ-3-5, 3504              | K.NYITMDEL.R                                                            | 1155.30648 | 2 | 7.72E-05 | 0.83  | 3.39   | -     | 632.8   |
| AHQ-3-5, 2687              | R.QKDYETATLSEIK.A                                                       | 1526.67030 | 2 | 6.43E-04 | 0.46  | 2.85   | -     | 272.2   |
| AHQ-3-10, 3630             | R.TINEVENQILTR.D                                                        | 1430.58898 | 2 | 2.70E-06 | 0.87  | 3.34   | -     | 966.7   |
| AHQ-3-5, 2947 - 3004       | R.TINEVENQILTR.D                                                        | 1430.58898 | 1 | 4.71E-04 | 0.08  | 1.98   | -     | 124.0   |
| AHQ-3-5, 3960 - 4036       | R.TINEVENQILTR.D                                                        | 1430.58898 | 2 | 7.59E-05 | 0.90  | 3.60   | -     | 1044.4  |
| AHQ-3-8, 3617 - 3692       | R.TINEVENQILTR.D                                                        | 1430.58898 | 2 | 2.96E-04 | 0.81  | 2.98   | -     | 988.1   |
| AHQ-3-6, 3741 - 3745       | R.TINEVENQILTR.D                                                        | 1430.58898 | 2 | 1.01E-07 | 0.90  | 3.98   | -     | 898.3   |
| AHQ-3-2, 4059              | R.TINEVENQILTR.D                                                        | 1430.58898 | 2 | 2.62E-05 | 0.82  | 3.38   | -     | 880.4   |
| AHQ-3-4, 3952              | R.TINEVENQILTR.D                                                        | 1430.58898 | 1 | 8.13E-05 | 0.20  | 2.42   | -     | 139.1   |
| AHQ-3-4, 3937 - 3940       | R.TINEVENQILTR.D                                                        | 1430.58898 | 2 | 1.05E-07 | 0.95  | 4.58   | -     | 1214.6  |
| AHQ-3-4, 3573              | R.TINEVENQILTR.D                                                        | 1430.58898 | 2 | 6.53E-05 | 0.73  | 3.05   | -     | 485.9   |
| AHQ-3-7, 3704              | R.TINEVENQILTR.D                                                        | 1430.58898 | 1 | 4.89E-05 | 0.22  | 2.54   | -     | 118.2   |
| AHQ-3-7, 3690              | R.TINEVENQILTR.D                                                        | 1430.58898 | 2 | 2.21E-04 | 0.71  | 3.20   | -     | 586.1   |
| AHQ-3-3, 4009              | R.TINEVENQILTR.D                                                        | 1430.58898 | 2 | 2.76E-06 | 0.91  | 3.64   | -     | 946.0   |
| AHQ-3-6, 3365              | R.TINEVENQILTR.D                                                        | 1430.58898 | 2 | 2.05E-04 | 0.71  | 2.63   | -     | 487.1   |
| AHQ-3-5, 3784              | R.TINEVENQILTR.D                                                        | 1430.58898 | 1 | 1.54E-04 | 0.51  | 2.70   | -     | 164.7   |
| AHQ-3-5, 7083 - 7147       | R.VEQIAAIAQELNELDYDPSVNR.C                                              | 2810.02233 | 3 | 1.53E-09 | 0.98  | 6.68   | -     | 2239.9  |
| AHQ-3-5, 7051 - 7116       | R.VEQIAAIAQELNELDYDPSVNR.C                                              | 2810.02233 | 2 | 1.29E-06 | 0.97  | 5.59   | -     | 1238.7  |
| AHQ-3-5, 7143 - 7207       | R.VEQIAAIAQELNELDYDPSVNR.C                                              | 2810.02233 | 2 | 1.24E-05 | 0.82  | 3.30   | -     | 728.1   |
| AHQ-3-10, 5998             | R.VGWEQLLTTIAR.T                                                        | 1387.60894 | 2 | 1.20E-04 | 0.86  | 3.01   | -     | 1047.7  |
| AHQ-3-6, 6613              | R.VGWEQLLTTIAR.T                                                        | 1387.60894 | 2 | 1.01E-05 | 0.94  | 3.99   | -     | 1353.5  |
| AHQ-3-2, 7018 - 7019       | R.VGWEQLLTTIAR.T                                                        | 1387.60894 | 2 | 2.95E-09 | 0.97  | 4.91   | -     | 2005.9  |
| AHQ-3-14-, 6408            | R.VGWEQLLTTIAR.T                                                        | 1387.60894 | 2 | 2.59E-07 | 0.94  | 3.61   | -     | 1457.1  |
| AHQ-3-9, 6247 - 6263       | R.VGWEQLLTTIAR.T                                                        | 1387.60894 | 2 | 5.68E-08 | 0.96  | 4.42   | -     | 1689.9  |
| AHQ-3-1, 6908 - 6910       | R.VGWEQLLTTIAR.T                                                        | 1387.60894 | 2 | 5.33E-08 | 0.97  | 5.04   | -     | 1784.0  |
| AHQ-3-8, 6317              | R.VGWEQLLTTIAR.T                                                        | 1387.60894 | 2 | 2.98E-04 | 0.94  | 3.57   | -     | 1617.5  |
| AHQ-3-4, 6908 - 6910       | R.VGWEQLLTTIAR.T                                                        | 1387.60894 | 2 | 7.97E-08 | 0.96  | 4.73   | -     | 1353.0  |
| AHQ-3-5, 6695 - 6771       | R.VGWEQLLTTIAR.T                                                        | 1387.60894 | 2 | 1.58E-07 | 0.95  | 4.12   | -     | 1404.8  |
| AHQ-3-7, 6527 - 6530       | R.VGWEQLLTTIAR.T                                                        | 1387.60894 | 2 | 3.02E-08 | 0.97  | 4.58   | -     | 1730.9  |
| AHQ-3-3, 6924              | R.VGWEQLLTTIAR.T                                                        | 1387.60894 | 2 | 9.92E-10 | 0.95  | 3.96   | -     | 1500.2  |
| AHQ-3-11, 6224             | R.VGWEQLLTTIAR.T                                                        | 1387.60894 | 2 | 2.05E-07 | 0.95  | 4.21   | -     | 1488.2  |
| AHQ-3-4, 4700              | K.VLAVNQENEQLMEDIYEK.L                                                  | 2053.23635 | 2 | 7.90E-06 | 0.76  | 3.76   | -     | 366.2   |
| AHQ-3-3, 4430              | K.VLAVNQENEQLMEDIYEK.L                                                  | 2053.23635 | 2 | 1.20E-07 | 0.88  | 4.01   | -     | 767.7   |
| AHQ-3-8, 3850              | K.VLAVNQENEQLMEDIYEK.L                                                  | 2053.23635 | 2 | 2.79E-08 | 0.95  | 4.67   | -     | 1042.6  |
| AHQ-3-5, 3435 - 3463       | K.VLAVNQENEQLMEDIYEK.L                                                  | 2069.23575 | 2 | 5.10E-07 | 0.95  | 4.85   | -     | 1133.9  |
| AHQ-3-7, 4050 - 4128       | K.VLAVNQENEQLMEDIYEK.L                                                  | 2053.23635 | 2 | 2.45E-05 | 0.94  | 4.33   | -     | 984.5   |
| AHQ-3-4, 3792              | K.VLAVNQENEQLMEDIYEK.L                                                  | 2069.23575 | 2 | 9.32E-07 | 0.72  | 2.60   | -     | 532.6   |
| AHQ-3-5, 4637              | K.VLAVNQENEQLMEDIYEK.L                                                  | 2053.23635 | 2 | 6.86E-08 | 0.97  | 5.70   | -     | 1687.6  |
| AHQ-3-5, 4167 - 4247       | K.VLAVNQENEQLMEDIYEK.L                                                  | 2053.23635 | 2 | 1.63E-08 | 0.97  | 5.56   | -     | 1469.0  |
| AHQ-3-4, 3605 - 3620       | K.VLAVNQENEQLMEDIYEK.L                                                  | 2069.23575 | 2 | 2.12E-04 | 0.91  | 3.73   | -     | 925.1   |
| AHQ-3-6, 4411 - 4485       | K.VLAVNQENEQLMEDIYEK.L                                                  | 2053.23635 | 2 | 5.45E-09 | 0.89  | 3.84   | -     | 596.3   |
| AHQ-3-5, 4315 - 4391       | K.VLAVNQENEQLMEDIYEK.L                                                  | 2053.23635 | 2 | 1.39E-07 | 0.98  | 5.66   | -     | 1671.6  |
| AHQ-3-2, 4490              | K.VLAVNQENEQLMEDIYEK.L                                                  | 2053.23635 | 2 | 4.53E-05 | 0.88  | 3.27   | -     | 1057.3  |
| AHQ-3-6, 3410              | K.VLAVNQENEQLMEDIYEK.L                                                  | 2069.23575 | 2 | 1.42E-05 | 0.95  | 4.36   | -     | 1238.3  |
| AHQ-3-5, 4460 - 4531       | K.VLAVNQENEQLMEDIYEK.L                                                  | 2053.23635 | 2 | 2.93E-13 | 0.96  | 4.91   | -     | 1395.6  |
| AHQ-3-6, 4102              | K.VLAVNQENEQLMEDIYEK.L                                                  | 2053.23635 | 2 | 7.64E-09 | 0.95  | 4.42   | -     | 1349.5  |
| AHQ-3-5, 4264              | K.VLAVNQENEQLMEDIYEK.L                                                  | 2053.23635 | 2 | 1.96E-05 | 0.87  | 3.34   | -     | 867.1   |
| AHQ-3-1, 4504              | K.VLAVNQENEQLMEDIYEK.L                                                  | 2053.23635 | 2 | 5.17E-08 | 0.96  | 4.33   | -     | 1562.0  |
| AHQ-3-4, 4324 - 4392       | K.VLAVNQENEQLMEDIYEK.L                                                  | 2053.23635 | 2 | 2.53E-04 | 0.91  | 4.05   | -     | 804.2   |
| AHQ-3-5, 3675              | K.VLAVNQENEQLMEDIYEK.L                                                  | 2069.23575 | 2 | 2.48E-09 | 0.94  | 4.48   | -     | 877.5   |
| AHQ-3-5, 1549              | R.VPENTMHAMQK.L                                                         | 1414.63656 | 1 | 1.65E-05 | 0.45  | 2.70   | -     | 273.6   |
| gj 5902128 ref NP_008880.1 | syntaxin binding protein 2; Hunc18b [Homo sapiens]                      |            |   | 3.66E-13 | 6.53  | 70.34  | 18.90 | 66438.1 |
| AHQ-3-6, 6331              | K.AAHIFFTDTCPEPLFSELGR.S                                                | 2310.57011 | 2 | 4.79E-07 | 0.97  | 5.36   | -     | 1287.0  |
| AHQ-3-6, 6626              | R.EPIPSLEAIYLLSPTK.S                                                    | 1901.18939 | 2 | 1.22E-07 | 0.90  | 3.36   | -     | 949.1   |
| AHQ-3-6, 2931              | R.KGPEDTAQLAHAVLAK.L                                                    | 1649.87303 | 3 | 2.19E-09 | 0.97  | 5.44   | -     | 1678.4  |
| AHQ-3-6, 2921              | R.KGPEDTAQLAHAVLAK.L                                                    | 1649.87303 | 2 | 3.00E-08 | 0.93  | 4.13   | -     | 1003.1  |
| AHQ-3-6, 6383 - 6389       | K.LIVPVLLDAVPAVDK.I                                                     | 1698.03911 | 2 | 3.66E-13 | 0.98  | 5.31   | -     | 2135.0  |
| AHQ-3-6, 3063              | R.NLEQLGGTVTPNGGSGTSSR.L                                                | 1933.02693 | 2 | 8.54E-06 | 0.96  | 5.13   | -     | 1013.8  |
| AHQ-3-6, 5354 - 5425       | R.NLWPFVSDPAPTASSQAASAR.F                                               | 2273.48981 | 2 | 7.69E-04 | 0.78  | 3.20   | -     | 555.5   |
| AHQ-3-6, 5909 - 5933       | R.REPIPSLEAIYLLSPTK.S                                                   | 2057.37574 | 2 | 5.95E-06 | 0.98  | 6.76   | -     | 1841.4  |
| gj 4501881 ref NP_001091.1 | alpha 1 actin precursor; alpha skeletal muscle actin [Homo sapiens] [MA |            |   | 4.05E-13 | 14.46 | 190.28 | 46.20 | 42050.8 |
| AHQ-3-12, 1822 - 1882      | K.AGFAGDDAPR.A                                                          | 977.01283  | 2 | 2.62E-05 | 0.90  | 2.89   | -     | 1272.7  |
| AHQ-3-13-, 1777 - 1846     | K.AGFAGDDAPR.A                                                          | 977.01283  | 2 | 9.86E-04 | 0.88  | 2.94   | -     | 1066.4  |
| AHQ-3-13-, 1905 - 1933     | K.AGFAGDDAPR.A                                                          | 977.01283  | 2 | 2.86E-04 | 0.91  | 3.16   | -     | 1171.9  |
| AHQ-3-8, 1447 - 1529       | K.AGFAGDDAPR.A                                                          | 977.01283  | 2 | 1.07E-05 | 0.85  | 2.66   | -     | 1111.4  |
| AHQ-3-8, 2850 - 2920       | R.AVFPISVGR.P                                                           | 946.12815  | 2 | 4.52E-05 | 0.78  | 2.65   | -     | 649.8   |
| AHQ-3-8, 2704              | R.AVFPISVGRPR.H                                                         | 1199.43018 | 2 | 2.60E-04 | 0.63  | 2.76   | -     | 459.4   |
| AHQ-3-7, 2644 - 2724       | R.AVFPISVGRPR.H                                                         | 1199.43018 | 2 | 4.03E-04 | 0.56  | 2.65   | -     | 407.7   |
| AHQ-3-10, 2834 - 2851      | R.AVFPISVGRPR.H                                                         | 1199.43018 | 2 | 1.60E-04 | 0.54  | 2.54   | -     | 508.4   |
| AHQ-3-1, 3937              | R.DLTDYLM*K.I                                                           | 1015.16266 | 2 | 1.03E-04 | 0.67  | 2.71   | -     | 427.0   |



|                        |                             |            |   |          |      |      |   |        |
|------------------------|-----------------------------|------------|---|----------|------|------|---|--------|
| AHQ-3-14, 5331         | R.DLTDYLMK.I                | 999.16326  | 1 | 7.72E-04 | 0.20 | 1.91 | - | 502.7  |
| AHQ-3-8, 3720          | R.DLTDYLMK.I                | 999.16326  | 1 | 1.88E-04 | 0.19 | 2.10 | - | 237.4  |
| AHQ-3-8, 4331          | R.DLTDYLMK.I                | 999.16326  | 2 | 5.53E-04 | 0.74 | 3.01 | - | 379.6  |
| AHQ-3-12, 4387         | R.DLTDYLMK.I                | 999.16326  | 1 | 7.02E-04 | 0.43 | 2.57 | - | 554.2  |
| AHQ-3-14, 5335         | R.DLTDYLMK.I                | 999.16326  | 1 | 2.19E-04 | 0.15 | 2.18 | - | 326.3  |
| AHQ-3-14-, 4308        | R.DLTDYLMK.I                | 999.16326  | 1 | 8.88E-05 | 0.31 | 2.12 | - | 515.5  |
| AHQ-3-9, 3455          | R.DLTDYLM*K.I               | 1015.16266 | 1 | 1.19E-04 | 0.30 | 1.97 | - | 123.5  |
| AHQ-3-4, 3832          | R.DLTDYLM*K.I               | 1015.16266 | 1 | 6.62E-04 | 0.64 | 2.76 | - | 160.6  |
| AHQ-3-10, 3147         | R.DLTDYLMK.I                | 999.16326  | 1 | 7.67E-06 | 0.34 | 2.03 | - | 392.2  |
| AHQ-3-9, 4157          | R.DLTDYLM*K.I               | 1015.16266 | 1 | 2.49E-04 | 0.46 | 2.24 | - | 327.7  |
| AHQ-3-10, 4398         | R.DLTDYLMK.I                | 999.16326  | 1 | 1.36E-04 | 0.18 | 1.94 | - | 384.8  |
| AHQ-3-9, 4159 - 4163   | R.DLTDYLMK.I                | 999.16326  | 1 | 4.72E-04 | 0.20 | 2.74 | - | 358.6  |
| AHQ-3-8, 5153 - 5235   | K.DLYANNVMSGGTTMYPGIADR.M   | 2247.49444 | 2 | 5.51E-04 | 0.65 | 3.06 | - | 504.3  |
| AHQ-3-14-, 5311 - 5312 | K.DLYANNVMSGGTTMYPGIADR.M   | 2247.49444 | 2 | 2.54E-05 | 0.73 | 3.58 | - | 347.3  |
| AHQ-3-12, 1714         | K.DSYVGDEAQS.R              | 1199.20634 | 2 | 2.08E-05 | 0.82 | 2.86 | - | 555.3  |
| AHQ-3-8, 1449 - 1516   | K.DSYVGDEAQS.R              | 1199.20634 | 1 | 7.18E-05 | 0.59 | 2.91 | - | 429.7  |
| AHQ-3-8, 1448 - 1528   | K.DSYVGDEAQS.R              | 1199.20634 | 2 | 7.46E-06 | 0.87 | 2.82 | - | 835.3  |
| AHQ-3-8, 1733 - 1769   | K.DSYVGDEAQS.R              | 1199.20634 | 2 | 4.91E-04 | 0.78 | 3.09 | - | 483.3  |
| AHQ-3-8, 1432          | K.DSYVGDEAQS.R.G            | 1355.39270 | 2 | 1.09E-06 | 0.85 | 2.75 | - | 713.9  |
| AHQ-3-13, 2335 - 2415  | K.EITALAPSTM*K.I            | 1178.38146 | 2 | 7.77E-04 | 0.78 | 3.11 | - | 667.2  |
| AHQ-3-13, 2882 - 2957  | K.EITALAPSTM.K.I            | 1162.38206 | 2 | 2.78E-04 | 0.69 | 2.59 | - | 513.9  |
| AHQ-3-13-, 2850 - 2914 | K.EITALAPSTM.K.I            | 1162.38206 | 2 | 5.13E-04 | 0.88 | 3.11 | - | 932.0  |
| AHQ-3-14-, 2279 - 2355 | K.EITALAPSTM*K.I            | 1178.38146 | 2 | 2.06E-05 | 0.84 | 3.32 | - | 673.1  |
| AHQ-3-6, 2725          | K.EITALAPSTM.K.I            | 1162.38206 | 1 | 4.83E-05 | 0.23 | 2.21 | - | 228.5  |
| AHQ-3-14-, 2751 - 2795 | K.EITALAPSTM.K.I            | 1162.38206 | 2 | 1.03E-04 | 0.83 | 2.94 | - | 649.8  |
| AHQ-3-8, 2517 - 2552   | K.EITALAPSTM*K.I            | 1178.38146 | 2 | 7.16E-05 | 0.85 | 3.04 | - | 786.9  |
| AHQ-3-8, 2246 - 2316   | K.EITALAPSTM.K.I            | 1162.38206 | 2 | 3.13E-04 | 0.92 | 3.33 | - | 987.5  |
| AHQ-3-12, 2879         | K.EITALAPSTM.K.I            | 1162.38206 | 1 | 8.18E-04 | 0.28 | 2.56 | - | 250.4  |
| AHQ-3-14-, 2859 - 2860 | K.EITALAPSTM.K.I            | 1162.38206 | 2 | 4.48E-04 | 0.90 | 3.33 | - | 814.3  |
| AHQ-3-1, 3109          | K.EITALAPSTM.K.I            | 1162.38206 | 2 | 2.26E-04 | 0.82 | 3.10 | - | 625.0  |
| AHQ-3-12, 2874         | K.EITALAPSTM.K.I            | 1162.38206 | 2 | 8.77E-05 | 0.72 | 2.80 | - | 484.2  |
| AHQ-3-7, 2606          | K.EITALAPSTM.K.I            | 1162.38206 | 1 | 5.63E-04 | 0.55 | 2.44 | - | 312.7  |
| AHQ-3-8, 1956 - 2028   | K.EITALAPSTM*K.I            | 1178.38146 | 2 | 2.60E-07 | 0.83 | 3.01 | - | 702.1  |
| AHQ-3-8, 2266 - 2297   | R.HQGMVGMGQKDSYVGDEAQS.R    | 2352.59065 | 3 | 1.27E-05 | 0.82 | 3.35 | - | 1205.7 |
| AHQ-3-8, 2256 - 2328   | K.IWHHTFYNELR.V             | 1516.68695 | 2 | 2.22E-07 | 0.90 | 3.63 | - | 1011.8 |
| AHQ-3-9, 2628 - 2687   | K.IWHHTFYNELR.V             | 1516.68695 | 2 | 2.16E-06 | 0.81 | 3.05 | - | 721.1  |
| AHQ-3-8, 2293 - 2308   | K.IWHHTFYNELR.V             | 1516.68695 | 3 | 8.75E-06 | 0.91 | 4.45 | - | 1260.3 |
| AHQ-3-8, 2377 - 2445   | K.IWHHTFYNELR.V             | 1516.68695 | 3 | 7.16E-05 | 0.97 | 4.81 | - | 1747.8 |
| AHQ-3-12, 3175         | K.IWHHTFYNELR.V             | 1516.68695 | 2 | 4.04E-05 | 0.88 | 3.36 | - | 852.8  |
| AHQ-3-7, 2558 - 2576   | K.IWHHTFYNELR.V             | 1516.68695 | 2 | 1.39E-07 | 0.82 | 3.16 | - | 802.3  |
| AHQ-3-8, 2717 - 2744   | K.IWHHTFYNELR.V             | 1516.68695 | 2 | 2.46E-09 | 0.92 | 3.68 | - | 884.9  |
| AHQ-3-8, 2738 - 2748   | K.IWHHTFYNELR.V             | 1516.68695 | 3 | 1.06E-05 | 0.96 | 4.28 | - | 2017.7 |
| AHQ-3-7, 2547          | K.IWHHTFYNELR.V             | 1516.68695 | 3 | 1.10E-04 | 0.96 | 4.32 | - | 1793.6 |
| AHQ-3-12, 3040         | K.IWHHTFYNELR.V             | 1516.68695 | 3 | 5.81E-06 | 0.92 | 3.45 | - | 1736.1 |
| AHQ-3-1, 3162          | K.IWHHTFYNELR.V             | 1516.68695 | 2 | 8.56E-04 | 0.60 | 3.03 | - | 596.4  |
| AHQ-3-12, 3038         | K.IWHHTFYNELR.V             | 1516.68695 | 2 | 3.99E-07 | 0.93 | 3.62 | - | 1106.3 |
| AHQ-3-12, 2878 - 2891  | K.IWHHTFYNELR.V             | 1516.68695 | 3 | 4.86E-07 | 0.91 | 4.39 | - | 1394.4 |
| AHQ-3-12, 2875 - 2942  | K.IWHHTFYNELR.V             | 1516.68695 | 2 | 7.64E-05 | 0.77 | 3.39 | - | 735.7  |
| AHQ-3-13-, 2981        | K.IWHHTFYNELR.V             | 1516.68695 | 3 | 4.11E-06 | 0.85 | 3.40 | - | 914.2  |
| AHQ-3-13-, 2987        | K.IWHHTFYNELR.V             | 1516.68695 | 3 | 5.61E-06 | 0.97 | 4.53 | - | 1761.6 |
| AHQ-3-3, 2909          | K.IWHHTFYNELR.V             | 1516.68695 | 2 | 3.53E-06 | 0.78 | 3.40 | - | 740.3  |
| AHQ-3-9, 2788          | K.IWHHTFYNELR.V             | 1516.68695 | 2 | 3.87E-06 | 0.85 | 3.19 | - | 825.1  |
| AHQ-3-6, 2653          | K.IWHHTFYNELR.V             | 1516.68695 | 2 | 4.25E-04 | 0.65 | 2.93 | - | 691.4  |
| AHQ-3-9, 2401 - 2464   | K.IWHHTFYNELR.V             | 1516.68695 | 2 | 1.58E-05 | 0.72 | 3.23 | - | 750.7  |
| AHQ-3-8, 7440          | K.LCYVALDFENEM*ATAASSSLEK.S | 2554.78938 | 3 | 1.25E-04 | 0.95 | 5.09 | - | 1567.8 |
| AHQ-3-10, 4814 - 4844  | R.LDLAGRDLTDYLMK.I          | 1624.88375 | 2 | 3.38E-05 | 0.84 | 3.72 | - | 696.9  |
| AHQ-3-8, 4844 - 4917   | K.SYELPDGQVITIGNER.F        | 1791.93998 | 2 | 6.06E-12 | 0.96 | 5.22 | - | 1055.5 |
| AHQ-3-8, 4993 - 5069   | K.SYELPDGQVITIGNER.F        | 1791.93998 | 2 | 8.42E-05 | 0.81 | 3.35 | - | 525.6  |
| AHQ-3-13-, 4873        | K.SYELPDGQVITIGNER.F        | 1791.93998 | 2 | 6.70E-05 | 0.94 | 4.13 | - | 1121.6 |
| AHQ-3-13-, 4589        | K.SYELPDGQVITIGNER.F        | 1791.93998 | 2 | 4.80E-09 | 0.92 | 3.67 | - | 860.1  |
| AHQ-3-13-, 5026 - 5074 | K.SYELPDGQVITIGNER.F        | 1791.93998 | 2 | 2.27E-10 | 0.96 | 5.12 | - | 1054.5 |
| AHQ-3-8, 4707 - 4776   | K.SYELPDGQVITIGNER.F        | 1791.93998 | 2 | 4.16E-11 | 0.97 | 5.36 | - | 1073.9 |
| AHQ-3-8, 4607 - 4679   | K.SYELPDGQVITIGNER.F        | 1791.93998 | 2 | 1.14E-11 | 0.96 | 4.88 | - | 1014.4 |
| AHQ-3-8, 4576 - 4605   | K.SYELPDGQVITIGNER.F        | 1791.93998 | 3 | 6.35E-08 | 0.96 | 5.11 | - | 1376.2 |
| AHQ-3-1, 4898          | K.SYELPDGQVITIGNER.F        | 1791.93998 | 2 | 6.98E-10 | 0.86 | 3.70 | - | 668.6  |
| AHQ-3-5, 5264          | K.SYELPDGQVITIGNER.F        | 1791.93998 | 2 | 4.97E-06 | 0.94 | 4.20 | - | 918.5  |
| AHQ-3-5, 4917 - 4987   | K.SYELPDGQVITIGNER.F        | 1791.93998 | 2 | 7.01E-06 | 0.93 | 4.16 | - | 968.1  |
| AHQ-3-5, 4576 - 4652   | K.SYELPDGQVITIGNER.F        | 1791.93998 | 2 | 5.65E-04 | 0.77 | 2.75 | - | 808.8  |
| AHQ-3-13-, 4473 - 4486 | K.SYELPDGQVITIGNER.F        | 1791.93998 | 2 | 2.12E-11 | 0.95 | 4.39 | - | 983.4  |
| AHQ-3-9, 4196 - 4267   | K.SYELPDGQVITIGNER.F        | 1791.93998 | 2 | 4.98E-06 | 0.85 | 3.53 | - | 543.3  |
| AHQ-3-9, 4201          | K.SYELPDGQVITIGNER.F        | 1791.93998 | 2 | 1.34E-07 | 0.75 | 2.85 | - | 664.3  |
| AHQ-3-8, 4475 - 4543   | K.SYELPDGQVITIGNER.F        | 1791.93998 | 2 | 4.08E-12 | 0.95 | 4.18 | - | 1157.8 |
| AHQ-3-9, 4493 - 4563   | K.SYELPDGQVITIGNER.F        | 1791.93998 | 2 | 9.42E-08 | 0.92 | 4.19 | - | 768.4  |
| AHQ-3-9, 4619          | K.SYELPDGQVITIGNER.F        | 1791.93998 | 2 | 6.22E-09 | 0.88 | 3.39 | - | 821.8  |
| AHQ-3-9, 4737 - 4780   | K.SYELPDGQVITIGNER.F        | 1791.93998 | 2 | 7.31E-05 | 0.92 | 3.88 | - | 962.2  |
| AHQ-3-9, 4847 - 4848   | K.SYELPDGQVITIGNER.F        | 1791.93998 | 2 | 2.85E-04 | 0.95 | 4.30 | - | 1225.0 |
| AHQ-3-6, 4861 - 4875   | K.SYELPDGQVITIGNER.F        | 1791.93998 | 2 | 6.06E-12 | 0.95 | 4.75 | - | 944.2  |
| AHQ-3-8, 4280 - 4359   | K.SYELPDGQVITIGNER.F        | 1791.93998 | 2 | 4.05E-13 | 0.95 | 4.24 | - | 1094.3 |
| AHQ-3-10, 4078 - 4150  | K.SYELPDGQVITIGNER.F        | 1791.93998 | 2 | 4.58E-06 | 0.95 | 4.67 | - | 918.7  |
| AHQ-3-10, 4284         | K.SYELPDGQVITIGNER.F        | 1791.93998 | 2 | 1.57E-07 | 0.90 | 3.52 | - | 823.5  |
| AHQ-3-4, 5314 - 5384   | K.SYELPDGQVITIGNER.F        | 1791.93998 | 2 | 2.10E-10 | 0.90 | 3.81 | - | 765.9  |
| AHQ-3-10, 4454 - 4530  | K.SYELPDGQVITIGNER.F        | 1791.93998 | 2 | 1.36E-10 | 0.97 | 5.04 | - | 1234.4 |
| AHQ-3-10, 4650 - 4714  | K.SYELPDGQVITIGNER.F        | 1791.93998 | 2 | 1.48E-10 | 0.91 | 3.84 | - | 901.2  |
| AHQ-3-1, 5188 - 5209   | K.SYELPDGQVITIGNER.F        | 1791.93998 | 2 | 1.98E-08 | 0.94 | 4.01 | - | 1035.3 |
| AHQ-3-7, 4582 - 4654   | K.SYELPDGQVITIGNER.F        | 1791.93998 | 2 | 3.69E-06 | 0.90 | 3.91 | - | 758.9  |
| AHQ-3-1, 5385 - 5428   | K.SYELPDGQVITIGNER.F        | 1791.93998 | 2 | 1.75E-09 | 0.95 | 4.33 | - | 1071.9 |
| AHQ-3-11, 4252 - 4326  | K.SYELPDGQVITIGNER.F        | 1791.93998 | 2 | 1.61E-07 | 0.89 | 3.80 | - | 646.6  |
| AHQ-3-11, 4335         | K.SYELPDGQVITIGNER.F        | 1791.93998 | 2 | 6.40E-08 | 0.93 | 3.74 | - | 840.1  |
| AHQ-3-11, 4478 - 4490  | K.SYELPDGQVITIGNER.F        | 1791.93998 | 2 | 5.80E-12 | 0.95 | 4.28 | - | 1048.2 |
| AHQ-3-11, 4840 - 4907  | K.SYELPDGQVITIGNER.F        | 1791.93998 | 2 | 5.01E-09 | 0.94 | 3.93 | - | 1024.5 |
| AHQ-3-4, 4714          | K.SYELPDGQVITIGNER.F        | 1791.93998 | 2 | 1.11E-07 | 0.86 | 3.61 | - | 695.2  |
| AHQ-3-4, 4610          | K.SYELPDGQVITIGNER.F        | 1791.93998 | 2 | 1.63E-04 | 0.84 | 3.05 | - | 789.0  |
| AHQ-3-3, 5344 - 5361   | K.SYELPDGQVITIGNER.F        | 1791.93998 | 2 | 1.59E-06 | 0.78 | 3.38 | - | 380.1  |
| AHQ-3-1, 4801          | K.SYELPDGQVITIGNER.F        | 1791.93998 | 2 | 4.72E-08 | 0.84 | 3.62 | - | 452.9  |
| AHQ-3-8, 4141 - 4212   | K.SYELPDGQVITIGNER.F        | 1791.93998 | 2 | 1.94E-10 | 0.98 | 5.68 | - | 1391.0 |
| AHQ-3-3, 5153 - 5172   | K.SYELPDGQVITIGNER.F        | 1791.93998 | 2 | 4.92E-13 | 0.95 | 4.38 | - | 1162.0 |
| AHQ-3-6, 5083 - 5162   | K.SYELPDGQVITIGNER.F        | 1791.93998 | 2 | 4.47E-08 | 0.93 | 4.07 | - | 1013.4 |
| AHQ-3-14-, 4871        | K.SYELPDGQVITIGNER.F        | 1791.93998 | 2 | 8.43E-10 | 0.94 | 4.09 | - | 936.4  |
| AHQ-3-14-, 5041        | K.SYELPDGQVITIGNER.F        | 1791.93998 | 2 | 3.29E-07 | 0.92 | 3.90 | - | 967.3  |
| AHQ-3-3, 4904          | K.SYELPDGQVITIGNER.F        | 1791.93998 | 2 | 1.02E-06 | 0.80 | 3.05 | - | 528.4  |
| AHQ-3-2, 4809          | K.SYELPDGQVITIGNER.F        | 1791.93998 | 2 | 1.27E-09 | 0.93 | 4.06 | - | 850.0  |
| AHQ-3-12, 4514         | K.SYELPDGQVITIGNER.F        | 1791.93998 | 2 | 2.70E-06 | 0.70 | 2.69 | - | 542.2  |
| AHQ-3-2, 5202 - 5214   | K.SYELPDGQVITIGNER.F        | 1791.93998 | 2 | 3.63E-09 | 0.96 | 4.79 | - | 1108.0 |
| AHQ-3-12, 4887 - 4914  | K.SYELPDGQVITIGNER.F        | 1791.93998 | 2 | 6.52E-13 | 0.95 | 4.43 | - | 1014.0 |
| AHQ-3-14, 6007         | K.SYELPDGQVITIGNER.F        | 1791.93998 | 2 | 5.91E-07 | 0.87 | 3.74 | - | 763.5  |
| AHQ-3-12, 5056 - 5118  | K.SYELPDGQVITIGNER.F        | 1791.93998 | 2 | 7.79E-13 | 0.95 | 4.43 | - | 1058.4 |
| AHQ-3-3, 4765          | K.SYELPDGQVITIGNER.F        | 1791.93998 | 2 | 4.31E-07 | 0.85 | 3.36 | - | 626.5  |

|                             |                                                                         |            |   |          |       |        |       |         |
|-----------------------------|-------------------------------------------------------------------------|------------|---|----------|-------|--------|-------|---------|
| AHQ-3-14, 5880 - 5919       | K.SYELPDGGQVITIGNER.F                                                   | 1791.93998 | 2 | 6.20E-04 | 0.54  | 2.83   | -     | 627.9   |
| AHQ-3-2, 5399               | K.SYELPDGGQVITIGNER.F                                                   | 1791.93998 | 2 | 1.98E-05 | 0.89  | 3.64   | -     | 734.4   |
| AHQ-3-9, 4337 - 4405        | K.SYELPDGGQVITIGNER.F                                                   | 1791.93998 | 2 | 1.99E-09 | 0.92  | 3.70   | -     | 958.9   |
| AHQ-3-13, 5006 - 5078       | K.SYELPDGGQVITIGNER.F                                                   | 1791.93998 | 2 | 3.11E-04 | 0.90  | 3.49   | -     | 834.2   |
| AHQ-3-13, 4469              | K.SYELPDGGQVITIGNER.F                                                   | 1791.93998 | 2 | 6.68E-09 | 0.89  | 3.26   | -     | 836.9   |
| AHQ-3-13, 4590 - 4598       | K.SYELPDGGQVITIGNER.F                                                   | 1791.93998 | 2 | 8.03E-07 | 0.88  | 3.56   | -     | 865.2   |
| AHQ-3-13, 4885 - 4925       | K.SYELPDGGQVITIGNER.F                                                   | 1791.93998 | 2 | 5.33E-07 | 0.96  | 4.55   | -     | 1241.0  |
| AHQ-3-11, 3670              | R.VAPEEHPTLLTEAPLNPKA                                                   | 1957.21627 | 2 | 4.89E-06 | 0.85  | 3.59   | -     | 679.4   |
| AHQ-3-5, 3681               | R.VAPEEHPTLLTEAPLNPKA                                                   | 1957.21627 | 2 | 2.58E-04 | 0.93  | 4.23   | -     | 933.4   |
| AHQ-3-7, 3519               | R.VAPEEHPTLLTEAPLNPKA                                                   | 1957.21627 | 2 | 1.29E-04 | 0.75  | 3.10   | -     | 670.4   |
| AHQ-3-3, 4654 - 4658        | K.YPIEHGIITNWDDEMEK.I                                                   | 1962.17174 | 2 | 1.45E-04 | 0.56  | 3.14   | -     | 557.3   |
| AHQ-3-12, 5031              | K.YPIEHGIITNWDDEMEK.I                                                   | 1962.17174 | 2 | 6.20E-04 | 0.83  | 3.38   | -     | 636.7   |
| AHQ-3-12, 4700              | K.YPIEHGIITNWDDEMEK.I                                                   | 1962.17174 | 2 | 4.39E-06 | 0.79  | 3.72   | -     | 535.9   |
| AHQ-3-13, 3991 - 4014       | K.YPIEHGIITNWDDEMEK.I                                                   | 1978.17114 | 2 | 3.86E-04 | 0.76  | 3.32   | -     | 437.4   |
| AHQ-3-11, 4203 - 4212       | K.YPIEHGIITNWDDEMEK.I                                                   | 1962.17174 | 3 | 5.13E-04 | 0.63  | 3.36   | -     | 860.1   |
| AHQ-3-13, 4078              | K.YPIEHGIITNWDDEMEK.I                                                   | 1978.17114 | 2 | 4.97E-04 | 0.84  | 3.30   | -     | 699.2   |
| AHQ-3-5, 4351 - 4389        | K.YPIEHGIITNWDDEMEK.I                                                   | 1962.17174 | 2 | 2.00E-04 | 0.87  | 3.98   | -     | 696.2   |
| AHQ-3-9, 4195 - 4271        | K.YPIEHGIITNWDDEMEK.I                                                   | 1962.17174 | 2 | 1.66E-06 | 0.80  | 3.90   | -     | 409.4   |
| AHQ-3-6, 4261 - 4274        | K.YPIEHGIITNWDDEMEK.I                                                   | 1962.17174 | 2 | 4.21E-04 | 0.90  | 4.18   | -     | 850.2   |
| AHQ-3-12, 4491 - 4555       | K.YPIEHGIITNWDDEMEK.I                                                   | 1962.17174 | 2 | 6.04E-04 | 0.85  | 3.95   | -     | 568.0   |
| AHQ-3-8, 3584 - 3657        | K.YPIEHGIITNWDDEMEK.I                                                   | 1978.17114 | 2 | 4.66E-05 | 0.81  | 3.89   | -     | 452.2   |
| AHQ-3-8, 4705               | K.YPIEHGIITNWDDEMEK.I                                                   | 1962.17174 | 2 | 4.96E-08 | 0.83  | 3.80   | -     | 621.9   |
| AHQ-3-8, 4571               | K.YPIEHGIITNWDDEMEK.I                                                   | 1962.17174 | 2 | 2.17E-06 | 0.71  | 3.68   | -     | 434.4   |
| AHQ-3-8, 4206 - 4276        | K.YPIEHGIITNWDDEMEK.I                                                   | 1962.17174 | 2 | 7.33E-04 | 0.84  | 3.85   | -     | 640.4   |
| AHQ-3-8, 3653 - 3733        | K.YPIEHGIITNWDDEMEK.I                                                   | 1978.17114 | 2 | 6.67E-04 | 0.87  | 4.09   | -     | 639.7   |
| AHQ-3-13, 4350 - 4362       | K.YPIEHGIITNWDDEMEK.I                                                   | 1962.17174 | 3 | 5.72E-04 | 0.78  | 3.84   | -     | 698.0   |
| AHQ-3-8, 5113 - 5136        | K.YPIEHGIITNWDDEMEK.IKWIHHTFYNELR.V                                     | 3475.83549 | 3 | 6.70E-04 | 0.88  | 4.38   | -     | 629.0   |
| AHQ-3-8, 4783               | K.YPIEHGIITNWDDEMEK.IKWIHHTFYNELR.V                                     | 3475.83549 | 3 | 1.01E-04 | 0.81  | 4.42   | -     | 625.2   |
| gj 580301 ref NP_001966.1   | enolase 2; enolase-2, gamma, neuronal; neurone-specific enolase; neuron |            |   | 5.11E-13 | 0.96  | 10.27  | 3.70  | 47268.3 |
| AHQ-3-8, 6392               | R.YITGDQLGALYQDFVR.D                                                    | 1860.05915 | 2 | 3.34E-11 | 0.97  | 5.31   | -     | 1426.6  |
| AHQ-3-7, 6598               | R.YITGDQLGALYQDFVR.D                                                    | 1860.05915 | 2 | 5.11E-13 | 0.96  | 5.02   | -     | 1206.7  |
| gj 10346135 ref NP_055083.1 | microtubule-associated protein, RP/EB family, member 2; T-cell activat  |            |   | 5.72E-13 | 1.93  | 20.28  | 9.80  | 37031.1 |
| AHQ-3-12, 6790              | R.FQDNLDIFQWFK.K                                                        | 1601.78539 | 2 | 3.21E-06 | 0.96  | 5.00   | -     | 1168.6  |
| AHQ-3-9, 6680               | R.FQDNLDIFQWFK.K                                                        | 1601.78539 | 2 | 2.48E-08 | 0.97  | 4.63   | -     | 1480.0  |
| AHQ-3-13, 6789              | R.FQDNLDIFQWFK.K                                                        | 1601.78539 | 2 | 2.68E-06 | 0.97  | 4.52   | -     | 1852.8  |
| AHQ-3-9, 4411               | K.SDKDLETQVQLNEQVHSLK.L                                                 | 2325.56134 | 2 | 5.72E-13 | 0.97  | 5.08   | -     | 1398.3  |
| AHQ-3-9, 4404 - 4416        | K.SDKDLETQVQLNEQVHSLK.L                                                 | 2325.56134 | 3 | 4.87E-04 | 0.97  | 5.61   | -     | 1729.9  |
| gj 4503571 ref NP_001419.1  | enolase 1; phosphopyruvate hydratase; MYC promoter-binding protein 1; n |            |   | 5.94E-13 | 9.78  | 110.29 | 36.20 | 47168.7 |
| AHQ-3-14-, 5247 - 5265      | R.AAVPSGASTGYEALERL.D                                                   | 1806.00979 | 2 | 3.25E-06 | 0.93  | 4.53   | -     | 617.4   |
| AHQ-3-8, 4779 - 4852        | R.AAVPSGASTGYEALERL.D                                                   | 1806.00979 | 2 | 2.24E-12 | 0.96  | 5.33   | -     | 686.4   |
| AHQ-3-13-, 5246 - 5266      | R.AAVPSGASTGYEALERL.D                                                   | 1806.00979 | 2 | 8.82E-13 | 0.94  | 4.87   | -     | 800.9   |
| AHQ-3-7, 5232               | R.AAVPSGASTGYEALERL.D                                                   | 1806.00979 | 2 | 8.37E-04 | 0.81  | 3.33   | -     | 444.0   |
| AHQ-3-11, 5036              | R.AAVPSGASTGYEALERL.D                                                   | 1806.00979 | 2 | 1.71E-10 | 0.96  | 4.62   | -     | 1016.5  |
| AHQ-3-12, 5275              | R.AAVPSGASTGYEALERL.D                                                   | 1806.00979 | 2 | 1.10E-08 | 0.71  | 3.28   | -     | 242.8   |
| AHQ-3-14, 6237              | R.AAVPSGASTGYEALERL.D                                                   | 1806.00979 | 2 | 5.19E-06 | 0.94  | 4.68   | -     | 685.8   |
| AHQ-3-13, 5190 - 5270       | R.AAVPSGASTGYEALERL.D                                                   | 1806.00979 | 2 | 3.24E-09 | 0.90  | 3.96   | -     | 498.8   |
| AHQ-3-9, 4880 - 4888        | R.AAVPSGASTGYEALERL.D                                                   | 1806.00979 | 2 | 4.04E-11 | 0.92  | 4.40   | -     | 715.6   |
| AHQ-3-10, 4199              | K.DATNVGDEGGFAPNILENK.E                                                 | 1962.06350 | 2 | 8.98E-04 | 0.92  | 4.76   | -     | 751.4   |
| AHQ-3-8, 4348 - 4391        | K.DATNVGDEGGFAPNILENK.E                                                 | 1962.06350 | 2 | 3.70E-05 | 0.89  | 4.78   | -     | 730.6   |
| AHQ-3-7, 4498               | K.DATNVGDEGGFAPNILENK.E                                                 | 1962.06350 | 2 | 1.73E-06 | 0.92  | 4.74   | -     | 669.1   |
| AHQ-3-13-, 4222             | R.GNPTVEVLDFTSK.G                                                       | 1407.55065 | 2 | 2.21E-06 | 0.57  | 2.68   | -     | 490.3   |
| AHQ-3-8, 3849               | R.GNPTVEVLDFTSK.G                                                       | 1407.55065 | 1 | 5.45E-08 | 0.68  | 3.26   | -     | 601.7   |
| AHQ-3-13, 4214 - 4218       | R.GNPTVEVLDFTSK.G                                                       | 1407.55065 | 2 | 4.43E-06 | 0.77  | 3.16   | -     | 607.9   |
| AHQ-3-7, 5823               | R.HIADLAGNSEVILPVAFNVINGSHAGNK.L                                        | 3013.35654 | 3 | 5.03E-04 | 0.79  | 3.47   | -     | 1009.6  |
| AHQ-3-7, 1966 - 1968        | R.IGAEVYHNK.L                                                           | 1144.30502 | 2 | 7.85E-05 | 0.95  | 3.61   | -     | 1688.4  |
| AHQ-3-7, 6892               | K.LAMQEFMLPVGAAANFR.E                                                   | 1909.30812 | 2 | 9.16E-04 | 0.91  | 4.26   | -     | 779.5   |
| AHQ-3-7, 5447               | K.LAM*QEFM*LPVGAAANFR.E                                                 | 1941.30692 | 2 | 9.27E-04 | 0.91  | 3.84   | -     | 971.4   |
| AHQ-3-8, 5157               | K.LAM*QEFM*LPVGAAANFR.E                                                 | 1941.30692 | 2 | 3.34E-05 | 0.95  | 4.82   | -     | 958.4   |
| AHQ-3-9, 5173               | K.LAM*QEFM*LPVGAAANFR.E                                                 | 1941.30692 | 2 | 9.99E-04 | 0.93  | 4.12   | -     | 783.4   |
| AHQ-3-9, 6588 - 6592        | K.LAMQEFMLPVGAAANFR.E                                                   | 1909.30812 | 2 | 1.16E-04 | 0.94  | 4.55   | -     | 822.3   |
| AHQ-3-8, 6701               | K.LAMQEFMLPVGAAANFR.E                                                   | 1909.30812 | 2 | 8.50E-05 | 0.94  | 4.84   | -     | 698.7   |
| AHQ-3-8, 2824               | K.SCNCLLK.V                                                             | 1010.21066 | 2 | 8.71E-04 | 0.80  | 2.77   | -     | 653.2   |
| AHQ-3-8, 6805               | K.SFIKDPVVSIEDPFDQDDWGAWQK.F                                            | 2987.22328 | 3 | 5.94E-13 | 0.97  | 5.78   | -     | 1972.5  |
| AHQ-3-8, 6804               | K.SFIKDPVVSIEDPFDQDDWGAWQK.F                                            | 2987.22328 | 2 | 1.25E-07 | 0.89  | 4.13   | -     | 743.3   |
| AHQ-3-8, 3665               | K.VNQIGSVTSLQACK.L                                                      | 1635.82159 | 2 | 3.21E-06 | 0.83  | 3.32   | -     | 628.9   |
| AHQ-3-13-, 3782             | K.VNQIGSVTSLQACK.L                                                      | 1635.82159 | 2 | 2.25E-04 | 0.80  | 3.07   | -     | 765.7   |
| AHQ-3-8, 3373               | K.VNQIGSVTSLQACK.L                                                      | 1635.82159 | 2 | 1.62E-07 | 0.92  | 3.96   | -     | 828.3   |
| AHQ-3-9, 4507               | R.YISPDQLADLYK.S                                                        | 1426.59557 | 2 | 3.67E-05 | 0.88  | 3.21   | -     | 711.1   |
| AHQ-3-7, 4722 - 4738        | R.YISPDQLADLYK.S                                                        | 1426.59557 | 2 | 5.35E-07 | 0.94  | 4.20   | -     | 768.4   |
| AHQ-3-8, 4513               | R.YISPDQLADLYK.S                                                        | 1426.59557 | 1 | 7.85E-04 | 0.75  | 3.32   | -     | 623.5   |
| AHQ-3-8, 4500 - 4507        | R.YISPDQLADLYK.S                                                        | 1426.59557 | 2 | 9.12E-09 | 0.93  | 4.21   | -     | 722.3   |
| gj 4557677 ref NP_000203.1  | integrin beta chain, beta 3 precursor; platelet glycoprotein IIIa precu |            |   | 6.81E-13 | 18.65 | 240.26 | 36.80 | 87185.6 |
| AHQ-3-3, 2873 - 2888        | R.AKWDANNPLYK.E                                                         | 1421.58225 | 2 | 9.40E-07 | 0.85  | 3.21   | -     | 669.0   |
| AHQ-3-3, 5638               | R.CDLKENLLKDNCAPESEIEFPVSEAR.V                                          | 2938.23689 | 2 | 1.08E-04 | 0.79  | 2.86   | -     | 781.0   |
| AHQ-3-5, 5403               | R.CDLKENLLKDNCAPESEIEFPVSEAR.V                                          | 2938.23689 | 3 | 1.29E-08 | 0.92  | 4.34   | -     | 1153.5  |
| AHQ-3-3, 5628               | R.CDLKENLLKDNCAPESEIEFPVSEAR.V                                          | 2938.23689 | 3 | 6.44E-04 | 0.85  | 4.25   | -     | 680.6   |
| AHQ-3-4, 5497               | R.CDLKENLLKDNCAPESEIEFPVSEAR.V                                          | 2938.23689 | 3 | 8.70E-04 | 0.85  | 3.82   | -     | 973.9   |
| AHQ-3-3, 5520 - 5588        | R.CDLKENLLKDNCAPESEIEFPVSEAR.V                                          | 2938.23689 | 2 | 2.03E-06 | 0.92  | 5.10   | -     | 497.4   |
| AHQ-3-3, 5481 - 5560        | R.CDLKENLLKDNCAPESEIEFPVSEAR.V                                          | 2938.23689 | 3 | 2.25E-06 | 0.93  | 4.89   | -     | 1200.7  |
| AHQ-3-3, 4616               | R.CGPWLGSGQCESEEDYRPSQQDECSPR.E                                         | 3380.49342 | 3 | 6.81E-13 | 0.69  | 3.42   | -     | 437.0   |
| AHQ-3-4, 4476               | R.CGPWLGSGQCESEEDYRPSQQDECSPR.E                                         | 3380.49342 | 3 | 2.61E-10 | 0.81  | 3.76   | -     | 434.3   |
| AHQ-3-5, 4403               | R.CGPWLGSGQCESEEDYRPSQQDECSPR.E                                         | 3380.49342 | 3 | 7.68E-05 | 0.73  | 3.52   | -     | 393.0   |
| AHQ-3-3, 4464 - 4532        | R.CGPWLGSGQCESEEDYRPSQQDECSPR.E                                         | 3380.49342 | 3 | 9.97E-05 | 0.68  | 3.55   | -     | 433.5   |
| AHQ-3-3, 6656 - 6724        | R.DAPEGGFDAIMQATVCDEK.I                                                 | 2056.21716 | 2 | 2.48E-05 | 0.93  | 4.13   | -     | 1117.6  |
| AHQ-3-1, 6045 - 6076        | R.DAPEGGFDAIMQATVCDEK.I                                                 | 2056.21716 | 2 | 2.37E-09 | 0.83  | 3.89   | -     | 527.5   |
| AHQ-3-3, 6564 - 6634        | R.DAPEGGFDAIMQATVCDEK.I                                                 | 2056.21716 | 2 | 4.77E-05 | 0.94  | 4.49   | -     | 955.7   |
| AHQ-3-3, 6421 - 6497        | R.DAPEGGFDAIMQATVCDEK.I                                                 | 2056.21716 | 2 | 5.71E-06 | 0.86  | 3.81   | -     | 562.4   |
| AHQ-3-3, 6281 - 6350        | R.DAPEGGFDAIMQATVCDEK.I                                                 | 2056.21716 | 2 | 4.85E-06 | 0.94  | 4.40   | -     | 947.1   |
| AHQ-3-3, 6149               | R.DAPEGGFDAIMQATVCDEK.I                                                 | 2056.21716 | 2 | 8.18E-05 | 0.96  | 4.36   | -     | 1246.0  |
| AHQ-3-3, 6744 - 6812        | R.DAPEGGFDAIMQATVCDEK.I                                                 | 2056.21716 | 2 | 2.48E-06 | 0.92  | 4.45   | -     | 671.7   |
| AHQ-3-3, 4632 - 4705        | R.DAPEGGFDAIM*QATVCDEK.I                                                | 2072.21656 | 2 | 1.71E-05 | 0.92  | 3.59   | -     | 1134.2  |
| AHQ-3-1, 4633               | R.DAPEGGFDAIM*QATVCDEK.I                                                | 2072.21656 | 2 | 1.27E-04 | 0.92  | 3.70   | -     | 890.2   |
| AHQ-3-3, 4782               | R.DAPEGGFDAIM*QATVCDEK.I                                                | 2072.21656 | 2 | 3.26E-04 | 0.88  | 3.90   | -     | 589.3   |
| AHQ-3-3, 5084               | K.DDLWSIQNLGK.L                                                         | 1390.52332 | 1 | 4.20E-04 | 0.61  | 2.74   | -     | 387.3   |
| AHQ-3-3, 5081 - 5096        | K.DDLWSIQNLGK.L                                                         | 1390.52332 | 2 | 6.34E-06 | 0.95  | 4.64   | -     | 951.0   |
| AHQ-3-4, 5045               | K.DDLWSIQNLGK.L                                                         | 1390.52332 | 1 | 6.61E-08 | 0.73  | 2.99   | -     | 428.7   |
| AHQ-3-1, 5120               | K.DDLWSIQNLGK.L                                                         | 1390.52332 | 2 | 5.30E-05 | 0.93  | 3.86   | -     | 1069.1  |
| AHQ-3-11, 4184              | K.DNCAPESIEFPVSEAR.V                                                    | 1822.93099 | 2 | 6.20E-05 | 0.65  | 2.69   | -     | 729.6   |
| AHQ-3-6, 4347               | K.DNCAPESIEFPVSEAR.V                                                    | 1822.93099 | 2 | 4.49E-06 | 0.66  | 3.04   | -     | 520.6   |
| AHQ-3-3, 4778               | K.DNCAPESIEFPVSEAR.V                                                    | 1822.93099 | 2 | 1.10E-04 | 0.77  | 3.15   | -     | 779.2   |
| AHQ-3-4, 4542 - 4549        | K.DNCAPESIEFPVSEAR.V                                                    | 1822.93099 | 2 | 9.56E-05 | 0.88  | 3.30   | -     | 1059.0  |
| AHQ-3-3, 3325 - 3332        | K.EATSTFTNITYR.G                                                        | 1404.50685 | 2 | 1.50E-04 | 0.84  | 3.12   | -     | 778.4   |
| AHQ-3-1, 3464 - 3470        | K.EATSTFTNITYR.G                                                        | 1404.50685 | 2 | 2.26E-06 | 0.85  | 3.36   | -     | 688.7   |
| AHQ-3-3, 2241 - 2252        | R.FQYVEDSSGK.S                                                          | 1224.25749 | 1 | 8.13E-04 | 0.27  | 2.29   | -     | 450.8   |
| AHQ-3-4, 3578 - 3648        | R.GECLCGQCVCCHSSDFGK.I                                                  | 2006.16137 | 2 | 2.68E-05 | 0.94  | 3.96   | -     | 1302.0  |
| AHQ-3-3, 3681               | R.GECLCGQCVCCHSSDFGK.I                                                  | 2006.16137 | 3 | 2.18E-04 | 0.74  | 3.29   | -     | 663.9   |
| AHQ-3-3, 3664 - 3737        | R.GECLCGQCVCCHSSDFGK.I                                                  | 2006.16137 | 2 | 6.65E-05 | 0.92  | 4.28   | -     | 1004.1  |

|                                                                                          |                                              |            |   |          |       |        |       |         |
|------------------------------------------------------------------------------------------|----------------------------------------------|------------|---|----------|-------|--------|-------|---------|
| AHQ-3-3, 3821                                                                            | R.GECLCGQCVCCHSSDFGK.I                       | 2006.16137 | 2 | 1.34E-08 | 0.92  | 4.56   | -     | 827.7   |
| AHQ-3-2, 3750 - 3758                                                                     | R.GECLCGQCVCCHSSDFGK.I                       | 2006.16137 | 2 | 5.94E-09 | 0.97  | 4.26   | -     | 2047.0  |
| AHQ-3-6, 3473 - 3482                                                                     | R.GECLCGQCVCCHSSDFGK.I                       | 2006.16137 | 2 | 1.38E-05 | 0.92  | 3.36   | -     | 1267.2  |
| AHQ-3-5, 3531 - 3535                                                                     | R.GECLCGQCVCCHSSDFGK.I                       | 2006.16137 | 2 | 9.88E-05 | 0.97  | 4.68   | -     | 2019.0  |
| AHQ-3-3, 4426                                                                            | R.GKCECGSCVCIQPGSYGDTCEKCPCTCPDACTFKK.E      | 4028.42584 | 3 | 2.33E-04 | 0.93  | 5.20   | -     | 792.3   |
| AHQ-3-4, 4372                                                                            | R.GKCECGSCVCIQPGSYGDTCEKCPCTCPDACTFKK.E      | 4028.42584 | 3 | 9.31E-05 | 0.76  | 3.76   | -     | 539.1   |
| AHQ-3-3, 1952 - 2020                                                                     | K.GSGDSSQVTVQVSPQR.I                         | 1533.58302 | 2 | 1.40E-04 | 0.79  | 3.21   | -     | 817.7   |
| AHQ-3-3, 1800 - 1884                                                                     | K.GSGDSSQVTVQVSPQR.I                         | 1533.58302 | 2 | 7.88E-04 | 0.71  | 2.88   | -     | 623.9   |
| AHQ-3-3, 2560 - 2630                                                                     | K.HVLTLDQVTR.F                               | 1283.45912 | 2 | 6.96E-07 | 0.92  | 3.32   | -     | 776.7   |
| AHQ-3-4, 2560                                                                            | K.HVLTLDQVTR.F                               | 1283.45912 | 2 | 1.23E-06 | 0.88  | 3.13   | -     | 730.5   |
| AHQ-3-6, 2405 - 2413                                                                     | K.HVLTLDQVTR.F                               | 1283.45912 | 1 | 2.74E-04 | 0.22  | 1.87   | -     | 228.8   |
| AHQ-3-2, 2590                                                                            | K.HVLTLDQVTR.F                               | 1283.45912 | 2 | 4.90E-05 | 0.89  | 3.37   | -     | 666.1   |
| AHQ-3-5, 2431                                                                            | K.HVLTLDQVTR.F                               | 1283.45912 | 2 | 1.99E-06 | 0.91  | 3.38   | -     | 786.5   |
| AHQ-3-1, 2809                                                                            | K.HVLTLDQVTR.F                               | 1283.45912 | 2 | 2.17E-04 | 0.90  | 3.24   | -     | 806.2   |
| AHQ-3-8, 2252                                                                            | K.HVLTLDQVTR.F                               | 1283.45912 | 2 | 2.24E-04 | 0.92  | 3.43   | -     | 876.1   |
| AHQ-3-3, 5449                                                                            | R.LAGIVQPNDDGQCHVGSNDNHYSASTTMDYP SLGLMTEK.L | 3997.35517 | 3 | 6.53E-09 | 0.73  | 3.55   | -     | 474.3   |
| AHQ-3-4, 5529                                                                            | R.LAGIVQPNDDGQCHVGSNDNHYSASTTMDYP SLGLMTEK.L | 3997.35517 | 3 | 5.88E-04 | 0.48  | 3.11   | -     | 503.7   |
| AHQ-3-3, 5537 - 5609                                                                     | R.LAGIVQPNDDGQCHVGSNDNHYSASTTMDYP SLGLMTEK.L | 3997.35517 | 3 | 1.29E-04 | 0.84  | 3.85   | -     | 733.9   |
| AHQ-3-3, 3845 - 3909                                                                     | R.NDASHLLVFTTDAK.T                           | 1532.67977 | 2 | 3.70E-07 | 0.97  | 5.11   | -     | 1241.3  |
| AHQ-3-4, 3781                                                                            | R.NDASHLLVFTTDAK.T                           | 1532.67977 | 2 | 6.45E-06 | 0.92  | 4.01   | -     | 1009.1  |
| AHQ-3-1, 4562                                                                            | R.NDASHLLVFTTDAK.T                           | 1532.67977 | 2 | 3.51E-07 | 0.94  | 4.55   | -     | 937.8   |
| AHQ-3-4, 4400 - 4410                                                                     | R.NDASHLLVFTTDAK.T                           | 1532.67977 | 2 | 6.28E-10 | 0.97  | 4.91   | -     | 1338.5  |
| AHQ-3-6, 3449 - 3525                                                                     | R.NDASHLLVFTTDAK.T                           | 1532.67977 | 2 | 8.01E-08 | 0.96  | 4.49   | -     | 1249.4  |
| AHQ-3-3, 4460 - 4469                                                                     | R.NDASHLLVFTTDAK.T                           | 1532.67977 | 2 | 6.84E-09 | 0.94  | 4.48   | -     | 926.1   |
| AHQ-3-6, 4158                                                                            | R.NDASHLLVFTTDAK.T                           | 1532.67977 | 2 | 6.96E-04 | 0.80  | 2.63   | -     | 928.5   |
| AHQ-3-2, 3926                                                                            | R.NDASHLLVFTTDAK.T                           | 1532.67977 | 2 | 1.88E-09 | 0.92  | 4.14   | -     | 847.8   |
| AHQ-3-9, 3231                                                                            | R.NDASHLLVFTTDAK.T                           | 1532.67977 | 2 | 2.37E-07 | 0.93  | 4.28   | -     | 946.1   |
| AHQ-3-1, 4065 - 4074                                                                     | R.NDASHLLVFTTDAK.T                           | 1532.67977 | 2 | 1.36E-09 | 0.97  | 4.85   | -     | 1423.4  |
| AHQ-3-5, 2959                                                                            | K.SFTIKPVGFK.D                               | 1124.35685 | 1 | 7.17E-04 | 0.43  | 2.28   | -     | 692.2   |
| AHQ-3-3, 3242                                                                            | K.SFTIKPVGFK.D                               | 1124.35685 | 1 | 2.50E-04 | 0.71  | 2.89   | -     | 541.3   |
| AHQ-3-3, 3690 - 3772                                                                     | R.TDTCMSSNGLLCSGR.G                          | 1661.81786 | 2 | 2.68E-08 | 0.91  | 3.57   | -     | 776.0   |
| AHQ-3-1, 3630                                                                            | R.TDTCMSSNGLLCSGR.G                          | 1661.81786 | 2 | 7.17E-09 | 0.85  | 3.32   | -     | 843.5   |
| AHQ-3-4, 3506 - 3584                                                                     | R.TDTCMSSNGLLCSGR.G                          | 1661.81786 | 2 | 1.91E-08 | 0.86  | 3.27   | -     | 902.5   |
| AHQ-3-3, 2958 - 3034                                                                     | R.TDTCM*SSNGLLCSGR.G                         | 1677.81726 | 2 | 1.34E-08 | 0.88  | 3.74   | -     | 771.7   |
| AHQ-3-4, 2966                                                                            | R.TDTCM*SSNGLLCSGR.G                         | 1677.81726 | 2 | 2.60E-06 | 0.75  | 2.98   | -     | 462.5   |
| AHQ-3-3, 2856                                                                            | R.TDTCM*SSNGLLCSGR.G                         | 1677.81726 | 2 | 3.90E-07 | 0.96  | 4.19   | -     | 1442.3  |
| AHQ-3-1, 2894                                                                            | R.TDTCM*SSNGLLCSGR.G                         | 1677.81726 | 2 | 9.10E-07 | 0.95  | 3.89   | -     | 1592.9  |
| AHQ-3-3, 1542                                                                            | K.THIALDGR.L                                 | 882.98732  | 1 | 2.35E-04 | 0.00  | 2.02   | -     | 91.4    |
| AHQ-3-3, 1728 - 1796                                                                     | R.VLEDRPLSDK.G                               | 1172.31354 | 2 | 4.18E-05 | 0.89  | 3.17   | -     | 932.9   |
| AHQ-3-1, 2066                                                                            | R.VLEDRPLSDK.G                               | 1172.31354 | 2 | 1.84E-06 | 0.87  | 2.97   | -     | 1019.3  |
| AHQ-3-1, 2882                                                                            | R.VLEDRPLSDK.GSGDSSQVTVQVSPQR.I              | 2686.87396 | 3 | 8.27E-06 | 0.94  | 4.60   | -     | 1328.1  |
| AHQ-3-3, 2738                                                                            | R.VLEDRPLSDK.GSGDSSQVTVQVSPQR.I              | 2686.87396 | 3 | 2.52E-08 | 0.94  | 4.89   | -     | 1242.1  |
| AHQ-3-1, 3420                                                                            | K.WDTANNPLYK.E                               | 1222.33111 | 2 | 1.19E-04 | 0.75  | 2.86   | -     | 662.1   |
| AHQ-3-3, 3206 - 3276                                                                     | K.WDTANNPLYK.E                               | 1222.33111 | 2 | 5.10E-04 | 0.65  | 2.79   | -     | 461.7   |
| AHQ-3-6, 3614                                                                            | K.YCECDDFSCVR.Y                              | 1514.59674 | 2 | 1.51E-04 | 0.90  | 3.21   | -     | 963.8   |
| AHQ-3-2, 3843                                                                            | K.YCECDDFSCVR.Y                              | 1514.59674 | 2 | 2.16E-04 | 0.94  | 3.82   | -     | 1268.5  |
| AHQ-3-1, 3780                                                                            | K.YCECDDFSCVR.Y                              | 1514.59674 | 2 | 8.73E-07 | 0.95  | 3.69   | -     | 1328.6  |
| AHQ-3-5, 3680                                                                            | K.YCECDDFSCVR.Y                              | 1514.59674 | 2 | 9.32E-06 | 0.96  | 3.89   | -     | 1300.5  |
| AHQ-3-3, 3760                                                                            | K.YCECDDFSCVR.Y                              | 1514.59674 | 2 | 1.63E-07 | 0.96  | 3.95   | -     | 1323.8  |
| AHQ-3-4, 3750                                                                            | K.YCECDDFSCVR.Y                              | 1514.59674 | 2 | 4.93E-09 | 0.93  | 3.34   | -     | 1005.4  |
| AHQ-3-3, 2224                                                                            | R.YCRDEIESVK.E                               | 1300.42023 | 2 | 1.04E-04 | 0.86  | 3.45   | -     | 984.6   |
| gi4504165[ref NP_000168.1] gelsolin (amyloidosis, Finnish type); Gelsolin [Homo sapiens] |                                              |            |   | 7.64E-13 | 22.16 | 260.35 | 39.30 | 85696.9 |
| AHQ-3-5, 3611 - 3613                                                                     | K.AGALNSNDAFVLK.T                            | 1320.47622 | 1 | 6.63E-06 | 0.70  | 3.04   | -     | 522.1   |
| AHQ-3-5, 3712                                                                            | K.AGALNSNDAFVLK.T                            | 1320.47622 | 1 | 6.13E-07 | 0.41  | 2.41   | -     | 454.1   |
| AHQ-3-5, 3721 - 3744                                                                     | K.AGALNSNDAFVLK.T                            | 1320.47622 | 2 | 2.24E-07 | 0.85  | 3.83   | -     | 456.4   |
| AHQ-3-5, 3393 - 3405                                                                     | K.AGALNSNDAFVLK.T                            | 1320.47622 | 2 | 7.12E-07 | 0.90  | 3.96   | -     | 708.2   |
| AHQ-3-5, 2668                                                                            | K.AGKEPGLQIWR.V                              | 1255.45060 | 2 | 4.62E-05 | 0.57  | 2.57   | -     | 412.0   |
| AHQ-3-6, 5531 - 5546                                                                     | R.AQPQVAEGSEPDGFWEALGK.A                     | 2273.44345 | 2 | 4.13E-04 | 0.92  | 4.86   | -     | 498.1   |
| AHQ-3-6, 5673 - 5683                                                                     | R.AQPQVAEGSEPDGFWEALGK.A                     | 2273.44345 | 2 | 6.32E-04 | 0.95  | 4.55   | -     | 897.9   |
| AHQ-3-7, 5488                                                                            | R.AQPQVAEGSEPDGFWEALGK.A                     | 2273.44345 | 2 | 1.63E-11 | 0.94  | 5.09   | -     | 582.8   |
| AHQ-3-7, 5642                                                                            | R.AQPQVAEGSEPDGFWEALGK.A                     | 2273.44345 | 2 | 5.64E-07 | 0.96  | 5.50   | -     | 808.3   |
| AHQ-3-5, 5939 - 6015                                                                     | R.AQPQVAEGSEPDGFWEALGK.A                     | 2273.44345 | 2 | 5.85E-08 | 0.96  | 5.29   | -     | 766.0   |
| AHQ-3-8, 5425                                                                            | R.AQPQVAEGSEPDGFWEALGK.A                     | 2273.44345 | 2 | 1.26E-05 | 0.91  | 4.56   | -     | 594.8   |
| AHQ-3-11, 5435                                                                           | R.AQPQVAEGSEPDGFWEALGK.A                     | 2273.44345 | 2 | 7.21E-05 | 0.93  | 4.28   | -     | 626.5   |
| AHQ-3-5, 5604                                                                            | R.AQPQVAEGSEPDGFWEALGK.A                     | 2273.44345 | 2 | 4.00E-07 | 0.95  | 5.22   | -     | 675.4   |
| AHQ-3-4, 5960                                                                            | R.AQPQVAEGSEPDGFWEALGK.A                     | 2273.44345 | 2 | 1.69E-05 | 0.92  | 4.53   | -     | 647.9   |
| AHQ-3-5, 5755 - 5823                                                                     | R.AQPQVAEGSEPDGFWEALGK.A                     | 2273.44345 | 2 | 5.79E-06 | 0.96  | 5.54   | -     | 938.0   |
| AHQ-3-10, 5190                                                                           | R.AQPQVAEGSEPDGFWEALGK.A                     | 2273.44345 | 2 | 1.56E-06 | 0.91  | 4.55   | -     | 521.0   |
| AHQ-3-1, 6061 - 6064                                                                     | R.AQPQVAEGSEPDGFWEALGK.A                     | 2273.44345 | 2 | 1.40E-06 | 0.96  | 5.49   | -     | 701.9   |
| AHQ-3-9, 5359 - 5379                                                                     | R.AQPQVAEGSEPDGFWEALGK.A                     | 2273.44345 | 2 | 5.77E-07 | 0.95  | 5.08   | -     | 664.4   |
| AHQ-3-8, 5264 - 5340                                                                     | R.AQPQVAEGSEPDGFWEALGK.A                     | 2273.44345 | 2 | 7.73E-05 | 0.94  | 4.95   | -     | 588.7   |
| AHQ-3-9, 5191                                                                            | R.AQPQVAEGSEPDGFWEALGK.A                     | 2273.44345 | 2 | 3.60E-04 | 0.86  | 4.01   | -     | 403.0   |
| AHQ-3-6, 5597                                                                            | R.DPDQTDGLGLSYLSSHIANVER.V                   | 2388.53285 | 3 | 7.64E-13 | 0.95  | 4.85   | -     | 1570.2  |
| AHQ-3-5, 5928                                                                            | R.DPDQTDGLGLSYLSSHIANVER.V                   | 2388.53285 | 3 | 3.91E-06 | 0.89  | 3.84   | -     | 1283.1  |
| AHQ-3-5, 2167                                                                            | K.DSQEEEKTEALTSK.R                           | 1666.72289 | 2 | 1.01E-06 | 0.86  | 3.24   | -     | 933.4   |
| AHQ-3-5, 2080 - 2085                                                                     | K.DSQEEEKTEALTSK.R                           | 1666.72289 | 2 | 6.03E-06 | 0.95  | 4.15   | -     | 1496.6  |
| AHQ-3-12, 2171                                                                           | K.DSQEEEKTEALTSK.R                           | 1666.72289 | 2 | 1.15E-05 | 0.86  | 3.38   | -     | 932.8   |
| AHQ-3-3, 2150                                                                            | K.DSQEEEKTEALTSK.R                           | 1666.72289 | 2 | 7.96E-07 | 0.87  | 3.18   | -     | 1106.8  |
| AHQ-3-5, 1989                                                                            | K.DSQEEEKTEALTSK.R                           | 1666.72289 | 3 | 4.98E-05 | 0.96  | 4.42   | -     | 1999.0  |
| AHQ-3-5, 1983 - 1995                                                                     | K.DSQEEEKTEALTSK.R                           | 1666.72289 | 2 | 1.54E-08 | 0.95  | 4.16   | -     | 1462.0  |
| AHQ-3-7, 1890                                                                            | K.DSQEEEKTEALTSK.R                           | 1666.72289 | 2 | 5.16E-06 | 0.94  | 3.83   | -     | 1477.9  |
| AHQ-3-13, 2261                                                                           | K.DSQEEEKTEALTSK.R                           | 1666.72289 | 2 | 4.63E-06 | 0.91  | 3.71   | -     | 1137.6  |
| AHQ-3-11, 2094                                                                           | K.DSQEEEKTEALTSK.R                           | 1666.72289 | 2 | 3.07E-06 | 0.92  | 3.58   | -     | 1147.1  |
| AHQ-3-10, 2070                                                                           | K.DSQEEEKTEALTSK.R                           | 1666.72289 | 2 | 6.47E-08 | 0.95  | 3.95   | -     | 1560.8  |
| AHQ-3-6, 1961                                                                            | K.DSQEEEKTEALTSK.R                           | 1666.72289 | 2 | 5.85E-10 | 0.94  | 3.62   | -     | 1591.6  |
| AHQ-3-13-, 2225                                                                          | K.DSQEEEKTEALTSK.R                           | 1666.72289 | 2 | 8.89E-06 | 0.96  | 4.54   | -     | 1568.5  |
| AHQ-3-5, 6432 - 6496                                                                     | R.EVQGFESATFLGYFK.S                          | 1723.90570 | 2 | 1.06E-08 | 0.97  | 5.05   | -     | 1410.3  |
| AHQ-3-5, 6953                                                                            | R.EVQGFESATFLGYFK.S                          | 1723.90570 | 2 | 4.21E-04 | 0.90  | 3.21   | -     | 1175.5  |
| AHQ-3-13-, 6143                                                                          | R.EVQGFESATFLGYFK.S                          | 1723.90570 | 2 | 2.18E-05 | 0.93  | 3.40   | -     | 1372.8  |
| AHQ-3-12, 6111                                                                           | R.EVQGFESATFLGYFK.S                          | 1723.90570 | 2 | 4.16E-07 | 0.92  | 3.77   | -     | 874.9   |
| AHQ-3-13, 6154                                                                           | R.EVQGFESATFLGYFK.S                          | 1723.90570 | 2 | 1.34E-04 | 0.94  | 4.07   | -     | 1005.0  |
| AHQ-3-5, 6532                                                                            | R.EVQGFESATFLGYFK.S                          | 1723.90570 | 2 | 1.02E-06 | 0.90  | 3.17   | -     | 1162.1  |
| AHQ-3-14-, 6035                                                                          | R.EVQGFESATFLGYFK.S                          | 1723.90570 | 2 | 8.50E-06 | 0.89  | 3.69   | -     | 831.8   |
| AHQ-3-8, 1913                                                                            | K.HVVPNEVVQR.L                               | 1276.46981 | 2 | 1.70E-04 | 0.87  | 3.11   | -     | 669.3   |
| AHQ-3-5, 2055 - 2075                                                                     | K.HVVPNEVVQR.L                               | 1276.46981 | 2 | 1.27E-07 | 0.90  | 3.34   | -     | 566.4   |
| AHQ-3-9, 2004                                                                            | K.HVVPNEVVQR.L                               | 1276.46981 | 2 | 7.76E-06 | 0.87  | 3.16   | -     | 598.8   |
| AHQ-3-12, 2266                                                                           | K.HVVPNEVVQR.L                               | 1276.46981 | 1 | 5.45E-06 | 0.54  | 2.50   | -     | 480.9   |
| AHQ-3-5, 2276 - 2277                                                                     | K.HVVPNEVVQR.L                               | 1276.46981 | 1 | 2.21E-08 | 0.70  | 2.53   | -     | 543.6   |
| AHQ-3-12, 2258                                                                           | K.HVVPNEVVQR.L                               | 1276.46981 | 2 | 8.06E-08 | 0.92  | 3.52   | -     | 555.8   |
| AHQ-3-5, 2059 - 2065                                                                     | K.HVVPNEVVQR.L                               | 1276.46981 | 1 | 2.85E-05 | 0.25  | 2.12   | -     | 295.3   |
| AHQ-3-5, 2069                                                                            | K.HVVPNEVVQR.L                               | 1276.46981 | 1 | 9.20E-04 | 0.34  | 2.73   | -     | 255.0   |
| AHQ-3-6, 2035                                                                            | K.HVVPNEVVQR.L                               | 1276.46981 | 2 | 4.15E-09 | 0.86  | 2.86   | -     | 620.0   |
| AHQ-3-11, 2172                                                                           | K.HVVPNEVVQR.L                               | 1276.46981 | 1 | 7.94E-06 | 0.63  | 2.77   | -     | 370.6   |
| AHQ-3-11, 2168                                                                           | K.HVVPNEVVQR.L                               | 1276.46981 | 1 | 3.77E-04 | 0.14  | 1.85   | -     | 265.5   |
| AHQ-3-11, 2163                                                                           | K.HVVPNEVVQR.L                               | 1276.46981 | 2 | 1.67E-08 | 0.87  | 3.03   | -     | 535.4   |
| AHQ-3-5, 2272                                                                            | K.HVVPNEVVQR.L                               | 1276.46981 | 2 | 2.71E-07 | 0.89  | 2.88   | -     | 860.5   |
| AHQ-3-7, 1958                                                                            | K.HVVPNEVVQR.L                               | 1276.46981 | 2 | 1.35E-05 | 0.82  | 2.60   | -     | 713.4   |

|                             |                                                                     |            |   |          |       |        |       |          |
|-----------------------------|---------------------------------------------------------------------|------------|---|----------|-------|--------|-------|----------|
| AHQ-3-5, 6439               | R.IEGSNKVPVDPATYQGFYGGDSYIILYNYR.H                                  | 3401.72499 | 3 | 2.24E-05 | 0.95  | 4.79   | -     | 1541.8   |
| AHQ-3-6, 6285               | R.IEGSNKVPVDPATYQGFYGGDSYIILYNYR.H                                  | 3401.72499 | 3 | 1.09E-04 | 0.90  | 4.18   | -     | 1221.4   |
| AHQ-3-5, 6563               | R.IEGSNKVPVDPATYQGFYGGDSYIILYNYR.H                                  | 3401.72499 | 3 | 2.60E-04 | 0.87  | 4.17   | -     | 920.6    |
| AHQ-3-5, 5507 - 5576        | K.NWRDPDQTDGLGLSYLSSHANVER.V                                        | 2845.03323 | 3 | 1.29E-11 | 0.98  | 6.72   | -     | 1676.2   |
| AHQ-3-5, 6081 - 6108        | K.NWRDPDQTDGLGLSYLSSHANVER.V                                        | 2845.03323 | 3 | 7.48E-09 | 0.96  | 5.11   | -     | 1303.4   |
| AHQ-3-6, 5491               | K.NWRDPDQTDGLGLSYLSSHANVER.V                                        | 2845.03323 | 3 | 1.47E-05 | 0.95  | 5.33   | -     | 1260.0   |
| AHQ-3-5, 1769 - 1831        | K.PALPAGTEDTAK.E                                                    | 1171.28241 | 2 | 1.22E-04 | 0.49  | 2.53   | -     | 325.6    |
| AHQ-3-6, 2283 - 2295        | K.PALPAGTEDTAKEDAANR.K                                              | 1827.93072 | 3 | 1.64E-06 | 0.71  | 3.04   | -     | 392.7    |
| AHQ-3-5, 2307               | K.PALPAGTEDTAKEDAANR.K                                              | 1827.93072 | 2 | 2.91E-05 | 0.87  | 3.71   | -     | 445.6    |
| AHQ-3-5, 4736 - 4760        | K.QTQVSVLPEGGETPLFK.Q                                               | 1831.05925 | 2 | 4.57E-05 | 0.79  | 3.52   | -     | 366.2    |
| AHQ-3-7, 4559               | K.QTQVSVLPEGGETPLFK.Q                                               | 1831.05925 | 2 | 6.64E-04 | 0.73  | 3.21   | -     | 312.8    |
| AHQ-3-5, 2428               | K.SEDCFILDHGKDGK.I                                                  | 1622.73823 | 2 | 1.06E-04 | 0.53  | 2.55   | -     | 647.2    |
| AHQ-3-5, 1851 - 1852        | K.TASDFITK.M                                                        | 882.98086  | 2 | 5.52E-05 | 0.75  | 2.62   | -     | 434.4    |
| AHQ-3-5, 1912 - 1928        | K.TGAQELLR.V                                                        | 888.00387  | 2 | 5.67E-05 | 0.90  | 3.18   | -     | 1048.3   |
| AHQ-3-5, 4313 - 4383        | K.TPSAAYLWVGTGASEAEK.T                                              | 1838.99510 | 2 | 2.37E-06 | 0.98  | 5.91   | -     | 1890.3   |
| AHQ-3-5, 4452 - 4497        | K.TPSAAYLWVGTGASEAEK.T                                              | 1838.99510 | 2 | 1.34E-07 | 0.94  | 3.96   | -     | 1053.8   |
| AHQ-3-7, 4154               | K.TPSAAYLWVGTGASEAEK.T                                              | 1838.99510 | 2 | 6.60E-04 | 0.89  | 3.89   | -     | 868.8    |
| AHQ-3-5, 4709               | K.TPSAAYLWVGTGASEAEK.T                                              | 1838.99510 | 2 | 1.80E-04 | 0.85  | 3.30   | -     | 802.4    |
| AHQ-3-5, 4845 - 4921        | K.TPSAAYLWVGTGASEAEK.T                                              | 1838.99510 | 2 | 9.71E-05 | 0.89  | 3.69   | -     | 857.5    |
| AHQ-3-5, 4731 - 4799        | R.VHVSEEGTEPEAMLQVLGPK.P                                            | 2151.42630 | 2 | 3.64E-07 | 0.97  | 5.76   | -     | 1075.5   |
| AHQ-3-9, 4361               | R.VHVSEEGTEPEAMLQVLGPK.P                                            | 2151.42630 | 2 | 7.88E-04 | 0.89  | 3.70   | -     | 714.6    |
| AHQ-3-6, 4747               | R.VHVSEEGTEPEAMLQVLGPK.P                                            | 2151.42630 | 2 | 6.26E-07 | 0.97  | 5.76   | -     | 1097.0   |
| AHQ-3-5, 5121               | R.VHVSEEGTEPEAMLQVLGPKPALPAGTEDTAK.E                                | 3303.88611 | 3 | 2.47E-10 | 0.93  | 4.97   | -     | 833.5    |
| AHQ-3-5, 4213               | R.VHVSEEGTEPEAM*LQVLGPKPALPAGTEDTAK.E                               | 3319.68551 | 3 | 6.11E-05 | 0.94  | 5.15   | -     | 796.6    |
| AHQ-3-5, 4889               | R.VHVSEEGTEPEAMLQVLGPKPALPAGTEDTAKEDAANR.K                          | 3960.33442 | 3 | 4.12E-04 | 0.94  | 5.37   | -     | 761.4    |
| AHQ-3-5, 2984 - 2987        | R.VPFDAAATLHTSTAM*AAQHGM*DDGDTGQK.Q                                 | 2907.10021 | 3 | 3.45E-06 | 0.95  | 5.65   | -     | 899.6    |
| AHQ-3-6, 3429               | R.VPFDAAATLHTSTAM*AAQHGM*DDGDTGQK.Q                                 | 2891.10081 | 3 | 1.34E-04 | 0.95  | 5.18   | -     | 964.8    |
| AHQ-3-6, 2951               | R.VPFDAAATLHTSTAM*AAQHGM*DDGDTGQK.Q                                 | 2907.10021 | 3 | 1.05E-05 | 0.95  | 5.66   | -     | 1655.7   |
| AHQ-3-5, 3856               | R.VPFDAAATLHTSTAMAAQHGMDDGDTGQK.Q                                   | 2875.10141 | 3 | 1.45E-04 | 0.98  | 7.09   | -     | 2074.4   |
| AHQ-3-5, 6891 - 6903        | K.VPVPDPATYQGFYGGDSYIILYNYR.H                                       | 2773.04698 | 2 | 1.25E-06 | 0.76  | 3.28   | -     | 457.8    |
| AHQ-3-5, 5237               | K.VSNGAGTM*SVSLVADENPFAQGALK.S                                      | 2480.73680 | 2 | 3.96E-06 | 0.58  | 2.55   | -     | 502.6    |
| AHQ-3-5, 5500               | K.VSNGAGTM*SVSLVADENPFAQGALK.S                                      | 2480.73680 | 3 | 4.54E-07 | 0.95  | 5.41   | -     | 1330.5   |
| AHQ-3-5, 1608 - 1688        | R.YIETDPANR.D                                                       | 1079.14506 | 2 | 5.19E-07 | 0.68  | 2.89   | -     | 445.7    |
| gi 27498267 ref XP_209737.1 | similar to tyrosine 3-tryptophan 5-monoxygenase activation protein, |            |   | 9.48E-13 | 3.21  | 40.33  | 33.70 | 11066.6  |
| AHQ-3-10, 5607 - 5608       | R.DICNDVLSLLEK.F                                                    | 1420.61093 | 1 | 4.89E-09 | 0.77  | 3.09   | -     | 877.8    |
| AHQ-3-11, 6688              | R.DICNDVLSLLEK.F                                                    | 1420.61093 | 2 | 2.33E-06 | 0.97  | 4.62   | -     | 2134.3   |
| AHQ-3-9, 5924               | R.DICNDVLSLLEK.F                                                    | 1420.61093 | 1 | 1.06E-08 | 0.40  | 2.12   | -     | 684.3    |
| AHQ-3-9, 5929               | R.DICNDVLSLLEK.F                                                    | 1420.61093 | 1 | 1.59E-06 | 0.85  | 3.13   | -     | 884.6    |
| AHQ-3-9, 5937               | R.DICNDVLSLLEK.F                                                    | 1420.61093 | 2 | 5.63E-06 | 0.94  | 3.52   | -     | 1260.9   |
| AHQ-3-9, 6936               | R.DICNDVLSLLEK.F                                                    | 1420.61093 | 1 | 3.83E-10 | 0.80  | 3.51   | -     | 583.6    |
| AHQ-3-9, 6937               | R.DICNDVLSLLEK.F                                                    | 1420.61093 | 2 | 4.53E-07 | 0.97  | 4.99   | -     | 1960.2   |
| AHQ-3-11, 5811              | R.DICNDVLSLLEK.F                                                    | 1420.61093 | 1 | 1.60E-10 | 0.42  | 2.20   | -     | 574.1    |
| AHQ-3-10, 6486 - 6546       | R.DICNDVLSLLEK.F                                                    | 1420.61093 | 1 | 9.45E-07 | 0.81  | 3.39   | -     | 617.1    |
| AHQ-3-10, 6484 - 6498       | R.DICNDVLSLLEK.F                                                    | 1420.61093 | 2 | 1.10E-05 | 0.97  | 5.03   | -     | 1782.0   |
| AHQ-3-10, 5978              | R.DICNDVLSLLEK.F                                                    | 1420.61093 | 2 | 2.35E-05 | 0.94  | 3.60   | -     | 1731.2   |
| AHQ-3-14-, 6736 - 6751      | R.DICNDVLSLLEK.F                                                    | 1420.61093 | 2 | 2.28E-06 | 0.97  | 4.96   | -     | 2013.3   |
| AHQ-3-10, 4818 - 4898       | K.GIVDQSQQAYQEAFAEISK.K                                             | 2042.19176 | 2 | 2.92E-09 | 0.98  | 5.59   | -     | 1689.2   |
| AHQ-3-10, 4835              | K.GIVDQSQQAYQEAFAEISK.K                                             | 2042.19176 | 2 | 1.08E-08 | 0.97  | 5.11   | -     | 1603.0   |
| AHQ-3-10, 4958 - 5022       | K.GIVDQSQQAYQEAFAEISK.K                                             | 2042.19176 | 2 | 4.03E-09 | 0.98  | 6.68   | -     | 1599.6   |
| AHQ-3-10, 5082 - 5143       | K.GIVDQSQQAYQEAFAEISK.K                                             | 2042.19176 | 2 | 1.65E-07 | 0.97  | 5.27   | -     | 1432.8   |
| AHQ-3-10, 5202 - 5271       | K.GIVDQSQQAYQEAFAEISK.K                                             | 2042.19176 | 2 | 1.02E-08 | 0.98  | 5.99   | -     | 1435.2   |
| AHQ-3-10, 5332 - 5395       | K.GIVDQSQQAYQEAFAEISK.K                                             | 2042.19176 | 2 | 3.53E-07 | 0.94  | 5.02   | -     | 942.3    |
| AHQ-3-10, 5416 - 5474       | K.GIVDQSQQAYQEAFAEISK.K                                             | 2042.19176 | 2 | 3.72E-05 | 0.97  | 4.81   | -     | 1793.1   |
| AHQ-3-10, 4771 - 4798       | K.GIVDQSQQAYQEAFAEISK.K                                             | 2042.19176 | 3 | 8.46E-07 | 0.97  | 5.09   | -     | 2046.6   |
| AHQ-3-10, 5635 - 5711       | K.GIVDQSQQAYQEAFAEISK.K                                             | 2042.19176 | 2 | 2.40E-08 | 0.97  | 5.27   | -     | 1363.0   |
| AHQ-3-10, 4710 - 4778       | K.GIVDQSQQAYQEAFAEISK.K                                             | 2042.19176 | 2 | 4.09E-08 | 0.98  | 5.90   | -     | 1793.9   |
| AHQ-3-10, 6315 - 6355       | K.GIVDQSQQAYQEAFAEISK.K                                             | 2042.19176 | 2 | 1.19E-04 | 0.95  | 4.80   | -     | 1048.4   |
| AHQ-3-10, 4476 - 4546       | K.GIVDQSQQAYQEAFAEISK.K                                             | 2042.19176 | 2 | 2.10E-11 | 0.98  | 5.81   | -     | 1671.9   |
| AHQ-3-10, 4334 - 4394       | K.GIVDQSQQAYQEAFAEISK.K                                             | 2042.19176 | 2 | 3.92E-10 | 0.98  | 6.49   | -     | 1626.7   |
| AHQ-3-10, 6704              | K.GIVDQSQQAYQEAFAEISK.K                                             | 2042.19176 | 2 | 8.50E-08 | 0.88  | 3.94   | -     | 639.6    |
| AHQ-3-11, 4675              | K.GIVDQSQQAYQEAFAEISK.K                                             | 2042.19176 | 2 | 8.36E-12 | 0.95  | 4.85   | -     | 1087.0   |
| AHQ-3-11, 4946 - 4952       | K.GIVDQSQQAYQEAFAEISK.K                                             | 2042.19176 | 2 | 2.03E-10 | 0.97  | 5.57   | -     | 1427.5   |
| AHQ-3-11, 4974              | K.GIVDQSQQAYQEAFAEISK.K                                             | 2042.19176 | 3 | 2.88E-06 | 0.97  | 5.34   | -     | 2208.2   |
| AHQ-3-14-, 5076             | K.GIVDQSQQAYQEAFAEISK.K                                             | 2042.19176 | 2 | 2.53E-08 | 0.97  | 5.21   | -     | 1334.5   |
| AHQ-3-9, 4951 - 5031        | K.GIVDQSQQAYQEAFAEISK.K                                             | 2042.19176 | 2 | 7.67E-08 | 0.98  | 6.17   | -     | 1522.3   |
| AHQ-3-12, 5080 - 5148       | K.GIVDQSQQAYQEAFAEISK.K                                             | 2042.19176 | 2 | 6.76E-10 | 0.96  | 4.84   | -     | 1367.9   |
| AHQ-3-13, 5086 - 5153       | K.GIVDQSQQAYQEAFAEISK.K                                             | 2042.19176 | 2 | 9.54E-09 | 0.98  | 6.60   | -     | 1559.4   |
| AHQ-3-13, 5155              | K.GIVDQSQQAYQEAFAEISK.K                                             | 2042.19176 | 3 | 3.00E-07 | 0.97  | 5.35   | -     | 1930.8   |
| AHQ-3-14, 5992 - 5993       | K.GIVDQSQQAYQEAFAEISK.K                                             | 2042.19176 | 2 | 2.56E-09 | 0.97  | 4.97   | -     | 1648.1   |
| AHQ-3-13-, 5103 - 5125      | K.GIVDQSQQAYQEAFAEISK.K                                             | 2042.19176 | 2 | 9.48E-13 | 0.98  | 5.60   | -     | 1505.1   |
| AHQ-3-10, 4322 - 4403       | K.GIVDQSQQAYQEAFAEISK.K.E                                           | 2170.36467 | 2 | 2.65E-05 | 0.95  | 4.42   | -     | 1288.1   |
| AHQ-3-9, 4239               | K.KGIVDQSQQAYQEAFAEISK.K                                            | 2170.36467 | 2 | 6.46E-08 | 0.97  | 5.27   | -     | 1417.8   |
| gi 4507877 ref NP_003364.1  | vinculin isoform VCL [Homo sapiens]                                 |            |   | 1.12E-12 | 44.72 | 530.32 | 44.60 | 116721.6 |
| AHQ-3-14-, 6781 - 6847      | K.AIPDLTAPVAAVQAAVSNLVR.V                                           | 2077.41342 | 2 | 3.80E-06 | 0.90  | 3.62   | -     | 827.2    |
| AHQ-3-13-, 6901 - 6903      | K.AIPDLTAPVAAVQAAVSNLVR.V                                           | 2077.41342 | 2 | 4.77E-05 | 0.94  | 4.47   | -     | 905.4    |
| AHQ-3-3, 7576               | K.AIPDLTAPVAAVQAAVSNLVR.V                                           | 2077.41342 | 2 | 9.20E-07 | 0.96  | 4.80   | -     | 1091.4   |
| AHQ-3-13, 7013 - 7017       | K.AIPDLTAPVAAVQAAVSNLVR.V                                           | 2077.41342 | 2 | 2.22E-11 | 0.97  | 5.50   | -     | 1205.9   |
| AHQ-3-12, 7026 - 7028       | K.AIPDLTAPVAAVQAAVSNLVR.V                                           | 2077.41342 | 2 | 4.75E-08 | 0.96  | 4.97   | -     | 1034.2   |
| AHQ-3-11, 6796 - 6868       | K.AIPDLTAPVAAVQAAVSNLVR.V                                           | 2077.41342 | 2 | 9.71E-05 | 0.97  | 5.35   | -     | 1177.4   |
| AHQ-3-6, 7353 - 7357        | K.AIPDLTAPVAAVQAAVSNLVR.V                                           | 2077.41342 | 2 | 1.48E-07 | 0.96  | 4.94   | -     | 1168.9   |
| AHQ-3-7, 7415 - 7430        | K.AIPDLTAPVAAVQAAVSNLVR.V                                           | 2077.41342 | 2 | 3.82E-06 | 0.94  | 4.79   | -     | 964.0    |
| AHQ-3-10, 6614 - 6615       | K.AIPDLTAPVAAVQAAVSNLVR.V                                           | 2077.41342 | 2 | 5.55E-11 | 0.98  | 6.44   | -     | 1288.6   |
| AHQ-3-9, 7053               | K.AIPDLTAPVAAVQAAVSNLVR.V                                           | 2077.41342 | 2 | 3.47E-09 | 0.96  | 5.02   | -     | 1072.8   |
| AHQ-3-1, 7340 - 7405        | K.AIPDLTAPVAAVQAAVSNLVR.V                                           | 2077.41342 | 2 | 1.73E-08 | 0.95  | 4.38   | -     | 1050.4   |
| AHQ-3-1, 7344               | K.AIPDLTAPVAAVQAAVSNLVR.V                                           | 2077.41342 | 3 | 4.22E-04 | 0.88  | 3.92   | -     | 1024.9   |
| AHQ-3-2, 7582 - 7657        | K.AIPDLTAPVAAVQAAVSNLVR.V                                           | 2077.41342 | 2 | 2.50E-06 | 0.92  | 4.13   | -     | 994.1    |
| AHQ-3-5, 7535               | K.AIPDLTAPVAAVQAAVSNLVR.V                                           | 2077.41342 | 2 | 6.57E-11 | 0.97  | 5.25   | -     | 1412.7   |
| AHQ-3-8, 7307 - 7308        | K.AIPDLTAPVAAVQAAVSNLVR.V                                           | 2077.41342 | 2 | 9.71E-11 | 0.97  | 5.83   | -     | 1310.2   |
| AHQ-3-4, 7592 - 7672        | K.AIPDLTAPVAAVQAAVSNLVR.V                                           | 2077.41342 | 2 | 2.00E-11 | 0.97  | 5.01   | -     | 1221.0   |
| AHQ-3-7, 2990               | R.ALASQLQDSLK.D                                                     | 1174.32943 | 2 | 1.59E-04 | 0.94  | 3.53   | -     | 1250.0   |
| AHQ-3-4, 3325               | R.ALASQLQDSLK.D                                                     | 1174.32943 | 2 | 7.96E-05 | 0.89  | 3.04   | -     | 938.4    |
| AHQ-3-3, 3314               | R.ALASQLQDSLK.D                                                     | 1174.32943 | 2 | 2.37E-04 | 0.60  | 2.98   | -     | 512.6    |
| AHQ-3-6, 3047 - 3053        | R.ALASQLQDSLK.D                                                     | 1174.32943 | 2 | 1.21E-04 | 0.91  | 3.73   | -     | 934.8    |
| AHQ-3-1, 3473               | R.ALASQLQDSLK.D                                                     | 1174.32943 | 2 | 3.30E-04 | 0.88  | 3.15   | -     | 939.1    |
| AHQ-3-4, 3734 - 3746        | K.AQQVSGQLDVLTA.K.V                                                 | 1458.64233 | 2 | 9.63E-05 | 0.76  | 3.23   | -     | 758.1    |
| AHQ-3-6, 3310               | K.AQQVSGQLDVLTA.K.V                                                 | 1458.64233 | 1 | 1.24E-06 | 0.77  | 3.55   | -     | 362.6    |
| AHQ-3-6, 3286               | K.AQQVSGQLDVLTA.K.V                                                 | 1458.64233 | 2 | 1.45E-08 | 0.96  | 4.04   | -     | 1840.5   |
| AHQ-3-8, 2961               | K.AQQVSGQLDVLTA.K.V                                                 | 1458.64233 | 2 | 5.53E-09 | 0.95  | 4.22   | -     | 1254.3   |
| AHQ-3-11, 3340              | K.AQQVSGQLDVLTA.K.V                                                 | 1458.64233 | 2 | 5.80E-04 | 0.93  | 4.12   | -     | 1013.3   |
| AHQ-3-7, 3235               | K.AQQVSGQLDVLTA.K.V                                                 | 1458.64233 | 1 | 9.51E-09 | 0.80  | 3.73   | -     | 454.4    |
| AHQ-3-7, 3223               | K.AQQVSGQLDVLTA.K.V                                                 | 1458.64233 | 1 | 8.42E-05 | 0.19  | 2.40   | -     | 320.3    |
| AHQ-3-7, 3219 - 3220        | K.AQQVSGQLDVLTA.K.V                                                 | 1458.64233 | 2 | 3.63E-10 | 0.97  | 5.08   | -     | 1554.4   |
| AHQ-3-4, 3733               | K.AQQVSGQLDVLTA.K.V                                                 | 1458.64233 | 1 | 7.07E-05 | 0.35  | 2.47   | -     | 434.7    |
| AHQ-3-2, 3571 - 3641        | K.AQQVSGQLDVLTA.K.V                                                 | 1458.64233 | 2 | 4.23E-05 | 0.97  | 4.17   | -     | 1947.7   |
| AHQ-3-4, 3461 - 3532        | K.AQQVSGQLDVLTA.K.V                                                 | 1458.64233 | 2 | 3.63E-10 | 0.97  | 4.69   | -     | 1594.1   |
| AHQ-3-2, 2383 - 2454        | K.AVAGNISDPGLQK.S                                                   | 1270.41721 | 2 | 1.32E-04 | 0.87  | 3.39   | -     | 782.7    |
| AHQ-3-5, 2288 - 2299        | K.AVAGNISDPGLQK.S                                                   | 1270.41721 | 2 | 1.39E-05 | 0.90  | 3.72   | -     | 943.9    |

|                      |                                       |            |   |          |      |      |   |        |
|----------------------|---------------------------------------|------------|---|----------|------|------|---|--------|
| AHQ-3-7, 2222 - 2234 | K.AVAGNISDPGLQK.S                     | 1270.41721 | 2 | 6.09E-05 | 0.85 | 3.44 | - | 647.0  |
| AHQ-3-4, 2405 - 2424 | K.AVAGNISDPGLQK.S                     | 1270.41721 | 2 | 3.25E-07 | 0.82 | 3.33 | - | 622.2  |
| AHQ-3-6, 2270        | K.AVAGNISDPGLQK.S                     | 1270.41721 | 2 | 8.07E-06 | 0.85 | 3.59 | - | 592.3  |
| AHQ-3-8, 2129        | K.AVAGNISDPGLQK.S                     | 1270.41721 | 2 | 7.06E-06 | 0.85 | 3.39 | - | 672.1  |
| AHQ-3-3, 2436        | K.AVAGNISDPGLQK.S                     | 1270.41721 | 2 | 1.27E-08 | 0.83 | 3.21 | - | 668.6  |
| AHQ-3-6, 5907 - 5910 | K.CDRVDQLTAQLADLAAR.G                 | 1918.12182 | 2 | 2.61E-04 | 0.92 | 3.69 | - | 1211.2 |
| AHQ-3-2, 6233        | K.CDRVDQLTAQLADLAAR.G                 | 1918.12182 | 2 | 3.86E-04 | 0.92 | 3.70 | - | 1081.9 |
| AHQ-3-7, 5882        | K.CDRVDQLTAQLADLAAR.G                 | 1918.12182 | 2 | 2.81E-04 | 0.87 | 3.38 | - | 879.1  |
| AHQ-3-1, 6172        | K.CDRVDQLTAQLADLAAR.G                 | 1918.12182 | 2 | 9.39E-04 | 0.96 | 4.29 | - | 1499.9 |
| AHQ-3-4, 6120 - 6173 | K.CDRVDQLTAQLADLAAR.G                 | 1918.12182 | 2 | 1.79E-08 | 0.93 | 3.80 | - | 1212.3 |
| AHQ-3-5, 6027 - 6039 | K.CDRVDQLTAQLADLAAR.G                 | 1918.12182 | 3 | 6.50E-05 | 0.93 | 4.80 | - | 1152.2 |
| AHQ-3-5, 6012 - 6089 | K.CDRVDQLTAQLADLAAR.G                 | 1918.12182 | 2 | 1.06E-05 | 0.92 | 3.60 | - | 1164.1 |
| AHQ-3-4, 6150 - 6182 | K.CDRVDQLTAQLADLAAR.G                 | 1918.12182 | 3 | 7.32E-06 | 0.85 | 4.05 | - | 986.0  |
| AHQ-3-8, 5773        | K.CDRVDQLTAQLADLAAR.G                 | 1918.12182 | 2 | 1.91E-06 | 0.94 | 4.00 | - | 1319.5 |
| AHQ-3-9, 5605        | K.CDRVDQLTAQLADLAAR.G                 | 1918.12182 | 2 | 1.29E-05 | 0.87 | 3.48 | - | 925.5  |
| AHQ-3-7, 2166        | R.DPSASPGDAGEQAIR.Q                   | 1471.51169 | 2 | 5.74E-04 | 0.86 | 3.41 | - | 668.7  |
| AHQ-3-4, 2305 - 2378 | R.DPSASPGDAGEQAIR.Q                   | 1471.51169 | 2 | 4.21E-08 | 0.91 | 3.76 | - | 773.9  |
| AHQ-3-2, 2342        | R.DPSASPGDAGEQAIR.Q                   | 1471.51169 | 2 | 2.05E-05 | 0.86 | 3.39 | - | 554.9  |
| AHQ-3-6, 2186        | R.DPSASPGDAGEQAIR.Q                   | 1471.51169 | 2 | 4.42E-06 | 0.92 | 3.78 | - | 797.8  |
| AHQ-3-4, 2304        | R.DPSASPGDAGEQAIR.Q                   | 1471.51169 | 1 | 2.52E-04 | 0.11 | 2.09 | - | 138.8  |
| AHQ-3-1, 2422        | R.DPSASPGDAGEQAIR.Q                   | 1471.51169 | 2 | 2.34E-06 | 0.83 | 3.26 | - | 572.6  |
| AHQ-3-11, 5514       | K.ELLPLVISAMK.I                       | 1214.54325 | 2 | 1.82E-04 | 0.61 | 2.77 | - | 381.3  |
| AHQ-3-5, 2908        | K.ETVQTTEDQILK.R                      | 1405.53306 | 1 | 7.12E-06 | 0.06 | 2.42 | - | 81.8   |
| AHQ-3-14, 3821       | K.ETVQTTEDQILK.R                      | 1561.71942 | 2 | 2.12E-05 | 0.52 | 2.54 | - | 464.6  |
| AHQ-3-14-, 2892      | K.ETVQTTEDQILK.R                      | 1561.71942 | 2 | 4.44E-06 | 0.79 | 2.89 | - | 572.1  |
| AHQ-3-5, 2716        | K.ETVQTTEDQILK.R                      | 1561.71942 | 2 | 4.22E-05 | 0.85 | 3.55 | - | 828.1  |
| AHQ-3-7, 2664        | K.ETVQTTEDQILK.R                      | 1561.71942 | 2 | 1.33E-04 | 0.78 | 3.01 | - | 652.1  |
| AHQ-3-6, 2733 - 2743 | K.ETVQTTEDQILK.R                      | 1561.71942 | 2 | 4.82E-05 | 0.88 | 3.53 | - | 826.1  |
| AHQ-3-11, 2806       | K.ETVQTTEDQILK.R                      | 1561.71942 | 2 | 2.50E-04 | 0.61 | 2.69 | - | 536.4  |
| AHQ-3-4, 2897 - 2905 | K.ETVQTTEDQILK.R                      | 1561.71942 | 2 | 1.66E-06 | 0.85 | 3.30 | - | 781.3  |
| AHQ-3-1, 7185        | R.GILSGTSDLLTFDEAEVR.K                | 2037.25656 | 2 | 2.12E-05 | 0.93 | 4.40 | - | 707.1  |
| AHQ-3-11, 6602       | R.GILSGTSDLLTFDEAEVR.K                | 2037.25656 | 2 | 3.26E-06 | 0.95 | 4.83 | - | 961.9  |
| AHQ-3-4, 7364 - 7378 | R.GILSGTSDLLTFDEAEVR.K                | 2037.25656 | 2 | 2.46E-10 | 0.94 | 4.81 | - | 881.9  |
| AHQ-3-6, 7402 - 7473 | R.GILSGTSDLLTFDEAEVR.K                | 2037.25656 | 2 | 2.18E-04 | 0.84 | 3.99 | - | 526.0  |
| AHQ-3-6, 7117        | R.GILSGTSDLLTFDEAEVR.K                | 2037.25656 | 2 | 4.17E-07 | 0.91 | 4.46 | - | 597.4  |
| AHQ-3-5, 7043        | R.GILSGTSDLLTFDEAEVR.K                | 2037.25656 | 2 | 2.20E-06 | 0.89 | 4.58 | - | 573.9  |
| AHQ-3-5, 7269 - 7332 | R.GILSGTSDLLTFDEAEVR.K                | 2037.25656 | 2 | 1.84E-08 | 0.97 | 5.24 | - | 1367.5 |
| AHQ-3-4, 7710        | R.GILSGTSDLLTFDEAEVR.K                | 2037.25656 | 2 | 2.45E-05 | 0.53 | 2.76 | - | 473.6  |
| AHQ-3-4, 7122 - 7188 | R.GILSGTSDLLTFDEAEVR.K                | 2037.25656 | 2 | 7.45E-07 | 0.89 | 4.01 | - | 737.4  |
| AHQ-3-5, 6621 - 6637 | R.GILSGTSDLLTFDEAEVR.K                | 2165.42947 | 2 | 4.52E-05 | 0.64 | 2.83 | - | 576.3  |
| AHQ-3-14-, 6284      | R.GILSGTSDLLTFDEAEVR.K                | 2165.42947 | 2 | 5.62E-08 | 0.89 | 3.32 | - | 1168.5 |
| AHQ-3-11, 6120       | R.GILSGTSDLLTFDEAEVR.K                | 2165.42947 | 2 | 1.09E-05 | 0.89 | 3.57 | - | 1085.4 |
| AHQ-3-1, 6806        | R.GILSGTSDLLTFDEAEVR.K                | 2165.42947 | 2 | 8.74E-04 | 0.58 | 2.74 | - | 562.4  |
| AHQ-3-6, 6522        | R.GILSGTSDLLTFDEAEVR.K                | 2165.42947 | 2 | 7.99E-04 | 0.80 | 3.31 | - | 786.9  |
| AHQ-3-7, 3259        | K.GWLRDPSASPGDAGEQAIR.Q               | 1984.11876 | 2 | 5.48E-07 | 0.83 | 3.72 | - | 553.9  |
| AHQ-3-5, 3344 - 3352 | K.GWLRDPSASPGDAGEQAIR.Q               | 1984.11876 | 2 | 5.05E-05 | 0.93 | 4.75 | - | 877.8  |
| AHQ-3-4, 3520        | K.GWLRDPSASPGDAGEQAIR.Q               | 1984.11876 | 2 | 7.19E-05 | 0.91 | 4.10 | - | 760.6  |
| AHQ-3-4, 2149        | K.IAELCDDPKERD.S                      | 1347.47690 | 2 | 5.28E-07 | 0.88 | 3.25 | - | 1058.5 |
| AHQ-3-4, 3437        | K.IAELCDDPKERDILR.S                   | 1960.15548 | 3 | 3.66E-06 | 0.90 | 3.96 | - | 1240.5 |
| AHQ-3-5, 3248 - 3252 | K.IAELCDDPKERDILR.S                   | 1960.15548 | 3 | 3.91E-05 | 0.87 | 3.89 | - | 1108.4 |
| AHQ-3-5, 3239 - 3240 | K.IAELCDDPKERDILR.S                   | 1960.15548 | 2 | 5.22E-04 | 0.42 | 3.07 | - | 429.5  |
| AHQ-3-12, 2831       | R.IPTISTQLK.I                         | 1001.20202 | 1 | 3.25E-05 | 0.24 | 2.10 | - | 264.2  |
| AHQ-3-12, 2994       | R.IPTISTQLK.I                         | 1001.20202 | 2 | 1.33E-05 | 0.80 | 2.72 | - | 685.6  |
| AHQ-3-5, 4212 - 4284 | K.KIDAAQNWLADPNNGPGEQIR.G             | 2509.67332 | 2 | 1.97E-04 | 0.71 | 3.47 | - | 261.4  |
| AHQ-3-6, 4166        | K.KIDAAQNWLADPNNGPGEQIR.G             | 2509.67332 | 3 | 1.20E-08 | 0.90 | 4.34 | - | 1372.7 |
| AHQ-3-4, 4350 - 4425 | K.KIDAAQNWLADPNNGPGEQIR.G             | 2509.67332 | 2 | 2.13E-08 | 0.89 | 4.28 | - | 372.2  |
| AHQ-3-4, 2785        | R.LANVMM*GPYR.Q                       | 1168.41500 | 2 | 1.40E-06 | 0.76 | 3.13 | - | 699.9  |
| AHQ-3-5, 2020        | R.LANVM*MPYR.Q                        | 1184.41440 | 2 | 4.58E-04 | 0.88 | 3.29 | - | 782.1  |
| AHQ-3-5, 3019        | K.LLVAATAPPDAPNRE.E                   | 1477.69048 | 2 | 8.73E-05 | 0.87 | 3.32 | - | 743.6  |
| AHQ-3-4, 4474        | K.LLVAATAPPDAPNREEVFDER.A             | 2382.61458 | 2 | 1.69E-04 | 0.40 | 2.51 | - | 315.5  |
| AHQ-3-2, 4463        | K.LLVAATAPPDAPNREEVFDER.A             | 2382.61458 | 2 | 2.96E-04 | 0.72 | 3.60 | - | 239.9  |
| AHQ-3-4, 4274 - 4344 | K.LLVAATAPPDAPNREEVFDER.A             | 2382.61458 | 3 | 7.95E-05 | 0.76 | 3.54 | - | 699.7  |
| AHQ-3-1, 4508        | K.LLVAATAPPDAPNREEVFDER.A             | 2382.61458 | 3 | 9.97E-05 | 0.77 | 3.46 | - | 638.8  |
| AHQ-3-6, 4343        | R.LTDELAPPKPLPEGEVPPRPPPEEKDEEFPEQK.A | 4028.46845 | 3 | 1.48E-04 | 0.52 | 3.04 | - | 369.8  |
| AHQ-3-5, 4401 - 4483 | R.LTDELAPPKPLPEGEVPPRPPPEEKDEEFPEQK.A | 4028.46845 | 3 | 6.75E-06 | 0.87 | 4.47 | - | 501.5  |
| AHQ-3-3, 3802        | K.LVQAAQM*QSDPYSVPAR.D                | 1991.25773 | 2 | 7.35E-06 | 0.79 | 3.05 | - | 576.5  |
| AHQ-3-4, 3728 - 3732 | K.LVQAAQM*QSDPYSVPAR.D                | 1991.25773 | 2 | 9.49E-07 | 0.93 | 4.05 | - | 916.5  |
| AHQ-3-4, 3777        | K.LVQAAQM*QSDPYSVPAR.D                | 1991.25773 | 3 | 4.01E-07 | 0.95 | 3.95 | - | 2006.4 |
| AHQ-3-8, 4172        | K.LVQAAQM*QSDPYSVPAR.D                | 1991.25773 | 2 | 3.55E-04 | 0.92 | 4.47 | - | 680.2  |
| AHQ-3-2, 3853        | K.LVQAAQM*QSDPYSVPAR.D                | 1991.25773 | 2 | 3.08E-04 | 0.88 | 4.07 | - | 532.0  |
| AHQ-3-5, 3591 - 3595 | K.LVQAAQM*QSDPYSVPAR.D                | 1991.25773 | 2 | 5.83E-08 | 0.95 | 4.87 | - | 758.0  |
| AHQ-3-5, 3603 - 3619 | K.LVQAAQM*QSDPYSVPAR.D                | 1991.25773 | 3 | 1.16E-04 | 0.94 | 4.54 | - | 1646.0 |
| AHQ-3-5, 4475 - 4476 | K.LVQAAQM*QSDPYSVPAR.D                | 1991.25773 | 2 | 3.62E-05 | 0.88 | 4.34 | - | 386.7  |
| AHQ-3-6, 3534 - 3542 | K.LVQAAQM*QSDPYSVPAR.D                | 1991.25773 | 2 | 7.37E-06 | 0.95 | 4.83 | - | 778.4  |
| AHQ-3-12, 4194       | R.MALLMAEMSR.L                        | 1153.46531 | 2 | 3.82E-04 | 0.93 | 3.73 | - | 1350.8 |
| AHQ-3-5, 4033 - 4112 | K.M*LGQM*TDQVADLR.A                   | 1510.71935 | 2 | 8.61E-05 | 0.91 | 3.48 | - | 1198.5 |
| AHQ-3-5, 4019 - 4020 | K.M*LGQM*TDQVADLR.A                   | 1478.72055 | 2 | 1.32E-06 | 0.96 | 4.93 | - | 1446.0 |
| AHQ-3-3, 2898        | K.M*LGQM*TDQVADLR.A                   | 1510.71935 | 2 | 9.60E-04 | 0.81 | 2.71 | - | 917.9  |
| AHQ-3-4, 4176        | K.M*LGQM*TDQVADLR.A                   | 1478.72055 | 2 | 1.97E-07 | 0.97 | 4.31 | - | 1865.5 |
| AHQ-3-6, 3527 - 3531 | K.M*LGQM*TDQVADLR.A                   | 1494.71995 | 2 | 2.46E-04 | 0.94 | 3.35 | - | 1770.6 |
| AHQ-3-4, 3737        | K.M*LGQM*TDQVADLR.A                   | 1494.71995 | 2 | 2.47E-06 | 0.95 | 3.85 | - | 1845.6 |
| AHQ-3-7, 3920        | K.M*LGQM*TDQVADLR.A                   | 1478.72055 | 2 | 3.30E-06 | 0.90 | 3.10 | - | 1268.6 |
| AHQ-3-6, 3965        | K.M*LGQM*TDQVADLR.A                   | 1478.72055 | 2 | 5.63E-05 | 0.97 | 4.74 | - | 2274.4 |
| AHQ-3-4, 2846 - 2866 | K.M*LGQM*TDQVADLR.A                   | 1510.71935 | 2 | 5.82E-06 | 0.96 | 4.20 | - | 1761.1 |
| AHQ-3-4, 4189        | K.M*LGQM*TDQVADLR.A                   | 1510.71935 | 2 | 1.60E-04 | 0.87 | 2.99 | - | 1166.5 |
| AHQ-3-5, 3121 - 3156 | K.M*LGQM*TDQVADLR.A                   | 1494.71995 | 2 | 5.36E-07 | 0.92 | 3.24 | - | 1542.7 |
| AHQ-3-3, 4272        | K.M*LGQM*TDQVADLR.A                   | 1478.72055 | 2 | 5.85E-07 | 0.97 | 4.06 | - | 1993.4 |
| AHQ-3-4, 3254 - 3257 | K.M*LGQM*TDQVADLR.A                   | 1494.71995 | 2 | 3.51E-06 | 0.93 | 3.69 | - | 1543.5 |
| AHQ-3-2, 3882        | K.M*LGQM*TDQVADLR.A                   | 1494.71995 | 2 | 9.33E-05 | 0.96 | 3.73 | - | 1831.8 |
| AHQ-3-1, 3033        | K.M*LGQM*TDQVADLR.A                   | 1510.71935 | 2 | 1.39E-04 | 0.92 | 3.67 | - | 1298.4 |
| AHQ-3-8, 3764        | K.M*LGQM*TDQVADLR.A                   | 1478.72055 | 2 | 2.64E-07 | 0.95 | 3.63 | - | 1727.1 |
| AHQ-3-4, 3068        | K.M*SAEINEIR.V                        | 1192.36823 | 2 | 1.52E-05 | 0.92 | 3.59 | - | 1077.5 |
| AHQ-3-4, 3766        | K.M*SAEINEIR.V                        | 1176.36883 | 2 | 7.12E-05 | 0.93 | 3.38 | - | 1575.9 |
| AHQ-3-5, 3544        | K.M*SAEINEIR.V                        | 1176.36883 | 2 | 1.55E-05 | 0.91 | 3.57 | - | 1323.5 |
| AHQ-3-5, 2900        | K.M*SAEINEIR.V                        | 1192.36823 | 2 | 3.23E-05 | 0.89 | 3.29 | - | 997.8  |
| AHQ-3-5, 2912        | K.M*MTGLVDEAIDTK.S                    | 1309.46876 | 1 | 9.81E-05 | 0.53 | 2.54 | - | 251.8  |
| AHQ-3-5, 2887        | K.M*MTGLVDEAIDTK.S                    | 1309.46876 | 2 | 8.67E-06 | 0.84 | 2.84 | - | 963.8  |
| AHQ-3-6, 3325        | K.M*MTGLVDEAIDTK.S                    | 1293.46936 | 2 | 9.12E-07 | 0.96 | 3.63 | - | 1748.5 |
| AHQ-3-4, 3044        | K.M*MTGLVDEAIDTK.S                    | 1309.46876 | 1 | 6.28E-05 | 0.26 | 2.36 | - | 174.9  |
| AHQ-3-4, 3045        | K.M*MTGLVDEAIDTK.S                    | 1309.46876 | 2 | 3.88E-07 | 0.94 | 3.62 | - | 1307.5 |
| AHQ-3-6, 3261 - 3334 | K.M*MTGLVDEAIDTK.S                    | 1293.46936 | 1 | 4.87E-04 | 0.31 | 2.21 | - | 286.0  |
| AHQ-3-4, 2854        | R.NPGNQAAYEHFETMK.N                   | 1737.87437 | 2 | 2.32E-07 | 0.94 | 3.27 | - | 1024.4 |
| AHQ-3-5, 2640        | R.NPGNQAAYEHFETMK.N                   | 1737.87437 | 2 | 2.68E-05 | 0.93 | 3.87 | - | 1064.0 |
| AHQ-3-4, 2861        | K.NQWIDNVEK.M                         | 1146.23464 | 1 | 1.67E-04 | 0.45 | 2.44 | - | 266.3  |
| AHQ-3-6, 3153        | R.SLGEISALTSK.L                       | 1106.25186 | 2 | 1.29E-05 | 0.93 | 3.45 | - | 1031.9 |
| AHQ-3-4, 3368        | R.SLGEISALTSK.L                       | 1106.25186 | 1 | 4.03E-05 | 0.23 | 2.33 | - | 187.5  |
| AHQ-3-4, 3372        | R.SLGEISALTSK.L                       | 1106.25186 | 2 | 2.37E-04 | 0.84 | 3.18 | - | 668.3  |

|                             |                                                                        |            |   |          |       |        |       |         |
|-----------------------------|------------------------------------------------------------------------|------------|---|----------|-------|--------|-------|---------|
| AHQ-3-1, 3628               | R.SLGEISALTSK.L                                                        | 1106.25186 | 2 | 2.62E-04 | 0.91  | 3.48   | -     | 783.7   |
| AHQ-3-5, 3177               | R.SLGEISALTSK.L                                                        | 1106.25186 | 1 | 6.15E-05 | 0.10  | 2.07   | -     | 105.3   |
| AHQ-3-5, 3063               | K.SLLDASEEAIKK.D                                                       | 1304.47187 | 2 | 4.54E-06 | 0.76  | 2.82   | -     | 713.8   |
| AHQ-3-4, 3236 - 3237        | K.SLLDASEEAIKK.D                                                       | 1304.47187 | 2 | 3.43E-07 | 0.87  | 2.82   | -     | 1006.5  |
| AHQ-3-7, 2950 - 2967        | K.SLLDASEEAIKK.D                                                       | 1304.47187 | 2 | 6.75E-07 | 0.92  | 3.54   | -     | 1186.4  |
| AHQ-3-4, 2301               | K.STVEGIGQASVY.T                                                       | 1119.25064 | 2 | 8.33E-09 | 0.91  | 3.32   | -     | 951.9   |
| AHQ-3-5, 2163 - 2213        | K.STVEGIGQASVY.T                                                       | 1119.25064 | 2 | 6.41E-05 | 0.80  | 2.63   | -     | 819.3   |
| AHQ-3-12, 2424              | R.TDAGFTLR.W                                                           | 880.96819  | 2 | 5.34E-04 | 0.83  | 2.56   | -     | 827.1   |
| AHQ-3-11, 6738 - 6740       | R.TIESILEPVAQIISHLVMHEEGEVDGK.A                                        | 3103.49334 | 3 | 7.07E-04 | 0.84  | 4.47   | -     | 444.5   |
| AHQ-3-5, 7475 - 7481        | R.TIESILEPVAQIISHLVMHEEGEVDGK.A                                        | 3103.49334 | 3 | 3.60E-06 | 0.90  | 4.41   | -     | 578.8   |
| AHQ-3-5, 7284 - 7299        | R.TNISDEESEQATEMLVHNAQNLM*QSVK.E                                       | 3048.31017 | 3 | 5.73E-06 | 0.86  | 4.17   | -     | 605.4   |
| AHQ-3-4, 5329               | R.TNISDEESEQATEMLVHNAQNLM*QSVK.E                                       | 3064.30957 | 3 | 4.16E-04 | 0.61  | 3.47   | -     | 329.0   |
| AHQ-3-4, 5748 - 5797        | R.TNISDEESEQATEMLVHNAQNLM*QSVK.E                                       | 3064.30957 | 3 | 1.83E-04 | 0.42  | 3.01   | -     | 349.8   |
| AHQ-3-13, 5950              | R.TNISDEESEQATEMLVHNAQNLM*QSVK.E                                       | 3064.30957 | 3 | 1.73E-04 | 0.52  | 3.50   | -     | 383.6   |
| AHQ-3-13, 6739 - 6805       | R.TNISDEESEQATEMLVHNAQNLM*QSVK.E                                       | 3048.31017 | 3 | 1.79E-07 | 0.85  | 4.37   | -     | 471.7   |
| AHQ-3-12, 5884              | R.TNISDEESEQATEMLVHNAQNLM*QSVK.E                                       | 3048.31017 | 3 | 1.63E-06 | 0.85  | 3.88   | -     | 679.1   |
| AHQ-3-12, 4679              | R.TNISDEESEQATEMLVHNAQNLM*QSVK.E                                       | 3080.30897 | 3 | 3.67E-09 | 0.77  | 3.77   | -     | 373.8   |
| AHQ-3-13-, 5947             | R.TNISDEESEQATEMLVHNAQNLM*QSVK.E                                       | 3064.30957 | 3 | 6.13E-04 | 0.79  | 3.57   | -     | 601.9   |
| AHQ-3-12, 5458 - 5460       | R.TNISDEESEQATEMLVHNAQNLM*QSVK.E                                       | 3064.30957 | 3 | 8.55E-10 | 0.91  | 5.50   | -     | 727.5   |
| AHQ-3-2, 7477               | R.TNISDEESEQATEMLVHNAQNLM*QSVK.E                                       | 3048.31017 | 3 | 2.53E-05 | 0.88  | 4.74   | -     | 483.8   |
| AHQ-3-4, 7040 - 7117        | R.TNISDEESEQATEMLVHNAQNLM*QSVK.E                                       | 3064.30957 | 3 | 6.50E-04 | 0.68  | 3.74   | -     | 499.7   |
| AHQ-3-14-, 6688             | R.TNISDEESEQATEMLVHNAQNLM*QSVK.E                                       | 3048.31017 | 3 | 8.54E-04 | 0.85  | 4.29   | -     | 500.0   |
| AHQ-3-12, 6558 - 6619       | R.TNISDEESEQATEMLVHNAQNLM*QSVK.E                                       | 3064.30957 | 3 | 1.01E-06 | 0.46  | 3.61   | -     | 345.7   |
| AHQ-3-4, 6332 - 6406        | R.TNISDEESEQATEMLVHNAQNLM*QSVK.E                                       | 3064.30957 | 3 | 9.47E-05 | 0.77  | 3.50   | -     | 572.8   |
| AHQ-3-12, 6775 - 6818       | R.TNISDEESEQATEMLVHNAQNLM*QSVK.E                                       | 3048.31017 | 3 | 3.31E-07 | 0.88  | 4.32   | -     | 612.0   |
| AHQ-3-4, 7386 - 7390        | R.TNISDEESEQATEMLVHNAQNLM*QSVK.E                                       | 3048.31017 | 3 | 2.25E-08 | 0.86  | 3.98   | -     | 670.9   |
| AHQ-3-4, 6336 - 6362        | R.TNISDEESEQATEMLVHNAQNLM*QSVK.E                                       | 3048.31017 | 3 | 3.57E-05 | 0.66  | 3.66   | -     | 306.2   |
| AHQ-3-12, 5830 - 5894       | R.TNISDEESEQATEMLVHNAQNLM*QSVK.E                                       | 3064.30957 | 3 | 5.22E-08 | 0.70  | 4.45   | -     | 443.2   |
| AHQ-3-12, 3115              | R.TNLLQVGER.I                                                          | 1134.28859 | 2 | 2.46E-06 | 0.87  | 3.48   | -     | 785.0   |
| AHQ-3-4, 3174               | R.TNLLQVGER.I                                                          | 1134.28859 | 2 | 1.22E-05 | 0.93  | 3.12   | -     | 1488.6  |
| AHQ-3-5, 5999 - 6068        | K.VAMANIQPQMLVAGATSIAR.R                                               | 2043.44398 | 2 | 1.40E-04 | 0.94  | 4.92   | -     | 650.8   |
| AHQ-3-5, 5345               | K.VAM*ANIQQPMLVAGATSIAR.R                                              | 2059.44338 | 3 | 6.05E-07 | 0.91  | 4.69   | -     | 1310.2  |
| AHQ-3-4, 5525               | K.VAM*ANIQQPMLVAGATSIAR.R                                              | 2059.44338 | 3 | 6.40E-08 | 0.83  | 3.77   | -     | 1168.4  |
| AHQ-3-1, 5154               | K.VAM*ANIQQPMLVAGATSIAR.R                                              | 2075.44278 | 2 | 5.26E-04 | 0.85  | 3.89   | -     | 411.4   |
| AHQ-3-3, 5773 - 5786        | K.VAMANIQPQM*LVAGATSIAR.R                                              | 2059.44338 | 2 | 8.11E-05 | 0.77  | 3.62   | -     | 476.1   |
| AHQ-3-7, 5148               | K.VAM*ANIQQPMLVAGATSIAR.R                                              | 2059.44338 | 2 | 8.28E-04 | 0.58  | 3.13   | -     | 449.8   |
| AHQ-3-7, 5843               | K.VAMANIQPQMLVAGATSIAR.R                                               | 2043.44398 | 2 | 2.53E-05 | 0.87  | 4.31   | -     | 513.9   |
| AHQ-3-4, 5002               | K.VAM*ANIQQPQM*LVAGATSIAR.R                                            | 2075.44278 | 2 | 2.82E-06 | 0.93  | 4.77   | -     | 721.8   |
| AHQ-3-6, 4791               | K.VAM*ANIQQPQM*LVAGATSIAR.R                                            | 2075.44278 | 2 | 1.67E-04 | 0.82  | 3.62   | -     | 584.2   |
| AHQ-3-5, 5317 - 5339        | K.VAM*ANIQQPMLVAGATSIAR.R                                              | 2059.44338 | 2 | 2.03E-05 | 0.90  | 4.32   | -     | 847.3   |
| AHQ-3-4, 5474 - 5548        | K.VAM*ANIQQPMLVAGATSIAR.R                                              | 2059.44338 | 2 | 1.55E-07 | 0.91  | 4.68   | -     | 777.6   |
| AHQ-3-4, 6130 - 6204        | K.VAMANIQPQMLVAGATSIAR.R                                               | 2043.44398 | 2 | 7.02E-04 | 0.87  | 4.60   | -     | 385.8   |
| AHQ-3-5, 5024 - 5025        | R.VDQLTAQLADLAAR.G                                                     | 1485.66778 | 2 | 1.52E-08 | 0.98  | 5.86   | -     | 2894.6  |
| AHQ-3-4, 5321               | R.VDQLTAQLADLAAR.G                                                     | 1485.66778 | 2 | 5.65E-04 | 0.97  | 4.79   | -     | 1731.2  |
| AHQ-3-1, 5282 - 5285        | R.VDQLTAQLADLAAR.G                                                     | 1485.66778 | 2 | 9.67E-08 | 0.97  | 4.06   | -     | 2355.3  |
| AHQ-3-4, 5132               | R.VDQLTAQLADLAAR.G                                                     | 1485.66778 | 2 | 5.67E-07 | 0.84  | 2.81   | -     | 1355.1  |
| AHQ-3-7, 5258               | R.VLQLTSWDEDAWASK.D                                                    | 1749.90156 | 2 | 6.50E-07 | 0.95  | 4.06   | -     | 1084.7  |
| AHQ-3-3, 5608               | R.VLQLTSWDEDAWASK.D                                                    | 1749.90156 | 2 | 3.20E-05 | 0.94  | 4.14   | -     | 1015.0  |
| AHQ-3-4, 5476 - 5549        | R.VLQLTSWDEDAWASK.D                                                    | 1749.90156 | 2 | 2.20E-04 | 0.92  | 3.78   | -     | 838.3   |
| AHQ-3-5, 5331 - 5400        | R.VLQLTSWDEDAWASK.D                                                    | 1749.90156 | 2 | 8.12E-06 | 0.97  | 4.88   | -     | 1739.7  |
| AHQ-3-2, 5661               | R.VLQLTSWDEDAWASK.D                                                    | 1749.90156 | 2 | 6.56E-08 | 0.94  | 3.87   | -     | 1043.6  |
| AHQ-3-6, 5314 - 5321        | R.VLQLTSWDEDAWASK.D                                                    | 1749.90156 | 2 | 1.12E-12 | 0.97  | 4.90   | -     | 1323.7  |
| AHQ-3-4, 2138               | R.VM*LVNSM*NTVK.E                                                      | 1268.52961 | 2 | 1.24E-04 | 0.71  | 2.91   | -     | 779.1   |
| AHQ-3-4, 3112 - 3121        | R.VMLVNSM*NTVK.E                                                       | 1236.53081 | 2 | 2.92E-05 | 0.93  | 3.42   | -     | 1337.6  |
| AHQ-3-5, 2720               | R.WIDNPTVDDR.G                                                         | 1231.29640 | 2 | 7.94E-04 | 0.94  | 3.45   | -     | 1533.5  |
| AHQ-3-4, 2830 - 2902        | R.WIDNPTVDDR.G                                                         | 1231.29640 | 1 | 2.08E-04 | 0.19  | 1.87   | -     | 313.0   |
| AHQ-3-4, 2838               | R.WIDNPTVDDR.G                                                         | 1231.29640 | 2 | 5.07E-04 | 0.93  | 3.88   | -     | 1022.1  |
| gj 4759212 ref NP_004598.1  | beta-tubulin cofactor A [Homo sapiens]                                 |            |   | 1.13E-12 | 0.98  | 10.37  | 16.70 | 12854.8 |
| AHQ-3-13-, 3339             | R.ILENEKDLLEAEYKEAR.L                                                  | 2209.35284 | 2 | 1.41E-06 | 0.90  | 4.23   | -     | 653.7   |
| AHQ-3-13-, 3329 - 3334      | R.ILENEKDLLEAEYKEAR.L                                                  | 2209.35284 | 3 | 1.13E-12 | 0.98  | 7.46   | -     | 1361.6  |
| gj 4557419 ref NP_000063.1  | CD36 antigen (collagen type I receptor, thrombospondin receptor); CD36 |            |   | 1.32E-12 | 2.80  | 30.24  | 10.20 | 53052.1 |
| AHQ-3-2, 4975               | K.AFASPVENPNDFCFCTEK.I                                                 | 2152.30319 | 2 | 3.65E-04 | 0.36  | 2.68   | -     | 178.4   |
| AHQ-3-6, 4662 - 4743        | K.AFASPVENPNDFCFCTEK.I                                                 | 2152.30319 | 2 | 1.08E-04 | 0.56  | 2.88   | -     | 344.7   |
| AHQ-3-1, 4938 - 4940        | K.AFASPVENPNDFCFCTEK.I                                                 | 2152.30319 | 2 | 7.67E-07 | 0.77  | 4.09   | -     | 485.0   |
| AHQ-3-1, 5872               | K.SQVLQFFSSDICR.S                                                      | 1588.76661 | 2 | 2.50E-05 | 0.92  | 3.31   | -     | 1330.0  |
| AHQ-3-6, 5473               | K.SQVLQFFSSDICR.S                                                      | 1588.76661 | 2 | 3.61E-08 | 0.94  | 4.30   | -     | 1029.1  |
| AHQ-3-5, 5519 - 5520        | K.SQVLQFFSSDICR.S                                                      | 1588.76661 | 2 | 2.47E-09 | 0.97  | 4.81   | -     | 1432.8  |
| AHQ-3-1, 7201               | R.TYLDIQPIPTGFTLQFAK.R                                                 | 1957.25787 | 2 | 1.35E-10 | 0.95  | 4.20   | -     | 1268.4  |
| AHQ-3-3, 7398               | R.TYLDIQPIPTGFTLQFAK.R                                                 | 1957.25787 | 2 | 6.49E-07 | 0.94  | 4.08   | -     | 1088.3  |
| AHQ-3-5, 7323 - 7327        | R.TYLDIQPIPTGFTLQFAK.R                                                 | 1957.25787 | 2 | 1.32E-12 | 0.97  | 4.88   | -     | 1403.6  |
| gj 10835187 ref NP_000627.1 | superoxide dismutase 2, mitochondrial [Homo sapiens]                   |            |   | 1.38E-12 | 6.49  | 70.34  | 59.90 | 24733.0 |
| AHQ-3-11, 5902 - 5966       | K.AIWNVINWENVTYR.Y                                                     | 1744.93137 | 2 | 1.63E-10 | 0.95  | 4.70   | -     | 1168.5  |
| AHQ-3-13-, 6190             | K.AIWNVINWENVTYR.Y                                                     | 1744.93137 | 2 | 9.40E-06 | 0.94  | 3.61   | -     | 1383.2  |
| AHQ-3-13, 6197              | K.AIWNVINWENVTYR.Y                                                     | 1744.93137 | 2 | 5.03E-04 | 0.95  | 4.13   | -     | 1302.5  |
| AHQ-3-12, 6147              | K.AIWNVINWENVTYR.Y                                                     | 1744.93137 | 2 | 2.01E-10 | 0.90  | 3.98   | -     | 803.8   |
| AHQ-3-11, 6039 - 6051       | K.AIWNVINWENVTYR.Y                                                     | 1744.93137 | 2 | 6.02E-10 | 0.96  | 4.49   | -     | 1274.9  |
| AHQ-3-11, 5956              | K.AIWNVINWENVTYR.Y                                                     | 1744.93137 | 2 | 1.89E-11 | 0.96  | 4.66   | -     | 1335.1  |
| AHQ-3-14-, 6083             | K.AIWNVINWENVTYR.Y                                                     | 1744.93137 | 2 | 1.12E-08 | 0.95  | 4.33   | -     | 1278.8  |
| AHQ-3-11, 5824 - 5888       | K.AIWNVINWENVTYR.Y                                                     | 1744.93137 | 2 | 1.38E-12 | 0.93  | 3.98   | -     | 910.7   |
| AHQ-3-11, 5603              | K.AIWNVINWENVTYR.Y                                                     | 1744.93137 | 2 | 2.33E-07 | 0.90  | 3.29   | -     | 941.9   |
| AHQ-3-11, 4324 - 4398       | K.FNGGGHINHISFWTNLSPNGGGEPK.G                                          | 2638.83761 | 2 | 9.11E-07 | 0.95  | 4.73   | -     | 1001.2  |
| AHQ-3-11, 4467              | K.FNGGGHINHISFWTNLSPNGGGEPK.G                                          | 2638.83761 | 2 | 5.18E-06 | 0.90  | 3.81   | -     | 895.1   |
| AHQ-3-11, 3904              | K.GDVTAQIALQPALK.F                                                     | 1425.65548 | 2 | 5.60E-05 | 0.83  | 3.32   | -     | 828.7   |
| AHQ-3-11, 3704 - 3766       | K.GDVTAQIALQPALK.F                                                     | 1425.65548 | 1 | 2.37E-04 | 0.83  | 3.25   | -     | 903.5   |
| AHQ-3-11, 3687 - 3759       | K.GDVTAQIALQPALK.F                                                     | 1425.65548 | 2 | 1.35E-06 | 0.95  | 4.68   | -     | 1182.5  |
| AHQ-3-11, 3691 - 3754       | K.GDVTAQIALQPALK.F                                                     | 1425.65548 | 1 | 6.27E-04 | 0.56  | 2.62   | -     | 868.1   |
| AHQ-3-11, 6775              | R.GHLQIAACPNDPLQGTGLIPLLGIDVWEHAYLQYK.N                                | 4296.85327 | 3 | 4.66E-11 | 0.97  | 6.71   | -     | 1390.8  |
| AHQ-3-11, 2244              | K.HHAAAYVNNLNVTTEEK.Y                                                  | 1739.86999 | 3 | 3.62E-04 | 0.90  | 3.76   | -     | 1337.7  |
| AHQ-3-11, 2150              | K.HHAAAYVNNLNVTTEEK.Y                                                  | 1739.86999 | 2 | 1.76E-10 | 0.96  | 4.33   | -     | 1229.9  |
| AHQ-3-11, 3447              | K.HHAAAYVNNLNVTTEEK.Y                                                  | 2543.77604 | 3 | 3.76E-07 | 0.90  | 4.70   | -     | 820.8   |
| AHQ-3-11, 5976 - 6056       | K.LTAAASVGVQSGGWGLGFNKE                                                | 2036.27841 | 2 | 5.44E-06 | 0.84  | 3.91   | -     | 528.3   |
| AHQ-3-11, 6387 - 6388       | K.LTAAASVGVQSGGWGLGFNKE                                                | 2036.27841 | 2 | 6.15E-04 | 0.78  | 3.65   | -     | 485.0   |
| AHQ-3-11, 6816              | K.LTAAASVGVQSGGWGLGFNKE                                                | 2036.27841 | 2 | 1.58E-05 | 0.79  | 3.37   | -     | 608.0   |
| gj 13562114 ref NP_110400.1 | beta tubulin 1, class VI [Homo sapiens]                                |            |   | 2.85E-12 | 18.79 | 220.35 | 55.20 | 50326.6 |
| AHQ-3-1, 6625               | R.ALSVAELTQQMFDAR.N                                                    | 1680.90740 | 2 | 4.24E-04 | 0.88  | 3.35   | -     | 1136.8  |
| AHQ-3-9, 5935 - 5952        | R.ALSVAELTQQMFDAR.N                                                    | 1680.90740 | 2 | 8.55E-05 | 0.95  | 4.57   | -     | 1238.1  |
| AHQ-3-10, 5746              | R.ALSVAELTQQMFDAR.N                                                    | 1680.90740 | 2 | 2.44E-06 | 0.93  | 4.23   | -     | 1131.1  |
| AHQ-3-7, 6190 - 6270        | R.ALSVAELTQQMFDAR.N                                                    | 1680.90740 | 2 | 3.36E-06 | 0.96  | 5.33   | -     | 1353.0  |
| AHQ-3-11, 5950 - 5954       | R.ALSVAELTQQMFDAR.N                                                    | 1680.90740 | 2 | 1.14E-06 | 0.97  | 4.95   | -     | 1811.0  |
| AHQ-3-7, 4427 - 4502        | R.ALSVAELTQQM*FDFAR.N                                                  | 1696.90680 | 2 | 2.41E-07 | 0.94  | 4.68   | -     | 843.9   |
| AHQ-3-4, 6636 - 6638        | R.ALSVAELTQQMFDAR.N                                                    | 1680.90740 | 2 | 4.34E-05 | 0.83  | 3.06   | -     | 1099.9  |
| AHQ-3-7, 4491               | R.ALSVAELTQQM*FDFAR.N                                                  | 1696.90680 | 2 | 3.11E-05 | 0.97  | 5.01   | -     | 1565.5  |
| AHQ-3-7, 4750               | R.AVLVDLEPMTMDSIR.S                                                    | 1616.86162 | 2 | 9.11E-10 | 0.93  | 4.46   | -     | 799.1   |
| AHQ-3-7, 3558 - 3634        | R.EIVHIQIQCGCQNIQIGAK.F                                                | 1867.11965 | 2 | 3.03E-04 | 0.89  | 4.15   | -     | 563.5   |
| AHQ-3-7, 3006               | K.EVDQQLLSVQTR.N                                                       | 1416.56231 | 2 | 4.41E-05 | 0.93  | 4.55   | -     | 903.6   |
| AHQ-3-9, 2873               | K.EVDQQLLSVQTR.N                                                       | 1416.56231 | 1 | 2.92E-05 | 0.19  | 2.17   | -     | 116.3   |
| AHQ-3-14, 5740              | K.FWEM*IGEEHGIDLAGSDR.G                                                | 2079.23556 | 3 | 4.40E-06 | 0.87  | 3.62   | -     | 770.9   |

|                          |                                                                         |            |   |          |       |        |       |         |
|--------------------------|-------------------------------------------------------------------------|------------|---|----------|-------|--------|-------|---------|
| AHQ-3-14, 5739 - 5747    | K.FWEM*IGEEHGIDLAGSDR.G                                                 | 2079.23556 | 2 | 1.00E-04 | 0.96  | 4.88   | -     | 968.3   |
| AHQ-3-14, 6172           | K.FWEMIGEEHGIDLAGSDR.G                                                  | 2063.23616 | 2 | 7.42E-07 | 0.98  | 5.86   | -     | 1891.9  |
| AHQ-3-10, 4744           | K.FWEMIGEEHGIDLAGSDR.G                                                  | 2063.23616 | 2 | 7.79E-04 | 0.94  | 4.23   | -     | 1180.1  |
| AHQ-3-13, 5201 - 5202    | K.FWEMIGEEHGIDLAGSDR.G                                                  | 2063.23616 | 2 | 1.49E-07 | 0.98  | 6.17   | -     | 1853.0  |
| AHQ-3-13-, 5181          | K.FWEMIGEEHGIDLAGSDR.G                                                  | 2063.23616 | 2 | 3.12E-12 | 0.98  | 6.31   | -     | 2203.8  |
| AHQ-3-14-, 5115 - 5172   | K.FWEMIGEEHGIDLAGSDR.G                                                  | 2063.23616 | 2 | 2.20E-06 | 0.98  | 6.17   | -     | 2166.0  |
| AHQ-3-11, 4962           | K.FWEMIGEEHGIDLAGSDR.G                                                  | 2063.23616 | 2 | 7.93E-05 | 0.95  | 4.70   | -     | 1069.5  |
| AHQ-3-14-, 4609          | K.FWEM*IGEEHGIDLAGSDR.G                                                 | 2079.23556 | 2 | 8.91E-07 | 0.95  | 4.77   | -     | 809.7   |
| AHQ-3-12, 5182           | K.FWEMIGEEHGIDLAGSDR.G                                                  | 2063.23616 | 2 | 3.39E-07 | 0.98  | 5.46   | -     | 1946.2  |
| AHQ-3-12, 5319           | K.FWEMIGEEHGIDLAGSDR.G                                                  | 2063.23616 | 2 | 9.58E-04 | 0.76  | 3.40   | -     | 562.9   |
| AHQ-3-7, 5122 - 5190     | K.FWEMIGEEHGIDLAGSDR.G                                                  | 2063.23616 | 2 | 2.85E-12 | 0.98  | 6.12   | -     | 2394.6  |
| AHQ-3-12, 2218           | R.GASALQLER.I                                                           | 945.05542  | 2 | 2.83E-04 | 0.63  | 2.76   | -     | 786.7   |
| AHQ-3-11, 6426           | K.GHYTEGAELIENLVLR.H                                                    | 2029.23935 | 3 | 7.52E-04 | 0.82  | 3.75   | -     | 1284.8  |
| AHQ-3-13-, 6705          | K.GHYTEGAELIENLVLR.H                                                    | 2029.23935 | 2 | 1.22E-10 | 0.98  | 6.93   | -     | 2422.6  |
| AHQ-3-13-, 6702          | K.GHYTEGAELIENLVLR.H                                                    | 2029.23935 | 3 | 4.23E-04 | 0.90  | 4.12   | -     | 1604.7  |
| AHQ-3-3, 7176            | K.GHYTEGAELIENLVLR.H                                                    | 2029.23935 | 2 | 8.21E-09 | 0.98  | 6.65   | -     | 2144.2  |
| AHQ-3-10, 6207 - 6216    | K.GHYTEGAELIENLVLR.H                                                    | 2029.23935 | 2 | 4.41E-07 | 0.98  | 6.00   | -     | 2185.1  |
| AHQ-3-5, 7024            | K.GHYTEGAELIENLVLR.H                                                    | 2029.23935 | 2 | 1.41E-04 | 0.98  | 5.60   | -     | 2463.1  |
| AHQ-3-7, 6730 - 6798     | K.GHYTEGAELIENLVLR.H                                                    | 2029.23935 | 2 | 3.73E-11 | 0.99  | 7.00   | -     | 2531.3  |
| AHQ-3-7, 6732            | K.GHYTEGAELIENLVLR.H                                                    | 2029.23935 | 3 | 1.03E-04 | 0.95  | 5.19   | -     | 1657.2  |
| AHQ-3-13, 6713 - 6719    | K.GHYTEGAELIENLVLR.H                                                    | 2029.23935 | 2 | 9.66E-09 | 0.99  | 6.36   | -     | 3025.3  |
| AHQ-3-14-, 6599 - 6600   | K.GHYTEGAELIENLVLR.H                                                    | 2029.23935 | 2 | 6.48E-07 | 0.98  | 6.93   | -     | 2452.0  |
| AHQ-3-9, 6511            | K.GHYTEGAELIENLVLR.H                                                    | 2029.23935 | 2 | 2.10E-05 | 0.97  | 5.23   | -     | 1832.6  |
| AHQ-3-14-, 6597 - 6603   | K.GHYTEGAELIENLVLR.H                                                    | 2029.23935 | 3 | 1.72E-06 | 0.88  | 4.67   | -     | 1072.8  |
| AHQ-3-11, 6419           | K.GHYTEGAELIENLVLR.H                                                    | 2029.23935 | 2 | 6.53E-08 | 0.98  | 6.75   | -     | 2252.3  |
| AHQ-3-8, 6537 - 6609     | K.GHYTEGAELIENLVLR.H                                                    | 2029.23935 | 2 | 2.88E-04 | 0.95  | 4.23   | -     | 1947.7  |
| AHQ-3-7, 6768            | R.GLSM*AATFIGNNTAIQEIFNR.V                                              | 2285.56551 | 2 | 3.77E-09 | 0.91  | 4.20   | -     | 748.1   |
| AHQ-3-10, 6040           | R.GLSM*AATFIGNNTAIQEIFNR.V                                              | 2285.56551 | 2 | 6.62E-04 | 0.64  | 3.14   | -     | 392.4   |
| AHQ-3-12, 6456           | R.GLSM*AATFIGNNTAIQEIFNR.V                                              | 2285.56551 | 2 | 4.91E-07 | 0.88  | 3.98   | -     | 645.7   |
| AHQ-3-1, 6882 - 6894     | R.GLSM*AATFIGNNTAIQEIFNR.V                                              | 2285.56551 | 2 | 7.58E-04 | 0.80  | 3.29   | -     | 676.2   |
| AHQ-3-14-, 6355 - 6371   | R.GLSM*AATFIGNNTAIQEIFNR.V                                              | 2285.56551 | 2 | 1.19E-09 | 0.94  | 5.22   | -     | 736.1   |
| AHQ-3-14-, 6220          | R.GLSM*AATFIGNNTAIQEIFNR.V                                              | 2285.56551 | 2 | 4.48E-04 | 0.78  | 3.23   | -     | 620.7   |
| AHQ-3-7, 6586 - 6662     | R.GLSM*AATFIGNNTAIQEIFNR.V                                              | 2285.56551 | 2 | 2.76E-09 | 0.94  | 4.68   | -     | 859.3   |
| AHQ-3-13, 6478 - 6481    | R.GLSM*AATFIGNNTAIQEIFNR.V                                              | 2285.56551 | 2 | 9.25E-07 | 0.96  | 5.32   | -     | 936.7   |
| AHQ-3-9, 6337 - 6401     | R.GLSM*AATFIGNNTAIQEIFNR.V                                              | 2285.56551 | 2 | 3.25E-04 | 0.91  | 4.10   | -     | 795.1   |
| AHQ-3-7, 7243 - 7315     | R.GLSMAATFIGNNTAIQEIFNR.V                                               | 2269.56611 | 2 | 2.28E-07 | 0.93  | 4.77   | -     | 799.0   |
| AHQ-3-12, 6187           | R.HESECDLQGFQVHSLGGGTSGMGTLMMNK.I                                       | 3511.88634 | 3 | 5.52E-08 | 0.96  | 4.82   | -     | 2119.6  |
| AHQ-3-11, 5974           | R.HESECDLQGFQVHSLGGGTSGMGTLMMNK.I                                       | 3511.88634 | 3 | 7.61E-05 | 0.79  | 3.63   | -     | 657.7   |
| AHQ-3-7, 3767            | R.IMNSFSVMPSPK.V                                                        | 1338.62160 | 2 | 1.35E-06 | 0.84  | 2.94   | -     | 717.2   |
| AHQ-3-7, 3780 - 3784     | R.IMNSFSVMPSPK.V                                                        | 1338.62160 | 1 | 1.01E-07 | 0.52  | 2.32   | -     | 571.7   |
| AHQ-3-7, 3490 - 3538     | R.IMNSFSVMPSPK.V                                                        | 1338.62160 | 2 | 3.85E-06 | 0.92  | 3.35   | -     | 1333.8  |
| AHQ-3-7, 3232            | R.IM*NSFSVMPSPK.V                                                       | 1354.62100 | 2 | 6.50E-04 | 0.84  | 3.48   | -     | 565.2   |
| AHQ-3-7, 3008            | R.IM*NSFSVMPSPK.V                                                       | 1354.62100 | 2 | 5.90E-06 | 0.87  | 3.81   | -     | 749.2   |
| AHQ-3-13-, 3223          | R.ISVYYNEAYGR.K                                                         | 1335.44622 | 2 | 8.14E-09 | 0.87  | 2.82   | -     | 961.4   |
| AHQ-3-7, 2908            | R.ISVYYNEAYGR.K                                                         | 1335.44622 | 2 | 7.13E-08 | 0.94  | 3.39   | -     | 1326.4  |
| AHQ-3-14-, 3173          | R.ISVYYNEAYGR.K                                                         | 1335.44622 | 2 | 3.41E-07 | 0.93  | 3.32   | -     | 1219.2  |
| AHQ-3-13, 3226           | R.ISVYYNEAYGR.K                                                         | 1335.44622 | 2 | 2.15E-08 | 0.88  | 2.68   | -     | 1126.4  |
| AHQ-3-12, 3090           | R.ISVYYNEAYGR.K                                                         | 1335.44622 | 2 | 3.96E-07 | 0.91  | 3.42   | -     | 978.4   |
| AHQ-3-14-, 3031 - 3032   | R.ISVYYNEAYGR.K                                                         | 1335.44622 | 2 | 3.32E-07 | 0.96  | 3.69   | -     | 1685.8  |
| AHQ-3-14, 3967 - 4011    | R.ISVYYNEAYGR.K                                                         | 1335.44622 | 2 | 7.51E-07 | 0.92  | 3.00   | -     | 1095.4  |
| AHQ-3-12, 5115           | K.LGALFQPDPSFVHGNSGAGNNWAK.G                                            | 2388.58260 | 2 | 2.23E-06 | 0.85  | 3.61   | -     | 634.8   |
| AHQ-3-7, 4714            | K.LGALFQPDPSFVHGNSGAGNNWAK.G                                            | 2388.58260 | 3 | 1.91E-09 | 0.87  | 4.14   | -     | 681.3   |
| AHQ-3-13, 5099           | K.LGALFQPDPSFVHGNSGAGNNWAK.G                                            | 2388.58260 | 2 | 8.12E-08 | 0.80  | 3.35   | -     | 618.1   |
| AHQ-3-13-, 5093          | K.LGALFQPDPSFVHGNSGAGNNWAK.G                                            | 2388.58260 | 3 | 1.68E-09 | 0.87  | 4.21   | -     | 585.0   |
| AHQ-3-12, 5012 - 5015    | K.LGALFQPDPSFVHGNSGAGNNWAK.G                                            | 2388.58260 | 2 | 7.71E-06 | 0.89  | 3.81   | -     | 887.4   |
| AHQ-3-13-, 5182          | K.LGALFQPDPSFVHGNSGAGNNWAK.G                                            | 2388.58260 | 3 | 7.82E-07 | 0.82  | 3.59   | -     | 755.6   |
| AHQ-3-7, 4834 - 4855     | R.LHFFM*PGFAPLTAQGSQQYR.A                                               | 2313.62224 | 3 | 3.57E-06 | 0.98  | 6.12   | -     | 2994.7  |
| AHQ-3-9, 5271            | R.LHFFM*PGFAPLTAQGSQQYR.A                                               | 2297.62284 | 2 | 3.53E-06 | 0.97  | 5.81   | -     | 995.9   |
| AHQ-3-7, 5552 - 5558     | R.LHFFM*PGFAPLTAQGSQQYR.A                                               | 2297.62284 | 2 | 2.37E-09 | 0.97  | 6.09   | -     | 689.0   |
| AHQ-3-10, 5262           | R.LHFFM*PGFAPLTAQGSQQYR.A                                               | 2297.62284 | 2 | 3.63E-05 | 0.93  | 4.46   | -     | 597.9   |
| AHQ-3-12, 5151           | R.LHFFM*PGFAPLTAQGSQQYR.A                                               | 2313.62224 | 2 | 2.72E-06 | 0.96  | 5.04   | -     | 1005.4  |
| AHQ-3-7, 4827            | R.LHFFM*PGFAPLTAQGSQQYR.A                                               | 2313.62224 | 2 | 6.08E-04 | 0.95  | 4.33   | -     | 1055.3  |
| AHQ-3-14-, 5109 - 5124   | R.LHFFM*PGFAPLTAQGSQQYR.A                                               | 2313.62224 | 3 | 8.19E-05 | 0.89  | 4.02   | -     | 1197.9  |
| AHQ-3-11, 5547           | R.LHFFM*PGFAPLTAQGSQQYR.A                                               | 2297.62284 | 2 | 3.56E-06 | 0.96  | 5.81   | -     | 723.9   |
| AHQ-3-12, 5776           | R.LHFFM*PGFAPLTAQGSQQYR.A                                               | 2297.62284 | 2 | 6.37E-04 | 0.96  | 5.06   | -     | 859.9   |
| AHQ-3-9, 4609 - 4611     | R.LHFFM*PGFAPLTAQGSQQYR.A                                               | 2313.62224 | 2 | 5.55E-07 | 0.95  | 4.97   | -     | 838.4   |
| AHQ-3-8, 4515            | R.LHFFM*PGFAPLTAQGSQQYR.A                                               | 2313.62224 | 2 | 1.84E-04 | 0.96  | 5.17   | -     | 927.5   |
| AHQ-3-8, 5199            | R.LHFFM*PGFAPLTAQGSQQYR.A                                               | 2297.62284 | 2 | 2.54E-04 | 0.95  | 4.56   | -     | 741.9   |
| AHQ-3-11, 4894 - 4906    | R.LHFFM*PGFAPLTAQGSQQYR.A                                               | 2313.62224 | 2 | 3.92E-05 | 0.97  | 5.69   | -     | 1054.7  |
| AHQ-3-8, 4521            | R.LHFFM*PGFAPLTAQGSQQYR.A                                               | 2313.62224 | 3 | 8.06E-05 | 0.90  | 3.43   | -     | 1057.7  |
| AHQ-3-10, 4651 - 4654    | R.LHFFM*PGFAPLTAQGSQQYR.A                                               | 2313.62224 | 2 | 1.57E-04 | 0.96  | 5.20   | -     | 1055.9  |
| AHQ-3-8, 6597            | K.LTTPTYGDLNHLVSLTM*SGITTSR.F                                           | 2709.06919 | 3 | 2.96E-04 | 0.68  | 3.21   | -     | 645.4   |
| AHQ-3-14-, 6551          | K.LTTPTYGDLNHLVSLTM*SGITTSR.F                                           | 2693.06979 | 3 | 9.61E-06 | 0.90  | 4.03   | -     | 1111.4  |
| AHQ-3-14-, 6524 - 6583   | K.LTTPTYGDLNHLVSLTM*SGITTSR.F                                           | 2709.06919 | 3 | 8.24E-07 | 0.94  | 5.08   | -     | 931.9   |
| AHQ-3-7, 5964            | K.LTTPTYGDLNHLVSLTM*SGITTSR.F                                           | 2709.06919 | 3 | 7.49E-04 | 0.59  | 3.17   | -     | 356.8   |
| AHQ-3-8, 7227            | K.LTTPTYGDLNHLVSLTM*SGITTSR.F                                           | 2693.06979 | 2 | 1.15E-06 | 0.92  | 4.84   | -     | 757.4   |
| AHQ-3-7, 7350 - 7351     | K.LTTPTYGDLNHLVSLTM*SGITTSR.F                                           | 2693.06979 | 3 | 7.75E-08 | 0.95  | 5.40   | -     | 1220.2  |
| AHQ-3-10, 6534           | K.LTTPTYGDLNHLVSLTM*SGITTSR.F                                           | 2693.06979 | 2 | 5.27E-08 | 0.95  | 4.97   | -     | 1030.8  |
| AHQ-3-7, 6700 - 6770     | K.LTTPTYGDLNHLVSLTM*SGITTSR.F                                           | 2709.06919 | 3 | 2.77E-04 | 0.77  | 3.63   | -     | 442.8   |
| AHQ-3-7, 6866 - 6888     | K.LTTPTYGDLNHLVSLTM*SGITTSR.F                                           | 2693.06979 | 3 | 5.02E-08 | 0.91  | 4.70   | -     | 780.3   |
| AHQ-3-9, 6975 - 6976     | K.LTTPTYGDLNHLVSLTM*SGITTSR.F                                           | 2693.06979 | 3 | 2.21E-06 | 0.93  | 4.65   | -     | 1231.8  |
| AHQ-3-9, 6971 - 7003     | K.LTTPTYGDLNHLVSLTM*SGITTSR.F                                           | 2693.06979 | 2 | 1.23E-09 | 0.96  | 5.59   | -     | 984.3   |
| AHQ-3-4, 7524 - 7526     | K.LTTPTYGDLNHLVSLTM*SGITTSR.F                                           | 2693.06979 | 2 | 2.01E-06 | 0.95  | 5.36   | -     | 824.4   |
| AHQ-3-3, 7506            | K.LTTPTYGDLNHLVSLTM*SGITTSR.F                                           | 2693.06979 | 3 | 7.72E-05 | 0.90  | 3.96   | -     | 1190.9  |
| AHQ-3-9, 6519 - 6533     | K.LTTPTYGDLNHLVSLTM*SGITTSR.F                                           | 2693.06979 | 3 | 8.33E-06 | 0.93  | 4.70   | -     | 1098.6  |
| AHQ-3-7, 6874 - 6875     | K.LTTPTYGDLNHLVSLTM*SGITTSR.F                                           | 2709.06919 | 3 | 2.19E-05 | 0.93  | 4.74   | -     | 1042.0  |
| AHQ-3-3, 7504            | K.LTTPTYGDLNHLVSLTM*SGITTSR.F                                           | 2693.06979 | 2 | 6.63E-05 | 0.86  | 3.48   | -     | 801.5   |
| AHQ-3-1, 7064            | K.LTTPTYGDLNHLVSLTM*SGITTSR.F                                           | 2709.06919 | 3 | 2.93E-05 | 0.88  | 4.43   | -     | 583.4   |
| AHQ-3-12, 6622           | K.LTTPTYGDLNHLVSLTM*SGITTSR.F                                           | 2709.06919 | 3 | 3.69E-05 | 0.93  | 4.64   | -     | 1147.4  |
| AHQ-3-7, 6022            | R.NSSCFVEWIPNNVK.V                                                      | 1695.87718 | 2 | 9.11E-05 | 0.67  | 2.70   | -     | 690.7   |
| AHQ-3-7, 5383 - 5391     | R.NSSCFVEWIPNNVK.V                                                      | 1695.87718 | 2 | 7.54E-04 | 0.41  | 3.05   | -     | 472.4   |
| AHQ-3-9, 4920            | R.NSSCFVEWIPNNVK.V                                                      | 1695.87718 | 2 | 1.17E-04 | 0.77  | 3.36   | -     | 552.9   |
| AHQ-3-13, 5287           | R.YLTVACIFR.G                                                           | 1144.36822 | 2 | 5.03E-05 | 0.86  | 2.95   | -     | 654.2   |
| AHQ-3-12, 5252           | R.YLTVACIFR.G                                                           | 1144.36822 | 2 | 9.86E-04 | 0.88  | 2.81   | -     | 805.6   |
| AHQ-3-11, 5010           | R.YLTVACIFR.G                                                           | 1144.36822 | 2 | 1.45E-04 | 0.88  | 2.93   | -     | 879.6   |
| gi5729877 refNP_006588.1 | heat shock 70kDa protein 8 isoform 1; heat shock cognate protein, 71-kD |            |   |          | 13.51 | 150.27 | 26.90 | 70897.6 |
| AHQ-3-6, 4575            | R.FEELNADLFR.G                                                          | 1254.37310 | 2 | 1.30E-05 | 0.91  | 3.66   | -     | 1008.6  |
| AHQ-3-6, 5218 - 5290     | K.GPAVGIDLGTTYSCVGVFQHGK.V                                              | 2265.53088 | 2 | 2.59E-08 | 0.96  | 5.43   | -     | 1399.2  |
| AHQ-3-6, 5209            | K.GPAVGIDLGTTYSCVGVFQHGK.V                                              | 2265.53088 | 3 | 2.87E-12 | 0.94  | 4.98   | -     | 1088.1  |
| AHQ-3-6, 2938            | K.HWPFM*VNDAGRPK.V                                                      | 1670.91910 | 3 | 8.50E-07 | 0.93  | 4.08   | -     | 1180.1  |
| AHQ-3-6, 5571 - 5639     | K.ILDKCNIEINWLDK.N                                                      | 1776.04688 | 2 | 3.97E-04 | 0.94  | 4.19   | -     | 1282.5  |
| AHQ-3-6, 3010 - 3067     | R.MVNHFAIEFK.R                                                          | 1236.46756 | 2 | 1.22E-07 | 0.95  | 3.64   | -     | 1521.7  |
| AHQ-3-14-, 2897          | K.NQVAM*NPTNTVFDAR.K                                                    | 1666.83756 | 2 | 1.72E-05 | 0.91  | 3.83   | -     | 644.4   |
| AHQ-3-6, 2773 - 2774     | K.NQVAM*NPTNTVFDAR.K                                                    | 1666.83756 | 2 | 1.17E-05 | 0.95  | 4.56   | -     | 1023.9  |
| AHQ-3-6, 3321            | K.NQVAM*NPTNTVFDAR.K                                                    | 1666.83756 | 2 | 3.28E-05 | 0.92  | 4.06   | -     | 968.6   |
| AHQ-3-6, 3737            | K.NQVAM*NPTNTVFDAR.K                                                    | 1650.83816 | 2 | 3.81E-06 | 0.74  | 3.21   | -     | 678.7   |
| AHQ-3-6, 3886            | K.NSLEYAFNMKA                                                           | 1304.45393 | 2 | 9.54E-05 | 0.86  | 2.95   | -     | 869.9   |

|                             |                                                                                    |            |   |          |       |        |       |         |
|-----------------------------|------------------------------------------------------------------------------------|------------|---|----------|-------|--------|-------|---------|
| AHQ-3-6, 2427               | R.RFDDAVVQSDMK.H                                                                   | 1411.56603 | 2 | 4.10E-06 | 0.96  | 3.92   | -     | 1511.4  |
| AHQ-3-6, 1903 - 1913        | R.RFDDAVVQSDM*K.H                                                                  | 1427.56543 | 2 | 4.69E-05 | 0.90  | 3.69   | -     | 788.0   |
| AHQ-3-6, 4390 - 4393        | K.SFYPEEVSSM*VLTK.M                                                                | 1633.84425 | 2 | 3.20E-04 | 0.85  | 3.26   | -     | 600.1   |
| AHQ-3-6, 7079               | K.SINPDEAVAYGAAVQAAIISGDK.S                                                        | 2261.47411 | 2 | 8.48E-05 | 0.70  | 3.65   | -     | 445.1   |
| AHQ-3-7, 6906               | K.SINPDEAVAYGAAVQAAIISGDK.S                                                        | 2261.47411 | 2 | 1.62E-06 | 0.95  | 4.47   | -     | 1209.5  |
| AHQ-3-6, 6861 - 6934        | K.SINPDEAVAYGAAVQAAIISGDK.S                                                        | 2261.47411 | 2 | 1.04E-06 | 0.96  | 4.94   | -     | 1210.2  |
| AHQ-3-6, 2775               | K.SQIHDIIVLGGSTR.I                                                                 | 1482.66712 | 1 | 4.98E-04 | 0.87  | 3.49   | -     | 767.2   |
| AHQ-3-6, 2771               | K.SQIHDIIVLGGSTR.I                                                                 | 1482.66712 | 2 | 6.67E-10 | 0.96  | 4.26   | -     | 1590.0  |
| AHQ-3-6, 2786               | K.SQIHDIIVLGGSTR.I                                                                 | 1482.66712 | 1 | 4.47E-07 | 0.69  | 2.83   | -     | 377.0   |
| AHQ-3-7, 2694               | K.SQIHDIIVLGGSTR.I                                                                 | 1482.66712 | 2 | 1.54E-08 | 0.98  | 4.59   | -     | 2253.2  |
| AHQ-3-6, 4759               | K.TVTNAVTVTPAVFNDSSQR.Q                                                            | 1983.17068 | 2 | 1.78E-08 | 0.82  | 3.71   | -     | 346.0   |
| AHQ-3-6, 2181 - 2191        | K.VCNPIITK.L                                                                       | 946.14652  | 2 | 1.56E-04 | 0.85  | 2.81   | -     | 661.9   |
| gj 9507215 ref NP_061816.1  | tubulin, alpha-like 2; tubulin, alpha 8 [Homo sapiens]                             |            |   | 3.02E-12 | 3.48  | 40.22  | 10.90 | 50093.2 |
| AHQ-3-14, 5936              | R.AVM*IDLEPTVVDEVR.A                                                               | 1702.95125 | 2 | 3.61E-04 | 0.94  | 3.98   | -     | 1166.8  |
| AHQ-3-13, 4921              | R.AVM*IDLEPTVVDEVR.A                                                               | 1702.95125 | 2 | 1.71E-07 | 0.90  | 3.71   | -     | 864.6   |
| AHQ-3-7, 5204 - 5207        | R.AVMIDLEPTVVDEVR.A                                                                | 1686.95185 | 2 | 9.79E-06 | 0.81  | 3.96   | -     | 604.4   |
| AHQ-3-9, 5092               | R.IHFPLVYAPIISAEK.A                                                                | 1800.13312 | 2 | 2.00E-05 | 0.76  | 2.97   | -     | 425.8   |
| AHQ-3-7, 5338               | R.IHFPLVYAPIISAEK.A                                                                | 1800.13312 | 2 | 9.12E-07 | 0.85  | 3.28   | -     | 566.3   |
| AHQ-3-14-, 5243             | K.INDDDSFTTFFSETGNGK.H                                                             | 1996.03358 | 2 | 3.02E-12 | 0.92  | 4.48   | -     | 711.9   |
| AHQ-3-13, 5317 - 5331       | K.INDDDSFTTFFSETGNGK.H                                                             | 1996.03358 | 2 | 1.28E-10 | 0.90  | 4.24   | -     | 749.3   |
| gj 17986258 ref NP_066299.2 | smooth muscle and non-muscle myosin alkali light chain isoform 1 [Homo sapiens]    |            |   | 3.17E-12 | 5.59  | 60.28  | 37.10 | 16930.0 |
| AHQ-3-12, 4182 - 4251       | K.DQGTEDYVEGLR.V                                                                   | 1545.58904 | 2 | 2.30E-10 | 0.94  | 4.20   | -     | 1091.0  |
| AHQ-3-13-, 4234             | K.DQGTEDYVEGLR.V                                                                   | 1545.58904 | 2 | 1.02E-06 | 0.87  | 2.56   | -     | 1374.9  |
| AHQ-3-14-, 4204             | K.DQGTEDYVEGLR.V                                                                   | 1545.58904 | 2 | 7.77E-05 | 0.73  | 2.68   | -     | 722.9   |
| AHQ-3-13, 4243 - 4307       | K.DQGTEDYVEGLR.V                                                                   | 1545.58904 | 2 | 1.29E-05 | 0.70  | 2.86   | -     | 394.1   |
| AHQ-3-12, 2231              | R.HVLVLGEEK.M                                                                      | 996.18547  | 2 | 2.42E-06 | 0.88  | 2.77   | -     | 854.8   |
| AHQ-3-13, 2318 - 2325       | R.HVLVLGEEK.M                                                                      | 996.18547  | 2 | 1.21E-06 | 0.89  | 3.42   | -     | 748.1   |
| AHQ-3-12, 2146 - 2203       | R.HVLVLGEEK.M                                                                      | 996.18547  | 1 | 9.59E-04 | 0.75  | 3.29   | -     | 603.4   |
| AHQ-3-13-, 2258             | R.HVLVLGEEK.M                                                                      | 996.18547  | 1 | 2.56E-04 | 0.78  | 2.89   | -     | 695.1   |
| AHQ-3-13, 2330              | R.HVLVLGEEK.M                                                                      | 996.18547  | 1 | 2.26E-05 | 0.55  | 2.67   | -     | 531.3   |
| AHQ-3-13-, 2259 - 2265      | R.HVLVLGEEK.M                                                                      | 996.18547  | 2 | 1.49E-04 | 0.85  | 2.84   | -     | 666.2   |
| AHQ-3-12, 2140 - 2168       | R.HVLVLGEEK.M                                                                      | 996.18547  | 2 | 8.28E-06 | 0.91  | 3.10   | -     | 935.3   |
| AHQ-3-12, 4022 - 4023       | K.NKDQGTEDYVEGLR.V                                                                 | 1787.86505 | 3 | 4.26E-05 | 0.52  | 3.10   | -     | 599.2   |
| AHQ-3-12, 3952 - 4018       | K.NKDQGTEDYVEGLR.V                                                                 | 1787.86505 | 2 | 3.06E-09 | 0.87  | 3.70   | -     | 914.4   |
| AHQ-3-14-, 3632             | K.NKDQGTEDYVEGLR.V                                                                 | 1787.86505 | 3 | 7.42E-05 | 0.87  | 3.81   | -     | 1029.2  |
| AHQ-3-12, 3894              | K.NKDQGTEDYVEGLR.V                                                                 | 1787.86505 | 3 | 2.28E-04 | 0.90  | 4.04   | -     | 1455.8  |
| AHQ-3-13-, 3758             | K.NKDQGTEDYVEGLR.V                                                                 | 1787.86505 | 2 | 2.46E-07 | 0.93  | 4.10   | -     | 1199.1  |
| AHQ-3-12, 3691 - 3758       | K.NKDQGTEDYVEGLR.V                                                                 | 1787.86505 | 3 | 2.35E-04 | 0.94  | 4.38   | -     | 1555.0  |
| AHQ-3-12, 3678 - 3743       | K.NKDQGTEDYVEGLR.V                                                                 | 1787.86505 | 2 | 1.15E-06 | 0.93  | 4.22   | -     | 980.2   |
| AHQ-3-12, 3598 - 3614       | K.NKDQGTEDYVEGLR.V                                                                 | 1787.86505 | 3 | 4.01E-05 | 0.94  | 4.77   | -     | 1424.4  |
| AHQ-3-13, 3742              | K.NKDQGTEDYVEGLR.V                                                                 | 1787.86505 | 2 | 8.58E-09 | 0.93  | 4.21   | -     | 982.6   |
| AHQ-3-13, 3743 - 3745       | K.NKDQGTEDYVEGLR.V                                                                 | 1787.86505 | 3 | 5.27E-05 | 0.82  | 3.23   | -     | 1041.3  |
| AHQ-3-13, 4047 - 4051       | K.NKDQGTEDYVEGLR.V                                                                 | 1787.86505 | 2 | 3.17E-12 | 0.92  | 3.78   | -     | 1088.1  |
| AHQ-3-12, 3591 - 3654       | K.NKDQGTEDYVEGLR.V                                                                 | 1787.86505 | 2 | 5.99E-09 | 0.93  | 3.94   | -     | 1049.6  |
| AHQ-3-14-, 3635             | K.NKDQGTEDYVEGLR.V                                                                 | 1787.86505 | 2 | 3.93E-08 | 0.92  | 4.05   | -     | 1009.7  |
| AHQ-3-14, 4571              | K.NKDQGTEDYVEGLR.V                                                                 | 1787.86505 | 2 | 6.90E-08 | 0.94  | 4.19   | -     | 1226.1  |
| AHQ-3-13, 3325 - 3346       | R.VFDKEGNGTVMGAIR.H                                                                | 1723.93228 | 2 | 1.67E-09 | 0.94  | 4.21   | -     | 1118.1  |
| AHQ-3-13, 6337              | K.VLDFEHLPM*LQTVAK.N                                                               | 1905.24957 | 3 | 6.45E-07 | 0.92  | 4.35   | -     | 747.8   |
| AHQ-3-13, 6817 - 6819       | K.VLDFEHLPM*LQTVAK.N                                                               | 1889.25017 | 2 | 8.05E-08 | 0.93  | 4.99   | -     | 584.3   |
| AHQ-3-12, 6816 - 6820       | K.VLDFEHLPM*LQTVAK.N                                                               | 1889.25017 | 3 | 1.94E-06 | 0.95  | 4.68   | -     | 1881.9  |
| AHQ-3-12, 6518              | K.VLDFEHLPM*LQTVAK.N                                                               | 1905.24957 | 2 | 4.32E-04 | 0.81  | 3.79   | -     | 529.6   |
| AHQ-3-13-, 6337 - 6347      | K.VLDFEHLPM*LQTVAK.N                                                               | 1905.24957 | 2 | 3.82E-05 | 0.90  | 4.13   | -     | 648.3   |
| AHQ-3-13-, 6354             | K.VLDFEHLPM*LQTVAK.N                                                               | 1905.24957 | 3 | 9.65E-05 | 0.88  | 4.13   | -     | 673.1   |
| AHQ-3-13-, 6757             | K.VLDFEHLPM*LQTVAK.N                                                               | 1889.25017 | 2 | 3.14E-07 | 0.95  | 5.15   | -     | 809.3   |
| AHQ-3-13-, 6762 - 6763      | K.VLDFEHLPM*LQTVAK.N                                                               | 1889.25017 | 3 | 2.63E-04 | 0.97  | 5.67   | -     | 1777.6  |
| AHQ-3-12, 6342              | K.VLDFEHLPM*LQTVAK.N                                                               | 1905.24957 | 2 | 4.38E-09 | 0.95  | 4.66   | -     | 849.8   |
| AHQ-3-12, 6246 - 6319       | K.VLDFEHLPM*LQTVAK.N                                                               | 1905.24957 | 3 | 1.82E-04 | 0.80  | 3.48   | -     | 777.2   |
| AHQ-3-12, 6208 - 6280       | K.VLDFEHLPM*LQTVAK.N                                                               | 1905.24957 | 2 | 2.61E-06 | 0.95  | 4.68   | -     | 864.0   |
| AHQ-3-14-, 6227 - 6248      | K.VLDFEHLPM*LQTVAK.N                                                               | 1905.24957 | 2 | 4.80E-05 | 0.90  | 4.11   | -     | 696.6   |
| AHQ-3-14-, 6235 - 6239      | K.VLDFEHLPM*LQTVAK.N                                                               | 1905.24957 | 3 | 3.41E-05 | 0.90  | 4.46   | -     | 730.4   |
| AHQ-3-14-, 6695 - 6700      | K.VLDFEHLPM*LQTVAK.N                                                               | 1889.25017 | 2 | 1.27E-09 | 0.96  | 4.95   | -     | 1061.7  |
| gj 16933542 ref NP_002017.1 | fibronectin 1 isoform 1 preproprotein; cold-insoluble globulin [Homo sapiens]      |            |   | 3.21E-12 | 7.37  | 90.24  | 6.50  | 25922.8 |
| AHQ-3-1, 6278               | K.FTQVPTSLSAQWTPPNVQLTGYR.V                                                        | 2693.99453 | 2 | 2.27E-05 | 0.91  | 4.37   | -     | 451.5   |
| AHQ-3-1, 2800               | R.GDSPASSKPIISINRY.T                                                               | 1592.73521 | 2 | 3.21E-12 | 0.83  | 3.70   | -     | 410.6   |
| AHQ-3-1, 5142               | R.NLQPASEYTVSLVAIK.G                                                               | 1733.98671 | 2 | 3.11E-04 | 0.91  | 3.92   | -     | 542.4   |
| AHQ-3-2, 6403 - 6406        | R.NTFAEVTGLSPGVTYYFK.V                                                             | 1995.21983 | 2 | 6.31E-07 | 0.91  | 4.26   | -     | 726.3   |
| AHQ-3-1, 6320               | R.NTFAEVTGLSPGVTYYFK.V                                                             | 1995.21983 | 2 | 3.25E-07 | 0.95  | 4.87   | -     | 837.4   |
| AHQ-3-1, 4901 - 4914        | R.SSPVIDASTADAPSNI.R.F                                                             | 1914.10666 | 2 | 1.04E-05 | 0.92  | 4.20   | -     | 1214.5  |
| AHQ-3-1, 3898 - 3916        | R.SYITTLQPGTDYK.I                                                                  | 1544.68732 | 2 | 4.04E-04 | 0.36  | 2.71   | -     | 403.2   |
| AHQ-3-1, 4114               | R.VDIVPVLNPGEHGQR.L                                                                | 1630.82981 | 2 | 4.86E-09 | 0.81  | 3.06   | -     | 608.0   |
| AHQ-3-1, 7180               | R.VTWAPPPSIDLTFVLR.Y                                                               | 1927.23500 | 2 | 2.24E-06 | 0.77  | 2.91   | -     | 472.8   |
| AHQ-3-2, 7446               | R.VTWAPPPSIDLTFVLR.Y                                                               | 1927.23500 | 2 | 3.18E-05 | 0.62  | 2.86   | -     | 229.1   |
| AHQ-3-1, 4010               | K.YSFCDTHTVLQVTR.G                                                                 | 1728.90717 | 2 | 9.30E-07 | 0.92  | 3.95   | -     | 1186.1  |
| gj 13994151 ref NP_066272.1 | PDZ and LIM domain 1 (elfin); carboxy terminal LIM domain protein 1 [Homo sapiens] |            |   | 3.76E-12 | 16.89 | 190.31 | 73.30 | 36071.5 |
| AHQ-3-13, 6637 - 6697       | K.AALANLCIGDVITADGENTSNM*THLEAQR.I                                                 | 3331.63807 | 3 | 1.14E-07 | 0.88  | 4.59   | -     | 369.1   |
| AHQ-3-14-, 6555 - 6615      | K.AALANLCIGDVITADGENTSNM*THLEAQR.I                                                 | 3331.63807 | 3 | 1.98E-07 | 0.96  | 6.21   | -     | 774.7   |
| AHQ-3-14-, 6465 - 6527      | K.AALANLCIGDVITADGENTSNM*THLEAQR.I                                                 | 3331.63807 | 3 | 2.88E-08 | 0.93  | 5.14   | -     | 650.8   |
| AHQ-3-14-, 6279 - 6351      | K.AALANLCIGDVITADGENTSNM*THLEAQR.I                                                 | 3331.63807 | 3 | 2.42E-10 | 0.96  | 5.84   | -     | 958.3   |
| AHQ-3-14-, 5940 - 6009      | K.AALANLCIGDVITADGENTSNM*THLEAQR.I                                                 | 3331.63807 | 3 | 5.86E-05 | 0.88  | 4.48   | -     | 688.0   |
| AHQ-3-11, 6616              | K.AALANLCIGDVITADGENTSNM*THLEAQR.I                                                 | 3315.63867 | 3 | 7.87E-07 | 0.94  | 4.87   | -     | 973.7   |
| AHQ-3-13-, 6751             | K.AALANLCIGDVITADGENTSNM*THLEAQR.I                                                 | 3315.63867 | 3 | 8.96E-09 | 0.92  | 5.00   | -     | 887.5   |
| AHQ-3-13-, 6642             | K.AALANLCIGDVITADGENTSNM*THLEAQR.I                                                 | 3331.63807 | 3 | 2.22E-06 | 0.90  | 4.57   | -     | 579.1   |
| AHQ-3-13, 6813              | K.AALANLCIGDVITADGENTSNM*THLEAQR.I                                                 | 3315.63867 | 3 | 8.09E-10 | 0.83  | 4.25   | -     | 424.6   |
| AHQ-3-14-, 6681             | K.AALANLCIGDVITADGENTSNM*THLEAQR.I                                                 | 3331.63807 | 3 | 2.58E-06 | 0.72  | 3.30   | -     | 330.2   |
| AHQ-3-12, 6843              | K.AALANLCIGDVITADGENTSNM*THLEAQR.I                                                 | 3315.63867 | 3 | 3.76E-12 | 0.92  | 4.87   | -     | 777.0   |
| AHQ-3-12, 6626              | K.AALANLCIGDVITADGENTSNM*THLEAQR.I                                                 | 3331.63807 | 3 | 2.01E-09 | 0.93  | 5.06   | -     | 798.7   |
| AHQ-3-13, 4431              | K.CGTGIVGVFK.L                                                                     | 1138.36198 | 2 | 8.73E-05 | 0.93  | 3.26   | -     | 1185.6  |
| AHQ-3-14-, 4409             | K.CGTGIVGVFK.L                                                                     | 1138.36198 | 2 | 1.83E-04 | 0.93  | 2.86   | -     | 1355.5  |
| AHQ-3-13-, 3627 - 3690      | K.DFEQPLAIR.V                                                                      | 1176.30388 | 2 | 2.05E-04 | 0.91  | 3.25   | -     | 1149.2  |
| AHQ-3-14-, 3563 - 3583      | K.DFEQPLAIR.V                                                                      | 1176.30388 | 2 | 2.40E-04 | 0.74  | 2.68   | -     | 743.8   |
| AHQ-3-12, 3587              | K.DFEQPLAIR.V                                                                      | 1176.30388 | 2 | 1.87E-05 | 0.90  | 3.52   | -     | 955.3   |
| AHQ-3-12, 3590              | K.DFEQPLAIR.V                                                                      | 1176.30388 | 1 | 8.29E-05 | 0.17  | 1.96   | -     | 343.8   |
| AHQ-3-13, 3651 - 3662       | K.DFEQPLAIR.V                                                                      | 1176.30388 | 2 | 4.73E-05 | 0.94  | 3.56   | -     | 1147.9  |
| AHQ-3-13, 3654 - 3658       | K.DFEQPLAIR.V                                                                      | 1176.30388 | 1 | 4.04E-04 | 0.12  | 2.29   | -     | 175.4   |
| AHQ-3-13-, 3361 - 3369      | K.GCTDNLTIVAR.S                                                                    | 1322.47058 | 2 | 1.80E-04 | 0.82  | 3.42   | -     | 648.3   |
| AHQ-3-13, 3381 - 3385       | K.GCTDNLTIVAR.S                                                                    | 1322.47058 | 2 | 5.62E-04 | 0.85  | 3.51   | -     | 755.1   |
| AHQ-3-14, 4892 - 4956       | K.GHFFVEDQYCEK.H                                                                   | 1673.82684 | 2 | 1.29E-04 | 0.90  | 3.03   | -     | 885.0   |
| AHQ-3-13, 4005 - 4066       | K.GHFFVEDQYCEK.H                                                                   | 1673.82684 | 2 | 1.89E-05 | 0.95  | 4.37   | -     | 1100.6  |
| AHQ-3-12, 3966 - 4039       | K.GHFFVEDQYCEK.H                                                                   | 1673.82684 | 2 | 5.54E-04 | 0.96  | 4.13   | -     | 1227.3  |
| AHQ-3-13-, 4015             | K.GHFFVEDQYCEK.H                                                                   | 1673.82684 | 2 | 1.21E-04 | 0.96  | 4.23   | -     | 1214.7  |
| AHQ-3-13-, 2665             | R.HRHPEYCVCTDCGNTLQK.Q                                                             | 2151.34648 | 3 | 4.95E-09 | 0.96  | 5.36   | -     | 1193.1  |
| AHQ-3-14, 3911 - 3976       | R.IKGCTDNLTIVAR.S                                                                  | 1563.80174 | 2 | 3.29E-10 | 0.91  | 3.55   | -     | 874.8   |
| AHQ-3-11, 3192              | R.IKGCTDNLTIVAR.S                                                                  | 1563.80174 | 2 | 1.77E-04 | 0.65  | 2.52   | -     | 795.5   |
| AHQ-3-11, 2983 - 2986       | R.IKGCTDNLTIVAR.S                                                                  | 1563.80174 | 2 | 1.77E-08 | 0.95  | 3.96   | -     | 1240.4  |
| AHQ-3-13-, 2975 - 3054      | R.IKGCTDNLTIVAR.S                                                                  | 1563.80174 | 2 | 1.04E-08 | 0.95  | 4.21   | -     | 1155.9  |
| AHQ-3-13, 3079              | R.IKGCTDNLTIVAR.S                                                                  | 1563.80174 | 2 | 7.32E-11 | 0.96  | 4.66   | -     | 1156.7  |
| AHQ-3-14-, 3015             | R.IKGCTDNLTIVAR.S                                                                  | 1563.80174 | 2 | 6.97E-10 | 0.95  | 4.63   | -     | 990.0   |



|                            |                                                                         |            |   |          |       |        |       |          |
|----------------------------|-------------------------------------------------------------------------|------------|---|----------|-------|--------|-------|----------|
| AHQ-3-14, 4036             | R.IKGCNDNLTLTVAR.S                                                      | 1563.80174 | 2 | 7.36E-06 | 0.89  | 3.15   | -     | 981.9    |
| AHQ-3-14-, 4769            | K.LPM*CDKCGTGIVGVFK.L                                                   | 1900.27298 | 3 | 3.56E-04 | 0.86  | 3.61   | -     | 776.9    |
| AHQ-3-12, 4707 - 4752      | K.LPM*CDKCGTGIVGVFK.L                                                   | 1900.27298 | 2 | 3.84E-04 | 0.79  | 3.40   | -     | 483.6    |
| AHQ-3-13-, 3785            | R.LVGGKDFEQPLAISR.V                                                     | 1630.86972 | 2 | 1.90E-08 | 0.96  | 4.61   | -     | 1379.0   |
| AHQ-3-14-, 3663 - 3740     | R.LVGGKDFEQPLAISR.V                                                     | 1630.86972 | 2 | 1.48E-08 | 0.96  | 5.12   | -     | 1196.7   |
| AHQ-3-13, 3781             | R.LVGGKDFEQPLAISR.V                                                     | 1630.86972 | 2 | 1.85E-05 | 0.92  | 3.74   | -     | 1146.5   |
| AHQ-3-14, 4588 - 4607      | R.LVGGKDFEQPLAISR.V                                                     | 1630.86972 | 2 | 2.06E-08 | 0.95  | 4.50   | -     | 1258.6   |
| AHQ-3-13, 4054             | K.MNLASEPQEVHLIGSAHNR.S                                                 | 2104.33619 | 2 | 3.75E-09 | 0.91  | 4.28   | -     | 642.1    |
| AHQ-3-13-, 3710            | K.M*NLASEPQEVHLIGSAHNR.S                                                | 2120.33559 | 2 | 1.98E-05 | 0.90  | 4.45   | -     | 536.4    |
| AHQ-3-13, 3497             | K.M*NLASEPQEVHLIGSAHNR.S                                                | 2120.33559 | 3 | 3.92E-05 | 0.78  | 3.63   | -     | 455.5    |
| AHQ-3-12, 3530             | K.M*NLASEPQEVHLIGSAHNR.S                                                | 2120.33559 | 2 | 8.76E-06 | 0.90  | 4.28   | -     | 531.2    |
| AHQ-3-13, 3499             | K.M*NLASEPQEVHLIGSAHNR.S                                                | 2120.33559 | 2 | 3.33E-06 | 0.90  | 3.91   | -     | 629.8    |
| AHQ-3-12, 6630             | K.QSTSFLVLQEIIESEEK.G                                                   | 1981.18977 | 2 | 1.93E-07 | 0.97  | 4.75   | -     | 1632.6   |
| AHQ-3-13-, 6639            | K.QSTSFLVLQEIIESEEK.G                                                   | 1981.18977 | 2 | 6.08E-06 | 0.97  | 5.05   | -     | 1780.4   |
| AHQ-3-13, 6657             | K.QSTSFLVLQEIIESEEK.G                                                   | 1981.18977 | 2 | 4.44E-10 | 0.95  | 4.01   | -     | 1397.2   |
| AHQ-3-13, 6163             | K.QSTSFLVLQEIIESEEKGDPNKPSGFR.S                                         | 3037.32681 | 3 | 7.37E-06 | 0.87  | 3.86   | -     | 834.8    |
| AHQ-3-12, 6084             | K.QSTSFLVLQEIIESEEKGDPNKPSGFR.S                                         | 3037.32681 | 3 | 3.41E-05 | 0.65  | 3.34   | -     | 412.8    |
| AHQ-3-14-, 6072            | K.QSTSFLVLQEIIESEEKGDPNKPSGFR.S                                         | 3037.32681 | 3 | 2.25E-04 | 0.70  | 3.57   | -     | 383.9    |
| AHQ-3-13, 2477             | R.SAM*PFTASPASSTTAR.V                                                   | 1599.74799 | 2 | 3.62E-06 | 0.90  | 3.58   | -     | 990.7    |
| AHQ-3-13-, 2969 - 2971     | R.SAMPFTASPASSTTAR.V                                                    | 1583.74859 | 2 | 1.45E-04 | 0.40  | 2.67   | -     | 455.4    |
| AHQ-3-12, 2387             | R.SAM*PFTASPASSTTAR.V                                                   | 1599.74799 | 2 | 7.32E-06 | 0.90  | 3.37   | -     | 922.5    |
| AHQ-3-11, 2876 - 2948      | R.SAMPFTASPASSTTAR.V                                                    | 1583.74859 | 2 | 2.95E-04 | 0.32  | 2.56   | -     | 351.4    |
| AHQ-3-11, 3864             | K.TAASGVANSRPLDHAQPPSSLVIDKESEVYK.M                                     | 3397.69458 | 3 | 1.35E-04 | 0.95  | 6.05   | -     | 1059.0   |
| AHQ-3-12, 5443             | R.VITNQYNNPAGLYSSENISFNNALESK.T                                         | 3103.30221 | 3 | 4.77E-05 | 0.90  | 4.42   | -     | 885.2    |
| AHQ-3-11, 2892 - 2899      | K.VVSPLVTEEGKR.H                                                        | 1401.59247 | 2 | 5.56E-09 | 0.89  | 3.14   | -     | 1073.6   |
| AHQ-3-14-, 2959            | K.VVSPLVTEEGKR.H                                                        | 1401.59247 | 2 | 5.45E-10 | 0.92  | 3.35   | -     | 1151.7   |
| AHQ-3-12, 3002             | K.VVSPLVTEEGKR.H                                                        | 1401.59247 | 2 | 5.40E-06 | 0.61  | 2.70   | -     | 509.1    |
| gi 7706497 ref NP_057392.1 | UMP-CMP kinase [Homo sapiens]                                           |            |   | 4.03E-12 | 2.75  | 30.24  | 20.20 | 25854.7  |
| AHQ-3-11, 5886             | R.IQTYLQSTKPIIDLYEEMGK.V                                                | 2371.73502 | 2 | 2.54E-08 | 0.93  | 4.43   | -     | 640.5    |
| AHQ-3-11, 2458             | R.KNPDSQYGELEIK.Y                                                       | 1521.65375 | 2 | 6.03E-05 | 0.86  | 3.59   | -     | 609.8    |
| AHQ-3-11, 3614             | K.YGYTHLSAGELL.D                                                        | 1480.64969 | 2 | 4.03E-12 | 0.96  | 4.71   | -     | 1272.8   |
| gi 7657007 ref NP_055210.1 | dual adaptor of phosphotyrosine and 3-phosphoinositides [Homo sapiens]  |            |   | 4.12E-12 | 3.57  | 40.24  | 22.50 | 32044.2  |
| AHQ-3-13-, 3877            | R.DSNETGLYLSVLR.A                                                       | 1542.62982 | 2 | 2.94E-06 | 0.78  | 2.99   | -     | 866.7    |
| AHQ-3-13, 5094             | R.HAAEALLLSNGCDGSYLLR.D                                                 | 2062.29263 | 2 | 5.46E-11 | 0.97  | 4.87   | -     | 1677.3   |
| AHQ-3-13, 6010             | R.SDGEALLQLDGLWYHGNLTR.H                                                | 1272.41943 | 3 | 4.12E-12 | 0.95  | 4.45   | -     | 1702.7   |
| AHQ-3-13-, 3402 - 3403     | K.TGVEADEWIK.I                                                          | 1148.24730 | 2 | 1.30E-04 | 0.87  | 3.04   | -     | 771.4    |
| gi 5729887 ref NP_006624.1 | IQ motif containing GTPase activating protein 2 [Homo sapiens]          |            |   | 4.23E-12 | 7.44  | 80.30  | 6.80  | 180611.0 |
| AHQ-3-5, 3492              | K.AWVNQLETQTGEASK.L                                                     | 1662.78230 | 2 | 1.54E-06 | 0.97  | 5.68   | -     | 1274.7   |
| AHQ-3-4, 3672              | K.AWVNQLETQTGEASK.L                                                     | 1662.78230 | 2 | 3.86E-05 | 0.92  | 4.15   | -     | 1043.2   |
| AHQ-3-6, 5567              | K.GVLLDIDLQTNQPKF.N                                                     | 1719.91690 | 2 | 1.92E-05 | 0.94  | 4.30   | -     | 1401.5   |
| AHQ-3-13-, 5497            | K.GVLLDIDLQTNQPKF.N                                                     | 1719.91690 | 2 | 3.77E-05 | 0.94  | 4.66   | -     | 1274.2   |
| AHQ-3-3, 5881 - 5888       | K.GVLLDIDLQTNQPKF.N                                                     | 1719.91690 | 2 | 9.14E-10 | 0.98  | 6.09   | -     | 1638.0   |
| AHQ-3-3, 2293              | R.KSFLHEQEENVVK.I                                                       | 1587.75856 | 2 | 4.72E-06 | 0.92  | 3.62   | -     | 1277.4   |
| AHQ-3-4, 4933              | K.LPYDVTTEQALTYPEVK.N                                                   | 1968.19269 | 2 | 4.23E-12 | 0.97  | 4.94   | -     | 1968.0   |
| AHQ-3-3, 4989 - 4998       | K.LPYDVTTEQALTYPEVK.N                                                   | 1968.19269 | 2 | 2.79E-07 | 0.94  | 3.93   | -     | 1213.0   |
| AHQ-3-6, 6845              | R.NQPNTLLEITETATAQEQVDHATDMVSR.A                                        | 3268.51558 | 3 | 1.86E-04 | 0.83  | 3.84   | -     | 499.5    |
| AHQ-3-3, 4205              | K.TLVGSENPLTVIR.K                                                       | 1496.73370 | 2 | 1.83E-04 | 0.87  | 3.50   | -     | 807.6    |
| AHQ-3-3, 4312              | K.VDQVQDVTGNPTVIK.M                                                     | 1726.95257 | 2 | 5.35E-08 | 0.97  | 5.60   | -     | 1526.7   |
| AHQ-3-4, 4236              | K.VDQVQDVTGNPTVIK.M                                                     | 1726.95257 | 2 | 1.28E-05 | 0.92  | 3.89   | -     | 925.5    |
| AHQ-3-3, 7482              | K.VLNSISSLDLLPYGLR.Y                                                    | 1874.21354 | 2 | 9.02E-08 | 0.93  | 4.48   | -     | 725.9    |
| gi 7661678 ref NP_056461.1 | RAP1B, member of RAS oncogene family; K-REV; RAS-related protein RAP1B  |            |   | 4.53E-12 | 7.52  | 90.33  | 33.70 | 20824.7  |
| AHQ-3-11, 4223             | K.DTDDVPMILVGNK.C                                                       | 1417.61048 | 2 | 9.58E-09 | 0.84  | 3.34   | -     | 639.2    |
| AHQ-3-11, 4787 - 4806      | K.DTDDVPMILVGNKCDLEDER.V                                                | 2336.53972 | 2 | 7.79E-04 | 0.42  | 2.57   | -     | 488.7    |
| AHQ-3-11, 6444             | R.KQVEVDAQQCMLLEILD TAGTEQFTAM*R.D                                      | 3131.50548 | 3 | 1.31E-05 | 0.89  | 4.61   | -     | 869.3    |
| AHQ-3-11, 6611             | R.KQVEVDAQQCMLLEILD TAGTEQFTAMR.D                                       | 3115.50608 | 3 | 1.05E-04 | 0.91  | 4.52   | -     | 844.8    |
| AHQ-3-13-, 6643            | R.KQVEVDAQQCMLLEILD TAGTEQFTAM*R.D                                      | 3131.50548 | 3 | 3.38E-05 | 0.65  | 3.29   | -     | 684.2    |
| AHQ-3-11, 6360 - 6378      | R.KQVEVDAQQCMLLEILD TAGTEQFTAM*R.D                                      | 3131.50548 | 3 | 1.96E-07 | 0.94  | 5.01   | -     | 1047.5   |
| AHQ-3-14-, 5233 - 5237     | R.KQVEVDAQQCMLLEILD TAGTEQFTAM*R.D                                      | 3131.50548 | 3 | 1.58E-08 | 0.98  | 6.62   | -     | 2384.1   |
| AHQ-3-11, 4162 - 4164      | R.QWNNCAFLESSAK.S                                                       | 1556.68148 | 2 | 1.42E-06 | 0.28  | 2.70   | -     | 165.2    |
| AHQ-3-11, 3955 - 3971      | R.QWNNCAFLESSAK.S                                                       | 1556.68148 | 2 | 3.21E-06 | 0.61  | 2.72   | -     | 304.6    |
| AHQ-3-11, 4052             | R.QWNNCAFLESSAK.S                                                       | 1556.68148 | 2 | 1.00E-05 | 0.64  | 2.84   | -     | 286.4    |
| AHQ-3-11, 3803 - 3867      | R.QWNNCAFLESSAK.S                                                       | 1556.68148 | 2 | 6.93E-08 | 0.62  | 3.11   | -     | 185.8    |
| AHQ-3-13-, 3854            | R.VKDTPVPMILVGNK.C                                                      | 1644.91497 | 2 | 7.76E-05 | 0.97  | 4.72   | -     | 1747.9   |
| AHQ-3-13, 3827 - 3843      | R.VKDTPVPMILVGNK.C                                                      | 1644.91497 | 2 | 1.23E-08 | 0.96  | 4.13   | -     | 1691.8   |
| AHQ-3-13-, 3851            | R.VKDTPVPMILVGNK.C                                                      | 1644.91497 | 3 | 3.35E-04 | 0.95  | 4.62   | -     | 1752.0   |
| AHQ-3-11, 3506 - 3570      | R.VKDTPVPMILVGNK.C                                                      | 1644.91497 | 2 | 8.02E-08 | 0.96  | 4.68   | -     | 1500.8   |
| AHQ-3-14, 4699 - 4759      | R.VKDTPVPMILVGNK.C                                                      | 1644.91497 | 2 | 3.33E-07 | 0.85  | 3.32   | -     | 894.1    |
| AHQ-3-11, 4470             | R.VKDTPVPMILVGNKCDLEDER.V                                               | 2563.84420 | 2 | 2.95E-06 | 0.59  | 2.65   | -     | 623.7    |
| AHQ-3-11, 4376 - 4438      | R.VKDTPVPMILVGNKCDLEDER.V                                               | 2563.84420 | 3 | 6.00E-11 | 0.95  | 5.27   | -     | 1143.6   |
| AHQ-3-11, 4311 - 4388      | R.VKDTPVPMILVGNKCDLEDER.V                                               | 2563.84420 | 2 | 7.34E-10 | 0.95  | 4.87   | -     | 868.5    |
| AHQ-3-11, 4274             | R.VKDTPVPMILVGNKCDLEDER.V                                               | 2563.84420 | 3 | 8.22E-09 | 0.83  | 3.96   | -     | 835.6    |
| AHQ-3-11, 4222             | R.VKDTPVPMILVGNKCDLEDER.V                                               | 2563.84420 | 2 | 4.53E-12 | 0.93  | 4.47   | -     | 694.1    |
| AHQ-3-13, 4031 - 4095      | R.VKDTPVPMILVGNKCDLEDER.V                                               | 2579.84360 | 3 | 1.55E-06 | 0.92  | 5.15   | -     | 1091.8   |
| AHQ-3-11, 4186 - 4258      | R.VKDTPVPMILVGNKCDLEDER.V                                               | 2563.84420 | 3 | 1.86E-11 | 0.95  | 5.68   | -     | 941.7    |
| AHQ-3-11, 4183 - 4250      | R.VKDTPVPMILVGNKCDLEDER.V                                               | 2563.84420 | 2 | 7.37E-04 | 0.91  | 3.93   | -     | 775.2    |
| AHQ-3-11, 4030 - 4050      | R.VKDTPVPMILVGNKCDLEDER.V                                               | 2579.84360 | 3 | 8.91E-04 | 0.93  | 4.63   | -     | 1462.8   |
| AHQ-3-13-, 4115 - 4122     | R.VKDTPVPMILVGNKCDLEDER.V                                               | 2579.84360 | 3 | 3.40E-09 | 0.92  | 4.63   | -     | 960.3    |
| AHQ-3-13-, 4466 - 4471     | R.VKDTPVPMILVGNKCDLEDER.V                                               | 2579.84360 | 3 | 2.95E-08 | 0.85  | 4.45   | -     | 622.4    |
| AHQ-3-11, 3902 - 3903      | R.VKDTPVPMILVGNKCDLEDER.V                                               | 2579.84360 | 2 | 1.44E-04 | 0.79  | 3.19   | -     | 613.1    |
| AHQ-3-11, 4404 - 4471      | R.VKDTPVPMILVGNKCDLEDER.V                                               | 2563.84420 | 2 | 1.31E-05 | 0.70  | 2.94   | -     | 476.2    |
| gi 5031987 ref NP_005720.1 | peptidylprolyl isomerase F (cyclophilin F) [Homo sapiens]               |            |   | 4.58E-12 | 4.09  | 50.25  | 41.50 | 22040.1  |
| AHQ-3-12, 3979             | R.FPDENFTLK.H                                                           | 1111.22866 | 2 | 2.66E-06 | 0.82  | 2.78   | -     | 720.0    |
| AHQ-3-11, 4912 - 4975      | K.GSGDPSSSSSSGNPLVYLDVDANGKPLGR.V                                       | 2834.99028 | 3 | 4.58E-12 | 0.90  | 4.57   | -     | 654.0    |
| AHQ-3-12, 5131             | K.GSGDPSSSSSSGNPLVYLDVDANGKPLGR.V                                       | 2834.99028 | 2 | 3.74E-07 | 0.60  | 2.77   | -     | 320.5    |
| AHQ-3-12, 5112 - 5174      | K.GSGDPSSSSSSGNPLVYLDVDANGKPLGR.V                                       | 2834.99028 | 3 | 8.98E-11 | 0.85  | 3.93   | -     | 1094.3   |
| AHQ-3-12, 5298             | K.HVGPVGLSM*ANAGPNTNGSQFFICTIK.T                                        | 2836.19605 | 2 | 2.31E-05 | 0.61  | 3.00   | -     | 431.5    |
| AHQ-3-12, 5404             | K.HVGPVGLSM*ANAGPNTNGSQFFICTIK.T                                        | 2836.19605 | 2 | 6.32E-05 | 0.54  | 2.84   | -     | 343.4    |
| AHQ-3-12, 5855 - 5927      | K.HVGPVGLSM*ANAGPNTNGSQFFICTIK.T                                        | 2820.19665 | 2 | 3.14E-09 | 0.93  | 5.02   | -     | 612.5    |
| AHQ-3-14, 6236             | K.HVGPVGLSM*ANAGPNTNGSQFFICTIK.T                                        | 2836.19605 | 3 | 2.12E-04 | 0.90  | 4.12   | -     | 1304.2   |
| AHQ-3-12, 4618 - 4691      | R.VIPSFMCQAQDFTNHNHGTGGK.S                                              | 2240.46178 | 2 | 1.98E-08 | 0.83  | 3.59   | -     | 491.9    |
| gi 4505839 ref NP_002645.1 | pyruvate kinase, muscle; Pyruvate kinase-3; Thyroid hormone-binding pro |            |   | 5.35E-12 | 14.94 | 170.33 | 41.20 | 57913.6  |
| AHQ-3-7, 6118 - 6143       | R.AGKPVICATQMLESMIK.K                                                   | 1879.29869 | 2 | 7.97E-06 | 0.96  | 4.25   | -     | 1204.6   |
| AHQ-3-7, 6126              | R.AGKPVICATQMLESMIK.K                                                   | 1879.29869 | 3 | 1.49E-07 | 0.92  | 4.00   | -     | 1387.4   |
| AHQ-3-7, 4996 - 5036       | R.AGKPVICATQMLESMIK.K                                                   | 1895.29809 | 2 | 2.98E-04 | 0.86  | 4.03   | -     | 694.0    |
| AHQ-3-7, 5396              | K.CDENILWLDDYK.N                                                        | 1470.62849 | 2 | 1.77E-04 | 0.90  | 2.90   | -     | 1062.3   |
| AHQ-3-7, 7436              | K.FGVEQDQVDMVFASFIR.K                                                   | 1861.11055 | 2 | 1.42E-10 | 0.96  | 4.96   | -     | 1357.6   |
| AHQ-3-7, 7348              | K.FGVEQDQVDMVFASFIR.K                                                   | 1877.10995 | 2 | 3.44E-09 | 0.97  | 4.62   | -     | 1675.8   |
| AHQ-3-7, 4767 - 4838       | K.GADFLVTEVENGSSGLGSK.K                                                 | 1780.91396 | 2 | 4.11E-09 | 0.98  | 5.46   | -     | 2130.9   |
| AHQ-3-7, 5091 - 5096       | K.GADFLVTEVENGSSGLGSK.K                                                 | 1780.91396 | 2 | 5.25E-09 | 0.97  | 5.26   | -     | 1445.9   |
| AHQ-3-9, 4301              | K.GADFLVTEVENGSSGLGSK.K                                                 | 1780.91396 | 2 | 1.95E-05 | 0.34  | 2.68   | -     | 343.5    |
| AHQ-3-7, 4862              | K.GADFLVTEVENGSSGLGSK.K                                                 | 1780.91396 | 2 | 1.73E-07 | 0.96  | 4.67   | -     | 1520.1   |
| AHQ-3-7, 4510 - 4547       | K.GADFLVTEVENGSSGLGSK.K                                                 | 1780.91396 | 2 | 2.62E-06 | 0.94  | 4.36   | -     | 1149.4   |
| AHQ-3-7, 6718 - 6786       | R.GIFPVLCKDPVQEAWAEDVDLR.V                                              | 2559.87857 | 3 | 5.35E-12 | 0.98  | 6.49   | -     | 1989.3   |
| AHQ-3-9, 6447              | R.GIFPVLCKDPVQEAWAEDVDLR.V                                              | 2559.87857 | 2 | 3.33E-05 | 0.87  | 3.95   | -     | 600.9    |
| AHQ-3-11, 6315             | R.GIFPVLCKDPVQEAWAEDVDLR.V                                              | 2559.87857 | 3 | 1.81E-04 | 0.95  | 4.47   | -     | 1685.7   |
| AHQ-3-14-, 6431 - 6479     | R.GIFPVLCKDPVQEAWAEDVDLR.V                                              | 2559.87857 | 3 | 1.97E-07 | 0.94  | 4.56   | -     | 1305.2   |
| AHQ-3-10, 6119 - 6122      | R.GIFPVLCKDPVQEAWAEDVDLR.V                                              | 2559.87857 | 2 | 7.26E-04 | 0.81  | 3.47   | -     | 573.7    |

|                             |                                                                             |            |   |          |       |        |       |          |
|-----------------------------|-----------------------------------------------------------------------------|------------|---|----------|-------|--------|-------|----------|
| AHQ-3-7, 2910 - 2980        | K.ITLDNAYMEK.C                                                              | 1198.37126 | 2 | 1.33E-04 | 0.49  | 2.63   | -     | 471.2    |
| AHQ-3-7, 3840               | K.KGVNLPAAVDLPAVSEK.D                                                       | 1766.03194 | 3 | 2.37E-04 | 0.85  | 3.70   | -     | 1027.0   |
| AHQ-3-7, 3831               | K.KGVNLPAAVDLPAVSEK.D                                                       | 1766.03194 | 2 | 2.28E-09 | 0.97  | 5.58   | -     | 1036.8   |
| AHQ-3-7, 5046 - 5047        | K.KGVNLPAAVDLPAVSEKIQDLK.F                                                  | 2478.82685 | 3 | 1.95E-07 | 0.98  | 6.67   | -     | 1745.8   |
| AHQ-3-7, 6414               | R.LAPITSDPTEATAVGAVEASF.K.C                                                 | 2176.40912 | 2 | 4.98E-07 | 0.94  | 3.91   | -     | 1065.2   |
| AHQ-3-7, 7062               | R.LAPITSDPTEATAVGAVEASF.K.C                                                 | 2176.40912 | 2 | 5.44E-06 | 0.89  | 3.71   | -     | 799.4    |
| AHQ-3-7, 5792 - 5858        | R.LAPITSDPTEATAVGAVEASF.K.C                                                 | 2176.40912 | 2 | 1.42E-06 | 0.97  | 4.90   | -     | 1279.3   |
| AHQ-3-7, 5926 - 6007        | R.LAPITSDPTEATAVGAVEASF.K.C                                                 | 2176.40912 | 2 | 1.24E-08 | 0.98  | 5.78   | -     | 1436.3   |
| AHQ-3-7, 6074 - 6150        | R.LAPITSDPTEATAVGAVEASF.K.C                                                 | 2176.40912 | 2 | 3.77E-05 | 0.97  | 5.32   | -     | 1361.7   |
| AHQ-3-11, 5520              | R.LAPITSDPTEATAVGAVEASF.K.C                                                 | 2176.40912 | 2 | 2.40E-04 | 0.94  | 3.89   | -     | 1174.2   |
| AHQ-3-12, 5747              | R.LAPITSDPTEATAVGAVEASF.K.C                                                 | 2176.40912 | 2 | 1.40E-08 | 0.95  | 5.03   | -     | 931.0    |
| AHQ-3-7, 6242               | R.LAPITSDPTEATAVGAVEASF.K.C                                                 | 2176.40912 | 2 | 4.03E-07 | 0.96  | 4.71   | -     | 1124.0   |
| AHQ-3-7, 6706 - 6756        | R.LAPITSDPTEATAVGAVEASF.K.C                                                 | 2176.40912 | 2 | 2.67E-07 | 0.95  | 4.47   | -     | 1107.8   |
| AHQ-3-7, 6504 - 6578        | R.LAPITSDPTEATAVGAVEASF.K.C                                                 | 2176.40912 | 2 | 5.49E-07 | 0.96  | 4.54   | -     | 1017.6   |
| AHQ-3-7, 5378               | R.LAPITSDPTEATAVGAVEASF.K.C                                                 | 2176.40912 | 2 | 1.51E-07 | 0.97  | 5.40   | -     | 1286.5   |
| AHQ-3-13-, 3417             | R.LDIDSPPTAR.N                                                              | 1198.35099 | 2 | 1.06E-05 | 0.93  | 3.35   | -     | 1247.1   |
| AHQ-3-13, 3422 - 3427       | R.LDIDSPPTAR.N                                                              | 1198.35099 | 2 | 5.10E-06 | 0.88  | 3.59   | -     | 797.9    |
| AHQ-3-7, 3138 - 3207        | R.LDIDSPPTAR.N                                                              | 1198.35099 | 2 | 2.62E-06 | 0.94  | 3.99   | -     | 1210.8   |
| AHQ-3-11, 3279              | R.LDIDSPPTAR.N                                                              | 1198.35099 | 2 | 5.29E-05 | 0.94  | 3.43   | -     | 1213.5   |
| AHQ-3-7, 2056               | R.LNFSHGTHEYHAETIK.N                                                        | 1885.02879 | 2 | 1.53E-07 | 0.91  | 3.50   | -     | 950.8    |
| AHQ-3-7, 2064               | R.LNFSHGTHEYHAETIK.N                                                        | 1885.02879 | 3 | 5.14E-05 | 0.92  | 4.31   | -     | 1249.2   |
| AHQ-3-7, 2359               | R.LNFSHGTHEYHAETIK.N                                                        | 1885.02879 | 2 | 8.68E-06 | 0.78  | 3.11   | -     | 514.7    |
| AHQ-3-11, 3266              | R.NTGIICTIGPASR.S                                                           | 1361.54994 | 2 | 6.39E-05 | 0.92  | 3.79   | -     | 1077.1   |
| AHQ-3-14-, 3396             | R.NTGIICTIGPASR.S                                                           | 1361.54994 | 2 | 5.35E-05 | 0.80  | 3.21   | -     | 677.0    |
| AHQ-3-7, 3158 - 3239        | R.NTGIICTIGPASR.S                                                           | 1361.54994 | 2 | 9.85E-05 | 0.92  | 3.96   | -     | 951.0    |
| AHQ-3-13-, 3429 - 3431      | R.NTGIICTIGPASR.S                                                           | 1361.54994 | 2 | 2.80E-06 | 0.92  | 3.77   | -     | 958.5    |
| AHQ-3-13, 3431              | R.NTGIICTIGPASR.S                                                           | 1361.54994 | 2 | 3.49E-05 | 0.88  | 3.44   | -     | 928.5    |
| AHQ-3-7, 3930               | R.NTGIICTIGPASR.S                                                           | 1361.54994 | 2 | 1.09E-08 | 0.91  | 3.78   | -     | 755.7    |
| AHQ-3-7, 4978               | R.RFDEILEASDGIMVAR.G                                                        | 1823.06385 | 2 | 1.21E-07 | 0.97  | 5.66   | -     | 1172.3   |
| AHQ-3-7, 4682               | R.RFDEILEASDGIMVAR.G                                                        | 1823.06385 | 2 | 3.45E-07 | 0.96  | 5.00   | -     | 1161.4   |
| AHQ-3-7, 3870               | R.TATESFASDPILYR.P                                                          | 1571.71277 | 2 | 2.83E-05 | 0.64  | 2.84   | -     | 478.8    |
| AHQ-3-13-, 5573 - 5638      | R.TATESFASDPILYR.PVAVALDTK.G                                                | 2466.77140 | 3 | 7.43E-04 | 0.56  | 3.11   | -     | 570.9    |
| AHQ-3-7, 5452 - 5523        | R.TATESFASDPILYR.PVAVALDTK.G                                                | 2466.77140 | 3 | 1.01E-04 | 0.88  | 4.07   | -     | 1039.0   |
| AHQ-3-7, 5458 - 5534        | R.TATESFASDPILYR.PVAVALDTK.G                                                | 2466.77140 | 2 | 3.41E-08 | 0.61  | 3.36   | -     | 185.4    |
| gj4501893[ref][NP_001094.1] | actinin, alpha 2 [Homo sapiens]                                             |            |   | 5.38E-12 | 10.47 | 120.29 | 12.60 | 103853.1 |
| AHQ-3-5, 4353 - 4360        | K.AGTQIENIEEDFR.N                                                           | 1522.59861 | 2 | 2.27E-04 | 0.87  | 3.50   | -     | 852.9    |
| AHQ-3-5, 5204 - 5277        | K.CQLEINFNTLQTK.L                                                           | 1610.81373 | 2 | 1.03E-07 | 0.96  | 4.84   | -     | 1163.2   |
| AHQ-3-6, 4950 - 5018        | K.CQLEINFNTLQTK.L                                                           | 1610.81373 | 2 | 1.24E-04 | 0.96  | 4.56   | -     | 1154.3   |
| AHQ-3-4, 5161               | K.CQLEINFNTLQTK.L                                                           | 1610.81373 | 2 | 9.00E-04 | 0.84  | 3.18   | -     | 827.8    |
| AHQ-3-5, 5064 - 5135        | K.CQLEINFNTLQTK.L                                                           | 1610.81373 | 2 | 3.80E-04 | 0.96  | 4.56   | -     | 1276.9   |
| AHQ-3-5, 4864               | R.DLLLPDPAWEK.Q                                                             | 1200.36535 | 2 | 8.87E-05 | 0.81  | 3.10   | -     | 902.0    |
| AHQ-3-4, 4993               | K.EGILLWCQR.K                                                               | 1176.37031 | 2 | 2.84E-04 | 0.92  | 3.20   | -     | 930.2    |
| AHQ-3-5, 4811 - 4819        | K.EGILLWCQR.K                                                               | 1176.37031 | 2 | 3.67E-06 | 0.94  | 3.95   | -     | 919.1    |
| AHQ-3-10, 3868              | R.FAIQDISVEETSAK.E                                                          | 1538.68108 | 2 | 5.38E-12 | 0.91  | 3.59   | -     | 1075.1   |
| AHQ-3-1, 4436               | R.FAIQDISVEETSAK.E                                                          | 1538.68108 | 2 | 4.33E-07 | 0.77  | 3.16   | -     | 647.3    |
| AHQ-3-4, 4257               | R.FAIQDISVEETSAK.E                                                          | 1538.68108 | 2 | 8.55E-04 | 0.74  | 3.01   | -     | 760.5    |
| AHQ-3-8, 3822               | R.FAIQDISVEETSAK.E                                                          | 1538.68108 | 2 | 5.99E-06 | 0.95  | 3.96   | -     | 1315.7   |
| AHQ-3-5, 3996               | R.FAIQDISVEETSAK.E                                                          | 1538.68108 | 2 | 7.62E-08 | 0.94  | 3.53   | -     | 1506.4   |
| AHQ-3-5, 4101               | R.FAIQDISVEETSAK.E                                                          | 1538.68108 | 2 | 1.10E-06 | 0.87  | 3.28   | -     | 890.2    |
| AHQ-3-6, 3970 - 4041        | R.FAIQDISVEETSAK.E                                                          | 1538.68108 | 2 | 1.14E-05 | 0.95  | 4.39   | -     | 1237.1   |
| AHQ-3-11, 3982              | R.FAIQDISVEETSAK.E                                                          | 1538.68108 | 2 | 4.70E-04 | 0.90  | 3.57   | -     | 955.5    |
| AHQ-3-1, 6286               | K.GYEEWLLNEIR.R                                                             | 1422.56701 | 2 | 2.85E-06 | 0.95  | 4.35   | -     | 1436.6   |
| AHQ-3-4, 6288               | K.GYEEWLLNEIR.R                                                             | 1422.56701 | 2 | 9.70E-06 | 0.97  | 4.38   | -     | 1790.9   |
| AHQ-3-6, 6015               | K.GYEEWLLNEIR.R                                                             | 1422.56701 | 1 | 1.88E-05 | 0.43  | 2.40   | -     | 189.6    |
| AHQ-3-5, 6285               | K.GYEEWLLNEIR.R                                                             | 1422.56701 | 1 | 1.25E-08 | 0.50  | 2.60   | -     | 423.2    |
| AHQ-3-5, 5456 - 5535        | K.GYEEWLLNEIR.R                                                             | 1422.56701 | 1 | 6.68E-06 | 0.33  | 2.16   | -     | 336.1    |
| AHQ-3-5, 5467 - 5529        | K.GYEEWLLNEIR.R                                                             | 1422.56701 | 2 | 2.02E-06 | 0.82  | 2.54   | -     | 994.7    |
| AHQ-3-5, 6099 - 6168        | K.GYEEWLLNEIR.R                                                             | 1422.56701 | 1 | 3.08E-04 | 0.44  | 2.89   | -     | 248.2    |
| AHQ-3-5, 6100 - 6169        | K.GYEEWLLNEIR.R                                                             | 1422.56701 | 2 | 1.68E-06 | 0.96  | 4.47   | -     | 1532.8   |
| AHQ-3-5, 6103               | K.GYEEWLLNEIR.R                                                             | 1422.56701 | 1 | 4.36E-06 | 0.42  | 2.48   | -     | 170.3    |
| AHQ-3-5, 6284               | K.GYEEWLLNEIR.R                                                             | 1422.56701 | 2 | 3.29E-07 | 0.88  | 2.86   | -     | 1185.9   |
| AHQ-3-5, 2021 - 2027        | K.HEAFESDLAAHQDR.V                                                          | 1626.66861 | 2 | 9.60E-10 | 0.98  | 5.24   | -     | 1889.2   |
| AHQ-3-6, 2007               | K.HEAFESDLAAHQDR.V                                                          | 1626.66861 | 2 | 3.26E-06 | 0.92  | 3.83   | -     | 778.4    |
| AHQ-3-5, 2024               | K.HEAFESDLAAHQDR.V                                                          | 1626.66861 | 3 | 1.72E-10 | 0.98  | 5.55   | -     | 2755.9   |
| AHQ-3-5, 3631               | R.KAGTQIENIEEDFR.N                                                          | 1650.77152 | 2 | 6.54E-06 | 0.95  | 4.56   | -     | 922.5    |
| AHQ-3-5, 1676               | R.KHEAFESDLAAHQDR.V                                                         | 1754.84152 | 2 | 4.37E-07 | 0.97  | 4.50   | -     | 1423.3   |
| AHQ-3-6, 1707               | R.KHEAFESDLAAHQDR.V                                                         | 1754.84152 | 3 | 1.13E-09 | 0.97  | 5.79   | -     | 1331.2   |
| AHQ-3-5, 2801               | R.KTFTAWCNSHLR.K                                                            | 1522.71309 | 2 | 2.75E-09 | 0.93  | 3.35   | -     | 1073.9   |
| AHQ-3-5, 4833               | K.LVSGIAEEIVDGNVK.M                                                         | 1543.74400 | 2 | 5.70E-06 | 0.85  | 3.03   | -     | 1061.1   |
| AHQ-3-5, 3249               | K.TFTAWCNSHLR.K                                                             | 1394.54018 | 2 | 3.55E-07 | 0.80  | 3.26   | -     | 640.0    |
| gj4504345[ref][NP_000508.1] | alpha 2 globin [Homo sapiens]                                               |            |   | 5.57E-12 | 3.72  | 40.25  | 50.70 | 15257.4  |
| AHQ-3-13, 4226              | K.FLAVSTVLTSK.Y                                                             | 1253.46970 | 2 | 5.34E-04 | 0.88  | 3.19   | -     | 930.3    |
| AHQ-3-13, 3989              | K.TYFPFHDLSHGSAQVK.G                                                        | 1835.01138 | 2 | 8.22E-09 | 0.92  | 3.87   | -     | 863.8    |
| AHQ-3-13, 3997              | K.TYFPFHDLSHGSAQVK.G                                                        | 1835.01138 | 3 | 1.11E-06 | 0.85  | 3.90   | -     | 676.1    |
| AHQ-3-14, 4899 - 4912       | K.TYFPFHDLSHGSAQVK.G                                                        | 1835.01138 | 2 | 1.16E-07 | 0.96  | 4.06   | -     | 1624.2   |
| AHQ-3-13-, 4017 - 4021      | K.TYFPFHDLSHGSAQVK.G                                                        | 1835.01138 | 2 | 3.41E-10 | 0.95  | 4.26   | -     | 983.7    |
| AHQ-3-14, 6441              | K.VADALTNVAHVDDM*PNALSALSDDLHAKH.L                                          | 3014.31995 | 3 | 6.61E-05 | 0.92  | 4.83   | -     | 929.0    |
| AHQ-3-14, 3284              | K.VGAHAGEYGAEALER.M                                                         | 1530.62397 | 2 | 1.03E-05 | 0.83  | 3.03   | -     | 764.2    |
| AHQ-3-13, 2581              | K.VGAHAGEYGAEALER.M                                                         | 1530.62397 | 3 | 8.28E-04 | 0.97  | 4.98   | -     | 2206.6   |
| AHQ-3-13-, 2534 - 2537      | K.VGAHAGEYGAEALER.M                                                         | 1530.62397 | 2 | 5.57E-12 | 0.97  | 5.06   | -     | 1398.8   |
| AHQ-3-13, 2574              | K.VGAHAGEYGAEALER.M                                                         | 1530.62397 | 2 | 6.09E-11 | 0.98  | 4.71   | -     | 2130.0   |
| gj4507109[ref][NP_000336.1] | alpha-synuclein isoform NACP140; non A4 component of amyloid precursor      |            |   | 5.77E-12 | 5.59  | 60.33  | 45.70 | 14460.1  |
| AHQ-3-12, 2132              | K.EGVVHGVATVAEK.T                                                           | 1296.45466 | 2 | 3.47E-06 | 0.69  | 2.62   | -     | 574.3    |
| AHQ-3-13-, 2218             | K.EGVVHGVATVAEK.T                                                           | 1296.45466 | 2 | 1.04E-07 | 0.93  | 3.70   | -     | 960.8    |
| AHQ-3-12, 4659              | K.EQVTVNGGAVTVGTVAQAQ.T                                                     | 1929.16446 | 3 | 1.48E-04 | 0.96  | 4.91   | -     | 1682.9   |
| AHQ-3-12, 4880              | K.EQVTVNGGAVTVGTVAQAQ.T                                                     | 1929.16446 | 2 | 1.90E-11 | 0.94  | 4.46   | -     | 845.3    |
| AHQ-3-14-, 4617             | K.EQVTVNGGAVTVGTVAQAQ.T                                                     | 1929.16446 | 3 | 1.32E-04 | 0.95  | 4.44   | -     | 1546.4   |
| AHQ-3-14-, 4628             | K.EQVTVNGGAVTVGTVAQAQ.T                                                     | 1929.16446 | 2 | 3.44E-09 | 0.95  | 4.43   | -     | 1153.1   |
| AHQ-3-14, 5620              | K.EQVTVNGGAVTVGTVAQAQ.T                                                     | 1929.16446 | 2 | 3.56E-07 | 0.94  | 5.03   | -     | 668.2    |
| AHQ-3-12, 4643              | K.EQVTVNGGAVTVGTVAQAQ.T                                                     | 1929.16446 | 2 | 6.56E-06 | 0.92  | 3.83   | -     | 1000.1   |
| AHQ-3-13, 4614              | K.EQVTVNGGAVTVGTVAQAQ.T                                                     | 1929.16446 | 2 | 1.02E-05 | 0.96  | 5.23   | -     | 1233.1   |
| AHQ-3-12, 2035 - 2039       | K.TKEGVLYVGSK.T                                                             | 1181.36357 | 2 | 1.12E-05 | 0.83  | 2.83   | -     | 768.9    |
| AHQ-3-12, 2024              | K.TKEGVVHGVATVAEK.T                                                         | 1525.73191 | 3 | 3.32E-06 | 0.88  | 3.73   | -     | 957.5    |
| AHQ-3-12, 2022              | K.TKEGVVHGVATVAEK.T                                                         | 1525.73191 | 2 | 3.16E-10 | 0.96  | 4.32   | -     | 1821.3   |
| AHQ-3-13, 4190 - 4191       | K.TKEQVTVNGGAVTVGTVAQAQ.T                                                   | 2158.44170 | 2 | 5.77E-12 | 0.98  | 6.65   | -     | 1953.5   |
| AHQ-3-14, 5351              | K.TKEQVTVNGGAVTVGTVAQAQ.T                                                   | 2158.44170 | 2 | 1.50E-06 | 0.96  | 5.45   | -     | 920.0    |
| AHQ-3-12, 4206 - 4218       | K.TKEQVTVNGGAVTVGTVAQAQ.T                                                   | 2158.44170 | 3 | 1.20E-05 | 0.93  | 5.04   | -     | 1042.0   |
| AHQ-3-13-, 4206             | K.TKEQVTVNGGAVTVGTVAQAQ.T                                                   | 2158.44170 | 2 | 6.06E-05 | 0.97  | 4.88   | -     | 1681.7   |
| AHQ-3-14-, 4181             | K.TKEQVTVNGGAVTVGTVAQAQ.T                                                   | 2158.44170 | 2 | 2.43E-06 | 0.97  | 5.85   | -     | 1247.7   |
| AHQ-3-13-, 4205 - 4210      | K.TKEQVTVNGGAVTVGTVAQAQ.T                                                   | 2158.44170 | 3 | 5.34E-09 | 0.98  | 6.01   | -     | 2342.4   |
| AHQ-3-12, 4138              | K.TVEGAGSIAAATGFVK.K                                                        | 1479.68001 | 1 | 7.74E-07 | 0.66  | 3.11   | -     | 437.2    |
| AHQ-3-13-, 4087 - 4154      | K.TVEGAGSIAAATGFVK.K                                                        | 1479.68001 | 2 | 2.78E-04 | 0.73  | 3.22   | -     | 607.4    |
| AHQ-3-13-, 4153             | K.TVEGAGSIAAATGFVK.K                                                        | 1479.68001 | 1 | 1.09E-04 | 0.46  | 2.64   | -     | 275.5    |
| AHQ-3-12, 4127 - 4135       | K.TVEGAGSIAAATGFVK.K                                                        | 1479.68001 | 2 | 6.90E-10 | 0.93  | 3.86   | -     | 1159.9   |
| AHQ-3-13, 4142              | K.TVEGAGSIAAATGFVK.K                                                        | 1479.68001 | 1 | 7.58E-04 | 0.23  | 2.68   | -     | 316.8    |
| gj5902016[ref][NP_008939.1] | reticulin 4; neuroendocrine-specific protein C like (foocen) [Homo sapiens] |            |   | 6.13E-12 | 1.91  | 20.25  | 14.10 | 22395.3  |
| AHQ-3-1, 3125 - 3205        | R.HQAQIDHYLGLANK.N                                                          | 1608.78270 | 2 | 9.54E-07 | 0.84  | 3.58   | -     | 334.4    |

|                             |                                                                         |            |   |          |      |        |       |          |
|-----------------------------|-------------------------------------------------------------------------|------------|---|----------|------|--------|-------|----------|
| AHQ-3-1, 3200               | R.HQAQIDHYLGLANK.N                                                      | 1608.78270 | 2 | 8.32E-07 | 0.97 | 5.02   | -     | 1456.0   |
| AHQ-3-1, 3394               | R.HQAQIDHYLGLANK.N                                                      | 1608.78270 | 2 | 1.83E-05 | 0.87 | 3.74   | -     | 735.2    |
| AHQ-3-12, 2967              | R.HQAQIDHYLGLANK.N                                                      | 1608.78270 | 2 | 1.88E-05 | 0.95 | 4.48   | -     | 938.3    |
| AHQ-3-1, 3046 - 3117        | K.YSNSALGHVNCITK.E                                                      | 1565.73305 | 2 | 6.13E-12 | 0.94 | 4.23   | -     | 1094.8   |
| gi 5729980 ref NP_006547.1  | phosphomevalonate kinase [Homo sapiens]                                 |            |   | 6.55E-12 | 0.90 | 10.23  | 8.30  | 21994.8  |
| AHQ-3-11, 5206              | K.IVEGISQPIWLVSDTR.R                                                    | 1814.07506 | 2 | 6.55E-12 | 0.90 | 4.53   | -     | 434.6    |
| gi 4557361 ref NP_001187.1  | BH3 interacting domain death agonist; BH3-interacting domain death agon |            |   | 6.96E-12 | 3.77 | 40.27  | 36.40 | 21994.6  |
| AHQ-3-11, 6791              | R.DLATALQQLQAYPR.D                                                      | 1702.93270 | 2 | 6.96E-12 | 0.94 | 4.32   | -     | 1060.3   |
| AHQ-3-11, 5972              | R.DVFTTTFNFINQLNR.L                                                     | 1819.01348 | 2 | 9.66E-07 | 0.92 | 3.91   | -     | 1190.5   |
| AHQ-3-11, 6063 - 6075       | R.ELDALGHLEPLVAPQWEGYDELQTDGNR.S                                        | 3167.38790 | 3 | 9.74E-11 | 0.95 | 5.41   | -     | 988.0    |
| AHQ-3-11, 2655              | R.IEADSESEQEIIIR.N                                                      | 1505.56635 | 2 | 2.37E-10 | 0.96 | 4.28   | -     | 1789.0   |
| gi 4502549 ref NP_001734.1  | calmodulin 2 (phosphorylase kinase, delta); phosphorylase kinase delta  |            |   | 7.02E-12 | 3.57 | 40.25  | 25.50 | 16837.5  |
| AHQ-3-12, 5867 - 5880       | R.EADIDGDGVNYEEFVQM*MTAK                                                | 2507.69302 | 3 | 5.61E-05 | 0.86 | 4.77   | -     | 1140.4   |
| AHQ-3-12, 4666              | R.EADIDGDGVNYEEFVQM*MTAK                                                | 2523.69242 | 2 | 3.37E-05 | 0.80 | 3.39   | -     | 475.7    |
| AHQ-3-12, 4094 - 4166       | K.EAFSLFDKDDGGDTITK.E                                                   | 1845.98441 | 2 | 2.82E-04 | 0.94 | 4.51   | -     | 1072.2   |
| AHQ-3-11, 3919 - 3926       | K.EAFSLFDKDDGGDTITK.E                                                   | 1845.98441 | 2 | 4.11E-04 | 0.88 | 3.53   | -     | 865.1    |
| AHQ-3-12, 3895              | R.VFDKDGNGVISAALR.H                                                     | 1755.90933 | 3 | 6.37E-05 | 0.90 | 4.41   | -     | 1039.4   |
| AHQ-3-12, 3902 - 3976       | R.VFDKDGNGVISAALR.H                                                     | 1755.90933 | 2 | 6.48E-05 | 0.92 | 3.83   | -     | 1051.6   |
| AHQ-3-11, 3679 - 3742       | R.VFDKDGNGVISAALR.H                                                     | 1755.90933 | 2 | 7.02E-12 | 0.96 | 4.91   | -     | 1273.8   |
| AHQ-3-12, 3768 - 3830       | R.VFDKDGNGVISAALR.H                                                     | 1755.90933 | 3 | 1.75E-08 | 0.89 | 4.41   | -     | 891.3    |
| AHQ-3-12, 3767 - 3835       | R.VFDKDGNGVISAALR.H                                                     | 1755.90933 | 2 | 1.57E-08 | 0.96 | 4.97   | -     | 1142.6   |
| AHQ-3-11, 3592 - 3659       | R.VFDKDGNGVISAALR.H                                                     | 1755.90933 | 2 | 8.40E-07 | 0.91 | 3.66   | -     | 1053.7   |
| gi 27500274 ref XP_113950.3 | similar to Munc13-4 protein [Homo sapiens]                              |            |   | 9.16E-12 | 9.36 | 110.29 | 19.40 | 123281.1 |
| AHQ-3-4, 7664               | K.AFGELCPNTAPLPQLVTEALQTGTTEWFLHK.Q                                     | 3472.91108 | 3 | 9.16E-12 | 0.81 | 4.23   | -     | 403.5    |
| AHQ-3-4, 7448               | K.ALLGLVQDVIQDLHQCCR.T                                                  | 2037.32944 | 2 | 6.74E-08 | 0.96 | 5.45   | -     | 1129.6   |
| AHQ-3-4, 7450               | K.ALLGLVQDVIQDLHQCCR.T                                                  | 2037.32944 | 3 | 5.39E-07 | 0.93 | 4.15   | -     | 1242.1   |
| AHQ-3-4, 3169               | R.GQCHLQQLIHK.R                                                         | 1510.74545 | 2 | 8.64E-04 | 0.90 | 3.46   | -     | 1074.6   |
| AHQ-3-5, 4421               | K.HSTSAVLDSTCFQAQISHAR.Q                                                | 2191.36726 | 3 | 2.69E-06 | 0.95 | 4.18   | -     | 1683.1   |
| AHQ-3-4, 3418 - 3488        | R.IQQAEETSEELGAVTVK.A                                                   | 1933.10674 | 2 | 1.77E-04 | 0.93 | 4.19   | -     | 1009.9   |
| AHQ-3-4, 3306               | R.LGHPEPNHVTEASELLR.Y                                                   | 1900.08490 | 2 | 4.29E-04 | 0.61 | 2.83   | -     | 448.3    |
| AHQ-3-4, 5545               | K.LPAQLAWAELEQR.V                                                       | 1525.73360 | 2 | 4.13E-05 | 0.91 | 3.24   | -     | 1164.4   |
| AHQ-3-5, 5365               | K.LPAQLAWAELEQR.V                                                       | 1525.73360 | 2 | 6.61E-09 | 0.96 | 4.08   | -     | 1452.9   |
| AHQ-3-4, 7506               | R.LYQSLEFFSPCLLPITSIEYQWIIQGR.L                                         | 3268.68653 | 3 | 1.64E-04 | 0.90 | 4.54   | -     | 709.1    |
| AHQ-3-4, 4112               | R.SVFPVLSVSDSPAR.L                                                      | 1362.51311 | 2 | 5.26E-06 | 0.85 | 3.05   | -     | 997.2    |
| AHQ-3-4, 7344               | R.VGAVLEQQQLQTLHAQLQSALAGLGHIE.R                                        | 3153.54178 | 3 | 3.03E-05 | 0.93 | 5.20   | -     | 1037.8   |
| AHQ-3-4, 6405               | R.WFQPAIPSWLQK.T                                                        | 1501.75533 | 2 | 3.72E-05 | 0.56 | 2.56   | -     | 395.2    |
| gi 27480104 ref XP_208215.1 | similar to triosephosphate isomerase 1 [Homo sapiens]                   |            |   | 9.25E-12 | 5.10 | 60.26  | 22.10 | 26942.6  |
| AHQ-3-10, 2723              | R.HVFGSEDELIGQK.V                                                       | 1459.58565 | 1 | 1.58E-06 | 0.89 | 3.81   | -     | 921.2    |
| AHQ-3-11, 2855              | R.HVFGSEDELIGQK.V                                                       | 1459.58565 | 2 | 8.97E-08 | 0.94 | 3.82   | -     | 833.7    |
| AHQ-3-10, 2718              | R.HVFGSEDELIGQK.V                                                       | 1459.58565 | 1 | 8.29E-04 | 0.84 | 2.89   | -     | 1130.4   |
| AHQ-3-10, 2722              | R.HVFGSEDELIGQK.V                                                       | 1459.58565 | 2 | 9.25E-12 | 0.95 | 4.34   | -     | 868.6    |
| AHQ-3-10, 2259              | K.IAVAAQNCYK.V                                                          | 1139.30684 | 1 | 1.94E-05 | 0.51 | 2.57   | -     | 325.4    |
| AHQ-3-10, 2439 - 2442       | R.RHVFGSEDELIGQK.V                                                      | 1615.77200 | 2 | 1.19E-08 | 0.98 | 5.22   | -     | 2451.2   |
| AHQ-3-10, 3970 - 3991       | K.VTNGAFTGEISPGMIK.D                                                    | 1622.86786 | 2 | 1.59E-05 | 0.87 | 3.69   | -     | 745.7    |
| AHQ-3-10, 3511              | K.VTNGAFTGEISPGMIK.D                                                    | 1638.86726 | 2 | 1.74E-04 | 0.91 | 3.87   | -     | 886.6    |
| AHQ-3-10, 4910 - 4974       | K.VVLAYPEPWAIQGTG.T                                                     | 1603.88887 | 2 | 1.77E-04 | 0.87 | 3.52   | -     | 788.2    |
| gi 30151108 ref XP_301187.1 | similar to actin beta, cytoskeletal - Kenyan clawed frog [Homo sapiens] |            |   | 9.49E-12 | 1.94 | 20.34  | 7.40  | 32164.8  |
| AHQ-3-1, 5080 - 5160        | K.DLYANTVLSGGTTM*YPGIADR.M                                              | 2232.45624 | 2 | 2.28E-06 | 0.91 | 4.46   | -     | 693.3    |
| AHQ-3-1, 5228               | K.DLYANTVLSGGTTM*YPGIADR.M                                              | 2232.45624 | 2 | 4.62E-04 | 0.94 | 4.69   | -     | 1021.6   |
| AHQ-3-2, 5838 - 5841        | K.DLYANTVLSGGTTM*YPGIADR.M                                              | 2216.45684 | 2 | 3.69E-05 | 0.91 | 4.36   | -     | 621.7    |
| AHQ-3-3, 5593 - 5604        | K.DLYANTVLSGGTTM*YPGIADR.M                                              | 2216.45684 | 2 | 1.00E-05 | 0.94 | 4.88   | -     | 908.7    |
| AHQ-3-4, 5092               | K.DLYANTVLSGGTTM*YPGIADR.M                                              | 2232.45624 | 2 | 5.80E-10 | 0.96 | 5.21   | -     | 1076.5   |
| AHQ-3-4, 5216 - 5222        | K.DLYANTVLSGGTTM*YPGIADR.M                                              | 2232.45624 | 2 | 6.18E-04 | 0.88 | 3.89   | -     | 770.8    |
| AHQ-3-4, 5573 - 5580        | K.DLYANTVLSGGTTM*YPGIADR.M                                              | 2216.45684 | 2 | 2.23E-04 | 0.93 | 3.99   | -     | 1034.3   |
| AHQ-3-5, 5056 - 5136        | K.DLYANTVLSGGTTM*YPGIADR.M                                              | 2232.45624 | 2 | 3.19E-05 | 0.94 | 4.98   | -     | 807.1    |
| AHQ-3-5, 5508               | K.DLYANTVLSGGTTM*YPGIADR.M                                              | 2216.45684 | 2 | 1.82E-05 | 0.96 | 4.84   | -     | 1115.2   |
| AHQ-3-6, 4915               | K.DLYANTVLSGGTTM*YPGIADR.M                                              | 2232.45624 | 2 | 2.44E-07 | 0.87 | 3.61   | -     | 685.7    |
| AHQ-3-6, 5370               | K.DLYANTVLSGGTTM*YPGIADR.M                                              | 2216.45684 | 2 | 1.67E-06 | 0.94 | 4.87   | -     | 867.7    |
| AHQ-3-6, 5515               | K.DLYANTVLSGGTTM*YPGIADR.M                                              | 2216.45684 | 2 | 3.58E-04 | 0.87 | 3.69   | -     | 880.7    |
| AHQ-3-7, 4904               | K.DLYANTVLSGGTTM*YPGIADR.M                                              | 2232.45624 | 2 | 9.94E-07 | 0.84 | 3.78   | -     | 460.5    |
| AHQ-3-7, 4995               | K.DLYANTVLSGGTTM*YPGIADR.M                                              | 2232.45624 | 2 | 1.66E-05 | 0.93 | 4.35   | -     | 999.5    |
| AHQ-3-8, 4732 - 4803        | K.DLYANTVLSGGTTM*YPGIADR.M                                              | 2232.45624 | 2 | 4.31E-06 | 0.95 | 5.29   | -     | 773.4    |
| AHQ-3-8, 4871 - 4943        | K.DLYANTVLSGGTTM*YPGIADR.M                                              | 2232.45624 | 2 | 2.85E-05 | 0.95 | 5.22   | -     | 923.1    |
| AHQ-3-8, 5013 - 5085        | K.DLYANTVLSGGTTM*YPGIADR.M                                              | 2232.45624 | 2 | 2.59E-06 | 0.96 | 5.33   | -     | 1055.2   |
| AHQ-3-8, 5045               | K.DLYANTVLSGGTTM*YPGIADR.M                                              | 2216.45684 | 2 | 7.25E-04 | 0.95 | 5.00   | -     | 987.5    |
| AHQ-3-8, 5151 - 5231        | K.DLYANTVLSGGTTM*YPGIADR.M                                              | 2232.45624 | 2 | 5.05E-05 | 0.85 | 3.93   | -     | 463.0    |
| AHQ-3-8, 5227 - 5307        | K.DLYANTVLSGGTTM*YPGIADR.M                                              | 2216.45684 | 2 | 6.95E-09 | 0.96 | 5.28   | -     | 1002.5   |
| AHQ-3-8, 5375 - 5439        | K.DLYANTVLSGGTTM*YPGIADR.M                                              | 2216.45684 | 2 | 1.36E-04 | 0.96 | 5.73   | -     | 837.1    |
| AHQ-3-8, 5484 - 5560        | K.DLYANTVLSGGTTM*YPGIADR.M                                              | 2232.45624 | 2 | 7.55E-04 | 0.92 | 4.36   | -     | 744.2    |
| AHQ-3-8, 5507 - 5571        | K.DLYANTVLSGGTTM*YPGIADR.M                                              | 2216.45684 | 2 | 2.40E-04 | 0.95 | 4.92   | -     | 933.9    |
| AHQ-3-8, 5635 - 5699        | K.DLYANTVLSGGTTM*YPGIADR.M                                              | 2216.45684 | 2 | 2.58E-07 | 0.96 | 5.36   | -     | 933.2    |
| AHQ-3-8, 5764 - 5832        | K.DLYANTVLSGGTTM*YPGIADR.M                                              | 2216.45684 | 2 | 2.22E-04 | 0.93 | 4.74   | -     | 764.7    |
| AHQ-3-8, 5899 - 5964        | K.DLYANTVLSGGTTM*YPGIADR.M                                              | 2216.45684 | 2 | 7.29E-06 | 0.97 | 6.46   | -     | 736.9    |
| AHQ-3-8, 6163 - 6227        | K.DLYANTVLSGGTTM*YPGIADR.M                                              | 2216.45684 | 2 | 8.32E-04 | 0.95 | 4.98   | -     | 860.3    |
| AHQ-3-8, 6291 - 6355        | K.DLYANTVLSGGTTM*YPGIADR.M                                              | 2216.45684 | 2 | 1.48E-04 | 0.95 | 4.74   | -     | 884.0    |
| AHQ-3-8, 6423 - 6497        | K.DLYANTVLSGGTTM*YPGIADR.M                                              | 2216.45684 | 2 | 9.45E-05 | 0.94 | 5.39   | -     | 667.0    |
| AHQ-3-8, 6563 - 6635        | K.DLYANTVLSGGTTM*YPGIADR.M                                              | 2216.45684 | 2 | 5.51E-05 | 0.94 | 5.10   | -     | 766.6    |
| AHQ-3-8, 6808 - 6873        | K.DLYANTVLSGGTTM*YPGIADR.M                                              | 2216.45684 | 2 | 5.17E-04 | 0.91 | 4.46   | -     | 700.4    |
| AHQ-3-8, 7212 - 7277        | K.DLYANTVLSGGTTM*YPGIADR.M                                              | 2216.45684 | 2 | 1.12E-04 | 0.93 | 4.56   | -     | 752.1    |
| AHQ-3-8, 7348 - 7419        | K.DLYANTVLSGGTTM*YPGIADR.M                                              | 2216.45684 | 2 | 2.84E-04 | 0.96 | 5.56   | -     | 805.1    |
| AHQ-3-9, 4639 - 4720        | K.DLYANTVLSGGTTM*YPGIADR.M                                              | 2232.45624 | 2 | 9.08E-07 | 0.94 | 4.82   | -     | 685.7    |
| AHQ-3-9, 5195 - 5269        | K.DLYANTVLSGGTTM*YPGIADR.M                                              | 2216.45684 | 2 | 5.61E-04 | 0.81 | 3.70   | -     | 634.7    |
| AHQ-3-9, 5335 - 5408        | K.DLYANTVLSGGTTM*YPGIADR.M                                              | 2216.45684 | 2 | 3.83E-05 | 0.91 | 4.28   | -     | 777.4    |
| AHQ-3-10, 4482 - 4543       | K.DLYANTVLSGGTTM*YPGIADR.M                                              | 2232.45624 | 2 | 3.09E-08 | 0.96 | 5.07   | -     | 936.0    |
| AHQ-3-10, 4602 - 4631       | K.DLYANTVLSGGTTM*YPGIADR.M                                              | 2232.45624 | 2 | 6.93E-06 | 0.96 | 5.42   | -     | 934.3    |
| AHQ-3-10, 4680 - 4750       | K.DLYANTVLSGGTTM*YPGIADR.M                                              | 2232.45624 | 2 | 7.62E-05 | 0.96 | 5.20   | -     | 1235.2   |
| AHQ-3-10, 4994 - 5054       | K.DLYANTVLSGGTTM*YPGIADR.M                                              | 2216.45684 | 2 | 1.75E-06 | 0.95 | 4.62   | -     | 1147.0   |
| AHQ-3-10, 5114 - 5179       | K.DLYANTVLSGGTTM*YPGIADR.M                                              | 2216.45684 | 2 | 1.03E-04 | 0.88 | 3.89   | -     | 773.8    |
| AHQ-3-11, 4659              | K.DLYANTVLSGGTTM*YPGIADR.M                                              | 2232.45624 | 2 | 4.47E-09 | 0.96 | 4.93   | -     | 1074.4   |
| AHQ-3-11, 4770 - 4798       | K.DLYANTVLSGGTTM*YPGIADR.M                                              | 2232.45624 | 2 | 3.42E-06 | 0.94 | 4.66   | -     | 910.3    |
| AHQ-3-11, 5066              | K.DLYANTVLSGGTTM*YPGIADR.M                                              | 2216.45684 | 2 | 1.75E-08 | 0.94 | 4.88   | -     | 801.2    |
| AHQ-3-11, 5218 - 5292       | K.DLYANTVLSGGTTM*YPGIADR.M                                              | 2216.45684 | 2 | 2.51E-07 | 0.94 | 4.86   | -     | 855.0    |
| AHQ-3-12, 4830              | K.DLYANTVLSGGTTM*YPGIADR.M                                              | 2232.45624 | 2 | 8.79E-09 | 0.96 | 4.95   | -     | 934.9    |
| AHQ-3-12, 5254              | K.DLYANTVLSGGTTM*YPGIADR.M                                              | 2216.45684 | 2 | 5.05E-10 | 0.97 | 6.30   | -     | 1388.1   |
| AHQ-3-13, 4739 - 4801       | K.DLYANTVLSGGTTM*YPGIADR.M                                              | 2232.45624 | 2 | 2.34E-09 | 0.97 | 5.62   | -     | 1377.7   |
| AHQ-3-13, 4866 - 4937       | K.DLYANTVLSGGTTM*YPGIADR.M                                              | 2232.45624 | 2 | 5.89E-06 | 0.95 | 4.93   | -     | 1047.0   |
| AHQ-3-13, 5005              | K.DLYANTVLSGGTTM*YPGIADR.M                                              | 2232.45624 | 2 | 1.27E-05 | 0.95 | 5.47   | -     | 755.5    |
| AHQ-3-13, 5109 - 5178       | K.DLYANTVLSGGTTM*YPGIADR.M                                              | 2232.45624 | 2 | 7.33E-08 | 0.94 | 4.67   | -     | 952.7    |
| AHQ-3-13, 5185 - 5250       | K.DLYANTVLSGGTTM*YPGIADR.M                                              | 2216.45684 | 2 | 5.25E-06 | 0.96 | 4.91   | -     | 1140.4   |
| AHQ-3-13, 5359 - 5441       | K.DLYANTVLSGGTTM*YPGIADR.M                                              | 2216.45684 | 2 | 8.30E-07 | 0.97 | 6.14   | -     | 900.7    |
| AHQ-3-14, 5553 - 5619       | K.DLYANTVLSGGTTM*YPGIADR.M                                              | 2232.45624 | 2 | 1.23E-06 | 0.95 | 4.93   | -     | 1026.7   |
| AHQ-3-14, 5669 - 5731       | K.DLYANTVLSGGTTM*YPGIADR.M                                              | 2232.45624 | 2 | 8.31E-07 | 0.90 | 4.53   | -     | 508.9    |
| AHQ-3-14, 5741 - 5792       | K.DLYANTVLSGGTTM*YPGIADR.M                                              | 2232.45624 | 2 | 1.42E-04 | 0.97 | 6.01   | -     | 1177.3   |
| AHQ-3-14, 5855 - 5915       | K.DLYANTVLSGGTTM*YPGIADR.M                                              | 2232.45624 | 2 | 8.32E-06 | 0.96 | 5.21   | -     | 987.7    |
| AHQ-3-14, 6003 - 6063       | K.DLYANTVLSGGTTM*YPGIADR.M                                              | 2216.45684 | 2 | 8.40E-10 | 0.96 | 5.24   | -     | 1086.2   |
| AHQ-3-14, 6008 - 6068       | K.DLYANTVLSGGTTM*YPGIADR.M                                              | 2232.45624 | 2 | 1.79E-05 | 0.90 | 3.89   | -     | 737.3    |
| AHQ-3-14, 6056 - 6128       | K.DLYANTVLSGGTTM*YPGIADR.M                                              | 2232.45624 | 2 | 1.38E-09 | 0.89 | 4.42   | -     | 588.5    |

|                           |                                                                         |            |   |          |       |        |       |          |
|---------------------------|-------------------------------------------------------------------------|------------|---|----------|-------|--------|-------|----------|
| AHQ-3-14, 6348            | K.DLYANTVLSGGTTM*YPGIADR.M                                              | 2232.45624 | 2 | 2.25E-04 | 0.58  | 3.09   | -     | 322.0    |
| AHQ-3-13-, 4745 - 4822    | K.DLYANTVLSGGTTM*YPGIADR.M                                              | 2232.45624 | 2 | 3.36E-07 | 0.96  | 5.63   | -     | 873.5    |
| AHQ-3-13-, 4885 - 4955    | K.DLYANTVLSGGTTM*YPGIADR.M                                              | 2232.45624 | 2 | 1.07E-06 | 0.97  | 5.51   | -     | 1254.3   |
| AHQ-3-13-, 4990 - 5057    | K.DLYANTVLSGGTTM*YPGIADR.M                                              | 2232.45624 | 2 | 5.17E-04 | 0.93  | 4.45   | -     | 841.1    |
| AHQ-3-13-, 5141 - 5166    | K.DLYANTVLSGGTTM*YPGIADR.M                                              | 2216.45684 | 2 | 1.85E-06 | 0.95  | 4.44   | -     | 1222.3   |
| AHQ-3-13-, 5425 - 5506    | K.DLYANTVLSGGTTM*YPGIADR.M                                              | 2216.45684 | 2 | 4.71E-05 | 0.98  | 6.71   | -     | 1132.8   |
| AHQ-3-13-, 5569 - 5645    | K.DLYANTVLSGGTTM*YPGIADR.M                                              | 2216.45684 | 2 | 1.17E-04 | 0.95  | 5.04   | -     | 911.0    |
| AHQ-3-14-, 4693 - 4755    | K.DLYANTVLSGGTTM*YPGIADR.M                                              | 2232.45624 | 2 | 9.49E-12 | 0.96  | 5.83   | -     | 983.9    |
| AHQ-3-14-, 4815 - 4879    | K.DLYANTVLSGGTTM*YPGIADR.M                                              | 2232.45624 | 2 | 5.48E-04 | 0.97  | 5.58   | -     | 1162.3   |
| AHQ-3-14-, 4940 - 5017    | K.DLYANTVLSGGTTM*YPGIADR.M                                              | 2232.45624 | 2 | 2.02E-04 | 0.93  | 4.67   | -     | 887.2    |
| AHQ-3-14-, 5081 - 5148    | K.DLYANTVLSGGTTM*YPGIADR.M                                              | 2232.45624 | 2 | 6.95E-04 | 0.97  | 5.58   | -     | 1118.7   |
| AHQ-3-14-, 5105 - 5167    | K.DLYANTVLSGGTTM*YPGIADR.M                                              | 2216.45684 | 2 | 4.91E-05 | 0.98  | 6.32   | -     | 1358.0   |
| AHQ-3-14-, 5200 - 5271    | K.DLYANTVLSGGTTM*YPGIADR.M                                              | 2216.45684 | 2 | 2.39E-05 | 0.95  | 4.87   | -     | 970.8    |
| AHQ-3-14-, 5319 - 5383    | K.DLYANTVLSGGTTM*YPGIADR.M                                              | 2216.45684 | 2 | 4.77E-04 | 0.95  | 5.35   | -     | 806.7    |
| AHQ-3-14-, 5451 - 5516    | K.DLYANTVLSGGTTM*YPGIADR.M                                              | 2216.45684 | 2 | 3.55E-04 | 0.96  | 5.66   | -     | 999.3    |
| gj4503715 ref NP_000500.1 | fibrinogen, gamma chain isoform gamma-A precursor [Homo sapiens]        |            |   | 1.14E-11 | 10.98 | 130.34 | 46.50 | 49481.2  |
| AHQ-3-7, 4396 - 4415      | K.AIQLTYNPDESSKPNMIDAATLK.S                                             | 2521.82886 | 3 | 1.56E-05 | 0.61  | 3.18   | -     | 389.4    |
| AHQ-3-7, 4483 - 4495      | K.AIQLTYNPDESSKPNMIDAATLK.S                                             | 2521.82886 | 3 | 7.55E-07 | 0.83  | 3.93   | -     | 681.7    |
| AHQ-3-5, 4593 - 4595      | K.AIQLTYNPDESSKPNMIDAATLK.S                                             | 2521.82886 | 3 | 2.57E-06 | 0.75  | 3.72   | -     | 355.6    |
| AHQ-3-8, 4218             | K.AIQLTYNPDESSKPNMIDAATLK.S                                             | 2521.82886 | 2 | 4.46E-04 | 0.54  | 3.24   | -     | 212.0    |
| AHQ-3-7, 4532 - 4602      | K.AIQLTYNPDESSKPNMIDAATLK.S                                             | 2521.82886 | 2 | 6.27E-04 | 0.31  | 2.58   | -     | 282.0    |
| AHQ-3-1, 5824 - 5888      | K.ASTPNGYDNGIIWATWK.T                                                   | 1895.06358 | 2 | 1.14E-11 | 0.87  | 3.43   | -     | 657.7    |
| AHQ-3-13, 5453            | K.ASTPNGYDNGIIWATWK.T                                                   | 1895.06358 | 2 | 2.13E-09 | 0.80  | 3.46   | -     | 511.6    |
| AHQ-3-5, 5603             | K.ASTPNGYDNGIIWATWK.T                                                   | 1895.06358 | 2 | 2.15E-10 | 0.67  | 3.13   | -     | 364.5    |
| AHQ-3-4, 5741             | K.ASTPNGYDNGIIWATWK.T                                                   | 1895.06358 | 2 | 2.28E-08 | 0.59  | 2.91   | -     | 338.1    |
| AHQ-3-13-, 5407           | K.ASTPNGYDNGIIWATWK.T                                                   | 1895.06358 | 2 | 3.68E-05 | 0.76  | 3.24   | -     | 511.1    |
| AHQ-3-14, 6384 - 6439     | K.ASTPNGYDNGIIWATWK.T                                                   | 1895.06358 | 2 | 1.72E-10 | 0.70  | 3.04   | -     | 501.7    |
| AHQ-3-6, 2497             | K.CHAGHLNGVYVYGGGTYSK.A                                                 | 2014.16662 | 3 | 2.66E-06 | 0.83  | 3.16   | -     | 1231.8   |
| AHQ-3-7, 2431 - 2508      | K.CHAGHLNGVYVYGGGTYSK.A                                                 | 2014.16662 | 2 | 3.60E-07 | 0.96  | 4.86   | -     | 1102.1   |
| AHQ-3-9, 2389             | K.CHAGHLNGVYVYGGGTYSK.A                                                 | 2014.16662 | 2 | 5.25E-07 | 0.93  | 4.41   | -     | 787.3    |
| AHQ-3-7, 2434 - 2512      | K.CHAGHLNGVYVYGGGTYSK.A                                                 | 2014.16662 | 3 | 9.10E-10 | 0.92  | 3.90   | -     | 1552.4   |
| AHQ-3-4, 2637             | K.CHAGHLNGVYVYGGGTYSK.A                                                 | 2014.16662 | 2 | 1.41E-06 | 0.93  | 4.50   | -     | 746.3    |
| AHQ-3-3, 5468             | K.EGFGHLSPTGTTEFFWLGNK.I                                                | 2208.37146 | 2 | 4.53E-06 | 0.87  | 3.97   | -     | 584.1    |
| AHQ-3-4, 5396 - 5413      | K.EGFGHLSPTGTTEFFWLGNK.I                                                | 2208.37146 | 2 | 6.53E-06 | 0.87  | 3.79   | -     | 684.9    |
| AHQ-3-4, 5553             | K.EGFGHLSPTGTTEFFWLGNK.I                                                | 2208.37146 | 2 | 8.79E-04 | 0.79  | 3.30   | -     | 562.3    |
| AHQ-3-1, 5616             | K.EGFGHLSPTGTTEFFWLGNK.I                                                | 2208.37146 | 2 | 2.56E-07 | 0.92  | 4.10   | -     | 720.6    |
| AHQ-3-7, 4990 - 5062      | K.EGFGHLSPTGTTEFFWLGNK.I                                                | 2208.37146 | 2 | 4.50E-06 | 0.94  | 5.13   | -     | 600.2    |
| AHQ-3-1, 5612             | K.EGFGHLSPTGTTEFFWLGNK.I                                                | 2208.37146 | 3 | 1.43E-06 | 0.95  | 4.63   | -     | 1714.4   |
| AHQ-3-7, 5138             | K.EGFGHLSPTGTTEFFWLGNK.I                                                | 2208.37146 | 2 | 2.05E-09 | 0.91  | 4.36   | -     | 631.6    |
| AHQ-3-6, 5109 - 5117      | K.EGFGHLSPTGTTEFFWLGNK.I                                                | 2208.37146 | 2 | 8.92E-04 | 0.94  | 4.52   | -     | 856.7    |
| AHQ-3-5, 5193 - 5199      | K.EGFGHLSPTGTTEFFWLGNK.I                                                | 2208.37146 | 2 | 3.83E-06 | 0.90  | 4.17   | -     | 617.1    |
| AHQ-3-9, 4868 - 4940      | K.EGFGHLSPTGTTEFFWLGNK.I                                                | 2208.37146 | 2 | 1.05E-07 | 0.87  | 4.06   | -     | 565.0    |
| AHQ-3-10, 4730 - 4734     | K.EGFGHLSPTGTTEFFWLGNK.I                                                | 2208.37146 | 2 | 1.07E-06 | 0.93  | 4.56   | -     | 726.6    |
| AHQ-3-7, 5219             | K.EGFGHLSPTGTTEFFWLGNK.I                                                | 2208.37146 | 2 | 1.23E-07 | 0.94  | 4.42   | -     | 973.3    |
| AHQ-3-9, 4763 - 4764      | K.EGFGHLSPTGTTEFFWLGNK.I                                                | 2208.37146 | 2 | 6.72E-04 | 0.90  | 4.28   | -     | 656.8    |
| AHQ-3-10, 6086 - 6143     | R.FGSYCPPTCGIADFLSTYQTK.V                                               | 2420.65656 | 2 | 7.34E-04 | 0.73  | 3.25   | -     | 550.5    |
| AHQ-3-1, 6952 - 6956      | R.FGSYCPPTCGIADFLSTYQTK.V                                               | 2420.65656 | 3 | 1.91E-06 | 0.72  | 3.38   | -     | 677.9    |
| AHQ-3-1, 6948 - 7024      | R.FGSYCPPTCGIADFLSTYQTK.V                                               | 2420.65656 | 2 | 9.84E-06 | 0.72  | 3.20   | -     | 395.5    |
| AHQ-3-14-, 6443           | R.FGSYCPPTCGIADFLSTYQTK.V                                               | 2420.65656 | 2 | 6.13E-05 | 0.70  | 2.77   | -     | 618.6    |
| AHQ-3-13, 6566 - 6646     | R.FGSYCPPTCGIADFLSTYQTK.V                                               | 2420.65656 | 2 | 8.48E-05 | 0.52  | 2.64   | -     | 368.4    |
| AHQ-3-11, 6298            | R.FGSYCPPTCGIADFLSTYQTK.V                                               | 2420.65656 | 2 | 1.73E-04 | 0.60  | 2.73   | -     | 613.8    |
| AHQ-3-3, 4754             | K.IHLISTQSAIPYALR.V                                                     | 1683.97576 | 2 | 1.14E-04 | 0.88  | 3.51   | -     | 803.6    |
| AHQ-3-9, 3928 - 3997      | K.IHLISTQSAIPYALR.V                                                     | 1683.97576 | 2 | 2.44E-04 | 0.95  | 4.03   | -     | 1405.8   |
| AHQ-3-10, 4075            | K.IHLISTQSAIPYALR.V                                                     | 1683.97576 | 2 | 1.74E-08 | 0.93  | 3.77   | -     | 1109.8   |
| AHQ-3-8, 3908 - 3913      | K.IHLISTQSAIPYALR.V                                                     | 1683.97576 | 2 | 2.16E-09 | 0.97  | 4.98   | -     | 1265.1   |
| AHQ-3-7, 4158 - 4230      | K.IHLISTQSAIPYALR.V                                                     | 1683.97576 | 2 | 2.37E-07 | 0.97  | 4.93   | -     | 1316.6   |
| AHQ-3-8, 3909             | K.IHLISTQSAIPYALR.V                                                     | 1683.97576 | 3 | 7.51E-04 | 0.48  | 3.11   | -     | 459.4    |
| AHQ-3-7, 4399 - 4479      | K.IHLISTQSAIPYALR.V                                                     | 1683.97576 | 2 | 7.36E-06 | 0.79  | 3.52   | -     | 476.8    |
| AHQ-3-2, 4766             | K.IHLISTQSAIPYALR.V                                                     | 1683.97576 | 2 | 1.43E-07 | 0.93  | 4.09   | -     | 964.5    |
| AHQ-3-5, 4407             | K.IHLISTQSAIPYALR.V                                                     | 1683.97576 | 2 | 8.13E-09 | 0.97  | 5.04   | -     | 1275.0   |
| AHQ-3-4, 4637             | K.IHLISTQSAIPYALR.V                                                     | 1683.97576 | 2 | 8.16E-08 | 0.97  | 5.51   | -     | 1173.7   |
| AHQ-3-13, 2146 - 2186     | R.LTIGEGQQHHLGGAK.Q                                                     | 1546.71290 | 2 | 4.88E-05 | 0.90  | 4.01   | -     | 958.0    |
| AHQ-3-7, 1590 - 1599      | R.LTIGEGQQHHLGGAK.Q                                                     | 1546.71290 | 2 | 9.10E-07 | 0.94  | 4.11   | -     | 1285.5   |
| AHQ-3-11, 1966            | R.LTIGEGQQHHLGGAK.Q                                                     | 1546.71290 | 2 | 1.31E-06 | 0.80  | 3.40   | -     | 647.0    |
| AHQ-3-7, 1679 - 1747      | R.LTIGEGQQHHLGGAK.Q                                                     | 1546.71290 | 2 | 1.58E-09 | 0.94  | 4.19   | -     | 1058.2   |
| AHQ-3-13-, 2125 - 2127    | R.LTIGEGQQHHLGGAK.Q                                                     | 1546.71290 | 2 | 1.57E-09 | 0.94  | 3.80   | -     | 1446.6   |
| AHQ-3-4, 2557             | K.NWIQYK.E                                                              | 851.97188  | 1 | 1.72E-04 | 0.41  | 1.82   | -     | 519.0    |
| AHQ-3-8, 2894             | K.QSGLYFIKPLK.A                                                         | 1294.56665 | 2 | 5.33E-06 | 0.82  | 3.10   | -     | 442.8    |
| AHQ-3-1, 4116             | K.QSGLYFIKPLK.A                                                         | 1294.56665 | 2 | 3.25E-07 | 0.69  | 2.95   | -     | 374.6    |
| AHQ-3-7, 3298 - 3299      | K.QSGLYFIKPLK.A                                                         | 1294.56665 | 2 | 2.89E-04 | 0.63  | 2.53   | -     | 350.6    |
| AHQ-3-7, 3734             | K.VAQLAQCEPCKDVTQIHDITGK.D                                              | 2772.06211 | 2 | 1.56E-04 | 0.72  | 3.40   | -     | 236.1    |
| AHQ-3-1, 4170             | K.VAQLAQCEPCKDVTQIHDITGK.D                                              | 2772.06211 | 3 | 2.51E-07 | 0.85  | 3.57   | -     | 825.3    |
| AHQ-3-5, 3845 - 3863      | K.VAQLAQCEPCKDVTQIHDITGK.D                                              | 2772.06211 | 3 | 6.48E-11 | 0.89  | 4.04   | -     | 920.0    |
| AHQ-3-7, 3727 - 3742      | K.VAQLAQCEPCKDVTQIHDITGK.D                                              | 2772.06211 | 3 | 2.45E-04 | 0.83  | 3.66   | -     | 826.6    |
| AHQ-3-8, 3640             | K.VAQLAQCEPCKDVTQIHDITGK.D                                              | 2772.06211 | 2 | 9.56E-05 | 0.62  | 3.28   | -     | 390.3    |
| AHQ-3-9, 3775             | K.VAQLAQCEPCKDVTQIHDITGKDCQDIANK.G                                      | 3718.05993 | 3 | 2.29E-08 | 0.96  | 6.73   | -     | 1014.8   |
| AHQ-3-1, 4392 - 4397      | K.VAQLAQCEPCKDVTQIHDITGKDCQDIANK.G                                      | 3718.05993 | 3 | 2.87E-07 | 0.88  | 4.58   | -     | 868.2    |
| AHQ-3-8, 3773 - 3774      | K.VAQLAQCEPCKDVTQIHDITGKDCQDIANK.G                                      | 3718.05993 | 3 | 1.74E-06 | 0.95  | 5.19   | -     | 1524.1   |
| AHQ-3-7, 3907 - 3974      | K.VAQLAQCEPCKDVTQIHDITGKDCQDIANK.G                                      | 3718.05993 | 3 | 6.62E-04 | 0.96  | 5.91   | -     | 1372.7   |
| AHQ-3-8, 2510             | K.YEASILTHDSSIR.Y                                                       | 1492.61564 | 2 | 4.51E-08 | 0.91  | 3.32   | -     | 1010.3   |
| AHQ-3-11, 2843            | K.YEASILTHDSSIR.Y                                                       | 1492.61564 | 2 | 2.39E-06 | 0.86  | 3.75   | -     | 553.4    |
| AHQ-3-7, 2648             | K.YEASILTHDSSIR.Y                                                       | 1492.61564 | 1 | 6.62E-05 | 0.46  | 2.64   | -     | 268.6    |
| AHQ-3-9, 2567             | K.YEASILTHDSSIR.Y                                                       | 1492.61564 | 2 | 7.13E-05 | 0.87  | 3.32   | -     | 799.4    |
| AHQ-3-7, 2612 - 2638      | K.YEASILTHDSSIR.Y                                                       | 1492.61564 | 2 | 5.40E-07 | 0.84  | 3.34   | -     | 628.7    |
| AHQ-3-6, 2745             | K.YEASILTHDSSIR.Y                                                       | 1492.61564 | 2 | 7.71E-07 | 0.87  | 3.66   | -     | 698.1    |
| AHQ-3-4, 2893 - 2913      | K.YEASILTHDSSIR.Y                                                       | 1492.61564 | 2 | 4.13E-05 | 0.70  | 2.91   | -     | 626.1    |
| AHQ-3-3, 2950             | K.YEASILTHDSSIR.Y                                                       | 1492.61564 | 2 | 7.68E-04 | 0.67  | 2.62   | -     | 564.4    |
| AHQ-3-2, 2946 - 2957      | K.YEASILTHDSSIR.Y                                                       | 1492.61564 | 2 | 2.22E-04 | 0.71  | 2.88   | -     | 530.7    |
| AHQ-3-12, 2936            | K.YEASILTHDSSIR.Y                                                       | 1492.61564 | 2 | 3.06E-05 | 0.86  | 3.38   | -     | 534.5    |
| AHQ-3-1, 2840 - 2918      | R.YLQEIYNSNNQK.I                                                        | 1514.62131 | 2 | 1.33E-04 | 0.96  | 4.36   | -     | 1433.6   |
| gj4758012 ref NP_004850.1 | clathrin heavy chain; clathrin, heavy polypeptide-like 2 [Homo sapiens] |            |   | 1.32E-11 | 20.03 | 220.31 | 20.00 | 191612.6 |
| AHQ-3-3, 7452 - 7525      | K.AFM*ADLPNELILLELEK.I                                                  | 1964.26896 | 2 | 2.19E-04 | 0.95  | 5.02   | -     | 743.4    |
| AHQ-3-3, 7568             | K.AFM*ADLPNELILLELEK.I                                                  | 1948.26956 | 2 | 1.32E-11 | 0.95  | 4.92   | -     | 812.0    |
| AHQ-3-3, 4508             | R.ALEHFTLDYDIK.R                                                        | 1465.63179 | 2 | 2.32E-08 | 0.96  | 4.10   | -     | 1123.0   |
| AHQ-3-3, 7620 - 7622      | K.DTELAELLQWFLQEEK.R                                                    | 2122.31678 | 2 | 1.72E-06 | 0.97  | 5.25   | -     | 1561.9   |
| AHQ-3-3, 7564             | R.FQSVPAQPGQTSPLQYFGILLDDGQLNK.Y                                        | 3189.60926 | 3 | 3.61E-06 | 0.91  | 4.48   | -     | 1076.8   |
| AHQ-3-1, 7336 - 7337      | R.FQSVPAQPGQTSPLQYFGILLDDGQLNK.Y                                        | 3189.60926 | 3 | 3.43E-05 | 0.94  | 4.83   | -     | 1542.9   |
| AHQ-3-3, 4969 - 4976      | R.GQFSTDELVAEVEK.R                                                      | 1552.66462 | 2 | 3.16E-07 | 0.95  | 4.28   | -     | 1180.4   |
| AHQ-3-4, 4765             | R.GQFSTDELVAEVEK.R                                                      | 1708.85097 | 2 | 4.82E-10 | 0.94  | 3.83   | -     | 1331.9   |
| AHQ-3-5, 4548             | R.GQFSTDELVAEVEK.R                                                      | 1708.85097 | 2 | 6.63E-07 | 0.91  | 3.59   | -     | 1175.9   |
| AHQ-3-3, 4822             | R.GQFSTDELVAEVEK.R                                                      | 1708.85097 | 2 | 1.26E-07 | 0.77  | 3.28   | -     | 575.1    |
| AHQ-3-3, 1953             | R.IHEGCEEPATHNALAK.I                                                    | 1778.92458 | 2 | 7.49E-04 | 0.91  | 4.13   | -     | 780.8    |
| AHQ-3-3, 3581             | K.IVLDNSVFSQHR.N                                                        | 1416.56400 | 2 | 4.38E-08 | 0.90  | 3.35   | -     | 1061.4   |
| AHQ-3-3, 7284             | R.KFDVNTSAVQVLIHIGNLDR.A                                                | 2369.66218 | 3 | 8.17E-06 | 0.97  | 6.16   | -     | 1361.9   |
| AHQ-3-3, 3512             | R.KFNALFAQGNYSEAAK.V                                                    | 1759.94281 | 2 | 4.40E-07 | 0.97  | 5.54   | -     | 1418.3   |
| AHQ-3-3, 4577 - 4626      | R.LASTLVHLGEYQAAVDGAR.K                                                 | 1972.19103 | 2 | 1.10E-08 | 0.91  | 3.95   | -     | 892.3    |
| AHQ-3-3, 4586             | R.LASTLVHLGEYQAAVDGAR.K                                                 | 1972.19103 | 3 | 3.82E-06 | 0.87  | 4.49   | -     | 809.0    |

|                             |                                                                             |            |   |          |      |       |       |         |
|-----------------------------|-----------------------------------------------------------------------------|------------|---|----------|------|-------|-------|---------|
| AHQ-3-3, 4398               | K.LHIIIEVGTPTTGNQPPFK.K                                                     | 1946.23831 | 2 | 4.86E-04 | 0.68 | 3.38  | -     | 290.4   |
| AHQ-3-3, 3890               | K.LLYNNVSNFGR.L                                                             | 1297.44435 | 2 | 7.71E-05 | 0.79 | 2.75  | -     | 656.5   |
| AHQ-3-3, 7233               | R.LPVVIGGLLDVDCSEVDIK.N                                                     | 2043.36744 | 2 | 5.38E-04 | 0.93 | 3.90  | -     | 1158.3  |
| AHQ-3-3, 6457               | R.LNQLNLLITAIK.A                                                            | 1354.66353 | 2 | 5.71E-07 | 0.97 | 4.85  | -     | 1969.1  |
| AHQ-3-3, 2526               | R.RPISADSAIMNPASK.V                                                         | 1558.78540 | 2 | 6.41E-07 | 0.98 | 5.23  | -     | 1657.4  |
| AHQ-3-4, 7129               | R.RPLIDQVWQIALSETQDPEEVSVTVK.A                                              | 2883.20103 | 2 | 3.59E-04 | 0.84 | 3.84  | -     | 345.0   |
| AHQ-3-3, 7088 - 7097        | R.RPLIDQVWQIALSETQDPEEVSVTVK.A                                              | 2883.20103 | 3 | 7.09E-07 | 0.96 | 6.01  | -     | 1336.1  |
| AHQ-3-3, 7101               | R.RPLIDQVWQIALSETQDPEEVSVTVK.A                                              | 2883.20103 | 2 | 9.82E-05 | 0.94 | 4.85  | -     | 592.1   |
| AHQ-3-4, 7121 - 7134        | R.RPLIDQVWQIALSETQDPEEVSVTVK.A                                              | 2883.20103 | 3 | 1.02E-04 | 0.95 | 5.28  | -     | 1454.0  |
| AHQ-3-4, 5062 - 5112        | R.TSIDAYDNFDNISLAQR.L                                                       | 1944.04818 | 2 | 1.99E-08 | 0.79 | 3.86  | -     | 285.3   |
| AHQ-3-5, 7093               | K.VGYTPDWIFLLR.N                                                            | 1480.73443 | 2 | 3.89E-09 | 0.85 | 3.68  | -     | 509.1   |
| AHQ-3-3, 7230               | K.VGYTPDWIFLLR.N                                                            | 1480.73443 | 2 | 4.93E-11 | 0.77 | 3.12  | -     | 450.2   |
| AHQ-3-3, 3094               | K.VIQCFIETGQVQK.I                                                           | 1509.70940 | 2 | 1.41E-05 | 0.93 | 3.21  | -     | 1889.3  |
| AHQ-3-3, 5018               | K.WLKEDKLECSEELGDLVK.S                                                      | 2193.45974 | 2 | 7.26E-07 | 0.96 | 4.49  | -     | 1579.4  |
| gi 4759082 ref NP_004648.1  | serum deprivation response protein; serum deprivation response; phosphatase |            |   |          |      |       |       |         |
| AHQ-3-9, 6380 - 6384        | R.DNSQVNAVTVLTLDDK.L                                                        | 1730.94122 | 2 | 2.26E-07 | 0.94 | 4.08  | 11.10 | 47172.9 |
| AHQ-3-12, 6291              | R.DNSQVNAVTVLTLDDK.L                                                        | 1730.94122 | 2 | 1.94E-05 | 0.96 | 4.97  | -     | 1372.4  |
| AHQ-3-9, 6155 - 6223        | R.DNSQVNAVTVLTLDDK.L                                                        | 1730.94122 | 2 | 1.47E-05 | 0.98 | 5.32  | -     | 1718.8  |
| AHQ-3-11, 6175 - 6235       | R.DNSQVNAVTVLTLDDK.L                                                        | 1730.94122 | 2 | 7.71E-08 | 0.95 | 4.23  | -     | 1482.0  |
| AHQ-3-11, 6086 - 6090       | R.DNSQVNAVTVLTLDDK.L                                                        | 1730.94122 | 2 | 7.56E-11 | 0.95 | 4.69  | -     | 1224.0  |
| AHQ-3-10, 5888              | R.DNSQVNAVTVLTLDDK.L                                                        | 1730.94122 | 2 | 5.13E-04 | 0.94 | 3.97  | -     | 1148.7  |
| AHQ-3-12, 3494              | K.LVNMLDAVQENQHK.M                                                          | 1639.85851 | 2 | 3.67E-05 | 0.90 | 4.08  | -     | 807.9   |
| AHQ-3-13, 3514              | K.LVNMLDAVQENQHK.M                                                          | 1639.85851 | 2 | 7.12E-06 | 0.94 | 4.24  | -     | 1110.5  |
| AHQ-3-13, 3502              | K.LVNMLDAVQENQHK.M                                                          | 1639.85851 | 2 | 2.53E-08 | 0.94 | 4.39  | -     | 1044.0  |
| AHQ-3-10, 5626              | K.VLIFQEENEIPASVVFVK.Q                                                      | 1963.26241 | 2 | 2.23E-04 | 0.96 | 4.75  | -     | 1211.6  |
| AHQ-3-11, 5828 - 5894       | K.VLIFQEENEIPASVVFVK.Q                                                      | 1963.26241 | 2 | 2.35E-05 | 0.93 | 4.40  | -     | 741.2   |
| AHQ-3-9, 6063 - 6143        | K.VLIFQEENEIPASVVFVK.Q                                                      | 1963.26241 | 2 | 1.37E-11 | 0.96 | 5.10  | -     | 1049.9  |
| AHQ-3-9, 5979 - 6052        | K.VLIFQEENEIPASVVFVK.Q                                                      | 1963.26241 | 2 | 2.75E-09 | 0.95 | 4.83  | -     | 1021.0  |
| AHQ-3-9, 5805 - 5879        | K.VLIFQEENEIPASVVFVK.Q                                                      | 1963.26241 | 2 | 7.30E-10 | 0.95 | 5.01  | -     | 855.3   |
| AHQ-3-12, 6054 - 6059       | K.VLIFQEENEIPASVVFVK.Q                                                      | 1963.26241 | 2 | 2.54E-05 | 0.96 | 5.20  | -     | 915.4   |
| AHQ-3-8, 5983               | K.VLIFQEENEIPASVVFVK.Q                                                      | 1963.26241 | 2 | 3.58E-06 | 0.91 | 4.30  | -     | 873.4   |
| AHQ-3-7, 6100 - 6123        | K.VLIFQEENEIPASVVFVK.Q                                                      | 1963.26241 | 2 | 8.25E-05 | 0.94 | 4.21  | -     | 1174.6  |
| AHQ-3-3, 6521               | K.VLIFQEENEIPASVVFVK.Q                                                      | 1963.26241 | 2 | 2.03E-04 | 0.93 | 4.36  | -     | 845.0   |
| AHQ-3-13, 6097              | K.VLIFQEENEIPASVVFVK.Q                                                      | 1963.26241 | 2 | 1.58E-04 | 0.96 | 5.12  | -     | 984.2   |
| AHQ-3-14, 6016              | K.VLIFQEENEIPASVVFVK.Q                                                      | 1963.26241 | 2 | 4.53E-04 | 0.92 | 3.83  | -     | 954.5   |
| gi 10863927 ref NP_066953.1 | peptidylprolyl isomerase A (cyclophilin A) [Homo sapiens]                   |            |   |          |      |       |       |         |
| AHQ-3-12, 4132              | K.FEDENFILK.H                                                               | 1155.28144 | 1 | 8.11E-05 | 0.70 | 2.89  | -     | 944.1   |
| AHQ-3-13, 3981              | K.FEDENFILK.H                                                               | 1155.28144 | 2 | 6.40E-04 | 0.76 | 3.30  | -     | 555.7   |
| AHQ-3-12, 3447 - 3524       | K.KITIADCGQLE                                                               | 1249.41637 | 2 | 9.52E-04 | 0.77 | 3.18  | -     | 942.5   |
| AHQ-3-12, 3279 - 3362       | K.KITIADCGQLE                                                               | 1249.41637 | 2 | 7.36E-07 | 0.87 | 4.11  | -     | 923.4   |
| AHQ-3-14, 5860 - 5883       | K.SIYGKFEFEDENFILK.H                                                        | 1833.03047 | 2 | 1.06E-07 | 0.87 | 3.77  | -     | 852.6   |
| AHQ-3-13, 4626              | K.SIYGKFEFEDENFILK.H                                                        | 1833.03047 | 2 | 4.71E-09 | 0.96 | 4.92  | -     | 1181.0  |
| AHQ-3-12, 4723              | K.SIYGKFEFEDENFILK.H                                                        | 1833.03047 | 2 | 4.57E-08 | 0.63 | 2.68  | -     | 694.4   |
| AHQ-3-14, 4648 - 4657       | K.SIYGKFEFEDENFILK.H                                                        | 1833.03047 | 2 | 1.50E-11 | 0.97 | 5.61  | -     | 1242.9  |
| AHQ-3-12, 4831 - 4894       | K.SIYGKFEFEDENFILK.H                                                        | 1833.03047 | 2 | 5.06E-08 | 0.87 | 3.86  | -     | 754.4   |
| AHQ-3-12, 4604 - 4670       | K.SIYGKFEFEDENFILK.H                                                        | 1833.03047 | 2 | 2.59E-06 | 0.95 | 5.02  | -     | 1041.4  |
| AHQ-3-12, 2426              | K.VKEGMNIVEAM*ER.F                                                          | 1522.77330 | 3 | 2.47E-04 | 0.86 | 3.98  | -     | 1288.9  |
| AHQ-3-12, 2850 - 2922       | K.VKEGMNIVEAMER.F                                                           | 1522.77330 | 2 | 8.13E-04 | 0.57 | 2.61  | -     | 504.6   |
| AHQ-3-12, 4464 - 4544       | R.VSFFELFADK.V                                                              | 1056.19300 | 1 | 9.33E-04 | 0.77 | 2.99  | -     | 735.7   |
| AHQ-3-12, 4459              | R.VSFFELFADK.V                                                              | 1056.19300 | 2 | 4.11E-06 | 0.88 | 3.54  | -     | 1002.9  |
| AHQ-3-12, 4372              | R.VSFFELFADK.V                                                              | 1056.19300 | 1 | 2.12E-05 | 0.70 | 2.86  | -     | 685.8   |
| AHQ-3-12, 4370 - 4371       | R.VSFFELFADK.V                                                              | 1056.19300 | 2 | 7.52E-06 | 0.95 | 3.42  | -     | 1052.9  |
| AHQ-3-13, 4410              | R.VSFFELFADK.V                                                              | 1056.19300 | 2 | 8.65E-05 | 0.84 | 3.24  | -     | 769.7   |
| AHQ-3-12, 4295              | R.VSFFELFADKVPK.T                                                           | 1380.61317 | 2 | 1.70E-04 | 0.90 | 3.77  | -     | 993.2   |
| AHQ-3-12, 4502 - 4578       | R.VSFFELFADKVPK.T                                                           | 1380.61317 | 2 | 8.15E-06 | 0.91 | 3.75  | -     | 983.4   |
| AHQ-3-12, 4520              | R.VSFFELFADKVPK.T                                                           | 1380.61317 | 3 | 4.51E-06 | 0.50 | 3.15  | -     | 343.0   |
| gi 10834976 ref NP_000572.1 | glutathione peroxidase 1 [Homo sapiens]                                     |            |   |          |      |       |       |         |
| AHQ-3-11, 5282              | K.CEVNGAGAHPLFAFLR.E                                                        | 1760.99723 | 2 | 1.60E-11 | 5.38 | 60.24 | 43.30 | 21909.0 |
| AHQ-3-11, 5191 - 5204       | K.CEVNGAGAHPLFAFLR.E                                                        | 1760.99723 | 2 | 3.96E-10 | 0.90 | 4.35  | -     | 554.1   |
| AHQ-3-11, 2714 - 2776       | R.DYTGQMNELQR.R                                                             | 1298.40778 | 2 | 1.54E-04 | 0.81 | 2.61  | -     | 902.3   |
| AHQ-3-11, 3935              | K.FLVGPDGVPLR.L                                                             | 1170.38561 | 2 | 4.91E-05 | 0.89 | 2.94  | -     | 1231.5  |
| AHQ-3-11, 4802 - 4811       | R.GLVVLGFPCNQGFHQENAK.N                                                     | 2117.37312 | 2 | 2.30E-04 | 0.89 | 4.76  | -     | 306.6   |
| AHQ-3-14, 3836              | R.PLAGGEPVSLGSLR.G                                                          | 1353.54935 | 2 | 5.80E-06 | 0.96 | 4.09  | -     | 1340.6  |
| AHQ-3-11, 3692 - 3699       | R.PLAGGEPVSLGSLR.G                                                          | 1353.54935 | 2 | 1.77E-07 | 0.94 | 4.13  | -     | 979.2   |
| AHQ-3-11, 5071              | K.YVRPGGGFEPNMLFEK.C                                                        | 1989.28515 | 3 | 1.68E-07 | 0.89 | 3.97  | -     | 975.9   |
| gi 5729997 ref NP_004154.2  | RAB27B, member RAS oncogene family [Homo sapiens]                           |            |   |          |      |       |       |         |
| AHQ-3-11, 5544              | K.AVETLLDLIM*K.R                                                            | 1262.54151 | 2 | 8.25E-06 | 0.94 | 4.53  | -     | 788.0   |
| AHQ-3-10, 5272              | K.AVETLLDLIM*K.R                                                            | 1262.54151 | 2 | 5.87E-06 | 0.85 | 3.28  | -     | 664.0   |
| AHQ-3-11, 6456              | K.AVETLLDLIMK.R                                                             | 1246.54211 | 2 | 4.24E-08 | 0.94 | 3.68  | -     | 1194.7  |
| AHQ-3-10, 6227              | K.AVETLLDLIMK.R                                                             | 1246.54211 | 2 | 7.09E-08 | 0.92 | 3.80  | -     | 886.5   |
| AHQ-3-10, 4854              | K.AVETLLDLIM*K.R.M                                                          | 1418.72786 | 2 | 1.50E-05 | 0.40 | 2.58  | -     | 394.6   |
| AHQ-3-11, 2874              | K.LLALGDSGVGK.T                                                             | 1030.20023 | 1 | 8.96E-04 | 0.29 | 1.91  | -     | 476.1   |
| AHQ-3-13, 3030              | K.LLALGDSGVGK.T                                                             | 1030.20023 | 1 | 6.14E-07 | 0.31 | 2.09  | -     | 414.3   |
| AHQ-3-10, 5810              | R.NWMSQLQANAYCENPDIVLIGNK.A                                                 | 2680.99772 | 2 | 7.05E-07 | 0.81 | 3.77  | -     | 469.1   |
| AHQ-3-11, 6180              | R.NWMSQLQANAYCENPDIVLIGNK.A                                                 | 2680.99772 | 2 | 1.71E-04 | 0.87 | 3.98  | -     | 638.2   |
| AHQ-3-10, 5274              | R.NWMSQLQANAYCENPDIVLIGNK.A                                                 | 2696.99712 | 2 | 7.17E-04 | 0.42 | 2.54  | -     | 531.8   |
| AHQ-3-10, 5931 - 5995       | R.NWMSQLQANAYCENPDIVLIGNK.A                                                 | 2680.99772 | 2 | 2.29E-04 | 0.72 | 3.02  | -     | 612.7   |
| AHQ-3-10, 4162 - 4166       | K.YGIPYFETSAATGQNVK.A                                                       | 1976.13177 | 2 | 1.61E-11 | 0.96 | 4.74  | -     | 1096.1  |
| AHQ-3-12, 4488 - 4559       | K.YGIPYFETSAATGQNVK.A                                                       | 1976.13177 | 2 | 4.36E-05 | 0.45 | 2.90  | -     | 325.1   |
| gi 4758606 ref NP_004508.1  | integrin-linked kinase [Homo sapiens]                                       |            |   |          |      |       |       |         |
| AHQ-3-7, 4704               | R.EVFPFADLSNM*EIGMK.V                                                       | 1697.95498 | 2 | 6.80E-05 | 0.92 | 5.21  | 12.77 | 51418.9 |
| AHQ-3-7, 4178               | R.EVFPFADLSNM*EIGMK*V                                                       | 1713.95438 | 2 | 5.15E-04 | 0.74 | 3.09  | -     | 517.5   |
| AHQ-3-10, 5240              | R.EVFPFADLSNMEIGMK.V                                                        | 1681.95558 | 2 | 7.22E-04 | 0.59 | 3.28  | -     | 523.0   |
| AHQ-3-7, 5107 - 5116        | R.EVFPFADLSNMEIGMK*V                                                        | 1697.95498 | 2 | 4.61E-06 | 0.91 | 4.01  | -     | 402.0   |
| AHQ-3-7, 5442 - 5454        | K.FDMIVPILEK.M                                                              | 1205.49168 | 2 | 5.53E-06 | 0.87 | 3.24  | -     | 763.5   |
| AHQ-3-7, 1631 - 1659        | R.GDDTPLLHLAASHGHR.D                                                        | 1584.67809 | 2 | 1.37E-08 | 0.87 | 3.42  | -     | 947.3   |
| AHQ-3-13, 2186              | R.GDDTPLLHLAASHGHR.D                                                        | 1584.67809 | 2 | 1.65E-04 | 0.86 | 2.60  | -     | 1349.6  |
| AHQ-3-7, 1648               | R.GDDTPLLHLAASHGHR.D                                                        | 1584.67809 | 3 | 1.16E-04 | 0.78 | 3.54  | -     | 711.4   |
| AHQ-3-11, 4904              | R.GM*AFHLTLEPLIPR.H                                                         | 1611.93301 | 2 | 1.78E-04 | 0.91 | 3.38  | -     | 1048.1  |
| AHQ-3-10, 4644              | R.GM*AFHLTLEPLIPR.H                                                         | 1611.93301 | 2 | 4.47E-05 | 0.88 | 3.35  | -     | 838.1   |
| AHQ-3-9, 5401               | R.GMAFLHTLEPLIPR.H                                                          | 1595.93361 | 2 | 2.53E-10 | 0.97 | 4.66  | -     | 1621.3  |
| AHQ-3-7, 4752 - 4831        | R.GM*AFHLTLEPLIPR.H                                                         | 1611.93301 | 2 | 3.02E-05 | 0.77 | 2.76  | -     | 637.9   |
| AHQ-3-7, 4768               | R.GM*AFHLTLEPLIPR.H                                                         | 1611.93301 | 3 | 1.79E-07 | 0.91 | 3.99  | -     | 1128.5  |
| AHQ-3-7, 5671               | R.GMAFLHTLEPLIPR.H                                                          | 1595.93361 | 3 | 9.95E-06 | 0.90 | 3.90  | -     | 1255.5  |
| AHQ-3-7, 5599 - 5667        | R.GMAFLHTLEPLIPR.H                                                          | 1595.93361 | 2 | 1.74E-06 | 0.95 | 4.12  | -     | 1363.2  |
| AHQ-3-7, 1944 - 1959        | K.LNENHSGELWK.G                                                             | 1327.42732 | 2 | 6.68E-05 | 0.83 | 3.17  | -     | 828.3   |
| AHQ-3-7, 2184               | K.LNENHSGELWK.G                                                             | 1327.42732 | 2 | 3.98E-05 | 0.90 | 3.58  | -     | 973.7   |
| AHQ-3-7, 6102               | R.LWLDNTENDLNQGGDDHGFSPHLWACR.E                                             | 3113.28217 | 3 | 8.41E-09 | 0.94 | 4.79  | -     | 1182.9  |
| AHQ-3-7, 6004               | R.LWLDNTENDLNQGGDDHGFSPHLWACR.E                                             | 3113.28217 | 3 | 1.28E-06 | 0.93 | 4.62  | -     | 1085.0  |
| AHQ-3-8, 4258               | R.MYAPAWVAPEALQK.K                                                          | 1575.85602 | 2 | 1.82E-07 | 0.92 | 3.50  | -     | 959.3   |
| AHQ-3-13, 4230              | R.M*YAPAWVAPEALQK.K                                                         | 1591.85542 | 2 | 9.92E-06 | 0.90 | 3.68  | -     | 631.2   |
| AHQ-3-7, 4480               | R.MYAPAWVAPEALQK.K                                                          | 1575.85602 | 2 | 2.56E-05 | 0.84 | 2.77  | -     | 812.8   |
| AHQ-3-13, 4233              | R.M*YAPAWVAPEALQK.K                                                         | 1591.85542 | 2 | 8.82E-09 | 0.93 | 3.58  | -     | 881.3   |
| AHQ-3-7, 4054 - 4078        | R.M*YAPAWVAPEALQK.K                                                         | 1591.85542 | 2 | 7.87E-08 | 0.95 | 4.66  | -     | 750.7   |
| AHQ-3-11, 4530              | R.MYAPAWVAPEALQK.K                                                          | 1575.85602 | 2 | 9.14E-07 | 0.96 | 3.95  | -     | 1310.6  |
| AHQ-3-7, 4440 - 4444        | R.SAVVEMLIMR.G                                                              | 1149.45316 | 2 | 3.60E-07 | 0.91 | 3.38  | -     | 1213.9  |
| AHQ-3-7, 4254 - 4263        | K.VALEGLRPTIPPGISPHVCK.L                                                    | 2143.53829 | 3 | 1.64E-11 | 0.96 | 5.77  | -     | 905.3   |

|                             |                                                                         |            |   |          |       |        |       |         |
|-----------------------------|-------------------------------------------------------------------------|------------|---|----------|-------|--------|-------|---------|
| AHQ-3-7, 4346               | K.VALEGLRPTIPPGISPHVCK.L                                                | 2143.53829 | 2 | 7.48E-04 | 0.89  | 4.39   | -     | 959.4   |
| AHQ-3-7, 2698               | R.WQGNDIVKV.V                                                           | 1059.20012 | 1 | 2.11E-04 | 0.43  | 2.02   | -     | 625.1   |
| gi 5031635 ref NP_005498.1  | cofilin 1 (non-muscle) [Homo sapiens]                                   |            |   | 1.85E-11 | 12.24 | 130.39 | 63.90 | 18502.4 |
| AHQ-3-12, 3320 - 3386       | K.AVFLCISEDKK.N                                                         | 1311.52930 | 2 | 4.42E-07 | 0.88  | 3.83   | -     | 799.1   |
| AHQ-3-13, 3465              | K.AVFLCISEDKK.N                                                         | 1311.52930 | 2 | 9.70E-07 | 0.87  | 3.26   | -     | 816.8   |
| AHQ-3-12, 3344 - 3414       | K.AVFLCISEDKK.N                                                         | 1311.52930 | 2 | 3.27E-06 | 0.79  | 2.73   | -     | 845.5   |
| AHQ-3-12, 6908              | K.EDLVFIFWAPESAPLK.S                                                    | 1863.14454 | 2 | 3.19E-05 | 0.95  | 4.10   | -     | 1229.4  |
| AHQ-3-12, 5642 - 5706       | K.EILVGDVGQTVDDPYATFVK.M                                                | 2167.40069 | 2 | 1.89E-06 | 0.97  | 5.29   | -     | 1751.1  |
| AHQ-3-11, 5484 - 5499       | K.EILVGDVGQTVDDPYATFVK.M                                                | 2167.40069 | 2 | 2.35E-07 | 0.97  | 4.96   | -     | 1675.9  |
| AHQ-3-13, 5651 - 5681       | K.EILVGDVGQTVDDPYATFVK.M                                                | 2167.40069 | 2 | 4.25E-05 | 0.96  | 5.16   | -     | 1168.0  |
| AHQ-3-14-, 5621             | K.EILVGDVGQTVDDPYATFVK.M                                                | 2167.40069 | 2 | 3.93E-07 | 0.97  | 5.56   | -     | 1462.9  |
| AHQ-3-12, 5858 - 5888       | K.EILVGDVGQTVDDPYATFVK.M                                                | 2167.40069 | 2 | 3.45E-04 | 0.82  | 3.24   | -     | 374.5   |
| AHQ-3-12, 5403              | K.EILVGDVGQTVDDPYATFVK.M                                                | 2167.40069 | 2 | 4.95E-07 | 0.97  | 4.83   | -     | 1433.8  |
| AHQ-3-12, 5514 - 5574       | K.EILVGDVGQTVDDPYATFVK.M                                                | 2167.40069 | 2 | 3.29E-04 | 0.96  | 5.27   | -     | 1012.8  |
| AHQ-3-13-, 5618             | K.EILVGDVGQTVDDPYATFVK.M                                                | 2167.40069 | 2 | 2.79E-06 | 0.97  | 5.90   | -     | 1159.0  |
| AHQ-3-14, 6495 - 6576       | K.EILVGDVGQTVDDPYATFVK.M                                                | 2167.40069 | 2 | 1.29E-10 | 0.97  | 5.35   | -     | 1340.8  |
| AHQ-3-12, 5730 - 5799       | K.EILVGDVGQTVDDPYATFVK.M                                                | 2167.40069 | 2 | 1.40E-10 | 0.98  | 5.64   | -     | 1488.7  |
| AHQ-3-12, 6014              | K.ESKKEDLVIFWAPESAPLK.S                                                 | 2335.68256 | 2 | 6.06E-07 | 0.87  | 3.27   | -     | 961.2   |
| AHQ-3-12, 2374              | K.HELQANCYEEVKDR.C                                                      | 1792.90812 | 3 | 1.56E-10 | 0.98  | 5.82   | -     | 2089.2  |
| AHQ-3-12, 2294 - 2323       | K.HELQANCYEEVKDR.C                                                      | 1792.90812 | 2 | 4.86E-04 | 0.90  | 3.47   | -     | 713.7   |
| AHQ-3-13-, 2455 - 2519      | K.HELQANCYEEVKDR.C                                                      | 1792.90812 | 3 | 3.61E-05 | 0.95  | 4.61   | -     | 1575.5  |
| AHQ-3-12, 2526 - 2530       | K.HELQANCYEEVKDR.C                                                      | 1792.90812 | 2 | 1.65E-04 | 0.96  | 4.00   | -     | 1271.5  |
| AHQ-3-12, 2455 - 2527       | K.HELQANCYEEVKDR.C                                                      | 1792.90812 | 3 | 8.21E-10 | 0.98  | 5.58   | -     | 2033.2  |
| AHQ-3-12, 2390 - 2458       | K.HELQANCYEEVKDR.C                                                      | 1792.90812 | 2 | 4.20E-07 | 0.98  | 5.37   | -     | 1972.2  |
| AHQ-3-12, 2838 - 2839       | K.KAVLFCLESDKK.N                                                        | 1439.70221 | 2 | 1.05E-06 | 0.94  | 4.43   | -     | 982.4   |
| AHQ-3-12, 2840              | K.KAVLFCLESDKK.N                                                        | 1439.70221 | 3 | 4.09E-05 | 0.95  | 4.63   | -     | 1462.5  |
| AHQ-3-12, 6368 - 6434       | K.KEDLVFIFWAPESAPLK.S                                                   | 1991.31745 | 2 | 4.81E-06 | 0.98  | 6.17   | -     | 1480.7  |
| AHQ-3-12, 6383 - 6452       | K.KEDLVFIFWAPESAPLK.S                                                   | 1991.31745 | 3 | 7.22E-06 | 0.96  | 5.16   | -     | 1203.1  |
| AHQ-3-13, 6451 - 6466       | K.KEDLVFIFWAPESAPLK.S                                                   | 1991.31745 | 2 | 3.41E-05 | 0.95  | 4.74   | -     | 1047.7  |
| AHQ-3-13, 6470              | K.KEDLVFIFWAPESAPLK.S                                                   | 1991.31745 | 3 | 2.35E-08 | 0.88  | 4.20   | -     | 790.6   |
| AHQ-3-14-, 6385             | K.KEDLVFIFWAPESAPLK.S                                                   | 1991.31745 | 2 | 9.63E-07 | 0.96  | 4.39   | -     | 1275.6  |
| AHQ-3-11, 6131 - 6195       | K.KEDLVFIFWAPESAPLK.S                                                   | 1991.31745 | 2 | 3.21E-07 | 0.98  | 5.65   | -     | 1553.8  |
| AHQ-3-12, 6471 - 6532       | K.KEDLVFIFWAPESAPLK.S                                                   | 1991.31745 | 2 | 1.68E-08 | 0.97  | 5.34   | -     | 1566.2  |
| AHQ-3-12, 5716 - 5796       | K.KEDLVFIFWAPESAPLK.S.M                                                 | 2206.56802 | 2 | 6.99E-06 | 0.96  | 5.35   | -     | 1056.0  |
| AHQ-3-12, 5127              | K.LGGSVAVILEGKPL                                                        | 1341.57848 | 2 | 8.50E-04 | 0.91  | 3.35   | -     | 1109.0  |
| AHQ-3-12, 4899 - 4966       | K.LGGSVAVILEGKPL                                                        | 1341.57848 | 2 | 2.36E-07 | 0.94  | 3.69   | -     | 1216.6  |
| AHQ-3-12, 4642 - 4710       | K.LGGSVAVILEGKPL                                                        | 1341.57848 | 2 | 6.40E-07 | 0.94  | 4.31   | -     | 1061.4  |
| AHQ-3-12, 4508 - 4575       | K.LGGSVAVILEGKPL                                                        | 1341.57848 | 2 | 7.22E-09 | 0.97  | 5.06   | -     | 1196.5  |
| AHQ-3-12, 4423 - 4554       | K.LGGSVAVILEGKPL                                                        | 1341.57848 | 1 | 2.11E-05 | 0.52  | 2.99   | -     | 304.9   |
| AHQ-3-13-, 4373             | K.LGGSVAVILEGKPL                                                        | 1341.57848 | 2 | 1.42E-04 | 0.87  | 3.81   | -     | 698.5   |
| AHQ-3-12, 4007 - 4028       | K.LGGSVAVILEGKPL                                                        | 1341.57848 | 2 | 3.30E-08 | 0.96  | 3.91   | -     | 1878.3  |
| AHQ-3-12, 4420 - 4486       | K.LGGSVAVILEGKPL                                                        | 1341.57848 | 2 | 1.91E-05 | 0.96  | 4.58   | -     | 1201.9  |
| AHQ-3-12, 4331 - 4402       | K.LGGSVAVILEGKPL                                                        | 1341.57848 | 2 | 1.62E-05 | 0.96  | 4.45   | -     | 1522.1  |
| AHQ-3-12, 4336              | K.LGGSVAVILEGKPL                                                        | 1341.57848 | 1 | 3.42E-04 | 0.10  | 2.30   | -     | 249.5   |
| AHQ-3-12, 2962              | K.LTGKHELQANCYEEVKDR.C                                                  | 2305.55341 | 2 | 3.56E-09 | 0.97  | 5.44   | -     | 1179.3  |
| AHQ-3-12, 6966              | K.NIILEEGKILVGDVGQTVDDPYATFVK.M                                         | 3064.43208 | 3 | 2.91E-04 | 0.94  | 5.13   | -     | 1893.0  |
| AHQ-3-12, 6806 - 6887       | K.NIILEEGKILVGDVGQTVDDPYATFVK.M                                         | 3064.43208 | 3 | 3.05E-10 | 0.98  | 7.35   | -     | 1816.1  |
| AHQ-3-12, 6680 - 6744       | K.NIILEEGKILVGDVGQTVDDPYATFVK.M                                         | 3064.43208 | 3 | 3.77E-10 | 0.97  | 7.04   | -     | 1537.6  |
| AHQ-3-13, 6725              | K.NIILEEGKILVGDVGQTVDDPYATFVK.M                                         | 3064.43208 | 3 | 3.95E-07 | 0.98  | 7.35   | -     | 1857.9  |
| AHQ-3-13-, 6681 - 6682      | K.NIILEEGKILVGDVGQTVDDPYATFVK.M                                         | 3064.43208 | 3 | 1.85E-11 | 0.98  | 7.70   | -     | 1929.9  |
| AHQ-3-13-, 3247             | R.YALYDATYETK.E                                                         | 1338.44364 | 2 | 1.13E-06 | 0.95  | 3.86   | -     | 1204.9  |
| AHQ-3-13-, 3255             | R.YALYDATYETK.E                                                         | 1338.44364 | 1 | 3.51E-07 | 0.45  | 2.82   | -     | 315.4   |
| AHQ-3-12, 3272 - 3338       | R.YALYDATYETK.E                                                         | 1338.44364 | 2 | 2.47E-04 | 0.80  | 2.90   | -     | 704.3   |
| AHQ-3-12, 3158 - 3184       | R.YALYDATYETK.E                                                         | 1338.44364 | 2 | 4.84E-09 | 0.91  | 3.54   | -     | 827.7   |
| AHQ-3-12, 3116 - 3174       | R.YALYDATYETK.E                                                         | 1338.44364 | 1 | 4.77E-08 | 0.58  | 2.85   | -     | 340.0   |
| AHQ-3-13, 3265              | R.YALYDATYETK.E                                                         | 1338.44364 | 1 | 4.24E-04 | 0.59  | 2.90   | -     | 319.6   |
| AHQ-3-11, 3075 - 3092       | R.YALYDATYETK.E                                                         | 1338.44364 | 2 | 1.70E-06 | 0.85  | 3.09   | -     | 679.4   |
| AHQ-3-12, 2794              | R.YALYDATYETKESK.K                                                      | 1682.80875 | 2 | 5.39E-06 | 0.91  | 3.55   | -     | 918.7   |
| gi 4757900 ref NP_004334.1  | calreticulin precursor; Sicca syndrome antigen A (autoantigen Ro; calre |            |   | 1.88E-11 | 6.42  | 80.28  | 28.50 | 48141.1 |
| AHQ-3-7, 5890               | R.CKDDEFTHLYLIVRPDNTYEVK.I                                              | 2859.15977 | 3 | 4.38E-06 | 0.92  | 4.33   | -     | 1165.2  |
| AHQ-3-7, 5743               | R.CKDDEFTHLYLIVRPDNTYEVK.I                                              | 2859.15977 | 3 | 3.87E-08 | 0.96  | 5.50   | -     | 1322.0  |
| AHQ-3-7, 3786               | K.EQFLDGDGWTSR.W                                                        | 1411.45795 | 1 | 6.86E-04 | 0.20  | 1.85   | -     | 202.1   |
| AHQ-3-7, 5362 - 5434        | R.FYALSASFEPFSNK.G                                                      | 1608.77470 | 2 | 1.88E-11 | 0.97  | 4.88   | -     | 1656.1  |
| AHQ-3-14, 6399              | R.FYALSASFEPFSNK.G                                                      | 1608.77470 | 2 | 1.79E-10 | 0.92  | 3.36   | -     | 1156.2  |
| AHQ-3-7, 5052 - 5059        | K.IDNSQVESGSLDDWDFLPPKK.I                                               | 2520.68965 | 3 | 2.21E-09 | 0.91  | 4.21   | -     | 801.3   |
| AHQ-3-7, 2227               | K.IKDPDASKPEDWDER.A                                                     | 1801.89173 | 2 | 2.13E-07 | 0.90  | 3.95   | -     | 754.9   |
| AHQ-3-7, 5387               | K.KPEDWDEEMDGWEPPIQNPYK.G                                               | 2962.14926 | 3 | 2.12E-04 | 0.83  | 4.11   | -     | 528.6   |
| AHQ-3-7, 1934               | K.KVHVIFNYK.G                                                           | 1148.38164 | 1 | 1.86E-06 | 0.82  | 2.92   | -     | 596.7   |
| AHQ-3-7, 2344               | K.VHVIFNYK.G                                                            | 1020.20872 | 1 | 1.67E-06 | 0.83  | 2.81   | -     | 689.5   |
| gi 4504349 ref NP_000509.1  | beta globin [Homo sapiens]                                              |            |   | 1.94E-11 | 7.20  | 80.27  | 66.70 | 15998.3 |
| AHQ-3-14, 6493              | R.FFESFGDLSTPDVAVMGNPK.V                                                | 2060.27218 | 2 | 1.07E-07 | 0.94  | 4.42   | -     | 931.5   |
| AHQ-3-14-, 4995             | R.FFESFGDLSTPDVAVMGNPK.V                                                | 2076.27158 | 2 | 1.23E-04 | 0.73  | 3.49   | -     | 394.3   |
| AHQ-3-13-, 5571 - 5577      | R.FFESFGDLSTPDVAVMGNPK.V                                                | 2060.27218 | 2 | 5.15E-08 | 0.97  | 5.34   | -     | 990.1   |
| AHQ-3-13-, 5021 - 5091      | R.FFESFGDLSTPDVAVMGNPK.V                                                | 2076.27158 | 2 | 6.71E-08 | 0.93  | 4.64   | -     | 606.7   |
| AHQ-3-14-, 5576             | R.FFESFGDLSTPDVAVMGNPK.V                                                | 2060.27218 | 2 | 8.37E-08 | 0.96  | 4.51   | -     | 1210.1  |
| AHQ-3-14, 6015 - 6081       | R.FFESFGDLSTPDVAVMGNPK.V                                                | 2076.27158 | 2 | 4.97E-06 | 0.91  | 4.23   | -     | 748.6   |
| AHQ-3-13, 4967 - 5042       | R.FFESFGDLSTPDVAVMGNPK.V                                                | 2076.27158 | 2 | 6.50E-05 | 0.81  | 3.53   | -     | 436.8   |
| AHQ-3-13, 5578 - 5646       | R.FFESFGDLSTPDVAVMGNPK.V                                                | 2060.27218 | 2 | 4.00E-07 | 0.95  | 4.97   | -     | 781.3   |
| AHQ-3-13, 5051              | R.FFESFGDLSTPDVAVMGNPK.V                                                | 2076.27158 | 2 | 5.82E-06 | 0.92  | 4.39   | -     | 586.5   |
| AHQ-3-13, 5055              | R.FFESFGDLSTPDVAVMGNPK.V                                                | 2076.27158 | 3 | 4.39E-05 | 0.95  | 4.11   | -     | 1771.6  |
| AHQ-3-13-, 3478             | K.GTFATLSELHCDKL.L                                                      | 1480.62492 | 2 | 3.71E-09 | 0.74  | 3.19   | -     | 451.4   |
| AHQ-3-13, 3485 - 3487       | K.GTFATLSELHCDKL.L                                                      | 1480.62492 | 2 | 3.54E-07 | 0.91  | 4.36   | -     | 668.6   |
| AHQ-3-13, 5014 - 5021       | K.GTFATLSELHCDKLHVDPENFR.L                                              | 2588.83687 | 3 | 5.85E-11 | 0.95  | 4.77   | -     | 1262.3  |
| AHQ-3-13-, 5006             | K.GTFATLSELHCDKLHVDPENFR.L                                              | 2588.83687 | 3 | 9.45E-08 | 0.94  | 4.56   | -     | 1451.0  |
| AHQ-3-13-, 6583             | R.LLGNVLVCLVHHFGK.E                                                     | 1779.14197 | 3 | 3.24E-05 | 0.73  | 3.07   | -     | 630.7   |
| AHQ-3-14-, 5097             | K.VLGAFSDGLAHLNDLK.G                                                    | 1670.89071 | 2 | 4.01E-10 | 0.96  | 4.79   | -     | 1573.5  |
| AHQ-3-13, 4919 - 4954       | K.VLGAFSDGLAHLNDLK.G                                                    | 1670.89071 | 2 | 6.96E-09 | 0.94  | 4.23   | -     | 1195.3  |
| AHQ-3-13-, 4957             | K.VLGAFSDGLAHLNDLK.G                                                    | 1670.89071 | 2 | 9.20E-09 | 0.97  | 5.30   | -     | 1566.8  |
| AHQ-3-13, 5113              | K.VLGAFSDGLAHLNDLK.G                                                    | 1670.89071 | 2 | 1.94E-11 | 0.96  | 4.70   | -     | 1300.4  |
| AHQ-3-13-, 5117             | K.VLGAFSDGLAHLNDLK.G                                                    | 1670.89071 | 2 | 4.79E-11 | 0.98  | 5.42   | -     | 2100.8  |
| AHQ-3-13, 3249 - 3251       | K.VNVDEVGGALGR.L                                                        | 1315.41484 | 1 | 8.78E-04 | 0.21  | 2.20   | -     | 255.9   |
| AHQ-3-13-, 3237             | K.VNVDEVGGALGR.L                                                        | 1315.41484 | 2 | 1.68E-05 | 0.97  | 5.11   | -     | 1533.7  |
| AHQ-3-13, 3250              | K.VNVDEVGGALGR.L                                                        | 1315.41484 | 2 | 5.48E-04 | 0.96  | 4.44   | -     | 1730.3  |
| AHQ-3-13-, 2162             | K.VVAGVANALAHK.Y                                                        | 1150.35593 | 2 | 5.23E-08 | 0.96  | 3.85   | -     | 1776.8  |
| AHQ-3-13, 2223              | K.VVAGVANALAHK.Y                                                        | 1150.35593 | 2 | 2.63E-04 | 0.95  | 3.95   | -     | 1442.9  |
| AHQ-3-13, 2691              | K.VVAGVANALAHK.Y                                                        | 1150.35593 | 2 | 1.07E-04 | 0.93  | 3.57   | -     | 1281.2  |
| gi 30159830 ref XP_302246.1 | similar to HSPC280 [Homo sapiens]                                       |            |   | 1.96E-11 | 1.92  | 20.27  | 3.90  | 45644.4 |
| AHQ-3-14-, 6783             | K.CANLFEALVGTLLK.A                                                      | 1437.68632 | 2 | 5.77E-08 | 0.97  | 5.50   | -     | 1372.6  |
| AHQ-3-14-, 6721 - 6727      | R.DDKCANLFEALVGTLLK.A                                                   | 1796.03496 | 2 | 6.01E-11 | 0.97  | 5.13   | -     | 1489.2  |
| AHQ-3-13, 6862              | R.DDKCANLFEALVGTLLK.A                                                   | 1796.03496 | 2 | 1.96E-11 | 0.94  | 4.32   | -     | 1072.2  |
| gi 4505981 ref NP_002695.1  | pro-platelet basic protein (includes platelet basic protein, bet; Pro-p |            |   | 1.98E-11 | 9.26  | 110.30 | 50.00 | 13894.1 |
| AHQ-3-14, 5408 - 5447       | K.EESLSDSLYAEALR.C                                                      | 1540.61070 | 2 | 5.13E-06 | 0.42  | 2.65   | -     | 286.7   |
| AHQ-3-14-, 4448 - 4528      | K.EESLSDSLYAEALR.C                                                      | 1540.61070 | 2 | 3.22E-05 | 0.84  | 2.88   | -     | 958.7   |
| AHQ-3-14-, 4811 - 4836      | K.EESLSDSLYAEALR.C                                                      | 1540.61070 | 2 | 6.20E-05 | 0.97  | 4.69   | -     | 1483.2  |
| AHQ-3-14, 5751 - 5817       | K.EESLSDSLYAEALR.C                                                      | 1540.61070 | 2 | 4.05E-05 | 0.88  | 3.53   | -     | 851.1   |
| AHQ-3-14, 5795              | K.EESLSDSLYAEALR.C                                                      | 1540.61070 | 2 | 4.09E-08 | 0.97  | 4.82   | -     | 1361.8  |
| AHQ-3-14, 5879 - 5889       | K.EESLSDSLYAEALR.C                                                      | 1540.61070 | 2 | 1.49E-07 | 0.79  | 3.20   | -     | 828.4   |

|                        |                        |            |   |          |      |      |   |        |
|------------------------|------------------------|------------|---|----------|------|------|---|--------|
| AHQ-3-14-, 4688 - 4751 | K.EESLSDLYAELR.C       | 1540.61070 | 2 | 2.11E-09 | 0.95 | 4.49 | - | 1008.7 |
| AHQ-3-14-, 4351        | K.EESLSDLYAELR.C       | 1540.61070 | 2 | 4.98E-05 | 0.83 | 3.35 | - | 513.6  |
| AHQ-3-14, 5292 - 5307  | K.EESLSDLYAELR.C       | 1540.61070 | 2 | 1.55E-06 | 0.87 | 3.76 | - | 670.1  |
| AHQ-3-14-, 4328 - 4407 | K.GKEESLSDLYAELR.C     | 1725.83517 | 2 | 8.39E-11 | 0.98 | 5.40 | - | 2468.7 |
| AHQ-3-14-, 4079 - 4139 | K.GKEESLSDLYAELR.C     | 1725.83517 | 2 | 2.25E-10 | 0.98 | 5.58 | - | 2489.3 |
| AHQ-3-13-, 4162 - 4179 | K.GKEESLSDLYAELR.C     | 1725.83517 | 2 | 1.39E-05 | 0.98 | 5.34 | - | 2895.4 |
| AHQ-3-14, 6061         | K.GKEESLSDLYAELR.C     | 1725.83517 | 2 | 3.15E-05 | 0.97 | 4.51 | - | 2172.9 |
| AHQ-3-14, 5928 - 6000  | K.GKEESLSDLYAELR.C     | 1725.83517 | 2 | 2.04E-10 | 0.98 | 5.16 | - | 2056.6 |
| AHQ-3-14-, 3980 - 4064 | K.GKEESLSDLYAELR.C     | 1725.83517 | 3 | 8.94E-06 | 0.93 | 5.02 | - | 1135.1 |
| AHQ-3-14, 5832         | K.GKEESLSDLYAELR.C     | 1725.83517 | 2 | 1.42E-06 | 0.98 | 5.83 | - | 2585.9 |
| AHQ-3-13, 4157         | K.GKEESLSDLYAELR.C     | 1725.83517 | 2 | 1.71E-08 | 0.98 | 5.16 | - | 2318.7 |
| AHQ-3-13, 3966         | K.GKEESLSDLYAELR.C     | 1725.83517 | 2 | 1.72E-06 | 0.94 | 4.00 | - | 1272.5 |
| AHQ-3-14, 5715 - 5763  | K.GKEESLSDLYAELR.C     | 1725.83517 | 2 | 3.83E-09 | 0.96 | 4.87 | - | 1487.0 |
| AHQ-3-14, 5581 - 5653  | K.GKEESLSDLYAELR.C     | 1725.83517 | 2 | 1.76E-07 | 0.98 | 4.91 | - | 2703.6 |
| AHQ-3-14-, 4667 - 4700 | K.GKEESLSDLYAELR.C     | 1725.83517 | 2 | 1.05E-09 | 0.96 | 4.38 | - | 1837.0 |
| AHQ-3-14, 5467 - 5547  | K.GKEESLSDLYAELR.C     | 1725.83517 | 2 | 8.65E-09 | 0.98 | 5.96 | - | 2443.1 |
| AHQ-3-14, 5455         | K.GKEESLSDLYAELR.C     | 1725.83517 | 3 | 5.10E-05 | 0.82 | 3.62 | - | 727.8  |
| AHQ-3-14-, 4952        | K.GKEESLSDLYAELR.C     | 1725.83517 | 2 | 2.69E-07 | 0.97 | 4.95 | - | 1989.8 |
| AHQ-3-14-, 4472 - 4535 | K.GKEESLSDLYAELR.C     | 1725.83517 | 2 | 4.43E-07 | 0.98 | 5.51 | - | 2688.5 |
| AHQ-3-14, 5343 - 5404  | K.GKEESLSDLYAELR.C     | 1725.83517 | 2 | 2.06E-10 | 0.98 | 5.71 | - | 2769.0 |
| AHQ-3-14-, 3825 - 3907 | K.GKEESLSDLYAELR.C     | 1725.83517 | 2 | 5.27E-08 | 0.97 | 5.49 | - | 1730.9 |
| AHQ-3-14-, 4203 - 4263 | K.GKEESLSDLYAELR.C     | 1725.83517 | 2 | 1.98E-11 | 0.98 | 5.58 | - | 2328.6 |
| AHQ-3-14, 5281 - 5347  | K.GKEESLSDLYAELR.C     | 1725.83517 | 3 | 3.64E-07 | 0.86 | 3.73 | - | 926.6  |
| AHQ-3-14, 5223 - 5283  | K.GKEESLSDLYAELR.C     | 1725.83517 | 2 | 7.71E-09 | 0.98 | 5.59 | - | 2945.0 |
| AHQ-3-14, 4628         | K.GKEESLSDLYAELR.C     | 1725.83517 | 2 | 1.07E-04 | 0.97 | 5.01 | - | 2074.9 |
| AHQ-3-14, 5160 - 5219  | K.GKEESLSDLYAELR.C     | 1725.83517 | 3 | 2.38E-07 | 0.85 | 3.89 | - | 785.1  |
| AHQ-3-14, 4760 - 4819  | K.GKEESLSDLYAELR.C     | 1725.83517 | 2 | 8.07E-10 | 0.98 | 5.72 | - | 1583.1 |
| AHQ-3-14, 4847 - 4909  | K.GKEESLSDLYAELR.C     | 1725.83517 | 2 | 9.56E-11 | 0.98 | 5.46 | - | 2496.9 |
| AHQ-3-14, 5103 - 5167  | K.GKEESLSDLYAELR.C     | 1725.83517 | 2 | 1.87E-10 | 0.98 | 5.18 | - | 2676.6 |
| AHQ-3-14, 4924         | K.GKEESLSDLYAELR.C     | 1725.83517 | 3 | 5.87E-07 | 0.90 | 4.30 | - | 975.7  |
| AHQ-3-14, 4971 - 5040  | K.GKEESLSDLYAELR.C     | 1725.83517 | 2 | 6.89E-07 | 0.98 | 5.42 | - | 2449.0 |
| AHQ-3-14, 5023 - 5095  | K.GKEESLSDLYAELR.C     | 1725.83517 | 3 | 2.05E-06 | 0.90 | 4.43 | - | 855.9  |
| AHQ-3-14-, 3979 - 4059 | K.GKEESLSDLYAELR.C     | 1725.83517 | 2 | 9.35E-11 | 0.98 | 5.87 | - | 2734.0 |
| AHQ-3-14, 5073 - 5148  | K.GTHCNQVEIATLK.D      | 1571.78073 | 2 | 2.77E-07 | 0.97 | 4.66 | - | 2019.5 |
| AHQ-3-14, 4859 - 4919  | K.GTHCNQVEIATLK.D      | 1571.78073 | 2 | 3.51E-09 | 0.97 | 4.82 | - | 1938.5 |
| AHQ-3-14, 4739         | K.GTHCNQVEIATLK.D      | 1571.78073 | 2 | 7.31E-06 | 0.97 | 4.84 | - | 1627.2 |
| AHQ-3-14, 5207 - 5275  | K.GTHCNQVEIATLK.D      | 1571.78073 | 2 | 4.02E-07 | 0.97 | 5.01 | - | 1929.3 |
| AHQ-3-14, 4616         | K.GTHCNQVEIATLK.D      | 1571.78073 | 2 | 7.14E-07 | 0.97 | 4.25 | - | 1721.2 |
| AHQ-3-14-, 4404 - 4471 | K.GTHCNQVEIATLK.D      | 1571.78073 | 2 | 1.18E-04 | 0.97 | 4.78 | - | 1884.4 |
| AHQ-3-14, 4483 - 4555  | K.GTHCNQVEIATLK.D      | 1571.78073 | 2 | 6.28E-06 | 0.98 | 5.39 | - | 1688.2 |
| AHQ-3-14, 5337 - 5400  | K.GTHCNQVEIATLK.D      | 1571.78073 | 2 | 2.38E-07 | 0.94 | 3.91 | - | 1310.1 |
| AHQ-3-14, 4435 - 4495  | K.GTHCNQVEIATLK.D      | 1571.78073 | 2 | 5.32E-08 | 0.96 | 4.27 | - | 1745.7 |
| AHQ-3-14, 4331 - 4365  | K.GTHCNQVEIATLK.D      | 1571.78073 | 2 | 7.18E-05 | 0.97 | 5.04 | - | 1577.6 |
| AHQ-3-14-, 4488        | K.GTHCNQVEIATLK.D      | 1571.78073 | 2 | 8.97E-05 | 0.95 | 4.07 | - | 1353.8 |
| AHQ-3-14, 4219 - 4268  | K.GTHCNQVEIATLK.D      | 1571.78073 | 2 | 3.17E-07 | 0.96 | 4.52 | - | 1328.8 |
| AHQ-3-14, 5485 - 5525  | K.GTHCNQVEIATLK.D      | 1571.78073 | 2 | 8.48E-09 | 0.95 | 4.01 | - | 1551.1 |
| AHQ-3-14, 4091 - 4155  | K.GTHCNQVEIATLK.D      | 1571.78073 | 2 | 5.44E-06 | 0.95 | 4.30 | - | 1501.7 |
| AHQ-3-14, 5585 - 5613  | K.GTHCNQVEIATLK.D      | 1571.78073 | 2 | 1.43E-07 | 0.96 | 4.33 | - | 1539.6 |
| AHQ-3-14, 5685 - 5759  | K.GTHCNQVEIATLK.D      | 1571.78073 | 2 | 3.02E-08 | 0.98 | 5.01 | - | 2270.1 |
| AHQ-3-14-, 3945 - 3975 | K.GTHCNQVEIATLK.D      | 1571.78073 | 2 | 3.66E-08 | 0.96 | 4.87 | - | 1237.1 |
| AHQ-3-14-, 3839 - 3904 | K.GTHCNQVEIATLK.D      | 1571.78073 | 2 | 4.76E-11 | 0.98 | 5.41 | - | 1897.4 |
| AHQ-3-14-, 3800 - 3865 | K.GTHCNQVEIATLK.D      | 1571.78073 | 2 | 3.25E-07 | 0.97 | 4.54 | - | 1958.4 |
| AHQ-3-14-, 3711        | K.GTHCNQVEIATLK.D      | 1571.78073 | 2 | 6.13E-08 | 0.97 | 4.95 | - | 1880.2 |
| AHQ-3-14-, 3707 - 3775 | K.GTHCNQVEIATLK.D      | 1571.78073 | 2 | 6.99E-08 | 0.98 | 5.81 | - | 1995.6 |
| AHQ-3-14-, 4705 - 4731 | K.GTHCNQVEIATLK.D      | 1571.78073 | 2 | 2.41E-05 | 0.91 | 4.14 | - | 982.8  |
| AHQ-3-14-, 4069 - 4136 | K.GTHCNQVEIATLK.D      | 1571.78073 | 2 | 1.42E-07 | 0.97 | 5.13 | - | 1658.6 |
| AHQ-3-14-, 3580 - 3647 | K.GTHCNQVEIATLK.D      | 1571.78073 | 2 | 8.69E-11 | 0.97 | 5.14 | - | 1692.7 |
| AHQ-3-14, 6140         | K.GTHCNQVEIATLK.D      | 1571.78073 | 2 | 8.46E-05 | 0.87 | 3.24 | - | 693.1  |
| AHQ-3-14, 6555         | K.GTHCNQVEIATLK.D      | 1571.78073 | 2 | 2.87E-04 | 0.84 | 3.25 | - | 659.3  |
| AHQ-3-14-, 3471 - 3548 | K.GTHCNQVEIATLK.D      | 1571.78073 | 2 | 3.65E-08 | 0.97 | 5.11 | - | 1682.6 |
| AHQ-3-13-, 3350        | K.GTHCNQVEIATLK.D      | 1571.78073 | 2 | 1.26E-06 | 0.94 | 3.91 | - | 1276.0 |
| AHQ-3-14, 4980 - 4981  | K.GTHCNQVEIATLK.D      | 1571.78073 | 2 | 1.77E-06 | 0.97 | 4.85 | - | 1708.8 |
| AHQ-3-14-, 4165 - 4235 | K.GTHCNQVEIATLK.D      | 1571.78073 | 2 | 3.36E-06 | 0.95 | 4.29 | - | 1364.9 |
| AHQ-3-14-, 3339 - 3420 | K.GTHCNQVEIATLK.D      | 1571.78073 | 2 | 1.10E-06 | 0.97 | 4.71 | - | 1633.1 |
| AHQ-3-14-, 3227 - 3295 | K.GTHCNQVEIATLK.D      | 1571.78073 | 2 | 1.56E-05 | 0.98 | 5.67 | - | 1961.7 |
| AHQ-3-14-, 4315        | K.GTHCNQVEIATLK.D      | 1571.78073 | 2 | 5.15E-06 | 0.97 | 5.06 | - | 1875.5 |
| AHQ-3-14, 4047 - 4109  | K.GTHCNQVEIATLKDGR.K   | 1900.10650 | 2 | 2.19E-05 | 0.96 | 4.87 | - | 1313.9 |
| AHQ-3-14-, 2888 - 2961 | K.GTHCNQVEIATLKDGR.K   | 1900.10650 | 3 | 2.59E-10 | 0.92 | 4.34 | - | 1014.6 |
| AHQ-3-14-, 2997        | K.GTHCNQVEIATLKDGR.K   | 1900.10650 | 2 | 4.80E-07 | 0.98 | 5.67 | - | 1868.3 |
| AHQ-3-14, 4009 - 4081  | K.GTHCNQVEIATLKDGR.K   | 1900.10650 | 3 | 2.77E-08 | 0.94 | 4.45 | - | 1280.9 |
| AHQ-3-14, 3885 - 3948  | K.GTHCNQVEIATLKDGR.K   | 1900.10650 | 3 | 2.72E-06 | 0.90 | 3.98 | - | 961.3  |
| AHQ-3-14-, 3176 - 3189 | K.GTHCNQVEIATLKDGR.K   | 1900.10650 | 3 | 4.15E-06 | 0.94 | 4.35 | - | 1158.4 |
| AHQ-3-14-, 3564        | K.GTHCNQVEIATLKDGR.K   | 1900.10650 | 3 | 5.08E-05 | 0.91 | 4.14 | - | 859.0  |
| AHQ-3-14-, 3401        | K.GTHCNQVEIATLKDGR.K   | 1900.10650 | 3 | 2.01E-06 | 0.93 | 4.31 | - | 1066.2 |
| AHQ-3-14, 3873 - 3936  | K.GTHCNQVEIATLKDGR.K   | 1900.10650 | 2 | 1.74E-06 | 0.97 | 5.72 | - | 1579.6 |
| AHQ-3-14-, 2640 - 2716 | K.GTHCNQVEIATLKDGRK.I  | 2028.27941 | 3 | 1.17E-06 | 0.91 | 4.40 | - | 1034.0 |
| AHQ-3-14-, 2655        | K.GTHCNQVEIATLKDGRK.I  | 2028.27941 | 2 | 2.72E-05 | 0.96 | 5.42 | - | 1094.9 |
| AHQ-3-14, 3568 - 3628  | K.GTHCNQVEIATLKDGRK.I  | 2028.27941 | 3 | 2.72E-04 | 0.82 | 3.66 | - | 757.3  |
| AHQ-3-14-, 2760 - 2829 | K.ICLDPDAPR.I          | 1058.19059 | 2 | 1.63E-05 | 0.85 | 3.15 | - | 929.4  |
| AHQ-3-13-, 2582 - 2609 | R.ICLDPDAPR.I          | 1186.36350 | 2 | 1.37E-05 | 0.48 | 2.83 | - | 414.2  |
| AHQ-3-14-, 2427 - 2503 | R.ICLDPDAPR.I          | 1186.36350 | 2 | 6.25E-05 | 0.83 | 3.23 | - | 812.4  |
| AHQ-3-14-, 2519 - 2580 | R.ICLDPDAPR.I          | 1186.36350 | 2 | 2.37E-04 | 0.87 | 3.32 | - | 842.6  |
| AHQ-3-14, 3655         | R.ICLDPDAPR.I          | 1186.36350 | 2 | 2.74E-04 | 0.46 | 2.58 | - | 454.1  |
| AHQ-3-14, 3853         | R.ICLDPDAPR.I          | 1186.36350 | 2 | 5.59E-05 | 0.77 | 3.15 | - | 764.9  |
| AHQ-3-14, 3215 - 3271  | R.ICLDPDAPR.I          | 1186.36350 | 2 | 3.65E-05 | 0.69 | 2.78 | - | 576.8  |
| AHQ-3-14, 3331 - 3396  | R.ICLDPDAPR.I          | 1186.36350 | 2 | 4.56E-06 | 0.90 | 3.40 | - | 954.3  |
| AHQ-3-12, 2484 - 2522  | R.ICLDPDAPR.I          | 1186.36350 | 2 | 3.76E-05 | 0.68 | 2.73 | - | 619.4  |
| AHQ-3-13, 2625         | R.ICLDPDAPR.I          | 1186.36350 | 2 | 1.27E-04 | 0.86 | 3.43 | - | 675.6  |
| AHQ-3-14, 3452 - 3512  | R.ICLDPDAPR.I          | 1186.36350 | 2 | 7.76E-05 | 0.81 | 3.10 | - | 735.3  |
| AHQ-3-14, 3083 - 3157  | R.ICLDPDAPR.I          | 1186.36350 | 2 | 7.71E-04 | 0.61 | 2.60 | - | 553.6  |
| AHQ-3-14, 3455 - 3511  | R.ICLDPDAPR.I          | 1186.36350 | 2 | 5.96E-05 | 0.88 | 3.48 | - | 786.9  |
| AHQ-3-14, 1369 - 2623  | K.KLAGDESAD            | 905.92969  | 1 | 7.96E-05 | 0.21 | 2.00 | - | 301.0  |
| AHQ-3-14, 2852 - 2873  | K.KLAGDESAD            | 905.92969  | 1 | 5.18E-04 | 0.22 | 1.86 | - | 277.2  |
| AHQ-3-13, 3311 - 3321  | K.NIQSLEVIK.G          | 1101.27845 | 2 | 1.06E-06 | 0.84 | 3.27 | - | 659.0  |
| AHQ-3-14-, 3427 - 3499 | K.NIQSLEVIK.G          | 1101.27845 | 2 | 2.79E-04 | 0.79 | 3.28 | - | 645.6  |
| AHQ-3-14-, 3327 - 3332 | K.NIQSLEVIK.G          | 1101.27845 | 2 | 1.06E-06 | 0.87 | 3.23 | - | 776.5  |
| AHQ-3-14-, 3204 - 3268 | K.NIQSLEVIK.G          | 1101.27845 | 2 | 2.66E-05 | 0.89 | 3.73 | - | 826.3  |
| AHQ-3-14-, 3135 - 3203 | K.NIQSLEVIK.G          | 1101.27845 | 2 | 3.21E-05 | 0.89 | 4.01 | - | 640.0  |
| AHQ-3-14-, 3667        | K.NIQSLEVIK.G          | 1101.27845 | 1 | 8.57E-04 | 0.67 | 2.52 | - | 654.8  |
| AHQ-3-14, 4599 - 4629  | K.NIQSLEVIK.G          | 1101.27845 | 2 | 6.98E-04 | 0.83 | 3.34 | - | 748.5  |
| AHQ-3-14, 4479 - 4539  | K.NIQSLEVIK.G          | 1101.27845 | 2 | 4.70E-04 | 0.84 | 3.28 | - | 647.6  |
| AHQ-3-14, 4395 - 4455  | K.NIQSLEVIK.G          | 1101.27845 | 2 | 3.02E-05 | 0.81 | 3.24 | - | 563.3  |
| AHQ-3-14, 4255 - 4332  | K.NIQSLEVIK.G          | 1101.27845 | 2 | 3.08E-06 | 0.90 | 3.81 | - | 763.5  |
| AHQ-3-14, 4112 - 4191  | K.NIQSLEVIK.G          | 1101.27845 | 2 | 8.42E-06 | 0.89 | 3.77 | - | 645.2  |
| AHQ-3-14-, 3072 - 3393 | K.NIQSLEVIK.G          | 1101.27845 | 1 | 8.25E-04 | 0.36 | 2.31 | - | 339.8  |
| AHQ-3-14-, 3675        | K.NIQSLEVIK.G          | 1101.27845 | 1 | 5.99E-04 | 0.42 | 2.51 | - | 296.1  |
| AHQ-3-14, 5777         | R.NLAGKKEESLSDLYAELR.C | 2152.34765 | 2 | 4.17E-05 | 0.77 | 3.58 | - | 499.9  |

|                             |                                                                        |            |   |          |       |        |       |          |
|-----------------------------|------------------------------------------------------------------------|------------|---|----------|-------|--------|-------|----------|
| AHQ-3-14-, 3461             | K.TTSGIHPKNIQSLEVIQK.G                                                 | 1923.20305 | 2 | 7.30E-06 | 0.91  | 4.13   | -     | 664.9    |
| gi 4502985 ref NP_001854.1  | cytochrome c oxidase subunit Vlb                                       |            |   | 1.99E-11 | 2.54  | 30.20  | 31.40 | 10192.3  |
| AHQ-3-14-, 6073 - 6137      | R.VYQSLCPTSWWTDWDEQRA                                                  | 2272.43560 | 2 | 1.99E-11 | 0.93  | 3.99   | -     | 1108.1   |
| AHQ-3-14-, 6124 - 6147      | R.VYQSLCPTSWWTDWDEQRAEGTFPGK.I                                         | 3060.29908 | 3 | 8.49E-06 | 0.78  | 3.61   | -     | 363.0    |
| AHQ-3-14-, 6531             | R.VYQSLCPTSWWTDWDEQRAEGTFPGK.I                                         | 3173.45733 | 3 | 9.14E-04 | 0.83  | 3.73   | -     | 588.1    |
| gi 7705296 ref NP_057271.1  | bridging integrator 2; bridging integrator-2; breast cancer associated |            |   | 2.22E-11 | 5.25  | 60.25  | 18.10 | 61746.8  |
| AHQ-3-10, 5630 - 5686       | K.AIVWNNLLWEDYEEKL                                                     | 2038.20157 | 2 | 2.22E-11 | 0.95  | 4.36   | -     | 1240.0   |
| AHQ-3-10, 5518 - 5594       | K.AIVWNNLLWEDYEEKL                                                     | 2038.20157 | 2 | 4.06E-11 | 0.95  | 4.44   | -     | 1212.4   |
| AHQ-3-9, 7009 - 7079        | K.AQTVFEDLNQELLEELPILYNSR.I                                            | 2736.02649 | 2 | 1.91E-07 | 0.90  | 4.71   | -     | 478.6    |
| AHQ-3-10, 2578 - 2579       | R.FEQSASNFYQQQAEGHK.L                                                  | 2000.07352 | 2 | 9.07E-06 | 0.96  | 4.94   | -     | 1033.0   |
| AHQ-3-14-, 6481 - 6485      | R.IGCYVTFIFQNISNLR.D                                                   | 1800.07167 | 2 | 6.43E-06 | 0.93  | 4.65   | -     | 956.8    |
| AHQ-3-13, 6615              | R.IGCYVTFIFQNISNLR.D                                                   | 1800.07167 | 2 | 1.94E-05 | 0.92  | 4.07   | -     | 829.0    |
| AHQ-3-9, 6471               | R.IGCYVTFIFQNISNLR.D                                                   | 1800.07167 | 2 | 2.38E-06 | 0.94  | 4.30   | -     | 1061.5   |
| AHQ-3-10, 6074 - 6130       | R.IGCYVTFIFQNISNLR.D                                                   | 1800.07167 | 2 | 4.27E-04 | 0.94  | 4.81   | -     | 897.8    |
| AHQ-3-11, 6330              | R.IGCYVTFIFQNISNLR.D                                                   | 1800.07167 | 2 | 1.08E-06 | 0.94  | 4.51   | -     | 1143.6   |
| AHQ-3-10, 2051              | K.LNHNLYEVM*SK.L                                                       | 1364.55247 | 2 | 4.24E-04 | 0.86  | 3.22   | -     | 655.2    |
| AHQ-3-7, 4028               | R.TATVSSPLTSPSTSLK.S                                                   | 1976.21467 | 2 | 4.27E-06 | 0.64  | 3.11   | -     | 412.8    |
| gi 4758086 ref NP_004069.1  | cysteine and glycine-rich protein 1; cysteine-rich protein; LIM-domain |            |   | 2.36E-11 | 6.82  | 80.25  | 51.30 | 20567.3  |
| AHQ-3-11, 1667 - 1742       | R.CSQAVYAAEK.V                                                         | 1128.23768 | 1 | 5.48E-06 | 0.41  | 2.56   | -     | 428.9    |
| AHQ-3-13, 4210              | K.GFGFGQGAAGALVHSE                                                     | 1434.53788 | 2 | 9.88E-06 | 0.95  | 4.29   | -     | 1041.6   |
| AHQ-3-11, 4024              | K.GFGFGQGAAGALVHSE                                                     | 1434.53788 | 1 | 8.38E-04 | 0.58  | 2.69   | -     | 522.1    |
| AHQ-3-11, 4018              | K.GFGFGQGAAGALVHSE                                                     | 1434.53788 | 2 | 8.83E-09 | 0.95  | 3.59   | -     | 1363.2   |
| AHQ-3-11, 3130 - 3198       | K.GLESTTLADKDGIEYCK.G                                                  | 1902.06957 | 2 | 7.36E-09 | 0.95  | 4.54   | -     | 1187.3   |
| AHQ-3-11, 2440              | K.GYGYGGQAGT.LSTDK.G                                                   | 1475.54194 | 2 | 1.11E-06 | 0.94  | 4.26   | -     | 921.0    |
| AHQ-3-10, 3299              | K.GYGYGGQAGT.LSTDKGSLGIK.H                                             | 2160.32665 | 2 | 7.61E-06 | 0.54  | 3.07   | -     | 225.9    |
| AHQ-3-12, 3515 - 3516       | K.GYGYGGQAGT.LSTDKGSLGIK.H                                             | 2160.32665 | 2 | 1.10E-10 | 0.91  | 4.55   | -     | 603.1    |
| AHQ-3-11, 3330 - 3390       | K.GYGYGGQAGT.LSTDKGSLGIK.H                                             | 2160.32665 | 2 | 2.36E-11 | 0.87  | 4.31   | -     | 501.1    |
| AHQ-3-13, 3626              | K.GYGYGGQAGT.LSTDKGSLGIK.H                                             | 2160.32665 | 2 | 7.89E-10 | 0.84  | 3.76   | -     | 648.5    |
| AHQ-3-11, 2884              | K.KNLDSTTVAVHGEEIYCK.S                                                 | 2066.27805 | 3 | 6.82E-05 | 0.95  | 4.37   | -     | 1490.8   |
| AHQ-3-11, 3339 - 3419       | K.KNLDSTTVAVHGEEIYCK.S                                                 | 1938.10514 | 2 | 2.46E-10 | 0.97  | 5.07   | -     | 1372.2   |
| AHQ-3-11, 3824              | K.TVYFAEEVQCEGNSFHK.S                                                  | 2047.19015 | 2 | 1.35E-05 | 0.95  | 4.71   | -     | 983.6    |
| AHQ-3-11, 4014              | K.TVYFAEEVQCEGNSFHK.S                                                  | 2047.19015 | 2 | 5.69E-05 | 0.89  | 3.96   | -     | 699.1    |
| AHQ-3-14, 5273              | K.TVYFAEEVQCEGNSFHK.S                                                  | 2047.19015 | 2 | 7.11E-06 | 0.78  | 3.78   | -     | 447.4    |
| gi 24431935 ref NP_065393.1 | reticulin 4; neuroendocrine-specific protein C like (foocen) [Homo sap |            |   | 2.46E-11 | 0.97  | 10.31  | 2.80  | 129930.3 |
| AHQ-3-14-, 6008             | K.YQVFRPEDEEEEEEEEEDEDELELEVLER.K                                      | 4189.14063 | 3 | 2.46E-11 | 0.97  | 6.18   | -     | 1726.4   |
| gi 13775198 ref NP_112576.1 | SH3 domain binding glutamic acid-rich protein like 3; SH3BGR3-like pr  |            |   | 2.98E-11 | 5.36  | 60.28  | 35.50 | 10437.7  |
| AHQ-3-13, 4813 - 4850       | R.IQYQLVDSQDNALR.D                                                     | 1776.97168 | 2 | 1.93E-07 | 0.97  | 5.05   | -     | 1936.9   |
| AHQ-3-13-, 4717             | R.IQYQLVDSQDNALR.D                                                     | 1776.97168 | 3 | 1.15E-06 | 0.96  | 4.85   | -     | 2099.0   |
| AHQ-3-14-, 4684             | R.IQYQLVDSQDNALR.D                                                     | 1776.97168 | 2 | 1.93E-10 | 0.97  | 5.59   | -     | 1850.0   |
| AHQ-3-13-, 4846 - 4854      | R.IQYQLVDSQDNALR.D                                                     | 1776.97168 | 2 | 4.53E-11 | 0.95  | 4.75   | -     | 1259.1   |
| AHQ-3-13-, 4693 - 4757      | R.IQYQLVDSQDNALR.D                                                     | 1776.97168 | 2 | 2.98E-11 | 0.96  | 5.13   | -     | 1631.3   |
| AHQ-3-13, 4961 - 5041       | R.IQYQLVDSQDNALRDEM.R.A                                                | 2308.55751 | 3 | 5.02E-07 | 0.91  | 4.32   | -     | 897.4    |
| AHQ-3-13, 5114 - 5142       | R.IQYQLVDSQDNALRDEM.R.A                                                | 2308.55751 | 3 | 4.31E-06 | 0.50  | 3.01   | -     | 452.8    |
| AHQ-3-13-, 4962 - 5025      | R.IQYQLVDSQDNALRDEM.R.A                                                | 2308.55751 | 3 | 1.20E-06 | 0.79  | 3.65   | -     | 701.2    |
| AHQ-3-14-, 4355 - 4381      | R.IQYQLVDSQDNALRDEM*R.A                                                | 2324.55691 | 3 | 7.91E-05 | 0.61  | 3.04   | -     | 358.0    |
| AHQ-3-14-, 4935 - 5007      | R.IQYQLVDSQDNALRDEM.R.A                                                | 2308.55751 | 3 | 1.53E-05 | 0.81  | 3.75   | -     | 439.4    |
| AHQ-3-13, 4809 - 4877       | R.IQYQLVDSQDNALRDEM.R.A                                                | 2308.55751 | 3 | 1.97E-07 | 0.94  | 4.77   | -     | 1192.4   |
| AHQ-3-13-, 4214             | R.IQYQLVDSQDNALRDEM*R.A                                                | 2324.55691 | 3 | 2.13E-10 | 0.88  | 3.71   | -     | 833.0    |
| AHQ-3-13-, 4329 - 4393      | R.IQYQLVDSQDNALRDEM*R.A                                                | 2324.55691 | 3 | 8.27E-05 | 0.74  | 3.12   | -     | 387.8    |
| AHQ-3-13, 4223              | K.RIQYQLVDSQDNALR.D                                                    | 1933.15803 | 2 | 3.94E-07 | 0.95  | 4.95   | -     | 793.9    |
| AHQ-3-13-, 1623 - 1689      | R.VYSTSVTGSR.E                                                         | 1057.13940 | 2 | 6.95E-06 | 0.92  | 3.06   | -     | 1120.7   |
| AHQ-3-13, 1885 - 1945       | R.VYSTSVTGSR.E                                                         | 1057.13940 | 2 | 9.45E-07 | 0.91  | 3.27   | -     | 973.3    |
| AHQ-3-13-, 1749 - 1810      | R.VYSTSVTGSR.E                                                         | 1057.13940 | 2 | 1.31E-05 | 0.91  | 3.04   | -     | 979.3    |
| AHQ-3-13, 1765 - 1827       | R.VYSTSVTGSR.E                                                         | 1057.13940 | 2 | 1.19E-04 | 0.72  | 2.59   | -     | 634.8    |
| AHQ-3-13-, 2246             | R.VYSTSVTGSREIK.S                                                      | 1427.58510 | 2 | 1.09E-06 | 0.82  | 3.29   | -     | 718.4    |
| AHQ-3-13, 2281 - 2289       | R.VYSTSVTGSREIK.S                                                      | 1427.58510 | 2 | 1.09E-06 | 0.73  | 3.29   | -     | 633.3    |
| gi 4502027 ref NP_000468.1  | albumin precursor; PRO0883 protein [Homo sapiens]                      |            |   | 3.01E-11 | 24.67 | 290.38 | 52.50 | 69366.4  |
| AHQ-3-6, 2353               | K.AAFTECCQAADK.A                                                       | 1374.47927 | 1 | 1.33E-04 | 0.63  | 3.09   | -     | 490.2    |
| AHQ-3-6, 2346 - 2347        | K.AAFTECCQAADK.A                                                       | 1374.47927 | 2 | 9.87E-04 | 0.92  | 3.68   | -     | 986.5    |
| AHQ-3-5, 2375               | K.AAFTECCQAADK.A                                                       | 1374.47927 | 1 | 1.03E-04 | 0.56  | 2.79   | -     | 425.9    |
| AHQ-3-5, 2372               | K.AAFTECCQAADK.A                                                       | 1374.47927 | 2 | 2.30E-04 | 0.91  | 3.85   | -     | 978.0    |
| AHQ-3-6, 4302               | K.AVM*DDFAAFVEK.C                                                      | 1359.52946 | 2 | 1.93E-08 | 0.87  | 3.38   | -     | 730.6    |
| AHQ-3-5, 4395 - 4468        | K.AVM*DDFAAFVEK.C                                                      | 1359.52946 | 2 | 1.88E-07 | 0.95  | 3.65   | -     | 1407.3   |
| AHQ-3-5, 5541 - 5545        | K.AVMDDFAAFVEK.C                                                       | 1343.53006 | 2 | 4.49E-07 | 0.96  | 4.48   | -     | 1249.6   |
| AHQ-3-6, 5461 - 5463        | K.AVMDDFAAFVEK.C                                                       | 1343.53006 | 2 | 9.35E-08 | 0.95  | 3.84   | -     | 1528.9   |
| AHQ-3-6, 5469 - 5539        | K.AVMDDFAAFVEK.C                                                       | 1343.53006 | 1 | 5.60E-05 | 0.90  | 3.86   | -     | 945.5    |
| AHQ-3-14-, 5388 - 5391      | K.AVMDDFAAFVEK.C                                                       | 1343.53006 | 2 | 1.66E-09 | 0.95  | 4.17   | -     | 1201.1   |
| AHQ-3-5, 5548               | K.AVMDDFAAFVEK.C                                                       | 1343.53006 | 1 | 6.62E-06 | 0.88  | 3.94   | -     | 895.3    |
| AHQ-3-12, 5447              | K.AVMDDFAAFVEK.C                                                       | 1343.53006 | 2 | 3.75E-06 | 0.87  | 3.35   | -     | 977.1    |
| AHQ-3-14, 6396              | K.AVMDDFAAFVEK.C                                                       | 1343.53006 | 2 | 9.35E-08 | 0.94  | 3.36   | -     | 1423.8   |
| AHQ-3-5, 2029               | K.CCAAADPHECYAK.V                                                      | 1556.67999 | 2 | 4.89E-05 | 0.87  | 3.29   | -     | 922.5    |
| AHQ-3-6, 2305 - 2313        | K.CCTESLVNR.R                                                          | 1141.25805 | 2 | 2.94E-06 | 0.88  | 2.66   | -     | 1211.2   |
| AHQ-3-5, 2344               | K.CCTESLVNR.R                                                          | 1141.25805 | 2 | 1.16E-04 | 0.89  | 2.99   | -     | 1053.4   |
| AHQ-3-1, 7054               | K.DVFLGM*FLYFYAR.R                                                     | 1640.88331 | 2 | 1.43E-04 | 0.86  | 3.24   | -     | 901.1    |
| AHQ-3-6, 2539               | R.ETYGEMADCCAK.Q                                                       | 1437.55563 | 1 | 1.78E-06 | 0.34  | 2.50   | -     | 104.7    |
| AHQ-3-5, 2569               | R.ETYGEMADCCAK.Q                                                       | 1437.55563 | 1 | 4.62E-08 | 0.65  | 3.47   | -     | 100.0    |
| AHQ-3-13, 2711              | R.FKDLGEEFNK.A                                                         | 1227.34766 | 2 | 6.94E-06 | 0.73  | 3.14   | -     | 560.2    |
| AHQ-3-6, 2373 - 2418        | R.FKDLGEEFNK.A                                                         | 1227.34766 | 2 | 2.10E-05 | 0.81  | 3.43   | -     | 593.2    |
| AHQ-3-6, 2374               | R.FKDLGEEFNK.A                                                         | 1227.34766 | 1 | 1.53E-04 | 0.18  | 1.90   | -     | 424.6    |
| AHQ-3-7, 2328               | R.FKDLGEEFNK.A                                                         | 1227.34766 | 2 | 2.32E-05 | 0.50  | 2.54   | -     | 511.6    |
| AHQ-3-5, 2393               | R.FKDLGEEFNK.A                                                         | 1227.34766 | 2 | 9.03E-07 | 0.82  | 2.80   | -     | 776.1    |
| AHQ-3-13, 2714 - 2715       | R.FKDLGEEFNK.A                                                         | 1227.34766 | 1 | 3.01E-04 | 0.45  | 2.33   | -     | 494.6    |
| AHQ-3-14-, 2564 - 2621      | R.FKDLGEEFNK.A                                                         | 1227.34766 | 2 | 3.25E-06 | 0.78  | 3.17   | -     | 641.7    |
| AHQ-3-5, 2664               | K.FQNALLVR.Y                                                           | 961.14282  | 2 | 1.42E-04 | 0.77  | 2.68   | -     | 818.8    |
| AHQ-3-6, 2675               | K.FQNALLVR.Y                                                           | 961.14282  | 2 | 3.08E-04 | 0.79  | 2.68   | -     | 744.2    |
| AHQ-3-6, 2231 - 2306        | K.KQATLVELVK.H                                                         | 1129.37494 | 1 | 1.26E-04 | 0.19  | 2.13   | -     | 300.0    |
| AHQ-3-2, 3609               | K.KVPQVSTPTLVEVSR.N                                                    | 1640.90605 | 2 | 2.40E-07 | 0.91  | 3.81   | -     | 794.2    |
| AHQ-3-5, 3263 - 3337        | K.KVPQVSTPTLVEVSR.N                                                    | 1640.90605 | 2 | 2.37E-04 | 0.84  | 3.12   | -     | 649.0    |
| AHQ-3-5, 3272               | K.KVPQVSTPTLVEVSR.N                                                    | 1640.90605 | 3 | 5.62E-06 | 0.94  | 5.14   | -     | 1109.3   |
| AHQ-3-8, 2866               | K.KVPQVSTPTLVEVSR.N                                                    | 1640.90605 | 2 | 9.93E-07 | 0.85  | 3.31   | -     | 554.7    |
| AHQ-3-7, 3122 - 3130        | K.KVPQVSTPTLVEVSR.N                                                    | 1640.90605 | 2 | 1.01E-09 | 0.94  | 4.14   | -     | 871.8    |
| AHQ-3-6, 2975               | K.KVPQVSTPTLVEVSR.N                                                    | 1640.90605 | 2 | 7.64E-09 | 0.82  | 3.16   | -     | 502.8    |
| AHQ-3-9, 2980 - 3033        | K.KVPQVSTPTLVEVSR.N                                                    | 1640.90605 | 2 | 2.76E-04 | 0.89  | 3.58   | -     | 924.9    |
| AHQ-3-10, 3191              | K.KVPQVSTPTLVEVSR.N                                                    | 1640.90605 | 2 | 5.83E-10 | 0.91  | 4.08   | -     | 656.4    |
| AHQ-3-6, 3213 - 3267        | K.KVPQVSTPTLVEVSR.N                                                    | 1640.90605 | 2 | 2.92E-07 | 0.91  | 3.71   | -     | 843.4    |
| AHQ-3-1, 3781               | K.KVPQVSTPTLVEVSR.N                                                    | 1640.90605 | 3 | 2.36E-06 | 0.93  | 4.26   | -     | 1239.0   |
| AHQ-3-3, 3564 - 3594        | K.KVPQVSTPTLVEVSR.N                                                    | 1640.90605 | 2 | 8.38E-10 | 0.88  | 3.49   | -     | 746.1    |
| AHQ-3-1, 3452               | K.LVNEVTEFAK.T                                                         | 1150.30633 | 2 | 2.19E-05 | 0.89  | 3.47   | -     | 679.9    |
| AHQ-3-14-, 3208             | K.LVNEVTEFAK.T                                                         | 1150.30633 | 2 | 3.79E-07 | 0.86  | 2.95   | -     | 876.3    |
| AHQ-3-13-, 3275             | K.LVNEVTEFAK.T                                                         | 1150.30633 | 2 | 2.75E-06 | 0.68  | 2.85   | -     | 462.3    |
| AHQ-3-5, 3035 - 3088        | K.LVNEVTEFAK.T                                                         | 1150.30633 | 2 | 1.95E-06 | 0.61  | 2.89   | -     | 355.8    |
| AHQ-3-6, 5642 - 5653        | R.LVRPEVDMCTAFHDNEETFLK.K                                              | 2652.98428 | 3 | 1.25E-05 | 0.98  | 6.50   | -     | 1995.9   |
| AHQ-3-5, 5684               | R.LVRPEVDMCTAFHDNEETFLK.K                                              | 2652.98428 | 3 | 7.59E-06 | 0.98  | 6.64   | -     | 2057.2   |
| AHQ-3-5, 5297               | R.LVRPEVDMCTAFHDNEETFLK.K                                              | 2781.15719 | 3 | 9.33E-08 | 0.98  | 7.87   | -     | 1605.6   |
| AHQ-3-6,                    |                                                                        |            |   |          |       |        |       |          |



|                            |                                                                         |            |   |          |       |        |       |          |
|----------------------------|-------------------------------------------------------------------------|------------|---|----------|-------|--------|-------|----------|
| AHQ-3-3, 4086              | R.RHPDYSVLLLR.L                                                         | 1468.72842 | 2 | 2.85E-07 | 0.89  | 3.62   | -     | 740.2    |
| AHQ-3-6, 3663              | R.RHPDYSVLLLR.L                                                         | 1468.72842 | 3 | 2.20E-07 | 0.95  | 4.86   | -     | 1810.5   |
| AHQ-3-6, 3661              | R.RHPDYSVLLLR.L                                                         | 1468.72842 | 2 | 3.53E-08 | 0.93  | 3.63   | -     | 1016.1   |
| AHQ-3-6, 5782              | R.RHPYFYAPPELLFFAK.R                                                    | 1900.21293 | 3 | 7.51E-07 | 0.97  | 5.43   | -     | 1970.2   |
| AHQ-3-6, 5781 - 5790       | R.RHPYFYAPPELLFFAK.R                                                    | 1900.21293 | 2 | 2.42E-05 | 0.98  | 5.12   | -     | 2141.4   |
| AHQ-3-5, 5675 - 5679       | R.RHPYFYAPPELLFFAK.R                                                    | 1900.21293 | 2 | 6.77E-09 | 0.98  | 5.11   | -     | 2932.8   |
| AHQ-3-6, 7223              | K.RM*PCAEDYLSVVLNQLCVLHEK.T                                             | 2694.10110 | 3 | 5.92E-06 | 0.95  | 5.72   | -     | 1358.3   |
| AHQ-3-5, 7439              | K.RMPCAEDYLSVVLNQLCVLHEK.T                                              | 2678.10170 | 3 | 5.34E-04 | 0.98  | 7.14   | -     | 1564.2   |
| AHQ-3-5, 7399 - 7400       | K.RM*PCAEDYLSVVLNQLCVLHEK.T                                             | 2694.10110 | 3 | 9.67E-04 | 0.96  | 5.75   | -     | 1438.2   |
| AHQ-3-6, 7263              | K.RMPCAEDYLSVVLNQLCVLHEK.T                                              | 2678.10170 | 3 | 3.18E-04 | 0.98  | 6.39   | -     | 2326.5   |
| AHQ-3-1, 4989 - 4990       | R.RPCFSALEVDETVVPK.E                                                    | 1913.14041 | 2 | 6.66E-05 | 0.77  | 3.43   | -     | 486.8    |
| AHQ-3-6, 4609              | R.RPCFSALEVDETVVPK.E                                                    | 1913.14041 | 2 | 1.31E-05 | 0.91  | 4.03   | -     | 674.5    |
| AHQ-3-4, 4853              | R.RPCFSALEVDETVVPK.E                                                    | 1913.14041 | 2 | 1.66E-04 | 0.91  | 4.43   | -     | 612.1    |
| AHQ-3-3, 4932 - 4933       | R.RPCFSALEVDETVVPK.E                                                    | 1913.14041 | 2 | 4.14E-04 | 0.86  | 4.07   | -     | 574.7    |
| AHQ-3-10, 4292 - 4352      | R.RPCFSALEVDETVVPK.E                                                    | 1913.14041 | 2 | 2.27E-04 | 0.84  | 3.16   | -     | 702.2    |
| AHQ-3-11, 4502             | R.RPCFSALEVDETVVPK.E                                                    | 1913.14041 | 2 | 3.04E-04 | 0.90  | 4.03   | -     | 603.3    |
| AHQ-3-5, 4667 - 4735       | R.RPCFSALEVDETVVPK.E                                                    | 1913.14041 | 2 | 9.09E-04 | 0.96  | 4.46   | -     | 1047.0   |
| AHQ-3-5, 6184              | K.SHCIAEVENDEMPADLPSLAADFVESK.D                                         | 2977.22697 | 3 | 1.34E-05 | 0.53  | 3.36   | -     | 299.5    |
| AHQ-3-7, 6923              | K.SHCIAEVENDEMPADLPSLAADFVESK.D                                         | 2977.22697 | 3 | 7.09E-04 | 0.87  | 4.73   | -     | 356.8    |
| AHQ-3-5, 7035 - 7115       | K.SHCIAEVENDEMPADLPSLAADFVESK.D                                         | 2977.22697 | 3 | 2.04E-07 | 0.95  | 5.61   | -     | 923.9    |
| AHQ-3-5, 7037 - 7117       | K.SHCIAEVENDEMPADLPSLAADFVESK.D                                         | 2977.22697 | 2 | 2.13E-07 | 0.95  | 5.09   | -     | 926.2    |
| AHQ-3-4, 7214 - 7220       | K.SHCIAEVENDEMPADLPSLAADFVESK.D                                         | 2977.22697 | 3 | 2.34E-05 | 0.88  | 4.54   | -     | 556.7    |
| AHQ-3-1, 6596 - 6632       | K.SHCIAEVENDEMPADLPSLAADFVESK.D                                         | 2993.22637 | 3 | 1.05E-04 | 0.95  | 5.55   | -     | 983.7    |
| AHQ-3-1, 6626              | K.SHCIAEVENDEMPADLPSLAADFVESK.D                                         | 2993.22637 | 2 | 6.21E-05 | 0.78  | 3.43   | -     | 521.1    |
| AHQ-3-6, 6853 - 6918       | K.SHCIAEVENDEMPADLPSLAADFVESK.D                                         | 2977.22697 | 3 | 2.01E-09 | 0.96  | 6.04   | -     | 844.3    |
| AHQ-3-6, 6905 - 6915       | K.SHCIAEVENDEMPADLPSLAADFVESK.D                                         | 2977.22697 | 2 | 3.96E-04 | 0.93  | 4.52   | -     | 857.4    |
| AHQ-3-5, 2300              | K.SLHTLFGDK.L                                                           | 1018.14800 | 1 | 1.19E-05 | 0.56  | 2.55   | -     | 449.4    |
| AHQ-3-5, 2313              | K.SLHTLFGDK.L                                                           | 1018.14800 | 1 | 4.40E-05 | 0.54  | 2.50   | -     | 431.8    |
| AHQ-3-5, 4937              | K.SLHTLFGDKLCTVATLR.E                                                   | 1934.24913 | 2 | 5.33E-06 | 0.96  | 5.24   | -     | 1159.4   |
| AHQ-3-6, 4865              | K.SLHTLFGDKLCTVATLR.E                                                   | 1934.24913 | 2 | 1.32E-04 | 0.96  | 4.64   | -     | 1402.4   |
| AHQ-3-1, 6125              | K.VFDEFKPLVVEEPQNLIK.Q                                                  | 2046.35142 | 2 | 2.25E-04 | 0.91  | 4.26   | -     | 570.1    |
| AHQ-3-6, 5749 - 5817       | K.VFDEFKPLVVEEPQNLIK.Q                                                  | 2046.35142 | 3 | 1.55E-05 | 0.97  | 5.71   | -     | 1684.0   |
| AHQ-3-5, 6009 - 6083       | K.VFDEFKPLVVEEPQNLIK.Q                                                  | 2046.35142 | 2 | 7.57E-08 | 0.81  | 3.75   | -     | 531.5    |
| AHQ-3-2, 6138              | K.VFDEFKPLVVEEPQNLIK.Q                                                  | 2046.35142 | 2 | 5.34E-05 | 0.92  | 4.48   | -     | 520.3    |
| AHQ-3-5, 5840 - 5908       | K.VFDEFKPLVVEEPQNLIK.Q                                                  | 2046.35142 | 3 | 6.26E-06 | 0.94  | 4.47   | -     | 1004.4   |
| AHQ-3-6, 5357 - 5434       | K.VFDEFKPLVVEEPQNLIK.Q                                                  | 2046.35142 | 2 | 4.61E-05 | 0.76  | 3.85   | -     | 456.5    |
| AHQ-3-1, 6132              | K.VFDEFKPLVVEEPQNLIK.Q                                                  | 2046.35142 | 3 | 2.97E-07 | 0.97  | 5.43   | -     | 1893.7   |
| AHQ-3-6, 5718 - 5798       | K.VFDEFKPLVVEEPQNLIK.Q                                                  | 2046.35142 | 2 | 6.56E-04 | 0.93  | 4.84   | -     | 533.6    |
| AHQ-3-7, 5694              | K.VFDEFKPLVVEEPQNLIK.Q                                                  | 2046.35142 | 2 | 2.09E-06 | 0.92  | 4.81   | -     | 492.0    |
| AHQ-3-7, 5708              | K.VFDEFKPLVVEEPQNLIK.Q                                                  | 2046.35142 | 3 | 7.26E-09 | 0.95  | 4.67   | -     | 1209.2   |
| AHQ-3-5, 5660              | K.VFDEFKPLVVEEPQNLIK.Q                                                  | 2046.35142 | 2 | 2.44E-07 | 0.88  | 3.75   | -     | 575.6    |
| AHQ-3-3, 6030 - 6108       | K.VFDEFKPLVVEEPQNLIK.Q                                                  | 2046.35142 | 2 | 6.53E-06 | 0.81  | 3.60   | -     | 377.4    |
| AHQ-3-5, 5835 - 5913       | K.VFDEFKPLVVEEPQNLIK.Q                                                  | 2046.35142 | 2 | 6.98E-05 | 0.92  | 4.27   | -     | 516.4    |
| AHQ-3-9, 5417              | K.VFDEFKPLVVEEPQNLIK.Q                                                  | 2046.35142 | 2 | 6.79E-04 | 0.76  | 3.38   | -     | 306.3    |
| AHQ-3-10, 5259             | K.VFDEFKPLVVEEPQNLIK.Q                                                  | 2046.35142 | 2 | 1.54E-04 | 0.72  | 3.21   | -     | 379.6    |
| AHQ-3-6, 2887              | K.VHTECCHGDLLCADDR.A                                                    | 2091.20307 | 2 | 2.11E-06 | 0.96  | 4.60   | -     | 1634.0   |
| AHQ-3-3, 3797              | K.VHTECCHGDLLCADDRADLAK.Y                                               | 2589.77855 | 3 | 7.59E-04 | 0.89  | 4.85   | -     | 580.7    |
| AHQ-3-5, 3564              | K.VHTECCHGDLLCADDRADLAK.Y                                               | 2589.77855 | 3 | 1.24E-06 | 0.88  | 4.59   | -     | 600.9    |
| AHQ-3-6, 3514              | K.VHTECCHGDLLCADDRADLAK.Y                                               | 2589.77855 | 3 | 4.94E-05 | 0.79  | 3.85   | -     | 524.8    |
| AHQ-3-5, 3740 - 3811       | K.VPQVSTPTLVEVSR.N                                                      | 1512.73313 | 2 | 9.64E-07 | 0.86  | 3.44   | -     | 614.4    |
| AHQ-3-5, 3797              | K.VPQVSTPTLVEVSR.N                                                      | 1512.73313 | 2 | 1.19E-07 | 0.93  | 3.62   | -     | 951.6    |
| AHQ-3-3, 2329              | K.YICENQDSISSK.L                                                        | 1445.53420 | 2 | 1.07E-06 | 0.86  | 3.81   | -     | 569.5    |
| AHQ-3-5, 2076 - 2224       | K.YICENQDSISSK.L                                                        | 1445.53420 | 1 | 1.03E-05 | 0.58  | 2.92   | -     | 323.5    |
| AHQ-3-6, 2189              | K.YICENQDSISSK.L                                                        | 1445.53420 | 2 | 6.56E-05 | 0.91  | 3.82   | -     | 651.7    |
| AHQ-3-5, 2216              | K.YICENQDSISSK.L                                                        | 1445.53420 | 2 | 5.62E-05 | 0.90  | 3.35   | -     | 736.3    |
| AHQ-3-1, 2449 - 2457       | K.YICENQDSISSK.L                                                        | 1445.53420 | 2 | 3.40E-04 | 0.82  | 3.46   | -     | 483.5    |
| gj 6681259 ref NP_031377.1 | multimerin [Homo sapiens]                                               |            |   | 3.24E-11 | 17.09 | 190.31 | 20.40 | 138070.8 |
| AHQ-3-3, 2356              | R.AQEQQSLIHTNQAESHTAV.GR.G                                              | 2306.43830 | 2 | 1.67E-09 | 0.93  | 4.81   | -     | 781.6    |
| AHQ-3-3, 2261 - 2272       | R.AQEQQSLIHTNQAESHTAV.GR.G                                              | 2306.43830 | 2 | 2.75E-08 | 0.96  | 5.78   | -     | 812.1    |
| AHQ-3-2, 2301              | R.AQEQQSLIHTNQAESHTAV.GR.G                                              | 2306.43830 | 2 | 3.68E-09 | 0.94  | 5.15   | -     | 632.9    |
| AHQ-3-3, 7369              | K.CTSDMETILTFIPQFHR.L                                                   | 2098.38838 | 2 | 1.25E-05 | 0.83  | 3.84   | -     | 576.3    |
| AHQ-3-4, 7394              | K.CTSDMETILTFIPQFHR.L                                                   | 2098.38838 | 2 | 5.65E-08 | 0.87  | 3.66   | -     | 550.5    |
| AHQ-3-3, 7376              | K.CTSDMETILTFIPQFHR.L                                                   | 2098.38838 | 3 | 1.30E-05 | 0.91  | 4.23   | -     | 1239.5   |
| AHQ-3-3, 4117              | R.DQALQLQVLNSR.F                                                        | 1385.55144 | 2 | 1.60E-05 | 0.96  | 4.08   | -     | 1717.6   |
| AHQ-3-3, 2729              | K.EVHEQLLSTEQVSDQK.N                                                    | 1870.99550 | 2 | 6.40E-04 | 0.95  | 4.65   | -     | 928.3    |
| AHQ-3-14-, 6115 - 6144     | K.FPPVTTFSGYLLYR.T                                                      | 1661.92388 | 2 | 3.58E-11 | 0.96  | 4.80   | -     | 856.8    |
| AHQ-3-10, 5732             | K.FPPVTTFSGYLLYR.T                                                      | 1661.92388 | 2 | 4.58E-05 | 0.88  | 3.38   | -     | 567.5    |
| AHQ-3-5, 5703              | K.FVLVQENRPTLTDIVELR.N                                                  | 2143.47187 | 2 | 7.02E-06 | 0.81  | 3.63   | -     | 485.8    |
| AHQ-3-3, 5980              | K.FVLVQENRPTLTDIVELR.N                                                  | 2143.47187 | 2 | 6.90E-04 | 0.89  | 4.33   | -     | 501.6    |
| AHQ-3-3, 5982              | K.FVLVQENRPTLTDIVELR.N                                                  | 2143.47187 | 3 | 3.20E-07 | 0.95  | 4.41   | -     | 1354.1   |
| AHQ-3-4, 5920              | K.FVLVQENRPTLTDIVELR.N                                                  | 2143.47187 | 2 | 3.96E-04 | 0.65  | 3.66   | -     | 338.0    |
| AHQ-3-1, 6317              | K.GLTEFVEPIQIK.T                                                        | 1487.76518 | 2 | 9.09E-05 | 0.81  | 3.70   | -     | 625.4    |
| AHQ-3-3, 6302              | K.GLTEFVEPIQIK.T                                                        | 1487.76518 | 1 | 5.11E-04 | 0.23  | 2.48   | -     | 440.6    |
| AHQ-3-6, 6027              | K.GLTEFVEPIQIK.T                                                        | 1487.76518 | 2 | 5.18E-06 | 0.94  | 4.22   | -     | 1148.5   |
| AHQ-3-3, 2629              | K.GPCGWTGGSCPQR.S                                                       | 1422.52885 | 2 | 1.07E-07 | 0.86  | 3.47   | -     | 696.6    |
| AHQ-3-2, 3839              | K.HSLPDIQLQK.G                                                          | 1292.50915 | 2 | 8.57E-06 | 0.91  | 3.42   | -     | 740.3    |
| AHQ-3-1, 4028              | K.HSLPDIQLQK.G                                                          | 1292.50915 | 2 | 8.73E-07 | 0.88  | 2.82   | -     | 831.6    |
| AHQ-3-3, 3756              | K.HSLPDIQLQK.G                                                          | 1292.50915 | 2 | 3.52E-08 | 0.91  | 3.45   | -     | 740.5    |
| AHQ-3-3, 6884 - 6957       | K.IFQNDMQETVAQLFK.T                                                     | 1813.06743 | 2 | 1.06E-06 | 0.94  | 4.26   | -     | 1339.1   |
| AHQ-3-3, 6708 - 6776       | K.IFQNDMQETVAQLFK.T                                                     | 1813.06743 | 2 | 1.61E-09 | 0.97  | 4.93   | -     | 1666.3   |
| AHQ-3-3, 5213              | K.IFQNDMQETVAQLFK.T                                                     | 1829.06683 | 2 | 4.10E-05 | 0.88  | 4.09   | -     | 660.7    |
| AHQ-3-5, 6620              | K.IFQNDMQETVAQLFK.T                                                     | 1813.06743 | 2 | 3.24E-11 | 0.97  | 5.27   | -     | 1610.5   |
| AHQ-3-3, 5457              | K.IFQNDMQETVAQLFK.T                                                     | 1829.06683 | 2 | 1.10E-08 | 0.95  | 3.92   | -     | 1364.7   |
| AHQ-3-3, 4970              | R.KKIENLTSAVNSLNFIIK.E                                                  | 2033.40055 | 2 | 6.00E-04 | 0.75  | 3.38   | -     | 541.0    |
| AHQ-3-4, 2724              | K.LKEVHEQLLSTEQVSDQK.N                                                  | 2112.32666 | 2 | 4.09E-04 | 0.88  | 3.87   | -     | 801.6    |
| AHQ-3-1, 2989              | K.LKEVHEQLLSTEQVSDQK.N                                                  | 2112.32666 | 2 | 5.15E-06 | 0.95  | 4.80   | -     | 825.3    |
| AHQ-3-3, 2690 - 2745       | K.LKEVHEQLLSTEQVSDQK.N                                                  | 2112.32666 | 2 | 2.81E-06 | 0.98  | 6.23   | -     | 1603.4   |
| AHQ-3-10, 3419             | K.LVEENALAPDFSK.G                                                       | 1433.58810 | 2 | 2.60E-04 | 0.73  | 2.86   | -     | 569.9    |
| AHQ-3-11, 3546             | K.LVEENALAPDFSK.G                                                       | 1433.58810 | 2 | 4.18E-04 | 0.45  | 2.59   | -     | 425.7    |
| AHQ-3-10, 3412 - 3442      | K.LVEENALAPDFSK.G                                                       | 1433.58810 | 1 | 4.04E-05 | 0.52  | 2.34   | -     | 582.0    |
| AHQ-3-1, 7136 - 7214       | K.M*SEQLNDLTYDM*EILQPLLEQASLR.Q                                         | 3041.40062 | 3 | 5.26E-06 | 0.89  | 4.56   | -     | 829.5    |
| AHQ-3-3, 7512 - 7513       | K.TMTIINNAIDFIQDNLYALK.E                                                | 2199.51256 | 2 | 6.60E-09 | 0.95  | 5.19   | -     | 877.3    |
| AHQ-3-3, 7448              | K.TM*TIINNAIDFIQDNLYALK.E                                               | 2215.51196 | 2 | 1.14E-08 | 0.91  | 4.66   | -     | 567.5    |
| AHQ-3-4, 7532              | K.TMTIINNAIDFIQDNLYALK.E                                                | 2199.51256 | 2 | 6.99E-10 | 0.96  | 5.00   | -     | 1075.0   |
| AHQ-3-3, 3414 - 3436       | K.TVSSLSSEDEST.R.Q                                                      | 1424.49324 | 2 | 7.14E-08 | 0.94  | 3.76   | -     | 1074.9   |
| AHQ-3-4, 3384              | K.TVSSLSSEDEST.R.Q                                                      | 1424.49324 | 2 | 1.09E-04 | 0.62  | 2.59   | -     | 649.6    |
| AHQ-3-3, 4028              | R.YNFVLQVAK.T                                                           | 1082.27683 | 2 | 2.12E-05 | 0.91  | 3.33   | -     | 796.6    |
| gj 4505733 ref NP_002610.1 | platelet factor 4 (chemokine (C-X-C motif) ligand 4); platelet factor 4 |            |   | 3.36E-11 | 5.63  | 60.27  | 38.60 | 10844.9  |
| AHQ-3-12, 4096             | K.AGPHCPAQLIATLKN.R                                                     | 1579.84600 | 2 | 7.12E-04 | 0.90  | 3.76   | -     | 835.3    |
| AHQ-3-14-, 3957 - 3965     | K.AGPHCPAQLIATLKN.R                                                     | 1579.84600 | 3 | 2.78E-04 | 0.88  | 3.94   | -     | 1020.1   |
| AHQ-3-14-, 3959 - 3960     | K.AGPHCPAQLIATLKN.R                                                     | 1579.84600 | 2 | 1.36E-07 | 0.93  | 4.22   | -     | 824.9    |
| AHQ-3-14-, 4137 - 4215     | K.AGPHCPAQLIATLKN.R                                                     | 1579.84600 | 2 | 3.61E-08 | 0.87  | 3.57   | -     | 707.1    |
| AHQ-3-14, 5360 - 5436      | K.AGPHCPAQLIATLKN.R                                                     | 1579.84600 | 2 | 7.09E-04 | 0.92  | 3.97   | -     | 895.8    |
| AHQ-3-14, 5239 - 5300      | K.AGPHCPAQLIATLKN.R                                                     | 1579.84600 | 2 | 7.31E-04 | 0.93  | 4.29   | -     | 827.3    |
| AHQ-3-14, 5100 - 5179      | K.AGPHCPAQLIATLKN.R                                                     | 1579.84600 | 2 | 1.63E-04 | 0.95  | 4.40   | -     | 931.9    |
| AHQ-3-14-, 3765            | K.AGPHCPAQLIATLKN.R                                                     | 1907.18700 | 2 | 4.24E-06 | 0.97  | 4.91   | -     | 1443.7   |
| AHQ-3-14-, 3895            | K.AGPHCPAQLIATLKN.R                                                     | 1907.18700 | 2 | 9.00E-09 | 0.94  | 4.72   | -     | 802.4    |

|                             |                                                                          |            |      |          |       |        |       |         |
|-----------------------------|--------------------------------------------------------------------------|------------|------|----------|-------|--------|-------|---------|
| AHQ-3-14-, 3879 - 3943      | K.AGPHCPTAQLIATLKNGR.K                                                   | 1907.18700 | 3    | 2.96E-09 | 0.97  | 5.39   | -     | 2034.3  |
| AHQ-3-14, 4740              | K.AGPHCPTAQLIATLKNGR.K                                                   | 1907.18700 | 2    | 6.80E-05 | 0.92  | 3.91   | -     | 1014.3  |
| AHQ-3-14, 4751              | K.AGPHCPTAQLIATLKNGR.K                                                   | 1907.18700 | 3    | 1.71E-08 | 0.94  | 4.89   | -     | 1279.2  |
| AHQ-3-14, 4865 - 4939       | K.AGPHCPTAQLIATLKNGR.K                                                   | 1907.18700 | 2    | 3.36E-11 | 0.96  | 4.97   | -     | 1150.4  |
| AHQ-3-14, 4944 - 4945       | K.AGPHCPTAQLIATLKNGR.K                                                   | 1907.18700 | 3    | 3.02E-09 | 0.96  | 5.19   | -     | 1472.3  |
| AHQ-3-14, 4452              | K.AGPHCPTAQLIATLKNGR.I                                                   | 2035.35992 | 3    | 3.61E-04 | 0.94  | 4.41   | -     | 1417.2  |
| AHQ-3-14, 4473              | K.AGPHCPTAQLIATLKNGR.I                                                   | 2035.35992 | 2    | 5.82E-06 | 0.95  | 4.07   | -     | 1264.8  |
| AHQ-3-14-, 2395 - 2459      | R.HITSLEVIK.A                                                            | 1040.23825 | 2    | 2.16E-07 | 0.90  | 3.53   | -     | 649.6   |
| AHQ-3-13, 2606              | R.HITSLEVIK.A                                                            | 1040.23825 | 2    | 2.91E-05 | 0.64  | 2.75   | -     | 400.0   |
| AHQ-3-14-, 2520 - 2599      | R.HITSLEVIK.A                                                            | 1040.23825 | 2    | 3.31E-06 | 0.90  | 3.28   | -     | 659.3   |
| AHQ-3-14, 3483 - 3552       | R.HITSLEVIK.A                                                            | 1040.23825 | 2    | 5.13E-06 | 0.85  | 3.27   | -     | 531.8   |
| AHQ-3-14, 3363 - 3423       | R.HITSLEVIK.A                                                            | 1040.23825 | 2    | 1.49E-04 | 0.83  | 3.36   | -     | 470.0   |
| AHQ-3-13-, 2557             | R.HITSLEVIK.A                                                            | 1040.23825 | 2    | 6.18E-05 | 0.68  | 2.74   | -     | 446.4   |
| AHQ-3-14, 3611 - 3621       | R.HITSLEVIK.A                                                            | 1040.23825 | 2    | 8.34E-04 | 0.72  | 2.65   | -     | 466.8   |
| AHQ-3-14-, 4883 - 4907      | K.ICLDLQAPLYK.K                                                          | 1335.59400 | 2    | 1.13E-06 | 0.96  | 4.57   | -     | 1665.3  |
| AHQ-3-13-, 4935             | K.ICLDLQAPLYK.K                                                          | 1335.59400 | 2    | 6.21E-06 | 0.97  | 4.53   | -     | 2205.9  |
| AHQ-3-14-, 4761             | K.ICLDLQAPLYK.K                                                          | 1335.59400 | 2    | 1.42E-05 | 0.91  | 3.15   | -     | 1326.4  |
| AHQ-3-13, 4953              | K.ICLDLQAPLYK.K                                                          | 1335.59400 | 2    | 2.21E-05 | 0.94  | 3.93   | -     | 1218.7  |
| AHQ-3-14, 5979 - 5980       | K.ICLDLQAPLYK.K                                                          | 1335.59400 | 2    | 2.66E-05 | 0.97  | 4.84   | -     | 1975.4  |
| AHQ-3-14, 5988              | K.ICLDLQAPLYK.K                                                          | 1335.59400 | 1    | 9.75E-06 | 0.71  | 3.17   | -     | 552.8   |
| AHQ-3-13-, 4405             | R.KICLDLQAPLYK.K                                                         | 1463.76691 | 2    | 1.61E-05 | 0.98  | 4.88   | -     | 2045.5  |
| AHQ-3-14, 5616              | R.KICLDLQAPLYK.K                                                         | 1463.76691 | 1    | 1.86E-06 | 0.89  | 3.53   | -     | 800.4   |
| AHQ-3-14, 5568 - 5627       | R.KICLDLQAPLYK.K                                                         | 1463.76691 | 2    | 1.09E-05 | 0.97  | 4.78   | -     | 1592.7  |
| AHQ-3-14, 5468              | R.KICLDLQAPLYK.K                                                         | 1463.76691 | 2    | 2.10E-06 | 0.97  | 4.90   | -     | 1556.2  |
| AHQ-3-13, 4402              | R.KICLDLQAPLYK.K                                                         | 1463.76691 | 1    | 2.28E-04 | 0.77  | 2.97   | -     | 808.2   |
| AHQ-3-14-, 4383 - 4460      | R.KICLDLQAPLYK.K                                                         | 1463.76691 | 2    | 4.77E-04 | 0.98  | 5.44   | -     | 1597.2  |
| AHQ-3-14-, 4385 - 4503      | R.KICLDLQAPLYK.K                                                         | 1463.76691 | 1    | 8.19E-04 | 0.84  | 3.53   | -     | 637.6   |
| AHQ-3-14-, 4392 - 4459      | R.KICLDLQAPLYK.K                                                         | 1463.76691 | 3    | 7.90E-05 | 0.91  | 4.35   | -     | 1267.5  |
| AHQ-3-14-, 4511 - 4589      | R.KICLDLQAPLYK.K                                                         | 1463.76691 | 2    | 1.65E-05 | 0.97  | 5.25   | -     | 1667.0  |
| AHQ-3-13, 4397              | R.KICLDLQAPLYK.K                                                         | 1463.76691 | 2    | 1.92E-04 | 0.95  | 4.00   | -     | 1335.3  |
| AHQ-3-14, 5687 - 5691       | R.KICLDLQAPLYK.K                                                         | 1463.76691 | 2    | 2.55E-08 | 0.98  | 5.07   | -     | 1794.6  |
| gi 7656991 ref NP_055140.1  | coronin, actin binding protein, 1C; coronin, actin-binding protein, 1C;  | 6112.34111 | 6112 | 3.41E-11 | 6.11  | 70.28  | 24.30 | 53248.7 |
| AHQ-3-7, 5898 - 5974        | R.AIFLADGNVFTTGFSSR.M                                                    | 1716.91793 | 2    | 4.71E-04 | 0.78  | 2.63   | -     | 959.0   |
| AHQ-3-6, 6047 - 6123        | R.AIFLADGNVFTTGFSSR.M                                                    | 1716.91793 | 2    | 7.20E-08 | 0.94  | 4.18   | -     | 1150.4  |
| AHQ-3-6, 5906 - 5937        | R.AIFLADGNVFTTGFSSR.M                                                    | 1716.91793 | 2    | 3.41E-11 | 0.97  | 5.22   | -     | 1465.4  |
| AHQ-3-6, 2911               | R.HVFGQAVKNDQCYDDIR.V                                                    | 2067.22783 | 2    | 1.80E-07 | 0.96  | 4.70   | -     | 1332.5  |
| AHQ-3-6, 3029               | R.KCEPIIMTVPR.K                                                          | 1345.65706 | 2    | 2.86E-06 | 0.90  | 3.58   | -     | 739.4   |
| AHQ-3-7, 7262 - 7272        | R.KSDLFQDDLYPDTAGPEAALEAEWFEQK.N                                         | 3273.46087 | 3    | 4.77E-06 | 0.94  | 5.00   | -     | 1075.4  |
| AHQ-3-6, 7194               | R.KSDLFQDDLYPDTAGPEAALEAEWFEQK.N                                         | 3273.46087 | 3    | 9.81E-10 | 0.95  | 5.51   | -     | 1013.9  |
| AHQ-3-6, 2414               | R.NGSLICTASK.D                                                           | 1052.18435 | 1    | 1.23E-04 | 0.47  | 2.21   | -     | 328.0   |
| AHQ-3-6, 2197               | K.SIKDTICNODER.I                                                         | 1480.58332 | 2    | 5.86E-04 | 0.92  | 2.83   | -     | 1592.9  |
| AHQ-3-7, 5999               | R.YFEITDESPLYVHYLNTFSSK.E                                                | 2441.63258 | 3    | 9.01E-06 | 0.94  | 4.74   | -     | 879.0   |
| AHQ-3-6, 6109 - 6129        | R.YFEITDESPLYVHYLNTFSSK.E                                                | 2441.63258 | 2    | 2.01E-09 | 0.95  | 4.91   | -     | 811.1   |
| AHQ-3-6, 6110 - 6121        | R.YFEITDESPLYVHYLNTFSSK.E                                                | 2441.63258 | 3    | 5.08E-07 | 0.92  | 4.48   | -     | 1640.8  |
| gi 27482573 ref XP_208709.1 | similar to Ubiquitin-conjugating enzyme E2-18 kDa UbcH7 (Ubiquitin-pro   |            |      | 3.52E-11 | 1.93  | 20.29  | 26.00 | 17875.4 |
| AHQ-3-12, 4890              | K.GQVCLPVISAEWKPATK.T                                                    | 2000.30757 | 3    | 4.96E-04 | 0.49  | 3.03   | -     | 235.1   |
| AHQ-3-12, 4879 - 4882       | K.GQVCLPVISAEWKPATK.T                                                    | 2000.30757 | 2    | 3.48E-07 | 0.97  | 5.83   | -     | 1147.0  |
| AHQ-3-12, 6740              | K.TDQVIQSLIALVNDPQPEHPLR.A                                               | 2484.79318 | 3    | 3.52E-11 | 0.95  | 5.14   | -     | 1141.3  |
| AHQ-3-12, 6739              | K.TDQVIQSLIALVNDPQPEHPLR.A                                               | 2484.79318 | 2    | 7.83E-11 | 0.90  | 4.89   | -     | 401.3   |
| gi 27764873 ref NP_057070.2 | cytokine receptor-like factor 3; cytokine receptor-like molecule 9; cy   |            |      | 3.59E-11 | 0.95  | 10.21  | 3.20  | 49373.6 |
| AHQ-3-7, 3102               | K.LIEHGVNTAEDLVR.E                                                       | 1566.74089 | 2    | 3.59E-11 | 0.95  | 4.15   | -     | 1340.6  |
| gi 5031857 ref NP_005557.1  | lactate dehydrogenase A [Homo sapiens]                                   |            |      | 4.18E-11 | 5.05  | 60.30  | 19.30 | 36688.5 |
| AHQ-3-9, 6987 - 6988        | K.DDVFLSVPCLGQNGISDLVK.V                                                 | 2291.60655 | 2    | 2.56E-05 | 0.92  | 4.29   | -     | 648.5   |
| AHQ-3-13, 6761              | K.DLADELALVDIEDIK.L                                                      | 1658.82864 | 2    | 3.45E-10 | 0.96  | 4.88   | -     | 1364.8  |
| AHQ-3-9, 6723 - 6784        | K.DLADELALVDIEDIK.L                                                      | 1658.82864 | 2    | 1.87E-06 | 0.96  | 4.32   | -     | 1333.3  |
| AHQ-3-13-, 6698             | K.DLADELALVDIEDIK.L                                                      | 1658.82864 | 2    | 4.18E-11 | 0.97  | 5.68   | -     | 1407.1  |
| AHQ-3-9, 6944               | K.DLADELALVDIEDIK.L                                                      | 1900.15980 | 2    | 1.96E-04 | 0.96  | 4.69   | -     | 1297.6  |
| AHQ-3-9, 6977               | K.GLYGIKDDVFLSVPCLGQNGISDLVK.V                                           | 2923.37318 | 2    | 3.90E-09 | 0.86  | 4.33   | -     | 339.7   |
| AHQ-3-9, 2912               | K.SADTLWGIQK.E                                                           | 1119.25233 | 2    | 9.89E-04 | 0.88  | 2.81   | -     | 1479.6  |
| AHQ-3-9, 2913               | K.SADTLWGIQK.E                                                           | 1119.25233 | 1    | 3.13E-05 | 0.43  | 2.65   | -     | 337.0   |
| AHQ-3-9, 1837               | K.VTLTSEEAR.L                                                            | 1135.20693 | 1    | 7.75E-04 | 0.19  | 1.88   | -     | 269.8   |
| AHQ-3-11, 2023              | K.VTLTSEEAR.L                                                            | 1135.20693 | 2    | 2.16E-05 | 0.91  | 3.00   | -     | 1265.9  |
| gi 4557395 ref NP_000058.1  | carbonic anhydrase II; carbonate dehydratase II; carbonic dehydratase;   |            |      | 4.40E-11 | 4.62  | 50.24  | 22.30 | 29248.8 |
| AHQ-3-10, 6454              | K.AVQPDGLAVLGLFLK.V                                                      | 1669.98899 | 2    | 3.08E-05 | 0.94  | 4.59   | -     | 668.2   |
| AHQ-3-10, 3843 - 3903       | R.LLNNGHAFNVFDDSQDK.A                                                    | 2064.15751 | 2    | 1.03E-10 | 0.95  | 4.80   | -     | 1000.9  |
| AHQ-3-10, 2832              | K.KYAAELHLVHWNTK.Y                                                       | 1710.95976 | 2    | 1.04E-08 | 0.98  | 4.64   | -     | 2770.4  |
| AHQ-3-10, 3102              | K.SADTFNDFPR.G                                                           | 1570.21306 | 2    | 4.39E-05 | 0.78  | 2.96   | -     | 691.6   |
| AHQ-3-10, 3206 - 3210       | K.YAAELHLVHWNTK.Y                                                        | 1582.78684 | 2    | 4.40E-11 | 0.97  | 4.64   | -     | 1708.1  |
| gi 18201905 ref NP_000166.2 | glucose phosphate isomerase; neuroleukin; glucose-6-phosphate isomerases |            |      | 5.16E-11 | 4.36  | 50.23  | 16.80 | 63146.7 |
| AHQ-3-7, 6587               | K.LLLANFLAQTALMIR.G                                                      | 1721.05778 | 2    | 3.59E-05 | 0.92  | 3.62   | -     | 1064.1  |
| AHQ-3-7, 2758 - 2759        | K.TFTTQETITNAETA.K                                                       | 1656.77283 | 2    | 1.10E-08 | 0.96  | 4.57   | -     | 1192.9  |
| AHQ-3-7, 7330               | K.TITDVINIGIGSDGLPLMVTEALKPYSSGGPR.V                                     | 3330.79783 | 3    | 2.93E-08 | 0.63  | 3.68   | -     | 435.8   |
| AHQ-3-7, 6000 - 6006        | K.TLAQLNPESLFIASK.T                                                      | 1833.11828 | 2    | 5.73E-04 | 0.90  | 4.32   | -     | 561.1   |
| AHQ-3-7, 3587               | R.VVYVSNIDGTHIAK.T                                                       | 1603.80282 | 2    | 5.16E-11 | 0.96  | 4.24   | -     | 1287.5  |
| gi 4758442 ref NP_004115.1  | glia maturation factor, beta [Homo sapiens]                              |            |      | 5.44E-11 | 0.88  | 10.21  | 16.20 | 16713.1 |
| AHQ-3-12, 6146              | R.LVVLDEELGEGISDELKDELPER.Q                                              | 2638.90589 | 2    | 5.44E-11 | 0.88  | 4.09   | -     | 571.8   |
| AHQ-3-12, 6074 - 6144       | R.LVVLDEELGEGISDELKDELPER.Q                                              | 2638.90589 | 3    | 5.71E-04 | 0.90  | 4.19   | -     | 962.1   |
| gi 18104967 ref NP_000953.2 | prostaglandin-endoperoxide synthase 1 isoform 1 precursor; prostagland   |            |      | 5.47E-11 | 4.61  | 50.29  | 12.90 | 68686.0 |
| AHQ-3-6, 3749               | K.AEHPTWGDQLFQTTR.L                                                      | 1917.02765 | 2    | 1.44E-05 | 0.94  | 4.26   | -     | 896.7   |
| AHQ-3-6, 3758               | K.AEHPTWGDQLFQTTR.L                                                      | 1917.02765 | 3    | 1.04E-06 | 0.89  | 4.30   | -     | 1072.3  |
| AHQ-3-6, 3675 - 3686        | K.ALGHGVLDLGHYGDNLER.Q                                                   | 1937.10524 | 2    | 2.28E-06 | 0.98  | 5.72   | -     | 2030.8  |
| AHQ-3-6, 3162 - 3237        | R.VPDASQDDGPAVERPSTEL                                                    | 1984.06747 | 2    | 8.25E-06 | 0.96  | 5.36   | -     | 971.4   |
| AHQ-3-6, 5850 - 5857        | K.YQVLDGEMYPSPVEEAPVLMHYPR.G                                             | 2822.20799 | 3    | 5.47E-11 | 0.94  | 5.74   | -     | 783.6   |
| AHQ-3-6, 5318               | K.YQVLDGEMYPSPVEEAPVLMHYPR.G                                             | 2838.20739 | 3    | 1.55E-04 | 0.83  | 3.68   | -     | 878.8   |
| gi 4502295 ref NP_001677.1  | ATP synthase, H+ transporting, mitochondrial F1 complex, beta polypepti  |            |      | 5.70E-11 | 14.94 | 180.30 | 41.20 | 57955.2 |
| AHQ-3-7, 2543               | K.AHGGYSVFAGVGER.T                                                       | 1407.51566 | 1    | 1.59E-04 | 0.34  | 2.21   | -     | 249.1   |
| AHQ-3-7, 5540 - 5546        | R.AIAELGYPVAVDPLDSTSR.I                                                  | 1989.21513 | 2    | 7.85E-08 | 0.91  | 4.21   | -     | 505.2   |
| AHQ-3-7, 7486               | R.DQEGQDVLFDINIFR.F                                                      | 1923.11524 | 2    | 4.75E-09 | 0.98  | 5.60   | -     | 1524.1  |
| AHQ-3-7, 5370               | R.FLSQPFQVAEVFTGHM*GK.L                                                  | 2040.33044 | 3    | 6.08E-05 | 0.78  | 3.50   | -     | 543.1   |
| AHQ-3-7, 6031               | R.FLSQPFQVAEVFTGHM*GK.L                                                  | 2024.33104 | 3    | 3.01E-06 | 0.82  | 4.00   | -     | 513.0   |
| AHQ-3-7, 4266 - 4294        | R.FTQAGSEVSALLGR.I                                                       | 1436.59522 | 2    | 1.62E-06 | 0.94  | 3.99   | -     | 1217.4  |
| AHQ-3-7, 4292               | R.FTQAGSEVSALLGR.I                                                       | 1436.59522 | 1    | 2.32E-06 | 0.40  | 2.33   | -     | 93.5    |
| AHQ-3-7, 7228               | K.GFQQILAGEYDHLPEQAFYMGVPIEEAVAK.A                                       | 3368.75991 | 3    | 5.70E-11 | 0.96  | 6.04   | -     | 1031.4  |
| AHQ-3-7, 7360 - 7362        | K.GFQQILAGEYDHLPEQAFYMGVPIEEAVAK.A                                       | 3352.76051 | 3    | 4.58E-06 | 0.78  | 3.79   | -     | 374.2   |
| AHQ-3-7, 3386               | R.IMDPNIVGSEHYDVAR.G                                                     | 1817.01617 | 2    | 1.06E-08 | 0.90  | 3.92   | -     | 694.4   |
| AHQ-3-7, 2968               | R.IMDPNIVGSEHYDVAR.G                                                     | 1833.01557 | 3    | 3.24E-09 | 0.86  | 3.59   | -     | 969.7   |
| AHQ-3-7, 2895 - 2976        | R.IMDPNIVGSEHYDVAR.G                                                     | 1402.59902 | 2    | 9.00E-05 | 0.57  | 2.83   | -     | 698.3   |
| AHQ-3-7, 3858               | R.IPSAVGYOPTLATDM*GTMQER.I                                               | 2283.56820 | 2    | 1.59E-04 | 0.81  | 4.70   | -     | 442.2   |
| AHQ-3-7, 4560               | R.IPSAVGYOPTLATDM*GTMQER.I                                               | 2267.56880 | 2    | 5.99E-05 | 0.94  | 4.53   | -     | 613.0   |
| AHQ-3-7, 2628               | K.IPVGPETLGR.I                                                           | 1039.21035 | 2    | 7.37E-05 | 0.93  | 3.11   | -     | 1008.5  |
| AHQ-3-7, 3946               | R.LVLEVAQLHGESTVR.T                                                      | 1651.88893 | 2    | 1.51E-06 | 0.96  | 4.69   | -     | 1155.6  |
| AHQ-3-7, 5563               | R.VALTGLTVAEYFR.D                                                        | 1440.66861 | 2    | 9.27E-07 | 0.88  | 3.39   | -     | 951.0   |
| AHQ-3-7, 3236 - 3311        | K.VALVYQGMNQPPGAR.A                                                      | 1601.85511 | 2    | 2.81E-08 | 0.82  | 3.18   | -     | 545.8   |
| AHQ-3-7, 4490               | K.VLDSGAPIKIPVGPETLGR.I                                                  | 1920.24231 | 2    | 4.41E-05 | 0.78  | 3.45   | -     | 407.3   |
| gi 4507357 ref NP_003555.1  | transgelin 2; SM22-alpha homolog [Homo sapiens]                          |            |      | 6.16E-11 | 12.99 | 160.29 | 67.30 | 22391.3 |
| AHQ-3-12, 6103 - 6114       | R.DDGLFSGDPNWFPPK.K                                                      | 1595.69288 | 2    | 2.07E-07 | 0.96  | 4.15   | -     | 1342.4  |
| AHQ-3-12, 5942 - 6020       | R.DDGLFSGDPNWFPPK.K                                                      | 1595.69288 | 2    | 1.27E-07 | 0.96  | 4.73   | -     | 1289.5  |

|                             |                                                                        |            |      |          |       |         |   |        |
|-----------------------------|------------------------------------------------------------------------|------------|------|----------|-------|---------|---|--------|
| AHQ-3-12, 5692 - 5755       | R.DDGLFSGDPNWFPPK.K                                                    | 1595.69288 | 2    | 5.31E-05 | 0.89  | 3.22    | - | 988.5  |
| AHQ-3-11, 5763 - 5826       | R.DDGLFSGDPNWFPPK.K                                                    | 1595.69288 | 2    | 5.31E-08 | 0.97  | 5.15    | - | 1691.1 |
| AHQ-3-12, 5803 - 5883       | R.DDGLFSGDPNWFPPK.K                                                    | 1595.69288 | 2    | 8.77E-10 | 0.96  | 4.04    | - | 1458.8 |
| AHQ-3-11, 5914              | R.DDGLFSGDPNWFPPK.K                                                    | 1595.69288 | 2    | 4.71E-07 | 0.95  | 4.27    | - | 1096.6 |
| AHQ-3-11, 5610 - 5678       | R.DDGLFSGDPNWFPPK.K                                                    | 1595.69288 | 2    | 3.57E-08 | 0.96  | 4.35    | - | 1562.0 |
| AHQ-3-12, 7007              | K.DGTVLCCELINALYPEGQAPVK.K                                             | 2289.59066 | 2    | 3.98E-05 | 0.74  | 3.21    | - | 567.7  |
| AHQ-3-13, 6997              | K.DGTVLCCELINALYPEGQAPVK.K                                             | 2289.59066 | 3    | 3.18E-04 | 0.81  | 3.83    | - | 695.3  |
| AHQ-3-13-, 6241 - 6247      | K.DGTVLCCELINALYPEGQAPVK.K                                             | 2289.59066 | 2    | 2.84E-05 | 0.94  | 4.67    | - | 854.5  |
| AHQ-3-12, 6258              | K.DGTVLCCELINALYPEGQAPVK.K                                             | 2289.59066 | 2    | 5.63E-07 | 0.87  | 4.07    | - | 534.6  |
| AHQ-3-11, 6794              | K.DGTVLCCELINALYPEGQAPVK.K                                             | 2289.59066 | 3    | 1.58E-07 | 0.88  | 4.63    | - | 710.9  |
| AHQ-3-14-, 6165 - 6233      | K.DGTVLCCELINALYPEGQAPVK.K                                             | 2289.59066 | 2    | 2.39E-05 | 0.70  | 3.42    | - | 264.1  |
| AHQ-3-13, 6291 - 6313       | K.DGTVLCCELINALYPEGQAPVK.K                                             | 2289.59066 | 2    | 1.01E-04 | 0.65  | 3.49    | - | 349.7  |
| AHQ-3-11, 6042 - 6080       | K.DGTVLCCELINALYPEGQAPVK.K                                             | 2289.59066 | 2    | 2.34E-04 | 0.63  | 3.18    | - | 325.1  |
| AHQ-3-11, 5522              | K.DGTVLCCELINALYPEGQAPVK.K                                             | 2417.76357 | 2    | 3.09E-08 | 0.72  | 3.67    | - | 351.1  |
| AHQ-3-11, 5752 - 5764       | K.DGTVLCCELINALYPEGQAPVK.K                                             | 2417.76357 | 2    | 2.52E-04 | 0.87  | 3.88    | - | 619.9  |
| AHQ-3-11, 5754 - 5760       | K.DGTVLCCELINALYPEGQAPVK.K                                             | 2417.76357 | 3    | 1.82E-06 | 0.62  | 3.07    | - | 636.7  |
| AHQ-3-12, 6943 - 6982       | K.DGTVLCCELINALYPEGQAPVK.K                                             | 2417.76357 | 2    | 2.77E-07 | 0.56  | 3.30    | - | 451.2  |
| AHQ-3-12, 6948 - 6956       | K.DGTVLCCELINALYPEGQAPVK.K                                             | 2417.76357 | 3    | 2.92E-08 | 0.86  | 4.24    | - | 680.2  |
| AHQ-3-13, 6935              | K.DGTVLCCELINALYPEGQAPVK.K                                             | 2417.76357 | 3    | 1.32E-08 | 0.83  | 3.46    | - | 621.0  |
| AHQ-3-11, 6722              | K.DGTVLCCELINALYPEGQAPVK.K                                             | 2417.76357 | 3    | 2.11E-07 | 0.92  | 4.28    | - | 1122.8 |
| AHQ-3-12, 5723              | K.DGTVLCCELINALYPEGQAPVK.K                                             | 2417.76357 | 2    | 1.45E-05 | 0.66  | 3.37    | - | 396.1  |
| AHQ-3-13-, 6845 - 6846      | K.DGTVLCCELINALYPEGQAPVK.K                                             | 2417.76357 | 3    | 1.12E-10 | 0.90  | 4.21    | - | 990.0  |
| AHQ-3-14-, 6792 - 6793      | K.DGTVLCCELINALYPEGQAPVK.K                                             | 2417.76357 | 2    | 7.61E-07 | 0.88  | 4.46    | - | 591.0  |
| AHQ-3-11, 6716              | K.DGTVLCCELINALYPEGQAPVK.K                                             | 2417.76357 | 2    | 5.70E-08 | 0.93  | 4.80    | - | 777.3  |
| AHQ-3-11, 2574 - 2576       | R.GASQAGMTGYGMPR.Q                                                     | 1384.56732 | 2    | 1.20E-05 | 0.94  | 4.11    | - | 1141.4 |
| AHQ-3-11, 1798 - 1855       | R.GPAYGLSR.E                                                           | 820.91599  | 2    | 2.90E-04 | 0.83  | 2.99    | - | 755.8  |
| AHQ-3-12, 2115              | R.GPAYGLSREVQQK.I                                                      | 1433.59456 | 2    | 1.57E-04 | 0.96  | 4.72    | - | 1493.5 |
| AHQ-3-12, 2486              | K.IQASTMAFK.Q                                                          | 997.19374  | 1    | 8.38E-04 | 0.37  | 2.16    | - | 467.3  |
| AHQ-3-12, 2492              | K.IQASTMAFK.Q                                                          | 997.19374  | 1    | 2.60E-04 | 0.60  | 2.49    | - | 665.1  |
| AHQ-3-12, 2210              | K.IQASTMAFK.Q                                                          | 1125.36665 | 2    | 3.23E-04 | 0.89  | 2.85    | - | 1118.4 |
| AHQ-3-12, 2206              | K.IQASTMAFK.Q                                                          | 1125.36665 | 1    | 1.97E-04 | 0.36  | 2.18    | - | 561.0  |
| AHQ-3-11, 2232              | R.NFSDNQLQEGK.N                                                        | 1280.32582 | 2    | 2.35E-07 | 0.71  | 2.97    | - | 419.7  |
| AHQ-3-12, 2322              | R.NFSDNQLQEGK.N                                                        | 1280.32582 | 1    | 6.21E-05 | 0.21  | 2.34    | - | 226.2  |
| AHQ-3-12, 2410              | R.NFSDNQLQEGK.N                                                        | 1280.32582 | 1    | 1.29E-09 | 0.25  | 2.09    | - | 299.4  |
| AHQ-3-12, 2416              | R.NFSDNQLQEGK.N                                                        | 1280.32582 | 2    | 1.07E-04 | 0.85  | 3.25    | - | 809.5  |
| AHQ-3-12, 2190 - 2267       | R.NFSDNQLQEGK.N                                                        | 1280.32582 | 2    | 8.18E-04 | 0.75  | 3.05    | - | 737.9  |
| AHQ-3-11, 2518              | R.NFSDNQLQEGK.N                                                        | 1280.32582 | 1    | 1.22E-06 | 0.12  | 1.87    | - | 288.7  |
| AHQ-3-11, 2080 - 2140       | R.NFSDNQLQEGK.N                                                        | 1280.32582 | 2    | 2.13E-05 | 0.90  | 3.56    | - | 858.4  |
| AHQ-3-13, 4698 - 4726       | K.QM*EQISQFLQAAER.Y                                                    | 1695.87890 | 2    | 3.44E-05 | 0.87  | 3.78    | - | 620.7  |
| AHQ-3-11, 4504              | K.QM*EQISQFLQAAER.Y                                                    | 1695.87890 | 2    | 7.95E-04 | 0.88  | 3.69    | - | 715.8  |
| AHQ-3-14-, 5399             | K.QMEQISQFLQAAER.Y                                                     | 1679.87950 | 2    | 1.61E-05 | 0.94  | 4.50    | - | 953.0  |
| AHQ-3-13, 5446              | K.QMEQISQFLQAAER.Y                                                     | 1679.87950 | 2    | 1.60E-05 | 0.92  | 4.19    | - | 796.7  |
| AHQ-3-13-, 5413 - 5417      | K.QMEQISQFLQAAER.Y                                                     | 1679.87950 | 2    | 2.18E-04 | 0.96  | 5.14    | - | 1047.3 |
| AHQ-3-14-, 4707 - 4715      | K.QM*EQISQFLQAAER.Y                                                    | 1695.87890 | 2    | 2.30E-04 | 0.81  | 3.45    | - | 499.3  |
| AHQ-3-11, 5166 - 5187       | K.QMEQISQFLQAAER.Y                                                     | 1679.87950 | 2    | 6.72E-05 | 0.96  | 4.56    | - | 1304.6 |
| AHQ-3-11, 5184              | K.QMEQISQFLQAAER.Y                                                     | 1679.87950 | 3    | 1.40E-05 | 0.96  | 4.78    | - | 1776.6 |
| AHQ-3-11, 5398 - 5476       | K.QMEQISQFLQAAER.Y                                                     | 1679.87950 | 2    | 1.51E-06 | 0.92  | 3.83    | - | 1058.5 |
| AHQ-3-12, 3550 - 3551       | R.TLM*NLGGLAVAR.D                                                      | 1232.47872 | 2    | 1.98E-04 | 0.89  | 3.86    | - | 775.1  |
| AHQ-3-13-, 4447             | R.TLMNLGGLAVAR.D                                                       | 1216.47932 | 2    | 7.62E-05 | 0.93  | 4.19    | - | 1012.4 |
| AHQ-3-13-, 4361 - 4431      | R.TLMNLGGLAVAR.D                                                       | 1216.47932 | 2    | 1.18E-04 | 0.94  | 4.40    | - | 1077.5 |
| AHQ-3-12, 4788              | R.TLMNLGGLAVAR.D                                                       | 1216.47932 | 2    | 3.10E-05 | 0.92  | 3.77    | - | 1365.8 |
| AHQ-3-11, 3404 - 3406       | R.TLM*NLGGLAVAR.D                                                      | 1232.47872 | 2    | 8.40E-06 | 0.94  | 4.31    | - | 1079.2 |
| AHQ-3-11, 4230 - 4288       | R.TLMNLGGLAVAR.D                                                       | 1216.47932 | 2    | 1.45E-06 | 0.91  | 3.95    | - | 973.5  |
| AHQ-3-12, 4430 - 4439       | R.TLMNLGGLAVAR.D                                                       | 1216.47932 | 2    | 1.62E-04 | 0.89  | 4.18    | - | 883.5  |
| AHQ-3-11, 4240              | R.TLM*NLGGLAVAR.D                                                      | 1232.47872 | 2    | 3.23E-05 | 0.85  | 3.29    | - | 782.3  |
| AHQ-3-11, 4587 - 4596       | R.TLMNLGGLAVAR.D                                                       | 1216.47932 | 2    | 2.05E-07 | 0.94  | 3.96    | - | 1245.8 |
| AHQ-3-12, 3990              | R.TLM*NLGGLAVAR.D                                                      | 1232.47872 | 2    | 6.81E-05 | 0.91  | 3.41    | - | 1128.8 |
| AHQ-3-11, 4318              | R.TLMNLGGLAVAR.D                                                       | 1216.47932 | 2    | 9.04E-08 | 0.91  | 3.83    | - | 1036.1 |
| AHQ-3-13, 4417 - 4419       | R.TLMNLGGLAVAR.D                                                       | 1216.47932 | 2    | 2.22E-06 | 0.90  | 4.28    | - | 874.2  |
| AHQ-3-12, 3812              | R.TLM*NLGGLAVAR.D                                                      | 1232.47872 | 2    | 1.51E-05 | 0.92  | 2.90    | - | 1396.5 |
| AHQ-3-14-, 3585             | R.TLM*NLGGLAVAR.D                                                      | 1232.47872 | 2    | 5.91E-05 | 0.91  | 3.30    | - | 1410.8 |
| AHQ-3-12, 6918 - 6986       | R.YGINTTDFQTVDLWEGK.N                                                  | 2101.30080 | 2    | 9.66E-10 | 0.95  | 4.81    | - | 747.7  |
| AHQ-3-13, 6833 - 6835       | R.YGINTTDFQTVDLWEGK.N                                                  | 2101.30080 | 2    | 3.44E-05 | 0.97  | 5.31    | - | 1219.9 |
| AHQ-3-12, 6771 - 6850       | R.YGINTTDFQTVDLWEGK.N                                                  | 2101.30080 | 2    | 2.47E-08 | 0.96  | 5.28    | - | 1176.1 |
| AHQ-3-12, 6671              | R.YGINTTDFQTVDLWEGK.N                                                  | 2101.30080 | 2    | 6.17E-06 | 0.90  | 3.99    | - | 972.5  |
| AHQ-3-11, 6572 - 6626       | R.YGINTTDFQTVDLWEGK.N                                                  | 2101.30080 | 2    | 6.16E-11 | 0.97  | 5.66    | - | 1421.1 |
| AHQ-3-11, 6406 - 6468       | R.YGINTTDFQTVDLWEGK.N                                                  | 2101.30080 | 2    | 5.33E-05 | 0.79  | 3.18    | - | 776.4  |
| AHQ-3-14-, 6711 - 6712      | R.YGINTTDFQTVDLWEGK.N                                                  | 2101.30080 | 2    | 5.42E-10 | 0.97  | 5.72    | - | 1073.1 |
| AHQ-3-11, 6824 - 6894       | R.YGINTTDFQTVDLWEGK.N                                                  | 2101.30080 | 2    | 3.95E-06 | 0.95  | 4.42    | - | 1048.5 |
| AHQ-3-13-, 6766             | R.YGINTTDFQTVDLWEGK.N                                                  | 2101.30080 | 2    | 4.51E-10 | 0.97  | 5.31    | - | 1602.3 |
| AHQ-3-11, 6632              | R.YGINTTDFQTVDLWEGK.N                                                  | 2101.30080 | 3    | 2.30E-05 | 0.75  | 3.46    | - | 692.8  |
| AHQ-3-11, 6192 - 6258       | R.YGINTTDFQTVDLWEGK.N                                                  | 2101.30080 | 2    | 7.84E-06 | 0.95  | 4.67    | - | 1210.7 |
| AHQ-3-12, 6354 - 6423       | R.YGINTTDFQTVDLWEGK.N                                                  | 2101.30080 | 2    | 2.92E-04 | 0.91  | 4.34    | - | 923.5  |
| AHQ-3-11, 6695              | R.YGINTTDFQTVDLWEGK.N                                                  | 2101.30080 | 2    | 1.78E-06 | 0.94  | 4.27    | - | 1201.7 |
| AHQ-3-11, 6622              | R.YGINTTDFQTVDLWEGKNMVCQR.T                                            | 2962.30673 | 3    | 2.31E-08 | 0.85  | 3.87    | - | 699.1  |
| AHQ-3-12, 6639              | R.YGINTTDFQTVDLWEGKNM*ACVQR.T                                          | 2978.30613 | 3    | 1.56E-07 | 0.84  | 4.23    | - | 615.6  |
| AHQ-3-12, 6842              | R.YGINTTDFQTVDLWEGKNMVCQR.T                                            | 2962.30673 | 3    | 7.46E-08 | 0.91  | 4.89    | - | 988.0  |
| gi 28827809 ref NP_789797.1 | nucleoside diphosphate kinase B-like [Homo sapiens]                    | 6.33E-11   | 5.14 | 60.26    | 50.40 | 15529.0 |   |        |
| AHQ-3-12, 3786              | K.DRPFPPGLVK.Y                                                         | 1176.39185 | 2    | 2.52E-04 | 0.85  | 3.01    | - | 976.7  |
| AHQ-3-12, 3340              | R.GDFCIQVGR.N                                                          | 1053.17404 | 2    | 1.16E-04 | 0.93  | 3.54    | - | 1284.8 |
| AHQ-3-12, 3352              | R.GDFCIQVGR.N                                                          | 1053.17404 | 1    | 7.69E-04 | 0.37  | 2.00    | - | 250.8  |
| AHQ-3-12, 3334              | R.GDFCIQVGR.N                                                          | 1053.17404 | 1    | 6.95E-04 | 0.36  | 1.98    | - | 393.4  |
| AHQ-3-12, 2086              | R.NIIHGSDSVKSAEK.E                                                     | 1485.62464 | 1    | 1.16E-06 | 0.75  | 3.81    | - | 548.6  |
| AHQ-3-12, 2079 - 2082       | R.NIIHGSDSVKSAEK.E                                                     | 1485.62464 | 2    | 1.15E-08 | 0.88  | 3.96    | - | 1016.4 |
| AHQ-3-12, 2579              | R.VM*LGETNPADSKPGTIR.G                                                 | 1803.03091 | 2    | 8.73E-05 | 0.77  | 3.52    | - | 713.9  |
| AHQ-3-12, 2479              | R.VM*LGETNPADSKPGTIR.G                                                 | 1803.03091 | 2    | 2.50E-06 | 0.72  | 3.18    | - | 476.7  |
| AHQ-3-12, 2688 - 2768       | R.VMLGETNPADSKPGTIR.G                                                  | 1787.03151 | 2    | 6.33E-11 | 0.81  | 3.44    | - | 744.2  |
| AHQ-3-12, 6924              | K.YM*NSGPVAMVVWGLNVVK.T                                                | 2110.48562 | 2    | 3.50E-08 | 0.95  | 5.11    | - | 1002.5 |
| gi 7657486 ref NP_055217.1  | low molecular mass ubiquitinone-binding protein [Homo sapiens]         | 6.71E-11   | 0.97 | 10.23    | 14.00 | 11316.3 |   |        |
| AHQ-3-14-, 3821             | R.HVISYSLSPFEQR.A                                                      | 1563.73870 | 2    | 6.71E-11 | 0.97  | 4.53    | - | 1572.8 |
| gi 27478749 ref XP_208411.1 | similar to L-lactate dehydrogenase A chain (LDH-A) (LDH muscle subunit | 6.86E-11   | 1.93 | 20.31    | 13.40 | 25628.5 |   |        |
| AHQ-3-9, 4211               | K.GEMMDLQHGSLFLR.T                                                     | 1634.90537 | 2    | 6.86E-11 | 0.97  | 4.96    | - | 1474.1 |
| AHQ-3-9, 7031 - 7032        | K.LLIVSNPVDILTYYVWK.I                                                  | 1945.33337 | 2    | 4.75E-07 | 0.96  | 6.29    | - | 920.3  |
| gi 5453595 ref NP_006358.1  | adenylyl cyclase-associated protein [Homo sapiens]                     | 6.88E-11   | 9.21 | 130.32   | 31.80 | 51672.7 |   |        |
| AHQ-3-7, 2546 - 2548        | R.ALLVTASQCQQPAENK.L                                                   | 1759.96271 | 2    | 6.79E-07 | 0.96  | 5.14    | - | 1151.2 |
| AHQ-3-14-, 2711             | R.ALLVTASQCQQPAENK.L                                                   | 1759.96271 | 2    | 1.10E-04 | 0.94  | 4.28    | - | 899.6  |
| AHQ-3-11, 2666              | R.ALLVTASQCQQPAENK.L                                                   | 1759.96271 | 2    | 4.86E-06 | 0.93  | 4.09    | - | 983.8  |
| AHQ-3-13-, 2785             | R.ALLVTASQCQQPAENK.L                                                   | 1759.96271 | 2    | 2.44E-04 | 0.97  | 4.92    | - | 1288.7 |
| AHQ-3-13, 2830 - 2831       | R.ALLVTASQCQQPAENK.L                                                   | 1759.96271 | 2    | 2.33E-05 | 0.96  | 4.83    | - | 1182.9 |
| AHQ-3-7, 6779               | R.ALLVTASQCQQPAENKLSDLLAPISEQIK.E                                      | 3168.60826 | 3    | 6.25E-06 | 0.88  | 3.96    | - | 1097.2 |
| AHQ-3-7, 6563               | R.ALLVTASQCQQPAENKLSDLLAPISEQIK.E                                      | 3168.60826 | 3    | 5.49E-06 | 0.95  | 5.27    | - | 1075.2 |
| AHQ-3-7, 2452               | K.CVNTTLQIK.Q                                                          | 1078.26494 | 1    | 2.39E-04 | 0.20  | 2.76    | - | 146.9  |
| AHQ-3-7, 3306               | K.EMNDAAMFYTNR.V                                                       | 1463.62130 | 2    | 9.37E-04 | 0.49  | 2.71    | - | 520.9  |
| AHQ-3-7, 2931               | K.EPAVLELEGK.K                                                         | 1085.23265 | 1    | 4.74E-05 | 0.18  | 2.12    | - | 232.4  |
| AHQ-3-11, 2502              | K.KEPVLELEGK.K                                                         | 1213.40557 | 2    | 9.66E-05 | 0.65  | 2.80    | - | 343.8  |
| AHQ-3-10, 2492              | K.KEPVLELEGK.K                                                         | 1213.40557 | 1    | 2.87E-08 | 0.33  | 2.33    | - | 352.7  |
| AHQ-3-7, 7512 - 7550        | K.LGLVFDVVIGVEINSK.D                                                   | 1931.26186 | 2    | 6.88E-11 | 0.98  | 6.31    | - | 1993.7 |

|                            |                                                                        |            |   |          |       |        |       |         |
|----------------------------|------------------------------------------------------------------------|------------|---|----------|-------|--------|-------|---------|
| AHQ-3-7, 4830              | K.LSDLLAPISEQIK.E                                                      | 1427.66814 | 1 | 2.80E-05 | 0.48  | 2.57   | -     | 501.4   |
| AHQ-3-13, 5038             | K.LSDLLAPISEQIK.E                                                      | 1427.66814 | 2 | 8.70E-06 | 0.86  | 3.17   | -     | 866.2   |
| AHQ-3-12, 5034             | K.LSDLLAPISEQIK.E                                                      | 1427.66814 | 2 | 3.95E-04 | 0.72  | 3.32   | -     | 546.0   |
| AHQ-3-11, 4799             | K.LSDLLAPISEQIK.E                                                      | 1427.66814 | 2 | 1.59E-04 | 0.87  | 3.45   | -     | 847.0   |
| AHQ-3-9, 4612              | K.LSDLLAPISEQIK.E                                                      | 1427.66814 | 1 | 1.21E-06 | 0.61  | 2.81   | -     | 531.2   |
| AHQ-3-7, 2848              | K.NSLDCEIVSAK.S                                                        | 1237.36245 | 2 | 2.64E-05 | 0.93  | 3.41   | -     | 1157.6  |
| AHQ-3-9, 4255 - 4257       | R.SALFAQINQGESITHALK.H                                                 | 1929.16615 | 2 | 5.03E-06 | 0.93  | 4.65   | -     | 854.4   |
| AHQ-3-7, 4684              | R.SALFAQINQGESITHALK.H                                                 | 1929.16615 | 2 | 7.35E-07 | 0.87  | 4.21   | -     | 522.9   |
| AHQ-3-8, 4225              | R.SALFAQINQGESITHALK.H                                                 | 1929.16615 | 2 | 4.71E-08 | 0.96  | 5.39   | -     | 1134.9  |
| AHQ-3-7, 4402 - 4435       | R.SALFAQINQGESITHALK.H                                                 | 1929.16615 | 2 | 8.31E-07 | 0.95  | 5.35   | -     | 908.9   |
| AHQ-3-7, 6607 - 6671       | K.SSEMNVLIPTEGGDFNEFPVPEQFK.T                                          | 2813.08809 | 2 | 9.58E-06 | 0.87  | 3.83   | -     | 413.0   |
| AHQ-3-14-, 6099            | K.SSEMNVLIPTEGGDFNEFPVPEQFK.T                                          | 2829.08749 | 2 | 2.45E-05 | 0.77  | 3.61   | -     | 215.3   |
| AHQ-3-14-, 6349            | K.SSEMNVLIPTEGGDFNEFPVPEQFK.T                                          | 2813.08809 | 2 | 1.50E-06 | 0.60  | 2.80   | -     | 263.7   |
| AHQ-3-14-, 6212            | K.SSEMNVLIPTEGGDFNEFPVPEQFK.T                                          | 2829.08749 | 2 | 1.64E-05 | 0.74  | 3.70   | -     | 231.3   |
| AHQ-3-7, 6910 - 6926       | K.SSEMNVLIPTEGGDFNEFPVPEQFK.T                                          | 2813.08809 | 2 | 5.28E-05 | 0.65  | 3.20   | -     | 186.5   |
| AHQ-3-14-, 6544            | K.SSEMNVLIPTEGGDFNEFPVPEQFK.T                                          | 2813.08809 | 2 | 6.99E-05 | 0.52  | 2.71   | -     | 225.3   |
| AHQ-3-14-, 6436 - 6509     | K.SSEMNVLIPTEGGDFNEFPVPEQFK.T                                          | 2813.08809 | 2 | 1.08E-06 | 0.92  | 4.50   | -     | 451.5   |
| AHQ-3-7, 4790 - 4815       | R.VENQENSVNLVIDTELK.Q                                                  | 2074.23206 | 2 | 1.87E-05 | 0.94  | 4.50   | -     | 846.2   |
| AHQ-3-7, 4952              | R.VENQENSVNLVIDTELK.Q                                                  | 2074.23206 | 2 | 1.48E-07 | 0.85  | 3.66   | -     | 580.6   |
| AHQ-3-13, 4755 - 4761      | R.VENQENSVNLVIDTELK.Q                                                  | 2074.23206 | 2 | 6.48E-04 | 0.86  | 4.04   | -     | 613.2   |
| AHQ-3-7, 4576 - 4650       | R.VENQENSVNLVIDTELK.Q                                                  | 2074.23206 | 2 | 2.82E-05 | 0.92  | 4.53   | -     | 731.3   |
| AHQ-3-11, 4570             | R.VENQENSVNLVIDTELK.Q                                                  | 2074.23206 | 3 | 5.37E-05 | 0.91  | 4.31   | -     | 1142.4  |
| AHQ-3-13-, 4771            | R.VENQENSVNLVIDTELK.Q                                                  | 2074.23206 | 2 | 1.47E-04 | 0.91  | 3.89   | -     | 735.5   |
| AHQ-3-11, 4554 - 4634      | R.VENQENSVNLVIDTELK.Q                                                  | 2074.23206 | 2 | 2.74E-07 | 0.90  | 4.16   | -     | 681.0   |
| AHQ-3-7, 5035 - 5044       | R.VENQENSVNLVIDTELK.Q                                                  | 2074.23206 | 2 | 1.12E-08 | 0.95  | 4.54   | -     | 1131.1  |
| AHQ-3-10, 4354 - 4356      | R.VENQENSVNLVIDTELK.Q                                                  | 2074.23206 | 2 | 9.15E-09 | 0.96  | 5.39   | -     | 1025.0  |
| AHQ-3-9, 4387              | R.VENQENSVNLVIDTELK.Q                                                  | 2074.23206 | 2 | 4.58E-05 | 0.68  | 3.12   | -     | 476.0   |
| AHQ-3-12, 4755             | R.VENQENSVNLVIDTELK.Q                                                  | 2074.23206 | 2 | 2.15E-05 | 0.89  | 3.78   | -     | 816.9   |
| AHQ-3-8, 4425 - 4435       | R.VENQENSVNLVIDTELK.Q                                                  | 2074.23206 | 2 | 2.56E-09 | 0.95  | 5.50   | -     | 803.0   |
| gj17921989[ref]NP_005991.1 | tubulin, alpha 1; testis-specific alpha tubulin; tubulin alpha-1 chain |            |   | 7.43E-11 | 11.64 | 140.28 | 33.00 | 49924.1 |
| AHQ-3-12, 4595             | R.AFVHWYVYVGEQM.EEGGFSEAR.E                                            | 2347.50435 | 2 | 2.11E-05 | 0.73  | 2.73   | -     | 791.3   |
| AHQ-3-13-, 4594 - 4666     | R.AFVHWYVYVGEQM.EEGGFSEAR.E                                            | 2347.50435 | 3 | 7.63E-05 | 0.96  | 4.59   | -     | 1735.4  |
| AHQ-3-12, 4596             | R.AFVHWYVYVGEQM.EEGGFSEAR.E                                            | 2347.50435 | 3 | 1.24E-05 | 0.95  | 4.44   | -     | 1573.6  |
| AHQ-3-12, 5994 - 6062      | R.AVCMLSNTTAAIEAWAR.L                                                  | 1867.13992 | 2 | 1.76E-09 | 0.96  | 4.79   | -     | 1871.3  |
| AHQ-3-14-, 5179 - 5180     | R.AVCMLSNTTAAIEAWAR.L                                                  | 1883.13932 | 2 | 3.23E-06 | 0.91  | 4.15   | -     | 1094.1  |
| AHQ-3-13-, 5989 - 6057     | R.AVCMLSNTTAAIEAWAR.L                                                  | 1867.13992 | 2 | 2.76E-07 | 0.96  | 4.65   | -     | 1707.4  |
| AHQ-3-14-, 5956 - 5959     | R.AVCMLSNTTAAIEAWAR.L                                                  | 1867.13992 | 2 | 2.89E-05 | 0.97  | 5.26   | -     | 1692.7  |
| AHQ-3-7, 6338 - 6406       | R.AVCMLSNTTAAIEAWAR.L                                                  | 1867.13992 | 2 | 4.35E-04 | 0.74  | 3.59   | -     | 811.3   |
| AHQ-3-13-, 5439 - 5443     | R.AVCMLSNTTAAIEAWAR.L                                                  | 1883.13932 | 2 | 1.26E-08 | 0.97  | 5.66   | -     | 1473.3  |
| AHQ-3-13-, 5194 - 5217     | R.AVCMLSNTTAAIEAWAR.L                                                  | 1883.13932 | 2 | 1.46E-09 | 0.97  | 5.13   | -     | 1426.2  |
| AHQ-3-13, 5218             | R.AVCMLSNTTAAIEAWAR.L                                                  | 1883.13932 | 2 | 1.48E-04 | 0.93  | 3.11   | -     | 1825.7  |
| AHQ-3-7, 6704              | R.AVCMLSNTTAAIEAWAR.L                                                  | 1867.13992 | 2 | 2.58E-06 | 0.76  | 3.74   | -     | 519.7   |
| AHQ-3-14, 6153             | R.AVCMLSNTTAAIEAWAR.L                                                  | 1883.13932 | 2 | 2.51E-07 | 0.92  | 3.42   | -     | 1389.3  |
| AHQ-3-7, 6203 - 6272       | R.AVCMLSNTTAAIEAWAR.L                                                  | 1867.13992 | 2 | 2.68E-06 | 0.96  | 4.72   | -     | 1503.8  |
| AHQ-3-13, 5415 - 5491      | R.AVCMLSNTTAAIEAWAR.L                                                  | 1883.13932 | 2 | 4.00E-08 | 0.95  | 4.18   | -     | 1380.8  |
| AHQ-3-13, 6081 - 6087      | R.AVFVDLEPTVIDEIR.N                                                    | 1716.95615 | 2 | 1.59E-06 | 0.89  | 3.54   | -     | 1290.8  |
| AHQ-3-11, 5818 - 5822      | R.AVFVDLEPTVIDEIR.N                                                    | 1716.95615 | 2 | 3.06E-08 | 0.92  | 3.64   | -     | 1609.2  |
| AHQ-3-9, 5828 - 5845       | R.AVFVDLEPTVIDEIR.N                                                    | 1716.95615 | 2 | 1.93E-08 | 0.68  | 2.72   | -     | 920.0   |
| AHQ-3-10, 5598 - 5606      | R.AVFVDLEPTVIDEIR.N                                                    | 1716.95615 | 2 | 1.01E-05 | 0.86  | 3.31   | -     | 1151.2  |
| AHQ-3-12, 6031             | R.AVFVDLEPTVIDEIR.N                                                    | 1716.95615 | 2 | 3.27E-06 | 0.69  | 2.82   | -     | 863.2   |
| AHQ-3-7, 6070 - 6148       | R.AVFVDLEPTVIDEIR.N                                                    | 1716.95615 | 2 | 1.15E-06 | 0.93  | 3.92   | -     | 1471.1  |
| AHQ-3-7, 3383 - 3391       | K.DVNAAIAAIK.T                                                         | 986.14745  | 1 | 3.37E-05 | 0.85  | 3.03   | -     | 951.0   |
| AHQ-3-7, 3480              | K.DVNAAIAAIK.T                                                         | 986.14745  | 1 | 1.66E-04 | 0.92  | 2.81   | -     | 1618.7  |
| AHQ-3-7, 3160              | K.DVNAAIAAIK.T                                                         | 986.14745  | 2 | 4.65E-05 | 0.87  | 3.03   | -     | 1237.6  |
| AHQ-3-2, 3159              | K.DVNAAIAAIK.T                                                         | 986.14745  | 1 | 2.19E-04 | 0.25  | 2.21   | -     | 437.7   |
| AHQ-3-7, 3151              | K.DVNAAIAAIK.T                                                         | 986.14745  | 1 | 6.91E-04 | 0.24  | 1.99   | -     | 464.2   |
| AHQ-3-11, 3252             | K.DVNAAIAAIK.T                                                         | 986.14745  | 2 | 5.43E-05 | 0.94  | 3.59   | -     | 1260.7  |
| AHQ-3-4, 3458              | K.DVNAAIAAIK.T                                                         | 986.14745  | 1 | 2.53E-04 | 0.17  | 1.91   | -     | 490.4   |
| AHQ-3-12, 3023             | K.DVNAAIAAIK.T                                                         | 986.14745  | 1 | 1.20E-04 | 0.64  | 2.30   | -     | 714.0   |
| AHQ-3-7, 2916              | K.DVNAAIAAIK.T                                                         | 986.14745  | 1 | 4.07E-04 | 0.61  | 2.19   | -     | 914.4   |
| AHQ-3-12, 3360 - 3367      | K.DVNAAIAAIK.T                                                         | 986.14745  | 2 | 9.30E-05 | 0.94  | 3.83   | -     | 1278.0  |
| AHQ-3-12, 3547             | K.DVNAAIAAIK.T                                                         | 986.14745  | 1 | 4.79E-04 | 0.73  | 2.24   | -     | 874.8   |
| AHQ-3-3, 3136              | K.DVNAAIAAIK.T                                                         | 986.14745  | 1 | 1.57E-04 | 0.54  | 2.38   | -     | 598.3   |
| AHQ-3-9, 4608              | R.IHFPLATYAPVISAIEA.A                                                  | 1758.05310 | 2 | 3.18E-05 | 0.84  | 2.96   | -     | 587.9   |
| AHQ-3-7, 4663 - 4734       | R.IHFPLATYAPVISAIEA.A                                                  | 1758.05310 | 2 | 1.58E-06 | 0.96  | 4.34   | -     | 987.5   |
| AHQ-3-3, 5325              | R.IHFPLATYAPVISAIEA.A                                                  | 1758.05310 | 2 | 1.38E-06 | 0.86  | 3.38   | -     | 535.8   |
| AHQ-3-7, 4748 - 4818       | R.IHFPLATYAPVISAIEA.A                                                  | 1758.05310 | 2 | 1.29E-07 | 0.93  | 4.10   | -     | 676.1   |
| AHQ-3-11, 4870             | R.IHFPLATYAPVISAIEA.A                                                  | 1758.05310 | 2 | 2.55E-05 | 0.88  | 3.90   | -     | 585.0   |
| AHQ-3-9, 4471 - 4543       | R.IHFPLATYAPVISAIEA.A                                                  | 1758.05310 | 2 | 7.64E-05 | 0.93  | 3.80   | -     | 837.0   |
| AHQ-3-7, 6930 - 6990       | R.LISQIVSSITASLR.F                                                     | 1488.75471 | 2 | 1.02E-07 | 0.96  | 4.53   | -     | 1333.8  |
| AHQ-3-7, 7055 - 7114       | R.LISQIVSSITASLR.F                                                     | 1488.75471 | 2 | 3.71E-06 | 0.87  | 3.15   | -     | 1026.7  |
| AHQ-3-9, 6555              | R.LISQIVSSITASLR.F                                                     | 1488.75471 | 2 | 1.27E-07 | 0.96  | 4.23   | -     | 1406.2  |
| AHQ-3-14-, 6591            | R.LISQIVSSITASLR.F                                                     | 1488.75471 | 2 | 1.03E-05 | 0.92  | 4.00   | -     | 966.5   |
| AHQ-3-7, 6815 - 6878       | R.LISQIVSSITASLR.F                                                     | 1488.75471 | 2 | 3.64E-07 | 0.92  | 4.07   | -     | 798.0   |
| AHQ-3-2, 3559              | R.NLDIERPTYTLNLR.L                                                     | 1719.88022 | 2 | 5.83E-05 | 0.53  | 3.10   | -     | 379.9   |
| AHQ-3-6, 3217              | R.NLDIERPTYTLNLR.L                                                     | 1719.88022 | 2 | 3.95E-07 | 0.34  | 2.70   | -     | 288.1   |
| AHQ-3-7, 3118 - 3186       | R.NLDIERPTYTLNLR.L                                                     | 1719.88022 | 2 | 1.21E-07 | 0.80  | 3.55   | -     | 472.6   |
| AHQ-3-13, 3418 - 3421      | R.NLDIERPTYTLNLR.L                                                     | 1719.88022 | 2 | 5.18E-05 | 0.74  | 3.41   | -     | 556.8   |
| AHQ-3-8, 2877              | R.NLDIERPTYTLNLR.L                                                     | 1719.88022 | 2 | 1.60E-05 | 0.38  | 2.55   | -     | 258.6   |
| AHQ-3-5, 3268              | R.NLDIERPTYTLNLR.L                                                     | 1719.88022 | 2 | 2.15E-04 | 0.21  | 2.56   | -     | 167.6   |
| AHQ-3-1, 3604 - 3680       | R.NLDIERPTYTLNLR.L                                                     | 1719.88022 | 2 | 2.04E-04 | 0.20  | 2.82   | -     | 290.1   |
| AHQ-3-9, 3493 - 3495       | R.QLFHPEQLITGK.E                                                       | 1411.63050 | 2 | 7.74E-04 | 0.41  | 2.98   | -     | 103.6   |
| AHQ-3-4, 6002              | R.SIQFVDWCPTGFK.V                                                      | 1586.79232 | 2 | 3.46E-04 | 0.90  | 3.98   | -     | 671.0   |
| AHQ-3-3, 6060              | R.SIQFVDWCPTGFK.V                                                      | 1586.79232 | 2 | 1.85E-06 | 0.91  | 3.83   | -     | 832.4   |
| AHQ-3-12, 5663 - 5671      | R.SIQFVDWCPTGFK.V                                                      | 1586.79232 | 2 | 1.41E-07 | 0.93  | 3.98   | -     | 982.2   |
| AHQ-3-7, 5626 - 5695       | R.SIQFVDWCPTGFK.V                                                      | 1586.79232 | 2 | 1.12E-07 | 0.96  | 5.01   | -     | 1094.3  |
| AHQ-3-5, 5829              | R.SIQFVDWCPTGFK.V                                                      | 1586.79232 | 2 | 1.32E-05 | 0.91  | 3.64   | -     | 869.9   |
| AHQ-3-13-, 5633 - 5643     | R.SIQFVDWCPTGFK.V                                                      | 1586.79232 | 2 | 6.70E-04 | 0.88  | 3.25   | -     | 948.1   |
| AHQ-3-1, 6112              | R.SIQFVDWCPTGFK.V                                                      | 1586.79232 | 2 | 2.76E-04 | 0.79  | 2.75   | -     | 730.4   |
| AHQ-3-7, 5740 - 5814       | K.TIGGGDSFTTFFCETGAGK.H                                                | 2070.17889 | 2 | 3.41E-07 | 0.82  | 3.69   | -     | 520.3   |
| AHQ-3-7, 5886              | K.TIGGGDSFTTFFCETGAGK.H                                                | 2070.17889 | 2 | 8.01E-08 | 0.80  | 3.35   | -     | 501.8   |
| AHQ-3-7, 5983 - 5992       | K.TIGGGDSFTTFFCETGAGK.H                                                | 2070.17889 | 2 | 2.55E-09 | 0.84  | 3.96   | -     | 517.6   |
| AHQ-3-7, 5683 - 5750       | K.TIGGGDSFTTFFCETGAGK.H                                                | 2070.17889 | 2 | 9.71E-09 | 0.92  | 4.05   | -     | 868.2   |
| AHQ-3-14-, 5607            | K.TIGGGDSFTTFFCETGAGK.H                                                | 2070.17889 | 2 | 7.43E-11 | 0.95  | 4.84   | -     | 904.4   |
| AHQ-3-12, 5626             | K.TIGGGDSFTTFFCETGAGK.H                                                | 2070.17889 | 2 | 4.07E-08 | 0.68  | 3.20   | -     | 385.0   |
| AHQ-3-9, 5436 - 5439       | K.TIGGGDSFTTFFCETGAGK.H                                                | 2070.17889 | 2 | 5.02E-09 | 0.84  | 3.61   | -     | 469.9   |
| AHQ-3-3, 5962 - 6040       | K.TIGGGDSFTTFFCETGAGK.H                                                | 2070.17889 | 2 | 2.90E-04 | 0.39  | 2.94   | -     | 249.6   |
| AHQ-3-1, 6028              | K.TIGGGDSFTTFFCETGAGK.H                                                | 2070.17889 | 2 | 3.13E-06 | 0.63  | 3.30   | -     | 354.9   |
| AHQ-3-10, 5212             | K.TIGGGDSFTTFFCETGAGK.H                                                | 2070.17889 | 2 | 8.25E-04 | 0.59  | 3.25   | -     | 279.1   |
| AHQ-3-9, 5543              | K.TIGGGDSFTTFFCETGAGK.H                                                | 2070.17889 | 2 | 1.14E-04 | 0.73  | 3.18   | -     | 327.8   |
| AHQ-3-13-, 5591            | K.TIGGGDSFTTFFCETGAGK.H                                                | 2070.17889 | 2 | 3.41E-10 | 0.82  | 3.69   | -     | 378.8   |
| AHQ-3-7, 4176 - 4246       | K.VGINYQPPTVPPGGDLAK.V                                                 | 1826.08584 | 2 | 7.47E-06 | 0.66  | 3.28   | -     | 296.9   |
| AHQ-3-13, 4465 - 4530      | K.VGINYQPPTVPPGGDLAK.V                                                 | 1826.08584 | 2 | 2.68E-05 | 0.61  | 2.92   | -     | 323.8   |
| AHQ-3-13, 4333 - 4401      | K.VGINYQPPTVPPGGDLAK.V                                                 | 1826.08584 | 2 | 1.47E-04 | 0.63  | 3.03   | -     | 382.8   |
| AHQ-3-4, 4712              | K.VGINYQPPTVPPGGDLAK.V                                                 | 1826.08584 | 2 | 1.58E-05 | 0.59  | 3.15   | -     | 258.5   |
| AHQ-3-13-, 4341 - 4406     | K.VGINYQPPTVPPGGDLAK.V                                                 | 1826.08584 | 2 | 8.72E-06 | 0.86  | 3.72   | -     | 433.7   |
| AHQ-3-4, 4556 - 4624       | K.VGINYQPPTVPPGGDLAK.V                                                 | 1826.08584 | 2 | 2.87E-06 | 0.49  | 3.19   | -     | 282.3   |

|                             |                                                                          |            |   |          |       |        |       |          |
|-----------------------------|--------------------------------------------------------------------------|------------|---|----------|-------|--------|-------|----------|
| AHQ-3-7, 4314 - 4391        | K.VGINYQPPTVPPGGDLAK.V                                                   | 1826.08584 | 2 | 9.10E-05 | 0.76  | 3.67   | -     | 316.5    |
| AHQ-3-11, 4246 - 4306       | K.VGINYQPPTVPPGGDLAK.V                                                   | 1826.08584 | 2 | 9.69E-04 | 0.68  | 2.99   | -     | 414.0    |
| AHQ-3-12, 4523 - 4524       | K.VGINYQPPTVPPGGDLAK.V                                                   | 1826.08584 | 2 | 1.77E-06 | 0.76  | 3.57   | -     | 277.4    |
| AHQ-3-8, 4070 - 4152        | K.VGINYQPPTVPPGGDLAK.V                                                   | 1826.08584 | 2 | 1.09E-04 | 0.73  | 3.34   | -     | 398.3    |
| AHQ-3-2, 4703               | K.VGINYQPPTVPPGGDLAK.V                                                   | 1826.08584 | 2 | 8.31E-06 | 0.47  | 2.83   | -     | 235.3    |
| AHQ-3-12, 4390 - 4458       | K.VGINYQPPTVPPGGDLAK.V                                                   | 1826.08584 | 2 | 1.50E-05 | 0.80  | 3.29   | -     | 419.7    |
| AHQ-3-7, 4354 - 4355        | K.YMACLLYR.G                                                             | 1252.50864 | 2 | 7.36E-04 | 0.96  | 3.61   | -     | 1063.3   |
| AHQ-3-12, 4406              | K.YMACLLYR.G                                                             | 1252.50864 | 2 | 3.10E-05 | 0.93  | 3.43   | -     | 820.8    |
| AHQ-3-7, 3804               | K.YMACLLYR.G                                                             | 1268.50804 | 2 | 3.10E-04 | 0.72  | 2.84   | -     | 489.6    |
| gj 4504391 ref NP_000179.1  | hexokinase 1 isoform HKI; brain form hexokinase [Homo sapiens]           |            |   | 7.53E-11 | 7.30  | 90.26  | 14.20 | 102502.4 |
| AHQ-3-4, 6396               | R.AILQQLLNSTCDDSLV.K.T                                                   | 2090.38419 | 2 | 5.45E-07 | 0.89  | 4.38   | -     | 692.1    |
| AHQ-3-4, 4453 - 4470        | K.ATDCVGHVDTLLR.D                                                        | 1557.75406 | 2 | 7.53E-11 | 0.85  | 3.30   | -     | 774.0    |
| AHQ-3-4, 2462               | R.FLLSESGSGK.G                                                           | 1025.13731 | 1 | 2.83E-04 | 0.41  | 2.67   | -     | 198.9    |
| AHQ-3-4, 5746               | K.GDFIALDLGGSSFR.I                                                       | 1455.59700 | 2 | 3.67E-10 | 0.97  | 5.19   | -     | 1635.5   |
| AHQ-3-4, 2174               | R.HIDLVEGDEGR.M                                                          | 1240.30483 | 2 | 9.98E-08 | 0.94  | 3.81   | -     | 1051.2   |
| AHQ-3-4, 2176               | R.HIDLVEGDEGR.M                                                          | 1240.30483 | 1 | 1.27E-06 | 0.55  | 2.35   | -     | 529.0    |
| AHQ-3-4, 6098               | K.LPVGFTFSPFCQSQK.I                                                      | 1744.99134 | 2 | 2.78E-05 | 0.94  | 3.89   | -     | 1094.1   |
| AHQ-3-4, 2717 - 2721        | R.LVNEYSLNAGK.Q                                                          | 1208.34588 | 1 | 1.38E-06 | 0.51  | 2.16   | -     | 536.0    |
| AHQ-3-4, 2726               | R.LVNEYSLNAGK.Q                                                          | 1208.34588 | 2 | 8.70E-04 | 0.59  | 2.67   | -     | 634.9    |
| AHQ-3-4, 7446               | R.SANLVAATLGAALNR.L                                                      | 1484.72615 | 2 | 1.18E-04 | 0.96  | 5.04   | -     | 1422.5   |
| AHQ-3-4, 6470 - 6549        | R.TPDGTENGDFLALDLGGTNR.V                                                 | 2211.33051 | 2 | 1.34E-06 | 0.83  | 3.93   | -     | 441.2    |
| AHQ-3-4, 6348 - 6356        | R.TPDGTENGDFLALDLGGTNR.V                                                 | 2211.33051 | 2 | 1.58E-06 | 0.91  | 4.07   | -     | 869.5    |
| gj 4507907 ref NP_000543.1  | von Willebrand factor precursor; Coagulation factor VIII VWF (von Wille) |            |   | 8.12E-11 | 28.15 | 320.32 | 15.50 | 309296.7 |
| AHQ-3-1, 5096               | K.AFVLSVDELEQR.D                                                         | 1621.77332 | 2 | 8.59E-04 | 0.90  | 3.71   | -     | 1451.0   |
| AHQ-3-1, 5045               | K.AHLLSLVDVMQR.E                                                         | 1382.65733 | 1 | 9.06E-06 | 0.59  | 2.75   | -     | 459.1    |
| AHQ-3-1, 5054               | K.AHLLSLVDVMQR.E                                                         | 1382.65733 | 2 | 2.57E-08 | 0.96  | 4.02   | -     | 1500.1   |
| AHQ-3-1, 4037               | K.AHLLSLVDVMQR.E                                                         | 1398.65673 | 2 | 9.19E-06 | 0.96  | 3.77   | -     | 1834.7   |
| AHQ-3-3, 5521               | R.CHPLVDPEPFVALCEK.T                                                     | 1914.19160 | 2 | 4.39E-04 | 0.93  | 3.80   | -     | 971.6    |
| AHQ-3-3, 4036               | R.CLPSACEVVTGSPR.G                                                       | 1535.72531 | 2 | 1.21E-05 | 0.76  | 3.57   | -     | 508.3    |
| AHQ-3-1, 4058               | R.CLPSACEVVTGSPR.G                                                       | 1535.72531 | 2 | 2.31E-04 | 0.91  | 3.71   | -     | 767.1    |
| AHQ-3-3, 5194               | R.EGGPSQIGDALGFAVR.Y                                                     | 1574.71988 | 2 | 7.65E-04 | 0.45  | 2.72   | -     | 429.0    |
| AHQ-3-2, 5222               | R.EGGPSQIGDALGFAVR.Y                                                     | 1574.71988 | 2 | 9.40E-04 | 0.21  | 2.56   | -     | 420.3    |
| AHQ-3-1, 5230               | R.EGGPSQIGDALGFAVR.Y                                                     | 1574.71988 | 2 | 5.50E-07 | 0.79  | 3.32   | -     | 577.0    |
| AHQ-3-1, 4894 - 4897        | R.EQAPNLVYM*VTGNPASDEIK.R                                                | 2193.42002 | 2 | 9.89E-06 | 0.90  | 4.20   | -     | 598.8    |
| AHQ-3-1, 4172 - 4240        | K.EQDLLEVILHNGACSPGAR.Q                                                  | 1968.13770 | 2 | 1.48E-04 | 0.89  | 3.79   | -     | 800.1    |
| AHQ-3-1, 4536 - 4605        | K.EQDLLEVILHNGACSPGAR.Q                                                  | 1968.13770 | 2 | 4.75E-06 | 0.71  | 3.34   | -     | 523.9    |
| AHQ-3-1, 3134 - 3210        | R.HIVTFDGGNFK.L                                                          | 1306.45124 | 2 | 3.81E-04 | 0.88  | 3.16   | -     | 735.5    |
| AHQ-3-1, 6425               | R.IEDLPTMTLGNLSFLHK.L                                                    | 1916.23079 | 2 | 1.88E-05 | 0.89  | 3.55   | -     | 838.3    |
| AHQ-3-1, 5977               | R.IEDLPTMTLGNLSFLHK.L                                                    | 1916.23079 | 2 | 1.97E-06 | 0.97  | 5.03   | -     | 1451.3   |
| AHQ-3-2, 7565               | R.IGWPNAPILQDFETLPR.E                                                    | 2081.40223 | 2 | 5.26E-05 | 0.93  | 4.82   | -     | 629.6    |
| AHQ-3-1, 7262               | R.IGWPNAPILQDFETLPR.E                                                    | 2081.40223 | 2 | 8.23E-07 | 0.93  | 4.76   | -     | 645.1    |
| AHQ-3-1, 2693               | R.ILAGPAGDSNVVK.L                                                        | 1241.41901 | 2 | 2.10E-06 | 0.92  | 3.83   | -     | 1005.2   |
| AHQ-3-2, 2526               | R.ILAGPAGDSNVVK.L                                                        | 1241.41901 | 2 | 1.34E-05 | 0.89  | 3.63   | -     | 833.6    |
| AHQ-3-1, 6513               | K.ILEDLQLTQVDPEDPCVCEVAGR.R                                              | 2692.97859 | 2 | 7.23E-06 | 0.85  | 4.05   | -     | 416.1    |
| AHQ-3-1, 3873               | R.ILTSDFVQDCKN.L                                                         | 1441.58869 | 2 | 6.57E-08 | 0.94  | 3.60   | -     | 1253.0   |
| AHQ-3-2, 3831               | R.ILTSDFVQDCKN.L                                                         | 1441.58869 | 2 | 2.91E-10 | 0.94  | 3.50   | -     | 1237.7   |
| AHQ-3-1, 5996               | R.LPGDIQVVPVIGVGNANVQELER.I                                              | 2415.73085 | 2 | 3.33E-05 | 0.38  | 2.62   | -     | 212.8    |
| AHQ-3-1, 4336               | R.LSEAEFEVLK.A                                                           | 1165.31777 | 2 | 1.15E-05 | 0.91  | 3.54   | -     | 1077.5   |
| AHQ-3-1, 4305               | K.LTGSCSYVLFQNK.E                                                        | 1518.71629 | 2 | 8.08E-04 | 0.95  | 4.12   | -     | 1404.7   |
| AHQ-3-1, 5653               | K.RLPGDIQVVPVIGVGNANVQELER.I                                             | 2571.91720 | 3 | 2.14E-10 | 0.98  | 6.45   | -     | 2206.1   |
| AHQ-3-1, 5294               | K.RPGDVVTLTDPDQCHTVTCQPDGQTLK.K.S                                        | 3026.35060 | 3 | 3.95E-04 | 0.91  | 4.18   | -     | 1098.4   |
| AHQ-3-1, 2532               | R.SKEFM*EEVIQR.M                                                         | 1412.59390 | 2 | 1.43E-05 | 0.84  | 2.81   | -     | 856.2    |
| AHQ-3-1, 3461               | R.SKEFM*EEVIQR.M                                                         | 1396.59450 | 2 | 6.07E-09 | 0.95  | 4.25   | -     | 1237.1   |
| AHQ-3-3, 5106               | K.SVGSQWASPEPNCLINECVR.V                                                 | 2306.51832 | 2 | 3.00E-05 | 0.93  | 4.64   | -     | 540.8    |
| AHQ-3-1, 5098 - 5108        | K.SVGSQWASPEPNCLINECVR.V                                                 | 2306.51832 | 2 | 1.48E-06 | 0.89  | 4.33   | -     | 538.9    |
| AHQ-3-2, 6417               | K.TYGLCGICDENGANDFMLR.D                                                  | 2209.42291 | 2 | 1.60E-06 | 0.67  | 3.16   | -     | 524.8    |
| AHQ-3-1, 5848 - 5922        | K.TYGLCGICDENGANDFMLR.D                                                  | 2225.42231 | 2 | 1.33E-07 | 0.95  | 4.98   | -     | 732.7    |
| AHQ-3-1, 6258               | K.TYGLCGICDENGANDFMLR.D                                                  | 2209.42291 | 2 | 8.12E-11 | 0.90  | 3.60   | -     | 864.0    |
| AHQ-3-1, 4614               | K.VIVIPGIGPHANLK.Q                                                       | 1527.87891 | 2 | 4.96E-08 | 0.80  | 3.23   | -     | 500.5    |
| AHQ-3-1, 2469               | R.VKEEVFIQQR.N                                                           | 1276.46658 | 2 | 6.35E-07 | 0.88  | 3.58   | -     | 731.0    |
| AHQ-3-1, 4750               | R.VTVFPIGIDR.Y                                                           | 1174.37426 | 2 | 1.70E-07 | 0.95  | 3.85   | -     | 1363.2   |
| AHQ-3-1, 3645               | R.WTCPVCTGSSTR.H                                                         | 1575.72645 | 2 | 3.74E-06 | 0.73  | 2.85   | -     | 497.5    |
| AHQ-3-1, 3004               | K.YAGSQVASTSEVLK.Y                                                       | 1440.58064 | 2 | 2.68E-09 | 0.94  | 4.13   | -     | 1065.6   |
| AHQ-3-1, 3021               | K.YAGSQVASTSEVLK.Y                                                       | 1440.58064 | 1 | 2.86E-06 | 0.58  | 2.78   | -     | 552.9    |
| AHQ-3-2, 2861               | K.YAGSQVASTSEVLK.Y                                                       | 1440.58064 | 2 | 3.71E-08 | 0.96  | 4.60   | -     | 989.3    |
| AHQ-3-3, 2845               | K.YAGSQVASTSEVLK.Y                                                       | 1440.58064 | 2 | 3.52E-07 | 0.95  | 4.28   | -     | 1042.0   |
| AHQ-3-1, 6841 - 6844        | K.YLFPGECCYVLVQDYGCSNPGTFR.I                                             | 2874.15305 | 2 | 1.13E-09 | 0.88  | 3.59   | -     | 807.2    |
| AHQ-3-2, 3282               | R.YLSDHSLVLSQDGR.E                                                       | 1624.73576 | 2 | 2.31E-07 | 0.96  | 4.35   | -     | 1633.7   |
| AHQ-3-1, 3454               | R.YLSDHSLVLSQDGR.E                                                       | 1624.73576 | 2 | 1.62E-07 | 0.96  | 4.05   | -     | 1661.0   |
| AHQ-3-1, 6180               | K.YTLFQIFSK.I                                                            | 1147.34728 | 2 | 9.69E-08 | 0.94  | 3.13   | -     | 1154.9   |
| gj 10835002 ref NP_001166.1 | Rho GDP dissociation inhibitor (GDI) beta; Ly-GDI [Homo sapiens]         |            |   | 8.33E-11 | 6.24  | 70.28  | 34.80 | 22987.8  |
| AHQ-3-10, 2351              | K.APEPHVEDDDDELDSK.L                                                     | 1940.90995 | 2 | 1.44E-07 | 0.97  | 5.67   | -     | 953.4    |
| AHQ-3-10, 2348              | K.APEPHVEDDDDELDSK.L                                                     | 1940.90995 | 3 | 2.74E-09 | 0.94  | 4.61   | -     | 1379.5   |
| AHQ-3-13, 5551              | K.ATFM*VGSYGRPEEYEFLLPVEEAPK.G                                           | 2962.27864 | 3 | 1.91E-06 | 0.85  | 4.05   | -     | 626.6    |
| AHQ-3-13, 5565              | K.ATFM*VGSYGRPEEYEFLLPVEEAPK.G                                           | 2962.27864 | 3 | 1.29E-05 | 0.68  | 3.31   | -     | 579.2    |
| AHQ-3-12, 5791              | K.ATFMVGSYGRPEEYEFLLPVEEAPK.G                                            | 2946.27924 | 2 | 8.90E-05 | 0.86  | 4.03   | -     | 578.6    |
| AHQ-3-10, 5312 - 5374       | K.ATFMVGSYGRPEEYEFLLPVEEAPK.G                                            | 2946.27924 | 2 | 3.97E-07 | 0.94  | 4.36   | -     | 997.6    |
| AHQ-3-14, 5543              | K.ATFM*VGSYGRPEEYEFLLPVEEAPK.G                                           | 2962.27864 | 3 | 6.70E-05 | 0.86  | 3.92   | -     | 786.2    |
| AHQ-3-11, 5379              | K.ATFM*VGSYGRPEEYEFLLPVEEAPK.G                                           | 2962.27864 | 3 | 1.20E-05 | 0.77  | 3.52   | -     | 546.0    |
| AHQ-3-10, 2920 - 2922       | K.ELQEMDKDDESLIK.Y                                                       | 1693.85489 | 2 | 8.33E-11 | 0.92  | 4.03   | -     | 1195.0   |
| AHQ-3-10, 2418              | K.ELQEMDKDDESLIK.Y                                                       | 1709.85429 | 2 | 2.24E-05 | 0.84  | 4.32   | -     | 433.9    |
| AHQ-3-10, 6182 - 6263       | R.LTLVCEAPGPTMDLTGDLEALKK.E                                              | 2675.11274 | 3 | 1.30E-04 | 0.76  | 3.52   | -     | 534.4    |
| AHQ-3-10, 6184              | R.LTLVCEAPGPTMDLTGDLEALKK.E                                              | 2675.11274 | 2 | 2.43E-07 | 0.81  | 3.74   | -     | 263.8    |
| AHQ-3-10, 3118 - 3139       | K.TLLGDGPVTDPK.A                                                         | 1312.44940 | 2 | 2.90E-07 | 0.94  | 4.06   | -     | 1202.6   |
| gj 17986273 ref NP_524144.1 | fast skeletal myosin alkali light chain 1 isoform 1f; A1 catalytic; A2   |            |   | 8.34E-11 | 1.78  | 20.22  | 8.20  | 21145.0  |
| AHQ-3-12, 2603 - 2666       | R.VFDKEGNGTVM*GAELR.H                                                    | 1739.93168 | 2 | 2.57E-06 | 0.89  | 3.88   | -     | 870.5    |
| AHQ-3-12, 3178 - 3254       | R.VFDKEGNGTVM*GAELR.H                                                    | 1723.93228 | 2 | 6.86E-10 | 0.94  | 4.35   | -     | 959.8    |
| AHQ-3-12, 3190 - 3266       | R.VFDKEGNGTVM*GAELR.H                                                    | 1723.93228 | 3 | 6.92E-06 | 0.88  | 3.57   | -     | 1331.0   |
| AHQ-3-12, 3247              | R.VFDKEGNGTVM*GAELR.H                                                    | 1739.93168 | 2 | 8.37E-04 | 0.84  | 3.53   | -     | 785.1    |
| AHQ-3-12, 3267              | R.VFDKEGNGTVM*GAELR.H                                                    | 1723.93228 | 2 | 3.05E-10 | 0.93  | 3.63   | -     | 1226.0   |
| AHQ-3-12, 3351 - 3368       | R.VFDKEGNGTVM*GAELR.H                                                    | 1723.93228 | 2 | 1.79E-09 | 0.88  | 3.35   | -     | 971.0    |
| AHQ-3-13, 2581 - 2654       | R.VFDKEGNGTVM*GAELR.H                                                    | 1739.93168 | 2 | 1.40E-04 | 0.82  | 3.32   | -     | 720.9    |
| AHQ-3-13, 3326              | R.VFDKEGNGTVM*GAELR.H                                                    | 1723.93228 | 2 | 8.34E-11 | 0.95  | 4.22   | -     | 1370.6   |
| AHQ-3-14, 2596              | R.VFDKEGNGTVM*GAELR.H                                                    | 1739.93168 | 2 | 9.60E-11 | 0.83  | 3.38   | -     | 608.5    |
| gj 4506877 ref NP_002996.1  | selectin P precursor; Selectin P (granulocyte membrane protein, 140kD);  |            |   | 8.48E-11 | 8.90  | 110.27 | 23.70 | 90844.7  |
| AHQ-3-3, 4937               | K.AVQCQHLAPSEGT.M*DCVHLTAFAYGSCK.F                                       | 3472.80519 | 3 | 8.26E-06 | 0.71  | 3.61   | -     | 495.0    |
| AHQ-3-3, 3318               | R.CAEGFMLR.G                                                             | 985.16311  | 1 | 1.82E-04 | 0.23  | 1.80   | -     | 231.7    |
| AHQ-3-3, 6900 - 6981        | R.CDNLGGWTAPAPVCOALQCQDLVPPNEAR.V                                        | 3313.64431 | 3 | 2.36E-05 | 0.77  | 3.53   | -     | 619.6    |
| AHQ-3-2, 6393               | R.CIDSGHWSAPLPTCEAISCEPLESPVHSGMDCSPSLR.A                                | 4146.54406 | 3 | 1.66E-05 | 0.96  | 5.31   | -     | 1555.7   |
| AHQ-3-3, 6113               | R.CIDSGHWSAPLPTCEAISCEPLESPVHSGMDCSPSLR.A                                | 4162.54346 | 3 | 5.99E-04 | 0.83  | 3.79   | -     | 736.0    |
| AHQ-3-3, 6326               | R.CIDSGHWSAPLPTCEAISCEPLESPVHSGMDCSPSLR.A                                | 4146.54406 | 3 | 3.24E-04 | 0.77  | 3.59   | -     | 419.4    |
| AHQ-3-2, 4803               | K.CPELFAPEQSGSLDCSDTR.G                                                  | 2085.21515 | 2 | 6.15E-04 | 0.91  | 4.27   | -     | 578.8    |
| AHQ-3-3, 6110               | K.LECLASGIWTKNPPQCLAAQCPLK.I                                             | 2857.31818 | 3 | 1.73E-04 | 0.89  | 3.93   | -     | 1159.3   |
| AHQ-3-3, 6310               | K.LECLASGIWTKNPPQCLAAQCPLKIPER.G                                         | 3352.89300 | 3 | 1.24E-06 | 0.93  | 5.23   | -     | 838.9    |
| AHQ-3-3, 3082               | R.PSGQWATVTPACR.A                                                        | 1432.58672 | 2 | 4.05E-07 | 0.92  | 3.65   | -     | 1018.2   |
| AHQ-3-3, 5062 - 5138        | K.STCQFICDEGYLSGPER.L                                                    | 2109.23671 | 2 | 2.99E-10 | 0.95  | 4.49   | -     | 1082.6   |
| AHQ-3-1, 5056               | K.STCQFICDEGYLSGPER.L                                                    | 2109.23671 | 2 | 1.84E-07 | 0.85  | 3.65   | -     | 659.9    |

|                             |                                                                         |            |   |          |      |       |       |         |
|-----------------------------|-------------------------------------------------------------------------|------------|---|----------|------|-------|-------|---------|
| AHQ-3-2, 5129               | K.STCQFICDEGYSLSGPER.L                                                  | 2109.23671 | 2 | 8.48E-11 | 0.92 | 3.76  | -     | 1083.8  |
| AHQ-3-4, 5034               | K.STCQFICDEGYSLSGPER.L                                                  | 2109.23671 | 2 | 1.83E-04 | 0.76 | 3.37  | -     | 667.9   |
| AHQ-3-2, 6554               | K.VLPYSSYYWIGIR.K                                                       | 1781.04522 | 2 | 2.80E-05 | 0.91 | 3.79  | -     | 770.2   |
| AHQ-3-3, 6508               | K.VLPYSSYYWIGIR.K                                                       | 1781.04522 | 2 | 8.85E-06 | 0.85 | 3.27  | -     | 639.1   |
| gi 4505989 ref NP_000299.1  | protective protein for beta-galactosidase; Protective protein for beta- |            |   | 9.52E-11 | 0.97 | 10.21 | 2.70  | 54495.8 |
| AHQ-3-12, 3487 - 3491       | K.YGDSGQIAGFVK.E                                                        | 1371.47686 | 2 | 9.52E-11 | 0.97 | 4.27  | -     | 2309.8  |
| AHQ-3-11, 3356              | K.YGDSGQIAGFVK.E                                                        | 1371.47686 | 2 | 1.67E-10 | 0.95 | 3.81  | -     | 1407.2  |
| gi 4502097 ref NP_001142.1  | solute carrier family 25 (mitochondrial carrier; adenine nucleotide tra |            |   | 9.57E-11 | 1.50 | 20.17 | 13.10 | 33148.4 |
| AHQ-3-10, 6472 - 6544       | R.YFAGNLASGGGAAGATSLCFVYPLDFAR.T                                        | 2799.10926 | 2 | 2.36E-04 | 0.60 | 2.74  | -     | 425.2   |
| AHQ-3-10, 5218              | R.YFPTQALNFAFK.D                                                        | 1447.66130 | 1 | 6.17E-08 | 0.79 | 3.46  | -     | 522.1   |
| AHQ-3-11, 5491              | R.YFPTQALNFAFK.D                                                        | 1447.66130 | 2 | 1.36E-05 | 0.68 | 2.57  | -     | 436.5   |
| AHQ-3-14-, 5712             | R.YFPTQALNFAFK.D                                                        | 1447.66130 | 2 | 9.57E-11 | 0.91 | 3.21  | -     | 771.0   |
| AHQ-3-10, 5214 - 5215       | R.YFPTQALNFAFK.D                                                        | 1447.66130 | 2 | 1.22E-07 | 0.91 | 3.46  | -     | 859.1   |
| gi 5032161 ref NP_005639.1  | elongin C; transcription elongation factor B (SIII), polypeptide 1 (15k |            |   | 1.03E-10 | 3.66 | 40.28 | 41.10 | 12473.1 |
| AHQ-3-13, 4462 - 4466       | K.AM*LSGPGQFAENETNEVNF.R.E                                              | 2228.38455 | 2 | 1.03E-10 | 0.98 | 5.69  | -     | 1562.6  |
| AHQ-3-13, 4847              | K.AM*LSGPGQFAENETNEVNF.R.E                                              | 2212.38515 | 2 | 1.86E-08 | 0.96 | 4.96  | -     | 1193.1  |
| AHQ-3-13-, 4857             | K.AM*LSGPGQFAENETNEVNF.R.E                                              | 2212.38515 | 2 | 1.02E-09 | 0.93 | 4.60  | -     | 815.2   |
| AHQ-3-13-, 3030             | K.LISSDGHFVIV.R                                                         | 1345.52569 | 2 | 3.41E-08 | 0.90 | 3.84  | -     | 630.4   |
| AHQ-3-13, 2735              | K.TYGGCEGPDAM*YV.K.L                                                    | 1565.70692 | 2 | 6.29E-05 | 0.86 | 3.34  | -     | 629.7   |
| gi 5803227 ref NP_006817.1  | tyrosine 3/tryptophan 5-monoxygenase activation protein, theta polype   |            |   | 1.10E-10 | 4.40 | 60.26 | 34.70 | 27764.1 |
| AHQ-3-10, 2042 - 2116       | K.AVTEQGAELSNEER.N                                                      | 1533.57979 | 2 | 1.82E-06 | 0.82 | 3.59  | -     | 577.7   |
| AHQ-3-14-, 2201             | K.AVTEQGAELSNEER.N                                                      | 1533.57979 | 2 | 4.76E-06 | 0.91 | 3.24  | -     | 1387.4  |
| AHQ-3-10, 1542              | K.EMQPTHP.I.R.L                                                         | 1109.28418 | 1 | 1.07E-04 | 0.07 | 1.85  | -     | 84.2    |
| AHQ-3-10, 1496 - 1554       | K.EMQPTHP.I.R.L                                                         | 1109.28418 | 1 | 7.42E-04 | 0.10 | 1.91  | -     | 167.9   |
| AHQ-3-10, 3587              | R.KQTDNSOGAGYQAEAFDISK.K                                                | 2144.28408 | 2 | 3.04E-05 | 0.94 | 4.59  | -     | 734.3   |
| AHQ-3-10, 6468              | R.SICTTVLELLDK.Y                                                        | 1393.62862 | 2 | 1.07E-04 | 0.68 | 2.70  | -     | 550.5   |
| AHQ-3-10, 6234              | K.TAFDEAIAELDTLNEYSYK.D                                                 | 2146.25037 | 2 | 1.03E-06 | 0.87 | 3.48  | -     | 896.4   |
| AHQ-3-13, 6693              | K.TAFDEAIAELDTLNEYSYK.D                                                 | 2146.25037 | 2 | 1.10E-10 | 0.97 | 5.20  | -     | 1452.2  |
| AHQ-3-13-, 6655             | K.TAFDEAIAELDTLNEYSYK.D                                                 | 2146.25037 | 2 | 4.23E-06 | 0.96 | 5.25  | -     | 1126.4  |
| AHQ-3-10, 2483              | K.YLIANATNPESK.V                                                        | 1321.46099 | 1 | 1.17E-06 | 0.92 | 4.19  | -     | 803.1   |
| AHQ-3-10, 2600 - 2606       | K.YLIANATNPESK.V                                                        | 1321.46099 | 1 | 2.50E-06 | 0.82 | 2.94  | -     | 843.2   |
| AHQ-3-10, 2484 - 2491       | K.YLIANATNPESK.V                                                        | 1321.46099 | 2 | 2.75E-04 | 0.96 | 3.53  | -     | 2165.1  |
| gi 10863977 ref NP_067000.1 | LSM2 homolog, U6 small nuclear RNA associated; U6 snRNA-associated Sm-  |            |   | 1.11E-10 | 1.92 | 20.26 | 40.00 | 10834.5 |
| AHQ-3-14-, 6616             | K.NDLSICGTLHSDVQYLN.I.K.L                                               | 2192.43507 | 2 | 1.14E-09 | 0.95 | 4.81  | -     | 1071.9  |
| AHQ-3-14-, 5364 - 5375      | R.YVQLPADEVDTQLLQDAAR.K                                                 | 2146.34311 | 2 | 1.88E-08 | 0.97 | 5.06  | -     | 1268.5  |
| AHQ-3-14, 6264              | R.YVQLPADEVDTQLLQDAAR.K                                                 | 2146.34311 | 2 | 1.11E-10 | 0.97 | 5.28  | -     | 1436.6  |
| gi 4504523 ref NP_002148.1  | heat shock 10kDa protein 1 (chaperonin 10); heat shock 10kD protein 1 ( |            |   | 1.11E-10 | 1.87 | 20.28 | 25.50 | 10931.6 |
| AHQ-3-14-, 2712             | K.VLQATVAVGSSGK.G                                                       | 1316.52902 | 2 | 6.15E-08 | 0.98 | 5.57  | -     | 1759.6  |
| AHQ-3-14, 3612 - 3675       | K.VLQATVAVGSSGK.G                                                       | 1316.52902 | 2 | 8.19E-06 | 0.83 | 3.09  | -     | 838.0   |
| AHQ-3-14-, 4965             | K.VVLDKDYFLFR.D                                                         | 1530.74861 | 2 | 2.04E-09 | 0.91 | 3.37  | -     | 977.1   |
| AHQ-3-14-, 4968             | K.VVLDKDYFLFR.D                                                         | 1530.74861 | 3 | 8.42E-09 | 0.91 | 3.78  | -     | 765.7   |
| AHQ-3-14, 6107              | K.VVLDKDYFLFR.D                                                         | 1530.74861 | 2 | 1.11E-10 | 0.89 | 3.68  | -     | 769.7   |
| gi 4505759 ref NP_002622.1  | phosphogluconate dehydrogenase; 6-phosphogluconate dehydrogenase [Homo  |            |   | 1.23E-10 | 3.66 | 40.29 | 15.50 | 53151.7 |
| AHQ-3-7, 4316               | R.DYFGAHTYELLAK.P                                                       | 1528.68958 | 2 | 5.38E-06 | 0.96 | 3.56  | -     | 1832.2  |
| AHQ-3-7, 6692               | K.IKDAFDRNPELQNL.LDDFFK.S                                               | 2552.86598 | 3 | 4.15E-09 | 0.97 | 5.78  | -     | 1738.3  |
| AHQ-3-7, 6467               | K.LVPLLDGDIIDGGNSEYR.D                                                  | 2161.39768 | 2 | 1.23E-10 | 0.89 | 3.77  | -     | 780.8   |
| AHQ-3-13, 6297              | K.LVPLLDGDIIDGGNSEYR.D                                                  | 2161.39768 | 2 | 1.59E-06 | 0.94 | 3.91  | -     | 1008.5  |
| AHQ-3-7, 6251               | K.LVPLLDGDIIDGGNSEYR.D                                                  | 2161.39768 | 2 | 2.24E-06 | 0.98 | 5.49  | -     | 2181.3  |
| AHQ-3-8, 4140               | K.VGTGPECCDWVGDEGAGHFVK.M                                               | 2280.43619 | 2 | 2.53E-04 | 0.81 | 3.72  | -     | 609.3   |
| AHQ-3-8, 4137               | K.VGTGPECCDWVGDEGAGHFVK.M                                               | 2280.43619 | 3 | 2.11E-06 | 0.83 | 3.88  | -     | 4561.2  |
| gi 4507869 ref NP_003361.1  | vasodilator-stimulated phosphoprotein [Homo sapiens]                    |            |   | 1.25E-10 | 3.64 | 40.26 | 14.20 | 39829.4 |
| AHQ-3-7, 3471               | R.KMQPDDQVINCIAI.R.G                                                    | 1901.24418 | 2 | 4.51E-06 | 0.94 | 4.76  | -     | 788.9   |
| AHQ-3-7, 5998               | K.VKEEIEAFVQEL.R.K                                                      | 1703.96061 | 2 | 7.50E-10 | 0.97 | 5.12  | -     | 1514.1  |
| AHQ-3-7, 1795               | R.VKELLEEVK.E                                                           | 1343.59438 | 2 | 1.91E-04 | 0.83 | 3.60  | -     | 881.1   |
| AHQ-3-7, 2536 - 2615        | R.VQIYHNPTANSFR.V                                                       | 1547.69936 | 2 | 1.25E-10 | 0.90 | 3.43  | -     | 894.2   |
| AHQ-3-7, 2443 - 2444        | R.VQIYHNPTANSFR.V                                                       | 1547.69936 | 2 | 1.24E-04 | 0.92 | 3.71  | -     | 819.6   |
| gi 4506413 ref NP_002875.1  | RAP1A, member of RAS oncogene family; RAS-related protein RAP1A [Homo s |            |   | 1.33E-10 | 5.73 | 70.28 | 40.80 | 20987.1 |
| AHQ-3-10, 6402              | K.INVNEIFYDLVR.Q                                                        | 1495.70427 | 2 | 5.62E-10 | 0.94 | 3.87  | -     | 1141.0  |
| AHQ-3-14-, 6529             | K.INVNEIFYDLVR.Q                                                        | 1495.70427 | 2 | 1.51E-05 | 0.89 | 3.58  | -     | 854.8   |
| AHQ-3-14-, 5852             | K.INVNEIFYDLVR.Q                                                        | 1495.70427 | 2 | 9.79E-04 | 0.94 | 3.78  | -     | 1209.4  |
| AHQ-3-12, 6822              | K.INVNEIFYDLVR.Q                                                        | 1495.70427 | 2 | 3.40E-07 | 0.95 | 4.40  | -     | 1060.9  |
| AHQ-3-11, 6582 - 6662       | K.INVNEIFYDLVR.Q                                                        | 1495.70427 | 2 | 6.25E-07 | 0.95 | 4.71  | -     | 1085.1  |
| AHQ-3-11, 6503 - 6562       | K.INVNEIFYDLVR.Q                                                        | 1495.70427 | 1 | 9.05E-08 | 0.65 | 3.48  | -     | 231.1   |
| AHQ-3-11, 6491 - 6550       | K.INVNEIFYDLVR.Q                                                        | 1495.70427 | 2 | 1.67E-08 | 0.95 | 5.55  | -     | 974.9   |
| AHQ-3-11, 6348              | K.INVNEIFYDLVR.Q                                                        | 1495.70427 | 2 | 3.08E-08 | 0.91 | 3.67  | -     | 1088.7  |
| AHQ-3-11, 6280 - 6354       | K.INVNEIFYDLVR.Q                                                        | 1495.70427 | 1 | 6.86E-08 | 0.16 | 2.16  | -     | 182.7   |
| AHQ-3-11, 5947              | K.INVNEIFYDLVR.Q                                                        | 1495.70427 | 2 | 7.87E-05 | 0.87 | 3.10  | -     | 1004.1  |
| AHQ-3-11, 5646 - 5706       | K.INVNEIFYDLVR.Q                                                        | 1495.70427 | 2 | 4.42E-04 | 0.94 | 4.35  | -     | 1088.0  |
| AHQ-3-11, 5650              | K.INVNEIFYDLVR.Q                                                        | 1495.70427 | 1 | 3.96E-05 | 0.04 | 1.80  | -     | 128.6   |
| AHQ-3-11, 5920              | K.INVNEIFYDLVR.Q                                                        | 1495.70427 | 2 | 9.22E-06 | 0.93 | 4.29  | -     | 989.8   |
| AHQ-3-14-, 6680 - 6760      | K.INVNEIFYDLVR.Q                                                        | 1495.70427 | 2 | 4.41E-07 | 0.95 | 4.81  | -     | 1142.6  |
| AHQ-3-11, 2544 - 2606       | K.LVLVLSGGVGVK.S                                                        | 986.19059  | 1 | 1.44E-06 | 0.65 | 3.16  | -     | 437.0   |
| AHQ-3-12, 2702              | K.LVLVLSGGVGVK.S                                                        | 986.19059  | 1 | 1.80E-04 | 0.84 | 3.44  | -     | 530.3   |
| AHQ-3-11, 2746              | K.LVLVLSGGVGVK.S                                                        | 986.19059  | 1 | 3.79E-04 | 0.83 | 2.89  | -     | 706.5   |
| AHQ-3-11, 2530 - 2595       | K.LVLVLSGGVGVK.S                                                        | 986.19059  | 2 | 1.03E-04 | 0.89 | 3.06  | -     | 1109.4  |
| AHQ-3-13, 2781              | K.LVLVLSGGVGVK.S                                                        | 986.19059  | 2 | 8.06E-07 | 0.91 | 3.77  | -     | 1011.9  |
| AHQ-3-13-, 2745 - 2747      | K.LVLVLSGGVGVK.S                                                        | 986.19059  | 2 | 2.36E-04 | 0.84 | 2.82  | -     | 1063.6  |
| AHQ-3-13, 2795 - 2871       | K.LVLVLSGGVGVK.S                                                        | 986.19059  | 1 | 8.01E-04 | 0.67 | 3.11  | -     | 491.5   |
| AHQ-3-12, 2699 - 2706       | K.LVLVLSGGVGVK.S                                                        | 986.19059  | 2 | 2.32E-07 | 0.88 | 3.72  | -     | 857.0   |
| AHQ-3-11, 6811 - 6875       | K.NGQGFALVYSITAQSTFNDLQDLR.E                                            | 2659.89181 | 3 | 8.18E-04 | 0.75 | 3.64  | -     | 458.5   |
| AHQ-3-11, 6058 - 6119       | K.SALTQVFQGGFVKE.Y                                                      | 1666.94196 | 2 | 2.68E-06 | 0.97 | 5.50  | -     | 1811.5  |
| AHQ-3-11, 5604              | K.SALTQVFQGGFVKE.Y                                                      | 1666.94196 | 2 | 3.02E-07 | 0.93 | 4.44  | -     | 958.1   |
| AHQ-3-11, 6367 - 6400       | K.SALTQVFQGGFVKE.Y                                                      | 1666.94196 | 2 | 9.46E-04 | 0.85 | 3.29  | -     | 1215.1  |
| AHQ-3-11, 6427 - 6462       | K.SALTQVFQGGFVKE.Y                                                      | 1666.94196 | 2 | 4.97E-05 | 0.97 | 5.14  | -     | 1844.2  |
| AHQ-3-11, 6178 - 6242       | K.SALTQVFQGGFVKE.Y                                                      | 1666.94196 | 2 | 5.73E-04 | 0.97 | 5.18  | -     | 1583.2  |
| AHQ-3-11, 5918 - 5998       | K.SALTQVFQGGFVKE.Y                                                      | 1666.94196 | 2 | 3.20E-06 | 0.97 | 4.59  | -     | 1758.1  |
| AHQ-3-11, 6535 - 6556       | K.SALTQVFQGGFVKE.Y                                                      | 1666.94196 | 2 | 1.00E-05 | 0.97 | 4.90  | -     | 1681.8  |
| AHQ-3-14-, 6052 - 6117      | K.SALTQVFQGGFVKE.Y                                                      | 1666.94196 | 2 | 1.14E-05 | 0.96 | 5.10  | -     | 1437.3  |
| AHQ-3-11, 6620 - 6683       | K.SALTQVFQGGFVKE.Y                                                      | 1666.94196 | 2 | 6.87E-04 | 0.90 | 4.22  | -     | 811.0   |
| AHQ-3-11, 5699              | K.SALTQVFQGGFVKE.Y                                                      | 1666.94196 | 2 | 9.39E-07 | 0.91 | 3.61  | -     | 945.2   |
| AHQ-3-11, 6843              | K.SALTQVFQGGFVKE.Y                                                      | 1666.94196 | 2 | 6.16E-05 | 0.97 | 5.13  | -     | 1677.9  |
| AHQ-3-11, 6211 - 6287       | K.SALTQVFQGGFVKE.Y                                                      | 1666.94196 | 2 | 9.38E-04 | 0.83 | 3.20  | -     | 1149.6  |
| AHQ-3-11, 5802 - 5867       | K.SKINVNEIFYDLVR.Q                                                      | 1710.95483 | 2 | 1.14E-09 | 0.95 | 4.65  | -     | 1036.7  |
| AHQ-3-11, 5026 - 5048       | K.SKINVNEIFYDLVR.Q                                                      | 1710.95483 | 2 | 1.30E-08 | 0.87 | 3.82  | -     | 582.5   |
| AHQ-3-14-, 6091 - 6109      | K.SKINVNEIFYDLVR.Q                                                      | 1710.95483 | 3 | 2.66E-08 | 0.95 | 4.53  | -     | 1883.1  |
| AHQ-3-11, 5151 - 5202       | K.SKINVNEIFYDLVR.Q                                                      | 1710.95483 | 2 | 9.56E-09 | 0.91 | 4.16  | -     | 847.7   |
| AHQ-3-11, 6262              | K.SKINVNEIFYDLVR.Q                                                      | 1710.95483 | 2 | 7.92E-08 | 0.91 | 3.56  | -     | 997.7   |
| AHQ-3-11, 6143              | K.SKINVNEIFYDLVR.Q                                                      | 1710.95483 | 2 | 1.33E-10 | 0.96 | 4.84  | -     | 1448.3  |
| AHQ-3-11, 5862              | K.SKINVNEIFYDLVR.Q                                                      | 1710.95483 | 3 | 3.47E-06 | 0.92 | 4.60  | -     | 1078.8  |
| AHQ-3-14-, 6087             | K.SKINVNEIFYDLVR.Q                                                      | 1710.95483 | 2 | 2.09E-09 | 0.97 | 4.97  | -     | 1367.1  |
| AHQ-3-13-, 2795 - 2798      | K.YDPTIEDSYR.K                                                          | 1259.30338 | 2 | 5.55E-07 | 0.78 | 2.62  | -     | 365.4   |
| AHQ-3-11, 2487              | K.YDPTIEDSYR.K                                                          | 1259.30338 | 2 | 1.63E-05 | 0.86 | 3.01  | -     | 446.7   |
| AHQ-3-14-, 2724             | K.YDPTIEDSYR.K                                                          | 1259.30338 | 2 | 8.75E-07 | 0.80 | 2.77  | -     | 405.4   |
| AHQ-3-11, 2668 - 2731       | K.YDPTIEDSYR.K                                                          | 1259.30338 | 2 | 4.99E-06 | 0.82 | 2.83  | -     | 326.8   |
| AHQ-3-11, 2167 - 2171       | K.YDPTIEDSYR.K.Q                                                        | 1387.47629 | 2 | 2.68E-07 | 0.49 | 2.53  | -     | 258.9   |
| AHQ-3-13, 2463              | K.YDPTIEDSYR.K.Q                                                        | 1387.47629 | 2 | 4.18E-05 | 0.80 | 3.21  | -     | 399.4   |
| gi 7661922 ref NP_055814.1  | RAB21, member RAS oncogene family [Homo sapiens]                        |            |   | 1.39E-10 | 1.75 | 20.27 | 12.90 | 24347.4 |

|                             |                                                                         |            |   |          |      |       |       |         |
|-----------------------------|-------------------------------------------------------------------------|------------|---|----------|------|-------|-------|---------|
| AHQ-3-10, 5736              | K.GIEELFLDLCR.M                                                         | 1494.73787 | 2 | 7.42E-04 | 0.78 | 2.58  | -     | 837.9   |
| AHQ-3-10, 3954 - 3962       | R.HVSIQEAESYAESVGAH.H                                                   | 1805.92351 | 2 | 1.39E-10 | 0.97 | 5.33  | -     | 1139.4  |
| gi 4758484 ref NP_004823.1  | glutathione-S-transferase like; glutathione transferase omega [Homo sap |            |   | 1.43E-10 | 3.77 | 60.24 | 41.10 | 27565.7 |
| AHQ-3-10, 3680              | K.EDPTVSALLTSEK.D                                                       | 1390.51840 | 1 | 3.21E-04 | 0.19 | 2.19  | -     | 167.9   |
| AHQ-3-10, 3774              | K.EFTKLEEVLTNR.K                                                        | 1451.64657 | 2 | 1.65E-06 | 0.91 | 3.97  | -     | 683.1   |
| AHQ-3-10, 2386              | K.GSAPPGPVPEGSIR.I                                                      | 1321.46422 | 1 | 9.36E-05 | 0.27 | 2.47  | -     | 236.4   |
| AHQ-3-10, 2540              | R.HEVINLNK.N                                                            | 1080.26247 | 1 | 2.89E-04 | 0.80 | 3.27  | -     | 407.4   |
| AHQ-3-10, 6458              | K.KNPFGLVPLVLENSQGLIYESAITCEYLDEAYPGKK.L                                | 4074.56041 | 3 | 1.43E-10 | 0.91 | 4.87  | -     | 737.5   |
| AHQ-3-10, 2500              | R.SQNKEYAGLKEEFR.K                                                      | 1814.93364 | 2 | 7.37E-05 | 0.71 | 2.93  | -     | 721.1   |
| gi 12545410 ref NP_031394.1 | RAS p21 protein activator 3; GTPase activating protein III; Ins(1,3,4,  |            |   | 1.49E-10 | 2.82 | 30.28 | 6.40  | 95912.5 |
| AHQ-3-5, 4809               | K.FGDFELGELR.I                                                          | 1183.29488 | 2 | 1.21E-06 | 0.95 | 3.76  | -     | 1450.8  |
| AHQ-3-5, 7391               | K.SKGDQPLYSIPIENILAVEKLEEEFSK.M                                         | 3078.45875 | 3 | 1.49E-10 | 0.96 | 5.64  | -     | 1220.0  |
| AHQ-3-5, 6475               | K.SLPCFFYGEDFYCEIPR.S                                                   | 2056.26024 | 2 | 5.26E-08 | 0.91 | 3.60  | -     | 894.6   |
| gi 6005846 ref NP_009215.1  | PTK9L protein tyrosine kinase 9-like (A6-related protein); protein tyro |            |   | 1.49E-10 | 8.40 | 90.30 | 49.30 | 39547.7 |
| AHQ-3-13-, 6550 - 6558      | R.AVPLLLDAQQPCCYLLYR.L                                                  | 2035.39506 | 2 | 3.65E-05 | 0.96 | 5.08  | -     | 1179.4  |
| AHQ-3-12, 6455 - 6523       | R.AVPLLLDAQQPCCYLLYR.L                                                  | 2035.39506 | 2 | 2.21E-04 | 0.57 | 2.60  | -     | 428.0   |
| AHQ-3-13, 6585              | R.AVPLLLDAQQPCCYLLYR.L                                                  | 2035.39506 | 2 | 5.72E-09 | 0.96 | 5.24  | -     | 954.1   |
| AHQ-3-12, 6547              | R.AVPLLLDAQQPCCYLLYR.L                                                  | 2035.39506 | 3 | 5.75E-09 | 0.96 | 4.81  | -     | 1451.7  |
| AHQ-3-14-, 6447             | R.AVPLLLDAQQPCCYLLYR.L                                                  | 2035.39506 | 2 | 5.36E-07 | 0.96 | 5.23  | -     | 1028.2  |
| AHQ-3-12, 5900              | K.EFGGGHKLDELFTVKDDLSFAGYQK.H                                           | 2860.12617 | 3 | 5.31E-04 | 0.94 | 4.85  | -     | 1366.0  |
| AHQ-3-11, 3990 - 4006       | R.ETIELVHTEPTDVAQLPSR.V                                                 | 2136.34822 | 2 | 1.71E-05 | 0.95 | 5.07  | -     | 1056.1  |
| AHQ-3-10, 3863              | R.ETIELVHTEPTDVAQLPSR.V                                                 | 2136.34822 | 2 | 1.55E-04 | 0.83 | 3.62  | -     | 588.1   |
| AHQ-3-12, 2570 - 2587       | K.HLSSCAAPPLTSAER.E                                                     | 1669.84126 | 2 | 3.30E-06 | 0.94 | 4.50  | -     | 743.9   |
| AHQ-3-11, 4146              | K.HQTLQGLAFFLQPEAQR.A                                                   | 1935.17562 | 2 | 1.49E-10 | 0.97 | 5.31  | -     | 983.8   |
| AHQ-3-10, 3923 - 3986       | K.HQTLQGLAFFLQPEAQR.A                                                   | 1935.17562 | 2 | 3.42E-05 | 0.90 | 3.90  | -     | 738.2   |
| AHQ-3-11, 5495              | K.HTHEGDPLESVVFIYSMPGYK.C                                               | 2407.68601 | 2 | 7.39E-05 | 0.75 | 2.86  | -     | 494.2   |
| AHQ-3-11, 6102              | K.KIEIGDGAELTAEFLYDEVHPK.Q                                              | 2475.73515 | 3 | 2.50E-07 | 0.96 | 5.56  | -     | 1949.6  |
| AHQ-3-11, 5030 - 5035       | R.LLDSVEQDFHLEIAK.K                                                     | 1757.96513 | 2 | 3.47E-09 | 0.97 | 5.05  | -     | 1546.2  |
| AHQ-3-12, 4814              | K.VVIEDEQLVLGASQEPVGR.W                                                 | 2039.27568 | 2 | 9.51E-06 | 0.95 | 4.46  | -     | 1550.9  |
| AHQ-3-13-, 4702             | K.VVIEDEQLVLGASQEPVGR.W                                                 | 2039.27568 | 2 | 1.26E-07 | 0.96 | 4.42  | -     | 1737.7  |
| AHQ-3-12, 4720 - 4740       | K.VVIEDEQLVLGASQEPVGR.W                                                 | 2039.27568 | 2 | 2.00E-07 | 0.96 | 4.47  | -     | 1806.9  |
| AHQ-3-13, 4710              | K.VVIEDEQLVLGASQEPVGR.W                                                 | 2039.27568 | 2 | 1.64E-07 | 0.95 | 3.62  | -     | 1794.1  |
| AHQ-3-12, 4728 - 4730       | K.VVIEDEQLVLGASQEPVGR.W                                                 | 2039.27568 | 3 | 2.82E-04 | 0.98 | 5.97  | -     | 3033.1  |
| gi 29739414 ref XP_294015.1 | similar to Glyceroldehyde 3-phosphate dehydrogenase, liver (GAPDH) [Ho  |            |   | 1.56E-10 | 3.66 | 40.25 | 17.70 | 26916.7 |
| AHQ-3-10, 3819              | K.IISNASCTTNCCLAPLAK.V                                                  | 1837.10868 | 2 | 5.35E-09 | 0.52 | 2.94  | -     | 766.0   |
| AHQ-3-11, 3787 - 3846       | K.IISNASCTTNCCLAPLAK.V                                                  | 1837.10868 | 2 | 1.93E-08 | 0.82 | 4.07  | -     | 979.0   |
| AHQ-3-9, 3601 - 3676        | K.IISNASCTTNCCLAPLAK.V                                                  | 1837.10868 | 2 | 1.56E-10 | 0.93 | 4.40  | -     | 1464.5  |
| AHQ-3-9, 4068 - 4135        | K.IISNASCTTNCCLAPLAK.V                                                  | 1837.10868 | 2 | 1.16E-07 | 0.85 | 3.73  | -     | 1315.8  |
| AHQ-3-10, 4006              | K.IISNASCTTNCCLAPLAK.V                                                  | 1837.10868 | 2 | 1.37E-05 | 0.57 | 3.01  | -     | 677.6   |
| AHQ-3-10, 3727              | K.IISNASCTTNCCLAPLAK.V                                                  | 1837.10868 | 2 | 1.40E-05 | 0.81 | 3.31  | -     | 1041.9  |
| AHQ-3-12, 3992              | K.IISNASCTTNCCLAPLAK.V                                                  | 1837.10868 | 2 | 4.78E-07 | 0.83 | 3.37  | -     | 1215.8  |
| AHQ-3-14-, 4963 - 4972      | K.LISWYDNEFGYSNR.V                                                      | 1764.87478 | 2 | 2.28E-08 | 0.96 | 4.67  | -     | 1223.9  |
| AHQ-3-9, 4651 - 4723        | K.LISWYDNEFGYSNR.V                                                      | 1764.87478 | 2 | 2.00E-07 | 0.95 | 4.91  | -     | 886.3   |
| AHQ-3-10, 4599 - 4675       | K.LISWYDNEFGYSNR.V                                                      | 1764.87478 | 2 | 5.75E-09 | 0.96 | 4.51  | -     | 1474.1  |
| AHQ-3-13-, 4994             | K.LISWYDNEFGYSNR.V                                                      | 1764.87478 | 2 | 8.47E-09 | 0.94 | 4.32  | -     | 885.3   |
| AHQ-3-9, 4984 - 5052        | K.LISWYDNEFGYSNR.V                                                      | 1764.87478 | 2 | 4.44E-05 | 0.73 | 3.07  | -     | 586.6   |
| AHQ-3-9, 4791 - 4799        | K.LISWYDNEFGYSNR.V                                                      | 1764.87478 | 2 | 1.61E-07 | 0.97 | 4.74  | -     | 1364.5  |
| AHQ-3-13, 5001              | K.LISWYDNEFGYSNR.V                                                      | 1764.87478 | 2 | 1.66E-08 | 0.92 | 4.12  | -     | 763.3   |
| AHQ-3-9, 2457               | R.VVDLMAHMASK.E                                                         | 1202.47292 | 2 | 1.18E-05 | 0.95 | 3.61  | -     | 1408.3  |
| AHQ-3-9, 1877 - 1951        | R.VVDLMAHM*ASKE                                                         | 1247.58686 | 2 | 6.68E-04 | 0.81 | 3.64  | -     | 637.2   |
| gi 5031597 ref NP_005710.1  | actin related protein 2/3 complex subunit 3; ARP2/3 protein complex sub |            |   | 1.67E-10 | 2.87 | 30.27 | 15.20 | 20546.5 |
| AHQ-3-13, 6610              | K.DTDIVDEAIYFK.A                                                        | 1592.72721 | 2 | 1.67E-10 | 0.96 | 4.76  | -     | 1355.0  |
| AHQ-3-11, 6318 - 6319       | K.DTDIVDEAIYFK.A                                                        | 1592.72721 | 2 | 1.13E-09 | 0.97 | 5.48  | -     | 1409.6  |
| AHQ-3-12, 6571 - 6582       | K.DTDIVDEAIYFK.A                                                        | 1592.72721 | 2 | 3.73E-05 | 0.97 | 5.22  | -     | 1473.7  |
| AHQ-3-14-, 6467 - 6471      | K.DTDIVDEAIYFK.A                                                        | 1592.72721 | 2 | 6.94E-09 | 0.96 | 4.47  | -     | 1290.4  |
| AHQ-3-12, 5976              | R.ETKDDTDIVDEAIYFK.A                                                    | 1951.11899 | 2 | 2.49E-04 | 0.59 | 2.75  | -     | 588.0   |
| AHQ-3-11, 5771              | R.ETKDDTDIVDEAIYFK.A                                                    | 1951.11899 | 2 | 2.06E-05 | 0.94 | 4.28  | -     | 1048.3  |
| AHQ-3-11, 4878              | K.LIGNMALLPIR.S                                                         | 1211.54582 | 2 | 6.81E-04 | 0.97 | 4.01  | -     | 2206.7  |
| gi 6912638 ref NP_036557.1  | ras suppressor protein 1 [Homo sapiens]                                 |            |   | 1.69E-10 | 5.65 | 90.25 | 56.00 | 31540.1 |
| AHQ-3-10, 6574 - 6582       | K.AENNPWPTPIADQFQLGVSHVFEYIR.S                                          | 3032.35678 | 3 | 3.03E-09 | 0.75 | 3.78  | -     | 493.9   |
| AHQ-3-10, 5712 - 5770       | R.ALYLSDNDFEILPDDIGK.L                                                  | 2021.25559 | 2 | 2.42E-06 | 0.93 | 4.62  | -     | 515.0   |
| AHQ-3-10, 5826 - 5886       | R.ALYLSDNDFEILPDDIGK.L                                                  | 2021.25559 | 2 | 1.97E-10 | 0.92 | 4.49  | -     | 524.9   |
| AHQ-3-10, 1479              | K.ELHIGQNR.L                                                            | 967.06432  | 1 | 6.32E-04 | 0.34 | 2.40  | -     | 140.7   |
| AHQ-3-10, 6550              | R.GISNMLDVNGLFTLSHITQLVLSHKN.L                                          | 2853.28963 | 2 | 5.19E-06 | 0.75 | 3.46  | -     | 309.4   |
| AHQ-3-10, 6552              | R.GISNMLDVNGLFTLSHITQLVLSHKN.L                                          | 2853.28963 | 3 | 1.69E-10 | 0.82 | 4.41  | -     | 404.5   |
| AHQ-3-10, 1868              | K.HLNLGMNR.L                                                            | 955.12018  | 1 | 8.43E-04 | 0.14 | 1.83  | -     | 127.7   |
| AHQ-3-10, 5320              | K.LQILSLRDNLSLPE.K                                                      | 1839.16919 | 2 | 4.12E-07 | 0.94 | 5.06  | -     | 1357.6  |
| AHQ-3-10, 5410 - 5419       | K.LQILSLRDNLSLPE.K                                                      | 1839.16919 | 2 | 7.68E-09 | 0.94 | 5.09  | -     | 1534.8  |
| AHQ-3-10, 4263 - 4368       | K.LTMVPPNIAELK.N                                                        | 1326.63045 | 1 | 6.42E-04 | 0.21 | 2.38  | -     | 271.4   |
| AHQ-3-13, 5867 - 5929       | R.LTVLPPPELGNLDTGQK.Q                                                   | 1809.09672 | 2 | 4.78E-04 | 0.72 | 2.86  | -     | 457.0   |
| AHQ-3-10, 5423 - 5482       | R.LTVLPPPELGNLDTGQK.Q                                                   | 1809.09672 | 2 | 4.38E-06 | 0.91 | 3.86  | -     | 618.7   |
| AHQ-3-11, 5643 - 5702       | R.LTVLPPPELGNLDTGQK.Q                                                   | 1809.09672 | 2 | 3.16E-08 | 0.91 | 4.07  | -     | 706.5   |
| AHQ-3-10, 5538 - 5611       | R.LTVLPPPELGNLDTGQK.Q                                                   | 1809.09672 | 2 | 1.43E-05 | 0.89 | 3.93  | -     | 468.8   |
| AHQ-3-14-, 6724 - 6796      | K.NLEVLNFFNQIEELPTQISSLQK.L                                             | 2820.14663 | 2 | 6.97E-04 | 0.64 | 3.47  | -     | 192.9   |
| AHQ-3-10, 6566              | K.NLEVLNFFNQIEELPTQISSLQK.L                                             | 2820.14663 | 2 | 5.58E-05 | 0.62 | 2.92  | -     | 445.1   |
| gi 21956645 ref NP_665807.1 | myotrophin; granule cell differentiation protein [Homo sapiens]         |            |   | 1.86E-10 | 3.70 | 40.30 | 49.20 | 12894.7 |
| AHQ-3-13, 4339 - 4354       | K.GADINAPDKHHITPLLSAVYEGHVSCVK.L                                        | 3031.39193 | 3 | 7.62E-05 | 0.80 | 4.22  | -     | 493.6   |
| AHQ-3-14, 4975 - 5003       | K.GPDGLTAFEATDNQAIK.A                                                   | 1748.87196 | 2 | 1.71E-06 | 0.97 | 5.53  | -     | 1342.8  |
| AHQ-3-13, 4090              | K.GPDGLTAFEATDNQAIK.A                                                   | 1748.87196 | 2 | 2.10E-07 | 0.96 | 4.60  | -     | 1461.0  |
| AHQ-3-13, 3946 - 4021       | K.GPDGLTAFEATDNQAIK.A                                                   | 1748.87196 | 2 | 2.64E-04 | 0.97 | 5.21  | -     | 1502.1  |
| AHQ-3-14-, 4001             | K.GPDGLTAFEATDNQAIK.A                                                   | 1748.87196 | 2 | 5.34E-04 | 0.95 | 3.99  | -     | 1385.5  |
| AHQ-3-14-, 3855 - 3919      | K.GPDGLTAFEATDNQAIK.A                                                   | 1748.87196 | 2 | 1.53E-09 | 0.97 | 5.33  | -     | 1471.1  |
| AHQ-3-13-, 4086             | K.GPDGLTAFEATDNQAIK.A                                                   | 1748.87196 | 2 | 6.91E-05 | 0.97 | 5.42  | -     | 1534.5  |
| AHQ-3-14, 4851 - 4931       | K.GPDGLTAFEATDNQAIK.A                                                   | 1748.87196 | 2 | 1.93E-05 | 0.98 | 5.76  | -     | 1516.8  |
| AHQ-3-13-, 3938 - 4011      | K.GPDGLTAFEATDNQAIK.A                                                   | 1748.87196 | 2 | 6.95E-08 | 0.98 | 5.89  | -     | 1995.1  |
| AHQ-3-13-, 4003             | K.HHITPLLSAVYEGHVSCVK.L                                                 | 2149.45825 | 3 | 8.97E-09 | 0.98 | 6.04  | -     | 2572.1  |
| AHQ-3-14, 5321              | K.HHITPLLSAVYEGHVSCVK.L                                                 | 2149.45825 | 3 | 2.25E-10 | 0.98 | 5.63  | -     | 3081.4  |
| AHQ-3-13, 3987              | K.HHITPLLSAVYEGHVSCVK.L                                                 | 2149.45825 | 3 | 7.50E-08 | 0.97 | 4.87  | -     | 2064.3  |
| AHQ-3-14, 4511              | K.NGDLDEVKDYVAK.G                                                       | 1466.57496 | 2 | 5.26E-05 | 0.87 | 3.34  | -     | 841.4   |
| AHQ-3-14-, 3519             | K.NGDLDEVKDYVAK.G                                                       | 1466.57496 | 2 | 3.60E-09 | 0.95 | 4.10  | -     | 1352.6  |
| AHQ-3-14-, 3527 - 3600      | K.NGDLDEVKDYVAK.G                                                       | 1466.57496 | 1 | 6.46E-07 | 0.48 | 2.22  | -     | 353.7   |
| AHQ-3-14-, 3624             | K.NGDLDEVKDYVAK.G                                                       | 1466.57496 | 2 | 3.46E-09 | 0.96 | 3.77  | -     | 1654.2  |
| AHQ-3-14, 4417              | K.NGDLDEVKDYVAK.G                                                       | 1466.57496 | 2 | 5.03E-07 | 0.96 | 3.97  | -     | 1580.4  |
| AHQ-3-13, 3723              | K.NGDLDEVKDYVAK.G                                                       | 1466.57496 | 2 | 1.86E-10 | 0.95 | 4.17  | -     | 1337.1  |
| AHQ-3-13-, 3718 - 3719      | K.NGDLDEVKDYVAK.G                                                       | 1466.57496 | 2 | 2.46E-08 | 0.94 | 3.94  | -     | 1446.0  |
| gi 11321601 ref NP_002618.1 | phosphofructokinase, platelet; Phosphofructokinase, platelet type [Hom  |            |   | 1.93E-10 | 7.69 | 80.32 | 15.60 | 85595.6 |
| AHQ-3-5, 3527               | K.AIGVLTSGGDAQGMNAAVR.A                                                 | 1789.00750 | 2 | 1.40E-08 | 0.98 | 6.33  | -     | 1843.8  |
| AHQ-3-5, 2804               | K.AIGVLTSGGDAQGMNAAVR.A                                                 | 1805.00690 | 2 | 4.98E-06 | 0.97 | 5.17  | -     | 1682.7  |
| AHQ-3-5, 3247               | R.DLQSNVEHLTK.M                                                         | 1413.51529 | 2 | 3.14E-08 | 0.94 | 4.21  | -     | 1166.8  |
| AHQ-3-5, 6163 - 6175        | K.EIGWTDVGGWGTGGSSILGTR.R                                               | 2120.30735 | 2 | 2.63E-06 | 0.96 | 4.90  | -     | 1345.7  |
| AHQ-3-5, 6595               | R.GITNLCVIGDGSLTGANLFR.K                                                | 2137.40264 | 2 | 1.93E-10 | 0.96 | 5.33  | -     | 942.0   |
| AHQ-3-5, 5393               | R.IIEVDDAIMTDAQSHQR.T                                                   | 1913.18853 | 2 | 1.20E-08 | 0.97 | 5.08  | -     | 1572.0  |
| AHQ-3-5, 4945               | R.LPLMECVQMTQDVQK.A                                                     | 1822.16087 | 2 | 1.96E-05 | 0.98 | 5.04  | -     | 2785.2  |
| AHQ-3-5, 3312               | K.NVLGHMQQGGAPSPFDR.N                                                   | 1812.00285 | 2 | 1.53E-06 | 0.93 | 3.75  | -     | 1309.9  |
| gi 5453740 ref NP_006462.1  | myosin regulatory light chain MRCL3; myosin, light polypeptide, regulat |            |   | 2.02E-10 | 6.22 | 70.29 | 32.70 | 19794.0 |
| AHQ-3-11, 5935              | R.ATSNVAMFQDSQIQEFK.E                                                   | 2092.31741 | 3 | 7.18E-06 | 0.91 | 3.98  | -     | 1383.0  |
| AHQ-3-14-, 5396 - 5413      | R.ATSNVAM*FDQSQIQEFK.E                                                  | 2108.31681 | 2 | 8.66E-07 | 0.98 | 5.49  | -     | 1705.0  |

|                             |                                                                          |            |   |          |       |        |       |         |
|-----------------------------|--------------------------------------------------------------------------|------------|---|----------|-------|--------|-------|---------|
| AHQ-3-14, 6300              | R.ATSNVAM*FDQSQIQEFK.E                                                   | 2108.31681 | 2 | 4.41E-06 | 0.85  | 3.55   | -     | 560.4   |
| AHQ-3-12, 6080 - 6143       | R.ATSNVAM*FDQSQIQEFK.E                                                   | 2092.31741 | 2 | 1.25E-04 | 0.96  | 4.68   | -     | 1400.3  |
| AHQ-3-12, 5446              | R.ATSNVAM*FDQSQIQEFK.E                                                   | 2108.31681 | 2 | 1.17E-04 | 0.86  | 3.27   | -     | 651.8   |
| AHQ-3-11, 6294              | R.ATSNVAM*FDQSQIQEFK.E                                                   | 2092.31741 | 2 | 8.63E-07 | 0.93  | 4.23   | -     | 794.0   |
| AHQ-3-11, 5159 - 5222       | R.ATSNVAM*FDQSQIQEFK.E                                                   | 2108.31681 | 2 | 9.15E-09 | 0.97  | 5.03   | -     | 1861.2  |
| AHQ-3-11, 5323 - 5387       | R.ATSNVAM*FDQSQIQEFK.E                                                   | 2108.31681 | 2 | 1.70E-07 | 0.96  | 4.55   | -     | 1457.4  |
| AHQ-3-11, 6023              | R.ATSNVAM*FDQSQIQEFK.E                                                   | 2092.31741 | 2 | 1.56E-08 | 0.98  | 5.25   | -     | 1812.9  |
| AHQ-3-14-, 6088 - 6095      | R.ATSNVAM*FDQSQIQEFK.E                                                   | 2092.31741 | 2 | 5.91E-05 | 0.97  | 5.13   | -     | 1451.3  |
| AHQ-3-11, 5900 - 5958       | R.ATSNVAM*FDQSQIQEFK.E                                                   | 2092.31741 | 2 | 7.66E-06 | 0.98  | 5.81   | -     | 1957.3  |
| AHQ-3-11, 5816              | R.ATSNVAM*FDQSQIQEFK.E                                                   | 2092.31741 | 2 | 1.65E-04 | 0.94  | 4.17   | -     | 967.7   |
| AHQ-3-11, 5758 - 5762       | R.DGFIDKEDLHDMLASLQK.N                                                   | 2005.23806 | 2 | 6.09E-09 | 0.97  | 5.27   | -     | 1573.6  |
| AHQ-3-11, 5766              | R.DGFIDKEDLHDMLASLQK.N                                                   | 2005.23806 | 3 | 1.43E-09 | 0.89  | 3.69   | -     | 1104.0  |
| AHQ-3-14-, 5851             | R.DGFIDKEDLHDMLASLQK.N                                                   | 2005.23806 | 2 | 1.97E-08 | 0.97  | 5.51   | -     | 1450.1  |
| AHQ-3-11, 5662              | R.DGFIDKEDLHDMLASLQK.N                                                   | 2005.23806 | 2 | 2.02E-10 | 0.98  | 5.62   | -     | 1672.7  |
| AHQ-3-11, 5614 - 5676       | R.DGFIDKEDLHDMLASLQK.N                                                   | 2005.23806 | 3 | 1.02E-06 | 0.92  | 4.09   | -     | 1245.6  |
| AHQ-3-11, 5526 - 5602       | R.DGFIDKEDLHDMLASLQK.N                                                   | 2005.23806 | 2 | 4.26E-07 | 0.85  | 4.60   | -     | 633.1   |
| AHQ-3-14-, 5840             | R.DGFIDKEDLHDMLASLQK.N                                                   | 2005.23806 | 3 | 3.89E-08 | 0.78  | 3.07   | -     | 1046.0  |
| AHQ-3-11, 5138 - 5147       | R.DGFIDKEDLHDMLASLQK.N                                                   | 2005.23806 | 2 | 4.13E-04 | 0.88  | 3.41   | -     | 979.9   |
| AHQ-3-13-, 4578             | R.DGFIDKEDLHDM*LASLQK.N                                                  | 2021.23746 | 2 | 7.90E-06 | 0.84  | 4.08   | -     | 358.1   |
| AHQ-3-11, 4480 - 4482       | R.DGFIDKEDLHDM*LASLQK.N                                                  | 2021.23746 | 2 | 1.89E-04 | 0.92  | 4.36   | -     | 901.6   |
| AHQ-3-11, 4884              | R.DGFIDKEDLHDMLASLQK.N                                                   | 2005.23806 | 2 | 2.00E-05 | 0.88  | 4.01   | -     | 802.9   |
| AHQ-3-12, 5886 - 5887       | R.DGFIDKEDLHDMLASLQK.N                                                   | 2005.23806 | 2 | 7.99E-10 | 0.92  | 5.52   | -     | 1531.9  |
| AHQ-3-12, 5890              | R.DGFIDKEDLHDMLASLQK.N                                                   | 2005.23806 | 3 | 1.49E-05 | 0.91  | 4.29   | -     | 1014.9  |
| AHQ-3-11, 6071 - 6148       | K.EAFNMIDQNRDGFIDKEDLHDMLASLQK.N                                         | 3224.57104 | 3 | 1.10E-07 | 0.96  | 5.78   | -     | 1355.6  |
| AHQ-3-11, 5742 - 5810       | K.EAFNM*IDQNRDGFIDKEDLHDMLASLQK.N                                        | 3240.57044 | 3 | 4.35E-04 | 0.71  | 3.34   | -     | 789.3   |
| AHQ-3-12, 4164 - 4170       | K.GNFNIEFTR.I                                                            | 1261.36733 | 2 | 1.16E-04 | 0.81  | 3.29   | -     | 740.0   |
| AHQ-3-11, 4007              | K.GNFNIEFTR.I                                                            | 1261.36733 | 2 | 2.15E-05 | 0.78  | 3.14   | -     | 773.9   |
| AHQ-3-11, 4187 - 4188       | K.GNFNIEFTR.I                                                            | 1261.36733 | 1 | 1.12E-04 | 0.29  | 2.16   | -     | 402.4   |
| AHQ-3-13, 4193              | K.GNFNIEFTR.I                                                            | 1261.36733 | 2 | 2.90E-04 | 0.82  | 2.99   | -     | 967.5   |
| AHQ-3-11, 3872 - 3944       | K.GNFNIEFTR.I                                                            | 1261.36733 | 2 | 1.42E-04 | 0.79  | 2.99   | -     | 657.1   |
| AHQ-3-12, 4171 - 4175       | K.GNFNIEFTR.I                                                            | 1261.36733 | 1 | 2.96E-05 | 0.26  | 2.55   | -     | 188.1   |
| gi 4504515 ref NP_002146.1  | heat shock 70kDa protein 6 (HSP70B); heat shock 70kDa protein 6 (HSP70B) |            |   | 2.03E-10 | 2.55  | 40.25  | 6.40  | 70853.4 |
| AHQ-3-6, 2239               | K.ATAGDTHLGGEDFDNR.L                                                     | 1676.68279 | 2 | 1.54E-04 | 0.82  | 3.30   | -     | 642.0   |
| AHQ-3-6, 4778 - 4789        | R.IINEPTAAAIYGLDR.R                                                      | 1688.90603 | 2 | 2.03E-10 | 0.96  | 4.97   | -     | 1131.7  |
| AHQ-3-6, 4277 - 4383        | K.LLQDFNFKG.E                                                            | 1082.23369 | 1 | 1.26E-05 | 0.16  | 2.14   | -     | 224.3   |
| AHQ-3-13-, 3430 - 3441      | R.TTSPYVAFDTER.L                                                         | 1488.58062 | 2 | 8.33E-07 | 0.61  | 2.68   | -     | 571.7   |
| AHQ-3-13, 3375 - 3438       | R.TTSPYVAFDTER.L                                                         | 1488.58062 | 2 | 4.08E-04 | 0.53  | 2.63   | -     | 299.1   |
| gi 21624607 ref NP_066972.1 | coactosin-like 1 (Homo sapiens)                                          |            |   | 2.08E-10 | 4.54  | 70.31  | 58.50 | 15944.9 |
| AHQ-3-12, 2134              | R.AAYNLVR.D                                                              | 806.93245  | 2 | 2.90E-04 | 0.64  | 2.56   | -     | 580.1   |
| AHQ-3-13-, 5307             | R.DDGSAVIWWTFK.Y                                                         | 1338.49001 | 1 | 4.45E-06 | 0.73  | 3.15   | -     | 553.2   |
| AHQ-3-13, 4137              | K.ELEEDFKSELK.K                                                          | 1480.64154 | 2 | 5.74E-05 | 0.84  | 3.52   | -     | 654.3   |
| AHQ-3-13-, 2105 - 2165      | K.EVVQNFAX.E                                                             | 935.05900  | 1 | 2.00E-05 | 0.23  | 2.30   | -     | 147.0   |
| AHQ-3-12, 6879              | K.FALITWIGENVSGLQR.A                                                     | 1805.06986 | 2 | 5.26E-05 | 0.96  | 5.21   | -     | 1310.8  |
| AHQ-3-13, 6857              | K.FALITWIGENVSGLQR.A                                                     | 1805.06986 | 2 | 4.03E-06 | 0.97  | 5.84   | -     | 1571.5  |
| AHQ-3-13-, 6785             | K.FALITWIGENVSGLQR.A                                                     | 1805.06986 | 2 | 2.91E-08 | 0.98  | 6.11   | -     | 2202.1  |
| AHQ-3-13, 2813              | R.KELEEDFK.S                                                             | 1151.29110 | 2 | 8.78E-04 | 0.83  | 3.22   | -     | 772.5   |
| AHQ-3-13-, 2793             | R.KELEEDFK.S                                                             | 1151.29110 | 2 | 2.52E-04 | 0.65  | 2.69   | -     | 572.0   |
| AHQ-3-12, 2735              | R.KELEEDFK.S                                                             | 1151.29110 | 1 | 1.11E-04 | 0.13  | 2.16   | -     | 377.6   |
| AHQ-3-13, 2818              | R.KELEEDFK.S                                                             | 1151.29110 | 1 | 5.82E-05 | 0.46  | 2.76   | -     | 472.6   |
| AHQ-3-12, 5263 - 5342       | K.YDGSITVPEQGAQYQHFIQQCTDDVR.L                                           | 3116.27790 | 3 | 2.08E-10 | 0.65  | 3.14   | -     | 356.3   |
| gi 4503631 ref NP_000120.1  | coagulation factor XIII A1 subunit precursor; Coagulation factor XIII,   |            |   | 2.08E-10 | 22.67 | 260.30 | 37.30 | 83232.8 |
| AHQ-3-5, 5427 - 5459        | R.AVPPNNSNAEEDLPTVELQGVPR.G                                              | 2603.82656 | 2 | 5.41E-07 | 0.45  | 3.07   | -     | 150.8   |
| AHQ-3-5, 2136               | R.CGPASVQAIK.H                                                           | 1032.19627 | 1 | 2.68E-04 | 0.48  | 2.93   | -     | 259.7   |
| AHQ-3-7, 2283               | K.DGTHVVENVVDATHIGK.L                                                    | 1692.81163 | 2 | 1.90E-06 | 0.88  | 3.73   | -     | 752.2   |
| AHQ-3-5, 2472               | K.DGTHVVENVVDATHIGK.L                                                    | 1692.81163 | 2 | 4.25E-09 | 0.94  | 4.00   | -     | 1056.8  |
| AHQ-3-5, 2340 - 2341        | K.DGTHVVENVVDATHIGK.L                                                    | 1692.81163 | 2 | 5.91E-10 | 0.95  | 4.99   | -     | 753.2   |
| AHQ-3-5, 2353               | K.DGTHVVENVVDATHIGK.L                                                    | 1692.81163 | 3 | 6.94E-08 | 0.87  | 4.37   | -     | 781.1   |
| AHQ-3-5, 4228               | R.EIRPNSTWQEEVCRPWVSGHR.K                                                | 2724.99524 | 3 | 1.47E-04 | 0.80  | 3.24   | -     | 789.7   |
| AHQ-3-11, 5400 - 5438       | K.ETFDVTLPLSFK.K                                                         | 1526.71190 | 2 | 1.11E-05 | 0.64  | 2.64   | -     | 611.2   |
| AHQ-3-5, 5712 - 5792        | K.ETFDVTLPLSFK.K                                                         | 1526.71190 | 2 | 4.58E-06 | 0.90  | 4.16   | -     | 912.3   |
| AHQ-3-8, 4467               | K.ETFDVTLPLSFK.K                                                         | 1654.88482 | 2 | 1.20E-07 | 0.77  | 2.89   | -     | 548.6   |
| AHQ-3-5, 5559 - 5628        | K.GTYIPVPIVSELQSGK.W                                                     | 1688.94594 | 2 | 1.94E-06 | 0.93  | 4.03   | -     | 665.7   |
| AHQ-3-8, 6733               | R.GVNLQEFNLVTSVHLFK.E                                                    | 1946.23831 | 2 | 9.66E-07 | 0.95  | 4.92   | -     | 1004.4  |
| AHQ-3-10, 6342              | R.GVNLQEFNLVTSVHLFK.E                                                    | 1946.23831 | 2 | 6.29E-08 | 0.95  | 4.85   | -     | 1126.5  |
| AHQ-3-7, 6951               | R.GVNLQEFNLVTSVHLFK.E                                                    | 1946.23831 | 3 | 2.09E-06 | 0.92  | 4.76   | -     | 979.0   |
| AHQ-3-7, 6942               | R.GVNLQEFNLVTSVHLFK.E                                                    | 1946.23831 | 2 | 2.68E-09 | 0.98  | 6.07   | -     | 1702.9  |
| AHQ-3-11, 6490              | R.GVNLQEFNLVTSVHLFK.E                                                    | 1946.23831 | 2 | 2.20E-08 | 0.97  | 5.43   | -     | 1437.6  |
| AHQ-3-6, 7086               | R.GVNLQEFNLVTSVHLFK.E                                                    | 1946.23831 | 2 | 3.23E-07 | 0.85  | 3.77   | -     | 929.9   |
| AHQ-3-12, 6791              | R.GVNLQEFNLVTSVHLFK.E                                                    | 1946.23831 | 2 | 1.17E-06 | 0.96  | 4.81   | -     | 1305.1  |
| AHQ-3-6, 7010               | R.GVNLQEFNLVTSVHLFK.E                                                    | 1946.23831 | 3 | 2.08E-10 | 0.93  | 4.71   | -     | 838.4   |
| AHQ-3-6, 6987               | R.GVNLQEFNLVTSVHLFK.E                                                    | 1946.23831 | 2 | 2.31E-06 | 0.93  | 4.34   | -     | 893.5   |
| AHQ-3-5, 7247 - 7317        | R.GVNLQEFNLVTSVHLFK.E                                                    | 1946.23831 | 2 | 8.28E-07 | 0.97  | 4.95   | -     | 1608.9  |
| AHQ-3-5, 7120 - 7187        | R.GVNLQEFNLVTSVHLFK.E                                                    | 1946.23831 | 3 | 3.54E-09 | 0.87  | 4.21   | -     | 621.2   |
| AHQ-3-14-, 6653 - 6667      | R.GVNLQEFNLVTSVHLFK.E                                                    | 1946.23831 | 2 | 1.06E-08 | 0.96  | 4.80   | -     | 1382.2  |
| AHQ-3-3, 7329               | R.GVNLQEFNLVTSVHLFK.E                                                    | 1946.23831 | 2 | 1.19E-07 | 0.93  | 4.58   | -     | 956.0   |
| AHQ-3-9, 6623 - 6700        | R.GVNLQEFNLVTSVHLFK.E                                                    | 1946.23831 | 2 | 1.12E-06 | 0.96  | 5.38   | -     | 1120.8  |
| AHQ-3-5, 7119 - 7184        | R.GVNLQEFNLVTSVHLFK.E                                                    | 1946.23831 | 2 | 5.15E-09 | 0.97  | 5.77   | -     | 1297.8  |
| AHQ-3-5, 3416               | R.HVYGELDVQIQR.R                                                         | 1457.61612 | 2 | 3.73E-06 | 0.88  | 2.96   | -     | 836.3   |
| AHQ-3-5, 7325               | R.IVTNYFAHNDANLQMDIFLEEDGNVNSK.L                                         | 3415.64559 | 3 | 1.09E-08 | 0.94  | 5.29   | -     | 1050.4  |
| AHQ-3-5, 7243               | R.IVTNYFAHNDANLQMDIFLEEDGNVNSK.L                                         | 3415.64559 | 3 | 2.76E-07 | 0.94  | 5.01   | -     | 1135.6  |
| AHQ-3-6, 1931               | K.KDGTTHVVENVVDATHIGK.L                                                  | 1820.98455 | 2 | 9.18E-07 | 0.95  | 4.43   | -     | 1133.8  |
| AHQ-3-5, 1953               | K.KDGTTHVVENVVDATHIGK.L                                                  | 1820.98455 | 2 | 8.76E-06 | 0.96  | 4.18   | -     | 1688.0  |
| AHQ-3-6, 2138               | K.KDGTTHVVENVVDATHIGK.L                                                  | 1820.98455 | 2 | 6.49E-04 | 0.94  | 4.12   | -     | 1019.7  |
| AHQ-3-5, 5004 - 5021        | K.KETFDVTLPLSFK.K                                                        | 1654.88482 | 2 | 2.75E-08 | 0.97  | 4.75   | -     | 1888.6  |
| AHQ-3-11, 4834              | K.KETFDVTLPLSFK.K                                                        | 1654.88482 | 2 | 5.72E-08 | 0.96  | 4.41   | -     | 1801.5  |
| AHQ-3-5, 2425 - 2427        | R.KLIASMSDSL.R.H                                                         | 1308.53039 | 2 | 2.15E-09 | 0.96  | 4.35   | -     | 1594.4  |
| AHQ-3-5, 4592 - 4664        | R.LALETALMYGAK.K                                                         | 1281.54655 | 2 | 2.67E-05 | 0.94  | 3.69   | -     | 1292.1  |
| AHQ-3-5, 4609               | R.LALETALMYGAK.K                                                         | 1281.54655 | 1 | 2.03E-04 | 0.70  | 3.02   | -     | 371.5   |
| AHQ-3-5, 4665               | R.LALETALMYGAK.K                                                         | 1281.54655 | 2 | 1.95E-04 | 0.94  | 3.57   | -     | 1592.7  |
| AHQ-3-5, 4095 - 4099        | R.LALETALMYGAK.K                                                         | 1297.54595 | 2 | 2.06E-04 | 0.93  | 3.89   | -     | 1083.4  |
| AHQ-3-11, 2850              | K.LIASMSDSL.R.H                                                          | 1180.35748 | 2 | 3.39E-04 | 0.95  | 3.51   | -     | 1398.8  |
| AHQ-3-5, 2796 - 2821        | K.LIASMSDSL.R.H                                                          | 1180.35748 | 2 | 1.22E-07 | 0.97  | 3.72   | -     | 1947.6  |
| AHQ-3-6, 2779               | K.LIASMSDSL.R.H                                                          | 1180.35748 | 2 | 7.32E-05 | 0.95  | 3.73   | -     | 1184.5  |
| AHQ-3-5, 6143 - 6207        | R.MYVAVWTPYGVLR.T                                                        | 1555.86794 | 2 | 1.33E-06 | 0.97  | 5.22   | -     | 1181.6  |
| AHQ-3-5, 5504 - 5505        | R.MYVAVWTPYGVLR.T                                                        | 1571.86734 | 2 | 1.07E-06 | 0.96  | 5.16   | -     | 915.6   |
| AHQ-3-6, 5998 - 6078        | R.MYVAVWTPYGVLR.T                                                        | 1555.86794 | 2 | 1.79E-05 | 0.93  | 4.14   | -     | 921.1   |
| AHQ-3-6, 5474               | R.MYVAVWTPYGVLR.T                                                        | 1571.86734 | 2 | 4.55E-06 | 0.95  | 4.36   | -     | 1003.1  |
| AHQ-3-9, 5719               | R.MYVAVWTPYGVLR.T                                                        | 1555.86794 | 2 | 7.36E-05 | 0.91  | 3.48   | -     | 848.1   |
| AHQ-3-7, 5975               | R.MYVAVWTPYGVLR.T                                                        | 1555.86794 | 2 | 1.44E-07 | 0.95  | 4.37   | -     | 912.6   |
| AHQ-3-5, 6779 - 6843        | R.NPETDTYILFNPWCEDDAVYLNEKER.E                                           | 3349.53903 | 3 | 2.20E-06 | 0.95  | 5.55   | -     | 1193.9  |
| AHQ-3-5, 3376 - 3377        | R.NVVVHLDGPGVTRPM.K                                                      | 1450.62682 | 2 | 6.23E-08 | 0.91  | 3.65   | -     | 1009.3  |
| AHQ-3-5, 2955               | R.NVVVHLDGPGVTRPM*K.K                                                    | 1823.11188 | 2 | 2.68E-04 | 0.89  | 3.62   | -     | 852.2   |
| AHQ-3-5, 2961               | R.NVVVHLDGPGVTRPM*K.K                                                    | 1823.11188 | 3 | 4.66E-06 | 0.68  | 3.14   | -     | 518.6   |
| AHQ-3-7, 3247               | R.NVVVHLDGPGVTRPMK.K                                                     | 1807.11248 | 2 | 6.36E-05 | 0.80  | 3.14   | -     | 579.2   |
| AHQ-3-5, 3356 - 3379        | R.NVVVHLDGPGVTRPMK.K                                                     | 1807.11248 | 2 | 2.51E-10 | 0.92  | 3.94   | -     | 842.3   |
| AHQ-3-5, 2537               | R.NVVVHLDGPGVTRPM*K.K.M                                                  | 1951.28480 | 3 | 9.84E-04 | 0.84  | 3.62   | -     | 917.3   |
| AHQ-3-5, 2539               | R.NVVVHLDGPGVTRPM*K.K.M                                                  | 1951.28480 | 2 | 2.60E-04 | 0.81  | 3.42   | -     | 439.2   |



|                           |                                                                         |            |   |          |       |        |       |         |
|---------------------------|-------------------------------------------------------------------------|------------|---|----------|-------|--------|-------|---------|
| AHQ-3-5, 4627             | R.SNVDM*DFEVENAVLGK.D                                                   | 1783.93809 | 2 | 1.65E-08 | 0.97  | 4.70   | -     | 1912.7  |
| AHQ-3-5, 4559 - 4636      | R.SNVDM*DFEVENAVLGK.D                                                   | 1783.93809 | 2 | 3.78E-08 | 0.95  | 3.96   | -     | 1496.5  |
| AHQ-3-1, 4828 - 4900      | R.SNVDM*DFEVENAVLGK.D                                                   | 1783.93809 | 2 | 1.06E-05 | 0.80  | 3.25   | -     | 801.2   |
| AHQ-3-5, 5949             | R.SNVDM*DFEVENAVLGK.D                                                   | 1767.93869 | 2 | 6.68E-04 | 0.85  | 3.06   | -     | 1156.5  |
| AHQ-3-6, 4546             | R.SNVDM*DFEVENAVLGK.D                                                   | 1783.93809 | 2 | 5.81E-08 | 0.94  | 3.85   | -     | 1525.4  |
| AHQ-3-13-, 5661           | K.STVLTIPEIHK.V                                                         | 1327.63485 | 2 | 3.03E-04 | 0.88  | 3.28   | -     | 1073.3  |
| AHQ-3-9, 5249 - 5251      | K.STVLTIPEIHK.V                                                         | 1327.63485 | 2 | 4.68E-06 | 0.91  | 3.53   | -     | 1120.5  |
| gi4503689 ref NP_000499.1 | fibrinogen, alpha chain isoform alpha-E preproprotein [Homo sapiens] [M |            |   | 2.14E-10 | 18.78 | 240.28 | 29.20 | 94972.5 |
| AHQ-3-7, 5960             | K.DSDWPFCSDEDWNYK.C                                                     | 1965.98609 | 2 | 1.02E-05 | 0.93  | 4.05   | -     | 668.1   |
| AHQ-3-1, 6066             | K.DSDWPFCSDEDWNYK.C                                                     | 1965.98609 | 2 | 9.66E-07 | 0.44  | 2.58   | -     | 189.0   |
| AHQ-3-6, 5897             | K.DSDWPFCSDEDWNYK.C                                                     | 1965.98609 | 2 | 8.21E-07 | 0.90  | 3.35   | -     | 687.1   |
| AHQ-3-1, 5197             | K.DSHSLTNNIM*EILR.G                                                     | 1646.84779 | 2 | 5.88E-04 | 0.89  | 3.66   | -     | 930.9   |
| AHQ-3-10, 4414 - 4422     | K.DSHSLTNNIM*EILR.G                                                     | 1646.84779 | 2 | 2.06E-05 | 0.90  | 3.85   | -     | 1027.5  |
| AHQ-3-9, 5224             | K.DSHSLTNNIMEILR.G                                                      | 1630.84839 | 2 | 2.80E-04 | 0.97  | 4.78   | -     | 1518.1  |
| AHQ-3-11, 5440            | K.DSHSLTNNIMEILR.G                                                      | 1630.84839 | 2 | 2.81E-05 | 0.95  | 3.85   | -     | 1440.0  |
| AHQ-3-10, 5172            | K.DSHSLTNNIMEILR.G                                                      | 1630.84839 | 2 | 2.70E-05 | 0.93  | 3.63   | -     | 1212.9  |
| AHQ-3-6, 5641             | K.DSHSLTNNIMEILR.G                                                      | 1630.84839 | 2 | 8.22E-06 | 0.95  | 4.08   | -     | 1419.6  |
| AHQ-3-13, 2363            | K.ESSSHHPGIAEFPSPR.G                                                    | 1638.72252 | 2 | 2.44E-06 | 0.89  | 3.37   | -     | 766.7   |
| AHQ-3-1, 2697             | R.EVDLKYEDQQQ.Q                                                         | 1510.58460 | 2 | 4.06E-05 | 0.80  | 2.90   | -     | 737.3   |
| AHQ-3-13-, 2613           | R.EVDLKYEDQQQ.Q                                                         | 1510.58460 | 2 | 6.25E-06 | 0.90  | 3.60   | -     | 867.9   |
| AHQ-3-8, 2237             | R.EVDLKYEDQQQ.Q                                                         | 1510.58460 | 2 | 9.09E-06 | 0.53  | 2.63   | -     | 525.9   |
| AHQ-3-13, 2649            | R.EVDLKYEDQQQ.Q                                                         | 1510.58460 | 2 | 4.50E-07 | 0.83  | 3.40   | -     | 528.6   |
| AHQ-3-14-, 2560           | R.EVDLKYEDQQQ.Q                                                         | 1510.58460 | 2 | 4.81E-08 | 0.87  | 2.94   | -     | 982.2   |
| AHQ-3-10, 2430            | R.EVDLKYEDQQQ.Q                                                         | 1510.58460 | 2 | 5.38E-07 | 0.84  | 3.31   | -     | 728.9   |
| AHQ-3-9, 2304 - 2309      | R.EVDLKYEDQQQ.Q                                                         | 1510.58460 | 2 | 3.10E-07 | 0.85  | 3.22   | -     | 720.0   |
| AHQ-3-13, 6374 - 6454     | K.EVVTSEDGSDCPEAMDGLTSLGIGTLDGFR.H                                      | 3131.34937 | 3 | 4.29E-06 | 0.86  | 3.58   | -     | 1047.6  |
| AHQ-3-13, 6229            | K.EVVTSEDGSDCPEAM*DLGTLGIGTLDGFR.H                                      | 3147.34877 | 3 | 3.59E-07 | 0.95  | 5.66   | -     | 938.2   |
| AHQ-3-13-, 5925           | K.EVVTSEDGSDCPEAM*DLGTLGIGTLDGFR.H                                      | 3147.34877 | 3 | 1.25E-05 | 0.96  | 5.41   | -     | 1257.3  |
| AHQ-3-6, 6858 - 6865      | K.EVVTSEDGSDCPEAMDGLTSLGIGTLDGFR.H                                      | 3131.34937 | 3 | 4.48E-10 | 0.93  | 4.73   | -     | 1383.9  |
| AHQ-3-6, 6605 - 6671      | K.EVVTSEDGSDCPEAMDGLTSLGIGTLDGFR.H                                      | 3131.34937 | 3 | 7.43E-05 | 0.81  | 3.86   | -     | 762.6   |
| AHQ-3-13-, 6317           | K.EVVTSEDGSDCPEAMDGLTSLGIGTLDGFR.H                                      | 3131.34937 | 3 | 9.81E-08 | 0.86  | 3.65   | -     | 1027.6  |
| AHQ-3-1, 6737             | K.EVVTSEDGSDCPEAMDGLTSLGIGTLDGFR.H                                      | 3131.34937 | 3 | 1.32E-05 | 0.86  | 3.81   | -     | 984.5   |
| AHQ-3-1, 6997             | K.EVVTSEDGSDCPEAMDGLTSLGIGTLDGFR.H                                      | 3131.34937 | 3 | 4.72E-05 | 0.76  | 3.75   | -     | 688.5   |
| AHQ-3-11, 6146            | K.EVVTSEDGSDCPEAMDGLTSLGIGTLDGFR.H                                      | 3131.34937 | 3 | 2.60E-07 | 0.93  | 5.06   | -     | 1026.7  |
| AHQ-3-7, 1484             | R.GGSTSYGTGSETESPR.N                                                    | 1573.55765 | 2 | 7.29E-05 | 0.76  | 3.37   | -     | 543.6   |
| AHQ-3-6, 1503 - 1530      | R.GGSTSYGTGSETESPR.N                                                    | 1573.55765 | 2 | 6.72E-06 | 0.56  | 3.21   | -     | 299.2   |
| AHQ-3-4, 4905             | K.GLIDEVNDQFTNR.I                                                       | 1521.61384 | 2 | 9.71E-10 | 0.93  | 3.93   | -     | 878.5   |
| AHQ-3-2, 5011             | K.GLIDEVNDQFTNR.I                                                       | 1521.61384 | 2 | 7.78E-06 | 0.92  | 3.72   | -     | 989.1   |
| AHQ-3-13, 4678 - 4679     | K.GLIDEVNDQFTNR.I                                                       | 1521.61384 | 2 | 2.67E-08 | 0.89  | 2.92   | -     | 1068.8  |
| AHQ-3-9, 4853             | K.GLIDEVNDQFTNR.I                                                       | 1521.61384 | 2 | 2.14E-05 | 0.82  | 3.10   | -     | 802.5   |
| AHQ-3-1, 4946             | K.GLIDEVNDQFTNR.I                                                       | 1521.61384 | 2 | 1.32E-08 | 0.95  | 4.31   | -     | 1249.7  |
| AHQ-3-12, 4672 - 4683     | K.GLIDEVNDQFTNR.I                                                       | 1521.61384 | 2 | 3.17E-07 | 0.88  | 3.47   | -     | 778.2   |
| AHQ-3-10, 4342            | K.GLIDEVNDQFTNR.I                                                       | 1521.61384 | 2 | 7.44E-08 | 0.89  | 3.67   | -     | 776.9   |
| AHQ-3-3, 4956             | K.GLIDEVNDQFTNR.I                                                       | 1521.61384 | 2 | 1.08E-06 | 0.90  | 3.66   | -     | 787.7   |
| AHQ-3-9, 4336             | K.GLIDEVNDQFTNR.I                                                       | 1521.61384 | 2 | 1.08E-08 | 0.86  | 2.99   | -     | 951.7   |
| AHQ-3-7, 4603 - 4674      | K.GLIDEVNDQFTNR.I                                                       | 1521.61384 | 2 | 8.01E-07 | 0.85  | 3.23   | -     | 675.6   |
| AHQ-3-13, 2315            | R.GSESGIFNTK.E                                                          | 1141.21317 | 1 | 5.64E-05 | 0.25  | 2.13   | -     | 333.7   |
| AHQ-3-13, 2327            | R.GSESGIFNTK.E                                                          | 1141.21317 | 1 | 6.23E-05 | 0.46  | 2.51   | -     | 285.4   |
| AHQ-3-6, 1938             | R.GSESGIFNTK.E                                                          | 1141.21317 | 2 | 4.34E-05 | 0.76  | 2.74   | -     | 825.8   |
| AHQ-3-4, 2157             | R.GSESGIFNTK.E                                                          | 1141.21317 | 1 | 6.66E-04 | 0.19  | 2.15   | -     | 268.5   |
| AHQ-3-13, 2326            | R.GSESGIFNTK.E                                                          | 1141.21317 | 2 | 7.85E-05 | 0.84  | 2.97   | -     | 999.0   |
| AHQ-3-13, 3065            | R.HPDEAAFFDASTGK.T                                                      | 1594.66329 | 2 | 2.36E-04 | 0.75  | 3.04   | -     | 429.8   |
| AHQ-3-13-, 3039           | R.HPDEAAFFDASTGK.T                                                      | 1594.66329 | 2 | 2.00E-09 | 0.69  | 3.03   | -     | 285.7   |
| AHQ-3-13-, 2601           | R.HRHPDEAAFFDASTGK.T                                                    | 1887.98954 | 2 | 2.17E-05 | 0.96  | 4.96   | -     | 1117.9  |
| AHQ-3-10, 2332            | R.HRHPDEAAFFDASTGK.T                                                    | 1887.98954 | 2 | 1.95E-06 | 0.96  | 4.70   | -     | 1172.4  |
| AHQ-3-1, 2686             | R.HRHPDEAAFFDASTGK.T                                                    | 1887.98954 | 3 | 1.72E-05 | 0.94  | 4.70   | -     | 1351.8  |
| AHQ-3-6, 2177 - 2247      | R.HRHPDEAAFFDASTGK.T                                                    | 1887.98954 | 2 | 1.20E-07 | 0.96  | 4.95   | -     | 1226.9  |
| AHQ-3-2, 2449             | R.HRHPDEAAFFDASTGK.T                                                    | 1887.98954 | 2 | 7.53E-04 | 0.96  | 5.10   | -     | 1204.7  |
| AHQ-3-9, 2176             | R.HRHPDEAAFFDASTGK.T                                                    | 1887.98954 | 2 | 7.55E-06 | 0.96  | 4.35   | -     | 1173.2  |
| AHQ-3-6, 2169 - 2242      | R.HRHPDEAAFFDASTGK.T                                                    | 1887.98954 | 3 | 6.97E-05 | 0.95  | 4.39   | -     | 1422.7  |
| AHQ-3-12, 2494            | R.HRHPDEAAFFDASTGK.T                                                    | 1887.98954 | 3 | 6.72E-07 | 0.94  | 4.17   | -     | 1520.7  |
| AHQ-3-12, 2495            | R.HRHPDEAAFFDASTGK.T                                                    | 1887.98954 | 2 | 8.83E-04 | 0.96  | 4.80   | -     | 1436.1  |
| AHQ-3-11, 2355            | R.HRHPDEAAFFDASTGK.T                                                    | 1887.98954 | 2 | 6.00E-04 | 0.95  | 4.20   | -     | 1218.8  |
| AHQ-3-13-, 2606           | R.HRHPDEAAFFDASTGK.T                                                    | 1887.98954 | 3 | 8.92E-04 | 0.94  | 4.41   | -     | 1462.1  |
| AHQ-3-6, 2369             | R.MELERPGEINTR.G                                                        | 1502.67870 | 2 | 4.18E-07 | 0.64  | 3.04   | -     | 541.3   |
| AHQ-3-9, 2285             | R.MELERPGEINTR.G                                                        | 1502.67870 | 2 | 7.33E-05 | 0.87  | 3.54   | -     | 794.4   |
| AHQ-3-10, 3632            | K.MKPPVPLVPGNFK.S                                                       | 1442.75114 | 2 | 1.84E-06 | 0.71  | 2.75   | -     | 514.9   |
| AHQ-3-9, 2959             | K.M*PKPPVPLVPGNFK.S                                                     | 1458.75054 | 2 | 7.08E-04 | 0.84  | 3.35   | -     | 619.9   |
| AHQ-3-9, 4831             | K.NNKDSHSLTNNIMEILR.G                                                   | 1987.22751 | 2 | 2.57E-05 | 0.93  | 4.13   | -     | 986.1   |
| AHQ-3-9, 2049             | R.NPSSAGSWNSGSSGPGSTGNR.N                                               | 1964.94443 | 2 | 9.47E-04 | 0.84  | 3.65   | -     | 843.6   |
| AHQ-3-7, 1999             | R.NPSSAGSWNSGSSGPGSTGNR.N                                               | 1964.94443 | 2 | 2.57E-08 | 0.94  | 4.46   | -     | 771.0   |
| AHQ-3-6, 1943             | R.NPSSAGSWNSGSSGPGSTGNR.N                                               | 1964.94443 | 2 | 1.73E-08 | 0.94  | 4.91   | -     | 799.1   |
| AHQ-3-9, 2693             | K.NSLFEYQK.N                                                            | 1029.12765 | 1 | 1.21E-05 | 0.17  | 1.82   | -     | 253.2   |
| AHQ-3-6, 3122             | K.NSLFEYQK.N                                                            | 1029.12765 | 1 | 4.45E-05 | 0.23  | 1.89   | -     | 264.2   |
| AHQ-3-8, 2272             | K.NSLFEYQK.N                                                            | 1029.12765 | 1 | 5.09E-05 | 0.07  | 1.84   | -     | 166.2   |
| AHQ-3-9, 2400             | K.NSLFEYQK.N                                                            | 1029.12765 | 1 | 3.44E-04 | 0.18  | 2.51   | -     | 176.1   |
| AHQ-3-6, 1941             | R.PGSTGTWNPSSER.G                                                       | 1433.46515 | 2 | 2.14E-10 | 0.85  | 3.18   | -     | 659.3   |
| AHQ-3-8, 1850             | R.PGSTGTWNPSSER.G                                                       | 1433.46515 | 2 | 1.73E-05 | 0.88  | 3.56   | -     | 745.4   |
| AHQ-3-6, 4729             | R.PNPDWGTFFEEVSGNVSPGTR.R                                               | 2261.34962 | 2 | 1.24E-08 | 0.97  | 5.63   | -     | 1316.0  |
| AHQ-3-10, 4367            | R.PNPDWGTFFEEVSGNVSPGTR.R                                               | 2261.34962 | 2 | 2.56E-07 | 0.95  | 4.63   | -     | 1090.0  |
| AHQ-3-7, 4664             | R.PNPDWGTFFEEVSGNVSPGTR.R                                               | 2261.34962 | 2 | 4.01E-09 | 0.95  | 4.66   | -     | 1007.0  |
| AHQ-3-9, 4425             | R.PNPDWGTFFEEVSGNVSPGTR.R                                               | 2261.34962 | 2 | 2.61E-05 | 0.83  | 3.40   | -     | 609.1   |
| AHQ-3-3, 5004             | R.PNPDWGTFFEEVSGNVSPGTR.R                                               | 2261.34962 | 2 | 2.67E-05 | 0.63  | 3.11   | -     | 359.9   |
| AHQ-3-10, 6542 - 6543     | K.TFPGFFSPMLGEFVSETESR.G                                                | 2266.51432 | 2 | 1.76E-05 | 0.88  | 3.77   | -     | 490.4   |
| AHQ-3-2, 7599             | K.TFPGFFSPMLGEFVSETESR.G                                                | 2266.51432 | 2 | 3.62E-05 | 0.69  | 3.21   | -     | 211.5   |
| AHQ-3-7, 7358 - 7359      | K.TFPGFFSPMLGEFVSETESR.G                                                | 2266.51432 | 2 | 1.04E-04 | 0.69  | 3.00   | -     | 290.4   |
| AHQ-3-3, 7510             | K.TFPGFFSPMLGEFVSETESR.G                                                | 2266.51432 | 2 | 4.84E-06 | 0.76  | 3.23   | -     | 356.1   |
| AHQ-3-12, 6682            | K.TFPGFFSPMLGEFVSETESR.G                                                | 2282.51372 | 2 | 1.24E-05 | 0.37  | 2.71   | -     | 140.2   |
| AHQ-3-12, 6962            | K.TFPGFFSPMLGEFVSETESR.G                                                | 2266.51432 | 2 | 1.05E-06 | 0.84  | 3.63   | -     | 387.2   |
| AHQ-3-11, 6723            | K.TFPGFFSPMLGEFVSETESR.G                                                | 2266.51432 | 2 | 1.96E-04 | 0.89  | 3.58   | -     | 564.1   |
| AHQ-3-14-, 6604           | K.TFPGFFSPMLGEFVSETESR.G                                                | 2282.51372 | 2 | 8.29E-05 | 0.50  | 2.59   | -     | 208.3   |
| AHQ-3-13-, 6687 - 6691    | K.TFPGFFSPMLGEFVSETESR.G                                                | 2282.51372 | 2 | 7.38E-05 | 0.91  | 4.37   | -     | 419.8   |
| AHQ-3-6, 7285             | K.TFPGFFSPMLGEFVSETESR.G                                                | 2266.51432 | 2 | 3.95E-05 | 0.82  | 3.65   | -     | 409.8   |
| AHQ-3-6, 6902             | K.TFPGFFSPMLGEFVSETESR.G                                                | 2282.51372 | 2 | 4.24E-04 | 0.70  | 3.33   | -     | 180.1   |
| AHQ-3-9, 6557 - 6575      | K.TFPGFFSPMLGEFVSETESR.G                                                | 2282.51372 | 2 | 2.28E-04 | 0.61  | 2.73   | -     | 297.0   |
| AHQ-3-13-, 6849           | K.TFPGFFSPMLGEFVSETESR.G                                                | 2266.51432 | 2 | 9.05E-06 | 0.89  | 4.00   | -     | 500.9   |
| AHQ-3-9, 6979             | K.TFPGFFSPMLGEFVSETESR.G                                                | 2266.51432 | 2 | 3.05E-05 | 0.75  | 3.42   | -     | 327.3   |
| AHQ-3-5, 7465             | K.TFPGFFSPMLGEFVSETESR.G                                                | 2266.51432 | 2 | 1.79E-04 | 0.69  | 2.76   | -     | 362.0   |
| AHQ-3-5, 7067             | K.TFPGFFSPMLGEFVSETESR.G                                                | 2282.51372 | 2 | 8.90E-05 | 0.52  | 2.90   | -     | 168.6   |
| AHQ-3-13, 6726            | K.TFPGFFSPMLGEFVSETESR.G                                                | 2282.51372 | 2 | 1.19E-04 | 0.81  | 3.42   | -     | 308.4   |
| AHQ-3-13, 6942 - 7018     | K.TFPGFFSPMLGEFVSETESR.G                                                | 2266.51432 | 2 | 7.47E-08 | 0.79  | 3.44   | -     | 410.9   |
| AHQ-3-13-, 2362           | K.VQHIQLLQK.N                                                           | 1107.33106 | 1 | 2.75E-04 | 0.52  | 2.33   | -     | 327.5   |
| AHQ-3-10, 2118            | K.VQHIQLLQK.N                                                           | 1107.33106 | 1 | 2.59E-04 | 0.68  | 2.77   | -     | 530.3   |
| AHQ-3-10, 2110            | K.VQHIQLLQK.N                                                           | 1107.33106 | 1 | 2.48E-04 | 0.40  | 2.17   | -     | 522.5   |
| AHQ-3-9, 1987 - 1988      | K.VQHIQLLQK.N                                                           | 1107.33106 | 2 | 2.01E-04 | 0.82  | 3.17   | -     | 673.7   |
| AHQ-3-2, 2285             | K.VQHIQLLQK.N                                                           | 1107.33106 | 1 | 7.21E-04 | 0.48  | 2.33   | -     | 609.9   |
| AHQ-3-8, 1876             | K.VQHIQLLQK.N                                                           | 1107.33106 | 1 | 2.39E-05 | 0.20  | 2.52   | -     | 207.1   |

|                            |                                                                         |            |      |          |       |         |       |          |
|----------------------------|-------------------------------------------------------------------------|------------|------|----------|-------|---------|-------|----------|
| AHQ-3-8, 1872              | K.VQHIQLLQK.N                                                           | 1107.33106 | 2    | 1.32E-05 | 0.77  | 2.78    | -     | 583.5    |
| AHQ-3-7, 1919              | K.VQHIQLLQK.N                                                           | 1107.33106 | 1    | 1.16E-04 | 0.14  | 2.39    | -     | 203.4    |
| AHQ-3-6, 2023              | K.VQHIQLLQK.N                                                           | 1107.33106 | 1    | 2.96E-04 | 0.42  | 2.58    | -     | 349.0    |
| AHQ-3-1, 2506              | K.VQHIQLLQK.N                                                           | 1107.33106 | 2    | 2.47E-04 | 0.73  | 2.67    | -     | 593.3    |
| AHQ-3-9, 1979              | K.VQHIQLLQKNV.R.A                                                       | 1476.75208 | 2    | 6.40E-05 | 0.54  | 2.68    | -     | 375.5    |
| gi4505775 ref NP_002626.1  | phosphate carrier precursor isoform 1b; phosphate carrier, mitochondria |            |      |          |       |         |       |          |
| AHQ-3-9, 5473              | K.VLYSNMLGEENTYLVWR.T                                                   |            |      |          |       |         |       |          |
| gi4504071 ref NP_000164.1  | platelet glycoprotein Ib alpha polypeptide precursor [Homo sapiens] [MA | 1989.24032 | 2    | 2.37E-10 | 0.88  | 3.94    | -     | 776.4    |
| AHQ-3-9, 4465              | R.GLGEQLQELYLK.G                                                        |            |      |          |       |         |       |          |
| AHQ-3-3, 5097 - 5100       | R.GLGEQLQELYLK.G                                                        | 1263.46458 | 2    | 9.71E-06 | 0.85  | 2.93    | -     | 1030.9   |
| AHQ-3-1, 5182              | R.GLGEQLQELYLK.G                                                        | 1263.46458 | 2    | 5.02E-06 | 0.93  | 3.98    | -     | 1075.7   |
| AHQ-3-4, 5029              | R.GLGEQLQELYLK.G                                                        | 1263.46458 | 2    | 9.00E-06 | 0.93  | 3.88    | -     | 1219.3   |
| AHQ-3-4, 4117              | R.GQDLLSTVSIR.Y                                                         | 1189.34410 | 2    | 2.80E-05 | 0.92  | 3.33    | -     | 1213.4   |
| AHQ-3-3, 4182              | R.GQDLLSTVSIR.Y                                                         | 1189.34410 | 2    | 5.69E-05 | 0.95  | 3.77    | -     | 1255.6   |
| AHQ-3-13, 4062 - 4077      | R.GQDLLSTVSIR.Y                                                         | 1189.34410 | 2    | 8.64E-05 | 0.95  | 3.90    | -     | 1186.7   |
| AHQ-3-13-, 4073 - 4093     | R.GQDLLSTVSIR.Y                                                         | 1189.34410 | 2    | 1.90E-06 | 0.95  | 3.94    | -     | 1463.4   |
| AHQ-3-14-, 3953            | R.GQDLLSTVSIR.Y                                                         | 1189.34410 | 2    | 2.07E-07 | 0.95  | 3.43    | -     | 1451.5   |
| AHQ-3-3, 1966 - 1973       | R.GVLQGHLESSR.N                                                         | 1183.29965 | 2    | 5.30E-05 | 0.95  | 3.41    | -     | 1567.6   |
| AHQ-3-4, 2005              | R.GVLQGHLESSR.N                                                         | 1183.29965 | 2    | 9.86E-07 | 0.90  | 3.47    | -     | 895.8    |
| AHQ-3-3, 3617              | R.LTQLNDRCELTK.L                                                        | 1183.29965 | 2    | 1.30E-05 | 0.84  | 3.07    | -     | 742.4    |
| AHQ-3-1, 3833              | R.LTQLNDRCELTK.L                                                        | 1605.83862 | 2    | 9.34E-04 | 0.81  | 3.52    | -     | 719.6    |
| AHQ-3-4, 3580 - 3590       | R.LTQLNDRCELTK.L                                                        | 1605.83862 | 2    | 2.92E-04 | 0.90  | 3.99    | -     | 832.6    |
| AHQ-3-3, 1852              | R.VGPLVAGR.R                                                            | 1605.83862 | 2    | 8.86E-04 | 0.91  | 3.79    | -     | 1064.8   |
| AHQ-3-1, 5101 - 5152       | R.WLQDNAENYVYWK.Q                                                       | 768.92735  | 1    | 4.94E-04 | 0.66  | 3.00    | -     | 369.6    |
| AHQ-3-3, 5285 - 5358       | R.WLQDNAENYVYWK.Q                                                       | 1665.82948 | 2    | 1.39E-04 | 0.92  | 3.75    | -     | 1171.4   |
| AHQ-3-3, 5048              | R.WLQDNAENYVYWK.Q                                                       | 1665.82948 | 2    | 3.37E-10 | 0.96  | 4.55    | -     | 1619.0   |
| gi29568101 ref NP_006467.3 | ATP synthase, H+ transporting, mitochondrial F0 complex, subunit g; AT  |            |      |          |       |         |       |          |
| AHQ-3-14-, 3509            | K.TPALVNAAVTYSKPR.L                                                     | 1588.83283 | 3    | 1.46E-05 | 0.92  | 3.32    | -     | 1430.2   |
| gi5803225 ref NP_006752.1  | tyrosine 3/tryptophan 5-monoxygenase activation protein, epsilon poly   |            |      |          |       |         |       |          |
| AHQ-3-9, 6645 - 6655       | K.AAFDDAIAELDTLSEESYK.D                                                 |            |      |          |       |         |       |          |
| AHQ-3-10, 6300 - 6302      | K.AAFDDAIAELDTLSEESYK.D                                                 | 2089.19882 | 2    | 4.18E-10 | 2.07  | 30.22   | 15.70 | 29173.7  |
| AHQ-3-9, 7191 - 7192       | K.AAFDDAIAELDTLSEESYKSTLMQLLR.D                                         | 2089.19882 | 2    | 5.45E-10 | 0.95  | 4.37    | -     | 1228.9   |
| AHQ-3-9, 2439              | K.EAAENSLVAYK.A                                                         | 3260.61486 | 3    | 4.18E-10 | 0.95  | 4.44    | -     | 1195.8   |
| gi4502303 ref NP_001888.1  | mitochondrial ATP synthase, O subunit; ATP synthase, H+ transporting, m |            |      |          |       |         |       |          |
| AHQ-3-11, 6584 - 6627      | R.FSPLTTNLIINLAENGR.L                                                   | 1195.30397 | 1    | 1.90E-05 | 0.82  | 3.83    | -     | 1075.7   |
| AHQ-3-11, 5363 - 5418      | R.GEVPCTVTSASPLEEATLSELK.T                                              |            |      |          |       |         |       |          |
| AHQ-3-14, 6444             | R.GEVPCTVTSASPLEEATLSELK.T                                              | 1874.13050 | 2    | 4.21E-10 | 0.88  | 3.71    | -     | 963.8    |
| AHQ-3-14-, 5577            | R.GEVPCTVTSASPLEEATLSELK.T                                              | 2320.55669 | 2    | 1.18E-09 | 0.93  | 4.61    | -     | 889.9    |
| AHQ-3-11, 3487             | K.TDPSILGGM*IVR.I                                                       | 2320.55669 | 2    | 3.61E-08 | 0.92  | 4.69    | -     | 673.5    |
| AHQ-3-11, 3100             | K.VAASVLNPNYK.R                                                         | 2320.55669 | 2    | 1.49E-05 | 0.88  | 3.99    | -     | 712.9    |
| gi23510338 ref NP_003325.1 | ubiquitin-activating enzyme E1; A1S9T and BN75 temperature sensitivity  |            |      |          |       |         |       |          |
| AHQ-3-4, 4618              | R.ALPAVQNNLDEDLIR.K                                                     | 1275.50037 | 2    | 9.33E-06 | 0.64  | 2.65    | -     | 420.3    |
| AHQ-3-4, 4769              | R.ALPAVQNNLDEDLIR.K                                                     | 1161.37549 | 2    | 2.09E-04 | 0.90  | 3.31    | -     | 945.7    |
| AHQ-3-4, 4081              | R.FEVQQLPQNGEEM*TLK.Q                                                   |            |      |          |       |         |       |          |
| AHQ-3-4, 5429 - 5430       | R.LAGTQPLEVLEAVQR.S                                                     |            |      |          |       |         |       |          |
| AHQ-3-4, 3638              | R.LQTSVSLVSLGR.G                                                        | 1810.00167 | 2    | 4.77E-10 | 3.14  | 40.24   | 5.60  | 117848.1 |
| gi4757812 ref NP_004880.1  | ATP synthase, H+ transporting, mitochondrial F0 complex, subunit f, iso |            |      |          |       |         |       |          |
| AHQ-3-13, 6042             | R.DFSPSGIFGAFQR.G                                                       | 1810.00167 | 2    | 4.77E-10 | 0.90  | 3.83    | -     | 565.0    |
| AHQ-3-13-, 6010            | R.DFSPSGIFGAFQR.G                                                       | 1810.00167 | 2    | 1.16E-04 | 0.66  | 2.91    | -     | 314.0    |
| AHQ-3-14-, 5927            | R.DFSPSGIFGAFQR.G                                                       | 1837.04413 | 2    | 1.97E-04 | 0.55  | 3.40    | -     | 231.1    |
| AHQ-3-13-, 5522            | K.LGELPSWILM*R.D                                                        | 1624.86348 | 2    | 3.43E-06 | 0.90  | 4.01    | -     | 592.6    |
| AHQ-3-14-, 5495            | K.LGELPSWILM*R.D                                                        | 1260.46546 | 2    | 5.32E-05 | 0.79  | 2.69    | -     | 823.2    |
| AHQ-3-14, 6565             | K.LGELPSWILM*R.D                                                        |            |      |          |       |         |       |          |
| AHQ-3-14-, 5949 - 5955     | K.LGELPSWILM.R.D                                                        |            |      |          |       |         |       |          |
| AHQ-3-13, 5537             | K.LGELPSWILM*R.D                                                        | 1429.56124 | 2    | 4.84E-10 | 2.72  | 30.21   | 25.50 | 10917.8  |
| gi4758038 ref NP_004246.1  | cytochrome c oxidase subunit Va precursor; cytochrome c oxidase polypep |            |      |          |       |         |       |          |
| AHQ-3-14-, 6787 - 6849     | K.EIYPYVIELRPTNLGELGISTPEELGLDKV                                        | 1429.56124 | 2    | 1.18E-05 | 0.87  | 3.02    | -     | 920.1    |
| AHQ-3-13, 6937 - 6998      | K.EIYPYVIELRPTNLGELGISTPEELGLDKV                                        | 1429.56124 | 2    | 5.65E-09 | 0.95  | 4.02    | -     | 1292.1   |
| gi4507521 ref NP_001055.1  | transketolase [Homo sapiens]                                            | 1429.56124 | 2    | 4.84E-10 | 0.96  | 4.23    | -     | 1185.9   |
| AHQ-3-6, 4603 - 4610       | K.ILATPPQEDAPSVDIANIR.M                                                 | 1331.60876 | 2    | 2.13E-06 | 0.84  | 3.53    | -     | 416.9    |
| AHQ-3-6, 3705              | R.SVPTSTVFYPSDGVATEK.A                                                  | 1331.60876 | 2    | 1.95E-05 | 0.91  | 3.42    | -     | 679.5    |
| AHQ-3-6, 7207              | R.TVPFCSTFAAFTR.A                                                       | 1331.60876 | 2    | 1.30E-04 | 0.69  | 2.76    | -     | 381.6    |
| gi4502565 ref NP_001740.1  | calpain, small subunit 1; calpain, small polypeptide; calcium-dependent |            |      |          |       |         |       |          |
| AHQ-3-14-, 6520 - 6601     | R.ILGGVISAIEAAQYNPEPPPPR.T                                              | 1315.60936 | 2    | 7.39E-07 | 0.91  | 3.77    | -     | 763.1    |
| AHQ-3-12, 6606             | R.SGTCSSSELPGAFAEAGFHLEHLYNM*II.R                                       | 1331.60876 | 2    | 7.55E-05 | 0.90  | 3.45    | -     | 600.2    |
| AHQ-3-12, 2842 - 2844      | K.TDGFIDTCR.S                                                           |            |      |          |       |         |       |          |
| AHQ-3-11, 6386             | R.YSDESGNM*DFDNFISCLVR.L                                                |            |      |          |       |         |       |          |
| AHQ-3-12, 6878             | R.YSDESGNM*DFDNFISCLVR.L                                                | 615E-10    | 0.90 | 10.25    | 20.00 | 16774.1 |       |          |
| AHQ-3-13, 6686             | R.YSDESGNM*DFDNFISCLVR.L                                                | 3430.88913 | 3    | 6.15E-10 | 0.90  | 4.68    | -     | 731.4    |
| AHQ-3-11, 6376             | R.YSDESGNM*DFDNFISCLVR.L                                                | 3430.88913 | 3    | 9.60E-07 | 0.94  | 4.94    | -     | 1175.4   |
| AHQ-3-10, 6210             | R.YSDESGNM*DFDNFISCLVR.L                                                |            |      |          |       |         |       |          |
| gi18860900 ref NP_002834.2 | protein tyrosine phosphatase, receptor type, J precursor; protein tyro  |            |      |          |       |         |       |          |
| AHQ-3-1, 3502 - 3508       | R.AGSPATPVHDESIVLGPVDPSSGQQSR.D                                         | 2021.26036 | 2    | 6.77E-10 | 2.46  | 30.19   | 8.20  | 67873.3  |
| AHQ-3-1, 3504              | R.AGSPATPVHDESIVLGPVDPSSGQQSR.D                                         | 2021.26036 | 2    | 6.77E-10 | 0.91  | 3.90    | -     | 671.8    |
| AHQ-3-1, 5989              | K.AVSIPTNVLITWK.S                                                       | 1886.04854 | 2    | 9.12E-05 | 0.80  | 3.09    | -     | 536.9    |
| AHQ-3-1, 4464 - 4489       | K.AYAVILTTGEAGHPADVLK.Y                                                 | 1653.88190 | 2    | 8.15E-09 | 0.75  | 2.51    | -     | 382.7    |
| AHQ-3-1, 3229              | K.GDPLTTEGGGLDASNTER.S                                                  |            |      |          |       |         |       |          |
| AHQ-3-1, 5461              | K.GLIDGAEYSVFSR.Y                                                       |            |      |          |       |         |       |          |
| AHQ-3-1, 5900              | K.SFCTDPASMASFDCEVVPK.E                                                 |            |      |          |       |         |       |          |
| AHQ-3-1, 5041              | K.SFCTDPASM*ASFDCEVVPK.E                                                |            |      |          |       |         |       |          |
| AHQ-3-1, 5472              | K.SPDGASEYVYHLVIESK.H                                                   |            |      |          |       |         |       |          |
| AHQ-3-1, 5458              | K.SPDGASEYVYHLVIESK.H                                                   |            |      |          |       |         |       |          |
| AHQ-3-1, 2758              | K.TKGDPLTTEGGGLDASNTER.S                                                |            |      |          |       |         |       |          |
| AHQ-3-1, 2766              | K.TKGDPLTTEGGGLDASNTER.S                                                |            |      |          |       |         |       |          |
| AHQ-3-1, 4568              | R.VENFEAFPK.K                                                           |            |      |          |       |         |       |          |
| AHQ-3-1, 4384              | K.VITEPIPVSDLR.V                                                        |            |      |          |       |         |       |          |
| AHQ-3-1, 3921              | R.VLLESIGSHEELTQDSR.L                                                   |            |      |          |       |         |       |          |
| AHQ-3-1, 3926              | R.VLLESIGSHEELTQDSR.L                                                   |            |      |          |       |         |       |          |
| gi4504183 ref NP_000843.1  | glutathione transferase; deafness, X-linked 7; fatty acid ethyl ester s |            |      |          |       |         |       |          |
| AHQ-3-13, 5370             | K.ALPGQLKPFETLLSQNQGK.T                                                 | 2448.75930 | 3    | 6.03E-04 | 4.47  | 50.23   | 27.20 | 28315.5  |
| AHQ-3-11, 5086             | K.ALPGQLKPFETLLSQNQGK.T                                                 | 3353.73016 | 3    | 3.65E-04 | 0.88  | 4.58    | -     | 688.9    |
| AHQ-3-10, 4843 - 4923      | K.ALPGQLKPFETLLSQNQGK.T                                                 | 1143.20921 | 2    | 9.25E-04 | 0.90  | 3.49    | -     | 364.4    |
| AHQ-3-11, 5404             | K.ALPGQLKPFETLLSQNQGK.T                                                 | 2287.42568 | 2    | 1.13E-05 | 0.86  | 3.70    | -     | 647.1    |
| AHQ-3-11, 5176 - 5238      | K.ALPGQLKPFETLLSQNQGK.T                                                 | 2271.42628 | 2    | 6.92E-10 | 0.92  | 4.28    | -     | 785.7    |
| AHQ-3-11, 3054             | K.ASCLYQLPK.F                                                           | 2287.42568 | 2    | 2.24E-06 | 0.87  | 3.15    | -     | 857.7    |
| AHQ-3-11, 6383             | K.DQQEAAALVDMVNDGVEDLR.C                                                | 2287.42568 | 2    | 6.08E-05 | 0.66  | 3.22    | -     | 500.2    |
| AHQ-3-11, 6198 - 6275      | K.DQQEAAALVDMVNDGVEDLR.C                                                | 2287.42568 | 2    | 1.32E-05 | 0.67  | 3.36    | -     | 333.9    |
| AHQ-3-10, 6024             | K.DQQEAAALVDMVNDGVEDLR.C                                                |            |      |          |       |         |       |          |
| AHQ-3-11, 5079             | K.DQQEAAALVDMVNDGVEDLR.C                                                |            |      |          |       |         |       |          |
| AHQ-3-13-, 6421            | K.DQQEAAALVDMVNDGVEDLR.C                                                |            |      |          |       |         |       |          |
| AHQ-3-11, 5242             | K.DQQEAAALVDMVNDGVEDLR.C                                                |            |      |          |       |         |       |          |
| AHQ-3-13, 6455             | K.DQQEAAALVDMVNDGVEDLR.C                                                |            |      |          |       |         |       |          |
| AHQ-3-14-, 6337            | K.DQQEAAALVDMVNDGVEDLR.C                                                |            |      |          |       |         |       |          |
| AHQ-3-11, 4883 - 4899      | K.FQDGDLTLYQSNTILR.H                                                    |            |      |          |       |         |       |          |
| AHQ-3-10, 4558 - 4566      | K.FQDGDLTLYQSNTILR.H                                                    |            |      |          |       |         |       |          |
| AHQ-3-11, 4786             | K.FQDGDLTLYQSNTILR.H                                                    |            |      |          |       |         |       |          |
| AHQ-3-11, 4666 - 4726      | K.FQDGDLTLYQSNTILR.H                                                    |            |      |          |       |         |       |          |

|                            |                                                                          |            |   |          |      |       |       |         |
|----------------------------|--------------------------------------------------------------------------|------------|---|----------|------|-------|-------|---------|
| AHQ-3-14, 5952 - 6029      | K.FQDGDLTLYQSNTILR.H                                                     | 1885.06701 | 2 | 3.43E-07 | 0.75 | 3.22  | -     | 541.0   |
| AHQ-3-13, 4943             | K.FQDGDLTLYQSNTILR.H                                                     | 1885.06701 | 2 | 2.18E-05 | 0.86 | 3.82  | -     | 630.7   |
| AHQ-3-14-, 4923 - 4928     | K.FQDGDLTLYQSNTILR.H                                                     | 1885.06701 | 2 | 6.37E-07 | 0.91 | 4.30  | -     | 772.1   |
| AHQ-3-11, 2782             | R.M*LLADGGQSWK.E                                                         | 1293.47425 | 2 | 1.44E-05 | 0.89 | 3.21  | -     | 995.6   |
| AHQ-3-11, 6030 - 6100      | R.MLLADGGQSWKEEYVTVETWQEGSLK.A                                           | 2993.33745 | 3 | 7.76E-06 | 0.91 | 4.91  | -     | 725.1   |
| AHQ-3-13, 4575             | K.YISLYTNYEAGKDDYVK.A                                                    | 2156.37637 | 2 | 2.05E-07 | 0.42 | 2.75  | -     | 357.8   |
| AHQ-3-11, 4458             | K.YISLYTNYEAGKDDYVK.A                                                    | 2156.37637 | 2 | 5.11E-08 | 0.92 | 3.97  | -     | 832.1   |
| AHQ-3-10, 4155 - 4164      | K.YISLYTNYEAGKDDYVK.A                                                    | 2156.37637 | 2 | 4.50E-04 | 0.49 | 2.93  | -     | 145.1   |
| gj4505735 ref NP_002611.1  | platelet factor 4 variant 1; Platelet factor 4, variant 1 (PF4-like) [H] |            |   | 7.03E-10 | 1.91 | 20.28 | 26.00 | 11552.6 |
| AHQ-3-14-, 3692 - 3699     | R.AEAEEDGDLQCLCVK.T                                                      | 1739.86036 | 2 | 1.00E-09 | 0.95 | 4.40  | -     | 1056.2  |
| AHQ-3-14-, 3783 - 3789     | R.AEAEEDGDLQCLCVK.T                                                      | 1739.86036 | 2 | 7.03E-10 | 0.98 | 5.65  | -     | 1524.8  |
| AHQ-3-14, 4604 - 4667      | R.AEAEEDGDLQCLCVK.T                                                      | 1739.86036 | 2 | 1.87E-04 | 0.89 | 3.49  | -     | 796.3   |
| AHQ-3-14-, 4417 - 4463     | R.KICLDLQALLYK.K                                                         | 1479.80948 | 2 | 3.41E-04 | 0.93 | 4.49  | -     | 1030.5  |
| gj14149734 ref NP_065174.1 | coronin, actin binding protein, 1B [Homo sapiens]                        |            |   | 7.77E-10 | 0.96 | 10.28 | 5.90  | 54234.4 |
| AHQ-3-6, 6994 - 7017       | R.KSDLFQDDLYPDTAGPEAALEAEWVSGR.D                                         | 3211.39431 | 3 | 7.77E-10 | 0.96 | 5.65  | -     | 1109.8  |
| gj11993943 ref NP_055419.1 | Tax interaction protein 1 [Homo sapiens]                                 |            |   | 7.81E-10 | 0.95 | 10.21 | 13.70 | 13734.6 |
| AHQ-3-13-, 4117 - 4126     | R.VSEGGPAEIALQIGDK.I                                                     | 1641.80454 | 2 | 7.81E-10 | 0.95 | 4.22  | -     | 1424.3  |
| AHQ-3-13, 4102             | R.VSEGGPAEIALQIGDK.I                                                     | 1641.80454 | 2 | 3.03E-05 | 0.94 | 3.92  | -     | 1138.6  |
| gj4503445 ref NP_001944.1  | endothelial cell growth factor 1 (platelet-derived); thymidine phosphor  |            |   | 7.82E-10 | 3.66 | 40.25 | 12.70 | 49955.2 |
| AHQ-3-7, 6514              | R.ALPLALVLHELGAAGR.S                                                     | 1530.83966 | 2 | 7.82E-10 | 0.97 | 5.00  | -     | 1494.3  |
| AHQ-3-7, 7318              | R.DVTATVDSLPLTASILSK.K                                                   | 1945.24371 | 2 | 3.61E-05 | 0.93 | 4.48  | -     | 637.9   |
| AHQ-3-7, 2484              | R.VAAALDDGSLGR.F                                                         | 1216.32641 | 2 | 1.16E-04 | 0.84 | 2.96  | -     | 918.4   |
| AHQ-3-7, 2847              | R.VAAALTAMDKPLGR.C                                                       | 1414.69933 | 2 | 5.26E-04 | 0.92 | 3.42  | -     | 1359.9  |
| gj21361370 ref NP_002853.2 | phosphorylase, glycogen; brain [Homo sapiens]                            |            |   | 8.11E-10 | 5.64 | 60.25 | 10.70 | 96695.3 |
| AHQ-3-5, 3615 - 3621       | R.GLAGLGDVAEVR.K                                                         | 1157.30210 | 2 | 3.82E-08 | 0.97 | 4.68  | -     | 1389.6  |
| AHQ-3-5, 3385              | R.HLDHVAALFPGDVRDL.R                                                     | 1662.83036 | 2 | 8.11E-10 | 0.95 | 4.08  | -     | 1263.9  |
| AHQ-3-5, 6264 - 6267       | K.IGEEFLDLSQLK.K                                                         | 1493.68345 | 2 | 9.14E-08 | 0.97 | 4.99  | -     | 1569.6  |
| AHQ-3-5, 7459              | K.LQDFNVGVYEAVALDR.N                                                     | 1868.03645 | 2 | 2.86E-08 | 0.96 | 4.98  | -     | 1135.7  |
| AHQ-3-5, 4133 - 4139       | K.LVTSIGDVNHPVVGDR.L                                                     | 1893.09067 | 2 | 8.87E-09 | 0.82 | 3.90  | -     | 605.8   |
| AHQ-3-6, 6573 - 6578       | R.WLLCNPGLADTIVEK.I                                                      | 1844.16436 | 2 | 4.66E-05 | 0.97 | 5.10  | -     | 1448.4  |
| gj14211923 ref NP_115982.1 | PKC1-related HIT protein [Homo sapiens]                                  |            |   | 8.17E-10 | 2.70 | 30.30 | 32.50 | 1716.6  |
| AHQ-3-13-, 3257            | K.AQQATPGGAAPTIFSR.I                                                     | 1573.73512 | 2 | 1.06E-04 | 0.79 | 3.27  | -     | 389.2   |
| AHQ-3-13, 3258             | K.AQQATPGGAAPTIFSR.I                                                     | 1573.73512 | 2 | 6.01E-06 | 0.80 | 3.22  | -     | 379.9   |
| AHQ-3-13-, 6209            | R.ISQAEEDDQQLGHLLLVAK.Q                                                  | 2235.52293 | 2 | 1.70E-07 | 0.96 | 5.42  | -     | 1553.5  |
| AHQ-3-13, 6189 - 6190      | R.ISQAEEDDQQLGHLLLVAK.Q                                                  | 2235.52293 | 3 | 8.17E-10 | 0.95 | 5.34  | -     | 1146.9  |
| AHQ-3-13-, 6202            | R.ISQAEEDDQQLGHLLLVAK.Q                                                  | 2235.52293 | 3 | 1.84E-07 | 0.80 | 3.72  | -     | 856.9   |
| AHQ-3-13, 6186 - 6191      | R.ISQAEEDDQQLGHLLLVAK.Q                                                  | 2235.52293 | 2 | 9.48E-08 | 0.97 | 6.00  | -     | 1456.3  |
| AHQ-3-13-, 6175 - 6238     | K.SLPADILYEDQQLVFR.D                                                     | 2069.32354 | 2 | 8.15E-05 | 0.92 | 4.09  | -     | 905.7   |
| AHQ-3-13, 6233 - 6294      | K.SLPADILYEDQQLVFR.D                                                     | 2069.32354 | 2 | 1.85E-06 | 0.95 | 4.27  | -     | 1003.2  |
| gj4502693 ref NP_001760.1  | CD9 antigen; motility related protein; leukocyte antigen MIC3; antigen   |            |   | 8.67E-10 | 2.77 | 40.22 | 24.10 | 25415.9 |
| AHQ-3-11, 6747             | K.AIHVALNCCGLAGGVEQFISIDCPK.K                                            | 2798.16446 | 3 | 8.67E-10 | 0.91 | 4.43  | -     | 921.6   |
| AHQ-3-11, 2107             | K.EVQEFYK.D                                                              | 943.03476  | 1 | 1.67E-04 | 0.31 | 2.26  | -     | 221.1   |
| AHQ-3-12, 3234             | K.KDVLTFITVK.S                                                           | 1180.37558 | 2 | 5.15E-05 | 0.89 | 3.18  | -     | 1126.2  |
| AHQ-3-11, 3094 - 3106      | K.KDVLTFITVK.S                                                           | 1180.37558 | 2 | 1.37E-04 | 0.92 | 3.49  | -     | 1089.4  |
| AHQ-3-1, 3554              | K.KDVLTFITVK.S                                                           | 1180.37558 | 2 | 1.14E-05 | 0.62 | 3.00  | -     | 425.0   |
| AHQ-3-11, 3639             | K.SCPDAIKEVFDNK.F                                                        | 1524.67770 | 2 | 3.22E-05 | 0.93 | 4.05  | -     | 1018.2  |
| gj4557871 ref NP_001054.1  | transferrin [Homo sapiens]                                               |            |   | 8.93E-10 | 1.86 | 20.27 | 5.90  | 77049.5 |
| AHQ-3-5, 2791              | R.KPVDEYKCHLAQVPSHTVVAR.S                                                | 2551.86290 | 3 | 3.56E-05 | 0.90 | 4.64  | -     | 549.6   |
| AHQ-3-5, 7401              | R.SAGWNIPIGLLYCDEPEPR.K                                                  | 2173.47658 | 2 | 8.93E-10 | 0.96 | 5.41  | -     | 932.0   |
| gj29742827 ref XP_294099.1 | similar to myosin:SUBUNIT=regulatory light chain [Homo sapiens]          |            |   | 9.73E-10 | 1.46 | 20.24 | 14.20 | 17094.0 |
| AHQ-3-11, 2772 - 2839      | K.EAFNMIDQNR.D                                                           | 1238.35558 | 2 | 7.11E-04 | 0.93 | 3.98  | -     | 996.7   |
| AHQ-3-11, 3090 - 3091      | R.FTDEEVDLYR.E                                                           | 1416.47127 | 2 | 5.68E-07 | 0.95 | 4.01  | -     | 1365.3  |
| AHQ-3-11, 3336             | R.FTDEEVDLYR.E                                                           | 1416.47127 | 2 | 2.46E-09 | 0.94 | 3.84  | -     | 1145.3  |
| AHQ-3-11, 3660 - 3722      | R.FTDEEVDLYR.E                                                           | 1416.47127 | 2 | 8.37E-09 | 0.96 | 4.32  | -     | 1692.3  |
| AHQ-3-11, 3663 - 3726      | R.FTDEEVDLYR.E                                                           | 1416.47127 | 1 | 1.09E-06 | 0.54 | 1.97  | -     | 494.5   |
| AHQ-3-11, 3671 - 3734      | R.FTDEEVDLYR.E                                                           | 1416.47127 | 1 | 9.73E-10 | 0.53 | 2.79  | -     | 339.3   |
| AHQ-3-12, 3800             | R.FTDEEVDLYR.E                                                           | 1416.47127 | 2 | 3.99E-09 | 0.97 | 4.34  | -     | 2015.9  |
| AHQ-3-12, 3815             | R.FTDEEVDLYR.E                                                           | 1416.47127 | 1 | 1.24E-06 | 0.34 | 2.51  | -     | 292.3   |
| AHQ-3-13, 3869 - 3950      | R.FTDEEVDLYR.E                                                           | 1416.47127 | 2 | 1.74E-05 | 0.96 | 3.51  | -     | 1621.0  |
| AHQ-3-13, 3875 - 3879      | R.FTDEEVDLYR.E                                                           | 1416.47127 | 1 | 5.50E-09 | 0.44 | 1.95  | -     | 484.5   |
| AHQ-3-14, 4723             | R.FTDEEVDLYR.E                                                           | 1416.47127 | 1 | 3.27E-07 | 0.49 | 1.89  | -     | 497.4   |
| AHQ-3-13-, 3878            | R.FTDEEVDLYR.E                                                           | 1416.47127 | 2 | 6.88E-08 | 0.98 | 4.77  | -     | 2222.9  |
| AHQ-3-14-, 3777            | R.FTDEEVDLYR.E                                                           | 1416.47127 | 2 | 1.53E-08 | 0.97 | 4.72  | -     | 1813.1  |
| gj29730023 ref XP_291482.1 | similar to 78 kDa glucose-regulated protein precursor (GRP 78) (Immun    |            |   | 1.03E-09 | 5.69 | 70.22 | 15.90 | 63563.0 |
| AHQ-3-6, 4381              | K.ELEEIVQIISK.L                                                          | 1398.62680 | 1 | 4.61E-08 | 0.65 | 2.91  | -     | 226.7   |
| AHQ-3-6, 4622              | R.IINKPTAAAIYGLDK.R                                                      | 1659.95097 | 2 | 1.03E-09 | 0.79 | 3.65  | -     | 709.0   |
| AHQ-3-10, 4340             | R.IINKPTAAAIYGLDK.R                                                      | 1659.95097 | 2 | 1.80E-05 | 0.73 | 3.14  | -     | 797.8   |
| AHQ-3-6, 3234 - 3242       | K.KKELEEIVQIISK.L                                                        | 1654.97263 | 2 | 7.71E-04 | 0.90 | 4.41  | -     | 843.9   |
| AHQ-3-5, 3465              | K.LYGSAGPPPTGEEDTAEKDEL                                                  | 2177.26447 | 2 | 2.84E-05 | 0.89 | 4.38  | -     | 489.5   |
| AHQ-3-6, 3845 - 3855       | R.NELESYAYSLK.N                                                          | 1317.42597 | 2 | 4.19E-04 | 0.91 | 3.34  | -     | 932.2   |
| AHQ-3-6, 3875              | K.NQLTSPNKNTVFDAR.R                                                      | 1677.84011 | 2 | 2.53E-04 | 0.53 | 3.28  | -     | 333.5   |
| AHQ-3-5, 3347              | K.NQLTSPNKNTVFDAR.R                                                      | 1677.84011 | 2 | 6.26E-09 | 0.70 | 3.31  | -     | 655.9   |
| AHQ-3-6, 5570 - 5578       | K.TFAPKEISAMVLTK.M                                                       | 1536.86124 | 2 | 1.73E-07 | 0.85 | 3.76  | -     | 1074.5  |
| gj1765713 ref NP_055277.1  | Lsm1 protein [Homo sapiens]                                              |            |   | 1.04E-09 | 0.91 | 10.20 | 12.00 | 15179.3 |
| AHQ-3-12, 5878 - 5920      | R.SIDQFANLVLHQTVER.I                                                     | 1871.08670 | 2 | 1.04E-09 | 0.91 | 3.92  | -     | 886.0   |
| gj30159310 ref XP_301899.1 | similar to beta-actin [Homo sapiens]                                     |            |   | 1.05E-09 | 1.64 | 30.17 | 9.60  | 32376.4 |
| AHQ-3-8, 1431 - 1833       | K.DSYVNEAQS.R                                                            | 1198.22158 | 1 | 2.11E-07 | 0.51 | 2.75  | -     | 320.1   |
| AHQ-3-12, 1666 - 1739      | K.DSYVNEAQS.R                                                            | 1198.22158 | 1 | 2.13E-07 | 0.38 | 2.27  | -     | 356.8   |
| AHQ-3-8, 1568 - 1641       | K.DSYVNEAQS.R                                                            | 1198.22158 | 2 | 2.78E-05 | 0.71 | 3.22  | -     | 579.7   |
| AHQ-3-8, 1834              | K.DSYVNEAQS.R                                                            | 1198.22158 | 2 | 5.80E-05 | 0.67 | 2.71  | -     | 585.9   |
| AHQ-3-8, 2014              | K.DSYVNEAQS.R                                                            | 1198.22158 | 1 | 7.91E-09 | 0.66 | 2.49  | -     | 558.9   |
| AHQ-3-12, 1602 - 1658      | K.DSYVNEAQS.R                                                            | 1198.22158 | 2 | 5.47E-05 | 0.61 | 2.95  | -     | 562.2   |
| AHQ-3-13, 1714 - 1790      | K.DSYVNEAQS.R                                                            | 1198.22158 | 1 | 1.39E-07 | 0.72 | 2.36  | -     | 691.2   |
| AHQ-3-9, 1463 - 1527       | K.DSYVNEAQS.R                                                            | 1198.22158 | 1 | 3.38E-08 | 0.49 | 2.55  | -     | 317.3   |
| AHQ-3-8, 1453              | K.DSYVNEAQS.R                                                            | 1354.40793 | 1 | 1.05E-09 | 0.15 | 2.04  | -     | 234.7   |
| AHQ-3-8, 4193 - 4270       | K.SYKLLDGGVITIGNER.F                                                     | 1807.04092 | 2 | 5.67E-07 | 0.82 | 3.50  | -     | 524.1   |
| AHQ-3-8, 4537 - 4608       | K.SYKLLDGGVITIGNER.F                                                     | 1807.04092 | 2 | 3.11E-07 | 0.83 | 3.37  | -     | 399.6   |
| AHQ-3-10, 4160 - 4180      | K.SYKLLDGGVITIGNER.F                                                     | 1807.04092 | 2 | 6.11E-05 | 0.74 | 2.89  | -     | 551.4   |
| gj4557705 ref NP_000217.1  | keratin 9 [Homo sapiens]                                                 |            |   | 1.13E-09 | 3.38 | 40.27 | 16.10 | 61986.9 |
| AHQ-3-14-, 6127            | K.DIENQYETQITQIEHEVSSSGQEVQSSAK.E                                        | 3266.38667 | 3 | 1.15E-05 | 0.96 | 5.47  | -     | 1196.1  |
| AHQ-3-12, 6186 - 6194      | K.DIENQYETQITQIEHEVSSSGQEVQSSAK.E                                        | 3266.38667 | 3 | 2.98E-06 | 0.95 | 5.29  | -     | 1330.2  |
| AHQ-3-1, 6609              | K.DIENQYETQITQIEHEVSSSGQEVQSSAK.E                                        | 3266.38667 | 3 | 1.57E-08 | 0.91 | 4.06  | -     | 1140.8  |
| AHQ-3-12, 5042             | R.GGGGSGFYDGGGGGGGFSASSLGGGFGGGS.R                                       | 2706.73770 | 2 | 6.12E-07 | 0.72 | 3.36  | -     | 392.3   |
| AHQ-3-14-, 6708            | K.NYSPYNTIDDLKQIVDLTVGNKK.T                                              | 2904.13412 | 3 | 1.13E-09 | 0.80 | 3.62  | -     | 409.4   |
| AHQ-3-1, 7208 - 7218       | K.NYSPYNTIDDLKQIVDLTVGNKK.T                                              | 2904.13412 | 3 | 8.31E-07 | 0.89 | 4.35  | -     | 567.0   |
| AHQ-3-12, 2938             | K.VQALEEANNDLENK.I                                                       | 1587.67060 | 2 | 1.26E-06 | 0.95 | 3.97  | -     | 1493.2  |
| gj4503821 ref NP_001456.1  | FYN binding protein (FYB-120/130); FYN-binding protein (FYB-120/130) [H] |            |   | 1.18E-09 | 0.95 | 10.24 | 2.60  | 85450.5 |
| AHQ-3-12, 4143             | R.DLQVKPGESLEVIQTDDTK.V                                                  | 2217.41641 | 2 | 1.19E-07 | 0.92 | 4.38  | -     | 522.8   |
| AHQ-3-13, 4126             | R.DLQVKPGESLEVIQTDDTK.V                                                  | 2217.41641 | 2 | 1.18E-09 | 0.95 | 4.79  | -     | 805.1   |
| AHQ-3-10, 3862             | R.DLQVKPGESLEVIQTDDTK.V                                                  | 2217.41641 | 2 | 3.14E-04 | 0.90 | 4.24  | -     | 396.6   |
| gj7661818 ref NP_054900.1  | HSPC159 protein [Homo sapiens]                                           |            |   | 1.20E-09 | 5.08 | 60.25 | 48.30 | 19011.6 |
| AHQ-3-12, 6716 - 6786      | R.GEEQSAIPYFPFIDQPFR.V                                                   | 2239.47029 | 2 | 8.52E-05 | 0.84 | 3.84  | -     | 289.4   |
| AHQ-3-13-, 6729 - 6730     | R.GEEQSAIPYFPFIDQPFR.V                                                   | 2239.47029 | 2 | 1.12E-04 | 0.86 | 4.23  | -     | 348.9   |
| AHQ-3-13, 6781             | R.GEEQSAIPYFPFIDQPFR.V                                                   | 2239.47029 | 2 | 1.68E-06 | 0.81 | 3.82  | -     | 325.0   |
| AHQ-3-11, 6542             | R.GEEQSAIPYFPFIDQPFR.V                                                   | 2239.47029 | 2 | 1.45E-04 | 0.33 | 2.84  | -     | 123.6   |
| AHQ-3-14-, 6664 - 6672     | R.GEEQSAIPYFPFIDQPFR.V                                                   | 2239.47029 | 2 | 4.57E-06 | 0.79 | 3.44  | -     | 394.0   |
| AHQ-3-13-, 2577            | K.INGDLQITK.L                                                            | 1002.14688 | 2 | 7.03E-04 | 0.81 | 2.73  | -     | 511.2   |

|                             |                                                                                                         |            |   |          |       |        |       |         |
|-----------------------------|---------------------------------------------------------------------------------------------------------|------------|---|----------|-------|--------|-------|---------|
| AHQ-3-13-, 3717 - 3754      | R.IQTLAIDTIK.I                                                                                          | 1203.41068 | 2 | 6.88E-07 | 0.82  | 3.05   | -     | 644.2   |
| AHQ-3-11, 4874              | K.LDDGHLNLSLSSPVQADVYFPR.L                                                                              | 2445.62923 | 2 | 4.49E-07 | 0.94  | 3.53   | -     | 1579.1  |
| AHQ-3-13, 6806              | R.NSCISGERGEEQSAIYFFPIPDQPPF.V                                                                          | 3144.41922 | 3 | 1.86E-04 | 0.71  | 3.58   | -     | 461.3   |
| AHQ-3-11, 6607              | R.NSCISGERGEEQSAIYFFPIPDQPPF.V                                                                          | 3144.41922 | 3 | 4.26E-06 | 0.73  | 3.73   | -     | 515.1   |
| AHQ-3-11, 4640              | R.VFVDGHLQDFDFYHR.I                                                                                     | 1780.96540 | 3 | 1.50E-08 | 0.76  | 3.53   | -     | 408.0   |
| AHQ-3-11, 4627              | R.VFVDGHLQDFDFYHR.I                                                                                     | 1780.96540 | 2 | 1.20E-09 | 0.97  | 5.07   | -     | 1570.6  |
| AHQ-3-12, 4878              | R.VFVDGHLQDFDFYHR.I                                                                                     | 1780.96540 | 2 | 3.22E-07 | 0.95  | 4.25   | -     | 1380.8  |
| gi 13569962 ref NP_112243.1 | RAB1B, member RAS oncogene family; small GTP-binding protein [Homo sapiens]                             |            |   | 1.38E-09 | 4.88  | 60.35  | 26.40 | 22171.0 |
| AHQ-3-11, 4344 - 4411       | R.GAHGIIVVYDVTDOESYANVK.Q                                                                               | 2279.49113 | 2 | 1.05E-06 | 0.98  | 6.93   | -     | 1764.6  |
| AHQ-3-11, 2019 - 2020       | R.M*GPGAASGGGERPNLK.I                                                                                   | 1458.62590 | 2 | 8.01E-05 | 0.44  | 2.67   | -     | 600.7   |
| AHQ-3-11, 2002              | R.MGPGAASGGGERPNLK.I                                                                                    | 1442.62650 | 2 | 7.88E-08 | 0.89  | 3.73   | -     | 906.7   |
| AHQ-3-11, 4991 - 5064       | K.NATNVEQAFMTM*AAEIK.K                                                                                  | 1886.14019 | 2 | 1.23E-05 | 0.68  | 3.20   | -     | 767.5   |
| AHQ-3-11, 5778              | K.NATNVEQAFMTM*AAEIK.K                                                                                  | 1886.14019 | 2 | 5.28E-05 | 0.80  | 3.67   | -     | 776.1   |
| AHQ-3-11, 6475              | K.NATNVEQAFMTM*AAEIK.K                                                                                  | 1870.14079 | 2 | 1.38E-09 | 0.96  | 5.11   | -     | 1294.7  |
| AHQ-3-11, 4300 - 4302       | K.NATNVEQAFMTM*AAEIK.K                                                                                  | 1902.13959 | 2 | 1.26E-04 | 0.93  | 4.61   | -     | 1454.9  |
| gi 4507789 ref NP_003338.1  | ubiquitin-conjugating enzyme E2L 3 [Homo sapiens]                                                       |            |   | 1.41E-09 | 0.93  | 10.20  | 0.00  | 17861.5 |
| AHQ-3-12, 5191 - 5259       | R.IEINFPAEYFPKPKP.K                                                                                     | 1791.08155 | 2 | 1.41E-09 | 0.93  | 3.98   | -     | 1118.4  |
| AHQ-3-12, 5184 - 5255       | R.IEINFPAEYFPKPKP.K                                                                                     | 1791.08155 | 2 | 3.12E-08 | 0.88  | 3.16   | -     | 1056.6  |
| gi 21314617 ref NP_000433.2 | platelet/endothelial cell adhesion molecule (CD31 antigen); platelet/endothelial cell adhesion molecule |            |   | 1.53E-09 | 4.39  | 60.27  | 12.60 | 82449.6 |
| AHQ-3-5, 5964               | R.CESISGTLPISYQLLK.T                                                                                    | 1811.08954 | 2 | 5.76E-04 | 0.77  | 3.67   | -     | 353.7   |
| AHQ-3-4, 6060               | R.CESISGTLPISYQLLK.T                                                                                    | 1811.08954 | 2 | 4.61E-04 | 0.21  | 2.52   | -     | 243.1   |
| AHQ-3-1, 6130               | R.CESISGTLPISYQLLK.T                                                                                    | 1811.08954 | 2 | 6.10E-04 | 0.77  | 3.26   | -     | 367.4   |
| AHQ-3-4, 6684               | K.CTIQVTHLAQEFPEIIQK.D                                                                                  | 2270.63371 | 2 | 1.00E-07 | 0.96  | 5.20   | -     | 1225.8  |
| AHQ-3-5, 6576               | K.CTIQVTHLAQEFPEIIQK.D                                                                                  | 2270.63371 | 2 | 3.40E-06 | 0.97  | 5.41   | -     | 1334.1  |
| AHQ-3-1, 6428               | R.DQNFFVLEFPVEEQDR.V                                                                                    | 1979.13566 | 2 | 1.03E-04 | 0.66  | 3.36   | -     | 441.6   |
| AHQ-3-3, 6474               | R.DQNFFVLEFPVEEQDR.V                                                                                    | 1979.13566 | 2 | 2.61E-04 | 0.63  | 3.36   | -     | 566.4   |
| AHQ-3-5, 6380               | R.DQNFFVLEFPVEEQDR.V                                                                                    | 1979.13566 | 2 | 2.58E-04 | 0.82  | 3.94   | -     | 580.9   |
| AHQ-3-4, 3454 - 3474        | K.EDTIVSQTQDFTK.I                                                                                       | 1512.60049 | 2 | 4.89E-06 | 0.93  | 4.55   | -     | 722.1   |
| AHQ-3-4, 3602               | K.EQEGEYYCTAFNR.A                                                                                       | 1668.72232 | 2 | 1.19E-05 | 0.71  | 2.94   | -     | 519.2   |
| AHQ-3-4, 5625 - 5633        | K.VIAPVDEVQISLSSK.V                                                                                     | 1698.98227 | 2 | 1.53E-09 | 0.92  | 4.04   | -     | 769.6   |
| gi 5031573 ref NP_005712.1  | ARP3 actin-related protein 3 homolog; ARP3 (actin-related protein 3, yeast)                             |            |   | 1.58E-09 | 6.68  | 90.26  | 36.60 | 47370.9 |
| AHQ-3-7, 4739 - 4812        | R.AEPEDHYFLTEPPLNTENR.E                                                                                 | 2483.67423 | 2 | 2.55E-08 | 0.95  | 4.99   | -     | 898.9   |
| AHQ-3-7, 7427 - 7428        | R.DITYFIQQLLR.D                                                                                         | 1410.64250 | 2 | 3.97E-07 | 0.95  | 4.24   | -     | 1274.8  |
| AHQ-3-9, 7051 - 7052        | R.DITYFIQQLLR.D                                                                                         | 1410.64250 | 1 | 3.03E-04 | 0.07  | 1.88   | -     | 149.5   |
| AHQ-3-7, 7426               | R.DITYFIQQLLR.D                                                                                         | 1410.64250 | 1 | 3.66E-05 | 0.40  | 2.75   | -     | 240.5   |
| AHQ-3-7, 3498               | K.DYEEIGPSICR.H                                                                                         | 1340.44122 | 1 | 5.76E-05 | 0.11  | 1.87   | -     | 211.2   |
| AHQ-3-7, 5790               | K.GVDDLDFGDEAIEKPTYATK.W                                                                                | 2445.66268 | 3 | 7.94E-05 | 0.76  | 3.58   | -     | 603.9   |
| AHQ-3-7, 4174               | R.HGIVEDWDLMER.F                                                                                        | 1500.66127 | 2 | 1.58E-09 | 0.96  | 4.11   | -     | 1425.9  |
| AHQ-3-13, 6155              | K.LGYAGNTEPFPIISCAIA.E                                                                                  | 2194.53570 | 2 | 2.51E-05 | 0.55  | 3.05   | -     | 365.6   |
| AHQ-3-7, 6443 - 6444        | K.LGYAGNTEPFPIISCAIA.E                                                                                  | 2194.53570 | 2 | 3.14E-05 | 0.93  | 4.56   | -     | 854.2   |
| AHQ-3-13-, 3683             | R.LPACVDCGTGYTK.L                                                                                       | 1543.74421 | 2 | 6.73E-04 | 0.63  | 2.63   | -     | 577.6   |
| AHQ-3-7, 3715               | K.NIVLSSGGSTMFR.D                                                                                       | 1282.49463 | 2 | 1.31E-06 | 0.85  | 3.17   | -     | 1035.8  |
| AHQ-3-9, 6287               | R.TLTGTVIDSGDGVTHVIPVAEGYVIGSCIK.H                                                                      | 3061.45302 | 3 | 4.78E-04 | 0.90  | 4.14   | -     | 1149.7  |
| gi 7657431 ref NP_055205.1  | EBNA-2 co-activator (100kD) [Homo sapiens]                                                              |            |   | 1.75E-09 | 2.69  | 30.22  | 7.10  | 99689.7 |
| AHQ-3-4, 6380               | R.DIGNTQCLLNVEHLGACGPVHTLQFADSK.G                                                                       | 3299.63749 | 3 | 3.99E-06 | 0.83  | 4.08   | -     | 694.8   |
| AHQ-3-4, 6696               | R.NLPLGLVQEGEPFSEATLFTK.E                                                                               | 2307.54125 | 2 | 1.75E-09 | 0.91  | 4.39   | -     | 478.5   |
| AHQ-3-6, 6446               | R.NLPLGLVQEGEPFSEATLFTK.E                                                                               | 2307.54125 | 2 | 3.00E-05 | 0.90  | 3.87   | -     | 673.9   |
| AHQ-3-4, 3017               | R.SSHYDELLAAEAR.A                                                                                       | 1982.54640 | 2 | 2.30E-08 | 0.95  | 3.70   | -     | 1464.0  |
| gi 17986283 ref NP_006000.2 | tubulin, alpha 3; tubulin, alpha, brain-specific; hum-a-tub 1; hum-a-tub 1                              |            |   | 1.77E-09 | 0.96  | 10.28  | 3.30  | 50135.3 |
| AHQ-3-1, 6089               | R.AVFDLEPTVIDEVR.T                                                                                      | 1702.92947 | 2 | 4.41E-05 | 0.84  | 3.72   | -     | 653.9   |
| AHQ-3-2, 6090               | R.AVFDLEPTVIDEVR.T                                                                                      | 1702.92947 | 2 | 1.46E-07 | 0.89  | 3.83   | -     | 724.1   |
| AHQ-3-3, 6042 - 6044        | R.AVFDLEPTVIDEVR.T                                                                                      | 1702.92947 | 2 | 7.19E-07 | 0.94  | 5.17   | -     | 719.2   |
| AHQ-3-4, 5977               | R.AVFDLEPTVIDEVR.T                                                                                      | 1702.92947 | 2 | 1.18E-07 | 0.94  | 4.64   | -     | 973.0   |
| AHQ-3-7, 5555 - 5623        | R.AVFDLEPTVIDEVR.T                                                                                      | 1702.92947 | 2 | 1.77E-09 | 0.96  | 5.47   | -     | 981.7   |
| AHQ-3-7, 5690 - 5758        | R.AVFDLEPTVIDEVR.T                                                                                      | 1702.92947 | 2 | 1.89E-06 | 0.96  | 5.35   | -     | 931.4   |
| AHQ-3-12, 5662 - 5738       | R.AVFDLEPTVIDEVR.T                                                                                      | 1702.92947 | 2 | 7.11E-05 | 0.89  | 3.26   | -     | 853.6   |
| AHQ-3-13, 5665              | R.AVFDLEPTVIDEVR.T                                                                                      | 1702.92947 | 2 | 3.27E-05 | 0.86  | 4.35   | -     | 508.9   |
| AHQ-3-13-, 5617             | R.AVFDLEPTVIDEVR.T                                                                                      | 1702.92947 | 2 | 8.21E-04 | 0.49  | 2.64   | -     | 505.9   |
| AHQ-3-14-, 5613 - 5631      | R.AVFDLEPTVIDEVR.T                                                                                      | 1702.92947 | 2 | 2.23E-08 | 0.97  | 5.65   | -     | 1141.4  |
| gi 5174539 ref NP_005908.1  | cytosolic malate dehydrogenase; soluble malate dehydrogenase [Homo sapiens]                             |            |   | 1.80E-09 | 2.31  | 30.22  | 12.00 | 36425.9 |
| AHQ-3-13-, 2977             | K.DVIATKEDVAFK.D                                                                                        | 1451.60343 | 2 | 9.13E-08 | 0.94  | 3.76   | -     | 1305.4  |
| AHQ-3-9, 4839 - 4852        | K.EVGVYEAALKDDSWLK.G                                                                                    | 1752.94535 | 2 | 1.80E-09 | 0.92  | 4.43   | -     | 839.4   |
| AHQ-3-9, 4344 - 4351        | K.FVEGLPIPDFSR.E                                                                                        | 1394.55680 | 1 | 6.70E-07 | 0.45  | 2.59   | -     | 253.0   |
| gi 16507237 ref NP_005338.1 | heat shock 70kDa protein 5 (glucose-regulated protein, 78kDa); BiP; hsc70                               |            |   | 1.87E-09 | 11.48 | 130.32 | 25.70 | 72332.5 |
| AHQ-3-6, 4818               | R.AKFEELNMDLFR.S                                                                                        | 1513.74309 | 2 | 2.67E-09 | 0.95  | 4.05   | -     | 1270.0  |
| AHQ-3-6, 3919               | R.AKFEELNMDLFR.S                                                                                        | 1529.74249 | 2 | 2.55E-06 | 0.88  | 3.39   | -     | 769.7   |
| AHQ-3-6, 3811               | K.DAGTIAGLNVMI.R                                                                                        | 1218.40894 | 2 | 2.98E-05 | 0.96  | 3.98   | -     | 1493.1  |
| AHQ-3-6, 5481               | K.DNHLGLTDFDLTGIPPPR.G                                                                                  | 1935.17239 | 2 | 1.60E-07 | 0.93  | 3.75   | -     | 950.6   |
| AHQ-3-6, 5598               | K.DNHLGLTDFDLTGIPPPR.G                                                                                  | 1935.17239 | 2 | 7.07E-06 | 0.94  | 4.71   | -     | 624.1   |
| AHQ-3-6, 6683               | R.IEIESFYEGEDFSETLTR.A                                                                                  | 2166.28328 | 2 | 1.08E-04 | 0.84  | 3.59   | -     | 613.2   |
| AHQ-3-6, 6187 - 6253        | R.IEIESFYEGEDFSETLTR.A                                                                                  | 2166.28328 | 2 | 4.84E-04 | 0.63  | 2.99   | -     | 494.6   |
| AHQ-3-6, 6082               | R.IEIESFYEGEDFSETLTR.A                                                                                  | 2166.28328 | 2 | 1.51E-06 | 0.89  | 3.78   | -     | 888.9   |
| AHQ-3-5, 4719               | K.IEWLESHQDADIEDFK.A                                                                                    | 1976.08864 | 2 | 3.07E-05 | 0.96  | 5.68   | -     | 1074.9  |
| AHQ-3-6, 4641               | K.IEWLESHQDADIEDFK.A                                                                                    | 1976.08864 | 2 | 1.87E-09 | 0.98  | 6.45   | -     | 1599.2  |
| AHQ-3-6, 4193               | R.IINEPTAAAIYGLDKR.E                                                                                    | 1817.07894 | 3 | 8.00E-05 | 0.55  | 3.36   | -     | 333.1   |
| AHQ-3-6, 3671 - 3697        | R.ITPSYVAFTPEGER.L                                                                                      | 1567.72412 | 2 | 1.14E-06 | 0.71  | 2.75   | -     | 576.0   |
| AHQ-3-5, 3731               | R.ITPSYVAFTPEGER.L                                                                                      | 1567.72412 | 2 | 2.92E-04 | 0.89  | 3.75   | -     | 750.7   |
| AHQ-3-6, 3506               | K.KSDIDFVLVGGSTR.I                                                                                      | 1589.77277 | 2 | 2.42E-07 | 0.96  | 4.97   | -     | 1357.6  |
| AHQ-3-6, 3011 - 3082        | K.KSQIFSTASDNQPTVTK.V                                                                                   | 1966.18156 | 2 | 1.04E-06 | 0.96  | 5.15   | -     | 1380.9  |
| AHQ-3-6, 2082               | K.MKETAAYLKG.K                                                                                          | 1241.43928 | 2 | 1.76E-04 | 0.92  | 3.76   | -     | 967.0   |
| AHQ-3-6, 3690               | K.SQIFSTASDNQPTVTK.V                                                                                    | 1838.00865 | 2 | 6.42E-04 | 0.92  | 3.65   | -     | 1013.1  |
| AHQ-3-6, 3819               | K.VTHAVVTPAYFNDAQR.Q                                                                                    | 1889.10372 | 2 | 9.37E-06 | 0.87  | 3.54   | -     | 616.2   |
| AHQ-3-6, 3630 - 3707        | K.VTHAVVTPAYFNDAQR.Q                                                                                    | 1889.10372 | 3 | 4.95E-04 | 0.60  | 3.32   | -     | 504.1   |
| gi 4503327 ref NP_000389.1  | cytochrome b5 reductase membrane-bound isoform; diaphorase (NADH) [Homo sapiens]                        |            |   | 1.98E-09 | 6.90  | 80.30  | 42.20 | 34234.6 |
| AHQ-3-9, 4747 - 4748        | R.APEAWDYGGGFVNEEM*IR.D                                                                                 | 2129.29457 | 2 | 5.35E-06 | 0.96  | 4.34   | -     | 1775.4  |
| AHQ-3-9, 4372               | K.DILLRPELEELR.N                                                                                        | 1496.73370 | 2 | 2.04E-05 | 0.83  | 3.45   | -     | 681.6   |
| AHQ-3-9, 5743 - 5811        | R.FALPSPQHILGLPVGQHIYSAR.I                                                                              | 2515.94007 | 2 | 2.96E-07 | 0.94  | 4.70   | -     | 782.7   |
| AHQ-3-9, 5759               | R.FALPSPQHILGLPVGQHIYSAR.I                                                                              | 2515.94007 | 3 | 1.98E-09 | 0.93  | 4.70   | -     | 1227.8  |
| AHQ-3-9, 2595               | R.GPSGLLVYQKG.G                                                                                         | 1119.29547 | 2 | 2.23E-05 | 0.96  | 4.12   | -     | 1310.7  |
| AHQ-3-9, 2585               | R.GPSGLLVYQKG.G                                                                                         | 1119.29547 | 1 | 4.22E-06 | 0.73  | 3.35   | -     | 268.6   |
| AHQ-3-9, 5629               | R.IDGNLVRPYTPISSDDDKGFVLDLVK.V                                                                          | 2977.35765 | 3 | 9.20E-05 | 0.91  | 4.76   | -     | 896.3   |
| AHQ-3-9, 5712 - 5713        | R.IDGNLVRPYTPISSDDDKGFVLDLVK.V                                                                          | 2977.35765 | 3 | 3.34E-07 | 0.94  | 5.90   | -     | 661.3   |
| AHQ-3-9, 3252               | R.STPAITLESPIK.Y                                                                                        | 1372.54621 | 1 | 1.07E-04 | 0.73  | 3.18   | -     | 453.8   |
| AHQ-3-12, 3718              | R.STPAITLESPIK.Y                                                                                        | 1372.54621 | 2 | 1.80E-05 | 0.86  | 3.21   | -     | 927.9   |
| AHQ-3-9, 4207               | R.STPAITLESPIKYLPLR.L                                                                                   | 1902.18061 | 2 | 7.08E-08 | 0.80  | 3.57   | -     | 508.5   |
| AHQ-3-9, 4704               | K.SVGMIAAGGTGTPM*LQVIR.A                                                                                | 1918.31483 | 2 | 1.10E-05 | 0.85  | 3.73   | -     | 611.8   |
| gi 6005942 ref NP_009057.1  | valosin-containing protein; yeast Cdc48p homolog; transitional endoplasmic reticulum chaperone          |            |   | 2.06E-09 | 7.58  | 90.24  | 13.80 | 89321.3 |
| AHQ-3-5, 6885               | R.IVSQLLTMDLGLQ.Q                                                                                       | 1431.76657 | 2 | 2.06E-09 | 0.96  | 4.75   | -     | 1364.7  |
| AHQ-3-5, 3039               | R.KYEM*FAQTLQQR.G                                                                                       | 1630.85008 | 2 | 2.12E-05 | 0.97  | 4.65   | -     | 1736.9  |
| AHQ-3-5, 2573               | R.KYEM*FAQTLQQR.G                                                                                       | 1646.84948 | 2 | 3.42E-06 | 0.76  | 2.98   | -     | 575.8   |
| AHQ-3-5, 5705 - 5735        | R.LDQLYIPLPEK.S                                                                                         | 1557.81228 | 2 | 2.30E-09 | 0.94  | 4.33   | -     | 805.1   |
| AHQ-3-5, 2789 - 2864        | R.LEILQIHTK.N                                                                                           | 1095.31705 | 1 | 6.50E-06 | 0.65  | 2.66   | -     | 370.5   |
| AHQ-3-6, 4151               | R.LGVDIISQPCPDVK.Y                                                                                      | 1542.77930 | 2 | 7.19E-04 | 0.56  | 2.81   | -     | 492.9   |
| AHQ-3-5, 5113 - 5157        | R.LIVDEAINEDNSVLSQPK.M                                                                                  | 2171.39088 | 2 | 3.01E-04 | 0.96  | 4.78   | -     | 1160.7  |

|                             |                                                                         |            |   |          |      |      |   |        |
|-----------------------------|-------------------------------------------------------------------------|------------|---|----------|------|------|---|--------|
| AHQ-3-8, 5491               | K.ACANPAAGSVILLENLR.F                                                   | 1771.03187 | 2 | 3.20E-05 | 0.93 | 4.19 | - | 1107.9 |
| AHQ-3-10, 5347              | K.ACANPAAGSVILLENLR.F                                                   | 1771.03187 | 2 | 6.13E-04 | 0.93 | 4.39 | - | 1101.2 |
| AHQ-3-11, 5586 - 5592       | K.ACANPAAGSVILLENLR.F                                                   | 1771.03187 | 2 | 5.11E-06 | 0.95 | 5.01 | - | 945.4  |
| AHQ-3-8, 4855               | K.ALESERPFLAILGGAK.V                                                    | 1770.06542 | 2 | 8.26E-06 | 0.97 | 5.48 | - | 1437.4 |
| AHQ-3-10, 4894 - 4903       | K.ALESERPFLAILGGAK.V                                                    | 1770.06542 | 2 | 2.19E-09 | 0.97 | 6.05 | - | 1744.7 |
| AHQ-3-11, 5188              | K.ALESERPFLAILGGAK.V                                                    | 1770.06542 | 2 | 6.50E-05 | 0.95 | 4.57 | - | 1274.5 |
| AHQ-3-9, 4873 - 4953        | K.ALESERPFLAILGGAK.V                                                    | 1770.06542 | 2 | 1.36E-04 | 0.97 | 4.96 | - | 1613.5 |
| AHQ-3-8, 4412               | K.DVLFKDCVGPVEVEK.A                                                     | 1750.00620 | 2 | 2.07E-09 | 0.96 | 4.59 | - | 1395.3 |
| AHQ-3-11, 5139              | K.ITLPVDFVTADKFDENAK.T                                                  | 2024.25948 | 2 | 1.73E-05 | 0.58 | 3.25 | - | 315.1  |
| AHQ-3-10, 4863              | K.ITLPVDFVTADKFDENAK.T                                                  | 2024.25948 | 2 | 2.93E-05 | 0.65 | 3.07 | - | 465.9  |
| AHQ-3-8, 3521               | K.SVVLMSHLGRDPVMPDK.Y                                                   | 2036.40831 | 3 | 2.48E-04 | 0.83 | 3.95 | - | 1035.6 |
| AHQ-3-8, 3894               | K.TGQATVASGIPAGWWM*GLDCGPESK.Y                                          | 2623.90130 | 3 | 6.59E-04 | 0.75 | 3.56 | - | 514.4  |
| AHQ-3-8, 4468 - 4481        | K.TGQATVASGIPAGWMLDCCGPESK.Y                                            | 2607.90190 | 2 | 5.14E-04 | 0.69 | 3.02 | - | 261.6  |
| gj 21464101 ref NP_036611.2 | tyrosine 3-monooxygenase/tryptophan 5-monooxygenase activation protein  |            |   |          |      |      |   |        |
| AHQ-3-10, 6711 - 6712       | K.ELEAVCQDVLSLDNLILYK.N                                                 | 2237.55566 | 2 | 2.08E-09 | 0.98 | 5.47 | - | 1745.0 |
| AHQ-3-10, 3891 - 3894       | R.NLLSVAYKNVVGAR.R                                                      | 1504.75906 | 2 | 9.36E-07 | 0.95 | 3.92 | - | 1434.3 |
| AHQ-3-10, 2902              | K.NVTELNEPLSNEER.N                                                      | 1644.72215 | 2 | 4.24E-04 | 0.93 | 3.88 | - | 957.4  |
| AHQ-3-14, 3883              | K.NVTELNEPLSNEER.N                                                      | 1644.72215 | 2 | 1.05E-04 | 0.76 | 2.93 | - | 698.9  |
| AHQ-3-14-, 2963             | K.NVTELNEPLSNEER.N                                                      | 1644.72215 | 2 | 2.13E-07 | 0.94 | 4.43 | - | 954.4  |
| AHQ-3-10, 4868              | K.NVTELNEPLSNEERNLLSVAYK.N                                              | 2533.77623 | 2 | 6.11E-06 | 0.55 | 3.33 | - | 201.2  |
| AHQ-3-10, 6083 - 6148       | K.TAFDDAIAELDTLNEDSYK.D                                                 | 2132.22370 | 2 | 8.19E-08 | 0.94 | 4.18 | - | 1108.1 |
| AHQ-3-10, 5960              | K.TAFDDAIAELDTLNEDSYK.D                                                 | 2132.22370 | 2 | 6.87E-05 | 0.76 | 3.48 | - | 513.3  |
| AHQ-3-13-, 6570             | K.TAFDDAIAELDTLNEDSYK.D                                                 | 2132.22370 | 2 | 1.53E-04 | 0.77 | 2.94 | - | 890.4  |
| AHQ-3-10, 2127              | R.YLAEVATGEK.R                                                          | 1081.20087 | 1 | 7.70E-05 | 0.23 | 2.50 | - | 271.6  |
| gj 4506925 ref NP_003013.1  | SH3 domain binding glutamic acid-rich protein like; SH3-binding domain  |            |   |          |      |      |   |        |
| AHQ-3-13, 6321 - 6399       | R.ENNAVYAFGLTAPPVGSK.E                                                  | 1850.06426 | 2 | 2.18E-05 | 0.87 | 3.32 | - | 850.1  |
| AHQ-3-13, 4998 - 5065       | R.ENVPENSRPATGYPLPQIFNESQYR.G                                           | 3005.24660 | 3 | 9.85E-04 | 0.95 | 5.17 | - | 1131.2 |
| AHQ-3-13, 5129 - 5198       | R.ENVPENSRPATGYPLPQIFNESQYR.G                                           | 3005.24660 | 3 | 3.47E-07 | 0.88 | 4.47 | - | 786.2  |
| AHQ-3-13, 4859 - 4927       | R.ENVPENSRPATGYPLPQIFNESQYR.G                                           | 3005.24660 | 3 | 7.20E-04 | 0.80 | 3.92 | - | 667.5  |
| AHQ-3-13-, 4925 - 4997      | R.ENVPENSRPATGYPLPQIFNESQYR.G                                           | 3005.24660 | 3 | 2.15E-09 | 0.93 | 5.42 | - | 878.7  |
| AHQ-3-13-, 5061 - 5130      | R.ENVPENSRPATGYPLPQIFNESQYR.G                                           | 3005.24660 | 3 | 6.67E-08 | 0.94 | 5.23 | - | 1015.2 |
| AHQ-3-13-, 4302             | K.KQQDVLGFLEANK.I                                                       | 1490.68802 | 2 | 9.05E-08 | 0.95 | 4.35 | - | 1594.6 |
| AHQ-3-13, 2411              | R.VYIASSSGSTAIK.R                                                       | 1284.44065 | 1 | 1.50E-04 | 0.26 | 2.58 | - | 293.1  |
| gj 9966867 ref NP_065123.1  | eIF-5A2 protein; eIF5AII [Homo sapiens]                                 |            |   |          |      |      |   |        |
| AHQ-3-12, 3615 - 3623       | K.KYEDICPSTHNMDDVPIK.R                                                  | 2163.41723 | 3 | 6.33E-06 | 0.98 | 5.96 | - | 2291.3 |
| AHQ-3-12, 3015              | K.KYEDICPSTHNM*DVPIK.R                                                  | 2179.41663 | 3 | 3.25E-05 | 0.97 | 5.56 | - | 1701.1 |
| AHQ-3-12, 4802              | K.VHLVGIDIFTGK.K                                                        | 1299.54329 | 2 | 2.19E-09 | 0.93 | 3.58 | - | 1095.7 |
| AHQ-3-12, 4800              | K.VHLVGIDIFTGK.K                                                        | 1299.54329 | 1 | 1.72E-04 | 0.69 | 2.01 | - | 1117.8 |
| gj 5031571 ref NP_005713.1  | actin-related protein 2; ARP2 (actin-related protein 2, yeast) homolog  |            |   |          |      |      |   |        |
| AHQ-3-8, 3566 - 3576        | K.DLMVGDASELR.S                                                         | 1335.46633 | 2 | 1.79E-07 | 0.94 | 3.93 | - | 1061.5 |
| AHQ-3-8, 2814               | R.GYAFNHSADFETVR.M                                                      | 1614.69943 | 2 | 2.35E-09 | 0.93 | 3.87 | - | 979.3  |
| AHQ-3-8, 3428               | K.HIVLGGSTMYPLGSPRL                                                     | 1773.04967 | 2 | 1.64E-05 | 0.98 | 5.81 | - | 2509.8 |
| AHQ-3-8, 3742               | K.HLWVDTFGPEK.L                                                         | 1393.52736 | 2 | 3.68E-07 | 0.89 | 3.33 | - | 692.7  |
| AHQ-3-8, 3750               | K.HLWVDTFGPEK.L                                                         | 1393.52736 | 1 | 1.95E-04 | 0.75 | 2.49 | - | 706.3  |
| AHQ-3-8, 2602               | K.ILLTEPPM*NPTK.K                                                       | 1370.64006 | 2 | 1.06E-04 | 0.73 | 3.54 | - | 518.2  |
| AHQ-3-8, 2508               | R.KVVVCDNGTGFVK.C                                                       | 1424.64764 | 2 | 2.54E-05 | 0.72 | 3.03 | - | 823.7  |
| AHQ-3-8, 3578               | K.LCYVGYNIEQEQK.L                                                       | 1645.81494 | 2 | 9.12E-08 | 0.97 | 4.66 | - | 1666.2 |
| AHQ-3-8, 4148               | R.SMLEVNYPM*ENGIVR.N                                                    | 1769.03643 | 2 | 2.08E-04 | 0.30 | 2.71 | - | 367.0  |
| gj 4507951 ref NP_003396.1  | tyrosine 3/tryptophan 5-monooxygenase activation protein, eta polypept  |            |   |          |      |      |   |        |
| AHQ-3-14-, 2884             | K.AVTELNEPLSNEDR.N                                                      | 1587.67060 | 2 | 2.36E-09 | 0.90 | 3.47 | - | 852.8  |
| AHQ-3-10, 2727              | K.AVTELNEPLSNEDR.N                                                      | 1587.67060 | 2 | 2.30E-05 | 0.59 | 2.61 | - | 563.1  |
| AHQ-3-13-, 2942 - 2967      | K.AVTELNEPLSNEDR.N                                                      | 1587.67060 | 2 | 2.88E-08 | 0.87 | 4.02 | - | 555.0  |
| AHQ-3-10, 2866              | K.AVTELNEPLSNEDR.N                                                      | 1587.67060 | 2 | 5.54E-07 | 0.89 | 4.03 | - | 832.5  |
| AHQ-3-13, 2970              | K.AVTELNEPLSNEDR.N                                                      | 1587.67060 | 2 | 4.31E-07 | 0.80 | 3.30 | - | 583.8  |
| AHQ-3-10, 5572              | K.ELETVCNVDLSLLDK.F                                                     | 1749.96137 | 2 | 2.63E-05 | 0.71 | 3.07 | - | 451.3  |
| AHQ-3-10, 6348 - 6426       | K.ELETVCNVDLSLLDK.F                                                     | 1749.96137 | 2 | 9.40E-05 | 0.88 | 3.68 | - | 831.6  |
| AHQ-3-14-, 6699             | K.ELETVCNVDLSLLDK.F                                                     | 1749.96137 | 2 | 7.48E-05 | 0.90 | 3.96 | - | 694.7  |
| AHQ-3-10, 2779              | K.NSVVEASEAYK.E                                                         | 1268.35495 | 1 | 2.61E-05 | 0.28 | 1.90 | - | 376.4  |
| AHQ-3-10, 5707              | K.QAFDDAIAELDTLNEDSYK.D                                                 | 2159.24915 | 2 | 5.88E-04 | 0.59 | 3.29 | - | 597.2  |
| AHQ-3-13-, 6114             | K.QAFDDAIAELDTLNEDSYK.D                                                 | 2159.24915 | 2 | 3.35E-04 | 0.88 | 3.76 | - | 355.0  |
| AHQ-3-13, 2247              | R.YLAEVASGEK.K                                                          | 1067.17419 | 1 | 3.07E-05 | 0.22 | 1.87 | - | 541.3  |
| AHQ-3-10, 2028 - 2030       | R.YLAEVASGEK.K                                                          | 1067.17419 | 2 | 2.71E-05 | 0.91 | 3.32 | - | 848.1  |
| AHQ-3-10, 2022              | R.YLAEVASGEK.K                                                          | 1067.17419 | 1 | 1.12E-06 | 0.72 | 3.10 | - | 385.6  |
| AHQ-3-13, 2245              | R.YLAEVASGEK.K                                                          | 1067.17419 | 2 | 2.68E-04 | 0.76 | 2.99 | - | 623.1  |
| gj 28395033 ref NP_786886.1 | ras homolog gene family, member C; Aplysia RAS-related homolog 9 (onco  |            |   |          |      |      |   |        |
| AHQ-3-10, 4238 - 4243       | K.HFCPNVPIILVGNK.K                                                      | 1609.91693 | 2 | 2.42E-09 | 0.97 | 4.90 | - | 1528.7 |
| AHQ-3-11, 4514              | K.HFCPNVPIILVGNK.K                                                      | 1609.91693 | 2 | 4.70E-04 | 0.95 | 3.52 | - | 1400.3 |
| AHQ-3-10, 3936              | K.HFCPNVPIILVGNK.D                                                      | 1738.08985 | 2 | 3.75E-05 | 0.94 | 3.37 | - | 1466.8 |
| AHQ-3-10, 2175              | K.KLVIVGDGACGK.T                                                        | 1218.44864 | 2 | 4.11E-06 | 0.94 | 3.39 | - | 1591.4 |
| AHQ-3-10, 6398 - 6403       | R.LRPLSYPTDVLIM*CFSIDSPDSLENIPEK.W                                      | 3483.90759 | 3 | 9.90E-04 | 0.93 | 5.19 | - | 788.3  |
| AHQ-3-10, 2551              | K.LVIVGDGACGK.T                                                         | 1090.27572 | 1 | 5.94E-07 | 0.75 | 3.33 | - | 423.7  |
| AHQ-3-10, 2543              | K.LVIVGDGACGK.T                                                         | 1090.27572 | 2 | 4.28E-04 | 0.91 | 3.24 | - | 1037.4 |
| AHQ-3-10, 4646 - 4684       | K.QVELALWDTAQGEDYDR.L                                                   | 2010.10662 | 2 | 4.41E-04 | 0.95 | 4.11 | - | 1513.3 |
| gj 4503747 ref NP_001448.1  | filamin B, beta (actin binding protein 278); beta filamin; filamin 1 (a |            |   |          |      |      |   |        |
| AHQ-3-1, 3740               | K.DLAEDAPWK.K                                                           | 1045.12708 | 1 | 8.01E-06 | 0.37 | 2.06 | - | 527.4  |
| AHQ-3-3, 3636               | K.DLAEDAPWK.K                                                           | 1045.12708 | 1 | 3.93E-06 | 0.58 | 2.00 | - | 819.1  |
| AHQ-3-2, 3715               | K.DLAEDAPWK.K                                                           | 1045.12708 | 2 | 5.94E-04 | 0.88 | 3.14 | - | 962.9  |
| AHQ-3-2, 3706               | K.DLAEDAPWK.K                                                           | 1045.12708 | 1 | 2.73E-05 | 0.50 | 2.57 | - | 434.6  |
| AHQ-3-2, 3689               | K.DLAEDAPWK.K                                                           | 1045.12708 | 1 | 1.35E-05 | 0.49 | 2.46 | - | 520.8  |
| AHQ-3-5, 3472               | K.DLAEDAPWK.K                                                           | 1045.12708 | 1 | 1.03E-04 | 0.24 | 1.83 | - | 572.6  |
| AHQ-3-2, 2894               | K.DLAEDAPWK.K                                                           | 1173.29999 | 2 | 5.18E-04 | 0.87 | 2.83 | - | 1297.7 |
| AHQ-3-1, 3096               | K.DLAEDAPWK.K                                                           | 1173.29999 | 2 | 5.60E-05 | 0.79 | 2.93 | - | 1081.6 |
| AHQ-3-6, 6321               | R.LIALLEVLISQK.R                                                        | 1227.51852 | 2 | 2.46E-08 | 0.98 | 4.90 | - | 1628.8 |
| AHQ-3-11, 5948              | R.LIALLEVLISQK.R                                                        | 1227.51852 | 2 | 3.69E-07 | 0.97 | 4.58 | - | 1266.1 |
| AHQ-3-7, 6168               | R.LIALLEVLISQK.R                                                        | 1227.51852 | 2 | 7.58E-07 | 0.97 | 4.16 | - | 1664.2 |
| AHQ-3-3, 6620               | R.LIALLEVLISQK.R                                                        | 1227.51852 | 2 | 8.13E-07 | 0.97 | 4.84 | - | 1391.0 |
| AHQ-3-5, 6381               | R.LIALLEVLISQK.R                                                        | 1227.51852 | 2 | 2.43E-09 | 0.98 | 4.83 | - | 1617.7 |
| AHQ-3-4, 6621               | R.LIALLEVLISQK.R                                                        | 1227.51852 | 2 | 2.45E-08 | 0.97 | 4.67 | - | 1456.7 |
| AHQ-3-2, 6625 - 6705        | R.LIALLEVLISQK.R                                                        | 1227.51852 | 2 | 2.17E-08 | 0.97 | 4.49 | - | 1670.1 |
| AHQ-3-1, 6656 - 6657        | R.LIALLEVLISQK.R                                                        | 1227.51852 | 2 | 6.29E-09 | 0.97 | 4.49 | - | 1382.0 |
| AHQ-3-2, 6773 - 6847        | R.QM*QLENVVALEFLDR.E                                                    | 1909.15348 | 2 | 1.71E-05 | 0.94 | 4.66 | - | 1042.7 |
| AHQ-3-1, 6654               | R.QM*QLENVVALEFLDR.E                                                    | 1909.15348 | 2 | 4.17E-09 | 0.93 | 4.66 | - | 899.9  |
| AHQ-3-2, 7342 - 7407        | R.QM*QLENVVALEFLDR.E                                                    | 1893.15408 | 2 | 5.32E-06 | 0.96 | 4.63 | - | 1180.4 |
| AHQ-3-3, 7261               | R.QM*QLENVVALEFLDR.E                                                    | 1893.15408 | 2 | 3.82E-04 | 0.54 | 2.72 | - | 544.2  |
| gj 5453549 ref NP_006397.1  | thioredoxin peroxidase; thioredoxin peroxidase (antioxidant enzyme) [Ho |            |   |          |      |      |   |        |
| AHQ-3-10, 3470              | K.DYGVYLEDGHTLR.G                                                       | 1625.72052 | 2 | 2.46E-09 | 0.95 | 3.86 | - | 1291.5 |
| AHQ-3-10, 3854              | K.HGEVCPAGWKPGETIIPDPAGK.L                                              | 2405.67144 | 3 | 2.45E-05 | 0.93 | 4.46 | - | 1381.7 |
| AHQ-3-10, 4507              | R.IPLSLDLTHQISK.D                                                       | 1465.71961 | 2 | 3.71E-07 | 0.95 | 3.45 | - | 1465.7 |
| AHQ-3-10, 4419              | K.ISKPAPYWEGETAVIDGEFK.E                                                | 2109.36607 | 2 | 9.05E-07 | 0.88 | 3.49 | - | 851.6  |
| gj 13518026 ref NP_004978.2 | LIM and senescent cell antigen-like domains 1 [Homo sapiens]            |            |   |          |      |      |   |        |
| AHQ-3-9, 7016               | R.CDLCQEVLEADIGFVK.N                                                    | 1770.01757 | 2 | 2.44E-05 | 0.95 | 3.78 | - | 1703.9 |
| AHQ-3-11, 4310              | K.CHAIIEQPLIFK.N                                                        | 1585.84900 | 2 | 2.52E-09 | 0.95 | 4.76 | - | 1271.6 |
| AHQ-3-9, 4104 - 4107        | K.CHAIIEQPLIFK.N                                                        | 1585.84900 | 2 | 2.57E-06 | 0.95 | 5.01 | - | 1228.1 |
| AHQ-3-8, 4097 - 4105        | K.CHAIIEQPLIFK.N                                                        | 1585.84900 | 2 | 1.30E-04 | 0.95 | 4.40 | - | 1302.7 |
| AHQ-3-11, 3346 - 3418       | R.VIEGDVVSALNK.A                                                        | 1244.41966 | 2 | 2.55E-06 | 0.96 | 4.04 | - | 1567.7 |
| AHQ-3-8, 3020               | R.VIEGDVVSALNK.A                                                        | 1244.41966 | 2 | 3.74E-08 | 0.90 | 3.87 | - | 858.9  |
| AHQ-3-9, 3096               | R.VIEGDVVSALNK.A                                                        | 1244.41966 | 2 | 2.14E-05 | 0.91 | 3.78 | - | 916.8  |

|                             |                                                                             |            |   |          |      |        |       |          |
|-----------------------------|-----------------------------------------------------------------------------|------------|---|----------|------|--------|-------|----------|
| AHQ-3-13, 3483              | R.VIEGDVVSALNK.A                                                            | 1244.41966 | 1 | 4.95E-04 | 0.25 | 1.91   | -     | 542.7    |
| AHQ-3-14-, 3479             | R.VIEGDVVSALNK.A                                                            | 1244.41966 | 2 | 5.81E-08 | 0.96 | 4.44   | -     | 1203.2   |
| gi 4507645 ref NP_000356.1  | triosephosphate isomerase 1 [Homo sapiens]                                  |            |   | 2.59E-09 | 5.11 | 60.27  | 33.30 | 2669.3   |
| AHQ-3-10, 6270 - 6350       | K.ELASQPDVDGFLVGGASLKPFEVDIINAK.Q                                           | 3031.40532 | 3 | 2.59E-09 | 0.77 | 4.06   | -     | 231.9    |
| AHQ-3-10, 6370 - 6428       | K.ELASQPDVDGFLVGGASLKPFEVDIINAK.Q                                           | 3031.40532 | 3 | 1.33E-08 | 0.69 | 3.16   | -     | 257.7    |
| AHQ-3-10, 6010 - 6090       | K.ELASQPDVDGFLVGGASLKPFEVDIINAK.Q                                           | 3031.40532 | 3 | 7.02E-05 | 0.78 | 4.06   | -     | 300.4    |
| AHQ-3-10, 6228              | K.ELASQPDVDGFLVGGASLKPFEVDIINAK.Q                                           | 3159.53509 | 3 | 4.07E-05 | 0.50 | 3.15   | -     | 179.1    |
| AHQ-3-10, 3998              | R.KQSLGELIGLTNAAK.V                                                         | 1543.79037 | 2 | 4.83E-05 | 0.96 | 3.94   | -     | 1956.1   |
| AHQ-3-10, 4796 - 4802       | K.QSLGELIGLTNAAK.V                                                          | 1415.61746 | 2 | 3.81E-07 | 0.93 | 3.93   | -     | 911.9    |
| AHQ-3-10, 4920 - 4998       | K.VAHALAEGLGVIACIGEK.L                                                      | 1810.10800 | 2 | 1.95E-08 | 0.98 | 5.38   | -     | 2194.3   |
| AHQ-3-11, 5364              | K.VPADTEVVCAPPTAYIDFAR.Q                                                    | 2194.44943 | 2 | 7.67E-04 | 0.96 | 5.44   | -     | 847.9    |
| gi 13489087 ref NP_109591.1 | serine (or cysteine) proteinase inhibitor, clade B (ovalbumin), member      |            |   | 2.65E-09 | 5.49 | 60.22  | 22.20 | 42741.5  |
| AHQ-3-8, 3914 - 3926        | K.FAYGYIEDLK.C                                                              | 1219.36713 | 2 | 1.25E-05 | 0.95 | 3.89   | -     | 1089.9   |
| AHQ-3-8, 4045               | R.LGVQDLFNSSK.A                                                             | 1208.34588 | 2 | 1.15E-06 | 0.90 | 3.27   | -     | 932.1    |
| AHQ-3-8, 3709               | K.TYGADLASVDFQHASEDAR.K                                                     | 2054.11949 | 3 | 1.33E-05 | 0.88 | 4.14   | -     | 510.2    |
| AHQ-3-9, 3681               | K.TYGADLASVDFQHASEDAR.K                                                     | 2054.11949 | 2 | 6.20E-07 | 0.82 | 3.46   | -     | 522.6    |
| AHQ-3-8, 3705               | K.TYGADLASVDFQHASEDAR.K                                                     | 2054.11949 | 2 | 2.65E-09 | 0.94 | 3.93   | -     | 1140.5   |
| AHQ-3-13, 6206              | K.TYNFLPEFLVSTQK.T                                                          | 1687.91650 | 2 | 4.46E-06 | 0.92 | 4.33   | -     | 479.3    |
| AHQ-3-8, 7211               | R.VLELPYQGEELSMVILLPDDIEDESTGLKK.I                                          | 3375.82891 | 3 | 5.49E-08 | 0.91 | 4.49   | -     | 840.0    |
| AHQ-3-8, 7123               | R.VLELPYQGEELSMVILLPDDIEDESTGLKK.I                                          | 3391.82831 | 3 | 5.70E-05 | 0.88 | 4.24   | -     | 528.2    |
| gi 29736622 ref XP_293924.1 | similar to cytoplasmic beta-actin [Homo sapiens]                            |            |   | 2.70E-09 | 3.55 | 40.29  | 16.00 | 42002.9  |
| AHQ-3-8, 7135 - 7136        | R.CPEAIFQPSFLGIESSGHIETTFNSIMK.C                                            | 3143.53608 | 3 | 4.35E-05 | 0.88 | 3.76   | -     | 844.0    |
| AHQ-3-8, 7029 - 7033        | R.FRCPFAIFQPSFLGIESSGHIETTFNSIMK.C                                          | 3446.89713 | 3 | 2.70E-09 | 0.97 | 5.75   | -     | 1933.1   |
| AHQ-3-9, 6087               | R.TTGIVMDSGDGVTHIVPIYEGYALPHAILR.L                                          | 3197.65320 | 3 | 1.87E-04 | 0.82 | 3.54   | -     | 888.9    |
| AHQ-3-10, 5700 - 5763       | R.TTGIVMDSGDGVTHIVPIYEGYALPHAILR.L                                          | 3213.65260 | 3 | 3.87E-04 | 0.78 | 3.85   | -     | 475.8    |
| AHQ-3-8, 5988 - 5999        | R.TTGIVMDSGDGVTHIVPIYEGYALPHAILR.L                                          | 3213.65260 | 3 | 1.15E-04 | 0.88 | 4.11   | -     | 1062.8   |
| gi 4505753 ref NP_002620.1  | phosphoglycerate mutase 1 (brain); Phosphoglycerate mutase A, nonmuscle     |            |   | 2.72E-09 | 4.05 | 60.21  | 31.10 | 28803.7  |
| AHQ-3-10, 3715 - 3743       | R.FSGWYDADLSPAGHEEAKR.K                                                     | 1981.06697 | 2 | 1.07E-04 | 0.91 | 3.55   | -     | 1279.2   |
| AHQ-3-10, 3330              | R.FSGWYDADLSPAGHEEAKR.G                                                     | 2137.25332 | 2 | 7.27E-08 | 0.76 | 3.22   | -     | 768.2    |
| AHQ-3-10, 2155              | R.HGESAVNLENR.F                                                             | 1313.36073 | 1 | 5.94E-05 | 0.26 | 2.28   | -     | 266.4    |
| AHQ-3-10, 1907              | R.HYGGTLGLNK.A                                                              | 1060.18811 | 1 | 9.97E-04 | 0.43 | 2.44   | -     | 284.8    |
| AHQ-3-10, 3892              | K.NLKPQPMQFLGDEEIVR.K                                                       | 2116.46992 | 3 | 2.31E-08 | 0.80 | 3.53   | -     | 499.9    |
| AHQ-3-10, 3879              | K.NLKPQPMQFLGDEEIVR.K                                                       | 2116.46992 | 2 | 8.35E-04 | 0.92 | 4.15   | -     | 622.1    |
| AHQ-3-10, 4627              | R.YADLTEDQLPSCSELKDTIAR.A                                                   | 2427.62735 | 3 | 2.72E-09 | 0.90 | 4.11   | -     | 1042.7   |
| gi 21361198 ref NP_000286.2 | serine (or cysteine) proteinase inhibitor, clade A (alpha-1 antitrypsin)    |            |   | 2.73E-09 | 1.77 | 20.23  | 7.70  | 46722.2  |
| AHQ-3-7, 6894               | K.ITPNLAFAFLYR.Q                                                            | 1642.87896 | 2 | 1.01E-06 | 0.81 | 2.87   | -     | 618.7    |
| AHQ-3-7, 4507 - 4578        | K.VFNSGADLSGVTEEAAPL.L                                                      | 1835.00476 | 2 | 4.97E-07 | 0.90 | 4.51   | -     | 722.6    |
| AHQ-3-7, 4400               | K.VFNSGADLSGVTEEAAPL.L                                                      | 1835.00476 | 2 | 2.73E-09 | 0.95 | 4.43   | -     | 1110.4   |
| gi 4507725 ref NP_000362.1  | transthyretin (prealbumin, amyloidosis type I); Transthyretin (prealbumin)  |            |   | 2.84E-09 | 3.75 | 40.27  | 48.30 | 15889.6  |
| AHQ-3-13-, 3813 - 3830      | K.AADDTWEFPASGK.T                                                           | 1395.45529 | 2 | 9.67E-06 | 0.84 | 2.89   | -     | 875.6    |
| AHQ-3-13, 3807 - 3809       | K.AADDTWEFPASGK.T                                                           | 1395.45529 | 2 | 4.04E-06 | 0.91 | 4.32   | -     | 677.7    |
| AHQ-3-13-, 4013             | R.GSPAINVAHVFR.K                                                            | 1367.58095 | 2 | 3.32E-09 | 0.94 | 4.14   | -     | 1255.6   |
| AHQ-3-13, 3990              | R.GSPAINVAHVFR.K                                                            | 1367.58095 | 2 | 2.84E-09 | 0.91 | 3.71   | -     | 887.7    |
| AHQ-3-13, 3978              | R.GSPAINVAHVFR.K                                                            | 1367.58095 | 2 | 5.16E-06 | 0.82 | 3.59   | -     | 832.0    |
| AHQ-3-13, 5906              | R.RYTIALLSPYSYSTTAVVTNPK.E                                                  | 2517.86154 | 2 | 3.91E-06 | 0.97 | 5.43   | -     | 1518.7   |
| AHQ-3-13, 5507 - 5583       | K.TSESGELHGLTTEEEFVEGIYK.V                                                  | 2456.60073 | 2 | 3.27E-07 | 0.97 | 5.17   | -     | 1272.6   |
| AHQ-3-13, 5501              | K.TSESGELHGLTTEEEFVEGIYK.V                                                  | 2456.60073 | 3 | 2.04E-05 | 0.96 | 5.17   | -     | 1818.2   |
| AHQ-3-13-, 5498             | K.TSESGELHGLTTEEEFVEGIYK.V                                                  | 2456.60073 | 2 | 6.13E-06 | 0.78 | 2.86   | -     | 846.3    |
| gi 4502011 ref NP_000467.1  | adenylate kinase 1 [Homo sapiens]                                           |            |   | 3.03E-09 | 5.33 | 60.27  | 42.30 | 21634.7  |
| AHQ-3-11, 6766              | K.GQLVPLETVLMDLR.D                                                          | 1584.90590 | 2 | 3.03E-09 | 0.90 | 4.26   | -     | 419.6    |
| AHQ-3-11, 5596              | R.IGQPTLLLYVDAGPETMTQR.L                                                    | 2204.53234 | 2 | 2.73E-04 | 0.95 | 4.84   | -     | 865.0    |
| AHQ-3-11, 5095              | R.IGQPTLLLYVDAGPETMTQR.L                                                    | 2220.53174 | 2 | 1.21E-05 | 0.70 | 3.05   | -     | 743.5    |
| AHQ-3-11, 5588              | R.IGQPTLLLYVDAGPETMTQR.L                                                    | 2204.53234 | 2 | 1.37E-05 | 0.88 | 3.28   | -     | 907.3    |
| AHQ-3-11, 3307              | K.IIFVVGPGSGK.G                                                             | 1131.34939 | 2 | 1.49E-05 | 0.97 | 4.13   | -     | 2552.3   |
| AHQ-3-11, 5850              | R.KVNAEGSVDVSQVCTHLDAK                                                      | 2506.77407 | 3 | 3.20E-04 | 0.96 | 5.47   | -     | 1520.0   |
| AHQ-3-11, 3600              | K.YGYTHLSTGDLR.S                                                            | 1496.64912 | 1 | 6.89E-05 | 0.46 | 2.20   | -     | 383.9    |
| AHQ-3-11, 3590              | K.YGYTHLSTGDLR.S                                                            | 1496.64912 | 2 | 2.90E-08 | 0.92 | 3.42   | -     | 1112.1   |
| gi 4759044 ref NP_004841.1  | Rho-associated, coiled-coil containing protein kinase 2 [Homo sapiens]      |            |   | 3.04E-09 | 4.19 | 50.27  | 6.60  | 160883.4 |
| AHQ-3-3, 6974               | K.AFVGNLQPFPIGTYTYR.E                                                       | 1894.16356 | 2 | 3.04E-09 | 0.92 | 4.49   | -     | 542.9    |
| AHQ-3-3, 3066               | R.DLQDKNCLLETAK.L                                                           | 1549.72870 | 2 | 2.32E-06 | 0.80 | 3.28   | -     | 608.8    |
| AHQ-3-3, 6321               | K.ELQDQLEAEQYFTSLYK.T                                                       | 2106.27421 | 2 | 6.98E-04 | 0.81 | 3.05   | -     | 703.0    |
| AHQ-3-3, 2902               | R.SIAEEQYSLEKE.I                                                            | 1669.76838 | 2 | 4.30E-04 | 0.70 | 3.11   | -     | 583.1    |
| AHQ-3-3, 5542               | R.SQLQALHIGLDSISGSGPGDAEADGFPESR.L                                          | 3215.34459 | 3 | 1.82E-05 | 0.96 | 5.48   | -     | 1525.3   |
| gi 5453555 ref NP_006316.1  | ras-related nuclear protein [Homo sapiens]                                  |            |   | 3.23E-09 | 1.69 | 20.20  | 14.80 | 24422.9  |
| AHQ-3-10, 5208              | K.SNYNFEKPFLLWRAR.K                                                         | 1786.02509 | 2 | 3.23E-09 | 0.87 | 3.60   | -     | 527.3    |
| AHQ-3-10, 5666 - 5676       | K.SNYNFEKPFLLWRAR.K                                                         | 1786.02509 | 2 | 8.48E-07 | 0.67 | 3.13   | -     | 540.6    |
| AHQ-3-10, 3983              | K.YVATLGEVHPLVHFTN.R                                                        | 2053.35211 | 2 | 2.90E-05 | 0.82 | 3.95   | -     | 445.0    |
| gi 5453714 ref NP_006448.1  | LIM protein (similar to rat protein kinase C-binding enigma) [Homo sapiens] |            |   | 3.31E-09 | 0.86 | 10.21  | 2.50  | 64027.9  |
| AHQ-3-13-, 2817 - 2894      | K.EVVKPVPITSPAIVK.V                                                         | 1551.85241 | 2 | 2.69E-08 | 0.88 | 4.30   | -     | 354.9    |
| AHQ-3-13, 2858 - 2906       | K.EVVKPVPITSPAIVK.V                                                         | 1551.85241 | 2 | 3.31E-09 | 0.86 | 3.78   | -     | 319.7    |
| gi 24497612 ref NP_116262.2 | nm23-phosphorylated unknown substrate; SH3 domain-containing 70 kDa pr      |            |   | 3.32E-09 | 3.43 | 40.28  | 11.60 | 72695.6  |
| AHQ-3-6, 4089               | R.EYVLYLRPTGLAQK.L                                                          | 1749.04621 | 2 | 4.99E-05 | 0.90 | 3.66   | -     | 703.6    |
| AHQ-3-6, 6697               | K.LGCDWVATIFSR.D                                                            | 1426.62208 | 2 | 3.32E-09 | 0.94 | 3.68   | -     | 1096.8   |
| AHQ-3-6, 6527               | R.LVGEALLESNITIDHVCYSPSLR.C                                                 | 2588.91822 | 2 | 6.06E-07 | 0.96 | 5.57   | -     | 932.4    |
| AHQ-3-6, 5335               | R.RPYEDDGLGETTPTIICQPM*QPLR.V                                               | 2932.32204 | 3 | 5.10E-04 | 0.64 | 3.72   | -     | 434.0    |
| gi 4507855 ref NP_003472.1  | Ubiquitin isopeptidase T; Ubiquitin-specific protease-5 (ubiquitin isop     |            |   | 3.47E-09 | 0.97 | 10.30  | 3.10  | 93393.2  |
| AHQ-3-5, 7239               | R.IGEWELIQESGVPLKPLFPGPYTGIR.N                                              | 2858.28283 | 3 | 3.47E-09 | 0.97 | 5.98   | -     | 1792.2   |
| gi 19913424 ref NP_001681.2 | ATPase, H+ transporting, lysosomal 70kD, V1 subunit A, isoform 1; V-AT      |            |   | 3.48E-09 | 2.72 | 30.20  | 5.20  | 68303.7  |
| AHQ-3-6, 4159               | R.LAEMPADSGYPAYLGAR.L                                                       | 1782.99819 | 2 | 3.48E-09 | 0.92 | 4.09   | -     | 861.3    |
| AHQ-3-6, 2886               | R.TALVANTSNNPVAAR.E                                                         | 1516.74852 | 2 | 7.62E-05 | 0.86 | 2.95   | -     | 1483.6   |
| AHQ-3-6, 2178               | R.TALVANTSNNPVAAR.E                                                         | 1532.74792 | 2 | 7.28E-04 | 0.94 | 3.93   | -     | 1597.8   |
| gi 4507677 ref NP_003290.1  | tumor rejection antigen (gp96) 1; Tumor rejection antigen-1 (gp96); glu     |            |   | 3.67E-09 | 8.20 | 110.25 | 18.20 | 92468.2  |
| AHQ-3-5, 4473 - 4477        | K.EEASDYLEDLTIK.N                                                           | 1526.62393 | 2 | 2.41E-05 | 0.92 | 3.83   | -     | 1056.9   |
| AHQ-3-6, 3706               | R.FQSSHPTDITSLDQYVER.M                                                      | 2261.39276 | 2 | 4.36E-04 | 0.95 | 4.56   | -     | 1142.1   |
| AHQ-3-5, 3708               | R.FQSSHPTDITSLDQYVER.M                                                      | 2261.39276 | 2 | 2.31E-04 | 0.87 | 3.40   | -     | 898.4    |
| AHQ-3-5, 3989 - 4067        | K.GVVSDDDLPLNVS.R                                                           | 1486.60940 | 2 | 1.89E-04 | 0.93 | 4.27   | -     | 906.2    |
| AHQ-3-5, 6977 - 7048        | K.GYEVYIETPEVDYCIQALPEFDGKR.F                                               | 3107.43557 | 3 | 1.47E-07 | 0.91 | 4.96   | -     | 555.5    |
| AHQ-3-5, 3473               | K.IADDKYNDTFWK.E                                                            | 1516.63566 | 2 | 1.83E-06 | 0.93 | 3.58   | -     | 1087.5   |
| AHQ-3-5, 6336 - 6337        | K.KYSQFINPIYVWSSK.T                                                         | 2008.30657 | 2 | 1.51E-07 | 0.96 | 4.52   | -     | 1635.1   |
| AHQ-3-5, 3581               | K.LIINSLYK.N                                                                | 964.18338  | 1 | 9.29E-04 | 0.30 | 1.87   | -     | 502.1    |
| AHQ-3-5, 5316 - 5367        | R.LISLTDENALSGNEELTVK.I                                                     | 2047.24975 | 2 | 3.30E-07 | 0.62 | 3.05   | -     | 444.1    |
| AHQ-3-5, 3303               | R.LSLNIDPDAK.V                                                              | 1086.22065 | 1 | 1.56E-04 | 0.23 | 1.96   | -     | 661.1    |
| AHQ-3-5, 2479               | R.SGYLLPDTK.A                                                               | 994.12321  | 1 | 1.73E-04 | 0.59 | 2.07   | -     | 689.6    |
| AHQ-3-5, 6999               | K.YSQFINPIYVWSSK.T                                                          | 1880.13366 | 2 | 3.67E-09 | 0.95 | 4.54   | -     | 860.8    |
| gi 5453603 ref NP_006422.1  | chaperonin containing TCP1, subunit 2 (beta); chaperonin containing t-c     |            |   | 3.72E-09 | 1.67 | 20.17  | 5.60  | 57487.9  |
| AHQ-3-7, 2871               | R.EALLSVAVDHGSDEVK.F                                                        | 1657.76083 | 2 | 3.72E-09 | 0.89 | 3.35   | -     | 1313.9   |
| AHQ-3-7, 5470               | R.SLHDALCVLAQTVK.D                                                          | 1556.80920 | 2 | 5.39E-04 | 0.78 | 2.51   | -     | 1242.4   |
| gi 4557032 ref NP_002291.1  | lactate dehydrogenase B [Homo sapiens]                                      |            |   | 3.96E-09 | 9.53 | 110.28 | 37.10 | 36638.3  |
| AHQ-3-9, 4373               | K.GEMMDLQHGSLFLQTPK.I                                                       | 1933.24171 | 2 | 1.02E-04 | 0.86 | 3.81   | -     | 618.7    |
| AHQ-3-9, 6965 - 7044        | K.GMYGIENEVFLSLPCLNAR.G                                                     | 2314.66682 | 2 | 1.50E-05 | 0.94 | 4.81   | -     | 748.6    |
| AHQ-3-9, 6968               | K.GMYGIENEVFLSLPCLNAR.G                                                     | 2298.66742 | 2 | 1.80E-07 | 0.92 | 4.50   | -     | 647.2    |
| AHQ-3-13-, 2141             | K.IVADKDYSVTANSK.I                                                          | 1511.65887 | 2 | 3.96E-09 | 0.93 | 3.49   | -     | 1273.7   |
| AHQ-3-13, 2199              | K.IVADKDYSVTANSK.I                                                          | 1511.65887 | 2 | 4.08E-04 | 0.92 | 3.48   | -     | 888.3    |
| AHQ-3-9, 1923               | K.IVADKDYSVTANSK.I                                                          | 1511.65887 | 2 | 2.61E-04 | 0.90 | 3.47   | -     | 948.4    |
| AHQ-3-13, 2643              | K.IVVVTAGVR.Q                                                               | 914.12760  | 2 | 1.70E-05 | 0.88 | 3.04   | -     | 980.1    |
| AHQ-3-13-, 2502             | K.IVVVTAGVR.Q                                                               | 914.12760  | 2 | 3.51E-05 | 0.85 | 3.24   | -     | 768.3    |
| AHQ-3-13-, 3487             | K.LIAPVAAEEATVPPNKK.I                                                       | 1695.89534 | 2 | 8.73E-04 | 0.92 | 3.84   | -     | 945.2    |

|                             |                                                                         |            |   |          |      |      |   |        |
|-----------------------------|-------------------------------------------------------------------------|------------|---|----------|------|------|---|--------|
| AHQ-3-9, 3224               | K.LIAPVAEEETVPPNKK.I                                                    | 1695.89534 | 2 | 5.12E-05 | 0.85 | 2.96 | - | 831.1  |
| AHQ-3-9, 1864 - 1867        | K.LKDDEVAQLK.K                                                          | 1159.31477 | 1 | 6.38E-04 | 0.23 | 2.64 | - | 338.7  |
| AHQ-3-9, 1871               | K.LKDDEVAQLK.K                                                          | 1159.31477 | 2 | 1.29E-05 | 0.63 | 2.77 | - | 544.5  |
| AHQ-3-9, 3459               | K.MVVESAYEVK.K                                                          | 1268.50463 | 2 | 1.03E-08 | 0.95 | 4.14 | - | 1078.0 |
| AHQ-3-9, 3188               | K.SADTLWDIQK.D                                                          | 1177.28864 | 2 | 6.61E-07 | 0.77 | 2.82 | - | 666.7  |
| AHQ-3-9, 6587 - 6595        | K.SLADELALVDVLEDK.L                                                     | 1630.81843 | 2 | 8.55E-08 | 0.97 | 5.63 | - | 1433.2 |
| AHQ-3-13, 6711 - 6722       | K.SLADELALVDVLEDK.L                                                     | 1630.81843 | 2 | 2.91E-08 | 0.98 | 5.05 | - | 1968.1 |
| AHQ-3-14-, 6587             | K.SLADELALVDVLEDK.L                                                     | 1630.81843 | 2 | 1.68E-05 | 0.96 | 4.40 | - | 1527.9 |
| AHQ-3-13-, 6670             | K.SLADELALVDVLEDK.L                                                     | 1630.81843 | 2 | 9.92E-07 | 0.96 | 4.86 | - | 1366.1 |
| AHQ-3-11, 6438              | K.SLADELALVDVLEDK.L                                                     | 1630.81843 | 2 | 1.64E-04 | 0.82 | 3.05 | - | 761.9  |
| AHQ-3-9, 6871               | K.SLADELALVDVLEDKL.K.G                                                  | 1872.14959 | 2 | 1.13E-05 | 0.82 | 3.17 | - | 845.8  |
| gi 4507949 ref NP_003395.1  | tyrosine 3-monooxygenase/tryptophan 5-monooxygenase activation protein, |            |   |          |      |      |   |        |
| AHQ-3-10, 4031              | K.QTTVSNQQAYQEAFISK.K                                                   | 2160.28351 | 2 | 8.86E-04 | 0.80 | 3.55 | - | 474.2  |
| AHQ-3-10, 6251 - 6252       | K.TAFDEAIAELDTLNEESYK.D                                                 | 2160.27705 | 2 | 3.18E-07 | 0.97 | 5.73 | - | 1544.4 |
| AHQ-3-13, 6981              | K.TAFDEAIAELDTLNEESYK.D                                                 | 2160.27705 | 2 | 7.86E-04 | 0.30 | 2.79 | - | 256.9  |
| AHQ-3-14-, 6575 - 6644      | K.TAFDEAIAELDTLNEESYK.D                                                 | 2160.27705 | 2 | 4.32E-09 | 0.97 | 5.57 | - | 1192.7 |
| AHQ-3-10, 2847 - 2855       | K.YLIPNATQPESK.V                                                        | 1361.52512 | 1 | 1.77E-05 | 0.82 | 2.93 | - | 842.9  |
| AHQ-3-10, 2688 - 2758       | K.YLIPNATQPESK.V                                                        | 1361.52512 | 1 | 2.16E-07 | 0.76 | 3.01 | - | 758.2  |
| AHQ-3-10, 2674              | K.YLIPNATQPESK.V                                                        | 1361.52512 | 2 | 3.97E-05 | 0.88 | 3.22 | - | 795.2  |
| gi 4502013 ref NP_001616.1  | adenylate kinase 2 isoform a; adenylate kinase, mitochondrial; adenylat |            |   |          |      |      |   |        |
| AHQ-3-10, 3640 - 3700       | R.LQAYHTQTTPLIEYR.K                                                     | 1998.22695 | 2 | 2.15E-05 | 0.94 | 4.30 | - | 985.4  |
| AHQ-3-10, 5555              | K.NLETPLCCKNGFLDGFPR.T                                                  | 2093.39146 | 2 | 4.63E-09 | 0.88 | 4.03 | - | 524.1  |
| gi 4758208 ref NP_004081.1  | dual specificity phosphatase 3; vaccinia virus phosphatase VH1-related; |            |   |          |      |      |   |        |
| AHQ-3-11, 5288 - 5315       | K.ANDTQEFNLDSAYFER.A                                                    | 1805.88207 | 2 | 2.94E-07 | 0.94 | 4.64 | - | 1091.0 |
| AHQ-3-11, 5838 - 5898       | R.EIGPNDGFLAQCLQNLDR.L                                                  | 2062.24949 | 2 | 3.60E-06 | 0.93 | 4.56 | - | 773.5  |
| AHQ-3-11, 6034              | R.EIGPNDGFLAQCLQNLDR.L                                                  | 2062.24949 | 2 | 4.83E-09 | 0.91 | 4.67 | - | 574.4  |
| AHQ-3-11, 3591              | R.IYVGNASVAQDIPK.L                                                      | 1475.67136 | 2 | 3.04E-06 | 0.88 | 3.58 | - | 829.7  |
| AHQ-3-11, 3224 - 3272       | K.LGITHVNAEAEGR.S                                                       | 1351.53669 | 2 | 5.83E-04 | 0.92 | 3.31 | - | 1283.2 |
| gi 24119203 ref NP_705935.1 | tropomyosin 3 [Homo sapiens]                                            |            |   |          |      |      |   |        |
| AHQ-3-9, 2121               | R.AREQAEAEVASLNR.R                                                      | 1544.65218 | 2 | 6.38E-08 | 0.97 | 5.19 | - | 2438.6 |
| AHQ-3-9, 3199               | R.IQLVEEELDR.A                                                          | 1244.37653 | 2 | 1.43E-06 | 0.90 | 3.29 | - | 973.5  |
| AHQ-3-6, 3479               | R.IQLVEEELDR.A                                                          | 1244.37653 | 2 | 1.25E-04 | 0.83 | 2.76 | - | 878.6  |
| AHQ-3-9, 3593 - 3641        | R.IQLVEEELDRAQER.L                                                      | 1728.88542 | 2 | 9.03E-05 | 0.65 | 2.75 | - | 721.6  |
| AHQ-3-10, 2611              | K.IQVLQQQADDAEER.A                                                      | 1643.73738 | 2 | 1.32E-05 | 0.94 | 3.58 | - | 1420.9 |
| AHQ-3-9, 2499               | K.IQVLQQQADDAEER.A                                                      | 1643.73738 | 2 | 9.43E-09 | 0.97 | 4.89 | - | 1906.2 |
| AHQ-3-9, 2231               | R.KIQVLQQQADDAEER.A                                                     | 1771.91030 | 2 | 1.75E-06 | 0.98 | 5.17 | - | 1897.5 |
| AHQ-3-9, 2244               | R.KIQVLQQQADDAEER.A                                                     | 1771.91030 | 3 | 4.91E-09 | 0.88 | 3.19 | - | 1397.0 |
| AHQ-3-9, 2799               | R.RIQLVEEELDR.A                                                         | 1400.56288 | 2 | 1.91E-05 | 0.98 | 4.88 | - | 1856.2 |
| AHQ-3-10, 3044              | R.RIQLVEEELDR.A                                                         | 1400.56288 | 2 | 1.23E-07 | 0.97 | 4.64 | - | 1725.2 |
| AHQ-3-9, 3219               | R.RIQLVEEELDRAQER.L                                                     | 1885.07177 | 3 | 1.98E-05 | 0.83 | 3.24 | - | 1276.6 |
| AHQ-3-9, 2727 - 2731        | K.TIDDLK.LC                                                             | 1190.32563 | 2 | 1.25E-04 | 0.75 | 2.97 | - | 506.4  |
| gi 20535366 ref XP_053177.4 | similar to Tubulin alpha-3/alpha-7 chain (Alpha-tubulin 3/7) [Homo sap  |            |   |          |      |      |   |        |
| AHQ-3-12, 2872              | K.DVNAAIATIK.T                                                          | 1016.17355 | 1 | 9.85E-06 | 0.41 | 2.09 | - | 549.7  |
| AHQ-3-9, 2667               | K.DVNAAIATIK.T                                                          | 1016.17355 | 1 | 3.52E-05 | 0.40 | 2.12 | - | 331.3  |
| AHQ-3-7, 3062               | K.DVNAAIATIK.T                                                          | 1016.17355 | 1 | 8.83E-06 | 0.48 | 2.05 | - | 446.8  |
| AHQ-3-7, 2863               | K.DVNAAIATIK.T                                                          | 1016.17355 | 1 | 4.53E-04 | 0.28 | 2.67 | - | 214.8  |
| AHQ-3-7, 2862               | K.DVNAAIATIK.T                                                          | 1016.17355 | 2 | 5.65E-05 | 0.92 | 3.82 | - | 957.4  |
| AHQ-3-7, 4887 - 4898        | K.RTIQFVWCPTGFK.V                                                       | 1757.00535 | 2 | 8.82E-04 | 0.94 | 3.98 | - | 1025.4 |
| AHQ-3-3, 5470               | K.TIGGGDDSFNTFFSETGAGK.H                                                | 2009.07549 | 2 | 3.38E-06 | 0.71 | 3.13 | - | 532.9  |
| AHQ-3-4, 5438               | K.TIGGGDDSFNTFFSETGAGK.H                                                | 2009.07549 | 2 | 3.60E-08 | 0.68 | 3.12 | - | 463.4  |
| AHQ-3-6, 5185 - 5189        | K.TIGGGDDSFNTFFSETGAGK.H                                                | 2009.07549 | 2 | 1.75E-06 | 0.84 | 3.39 | - | 712.4  |
| AHQ-3-7, 4968               | K.TIGGGDDSFNTFFSETGAGK.H                                                | 2009.07549 | 2 | 7.13E-09 | 0.92 | 4.35 | - | 884.1  |
| AHQ-3-7, 5124 - 5195        | K.TIGGGDDSFNTFFSETGAGK.H                                                | 2009.07549 | 2 | 5.89E-07 | 0.94 | 4.34 | - | 1039.4 |
| AHQ-3-7, 5274 - 5346        | K.TIGGGDDSFNTFFSETGAGK.H                                                | 2009.07549 | 2 | 2.88E-08 | 0.92 | 4.60 | - | 642.6  |
| AHQ-3-14-, 5039 - 5108      | K.TIGGGDDSFNTFFSETGAGK.H                                                | 2009.07549 | 2 | 7.83E-09 | 0.92 | 4.52 | - | 663.4  |
| AHQ-3-7, 4795               | K.TIGGGDDSFNTFFSETGAGK.H                                                | 2009.07549 | 2 | 5.02E-09 | 0.89 | 4.11 | - | 488.6  |
| AHQ-3-9, 4851               | K.TIGGGDDSFNTFFSETGAGK.H                                                | 2009.07549 | 2 | 9.91E-06 | 0.83 | 3.81 | - | 451.0  |
| AHQ-3-10, 4754 - 4828       | K.TIGGGDDSFNTFFSETGAGK.H                                                | 2009.07549 | 2 | 2.08E-07 | 0.88 | 4.27 | - | 710.3  |
| AHQ-3-11, 4950              | K.TIGGGDDSFNTFFSETGAGK.H                                                | 2009.07549 | 2 | 2.81E-07 | 0.87 | 3.75 | - | 714.1  |
| AHQ-3-1, 5513               | K.TIGGGDDSFNTFFSETGAGK.H                                                | 2009.07549 | 2 | 1.26E-06 | 0.93 | 4.53 | - | 854.3  |
| AHQ-3-12, 5170              | K.TIGGGDDSFNTFFSETGAGK.H                                                | 2009.07549 | 2 | 1.86E-07 | 0.90 | 3.84 | - | 766.6  |
| AHQ-3-14, 6285              | K.TIGGGDDSFNTFFSETGAGK.H                                                | 2009.07549 | 2 | 4.69E-08 | 0.84 | 3.30 | - | 699.7  |
| AHQ-3-13, 4797              | K.TIGGGDDSFNTFFSETGAGK.H                                                | 2009.07549 | 2 | 5.16E-08 | 0.81 | 4.03 | - | 322.2  |
| AHQ-3-13, 5182              | K.TIGGGDDSFNTFFSETGAGK.H                                                | 2009.07549 | 2 | 1.43E-07 | 0.78 | 3.53 | - | 554.9  |
| AHQ-3-14, 6059 - 6119       | K.TIGGGDDSFNTFFSETGAGK.H                                                | 2009.07549 | 2 | 4.02E-07 | 0.64 | 3.10 | - | 431.5  |
| AHQ-3-14, 5783              | K.TIGGGDDSFNTFFSETGAGK.H                                                | 2009.07549 | 2 | 2.32E-08 | 0.82 | 3.55 | - | 525.6  |
| AHQ-3-14-, 5171             | K.TIGGGDDSFNTFFSETGAGK.H                                                | 2009.07549 | 2 | 3.91E-08 | 0.92 | 4.44 | - | 721.4  |
| AHQ-3-7, 5636 - 5706        | R.TIQFVWCPTGFK.V                                                        | 1600.81899 | 2 | 3.21E-06 | 0.88 | 3.64 | - | 684.9  |
| AHQ-3-12, 5675 - 5722       | R.TIQFVWCPTGFK.V                                                        | 1600.81899 | 2 | 2.78E-04 | 0.79 | 3.15 | - | 577.3  |
| AHQ-3-13, 5699 - 5707       | R.TIQFVWCPTGFK.V                                                        | 1600.81899 | 2 | 3.26E-05 | 0.66 | 2.95 | - | 512.5  |
| gi 25188179 ref NP_005653.3 | voltage-dependent anion channel 3 [Homo sapiens]                        |            |   |          |      |      |   |        |
| AHQ-3-10, 3008 - 3016       | K.LSQNNFALGYK.A                                                         | 1255.40424 | 1 | 6.38E-04 | 0.38 | 2.44 | - | 324.8  |
| AHQ-3-10, 4572              | K.LTLDTIFVPNTGK.K                                                       | 1419.64771 | 2 | 8.27E-04 | 0.72 | 2.85 | - | 527.2  |
| AHQ-3-9, 4396               | K.VNNASLIGLGYTQLTRPGVK.L                                                | 2102.42298 | 2 | 7.36E-05 | 0.53 | 2.72 | - | 548.2  |
| AHQ-3-9, 4215               | K.VNNASLIGLGYTQLTRPGVK.L                                                | 2102.42298 | 2 | 2.10E-08 | 0.65 | 3.34 | - | 457.4  |
| AHQ-3-9, 3935               | K.VNNASLIGLGYTQLTRPGVK.L                                                | 2102.42298 | 2 | 1.42E-08 | 0.87 | 3.85 | - | 560.0  |
| AHQ-3-10, 4022 - 4023       | K.VNNASLIGLGYTQLTRPGVK.L                                                | 2102.42298 | 2 | 1.16E-07 | 0.89 | 4.43 | - | 493.0  |
| AHQ-3-10, 4028              | K.VNNASLIGLGYTQLTRPGVK.L                                                | 2102.42298 | 3 | 5.29E-08 | 0.93 | 4.78 | - | 1379.0 |
| AHQ-3-10, 4203              | K.VNNASLIGLGYTQLTRPGVK.L                                                | 2102.42298 | 2 | 2.41E-07 | 0.86 | 3.84 | - | 665.7  |
| AHQ-3-10, 4366 - 4375       | K.VNNASLIGLGYTQLTRPGVK.L                                                | 2102.42298 | 2 | 5.02E-09 | 0.73 | 3.46 | - | 463.7  |
| AHQ-3-14, 5595              | K.VNNASLIGLGYTQLTRPGVK.L                                                | 2102.42298 | 2 | 4.46E-04 | 0.75 | 3.44 | - | 468.2  |
| AHQ-3-10, 3574              | K.YKVCNYGLTFTQK.W                                                       | 1623.85410 | 2 | 1.68E-06 | 0.97 | 4.36 | - | 1582.7 |
| gi 29737978 ref NP_290747.1 | similar to Myosin heavy chain, nonmuscle type B (Cellular myosin heavy  |            |   |          |      |      |   |        |
| AHQ-3-4, 3925 - 3926        | K.ADFCIHYAGK.V                                                          | 1296.47641 | 2 | 2.54E-07 | 0.95 | 3.74 | - | 1301.4 |
| AHQ-3-3, 3972               | K.ADFCIHYAGK.V                                                          | 1296.47641 | 2 | 2.67E-06 | 0.94 | 3.42 | - | 1232.5 |
| AHQ-3-2, 4017 - 4050        | K.ADFCIHYAGK.V                                                          | 1296.47641 | 2 | 3.39E-06 | 0.96 | 3.99 | - | 1511.0 |
| AHQ-3-5, 3732               | K.ADFCIHYAGK.V                                                          | 1296.47641 | 2 | 7.60E-07 | 0.93 | 3.81 | - | 1036.0 |
| AHQ-3-2, 2789 - 2835        | R.AGVLAHLEEER.D                                                         | 1224.34854 | 2 | 5.17E-09 | 0.96 | 4.34 | - | 1558.1 |
| AHQ-3-3, 2753 - 2824        | R.AGVLAHLEEER.D                                                         | 1224.34854 | 2 | 4.59E-07 | 0.95 | 3.73 | - | 1529.1 |
| AHQ-3-2, 2543 - 2842        | R.AGVLAHLEEER.D                                                         | 1224.34854 | 1 | 1.34E-05 | 0.30 | 2.72 | - | 217.5  |
| AHQ-3-3, 2790               | R.AGVLAHLEEER.D                                                         | 1224.34854 | 1 | 9.05E-04 | 0.40 | 2.40 | - | 457.4  |
| AHQ-3-1, 3060 - 3082        | R.AGVLAHLEEER.D                                                         | 1224.34854 | 2 | 1.67E-06 | 0.95 | 4.35 | - | 1302.1 |
| AHQ-3-2, 3770               | K.DKADFCHYAGK.V                                                         | 1539.73719 | 2 | 1.87E-06 | 0.96 | 4.42 | - | 1698.7 |
| AHQ-3-5, 3440               | K.DKADFCHYAGK.V                                                         | 1539.73719 | 2 | 5.24E-06 | 0.94 | 3.96 | - | 1176.7 |
| AHQ-3-3, 3702               | K.DKADFCHYAGK.V                                                         | 1539.73719 | 2 | 3.68E-05 | 0.95 | 4.23 | - | 1273.5 |
| AHQ-3-1, 3881 - 3885        | K.DKADFCHYAGK.V                                                         | 1539.73719 | 2 | 5.82E-08 | 0.97 | 4.90 | - | 1718.1 |
| AHQ-3-2, 3779               | K.DKADFCHYAGK.V                                                         | 1539.73719 | 3 | 4.47E-08 | 0.91 | 4.08 | - | 1176.3 |
| AHQ-3-4, 3650               | K.DKADFCHYAGK.V                                                         | 1539.73719 | 2 | 2.26E-04 | 0.97 | 4.43 | - | 1706.6 |
| AHQ-3-1, 4928               | K.LDPHLVLDQLR.C                                                         | 1319.53460 | 3 | 1.42E-05 | 0.82 | 3.19 | - | 613.9  |
| AHQ-3-3, 4796 - 4820        | K.LDPHLVLDQLR.C                                                         | 1319.53460 | 2 | 2.28E-07 | 0.81 | 2.63 | - | 617.1  |
| AHQ-3-1, 4913 - 4916        | K.LDPHLVLDQLR.C                                                         | 1319.53460 | 2 | 3.33E-06 | 0.82 | 2.53 | - | 702.5  |
| gi 4826657 ref NP_004333.1  | caldesmon 1 isoform 3; H-CAD; L-CAD [Homo sapiens]                      |            |   |          |      |      |   |        |
| AHQ-3-12, 2744              | R.LEQYTSALIEGK.S                                                        | 1340.46107 | 2 | 3.68E-04 | 0.41 | 2.53 | - | 612.5  |
| AHQ-3-6, 2583               | R.LEQYTSALIEGK.S                                                        | 1340.46107 | 2 | 4.16E-04 | 0.89 | 3.23 | - | 1107.2 |
| AHQ-3-9, 3411               | K.TTTNTQVEGGDEEAFLER.L                                                  | 2099.15534 | 2 | 1.92E-07 | 0.92 | 3.88 | - | 957.1  |
| AHQ-3-8, 3461               | K.TTTNTQVEGGDEEAFLER.L                                                  | 2099.15534 | 2 | 2.53E-08 | 0.84 | 3.48 | - | 678.7  |
| AHQ-3-6, 3638               | K.TTTNTQVEGGDEEAFLER.L                                                  | 2099.15534 | 2 | 5.33E-09 | 0.92 | 3.77 | - | 1078.1 |





|                             |                                                                          |            |   |          |       |        |       |          |
|-----------------------------|--------------------------------------------------------------------------|------------|---|----------|-------|--------|-------|----------|
| AHQ-3-14, 4715              | K.NASTFEDVTQVSSAYQK.T                                                    | 1875.97061 | 2 | 2.22E-05 | 0.84  | 3.28   | -     | 887.8    |
| AHQ-3-12, 2407              | K.SAVGFYQGGK.T                                                           | 1086.17920 | 1 | 1.46E-04 | 0.12  | 1.92   | -     | 328.0    |
| AHQ-3-13-, 3027 - 3093      | K.VDKSAVGFYQGGK.T                                                        | 1428.57155 | 2 | 1.18E-06 | 0.89  | 3.62   | -     | 668.9    |
| AHQ-3-12, 5412              | R.YGLFPANYYELR.Q                                                         | 1442.64306 | 2 | 9.08E-09 | 0.87  | 3.45   | -     | 509.8    |
| AHQ-3-12, 5318              | R.YGLFPANYYELR.Q                                                         | 1442.64306 | 2 | 3.05E-07 | 0.83  | 2.96   | -     | 484.4    |
| gi 4557731 ref NP_000618.1  | latent transforming growth factor beta binding protein 1 precursor [Homo |            |   | 1.00E-08 | 11.13 | 130.25 | 14.30 | 152790.9 |
| AHQ-3-2, 3775               | R.ASGLGDHCEINCELEDK.S                                                    | 2065.13910 | 2 | 1.41E-05 | 0.95  | 5.01   | -     | 968.8    |
| AHQ-3-1, 3792               | R.ASGLGDHCEINCELEDK.S                                                    | 2065.13910 | 2 | 4.10E-08 | 0.96  | 4.69   | -     | 1458.0   |
| AHQ-3-1, 6728               | K.CLCLPGYVPSDPKNYCTPLNTALNLEK.D                                          | 3142.56947 | 3 | 3.20E-08 | 0.87  | 4.08   | -     | 481.8    |
| AHQ-3-1, 2661 - 2741        | R.CTCGGGYQLSAAK.D                                                        | 1446.58862 | 2 | 1.00E-08 | 0.93  | 4.10   | -     | 830.9    |
| AHQ-3-1, 3718               | R.CTCGGGYQLSAAKQDCEIDECQHR.H                                             | 3035.18500 | 3 | 1.38E-04 | 0.92  | 4.27   | -     | 1092.2   |
| AHQ-3-1, 4273               | K.CVDIDECTQVQHLCSSQGR.C                                                  | 2209.38110 | 2 | 2.50E-07 | 0.95  | 5.06   | -     | 789.1    |
| AHQ-3-1, 4270 - 4282        | K.CVDIDECTQVQHLCSSQGR.C                                                  | 2209.38110 | 3 | 1.66E-04 | 0.73  | 3.45   | -     | 575.4    |
| AHQ-3-1, 2198 - 2201        | K.DQCEIDECQHR.H                                                          | 1607.61898 | 2 | 4.67E-04 | 0.83  | 3.21   | -     | 645.4    |
| AHQ-3-1, 3468               | K.EAQPQQSQVSYGQLPVQK.T                                                   | 1945.12244 | 2 | 7.66E-05 | 0.89  | 3.82   | -     | 670.5    |
| AHQ-3-3, 3193               | K.EAQPQQSQVSYGQLPVQK.T                                                   | 1945.12244 | 2 | 7.65E-04 | 0.55  | 3.16   | -     | 311.2    |
| AHQ-3-1, 4056 - 4057        | K.EEPEVALTFSR.E                                                          | 1278.39297 | 2 | 1.02E-04 | 0.84  | 3.21   | -     | 658.2    |
| AHQ-3-2, 5773 - 5782        | R.GRCEDIECLNPSTCPDEQCVCVSPGSYQCVPCTEGFR.G                                | 4402.64921 | 3 | 1.67E-04 | 0.85  | 3.95   | -     | 620.3    |
| AHQ-3-1, 3120               | K.LCQIPVHGASVPK.L                                                        | 1407.66344 | 2 | 5.90E-06 | 0.63  | 3.12   | -     | 345.9    |
| AHQ-3-1, 4466               | K.NGFCLNTRPGVEYCYCK.Q                                                    | 2043.24638 | 2 | 4.82E-04 | 0.85  | 3.84   | -     | 441.5    |
| AHQ-3-1, 2988               | R.TSTDLDVVDQPK.E                                                         | 1433.50014 | 2 | 4.41E-07 | 0.77  | 3.02   | -     | 879.0    |
| AHQ-3-3, 2590               | R.TSTDLDVVDQPKKEE.K                                                      | 1819.90213 | 2 | 1.26E-07 | 0.85  | 3.67   | -     | 953.4    |
| AHQ-3-2, 2598               | R.TSTDLDVVDQPKKEE.K                                                      | 1819.90213 | 2 | 5.82E-04 | 0.92  | 3.97   | -     | 1312.1   |
| AHQ-3-1, 2756               | R.TSTDLDVVDQPKKEE.K                                                      | 1819.90213 | 2 | 6.61E-07 | 0.65  | 2.99   | -     | 615.6    |
| gi 27477800 ref XP_208313.1 | similar to tropomyosin 4 [Homo sapiens]                                  |            |   | 1.06E-08 | 1.86  | 20.25  | 10.10 | 18426.7  |
| AHQ-3-9, 2733               | K.CGDLEELK.N                                                             | 1094.17487 | 2 | 9.91E-04 | 0.92  | 3.70   | -     | 1036.4   |
| AHQ-3-9, 4833 - 4903        | K.CGDLEELKNNVTNNK.S                                                      | 1878.05124 | 2 | 1.06E-08 | 0.94  | 4.62   | -     | 1291.2   |
| AHQ-3-9, 5248               | K.CGDLEELKNNVTNNK.S                                                      | 1878.05124 | 2 | 1.21E-04 | 0.84  | 3.88   | -     | 732.8    |
| AHQ-3-9, 5272               | K.CGDLEELKNNVTNNK.S                                                      | 1878.05124 | 3 | 1.51E-07 | 0.92  | 4.25   | -     | 1145.0   |
| AHQ-3-9, 5485 - 5556        | K.CGDLEELKNNVTNNK.S                                                      | 1878.05124 | 2 | 1.31E-06 | 0.78  | 4.43   | -     | 835.9    |
| AHQ-3-9, 4315 - 4327        | K.CGDLEELKNNVTNNK.S                                                      | 1878.05124 | 2 | 5.46E-06 | 0.96  | 5.04   | -     | 1488.0   |
| gi 4504981 ref NP_002296.1  | beta-galactosidase binding lectin precursor; Lectin, galactose-binding,  |            |   | 1.09E-08 | 0.83  | 10.15  | 8.90  | 14715.6  |
| AHQ-3-13, 3731              | K.DSNNLCLHFNFR.P                                                         | 1488.61037 | 2 | 1.09E-08 | 0.83  | 3.02   | -     | 918.1    |
| gi 14210536 ref NP_115914.1 | similar to chicken tubulin beta 5 [Homo sapiens]                         |            |   | 1.10E-08 | 0.65  | 10.19  | 3.80  | 49856.8  |
| AHQ-3-13-, 5999 - 6077      | K.M*ASTFIGNSTAIQELFK.R                                                   | 1875.13550 | 2 | 1.10E-08 | 0.65  | 3.85   | -     | 675.9    |
| gi 12408656 ref NP_005177.2 | calpain 1, large subunit; calpain, large polypeptide L1; calcium-activ   |            |   | 1.15E-08 | 14.90 | 170.27 | 26.10 | 81889.4  |
| AHQ-3-6, 5055               | K.APSDLYQILK.A                                                           | 1261.49183 | 2 | 6.24E-07 | 0.94  | 3.50   | -     | 1306.8   |
| AHQ-3-6, 6726               | R.DMETIGFAVYVPELVLGQPAVHLK.R                                             | 2741.15451 | 3 | 2.91E-06 | 0.90  | 3.94   | -     | 1326.5   |
| AHQ-3-6, 6435               | R.DM*ETIGFAVYVPELVLGQPAVHLK.R                                            | 2757.15391 | 3 | 8.74E-06 | 0.80  | 3.49   | -     | 728.6    |
| AHQ-3-6, 6347 - 6362        | R.DM*ETIGFAVYVPELVLGQPAVHLK.R                                            | 2757.15391 | 3 | 7.51E-05 | 0.73  | 3.26   | -     | 545.8    |
| AHQ-3-6, 6002 - 6011        | R.FRLPPGEYVVVPSFTEPNKEGDFVLR.F                                           | 2994.39160 | 3 | 1.54E-07 | 0.95  | 5.47   | -     | 1305.1   |
| AHQ-3-6, 2811               | K.IRLDETDDDPDYGRD.E                                                      | 1795.79921 | 2 | 4.37E-05 | 0.80  | 3.72   | -     | 440.9    |
| AHQ-3-6, 4117               | R.KAPSDLYQILK.A                                                          | 1389.66474 | 2 | 6.78E-05 | 0.87  | 3.23   | -     | 880.2    |
| AHQ-3-6, 3173               | K.KLYELIITR.Y                                                            | 1149.40785 | 2 | 1.58E-04 | 0.86  | 3.32   | -     | 676.1    |
| AHQ-3-6, 3511               | R.KWNTTLYEGTWR.R                                                         | 1555.71826 | 2 | 1.21E-05 | 0.89  | 3.10   | -     | 830.1    |
| AHQ-3-6, 4694               | R.LPPGEYVVVPSFTEPNKE                                                     | 1874.12573 | 2 | 3.97E-06 | 0.90  | 4.07   | -     | 575.4    |
| AHQ-3-6, 5686               | R.LPPGEYVVVPSFTEPNKEGDFVLR.F                                             | 2691.03055 | 3 | 2.29E-07 | 0.80  | 3.59   | -     | 571.2    |
| AHQ-3-6, 5689               | R.LPPGEYVVVPSFTEPNKEGDFVLR.F                                             | 2691.03055 | 2 | 6.04E-04 | 0.71  | 3.04   | -     | 271.1    |
| AHQ-3-6, 6485               | K.LVVFHSAEGNEFWVALLEK.A                                                  | 2177.44364 | 2 | 9.48E-06 | 0.97  | 5.27   | -     | 1525.2   |
| AHQ-3-6, 3766               | K.LYELIITR.Y                                                             | 1021.23493 | 2 | 4.66E-04 | 0.95  | 3.95   | -     | 1458.5   |
| AHQ-3-6, 5085               | R.NYPATFWNPFQK.I                                                         | 1612.81141 | 2 | 6.51E-08 | 0.96  | 3.96   | -     | 1462.9   |
| AHQ-3-6, 4349 - 4357        | K.RPTELLSNPQFIVDGATR.T                                                   | 2015.25904 | 3 | 2.14E-05 | 0.95  | 4.85   | -     | 1238.4   |
| AHQ-3-6, 2854               | R.SEQFINLR.E                                                             | 1007.12521 | 2 | 1.00E-04 | 0.89  | 2.83   | -     | 1026.7   |
| AHQ-3-6, 3130               | K.YLGDQDYELR.V                                                           | 1285.38720 | 2 | 1.53E-06 | 0.88  | 3.05   | -     | 682.6    |
| AHQ-3-14-, 6864             | R.YSEPDLAVDNFDNVCVLR.L                                                   | 2322.55612 | 2 | 1.15E-08 | 0.60  | 2.96   | -     | 258.6    |
| AHQ-3-6, 7377               | R.YSEPDLAVDNFDNVCVLR.L                                                   | 2322.55612 | 2 | 8.38E-07 | 0.96  | 5.42   | -     | 879.6    |
| gi 17318569 ref NP_006112.2 | keratin 1; Keratin-1; cytokeratin 1; hair alpha protein [Homo sapiens]   |            |   | 1.23E-08 | 2.73  | 30.22  | 5.90  | 66063.6  |
| AHQ-3-1, 3894               | K.QISNLQSSIDAQGR.G                                                       | 1717.81950 | 2 | 1.23E-08 | 0.90  | 3.78   | -     | 803.5    |
| AHQ-3-1, 6444               | R.SLDLDSIAEYK.A                                                          | 1303.48388 | 2 | 3.75E-07 | 0.94  | 3.76   | -     | 1412.2   |
| AHQ-3-12, 6036              | R.SLDLDSIAEYK.A                                                          | 1303.48388 | 2 | 2.30E-06 | 0.96  | 4.32   | -     | 1420.4   |
| AHQ-3-14-, 5975 - 5987      | R.SLDLDSIAEYK.A                                                          | 1303.48388 | 2 | 1.01E-05 | 0.94  | 4.06   | -     | 1216.1   |
| AHQ-3-1, 3256               | R.TNAENEFVTIK.K                                                          | 1266.38219 | 2 | 1.74E-04 | 0.88  | 3.35   | -     | 735.6    |
| gi 12707570 ref NP_004083.2 | mitochondrial short-chain enoyl-coenzyme A hydratase 1 precursor [Homo   |            |   | 1.29E-08 | 0.97  | 10.27  | 6.20  | 31371.2  |
| AHQ-3-10, 4682 - 4683       | K.IFEEDPAVGAIVLTGGDK.A                                                   | 1832.04401 | 2 | 1.29E-08 | 0.97  | 5.38   | -     | 1733.4   |
| gi 5803133 ref NP_006825.1  | RAB32, member RAS oncogene family [Homo sapiens]                         |            |   | 1.33E-08 | 0.79  | 10.16  | 7.60  | 24997.1  |
| AHQ-3-10, 4444              | K.VHLPNGSPIPAVLLANK.C                                                    | 1741.07044 | 2 | 1.33E-08 | 0.79  | 3.29   | -     | 411.2    |
| gi 5802966 ref NP_006861.1  | destrin (actin depolymerizing factor); destrin [Homo sapiens]            |            |   | 1.35E-08 | 2.56  | 30.27  | 26.70 | 18505.6  |
| AHQ-3-12, 6212              | K.EILVGDVGTITDPFK.K                                                      | 1703.95738 | 2 | 3.57E-06 | 0.94  | 3.77   | -     | 1217.0   |
| AHQ-3-12, 6810              | R.KEELM*FFWLWAPLAPL.K.S                                                  | 2079.48962 | 2 | 2.79E-04 | 0.98  | 5.46   | -     | 2294.9   |
| AHQ-3-12, 3724              | R.YALYDASFETK.E                                                          | 1308.41754 | 1 | 1.35E-08 | 0.64  | 2.92   | -     | 435.5    |
| AHQ-3-12, 3710 - 3788       | R.YALYDASFETK.E                                                          | 1308.41754 | 2 | 5.14E-06 | 0.89  | 3.13   | -     | 846.8    |
| gi 30158844 ref XP_292513.2 | similar to KIAA1879 protein [Homo sapiens]                               |            |   | 1.36E-08 | 0.95  | 10.20  | 0.70  | 203894.8 |
| AHQ-3-7, 2818 - 2819        | R.VVDALGNAIDGK.G                                                         | 1172.31354 | 2 | 1.36E-08 | 0.95  | 3.93   | -     | 1380.1   |
| gi 30160191 ref XP_294035.2 | similar to Pyruvate kinase, M1 isozyme (Pyruvate kinase muscle isozyme   |            |   | 1.42E-08 | 0.96  | 10.18  | 2.80  | 50222.2  |
| AHQ-3-7, 5071 - 5142        | K.IYVDDGLSLQVK.Q                                                         | 1463.70048 | 1 | 2.44E-04 | 0.65  | 3.14   | -     | 514.4    |
| AHQ-3-7, 5066 - 5123        | K.IYVDDGLSLQVK.Q                                                         | 1463.70048 | 2 | 1.42E-08 | 0.96  | 3.52   | -     | 2448.9   |
| gi 12025678 ref NP_004915.2 | actinin, alpha 4 [Homo sapiens]                                          |            |   | 1.42E-08 | 5.80  | 70.25  | 14.30 | 104853.3 |
| AHQ-3-5, 4408               | K.AGTQIENIDFRDGLK.L                                                      | 1922.04251 | 2 | 5.33E-05 | 0.88  | 4.15   | -     | 658.2    |
| AHQ-3-4, 4841               | R.ETTTDTADQVIASFV.V                                                      | 1742.81936 | 2 | 1.42E-08 | 0.93  | 4.12   | -     | 1165.7   |
| AHQ-3-5, 2772               | K.GISQEQQMGEFR.A                                                         | 1353.48658 | 2 | 2.45E-07 | 0.62  | 3.02   | -     | 741.0    |
| AHQ-3-5, 3843               | R.M*APYQGPDAVPGALDYK.S                                                   | 1810.02037 | 2 | 6.48E-04 | 0.97  | 4.60   | -     | 1410.9   |
| AHQ-3-5, 3633               | K.M*LDAEIVNTARPDEK.A                                                     | 1833.99864 | 2 | 3.59E-05 | 0.70  | 3.20   | -     | 491.9    |
| AHQ-3-6, 7118               | R.SIVDYKPNLDLLEQQHQLIQEALIFDNK.H                                         | 3326.74423 | 3 | 2.10E-05 | 0.90  | 5.07   | -     | 667.4    |
| AHQ-3-6, 6449 - 6510        | R.VEQIAAIAQENLDDYDSSHVNTR.C                                              | 2907.09810 | 3 | 5.09E-07 | 0.81  | 3.44   | -     | 810.6    |
| gi 10716563 ref NP_001737.1 | calnexin [Homo sapiens]                                                  |            |   | 1.46E-08 | 4.43  | 50.21  | 10.50 | 67567.8  |
| AHQ-3-5, 4929 - 4980        | K.APVPTGEVYFADSFDR.G                                                     | 1771.90722 | 2 | 2.19E-08 | 0.93  | 3.55   | -     | 1131.2   |
| AHQ-3-11, 4698              | K.APVPTGEVYFADSFDR.G                                                     | 1771.90722 | 2 | 1.46E-08 | 0.84  | 3.10   | -     | 717.7    |
| AHQ-3-5, 3880               | K.IPDPEAVKPDWDDEDAPAK.I                                                  | 2109.23496 | 2 | 7.39E-05 | 0.89  | 3.71   | -     | 757.9    |
| AHQ-3-5, 6947               | K.IPNPDFFEDLEPFR.M                                                       | 1736.90447 | 2 | 4.05E-05 | 0.88  | 3.34   | -     | 750.3    |
| AHQ-3-9, 5848               | R.KIPNPDFFEDLEPFR.M                                                      | 1865.07739 | 2 | 3.56E-06 | 0.88  | 3.50   | -     | 689.8    |
| AHQ-3-5, 6311 - 6389        | R.KIPNPDFFEDLEPFR.M                                                      | 1865.07739 | 2 | 2.91E-05 | 0.90  | 3.79   | -     | 712.2    |
| AHQ-3-5, 3317 - 3319        | K.TPELNLDQFDHK.T                                                         | 1457.56976 | 2 | 9.84E-07 | 0.95  | 4.22   | -     | 1429.3   |
| gi 4826774 ref NP_005092.1  | interferon, alpha-inducible protein (clone IFI-15K); interferon-stimula  |            |   | 1.58E-08 | 0.86  | 10.23  | 18.20 | 17887.4  |
| AHQ-3-13, 6877              | R.VPLASQGLGPGSTVLLVVDKDEPLSILVR.N                                        | 3135.66454 | 3 | 1.58E-08 | 0.86  | 4.51   | -     | 571.9    |
| gi 4759140 ref NP_004243.1  | solute carrier family 9 (sodium/hydrogen exchanger), isoform 3 regulato  |            |   | 1.58E-08 | 0.89  | 10.16  | 3.90  | 38868.2  |
| AHQ-3-13-, 3806             | R.LLVDPETDEQLQK.L                                                        | 1627.81777 | 2 | 1.58E-08 | 0.89  | 3.20   | -     | 833.0    |
| gi 6679056 ref NP_031387.1  | nidogen 2 (osteonidogen); nidogen 2 [Homo sapiens]                       |            |   | 1.61E-08 | 0.84  | 10.20  | 2.10  | 151153.0 |
| AHQ-3-2, 7190               | R.AGLELGAEPETIVNSGLISPEGLAIDHIR.R                                        | 2973.32740 | 3 | 1.61E-08 | 0.84  | 4.10   | -     | 569.0    |
| gi 4758988 ref NP_004152.1  | RAB1A, member RAS oncogene family; RAB1, member RAS oncogene family [Ho  |            |   | 1.66E-08 | 1.62  | 20.23  | 17.10 | 22677.6  |
| AHQ-3-14-, 6157 - 6163      | K.EFADSLGIPFLETSK.N                                                      | 1725.91990 | 2 | 1.45E-05 | 0.77  | 3.71   | -     | 396.6    |
| AHQ-3-12, 6226              | K.EFADSLGIPFLETSK.N                                                      | 1725.91990 | 2 | 2.18E-04 | 0.50  | 2.95   | -     | 348.9    |
| AHQ-3-11, 5851 - 5908       | K.EFADSLGIPFLETSK.N                                                      | 1725.91990 | 2 | 8.25E-06 | 0.60  | 3.00   | -     | 221.3    |
| AHQ-3-13-, 6257 - 6258      | K.EFADSLGIPFLETSK.N                                                      | 1725.91990 | 2 | 2.68E-04 | 0.57  | 3.09   | -     | 381.4    |
| AHQ-3-11, 5967 - 6038       | K.EFADSLGIPFLETSK.N                                                      | 1725.91990 | 2 | 1.11E-07 | 0.81  | 4.08   | -     | 399.6    |
| AHQ-3-11, 6838 - 6915       | R.FADDYTESYISTIGVDFK.I                                                   | 2173.31742 | 2 | 6.41E-05 | 0.94  | 4.27   | -     | 1108.8   |
| AHQ-3-11, 5783 - 5806       | R.FADDYTESYISTIGVDFK.I                                                   | 2173.31742 | 2 | 2.46E-07 | 0.61  | 2.87   | -     | 766.2    |
| AHQ-3-13, 6034              | R.FADDYTESYISTIGVDFK.I                                                   | 2173.31742 | 2 | 1.66E-08 | 0.80  | 3.28   | -     | 586.2    |

|                             |                                                                           |            |   |          |      |        |       |          |
|-----------------------------|---------------------------------------------------------------------------|------------|---|----------|------|--------|-------|----------|
| AHQ-3-13-, 6015             | R.FADDYTESYISTIGVDFK.I                                                    | 2173.31742 | 2 | 5.57E-05 | 0.83 | 3.42   | -     | 580.2    |
| AHQ-3-11, 5995 - 6066       | R.FADDYTESYISTIGVDFK.I                                                    | 2173.31742 | 2 | 2.74E-06 | 0.96 | 4.61   | -     | 1459.8   |
| AHQ-3-11, 5866 - 5927       | R.FADDYTESYISTIGVDFK.I                                                    | 2173.31742 | 2 | 1.44E-06 | 0.96 | 4.31   | -     | 1351.0   |
| AHQ-3-14-, 5881 - 5945      | R.FADDYTESYISTIGVDFK.I                                                    | 2173.31742 | 2 | 2.66E-04 | 0.96 | 4.02   | -     | 1628.6   |
| AHQ-3-11, 5619              | R.FADDYTESYISTIGVDFK.I                                                    | 2173.31742 | 2 | 6.62E-06 | 0.83 | 3.45   | -     | 584.9    |
| gi 14251209 ref NP_001279.2 | chloride intracellular channel 1; p64CLCP; chloride channel ABP [Homo     |            |   | 1.73E-08 | 7.23 | 100.30 | 58.50 | 26922.5  |
| AHQ-3-9, 6013 - 6077        | K.FLDGNELTLADCNLLPK.L                                                     | 1935.18752 | 2 | 9.61E-04 | 0.64 | 3.68   | -     | 599.6    |
| AHQ-3-9, 6140               | K.FLDGNELTLADCNLLPK.L                                                     | 1935.18752 | 2 | 1.73E-08 | 0.69 | 3.77   | -     | 745.7    |
| AHQ-3-9, 5875 - 5943        | K.FLDGNELTLADCNLLPK.L                                                     | 1935.18752 | 2 | 5.49E-08 | 0.93 | 4.81   | -     | 1255.2   |
| AHQ-3-9, 3375               | K.FSAYIKNSNPALNDLEK.G                                                     | 2039.23424 | 2 | 1.92E-06 | 0.63 | 3.45   | -     | 449.0    |
| AHQ-3-13-, 3367 - 3397      | K.GVTFNVTTVDTK.R                                                          | 1282.42476 | 2 | 2.33E-04 | 0.93 | 3.67   | -     | 1429.2   |
| AHQ-3-13, 3402              | K.GVTFNVTTVDTK.R                                                          | 1282.42476 | 2 | 2.73E-06 | 0.96 | 4.34   | -     | 1383.7   |
| AHQ-3-10, 3123              | K.GVTFNVTTVDTK.R                                                          | 1282.42476 | 2 | 1.11E-06 | 0.84 | 3.15   | -     | 821.6    |
| AHQ-3-13, 2506              | K.IGNCPFSQR.L                                                             | 1080.19948 | 2 | 2.79E-05 | 0.81 | 2.86   | -     | 588.5    |
| AHQ-3-9, 5617 - 5628        | R.KFLDGNELTLADCNLLPK.L                                                    | 2063.36044 | 2 | 1.35E-05 | 0.79 | 4.09   | -     | 774.9    |
| AHQ-3-9, 5447               | R.KFLDGNELTLADCNLLPK.L                                                    | 2063.36044 | 2 | 2.89E-05 | 0.78 | 3.64   | -     | 958.7    |
| AHQ-3-9, 4971 - 5044        | K.LAALNPESNTAGLDIFAK.F                                                    | 1846.07392 | 2 | 1.57E-05 | 0.96 | 4.78   | -     | 1073.7   |
| AHQ-3-9, 5201 - 5205        | K.LAALNPESNTAGLDIFAK.F                                                    | 1846.07392 | 2 | 2.75E-08 | 0.96 | 5.06   | -     | 1070.4   |
| AHQ-3-13, 5311 - 5345       | K.LAALNPESNTAGLDIFAK.F                                                    | 1846.07392 | 2 | 5.57E-08 | 0.94 | 4.69   | -     | 669.2    |
| AHQ-3-13-, 5451             | K.LAALNPESNTAGLDIFAK.F                                                    | 1846.07392 | 2 | 4.33E-04 | 0.93 | 4.56   | -     | 711.2    |
| AHQ-3-13-, 5318             | K.LAALNPESNTAGLDIFAK.F                                                    | 1846.07392 | 2 | 1.10E-05 | 0.94 | 5.15   | -     | 716.3    |
| AHQ-3-10, 4858              | K.LAALNPESNTAGLDIFAK.F                                                    | 1846.07392 | 2 | 4.43E-07 | 0.94 | 4.37   | -     | 908.3    |
| AHQ-3-13, 5481 - 5489       | K.LAALNPESNTAGLDIFAK.F                                                    | 1846.07392 | 2 | 3.73E-06 | 0.82 | 3.30   | -     | 522.2    |
| AHQ-3-14, 6283              | K.LAALNPESNTAGLDIFAK.F                                                    | 1846.07392 | 2 | 2.40E-04 | 0.93 | 4.45   | -     | 850.6    |
| AHQ-3-11, 5119 - 5123       | K.LAALNPESNTAGLDIFAK.F                                                    | 1846.07392 | 2 | 3.39E-05 | 0.97 | 6.01   | -     | 930.1    |
| AHQ-3-10, 5275              | K.LCPGGQLPFLLYGVEHTDNTK.I                                                 | 2462.76290 | 2 | 3.73E-06 | 0.78 | 3.42   | -     | 563.1    |
| AHQ-3-9, 5171               | R.LFM*VWLK.G                                                              | 1066.38391 | 1 | 8.67E-04 | 0.25 | 2.12   | -     | 199.0    |
| AHQ-3-10, 2511              | K.LHIVQVCK.K                                                              | 1097.35623 | 1 | 9.30E-05 | 0.75 | 2.65   | -     | 622.7    |
| AHQ-3-9, 2355               | K.LHIVQVCK.K                                                              | 1097.35623 | 2 | 5.59E-06 | 0.77 | 2.56   | -     | 648.3    |
| AHQ-3-9, 2365               | K.LHIVQVCK.K                                                              | 1097.35623 | 1 | 6.38E-06 | 0.73 | 3.15   | -     | 484.8    |
| AHQ-3-10, 2506              | K.LHIVQVCK.K                                                              | 1097.35623 | 2 | 4.37E-05 | 0.89 | 3.06   | -     | 754.8    |
| AHQ-3-10, 4839 - 4906       | K.VLDNYLTSPLPEEVDSETSAEDEGVSQR.K                                          | 2994.12446 | 2 | 2.80E-04 | 0.46 | 2.80   | -     | 294.8    |
| AHQ-3-12, 5264              | K.VLDNYLTSPLPEEVDSETSAEDEGVSQR.K                                          | 2994.12446 | 3 | 5.00E-05 | 0.70 | 3.42   | -     | 539.8    |
| AHQ-3-9, 5056 - 5091        | K.VLDNYLTSPLPEEVDSETSAEDEGVSQR.K                                          | 2994.12446 | 2 | 1.84E-04 | 0.91 | 4.70   | -     | 411.2    |
| gi 4506005 ref NP_002700.1  | protein phosphatase 1, catalytic subunit, beta isoform [Homo sapiens] [   |            |   | 1.74E-08 | 3.81 | 40.28  | 20.80 | 37186.6  |
| AHQ-3-9, 3511               | R.AHQVVEDGVEFFAK.R                                                        | 1640.77679 | 2 | 2.06E-04 | 0.96 | 4.14   | -     | 1487.7   |
| AHQ-3-14-, 6773 - 6840      | R.EIFLSQPILLEEAPLK.I                                                      | 1954.33857 | 2 | 3.11E-06 | 0.94 | 4.80   | -     | 700.4    |
| AHQ-3-13, 6913 - 6915       | R.EIFLSQPILLEEAPLK.I                                                      | 1954.33857 | 2 | 1.94E-07 | 0.96 | 5.60   | -     | 651.5    |
| AHQ-3-9, 6947               | R.EIFLSQPILLEEAPLK.I                                                      | 1954.33857 | 2 | 7.76E-06 | 0.96 | 5.06   | -     | 807.2    |
| AHQ-3-9, 4905               | K.IFCCHGGLSPDLQSMEQIR.R                                                   | 2251.54930 | 2 | 9.74E-04 | 0.95 | 5.39   | -     | 1480.6   |
| AHQ-3-9, 6879 - 6884        | K.TFTDFCNCLPIAAIVDEK.I                                                    | 2117.38502 | 2 | 8.58E-07 | 0.97 | 5.36   | -     | 1260.3   |
| AHQ-3-9, 6681               | K.TFTDFCNCLPIAAIVDEK.I                                                    | 2117.38502 | 2 | 1.74E-08 | 0.93 | 3.75   | -     | 1159.7   |
| gi 30158852 ref XP_301583.1 | similar to actin CA15 - sea squirt (Styela clava) (fragments) [Homo sa    |            |   | 1.88E-08 | 0.76 | 10.17  | 6.50  | 19197.0  |
| AHQ-3-10, 2584 - 2647       | K.IWHHTFYNKL.R.V                                                          | 1515.74533 | 2 | 2.95E-06 | 0.91 | 3.46   | -     | 1253.2   |
| AHQ-3-8, 2376 - 2398        | K.IWHHTFYNKL.R.V                                                          | 1515.74533 | 2 | 1.88E-08 | 0.76 | 2.98   | -     | 858.4    |
| gi 4759300 ref NP_004772.1  | vesicle-associated membrane protein 3 (cellubrevin); vesicle-associated   |            |   | 1.88E-08 | 2.89 | 30.28  | 33.00 | 11309.0  |
| AHQ-3-14-, 3451 - 3503      | R.ADALQAGASQFETSAAK.L                                                     | 1666.77095 | 2 | 1.49E-04 | 0.86 | 3.69   | -     | 691.8    |
| AHQ-3-14, 4411              | R.ADALQAGASQFETSAAK.L                                                     | 1666.77095 | 2 | 1.92E-04 | 0.88 | 3.69   | -     | 675.9    |
| AHQ-3-13, 3562              | R.ADALQAGASQFETSAAK.L                                                     | 1666.77095 | 2 | 1.88E-08 | 0.94 | 4.34   | -     | 959.2    |
| AHQ-3-13-, 3733             | R.LQQTQNQVDEVVDIMR.V                                                      | 1933.13344 | 2 | 4.60E-08 | 0.97 | 5.21   | -     | 1725.0   |
| AHQ-3-13-, 4881             | R.LQQTQNQVDEVVDIMR.V                                                      | 1917.13404 | 2 | 5.38E-07 | 0.98 | 5.67   | -     | 2089.1   |
| AHQ-3-13, 4881              | R.LQQTQNQVDEVVDIMR.V                                                      | 1917.13404 | 2 | 6.01E-08 | 0.98 | 5.49   | -     | 2237.5   |
| AHQ-3-13, 3733              | R.LQQTQNQVDEVVDIMR.V                                                      | 1933.13344 | 2 | 2.13E-06 | 0.96 | 4.92   | -     | 1230.4   |
| gi 5802974 ref NP_006784.1  | peroxiredoxin 3; antioxidant protein 1; thioredoxin-dependent peroxide    |            |   | 1.93E-08 | 1.98 | 30.30  | 19.50 | 27692.5  |
| AHQ-3-11, 4391              | K.AFOYVETHGVECPANWTPDSPTIKPSPAASK.E                                       | 3388.70790 | 3 | 1.93E-08 | 0.96 | 6.09   | -     | 1251.7   |
| AHQ-3-11, 3890              | K.DLSLDDFK.G                                                              | 953.02795  | 1 | 1.08E-04 | 0.97 | 2.25   | -     | 472.5    |
| AHQ-3-11, 2863 - 2882       | K.HLSVNDLPVGR.S                                                           | 1207.36435 | 2 | 3.23E-04 | 0.65 | 2.66   | -     | 358.8    |
| gi 29731325 ref XP_293023.1 | similar to peptidyl-Pro cis trans isomerase [Homo sapiens]                |            |   | 1.95E-08 | 0.80 | 10.17  | 6.00  | 28867.8  |
| AHQ-3-12, 4078 - 4080       | K.AGPNTNGSOFICTAK.T                                                       | 1714.88050 | 2 | 1.95E-08 | 0.80 | 3.33   | -     | 539.9    |
| gi 4557385 ref NP_000055.1  | complement component 3 precursor; acylation-stimulating protein cleavag   |            |   | 2.10E-08 | 1.88 | 20.28  | 2.40  | 187162.3 |
| AHQ-3-6, 5183               | R.AYYENSPQQVTFSTFEVK.E                                                    | 2167.31611 | 2 | 1.36E-05 | 0.91 | 3.98   | -     | 822.6    |
| AHQ-3-6, 4523               | R.VPVAVQGEDTVQSLTQGDGVAK.L                                                | 2199.40432 | 2 | 2.10E-08 | 0.97 | 5.64   | -     | 1303.0   |
| gi 5174393 ref NP_006001.1  | arginine-rich, mutated in early stage tumors; arginine-rich protein [Ho   |            |   | 2.16E-08 | 3.29 | 40.28  | 25.60 | 26906.2  |
| AHQ-3-12, 5640              | K.DRDVTFSPATIENELIK.F                                                     | 1949.15100 | 3 | 3.48E-04 | 0.76 | 3.17   | -     | 899.0    |
| AHQ-3-12, 5643              | K.DRDVTFSPATIENELIK.F                                                     | 1949.15100 | 2 | 2.16E-08 | 0.98 | 5.63   | -     | 2612.3   |
| AHQ-3-12, 2722              | K.DSQICELKYDK.Q                                                           | 1400.53657 | 2 | 6.70E-07 | 0.80 | 2.90   | -     | 683.2    |
| AHQ-3-12, 2803              | K.IINEVSKPLAHHIPVKE.I                                                     | 1925.26378 | 3 | 1.68E-07 | 0.82 | 3.81   | -     | 885.6    |
| AHQ-3-12, 3160 - 3230       | K.IILDWGETCXGCAEK.S                                                       | 1784.94596 | 2 | 3.68E-05 | 0.69 | 2.84   | -     | 472.9    |
| gi 5031677 ref NP_005681.1  | dynamins 1-like protein isoform 3; dynamins-like protein [Homo sapiens] [ |            |   | 2.18E-08 | 9.48 | 110.27 | 20.70 | 78060.6  |
| AHQ-3-14, 5941              | K.ALQGSQIAEIR.E                                                           | 1370.57991 | 2 | 2.18E-08 | 0.91 | 3.86   | -     | 1312.0   |
| AHQ-3-14, 6135              | K.DTLQSELVGLYK.S                                                          | 1494.67144 | 2 | 9.03E-06 | 0.91 | 3.35   | -     | 1273.8   |
| AHQ-3-13, 5206              | K.DTLQSELVGLYK.S                                                          | 1494.67144 | 2 | 3.81E-04 | 0.85 | 3.42   | -     | 791.8    |
| AHQ-3-6, 6887 - 6961        | K.IFSPNVNLTLLVLDLPGMTK.V                                                  | 2059.45828 | 2 | 3.08E-07 | 0.92 | 3.86   | -     | 1095.2   |
| AHQ-3-6, 6434               | K.IFSPNVNLTLLVLDLPGMTK.V                                                  | 2075.45768 | 2 | 1.22E-05 | 0.88 | 3.62   | -     | 846.0    |
| AHQ-3-11, 6484              | K.IFSPNVNLTLLVLDLPGMTK.V                                                  | 2059.45828 | 2 | 1.41E-05 | 0.40 | 2.53   | -     | 442.5    |
| AHQ-3-6, 3033               | R.IIHCNSYNTQELLR.F                                                        | 1864.07262 | 2 | 3.59E-04 | 0.63 | 2.77   | -     | 448.6    |
| AHQ-3-6, 7034               | K.LHDAIVEVTVCLLR.K                                                        | 1639.94134 | 2 | 1.64E-05 | 0.97 | 4.21   | -     | 2119.9   |
| AHQ-3-6, 6203               | K.LYTFDFEIRQEIEINETER.I                                                   | 2301.40883 | 2 | 4.19E-06 | 0.47 | 2.95   | -     | 377.7    |
| AHQ-3-7, 6115               | K.LYTFDFEIRQEIEINETER.I                                                   | 2301.40883 | 2 | 6.22E-05 | 0.53 | 2.67   | -     | 357.4    |
| AHQ-3-14-, 6140 - 6141      | K.SSLDDLLTSESDM*AQR.R                                                     | 1940.07638 | 2 | 2.53E-08 | 0.96 | 4.72   | -     | 1313.5   |
| AHQ-3-13-, 6801             | K.SSLDDLLTSESDM*AQR.R                                                     | 1924.07698 | 2 | 7.96E-05 | 0.96 | 5.35   | -     | 974.8    |
| AHQ-3-14-, 6747 - 6748      | K.SSLDDLLTSESDM*AQR.R                                                     | 1924.07698 | 2 | 1.51E-04 | 0.96 | 4.86   | -     | 1128.5   |
| AHQ-3-6, 4677               | K.SVTDSDIRDEYAFLOK.K                                                      | 1772.93666 | 2 | 7.79E-06 | 0.91 | 3.86   | -     | 1039.5   |
| AHQ-3-6, 7277               | R.TLESVDPLGGLNTIDILTAIR.N                                                 | 2212.52928 | 2 | 5.31E-06 | 0.97 | 5.28   | -     | 1202.3   |
| gi 4503481 ref NP_001395.1  | eukaryotic translation elongation factor 1 gamma; elongation factor 1-g   |            |   | 2.26E-08 | 1.83 | 20.19  | 6.20  | 50118.5  |
| AHQ-3-7, 2768               | K.ALIAAQYSGAQR.V                                                          | 1348.53280 | 2 | 2.26E-08 | 0.93 | 3.10   | -     | 1678.3   |
| AHQ-3-14, 6137              | R.EYFSWEGAFQHVHGK.A                                                       | 1685.81925 | 2 | 2.73E-06 | 0.90 | 3.56   | -     | 932.8    |
| AHQ-3-12, 4996              | R.EYFSWEGAFQHVHGK.A                                                       | 1685.81925 | 2 | 3.30E-06 | 0.85 | 3.77   | -     | 583.6    |
| gi 4503545 ref NP_001961.1  | eukaryotic translation initiation factor 5A; eIF5A; eIF5A [Homo sapien    |            |   | 2.48E-08 | 1.82 | 20.24  | 26.00 | 16832.2  |
| AHQ-3-12, 3960 - 3962       | R.EDLRLPEGDLGKIEIQK.Y                                                     | 1970.17021 | 2 | 2.48E-08 | 0.86 | 4.32   | -     | 338.7    |
| AHQ-3-12, 6896              | R.NDFQLIGIQDGYLSLLQDSGEVR.E                                               | 2581.81935 | 2 | 1.76E-07 | 0.96 | 4.89   | -     | 1196.1   |
| gi 19923483 ref NP_057406.2 | GTPase Rab14 [Homo sapiens]                                               |            |   | 2.48E-08 | 5.94 | 70.23  | 45.10 | 23898.8  |
| AHQ-3-10, 4004              | R.GAAGALMYYDITR.R                                                         | 1338.55819 | 2 | 1.82E-04 | 0.92 | 3.87   | -     | 901.7    |
| AHQ-3-11, 3739              | K.IYQNIQDGLDLNAAESGVQHKPSAPQGGR.L                                         | 3152.38123 | 3 | 2.93E-05 | 0.82 | 3.67   | -     | 596.6    |
| AHQ-3-10, 3604 - 3646       | K.IYQNIQDGLDLNAAESGVQHKPSAPQGGR.L                                         | 3152.38123 | 3 | 3.78E-04 | 0.79 | 3.79   | -     | 399.3    |
| AHQ-3-10, 4606              | R.NLTNPNTVILIGNK.A                                                        | 1624.90662 | 2 | 3.93E-04 | 0.86 | 3.30   | -     | 680.0    |
| AHQ-3-11, 4851 - 4854       | R.NLTNPNTVILIGNK.A                                                        | 1624.90662 | 2 | 4.17E-05 | 0.95 | 4.57   | -     | 919.4    |
| AHQ-3-11, 3063 - 3064       | K.SCLLHQFTEK.K                                                            | 1264.43272 | 2 | 9.24E-06 | 0.76 | 2.90   | -     | 664.5    |
| AHQ-3-10, 3931              | R.STYNHLSSWLTDR.N                                                         | 1651.76121 | 2 | 2.95E-04 | 0.57 | 2.84   | -     | 295.2    |
| AHQ-3-11, 3916              | R.STYNHLSSWLTDR.N                                                         | 1651.76121 | 2 | 1.08E-04 | 0.72 | 2.89   | -     | 678.7    |
| AHQ-3-11, 4352 - 4408       | K.TGENVEDAFLEAAK.K                                                        | 1494.58517 | 2 | 1.68E-04 | 0.62 | 2.92   | -     | 420.2    |
| AHQ-3-10, 4184 - 4186       | K.TGENVEDAFLEAAK.K                                                        | 1494.58517 | 2 | 3.52E-07 | 0.93 | 4.27   | -     | 788.4    |
| AHQ-3-10, 4187              | K.TGENVEDAFLEAAK.K                                                        | 1494.58517 | 1 | 6.66E-05 | 0.63 | 3.22   | -     | 517.9    |
| AHQ-3-10, 3810              | K.TGENVEDAFLEAAK.K                                                        | 1622.75808 | 2 | 6.93E-04 | 0.80 | 3.62   | -     | 499.4    |
| AHQ-3-11, 3907              | K.TGENVEDAFLEAAK.K                                                        | 1622.75808 | 3 | 2.48E-08 | 0.85 | 3.70   | -     | 976.7    |
| gi 4885063 ref NP_005156.1  | aldolase C, fructose-bisphosphate; Aldolase C, fructose-bisphosphatase    |            |   | 2.55E-08 | 1.76 | 20.29  | 7.10  | 39455.6  |
| AHQ-3-8, 4176 - 4245        | K.GVVPLAGTDGETTQGLDGLSER.C                                                | 2274.42806 | 2 | 1.65E-07 | 0.92 | 5.47   | -     | 1010.4   |

|                             |                                                                         |            |   |          |      |        |       |          |
|-----------------------------|-------------------------------------------------------------------------|------------|---|----------|------|--------|-------|----------|
| AHQ-3-12, 4610              | K.GVVPLAGTDGETTQGLDGLSER.C                                              | 2274.42806 | 2 | 1.53E-07 | 0.82 | 4.97   | -     | 466.9    |
| AHQ-3-8, 4093               | K.VDKGVVPLAGTDGETTQGLDGLSER.C                                           | 2616.82041 | 2 | 2.89E-06 | 0.93 | 4.62   | -     | 458.8    |
| AHQ-3-8, 4090               | K.VDKGVVPLAGTDGETTQGLDGLSER.C                                           | 2616.82041 | 3 | 2.55E-08 | 0.94 | 5.73   | -     | 1167.9   |
| gi 4504085 ref NP_000399.1  | glycerol-3-phosphate dehydrogenase 2 (mitochondrial) [Homo sapiens] [MA |            |   | 2.58E-08 | 3.29 | 40.19  | 6.50  | 80814.1  |
| AHQ-3-6, 5574               | R.LVQDYLGLESEVAQHLAATYGDK.A                                             | 2408.60567 | 3 | 2.58E-08 | 0.82 | 3.11   | -     | 1180.3   |
| AHQ-3-6, 6105               | R.VIFFLPWQK.M                                                           | 1178.44934 | 2 | 3.86E-05 | 0.85 | 3.07   | -     | 745.2    |
| AHQ-3-6, 6202 - 6281        | R.YGAATANYMVEVSLLK.K                                                    | 1731.00632 | 2 | 1.28E-04 | 0.81 | 2.83   | -     | 814.1    |
| AHQ-3-6, 5470               | R.YGAATANYM*EVVSLLK.K                                                   | 1747.00572 | 2 | 2.05E-04 | 0.81 | 3.78   | -     | 445.6    |
| gi 17450333 ref XP_060887.1 | similar to peptidyl-Pro cis trans isomerase [Homo sapiens]              |            |   | 2.59E-08 | 0.94 | 10.21  | 11.00 | 17503.9  |
| AHQ-3-12, 6418 - 6483       | -M*VNPTVFDIAVDGKPLGR.V                                                  | 1946.26009 | 2 | 2.59E-08 | 0.94 | 4.15   | -     | 1105.1   |
| AHQ-3-12, 6638 - 6706       | -M*VNPTVFDIAVDGKPLGR.V                                                  | 1946.26009 | 2 | 1.95E-06 | 0.93 | 3.92   | -     | 1190.8   |
| AHQ-3-12, 6643 - 6659       | -M*VNPTVFDIAVDGKPLGR.V                                                  | 1946.26009 | 3 | 4.32E-06 | 0.89 | 3.49   | -     | 1347.9   |
| AHQ-3-13, 6674              | -M*VNPTVFDIAVDGKPLGR.V                                                  | 1946.26009 | 2 | 1.18E-04 | 0.88 | 3.77   | -     | 752.4    |
| AHQ-3-12, 5958              | -M*VNPTVFDIAVDGKPLGR.V                                                  | 1946.26009 | 2 | 5.72E-04 | 0.44 | 2.56   | -     | 445.0    |
| gi 4507767 ref NP_003326.1  | ubiquitin-activating enzyme E1-like; Ubiquitin-activating enzyme-2; ubi |            |   | 2.65E-08 | 2.36 | 40.21  | 6.70  | 111719.5 |
| AHQ-3-4, 7424               | R.GLNPDQLVPLTYLDPDTEHIYGDNFFSR.V                                        | 3434.79811 | 3 | 1.68E-05 | 0.45 | 3.02   | -     | 232.2    |
| AHQ-3-4, 3358               | K.LLDEELYSR.Q                                                           | 1138.25242 | 1 | 1.43E-04 | 0.17 | 2.19   | -     | 244.9    |
| AHQ-3-4, 4686 - 4697        | R.VLVSGLQGLGAEVAEK.N                                                    | 1441.69805 | 2 | 2.65E-08 | 0.92 | 4.22   | -     | 931.3    |
| AHQ-3-4, 4061               | R.YFPSTAETHLQWAR.H                                                      | 1707.86959 | 2 | 2.72E-05 | 0.81 | 3.28   | -     | 471.6    |
| gi 4506365 ref NP_002856.1  | RAB2, member RAS oncogene family [Homo sapiens]                         |            |   | 2.67E-08 | 0.96 | 10.21  | 6.10  | 23545.4  |
| AHQ-3-11, 4231              | K.LQIWDTAQGESFR.S                                                       | 1551.68478 | 2 | 2.67E-08 | 0.96 | 4.25   | -     | 1548.4   |
| gi 4502297 ref NP_001678.1  | ATP synthase, H+ transporting, mitochondrial F1 complex, delta subunit  |            |   | 2.72E-08 | 0.89 | 10.19  | 8.30  | 17489.8  |
| AHQ-3-13-, 2517             | K.AQAELVGTAEATR.A                                                       | 1432.51860 | 2 | 2.72E-08 | 0.89 | 3.56   | -     | 743.4    |
| AHQ-3-13, 2557              | K.AQAELVGTAEATR.A                                                       | 1432.51860 | 2 | 2.79E-07 | 0.90 | 3.74   | -     | 832.4    |
| gi 4758304 ref NP_004902.1  | protein disulfide isomerase related protein (calcium-binding protein, i |            |   | 2.79E-08 | 4.34 | 50.22  | 9.50  | 72931.9  |
| AHQ-3-6, 4611               | K.DLGLSEGEDVNAAILDESGKK.F                                               | 2248.38737 | 2 | 3.67E-08 | 0.92 | 4.47   | -     | 1105.0   |
| AHQ-3-6, 3730               | K.FAM*EPEEFDSDLR.E                                                      | 1703.80830 | 2 | 2.79E-08 | 0.86 | 3.40   | -     | 604.4    |
| AHQ-3-6, 4581               | K.FAMEPEEFDSDLR.E                                                       | 1687.80890 | 2 | 2.52E-07 | 0.75 | 2.89   | -     | 602.0    |
| AHQ-3-6, 2761               | K.IDATSASVLSR.F                                                         | 1191.31686 | 2 | 1.17E-07 | 0.95 | 4.07   | -     | 1574.4   |
| AHQ-3-6, 2738               | K.VSQGLVVMQPEK.F                                                        | 1445.69431 | 2 | 1.96E-07 | 0.85 | 3.04   | -     | 1282.5   |
| gi 4758906 ref NP_004146.1  | serine (or cysteine) proteinase inhibitor, clade B (ovalbumin), member  |            |   | 2.80E-08 | 1.80 | 20.20  | 8.50  | 42403.4  |
| AHQ-3-8, 3686               | R.AFQSLLTEVNK.A                                                         | 1250.42590 | 2 | 2.80E-08 | 0.91 | 3.20   | -     | 1186.5   |
| AHQ-3-8, 4226 - 4232        | K.GNTATQMAQALSNTTEEDIHR.A                                               | 2301.48023 | 3 | 2.28E-04 | 0.89 | 3.91   | -     | 1056.4   |
| gi 4557471 ref NP_001274.1  | adaptor-related protein complex 1, sigma 1 subunit isoform 1; clathrin- |            |   | 2.88E-08 | 0.95 | 10.25  | 10.10 | 18732.9  |
| AHQ-3-12, 3575              | K.AIEQADLLQEEDSPR.S                                                     | 1843.92692 | 2 | 2.88E-08 | 0.95 | 4.93   | -     | 1286.2   |
| gi 4503291 ref NP_001346.1  | D-dopachrome tautomerase [Homo sapiens]                                 |            |   | 2.97E-08 | 1.83 | 20.20  | 22.90 | 12711.7  |
| AHQ-3-14-, 5579 - 5592      | R.FFPLESWQIK.I                                                          | 1352.56151 | 2 | 2.97E-08 | 0.90 | 3.10   | -     | 757.7    |
| AHQ-3-14-, 3441             | K.RLCAAAASILGKPADR.V                                                    | 1671.94666 | 3 | 6.14E-05 | 0.93 | 4.00   | -     | 1698.4   |
| gi 21360262 ref NP_115744.2 | leucine zipper and CTNNBP1 domain containing [Homo sapiens]             |            |   | 2.98E-08 | 0.95 | 10.21  | 11.60 | 21494.4  |
| AHQ-3-11, 6658 - 6703       | K.LTADDEAFLSANAGAILSQFEK.V                                              | 2312.51789 | 2 | 2.98E-08 | 0.95 | 4.18   | -     | 1298.9   |
| gi 22042381 ref XP_065237.3 | similar to FKS30 [Homo sapiens]                                         |            |   | 3.14E-08 | 1.48 | 20.20  | 3.50  | 42016.0  |
| AHQ-3-10, 2247              | K.QEYDESGSPVHR.K                                                        | 1517.58206 | 3 | 8.69E-04 | 0.81 | 3.14   | -     | 908.3    |
| AHQ-3-8, 2025 - 2036        | K.QEYDESGSPVHR.K                                                        | 1517.58206 | 2 | 1.06E-06 | 0.78 | 3.28   | -     | 361.7    |
| AHQ-3-13-, 2386             | K.QEYDESGSPVHR.K                                                        | 1517.58206 | 2 | 1.18E-07 | 0.57 | 3.05   | -     | 271.2    |
| AHQ-3-13, 2438              | K.QEYDESGSPVHR.K                                                        | 1517.58206 | 3 | 2.70E-07 | 0.72 | 3.01   | -     | 847.0    |
| AHQ-3-13, 2437 - 2445       | K.QEYDESGSPVHR.K                                                        | 1517.58206 | 2 | 3.14E-08 | 0.69 | 2.85   | -     | 349.3    |
| AHQ-3-14-, 2293 - 2315      | K.QEYDESGSPVHR.K                                                        | 1517.58206 | 2 | 4.78E-07 | 0.77 | 3.20   | -     | 363.6    |
| AHQ-3-8, 3113 - 3185        | R.VAPEEHPIILTEAPLNPK.A                                                  | 1969.27019 | 2 | 3.29E-05 | 0.79 | 3.68   | -     | 414.4    |
| AHQ-3-8, 3048 - 3117        | R.VAPEEHPIILTEAPLNPK.A                                                  | 1969.27019 | 2 | 3.98E-04 | 0.78 | 3.46   | -     | 465.3    |
| AHQ-3-7, 3531               | R.VAPEEHPIILTEAPLNPK.A                                                  | 1969.27019 | 2 | 1.57E-04 | 0.62 | 3.24   | -     | 257.5    |
| AHQ-3-8, 3253 - 3320        | R.VAPEEHPIILTEAPLNPK.A                                                  | 1969.27019 | 2 | 6.37E-04 | 0.74 | 3.16   | -     | 448.8    |
| gi 5031973 ref NP_005733.1  | protein disulfide isomerase-related protein [Homo sapiens]              |            |   | 3.29E-08 | 5.37 | 60.24  | 24.50 | 48121.0  |
| AHQ-3-7, 7398               | R.ALDLFSNDNAPPPELLLEIINEDIAK.R                                          | 2638.95072 | 2 | 3.29E-08 | 0.91 | 4.41   | -     | 585.4    |
| AHQ-3-7, 7242               | R.DGELPVEDDILSDVELDDLKGDDEL                                             | 2759.86565 | 2 | 3.97E-08 | 0.91 | 4.14   | -     | 961.9    |
| AHQ-3-7, 4586 - 4612        | K.GSFSEQGINEFLR.E                                                       | 1484.59520 | 2 | 4.93E-05 | 0.84 | 3.18   | -     | 694.3    |
| AHQ-3-7, 3792               | R.GSTAPVGGGAFPTIVER.E                                                   | 1616.79990 | 2 | 1.06E-05 | 0.77 | 2.78   | -     | 883.3    |
| AHQ-3-7, 4640 - 4648        | K.LAAVDATVNVQLASR.Y                                                     | 1528.73579 | 2 | 7.58E-07 | 0.97 | 4.88   | -     | 1653.2   |
| AHQ-3-7, 6119               | R.TGEAIVDAALSALR.Q                                                      | 1387.56411 | 2 | 1.19E-07 | 0.97 | 4.82   | -     | 1837.4   |
| gi 22043610 ref XP_171081.1 | similar to ras-related C3 botulinum toxin substrate 1 isoform Rac1; rh  |            |   | 3.30E-08 | 4.07 | 50.24  | 28.10 | 21543.1  |
| AHQ-3-11, 2630              | R.HHCNPPIILVGTK.L                                                       | 1588.85612 | 2 | 3.16E-04 | 0.69 | 2.62   | -     | 575.9    |
| AHQ-3-11, 3716              | K.KLTPITYPQGLAMAK.E                                                     | 1632.99216 | 2 | 8.75E-05 | 0.71 | 3.18   | -     | 440.7    |
| AHQ-3-11, 3684 - 3694       | K.KLTPITYPQGLAM*AK.E                                                    | 1520.81864 | 2 | 2.53E-05 | 0.85 | 3.32   | -     | 481.2    |
| AHQ-3-11, 4607 - 4650       | K.PVNLGLWDTAGQEDYDR.L                                                   | 1950.05441 | 2 | 3.30E-08 | 0.97 | 4.74   | -     | 1809.1   |
| AHQ-3-11, 2866              | K.TVDFEAIK.A                                                            | 951.05843  | 1 | 1.40E-04 | 0.06 | 1.99   | -     | 120.9    |
| AHQ-3-11, 2858 - 2859       | K.TVDFEAIK.A                                                            | 951.05843  | 2 | 1.31E-05 | 0.86 | 3.25   | -     | 640.4    |
| gi 29732955 ref XP_291603.1 | similar to glyceraldehyde 3-phosphate dehydrogenase [Homo sapiens] [MA  |            |   | 3.33E-08 | 0.92 | 10.21  | 16.80 | 11173.0  |
| AHQ-3-9, 3843 - 3912        | K.NISNASCTTNCIAPLAK.M                                                   | 1838.05353 | 2 | 3.99E-07 | 0.83 | 4.30   | -     | 992.4    |
| AHQ-3-9, 3979 - 4049        | K.NISNASCTTNCIAPLAK.M                                                   | 1838.05353 | 2 | 3.33E-08 | 0.92 | 3.97   | -     | 1514.1   |
| AHQ-3-11, 4159              | K.NISNASCTTNCIAPLAK.M                                                   | 1838.05353 | 2 | 1.43E-06 | 0.60 | 2.92   | -     | 861.7    |
| AHQ-3-9, 3745 - 3811        | K.NISNASCTTNCIAPLAK.M                                                   | 1838.05353 | 2 | 2.58E-07 | 0.76 | 4.00   | -     | 866.9    |
| gi 4502201 ref NP_001649.1  | ADP-ribosylation factor 1 [Homo sapiens]                                |            |   | 3.34E-08 | 8.95 | 100.33 | 58.60 | 20696.6  |
| AHQ-3-12, 4648              | R.DAVLLVFANK.Q                                                          | 1090.29726 | 1 | 2.86E-05 | 0.63 | 3.01   | -     | 512.1    |
| AHQ-3-12, 4616 - 4762       | R.DAVLLVFANK.Q                                                          | 1090.29726 | 1 | 8.74E-07 | 0.87 | 2.74   | -     | 1057.2   |
| AHQ-3-12, 4780              | R.DAVLLVFANK.Q                                                          | 1090.29726 | 2 | 1.21E-05 | 0.94 | 3.73   | -     | 1403.3   |
| AHQ-3-11, 4512              | R.DAVLLVFANK.Q                                                          | 1090.29726 | 1 | 1.59E-04 | 0.61 | 2.50   | -     | 681.6    |
| AHQ-3-12, 4640              | R.DAVLLVFANK.Q                                                          | 1090.29726 | 2 | 3.34E-08 | 0.97 | 4.04   | -     | 1750.1   |
| AHQ-3-12, 5163              | R.HYFQNTQGLIFVVDSDNR.E                                                  | 2154.32702 | 2 | 1.18E-07 | 0.98 | 5.20   | -     | 1903.8   |
| AHQ-3-12, 4856              | R.HYFQNTQGLIFVVDSDNR.E                                                  | 2154.32702 | 2 | 2.34E-05 | 0.98 | 5.26   | -     | 2006.5   |
| AHQ-3-12, 5059 - 5132       | R.HYFQNTQGLIFVVDSDNR.E                                                  | 2154.32702 | 2 | 8.36E-05 | 0.99 | 6.53   | -     | 2869.4   |
| AHQ-3-12, 4950              | R.HYFQNTQGLIFVVDSDNR.E                                                  | 2154.32702 | 2 | 2.79E-05 | 0.97 | 5.28   | -     | 1473.9   |
| AHQ-3-12, 5244 - 5283       | R.HYFQNTQGLIFVVDSDNR.E                                                  | 2154.32702 | 2 | 3.38E-04 | 0.98 | 5.33   | -     | 2355.7   |
| AHQ-3-12, 5499 - 5572       | R.HYFQNTQGLIFVVDSDNR.E                                                  | 2154.32702 | 2 | 2.63E-07 | 0.95 | 5.50   | -     | 398.6    |
| AHQ-3-12, 4480 - 4552       | R.HYFQNTQGLIFVVDSDNRER.V                                                | 2439.62792 | 3 | 7.43E-04 | 0.93 | 4.60   | -     | 977.4    |
| AHQ-3-12, 5096 - 5176       | R.HYFQNTQGLIFVVDSDNRER.V                                                | 2439.62792 | 3 | 1.44E-04 | 0.76 | 3.89   | -     | 503.8    |
| AHQ-3-12, 4874 - 4944       | R.HYFQNTQGLIFVVDSDNRER.V                                                | 2439.62792 | 3 | 1.08E-06 | 0.92 | 4.80   | -     | 833.9    |
| AHQ-3-12, 4622 - 4678       | R.HYFQNTQGLIFVVDSDNRER.V                                                | 2439.62792 | 3 | 1.16E-04 | 0.95 | 5.29   | -     | 1231.9   |
| AHQ-3-11, 3514              | R.ILMVGLDAAGK.T                                                         | 1088.34632 | 2 | 3.56E-04 | 0.93 | 3.48   | -     | 1052.5   |
| AHQ-3-12, 3659 - 3723       | R.ILMVGLDAAGK.T                                                         | 1088.34632 | 2 | 4.54E-07 | 0.93 | 3.71   | -     | 1136.4   |
| AHQ-3-12, 3672              | R.ILMVGLDAAGK.T                                                         | 1088.34632 | 1 | 9.65E-06 | 0.76 | 3.49   | -     | 428.7    |
| AHQ-3-12, 3098              | R.ILM*VGLDAAGK.T                                                        | 1104.34572 | 2 | 8.10E-06 | 0.96 | 3.85   | -     | 1692.5   |
| AHQ-3-11, 3011              | R.ILM*VGLDAAGK.T                                                        | 1104.34572 | 2 | 2.14E-05 | 0.94 | 3.55   | -     | 1455.0   |
| AHQ-3-11, 6179 - 6260       | K.LGEIVTTIPIGFNVETVEYK.N                                                | 2324.65485 | 3 | 4.63E-04 | 0.55 | 3.13   | -     | 476.6    |
| AHQ-3-12, 6316 - 6387       | K.LGEIVTTIPIGFNVETVEYK.N                                                | 2324.65485 | 2 | 6.37E-06 | 0.72 | 3.42   | -     | 231.6    |
| AHQ-3-12, 6570 - 6595       | K.LGEIVTTIPIGFNVETVEYK.N                                                | 2324.65485 | 2 | 8.86E-08 | 0.55 | 3.26   | -     | 212.2    |
| AHQ-3-12, 6160              | K.LGEIVTTIPIGFNVETVEYK.N                                                | 2324.65485 | 2 | 5.10E-04 | 0.20 | 2.57   | -     | 124.8    |
| AHQ-3-11, 6230 - 6286       | K.LGEIVTTIPIGFNVETVEYK.N                                                | 2324.65485 | 2 | 3.46E-04 | 0.54 | 3.15   | -     | 202.9    |
| AHQ-3-12, 6450 - 6510       | K.LGEIVTTIPIGFNVETVEYK.N                                                | 2324.65485 | 2 | 8.66E-07 | 0.91 | 4.51   | -     | 388.1    |
| AHQ-3-12, 6395 - 6458       | K.LGEIVTTIPIGFNVETVEYK.N                                                | 2324.65485 | 3 | 1.71E-06 | 0.88 | 4.26   | -     | 666.7    |
| AHQ-3-11, 6135 - 6194       | K.LGEIVTTIPIGFNVETVEYK.N                                                | 2324.65485 | 2 | 1.70E-04 | 0.91 | 4.59   | -     | 359.6    |
| AHQ-3-12, 2102              | K.LGLHSLR.H                                                             | 795.95280  | 2 | 4.81E-04 | 0.86 | 3.03   | -     | 901.2    |
| AHQ-3-12, 6883              | R.M*LAEDELKDAVLLVFANK.Q                                                 | 2064.39175 | 3 | 7.59E-08 | 0.94 | 4.40   | -     | 1646.4   |
| AHQ-3-12, 5062 - 5122       | K.NISFTVVDVGGQDK.I                                                      | 1566.69621 | 2 | 4.64E-07 | 0.95 | 4.77   | -     | 970.2    |
| AHQ-3-14-, 5055             | K.NISFTVVDVGGQDK.I                                                      | 1566.69621 | 2 | 4.92E-05 | 0.72 | 2.72   | -     | 699.5    |
| AHQ-3-11, 4866              | K.NISFTVVDVGGQDK.I                                                      | 1566.69621 | 2 | 5.64E-04 | 0.90 | 3.62   | -     | 835.4    |
| AHQ-3-13-, 5090             | K.NISFTVVDVGGQDK.I                                                      | 1566.69621 | 2 | 5.87E-08 | 0.93 | 4.41   | -     | 831.3    |
| AHQ-3-12, 3731 - 3748       | K.QDLPNAMNAAEITDK.L                                                     | 1631.79001 | 2 | 5.00E-06 | 0.94 | 4.48   | -     | 918.6    |
| AHQ-3-12, 3650              | K.QDLPNAMNAAEITDK.L                                                     | 1631.79001 | 2 | 6.86E-08 | 0.91 | 4.06   | -     | 714.9    |

|                             |                                                                         |            |   |          |      |        |       |         |
|-----------------------------|-------------------------------------------------------------------------|------------|---|----------|------|--------|-------|---------|
| AHQ-3-11, 3615              | K.QDLPNAMNAAEITDK.L                                                     | 1631.79001 | 2 | 8.88E-05 | 0.41 | 2.99   | -     | 271.3   |
| AHQ-3-12, 3867 - 3947       | K.QDLPNAMNAAEITDK.L                                                     | 1631.79001 | 2 | 3.67E-05 | 0.91 | 3.66   | -     | 915.2   |
| gi 9910542 ref NP_064535.1  | SAR1a gene homolog 1; SAR1 protein [Homo sapiens]                       |            |   | 3.39E-08 | 2.53 | 30.33  | 33.30 | 22366.6 |
| AHQ-3-11, 3556              | R.EIFGLYGGTTG.K                                                         | 1314.46845 | 1 | 2.86E-07 | 0.66 | 3.29   | -     | 223.9   |
| AHQ-3-11, 6014              | R.LGQHVPTLHPTEELTIAGMFTTFLDGLGHEQAR.R                                   | 3694.08659 | 3 | 4.19E-08 | 0.96 | 6.69   | -     | 713.1   |
| AHQ-3-11, 6726              | K.NYLPAINGVFLVDCADHSR.L                                                 | 2276.55690 | 2 | 3.39E-08 | 0.91 | 4.19   | -     | 699.2   |
| AHQ-3-11, 6344              | K.NYLPAINGVFLVDCADHSR.L                                                 | 2276.55690 | 2 | 2.04E-05 | 0.90 | 4.18   | -     | 644.4   |
| gi 30154095 ref XP_293967.2 | similar to gamma actin-like protein [Homo sapiens]                      |            |   | 3.46E-08 | 1.00 | 20.20  | 12.20 | 19259.0 |
| AHQ-3-8, 4739 - 4807        | K.DLYTSTVLSGGTTM*YPGIADR.M                                              | 2235.45690 | 2 | 1.22E-04 | 0.53 | 3.32   | -     | 321.9   |
| AHQ-3-8, 4976 - 5012        | K.DLYTSTVLSGGTTM*YPGIADR.M                                              | 2235.45690 | 2 | 6.37E-06 | 0.45 | 2.64   | -     | 475.0   |
| AHQ-3-8, 5759 - 5831        | K.DLYTSTVLSGGTTM*YPGIADR.M                                              | 2219.45750 | 2 | 1.29E-05 | 0.12 | 2.69   | -     | 235.3   |
| AHQ-3-10, 4494              | K.DLYTSTVLSGGTTM*YPGIADR.M                                              | 2235.45690 | 2 | 8.15E-05 | 0.53 | 2.91   | -     | 408.8   |
| AHQ-3-10, 4582 - 4643       | K.DLYTSTVLSGGTTM*YPGIADR.M                                              | 2235.45690 | 2 | 7.92E-05 | 0.48 | 2.81   | -     | 406.8   |
| AHQ-3-10, 4875              | K.DLYTSTVLSGGTTM*YPGIADR.M                                              | 2219.45750 | 2 | 7.48E-05 | 0.70 | 3.31   | -     | 487.6   |
| AHQ-3-13, 4782              | K.DLYTSTVLSGGTTM*YPGIADR.M                                              | 2235.45690 | 2 | 3.46E-08 | 0.87 | 3.85   | -     | 681.8   |
| AHQ-3-14, 5797 - 5859       | K.DLYTSTVLSGGTTM*YPGIADR.M                                              | 2235.45690 | 2 | 3.21E-04 | 0.44 | 2.81   | -     | 424.3   |
| AHQ-3-14, 5945 - 5981       | K.DLYTSTVLSGGTTM*YPGIADR.M                                              | 2235.45690 | 2 | 5.63E-04 | 0.33 | 2.77   | -     | 349.3   |
| AHQ-3-13-, 5085             | K.DLYTSTVLSGGTTM*YPGIADR.M                                              | 2235.45690 | 2 | 1.66E-05 | 0.70 | 3.07   | -     | 557.3   |
| AHQ-3-14-, 4732             | K.DLYTSTVLSGGTTM*YPGIADR.M                                              | 2235.45690 | 2 | 9.84E-05 | 0.51 | 3.18   | -     | 429.5   |
| AHQ-3-14-, 4828 - 4891      | K.DLYTSTVLSGGTTM*YPGIADR.M                                              | 2235.45690 | 2 | 5.66E-05 | 0.85 | 3.67   | -     | 616.4   |
| gi 16933567 ref NP_005361.2 | mel transforming oncogene; ras-associated protein RAB8 [Homo sapiens]   |            |   | 3.53E-08 | 0.92 | 10.21  | 6.80  | 23668.1 |
| AHQ-3-11, 5626              | K.ANINVENAFTLAR.D                                                       | 1580.76926 | 2 | 7.52E-05 | 0.91 | 3.54   | -     | 817.1   |
| AHQ-3-11, 5848 - 5911       | K.ANINVENAFTLAR.D                                                       | 1580.76926 | 2 | 1.04E-06 | 0.87 | 3.36   | -     | 793.4   |
| AHQ-3-11, 4996              | K.ANINVENAFTLAR.D                                                       | 1580.76926 | 2 | 3.53E-08 | 0.92 | 4.19   | -     | 928.6   |
| gi 22059949 ref XP_114617.2 | similar to tubulin, beta 5 [Homo sapiens]                               |            |   | 3.76E-08 | 1.89 | 20.30  | 18.80 | 22810.8 |
| AHQ-3-11, 4994 - 5072       | K.FWEVISDEHGIDPTGTYYHGSDSLQLDR.I                                        | 3104.24553 | 3 | 2.86E-04 | 0.89 | 4.52   | -     | 695.8   |
| AHQ-3-14-, 5232 - 5300      | K.FWEVISDEHGIDPTGTYYHGSDSLQLDR.I                                        | 3104.24553 | 3 | 1.86E-06 | 0.96 | 6.08   | -     | 1321.5  |
| AHQ-3-7, 5320               | K.FWEVISDEHGIDPTGTYYHGSDSLQLDR.I                                        | 3104.24553 | 3 | 1.65E-04 | 0.94 | 5.20   | -     | 1031.4  |
| AHQ-3-7, 5407               | K.FWEVISDEHGIDPTGTYYHGSDSLQLDR.I                                        | 3104.24553 | 3 | 5.51E-04 | 0.91 | 4.07   | -     | 1352.9  |
| AHQ-3-13, 2755              | R.ISVYYNEATGGK.Y                                                        | 1302.41453 | 2 | 3.93E-04 | 0.83 | 3.14   | -     | 700.6   |
| AHQ-3-13-, 2725             | R.ISVYYNEATGGK.Y                                                        | 1302.41453 | 2 | 3.28E-05 | 0.77 | 2.78   | -     | 667.0   |
| AHQ-3-14-, 2675             | R.ISVYYNEATGGK.Y                                                        | 1302.41453 | 2 | 1.28E-06 | 0.79 | 2.54   | -     | 767.3   |
| AHQ-3-7, 2451 - 2454        | R.ISVYYNEATGGK.Y                                                        | 1302.41453 | 2 | 3.76E-08 | 0.92 | 3.57   | -     | 920.4   |
| AHQ-3-7, 2462               | R.ISVYYNEATGGK.Y                                                        | 1302.41453 | 1 | 6.40E-04 | 0.57 | 2.85   | -     | 415.7   |
| gi 4505813 ref NP_003737.1  | cytoplasmic dynein light polypeptide; dynein, cytoplasmic, light chain  |            |   | 3.90E-08 | 2.34 | 30.18  | 49.40 | 10365.8 |
| AHQ-3-14, 4940              | K.NADMSEEM*QDQSVECATQALEK.Y                                             | 2532.67934 | 2 | 1.41E-05 | 0.74 | 3.54   | -     | 653.1   |
| AHQ-3-14-, 2267             | R.NFGSYVTHETK.H                                                         | 1283.37131 | 2 | 3.90E-08 | 0.87 | 3.36   | -     | 721.9   |
| AHQ-3-13-, 3485             | K.YNPPTHWCIVGR.N                                                        | 1404.57820 | 2 | 1.58E-07 | 0.74 | 2.64   | -     | 509.4   |
| AHQ-3-14-, 3511             | K.YNPPTHWCIVGR.N                                                        | 1404.57820 | 2 | 1.08E-06 | 0.80 | 3.12   | -     | 372.0   |
| AHQ-3-14, 4472              | K.YNPPTHWCIVGR.N                                                        | 1404.57820 | 2 | 1.07E-05 | 0.74 | 2.54   | -     | 596.0   |
| gi 21361478 ref NP_055944.2 | septin 6 isoform B; septin 2 [Homo sapiens]                             |            |   | 3.97E-08 | 3.86 | 50.26  | 18.20 | 49716.3 |
| AHQ-3-7, 3782               | K.FEGEPATHOPGVQLQSNTRYDLQESNVR.L                                        | 3147.31508 | 3 | 3.97E-08 | 0.93 | 5.30   | -     | 1133.2  |
| AHQ-3-7, 2719               | R.KTAAELLQSGSQAGGSQTLK.R                                                | 2104.30776 | 2 | 1.39E-04 | 0.89 | 4.01   | -     | 594.0   |
| AHQ-3-7, 3450               | K.SLDDEVNAFK.Q                                                          | 1138.20928 | 1 | 9.53E-07 | 0.14 | 1.85   | -     | 356.8   |
| AHQ-3-7, 2900               | K.TAAELLQSGSQAGGSQTLK.R                                                 | 1976.13485 | 2 | 1.46E-04 | 0.96 | 4.95   | -     | 1177.5  |
| AHQ-3-7, 4886               | R.TVPLAGHVGFDLPLDQLVKN.S                                                | 2108.38284 | 2 | 5.50E-05 | 0.93 | 4.52   | -     | 829.7   |
| gi 7705827 ref NP_057187.1  | GTP-binding protein Sara [Homo sapiens]                                 |            |   | 4.04E-08 | 0.70 | 10.19  | 5.60  | 22409.7 |
| AHQ-3-11, 4094              | K.LVFLGLDNAGK.T                                                         | 1147.34882 | 1 | 5.65E-05 | 0.85 | 2.66   | -     | 1140.2  |
| AHQ-3-11, 4095              | K.LVFLGLDNAGK.T                                                         | 1147.34882 | 1 | 4.04E-08 | 0.70 | 2.98   | -     | 356.2   |
| AHQ-3-11, 4360              | K.LVFLGLDNAGK.T                                                         | 1147.34882 | 2 | 1.72E-05 | 0.95 | 3.75   | -     | 1479.2  |
| AHQ-3-11, 4090 - 4107       | K.LVFLGLDNAGK.T                                                         | 1147.34882 | 2 | 1.69E-06 | 0.94 | 3.70   | -     | 1263.0  |
| gi 13129150 ref NP_005339.1 | heat shock 90kDa protein 1, alpha; heat shock 90kD protein 1, alpha [H] |            |   | 4.06E-08 | 2.82 | 40.26  | 6.10  | 84659.0 |
| AHQ-3-5, 2767               | K.ELHNLIPNKQDR.T                                                        | 1590.80882 | 2 | 3.31E-06 | 0.43 | 2.59   | -     | 385.2   |
| AHQ-3-5, 2187 - 2260        | K.FYEQFSK.N                                                             | 949.04099  | 1 | 2.50E-04 | 0.58 | 2.33   | -     | 446.2   |
| AHQ-3-5, 4027               | R.NPDDITNEEYGEFYK.S                                                     | 1834.87381 | 2 | 4.06E-08 | 0.97 | 5.11   | -     | 1443.8  |
| AHQ-3-6, 3974               | R.NPDDITNEEYGEFYK.S                                                     | 1834.87381 | 2 | 6.31E-05 | 0.90 | 4.22   | -     | 1005.2  |
| AHQ-3-5, 3808               | R.RAPFDLLENR.K                                                          | 1265.40235 | 2 | 3.57E-07 | 0.84 | 3.66   | -     | 521.8   |
| gi 20149594 ref NP_031381.2 | heat shock 90kDa protein 1, beta; heat shock 90kD protein 1, beta; Hea  |            |   | 4.70E-08 | 5.12 | 60.23  | 10.20 | 83263.6 |
| AHQ-3-5, 2352               | K.EDQTEYLEER.R                                                          | 1312.32145 | 2 | 1.03E-04 | 0.66 | 2.96   | -     | 449.5   |
| AHQ-3-5, 2985 - 2988        | R.ELISNASDALDK.I                                                        | 1276.37539 | 2 | 6.33E-05 | 0.91 | 3.29   | -     | 1029.1  |
| AHQ-3-5, 5439               | K.HSQFYGYPITLYLEK.E                                                     | 1810.08487 | 2 | 4.41E-06 | 0.96 | 4.56   | -     | 1115.2  |
| AHQ-3-5, 4117               | R.NPDDITQEEYGEFYK.S                                                     | 1848.90048 | 2 | 4.70E-08 | 0.87 | 3.63   | -     | 711.2   |
| AHQ-3-5, 3487               | R.TLTLVDTGIGM*TK.A                                                      | 1366.60658 | 2 | 1.00E-05 | 0.91 | 2.99   | -     | 1190.9  |
| AHQ-3-5, 2033               | K.YIDQEELNK.T                                                           | 1152.23595 | 2 | 2.15E-04 | 0.80 | 3.16   | -     | 669.7   |
| gi 19923457 ref NP_057447.2 | glycoprotein VI (platelet); platelet glycoprotein VI [Homo sapiens] [M] |            |   | 4.73E-08 | 0.96 | 10.26  | 3.20  | 67308.6 |
| AHQ-3-7, 5390               | K.PSLQALPSSLVPLEKPVTLR.C                                                | 2146.55880 | 2 | 6.71E-05 | 0.92 | 4.41   | -     | 775.7   |
| AHQ-3-7, 5379               | K.PSLQALPSSLVPLEKPVTLR.C                                                | 2146.55880 | 3 | 4.73E-08 | 0.96 | 5.00   | -     | 1732.9  |
| gi 28269681 ref NP_783313.1 | NADH-ubiquinone oxidoreductase subunit B14.7 [Homo sapiens]             |            |   | 4.98E-08 | 1.59 | 20.32  | 27.00 | 14852.0 |
| AHQ-3-13, 6577 - 6586       | R.EKPDPLPNLYFLGGCAGGLTLGAR.T                                            | 2423.68676 | 3 | 1.87E-04 | 0.94 | 4.33   | -     | 1500.8  |
| AHQ-3-13-, 4918 - 4989      | R.VTLNPPGTFLEGVAK.V                                                     | 1543.78883 | 2 | 4.98E-08 | 0.65 | 3.13   | -     | 280.3   |
| AHQ-3-13, 4923 - 4945       | R.VTLNPPGTFLEGVAK.V                                                     | 1543.78883 | 2 | 1.03E-05 | 0.84 | 3.56   | -     | 475.2   |
| gi 21614499 ref NP_003370.2 | villin 2; Villin-2; cytovillin [Homo sapiens]                           |            |   | 5.06E-08 | 1.57 | 20.23  | 1.90  | 69412.3 |
| AHQ-3-6, 4165               | K.APDPVFYAPR.L                                                          | 1183.33971 | 2 | 3.97E-06 | 0.97 | 4.57   | -     | 1317.4  |
| AHQ-3-6, 3457 - 3467        | K.KAPDFVFYAPR.L                                                         | 1311.51262 | 2 | 5.06E-08 | 0.60 | 2.97   | -     | 396.9   |
| gi 21361657 ref NP_005304.3 | glucose regulated protein, 58kDa; glucose regulated protein, 58kD [Hom  |            |   | 5.19E-08 | 8.49 | 110.36 | 26.10 | 56782.0 |
| AHQ-3-7, 1752               | R.EATNPPVIQEEKPK.K                                                      | 1580.76433 | 2 | 1.01E-04 | 0.75 | 3.18   | -     | 522.5   |
| AHQ-3-7, 5796 - 5806        | R.ELSDFISYLQR.E                                                         | 1371.52000 | 2 | 8.10E-06 | 0.96 | 4.27   | -     | 1319.2  |
| AHQ-3-7, 4759 - 4764        | K.FIQENIFGICPHM*TEDNKDLIQGK.D                                           | 2866.21892 | 3 | 3.24E-04 | 0.33 | 4.04   | -     | 274.9   |
| AHQ-3-7, 4608               | R.FLQDYFDGNLKR.R                                                        | 1360.49568 | 1 | 7.35E-06 | 0.29 | 2.32   | -     | 426.9   |
| AHQ-3-7, 4528 - 4606        | R.FLQDYFDGNLKR.R                                                        | 1360.49568 | 2 | 3.60E-04 | 0.94 | 3.36   | -     | 1360.5  |
| AHQ-3-7, 3910               | R.FLQDYFDGNLKR.Y                                                        | 1516.68203 | 2 | 1.92E-04 | 0.87 | 3.85   | -     | 792.3   |
| AHQ-3-7, 4352               | R.GPPTIYFSPANK.K                                                        | 1342.52349 | 1 | 5.69E-07 | 0.84 | 3.66   | -     | 529.8   |
| AHQ-3-7, 5602 - 5607        | R.KTFSHELSDFGLESTAGEIPVVAIR.T                                           | 2705.01562 | 2 | 3.03E-05 | 0.93 | 4.18   | -     | 780.0   |
| AHQ-3-7, 2366               | K.LNFVAASR.K                                                            | 878.01067  | 2 | 6.44E-05 | 0.86 | 3.14   | -     | 918.3   |
| AHQ-3-7, 1964 - 1976        | K.LSKDPNIVIAK.M                                                         | 1198.43727 | 2 | 3.08E-06 | 0.89 | 2.98   | -     | 1034.4  |
| AHQ-3-7, 3271 - 3342        | K.MDATANDVPSPEYVR.G                                                     | 1665.80646 | 2 | 2.76E-07 | 0.79 | 3.44   | -     | 484.8   |
| AHQ-3-7, 6218 - 6235        | K.TFSEHLSDFGLESTAGEIPVVAIR.T                                            | 2576.84271 | 3 | 9.67E-07 | 0.90 | 4.08   | -     | 1095.5  |
| AHQ-3-7, 6147 - 6223        | K.TFSEHLSDFGLESTAGEIPVVAIR.T                                            | 2576.84271 | 2 | 5.19E-08 | 0.98 | 7.29   | -     | 1502.7  |
| gi 18570595 ref XP_095590.1 | similar to myosin regulatory light chain [Homo sapiens]                 |            |   | 5.24E-08 | 0.94 | 10.20  | 8.90  | 13951.5 |
| AHQ-3-11, 3008 - 3086       | K.LNGTDPEDVIR.H                                                         | 1229.32195 | 2 | 3.49E-04 | 0.87 | 3.42   | -     | 790.6   |
| AHQ-3-11, 3136              | K.LNGTDPEDVIR.H                                                         | 1229.32195 | 2 | 1.08E-04 | 0.83 | 3.11   | -     | 865.6   |
| AHQ-3-12, 2992              | K.LNGTDPEDVIR.H                                                         | 1229.32195 | 2 | 1.76E-04 | 0.90 | 3.10   | -     | 1114.6  |
| AHQ-3-12, 3188              | K.LNGTDPEDVIR.H                                                         | 1229.32195 | 2 | 1.10E-04 | 0.92 | 3.56   | -     | 1090.8  |
| AHQ-3-11, 2910 - 2918       | K.LNGTDPEDVIR.H                                                         | 1229.32195 | 2 | 5.24E-08 | 0.94 | 4.02   | -     | 1127.4  |
| gi 20357529 ref NP_005264.2 | guanine nucleotide-binding protein, beta-2 subunit; G protein, beta-2   |            |   | 5.51E-08 | 0.94 | 10.23  | 5.90  | 37330.8 |
| AHQ-3-9, 4583 - 4585        | R.KACGDSSTLQITAGLDPVGR.I                                                | 2062.29094 | 2 | 5.51E-08 | 0.94 | 4.60   | -     | 868.6   |
| gi 4507745 ref NP_003320.1  | thioredoxin [Homo sapiens]                                              |            |   | 5.72E-08 | 1.90 | 20.20  | 22.90 | 11693.3 |
| AHQ-3-14-, 4620 - 4633      | K.EKLEATINELV                                                           | 1259.43110 | 2 | 5.30E-04 | 0.95 | 3.71   | -     | 1481.9  |
| AHQ-3-14, 4731              | K.TAFQEALDAAGDK.L                                                       | 1337.41728 | 2 | 1.99E-05 | 0.86 | 3.03   | -     | 1060.2  |
| AHQ-3-13-, 3850 - 3873      | K.TAFQEALDAAGDK.L                                                       | 1337.41728 | 2 | 5.72E-08 | 0.95 | 3.97   | -     | 1468.7  |
| AHQ-3-14-, 3748 - 3759      | K.TAFQEALDAAGDK.L                                                       | 1337.41728 | 2 | 9.82E-06 | 0.93 | 3.62   | -     | 1516.7  |
| AHQ-3-13, 3841 - 3842       | K.TAFQEALDAAGDK.L                                                       | 1337.41728 | 1 | 4.06E-04 | 0.44 | 2.23   | -     | 812.5   |
| AHQ-3-13, 3837              | K.TAFQEALDAAGDK.L                                                       | 1337.41728 | 2 | 8.23E-04 | 0.87 | 3.17   | -     | 1303.6  |
| gi 4758638 ref NP_004896.1  | peroxiredoxin 6; antioxidant protein 2; non-selenium glutathione peroxi |            |   | 5.79E-08 | 6.62 | 90.32  | 48.20 | 25034.8 |
| AHQ-3-10, 3990              | K.DGDSVM*VLTPIEEAAK.K                                                   | 1847.03409 | 2 | 2.98E-05 | 0.56 | 2.83   | -     | 473.0   |
| AHQ-3-10, 5327              | K.DINAYNCEEPTKLPPIIDDR.N                                                | 2651.88650 | 2 | 5.79E-08 | 0.33 | 2.81   | -     | 376.5   |
| AHQ-3-10, 5670              | R.ELAILGMLDPAEKDEK.G                                                    | 1886.19976 | 2 | 5.56E-06 | 0.91 | 3.81   | -     | 943.0   |

|                             |                                                                         |            |   |          |      |       |       |          |
|-----------------------------|-------------------------------------------------------------------------|------------|---|----------|------|-------|-------|----------|
| AHQ-3-10, 5584 - 5646       | R.ELAILLGMLDPAEKDEK.G                                                   | 1886.19976 | 2 | 1.82E-04 | 0.87 | 3.80  | -     | 769.3    |
| AHQ-3-10, 5883              | R.FHDFLGDWSWGLFHSFPR.D                                                  | 2032.24831 | 2 | 1.04E-07 | 0.98 | 6.30  | -     | 2215.5   |
| AHQ-3-14-, 5899             | K.LIALSIDSVDHLAWSK.D                                                    | 1898.14883 | 3 | 1.44E-04 | 0.63 | 3.49  | -     | 380.2    |
| AHQ-3-10, 5487 - 5542       | K.LIALSIDSVDHLAWSK.D                                                    | 1898.14883 | 2 | 8.81E-05 | 0.96 | 4.87  | -     | 1175.2   |
| AHQ-3-10, 4140              | K.LPFFIIDRR.N                                                           | 1086.26548 | 2 | 1.03E-05 | 0.93 | 3.22  | -     | 1185.3   |
| AHQ-3-10, 5151              | R.VATPVDWKGDSVMVLPTIPEEEAK.K                                            | 2728.06777 | 2 | 1.33E-06 | 0.82 | 3.96  | -     | 545.5    |
| AHQ-3-10, 3495              | R.VVVFVGPDK.K                                                           | 1008.19471 | 1 | 7.85E-05 | 0.46 | 1.81  | -     | 883.3    |
| AHQ-3-10, 2763              | R.VVVFVGPDK.L                                                           | 1136.36763 | 1 | 2.53E-04 | 0.67 | 2.89  | -     | 744.9    |
| gi 22027655 ref NP_003907.3 | adaptor-related protein complex 1 sigma 2 subunit; clathrin adaptor co  |            |   | 6.30E-08 | 0.97 | 10.27 | 10.20 | 18614.6  |
| AHQ-3-12, 3927 - 3928       | K.AIEQADLLQEEAETPR.S                                                    | 1813.94395 | 2 | 6.30E-08 | 0.97 | 5.42  | -     | 1431.4   |
| gi 4758460 ref NP_004479.1  | glycoprotein V (platelet) [Homo sapiens]                                |            |   | 6.39E-08 | 1.74 | 20.26 | 9.80  | 60958.9  |
| AHQ-3-5, 5515 - 5523        | R.CAGPGAHAAGLPLVALPGGDAECPGPR.G                                         | 2587.87539 | 3 | 6.39E-08 | 0.79 | 4.10  | -     | 687.9    |
| AHQ-3-1, 5858               | R.CAGPGAHAAGLPLVALPGGDAECPGPR.G                                         | 2587.87539 | 3 | 1.91E-04 | 0.87 | 4.25  | -     | 823.0    |
| AHQ-3-6, 7410               | K.LVNLQELALNQLDFLPSLFTNLLENL.K.L                                        | 3314.77659 | 3 | 2.01E-07 | 0.95 | 5.24  | -     | 1125.0   |
| gi 4557697 ref NP_000412.1  | keratin 10; Keratin-10 [Homo sapiens]                                   |            |   | 6.44E-08 | 2.45 | 30.25 | 8.60  | 57247.1  |
| AHQ-3-14-, 2661             | R.ALEESNYELEGK.I                                                        | 1382.45482 | 2 | 1.06E-04 | 0.72 | 3.02  | -     | 577.0    |
| AHQ-3-1, 5698               | K.ELTTEIDNINQISSYK.S                                                    | 1998.13406 | 2 | 6.44E-08 | 0.78 | 3.34  | -     | 705.9    |
| AHQ-3-13-, 4123             | K.GSLGGGFSGGGFSR.G                                                      | 1708.76962 | 2 | 1.12E-07 | 0.95 | 4.91  | -     | 990.1    |
| gi 5453605 ref NP_006421.1  | chaperonin containing TCP1, subunit 4 (delta); chaperonin containing t- |            |   | 6.79E-08 | 0.89 | 10.16 | 2.40  | 57838.8  |
| AHQ-3-7, 3379 - 3380        | K.VIDPATATSDLR.D                                                        | 1358.52277 | 2 | 6.79E-08 | 0.89 | 3.27  | -     | 1106.2   |
| gi 4503643 ref NP_000121.1  | coagulation factor V precursor; labile factor; factor V Leiden [Homo sa |            |   | 6.95E-08 | 3.53 | 40.23 | 2.10  | 251716.5 |
| AHQ-3-1, 3641               | R.ETDIEDSDIPEDTTYK.K                                                    | 1986.97539 | 2 | 1.01E-05 | 0.84 | 3.80  | -     | 445.4    |
| AHQ-3-5, 2873               | R.ETDIEDSDIPEDTTYK.V                                                    | 2115.14831 | 2 | 1.82E-07 | 0.80 | 3.55  | -     | 564.5    |
| AHQ-3-6, 2863               | K.EVITGQIQGAK.H                                                         | 1358.56590 | 2 | 6.95E-08 | 0.94 | 4.03  | -     | 982.9    |
| AHQ-3-3, 3713 - 3722        | K.LSEGASYLDRHTFPAEK.M                                                   | 1765.90099 | 2 | 3.23E-07 | 0.94 | 4.67  | -     | 1139.1   |
| gi 5032041 ref NP_005605.1  | Ras homolog enriched in brain 2 [Homo sapiens]                          |            |   | 7.14E-08 | 0.78 | 10.23 | 8.70  | 20497.4  |
| AHQ-3-12, 5199              | K.ALAESWNAAFLESSAK.E                                                    | 1695.85389 | 2 | 7.14E-08 | 0.78 | 3.41  | -     | 367.6    |
| AHQ-3-12, 4974 - 4983       | K.ALAESWNAAFLESSAK.E                                                    | 1695.85389 | 2 | 1.38E-05 | 0.95 | 4.62  | -     | 1079.3   |
| gi 4757768 ref NP_004300.1  | Rho GDP dissociation inhibitor (GDI) alpha [Homo sapiens]               |            |   | 7.26E-08 | 2.68 | 30.24 | 15.70 | 23206.9  |
| AHQ-3-11, 4447 - 4451       | R.AEYEFLLTPVEEAPK.G                                                     | 1752.89898 | 2 | 1.46E-04 | 0.89 | 3.51  | -     | 972.9    |
| AHQ-3-10, 4156 - 4234       | R.AEYEFLLTPVEEAPK.G                                                     | 1752.89898 | 2 | 1.89E-06 | 0.92 | 3.93  | -     | 862.6    |
| AHQ-3-12, 4634              | R.AEYEFLLTPVEEAPK.G                                                     | 1752.89898 | 2 | 1.55E-06 | 0.81 | 2.89  | -     | 798.0    |
| AHQ-3-10, 3562 - 3563       | K.SIQEIQLDKDDSLR.K                                                      | 1919.03693 | 2 | 7.26E-08 | 0.95 | 4.85  | -     | 1018.4   |
| AHQ-3-10, 3134              | K.SIQEIQLDKDDSLR.Y                                                      | 2047.20984 | 2 | 2.00E-05 | 0.92 | 4.61  | -     | 883.9    |
| gi 19923437 ref NP_057366.2 | adenylate kinase 3 alpha like [Homo sapiens]                            |            |   | 7.60E-08 | 0.97 | 10.21 | 6.20  | 25565.2  |
| AHQ-3-10, 6092              | K.NLTQYSWLLDGFPR.T                                                      | 1710.91339 | 2 | 7.60E-08 | 0.97 | 4.27  | -     | 1954.0   |
| gi 5453597 ref NP_006126.1  | F-actin capping protein alpha-1 subunit; Cap Z [Homo sapiens]           |            |   | 8.03E-08 | 1.86 | 30.19 | 16.10 | 32925.5  |
| AHQ-3-13-, 2821             | K.DVQDSLTVNEAQTAK.E                                                     | 1706.79025 | 2 | 3.78E-05 | 0.92 | 3.78  | -     | 1015.5   |
| AHQ-3-9, 4109               | R.LLLNNDLLR.E                                                           | 1198.39736 | 1 | 2.89E-04 | 0.30 | 2.31  | -     | 302.8    |
| AHQ-3-9, 5165 - 5169        | K.TIDGQQTACIESHQFQPK.N                                                  | 2316.57620 | 2 | 2.88E-04 | 0.30 | 2.83  | -     | 219.5    |
| AHQ-3-9, 5069 - 5075        | K.TIDGQQTACIESHQFQPK.N                                                  | 2316.57620 | 2 | 8.03E-08 | 0.65 | 3.34  | -     | 269.1    |
| gi 30147857 ref XP_293007.2 | similar to peptidylprolyl isomerase A (cyclophilin A) [Homo sapiens] [  |            |   | 8.15E-08 | 0.34 | 10.14 | 5.90  | 20789.8  |
| AHQ-3-13-, 3353             | K.KITIADCGQLQ                                                           | 1248.43160 | 2 | 2.64E-06 | 0.75 | 2.88  | -     | 830.3    |
| AHQ-3-12, 3278 - 3342       | K.KITIADCGQLQ                                                           | 1248.43160 | 1 | 8.15E-08 | 0.34 | 2.24  | -     | 472.7    |
| gi 4506063 ref NP_002725.1  | protein kinase, cAMP-dependent, regulatory, type I, alpha; tissue-speci |            |   | 8.16E-08 | 1.82 | 20.20 | 7.60  | 42981.4  |
| AHQ-3-7, 5060 - 5072        | R.LTVADALEPVFEDGQK.I                                                    | 1861.04222 | 2 | 6.51E-06 | 0.88 | 3.89  | -     | 502.5    |
| AHQ-3-7, 2779 - 2858        | K.NVLFSLHDDNER.S                                                        | 1459.54574 | 2 | 8.16E-08 | 0.94 | 3.36  | -     | 1486.8   |
| gi 8923579 ref NP_060377.1  | hypothetical protein FLJ20625 [Homo sapiens]                            |            |   | 8.40E-08 | 3.57 | 40.31 | 34.80 | 17744.7  |
| AHQ-3-14-, 5989 - 6055      | K.KLPLPLSLTSQPHQVLASEPIPFSDLQVSR.I                                      | 3411.89550 | 3 | 5.74E-05 | 0.94 | 5.09  | -     | 1136.9   |
| AHQ-3-14, 5017              | R.LAVLSSSLTHWK.K                                                        | 1342.56817 | 2 | 2.33E-05 | 0.76 | 2.96  | -     | 554.2    |
| AHQ-3-12, 6371              | K.LPPLPLSLTSQPHQVLASEPIPFSDLQVSR.I                                      | 3283.72259 | 3 | 1.32E-04 | 0.94 | 5.09  | -     | 869.8    |
| AHQ-3-14-, 6277 - 6283      | K.LPPLPLSLTSQPHQVLASEPIPFSDLQVSR.I                                      | 3283.72259 | 3 | 1.69E-04 | 0.96 | 6.10  | -     | 1219.1   |
| AHQ-3-12, 5375              | R.TDEQALLSSILAK.T                                                       | 1389.57677 | 2 | 8.40E-08 | 0.93 | 3.96  | -     | 1077.1   |
| gi 24234688 ref NP_004125.3 | heat shock 70kDa protein 9B precursor; heat shock 70kD protein 9; stre  |            |   | 8.86E-08 | 0.95 | 10.20 | 1.80  | 73680.1  |
| AHQ-3-6, 5585               | R.AQFGEIVTLDIR.R                                                        | 1362.55625 | 2 | 8.86E-08 | 0.95 | 4.00  | -     | 1874.4   |
| gi 4502211 ref NP_001654.1  | ADP-ribosylation factor 6 [Homo sapiens]                                |            |   | 8.89E-08 | 2.69 | 30.23 | 28.00 | 20082.0  |
| AHQ-3-12, 4030              | K.FNVWVWGQDQK.I                                                         | 1265.35598 | 2 | 5.15E-07 | 0.85 | 3.28  | -     | 921.4    |
| AHQ-3-12, 3682              | R.ILM*GLDAAGK.T                                                         | 1118.37239 | 2 | 4.98E-04 | 0.91 | 3.08  | -     | 1381.9   |
| AHQ-3-12, 6930              | R.NWYVQPSCATSGDGLYGLTWTLSNYK.S                                          | 3113.35876 | 3 | 8.89E-08 | 0.93 | 4.50  | -     | 1128.7   |
| gi 4507231 ref NP_003134.1  | single-stranded DNA binding protein; single-stranded DNA-binding protei |            |   | 9.82E-08 | 3.23 | 40.23 | 37.84 | 17259.5  |
| AHQ-3-13, 2487              | R.DVAYQYVK.K                                                            | 986.10277  | 1 | 2.56E-04 | 0.63 | 2.06  | -     | 822.7    |
| AHQ-3-13, 6009 - 6027       | K.NPVTIFSLATNEM*WR.S                                                    | 1796.04007 | 2 | 3.15E-07 | 0.92 | 4.26  | -     | 747.9    |
| AHQ-3-13-, 6098             | R.QATTIADNIIFLSDQTK.E                                                   | 1993.24692 | 2 | 3.85E-05 | 0.72 | 3.34  | -     | 613.5    |
| AHQ-3-13-, 3194             | R.SGDSEVYQLGDVDSQK.T                                                    | 1612.67692 | 2 | 9.82E-08 | 0.95 | 4.67  | -     | 1224.4   |
| AHQ-3-13, 3193              | R.SGDSEVYQLGDVDSQK.T                                                    | 1612.67692 | 2 | 3.68E-07 | 0.92 | 4.19  | -     | 843.9    |
| gi 30150022 ref XP_300862.1 | similar to beta-tubulin 4Q [Homo sapiens]                               |            |   | 9.87E-08 | 3.72 | 40.30 | 11.59 | 33545.2  |
| AHQ-3-7, 3028 - 3106        | R.FPGQLNADLR.K                                                          | 1131.26634 | 2 | 7.93E-06 | 0.88 | 3.25  | -     | 796.5    |
| AHQ-3-7, 3246               | R.FPGQLNADLR.K                                                          | 1131.26634 | 2 | 9.87E-08 | 0.93 | 3.13  | -     | 1215.2   |
| AHQ-3-7, 3351               | R.FPGQLNADLR.K                                                          | 1131.26634 | 2 | 2.75E-07 | 0.92 | 3.02  | -     | 1043.5   |
| AHQ-3-9, 2939               | R.FPGQLNADLR.K                                                          | 1131.26634 | 2 | 1.92E-05 | 0.80 | 3.16  | -     | 593.1    |
| AHQ-3-11, 3220              | R.FPGQLNADLR.K                                                          | 1131.26634 | 2 | 1.09E-05 | 0.74 | 2.63  | -     | 667.7    |
| AHQ-3-7, 3491               | R.KLAVNMVFPFR.L                                                         | 1272.58771 | 2 | 3.26E-06 | 0.93 | 3.60  | -     | 1194.4   |
| AHQ-3-8, 3924               | K.LAVNMVFPFR.L                                                          | 1144.41480 | 2 | 6.28E-05 | 0.92 | 3.36  | -     | 907.1    |
| AHQ-3-9, 3995               | K.LAVNMVFPFR.L                                                          | 1144.41480 | 2 | 1.73E-04 | 0.92 | 3.21  | -     | 938.1    |
| AHQ-3-7, 4431               | K.LAVNMVFPFR.L                                                          | 1144.41480 | 1 | 3.31E-07 | 0.23 | 2.17  | -     | 245.6    |
| AHQ-3-7, 4163 - 4191        | K.LAVNMVFPFR.L                                                          | 1144.41480 | 2 | 1.39E-07 | 0.93 | 3.86  | -     | 851.0    |
| AHQ-3-14-, 4411             | K.LAVNMVFPFR.L                                                          | 1144.41480 | 2 | 2.83E-04 | 0.91 | 3.33  | -     | 964.2    |
| AHQ-3-9, 5199               | R.LHFFMPGFAPLTSR.G                                                      | 1621.92962 | 2 | 5.00E-07 | 0.92 | 4.07  | -     | 744.0    |
| gi 10835189 ref NP_000628.1 | glutathione reductase [Homo sapiens]                                    |            |   | 1.08E-07 | 1.80 | 20.25 | 8.14  | 51700.3  |
| AHQ-3-7, 4618               | K.ADFDNTVAIHPTSEELVTLR                                                  | 2316.50977 | 2 | 1.08E-07 | 0.84 | 4.25  | -     | 412.0    |
| AHQ-3-7, 2276               | R.GHAAFTSDPKPTIEVSGK.K                                                  | 1843.03012 | 2 | 1.03E-04 | 0.96 | 5.07  | -     | 729.7    |
| gi 29729616 ref XP_292963.1 | similar to peptidylprolyl isomerase A (cyclophilin A) [Homo sapiens] [  |            |   | 1.08E-07 | 1.67 | 20.30 | 16.36 | 18025.4  |
| AHQ-3-12, 4832 - 4911       | K.HTGPGILSM*ANAGPNTNGSQFFICTAK.S                                        | 2810.11545 | 3 | 3.69E-05 | 0.94 | 5.48  | -     | 844.5    |
| AHQ-3-12, 4926 - 4988       | K.HTGPGILSM*ANAGPNTNGSQFFICTAK.S                                        | 2810.11545 | 3 | 9.36E-05 | 0.95 | 5.06  | -     | 1337.1   |
| AHQ-3-12, 4975 - 5038       | K.HTGPGILSM*ANAGPNTNGSQFFICTAK.S                                        | 2810.11545 | 2 | 4.17E-04 | 0.81 | 3.31  | -     | 598.1    |
| AHQ-3-12, 5490 - 5554       | K.HTGPGILSMANAGPNTNGSQFFICTAK.S                                         | 2794.11605 | 2 | 7.74E-05 | 0.92 | 4.75  | -     | 633.0    |
| AHQ-3-12, 5618              | K.HTGPGILSMANAGPNTNGSQFFICTAK.S                                         | 2794.11605 | 2 | 1.08E-07 | 0.91 | 4.73  | -     | 730.6    |
| AHQ-3-13, 4874              | K.HTGPGILSM*ANAGPNTNGSQFFICTAK.S                                        | 2810.11545 | 3 | 2.55E-04 | 0.92 | 4.45  | -     | 1066.6   |
| AHQ-3-13, 4889              | K.HTGPGILSM*ANAGPNTNGSQFFICTAK.S                                        | 2810.11545 | 2 | 3.43E-05 | 0.75 | 3.33  | -     | 432.8    |
| AHQ-3-13-, 4869             | K.HTGPGILSM*ANAGPNTNGSQFFICTAK.S                                        | 2810.11545 | 2 | 3.11E-04 | 0.55 | 2.82  | -     | 309.9    |
| AHQ-3-13-, 5485             | K.HTGPGILSMANAGPNTNGSQFFICTAK.S                                         | 2794.11605 | 3 | 1.45E-07 | 0.96 | 6.03  | -     | 1522.3   |
| gi 5901944 ref NP_008977.1  | elastin microfibril interface located protein; TNF? elastin microfibril |            |   | 1.15E-07 | 4.38 | 50.26 | 10.04 | 106694.7 |
| AHQ-3-3, 3560               | R.APAPASAPPGPSEELLR.Q                                                   | 1660.85268 | 2 | 9.20E-05 | 0.78 | 3.14  | -     | 377.2    |
| AHQ-3-4, 2984               | R.GLEEGQAAGQCPSPLEGR.L                                                  | 1888.99421 | 2 | 1.94E-05 | 0.89 | 4.05  | -     | 821.8    |
| AHQ-3-3, 3032               | R.GTELGGAAGQGGHPGGYTLASLR.L                                             | 2142.27464 | 2 | 2.30E-04 | 0.81 | 3.78  | -     | 352.4    |
| AHQ-3-3, 2773               | R.LVGSGLHTVEAGEAR.Q                                                     | 1567.72888 | 2 | 1.15E-07 | 0.96 | 4.29  | -     | 1270.3   |
| AHQ-3-3, 3720               | R.PARPNLGSASSAPSLGGLGEGPGESEK.V                                         | 2596.74928 | 3 | 1.55E-06 | 0.94 | 5.13  | -     | 1108.2   |
| gi 4507651 ref NP_003281.1  | tropomyosin 4 [Homo sapiens]                                            |            |   | 1.17E-07 | 6.38 | 70.26 | 25.40 | 28521.6  |
| AHQ-3-9, 1709               | K.AEGDVAALNR.R                                                          | 1016.09051 | 2 | 2.05E-06 | 0.94 | 2.59  | -     | 2132.1   |
| AHQ-3-9, 3669 - 3735        | R.AEVSELKCGDLEELKLN                                                     | 1851.02256 | 2 | 5.90E-04 | 0.82 | 3.48  | -     | 818.8    |
| AHQ-3-9, 5653               | R.AEVSELKCGDLEELKLNVTNNLK.S                                             | 2634.89893 | 3 | 1.30E-06 | 0.95 | 4.90  | -     | 1608.9   |
| AHQ-3-9, 1581 - 1608        | R.EKAEQDVAALNR.R                                                        | 1273.37796 | 2 | 1.77E-04 | 0.78 | 2.85  | -     | 820.3    |
| AHQ-3-9, 2335               | K.IQALQQQADEADR.A                                                       | 1615.68404 | 2 | 1.17E-07 | 0.97 | 4.56  | -     | 1736.0   |
| AHQ-3-11, 2474              | K.IQALQQQADEADR.A                                                       | 1615.68404 | 2 | 8.58E-06 | 0.93 | 3.49  | -     | 1331.0   |
| AHQ-3-10, 2255              | R.IQALQQQADEADR.A                                                       | 1743.85695 | 2 | 1.03E-06 | 0.97 | 5.25  | -     | 1904.2   |
| AHQ-3-9, 1895               | K.YSEKEDKYEEIK.L                                                        | 1690.78605 | 2 | 1.32E-07 | 0.94 | 4.64  | -     | 1044.3   |
| gi 5901922 ref NP_008996.1  | CDC37 homolog [Homo sapiens]                                            |            |   | 1.17E-07 | 0.95 | 10.26 | 5.56  | 44468.0  |

|                             |                                                                         |            |   |          |      |       |       |          |
|-----------------------------|-------------------------------------------------------------------------|------------|---|----------|------|-------|-------|----------|
| AHQ-3-7, 6712               | R.LGPGGLDPVEYVESLPEELQK.C                                               | 2270.52091 | 2 | 1.17E-07 | 0.95 | 5.24  | -     | 613.8    |
| gi 7657176 ref NP_055070.1  | transmembrane protein 4 [Homo sapiens]                                  |            |   | 1.25E-07 | 0.61 | 10.20 | 8.79  | 20652.1  |
| AHQ-3-11, 3488              | R.INPDGSQSVEVPYAR.S                                                     | 1731.88777 | 2 | 1.25E-07 | 0.61 | 3.03  | -     | 348.5    |
| gi 4503725 ref NP_000792.1  | FK506-binding protein 1A; FK506-binding protei                          |            |   | 1.28E-07 | 2.78 | 30.22 | 29.63 | 11950.6  |
| AHQ-3-13-, 2962             | R.GWEEGVAQM*SVGQR.A                                                     | 1550.67866 | 2 | 8.79E-06 | 0.94 | 4.10  | -     | 943.9    |
| AHQ-3-14-, 3805 - 3811      | R.GWEEGVAQM*SVGQR.A                                                     | 1534.67926 | 2 | 9.24E-06 | 0.83 | 3.08  | -     | 1121.3   |
| AHQ-3-14-, 2911             | R.GWEEGVAQM*SVGQR.A                                                     | 1550.67866 | 2 | 1.54E-06 | 0.90 | 3.35  | -     | 965.8    |
| AHQ-3-14, 4741              | R.GWEEGVAQM*SVGQR.A                                                     | 1534.67926 | 2 | 1.28E-07 | 0.94 | 3.89  | -     | 1283.3   |
| AHQ-3-13-, 2983             | K.RGQTCVHHYTGMLDEGK.K                                                   | 2081.36259 | 3 | 6.77E-06 | 0.95 | 3.99  | -     | 1768.8   |
| gi 6912494 ref NP_036457.1  | microtubule-associated protein, RP/EB family, member 1; ADENOMATOUS POL |            |   | 1.31E-07 | 3.32 | 40.28 | 21.64 | 29998.9  |
| AHQ-3-12, 3950              | K.FFDANYDGKDYDPAAR.Q                                                    | 1965.06754 | 2 | 1.50E-06 | 0.92 | 4.49  | -     | 651.8    |
| AHQ-3-12, 6542              | K.FQDNFVQWFK.K                                                          | 1635.80184 | 2 | 1.31E-07 | 0.95 | 4.40  | -     | 960.3    |
| AHQ-3-12, 2586              | K.LEHEYIQNF.K                                                           | 1321.46268 | 2 | 8.06E-06 | 0.48 | 2.65  | -     | 575.2    |
| AHQ-3-13-, 4439             | R.NIELICQENEGENDPVLQR.I                                                 | 2272.43545 | 2 | 5.19E-05 | 0.98 | 5.70  | -     | 1720.5   |
| AHQ-3-13-, 4555             | R.NIELICQENEGENDPVLQR.I                                                 | 2272.43545 | 2 | 1.94E-06 | 0.97 | 5.55  | -     | 1608.7   |
| AHQ-3-13, 4565              | R.NIELICQENEGENDPVLQR.I                                                 | 2272.43545 | 2 | 1.62E-05 | 0.93 | 4.68  | -     | 824.3    |
| gi 4758950 ref NP_000933.1  | peptidylprolyl isomerase B (cyclophilin B) [Homo sapiens]               |            |   | 1.31E-07 | 7.55 | 90.22 | 40.74 | 23742.4  |
| AHQ-3-11, 4039              | K.DFMIQGGDFTR.G                                                         | 1287.42660 | 2 | 2.42E-07 | 0.93 | 3.42  | -     | 1305.0   |
| AHQ-3-12, 4179 - 4180       | K.DFMIQGGDFTR.G                                                         | 1287.42660 | 2 | 6.72E-06 | 0.88 | 3.45  | -     | 1009.9   |
| AHQ-3-11, 2790              | R.DKPLKDVIIADCGK.I                                                      | 1573.83653 | 3 | 1.45E-06 | 0.89 | 4.31  | -     | 976.0    |
| AHQ-3-11, 2751 - 2819       | R.DKPLKDVIIADCGK.I                                                      | 1573.83653 | 2 | 1.23E-04 | 0.91 | 3.47  | -     | 982.1    |
| AHQ-3-12, 2894              | R.DKPLKDVIIADCGK.I                                                      | 1573.83653 | 2 | 1.31E-07 | 0.96 | 3.53  | -     | 1801.7   |
| AHQ-3-11, 4108              | K.DTNGSQFFITTVK.T                                                       | 1458.59766 | 2 | 2.90E-05 | 0.96 | 3.82  | -     | 1895.5   |
| AHQ-3-11, 4191 - 4238       | K.DTNGSQFFITTVK.T                                                       | 1458.59766 | 2 | 1.98E-06 | 0.94 | 4.06  | -     | 1350.5   |
| AHQ-3-12, 4382              | K.DTNGSQFFITTVK.T                                                       | 1458.59766 | 1 | 3.38E-04 | 0.18 | 2.08  | -     | 291.0    |
| AHQ-3-12, 4352              | K.DTNGSQFFITTVK.T                                                       | 1458.59766 | 2 | 1.34E-07 | 0.94 | 3.67  | -     | 1279.5   |
| AHQ-3-11, 4150 - 4220       | K.DTNGSQFFITTVK.T                                                       | 1458.59766 | 1 | 4.10E-06 | 0.28 | 2.42  | -     | 324.4    |
| AHQ-3-11, 2328              | K.DVIIADCGK.I                                                           | 992.12891  | 1 | 8.34E-07 | 0.37 | 1.95  | -     | 496.7    |
| AHQ-3-12, 2403              | K.DVIIADCGK.I                                                           | 992.12891  | 1 | 7.01E-05 | 0.73 | 2.20  | -     | 826.1    |
| AHQ-3-12, 2950 - 3030       | K.HYGPWVWSMANAGK.D                                                      | 1475.65664 | 2 | 3.46E-04 | 0.80 | 2.96  | -     | 857.0    |
| AHQ-3-12, 3074              | K.IEVEKPAIAK.E                                                          | 1245.49240 | 2 | 2.00E-05 | 0.88 | 3.52  | -     | 906.1    |
| AHQ-3-12, 4346 - 4351       | K.TVDNDFVALATGEK.G                                                      | 1365.51377 | 2 | 4.87E-07 | 0.92 | 4.22  | -     | 798.2    |
| AHQ-3-14-, 4320             | K.TVDNDFVALATGEK.G                                                      | 1365.51377 | 2 | 2.25E-04 | 0.92 | 3.80  | -     | 1025.1   |
| AHQ-3-11, 4172              | K.TVDNDFVALATGEK.G                                                      | 1365.51377 | 1 | 1.87E-04 | 0.33 | 2.56  | -     | 259.2    |
| AHQ-3-12, 3707              | R.VIKDFM*IQGGDFTR.G                                                     | 1643.88873 | 2 | 2.62E-05 | 0.87 | 3.72  | -     | 783.6    |
| AHQ-3-12, 2978 - 3016       | K.VLEGMEVVR.K                                                           | 1032.23962 | 2 | 2.42E-06 | 0.88 | 2.82  | -     | 874.9    |
| gi 4504073 ref NP_000398.1  | glycoprotein Ib beta polypeptide precursor [Homo sapiens]               |            |   | 1.36E-07 | 2.08 | 30.18 | 10.68 | 21717.6  |
| AHQ-3-10, 4218              | R.LLPLYAEDELRA.A                                                        | 1332.52691 | 1 | 1.13E-04 | 0.51 | 2.58  | -     | 540.8    |
| AHQ-3-1, 4966               | R.LLPLYAEDELRA.A                                                        | 1332.52691 | 2 | 6.39E-05 | 0.88 | 2.94  | -     | 585.1    |
| AHQ-3-4, 4840               | R.LLPLYAEDELRA.A                                                        | 1332.52691 | 2 | 4.04E-06 | 0.67 | 2.60  | -     | 486.8    |
| AHQ-3-6, 4559               | R.LLPLYAEDELRA.A                                                        | 1332.52691 | 2 | 9.83E-07 | 0.90 | 3.14  | -     | 969.7    |
| AHQ-3-7, 4443               | R.LLPLYAEDELRA.A                                                        | 1332.52691 | 2 | 5.02E-07 | 0.79 | 3.03  | -     | 380.7    |
| AHQ-3-10, 4214 - 4244       | R.LLPLYAEDELRA.A                                                        | 1332.52691 | 2 | 1.96E-07 | 0.81 | 2.69  | -     | 654.9    |
| AHQ-3-13-, 4635 - 4642      | R.LLPLYAEDELRA.A                                                        | 1332.52691 | 2 | 8.07E-06 | 0.91 | 3.43  | -     | 762.2    |
| AHQ-3-13, 4638              | R.LLPLYAEDELRA.A                                                        | 1332.52691 | 2 | 2.86E-06 | 0.76 | 2.74  | -     | 449.7    |
| AHQ-3-11, 4403 - 4430       | R.LLPLYAEDELRA.A                                                        | 1332.52691 | 2 | 1.01E-04 | 0.87 | 3.33  | -     | 568.0    |
| AHQ-3-1, 4598               | R.LSLTDPVLAER.A                                                         | 1214.39356 | 2 | 9.62E-06 | 0.96 | 3.48  | -     | 1695.4   |
| AHQ-3-11, 4082              | R.LSLTDPVLAER.A                                                         | 1214.39356 | 2 | 1.36E-07 | 0.95 | 3.65  | -     | 1426.2   |
| AHQ-3-11, 2174              | R.TAHLGANPWR.C                                                          | 1123.24913 | 1 | 3.16E-04 | 0.31 | 2.15  | -     | 292.0    |
| gi 15306356 ref XP_035638.2 | similar to interleukin 25; lymphocyte antigen 6 complex, locus E ligand |            |   | 1.40E-07 | 2.67 | 30.20 | 20.81 | 18795.1  |
| AHQ-3-13, 3447 - 3451       | R.ESDVPKTEEFVETK.T                                                      | 1751.91253 | 2 | 5.82E-05 | 0.92 | 3.96  | -     | 623.0    |
| AHQ-3-13-, 3445             | R.ESDVPKTEEFVETK.T                                                      | 1751.91253 | 2 | 1.40E-07 | 0.84 | 3.39  | -     | 498.8    |
| AHQ-3-12, 3458              | R.ESDVPKTEEFVETK.T                                                      | 1751.91253 | 2 | 1.55E-04 | 0.91 | 3.59  | -     | 740.8    |
| AHQ-3-13-, 2794             | R.GAEIYAM*AYS.K.A                                                       | 1349.49144 | 2 | 1.11E-05 | 0.93 | 3.78  | -     | 1239.3   |
| AHQ-3-13-, 4605             | K.SYLYFTQFK.A                                                           | 1197.36315 | 2 | 3.89E-04 | 0.81 | 2.53  | -     | 1054.9   |
| AHQ-3-13, 4586              | K.SYLYFTQFK.A                                                           | 1197.36315 | 2 | 3.56E-05 | 0.90 | 2.77  | -     | 1216.4   |
| gi 18104998 ref NP_001119.2 | adaptor-related protein complex 1, gamma 1 subunit; gamma adaptin; cla  |            |   | 1.57E-07 | 0.97 | 10.32 | 3.27  | 91679.3  |
| AHQ-3-13-, 6802             | K.TFQLQLSPSSSIVPAFNTGITTVQIK.V                                          | 2892.33903 | 3 | 1.57E-07 | 0.97 | 6.36  | -     | 1837.8   |
| AHQ-3-13, 6887              | K.TFQLQLSPSSSIVPAFNTGITTVQIK.V                                          | 2892.33903 | 3 | 7.09E-05 | 0.94 | 4.99  | -     | 1482.3   |
| gi 21389549 ref NP_653263.1 | hypothetical protein MGC26605 [Homo sapiens]                            |            |   | 1.58E-07 | 1.81 | 20.23 | 14.88 | 26927.2  |
| AHQ-3-10, 5152              | R.AITVFSPDGHLFQVEYQAQAVK.K                                              | 2450.73052 | 2 | 1.58E-07 | 0.93 | 4.51  | -     | 801.8    |
| AHQ-3-10, 4316 - 4323       | K.LTVEEDPVTVEYITR.F                                                     | 1635.83990 | 2 | 4.01E-04 | 0.88 | 3.52  | -     | 728.5    |
| gi 4507171 ref NP_003109.1  | secreted protein, acidic, cysteine-rich (osteonectin); Osteonectin (sec |            |   | 1.59E-07 | 1.60 | 20.20 | 4.62  | 34632.0  |
| AHQ-3-8, 2290               | K.RLEAGHPVELLAR.D                                                       | 1576.78214 | 3 | 1.00E-05 | 0.92 | 3.38  | -     | 1521.5   |
| AHQ-3-9, 6203 - 6241        | K.YIPPCDSELTEFFPLR.M                                                    | 1952.21655 | 2 | 1.59E-07 | 0.69 | 3.20  | -     | 183.7    |
| gi 4507143 ref NP_003786.1  | sorting nexin 3 isoform a; sorting nexin 3A [Homo sapiens]              |            |   | 1.59E-07 | 1.86 | 20.20 | 16.67 | 18762.2  |
| AHQ-3-12, 5064              | R.CLHMFLQDEIIDK.S                                                       | 1663.94004 | 2 | 1.59E-07 | 0.93 | 4.07  | -     | 1104.5   |
| AHQ-3-12, 5022 - 5040       | R.GDDGIFDNDFIEER.K                                                      | 1642.66158 | 2 | 3.65E-07 | 0.94 | 3.88  | -     | 894.4    |
| gi 19923993 ref NP_612469.1 | chemokine-like factor super family 5 [Homo sapiens]                     |            |   | 1.62E-07 | 0.91 | 10.22 | 12.18 | 17444.2  |
| AHQ-3-12, 4908 - 4971       | R.DRHPEGVVVAELQGFADVK.A                                                 | 2097.27378 | 2 | 1.62E-07 | 0.91 | 4.33  | -     | 759.2    |
| gi 4557801 ref NP_000261.1  | purine nucleoside phosphorylase [Homo sapiens]                          |            |   | 1.65E-07 | 2.57 | 30.36 | 19.72 | 32147.7  |
| AHQ-3-13, 7001              | K.LEQFVILMASIPDPK.A                                                     | 1902.28716 | 2 | 9.97E-04 | 0.86 | 3.87  | -     | 551.6    |
| AHQ-3-11, 4740              | K.LGADAVGMSTVPEVIVAR.H                                                  | 1786.08666 | 2 | 1.35E-05 | 0.77 | 3.33  | -     | 676.6    |
| AHQ-3-9, 5813               | R.VFHLLGVDTLVTNAAGGLNPK.F                                               | 2236.59890 | 2 | 1.65E-07 | 0.95 | 4.96  | -     | 908.0    |
| AHQ-3-9, 5616 - 5623        | R.VFHLLGVDTLVTNAAGGLNPK.F                                               | 2236.59890 | 2 | 3.76E-07 | 0.99 | 7.17  | -     | 2997.4   |
| gi 5453710 ref NP_006139.1  | LIM and SH3 protein 1; Lasp-1 [Homo sapiens]                            |            |   | 1.70E-07 | 0.89 | 10.18 | 4.60  | 29717.0  |
| AHQ-3-12, 1982              | R.LKQSQELQSQV.R                                                         | 1444.61889 | 2 | 1.70E-07 | 0.89 | 3.59  | -     | 1066.8   |
| gi 2956811 ref NP_006088.2  | myosin, light polypeptide 9, regulatory; myosin regulatory light chain  |            |   | 1.71E-07 | 3.60 | 40.22 | 23.84 | 19827.1  |
| AHQ-3-11, 3315              | R.FTDEEVDMYR.E                                                          | 1434.51009 | 1 | 7.33E-05 | 0.56 | 2.36  | -     | 413.3    |
| AHQ-3-13, 3458              | R.FTDEEVDMYR.E                                                          | 1434.51009 | 2 | 3.80E-07 | 0.89 | 2.94  | -     | 1028.8   |
| AHQ-3-14-, 3440             | R.FTDEEVDMYR.E                                                          | 1434.51009 | 2 | 1.71E-07 | 0.94 | 3.33  | -     | 1502.1   |
| AHQ-3-11, 2614 - 2626       | R.FTDEEVDMYR*YR.E                                                       | 1450.50949 | 2 | 7.85E-07 | 0.96 | 4.35  | -     | 1231.5   |
| AHQ-3-11, 3878              | K.GNFNYVEFTR.I                                                          | 1247.34066 | 2 | 6.24E-05 | 0.92 | 3.64  | -     | 992.9    |
| AHQ-3-11, 3774 - 3776       | K.GNFNYVEFTR.I                                                          | 1247.34066 | 2 | 1.71E-06 | 0.84 | 3.14  | -     | 609.6    |
| AHQ-3-11, 3631              | K.GNFNYVEFTR.I                                                          | 1247.34066 | 2 | 4.25E-06 | 0.93 | 3.85  | -     | 1025.7   |
| AHQ-3-11, 5690              | R.NAFACFDEEASGFHEDHLR.E                                                 | 2367.49548 | 2 | 2.74E-07 | 0.86 | 2.94  | -     | 1217.3   |
| gi 29788766 ref NP_064424.2 | tubulin, beta polypeptide 4, member Q [Homo sapiens]                    |            |   | 1.78E-07 | 1.69 | 20.26 | 7.39  | 48377.2  |
| AHQ-3-7, 6255 - 6322        | K.EAESDCDQLGQFLTHSLGGGTGSGMGTLLLSK.I                                    | 3315.65550 | 3 | 2.04E-06 | 0.91 | 4.37  | -     | 1138.0   |
| AHQ-3-9, 5972               | K.EAESDCDQLGQFLTHSLGGGTGSGMGTLLLSK.I                                    | 3315.65550 | 3 | 1.09E-04 | 0.67 | 3.20  | -     | 930.3    |
| AHQ-3-12, 6123              | K.EAESDCDQLGQFLTHSLGGGTGSGMGTLLLSK.I                                    | 3315.65550 | 3 | 1.78E-07 | 0.94 | 5.22  | -     | 1093.1   |
| AHQ-3-7, 5722               | K.EAESDCDQLGQFLTHSLGGGTGSGM*GTLTLLSK.I                                  | 3331.65490 | 3 | 1.77E-04 | 0.75 | 3.47  | -     | 751.4    |
| gi 4503743 ref NP_002009.1  | flightless 1 homolog [Homo sapiens]                                     |            |   | 1.78E-07 | 3.43 | 40.23 | 5.67  | 144750.1 |
| AHQ-3-4, 3138               | K.AVQGAQQPSLYQIR.T                                                      | 1559.75158 | 2 | 4.74E-04 | 0.84 | 3.79  | -     | 503.2    |
| AHQ-3-3, 3190               | K.AVQGAQQPSLYQIR.T                                                      | 1559.75158 | 2 | 3.48E-04 | 0.74 | 3.96  | -     | 595.5    |
| AHQ-3-3, 6541 - 6554        | R.TGLCYLPEELAAQK.L                                                      | 1707.96931 | 2 | 3.04E-04 | 0.84 | 3.69  | -     | 393.2    |
| AHQ-3-3, 7292               | R.TQSNLPTSEGLSNLADVDLSCNDLTR.V                                          | 2936.15611 | 2 | 4.00E-06 | 0.92 | 4.39  | -     | 840.9    |
| AHQ-3-4, 6849               | K.VGLGLYLELPQINYK.L                                                     | 1778.08432 | 2 | 1.78E-07 | 0.93 | 4.38  | -     | 912.6    |
| AHQ-3-3, 6852 - 6921        | K.VGLGLYLELPQINYK.L                                                     | 1778.08432 | 2 | 8.31E-05 | 0.93 | 4.59  | -     | 907.1    |
| gi 18105037 ref NP_004709.2 | cytochrome c oxidase subunit VIIa polypeptide 2 like; estrogen recepto  |            |   | 1.87E-07 | 0.95 | 10.27 | 28.95 | 12614.6  |
| AHQ-3-14-, 6053 - 6067      | K.LAGAWASEAYSPOGLKPVVSTEAFFIATPTK.L                                     | 3399.87995 | 3 | 1.87E-07 | 0.95 | 5.45  | -     | 1053.9   |
| gi 21618359 ref NP_004095.3 | fatty acid synthase [Homo sapiens]                                      |            |   | 1.87E-07 | 2.79 | 30.28 | 2.11  | 273262.0 |
| AHQ-3-1, 6226 - 6237        | R.LFDHPESPNTPEPLFLAQAEVYK.E                                             | 2842.15075 | 3 | 2.78E-05 | 0.97 | 5.60  | -     | 1657.1   |
| AHQ-3-1, 7037 - 7053        | K.LPEDPILLSGLLDSPALK.A                                                  | 1779.06739 | 2 | 4.88E-04 | 0.98 | 5.44  | -     | 2881.0   |
| AHQ-3-2, 7187               | K.LPEDPILLSGLLDSPALK.A                                                  | 1779.06739 | 2 | 1.87E-07 | 0.98 | 5.12  | -     | 1811.1   |
| AHQ-3-1, 3840               | R.LQVVDQPLVPR.G                                                         | 1264.49894 | 2 | 6.86E-04 | 0.85 | 3.30  | -     | 1008.5   |
| gi 5174613 ref NP_005960.1  | nucleosome assembly protein 1-like 4; nucleosome assembly protein 2 [Ho |            |   | 1.90E-07 | 0.97 | 10.18 | 2.67  | 42823.1  |
| AHQ-3-7, 2635 - 2636        | K.FYEEVHDLER.K                                                          | 1337.41897 | 2 | 1.90E-07 | 0.97 | 3.56  | -     | 1956.3   |







|                             |                                                                           |            |   |          |      |       |       |          |       |
|-----------------------------|---------------------------------------------------------------------------|------------|---|----------|------|-------|-------|----------|-------|
| AHQ-3-11, 2972              | R.TIAQDYGVLK.A                                                            | 1108.26945 | 2 | 7.71E-07 | 0.82 |       |       |          | 567.4 |
| gi 20127528 ref NP_037459.2 | parvin, beta; CGI-56 protein; beta-parvin [Homo sapiens]                  |            |   | 7.95E-07 | 4.42 | 60.23 | 22.25 | 41714.0  |       |
| AHQ-3-14-, 3428             | K.ARPEDVNNLDLK.S                                                          | 1369.54878 | 2 | 7.19E-05 | 0.86 | 3.41  |       | 718.0    |       |
| AHQ-3-9, 2955               | K.ARPEDVNNLDLK.S                                                          | 1369.54878 | 2 | 3.13E-06 | 0.93 | 4.10  |       | 971.4    |       |
| AHQ-3-9, 2972               | K.ARPEDVNNLDLK.S                                                          | 1369.54878 | 1 | 8.27E-05 | 0.34 | 2.87  |       | 235.1    |       |
| AHQ-3-13, 3450              | K.ARPEDVNNLDLK.S                                                          | 1369.54878 | 2 | 1.65E-04 | 0.93 | 4.39  |       | 874.4    |       |
| AHQ-3-10, 3168              | K.ARPEDVNNLDLK.S                                                          | 1369.54878 | 2 | 1.29E-04 | 0.92 | 4.13  |       | 773.1    |       |
| AHQ-3-13-, 3447 - 3450      | K.ARPEDVNNLDLK.S                                                          | 1369.54878 | 2 | 7.95E-07 | 0.95 | 4.56  |       | 916.0    |       |
| AHQ-3-9, 5000               | R.DAFDTLFDHAPDKLSVVK.K                                                    | 2019.24293 | 2 | 1.33E-04 | 0.88 | 3.92  |       | 658.2    |       |
| AHQ-3-9, 3288 - 3303        | K.LNVAEVTQSEIGQK.Q                                                        | 1516.67865 | 2 | 2.54E-06 | 0.93 | 3.87  |       | 995.1    |       |
| AHQ-3-13, 3775              | K.LNVAEVTQSEIGQK.Q                                                        | 1516.67865 | 2 | 2.71E-06 | 0.95 | 3.81  |       | 1525.0   |       |
| AHQ-3-9, 3707 - 3723        | K.QLEEDLYDGGVLQK.L                                                        | 1678.82164 | 2 | 1.22E-05 | 0.90 | 3.94  |       | 1026.5   |       |
| AHQ-3-9, 6065 - 6135        | K.VLLDWINDVLVEER.I                                                        | 1713.95549 | 2 | 2.94E-04 | 0.72 | 2.82  |       | 682.1    |       |
| AHQ-3-9, 6913               | K.VLLDWINDVLVEER.I                                                        | 1713.95549 | 2 | 5.02E-04 | 0.94 | 4.07  |       | 1197.9   |       |
| AHQ-3-9, 2111               | R.WSVDLSHGK.N                                                             | 1029.13088 | 1 | 8.14E-04 | 0.05 | 1.85  |       | 214.5    |       |
| gi 4506765 ref NP_002952.1  | S100 calcium-binding protein A4; 18A2; 42A; S100 calcium-binding protei   |            |   | 8.32E-07 | 1.82 | 20.18 | 10.89 | 11728.5  |       |
| AHQ-3-14-, 3369             | K.ALDVMVSTFHK.Y                                                           | 1248.47665 | 2 | 8.32E-07 | 0.87 | 3.33  |       | 822.0    |       |
| AHQ-3-14-, 2791             | K.ALDVMVSTFHK.Y                                                           | 1264.47605 | 2 | 1.23E-04 | 0.94 | 3.59  |       | 1302.1   |       |
| gi 4758018 ref NP_004359.1  | calponin 2; Calonin 2 [Homo sapiens]                                      |            |   | 8.41E-07 | 1.82 | 20.25 | 9.06  | 33696.9  |       |
| AHQ-3-13, 2886              | K.GLQSGVDIGVK.Y                                                           | 1073.22510 | 2 | 1.31E-04 | 0.90 | 2.83  |       | 1203.0   |       |
| AHQ-3-12, 2807              | K.GLQSGVDIGVK.Y                                                           | 1073.22510 | 2 | 2.38E-06 | 0.89 | 3.08  |       | 1124.3   |       |
| AHQ-3-13-, 2845             | K.GLQSGVDIGVK.Y                                                           | 1073.22510 | 2 | 2.46E-05 | 0.84 | 2.62  |       | 1131.5   |       |
| AHQ-3-12, 6332 - 6394       | R.TWIEGLTGLSIGPDFQK.G                                                     | 1863.10294 | 2 | 1.83E-06 | 0.96 | 4.92  |       | 1319.0   |       |
| AHQ-3-12, 6360              | R.TWIEGLTGLSIGPDFQK.G                                                     | 1863.10294 | 3 | 3.65E-04 | 0.86 | 4.07  |       | 870.8    |       |
| AHQ-3-12, 6472              | R.TWIEGLTGLSIGPDFQK.G                                                     | 1863.10294 | 2 | 2.93E-04 | 0.89 | 3.21  |       | 1224.9   |       |
| AHQ-3-11, 6139 - 6160       | R.TWIEGLTGLSIGPDFQK.G                                                     | 1863.10294 | 2 | 8.35E-04 | 0.93 | 4.29  |       | 908.1    |       |
| AHQ-3-9, 6269               | R.TWIEGLTGLSIGPDFQK.G                                                     | 1863.10294 | 2 | 8.02E-04 | 0.90 | 3.56  |       | 952.9    |       |
| AHQ-3-1, 6726 - 6785        | R.TWIEGLTGLSIGPDFQK.G                                                     | 1863.10294 | 2 | 2.43E-04 | 0.83 | 3.11  |       | 1004.1   |       |
| AHQ-3-13-, 6349 - 6415      | R.TWIEGLTGLSIGPDFQK.G                                                     | 1863.10294 | 2 | 8.41E-07 | 0.93 | 3.97  |       | 1068.0   |       |
| AHQ-3-14-, 6276             | R.TWIEGLTGLSIGPDFQK.G                                                     | 1863.10294 | 2 | 1.07E-04 | 0.85 | 3.12  |       | 1254.9   |       |
| gi 5803181 ref NP_006810.1  | stress-induced-phosphoprotein 1 (Hsp70/Hsp90-organizing protein) [Homo    |            |   | 8.44E-07 | 0.94 | 10.24 | 3.50  | 62638.9  |       |
| AHQ-3-13, 6362              | K.ALSVGNIDALQCYSEAIK.L                                                    | 2069.27871 | 2 | 6.35E-05 | 0.64 | 3.41  |       | 330.2    |       |
| AHQ-3-6, 6525 - 6526        | K.ALSVGNIDALQCYSEAIK.L                                                    | 2069.27871 | 2 | 8.44E-07 | 0.94 | 4.87  |       | 846.7    |       |
| gi 4506195 ref NP_002785.1  | proteasome beta 2 subunit; proteasome subunit, beta type. 2; macropain    |            |   | 8.79E-07 | 0.86 | 10.17 | 5.47  | 22836.1  |       |
| AHQ-3-11, 5846 - 5924       | R.FILNLPFTSVR.I                                                           | 1307.56542 | 2 | 8.79E-07 | 0.86 | 3.39  |       | 769.5    |       |
| gi 4757766 ref NP_004299.1  | Rho GTPase activating protein 1; RhoGAP; p50rhoGAP; CDC42 GTPase-activa   |            |   | 9.02E-07 | 1.75 | 20.21 | 7.29  | 50435.4  |       |
| AHQ-3-7, 3871               | K.NPEQPEPIVLR.E                                                           | 1405.62426 | 2 | 1.81E-05 | 0.84 | 3.16  |       | 783.9    |       |
| AHQ-3-11, 5878              | R.VPATLQVLTLPPEENYQVLR.F                                                  | 2312.65053 | 2 | 2.41E-05 | 0.88 | 4.25  |       | 510.6    |       |
| AHQ-3-7, 6127               | R.VPATLQVLTLPPEENYQVLR.F                                                  | 2312.65053 | 2 | 9.02E-07 | 0.91 | 4.25  |       | 558.8    |       |
| gi 4557553 ref NP_000108.1  | emerin [Homo sapiens]                                                     |            |   | 9.05E-07 | 0.82 | 10.18 | 8.27  | 28993.6  |       |
| AHQ-3-13, 4125              | R.LSPSSSSAASSYSFSDLNSTR.G                                                 | 2162.25626 | 2 | 9.05E-07 | 0.82 | 3.58  |       | 276.0    |       |
| gi 21361794 ref NP_060918.2 | TIP120 protein [Homo sapiens]                                             |            |   | 9.28E-07 | 0.89 | 10.21 | 1.46  | 136374.7 |       |
| AHQ-3-4, 4561 - 4562        | K.VIRPLDQPSFDTATPYIK.D                                                    | 2048.32741 | 2 | 9.28E-07 | 0.89 | 4.12  |       | 596.0    |       |
| gi 21361547 ref NP_002930.2 | ribonuclease/angiogenesis inhibitor; Placental ribonuclease inhibitor [H] |            |   | 9.43E-07 | 0.88 | 10.20 | 3.25  | 49973.3  |       |
| AHQ-3-14-, 6405             | R.WAELLPLLQQCQVVR.L                                                       | 1855.19360 | 2 | 7.14E-06 | 0.72 | 3.08  |       | 480.7    |       |
| AHQ-3-7, 6628               | R.WAELLPLLQQCQVVR.L                                                       | 1855.19360 | 2 | 9.43E-07 | 0.88 | 3.73  |       | 604.8    |       |
| gi 4508047 ref NP_003452.1  | zyxin [Homo sapiens]                                                      |            |   | 9.59E-07 | 1.92 | 30.22 | 11.54 | 61277.0  |       |
| AHQ-3-8, 7183               | K.EVEELEQLTQQLMQDMEHPQR.Q                                                 | 2612.87876 | 3 | 3.49E-04 | 0.82 | 3.48  |       | 848.6    |       |
| AHQ-3-9, 6931               | K.EVEELEQLTQQLMQDMEHPQR.Q                                                 | 2612.87876 | 2 | 9.59E-07 | 0.65 | 2.70  |       | 587.4    |       |
| AHQ-3-10, 3623 - 3627       | K.LGHPPEALSAAGTGSPOPPSFTYAQQR.E                                           | 2598.81170 | 2 | 2.88E-05 | 0.82 | 3.70  |       | 510.4    |       |
| AHQ-3-8, 3606               | K.LGHPPEALSAAGTGSPOPPSFTYAQQR.E                                           | 2598.81170 | 2 | 1.24E-04 | 0.92 | 4.39  |       | 620.2    |       |
| AHQ-3-9, 7025 - 7097        | K.VSSIDLEIDLSSLLDDMTK.N                                                   | 2182.43225 | 2 | 6.11E-04 | 0.45 | 2.59  |       | 485.8    |       |
| gi 5453898 ref NP_006212.1  | protein (peptidyl-prolyl) cis/trans isomerase NIMA-interacting 1; dox;    |            |   | 9.70E-07 | 1.55 | 20.22 | 21.47 | 18243.2  |       |
| AHQ-3-12, 5428              | K.SGEEDFELASQFSDCSSAK.A                                                   | 2183.20603 | 2 | 2.84E-05 | 0.60 | 2.64  |       | 566.7    |       |
| AHQ-3-12, 4003 - 4068       | R.TKEEALELINGYQIK.I                                                       | 1749.98614 | 2 | 9.70E-07 | 0.95 | 4.32  |       | 1257.0   |       |
| gi 4502695 ref NP_001779.1  | cell division cycle 10 (homolog to CDC10 of S.c                           |            |   | 9.81E-07 | 2.16 | 30.27 | 8.13  | 48786.6  |       |
| AHQ-3-8, 3648               | K.IYEFETDDEEENKLVK.K                                                      | 2099.23685 | 2 | 2.65E-04 | 0.54 | 3.07  |       | 298.5    |       |
| AHQ-3-14-, 5401             | K.NLEGYVGFANLNQVYR.K                                                      | 1955.16216 | 2 | 9.81E-07 | 0.95 | 4.32  |       | 1158.2   |       |
| AHQ-3-14, 6305              | K.NLEGYVGFANLNQVYR.K                                                      | 1955.16216 | 2 | 4.41E-06 | 0.96 | 5.43  |       | 1037.7   |       |
| AHQ-3-14-, 6449             | K.STLNSLFLTDLVSPPEYGPSPHR.I                                               | 2608.88640 | 2 | 6.85E-05 | 0.67 | 2.50  |       | 511.6    |       |
| gi 4506417 ref NP_002877.1  | RAP2B, member of RAS oncogene family [Homo sapiens]                       |            |   | 1.01E-06 | 4.44 | 50.25 | 43.72 | 20494.2  |       |
| AHQ-3-11, 4986              | K.ALAEEWSCPFFMETSAN.N                                                     | 1859.06988 | 2 | 2.36E-05 | 0.96 | 5.05  |       | 965.7    |       |
| AHQ-3-11, 5992 - 6004       | K.ASVDELFAEIVR.Q                                                          | 1349.51434 | 2 | 1.01E-06 | 0.94 | 4.35  |       | 1283.2   |       |
| AHQ-3-11, 6002              | K.ASVDELFAEIVR.Q                                                          | 1349.51434 | 1 | 1.26E-05 | 0.36 | 2.36  |       | 300.0    |       |
| AHQ-3-11, 6463              | R.KEIEVDSPPSVLEILDATGTEQFASMR.D                                           | 2954.25639 | 3 | 6.05E-05 | 0.90 | 4.82  |       | 736.2    |       |
| AHQ-3-11, 2616              | K.VDLEGGEREVS7GEGK.A                                                      | 1667.75571 | 2 | 5.23E-04 | 0.88 | 3.77  |       | 816.0    |       |
| AHQ-3-11, 4083              | K.YDPTIEDFYR.K                                                            | 1319.40042 | 2 | 1.27E-04 | 0.78 | 2.85  |       | 330.2    |       |
| gi 8923812 ref NP_060943.1  | uncharacterized hypothalamus protein HT012 [Homo sapiens]                 |            |   | 1.02E-06 | 0.96 | 10.21 | 8.57  | 14960.4  |       |
| AHQ-3-13-, 4106             | K.TLAFTSVDLTNK.A                                                          | 1310.47811 | 2 | 1.02E-06 | 0.96 | 4.16  |       | 1245.9   |       |
| AHQ-3-13, 4099              | K.TLAFTSVDLTNK.A                                                          | 1310.47811 | 2 | 4.73E-04 | 0.94 | 3.52  |       | 1146.9   |       |
| gi 27597085 ref NP_000357.3 | tropomyosin 1 (alpha) [Homo sapiens]                                      |            |   | 1.02E-06 | 0.94 | 20.20 | 7.04  | 32865.7  |       |
| AHQ-3-9, 1512               | R.AELSEGVQR.Q                                                             | 989.06506  | 1 | 2.88E-05 | 0.27 | 1.92  |       | 300.8    |       |
| AHQ-3-9, 2817               | R.KLVIIESDLER.A                                                           | 1315.54103 | 2 | 8.38E-06 | 0.95 | 3.98  |       | 1534.5   |       |
| AHQ-3-9, 2815               | R.KLVIIESDLER.A                                                           | 1315.54103 | 1 | 1.02E-06 | 0.67 | 2.46  |       | 623.5    |       |
| gi 4557675 ref NP_000201.1  | integrin alpha chain, alpha 6 [Homo sapiens]                              |            |   | 1.13E-06 | 1.87 | 20.25 | 2.80  | 119509.5 |       |
| AHQ-3-4, 5942               | K.DFHVIVFGAPGTYNWK.G                                                      | 1916.12609 | 2 | 1.13E-06 | 0.94 | 4.14  |       | 1030.1   |       |
| AHQ-3-4, 3422               | K.FGSCQQGVAATFTK.D                                                        | 1503.66172 | 2 | 1.62E-05 | 0.93 | 3.85  |       | 1098.7   |       |
| gi 4758076 ref NP_004068.1  | citrate synthase precursor; Citrate synthase, mitochondrial [Homo sapie   |            |   | 1.17E-06 | 1.62 | 20.16 | 5.79  | 51706.2  |       |
| AHQ-3-8, 4420               | K.GLVYETSVLDPDEGIR.F                                                      | 1763.92654 | 2 | 2.31E-05 | 0.81 | 3.11  |       | 782.2    |       |
| AHQ-3-8, 2994               | K.IVPNVLEQGK.A                                                            | 1210.44805 | 2 | 1.17E-06 | 0.81 | 2.52  |       | 526.1    |       |
| gi 4507295 ref NP_003560.1  | syntaxin 7 [Homo sapiens]                                                 |            |   | 1.20E-06 | 0.86 | 10.18 | 5.75  | 29845.3  |       |
| AHQ-3-13, 3354              | R.TLNQLGTPQDPSPELR.Q                                                      | 1669.81798 | 2 | 3.57E-05 | 0.71 | 3.34  |       | 341.1    |       |
| AHQ-3-13-, 3345 - 3375      | R.TLNQLGTPQDPSPELR.Q                                                      | 1669.81798 | 2 | 1.20E-06 | 0.86 | 3.56  |       | 691.9    |       |
| AHQ-3-10, 3107              | R.TLNQLGTPQDPSPELR.Q                                                      | 1669.81798 | 2 | 3.39E-04 | 0.70 | 2.88  |       | 506.4    |       |
| gi 4502905 ref NP_001822.1  | clusterin; complement-associated protein SP-40 [Homo sapiens]             |            |   | 1.21E-06 | 2.73 | 30.28 | 11.36 | 52494.3  |       |
| AHQ-3-9, 5537               | R.ASSIIDELFQDR.F                                                          | 1394.51197 | 2 | 2.18E-05 | 0.92 | 3.61  |       | 1089.0   |       |
| AHQ-3-9, 2712               | R.EILSDVCSTNPNQAK.L                                                       | 1764.89299 | 2 | 2.11E-05 | 0.86 | 3.52  |       | 726.6    |       |
| AHQ-3-11, 3359              | R.VTTVASHTSDSDVPSGVTVEVVK.L                                               | 2315.52008 | 2 | 4.42E-05 | 0.96 | 5.53  |       | 1103.3   |       |
| AHQ-3-9, 3064               | R.VTTVASHTSDSDVPSGVTVEVVK.L                                               | 2315.52008 | 2 | 1.21E-06 | 0.94 | 4.71  |       | 912.4    |       |
| gi 11496891 ref NP_000662.2 | class III alcohol dehydrogenase 5 chi subunit; Alcohol dehydrogenase (    |            |   | 1.22E-06 | 0.95 | 10.25 | 5.88  | 39738.1  |       |
| AHQ-3-9, 4845               | K.AAAVAEAGKPLSIEIEIAPPK.A                                                 | 2306.64276 | 2 | 1.22E-06 | 0.95 | 4.98  |       | 921.4    |       |
| gi 4502167 ref NP_000475.1  | amyloid beta (A4) precursor protein (protease nexin-II, Alzheimer disea   |            |   | 1.22E-06 | 0.67 | 10.19 | 2.34  | 86942.8  |       |
| AHQ-3-4, 7050 - 7118        | R.CLVGFEVSDALLVPDKCK.F                                                    | 2053.38561 | 2 | 1.22E-06 | 0.67 | 3.79  |       | 451.5    |       |
| gi 21361122 ref NP_001440.2 | four and a half LIM domains 1; Four-and-a-half LIM domains 1 [Homo sap    |            |   | 1.25E-06 | 3.45 | 40.22 | 18.93 | 31894.7  |       |
| AHQ-3-9, 2233               | K.AIVAGDQNVYK.D                                                           | 1307.43431 | 2 | 3.28E-05 | 0.91 | 3.26  |       | 1018.4   |       |
| AHQ-3-9, 2883               | K.CLHPLANETVFAK.D                                                         | 1501.73210 | 2 | 6.83E-06 | 0.68 | 2.75  |       | 336.9    |       |
| AHQ-3-13, 3805              | R.FVFHQEQVYCPDCAK.K                                                       | 1931.13758 | 3 | 6.80E-05 | 0.72 | 3.43  |       | 799.9    |       |
| AHQ-3-14, 4609              | R.FVFHQEQVYCPDCAK.K                                                       | 1931.13758 | 2 | 3.28E-05 | 0.95 | 4.32  |       | 1216.1   |       |
| AHQ-3-9, 2760 - 2767        | K.GEDFYCVTCHETK.F                                                         | 1648.75260 | 2 | 1.25E-06 | 0.92 | 3.99  |       | 917.9    |       |
| gi 7706675 ref NP_057861.1  | RAB6B, member RAS oncogene family; small GTPase RAB6B [Homo sapiens] [M   |            |   | 1.26E-06 | 2.80 | 30.21 | 16.35 | 23461.5  |       |
| AHQ-3-11, 4547              | R.GSDVIIMLVGNK.T                                                          | 1246.50220 | 2 | 1.26E-06 | 0.96 | 4.20  |       | 1887.5   |       |
| AHQ-3-14-, 3411             | R.LQLWDTAGQER.F                                                           | 1317.43243 | 2 | 3.27E-04 | 0.84 | 2.94  |       | 735.8    |       |
| AHQ-3-11, 3206 - 3271       | R.LQLWDTAGQER.F                                                           | 1317.43243 | 2 | 4.68E-05 | 0.94 | 4.03  |       | 988.7    |       |
| AHQ-3-11, 3450 - 3460       | K.LVFLGEQSVGK.T                                                           | 1177.37492 | 2 | 1.24E-05 | 0.90 | 3.26  |       | 1013.6   |       |
| gi 6715607 ref NP_000175.1  | G-gamma globin [Homo sapiens]                                             |            |   | 1.28E-06 | 0.91 | 10.18 | 6.80  | 16126.3  |       |
| AHQ-3-13-, 4835 - 4845      | R.LLVVYPWTQR.F                                                            | 1275.52342 | 2 | 1.28E-06 | 0.91 | 3.53  |       | 922.5    |       |
| AHQ-3-13, 4742 - 4819       | R.LLVVYPWTQR.F                                                            | 1275.52342 | 2 | 8.97E-04 | 0.91 | 3.11  |       | 1035.4   |       |

















|                             |                                                                            |            |   |          |      |       |       |          |
|-----------------------------|----------------------------------------------------------------------------|------------|---|----------|------|-------|-------|----------|
| gi 20127517 ref NP_009148.2 | programmed cell death 10; apoptosis-related protein 15 [Homo sapiens]      |            |   | 6.64E-04 | 0.73 | 10.14 | 6.13  | 24701.4  |
| AHQ-3-10, 3871              | R.LIHQTNLILQTFK.T                                                          | 1569.87265 | 2 | 6.64E-04 | 0.73 | 2.79  | -     | 586.2    |
| gi 27485697 ref XP_097771.2 | similar to hypothetical protein [Homo sapiens]                             |            |   | 6.64E-04 | 0.15 | 10.14 | 14.41 | 12705.1  |
| AHQ-3-13-, 4615 - 4679      | K.NTTKNLYHVELRLAEK.H                                                       | 1930.19728 | 2 | 6.64E-04 | 0.15 | 2.69  | -     | 169.4    |
| gi 29150259 ref NP_803875.1 | fibrocystin L; polycystic kidney and hepatic disease-like 1 [Homo sapiens] |            |   | 6.74E-04 | 0.02 | 10.09 | 0.24  | 465745.4 |
| AHQ-3-1, 3000               | R.SPELPPVYGAK.T                                                            | 1061.21279 | 1 | 6.74E-04 | 0.02 | 1.84  | -     | 270.8    |
| gi 29741322 ref XP_086001.2 | similar to placental protein 13; galectin-13 [Homo sapiens]                |            |   | 6.78E-04 | 0.06 | 10.10 | 8.45  | 16576.0  |
| AHQ-3-3, 3412               | R.VHLGRRVVMNSR.E                                                           | 1424.70391 | 1 | 6.78E-04 | 0.06 | 2.02  | -     | 139.7    |
| gi 5174697 ref NP_006091.1  | alpha2,3-sialyltransferase VI [Homo sapiens]                               |            |   | 6.85E-04 | 0.07 | 10.10 | 2.11  | 38213.3  |
| AHQ-3-6, 1890 - 1893        | K.YNFSDLK.S                                                                | 886.97120  | 1 | 6.85E-04 | 0.07 | 2.00  | -     | 83.5     |
| gi 9257257 ref NP_059830.1  | WD repeat-containing protein 1 isoform 1 [Homo sapiens]                    |            |   | 6.96E-04 | 0.95 | 10.25 | -     | 66193.1  |
| AHQ-3-6, 3865               | R.LHHVSSLAWLDEHTLVTTSHDASVK.E                                              | 2785.06406 | 3 | 6.96E-04 | 0.95 | 5.09  | -     | 1234.8   |
| gi 4502139 ref NP_001156.1  | baculoviral IAP repeat-containing protein 3; apoptosis inhibitor 2; TNF    |            |   | 6.97E-04 | 0.37 | 10.13 | 1.49  | 68371.2  |
| AHQ-3-14-, 4155             | R.ELIDTILVK.G                                                              | 1044.26681 | 1 | 6.97E-04 | 0.37 | 1.89  | -     | 532.1    |
| gi 30149984 ref XP_210576.2 | similar to RIKEN cDNA 4921517D21 [Homo sapiens]                            |            |   | 7.04E-04 | 0.09 | 10.11 | 0.83  | 116840.3 |
| AHQ-3-13, 3397              | K.QVITLGP.F                                                                | 1013.17290 | 1 | 7.04E-04 | 0.09 | 2.11  | -     | 80.6     |
| gi 29730632 ref XP_293786.1 | similar to RAN, member RAS oncogene family [Homo sapiens]                  |            |   | 7.13E-04 | 0.67 | 10.12 | 7.69  | 16428.8  |
| AHQ-3-10, 2274              | K.LVLVGDGGTGK.T                                                            | 1016.17355 | 1 | 7.13E-04 | 0.67 | 2.43  | -     | 658.2    |
| gi 27499555 ref XP_051091.3 | similar to SF21 protein [Homo sapiens]                                     |            |   | 7.38E-04 | 0.54 | 10.15 | 0.93  | 190356.9 |
| AHQ-3-4, 3941 - 3944        | K.FPPVKEAAESGIKRVK.T                                                       | 1714.04177 | 2 | 7.38E-04 | 0.54 | 2.94  | -     | 663.7    |
| gi 8393147 ref NP_058625.1  | chloride intracellular channel 5 [Homo sapiens]                            |            |   | 7.48E-04 | 0.69 | 10.18 | 6.77  | 28109.7  |
| AHQ-3-10, 5815              | K.FLDGDELTLADCNLLPK.L                                                      | 1936.17229 | 2 | 7.48E-04 | 0.69 | 3.54  | -     | 424.0    |
| gi 27754771 ref NP_002578.2 | protocadherin 1 isoform 1 precursor; protocadherin 42; cadherin-like p     |            |   | 7.54E-04 | 0.51 | 10.17 | 1.32  | 114742.6 |
| AHQ-3-14, 5097 - 5159       | K.KYFLQTTTTPLDYEK.V                                                        | 1747.96871 | 2 | 7.54E-04 | 0.51 | 3.30  | -     | 379.8    |
| gi 22749429 ref NP_689936.1 | hypothetical protein FLJ38159 [Homo sapiens]                               |            |   | 7.84E-04 | 0.80 | 10.20 | 4.28  | 43808.3  |
| AHQ-3-7, 6731               | R.SRIEESQLICILKRR.S                                                        | 2031.36958 | 2 | 7.84E-04 | 0.80 | 4.02  | -     | 790.2    |
| gi 21618338 ref NP_003141.2 | signal transducer and activator of transcription 3 isoform 2; acute-ph     |            |   | 7.97E-04 | 0.58 | 10.14 | 1.82  | 87980.2  |
| AHQ-3-6, 3445               | R.FLQESNVLYQHNL.R                                                          | 1761.96193 | 2 | 7.97E-04 | 0.58 | 2.83  | -     | 500.5    |
| gi 22748825 ref NP_689598.1 | hypothetical protein FLJ31438 [Homo sapiens]                               |            |   | 8.02E-04 | 0.11 | 10.14 | 2.90  | 67291.5  |
| AHQ-3-2, 6130               | R.TIQLEAKMRIESNSSK.I                                                       | 1949.26232 | 2 | 8.02E-04 | 0.11 | 2.72  | -     | 174.8    |
| gi 4506193 ref NP_002784.1  | proteasome beta 1 subunit; proteasome subunit HC5; proteasome component    |            |   | 8.14E-04 | 0.88 | 10.22 | 8.30  | 26489.2  |
| AHQ-3-11, 4631              | K.AGGSASAM*LQPLLDNQVGF.K.N                                                 | 2021.28383 | 2 | 8.14E-04 | 0.88 | 4.31  | -     | 336.6    |
| gi 24158492 ref NP_699179.1 | F-box only protein 29; F-box protein Fbx29 [Homo sapiens]                  |            |   | 8.23E-04 | 0.52 | 10.16 | 2.51  | 67296.3  |
| AHQ-3-13-, 5394             | R.RRWQEELAQAQAPKK.R                                                        | 1840.07906 | 2 | 8.23E-04 | 0.52 | 2.53  | -     | 593.9    |
| gi 9845496 ref NP_002283.2  | laminin, beta 2 precursor; laminin S [Homo sapiens]                        |            |   | 8.49E-04 | 0.04 | 10.10 | 0.56  | 195993.7 |
| AHQ-3-10, 3434              | R.DRLALNLT.R.Q                                                             | 1185.40182 | 1 | 8.49E-04 | 0.04 | 2.04  | -     | 140.0    |
| gi 13899253 ref NP_113620.1 | uridine-cytidine kinase 1 [Homo sapiens]                                   |            |   | 8.56E-04 | 0.21 | 10.16 | 4.33  | 31434.5  |
| AHQ-3-12, 6398 - 6399       | R.KVVILSQDRFYK.V                                                           | 1496.77853 | 1 | 8.56E-04 | 0.21 | 2.31  | -     | 357.1    |
| gi 20143964 ref NP_597702.1 | glutamate receptor, ionotropic, N-methyl-D-aspartate 3A [Homo sapiens]     |            |   | 8.60E-04 | 0.21 | 10.16 | 2.42  | 125436.3 |
| AHQ-3-2, 4339 - 4363        | R.YNVPATPDGVEYLYKNDPEKLDAFIM*DK.A                                          | 3100.44475 | 3 | 8.60E-04 | 0.21 | 3.12  | -     | 295.1    |
| gi 4507879 ref NP_003365.1  | voltage-dependent anion channel 1 [Homo sapiens]                           |            |   | 8.72E-04 | 0.49 | 10.14 | 3.89  | 30772.3  |
| AHQ-3-9, 4076               | R.WTEYGLTFTEK.W                                                            | 1375.50711 | 1 | 8.72E-04 | 0.49 | 2.79  | -     | 227.3    |
| gi 16753212 ref NP_003921.2 | src family associated phosphoprotein 2; src kinase-associated phosphop     |            |   | 8.80E-04 | 0.93 | 10.18 | 2.79  | 41216.5  |
| AHQ-3-12, 3078              | K.RGDVIVLSK.E                                                              | 1164.37938 | 2 | 8.80E-04 | 0.93 | 3.65  | -     | 1234.7   |
| gi 29736279 ref XP_296484.1 | hypothetical protein XP_296484 [Homo sapiens]                              |            |   | 8.82E-04 | 0.10 | 10.14 | 6.35  | 27690.3  |
| AHQ-3-4, 3705               | K.TGSSSRGKGPEDRQIPK.S                                                      | 1713.87721 | 2 | 8.82E-04 | 0.10 | 2.90  | -     | 264.9    |
| gi 13994351 ref NP_114159.1 | MSTP043 protein [Homo sapiens]                                             |            |   | 8.99E-04 | 0.04 | 10.10 | 2.42  | 62669.3  |
| AHQ-3-12, 4687              | K.KVQLPSLSKLPFK.S                                                          | 1485.83879 | 1 | 8.99E-04 | 0.04 | 1.95  | -     | 144.5    |
| gi 5730118 ref NP_006514.1  | X-prolyl aminopeptidase (aminopeptidase P) 1, soluble; X-prolyl aminope    |            |   | 9.70E-04 | 0.86 | 10.19 | 2.57  | 69858.4  |
| AHQ-3-6, 6235 - 6306        | R.GSLTFEPLTLVPIQTK.M                                                       | 1745.05263 | 2 | 9.70E-04 | 0.86 | 3.30  | -     | 607.3    |
| gi 22538455 ref NP_003734.3 | nuclear receptor coactivator 1 isoform 1 [Homo sapiens]                    |            |   | 9.72E-04 | 0.31 | 10.13 | 1.04  | 156755.4 |
| AHQ-3-6, 4831               | K.KESKDHQLLRLLDK.D                                                         | 1887.17241 | 2 | 9.72E-04 | 0.31 | 2.59  | -     | 205.4    |
| gi 30155338 ref XP_303366.1 | hypothetical protein XP_303366 [Homo sapiens]                              |            |   | 9.74E-04 | 0.61 | 10.14 | 6.17  | 17471.0  |
| AHQ-3-11, 2006              | K.ASVIILAGRR.R                                                             | 1056.28728 | 2 | 9.74E-04 | 0.61 | 2.88  | -     | 662.1    |
| gi 30156349 ref XP_301652.1 | similar to Eukaryotic initiation factor 4A-II (eIF-4A-II) (eIF4A-II) [     |            |   | 9.98E-04 | 0.29 | 10.13 | 9.33  | 21450.7  |
| AHQ-3-8, 4080               | K.M*HAADLTVSALRGDM*DEK.E                                                   | 1993.20912 | 2 | 9.98E-04 | 0.29 | 2.53  | -     | 329.5    |

| Reference                  | Peptide                                            | MH+        | z | P (pro)  | Sf    | Score  | Coverage | MW      |
|----------------------------|----------------------------------------------------|------------|---|----------|-------|--------|----------|---------|
| File, Scan(s)              |                                                    |            |   | P (pep)  | Sf    | XC     |          | Sp      |
| gi 4501885 ref NP_001092.1 | beta actin; beta cytoskeletal actin [Homo sapiens] |            |   | 1.00E-30 | 14.77 | 170.38 | 36.80    | 41736.5 |
| AHQ-4-8, 6733 - 6797       | R.CPEALFQPSFLGMESCGIHETTFNSIMK.C                   | 3235.67708 | 3 | 4.78E-11 | 0.96  | 5.58   | -        | 1041.5  |
| AHQ-4-8, 6945 - 6995       | R.CPEALFQPSFLGMESCGIHETTFNSIMK.C                   | 3235.67708 | 3 | 9.44E-09 | 0.92  | 4.69   | -        | 939.5   |
| AHQ-4-13-, 6580 - 6645     | R.CPEALFQPSFLGMESCGIHETTFNSIM*K.C                  | 3251.67648 | 3 | 3.73E-05 | 0.64  | 4.28   | -        | 321.5   |
| AHQ-4-13-, 6354 - 6401     | R.CPEALFQPSFLGM*ESCGIHETTFNSIMK.C                  | 3251.67648 | 3 | 2.26E-04 | 0.55  | 3.13   | -        | 382.4   |
| AHQ-4-1, 6827 - 6893       | R.CPEALFQPSFLGM*ESCGIHETTFNSIMK.C                  | 3251.67648 | 3 | 1.46E-04 | 0.46  | 3.12   | -        | 480.5   |
| AHQ-4-13-, 6017 - 6084     | R.CPEALFQPSFLGM*ESCGIHETTFNSIM*K.C                 | 3267.67588 | 3 | 1.47E-04 | 0.86  | 3.95   | -        | 535.9   |
| AHQ-4-13, 6820 - 6886      | R.CPEALFQPSFLGMESCGIHETTFNSIMK.C                   | 3235.67708 | 3 | 5.14E-06 | 0.82  | 3.98   | -        | 634.7   |
| AHQ-4-8, 7209 - 7278       | R.CPEALFQPSFLGMESCGIHETTFNSIMK.C                   | 3235.67708 | 3 | 9.88E-11 | 0.94  | 5.19   | -        | 948.5   |
| AHQ-4-13, 6729             | R.CPEALFQPSFLGM*ESCGIHETTFNSIMK.C                  | 3251.67648 | 3 | 6.66E-04 | 0.65  | 3.66   | -        | 358.8   |
| AHQ-4-8, 7345              | R.CPEALFQPSFLGMESCGIHETTFNSIMK.C                   | 3235.67708 | 3 | 3.42E-09 | 0.92  | 4.76   | -        | 714.7   |
| AHQ-4-13, 6457 - 6461      | R.CPEALFQPSFLGM*ESCGIHETTFNSIMK.C                  | 3251.67648 | 3 | 7.36E-07 | 0.74  | 3.76   | -        | 420.4   |
| AHQ-4-13, 6101 - 6168      | R.CPEALFQPSFLGM*ESCGIHETTFNSIM*K.C                 | 3267.67588 | 3 | 2.00E-04 | 0.87  | 3.92   | -        | 663.6   |
| AHQ-4-11, 6598 - 6660      | R.CPEALFQPSFLGMESCGIHETTFNSIMK.C                   | 3235.67708 | 3 | 1.35E-04 | 0.93  | 4.84   | -        | 897.6   |
| AHQ-4-8, 6011              | R.CPEALFQPSFLGM*ESCGIHETTFNSIM*K.C                 | 3267.67588 | 3 | 4.96E-10 | 0.83  | 3.85   | -        | 598.0   |
| AHQ-4-8, 6859 - 6921       | R.CPEALFQPSFLGMESCGIHETTFNSIMK.C                   | 3235.67708 | 3 | 1.93E-13 | 0.94  | 5.46   | -        | 664.3   |
| AHQ-4-10, 6284 - 6345      | R.CPEALFQPSFLGMESCGIHETTFNSIMK.C                   | 3235.67708 | 3 | 3.15E-08 | 0.95  | 4.98   | -        | 1077.5  |
| AHQ-4-8, 6559 - 6641       | R.CPEALFQPSFLGM*ESCGIHETTFNSIMK.C                  | 3251.67648 | 3 | 2.91E-04 | 0.63  | 4.00   | -        | 402.7   |
| AHQ-4-10, 6047 - 6125      | R.CPEALFQPSFLGM*ESCGIHETTFNSIMK.C                  | 3251.67648 | 3 | 1.19E-04 | 0.52  | 3.27   | -        | 275.9   |
| AHQ-4-10, 5927 - 5991      | R.CPEALFQPSFLGMESCGIHETTFNSIM*K.C                  | 3251.67648 | 3 | 8.02E-05 | 0.75  | 4.49   | -        | 524.9   |
| AHQ-4-8, 7061 - 7137       | R.CPEALFQPSFLGMESCGIHETTFNSIMK.C                   | 3235.67708 | 3 | 8.02E-08 | 0.93  | 4.72   | -        | 991.2   |
| AHQ-4-10, 5581 - 5640      | R.CPEALFQPSFLGM*ESCGIHETTFNSIM*K.C                 | 3267.67588 | 3 | 9.33E-04 | 0.71  | 3.67   | -        | 385.1   |
| AHQ-4-5, 7154              | R.CPEALFQPSFLGMESCGIHETTFNSIMK.C                   | 3235.67708 | 3 | 3.05E-07 | 0.82  | 4.09   | -        | 657.8   |
| AHQ-4-8, 6791 - 6853       | R.CPEALFQPSFLGM*ESCGIHETTFNSIMK.C                  | 3251.67648 | 3 | 1.71E-05 | 0.62  | 3.47   | -        | 447.4   |
| AHQ-4-9, 6500              | R.CPEALFQPSFLGMESCGIHETTFNSIMK.C                   | 3235.67708 | 3 | 4.82E-04 | 0.88  | 4.14   | -        | 668.9   |
| AHQ-4-9, 6471 - 6531       | K.EKLCYVALDFEQEMATAAASSSSLEK.S                     | 2810.10410 | 2 | 5.23E-06 | 0.85  | 3.70   | -        | 809.0   |
| AHQ-4-10, 6337 - 6396      | K.EKLCYVALDFEQEMATAAASSSSLEK.S                     | 2810.10410 | 2 | 8.91E-04 | 0.80  | 3.14   | -        | 729.6   |
| AHQ-4-8, 6918 - 6985       | K.EKLCYVALDFEQEMATAAASSSSLEK.S                     | 2810.10410 | 3 | 9.38E-05 | 0.85  | 3.96   | -        | 908.3   |
| AHQ-4-8, 5302 - 5337       | K.EKLCYVALDFEQEM*ATAAASSSSLEK.S                    | 2826.10350 | 3 | 1.00E-07 | 0.63  | 3.19   | -        | 831.7   |
| AHQ-4-8, 7337 - 7338       | K.EKLCYVALDFEQEMATAAASSSSLEK.S                     | 2810.10410 | 2 | 1.68E-08 | 0.91  | 4.13   | -        | 843.6   |
| AHQ-4-8, 5410 - 5478       | K.EKLCYVALDFEQEM*ATAAASSSSLEK.S                    | 2826.10350 | 3 | 7.42E-08 | 0.93  | 4.45   | -        | 1201.3  |
| AHQ-4-8, 7309 - 7377       | K.EKLCYVALDFEQEMATAAASSSSLEK.S                     | 2810.10410 | 3 | 5.81E-12 | 0.92  | 5.05   | -        | 1041.8  |
| AHQ-4-8, 5707              | K.EKLCYVALDFEQEM*ATAAASSSSLEK.S                    | 2826.10350 | 3 | 7.37E-05 | 0.82  | 3.65   | -        | 899.9   |
| AHQ-4-8, 5606 - 5638       | K.EKLCYVALDFEQEM*ATAAASSSSLEK.S                    | 2826.10350 | 3 | 9.07E-06 | 0.82  | 3.70   | -        | 857.5   |
| AHQ-4-8, 6954 - 7022       | K.EKLCYVALDFEQEMATAAASSSSLEK.S                     | 2810.10410 | 2 | 2.74E-09 | 0.91  | 4.93   | -        | 718.7   |
| AHQ-4-8, 7021 - 7098       | K.EKLCYVALDFEQEMATAAASSSSLEK.S                     | 2810.10410 | 3 | 7.30E-06 | 0.92  | 4.87   | -        | 1174.1  |
| AHQ-4-8, 7201 - 7269       | K.EKLCYVALDFEQEMATAAASSSSLEK.S                     | 2810.10410 | 2 | 8.65E-08 | 0.87  | 3.87   | -        | 811.5   |
| AHQ-4-8, 7163 - 7242       | K.EKLCYVALDFEQEMATAAASSSSLEK.S                     | 2810.10410 | 3 | 3.89E-08 | 0.95  | 5.72   | -        | 1293.7  |
| AHQ-4-8, 7062 - 7133       | K.EKLCYVALDFEQEMATAAASSSSLEK.S                     | 2810.10410 | 2 | 3.14E-07 | 0.89  | 3.69   | -        | 902.0   |
| AHQ-4-8, 6930 - 6994       | K.EKLCYVALDFEQEMATAAASSSSLEK.S                     | 2810.10410 | 2 | 3.83E-04 | 0.82  | 3.57   | -        | 617.6   |
| AHQ-4-8, 7317 - 7381       | R.FRCPEALFQPSFLGMESCGIHETTFNSIMK.C                 | 3539.03813 | 3 | 9.13E-04 | 0.83  | 3.40   | -        | 918.2   |
| AHQ-4-8, 6158 - 6293       | R.FRCPEALFQPSFLGMESCGIHETTFNSIM*K.C                | 3555.03753 | 3 | 1.05E-08 | 0.97  | 7.28   | -        | 1264.4  |
| AHQ-4-10, 6263 - 6320      | R.FRCPEALFQPSFLGMESCGIHETTFNSIMK.C                 | 3539.03813 | 3 | 1.97E-04 | 0.98  | 7.55   | -        | 1456.6  |
| AHQ-4-8, 6666 - 6729       | R.FRCPEALFQPSFLGMESCGIHETTFNSIMK.C                 | 3539.03813 | 3 | 3.33E-14 | 0.98  | 7.11   | -        | 1778.2  |
| AHQ-4-10, 5916 - 5981      | R.FRCPEALFQPSFLGMESCGIHETTFNSIM*K.C                | 3555.03753 | 3 | 1.12E-08 | 0.95  | 6.44   | -        | 1130.3  |
| AHQ-4-8, 6901 - 6966       | R.FRCPEALFQPSFLGMESCGIHETTFNSIMK.C                 | 3539.03813 | 3 | 2.75E-11 | 0.98  | 7.66   | -        | 2026.7  |
| AHQ-4-8, 6793 - 6857       | R.FRCPEALFQPSFLGMESCGIHETTFNSIMK.C                 | 3539.03813 | 3 | 1.00E-30 | 0.98  | 7.60   | -        | 2267.7  |
| AHQ-4-8, 6831 - 6906       | R.FRCPEALFQPSFLGM*ESCGIHETTFNSIMK.C                | 3555.03753 | 3 | 6.37E-04 | 0.49  | 3.19   | -        | 541.1   |
| AHQ-4-13, 6490 - 6560      | R.FRCPEALFQPSFLGMESCGIHETTFNSIM*K.C                | 3555.03753 | 3 | 1.96E-05 | 0.73  | 3.49   | -        | 558.4   |
| AHQ-4-7, 2238 - 2243       | R.GYSFTTTAER.E                                     | 1133.19273 | 2 | 2.12E-04 | 0.91  | 3.14   | -        | 1043.1  |
| AHQ-4-1, 2610              | R.GYSFTTTAER.E                                     | 1133.19273 | 2 | 4.38E-04 | 0.90  | 2.91   | -        | 906.3   |
| AHQ-4-8, 2051 - 2119       | R.GYSFTTTAER.E                                     | 1133.19273 | 2 | 1.75E-04 | 0.88  | 3.25   | -        | 781.5   |
| AHQ-4-8, 2124 - 2199       | R.GYSFTTTAER.E                                     | 1133.19273 | 2 | 8.44E-05 | 0.89  | 2.85   | -        | 1351.6  |
| AHQ-4-11, 2389 - 2392      | R.GYSFTTTAER.E                                     | 1133.19273 | 2 | 3.79E-04 | 0.91  | 3.34   | -        | 1008.3  |
| AHQ-4-6, 2279              | R.GYSFTTTAER.E                                     | 1133.19273 | 2 | 1.11E-04 | 0.89  | 3.08   | -        | 884.2   |
| AHQ-4-9, 2172 - 2179       | R.GYSFTTTAER.E                                     | 1133.19273 | 2 | 3.88E-05 | 0.88  | 3.06   | -        | 967.2   |
| AHQ-4-3, 2439              | R.GYSFTTTAER.E                                     | 1133.19273 | 2 | 3.94E-05 | 0.93  | 3.14   | -        | 1208.4  |
| AHQ-4-14-, 2383            | R.GYSFTTTAER.E                                     | 1133.19273 | 2 | 3.98E-05 | 0.90  | 2.70   | -        | 828.5   |
| AHQ-4-8, 2183 - 2263       | R.GYSFTTTAER.E                                     | 1133.19273 | 2 | 6.55E-05 | 0.90  | 3.14   | -        | 887.5   |
| AHQ-4-13, 4342 - 4356      | R.KDLYANTVLSGGTTM*YPGIADR.M                        | 2360.62916 | 3 | 2.50E-06 | 0.82  | 3.56   | -        | 866.7   |
| AHQ-4-11, 4565             | R.KDLYANTVLSGGTTM*YPGIADR.M                        | 2344.62976 | 2 | 1.13E-05 | 0.86  | 3.74   | -        | 605.6   |
| AHQ-4-10, 4259 - 4316      | R.KDLYANTVLSGGTTM*YPGIADR.M                        | 2344.62976 | 2 | 3.33E-05 | 0.91  | 3.55   | -        | 1039.7  |
| AHQ-4-13, 4778 - 4816      | R.KDLYANTVLSGGTTM*YPGIADR.M                        | 2344.62976 | 2 | 8.61E-04 | 0.87  | 3.73   | -        | 719.4   |
| AHQ-4-14, 5433             | R.KDLYANTVLSGGTTM*YPGIADR.M                        | 2360.62916 | 2 | 1.21E-07 | 0.84  | 3.57   | -        | 542.2   |
| AHQ-4-13-, 4224            | R.KDLYANTVLSGGTTM*YPGIADR.M                        | 2360.62916 | 3 | 6.91E-05 | 0.95  | 5.84   | -        | 1340.1  |
| AHQ-4-14-, 4615 - 4658     | R.KDLYANTVLSGGTTM*YPGIADR.M                        | 2344.62976 | 2 | 5.16E-04 | 0.94  | 3.93   | -        | 1121.9  |
| AHQ-4-8, 3833 - 3841       | R.KDLYANTVLSGGTTM*YPGIADR.M                        | 2360.62916 | 3 | 3.03E-05 | 0.94  | 5.09   | -        | 780.8   |
| AHQ-4-8, 3997 - 4071       | R.KDLYANTVLSGGTTM*YPGIADR.M                        | 2360.62916 | 2 | 3.73E-05 | 0.94  | 4.86   | -        | 753.9   |
| AHQ-4-8, 4637              | R.KDLYANTVLSGGTTM*YPGIADR.M                        | 2344.62976 | 3 | 3.93E-04 | 0.77  | 3.82   | -        | 593.3   |
| AHQ-4-8, 4553              | R.KDLYANTVLSGGTTM*YPGIADR.M                        | 2344.62976 | 3 | 6.96E-05 | 0.88  | 4.35   | -        | 872.7   |
| AHQ-4-8, 4339 - 4389       | R.KDLYANTVLSGGTTM*YPGIADR.M                        | 2344.62976 | 2 | 3.38E-07 | 0.98  | 5.23   | -        | 1889.0  |
| AHQ-4-8, 4187              | R.KDLYANTVLSGGTTM*YPGIADR.M                        | 2344.62976 | 3 | 2.96E-04 | 0.97  | 5.76   | -        | 1700.2  |
| AHQ-4-8, 4181              | R.KDLYANTVLSGGTTM*YPGIADR.M                        | 2344.62976 | 2 | 4.92E-05 | 0.75  | 2.79   | -        | 915.7   |
| AHQ-4-8, 7365 - 7394       | K.LCYVALDFEQEMATAAASSSSLEK.S                       | 2552.81665 | 3 | 3.41E-06 | 0.98  | 6.89   | -        | 2348.6  |
| AHQ-4-8, 5298 - 5323       | R.TTGIVM*DSGDGVVTHVPIYEGYALPHAIR.L                 | 3201.59868 | 3 | 2.03E-04 | 0.75  | 3.79   | -        | 513.4   |
| AHQ-4-14-, 5574 - 5633     | R.TTGIVMDSGDGVVTHVPIYEGYALPHAIR.L                  | 3185.59928 | 3 | 2.61E-14 | 0.98  | 6.98   | -        | 1542.5  |
| AHQ-4-14-, 5359 - 5427     | R.TTGIVM*DSGDGVVTHVPIYEGYALPHAIR.L                 | 3201.59868 | 3 | 3.50E-07 | 0.96  | 5.75   | -        | 1299.8  |
| AHQ-4-8, 5869              | R.TTGIVMDSGDGVVTHVPIYEGYALPHAIR.L                  | 3185.59928 | 3 | 2.35E-04 | 0.87  | 4.01   | -        | 1085.2  |
| AHQ-4-1, 5809 - 5879       | R.TTGIVM*DSGDGVVTHVPIYEGYALPHAIR.L                 | 3201.59868 | 3 | 4.44E-07 | 0.93  | 4.70   | -        | 1335.5  |
| AHQ-4-2, 6066 - 6082       | R.TTGIVMDSGDGVVTHVPIYEGYALPHAIR.L                  | 3185.59928 | 3 | 7.13E-08 | 0.94  | 5.01   | -        | 1088.5  |
| AHQ-4-13-, 5769            | R.TTGIVMDSGDGVVTHVPIYEGYALPHAIR.L                  | 3185.59928 | 3 | 4.96E-06 | 0.96  | 5.93   | -        | 1110.8  |
| AHQ-4-13-, 5652            | R.TTGIVMDSGDGVVTHVPIYEGYALPHAIR.L                  | 3185.59928 | 3 | 1.42E-08 | 0.97  | 5.71   | -        | 1699.1  |
| AHQ-4-13-, 5465            | R.TTGIVM*DSGDGVVTHVPIYEGYALPHAIR.L                 | 3201.59868 | 3 | 1.22E-07 | 0.94  | 5.23   | -        | 1234.3  |
| AHQ-4-13-, 5378            | R.TTGIVM*DSGDGVVTHVPIYEGYALPHAIR.L                 | 3201.59868 | 3 | 5.71E-05 | 0.92  | 4.98   | -        | 1111.7  |
| AHQ-4-8, 5721 - 5797       | R.TTGIVMDSGDGVVTHVPIYEGYALPHAIR.L                  | 3185.59928 | 3 | 1.64E-12 | 0.97  | 5.81   | -        | 1835.8  |
| AHQ-4-7, 5842              | R.TTGIVMDSGDGVVTHVPIYEGYALPHAIR.L                  | 3185.59928 | 3 | 7.65E-09 | 0.94  | 4.87   | -        | 1299.6  |
| AHQ-4-7, 5761              | R.TTGIVMDSGDGVVTHVPIYEGYALPHAIR.L                  | 3185.59928 | 3 | 2.74E-09 | 0.95  | 5.27   | -        | 1307.0  |
| AHQ-4-7, 5573 - 5578       | R.TTGIVMDSGDGVVTHVPIYEGYALPHAIR.L                  | 3185.59928 | 3 | 5.20E-11 | 0.97  | 6.15   | -        | 1507.6  |
| AHQ-4-7, 5269 - 5283       | R.TTGIVM*DSGDGVVTHVPIYEGYALPHAIR.L                 | 3201.59868 | 3 | 6.11E-10 | 0.94  | 5.28   | -        | 968.5   |
| AHQ-4-8, 5366 - 5445       | R.TTGIVMDSGDGVVTHVPIYEGYALPHAIR.L                  | 3185.59928 | 3 | 1.33E-14 | 0.97  | 6.50   | -        | 1614.5  |
| AHQ-4-8, 5134 - 5205       | R.TTGIVMDSGDGVVTHVPIYEGYALPHAIR.L                  | 3185.59928 | 3 | 1.82E-12 | 0.97  | 5.93   | -        | 1660.0  |
| AHQ-4-8, 5390 - 5473       | R.TTGIVM*DSGDGVVTHVPIYEGYALPHAIR.L                 | 3201.59868 | 3 | 7.58E-04 | 0.85  | 4.28   | -        | 777.1   |
| AHQ-4-2, 6171              | R.TTGIVMDSGDGVVTHVPIYEGYALPHAIR.L                  | 3185.59928 | 3 | 4.74E-06 | 0.96  | 5.38   | -        | 1333.8  |
| AHQ-4-3, 5681 - 5749       | R.TTGIVM*DSGDGVVTHVPIYEGYALPHAIR.L                 | 3201.59868 | 3 | 4.66E-06 | 0.88  | 4.16   | -        | 919.3   |
| AHQ-4-9, 4695 - 4767       | R.TTGIVM*DSGDGVVTHVPIYEGYALPHAIR.L                 | 3201.59868 | 3 | 5.90E-07 | 0.94  | 5.38   | -        | 1039.1  |
| AHQ-4-9, 4835 - 4911       | R.TTGIVM*DSGDGVVTHVPIYEGYALPHAIR.L                 | 3201.59868 | 3 | 5.99E-09 | 0.94  | 5.21   | -        | 1282.3  |
| AHQ-4-9, 5119 - 5183       | R.TTGIVMDSGDGVVTHVPIYEGYALPHAIR.L                  | 3185.59928 | 3 | 1.42E-10 | 0.96  | 5.59   | -        | 1373.9  |
| AHQ-4-9, 5279 - 5339       | R.TTGIVMDSGDGVVTHVPIYEGYALPHAIR.L                  | 3185.5992  |   |          |       |        |          |         |

|                             |                                                                        |            |   |          |        |         |       |          |
|-----------------------------|------------------------------------------------------------------------|------------|---|----------|--------|---------|-------|----------|
| AHQ-4-10, 5148 - 5211       | R.TTGIVMDSGDGVVHTVPIYEGYALPHAILR.L                                     | 3185.59928 | 3 | 7.21E-12 | 0.96   | 5.95    | -     | 1238.3   |
| AHQ-4-10, 5301 - 5363       | R.TTGIVMDSGDGVVHTVPIYEGYALPHAILR.L                                     | 3185.59928 | 3 | 1.14E-07 | 0.96   | 5.36    | -     | 1647.2   |
| AHQ-4-10, 5433 - 5507       | R.TTGIVMDSGDGVVHTVPIYEGYALPHAILR.L                                     | 3185.59928 | 3 | 4.27E-05 | 0.93   | 5.03    | -     | 899.1    |
| AHQ-4-5, 5913 - 5981        | R.TTGIVMDSGDGVVHTVPIYEGYALPHAILR.L                                     | 3185.59928 | 3 | 2.15E-07 | 0.96   | 5.23    | -     | 1585.3   |
| AHQ-4-5, 5818 - 5894        | R.TTGIVMDSGDGVVHTVPIYEGYALPHAILR.L                                     | 3185.59928 | 3 | 9.52E-06 | 0.93   | 4.67    | -     | 1431.4   |
| AHQ-4-5, 5707 - 5730        | R.TTGIVMDSGDGVVHTVPIYEGYALPHAILR.L                                     | 3185.59928 | 3 | 9.84E-12 | 0.97   | 6.24    | -     | 1835.7   |
| AHQ-4-5, 5511 - 5515        | R.TTGIVM*DSGDGVVHTVPIYEGYALPHAILR.L                                    | 3201.59868 | 3 | 3.37E-06 | 0.96   | 5.78    | -     | 1489.2   |
| AHQ-4-13, 5844              | R.TTGIVMDSGDGVVHTVPIYEGYALPHAILR.L                                     | 3185.59928 | 3 | 2.57E-08 | 0.97   | 5.51    | -     | 1553.1   |
| AHQ-4-13, 5701 - 5757       | R.TTGIVMDSGDGVVHTVPIYEGYALPHAILR.L                                     | 3185.59928 | 3 | 3.11E-04 | 0.96   | 5.53    | -     | 1694.8   |
| AHQ-4-4, 6142               | R.TTGIVMDSGDGVVHTVPIYEGYALPHAILR.L                                     | 3185.59928 | 3 | 2.47E-07 | 0.96   | 5.73    | -     | 1520.5   |
| AHQ-4-4, 6003 - 6070        | R.TTGIVMDSGDGVVHTVPIYEGYALPHAILR.L                                     | 3185.59928 | 3 | 2.91E-08 | 0.95   | 5.29    | -     | 1280.9   |
| AHQ-4-13, 5558 - 5565       | R.TTGIVM*DSGDGVVHTVPIYEGYALPHAILR.L                                    | 3201.59868 | 3 | 3.51E-04 | 0.76   | 3.64    | -     | 448.6    |
| AHQ-4-8, 5542 - 5581        | R.TTGIVM*DSGDGVVHTVPIYEGYALPHAILR.L                                    | 3201.59868 | 3 | 1.71E-04 | 0.80   | 4.13    | -     | 583.8    |
| AHQ-4-11, 5213              | R.TTGIVM*DSGDGVVHTVPIYEGYALPHAILR.L                                    | 3201.59868 | 3 | 1.98E-09 | 0.94   | 5.02    | -     | 1092.2   |
| AHQ-4-11, 5516 - 5596       | R.TTGIVMDSGDGVVHTVPIYEGYALPHAILR.L                                     | 3185.59928 | 3 | 3.26E-07 | 0.96   | 6.05    | -     | 1296.2   |
| AHQ-4-11, 5600 - 5660       | R.TTGIVMDSGDGVVHTVPIYEGYALPHAILR.L                                     | 3185.59928 | 3 | 8.87E-11 | 0.97   | 6.09    | -     | 1264.5   |
| AHQ-4-4, 5727 - 5803        | R.TTGIVM*DSGDGVVHTVPIYEGYALPHAILR.L                                    | 3201.59868 | 3 | 4.26E-05 | 0.94   | 4.67    | -     | 1274.3   |
| AHQ-4-6, 5675 - 5744        | R.TTGIVMDSGDGVVHTVPIYEGYALPHAILR.L                                     | 3185.59928 | 3 | 9.16E-09 | 0.96   | 5.69    | -     | 1380.0   |
| AHQ-4-12, 5453              | R.TTGIVM*DSGDGVVHTVPIYEGYALPHAILR.L                                    | 3201.59868 | 3 | 4.97E-05 | 0.93   | 4.97    | -     | 1028.4   |
| AHQ-4-12, 5534              | R.TTGIVM*DSGDGVVHTVPIYEGYALPHAILR.L                                    | 3201.59868 | 3 | 8.08E-09 | 0.95   | 5.52    | -     | 1244.8   |
| AHQ-4-12, 5689 - 5754       | R.TTGIVMDSGDGVVHTVPIYEGYALPHAILR.L                                     | 3185.59928 | 3 | 9.55E-04 | 0.92   | 4.76    | -     | 1005.0   |
| AHQ-4-12, 5866              | R.TTGIVMDSGDGVVHTVPIYEGYALPHAILR.L                                     | 3185.59928 | 3 | 6.27E-07 | 0.94   | 4.75    | -     | 1296.3   |
| AHQ-4-8, 5509 - 5574        | R.TTGIVMDSGDGVVHTVPIYEGYALPHAILR.L                                     | 3185.59928 | 3 | 7.37E-12 | 0.97   | 5.48    | -     | 2306.2   |
| AHQ-4-14-, 5622 - 5694      | R.TTGIVMDSGDGVVHTVPIYEGYALPHAILR.L                                     | 3185.59928 | 3 | 1.00E-30 | 0.98   | 6.98    | -     | 1736.5   |
| AHQ-4-11, 3673              | R.VAPEEHPVLLTEAPLNPK.A                                                 | 1955.24351 | 2 | 9.06E-07 | 0.91   | 4.17    | -     | 857.5    |
| AHQ-4-5, 3634 - 3709        | R.VAPEEHPVLLTEAPLNPK.A                                                 | 1955.24351 | 3 | 4.10E-04 | 0.67   | 4.15    | -     | 539.9    |
| AHQ-4-5, 3637 - 3639        | R.VAPEEHPVLLTEAPLNPK.A                                                 | 1955.24351 | 2 | 1.07E-04 | 0.92   | 4.42    | -     | 820.8    |
| AHQ-4-10, 3512 - 3567       | R.VAPEEHPVLLTEAPLNPK.A                                                 | 1955.24351 | 2 | 3.49E-10 | 0.93   | 4.80    | -     | 830.3    |
| AHQ-4-6, 3576 - 3580        | R.VAPEEHPVLLTEAPLNPK.A                                                 | 1955.24351 | 2 | 2.97E-06 | 0.92   | 4.43    | -     | 789.0    |
| AHQ-4-9, 3247 - 3319        | R.VAPEEHPVLLTEAPLNPK.A                                                 | 1955.24351 | 2 | 7.71E-07 | 0.90   | 4.28    | -     | 772.5    |
| AHQ-4-3, 3923 - 3935        | R.VAPEEHPVLLTEAPLNPK.A                                                 | 1955.24351 | 2 | 3.53E-04 | 0.60   | 3.35    | -     | 492.7    |
| AHQ-4-9, 3153 - 3223        | R.VAPEEHPVLLTEAPLNPK.A                                                 | 1955.24351 | 2 | 3.84E-06 | 0.94   | 4.76    | -     | 850.3    |
| AHQ-4-7, 3494               | R.VAPEEHPVLLTEAPLNPK.A                                                 | 1955.24351 | 2 | 5.02E-06 | 0.91   | 4.62    | -     | 503.2    |
| AHQ-4-13-, 3902             | R.VAPEEHPVLLTEAPLNPK.A                                                 | 1955.24351 | 2 | 3.81E-04 | 0.94   | 4.68    | -     | 1110.5   |
| AHQ-4-8, 3683               | R.VAPEEHPVLLTEAPLNPK.A                                                 | 1955.24351 | 2 | 5.18E-04 | 0.68   | 2.62    | -     | 602.8    |
| AHQ-4-8, 3109 - 3177        | R.VAPEEHPVLLTEAPLNPK.A                                                 | 1955.24351 | 2 | 4.71E-05 | 0.92   | 4.34    | -     | 805.6    |
| AHQ-4-8, 3209 - 3277        | R.VAPEEHPVLLTEAPLNPK.A                                                 | 1955.24351 | 2 | 4.78E-07 | 0.95   | 5.17    | -     | 1087.9   |
| AHQ-4-8, 3270 - 3337        | R.VAPEEHPVLLTEAPLNPK.A                                                 | 1955.24351 | 3 | 2.98E-04 | 0.66   | 3.83    | -     | 684.1    |
| AHQ-4-8, 3318 - 3385        | R.VAPEEHPVLLTEAPLNPK.A                                                 | 1955.24351 | 2 | 1.20E-06 | 0.93   | 4.76    | -     | 813.2    |
| AHQ-4-8, 3321               | R.VAPEEHPVLLTEAPLNPK.A                                                 | 1955.24351 | 2 | 4.25E-09 | 0.90   | 4.17    | -     | 788.2    |
| AHQ-4-8, 3401 - 3477        | R.VAPEEHPVLLTEAPLNPK.A                                                 | 1955.24351 | 3 | 1.78E-06 | 0.76   | 4.26    | -     | 678.3    |
| AHQ-4-1, 4166               | R.VAPEEHPVLLTEAPLNPK.A                                                 | 1955.24351 | 2 | 3.05E-04 | 0.83   | 3.36    | -     | 499.7    |
| AHQ-4-1, 4153               | R.VAPEEHPVLLTEAPLNPK.A                                                 | 1955.24351 | 3 | 9.18E-04 | 0.57   | 3.29    | -     | 712.3    |
| AHQ-4-14-, 3786             | R.VAPEEHPVLLTEAPLNPK.A                                                 | 1955.24351 | 2 | 4.26E-05 | 0.84   | 3.98    | -     | 633.8    |
| AHQ-4-8, 3453               | R.VAPEEHPVLLTEAPLNPK.A                                                 | 1955.24351 | 2 | 9.74E-05 | 0.90   | 3.59    | -     | 762.3    |
| AHQ-4-8, 3590 - 3594        | R.VAPEEHPVLLTEAPLNPK.A                                                 | 1955.24351 | 2 | 2.60E-05 | 0.93   | 4.15    | -     | 812.1    |
| AHQ-4-12, 3749 - 3817       | R.VAPEEHPVLLTEAPLNPK.A                                                 | 1955.24351 | 2 | 1.03E-04 | 0.92   | 4.71    | -     | 842.1    |
| AHQ-4-8, 2787 - 2861        | R.VAPEEHPVLLTEAPLNPKANR.E                                              | 2296.61120 | 3 | 8.01E-07 | 0.78   | 3.89    | -     | 342.4    |
| gj 5729770 ref NP_000382.3  | ceroid-lipofuscinosis, neuronal 2, late infantile (Jansky-Bielschowsky |            |   |          |        |         |       |          |
| AHQ-4-8, 7191               | R.VPIPVWSGTSVPVFGGILSLINEHR.I                                          | 2836.23725 | 3 | 1.00E-30 | 0.97   | 5.45    | 4.80  | 61247.6  |
| gj 16753233 ref NP_006280.2 | talin 1 [Homo sapiens]                                                 |            |   |          |        |         |       |          |
| AHQ-4-3, 3361               | K.AAAFEQENETVWVK.E                                                     | 1664.79496 | 2 | 5.55E-16 | 108.19 | 1240.38 | 54.80 | 269665.3 |
| AHQ-4-1, 3431 - 3441        | K.AAAFEQENETVWVK.E                                                     | 1664.79496 | 2 | 9.99E-05 | 0.91   | 3.81    | -     | 970.2    |
| AHQ-4-2, 3523 - 3552        | K.AAAFEQENETVWVK.E                                                     | 1664.79496 | 2 | 3.75E-06 | 0.81   | 3.58    | -     | 678.4    |
| AHQ-4-2, 3370               | K.AAAFEQENETVWVK.E                                                     | 1664.79496 | 2 | 3.96E-04 | 0.95   | 4.79    | -     | 1258.4   |
| AHQ-4-6, 3002               | K.AAAFEQENETVWVK.E                                                     | 1664.79496 | 2 | 1.14E-04 | 0.90   | 3.67    | -     | 1211.8   |
| AHQ-4-13, 3299              | K.AAAFEQENETVWVK.E                                                     | 1664.79496 | 2 | 4.89E-07 | 0.94   | 4.50    | -     | 1204.3   |
| AHQ-4-2, 3124 - 3196        | K.AAAFEQENETVWVK.E                                                     | 1664.79496 | 2 | 4.29E-04 | 0.92   | 3.90    | -     | 1084.9   |
| AHQ-4-1, 2671               | R.AAM*EPIVIAK.T                                                        | 1146.38260 | 2 | 5.39E-05 | 0.60   | 2.80    | -     | 478.8    |
| AHQ-4-2, 2490               | R.AAM*EPIVIAK.T                                                        | 1146.38260 | 2 | 2.96E-06 | 0.87   | 2.93    | -     | 920.1    |
| AHQ-4-3, 3155               | R.AAM*EPIVIAK.T                                                        | 1146.38260 | 2 | 7.50E-06 | 0.78   | 2.74    | -     | 643.3    |
| AHQ-4-4, 2459               | R.AAM*EPIVIAK.T                                                        | 1130.38320 | 2 | 1.74E-06 | 0.70   | 2.71    | -     | 515.0    |
| AHQ-4-4, 2460               | R.AAM*EPIVIAK.T                                                        | 1146.38260 | 1 | 6.10E-05 | 0.62   | 2.68    | -     | 283.4    |
| AHQ-4-2, 3167 - 3180        | R.AAM*EPIVIAK.T                                                        | 1146.38260 | 2 | 1.86E-05 | 0.80   | 2.85    | -     | 738.9    |
| AHQ-4-2, 2496               | R.AAM*EPIVIAK.T                                                        | 1130.38320 | 2 | 8.14E-06 | 0.89   | 3.15    | -     | 928.8    |
| AHQ-4-3, 2441 - 2468        | R.AAM*EPIVIAK.T                                                        | 1146.38260 | 1 | 1.20E-04 | 0.55   | 2.67    | -     | 190.9    |
| AHQ-4-5, 2326               | R.AAM*EPIVIAK.T                                                        | 1146.38260 | 1 | 8.20E-04 | 0.47   | 2.28    | -     | 246.3    |
| AHQ-4-4, 3138 - 3148        | R.AAM*EPIVIAK.T                                                        | 1146.38260 | 2 | 1.12E-04 | 0.83   | 2.57    | -     | 786.4    |
| AHQ-4-3, 2476 - 2479        | R.AAM*EPIVIAK.T                                                        | 1130.38320 | 2 | 3.49E-05 | 0.74   | 2.64    | -     | 669.3    |
| AHQ-4-5, 1641               | K.ADAEGESDLENSR.K                                                      | 1146.38260 | 2 | 1.76E-06 | 0.84   | 2.97    | -     | 660.7    |
| AHQ-4-1, 2043 - 2047        | K.ADAEGESDLENSR.K                                                      | 1393.35296 | 2 | 2.60E-07 | 0.83   | 2.94    | -     | 753.1    |
| AHQ-4-2, 1804 - 1882        | K.ADAEGESDLENSR.K                                                      | 1393.35296 | 2 | 7.65E-07 | 0.93   | 4.11    | -     | 1040.7   |
| AHQ-4-3, 2571               | K.AGALQCSPSDAYTK.K                                                     | 1393.35296 | 2 | 2.13E-06 | 0.95   | 4.83    | -     | 1101.1   |
| AHQ-4-6, 2435               | K.AGALQCSPSDAYTK.K                                                     | 1470.58689 | 2 | 2.00E-04 | 0.88   | 3.61    | -     | 721.8    |
| AHQ-4-2, 2600               | K.AGALQCSPSDAYTK.K                                                     | 1470.58689 | 2 | 4.43E-04 | 0.67   | 2.91    | -     | 494.7    |
| AHQ-4-4, 2555               | K.AGALQCSPSDAYTK.K                                                     | 1470.58689 | 1 | 6.06E-07 | 0.75   | 3.31    | -     | 502.1    |
| AHQ-4-4, 2546 - 2558        | K.AGALQCSPSDAYTK.K                                                     | 1470.58689 | 1 | 3.17E-05 | 0.83   | 3.38    | -     | 517.2    |
| AHQ-4-3, 2589               | K.AGALQCSPSDAYTK.K                                                     | 1470.58689 | 2 | 2.52E-04 | 0.92   | 3.93    | -     | 770.6    |
| AHQ-4-2, 2303               | K.AGALQCSPSDAYTK.K                                                     | 1470.58689 | 1 | 7.05E-08 | 0.67   | 3.47    | -     | 445.3    |
| AHQ-4-7, 6069               | K.AGALQCSPSDAYTK.K                                                     | 1598.75981 | 2 | 3.01E-04 | 0.59   | 3.18    | -     | 375.3    |
| AHQ-4-2, 4180               | K.AGFLLDKDFLPK.E                                                       | 1364.61374 | 2 | 5.26E-04 | 0.91   | 3.57    | -     | 1304.7   |
| AHQ-4-4, 3963               | K.AIAVTQEMVTK.S                                                        | 1290.55498 | 2 | 2.09E-04 | 0.96   | 4.27    | -     | 1516.3   |
| AHQ-4-3, 4011               | K.AIAVTQEMVTK.S                                                        | 1290.55498 | 2 | 6.05E-05 | 0.96   | 4.38    | -     | 1376.2   |
| AHQ-4-3, 2437               | K.ALDGAFTEENR.A                                                        | 1290.55498 | 2 | 5.00E-08 | 0.94   | 4.01    | -     | 1177.2   |
| AHQ-4-1, 2571               | K.ALDGAFTEENR.A                                                        | 1223.27427 | 2 | 5.51E-08 | 0.94   | 3.34    | -     | 1482.6   |
| AHQ-4-2, 2451               | K.ALDGAFTEENR.A                                                        | 1223.27427 | 2 | 7.28E-04 | 0.93   | 3.22    | -     | 1344.8   |
| AHQ-4-1, 2723               | K.ALDGAFTEENR.A                                                        | 1223.27427 | 2 | 1.91E-06 | 0.91   | 3.34    | -     | 1162.2   |
| AHQ-4-4, 2416 - 2424        | K.ALDGAFTEENR.A                                                        | 1223.27427 | 2 | 1.77E-05 | 0.95   | 3.79    | -     | 1763.4   |
| AHQ-4-7, 3605               | K.ALDYYMLR.N                                                           | 1223.27427 | 2 | 5.24E-05 | 0.88   | 3.07    | -     | 963.6    |
| AHQ-4-13-, 3306 - 3308      | K.ALDYYMLR.N                                                           | 1045.23686 | 2 | 2.50E-04 | 0.92   | 3.10    | -     | 901.1    |
| AHQ-4-13, 3449              | K.ALDYYMLR.N                                                           | 1061.23626 | 2 | 9.39E-06 | 0.90   | 2.52    | -     | 1019.7   |
| AHQ-4-13, 4088              | K.ALDYYMLR.N                                                           | 1061.23626 | 2 | 1.52E-05 | 0.91   | 2.92    | -     | 940.9    |
| AHQ-4-7, 2962               | K.ALDYYMLR.N                                                           | 1045.23686 | 2 | 5.98E-05 | 0.91   | 2.99    | -     | 836.2    |
| AHQ-4-13-, 3944             | K.ALDYYMLR.N                                                           | 1061.23626 | 2 | 1.15E-04 | 0.90   | 2.54    | -     | 1013.0   |
| AHQ-4-1, 2063               | R.ALEATTEHIR.Q                                                         | 1045.23686 | 2 | 1.80E-05 | 0.87   | 2.55    | -     | 805.2    |
| AHQ-4-2, 1802               | R.ALEATTEHIR.Q                                                         | 1141.25953 | 2 | 6.95E-06 | 0.85   | 3.14    | -     | 1041.7   |
| AHQ-4-3, 1760               | R.ALEATTEHIR.Q                                                         | 1141.25953 | 1 | 4.20E-04 | 0.12   | 2.17    | -     | 137.1    |
| AHQ-4-6, 1644               | R.ALEATTEHIR.Q                                                         | 1141.25953 | 2 | 6.91E-06 | 0.79   | 3.09    | -     | 880.9    |
| AHQ-4-2, 1783 - 1862        | R.ALEATTEHIR.Q                                                         | 1141.25953 | 2 | 2.30E-07 | 0.80   | 3.10    | -     | 927.4    |
| AHQ-4-1, 2098               | R.ALEATTEHIR.Q                                                         | 1141.25953 | 2 | 9.31E-07 | 0.79   | 3.16    | -     | 929.9    |
| AHQ-4-4, 1799 - 1830        | R.ALEATTEHIR.Q                                                         | 1141.25953 | 1 | 1.73E-04 | 0.05   | 1.87    | -     | 205.1    |
| AHQ-4-1, 3546               | K.ALGDLSATK.A                                                          | 1141.25953 | 2 | 7.95E-04 | 0.80   | 2.95    | -     | 973.7    |
| AHQ-4-4, 3408               | K.ALGDLSATK.A                                                          | 989.14811  | 2 | 1.35E-06 | 0.92   | 3.30    | -     | 986.3    |
| AHQ-4-4, 3406               | K.ALGDLSATK.A                                                          | 989.14811  | 2 | 2.35E-06 | 0.92   | 4.10    | -     | 731.9    |
| AHQ-4-5, 3233               | K.ALGDLSATK.A                                                          | 989.14811  | 1 | 1.70E-04 | 0.31   | 2.30    | -     | 459.3    |
| AHQ-4-6, 3182 - 3204        | K.ALGDLSATK.A                                                          | 989.14811  | 2 | 2.83E-06 | 0.93   | 3.92    | -     | 850.5    |
| AHQ-4-2, 3426               | K.ALGDLSATK.A                                                          | 989.14811  | 2 | 2.02E-04 | 0.93   | 3.69    | -     | 762.4    |
|                             |                                                                        | 989.14811  | 2 | 2.73E-07 | 0.92   | 3.55    | -     | 788.0    |

|                      |                                  |            |   |          |      |      |   |        |
|----------------------|----------------------------------|------------|---|----------|------|------|---|--------|
| AHQ-4-3, 3432        | K.ALGDILISATK.A                  | 989.14811  | 2 | 4.70E-05 | 0.92 | 3.61 | - | 857.2  |
| AHQ-4-7, 2367        | K.ALSTDPAPNLK.S                  | 1198.35099 | 2 | 6.64E-07 | 0.71 | 3.09 | - | 528.9  |
| AHQ-4-4, 2539        | K.ALSTDPAPNLK.S                  | 1198.35099 | 2 | 8.06E-07 | 0.70 | 3.18 | - | 472.2  |
| AHQ-4-3, 2556        | K.ALSTDPAPNLK.S                  | 1198.35099 | 2 | 3.62E-07 | 0.69 | 2.56 | - | 648.9  |
| AHQ-4-2, 2403        | K.ALSTDPAPNLK.S                  | 1198.35099 | 2 | 2.29E-04 | 0.67 | 2.57 | - | 609.5  |
| AHQ-4-2, 2554        | K.ALSTDPAPNLK.S                  | 1198.35099 | 2 | 4.29E-06 | 0.76 | 3.44 | - | 549.0  |
| AHQ-4-6, 2407 - 2411 | K.ALSTDPAPNLK.S                  | 1198.35099 | 2 | 1.13E-06 | 0.82 | 2.80 | - | 724.8  |
| AHQ-4-1, 2715 - 2726 | K.ALSTDPAPNLK.S                  | 1198.35099 | 2 | 3.88E-06 | 0.79 | 3.20 | - | 658.9  |
| AHQ-4-2, 3582        | K.ALSTDPAPNLKSQLAAAAA.A          | 1967.21592 | 2 | 2.62E-06 | 0.76 | 3.04 | - | 570.5  |
| AHQ-4-4, 5674        | K.APGQLECEATAIALNSCLR.D          | 2077.32566 | 2 | 2.35E-09 | 0.94 | 4.48 | - | 1087.7 |
| AHQ-4-2, 6426        | K.APGQLECEATAIALNSCLR.D          | 2077.32566 | 2 | 7.36E-10 | 0.97 | 5.40 | - | 1117.8 |
| AHQ-4-5, 6287        | K.APGQLECEATAIALNSCLR.D          | 2077.32566 | 2 | 3.79E-05 | 0.95 | 4.48 | - | 1341.3 |
| AHQ-4-3, 6420        | K.APGQLECEATAIALNSCLR.D          | 2077.32566 | 2 | 7.98E-08 | 0.95 | 4.74 | - | 1147.9 |
| AHQ-4-2, 5744        | K.APGQLECEATAIALNSCLR.D          | 2077.32566 | 2 | 4.37E-08 | 0.95 | 5.05 | - | 882.8  |
| AHQ-4-6, 6163        | K.APGQLECEATAIALNSCLR.D          | 2077.32566 | 2 | 3.96E-04 | 0.60 | 2.66 | - | 585.0  |
| AHQ-4-1, 6306 - 6369 | K.APGQLECEATAIALNSCLR.D          | 2077.32566 | 2 | 1.23E-06 | 0.93 | 4.09 | - | 1006.4 |
| AHQ-4-3, 5723        | K.APGQLECEATAIALNSCLR.D          | 2077.32566 | 2 | 3.38E-10 | 0.94 | 4.18 | - | 1048.7 |
| AHQ-4-4, 6403        | K.APGQLECEATAIALNSCLR.D          | 2077.32566 | 2 | 2.87E-08 | 0.96 | 5.09 | - | 1052.5 |
| AHQ-4-3, 7059        | K.AQECGPLEMDSALSVMQLEK.D         | 2391.66165 | 3 | 7.90E-10 | 0.92 | 4.20 | - | 1259.3 |
| AHQ-4-6, 6763        | K.AQECGPLEMDSALSVMQLEK.D         | 2391.66165 | 3 | 4.81E-04 | 0.93 | 4.78 | - | 1320.5 |
| AHQ-4-3, 7049 - 7131 | K.AQECGPLEMDSALSVMQLEK.D         | 2391.66165 | 2 | 4.64E-07 | 0.89 | 4.26 | - | 807.1  |
| AHQ-4-1, 6930        | K.AQECGPLEMDSALSVMQLEK.D         | 2391.66165 | 3 | 1.44E-08 | 0.94 | 4.65 | - | 1389.4 |
| AHQ-4-2, 7070        | K.AQECGPLEMDSALSVMQLEK.D         | 2391.66165 | 3 | 3.29E-04 | 0.92 | 4.04 | - | 1627.4 |
| AHQ-4-5, 6903        | K.AQECGPLEMDSALSVMQLEK.D         | 2391.66165 | 3 | 2.16E-04 | 0.84 | 3.88 | - | 831.9  |
| AHQ-4-4, 7011        | K.AQECGPLEMDSALSVMQLEK.D         | 2391.66165 | 3 | 4.04E-06 | 0.77 | 3.51 | - | 945.3  |
| AHQ-4-1, 2987 - 3066 | K.ASAGPQPLLVQSCK.A               | 1457.67763 | 2 | 7.68E-07 | 0.82 | 3.33 | - | 488.8  |
| AHQ-4-2, 3135        | K.ASAGPQPLLVQSCK.A               | 1457.67763 | 2 | 2.08E-07 | 0.50 | 2.78 | - | 345.1  |
| AHQ-4-2, 2867 - 2872 | K.ASAGPQPLLVQSCK.A               | 1457.67763 | 1 | 5.42E-05 | 0.26 | 2.10 | - | 315.7  |
| AHQ-4-5, 2687        | K.ASAGPQPLLVQSCK.A               | 1457.67763 | 1 | 4.46E-09 | 0.75 | 3.68 | - | 352.8  |
| AHQ-4-5, 2643 - 2681 | K.ASAGPQPLLVQSCK.A               | 1457.67763 | 2 | 4.81E-09 | 0.84 | 3.57 | - | 466.5  |
| AHQ-4-2, 2848 - 2918 | K.ASAGPQPLLVQSCK.A               | 1457.67763 | 2 | 1.60E-05 | 0.85 | 3.56 | - | 458.9  |
| AHQ-4-4, 2868        | K.ASAGPQPLLVQSCK.A               | 1457.67763 | 1 | 5.03E-07 | 0.49 | 2.91 | - | 326.9  |
| AHQ-4-3, 2883        | K.ASAGPQPLLVQSCK.A               | 1457.67763 | 1 | 6.43E-08 | 0.77 | 3.62 | - | 521.5  |
| AHQ-4-6, 2699        | K.ASAGPQPLLVQSCK.A               | 1457.67763 | 1 | 4.00E-10 | 0.70 | 3.36 | - | 317.8  |
| AHQ-4-6, 2667 - 2686 | K.ASAGPQPLLVQSCK.A               | 1457.67763 | 2 | 1.31E-08 | 0.88 | 3.62 | - | 543.6  |
| AHQ-4-3, 2849 - 2884 | K.ASAGPQPLLVQSCK.A               | 1457.67763 | 2 | 5.01E-05 | 0.70 | 3.22 | - | 477.8  |
| AHQ-4-2, 4059        | K.ASVPTIQDQASAM*QSQCAK.N         | 2152.39272 | 2 | 6.40E-05 | 0.69 | 3.16 | - | 324.8  |
| AHQ-4-2, 4387 - 4467 | K.ASVPTIQDQASAMQSQCAK.N          | 2136.39332 | 2 | 7.84E-07 | 0.94 | 4.69 | - | 604.1  |
| AHQ-4-2, 4560        | K.ASVPTIQDQASAMQSQCAK.N          | 2136.39332 | 2 | 1.54E-09 | 0.91 | 4.43 | - | 556.3  |
| AHQ-4-7, 4083        | K.ASVPTIQDQASAMQSQCAK.N          | 2136.39332 | 2 | 8.89E-06 | 0.63 | 3.07 | - | 380.6  |
| AHQ-4-2, 4880        | K.ASVPTIQDQASAMQSQCAK.N          | 2136.39332 | 2 | 6.37E-09 | 0.89 | 3.40 | - | 808.7  |
| AHQ-4-3, 4384 - 4425 | K.ASVPTIQDQASAMQSQCAK.N          | 2136.39332 | 2 | 1.23E-06 | 0.78 | 3.44 | - | 416.3  |
| AHQ-4-3, 3928        | K.ASVPTIQDQASAM*QSQCAK.N         | 2152.39272 | 2 | 4.09E-04 | 0.91 | 3.89 | - | 826.4  |
| AHQ-4-1, 4419        | K.ASVPTIQDQASAMQSQCAK.N          | 2136.39332 | 2 | 2.00E-07 | 0.94 | 4.34 | - | 964.3  |
| AHQ-4-4, 3736 - 3754 | K.ASVPTIQDQASAM*QSQCAK.N         | 2152.39272 | 2 | 1.41E-05 | 0.89 | 4.09 | - | 538.1  |
| AHQ-4-5, 3577        | K.ASVPTIQDQASAM*QSQCAK.N         | 2152.39272 | 2 | 2.73E-05 | 0.74 | 3.16 | - | 502.4  |
| AHQ-4-6, 4086        | K.ASVPTIQDQASAMQSQCAK.N          | 2136.39332 | 2 | 3.56E-09 | 0.90 | 4.25 | - | 546.4  |
| AHQ-4-6, 3507        | K.ASVPTIQDQASAM*QSQCAK.N         | 2152.39272 | 2 | 1.33E-04 | 0.80 | 3.42 | - | 532.6  |
| AHQ-4-4, 4331 - 4355 | K.ASVPTIQDQASAMQSQCAK.N          | 2136.39332 | 2 | 5.45E-09 | 0.93 | 4.35 | - | 769.7  |
| AHQ-4-6, 4730        | K.AVAEQIPLLVQVGR.G               | 1493.77619 | 1 | 2.72E-04 | 0.47 | 2.81 | - | 269.9  |
| AHQ-4-2, 5359        | K.AVAEQIPLLVQVGR.G               | 1493.77619 | 2 | 2.07E-06 | 0.90 | 3.86 | - | 746.6  |
| AHQ-4-2, 5075        | K.AVAEQIPLLVQVGR.G               | 1493.77619 | 1 | 1.33E-08 | 0.59 | 3.19 | - | 233.4  |
| AHQ-4-2, 5042 - 5111 | K.AVAEQIPLLVQVGR.G               | 1493.77619 | 2 | 6.39E-08 | 0.94 | 4.44 | - | 859.4  |
| AHQ-4-3, 5036 - 5051 | K.AVAEQIPLLVQVGR.G               | 1493.77619 | 2 | 1.34E-06 | 0.94 | 4.90 | - | 649.0  |
| AHQ-4-3, 5043        | K.AVAEQIPLLVQVGR.G               | 1493.77619 | 1 | 5.57E-05 | 0.44 | 2.89 | - | 199.3  |
| AHQ-4-3, 5351        | K.AVAEQIPLLVQVGR.G               | 1493.77619 | 1 | 1.43E-04 | 0.25 | 2.07 | - | 232.9  |
| AHQ-4-4, 5010 - 5014 | K.AVAEQIPLLVQVGR.G               | 1493.77619 | 1 | 9.65E-05 | 0.39 | 2.80 | - | 304.1  |
| AHQ-4-6, 4726 - 4728 | K.AVAEQIPLLVQVGR.G               | 1493.77619 | 2 | 4.73E-06 | 0.89 | 3.82 | - | 620.6  |
| AHQ-4-4, 3871        | K.AVASAAAALVLK.A                 | 1085.32216 | 2 | 4.60E-05 | 0.94 | 3.20 | - | 1454.0 |
| AHQ-4-2, 3986 - 4063 | K.AVASAAAALVLK.A                 | 1085.32216 | 2 | 1.65E-05 | 0.96 | 4.20 | - | 1590.6 |
| AHQ-4-2, 3882        | K.AVASAAAALVLK.A                 | 1085.32216 | 2 | 4.31E-06 | 0.95 | 4.11 | - | 1166.8 |
| AHQ-4-1, 4013        | K.AVASAAAALVLK.A                 | 1085.32216 | 2 | 2.97E-06 | 0.96 | 3.72 | - | 2030.0 |
| AHQ-4-2, 5216 - 5288 | K.AVEGCVSASQAATEDGQLLR.G         | 2064.22056 | 2 | 2.61E-05 | 0.51 | 2.99 | - | 636.8  |
| AHQ-4-2, 4843        | K.AVEGCVSASQAATEDGQLLR.G         | 2064.22056 | 2 | 1.01E-07 | 0.88 | 3.68 | - | 1015.1 |
| AHQ-4-2, 4739        | K.AVEGCVSASQAATEDGQLLR.G         | 2064.22056 | 2 | 2.45E-06 | 0.31 | 2.66 | - | 523.4  |
| AHQ-4-1, 4185 - 4262 | K.AVEGCVSASQAATEDGQLLR.G         | 2064.22056 | 2 | 1.84E-07 | 0.93 | 4.03 | - | 1380.8 |
| AHQ-4-2, 4354 - 4427 | K.AVEGCVSASQAATEDGQLLR.G         | 2064.22056 | 2 | 6.80E-06 | 0.93 | 4.04 | - | 1399.0 |
| AHQ-4-8, 3702        | K.AVEGCVSASQAATEDGQLLR.G         | 2064.22056 | 2 | 6.45E-04 | 0.91 | 4.36 | - | 738.1  |
| AHQ-4-4, 4268 - 4300 | K.AVEGCVSASQAATEDGQLLR.G         | 2064.22056 | 2 | 1.60E-04 | 0.92 | 4.27 | - | 1153.3 |
| AHQ-4-1, 4357 - 4433 | K.AVEGCVSASQAATEDGQLLR.G         | 2064.22056 | 2 | 5.48E-06 | 0.89 | 3.56 | - | 1174.1 |
| AHQ-4-2, 3888 - 3959 | K.AVEGCVSASQAATEDGQLLR.G         | 2064.22056 | 2 | 3.07E-07 | 0.95 | 4.24 | - | 1554.5 |
| AHQ-4-1, 3887 - 3962 | K.AVEGCVSASQAATEDGQLLR.G         | 2064.22056 | 2 | 9.97E-08 | 0.86 | 3.79 | - | 796.8  |
| AHQ-4-2, 4242 - 4319 | K.AVEGCVSASQAATEDGQLLR.G         | 2064.22056 | 2 | 4.05E-09 | 0.94 | 4.15 | - | 1442.4 |
| AHQ-4-8, 3541        | K.AVEGCVSASQAATEDGQLLR.G         | 2064.22056 | 2 | 5.17E-04 | 0.91 | 2.66 | - | 143.0  |
| AHQ-4-6, 7130 - 7132 | K.AVSSAIAQLLGEVAQGNENYAGIAAR.D   | 2574.83158 | 3 | 4.51E-07 | 0.96 | 5.36 | - | 1578.2 |
| AHQ-4-2, 4816 - 4898 | R.AVTDSINQLITMCTQQAPGQK.E        | 2306.60312 | 2 | 1.62E-04 | 0.55 | 2.93 | - | 290.6  |
| AHQ-4-4, 4844 - 4856 | R.AVTDSINQLITMCTQQAPGQK.E        | 2306.60312 | 2 | 5.61E-06 | 0.74 | 3.40 | - | 439.6  |
| AHQ-4-3, 6255 - 6263 | R.AVTDSINQLITMCTQQAPGQK.E        | 2306.60312 | 2 | 4.86E-05 | 0.61 | 2.91 | - | 432.7  |
| AHQ-4-3, 4891        | R.AVTDSINQLITMCTQQAPGQK.E        | 2306.60312 | 2 | 3.25E-06 | 0.90 | 4.15 | - | 580.3  |
| AHQ-4-6, 5995        | R.AVTDSINQLITMCTQQAPGQK.E        | 2306.60312 | 2 | 1.53E-04 | 0.53 | 2.73 | - | 467.5  |
| AHQ-4-1, 6161 - 6162 | R.AVTDSINQLITMCTQQAPGQK.E        | 2306.60312 | 2 | 8.24E-07 | 0.80 | 3.62 | - | 435.6  |
| AHQ-4-2, 5846        | R.AVTDSINQLITMCTQQAPGQK.E        | 2322.60252 | 2 | 3.18E-06 | 0.85 | 4.04 | - | 466.4  |
| AHQ-4-5, 6114        | R.AVTDSINQLITMCTQQAPGQK.E        | 2306.60312 | 2 | 3.95E-05 | 0.85 | 3.53 | - | 566.4  |
| AHQ-4-3, 6313 - 6383 | R.AVTDSINQLITMCTQQAPGQKCEDNALR.E | 3166.51128 | 3 | 1.08E-10 | 0.91 | 4.74 | - | 1017.9 |
| AHQ-4-4, 6358        | R.AVTDSINQLITMCTQQAPGQKCEDNALR.E | 3166.51128 | 3 | 1.10E-08 | 0.96 | 5.40 | - | 1382.8 |
| AHQ-4-5, 6153        | R.AVTDSINQLITMCTQQAPGQKCEDNALR.E | 3166.51128 | 3 | 5.72E-12 | 0.93 | 5.28 | - | 942.5  |
| AHQ-4-1, 6234 - 6299 | R.AVTDSINQLITMCTQQAPGQKCEDNALR.E | 3166.51128 | 3 | 5.59E-12 | 0.94 | 4.88 | - | 1203.3 |
| AHQ-4-4, 6272 - 6290 | R.AVTDSINQLITMCTQQAPGQKCEDNALR.E | 3166.51128 | 3 | 5.05E-14 | 0.77 | 3.61 | - | 733.5  |
| AHQ-4-4, 5856 - 5926 | R.AVTDSINQLITMCTQQAPGQKCEDNALR.E | 3182.51068 | 3 | 2.48E-08 | 0.94 | 5.09 | - | 1110.8 |
| AHQ-4-6, 6042 - 6111 | R.AVTDSINQLITMCTQQAPGQKCEDNALR.E | 3166.51128 | 3 | 3.86E-13 | 0.84 | 4.00 | - | 881.8  |
| AHQ-4-2, 6312 - 6382 | R.AVTDSINQLITMCTQQAPGQKCEDNALR.E | 3166.51128 | 3 | 2.16E-11 | 0.93 | 4.62 | - | 1242.8 |
| AHQ-4-5, 6234 - 6265 | R.AVTDSINQLITMCTQQAPGQKCEDNALR.E | 3166.51128 | 3 | 2.28E-09 | 0.89 | 4.40 | - | 849.0  |
| AHQ-4-1, 5949        | R.AVTDSINQLITMCTQQAPGQKCEDNALR.E | 3182.51068 | 3 | 7.35E-06 | 0.70 | 3.49 | - | 639.7  |
| AHQ-4-2, 2406        | R.CVSLPQGR.D                     | 1079.23309 | 1 | 4.06E-07 | 0.17 | 2.13 | - | 107.1  |
| AHQ-4-1, 3767        | R.DDILNGSHPVSFDK.A               | 1544.64741 | 2 | 5.69E-04 | 0.75 | 2.70 | - | 800.7  |
| AHQ-4-1, 3637 - 3655 | R.DDILNGSHPVSFDK.A               | 1544.64741 | 2 | 9.46E-04 | 0.71 | 2.99 | - | 595.0  |
| AHQ-4-10, 3380       | R.DDILNGSHPVSFDK.A               | 1544.64741 | 2 | 1.03E-08 | 0.85 | 3.14 | - | 964.3  |
| AHQ-4-7, 3238 - 3309 | R.DDILNGSHPVSFDK.A               | 1544.64741 | 2 | 1.21E-06 | 0.92 | 3.74 | - | 982.7  |
| AHQ-4-10, 3208       | R.DDILNGSHPVSFDK.A               | 1544.64741 | 2 | 2.39E-07 | 0.88 | 3.58 | - | 754.6  |
| AHQ-4-7, 3441 - 3509 | R.DDILNGSHPVSFDK.A               | 1544.64741 | 2 | 5.82E-09 | 0.97 | 4.31 | - | 1873.8 |
| AHQ-4-7, 3321        | R.DDILNGSHPVSFDK.A               | 1544.64741 | 2 | 3.51E-07 | 0.92 | 3.75 | - | 935.2  |
| AHQ-4-9, 3040        | R.DDILNGSHPVSFDK.A               | 1544.64741 | 2 | 8.40E-08 | 0.94 | 3.90 | - | 1178.5 |
| AHQ-4-7, 4741        | K.DHFGLEGDEESTMLEDSVSPK.K        | 2323.43307 | 2 | 4.68E-06 | 0.92 | 4.07 | - | 1037.0 |
| AHQ-4-12, 4811       | K.DHFGLEGDEESTMLEDSVSPK.K        | 2323.43307 | 2 | 8.00E-07 | 0.96 | 5.27 | - | 1296.8 |
| AHQ-4-4, 6446        | R.DKAPGQLECEATAIALNSCLR.D        | 2320.58644 | 2 | 3.31E-12 | 0.93 | 4.07 | - | 851.4  |
| AHQ-4-10, 5399       | R.DKAPGQLECEATAIALNSCLR.D        | 2320.58644 | 2 | 5.23E-06 | 0.86 | 3.30 | - | 735.1  |
| AHQ-4-5, 6051        | R.DKAPGQLECEATAIALNSCLR.D        | 2320.58644 | 3 | 1.79E-04 | 0.77 | 3.42 | - | 859.1  |

|                        |                                      |            |   |          |      |      |   |        |
|------------------------|--------------------------------------|------------|---|----------|------|------|---|--------|
| AHQ-4-2, 6394 - 6464   | R.DKAPGQLECEIAAALNSCLR.D             | 2320.58644 | 2 | 1.21E-05 | 0.90 | 4.09 | - | 754.5  |
| AHQ-4-4, 6196          | R.DKAPGQLECEIAAALNSCLR.D             | 2320.58644 | 2 | 1.88E-08 | 0.89 | 4.04 | - | 765.2  |
| AHQ-4-2, 5796 - 5862   | R.DKAPGQLECEIAAALNSCLR.D             | 2320.58644 | 2 | 3.87E-08 | 0.72 | 3.48 | - | 763.9  |
| AHQ-4-2, 5442 - 5446   | R.DKAPGQLECEIAAALNSCLR.D             | 2320.58644 | 2 | 2.25E-05 | 0.76 | 3.19 | - | 643.1  |
| AHQ-4-6, 5958          | R.DKAPGQLECEIAAALNSCLR.D             | 2320.58644 | 2 | 1.15E-10 | 0.94 | 4.74 | - | 879.5  |
| AHQ-4-3, 6455 - 6456   | R.DKAPGQLECEIAAALNSCLR.D             | 2320.58644 | 2 | 3.53E-11 | 0.94 | 4.16 | - | 1137.8 |
| AHQ-4-3, 6219 - 6287   | R.DKAPGQLECEIAAALNSCLR.D             | 2320.58644 | 2 | 3.49E-08 | 0.95 | 4.95 | - | 916.2  |
| AHQ-4-1, 5466          | R.DKAPGQLECEIAAALNSCLR.D             | 2320.58644 | 2 | 6.16E-08 | 0.94 | 4.46 | - | 1021.8 |
| AHQ-4-3, 5396 - 5467   | R.DKAPGQLECEIAAALNSCLR.D             | 2320.58644 | 2 | 1.63E-13 | 0.92 | 4.32 | - | 820.3  |
| AHQ-4-3, 5771 - 5839   | R.DKAPGQLECEIAAALNSCLR.D             | 2320.58644 | 2 | 4.57E-05 | 0.65 | 3.42 | - | 558.2  |
| AHQ-4-11, 5677         | R.DKAPGQLECEIAAALNSCLR.D             | 2320.58644 | 2 | 2.22E-06 | 0.94 | 4.20 | - | 1032.9 |
| AHQ-4-2, 6234          | R.DKAPGQLECEIAAALNSCLR.D             | 2320.58644 | 3 | 1.71E-05 | 0.72 | 3.56 | - | 810.4  |
| AHQ-4-2, 6232          | R.DKAPGQLECEIAAALNSCLR.D             | 2320.58644 | 2 | 8.74E-12 | 0.97 | 5.89 | - | 1152.4 |
| AHQ-4-5, 6045 - 6057   | R.DKAPGQLECEIAAALNSCLR.D             | 2320.58644 | 2 | 6.64E-13 | 0.95 | 5.51 | - | 753.6  |
| AHQ-4-1, 6177 - 6247   | R.DKAPGQLECEIAAALNSCLR.D             | 2320.58644 | 2 | 1.37E-09 | 0.96 | 5.35 | - | 1088.6 |
| AHQ-4-5, 5269 - 5270   | R.DKAPGQLECEIAAALNSCLR.D             | 2320.58644 | 2 | 3.37E-10 | 0.97 | 5.07 | - | 1491.8 |
| AHQ-4-3, 6365          | R.DKAPGQLECEIAAALNSCLR.D             | 2320.58644 | 2 | 1.61E-04 | 0.40 | 2.56 | - | 433.4  |
| AHQ-4-5, 6311          | R.DKAPGQLECEIAAALNSCLR.D             | 2320.58644 | 2 | 2.44E-09 | 0.89 | 3.59 | - | 766.8  |
| AHQ-4-7, 5926          | R.DKAPGQLECEIAAALNSCLR.D             | 2320.58644 | 2 | 5.41E-08 | 0.75 | 3.24 | - | 484.1  |
| AHQ-4-4, 5410 - 5435   | R.DLDQASLAASVSOQLAPR.E               | 1783.96422 | 2 | 3.15E-04 | 0.90 | 3.48 | - | 1003.8 |
| AHQ-4-2, 5470          | R.DLDQASLAASVSOQLAPR.E               | 1783.96422 | 3 | 4.48E-07 | 0.97 | 5.11 | - | 2178.9 |
| AHQ-4-3, 5447 - 5483   | R.DLDQASLAASVSOQLAPR.E               | 1783.96422 | 2 | 6.23E-05 | 0.95 | 4.58 | - | 1094.3 |
| AHQ-4-3, 5469          | R.DLDQASLAASVSOQLAPR.E               | 1783.96422 | 3 | 2.44E-07 | 0.95 | 4.35 | - | 1750.4 |
| AHQ-4-11, 5017         | R.DLDQASLAASVSOQLAPR.E               | 1783.96422 | 2 | 2.23E-04 | 0.81 | 3.43 | - | 712.2  |
| AHQ-4-2, 3544 - 3570   | R.DPPSWSVLAGHSR.T                    | 1409.53156 | 2 | 8.31E-11 | 0.92 | 3.33 | - | 688.9  |
| AHQ-4-1, 3705          | R.DPPSWSVLAGHSR.T                    | 1409.53156 | 2 | 1.10E-07 | 0.90 | 3.37 | - | 587.2  |
| AHQ-4-2, 3556          | R.DPPSWSVLAGHSR.T                    | 1409.53156 | 3 | 8.51E-08 | 0.86 | 3.65 | - | 796.0  |
| AHQ-4-3, 3520          | R.DPPSWSVLAGHSR.T                    | 1409.53156 | 2 | 4.28E-09 | 0.85 | 3.11 | - | 549.7  |
| AHQ-4-10, 4671         | R.DPVQNLNLYVQAR.D                    | 1529.76539 | 2 | 7.48E-07 | 0.97 | 5.12 | - | 1610.5 |
| AHQ-4-4, 2344          | K.EAAYHPEVAPDVR.L                    | 1454.56910 | 2 | 1.21E-07 | 0.73 | 2.53 | - | 714.1  |
| AHQ-4-4, 2358          | K.EAAYHPEVAPDVR.L                    | 1454.56910 | 1 | 1.63E-05 | 0.73 | 2.90 | - | 396.0  |
| AHQ-4-2, 2383 - 2386   | K.EAAYHPEVAPDVR.L                    | 1454.56910 | 1 | 1.98E-06 | 0.68 | 2.50 | - | 523.0  |
| AHQ-4-4, 6262 - 6332   | K.EADESLNFEEOQLEAAK.S                | 1937.05072 | 2 | 1.05E-09 | 0.96 | 5.05 | - | 1357.5 |
| AHQ-4-4, 6127 - 6194   | K.EADESLNFEEOQLEAAK.S                | 1937.05072 | 2 | 3.09E-08 | 0.91 | 4.13 | - | 1218.5 |
| AHQ-4-6, 5972 - 6047   | K.EADESLNFEEOQLEAAK.S                | 1937.05072 | 2 | 3.08E-07 | 0.96 | 5.02 | - | 1577.8 |
| AHQ-4-4, 5919 - 5922   | K.EADESLNFEEOQLEAAK.S                | 1937.05072 | 2 | 6.11E-09 | 0.88 | 4.06 | - | 581.1  |
| AHQ-4-5, 6159          | K.EADESLNFEEOQLEAAK.S                | 1937.05072 | 2 | 7.08E-06 | 0.91 | 4.05 | - | 1275.8 |
| AHQ-4-5, 6013 - 6085   | K.EADESLNFEEOQLEAAK.S                | 1937.05072 | 2 | 2.33E-05 | 0.94 | 4.85 | - | 879.4  |
| AHQ-4-2, 6654 - 6734   | K.EADESLNFEEOQLEAAK.S                | 1937.05072 | 2 | 3.10E-08 | 0.92 | 4.40 | - | 968.3  |
| AHQ-4-4, 6411 - 6463   | K.EADESLNFEEOQLEAAK.S                | 1937.05072 | 2 | 2.79E-06 | 0.95 | 4.71 | - | 1223.0 |
| AHQ-4-1, 6279          | K.EADESLNFEEOQLEAAK.S                | 1937.05072 | 2 | 2.37E-05 | 0.79 | 3.29 | - | 951.4  |
| AHQ-4-1, 6129 - 6209   | K.EADESLNFEEOQLEAAK.S                | 1937.05072 | 2 | 3.77E-08 | 0.95 | 4.72 | - | 1318.6 |
| AHQ-4-6, 5840 - 5907   | K.EADESLNFEEOQLEAAK.S                | 1937.05072 | 2 | 3.20E-08 | 0.95 | 4.36 | - | 1497.6 |
| AHQ-4-4, 6644          | K.EADESLNFEEOQLEAAK.S                | 1937.05072 | 2 | 3.44E-05 | 0.63 | 3.24 | - | 571.0  |
| AHQ-4-7, 5921          | K.EADESLNFEEOQLEAAK.S                | 1937.05072 | 2 | 3.32E-05 | 0.83 | 3.76 | - | 725.2  |
| AHQ-4-11, 5632         | K.EADESLNFEEOQLEAAK.S                | 1937.05072 | 2 | 2.01E-06 | 0.96 | 5.35 | - | 1183.4 |
| AHQ-4-3, 5964          | K.EADESLNFEEOQLEAAK.S                | 1937.05072 | 2 | 1.08E-05 | 0.38 | 2.54 | - | 351.8  |
| AHQ-4-2, 6391          | K.EADESLNFEEOQLEAAK.S                | 1937.05072 | 2 | 2.55E-06 | 0.94 | 4.52 | - | 1187.1 |
| AHQ-4-2, 6095 - 6175   | K.EADESLNFEEOQLEAAK.S                | 1937.05072 | 2 | 1.37E-06 | 0.97 | 5.33 | - | 1476.5 |
| AHQ-4-3, 6177 - 6196   | K.EADESLNFEEOQLEAAK.S                | 1937.05072 | 2 | 2.89E-08 | 0.95 | 4.77 | - | 1168.6 |
| AHQ-4-3, 6268 - 6335   | K.EADESLNFEEOQLEAAK.S                | 1937.05072 | 2 | 1.72E-08 | 0.96 | 5.06 | - | 1527.8 |
| AHQ-4-2, 6242 - 6311   | K.EADESLNFEEOQLEAAK.S                | 1937.05072 | 2 | 3.07E-09 | 0.97 | 5.46 | - | 1483.0 |
| AHQ-4-1, 5833 - 5903   | K.EADESLNFEEOQLEAAK.S                | 1937.05072 | 2 | 1.31E-08 | 0.94 | 4.45 | - | 855.7  |
| AHQ-4-2, 6484          | K.EADESLNFEEOQLEAAK.S                | 1937.05072 | 2 | 9.38E-08 | 0.95 | 4.73 | - | 1384.9 |
| AHQ-4-1, 6113 - 6145   | K.EADESLNFEEOQLEAAK.S                | 1937.05072 | 2 | 7.70E-07 | 0.95 | 4.96 | - | 1282.7 |
| AHQ-4-10, 5325 - 5389  | K.EADESLNFEEOQLEAAK.S                | 1937.05072 | 2 | 1.95E-06 | 0.86 | 3.80 | - | 915.7  |
| AHQ-4-14-, 5722        | K.EADESLNFEEOQLEAAK.S                | 1937.05072 | 2 | 2.74E-10 | 0.97 | 5.39 | - | 1602.6 |
| AHQ-4-2, 7494          | R.ECANGYLELHDVLLTLQKPSPEL.Q          | 2883.30906 | 3 | 9.29E-05 | 0.93 | 4.93 | - | 1248.1 |
| AHQ-4-4, 7442          | R.ECANGYLELHDVLLTLQKPSPEL.Q          | 2883.30906 | 2 | 2.73E-06 | 0.90 | 4.17 | - | 516.1  |
| AHQ-4-3, 7501          | R.ECANGYLELHDVLLTLQKPSPEL.Q          | 2883.30906 | 3 | 2.85E-09 | 0.94 | 5.13 | - | 1077.0 |
| AHQ-4-3, 7503          | R.ECANGYLELHDVLLTLQKPSPEL.Q          | 2883.30906 | 2 | 3.62E-04 | 0.78 | 3.55 | - | 495.7  |
| AHQ-4-7, 7442          | R.ECANGYLELHDVLLTLQKPSPEL.Q          | 2883.30906 | 3 | 3.22E-06 | 0.84 | 3.68 | - | 930.8  |
| AHQ-4-9, 6687 - 6691   | R.ECANGYLELHDVLLTLQKPSPEL.Q          | 2883.30906 | 2 | 5.13E-05 | 0.74 | 3.41 | - | 413.7  |
| AHQ-4-3, 7388          | R.EGISQEAALHTQMLTAVQEISHLIEPLANAAR.A | 3388.79744 | 3 | 1.45E-05 | 0.89 | 4.06 | - | 1133.2 |
| AHQ-4-7, 7501          | R.EGISQEAALHTQMLTAVQEISHLIEPLANAAR.A | 3372.79804 | 3 | 3.55E-06 | 0.95 | 5.23 | - | 1423.3 |
| AHQ-4-6, 7288          | R.EGISQEAALHTQMLTAVQEISHLIEPLANAAR.A | 3372.79804 | 3 | 3.92E-11 | 0.97 | 5.96 | - | 1600.0 |
| AHQ-4-2, 7328 - 7395   | R.EGISQEAALHTQMLTAVQEISHLIEPLANAAR.A | 3388.79744 | 3 | 3.44E-05 | 0.96 | 5.64 | - | 1265.5 |
| AHQ-4-11, 6870         | R.EGISQEAALHTQMLTAVQEISHLIEPLANAAR.A | 3372.79804 | 3 | 1.37E-09 | 0.96 | 5.95 | - | 1421.5 |
| AHQ-4-2, 7430          | R.EGISQEAALHTQMLTAVQEISHLIEPLANAAR.A | 3388.79744 | 3 | 5.79E-05 | 0.90 | 4.62 | - | 950.9  |
| AHQ-4-5, 7455 - 7478   | R.EGISQEAALHTQMLTAVQEISHLIEPLANAAR.A | 3372.79804 | 3 | 6.21E-10 | 0.98 | 7.27 | - | 1692.9 |
| AHQ-4-4, 7506          | R.EGISQEAALHTQMLTAVQEISHLIEPLANAAR.A | 3372.79804 | 3 | 1.19E-10 | 0.96 | 6.22 | - | 1384.3 |
| AHQ-4-4, 7338          | R.EGISQEAALHTQMLTAVQEISHLIEPLANAAR.A | 3388.79744 | 3 | 5.27E-06 | 0.93 | 4.86 | - | 955.0  |
| AHQ-4-2, 7490 - 7556   | R.EGISQEAALHTQMLTAVQEISHLIEPLANAAR.A | 3372.79804 | 3 | 4.80E-08 | 0.93 | 5.31 | - | 883.0  |
| AHQ-4-5, 7297          | R.EGISQEAALHTQMLTAVQEISHLIEPLANAAR.A | 3388.79744 | 3 | 4.48E-07 | 0.90 | 3.99 | - | 1248.9 |
| AHQ-4-10, 6556 - 6572  | R.EGISQEAALHTQMLTAVQEISHLIEPLANAAR.A | 3372.79804 | 3 | 7.19E-06 | 0.70 | 3.16 | - | 740.5  |
| AHQ-4-3, 7567          | R.EGISQEAALHTQMLTAVQEISHLIEPLANAAR.A | 3372.79804 | 3 | 2.21E-08 | 0.97 | 6.15 | - | 1542.1 |
| AHQ-4-3, 7472 - 7544   | R.EGISQEAALHTQMLTAVQEISHLIEPLANAAR.A | 3372.79804 | 3 | 8.31E-05 | 0.84 | 3.97 | - | 681.5  |
| AHQ-4-4, 7411 - 7438   | R.EGISQEAALHTQMLTAVQEISHLIEPLANAAR.A | 3372.79804 | 3 | 2.41E-04 | 0.87 | 4.41 | - | 644.2  |
| AHQ-4-1, 7099 - 7169   | R.EGISQEAALHTQMLTAVQEISHLIEPLANAAR.A | 3388.79744 | 3 | 8.98E-07 | 0.94 | 5.52 | - | 996.0  |
| AHQ-4-2, 7266          | R.ELLENVPQINDM*SYFGCLDSVMENSK.V      | 3148.48814 | 3 | 2.88E-04 | 0.87 | 4.42 | - | 657.8  |
| AHQ-4-4, 7186          | R.ELLENVPQINDM*SYFGCLDSVMENSK.V      | 3148.48814 | 3 | 1.05E-04 | 0.90 | 4.58 | - | 719.6  |
| AHQ-4-2, 7142 - 7202   | R.ELLENVPQINDM*SYFGCLDSVMENSK.V      | 3148.48814 | 3 | 1.12E-06 | 0.75 | 4.71 | - | 420.8  |
| AHQ-4-7, 2733          | R.ELMEEKKEITGLR.K                    | 1807.05950 | 2 | 1.72E-10 | 0.83 | 3.58 | - | 550.7  |
| AHQ-4-12, 5563         | R.ERIEAPAGPPSDFGLFLSDDDPK.K          | 2571.77979 | 3 | 8.78E-07 | 0.94 | 4.68 | - | 1218.7 |
| AHQ-4-13-, 5481 - 5549 | R.ERIEAPAGPPSDFGLFLSDDDPK.K          | 2571.77979 | 3 | 1.80E-11 | 0.97 | 6.30 | - | 1370.8 |
| AHQ-4-7, 5422 - 5429   | R.ERIEAPAGPPSDFGLFLSDDDPK.K          | 2571.77979 | 3 | 4.44E-10 | 0.98 | 6.55 | - | 2107.0 |
| AHQ-4-13-, 5128        | R.ERIEAPAGPPSDFGLFLSDDDPK.K          | 2699.95270 | 3 | 5.26E-06 | 0.98 | 6.46 | - | 2902.8 |
| AHQ-4-13, 5218         | R.ERIEAPAGPPSDFGLFLSDDDPK.K          | 2699.95270 | 3 | 1.77E-07 | 0.98 | 6.69 | - | 2484.2 |
| AHQ-4-7, 4921 - 4989   | R.ERIEAPAGPPSDFGLFLSDDDPK.K          | 2699.95270 | 3 | 8.30E-06 | 0.97 | 5.90 | - | 1478.5 |
| AHQ-4-7, 4934          | R.ERIEAPAGPPSDFGLFLSDDDPK.K          | 2699.95270 | 2 | 1.29E-04 | 0.73 | 2.93 | - | 372.5  |
| AHQ-4-14-, 5077        | R.ERIEAPAGPPSDFGLFLSDDDPK.K          | 2699.95270 | 3 | 8.06E-08 | 0.98 | 6.72 | - | 2381.1 |
| AHQ-4-4, 2042 - 2270   | K.EVANSTANLVK.T                      | 1146.27608 | 1 | 4.67E-06 | 0.11 | 2.23 | - | 131.4  |
| AHQ-4-4, 2143          | K.EVANSTANLVK.T                      | 1146.27608 | 1 | 8.68E-05 | 0.22 | 2.52 | - | 154.8  |
| AHQ-4-4, 2262          | K.EVANSTANLVK.T                      | 1146.27608 | 2 | 6.76E-04 | 0.82 | 2.62 | - | 903.8  |
| AHQ-4-2, 2308          | K.EVANSTANLVK.T                      | 1146.27608 | 2 | 6.30E-05 | 0.84 | 2.79 | - | 918.9  |
| AHQ-4-3, 2113 - 2269   | K.EVANSTANLVK.T                      | 1146.27608 | 1 | 1.36E-07 | 0.17 | 2.25 | - | 151.9  |
| AHQ-4-2, 2300          | K.EVANSTANLVK.T                      | 1146.27608 | 1 | 7.39E-05 | 0.24 | 2.02 | - | 218.8  |
| AHQ-4-7, 4477          | K.EVIQEWNLNLIK.R                     | 1487.68214 | 1 | 8.62E-07 | 0.74 | 3.17 | - | 368.1  |
| AHQ-4-12, 4677 - 4707  | K.EVIQEWNLNLIK.R                     | 1487.68214 | 2 | 9.61E-05 | 0.77 | 3.31 | - | 652.2  |
| AHQ-4-13-, 4674 - 4736 | K.EVIQEWNLNLIK.R                     | 1487.68214 | 2 | 2.29E-06 | 0.69 | 2.68 | - | 784.0  |
| AHQ-4-11, 4536 - 4538  | K.EVIQEWNLNLIK.R                     | 1487.68214 | 2 | 3.36E-06 | 0.91 | 3.88 | - | 1028.1 |
| AHQ-4-7, 3797          | K.EVIQEWNLNLIK.R                     | 1643.86849 | 2 | 1.89E-05 | 0.88 | 3.31 | - | 1015.6 |
| AHQ-4-8, 2690 - 2691   | K.FFYSDQNVDSR.D                      | 1378.42795 | 2 | 1.23E-05 | 0.93 | 3.42 | - | 1075.1 |
| AHQ-4-7, 2775          | K.FFYSDQNVDSR.D                      | 1378.42795 | 2 | 6.33E-07 | 0.90 | 3.22 | - | 962.8  |
| AHQ-4-7, 5937 - 5993   | K.FFYSDQNVDSRDPVQLNLLYVQAR.D         | 2889.17074 | 3 | 8.33E-06 | 0.97 | 5.34 | - | 1917.3 |
| AHQ-4-3, 6551 - 6565   | R.FGQDFSTFLEAGVEM*AGQAPSQEDR.A       | 2734.89265 | 2 | 6.50E-06 | 0.79 | 3.19 | - | 753.8  |
| AHQ-4-2, 7640          | R.FGQDFSTFLEAGVEMAGQAPSQEDR.A        | 2718.89325 | 3 | 3.53E-08 | 0.90 | 4.61 | - | 609.9  |

|                        |                                    |            |   |          |      |      |   |        |
|------------------------|------------------------------------|------------|---|----------|------|------|---|--------|
| AHQ-4-1, 6443 - 6505   | R.FGQDFSTFLEAGVEM*AGQAPSQEDR.A     | 2734.89265 | 2 | 2.05E-05 | 0.57 | 2.71 | - | 505.9  |
| AHQ-4-2, 6547 - 6623   | R.FGQDFSTFLEAGVEM*AGQAPSQEDR.A     | 2734.89265 | 2 | 8.84E-06 | 0.87 | 3.47 | - | 1058.6 |
| AHQ-4-2, 6543 - 6612   | R.FGQDFSTFLEAGVEM*AGQAPSQEDR.A     | 2734.89265 | 3 | 1.31E-06 | 0.86 | 4.08 | - | 669.9  |
| AHQ-4-2, 7372 - 7452   | R.FGQDFSTFLEAGVEM*AGQAPSQEDR.A     | 2718.89325 | 2 | 1.19E-05 | 0.90 | 4.00 | - | 695.2  |
| AHQ-4-3, 6639          | R.FGQDFSTFLEAGVEM*AGQAPSQEDR.A     | 2734.89265 | 2 | 4.90E-07 | 0.71 | 3.67 | - | 396.5  |
| AHQ-4-4, 6522 - 6599   | R.FGQDFSTFLEAGVEM*AGQAPSQEDR.A     | 2734.89265 | 2 | 2.65E-06 | 0.76 | 3.16 | - | 796.0  |
| AHQ-4-3, 6555 - 6629   | R.FGQDFSTFLEAGVEM*AGQAPSQEDR.A     | 2734.89265 | 3 | 6.17E-06 | 0.83 | 4.23 | - | 591.4  |
| AHQ-4-1, 2878          | K.FLPSELRDEH                       | 1243.35032 | 2 | 1.43E-05 | 0.61 | 2.73 | - | 277.6  |
| AHQ-4-1, 5297 - 5298   | K.GLAGAVSELLR.S                    | 1086.26701 | 2 | 1.11E-06 | 0.97 | 4.92 | - | 1887.6 |
| AHQ-4-5, 4919          | K.GLAGAVSELLR.S                    | 1086.26701 | 2 | 1.37E-05 | 0.98 | 5.33 | - | 2246.6 |
| AHQ-4-4, 5154          | K.GLAGAVSELLR.S                    | 1086.26701 | 2 | 2.70E-07 | 0.97 | 4.87 | - | 1771.3 |
| AHQ-4-7, 4757          | K.GLAGAVSELLR.S                    | 1086.26701 | 2 | 3.61E-06 | 0.98 | 5.02 | - | 2068.7 |
| AHQ-4-2, 5230          | K.GLAGAVSELLR.S                    | 1086.26701 | 2 | 1.38E-06 | 0.97 | 4.87 | - | 1735.6 |
| AHQ-4-8, 4501 - 4502   | K.GLAGAVSELLR.S                    | 1086.26701 | 2 | 6.20E-07 | 0.97 | 5.05 | - | 1847.6 |
| AHQ-4-6, 4862 - 4867   | K.GLAGAVSELLR.S                    | 1086.26701 | 2 | 2.18E-06 | 0.98 | 5.31 | - | 1985.8 |
| AHQ-4-5, 6661 - 6737   | R.GSQAQPDSPSAQLALIAAASQSFLLQPGGK.M | 2756.02103 | 2 | 2.31E-06 | 0.89 | 4.40 | - | 459.4  |
| AHQ-4-2, 6778 - 6842   | R.GSQAQPDSPSAQLALIAAASQSFLLQPGGK.M | 2756.02103 | 2 | 7.99E-07 | 0.92 | 4.72 | - | 626.1  |
| AHQ-4-2, 6839 - 6922   | R.GSQAQPDSPSAQLALIAAASQSFLLQPGGK.M | 2756.02103 | 3 | 4.27E-06 | 0.93 | 5.13 | - | 1026.0 |
| AHQ-4-2, 7195 - 7196   | R.GSQAQPDSPSAQLALIAAASQSFLLQPGGK.M | 2756.02103 | 2 | 1.53E-07 | 0.89 | 4.39 | - | 753.9  |
| AHQ-4-4, 6822 - 6870   | R.GSQAQPDSPSAQLALIAAASQSFLLQPGGK.M | 2756.02103 | 2 | 5.47E-06 | 0.92 | 4.87 | - | 589.8  |
| AHQ-4-5, 6618 - 6685   | R.GSQAQPDSPSAQLALIAAASQSFLLQPGGK.M | 2756.02103 | 3 | 3.55E-05 | 0.73 | 3.67 | - | 455.5  |
| AHQ-4-4, 6810 - 6874   | R.GSQAQPDSPSAQLALIAAASQSFLLQPGGK.M | 2756.02103 | 3 | 3.26E-06 | 0.96 | 5.40 | - | 1719.3 |
| AHQ-4-6, 6531 - 6598   | R.GSQAQPDSPSAQLALIAAASQSFLLQPGGK.M | 2756.02103 | 3 | 7.23E-05 | 0.84 | 3.94 | - | 842.4  |
| AHQ-4-1, 7041          | R.GSQAQPDSPSAQLALIAAASQSFLLQPGGK.M | 2756.02103 | 2 | 2.28E-05 | 0.43 | 2.95 | - | 306.0  |
| AHQ-4-2, 6991 - 7059   | R.GSQAQPDSPSAQLALIAAASQSFLLQPGGK.M | 2756.02103 | 3 | 8.55E-06 | 0.85 | 4.51 | - | 643.8  |
| AHQ-4-1, 6693 - 6753   | R.GSQAQPDSPSAQLALIAAASQSFLLQPGGK.M | 2756.02103 | 3 | 4.36E-09 | 0.96 | 5.78 | - | 1330.2 |
| AHQ-4-3, 6577          | R.GSQAQPDSPSAQLALIAAASQSFLLQPGGK.M | 2756.02103 | 2 | 5.29E-04 | 0.85 | 3.91 | - | 531.5  |
| AHQ-4-3, 7160          | R.GSQAQPDSPSAQLALIAAASQSFLLQPGGK.M | 2756.02103 | 2 | 1.20E-05 | 0.83 | 3.71 | - | 536.0  |
| AHQ-4-2, 7018 - 7019   | R.GSQAQPDSPSAQLALIAAASQSFLLQPGGK.M | 2756.02103 | 2 | 2.12E-06 | 0.94 | 5.41 | - | 657.7  |
| AHQ-4-3, 6837 - 6907   | R.GSQAQPDSPSAQLALIAAASQSFLLQPGGK.M | 2756.02103 | 2 | 1.07E-08 | 0.91 | 4.83 | - | 634.8  |
| AHQ-4-3, 6912 - 6987   | R.GSQAQPDSPSAQLALIAAASQSFLLQPGGK.M | 2756.02103 | 3 | 1.89E-07 | 0.80 | 4.36 | - | 630.6  |
| AHQ-4-5, 7513 - 7582   | K.GTEWVDPEDPTVIAENELLGAAAAIEAAAK.K | 3053.32301 | 3 | 9.80E-13 | 0.96 | 6.06 | - | 1453.9 |
| AHQ-4-2, 7514 - 7583   | K.GTEWVDPEDPTVIAENELLGAAAAIEAAAK.K | 3053.32301 | 3 | 9.62E-11 | 0.97 | 6.38 | - | 1529.2 |
| AHQ-4-1, 7277 - 7350   | K.GTEWVDPEDPTVIAENELLGAAAAIEAAAK.K | 3053.32301 | 3 | 1.62E-09 | 0.97 | 5.89 | - | 1643.4 |
| AHQ-4-9, 6787 - 6788   | K.GTEWVDPEDPTVIAENELLGAAAAIEAAAK.K | 3053.32301 | 3 | 2.68E-12 | 0.96 | 5.29 | - | 1732.1 |
| AHQ-4-7, 7533          | K.GTEWVDPEDPTVIAENELLGAAAAIEAAAK.K | 3053.32301 | 3 | 6.05E-12 | 0.97 | 6.05 | - | 1788.7 |
| AHQ-4-5, 7357          | R.GVAALTSDPVAQIAVLDTASDVLDK.A      | 2470.75835 | 3 | 6.71E-11 | 0.98 | 7.53 | - | 2626.9 |
| AHQ-4-4, 7308 - 7383   | R.GVAALTSDPVAQIAVLDTASDVLDK.A      | 2470.75835 | 2 | 4.15E-11 | 0.98 | 6.85 | - | 1231.6 |
| AHQ-4-2, 7443 - 7444   | R.GVAALTSDPVAQIAVLDTASDVLDK.A      | 2470.75835 | 3 | 4.79E-12 | 0.98 | 7.11 | - | 2264.5 |
| AHQ-4-10, 6439         | R.GVAALTSDPVAQIAVLDTASDVLDK.A      | 2470.75835 | 2 | 1.58E-04 | 0.72 | 3.08 | - | 503.5  |
| AHQ-4-3, 7444 - 7445   | R.GVAALTSDPVAQIAVLDTASDVLDK.A      | 2470.75835 | 3 | 3.63E-12 | 0.98 | 6.77 | - | 2054.3 |
| AHQ-4-4, 7386 - 7387   | R.GVAALTSDPVAQIAVLDTASDVLDK.A      | 2470.75835 | 3 | 1.36E-06 | 0.98 | 7.23 | - | 2718.8 |
| AHQ-4-6, 7178 - 7179   | R.GVAALTSDPVAQIAVLDTASDVLDK.A      | 2470.75835 | 2 | 3.51E-12 | 0.97 | 6.84 | - | 704.4  |
| AHQ-4-2, 7442          | R.GVAALTSDPVAQIAVLDTASDVLDK.A      | 2470.75835 | 2 | 6.92E-12 | 0.97 | 6.19 | - | 1122.0 |
| AHQ-4-7, 7441          | R.GVGAATAVTOALNELLQHV.K            | 2092.38495 | 3 | 1.25E-09 | 0.92 | 4.23 | - | 1000.9 |
| AHQ-4-3, 5869          | R.GVGAATAVTOALNELLQHV.K            | 2092.38495 | 2 | 2.57E-08 | 0.92 | 4.80 | - | 785.6  |
| AHQ-4-5, 7413 - 7419   | R.GVGAATAVTOALNELLQHV.K            | 2092.38495 | 3 | 1.33E-06 | 0.81 | 3.65 | - | 810.7  |
| AHQ-4-4, 7446 - 7448   | R.GVGAATAVTOALNELLQHV.K            | 2092.38495 | 3 | 2.10E-09 | 0.95 | 5.06 | - | 1119.8 |
| AHQ-4-2, 5868          | R.GVGAATAVTOALNELLQHV.K            | 2092.38495 | 2 | 1.83E-08 | 0.95 | 4.99 | - | 1005.7 |
| AHQ-4-8, 7197          | R.GVGAATAVTOALNELLQHV.K            | 2092.38495 | 2 | 9.53E-04 | 0.94 | 4.83 | - | 1010.5 |
| AHQ-4-4, 7447 - 7460   | R.GVGAATAVTOALNELLQHV.K            | 2092.38495 | 2 | 2.56E-06 | 0.94 | 5.21 | - | 678.8  |
| AHQ-4-2, 5867          | R.GVGAATAVTOALNELLQHV.K            | 2092.38495 | 3 | 2.54E-07 | 0.95 | 5.38 | - | 1049.6 |
| AHQ-4-2, 7499 - 7500   | R.GVGAATAVTOALNELLQHV.K            | 2092.38495 | 2 | 8.44E-11 | 0.97 | 5.64 | - | 1216.2 |
| AHQ-4-2, 7498          | R.GVGAATAVTOALNELLQHV.K            | 2092.38495 | 3 | 2.32E-09 | 0.95 | 5.31 | - | 1143.3 |
| AHQ-4-3, 7507          | R.GVGAATAVTOALNELLQHV.K            | 2092.38495 | 2 | 9.15E-05 | 0.95 | 5.20 | - | 821.7  |
| AHQ-4-1, 7234          | R.GVGAATAVTOALNELLQHV.K            | 2092.38495 | 2 | 7.47E-07 | 0.94 | 4.99 | - | 966.7  |
| AHQ-4-5, 7414 - 7415   | R.GVGAATAVTOALNELLQHV.K            | 2092.38495 | 2 | 2.64E-05 | 0.95 | 5.27 | - | 937.1  |
| AHQ-4-8, 7203          | R.GVGAATAVTOALNELLQHV.K            | 2092.38495 | 3 | 8.35E-06 | 0.94 | 4.80 | - | 1069.4 |
| AHQ-4-3, 7508          | R.GVGAATAVTOALNELLQHV.K            | 2092.38495 | 3 | 4.12E-09 | 0.94 | 4.94 | - | 1161.9 |
| AHQ-4-7, 7439          | R.GVGAATAVTOALNELLQHV.K            | 2092.38495 | 2 | 8.14E-05 | 0.93 | 4.76 | - | 818.6  |
| AHQ-4-4, 5819          | R.GVGAATAVTOALNELLQHV.K            | 2092.38495 | 2 | 1.23E-07 | 0.95 | 4.71 | - | 1036.7 |
| AHQ-4-13, 7030         | R.GVGAATAVTOALNELLQHV.K            | 2092.38495 | 2 | 8.60E-04 | 0.74 | 3.55 | - | 534.1  |
| AHQ-4-4, 5827          | R.GVGAATAVTOALNELLQHV.K            | 2092.38495 | 3 | 5.34E-09 | 0.93 | 4.56 | - | 1044.6 |
| AHQ-4-14-, 6766 - 6771 | R.GVGAATAVTOALNELLQHV.K            | 2092.38495 | 2 | 1.57E-06 | 0.96 | 5.50 | - | 1284.2 |
| AHQ-4-9, 6696          | R.GVGAATAVTOALNELLQHV.K            | 2092.38495 | 2 | 5.16E-06 | 0.87 | 4.13 | - | 539.4  |
| AHQ-4-5, 5513          | R.GVGAATAVTOALNELLQHV.K            | 2092.38495 | 2 | 8.92E-09 | 0.92 | 4.35 | - | 805.1  |
| AHQ-4-6, 7239 - 7242   | R.GVGAATAVTOALNELLQHV.K            | 2092.38495 | 3 | 1.78E-05 | 0.95 | 4.90 | - | 1280.6 |
| AHQ-4-1, 7233          | R.GVGAATAVTOALNELLQHV.K            | 2092.38495 | 3 | 3.67E-07 | 0.89 | 3.77 | - | 1057.9 |
| AHQ-4-6, 7238          | R.GVGAATAVTOALNELLQHV.K            | 2092.38495 | 2 | 3.59E-06 | 0.93 | 5.29 | - | 733.1  |
| AHQ-4-7, 2571          | K.IFOAHKNCQMSIEIAK.V               | 1993.25380 | 2 | 7.84E-06 | 0.40 | 2.76 | - | 301.1  |
| AHQ-4-13-, 3326 - 3340 | R.IGITNHDEYSLVR.E                  | 1517.66833 | 2 | 2.16E-11 | 0.96 | 4.26 | - | 1471.9 |
| AHQ-4-7, 3239          | R.IGITNHDEYSLVR.E                  | 1517.66833 | 2 | 9.88E-07 | 0.83 | 3.24 | - | 858.4  |
| AHQ-4-7, 2919 - 2943   | R.IGITNHDEYSLVR.E                  | 1517.66833 | 2 | 3.52E-08 | 0.94 | 3.74 | - | 1289.7 |
| AHQ-4-13, 3821         | R.IGITNHDEYSLVR.E                  | 1517.66833 | 2 | 5.06E-05 | 0.87 | 2.88 | - | 963.7  |
| AHQ-4-13-, 3685        | R.IGITNHDEYSLVR.E                  | 1517.66833 | 2 | 1.97E-06 | 0.86 | 2.96 | - | 780.7  |
| AHQ-4-7, 3346 - 3421   | R.IGITNHDEYSLVR.E                  | 1517.66833 | 2 | 7.26E-04 | 0.95 | 3.61 | - | 1459.4 |
| AHQ-4-10, 3040         | R.IGITNHDEYSLVR.E                  | 1517.66833 | 2 | 1.25E-10 | 0.94 | 3.77 | - | 1343.5 |
| AHQ-4-11, 3140         | R.IGITNHDEYSLVR.E                  | 1517.66833 | 2 | 4.94E-08 | 0.95 | 3.92 | - | 1506.9 |
| AHQ-4-2, 5190          | R.ILAQATSDLVNAIK.A                 | 1457.69748 | 1 | 6.73E-06 | 0.74 | 3.59 | - | 570.2  |
| AHQ-4-3, 5177          | R.ILAQATSDLVNAIK.A                 | 1457.69748 | 1 | 9.48E-07 | 0.59 | 3.37 | - | 352.3  |
| AHQ-4-3, 4229          | R.ILAQATSDLVNAIK.A                 | 1457.69748 | 1 | 6.95E-06 | 0.10 | 1.86 | - | 273.9  |
| AHQ-4-3, 5155 - 5171   | R.ILAQATSDLVNAIK.A                 | 1457.69748 | 2 | 1.31E-07 | 0.97 | 5.00 | - | 1848.4 |
| AHQ-4-4, 5119          | R.ILAQATSDLVNAIK.A                 | 1457.69748 | 1 | 2.00E-04 | 0.81 | 3.77 | - | 559.4  |
| AHQ-4-5, 4947          | R.ILAQATSDLVNAIK.A                 | 1457.69748 | 1 | 8.13E-04 | 0.75 | 3.56 | - | 579.4  |
| AHQ-4-7, 4794 - 4806   | R.ILAQATSDLVNAIK.A                 | 1457.69748 | 2 | 6.49E-09 | 0.98 | 4.79 | - | 2825.6 |
| AHQ-4-2, 4226          | R.ILAQATSDLVNAIK.A                 | 1457.69748 | 2 | 7.00E-08 | 0.98 | 4.50 | - | 2168.1 |
| AHQ-4-4, 4435 - 4446   | R.ILAQATSDLVNAIK.A                 | 1457.69748 | 2 | 1.41E-10 | 0.97 | 4.18 | - | 2246.7 |
| AHQ-4-2, 5174 - 5176   | R.ILAQATSDLVNAIK.A                 | 1457.69748 | 2 | 1.60E-10 | 0.98 | 5.94 | - | 1862.3 |
| AHQ-4-2, 4506          | R.ILAQATSDLVNAIK.A                 | 1457.69748 | 2 | 9.05E-10 | 0.97 | 4.58 | - | 1755.6 |
| AHQ-4-3, 4495 - 4564   | R.ILAQATSDLVNAIK.A                 | 1457.69748 | 2 | 2.92E-04 | 0.96 | 4.42 | - | 1593.4 |
| AHQ-4-5, 4909 - 4929   | R.ILAQATSDLVNAIK.A                 | 1457.69748 | 2 | 1.43E-08 | 0.98 | 4.96 | - | 2016.6 |
| AHQ-4-4, 4180          | R.ILAQATSDLVNAIK.A                 | 1457.69748 | 1 | 2.93E-08 | 0.25 | 1.82 | - | 564.6  |
| AHQ-4-4, 4152 - 4168   | R.ILAQATSDLVNAIK.A                 | 1457.69748 | 2 | 1.58E-09 | 0.97 | 4.68 | - | 2207.7 |
| AHQ-4-6, 4838 - 4854   | R.ILAQATSDLVNAIK.A                 | 1457.69748 | 2 | 1.21E-09 | 0.98 | 5.27 | - | 2092.9 |
| AHQ-4-2, 4704          | R.ILAQATSDLVNAIK.A                 | 1457.69748 | 2 | 1.82E-09 | 0.96 | 4.31 | - | 1407.9 |
| AHQ-4-1, 4539          | R.ILAQATSDLVNAIK.A                 | 1457.69748 | 2 | 4.53E-07 | 0.89 | 3.51 | - | 1108.5 |
| AHQ-4-1, 5194          | R.ILAQATSDLVNAIK.A                 | 1457.69748 | 2 | 1.91E-09 | 0.97 | 4.52 | - | 2022.2 |
| AHQ-4-1, 4299 - 4306   | R.ILAQATSDLVNAIK.A                 | 1457.69748 | 2 | 1.27E-06 | 0.97 | 4.07 | - | 2423.3 |
| AHQ-4-8, 4495          | R.ILAQATSDLVNAIK.A                 | 1457.69748 | 2 | 3.40E-08 | 0.96 | 4.61 | - | 1279.7 |
| AHQ-4-7, 5929 - 5998   | R.IPEAPAGPPSDFGLFLSDDDPK.K         | 2286.47890 | 2 | 1.02E-04 | 0.96 | 5.09 | - | 1176.5 |
| AHQ-4-13, 5912 - 5973  | R.IPEAPAGPPSDFGLFLSDDDPK.K         | 2286.47890 | 2 | 8.39E-06 | 0.97 | 5.61 | - | 1085.0 |
| AHQ-4-14-, 5743 - 5749 | R.IPEAPAGPPSDFGLFLSDDDPK.K         | 2286.47890 | 2 | 2.03E-04 | 0.97 | 5.59 | - | 1181.6 |
| AHQ-4-12, 5906 - 5985  | R.IPEAPAGPPSDFGLFLSDDDPK.K         | 2286.47890 | 2 | 1.02E-04 | 0.83 | 3.93 | - | 475.7  |
| AHQ-4-8, 5741 - 5749   | R.IPEAPAGPPSDFGLFLSDDDPK.K         | 2286.47890 | 2 | 5.58E-05 | 0.96 | 5.10 | - | 1172.1 |
| AHQ-4-10, 5377         | R.IPEAPAGPPSDFGLFLSDDDPK.K         | 2286.47890 | 2 | 1.28E-04 | 0.47 | 2.63 | - | 333.9  |
| AHQ-4-13-, 5829 - 5864 | R.IPEAPAGPPSDFGLFLSDDDPK.K         | 2286.47890 | 2 | 8.17E-07 | 0.95 | 4.44 | - | 1180.4 |
| AHQ-4-12, 5443 - 5509  | R.IPEAPAGPPSDFGLFLSDDDPK.K         | 2414.65181 | 3 | 9.23E-04 | 0.89 | 4.07 | - | 1112.7 |

|                        |                                      |            |   |          |      |      |   |        |
|------------------------|--------------------------------------|------------|---|----------|------|------|---|--------|
| AHQ-4-10, 4865 - 4939  | R.IPEAPAGPPSDFGLFLSDDDPKK.G          | 2414.65181 | 3 | 9.40E-05 | 0.83 | 3.23 | - | 1064.7 |
| AHQ-4-13, 5473 - 5540  | R.IPEAPAGPPSDFGLFLSDDDPKK.G          | 2414.65181 | 3 | 4.18E-07 | 0.85 | 3.72 | - | 1120.8 |
| AHQ-4-14-, 5317 - 5381 | R.IPEAPAGPPSDFGLFLSDDDPKK.G          | 2414.65181 | 3 | 2.30E-08 | 0.91 | 3.72 | - | 1483.1 |
| AHQ-4-7, 5265 - 5345   | R.IPEAPAGPPSDFGLFLSDDDPKK.G          | 2414.65181 | 3 | 4.08E-13 | 0.95 | 4.70 | - | 1313.9 |
| AHQ-4-13-, 5334 - 5382 | R.IPEAPAGPPSDFGLFLSDDDPKK.G          | 2414.65181 | 3 | 7.69E-13 | 0.94 | 4.51 | - | 1380.0 |
| AHQ-4-13, 2963         | K.ISIGNVVK.T                         | 830.00746  | 2 | 7.32E-04 | 0.78 | 2.58 | - | 516.2  |
| AHQ-4-7, 1507 - 1522   | K.KEEITGLTR.K                        | 1047.18765 | 1 | 5.99E-04 | 0.17 | 1.98 | - | 269.3  |
| AHQ-4-7, 2338 - 2341   | R.KFFYSDQNVDSDR.D                    | 1506.60087 | 2 | 1.24E-04 | 0.94 | 4.27 | - | 924.3  |
| AHQ-4-7, 5290 - 5363   | R.KFFYSDQNVDSDR.PVQLNLLVQAR.D        | 3017.34366 | 3 | 1.34E-04 | 0.76 | 3.66 | - | 536.8  |
| AHQ-4-14-, 2618        | K.LAQAAQSSVATITR.L                   | 1417.59344 | 2 | 7.16E-07 | 0.92 | 3.05 | - | 1269.6 |
| AHQ-4-7, 2414 - 2466   | K.LAQAAQSSVATITR.L                   | 1417.59344 | 2 | 1.17E-06 | 0.97 | 4.82 | - | 1528.7 |
| AHQ-4-11, 2589         | K.LAQAAQSSVATITR.L                   | 1417.59344 | 2 | 1.96E-09 | 0.96 | 4.03 | - | 1691.6 |
| AHQ-4-10, 2509         | K.LAQAAQSSVATITR.L                   | 1417.59344 | 2 | 1.56E-04 | 0.80 | 2.77 | - | 902.7  |
| AHQ-4-2, 2474          | K.LAQAAQSSVATITR.L                   | 1417.59344 | 2 | 1.89E-06 | 0.94 | 4.08 | - | 1113.7 |
| AHQ-4-12, 2675         | K.LAQAAQSSVATITR.L                   | 1417.59344 | 2 | 1.81E-07 | 0.89 | 3.60 | - | 980.2  |
| AHQ-4-5, 2469 - 2501   | K.LAQAAQSSVATITR.L                   | 1417.59344 | 2 | 9.26E-13 | 0.97 | 5.34 | - | 1514.2 |
| AHQ-4-1, 2791 - 2870   | K.LAQAAQSSVATITR.L                   | 1417.59344 | 2 | 7.58E-08 | 0.96 | 4.74 | - | 1383.8 |
| AHQ-4-5, 2331          | K.LAQAAQSSVATITR.L                   | 1417.59344 | 2 | 1.63E-11 | 0.96 | 4.10 | - | 1778.4 |
| AHQ-4-4, 2450          | K.LAQAAQSSVATITR.L                   | 1417.59344 | 2 | 1.70E-07 | 0.94 | 4.18 | - | 1339.6 |
| AHQ-4-6, 2323 - 2326   | K.LAQAAQSSVATITR.L                   | 1417.59344 | 2 | 5.10E-10 | 0.97 | 4.47 | - | 1710.6 |
| AHQ-4-1, 2643          | K.LAQAAQSSVATITR.L                   | 1417.59344 | 2 | 7.89E-07 | 0.94 | 3.65 | - | 1602.2 |
| AHQ-4-3, 2623 - 2625   | K.LAQAAQSSVATITR.L                   | 1417.59344 | 2 | 1.57E-10 | 0.98 | 5.27 | - | 1904.3 |
| AHQ-4-2, 2631          | K.LAQAAQSSVATITR.L                   | 1417.59344 | 1 | 7.02E-05 | 0.50 | 3.07 | - | 194.6  |
| AHQ-4-2, 2622 - 2690   | K.LAQAAQSSVATITR.L                   | 1417.59344 | 2 | 3.19E-11 | 0.98 | 5.24 | - | 1888.1 |
| AHQ-4-6, 2474 - 2550   | K.LAQAAQSSVATITR.L                   | 1417.59344 | 2 | 6.23E-08 | 0.97 | 4.46 | - | 1619.0 |
| AHQ-4-4, 2598          | K.LAQAAQSSVATITR.L                   | 1417.59344 | 2 | 1.32E-12 | 0.97 | 5.26 | - | 1584.7 |
| AHQ-4-1, 3106          | R.LASEAKPAAVAENEIEIGSHIK.H           | 2236.46779 | 3 | 1.57E-07 | 0.67 | 3.25 | - | 858.5  |
| AHQ-4-4, 3124 - 3130   | R.LASEAKPAAVAENEIEIGSHIK.H           | 2236.46779 | 2 | 1.54E-07 | 0.96 | 5.35 | - | 794.6  |
| AHQ-4-1, 3345 - 3378   | R.LASEAKPAAVAENEIEIGSHIK.H           | 2236.46779 | 3 | 3.27E-05 | 0.94 | 5.03 | - | 1179.0 |
| AHQ-4-4, 3123 - 3160   | R.LASEAKPAAVAENEIEIGSHIK.H           | 2236.46779 | 3 | 1.56E-04 | 0.95 | 4.96 | - | 1474.4 |
| AHQ-4-2, 3150          | R.LASEAKPAAVAENEIEIGSHIK.H           | 2236.46779 | 2 | 4.26E-06 | 0.95 | 5.08 | - | 691.6  |
| AHQ-4-5, 2894 - 2918   | R.LASEAKPAAVAENEIEIGSHIK.H           | 2236.46779 | 3 | 2.94E-09 | 0.98 | 6.13 | - | 2551.8 |
| AHQ-4-6, 2890 - 2898   | R.LASEAKPAAVAENEIEIGSHIK.H           | 2236.46779 | 2 | 2.10E-06 | 0.95 | 4.96 | - | 810.9  |
| AHQ-4-4, 3426          | R.LASEAKPAAVAENEIEIGSHIK.H           | 2236.46779 | 2 | 2.67E-06 | 0.87 | 4.30 | - | 512.7  |
| AHQ-4-3, 3132 - 3133   | R.LASEAKPAAVAENEIEIGSHIK.H           | 2236.46779 | 2 | 4.02E-06 | 0.94 | 5.07 | - | 758.2  |
| AHQ-4-2, 3142          | R.LASEAKPAAVAENEIEIGSHIK.H           | 2236.46779 | 3 | 1.03E-07 | 0.97 | 5.73 | - | 2198.5 |
| AHQ-4-3, 2924          | R.LASEAKPAAVAENEIEIGSHIK.H           | 2236.46779 | 2 | 2.63E-06 | 0.94 | 4.49 | - | 845.8  |
| AHQ-4-3, 3128          | R.LASEAKPAAVAENEIEIGSHIK.H           | 2236.46779 | 3 | 6.02E-10 | 0.97 | 6.04 | - | 1927.8 |
| AHQ-4-6, 2887 - 2903   | R.LASEAKPAAVAENEIEIGSHIK.H           | 2236.46779 | 3 | 3.10E-08 | 0.98 | 6.67 | - | 2442.1 |
| AHQ-4-12, 5370         | K.LGAASLGAEDPETQVVLINAVK.D           | 2196.48671 | 2 | 4.73E-04 | 0.93 | 4.28 | - | 1017.7 |
| AHQ-4-5, 5182 - 5209   | K.LGAASLGAEDPETQVVLINAVK.D           | 2196.48671 | 2 | 1.20E-06 | 0.96 | 5.23 | - | 1009.5 |
| AHQ-4-5, 5281          | K.LGAASLGAEDPETQVVLINAVK.D           | 2196.48671 | 2 | 1.96E-09 | 0.91 | 4.21 | - | 829.4  |
| AHQ-4-5, 5365 - 5366   | K.LGAASLGAEDPETQVVLINAVK.D           | 2196.48671 | 2 | 3.31E-05 | 0.97 | 5.40 | - | 1236.6 |
| AHQ-4-5, 5541          | K.LGAASLGAEDPETQVVLINAVK.D           | 2196.48671 | 2 | 2.46E-07 | 0.97 | 5.25 | - | 1238.8 |
| AHQ-4-4, 5742 - 5799   | K.LGAASLGAEDPETQVVLINAVK.D           | 2196.48671 | 2 | 1.41E-10 | 0.95 | 5.12 | - | 892.6  |
| AHQ-4-2, 5975 - 6026   | K.LGAASLGAEDPETQVVLINAVK.D           | 2196.48671 | 2 | 1.76E-06 | 0.91 | 4.38 | - | 744.4  |
| AHQ-4-4, 5658 - 5726   | K.LGAASLGAEDPETQVVLINAVK.D           | 2196.48671 | 2 | 2.39E-10 | 0.96 | 4.84 | - | 1198.6 |
| AHQ-4-7, 5267          | K.LGAASLGAEDPETQVVLINAVK.D           | 2196.48671 | 2 | 3.09E-05 | 0.96 | 4.83 | - | 1186.8 |
| AHQ-4-7, 5111          | K.LGAASLGAEDPETQVVLINAVK.D           | 2196.48671 | 2 | 2.11E-06 | 0.80 | 3.76 | - | 546.5  |
| AHQ-4-1, 5637          | K.LGAASLGAEDPETQVVLINAVK.D           | 2196.48671 | 3 | 2.84E-08 | 0.96 | 4.79 | - | 1873.6 |
| AHQ-4-4, 5518 - 5586   | K.LGAASLGAEDPETQVVLINAVK.D           | 2196.48671 | 2 | 6.65E-07 | 0.96 | 4.87 | - | 1192.8 |
| AHQ-4-2, 5790 - 5863   | K.LGAASLGAEDPETQVVLINAVK.D           | 2196.48671 | 2 | 1.77E-13 | 0.96 | 5.25 | - | 1151.3 |
| AHQ-4-4, 5340 - 5414   | K.LGAASLGAEDPETQVVLINAVK.D           | 2196.48671 | 2 | 2.02E-05 | 0.81 | 3.83 | - | 544.6  |
| AHQ-4-2, 5699 - 5726   | K.LGAASLGAEDPETQVVLINAVK.D           | 2196.48671 | 2 | 8.41E-06 | 0.95 | 4.70 | - | 1004.9 |
| AHQ-4-3, 5371 - 5419   | K.LGAASLGAEDPETQVVLINAVK.D           | 2196.48671 | 2 | 5.85E-07 | 0.92 | 4.44 | - | 813.3  |
| AHQ-4-2, 5558 - 5602   | K.LGAASLGAEDPETQVVLINAVK.D           | 2196.48671 | 2 | 7.30E-08 | 0.95 | 4.69 | - | 1060.6 |
| AHQ-4-1, 5798          | K.LGAASLGAEDPETQVVLINAVK.D           | 2196.48671 | 2 | 9.55E-07 | 0.93 | 4.83 | - | 665.6  |
| AHQ-4-11, 5142         | K.LGAASLGAEDPETQVVLINAVK.D           | 2196.48671 | 2 | 4.03E-06 | 0.94 | 4.30 | - | 1064.8 |
| AHQ-4-2, 5368 - 5438   | K.LGAASLGAEDPETQVVLINAVK.D           | 2196.48671 | 2 | 1.84E-07 | 0.96 | 4.97 | - | 1227.1 |
| AHQ-4-13-, 5268        | K.LGAASLGAEDPETQVVLINAVK.D           | 2196.48671 | 2 | 3.50E-04 | 0.97 | 5.04 | - | 1413.1 |
| AHQ-4-3, 5487 - 5568   | K.LGAASLGAEDPETQVVLINAVK.D           | 2196.48671 | 2 | 2.47E-04 | 0.93 | 4.78 | - | 723.5  |
| AHQ-4-13-, 5406        | K.LGAASLGAEDPETQVVLINAVK.D           | 2196.48671 | 2 | 9.00E-04 | 0.18 | 2.65 | - | 267.4  |
| AHQ-4-1, 5603 - 5669   | K.LGAASLGAEDPETQVVLINAVK.D           | 2196.48671 | 2 | 1.38E-05 | 0.94 | 4.53 | - | 862.5  |
| AHQ-4-6, 5120 - 5200   | K.LGAASLGAEDPETQVVLINAVK.D           | 2196.48671 | 2 | 1.58E-13 | 0.96 | 4.97 | - | 1229.5 |
| AHQ-4-6, 5291          | K.LGAASLGAEDPETQVVLINAVK.D           | 2196.48671 | 2 | 8.25E-06 | 0.95 | 4.83 | - | 1117.0 |
| AHQ-4-3, 5708 - 5785   | K.LGAASLGAEDPETQVVLINAVK.D           | 2196.48671 | 2 | 1.45E-04 | 0.96 | 5.26 | - | 1015.3 |
| AHQ-4-6, 5466          | K.LGAASLGAEDPETQVVLINAVK.D           | 2196.48671 | 2 | 2.95E-08 | 0.95 | 4.47 | - | 1166.1 |
| AHQ-4-1, 5479          | K.LGAASLGAEDPETQVVLINAVK.D           | 2196.48671 | 2 | 4.01E-05 | 0.94 | 4.30 | - | 1149.8 |
| AHQ-4-7, 3365 - 3434   | K.LHTDDELNWLHDHGR.T                  | 1721.81153 | 3 | 1.09E-04 | 0.90 | 3.68 | - | 1045.6 |
| AHQ-4-8, 3022          | K.LHTDDELNWLHDHGR.T                  | 1721.81153 | 2 | 5.26E-06 | 0.95 | 4.12 | - | 1456.1 |
| AHQ-4-9, 3088          | K.LHTDDELNWLHDHGR.T                  | 1721.81153 | 2 | 2.61E-04 | 0.97 | 4.76 | - | 1794.3 |
| AHQ-4-2, 4442 - 4460   | K.LLAALLEDEGGSSR.P                   | 1401.54764 | 2 | 3.72E-04 | 0.96 | 4.71 | - | 1069.4 |
| AHQ-4-4, 4368          | K.LLAALLEDEGGSSR.P                   | 1401.54764 | 2 | 9.96E-05 | 0.93 | 4.00 | - | 1141.8 |
| AHQ-4-5, 5051 - 5075   | K.LLAALLEDEGGSSRPLLQAAK.G            | 2123.43896 | 2 | 1.56E-10 | 0.98 | 7.11 | - | 1334.4 |
| AHQ-4-10, 4643         | K.LLAALLEDEGGSSRPLLQAAK.G            | 2123.43896 | 3 | 3.50E-06 | 0.91 | 4.13 | - | 1140.2 |
| AHQ-4-12, 5183         | K.LLAALLEDEGGSSRPLLQAAK.G            | 2123.43896 | 2 | 1.01E-05 | 0.94 | 4.97 | - | 844.0  |
| AHQ-4-9, 4500 - 4504   | K.LLAALLEDEGGSSRPLLQAAK.G            | 2123.43896 | 2 | 2.97E-06 | 0.98 | 6.67 | - | 1618.4 |
| AHQ-4-12, 5181         | K.LLAALLEDEGGSSRPLLQAAK.G            | 2123.43896 | 3 | 1.02E-10 | 0.94 | 4.75 | - | 1312.4 |
| AHQ-4-3, 5352          | K.LLAALLEDEGGSSRPLLQAAK.G            | 2123.43896 | 2 | 2.70E-09 | 0.97 | 6.00 | - | 1261.3 |
| AHQ-4-7, 4898 - 4899   | K.LLAALLEDEGGSSRPLLQAAK.G            | 2123.43896 | 2 | 4.31E-06 | 0.98 | 5.87 | - | 1902.9 |
| AHQ-4-4, 5306 - 5307   | K.LLAALLEDEGGSSRPLLQAAK.G            | 2123.43896 | 2 | 1.79E-09 | 0.98 | 6.76 | - | 1248.4 |
| AHQ-4-1, 5461          | K.LLAALLEDEGGSSRPLLQAAK.G            | 2123.43896 | 2 | 5.10E-08 | 0.97 | 5.78 | - | 1148.7 |
| AHQ-4-6, 5022          | K.LLAALLEDEGGSSRPLLQAAK.G            | 2123.43896 | 2 | 2.20E-07 | 0.98 | 6.84 | - | 1486.9 |
| AHQ-4-4, 5304          | K.LLAALLEDEGGSSRPLLQAAK.G            | 2123.43896 | 3 | 6.71E-08 | 0.96 | 5.17 | - | 1517.7 |
| AHQ-4-6, 5014 - 5031   | K.LLAALLEDEGGSSRPLLQAAK.G            | 2123.43896 | 3 | 1.48E-09 | 0.95 | 5.32 | - | 1183.2 |
| AHQ-4-5, 5050          | K.LLAALLEDEGGSSRPLLQAAK.G            | 2123.43896 | 3 | 1.33E-07 | 0.97 | 5.46 | - | 1841.3 |
| AHQ-4-10, 4635         | K.LLAALLEDEGGSSRPLLQAAK.G            | 2123.43896 | 2 | 2.24E-09 | 0.96 | 5.13 | - | 1183.2 |
| AHQ-4-3, 5356 - 5363   | K.LLAALLEDEGGSSRPLLQAAK.G            | 2123.43896 | 3 | 2.36E-09 | 0.96 | 5.35 | - | 1475.1 |
| AHQ-4-2, 5355 - 5378   | K.LLAALLEDEGGSSRPLLQAAK.G            | 2123.43896 | 2 | 4.72E-06 | 0.98 | 6.82 | - | 1347.3 |
| AHQ-4-1, 5458 - 5478   | K.LLAALLEDEGGSSRPLLQAAK.G            | 2123.43896 | 3 | 4.02E-08 | 0.94 | 4.98 | - | 1308.4 |
| AHQ-4-2, 5356 - 5363   | K.LLAALLEDEGGSSRPLLQAAK.G            | 2123.43896 | 3 | 1.48E-07 | 0.97 | 5.31 | - | 1992.9 |
| AHQ-4-8, 4505          | K.LLAALLEDEGGSSRPLLQAAK.G            | 2123.43896 | 2 | 1.18E-07 | 0.97 | 5.81 | - | 1365.1 |
| AHQ-4-11, 4946         | K.LLAALLEDEGGSSRPLLQAAK.G            | 2123.43896 | 3 | 3.33E-08 | 0.95 | 4.88 | - | 1635.6 |
| AHQ-4-7, 4893          | K.LLAALLEDEGGSSRPLLQAAK.G            | 2123.43896 | 3 | 4.81E-04 | 0.83 | 3.22 | - | 1076.8 |
| AHQ-4-3, 5360          | K.LLAALLEDEGGSSRPLLQAAKGLAGAVSELLR.S | 3190.68337 | 3 | 1.18E-04 | 0.81 | 4.30 | - | 650.9  |
| AHQ-4-8, 4509          | K.LLAALLEDEGGSSRPLLQAAKGLAGAVSELLR.S | 3190.68337 | 3 | 7.84E-04 | 0.88 | 4.66 | - | 997.1  |
| AHQ-4-10, 4641         | K.LLAALLEDEGGSSRPLLQAAKGLAGAVSELLR.S | 3190.68337 | 3 | 1.94E-04 | 0.61 | 3.89 | - | 578.9  |
| AHQ-4-5, 4087 - 4157   | R.LLSDSLPPSTGTGFQEAQSR.L             | 2035.20076 | 2 | 7.82E-08 | 0.78 | 3.62 | - | 292.4  |
| AHQ-4-5, 3950 - 4017   | R.LLSDSLPPSTGTGFQEAQSR.L             | 2035.20076 | 2 | 1.77E-04 | 0.83 | 3.87 | - | 359.4  |
| AHQ-4-2, 4270 - 4339   | R.LLSDSLPPSTGTGFQEAQSR.L             | 2035.20076 | 2 | 1.58E-10 | 0.92 | 4.51 | - | 446.1  |
| AHQ-4-7, 3917 - 3933   | R.LLSDSLPPSTGTGFQEAQSR.L             | 2035.20076 | 2 | 2.17E-05 | 0.44 | 2.90 | - | 223.7  |
| AHQ-4-5, 4225          | R.LLSDSLPPSTGTGFQEAQSR.L             | 2035.20076 | 2 | 5.91E-06 | 0.63 | 3.14 | - | 222.8  |
| AHQ-4-1, 4213 - 4281   | R.LLSDSLPPSTGTGFQEAQSR.L             | 2035.20076 | 2 | 2.11E-05 | 0.82 | 3.59 | - | 380.2  |
| AHQ-4-3, 4383 - 4451   | R.LLSDSLPPSTGTGFQEAQSR.L             | 2035.20076 | 2 | 7.22E-07 | 0.80 | 3.67 | - | 281.8  |
| AHQ-4-5, 4070 - 4085   | R.LLSDSLPPSTGTGFQEAQSR.L             | 2035.20076 | 2 | 3.56E-11 | 0.93 | 4.57 | - | 452.2  |
| AHQ-4-2, 4139 - 4211   | R.LLSDSLPPSTGTGFQEAQSR.L             | 2035.20076 | 2 | 1.69E-05 | 0.77 | 3.28 | - | 240.8  |
| AHQ-4-2, 4410 - 4484   | R.LLSDSLPPSTGTGFQEAQSR.L             | 2035.20076 | 2 | 2.09E-08 | 0.92 | 4.79 | - | 395.3  |

|                        |                               |            |   |          |      |      |   |        |
|------------------------|-------------------------------|------------|---|----------|------|------|---|--------|
| AHQ-4-4, 4254 - 4335   | R.LLSDSLPPSTGTGFQEAQSR.L      | 2035.20076 | 2 | 5.40E-07 | 0.85 | 3.83 | - | 330.5  |
| AHQ-4-4, 4194 - 4262   | R.LLSDSLPPSTGTGFQEAQSR.L      | 2035.20076 | 2 | 1.26E-05 | 0.80 | 3.38 | - | 355.4  |
| AHQ-4-4, 4108 - 4178   | R.LLSDSLPPSTGTGFQEAQSR.L      | 2035.20076 | 2 | 2.40E-04 | 0.82 | 3.57 | - | 347.7  |
| AHQ-4-1, 4273 - 4349   | R.LLSDSLPPSTGTGFQEAQSR.L      | 2035.20076 | 2 | 8.54E-09 | 0.90 | 4.24 | - | 396.8  |
| AHQ-4-3, 5988 - 6055   | R.LNEAAAGLNOAATELVQASR.G      | 2028.21299 | 2 | 5.85E-12 | 0.97 | 5.64 | - | 1616.1 |
| AHQ-4-3, 5657          | R.LNEAAAGLNOAATELVQASR.G      | 2028.21299 | 3 | 2.29E-04 | 0.95 | 4.71 | - | 1444.1 |
| AHQ-4-2, 4534 - 4550   | R.LNEAAAGLNOAATELVQASR.G      | 2028.21299 | 2 | 1.53E-06 | 0.86 | 3.47 | - | 848.9  |
| AHQ-4-4, 5428 - 5432   | R.LNEAAAGLNOAATELVQASR.G      | 2028.21299 | 2 | 1.74E-08 | 0.97 | 5.84 | - | 1280.0 |
| AHQ-4-1, 5941 - 5986   | R.LNEAAAGLNOAATELVQASR.G      | 2028.21299 | 2 | 3.85E-10 | 0.96 | 5.32 | - | 1307.6 |
| AHQ-4-2, 5818 - 5822   | R.LNEAAAGLNOAATELVQASR.G      | 2028.21299 | 2 | 4.40E-13 | 0.98 | 5.53 | - | 1935.7 |
| AHQ-4-1, 5630          | R.LNEAAAGLNOAATELVQASR.G      | 2028.21299 | 2 | 4.05E-04 | 0.71 | 3.55 | - | 471.8  |
| AHQ-4-2, 5904 - 5919   | R.LNEAAAGLNOAATELVQASR.G      | 2028.21299 | 2 | 3.49E-05 | 0.94 | 4.62 | - | 1098.4 |
| AHQ-4-4, 5571 - 5624   | R.LNEAAAGLNOAATELVQASR.G      | 2028.21299 | 2 | 2.28E-07 | 0.97 | 5.13 | - | 1540.2 |
| AHQ-4-4, 5639 - 5646   | R.LNEAAAGLNOAATELVQASR.G      | 2028.21299 | 3 | 3.26E-08 | 0.97 | 5.99 | - | 1624.5 |
| AHQ-4-7, 5321          | R.LNEAAAGLNOAATELVQASR.G      | 2028.21299 | 2 | 4.41E-09 | 0.97 | 5.32 | - | 1800.3 |
| AHQ-4-3, 5569 - 5649   | R.LNEAAAGLNOAATELVQASR.G      | 2028.21299 | 2 | 1.10E-10 | 0.97 | 5.60 | - | 1496.9 |
| AHQ-4-2, 6047          | R.LNEAAAGLNOAATELVQASR.G      | 2028.21299 | 2 | 2.95E-11 | 0.94 | 4.18 | - | 1013.0 |
| AHQ-4-10, 4900         | R.LNEAAAGLNOAATELVQASR.G      | 2028.21299 | 2 | 7.63E-04 | 0.92 | 4.20 | - | 948.0  |
| AHQ-4-3, 5667          | R.LNEAAAGLNOAATELVQASR.G      | 2028.21299 | 2 | 1.74E-12 | 0.97 | 5.30 | - | 1587.1 |
| AHQ-4-3, 5795          | R.LNEAAAGLNOAATELVQASR.G      | 2028.21299 | 2 | 5.61E-13 | 0.98 | 5.76 | - | 1654.9 |
| AHQ-4-5, 5873 - 5897   | R.LNEAAAGLNOAATELVQASR.G      | 2028.21299 | 2 | 7.27E-14 | 0.98 | 6.16 | - | 1622.2 |
| AHQ-4-5, 5782          | R.LNEAAAGLNOAATELVQASR.G      | 2028.21299 | 2 | 7.38E-14 | 0.97 | 5.03 | - | 1751.4 |
| AHQ-4-4, 5858          | R.LNEAAAGLNOAATELVQASR.G      | 2028.21299 | 2 | 8.14E-10 | 0.97 | 5.34 | - | 1257.9 |
| AHQ-4-12, 5435         | R.LNEAAAGLNOAATELVQASR.G      | 2028.21299 | 2 | 2.39E-08 | 0.98 | 5.60 | - | 2198.1 |
| AHQ-4-1, 6077          | R.LNEAAAGLNOAATELVQASR.G      | 2028.21299 | 2 | 5.55E-15 | 0.97 | 5.91 | - | 1597.4 |
| AHQ-4-1, 5743 - 5819   | R.LNEAAAGLNOAATELVQASR.G      | 2028.21299 | 2 | 3.84E-09 | 0.98 | 5.44 | - | 1876.6 |
| AHQ-4-2, 5650 - 5720   | R.LNEAAAGLNOAATELVQASR.G      | 2028.21299 | 3 | 8.64E-04 | 0.98 | 6.23 | - | 1841.0 |
| AHQ-4-4, 5991          | R.LNEAAAGLNOAATELVQASR.G      | 2028.21299 | 2 | 1.18E-05 | 0.89 | 3.80 | - | 710.1  |
| AHQ-4-6, 5366          | R.LNEAAAGLNOAATELVQASR.G      | 2028.21299 | 2 | 1.17E-09 | 0.98 | 5.15 | - | 2281.8 |
| AHQ-4-1, 5750          | R.LNEAAAGLNOAATELVQASR.G      | 2028.21299 | 3 | 2.32E-06 | 0.96 | 5.60 | - | 1245.2 |
| AHQ-4-2, 4574          | R.LNEAAAGLNOAATELVQASR.G      | 2028.21299 | 3 | 1.77E-08 | 0.95 | 4.58 | - | 1614.4 |
| AHQ-4-3, 5895          | R.LNEAAAGLNOAATELVQASR.G      | 2028.21299 | 2 | 3.16E-12 | 0.97 | 5.03 | - | 1363.6 |
| AHQ-4-14-, 5342        | R.LNEAAAGLNOAATELVQASR.G      | 2028.21299 | 2 | 1.85E-09 | 0.93 | 4.15 | - | 1122.8 |
| AHQ-4-6, 5703 - 5770   | R.LNEAAAGLNOAATELVQASR.G      | 2028.21299 | 2 | 9.42E-07 | 0.93 | 4.41 | - | 846.4  |
| AHQ-4-1, 4555          | R.LNEAAAGLNOAATELVQASR.G      | 2028.21299 | 2 | 1.58E-09 | 0.93 | 4.04 | - | 880.6  |
| AHQ-4-5, 4342          | R.LNEAAAGLNOAATELVQASR.G      | 2028.21299 | 2 | 1.52E-08 | 0.94 | 4.87 | - | 874.8  |
| AHQ-4-2, 5643 - 5722   | R.LNEAAAGLNOAATELVQASR.G      | 2028.21299 | 2 | 2.81E-12 | 0.98 | 5.98 | - | 1561.8 |
| AHQ-4-2, 5458          | R.LNEAAAGLNOAATELVQASR.G      | 2028.21299 | 2 | 6.58E-08 | 0.97 | 5.25 | - | 1532.3 |
| AHQ-4-6, 4263          | R.LNEAAAGLNOAATELVQASR.G      | 2028.21299 | 2 | 9.72E-05 | 0.84 | 3.54 | - | 585.8  |
| AHQ-4-11, 5200         | R.LNEAAAGLNOAATELVQASR.G      | 2028.21299 | 2 | 3.01E-06 | 0.89 | 4.35 | - | 668.1  |
| AHQ-4-3, 5459          | R.LNEAAAGLNOAATELVQASR.G      | 2028.21299 | 2 | 2.03E-09 | 0.97 | 5.70 | - | 1486.1 |
| AHQ-4-4, 4492          | R.LNEAAAGLNOAATELVQASR.G      | 2028.21299 | 2 | 7.94E-09 | 0.96 | 5.31 | - | 985.4  |
| AHQ-4-8, 5010          | R.LNEAAAGLNOAATELVQASR.G      | 2028.21299 | 2 | 3.06E-08 | 0.98 | 5.32 | - | 2270.8 |
| AHQ-4-9, 4832          | R.LNEAAAGLNOAATELVQASR.G      | 2028.21299 | 2 | 2.38E-07 | 0.95 | 4.64 | - | 1185.4 |
| AHQ-4-13, 5518         | R.LNEAAAGLNOAATELVQASR.G      | 2028.21299 | 2 | 1.59E-04 | 0.93 | 3.77 | - | 1285.0 |
| AHQ-4-5, 1661          | R.MATNAAQAIAIK                | 1204.38227 | 2 | 9.89E-04 | 0.80 | 3.46 | - | 770.3  |
| AHQ-4-2, 1823 - 1890   | R.MATNAAQAIAIK                | 1204.38227 | 2 | 3.38E-04 | 0.66 | 2.92 | - | 655.2  |
| AHQ-4-6, 4040          | R.MVAAATNNLCEAANAAVQGHASQEK.L | 2558.79098 | 3 | 8.83E-07 | 0.92 | 4.36 | - | 1052.4 |
| AHQ-4-8, 3757          | R.MVAAATNNLCEAANAAVQGHASQEK.L | 2558.79098 | 3 | 9.42E-09 | 0.95 | 4.98 | - | 1171.7 |
| AHQ-4-4, 4267 - 4343   | R.MVAAATNNLCEAANAAVQGHASQEK.L | 2558.79098 | 3 | 8.72E-08 | 0.94 | 5.02 | - | 1204.5 |
| AHQ-4-4, 4007 - 4068   | R.MVAAATNNLCEAANAAVQGHASQEK.L | 2574.79038 | 3 | 2.22E-09 | 0.87 | 4.31 | - | 732.6  |
| AHQ-4-2, 4375          | R.MVAAATNNLCEAANAAVQGHASQEK.L | 2558.79098 | 2 | 4.75E-04 | 0.81 | 3.02 | - | 647.9  |
| AHQ-4-2, 4367          | R.MVAAATNNLCEAANAAVQGHASQEK.L | 2558.79098 | 3 | 1.16E-05 | 0.69 | 3.42 | - | 557.7  |
| AHQ-4-2, 4454 - 4455   | R.MVAAATNNLCEAANAAVQGHASQEK.L | 2558.79098 | 3 | 1.47E-07 | 0.97 | 5.88 | - | 1503.0 |
| AHQ-4-2, 4466          | R.MVAAATNNLCEAANAAVQGHASQEK.L | 2558.79098 | 2 | 4.81E-08 | 0.68 | 3.09 | - | 552.1  |
| AHQ-4-1, 4510 - 4511   | R.MVAAATNNLCEAANAAVQGHASQEK.L | 2558.79098 | 3 | 1.07E-09 | 0.93 | 4.75 | - | 1006.4 |
| AHQ-4-1, 4229          | R.MVAAATNNLCEAANAAVQGHASQEK.L | 2574.79038 | 3 | 1.78E-11 | 0.95 | 5.29 | - | 1208.0 |
| AHQ-4-2, 4552 - 4576   | R.MVAAATNNLCEAANAAVQGHASQEK.L | 2558.79098 | 3 | 3.01E-08 | 0.89 | 4.00 | - | 1042.0 |
| AHQ-4-5, 3858          | R.MVAAATNNLCEAANAAVQGHASQEK.L | 2574.79038 | 3 | 1.56E-07 | 0.92 | 4.22 | - | 1097.6 |
| AHQ-4-8, 3621          | R.MVAAATNNLCEAANAAVQGHASQEK.L | 2574.79038 | 3 | 4.49E-11 | 0.91 | 4.53 | - | 946.1  |
| AHQ-4-10, 3872         | R.MVAAATNNLCEAANAAVQGHASQEK.L | 2558.79098 | 2 | 2.04E-05 | 0.61 | 2.55 | - | 518.4  |
| AHQ-4-2, 6846          | K.MVGGIAQIIAAQEEMLR.K         | 1847.19347 | 2 | 8.18E-05 | 0.98 | 5.44 | - | 1869.8 |
| AHQ-4-7, 6557          | K.MVGGIAQIIAAQEEMLR.K         | 1847.19347 | 2 | 5.28E-04 | 0.94 | 4.17 | - | 1267.5 |
| AHQ-4-7, 6917          | K.MVGGIAQIIAAQEEMLR.K         | 1831.19407 | 2 | 3.50E-04 | 0.95 | 4.13 | - | 1393.6 |
| AHQ-4-2, 6502          | K.MVGGIAQIIAAQEEMLR.K         | 1847.19347 | 2 | 1.36E-11 | 0.97 | 5.10 | - | 1593.9 |
| AHQ-4-4, 6799 - 6814   | K.MVGGIAQIIAAQEEMLR.K         | 1847.19347 | 2 | 6.94E-05 | 0.97 | 5.12 | - | 1676.6 |
| AHQ-4-2, 6183          | K.MVGGIAQIIAAQEEMLR.K         | 1863.19287 | 2 | 3.10E-06 | 0.98 | 5.82 | - | 1621.0 |
| AHQ-4-3, 6429          | K.MVGGIAQIIAAQEEMLR.K         | 1847.19347 | 2 | 5.67E-04 | 0.63 | 2.88 | - | 558.7  |
| AHQ-4-2, 7143          | K.MVGGIAQIIAAQEEMLR.K         | 1831.19407 | 2 | 2.89E-07 | 0.97 | 5.09 | - | 1669.4 |
| AHQ-4-3, 6793 - 6835   | K.MVGGIAQIIAAQEEMLR.K         | 1847.19347 | 2 | 1.63E-04 | 0.97 | 5.60 | - | 1842.5 |
| AHQ-4-4, 6148          | K.MVGGIAQIIAAQEEMLR.K         | 1863.19287 | 2 | 9.75E-05 | 0.94 | 4.22 | - | 1205.8 |
| AHQ-4-2, 7259          | K.MVGGIAQIIAAQEEMLR.K         | 1831.19407 | 2 | 3.10E-06 | 0.96 | 5.18 | - | 1263.6 |
| AHQ-4-14-, 6281        | K.MVGGIAQIIAAQEEMLR.K         | 1847.19347 | 2 | 1.02E-04 | 0.98 | 5.68 | - | 1994.5 |
| AHQ-4-3, 7121          | K.MVGGIAQIIAAQEEMLR.K         | 1831.19407 | 2 | 1.19E-06 | 0.98 | 5.90 | - | 1760.0 |
| AHQ-4-5, 6958 - 6965   | K.MVGGIAQIIAAQEEMLR.K         | 1831.19407 | 2 | 1.32E-09 | 0.98 | 5.75 | - | 1709.6 |
| AHQ-4-1, 6210 - 6275   | K.MVGGIAQIIAAQEEMLR.K         | 1863.19287 | 2 | 1.26E-09 | 0.97 | 5.71 | - | 1469.0 |
| AHQ-4-8, 6575          | K.MVGGIAQIIAAQEEMLR.K         | 1831.19407 | 2 | 1.47E-08 | 0.97 | 5.27 | - | 1490.5 |
| AHQ-4-1, 6750 - 6765   | K.MVGGIAQIIAAQEEMLR.K         | 1847.19347 | 2 | 1.97E-04 | 0.95 | 4.46 | - | 1290.9 |
| AHQ-4-14-, 5695 - 5701 | K.MVGGIAQIIAAQEEMLR.K         | 1863.19287 | 2 | 2.36E-07 | 0.92 | 4.03 | - | 877.0  |
| AHQ-4-4, 7091 - 7110   | K.MVGGIAQIIAAQEEMLR.K         | 1831.19407 | 2 | 2.04E-13 | 0.98 | 5.63 | - | 2344.7 |
| AHQ-4-4, 6502          | K.MVGGIAQIIAAQEEMLR.K         | 1847.19347 | 2 | 2.54E-07 | 0.96 | 4.78 | - | 1273.2 |
| AHQ-4-6, 6830          | K.MVGGIAQIIAAQEEMLR.K         | 1831.19407 | 2 | 2.53E-13 | 0.98 | 5.44 | - | 1736.1 |
| AHQ-4-10, 6153         | K.MVGGIAQIIAAQEEMLR.K         | 1831.19407 | 2 | 1.26E-05 | 0.97 | 5.16 | - | 1352.0 |
| AHQ-4-7, 2126          | K.NCGQMSEIEAK.V               | 1268.40005 | 1 | 3.44E-06 | 0.49 | 3.21 | - | 279.8  |
| AHQ-4-5, 4643          | K.NGNLPEFGDAISTASK.A          | 1621.73018 | 2 | 1.57E-09 | 0.93 | 4.25 | - | 600.0  |
| AHQ-4-6, 4527          | K.NGNLPEFGDAISTASK.A          | 1621.73018 | 2 | 3.05E-07 | 0.79 | 3.11 | - | 449.5  |
| AHQ-4-1, 4725          | K.NGNLPEFGDAISTASK.A          | 1621.73018 | 2 | 3.16E-04 | 0.82 | 3.59 | - | 494.1  |
| AHQ-4-2, 4538          | K.NGNLPEFGDAISTASK.A          | 1621.73018 | 2 | 5.30E-04 | 0.67 | 3.02 | - | 371.4  |
| AHQ-4-3, 4767          | K.NGNLPEFGDAISTASK.A          | 1621.73018 | 2 | 2.43E-09 | 0.88 | 3.48 | - | 694.4  |
| AHQ-4-3, 4656          | K.NGNLPEFGDAISTASK.A          | 1621.73018 | 2 | 8.60E-06 | 0.78 | 2.93 | - | 479.6  |
| AHQ-4-2, 4778 - 4800   | K.NGNLPEFGDAISTASK.A          | 1621.73018 | 2 | 7.05E-07 | 0.81 | 3.75 | - | 436.4  |
| AHQ-4-4, 4070 - 4076   | K.NLGTALAE.LR.T               | 1058.21367 | 2 | 2.30E-04 | 0.91 | 3.47 | - | 1097.8 |
| AHQ-4-2, 4146 - 4191   | K.NLGTALAE.LR.T               | 1058.21367 | 2 | 2.33E-05 | 0.90 | 3.62 | - | 840.6  |
| AHQ-4-6, 3794 - 3795   | K.NLGTALAE.LR.T               | 1058.21367 | 2 | 1.88E-05 | 0.89 | 3.20 | - | 915.8  |
| AHQ-4-5, 3822          | K.NLGTALAE.LR.T               | 1058.21367 | 2 | 1.38E-06 | 0.90 | 3.62 | - | 936.1  |
| AHQ-4-3, 4109 - 4128   | K.NLGTALAE.LR.T               | 1058.21367 | 2 | 7.73E-05 | 0.88 | 3.24 | - | 865.8  |
| AHQ-4-6, 2431          | K.PAAVAANEIEIGSHIK.H          | 1636.78798 | 2 | 2.17E-06 | 0.96 | 4.63 | - | 1438.7 |
| AHQ-4-4, 2582 - 2583   | K.PAAVAANEIEIGSHIK.H          | 1636.78798 | 2 | 6.01E-05 | 0.98 | 5.97 | - | 1898.5 |
| AHQ-4-3, 2603 - 2609   | K.PAAVAANEIEIGSHIK.H          | 1636.78798 | 2 | 1.16E-11 | 0.98 | 5.48 | - | 2325.3 |
| AHQ-4-5, 2431 - 2434   | K.PAAVAANEIEIGSHIK.H          | 1636.78798 | 2 | 1.22E-13 | 0.98 | 5.85 | - | 1810.7 |
| AHQ-4-6, 2430          | K.PAAVAANEIEIGSHIK.H          | 1636.78798 | 3 | 1.01E-10 | 0.97 | 5.99 | - | 1735.7 |
| AHQ-4-5, 2429          | K.PAAVAANEIEIGSHIK.H          | 1636.78798 | 3 | 1.25E-12 | 0.97 | 5.79 | - | 1848.3 |
| AHQ-4-1, 2837          | K.PAAVAANEIEIGSHIK.H          | 1636.78798 | 2 | 1.42E-07 | 0.98 | 5.18 | - | 1772.0 |
| AHQ-4-1, 2830          | K.PAAVAANEIEIGSHIK.H          | 1636.78798 | 3 | 7.91E-07 | 0.97 | 5.16 | - | 1814.8 |
| AHQ-4-2, 2611          | K.PAAVAANEIEIGSHIK.H          | 1636.78798 | 2 | 3.84E-11 | 0.98 | 5.53 | - | 2037.1 |
| AHQ-4-3, 2608          | K.PAAVAANEIEIGSHIK.H          | 1636.78798 | 3 | 3.74E-08 | 0.97 | 5.81 | - | 2122.8 |
| AHQ-4-2, 2612          | K.PAAVAANEIEIGSHIK.H          | 1636.78798 | 3 | 5.86E-10 | 0.97 | 5.45 | - | 1698.8 |



|                        |                                              |            |   |          |      |      |   |        |
|------------------------|----------------------------------------------|------------|---|----------|------|------|---|--------|
| AHQ-4-3, 3195          | K.QAAASATQTIAAAQHAASTPK.A                    | 1996.17099 | 2 | 7.95E-07 | 0.91 | 4.49 | - | 668.9  |
| AHQ-4-3, 3388 - 3391   | K.QAAASATQTIAAAQHAASTPK.A                    | 1996.17099 | 2 | 1.45E-10 | 0.89 | 4.62 | - | 599.5  |
| AHQ-4-5, 3133          | K.QAAASATQTIAAAQHAASTPK.A                    | 1996.17099 | 2 | 1.34E-05 | 0.90 | 4.14 | - | 792.6  |
| AHQ-4-4, 3366          | K.QAAASATQTIAAAQHAASTPK.A                    | 1996.17099 | 2 | 1.06E-07 | 0.88 | 4.64 | - | 463.4  |
| AHQ-4-6, 2926          | K.QAAASATQTIAAAQHAASTPK.A                    | 1996.17099 | 3 | 2.44E-05 | 0.79 | 3.46 | - | 638.9  |
| AHQ-4-2, 3423          | K.QAAASATQTIAAAQHAASTPK.A                    | 1996.17099 | 2 | 5.84E-07 | 0.85 | 4.19 | - | 432.4  |
| AHQ-4-5, 2942          | K.QAAASATQTIAAAQHAASTPK.A                    | 1996.17099 | 2 | 4.08E-05 | 0.85 | 4.03 | - | 530.4  |
| AHQ-4-3, 3197          | K.QAAASATQTIAAAQHAASTPK.A                    | 1996.17099 | 3 | 1.19E-05 | 0.82 | 3.39 | - | 847.8  |
| AHQ-4-1, 3381          | K.QAAASATQTIAAAQHAASTPK.A                    | 1996.17099 | 3 | 4.53E-06 | 0.82 | 3.47 | - | 752.7  |
| AHQ-4-4, 3175          | K.QAAASATQTIAAAQHAASTPK.A                    | 1996.17099 | 2 | 3.10E-04 | 0.78 | 3.56 | - | 492.4  |
| AHQ-4-2, 3210          | K.QAAASATQTIAAAQHAASTPK.A                    | 1996.17099 | 2 | 1.94E-05 | 0.86 | 3.76 | - | 628.0  |
| AHQ-4-6, 3782          | R.QELAVFCSPPEPAK.T                           | 1574.77985 | 2 | 2.07E-06 | 0.78 | 3.39 | - | 725.8  |
| AHQ-4-1, 4154 - 4158   | R.QELAVFCSPPEPAK.T                           | 1574.77985 | 2 | 1.20E-05 | 0.85 | 3.04 | - | 849.7  |
| AHQ-4-3, 4047 - 4051   | R.QELAVFCSPPEPAK.T                           | 1574.77985 | 2 | 2.82E-09 | 0.88 | 3.60 | - | 891.5  |
| AHQ-4-2, 4070          | R.QELAVFCSPPEPAK.T                           | 1574.77985 | 2 | 1.54E-06 | 0.93 | 3.62 | - | 1060.7 |
| AHQ-4-5, 3869          | R.QELAVFCSPPEPAK.T                           | 1574.77985 | 2 | 1.14E-07 | 0.96 | 4.13 | - | 1424.9 |
| AHQ-4-4, 7406 - 7486   | R.QNLLQAAAGNVGQASGELLQQIGESDTPHFQDALM*QLAK.A | 4154.52584 | 3 | 1.32E-09 | 0.94 | 5.42 | - | 1005.6 |
| AHQ-4-5, 7367 - 7405   | R.QNLLQAAAGNVGQASGELLQQIGESDTPHFQDALMQLAK.A  | 4138.52644 | 3 | 1.97E-11 | 0.95 | 5.60 | - | 835.6  |
| AHQ-4-4, 7426 - 7471   | R.QNLLQAAAGNVGQASGELLQQIGESDTPHFQDALMQLAK.A  | 4138.52644 | 3 | 1.78E-11 | 0.96 | 6.24 | - | 865.5  |
| AHQ-4-3, 3768 - 3801   | K.QVAASTAQLLVACK.V                           | 1461.70942 | 2 | 3.32E-06 | 0.85 | 3.37 | - | 501.8  |
| AHQ-4-1, 3933 - 3934   | K.QVAASTAQLLVACK.V                           | 1461.70942 | 2 | 9.69E-07 | 0.89 | 3.78 | - | 544.9  |
| AHQ-4-13-, 3764 - 3841 | K.QVAASTAQLLVACK.V                           | 1461.70942 | 2 | 5.31E-04 | 0.80 | 3.34 | - | 685.7  |
| AHQ-4-2, 3839          | K.QVAASTAQLLVACK.V                           | 1461.70942 | 2 | 1.76E-04 | 0.93 | 3.86 | - | 715.9  |
| AHQ-4-4, 5916          | K.RVAGSVTELIIQAAEAMK.G                       | 1775.06387 | 2 | 7.28E-05 | 0.98 | 5.52 | - | 1877.0 |
| AHQ-4-5, 5606          | K.RVAGSVTELIIQAAEAMK.G                       | 1775.06387 | 2 | 5.04E-05 | 0.96 | 4.71 | - | 1232.5 |
| AHQ-4-2, 5982 - 5987   | K.RVAGSVTELIIQAAEAMK.G                       | 1775.06387 | 2 | 4.95E-07 | 0.98 | 5.66 | - | 2275.0 |
| AHQ-4-3, 5965 - 5972   | K.RVAGSVTELIIQAAEAMK.G                       | 1775.06387 | 2 | 1.05E-05 | 0.98 | 6.42 | - | 2205.1 |
| AHQ-4-1, 3125          | K.SIAAATSALVK.A                              | 1032.21612 | 2 | 5.32E-05 | 0.91 | 3.33 | - | 969.7  |
| AHQ-4-4, 2886          | K.SIAAATSALVK.A                              | 1032.21612 | 2 | 1.43E-04 | 0.85 | 3.12 | - | 800.4  |
| AHQ-4-3, 2908          | K.SIAAATSALVK.A                              | 1032.21612 | 2 | 3.24E-04 | 0.84 | 3.33 | - | 733.2  |
| AHQ-4-5, 2595 - 2665   | K.SIAAATSALVK.A                              | 1032.21612 | 2 | 1.96E-04 | 0.95 | 3.96 | - | 1165.1 |
| AHQ-4-7, 4089          | K.SKDFHFLGEGDEESTMLEDSVSPK.K                 | 2538.68364 | 2 | 1.17E-07 | 0.86 | 3.93 | - | 663.4  |
| AHQ-4-7, 3614 - 3649   | K.SKDFHFLGEGDEESTMLEDSVSPK.K                 | 2554.68304 | 3 | 1.33E-07 | 0.96 | 5.16 | - | 1572.6 |
| AHQ-4-7, 3994 - 4073   | K.SKDFHFLGEGDEESTMLEDSVSPK.K                 | 2538.68364 | 3 | 4.21E-11 | 0.96 | 5.13 | - | 1809.5 |
| AHQ-4-3, 5317 - 5387   | K.SNTSPEELGPLANQLTSDYGR.L                    | 2250.36505 | 2 | 7.56E-08 | 0.91 | 4.22 | - | 600.3  |
| AHQ-4-1, 4738          | K.SNTSPEELGPLANQLTSDYGR.L                    | 2250.36505 | 2 | 3.06E-09 | 0.83 | 3.69 | - | 538.9  |
| AHQ-4-4, 5566          | K.SNTSPEELGPLANQLTSDYGR.L                    | 2250.36505 | 2 | 3.34E-06 | 0.89 | 3.77 | - | 594.8  |
| AHQ-4-7, 5067          | K.SNTSPEELGPLANQLTSDYGR.L                    | 2250.36505 | 2 | 1.56E-07 | 0.83 | 3.62 | - | 497.3  |
| AHQ-4-2, 4762          | K.SNTSPEELGPLANQLTSDYGR.L                    | 2250.36505 | 2 | 1.03E-07 | 0.87 | 3.97 | - | 463.8  |
| AHQ-4-4, 5478 - 5498   | K.SNTSPEELGPLANQLTSDYGR.L                    | 2250.36505 | 2 | 2.20E-06 | 0.90 | 4.25 | - | 511.9  |
| AHQ-4-2, 5298 - 5338   | K.SNTSPEELGPLANQLTSDYGR.L                    | 2250.36505 | 2 | 6.41E-07 | 0.56 | 3.48 | - | 243.7  |
| AHQ-4-6, 5244          | K.SNTSPEELGPLANQLTSDYGR.L                    | 2250.36505 | 2 | 2.10E-07 | 0.56 | 3.11 | - | 353.9  |
| AHQ-4-1, 5330 - 5393   | K.SNTSPEELGPLANQLTSDYGR.L                    | 2250.36505 | 2 | 1.66E-05 | 0.77 | 3.44 | - | 392.7  |
| AHQ-4-1, 5693          | K.SNTSPEELGPLANQLTSDYGR.L                    | 2250.36505 | 2 | 1.88E-07 | 0.78 | 3.58 | - | 352.7  |
| AHQ-4-2, 5184          | K.SNTSPEELGPLANQLTSDYGR.L                    | 2250.36505 | 2 | 9.28E-09 | 0.74 | 3.21 | - | 399.1  |
| AHQ-4-2, 4984          | K.SNTSPEELGPLANQLTSDYGR.L                    | 2250.36505 | 2 | 1.61E-07 | 0.91 | 4.46 | - | 564.3  |
| AHQ-4-6, 5052 - 5075   | K.SNTSPEELGPLANQLTSDYGR.L                    | 2250.36505 | 2 | 7.31E-06 | 0.91 | 4.47 | - | 512.9  |
| AHQ-4-4, 5280 - 5362   | K.SNTSPEELGPLANQLTSDYGR.L                    | 2250.36505 | 2 | 1.06E-05 | 0.89 | 3.84 | - | 631.1  |
| AHQ-4-4, 5120          | K.SNTSPEELGPLANQLTSDYGR.L                    | 2250.36505 | 2 | 4.85E-06 | 0.83 | 3.60 | - | 550.7  |
| AHQ-4-1, 5555 - 5625   | K.SNTSPEELGPLANQLTSDYGR.L                    | 2250.36505 | 2 | 2.59E-06 | 0.91 | 4.39 | - | 469.7  |
| AHQ-4-3, 4743          | K.SNTSPEELGPLANQLTSDYGR.L                    | 2250.36505 | 2 | 1.34E-09 | 0.72 | 3.28 | - | 408.2  |
| AHQ-4-4, 4932          | K.SNTSPEELGPLANQLTSDYGR.L                    | 2250.36505 | 2 | 6.77E-08 | 0.87 | 3.68 | - | 560.1  |
| AHQ-4-3, 5516 - 5597   | K.SNTSPEELGPLANQLTSDYGR.L                    | 2250.36505 | 2 | 3.88E-06 | 0.93 | 4.63 | - | 683.4  |
| AHQ-4-5, 4567          | K.SNTSPEELGPLANQLTSDYGR.L                    | 2250.36505 | 2 | 2.99E-06 | 0.88 | 4.02 | - | 498.1  |
| AHQ-4-2, 5607 - 5611   | K.SNTSPEELGPLANQLTSDYGR.L                    | 2250.36505 | 2 | 3.11E-06 | 0.90 | 4.34 | - | 414.8  |
| AHQ-4-2, 5382 - 5451   | K.SNTSPEELGPLANQLTSDYGR.L                    | 2250.36505 | 2 | 1.90E-09 | 0.86 | 4.09 | - | 407.2  |
| AHQ-4-5, 5443 - 5471   | K.SNTSPEELGPLANQLTSDYGR.L                    | 2250.36505 | 2 | 1.05E-09 | 0.92 | 4.53 | - | 638.9  |
| AHQ-4-3, 5415          | K.SNTSPEELGPLANQLTSDYGR.L                    | 2250.36505 | 2 | 1.30E-04 | 0.87 | 3.90 | - | 459.9  |
| AHQ-4-2, 5471 - 5538   | K.SNTSPEELGPLANQLTSDYGR.L                    | 2250.36505 | 2 | 1.84E-08 | 0.85 | 3.86 | - | 378.2  |
| AHQ-4-9, 4589          | K.SNTSPEELGPLANQLTSDYGR.L                    | 2250.36505 | 2 | 1.31E-07 | 0.62 | 3.12 | - | 333.0  |
| AHQ-4-5, 5330 - 5338   | K.SNTSPEELGPLANQLTSDYGR.L                    | 2250.36505 | 2 | 1.10E-11 | 0.89 | 4.52 | - | 441.7  |
| AHQ-4-3, 5189          | K.SNTSPEELGPLANQLTSDYGR.L                    | 2250.36505 | 2 | 6.91E-04 | 0.81 | 3.63 | - | 605.8  |
| AHQ-4-12, 5163         | K.SNTSPEELGPLANQLTSDYGR.L                    | 2250.36505 | 2 | 3.23E-07 | 0.43 | 2.85 | - | 198.6  |
| AHQ-4-6, 4475          | K.SNTSPEELGPLANQLTSDYGR.L                    | 2250.36505 | 2 | 2.43E-11 | 0.89 | 3.81 | - | 668.7  |
| AHQ-4-4, 4710          | K.SNTSPEELGPLANQLTSDYGR.L                    | 2250.36505 | 2 | 1.52E-07 | 0.81 | 3.59 | - | 436.8  |
| AHQ-4-5, 5142 - 5167   | K.SNTSPEELGPLANQLTSDYGR.L                    | 2250.36505 | 2 | 7.96E-07 | 0.92 | 4.42 | - | 596.9  |
| AHQ-4-3, 7427          | R.TEDSGLQTQVIAAATQCALSTSQLVACTK.V            | 3056.37009 | 3 | 3.89E-15 | 0.98 | 6.90 | - | 2091.5 |
| AHQ-4-5, 7341          | R.TEDSGLQTQVIAAATQCALSTSQLVACTK.V            | 3056.37009 | 3 | 8.04E-12 | 0.97 | 6.24 | - | 1499.7 |
| AHQ-4-13, 6821 - 6893  | R.TEDSGLQTQVIAAATQCALSTSQLVACTK.V            | 3056.37009 | 3 | 9.96E-05 | 0.94 | 4.75 | - | 1647.3 |
| AHQ-4-2, 7424          | R.TEDSGLQTQVIAAATQCALSTSQLVACTK.V            | 3056.37009 | 3 | 5.55E-16 | 0.98 | 6.97 | - | 1769.2 |
| AHQ-4-1, 4571          | K.TKEVIEQWNLNIIK.R                           | 1716.95938 | 2 | 3.03E-04 | 0.88 | 3.33 | - | 1233.1 |
| AHQ-4-7, 3895          | K.TKEVIEQWNLNIIK.R                           | 1716.95938 | 3 | 3.66E-04 | 0.96 | 4.38 | - | 2079.4 |
| AHQ-4-8, 3715          | K.TKEVIEQWNLNIIK.R                           | 1716.95938 | 2 | 3.27E-05 | 0.95 | 4.42 | - | 1396.9 |
| AHQ-4-13, 4306 - 4381  | K.TKEVIEQWNLNIIK.R                           | 1716.95938 | 2 | 9.53E-05 | 0.94 | 3.90 | - | 1471.6 |
| AHQ-4-12, 4209 - 4223  | K.TKEVIEQWNLNIIK.R                           | 1716.95938 | 2 | 4.07E-06 | 0.95 | 4.26 | - | 1545.9 |
| AHQ-4-9, 3604          | K.TKEVIEQWNLNIIK.R                           | 1716.95938 | 2 | 1.68E-06 | 0.94 | 4.38 | - | 1441.2 |
| AHQ-4-2, 6686 - 6759   | K.TLAESALQLLYTAK.E                           | 1522.76793 | 2 | 2.70E-06 | 0.92 | 4.04 | - | 920.1  |
| AHQ-4-2, 6872          | K.TLAESALQLLYTAK.E                           | 1522.76793 | 2 | 1.05E-06 | 0.95 | 3.85 | - | 1197.8 |
| AHQ-4-1, 6585 - 6602   | K.TLAESALQLLYTAK.E                           | 1522.76793 | 2 | 1.57E-10 | 0.96 | 4.62 | - | 1115.7 |
| AHQ-4-4, 6591 - 6659   | K.TLAESALQLLYTAK.E                           | 1522.76793 | 2 | 4.26E-07 | 0.95 | 4.57 | - | 1128.0 |
| AHQ-4-11, 6046         | K.TLAESALQLLYTAK.E                           | 1522.76793 | 2 | 3.69E-05 | 0.96 | 4.55 | - | 1082.0 |
| AHQ-4-14-, 6146 - 6149 | K.TLAESALQLLYTAK.E                           | 1522.76793 | 2 | 4.49E-04 | 0.89 | 3.02 | - | 925.8  |
| AHQ-4-3, 6604 - 6671   | K.TLAESALQLLYTAK.E                           | 1522.76793 | 2 | 1.71E-08 | 0.96 | 4.70 | - | 1169.8 |
| AHQ-4-13, 6366         | K.TLAESALQLLYTAK.E                           | 1522.76793 | 2 | 7.78E-07 | 0.95 | 3.69 | - | 1369.0 |
| AHQ-4-1, 6786          | K.TLAESALQLLYTAK.E                           | 1522.76793 | 2 | 7.67E-07 | 0.88 | 3.46 | - | 790.4  |
| AHQ-4-4, 3128          | K.TLSHPQQMALLDQTK.T                          | 1711.96464 | 3 | 5.78E-05 | 0.92 | 4.40 | - | 1064.0 |
| AHQ-4-1, 3354          | K.TLSHPQQMALLDQTK.T                          | 1711.96464 | 2 | 1.34E-05 | 0.95 | 4.68 | - | 833.0  |
| AHQ-4-2, 3146          | K.TLSHPQQMALLDQTK.T                          | 1711.96464 | 2 | 2.91E-04 | 0.94 | 4.94 | - | 604.8  |
| AHQ-4-2, 3152          | K.TLSHPQQMALLDQTK.T                          | 1711.96464 | 3 | 7.40E-04 | 0.86 | 4.16 | - | 901.7  |
| AHQ-4-6, 2882          | K.TLSHPQQMALLDQTK.T                          | 1711.96464 | 2 | 5.14E-04 | 0.93 | 4.23 | - | 686.9  |
| AHQ-4-1, 3371          | K.TLSHPQQMALLDQTK.T                          | 1711.96464 | 3 | 1.64E-04 | 0.91 | 4.21 | - | 1196.1 |
| AHQ-4-2, 2431 - 2446   | K.TLSHPQQMALLDQTK.T                          | 1727.96404 | 3 | 5.61E-04 | 0.90 | 4.41 | - | 893.8  |
| AHQ-4-1, 2589          | K.TLSHPQQMALLDQTK.T                          | 1727.96404 | 2 | 1.92E-04 | 0.84 | 3.43 | - | 482.7  |
| AHQ-4-4, 3114 - 3142   | K.TLSHPQQMALLDQTK.T                          | 1711.96464 | 2 | 1.06E-04 | 0.91 | 4.14 | - | 644.6  |
| AHQ-4-9, 2647 - 2649   | K.TLSHPQQMALLDQTK.T                          | 1711.96464 | 2 | 2.29E-04 | 0.94 | 4.49 | - | 724.2  |
| AHQ-4-3, 2416          | K.TLSHPQQMALLDQTK.T                          | 1727.96404 | 3 | 2.63E-04 | 0.88 | 4.02 | - | 860.2  |
| AHQ-4-3, 4345 - 4415   | K.TMLESAGGLIQTAR.A                           | 1448.67095 | 2 | 1.01E-06 | 0.94 | 4.10 | - | 1777.4 |
| AHQ-4-1, 4391 - 4459   | K.TMLESAGGLIQTAR.A                           | 1448.67095 | 2 | 9.81E-05 | 0.92 | 3.54 | - | 1471.7 |
| AHQ-4-2, 3490 - 3512   | K.TMLESAGGLIQTAR.A                           | 1464.67035 | 2 | 1.74E-08 | 0.97 | 5.13 | - | 1430.4 |
| AHQ-4-6, 4038          | K.TMLESAGGLIQTAR.A                           | 1448.67095 | 2 | 8.68E-06 | 0.90 | 3.70 | - | 1109.6 |
| AHQ-4-3, 4375          | K.TMLESAGGLIQTAR.A                           | 1448.67095 | 1 | 7.85E-04 | 0.24 | 2.44 | - | 220.9  |
| AHQ-4-5, 4117          | K.TMLESAGGLIQTAR.A                           | 1448.67095 | 2 | 4.03E-07 | 0.93 | 4.08 | - | 1254.7 |
| AHQ-4-3, 3475 - 3504   | K.TMLESAGGLIQTAR.A                           | 1464.67035 | 2 | 3.61E-07 | 0.93 | 4.55 | - | 930.3  |
| AHQ-4-2, 4327 - 4406   | K.TMLESAGGLIQTAR.A                           | 1448.67095 | 2 | 9.42E-05 | 0.77 | 2.91 | - | 909.7  |
| AHQ-4-4, 4310          | K.TMLESAGGLIQTAR.A                           | 1448.67095 | 2 | 1.82E-05 | 0.87 | 3.06 | - | 1389.9 |
| AHQ-4-1, 3603          | K.TMLESAGGLIQTAR.A                           | 1464.67035 | 2 | 2.19E-05 | 0.96 | 4.15 | - | 1714.2 |
| AHQ-4-7, 3859 - 3863   | K.TMQFEPSTM*YYDACR.I                         | 1854.07511 | 2 | 5.44E-07 | 0.93 | 4.34 | - | 514.3  |

|                        |                                    |            |   |          |      |      |   |        |
|------------------------|------------------------------------|------------|---|----------|------|------|---|--------|
| AHQ-4-13-, 4786        | K.TMQFEPSTMVYDACR.I                | 1838.07571 | 2 | 9.26E-07 | 0.93 | 4.37 | - | 623.2  |
| AHQ-4-7, 4113          | K.TM*QFEPSTMVYDACR.I               | 1854.07511 | 2 | 1.64E-04 | 0.88 | 3.82 | - | 565.9  |
| AHQ-4-13-, 4233        | K.TM*QFEPSTMVYDACR.I               | 1854.07511 | 2 | 3.42E-04 | 0.90 | 3.95 | - | 592.2  |
| AHQ-4-13, 4897         | K.TMQFEPSTMVYDACR.I                | 1838.07571 | 2 | 1.13E-06 | 0.88 | 3.97 | - | 437.7  |
| AHQ-4-13, 4368         | K.TM*QFEPSTMVYDACR.I               | 1854.07511 | 2 | 3.37E-04 | 0.90 | 3.94 | - | 703.0  |
| AHQ-4-7, 4651 - 4675   | K.TMQFEPSTMVYDACR.I                | 1838.07571 | 2 | 1.17E-05 | 0.96 | 5.50 | - | 650.6  |
| AHQ-4-13-, 3662 - 3729 | K.TVTDMLM*TCAR.I                   | 1445.70887 | 2 | 1.98E-06 | 0.86 | 3.52 | - | 649.7  |
| AHQ-4-13, 3816 - 3885  | K.TVTDMLM*TCAR.I                   | 1445.70887 | 2 | 5.87E-04 | 0.91 | 3.50 | - | 852.6  |
| AHQ-4-12, 5239 - 5241  | K.TYGVSFLLVK.E                     | 1161.37395 | 2 | 9.43E-07 | 0.79 | 3.41 | - | 458.7  |
| AHQ-4-7, 4945          | K.TYGVSFLLVK.E                     | 1161.37395 | 2 | 7.11E-06 | 0.85 | 3.33 | - | 603.2  |
| AHQ-4-6, 6234 - 6259   | R.VAGSVTELIQAAEAMK.G               | 1618.87752 | 2 | 2.26E-07 | 0.96 | 4.91 | - | 1404.6 |
| AHQ-4-2, 6454 - 6522   | R.VAGSVTELIQAAEAMK.G               | 1618.87752 | 2 | 4.71E-09 | 0.97 | 5.36 | - | 1460.9 |
| AHQ-4-5, 6318          | R.VAGSVTELIQAAEAMK.G               | 1618.87752 | 2 | 7.68E-08 | 0.97 | 4.51 | - | 2026.5 |
| AHQ-4-4, 6510 - 6519   | R.VAGSVTELIQAAEAMK.G               | 1618.87752 | 2 | 2.18E-06 | 0.97 | 5.65 | - | 1491.0 |
| AHQ-4-9, 5644          | R.VAGSVTELIQAAEAMK.G               | 1618.87752 | 2 | 8.41E-07 | 0.88 | 3.46 | - | 1032.4 |
| AHQ-4-3, 5428          | R.VAGSVTELIQAAEAM*K.G              | 1634.87692 | 2 | 8.73E-07 | 0.92 | 3.85 | - | 1145.7 |
| AHQ-4-10, 5672         | R.VAGSVTELIQAAEAMK.G               | 1618.87752 | 2 | 1.82E-09 | 0.93 | 3.94 | - | 1092.6 |
| AHQ-4-3, 6527 - 6528   | R.VAGSVTELIQAAEAMK.G               | 1618.87752 | 2 | 1.08E-09 | 0.98 | 6.02 | - | 1543.9 |
| AHQ-4-4, 5390 - 5444   | R.VAGSVTELIQAAEAM*K.G              | 1634.87692 | 2 | 7.99E-06 | 0.91 | 4.14 | - | 1088.5 |
| AHQ-4-1, 6509          | R.VAGSVTELIQAAEAMK.G               | 1618.87752 | 2 | 5.37E-09 | 0.94 | 4.02 | - | 1212.4 |
| AHQ-4-1, 5513 - 5542   | R.VAGSVTELIQAAEAM*K.G              | 1634.87692 | 2 | 4.90E-04 | 0.75 | 2.70 | - | 735.1  |
| AHQ-4-2, 5424 - 5495   | R.VAGSVTELIQAAEAM*K.G              | 1634.87692 | 2 | 2.91E-04 | 0.87 | 3.69 | - | 837.9  |
| AHQ-4-3, 6271 - 6340   | K.VGAIPANALDDGQWSQGLISAAR.M        | 2311.53959 | 2 | 1.06E-06 | 0.56 | 3.39 | - | 356.5  |
| AHQ-4-3, 6135 - 6203   | K.VGAIPANALDDGQWSQGLISAAR.M        | 2311.53959 | 2 | 3.01E-11 | 0.94 | 4.91 | - | 793.7  |
| AHQ-4-3, 5992 - 6065   | K.VGAIPANALDDGQWSQGLISAAR.M        | 2311.53959 | 2 | 5.39E-11 | 0.96 | 5.49 | - | 765.2  |
| AHQ-4-6, 5999 - 6007   | K.VGAIPANALDDGQWSQGLISAAR.M        | 2311.53959 | 2 | 1.78E-12 | 0.96 | 4.83 | - | 1034.8 |
| AHQ-4-6, 5776 - 5858   | K.VGAIPANALDDGQWSQGLISAAR.M        | 2311.53959 | 2 | 2.75E-10 | 0.93 | 4.84 | - | 456.9  |
| AHQ-4-10, 5407         | K.VGAIPANALDDGQWSQGLISAAR.M        | 2311.53959 | 2 | 6.06E-08 | 0.94 | 4.25 | - | 878.0  |
| AHQ-4-6, 5619          | K.VGAIPANALDDGQWSQGLISAAR.M        | 2311.53959 | 2 | 2.50E-06 | 0.95 | 4.43 | - | 1089.1 |
| AHQ-4-3, 5865 - 5923   | K.VGAIPANALDDGQWSQGLISAAR.M        | 2311.53959 | 2 | 2.71E-05 | 0.90 | 4.23 | - | 687.4  |
| AHQ-4-11, 5540 - 5604  | K.VGAIPANALDDGQWSQGLISAAR.M        | 2311.53959 | 2 | 1.91E-09 | 0.92 | 4.80 | - | 520.5  |
| AHQ-4-2, 5760          | K.VGAIPANALDDGQWSQGLISAAR.M        | 2311.53959 | 2 | 5.02E-06 | 0.93 | 4.85 | - | 638.2  |
| AHQ-4-14-, 5671        | K.VGAIPANALDDGQWSQGLISAAR.M        | 2311.53959 | 2 | 6.38E-14 | 0.98 | 5.52 | - | 1731.1 |
| AHQ-4-1, 6081 - 6149   | K.VGAIPANALDDGQWSQGLISAAR.M        | 2311.53959 | 2 | 1.37E-06 | 0.93 | 4.68 | - | 759.3  |
| AHQ-4-2, 5859 - 5926   | K.VGAIPANALDDGQWSQGLISAAR.M        | 2311.53959 | 2 | 1.24E-09 | 0.91 | 4.39 | - | 622.6  |
| AHQ-4-2, 5946 - 6019   | K.VGAIPANALDDGQWSQGLISAAR.M        | 2311.53959 | 2 | 7.18E-09 | 0.95 | 5.02 | - | 1000.7 |
| AHQ-4-4, 5688 - 5708   | K.VGAIPANALDDGQWSQGLISAAR.M        | 2311.53959 | 2 | 2.19E-04 | 0.90 | 4.45 | - | 542.2  |
| AHQ-4-2, 6084 - 6150   | K.VGAIPANALDDGQWSQGLISAAR.M        | 2311.53959 | 2 | 2.39E-09 | 0.90 | 3.81 | - | 867.4  |
| AHQ-4-4, 5822 - 5890   | K.VGAIPANALDDGQWSQGLISAAR.M        | 2311.53959 | 2 | 6.98E-07 | 0.96 | 5.22 | - | 1015.9 |
| AHQ-4-5, 6106 - 6125   | K.VGAIPANALDDGQWSQGLISAAR.M        | 2311.53959 | 2 | 3.75E-10 | 0.96 | 4.67 | - | 1182.9 |
| AHQ-4-9, 5437          | K.VGAIPANALDDGQWSQGLISAAR.M        | 2311.53959 | 2 | 9.35E-04 | 0.61 | 3.16 | - | 449.3  |
| AHQ-4-5, 5905 - 5906   | K.VGAIPANALDDGQWSQGLISAAR.M        | 2311.53959 | 2 | 8.66E-08 | 0.92 | 4.30 | - | 750.1  |
| AHQ-4-5, 5682 - 5739   | K.VGAIPANALDDGQWSQGLISAAR.M        | 2311.53959 | 2 | 2.27E-07 | 0.96 | 4.82 | - | 1191.6 |
| AHQ-4-4, 5988 - 6060   | K.VGAIPANALDDGQWSQGLISAAR.M        | 2311.53959 | 2 | 1.13E-07 | 0.92 | 4.64 | - | 537.3  |
| AHQ-4-4, 6082 - 6150   | K.VGAIPANALDDGQWSQGLISAAR.M        | 2311.53959 | 2 | 2.41E-09 | 0.95 | 5.01 | - | 930.6  |
| AHQ-4-10, 5228 - 5287  | K.VGAIPANALDDGQWSQGLISAAR.M        | 2311.53959 | 2 | 1.18E-10 | 0.94 | 4.71 | - | 730.5  |
| AHQ-4-7, 5810 - 5825   | K.VGAIPANALDDGQWSQGLISAAR.M        | 2311.53959 | 2 | 5.19E-08 | 0.93 | 4.80 | - | 552.6  |
| AHQ-4-12, 5793 - 5795  | K.VGAIPANALDDGQWSQGLISAAR.M        | 2311.53959 | 2 | 2.76E-04 | 0.55 | 3.54 | - | 526.0  |
| AHQ-4-4, 6240          | K.VGAIPANALDDGQWSQGLISAAR.M        | 2311.53959 | 2 | 7.21E-06 | 0.79 | 2.82 | - | 702.3  |
| AHQ-4-8, 5391          | K.VGAIPANALDDGQWSQGLISAAR.M        | 2311.53959 | 2 | 6.08E-04 | 0.74 | 3.11 | - | 535.0  |
| AHQ-4-8, 5545 - 5557   | K.VGAIPANALDDGQWSQGLISAAR.M        | 2311.53959 | 2 | 4.45E-11 | 0.97 | 5.98 | - | 1321.9 |
| AHQ-4-7, 5974          | K.VGAIPANALDDGQWSQGLISAAR.M        | 2311.53959 | 2 | 8.74E-04 | 0.74 | 3.34 | - | 446.2  |
| AHQ-4-9, 5120          | K.VGAIPANALDDGQWSQGLISAAR.M        | 2311.53959 | 2 | 1.02E-08 | 0.87 | 3.89 | - | 610.0  |
| AHQ-4-13, 5849         | K.VGAIPANALDDGQWSQGLISAAR.M        | 2311.53959 | 2 | 2.09E-04 | 0.34 | 2.59 | - | 310.8  |
| AHQ-4-9, 5263 - 5287   | K.VGAIPANALDDGQWSQGLISAAR.M        | 2311.53959 | 2 | 2.30E-09 | 0.93 | 4.96 | - | 529.7  |
| AHQ-4-1, 5991          | K.VGAIPANALDDGQWSQGLISAAR.M        | 2311.53959 | 2 | 4.60E-08 | 0.95 | 4.63 | - | 1009.7 |
| AHQ-4-1, 5855 - 5894   | K.VGAIPANALDDGQWSQGLISAAR.M        | 2311.53959 | 2 | 6.76E-05 | 0.88 | 4.09 | - | 444.1  |
| AHQ-4-5, 3533          | K.VGDDPAVWQLK.N                    | 1228.37879 | 2 | 7.73E-09 | 0.91 | 3.80 | - | 784.3  |
| AHQ-4-6, 3495 - 3498   | K.VGDDPAVWQLK.N                    | 1228.37879 | 2 | 7.61E-09 | 0.93 | 3.88 | - | 847.6  |
| AHQ-4-1, 3946          | K.VGDDPAVWQLK.N                    | 1228.37879 | 2 | 1.25E-06 | 0.94 | 3.99 | - | 962.4  |
| AHQ-4-4, 3758          | K.VGDDPAVWQLK.N                    | 1228.37879 | 2 | 3.84E-09 | 0.94 | 4.03 | - | 844.4  |
| AHQ-4-7, 3449          | K.VGDDPAVWQLK.N                    | 1228.37879 | 2 | 8.05E-08 | 0.86 | 3.16 | - | 749.2  |
| AHQ-4-2, 3834 - 3875   | K.VGDDPAVWQLK.N                    | 1228.37879 | 2 | 9.17E-09 | 0.92 | 3.75 | - | 857.0  |
| AHQ-4-3, 3797          | K.VGDDPAVWQLK.N                    | 1228.37879 | 2 | 3.91E-08 | 0.93 | 3.68 | - | 909.3  |
| AHQ-4-2, 2318 - 2392   | K.VLGEAM*TGISQNAK.N                | 1435.62901 | 2 | 9.12E-06 | 0.96 | 4.60 | - | 1227.0 |
| AHQ-4-1, 3391          | K.VLGEAM*TGISQNAK.N                | 1419.62961 | 2 | 4.86E-07 | 0.96 | 3.80 | - | 1879.7 |
| AHQ-4-4, 3080          | K.VLGEAM*TGISQNAK.N                | 1419.62961 | 1 | 6.58E-06 | 0.84 | 3.49 | - | 512.7  |
| AHQ-4-4, 3071          | K.VLGEAM*TGISQNAK.N                | 1419.62961 | 2 | 7.98E-08 | 0.97 | 4.08 | - | 2044.2 |
| AHQ-4-2, 2328          | K.VLGEAM*TGISQNAK.N                | 1435.62901 | 1 | 3.75E-04 | 0.59 | 2.69 | - | 157.3  |
| AHQ-4-2, 3106          | K.VLGEAM*TGISQNAK.N                | 1419.62961 | 2 | 2.16E-10 | 0.97 | 4.64 | - | 2107.9 |
| AHQ-4-6, 2860          | K.VLGEAM*TGISQNAK.N                | 1419.62961 | 2 | 2.55E-06 | 0.97 | 4.36 | - | 1953.1 |
| AHQ-4-3, 3264          | K.VLGEAM*TGISQNAK.N                | 1419.62961 | 2 | 4.97E-10 | 0.98 | 4.06 | - | 2254.8 |
| AHQ-4-3, 3088          | K.VLGEAM*TGISQNAK.N                | 1419.62961 | 1 | 2.81E-06 | 0.87 | 3.81 | - | 571.4  |
| AHQ-4-3, 3083 - 3151   | K.VLGEAM*TGISQNAK.N                | 1419.62961 | 2 | 2.08E-09 | 0.97 | 4.64 | - | 2061.8 |
| AHQ-4-4, 2282 - 2352   | K.VLGEAM*TGISQNAK.N                | 1435.62901 | 2 | 4.57E-04 | 0.90 | 3.00 | - | 1270.0 |
| AHQ-4-5, 2187 - 2190   | K.VLGEAM*TGISQNAK.N                | 1435.62901 | 2 | 1.85E-05 | 0.95 | 4.63 | - | 1274.6 |
| AHQ-4-3, 4829 - 4908   | K.VLGEAM*TGISQNAKGNLPEFGDAISTASK.A | 3038.33659 | 3 | 4.21E-08 | 0.73 | 3.88 | - | 263.9  |
| AHQ-4-3, 5489 - 5563   | K.VLGEAM*TGISQNAKGNLPEFGDAISTASK.A | 3022.33719 | 3 | 3.13E-07 | 0.93 | 5.39 | - | 616.9  |
| AHQ-4-4, 5450 - 5523   | K.VLGEAM*TGISQNAKGNLPEFGDAISTASK.A | 3022.33719 | 3 | 7.56E-06 | 0.90 | 4.93 | - | 632.2  |
| AHQ-4-2, 5023          | K.VLGEAM*TGISQNAKGNLPEFGDAISTASK.A | 3038.33659 | 3 | 3.08E-06 | 0.91 | 4.79 | - | 593.3  |
| AHQ-4-1, 4919 - 4991   | K.VLGEAM*TGISQNAKGNLPEFGDAISTASK.A | 3038.33659 | 3 | 1.29E-07 | 0.95 | 5.90 | - | 767.4  |
| AHQ-4-2, 5492 - 5563   | K.VLGEAM*TGISQNAKGNLPEFGDAISTASK.A | 3022.33719 | 3 | 7.16E-11 | 0.89 | 4.98 | - | 532.4  |
| AHQ-4-1, 5522          | K.VLGEAM*TGISQNAKGNLPEFGDAISTASK.A | 3022.33719 | 3 | 1.88E-04 | 0.85 | 4.75 | - | 380.3  |
| AHQ-4-2, 1647 - 1660   | K.VLVQNAAGSQUEK.L                  | 1244.37976 | 1 | 1.47E-05 | 0.43 | 1.96 | - | 620.2  |
| AHQ-4-3, 1516 - 1587   | K.VLVQNAAGSQUEK.L                  | 1244.37976 | 2 | 5.84E-10 | 0.89 | 3.51 | - | 797.9  |
| AHQ-4-5, 1484          | K.VLVQNAAGSQUEK.L                  | 1244.37976 | 2 | 1.32E-04 | 0.86 | 3.23 | - | 710.1  |
| AHQ-4-1, 1803          | K.VLVQNAAGSQUEK.L                  | 1244.37976 | 2 | 3.00E-06 | 0.88 | 3.26 | - | 843.9  |
| AHQ-4-6, 1498          | K.VLVQNAAGSQUEK.L                  | 1244.37976 | 2 | 1.15E-04 | 0.89 | 3.25 | - | 916.9  |
| AHQ-4-2, 1504 - 1580   | K.VLVQNAAGSQUEK.L                  | 1244.37976 | 2 | 1.03E-05 | 0.93 | 3.70 | - | 1102.8 |
| AHQ-4-2, 1644          | K.VLVQNAAGSQUEK.L                  | 1244.37976 | 2 | 9.23E-05 | 0.86 | 3.23 | - | 846.8  |
| AHQ-4-1, 1891          | K.VLVQNAAGSQUEK.L                  | 1244.37976 | 2 | 7.41E-05 | 0.50 | 2.54 | - | 472.7  |
| AHQ-4-3, 1691 - 1717   | K.VLVQNAAGSQUEK.L                  | 1244.37976 | 2 | 1.96E-04 | 0.84 | 3.34 | - | 798.7  |
| AHQ-4-4, 1578 - 1620   | K.VLVQNAAGSQUEK.L                  | 1244.37976 | 1 | 3.51E-05 | 0.66 | 1.91 | - | 162.9  |
| AHQ-4-4, 1786          | K.VLVQNAAGSQUEK.L                  | 1244.37976 | 1 | 1.17E-04 | 0.22 | 1.97 | - | 289.1  |
| AHQ-4-4, 1654          | K.VLVQNAAGSQUEK.L                  | 1244.37976 | 2 | 1.07E-06 | 0.89 | 3.43 | - | 835.6  |
| AHQ-4-6, 4010          | K.VM*VTNVTSLK.T                    | 1221.49262 | 2 | 3.12E-05 | 0.90 | 3.28 | - | 895.1  |
| AHQ-4-3, 4753          | K.VM*VTNVTSLK.T                    | 1205.49322 | 2 | 9.58E-06 | 0.93 | 4.02 | - | 907.4  |
| AHQ-4-4, 4311          | K.VM*VTNVTSLK.T                    | 1221.49262 | 2 | 7.40E-06 | 0.93 | 3.95 | - | 1007.1 |
| AHQ-4-3, 4364          | K.VM*VTNVTSLK.T                    | 1221.49262 | 2 | 8.16E-04 | 0.66 | 3.15 | - | 525.0  |
| AHQ-4-1, 4499 - 4501   | K.VM*VTNVTSLK.T                    | 1221.49262 | 2 | 1.85E-04 | 0.82 | 3.32 | - | 697.2  |
| AHQ-4-5, 4403 - 4406   | K.VM*VTNVTSLK.T                    | 1205.49322 | 2 | 1.24E-06 | 0.95 | 4.38 | - | 1029.7 |
| AHQ-4-1, 4861          | K.VM*VTNVTSLK.T                    | 1205.49322 | 2 | 1.44E-05 | 0.87 | 3.67 | - | 762.3  |
| AHQ-4-4, 4702          | K.VM*VTNVTSLK.T                    | 1205.49322 | 2 | 3.31E-04 | 0.86 | 3.71 | - | 722.9  |
| AHQ-4-6, 4350          | K.VM*VTNVTSLK.T                    | 1205.49322 | 2 | 1.80E-07 | 0.89 | 3.70 | - | 768.6  |
| AHQ-4-2, 4766          | K.VM*VTNVTSLK.T                    | 1205.49322 | 2 | 6.19E-05 | 0.88 | 3.62 | - | 786.8  |
| AHQ-4-2, 4382          | K.VM*VTNVTSLK.T                    | 1221.49262 | 2 | 4.07E-04 | 0.73 | 2.92 | - | 690.4  |
| AHQ-4-7, 4242          | K.VM*VTNVTSLK.T                    | 1205.49322 | 2 | 2.27E-04 | 0.91 | 3.98 | - | 763.5  |

|                                                                                    |                                       |            |   |          |       |        |       |         |
|------------------------------------------------------------------------------------|---------------------------------------|------------|---|----------|-------|--------|-------|---------|
| AHQ-4-8, 2287                                                                      | R.VQELGHGCAALVTK.A                    | 1484.70307 | 2 | 5.38E-06 | 0.96  | 4.05   | -     | 1577.1  |
| AHQ-4-1, 2889                                                                      | R.VQELGHGCAALVTK.A                    | 1484.70307 | 2 | 9.40E-06 | 0.97  | 4.94   | -     | 1441.4  |
| AHQ-4-3, 2717                                                                      | R.VQELGHGCAALVTK.A                    | 1484.70307 | 1 | 2.66E-05 | 0.87  | 3.65   | -     | 757.4   |
| AHQ-4-4, 2663                                                                      | R.VQELGHGCAALVTK.A                    | 1484.70307 | 1 | 2.23E-06 | 0.89  | 3.95   | -     | 689.0   |
| AHQ-4-6, 2523 - 2526                                                               | R.VQELGHGCAALVTK.A                    | 1484.70307 | 2 | 4.87E-08 | 0.98  | 5.18   | -     | 1890.6  |
| AHQ-4-3, 2685                                                                      | R.VQELGHGCAALVTK.A                    | 1484.70307 | 2 | 4.16E-09 | 0.97  | 5.13   | -     | 1654.8  |
| AHQ-4-4, 2654                                                                      | R.VQELGHGCAALVTK.A                    | 1484.70307 | 2 | 1.56E-05 | 0.96  | 4.37   | -     | 1596.6  |
| AHQ-4-2, 2704                                                                      | R.VQELGHGCAALVTK.A                    | 1484.70307 | 2 | 4.79E-05 | 0.96  | 4.72   | -     | 1200.7  |
| AHQ-4-2, 2724                                                                      | R.VQELGHGCAALVTK.A                    | 1484.70307 | 1 | 7.47E-06 | 0.86  | 3.58   | -     | 633.1   |
| AHQ-4-11, 2654                                                                     | R.VQELGHGCAALVTK.A                    | 1484.70307 | 2 | 4.67E-05 | 0.96  | 4.36   | -     | 1470.8  |
| AHQ-4-5, 2518                                                                      | R.VQELGHGCAALVTK.A                    | 1484.70307 | 1 | 4.47E-07 | 0.91  | 3.95   | -     | 588.1   |
| AHQ-4-5, 2505 - 2579                                                               | R.VQELGHGCAALVTK.A                    | 1484.70307 | 2 | 6.00E-11 | 0.98  | 4.97   | -     | 2676.9  |
| AHQ-4-7, 2454                                                                      | R.VQELGHGCAALVTK.A                    | 1484.70307 | 2 | 2.30E-05 | 0.97  | 4.39   | -     | 1834.7  |
| AHQ-4-5, 2346                                                                      | K.VSHVLAALQAGNR.G                     | 1336.52525 | 2 | 1.51E-09 | 0.97  | 4.60   | -     | 1897.9  |
| AHQ-4-5, 2345 - 2349                                                               | K.VSHVLAALQAGNR.G                     | 1336.52525 | 1 | 1.16E-06 | 0.83  | 3.29   | -     | 404.0   |
| AHQ-4-3, 2660                                                                      | K.VSHVLAALQAGNR.G                     | 1336.52525 | 1 | 1.36E-05 | 0.15  | 1.86   | -     | 288.2   |
| AHQ-4-2, 2675                                                                      | K.VSHVLAALQAGNR.G                     | 1336.52525 | 1 | 1.52E-06 | 0.62  | 2.20   | -     | 663.5   |
| AHQ-4-4, 2524                                                                      | K.VSHVLAALQAGNR.G                     | 1336.52525 | 1 | 3.37E-05 | 0.92  | 3.45   | -     | 784.3   |
| AHQ-4-4, 2528 - 2564                                                               | K.VSHVLAALQAGNR.G                     | 1336.52525 | 2 | 5.31E-11 | 0.97  | 4.48   | -     | 1765.1  |
| AHQ-4-4, 2531                                                                      | K.VSHVLAALQAGNR.G                     | 1336.52525 | 1 | 3.29E-06 | 0.85  | 3.58   | -     | 392.6   |
| AHQ-4-3, 2523 - 2525                                                               | K.VSHVLAALQAGNR.G                     | 1336.52525 | 2 | 6.48E-09 | 0.98  | 5.25   | -     | 1894.3  |
| AHQ-4-1, 2802                                                                      | K.VSHVLAALQAGNR.G                     | 1336.52525 | 2 | 1.36E-08 | 0.97  | 4.64   | -     | 1967.8  |
| AHQ-4-3, 2519                                                                      | K.VSHVLAALQAGNR.G                     | 1336.52525 | 1 | 4.39E-08 | 0.76  | 3.28   | -     | 385.1   |
| AHQ-4-2, 2536 - 2538                                                               | K.VSHVLAALQAGNR.G                     | 1336.52525 | 1 | 6.74E-07 | 0.88  | 3.49   | -     | 494.7   |
| AHQ-4-6, 2512                                                                      | K.VSHVLAALQAGNR.G                     | 1336.52525 | 2 | 1.11E-10 | 0.95  | 4.03   | -     | 1370.3  |
| AHQ-4-6, 2372                                                                      | K.VSHVLAALQAGNR.G                     | 1336.52525 | 1 | 1.95E-07 | 0.52  | 2.36   | -     | 177.0   |
| AHQ-4-2, 2531 - 2595                                                               | K.VSHVLAALQAGNR.G                     | 1336.52525 | 2 | 2.98E-04 | 0.90  | 3.31   | -     | 959.0   |
| AHQ-4-6, 2363                                                                      | K.VSHVLAALQAGNR.G                     | 1336.52525 | 1 | 1.34E-05 | 0.79  | 3.07   | -     | 413.6   |
| AHQ-4-4, 2655                                                                      | K.VSHVLAALQAGNR.G                     | 1336.52525 | 1 | 1.75E-06 | 0.39  | 1.95   | -     | 512.8   |
| AHQ-4-9, 2267                                                                      | K.VSHVLAALQAGNR.G                     | 1336.52525 | 1 | 6.25E-04 | 0.55  | 2.82   | -     | 305.8   |
| AHQ-4-1, 2803                                                                      | K.VSHVLAALQAGNR.G                     | 1336.52525 | 1 | 3.09E-06 | 0.72  | 2.61   | -     | 510.4   |
| AHQ-4-3, 2536                                                                      | K.VSHVLAALQAGNR.G                     | 1336.52525 | 1 | 1.87E-06 | 0.88  | 3.57   | -     | 412.7   |
| AHQ-4-6, 2366                                                                      | K.VSHVLAALQAGNR.G                     | 1336.52525 | 2 | 1.82E-08 | 0.97  | 4.28   | -     | 1967.3  |
| AHQ-4-5, 6698 - 6773                                                               | K.VSQMAQYFEPLTLAAVGAASK.T             | 2183.51313 | 2 | 1.16E-09 | 0.97  | 5.92   | -     | 927.9   |
| AHQ-4-2, 6179                                                                      | K.VSQMAQYFEPLTLAAVGAASK.T             | 2199.51253 | 2 | 6.63E-06 | 0.91  | 3.97   | -     | 850.3   |
| AHQ-4-2, 6860 - 6892                                                               | K.VSQMAQYFEPLTLAAVGAASK.T             | 2183.51313 | 2 | 7.71E-04 | 0.86  | 3.83   | -     | 492.7   |
| AHQ-4-2, 6940                                                                      | K.VSQMAQYFEPLTLAAVGAASK.T             | 2183.51313 | 3 | 3.99E-08 | 0.96  | 5.06   | -     | 1680.4  |
| AHQ-4-2, 6962 - 7026                                                               | K.VSQMAQYFEPLTLAAVGAASK.T             | 2183.51313 | 2 | 4.75E-06 | 0.96  | 5.18   | -     | 972.1   |
| AHQ-4-5, 5737 - 5757                                                               | K.VSQMAQYFEPLTLAAVGAASK.T             | 2199.51253 | 2 | 2.13E-07 | 0.93  | 4.30   | -     | 988.5   |
| AHQ-4-2, 7119                                                                      | K.VSQMAQYFEPLTLAAVGAASK.T             | 2183.51313 | 2 | 9.31E-08 | 0.96  | 5.26   | -     | 1120.2  |
| AHQ-4-3, 6185                                                                      | K.VSQMAQYFEPLTLAAVGAASK.T             | 2199.51253 | 2 | 1.47E-06 | 0.95  | 4.25   | -     | 1213.0  |
| AHQ-4-2, 6042                                                                      | K.VSQMAQYFEPLTLAAVGAASK.T             | 2199.51253 | 2 | 3.31E-05 | 0.96  | 4.73   | -     | 1113.1  |
| AHQ-4-1, 6759                                                                      | K.VSQMAQYFEPLTLAAVGAASK.T             | 2183.51313 | 2 | 1.75E-04 | 0.86  | 3.44   | -     | 683.3   |
| AHQ-4-14-, 6383                                                                    | K.VSQMAQYFEPLTLAAVGAASK.T             | 2183.51313 | 2 | 8.95E-06 | 0.94  | 5.33   | -     | 668.4   |
| AHQ-4-8, 6371                                                                      | K.VSQMAQYFEPLTLAAVGAASK.T             | 2183.51313 | 2 | 6.17E-06 | 0.96  | 5.45   | -     | 966.9   |
| AHQ-4-1, 6061 - 6063                                                               | K.VSQMAQYFEPLTLAAVGAASK.T             | 2199.51253 | 2 | 3.45E-08 | 0.95  | 4.92   | -     | 1059.5  |
| AHQ-4-3, 7072                                                                      | K.VSQMAQYFEPLTLAAVGAASK.T             | 2183.51313 | 2 | 1.19E-08 | 0.96  | 5.25   | -     | 1127.8  |
| AHQ-4-6, 5702                                                                      | K.VSQMAQYFEPLTLAAVGAASK.T             | 2199.51253 | 2 | 5.87E-05 | 0.89  | 3.84   | -     | 770.1   |
| AHQ-4-6, 6622 - 6638                                                               | K.VSQMAQYFEPLTLAAVGAASK.T             | 2183.51313 | 2 | 2.52E-06 | 0.96  | 5.51   | -     | 978.5   |
| AHQ-4-1, 6842 - 6853                                                               | K.VSQMAQYFEPLTLAAVGAASK.T             | 2183.51313 | 2 | 3.15E-06 | 0.96  | 5.24   | -     | 1048.9  |
| AHQ-4-3, 6839                                                                      | K.VSQMAQYFEPLTLAAVGAASK.T             | 2183.51313 | 2 | 9.00E-06 | 0.94  | 4.79   | -     | 814.1   |
| AHQ-4-3, 6932                                                                      | K.VSQMAQYFEPLTLAAVGAASK.T             | 2183.51313 | 3 | 1.07E-11 | 0.96  | 5.60   | -     | 1606.4  |
| AHQ-4-1, 6851 - 6855                                                               | K.VSQMAQYFEPLTLAAVGAASK.T             | 2183.51313 | 3 | 1.04E-08 | 0.96  | 5.94   | -     | 1221.0  |
| AHQ-4-3, 6923 - 6991                                                               | K.VSQMAQYFEPLTLAAVGAASK.T             | 2183.51313 | 2 | 1.10E-08 | 0.96  | 5.43   | -     | 879.9   |
| AHQ-4-7, 5639                                                                      | K.VSQMAQYFEPLTLAAVGAASK.T             | 2199.51253 | 2 | 1.42E-06 | 0.94  | 4.57   | -     | 964.1   |
| AHQ-4-7, 6741                                                                      | K.VSQMAQYFEPLTLAAVGAASK.T             | 2183.51313 | 2 | 5.19E-08 | 0.96  | 5.29   | -     | 895.1   |
| AHQ-4-4, 6946                                                                      | K.VSQMAQYFEPLTLAAVGAASK.T             | 2183.51313 | 2 | 1.49E-06 | 0.94  | 4.90   | -     | 774.1   |
| AHQ-4-4, 6851 - 6918                                                               | K.VSQMAQYFEPLTLAAVGAASK.T             | 2183.51313 | 2 | 2.28E-04 | 0.96  | 5.80   | -     | 820.6   |
| AHQ-4-1, 6070 - 6095                                                               | K.VSQMAQYFEPLTLAAVGAASK.T             | 2199.51253 | 3 | 6.29E-11 | 0.96  | 5.34   | -     | 1717.0  |
| AHQ-4-1, 6961                                                                      | K.VSQMAQYFEPLTLAAVGAASK.T             | 2183.51313 | 2 | 4.29E-07 | 0.83  | 3.67   | -     | 545.7   |
| AHQ-4-9, 6075 - 6076                                                               | K.VSQMAQYFEPLTLAAVGAASK.T             | 2183.51313 | 2 | 4.36E-05 | 0.94  | 4.29   | -     | 890.6   |
| AHQ-4-4, 6140                                                                      | K.VSQMAQYFEPLTLAAVGAASK.T             | 2199.51253 | 2 | 2.19E-06 | 0.87  | 3.76   | -     | 676.3   |
| AHQ-4-4, 5982                                                                      | K.VSQMAQYFEPLTLAAVGAASK.T             | 2199.51253 | 2 | 3.63E-06 | 0.96  | 4.83   | -     | 1189.4  |
| AHQ-4-2, 6043 - 6062                                                               | K.VSQMAQYFEPLTLAAVGAASK.T             | 2199.51253 | 3 | 3.21E-07 | 0.97  | 5.06   | -     | 1872.7  |
| AHQ-4-3, 4939                                                                      | K.VVAPTISSPVCQEQLVLEAGR.L             | 2142.41919 | 2 | 2.45E-11 | 0.90  | 4.36   | -     | 477.5   |
| AHQ-4-4, 5046 - 5050                                                               | K.VVAPTISSPVCQEQLVLEAGR.L             | 2142.41919 | 2 | 9.14E-05 | 0.82  | 3.76   | -     | 425.4   |
| AHQ-4-4, 4902                                                                      | K.VVAPTISSPVCQEQLVLEAGR.L             | 2142.41919 | 2 | 1.35E-09 | 0.89  | 4.55   | -     | 435.4   |
| AHQ-4-4, 4738 - 4746                                                               | K.VVAPTISSPVCQEQLVLEAGR.L             | 2142.41919 | 2 | 3.03E-07 | 0.97  | 5.61   | -     | 1091.0  |
| AHQ-4-3, 4771 - 4773                                                               | K.VVAPTISSPVCQEQLVLEAGR.L             | 2142.41919 | 2 | 1.72E-08 | 0.95  | 5.81   | -     | 688.8   |
| AHQ-4-4, 4598                                                                      | K.VVAPTISSPVCQEQLVLEAGR.L             | 2142.41919 | 2 | 7.31E-04 | 0.81  | 3.53   | -     | 413.2   |
| AHQ-4-3, 4652                                                                      | K.VVAPTISSPVCQEQLVLEAGR.L             | 2142.41919 | 2 | 3.73E-04 | 0.70  | 3.58   | -     | 189.0   |
| AHQ-4-5, 4467 - 4471                                                               | K.VVAPTISSPVCQEQLVLEAGR.L             | 2142.41919 | 2 | 2.25E-05 | 0.94  | 4.82   | -     | 605.0   |
| AHQ-4-5, 4573                                                                      | K.VVAPTISSPVCQEQLVLEAGR.L             | 2142.41919 | 2 | 1.42E-08 | 0.93  | 4.39   | -     | 833.1   |
| AHQ-4-5, 4911                                                                      | K.VVAPTISSPVCQEQLVLEAGR.L             | 2142.41919 | 2 | 3.30E-07 | 0.93  | 4.70   | -     | 488.3   |
| AHQ-4-1, 4663                                                                      | K.VVAPTISSPVCQEQLVLEAGR.L             | 2142.41919 | 2 | 1.28E-04 | 0.53  | 3.15   | -     | 179.6   |
| AHQ-4-1, 4773 - 4787                                                               | K.VVAPTISSPVCQEQLVLEAGR.L             | 2142.41919 | 2 | 7.66E-06 | 0.69  | 3.17   | -     | 336.0   |
| AHQ-4-14-, 4401 - 4465                                                             | K.VVAPTISSPVCQEQLVLEAGR.L             | 2142.41919 | 2 | 4.12E-05 | 0.97  | 5.46   | -     | 1262.5  |
| AHQ-4-12, 4562 - 4566                                                              | K.VVAPTISSPVCQEQLVLEAGR.L             | 2142.41919 | 2 | 1.67E-07 | 0.90  | 4.73   | -     | 452.1   |
| AHQ-4-6, 4476 - 4483                                                               | K.VVAPTISSPVCQEQLVLEAGR.L             | 2142.41919 | 2 | 4.57E-06 | 0.97  | 5.80   | -     | 1033.9  |
| AHQ-4-2, 4872 - 4954                                                               | K.VVAPTISSPVCQEQLVLEAGR.L             | 2142.41919 | 2 | 3.86E-11 | 0.95  | 5.33   | -     | 628.8   |
| AHQ-4-2, 4775 - 4782                                                               | K.VVAPTISSPVCQEQLVLEAGR.L             | 2142.41919 | 2 | 6.92E-07 | 0.95  | 5.00   | -     | 697.2   |
| AHQ-4-11, 4413                                                                     | K.VVAPTISSPVCQEQLVLEAGR.L             | 2142.41919 | 2 | 1.40E-04 | 0.41  | 3.19   | -     | 275.9   |
| AHQ-4-2, 4654                                                                      | K.VVAPTISSPVCQEQLVLEAGR.L             | 2142.41919 | 2 | 9.28E-06 | 0.93  | 4.51   | -     | 588.6   |
| AHQ-4-7, 4457 - 4486                                                               | K.VVAPTISSPVCQEQLVLEAGR.L             | 2142.41919 | 2 | 8.37E-09 | 0.96  | 5.48   | -     | 797.6   |
| AHQ-4-10, 4095 - 4155                                                              | K.VVAPTISSPVCQEQLVLEAGR.L             | 2142.41919 | 2 | 6.78E-04 | 0.59  | 3.45   | -     | 191.2   |
| AHQ-4-8, 4143                                                                      | K.VVAPTISSPVCQEQLVLEAGR.L             | 2142.41919 | 2 | 2.75E-08 | 0.90  | 4.44   | -     | 467.5   |
| AHQ-4-8, 4298 - 4313                                                               | K.VVAPTISSPVCQEQLVLEAGR.L             | 2142.41919 | 2 | 2.34E-06 | 0.96  | 5.30   | -     | 895.3   |
| AHQ-4-9, 4055                                                                      | K.VVAPTISSPVCQEQLVLEAGR.L             | 2142.41919 | 2 | 3.37E-07 | 0.92  | 4.29   | -     | 748.4   |
| gj 4827056 ref NP_005103.1 WD repeat-containing protein 1 isoform 2 [Homo sapiens] |                                       |            |   | 5.55E-16 | 10.72 | 130.36 | 46.40 | 58001.9 |
| AHQ-4-9, 4299                                                                      | K.AHDGGIYAIWSWSPDSTHLLSASGDK.T        | 2586.75455 | 2 | 5.67E-04 | 0.87  | 3.79   | -     | 605.8   |
| AHQ-4-6, 4987                                                                      | K.AHDGGIYAIWSWSPDSTHLLSASGDK.T        | 2586.75455 | 3 | 2.63E-05 | 0.97  | 5.67   | -     | 1665.8  |
| AHQ-4-6, 4810                                                                      | K.AHDGGIYAIWSWSPDSTHLLSASGDK.T        | 2586.75455 | 3 | 2.05E-12 | 0.98  | 7.21   | -     | 2146.0  |
| AHQ-4-10, 5111                                                                     | K.CFSIDNPYGEPEVVAVHPGGDTVAIGGVDGNVR.L | 3400.67708 | 3 | 2.16E-13 | 0.96  | 5.38   | -     | 1262.1  |
| AHQ-4-9, 5133                                                                      | K.CFSIDNPYGEPEVVAVHPGGDTVAIGGVDGNVR.L | 3400.67708 | 3 | 8.63E-11 | 0.71  | 3.32   | -     | 445.4   |
| AHQ-4-11, 5438                                                                     | K.CFSIDNPYGEPEVVAVHPGGDTVAIGGVDGNVR.L | 3400.67708 | 3 | 2.02E-11 | 0.89  | 4.32   | -     | 730.2   |
| AHQ-4-4, 5955                                                                      | K.CFSIDNPYGEPEVVAVHPGGDTVAIGGVDGNVR.L | 3400.67708 | 3 | 1.70E-04 | 0.73  | 3.20   | -     | 542.3   |
| AHQ-4-6, 5766                                                                      | K.CFSIDNPYGEPEVVAVHPGGDTVAIGGVDGNVR.L | 3400.67708 | 3 | 5.81E-08 | 0.88  | 4.00   | -     | 840.9   |
| AHQ-4-7, 5666                                                                      | K.CFSIDNPYGEPEVVAVHPGGDTVAIGGVDGNVR.L | 3400.67708 | 3 | 5.03E-08 | 0.71  | 3.24   | -     | 515.2   |
| AHQ-4-6, 5624 - 5690                                                               | K.CFSIDNPYGEPEVVAVHPGGDTVAIGGVDGNVR.L | 3400.67708 | 3 | 5.55E-16 | 0.94  | 5.05   | -     | 929.1   |
| AHQ-4-6, 5543                                                                      | K.FGAVFLWDSGSSVGEITGHNK.V             | 2209.40259 | 2 | 2.41E-05 | 0.87  | 3.67   | -     | 731.4   |
| AHQ-4-9, 4119                                                                      | K.GPVTDVAYSHDGAFLAVCDASK.V            | 2282.47194 | 2 | 8.11E-08 | 0.92  | 4.04   | -     | 1004.7  |
| AHQ-4-10, 4227                                                                     | K.GPVTDVAYSHDGAFLAVCDASK.V            | 2282.47194 | 2 | 5.33E-05 | 0.93  | 4.01   | -     | 1190.3  |
| AHQ-4-3, 4880                                                                      | K.GPVTDVAYSHDGAFLAVCDASK.V            | 2282.47194 | 2 | 2.82E-04 | 0.79  | 3.53   | -     | 594.1   |
| AHQ-4-6, 4548 - 4619                                                               | K.GPVTDVAYSHDGAFLAVCDASK.V            | 2282.47194 | 2 | 2.70E-06 | 0.97  | 5.22   | -     | 1684.9  |
| AHQ-4-6, 4696                                                                      | K.GPVTDVAYSHDGAFLAVCDASK.V            | 2282.47194 | 2 | 6.67E-07 | 0.97  | 5.53   | -     | 1404.1  |
| AHQ-4-6, 2031                                                                      | K.IKDIAWTEDSKR.I                      | 1462.63267 | 2 | 8.10E-08 | 0.93  | 4.77   | -     | 1206.9  |
| AHQ-4-6, 2026                                                                      | K.IKDIAWTEDSKR.I                      | 1462.63267 | 3 | 4.76E-09 | 0.82  | 3.71   | -     | 624.8   |

|                            |                                                   |            |   |          |       |        |       |         |
|----------------------------|---------------------------------------------------|------------|---|----------|-------|--------|-------|---------|
| AHQ-4-12, 2273             | K.IKDIAWTEDSKR.I                                  | 1462.63267 | 2 | 3.70E-04 | 0.84  | 3.37   | -     | 905.1   |
| AHQ-4-11, 5369             | R.LATGSDDNCAAFFEGPPFK.F                           | 2046.20216 | 2 | 3.14E-04 | 0.88  | 3.96   | -     | 664.4   |
| AHQ-4-11, 5226 - 5273      | R.LATGSDDNCAAFFEGPPFK.F                           | 2046.20216 | 2 | 6.72E-10 | 0.81  | 3.74   | -     | 634.9   |
| AHQ-4-6, 5327 - 5395       | R.LATGSDDNCAAFFEGPPFK.F                           | 2046.20216 | 2 | 2.59E-06 | 0.89  | 3.86   | -     | 880.6   |
| AHQ-4-6, 5570              | R.LATGSDDNCAAFFEGPPFK.F                           | 2046.20216 | 2 | 6.01E-07 | 0.91  | 4.34   | -     | 875.2   |
| AHQ-4-6, 5423 - 5498       | R.LATGSDDNCAAFFEGPPFK.F                           | 2046.20216 | 2 | 4.79E-09 | 0.92  | 4.60   | -     | 867.9   |
| AHQ-4-6, 3638              | R.LYSILGTTLLKDEGK.L                               | 1538.76736 | 2 | 2.43E-07 | 0.89  | 3.81   | -     | 763.6   |
| AHQ-4-10, 3611 - 3620      | R.LYSILGTTLLKDEGK.L                               | 1538.76736 | 2 | 3.23E-10 | 0.90  | 4.10   | -     | 787.1   |
| AHQ-4-13, 4141 - 4197      | R.LYSILGTTLLKDEGK.L                               | 1538.76736 | 2 | 4.24E-04 | 0.74  | 2.79   | -     | 851.0   |
| AHQ-4-6, 4899              | R.MTVDESQGLISCSMDTVR.Y                            | 2146.36365 | 2 | 4.19E-04 | 0.52  | 3.22   | -     | 268.2   |
| AHQ-4-13, 4364             | R.NIDNPALADIYTEHAHQVVVAK.Y                        | 2419.67805 | 2 | 2.88E-08 | 0.87  | 3.33   | -     | 897.3   |
| AHQ-4-10, 3884             | R.NIDNPALADIYTEHAHQVVVAK.Y                        | 2419.67805 | 2 | 2.31E-08 | 0.77  | 3.40   | -     | 496.7   |
| AHQ-4-6, 3979              | K.SYIYSGSHDQHINYWDETSETGENSFAGK.G                 | 3138.17570 | 3 | 7.54E-10 | 0.97  | 6.53   | -     | 1558.3  |
| AHQ-4-6, 2088 - 2166       | K.VINSVDIK.Q                                      | 888.04378  | 1 | 6.05E-04 | 0.46  | 2.34   | -     | 521.4   |
| AHQ-4-13-, 3905 - 3929     | K.YAPSGFYIAGSDVSGK.L                              | 1619.75589 | 2 | 2.54E-06 | 0.89  | 3.89   | -     | 782.4   |
| AHQ-4-6, 3683 - 3766       | K.YAPSGFYIAGSDVSGK.L                              | 1619.75589 | 2 | 8.15E-08 | 0.94  | 4.55   | -     | 687.9   |
| AHQ-4-12, 3910             | K.YAPSGFYIAGSDVSGK.L                              | 1619.75589 | 2 | 2.32E-10 | 0.95  | 4.51   | -     | 897.4   |
| AHQ-4-6, 2588 - 2596       | K.YEYQPFAGK.I                                     | 1103.20822 | 2 | 7.74E-05 | 0.80  | 3.02   | -     | 460.9   |
| gi 4502027 ref NP_000468.1 | albumin precursor; PRO0883 protein [Homo sapiens] |            |   | 1.11E-15 | 22.95 | 270.37 | 50.40 | 69366.4 |
| AHQ-4-6, 2356              | K.AAFTECCQAADK.A                                  | 1374.47927 | 1 | 2.28E-04 | 0.71  | 3.06   | -     | 539.0   |
| AHQ-4-5, 2369              | K.AAFTECCQAADK.A                                  | 1374.47927 | 1 | 8.02E-04 | 0.64  | 3.10   | -     | 411.8   |
| AHQ-4-5, 4458              | K.AVMDDFAAFVEK.C                                  | 1359.52946 | 2 | 1.07E-07 | 0.95  | 3.69   | -     | 1189.8  |
| AHQ-4-5, 5494 - 5517       | K.AVMDDFAAFVEK.C                                  | 1343.53006 | 2 | 3.24E-08 | 0.97  | 4.31   | -     | 1892.4  |
| AHQ-4-12, 5477             | K.AVMDDFAAFVEK.C                                  | 1343.53006 | 2 | 6.61E-05 | 0.87  | 2.95   | -     | 1196.5  |
| AHQ-4-14-, 5358            | K.AVMDDFAAFVEK.C                                  | 1343.53006 | 2 | 8.40E-09 | 0.94  | 3.83   | -     | 1297.4  |
| AHQ-4-6, 5424 - 5431       | K.AVMDDFAAFVEK.C                                  | 1343.53006 | 2 | 1.66E-08 | 0.97  | 4.35   | -     | 1754.9  |
| AHQ-4-6, 5430              | K.AVMDDFAAFVEK.C                                  | 1343.53006 | 1 | 1.88E-05 | 0.89  | 4.23   | -     | 827.6   |
| AHQ-4-5, 2330              | K.CCTESLVNR.R                                     | 1141.25805 | 2 | 3.51E-05 | 0.91  | 2.73   | -     | 1243.5  |
| AHQ-4-5, 6395              | K.EFNAETFTFHADICTLSEK.E                           | 2262.43749 | 2 | 2.50E-07 | 0.58  | 3.25   | -     | 347.7   |
| AHQ-4-13-, 2661 - 2716     | R.FKDLGEEENFK.A                                   | 1227.34766 | 2 | 1.99E-07 | 0.76  | 2.77   | -     | 700.8   |
| AHQ-4-5, 2385 - 2466       | R.FKDLGEEENFK.A                                   | 1227.34766 | 2 | 4.13E-05 | 0.85  | 3.30   | -     | 682.5   |
| AHQ-4-6, 2688              | K.FQNALLVR.Y                                      | 961.14282  | 2 | 8.47E-04 | 0.73  | 2.77   | -     | 653.7   |
| AHQ-4-6, 6506              | R.HPYFYAPELFFFAK.R                                | 1744.02658 | 2 | 1.22E-05 | 0.49  | 2.52   | -     | 253.8   |
| AHQ-4-5, 6591              | R.HPYFYAPELFFFAK.R                                | 1744.02658 | 3 | 4.26E-08 | 0.95  | 4.28   | -     | 1299.7  |
| AHQ-4-5, 2319              | K.KQTALVELVK.H                                    | 1129.37494 | 2 | 1.90E-05 | 0.73  | 2.75   | -     | 796.3   |
| AHQ-4-13-, 2753            | K.KQTALVELVK.H                                    | 1129.37494 | 2 | 1.58E-06 | 0.77  | 2.93   | -     | 632.9   |
| AHQ-4-2, 3586 - 3590       | K.KVPQVSTPTLVEVSR.N                               | 1640.90605 | 2 | 1.88E-08 | 0.89  | 3.59   | -     | 673.7   |
| AHQ-4-10, 3181             | K.KVPQVSTPTLVEVSR.N                               | 1640.90605 | 2 | 3.06E-07 | 0.80  | 3.03   | -     | 578.5   |
| AHQ-4-3, 3549              | K.KVPQVSTPTLVEVSR.N                               | 1640.90605 | 2 | 1.90E-07 | 0.80  | 2.67   | -     | 755.8   |
| AHQ-4-6, 3208 - 3234       | K.KVPQVSTPTLVEVSR.N                               | 1640.90605 | 2 | 6.01E-07 | 0.91  | 3.34   | -     | 883.3   |
| AHQ-4-6, 3226              | K.KVPQVSTPTLVEVSR.N                               | 1640.90605 | 3 | 4.77E-09 | 0.94  | 4.45   | -     | 1404.4  |
| AHQ-4-5, 3257 - 3281       | K.KVPQVSTPTLVEVSR.N                               | 1640.90605 | 2 | 5.40E-07 | 0.93  | 3.96   | -     | 869.1   |
| AHQ-4-5, 3267 - 3277       | K.KVPQVSTPTLVEVSR.N                               | 1640.90605 | 3 | 4.90E-08 | 0.97  | 5.82   | -     | 1774.2  |
| AHQ-4-4, 3527              | K.KVPQVSTPTLVEVSR.N                               | 1640.90605 | 2 | 2.05E-04 | 0.73  | 2.59   | -     | 640.5   |
| AHQ-4-7, 3117              | K.KVPQVSTPTLVEVSR.N                               | 1640.90605 | 2 | 2.32E-06 | 0.81  | 3.36   | -     | 383.6   |
| AHQ-4-8, 2863              | K.KVPQVSTPTLVEVSR.N                               | 1640.90605 | 2 | 2.90E-10 | 0.70  | 2.85   | -     | 413.2   |
| AHQ-4-13-, 3300            | K.LVNEVTEFAK.T                                    | 1150.30633 | 2 | 7.20E-04 | 0.82  | 2.63   | -     | 672.4   |
| AHQ-4-6, 2987 - 3043       | K.LVNEVTEFAK.T                                    | 1150.30633 | 2 | 1.77E-05 | 0.77  | 3.27   | -     | 497.5   |
| AHQ-4-5, 3405              | K.LVNEVTEFAK.T                                    | 1150.30633 | 1 | 2.28E-05 | 0.85  | 3.00   | -     | 910.6   |
| AHQ-4-13, 3439 - 3441      | K.LVNEVTEFAK.T                                    | 1150.30633 | 2 | 1.42E-05 | 0.85  | 2.78   | -     | 708.3   |
| AHQ-4-5, 3042 - 3077       | K.LVNEVTEFAK.T                                    | 1150.30633 | 1 | 6.22E-06 | 0.67  | 2.25   | -     | 810.2   |
| AHQ-4-7, 2991              | K.LVNEVTEFAK.T                                    | 1150.30633 | 2 | 1.87E-04 | 0.79  | 2.85   | -     | 599.2   |
| AHQ-4-11, 5464             | R.LVRPEVDVMCTAFHDNEETFLK.K                        | 2652.98428 | 3 | 4.73E-04 | 0.86  | 4.37   | -     | 873.5   |
| AHQ-4-6, 5611 - 5655       | R.LVRPEVDVMCTAFHDNEETFLK.K                        | 2652.98428 | 3 | 2.11E-05 | 0.98  | 6.29   | -     | 2035.8  |
| AHQ-4-5, 7422              | R.MPCAEDYLSVVLNQLCVLHEK.T                         | 2521.91535 | 3 | 6.13E-05 | 0.97  | 5.45   | -     | 1910.4  |
| AHQ-4-1, 5278 - 5299       | K.QNCELFEQLGEYK.F                                 | 1659.79847 | 2 | 1.77E-06 | 0.74  | 3.21   | -     | 418.7   |
| AHQ-4-6, 3650              | R.RHPDYSVLLLLL.L                                  | 1468.72842 | 3 | 1.58E-04 | 0.96  | 4.55   | -     | 1928.2  |
| AHQ-4-5, 3678              | R.RHPDYSVLLLLL.L                                  | 1468.72842 | 2 | 2.07E-04 | 0.89  | 3.56   | -     | 734.9   |
| AHQ-4-6, 3648              | R.RHPDYSVLLLLL.L                                  | 1468.72842 | 2 | 2.42E-06 | 0.90  | 3.17   | -     | 954.7   |
| AHQ-4-5, 3703              | R.RHPDYSVLLLLL.L                                  | 1468.72842 | 3 | 1.13E-05 | 0.96  | 4.84   | -     | 2009.4  |
| AHQ-4-3, 6215              | R.RHPYFYAPELFFFAK.R                               | 1900.21293 | 2 | 8.79E-04 | 0.95  | 3.56   | -     | 1643.9  |
| AHQ-4-10, 5299             | R.RHPYFYAPELFFFAK.R                               | 1900.21293 | 2 | 1.57E-04 | 0.98  | 5.25   | -     | 2542.1  |
| AHQ-4-5, 5645              | R.RHPYFYAPELFFFAK.R                               | 1900.21293 | 2 | 8.07E-10 | 0.98  | 5.47   | -     | 2388.2  |
| AHQ-4-6, 5774              | R.RHPYFYAPELFFFAK.R                               | 1900.21293 | 3 | 6.56E-06 | 0.98  | 5.67   | -     | 2391.9  |
| AHQ-4-6, 5762              | R.RHPYFYAPELFFFAK.R                               | 1900.21293 | 2 | 1.42E-08 | 0.98  | 5.37   | -     | 2931.6  |
| AHQ-4-6, 7191              | K.RMPCAEDYLSVVLNQLCVLHEK.T                        | 2678.10170 | 3 | 9.72E-06 | 0.98  | 6.39   | -     | 2194.9  |
| AHQ-4-6, 7151              | K.RMPCAEDYLSVVLNQLCVLHEK.T                        | 2694.10110 | 3 | 4.50E-04 | 0.94  | 5.00   | -     | 1349.4  |
| AHQ-4-5, 7329              | K.RMPCAEDYLSVVLNQLCVLHEK.T                        | 2694.10110 | 3 | 3.39E-06 | 0.92  | 4.89   | -     | 825.5   |
| AHQ-4-5, 7365              | K.RMPCAEDYLSVVLNQLCVLHEK.T                        | 2678.10170 | 3 | 1.19E-06 | 0.97  | 6.14   | -     | 1928.5  |
| AHQ-4-3, 4904 - 4905       | R.RPCFSALEVDETYVPK.E                              | 1913.14041 | 2 | 2.03E-05 | 0.93  | 4.85   | -     | 579.6   |
| AHQ-4-11, 4544             | R.RPCFSALEVDETYVPK.E                              | 1913.14041 | 2 | 8.83E-06 | 0.76  | 3.44   | -     | 462.5   |
| AHQ-4-6, 4562              | R.RPCFSALEVDETYVPK.E                              | 1913.14041 | 2 | 1.40E-04 | 0.93  | 4.49   | -     | 596.9   |
| AHQ-4-1, 4951              | R.RPCFSALEVDETYVPK.E                              | 1913.14041 | 2 | 3.42E-05 | 0.86  | 3.56   | -     | 637.7   |
| AHQ-4-10, 4253 - 4255      | R.RPCFSALEVDETYVPK.E                              | 1913.14041 | 2 | 2.05E-04 | 0.94  | 4.62   | -     | 740.3   |
| AHQ-4-4, 4870              | R.RPCFSALEVDETYVPK.E                              | 1913.14041 | 2 | 9.16E-04 | 0.84  | 3.56   | -     | 554.4   |
| AHQ-4-12, 4694             | R.RPCFSALEVDETYVPK.E                              | 1913.14041 | 2 | 4.31E-04 | 0.92  | 4.05   | -     | 684.5   |
| AHQ-4-13, 4809             | R.RPCFSALEVDETYVPK.E                              | 1913.14041 | 2 | 2.79E-05 | 0.80  | 3.85   | -     | 381.4   |
| AHQ-4-5, 6481 - 6485       | K.SHCIAEVENDEMPADLPSLAADFVESK.D                   | 2993.22697 | 2 | 7.17E-06 | 0.93  | 4.62   | -     | 822.9   |
| AHQ-4-1, 7029              | K.SHCIAEVENDEMPADLPSLAADFVESK.D                   | 2977.22697 | 3 | 4.04E-04 | 0.75  | 3.94   | -     | 515.0   |
| AHQ-4-5, 6975 - 7038       | K.SHCIAEVENDEMPADLPSLAADFVESK.D                   | 2977.22697 | 2 | 8.19E-05 | 0.96  | 4.84   | -     | 1384.2  |
| AHQ-4-5, 6963 - 7025       | K.SHCIAEVENDEMPADLPSLAADFVESK.D                   | 2977.22697 | 3 | 1.11E-15 | 0.95  | 5.43   | -     | 1152.1  |
| AHQ-4-6, 6767 - 6842       | K.SHCIAEVENDEMPADLPSLAADFVESK.D                   | 2977.22697 | 2 | 2.96E-04 | 0.90  | 4.08   | -     | 654.3   |
| AHQ-4-6, 6839 - 6916       | K.SHCIAEVENDEMPADLPSLAADFVESK.D                   | 2977.22697 | 3 | 3.42E-07 | 0.96  | 5.73   | -     | 993.9   |
| AHQ-4-7, 6997 - 7007       | K.SHCIAEVENDEMPADLPSLAADFVESK.D                   | 2977.22697 | 3 | 9.24E-13 | 0.92  | 4.76   | -     | 765.0   |
| AHQ-4-6, 4831              | K.SLHTLFGDKLCTVATLR.E                             | 1934.24913 | 3 | 4.11E-04 | 0.81  | 3.18   | -     | 847.5   |
| AHQ-4-5, 3662              | K.TYETTLKCCAAADPHCEYAK.V                          | 2522.72734 | 3 | 2.94E-04 | 0.78  | 3.35   | -     | 716.1   |
| AHQ-4-3, 6072              | K.VFDEFKPLVEEPQNLK.Q                              | 2046.35142 | 2 | 7.75E-04 | 0.77  | 3.51   | -     | 342.3   |
| AHQ-4-7, 5695              | K.VFDEFKPLVEEPQNLK.Q                              | 2046.35142 | 2 | 6.57E-04 | 0.91  | 4.50   | -     | 432.3   |
| AHQ-4-7, 5714              | K.VFDEFKPLVEEPQNLK.Q                              | 2046.35142 | 3 | 1.45E-07 | 0.94  | 4.26   | -     | 1208.7  |
| AHQ-4-3, 6079              | K.VFDEFKPLVEEPQNLK.Q                              | 2046.35142 | 3 | 2.80E-06 | 0.93  | 4.28   | -     | 1087.4  |
| AHQ-4-6, 5718 - 5788       | K.VFDEFKPLVEEPQNLK.Q                              | 2046.35142 | 3 | 2.61E-05 | 0.97  | 5.46   | -     | 1710.2  |
| AHQ-4-9, 5195 - 5197       | K.VFDEFKPLVEEPQNLK.Q                              | 2046.35142 | 2 | 1.11E-05 | 0.90  | 4.12   | -     | 451.8   |
| AHQ-4-6, 5656 - 5738       | K.VFDEFKPLVEEPQNLK.Q                              | 2046.35142 | 2 | 2.50E-05 | 0.90  | 4.38   | -     | 843.4   |
| AHQ-4-4, 6030 - 6107       | K.VFDEFKPLVEEPQNLK.Q                              | 2046.35142 | 2 | 7.48E-05 | 0.79  | 3.25   | -     | 451.9   |
| AHQ-4-5, 5618 - 5626       | K.VFDEFKPLVEEPQNLK.Q                              | 2046.35142 | 2 | 1.60E-09 | 0.92  | 4.28   | -     | 694.8   |
| AHQ-4-5, 5781 - 5851       | K.VFDEFKPLVEEPQNLK.Q                              | 2046.35142 | 2 | 5.92E-04 | 0.93  | 4.87   | -     | 491.1   |
| AHQ-4-5, 5785              | K.VFDEFKPLVEEPQNLK.Q                              | 2046.35142 | 3 | 1.82E-06 | 0.96  | 5.27   | -     | 1418.1  |
| AHQ-4-1, 6066              | K.VFDEFKPLVEEPQNLK.Q                              | 2046.35142 | 3 | 3.38E-06 | 0.94  | 4.63   | -     | 1273.8  |
| AHQ-4-1, 6073              | K.VFDEFKPLVEEPQNLK.Q                              | 2046.35142 | 2 | 1.09E-05 | 0.89  | 4.01   | -     | 420.1   |
| AHQ-4-5, 2863 - 2919       | K.VHTECCHGDLLECADDR.A                             | 2091.20307 | 2 | 9.13E-06 | 0.84  | 3.78   | -     | 615.3   |
| AHQ-4-5, 3777 - 3781       | K.VPQVSTPTLVEVSR.N                                | 1512.73313 | 2 | 3.57E-08 | 0.91  | 3.51   | -     | 878.9   |
| AHQ-4-6, 3716 - 3719       | K.VPQVSTPTLVEVSR.N                                | 1512.73313 | 2 | 5.21E-06 | 0.88  | 3.26   | -     | 837.9   |
| AHQ-4-5, 2207              | K.YICENQDSISSK.L                                  | 1445.53420 | 2 | 1.24E-04 | 0.83  | 3.17   | -     | 608.7   |
| AHQ-4-6, 2192              | K.YICENQDSISSK.L                                  | 1445.53420 | 2 | 6.18E-04 | 0.89  | 3.25   | -     | 688.0   |
| AHQ-4-1, 2441              | K.YICENQDSISSK.L                                  | 1445.53420 | 2 | 1.20E-07 | 0.92  | 3.64   | -     | 854.9   |
| gi 4507729 ref NP_001060.1 | tubulin, beta polypeptide [Homo sapiens]          |            |   | 1.11E-15 | 8.29  | 100.40 | 29.40 | 49906.7 |
| AHQ-4-7, 2665 - 2673       | R.EIVHIQAGCCNQIGAK.F                              | 1825.03962 | 2 | 1.22E-04 | 0.96  | 4.35   | -     | 1463.5  |

|                            |                                                              |            |   |          |       |        |       |         |
|----------------------------|--------------------------------------------------------------|------------|---|----------|-------|--------|-------|---------|
| AHQ-4-7, 2701              | K.EVDEQMLNVQNK.N                                             | 1447.59668 | 2 | 4.72E-06 | 0.88  | 3.66   | -     | 891.0   |
| AHQ-4-7, 2855              | K.EVDEQMLNVQNK.N                                             | 1447.59668 | 1 | 6.31E-07 | 0.51  | 2.99   | -     | 251.7   |
| AHQ-4-7, 2702              | K.EVDEQMLNVQNK.N                                             | 1447.59668 | 1 | 3.48E-06 | 0.63  | 3.60   | -     | 253.6   |
| AHQ-4-7, 2090              | K.EVDEQM*LVNVQNK.N                                           | 1463.59608 | 2 | 5.70E-05 | 0.73  | 3.16   | -     | 685.2   |
| AHQ-4-13-, 6284 - 6294     | K.GHYTEGAEVLDSVLDVVR.K                                       | 1960.13388 | 2 | 1.18E-07 | 0.98  | 6.28   | -     | 2814.7  |
| AHQ-4-13, 6349             | K.GHYTEGAEVLDSVLDVVR.K                                       | 1960.13388 | 2 | 4.26E-09 | 0.98  | 6.67   | -     | 2611.0  |
| AHQ-4-7, 4430              | K.GHYTEGAEVLDSVLDVVR.K                                       | 1960.13388 | 2 | 4.54E-04 | 0.96  | 4.80   | -     | 1210.8  |
| AHQ-4-7, 5270              | K.GHYTEGAEVLDSVLDVVR.K                                       | 1960.13388 | 2 | 1.33E-06 | 0.97  | 5.35   | -     | 1574.6  |
| AHQ-4-13, 6344 - 6357      | K.GHYTEGAEVLDSVLDVVR.K                                       | 1960.13388 | 3 | 1.34E-05 | 0.87  | 4.50   | -     | 745.6   |
| AHQ-4-7, 6191 - 6261       | K.GHYTEGAEVLDSVLDVVR.K                                       | 1960.13388 | 2 | 8.01E-06 | 0.99  | 7.18   | -     | 3122.1  |
| AHQ-4-7, 6202              | K.GHYTEGAEVLDSVLDVVR.K                                       | 1960.13388 | 3 | 6.22E-06 | 0.92  | 5.06   | -     | 1060.5  |
| AHQ-4-12, 6257             | K.GHYTEGAEVLDSVLDVVR.K                                       | 1960.13388 | 3 | 6.56E-04 | 0.84  | 4.50   | -     | 713.3   |
| AHQ-4-12, 6254             | K.GHYTEGAEVLDSVLDVVR.K                                       | 1960.13388 | 2 | 3.56E-08 | 0.99  | 7.07   | -     | 3498.1  |
| AHQ-4-11, 6032             | K.GHYTEGAEVLDSVLDVVR.K                                       | 1960.13388 | 2 | 3.19E-06 | 0.98  | 6.66   | -     | 2371.4  |
| AHQ-4-10, 5728             | K.GHYTEGAEVLDSVLDVVR.K                                       | 1960.13388 | 2 | 6.04E-06 | 0.98  | 5.16   | -     | 2144.7  |
| AHQ-4-9, 5692 - 5751       | K.GHYTEGAEVLDSVLDVVR.K                                       | 1960.13388 | 2 | 8.60E-06 | 0.98  | 6.06   | -     | 2520.7  |
| AHQ-4-14-, 6159            | K.GHYTEGAEVLDSVLDVVR.K                                       | 1960.13388 | 2 | 3.61E-13 | 0.99  | 7.40   | -     | 2971.3  |
| AHQ-4-7, 2701              | R.GRM*SM*KEVDEQMLNVQNK.N                                     | 2170.47810 | 3 | 1.54E-04 | 0.48  | 3.11   | -     | 463.5   |
| AHQ-4-7, 4335              | R.ISEQFTAMFR.L                                               | 1230.41818 | 2 | 4.90E-06 | 0.94  | 3.25   | -     | 1522.5  |
| AHQ-4-10, 6380             | K.LTTPTYGDLNHLVSATMSGVTTCLR.F                                | 2711.06527 | 2 | 5.49E-09 | 0.92  | 4.45   | -     | 608.3   |
| AHQ-4-7, 6129              | K.LTTPTYGDLNHLVSATMSGVTTCLR.F                                | 2727.06467 | 3 | 2.95E-05 | 0.91  | 4.63   | -     | 791.5   |
| AHQ-4-7, 7285 - 7286       | K.LTTPTYGDLNHLVSATMSGVTTCLR.F                                | 2170.47810 | 3 | 1.47E-05 | 0.94  | 4.88   | -     | 1240.0  |
| AHQ-4-12, 6050             | K.M*SATFIGNSTAIQELFK.R                                       | 1875.13550 | 2 | 2.61E-07 | 0.80  | 3.66   | -     | 945.9   |
| AHQ-4-7, 6637              | K.M*SATFIGNSTAIQELFK.R                                       | 1875.13550 | 2 | 1.24E-08 | 0.88  | 4.39   | -     | 1015.9  |
| AHQ-4-14-, 5946            | K.M*SATFIGNSTAIQELFK.R                                       | 1875.13550 | 2 | 2.13E-05 | 0.67  | 3.61   | -     | 635.8   |
| AHQ-4-7, 6393 - 6461       | R.SGPFQGIIFRPDNVVFVGGSGAGNNWAK.G                             | 2800.03898 | 3 | 3.18E-11 | 0.96  | 6.14   | -     | 1555.3  |
| AHQ-4-7, 6337 - 6401       | R.SGPFQGIIFRPDNVVFVGGSGAGNNWAK.G                             | 2800.03898 | 2 | 7.91E-08 | 0.95  | 5.36   | -     | 915.0   |
| AHQ-4-11, 6065 - 6125      | R.SGPFQGIIFRPDNVVFVGGSGAGNNWAK.G                             | 2800.03898 | 3 | 1.11E-15 | 0.97  | 6.50   | -     | 1839.8  |
| AHQ-4-9, 5708 - 5755       | R.SGPFQGIIFRPDNVVFVGGSGAGNNWAK.G                             | 2800.03898 | 2 | 8.44E-04 | 0.94  | 4.92   | -     | 926.3   |
| AHQ-4-12, 6243             | R.SGPFQGIIFRPDNVVFVGGSGAGNNWAK.G                             | 2800.03898 | 3 | 8.77E-09 | 0.96  | 5.39   | -     | 1528.2  |
| AHQ-4-7, 6259 - 6329       | R.SGPFQGIIFRPDNVVFVGGSGAGNNWAK.G                             | 2800.03898 | 2 | 5.26E-07 | 0.97  | 5.85   | -     | 1605.0  |
| AHQ-4-7, 6255 - 6326       | R.SGPFQGIIFRPDNVVFVGGSGAGNNWAK.G                             | 2800.03898 | 3 | 4.12E-05 | 0.97  | 6.73   | -     | 1644.4  |
| AHQ-4-12, 6367             | R.SGPFQGIIFRPDNVVFVGGSGAGNNWAK.G                             | 2800.03898 | 2 | 5.25E-05 | 0.81  | 3.59   | -     | 444.8   |
| AHQ-4-13, 6306 - 6381      | R.SGPFQGIIFRPDNVVFVGGSGAGNNWAK.G                             | 2800.03898 | 3 | 7.06E-04 | 0.69  | 3.17   | -     | 838.3   |
| AHQ-4-7, 6458 - 6525       | R.SGPFQGIIFRPDNVVFVGGSGAGNNWAK.G                             | 2800.03898 | 2 | 3.49E-07 | 0.96  | 6.14   | -     | 948.4   |
| AHQ-4-7, 6583 - 6650       | R.SGPFQGIIFRPDNVVFVGGSGAGNNWAK.G                             | 2800.03898 | 3 | 1.01E-09 | 0.96  | 6.06   | -     | 1488.6  |
| AHQ-4-13-, 6272 - 6334     | R.SGPFQGIIFRPDNVVFVGGSGAGNNWAK.G                             | 2800.03898 | 3 | 6.88E-07 | 0.98  | 6.51   | -     | 1857.4  |
| AHQ-4-7, 6735 - 6763       | R.SGPFQGIIFRPDNVVFVGGSGAGNNWAK.G                             | 2800.03898 | 3 | 3.87E-07 | 0.94  | 5.03   | -     | 1327.0  |
| AHQ-4-10, 5813             | R.SGPFQGIIFRPDNVVFVGGSGAGNNWAK.G                             | 2800.03898 | 2 | 5.32E-08 | 0.94  | 4.55   | -     | 994.2   |
| AHQ-4-14-, 6118 - 6187     | R.SGPFQGIIFRPDNVVFVGGSGAGNNWAK.G                             | 2800.03898 | 3 | 1.91E-12 | 0.98  | 8.10   | -     | 2411.2  |
| AHQ-4-7, 6598 - 6665       | R.SGPFQGIIFRPDNVVFVGGSGAGNNWAK.G                             | 2800.03898 | 2 | 1.02E-04 | 0.80  | 3.44   | -     | 513.1   |
| gi 4557705 ref NP_000217.1 | keratin 9 [Homo sapiens]                                     |            |   | 1.11E-15 | 3.56  | 40.32  | 14.60 | 61986.9 |
| AHQ-4-1, 6559 - 6561       | K.DIENQYETQITQIEHEVSSSGQEVQSSAK.E                            | 3266.38667 | 3 | 1.11E-15 | 0.98  | 6.39   | -     | 2491.3  |
| AHQ-4-14-, 6097            | K.DIENQYETQITQIEHEVSSSGQEVQSSAK.E                            | 3266.38667 | 3 | 1.26E-08 | 0.95  | 5.15   | -     | 1287.8  |
| AHQ-4-1, 4767              | K.EIETYHLLLEGGQEDFESSGAGK.I                                  | 2511.59648 | 3 | 2.47E-06 | 0.95  | 5.21   | -     | 1362.7  |
| AHQ-4-1, 7126 - 7193       | K.NYSPYNTIDDLQDQVLDLTVGNK.N.T                                | 2904.13412 | 3 | 1.58E-04 | 0.85  | 4.12   | -     | 572.7   |
| AHQ-4-1, 3110              | K.VQALEEANNDLENK.I                                           | 1587.67060 | 2 | 1.18E-04 | 0.78  | 3.25   | -     | 585.5   |
| gi 4504165 ref NP_000168.1 | gelsolin [amylolysis, Finnish type]; Gelsolin [Homo sapiens] |            |   | 1.67E-15 | 22.05 | 260.36 | 40.80 | 85696.9 |
| AHQ-4-5, 3685              | K.AGALNSNDAFVLK.T                                            | 1320.47622 | 1 | 6.05E-07 | 0.30  | 2.29   | -     | 387.6   |
| AHQ-4-6, 3530              | K.AGALNSNDAFVLK.T                                            | 1320.47622 | 2 | 1.11E-05 | 0.76  | 3.08   | -     | 649.4   |
| AHQ-4-5, 3594              | K.AGALNSNDAFVLK.T                                            | 1320.47622 | 1 | 7.21E-09 | 0.28  | 2.22   | -     | 372.5   |
| AHQ-4-5, 3593              | K.AGALNSNDAFVLK.T                                            | 1320.47622 | 2 | 2.35E-07 | 0.85  | 3.67   | -     | 582.4   |
| AHQ-4-5, 3390              | K.AGALNSNDAFVLK.T                                            | 1320.47622 | 2 | 9.41E-07 | 0.86  | 3.88   | -     | 629.8   |
| AHQ-4-5, 3687              | K.AGALNSNDAFVLK.T                                            | 1320.47622 | 2 | 3.78E-05 | 0.89  | 3.57   | -     | 773.2   |
| AHQ-4-6, 3536              | K.AGALNSNDAFVLK.T                                            | 1320.47622 | 1 | 3.77E-05 | 0.13  | 2.08   | -     | 249.9   |
| AHQ-4-7, 3283              | K.AGALNSNDAFVLK.T                                            | 1320.47622 | 2 | 5.63E-04 | 0.90  | 3.52   | -     | 936.5   |
| AHQ-4-5, 2667              | K.AGKEPGLIQR.V                                               | 1255.45060 | 2 | 6.54E-04 | 0.61  | 2.63   | -     | 423.5   |
| AHQ-4-5, 5566 - 5597       | R.AQPVQVQAESEPDGFWEALGGK.A                                   | 2273.44345 | 2 | 5.09E-08 | 0.97  | 6.22   | -     | 839.2   |
| AHQ-4-11, 5477             | R.AQPVQVQAESEPDGFWEALGGK.A                                   | 2273.44345 | 2 | 6.19E-04 | 0.85  | 3.82   | -     | 456.4   |
| AHQ-4-6, 5486 - 5506       | R.AQPVQVQAESEPDGFWEALGGK.A                                   | 2273.44345 | 2 | 5.56E-06 | 0.94  | 4.82   | -     | 637.0   |
| AHQ-4-6, 5639              | R.AQPVQVQAESEPDGFWEALGGK.A                                   | 2273.44345 | 2 | 4.42E-07 | 0.89  | 4.18   | -     | 471.2   |
| AHQ-4-7, 5654              | R.AQPVQVQAESEPDGFWEALGGK.A                                   | 2273.44345 | 2 | 2.26E-06 | 0.93  | 4.74   | -     | 688.6   |
| AHQ-4-10, 5147             | R.AQPVQVQAESEPDGFWEALGGK.A                                   | 2273.44345 | 2 | 2.28E-05 | 0.97  | 5.72   | -     | 958.9   |
| AHQ-4-5, 5678 - 5710       | R.AQPVQVQAESEPDGFWEALGGK.A                                   | 2273.44345 | 2 | 4.97E-07 | 0.95  | 4.96   | -     | 767.3   |
| AHQ-4-10, 4999 - 5000      | R.AQPVQVQAESEPDGFWEALGGK.A                                   | 2273.44345 | 2 | 3.09E-06 | 0.96  | 5.27   | -     | 766.8   |
| AHQ-4-5, 5777              | R.AQPVQVQAESEPDGFWEALGGK.A                                   | 2273.44345 | 2 | 5.72E-06 | 0.96  | 5.43   | -     | 743.5   |
| AHQ-4-5, 5885 - 5955       | R.AQPVQVQAESEPDGFWEALGGK.A                                   | 2273.44345 | 2 | 6.70E-06 | 0.93  | 4.72   | -     | 573.3   |
| AHQ-4-4, 5766              | R.AQPVQVQAESEPDGFWEALGGK.A                                   | 2273.44345 | 2 | 9.26E-04 | 0.61  | 3.25   | -     | 348.2   |
| AHQ-4-7, 5501              | R.AQPVQVQAESEPDGFWEALGGK.A                                   | 2273.44345 | 2 | 3.86E-04 | 0.96  | 5.44   | -     | 705.1   |
| AHQ-4-8, 5386              | R.AQPVQVQAESEPDGFWEALGGK.A                                   | 2273.44345 | 2 | 3.18E-04 | 0.88  | 3.77   | -     | 707.1   |
| AHQ-4-9, 5109              | R.AQPVQVQAESEPDGFWEALGGK.A                                   | 2273.44345 | 2 | 2.61E-04 | 0.90  | 4.33   | -     | 509.3   |
| AHQ-4-9, 4897 - 4967       | R.AQPVQVQAESEPDGFWEALGGK.A                                   | 2273.44345 | 2 | 3.13E-04 | 0.91  | 4.49   | -     | 499.7   |
| AHQ-4-5, 6023              | R.AQPVQVQAESEPDGFWEALGGK.A                                   | 2273.44345 | 2 | 5.15E-06 | 0.95  | 4.84   | -     | 779.1   |
| AHQ-4-5, 5622              | R.DPDQTDGLGLSYLSSHIANVER.V                                   | 2388.53285 | 3 | 1.03E-07 | 0.96  | 5.39   | -     | 1550.4  |
| AHQ-4-11, 2114             | K.DSQEKKTEALTSK.R                                            | 1666.72289 | 2 | 8.57E-07 | 0.83  | 3.17   | -     | 1117.2  |
| AHQ-4-12, 2182             | K.DSQEKKTEALTSK.R                                            | 1666.72289 | 2 | 1.28E-06 | 0.91  | 3.85   | -     | 1116.4  |
| AHQ-4-10, 2065             | K.DSQEKKTEALTSK.R                                            | 1666.72289 | 2 | 7.03E-06 | 0.90  | 3.55   | -     | 1086.0  |
| AHQ-4-13, 2341             | K.DSQEKKTEALTSK.R                                            | 1666.72289 | 2 | 1.52E-05 | 0.92  | 3.78   | -     | 1149.9  |
| AHQ-4-7, 1954              | K.DSQEKKTEALTSK.R                                            | 1666.72289 | 2 | 8.68E-07 | 0.94  | 4.12   | -     | 1248.9  |
| AHQ-4-13-, 2232            | K.DSQEKKTEALTSK.R                                            | 1666.72289 | 2 | 4.72E-08 | 0.95  | 4.02   | -     | 1682.7  |
| AHQ-4-5, 2077 - 2085       | K.DSQEKKTEALTSK.R                                            | 1666.72289 | 2 | 2.21E-06 | 0.91  | 3.54   | -     | 1400.5  |
| AHQ-4-8, 1872              | K.DSQEKKTEALTSK.R                                            | 1666.72289 | 2 | 3.64E-06 | 0.87  | 3.51   | -     | 990.2   |
| AHQ-4-5, 1982              | K.DSQEKKTEALTSK.R                                            | 1666.72289 | 3 | 1.10E-06 | 0.96  | 4.89   | -     | 1718.5  |
| AHQ-4-5, 1979 - 2009       | K.DSQEKKTEALTSK.R                                            | 1666.72289 | 2 | 1.41E-06 | 0.91  | 3.95   | -     | 1052.8  |
| AHQ-4-13-, 2238            | K.DSQEKKTEALTSK.R                                            | 1666.72289 | 3 | 7.46E-07 | 0.92  | 3.72   | -     | 1352.6  |
| AHQ-4-9, 1947              | K.DSQEKKTEALTSK.R                                            | 1666.72289 | 2 | 8.34E-05 | 0.68  | 2.97   | -     | 742.6   |
| AHQ-4-6, 1976              | K.DSQEKKTEALTSK.R                                            | 1666.72289 | 2 | 1.95E-09 | 0.95  | 4.30   | -     | 1722.8  |
| AHQ-4-5, 5078              | K.EPAHMLSLFGGKPMIYK.G                                        | 2033.48916 | 2 | 9.35E-05 | 0.87  | 3.92   | -     | 463.9   |
| AHQ-4-6, 5070              | K.EPAHMLSLFGGKPMIYK.G                                        | 2033.48916 | 2 | 1.58E-05 | 0.91  | 3.64   | -     | 886.3   |
| AHQ-4-12, 6163             | R.EVQGFESATFLGYFK.S                                          | 1723.90570 | 2 | 9.23E-09 | 0.93  | 3.94   | -     | 1045.2  |
| AHQ-4-5, 6434 - 6483       | R.EVQGFESATFLGYFK.S                                          | 1723.90570 | 2 | 2.93E-08 | 0.97  | 4.37   | -     | 1677.6  |
| AHQ-4-5, 6967              | R.EVQGFESATFLGYFK.S                                          | 1723.90570 | 2 | 1.79E-05 | 0.82  | 3.01   | -     | 686.2   |
| AHQ-4-13, 6214 - 6282      | R.EVQGFESATFLGYFK.S                                          | 1723.90570 | 2 | 1.63E-04 | 0.96  | 3.99   | -     | 1675.0  |
| AHQ-4-13-, 6124            | R.EVQGFESATFLGYFK.S                                          | 1723.90570 | 2 | 1.09E-08 | 0.97  | 4.77   | -     | 1967.4  |
| AHQ-4-5, 6343              | R.EVQGFESATFLGYFK.S                                          | 1723.90570 | 2 | 2.41E-07 | 0.95  | 4.26   | -     | 1309.4  |
| AHQ-4-5, 6549 - 6617       | R.EVQGFESATFLGYFK.S                                          | 1723.90570 | 2 | 1.66E-04 | 0.90  | 3.12   | -     | 1133.7  |
| AHQ-4-14-, 5993            | R.EVQGFESATFLGYFK.S                                          | 1723.90570 | 2 | 2.44E-06 | 0.92  | 2.99   | -     | 1435.2  |
| AHQ-4-5, 7449 - 7529       | K.FDLVPPVNTLYGDDFTGDAYVILK.T                                 | 2706.08359 | 2 | 8.81E-04 | 0.90  | 3.63   | -     | 738.5   |
| AHQ-4-5, 2045 - 2123       | K.HVVPNEVVQR.L                                               | 1276.46981 | 2 | 1.38E-06 | 0.88  | 2.96   | -     | 595.9   |
| AHQ-4-6, 2044              | K.HVVPNEVVQR.L                                               | 1276.46981 | 2 | 3.82E-09 | 0.87  | 3.11   | -     | 718.4   |
| AHQ-4-5, 2047              | K.HVVPNEVVQR.L                                               | 1276.46981 | 1 | 9.20E-04 | 0.35  | 2.03   | -     | 326.8   |
| AHQ-4-5, 2057              | K.HVVPNEVVQR.L                                               | 1276.46981 | 1 | 5.63E-05 | 0.24  | 2.41   | -     | 198.2   |
| AHQ-4-5, 2255 - 2262       | K.HVVPNEVVQR.L                                               | 1276.46981 | 2 | 6.05E-09 | 0.89  | 3.14   | -     | 680.8   |
| AHQ-4-12, 2261             | K.HVVPNEVVQR.L                                               | 1276.46981 | 2 | 2.14E-07 | 0.89  | 3.26   | -     | 555.0   |
| AHQ-4-11, 2182             | K.HVVPNEVVQR.L                                               | 1276.46981 | 2 | 2.37E-05 | 0.80  | 2.90   | -     | 441.5   |
| AHQ-4-11, 2189 - 2190      | K.HVVPNEVVQR.L                                               | 1276.46981 | 1 | 2.60E-05 | 0.49  | 2.45   | -     | 334.6   |
| AHQ-4-7, 1995              | K.HVVPNEVVQR.L                                               | 1276.46981 | 2 | 2.90E-04 | 0.83  | 2.81   | -     | 552.5   |

|                            |                                                                         |            |   |          |       |         |       |          |
|----------------------------|-------------------------------------------------------------------------|------------|---|----------|-------|---------|-------|----------|
| AHQ-4-5, 6757 - 6827       | R.IEGSNKVPVDPATYGGFYGGDSYIILYNR.H                                       | 3401.72499 | 3 | 5.64E-04 | 0.94  | 4.93    | -     | 1088.8   |
| AHQ-4-5, 6634              | R.IEGSNKVPVDPATYGGFYGGDSYIILYNR.H                                       | 3401.72499 | 3 | 6.19E-04 | 0.80  | 3.24    | -     | 879.0    |
| AHQ-4-5, 6370              | R.IEGSNKVPVDPATYGGFYGGDSYIILYNR.H                                       | 3401.72499 | 3 | 5.54E-08 | 0.95  | 5.01    | -     | 1138.2   |
| AHQ-4-6, 5434 - 5442       | K.NWRDPDQTDGLGLSYLSSHIANVER.V                                           | 2845.03323 | 3 | 3.19E-05 | 0.96  | 5.05    | -     | 1747.1   |
| AHQ-4-5, 5467 - 5539       | K.NWRDPDQTDGLGLSYLSSHIANVER.V                                           | 2845.03323 | 3 | 1.67E-15 | 0.96  | 5.97    | -     | 1053.5   |
| AHQ-4-6, 1854              | K.PALPAGTEDTAK.E                                                        | 1171.28241 | 2 | 3.87E-07 | 0.68  | 2.61    | -     | 429.4    |
| AHQ-4-5, 2295              | K.PALPAGTEDTAKEDAANR.K                                                  | 1827.93072 | 2 | 1.41E-07 | 0.88  | 3.79    | -     | 446.9    |
| AHQ-4-5, 4697 - 4701       | K.QTQVSVLPEGGETPLFK.Q                                                   | 2167.05925 | 2 | 1.22E-04 | 0.83  | 3.50    | -     | 427.1    |
| AHQ-4-8, 4255              | K.QTQVSVLPEGGETPLFK.Q                                                   | 1831.05925 | 2 | 5.91E-06 | 0.82  | 3.43    | -     | 402.8    |
| AHQ-4-6, 4642              | K.QTQVSVLPEGGETPLFK.Q                                                   | 1831.05925 | 2 | 9.01E-04 | 0.84  | 3.55    | -     | 477.4    |
| AHQ-4-5, 4846              | K.QTQVSVLPEGGETPLFK.Q                                                   | 1831.05925 | 2 | 4.40E-05 | 0.85  | 3.30    | -     | 527.5    |
| AHQ-4-6, 2759 - 2771       | K.SEDCFILDHGK.D                                                         | 1322.42590 | 2 | 1.94E-06 | 0.94  | 3.46    | -     | 1229.3   |
| AHQ-4-5, 2746 - 2753       | K.SEDCFILDHGK.D                                                         | 1322.42590 | 2 | 5.91E-04 | 0.96  | 3.88    | -     | 1429.0   |
| AHQ-4-5, 2422              | K.SEDCFILDHGKDGK.I                                                      | 1622.73823 | 2 | 2.45E-04 | 0.56  | 2.67    | -     | 604.3    |
| AHQ-4-5, 1894 - 1970       | K.TGAQELLR.V                                                            | 888.00387  | 2 | 1.30E-05 | 0.90  | 2.92    | -     | 1163.3   |
| AHQ-4-5, 4683              | K.TPSAAYLWVGTGASEAEK.T                                                  | 1838.99510 | 2 | 5.75E-05 | 0.93  | 4.29    | -     | 819.8    |
| AHQ-4-5, 4454 - 4525       | K.TPSAAYLWVGTGASEAEK.T                                                  | 1838.99510 | 2 | 1.60E-04 | 0.96  | 4.58    | -     | 1355.0   |
| AHQ-4-5, 4305 - 4373       | K.TPSAAYLWVGTGASEAEK.T                                                  | 1838.99510 | 2 | 9.86E-04 | 0.93  | 3.85    | -     | 932.2    |
| AHQ-4-5, 7387              | R.VEKFDLVPVPTNLYGDDFTGDAYVILK.T                                         | 3062.50261 | 3 | 2.39E-04 | 0.72  | 3.66    | -     | 520.8    |
| AHQ-4-5, 3570 - 3607       | R.VHVSEEGTEPEAMQLVGLPK.P                                                | 2167.42570 | 2 | 3.29E-06 | 0.96  | 5.14    | -     | 1047.8   |
| AHQ-4-9, 4191 - 4269       | R.VHVSEEGTEPEAMQLVGLPK.P                                                | 2151.42630 | 2 | 4.92E-04 | 0.90  | 4.11    | -     | 588.7    |
| AHQ-4-6, 4687              | R.VHVSEEGTEPEAMQLVGLPK.P                                                | 2151.42630 | 2 | 5.25E-06 | 0.96  | 5.20    | -     | 915.6    |
| AHQ-4-5, 4702 - 4782       | R.VHVSEEGTEPEAMQLVGLPK.P                                                | 2151.42630 | 2 | 4.26E-04 | 0.95  | 5.02    | -     | 984.9    |
| AHQ-4-9, 4508              | R.VHVSEEGTEPEAMQLVGLPKPALPAGTEDTAK.E                                    | 3303.68611 | 3 | 8.94E-04 | 0.83  | 3.94    | -     | 606.2    |
| AHQ-4-6, 5023              | R.VHVSEEGTEPEAMQLVGLPKPALPAGTEDTAK.E                                    | 3303.68611 | 3 | 2.22E-09 | 0.96  | 6.00    | -     | 801.6    |
| AHQ-4-5, 5073              | R.VHVSEEGTEPEAMQLVGLPKPALPAGTEDTAK.E                                    | 3303.68611 | 3 | 4.89E-08 | 0.95  | 5.83    | -     | 1058.3   |
| AHQ-4-5, 4838              | R.VHVSEEGTEPEAMQLVGLPKPALPAGTEDTAKEDAANR.K                              | 3960.33442 | 3 | 9.14E-04 | 0.78  | 3.64    | -     | 428.6    |
| AHQ-4-5, 3373 - 3450       | R.VPFDAATLHTSTAMAAQHGM*DDGTGQK.Q                                        | 2891.10081 | 3 | 8.88E-04 | 0.90  | 5.70    | -     | 966.6    |
| AHQ-4-5, 3837 - 3849       | R.VPFDAATLHTSTAMAAQHGM*DDGTGQK.Q                                        | 2875.10141 | 3 | 1.32E-10 | 0.98  | 7.29    | -     | 1700.1   |
| AHQ-4-5, 1571              | R.YIETDPANR.D                                                           | 1079.14506 | 2 | 4.13E-05 | 0.78  | 2.62    | -     | 603.7    |
| gj13899317 ref NP_113657.1 | SH3 domain binding glutamic acid-rich protein like 2 [Homo sapiens] [M  |            |   | 1.67E-15 | 5.51  | 60.32   | 72.00 | 12320.0  |
| AHQ-4-14-, 5394 - 5398     | K.ESNTVFSFLGKPR.L                                                       | 1595.82383 | 2 | 2.59E-10 | 0.82  | 3.63    | -     | 483.5    |
| AHQ-4-13-, 5432 - 5454     | K.ESNTVFSFLGKPR.L                                                       | 1595.82383 | 2 | 2.16E-06 | 0.49  | 2.79    | -     | 371.4    |
| AHQ-4-13-, 5680            | K.ESNTVFSFLGKPR.L                                                       | 1595.82383 | 2 | 3.32E-08 | 0.71  | 2.71    | -     | 452.3    |
| AHQ-4-14-, 5401            | K.ESNTVFSFLGKPR.L                                                       | 1595.82383 | 3 | 8.76E-04 | 0.69  | 3.02    | -     | 785.7    |
| AHQ-4-13-, 4940            | R.FLEANKIEFEEVDITM*SEEQR.Q                                              | 2574.80223 | 2 | 9.55E-05 | 0.91  | 4.00    | -     | 916.2    |
| AHQ-4-13-, 4932 - 4934     | R.FLEANKIEFEEVDITM*SEEQR.Q                                              | 2574.80223 | 3 | 8.84E-11 | 0.98  | 6.38    | -     | 3146.2   |
| AHQ-4-14-, 4911            | R.FLEANKIEFEEVDITM*SEEQR.Q                                              | 2574.80223 | 2 | 2.62E-06 | 0.95  | 5.16    | -     | 912.6    |
| AHQ-4-13, 5050             | R.FLEANKIEFEEVDITM*SEEQR.Q                                              | 2574.80223 | 3 | 2.08E-04 | 0.91  | 4.81    | -     | 1117.2   |
| AHQ-4-13, 4350             | K.IEFEEVDITM*SEEQR.Q                                                    | 1872.00051 | 2 | 6.02E-05 | 0.89  | 3.12    | -     | 1242.8   |
| AHQ-4-13, 3961             | K.KPTQGNPLPPQIFNGDR.Y                                                   | 1880.09682 | 2 | 3.37E-06 | 0.90  | 3.83    | -     | 710.6    |
| AHQ-4-13, 3876             | K.KPTQGNPLPPQIFNGDR.Y                                                   | 1880.09682 | 2 | 1.10E-04 | 0.91  | 3.51    | -     | 987.3    |
| AHQ-4-13-, 3781            | K.KPTQGNPLPPQIFNGDR.Y                                                   | 1880.09682 | 2 | 1.67E-15 | 0.91  | 4.01    | -     | 887.5    |
| AHQ-4-14-, 5758            | K.KPTQGNPLPPQIFNGDRYCGDYDSFFESK.E                                       | 3380.64432 | 3 | 1.10E-05 | 0.91  | 4.70    | -     | 791.5    |
| AHQ-4-14-, 5665 - 5738     | K.KPTQGNPLPPQIFNGDRYCGDYDSFFESK.E                                       | 3380.64432 | 3 | 1.82E-07 | 0.94  | 5.12    | -     | 973.2    |
| AHQ-4-13, 5852 - 5916      | K.KPTQGNPLPPQIFNGDRYCGDYDSFFESK.E                                       | 3380.64432 | 3 | 3.22E-04 | 0.90  | 4.88    | -     | 844.2    |
| AHQ-4-13-, 5766 - 5826     | K.KPTQGNPLPPQIFNGDRYCGDYDSFFESK.E                                       | 3380.64432 | 3 | 4.43E-04 | 0.90  | 4.58    | -     | 823.4    |
| AHQ-4-13-, 4366            | R.VFIASSSGVAIK.K                                                        | 1326.56551 | 1 | 4.13E-04 | 0.04  | 1.89    | -     | 186.3    |
| AHQ-4-13-, 4369            | R.VFIASSSGVAIK.K                                                        | 1326.56551 | 2 | 1.31E-05 | 0.97  | 4.24    | -     | 2087.0   |
| gj4505879 ref NP_002655.1  | pleckstrin; p47 [Homo sapiens]                                          |            |   | 2.78E-15 | 12.66 | 140.42  | 45.40 | 40082.5  |
| AHQ-4-8, 5311              | R.EDPAYLHYDPAAGADPLGAIHLR.G                                             | 2684.89982 | 3 | 1.05E-04 | 0.96  | 5.56    | -     | 1467.6   |
| AHQ-4-4, 5930              | R.EDPAYLHYDPAAGADPLGAIHLR.G                                             | 2684.89982 | 3 | 4.61E-04 | 0.92  | 4.34    | -     | 1330.4   |
| AHQ-4-12, 5651             | R.EDPAYLHYDPAAGADPLGAIHLR.G                                             | 2684.89982 | 3 | 2.97E-05 | 0.97  | 5.99    | -     | 2146.6   |
| AHQ-4-13-, 5578 - 5589     | R.EDPAYLHYDPAAGADPLGAIHLR.G                                             | 2684.89982 | 3 | 2.76E-09 | 0.97  | 6.20    | -     | 1673.7   |
| AHQ-4-8, 5315              | R.EDPAYLHYDPAAGADPLGAIHLR.G                                             | 2684.89982 | 2 | 4.50E-06 | 0.71  | 2.86    | -     | 567.5    |
| AHQ-4-10, 5132             | R.EDPAYLHYDPAAGADPLGAIHLR.G                                             | 2684.89982 | 2 | 2.22E-08 | 0.69  | 3.18    | -     | 359.9    |
| AHQ-4-14-, 5565 - 5627     | R.EDPAYLHYDPAAGADPLGAIHLR.G                                             | 2684.89982 | 3 | 1.79E-09 | 0.96  | 5.30    | -     | 1663.1   |
| AHQ-4-13, 5712             | R.EDPAYLHYDPAAGADPLGAIHLR.G                                             | 2684.89982 | 3 | 2.69E-04 | 0.98  | 6.81    | -     | 1730.7   |
| AHQ-4-11, 5458             | R.EDPAYLHYDPAAGADPLGAIHLR.G                                             | 2684.89982 | 3 | 1.71E-04 | 0.90  | 4.59    | -     | 1117.9   |
| AHQ-4-8, 2257 - 2272       | R.GCVVTSVESNSNGR.K                                                      | 1467.54464 | 2 | 1.16E-07 | 0.90  | 3.14    | -     | 1300.3   |
| AHQ-4-12, 2439             | R.GCVVTSVESNSNGR.K                                                      | 1467.54464 | 2 | 9.82E-04 | 0.89  | 3.32    | -     | 934.6    |
| AHQ-4-13-, 2458            | R.GCVVTSVESNSNGR.K                                                      | 1467.54464 | 2 | 4.52E-07 | 0.90  | 3.60    | -     | 1147.6   |
| AHQ-4-8, 1853              | R.GCVVTSVESNSNGR.S                                                      | 1595.71755 | 2 | 1.24E-06 | 0.57  | 2.68    | -     | 523.4    |
| AHQ-4-8, 2068 - 2072       | R.GCVVTSVESNSNGR.S                                                      | 1595.71755 | 2 | 5.92E-08 | 0.78  | 3.23    | -     | 724.3    |
| AHQ-4-13-, 2876            | K.GSTLSPCQDFGKR.M                                                       | 1555.69502 | 2 | 5.66E-07 | 0.74  | 3.16    | -     | 421.8    |
| AHQ-4-8, 7010 - 7073       | K.IFNHCFTGNCVIDWLVSNSQSVR.N                                             | 2669.97641 | 2 | 1.15E-08 | 0.97  | 5.14    | -     | 1392.5   |
| AHQ-4-8, 6869              | K.IFNHCFTGNCVIDWLVSNSQSVR.N                                             | 2669.97641 | 2 | 3.47E-09 | 0.98  | 5.94    | -     | 1607.1   |
| AHQ-4-8, 7150 - 7223       | K.IFNHCFTGNCVIDWLVSNSQSVR.N                                             | 2669.97641 | 2 | 1.49E-05 | 0.87  | 3.51    | -     | 920.4    |
| AHQ-4-10, 6373             | K.IFNHCFTGNCVIDWLVSNSQSVR.N                                             | 2669.97641 | 2 | 4.22E-06 | 0.72  | 3.09    | -     | 600.6    |
| AHQ-4-8, 7233              | R.KSEENLFEIITADEVHYFLQAATPK.E                                           | 3024.32650 | 3 | 3.41E-09 | 0.98  | 7.13    | -     | 2341.2   |
| AHQ-4-10, 6511             | R.KSEENLFEIITADEVHYFLQAATPK.E                                           | 3024.32650 | 3 | 7.92E-11 | 0.98  | 8.31    | -     | 2694.5   |
| AHQ-4-13, 7032             | R.KSEENLFEIITADEVHYFLQAATPK.E                                           | 3024.32650 | 3 | 1.05E-06 | 0.99  | 8.23    | -     | 3055.4   |
| AHQ-4-13-, 6876 - 6937     | R.KSEENLFEIITADEVHYFLQAATPK.E                                           | 3024.32650 | 3 | 1.85E-10 | 0.98  | 7.45    | -     | 2481.6   |
| AHQ-4-9, 6716              | R.KSEENLFEIITADEVHYFLQAATPK.E                                           | 3024.32650 | 3 | 1.04E-09 | 0.98  | 7.64    | -     | 2120.9   |
| AHQ-4-14-, 6777 - 6793     | R.KSEENLFEIITADEVHYFLQAATPK.E                                           | 3024.32650 | 3 | 1.13E-07 | 0.99  | 7.40    | -     | 3286.4   |
| AHQ-4-12, 7077 - 7078      | R.KSEENLFEIITADEVHYFLQAATPK.E                                           | 3024.32650 | 3 | 2.78E-15 | 0.98  | 7.52    | -     | 2815.5   |
| AHQ-4-11, 6829             | R.KSEENLFEIITADEVHYFLQAATPK.E                                           | 3024.32650 | 3 | 3.51E-11 | 0.99  | 7.82    | -     | 2921.9   |
| AHQ-4-12, 5671 - 5737      | R.LPETIDLGALYLSM*K.D                                                    | 1680.98719 | 2 | 3.85E-07 | 0.95  | 4.39    | -     | 1095.2   |
| AHQ-4-8, 6542 - 6615       | R.LPETIDLGALYLSM.K.D                                                    | 1664.98779 | 2 | 1.26E-07 | 0.97  | 4.75    | -     | 1961.4   |
| AHQ-4-8, 6445 - 6477       | R.LPETIDLGALYLSM.K.D                                                    | 1664.98779 | 2 | 2.71E-04 | 0.98  | 4.68    | -     | 2066.5   |
| AHQ-4-8, 6355 - 6413       | R.LPETIDLGALYLSM.K.D                                                    | 1664.98779 | 2 | 1.02E-04 | 0.97  | 3.73    | -     | 2248.1   |
| AHQ-4-13-, 5654            | R.LPETIDLGALYLSM*K.D                                                    | 1680.98719 | 2 | 6.77E-05 | 0.96  | 4.83    | -     | 1258.0   |
| AHQ-4-11, 6256             | R.LPETIDLGALYLSM.K.D                                                    | 1664.98779 | 2 | 4.46E-04 | 0.97  | 4.06    | -     | 2030.6   |
| AHQ-4-1, 6053              | R.LPETIDLGALYLSM*K.D                                                    | 1680.98719 | 2 | 3.83E-05 | 0.93  | 4.29    | -     | 1009.6   |
| AHQ-4-10, 5947 - 5955      | R.LPETIDLGALYLSM.K.D                                                    | 1664.98779 | 2 | 3.99E-06 | 0.98  | 5.47    | -     | 2218.3   |
| AHQ-4-8, 4811              | R.LPETIDLGALYLSM*KDTEK.G                                                | 2154.46684 | 3 | 6.00E-07 | 0.93  | 3.90    | -     | 1246.5   |
| AHQ-4-8, 4814 - 4885       | R.LPETIDLGALYLSM*KDTEK.G                                                | 2154.46684 | 2 | 1.15E-04 | 0.95  | 4.99    | -     | 747.8    |
| AHQ-4-12, 5334             | R.LPETIDLGALYLSM*KDTEK.G                                                | 2154.46684 | 3 | 8.24E-06 | 0.86  | 3.91    | -     | 824.9    |
| AHQ-4-8, 5042              | R.NRQEGLM*IASLLNEGYLQPADGM*SK.S                                         | 2856.18262 | 3 | 1.11E-05 | 0.92  | 5.01    | -     | 611.6    |
| AHQ-4-10, 5509 - 5545      | R.NRQEGLM*IASLLNEGYLQPADGM*SK.S                                         | 2824.18382 | 2 | 3.69E-07 | 0.97  | 4.93    | -     | 1525.1   |
| AHQ-4-10, 5279             | R.NRQEGLM*IASLLNEGYLQPADGM*SK.S                                         | 2840.18322 | 2 | 4.61E-06 | 0.89  | 4.05    | -     | 494.0    |
| AHQ-4-8, 5883 - 5953       | R.NRQEGLM*IASLLNEGYLQPADGM*SK.S                                         | 2824.18382 | 2 | 2.07E-07 | 0.97  | 5.86    | -     | 1235.3   |
| AHQ-4-8, 6027              | R.NRQEGLM*IASLLNEGYLQPADGM*SK.S                                         | 2824.18382 | 2 | 1.78E-04 | 0.83  | 3.58    | -     | 569.6    |
| AHQ-4-8, 5773 - 5818       | R.NRQEGLM*IASLLNEGYLQPADGM*SK.S                                         | 2824.18382 | 2 | 3.98E-04 | 0.94  | 4.50    | -     | 889.2    |
| AHQ-4-12, 4506             | K.QQDHFQAAFLER.D                                                        | 1766.89390 | 2 | 2.60E-08 | 0.80  | 3.40    | -     | 206.7    |
| AHQ-4-12, 7133             | K.SEEENLFEIITADEVHYFLQAATPK.E                                           | 2896.15359 | 2 | 2.70E-05 | 0.83  | 4.06    | -     | 460.8    |
| AHQ-4-12, 7130             | K.SEEENLFEIITADEVHYFLQAATPK.E                                           | 2896.15359 | 3 | 2.40E-09 | 0.91  | 4.73    | -     | 836.4    |
| AHQ-4-8, 7306 - 7318       | K.SEEENLFEIITADEVHYFLQAATPK.E                                           | 2896.15359 | 3 | 9.91E-11 | 0.92  | 4.57    | -     | 881.7    |
| AHQ-4-8, 7363              | K.SEEENLFEIITADEVHYFLQAATPK.E                                           | 2896.15359 | 2 | 2.53E-07 | 0.89  | 4.60    | -     | 433.0    |
| AHQ-4-10, 6577             | K.SEEENLFEIITADEVHYFLQAATPK.E                                           | 2896.15359 | 2 | 4.31E-08 | 0.90  | 4.86    | -     | 623.6    |
| AHQ-4-13-, 6917            | K.SEEENLFEIITADEVHYFLQAATPK.E                                           | 2896.15359 | 3 | 2.54E-09 | 0.78  | 3.91    | -     | 644.9    |
| AHQ-4-8, 7391              | K.SEEENLFEIITADEVHYFLQAATPK.E                                           | 2896.15359 | 3 | 9.30E-11 | 0.87  | 3.94    | -     | 857.5    |
| AHQ-4-10, 6587             | K.SEEENLFEIITADEVHYFLQAATPK.E                                           | 2896.15359 | 3 | 9.59E-08 | 0.71  | 3.83    | -     | 471.1    |
| AHQ-4-14-, 6817            | K.SEEENLFEIITADEVHYFLQAATPK.E                                           | 2896.15359 | 3 | 4.09E-10 | 0.91  | 4.44    | -     | 768.7    |
| AHQ-4-14-, 6819            | K.SEEENLFEIITADEVHYFLQAATPK.E                                           | 2896.15359 | 2 | 2.25E-04 | 0.77  | 3.55    | -     | 466.9    |
| gj4503745 ref NP_001447.1  | filamin 1 (actin-binding protein-280); filamin 1; filamin A, alpha (act |            |   | 4.44E-15 | 95.91 | 1150.35 | 54.70 | 280757.4 |
| AHQ-4-5, 5125 - 5197       | R.AEAGVPAEFSIWTRE                                                       | 1534.69735 | 2 | 3.32E-07 | 0.71  | 3.11    | -     | 328.2    |

|                        |                                  |            |   |          |      |      |   |        |
|------------------------|----------------------------------|------------|---|----------|------|------|---|--------|
| AHQ-4-6, 1788          | K.AEISFEDRK.D                    | 1095.18763 | 2 | 2.96E-04 | 0.87 | 2.70 | - | 1259.8 |
| AHQ-4-3, 2527 - 2601   | K.AFGPGLQGGGAGSPAR.F             | 1430.55077 | 2 | 1.07E-07 | 0.90 | 3.52 | - | 1122.6 |
| AHQ-4-3, 2683          | K.AFGPGLQGGGAGSPAR.F             | 1430.55077 | 2 | 1.97E-06 | 0.96 | 3.79 | - | 1716.2 |
| AHQ-4-4, 2518          | K.AFGPGLQGGGAGSPAR.F             | 1430.55077 | 2 | 3.32E-05 | 0.91 | 3.37 | - | 1264.6 |
| AHQ-4-4, 2536          | K.AFGPGLQGGGAGSPAR.F             | 1430.55077 | 1 | 1.47E-04 | 0.07 | 2.14 | - | 119.7  |
| AHQ-4-2, 2696 - 2706   | K.AFGPGLQGGGAGSPAR.F             | 1430.55077 | 2 | 6.91E-07 | 0.97 | 4.23 | - | 1916.4 |
| AHQ-4-1, 2705          | K.AFGPGLQGGGAGSPAR.F             | 1430.55077 | 2 | 8.34E-09 | 0.95 | 3.71 | - | 1616.4 |
| AHQ-4-5, 2393 - 2394   | K.AFGPGLQGGGAGSPAR.F             | 1430.55077 | 2 | 1.01E-06 | 0.93 | 3.72 | - | 1239.2 |
| AHQ-4-2, 2530 - 2560   | K.AFGPGLQGGGAGSPAR.F             | 1430.55077 | 2 | 6.63E-09 | 0.91 | 3.59 | - | 1190.5 |
| AHQ-4-1, 2862          | K.AFGPGLQGGGAGSPAR.F             | 1430.55077 | 2 | 1.09E-06 | 0.86 | 3.23 | - | 903.0  |
| AHQ-4-4, 2526          | K.AFGPGLQGGGAGSPAR.F             | 1430.55077 | 1 | 8.34E-04 | 0.09 | 2.10 | - | 118.4  |
| AHQ-4-14, 3541 - 3601  | K.AGNMMLLVGVHGPR.T               | 1451.67973 | 2 | 3.41E-06 | 0.78 | 3.34 | - | 660.9  |
| AHQ-4-14, 4062 - 4120  | K.AGNMMLLVGVHGPR.T               | 1435.68033 | 2 | 4.54E-06 | 0.86 | 3.16 | - | 858.1  |
| AHQ-4-14, 3912         | K.AGNMMLLVGVHGPR.T               | 1451.67973 | 2 | 3.05E-07 | 0.73 | 2.54 | - | 737.7  |
| AHQ-4-14, 4100 - 4116  | K.AGNMMLLVGVHGPR.T               | 1435.68033 | 2 | 1.24E-04 | 0.87 | 3.83 | - | 840.5  |
| AHQ-4-14, 3773 - 3850  | K.AGNMMLLVGVHGPR.T               | 1451.67973 | 2 | 1.09E-06 | 0.86 | 3.19 | - | 735.1  |
| AHQ-4-14-, 2621 - 2689 | K.AGNMMLLVGVHGPR.T               | 1451.67973 | 3 | 6.72E-04 | 0.91 | 3.85 | - | 1528.7 |
| AHQ-4-14, 3648 - 3708  | K.AGNMMLLVGVHGPR.T               | 1451.67973 | 2 | 2.03E-05 | 0.90 | 3.85 | - | 957.5  |
| AHQ-4-14-, 3295 - 3357 | K.AGNMMLLVGVHGPR.T               | 1435.68033 | 2 | 1.20E-08 | 0.80 | 3.01 | - | 710.2  |
| AHQ-4-14, 3633         | K.AGNMMLLVGVHGPR.T               | 1451.67973 | 3 | 2.24E-05 | 0.78 | 3.03 | - | 1006.9 |
| AHQ-4-14, 4350 - 4428  | K.AGNMMLLVGVHGPR.T               | 1435.68033 | 2 | 1.85E-10 | 0.77 | 3.25 | - | 591.9  |
| AHQ-4-14-, 3001 - 3005 | K.AGNMMLLVGVHGPR.T               | 1435.68033 | 2 | 2.74E-06 | 0.89 | 3.66 | - | 843.8  |
| AHQ-4-14-, 3002        | K.AGNMMLLVGVHGPR.T               | 1435.68033 | 3 | 4.27E-05 | 0.93 | 3.85 | - | 1563.2 |
| AHQ-4-14-, 2617 - 2694 | K.AGNMMLLVGVHGPR.T               | 1451.67973 | 2 | 7.08E-06 | 0.80 | 3.31 | - | 623.9  |
| AHQ-4-1, 1746 - 1805   | R.AGQSAAGAAPGGGVDR.D             | 1443.50471 | 2 | 7.32E-04 | 0.64 | 2.74 | - | 638.3  |
| AHQ-4-2, 2175 - 2182   | K.AGVAPLQVK.V                    | 883.07036  | 2 | 1.43E-05 | 0.82 | 2.69 | - | 699.2  |
| AHQ-4-1, 2385          | K.AGVAPLQVK.V                    | 883.07036  | 2 | 9.81E-04 | 0.87 | 2.96 | - | 731.3  |
| AHQ-4-1, 7270 - 7329   | K.AHEPTYFTVDCAEAGQGDVSIK.C       | 2567.76960 | 3 | 4.16E-04 | 0.96 | 4.91 | - | 1804.2 |
| AHQ-4-2, 7588 - 7656   | K.AHEPTYFTVDCAEAGQGDVSIK.C       | 2567.76960 | 3 | 1.52E-07 | 0.91 | 4.16 | - | 1165.7 |
| AHQ-4-2, 2518 - 2546   | K.AHVVPFCFDASK.V                 | 1232.39073 | 2 | 8.09E-08 | 0.67 | 2.79 | - | 543.8  |
| AHQ-4-1, 2717 - 2750   | K.AHVVPFCFDASK.V                 | 1232.39073 | 2 | 7.41E-04 | 0.66 | 2.53 | - | 520.9  |
| AHQ-4-4, 2510          | K.AHVVPFCFDASK.V                 | 1232.39073 | 2 | 6.20E-04 | 0.81 | 2.62 | - | 719.0  |
| AHQ-4-1, 6489 - 6569   | R.ALGALVDSAPGLCPDWSDWASKPVTNAR.E | 3233.53437 | 3 | 4.44E-15 | 0.87 | 4.62 | - | 531.2  |
| AHQ-4-5, 6149 - 6155   | R.ALGALVDSAPGLCPDWSDWASKPVTNAR.E | 3233.53437 | 3 | 2.45E-11 | 0.94 | 5.48 | - | 1101.3 |
| AHQ-4-4, 6458 - 6526   | R.ALGALVDSAPGLCPDWSDWASKPVTNAR.E | 3233.53437 | 3 | 7.83E-13 | 0.96 | 6.31 | - | 963.4  |
| AHQ-4-3, 6533 - 6559   | R.ALGALVDSAPGLCPDWSDWASKPVTNAR.E | 3233.53437 | 3 | 3.53E-09 | 0.93 | 5.21 | - | 804.7  |
| AHQ-4-6, 6299          | R.ALGALVDSAPGLCPDWSDWASKPVTNAR.E | 3233.53437 | 3 | 5.05E-08 | 0.90 | 4.95 | - | 447.1  |
| AHQ-4-6, 6186          | R.ALGALVDSAPGLCPDWSDWASKPVTNAR.E | 3233.53437 | 3 | 7.78E-11 | 0.92 | 5.04 | - | 589.3  |
| AHQ-4-8, 6134          | R.ALGALVDSAPGLCPDWSDWASKPVTNAR.E | 3233.53437 | 3 | 5.77E-09 | 0.69 | 3.63 | - | 463.2  |
| AHQ-4-5, 6431          | R.ALGALVDSAPGLCPDWSDWASKPVTNAR.E | 3233.53437 | 3 | 7.61E-14 | 0.87 | 4.43 | - | 546.4  |
| AHQ-4-5, 6261 - 6330   | R.ALGALVDSAPGLCPDWSDWASKPVTNAR.E | 3233.53437 | 3 | 1.62E-12 | 0.90 | 4.97 | - | 505.8  |
| AHQ-4-9, 5631 - 5635   | R.ALGALVDSAPGLCPDWSDWASKPVTNAR.E | 3233.53437 | 3 | 7.48E-07 | 0.83 | 4.40 | - | 558.9  |
| AHQ-4-2, 6520 - 6602   | R.ALGALVDSAPGLCPDWSDWASKPVTNAR.E | 3233.53437 | 3 | 4.27E-14 | 0.96 | 6.06 | - | 829.3  |
| AHQ-4-7, 6222          | R.ALGALVDSAPGLCPDWSDWASKPVTNAR.E | 3233.53437 | 3 | 6.12E-10 | 0.81 | 3.92 | - | 685.5  |
| AHQ-4-2, 6375 - 6448   | R.ALGALVDSAPGLCPDWSDWASKPVTNAR.E | 3233.53437 | 3 | 4.89E-12 | 0.95 | 5.66 | - | 885.9  |
| AHQ-4-3, 6627          | R.ALGALVDSAPGLCPDWSDWASKPVTNAR.E | 3233.53437 | 3 | 1.59E-06 | 0.91 | 5.02 | - | 602.2  |
| AHQ-4-1, 6365 - 6422   | R.ALGALVDSAPGLCPDWSDWASKPVTNAR.E | 3233.53437 | 3 | 1.52E-08 | 0.95 | 5.02 | - | 1132.6 |
| AHQ-4-3, 1447          | R.ALTQTGGPHVK.A                  | 1109.26067 | 1 | 2.72E-04 | 0.04 | 1.82 | - | 224.2  |
| AHQ-4-3, 3285          | R.ANLPQSFQVDTSK.A                | 1435.56409 | 1 | 1.21E-10 | 0.72 | 3.56 | - | 378.3  |
| AHQ-4-3, 3503          | R.ANLPQSFQVDTSK.A                | 1435.56409 | 1 | 2.12E-05 | 0.07 | 1.97 | - | 240.4  |
| AHQ-4-4, 3264 - 3266   | R.ANLPQSFQVDTSK.A                | 1435.56409 | 1 | 1.11E-04 | 0.20 | 2.10 | - | 313.1  |
| AHQ-4-5, 3115          | R.ANLPQSFQVDTSK.A                | 1435.56409 | 1 | 4.78E-08 | 0.71 | 2.98 | - | 386.6  |
| AHQ-4-1, 3511 - 3589   | R.ANLPQSFQVDTSK.A                | 1435.56409 | 2 | 3.12E-04 | 0.78 | 3.27 | - | 472.7  |
| AHQ-4-8, 2813 - 2858   | R.ANLPQSFQVDTSK.A                | 1435.56409 | 2 | 1.54E-07 | 0.87 | 3.08 | - | 616.7  |
| AHQ-4-7, 2985 - 2989   | R.ANLPQSFQVDTSK.A                | 1435.56409 | 2 | 3.71E-10 | 0.90 | 3.63 | - | 646.4  |
| AHQ-4-2, 3270          | R.ANLPQSFQVDTSK.A                | 1435.56409 | 1 | 4.38E-06 | 0.77 | 3.37 | - | 419.6  |
| AHQ-4-2, 3518          | R.ANLPQSFQVDTSK.A                | 1435.56409 | 2 | 4.63E-08 | 0.90 | 3.22 | - | 695.3  |
| AHQ-4-6, 3044 - 3046   | R.ANLPQSFQVDTSK.A                | 1435.56409 | 1 | 1.32E-06 | 0.54 | 2.55 | - | 422.4  |
| AHQ-4-1, 3409          | R.ANLPQSFQVDTSK.A                | 1435.56409 | 1 | 7.90E-05 | 0.45 | 2.46 | - | 392.4  |
| AHQ-4-2, 3208 - 3282   | R.ANLPQSFQVDTSK.A                | 1435.56409 | 2 | 7.45E-08 | 0.77 | 3.04 | - | 476.1  |
| AHQ-4-2, 3526          | R.ANLPQSFQVDTSK.A                | 1435.56409 | 1 | 3.18E-06 | 0.67 | 3.18 | - | 391.7  |
| AHQ-4-5, 3083 - 3117   | R.ANLPQSFQVDTSK.A                | 1435.56409 | 2 | 1.03E-09 | 0.84 | 3.54 | - | 439.7  |
| AHQ-4-4, 3480          | R.ANLPQSFQVDTSK.A                | 1435.56409 | 1 | 1.35E-05 | 0.37 | 2.17 | - | 314.7  |
| AHQ-4-6, 3039 - 3047   | R.ANLPQSFQVDTSK.A                | 1435.56409 | 2 | 7.92E-11 | 0.83 | 3.62 | - | 505.5  |
| AHQ-4-2, 4672          | R.ANLPQSFQVDTSKAGVAPLQVK.V       | 2299.61185 | 3 | 1.38E-08 | 0.80 | 3.24 | - | 663.3  |
| AHQ-4-6, 3104          | R.APSVANVSHCDLSLK.I              | 1656.84249 | 2 | 4.81E-04 | 0.86 | 4.05 | - | 441.5  |
| AHQ-4-5, 3138          | R.APSVANVSHCDLSLK.I              | 1656.84249 | 2 | 3.62E-06 | 0.93 | 4.23 | - | 908.1  |
| AHQ-4-4, 1636          | K.ATCAPQHAGPAGPADASK.V           | 1791.92336 | 2 | 3.52E-04 | 0.84 | 3.83 | - | 319.6  |
| AHQ-4-1, 3787          | R.AWGPGLGGVVGK.S                 | 1227.39403 | 2 | 1.29E-05 | 0.93 | 3.81 | - | 936.7  |
| AHQ-4-4, 3614          | R.AWGPGLGGVVGK.S                 | 1227.39403 | 2 | 1.10E-04 | 0.88 | 3.78 | - | 665.4  |
| AHQ-4-3, 3625          | R.AWGPGLGGVVGK.S                 | 1227.39403 | 2 | 2.55E-08 | 0.93 | 3.91 | - | 981.9  |
| AHQ-4-1, 3769 - 3773   | R.AWGPGLGGVVGK.S                 | 1227.39403 | 2 | 1.12E-06 | 0.93 | 3.59 | - | 889.6  |
| AHQ-4-6, 3271 - 3342   | R.AWGPGLGGVVGK.S                 | 1227.39403 | 2 | 9.25E-07 | 0.88 | 3.34 | - | 824.2  |
| AHQ-4-5, 3394          | R.AWGPGLGGVVGK.S                 | 1227.39403 | 2 | 4.62E-05 | 0.85 | 3.42 | - | 679.2  |
| AHQ-4-6, 3344 - 3346   | R.AWGPGLGGVVGK.S                 | 1227.39403 | 1 | 4.54E-04 | 0.22 | 1.97 | - | 544.4  |
| AHQ-4-2, 3730 - 3806   | R.AWGPGLGGVVGK.S                 | 1227.39403 | 2 | 7.82E-06 | 0.91 | 3.65 | - | 922.7  |
| AHQ-4-2, 3642 - 3715   | R.AWGPGLGGVVGK.S                 | 1227.39403 | 2 | 1.14E-05 | 0.88 | 3.61 | - | 717.5  |
| AHQ-4-2, 3118 - 3186   | R.AYGPPIEPTGNMVK.K               | 1434.64274 | 2 | 1.57E-05 | 0.65 | 3.33 | - | 425.2  |
| AHQ-4-5, 2971          | R.AYGPPIEPTGNMVK.K               | 1434.64274 | 1 | 5.08E-04 | 0.46 | 2.51 | - | 381.1  |
| AHQ-4-2, 2523          | R.AYGPPIEPTGNM*VK.K              | 1450.64214 | 2 | 3.13E-04 | 0.60 | 2.70 | - | 379.5  |
| AHQ-4-6, 3183          | R.AYGPPIEPTGNMVK.K               | 1434.64274 | 2 | 3.27E-04 | 0.85 | 3.30 | - | 748.6  |
| AHQ-4-3, 3183          | R.AYGPPIEPTGNMVK.K               | 1434.64274 | 1 | 7.15E-04 | 0.75 | 3.25 | - | 416.0  |
| AHQ-4-2, 3368 - 3448   | R.AYGPPIEPTGNMVK.K               | 1434.64274 | 2 | 5.12E-04 | 0.69 | 2.96 | - | 604.1  |
| AHQ-4-3, 3444          | R.AYGPPIEPTGNMVK.K               | 1434.64274 | 2 | 7.38E-05 | 0.70 | 2.78 | - | 496.8  |
| AHQ-4-1, 2834          | R.AYGPPIEPTGNM*VK.K              | 1450.64214 | 2 | 1.16E-04 | 0.72 | 2.92 | - | 467.4  |
| AHQ-4-7, 2858 - 2863   | R.AYGPPIEPTGNMVK.K               | 1434.64274 | 2 | 6.09E-04 | 0.51 | 3.20 | - | 295.8  |
| AHQ-4-4, 3090 - 3166   | R.AYGPPIEPTGNMVK.K               | 1434.64274 | 2 | 4.24E-06 | 0.85 | 4.04 | - | 405.5  |
| AHQ-4-3, 6361 - 6431   | K.CAPGVVGAPEADIDFDIR.N           | 2017.24863 | 2 | 3.71E-08 | 0.92 | 4.32 | - | 627.7  |
| AHQ-4-6, 6098 - 6134   | K.CAPGVVGAPEADIDFDIR.N           | 2017.24863 | 2 | 3.71E-06 | 0.93 | 4.77 | - | 555.7  |
| AHQ-4-5, 6254          | K.CAPGVVGAPEADIDFDIR.N           | 2017.24863 | 2 | 1.79E-05 | 0.77 | 3.50 | - | 394.9  |
| AHQ-4-1, 6263          | K.CAPGVVGAPEADIDFDIR.N           | 2017.24863 | 2 | 7.83E-05 | 0.76 | 3.15 | - | 528.1  |
| AHQ-4-2, 6194          | K.CAPGVVGAPEADIDFDIR.N           | 2017.24863 | 2 | 1.99E-08 | 0.93 | 3.93 | - | 915.3  |
| AHQ-4-2, 6354 - 6422   | K.CAPGVVGAPEADIDFDIR.N           | 2017.24863 | 2 | 5.55E-08 | 0.91 | 3.81 | - | 748.4  |
| AHQ-4-2, 6376          | K.CAPGVVGAPEADIDFDIR.N           | 2017.24863 | 3 | 4.55E-11 | 0.97 | 5.41 | - | 2004.0 |
| AHQ-4-1, 6283 - 6285   | K.CAPGVVGAPEADIDFDIR.N           | 2017.24863 | 3 | 1.36E-09 | 0.97 | 6.11 | - | 1512.9 |
| AHQ-4-4, 6346 - 6414   | K.CAPGVVGAPEADIDFDIR.N           | 2017.24863 | 2 | 2.15E-07 | 0.86 | 3.74 | - | 605.6  |
| AHQ-4-3, 6593          | K.CAPGVVGAPEADIDFDIRNDNDFTVK.Y   | 3052.31840 | 3 | 2.76E-05 | 0.83 | 3.90 | - | 406.2  |
| AHQ-4-2, 6583 - 6614   | K.CAPGVVGAPEADIDFDIRNDNDFTVK.Y   | 3052.31840 | 3 | 9.53E-05 | 0.55 | 3.12 | - | 358.1  |
| AHQ-4-3, 6675 - 6741   | K.CAPGVVGAPEADIDFDIRNDNDFTVK.Y   | 3052.31840 | 3 | 1.92E-06 | 0.75 | 4.14 | - | 368.0  |
| AHQ-4-3, 2940 - 2941   | K.CSGPGLSPGMVR.A                 | 1219.41699 | 2 | 8.05E-06 | 0.61 | 2.59 | - | 501.4  |
| AHQ-4-2, 2926 - 2934   | K.CSGPGLSPGMVR.A                 | 1219.41699 | 2 | 4.08E-06 | 0.75 | 3.05 | - | 479.4  |
| AHQ-4-5, 4733 - 4747   | R.CSYQPTM*EGVHTVHVTFAGVPIPR.S    | 2702.06173 | 3 | 8.17E-04 | 0.93 | 5.41 | - | 524.2  |
| AHQ-4-2, 5087 - 5088   | R.CSYQPTM*EGVHTVHVTFAGVPIPR.S    | 2702.06173 | 3 | 1.47E-05 | 0.61 | 3.15 | - | 291.2  |
| AHQ-4-3, 5003 - 5029   | R.CSYQPTM*EGVHTVHVTFAGVPIPR.S    | 2702.06173 | 3 | 4.93E-04 | 0.90 | 4.25 | - | 617.8  |
| AHQ-4-2, 5450 - 5518   | R.CSYQPTMEGVHTVHVTFAGVPIPR.S     | 2686.06233 | 3 | 2.03E-06 | 0.88 | 4.23 | - | 481.8  |
| AHQ-4-1, 5589          | R.CSYQPTMEGVHTVHVTFAGVPIPR.S     | 2686.06233 | 2 | 1.39E-08 | 0.97 | 5.37 | - | 1152.6 |
| AHQ-4-3, 5496          | R.CSYQPTMEGVHTVHVTFAGVPIPR.S     | 2686.06233 | 2 | 4.98E-06 | 0.67 | 2.83 | - | 482.1  |

|                        |                                       |            |   |          |      |      |   |        |
|------------------------|---------------------------------------|------------|---|----------|------|------|---|--------|
| AHQ-4-2, 5003 - 5076   | R.CSYQPTM*EGVHTVHVTFAGVPIPR.S         | 2702.06173 | 3 | 2.42E-09 | 0.93 | 5.22 | - | 562.1  |
| AHQ-4-1, 5062 - 5063   | R.CSYQPTM*EGVHTVHVTFAGVPIPR.S         | 2702.06173 | 2 | 2.18E-04 | 0.88 | 4.13 | - | 490.7  |
| AHQ-4-1, 5535 - 5601   | R.CSYQPTMEGVHTVHVTFAGVPIPR.S          | 2686.06233 | 3 | 4.17E-06 | 0.92 | 4.72 | - | 787.0  |
| AHQ-4-5, 5213 - 5230   | R.CSYQPTMEGVHTVHVTFAGVPIPR.S          | 2686.06233 | 3 | 1.85E-04 | 0.90 | 4.09 | - | 680.3  |
| AHQ-4-4, 5463          | R.CSYQPTMEGVHTVHVTFAGVPIPR.S          | 2686.06233 | 2 | 1.45E-04 | 0.85 | 2.99 | - | 747.7  |
| AHQ-4-2, 5496          | R.CSYQPTMEGVHTVHVTFAGVPIPR.S          | 2686.06233 | 2 | 6.47E-08 | 0.96 | 4.71 | - | 1217.5 |
| AHQ-4-5, 5229          | R.CSYQPTMEGVHTVHVTFAGVPIPR.S          | 2686.06233 | 2 | 7.01E-04 | 0.91 | 4.24 | - | 801.6  |
| AHQ-4-2, 5011 - 5014   | R.CSYQPTM*EGVHTVHVTFAGVPIPR.S         | 2702.06173 | 2 | 9.28E-08 | 0.91 | 4.40 | - | 538.5  |
| AHQ-4-2, 5516          | R.CSYQPTM*EGVHTVHVTFAGVPIPR.S         | 2702.06173 | 3 | 8.82E-05 | 0.66 | 3.54 | - | 450.7  |
| AHQ-4-1, 4105          | R.DAEM*PATEKDLAEDAPWK.K               | 2034.18987 | 2 | 2.53E-05 | 0.71 | 3.33 | - | 503.5  |
| AHQ-4-2, 4016 - 4038   | R.DAEM*PATEKDLAEDAPWK.K               | 2034.18987 | 2 | 7.97E-05 | 0.89 | 3.85 | - | 525.3  |
| AHQ-4-3, 4659          | R.DAEM*PATEKDLAEDAPWK.K               | 2018.19047 | 2 | 6.21E-05 | 0.62 | 2.69 | - | 561.2  |
| AHQ-4-2, 4614 - 4684   | R.DAEM*PATEKDLAEDAPWK.K               | 2018.19047 | 2 | 8.49E-04 | 0.81 | 3.14 | - | 814.0  |
| AHQ-4-2, 4680          | R.DAEM*PATEKDLAEDAPWK.K               | 2018.19047 | 3 | 2.38E-05 | 0.73 | 3.41 | - | 549.0  |
| AHQ-4-1, 4693          | R.DAEM*PATEKDLAEDAPWK.K               | 2018.19047 | 2 | 4.65E-06 | 0.87 | 3.83 | - | 851.1  |
| AHQ-4-2, 4156          | R.DAEM*PATEKDLAEDAPWK.K               | 2146.36338 | 3 | 3.09E-06 | 0.83 | 3.76 | - | 500.9  |
| AHQ-4-2, 4158          | R.DAEM*PATEKDLAEDAPWK.K               | 2146.36338 | 2 | 4.84E-05 | 0.81 | 3.56 | - | 581.9  |
| AHQ-4-3, 4084          | K.DAGEGGLSLAIEGPKS.A                  | 1501.62084 | 2 | 4.13E-05 | 0.89 | 4.01 | - | 1026.4 |
| AHQ-4-5, 3917 - 3986   | K.DAGEGGLSLAIEGPKS.A                  | 1501.62084 | 2 | 9.48E-06 | 0.94 | 4.76 | - | 1046.2 |
| AHQ-4-4, 4031 - 4050   | K.DAGEGGLSLAIEGPKS.A                  | 1501.62084 | 2 | 1.98E-04 | 0.92 | 4.09 | - | 1350.4 |
| AHQ-4-10, 3632 - 3688  | K.DAGEGGLSLAIEGPKS.A                  | 1501.62084 | 2 | 5.29E-04 | 0.44 | 2.83 | - | 637.8  |
| AHQ-4-1, 4081 - 4150   | K.DAGEGGLSLAIEGPKS.A                  | 1501.62084 | 2 | 5.26E-07 | 0.93 | 4.20 | - | 1328.7 |
| AHQ-4-1, 5018          | K.DAGEGLLAVQITDPEGK.P                 | 1713.86752 | 2 | 1.41E-05 | 0.89 | 3.63 | - | 1204.0 |
| AHQ-4-2, 4687 - 4712   | K.DAGEGLLAVQITDPEGKPK.K               | 1939.15612 | 2 | 2.13E-06 | 0.93 | 4.35 | - | 1108.9 |
| AHQ-4-1, 4535          | K.DAGEGLLAVQITDPEGKPK.K               | 1939.15612 | 2 | 6.34E-06 | 0.91 | 3.94 | - | 1106.7 |
| AHQ-4-3, 4691          | K.DAGEGLLAVQITDPEGKPK.K               | 1939.15612 | 2 | 2.14E-11 | 0.93 | 4.52 | - | 1082.4 |
| AHQ-4-10, 3896         | K.DAGEGLLAVQITDPEGKPK.K               | 1939.15612 | 2 | 1.58E-05 | 0.83 | 3.60 | - | 762.2  |
| AHQ-4-2, 4752          | K.DAGEGLLAVQITDPEGKPK.K               | 1939.15612 | 3 | 7.82E-06 | 0.83 | 3.97 | - | 890.4  |
| AHQ-4-4, 4655          | K.DAGEGLLAVQITDPEGKPK.K               | 1939.15612 | 2 | 2.69E-07 | 0.90 | 3.57 | - | 914.0  |
| AHQ-4-1, 4533 - 4598   | K.DAGEGLLAVQITDPEGKPK.K               | 1939.15612 | 2 | 7.75E-08 | 0.96 | 4.67 | - | 1553.3 |
| AHQ-4-4, 4376 - 4426   | K.DAGEGLLAVQITDPEGKPK.K               | 1939.15612 | 2 | 3.91E-08 | 0.95 | 4.54 | - | 1338.4 |
| AHQ-4-5, 4122 - 4197   | K.DAGEGLLAVQITDPEGKPK.K               | 1939.15612 | 2 | 4.21E-07 | 0.96 | 4.54 | - | 1488.5 |
| AHQ-4-8, 3830          | K.DAGEGLLAVQITDPEGKPK.K               | 1939.15612 | 2 | 6.84E-06 | 0.89 | 4.19 | - | 867.3  |
| AHQ-4-2, 4478 - 4487   | K.DAGEGLLAVQITDPEGKPK.K               | 1939.15612 | 3 | 5.04E-08 | 0.88 | 3.72 | - | 1088.1 |
| AHQ-4-7, 4074          | K.DAGEGLLAVQITDPEGKPK.K               | 1939.15612 | 2 | 2.23E-06 | 0.92 | 3.99 | - | 1105.9 |
| AHQ-4-2, 4471 - 4542   | K.DAGEGLLAVQITDPEGKPK.K               | 1939.15612 | 2 | 5.77E-09 | 0.93 | 4.32 | - | 1173.7 |
| AHQ-4-3, 4533 - 4603   | K.DAGEGLLAVQITDPEGKPK.K               | 1939.15612 | 2 | 1.54E-06 | 0.85 | 3.67 | - | 927.4  |
| AHQ-4-11, 4109 - 4182  | K.DAGEGLLAVQITDPEGKPK.K               | 1939.15612 | 2 | 4.15E-04 | 0.62 | 3.20 | - | 566.0  |
| AHQ-4-2, 4972          | K.DAGEGLLAVQITDPEGKPK.K               | 1939.15612 | 2 | 7.44E-06 | 0.96 | 4.20 | - | 1511.5 |
| AHQ-4-1, 4675 - 4745   | K.DAGEGLLAVQITDPEGKPK.K               | 1939.15612 | 2 | 1.98E-06 | 0.91 | 3.92 | - | 1191.5 |
| AHQ-4-1, 4411 - 4490   | K.DAGEGLLAVQITDPEGKPK.K               | 1939.15612 | 2 | 3.84E-05 | 0.83 | 3.09 | - | 871.4  |
| AHQ-4-2, 4598 - 4610   | K.DAGEGLLAVQITDPEGKPK.K               | 1939.15612 | 2 | 3.41E-07 | 0.95 | 4.90 | - | 1185.3 |
| AHQ-4-3, 4439 - 4507   | K.DAGEGLLAVQITDPEGKPK.K               | 1939.15612 | 2 | 2.59E-06 | 0.96 | 5.08 | - | 1288.4 |
| AHQ-4-3, 4453 - 4524   | K.DAGEGLLAVQITDPEGKPK.K               | 1939.15612 | 3 | 1.36E-07 | 0.89 | 3.44 | - | 1238.0 |
| AHQ-4-9, 3715          | K.DAGEGLLAVQITDPEGKPK.K               | 1939.15612 | 2 | 4.82E-06 | 0.90 | 4.01 | - | 1034.6 |
| AHQ-4-6, 4072 - 4122   | K.DAGEGLLAVQITDPEGKPK.K               | 1939.15612 | 2 | 3.04E-04 | 0.92 | 4.17 | - | 1214.0 |
| AHQ-4-5, 4539 - 4610   | R.DAGYGGLSLAIEGPKS.V                  | 1551.67986 | 2 | 5.57E-10 | 0.95 | 4.68 | - | 1306.2 |
| AHQ-4-5, 4230          | R.DAGYGGLSLAIEGPKS.V                  | 1551.67986 | 2 | 7.62E-08 | 0.88 | 3.50 | - | 821.1  |
| AHQ-4-3, 4680          | R.DAGYGGLSLAIEGPKS.V                  | 1551.67986 | 2 | 4.37E-04 | 0.90 | 3.28 | - | 1376.6 |
| AHQ-4-1, 4661          | R.DAGYGGLSLAIEGPKS.V                  | 1551.67986 | 2 | 4.58E-10 | 0.93 | 4.57 | - | 1024.0 |
| AHQ-4-2, 1844          | R.DAPQDFHPRD.V                        | 1198.22650 | 2 | 5.36E-08 | 0.59 | 2.55 | - | 387.7  |
| AHQ-4-1, 2002 - 2011   | R.DAPQDFHPRD.V                        | 1198.22650 | 2 | 5.35E-07 | 0.87 | 3.55 | - | 661.5  |
| AHQ-4-2, 5024          | K.DGSCGAYVQEPGDYEVSVK.F               | 2260.41990 | 2 | 9.31E-05 | 0.64 | 3.42 | - | 322.0  |
| AHQ-4-6, 4782          | K.DGSCGAYVQEPGDYEVSVK.F               | 2260.41990 | 2 | 2.14E-05 | 0.79 | 3.83 | - | 413.1  |
| AHQ-4-5, 4913 - 4985   | K.DGSCGAYVQEPGDYEVSVK.F               | 2260.41990 | 2 | 1.31E-06 | 0.91 | 4.26 | - | 703.0  |
| AHQ-4-6, 4883          | K.DGSCGAYVQEPGDYEVSVK.F               | 2260.41990 | 2 | 7.48E-06 | 0.84 | 3.51 | - | 610.3  |
| AHQ-4-1, 4914 - 4937   | K.DGSCGAYVQEPGDYEVSVK.F               | 2260.41990 | 2 | 5.12E-05 | 0.88 | 4.39 | - | 532.9  |
| AHQ-4-7, 4887 - 4911   | K.DGSCGAYVQEPGDYEVSVK.F               | 2260.41990 | 2 | 4.73E-05 | 0.89 | 4.49 | - | 576.3  |
| AHQ-4-4, 4966 - 5042   | K.DGSCGAYVQEPGDYEVSVK.F               | 2260.41990 | 2 | 1.59E-07 | 0.82 | 4.17 | - | 494.3  |
| AHQ-4-5, 5009 - 5077   | K.DGSCGAYVQEPGDYEVSVK.F               | 2260.41990 | 2 | 1.01E-06 | 0.92 | 4.58 | - | 758.5  |
| AHQ-4-4, 2339          | K.DKGEYTLVVK.W                        | 1152.32223 | 1 | 3.83E-04 | 0.40 | 2.77 | - | 415.4  |
| AHQ-4-14, 3288 - 3348  | K.DKGEYTLVVK.W                        | 1152.32223 | 2 | 2.39E-05 | 0.81 | 3.23 | - | 476.8  |
| AHQ-4-14-, 2305 - 2377 | K.DKGEYTLVVK.W                        | 1152.32223 | 2 | 5.90E-05 | 0.85 | 3.29 | - | 709.5  |
| AHQ-4-14, 3190 - 3566  | K.DKGEYTLVVK.W                        | 1152.32223 | 1 | 1.87E-06 | 0.34 | 2.57 | - | 381.0  |
| AHQ-4-14-, 2306 - 2381 | K.DKGEYTLVVK.W                        | 1152.32223 | 1 | 3.20E-04 | 0.22 | 2.27 | - | 406.9  |
| AHQ-4-2, 3387 - 3462   | K.DNNGNTYSCSYVPR.K                    | 1591.64109 | 2 | 2.93E-07 | 0.86 | 3.06 | - | 933.9  |
| AHQ-4-3, 3253          | R.DVDIIDHHDNTYTVK.Y                   | 1785.89230 | 2 | 2.82E-06 | 0.89 | 3.47 | - | 1028.2 |
| AHQ-4-2, 3092          | R.DVDIIDHHDNTYTVK.Y                   | 1785.89230 | 2 | 7.53E-05 | 0.93 | 3.75 | - | 1045.0 |
| AHQ-4-5, 2823          | R.DVDIIDHHDNTYTVK.Y                   | 1785.89230 | 2 | 6.76E-04 | 0.64 | 2.72 | - | 494.8  |
| AHQ-4-3, 3087 - 3164   | R.DVDIIDHHDNTYTVK.Y                   | 1785.89230 | 2 | 2.65E-06 | 0.87 | 3.58 | - | 720.8  |
| AHQ-4-2, 3259          | R.DVDIIDHHDNTYTVK.Y                   | 1785.89230 | 2 | 1.72E-05 | 0.91 | 4.25 | - | 707.6  |
| AHQ-4-1, 3213 - 3281   | R.DVDIIDHHDNTYTVK.Y                   | 1785.89230 | 2 | 1.55E-09 | 0.95 | 4.38 | - | 1010.5 |
| AHQ-4-3, 3011 - 3079   | R.DVDIIDHHDNTYTVK.Y                   | 1785.89230 | 3 | 8.45E-06 | 0.64 | 3.20 | - | 491.4  |
| AHQ-4-6, 3118 - 3186   | R.EAGAGGLAIAIEGPKS.A                  | 1427.58510 | 2 | 2.77E-08 | 0.96 | 4.20 | - | 1545.2 |
| AHQ-4-5, 3907          | R.EAGAGGLAIAIEGPKS.A                  | 1427.58510 | 1 | 1.90E-04 | 0.58 | 2.89 | - | 266.5  |
| AHQ-4-4, 3382          | R.EAGAGGLAIAIEGPKS.A                  | 1427.58510 | 1 | 8.57E-10 | 0.84 | 3.85 | - | 396.7  |
| AHQ-4-6, 3142          | R.EAGAGGLAIAIEGPKS.A                  | 1427.58510 | 1 | 1.92E-08 | 0.81 | 3.84 | - | 346.9  |
| AHQ-4-7, 3082          | R.EAGAGGLAIAIEGPKS.A                  | 1427.58510 | 1 | 9.11E-09 | 0.80 | 3.49 | - | 371.2  |
| AHQ-4-3, 3409          | R.EAGAGGLAIAIEGPKS.A                  | 1427.58510 | 2 | 1.63E-05 | 0.92 | 3.66 | - | 1216.8 |
| AHQ-4-5, 3177 - 3245   | R.EAGAGGLAIAIEGPKS.A                  | 1427.58510 | 2 | 1.95E-07 | 0.95 | 4.38 | - | 1211.9 |
| AHQ-4-1, 3681          | R.EAGAGGLAIAIEGPKS.A                  | 1427.58510 | 2 | 6.12E-08 | 0.92 | 3.57 | - | 1261.7 |
| AHQ-4-7, 3029 - 3105   | R.EAGAGGLAIAIEGPKS.A                  | 1427.58510 | 2 | 1.41E-05 | 0.85 | 3.10 | - | 1018.4 |
| AHQ-4-9, 2864          | R.EAGAGGLAIAIEGPKS.A                  | 1427.58510 | 1 | 2.53E-05 | 0.72 | 3.62 | - | 314.8  |
| AHQ-4-1, 3467 - 3505   | R.EAGAGGLAIAIEGPKS.A                  | 1427.58510 | 2 | 2.03E-06 | 0.94 | 4.38 | - | 1087.9 |
| AHQ-4-2, 2456 - 2534   | R.EATTEFSVDAR.A                       | 1226.27493 | 2 | 3.32E-05 | 0.86 | 3.08 | - | 786.4  |
| AHQ-4-2, 6430 - 6498   | R.EEGPYEVEVTDGVPVPGSPFPLEAVAPT.KPSK.V | 3487.85286 | 3 | 1.33E-08 | 0.93 | 4.88 | - | 906.2  |
| AHQ-4-3, 6523 - 6603   | R.EEGPYEVEVTDGVPVPGSPFPLEAVAPT.KPSK.V | 3487.85286 | 3 | 6.77E-07 | 0.91 | 4.88 | - | 731.6  |
| AHQ-4-2, 6566 - 6634   | R.EEGPYEVEVTDGVPVPGSPFPLEAVAPT.KPSK.V | 3487.85286 | 3 | 2.60E-07 | 0.95 | 5.63 | - | 828.0  |
| AHQ-4-4, 6434 - 6506   | R.EEGPYEVEVTDGVPVPGSPFPLEAVAPT.KPSK.V | 3487.85286 | 3 | 2.98E-08 | 0.96 | 6.33 | - | 1013.1 |
| AHQ-4-4, 6574 - 6587   | R.EEGPYEVEVTDGVPVPGSPFPLEAVAPT.KPSK.V | 3487.85286 | 3 | 8.23E-08 | 0.91 | 4.87 | - | 588.8  |
| AHQ-4-1, 6469 - 6533   | R.EEGPYEVEVTDGVPVPGSPFPLEAVAPT.KPSK.V | 3487.85286 | 3 | 1.42E-05 | 0.90 | 4.60 | - | 782.1  |
| AHQ-4-1, 6381 - 6449   | R.EEGPYEVEVTDGVPVPGSPFPLEAVAPT.KPSK.V | 3487.85286 | 3 | 7.70E-08 | 0.95 | 5.57 | - | 1005.8 |
| AHQ-4-5, 6477          | R.EEGPYEVEVTDGVPVPGSPFPLEAVAPT.KPSK.V | 3487.85286 | 3 | 4.10E-05 | 0.94 | 5.71 | - | 727.4  |
| AHQ-4-6, 6211 - 6282   | R.EEGPYEVEVTDGVPVPGSPFPLEAVAPT.KPSK.V | 3487.85286 | 3 | 7.28E-07 | 0.94 | 5.40 | - | 739.3  |
| AHQ-4-5, 6331 - 6410   | R.EEGPYEVEVTDGVPVPGSPFPLEAVAPT.KPSK.V | 3487.85286 | 3 | 2.17E-05 | 0.88 | 4.25 | - | 781.3  |
| AHQ-4-6, 4939          | R.EGPYSISLVGDEEIVPR.S                 | 1911.05809 | 2 | 2.55E-04 | 0.80 | 3.50 | - | 562.2  |
| AHQ-4-2, 5290 - 5312   | R.EGPYSISLVGDEEIVPR.S                 | 1911.05809 | 2 | 4.97E-09 | 0.93 | 4.44 | - | 1045.3 |
| AHQ-4-2, 5204 - 5223   | R.EGPYSISLVGDEEIVPR.S                 | 1911.05809 | 2 | 1.87E-11 | 0.92 | 3.87 | - | 1098.8 |
| AHQ-4-9, 4472 - 4487   | R.EGPYSISLVGDEEIVPR.S                 | 1911.05809 | 2 | 6.94E-08 | 0.96 | 4.99 | - | 1260.1 |
| AHQ-4-7, 4942          | R.EGPYSISLVGDEEIVPR.S                 | 1911.05809 | 2 | 1.33E-04 | 0.69 | 3.30 | - | 553.3  |
| AHQ-4-2, 4928 - 4940   | R.EGPYSISLVGDEEIVPR.S                 | 1911.05809 | 2 | 3.93E-10 | 0.83 | 3.43 | - | 639.2  |
| AHQ-4-4, 5166 - 5239   | R.EGPYSISLVGDEEIVPR.S                 | 1911.05809 | 2 | 5.11E-08 | 0.89 | 3.57 | - | 776.3  |
| AHQ-4-3, 5204 - 5275   | R.EGPYSISLVGDEEIVPR.S                 | 1911.05809 | 2 | 1.02E-07 | 0.92 | 3.64 | - | 952.4  |
| AHQ-4-5, 5045          | R.EGPYSISLVGDEEIVPR.S                 | 1911.05809 | 2 | 4.97E-06 | 0.90 | 4.10 | - | 899.0  |
| AHQ-4-10, 4537         | R.EGPYSISLVGDEEIVPR.S                 | 1911.05809 | 2 | 3.21E-07 | 0.76 | 3.09 | - | 737.9  |
| AHQ-4-1, 5267          | R.EGPYSISLVGDEEIVPR.S                 | 1911.05809 | 2 | 1.15E-05 | 0.91 | 3.65 | - | 1231.1 |
| AHQ-4-1, 5185 - 5253   | R.EGPYSISLVGDEEIVPR.S                 | 1911.05809 | 2 | 1.07E-06 | 0.90 | 3.70 | - | 999.3  |



|                        |                                 |            |   |          |      |      |   |        |
|------------------------|---------------------------------|------------|---|----------|------|------|---|--------|
| AHQ-4-8, 4649 - 4722   | R.EGPYSISVLYGDEEVPR.S           | 1911.05809 | 2 | 7.24E-05 | 0.82 | 3.31 | - | 757.4  |
| AHQ-4-5, 3719          | R.ENGVYLDVK.F                   | 1150.30633 | 2 | 1.90E-04 | 0.82 | 2.89 | - | 718.0  |
| AHQ-4-7, 3885          | R.ENGVYLDVK.F                   | 1150.30633 | 1 | 2.36E-04 | 0.25 | 2.11 | - | 365.1  |
| AHQ-4-3, 4029          | R.ENGVYLDVK.F                   | 1150.30633 | 1 | 2.19E-05 | 0.12 | 2.02 | - | 219.0  |
| AHQ-4-1, 4082          | R.ENGVYLDVK.F                   | 1150.30633 | 2 | 9.53E-04 | 0.58 | 2.58 | - | 426.4  |
| AHQ-4-3, 3441 - 3451   | K.FADQHVPGSPFSVK.V              | 1516.68203 | 2 | 4.62E-06 | 0.81 | 3.20 | - | 502.3  |
| AHQ-4-4, 3415 - 3440   | K.FADQHVPGSPFSVK.V              | 1516.68203 | 2 | 4.94E-07 | 0.80 | 3.21 | - | 554.8  |
| AHQ-4-7, 3043          | K.FADQHVPGSPFSVK.V              | 1516.68203 | 2 | 2.57E-07 | 0.90 | 3.55 | - | 738.9  |
| AHQ-4-12, 3311         | K.FADQHVPGSPFSVK.V              | 1516.68203 | 2 | 3.78E-04 | 0.80 | 3.19 | - | 360.1  |
| AHQ-4-6, 3128 - 3131   | K.FADQHVPGSPFSVK.V              | 1516.68203 | 3 | 7.37E-06 | 0.91 | 3.90 | - | 1056.7 |
| AHQ-4-13-, 3429 - 3430 | K.FADQHVPGSPFSVK.V              | 1516.68203 | 2 | 2.78E-05 | 0.85 | 3.52 | - | 534.0  |
| AHQ-4-5, 3279          | K.FADQHVPGSPFSVK.V              | 1516.68203 | 2 | 2.61E-04 | 0.65 | 2.52 | - | 435.4  |
| AHQ-4-13, 3547 - 3554  | K.FADQHVPGSPFSVK.V              | 1516.68203 | 2 | 3.03E-05 | 0.84 | 3.09 | - | 588.2  |
| AHQ-4-8, 2829          | K.FADQHVPGSPFSVK.V              | 1516.68203 | 3 | 3.25E-05 | 0.92 | 3.75 | - | 1309.2 |
| AHQ-4-1, 3601          | K.FADQHVPGSPFSVK.V              | 1516.68203 | 2 | 2.25E-10 | 0.86 | 3.04 | - | 681.2  |
| AHQ-4-6, 3114 - 3146   | K.FADQHVPGSPFSVK.V              | 1516.68203 | 2 | 8.84E-08 | 0.83 | 3.30 | - | 550.6  |
| AHQ-4-12, 5409         | R.FGGEHVNSPFQVTLALAGDQPSVQPLR.S | 2947.25342 | 2 | 1.97E-06 | 0.96 | 4.63 | - | 1340.2 |
| AHQ-4-4, 5598 - 5635   | R.FGGEHVNSPFQVTLALAGDQPSVQPLR.S | 2947.25342 | 2 | 7.40E-08 | 0.96 | 5.59 | - | 1134.5 |
| AHQ-4-2, 5784 - 5852   | R.FGGEHVNSPFQVTLALAGDQPSVQPLR.S | 2947.25342 | 2 | 2.68E-05 | 0.94 | 4.44 | - | 769.7  |
| AHQ-4-7, 5297 - 5299   | R.FGGEHVNSPFQVTLALAGDQPSVQPLR.S | 2947.25342 | 2 | 8.85E-06 | 0.96 | 5.29 | - | 892.5  |
| AHQ-4-6, 5359          | R.FGGEHVNSPFQVTLALAGDQPSVQPLR.S | 2947.25342 | 2 | 3.70E-08 | 0.97 | 5.20 | - | 1527.7 |
| AHQ-4-6, 5342          | R.FGGEHVNSPFQVTLALAGDQPSVQPLR.S | 2947.25342 | 3 | 1.46E-04 | 0.91 | 4.40 | - | 941.2  |
| AHQ-4-3, 5625 - 5687   | R.FGGEHVNSPFQVTLALAGDQPSVQPLR.S | 2947.25342 | 2 | 4.00E-04 | 0.95 | 4.48 | - | 1301.8 |
| AHQ-4-3, 5715 - 5784   | R.FGGEHVNSPFQVTLALAGDQPSVQPLR.S | 2947.25342 | 3 | 1.56E-08 | 0.95 | 5.58 | - | 945.2  |
| AHQ-4-11, 5201         | R.FGGEHVNSPFQVTLALAGDQPSVQPLR.S | 2947.25342 | 2 | 2.41E-09 | 0.95 | 5.11 | - | 939.4  |
| AHQ-4-3, 5623 - 5647   | R.FGGEHVNSPFQVTLALAGDQPSVQPLR.S | 2947.25342 | 3 | 2.34E-08 | 0.96 | 5.43 | - | 1391.1 |
| AHQ-4-8, 4979          | R.FGGEHVNSPFQVTLALAGDQPSVQPLR.S | 2947.25342 | 3 | 1.58E-07 | 0.94 | 5.91 | - | 699.9  |
| AHQ-4-11, 5192 - 5193  | R.FGGEHVNSPFQVTLALAGDQPSVQPLR.S | 2947.25342 | 3 | 3.82E-06 | 0.85 | 3.96 | - | 754.7  |
| AHQ-4-1, 5703 - 5725   | R.FGGEHVNSPFQVTLALAGDQPSVQPLR.S | 2947.25342 | 2 | 2.26E-05 | 0.95 | 4.98 | - | 808.3  |
| AHQ-4-8, 5002          | R.FGGEHVNSPFQVTLALAGDQPSVQPLR.S | 2947.25342 | 2 | 1.76E-05 | 0.94 | 4.29 | - | 1236.2 |
| AHQ-4-4, 5583 - 5655   | R.FGGEHVNSPFQVTLALAGDQPSVQPLR.S | 2947.25342 | 3 | 3.01E-09 | 0.93 | 5.26 | - | 774.3  |
| AHQ-4-2, 5694          | R.FGGEHVNSPFQVTLALAGDQPSVQPLR.S | 2947.25342 | 2 | 7.51E-05 | 0.96 | 5.09 | - | 1091.8 |
| AHQ-4-7, 5278 - 5293   | R.FGGEHVNSPFQVTLALAGDQPSVQPLR.S | 2947.25342 | 3 | 3.85E-05 | 0.95 | 5.57 | - | 1105.6 |
| AHQ-4-3, 5800 - 5811   | R.FGGEHVNSPFQVTLALAGDQPSVQPLR.S | 2947.25342 | 2 | 8.12E-06 | 0.97 | 6.16 | - | 890.2  |
| AHQ-4-13-, 5322        | R.FGGEHVNSPFQVTLALAGDQPSVQPLR.S | 2947.25342 | 3 | 5.68E-05 | 0.95 | 5.25 | - | 1115.6 |
| AHQ-4-5, 5393          | R.FGGEHVNSPFQVTLALAGDQPSVQPLR.S | 2947.25342 | 2 | 7.76E-08 | 0.97 | 5.36 | - | 1343.2 |
| AHQ-4-2, 5595 - 5619   | R.FGGEHVNSPFQVTLALAGDQPSVQPLR.S | 2947.25342 | 2 | 5.91E-06 | 0.91 | 4.09 | - | 991.8  |
| AHQ-4-1, 5843          | R.FGGEHVNSPFQVTLALAGDQPSVQPLR.S | 2947.25342 | 2 | 2.27E-10 | 0.98 | 5.93 | - | 1476.8 |
| AHQ-4-2, 5624 - 5695   | R.FGGEHVNSPFQVTLALAGDQPSVQPLR.S | 2947.25342 | 3 | 5.20E-05 | 0.90 | 4.54 | - | 694.2  |
| AHQ-4-1, 5670 - 5737   | R.FGGEHVNSPFQVTLALAGDQPSVQPLR.S | 2947.25342 | 3 | 1.88E-12 | 0.94 | 5.21 | - | 845.3  |
| AHQ-4-6, 4935 - 4936   | K.FNEEHIPDSPFVVPVAPSGDAR.R      | 2468.66280 | 2 | 2.62E-06 | 0.85 | 3.91 | - | 505.5  |
| AHQ-4-5, 4983 - 5065   | K.FNEEHIPDSPFVVPVAPSGDAR.R      | 2468.66280 | 2 | 2.13E-04 | 0.90 | 3.72 | - | 707.9  |
| AHQ-4-1, 3929          | K.FNGTHIPGSPFK.I                | 1302.46259 | 2 | 1.03E-07 | 0.54 | 2.56 | - | 528.1  |
| AHQ-4-5, 3521          | K.FNGTHIPGSPFK.I                | 1302.46259 | 2 | 9.00E-06 | 0.89 | 3.32 | - | 719.7  |
| AHQ-4-5, 3721          | K.FNGTHIPGSPFK.I                | 1302.46259 | 2 | 4.61E-04 | 0.57 | 2.82 | - | 394.2  |
| AHQ-4-5, 3705 - 3715   | K.FNGTHIPGSPFK.I                | 1302.46259 | 1 | 2.68E-04 | 0.36 | 1.93 | - | 468.6  |
| AHQ-4-5, 3411          | K.FNGTHIPGSPFK.I                | 1302.46259 | 2 | 2.51E-04 | 0.84 | 3.33 | - | 540.9  |
| AHQ-4-6, 3359          | K.FNGTHIPGSPFK.I                | 1302.46259 | 2 | 8.46E-05 | 0.86 | 3.23 | - | 779.0  |
| AHQ-4-1, 3758 - 3834   | K.FNGTHIPGSPFK.I                | 1302.46259 | 2 | 4.65E-04 | 0.63 | 2.98 | - | 370.8  |
| AHQ-4-5, 2683 - 2703   | R.FVPAEMGTHTVSVK.Y              | 1503.74821 | 2 | 6.24E-10 | 0.90 | 3.82 | - | 599.0  |
| AHQ-4-6, 2704          | R.FVPAEMGTHTVSVK.Y              | 1503.74821 | 2 | 1.05E-07 | 0.88 | 3.36 | - | 706.1  |
| AHQ-4-4, 2914 - 2922   | R.FVPAEMGTHTVSVK.Y              | 1503.74821 | 2 | 4.36E-05 | 0.80 | 3.44 | - | 396.7  |
| AHQ-4-3, 2287 - 2341   | R.FVPAEMGTHTVSVK.Y              | 1519.74761 | 2 | 8.39E-04 | 0.85 | 3.64 | - | 368.8  |
| AHQ-4-1, 3113          | R.FVPAEMGTHTVSVK.Y              | 1503.74821 | 2 | 1.40E-05 | 0.90 | 3.25 | - | 647.3  |
| AHQ-4-7, 2577          | R.FVPAEMGTHTVSVK.Y              | 1503.74821 | 2 | 1.05E-05 | 0.90 | 3.79 | - | 574.1  |
| AHQ-4-2, 6176 - 6219   | R.GAGSYTIM*VLFADQATPTSPIR.V     | 2313.61563 | 2 | 2.63E-04 | 0.88 | 4.42 | - | 533.6  |
| AHQ-4-2, 3478 - 3551   | R.GAGTGGLGLAVEGPSEAK.M          | 1571.71430 | 2 | 3.73E-05 | 0.86 | 3.93 | - | 609.7  |
| AHQ-4-3, 3328 - 3399   | R.GAGTGGLGLAVEGPSEAK.M          | 1571.71430 | 2 | 1.45E-06 | 0.93 | 4.16 | - | 1004.4 |
| AHQ-4-2, 3267 - 3339   | R.GAGTGGLGLAVEGPSEAK.M          | 1571.71430 | 2 | 9.99E-07 | 0.92 | 4.09 | - | 831.9  |
| AHQ-4-8, 2823          | R.GAGTGGLGLAVEGPSEAK.M          | 1571.71430 | 2 | 3.39E-05 | 0.77 | 3.13 | - | 687.4  |
| AHQ-4-4, 3323          | R.GAGTGGLGLAVEGPSEAK.M          | 1571.71430 | 2 | 3.22E-05 | 0.80 | 2.70 | - | 896.7  |
| AHQ-4-2, 3410 - 3414   | R.GAGTGGLGLAVEGPSEAK.M          | 1571.71430 | 2 | 6.43E-04 | 0.92 | 4.02 | - | 980.9  |
| AHQ-4-5, 3131 - 3210   | R.GAGTGGLGLAVEGPSEAK.M          | 1571.71430 | 2 | 2.23E-07 | 0.92 | 4.15 | - | 755.2  |
| AHQ-4-2, 3718 - 3763   | R.GAGTGGLGLAVEGPSEAK.M          | 1571.71430 | 2 | 7.33E-07 | 0.83 | 3.73 | - | 673.8  |
| AHQ-4-1, 3453 - 3521   | R.GAGTGGLGLAVEGPSEAK.M          | 1571.71430 | 2 | 2.19E-05 | 0.90 | 3.90 | - | 693.9  |
| AHQ-4-6, 3078          | R.GAGTGGLGLAVEGPSEAK.M          | 1571.71430 | 2 | 2.10E-05 | 0.82 | 3.33 | - | 651.9  |
| AHQ-4-1, 3575          | K.GKLDVQFSLGTLK.G               | 1293.49392 | 2 | 1.32E-06 | 0.93 | 3.73 | - | 1112.0 |
| AHQ-4-3, 3317 - 3395   | K.GKLDVQFSLGTLK.G               | 1293.49392 | 2 | 6.55E-05 | 0.88 | 3.61 | - | 794.0  |
| AHQ-4-2, 2128 - 2142   | K.GTVEPQLEAR.G                  | 1100.20741 | 2 | 6.30E-04 | 0.82 | 3.08 | - | 559.5  |
| AHQ-4-7, 1914          | K.GTVEPQLEAR.G                  | 1100.20741 | 2 | 2.35E-04 | 0.77 | 2.89 | - | 438.3  |
| AHQ-4-1, 2294          | K.GTVEPQLEAR.G                  | 1100.20741 | 2 | 1.62E-05 | 0.82 | 2.91 | - | 583.9  |
| AHQ-4-6, 1951 - 1955   | K.GTVEPQLEAR.G                  | 1100.20741 | 2 | 1.57E-05 | 0.88 | 3.27 | - | 653.2  |
| AHQ-4-5, 4915          | K.HTAM*VSWGGSIPNSPFR.V          | 1960.20541 | 2 | 2.70E-07 | 0.97 | 5.18 | - | 1351.5 |
| AHQ-4-5, 5318          | K.HTAM*VSWGGSIPNSPFR.V          | 1944.20601 | 2 | 4.98E-06 | 0.97 | 5.07 | - | 1329.1 |
| AHQ-4-2, 5206 - 5276   | K.HTAM*VSWGGSIPNSPFR.V          | 1960.20541 | 2 | 7.76E-06 | 0.96 | 4.66 | - | 1492.4 |
| AHQ-4-4, 5144          | K.HTAM*VSWGGSIPNSPFR.V          | 1960.20541 | 2 | 2.95E-04 | 0.94 | 4.71 | - | 836.5  |
| AHQ-4-4, 5554          | K.HTAM*VSWGGSIPNSPFR.V          | 1944.20601 | 2 | 1.92E-05 | 0.97 | 4.76 | - | 1626.3 |
| AHQ-4-1, 5329          | K.HTAM*VSWGGSIPNSPFR.V          | 1960.20541 | 3 | 2.80E-05 | 0.63 | 3.50 | - | 483.7  |
| AHQ-4-3, 5201 - 5273   | K.HTAM*VSWGGSIPNSPFR.V          | 1960.20541 | 2 | 7.03E-07 | 0.94 | 4.62 | - | 993.0  |
| AHQ-4-2, 5579          | K.HTAM*VSWGGSIPNSPFR.V          | 1944.20601 | 2 | 9.46E-06 | 0.97 | 5.30 | - | 1392.4 |
| AHQ-4-2, 5215          | K.HTAM*VSWGGSIPNSPFR.V          | 1960.20541 | 3 | 2.78E-05 | 0.82 | 3.91 | - | 844.5  |
| AHQ-4-1, 5317          | K.HTAM*VSWGGSIPNSPFR.V          | 1960.20541 | 2 | 8.62E-05 | 0.86 | 3.57 | - | 807.3  |
| AHQ-4-3, 5589 - 5591   | K.HTAM*VSWGGSIPNSPFR.V          | 1944.20601 | 2 | 9.66E-06 | 0.97 | 4.73 | - | 1514.9 |
| AHQ-4-1, 5715          | K.HTAM*VSWGGSIPNSPFR.V          | 1944.20601 | 2 | 4.08E-07 | 0.97 | 5.22 | - | 1116.8 |
| AHQ-4-3, 5295          | K.HTAM*VSWGGSIPNSPFR.V          | 1960.20541 | 2 | 6.43E-05 | 0.93 | 4.29 | - | 917.7  |
| AHQ-4-6, 3966 - 3968   | R.IANLQTDLSGGLR.L               | 1416.56231 | 2 | 1.40E-06 | 0.95 | 4.33 | - | 1071.2 |
| AHQ-4-11, 3958         | R.IANLQTDLSGGLR.L               | 1416.56231 | 2 | 1.45E-06 | 0.94 | 4.21 | - | 1026.9 |
| AHQ-4-13-, 4152        | R.IANLQTDLSGGLR.L               | 1416.56231 | 2 | 2.41E-04 | 0.90 | 3.66 | - | 942.6  |
| AHQ-4-1, 3966          | R.IANLQTDLSGGLR.L               | 1416.56231 | 2 | 5.32E-06 | 0.94 | 3.87 | - | 1214.0 |
| AHQ-4-4, 4242          | R.IANLQTDLSGGLR.L               | 1416.56231 | 2 | 4.96E-08 | 0.89 | 3.77 | - | 723.2  |
| AHQ-4-10, 3792         | R.IANLQTDLSGGLR.L               | 1416.56231 | 2 | 2.50E-07 | 0.88 | 3.58 | - | 849.0  |
| AHQ-4-1, 4063          | R.IANLQTDLSGGLR.L               | 1416.56231 | 2 | 4.65E-07 | 0.92 | 4.04 | - | 904.7  |
| AHQ-4-4, 3848          | R.IANLQTDLSGGLR.L               | 1416.56231 | 2 | 5.84E-04 | 0.87 | 3.12 | - | 1048.6 |
| AHQ-4-9, 3596          | R.IANLQTDLSGGLR.L               | 1416.56231 | 2 | 7.03E-05 | 0.94 | 3.73 | - | 1054.3 |
| AHQ-4-7, 3935          | R.IANLQTDLSGGLR.L               | 1416.56231 | 2 | 7.06E-05 | 0.72 | 2.74 | - | 934.7  |
| AHQ-4-2, 3998 - 4068   | R.IANLQTDLSGGLR.L               | 1416.56231 | 2 | 2.01E-06 | 0.93 | 4.02 | - | 934.2  |
| AHQ-4-1, 4566          | R.IANLQTDLSGGLR.L               | 1416.56231 | 2 | 7.79E-05 | 0.93 | 3.55 | - | 1112.0 |
| AHQ-4-3, 3876          | R.IANLQTDLSGGLR.L               | 1416.56231 | 2 | 7.33E-05 | 0.52 | 2.51 | - | 738.4  |
| AHQ-4-3, 4307          | R.IANLQTDLSGGLR.L               | 1416.56231 | 1 | 2.75E-06 | 0.59 | 3.10 | - | 266.8  |
| AHQ-4-3, 4292          | R.IANLQTDLSGGLR.L               | 1416.56231 | 1 | 5.27E-04 | 0.09 | 2.35 | - | 144.5  |
| AHQ-4-5, 4029          | R.IANLQTDLSGGLR.L               | 1416.56231 | 2 | 1.82E-07 | 0.92 | 3.65 | - | 1014.4 |
| AHQ-4-3, 4289 - 4360   | R.IANLQTDLSGGLR.L               | 1416.56231 | 2 | 6.70E-09 | 0.93 | 3.78 | - | 970.9  |
| AHQ-4-1, 4377 - 4393   | R.IANLQTDLSGGLR.L               | 1416.56231 | 2 | 9.35E-06 | 0.88 | 3.86 | - | 673.5  |
| AHQ-4-2, 4463 - 4535   | R.IANLQTDLSGGLR.L               | 1416.56231 | 2 | 9.23E-07 | 0.77 | 2.59 | - | 736.6  |
| AHQ-4-3, 4560          | R.IANLQTDLSGGLR.L               | 1416.56231 | 2 | 5.65E-05 | 0.87 | 3.42 | - | 819.5  |
| AHQ-4-2, 3898          | R.IANLQTDLSGGLR.L               | 1416.56231 | 2 | 2.04E-05 | 0.90 | 3.75 | - | 827.2  |
| AHQ-4-12, 4089         | R.IANLQTDLSGGLR.L               | 1416.56231 | 2 | 2.51E-06 | 0.92 | 4.25 | - | 923.7  |

|                       |                                |            |   |          |      |      |   |        |
|-----------------------|--------------------------------|------------|---|----------|------|------|---|--------|
| AHQ-4-13, 4280 - 4293 | R.IANLQTDLSDLGR.L              | 1416.56231 | 2 | 9.63E-05 | 0.86 | 3.43 | - | 859.4  |
| AHQ-4-1, 5681 - 5687  | K.IPEISIQDMTAQVTSPSGK.T        | 2003.26361 | 2 | 1.71E-06 | 0.97 | 4.84 | - | 1926.6 |
| AHQ-4-5, 5414 - 5491  | K.IPEISIQDMTAQVTSPSGK.T        | 2003.26361 | 2 | 5.18E-09 | 0.98 | 5.44 | - | 2259.5 |
| AHQ-4-3, 4236 - 4265  | K.IPEISIQDM*TAQVTSPSGK.T       | 2019.26301 | 2 | 6.20E-06 | 0.96 | 4.60 | - | 1520.6 |
| AHQ-4-11, 5180 - 5184 | K.IPEISIQDMTAQVTSPSGK.T        | 2003.26361 | 2 | 2.73E-09 | 0.89 | 3.96 | - | 937.2  |
| AHQ-4-4, 5536 - 5614  | K.IPEISIQDMTAQVTSPSGK.T        | 2003.26361 | 2 | 4.21E-09 | 0.96 | 4.91 | - | 1520.2 |
| AHQ-4-1, 4223 - 4294  | K.IPEISIQDM*TAQVTSPSGK.T       | 2019.26301 | 2 | 1.06E-04 | 0.97 | 4.87 | - | 1746.0 |
| AHQ-4-5, 5430         | K.IPEISIQDMTAQVTSPSGK.T        | 2003.26361 | 3 | 2.61E-08 | 0.93 | 4.75 | - | 844.2  |
| AHQ-4-5, 4005 - 4082  | K.IPEISIQDM*TAQVTSPSGK.T       | 2019.26301 | 2 | 1.01E-05 | 0.97 | 4.72 | - | 1973.9 |
| AHQ-4-7, 5285 - 5353  | K.IPEISIQDMTAQVTSPSGK.T        | 2003.26361 | 2 | 1.77E-10 | 0.98 | 6.45 | - | 1948.0 |
| AHQ-4-6, 4910         | K.IPEISIQDMTAQVTSPSGK.T        | 2003.26361 | 2 | 4.15E-04 | 0.89 | 3.97 | - | 699.6  |
| AHQ-4-4, 4167 - 4212  | K.IPEISIQDM*TAQVTSPSGK.T       | 2019.26301 | 2 | 6.68E-04 | 0.97 | 4.75 | - | 1565.2 |
| AHQ-4-7, 3922         | K.IPEISIQDM*TAQVTSPSGK.T       | 2019.26301 | 2 | 4.88E-06 | 0.96 | 4.86 | - | 1572.5 |
| AHQ-4-6, 5350         | K.IPEISIQDMTAQVTSPSGK.T        | 2003.26361 | 2 | 5.49E-08 | 0.95 | 4.81 | - | 1161.7 |
| AHQ-4-6, 3934 - 4008  | K.IPEISIQDM*TAQVTSPSGK.T       | 2019.26301 | 2 | 3.10E-06 | 0.96 | 4.64 | - | 1253.5 |
| AHQ-4-8, 5057         | K.IPEISIQDMTAQVTSPSGK.T        | 2003.26361 | 2 | 7.80E-06 | 0.92 | 4.02 | - | 1018.0 |
| AHQ-4-5, 5563         | K.IPEISIQDMTAQVTSPSGK.T        | 2003.26361 | 2 | 8.56E-06 | 0.84 | 4.27 | - | 540.5  |
| AHQ-4-4, 5607         | K.IPEISIQDMTAQVTSPSGK.T        | 2003.26361 | 2 | 4.75E-11 | 0.98 | 5.62 | - | 1750.1 |
| AHQ-4-1, 2613         | K.IVGPSSAAVPC.K.V              | 1157.36530 | 2 | 3.74E-08 | 0.82 | 3.03 | - | 604.5  |
| AHQ-4-2, 2476         | K.IVGPSSAAVPC.K.V              | 1157.36530 | 2 | 2.70E-09 | 0.93 | 4.20 | - | 941.5  |
| AHQ-4-5, 2339         | K.IVGPSSAAVPC.K.V              | 1157.36530 | 2 | 7.06E-05 | 0.48 | 2.50 | - | 482.6  |
| AHQ-4-4, 2463 - 2467  | K.IVGPSSAAVPC.K.V              | 1157.36530 | 2 | 2.00E-07 | 0.90 | 4.05 | - | 695.2  |
| AHQ-4-3, 2465         | K.IVGPSSAAVPC.K.V              | 1157.36530 | 2 | 6.46E-09 | 0.75 | 2.69 | - | 693.6  |
| AHQ-4-4, 4204 - 4218  | K.IVGPSSAAVPC.KVEPGLGADNSVVR.F | 2451.78478 | 3 | 9.54E-06 | 0.95 | 5.71 | - | 1284.8 |
| AHQ-4-3, 4248 - 4327  | K.IVGPSSAAVPC.KVEPGLGADNSVVR.F | 2451.78478 | 3 | 5.51E-09 | 0.96 | 5.27 | - | 1717.8 |
| AHQ-4-2, 4256 - 4326  | K.IVGPSSAAVPC.KVEPGLGADNSVVR.F | 2451.78478 | 3 | 7.40E-04 | 0.93 | 4.55 | - | 1384.9 |
| AHQ-4-2, 4402         | K.IVGPSSAAVPC.KVEPGLGADNSVVR.F | 2451.78478 | 2 | 7.94E-06 | 0.87 | 3.68 | - | 551.3  |
| AHQ-4-4, 4202 - 4270  | K.IVGPSSAAVPC.KVEPGLGADNSVVR.F | 2451.78478 | 2 | 4.41E-06 | 0.79 | 3.17 | - | 600.5  |
| AHQ-4-2, 4258 - 4334  | K.IVGPSSAAVPC.KVEPGLGADNSVVR.F | 2451.78478 | 2 | 4.68E-05 | 0.94 | 4.50 | - | 834.8  |
| AHQ-4-3, 4251 - 4319  | K.IVGPSSAAVPC.KVEPGLGADNSVVR.F | 2451.78478 | 2 | 1.45E-06 | 0.94 | 4.97 | - | 527.8  |
| AHQ-4-5, 4025 - 4026  | K.IVGPSSAAVPC.KVEPGLGADNSVVR.F | 2451.78478 | 3 | 7.38E-10 | 0.94 | 4.64 | - | 1546.0 |
| AHQ-4-1, 4317 - 4385  | K.IVGPSSAAVPC.KVEPGLGADNSVVR.F | 2451.78478 | 3 | 7.95E-07 | 0.89 | 4.65 | - | 905.7  |
| AHQ-4-5, 4379 - 4382  | R.KDGCSCVAVYVQEPGDYEVSVK.F     | 2388.59282 | 2 | 1.34E-04 | 0.70 | 2.63 | - | 842.3  |
| AHQ-4-4, 4315         | K.KNGQHVASSPIPVVISQSEIGDASR.V  | 2577.83547 | 2 | 8.12E-04 | 0.85 | 3.79 | - | 481.6  |
| AHQ-4-9, 3621         | K.KNGQHVASSPIPVVISQSEIGDASR.V  | 2577.83547 | 2 | 4.26E-06 | 0.83 | 3.46 | - | 525.5  |
| AHQ-4-1, 4519         | K.KNGQHVASSPIPVVISQSEIGDASR.V  | 2577.83547 | 2 | 4.04E-09 | 0.90 | 4.11 | - | 733.6  |
| AHQ-4-8, 3734         | K.KNGQHVASSPIPVVISQSEIGDASR.V  | 2577.83547 | 2 | 7.79E-07 | 0.89 | 3.82 | - | 629.0  |
| AHQ-4-4, 4244 - 4322  | K.KNGQHVASSPIPVVISQSEIGDASR.V  | 2577.83547 | 3 | 1.14E-10 | 0.91 | 4.39 | - | 1230.4 |
| AHQ-4-3, 4419 - 4465  | K.KNGQHVASSPIPVVISQSEIGDASR.V  | 2577.83547 | 3 | 3.08E-09 | 0.96 | 5.52 | - | 1453.7 |
| AHQ-4-1, 4481 - 4549  | K.KNGQHVASSPIPVVISQSEIGDASR.V  | 2577.83547 | 3 | 9.79E-08 | 0.86 | 3.60 | - | 1012.1 |
| AHQ-4-5, 3885 - 3959  | K.KNGQHVASSPIPVVISQSEIGDASR.V  | 2577.83547 | 3 | 2.41E-10 | 0.97 | 5.02 | - | 2173.3 |
| AHQ-4-5, 4053         | K.KNGQHVASSPIPVVISQSEIGDASR.V  | 2577.83547 | 2 | 2.16E-06 | 0.92 | 4.77 | - | 563.3  |
| AHQ-4-6, 4002 - 4016  | K.KNGQHVASSPIPVVISQSEIGDASR.V  | 2577.83547 | 2 | 2.30E-08 | 0.94 | 4.73 | - | 750.5  |
| AHQ-4-2, 3575         | K.KTHIQDNHDGTYTVAYVPDVTGR.Y    | 2588.77367 | 3 | 3.88E-05 | 0.90 | 4.12 | - | 1143.4 |
| AHQ-4-1, 3526         | K.KTHIQDNHDGTYTVAYVPDVTGR.Y    | 2588.77367 | 2 | 8.16E-05 | 0.94 | 4.48 | - | 890.7  |
| AHQ-4-3, 3484 - 3485  | K.KTHIQDNHDGTYTVAYVPDVTGR.Y    | 2588.77367 | 3 | 7.11E-06 | 0.94 | 4.67 | - | 1030.9 |
| AHQ-4-2, 3258 - 3335  | K.KTHIQDNHDGTYTVAYVPDVTGR.Y    | 2588.77367 | 3 | 1.12E-04 | 0.94 | 4.76 | - | 1090.9 |
| AHQ-4-2, 3444         | K.KTHIQDNHDGTYTVAYVPDVTGR.Y    | 2588.77367 | 2 | 1.74E-09 | 0.92 | 4.95 | - | 554.0  |
| AHQ-4-2, 3344         | K.KTHIQDNHDGTYTVAYVPDVTGR.Y    | 2588.77367 | 2 | 4.99E-04 | 0.81 | 3.85 | - | 399.5  |
| AHQ-4-1, 3614 - 3683  | K.KTHIQDNHDGTYTVAYVPDVTGR.Y    | 2588.77367 | 3 | 6.23E-05 | 0.92 | 4.17 | - | 1125.3 |
| AHQ-4-2, 3407 - 3484  | K.KTHIQDNHDGTYTVAYVPDVTGR.Y    | 2588.77367 | 3 | 1.02E-06 | 0.94 | 4.90 | - | 1038.3 |
| AHQ-4-2, 3440 - 3516  | K.KTHIQDNHDGTYTVAYVPDVTGR.Y    | 2588.77367 | 2 | 3.98E-06 | 0.92 | 4.19 | - | 816.2  |
| AHQ-4-1, 3519         | K.KTHIQDNHDGTYTVAYVPDVTGR.Y    | 2588.77367 | 3 | 4.19E-04 | 0.90 | 4.05 | - | 1003.2 |
| AHQ-4-3, 3572         | K.KTHIQDNHDGTYTVAYVPDVTGR.Y    | 2588.77367 | 3 | 1.57E-06 | 0.95 | 4.88 | - | 1359.9 |
| AHQ-4-4, 3907         | K.LDVQFSGLT.K.G                | 1108.26945 | 1 | 3.72E-05 | 0.09 | 2.13 | - | 214.8  |
| AHQ-4-1, 4050         | K.LDVQFSGLT.K.G                | 1108.26945 | 2 | 2.25E-05 | 0.92 | 3.38 | - | 1010.7 |
| AHQ-4-2, 3916 - 3967  | K.LDVQFSGLT.K.G                | 1108.26945 | 1 | 2.29E-05 | 0.54 | 2.64 | - | 313.8  |
| AHQ-4-2, 3962         | K.LDVQFSGLT.K.G                | 1108.26945 | 1 | 6.35E-04 | 0.13 | 1.82 | - | 249.7  |
| AHQ-4-3, 3939 - 3943  | K.LDVQFSGLT.K.G                | 1108.26945 | 1 | 1.10E-04 | 0.10 | 1.97 | - | 235.5  |
| AHQ-4-2, 3966 - 3970  | K.LDVQFSGLT.K.G                | 1108.26945 | 2 | 1.06E-04 | 0.94 | 3.55 | - | 1128.1 |
| AHQ-4-4, 3915         | K.LDVQFSGLT.K.G                | 1108.26945 | 2 | 7.27E-07 | 0.93 | 4.05 | - | 1022.4 |
| AHQ-4-3, 3947 - 3949  | K.LDVQFSGLT.K.G                | 1108.26945 | 2 | 5.51E-07 | 0.93 | 3.75 | - | 951.0  |
| AHQ-4-1, 6963         | R.LLRNGHVGISFVPK.E             | 2239.64761 | 3 | 2.65E-10 | 0.96 | 5.37 | - | 1319.6 |
| AHQ-4-9, 4123         | K.LPQLPITNFSR.D                | 1286.50461 | 2 | 5.38E-04 | 0.74 | 2.97 | - | 384.1  |
| AHQ-4-3, 5245         | K.LPQLPITNFSR.D                | 1286.50461 | 2 | 8.21E-06 | 0.87 | 3.18 | - | 715.6  |
| AHQ-4-4, 4908 - 4931  | K.LPQLPITNFSR.D                | 1286.50461 | 2 | 1.35E-04 | 0.90 | 2.96 | - | 773.0  |
| AHQ-4-11, 4578        | K.LPQLPITNFSR.D                | 1286.50461 | 2 | 6.54E-04 | 0.79 | 2.83 | - | 569.8  |
| AHQ-4-1, 5003         | K.LPQLPITNFSR.D                | 1286.50461 | 2 | 2.63E-05 | 0.87 | 3.01 | - | 769.7  |
| AHQ-4-2, 5170 - 5239  | K.LPQLPITNFSR.D                | 1286.50461 | 2 | 1.19E-04 | 0.80 | 2.87 | - | 611.2  |
| AHQ-4-6, 4578 - 4596  | K.LPQLPITNFSR.D                | 1286.50461 | 2 | 1.37E-05 | 0.84 | 2.90 | - | 672.6  |
| AHQ-4-2, 4918 - 4994  | K.LPQLPITNFSR.D                | 1286.50461 | 2 | 1.01E-04 | 0.88 | 3.03 | - | 707.8  |
| AHQ-4-3, 4927         | K.LPQLPITNFSR.D                | 1286.50461 | 2 | 2.92E-05 | 0.69 | 2.83 | - | 444.0  |
| AHQ-4-3, 5571 - 5640  | K.LQVEPAVDTSGVQCYGPIEGQQGVFR.E | 2766.03597 | 2 | 2.53E-12 | 0.97 | 5.88 | - | 1124.6 |
| AHQ-4-3, 5565 - 5636  | K.LQVEPAVDTSGVQCYGPIEGQQGVFR.E | 2766.03597 | 3 | 1.51E-04 | 0.98 | 6.09 | - | 1893.1 |
| AHQ-4-2, 5567 - 5646  | K.LQVEPAVDTSGVQCYGPIEGQQGVFR.E | 2766.03597 | 3 | 6.64E-12 | 0.98 | 7.00 | - | 2339.6 |
| AHQ-4-3, 5707 - 5777  | K.LQVEPAVDTSGVQCYGPIEGQQGVFR.E | 2766.03597 | 2 | 4.57E-09 | 0.96 | 4.90 | - | 1010.1 |
| AHQ-4-6, 5351         | K.LQVEPAVDTSGVQCYGPIEGQQGVFR.E | 2766.03597 | 2 | 1.15E-09 | 0.94 | 4.97 | - | 792.6  |
| AHQ-4-12, 5365        | K.LQVEPAVDTSGVQCYGPIEGQQGVFR.E | 2766.03597 | 2 | 3.17E-05 | 0.87 | 3.86 | - | 524.7  |
| AHQ-4-4, 5544 - 5618  | K.LQVEPAVDTSGVQCYGPIEGQQGVFR.E | 2766.03597 | 2 | 1.28E-06 | 0.91 | 4.08 | - | 805.7  |
| AHQ-4-10, 4877        | K.LQVEPAVDTSGVQCYGPIEGQQGVFR.E | 2766.03597 | 2 | 1.69E-05 | 0.80 | 3.36 | - | 452.0  |
| AHQ-4-6, 5310 - 5374  | K.LQVEPAVDTSGVQCYGPIEGQQGVFR.E | 2766.03597 | 2 | 1.19E-08 | 0.96 | 5.74 | - | 836.8  |
| AHQ-4-11, 5169        | K.LQVEPAVDTSGVQCYGPIEGQQGVFR.E | 2766.03597 | 2 | 1.16E-07 | 0.92 | 4.06 | - | 817.9  |
| AHQ-4-4, 5520 - 5603  | K.LQVEPAVDTSGVQCYGPIEGQQGVFR.E | 2766.03597 | 3 | 2.33E-14 | 0.97 | 6.40 | - | 1634.6 |
| AHQ-4-1, 5510 - 5573  | K.LQVEPAVDTSGVQCYGPIEGQQGVFR.E | 2766.03597 | 2 | 2.55E-08 | 0.96 | 4.94 | - | 1158.4 |
| AHQ-4-1, 5546 - 5614  | K.LQVEPAVDTSGVQCYGPIEGQQGVFR.E | 2766.03597 | 3 | 2.47E-10 | 0.98 | 6.45 | - | 2335.2 |
| AHQ-4-4, 5700         | K.LQVEPAVDTSGVQCYGPIEGQQGVFR.E | 2766.03597 | 2 | 3.31E-05 | 0.88 | 3.66 | - | 708.6  |
| AHQ-4-5, 5446 - 5461  | K.LQVEPAVDTSGVQCYGPIEGQQGVFR.E | 2766.03597 | 2 | 3.85E-06 | 0.94 | 4.51 | - | 912.6  |
| AHQ-4-5, 5453 - 5478  | K.LQVEPAVDTSGVQCYGPIEGQQGVFR.E | 2766.03597 | 3 | 3.53E-07 | 0.94 | 4.94 | - | 1321.4 |
| AHQ-4-2, 5690 - 5758  | K.LQVEPAVDTSGVQCYGPIEGQQGVFR.E | 2766.03597 | 2 | 3.67E-10 | 0.96 | 5.46 | - | 749.0  |
| AHQ-4-2, 5554 - 5623  | K.LQVEPAVDTSGVQCYGPIEGQQGVFR.E | 2766.03597 | 2 | 3.57E-06 | 0.96 | 5.07 | - | 961.6  |
| AHQ-4-1, 5605 - 5641  | K.LQVEPAVDTSGVQCYGPIEGQQGVFR.E | 2766.03597 | 2 | 5.41E-07 | 0.97 | 6.24 | - | 1043.1 |
| AHQ-4-1, 5709 - 5735  | K.LQVEPAVDTSGVQCYGPIEGQQGVFR.E | 2766.03597 | 2 | 7.97E-07 | 0.95 | 4.91 | - | 1011.9 |
| AHQ-4-5, 2722         | R.LLRNGHVGISFVPK.E             | 1424.67564 | 2 | 4.51E-05 | 0.61 | 2.62 | - | 558.0  |
| AHQ-4-6, 2656         | R.LLRNGHVGISFVPK.E             | 1424.67564 | 3 | 1.52E-05 | 0.89 | 3.54 | - | 1411.4 |
| AHQ-4-5, 2606         | R.LLRNGHVGISFVPK.E             | 1424.67564 | 2 | 4.18E-04 | 0.71 | 2.98 | - | 470.3  |
| AHQ-4-7, 3045         | R.LTVSSLLQESGLK.V              | 1262.43499 | 2 | 4.23E-04 | 0.81 | 3.02 | - | 621.4  |
| AHQ-4-4, 3399         | R.LTVSSLLQESGLK.V              | 1262.43499 | 2 | 5.03E-05 | 0.91 | 3.23 | - | 1005.6 |
| AHQ-4-1, 3571         | R.LTVSSLLQESGLK.V              | 1262.43499 | 2 | 4.25E-04 | 0.81 | 2.63 | - | 810.1  |
| AHQ-4-6, 3115         | R.LTVSSLLQESGLK.V              | 1262.43499 | 2 | 3.82E-04 | 0.87 | 3.24 | - | 933.2  |
| AHQ-4-13-, 4076       | R.LVSNHSLHETSSVFDLSLK.A        | 2201.42190 | 3 | 1.78E-04 | 0.89 | 3.52 | - | 1112.8 |
| AHQ-4-13-, 4084       | R.LVSNHSLHETSSVFDLSLK.A        | 2201.42190 | 2 | 8.48E-09 | 0.98 | 6.20 | - | 1927.8 |
| AHQ-4-14, 5441        | R.LVSNHSLHETSSVFDLSLK.A        | 2201.42190 | 3 | 2.09E-06 | 0.96 | 4.87 | - | 1350.2 |
| AHQ-4-4, 4056 - 4079  | R.LVSNHSLHETSSVFDLSLK.A        | 2201.42190 | 3 | 3.69E-05 | 0.96 | 5.07 | - | 1443.1 |
| AHQ-4-4, 4067         | R.LVSNHSLHETSSVFDLSLK.A        | 2201.42190 | 2 | 1.72E-06 | 0.96 | 5.19 | - | 1164.0 |
| AHQ-4-8, 3609         | R.LVSNHSLHETSSVFDLSLK.A        | 2201.42190 | 2 | 1.52E-05 | 0.93 | 4.60 | - | 836.2  |
| AHQ-4-7, 4039         | R.LVSNHSLHETSSVFDLSLK.A        | 2201.42190 | 2 | 8.54E-08 | 0.96 | 5.31 | - | 930.0  |
| AHQ-4-5, 4149 - 4150  | R.LVSNHSLHETSSVFDLSLK.A        | 2201.42190 | 2 | 8.79E-10 | 0.97 | 6.01 | - | 1407.3 |

|                        |                                 |            |   |          |      |      |   |        |
|------------------------|---------------------------------|------------|---|----------|------|------|---|--------|
| AHQ-4-3, 4155          | R.LVSNHSLHETSSVFVDSLTK.A        | 2201.42190 | 2 | 2.38E-06 | 0.95 | 5.10 | - | 973.2  |
| AHQ-4-13, 4201         | R.LVSNHSLHETSSVFVDSLTK.A        | 2201.42190 | 3 | 1.69E-05 | 0.96 | 5.21 | - | 1451.5 |
| AHQ-4-13, 4200         | R.LVSNHSLHETSSVFVDSLTK.A        | 2201.42190 | 2 | 4.16E-07 | 0.97 | 5.00 | - | 1462.9 |
| AHQ-4-5, 3799 - 3871   | R.LVSNHSLHETSSVFVDSLTK.A        | 2201.42190 | 2 | 8.33E-08 | 0.98 | 6.07 | - | 1666.1 |
| AHQ-4-1, 4623          | R.LVSNHSLHETSSVFVDSLTK.A        | 2201.42190 | 2 | 2.46E-08 | 0.96 | 5.06 | - | 1286.9 |
| AHQ-4-6, 3776 - 3791   | R.LVSNHSLHETSSVFVDSLTK.A        | 2201.42190 | 3 | 1.84E-06 | 0.97 | 5.73 | - | 1679.8 |
| AHQ-4-7, 3694          | R.LVSNHSLHETSSVFVDSLTK.A        | 2201.42190 | 3 | 5.41E-09 | 0.96 | 4.93 | - | 1331.5 |
| AHQ-4-11, 3854 - 3862  | R.LVSNHSLHETSSVFVDSLTK.A        | 2201.42190 | 2 | 1.62E-05 | 0.95 | 4.87 | - | 1031.2 |
| AHQ-4-6, 3774          | R.LVSNHSLHETSSVFVDSLTK.A        | 2201.42190 | 2 | 1.94E-06 | 0.97 | 5.29 | - | 1423.8 |
| AHQ-4-1, 4637          | R.LVSNHSLHETSSVFVDSLTK.A        | 2201.42190 | 3 | 2.43E-06 | 0.95 | 5.08 | - | 979.6  |
| AHQ-4-7, 3690 - 3705   | R.LVSNHSLHETSSVFVDSLTK.A        | 2201.42190 | 2 | 1.49E-06 | 0.95 | 4.58 | - | 1103.9 |
| AHQ-4-11, 3853         | R.LVSNHSLHETSSVFVDSLTK.A        | 2201.42190 | 3 | 2.54E-05 | 0.96 | 5.45 | - | 1202.6 |
| AHQ-4-5, 4234 - 4309   | R.LVSNHSLHETSSVFVDSLTK.A        | 2201.42190 | 2 | 1.30E-08 | 0.97 | 4.99 | - | 1260.5 |
| AHQ-4-13, 4550         | R.LYSVSYLLK.D                   | 1086.30538 | 2 | 9.67E-04 | 0.53 | 2.75 | - | 326.3  |
| AHQ-4-4, 2444 - 2522   | K.MDCQCEPEGYR.V                 | 1447.55375 | 2 | 1.83E-04 | 0.71 | 2.95 | - | 466.9  |
| AHQ-4-7, 2355 - 2357   | K.MDCQCEPEGYR.V                 | 1447.55375 | 2 | 2.31E-08 | 0.84 | 2.92 | - | 803.6  |
| AHQ-4-5, 2974          | R.NGHVGSFVPK.E                  | 1155.33104 | 1 | 3.40E-07 | 0.41 | 2.21 | - | 357.6  |
| AHQ-4-5, 2763          | R.NGHVGSFVPK.E                  | 1155.33104 | 1 | 2.28E-07 | 0.56 | 2.36 | - | 404.5  |
| AHQ-4-1, 4890 - 4894   | K.NGQHVASSPIPVISQSEIGDASR.V     | 2449.66256 | 2 | 3.68E-07 | 0.96 | 5.38 | - | 1081.5 |
| AHQ-4-1, 2119          | K.RAEFTVETR.S                   | 1109.21754 | 2 | 5.92E-06 | 0.95 | 3.65 | - | 1183.5 |
| AHQ-4-2, 1858          | K.RAEFTVETR.S                   | 1109.21754 | 2 | 4.50E-07 | 0.90 | 3.20 | - | 751.1  |
| AHQ-4-6, 2722          | R.RAPSVAHVSHCDLSLK.I            | 1813.02884 | 3 | 1.02E-04 | 0.97 | 5.19 | - | 1917.7 |
| AHQ-4-4, 3720          | K.RIANLQTDLSDGLR.L              | 1572.74866 | 2 | 1.33E-04 | 0.69 | 2.76 | - | 448.2  |
| AHQ-4-8, 2347          | R.RLTVSSLOESGLK.V               | 1418.62134 | 2 | 1.91E-05 | 0.95 | 4.07 | - | 1162.3 |
| AHQ-4-1, 3159 - 3239   | R.RLTVSSLOESGLK.V               | 1418.62134 | 2 | 2.19E-04 | 0.96 | 4.30 | - | 1645.1 |
| AHQ-4-2, 7555 - 7627   | K.SADFVVEAIGDDVGTLGFSVEGSPQAK.I | 2696.90399 | 3 | 1.69E-06 | 0.96 | 5.55 | - | 1801.8 |
| AHQ-4-3, 4145          | R.SAGQGEVLYYVEDPAGHQEEAK.V      | 2314.45074 | 2 | 3.86E-04 | 0.67 | 3.35 | - | 339.3  |
| AHQ-4-1, 4346          | R.SAGQGEVLYYVEDPAGHQEEAK.V      | 2314.45074 | 2 | 4.76E-05 | 0.86 | 3.74 | - | 508.3  |
| AHQ-4-1, 4161          | R.SAGQGEVLYYVEDPAGHQEEAK.V      | 2314.45074 | 2 | 2.19E-07 | 0.93 | 5.49 | - | 648.4  |
| AHQ-4-6, 3595          | R.SAGQGEVLYYVEDPAGHQEEAK.V      | 2314.45074 | 2 | 4.61E-06 | 0.91 | 4.13 | - | 692.2  |
| AHQ-4-3, 3891 - 3927   | R.SAGQGEVLYYVEDPAGHQEEAK.V      | 2314.45074 | 2 | 1.35E-06 | 0.89 | 4.08 | - | 650.7  |
| AHQ-4-3, 3892 - 3969   | R.SAGQGEVLYYVEDPAGHQEEAK.V      | 2314.45074 | 3 | 5.46E-06 | 0.96 | 4.54 | - | 1736.9 |
| AHQ-4-1, 4119          | R.SAGQGEVLYYVEDPAGHQEEAK.V      | 2314.45074 | 3 | 4.58E-05 | 0.87 | 3.47 | - | 1081.3 |
| AHQ-4-8, 3411          | R.SAGQGEVLYYVEDPAGHQEEAK.V      | 2314.45074 | 2 | 3.34E-09 | 0.83 | 3.72 | - | 511.7  |
| AHQ-4-4, 4092          | R.SAGQGEVLYYVEDPAGHQEEAK.V      | 2314.45074 | 2 | 2.04E-05 | 0.68 | 3.25 | - | 373.4  |
| AHQ-4-2, 4432          | R.SAGQGEVLYYVEDPAGHQEEAK.V      | 2314.45074 | 2 | 1.49E-08 | 0.91 | 4.35 | - | 725.5  |
| AHQ-4-2, 4328          | R.SAGQGEVLYYVEDPAGHQEEAK.V      | 2314.45074 | 2 | 4.36E-05 | 0.68 | 3.24 | - | 420.1  |
| AHQ-4-7, 3538          | R.SAGQGEVLYYVEDPAGHQEEAK.V      | 2314.45074 | 2 | 5.75E-07 | 0.85 | 4.00 | - | 542.1  |
| AHQ-4-2, 4228          | R.SAGQGEVLYYVEDPAGHQEEAK.V      | 2314.45074 | 2 | 3.65E-08 | 0.89 | 4.29 | - | 543.8  |
| AHQ-4-2, 4056          | R.SAGQGEVLYYVEDPAGHQEEAK.V      | 2314.45074 | 3 | 7.14E-06 | 0.88 | 3.99 | - | 954.5  |
| AHQ-4-2, 4054 - 4135   | R.SAGQGEVLYYVEDPAGHQEEAK.V      | 2314.45074 | 2 | 5.09E-10 | 0.95 | 5.31 | - | 816.7  |
| AHQ-4-2, 3914 - 3983   | R.SAGQGEVLYYVEDPAGHQEEAK.V      | 2314.45074 | 3 | 1.61E-06 | 0.92 | 4.44 | - | 1005.5 |
| AHQ-4-2, 3911 - 3984   | R.SAGQGEVLYYVEDPAGHQEEAK.V      | 2314.45074 | 2 | 1.45E-06 | 0.94 | 4.80 | - | 694.1  |
| AHQ-4-1, 4022 - 4089   | R.SAGQGEVLYYVEDPAGHQEEAK.V      | 2314.45074 | 2 | 1.60E-05 | 0.94 | 4.94 | - | 780.2  |
| AHQ-4-5, 3654 - 3658   | R.SAGQGEVLYYVEDPAGHQEEAK.V      | 2314.45074 | 3 | 5.10E-08 | 0.95 | 4.59 | - | 1531.0 |
| AHQ-4-1, 4021 - 4095   | R.SAGQGEVLYYVEDPAGHQEEAK.V      | 2314.45074 | 3 | 8.71E-09 | 0.94 | 4.60 | - | 1211.0 |
| AHQ-4-3, 3995          | R.SAGQGEVLYYVEDPAGHQEEAK.V      | 2314.45074 | 2 | 8.94E-05 | 0.82 | 3.83 | - | 535.9  |
| AHQ-4-3, 3335 - 3404   | K.SPFEVYVDK.S                   | 1084.20321 | 1 | 5.77E-04 | 0.55 | 2.50 | - | 587.6  |
| AHQ-4-2, 3326 - 3394   | K.SPFEVYVDK.S                   | 1084.20321 | 2 | 5.21E-06 | 0.94 | 3.27 | - | 1210.2 |
| AHQ-4-6, 3038 - 3107   | K.SPFEVYVDK.S                   | 1084.20321 | 1 | 1.39E-05 | 0.60 | 2.39 | - | 526.5  |
| AHQ-4-1, 3477          | K.SPFEVYVDK.S                   | 1084.20321 | 1 | 2.91E-05 | 0.82 | 3.25 | - | 838.9  |
| AHQ-4-3, 3343          | K.SPFEVYVDK.S                   | 1084.20321 | 1 | 3.07E-04 | 0.70 | 2.56 | - | 693.5  |
| AHQ-4-2, 3330          | K.SPFEVYVDK.S                   | 1084.20321 | 1 | 7.94E-06 | 0.78 | 3.02 | - | 682.9  |
| AHQ-4-1, 3470 - 3486   | K.SPFEVYVDK.S                   | 1084.20321 | 2 | 5.18E-05 | 0.92 | 3.07 | - | 1115.7 |
| AHQ-4-5, 3145          | K.SPFEVYVDK.S                   | 1084.20321 | 2 | 3.67E-06 | 0.88 | 2.55 | - | 1170.9 |
| AHQ-4-3, 3347 - 3360   | K.SPFEVYVDK.S                   | 1084.20321 | 2 | 7.94E-06 | 0.94 | 3.45 | - | 1297.4 |
| AHQ-4-4, 3339          | K.SPFEVYVDK.S                   | 1084.20321 | 2 | 8.82E-06 | 0.93 | 3.35 | - | 1239.8 |
| AHQ-4-4, 3347          | K.SPFEVYVDK.S                   | 1084.20321 | 1 | 3.47E-05 | 0.83 | 3.17 | - | 712.6  |
| AHQ-4-1, 4934          | K.SPFSVAVSPSLDLSK.I             | 1534.73557 | 2 | 2.63E-05 | 0.77 | 3.24 | - | 611.7  |
| AHQ-4-3, 4900          | K.SPFSVAVSPSLDLSK.I             | 1534.73557 | 2 | 3.36E-05 | 0.51 | 2.85 | - | 415.0  |
| AHQ-4-3, 5055 - 5092   | K.SPFSVAVSPSLDLSK.I             | 1534.73557 | 2 | 6.21E-06 | 0.89 | 3.83 | - | 766.1  |
| AHQ-4-4, 5016 - 5090   | K.SPFSVAVSPSLDLSK.I             | 1534.73557 | 2 | 1.87E-07 | 0.90 | 4.38 | - | 867.1  |
| AHQ-4-2, 5066 - 5134   | K.SPFSVAVSPSLDLSK.I             | 1534.73557 | 2 | 1.19E-05 | 0.93 | 4.66 | - | 833.6  |
| AHQ-4-2, 4911          | K.SPFSVAVSPSLDLSK.I             | 1534.73557 | 2 | 3.27E-06 | 0.81 | 3.40 | - | 677.1  |
| AHQ-4-5, 4871          | K.SPFSVAVSPSLDLSK.I             | 1534.73557 | 2 | 2.50E-07 | 0.88 | 3.51 | - | 941.0  |
| AHQ-4-2, 3691          | R.SPYTVTVOGACNPSACR.A           | 1871.04208 | 2 | 2.64E-05 | 0.88 | 4.02 | - | 558.8  |
| AHQ-4-2, 3603          | R.SPYTVTVOGACNPSACR.A           | 1871.04208 | 2 | 2.91E-05 | 0.73 | 3.40 | - | 401.1  |
| AHQ-4-2, 3442 - 3514   | R.SPYTVTVOGACNPSACR.A           | 1871.04208 | 2 | 6.13E-04 | 0.94 | 4.86 | - | 515.1  |
| AHQ-4-4, 3446          | R.SPYTVTVOGACNPSACR.A           | 1871.04208 | 2 | 2.12E-05 | 0.92 | 3.97 | - | 577.8  |
| AHQ-4-1, 3493 - 3561   | R.SPYTVTVOGACNPSACR.A           | 1871.04208 | 2 | 1.12E-04 | 0.93 | 4.80 | - | 510.0  |
| AHQ-4-1, 3726          | R.SPYTVTVOGACNPSACR.A           | 1871.04208 | 2 | 2.16E-04 | 0.81 | 3.17 | - | 469.9  |
| AHQ-4-3, 3471 - 3516   | R.SPYTVTVOGACNPSACR.A           | 1871.04208 | 2 | 1.29E-05 | 0.81 | 3.56 | - | 406.2  |
| AHQ-4-6, 3222          | R.SPYTVTVOGACNPSACR.A           | 1871.04208 | 2 | 2.45E-05 | 0.89 | 4.16 | - | 413.1  |
| AHQ-4-5, 3290          | R.SPYTVTVOGACNPSACR.A           | 1871.04208 | 2 | 1.67E-07 | 0.93 | 4.49 | - | 640.2  |
| AHQ-4-14, 2929         | K.SSFTVDCSK.A                   | 1032.10676 | 1 | 4.00E-05 | 0.39 | 2.60 | - | 282.3  |
| AHQ-4-14-, 2041 - 2101 | K.SSFTVDCSK.A                   | 1032.10676 | 1 | 4.13E-06 | 0.26 | 2.38 | - | 142.5  |
| AHQ-4-14, 3116         | K.SSFTVDCSK.A                   | 1032.10676 | 1 | 1.30E-05 | 0.16 | 2.07 | - | 221.5  |
| AHQ-4-3, 5060          | R.TFSVWVYVPEVTGTHK.V            | 1751.96228 | 3 | 1.31E-04 | 0.71 | 3.06 | - | 552.6  |
| AHQ-4-5, 4734          | R.TFSVWVYVPEVTGTHK.V            | 1751.96228 | 3 | 2.07E-05 | 0.82 | 3.48 | - | 589.9  |
| AHQ-4-9, 2551          | K.TGVAVNKPFEFTVDAK.H            | 1647.85391 | 2 | 1.36E-04 | 0.90 | 3.99 | - | 800.8  |
| AHQ-4-1, 3095 - 3165   | K.TGVAVNKPFEFTVDAK.H            | 1647.85391 | 2 | 1.03E-04 | 0.92 | 4.38 | - | 701.2  |
| AHQ-4-3, 2961 - 2973   | K.TGVAVNKPFEFTVDAK.H            | 1647.85391 | 3 | 1.95E-08 | 0.91 | 3.85 | - | 919.1  |
| AHQ-4-2, 3002 - 3071   | K.TGVAVNKPFEFTVDAK.H            | 1647.85391 | 2 | 2.41E-04 | 0.89 | 4.04 | - | 723.6  |
| AHQ-4-5, 2761          | K.TGVAVNKPFEFTVDAK.H            | 1647.85391 | 2 | 1.03E-04 | 0.81 | 3.76 | - | 505.3  |
| AHQ-4-4, 2966          | K.TGVAVNKPFEFTVDAK.H            | 1647.85391 | 3 | 1.75E-10 | 0.89 | 3.50 | - | 958.2  |
| AHQ-4-4, 2938 - 2954   | K.TGVAVNKPFEFTVDAK.H            | 1647.85391 | 2 | 1.76E-04 | 0.91 | 4.07 | - | 867.9  |
| AHQ-4-5, 2770          | K.TGVAVNKPFEFTVDAK.H            | 1647.85391 | 3 | 1.44E-07 | 0.87 | 3.55 | - | 747.9  |
| AHQ-4-1, 3150          | K.TGVAVNKPFEFTVDAK.H            | 1647.85391 | 3 | 1.18E-06 | 0.84 | 3.63 | - | 714.2  |
| AHQ-4-2, 2954          | K.TGVAVNKPFEFTVDAK.H            | 1647.85391 | 3 | 1.28E-06 | 0.84 | 3.49 | - | 846.1  |
| AHQ-4-1, 2958          | R.TGVELGKPTHFTVNAK.A            | 1699.93205 | 3 | 1.02E-04 | 0.57 | 3.26 | - | 457.4  |
| AHQ-4-1, 2941          | R.TGVELGKPTHFTVNAK.A            | 1699.93205 | 2 | 6.39E-05 | 0.87 | 3.99 | - | 543.5  |
| AHQ-4-2, 2839 - 2910   | R.TGVELGKPTHFTVNAK.A            | 1699.93205 | 2 | 6.04E-06 | 0.87 | 3.64 | - | 674.9  |
| AHQ-4-7, 2773          | K.THEAEIVEGENHTYCIR.F           | 2060.19046 | 2 | 2.53E-09 | 0.98 | 5.40 | - | 1733.6 |
| AHQ-4-4, 3103          | K.THEAEIVEGENHTYCIR.F           | 2060.19046 | 2 | 7.95E-06 | 0.97 | 5.01 | - | 1523.7 |
| AHQ-4-5, 2849          | K.THEAEIVEGENHTYCIR.F           | 2060.19046 | 2 | 2.61E-11 | 0.98 | 5.24 | - | 2154.1 |
| AHQ-4-6, 2743          | K.THEAEIVEGENHTYCIR.F           | 2060.19046 | 3 | 4.64E-06 | 0.91 | 4.37 | - | 863.6  |
| AHQ-4-4, 3014 - 3022   | K.THEAEIVEGENHTYCIR.F           | 2060.19046 | 2 | 7.55E-14 | 0.98 | 5.12 | - | 2202.9 |
| AHQ-4-6, 2820          | K.THEAEIVEGENHTYCIR.F           | 2060.19046 | 2 | 1.71E-07 | 0.98 | 6.69 | - | 1962.2 |
| AHQ-4-5, 2762 - 2839   | K.THEAEIVEGENHTYCIR.F           | 2060.19046 | 2 | 5.10E-11 | 0.98 | 5.85 | - | 1699.1 |
| AHQ-4-5, 2755          | K.THEAEIVEGENHTYCIR.F           | 2060.19046 | 3 | 7.94E-04 | 0.82 | 3.69 | - | 830.7  |
| AHQ-4-1, 3930          | K.THIQDNHGDGTYYAVVPDVTGR.Y      | 2460.60076 | 2 | 3.19E-07 | 0.81 | 3.00 | - | 705.9  |
| AHQ-4-13, 3189         | R.TPCEEILVK.H                   | 1090.27249 | 2 | 4.75E-07 | 0.86 | 3.54 | - | 770.1  |
| AHQ-4-13-, 3058        | R.TPCEEILVK.H                   | 1090.27249 | 2 | 4.74E-05 | 0.86 | 3.27 | - | 854.9  |
| AHQ-4-12, 3011         | R.TPCEEILVK.H                   | 1090.27249 | 2 | 5.39E-06 | 0.89 | 3.10 | - | 838.0  |
| AHQ-4-5, 2907 - 2909   | R.TPCEEILVK.H                   | 1090.27249 | 2 | 1.24E-05 | 0.90 | 3.10 | - | 825.5  |
| AHQ-4-14-, 2927 - 2959 | R.TPCEEILVK.H                   | 1090.27249 | 2 | 2.20E-04 | 0.91 | 3.21 | - | 1063.3 |
| AHQ-4-4, 3082          | R.TPCEEILVK.H                   | 1090.27249 | 1 | 9.99E-04 | 0.35 | 2.19 | - | 523.8  |

|                       |                                          |            |   |          |      |      |   |        |
|-----------------------|------------------------------------------|------------|---|----------|------|------|---|--------|
| AHQ-4-4, 3078 - 3079  | R.TPCEEILVK.H                            | 1090.27249 | 2 | 1.55E-06 | 0.86 | 3.02 | - | 751.1  |
| AHQ-4-6, 2879         | R.TPCEEILVK.H                            | 1090.27249 | 2 | 2.30E-04 | 0.81 | 2.97 | - | 718.4  |
| AHQ-4-1, 3229 - 3237  | R.TPCEEILVK.H                            | 1090.27249 | 2 | 1.26E-05 | 0.81 | 2.83 | - | 640.4  |
| AHQ-4-13, 3194        | R.TPCEEILVK.H                            | 1090.27249 | 1 | 5.41E-04 | 0.50 | 2.73 | - | 322.1  |
| AHQ-4-11, 2956        | R.TPCEEILVK.H                            | 1090.27249 | 2 | 3.08E-05 | 0.81 | 2.95 | - | 622.7  |
| AHQ-4-14-, 2934       | R.TPCEEILVK.H                            | 1090.27249 | 1 | 2.50E-05 | 0.08 | 2.17 | - | 178.4  |
| AHQ-4-14, 4080 - 4134 | R.TPCEEILVK.H                            | 1090.27249 | 2 | 5.33E-06 | 0.78 | 2.78 | - | 694.9  |
| AHQ-4-7, 2990         | R.VANPSGNLTETYVQDR.G                     | 1764.87462 | 2 | 8.69E-07 | 0.93 | 4.44 | - | 975.9  |
| AHQ-4-2, 3131         | R.VANPSGNLTETYVQDR.G                     | 1764.87462 | 2 | 1.74E-07 | 0.93 | 4.10 | - | 858.0  |
| AHQ-4-4, 3451         | R.VANPSGNLTETYVQDR.G                     | 1764.87462 | 2 | 5.23E-11 | 0.92 | 4.04 | - | 745.6  |
| AHQ-4-2, 3471 - 3542  | R.VANPSGNLTETYVQDR.G                     | 1764.87462 | 2 | 1.79E-11 | 0.96 | 4.98 | - | 973.9  |
| AHQ-4-1, 3507 - 3581  | R.VANPSGNLTETYVQDR.G                     | 1764.87462 | 2 | 1.95E-11 | 0.93 | 4.13 | - | 927.1  |
| AHQ-4-13, 3410        | R.VANPSGNLTETYVQDR.G                     | 1764.87462 | 2 | 9.82E-08 | 0.93 | 4.17 | - | 788.9  |
| AHQ-4-1, 3230         | R.VANPSGNLTETYVQDR.G                     | 1764.87462 | 2 | 2.17E-08 | 0.92 | 3.88 | - | 844.4  |
| AHQ-4-1, 3377 - 3379  | R.VANPSGNLTETYVQDR.G                     | 1764.87462 | 2 | 1.91E-10 | 0.94 | 4.61 | - | 651.7  |
| AHQ-4-10, 3029        | R.VANPSGNLTETYVQDR.G                     | 1764.87462 | 2 | 7.15E-05 | 0.74 | 3.03 | - | 555.8  |
| AHQ-4-3, 3428 - 3499  | R.VANPSGNLTETYVQDR.G                     | 1764.87462 | 2 | 4.26E-12 | 0.95 | 4.80 | - | 1104.3 |
| AHQ-4-3, 3244 - 3315  | R.VANPSGNLTETYVQDR.G                     | 1764.87462 | 2 | 9.91E-06 | 0.92 | 3.87 | - | 871.8  |
| AHQ-4-5, 3051 - 3122  | R.VANPSGNLTETYVQDR.G                     | 1764.87462 | 2 | 4.20E-07 | 0.94 | 3.70 | - | 1221.2 |
| AHQ-4-3, 3073 - 3145  | R.VANPSGNLTETYVQDR.G                     | 1764.87462 | 2 | 6.13E-04 | 0.44 | 2.73 | - | 471.4  |
| AHQ-4-2, 3242 - 3310  | R.VANPSGNLTETYVQDR.G                     | 1764.87462 | 2 | 5.18E-08 | 0.95 | 4.43 | - | 982.4  |
| AHQ-4-2, 3378 - 3446  | R.VANPSGNLTETYVQDR.G                     | 1764.87462 | 2 | 2.78E-11 | 0.96 | 4.51 | - | 1127.3 |
| AHQ-4-4, 3214 - 3282  | R.VANPSGNLTETYVQDR.G                     | 1764.87462 | 2 | 5.93E-10 | 0.93 | 4.06 | - | 1042.3 |
| AHQ-4-5, 3222         | R.VANPSGNLTETYVQDR.G                     | 1764.87462 | 2 | 5.06E-05 | 0.89 | 3.76 | - | 750.3  |
| AHQ-4-4, 2514         | K.VAQPTITDNKDGTVTVR.Y                    | 1816.00621 | 2 | 3.43E-05 | 0.73 | 3.33 | - | 570.1  |
| AHQ-4-3, 2795         | K.VAQPTITDNKDGTVTVR.Y                    | 1816.00621 | 2 | 4.38E-07 | 0.90 | 3.74 | - | 774.4  |
| AHQ-4-13-, 2820       | K.VAQPTITDNKDGTVTVR.Y                    | 1816.00621 | 2 | 7.83E-05 | 0.77 | 3.30 | - | 480.8  |
| AHQ-4-10, 2427        | K.VAQPTITDNKDGTVTVR.Y                    | 1816.00621 | 2 | 1.52E-05 | 0.81 | 3.57 | - | 445.5  |
| AHQ-4-10, 2603        | K.VAQPTITDNKDGTVTVR.Y                    | 1816.00621 | 2 | 8.73E-08 | 0.91 | 3.73 | - | 685.6  |
| AHQ-4-5, 2397         | K.VAQPTITDNKDGTVTVR.Y                    | 1816.00621 | 2 | 9.46E-07 | 0.90 | 3.75 | - | 757.1  |
| AHQ-4-1, 2905         | K.VAQPTITDNKDGTVTVR.Y                    | 1816.00621 | 2 | 5.25E-04 | 0.84 | 3.80 | - | 454.6  |
| AHQ-4-2, 2802         | K.VAQPTITDNKDGTVTVR.Y                    | 1816.00621 | 2 | 3.78E-04 | 0.87 | 3.72 | - | 561.5  |
| AHQ-4-7, 2526         | K.VAQPTITDNKDGTVTVR.Y                    | 1816.00621 | 2 | 2.15E-04 | 0.68 | 3.27 | - | 379.9  |
| AHQ-4-8, 2339         | K.VAQPTITDNKDGTVTVR.Y                    | 1816.00621 | 2 | 3.22E-08 | 0.90 | 3.73 | - | 711.0  |
| AHQ-4-5, 2561 - 2605  | K.VAQPTITDNKDGTVTVR.Y                    | 1816.00621 | 2 | 2.55E-05 | 0.89 | 4.15 | - | 587.0  |
| AHQ-4-4, 2755         | K.VAQPTITDNKDGTVTVR.Y                    | 1816.00621 | 2 | 5.76E-04 | 0.77 | 3.31 | - | 403.1  |
| AHQ-4-4, 3776 - 3779  | K.VDINTEDLEDGTCR.V                       | 1638.69283 | 2 | 1.53E-05 | 0.42 | 2.57 | - | 599.1  |
| AHQ-4-3, 3645 - 3683  | K.VDINTEDLEDGTCR.V                       | 1638.69283 | 2 | 7.64E-07 | 0.90 | 3.19 | - | 1061.5 |
| AHQ-4-4, 3635         | K.VDINTEDLEDGTCR.V                       | 1638.69283 | 2 | 3.92E-05 | 0.94 | 3.80 | - | 1254.9 |
| AHQ-4-1, 3514         | K.VDINTEDLEDGTCR.V                       | 1638.69283 | 2 | 2.00E-08 | 0.91 | 4.07 | - | 821.2  |
| AHQ-4-8, 3377 - 3454  | K.VDINTEDLEDGTCR.V                       | 1638.69283 | 2 | 6.19E-04 | 0.80 | 3.09 | - | 895.1  |
| AHQ-4-5, 3683         | K.VDINTEDLEDGTCR.V                       | 1638.69283 | 2 | 1.13E-05 | 0.91 | 3.40 | - | 1084.3 |
| AHQ-4-1, 3801         | K.VDINTEDLEDGTCR.V                       | 1638.69283 | 2 | 3.53E-09 | 0.90 | 3.74 | - | 866.7  |
| AHQ-4-2, 3710 - 3712  | K.VDINTEDLEDGTCR.V                       | 1638.69283 | 2 | 8.05E-07 | 0.94 | 4.77 | - | 1005.9 |
| AHQ-4-7, 3506         | K.VDINTEDLEDGTCR.V                       | 1638.69283 | 2 | 5.82E-06 | 0.93 | 3.18 | - | 1526.6 |
| AHQ-4-1, 3697         | K.VDINTEDLEDGTCR.V                       | 1638.69283 | 2 | 1.79E-06 | 0.97 | 4.92 | - | 1519.4 |
| AHQ-4-5, 3555         | K.VDINTEDLEDGTCR.V                       | 1638.69283 | 2 | 1.21E-05 | 0.70 | 3.11 | - | 589.5  |
| AHQ-4-6, 3454         | K.VDINTEDLEDGTCR.V                       | 1638.69283 | 2 | 1.70E-05 | 0.89 | 3.95 | - | 642.7  |
| AHQ-4-5, 3349 - 3427  | K.VDINTEDLEDGTCR.V                       | 1638.69283 | 2 | 1.22E-10 | 0.97 | 5.04 | - | 1376.9 |
| AHQ-4-1, 3421         | K.VDINTEDLEDGTCR.V                       | 1638.69283 | 2 | 4.84E-07 | 0.96 | 4.28 | - | 1391.7 |
| AHQ-4-5, 2310         | K.VDVGKDQEFVTK.S                         | 1365.51377 | 2 | 1.27E-08 | 0.84 | 3.22 | - | 542.8  |
| AHQ-4-6, 2318         | K.VDVGKDQEFVTK.S                         | 1365.51377 | 2 | 3.87E-10 | 0.70 | 2.92 | - | 521.4  |
| AHQ-4-2, 2462         | K.VDVGKDQEFVTK.S                         | 1365.51377 | 2 | 4.70E-06 | 0.86 | 3.56 | - | 591.1  |
| AHQ-4-3, 2448         | K.VDVGKDQEFVTK.S                         | 1365.51377 | 1 | 2.34E-05 | 0.80 | 3.51 | - | 618.9  |
| AHQ-4-1, 2629         | K.VDVGKDQEFVTK.S                         | 1365.51377 | 2 | 6.62E-07 | 0.83 | 3.25 | - | 679.5  |
| AHQ-4-3, 2529         | K.VDVGKDQEFVTK.S                         | 1365.51377 | 2 | 8.19E-05 | 0.68 | 2.88 | - | 496.3  |
| AHQ-4-2, 2467         | K.VDVGKDQEFVTK.S                         | 1365.51377 | 1 | 2.27E-07 | 0.52 | 2.93 | - | 298.6  |
| AHQ-4-4, 2443         | K.VDVGKDQEFVTK.S                         | 1365.51377 | 1 | 1.15E-07 | 0.65 | 3.61 | - | 363.0  |
| AHQ-4-2, 2630 - 2656  | K.VEPGLGADNSVWR.F                        | 1313.44209 | 2 | 2.62E-06 | 0.75 | 3.07 | - | 239.6  |
| AHQ-4-4, 2619 - 2628  | K.VEPGLGADNSVWR.F                        | 1313.44209 | 2 | 6.24E-08 | 0.74 | 2.51 | - | 312.5  |
| AHQ-4-2, 2876         | K.VEPGLGADNSVWR.F                        | 1313.44209 | 1 | 3.21E-04 | 0.15 | 2.01 | - | 153.0  |
| AHQ-4-1, 2793 - 2865  | K.VEPGLGADNSVWR.F                        | 1313.44209 | 2 | 9.95E-06 | 0.85 | 3.21 | - | 363.8  |
| AHQ-4-2, 2726 - 2736  | K.VEPGLGADNSVWR.F                        | 1313.44209 | 2 | 2.70E-06 | 0.76 | 2.86 | - | 345.0  |
| AHQ-4-3, 2647 - 2728  | K.VEPGLGADNSVWR.F                        | 1313.44209 | 2 | 3.38E-07 | 0.74 | 2.74 | - | 318.6  |
| AHQ-4-3, 2643 - 2719  | K.VEPGLGADNSVWR.F                        | 1313.44209 | 1 | 3.15E-04 | 0.16 | 2.21 | - | 179.0  |
| AHQ-4-1, 6490         | K.VEYTPYEGLHSVDVTDGSPVSPFPQVPTVEGCDPSR.V | 4300.57494 | 3 | 2.24E-06 | 0.91 | 4.54 | - | 845.6  |
| AHQ-4-3, 6581         | K.VEYTPYEGLHSVDVTDGSPVSPFPQVPTVEGCDPSR.V | 4300.57494 | 3 | 2.47E-04 | 0.88 | 4.50 | - | 463.9  |
| AHQ-4-4, 6422 - 6490  | K.VEYTPYEGLHSVDVTDGSPVSPFPQVPTVEGCDPSR.V | 4300.57494 | 3 | 3.72E-06 | 0.87 | 4.54 | - | 438.2  |
| AHQ-4-6, 6246         | K.VEYTPYEGLHSVDVTDGSPVSPFPQVPTVEGCDPSR.V | 4300.57494 | 3 | 6.10E-05 | 0.88 | 4.80 | - | 508.9  |
| AHQ-4-5, 6274 - 6341  | K.VEYTPYEGLHSVDVTDGSPVSPFPQVPTVEGCDPSR.V | 4300.57494 | 3 | 6.20E-05 | 0.80 | 4.17 | - | 436.6  |
| AHQ-4-3, 6443 - 6511  | K.VEYTPYEGLHSVDVTDGSPVSPFPQVPTVEGCDPSR.V | 4300.57494 | 3 | 2.19E-06 | 0.88 | 4.37 | - | 846.3  |
| AHQ-4-1, 6401 - 6423  | K.VEYTPYEGLHSVDVTDGSPVSPFPQVPTVEGCDPSR.V | 4300.57494 | 3 | 1.19E-07 | 0.97 | 6.72 | - | 899.1  |
| AHQ-4-1, 7114 - 7182  | K.VGSAADIPINISSETDLSLLTATVPPSGR.E        | 2895.25495 | 3 | 8.85E-04 | 0.88 | 4.78 | - | 522.2  |
| AHQ-4-6, 7198 - 7248  | K.VGSAADIPINISSETDLSLLTATVPPSGR.E        | 2895.25495 | 3 | 3.44E-05 | 0.72 | 3.59 | - | 522.8  |
| AHQ-4-10, 6451 - 6452 | K.VGSAADIPINISSETDLSLLTATVPPSGR.E        | 2895.25495 | 2 | 1.17E-05 | 0.91 | 4.41 | - | 711.6  |
| AHQ-4-7, 7393         | K.VGSAADIPINISSETDLSLLTATVPPSGR.E        | 2895.25495 | 2 | 9.35E-07 | 0.69 | 3.06 | - | 399.4  |
| AHQ-4-1, 7186         | K.VGSAADIPINISSETDLSLLTATVPPSGR.E        | 2895.25495 | 2 | 2.64E-04 | 0.79 | 3.00 | - | 642.4  |
| AHQ-4-3, 7465 - 7469  | K.VGSAADIPINISSETDLSLLTATVPPSGR.E        | 2895.25495 | 3 | 9.00E-06 | 0.86 | 4.58 | - | 457.4  |
| AHQ-4-2, 7466 - 7467  | K.VGSAADIPINISSETDLSLLTATVPPSGR.E        | 2895.25495 | 2 | 3.45E-05 | 0.96 | 5.93 | - | 813.2  |
| AHQ-4-1, 4554         | K.VHSPSGALEEYVTEIDQDK.Y                  | 2279.42322 | 2 | 7.32E-11 | 0.96 | 4.91 | - | 1181.6 |
| AHQ-4-5, 4198 - 4278  | K.VHSPSGALEEYVTEIDQDK.Y                  | 2279.42322 | 2 | 4.21E-10 | 0.97 | 5.49 | - | 1622.9 |
| AHQ-4-4, 4430         | K.VHSPSGALEEYVTEIDQDK.Y                  | 2279.42322 | 2 | 2.79E-05 | 0.97 | 6.05 | - | 1334.9 |
| AHQ-4-6, 4118         | K.VHSPSGALEEYVTEIDQDK.Y                  | 2279.42322 | 2 | 1.82E-05 | 0.96 | 5.42 | - | 1177.3 |
| AHQ-4-7, 4081         | K.VHSPSGALEEYVTEIDQDK.Y                  | 2279.42322 | 2 | 1.73E-05 | 0.92 | 4.42 | - | 822.1  |
| AHQ-4-6, 4127         | K.VHSPSGALEEYVTEIDQDK.Y                  | 2279.42322 | 3 | 4.77E-04 | 0.91 | 3.63 | - | 1558.0 |
| AHQ-4-7, 4357 - 4379  | K.VHSPSGALEEYVTEIDQDKYAVR.F              | 2768.99349 | 2 | 1.74E-10 | 0.89 | 3.82 | - | 1075.8 |
| AHQ-4-9, 4011         | K.VHSPSGALEEYVTEIDQDKYAVR.F              | 2768.99349 | 3 | 1.26E-04 | 0.89 | 4.35 | - | 619.1  |
| AHQ-4-1, 4882         | K.VHSPSGALEEYVTEIDQDKYAVR.F              | 2768.99349 | 3 | 3.78E-11 | 0.81 | 3.94 | - | 486.3  |
| AHQ-4-5, 4490 - 4501  | K.VHSPSGALEEYVTEIDQDKYAVR.F              | 2768.99349 | 2 | 1.07E-06 | 0.48 | 2.95 | - | 695.1  |
| AHQ-4-6, 4456         | K.VHSPSGALEEYVTEIDQDKYAVR.F              | 2768.99349 | 2 | 2.68E-06 | 0.93 | 4.47 | - | 1034.0 |
| AHQ-4-3, 4832         | K.VHSPSGALEEYVTEIDQDKYAVR.F              | 2768.99349 | 3 | 2.28E-05 | 0.91 | 4.19 | - | 1033.1 |
| AHQ-4-4, 4796         | K.VHSPSGALEEYVTEIDQDKYAVR.F              | 2768.99349 | 2 | 1.46E-04 | 0.89 | 3.67 | - | 1007.4 |
| AHQ-4-5, 4489 - 4497  | K.VHSPSGALEEYVTEIDQDKYAVR.F              | 2768.99349 | 3 | 4.05E-07 | 0.89 | 4.61 | - | 527.3  |
| AHQ-4-8, 4142         | K.VHSPSGALEEYVTEIDQDKYAVR.F              | 2768.99349 | 3 | 6.23E-12 | 0.92 | 4.76 | - | 659.0  |
| AHQ-4-4, 4790 - 4859  | K.VHSPSGALEEYVTEIDQDKYAVR.F              | 2768.99349 | 3 | 4.59E-06 | 0.77 | 3.75 | - | 514.6  |
| AHQ-4-7, 4351 - 4354  | K.VHSPSGALEEYVTEIDQDKYAVR.F              | 2768.99349 | 3 | 1.33E-09 | 0.94 | 5.27 | - | 744.4  |
| AHQ-4-6, 4446 - 4514  | K.VHSPSGALEEYVTEIDQDKYAVR.F              | 2768.99349 | 3 | 2.80E-08 | 0.93 | 5.23 | - | 690.0  |
| AHQ-4-7, 3533 - 3558  | K.VNQPASFAVSLNGAK.G                      | 1503.68480 | 2 | 1.94E-07 | 0.82 | 3.60 | - | 354.7  |
| AHQ-4-7, 3442         | K.VNQPASFAVSLNGAK.G                      | 1503.68480 | 2 | 1.54E-06 | 0.73 | 2.91 | - | 464.2  |
| AHQ-4-1, 3851 - 3925  | K.VNQPASFAVSLNGAK.G                      | 1503.68480 | 2 | 2.75E-07 | 0.93 | 4.37 | - | 644.9  |
| AHQ-4-2, 3779         | K.VNQPASFAVSLNGAK.G                      | 1503.68480 | 2 | 9.02E-05 | 0.59 | 2.51 | - | 485.9  |
| AHQ-4-6, 3463 - 3539  | K.VNQPASFAVSLNGAK.G                      | 1503.68480 | 2 | 6.50E-08 | 0.92 | 4.13 | - | 689.7  |
| AHQ-4-5, 3237         | K.VNQPASFAVSLNGAK.G                      | 1503.68480 | 2 | 9.98E-10 | 0.73 | 3.02 | - | 505.8  |
| AHQ-4-8, 3403         | K.VNQPASFAVSLNGAK.G                      | 1503.68480 | 2 | 8.33E-06 | 0.88 | 3.19 | - | 721.9  |
| AHQ-4-5, 3474 - 3539  | K.VNQPASFAVSLNGAK.G                      | 1503.68480 | 2 | 1.07E-07 | 0.81 | 3.11 | - | 676.7  |
| AHQ-4-5, 3611 - 3681  | K.VNQPASFAVSLNGAK.G                      | 1503.68480 | 2 | 1.19E-06 | 0.85 | 3.89 | - | 435.0  |
| AHQ-4-4, 3810 - 3878  | K.VNQPASFAVSLNGAK.G                      | 1503.68480 | 2 | 4.33E-07 | 0.92 | 4.05 | - | 646.2  |

|                       |                                  |            |   |          |      |      |   |        |
|-----------------------|----------------------------------|------------|---|----------|------|------|---|--------|
| AHQ-4-1, 3990         | K.VNQPASFAVSLNGAK.G              | 1503.68480 | 2 | 2.51E-07 | 0.85 | 3.28 | - | 562.7  |
| AHQ-4-2, 1560         | K.VPVHDVTDASK.V                  | 1168.28175 | 2 | 5.80E-05 | 0.94 | 3.27 | - | 1312.6 |
| AHQ-4-3, 1468         | K.VPVHDVTDASK.V                  | 1168.28175 | 2 | 4.45E-07 | 0.88 | 2.95 | - | 1055.6 |
| AHQ-4-2, 1478         | K.VPVHDVTDASK.V                  | 1168.28175 | 2 | 2.15E-06 | 0.96 | 3.54 | - | 1872.2 |
| AHQ-4-4, 4124         | R.VQVQDNEGCPVEALVK.D             | 1786.98493 | 2 | 2.92E-06 | 0.96 | 4.66 | - | 1203.3 |
| AHQ-4-4, 4287         | R.VQVQDNEGCPVEALVK.D             | 1786.98493 | 2 | 4.31E-07 | 0.93 | 3.93 | - | 1050.7 |
| AHQ-4-2, 4315 - 4386  | R.VQVQDNEGCPVEALVK.D             | 1786.98493 | 2 | 1.83E-08 | 0.97 | 5.00 | - | 1407.1 |
| AHQ-4-1, 4358 - 4434  | R.VQVQDNEGCPVEALVK.D             | 1786.98493 | 2 | 1.34E-10 | 0.92 | 4.20 | - | 925.0  |
| AHQ-4-3, 4335         | R.VQVQDNEGCPVEALVK.D             | 1786.98493 | 2 | 1.08E-08 | 0.94 | 4.11 | - | 1233.7 |
| AHQ-4-5, 3966 - 3969  | R.VQVQDNEGCPVEALVK.D             | 1786.98493 | 2 | 1.47E-07 | 0.94 | 4.88 | - | 981.1  |
| AHQ-4-2, 4128 - 4202  | R.VQVQDNEGCPVEALVK.D             | 1786.98493 | 2 | 9.52E-07 | 0.97 | 5.44 | - | 1435.9 |
| AHQ-4-2, 4152 - 4223  | R.VQVQDNEGCPVEALVK.D             | 1786.98493 | 2 | 6.20E-06 | 0.97 | 5.16 | - | 1496.5 |
| AHQ-4-1, 5202 - 5269  | R.VQVQDNEGCPVEALVKDNGNGTYSYVPR.K | 3359.60342 | 3 | 3.68E-12 | 0.92 | 4.45 | - | 1344.6 |
| AHQ-4-1, 5462 - 5509  | R.VQVQDNEGCPVEALVKDNGNGTYSYVPR.K | 3359.60342 | 3 | 1.04E-05 | 0.89 | 3.98 | - | 1236.9 |
| AHQ-4-2, 5348 - 5418  | R.VQVQDNEGCPVEALVKDNGNGTYSYVPR.K | 3359.60342 | 3 | 2.91E-06 | 0.94 | 5.13 | - | 1341.1 |
| AHQ-4-1, 5333 - 5397  | R.VQVQDNEGCPVEALVKDNGNGTYSYVPR.K | 3359.60342 | 3 | 3.40E-04 | 0.95 | 4.84 | - | 1460.6 |
| AHQ-4-2, 4875         | R.VSQQLHEGHTFEPAEPIIDTR.D        | 2441.64058 | 2 | 1.25E-04 | 0.75 | 3.35 | - | 555.8  |
| AHQ-4-6, 4398         | R.VSQQLHEGHTFEPAEPIIDTR.D        | 2441.64058 | 3 | 2.74E-10 | 0.93 | 4.97 | - | 1053.6 |
| AHQ-4-9, 3960         | R.VSQQLHEGHTFEPAEPIIDTR.D        | 2441.64058 | 3 | 8.14E-06 | 0.90 | 4.44 | - | 912.7  |
| AHQ-4-1, 4941 - 4975  | R.VSQQLHEGHTFEPAEPIIDTR.D        | 2441.64058 | 3 | 5.86E-11 | 0.96 | 5.86 | - | 1180.6 |
| AHQ-4-5, 4401 - 4470  | R.VSQQLHEGHTFEPAEPIIDTR.D        | 2441.64058 | 3 | 1.23E-09 | 0.94 | 5.19 | - | 1049.5 |
| AHQ-4-2, 4795 - 4866  | R.VSQQLHEGHTFEPAEPIIDTR.D        | 2441.64058 | 3 | 1.18E-05 | 0.96 | 5.44 | - | 1470.4 |
| AHQ-4-13, 4746        | R.VSQQLHEGHTFEPAEPIIDTR.D        | 2441.64058 | 2 | 2.80E-04 | 0.93 | 4.96 | - | 637.0  |
| AHQ-4-8, 3901         | R.VSQQLHEGHTFEPAEPIIDTR.D        | 2441.64058 | 3 | 8.23E-10 | 0.94 | 5.19 | - | 1023.5 |
| AHQ-4-8, 4126         | R.VSQQLHEGHTFEPAEPIIDTR.D        | 2441.64058 | 3 | 1.12E-04 | 0.87 | 3.78 | - | 883.8  |
| AHQ-4-4, 4742 - 4810  | R.VSQQLHEGHTFEPAEPIIDTR.D        | 2441.64058 | 3 | 4.32E-04 | 0.97 | 5.73 | - | 1606.8 |
| AHQ-4-6, 2583         | K.VTAQGPGLPEPSGNIANK.T           | 1653.81855 | 2 | 3.27E-05 | 0.81 | 3.33 | - | 630.2  |
| AHQ-4-3, 2755         | K.VTAQGPGLPEPSGNIANK.T           | 1653.81855 | 2 | 1.66E-11 | 0.82 | 3.54 | - | 562.7  |
| AHQ-4-1, 2913         | K.VTAQGPGLPEPSGNIANK.T           | 1653.81855 | 2 | 4.87E-10 | 0.84 | 3.79 | - | 458.4  |
| AHQ-4-4, 2604 - 2615  | K.VTAQGPGLPEPSGNIANK.T           | 1653.81855 | 2 | 1.61E-04 | 0.69 | 3.17 | - | 479.2  |
| AHQ-4-7, 2413         | K.VTAQGPGLPEPSGNIANK.T           | 1653.81855 | 2 | 5.38E-06 | 0.85 | 3.52 | - | 650.5  |
| AHQ-4-4, 2726 - 2731  | K.VTAQGPGLPEPSGNIANK.T           | 1653.81855 | 2 | 4.61E-06 | 0.77 | 3.66 | - | 525.8  |
| AHQ-4-7, 2529         | K.VTAQGPGLPEPSGNIANK.T           | 1653.81855 | 2 | 1.52E-05 | 0.83 | 3.98 | - | 508.8  |
| AHQ-4-2, 2738 - 2815  | K.VTAQGPGLPEPSGNIANK.T           | 1653.81855 | 2 | 4.64E-08 | 0.88 | 3.76 | - | 657.5  |
| AHQ-4-1, 2761 - 2842  | K.VTAQGPGLPEPSGNIANK.T           | 1653.81855 | 2 | 8.16E-06 | 0.92 | 4.81 | - | 544.0  |
| AHQ-4-3, 2848 - 2853  | K.VTAQGPGLPEPSGNIANK.T           | 1653.81855 | 2 | 8.11E-07 | 0.91 | 3.91 | - | 775.0  |
| AHQ-4-5, 2597         | K.VTAQGPGLPEPSGNIANK.T           | 1653.81855 | 2 | 1.58E-07 | 0.80 | 3.94 | - | 436.1  |
| AHQ-4-5, 2779 - 2801  | K.VTVLFAHQHIAK.S                 | 1284.53185 | 2 | 1.40E-06 | 0.92 | 3.77 | - | 923.0  |
| AHQ-4-2, 3114 - 3115  | K.VTVLFAHQHIAK.S                 | 1284.53185 | 2 | 2.14E-07 | 0.94 | 3.82 | - | 1041.8 |
| AHQ-4-6, 2802         | K.VTVLFAHQHIAK.S                 | 1284.53185 | 2 | 1.43E-05 | 0.88 | 3.44 | - | 770.0  |
| AHQ-4-7, 2658         | K.VTVLFAHQHIAK.S                 | 1284.53185 | 2 | 4.42E-07 | 0.84 | 3.22 | - | 653.5  |
| AHQ-4-2, 3090         | K.VTVLFAHQHIAK.S                 | 1284.53185 | 1 | 5.82E-04 | 0.63 | 3.05 | - | 398.8  |
| AHQ-4-2, 3031 - 3043  | K.VTVLFAHQHIAK.S                 | 1284.53185 | 2 | 8.16E-07 | 0.92 | 4.12 | - | 893.2  |
| AHQ-4-2, 3058         | K.VTVLFAHQHIAK.S                 | 1284.53185 | 3 | 1.52E-05 | 0.79 | 3.38 | - | 678.8  |
| AHQ-4-3, 3069 - 3072  | K.VTVLFAHQHIAK.S                 | 1284.53185 | 2 | 5.54E-04 | 0.90 | 3.66 | - | 818.8  |
| AHQ-4-1, 5398         | R.VTYCPTPEGNYIINIK.F             | 1884.14221 | 2 | 1.56E-06 | 0.80 | 3.11 | - | 420.7  |
| AHQ-4-1, 5039         | R.VTYCPTPEGNYIINIK.F             | 1884.14221 | 2 | 6.10E-05 | 0.77 | 2.91 | - | 518.0  |
| AHQ-4-5, 4823 - 4893  | R.VTYCPTPEGNYIINIK.F             | 1884.14221 | 2 | 1.16E-10 | 0.92 | 4.33 | - | 586.0  |
| AHQ-4-4, 5138         | R.VTYCPTPEGNYIINIK.F             | 1884.14221 | 2 | 1.81E-10 | 0.88 | 3.94 | - | 411.9  |
| AHQ-4-2, 5195 - 5203  | R.VTYCPTPEGNYIINIK.F             | 1884.14221 | 2 | 1.60E-10 | 0.87 | 3.82 | - | 414.6  |
| AHQ-4-8, 4605 - 4653  | R.VTYCPTPEGNYIINIK.F             | 1884.14221 | 2 | 3.96E-04 | 0.85 | 3.47 | - | 528.3  |
| AHQ-4-5, 4962 - 5033  | R.VTYCPTPEGNYIINIK.F             | 1884.14221 | 2 | 1.98E-07 | 0.92 | 4.47 | - | 458.2  |
| AHQ-4-13, 5461 - 5464 | R.VTYTPMAGPSYLSIK.Y              | 1742.07225 | 2 | 2.47E-04 | 0.51 | 2.78 | - | 502.6  |
| AHQ-4-2, 5614         | R.VTYTPMAGPSYLSIK.Y              | 1742.07225 | 2 | 1.52E-05 | 0.82 | 3.09 | - | 693.0  |
| AHQ-4-8, 4874 - 4875  | R.VTYTPMAGPSYLSIK.Y              | 1742.07225 | 2 | 8.22E-04 | 0.73 | 2.72 | - | 703.8  |
| AHQ-4-3, 5624         | R.VTYTPMAGPSYLSIK.Y              | 1742.07225 | 2 | 1.91E-05 | 0.90 | 3.44 | - | 919.3  |
| AHQ-4-10, 4391        | R.VTYTPMAGPSYLSIK.Y              | 1758.07165 | 2 | 8.10E-04 | 0.78 | 2.96 | - | 482.8  |
| AHQ-4-11, 5145 - 5152 | R.VTYTPMAGPSYLSIK.Y              | 1742.07225 | 2 | 4.30E-04 | 0.82 | 3.22 | - | 582.1  |
| AHQ-4-5, 5283 - 5353  | R.VTYTPMAGPSYLSIK.Y              | 1742.07225 | 2 | 1.31E-08 | 0.91 | 4.14 | - | 696.1  |
| AHQ-4-13-, 5344       | R.VTYTPMAGPSYLSIK.Y              | 1742.07225 | 2 | 8.10E-04 | 0.88 | 3.44 | - | 819.3  |
| AHQ-4-7, 5219 - 5221  | R.VTYTPMAGPSYLSIK.Y              | 1742.07225 | 2 | 3.09E-04 | 0.87 | 4.11 | - | 564.3  |
| AHQ-4-6, 5296 - 5299  | R.VTYTPMAGPSYLSIK.Y              | 1742.07225 | 2 | 3.07E-04 | 0.79 | 3.54 | - | 432.2  |
| AHQ-4-14-, 5297       | R.VTYTPMAGPSYLSIK.Y              | 1742.07225 | 2 | 5.74E-06 | 0.79 | 3.00 | - | 580.2  |
| AHQ-4-8, 2793         | R.YAPSEAGLHEM'DIR.Y              | 1589.75482 | 2 | 9.49E-05 | 0.76 | 2.54 | - | 732.4  |
| AHQ-4-5, 2405 - 2406  | R.YAPSEAGLHEM'DIR.Y              | 1605.75422 | 2 | 2.88E-05 | 0.86 | 3.48 | - | 897.6  |
| AHQ-4-10, 3047        | R.YAPSEAGLHEM'DIR.Y              | 1589.75482 | 2 | 8.83E-04 | 0.69 | 2.98 | - | 653.9  |
| AHQ-4-6, 4022         | K.YGGDEIPFSPYR.V                 | 1401.50466 | 1 | 3.98E-05 | 0.19 | 1.83 | - | 431.2  |
| AHQ-4-11, 4022        | K.YGGDEIPFSPYR.V                 | 1401.50466 | 1 | 7.96E-04 | 0.13 | 1.84 | - | 329.5  |
| AHQ-4-2, 4344 - 4347  | K.YGGDEIPFSPYR.V                 | 1401.50466 | 1 | 5.61E-04 | 0.42 | 2.32 | - | 565.9  |
| AHQ-4-11, 4021 - 4093 | K.YGGDEIPFSPYR.V                 | 1401.50466 | 2 | 3.36E-05 | 0.87 | 3.77 | - | 586.6  |
| AHQ-4-3, 4331 - 4365  | K.YGGDEIPFSPYR.V                 | 1401.50466 | 2 | 5.28E-05 | 0.80 | 3.46 | - | 500.6  |
| AHQ-4-3, 4339         | K.YGGDEIPFSPYR.V                 | 1401.50466 | 1 | 3.57E-07 | 0.26 | 2.27 | - | 394.6  |
| AHQ-4-4, 4284 - 4298  | K.YGGDEIPFSPYR.V                 | 1401.50466 | 2 | 1.52E-06 | 0.85 | 3.77 | - | 575.7  |
| AHQ-4-2, 4303 - 4374  | K.YGGDEIPFSPYR.V                 | 1401.50466 | 2 | 5.81E-06 | 0.79 | 3.38 | - | 497.3  |
| AHQ-4-4, 4292         | K.YGGDEIPFSPYR.V                 | 1401.50466 | 1 | 1.53E-05 | 0.26 | 2.39 | - | 387.0  |
| AHQ-4-1, 4425         | K.YGGDEIPFSPYR.V                 | 1401.50466 | 1 | 3.40E-05 | 0.50 | 2.79 | - | 554.5  |
| AHQ-4-8, 3809         | K.YGGDEIPFSPYR.V                 | 1401.50466 | 2 | 3.13E-04 | 0.76 | 3.25 | - | 467.8  |
| AHQ-4-11, 3082        | K.YGGPYHIGGSPFK.A                | 1380.53182 | 2 | 1.03E-05 | 0.94 | 4.02 | - | 1340.6 |
| AHQ-4-7, 2899         | K.YGGPYHIGGSPFK.A                | 1380.53182 | 1 | 8.50E-07 | 0.86 | 3.81 | - | 385.7  |
| AHQ-4-7, 2889         | K.YGGPYHIGGSPFK.A                | 1380.53182 | 2 | 8.70E-06 | 0.96 | 4.56 | - | 1613.3 |
| AHQ-4-5, 2986         | K.YGGPYHIGGSPFK.A                | 1380.53182 | 3 | 1.28E-05 | 0.77 | 3.17 | - | 463.7  |
| AHQ-4-6, 2990 - 3040  | K.YGGPYHIGGSPFK.A                | 1380.53182 | 2 | 2.68E-07 | 0.96 | 4.41 | - | 1398.6 |
| AHQ-4-5, 2977 - 3001  | K.YGGPYHIGGSPFK.A                | 1380.53182 | 2 | 3.51E-07 | 0.97 | 4.77 | - | 1737.9 |
| AHQ-4-3, 3255         | K.YGGPYHIGGSPFK.A                | 1380.53182 | 2 | 2.09E-04 | 0.96 | 3.90 | - | 2105.6 |
| AHQ-4-4, 3243         | K.YGGPYHIGGSPFK.A                | 1380.53182 | 1 | 5.05E-08 | 0.90 | 3.73 | - | 672.0  |
| AHQ-4-1, 3461         | K.YGGPYHIGGSPFK.A                | 1380.53182 | 2 | 2.72E-06 | 0.93 | 3.83 | - | 1215.9 |
| AHQ-4-4, 3232         | K.YGGPYHIGGSPFK.A                | 1380.53182 | 2 | 4.72E-04 | 0.97 | 4.44 | - | 1895.1 |
| AHQ-4-2, 2991 - 3018  | K.YGGQVPNPFPSK.L                 | 1291.43658 | 2 | 1.44E-07 | 0.93 | 4.06 | - | 631.0  |
| AHQ-4-4, 2974 - 2980  | K.YGGQVPNPFPSK.L                 | 1291.43658 | 2 | 6.60E-04 | 0.84 | 3.24 | - | 395.8  |
| AHQ-4-3, 2991 - 2993  | K.YGGQVPNPFPSK.L                 | 1291.43658 | 2 | 2.72E-04 | 0.86 | 3.42 | - | 446.7  |
| AHQ-4-1, 3267         | K.YGGQVPNPFPSK.L                 | 1291.43658 | 2 | 3.20E-04 | 0.67 | 3.11 | - | 234.9  |
| AHQ-4-5, 2807         | K.YGGQVPNPFPSK.L                 | 1291.43658 | 2 | 8.56E-04 | 0.45 | 2.51 | - | 251.6  |
| AHQ-4-1, 3114         | K.YGGQVPNPFPSK.L                 | 1291.43658 | 2 | 4.82E-05 | 0.83 | 3.33 | - | 376.2  |
| AHQ-4-2, 2992 - 3063  | K.YGGQVPNPFPSK.L                 | 1291.43658 | 1 | 4.48E-04 | 0.06 | 1.87 | - | 203.5  |
| AHQ-4-6, 3832         | K.YKGQHVPGSPFOFTVGPLGEGGAHK.V    | 2596.88377 | 3 | 1.97E-04 | 0.91 | 4.16 | - | 941.7  |
| AHQ-4-5, 3881         | K.YKGQHVPGSPFOFTVGPLGEGGAHK.V    | 2596.88377 | 3 | 3.12E-04 | 0.92 | 4.26 | - | 1343.0 |
| AHQ-4-4, 4234         | K.YKGQHVPGSPFOFTVGPLGEGGAHK.V    | 2596.88377 | 3 | 1.08E-05 | 0.89 | 4.07 | - | 1000.5 |
| AHQ-4-3, 4283         | K.YKGQHVPGSPFOFTVGPLGEGGAHK.V    | 2596.88377 | 3 | 2.90E-06 | 0.74 | 3.46 | - | 559.2  |
| AHQ-4-7, 3729 - 3791  | K.YKGQHVPGSPFOFTVGPLGEGGAHK.V    | 2596.88377 | 3 | 6.17E-05 | 0.92 | 4.27 | - | 1011.9 |
| AHQ-4-7, 2478         | K.YNEQHVPGSPFTAR.V               | 1603.71978 | 2 | 5.24E-06 | 0.73 | 3.22 | - | 334.3  |
| AHQ-4-10, 2575 - 2579 | K.YNEQHVPGSPFTAR.V               | 1603.71978 | 2 | 1.49E-05 | 0.79 | 2.57 | - | 492.1  |
| AHQ-4-6, 2563         | K.YNEQHVPGSPFTAR.V               | 1603.71978 | 2 | 3.51E-04 | 0.79 | 3.25 | - | 588.7  |
| AHQ-4-5, 2845         | K.YNEQHVPGSPFTAR.V               | 1603.71978 | 3 | 4.36E-07 | 0.92 | 4.30 | - | 1502.6 |
| AHQ-4-2, 2748         | K.YNEQHVPGSPFTAR.V               | 1603.71978 | 2 | 1.81E-04 | 0.62 | 2.68 | - | 390.5  |
| AHQ-4-4, 2703         | K.YNEQHVPGSPFTAR.V               | 1603.71978 | 2 | 6.08E-06 | 0.83 | 3.09 | - | 530.6  |
| AHQ-4-4, 2722         | K.YNEQHVPGSPFTAR.V               | 1603.71978 | 2 | 6.72E-06 | 0.92 | 4.14 | - | 483.8  |
| AHQ-4-3, 2731         | K.YNEQHVPGSPFTAR.V               | 1603.71978 | 2 | 1.34E-06 | 0.87 | 3.79 | - | 514.3  |

|                             |                                                                          |            |   |          |      |        |       |         |
|-----------------------------|--------------------------------------------------------------------------|------------|---|----------|------|--------|-------|---------|
| AHQ-4-5, 2833               | K.YNEQHVPGSPFFAR.V                                                       | 1603.71978 | 2 | 6.43E-04 | 0.73 | 3.10   | -     | 414.8   |
| AHQ-4-5, 2521 - 2522        | K.YNEQHVPGSPFFAR.V                                                       | 1603.71978 | 2 | 9.28E-08 | 0.91 | 3.74   | -     | 637.9   |
| AHQ-4-4, 3010               | K.YNEQHVPGSPFFAR.V                                                       | 1603.71978 | 2 | 1.74E-04 | 0.86 | 3.39   | -     | 502.3   |
| AHQ-4-6, 4386               | K.YTPVQQGPVGNVTVGGDPIPK.S                                                | 2287.55640 | 2 | 1.20E-07 | 0.87 | 3.64   | -     | 550.5   |
| AHQ-4-2, 4922               | K.YTPVQQGPVGNVTVGGDPIPK.S                                                | 2287.55640 | 2 | 6.18E-07 | 0.87 | 3.74   | -     | 617.3   |
| AHQ-4-2, 4830 - 4851        | K.YTPVQQGPVGNVTVGGDPIPK.S                                                | 2287.55640 | 2 | 3.40E-08 | 0.96 | 5.32   | -     | 843.3   |
| AHQ-4-2, 4710 - 4780        | K.YTPVQQGPVGNVTVGGDPIPK.S                                                | 2287.55640 | 2 | 3.05E-06 | 0.85 | 3.75   | -     | 504.9   |
| AHQ-4-2, 4626 - 4694        | K.YTPVQQGPVGNVTVGGDPIPK.S                                                | 2287.55640 | 2 | 1.92E-07 | 0.93 | 4.37   | -     | 714.2   |
| AHQ-4-2, 4502 - 4515        | K.YTPVQQGPVGNVTVGGDPIPK.S                                                | 2287.55640 | 2 | 1.89E-05 | 0.85 | 3.75   | -     | 644.6   |
| AHQ-4-5, 4474 - 4477        | K.YTPVQQGPVGNVTVGGDPIPK.S                                                | 2287.55640 | 2 | 1.18E-04 | 0.93 | 4.38   | -     | 748.2   |
| AHQ-4-3, 4480               | K.YTPVQQGPVGNVTVGGDPIPK.S                                                | 2287.55640 | 2 | 1.26E-06 | 0.87 | 3.75   | -     | 585.2   |
| AHQ-4-3, 4624 - 4699        | K.YTPVQQGPVGNVTVGGDPIPK.S                                                | 2287.55640 | 2 | 4.23E-05 | 0.90 | 4.02   | -     | 594.6   |
| AHQ-4-3, 4719 - 4792        | K.YTPVQQGPVGNVTVGGDPIPK.S                                                | 2287.55640 | 2 | 3.63E-08 | 0.89 | 3.92   | -     | 598.8   |
| AHQ-4-8, 4135               | K.YTPVQQGPVGNVTVGGDPIPK.S                                                | 2287.55640 | 2 | 2.25E-06 | 0.88 | 3.85   | -     | 566.8   |
| AHQ-4-3, 4805 - 4883        | K.YTPVQQGPVGNVTVGGDPIPK.S                                                | 2287.55640 | 2 | 6.19E-08 | 0.93 | 4.77   | -     | 587.2   |
| AHQ-4-4, 4700 - 4778        | K.YTPVQQGPVGNVTVGGDPIPK.S                                                | 2287.55640 | 2 | 2.38E-07 | 0.93 | 4.47   | -     | 712.2   |
| AHQ-4-10, 4060              | K.YTPVQQGPVGNVTVGGDPIPK.S                                                | 2287.55640 | 2 | 3.39E-07 | 0.88 | 3.81   | -     | 637.6   |
| AHQ-4-4, 4582 - 4650        | K.YTPVQQGPVGNVTVGGDPIPK.S                                                | 2287.55640 | 2 | 6.64E-06 | 0.94 | 4.75   | -     | 744.7   |
| AHQ-4-1, 4514               | K.YTPVQQGPVGNVTVGGDPIPK.S                                                | 2287.55640 | 2 | 9.42E-06 | 0.76 | 3.24   | -     | 480.7   |
| AHQ-4-1, 4641 - 4709        | K.YTPVQQGPVGNVTVGGDPIPK.S                                                | 2287.55640 | 2 | 1.40E-07 | 0.94 | 4.51   | -     | 736.2   |
| AHQ-4-1, 4805               | K.YTPVQQGPVGNVTVGGDPIPK.S                                                | 2287.55640 | 2 | 1.20E-06 | 0.93 | 4.53   | -     | 768.1   |
| AHQ-4-7, 4337               | K.YTPVQQGPVGNVTVGGDPIPK.S                                                | 2287.55640 | 2 | 3.88E-06 | 0.92 | 4.12   | -     | 738.5   |
| AHQ-4-9, 3952               | K.YTPVQQGPVGNVTVGGDPIPK.S                                                | 2287.55640 | 2 | 1.59E-05 | 0.87 | 4.01   | -     | 493.5   |
| AHQ-4-5, 6723               | R.YWPQEAEGYAVHVLCSNSEDIR.L                                               | 2538.73318 | 2 | 3.89E-05 | 0.72 | 3.04   | -     | 440.9   |
| AHQ-4-1, 6971               | R.YWPQEAEGYAVHVLCSNSEDIR.L                                               | 2538.73318 | 2 | 1.46E-12 | 0.76 | 3.02   | -     | 505.3   |
| AHQ-4-3, 6849 - 6920        | R.YWPQEAEGYAVHVLCSNSEDIR.L                                               | 2538.73318 | 3 | 2.34E-06 | 0.82 | 3.50   | -     | 620.3   |
| AHQ-4-3, 6508 - 6521        | R.YWPQEAEGYAVHVLCSNSEDIR.L                                               | 2538.73318 | 2 | 1.89E-06 | 0.92 | 4.45   | -     | 814.5   |
| AHQ-4-2, 7071 - 7076        | R.YWPQEAEGYAVHVLCSNSEDIR.L                                               | 2538.73318 | 2 | 1.34E-08 | 0.91 | 3.52   | -     | 1027.2  |
| AHQ-4-3, 6831 - 6900        | R.YWPQEAEGYAVHVLCSNSEDIR.L                                               | 2538.73318 | 2 | 3.48E-08 | 0.94 | 4.57   | -     | 807.8   |
| AHQ-4-1, 6462 - 6463        | R.YWPQEAEGYAVHVLCSNSEDIR.L                                               | 2538.73318 | 2 | 1.24E-04 | 0.81 | 3.14   | -     | 755.7   |
| AHQ-4-2, 6938 - 6958        | R.YWPQEAEGYAVHVLCSNSEDIR.L                                               | 2538.73318 | 2 | 4.34E-08 | 0.94 | 4.55   | -     | 923.7   |
| gi 7669492 ref NP_002037.2  | glyceraldehyde-3-phosphate dehydrogenase [Homo sapiens]                  |            |   | 5.00E-15 | 8.82 | 110.37 | 40.00 | 36053.0 |
| AHQ-4-9, 3029 - 3067        | R.GALQNIIPASTGAAK.A                                                      | 1412.61680 | 1 | 6.27E-07 | 0.87 | 3.68   | -     | 793.9   |
| AHQ-4-9, 3211               | R.GALQNIIPASTGAAK.A                                                      | 1412.61680 | 1 | 9.63E-05 | 0.49 | 2.29   | -     | 484.2   |
| AHQ-4-9, 3371               | R.GALQNIIPASTGAAK.A                                                      | 1412.61680 | 1 | 8.54E-07 | 0.23 | 2.25   | -     | 202.2   |
| AHQ-4-10, 3317 - 3327       | R.GALQNIIPASTGAAK.A                                                      | 1412.61680 | 1 | 3.47E-05 | 0.47 | 2.70   | -     | 423.4   |
| AHQ-4-11, 3524              | R.GALQNIIPASTGAAK.A                                                      | 1412.61680 | 2 | 5.63E-06 | 0.76 | 3.17   | -     | 575.1   |
| AHQ-4-9, 6412 - 6473        | K.GILGYTEHQVVSDFNSDTHSSTFDAGAGIALNDHFVK.L                                | 4039.28524 | 3 | 2.57E-05 | 0.90 | 5.35   | -     | 408.9   |
| AHQ-4-9, 5899 - 5963        | K.GILGYTEHQVVSDFNSDTHSSTFDAGAGIALNDHFVK.L                                | 4039.28524 | 3 | 3.09E-04 | 0.81 | 4.08   | -     | 486.9   |
| AHQ-4-9, 3896               | K.RVIISAPSDAPIMFVMGVNHEK.Y                                               | 2370.78022 | 3 | 1.41E-07 | 0.94 | 5.24   | -     | 844.8   |
| AHQ-4-9, 6544 - 6617        | K.VIHDNFGIVEGLMTTVHAITATQK.T                                             | 2596.98694 | 3 | 7.22E-15 | 0.98 | 6.82   | -     | 2194.5  |
| AHQ-4-11, 6705 - 6708       | K.VIHDNFGIVEGLMTTVHAITATQK.T                                             | 2596.98694 | 2 | 1.53E-08 | 0.97 | 6.84   | -     | 1958.7  |
| AHQ-4-9, 6543 - 6608        | K.VIHDNFGIVEGLMTTVHAITATQK.T                                             | 2596.98694 | 2 | 9.81E-09 | 0.97 | 6.46   | -     | 1642.7  |
| AHQ-4-11, 6130              | K.VIHDNFGIVEGLMTTVHAITATQK.T                                             | 2612.98634 | 2 | 8.39E-04 | 0.90 | 5.08   | -     | 993.0   |
| AHQ-4-10, 5789              | K.VIHDNFGIVEGLMTTVHAITATQK.T                                             | 2612.98634 | 3 | 2.12E-06 | 0.97 | 5.52   | -     | 1606.2  |
| AHQ-4-9, 5791 - 5860        | K.VIHDNFGIVEGLMTTVHAITATQK.T                                             | 2612.98634 | 3 | 5.00E-15 | 0.96 | 6.59   | -     | 1555.8  |
| AHQ-4-10, 6399 - 6405       | K.VIHDNFGIVEGLMTTVHAITATQK.T                                             | 2596.98694 | 3 | 4.44E-08 | 0.95 | 6.13   | -     | 1762.1  |
| AHQ-4-11, 6704 - 6710       | K.VIHDNFGIVEGLMTTVHAITATQK.T                                             | 2596.98694 | 3 | 1.05E-10 | 0.96 | 7.38   | -     | 1498.9  |
| AHQ-4-9, 4108               | R.VIISAPSDAPIMFVMGVNHEK.Y                                                | 2230.59327 | 2 | 1.34E-05 | 0.64 | 3.17   | -     | 454.2   |
| AHQ-4-9, 3911               | R.VIISAPSDAPIMFVMGVNHEK.Y                                                | 2230.59327 | 2 | 4.86E-04 | 0.67 | 3.57   | -     | 466.1   |
| AHQ-4-9, 3657               | R.VIISAPSDAPIMFVMGVNHEK.Y                                                | 2246.59267 | 2 | 6.55E-05 | 0.40 | 2.84   | -     | 223.7   |
| AHQ-4-9, 4323 - 4401        | R.VIISAPSDAPIMFVMGVNHEK.Y                                                | 2214.59387 | 2 | 1.82E-05 | 0.82 | 3.69   | -     | 328.3   |
| AHQ-4-9, 4560 - 4567        | R.VIISAPSDAPIMFVMGVNHEK.Y                                                | 2214.59387 | 2 | 2.18E-07 | 0.38 | 2.60   | -     | 320.9   |
| AHQ-4-12, 4113              | R.VPTANVSVDLTCL.L                                                        | 1532.74450 | 2 | 6.59E-09 | 0.93 | 4.22   | -     | 964.8   |
| AHQ-4-3, 4309               | R.VPTANVSVDLTCL.L                                                        | 1532.74450 | 2 | 4.69E-05 | 0.70 | 2.89   | -     | 750.2   |
| AHQ-4-13, 4205 - 4244       | R.VPTANVSVDLTCL.L                                                        | 1532.74450 | 2 | 7.37E-09 | 0.96 | 4.41   | -     | 1212.1  |
| AHQ-4-11, 4024              | R.VPTANVSVDLTCL.L                                                        | 1532.74450 | 2 | 6.11E-04 | 0.72 | 3.01   | -     | 367.8   |
| AHQ-4-11, 3882 - 3960       | R.VPTANVSVDLTCL.L                                                        | 1532.74450 | 2 | 1.44E-08 | 0.92 | 3.63   | -     | 941.1   |
| AHQ-4-9, 3439 - 3453        | R.VPTANVSVDLTCL.L                                                        | 1532.74450 | 2 | 1.05E-09 | 0.94 | 3.83   | -     | 1209.6  |
| AHQ-4-10, 3637              | R.VPTANVSVDLTCL.L                                                        | 1532.74450 | 2 | 6.59E-04 | 0.89 | 3.33   | -     | 915.8   |
| AHQ-4-9, 3717 - 3792        | R.VPTANVSVDLTCL.L                                                        | 1532.74450 | 2 | 2.51E-09 | 0.94 | 4.05   | -     | 859.0   |
| AHQ-4-13-, 4102             | R.VPTANVSVDLTCL.L                                                        | 1532.74450 | 2 | 2.01E-09 | 0.92 | 3.73   | -     | 1029.6  |
| AHQ-4-9, 3879               | R.VPTANVSVDLTCL.L                                                        | 1532.74450 | 2 | 5.13E-09 | 0.90 | 3.41   | -     | 861.1   |
| AHQ-4-11, 3781              | R.VPTANVSVDLTCL.L                                                        | 1532.74450 | 2 | 6.93E-04 | 0.92 | 3.72   | -     | 949.3   |
| AHQ-4-9, 6793 - 6860        | K.WGDAGAIEYVVESTGVFTTMEK.A                                               | 2278.48027 | 2 | 1.33E-09 | 0.93 | 4.32   | -     | 755.4   |
| AHQ-4-9, 6775 - 6848        | K.WGDAGAIEYVVESTGVFTTMEK.A                                               | 2294.47967 | 2 | 8.58E-06 | 0.87 | 3.63   | -     | 740.7   |
| AHQ-4-9, 6672 - 6755        | K.WGDAGAIEYVVESTGVFTTMEK.A                                               | 2278.48027 | 2 | 2.90E-06 | 0.95 | 4.66   | -     | 905.8   |
| AHQ-4-9, 6445 - 6524        | K.WGDAGAIEYVVESTGVFTTMEK.A                                               | 2278.48027 | 2 | 4.49E-07 | 0.85 | 3.59   | -     | 501.2   |
| AHQ-4-9, 6248 - 6280        | K.WGDAGAIEYVVESTGVFTTMEK.A                                               | 2278.48027 | 2 | 3.50E-08 | 0.83 | 3.95   | -     | 624.6   |
| AHQ-4-9, 6101 - 6181        | K.WGDAGAIEYVVESTGVFTTMEK.A                                               | 2278.48027 | 2 | 7.00E-05 | 0.88 | 3.48   | -     | 859.7   |
| AHQ-4-9, 5960 - 6025        | K.WGDAGAIEYVVESTGVFTTMEK.A                                               | 2278.48027 | 2 | 4.18E-09 | 0.91 | 3.85   | -     | 808.0   |
| AHQ-4-13, 6238 - 6304       | K.WGDAGAIEYVVESTGVFTTMEK.A                                               | 2278.48027 | 2 | 5.86E-04 | 0.90 | 4.04   | -     | 808.6   |
| AHQ-4-9, 5817 - 5891        | K.WGDAGAIEYVVESTGVFTTMEK.A                                               | 2278.48027 | 2 | 3.74E-06 | 0.94 | 3.84   | -     | 1246.0  |
| AHQ-4-13-, 6041 - 6120      | K.WGDAGAIEYVVESTGVFTTMEK.A                                               | 2278.48027 | 2 | 1.93E-04 | 0.95 | 4.72   | -     | 897.7   |
| AHQ-4-13-, 6177 - 6257      | K.WGDAGAIEYVVESTGVFTTMEK.A                                               | 2278.48027 | 2 | 1.43E-06 | 0.93 | 4.81   | -     | 659.2   |
| AHQ-4-14-, 6005             | K.WGDAGAIEYVVESTGVFTTMEK.A                                               | 2278.48027 | 2 | 1.24E-07 | 0.96 | 4.88   | -     | 1074.1  |
| gi 4758460 ref NP_004479.1  | glycoprotein V (platelet) [Homo sapiens]                                 |            |   | 6.66E-15 | 5.48 | 60.26  | 24.50 | 60958.9 |
| AHQ-4-5, 5465               | R.CAGPGAHAGLPLWALPGGDAECPGPR.G                                           | 2587.87539 | 3 | 8.35E-08 | 0.84 | 3.77   | -     | 805.8   |
| AHQ-4-5, 4611               | R.GVLQSQSFGMTVLQRL.L                                                     | 1738.99008 | 2 | 3.59E-05 | 0.95 | 3.75   | -     | 1657.8  |
| AHQ-4-5, 5495               | R.LM*ISDHSISAVAPGTFSDLIK.L                                               | 2219.54375 | 2 | 4.76E-05 | 0.93 | 4.60   | -     | 794.8   |
| AHQ-4-5, 4522               | R.LPNLSSLTSLR.N                                                          | 1201.39802 | 2 | 2.49E-04 | 0.95 | 3.52   | -     | 1838.2  |
| AHQ-4-5, 7381 - 7429        | R.LSALPQAGFQGLQELQVLAHNSGLTALPDGLLR.G                                    | 3471.99408 | 3 | 6.66E-15 | 0.91 | 5.11   | -     | 528.5   |
| AHQ-4-1, 7293               | K.LVNLQELALNQQLDFLPASLFTNLENL.K.L                                        | 3314.77659 | 3 | 1.93E-05 | 0.90 | 4.65   | -     | 738.7   |
| gi 21361755 ref NP_004090.3 | stomatins; erythrocyte membrane protein band 7.2 (stomatins) [Homo sapie |            |   | 7.22E-15 | 9.42 | 110.29 | 48.30 | 31708.5 |
| AHQ-4-1, 4905               | K.EASM*VITESPAALQLR.Y                                                    | 1716.98119 | 2 | 7.60E-05 | 0.86 | 3.75   | -     | 912.4   |
| AHQ-4-14, 5017 - 5072       | K.EASM*VITESPAALQLR.Y                                                    | 1732.98059 | 2 | 2.89E-04 | 0.54 | 2.74   | -     | 414.8   |
| AHQ-4-10, 3767 - 3772       | K.EASM*VITESPAALQLR.Y                                                    | 1732.98059 | 2 | 9.93E-06 | 0.83 | 3.24   | -     | 1033.9  |
| AHQ-4-14, 5858              | K.EASM*VITESPAALQLR.Y                                                    | 1716.98119 | 2 | 4.68E-07 | 0.75 | 3.15   | -     | 779.0   |
| AHQ-4-13-, 4609             | K.EASM*VITESPAALQLR.Y                                                    | 1716.98119 | 2 | 7.42E-04 | 0.90 | 4.50   | -     | 741.0   |
| AHQ-4-1, 4342 - 4354        | K.EASM*VITESPAALQLR.Y                                                    | 1732.98059 | 2 | 4.64E-04 | 0.91 | 3.76   | -     | 1214.7  |
| AHQ-4-13-, 4104 - 4134      | K.EASM*VITESPAALQLR.Y                                                    | 1732.98059 | 2 | 4.01E-08 | 0.91 | 4.20   | -     | 941.2   |
| AHQ-4-9, 4099               | K.EASM*VITESPAALQLR.Y                                                    | 1716.98119 | 2 | 2.47E-05 | 0.85 | 3.38   | -     | 902.0   |
| AHQ-4-13, 6953 - 6954       | K.GPGLFFILPCTDSFIK.V                                                     | 1814.13672 | 2 | 9.41E-06 | 0.94 | 4.89   | -     | 662.1   |
| AHQ-4-3, 7471               | K.GPGLFFILPCTDSFIK.V                                                     | 1814.13672 | 2 | 9.77E-05 | 0.91 | 4.51   | -     | 614.0   |
| AHQ-4-1, 7197               | K.GPGLFFILPCTDSFIK.V                                                     | 1814.13672 | 2 | 2.00E-04 | 0.95 | 4.35   | -     | 861.1   |
| AHQ-4-10, 6455              | K.GPGLFFILPCTDSFIK.V                                                     | 1814.13672 | 2 | 8.46E-05 | 0.94 | 4.89   | -     | 731.3   |
| AHQ-4-13-, 6832 - 6833      | K.GPGLFFILPCTDSFIK.V                                                     | 1814.13672 | 2 | 3.89E-06 | 0.96 | 5.21   | -     | 903.8   |
| AHQ-4-1, 7134 - 7199        | K.NLSQLSDREEIAHNMQSTLDDATDAWGIV.K                                        | 3373.65329 | 3 | 5.34E-05 | 0.86 | 4.44   | -     | 986.0   |
| AHQ-4-1, 6217 - 6221        | K.NLSQLSDREEIAHNMQSTLDDATDAWGIV.K                                        | 3389.65279 | 3 | 8.32E-05 | 0.96 | 5.30   | -     | 1821.3  |
| AHQ-4-2, 7591               | K.NSTIVFPLPIDMLQGIIGAK.H                                                 | 2128.56375 | 2 | 2.83E-04 | 0.68 | 3.41   | -     | 327.5   |
| AHQ-4-14-, 6745             | K.NSTIVFPLPIDMLQGIIGAK.H                                                 | 2144.56315 | 2 | 6.02E-04 | 0.79 | 3.71   | -     | 305.0   |
| AHQ-4-13-, 6924             | K.NSTIVFPLPIDMLQGIIGAK.H                                                 | 2128.56375 | 2 | 2.05E-04 | 0.89 | 4.03   | -     | 568.7   |
| AHQ-4-14-, 6825             | K.NSTIVFPLPIDMLQGIIGAK.H                                                 | 2128.56375 | 2 | 3.33E-05 | 0.67 | 3.47   | -     | 326.4   |
| AHQ-4-1, 5651 - 5721        | R.TISFDIPPEILTK.D                                                        | 1602.85305 | 2 | 3.87E-05 | 0.67 | 2.56   | -     | 329.2   |
| AHQ-4-1, 2323               | K.VIAAEGEMNASR.A                                                         | 1248.39191 | 2 | 4.55E-09 | 0.96 | 4.06   | -     | 1476.7  |
| AHQ-4-1, 4155               | R.VQNATLAVANITNADSATR.L                                                  | 1931.09731 | 2 | 9.48E-07 | 0.76 | 3.35   | -     | 491.5   |
| AHQ-4-10, 4092              | R.VQNATLAVANITNADSATR.L                                                  | 1931.09731 | 2 | 2.92E-08 | 0.90 | 4.25   | -     | 626.9   |

|                             |                                                                         |            |   |          |        |         |       |          |
|-----------------------------|-------------------------------------------------------------------------|------------|---|----------|--------|---------|-------|----------|
| AHQ-4-1, 3923               | R.VQNATLAVANITNADSATR.L                                                 | 1931.09731 | 2 | 7.22E-15 | 0.96   | 5.06    | -     | 1046.4   |
| AHQ-4-1, 4681               | R.VQNATLAVANITNADSATR.L                                                 | 1931.09731 | 2 | 1.74E-07 | 0.93   | 4.54    | -     | 730.8    |
| AHQ-4-10, 3679              | R.VQNATLAVANITNADSATR.L                                                 | 1931.09731 | 2 | 7.88E-04 | 0.30   | 2.61    | -     | 184.1    |
| AHQ-4-1, 4005 - 4025        | R.VQNATLAVANITNADSATR.L                                                 | 1931.09731 | 2 | 2.20E-12 | 0.97   | 5.89    | -     | 1115.0   |
| AHQ-4-13-, 3825             | R.YLQTLTTIAAEK.N                                                        | 1352.55813 | 2 | 6.54E-05 | 0.92   | 3.69    | -     | 1088.7   |
| AHQ-4-13, 3970 - 3978       | R.YLQTLTTIAAEK.N                                                        | 1352.55813 | 2 | 8.43E-04 | 0.91   | 3.55    | -     | 995.9    |
| AHQ-4-1, 3970 - 4030        | R.YLQTLTTIAAEK.N                                                        | 1352.55813 | 2 | 4.95E-08 | 0.93   | 3.34    | -     | 1513.1   |
| gi 4504517 ref NP_001531.1  | heat shock 27kDa protein 1; heat shock 27kD protein 1 [Homo sapiens] [M |            |   | 9.44E-15 | 5.61   | 60.35   | 39.50 | 22782.3  |
| AHQ-4-14-, 4735 - 4745      | K.LATQSNIEITPVTFESR.A                                                   | 1907.11412 | 2 | 1.37E-05 | 0.86   | 4.15    | -     | 394.6    |
| AHQ-4-10, 4481              | K.LATQSNIEITPVTFESR.A                                                   | 1907.11412 | 2 | 8.61E-04 | 0.56   | 3.12    | -     | 257.0    |
| AHQ-4-13, 4984 - 4992       | K.LATQSNIEITPVTFESR.A                                                   | 1907.11412 | 2 | 1.31E-07 | 0.90   | 4.24    | -     | 505.8    |
| AHQ-4-13-, 4853 - 4917      | K.LATQSNIEITPVTFESR.A                                                   | 1907.11412 | 2 | 1.07E-07 | 0.71   | 3.25    | -     | 398.3    |
| AHQ-4-13-, 4760 - 4780      | K.LATQSNIEITPVTFESR.A                                                   | 1907.11412 | 2 | 1.79E-04 | 0.80   | 3.74    | -     | 346.5    |
| AHQ-4-11, 4754              | K.LATQSNIEITPVTFESR.A                                                   | 1907.11412 | 2 | 1.11E-10 | 0.90   | 4.16    | -     | 486.9    |
| AHQ-4-14, 5996 - 6066       | K.LATQSNIEITPVTFESR.A                                                   | 1907.11412 | 2 | 3.66E-05 | 0.76   | 3.80    | -     | 359.1    |
| AHQ-4-11, 4628 - 4684       | K.LATQSNIEITPVTFESR.A                                                   | 1907.11412 | 2 | 1.26E-04 | 0.61   | 2.93    | -     | 397.7    |
| AHQ-4-11, 4477              | R.LFDQAFGLPLR.L                                                         | 1164.33793 | 2 | 1.32E-07 | 0.96   | 4.39    | -     | 1487.8   |
| AHQ-4-10, 6188              | R.LPEEWSQWLGGSSWPGYVR.P                                                 | 2235.44173 | 2 | 8.37E-04 | 0.74   | 3.45    | -     | 542.5    |
| AHQ-4-11, 6472 - 6480       | R.LPEEWSQWLGGSSWPGYVR.P                                                 | 2235.44173 | 2 | 7.08E-08 | 0.96   | 4.90    | -     | 999.9    |
| AHQ-4-11, 6688 - 6697       | R.LPEEWSQWLGGSSWPGYVRPLPPAAIESPAVAAPAYS.R.A                             | 4095.56787 | 3 | 9.44E-15 | 0.97   | 7.03    | -     | 1091.1   |
| AHQ-4-10, 6376              | R.LPEEWSQWLGGSSWPGYVRPLPPAAIESPAVAAPAYS.R.A                             | 4095.56787 | 3 | 2.60E-06 | 0.92   | 4.86    | -     | 808.7    |
| AHQ-4-11, 4025              | R.PLPPAAIESPAVAAPAYS.R.A                                                | 1879.14874 | 2 | 9.41E-07 | 0.84   | 3.44    | -     | 418.1    |
| AHQ-4-13, 4708 - 4709       | R.VSLDVNHFAPDELTVK.T                                                    | 1784.99058 | 2 | 1.30E-07 | 0.95   | 5.08    | -     | 1038.3   |
| AHQ-4-13-, 4596 - 4612      | R.VSLDVNHFAPDELTVK.T                                                    | 1784.99058 | 3 | 1.61E-07 | 0.80   | 3.50    | -     | 509.5    |
| AHQ-4-11, 4486 - 4549       | R.VSLDVNHFAPDELTVK.T                                                    | 1784.99058 | 2 | 1.53E-10 | 0.96   | 4.39    | -     | 1499.2   |
| AHQ-4-13-, 4845             | R.VSLDVNHFAPDELTVK.T                                                    | 1784.99058 | 2 | 8.73E-10 | 0.96   | 5.16    | -     | 1211.0   |
| AHQ-4-13-, 4593 - 4613      | R.VSLDVNHFAPDELTVK.T                                                    | 1784.99058 | 2 | 1.08E-11 | 0.97   | 5.08    | -     | 1517.0   |
| AHQ-4-11, 4665              | R.VSLDVNHFAPDELTVK.T                                                    | 1784.99058 | 2 | 5.80E-11 | 0.95   | 4.62    | -     | 1067.6   |
| AHQ-4-10, 4207 - 4208       | R.VSLDVNHFAPDELTVK.T                                                    | 1784.99058 | 2 | 3.12E-08 | 0.90   | 4.02    | -     | 988.3    |
| gi 12667788 ref NP_002464.1 | myosin, heavy polypeptide 9, non-muscle [Homo sapiens]                  |            |   | 1.17E-14 | 103.36 | 1180.37 | 45.70 | 226529.8 |
| AHQ-4-2, 2507               | K.AKQTLNERGELANEVK.V                                                    | 1930.10932 | 2 | 5.63E-05 | 0.89   | 4.06    | -     | 1033.5   |
| AHQ-4-3, 1809 - 1875        | R.ALEEAMEQK.A                                                           | 1049.18068 | 1 | 6.67E-04 | 0.45   | 2.38    | -     | 744.0    |
| AHQ-4-2, 1868 - 1943        | R.ALEEAMEQK.A                                                           | 1049.18068 | 2 | 6.68E-04 | 0.83   | 3.24    | -     | 787.3    |
| AHQ-4-2, 3784               | K.ALELDSNLYR.I                                                          | 1194.31920 | 2 | 1.07E-06 | 0.95   | 4.01    | -     | 1245.3   |
| AHQ-4-5, 3515 - 3517        | K.ALELDSNLYR.I                                                          | 1194.31920 | 2 | 8.95E-06 | 0.90   | 3.55    | -     | 980.3    |
| AHQ-4-2, 3899               | K.ALELDSNLYR.I                                                          | 1194.31920 | 2 | 4.09E-05 | 0.94   | 3.65    | -     | 1182.6   |
| AHQ-4-1, 3878 - 3891        | K.ALELDSNLYR.I                                                          | 1194.31920 | 2 | 1.88E-07 | 0.95   | 4.00    | -     | 1366.6   |
| AHQ-4-3, 3873               | K.ALELDSNLYR.I                                                          | 1194.31920 | 2 | 8.49E-07 | 0.89   | 3.12    | -     | 1063.4   |
| AHQ-4-4, 3719               | K.ALELDSNLYR.I                                                          | 1194.31920 | 2 | 2.70E-05 | 0.94   | 3.65    | -     | 1288.6   |
| AHQ-4-3, 3736 - 3737        | K.ALELDSNLYR.I                                                          | 1194.31920 | 2 | 1.03E-05 | 0.94   | 4.01    | -     | 1127.0   |
| AHQ-4-1, 2947               | R.ALEQQVEEMK.T                                                          | 1205.36380 | 2 | 3.54E-05 | 0.88   | 3.35    | -     | 1070.2   |
| AHQ-4-3, 2785 - 2800        | R.ALEQQVEEMK.T                                                          | 1205.36380 | 2 | 4.66E-05 | 0.92   | 3.69    | -     | 1098.5   |
| AHQ-4-2, 2792               | R.ALEQQVEEMK.T                                                          | 1205.36380 | 2 | 1.33E-05 | 0.88   | 3.61    | -     | 890.7    |
| AHQ-4-5, 2586               | R.ALEQQVEEMK.T                                                          | 1205.36380 | 2 | 5.56E-05 | 0.92   | 3.93    | -     | 1062.0   |
| AHQ-4-1, 2190               | R.ALEQQVEEM*K.T                                                         | 1221.36320 | 2 | 7.16E-05 | 0.79   | 3.13    | -     | 882.4    |
| AHQ-4-4, 2774               | R.ALEQQVEEMK.T                                                          | 1205.36380 | 2 | 1.33E-04 | 0.86   | 3.35    | -     | 1042.1   |
| AHQ-4-3, 2013               | R.ALEQQVEEM*K.T                                                         | 1221.36320 | 2 | 6.02E-04 | 0.81   | 3.13    | -     | 987.9    |
| AHQ-4-6, 2614               | R.ALEQQVEEMK.T                                                          | 1205.36380 | 2 | 3.42E-04 | 0.86   | 3.28    | -     | 912.4    |
| AHQ-4-5, 6513               | R.ALEQQVEEM*KTQLEEELEDELQATEDAK.L                                       | 3165.38394 | 3 | 2.12E-07 | 0.95   | 5.23    | -     | 1440.8   |
| AHQ-4-6, 6392               | R.ALEQQVEEM*KTQLEEELEDELQATEDAK.L                                       | 3165.38394 | 3 | 4.95E-06 | 0.91   | 4.35    | -     | 1214.3   |
| AHQ-4-3, 6595 - 6668        | R.ALEQQVEEM*KTQLEEELEDELQATEDAK.L                                       | 3165.38394 | 3 | 7.27E-14 | 0.98   | 7.44    | -     | 2810.3   |
| AHQ-4-1, 6571 - 6633        | R.ALEQQVEEM*KTQLEEELEDELQATEDAK.L                                       | 3165.38394 | 3 | 1.52E-06 | 0.97   | 6.68    | -     | 1534.3   |
| AHQ-4-5, 7370               | R.ALEQQVEEMKTOLEEELEDELQATEDAK.L                                        | 3149.38454 | 3 | 4.74E-04 | 0.94   | 4.96    | -     | 1239.2   |
| AHQ-4-4, 7394               | R.ALEQQVEEMKTOLEEELEDELQATEDAK.L                                        | 3149.38454 | 3 | 5.66E-11 | 0.96   | 6.09    | -     | 1384.8   |
| AHQ-4-2, 7455               | R.ALEQQVEEMKTOLEEELEDELQATEDAK.L                                        | 3149.38454 | 3 | 1.94E-07 | 0.96   | 5.55    | -     | 1701.6   |
| AHQ-4-6, 7190               | R.ALEQQVEEMKTOLEEELEDELQATEDAK.L                                        | 3149.38454 | 3 | 3.31E-12 | 0.97   | 6.18    | -     | 1400.5   |
| AHQ-4-3, 7456               | R.ALEQQVEEMKTOLEEELEDELQATEDAK.L                                        | 3149.38454 | 3 | 3.14E-06 | 0.96   | 6.12    | -     | 1504.9   |
| AHQ-4-2, 6664 - 6738        | R.ALEQQVEEM*KTQLEEELEDELQATEDAK.L                                       | 3165.38394 | 3 | 3.52E-11 | 0.97   | 5.82    | -     | 2068.6   |
| AHQ-4-1, 6710               | R.ALEQQVEEM*KTQLEEELEDELQATEDAK.L                                       | 3165.38394 | 3 | 1.75E-04 | 0.76   | 3.65    | -     | 758.9    |
| AHQ-4-3, 5148 - 5219        | K.ANLQIQDINTDLNLER.S                                                    | 1871.04187 | 2 | 3.46E-06 | 0.97   | 5.14    | -     | 1588.6   |
| AHQ-4-1, 5399               | K.ANLQIQDINTDLNLER.S                                                    | 1871.04187 | 2 | 1.06E-07 | 0.97   | 5.78    | -     | 1514.2   |
| AHQ-4-2, 5416 - 5487        | K.ANLQIQDINTDLNLER.S                                                    | 1871.04187 | 2 | 4.09E-05 | 0.97   | 5.76    | -     | 1624.6   |
| AHQ-4-2, 5270 - 5340        | K.ANLQIQDINTDLNLER.S                                                    | 1871.04187 | 2 | 8.37E-07 | 0.98   | 5.62    | -     | 1852.3   |
| AHQ-4-1, 5209 - 5277        | K.ANLQIQDINTDLNLER.S                                                    | 1871.04187 | 2 | 8.69E-04 | 0.94   | 5.14    | -     | 810.7    |
| AHQ-4-1, 5493 - 5567        | K.ANLQIQDINTDLNLER.S                                                    | 1871.04187 | 2 | 1.14E-05 | 0.94   | 4.49    | -     | 881.9    |
| AHQ-4-7, 4918               | K.ANLQIQDINTDLNLER.S                                                    | 1871.04187 | 2 | 2.64E-05 | 0.96   | 4.74    | -     | 1190.3   |
| AHQ-4-2, 4934               | K.ANLQIQDINTDLNLER.S                                                    | 1871.04187 | 2 | 1.27E-06 | 0.94   | 4.43    | -     | 1022.5   |
| AHQ-4-5, 5029 - 5046        | K.ANLQIQDINTDLNLER.S                                                    | 1871.04187 | 2 | 8.03E-07 | 0.97   | 5.68    | -     | 1398.0   |
| AHQ-4-1, 4997               | K.ANLQIQDINTDLNLER.S                                                    | 1871.04187 | 2 | 1.62E-08 | 0.91   | 4.13    | -     | 555.0    |
| AHQ-4-2, 5027 - 5034        | K.ANLQIQDINTDLNLER.S                                                    | 1871.04187 | 2 | 3.13E-09 | 0.96   | 5.19    | -     | 1089.7   |
| AHQ-4-9, 4461               | K.ANLQIQDINTDLNLER.S                                                    | 1871.04187 | 2 | 7.74E-07 | 0.81   | 3.52    | -     | 577.9    |
| AHQ-4-2, 5162 - 5231        | K.ANLQIQDINTDLNLER.S                                                    | 1871.04187 | 2 | 1.04E-06 | 0.97   | 5.44    | -     | 1515.0   |
| AHQ-4-3, 5400               | K.ANLQIQDINTDLNLER.S                                                    | 1871.04187 | 2 | 3.04E-09 | 0.97   | 5.65    | -     | 1585.0   |
| AHQ-4-2, 2242               | K.ASITALEAK.I                                                           | 904.04321  | 2 | 1.31E-04 | 0.88   | 2.78    | -     | 984.1    |
| AHQ-4-3, 2224               | K.ASITALEAK.I                                                           | 904.04321  | 2 | 4.88E-05 | 0.93   | 3.10    | -     | 1239.9   |
| AHQ-4-1, 2437               | K.ASITALEAK.I                                                           | 904.04321  | 2 | 1.16E-04 | 0.93   | 3.33    | -     | 1120.8   |
| AHQ-4-5, 2049               | K.ASITALEAK.I                                                           | 904.04321  | 2 | 1.61E-06 | 0.93   | 2.90    | -     | 1303.4   |
| AHQ-4-3, 1881               | R.ASREEILAAQK.E                                                         | 1216.36955 | 2 | 1.43E-04 | 0.91   | 3.41    | -     | 1278.8   |
| AHQ-4-2, 1906 - 1976        | R.ASREEILAAQK.E                                                         | 1216.36955 | 2 | 7.03E-06 | 0.95   | 3.54    | -     | 1837.5   |
| AHQ-4-5, 1666               | R.ASREEILAAQK.E                                                         | 1216.36955 | 2 | 8.11E-05 | 0.87   | 3.39    | -     | 1120.6   |
| AHQ-4-1, 2154               | R.ASREEILAAQK.E                                                         | 1216.36955 | 2 | 1.17E-05 | 0.91   | 3.55    | -     | 1307.7   |
| AHQ-4-2, 3400               | R.DELADEIANSSGK.G                                                       | 1349.38323 | 1 | 8.83E-10 | 0.70   | 2.55    | -     | 462.2    |
| AHQ-4-4, 3208               | R.DELADEIANSSGK.G                                                       | 1349.38323 | 2 | 5.25E-04 | 0.89   | 3.46    | -     | 789.0    |
| AHQ-4-3, 3215               | R.DELADEIANSSGK.G                                                       | 1349.38323 | 2 | 4.71E-06 | 0.96   | 3.90    | -     | 1758.9   |
| AHQ-4-1, 3265               | R.DELADEIANSSGK.G                                                       | 1349.38323 | 2 | 7.13E-07 | 0.96   | 4.11    | -     | 1783.3   |
| AHQ-4-5, 3127               | R.DELADEIANSSGK.G                                                       | 1349.38323 | 2 | 5.91E-06 | 0.94   | 3.66    | -     | 1413.9   |
| AHQ-4-2, 3230               | R.DELADEIANSSGK.G                                                       | 1349.38323 | 2 | 2.45E-06 | 0.93   | 3.79    | -     | 1252.7   |
| AHQ-4-2, 3231               | R.DELADEIANSSGK.G                                                       | 1349.38323 | 1 | 2.26E-08 | 0.31   | 2.13    | -     | 401.4    |
| AHQ-4-2, 7248 - 7254        | K.DFSALESQIQDQTELLQEENR.Q                                               | 2494.61059 | 3 | 2.22E-14 | 0.96   | 5.11    | -     | 1626.1   |
| AHQ-4-3, 7079 - 7100        | K.DFSALESQIQDQTELLQEENR.Q                                               | 2494.61059 | 3 | 4.16E-08 | 0.98   | 6.53    | -     | 2279.2   |
| AHQ-4-4, 7038 - 7062        | K.DFSALESQIQDQTELLQEENR.Q                                               | 2494.61059 | 3 | 1.36E-06 | 0.97   | 5.26    | -     | 2087.5   |
| AHQ-4-1, 7038 - 7039        | K.DFSALESQIQDQTELLQEENR.Q                                               | 2494.61059 | 3 | 1.13E-10 | 0.97   | 6.18    | -     | 1493.8   |
| AHQ-4-2, 7086 - 7150        | K.DFSALESQIQDQTELLQEENR.Q                                               | 2494.61059 | 3 | 8.54E-05 | 0.98   | 6.39    | -     | 1883.2   |
| AHQ-4-2, 6840               | K.DFSALESQIQDQTELLQEENR.Q                                               | 2494.61059 | 3 | 5.80E-05 | 0.91   | 4.65    | -     | 1023.3   |
| AHQ-4-3, 6659               | K.DFSALESQIQDQTELLQEENR.Q                                               | 2750.91328 | 2 | 8.49E-06 | 0.41   | 2.62    | -     | 269.5    |
| AHQ-4-2, 6671 - 6672        | K.DFSALESQIQDQTELLQEENR.Q                                               | 2750.91328 | 2 | 1.29E-10 | 0.73   | 3.26    | -     | 416.5    |
| AHQ-4-3, 2021 - 2052        | K.DLEAHIDSANK.N                                                         | 1213.27938 | 2 | 5.18E-05 | 0.97   | 3.88    | -     | 2162.7   |
| AHQ-4-2, 2046               | K.DLEAHIDSANK.N                                                         | 1213.27938 | 1 | 8.86E-05 | 0.65   | 1.94    | -     | 862.9    |
| AHQ-4-1, 2222               | K.DLEAHIDSANK.N                                                         | 1213.27938 | 1 | 3.25E-08 | 0.73   | 2.95    | -     | 579.6    |
| AHQ-4-4, 2038               | K.DLEAHIDSANK.N                                                         | 1213.27938 | 2 | 2.92E-07 | 0.97   | 4.07    | -     | 2225.0   |
| AHQ-4-1, 2223               | K.DLEAHIDSANK.N                                                         | 1213.27938 | 2 | 1.36E-06 | 0.96   | 4.06    | -     | 1759.3   |
| AHQ-4-2, 2044               | K.DLEAHIDSANK.N                                                         | 1213.27938 | 2 | 1.29E-07 | 0.97   | 4.19    | -     | 2044.4   |
| AHQ-4-1, 7265               | R.DLGEELALKTELEDTLDDSTAAQQELR.S                                         | 3019.21860 | 3 | 7.07E-10 | 0.96   | 4.90    | -     | 1935.6   |
| AHQ-4-3, 7631               | R.DLGEELALKTELEDTLDDSTAAQQELR.S                                         | 3019.21860 | 3 | 1.05E-08 | 0.97   | 6.32    | -     | 1874.7   |
| AHQ-4-3, 7523 - 7560        | R.DLGEELALKTELEDTLDDSTAAQQELR.S                                         | 3019.21860 | 3 | 8.67E-12 | 0.97   | 6.28    | -     | 1837.8   |
| AHQ-4-1, 7130 - 7131        | R.DLGEELALKTELEDTLDDSTAAQQELR.S                                         | 3019.21860 | 3 | 6.09E-12 | 0.97   | 6.50    | -     | 1768.2   |
| AHQ-4-6, 7290 - 7291        | R.DLGEELALKTELEDTLDDSTAAQQELR.S                                         | 3019.21860 | 3 | 1.50E-10 | 0.96   | 5.08    | -     | 1930.1   |

|                      |                                |            |   |          |      |      |   |        |
|----------------------|--------------------------------|------------|---|----------|------|------|---|--------|
| AHQ-4-4, 7462        | R.DLGEELKALTELEDTLDSTAAQQELR.S | 3019.21860 | 3 | 4.65E-11 | 0.97 | 5.90 | - | 1597.9 |
| AHQ-4-7, 7502        | R.DLGEELKALTELEDTLDSTAAQQELR.S | 3019.21860 | 3 | 8.55E-10 | 0.95 | 5.43 | - | 1263.3 |
| AHQ-4-2, 7518        | R.DLGEELKALTELEDTLDSTAAQQELR.S | 3019.21860 | 3 | 1.41E-11 | 0.97 | 5.82 | - | 1710.3 |
| AHQ-4-5, 7481        | R.DLGEELKALTELEDTLDSTAAQQELR.S | 3019.21860 | 3 | 8.10E-09 | 0.96 | 5.14 | - | 1769.9 |
| AHQ-4-2, 3411 - 3419 | K.DVLLQVDDER.R                 | 1202.29650 | 1 | 8.55E-04 | 0.19 | 1.99 | - | 261.2  |
| AHQ-4-3, 2827 - 2828 | K.DVLLQVDDER.R                 | 1358.48286 | 2 | 1.49E-04 | 0.48 | 2.74 | - | 495.5  |
| AHQ-4-2, 1819        | R.EEIIAQAK.E                   | 902.02731  | 1 | 9.37E-04 | 0.55 | 2.82 | - | 302.7  |
| AHQ-4-4, 2830        | R.ELEDATETADAMNR.E             | 1566.63006 | 2 | 3.16E-05 | 0.90 | 3.59 | - | 1018.1 |
| AHQ-4-6, 2714 - 2716 | R.ELEDATETADAMNR.E             | 1566.63006 | 2 | 9.83E-08 | 0.95 | 4.05 | - | 1446.0 |
| AHQ-4-3, 2772 - 2851 | R.ELEDATETADAMNR.E             | 1566.63006 | 2 | 1.34E-05 | 0.89 | 3.96 | - | 1048.9 |
| AHQ-4-2, 2862 - 2863 | R.ELEDATETADAMNR.E             | 1566.63006 | 2 | 1.23E-11 | 0.97 | 5.48 | - | 985.3  |
| AHQ-4-1, 6242        | R.ELESQISELOEDLESER.A          | 2035.10956 | 2 | 1.59E-05 | 0.82 | 2.96 | - | 886.9  |
| AHQ-4-3, 6432        | R.ELESQISELOEDLESER.A          | 2035.10956 | 2 | 4.23E-04 | 0.91 | 4.31 | - | 771.5  |
| AHQ-4-3, 6332        | R.ELESQISELOEDLESER.A          | 2035.10956 | 2 | 1.11E-05 | 0.74 | 3.39 | - | 522.1  |
| AHQ-4-4, 5975 - 6026 | R.ELESQISELOEDLESER.A          | 2035.10956 | 2 | 5.49E-09 | 0.96 | 4.38 | - | 1502.6 |
| AHQ-4-4, 5515        | R.ELESQISELOEDLESER.A          | 2035.10956 | 2 | 2.92E-04 | 0.92 | 4.06 | - | 906.4  |
| AHQ-4-3, 5991 - 6060 | R.ELESQISELOEDLESER.A          | 2035.10956 | 2 | 1.05E-06 | 0.96 | 5.12 | - | 1071.4 |
| AHQ-4-1, 5470        | R.ELESQISELOEDLESER.A          | 2035.10956 | 2 | 1.19E-05 | 0.61 | 2.91 | - | 497.7  |
| AHQ-4-3, 5549        | R.ELESQISELOEDLESER.A          | 2035.10956 | 2 | 2.72E-05 | 0.77 | 3.54 | - | 640.3  |
| AHQ-4-2, 6338        | R.ELESQISELOEDLESER.A          | 2035.10956 | 2 | 1.80E-07 | 0.94 | 4.69 | - | 957.0  |
| AHQ-4-2, 6064        | R.ELESQISELOEDLESER.A          | 2035.10956 | 2 | 2.77E-05 | 0.64 | 3.57 | - | 743.7  |
| AHQ-4-2, 6012        | R.ELESQISELOEDLESER.A          | 2035.10956 | 3 | 3.07E-05 | 0.98 | 5.65 | - | 3017.0 |
| AHQ-4-6, 5692 - 5694 | R.ELESQISELOEDLESER.A          | 2035.10956 | 2 | 5.18E-06 | 0.96 | 5.05 | - | 1128.2 |
| AHQ-4-1, 5577        | R.ELESQISELOEDLESER.A          | 2035.10956 | 2 | 1.58E-06 | 0.89 | 3.90 | - | 684.5  |
| AHQ-4-7, 5746        | R.ELESQISELOEDLESER.A          | 2035.10956 | 2 | 1.64E-08 | 0.96 | 4.91 | - | 1197.0 |
| AHQ-4-3, 6000 - 6003 | R.ELESQISELOEDLESER.A          | 2035.10956 | 3 | 9.36E-06 | 0.98 | 6.35 | - | 2377.2 |
| AHQ-4-1, 5898 - 5965 | R.ELESQISELOEDLESER.A          | 2035.10956 | 2 | 6.14E-09 | 0.96 | 5.48 | - | 931.8  |
| AHQ-4-2, 2495        | R.EMAELEDER.K                  | 1251.30306 | 2 | 3.34E-04 | 0.71 | 2.53 | - | 726.8  |
| AHQ-4-4, 2098 - 2106 | R.EMAELEDER.K                  | 1379.47597 | 2 | 1.00E-07 | 0.93 | 3.62 | - | 1230.3 |
| AHQ-4-5, 1933        | R.EMAELEDER.K                  | 1379.47597 | 2 | 6.67E-04 | 0.91 | 3.39 | - | 1137.3 |
| AHQ-4-1, 2275        | R.EMAELEDER.K                  | 1379.47597 | 2 | 2.54E-04 | 0.85 | 2.97 | - | 1002.4 |
| AHQ-4-2, 2107 - 2108 | R.EMAELEDER.K                  | 1379.47597 | 2 | 2.14E-05 | 0.93 | 3.62 | - | 1205.4 |
| AHQ-4-3, 4613        | K.EQADFAIEALAK.A               | 1306.44632 | 2 | 3.88E-04 | 0.60 | 2.55 | - | 564.0  |
| AHQ-4-4, 4447        | K.EQADFAIEALAK.A               | 1306.44632 | 2 | 6.48E-04 | 0.76 | 2.66 | - | 745.0  |
| AHQ-4-1, 2474        | R.EQLEEEEEAKHNLEK.Q            | 1855.93770 | 2 | 8.59E-04 | 0.82 | 3.58 | - | 726.9  |
| AHQ-4-6, 2175        | R.EQLEEEEEAKHNLEK.Q            | 1855.93770 | 2 | 2.77E-05 | 0.68 | 3.64 | - | 294.0  |
| AHQ-4-4, 2287        | R.EQLEEEEEAKHNLEK.Q            | 1855.93770 | 2 | 2.13E-05 | 0.87 | 3.94 | - | 627.4  |
| AHQ-4-3, 2295        | R.EQLEEEEEAKHNLEK.Q            | 1855.93770 | 2 | 1.70E-04 | 0.92 | 4.57 | - | 845.7  |
| AHQ-4-2, 3466        | R.FLSNGHVTPGGQDK.D             | 1641.80946 | 2 | 1.37E-07 | 0.90 | 3.64 | - | 737.3  |
| AHQ-4-1, 3570        | R.FLSNGHVTPGGQDK.D             | 1641.80946 | 2 | 1.09E-04 | 0.59 | 2.93 | - | 518.1  |
| AHQ-4-3, 3456        | R.FLSNGHVTPGGQDK.D             | 1641.80946 | 2 | 3.60E-09 | 0.92 | 3.48 | - | 1115.2 |
| AHQ-4-2, 5242 - 5310 | R.FLSNGHVTPGGQDKDMFQETMEAM*R.I | 3028.39040 | 3 | 4.45E-06 | 0.84 | 4.91 | - | 898.8  |
| AHQ-4-7, 5727        | R.FLSNGHVTPGGQDKDMFQETMEAMR.I  | 3012.39100 | 3 | 1.94E-04 | 0.65 | 3.61 | - | 370.3  |
| AHQ-4-4, 2682        | K.HEAMITDLEER.L                | 1344.47646 | 2 | 5.96E-05 | 0.97 | 4.14 | - | 1661.2 |
| AHQ-4-1, 2965        | K.HEAMITDLEER.L                | 1344.47646 | 2 | 2.52E-07 | 0.94 | 3.60 | - | 1088.4 |
| AHQ-4-3, 2723 - 2735 | K.HEAMITDLEER.L                | 1344.47646 | 2 | 2.31E-08 | 0.96 | 3.83 | - | 1122.0 |
| AHQ-4-3, 2725        | K.HEAMITDLEER.L                | 1344.47646 | 1 | 2.27E-05 | 0.62 | 3.10 | - | 436.4  |
| AHQ-4-4, 2683        | K.HEAMITDLEER.L                | 1344.47646 | 1 | 1.17E-06 | 0.83 | 3.04 | - | 785.4  |
| AHQ-4-2, 2758        | K.HEAMITDLEER.L                | 1344.47646 | 2 | 1.53E-07 | 0.97 | 4.72 | - | 1610.4 |
| AHQ-4-2, 2759        | K.HEAMITDLEER.L                | 1344.47646 | 1 | 1.56E-06 | 0.49 | 1.97 | - | 727.2  |
| AHQ-4-3, 3171 - 3173 | R.HEM*PPHYAITDTAYR.S           | 1932.14884 | 2 | 7.49E-04 | 0.92 | 3.43 | - | 938.4  |
| AHQ-4-1, 3334 - 3405 | R.HEM*PPHYAITDTAYR.S           | 1932.14884 | 3 | 3.26E-04 | 0.87 | 3.51 | - | 1129.0 |
| AHQ-4-3, 3176        | R.HEM*PPHYAITDTAYR.S           | 1932.14884 | 3 | 1.12E-05 | 0.98 | 5.02 | - | 2433.0 |
| AHQ-4-10, 2925       | R.HEM*PPHYAITDTAYR.S           | 1932.14884 | 3 | 4.25E-07 | 0.95 | 4.45 | - | 1792.7 |
| AHQ-4-2, 3500 - 3555 | R.HEMPPHYAITDTAYR.S            | 1916.14944 | 2 | 1.11E-04 | 0.93 | 3.52 | - | 941.5  |
| AHQ-4-4, 3511        | R.HEMPPHYAITDTAYR.S            | 1916.14944 | 2 | 9.26E-06 | 0.83 | 3.68 | - | 460.3  |
| AHQ-4-1, 3393        | R.HEM*PPHYAITDTAYR.S           | 1932.14884 | 2 | 7.10E-05 | 0.71 | 2.68 | - | 547.9  |
| AHQ-4-2, 3547        | R.HEMPPHYAITDTAYR.S            | 1916.14944 | 3 | 2.89E-11 | 0.97 | 4.51 | - | 2224.3 |
| AHQ-4-2, 3628        | R.HEMPPHYAITDTAYR.S            | 1916.14944 | 2 | 1.65E-04 | 0.83 | 3.20 | - | 683.3  |
| AHQ-4-2, 3662 - 3680 | R.HEMPPHYAITDTAYR.S            | 1916.14944 | 3 | 5.51E-05 | 0.95 | 3.67 | - | 1916.8 |
| AHQ-4-6, 2916        | R.HEM*PPHYAITDTAYR.S           | 1932.14884 | 2 | 2.33E-05 | 0.90 | 3.44 | - | 808.9  |
| AHQ-4-6, 2914        | R.HEM*PPHYAITDTAYR.S           | 1932.14884 | 3 | 9.18E-04 | 0.97 | 4.60 | - | 2150.3 |
| AHQ-4-5, 2930        | R.HEM*PPHYAITDTAYR.S           | 1932.14884 | 2 | 1.24E-04 | 0.87 | 3.15 | - | 714.3  |
| AHQ-4-2, 3175 - 3179 | R.HEM*PPHYAITDTAYR.S           | 1932.14884 | 2 | 9.84E-04 | 0.95 | 4.08 | - | 1009.4 |
| AHQ-4-1, 3742        | R.HEMPPHYAITDTAYR.S            | 1916.14944 | 2 | 1.45E-04 | 0.81 | 2.86 | - | 860.3  |
| AHQ-4-2, 3754        | R.HEMPPHYAITDTAYR.S            | 1916.14944 | 2 | 1.95E-04 | 0.66 | 3.12 | - | 496.4  |
| AHQ-4-2, 3183        | R.HEM*PPHYAITDTAYR.S           | 1932.14884 | 3 | 5.42E-06 | 0.96 | 4.64 | - | 1748.9 |
| AHQ-4-2, 4915        | K.HSQAVEELAEQLEQTK.R           | 1840.96940 | 2 | 1.08E-12 | 0.97 | 5.28 | - | 1764.4 |
| AHQ-4-5, 4206 - 4251 | K.HSQAVEELAEQLEQTK.R           | 1840.96940 | 2 | 2.99E-05 | 0.96 | 4.67 | - | 1311.3 |
| AHQ-4-3, 4537 - 4583 | K.HSQAVEELAEQLEQTK.R           | 1840.96940 | 2 | 1.17E-14 | 0.98 | 5.93 | - | 2171.8 |
| AHQ-4-3, 4547        | K.HSQAVEELAEQLEQTK.R           | 1840.96940 | 3 | 7.22E-08 | 0.96 | 5.10 | - | 2031.5 |
| AHQ-4-2, 4575        | K.HSQAVEELAEQLEQTK.R           | 1840.96940 | 3 | 1.57E-06 | 0.95 | 4.31 | - | 1801.9 |
| AHQ-4-2, 4567 - 4646 | K.HSQAVEELAEQLEQTK.R           | 1840.96940 | 2 | 1.46E-08 | 0.98 | 5.80 | - | 2240.1 |
| AHQ-4-4, 4495        | K.HSQAVEELAEQLEQTK.R           | 1840.96940 | 2 | 2.86E-08 | 0.98 | 5.59 | - | 2135.6 |
| AHQ-4-1, 4679        | K.HSQAVEELAEQLEQTK.R           | 1840.96940 | 3 | 9.36E-09 | 0.96 | 4.94 | - | 1858.8 |
| AHQ-4-10, 3969       | K.HSQAVEELAEQLEQTK.R           | 1840.96940 | 2 | 1.77E-04 | 0.81 | 3.45 | - | 512.0  |
| AHQ-4-1, 4378        | K.HSQAVEELAEQLEQTKR.V          | 1997.15575 | 3 | 7.44E-14 | 0.97 | 5.43 | - | 1955.1 |
| AHQ-4-2, 4091        | K.HSQAVEELAEQLEQTKR.V          | 1997.15575 | 2 | 1.07E-07 | 0.98 | 5.71 | - | 1949.4 |
| AHQ-4-6, 3744        | K.HSQAVEELAEQLEQTKR.V          | 1997.15575 | 3 | 1.75E-05 | 0.97 | 5.49 | - | 1452.5 |
| AHQ-4-1, 4295 - 4374 | K.HSQAVEELAEQLEQTKR.V          | 1997.15575 | 2 | 6.58E-07 | 0.96 | 5.25 | - | 913.8  |
| AHQ-4-1, 4277 - 4283 | K.HSQAVEELAEQLEQTKR.V          | 1997.15575 | 3 | 1.02E-05 | 0.97 | 5.61 | - | 1504.4 |
| AHQ-4-4, 4023 - 4026 | K.HSQAVEELAEQLEQTKR.V          | 1997.15575 | 3 | 3.89E-12 | 0.98 | 6.77 | - | 1644.4 |
| AHQ-4-4, 4018 - 4020 | K.HSQAVEELAEQLEQTKR.V          | 1997.15575 | 2 | 2.00E-04 | 0.98 | 5.35 | - | 2489.4 |
| AHQ-4-2, 4090        | K.HSQAVEELAEQLEQTKR.V          | 1997.15575 | 3 | 1.35E-09 | 0.97 | 5.38 | - | 1585.7 |
| AHQ-4-3, 4048        | K.HSQAVEELAEQLEQTKR.V          | 1997.15575 | 2 | 4.69E-06 | 0.97 | 5.23 | - | 1548.1 |
| AHQ-4-3, 4055        | K.HSQAVEELAEQLEQTKR.V          | 1997.15575 | 3 | 9.30E-08 | 0.96 | 5.48 | - | 1544.3 |
| AHQ-4-2, 4207        | K.HSQAVEELAEQLEQTKR.V          | 1997.15575 | 3 | 4.29E-07 | 0.97 | 5.42 | - | 1724.9 |
| AHQ-4-5, 3758        | K.HSQAVEELAEQLEQTKR.V          | 1997.15575 | 3 | 7.84E-07 | 0.98 | 5.97 | - | 1805.1 |
| AHQ-4-3, 3727 - 3795 | R.IAEFTTNTLEEEEEK.S            | 1654.75371 | 2 | 1.74E-10 | 0.97 | 4.62 | - | 1873.5 |
| AHQ-4-4, 3691 - 3763 | R.IAEFTTNTLEEEEEK.S            | 1654.75371 | 2 | 4.64E-09 | 0.96 | 4.50 | - | 1492.9 |
| AHQ-4-4, 3795 - 3872 | R.IAEFTTNTLEEEEEK.S            | 1654.75371 | 2 | 4.49E-06 | 0.96 | 4.17 | - | 1837.2 |
| AHQ-4-6, 3464        | R.IAEFTTNTLEEEEEK.S            | 1654.75371 | 2 | 1.41E-04 | 0.88 | 3.14 | - | 1291.7 |
| AHQ-4-2, 4143        | R.IAEFTTNTLEEEEEK.S            | 1654.75371 | 2 | 1.06E-05 | 0.90 | 3.26 | - | 1160.9 |
| AHQ-4-3, 3863 - 3931 | R.IAEFTTNTLEEEEEK.S            | 1654.75371 | 2 | 8.43E-09 | 0.96 | 4.11 | - | 2114.5 |
| AHQ-4-2, 3756 - 3826 | R.IAEFTTNTLEEEEEK.S            | 1654.75371 | 2 | 2.74E-11 | 0.97 | 4.55 | - | 2007.0 |
| AHQ-4-1, 4206        | R.IAEFTTNTLEEEEEK.S            | 1654.75371 | 2 | 3.60E-05 | 0.87 | 2.69 | - | 1457.0 |
| AHQ-4-3, 4000 - 4041 | R.IAEFTTNTLEEEEEK.S            | 1654.75371 | 2 | 2.72E-05 | 0.96 | 4.48 | - | 1770.5 |
| AHQ-4-2, 3895        | R.IAEFTTNTLEEEEEK.S            | 1654.75371 | 2 | 2.50E-06 | 0.98 | 5.07 | - | 2008.3 |
| AHQ-4-2, 3892 - 3963 | R.IAEFTTNTLEEEEEK.S            | 1654.75371 | 2 | 1.06E-07 | 0.92 | 3.50 | - | 1729.6 |
| AHQ-4-5, 3534        | R.IAEFTTNTLEEEEEK.S            | 1654.75371 | 2 | 1.92E-06 | 0.96 | 4.12 | - | 1568.9 |
| AHQ-4-1, 3838 - 3909 | R.IAEFTTNTLEEEEEK.S            | 1654.75371 | 2 | 1.10E-08 | 0.97 | 4.87 | - | 1752.4 |
| AHQ-4-1, 4067        | R.IAEFTTNTLEEEEEK.S            | 1654.75371 | 2 | 3.76E-07 | 0.97 | 4.56 | - | 1875.1 |
| AHQ-4-3, 3320 - 3400 | R.IAEFTTNTLEEEEEKSK.S          | 1870.00428 | 2 | 8.26E-06 | 0.86 | 3.65 | - | 754.4  |
| AHQ-4-2, 3311        | R.IAEFTTNTLEEEEEKSK.S          | 1870.00428 | 2 | 1.17E-06 | 0.73 | 3.49 | - | 530.9  |
| AHQ-4-1, 5307 - 5373 | R.IAQLEEELEEEQGNTLINDR.L       | 2473.58969 | 3 | 5.73E-06 | 0.92 | 4.57 | - | 1311.1 |
| AHQ-4-1, 5665        | R.IAQLEEELEEEQGNTLINDR.LK.K    | 2714.92085 | 2 | 1.96E-07 | 0.87 | 3.95 | - | 827.5  |
| AHQ-4-2, 3799 - 3831 | K.IAQLEEQLDNETK.E              | 1531.64695 | 2 | 1.08E-06 | 0.95 | 4.40 | - | 1008.0 |



|                        |                            |            |   |          |      |      |   |        |
|------------------------|----------------------------|------------|---|----------|------|------|---|--------|
| AHQ-4-10, 3076 - 3088  | K.IAQLLEEQLDNETK.E         | 1531.64695 | 2 | 5.90E-05 | 0.92 | 3.88 | - | 1154.1 |
| AHQ-4-2, 3607          | K.IAQLLEEQLDNETK.E         | 1531.64695 | 2 | 2.71E-09 | 0.97 | 4.95 | - | 1645.6 |
| AHQ-4-9, 2855          | K.IAQLLEEQLDNETK.E         | 1531.64695 | 2 | 1.59E-07 | 0.94 | 3.98 | - | 1399.2 |
| AHQ-4-11, 3174 - 3244  | K.IAQLLEEQLDNETK.E         | 1531.64695 | 2 | 8.26E-05 | 0.93 | 3.96 | - | 1391.7 |
| AHQ-4-4, 3475          | K.IAQLLEEQLDNETK.E         | 1531.64695 | 2 | 3.23E-08 | 0.95 | 4.26 | - | 1403.0 |
| AHQ-4-4, 3346 - 3359   | K.IAQLLEEQLDNETK.E         | 1531.64695 | 2 | 4.44E-05 | 0.93 | 3.32 | - | 1368.2 |
| AHQ-4-1, 3022          | K.IAQLLEEQLDNETK.E         | 1531.64695 | 2 | 1.08E-07 | 0.88 | 3.72 | - | 891.3  |
| AHQ-4-7, 3081          | K.IAQLLEEQLDNETK.E         | 1531.64695 | 2 | 7.58E-08 | 0.97 | 4.33 | - | 1850.8 |
| AHQ-4-2, 3519          | K.IAQLLEEQLDNETK.E         | 1531.64695 | 2 | 7.45E-06 | 0.96 | 4.67 | - | 1435.8 |
| AHQ-4-5, 3163 - 3178   | K.IAQLLEEQLDNETK.E         | 1531.64695 | 2 | 3.16E-04 | 0.93 | 3.92 | - | 1149.4 |
| AHQ-4-2, 3383 - 3422   | K.IAQLLEEQLDNETK.E         | 1531.64695 | 2 | 9.89E-07 | 0.91 | 3.64 | - | 1023.8 |
| AHQ-4-2, 3107 - 3178   | K.IAQLLEEQLDNETK.E         | 1531.64695 | 2 | 1.77E-07 | 0.96 | 4.70 | - | 1720.2 |
| AHQ-4-1, 3457          | K.IAQLLEEQLDNETK.E         | 1531.64695 | 2 | 1.44E-05 | 0.97 | 4.19 | - | 1672.8 |
| AHQ-4-6, 3106          | K.IAQLLEEQLDNETK.E         | 1531.64695 | 2 | 7.46E-06 | 0.97 | 3.79 | - | 2076.8 |
| AHQ-4-6, 2982          | K.IAQLLEEQLDNETK.E         | 1531.64695 | 2 | 1.11E-04 | 0.37 | 2.61 | - | 175.9  |
| AHQ-4-1, 3602 - 3610   | K.IAQLLEEQLDNETK.E         | 1531.64695 | 2 | 1.37E-05 | 0.77 | 3.44 | - | 734.6  |
| AHQ-4-3, 3163          | K.IAQLLEEQLDNETK.E         | 1531.64695 | 2 | 7.80E-07 | 0.96 | 4.37 | - | 1663.2 |
| AHQ-4-3, 3452          | K.IAQLLEEQLDNETKER.Q       | 1816.94784 | 2 | 1.82E-05 | 0.84 | 3.96 | - | 750.9  |
| AHQ-4-2, 3475          | K.IAQLLEEQLDNETKER.Q       | 1816.94784 | 2 | 1.33E-08 | 0.93 | 4.37 | - | 944.8  |
| AHQ-4-4, 3430          | K.IAQLLEEQLDNETKER.Q       | 1816.94784 | 2 | 1.76E-08 | 0.89 | 4.04 | - | 710.1  |
| AHQ-4-2, 3050 - 3062   | K.IAQLLEEQLDNETKER.Q       | 1816.94784 | 2 | 6.47E-07 | 0.85 | 3.44 | - | 886.5  |
| AHQ-4-2, 5447 - 5527   | R.IIGLDQVAGM*SETALPGAFK.T  | 2035.35041 | 2 | 4.08E-06 | 0.94 | 4.51 | - | 1043.4 |
| AHQ-4-2, 5439          | R.IIGLDQVAGM*SETALPGAFK.T  | 2035.35041 | 2 | 2.79E-04 | 0.91 | 4.16 | - | 729.7  |
| AHQ-4-2, 6762 - 6838   | R.IIGLDQVAGM*SETALPGAFK.T  | 2019.35101 | 2 | 6.03E-08 | 0.98 | 6.63 | - | 1539.7 |
| AHQ-4-2, 6696 - 6775   | R.IIGLDQVAGM*SETALPGAFK.T  | 2019.35101 | 2 | 7.30E-04 | 0.96 | 5.58 | - | 1040.0 |
| AHQ-4-6, 5610 - 5618   | R.IIGLDQVAGM*SETALPGAFK.T  | 2035.35041 | 2 | 3.26E-04 | 0.96 | 5.57 | - | 903.1  |
| AHQ-4-2, 6119 - 6122   | R.IIGLDQVAGM*SETALPGAFK.T  | 2019.35101 | 2 | 1.29E-06 | 0.97 | 5.49 | - | 1354.2 |
| AHQ-4-4, 6738 - 6758   | R.IIGLDQVAGM*SETALPGAFK.T  | 2019.35101 | 2 | 2.12E-06 | 0.97 | 5.81 | - | 1205.2 |
| AHQ-4-1, 6638 - 6665   | R.IIGLDQVAGM*SETALPGAFK.T  | 2019.35101 | 2 | 6.31E-06 | 0.97 | 5.39 | - | 1110.0 |
| AHQ-4-3, 6764 - 6833   | R.IIGLDQVAGM*SETALPGAFK.T  | 2019.35101 | 2 | 1.44E-05 | 0.94 | 4.80 | - | 970.1  |
| AHQ-4-1, 5990 - 6067   | R.IIGLDQVAGM*SETALPGAFK.T  | 2019.35101 | 2 | 2.57E-04 | 0.81 | 3.19 | - | 713.1  |
| AHQ-4-6, 6478          | R.IIGLDQVAGM*SETALPGAFK.T  | 2019.35101 | 2 | 1.39E-04 | 0.95 | 4.64 | - | 1063.5 |
| AHQ-4-7, 6625          | R.IIGLDQVAGM*SETALPGAFK.T  | 2019.35101 | 2 | 1.45E-05 | 0.97 | 4.88 | - | 1425.6 |
| AHQ-4-2, 5802          | R.IIGLDQVAGM*SETALPGAFK.T  | 2035.35041 | 2 | 1.65E-05 | 0.94 | 4.45 | - | 900.8  |
| AHQ-4-14-, 5475        | R.IIGLDQVAGM*SETALPGAFK.T  | 2035.35041 | 2 | 2.42E-06 | 0.96 | 5.18 | - | 865.9  |
| AHQ-4-5, 6622 - 6653   | R.IIGLDQVAGM*SETALPGAFK.T  | 2019.35101 | 2 | 2.66E-05 | 0.98 | 5.62 | - | 1579.6 |
| AHQ-4-14-, 6199 - 6279 | R.IIGLDQVAGM*SETALPGAFK.T  | 2019.35101 | 2 | 2.76E-04 | 0.96 | 5.13 | - | 1275.0 |
| AHQ-4-2, 5894 - 5971   | R.IIGLDQVAGM*SETALPGAFK.T  | 2035.35041 | 2 | 7.98E-04 | 0.88 | 4.20 | - | 562.1  |
| AHQ-4-8, 4766 - 4785   | R.IMGIPPEEQM*GLLR.V        | 1616.92826 | 2 | 3.51E-06 | 0.65 | 3.22 | - | 300.3  |
| AHQ-4-4, 4656 - 4667   | R.IMGIPPEEQM*GLLR.V        | 1632.92766 | 2 | 5.87E-04 | 0.87 | 3.57 | - | 470.4  |
| AHQ-4-4, 5363 - 5364   | R.IMGIPPEEQM*GLLR.V        | 1616.92826 | 2 | 6.87E-06 | 0.86 | 3.26 | - | 514.1  |
| AHQ-4-2, 4018          | R.IM*GIPEEQM*GLLR.V        | 1648.92706 | 2 | 2.00E-06 | 0.73 | 2.76 | - | 465.7  |
| AHQ-4-2, 4810          | R.IM*GIPEEQM*GLLR.V        | 1632.92766 | 2 | 6.91E-05 | 0.93 | 3.82 | - | 961.8  |
| AHQ-4-5, 5173          | R.IMGIPPEEQM*GLLR.V        | 1616.92826 | 2 | 2.76E-08 | 0.87 | 3.26 | - | 521.5  |
| AHQ-4-5, 4542          | R.IM*GIPEEQM*GLLR.V        | 1632.92766 | 2 | 8.09E-09 | 0.92 | 3.73 | - | 972.3  |
| AHQ-4-2, 5386 - 5387   | R.IMGIPPEEQM*GLLR.V        | 1616.92826 | 2 | 6.14E-07 | 0.91 | 4.07 | - | 524.5  |
| AHQ-4-2, 4791 - 4798   | R.IM*GIPEEQM*GLLR.V        | 1632.92766 | 2 | 1.44E-06 | 0.96 | 4.29 | - | 1082.6 |
| AHQ-4-1, 4086          | R.IM*GIPEEQM*GLLR.V        | 1648.92706 | 2 | 2.72E-04 | 0.70 | 2.75 | - | 471.4  |
| AHQ-4-5, 4413 - 4481   | R.IMGIPPEEQM*GLLR.V        | 1632.92766 | 2 | 8.87E-06 | 0.85 | 3.35 | - | 520.5  |
| AHQ-4-2, 4698 - 4727   | R.IMGIPPEEQM*GLLR.V        | 1632.92766 | 2 | 1.19E-06 | 0.88 | 3.89 | - | 443.5  |
| AHQ-4-3, 5933          | K.IRELESQISELQEDLESER.A    | 2304.45416 | 3 | 3.23E-05 | 0.97 | 5.65 | - | 1837.4 |
| AHQ-4-5, 5659 - 5735   | K.IRELESQISELQEDLESER.A    | 2304.45416 | 2 | 3.15E-04 | 0.98 | 6.93 | - | 1694.4 |
| AHQ-4-6, 5606          | K.IRELESQISELQEDLESER.A    | 2304.45416 | 2 | 9.80E-05 | 0.96 | 5.78 | - | 661.1  |
| AHQ-4-4, 5911          | K.IRELESQISELQEDLESER.A    | 2304.45416 | 3 | 1.65E-06 | 0.94 | 4.81 | - | 1394.1 |
| AHQ-4-1, 5987 - 6005   | K.IRELESQISELQEDLESER.A    | 2304.45416 | 3 | 7.28E-08 | 0.96 | 5.43 | - | 1790.0 |
| AHQ-4-2, 5966 - 5970   | K.IRELESQISELQEDLESER.A    | 2304.45416 | 2 | 5.06E-06 | 0.98 | 7.04 | - | 1523.1 |
| AHQ-4-1, 5985          | K.IRELESQISELQEDLESER.A    | 2304.45416 | 2 | 1.43E-05 | 0.98 | 7.23 | - | 1369.9 |
| AHQ-4-3, 5932          | K.IRELESQISELQEDLESER.A    | 2304.45416 | 2 | 2.00E-13 | 0.98 | 6.66 | - | 1492.1 |
| AHQ-4-2, 4847          | K.KANLQIDQINTDLNLER.S      | 1999.21478 | 2 | 7.12E-08 | 0.98 | 6.59 | - | 1881.4 |
| AHQ-4-6, 4226          | K.KANLQIDQINTDLNLER.S      | 1999.21478 | 2 | 3.39E-06 | 0.97 | 5.18 | - | 1653.4 |
| AHQ-4-3, 4611          | K.KANLQIDQINTDLNLER.S      | 1999.21478 | 2 | 1.32E-05 | 0.97 | 5.63 | - | 1410.2 |
| AHQ-4-1, 4862 - 4867   | K.KANLQIDQINTDLNLER.S      | 1999.21478 | 2 | 8.78E-05 | 0.93 | 4.68 | - | 1060.0 |
| AHQ-4-1, 4694          | K.KANLQIDQINTDLNLER.S      | 1999.21478 | 3 | 4.37E-04 | 0.87 | 4.17 | - | 943.8  |
| AHQ-4-3, 4701          | K.KANLQIDQINTDLNLER.S      | 1999.21478 | 2 | 2.33E-05 | 0.97 | 5.96 | - | 1430.1 |
| AHQ-4-3, 4811 - 4885   | K.KANLQIDQINTDLNLER.S      | 1999.21478 | 2 | 7.50E-04 | 0.93 | 4.28 | - | 1039.0 |
| AHQ-4-9, 3787          | K.KANLQIDQINTDLNLER.S      | 1999.21478 | 2 | 5.54E-05 | 0.98 | 6.37 | - | 2162.8 |
| AHQ-4-1, 4630 - 4697   | K.KANLQIDQINTDLNLER.S      | 1999.21478 | 2 | 3.93E-05 | 0.97 | 5.76 | - | 1242.5 |
| AHQ-4-5, 4310          | K.KANLQIDQINTDLNLER.S      | 1999.21478 | 2 | 7.86E-09 | 0.96 | 5.57 | - | 1209.8 |
| AHQ-4-2, 4764          | K.KANLQIDQINTDLNLER.S      | 1999.21478 | 2 | 3.32E-05 | 0.89 | 4.85 | - | 688.8  |
| AHQ-4-2, 2416          | R.KKVEAQLQELQVK.F          | 1541.81761 | 2 | 3.08E-07 | 0.96 | 4.56 | - | 1369.1 |
| AHQ-4-6, 2248          | R.KKVEAQLQELQVK.F          | 1541.81761 | 2 | 9.90E-04 | 0.95 | 4.30 | - | 1458.5 |
| AHQ-4-2, 2422          | R.KKVEAQLQELQVK.F          | 1541.81761 | 3 | 1.49E-04 | 0.86 | 3.63 | - | 883.6  |
| AHQ-4-3, 2396 - 2420   | R.KKVEAQLQELQVK.F          | 1541.81761 | 2 | 1.40E-07 | 0.97 | 5.05 | - | 1992.8 |
| AHQ-4-1, 2582 - 2642   | R.KKVEAQLQELQVK.F          | 1541.81761 | 2 | 3.10E-05 | 0.97 | 4.97 | - | 1628.1 |
| AHQ-4-4, 2390 - 2391   | R.KKVEAQLQELQVK.F          | 1541.81761 | 2 | 1.07E-08 | 0.98 | 5.17 | - | 2035.4 |
| AHQ-4-5, 2229 - 2245   | R.KKVEAQLQELQVK.F          | 1541.81761 | 2 | 2.92E-06 | 0.98 | 5.17 | - | 2042.7 |
| AHQ-4-1, 3555 - 3563   | K.KLEEEQIILEDQNK.L         | 1891.08992 | 2 | 1.52E-04 | 0.97 | 5.35 | - | 1405.9 |
| AHQ-4-5, 3209          | K.KLEEEQIILEDQNK.L         | 1891.08992 | 2 | 5.43E-05 | 0.97 | 5.17 | - | 1523.9 |
| AHQ-4-3, 3641 - 3643   | K.KLEEEQIILEDQNK.L         | 1891.08992 | 2 | 3.84E-04 | 0.94 | 4.53 | - | 607.2  |
| AHQ-4-3, 3352 - 3427   | K.KLEEEQIILEDQNK.L         | 1891.08992 | 2 | 2.01E-11 | 0.98 | 6.39 | - | 1581.4 |
| AHQ-4-3, 3783          | K.KLEEEQIILEDQNK.L         | 1891.08992 | 2 | 3.78E-06 | 0.98 | 4.91 | - | 2061.4 |
| AHQ-4-2, 3380 - 3452   | K.KLEEEQIILEDQNK.L         | 1891.08992 | 2 | 3.41E-09 | 0.98 | 6.31 | - | 1999.1 |
| AHQ-4-2, 3530 - 3598   | K.KLEEEQIILEDQNK.L         | 1891.08992 | 2 | 1.25E-10 | 0.98 | 5.61 | - | 1464.0 |
| AHQ-4-4, 3528          | K.KLEEEQIILEDQNK.L         | 1891.08992 | 3 | 9.44E-04 | 0.73 | 3.14 | - | 921.8  |
| AHQ-4-3, 3491 - 3559   | K.KLEEEQIILEDQNK.L         | 1891.08992 | 2 | 1.06E-05 | 0.97 | 5.26 | - | 1226.1 |
| AHQ-4-4, 3386 - 3387   | K.KLEEEQIILEDQNK.L         | 1891.08992 | 2 | 7.06E-05 | 0.97 | 5.72 | - | 1560.2 |
| AHQ-4-2, 3450          | K.KLEEEQIILEDQNK.L         | 1891.08992 | 3 | 7.92E-09 | 0.91 | 4.56 | - | 1155.7 |
| AHQ-4-1, 3661          | K.KLEEEQIILEDQNK.L         | 1891.08992 | 2 | 1.44E-09 | 0.98 | 6.27 | - | 1916.4 |
| AHQ-4-4, 3494 - 3563   | K.KLEEEQIILEDQNK.L         | 1891.08992 | 2 | 1.35E-07 | 0.97 | 5.25 | - | 1252.3 |
| AHQ-4-2, 3675 - 3752   | K.KLEEEQIILEDQNK.L         | 1891.08992 | 2 | 2.64E-05 | 0.97 | 5.29 | - | 1378.2 |
| AHQ-4-3, 3525          | K.KLEEEQIILEDQNK.L         | 1891.08992 | 3 | 1.09E-06 | 0.92 | 3.83 | - | 1539.6 |
| AHQ-4-6, 7042          | R.KLEGDSTLSDQIAELQAIAELK.M | 2616.86032 | 3 | 1.39E-04 | 0.89 | 4.51 | - | 889.4  |
| AHQ-4-5, 7186 - 7187   | R.KLEGDSTLSDQIAELQAIAELK.M | 2616.86032 | 2 | 8.57E-07 | 0.97 | 5.33 | - | 1768.6 |
| AHQ-4-3, 7297 - 7371   | R.KLEGDSTLSDQIAELQAIAELK.M | 2616.86032 | 3 | 8.36E-08 | 0.92 | 5.18 | - | 872.0  |
| AHQ-4-4, 7259          | R.KLEGDSTLSDQIAELQAIAELK.M | 2616.86032 | 2 | 1.27E-07 | 0.98 | 6.42 | - | 1537.1 |
| AHQ-4-1, 7093 - 7103   | R.KLEGDSTLSDQIAELQAIAELK.M | 2616.86032 | 3 | 2.24E-07 | 0.89 | 5.08 | - | 727.3  |
| AHQ-4-6, 7040 - 7086   | R.KLEGDSTLSDQIAELQAIAELK.M | 2616.86032 | 2 | 1.61E-06 | 0.91 | 4.30 | - | 847.7  |
| AHQ-4-5, 7185          | R.KLEGDSTLSDQIAELQAIAELK.M | 2616.86032 | 3 | 9.44E-09 | 0.96 | 5.88 | - | 1273.4 |
| AHQ-4-2, 7318          | R.KLEGDSTLSDQIAELQAIAELK.M | 2616.86032 | 3 | 7.73E-08 | 0.89 | 4.93 | - | 545.6  |
| AHQ-4-2, 7319          | R.KLEGDSTLSDQIAELQAIAELK.M | 2616.86032 | 2 | 4.31E-07 | 0.97 | 5.72 | - | 1335.2 |
| AHQ-4-1, 7094 - 7161   | R.KLEGDSTLSDQIAELQAIAELK.M | 2616.86032 | 2 | 7.62E-09 | 0.98 | 6.35 | - | 1402.9 |
| AHQ-4-4, 7258 - 7266   | R.KLEGDSTLSDQIAELQAIAELK.M | 2616.86032 | 3 | 2.20E-06 | 0.90 | 5.23 | - | 768.3  |
| AHQ-4-2, 2603          | K.KLVWVPSDK.S              | 1072.28194 | 2 | 3.30E-04 | 0.87 | 3.39 | - | 856.9  |
| AHQ-4-13-, 2801        | K.KLVWVPSDK.S              | 1072.28194 | 1 | 2.02E-04 | 0.47 | 2.35 | - | 394.7  |
| AHQ-4-4, 2600          | K.KLVWVPSDK.S              | 1072.28194 | 1 | 1.61E-04 | 0.73 | 2.67 | - | 680.8  |
| AHQ-4-7, 2334          | K.KLVWVPSDK.S              | 1072.28194 | 1 | 3.43E-04 | 0.38 | 2.36 | - | 492.7  |
| AHQ-4-2, 3620 - 3622   | K.KMEDSVGCLETAEEVK.R       | 1827.02450 | 2 | 2.35E-08 | 0.96 | 4.97 | - | 1326.3 |

|                      |                          |            |   |          |      |      |   |        |
|----------------------|--------------------------|------------|---|----------|------|------|---|--------|
| AHQ-4-3, 3585        | K.KMEDSVGCLETAEEVK.R     | 1827.02450 | 2 | 4.63E-04 | 0.90 | 4.12 | - | 826.2  |
| AHQ-4-1, 3275        | K.KM*EDSVGCLETAEEVK.R    | 1843.02390 | 2 | 2.23E-04 | 0.84 | 3.20 | - | 742.8  |
| AHQ-4-2, 3122 - 3123 | K.KM*EDSVGCLETAEEVK.R    | 1843.02390 | 2 | 1.84E-05 | 0.93 | 3.93 | - | 1102.1 |
| AHQ-4-4, 2784 - 2786 | K.KM*EDSVGCLETAEEVKR.K   | 1999.21025 | 2 | 2.66E-06 | 0.85 | 3.20 | - | 567.2  |
| AHQ-4-3, 3199        | K.KMEDSVGCLETAEEVKR.K    | 1983.21085 | 2 | 1.98E-05 | 0.96 | 4.78 | - | 1273.1 |
| AHQ-4-4, 3199        | K.KMEDSVGCLETAEEVKR.K    | 1983.21085 | 3 | 9.81E-09 | 0.93 | 4.92 | - | 1023.1 |
| AHQ-4-2, 3211        | K.KMEDSVGCLETAEEVKR.K    | 1983.21085 | 3 | 2.67E-04 | 0.94 | 5.04 | - | 1154.5 |
| AHQ-4-1, 3001        | K.KM*EDSVGCLETAEEVKR.K   | 1999.21025 | 2 | 5.70E-06 | 0.82 | 3.73 | - | 335.4  |
| AHQ-4-2, 2823        | K.KM*EDSVGCLETAEEVKR.K   | 1999.21025 | 2 | 1.46E-06 | 0.75 | 3.43 | - | 474.0  |
| AHQ-4-5, 2574        | K.KM*EDSVGCLETAEEVKR.K   | 1999.21025 | 3 | 5.04E-05 | 0.87 | 3.88 | - | 1051.3 |
| AHQ-4-2, 3212        | K.KMEDSVGCLETAEEVKR.K    | 1983.21085 | 2 | 2.26E-08 | 0.92 | 4.18 | - | 883.4  |
| AHQ-4-2, 2819        | K.KM*EDSVGCLETAEEVKR.K   | 1999.21025 | 3 | 2.66E-04 | 0.96 | 4.90 | - | 1607.1 |
| AHQ-4-1, 2998        | K.KM*EDSVGCLETAEEVKR.K   | 1999.21025 | 3 | 1.06E-05 | 0.97 | 5.12 | - | 2136.3 |
| AHQ-4-3, 3205        | K.KMEDSVGCLETAEEVKR.K    | 1983.21085 | 3 | 6.35E-05 | 0.95 | 5.17 | - | 1167.5 |
| AHQ-4-3, 2811        | K.KM*EDSVGCLETAEEVKR.K   | 1999.21025 | 3 | 2.02E-07 | 0.92 | 4.86 | - | 890.4  |
| AHQ-4-4, 5360 - 5382 | K.KMQQNIQELEEQLLEESAR.Q  | 2462.63354 | 2 | 8.24E-07 | 0.96 | 4.70 | - | 1288.3 |
| AHQ-4-1, 4973        | K.KM*QQNIQELEEQLLEESAR.Q | 2478.63294 | 2 | 8.51E-07 | 0.74 | 3.25 | - | 418.5  |
| AHQ-4-1, 5521        | K.KMQQNIQELEEQLLEESAR.Q  | 2462.63354 | 2 | 7.45E-08 | 0.95 | 5.19 | - | 926.4  |
| AHQ-4-2, 4930        | K.KM*QQNIQELEEQLLEESAR.Q | 2478.63294 | 2 | 2.20E-04 | 0.49 | 2.81 | - | 267.8  |
| AHQ-4-1, 4231        | K.KQLEEEIHDLEAR.V        | 1771.93036 | 2 | 8.37E-06 | 0.95 | 4.46 | - | 1540.4 |
| AHQ-4-3, 4071 - 4087 | K.KQLEEEIHDLEAR.V        | 1771.93036 | 3 | 2.92E-04 | 0.97 | 5.52 | - | 1869.0 |
| AHQ-4-5, 3798        | K.KQLEEEIHDLEAR.V        | 1771.93036 | 3 | 5.27E-04 | 0.95 | 4.83 | - | 1634.2 |
| AHQ-4-2, 4108 - 4178 | K.KQLEEEIHDLEAR.V        | 1771.93036 | 3 | 3.39E-07 | 0.95 | 4.84 | - | 1887.4 |
| AHQ-4-4, 4019 - 4039 | K.KQLEEEIHDLEAR.V        | 1771.93036 | 2 | 8.86E-04 | 0.97 | 4.68 | - | 1877.2 |
| AHQ-4-4, 4032        | K.KQLEEEIHDLEAR.V        | 1771.93036 | 3 | 4.55E-04 | 0.96 | 5.41 | - | 1807.1 |
| AHQ-4-9, 3415        | K.KQLEEEIHDLEAR.V        | 1771.93036 | 2 | 2.95E-04 | 0.98 | 5.21 | - | 2352.7 |
| AHQ-4-8, 3605        | K.KQLEEEIHDLEAR.V        | 1771.93036 | 2 | 3.29E-05 | 0.97 | 4.96 | - | 1911.7 |
| AHQ-4-5, 3731 - 3797 | K.KQLEEEIHDLEAR.V        | 1771.93036 | 2 | 5.93E-05 | 0.97 | 5.06 | - | 2022.8 |
| AHQ-4-3, 4053 - 4127 | K.KQLEEEIHDLEAR.V        | 1771.93036 | 2 | 3.69E-06 | 0.96 | 5.19 | - | 1496.4 |
| AHQ-4-5, 2539        | K.KVEAQLQELQVK.F         | 1413.64470 | 2 | 3.90E-04 | 0.96 | 4.83 | - | 1337.0 |
| AHQ-4-1, 3023 - 3042 | K.KVEAQLQELQVK.F         | 1413.64470 | 2 | 1.25E-05 | 0.97 | 4.84 | - | 1736.2 |
| AHQ-4-4, 2744        | K.KVEAQLQELQVK.F         | 1413.64470 | 2 | 2.94E-06 | 0.94 | 4.42 | - | 1141.6 |
| AHQ-4-3, 2751        | K.KVEAQLQELQVK.F         | 1413.64470 | 2 | 6.54E-05 | 0.95 | 4.83 | - | 1066.7 |
| AHQ-4-2, 2766        | K.KVEAQLQELQVK.F         | 1413.64470 | 2 | 5.81E-07 | 0.95 | 4.73 | - | 1107.8 |
| AHQ-4-2, 2791        | K.KVEAQLQELQVK.F         | 1413.64470 | 1 | 1.25E-06 | 0.74 | 3.25 | - | 506.4  |
| AHQ-4-6, 2575        | K.KVEAQLQELQVK.F         | 1413.64470 | 2 | 6.31E-05 | 0.95 | 4.48 | - | 1168.0 |
| AHQ-4-3, 2760        | K.KVEAQLQELQVK.F         | 1413.64470 | 1 | 3.08E-04 | 0.82 | 3.34 | - | 620.2  |
| AHQ-4-2, 3604        | K.KVIQYLYAVASSHK.S       | 1607.87775 | 2 | 9.87E-09 | 0.96 | 4.08 | - | 1689.5 |
| AHQ-4-1, 4070        | K.LEEEEIILEDQNK.L        | 1762.91700 | 2 | 2.99E-04 | 0.85 | 3.83 | - | 634.8  |
| AHQ-4-3, 3847 - 3912 | K.LEEEEIILEDQNK.L        | 1762.91700 | 2 | 2.78E-06 | 0.96 | 4.70 | - | 1254.7 |
| AHQ-4-1, 3913 - 3991 | K.LEEEEIILEDQNK.L        | 1762.91700 | 2 | 8.81E-08 | 0.97 | 5.60 | - | 1290.3 |
| AHQ-4-2, 3971 - 4043 | K.LEEEEIILEDQNK.L        | 1762.91700 | 2 | 2.29E-06 | 0.97 | 5.01 | - | 1382.1 |
| AHQ-4-4, 3819        | K.LEEEEIILEDQNK.L        | 1762.91700 | 2 | 1.09E-07 | 0.93 | 3.97 | - | 1209.2 |
| AHQ-4-3, 3952 - 3996 | K.LEEEEIILEDQNK.L        | 1762.91700 | 2 | 1.36E-09 | 0.95 | 4.65 | - | 1193.7 |
| AHQ-4-4, 7366 - 7368 | K.LEGSDTLDSDQIAELQAELK.M | 2488.68740 | 2 | 1.73E-09 | 0.95 | 4.76 | - | 1179.3 |
| AHQ-4-2, 7426        | K.LEGSDTLDSDQIAELQAELK.M | 2488.68740 | 2 | 1.68E-10 | 0.97 | 6.19 | - | 1105.6 |
| AHQ-4-1, 3642        | R.LEVNLQAMK.A            | 1046.26630 | 2 | 5.41E-05 | 0.88 | 3.47 | - | 677.5  |
| AHQ-4-3, 3469        | R.LEVNLQAMK.A            | 1046.26630 | 2 | 2.39E-05 | 0.80 | 3.56 | - | 506.2  |
| AHQ-4-2, 3459 - 3468 | R.LEVNLQAMK.A            | 1046.26630 | 2 | 1.98E-05 | 0.88 | 3.58 | - | 626.7  |
| AHQ-4-2, 2498 - 2508 | R.LEVNLQAM*K.A           | 1062.26570 | 2 | 6.01E-06 | 0.85 | 3.17 | - | 707.6  |
| AHQ-4-2, 3371        | K.LKDVLLQVDDER.R         | 1443.62767 | 2 | 1.20E-07 | 0.95 | 3.95 | - | 1418.1 |
| AHQ-4-5, 3130        | K.LKDVLLQVDDER.R         | 1443.62767 | 2 | 9.70E-09 | 0.95 | 4.27 | - | 1463.6 |
| AHQ-4-3, 3381 - 3392 | K.LKDVLLQVDDER.R         | 1443.62767 | 2 | 8.74E-10 | 0.96 | 4.03 | - | 1905.3 |
| AHQ-4-11, 3220       | K.LKDVLLQVDDER.R         | 1443.62767 | 2 | 1.53E-05 | 0.91 | 3.22 | - | 1640.4 |
| AHQ-4-1, 3606        | K.LKDVLLQVDDER.R         | 1443.62767 | 2 | 1.38E-05 | 0.96 | 4.18 | - | 1614.6 |
| AHQ-4-4, 2911 - 2918 | K.LKDVLLQVDDERR.N        | 1599.81402 | 2 | 4.01E-04 | 0.87 | 3.55 | - | 928.9  |
| AHQ-4-1, 3147 - 3209 | K.LKDVLLQVDDERR.N        | 1599.81402 | 2 | 2.23E-06 | 0.94 | 4.03 | - | 1430.2 |
| AHQ-4-2, 2875 - 2947 | K.LKDVLLQVDDERR.N        | 1599.81402 | 2 | 9.41E-06 | 0.91 | 3.76 | - | 1198.9 |
| AHQ-4-3, 2920        | K.LKDVLLQVDDERR.N        | 1599.81402 | 2 | 1.14E-04 | 0.89 | 3.52 | - | 1131.3 |
| AHQ-4-5, 2645        | K.LKDVLLQVDDERR.N        | 1599.81402 | 2 | 1.06E-04 | 0.83 | 3.43 | - | 886.5  |
| AHQ-4-2, 2616        | K.LKNKHEAMITDEER.L       | 1828.08363 | 2 | 1.88E-08 | 0.94 | 4.20 | - | 974.5  |
| AHQ-4-5, 6019 - 6042 | R.LQQELDDLLVLDHQR.Q      | 1951.12699 | 2 | 4.11E-09 | 0.97 | 5.49 | - | 1719.3 |
| AHQ-4-1, 6226        | R.LQQELDDLLVLDHQR.Q      | 1951.12699 | 2 | 4.18E-11 | 0.95 | 4.75 | - | 1209.1 |
| AHQ-4-4, 6154        | R.LQQELDDLLVLDHQR.Q      | 1951.12699 | 2 | 6.67E-08 | 0.95 | 4.55 | - | 1450.1 |
| AHQ-4-6, 5927        | R.LQQELDDLLVLDHQR.Q      | 1951.12699 | 3 | 2.20E-06 | 0.91 | 4.45 | - | 760.6  |
| AHQ-4-2, 6358 - 6415 | R.LQQELDDLLVLDHQR.Q      | 1951.12699 | 2 | 1.03E-06 | 0.95 | 4.89 | - | 1215.9 |
| AHQ-4-2, 5671        | R.LQQELDDLLVLDHQR.Q      | 1951.12699 | 2 | 6.20E-07 | 0.97 | 5.02 | - | 1450.5 |
| AHQ-4-2, 6274        | R.LQQELDDLLVLDHQR.Q      | 1951.12699 | 3 | 1.04E-04 | 0.91 | 4.30 | - | 822.3  |
| AHQ-4-3, 5040        | R.LQQELDDLLVLDHQR.Q      | 1951.12699 | 2 | 5.05E-07 | 0.96 | 4.82 | - | 1335.5 |
| AHQ-4-2, 6192 - 6262 | R.LQQELDDLLVLDHQR.Q      | 1951.12699 | 2 | 9.43E-11 | 0.98 | 5.34 | - | 2091.7 |
| AHQ-4-2, 6190 - 6258 | R.LQQELDDLLVLDHQR.Q      | 1951.12699 | 3 | 6.18E-04 | 0.91 | 4.09 | - | 975.1  |
| AHQ-4-1, 6383        | R.LQQELDDLLVLDHQR.Q      | 1951.12699 | 2 | 1.46E-06 | 0.94 | 4.54 | - | 1151.8 |
| AHQ-4-3, 6199 - 6207 | R.LQQELDDLLVLDHQR.Q      | 1951.12699 | 2 | 6.84E-08 | 0.98 | 5.48 | - | 1942.5 |
| AHQ-4-5, 5959        | R.LQQELDDLLVLDHQR.Q      | 1951.12699 | 3 | 1.27E-06 | 0.88 | 4.01 | - | 668.4  |
| AHQ-4-6, 5900        | R.LQQELDDLLVLDHQR.Q      | 1951.12699 | 2 | 3.53E-09 | 0.97 | 5.10 | - | 1479.0 |
| AHQ-4-7, 5890        | R.LQQELDDLLVLDHQR.Q      | 1951.12699 | 2 | 5.01E-08 | 0.97 | 4.72 | - | 1800.1 |
| AHQ-4-4, 5656        | R.LQQELDDLLVLDHQR.Q      | 1951.12699 | 2 | 7.13E-05 | 0.71 | 3.12 | - | 253.2  |
| AHQ-4-1, 6229        | R.LQQELDDLLVLDHQR.Q      | 1951.12699 | 3 | 4.62E-05 | 0.86 | 4.15 | - | 734.8  |
| AHQ-4-5, 5871 - 5950 | R.LQQELDDLLVLDHQR.Q      | 1951.12699 | 2 | 5.57E-11 | 0.96 | 4.95 | - | 1543.4 |
| AHQ-4-4, 6164        | R.LQQELDDLLVLDHQR.Q      | 1951.12699 | 3 | 5.47E-04 | 0.93 | 4.40 | - | 1019.0 |
| AHQ-4-3, 6201 - 6223 | R.LQQELDDLLVLDHQR.Q      | 1951.12699 | 3 | 5.64E-05 | 0.90 | 4.34 | - | 846.7  |
| AHQ-4-3, 5683 - 5692 | R.LQQELDDLLVLDHQR.Q      | 1951.12699 | 2 | 4.43E-06 | 0.82 | 3.59 | - | 452.7  |
| AHQ-4-1, 5902 - 5969 | K.LQVELDNVTGLLSQSDSK.S   | 1947.13342 | 2 | 1.04E-06 | 0.97 | 5.68 | - | 1367.2 |
| AHQ-4-3, 5860 - 5927 | K.LQVELDNVTGLLSQSDSK.S   | 1947.13342 | 2 | 3.04E-07 | 0.98 | 6.17 | - | 1409.6 |
| AHQ-4-2, 5910 - 5978 | K.LQVELDNVTGLLSQSDSK.S   | 1947.13342 | 2 | 6.00E-09 | 0.97 | 5.76 | - | 1150.5 |
| AHQ-4-2, 5955        | K.LQVELDNVTGLLSQSDSK.S   | 1947.13342 | 3 | 7.79E-05 | 0.96 | 5.12 | - | 1888.0 |
| AHQ-4-1, 6033        | K.LQVELDNVTGLLSQSDSK.S   | 1947.13342 | 2 | 2.13E-07 | 0.97 | 5.60 | - | 1383.4 |
| AHQ-4-14-, 5518      | K.LQVELDNVTGLLSQSDSK.S   | 1947.13342 | 2 | 1.06E-08 | 0.96 | 5.23 | - | 1179.3 |
| AHQ-4-3, 5996 - 6071 | K.LQVELDNVTGLLSQSDSK.S   | 1947.13342 | 2 | 3.52E-06 | 0.98 | 5.88 | - | 1709.5 |
| AHQ-4-2, 6046 - 6118 | K.LQVELDNVTGLLSQSDSK.S   | 1947.13342 | 2 | 3.66E-14 | 0.98 | 5.91 | - | 1813.2 |
| AHQ-4-1, 6151        | K.LQVELDNVTGLLSQSDSK.S   | 1947.13342 | 2 | 3.19E-05 | 0.93 | 3.82 | - | 1152.5 |
| AHQ-4-2, 6326        | K.LQVELDNVTGLLSQSDSK.S   | 1947.13342 | 2 | 1.77E-07 | 0.96 | 5.25 | - | 1065.6 |
| AHQ-4-5, 6087        | K.LQVELDNVTGLLSQSDSK.S   | 1947.13342 | 2 | 1.46E-05 | 0.96 | 5.27 | - | 968.3  |
| AHQ-4-1, 5591        | K.LQVELDNVTGLLSQSDSK.S   | 1947.13342 | 2 | 2.24E-08 | 0.97 | 5.69 | - | 1393.8 |
| AHQ-4-3, 6139 - 6220 | K.LQVELDNVTGLLSQSDSK.S   | 1947.13342 | 2 | 2.59E-09 | 0.98 | 6.67 | - | 1927.1 |
| AHQ-4-5, 5895        | K.LQVELDNVTGLLSQSDSK.S   | 1947.13342 | 2 | 3.08E-05 | 0.90 | 3.52 | - | 934.0  |
| AHQ-4-5, 5734 - 5803 | K.LQVELDNVTGLLSQSDSK.S   | 1947.13342 | 2 | 8.45E-05 | 0.96 | 5.02 | - | 1102.0 |
| AHQ-4-3, 6289        | K.LQVELDNVTGLLSQSDSK.S   | 1947.13342 | 2 | 1.01E-07 | 0.95 | 5.71 | - | 756.1  |
| AHQ-4-3, 6317 - 6388 | K.LQVELDNVTGLLSQSDSK.S   | 1947.13342 | 2 | 1.40E-04 | 0.82 | 3.65 | - | 508.5  |
| AHQ-4-4, 5560        | K.LQVELDNVTGLLSQSDSK.S   | 1947.13342 | 2 | 3.78E-04 | 0.92 | 4.36 | - | 705.1  |
| AHQ-4-4, 5931        | K.LQVELDNVTGLLSQSDSK.S   | 1947.13342 | 2 | 1.05E-06 | 0.97 | 5.27 | - | 1217.9 |
| AHQ-4-4, 6014        | K.LQVELDNVTGLLSQSDSK.S   | 1947.13342 | 2 | 4.25E-04 | 0.88 | 3.74 | - | 952.6  |
| AHQ-4-2, 7127        | K.LQVELDNVTGLLSQSDSK.S   | 1947.13342 | 2 | 4.06E-04 | 0.93 | 4.35 | - | 822.3  |
| AHQ-4-2, 7324        | K.LQVELDNVTGLLSQSDSK.S   | 1947.13342 | 2 | 4.91E-04 | 0.81 | 3.82 | - | 985.0  |
| AHQ-4-2, 5192 - 5210 | R.LTEMETLQQLMAEK.L       | 1753.03211 | 2 | 2.10E-09 | 0.97 | 5.50 | - | 1747.9 |
| AHQ-4-2, 4558 - 4638 | R.LTEMETLQQLMAEK.L       | 1769.03151 | 2 | 4.28E-04 | 0.80 | 3.51 | - | 701.9  |
| AHQ-4-3, 5175 - 5184 | R.LTEMETLQQLMAEK.L       | 1753.03211 | 2 | 1.59E-07 | 0.97 | 4.84 | - | 1882.2 |

|                        |                               |            |   |          |      |      |   |        |
|------------------------|-------------------------------|------------|---|----------|------|------|---|--------|
| AHQ-4-3, 3501 - 3571   | R.LTEM*ETLQSQLM*AEK.L         | 1785.03091 | 2 | 2.57E-04 | 0.62 | 3.03 | - | 520.5  |
| AHQ-4-2, 4743          | R.LTEMETLQSQLM*AEK.L          | 1769.03151 | 2 | 5.67E-06 | 0.91 | 3.94 | - | 944.6  |
| AHQ-4-3, 5293          | R.LTEMETLQSQLMAEK.L           | 1753.03211 | 2 | 2.92E-04 | 0.63 | 2.78 | - | 707.3  |
| AHQ-4-2, 3532 - 3602   | R.LTEM*ETLQSQLM*AEK.L         | 1785.03091 | 2 | 1.84E-05 | 0.85 | 3.87 | - | 731.9  |
| AHQ-4-1, 3622 - 3690   | R.LTEM*ETLQSQLM*AEK.L         | 1785.03091 | 2 | 7.28E-05 | 0.92 | 3.96 | - | 1110.4 |
| AHQ-4-4, 4571 - 4572   | R.LTEMETLQSQLM*AEK.L          | 1769.03151 | 2 | 2.74E-08 | 0.91 | 3.49 | - | 1221.0 |
| AHQ-4-5, 4945          | R.LTEMETLQSQLMAEK.L           | 1753.03211 | 2 | 2.01E-04 | 0.93 | 3.34 | - | 1423.6 |
| AHQ-4-2, 4067 - 4134   | R.LTEM*ETLQSQLMAEK.L          | 1769.03151 | 2 | 1.24E-06 | 0.98 | 5.49 | - | 1911.4 |
| AHQ-4-3, 4619          | R.LTEMETLQSQLM*AEK.L          | 1769.03151 | 2 | 1.36E-06 | 0.96 | 5.11 | - | 1454.2 |
| AHQ-4-2, 5211          | R.LTEM*ETLQSQLM*AEK.L         | 1785.03091 | 2 | 2.12E-05 | 0.92 | 3.34 | - | 1258.4 |
| AHQ-4-4, 5122 - 5124   | R.LTEMETLQSQLMAEK.L           | 1753.03211 | 2 | 6.07E-06 | 0.98 | 5.41 | - | 1939.5 |
| AHQ-4-1, 4145          | R.LTEM*ETLQSQLMAEK.L          | 1769.03151 | 2 | 7.74E-04 | 0.96 | 3.72 | - | 2305.3 |
| AHQ-4-2, 3022          | K.LVVVPSDK.S                  | 944.10903  | 1 | 9.62E-04 | 0.44 | 2.17 | - | 412.1  |
| AHQ-4-2, 3996          | K.MEDSVGCLETAEEVKR.K          | 1698.85159 | 2 | 2.98E-10 | 0.92 | 3.98 | - | 847.2  |
| AHQ-4-2, 3559          | K.MEDSVGCLETAEEVKR.K          | 1855.03794 | 3 | 4.46E-06 | 0.80 | 3.94 | - | 411.6  |
| AHQ-4-2, 3578          | K.MEDSVGCLETAEEVKR.K          | 1855.03794 | 2 | 1.25E-04 | 0.79 | 3.47 | - | 462.2  |
| AHQ-4-2, 3202          | K.M*EDSVGCLETAEEVKR.K         | 1871.03734 | 2 | 4.65E-07 | 0.68 | 2.80 | - | 394.8  |
| AHQ-4-3, 3531          | K.MEDSVGCLETAEEVKR.K          | 1855.03794 | 2 | 4.61E-07 | 0.87 | 3.82 | - | 543.8  |
| AHQ-4-4, 3503          | K.MEDSVGCLETAEEVKR.K          | 1855.03794 | 2 | 1.84E-06 | 0.81 | 3.45 | - | 576.5  |
| AHQ-4-1, 3577 - 3654   | K.MEDSVGCLETAEEVKR.K          | 1855.03794 | 2 | 1.30E-06 | 0.19 | 2.57 | - | 246.5  |
| AHQ-4-1, 5702          | K.MQNIQIEEEQLLEEEESAR.Q       | 2334.46063 | 3 | 2.85E-08 | 0.89 | 3.98 | - | 938.1  |
| AHQ-4-2, 5666 - 5735   | K.MQNIQIEEEQLLEEEESAR.Q       | 2334.46063 | 3 | 1.51E-04 | 0.87 | 4.41 | - | 827.4  |
| AHQ-4-13, 5278 - 5280  | K.NFINNPLAQADWAAK.K           | 1673.85315 | 2 | 2.60E-07 | 0.92 | 4.22 | - | 881.9  |
| AHQ-4-4, 6072          | K.NFINNPLAQADWAAK.K           | 1673.85315 | 2 | 3.60E-06 | 0.94 | 4.13 | - | 1170.0 |
| AHQ-4-1, 5474 - 5503   | K.NFINNPLAQADWAAK.K           | 1673.85315 | 2 | 5.13E-07 | 0.93 | 4.28 | - | 1065.1 |
| AHQ-4-13-, 5637 - 5709 | K.NFINNPLAQADWAAK.K           | 1673.85315 | 2 | 2.15E-06 | 0.89 | 3.81 | - | 711.4  |
| AHQ-4-2, 5396          | K.NFINNPLAQADWAAK.K           | 1673.85315 | 2 | 2.82E-07 | 0.95 | 4.76 | - | 1014.3 |
| AHQ-4-2, 6094          | K.NFINNPLAQADWAAK.K           | 1673.85315 | 2 | 5.89E-10 | 0.93 | 4.21 | - | 881.3  |
| AHQ-4-6, 5086 - 5102   | K.NFINNPLAQADWAAK.K           | 1673.85315 | 2 | 9.50E-05 | 0.96 | 5.05 | - | 1116.6 |
| AHQ-4-4, 5367 - 5398   | K.NFINNPLAQADWAAK.K           | 1673.85315 | 2 | 2.20E-09 | 0.95 | 4.62 | - | 1093.6 |
| AHQ-4-3, 5403          | K.NFINNPLAQADWAAK.K           | 1673.85315 | 2 | 7.70E-10 | 0.96 | 5.16 | - | 1156.3 |
| AHQ-4-2, 5559          | K.NFINNPLAQADWAAK.K           | 1673.85315 | 2 | 2.54E-08 | 0.89 | 3.94 | - | 792.1  |
| AHQ-4-10, 4680 - 4683  | K.NFINNPLAQADWAAK.K           | 1673.85315 | 2 | 4.13E-07 | 0.95 | 4.87 | - | 966.4  |
| AHQ-4-7, 5046          | K.NFINNPLAQADWAAK.K           | 1673.85315 | 2 | 4.92E-06 | 0.93 | 3.91 | - | 1134.3 |
| AHQ-4-11, 4982         | K.NFINNPLAQADWAAK.K           | 1673.85315 | 2 | 2.07E-05 | 0.97 | 5.28 | - | 1250.7 |
| AHQ-4-5, 5157          | K.NFINNPLAQADWAAK.K           | 1673.85315 | 2 | 7.29E-07 | 0.89 | 4.04 | - | 758.5  |
| AHQ-4-12, 5211         | K.NFINNPLAQADWAAK.K           | 1673.85315 | 2 | 8.78E-08 | 0.91 | 4.38 | - | 788.2  |
| AHQ-4-13-, 5172        | K.NFINNPLAQADWAAK.K           | 1673.85315 | 2 | 1.37E-10 | 0.97 | 5.86 | - | 1376.3 |
| AHQ-4-3, 6101          | K.NFINNPLAQADWAAK.K           | 1673.85315 | 2 | 2.16E-09 | 0.95 | 4.49 | - | 971.9  |
| AHQ-4-1, 2647          | K.NKHEAMITDLEER.L             | 1586.75247 | 2 | 1.65E-04 | 0.90 | 3.50 | - | 844.5  |
| AHQ-4-2, 2414 - 2415   | K.NKHEAMITDLEER.L             | 1586.75247 | 2 | 7.05E-09 | 0.95 | 3.91 | - | 1385.0 |
| AHQ-4-3, 2391          | K.NKHEAMITDLEER.L             | 1586.75247 | 2 | 1.09E-07 | 0.95 | 4.04 | - | 1348.3 |
| AHQ-4-4, 2382 - 2383   | K.NKHEAMITDLEER.L             | 1586.75247 | 2 | 1.41E-07 | 0.94 | 4.11 | - | 1298.1 |
| AHQ-4-6, 5542          | K.NLPIYSEEIVMYK.G             | 1728.98720 | 2 | 1.82E-04 | 0.91 | 3.24 | - | 803.6  |
| AHQ-4-13-, 5570        | K.NLPIYSEEIVMYK.G             | 1728.98720 | 2 | 1.66E-07 | 0.88 | 3.66 | - | 626.2  |
| AHQ-4-3, 5259          | K.NLPIYSEEIVMYK.G             | 1744.98660 | 2 | 3.09E-05 | 0.82 | 3.65 | - | 375.4  |
| AHQ-4-1, 5293 - 5357   | K.NLPIYSEEIVMYK.G             | 1744.98660 | 2 | 3.65E-04 | 0.96 | 4.21 | - | 1305.1 |
| AHQ-4-11, 4858         | K.NLPIYSEEIVMYK.G             | 1744.98660 | 2 | 9.91E-05 | 0.87 | 3.48 | - | 654.0  |
| AHQ-4-2, 5874 - 5942   | K.NLPIYSEEIVMYK.G             | 1728.98720 | 2 | 5.59E-07 | 0.93 | 4.06 | - | 656.1  |
| AHQ-4-5, 5015          | K.NLPIYSEEIVMYK.G             | 1744.98660 | 2 | 4.31E-04 | 0.95 | 4.37 | - | 1086.3 |
| AHQ-4-2, 5262 - 5282   | K.NLPIYSEEIVMYK.G             | 1744.98660 | 2 | 2.96E-04 | 0.92 | 4.06 | - | 715.9  |
| AHQ-4-3, 5872          | K.NLPIYSEEIVMYK.G             | 1728.98720 | 2 | 4.12E-04 | 0.69 | 2.53 | - | 545.4  |
| AHQ-4-10, 5056 - 5064  | K.NLPIYSEEIVMYK.G             | 1728.98720 | 2 | 5.52E-04 | 0.93 | 4.15 | - | 784.0  |
| AHQ-4-1, 5157          | K.NM*DPLNDNIATLLHQSSDK.F      | 2143.32109 | 2 | 6.73E-09 | 0.86 | 3.50 | - | 807.8  |
| AHQ-4-2, 5716          | K.NM*DPLNDNIATLLHQSSDK.F      | 2127.32169 | 2 | 8.97E-07 | 0.95 | 4.64 | - | 756.9  |
| AHQ-4-2, 5123          | K.NM*DPLNDNIATLLHQSSDK.F      | 2143.32109 | 3 | 1.47E-05 | 0.90 | 4.42 | - | 1073.3 |
| AHQ-4-6, 5260          | K.NM*DPLNDNIATLLHQSSDK.F      | 2127.32169 | 2 | 2.66E-06 | 0.87 | 4.18 | - | 495.2  |
| AHQ-4-4, 5546          | K.NM*DPLNDNIATLLHQSSDK.F      | 2127.32169 | 2 | 2.75E-08 | 0.94 | 4.64 | - | 897.6  |
| AHQ-4-2, 5578          | K.NM*DPLNDNIATLLHQSSDK.F      | 2127.32169 | 3 | 3.84E-07 | 0.70 | 3.03 | - | 479.4  |
| AHQ-4-5, 5483          | K.NM*DPLNDNIATLLHQSSDK.F      | 2127.32169 | 2 | 1.65E-10 | 0.93 | 4.53 | - | 859.9  |
| AHQ-4-1, 5690          | K.NM*DPLNDNIATLLHQSSDK.F      | 2127.32169 | 2 | 8.52E-05 | 0.86 | 4.00 | - | 549.1  |
| AHQ-4-5, 5319          | K.NM*DPLNDNIATLLHQSSDK.F      | 2127.32169 | 2 | 4.24E-07 | 0.91 | 4.93 | - | 627.0  |
| AHQ-4-2, 5207          | K.NM*DPLNDNIATLLHQSSDK.F      | 2143.32109 | 2 | 8.48E-08 | 0.93 | 3.97 | - | 1022.9 |
| AHQ-4-3, 5096          | K.NM*DPLNDNIATLLHQSSDK.F      | 2143.32109 | 2 | 8.09E-04 | 0.78 | 3.24 | - | 849.7  |
| AHQ-4-2, 5879          | K.NM*DPLNDNIATLLHQSSDK.F      | 2127.32169 | 2 | 1.81E-04 | 0.92 | 4.42 | - | 802.9  |
| AHQ-4-3, 5209          | K.NM*DPLNDNIATLLHQSSDK.F      | 2143.32109 | 2 | 2.59E-04 | 0.83 | 3.35 | - | 659.7  |
| AHQ-4-3, 5583          | K.NM*DPLNDNIATLLHQSSDK.F      | 2127.32169 | 2 | 7.06E-04 | 0.73 | 3.32 | - | 484.3  |
| AHQ-4-3, 5592          | K.NM*DPLNDNIATLLHQSSDK.F      | 2127.32169 | 3 | 3.42E-04 | 0.60 | 3.02 | - | 302.5  |
| AHQ-4-1, 7254          | K.PAGPPGILLALDEECWFFP.K       | 2112.43315 | 2 | 6.82E-07 | 0.98 | 6.03 | - | 1896.6 |
| AHQ-4-6, 7275          | K.PAGPPGILLALDEECWFFP.K       | 2112.43315 | 2 | 2.00E-06 | 0.97 | 5.11 | - | 1478.0 |
| AHQ-4-2, 7534          | K.PAGPPGILLALDEECWFFP.K       | 2112.43315 | 2 | 2.92E-07 | 0.98 | 6.10 | - | 2428.7 |
| AHQ-4-3, 7543          | K.PAGPPGILLALDEECWFFP.K       | 2112.43315 | 2 | 5.04E-09 | 0.98 | 6.08 | - | 1998.7 |
| AHQ-4-3, 3111          | R.QAQQERDELADEIANSSGK.G       | 2090.15168 | 2 | 1.16E-04 | 0.94 | 4.63 | - | 803.6  |
| AHQ-4-2, 3226          | R.QAQQERDELADEIANSSGK.G       | 2090.15168 | 2 | 4.53E-07 | 0.93 | 4.45 | - | 1014.2 |
| AHQ-4-1, 3283 - 3290   | R.QAQQERDELADEIANSSGK.G       | 2090.15168 | 2 | 5.02E-05 | 0.89 | 4.27 | - | 480.4  |
| AHQ-4-1, 2886          | R.QAQQERDELADEIANSSGK.G       | 2090.15168 | 2 | 7.66E-06 | 0.84 | 3.75 | - | 582.9  |
| AHQ-4-3, 2776 - 2784   | R.QAQQERDELADEIANSSGK.G       | 2090.15168 | 2 | 2.07E-04 | 0.87 | 4.02 | - | 513.1  |
| AHQ-4-2, 4620          | K.QELEEEICHLEAR.V             | 1643.75744 | 2 | 2.90E-05 | 0.66 | 3.08 | - | 337.2  |
| AHQ-4-1, 4669          | K.QELEEEICHLEAR.V             | 1643.75744 | 2 | 5.92E-07 | 0.30 | 2.55 | - | 250.3  |
| AHQ-4-2, 2172          | K.QIATLHAQVADM*K.K            | 1442.66637 | 2 | 3.56E-04 | 0.75 | 3.11 | - | 449.3  |
| AHQ-4-2, 1951          | R.QLEEEAEEAQR.A               | 1332.35590 | 2 | 3.24E-05 | 0.78 | 3.50 | - | 494.9  |
| AHQ-4-3, 1921          | R.QLEEEAEEAQR.A               | 1332.35590 | 2 | 1.21E-04 | 0.83 | 3.30 | - | 732.4  |
| AHQ-4-3, 3419 - 3431   | R.RGDLPFVVR.R                 | 1156.36217 | 2 | 6.25E-04 | 0.95 | 3.90 | - | 1226.5 |
| AHQ-4-10, 3152         | R.RGDLPFVVR.R                 | 1156.36217 | 2 | 1.49E-04 | 0.91 | 3.44 | - | 976.6  |
| AHQ-4-5, 3090 - 3161   | R.RGDLPFVVR.R                 | 1156.36217 | 2 | 6.37E-05 | 0.88 | 3.57 | - | 834.7  |
| AHQ-4-2, 3388 - 3460   | R.RGDLPFVVR.R                 | 1156.36217 | 2 | 4.59E-05 | 0.94 | 3.74 | - | 1202.0 |
| AHQ-4-1, 3646 - 3714   | R.RGDLPFVVR.R                 | 1156.36217 | 2 | 2.05E-04 | 0.95 | 3.97 | - | 1315.5 |
| AHQ-4-4, 3410          | R.RGDLPFVVR.R                 | 1156.36217 | 2 | 9.99E-07 | 0.92 | 3.54 | - | 1142.1 |
| AHQ-4-11, 3286         | R.RGDLPFVVR.R                 | 1156.36217 | 2 | 5.26E-06 | 0.93 | 3.66 | - | 1102.1 |
| AHQ-4-6, 3124          | R.RGDLPFVVR.R                 | 1156.36217 | 2 | 4.22E-05 | 0.90 | 3.24 | - | 948.5  |
| AHQ-4-2, 2847          | K.RHEM*PPHYAITDTAYR.S         | 2088.33519 | 3 | 4.64E-06 | 0.96 | 4.53 | - | 1680.8 |
| AHQ-4-1, 6871 - 6875   | R.RKLEGDSTDLSDQIAELQAQIAELK.M | 2773.04667 | 3 | 2.59E-13 | 0.98 | 7.24 | - | 1922.2 |
| AHQ-4-2, 6935 - 6983   | R.RKLEGDSTDLSDQIAELQAQIAELK.M | 2773.04667 | 3 | 1.06E-07 | 0.98 | 6.43 | - | 2068.5 |
| AHQ-4-4, 6902          | R.RKLEGDSTDLSDQIAELQAQIAELK.M | 2773.04667 | 3 | 6.12E-09 | 0.97 | 6.39 | - | 1347.7 |
| AHQ-4-3, 6915 - 6929   | R.RKLEGDSTDLSDQIAELQAQIAELK.M | 2773.04667 | 3 | 6.27E-10 | 0.97 | 6.74 | - | 1489.7 |
| AHQ-4-3, 2816          | K.RQAQQERDELADEIANSSGK.G      | 2246.33803 | 2 | 2.42E-05 | 0.82 | 3.63 | - | 438.0  |
| AHQ-4-2, 1871 - 1883   | K.RQLEEEAEEAQR.A              | 1488.54225 | 2 | 2.55E-08 | 0.98 | 5.28 | - | 3426.9 |
| AHQ-4-2, 6294 - 6336   | K.SGFEPASLKEEVGEEAIVLVENGKK.V | 2790.07246 | 3 | 1.54E-04 | 0.97 | 5.93 | - | 1582.1 |
| AHQ-4-10, 5592         | K.SGFEPASLKEEVGEEAIVLVENGKK.V | 2790.07246 | 3 | 6.38E-06 | 0.97 | 5.95 | - | 1613.1 |
| AHQ-4-2, 6388 - 6412   | K.SGFEPASLKEEVGEEAIVLVENGKK.V | 2790.07246 | 3 | 1.43E-06 | 0.89 | 4.67 | - | 897.8  |
| AHQ-4-1, 6341          | K.SGFEPASLKEEVGEEAIVLVENGKK.V | 2790.07246 | 3 | 5.98E-06 | 0.88 | 4.11 | - | 801.9  |
| AHQ-4-5, 6842 - 6861   | K.SMEAEMIQLEELAAAER.A         | 2050.30064 | 2 | 8.87E-06 | 0.94 | 3.98 | - | 1464.0 |
| AHQ-4-3, 7016 - 7017   | K.SMEAEMIQLEELAAAER.A         | 2050.30064 | 2 | 4.09E-08 | 0.98 | 6.15 | - | 1968.9 |
| AHQ-4-1, 6907 - 6909   | K.SMEAEMIQLEELAAAER.A         | 2050.30064 | 2 | 1.01E-07 | 0.98 | 6.40 | - | 1958.3 |
| AHQ-4-1, 6906          | K.SMEAEMIQLEELAAAER.A         | 2050.30064 | 3 | 3.20E-06 | 0.94 | 4.88 | - | 1433.2 |
| AHQ-4-1, 5901 - 5946   | K.SM*EAEM*IQLEELAAAER.A       | 2066.30004 | 2 | 9.56E-05 | 0.83 | 3.40 | - | 1144.0 |
| AHQ-4-1, 4854          | K.SM*EAEM*IQLEELAAAER.A       | 2082.29944 | 2 | 1.12E-09 | 0.98 | 5.89 | - | 2046.5 |

|                        |                             |            |   |          |      |      |   |        |
|------------------------|-----------------------------|------------|---|----------|------|------|---|--------|
| AHQ-4-2, 7048          | K.SM*EAEM*IQLEELAAAER.A     | 2082.29944 | 2 | 9.91E-08 | 0.96 | 4.74 | - | 1349.5 |
| AHQ-4-2, 7039          | K.SMEAEM*IQLEELAAAER.A      | 2050.30064 | 3 | 1.35E-09 | 0.97 | 5.45 | - | 2266.0 |
| AHQ-4-1, 5677          | K.SMEAEM*IQLEELAAAER.A      | 2066.30004 | 2 | 1.20E-05 | 0.96 | 5.02 | - | 1929.4 |
| AHQ-4-3, 7031          | K.SM*EAEM*IQLEELAAAER.A     | 2082.29944 | 2 | 9.41E-06 | 0.93 | 3.99 | - | 1106.6 |
| AHQ-4-2, 7027 - 7091   | K.SMEAEM*IQLEELAAAER.A      | 2050.30064 | 2 | 6.33E-08 | 0.96 | 5.70 | - | 1265.4 |
| AHQ-4-1, 4939          | K.SM*EAEM*IQLEELAAAER.A     | 2082.29944 | 2 | 8.24E-05 | 0.89 | 3.82 | - | 945.0  |
| AHQ-4-4, 6972 - 7014   | K.SMEAEM*IQLEELAAAER.A      | 2050.30064 | 2 | 1.54E-04 | 0.96 | 5.02 | - | 1627.0 |
| AHQ-4-3, 5765          | K.SMEAEM*IQLEELAAAER.A      | 2066.30004 | 2 | 3.69E-04 | 0.52 | 3.24 | - | 592.3  |
| AHQ-4-2, 4848 - 4923   | K.SM*EAEM*IQLEELAAAER.A     | 2082.29944 | 2 | 1.26E-10 | 0.97 | 5.21 | - | 1725.6 |
| AHQ-4-2, 5847 - 5928   | K.SM*EAEM*IQLEELAAAER.A     | 2066.30004 | 2 | 2.36E-04 | 0.90 | 4.43 | - | 1290.3 |
| AHQ-4-3, 4825 - 4836   | K.SM*EAEM*IQLEELAAAER.A     | 2082.29944 | 2 | 3.62E-09 | 0.98 | 5.76 | - | 1618.5 |
| AHQ-4-2, 3524 - 3539   | R.SMMQDREDQISILCTGESGAGK.T  | 2062.50687 | 2 | 9.48E-06 | 0.97 | 5.94 | - | 1590.0 |
| AHQ-4-10, 3155         | R.SMMQDREDQISILCTGESGAGK.T  | 2302.50687 | 2 | 1.92E-09 | 0.94 | 4.93 | - | 1004.3 |
| AHQ-4-3, 3493          | R.SMMQDREDQISILCTGESGAGK.T  | 2302.50687 | 2 | 2.13E-04 | 0.96 | 5.08 | - | 1643.6 |
| AHQ-4-4, 3471          | R.SMMQDREDQISILCTGESGAGK.T  | 2302.50687 | 2 | 2.72E-07 | 0.97 | 5.26 | - | 1902.0 |
| AHQ-4-5, 2783          | R.SM*MQDREDQISILCTGESGAGK.T | 2318.50627 | 2 | 4.86E-04 | 0.89 | 4.34 | - | 486.3  |
| AHQ-4-5, 3295          | R.SMMQDREDQISILCTGESGAGK.T  | 2302.50687 | 2 | 2.66E-04 | 0.93 | 4.66 | - | 1395.4 |
| AHQ-4-2, 3515          | R.SMMQDREDQISILCTGESGAGK.T  | 2302.50687 | 3 | 4.04E-04 | 0.59 | 3.14 | - | 654.0  |
| AHQ-4-7, 3314 - 3323   | K.TDLLLEPYNK.Y              | 1206.36989 | 2 | 3.23E-06 | 0.84 | 2.88 | - | 1102.5 |
| AHQ-4-5, 3441          | K.TDLLLEPYNK.Y              | 1206.36989 | 2 | 3.42E-05 | 0.85 | 3.66 | - | 811.7  |
| AHQ-4-6, 3374 - 3375   | K.TDLLLEPYNK.Y              | 1206.36989 | 2 | 5.44E-06 | 0.85 | 3.20 | - | 1059.2 |
| AHQ-4-3, 3676          | K.TDLLLEPYNK.Y              | 1206.36989 | 2 | 1.87E-05 | 0.86 | 3.56 | - | 906.7  |
| AHQ-4-4, 3660 - 3671   | K.TDLLLEPYNK.Y              | 1206.36989 | 2 | 2.30E-05 | 0.89 | 3.50 | - | 991.9  |
| AHQ-4-2, 3770          | K.TDLLLEPYNK.Y              | 1206.36989 | 2 | 9.89E-06 | 0.89 | 3.25 | - | 1192.6 |
| AHQ-4-1, 3817          | K.TDLLLEPYNK.Y              | 1206.36989 | 2 | 1.26E-04 | 0.80 | 3.24 | - | 858.8  |
| AHQ-4-2, 3687 - 3699   | K.TDLLLEPYNK.Y              | 1206.36989 | 2 | 2.30E-05 | 0.95 | 4.39 | - | 1238.6 |
| AHQ-4-7, 3347 - 3415   | K.TDLLLEPYNK.Y              | 1206.36989 | 1 | 6.63E-05 | 0.15 | 2.01 | - | 325.5  |
| AHQ-4-3, 3827          | K.TDLLLEPYNK.YR.F           | 1525.73037 | 2 | 3.93E-07 | 0.82 | 2.83 | - | 992.0  |
| AHQ-4-3, 4452 - 4455   | K.TELEDLTDSTAAQQLR.S        | 1921.00969 | 2 | 3.23E-05 | 0.95 | 4.97 | - | 1254.0 |
| AHQ-4-1, 4453          | K.TELEDLTDSTAAQQLR.S        | 1921.00969 | 2 | 2.82E-07 | 0.92 | 3.95 | - | 1082.9 |
| AHQ-4-4, 4422          | K.TELEDLTDSTAAQQLR.S        | 1921.00969 | 2 | 1.10E-09 | 0.96 | 4.64 | - | 1719.4 |
| AHQ-4-5, 4294 - 4298   | K.TELEDLTDSTAAQQLR.S        | 1921.00969 | 2 | 1.72E-07 | 0.97 | 4.65 | - | 2263.4 |
| AHQ-4-2, 3103          | R.TEMEDLMSK.D               | 1171.32449 | 2 | 2.85E-06 | 0.91 | 3.38 | - | 859.4  |
| AHQ-4-2, 3126          | R.TEMEDLMSKDDVVGK.S         | 1685.85626 | 2 | 1.77E-05 | 0.96 | 4.40 | - | 1832.7 |
| AHQ-4-3, 3337 - 3345   | R.TEMEDLMSKDDVVGK.S         | 1685.85626 | 2 | 4.59E-08 | 0.78 | 3.22 | - | 719.3  |
| AHQ-4-2, 3366          | R.TEMEDLMSKDDVVGK.S         | 1685.85626 | 2 | 2.17E-06 | 0.94 | 4.03 | - | 1366.1 |
| AHQ-4-2, 2444          | R.TEMEDLMSKDDVVGK.S         | 1701.85566 | 2 | 8.89E-05 | 0.81 | 3.34 | - | 704.9  |
| AHQ-4-5, 3147          | R.TEMEDLMSKDDVVGK.S         | 1685.85626 | 2 | 3.20E-06 | 0.92 | 3.81 | - | 1101.1 |
| AHQ-4-2, 6532 - 6550   | R.TFHIFYLLSGAGEHLK.T        | 1997.28378 | 2 | 5.74E-07 | 0.98 | 6.04 | - | 2382.2 |
| AHQ-4-2, 6527 - 6604   | R.TFHIFYLLSGAGEHLK.T        | 1997.28378 | 3 | 2.79E-10 | 0.97 | 5.77 | - | 1460.4 |
| AHQ-4-9, 5599 - 5624   | R.TFHIFYLLSGAGEHLK.T        | 1997.28378 | 2 | 5.17E-05 | 0.98 | 5.20 | - | 1990.1 |
| AHQ-4-3, 6575 - 6651   | R.TFHIFYLLSGAGEHLK.T        | 1997.28378 | 2 | 1.96E-04 | 0.98 | 5.63 | - | 1836.2 |
| AHQ-4-2, 6730          | R.TFHIFYLLSGAGEHLK.T        | 1997.28378 | 2 | 5.58E-04 | 0.96 | 4.02 | - | 1533.2 |
| AHQ-4-7, 6071          | R.TFHIFYLLSGAGEHLK.T        | 1997.28378 | 2 | 2.50E-05 | 0.75 | 2.92 | - | 910.7  |
| AHQ-4-2, 1692 - 1762   | K.VAAYDKLEK.T               | 1037.19123 | 2 | 9.36E-04 | 0.84 | 3.11 | - | 600.9  |
| AHQ-4-5, 3021          | K.VEAQLQELQV.F              | 1285.47179 | 2 | 2.00E-05 | 0.92 | 3.46 | - | 1141.2 |
| AHQ-4-3, 3224          | K.VEAQLQELQV.F              | 1285.47179 | 2 | 3.74E-05 | 0.96 | 4.31 | - | 1368.5 |
| AHQ-4-2, 3238          | K.VEAQLQELQV.F              | 1285.47179 | 2 | 1.62E-07 | 0.96 | 4.51 | - | 1544.8 |
| AHQ-4-4, 3206          | K.VEAQLQELQV.F              | 1285.47179 | 2 | 1.76E-05 | 0.95 | 4.08 | - | 1258.8 |
| AHQ-4-2, 3240          | K.VEAQLQELQV.F              | 1285.47179 | 1 | 9.66E-04 | 0.67 | 3.24 | - | 576.9  |
| AHQ-4-11, 5574         | K.VEDMAELTCLNEASVLHNLK.E    | 2288.58457 | 2 | 2.16E-05 | 0.70 | 3.33 | - | 383.8  |
| AHQ-4-13-, 5152 - 5160 | K.VEDM*AELTCLNEASVLHNLK.E   | 2304.58397 | 3 | 9.38E-09 | 0.95 | 5.54 | - | 1161.2 |
| AHQ-4-4, 5344 - 5355   | K.VEDM*AELTCLNEASVLHNLK.E   | 2304.58397 | 2 | 3.64E-06 | 0.95 | 4.75 | - | 943.6  |
| AHQ-4-10, 5472         | K.VEDMAELTCLNEASVLHNLK.E    | 2288.58457 | 2 | 2.39E-10 | 0.84 | 3.92 | - | 542.4  |
| AHQ-4-6, 5650 - 5727   | K.VEDMAELTCLNEASVLHNLK.E    | 2288.58457 | 2 | 8.81E-07 | 0.89 | 3.85 | - | 859.2  |
| AHQ-4-5, 5729 - 5797   | K.VEDMAELTCLNEASVLHNLK.E    | 2288.58457 | 3 | 7.93E-04 | 0.90 | 4.45 | - | 690.7  |
| AHQ-4-4, 6064          | K.VEDMAELTCLNEASVLHNLK.E    | 2288.58457 | 2 | 8.87E-07 | 0.93 | 4.96 | - | 655.6  |
| AHQ-4-6, 5754          | K.VEDMAELTCLNEASVLHNLK.E    | 2288.58457 | 3 | 9.30E-09 | 0.86 | 4.01 | - | 590.3  |
| AHQ-4-10, 5237 - 5259  | K.VEDMAELTCLNEASVLHNLK.E    | 2288.58457 | 2 | 2.35E-10 | 0.96 | 4.61 | - | 1507.6 |
| AHQ-4-5, 5893          | K.VEDMAELTCLNEASVLHNLK.E    | 2288.58457 | 2 | 3.67E-06 | 0.81 | 3.33 | - | 598.5  |
| AHQ-4-13, 5270         | K.VEDM*AELTCLNEASVLHNLK.E   | 2304.58397 | 2 | 1.27E-04 | 0.93 | 4.51 | - | 886.0  |
| AHQ-4-10, 4673         | K.VEDM*AELTCLNEASVLHNLK.E   | 2304.58397 | 3 | 1.34E-08 | 0.91 | 3.88 | - | 1320.3 |
| AHQ-4-1, 5482 - 5551   | K.VEDM*AELTCLNEASVLHNLK.E   | 2304.58397 | 2 | 2.26E-06 | 0.90 | 4.04 | - | 712.4  |
| AHQ-4-10, 4653         | K.VEDM*AELTCLNEASVLHNLK.E   | 2304.58397 | 2 | 6.69E-05 | 0.82 | 3.90 | - | 516.7  |
| AHQ-4-6, 5059          | K.VEDM*AELTCLNEASVLHNLK.E   | 2304.58397 | 2 | 4.82E-04 | 0.38 | 2.84 | - | 420.9  |
| AHQ-4-4, 6071 - 6079   | K.VEDMAELTCLNEASVLHNLK.E    | 2288.58457 | 3 | 3.43E-10 | 0.92 | 4.74 | - | 815.2  |
| AHQ-4-5, 5743 - 5807   | K.VEDMAELTCLNEASVLHNLK.E    | 2288.58457 | 2 | 2.30E-08 | 0.95 | 4.75 | - | 958.9  |
| AHQ-4-1, 6094          | K.VEDMAELTCLNEASVLHNLK.E    | 2288.58457 | 2 | 5.36E-06 | 0.70 | 3.39 | - | 352.7  |
| AHQ-4-2, 6099 - 6102   | K.VEDMAELTCLNEASVLHNLK.E    | 2288.58457 | 3 | 3.96E-10 | 0.94 | 4.85 | - | 1017.3 |
| AHQ-4-13-, 5144        | K.VEDM*AELTCLNEASVLHNLK.E   | 2304.58397 | 2 | 2.21E-04 | 0.78 | 3.27 | - | 548.1  |
| AHQ-4-3, 6109          | K.VEDMAELTCLNEASVLHNLK.E    | 2288.58457 | 3 | 1.01E-08 | 0.90 | 4.11 | - | 826.0  |
| AHQ-4-3, 6103          | K.VEDMAELTCLNEASVLHNLK.E    | 2288.58457 | 2 | 1.25E-10 | 0.92 | 4.48 | - | 585.3  |
| AHQ-4-3, 6047 - 6115   | K.VEDMAELTCLNEASVLHNLK.E    | 2288.58457 | 2 | 8.74E-11 | 0.92 | 4.19 | - | 835.6  |
| AHQ-4-2, 6098 - 6136   | K.VEDMAELTCLNEASVLHNLK.E    | 2288.58457 | 2 | 3.10E-09 | 0.94 | 4.77 | - | 692.9  |
| AHQ-4-11, 4961         | K.VEDM*AELTCLNEASVLHNLK.E   | 2304.58397 | 3 | 5.78E-06 | 0.78 | 3.40 | - | 676.6  |
| AHQ-4-9, 5293          | K.VEDMAELTCLNEASVLHNLK.E    | 2288.58457 | 2 | 3.10E-04 | 0.52 | 2.99 | - | 291.1  |
| AHQ-4-7, 5693 - 5694   | K.VEDMAELTCLNEASVLHNLK.E    | 2288.58457 | 2 | 5.76E-07 | 0.84 | 3.88 | - | 458.4  |
| AHQ-4-2, 5327 - 5403   | K.VEDM*AELTCLNEASVLHNLK.E   | 2304.58397 | 2 | 6.18E-07 | 0.91 | 4.09 | - | 722.7  |
| AHQ-4-2, 5375 - 5392   | K.VEDM*AELTCLNEASVLHNLK.E   | 2304.58397 | 3 | 2.02E-12 | 0.97 | 6.27 | - | 1730.7 |
| AHQ-4-7, 5795 - 5870   | K.VEDMAELTCLNEASVLHNLK.E    | 2288.58457 | 2 | 3.96E-05 | 0.84 | 3.89 | - | 558.0  |
| AHQ-4-3, 5385 - 5404   | K.VEDM*AELTCLNEASVLHNLK.E   | 2304.58397 | 3 | 1.58E-05 | 0.92 | 4.62 | - | 940.0  |
| AHQ-4-6, 6051          | K.VEDMAELTCLNEASVLHNLK.E    | 2288.58457 | 2 | 4.65E-08 | 0.37 | 2.84 | - | 321.0  |
| AHQ-4-9, 5192 - 5196   | K.VEDMAELTCLNEASVLHNLK.E    | 2288.58457 | 2 | 2.98E-06 | 0.85 | 3.80 | - | 656.7  |
| AHQ-4-13, 5789         | K.VEDMAELTCLNEASVLHNLK.E    | 2288.58457 | 3 | 6.45E-08 | 0.79 | 4.00 | - | 587.3  |
| AHQ-4-6, 5743          | K.VEDMAELTCLNEASVLHNLK.E    | 2288.58457 | 2 | 2.43E-09 | 0.93 | 4.56 | - | 728.7  |
| AHQ-4-2, 1902 - 1974   | R.VEEEEERCQHLQAEK.K         | 1916.01642 | 2 | 6.78E-04 | 0.92 | 4.27 | - | 1094.2 |
| AHQ-4-2, 3919          | K.VIQYLAYVASSHK.S           | 1479.70484 | 3 | 9.09E-05 | 0.86 | 3.43 | - | 696.7  |
| AHQ-4-2, 3918 - 3922   | K.VIQYLAYVASSHK.S           | 1479.70484 | 2 | 2.06E-06 | 0.95 | 4.36 | - | 1036.0 |
| AHQ-4-1, 4093          | K.VIQYLAYVASSHK.S           | 1479.70484 | 3 | 2.63E-05 | 0.67 | 3.45 | - | 445.5  |
| AHQ-4-6, 3523 - 3535   | K.VIQYLAYVASSHK.S           | 1479.70484 | 2 | 2.63E-05 | 0.93 | 3.92 | - | 1103.9 |
| AHQ-4-4, 3867          | K.VIQYLAYVASSHK.S           | 1479.70484 | 2 | 4.85E-05 | 0.94 | 3.97 | - | 1186.7 |
| AHQ-4-5, 3541 - 3542   | K.VIQYLAYVASSHK.S           | 1479.70484 | 2 | 8.41E-06 | 0.87 | 3.17 | - | 968.6  |
| AHQ-4-2, 4002          | K.VIQYLAYVASSHK.S           | 1479.70484 | 2 | 2.70E-05 | 0.89 | 3.03 | - | 1119.9 |
| AHQ-4-10, 3495         | K.VIQYLAYVASSHK.S           | 1479.70484 | 2 | 4.31E-05 | 0.86 | 3.23 | - | 853.0  |
| AHQ-4-7, 3430          | K.VIQYLAYVASSHK.S           | 1479.70484 | 2 | 1.06E-06 | 0.95 | 4.17 | - | 1316.3 |
| AHQ-4-1, 4083          | K.VIQYLAYVASSHK.S           | 1479.70484 | 2 | 2.42E-05 | 0.80 | 2.83 | - | 961.3  |
| AHQ-4-1, 6605 - 6607   | R.VISGVLQGNVFFK.K           | 1487.81155 | 2 | 9.68E-04 | 0.84 | 2.94 | - | 890.8  |
| AHQ-4-3, 6624 - 6695   | R.VISGVLQGNVFFK.K           | 1487.81155 | 2 | 5.67E-06 | 0.97 | 4.87 | - | 1936.8 |
| AHQ-4-2, 6515          | R.VISGVLQGNVFFK.K           | 1487.81155 | 2 | 9.98E-10 | 0.96 | 5.05 | - | 1268.9 |
| AHQ-4-5, 6541          | R.VISGVLQGNVFFK.K           | 1487.81155 | 1 | 1.11E-05 | 0.64 | 3.20 | - | 440.2  |
| AHQ-4-4, 6618 - 6684   | R.VISGVLQGNVFFK.K           | 1487.81155 | 2 | 6.05E-05 | 0.96 | 3.98 | - | 1867.2 |
| AHQ-4-7, 6209 - 6287   | R.VISGVLQGNVFFK.K           | 1487.81155 | 1 | 3.96E-04 | 0.05 | 1.94 | - | 124.6  |
| AHQ-4-6, 6346          | R.VISGVLQGNVFFK.K           | 1487.81155 | 2 | 2.50E-08 | 0.97 | 4.79 | - | 2010.9 |
| AHQ-4-5, 6409          | R.VISGVLQGNVFFK.K           | 1487.81155 | 2 | 6.31E-04 | 0.96 | 3.35 | - | 2022.1 |
| AHQ-4-7, 6246 - 6274   | R.VISGVLQGNVFFK.K           | 1487.81155 | 2 | 1.69E-07 | 0.98 | 5.28 | - | 1893.0 |
| AHQ-4-2, 6608 - 6674   | R.VISGVLQGNVFFK.K           | 1487.81155 | 2 | 7.63E-10 | 0.96 | 4.61 | - | 1551.1 |
| AHQ-4-5, 6443          | R.VISGVLQGNVFFK.K           | 1487.81155 | 1 | 8.15E-07 | 0.32 | 2.63 | - | 314.6  |



|                             |                                                                        |            |   |          |       |        |       |          |
|-----------------------------|------------------------------------------------------------------------|------------|---|----------|-------|--------|-------|----------|
| AHQ-4-7, 4742               | R.VYCDMNTENGWTVIQNR.Q                                                  | 2159.34553 | 2 | 4.77E-05 | 0.93  | 4.06   | -     | 892.6    |
| AHQ-4-6, 4470 - 4550        | R.VYCDMNTENGWTVIQNR.Q                                                  | 2159.34553 | 2 | 1.72E-14 | 0.96  | 4.91   | -     | 1301.7   |
| AHQ-4-11, 4860              | R.YYWGGQYTWDMAK.H                                                      | 1669.84009 | 2 | 1.22E-07 | 0.96  | 3.89   | -     | 1519.6   |
| AHQ-4-7, 4974               | R.YYWGGQYTWDMAK.H                                                      | 1669.84009 | 2 | 3.67E-06 | 0.82  | 2.62   | -     | 862.5    |
| AHQ-4-6, 4962 - 5042        | R.YYWGGQYTWDMAK.H                                                      | 1669.84009 | 2 | 1.87E-08 | 0.95  | 3.71   | -     | 1252.9   |
| AHQ-4-12, 5087 - 5154       | R.YYWGGQYTWDMAK.H                                                      | 1669.84009 | 2 | 4.46E-05 | 0.85  | 3.10   | -     | 766.9    |
| AHQ-4-14, 5624 - 5629       | R.YYWGGQYTWDMAK.H                                                      | 1685.83949 | 2 | 4.90E-04 | 0.61  | 2.62   | -     | 358.2    |
| AHQ-4-14, 5732 - 5740       | R.YYWGGQYTWDMAK.H                                                      | 1685.83949 | 2 | 1.48E-05 | 0.97  | 4.52   | -     | 1254.7   |
| AHQ-4-14, 6345              | R.YYWGGQYTWDMAK.H                                                      | 1669.84009 | 2 | 1.12E-04 | 0.89  | 3.13   | -     | 873.9    |
| AHQ-4-14-, 4426 - 4430      | R.YYWGGQYTWDMAK.H                                                      | 1685.83949 | 2 | 9.77E-04 | 0.97  | 4.77   | -     | 1672.5   |
| AHQ-4-14-, 4975             | R.YYWGGQYTWDMAK.H                                                      | 1669.84009 | 2 | 3.36E-05 | 0.95  | 3.80   | -     | 1257.0   |
| gi 24431935 ref NP_065393.1 | reticulin 4; neuroendocrine-specific protein C like (focoen) [Homo sap |            |   | 2.00E-14 | 0.97  | 10.31  | 2.80  | 129930.3 |
| AHQ-4-13-, 6080 - 6148      | K.YQFVREPEDEEEEEDEDEDELEEVLER.K                                        | 4189.14063 | 3 | 2.00E-14 | 0.97  | 6.18   | -     | 1621.5   |
| gi 28626504 ref NP_113659.3 | UNC-112 related protein 2 [Homo sapiens]                               |            |   | 2.78E-14 | 26.14 | 300.35 | 58.10 | 75429.7  |
| AHQ-4-6, 2955               | K.AGDALWLR.F                                                           | 902.03223  | 2 | 3.34E-04 | 0.89  | 3.29   | -     | 1245.3   |
| AHQ-4-14-, 6381             | R.ARGEELDEDLFLQLTGGHEAF                                                | 2348.51032 | 2 | 1.02E-12 | 0.97  | 5.42   | -     | 1660.9   |
| AHQ-4-10, 6011              | R.ARGEELDEDLFLQLTGGHEAF                                                | 2348.51032 | 2 | 3.57E-06 | 0.81  | 2.97   | -     | 706.8    |
| AHQ-4-12, 6565 - 6635       | R.ARGEELDEDLFLQLTGGHEAF                                                | 2348.51032 | 2 | 4.60E-07 | 0.93  | 4.20   | -     | 1090.8   |
| AHQ-4-9, 6103 - 6167        | R.ASFSQLFQAAVAICR.L                                                    | 1768.02967 | 2 | 4.81E-05 | 0.95  | 4.37   | -     | 964.7    |
| AHQ-4-1, 6926 - 6929        | R.ASFSQLFQAAVAICR.L                                                    | 1768.02967 | 2 | 8.91E-07 | 0.94  | 4.19   | -     | 929.1    |
| AHQ-4-8, 6417               | R.ASFSQLFQAAVAICR.L                                                    | 1768.02967 | 2 | 1.64E-04 | 0.70  | 2.57   | -     | 605.4    |
| AHQ-4-10, 6044              | R.ASFSQLFQAAVAICR.L                                                    | 1768.02967 | 2 | 1.47E-04 | 0.92  | 3.97   | -     | 796.2    |
| AHQ-4-5, 6845               | R.ASFSQLFQAAVAICR.L                                                    | 1768.02967 | 2 | 1.56E-07 | 0.94  | 4.58   | -     | 681.2    |
| AHQ-4-6, 6614 - 6678        | R.ASFSQLFQAAVAICR.L                                                    | 1768.02967 | 2 | 1.10E-08 | 0.95  | 4.91   | -     | 787.0    |
| AHQ-4-2, 7040               | R.ASFSQLFQAAVAICR.L                                                    | 1768.02967 | 2 | 2.08E-09 | 0.92  | 3.90   | -     | 784.9    |
| AHQ-4-12, 6629              | R.ASFSQLFQAAVAICR.L                                                    | 1768.02967 | 2 | 8.76E-06 | 0.88  | 3.57   | -     | 633.8    |
| AHQ-4-9, 6347               | R.ASFSQLFQAAVAICR.L                                                    | 1768.02967 | 2 | 1.71E-06 | 0.90  | 3.93   | -     | 604.9    |
| AHQ-4-6, 6922 - 6927        | R.ASFSQLFQAAVAICR.L                                                    | 1768.02967 | 2 | 4.80E-10 | 0.93  | 4.59   | -     | 686.5    |
| AHQ-4-6, 6742 - 6759        | R.ASFSQLFQAAVAICR.L                                                    | 1768.02967 | 2 | 1.41E-05 | 0.93  | 4.37   | -     | 777.9    |
| AHQ-4-6, 6671               | R.ASFSQLFQAAVAICR.L                                                    | 1768.02967 | 3 | 2.48E-08 | 0.95  | 5.06   | -     | 1365.3   |
| AHQ-4-3, 7019               | R.ASFSQLFQAAVAICR.L                                                    | 1768.02967 | 2 | 6.17E-06 | 0.94  | 4.34   | -     | 839.6    |
| AHQ-4-6, 3406               | K.EKEPEEELYDLSK.V                                                      | 1609.71294 | 2 | 7.19E-09 | 0.81  | 3.53   | -     | 434.1    |
| AHQ-4-9, 3048 - 3051        | K.EKEPEEELYDLSK.V                                                      | 1609.71294 | 2 | 9.16E-07 | 0.86  | 3.67   | -     | 426.0    |
| AHQ-4-6, 3279 - 3358        | K.EKEPEEELYDLSK.V                                                      | 1609.71294 | 2 | 9.74E-09 | 0.86  | 4.07   | -     | 428.0    |
| AHQ-4-9, 6607 - 6609        | R.FIQAWQSLPDFGISYVMVR.F                                                | 2258.62653 | 2 | 5.50E-05 | 0.91  | 4.81   | -     | 432.3    |
| AHQ-4-9, 6392               | R.FIQAWQSLPDFGISYVMVR.F                                                | 2274.62593 | 2 | 9.18E-05 | 0.92  | 4.79   | -     | 507.4    |
| AHQ-4-13, 6797              | R.FIQAWQSLPDFGISYVMVR.F                                                | 2274.62593 | 2 | 7.82E-04 | 0.77  | 3.56   | -     | 356.9    |
| AHQ-4-6, 7159 - 7166        | R.FIQAWQSLPDFGISYVMVR.F                                                | 2258.62653 | 2 | 3.84E-05 | 0.94  | 5.23   | -     | 543.2    |
| AHQ-4-6, 6974 - 6976        | R.FIQAWQSLPDFGISYVMVR.F                                                | 2274.62593 | 2 | 5.10E-04 | 0.95  | 5.18   | -     | 596.9    |
| AHQ-4-12, 6974              | R.FIQAWQSLPDFGISYVMVR.F                                                | 2258.62653 | 2 | 4.32E-06 | 0.92  | 4.57   | -     | 551.1    |
| AHQ-4-9, 2820               | K.GCEVVPDVNVSGQK.F                                                     | 1489.63335 | 1 | 1.60E-05 | 0.80  | 3.15   | -     | 731.9    |
| AHQ-4-6, 3064               | K.GCEVVPDVNVSGQK.F                                                     | 1489.63335 | 1 | 2.48E-07 | 0.91  | 3.90   | -     | 903.2    |
| AHQ-4-12, 3182 - 3194       | K.GCEVVPDVNVSGQK.F                                                     | 1489.63335 | 2 | 4.24E-05 | 0.83  | 3.28   | -     | 631.4    |
| AHQ-4-13, 6852              | R.GEELDEDLFLQLTGGHEAF                                                  | 2121.24574 | 2 | 2.14E-08 | 0.91  | 4.04   | -     | 913.2    |
| AHQ-4-6, 7072 - 7143        | R.GEELDEDLFLQLTGGHEAF                                                  | 2121.24574 | 2 | 1.77E-10 | 0.94  | 4.61   | -     | 1039.1   |
| AHQ-4-14-, 6649             | R.GEELDEDLFLQLTGGHEAF                                                  | 2121.24574 | 2 | 1.28E-13 | 0.95  | 5.51   | -     | 803.6    |
| AHQ-4-6, 2835               | R.GM*PAHFSDSAQTEACYHMLSR.P                                             | 2430.63997 | 3 | 5.34E-07 | 0.94  | 4.45   | -     | 1326.5   |
| AHQ-4-6, 3758               | R.GMPAHFSDSAQTEACYHMLSR.P                                              | 2398.64117 | 3 | 7.03E-09 | 0.93  | 4.10   | -     | 1333.8   |
| AHQ-4-9, 3325               | R.IDLAVGDVVK.T                                                         | 1029.21223 | 1 | 1.16E-05 | 0.72  | 3.00   | -     | 578.8    |
| AHQ-4-13-, 3849 - 3850      | R.IDLAVGDVVK.T                                                         | 1029.21223 | 1 | 7.66E-04 | 0.43  | 2.64   | -     | 398.8    |
| AHQ-4-13, 4018              | R.IDLAVGDVVK.T                                                         | 1029.21223 | 1 | 9.89E-04 | 0.81  | 3.19   | -     | 739.3    |
| AHQ-4-9, 3323 - 3548        | R.IDLAVGDVVK.T                                                         | 1029.21223 | 1 | 8.16E-04 | 0.33  | 2.17   | -     | 430.0    |
| AHQ-4-6, 3634 - 3702        | R.IDLAVGDVVK.T                                                         | 1029.21223 | 1 | 2.53E-04 | 0.18  | 2.05   | -     | 344.3    |
| AHQ-4-6, 4394               | R.ILEAHQNVQLSLAEAQLR.F                                                 | 2105.38372 | 2 | 7.11E-08 | 0.98  | 5.86   | -     | 1595.1   |
| AHQ-4-13, 4530              | R.ILEAHQNVQLSLAEAQLR.F                                                 | 2105.38372 | 2 | 8.25E-13 | 0.98  | 5.87   | -     | 2189.7   |
| AHQ-4-1, 4730 - 4741        | R.ILEAHQNVQLSLAEAQLR.F                                                 | 2105.38372 | 2 | 5.45E-09 | 0.98  | 5.43   | -     | 2103.7   |
| AHQ-4-12, 4418              | R.ILEAHQNVQLSLAEAQLR.F                                                 | 2105.38372 | 2 | 1.32E-09 | 0.98  | 6.17   | -     | 2432.4   |
| AHQ-4-7, 4193               | R.ILEAHQNVQLSLAEAQLR.F                                                 | 2105.38372 | 2 | 1.08E-08 | 0.98  | 6.01   | -     | 1686.8   |
| AHQ-4-4, 4616               | R.ILEAHQNVQLSLAEAQLR.F                                                 | 2105.38372 | 2 | 1.67E-11 | 0.97  | 5.69   | -     | 1216.8   |
| AHQ-4-11, 4256              | R.ILEAHQNVQLSLAEAQLR.F                                                 | 2105.38372 | 3 | 4.40E-07 | 0.91  | 4.77   | -     | 984.2    |
| AHQ-4-11, 4254              | R.ILEAHQNVQLSLAEAQLR.F                                                 | 2105.38372 | 2 | 3.45E-09 | 0.98  | 6.16   | -     | 1917.2   |
| AHQ-4-12, 4417              | R.ILEAHQNVQLSLAEAQLR.F                                                 | 2105.38372 | 3 | 2.67E-07 | 0.93  | 4.97   | -     | 1436.4   |
| AHQ-4-6, 4258 - 4323        | R.ILEAHQNVQLSLAEAQLR.F                                                 | 2105.38372 | 2 | 2.78E-14 | 0.98  | 6.56   | -     | 1942.9   |
| AHQ-4-5, 4349               | R.ILEAHQNVQLSLAEAQLR.F                                                 | 2105.38372 | 2 | 2.15E-04 | 0.97  | 5.01   | -     | 1705.6   |
| AHQ-4-9, 3889               | R.ILEAHQNVQLSLAEAQLR.F                                                 | 2105.38372 | 2 | 1.01E-07 | 0.98  | 5.95   | -     | 1454.2   |
| AHQ-4-6, 4487               | R.ILEAHQNVQLSLAEAQLR.F                                                 | 2105.38372 | 2 | 2.06E-09 | 0.98  | 5.14   | -     | 2187.9   |
| AHQ-4-10, 4011              | R.ILEAHQNVQLSLAEAQLR.F                                                 | 2105.38372 | 2 | 7.62E-06 | 0.98  | 7.09   | -     | 2214.9   |
| AHQ-4-3, 4657 - 4667        | R.ILEAHQNVQLSLAEAQLR.F                                                 | 2105.38372 | 2 | 2.73E-13 | 0.98  | 5.81   | -     | 1570.1   |
| AHQ-4-6, 2330               | R.KDEILGIANNR.L                                                        | 1243.39499 | 1 | 1.09E-04 | 0.18  | 1.83   | -     | 204.1    |
| AHQ-4-13, 2785 - 2845       | R.KDEILGIANNR.L                                                        | 1243.39499 | 1 | 2.92E-05 | 0.63  | 2.44   | -     | 451.9    |
| AHQ-4-13-, 2669 - 2676      | R.KDEILGIANNR.L                                                        | 1243.39499 | 2 | 3.64E-06 | 0.96  | 4.03   | -     | 1427.8   |
| AHQ-4-12, 2541 - 2543       | R.KDEILGIANNR.L                                                        | 1243.39499 | 2 | 5.68E-05 | 0.90  | 3.34   | -     | 1028.7   |
| AHQ-4-6, 2331 - 2410        | R.KDEILGIANNR.L                                                        | 1243.39499 | 2 | 3.27E-06 | 0.96  | 4.39   | -     | 1468.9   |
| AHQ-4-9, 2243 - 2304        | R.KDEILGIANNR.L                                                        | 1243.39499 | 2 | 1.97E-05 | 0.95  | 4.12   | -     | 1470.8   |
| AHQ-4-6, 2564               | R.KDEILGIANNR.L                                                        | 1243.39499 | 1 | 1.32E-10 | 0.19  | 1.92   | -     | 291.7    |
| AHQ-4-9, 2236 - 2309        | R.KDEILGIANNR.L                                                        | 1243.39499 | 1 | 6.77E-06 | 0.17  | 2.13   | -     | 246.5    |
| AHQ-4-6, 3708               | R.KQDWSDHAIWWEQK.R                                                     | 1858.00504 | 3 | 7.09E-07 | 0.93  | 4.36   | -     | 1210.1   |
| AHQ-4-6, 6540               | K.LEGSAPTDVLDLSLTIPELK.D                                               | 2100.35256 | 2 | 1.10E-05 | 0.63  | 3.01   | -     | 546.2    |
| AHQ-4-8, 6474               | K.LEGSAPTDVLDLSLTIPELK.D                                               | 2100.35256 | 2 | 2.85E-05 | 0.92  | 4.37   | -     | 763.6    |
| AHQ-4-6, 6654 - 6722        | K.LEGSAPTDVLDLSLTIPELK.D                                               | 2100.35256 | 2 | 2.49E-06 | 0.96  | 4.97   | -     | 915.5    |
| AHQ-4-3, 7011 - 7081        | K.LEGSAPTDVLDLSLTIPELK.D                                               | 2100.35256 | 2 | 1.08E-05 | 0.83  | 3.85   | -     | 461.5    |
| AHQ-4-14-, 6358 - 6397      | K.LEGSAPTDVLDLSLTIPELK.D                                               | 2100.35256 | 2 | 2.61E-04 | 0.86  | 3.91   | -     | 497.3    |
| AHQ-4-7, 6789               | K.LEGSAPTDVLDLSLTIPELK.D                                               | 2100.35256 | 2 | 3.20E-04 | 0.80  | 3.74   | -     | 434.5    |
| AHQ-4-6, 6235 - 6238        | K.LEGSAPTDVLDLSLTIPELK.D                                               | 2100.35256 | 2 | 5.09E-06 | 0.93  | 4.37   | -     | 852.7    |
| AHQ-4-6, 6370 - 6435        | K.LEGSAPTDVLDLSLTIPELK.D                                               | 2100.35256 | 2 | 2.08E-04 | 0.84  | 3.72   | -     | 514.9    |
| AHQ-4-6, 5586 - 5599        | K.LEGSAPTDVLDLSLTIPELK.D                                               | 2100.35256 | 2 | 2.37E-04 | 0.95  | 4.44   | -     | 1259.9   |
| AHQ-4-13-, 6529             | K.LEGSAPTDVLDLSLTIPELK.D                                               | 2100.35256 | 2 | 5.98E-06 | 0.85  | 3.72   | -     | 580.4    |
| AHQ-4-9, 6127               | K.LEGSAPTDVLDLSLTIPELK.D                                               | 2100.35256 | 2 | 1.17E-04 | 0.85  | 3.61   | -     | 522.1    |
| AHQ-4-5, 6846               | K.LEGSAPTDVLDLSLTIPELK.D                                               | 2100.35256 | 2 | 3.57E-06 | 0.93  | 4.43   | -     | 842.3    |
| AHQ-4-6, 6326 - 6334        | K.LEGSAPTDVLDLSLTIPELK.DHLR.I                                          | 2621.92493 | 3 | 1.35E-11 | 0.82  | 4.27   | -     | 551.0    |
| AHQ-4-12, 5769 - 5773       | K.LLVPSPEGMSEIYLR.C                                                    | 1705.01201 | 2 | 1.34E-06 | 0.58  | 3.07   | -     | 228.3    |
| AHQ-4-6, 4662 - 4742        | K.LLVPSPEGMSEIYLR.C                                                    | 1721.01141 | 2 | 9.50E-06 | 0.32  | 2.83   | -     | 136.3    |
| AHQ-4-6, 5826               | K.LLVPSPEGMSEIYLR.C                                                    | 1705.01201 | 2 | 9.43E-07 | 0.72  | 2.78   | -     | 392.8    |
| AHQ-4-11, 5570 - 5586       | K.LLVPSPEGMSEIYLR.C                                                    | 1705.01201 | 2 | 1.11E-05 | 0.71  | 2.72   | -     | 329.7    |
| AHQ-4-1, 7045               | K.LSQSGVEGEPAGTDPGLDLDVALSNLEVK.L                                      | 3027.24073 | 3 | 1.13E-09 | 0.90  | 4.38   | -     | 1025.8   |
| AHQ-4-4, 7162 - 7178        | K.LSQSGVEGEPAGTDPGLDLDVALSNLEVK.L                                      | 3027.24073 | 3 | 4.26E-04 | 0.87  | 4.19   | -     | 973.4    |
| AHQ-4-6, 6867 - 6938        | K.LSQSGVEGEPAGTDPGLDLDVALSNLEVK.L                                      | 3027.24073 | 3 | 9.09E-13 | 0.96  | 5.86   | -     | 1417.2   |
| AHQ-4-7, 7037               | K.LSQSGVEGEPAGTDPGLDLDVALSNLEVK.L                                      | 3027.24073 | 3 | 7.49E-08 | 0.79  | 3.37   | -     | 898.4    |
| AHQ-4-3, 7205 - 7208        | K.LSQSGVEGEPAGTDPGLDLDVALSNLEVK.L                                      | 3027.24073 | 3 | 1.41E-06 | 0.87  | 3.63   | -     | 1403.6   |
| AHQ-4-6, 6322 - 6390        | K.LSQSGVEGEPAGTDPGLDLDVALSNLEVK.L                                      | 3027.24073 | 3 | 6.13E-04 | 0.63  | 3.21   | -     | 592.1    |
| AHQ-4-9, 2059               | R.LTLQYEQAR.W                                                          | 1122.25622 | 2 | 9.59E-04 | 0.91  | 3.81   | -     | 1172.6   |
| AHQ-4-7, 2086               | R.LTLQYEQAR.W                                                          | 1122.25622 | 2 | 2.42E-06 | 0.89  | 3.45   | -     | 1066.5   |
| AHQ-4-6, 2114 - 2131        | R.LTLQYEQAR.W                                                          | 1122.25622 | 2 | 4.92E-05 | 0.91  | 3.97   | -     | 949.4    |
| AHQ-4-6, 3938 - 3959        | K.SQDEAPGDPIQLNLK.G                                                    | 1753.89174 | 2 | 1.97E-09 | 0.91  | 4.53   | -     | 505.9    |
| AHQ-4-11, 3904 - 3916       | K.SQDEAPGDPIQLNLK.G                                                    | 1753.89174 | 2 | 1.72E-08 | 0.88  | 3.66   | -     | 641.4    |
| AHQ-4-12, 4041              | K.SQDEAPGDPIQLNLK.G                                                    | 1753.89174 | 2 | 1.53E-08 | 0.87  | 4.02   | -     | 418.6    |
| AHQ-4-6, 3798 - 3870        | K.SQDEAPGDPIQLNLK.G                                                    | 1753.89174 | 2 | 8.08E-06 | 0.92  | 4.51   | -     | 576.2    |

|                                                                                                    |                                     |            |   |          |       |        |       |         |
|----------------------------------------------------------------------------------------------------|-------------------------------------|------------|---|----------|-------|--------|-------|---------|
| AHQ-4-14-, 4231 - 4241                                                                             | K.TASGDYIDSSWELR.V                  | 1600.66783 | 2 | 2.61E-07 | 0.74  | 3.35   | -     | 765.4   |
| AHQ-4-9, 3841 - 3843                                                                               | K.TASGDYIDSSWELR.V                  | 1600.66783 | 2 | 6.75E-11 | 0.92  | 3.63   | -     | 863.9   |
| AHQ-4-6, 4303 - 4380                                                                               | K.TASGDYIDSSWELR.V                  | 1600.66783 | 2 | 1.02E-10 | 0.95  | 4.36   | -     | 1009.1  |
| AHQ-4-9, 3191 - 3251                                                                               | R.TGSGGPGNHPHGPDPASAEGLNPLYGLVAPR.F | 2783.95312 | 3 | 7.39E-04 | 0.95  | 5.43   | -     | 1048.1  |
| AHQ-4-9, 3468                                                                                      | R.TGSGGPGNHPHGPDPASAEGLNPLYGLVAPR.F | 2783.95312 | 2 | 2.11E-04 | 0.43  | 2.52   | -     | 312.4   |
| AHQ-4-11, 3660                                                                                     | R.TGSGGPGNHPHGPDPASAEGLNPLYGLVAPR.F | 2783.95312 | 2 | 6.64E-05 | 0.94  | 4.77   | -     | 846.6   |
| AHQ-4-6, 3547 - 3618                                                                               | R.TGSGGPGNHPHGPDPASAEGLNPLYGLVAPR.F | 2783.95312 | 2 | 4.59E-06 | 0.93  | 5.04   | -     | 693.3   |
| AHQ-4-1, 4127                                                                                      | R.TGSGGPGNHPHGPDPASAEGLNPLYGLVAPR.F | 2783.95312 | 2 | 2.14E-06 | 0.77  | 3.28   | -     | 339.0   |
| AHQ-4-7, 3522                                                                                      | R.TGSGGPGNHPHGPDPASAEGLNPLYGLVAPR.F | 2783.95312 | 2 | 9.23E-04 | 0.93  | 4.54   | -     | 901.2   |
| AHQ-4-9, 3239                                                                                      | R.TGSGGPGNHPHGPDPASAEGLNPLYGLVAPR.F | 2783.95312 | 2 | 1.25E-04 | 0.82  | 3.93   | -     | 395.1   |
| AHQ-4-5, 3631                                                                                      | R.TGSGGPGNHPHGPDPASAEGLNPLYGLVAPR.F | 2783.95312 | 3 | 4.30E-04 | 0.93  | 4.80   | -     | 974.1   |
| AHQ-4-10, 3531                                                                                     | R.TGSGGPGNHPHGPDPASAEGLNPLYGLVAPR.F | 2783.95312 | 2 | 2.20E-05 | 0.91  | 4.31   | -     | 683.2   |
| AHQ-4-4, 3898                                                                                      | R.TGSGGPGNHPHGPDPASAEGLNPLYGLVAPR.F | 2783.95312 | 2 | 7.47E-05 | 0.76  | 3.40   | -     | 468.5   |
| AHQ-4-6, 3544 - 3614                                                                               | R.TGSGGPGNHPHGPDPASAEGLNPLYGLVAPR.F | 2783.95312 | 3 | 1.73E-10 | 0.97  | 6.20   | -     | 1316.7  |
| AHQ-4-6, 7283                                                                                      | R.TM*ADSSYTSVEQAILAFLSLQR.T         | 2448.73471 | 3 | 3.32E-09 | 0.96  | 5.24   | -     | 1641.9  |
| AHQ-4-6, 7302                                                                                      | R.TMADSSYTSVEQAILAFLSLQR.T          | 2432.73531 | 3 | 6.07E-06 | 0.97  | 5.36   | -     | 1897.9  |
| AHQ-4-3, 4151                                                                                      | R.VFVGEEDPEAESVTLR.V                | 1777.91007 | 2 | 1.96E-09 | 0.96  | 5.02   | -     | 1124.6  |
| AHQ-4-10, 3689 - 3695                                                                              | R.VFVGEEDPEAESVTLR.V                | 1777.91007 | 2 | 5.42E-06 | 0.94  | 4.63   | -     | 1238.9  |
| AHQ-4-14, 4877 - 4949                                                                              | R.VFVGEEDPEAESVTLR.V                | 1777.91007 | 2 | 2.61E-06 | 0.96  | 4.40   | -     | 1484.5  |
| AHQ-4-2, 4170                                                                                      | R.VFVGEEDPEAESVTLR.V                | 1777.91007 | 2 | 7.63E-06 | 0.74  | 3.21   | -     | 1003.0  |
| AHQ-4-13-, 3972 - 4045                                                                             | R.VFVGEEDPEAESVTLR.V                | 1777.91007 | 2 | 5.19E-08 | 0.95  | 4.54   | -     | 1178.4  |
| AHQ-4-5, 3945                                                                                      | R.VFVGEEDPEAESVTLR.V                | 1777.91007 | 2 | 1.89E-13 | 0.96  | 4.51   | -     | 1650.1  |
| AHQ-4-9, 3491 - 3536                                                                               | R.VFVGEEDPEAESVTLR.V                | 1777.91007 | 2 | 1.51E-04 | 0.86  | 3.44   | -     | 945.4   |
| AHQ-4-11, 3860                                                                                     | R.VFVGEEDPEAESVTLR.V                | 1777.91007 | 2 | 4.75E-11 | 0.95  | 4.50   | -     | 1377.2  |
| AHQ-4-14-, 3833                                                                                    | R.VFVGEEDPEAESVTLR.V                | 1777.91007 | 2 | 3.03E-06 | 0.85  | 3.16   | -     | 1037.4  |
| AHQ-4-6, 3856 - 3930                                                                               | R.VFVGEEDPEAESVTLR.V                | 1777.91007 | 2 | 3.66E-06 | 0.87  | 3.61   | -     | 1094.7  |
| AHQ-4-8, 3674 - 3677                                                                               | R.VFVGEEDPEAESVTLR.V                | 1777.91007 | 2 | 3.70E-09 | 0.96  | 4.74   | -     | 1447.6  |
| AHQ-4-7, 3853                                                                                      | R.VFVGEEDPEAESVTLR.V                | 1777.91007 | 2 | 3.97E-06 | 0.90  | 4.09   | -     | 1044.3  |
| AHQ-4-1, 4203                                                                                      | R.VFVGEEDPEAESVTLR.V                | 1777.91007 | 2 | 9.38E-10 | 0.91  | 4.12   | -     | 907.9   |
| AHQ-4-3, 4075 - 4152                                                                               | R.VFVGEEDPEAESVTLR.V                | 1777.91007 | 2 | 5.18E-07 | 0.92  | 4.23   | -     | 1133.2  |
| AHQ-4-12, 3979                                                                                     | R.VFVGEEDPEAESVTLR.V                | 1777.91007 | 2 | 2.03E-05 | 0.85  | 3.34   | -     | 935.9   |
| AHQ-4-6, 2483                                                                                      | R.VTGESHIGVLLK.I                    | 1310.52448 | 1 | 1.72E-09 | 0.82  | 3.11   | -     | 695.5   |
| AHQ-4-9, 2351 - 2353                                                                               | R.VTGESHIGVLLK.I                    | 1310.52448 | 2 | 1.75E-06 | 0.95  | 4.22   | -     | 1384.0  |
| AHQ-4-6, 2475                                                                                      | R.VTGESHIGVLLK.I                    | 1310.52448 | 2 | 1.43E-06 | 0.97  | 4.57   | -     | 1869.8  |
| AHQ-4-9, 2352                                                                                      | R.VTGESHIGVLLK.I                    | 1310.52448 | 1 | 4.75E-09 | 0.84  | 3.34   | -     | 728.7   |
| AHQ-4-7, 2401                                                                                      | R.VTGESHIGVLLK.I                    | 1310.52448 | 2 | 4.15E-09 | 0.96  | 4.08   | -     | 1869.9  |
| AHQ-4-11, 2661 - 2726                                                                              | R.VTGESHIGVLLK.I                    | 1310.52448 | 2 | 7.55E-08 | 0.94  | 3.82   | -     | 1458.7  |
| AHQ-4-14-, 2698                                                                                    | R.VTGESHIGVLLK.I                    | 1310.52448 | 2 | 3.08E-08 | 0.94  | 3.75   | -     | 1369.3  |
| AHQ-4-13-, 2852                                                                                    | R.VTGESHIGVLLK.I                    | 1310.52448 | 2 | 1.12E-08 | 0.96  | 4.24   | -     | 1900.0  |
| AHQ-4-1, 2946                                                                                      | R.VTGESHIGVLLK.I                    | 1310.52448 | 2 | 2.48E-06 | 0.94  | 3.71   | -     | 1516.6  |
| AHQ-4-13, 2971 - 2979                                                                              | R.VTGESHIGVLLK.I                    | 1310.52448 | 2 | 1.62E-09 | 0.94  | 3.81   | -     | 1635.8  |
| AHQ-4-3, 5011                                                                                      | K.VVLAGGVAPALFR.G                   | 1270.54832 | 2 | 5.58E-08 | 0.96  | 4.65   | -     | 1764.4  |
| AHQ-4-6, 4686                                                                                      | K.VVLAGGVAPALFR.G                   | 1270.54832 | 2 | 3.33E-07 | 0.96  | 4.85   | -     | 1392.2  |
| AHQ-4-11, 4632 - 4640                                                                              | K.VVLAGGVAPALFR.G                   | 1270.54832 | 2 | 1.91E-09 | 0.97  | 4.15   | -     | 1899.7  |
| AHQ-4-6, 4610                                                                                      | K.VVLAGGVAPALFR.G                   | 1270.54832 | 1 | 1.07E-06 | 0.20  | 2.19   | -     | 65.7    |
| AHQ-4-7, 4519 - 4522                                                                               | K.VVLAGGVAPALFR.G                   | 1270.54832 | 2 | 1.70E-06 | 0.97  | 5.04   | -     | 1583.4  |
| AHQ-4-9, 4139 - 4208                                                                               | K.VVLAGGVAPALFR.G                   | 1270.54832 | 2 | 4.47E-05 | 0.93  | 3.39   | -     | 1466.0  |
| AHQ-4-4, 4979                                                                                      | K.VVLAGGVAPALFR.G                   | 1270.54832 | 2 | 1.08E-04 | 0.96  | 4.26   | -     | 1916.2  |
| AHQ-4-5, 4711                                                                                      | K.VVLAGGVAPALFR.G                   | 1270.54832 | 2 | 5.66E-07 | 0.97  | 5.11   | -     | 1892.2  |
| AHQ-4-2, 5012                                                                                      | K.VVLAGGVAPALFR.G                   | 1270.54832 | 2 | 9.85E-06 | 0.94  | 3.40   | -     | 1792.7  |
| AHQ-4-1, 5085                                                                                      | K.VVLAGGVAPALFR.G                   | 1270.54832 | 2 | 1.75E-07 | 0.96  | 4.69   | -     | 1596.3  |
| AHQ-4-6, 4594 - 4618                                                                               | K.VVLAGGVAPALFR.G                   | 1270.54832 | 2 | 6.50E-08 | 0.97  | 4.97   | -     | 1624.7  |
| AHQ-4-6, 2296 - 2302                                                                               | K.YGILADAR.L                        | 878.99544  | 2 | 1.47E-04 | 0.94  | 3.21   | -     | 1287.2  |
| AHQ-4-7, 2274                                                                                      | K.YGILADAR.L                        | 878.99544  | 2 | 1.50E-05 | 0.94  | 2.70   | -     | 1737.3  |
| AHQ-4-6, 5215 - 5219                                                                               | K.YYSFFDLDPK.T                      | 1295.42046 | 2 | 3.82E-06 | 0.93  | 3.81   | -     | 844.5   |
| AHQ-4-9, 4712 - 4727                                                                               | K.YYSFFDLDPK.T                      | 1295.42046 | 2 | 1.95E-04 | 0.92  | 3.75   | -     | 806.2   |
| AHQ-4-1, 5678                                                                                      | K.YYSFFDLDPK.T                      | 1295.42046 | 2 | 6.06E-05 | 0.79  | 3.21   | -     | 741.0   |
| gi4503571[ref NP_001419.1] enolase 1; phosphopyruvate hydratase; MYC promoter-binding protein 1; n |                                     |            |   | 3.11E-14 | 11.92 | 140.29 | 36.40 | 47168.7 |
| AHQ-4-14-, 5213 - 5225                                                                             | R.AAVPSGASTGIYEALR.D                | 1806.00979 | 2 | 1.63E-05 | 0.97  | 5.79   | -     | 1101.0  |
| AHQ-4-13, 5370 - 5425                                                                              | R.AAVPSGASTGIYEALR.D                | 1806.00979 | 2 | 2.28E-10 | 0.93  | 4.28   | -     | 570.6   |
| AHQ-4-7, 5167                                                                                      | R.AAVPSGASTGIYEALR.D                | 1806.00979 | 2 | 5.13E-05 | 0.80  | 3.46   | -     | 338.7   |
| AHQ-4-7, 5259                                                                                      | R.AAVPSGASTGIYEALR.D                | 1806.00979 | 2 | 4.80E-04 | 0.94  | 4.28   | -     | 766.0   |
| AHQ-4-12, 5291 - 5329                                                                              | R.AAVPSGASTGIYEALR.D                | 1806.00979 | 2 | 6.12E-08 | 0.91  | 4.19   | -     | 606.1   |
| AHQ-4-8, 4777 - 4817                                                                               | R.AAVPSGASTGIYEALR.D                | 1806.00979 | 2 | 2.93E-12 | 0.93  | 4.89   | -     | 451.3   |
| AHQ-4-7, 4514 - 4517                                                                               | K.DATNVGDEGGFAPNILENK.E             | 1962.06350 | 2 | 4.20E-07 | 0.94  | 5.21   | -     | 705.5   |
| AHQ-4-9, 4021 - 4091                                                                               | K.DATNVGDEGGFAPNILENK.E             | 1962.06350 | 2 | 1.36E-04 | 0.67  | 3.72   | -     | 710.9   |
| AHQ-4-10, 4148                                                                                     | K.DATNVGDEGGFAPNILENK.E             | 1962.06350 | 2 | 2.03E-05 | 0.87  | 4.11   | -     | 671.5   |
| AHQ-4-8, 4345                                                                                      | K.DATNVGDEGGFAPNILENK.E             | 1962.06350 | 2 | 2.04E-06 | 0.84  | 3.95   | -     | 797.6   |
| AHQ-4-8, 5813 - 5885                                                                               | K.DATNVGDEGGFAPNILENK.E             | 1962.06350 | 2 | 6.10E-06 | 0.54  | 3.21   | -     | 584.5   |
| AHQ-4-11, 6592                                                                                     | K.DYPVVSIEDPFDQDDWGAWQK.F           | 2511.63977 | 2 | 1.89E-05 | 0.83  | 3.34   | -     | 552.4   |
| AHQ-4-10, 6276 - 6283                                                                              | K.DYPVVSIEDPFDQDDWGAWQK.F           | 2511.63977 | 2 | 4.74E-04 | 0.50  | 3.00   | -     | 441.4   |
| AHQ-4-8, 3821                                                                                      | R.GNPTVEVDLFTSK.G                   | 1407.55065 | 1 | 3.76E-09 | 0.72  | 3.68   | -     | 553.1   |
| AHQ-4-8, 5685 - 5757                                                                               | R.HIADLAGNSEVILPVPFNVINGGSHAGNK.L   | 3013.35654 | 3 | 8.39E-11 | 0.95  | 5.59   | -     | 1160.9  |
| AHQ-4-7, 5979                                                                                      | R.HIADLAGNSEVILPVPFNVINGGSHAGNK.L   | 3013.35654 | 3 | 6.25E-07 | 0.83  | 4.41   | -     | 645.3   |
| AHQ-4-8, 5126                                                                                      | K.LAMQEFM*ILPVGAAFR.E               | 1941.30692 | 2 | 5.90E-04 | 0.90  | 3.85   | -     | 660.6   |
| AHQ-4-8, 6026                                                                                      | K.LAMQEFM*ILPVGAAFR.E               | 1925.30752 | 2 | 1.67E-05 | 0.90  | 4.20   | -     | 868.5   |
| AHQ-4-8, 6673 - 6743                                                                               | K.LAMQEFMILPVGAAFR.E                | 1909.30812 | 2 | 2.20E-05 | 0.93  | 4.57   | -     | 677.4   |
| AHQ-4-8, 5725                                                                                      | K.LAMQEFMILPVGAAFR.E                | 1925.30752 | 2 | 1.74E-08 | 0.95  | 5.84   | -     | 1025.2  |
| AHQ-4-8, 5671 - 5738                                                                               | K.LAMQEFMILPVGAAFR.E                | 1925.30752 | 2 | 1.59E-04 | 0.49  | 2.86   | -     | 389.6   |
| AHQ-4-10, 6225                                                                                     | K.LAMQEFMILPVGAAFR.E                | 1909.30812 | 2 | 2.79E-05 | 0.82  | 3.62   | -     | 578.3   |
| AHQ-4-8, 6769                                                                                      | K.SFIKDYPVVSIEDPFDQDDWGAWQK.F       | 2987.22328 | 2 | 4.29E-06 | 0.74  | 3.49   | -     | 768.3   |
| AHQ-4-8, 6771                                                                                      | K.SFIKDYPVVSIEDPFDQDDWGAWQK.F       | 2987.22328 | 3 | 3.11E-14 | 0.97  | 5.84   | -     | 1930.9  |
| AHQ-4-8, 1951                                                                                      | K.TIAPALYSK.K                       | 900.09769  | 1 | 1.70E-04 | 0.52  | 2.50   | -     | 337.4   |
| AHQ-4-13, 3917                                                                                     | K.VNQIGSVTESLQACK.L                 | 1635.82159 | 2 | 1.43E-04 | 0.79  | 3.26   | -     | 543.5   |
| AHQ-4-8, 3610 - 3626                                                                               | K.VNQIGSVTESLQACK.L                 | 1635.82159 | 2 | 1.43E-04 | 0.86  | 3.73   | -     | 646.5   |
| AHQ-4-8, 3357                                                                                      | K.VNQIGSVTESLQACK.L                 | 1635.82159 | 2 | 4.96E-05 | 0.89  | 3.48   | -     | 863.4   |
| AHQ-4-11, 4690 - 4706                                                                              | R.YISPDQLADLYK.S                    | 1426.59557 | 2 | 3.25E-07 | 0.87  | 3.30   | -     | 739.3   |
| AHQ-4-9, 4313                                                                                      | R.YISPDQLADLYK.S                    | 1426.59557 | 1 | 2.09E-05 | 0.45  | 3.00   | -     | 426.8   |
| AHQ-4-9, 4312 - 4315                                                                               | R.YISPDQLADLYK.S                    | 1426.59557 | 2 | 1.15E-06 | 0.93  | 4.36   | -     | 699.7   |
| AHQ-4-8, 4483                                                                                      | R.YISPDQLADLYK.S                    | 1426.59557 | 1 | 3.42E-06 | 0.83  | 2.95   | -     | 863.2   |
| AHQ-4-7, 4750                                                                                      | R.YISPDQLADLYK.S                    | 1426.59557 | 2 | 2.12E-07 | 0.94  | 3.85   | -     | 1148.7  |
| AHQ-4-8, 4470 - 4471                                                                               | R.YISPDQLADLYK.S                    | 1426.59557 | 2 | 2.81E-06 | 0.93  | 4.26   | -     | 725.3   |
| AHQ-4-10, 4404 - 4408                                                                              | R.YISPDQLADLYK.S                    | 1426.59557 | 2 | 3.09E-07 | 0.94  | 4.05   | -     | 805.9   |
| gi27498267[ref XP_209737.1] similar to tyrosine 3/tryptophan 5-monooxygenase activation protein,   |                                     |            |   | 4.00E-14 | 3.31  | 50.31  | 41.10 | 11063.6 |
| AHQ-4-10, 5563                                                                                     | R.DICNDVLSLEK.F                     | 1420.61093 | 2 | 4.69E-07 | 0.95  | 3.24   | -     | 1651.1  |
| AHQ-4-11, 5852                                                                                     | R.DICNDVLSLEK.F                     | 1420.61093 | 1 | 2.19E-09 | 0.74  | 2.77   | -     | 764.9   |
| AHQ-4-10, 6412 - 6483                                                                              | R.DICNDVLSLEK.F                     | 1420.61093 | 1 | 9.27E-08 | 0.82  | 3.64   | -     | 643.7   |
| AHQ-4-9, 5649 - 5651                                                                               | R.DICNDVLSLEK.F                     | 1420.61093 | 1 | 1.58E-10 | 0.68  | 2.51   | -     | 650.9   |
| AHQ-4-9, 5657                                                                                      | R.DICNDVLSLEK.F                     | 1420.61093 | 2 | 2.21E-04 | 0.92  | 3.71   | -     | 1160.5  |
| AHQ-4-9, 6537 - 6616                                                                               | R.DICNDVLSLEK.F                     | 1420.61093 | 1 | 3.02E-05 | 0.70  | 3.21   | -     | 566.1   |
| AHQ-4-9, 6619                                                                                      | R.DICNDVLSLEK.F                     | 1420.61093 | 2 | 1.07E-06 | 0.97  | 5.06   | -     | 1688.0  |
| AHQ-4-10, 6409 - 6424                                                                              | R.DICNDVLSLEK.F                     | 1420.61093 | 2 | 6.03E-06 | 0.96  | 4.32   | -     | 1748.4  |
| AHQ-4-10, 5567                                                                                     | R.DICNDVLSLEK.F                     | 1420.61093 | 1 | 6.69E-06 | 0.64  | 2.93   | -     | 595.8   |
| AHQ-4-10, 5559                                                                                     | R.DICNDVLSLEK.F                     | 1420.61093 | 1 | 3.18E-10 | 0.64  | 2.39   | -     | 734.9   |
| AHQ-4-11, 5854                                                                                     | R.DICNDVLSLEK.F                     | 1420.61093 | 2 | 4.54E-06 | 0.89  | 3.36   | -     | 883.4   |
| AHQ-4-10, 1657 - 1775                                                                              | R.EKIQTELR.D                        | 1017.16155 | 1 | 3.05E-04 | 0.11  | 1.91   | -     | 90.4    |
| AHQ-4-10, 6531                                                                                     | R.EKIQTELR.DICNDVLSLEK.F            | 2418.74987 | 2 | 2.72E-05 | 0.58  | 3.80   | -     | 363.7   |

|                             |                                                                                                     |            |   |          |       |        |       |          |
|-----------------------------|-----------------------------------------------------------------------------------------------------|------------|---|----------|-------|--------|-------|----------|
| AHQ-4-10, 4781 - 4853       | K.GIVDQSQQAYQEAFEISK.K                                                                              | 2042.19176 | 2 | 2.06E-12 | 0.96  | 4.86   | -     | 1429.1   |
| AHQ-4-10, 4911 - 4973       | K.GIVDQSQQAYQEAFEISK.K                                                                              | 2042.19176 | 2 | 2.00E-10 | 0.97  | 5.78   | -     | 1424.1   |
| AHQ-4-10, 5080 - 5140       | K.GIVDQSQQAYQEAFEISK.K                                                                              | 2042.19176 | 2 | 8.30E-09 | 0.95  | 4.60   | -     | 1294.0   |
| AHQ-4-10, 4439              | K.GIVDQSQQAYQEAFEISK.K                                                                              | 2042.19176 | 2 | 3.47E-08 | 0.96  | 4.83   | -     | 1166.1   |
| AHQ-4-10, 5269 - 5328       | K.GIVDQSQQAYQEAFEISK.K                                                                              | 2042.19176 | 2 | 1.43E-10 | 0.98  | 5.46   | -     | 1750.2   |
| AHQ-4-10, 4720              | K.GIVDQSQQAYQEAFEISK.K                                                                              | 2042.19176 | 3 | 3.46E-08 | 0.98  | 5.98   | -     | 2687.4   |
| AHQ-4-14-, 5041             | K.GIVDQSQQAYQEAFEISK.K                                                                              | 2042.19176 | 2 | 6.21E-10 | 0.98  | 5.96   | -     | 1549.3   |
| AHQ-4-13-, 5100             | K.GIVDQSQQAYQEAFEISK.K                                                                              | 2042.19176 | 2 | 3.40E-08 | 0.98  | 6.21   | -     | 1673.6   |
| AHQ-4-10, 5731 - 5787       | K.GIVDQSQQAYQEAFEISK.K                                                                              | 2042.19176 | 2 | 2.97E-04 | 0.85  | 3.66   | -     | 762.5    |
| AHQ-4-10, 5851 - 5897       | K.GIVDQSQQAYQEAFEISK.K                                                                              | 2042.19176 | 2 | 9.78E-07 | 0.94  | 4.77   | -     | 975.7    |
| AHQ-4-10, 5956 - 6033       | K.GIVDQSQQAYQEAFEISK.K                                                                              | 2042.19176 | 2 | 2.35E-04 | 0.83  | 3.12   | -     | 869.4    |
| AHQ-4-10, 6313              | K.GIVDQSQQAYQEAFEISK.K                                                                              | 2042.19176 | 2 | 3.63E-04 | 0.50  | 2.62   | -     | 390.5    |
| AHQ-4-10, 4343 - 4417       | K.GIVDQSQQAYQEAFEISK.K                                                                              | 2042.19176 | 2 | 1.60E-10 | 0.98  | 5.65   | -     | 1574.2   |
| AHQ-4-9, 4707               | K.GIVDQSQQAYQEAFEISK.K                                                                              | 2042.19176 | 2 | 1.62E-09 | 0.97  | 5.53   | -     | 1549.0   |
| AHQ-4-10, 4663 - 4723       | K.GIVDQSQQAYQEAFEISK.K                                                                              | 2042.19176 | 2 | 5.78E-07 | 0.98  | 5.58   | -     | 1796.4   |
| AHQ-4-11, 4617              | K.GIVDQSQQAYQEAFEISK.K                                                                              | 2042.19176 | 2 | 8.19E-08 | 0.94  | 4.37   | -     | 1018.5   |
| AHQ-4-11, 4996              | K.GIVDQSQQAYQEAFEISK.K                                                                              | 2042.19176 | 2 | 4.81E-07 | 0.97  | 5.68   | -     | 1201.0   |
| AHQ-4-11, 5000              | K.GIVDQSQQAYQEAFEISK.K                                                                              | 2042.19176 | 3 | 1.56E-08 | 0.98  | 5.49   | -     | 2727.8   |
| AHQ-4-9, 4392               | K.GIVDQSQQAYQEAFEISK.K                                                                              | 2042.19176 | 2 | 4.25E-12 | 0.96  | 4.76   | -     | 1235.9   |
| AHQ-4-10, 5124 - 5205       | K.GIVDQSQQAYQEAFEISK.K                                                                              | 2042.19176 | 2 | 1.92E-07 | 0.97  | 5.39   | -     | 1353.6   |
| AHQ-4-12, 5111 - 5190       | K.GIVDQSQQAYQEAFEISK.K                                                                              | 2042.19176 | 2 | 5.04E-08 | 0.97  | 5.59   | -     | 1187.9   |
| AHQ-4-13, 5232              | K.GIVDQSQQAYQEAFEISK.K                                                                              | 2042.19176 | 2 | 7.42E-09 | 0.97  | 5.45   | -     | 1429.5   |
| AHQ-4-14, 6190 - 6196       | K.GIVDQSQQAYQEAFEISK.K                                                                              | 2042.19176 | 2 | 4.00E-14 | 0.98  | 6.20   | -     | 1540.2   |
| AHQ-4-9, 4061               | K.GIVDQSQQAYQEAFEISK.K                                                                              | 2170.36467 | 2 | 4.40E-07 | 0.98  | 5.77   | -     | 2420.1   |
| AHQ-4-10, 4108 - 4175       | K.GIVDQSQQAYQEAFEISK.K                                                                              | 2170.36467 | 2 | 4.29E-07 | 0.97  | 5.54   | -     | 1295.1   |
| gj 11321601 ref NP_002618.1 | phosphofruktokinase, platelet; Phosphofruktokinase, platelet type [Homo sapiens]                    |            |   | 4.33E-14 | 4.65  | 50.30  | 11.50 | 85596.9  |
| AHQ-4-5, 3519               | K.AIGVLTSGGDAQGMNAVR.A                                                                              | 1789.00750 | 2 | 4.33E-14 | 0.98  | 5.90   | -     | 1826.4   |
| AHQ-4-5, 3239 - 3249        | R.DLQSNVHELTK.M                                                                                     | 1413.51529 | 2 | 3.80E-04 | 0.88  | 3.42   | -     | 997.5    |
| AHQ-4-5, 6039 - 6094        | K.EIGWTDVGGWTTGGGSLGTR.K                                                                            | 2120.30735 | 2 | 7.51E-06 | 0.87  | 4.02   | -     | 581.0    |
| AHQ-4-5, 6529               | R.GITNLCVIGDGLTGANLFR.K                                                                             | 2137.40264 | 2 | 1.19E-06 | 0.96  | 5.02   | -     | 949.7    |
| AHQ-4-5, 5347               | R.IIEVDAIMTQAQSHQR.T                                                                                | 1913.18853 | 2 | 4.58E-12 | 0.96  | 5.22   | -     | 1285.5   |
| gj 4507907 ref NP_000543.1  | von Willebrand factor precursor; Coagulation factor VIII VWF (von Willebrand factor) [Homo sapiens] |            |   | 6.88E-14 | 31.74 | 370.40 | 18.90 | 309296.7 |
| AHQ-4-1, 4006               | K.AHLLSLVDVM*QR.E                                                                                   | 1398.65673 | 2 | 6.84E-08 | 0.94  | 3.59   | -     | 1550.3   |
| AHQ-4-1, 5014               | K.AHLLSLVDVMQR.E                                                                                    | 1382.65733 | 2 | 9.05E-06 | 0.95  | 3.82   | -     | 1641.1   |
| AHQ-4-2, 4291               | R.CLPTACTIQLR.G                                                                                     | 1335.57568 | 2 | 5.27E-07 | 0.56  | 2.69   | -     | 457.8    |
| AHQ-4-3, 5164               | R.EGGPSQIGDALGFVAVR.Y                                                                               | 1574.71988 | 2 | 6.93E-04 | 0.34  | 2.72   | -     | 409.4    |
| AHQ-4-1, 5173               | R.EGGPSQIGDALGFVAVR.Y                                                                               | 1574.71988 | 2 | 1.82E-04 | 0.78  | 3.01   | -     | 676.7    |
| AHQ-4-1, 4853               | R.EQAPNLVYM*VTGNPASDEIK.R                                                                           | 2193.42002 | 2 | 3.37E-06 | 0.79  | 3.51   | -     | 347.0    |
| AHQ-4-1, 4186 - 4265        | K.EQDLVILHNGACSPGAR.Q                                                                               | 1968.13770 | 2 | 4.19E-05 | 0.78  | 3.54   | -     | 542.6    |
| AHQ-4-1, 4498               | K.EQDLVILHNGACSPGAR.Q                                                                               | 1968.13770 | 2 | 2.88E-08 | 0.81  | 3.97   | -     | 479.7    |
| AHQ-4-1, 2414 - 2415        | R.GLRPSCPNSQSPVK.V                                                                                  | 1528.71594 | 2 | 7.27E-04 | 0.89  | 3.78   | -     | 910.6    |
| AHQ-4-3, 4919               | K.GLWEQCQLL.K                                                                                       | 1276.48664 | 2 | 1.46E-04 | 0.50  | 3.22   | -     | 370.7    |
| AHQ-4-1, 3126 - 3193        | R.HIVTFDQGNFK.L                                                                                     | 1306.45124 | 2 | 2.86E-04 | 0.82  | 3.08   | -     | 636.4    |
| AHQ-4-2, 2980               | R.HIVTFDQGNFK.L                                                                                     | 1306.45124 | 2 | 4.06E-04 | 0.77  | 3.23   | -     | 490.8    |
| AHQ-4-1, 4002 - 4069        | R.IALLLM*ASQEPQR.M                                                                                  | 1486.76229 | 2 | 4.88E-05 | 0.92  | 3.59   | -     | 1041.1   |
| AHQ-4-1, 5197 - 5270        | R.IEDLPTM*VTLGNPSFLHK.L                                                                             | 1932.23019 | 2 | 4.52E-04 | 0.75  | 3.35   | -     | 638.1    |
| AHQ-4-1, 5409               | R.IEDLPTM*VTLGNPSFLHK.L                                                                             | 1932.23019 | 2 | 2.62E-04 | 0.85  | 3.37   | -     | 854.7    |
| AHQ-4-1, 6362 - 6367        | R.IEDLPTM*VTLGNPSFLHK.L                                                                             | 1916.23079 | 2 | 1.11E-07 | 0.97  | 4.71   | -     | 1583.8   |
| AHQ-4-1, 5905               | R.IEDLPTM*VTLGNPSFLHK.L                                                                             | 1916.23079 | 2 | 2.18E-05 | 0.90  | 3.68   | -     | 789.8    |
| AHQ-4-1, 7058               | R.IGWPNAPILIQDFETLPR.E                                                                              | 2081.40223 | 2 | 1.01E-08 | 0.93  | 4.76   | -     | 804.2    |
| AHQ-4-2, 7450               | R.IGWPNAPILIQDFETLPR.E                                                                              | 2081.40223 | 2 | 7.08E-07 | 0.94  | 4.46   | -     | 872.4    |
| AHQ-4-1, 7181               | R.IGWPNAPILIQDFETLPR.E                                                                              | 2081.40223 | 2 | 3.53E-07 | 0.94  | 4.89   | -     | 659.4    |
| AHQ-4-3, 7447               | R.IGWPNAPILIQDFETLPR.E                                                                              | 2081.40223 | 2 | 3.97E-07 | 0.92  | 4.44   | -     | 625.4    |
| AHQ-4-1, 2678 - 2679        | R.ILAGPAGDSNVVK.L                                                                                   | 1241.41901 | 2 | 9.86E-09 | 0.94  | 3.50   | -     | 1264.9   |
| AHQ-4-1, 2770               | R.ILAGPAGDSNVVK.L                                                                                   | 1241.41901 | 2 | 4.86E-07 | 0.69  | 2.90   | -     | 650.9    |
| AHQ-4-2, 2510               | R.ILAGPAGDSNVVK.L                                                                                   | 1241.41901 | 2 | 2.64E-06 | 0.92  | 3.74   | -     | 1020.6   |
| AHQ-4-3, 2509               | R.ILAGPAGDSNVVK.L                                                                                   | 1241.41901 | 2 | 2.35E-05 | 0.85  | 3.23   | -     | 789.6    |
| AHQ-4-4, 2500               | R.ILAGPAGDSNVVK.L                                                                                   | 1241.41901 | 2 | 1.11E-05 | 0.85  | 3.02   | -     | 890.9    |
| AHQ-4-1, 6446 - 6453        | K.ILEDLQTCVDPEDCPVEVAGR.R                                                                           | 2692.97859 | 2 | 4.50E-05 | 0.76  | 3.67   | -     | 317.5    |
| AHQ-4-1, 3841               | R.ILTSDFVQDCNK.L                                                                                    | 1441.58869 | 2 | 1.92E-04 | 0.87  | 3.28   | -     | 837.7    |
| AHQ-4-2, 3804               | R.ILTSDFVQDCNK.L                                                                                    | 1441.58869 | 2 | 9.42E-08 | 0.82  | 2.98   | -     | 855.5    |
| AHQ-4-1, 4298               | R.LSEAEFVLK.A                                                                                       | 1165.31777 | 2 | 5.46E-07 | 0.92  | 3.86   | -     | 1028.4   |
| AHQ-4-1, 4261               | K.LTGSQSVYVLFQNK.E                                                                                  | 1518.71629 | 2 | 1.03E-05 | 0.93  | 3.44   | -     | 1341.8   |
| AHQ-4-3, 5205 - 5277        | R.NSQWICSNEECPGECVLTGQSHFK.S                                                                        | 2872.07402 | 3 | 1.60E-08 | 0.88  | 4.06   | -     | 753.0    |
| AHQ-4-1, 5593 - 5602        | K.RLPGDIQVPIVGGPNANVQELER.I                                                                         | 2571.91720 | 3 | 6.88E-14 | 0.98  | 8.03   | -     | 2203.4   |
| AHQ-4-2, 5539 - 5544        | K.RLPGDIQVPIVGGPNANVQELER.I                                                                         | 2571.91720 | 3 | 5.33E-10 | 0.98  | 7.06   | -     | 2716.4   |
| AHQ-4-2, 5747               | K.RLPGDIQVPIVGGPNANVQELER.I                                                                         | 2571.91720 | 3 | 3.21E-04 | 0.85  | 3.41   | -     | 1200.1   |
| AHQ-4-3, 5547               | K.RLPGDIQVPIVGGPNANVQELER.I                                                                         | 2571.91720 | 3 | 4.44E-05 | 0.89  | 4.32   | -     | 1003.1   |
| AHQ-4-1, 5186 - 5201        | K.RPGDVWTLDPDQCHTVTCQPDGQTLK.K                                                                      | 3026.35060 | 3 | 4.77E-05 | 0.89  | 4.67   | -     | 774.8    |
| AHQ-4-3, 4189               | R.SFSIIGDFQNGKR.V                                                                                   | 1469.62690 | 2 | 6.48E-10 | 0.82  | 3.31   | -     | 698.0    |
| AHQ-4-1, 4035               | R.SGFTYVHHEGECGR.C                                                                                  | 1774.91285 | 2 | 1.84E-08 | 0.89  | 3.58   | -     | 880.6    |
| AHQ-4-2, 3978               | R.SGFTYVHHEGECGR.C                                                                                  | 1774.91285 | 2 | 2.43E-06 | 0.94  | 3.75   | -     | 1301.8   |
| AHQ-4-1, 3450               | R.SKEFMEEVIQR.M                                                                                     | 1396.59450 | 2 | 7.31E-07 | 0.91  | 3.49   | -     | 983.0    |
| AHQ-4-3, 5083               | K.SVGSQWASPENPCLINECVR.V                                                                            | 2306.51832 | 2 | 2.57E-06 | 0.86  | 3.99   | -     | 465.3    |
| AHQ-4-4, 5040               | K.SVGSQWASPENPCLINECVR.V                                                                            | 2306.51832 | 2 | 4.44E-04 | 0.77  | 3.54   | -     | 324.8    |
| AHQ-4-1, 4983 - 5055        | K.SVGSQWASPENPCLINECVR.V                                                                            | 2306.51832 | 2 | 1.12E-09 | 0.85  | 4.18   | -     | 404.9    |
| AHQ-4-2, 5103               | K.SVGSQWASPENPCLINECVR.V                                                                            | 2306.51832 | 2 | 4.95E-08 | 0.93  | 4.75   | -     | 584.3    |
| AHQ-4-1, 4990               | R.TPDFCAMSPPSLVYNHCEHGCP.R.H                                                                        | 2898.20140 | 3 | 6.03E-07 | 0.78  | 3.76   | -     | 565.1    |
| AHQ-4-1, 6203               | K.TYGLCGICDENGANDFM*LR.D                                                                            | 2209.42291 | 2 | 1.49E-07 | 0.88  | 3.75   | -     | 613.4    |
| AHQ-4-1, 5654 - 5733        | K.TYGLCGICDENGANDFM*LR.D                                                                            | 2225.42231 | 2 | 6.81E-07 | 0.86  | 3.29   | -     | 698.0    |
| AHQ-4-1, 5797 - 5871        | K.TYGLCGICDENGANDFM*LR.D                                                                            | 2225.42231 | 2 | 1.12E-08 | 0.83  | 3.22   | -     | 650.4    |
| AHQ-4-1, 4581               | K.VIVIPVIGIPHANK.Q                                                                                  | 1527.87891 | 2 | 2.21E-07 | 0.81  | 3.18   | -     | 537.5    |
| AHQ-4-2, 2294               | R.VKEEVFIQQR.N                                                                                      | 1276.46658 | 2 | 5.60E-04 | 0.78  | 3.11   | -     | 469.3    |
| AHQ-4-1, 4713               | R.VTVFPIGIGDR.Y                                                                                     | 1174.37426 | 2 | 6.58E-04 | 0.94  | 3.92   | -     | 1074.3   |
| AHQ-4-2, 4662               | R.VTVFPIGIGDR.Y                                                                                     | 1174.37426 | 2 | 2.91E-06 | 0.94  | 3.68   | -     | 1117.4   |
| AHQ-4-1, 3611               | R.WTCPVCTGSSSTR.H                                                                                   | 1575.72645 | 2 | 3.57E-06 | 0.82  | 2.98   | -     | 635.4    |
| AHQ-4-2, 2846               | K.YAGSQVASTSEVLK.Y                                                                                  | 1440.58064 | 2 | 5.28E-08 | 0.94  | 3.69   | -     | 1127.9   |
| AHQ-4-4, 2812               | K.YAGSQVASTSEVLK.Y                                                                                  | 1440.58064 | 2 | 1.50E-05 | 0.94  | 4.13   | -     | 1053.1   |
| AHQ-4-1, 2997               | K.YAGSQVASTSEVLK.Y                                                                                  | 1440.58064 | 1 | 2.79E-04 | 0.11  | 2.28   | -     | 237.6    |
| AHQ-4-3, 2840               | K.YAGSQVASTSEVLK.Y                                                                                  | 1440.58064 | 2 | 5.65E-10 | 0.93  | 3.90   | -     | 927.4    |
| AHQ-4-3, 7437               | R.YFTFSGICQYLLAR.D                                                                                  | 1741.00269 | 2 | 1.36E-08 | 0.97  | 4.61   | -     | 1340.4   |
| AHQ-4-2, 6946               | K.YLFPGEQCVYLVQDYCGSNPQTF.R.I                                                                       | 2874.15305 | 2 | 2.39E-06 | 0.80  | 3.02   | -     | 827.0    |
| AHQ-4-2, 3268               | R.YLSDHSLVSGGDR.E                                                                                   | 1624.73576 | 2 | 1.32E-05 | 0.96  | 4.31   | -     | 1741.4   |
| AHQ-4-1, 3445               | R.YLSDHSLVSGGDR.E                                                                                   | 1624.73576 | 2 | 8.26E-07 | 0.96  | 5.04   | -     | 1444.7   |
| AHQ-4-1, 6111               | K.YTLFQIFS.K.I                                                                                      | 1147.34728 | 2 | 1.70E-07 | 0.94  | 3.04   | -     | 1165.8   |
| gj 11968039 ref NP_071930.1 | hypothetical protein FLJ22405 [Homo sapiens]                                                        |            |   | 7.22E-14 | 0.90  | 10.19  | 4.60  | 46880.2  |
| AHQ-4-14-, 6531             | R.AVAPSPSAGIGLLLEQFAR.G                                                                             | 1842.08850 | 2 | 7.22E-14 | 0.90  | 3.71   | -     | 689.3    |
| gj 21361399 ref NP_055040.2 | protein phosphatase 2 (formerly 2A), regulatory subunit A (PR 65), alp                              |            |   | 1.23E-13 | 2.80  | 30.33  | 10.50 | 65308.3  |
| AHQ-4-6, 3578               | R.AISHEHSPDLAEHFPVLK.R                                                                              | 2214.46551 | 3 | 2.72E-05 | 0.97  | 4.94   | -     | 1786.8   |
| AHQ-4-6, 7212               | K.DNTIEHLLPLFLAQQLKDECEV.R.L                                                                        | 2753.12348 | 3 | 1.23E-13 | 0.97  | 6.57   | -     | 1717.7   |
| AHQ-4-6, 5671 - 5739        | K.SEIIIPMSNLASDEQDSV.R.L                                                                            | 2139.32924 | 2 | 2.07E-05 | 0.85  | 3.84   | -     | 711.0    |
| gj 4501881 ref NP_001091.1  | alpha 1 actin precursor; alpha skeletal muscle actin [Homo sapiens] [MA]                            |            |   | 1.30E-13 | 15.57 | 220.28 | 44.60 | 42050.8  |
| AHQ-4-8, 1438 - 1522        | K.AGFAGDDAPR.A                                                                                      | 977.01283  | 2 | 1.14E-05 | 0.87  | 2.71   | -     | 1226.8   |
| AHQ-4-13, 2038 - 2101       | K.AGFAGDDAPR.A                                                                                      | 977.01283  | 2 | 4.51E-04 | 0.86  | 3.15   | -     | 1009.9   |
| AHQ-4-8, 1716 - 1780        | K.AGFAGDDAPR.A                                                                                      | 977.01283  | 2 | 1.70E-04 | 0.91  | 3.05   | -     | 1378.4   |
| AHQ-4-6, 2859               | R.AVFPISIVGRPR.H                                                                                    | 1199.43018 | 2 | 6.56E-04 | 0.53  | 2.67   | -     | 460.5    |
| AHQ-4-8, 2699               | R.AVFPISIVGRPR.H                                                                                    | 1199.43018 | 2 | 1.17E-04 | 0.59  | 2.67   | -     | 582.7    |



|                        |                                |            |   |          |      |      |   |        |
|------------------------|--------------------------------|------------|---|----------|------|------|---|--------|
| AHQ-4-13, 3233 - 3237  | R.AVFPSIVGRPR.H                | 1199.43018 | 2 | 4.01E-04 | 0.76 | 2.59 | - | 641.8  |
| AHQ-4-8, 2292 - 2363   | R.AVFPSIVGRPR.H                | 1199.43018 | 2 | 5.39E-05 | 0.53 | 2.61 | - | 470.0  |
| AHQ-4-10, 2855         | R.AVFPSIVGRPR.H                | 1199.43018 | 2 | 1.27E-05 | 0.80 | 3.10 | - | 675.7  |
| AHQ-4-13, 3889         | R.DLTDYLM*K.I                  | 1015.16266 | 2 | 4.49E-04 | 0.72 | 2.91 | - | 443.9  |
| AHQ-4-10, 4352         | R.DLTDYLMK.I                   | 999.16326  | 1 | 9.28E-04 | 0.18 | 1.92 | - | 311.2  |
| AHQ-4-11, 4264         | R.DLTDYLMK.I                   | 999.16326  | 1 | 1.60E-04 | 0.67 | 2.38 | - | 723.8  |
| AHQ-4-9, 4293 - 4301   | R.DLTDYLMK.I                   | 999.16326  | 1 | 5.02E-05 | 0.17 | 1.81 | - | 318.5  |
| AHQ-4-11, 4274         | R.DLTDYLMK.I                   | 999.16326  | 2 | 9.52E-04 | 0.86 | 3.16 | - | 463.0  |
| AHQ-4-13, 3896         | R.DLTDYLM*K.I                  | 1015.16266 | 1 | 9.70E-05 | 0.31 | 2.41 | - | 166.4  |
| AHQ-4-8, 6555          | R.DLTDYLMKILTR.G               | 1611.88498 | 2 | 6.89E-07 | 0.95 | 3.92 | - | 1319.7 |
| AHQ-4-14, 6130         | K.DLYANNVMSGGTTMYPGIADR.M      | 2247.49444 | 2 | 5.33E-04 | 0.27 | 2.58 | - | 354.1  |
| AHQ-4-8, 1591 - 1671   | K.DSYVGDQAQSK.R                | 1199.20634 | 2 | 8.63E-05 | 0.87 | 3.01 | - | 634.4  |
| AHQ-4-8, 1432 - 1484   | K.DSYVGDQAQSK.R                | 1199.20634 | 1 | 3.08E-05 | 0.79 | 3.85 | - | 475.4  |
| AHQ-4-12, 1653 - 1709  | K.DSYVGDQAQSK.R                | 1199.20634 | 2 | 3.68E-06 | 0.79 | 3.50 | - | 701.8  |
| AHQ-4-13, 1843         | K.DSYVGDQAQSK.R                | 1199.20634 | 1 | 6.98E-06 | 0.47 | 2.49 | - | 407.9  |
| AHQ-4-5, 2702          | K.EITALAPSTMK.I                | 1162.38206 | 1 | 7.26E-04 | 0.47 | 2.38 | - | 363.2  |
| AHQ-4-10, 2624 - 2689  | K.EITALAPSTMK.I                | 1162.38206 | 2 | 1.87E-06 | 0.79 | 3.17 | - | 509.4  |
| AHQ-4-4, 2319          | K.EITALAPSTM*K.I               | 1178.38146 | 2 | 7.17E-05 | 0.55 | 2.67 | - | 561.5  |
| AHQ-4-13, 3037 - 3062  | K.EITALAPSTMK.I                | 1162.38206 | 2 | 6.06E-04 | 0.73 | 2.79 | - | 516.2  |
| AHQ-4-8, 1961 - 2028   | K.EITALAPSTM*K.I               | 1178.38146 | 1 | 3.72E-04 | 0.08 | 1.93 | - | 95.5   |
| AHQ-4-14, 3109 - 3165  | K.EITALAPSTM*K.I               | 1178.38146 | 2 | 2.72E-04 | 0.60 | 2.74 | - | 474.8  |
| AHQ-4-14, 3757 - 3948  | K.EITALAPSTMK.I                | 1162.38206 | 1 | 4.61E-04 | 0.41 | 2.41 | - | 244.6  |
| AHQ-4-7, 2598          | K.EITALAPSTMK.I                | 1162.38206 | 1 | 3.11E-04 | 0.21 | 2.18 | - | 288.5  |
| AHQ-4-14, 3924         | K.EITALAPSTMK.I                | 1162.38206 | 2 | 4.06E-04 | 0.64 | 2.52 | - | 431.5  |
| AHQ-4-8, 2329 - 2529   | K.EITALAPSTMK.I                | 1162.38206 | 1 | 1.49E-04 | 0.53 | 2.74 | - | 351.2  |
| AHQ-4-8, 2327 - 2403   | K.EITALAPSTMK.I                | 1162.38206 | 2 | 3.08E-04 | 0.81 | 3.02 | - | 587.7  |
| AHQ-4-13-, 2301 - 2380 | K.EITALAPSTM*K.I               | 1178.38146 | 2 | 2.65E-04 | 0.87 | 2.94 | - | 824.7  |
| AHQ-4-14-, 2763 - 2841 | K.EITALAPSTM*K.I               | 1162.38206 | 1 | 4.49E-05 | 0.62 | 2.98 | - | 237.0  |
| AHQ-4-11, 2737 - 2810  | K.EITALAPSTMK.I                | 1162.38206 | 1 | 8.80E-09 | 0.46 | 2.61 | - | 346.6  |
| AHQ-4-14-, 2837 - 2838 | K.EITALAPSTMK.I                | 1162.38206 | 2 | 4.78E-04 | 0.80 | 3.34 | - | 441.6  |
| AHQ-4-8, 1892 - 1956   | K.EITALAPSTM*K.I               | 1178.38146 | 2 | 8.11E-04 | 0.78 | 2.93 | - | 607.7  |
| AHQ-4-8, 2019 - 2083   | K.EITALAPSTM*K.I               | 1178.38146 | 2 | 1.99E-04 | 0.84 | 3.26 | - | 751.2  |
| AHQ-4-8, 7194 - 7267   | K.EKLCYVALDFENEM*ATAASSSSLEK.S | 2812.07683 | 2 | 4.81E-07 | 0.74 | 3.57 | - | 470.4  |
| AHQ-4-8, 7059          | K.EKLCYVALDFENEM*ATAASSSSLEK.S | 2812.07683 | 3 | 1.87E-05 | 0.61 | 3.07 | - | 622.0  |
| AHQ-4-9, 1529 - 1603   | R.HQGVVMVGMGQK.D               | 1172.40691 | 1 | 8.19E-04 | 0.69 | 2.32 | - | 699.7  |
| AHQ-4-8, 2271 - 2307   | R.HQGVVMVGMGQK.D               | 2352.59065 | 3 | 8.31E-05 | 0.92 | 3.82 | - | 1203.9 |
| AHQ-4-8, 1960          | K.IKIAPPER.K                   | 1037.28073 | 2 | 5.64E-04 | 0.59 | 2.56 | - | 509.6  |
| AHQ-4-13, 3153         | K.IWHHTFYNELR.V                | 1516.68695 | 2 | 2.69E-06 | 0.87 | 3.57 | - | 1052.5 |
| AHQ-4-8, 2399 - 2459   | K.IWHHTFYNELR.V                | 1516.68695 | 2 | 6.08E-05 | 0.86 | 3.32 | - | 1072.5 |
| AHQ-4-8, 2426          | K.IWHHTFYNELR.V                | 1516.68695 | 3 | 1.93E-06 | 0.95 | 4.89 | - | 1969.4 |
| AHQ-4-8, 2665 - 2733   | K.IWHHTFYNELR.V                | 1516.68695 | 2 | 1.36E-05 | 0.65 | 3.18 | - | 430.9  |
| AHQ-4-3, 2905 - 2976   | K.IWHHTFYNELR.V                | 1516.68695 | 2 | 2.55E-04 | 0.67 | 2.71 | - | 717.0  |
| AHQ-4-13-, 3038 - 3041 | K.IWHHTFYNELR.V                | 1516.68695 | 2 | 3.45E-06 | 0.81 | 3.27 | - | 826.4  |
| AHQ-4-8, 2319 - 2389   | K.IWHHTFYNELR.V                | 1516.68695 | 3 | 2.37E-07 | 0.95 | 4.73 | - | 1254.5 |
| AHQ-4-12, 2850         | K.IWHHTFYNELR.V                | 1516.68695 | 3 | 5.36E-05 | 0.92 | 4.84 | - | 1155.2 |
| AHQ-4-12, 2849 - 2918  | K.IWHHTFYNELR.V                | 1516.68695 | 2 | 1.87E-07 | 0.83 | 3.23 | - | 965.8  |
| AHQ-4-11, 2806         | K.IWHHTFYNELR.V                | 1516.68695 | 3 | 3.17E-04 | 0.95 | 4.48 | - | 1604.1 |
| AHQ-4-6, 2666          | K.IWHHTFYNELR.V                | 1516.68695 | 2 | 1.08E-08 | 0.81 | 3.10 | - | 947.2  |
| AHQ-4-9, 2733 - 2741   | K.IWHHTFYNELR.V                | 1516.68695 | 2 | 2.10E-04 | 0.86 | 3.01 | - | 929.4  |
| AHQ-4-9, 2465          | K.IWHHTFYNELR.V                | 1516.68695 | 3 | 1.05E-04 | 0.90 | 3.88 | - | 1392.9 |
| AHQ-4-9, 2439 - 2495   | K.IWHHTFYNELR.V                | 1516.68695 | 2 | 1.18E-05 | 0.88 | 3.23 | - | 702.4  |
| AHQ-4-8, 2735          | K.IWHHTFYNELR.V                | 1516.68695 | 3 | 4.56E-06 | 0.94 | 4.12 | - | 1681.8 |
| AHQ-4-1, 3187          | K.IWHHTFYNELR.V                | 1516.68695 | 2 | 4.69E-04 | 0.76 | 2.76 | - | 628.8  |
| AHQ-4-10, 4777 - 4788  | R.LDLAGRDLTDVLMK.I             | 1624.88375 | 2 | 5.55E-04 | 0.86 | 3.42 | - | 955.0  |
| AHQ-4-8, 4453          | R.LDLAGRDLTDVLMK.I             | 1640.88315 | 2 | 9.99E-04 | 0.68 | 3.25 | - | 476.3  |
| AHQ-4-8, 4798 - 4870   | K.SYELPDGQVITIGNER.F           | 1791.93998 | 2 | 3.30E-07 | 0.96 | 4.93 | - | 1225.4 |
| AHQ-4-8, 4937 - 5011   | K.SYELPDGQVITIGNER.F           | 1791.93998 | 2 | 1.60E-06 | 0.96 | 4.55 | - | 1321.8 |
| AHQ-4-13-, 4869 - 4870 | K.SYELPDGQVITIGNER.F           | 1791.93998 | 2 | 5.67E-13 | 0.97 | 5.55 | - | 1014.3 |
| AHQ-4-13-, 4577        | K.SYELPDGQVITIGNER.F           | 1791.93998 | 2 | 9.66E-06 | 0.88 | 3.14 | - | 846.0  |
| AHQ-4-6, 5127 - 5135   | K.SYELPDGQVITIGNER.F           | 1791.93998 | 2 | 4.81E-05 | 0.88 | 3.69 | - | 884.3  |
| AHQ-4-6, 4823 - 4846   | K.SYELPDGQVITIGNER.F           | 1791.93998 | 2 | 2.10E-05 | 0.89 | 3.77 | - | 853.7  |
| AHQ-4-6, 4450 - 4458   | K.SYELPDGQVITIGNER.F           | 1791.93998 | 2 | 4.84E-08 | 0.92 | 3.63 | - | 814.0  |
| AHQ-4-8, 4550 - 4567   | K.SYELPDGQVITIGNER.F           | 1791.93998 | 3 | 5.07E-09 | 0.96 | 5.07 | - | 1528.0 |
| AHQ-4-8, 4545 - 4609   | K.SYELPDGQVITIGNER.F           | 1791.93998 | 2 | 5.15E-13 | 0.97 | 4.97 | - | 1196.9 |
| AHQ-4-13-, 5010 - 5080 | K.SYELPDGQVITIGNER.F           | 1791.93998 | 2 | 8.00E-13 | 0.97 | 5.17 | - | 1246.7 |
| AHQ-4-8, 4407 - 4477   | K.SYELPDGQVITIGNER.F           | 1791.93998 | 2 | 9.69E-08 | 0.96 | 4.78 | - | 1163.1 |
| AHQ-4-1, 4667 - 4671   | K.SYELPDGQVITIGNER.F           | 1791.93998 | 2 | 1.28E-05 | 0.80 | 3.57 | - | 540.5  |
| AHQ-4-9, 3895 - 3959   | K.SYELPDGQVITIGNER.F           | 1791.93998 | 2 | 1.79E-05 | 0.71 | 2.90 | - | 652.1  |
| AHQ-4-9, 4224 - 4296   | K.SYELPDGQVITIGNER.F           | 1791.93998 | 2 | 1.76E-04 | 0.78 | 2.71 | - | 877.7  |
| AHQ-4-8, 4253 - 4337   | K.SYELPDGQVITIGNER.F           | 1791.93998 | 2 | 6.37E-12 | 0.97 | 5.58 | - | 899.0  |
| AHQ-4-7, 4807          | K.SYELPDGQVITIGNER.F           | 1791.93998 | 2 | 1.28E-06 | 0.94 | 4.52 | - | 788.2  |
| AHQ-4-9, 4539 - 4619   | K.SYELPDGQVITIGNER.F           | 1791.93998 | 2 | 5.22E-04 | 0.82 | 3.20 | - | 648.1  |
| AHQ-4-5, 4905          | K.SYELPDGQVITIGNER.F           | 1791.93998 | 2 | 9.75E-11 | 0.94 | 4.91 | - | 837.5  |
| AHQ-4-5, 4549 - 4551   | K.SYELPDGQVITIGNER.F           | 1791.93998 | 2 | 1.37E-09 | 0.88 | 3.39 | - | 800.4  |
| AHQ-4-10, 4027 - 4107  | K.SYELPDGQVITIGNER.F           | 1791.93998 | 2 | 1.02E-09 | 0.93 | 4.15 | - | 820.0  |
| AHQ-4-10, 4169 - 4240  | K.SYELPDGQVITIGNER.F           | 1791.93998 | 2 | 2.92E-12 | 0.93 | 3.80 | - | 948.4  |
| AHQ-4-4, 5404          | K.SYELPDGQVITIGNER.F           | 1791.93998 | 2 | 4.57E-04 | 0.72 | 2.84 | - | 491.0  |
| AHQ-4-10, 4427 - 4461  | K.SYELPDGQVITIGNER.F           | 1791.93998 | 2 | 6.86E-08 | 0.95 | 4.70 | - | 930.8  |
| AHQ-4-10, 4604 - 4668  | K.SYELPDGQVITIGNER.F           | 1791.93998 | 2 | 2.03E-10 | 0.95 | 4.43 | - | 1049.9 |
| AHQ-4-13-, 4469        | K.SYELPDGQVITIGNER.F           | 1791.93998 | 2 | 1.30E-13 | 0.93 | 3.97 | - | 1112.5 |
| AHQ-4-4, 5056          | K.SYELPDGQVITIGNER.F           | 1791.93998 | 2 | 4.26E-04 | 0.45 | 2.52 | - | 472.5  |
| AHQ-4-1, 4758          | K.SYELPDGQVITIGNER.F           | 1791.93998 | 2 | 9.27E-09 | 0.90 | 3.92 | - | 593.4  |
| AHQ-4-4, 4711          | K.SYELPDGQVITIGNER.F           | 1791.93998 | 2 | 1.61E-08 | 0.89 | 3.78 | - | 761.7  |
| AHQ-4-3, 5131          | K.SYELPDGQVITIGNER.F           | 1791.93998 | 2 | 8.17E-05 | 0.95 | 4.64 | - | 911.1  |
| AHQ-4-11, 4297 - 4374  | K.SYELPDGQVITIGNER.F           | 1791.93998 | 2 | 1.88E-08 | 0.95 | 4.59 | - | 868.2  |
| AHQ-4-11, 4524         | K.SYELPDGQVITIGNER.F           | 1791.93998 | 2 | 1.05E-10 | 0.94 | 3.70 | - | 1100.0 |
| AHQ-4-11, 4685 - 4748  | K.SYELPDGQVITIGNER.F           | 1791.93998 | 2 | 9.22E-04 | 0.92 | 4.25 | - | 823.1  |
| AHQ-4-11, 4836 - 4893  | K.SYELPDGQVITIGNER.F           | 1791.93998 | 2 | 3.36E-05 | 0.95 | 3.82 | - | 1077.3 |
| AHQ-4-11, 4952 - 4958  | K.SYELPDGQVITIGNER.F           | 1791.93998 | 2 | 2.79E-10 | 0.95 | 4.83 | - | 917.6  |
| AHQ-4-3, 4747          | K.SYELPDGQVITIGNER.F           | 1791.93998 | 2 | 2.87E-05 | 0.87 | 3.47 | - | 646.1  |
| AHQ-4-8, 4654 - 4729   | K.SYELPDGQVITIGNER.F           | 1791.93998 | 2 | 6.35E-07 | 0.90 | 3.71 | - | 885.5  |
| AHQ-4-8, 4114 - 4185   | K.SYELPDGQVITIGNER.F           | 1791.93998 | 2 | 1.73E-11 | 0.86 | 3.73 | - | 677.6  |
| AHQ-4-14, 6224         | K.SYELPDGQVITIGNER.F           | 1791.93998 | 2 | 2.99E-04 | 0.85 | 3.02 | - | 791.6  |
| AHQ-4-1, 4857          | K.SYELPDGQVITIGNER.F           | 1791.93998 | 2 | 1.17E-07 | 0.94 | 3.63 | - | 1144.9 |
| AHQ-4-14, 6096         | K.SYELPDGQVITIGNER.F           | 1791.93998 | 2 | 7.73E-08 | 0.93 | 3.92 | - | 956.8  |
| AHQ-4-14, 6045 - 6117  | K.SYELPDGQVITIGNER.F           | 1791.93998 | 2 | 1.57E-05 | 0.81 | 3.50 | - | 843.6  |
| AHQ-4-12, 4530 - 4537  | K.SYELPDGQVITIGNER.F           | 1791.93998 | 2 | 1.15E-10 | 0.96 | 4.81 | - | 1136.0 |
| AHQ-4-12, 4663         | K.SYELPDGQVITIGNER.F           | 1791.93998 | 2 | 2.12E-05 | 0.81 | 3.29 | - | 616.5  |
| AHQ-4-12, 4898 - 4965  | K.SYELPDGQVITIGNER.F           | 1791.93998 | 2 | 6.08E-12 | 0.96 | 5.02 | - | 1250.7 |
| AHQ-4-12, 5079 - 5143  | K.SYELPDGQVITIGNER.F           | 1791.93998 | 2 | 1.78E-09 | 0.96 | 4.75 | - | 1127.2 |
| AHQ-4-1, 5137          | K.SYELPDGQVITIGNER.F           | 1791.93998 | 2 | 1.73E-06 | 0.91 | 3.65 | - | 867.0  |
| AHQ-4-1, 5310 - 5374   | K.SYELPDGQVITIGNER.F           | 1791.93998 | 2 | 1.39E-10 | 0.95 | 4.13 | - | 1377.6 |
| AHQ-4-2, 5352          | K.SYELPDGQVITIGNER.F           | 1791.93998 | 2 | 1.01E-04 | 0.56 | 2.94 | - | 283.7  |
| AHQ-4-7, 4683          | K.SYELPDGQVITIGNER.F           | 1791.93998 | 2 | 1.62E-09 | 0.91 | 3.64 | - | 777.2  |
| AHQ-4-2, 5152          | K.SYELPDGQVITIGNER.F           | 1791.93998 | 2 | 4.55E-08 | 0.89 | 3.67 | - | 666.9  |
| AHQ-4-2, 4904          | K.SYELPDGQVITIGNER.F           | 1791.93998 | 2 | 7.36E-06 | 0.76 | 2.91 | - | 496.5  |
| AHQ-4-2, 4771          | K.SYELPDGQVITIGNER.F           | 1791.93998 | 2 | 1.21E-10 | 0.94 | 4.11 | - | 1070.0 |

|                             |                                                                         |            |   |          |       |        |       |          |
|-----------------------------|-------------------------------------------------------------------------|------------|---|----------|-------|--------|-------|----------|
| AHQ-4-13, 4594 - 4614       | K.SYELPDGQVITIGNER.F                                                    | 1791.93998 | 2 | 7.58E-11 | 0.93  | 3.72   | -     | 1004.1   |
| AHQ-4-13, 4710              | K.SYELPDGQVITIGNER.F                                                    | 1791.93998 | 2 | 4.34E-11 | 0.93  | 3.89   | -     | 851.2    |
| AHQ-4-13, 4988              | K.SYELPDGQVITIGNER.F                                                    | 1791.93998 | 2 | 3.32E-09 | 0.95  | 4.14   | -     | 1250.4   |
| AHQ-4-13, 5141 - 5204       | K.SYELPDGQVITIGNER.F                                                    | 1791.93998 | 2 | 3.76E-11 | 0.95  | 4.18   | -     | 1119.8   |
| AHQ-4-7, 3525               | R.VAPEEHPHTLLTEAPLNPK.A                                                 | 1957.21627 | 2 | 5.20E-05 | 0.85  | 3.36   | -     | 856.6    |
| AHQ-4-3, 3948               | R.VAPEEHPHTLLTEAPLNPK.A                                                 | 1957.21627 | 2 | 4.92E-04 | 0.77  | 3.60   | -     | 397.4    |
| AHQ-4-12, 3766              | R.VAPEEHPHTLLTEAPLNPK.A                                                 | 1957.21627 | 2 | 5.78E-05 | 0.92  | 4.12   | -     | 740.4    |
| AHQ-4-13-, 3920             | R.VAPEEHPHTLLTEAPLNPK.A                                                 | 1957.21627 | 2 | 2.41E-05 | 0.90  | 3.94   | -     | 764.3    |
| AHQ-4-12, 3970 - 4043       | K.YPIEHGIITNWDDM.EK.I                                                   | 1978.17114 | 2 | 8.62E-06 | 0.76  | 3.29   | -     | 461.3    |
| AHQ-4-12, 4302 - 4369       | K.YPIEHGIITNWDDM.EK.I                                                   | 1962.17174 | 2 | 1.23E-04 | 0.87  | 4.05   | -     | 703.9    |
| AHQ-4-12, 4489 - 4563       | K.YPIEHGIITNWDDM.EK.I                                                   | 1962.17174 | 2 | 2.56E-04 | 0.89  | 4.27   | -     | 621.4    |
| AHQ-4-8, 4243               | K.YPIEHGIITNWDDM.EK.I                                                   | 1962.17174 | 2 | 1.39E-04 | 0.71  | 3.30   | -     | 458.1    |
| AHQ-4-9, 4465               | K.YPIEHGIITNWDDM.EK.I                                                   | 1962.17174 | 2 | 7.56E-06 | 0.86  | 3.79   | -     | 686.4    |
| AHQ-4-2, 4663               | K.YPIEHGIITNWDDM.EK.I                                                   | 1962.17174 | 2 | 7.11E-04 | 0.84  | 3.59   | -     | 657.5    |
| AHQ-4-13-, 4380 - 4445      | K.YPIEHGIITNWDDM.EK.I                                                   | 1962.17174 | 2 | 1.31E-05 | 0.83  | 3.56   | -     | 711.1    |
| AHQ-4-9, 3887               | K.YPIEHGIITNWDDM.EK.I                                                   | 1962.17174 | 2 | 1.05E-04 | 0.88  | 3.78   | -     | 798.0    |
| AHQ-4-8, 4661 - 4662        | K.YPIEHGIITNWDDM.EK.I                                                   | 1962.17174 | 2 | 6.02E-09 | 0.81  | 4.11   | -     | 544.8    |
| AHQ-4-8, 4670               | K.YPIEHGIITNWDDM.EK.I                                                   | 1962.17174 | 3 | 8.41E-05 | 0.85  | 3.95   | -     | 1308.9   |
| AHQ-4-8, 4237 - 4309        | K.YPIEHGIITNWDDM.EK.I                                                   | 1962.17174 | 2 | 3.36E-05 | 0.92  | 4.37   | -     | 764.0    |
| AHQ-4-8, 6437               | K.YPIEHGIITNWDDM.EKIWHHTFYNELR.V                                        | 3459.83609 | 3 | 5.56E-05 | 0.79  | 3.98   | -     | 443.5    |
| AHQ-4-8, 5094               | K.YPIEHGIITNWDDM.EKIWHHTFYNELR.V                                        | 3475.83549 | 3 | 2.27E-04 | 0.91  | 5.29   | -     | 695.8    |
| gj 4758012 ref NP_004850.1  | clathrin heavy chain; clathrin, heavy polypeptide-like 2 [Homo sapiens] |            |   | 1.98E-13 | 16.40 | 190.38 | 16.80 | 191612.6 |
| AHQ-4-4, 7479               | K.AFM*ADLPNELIELLEK.I                                                   | 1948.26956 | 2 | 6.13E-05 | 0.92  | 4.32   | -     | 543.9    |
| AHQ-4-1, 7217               | K.AFM*ADLPNELIELLEK.I                                                   | 1964.26896 | 2 | 2.75E-04 | 0.90  | 4.50   | -     | 507.5    |
| AHQ-4-3, 7539               | K.AFM*ADLPNELIELLEK.I                                                   | 1948.26956 | 2 | 7.69E-04 | 0.92  | 4.60   | -     | 513.3    |
| AHQ-4-3, 7423 - 7495        | K.AFM*ADLPNELIELLEK.I                                                   | 1964.26896 | 2 | 2.21E-06 | 0.84  | 4.10   | -     | 436.7    |
| AHQ-4-3, 1692               | R.AHIAQLCEKA                                                            | 1071.23250 | 1 | 1.89E-04 | 0.17  | 1.95   | -     | 271.6    |
| AHQ-4-4, 4448               | R.ALEHFDLYDIK.R                                                         | 1465.63179 | 2 | 2.39E-04 | 0.81  | 2.58   | -     | 994.3    |
| AHQ-4-1, 7253 - 7333        | R.FQSVPAQGGTSPLLQYFGILLDQGLNK.Y                                         | 3189.60926 | 3 | 2.36E-06 | 0.89  | 4.58   | -     | 652.0    |
| AHQ-4-3, 4944               | R.GQFSTDELVAEVEK.R                                                      | 1552.66462 | 2 | 3.24E-08 | 0.92  | 3.60   | -     | 1180.3   |
| AHQ-4-4, 4787               | R.GQFSTDELVAEVEK.R                                                      | 1708.85097 | 2 | 7.22E-10 | 0.92  | 3.87   | -     | 998.9    |
| AHQ-4-5, 4523               | R.GQFSTDELVAEVEK.R                                                      | 1708.85097 | 2 | 1.88E-07 | 0.93  | 3.44   | -     | 1397.1   |
| AHQ-4-3, 4808               | R.GQFSTDELVAEVEK.R                                                      | 1708.85097 | 2 | 2.06E-10 | 0.83  | 3.69   | -     | 659.6    |
| AHQ-4-3, 2011               | R.IHEGCEEPATHNALAK.I                                                    | 1778.92458 | 2 | 3.10E-08 | 0.88  | 4.08   | -     | 422.5    |
| AHQ-4-3, 3569               | K.IVLDNSVFSHR.N                                                         | 1416.56400 | 2 | 2.29E-06 | 0.94  | 3.49   | -     | 1614.4   |
| AHQ-4-3, 7231               | R.KFDVNTSAVQVLIIEHIGNLDR.A                                              | 2369.66218 | 3 | 1.98E-13 | 0.99  | 7.62   | -     | 3337.8   |
| AHQ-4-3, 3511               | R.KFNALFAQGNVSEAAK.V                                                    | 1759.94281 | 2 | 4.03E-05 | 0.98  | 5.61   | -     | 1545.1   |
| AHQ-4-1, 4655               | R.LASTLVHLGEGYQAADVGDAR.K                                               | 1972.19103 | 2 | 2.12E-08 | 0.94  | 4.56   | -     | 830.8    |
| AHQ-4-3, 4556               | R.LASTLVHLGEGYQAADVGDAR.K                                               | 1972.19103 | 2 | 2.30E-06 | 0.95  | 4.59   | -     | 1041.9   |
| AHQ-4-3, 7284               | R.LPVPVIGLLDVCSDVIK.N                                                   | 2043.36744 | 2 | 2.38E-04 | 0.72  | 3.15   | -     | 728.7    |
| AHQ-4-3, 6423               | R.NLQNLLITAIK.A                                                         | 1354.66353 | 2 | 5.52E-05 | 0.97  | 5.12   | -     | 1956.1   |
| AHQ-4-3, 2360               | K.RDPHLACVAYER.G                                                        | 1488.65351 | 2 | 9.86E-04 | 0.92  | 3.80   | -     | 878.1    |
| AHQ-4-2, 7100               | R.RPLIDQVQVQTALSETQDPPEEVSVTVK.A                                        | 2883.20103 | 3 | 1.70E-04 | 0.94  | 4.88   | -     | 1195.6   |
| AHQ-4-3, 7060               | R.RPLIDQVQVQTALSETQDPPEEVSVTVK.A                                        | 2883.20103 | 3 | 1.31E-05 | 0.95  | 5.67   | -     | 1104.9   |
| AHQ-4-1, 5138               | R.TSIDAYDNFNDISLAQR.L                                                   | 1944.04818 | 2 | 6.35E-06 | 0.96  | 4.15   | -     | 1619.2   |
| AHQ-4-5, 7017               | K.VGYTPDWIFLLR.N                                                        | 1480.73443 | 2 | 2.19E-09 | 0.81  | 3.26   | -     | 394.8    |
| AHQ-4-3, 7187               | K.VGYTPDWIFLLR.N                                                        | 1480.73443 | 2 | 2.39E-09 | 0.82  | 3.51   | -     | 379.7    |
| AHQ-4-3, 4997               | K.WLKEDKLECEGLDLVK.S                                                    | 2193.45974 | 2 | 1.92E-05 | 0.96  | 4.88   | -     | 1606.4   |
| gj 13562114 ref NP_110400.1 | beta tubulin 1, class VI [Homo sapiens]                                 |            |   | 2.11E-13 | 20.76 | 230.39 | 50.60 | 50326.6  |
| AHQ-4-1, 6570 - 6579        | R.ALSVAELTQQMFDFAR.N                                                    | 1680.90740 | 2 | 1.82E-06 | 0.96  | 5.13   | -     | 1333.3   |
| AHQ-4-14-, 6046 - 6109      | R.ALSVAELTQQMFDFAR.N                                                    | 1680.90740 | 2 | 7.63E-04 | 0.84  | 3.79   | -     | 803.6    |
| AHQ-4-2, 6595               | R.ALSVAELTQQMFDFAR.N                                                    | 1680.90740 | 2 | 1.48E-04 | 0.85  | 2.91   | -     | 1184.5   |
| AHQ-4-13, 6258 - 6320       | R.ALSVAELTQQMFDFAR.N                                                    | 1680.90740 | 2 | 2.47E-04 | 0.91  | 3.50   | -     | 1299.6   |
| AHQ-4-11, 5992 - 6018       | R.ALSVAELTQQMFDFAR.N                                                    | 1680.90740 | 2 | 2.98E-06 | 0.96  | 5.02   | -     | 1297.7   |
| AHQ-4-10, 4229              | R.ALSVAELTQQMFDFAR.N                                                    | 1696.90680 | 2 | 1.52E-04 | 0.93  | 3.86   | -     | 1327.2   |
| AHQ-4-7, 6219               | R.ALSVAELTQQMFDFAR.N                                                    | 1680.90740 | 2 | 3.25E-04 | 0.94  | 3.77   | -     | 1472.0   |
| AHQ-4-7, 6217 - 6289        | R.ALSVAELTQQMFDFAR.N                                                    | 1680.90740 | 2 | 6.19E-04 | 0.97  | 4.75   | -     | 2070.2   |
| AHQ-4-7, 4777               | R.AVLVDLEPGTMDISR.S                                                     | 1616.86162 | 2 | 1.72E-07 | 0.92  | 4.27   | -     | 755.3    |
| AHQ-4-14, 6136 - 6172       | R.AVLVDLEPGTMDISR.S                                                     | 1616.86162 | 2 | 5.55E-04 | 0.90  | 4.33   | -     | 508.3    |
| AHQ-4-12, 4161 - 4237       | R.AVLVDLEPGTMDISR.S                                                     | 1632.86102 | 2 | 6.35E-06 | 0.87  | 4.00   | -     | 520.3    |
| AHQ-4-7, 4674 - 4745        | R.AVLVDLEPGTMDISR.S                                                     | 1616.86162 | 2 | 3.71E-07 | 0.90  | 3.90   | -     | 638.5    |
| AHQ-4-7, 3739 - 3819        | R.EIVHIQCGCGNQIGAK.F                                                    | 1867.11965 | 2 | 1.97E-05 | 0.92  | 4.49   | -     | 838.6    |
| AHQ-4-7, 3565 - 3633        | R.EIVHIQCGCGNQIGAK.F                                                    | 1867.11965 | 2 | 1.78E-12 | 0.94  | 4.90   | -     | 745.8    |
| AHQ-4-14-, 3709 - 3711      | R.EIVHIQCGCGNQIGAK.F                                                    | 1867.11965 | 3 | 9.58E-04 | 0.89  | 3.40   | -     | 1694.9   |
| AHQ-4-14, 4962              | R.EIVHIQCGCGNQIGAK.F                                                    | 1867.11965 | 2 | 4.93E-07 | 0.85  | 3.98   | -     | 417.7    |
| AHQ-4-7, 3835               | R.EIVHIQCGCGNQIGAK.F                                                    | 1867.11965 | 2 | 3.29E-04 | 0.72  | 3.21   | -     | 496.1    |
| AHQ-4-13, 4086              | R.EIVHIQCGCGNQIGAK.F                                                    | 1867.11965 | 2 | 2.10E-07 | 0.92  | 4.28   | -     | 666.4    |
| AHQ-4-7, 3002 - 3003        | K.EVDQQLLSVQTR.N                                                        | 1416.56231 | 2 | 1.81E-04 | 0.85  | 3.96   | -     | 693.7    |
| AHQ-4-7, 5139               | K.FWEMIGEHEHGIDLAGSDR.G                                                 | 2063.23616 | 2 | 1.59E-10 | 0.98  | 5.67   | -     | 2183.6   |
| AHQ-4-14, 5897 - 5902       | K.FWEMIGEHEHGIDLAGSDR.G                                                 | 2079.23556 | 2 | 5.70E-05 | 0.96  | 4.57   | -     | 1108.7   |
| AHQ-4-7, 5287 - 5342        | K.FWEMIGEHEHGIDLAGSDR.G                                                 | 2063.23616 | 2 | 4.85E-05 | 0.90  | 3.98   | -     | 975.0    |
| AHQ-4-14-, 5119             | K.FWEMIGEHEHGIDLAGSDR.G                                                 | 2063.23616 | 3 | 1.95E-09 | 0.95  | 4.34   | -     | 1439.7   |
| AHQ-4-12, 5231              | K.FWEMIGEHEHGIDLAGSDR.G                                                 | 2063.23616 | 2 | 2.11E-13 | 0.98  | 6.56   | -     | 2135.2   |
| AHQ-4-14-, 5111 - 5129      | K.FWEMIGEHEHGIDLAGSDR.G                                                 | 2063.23616 | 2 | 8.42E-09 | 0.99  | 6.99   | -     | 2372.4   |
| AHQ-4-13-, 5181             | K.FWEMIGEHEHGIDLAGSDR.G                                                 | 2063.23616 | 2 | 2.13E-08 | 0.97  | 5.51   | -     | 1355.9   |
| AHQ-4-13, 5292              | K.FWEMIGEHEHGIDLAGSDR.G                                                 | 2063.23616 | 2 | 1.27E-07 | 0.98  | 6.12   | -     | 1649.1   |
| AHQ-4-12, 2222              | R.GASALQLER.I                                                           | 945.05542  | 2 | 9.81E-04 | 0.89  | 2.98   | -     | 1234.1   |
| AHQ-4-7, 6861 - 6926        | K.GHYTEGAELIENVLEVR.H                                                   | 2029.23935 | 2 | 3.66E-09 | 0.99  | 7.40   | -     | 2985.1   |
| AHQ-4-7, 6875               | K.GHYTEGAELIENVLEVR.H                                                   | 2029.23935 | 3 | 3.10E-05 | 0.89  | 4.06   | -     | 1631.3   |
| AHQ-4-13, 6766              | K.GHYTEGAELIENVLEVR.H                                                   | 2029.23935 | 3 | 2.49E-05 | 0.90  | 4.55   | -     | 1192.2   |
| AHQ-4-13-, 6692             | K.GHYTEGAELIENVLEVR.H                                                   | 2029.23935 | 2 | 2.31E-11 | 0.99  | 7.18   | -     | 2969.1   |
| AHQ-4-12, 6737              | K.GHYTEGAELIENVLEVR.H                                                   | 2029.23935 | 2 | 8.71E-09 | 0.98  | 6.95   | -     | 2457.5   |
| AHQ-4-13, 6765              | K.GHYTEGAELIENVLEVR.H                                                   | 2029.23935 | 2 | 1.76E-09 | 0.98  | 6.44   | -     | 2256.3   |
| AHQ-4-11, 6474              | K.GHYTEGAELIENVLEVR.H                                                   | 2029.23935 | 3 | 2.32E-05 | 0.85  | 3.84   | -     | 1425.1   |
| AHQ-4-11, 6465              | K.GHYTEGAELIENVLEVR.H                                                   | 2029.23935 | 2 | 2.06E-06 | 0.98  | 6.76   | -     | 2141.5   |
| AHQ-4-4, 7114               | K.GHYTEGAELIENVLEVR.H                                                   | 2029.23935 | 2 | 9.93E-11 | 0.99  | 7.31   | -     | 2508.3   |
| AHQ-4-14-, 6557             | K.GHYTEGAELIENVLEVR.H                                                   | 2029.23935 | 2 | 1.06E-12 | 0.98  | 6.09   | -     | 2434.2   |
| AHQ-4-10, 6151 - 6163       | K.GHYTEGAELIENVLEVR.H                                                   | 2029.23935 | 2 | 2.41E-07 | 0.98  | 6.60   | -     | 2674.7   |
| AHQ-4-9, 6220 - 6235        | K.GHYTEGAELIENVLEVR.H                                                   | 2029.23935 | 2 | 4.95E-05 | 0.98  | 6.17   | -     | 2090.7   |
| AHQ-4-8, 6490               | K.GHYTEGAELIENVLEVR.H                                                   | 2029.23935 | 2 | 1.76E-08 | 0.99  | 7.76   | -     | 3602.7   |
| AHQ-4-7, 7346 - 7422        | R.GLSMAATFIGNNTAIQEIFNR.V                                               | 2269.56611 | 2 | 2.56E-06 | 0.94  | 4.87   | -     | 929.7    |
| AHQ-4-7, 6551               | R.GLSM*AATFIGNNTAIQEIFNR.V                                              | 2285.56551 | 2 | 4.61E-07 | 0.87  | 3.73   | -     | 729.2    |
| AHQ-4-7, 6709 - 6773        | R.GLSM*AATFIGNNTAIQEIFNR.V                                              | 2285.56551 | 2 | 1.44E-08 | 0.92  | 4.74   | -     | 665.6    |
| AHQ-4-9, 6033 - 6096        | R.GLSM*AATFIGNNTAIQEIFNR.V                                              | 2285.56551 | 2 | 5.05E-06 | 0.93  | 4.77   | -     | 606.5    |
| AHQ-4-14-, 6462             | R.GLSM*AATFIGNNTAIQEIFNR.V                                              | 2285.56551 | 2 | 8.72E-08 | 0.79  | 3.55   | -     | 553.8    |
| AHQ-4-12, 6522              | R.GLSM*AATFIGNNTAIQEIFNR.V                                              | 2285.56551 | 2 | 3.43E-06 | 0.76  | 3.02   | -     | 626.2    |
| AHQ-4-14-, 6239 - 6309      | R.GLSM*AATFIGNNTAIQEIFNR.V                                              | 2285.56551 | 2 | 8.56E-10 | 0.96  | 5.65   | -     | 858.0    |
| AHQ-4-13-, 6434 - 6502      | R.GLSM*AATFIGNNTAIQEIFNR.V                                              | 2285.56551 | 2 | 1.97E-07 | 0.91  | 4.58   | -     | 774.0    |
| AHQ-4-13-, 6466             | R.GLSM*AATFIGNNTAIQEIFNR.V                                              | 2285.56551 | 3 | 3.51E-04 | 0.93  | 4.89   | -     | 1246.8   |
| AHQ-4-13, 6533 - 6556       | R.GLSM*AATFIGNNTAIQEIFNR.V                                              | 2285.56551 | 2 | 1.19E-07 | 0.93  | 5.06   | -     | 615.6    |
| AHQ-4-13, 6546              | R.GLSM*AATFIGNNTAIQEIFNR.V                                              | 2285.56551 | 3 | 2.48E-05 | 0.95  | 4.70   | -     | 1717.2   |
| AHQ-4-7, 3234 - 3246        | R.IM*NSFSVMPSPK.V                                                       | 1354.62100 | 2 | 5.21E-07 | 0.81  | 3.50   | -     | 489.4    |
| AHQ-4-8, 3643 - 3701        | R.IMNSFSVMPSPK.V                                                        | 1338.62100 | 2 | 3.97E-09 | 0.89  | 3.20   | -     | 810.2    |
| AHQ-4-7, 2747               | R.IMNSFSVMPSPK.V                                                        | 1354.62100 | 2 | 2.56E-04 | 0.54  | 2.80   | -     | 378.2    |
| AHQ-4-7, 3763               | R.IMNSFSVMPSPK.V                                                        | 1338.62100 | 2 | 2.49E-07 | 0.93  | 3.94   | -     | 859.7    |
| AHQ-4-7, 3498 - 3537        | R.IMNSFSVMPSPK.V                                                        | 1338.62100 | 2 | 1.18E-04 | 0.91  | 3.17   | -     | 1516.9   |
| AHQ-4-7, 3769               | R.IMNSFSVMPSPK.V                                                        | 1338.62100 | 1 | 2.30E-06 | 0.61  | 2.24   | -     | 663.8    |

|                                                             |                                           |            |   |          |       |        |       |          |
|-------------------------------------------------------------|-------------------------------------------|------------|---|----------|-------|--------|-------|----------|
| AHQ-4-14-, 3019 - 3021                                      | R.ISVYYNEAYGR.K                           | 1335.44622 | 2 | 8.20E-05 | 0.95  | 3.62   | -     | 1312.4   |
| AHQ-4-14, 4038 - 4109                                       | R.ISVYYNEAYGR.K                           | 1335.44622 | 2 | 2.35E-06 | 0.89  | 3.29   | -     | 784.3    |
| AHQ-4-13, 3373                                              | R.ISVYYNEAYGR.K                           | 1335.44622 | 1 | 5.42E-05 | 0.48  | 2.39   | -     | 199.6    |
| AHQ-4-7, 2905                                               | R.ISVYYNEAYGR.K                           | 1335.44622 | 2 | 6.36E-07 | 0.94  | 3.44   | -     | 1251.1   |
| AHQ-4-11, 3020                                              | R.ISVYYNEAYGR.K                           | 1335.44622 | 2 | 3.38E-04 | 0.65  | 2.74   | -     | 603.4    |
| AHQ-4-7, 3077                                               | R.ISVYYNEAYGR.K                           | 1335.44622 | 2 | 8.37E-07 | 0.72  | 3.06   | -     | 677.8    |
| AHQ-4-7, 2923                                               | R.ISVYYNEAYGR.K                           | 1335.44622 | 1 | 5.42E-05 | 0.23  | 2.19   | -     | 109.0    |
| AHQ-4-14-, 3175                                             | R.ISVYYNEAYGR.K                           | 1335.44622 | 2 | 9.83E-08 | 0.96  | 3.79   | -     | 1510.9   |
| AHQ-4-13-, 5182                                             | K.LGALFQPDFSVHNGSGAGNNWAK.G               | 2388.58260 | 3 | 3.34E-12 | 0.88  | 3.96   | -     | 830.1    |
| AHQ-4-13, 5290                                              | K.LGALFQPDFSVHNGSGAGNNWAK.G               | 2388.58260 | 3 | 9.58E-09 | 0.61  | 3.37   | -     | 552.0    |
| AHQ-4-12, 5223                                              | K.LGALFQPDFSVHNGSGAGNNWAK.G               | 2388.58260 | 3 | 6.57E-06 | 0.76  | 3.62   | -     | 605.6    |
| AHQ-4-12, 5150 - 5229                                       | K.LGALFQPDFSVHNGSGAGNNWAK.G               | 2388.58260 | 2 | 7.10E-08 | 0.91  | 4.43   | -     | 607.3    |
| AHQ-4-13-, 4986                                             | K.LGALFQPDFSVHNGSGAGNNWAK.G               | 2388.58260 | 3 | 2.52E-05 | 0.84  | 3.82   | -     | 722.9    |
| AHQ-4-11, 5581                                              | R.LHFFMPGFAPLTAQGSQQYR.A                  | 2297.62284 | 2 | 8.11E-05 | 0.97  | 5.82   | -     | 933.1    |
| AHQ-4-14-, 5046 - 5109                                      | R.LHFFMPGFAPLTAQGSQQYR.A                  | 2313.62224 | 3 | 2.02E-05 | 0.94  | 4.29   | -     | 2056.9   |
| AHQ-4-8, 4498                                               | R.LHFFMPGFAPLTAQGSQQYR.A                  | 2313.62224 | 2 | 1.07E-05 | 0.95  | 4.99   | -     | 757.8    |
| AHQ-4-8, 5179                                               | R.LHFFMPGFAPLTAQGSQQYR.A                  | 2297.62284 | 2 | 4.57E-06 | 0.95  | 4.63   | -     | 859.9    |
| AHQ-4-9, 5051                                               | R.LHFFMPGFAPLTAQGSQQYR.A                  | 2297.62284 | 2 | 8.91E-06 | 0.94  | 4.55   | -     | 644.2    |
| AHQ-4-9, 4451 - 4460                                        | R.LHFFMPGFAPLTAQGSQQYR.A                  | 2313.62224 | 2 | 1.45E-05 | 0.96  | 5.56   | -     | 733.5    |
| AHQ-4-7, 5553 - 5622                                        | R.LHFFMPGFAPLTAQGSQQYR.A                  | 2297.62284 | 2 | 4.05E-09 | 0.97  | 6.34   | -     | 935.9    |
| AHQ-4-4, 5308                                               | R.LHFFMPGFAPLTAQGSQQYR.A                  | 2313.62224 | 2 | 1.26E-04 | 0.94  | 4.42   | -     | 786.8    |
| AHQ-4-7, 4833                                               | R.LHFFMPGFAPLTAQGSQQYR.A                  | 2313.62224 | 3 | 5.40E-05 | 0.97  | 5.08   | -     | 2570.5   |
| AHQ-4-7, 7402 - 7405                                        | K.LTTPTYGDLNHLVSLTMSGITSLR.F              | 2693.06979 | 3 | 9.62E-06 | 0.93  | 4.57   | -     | 1350.0   |
| AHQ-4-14-, 6507                                             | K.LTTPTYGDLNHLVSLTMSGITSLR.F              | 2693.06979 | 3 | 3.03E-04 | 0.84  | 3.77   | -     | 699.3    |
| AHQ-4-13, 6685 - 6690                                       | K.LTTPTYGDLNHLVSLTMSGITSLR.F              | 2709.06919 | 3 | 9.98E-06 | 0.93  | 4.95   | -     | 949.2    |
| AHQ-4-14-, 6469 - 6535                                      | K.LTTPTYGDLNHLVSLTMSGITSLR.F              | 2709.06919 | 3 | 1.86E-04 | 0.94  | 4.60   | -     | 1252.6   |
| AHQ-4-7, 6929                                               | K.LTTPTYGDLNHLVSLTMSGITSLR.F              | 2693.06979 | 3 | 2.89E-07 | 0.76  | 3.68   | -     | 512.1    |
| AHQ-4-7, 6930                                               | K.LTTPTYGDLNHLVSLTMSGITSLR.F              | 2693.06979 | 2 | 8.80E-08 | 0.89  | 3.73   | -     | 815.9    |
| AHQ-4-7, 6938                                               | K.LTTPTYGDLNHLVSLTMSGITSLR.F              | 2709.06919 | 3 | 5.00E-06 | 0.84  | 4.04   | -     | 774.5    |
| AHQ-4-11, 6774 - 6776                                       | K.LTTPTYGDLNHLVSLTMSGITSLR.F              | 2693.06979 | 2 | 1.51E-09 | 0.95  | 4.89   | -     | 974.4    |
| AHQ-4-7, 7326 - 7403                                        | K.LTTPTYGDLNHLVSLTMSGITSLR.F              | 2693.06979 | 2 | 1.58E-09 | 0.94  | 5.65   | -     | 770.3    |
| AHQ-4-8, 7173 - 7174                                        | K.LTTPTYGDLNHLVSLTMSGITSLR.F              | 2693.06979 | 3 | 4.48E-11 | 0.94  | 4.97   | -     | 1041.9   |
| AHQ-4-9, 6193 - 6256                                        | K.LTTPTYGDLNHLVSLTMSGITSLR.F              | 2709.06919 | 3 | 5.43E-05 | 0.91  | 4.85   | -     | 856.1    |
| AHQ-4-9, 6657                                               | K.LTTPTYGDLNHLVSLTMSGITSLR.F              | 2693.06979 | 3 | 4.69E-09 | 0.91  | 4.57   | -     | 1008.1   |
| AHQ-4-1, 6986                                               | K.LTTPTYGDLNHLVSLTMSGITSLR.F              | 2709.06919 | 3 | 4.00E-04 | 0.71  | 3.33   | -     | 701.3    |
| AHQ-4-9, 6652 - 6728                                        | K.LTTPTYGDLNHLVSLTMSGITSLR.F              | 2693.06979 | 2 | 2.29E-10 | 0.93  | 4.84   | -     | 652.2    |
| AHQ-4-7, 6037                                               | R.NSSCFVEWIPNNVK.V                        | 1695.87718 | 2 | 3.84E-07 | 0.85  | 3.25   | -     | 728.4    |
| AHQ-4-7, 5198 - 5215                                        | R.NSSCFVEWIPNNVK.V                        | 1695.87718 | 2 | 2.58E-06 | 0.79  | 3.46   | -     | 553.5    |
| AHQ-4-12, 5289                                              | R.YLTVACIFR.G                             | 1144.36822 | 2 | 6.05E-07 | 0.94  | 3.22   | -     | 1146.2   |
| AHQ-4-11, 5048                                              | R.YLTVACIFR.G                             | 1144.36822 | 2 | 9.23E-05 | 0.91  | 2.81   | -     | 973.4    |
| gj[4507485]ref[NP_003237.1] thrombospondin 1 [Homo sapiens] |                                           |            |   | 2.45E-13 | 33.41 | 410.34 | 38.10 | 129351.8 |
| AHQ-4-2, 4740                                               | K.AGTLDSLTVQGG.Q                          | 1303.48711 | 2 | 4.41E-05 | 0.90  | 3.57   | -     | 975.2    |
| AHQ-4-2, 4284                                               | K.AGTLDSLTVQGG.Q                          | 1303.48711 | 2 | 1.08E-04 | 0.92  | 3.17   | -     | 1402.9   |
| AHQ-4-7, 1927                                               | R.AQGYSLVK.V                              | 1010.12587 | 1 | 7.91E-05 | 0.05  | 2.19   | -     | 106.5    |
| AHQ-4-5, 2503                                               | R.AQYIDCEK.M                              | 1141.27636 | 1 | 4.00E-04 | 0.23  | 1.92   | -     | 502.7    |
| AHQ-4-5, 2499                                               | R.AQYIDCEK.M                              | 1141.27636 | 1 | 4.00E-04 | 0.43  | 2.89   | -     | 192.2    |
| AHQ-4-10, 2523                                              | R.AQYIDCEK.M                              | 1141.27636 | 1 | 5.72E-05 | 0.22  | 2.68   | -     | 227.7    |
| AHQ-4-10, 5745                                              | R.AQYIDCEKMEAEALDVPIQSVFTR.D              | 2972.33983 | 2 | 5.49E-04 | 0.89  | 4.00   | -     | 764.0    |
| AHQ-4-10, 5867                                              | R.AQYIDCEKMEAEALDVPIQSVFTR.D              | 2972.33983 | 2 | 1.68E-05 | 0.84  | 3.95   | -     | 501.7    |
| AHQ-4-6, 6359 - 6368                                        | R.AQYIDCEKMEAEALDVPIQSVFTR.D              | 2972.33983 | 3 | 2.18E-04 | 0.86  | 4.62   | -     | 521.2    |
| AHQ-4-3, 6653                                               | R.AQYIDCEKMEAEALDVPIQSVFTR.D              | 2972.33983 | 3 | 5.89E-07 | 0.94  | 5.00   | -     | 1067.9   |
| AHQ-4-2, 6655                                               | R.AQYIDCEKMEAEALDVPIQSVFTR.D              | 2972.33983 | 3 | 5.02E-06 | 0.94  | 5.00   | -     | 1021.8   |
| AHQ-4-3, 4040                                               | R.CENTDPGYNCLPCPPR.F                      | 1954.10800 | 2 | 5.66E-04 | 0.89  | 3.89   | -     | 496.6    |
| AHQ-4-3, 4147 - 4217                                        | R.CENTDPGYNCLPCPPR.F                      | 1954.10800 | 2 | 4.07E-05 | 0.74  | 2.73   | -     | 625.3    |
| AHQ-4-4, 4000                                               | R.CENTDPGYNCLPCPPR.F                      | 1954.10800 | 2 | 6.40E-06 | 0.88  | 3.89   | -     | 538.5    |
| AHQ-4-2, 3942 - 4011                                        | R.CENTDPGYNCLPCPPR.F                      | 1954.10800 | 2 | 4.61E-05 | 0.42  | 2.85   | -     | 301.6    |
| AHQ-4-5, 3894                                               | R.CENTDPGYNCLPCPPR.F                      | 1954.10800 | 2 | 3.13E-07 | 0.90  | 4.05   | -     | 476.3    |
| AHQ-4-1, 3894 - 3898                                        | R.CENTDPGYNCLPCPPR.F                      | 1954.10800 | 2 | 3.58E-10 | 0.91  | 3.93   | -     | 631.9    |
| AHQ-4-2, 4048                                               | R.CENTDPGYNCLPCPPR.F                      | 1954.10800 | 2 | 3.71E-05 | 0.71  | 2.81   | -     | 424.1    |
| AHQ-4-2, 3907                                               | K.CNYLGHYSDDPMYR.C                        | 1677.84222 | 2 | 8.39E-06 | 0.87  | 3.37   | -     | 629.4    |
| AHQ-4-3, 3880 - 3889                                        | K.CNYLGHYSDDPMYR.C                        | 1677.84222 | 2 | 3.77E-07 | 0.94  | 4.39   | -     | 807.2    |
| AHQ-4-5, 3661                                               | K.CNYLGHYSDDPMYR.C                        | 1677.84222 | 2 | 4.73E-04 | 0.85  | 3.70   | -     | 808.7    |
| AHQ-4-1, 3451                                               | K.CNYLGHYSDDPMYR.C                        | 1693.84162 | 2 | 2.87E-05 | 0.77  | 2.89   | -     | 602.1    |
| AHQ-4-2, 3375                                               | K.CNYLGHYSDDPMYR.C                        | 1693.84162 | 2 | 4.08E-04 | 0.94  | 3.60   | -     | 1093.0   |
| AHQ-4-4, 3319                                               | K.CNYLGHYSDDPMYR.C                        | 1693.84162 | 2 | 5.37E-04 | 0.91  | 3.01   | -     | 951.9    |
| AHQ-4-1, 3983                                               | K.CNYLGHYSDDPMYR.C                        | 1677.84222 | 2 | 6.40E-07 | 0.80  | 3.08   | -     | 523.1    |
| AHQ-4-2, 3470                                               | K.DCVGDVTENQICNK.Q                        | 1654.75869 | 2 | 2.05E-04 | 0.95  | 4.03   | -     | 1225.4   |
| AHQ-4-3, 3455 - 3529                                        | K.DCVGDVTENQICNK.Q                        | 1654.75869 | 2 | 3.68E-06 | 0.94  | 4.35   | -     | 970.1    |
| AHQ-4-10, 2535                                              | K.DHSGQVFSVVSNGK.A                        | 1461.56164 | 1 | 3.68E-08 | 0.37  | 2.22   | -     | 449.2    |
| AHQ-4-3, 2668                                               | K.DHSGQVFSVVSNGK.A                        | 1461.56164 | 2 | 9.50E-06 | 0.93  | 3.60   | -     | 1020.4   |
| AHQ-4-5, 2531                                               | K.DHSGQVFSVVSNGK.A                        | 1461.56164 | 2 | 2.08E-06 | 0.95  | 3.96   | -     | 1214.2   |
| AHQ-4-2, 2694 - 2762                                        | K.DHSGQVFSVVSNGK.A                        | 1461.56164 | 2 | 5.92E-07 | 0.95  | 4.24   | -     | 1174.4   |
| AHQ-4-10, 2536                                              | K.DHSGQVFSVVSNGK.A                        | 1461.56164 | 2 | 4.35E-07 | 0.96  | 4.17   | -     | 1377.2   |
| AHQ-4-10, 2637                                              | K.DHSGQVFSVVSNGK.A                        | 1461.56164 | 1 | 5.93E-11 | 0.54  | 2.33   | -     | 562.0    |
| AHQ-4-4, 2650                                               | K.DHSGQVFSVVSNGK.A                        | 1461.56164 | 2 | 4.88E-09 | 0.95  | 4.01   | -     | 1397.0   |
| AHQ-4-6, 3218                                               | R.DNCQVYVNDQQR.D                          | 1575.64166 | 2 | 1.37E-04 | 0.67  | 2.90   | -     | 741.9    |
| AHQ-4-5, 2947 - 3025                                        | R.DNCQVYVNDQQR.D                          | 1575.64166 | 2 | 5.50E-05 | 0.73  | 2.63   | -     | 737.6    |
| AHQ-4-4, 3098                                               | R.DNCQVYVNDQQR.D                          | 1575.64166 | 2 | 1.12E-04 | 0.88  | 3.57   | -     | 970.4    |
| AHQ-4-7, 2986                                               | R.DNCQVYVNDQQR.D                          | 1575.64166 | 2 | 2.53E-04 | 0.87  | 3.52   | -     | 1034.2   |
| AHQ-4-1, 3177                                               | R.DNCQVYVNDQQR.D                          | 1575.64166 | 2 | 6.10E-06 | 0.83  | 2.93   | -     | 909.2    |
| AHQ-4-3, 3123                                               | R.DNCQVYVNDQQR.D                          | 1575.64166 | 2 | 9.17E-04 | 0.93  | 3.74   | -     | 1166.7   |
| AHQ-4-2, 3140                                               | R.DNCQVYVNDQQR.D                          | 1575.64166 | 2 | 8.87E-05 | 0.90  | 3.83   | -     | 902.1    |
| AHQ-4-1, 3338                                               | R.DNCQVYVNDQQR.D                          | 1575.64166 | 2 | 1.30E-05 | 0.85  | 3.47   | -     | 872.7    |
| AHQ-4-4, 3334                                               | R.DNCQVYVNDQQR.D                          | 1575.64166 | 2 | 2.67E-05 | 0.57  | 2.73   | -     | 835.7    |
| AHQ-4-2, 6146 - 6220                                        | K.DSDGDGRGDACKDFDHDSPDIDDICPENVDISETDFR.R | 4418.43100 | 3 | 1.17E-08 | 0.95  | 5.79   | -     | 975.3    |
| AHQ-4-3, 6152 - 6227                                        | K.DSDGDGRGDACKDFDHDSPDIDDICPENVDISETDFR.R | 4418.43100 | 3 | 1.02E-05 | 0.80  | 4.07   | -     | 576.0    |
| AHQ-4-4, 6128 - 6186                                        | K.DSDGDGRGDACKDFDHDSPDIDDICPENVDISETDFR.R | 4418.43100 | 3 | 2.52E-04 | 0.72  | 3.72   | -     | 485.2    |
| AHQ-4-1, 4274                                               | R.DTDMGVDGQDCDNCPLHNPDLQDSDSDR.I          | 3324.31882 | 3 | 4.77E-06 | 0.89  | 4.56   | -     | 495.9    |
| AHQ-4-6, 3988                                               | R.DTDMGVDGQDCDNCPLHNPDLQDSDSDR.I          | 3324.31882 | 3 | 1.75E-04 | 0.92  | 4.88   | -     | 704.2    |
| AHQ-4-5, 3866                                               | R.DTDMGVDGQDCDNCPLHNPDLQDSDSDR.I          | 3340.31822 | 3 | 3.88E-05 | 0.81  | 3.78   | -     | 621.0    |
| AHQ-4-4, 3870                                               | R.DTDMGVDGQDCDNCPLHNPDLQDSDSDR.I          | 3340.31822 | 3 | 1.92E-06 | 0.82  | 3.26   | -     | 902.8    |
| AHQ-4-3, 3913 - 3940                                        | R.DTDMGVDGQDCDNCPLHNPDLQDSDSDR.I          | 3340.31822 | 3 | 4.71E-08 | 0.90  | 4.55   | -     | 738.5    |
| AHQ-4-5, 4254                                               | R.DTDMGVDGQDCDNCPLHNPDLQDSDSDR.I          | 3324.31882 | 3 | 7.56E-05 | 0.88  | 4.45   | -     | 510.8    |
| AHQ-4-3, 4308                                               | R.DTDMGVDGQDCDNCPLHNPDLQDSDSDR.I          | 3324.31882 | 3 | 1.13E-04 | 0.89  | 4.20   | -     | 769.2    |
| AHQ-4-6, 3742                                               | R.DTDMGVDGQDCDNCPLHNPDLQDSDSDR.I          | 3340.31822 | 3 | 3.96E-09 | 0.79  | 3.73   | -     | 618.5    |
| AHQ-4-4, 4144                                               | R.DTDMGVDGQDCDNCPLHNPDLQDSDSDR.I          | 3324.31882 | 3 | 1.41E-04 | 0.94  | 5.21   | -     | 788.4    |
| AHQ-4-2, 3928 - 4003                                        | R.DTDMGVDGQDCDNCPLHNPDLQDSDSDR.I          | 3340.31822 | 3 | 2.29E-11 | 0.93  | 4.85   | -     | 829.4    |
| AHQ-4-1, 3863                                               | R.DTDMGVDGQDCDNCPLHNPDLQDSDSDR.I          | 3340.31822 | 3 | 8.54E-05 | 0.83  | 3.97   | -     | 703.5    |
| AHQ-4-4, 4260 - 4294                                        | R.DTDMGVDGQDCDNCPLHNPDLQDSDSDR.I          | 3324.31882 | 3 | 1.99E-06 | 0.87  | 4.40   | -     | 487.4    |
| AHQ-4-2, 4290 - 4358                                        | R.DTDMGVDGQDCDNCPLHNPDLQDSDSDR.I          | 3324.31882 | 3 | 1.54E-12 | 0.95  | 5.13   | -     | 1089.5   |
| AHQ-4-2, 4115                                               | R.DTDMGVDGQDCDNCPLHNPDLQDSDSDR.I          | 3340.31822 | 3 | 1.37E-05 | 0.89  | 4.32   | -     | 734.7    |
| AHQ-4-2, 3639 - 3646                                        | K.FQDLVDVAVR.A                            | 1063.18877 | 2 | 2.75E-06 | 0.93  | 3.89   | -     | 1067.3   |
| AHQ-4-2, 3638 - 3644                                        | K.FQDLVDVAVR.A                            | 1063.18877 | 1 | 2.54E-04 | 0.49  | 2.44   | -     | 414.6    |
| AHQ-4-1, 3750                                               | K.FQDLVDVAVR.A                            | 1063.18877 | 2 | 7.50E-06 | 0.84  | 2.88   | -     | 870.2    |
| AHQ-4-10, 3252                                              | K.FQDLVDVAVR.A                            | 1063.18877 | 1 | 1.75E-04 | 0.25  | 2.18   | -     | 154.0    |
| AHQ-4-5, 2619                                               | R.FTGSQPFQGVHEATANK.Q                     | 1877.00666 | 2 | 3.73E-05 | 0.75  | 3.06   | -     | 479.1    |
| AHQ-4-1, 3103                                               | R.FTGSQPFQGVHEATANK.Q                     | 1877.00666 | 2 | 2.15E-09 | 0.91  | 3.99   | -     | 591.2    |

|                        |                            |            |   |          |      |      |   |        |
|------------------------|----------------------------|------------|---|----------|------|------|---|--------|
| AHQ-4-2, 2928 - 2971   | R.FTGSQPFQGGVEHATANK.Q     | 1877.00666 | 2 | 9.77E-11 | 0.76 | 3.67 | - | 385.3  |
| AHQ-4-9, 2397          | R.FTGSQPFQGGVEHATANK.Q     | 1877.00666 | 2 | 2.81E-04 | 0.56 | 2.89 | - | 347.6  |
| AHQ-4-2, 2842          | R.FTGSQPFQGGVEHATANK.Q     | 1877.00666 | 2 | 1.63E-10 | 0.90 | 4.12 | - | 552.7  |
| AHQ-4-1, 2970 - 2977   | R.FTGSQPFQGGVEHATANK.Q     | 1877.00666 | 3 | 1.39E-04 | 0.79 | 3.67 | - | 488.5  |
| AHQ-4-1, 2954          | R.FTGSQPFQGGVEHATANK.Q     | 1877.00666 | 2 | 8.49E-09 | 0.93 | 4.70 | - | 672.4  |
| AHQ-4-4, 2680 - 2750   | R.FTGSQPFQGGVEHATANK.Q     | 1877.00666 | 2 | 2.43E-05 | 0.87 | 3.89 | - | 558.4  |
| AHQ-4-3, 2845 - 2923   | R.FTGSQPFQGGVEHATANK.Q     | 1877.00666 | 2 | 4.59E-09 | 0.91 | 4.39 | - | 510.4  |
| AHQ-4-3, 2732 - 2753   | R.FTGSQPFQGGVEHATANK.Q     | 1877.00666 | 3 | 3.01E-09 | 0.90 | 4.28 | - | 667.6  |
| AHQ-4-4, 2950          | R.FTGSQPFQGGVEHATANK.Q     | 1877.00666 | 2 | 4.16E-05 | 0.82 | 3.43 | - | 611.5  |
| AHQ-4-4, 5612          | R.FVFGTTPEDILR.N           | 1395.58470 | 1 | 5.11E-05 | 0.16 | 2.10 | - | 158.9  |
| AHQ-4-4, 5619          | R.FVFGTTPEDILR.N           | 1395.58470 | 1 | 1.28E-04 | 0.39 | 2.60 | - | 149.7  |
| AHQ-4-12, 5438         | R.FVFGTTPEDILR.N           | 1395.58470 | 2 | 2.95E-04 | 0.75 | 2.67 | - | 556.3  |
| AHQ-4-5, 5417          | R.FVFGTTPEDILR.N           | 1395.58470 | 1 | 1.94E-08 | 0.08 | 2.09 | - | 46.8   |
| AHQ-4-3, 5637 - 5665   | R.FVFGTTPEDILR.N           | 1395.58470 | 2 | 5.18E-04 | 0.69 | 2.80 | - | 488.7  |
| AHQ-4-2, 5638          | R.FVFGTTPEDILR.N           | 1395.58470 | 1 | 1.07E-05 | 0.31 | 2.65 | - | 142.8  |
| AHQ-4-9, 4796          | R.FVFGTTPEDILR.N           | 1395.58470 | 1 | 3.30E-05 | 0.35 | 2.78 | - | 156.1  |
| AHQ-4-3, 5652          | R.FVFGTTPEDILR.N           | 1395.58470 | 1 | 2.47E-04 | 0.23 | 2.49 | - | 129.1  |
| AHQ-4-2, 5662          | K.GFLLASLR.Q               | 990.22407  | 2 | 1.84E-05 | 0.97 | 3.42 | - | 2202.4 |
| AHQ-4-7, 4389          | K.GGVNDFQGGVLQNV.R.F       | 1617.74799 | 2 | 2.50E-09 | 0.90 | 3.73 | - | 910.8  |
| AHQ-4-9, 3991 - 3999   | K.GGVNDFQGGVLQNV.R.F       | 1617.74799 | 2 | 9.53E-10 | 0.89 | 4.10 | - | 739.5  |
| AHQ-4-7, 4121 - 4123   | K.GGVNDFQGGVLQNV.R.F       | 1617.74799 | 2 | 1.45E-05 | 0.84 | 3.52 | - | 763.4  |
| AHQ-4-6, 4546          | K.GGVNDFQGGVLQNV.R.F       | 1617.74799 | 2 | 2.05E-05 | 0.78 | 3.41 | - | 603.2  |
| AHQ-4-4, 4826 - 4828   | K.GGVNDFQGGVLQNV.R.F       | 1617.74799 | 2 | 1.81E-05 | 0.79 | 3.32 | - | 591.6  |
| AHQ-4-8, 3874 - 3875   | K.GGVNDFQGGVLQNV.R.F       | 1617.74799 | 2 | 5.41E-06 | 0.93 | 4.63 | - | 883.9  |
| AHQ-4-4, 4324          | K.GGVNDFQGGVLQNV.R.F       | 1617.74799 | 2 | 3.90E-04 | 0.86 | 4.10 | - | 622.3  |
| AHQ-4-11, 4334         | K.GGVNDFQGGVLQNV.R.F       | 1617.74799 | 2 | 3.53E-05 | 0.64 | 3.33 | - | 515.2  |
| AHQ-4-6, 4402 - 4471   | K.GGVNDFQGGVLQNV.R.F       | 1617.74799 | 2 | 2.32E-05 | 0.87 | 4.08 | - | 781.7  |
| AHQ-4-6, 4182 - 4216   | K.GGVNDFQGGVLQNV.R.F       | 1617.74799 | 2 | 8.61E-07 | 0.88 | 4.38 | - | 803.0  |
| AHQ-4-6, 4042          | K.GGVNDFQGGVLQNV.R.F       | 1617.74799 | 2 | 5.50E-06 | 0.51 | 2.74 | - | 513.6  |
| AHQ-4-4, 4479 - 4506   | K.GGVNDFQGGVLQNV.R.F       | 1617.74799 | 2 | 2.70E-04 | 0.86 | 3.74 | - | 779.2  |
| AHQ-4-5, 4142          | K.GGVNDFQGGVLQNV.R.F       | 1617.74799 | 2 | 4.13E-06 | 0.66 | 2.70 | - | 788.3  |
| AHQ-4-1, 4879          | K.GGVNDFQGGVLQNV.R.F       | 1617.74799 | 2 | 1.82E-06 | 0.90 | 3.59 | - | 1096.3 |
| AHQ-4-1, 4798          | K.GGVNDFQGGVLQNV.R.F       | 1617.74799 | 2 | 3.92E-06 | 0.68 | 3.22 | - | 598.1  |
| AHQ-4-10, 3849 - 3851  | K.GGVNDFQGGVLQNV.R.F       | 1617.74799 | 2 | 4.21E-05 | 0.88 | 3.72 | - | 846.8  |
| AHQ-4-10, 3943 - 4016  | K.GGVNDFQGGVLQNV.R.F       | 1617.74799 | 2 | 5.59E-05 | 0.90 | 3.97 | - | 825.0  |
| AHQ-4-2, 4870 - 4876   | K.GGVNDFQGGVLQNV.R.F       | 1617.74799 | 2 | 7.43E-10 | 0.92 | 4.41 | - | 1005.7 |
| AHQ-4-10, 4075 - 4135  | K.GGVNDFQGGVLQNV.R.F       | 1617.74799 | 2 | 1.63E-09 | 0.93 | 4.44 | - | 958.0  |
| AHQ-4-2, 4656 - 4730   | K.GGVNDFQGGVLQNV.R.F       | 1617.74799 | 2 | 7.19E-10 | 0.95 | 4.79 | - | 1225.7 |
| AHQ-4-5, 4269          | K.GGVNDFQGGVLQNV.R.F       | 1617.74799 | 2 | 2.06E-05 | 0.86 | 3.96 | - | 687.1  |
| AHQ-4-5, 4493          | K.GGVNDFQGGVLQNV.R.F       | 1617.74799 | 2 | 1.31E-05 | 0.85 | 3.71 | - | 826.8  |
| AHQ-4-3, 4381          | K.GGVNDFQGGVLQNV.R.F       | 1617.74799 | 2 | 1.22E-09 | 0.89 | 3.88 | - | 744.9  |
| AHQ-4-10, 4213         | K.GGVNDFQGGVLQNV.R.F       | 1617.74799 | 2 | 4.70E-09 | 0.88 | 3.67 | - | 853.5  |
| AHQ-4-3, 4532 - 4535   | K.GGVNDFQGGVLQNV.R.F       | 1617.74799 | 2 | 9.11E-07 | 0.90 | 4.20 | - | 765.5  |
| AHQ-4-3, 4687 - 4761   | K.GGVNDFQGGVLQNV.R.F       | 1617.74799 | 2 | 4.61E-08 | 0.93 | 4.34 | - | 1010.4 |
| AHQ-4-3, 4859          | K.GGVNDFQGGVLQNV.R.F       | 1617.74799 | 2 | 1.04E-05 | 0.90 | 4.01 | - | 797.2  |
| AHQ-4-11, 4180 - 4190  | K.GGVNDFQGGVLQNV.R.F       | 1617.74799 | 2 | 1.29E-04 | 0.82 | 3.27 | - | 578.9  |
| AHQ-4-2, 4407          | K.GGVNDFQGGVLQNV.R.F       | 1617.74799 | 2 | 1.39E-04 | 0.86 | 3.99 | - | 639.9  |
| AHQ-4-8, 4202          | K.GGVNDFQGGVLQNV.R.F       | 1617.74799 | 2 | 1.09E-06 | 0.86 | 3.60 | - | 748.6  |
| AHQ-4-2, 2078 - 2079   | K.GPDPSSPAFR.I             | 1031.10364 | 2 | 2.49E-05 | 0.71 | 3.12 | - | 437.0  |
| AHQ-4-5, 1886 - 1922   | K.GPDPSSPAFR.I             | 1031.10364 | 2 | 4.62E-05 | 0.56 | 2.51 | - | 463.2  |
| AHQ-4-3, 2057 - 2068   | K.GPDPSSPAFR.I             | 1031.10364 | 2 | 3.64E-05 | 0.84 | 3.20 | - | 601.6  |
| AHQ-4-1, 2255          | K.GPDPSSPAFR.I             | 1031.10364 | 2 | 3.27E-04 | 0.79 | 2.97 | - | 502.6  |
| AHQ-4-10, 2007         | K.GPDPSSPAFR.I             | 1031.10364 | 2 | 1.17E-04 | 0.76 | 2.92 | - | 494.1  |
| AHQ-4-4, 2067          | K.GPDPSSPAFR.I             | 1031.10364 | 2 | 2.72E-05 | 0.50 | 3.02 | - | 359.3  |
| AHQ-4-1, 3171          | R.GTLALER.K                | 873.03234  | 2 | 9.28E-04 | 0.88 | 3.23 | - | 1018.8 |
| AHQ-4-3, 2932          | R.GTLALER.K                | 873.03234  | 2 | 2.84E-04 | 0.91 | 3.59 | - | 954.9  |
| AHQ-4-2, 2559 - 2570   | K.GTSQNDPNWVVR.H           | 1373.45608 | 2 | 5.22E-04 | 0.56 | 3.01 | - | 516.4  |
| AHQ-4-1, 2765 - 2774   | K.GTSQNDPNWVVR.H           | 1373.45608 | 2 | 1.63E-04 | 0.60 | 2.86 | - | 625.6  |
| AHQ-4-14-, 6186 - 6253 | R.IEDANLIPPVDDKFQDLVDAVR.A | 2580.87450 | 3 | 1.73E-05 | 0.78 | 3.99 | - | 387.0  |
| AHQ-4-7, 6593 - 6611   | R.IEDANLIPPVDDKFQDLVDAVR.A | 2580.87450 | 3 | 2.30E-04 | 0.67 | 3.29 | - | 342.8  |
| AHQ-4-8, 6229          | R.IEDANLIPPVDDKFQDLVDAVR.A | 2580.87450 | 2 | 4.02E-05 | 0.78 | 3.59 | - | 237.8  |
| AHQ-4-13-, 6308 - 6322 | R.IEDANLIPPVDDKFQDLVDAVR.A | 2580.87450 | 2 | 5.59E-06 | 0.82 | 3.69 | - | 324.5  |
| AHQ-4-13-, 6300        | R.IEDANLIPPVDDKFQDLVDAVR.A | 2580.87450 | 3 | 3.64E-08 | 0.88 | 4.26 | - | 424.8  |
| AHQ-4-3, 6748 - 6775   | R.IEDANLIPPVDDKFQDLVDAVR.A | 2580.87450 | 3 | 2.45E-13 | 0.82 | 3.76 | - | 461.4  |
| AHQ-4-9, 5919 - 5992   | R.IEDANLIPPVDDKFQDLVDAVR.A | 2580.87450 | 2 | 2.76E-07 | 0.76 | 3.43 | - | 319.8  |
| AHQ-4-3, 6747 - 6819   | R.IEDANLIPPVDDKFQDLVDAVR.A | 2580.87450 | 2 | 1.01E-04 | 0.55 | 2.91 | - | 209.9  |
| AHQ-4-2, 6742 - 6818   | R.IEDANLIPPVDDKFQDLVDAVR.A | 2580.87450 | 3 | 4.12E-08 | 0.86 | 3.93 | - | 631.6  |
| AHQ-4-13, 6392         | R.IEDANLIPPVDDKFQDLVDAVR.A | 2580.87450 | 2 | 3.38E-07 | 0.69 | 3.33 | - | 243.3  |
| AHQ-4-13, 6350 - 6388  | R.IEDANLIPPVDDKFQDLVDAVR.A | 2580.87450 | 3 | 6.05E-07 | 0.87 | 3.90 | - | 547.0  |
| AHQ-4-2, 6746 - 6819   | R.IEDANLIPPVDDKFQDLVDAVR.A | 2580.87450 | 2 | 7.42E-06 | 0.87 | 4.27 | - | 312.4  |
| AHQ-4-12, 6545         | R.IEDANLIPPVDDKFQDLVDAVR.A | 2580.87450 | 3 | 1.60E-04 | 0.67 | 3.22 | - | 418.1  |
| AHQ-4-3, 6935          | R.IEDANLIPPVDDKFQDLVDAVR.A | 2580.87450 | 3 | 5.97E-07 | 0.69 | 3.45 | - | 320.2  |
| AHQ-4-9, 5925 - 5936   | R.IEDANLIPPVDDKFQDLVDAVR.A | 2580.87450 | 3 | 1.25E-05 | 0.83 | 3.79 | - | 399.5  |
| AHQ-4-14-, 6317        | R.IEDANLIPPVDDKFQDLVDAVR.A | 2580.87450 | 3 | 5.06E-09 | 0.74 | 3.42 | - | 361.9  |
| AHQ-4-2, 6863 - 6942   | R.IEDANLIPPVDDKFQDLVDAVR.A | 2580.87450 | 2 | 4.61E-05 | 0.77 | 3.22 | - | 413.3  |
| AHQ-4-2, 6884 - 6943   | R.IEDANLIPPVDDKFQDLVDAVR.A | 2580.87450 | 3 | 3.60E-10 | 0.69 | 3.47 | - | 436.0  |
| AHQ-4-1, 6797          | R.IEDANLIPPVDDKFQDLVDAVR.A | 2580.87450 | 3 | 2.23E-04 | 0.66 | 3.27 | - | 359.6  |
| AHQ-4-11, 6254 - 6296  | R.IEDANLIPPVDDKFQDLVDAVR.A | 2580.87450 | 2 | 6.06E-06 | 0.69 | 3.05 | - | 390.9  |
| AHQ-4-11, 6144         | R.IEDANLIPPVDDKFQDLVDAVR.A | 2580.87450 | 2 | 3.60E-08 | 0.84 | 3.45 | - | 337.2  |
| AHQ-4-11, 6070 - 6145  | R.IEDANLIPPVDDKFQDLVDAVR.A | 2580.87450 | 3 | 1.37E-08 | 0.76 | 3.61 | - | 367.3  |
| AHQ-4-1, 6657 - 6733   | R.IEDANLIPPVDDKFQDLVDAVR.A | 2580.87450 | 3 | 3.56E-10 | 0.81 | 4.10 | - | 427.4  |
| AHQ-4-1, 6651 - 6731   | R.IEDANLIPPVDDKFQDLVDAVR.A | 2580.87450 | 2 | 8.71E-06 | 0.60 | 2.82 | - | 245.5  |
| AHQ-4-6, 6554 - 6632   | R.IEDANLIPPVDDKFQDLVDAVR.A | 2580.87450 | 3 | 1.18E-05 | 0.69 | 3.32 | - | 399.9  |
| AHQ-4-10, 5716         | R.IEDANLIPPVDDKFQDLVDAVR.A | 2580.87450 | 2 | 4.18E-04 | 0.63 | 2.72 | - | 291.6  |
| AHQ-4-10, 5931 - 5989  | R.IEDANLIPPVDDKFQDLVDAVR.A | 2580.87450 | 3 | 1.01E-07 | 0.84 | 4.04 | - | 386.1  |
| AHQ-4-4, 6675 - 6746   | R.IEDANLIPPVDDKFQDLVDAVR.A | 2580.87450 | 2 | 1.31E-07 | 0.70 | 3.51 | - | 227.9  |
| AHQ-4-4, 6720          | R.IEDANLIPPVDDKFQDLVDAVR.A | 2580.87450 | 2 | 1.23E-06 | 0.39 | 2.99 | - | 230.1  |
| AHQ-4-4, 6820 - 6886   | R.IEDANLIPPVDDKFQDLVDAVR.A | 2580.87450 | 3 | 6.08E-07 | 0.91 | 4.57 | - | 601.2  |
| AHQ-4-12, 6385 - 6386  | R.IEDANLIPPVDDKFQDLVDAVR.A | 2580.87450 | 2 | 8.98E-07 | 0.81 | 3.83 | - | 260.9  |
| AHQ-4-6, 6454 - 6470   | R.IEDANLIPPVDDKFQDLVDAVR.A | 2580.87450 | 3 | 2.60E-10 | 0.87 | 4.50 | - | 421.2  |
| AHQ-4-10, 5920 - 5975  | R.IEDANLIPPVDDKFQDLVDAVR.A | 2580.87450 | 2 | 4.98E-07 | 0.67 | 3.31 | - | 242.5  |
| AHQ-4-6, 2386          | K.IMADSGPIYDK.T            | 1210.38204 | 2 | 1.64E-06 | 0.92 | 3.80 | - | 702.9  |
| AHQ-4-7, 2343          | K.IMADSGPIYDK.T            | 1210.38204 | 2 | 5.23E-04 | 0.84 | 3.21 | - | 603.1  |
| AHQ-4-14-, 2234        | K.IM*ADSGPIYDK.T           | 1226.38144 | 2 | 1.83E-05 | 0.85 | 3.36 | - | 535.7  |
| AHQ-4-11, 2224 - 2237  | K.IM*ADSGPIYDK.T           | 1226.38144 | 2 | 6.75E-05 | 0.72 | 2.73 | - | 611.5  |
| AHQ-4-11, 2481 - 2485  | K.IMADSGPIYDK.T            | 1210.38204 | 2 | 7.35E-05 | 0.91 | 3.67 | - | 703.7  |
| AHQ-4-2, 2291 - 2295   | K.IM*ADSGPIYDK.T           | 1226.38144 | 2 | 1.31E-05 | 0.88 | 3.71 | - | 562.5  |
| AHQ-4-13-, 2625 - 2644 | K.IMADSGPIYDK.T            | 1210.38204 | 2 | 9.20E-05 | 0.90 | 3.11 | - | 852.3  |
| AHQ-4-2, 2543          | K.IMADSGPIYDK.T            | 1210.38204 | 2 | 1.24E-06 | 0.94 | 4.18 | - | 813.4  |
| AHQ-4-12, 2549         | K.IMADSGPIYDK.T            | 1210.38204 | 2 | 1.75E-05 | 0.93 | 3.88 | - | 762.5  |
| AHQ-4-12, 2279 - 2351  | K.IM*ADSGPIYDK.T           | 1226.38144 | 2 | 4.92E-04 | 0.59 | 2.57 | - | 514.4  |
| AHQ-4-9, 6377 - 6440   | R.IPESGGDNSVDFILFELTGAAR.K | 2196.35899 | 2 | 2.30E-05 | 0.91 | 4.38 | - | 642.1  |
| AHQ-4-11, 6629 - 6638  | R.IPESGGDNSVDFILFELTGAAR.K | 2196.35899 | 2 | 4.85E-09 | 0.96 | 5.26 | - | 918.6  |
| AHQ-4-9, 6216 - 6283   | R.IPESGGDNSVDFILFELTGAAR.K | 2196.35899 | 2 | 3.71E-08 | 0.97 | 5.47 | - | 1373.0 |
| AHQ-4-2, 7167 - 7242   | R.IPESGGDNSVDFILFELTGAAR.K | 2196.35899 | 2 | 9.59E-10 | 0.97 | 5.79 | - | 1143.7 |
| AHQ-4-2, 7306          | R.IPESGGDNSVDFILFELTGAAR.K | 2196.35899 | 2 | 8.01E-07 | 0.97 | 5.44 | - | 1157.7 |
| AHQ-4-9, 6468          | R.IPESGGDNSVDFILFELTGAAR.K | 2196.35899 | 2 | 2.38E-09 | 0.93 | 3.92 | - | 1031.8 |

|                        |                                |            |   |          |      |      |   |        |
|------------------------|--------------------------------|------------|---|----------|------|------|---|--------|
| AHQ-4-13, 6762 - 6825  | R.IPESGGDNSVDFIFELTGAAR.K      | 2196.35899 | 2 | 1.39E-10 | 0.97 | 6.00 | - | 1368.8 |
| AHQ-4-1, 7013 - 7082   | R.IPESGGDNSVDFIFELTGAAR.K      | 2196.35899 | 2 | 7.00E-13 | 0.98 | 6.37 | - | 1849.2 |
| AHQ-4-1, 7035          | R.IPESGGDNSVDFIFELTGAAR.K      | 2196.35899 | 3 | 4.16E-04 | 0.82 | 3.79 | - | 918.6  |
| AHQ-4-13-, 6680        | R.IPESGGDNSVDFIFELTGAAR.K      | 2196.35899 | 2 | 2.55E-10 | 0.97 | 5.82 | - | 1404.9 |
| AHQ-4-11, 6485 - 6564  | R.IPESGGDNSVDFIFELTGAAR.K      | 2196.35899 | 2 | 5.98E-13 | 0.96 | 5.23 | - | 914.6  |
| AHQ-4-7, 6993 - 7047   | R.IPESGGDNSVDFIFELTGAAR.K      | 2196.35899 | 2 | 9.11E-04 | 0.59 | 2.66 | - | 543.5  |
| AHQ-4-10, 6304         | R.IPESGGDNSVDFIFELTGAAR.K      | 2196.35899 | 2 | 1.32E-10 | 0.97 | 5.62 | - | 1094.9 |
| AHQ-4-10, 6176 - 6248  | R.IPESGGDNSVDFIFELTGAAR.K      | 2196.35899 | 2 | 4.25E-11 | 0.97 | 5.93 | - | 1519.9 |
| AHQ-4-6, 6998          | R.IPESGGDNSVDFIFELTGAAR.K      | 2196.35899 | 2 | 5.24E-05 | 0.82 | 3.82 | - | 497.3  |
| AHQ-4-3, 7283 - 7291   | R.IPESGGDNSVDFIFELTGAAR.K      | 2196.35899 | 2 | 3.40E-11 | 0.97 | 5.67 | - | 1217.5 |
| AHQ-4-5, 6939 - 7009   | R.IPESGGDNSVDFIFELTGAAR.K      | 2196.35899 | 2 | 2.59E-06 | 0.98 | 6.74 | - | 1546.2 |
| AHQ-4-5, 7083 - 7150   | R.IPESGGDNSVDFIFELTGAAR.K      | 2196.35899 | 2 | 2.20E-09 | 0.96 | 5.34 | - | 1174.9 |
| AHQ-4-5, 7177          | R.IPESGGDNSVDFIFELTGAAR.K      | 2196.35899 | 2 | 2.76E-11 | 0.96 | 5.44 | - | 1089.2 |
| AHQ-4-3, 7155 - 7221   | R.IPESGGDNSVDFIFELTGAAR.K      | 2196.35899 | 2 | 3.24E-08 | 0.96 | 5.22 | - | 1212.9 |
| AHQ-4-12, 6855         | R.IPESGGDNSVDFIFELTGAAR.K      | 2196.35899 | 2 | 5.35E-04 | 0.91 | 4.22 | - | 599.4  |
| AHQ-4-4, 7122 - 7188   | R.IPESGGDNSVDFIFELTGAAR.K      | 2196.35899 | 2 | 2.90E-10 | 0.96 | 5.65 | - | 934.5  |
| AHQ-4-4, 7207 - 7254   | R.IPESGGDNSVDFIFELTGAAR.K      | 2196.35899 | 2 | 1.29E-10 | 0.97 | 6.05 | - | 1179.9 |
| AHQ-4-14-, 6537 - 6605 | R.IPESGGDNSVDFIFELTGAAR.K      | 2196.35899 | 2 | 5.81E-13 | 0.98 | 6.57 | - | 1345.5 |
| AHQ-4-3, 2193 - 2236   | R.KDHSQGVFVSVVNGK.A            | 1589.73455 | 2 | 2.27E-07 | 0.88 | 4.01 | - | 707.4  |
| AHQ-4-2, 2326          | R.KDHSQGVFVSVVNGK.A            | 1589.73455 | 2 | 7.99E-10 | 0.81 | 3.25 | - | 805.7  |
| AHQ-4-12, 2275         | R.KDHSQGVFVSVVNGK.A            | 1589.73455 | 2 | 5.87E-08 | 0.60 | 3.11 | - | 454.1  |
| AHQ-4-1, 2433          | R.KDHSQGVFVSVVNGK.A            | 1589.73455 | 2 | 4.53E-09 | 0.86 | 3.29 | - | 961.8  |
| AHQ-4-5, 2027 - 2098   | R.KDHSQGVFVSVVNGK.A            | 1589.73455 | 2 | 1.29E-08 | 0.91 | 4.08 | - | 801.5  |
| AHQ-4-13-, 2354        | R.KDHSQGVFVSVVNGK.A            | 1589.73455 | 2 | 5.57E-08 | 0.91 | 3.06 | - | 1426.7 |
| AHQ-4-2, 2235 - 2250   | R.KDHSQGVFVSVVNGK.A            | 1589.73455 | 2 | 3.14E-08 | 0.94 | 4.01 | - | 1202.6 |
| AHQ-4-3, 2276 - 2316   | R.KDHSQGVFVSVVNGK.A            | 1589.73455 | 2 | 5.54E-07 | 0.92 | 3.85 | - | 941.2  |
| AHQ-4-11, 2234         | K.KIMADSGPIYDK.T               | 1338.55496 | 2 | 3.69E-04 | 0.82 | 3.13 | - | 803.6  |
| AHQ-4-2, 2316          | K.KIMADSGPIYDK.T               | 1338.55496 | 1 | 3.88E-06 | 0.80 | 2.97 | - | 662.8  |
| AHQ-4-3, 2283          | K.KIMADSGPIYDK.T               | 1338.55496 | 2 | 6.86E-04 | 0.89 | 3.26 | - | 788.7  |
| AHQ-4-2, 2311          | K.KIMADSGPIYDK.T               | 1338.55496 | 2 | 1.01E-06 | 0.89 | 3.92 | - | 635.8  |
| AHQ-4-5, 2194 - 2195   | R.KVTEENKELANELR.R             | 1673.84976 | 2 | 2.60E-07 | 0.96 | 4.83 | - | 1368.0 |
| AHQ-4-6, 2062          | R.KVTEENKELANELR.R             | 1673.84976 | 2 | 1.60E-08 | 0.93 | 4.82 | - | 1212.8 |
| AHQ-4-5, 1991 - 2071   | R.KVTEENKELANELR.R             | 1673.84976 | 3 | 3.46E-06 | 0.79 | 3.89 | - | 727.3  |
| AHQ-4-2, 2268          | R.KVTEENKELANELR.R             | 1673.84976 | 3 | 3.00E-04 | 0.92 | 4.18 | - | 1284.3 |
| AHQ-4-2, 2364          | R.KVTEENKELANELR.R             | 1673.84976 | 2 | 2.91E-11 | 0.95 | 4.52 | - | 1487.8 |
| AHQ-4-7, 2005          | R.KVTEENKELANELR.R             | 1673.84976 | 2 | 3.99E-10 | 0.93 | 4.39 | - | 1286.3 |
| AHQ-4-1, 2389 - 2457   | R.KVTEENKELANELR.R             | 1673.84976 | 2 | 1.72E-09 | 0.95 | 5.07 | - | 1421.7 |
| AHQ-4-4, 2324 - 2328   | R.KVTEENKELANELR.R             | 1673.84976 | 2 | 1.20E-10 | 0.96 | 5.45 | - | 1493.0 |
| AHQ-4-4, 2239 - 2311   | R.KVTEENKELANELR.R             | 1673.84976 | 3 | 1.40E-04 | 0.79 | 3.82 | - | 900.4  |
| AHQ-4-4, 2230          | R.KVTEENKELANELR.R             | 1673.84976 | 2 | 6.99E-09 | 0.91 | 4.64 | - | 912.4  |
| AHQ-4-2, 2262 - 2267   | R.KVTEENKELANELR.R             | 1673.84976 | 2 | 1.66E-06 | 0.93 | 4.80 | - | 1208.3 |
| AHQ-4-4, 1987          | R.KVTEENKELANELR.R             | 1673.84976 | 2 | 2.73E-10 | 0.93 | 4.55 | - | 1221.0 |
| AHQ-4-3, 2225          | R.KVTEENKELANELR.R             | 1673.84976 | 2 | 8.14E-11 | 0.94 | 4.57 | - | 1284.3 |
| AHQ-4-9, 1997          | R.KVTEENKELANELR.R             | 1673.84976 | 2 | 1.01E-08 | 0.92 | 4.77 | - | 1041.9 |
| AHQ-4-8, 1903          | R.KVTEENKELANELR.R             | 1673.84976 | 2 | 1.30E-09 | 0.93 | 4.16 | - | 1224.1 |
| AHQ-4-3, 2344          | R.KVTEENKELANELR.R             | 1673.84976 | 2 | 1.81E-09 | 0.95 | 4.89 | - | 1314.2 |
| AHQ-4-5, 2447          | R.LCNNPAPQFGGK.D               | 1304.45694 | 2 | 5.36E-04 | 0.73 | 3.34 | - | 391.3  |
| AHQ-4-2, 4470          | R.LCNNPAPQFGGKDCVGDVTENQICNK.Q | 2940.19303 | 3 | 4.27E-04 | 0.80 | 3.66 | - | 653.7  |
| AHQ-4-2, 4475          | R.LCNNPAPQFGGKDCVGDVTENQICNK.Q | 2940.19303 | 2 | 1.95E-05 | 0.75 | 3.40 | - | 421.2  |
| AHQ-4-3, 2125 - 2131   | R.LCNSPSPQM*NGKPCGEAR.E        | 2151.34497 | 2 | 9.74E-04 | 0.86 | 3.62 | - | 555.4  |
| AHQ-4-4, 2468          | R.LCNSPSPQM*NGKPCGEAR.E        | 2135.34557 | 2 | 3.95E-07 | 0.89 | 4.09 | - | 488.8  |
| AHQ-4-3, 2129          | R.LCNSPSPQM*NGKPCGEAR.E        | 2151.34497 | 3 | 4.13E-04 | 0.85 | 3.66 | - | 856.5  |
| AHQ-4-3, 2495          | R.LCNSPSPQM*NGKPCGEAR.E        | 2135.34557 | 2 | 1.78E-08 | 0.85 | 3.84 | - | 487.6  |
| AHQ-4-2, 2504          | R.LCNSPSPQM*NGKPCGEAR.E        | 2135.34557 | 3 | 2.64E-05 | 0.89 | 3.49 | - | 1222.2 |
| AHQ-4-5, 2398          | R.LCNSPSPQM*NGKPCGEAR.E        | 2135.34557 | 2 | 1.60E-06 | 0.80 | 4.01 | - | 414.3  |
| AHQ-4-1, 2593          | R.LCNSPSPQM*NGKPCGEAR.E        | 2135.34557 | 2 | 1.52E-07 | 0.91 | 4.61 | - | 441.8  |
| AHQ-4-5, 2039          | R.LCNSPSPQM*NGKPCGEAR.E        | 2151.34497 | 2 | 3.57E-07 | 0.87 | 3.67 | - | 594.0  |
| AHQ-4-2, 2503          | R.LCNSPSPQM*NGKPCGEAR.E        | 2135.34557 | 2 | 9.48E-06 | 0.74 | 3.71 | - | 335.5  |
| AHQ-4-4, 5492          | K.M*ENALDVPQISVFTR.D           | 1866.08547 | 2 | 5.70E-08 | 0.89 | 3.76 | - | 668.1  |
| AHQ-4-6, 5588 - 5608   | K.MENALDVPQISVFTR.D            | 1850.08607 | 2 | 8.91E-06 | 0.78 | 3.71 | - | 330.5  |
| AHQ-4-2, 5774          | K.MENALDVPQISVFTR.D            | 1850.08607 | 2 | 3.50E-05 | 0.64 | 3.42 | - | 321.6  |
| AHQ-4-6, 5447          | K.MENALDVPQISVFTR.D            | 1850.08607 | 2 | 7.28E-05 | 0.89 | 3.91 | - | 499.8  |
| AHQ-4-5, 5506 - 5509   | K.MENALDVPQISVFTR.D            | 1850.08607 | 2 | 3.15E-11 | 0.94 | 4.98 | - | 622.5  |
| AHQ-4-6, 5206          | K.M*ENALDVPQISVFTR.D           | 1866.08547 | 2 | 3.67E-05 | 0.89 | 4.26 | - | 504.1  |
| AHQ-4-5, 5302          | K.M*ENALDVPQISVFTR.D           | 1866.08547 | 2 | 1.43E-09 | 0.88 | 3.58 | - | 617.4  |
| AHQ-4-4, 5719          | K.MENALDVPQISVFTR.D            | 1850.08607 | 2 | 8.93E-04 | 0.89 | 4.23 | - | 481.2  |
| AHQ-4-1, 5581 - 5650   | K.M*ENALDVPQISVFTR.D           | 1866.08547 | 2 | 4.82E-06 | 0.87 | 3.55 | - | 713.0  |
| AHQ-4-3, 5533          | K.M*ENALDVPQISVFTR.D           | 1866.08547 | 2 | 7.36E-07 | 0.90 | 4.11 | - | 538.6  |
| AHQ-4-7, 5403          | K.MENALDVPQISVFTR.D            | 1850.08607 | 2 | 4.44E-07 | 0.86 | 3.91 | - | 446.6  |
| AHQ-4-3, 5783 - 5799   | K.MENALDVPQISVFTR.D            | 1850.08607 | 2 | 1.52E-12 | 0.92 | 4.65 | - | 590.4  |
| AHQ-4-11, 5292         | K.MENALDVPQISVFTR.D            | 1850.08607 | 2 | 2.57E-04 | 0.85 | 3.71 | - | 459.5  |
| AHQ-4-2, 5534          | K.M*ENALDVPQISVFTR.D           | 1866.08547 | 2 | 8.10E-12 | 0.93 | 4.28 | - | 651.3  |
| AHQ-4-10, 4948         | K.MENALDVPQISVFTR.D            | 1850.08607 | 2 | 1.88E-04 | 0.87 | 3.92 | - | 540.5  |
| AHQ-4-2, 5552 - 5560   | K.QHVVSVEEALLATGQWK.S          | 1896.13616 | 2 | 4.68E-05 | 0.72 | 2.91 | - | 548.2  |
| AHQ-4-4, 3038          | K.QVTQSYWDTNPTR.A              | 1596.68241 | 2 | 4.44E-07 | 0.86 | 3.38 | - | 687.1  |
| AHQ-4-3, 3063 - 3064   | K.QVTQSYWDTNPTR.A              | 1596.68241 | 2 | 2.42E-07 | 0.93 | 4.06 | - | 733.6  |
| AHQ-4-6, 2843 - 2866   | K.QVTQSYWDTNPTR.A              | 1596.68241 | 2 | 2.30E-04 | 0.44 | 2.96 | - | 221.8  |
| AHQ-4-2, 3083          | K.QVTQSYWDTNPTR.A              | 1596.68241 | 2 | 4.73E-09 | 0.94 | 4.13 | - | 883.6  |
| AHQ-4-7, 2799          | K.QVTQSYWDTNPTR.A              | 1596.68241 | 2 | 4.28E-06 | 0.80 | 3.62 | - | 300.1  |
| AHQ-4-11, 2920 - 2921  | K.QVTQSYWDTNPTR.A              | 1596.68241 | 2 | 1.86E-05 | 0.88 | 3.55 | - | 737.8  |
| AHQ-4-5, 2869          | K.QVTQSYWDTNPTR.A              | 1596.68241 | 2 | 9.48E-05 | 0.63 | 2.59 | - | 412.9  |
| AHQ-4-5, 2563          | R.RPPLCYHNGVQYR.N              | 1661.86889 | 2 | 2.83E-06 | 0.91 | 3.71 | - | 809.9  |
| AHQ-4-2, 2715 - 2787   | R.RPPLCYHNGVQYR.N              | 1661.86889 | 2 | 7.21E-07 | 0.82 | 3.56 | - | 547.1  |
| AHQ-4-4, 2670 - 2678   | R.RPPLCYHNGVQYR.N              | 1661.86889 | 2 | 3.56E-05 | 0.88 | 3.60 | - | 723.6  |
| AHQ-4-6, 2546          | R.RPPLCYHNGVQYR.N              | 1661.86889 | 2 | 9.30E-06 | 0.89 | 3.35 | - | 784.3  |
| AHQ-4-1, 2938 - 2939   | R.RPPLCYHNGVQYR.N              | 1661.86889 | 2 | 3.17E-06 | 0.89 | 3.70 | - | 710.1  |
| AHQ-4-3, 2705 - 2787   | R.RPPLCYHNGVQYR.N              | 1661.86889 | 2 | 1.01E-08 | 0.93 | 4.09 | - | 790.4  |
| AHQ-4-3, 2508          | R.RPPLCYHNGVQYR.N              | 1661.86889 | 2 | 1.17E-05 | 0.91 | 3.63 | - | 906.4  |
| AHQ-4-11, 3642         | K.SITLFVQEDR.A                 | 1208.34588 | 2 | 3.54E-06 | 0.87 | 3.21 | - | 998.8  |
| AHQ-4-5, 3633          | K.SITLFVQEDR.A                 | 1208.34588 | 2 | 3.54E-06 | 0.90 | 3.04 | - | 1142.9 |
| AHQ-4-2, 3887 - 3894   | K.SITLFVQEDR.A                 | 1208.34588 | 2 | 8.87E-07 | 0.93 | 3.33 | - | 1328.3 |
| AHQ-4-6, 3548 - 3559   | K.SITLFVQEDR.A                 | 1208.34588 | 2 | 1.23E-06 | 0.92 | 3.40 | - | 1278.2 |
| AHQ-4-3, 3843 - 3881   | K.SITLFVQEDR.A                 | 1208.34588 | 2 | 4.55E-06 | 0.92 | 3.44 | - | 1170.5 |
| AHQ-4-4, 3812          | K.SITLFVQEDR.A                 | 1208.34588 | 2 | 3.19E-05 | 0.93 | 3.52 | - | 1261.2 |
| AHQ-4-1, 3993          | K.SITLFVQEDR.A                 | 1208.34588 | 2 | 7.76E-06 | 0.95 | 3.82 | - | 1390.6 |
| AHQ-4-10, 3448         | K.SITLFVQEDR.A                 | 1208.34588 | 2 | 8.26E-04 | 0.92 | 3.55 | - | 1131.5 |
| AHQ-4-2, 3987          | K.SITLFVQEDR.A                 | 1208.34588 | 2 | 2.17E-06 | 0.93 | 3.36 | - | 1334.2 |
| AHQ-4-12, 3745         | K.SITLFVQEDR.A                 | 1208.34588 | 2 | 3.96E-06 | 0.94 | 3.50 | - | 1496.7 |
| AHQ-4-1, 4597 - 4613   | R.TIVTTLQDSIR.K                | 1247.42355 | 2 | 8.61E-08 | 0.96 | 4.15 | - | 1540.0 |
| AHQ-4-9, 3725          | R.TIVTTLQDSIR.K                | 1247.42355 | 2 | 7.05E-04 | 0.93 | 3.39 | - | 1266.8 |
| AHQ-4-7, 4061 - 4063   | R.TIVTTLQDSIR.K                | 1247.42355 | 2 | 7.47E-07 | 0.97 | 4.25 | - | 1650.9 |
| AHQ-4-3, 4467 - 4541   | R.TIVTTLQDSIR.K                | 1247.42355 | 2 | 2.09E-06 | 0.97 | 4.13 | - | 1610.4 |
| AHQ-4-4, 4420 - 4427   | R.TIVTTLQDSIR.K                | 1247.42355 | 2 | 4.21E-05 | 0.96 | 3.78 | - | 1851.4 |
| AHQ-4-10, 3941         | R.TIVTTLQDSIR.K                | 1247.42355 | 2 | 2.82E-05 | 0.94 | 3.09 | - | 1481.7 |
| AHQ-4-2, 4496 - 4568   | R.TIVTTLQDSIR.K                | 1247.42355 | 2 | 5.00E-06 | 0.97 | 4.15 | - | 1693.9 |
| AHQ-4-14, 5492         | R.TIVTTLQDSIR.K                | 1247.42355 | 2 | 5.99E-08 | 0.95 | 3.55 | - | 1554.4 |
| AHQ-4-6, 4106 - 4126   | R.TIVTTLQDSIR.K                | 1247.42355 | 2 | 2.49E-07 | 0.97 | 4.01 | - | 1704.0 |

|                              |                                     |            |   |          |       |        |       |          |
|------------------------------|-------------------------------------|------------|---|----------|-------|--------|-------|----------|
| AHQ-4-8, 3831                | R.TIVTTLQDSIR.K                     | 1247.42355 | 2 | 4.51E-06 | 0.95  | 3.92   | -     | 1366.9   |
| AHQ-4-5, 4173 - 4178         | R.TIVTTLQDSIR.K                     | 1247.42355 | 2 | 1.28E-05 | 0.96  | 4.31   | -     | 1593.8   |
| AHQ-4-1, 6537                | K.TKDLOAICGISCDELSSM*VLELR.G        | 2658.02070 | 3 | 1.44E-07 | 0.91  | 3.99   | -     | 1296.5   |
| AHQ-4-5, 2235 - 2306         | K.VTEENKELANELR.R                   | 1545.67685 | 2 | 3.94E-10 | 0.95  | 4.47   | -     | 1287.1   |
| AHQ-4-6, 2300                | K.VTEENKELANELR.R                   | 1545.67685 | 2 | 3.09E-05 | 0.92  | 4.11   | -     | 986.1    |
| AHQ-4-1, 2659                | K.VTEENKELANELR.R                   | 1545.67685 | 2 | 1.58E-05 | 0.59  | 2.66   | -     | 828.6    |
| AHQ-4-7, 2249 - 2253         | K.VTEENKELANELR.R                   | 1545.67685 | 2 | 7.46E-05 | 0.92  | 4.09   | -     | 1097.2   |
| AHQ-4-4, 2430                | K.VTEENKELANELR.R                   | 1545.67685 | 2 | 2.65E-08 | 0.91  | 4.18   | -     | 1054.6   |
| gj[7661818]ref[INP_054900.1] | HSPC159 protein [Homo sapiens]      |            |   | 2.56E-13 | 3.79  | 50.25  | 35.50 | 19011.6  |
| AHQ-4-11, 6608               | R.GEEQSAIYFFIPDQPPFR.V              | 2239.47029 | 2 | 5.00E-06 | 0.85  | 4.14   | -     | 266.7    |
| AHQ-4-12, 6841               | R.GEEQSAIYFFIPDQPPFR.V              | 2239.47029 | 2 | 6.96E-06 | 0.82  | 3.39   | -     | 412.2    |
| AHQ-4-13-, 6720              | R.GEEQSAIYFFIPDQPPFR.V              | 2239.47029 | 2 | 5.34E-07 | 0.88  | 4.16   | -     | 302.6    |
| AHQ-4-14-, 6609              | R.GEEQSAIYFFIPDQPPFR.V              | 2239.47029 | 2 | 6.75E-06 | 0.73  | 3.06   | -     | 341.1    |
| AHQ-4-12, 2533               | K.INGDLQITK.L                       | 1002.14688 | 1 | 1.35E-04 | 0.29  | 2.08   | -     | 327.0    |
| AHQ-4-12, 2462 - 2538        | K.INGDLQITK.L                       | 1002.14688 | 2 | 6.27E-04 | 0.79  | 2.61   | -     | 589.0    |
| AHQ-4-13, 3849 - 3882        | R.IQTLSAIDTIK.I                     | 1203.41068 | 2 | 1.01E-05 | 0.80  | 2.91   | -     | 705.2    |
| AHQ-4-13-, 3728 - 3744       | R.IQTLSAIDTIK.I                     | 1203.41068 | 2 | 5.01E-05 | 0.83  | 3.28   | -     | 666.3    |
| AHQ-4-13-, 6562              | R.NSCISGERGEEQSAIYFFIPDQPPFR.V      | 3144.41922 | 3 | 9.70E-05 | 0.72  | 3.94   | -     | 391.7    |
| AHQ-4-13-, 6686              | R.NSCISGERGEEQSAIYFFIPDQPPFR.V      | 3144.41922 | 3 | 2.76E-04 | 0.84  | 3.55   | -     | 691.0    |
| AHQ-4-13, 6636               | R.NSCISGERGEEQSAIYFFIPDQPPFR.V      | 3144.41922 | 3 | 9.63E-06 | 0.85  | 3.90   | -     | 835.8    |
| AHQ-4-11, 4660 - 4668        | R.VFVDGHQLFDYFHR.I                  | 1780.96540 | 2 | 2.56E-13 | 0.97  | 4.99   | -     | 1427.4   |
| AHQ-4-12, 4886               | R.VFVDGHQLFDYFHR.I                  | 1780.96540 | 2 | 4.86E-08 | 0.96  | 4.22   | -     | 1597.2   |
| gj[4507877]ref[INP_003364.1] | vinculin isoform VCL [Homo sapiens] |            |   | 3.12E-13 | 43.85 | 550.29 | 47.90 | 116721.6 |
| AHQ-4-5, 7302 - 7375         | K.AIPDLTAPVAAVQAAVSNLVR.V           | 2077.41342 | 2 | 2.12E-12 | 0.97  | 5.38   | -     | 1320.0   |
| AHQ-4-4, 7482 - 7488         | K.AIPDLTAPVAAVQAAVSNLVR.V           | 2077.41342 | 3 | 3.31E-04 | 0.94  | 4.67   | -     | 1340.8   |
| AHQ-4-14-, 6718 - 6785       | K.AIPDLTAPVAAVQAAVSNLVR.V           | 2077.41342 | 2 | 1.25E-08 | 0.97  | 5.37   | -     | 1182.3   |
| AHQ-4-3, 7468 - 7548         | K.AIPDLTAPVAAVQAAVSNLVR.V           | 2077.41342 | 2 | 2.29E-06 | 0.93  | 4.20   | -     | 864.0    |
| AHQ-4-9, 6733 - 6739         | K.AIPDLTAPVAAVQAAVSNLVR.V           | 2077.41342 | 2 | 9.42E-09 | 0.96  | 5.38   | -     | 960.4    |
| AHQ-4-13-, 6889              | K.AIPDLTAPVAAVQAAVSNLVR.V           | 2077.41342 | 2 | 2.44E-04 | 0.94  | 4.50   | -     | 934.5    |
| AHQ-4-12, 7093               | K.AIPDLTAPVAAVQAAVSNLVR.V           | 2077.41342 | 2 | 6.33E-09 | 0.98  | 5.67   | -     | 1487.5   |
| AHQ-4-10, 6529               | K.AIPDLTAPVAAVQAAVSNLVR.V           | 2077.41342 | 2 | 4.58E-06 | 0.96  | 5.06   | -     | 1167.9   |
| AHQ-4-8, 7247 - 7251         | K.AIPDLTAPVAAVQAAVSNLVR.V           | 2077.41342 | 2 | 2.11E-07 | 0.96  | 5.17   | -     | 1145.7   |
| AHQ-4-6, 7276 - 7278         | K.AIPDLTAPVAAVQAAVSNLVR.V           | 2077.41342 | 2 | 5.15E-10 | 0.97  | 5.11   | -     | 1087.9   |
| AHQ-4-5, 7461 - 7462         | K.AIPDLTAPVAAVQAAVSNLVR.V           | 2077.41342 | 2 | 9.51E-07 | 0.97  | 5.34   | -     | 1339.4   |
| AHQ-4-1, 7190 - 7259         | K.AIPDLTAPVAAVQAAVSNLVR.V           | 2077.41342 | 2 | 1.18E-08 | 0.96  | 4.74   | -     | 1024.4   |
| AHQ-4-11, 6765 - 6844        | K.AIPDLTAPVAAVQAAVSNLVR.V           | 2077.41342 | 2 | 8.74E-04 | 0.89  | 3.37   | -     | 945.1    |
| AHQ-4-4, 7480 - 7560         | K.AIPDLTAPVAAVQAAVSNLVR.V           | 2077.41342 | 2 | 1.82E-11 | 0.97  | 5.21   | -     | 1335.5   |
| AHQ-4-11, 6921               | K.AIPDLTAPVAAVQAAVSNLVR.V           | 2077.41342 | 2 | 1.81E-07 | 0.96  | 5.14   | -     | 968.0    |
| AHQ-4-7, 7481 - 7487         | K.AIPDLTAPVAAVQAAVSNLVR.V           | 2077.41342 | 2 | 1.53E-06 | 0.96  | 5.09   | -     | 970.7    |
| AHQ-4-7, 2997                | R.ALASQLQDSLK.D                     | 1174.32943 | 2 | 5.24E-04 | 0.89  | 3.58   | -     | 949.5    |
| AHQ-4-4, 3342                | R.ALASQLQDSLK.D                     | 1174.32943 | 2 | 6.63E-05 | 0.88  | 3.42   | -     | 1013.1   |
| AHQ-4-5, 3082 - 3094         | R.ALASQLQDSLK.D                     | 1174.32943 | 2 | 9.83E-04 | 0.93  | 3.82   | -     | 1129.7   |
| AHQ-4-8, 2826                | R.ALASQLQDSLK.D                     | 1174.32943 | 2 | 7.19E-05 | 0.81  | 2.84   | -     | 830.0    |
| AHQ-4-6, 3050                | R.ALASQLQDSLK.D                     | 1174.32943 | 2 | 1.02E-04 | 0.90  | 3.52   | -     | 890.4    |
| AHQ-4-3, 3305                | R.ALASQLQDSLK.D                     | 1174.32943 | 2 | 1.35E-04 | 0.67  | 2.92   | -     | 495.4    |
| AHQ-4-5, 3317 - 3341         | K.AQQVSQLGLDVLTAK.V                 | 1458.64233 | 2 | 6.07E-09 | 0.96  | 4.58   | -     | 1521.6   |
| AHQ-4-3, 3589                | K.AQQVSQLGLDVLTAK.V                 | 1458.64233 | 1 | 4.36E-05 | 0.67  | 3.33   | -     | 364.6    |
| AHQ-4-8, 2954 - 2959         | K.AQQVSQLGLDVLTAK.V                 | 1458.64233 | 2 | 3.15E-08 | 0.97  | 4.44   | -     | 1495.7   |
| AHQ-4-5, 3323 - 3325         | K.AQQVSQLGLDVLTAK.V                 | 1458.64233 | 1 | 6.85E-05 | 0.82  | 4.04   | -     | 478.9    |
| AHQ-4-4, 3756                | K.AQQVSQLGLDVLTAK.V                 | 1458.64233 | 1 | 1.96E-05 | 0.28  | 2.38   | -     | 424.1    |
| AHQ-4-1, 3737                | K.AQQVSQLGLDVLTAK.V                 | 1458.64233 | 2 | 2.60E-08 | 0.97  | 4.63   | -     | 1698.1   |
| AHQ-4-5, 3531                | K.AQQVSQLGLDVLTAK.V                 | 1458.64233 | 1 | 2.54E-06 | 0.77  | 3.35   | -     | 488.1    |
| AHQ-4-4, 3539                | K.AQQVSQLGLDVLTAK.V                 | 1458.64233 | 1 | 1.37E-05 | 0.72  | 3.22   | -     | 434.1    |
| AHQ-4-7, 3211                | K.AQQVSQLGLDVLTAK.V                 | 1458.64233 | 2 | 6.74E-09 | 0.95  | 4.34   | -     | 1097.6   |
| AHQ-4-4, 3484 - 3554         | K.AQQVSQLGLDVLTAK.V                 | 1458.64233 | 2 | 1.55E-10 | 0.97  | 5.00   | -     | 1434.7   |
| AHQ-4-7, 3214                | K.AQQVSQLGLDVLTAK.V                 | 1458.64233 | 1 | 7.01E-04 | 0.17  | 2.21   | -     | 373.4    |
| AHQ-4-1, 2575                | K.AVAGNISDPGLQK.S                   | 1270.41721 | 2 | 1.12E-04 | 0.90  | 3.62   | -     | 904.2    |
| AHQ-4-4, 2340 - 2410         | K.AVAGNISDPGLQK.S                   | 1270.41721 | 2 | 1.86E-05 | 0.81  | 3.50   | -     | 552.7    |
| AHQ-4-3, 2424                | K.AVAGNISDPGLQK.S                   | 1270.41721 | 2 | 1.05E-05 | 0.87  | 3.86   | -     | 629.6    |
| AHQ-4-2, 2379 - 2452         | K.AVAGNISDPGLQK.S                   | 1270.41721 | 2 | 5.94E-04 | 0.66  | 3.06   | -     | 571.7    |
| AHQ-4-6, 2274                | K.AVAGNISDPGLQK.S                   | 1270.41721 | 1 | 2.71E-04 | 0.44  | 2.81   | -     | 248.9    |
| AHQ-4-5, 2274 - 2289         | K.AVAGNISDPGLQK.S                   | 1270.41721 | 2 | 8.72E-06 | 0.82  | 3.18   | -     | 662.3    |
| AHQ-4-7, 2237                | K.AVAGNISDPGLQK.S                   | 1270.41721 | 2 | 5.35E-06 | 0.80  | 3.57   | -     | 465.4    |
| AHQ-4-6, 5854 - 5882         | K.CDRVDQLTQAQLADLAAR.G              | 1918.12182 | 2 | 7.39E-09 | 0.96  | 4.12   | -     | 1674.5   |
| AHQ-4-6, 5863                | K.CDRVDQLTQAQLADLAAR.G              | 1918.12182 | 3 | 3.83E-06 | 0.90  | 3.94   | -     | 1351.0   |
| AHQ-4-4, 6098                | K.CDRVDQLTQAQLADLAAR.G              | 1918.12182 | 2 | 2.87E-06 | 0.78  | 3.22   | -     | 797.6    |
| AHQ-4-4, 6114                | K.CDRVDQLTQAQLADLAAR.G              | 1918.12182 | 3 | 1.31E-06 | 0.90  | 4.54   | -     | 992.8    |
| AHQ-4-8, 5698                | K.CDRVDQLTQAQLADLAAR.G              | 1918.12182 | 2 | 5.00E-06 | 0.90  | 3.55   | -     | 1007.3   |
| AHQ-4-5, 5966 - 5969         | K.CDRVDQLTQAQLADLAAR.G              | 1918.12182 | 2 | 6.74E-11 | 0.95  | 4.00   | -     | 1265.6   |
| AHQ-4-5, 5973 - 5989         | K.CDRVDQLTQAQLADLAAR.G              | 1918.12182 | 3 | 2.26E-04 | 0.85  | 4.00   | -     | 1033.9   |
| AHQ-4-7, 5889 - 5897         | K.CDRVDQLTQAQLADLAAR.G              | 1918.12182 | 2 | 8.86E-08 | 0.84  | 3.08   | -     | 879.4    |
| AHQ-4-6, 2187                | R.DPSASPDGAGEQAIR.Q                 | 1471.51169 | 2 | 2.67E-04 | 0.94  | 4.08   | -     | 959.6    |
| AHQ-4-5, 2134 - 2205         | R.DPSASPDGAGEQAIR.Q                 | 1471.51169 | 2 | 1.72E-07 | 0.92  | 3.86   | -     | 757.7    |
| AHQ-4-4, 2274 - 2291         | R.DPSASPDGAGEQAIR.Q                 | 1471.51169 | 2 | 7.19E-09 | 0.90  | 4.02   | -     | 670.1    |
| AHQ-4-4, 2279                | R.DPSASPDGAGEQAIR.Q                 | 1471.51169 | 1 | 4.19E-05 | 0.37  | 2.20   | -     | 207.0    |
| AHQ-4-3, 2309                | R.DPSASPDGAGEQAIR.Q                 | 1471.51169 | 2 | 2.57E-09 | 0.90  | 3.92   | -     | 755.6    |
| AHQ-4-1, 2410                | R.DPSASPDGAGEQAIR.Q                 | 1471.51169 | 2 | 5.58E-05 | 0.83  | 2.82   | -     | 711.5    |
| AHQ-4-5, 5706                | K.ELLPVLSAMK.I                      | 1214.54325 | 2 | 9.53E-04 | 0.88  | 3.48   | -     | 675.6    |
| AHQ-4-4, 6002                | K.ELLPVLSAMK.I                      | 1214.54325 | 2 | 3.89E-04 | 0.83  | 3.03   | -     | 624.9    |
| AHQ-4-5, 4510                | K.ELLPVLSAMK.I                      | 1230.54265 | 2 | 1.23E-05 | 0.72  | 2.95   | -     | 559.9    |
| AHQ-4-10, 2857               | K.ETVQTTEDQILK.R                    | 1405.53306 | 2 | 3.12E-04 | 0.61  | 2.66   | -     | 557.1    |
| AHQ-4-5, 2917                | K.ETVQTTEDQILK.R                    | 1405.53306 | 1 | 1.14E-04 | 0.09  | 2.55   | -     | 88.4     |
| AHQ-4-3, 2937                | K.ETVQTTEDQILK.R                    | 1561.71942 | 2 | 2.37E-05 | 0.71  | 2.95   | -     | 571.0    |
| AHQ-4-6, 2730                | K.ETVQTTEDQILK.R                    | 1561.71942 | 2 | 1.97E-05 | 0.69  | 2.84   | -     | 511.5    |
| AHQ-4-11, 2832               | K.ETVQTTEDQILK.R                    | 1561.71942 | 2 | 1.39E-05 | 0.80  | 3.61   | -     | 540.7    |
| AHQ-4-1, 3109                | K.ETVQTTEDQILK.R                    | 1561.71942 | 2 | 9.76E-05 | 0.69  | 2.94   | -     | 729.8    |
| AHQ-4-5, 2721                | K.ETVQTTEDQILK.R                    | 1561.71942 | 2 | 4.10E-04 | 0.84  | 3.57   | -     | 664.8    |
| AHQ-4-10, 2711               | K.ETVQTTEDQILK.R                    | 1561.71942 | 2 | 1.09E-07 | 0.80  | 3.39   | -     | 660.1    |
| AHQ-4-4, 2910 - 2923         | K.ETVQTTEDQILK.R                    | 1561.71942 | 2 | 5.01E-04 | 0.79  | 3.16   | -     | 667.5    |
| AHQ-4-4, 7347                | R.GILSGTSDLLTFDEAEVR.K              | 2037.25656 | 2 | 1.87E-07 | 0.93  | 4.54   | -     | 1138.2   |
| AHQ-4-4, 7056 - 7102         | R.GILSGTSDLLTFDEAEVR.K              | 2037.25656 | 2 | 2.44E-05 | 0.81  | 3.99   | -     | 489.3    |
| AHQ-4-5, 7201 - 7266         | R.GILSGTSDLLTFDEAEVR.K              | 2037.25656 | 2 | 1.04E-10 | 0.96  | 5.45   | -     | 987.6    |
| AHQ-4-3, 7313                | R.GILSGTSDLLTFDEAEVR.K              | 2037.25656 | 2 | 8.28E-05 | 0.93  | 4.43   | -     | 794.7    |
| AHQ-4-4, 7264 - 7331         | R.GILSGTSDLLTFDEAEVR.K              | 2037.25656 | 2 | 5.72E-08 | 0.97  | 5.74   | -     | 1071.6   |
| AHQ-4-1, 7107                | R.GILSGTSDLLTFDEAEVR.K              | 2037.25656 | 2 | 1.28E-04 | 0.83  | 4.48   | -     | 824.2    |
| AHQ-4-4, 6752                | R.GILSGTSDLLTFDEAEVR.K              | 2165.42947 | 3 | 4.44E-08 | 0.94  | 3.69   | -     | 774.3    |
| AHQ-4-4, 6747                | R.GILSGTSDLLTFDEAEVR.K              | 2165.42947 | 2 | 1.96E-11 | 0.87  | 3.63   | -     | 941.9    |
| AHQ-4-6, 6476                | R.GILSGTSDLLTFDEAEVR.K              | 2165.42947 | 2 | 2.14E-07 | 0.53  | 3.08   | -     | 582.7    |
| AHQ-4-4, 1928 - 2006         | K.GNDIIAAAK.R                       | 872.98920  | 1 | 2.47E-05 | 0.34  | 2.12   | -     | 516.8    |
| AHQ-4-5, 3345                | K.GWLDRDPSASPDGAGEQAIR.Q            | 1984.11876 | 2 | 1.24E-06 | 0.88  | 3.81   | -     | 721.0    |
| AHQ-4-4, 3540                | K.GWLDRDPSASPDGAGEQAIR.Q            | 1984.11876 | 2 | 1.14E-05 | 0.89  | 4.25   | -     | 657.3    |
| AHQ-4-5, 1969                | K.IAELCDPKERDILR.S                  | 1347.47690 | 2 | 6.02E-05 | 0.77  | 2.95   | -     | 833.1    |
| AHQ-4-4, 3455                | K.IAELCDPKERDILR.S                  | 1960.15548 | 3 | 1.01E-06 | 0.89  | 3.53   | -     | 1381.8   |
| AHQ-4-5, 3235                | K.IAELCDPKERDILR.S                  | 1960.15548 | 3 | 5.91E-04 | 0.86  | 3.17   | -     | 1416.1   |
| AHQ-4-4, 3018                | R.IPTISTQLK.I                       | 1001.20202 | 2 | 3.61E-04 | 0.74  | 2.70   | -     | 488.2    |
| AHQ-4-5, 2822                | R.IPTISTQLK.I                       | 1001.20202 | 2 | 1.02E-04 | 0.70  | 2.64   | -     | 551.0    |
| AHQ-4-12, 2977 - 2999        | R.IPTISTQLK.I                       | 1001.20202 | 2 | 2.48E-04 | 0.79  | 2.61   | -     | 710.5    |

|                        |                                       |            |   |          |      |      |   |        |
|------------------------|---------------------------------------|------------|---|----------|------|------|---|--------|
| AHQ-4-4, 4383 - 4419   | K.KIDAAQNWLADPNNGGPEEGEEQIR.G         | 2509.67332 | 3 | 6.62E-07 | 0.94 | 5.22 | - | 1085.9 |
| AHQ-4-4, 4442          | K.KIDAAQNWLADPNNGGPEEGEEQIR.G         | 2509.67332 | 2 | 9.99E-08 | 0.83 | 3.35 | - | 415.6  |
| AHQ-4-5, 4195          | K.KIDAAQNWLADPNNGGPEEGEEQIR.G         | 2509.67332 | 3 | 3.45E-10 | 0.95 | 5.46 | - | 1267.5 |
| AHQ-4-5, 2614          | R.LANVM*MGPYR.Q                       | 1168.41500 | 2 | 1.21E-05 | 0.81 | 3.30 | - | 862.3  |
| AHQ-4-4, 3300 - 3304   | R.LANVM*MGPYR.Q                       | 1152.41560 | 2 | 5.22E-04 | 0.81 | 2.89 | - | 694.0  |
| AHQ-4-4, 2819          | R.LANVM*MGPYR.Q                       | 1168.41500 | 2 | 3.57E-06 | 0.75 | 3.58 | - | 677.6  |
| AHQ-4-5, 3011 - 3014   | K.LLVAATAPPDAPNRE.E                   | 1477.69048 | 2 | 2.06E-05 | 0.93 | 4.30 | - | 673.4  |
| AHQ-4-2, 4430          | K.LLVAATAPPDAPNREVFDER.A              | 2382.61458 | 3 | 5.85E-04 | 0.75 | 3.25 | - | 543.4  |
| AHQ-4-4, 4488          | K.LLVAATAPPDAPNREVFDER.A              | 2382.61458 | 2 | 8.12E-05 | 0.65 | 3.11 | - | 285.5  |
| AHQ-4-1, 4742          | R.LTDELAPPKPLPEGEVPPRPPPEEKDEEFPEQK.A | 4028.46845 | 3 | 1.17E-06 | 0.73 | 3.62 | - | 477.3  |
| AHQ-4-4, 4658 - 4731   | R.LTDELAPPKPLPEGEVPPRPPPEEKDEEFPEQK.A | 4028.46845 | 3 | 3.19E-04 | 0.83 | 4.08 | - | 609.0  |
| AHQ-4-3, 4660          | R.LTDELAPPKPLPEGEVPPRPPPEEKDEEFPEQK.A | 4028.46845 | 3 | 5.33E-09 | 0.54 | 3.04 | - | 458.9  |
| AHQ-4-6, 3508          | K.LVQAAQM*QSDPYSVPA.R                 | 1991.25773 | 2 | 1.46E-09 | 0.93 | 3.95 | - | 791.2  |
| AHQ-4-4, 4675          | K.LVQAAQM*QSDPYSVPA.R                 | 1975.25833 | 3 | 2.12E-04 | 0.95 | 4.22 | - | 1782.9 |
| AHQ-4-11, 3540         | K.LVQAAQM*QSDPYSVPA.R                 | 1991.25773 | 2 | 1.00E-04 | 0.93 | 4.11 | - | 788.3  |
| AHQ-4-3, 3784 - 3807   | K.LVQAAQM*QSDPYSVPA.R                 | 1991.25773 | 2 | 3.27E-06 | 0.91 | 4.26 | - | 544.8  |
| AHQ-4-2, 3818          | K.LVQAAQM*QSDPYSVPA.R                 | 1991.25773 | 2 | 1.76E-05 | 0.95 | 4.47 | - | 810.9  |
| AHQ-4-4, 3742 - 3748   | K.LVQAAQM*QSDPYSVPA.R                 | 1991.25773 | 2 | 7.38E-05 | 0.91 | 4.16 | - | 756.8  |
| AHQ-4-5, 4453          | K.LVQAAQM*QSDPYSVPA.R                 | 1975.25833 | 2 | 6.78E-04 | 0.88 | 3.91 | - | 470.7  |
| AHQ-4-5, 3574 - 3579   | K.LVQAAQM*QSDPYSVPA.R                 | 1991.25773 | 2 | 4.30E-06 | 0.93 | 4.65 | - | 586.6  |
| AHQ-4-4, 3784          | K.LVQAAQM*QSDPYSVPA.R                 | 1991.25773 | 3 | 7.08E-05 | 0.97 | 5.37 | - | 2345.7 |
| AHQ-4-12, 4194         | R.MALLMAESR.L                         | 1153.46531 | 2 | 5.28E-04 | 0.96 | 4.47 | - | 1740.4 |
| AHQ-4-6, 3939 - 3940   | K.MLGQM*TDQVADLR.A                    | 1478.72055 | 2 | 1.93E-07 | 0.96 | 4.74 | - | 1584.1 |
| AHQ-4-5, 3114 - 3118   | K.MLGQM*TDQVADLR.A                    | 1494.71995 | 2 | 2.47E-07 | 0.94 | 4.24 | - | 1361.3 |
| AHQ-4-4, 2855          | K.M*LGQM*TDQVADLR.A                   | 1510.71935 | 2 | 3.88E-06 | 0.96 | 3.75 | - | 1776.4 |
| AHQ-4-6, 3511          | K.M*LGQM*TDQVADLR.A                   | 1494.71995 | 2 | 5.02E-06 | 0.88 | 2.89 | - | 1198.1 |
| AHQ-4-6, 3072          | K.MLGQM*TDQVADLR.A                    | 1494.71995 | 2 | 1.31E-04 | 0.77 | 2.88 | - | 829.2  |
| AHQ-4-8, 3723          | K.MLGQM*TDQVADLR.A                    | 1478.72055 | 2 | 8.37E-06 | 0.96 | 4.63 | - | 1903.3 |
| AHQ-4-4, 3255          | K.MLGQM*TDQVADLR.A                    | 1494.71995 | 2 | 2.59E-04 | 0.91 | 3.37 | - | 1473.9 |
| AHQ-4-7, 3919          | K.MLGQM*TDQVADLR.A                    | 1478.72055 | 2 | 1.14E-05 | 0.96 | 3.95 | - | 1791.6 |
| AHQ-4-1, 3018          | K.M*LGQM*TDQVADLR.A                   | 1510.71935 | 2 | 3.33E-04 | 0.90 | 3.43 | - | 1117.0 |
| AHQ-4-4, 4199          | K.M*LGQM*TDQVADLR.A                   | 1510.71935 | 2 | 7.47E-04 | 0.84 | 2.98 | - | 973.8  |
| AHQ-4-5, 4014          | K.M*LGQM*TDQVADLR.A                   | 1510.71935 | 2 | 9.27E-05 | 0.94 | 3.59 | - | 1408.1 |
| AHQ-4-4, 4186          | K.MLGQM*TDQVADLR.A                    | 1478.72055 | 2 | 9.67E-08 | 0.96 | 4.20 | - | 1973.3 |
| AHQ-4-4, 3751          | K.M*LGQM*TDQVADLR.A                   | 1494.71995 | 2 | 1.83E-06 | 0.95 | 4.05 | - | 1572.7 |
| AHQ-4-5, 2713 - 2729   | K.M*LGQM*TDQVADLR.A                   | 1510.71935 | 2 | 6.01E-05 | 0.94 | 3.50 | - | 1587.1 |
| AHQ-4-4, 3092 - 3095   | K.M*SAEINEIR.V                        | 1192.36823 | 2 | 1.06E-07 | 0.93 | 3.16 | - | 1206.8 |
| AHQ-4-6, 3483          | K.MSAEINEIR.V                         | 1176.36883 | 2 | 1.39E-05 | 0.95 | 3.23 | - | 1986.5 |
| AHQ-4-5, 2889          | K.M*SAEINEIR.V                        | 1192.36823 | 2 | 4.49E-08 | 0.90 | 3.12 | - | 1119.6 |
| AHQ-4-5, 3538          | K.MSAEINEIR.V                         | 1176.36883 | 2 | 3.22E-05 | 0.92 | 3.26 | - | 1580.6 |
| AHQ-4-5, 2886 - 2914   | K.M*GLVDEAIDTK.S                      | 1309.46876 | 2 | 2.08E-07 | 0.92 | 3.27 | - | 1121.1 |
| AHQ-4-4, 3062 - 3068   | K.M*GLVDEAIDTK.S                      | 1309.46876 | 2 | 9.87E-08 | 0.94 | 3.99 | - | 1158.9 |
| AHQ-4-6, 2863          | K.M*GLVDEAIDTK.S                      | 1309.46876 | 2 | 5.51E-09 | 0.93 | 3.20 | - | 1317.0 |
| AHQ-4-4, 2870          | R.NPGNQAAYEHFETMK.N                   | 1737.87437 | 2 | 4.05E-05 | 0.83 | 3.00 | - | 687.1  |
| AHQ-4-5, 2635          | R.NPGNQAAYEHFETMK.N                   | 1737.87437 | 2 | 1.23E-05 | 0.88 | 3.45 | - | 766.6  |
| AHQ-4-4, 2854          | K.NQWIDNVEK.M                         | 1146.23464 | 1 | 1.01E-04 | 0.32 | 2.42 | - | 207.1  |
| AHQ-4-7, 2631          | K.NQWIDNVEK.M                         | 1146.23464 | 1 | 1.21E-05 | 0.45 | 2.50 | - | 218.6  |
| AHQ-4-5, 2695          | K.NQWIDNVEK.M                         | 1146.23464 | 1 | 1.80E-04 | 0.41 | 2.58 | - | 195.9  |
| AHQ-4-4, 2835 - 2907   | K.SFLDSGYR.I                          | 945.01074  | 1 | 1.47E-04 | 0.33 | 2.07 | - | 241.8  |
| AHQ-4-4, 3391          | R.SLGEISALTSK.L                       | 1106.25186 | 1 | 1.45E-04 | 0.38 | 2.56 | - | 216.9  |
| AHQ-4-1, 3621          | R.SLGEISALTSK.L                       | 1106.25186 | 2 | 2.09E-06 | 0.93 | 3.69 | - | 973.5  |
| AHQ-4-6, 3150 - 3170   | R.SLGEISALTSK.L                       | 1106.25186 | 2 | 3.84E-05 | 0.93 | 3.69 | - | 933.1  |
| AHQ-4-6, 3154          | R.SLGEISALTSK.L                       | 1106.25186 | 1 | 9.49E-08 | 0.47 | 2.92 | - | 133.4  |
| AHQ-4-4, 3028          | R.SLGEISALTSK.L                       | 1106.25186 | 1 | 7.24E-04 | 0.18 | 2.06 | - | 345.9  |
| AHQ-4-4, 3258 - 3262   | K.SLLDASEAIAIK.D                      | 1304.47187 | 2 | 2.78E-06 | 0.80 | 2.92 | - | 797.0  |
| AHQ-4-2, 3283 - 3304   | K.SLLDASEAIAIK.D                      | 1304.47187 | 2 | 3.34E-04 | 0.64 | 2.57 | - | 581.1  |
| AHQ-4-8, 2803          | K.SLLDASEAIAIK.D                      | 1304.47187 | 2 | 5.81E-06 | 0.92 | 3.45 | - | 1250.1 |
| AHQ-4-5, 3058 - 3081   | K.SLLDASEAIAIK.D                      | 1304.47187 | 2 | 7.74E-06 | 0.77 | 2.78 | - | 881.0  |
| AHQ-4-1, 3473          | K.SLLDASEAIAIK.D                      | 1304.47187 | 2 | 2.06E-06 | 0.85 | 2.84 | - | 1060.3 |
| AHQ-4-5, 2153          | K.STVEGIQASV.T                        | 1119.25064 | 2 | 5.01E-08 | 0.89 | 2.83 | - | 885.9  |
| AHQ-4-4, 2292          | K.STVEGIQASV.T                        | 1119.25064 | 2 | 1.24E-06 | 0.90 | 3.31 | - | 850.3  |
| AHQ-4-2, 2340          | K.STVEGIQASV.T                        | 1119.25064 | 2 | 3.78E-07 | 0.83 | 3.08 | - | 741.5  |
| AHQ-4-12, 2421         | R.TDAGFTLR.W                          | 880.96819  | 2 | 3.80E-05 | 0.78 | 2.57 | - | 913.5  |
| AHQ-4-14-, 6722        | R.TIESILEPVAQQISHLVIM*HEEGEVDGK.A     | 3119.49274 | 3 | 4.63E-04 | 0.66 | 3.45 | - | 283.7  |
| AHQ-4-5, 7402 - 7403   | R.TIESILEPVAQQISHLVIM*HEEGEVDGK.A     | 3103.49334 | 3 | 7.96E-07 | 0.80 | 3.98 | - | 476.5  |
| AHQ-4-11, 6796 - 6798  | R.TIESILEPVAQQISHLVIM*HEEGEVDGK.A     | 3103.49334 | 3 | 7.00E-06 | 0.89 | 4.57 | - | 572.4  |
| AHQ-4-5, 7369          | R.TIESILEPVAQQISHLVIM*HEEGEVDGK.A     | 3119.49274 | 3 | 4.97E-05 | 0.79 | 3.71 | - | 475.5  |
| AHQ-4-10, 6344         | R.TNISDEESEQATEMLVHNAQNLMSQSVK.E      | 3048.31017 | 3 | 6.89E-06 | 0.82 | 4.20 | - | 513.3  |
| AHQ-4-14-, 6430 - 6437 | R.TNISDEESEQATEMLVHNAQNLMSQSVK.E      | 3064.30957 | 3 | 3.42E-06 | 0.77 | 4.08 | - | 440.6  |
| AHQ-4-2, 7363          | R.TNISDEESEQATEMLVHNAQNLMSQSVK.E      | 3048.31017 | 3 | 1.41E-04 | 0.69 | 3.37 | - | 488.0  |
| AHQ-4-4, 4848          | R.TNISDEESEQATEMLVHNAQNLMSQSVK.E      | 3080.30897 | 3 | 2.21E-04 | 0.70 | 3.15 | - | 503.8  |
| AHQ-4-6, 7052 - 7067   | R.TNISDEESEQATEMLVHNAQNLMSQSVK.E      | 3048.31017 | 3 | 7.27E-04 | 0.71 | 3.52 | - | 437.3  |
| AHQ-4-12, 4685         | R.TNISDEESEQATEMLVHNAQNLMSQSVK.E      | 3080.30897 | 3 | 1.14E-08 | 0.69 | 3.37 | - | 441.6  |
| AHQ-4-12, 6810 - 6877  | R.TNISDEESEQATEMLVHNAQNLMSQSVK.E      | 3048.31017 | 3 | 1.72E-08 | 0.87 | 4.38 | - | 524.5  |
| AHQ-4-12, 5483         | R.TNISDEESEQATEMLVHNAQNLMSQSVK.E      | 3064.30957 | 3 | 1.49E-09 | 0.76 | 3.80 | - | 400.1  |
| AHQ-4-12, 5498 - 5543  | R.TNISDEESEQATEMLVHNAQNLMSQSVK.E      | 3080.30897 | 3 | 6.27E-08 | 0.91 | 4.57 | - | 753.7  |
| AHQ-4-12, 5923         | R.TNISDEESEQATEMLVHNAQNLMSQSVK.E      | 3048.31017 | 3 | 6.35E-08 | 0.79 | 3.43 | - | 651.1  |
| AHQ-4-12, 5865 - 5930  | R.TNISDEESEQATEMLVHNAQNLMSQSVK.E      | 3064.30957 | 3 | 6.34E-06 | 0.92 | 5.63 | - | 607.5  |
| AHQ-4-4, 7226 - 7291   | R.TNISDEESEQATEMLVHNAQNLMSQSVK.E      | 3048.31017 | 3 | 6.60E-10 | 0.93 | 5.18 | - | 691.6  |
| AHQ-4-5, 7217          | R.TNISDEESEQATEMLVHNAQNLMSQSVK.E      | 3048.31017 | 3 | 1.52E-04 | 0.92 | 4.84 | - | 703.0  |
| AHQ-4-4, 6278          | R.TNISDEESEQATEMLVHNAQNLMSQSVK.E      | 3064.30957 | 3 | 8.96E-06 | 0.73 | 3.89 | - | 532.5  |
| AHQ-4-4, 6279 - 6335   | R.TNISDEESEQATEMLVHNAQNLMSQSVK.E      | 3048.31017 | 3 | 5.78E-09 | 0.91 | 5.14 | - | 560.6  |
| AHQ-4-4, 6966 - 7031   | R.TNISDEESEQATEMLVHNAQNLMSQSVK.E      | 3064.30957 | 3 | 5.23E-06 | 0.93 | 5.58 | - | 895.4  |
| AHQ-4-4, 3194          | R.TNLLQVCER.I                         | 1134.28859 | 2 | 2.11E-04 | 0.91 | 3.32 | - | 1163.5 |
| AHQ-4-10, 2963         | R.TNLLQVCER.I                         | 1134.28859 | 1 | 2.40E-07 | 0.26 | 2.02 | - | 67.0   |
| AHQ-4-7, 5850 - 5858   | K.VAMANIQQMLVAGATSIAR.R               | 2043.44398 | 2 | 6.21E-06 | 0.85 | 3.79 | - | 539.0  |
| AHQ-4-4, 5503          | K.VAM*ANIQQMLVAGATSIAR.R              | 2059.44338 | 3 | 3.60E-06 | 0.95 | 4.52 | - | 2405.9 |
| AHQ-4-4, 5030          | K.VAM*ANIQQMLVAGATSIAR.R              | 2075.44278 | 3 | 2.24E-06 | 0.95 | 4.59 | - | 1974.2 |
| AHQ-4-5, 4837          | K.VAM*ANIQQMLVAGATSIAR.R              | 2075.44278 | 2 | 1.63E-04 | 0.89 | 4.38 | - | 617.1  |
| AHQ-4-3, 5552          | K.VAM*ANIQQMLVAGATSIAR.R              | 2059.44338 | 2 | 1.63E-04 | 0.92 | 4.51 | - | 786.6  |
| AHQ-4-4, 5007          | K.VAM*ANIQQMLVAGATSIAR.R              | 2075.44278 | 2 | 7.46E-06 | 0.82 | 3.77 | - | 475.9  |
| AHQ-4-6, 5415          | K.VAMANIQQMLVAGATSIAR.R               | 2059.44338 | 2 | 1.99E-04 | 0.87 | 4.10 | - | 448.2  |
| AHQ-4-5, 4751 - 4826   | K.VAM*ANIQQMLVAGATSIAR.R              | 2075.44278 | 2 | 6.03E-04 | 0.91 | 4.65 | - | 634.6  |
| AHQ-4-4, 5130          | R.VDQLTAQLADLAAR.G                    | 1485.66778 | 2 | 6.74E-06 | 0.96 | 3.57 | - | 2347.4 |
| AHQ-4-4, 5142          | R.VDQLTAQLADLAAR.G                    | 1485.66778 | 1 | 1.18E-04 | 0.43 | 2.62 | - | 205.7  |
| AHQ-4-5, 4978          | R.VDQLTAQLADLAAR.G                    | 1485.66778 | 2 | 1.00E-05 | 0.96 | 2.87 | - | 2486.8 |
| AHQ-4-3, 5584          | R.VLQLTSWDEDAWASK.D                   | 1749.90156 | 2 | 1.71E-06 | 0.95 | 3.91 | - | 1375.1 |
| AHQ-4-1, 5633          | R.VLQLTSWDEDAWASK.D                   | 1749.90156 | 2 | 4.76E-06 | 0.94 | 4.38 | - | 914.6  |
| AHQ-4-5, 5301 - 5369   | R.VLQLTSWDEDAWASK.D                   | 1749.90156 | 2 | 3.12E-13 | 0.97 | 4.60 | - | 1409.6 |
| AHQ-4-2, 5598          | R.VLQLTSWDEDAWASK.D                   | 1749.90156 | 2 | 1.57E-06 | 0.93 | 3.38 | - | 1110.1 |
| AHQ-4-4, 5455 - 5535   | R.VLQLTSWDEDAWASK.D                   | 1749.90156 | 2 | 2.86E-10 | 0.96 | 4.70 | - | 1324.8 |
| AHQ-4-7, 5261          | R.VLQLTSWDEDAWASK.D                   | 1749.90156 | 2 | 1.98E-11 | 0.97 | 5.15 | - | 1227.6 |
| AHQ-4-5, 3037          | R.VMLVNSMNTVK.E                       | 1236.53081 | 2 | 8.85E-06 | 0.89 | 3.41 | - | 917.3  |
| AHQ-4-4, 3154          | R.VMLVNSMNTVK.E                       | 1236.53081 | 2 | 4.37E-06 | 0.89 | 3.23 | - | 968.3  |
| AHQ-4-5, 2718 - 2719   | R.WIDNPTVDDR.G                        | 1231.29640 | 2 | 9.70E-04 | 0.95 | 3.92 | - | 1296.9 |
| AHQ-4-1, 2991          | R.WIDNPTVDDR.G                        | 1231.29640 | 2 | 3.37E-04 | 0.92 | 3.23 | - | 1135.6 |
| AHQ-4-5, 2733          | R.WIDNPTVDDR.G                        | 1231.29640 | 1 | 8.80E-05 | 0.23 | 2.49 | - | 266.4  |

|                             |                                                                         |            |   |          |       |        |       |         |
|-----------------------------|-------------------------------------------------------------------------|------------|---|----------|-------|--------|-------|---------|
| AHQ-4-4, 2831 - 2843        | R.WIDNPTVDDR.G                                                          | 1231.29640 | 2 | 1.36E-04 | 0.94  | 3.57   | -     | 1245.0  |
| gi 4503631 ref NP_000120.1  | coagulation factor XIII A1 subunit precursor; Coagulation factor XIII.  |            |   | 3.17E-13 | 18.44 | 210.28 | 34.00 | 83232.8 |
| AHQ-4-5, 5477 - 5549        | R.AVPPNNSAAEEDDLPTVELQGVPR.G                                            | 2603.82656 | 2 | 2.39E-04 | 0.73  | 2.98   | -     | 195.6   |
| AHQ-4-5, 4210               | R.EIRPNSTVQWEVEVCRPWVSGHR.K                                             | 2123.99524 | 3 | 5.99E-06 | 0.84  | 4.01   | -     | 545.8   |
| AHQ-4-6, 5668 - 5683        | K.ETFDDVLEPLSFK.K                                                       | 1526.71190 | 2 | 4.46E-07 | 0.61  | 2.57   | -     | 540.2   |
| AHQ-4-5, 6746               | R.GTQVVGSDMTVTVQFTNPLK.E                                                | 2123.41609 | 2 | 2.38E-06 | 0.98  | 5.42   | -     | 2530.0  |
| AHQ-4-5, 5522 - 5593        | K.GTYIPVPIVSELQSGK.W                                                    | 1688.94594 | 2 | 2.42E-11 | 0.88  | 3.83   | -     | 442.9   |
| AHQ-4-12, 5606 - 5619       | K.GTYIPVPIVSELQSGK.W                                                    | 1688.94594 | 2 | 1.88E-05 | 0.46  | 2.67   | -     | 329.5   |
| AHQ-4-12, 6846              | R.GVNLQEFNLVTSVHLFK.E                                                   | 1946.23831 | 2 | 4.57E-07 | 0.96  | 4.91   | -     | 1201.4  |
| AHQ-4-5, 7053 - 7121        | R.GVNLQEFNLVTSVHLFK.E                                                   | 1946.23831 | 2 | 7.36E-09 | 0.97  | 5.05   | -     | 1405.0  |
| AHQ-4-5, 7057               | R.GVNLQEFNLVTSVHLFK.E                                                   | 1946.23831 | 3 | 3.07E-06 | 0.90  | 4.42   | -     | 858.5   |
| AHQ-4-5, 7254               | R.GVNLQEFNLVTSVHLFK.E                                                   | 1946.23831 | 2 | 1.08E-06 | 0.95  | 4.71   | -     | 1197.7  |
| AHQ-4-7, 7030 - 7045        | R.GVNLQEFNLVTSVHLFK.E                                                   | 1946.23831 | 2 | 1.67E-06 | 0.96  | 4.98   | -     | 1289.8  |
| AHQ-4-10, 6288              | R.GVNLQEFNLVTSVHLFK.E                                                   | 1946.23831 | 2 | 2.50E-07 | 0.92  | 4.34   | -     | 960.6   |
| AHQ-4-13-, 6728             | R.GVNLQEFNLVTSVHLFK.E                                                   | 1946.23831 | 2 | 1.53E-07 | 0.96  | 4.93   | -     | 1055.7  |
| AHQ-4-9, 6331               | R.GVNLQEFNLVTSVHLFK.E                                                   | 1946.23831 | 2 | 1.12E-06 | 0.91  | 3.85   | -     | 995.3   |
| AHQ-4-9, 6332               | R.GVNLQEFNLVTSVHLFK.E                                                   | 1946.23831 | 2 | 2.95E-07 | 0.96  | 5.19   | -     | 1226.2  |
| AHQ-4-11, 6537              | R.GVNLQEFNLVTSVHLFK.E                                                   | 1946.23831 | 2 | 5.46E-06 | 0.95  | 4.90   | -     | 1009.0  |
| AHQ-4-14-, 6615             | R.GVNLQEFNLVTSVHLFK.E                                                   | 1946.23831 | 2 | 7.54E-10 | 0.98  | 5.51   | -     | 1733.3  |
| AHQ-4-6, 6946               | R.GVNLQEFNLVTSVHLFK.E                                                   | 1946.23831 | 2 | 2.21E-07 | 0.95  | 4.88   | -     | 1068.2  |
| AHQ-4-7, 1881               | K.KDGTTHVVENVVDATHIGK.L                                                 | 1820.98455 | 2 | 1.29E-05 | 0.89  | 3.69   | -     | 726.1   |
| AHQ-4-5, 1946 - 1962        | K.KDGTTHVVENVVDATHIGK.L                                                 | 1820.98455 | 2 | 5.78E-10 | 0.95  | 4.17   | -     | 1319.8  |
| AHQ-4-6, 2144               | K.KDGTTHVVENVVDATHIGK.L                                                 | 1820.98455 | 2 | 6.87E-04 | 0.82  | 3.26   | -     | 600.9   |
| AHQ-4-5, 2133               | K.KDGTTHVVENVVDATHIGK.L                                                 | 1820.98455 | 2 | 1.22E-04 | 0.68  | 3.12   | -     | 313.0   |
| AHQ-4-5, 2129               | K.KDGTTHVVENVVDATHIGK.L                                                 | 1820.98455 | 3 | 1.67E-04 | 0.91  | 4.01   | -     | 1075.3  |
| AHQ-4-10, 4573              | K.KETFDVTLLEPLSFK.K                                                     | 1654.88482 | 2 | 2.99E-07 | 0.94  | 3.81   | -     | 1426.1  |
| AHQ-4-7, 4810 - 4830        | K.KETFDVTLLEPLSFK.K                                                     | 1654.88482 | 2 | 1.62E-06 | 0.84  | 3.17   | -     | 779.6   |
| AHQ-4-11, 4876              | K.KETFDVTLLEPLSFK.K                                                     | 1654.88482 | 2 | 5.78E-05 | 0.90  | 3.21   | -     | 1230.1  |
| AHQ-4-5, 4965               | K.KETFDVTLLEPLSFK.K                                                     | 1654.88482 | 2 | 5.68E-09 | 0.96  | 4.47   | -     | 1464.4  |
| AHQ-4-5, 2417               | R.KLIASMSDLSR.H                                                         | 1308.53039 | 2 | 2.67E-05 | 0.90  | 3.97   | -     | 825.2   |
| AHQ-4-5, 1534               | K.KPLNTEGVMK.S                                                          | 1117.34452 | 2 | 6.05E-04 | 0.45  | 2.66   | -     | 361.7   |
| AHQ-4-5, 4566 - 4579        | R.LALETALMYGAK.K                                                        | 1281.54655 | 2 | 9.12E-05 | 0.97  | 4.53   | -     | 1871.6  |
| AHQ-4-5, 2013 - 2017        | K.LIASM*SSDLSR.H                                                        | 1196.35688 | 2 | 9.64E-04 | 0.88  | 3.09   | -     | 773.9   |
| AHQ-4-14-, 2183             | K.LIASM*SSDLSR.H                                                        | 1196.35688 | 2 | 7.96E-05 | 0.86  | 3.27   | -     | 726.5   |
| AHQ-4-11, 2878              | K.LIASMSSDLSR.H                                                         | 1180.35748 | 2 | 7.92E-05 | 0.91  | 3.34   | -     | 1082.8  |
| AHQ-4-5, 2793 - 2799        | K.LIASMSSDLSR.H                                                         | 1180.35748 | 2 | 9.69E-06 | 0.96  | 4.21   | -     | 1222.4  |
| AHQ-4-5, 5469               | R.M*YVAVWTPYGVLR.T                                                      | 1571.86734 | 2 | 1.22E-08 | 0.95  | 4.56   | -     | 973.7   |
| AHQ-4-6, 5460 - 5528        | R.M*YVAVWTPYGVLR.T                                                      | 1571.86734 | 2 | 4.32E-05 | 0.85  | 3.14   | -     | 819.0   |
| AHQ-4-9, 5480               | R.MYVAVWTPYGVLR.T                                                       | 1555.86794 | 2 | 2.41E-04 | 0.95  | 4.44   | -     | 1160.3  |
| AHQ-4-5, 6089               | R.MYVAVWTPYGVLR.T                                                       | 1555.86794 | 2 | 2.74E-06 | 0.95  | 4.72   | -     | 914.2   |
| AHQ-4-11, 5302 - 5365       | R.M*YVAVWTPYGVLR.T                                                      | 1571.86734 | 2 | 3.91E-04 | 0.80  | 2.94   | -     | 619.4   |
| AHQ-4-6, 6606               | R.NPETDITYLFPWCEDDAVYLDNEKER.E                                          | 3349.53903 | 3 | 1.14E-06 | 0.95  | 5.04   | -     | 1199.9  |
| AHQ-4-5, 6753 - 6765        | R.NPETDITYLFPWCEDDAVYLDNEKER.E                                          | 3349.53903 | 3 | 3.17E-13 | 0.95  | 5.53   | -     | 1097.4  |
| AHQ-4-5, 3362               | R.NVWVHLDGPGVTRPMK.K                                                    | 1807.11248 | 2 | 8.08E-07 | 0.91  | 4.46   | -     | 602.8   |
| AHQ-4-5, 2951               | R.NVWVHLDGPGVTRPMK.K                                                    | 1823.11188 | 2 | 2.02E-04 | 0.95  | 4.33   | -     | 983.2   |
| AHQ-4-5, 4595               | R.SNVDM*DFEVENAVLKG.D                                                   | 1783.93809 | 2 | 1.24E-07 | 0.97  | 4.69   | -     | 1909.4  |
| AHQ-4-5, 5363               | R.SNVDM*DFEVENAVLKG.D                                                   | 1783.93809 | 2 | 5.58E-05 | 0.78  | 3.05   | -     | 838.1   |
| AHQ-4-6, 4532               | R.SNVDM*DFEVENAVLKG.D                                                   | 1783.93809 | 2 | 1.49E-06 | 0.91  | 3.57   | -     | 1293.1  |
| AHQ-4-7, 5518 - 5521        | K.STVLTIPEIIIK.V                                                        | 1327.63485 | 2 | 1.36E-04 | 0.92  | 3.42   | -     | 1462.9  |
| AHQ-4-13-, 5672 - 5677      | K.STVLTIPEIIIK.V                                                        | 1327.63485 | 2 | 2.07E-05 | 0.92  | 3.54   | -     | 1290.5  |
| AHQ-4-11, 5493 - 5496       | K.STVLTIPEIIIK.V                                                        | 1327.63485 | 2 | 2.60E-05 | 0.92  | 3.42   | -     | 1407.3  |
| gi 7661678 ref NP_056461.1  | RAP1B, member of RAS oncogene family; K-REV; RAS-related protein RAP1B  |            |   | 3.83E-13 | 6.81  | 80.29  | 33.70 | 20824.7 |
| AHQ-4-11, 4826              | K.DTDDVPMILVGNKCDLEDER.V                                                | 2336.53972 | 2 | 6.65E-07 | 0.76  | 2.88   | -     | 643.8   |
| AHQ-4-11, 5100              | R.KQVEVDAQQCML*LEILD*TAGTEQFTAM*R.D                                     | 3147.50488 | 3 | 2.61E-09 | 0.97  | 5.79   | -     | 1559.9  |
| AHQ-4-11, 6390 - 6452       | R.KQVEVDAQQCML*LEILD*TAGTEQFTAM*R.D                                     | 3131.50548 | 3 | 1.80E-08 | 0.93  | 4.41   | -     | 1633.5  |
| AHQ-4-14-, 6409 - 6485      | R.KQVEVDAQQCML*LEILD*TAGTEQFTAM*R.D                                     | 3131.50548 | 3 | 2.32E-06 | 0.91  | 4.29   | -     | 1251.8  |
| AHQ-4-11, 6713              | K.QVEVDAQQCML*LEILD*TAGTEQFTAM*R.D                                      | 3003.33257 | 3 | 1.05E-05 | 0.73  | 3.75   | -     | 782.1   |
| AHQ-4-11, 3840 - 3901       | R.QWNNCAFLESSAK.S                                                       | 1556.68148 | 2 | 2.80E-06 | 0.43  | 2.95   | -     | 174.6   |
| AHQ-4-11, 4149 - 4212       | R.QWNNCAFLESSAK.S                                                       | 1556.68148 | 2 | 1.44E-07 | 0.55  | 2.87   | -     | 308.1   |
| AHQ-4-14, 4844 - 4918       | R.VKD*DDVPMILVGNK.C                                                     | 1644.91497 | 2 | 1.44E-05 | 0.80  | 2.70   | -     | 1189.9  |
| AHQ-4-13-, 3852             | R.VKD*DDVPMILVGNK.C                                                     | 1644.91497 | 2 | 2.34E-07 | 0.98  | 4.78   | -     | 2139.4  |
| AHQ-4-11, 3790 - 3794       | R.VKD*DDVPMILVGNK.C                                                     | 1644.91497 | 2 | 2.25E-04 | 0.96  | 4.81   | -     | 1521.6  |
| AHQ-4-11, 3569 - 3616       | R.VKD*DDVPMILVGNK.C                                                     | 1644.91497 | 3 | 1.30E-05 | 0.91  | 4.06   | -     | 1656.1  |
| AHQ-4-11, 3545 - 3613       | R.VKD*DDVPMILVGNK.C                                                     | 1644.91497 | 2 | 1.38E-07 | 0.98  | 5.69   | -     | 1874.8  |
| AHQ-4-13, 3989 - 3990       | R.VKD*DDVPMILVGNK.C                                                     | 1644.91497 | 2 | 4.40E-09 | 0.97  | 4.84   | -     | 1787.4  |
| AHQ-4-11, 4513 - 4582       | R.VKD*DDVPMILVGNKCDLEDER.V                                              | 2563.84420 | 3 | 1.29E-12 | 0.89  | 4.18   | -     | 995.7   |
| AHQ-4-11, 4433 - 4505       | R.VKD*DDVPMILVGNKCDLEDER.V                                              | 2563.84420 | 2 | 1.66E-08 | 0.92  | 3.92   | -     | 991.4   |
| AHQ-4-11, 4333              | R.VKD*DDVPMILVGNKCDLEDER.V                                              | 2563.84420 | 3 | 1.63E-06 | 0.87  | 4.02   | -     | 839.2   |
| AHQ-4-11, 4265 - 4328       | R.VKD*DDVPMILVGNKCDLEDER.V                                              | 2563.84420 | 2 | 3.73E-05 | 0.92  | 4.29   | -     | 833.4   |
| AHQ-4-11, 4225 - 4292       | R.VKD*DDVPMILVGNKCDLEDER.V                                              | 2563.84420 | 3 | 1.81E-11 | 0.93  | 5.00   | -     | 982.5   |
| AHQ-4-11, 4074              | R.VKD*DDVPMILVGNKCDLEDER.V                                              | 2579.84360 | 3 | 1.13E-08 | 0.96  | 5.61   | -     | 1450.0  |
| AHQ-4-11, 3934 - 4014       | R.VKD*DDVPMILVGNKCDLEDER.V                                              | 2579.84360 | 2 | 3.47E-04 | 0.70  | 2.96   | -     | 503.4   |
| AHQ-4-11, 3930 - 3997       | R.VKD*DDVPMILVGNKCDLEDER.V                                              | 2579.84360 | 3 | 1.61E-05 | 0.87  | 4.18   | -     | 800.1   |
| AHQ-4-13-, 4114 - 4117      | R.VKD*DDVPMILVGNKCDLEDER.V                                              | 2579.84360 | 3 | 5.67E-05 | 0.90  | 4.63   | -     | 794.8   |
| AHQ-4-11, 4422 - 4438       | R.VKD*DDVPMILVGNKCDLEDER.V                                              | 2563.84420 | 3 | 3.83E-13 | 0.94  | 4.84   | -     | 1013.3  |
| gi 14149734 ref NP_065174.1 | coronin, actin binding protein, 1B [Homo sapiens]                       |            |   | 6.97E-13 | 0.95  | 10.26  | 5.90  | 54234.4 |
| AHQ-4-6, 6932               | R.KSDLFQDDLPD*TAGPEAAEAEEWWSGR.D                                        | 3211.39431 | 3 | 6.97E-13 | 0.95  | 5.29   | -     | 1241.2  |
| gi 4507855 ref NP_003472.1  | Ubiquitin isopeptidase 2; Ubiquitin-specific protease-5 (ubiquitin isop |            |   | 7.99E-13 | 1.89  | 20.30  | 5.40  | 93393.2 |
| AHQ-4-5, 4135               | K.IFQNAPTDPTQDFSTQVAK.L                                                 | 2109.28133 | 2 | 8.07E-06 | 0.91  | 3.82   | -     | 786.2   |
| AHQ-4-5, 7159               | R.IGEWELIQESGPLKPLFGPGYTGR.N                                            | 2858.28283 | 3 | 7.99E-13 | 0.98  | 5.95   | -     | 2212.7  |
| gi 4505839 ref NP_002645.1  | pyruvate kinase, muscle; Pyruvate kinase-3; Thyroid hormone-binding pro |            |   | 1.04E-12 | 14.56 | 160.33 | 44.30 | 57913.6 |
| AHQ-4-7, 6157               | R.AGKPVICATQMLESIMK.K                                                   | 1879.29869 | 3 | 9.29E-06 | 0.95  | 4.34   | -     | 1970.3  |
| AHQ-4-7, 6141 - 6142        | R.AGKPVICATQMLESIMK.K                                                   | 1879.29869 | 2 | 1.73E-06 | 0.97  | 5.20   | -     | 1195.9  |
| AHQ-4-7, 5414               | K.CDENILWLDYK.N                                                         | 1470.62849 | 1 | 5.28E-05 | 0.81  | 3.59   | -     | 465.9   |
| AHQ-4-7, 5522               | K.CDENILWLDYK.N                                                         | 1470.62849 | 1 | 4.34E-04 | 0.19  | 2.23   | -     | 243.9   |
| AHQ-4-7, 5806               | R.EAEAAYHLQLFEELR.R                                                     | 1933.15326 | 2 | 3.99E-08 | 0.95  | 4.77   | -     | 976.2   |
| AHQ-4-7, 7407               | K.FGVEQDQVDM*VFASFIR.K                                                  | 1877.10995 | 2 | 2.48E-08 | 0.97  | 5.54   | -     | 1399.4  |
| AHQ-4-8, 4357               | K.GADFLVTEVENGSSLSGSK.K                                                 | 1780.91396 | 2 | 6.18E-06 | 0.89  | 3.59   | -     | 983.4   |
| AHQ-4-7, 5105 - 5110        | K.GADFLVTEVENGSSLSGSK.K                                                 | 1780.91396 | 2 | 1.05E-07 | 0.97  | 5.49   | -     | 1503.1  |
| AHQ-4-7, 4850 - 4875        | K.GADFLVTEVENGSSLSGSK.K                                                 | 1780.91396 | 2 | 1.22E-09 | 0.96  | 4.78   | -     | 1532.1  |
| AHQ-4-7, 4606               | K.GADFLVTEVENGSSLSGSK.K                                                 | 1780.91396 | 2 | 3.12E-05 | 0.93  | 3.96   | -     | 1255.8  |
| AHQ-4-7, 4523 - 4531        | K.GADFLVTEVENGSSLSGSK.K                                                 | 1780.91396 | 2 | 1.38E-05 | 0.94  | 4.58   | -     | 1135.0  |
| AHQ-4-1, 4795 - 4809        | K.GADFLVTEVENGSSLSGSK.K                                                 | 1780.91396 | 2 | 9.65E-05 | 0.68  | 2.85   | -     | 598.7   |
| AHQ-4-14-, 6369 - 6442      | R.GIFPVLCKDPVQEAWEADVLR.V                                               | 2559.87857 | 3 | 6.68E-05 | 0.92  | 4.17   | -     | 1248.9  |
| AHQ-4-7, 6809 - 6877        | R.GIFPVLCKDPVQEAWEADVLR.V                                               | 2559.87857 | 2 | 1.66E-04 | 0.95  | 4.70   | -     | 935.3   |
| AHQ-4-7, 6813 - 6881        | R.GIFPVLCKDPVQEAWEADVLR.V                                               | 2559.87857 | 3 | 3.72E-11 | 0.97  | 6.26   | -     | 1751.3  |
| AHQ-4-13, 6644 - 6649       | R.GIFPVLCKDPVQEAWEADVLR.V                                               | 2559.87857 | 3 | 1.27E-07 | 0.96  | 5.27   | -     | 1445.6  |
| AHQ-4-11, 6365 - 6366       | R.GIFPVLCKDPVQEAWEADVLR.V                                               | 2559.87857 | 3 | 2.68E-12 | 0.97  | 6.02   | -     | 1675.1  |
| AHQ-4-11, 6380              | R.GIFPVLCKDPVQEAWEADVLR.V                                               | 2559.87857 | 2 | 3.18E-06 | 0.95  | 4.73   | -     | 778.3   |
| AHQ-4-7, 2914               | K.ITLDNAYMEK.C                                                          | 1198.37126 | 2 | 1.43E-05 | 0.81  | 2.98   | -     | 558.1   |
| AHQ-4-7, 3831 - 3837        | K.KGVNLP*GAADVLPV*SEK.D                                                 | 1766.03194 | 3 | 4.42E-06 | 0.92  | 4.34   | -     | 1088.1  |
| AHQ-4-7, 3817               | K.KGVNLP*GAADVLPV*SEK.D                                                 | 1766.03194 | 2 | 5.16E-04 | 0.96  | 4.96   | -     | 981.3   |
| AHQ-4-7, 5062 - 5070        | K.KGVNLP*GAADVLPV*SEKDIQDLK.F                                           | 2478.82685 | 3 | 6.43E-07 | 0.98  |        |       |         |



|                             |                                                                         |            |   |          |      |        |       |          |
|-----------------------------|-------------------------------------------------------------------------|------------|---|----------|------|--------|-------|----------|
| AHQ-4-11, 5580 - 5641       | R.LAPITSDPTEATAVGAVEASF.K.C                                             | 2176.40912 | 2 | 1.25E-05 | 0.95 | 4.56   | -     | 1105.7   |
| AHQ-4-7, 7165               | R.LAPITSDPTEATAVGAVEASF.K.C                                             | 2176.40912 | 2 | 2.03E-05 | 0.82 | 3.15   | -     | 768.9    |
| AHQ-4-7, 6950               | R.LAPITSDPTEATAVGAVEASF.K.C                                             | 2176.40912 | 2 | 1.59E-04 | 0.90 | 3.69   | -     | 889.8    |
| AHQ-4-7, 6205 - 6281        | R.LAPITSDPTEATAVGAVEASF.K.C                                             | 2176.40912 | 2 | 9.12E-07 | 0.97 | 5.60   | -     | 1362.9   |
| AHQ-4-7, 6439 - 6511        | R.LAPITSDPTEATAVGAVEASF.K.C                                             | 2176.40912 | 2 | 1.84E-04 | 0.93 | 4.15   | -     | 979.5    |
| AHQ-4-7, 6606 - 6683        | R.LAPITSDPTEATAVGAVEASF.K.C                                             | 2176.40912 | 2 | 1.01E-06 | 0.93 | 4.14   | -     | 865.1    |
| AHQ-4-12, 5774              | R.LAPITSDPTEATAVGAVEASF.K.C                                             | 2176.40912 | 2 | 2.73E-06 | 0.92 | 3.87   | -     | 818.6    |
| AHQ-4-7, 5379               | R.LAPITSDPTEATAVGAVEASF.K.C                                             | 2176.40912 | 2 | 9.17E-06 | 0.95 | 4.15   | -     | 1048.8   |
| AHQ-4-7, 6833               | R.LAPITSDPTEATAVGAVEASF.K.C                                             | 2176.40912 | 2 | 1.60E-04 | 0.95 | 4.13   | -     | 1212.1   |
| AHQ-4-7, 6109 - 6114        | R.LAPITSDPTEATAVGAVEASF.K.C                                             | 2176.40912 | 2 | 1.30E-06 | 0.96 | 5.27   | -     | 1061.4   |
| AHQ-4-6, 3243               | R.LDIDSPPIITAR.N                                                        | 1198.35099 | 2 | 2.04E-04 | 0.91 | 3.10   | -     | 1053.4   |
| AHQ-4-7, 3142 - 3215        | R.LDIDSPPIITAR.N                                                        | 1198.35099 | 2 | 6.61E-04 | 0.94 | 3.95   | -     | 1123.0   |
| AHQ-4-12, 3373              | R.LDIDSPPIITAR.N                                                        | 1198.35099 | 2 | 3.72E-06 | 0.94 | 3.44   | -     | 1184.2   |
| AHQ-4-13-, 3432             | R.LDIDSPPIITAR.N                                                        | 1198.35099 | 2 | 2.71E-04 | 0.93 | 3.53   | -     | 1086.8   |
| AHQ-4-7, 2070               | R.LNFSHGTHEYHAETIK.N                                                    | 1885.02879 | 2 | 1.59E-05 | 0.92 | 4.17   | -     | 896.8    |
| AHQ-4-13-, 3444             | R.NTGICTIGPASR.S                                                        | 1361.54994 | 2 | 7.98E-06 | 0.92 | 3.77   | -     | 1042.9   |
| AHQ-4-7, 3943               | R.NTGICTIGPASR.S                                                        | 1361.54994 | 2 | 9.38E-05 | 0.88 | 3.23   | -     | 965.2    |
| AHQ-4-7, 3145 - 3175        | R.NTGICTIGPASR.S                                                        | 1361.54994 | 2 | 7.94E-06 | 0.93 | 4.04   | -     | 974.3    |
| AHQ-4-13, 3585              | R.NTGICTIGPASR.S                                                        | 1361.54994 | 2 | 6.18E-05 | 0.93 | 4.14   | -     | 1056.4   |
| AHQ-4-7, 5179               | R.RFDEILEASDGIMVAR.G                                                    | 1823.06385 | 2 | 1.59E-08 | 0.94 | 4.55   | -     | 851.3    |
| AHQ-4-7, 5334 - 5406        | R.RFDEILEASDGIMVAR.G                                                    | 1823.06385 | 2 | 3.22E-04 | 0.84 | 3.43   | -     | 767.7    |
| AHQ-4-7, 3873               | R.TATESFASDPILYR.P                                                      | 1571.71277 | 2 | 5.85E-07 | 0.72 | 2.99   | -     | 539.3    |
| AHQ-4-11, 5478              | R.TATESFASDPILYR.PVAVALDTK.G                                            | 2466.77140 | 3 | 1.07E-05 | 0.69 | 3.10   | -     | 572.1    |
| AHQ-4-7, 5465 - 5534        | R.TATESFASDPILYR.PVAVALDTK.G                                            | 2466.77140 | 2 | 7.92E-06 | 0.87 | 4.41   | -     | 347.9    |
| AHQ-4-7, 5457 - 5529        | R.TATESFASDPILYR.PVAVALDTK.G                                            | 2466.77140 | 3 | 2.99E-07 | 0.81 | 3.21   | -     | 902.7    |
| AHQ-4-13, 5693 - 5768       | R.TATESFASDPILYR.PVAVALDTK.G                                            | 2466.77140 | 3 | 6.33E-04 | 0.86 | 3.67   | -     | 892.1    |
| gj 13124879 ref NP_002465.1 | smooth muscle myosin heavy chain 11 isoform SM1 [Homo sapiens]          |            |   | 1.39E-12 | 8.68 | 110.38 | 5.30  | 227336.7 |
| AHQ-4-3, 4907 - 4911        | R.DLGEELK.T                                                             | 1117.23151 | 1 | 7.15E-05 | 0.10 | 2.14   | -     | 335.8    |
| AHQ-4-1, 4926               | R.DLGEELK.T                                                             | 1117.23151 | 2 | 5.96E-05 | 0.90 | 3.61   | -     | 794.6    |
| AHQ-4-2, 4938               | R.DLGEELK.T                                                             | 1117.23151 | 2 | 1.53E-04 | 0.93 | 3.80   | -     | 978.1    |
| AHQ-4-1, 2821               | R.EDQSILCTGEGSAGK.T                                                     | 1553.63107 | 2 | 3.15E-04 | 0.69 | 3.43   | -     | 386.8    |
| AHQ-4-2, 2755               | R.EDQSILCTGEGSAGK.T                                                     | 1553.63107 | 2 | 2.94E-04 | 0.71 | 2.89   | -     | 478.7    |
| AHQ-4-3, 2799               | K.FDQLLAEEK.N                                                           | 1093.21165 | 2 | 1.89E-04 | 0.90 | 2.90   | -     | 1465.7   |
| AHQ-4-2, 2804               | K.FDQLLAEEK.N                                                           | 1093.21165 | 1 | 2.38E-07 | 0.75 | 2.66   | -     | 895.5    |
| AHQ-4-4, 2780               | K.FDQLLAEEK.N                                                           | 1093.21165 | 1 | 1.30E-05 | 0.50 | 2.34   | -     | 555.0    |
| AHQ-4-2, 2800               | K.FDQLLAEEK.N                                                           | 1093.21165 | 2 | 2.39E-05 | 0.94 | 3.30   | -     | 1680.3   |
| AHQ-4-1, 2974               | K.FDQLLAEEK.N                                                           | 1093.21165 | 2 | 1.79E-05 | 0.92 | 3.51   | -     | 1354.8   |
| AHQ-4-1, 2966               | K.FDQLLAEEK.N                                                           | 1093.21165 | 1 | 8.50E-05 | 0.49 | 2.13   | -     | 840.2    |
| AHQ-4-4, 2331               | K.KEEELQAALAR.L                                                         | 1258.40643 | 1 | 2.40E-04 | 0.22 | 2.28   | -     | 286.0    |
| AHQ-4-2, 2356               | K.KEEELQAALAR.L                                                         | 1258.40643 | 1 | 4.43E-06 | 0.22 | 2.01   | -     | 472.0    |
| AHQ-4-4, 2327               | K.KEEELQAALAR.L                                                         | 1258.40643 | 2 | 3.59E-04 | 0.91 | 3.17   | -     | 1379.6   |
| AHQ-4-1, 2882               | R.KFDQLLAEEK.N                                                          | 1221.38456 | 2 | 8.47E-05 | 0.82 | 3.13   | -     | 905.8    |
| AHQ-4-2, 2567 - 2635        | R.KFDQLLAEEK.N                                                          | 1221.38456 | 2 | 2.13E-05 | 0.86 | 3.11   | -     | 968.9    |
| AHQ-4-1, 6183 - 6197        | K.LQQLFNHTMFILEQEEYQR.E                                                 | 2468.77258 | 3 | 4.30E-08 | 0.97 | 5.89   | -     | 1690.4   |
| AHQ-4-4, 5420 - 5424        | K.LQQLFNHTMFILEQEEYQR.E                                                 | 2484.77198 | 2 | 5.43E-04 | 0.45 | 2.55   | -     | 167.3    |
| AHQ-4-3, 6156               | K.LQQLFNHTMFILEQEEYQR.E                                                 | 2468.77258 | 3 | 2.17E-10 | 0.98 | 6.09   | -     | 2793.9   |
| AHQ-4-1, 5533               | K.LQQLFNHTMFILEQEEYQR.E                                                 | 2484.77198 | 3 | 1.83E-07 | 0.97 | 5.26   | -     | 1906.5   |
| AHQ-4-1, 5422               | K.LQQLFNHTMFILEQEEYQR.E                                                 | 2484.77198 | 3 | 6.12E-07 | 0.98 | 5.80   | -     | 2313.1   |
| AHQ-4-3, 5335               | K.LQQLFNHTMFILEQEEYQR.E                                                 | 2484.77198 | 3 | 7.65E-11 | 0.98 | 6.02   | -     | 3528.3   |
| AHQ-4-2, 5342               | K.LQQLFNHTMFILEQEEYQR.E                                                 | 2484.77198 | 3 | 2.57E-10 | 0.98 | 6.61   | -     | 2125.8   |
| AHQ-4-2, 5571               | K.LQQLFNHTMFILEQEEYQR.E                                                 | 2484.77198 | 3 | 1.45E-09 | 0.98 | 6.47   | -     | 1942.6   |
| AHQ-4-2, 6144 - 6218        | K.LQQLFNHTMFILEQEEYQR.E                                                 | 2468.77258 | 3 | 5.45E-11 | 0.98 | 7.55   | -     | 2949.9   |
| AHQ-4-2, 2574 - 2654        | R.NCAAYLK.L                                                             | 840.96726  | 1 | 6.26E-04 | 0.57 | 2.40   | -     | 603.1    |
| AHQ-4-2, 2327               | R.NCAAYLK.L                                                             | 840.96726  | 1 | 9.14E-05 | 0.71 | 2.18   | -     | 824.0    |
| AHQ-4-2, 4586               | R.NWQWVRL                                                               | 976.07459  | 2 | 6.99E-04 | 0.62 | 2.51   | -     | 515.0    |
| AHQ-4-6, 6082 - 6086        | K.QLLQANPILEAFGNAK.T                                                    | 1727.98540 | 2 | 9.86E-11 | 0.96 | 4.55   | -     | 1308.9   |
| AHQ-4-2, 6299 - 6371        | K.QLLQANPILEAFGNAK.T                                                    | 1727.98540 | 2 | 2.00E-07 | 0.95 | 4.67   | -     | 1002.0   |
| AHQ-4-2, 6523 - 6534        | K.QLLQANPILEAFGNAK.T                                                    | 1727.98540 | 2 | 1.50E-09 | 0.96 | 4.75   | -     | 1267.0   |
| AHQ-4-6, 6248               | K.QLLQANPILEAFGNAK.T                                                    | 1727.98540 | 2 | 1.31E-07 | 0.87 | 3.12   | -     | 738.2    |
| AHQ-4-5, 6326 - 6399        | K.QLLQANPILEAFGNAK.T                                                    | 1727.98540 | 2 | 3.16E-09 | 0.94 | 4.24   | -     | 928.6    |
| AHQ-4-5, 6127               | K.QLLQANPILEAFGNAK.T                                                    | 1727.98540 | 2 | 4.94E-10 | 0.95 | 4.44   | -     | 1094.3   |
| AHQ-4-7, 6005               | K.QLLQANPILEAFGNAK.T                                                    | 1727.98540 | 2 | 8.77E-05 | 0.71 | 2.87   | -     | 529.2    |
| AHQ-4-4, 6354 - 6374        | K.QLLQANPILEAFGNAK.T                                                    | 1727.98540 | 2 | 1.36E-06 | 0.96 | 4.91   | -     | 981.9    |
| AHQ-4-1, 6339 - 6410        | K.QLLQANPILEAFGNAK.T                                                    | 1727.98540 | 2 | 1.24E-08 | 0.97 | 5.08   | -     | 1217.4   |
| AHQ-4-3, 6543               | K.QLLQANPILEAFGNAK.T                                                    | 1727.98540 | 2 | 2.05E-08 | 0.93 | 4.78   | -     | 672.6    |
| AHQ-4-3, 6379 - 6381        | K.QLLQANPILEAFGNAK.T                                                    | 1727.98540 | 2 | 1.39E-12 | 0.96 | 4.54   | -     | 1117.0   |
| AHQ-4-9, 5492               | K.QLLQANPILEAFGNAK.T                                                    | 1727.98540 | 2 | 2.04E-07 | 0.93 | 4.04   | -     | 781.9    |
| AHQ-4-1, 6526               | K.QLLQANPILEAFGNAK.T                                                    | 1727.98540 | 2 | 4.50E-07 | 0.96 | 4.70   | -     | 1209.8   |
| AHQ-4-3, 5883               | K.TQLEELDELOATEDAK.L                                                    | 1963.04334 | 3 | 3.98E-05 | 0.94 | 5.23   | -     | 1172.7   |
| AHQ-4-1, 5886               | K.TQLEELDELOATEDAK.L                                                    | 1963.04334 | 2 | 1.58E-06 | 0.97 | 4.68   | -     | 1630.8   |
| AHQ-4-1, 5870               | K.TQLEELDELOATEDAK.L                                                    | 1963.04334 | 3 | 3.07E-07 | 0.95 | 5.25   | -     | 1117.8   |
| AHQ-4-4, 5818               | K.TQLEELDELOATEDAK.L                                                    | 1963.04334 | 2 | 2.36E-05 | 0.97 | 5.20   | -     | 1735.5   |
| AHQ-4-3, 5851               | K.TQLEELDELOATEDAK.L                                                    | 1963.04334 | 2 | 1.12E-04 | 0.98 | 5.60   | -     | 1947.0   |
| AHQ-4-2, 4124               | K.TQLEELDELOATEDAK.L                                                    | 1963.04334 | 2 | 1.17E-04 | 0.92 | 4.12   | -     | 998.3    |
| AHQ-4-3, 4108               | K.TQLEELDELOATEDAK.L                                                    | 1963.04334 | 2 | 2.58E-08 | 0.94 | 4.59   | -     | 1022.4   |
| AHQ-4-6, 5550               | K.TQLEELDELOATEDAK.L                                                    | 1963.04334 | 2 | 1.30E-09 | 0.98 | 6.39   | -     | 2090.4   |
| AHQ-4-2, 6239               | K.TQLEELDELOATEDAK.L                                                    | 1963.04334 | 2 | 1.21E-04 | 0.36 | 2.85   | -     | 273.8    |
| AHQ-4-2, 5866 - 5940        | K.TQLEELDELOATEDAK.L                                                    | 1963.04334 | 2 | 2.92E-10 | 0.99 | 7.24   | -     | 2350.0   |
| AHQ-4-7, 5609               | K.TQLEELDELOATEDAK.L                                                    | 1963.04334 | 2 | 4.39E-08 | 0.98 | 6.54   | -     | 2021.2   |
| AHQ-4-2, 6035 - 6106        | K.TQLEELDELOATEDAK.L                                                    | 1963.04334 | 2 | 6.69E-07 | 0.98 | 6.60   | -     | 2216.0   |
| AHQ-4-2, 5878               | K.TQLEELDELOATEDAK.L                                                    | 1963.04334 | 3 | 1.04E-08 | 0.94 | 5.26   | -     | 887.2    |
| gj 4505981 ref NP_002695.1  | pro-platelet basic protein (includes platelet basic protein, bet; Pro-p |            |   | 1.70E-12 | 8.29 | 100.32 | 51.60 | 13894.1  |
| AHQ-4-14, 5848 - 5916       | K.EESLSDLYAELR.C                                                        | 1540.61070 | 2 | 1.63E-08 | 0.95 | 4.64   | -     | 1086.0   |
| AHQ-4-14, 5960 - 6032       | K.EESLSDLYAELR.C                                                        | 1540.61070 | 2 | 4.53E-08 | 0.71 | 3.29   | -     | 700.9    |
| AHQ-4-14-, 4310             | K.EESLSDLYAELR.C                                                        | 1540.61070 | 2 | 9.05E-08 | 0.81 | 2.68   | -     | 755.8    |
| AHQ-4-14-, 4785             | K.EESLSDLYAELR.C                                                        | 1540.61070 | 2 | 2.72E-07 | 0.94 | 4.37   | -     | 1018.3   |
| AHQ-4-14-, 4641 - 4725      | K.EESLSDLYAELR.C                                                        | 1540.61070 | 2 | 7.34E-08 | 0.95 | 4.66   | -     | 980.8    |
| AHQ-4-14-, 4650             | K.GKEESLSDLYAELR.C                                                      | 1725.83517 | 2 | 1.70E-09 | 0.97 | 4.85   | -     | 2096.5   |
| AHQ-4-14-, 4525             | K.GKEESLSDLYAELR.C                                                      | 1725.83517 | 2 | 1.97E-10 | 0.98 | 5.66   | -     | 2906.0   |
| AHQ-4-13, 4100 - 4105       | K.GKEESLSDLYAELR.C                                                      | 1725.83517 | 2 | 5.57E-04 | 0.97 | 4.83   | -     | 1534.4   |
| AHQ-4-13, 4308              | K.GKEESLSDLYAELR.C                                                      | 1725.83517 | 2 | 5.87E-06 | 0.98 | 5.26   | -     | 2425.4   |
| AHQ-4-14-, 4395 - 4461      | K.GKEESLSDLYAELR.C                                                      | 1725.83517 | 2 | 6.91E-11 | 0.98 | 5.62   | -     | 2726.9   |
| AHQ-4-12, 4137 - 4138       | K.GKEESLSDLYAELR.C                                                      | 1725.83517 | 2 | 1.70E-12 | 0.98 | 5.43   | -     | 2495.4   |
| AHQ-4-14-, 4297 - 4362      | K.GKEESLSDLYAELR.C                                                      | 1725.83517 | 2 | 1.20E-11 | 0.98 | 6.07   | -     | 2593.5   |
| AHQ-4-14-, 5223             | K.GKEESLSDLYAELR.C                                                      | 1725.83517 | 2 | 2.51E-06 | 0.98 | 4.67   | -     | 2577.6   |
| AHQ-4-14-, 4049             | K.GKEESLSDLYAELR.C                                                      | 1725.83517 | 2 | 1.86E-11 | 0.98 | 5.95   | -     | 3053.9   |
| AHQ-4-14-, 4033 - 4111      | K.GKEESLSDLYAELR.C                                                      | 1725.83517 | 2 | 7.51E-11 | 0.98 | 5.46   | -     | 2028.6   |
| AHQ-4-14-, 3921 - 3989      | K.GKEESLSDLYAELR.C                                                      | 1725.83517 | 2 | 6.14E-11 | 0.98 | 6.01   | -     | 2483.8   |
| AHQ-4-14-, 3774 - 3857      | K.GKEESLSDLYAELR.C                                                      | 1725.83517 | 2 | 3.00E-11 | 0.98 | 6.21   | -     | 2224.9   |
| AHQ-4-14-, 3682             | K.GKEESLSDLYAELR.C                                                      | 1725.83517 | 2 | 1.50E-04 | 0.98 | 5.49   | -     | 2205.8   |
| AHQ-4-13-, 4184 - 4185      | K.GKEESLSDLYAELR.C                                                      | 1725.83517 | 3 | 3.88E-06 | 0.92 | 3.86   | -     | 1505.7   |
| AHQ-4-13-, 4180 - 4201      | K.GKEESLSDLYAELR.C                                                      | 1725.83517 | 2 | 2.33E-11 | 0.98 | 5.26   | -     | 3273.3   |
| AHQ-4-14, 6488 - 6566       | K.GKEESLSDLYAELR.C                                                      | 1725.83517 | 2 | 3.10E-07 | 0.99 | 6.39   | -     | 2852.5   |
| AHQ-4-14, 6322              | K.GKEESLSDLYAELR.C                                                      | 1725.83517 | 2 | 4.00E-06 | 0.97 | 4.79   | -     | 1667.1   |
| AHQ-4-14, 6204 - 6257       | K.GKEESLSDLYAELR.C                                                      | 1725.83517 | 2 | 5.16E-06 | 0.98 | 5.56   | -     | 2484.9   |
| AHQ-4-14, 6108 - 6137       | K.GKEESLSDLYAELR.C                                                      | 1725.83517 | 2 | 1.21E-08 | 0.97 | 4.29   | -     | 1946.4   |
| AHQ-4-14-, 4161 - 4237      | K.GKEESLSDLYAELR.C                                                      | 1725.83517 | 2 | 1.91E-10 | 0.99 | 6.28   | -     | 2838.8   |

|                             |                                                                        |            |   |          |      |       |       |         |
|-----------------------------|------------------------------------------------------------------------|------------|---|----------|------|-------|-------|---------|
| AHQ-4-14, 5946 - 6021       | K.GKEESLSDSLYAEALR.C                                                   | 1725.83517 | 2 | 8.71E-09 | 0.97 | 4.86  | -     | 1672.3  |
| AHQ-4-14, 5862 - 5926       | K.GKEESLSDSLYAEALR.C                                                   | 1725.83517 | 2 | 1.70E-11 | 0.98 | 5.71  | -     | 2682.0  |
| AHQ-4-10, 3813 - 3825       | K.GKEESLSDSLYAEALR.C                                                   | 1725.83517 | 2 | 6.60E-07 | 0.98 | 5.46  | -     | 2356.4  |
| AHQ-4-14, 5728 - 5784       | K.GKEESLSDSLYAEALR.C                                                   | 1725.83517 | 2 | 8.95E-09 | 0.98 | 4.87  | -     | 2183.8  |
| AHQ-4-14-, 6361             | K.GKEESLSDSLYAEALR.C                                                   | 1725.83517 | 2 | 2.32E-05 | 0.82 | 3.00  | -     | 1238.5  |
| AHQ-4-14, 5600 - 5668       | K.GKEESLSDSLYAEALR.C                                                   | 1725.83517 | 2 | 1.47E-10 | 0.98 | 5.08  | -     | 2416.9  |
| AHQ-4-14, 5528 - 5592       | K.GKEESLSDSLYAEALR.C                                                   | 1725.83517 | 3 | 2.08E-05 | 0.91 | 4.12  | -     | 1021.1  |
| AHQ-4-14, 5476 - 5540       | K.GKEESLSDSLYAEALR.C                                                   | 1725.83517 | 2 | 3.87E-10 | 0.98 | 5.86  | -     | 2547.6  |
| AHQ-4-14, 5408 - 5468       | K.GKEESLSDSLYAEALR.C                                                   | 1725.83517 | 3 | 3.24E-05 | 0.87 | 4.09  | -     | 834.9   |
| AHQ-4-14, 5358 - 5416       | K.GKEESLSDSLYAEALR.C                                                   | 1725.83517 | 2 | 1.91E-09 | 0.98 | 5.71  | -     | 2826.9  |
| AHQ-4-14, 5240 - 5316       | K.GKEESLSDSLYAEALR.C                                                   | 1725.83517 | 2 | 2.70E-11 | 0.98 | 5.48  | -     | 2743.2  |
| AHQ-4-14, 4629 - 4706       | K.GKEESLSDSLYAEALR.C                                                   | 1725.83517 | 2 | 1.27E-06 | 0.98 | 4.97  | -     | 2096.2  |
| AHQ-4-14, 5166 - 5232       | K.GKEESLSDSLYAEALR.C                                                   | 1725.83517 | 3 | 1.25E-08 | 0.91 | 4.40  | -     | 1051.8  |
| AHQ-4-14, 5108 - 5178       | K.GKEESLSDSLYAEALR.C                                                   | 1725.83517 | 2 | 5.19E-09 | 0.98 | 5.65  | -     | 2602.9  |
| AHQ-4-14, 5057 - 5124       | K.GKEESLSDSLYAEALR.C                                                   | 1725.83517 | 3 | 2.90E-06 | 0.92 | 4.17  | -     | 1171.7  |
| AHQ-4-14, 4976 - 5041       | K.GKEESLSDSLYAEALR.C                                                   | 1725.83517 | 2 | 6.52E-08 | 0.97 | 5.27  | -     | 1947.7  |
| AHQ-4-14, 4946 - 5026       | K.GKEESLSDSLYAEALR.C                                                   | 1725.83517 | 3 | 6.11E-07 | 0.86 | 3.99  | -     | 824.8   |
| AHQ-4-14, 4860 - 4932       | K.GKEESLSDSLYAEALR.C                                                   | 1725.83517 | 3 | 6.10E-07 | 0.80 | 3.38  | -     | 966.0   |
| AHQ-4-14, 4850 - 4916       | K.GKEESLSDSLYAEALR.C                                                   | 1725.83517 | 2 | 5.88E-10 | 0.98 | 5.46  | -     | 2666.6  |
| AHQ-4-14, 6062              | K.GKEESLSDSLYAEALRCM*CIK.T                                             | 2436.72245 | 3 | 1.82E-06 | 0.79 | 3.57  | -     | 520.1   |
| AHQ-4-14, 4904 - 4964       | K.GTHCNQVEVIATLKD                                                      | 1571.78073 | 2 | 3.38E-08 | 0.97 | 4.91  | -     | 1672.6  |
| AHQ-4-14, 4710 - 4777       | K.GTHCNQVEVIATLKD                                                      | 1571.78073 | 2 | 5.75E-08 | 0.96 | 5.08  | -     | 1267.1  |
| AHQ-4-13, 3493 - 3567       | K.GTHCNQVEVIATLKD                                                      | 1571.78073 | 2 | 1.38E-05 | 0.97 | 5.07  | -     | 1640.4  |
| AHQ-4-14, 5024 - 5089       | K.GTHCNQVEVIATLKD                                                      | 1571.78073 | 2 | 5.43E-09 | 0.97 | 5.36  | -     | 1644.6  |
| AHQ-4-13, 3583 - 3650       | K.GTHCNQVEVIATLKD                                                      | 1571.78073 | 2 | 8.73E-08 | 0.97 | 4.27  | -     | 2003.5  |
| AHQ-4-13, 3750              | K.GTHCNQVEVIATLKD                                                      | 1571.78073 | 2 | 4.35E-07 | 0.93 | 3.81  | -     | 1160.8  |
| AHQ-4-14, 4644 - 4656       | K.GTHCNQVEVIATLKD                                                      | 1571.78073 | 2 | 5.62E-08 | 0.98 | 5.58  | -     | 1819.3  |
| AHQ-4-14, 5168 - 5237       | K.GTHCNQVEVIATLKD                                                      | 1571.78073 | 2 | 2.77E-09 | 0.94 | 4.28  | -     | 1145.9  |
| AHQ-4-14-, 4441 - 4505      | K.GTHCNQVEVIATLKD                                                      | 1571.78073 | 2 | 1.27E-08 | 0.98 | 4.93  | -     | 1993.9  |
| AHQ-4-14, 5301 - 5365       | K.GTHCNQVEVIATLKD                                                      | 1571.78073 | 2 | 2.62E-04 | 0.97 | 4.45  | -     | 1872.2  |
| AHQ-4-14-, 4334             | K.GTHCNQVEVIATLKD                                                      | 1571.78073 | 2 | 8.96E-08 | 0.97 | 4.43  | -     | 1760.2  |
| AHQ-4-14, 4520 - 4588       | K.GTHCNQVEVIATLKD                                                      | 1571.78073 | 2 | 5.11E-06 | 0.96 | 4.53  | -     | 1481.1  |
| AHQ-4-14, 5425 - 5485       | K.GTHCNQVEVIATLKD                                                      | 1571.78073 | 2 | 2.02E-05 | 0.95 | 4.42  | -     | 1169.6  |
| AHQ-4-14-, 4186 - 4251      | K.GTHCNQVEVIATLKD                                                      | 1571.78073 | 2 | 4.62E-06 | 0.96 | 4.50  | -     | 1516.3  |
| AHQ-4-14, 4436 - 4512       | K.GTHCNQVEVIATLKD                                                      | 1571.78073 | 2 | 1.50E-06 | 0.97 | 4.81  | -     | 1523.4  |
| AHQ-4-14, 5561 - 5632       | K.GTHCNQVEVIATLKD                                                      | 1571.78073 | 2 | 1.18E-06 | 0.94 | 4.45  | -     | 1182.9  |
| AHQ-4-14-, 4023 - 4082      | K.GTHCNQVEVIATLKD                                                      | 1571.78073 | 2 | 7.75E-10 | 0.97 | 5.18  | -     | 1659.6  |
| AHQ-4-14, 4352 - 4373       | K.GTHCNQVEVIATLKD                                                      | 1571.78073 | 2 | 2.74E-06 | 0.97 | 5.09  | -     | 1567.1  |
| AHQ-4-14, 4268 - 4332       | K.GTHCNQVEVIATLKD                                                      | 1571.78073 | 2 | 4.91E-09 | 0.97 | 5.58  | -     | 1542.0  |
| AHQ-4-14, 5836              | K.GTHCNQVEVIATLKD                                                      | 1571.78073 | 2 | 9.10E-06 | 0.90 | 3.72  | -     | 837.0   |
| AHQ-4-14-, 3937 - 3997      | K.GTHCNQVEVIATLKD                                                      | 1571.78073 | 2 | 8.99E-10 | 0.98 | 5.41  | -     | 2280.3  |
| AHQ-4-14-, 3809 - 3873      | K.GTHCNQVEVIATLKD                                                      | 1571.78073 | 2 | 1.88E-10 | 0.97 | 5.35  | -     | 1511.6  |
| AHQ-4-14, 4140 - 4204       | K.GTHCNQVEVIATLKD                                                      | 1571.78073 | 2 | 3.43E-04 | 0.95 | 3.87  | -     | 1432.1  |
| AHQ-4-14-, 3681 - 3745      | K.GTHCNQVEVIATLKD                                                      | 1571.78073 | 2 | 1.44E-08 | 0.98 | 5.06  | -     | 1740.4  |
| AHQ-4-14, 4776 - 4841       | K.GTHCNQVEVIATLKD                                                      | 1571.78073 | 2 | 3.58E-10 | 0.98 | 5.40  | -     | 2055.9  |
| AHQ-4-14-, 3573 - 3638      | K.GTHCNQVEVIATLKD                                                      | 1571.78073 | 2 | 5.87E-10 | 0.97 | 5.32  | -     | 1559.3  |
| AHQ-4-14-, 3446 - 3509      | K.GTHCNQVEVIATLKD                                                      | 1571.78073 | 2 | 1.84E-07 | 0.97 | 4.92  | -     | 1353.4  |
| AHQ-4-14, 6213              | K.GTHCNQVEVIATLKD                                                      | 1571.78073 | 2 | 6.23E-05 | 0.94 | 4.40  | -     | 1135.1  |
| AHQ-4-14, 6309 - 6364       | K.GTHCNQVEVIATLKD                                                      | 1571.78073 | 2 | 1.40E-04 | 0.89 | 4.13  | -     | 703.0   |
| AHQ-4-14-, 3369 - 3429      | K.GTHCNQVEVIATLKD                                                      | 1571.78073 | 2 | 1.83E-10 | 0.97 | 5.52  | -     | 1618.2  |
| AHQ-4-14-, 3305 - 3350      | K.GTHCNQVEVIATLKD                                                      | 1571.78073 | 2 | 1.84E-07 | 0.97 | 4.84  | -     | 1535.0  |
| AHQ-4-14-, 3219 - 3281      | K.GTHCNQVEVIATLKD                                                      | 1571.78073 | 2 | 1.47E-07 | 0.97 | 5.10  | -     | 1574.1  |
| AHQ-4-14, 5678 - 5753       | K.GTHCNQVEVIATLKD                                                      | 1571.78073 | 2 | 1.52E-04 | 0.94 | 4.01  | -     | 1414.7  |
| AHQ-4-13-, 3280 - 3356      | K.GTHCNQVEVIATLKD                                                      | 1571.78073 | 2 | 1.86E-04 | 0.87 | 3.52  | -     | 715.4   |
| AHQ-4-13-, 3648             | K.GTHCNQVEVIATLKD                                                      | 1571.78073 | 2 | 5.24E-07 | 0.96 | 4.56  | -     | 1521.6  |
| AHQ-4-13-, 3392 - 3462      | K.GTHCNQVEVIATLKD                                                      | 1571.78073 | 2 | 1.46E-04 | 0.94 | 3.86  | -     | 1395.0  |
| AHQ-4-14-, 3771             | K.GTHCNQVEVIATLKDGR.K                                                  | 1900.10650 | 3 | 9.14E-05 | 0.79 | 3.43  | -     | 674.2   |
| AHQ-4-14, 4089 - 4121       | K.GTHCNQVEVIATLKDGR.K                                                  | 1900.10650 | 3 | 9.51E-05 | 0.93 | 4.24  | -     | 1195.8  |
| AHQ-4-14, 4049 - 4112       | K.GTHCNQVEVIATLKDGR.K                                                  | 1900.10650 | 2 | 1.91E-04 | 0.98 | 6.13  | -     | 1820.7  |
| AHQ-4-14-, 3465             | K.GTHCNQVEVIATLKDGR.K                                                  | 1900.10650 | 3 | 1.98E-07 | 0.91 | 4.50  | -     | 796.4   |
| AHQ-4-14, 3985 - 3989       | K.GTHCNQVEVIATLKDGR.K                                                  | 1900.10650 | 3 | 1.10E-10 | 0.94 | 4.59  | -     | 1220.4  |
| AHQ-4-14, 3916 - 3984       | K.GTHCNQVEVIATLKDGR.K                                                  | 1900.10650 | 2 | 1.74E-05 | 0.98 | 5.54  | -     | 1937.6  |
| AHQ-4-14, 4594              | K.GTHCNQVEVIATLKDGR.K                                                  | 1900.10650 | 2 | 6.62E-06 | 0.92 | 4.09  | -     | 714.9   |
| AHQ-4-14, 4658              | K.GTHCNQVEVIATLKDGR.K                                                  | 1900.10650 | 3 | 4.30E-04 | 0.35 | 3.16  | -     | 405.0   |
| AHQ-4-14-, 2897 - 2977      | K.GTHCNQVEVIATLKDGR.K                                                  | 1900.10650 | 3 | 2.46E-08 | 0.95 | 4.66  | -     | 1213.6  |
| AHQ-4-14-, 2907 - 2979      | K.GTHCNQVEVIATLKDGR.K                                                  | 1900.10650 | 2 | 5.95E-06 | 0.96 | 5.26  | -     | 865.2   |
| AHQ-4-14, 4213 - 4282       | K.GTHCNQVEVIATLKDGR.K                                                  | 1900.10650 | 3 | 4.68E-07 | 0.92 | 4.14  | -     | 1031.4  |
| AHQ-4-14, 3810              | K.GTHCNQVEVIATLKDGRK.I                                                 | 2028.27941 | 3 | 2.34E-08 | 0.81 | 3.76  | -     | 581.4   |
| AHQ-4-14, 3616              | K.GTHCNQVEVIATLKDGRK.I                                                 | 2028.27941 | 2 | 5.81E-05 | 0.97 | 5.35  | -     | 1624.6  |
| AHQ-4-14-, 2641 - 2715      | K.GTHCNQVEVIATLKDGRK.I                                                 | 2028.27941 | 2 | 4.37E-05 | 0.96 | 5.14  | -     | 1030.9  |
| AHQ-4-13-, 2880             | K.ICLDPDAPR.I                                                          | 1058.19059 | 2 | 1.20E-04 | 0.81 | 2.90  | -     | 858.0   |
| AHQ-4-14-, 2725 - 2789      | K.ICLDPDAPR.I                                                          | 1058.19059 | 2 | 9.12E-05 | 0.78 | 2.85  | -     | 865.8   |
| AHQ-4-13-, 2588             | R.ICLDPDAPR.I                                                          | 1186.36350 | 2 | 1.81E-04 | 0.84 | 2.97  | -     | 826.1   |
| AHQ-4-14, 3640 - 3701       | R.ICLDPDAPR.I                                                          | 1186.36350 | 2 | 8.03E-05 | 0.88 | 3.31  | -     | 893.2   |
| AHQ-4-14, 3089              | R.ICLDPDAPR.I                                                          | 1186.36350 | 2 | 1.18E-05 | 0.86 | 3.00  | -     | 963.1   |
| AHQ-4-14-, 2593             | R.ICLDPDAPR.I                                                          | 1186.36350 | 2 | 1.26E-05 | 0.70 | 2.94  | -     | 616.7   |
| AHQ-4-14-, 2458 - 2517      | R.ICLDPDAPR.I                                                          | 1186.36350 | 2 | 3.27E-05 | 0.91 | 3.20  | -     | 1061.4  |
| AHQ-4-14, 3837 - 3905       | R.ICLDPDAPR.I                                                          | 1186.36350 | 2 | 4.45E-04 | 0.70 | 2.72  | -     | 691.4   |
| AHQ-4-14-, 2389 - 2457      | R.ICLDPDAPR.I                                                          | 1186.36350 | 2 | 1.50E-04 | 0.89 | 3.64  | -     | 778.7   |
| AHQ-4-14, 3522 - 3580       | R.ICLDPDAPR.I                                                          | 1186.36350 | 2 | 1.84E-04 | 0.86 | 3.01  | -     | 943.8   |
| AHQ-4-14, 3193 - 3270       | R.ICLDPDAPR.I                                                          | 1186.36350 | 2 | 1.16E-04 | 0.74 | 3.00  | -     | 692.6   |
| AHQ-4-14, 3300 - 3365       | R.ICLDPDAPR.I                                                          | 1186.36350 | 2 | 1.12E-05 | 0.88 | 3.44  | -     | 853.3   |
| AHQ-4-12, 2509              | R.ICLDPDAPR.I                                                          | 1186.36350 | 2 | 9.08E-05 | 0.63 | 2.75  | -     | 786.0   |
| AHQ-4-14, 1849              | K.KLAGDESAD                                                            | 905.92969  | 1 | 5.81E-05 | 0.35 | 2.16  | -     | 356.3   |
| AHQ-4-14, 1930              | K.KLAGDESAD                                                            | 905.92969  | 1 | 3.08E-04 | 0.07 | 1.88  | -     | 201.7   |
| AHQ-4-14, 2345              | K.KLAGDESAD                                                            | 905.92969  | 1 | 5.90E-05 | 0.13 | 1.86  | -     | 232.9   |
| AHQ-4-14, 1606              | K.KLAGDESAD                                                            | 905.92969  | 1 | 4.07E-04 | 0.17 | 1.88  | -     | 305.6   |
| AHQ-4-14, 4477 - 4550       | K.NIQSLEVIQ.G                                                          | 1101.27845 | 2 | 5.38E-04 | 0.81 | 3.39  | -     | 560.5   |
| AHQ-4-14-, 4093             | K.NIQSLEVIQ.G                                                          | 1101.27845 | 1 | 5.34E-04 | 0.68 | 2.61  | -     | 581.9   |
| AHQ-4-14-, 3654             | K.NIQSLEVIQ.G                                                          | 1101.27845 | 2 | 8.36E-05 | 0.85 | 3.03  | -     | 993.6   |
| AHQ-4-14, 4161 - 4228       | K.NIQSLEVIQ.G                                                          | 1101.27845 | 2 | 3.47E-05 | 0.90 | 3.64  | -     | 825.2   |
| AHQ-4-14-, 3273 - 3333      | K.NIQSLEVIQ.G                                                          | 1101.27845 | 2 | 7.40E-06 | 0.86 | 3.30  | -     | 757.2   |
| AHQ-4-14, 4392 - 4420       | K.NIQSLEVIQ.G                                                          | 1101.27845 | 2 | 3.00E-06 | 0.85 | 3.55  | -     | 589.1   |
| AHQ-4-14, 4600 - 4621       | K.NIQSLEVIQ.G                                                          | 1101.27845 | 2 | 4.58E-06 | 0.80 | 2.81  | -     | 800.0   |
| AHQ-4-14-, 3146 - 3210      | K.NIQSLEVIQ.G                                                          | 1101.27845 | 2 | 4.95E-05 | 0.91 | 4.10  | -     | 748.8   |
| AHQ-4-14, 4685 - 4732       | K.NIQSLEVIQ.G                                                          | 1101.27845 | 2 | 3.52E-05 | 0.87 | 3.28  | -     | 909.6   |
| AHQ-4-13, 3538              | K.NIQSLEVIQ.G                                                          | 1101.27845 | 2 | 1.23E-05 | 0.85 | 3.13  | -     | 725.7   |
| AHQ-4-14, 4708              | K.NIQSLEVIQ.G                                                          | 1101.27845 | 1 | 1.51E-05 | 0.77 | 3.01  | -     | 469.4   |
| AHQ-4-14-, 3035 - 3114      | K.NIQSLEVIQ.G                                                          | 1101.27845 | 2 | 2.72E-07 | 0.83 | 3.20  | -     | 674.5   |
| AHQ-4-13-, 3324 - 3325      | K.NIQSLEVIQ.G                                                          | 1101.27845 | 2 | 3.24E-05 | 0.86 | 3.57  | -     | 611.0   |
| gj 17986260 ref NP_524147.1 | smooth muscle and non-muscle myosin alkali light chain isoform 2 [Homo |            |   | 1.91E-12 | 3.59 | 40.36 | 23.30 | 12969.7 |
| AHQ-4-12, 5645 - 5713       | K.M*TEEEVEM*LVAGHEDSNGCINYEELVR.M                                      | 3188.42436 | 3 | 5.28E-07 | 0.98 | 7.28  | -     | 1699.5  |
| AHQ-4-12, 5785 - 5849       | K.M*TEEEVEM*LVAGHEDSNGCINYEELVR.M                                      | 3172.42496 | 3 | 2.57E-04 | 0.64 | 4.23  | -     | 419.2   |
| AHQ-4-12, 5909 - 5973       | K.M*TEEEVEM*LVAGHEDSNGCINYEELVR.M                                      | 3172.42496 | 3 | 1.04E-04 | 0.84 | 5.14  | -     | 631.3   |
| AHQ-4-12, 6037 - 6113       | K.M*TEEEVEM*LVAGHEDSNGCINYEELVR.M                                      | 3172.42496 | 3 | 1.22E-07 | 0.96 | 7.18  | -     | 1542.1  |
| AHQ-4-12, 6097              | K.M*TEEEVEM*LVAGHEDSNGCINYEELVR.M                                      | 3156.42556 | 3 | 9.85E-06 | 0.95 | 5.00  | -     | 1646.4  |
| AHQ-4-12, 6174 - 6237       | K.M*TEEEVEM*LVAGHEDSNGCINYEELVR.M                                      | 3172.42496 | 3 | 1.16E-09 | 0.82 | 4.36  | -     | 792.1   |

|                             |                                                                        |            |      |          |       |         |       |         |
|-----------------------------|------------------------------------------------------------------------|------------|------|----------|-------|---------|-------|---------|
| AHQ-4-12, 6197 - 6277       | K.MTEEEVEMLVAGHEDSNGCINYEELVR.M                                        | 3156.42556 | 3    | 4.55E-06 | 0.98  | 5.98    | -     | 2162.9  |
| AHQ-4-12, 6306 - 6339       | K.M*TEEEVEMLVAGHEDSNGCINYEELVR.M                                       | 3172.42496 | 3    | 1.97E-07 | 0.85  | 4.96    | -     | 891.8   |
| AHQ-4-12, 6342 - 6405       | K.MTEEEVEMLVAGHEDSNGCINYEELVR.M                                        | 3156.42556 | 3    | 4.27E-05 | 0.96  | 5.14    | -     | 1919.2  |
| AHQ-4-12, 7111 - 7159       | K.M*TEEEVEMLVAGHEDSNGCINYEELVR.M                                       | 3172.42496 | 3    | 3.42E-07 | 0.86  | 4.65    | -     | 723.7   |
| AHQ-4-13, 5994              | K.M*TEEEVEMLVAGHEDSNGCINYEELVR.M                                       | 3172.42496 | 3    | 1.31E-04 | 0.32  | 3.30    | -     | 299.0   |
| AHQ-4-14-, 5494             | K.M*TEEEVEM*LVAGHEDSNGCINYEELVR.M                                      | 3188.42436 | 3    | 9.89E-10 | 0.94  | 5.11    | -     | 1346.1  |
| AHQ-4-14-, 5877 - 5949      | K.MTEEEVEM*LVAGHEDSNGCINYEELVR.M                                       | 3172.42496 | 3    | 1.91E-12 | 0.85  | 4.58    | -     | 1045.3  |
| gi 5453595 ref NP_006358.1  | adenyl cyclase-associated protein [Homo sapiens]                       |            |      |          |       |         |       |         |
| AHQ-4-13, 2930 - 2933       | R.ALLVTASQCQQAENK.L                                                    | 1759.96271 | 2    | 2.03E-12 | 10.13 | 130.27  | 32.80 | 51672.7 |
| AHQ-4-8, 2482               | R.ALLVTASQCQQAENK.L                                                    | 1759.96271 | 2    | 9.97E-04 | 0.94  | 4.87    | -     | 704.2   |
| AHQ-4-7, 6758 - 6837        | R.ALLVTASQCQQAENK.LSDLLAPISEQIK.E                                      | 1759.96271 | 2    | 1.91E-05 | 0.95  | 4.74    | -     | 987.0   |
| AHQ-4-7, 6667               | R.ALLVTASQCQQAENK.LSDLLAPISEQIK.E                                      | 3168.60826 | 3    | 3.86E-08 | 0.91  | 4.88    | -     | 950.5   |
| AHQ-4-7, 2927               | K.EPAVLELEGG.K                                                         | 3168.60826 | 3    | 1.87E-06 | 0.95  | 5.45    | -     | 1403.3  |
| AHQ-4-7, 2314               | K.KEPVLELEGG.K                                                         | 1085.23265 | 1    | 5.99E-04 | 0.20  | 2.00    | -     | 306.0   |
| AHQ-4-7, 7581               | K.LGLVFDVVGVIEIINSK.D                                                  | 1427.66814 | 2    | 3.50E-04 | 0.66  | 2.68    | -     | 416.9   |
| AHQ-4-5, 5007               | K.LSDLLAPISEQIK.E                                                      | 1931.26186 | 2    | 1.73E-09 | 0.97  | 5.11    | -     | 1594.1  |
| AHQ-4-7, 4834 - 4906        | K.LSDLLAPISEQIK.E                                                      | 1427.66814 | 1    | 9.17E-04 | 0.68  | 3.41    | -     | 425.3   |
| AHQ-4-9, 4428               | K.LSDLLAPISEQIK.E                                                      | 1427.66814 | 2    | 4.45E-04 | 0.88  | 3.63    | -     | 936.0   |
| AHQ-4-7, 4835               | K.LSDLLAPISEQIK.E                                                      | 1427.66814 | 1    | 1.09E-05 | 0.68  | 3.23    | -     | 479.2   |
| AHQ-4-13-, 5012             | K.LSDLLAPISEQIK.E                                                      | 1427.66814 | 1    | 3.02E-05 | 0.38  | 2.15    | -     | 417.6   |
| AHQ-4-12, 5054              | K.LSDLLAPISEQIK.E                                                      | 1427.66814 | 2    | 7.43E-06 | 0.84  | 2.97    | -     | 858.9   |
| AHQ-4-7, 2849               | K.NSLDCEIVSAK.S                                                        | 1427.66814 | 2    | 6.74E-06 | 0.81  | 3.09    | -     | 816.2   |
| AHQ-4-7, 4557               | R.SALFAQINQGGSITHALK.H                                                 | 1237.36245 | 2    | 9.50E-06 | 0.92  | 3.19    | -     | 1142.8  |
| AHQ-4-7, 4417 - 4489        | R.SALFAQINQGGSITHALK.H                                                 | 1929.16615 | 2    | 1.86E-06 | 0.57  | 3.45    | -     | 305.0   |
| AHQ-4-9, 4096               | R.SALFAQINQGGSITHALK.H                                                 | 1929.16615 | 3    | 2.48E-06 | 0.71  | 3.41    | -     | 777.1   |
| AHQ-4-7, 4398 - 4474        | R.SALFAQINQGGSITHALK.H                                                 | 1929.16615 | 2    | 6.28E-05 | 0.94  | 4.79    | -     | 911.7   |
| AHQ-4-8, 4199               | R.SALFAQINQGGSITHALK.H                                                 | 1929.16615 | 2    | 2.92E-07 | 0.92  | 5.00    | -     | 599.5   |
| AHQ-4-7, 4690               | R.SALFAQINQGGSITHALK.H                                                 | 1929.16615 | 3    | 4.07E-06 | 0.72  | 3.14    | -     | 543.3   |
| AHQ-4-8, 4195               | R.SALFAQINQGGSITHALK.H                                                 | 1929.16615 | 2    | 2.03E-12 | 0.95  | 4.65    | -     | 988.5   |
| AHQ-4-7, 1861               | R.SGPKPFSAPKPTQSPSPK.R                                                 | 1929.16615 | 2    | 1.17E-09 | 0.90  | 4.44    | -     | 687.4   |
| AHQ-4-7, 1857               | R.SGPKPFSAPKPTQSPSPK.R                                                 | 1839.08461 | 2    | 5.63E-07 | 0.89  | 4.02    | -     | 813.2   |
| AHQ-4-7, 6737 - 6810        | K.SSEMNVLIPTGGDFNEFPVPEQFK.T                                           | 1839.08461 | 3    | 8.44E-08 | 0.89  | 3.45    | -     | 1245.2  |
| AHQ-4-13, 6276 - 6290       | K.SSEM*NVLIPTGGDFNEFPVPEQFK.T                                          | 2813.08809 | 2    | 5.56E-05 | 0.71  | 3.29    | -     | 252.7   |
| AHQ-4-14-, 6297 - 6370      | K.SSEMNVLIPTGGDFNEFPVPEQFK.T                                           | 2829.08749 | 2    | 1.35E-06 | 0.80  | 3.70    | -     | 221.5   |
| AHQ-4-10, 6057              | K.SSEMNVLIPTGGDFNEFPVPEQFK.T                                           | 2813.08809 | 2    | 4.54E-06 | 0.81  | 3.89    | -     | 250.9   |
| AHQ-4-13, 6618 - 6629       | K.SSEMNVLIPTGGDFNEFPVPEQFK.T                                           | 2813.08809 | 2    | 1.09E-05 | 0.53  | 3.02    | -     | 184.2   |
| AHQ-4-14-, 5953 - 6029      | K.SSEM*NVLIPTGGDFNEFPVPEQFK.T                                          | 2813.08809 | 2    | 6.16E-05 | 0.67  | 3.21    | -     | 287.0   |
| AHQ-4-11, 6298 - 6358       | K.SSEMNVLIPTGGDFNEFPVPEQFK.T                                           | 2829.08749 | 2    | 1.67E-06 | 0.70  | 3.23    | -     | 258.1   |
| AHQ-4-11, 6038 - 6042       | K.SSEM*NVLIPTGGDFNEFPVPEQFK.T                                          | 2813.08809 | 2    | 6.74E-04 | 0.58  | 2.75    | -     | 298.5   |
| AHQ-4-11, 4862              | R.VENQENSVNLVIEDTELK.Q                                                 | 2829.08749 | 2    | 6.31E-06 | 0.72  | 3.44    | -     | 178.0   |
| AHQ-4-12, 4765              | R.VENQENSVNLVIEDTELK.Q                                                 | 2074.23206 | 2    | 3.16E-04 | 0.83  | 3.99    | -     | 512.7   |
| AHQ-4-11, 4526 - 4592       | R.VENQENSVNLVIEDTELK.Q                                                 | 2074.23206 | 2    | 9.24E-07 | 0.93  | 4.41    | -     | 796.6   |
| AHQ-4-10, 4311              | R.VENQENSVNLVIEDTELK.Q                                                 | 2074.23206 | 2    | 6.73E-07 | 0.89  | 4.21    | -     | 667.6   |
| AHQ-4-13, 4866              | R.VENQENSVNLVIEDTELK.Q                                                 | 2074.23206 | 2    | 3.09E-06 | 0.92  | 4.20    | -     | 888.9   |
| AHQ-4-8, 4397               | R.VENQENSVNLVIEDTELK.Q                                                 | 2074.23206 | 2    | 1.37E-09 | 0.89  | 4.01    | -     | 688.0   |
| AHQ-4-7, 4730 - 4809        | R.VENQENSVNLVIEDTELK.Q                                                 | 2074.23206 | 2    | 4.72E-08 | 0.93  | 4.67    | -     | 802.0   |
| AHQ-4-14, 5954              | R.VENQENSVNLVIEDTELK.Q                                                 | 2074.23206 | 2    | 1.79E-08 | 0.93  | 4.40    | -     | 875.1   |
| AHQ-4-7, 4239               | R.VENQENSVNLVIEDTELK.Q                                                 | 2074.23206 | 2    | 8.02E-07 | 0.93  | 4.77    | -     | 823.5   |
| AHQ-4-13-, 4762             | R.VENQENSVNLVIEDTELK.Q                                                 | 2074.23206 | 2    | 2.19E-05 | 0.88  | 3.98    | -     | 550.5   |
| AHQ-4-7, 4589 - 4658        | R.VENQENSVNLVIEDTELK.Q                                                 | 2074.23206 | 2    | 5.19E-05 | 0.59  | 2.98    | -     | 752.3   |
| AHQ-4-14-, 4691             | R.VENQENSVNLVIEDTELK.Q                                                 | 2074.23206 | 2    | 6.33E-08 | 0.93  | 4.81    | -     | 563.7   |
| AHQ-4-1, 4994 - 5009        | R.VENQENSVNLVIEDTELK.Q                                                 | 2074.23206 | 2    | 4.53E-04 | 0.91  | 4.13    | -     | 660.5   |
| AHQ-4-13-, 2613             | K.VPTISINK.T                                                           | 2074.23206 | 2    | 1.27E-04 | 0.72  | 3.02    | -     | 544.6   |
| gi 9507215 ref NP_061816.1  | tubulin, alpha-like 2; tubulin, alpha 8 [Homo sapiens]                 | 872.04435  | 1    | 1.47E-04 | 0.37  | 2.42    | -     | 258.3   |
| AHQ-4-14-, 5209             | R.AVMIDLEPTVVDEVR.A                                                    | 2.13E-12   | 3.36 | 40.20    | 13.10 | 50093.2 | -     |         |
| AHQ-4-7, 3271               | K.DVNVAIAIK.T                                                          | 1686.95185 | 2    | 2.43E-04 | 0.86  | 3.15    | -     | 941.1   |
| AHQ-4-9, 4892               | R.IHFPLVTYAPIISAEK.A                                                   | 1014.20080 | 1    | 2.11E-04 | 0.70  | 3.22    | -     | 394.9   |
| AHQ-4-7, 5331 - 5365        | R.IHFPLVTYAPIISAEK.A                                                   | 1800.13312 | 2    | 6.94E-05 | 0.82  | 3.03    | -     | 537.5   |
| AHQ-4-14-, 5201             | K.INDDDSFTTFFSETGNKG.H                                                 | 1800.13312 | 2    | 1.64E-07 | 0.93  | 3.81    | -     | 732.1   |
| AHQ-4-14, 6504 - 6512       | K.INDDDSFTTFFSETGNKG.H                                                 | 1996.03358 | 2    | 2.50E-09 | 0.81  | 3.57    | -     | 602.8   |
| AHQ-4-13, 5413              | K.INDDDSFTTFFSETGNKG.H                                                 | 1996.03358 | 2    | 9.17E-08 | 0.86  | 3.69    | -     | 403.2   |
| gi 13489087 ref NP_109591.1 | serine (or cysteine) proteinase inhibitor, clade B (ovalbumin), member | 1996.03358 | 2    | 2.13E-12 | 0.87  | 4.00    | -     | 593.3   |
| AHQ-4-8, 3887               | K.FAYGIEDLK.C                                                          | 2.47E-12   | 5.49 | 60.22    | 22.70 | 42741.5 | -     |         |
| AHQ-4-8, 3749               | K.FAYGIEDLK.C                                                          | 1219.36713 | 2    | 3.88E-07 | 0.90  | 2.84    | -     | 1100.3  |
| AHQ-4-8, 4011               | R.LGVQDLFNSK.A                                                         | 1536.73331 | 2    | 1.34E-05 | 0.89  | 2.74    | -     | 1174.8  |
| AHQ-4-8, 4326               | R.LGVQDLFNSK.A                                                         | 1208.34588 | 2    | 3.46E-05 | 0.84  | 2.71    | -     | 868.9   |
| AHQ-4-8, 3675               | K.TYGADLASVDFQHASEDK.R                                                 | 1208.34588 | 2    | 1.89E-06 | 0.94  | 3.40    | -     | 1429.1  |
| AHQ-4-8, 3665               | K.TYGADLASVDFQHASEDK.R                                                 | 2054.11949 | 3    | 1.08E-09 | 0.87  | 3.84    | -     | 554.8   |
| AHQ-4-13, 4172              | K.TYGADLASVDFQHASEDK.R                                                 | 2054.11949 | 2    | 2.47E-12 | 0.94  | 4.08    | -     | 1172.9  |
| AHQ-4-13-, 4050             | K.TYGADLASVDFQHASEDK.R                                                 | 2054.11949 | 2    | 2.46E-09 | 0.72  | 3.58    | -     | 288.9   |
| AHQ-4-13, 6272              | K.TYNFLPEFLVSTQK.T                                                     | 2054.11949 | 2    | 2.87E-05 | 0.65  | 2.70    | -     | 445.1   |
| AHQ-4-8, 5922 - 5931        | K.TYNFLPEFLVSTQK.T                                                     | 1687.91650 | 2    | 5.07E-04 | 0.88  | 3.94    | -     | 467.9   |
| AHQ-4-8, 7157               | R.VLEPLYQGEELSMVILLPDDIEDESTGLKK.I                                     | 1687.91650 | 2    | 2.44E-05 | 0.92  | 4.31    | -     | 551.1   |
| gi 4507951 ref NP_003396.1  | tyrosine 3/tryptophan 5-monoxygenase activation protein, eta polypept  | 3375.82891 | 3    | 1.22E-08 | 0.90  | 4.31    | -     | 590.9   |
| AHQ-4-13-, 2969             | K.AVTELNEPLSNEDR.N                                                     | 2.52E-12   | 5.02 | 60.24    | 34.10 | 28218.5 | -     |         |
| AHQ-4-13, 3085              | K.AVTELNEPLSNEDR.N                                                     | 1587.67060 | 2    | 3.02E-04 | 0.87  | 3.32    | -     | 774.9   |
| AHQ-4-10, 2731 - 2733       | K.AVTELNEPLSNEDR.N                                                     | 1587.67060 | 2    | 8.75E-07 | 0.83  | 3.63    | -     | 658.2   |
| AHQ-4-10, 2821 - 2869       | K.AVTELNEPLSNEDR.N                                                     | 1587.67060 | 2    | 2.52E-12 | 0.95  | 4.88    | -     | 916.0   |
| AHQ-4-11, 6678              | K.ELETVCNDVLSLLDK.F                                                    | 1587.67060 | 2    | 1.44E-05 | 0.83  | 3.56    | -     | 588.2   |
| AHQ-4-14-, 6646             | K.ELETVCNDVLSLLDK.F                                                    | 1749.96137 | 2    | 8.26E-05 | 0.60  | 2.66    | -     | 473.8   |
| AHQ-4-10, 3833              | K.FLIKCNDFQYESK.V                                                      | 1749.96137 | 2    | 2.07E-07 | 0.93  | 4.32    | -     | 667.5   |
| AHQ-4-10, 2401              | K.NSVVEASEAAYK.E                                                       | 1808.00430 | 2    | 8.46E-05 | 0.78  | 3.57    | -     | 514.7   |
| AHQ-4-10, 2771 - 2780       | K.NSVVEASEAAYK.E                                                       | 1268.35495 | 2    | 1.59E-04 | 0.84  | 3.06    | -     | 984.9   |
| AHQ-4-10, 5657              | K.QAFDDAIAELDTLNEDSYK.D                                                | 1268.35495 | 1    | 2.17E-05 | 0.60  | 2.82    | -     | 448.3   |
| AHQ-4-10, 2027              | R.YLAEVASGEK.K                                                         | 2159.24915 | 2    | 2.23E-05 | 0.90  | 4.21    | -     | 639.1   |
| AHQ-4-10, 2017 - 2089       | R.YLAEVASGEK.K                                                         | 1067.17419 | 1    | 2.11E-05 | 0.41  | 2.79    | -     | 187.4   |
| AHQ-4-10, 2036              | R.YLAEVASGEK.K                                                         | 1067.17419 | 1    | 2.78E-05 | 0.40  | 2.22    | -     | 571.0   |
| gi 4758086 ref NP_004069.1  | cysteine and glycine-rich protein 1; cysteine-rich protein; LIM-domain | 1067.17419 | 2    | 1.25E-05 | 0.87  | 3.24    | -     | 781.8   |
| AHQ-4-11, 4058 - 4129       | K.GFGFGGAGALVHSE                                                       | 2.61E-12   | 4.28 | 50.27    | 45.60 | 20567.3 | -     |         |
| AHQ-4-13, 4361              | K.GFGFGGAGALVHSE                                                       | 1434.53788 | 2    | 3.17E-08 | 0.92  | 3.92    | -     | 849.2   |
| AHQ-4-11, 3201              | K.GLESTTLADKDGIEYCK.G                                                  | 1434.53788 | 2    | 4.77E-05 | 0.87  | 3.58    | -     | 651.4   |
| AHQ-4-11, 3306              | K.GLESTTLADKDGIEYCK.G                                                  | 1902.06957 | 3    | 4.25E-04 | 0.85  | 3.96    | -     | 543.9   |
| AHQ-4-13-, 3353             | K.GLESTTLADKDGIEYCK.G                                                  | 1902.06957 | 2    | 1.16E-04 | 0.94  | 3.95    | -     | 1081.2  |
| AHQ-4-11, 3156 - 3224       | K.GLESTTLADKDGIEYCK.G                                                  | 1902.06957 | 2    | 1.19E-06 | 0.95  | 4.68    | -     | 1192.4  |
| AHQ-4-10, 3089              | K.GLESTTLADKDGIEYCK.G                                                  | 1902.06957 | 2    | 1.90E-09 | 0.97  | 5.15    | -     | 1539.4  |
| AHQ-4-13, 3485              | K.GLESTTLADKDGIEYCK.G                                                  | 1902.06957 | 2    | 1.47E-05 | 0.85  | 3.86    | -     | 622.7   |
| AHQ-4-13-, 3626             | K.GYGYGGAAGTLSTDKGESLGIK.H                                             | 1902.06957 | 2    | 4.17E-07 | 0.90  | 4.10    | -     | 764.2   |
| AHQ-4-10, 3288 - 3301       | K.GYGYGGAAGTLSTDKGESLGIK.H                                             | 2160.32665 | 3    | 6.85E-06 | 0.87  | 3.68    | -     | 870.1   |
| AHQ-4-13, 3752              | K.GYGYGGAAGTLSTDKGESLGIK.H                                             | 2160.32665 | 2    | 3.36E-04 | 0.39  | 2.76    | -     | 114.1   |
| AHQ-4-12, 3506              | K.GYGYGGAAGTLSTDKGESLGIK.H                                             | 2160.32665 | 2    | 3.96E-09 | 0.89  | 4.51    | -     | 552.3   |
| AHQ-4-11, 3397 - 3424       | K.GYGYGGAAGTLSTDKGESLGIK.H                                             | 2160.32665 | 2    | 1.63E-08 | 0.94  | 4.63    | -     | 950.8   |
| AHQ-4-11, 3525              | K.GYGYGGAAGTLSTDKGESLGIK.H                                             | 2160.32665 | 2    | 2.61E-12 | 0.87  | 4.15    | -     | 616.2   |
| AHQ-4-11, 3381 - 3460       | K.NLDSTTVAVHGEEIYCK.S                                                  | 2160.32665 | 2    | 7.69E-07 | 0.88  | 4.40    | -     | 388.5   |
| AHQ-4-11, 3372              | K.NLDSTTVAVHGEEIYCK.S                                                  | 1938.10514 | 2    | 1.92E-09 | 0.97  | 5.11    | -     | 1356.2  |
| AHQ-4-11, 4052              | K.TVYFAEEVQCEGNSFHK.S                                                  | 1938.10514 | 2    | 6.00E-08 | 0.97  | 5.45    | -     | 1216.0  |
| AHQ-4-11, 4165 - 4169       | K.TVYFAEEVQCEGNSFHK.S                                                  | 2047.19015 | 2    | 1.97E-05 | 0.93  | 4.48    | -     | 757.0   |
| gi 4503715 ref NP_000500.1  | fibrinogen, gamma chain isoform gamma-A precursor [Homo sapiens]       | 2047.19015 | 2    | 2.45E-06 | 0.54  | 2.97    | -     | 142.2   |
|                             |                                                                        |            |      | 2.70E-12 | 12.19 | 140.29  | 47.10 | 49481.2 |

|                                                       |                                      |            |   |          |       |        |       |          |
|-------------------------------------------------------|--------------------------------------|------------|---|----------|-------|--------|-------|----------|
| AHQ-4-7, 4393 - 4461                                  | K.AIQLTYNPDESSKPNMIDAATLK.S          | 2521.82886 | 3 | 6.20E-08 | 0.92  | 4.89   | -     | 694.8    |
| AHQ-4-6, 4499                                         | K.AIQLTYNPDESSKPNMIDAATLK.S          | 2521.82886 | 3 | 1.56E-04 | 0.64  | 3.25   | -     | 420.7    |
| AHQ-4-7, 4469 - 4541                                  | K.AIQLTYNPDESSKPNMIDAATLK.S          | 2521.82886 | 2 | 6.52E-07 | 0.80  | 3.88   | -     | 387.0    |
| AHQ-4-7, 4609                                         | K.AIQLTYNPDESSKPNMIDAATLK.S          | 2521.82886 | 2 | 4.08E-06 | 0.73  | 3.62   | -     | 388.2    |
| AHQ-4-5, 4558 - 4565                                  | K.AIQLTYNPDESSKPNMIDAATLK.S          | 2521.82886 | 3 | 2.10E-05 | 0.76  | 3.49   | -     | 528.9    |
| AHQ-4-1, 4333 - 4405                                  | K.AIQLTYNPDESSKPNMIDAATLK.S          | 2537.82826 | 3 | 4.73E-04 | 0.73  | 3.56   | -     | 445.5    |
| AHQ-4-11, 4550                                        | K.AIQLTYNPDESSKPNMIDAATLK.S          | 2521.82886 | 2 | 9.81E-04 | 0.55  | 2.85   | -     | 282.8    |
| AHQ-4-12, 4733 - 4734                                 | K.AIQLTYNPDESSKPNMIDAATLK.S          | 2521.82886 | 2 | 4.23E-05 | 0.53  | 2.95   | -     | 315.8    |
| AHQ-4-7, 5849                                         | K.ASTPNQYDNGIIWATWK.T                | 1895.06358 | 2 | 8.87E-06 | 0.68  | 2.93   | -     | 496.8    |
| AHQ-4-5, 5561 - 5630                                  | K.ASTPNQYDNGIIWATWK.T                | 1895.06358 | 2 | 7.02E-08 | 0.79  | 3.45   | -     | 469.9    |
| AHQ-4-1, 5889                                         | K.ASTPNQYDNGIIWATWK.T                | 1895.06358 | 2 | 4.32E-06 | 0.73  | 3.04   | -     | 532.7    |
| AHQ-4-13, 5548 - 5560                                 | K.ASTPNQYDNGIIWATWK.T                | 1895.06358 | 2 | 2.53E-10 | 0.72  | 3.15   | -     | 516.9    |
| AHQ-4-14-, 5481 - 5551                                | K.ASTPNQYDNGIIWATWK.T                | 1895.06358 | 2 | 1.68E-10 | 0.80  | 3.45   | -     | 495.8    |
| AHQ-4-7, 5637 - 5705                                  | K.ASTPNQYDNGIIWATWK.T                | 1895.06358 | 2 | 1.46E-08 | 0.83  | 3.57   | -     | 578.3    |
| AHQ-4-7, 5461 - 5494                                  | K.ASTPNQYDNGIIWATWK.T                | 1895.06358 | 2 | 3.29E-08 | 0.81  | 3.40   | -     | 649.4    |
| AHQ-4-13-, 5537 - 5585                                | K.ASTPNQYDNGIIWATWK.T                | 1895.06358 | 2 | 1.30E-05 | 0.62  | 3.02   | -     | 429.4    |
| AHQ-4-4, 5710 - 5712                                  | K.ASTPNQYDNGIIWATWK.T                | 1895.06358 | 2 | 6.67E-06 | 0.60  | 3.16   | -     | 396.5    |
| AHQ-4-14-, 5341 - 5417                                | K.ASTPNQYDNGIIWATWK.T                | 1895.06358 | 2 | 5.85E-06 | 0.70  | 3.09   | -     | 444.2    |
| AHQ-4-7, 2435 - 2509                                  | K.CHAGHLNNGVYQGGTYSK.A               | 2014.16662 | 3 | 2.75E-06 | 0.98  | 5.81   | -     | 2455.4   |
| AHQ-4-7, 2423 - 2499                                  | K.CHAGHLNNGVYQGGTYSK.A               | 2014.16662 | 2 | 8.49E-06 | 0.97  | 5.23   | -     | 999.2    |
| AHQ-4-13-, 2789                                       | K.CHAGHLNNGVYQGGTYSK.A               | 2014.16662 | 2 | 2.58E-08 | 0.96  | 4.70   | -     | 1268.2   |
| AHQ-4-13, 2925                                        | K.CHAGHLNNGVYQGGTYSK.A               | 2014.16662 | 2 | 1.94E-04 | 0.90  | 3.82   | -     | 775.3    |
| AHQ-4-3, 2695                                         | K.CHAGHLNNGVYQGGTYSK.A               | 2014.16662 | 2 | 2.83E-06 | 0.90  | 3.88   | -     | 696.2    |
| AHQ-4-1, 2831                                         | K.CHAGHLNNGVYQGGTYSK.A               | 2014.16662 | 2 | 3.18E-08 | 0.95  | 4.63   | -     | 1078.3   |
| AHQ-4-13, 2833 - 2838                                 | K.CHAGHLNNGVYQGGTYSK.A               | 2014.16662 | 2 | 2.71E-05 | 0.97  | 5.12   | -     | 1164.9   |
| AHQ-4-1, 3277                                         | R.DNCCILDER.F                        | 1197.27847 | 2 | 3.52E-04 | 0.88  | 3.18   | -     | 864.6    |
| AHQ-4-5, 3193                                         | R.DNCCILDER.F                        | 1197.27847 | 2 | 1.16E-05 | 0.83  | 2.70   | -     | 944.9    |
| AHQ-4-1, 5553                                         | K.EGFGHLSPTGTTTFWLGNEK.I             | 2208.37146 | 3 | 2.65E-06 | 0.94  | 4.57   | -     | 1618.7   |
| AHQ-4-5, 5151                                         | K.EGFGHLSPTGTTTFWLGNEK.I             | 2208.37146 | 3 | 2.35E-05 | 0.96  | 4.78   | -     | 2098.7   |
| AHQ-4-5, 5278                                         | K.EGFGHLSPTGTTTFWLGNEK.I             | 2208.37146 | 2 | 2.53E-04 | 0.76  | 3.19   | -     | 471.7    |
| AHQ-4-4, 5534                                         | K.EGFGHLSPTGTTTFWLGNEK.I             | 2208.37146 | 2 | 8.80E-06 | 0.71  | 3.14   | -     | 525.4    |
| AHQ-4-1, 5634                                         | K.EGFGHLSPTGTTTFWLGNEK.I             | 2208.37146 | 2 | 1.24E-04 | 0.67  | 3.29   | -     | 529.3    |
| AHQ-4-11, 4990 - 5046                                 | K.EGFGHLSPTGTTTFWLGNEK.I             | 2208.37146 | 2 | 2.42E-04 | 0.90  | 4.31   | -     | 614.7    |
| AHQ-4-10, 4613 - 4688                                 | K.EGFGHLSPTGTTTFWLGNEK.I             | 2208.37146 | 2 | 6.88E-05 | 0.88  | 4.46   | -     | 436.1    |
| AHQ-4-9, 4705                                         | K.EGFGHLSPTGTTTFWLGNEK.I             | 2208.37146 | 2 | 2.47E-07 | 0.89  | 3.89   | -     | 774.5    |
| AHQ-4-9, 4559 - 4629                                  | K.EGFGHLSPTGTTTFWLGNEK.I             | 2208.37146 | 2 | 7.66E-05 | 0.89  | 4.05   | -     | 680.4    |
| AHQ-4-8, 4727 - 4737                                  | K.EGFGHLSPTGTTTFWLGNEK.I             | 2208.37146 | 2 | 8.07E-04 | 0.96  | 4.99   | -     | 917.9    |
| AHQ-4-7, 5134 - 5210                                  | K.EGFGHLSPTGTTTFWLGNEK.I             | 2208.37146 | 2 | 1.26E-10 | 0.95  | 5.04   | -     | 898.9    |
| AHQ-4-7, 4986 - 5054                                  | K.EGFGHLSPTGTTTFWLGNEK.I             | 2208.37146 | 2 | 4.98E-04 | 0.92  | 4.32   | -     | 691.9    |
| AHQ-4-2, 5455                                         | K.EGFGHLSPTGTTTFWLGNEK.I             | 2208.37146 | 2 | 3.57E-07 | 0.93  | 4.29   | -     | 753.1    |
| AHQ-4-3, 5432 - 5448                                  | K.EGFGHLSPTGTTTFWLGNEK.I             | 2208.37146 | 2 | 8.15E-04 | 0.94  | 4.63   | -     | 890.6    |
| AHQ-4-14-, 6395                                       | R.FGSYCPITCGIADFLSTYQTK.V            | 2420.65656 | 2 | 1.26E-04 | 0.47  | 2.75   | -     | 421.4    |
| AHQ-4-1, 6869 - 6870                                  | R.FGSYCPITCGIADFLSTYQTK.V            | 2420.65656 | 3 | 1.17E-06 | 0.78  | 3.90   | -     | 618.6    |
| AHQ-4-7, 6790 - 6858                                  | R.FGSYCPITCGIADFLSTYQTK.V            | 2420.65656 | 2 | 1.24E-05 | 0.89  | 4.51   | -     | 439.9    |
| AHQ-4-13, 6633 - 6634                                 | R.FGSYCPITCGIADFLSTYQTK.V            | 2420.65656 | 2 | 6.83E-07 | 0.80  | 3.38   | -     | 524.5    |
| AHQ-4-11, 6362                                        | R.FGSYCPITCGIADFLSTYQTK.V            | 2420.65656 | 3 | 2.37E-06 | 0.75  | 3.33   | -     | 741.7    |
| AHQ-4-9, 6137 - 6201                                  | R.FGSYCPITCGIADFLSTYQTK.V            | 2420.65656 | 2 | 4.24E-07 | 0.79  | 3.42   | -     | 463.1    |
| AHQ-4-6, 4334                                         | K.IHILISTQSAIPYALR.V                 | 1683.97576 | 2 | 1.72E-09 | 0.92  | 4.00   | -     | 946.8    |
| AHQ-4-1, 4829 - 4873                                  | K.IHILISTQSAIPYALR.V                 | 1683.97576 | 2 | 7.45E-04 | 0.91  | 3.53   | -     | 1033.2   |
| AHQ-4-5, 4346 - 4351                                  | K.IHILISTQSAIPYALR.V                 | 1683.97576 | 2 | 2.26E-04 | 0.92  | 3.80   | -     | 620.7    |
| AHQ-4-4, 4687                                         | K.IHILISTQSAIPYALR.V                 | 1683.97576 | 2 | 5.00E-06 | 0.94  | 3.99   | -     | 1146.7   |
| AHQ-4-8, 3882                                         | K.IHILISTQSAIPYALR.V                 | 1683.97576 | 2 | 4.41E-08 | 0.96  | 5.01   | -     | 1129.6   |
| AHQ-4-8, 3893                                         | K.IHILISTQSAIPYALR.V                 | 1683.97576 | 3 | 7.18E-04 | 0.74  | 3.64   | -     | 564.4    |
| AHQ-4-3, 4740                                         | K.IHILISTQSAIPYALR.V                 | 1683.97576 | 2 | 7.95E-11 | 0.97  | 4.82   | -     | 1499.5   |
| AHQ-4-11, 4350                                        | K.IHILISTQSAIPYALR.V                 | 1683.97576 | 2 | 3.19E-07 | 0.91  | 3.11   | -     | 1330.5   |
| AHQ-4-7, 4145 - 4225                                  | K.IHILISTQSAIPYALR.V                 | 1683.97576 | 2 | 2.70E-12 | 0.97  | 5.29   | -     | 1346.8   |
| AHQ-4-9, 3839                                         | K.IHILISTQSAIPYALR.V                 | 1683.97576 | 2 | 7.81E-09 | 0.97  | 4.94   | -     | 1349.4   |
| AHQ-4-2, 4742 - 4750                                  | K.IHILISTQSAIPYALR.V                 | 1683.97576 | 2 | 5.87E-08 | 0.94  | 4.60   | -     | 966.8    |
| AHQ-4-7, 1791                                         | R.LTIGEGQQHLLGGAAQ.Q                 | 1546.71290 | 2 | 4.90E-07 | 0.73  | 2.69   | -     | 637.5    |
| AHQ-4-7, 1875                                         | R.LTIGEGQQHLLGGAAQ.Q                 | 1546.71290 | 2 | 5.49E-04 | 0.40  | 2.54   | -     | 320.4    |
| AHQ-4-14-, 2071                                       | R.LTIGEGQQHLLGGAAQ.Q                 | 1546.71290 | 2 | 1.70E-11 | 0.91  | 3.42   | -     | 1183.3   |
| AHQ-4-13-, 2137 - 2144                                | R.LTIGEGQQHLLGGAAQ.Q                 | 1546.71290 | 2 | 1.41E-11 | 0.97  | 4.74   | -     | 1711.7   |
| AHQ-4-11, 1980                                        | R.LTIGEGQQHLLGGAAQ.Q                 | 1546.71290 | 2 | 7.05E-07 | 0.92  | 3.80   | -     | 1200.2   |
| AHQ-4-4, 1978                                         | R.LTIGEGQQHLLGGAAQ.Q                 | 1546.71290 | 2 | 3.27E-06 | 0.69  | 3.56   | -     | 415.2    |
| AHQ-4-13, 2257                                        | R.LTIGEGQQHLLGGAAQ.Q                 | 1546.71290 | 2 | 1.34E-06 | 0.90  | 3.57   | -     | 1191.1   |
| AHQ-4-7, 1665 - 1725                                  | R.LTIGEGQQHLLGGAAQ.Q                 | 1546.71290 | 2 | 2.50E-06 | 0.90  | 3.24   | -     | 1097.7   |
| AHQ-4-1, 4078 - 4087                                  | K.QSGLYFIKPLK.A                      | 1294.56665 | 2 | 1.01E-04 | 0.58  | 2.69   | -     | 328.0    |
| AHQ-4-1, 4125                                         | K.VAQLAQCCQEPCKDVTQIHDITGK.D         | 2772.06211 | 3 | 1.59E-05 | 0.91  | 4.04   | -     | 1032.1   |
| AHQ-4-2, 4074                                         | K.VAQLAQCCQEPCKDVTQIHDITGK.D         | 2772.06211 | 3 | 9.67E-05 | 0.89  | 4.05   | -     | 608.8    |
| AHQ-4-9, 3411                                         | K.VAQLAQCCQEPCKDVTQIHDITGK.D         | 2772.06211 | 2 | 4.20E-04 | 0.61  | 3.04   | -     | 329.4    |
| AHQ-4-10, 3760                                        | K.VAQLAQCCQEPCKDVTQIHDITGKDCQDIANK.G | 3718.05993 | 3 | 1.78E-07 | 0.91  | 4.37   | -     | 1237.1   |
| AHQ-4-1, 4351                                         | K.VAQLAQCCQEPCKDVTQIHDITGKDCQDIANK.G | 3718.05993 | 3 | 8.64E-05 | 0.93  | 4.43   | -     | 1303.6   |
| AHQ-4-11, 2858                                        | K.YEASILTHDSSIR.Y                    | 1492.61564 | 2 | 2.88E-06 | 0.85  | 3.18   | -     | 737.1    |
| AHQ-4-5, 2726                                         | K.YEASILTHDSSIR.Y                    | 1492.61564 | 2 | 8.59E-08 | 0.91  | 3.69   | -     | 875.3    |
| AHQ-4-7, 2597 - 2674                                  | K.YEASILTHDSSIR.Y                    | 1492.61564 | 2 | 7.48E-10 | 0.93  | 3.97   | -     | 877.3    |
| AHQ-4-9, 2527 - 2533                                  | K.YEASILTHDSSIR.Y                    | 1492.61564 | 2 | 8.06E-05 | 0.88  | 3.43   | -     | 713.6    |
| AHQ-4-12, 2833 - 2913                                 | K.YEASILTHDSSIR.Y                    | 1492.61564 | 2 | 1.91E-05 | 0.52  | 2.77   | -     | 376.9    |
| AHQ-4-2, 2895 - 2967                                  | K.YEASILTHDSSIR.Y                    | 1492.61564 | 2 | 2.01E-07 | 0.65  | 2.88   | -     | 453.8    |
| AHQ-4-8, 2499                                         | K.YEASILTHDSSIR.Y                    | 1492.61564 | 2 | 2.75E-07 | 0.89  | 2.82   | -     | 914.0    |
| AHQ-4-1, 2887                                         | R.YLQEIYNNQK.I                       | 1514.62131 | 2 | 2.64E-04 | 0.83  | 3.51   | -     | 722.1    |
| AHQ-4-4, 2788                                         | R.YLQEIYNNQK.I                       | 1514.62131 | 2 | 1.26E-04 | 0.93  | 3.98   | -     | 1208.0   |
| AHQ-4-7, 2599                                         | R.YLQEIYNNQK.I                       | 1514.62131 | 2 | 3.60E-05 | 0.93  | 4.00   | -     | 1128.9   |
| glj6681259 ref NP_031377.1  multimerin [Homo sapiens] |                                      |            |   | 2.93E-12 | 19.41 | 220.32 | 22.60 | 138070.8 |
| AHQ-4-1, 2439                                         | R.AQEQQSLIHTNQAESHTAVGR.G            | 2306.43830 | 3 | 3.55E-05 | 0.92  | 4.49   | -     | 1078.4   |
| AHQ-4-3, 2249 - 2252                                  | R.AQEQQSLIHTNQAESHTAVGR.G            | 2306.43830 | 2 | 5.90E-09 | 0.93  | 4.27   | -     | 722.0    |
| AHQ-4-4, 2247 - 2251                                  | R.AQEQQSLIHTNQAESHTAVGR.G            | 2306.43830 | 2 | 4.95E-07 | 0.95  | 5.14   | -     | 727.7    |
| AHQ-4-5, 2109                                         | R.AQEQQSLIHTNQAESHTAVGR.G            | 2306.43830 | 3 | 2.30E-04 | 0.90  | 3.96   | -     | 1152.5   |
| AHQ-4-2, 2286                                         | R.AQEQQSLIHTNQAESHTAVGR.G            | 2306.43830 | 2 | 6.78E-09 | 0.88  | 4.18   | -     | 429.9    |
| AHQ-4-3, 2347                                         | R.AQEQQSLIHTNQAESHTAVGR.G            | 2306.43830 | 2 | 2.93E-12 | 0.91  | 4.43   | -     | 771.9    |
| AHQ-4-3, 7340                                         | K.CTSDMETILTFIPIQFHR.L               | 2098.38838 | 3 | 2.55E-07 | 0.95  | 4.69   | -     | 1318.6   |
| AHQ-4-4, 7292                                         | K.CTSDMETILTFIPIQFHR.L               | 2098.38838 | 2 | 1.99E-05 | 0.47  | 2.74   | -     | 447.5    |
| AHQ-4-3, 4116 - 4129                                  | R.DOALQLQVLSNR.F                     | 1385.55144 | 2 | 9.53E-08 | 0.96  | 4.90   | -     | 1528.4   |
| AHQ-4-2, 4144                                         | R.DOALQLQVLSNR.F                     | 1385.55144 | 2 | 8.83E-08 | 0.95  | 3.86   | -     | 1596.1   |
| AHQ-4-13, 6301                                        | K.FPPVITTFSGYLLYR.T                  | 1661.92388 | 2 | 3.09E-04 | 0.78  | 2.95   | -     | 524.8    |
| AHQ-4-14-, 6069 - 6130                                | K.FPPVITTFSGYLLYR.T                  | 1661.92388 | 2 | 1.34E-06 | 0.93  | 3.82   | -     | 758.0    |
| AHQ-4-10, 5683 - 5700                                 | K.FPPVITTFSGYLLYR.T                  | 1661.92388 | 2 | 2.33E-04 | 0.89  | 3.48   | -     | 723.7    |
| AHQ-4-2, 5983                                         | K.FVLVQENRPTLDIVELR.N                | 2143.47187 | 3 | 6.10E-09 | 0.83  | 3.51   | -     | 795.4    |
| AHQ-4-6, 5644                                         | K.FVLVQENRPTLDIVELR.N                | 2143.47187 | 2 | 6.94E-04 | 0.42  | 2.87   | -     | 302.4    |
| AHQ-4-4, 5914                                         | K.FVLVQENRPTLDIVELR.N                | 2143.47187 | 2 | 6.09E-04 | 0.73  | 3.64   | -     | 369.9    |
| AHQ-4-3, 5943 - 5959                                  | K.FVLVQENRPTLDIVELR.N                | 2143.47187 | 3 | 3.50E-05 | 0.95  | 5.22   | -     | 1066.2   |
| AHQ-4-2, 6272                                         | K.GLTEFVEPIQIK.T                     | 1487.76518 | 1 | 6.11E-04 | 0.17  | 2.32   | -     | 398.4    |
| AHQ-4-1, 6251 - 6253                                  | K.GLTEFVEPIQIK.T                     | 1487.76518 | 2 | 1.30E-06 | 0.95  | 4.56   | -     | 1104.6   |
| AHQ-4-5, 6061 - 6062                                  | K.GLTEFVEPIQIK.T                     | 1487.76518 | 2 | 4.29E-06 | 0.92  | 4.06   | -     | 966.7    |
| AHQ-4-6, 6002                                         | K.GLTEFVEPIQIK.T                     | 1487.76518 | 2 | 2.12E-05 | 0.71  | 2.58   | -     | 884.2    |
| AHQ-4-3, 6260 - 6291                                  | K.GLTEFVEPIQIK.T                     | 1487.76518 | 2 | 5.29E-06 | 0.71  | 2.88   | -     | 746.2    |
| AHQ-4-3, 2607                                         | K.GPCGWTGGSCPQR.S                    | 1422.52885 | 2 | 6.90E-04 | 0.86  | 3.33   | -     | 739.5    |
| AHQ-4-3, 4231                                         | K.GSVVTNERDOALQLQVLSNR.F             | 2228.45212 | 2 | 2.61E-04 | 0.66  | 3.58   | -     | 404.6    |

|                             |                                                                               |            |   |          |       |        |       |          |
|-----------------------------|-------------------------------------------------------------------------------|------------|---|----------|-------|--------|-------|----------|
| AHQ-4-2, 3815               | K.HSLPDIQLLQK.G                                                               | 1292.50915 | 2 | 4.18E-08 | 0.92  | 3.40   | -     | 1011.2   |
| AHQ-4-3, 3739               | K.HSLPDIQLLQK.G                                                               | 1292.50915 | 2 | 3.33E-07 | 0.94  | 4.01   | -     | 957.8    |
| AHQ-4-4, 3759               | K.HSLPDIQLLQK.G                                                               | 1292.50915 | 2 | 3.75E-06 | 0.88  | 3.45   | -     | 772.3    |
| AHQ-4-3, 6151               | K.IENLTSAVNSLNFIIK.E                                                          | 1777.05472 | 2 | 1.38E-07 | 0.87  | 4.19   | -     | 597.0    |
| AHQ-4-3, 5188               | K.IFQNDM*QETVAQLFK.T                                                          | 1829.06683 | 2 | 1.76E-04 | 0.96  | 4.79   | -     | 1487.8   |
| AHQ-4-1, 5258               | K.IFQNDM*QETVAQLFK.T                                                          | 1829.06683 | 2 | 1.03E-05 | 0.89  | 3.37   | -     | 1093.5   |
| AHQ-4-5, 6545 - 6550        | K.IFQNDM*QETVAQLFK.T                                                          | 1813.06743 | 2 | 1.29E-08 | 0.98  | 4.94   | -     | 2384.7   |
| AHQ-4-1, 5459               | K.IFQNDM*QETVAQLFK.T                                                          | 1829.06683 | 2 | 2.42E-04 | 0.94  | 3.87   | -     | 1361.8   |
| AHQ-4-3, 5421 - 5437        | K.IFQNDM*QETVAQLFK.T                                                          | 1829.06683 | 2 | 4.64E-10 | 0.95  | 4.67   | -     | 1012.1   |
| AHQ-4-3, 6719 - 6795        | K.IFQNDM*QETVAQLFK.T                                                          | 1813.06743 | 2 | 3.89E-07 | 0.97  | 4.90   | -     | 1571.9   |
| AHQ-4-3, 5564               | K.KIENLTSAVNSLNFIIK.E                                                         | 1905.22764 | 2 | 5.17E-08 | 0.96  | 4.70   | -     | 1476.9   |
| AHQ-4-3, 4920               | R.KKIENLTSAVNSLNFIIK.E                                                        | 2033.40055 | 2 | 3.31E-07 | 0.87  | 3.64   | -     | 722.5    |
| AHQ-4-10, 3715              | K.LAFESENINSEIHDR.V                                                           | 1936.04933 | 2 | 6.68E-06 | 0.90  | 4.13   | -     | 778.1    |
| AHQ-4-10, 3493 - 3563       | K.LAFESENINSEIHDR.V                                                           | 1936.04933 | 2 | 2.25E-09 | 0.90  | 4.28   | -     | 689.6    |
| AHQ-4-4, 2736               | K.LKEVHEQLLSTEQVSDQK.N                                                        | 2112.32666 | 2 | 1.69E-05 | 0.94  | 4.39   | -     | 1123.5   |
| AHQ-4-5, 2547               | K.LKEVHEQLLSTEQVSDQK.N                                                        | 2112.32666 | 2 | 4.69E-08 | 0.97  | 6.10   | -     | 1381.7   |
| AHQ-4-3, 2743               | K.LKEVHEQLLSTEQVSDQK.N                                                        | 2112.32666 | 2 | 6.27E-06 | 0.98  | 6.20   | -     | 1689.0   |
| AHQ-4-10, 3391 - 3419       | K.LVEENALAPDFS.K                                                              | 1433.58810 | 1 | 2.35E-07 | 0.58  | 2.32   | -     | 773.3    |
| AHQ-4-11, 3596              | K.LVEENALAPDFS.K                                                              | 1433.58810 | 2 | 2.29E-06 | 0.88  | 3.13   | -     | 864.0    |
| AHQ-4-10, 3375 - 3436       | K.LVEENALAPDFS.K                                                              | 1433.58810 | 2 | 1.38E-05 | 0.93  | 4.00   | -     | 851.5    |
| AHQ-4-3, 7511               | K.M*SEQLNDLTYDMEIQLPLEQGASLR.Q                                                | 3025.40122 | 3 | 1.24E-06 | 0.96  | 6.34   | -     | 1754.5   |
| AHQ-4-1, 7225               | K.M*SEQLNDLTYDMEIQLPLEQGASLR.Q                                                | 3025.40122 | 3 | 1.03E-06 | 0.93  | 5.77   | -     | 971.5    |
| AHQ-4-2, 3848               | R.NTDNIIYPEEYSSCSR.H                                                          | 1950.02964 | 2 | 8.70E-04 | 0.77  | 3.72   | -     | 339.0    |
| AHQ-4-3, 7419               | K.TM*TIINNAIDFIQDNVYALK.E                                                     | 2215.51196 | 2 | 5.04E-08 | 0.96  | 5.08   | -     | 1013.9   |
| AHQ-4-4, 7424 - 7504        | K.TMTIINNAIDFIQDNVYALK.E                                                      | 2199.51256 | 2 | 4.85E-08 | 0.89  | 3.98   | -     | 607.5    |
| AHQ-4-3, 7461 - 7483        | K.TMTIINNAIDFIQDNVYALK.E                                                      | 2199.51256 | 2 | 2.43E-09 | 0.96  | 5.35   | -     | 888.3    |
| AHQ-4-3, 4016               | R.YNFVLQVAK.T                                                                 | 1082.27683 | 2 | 4.96E-06 | 0.92  | 3.29   | -     | 1083.0   |
| AHQ-4-3, 3997 - 4067        | R.YNFVLQVAK.T                                                                 | 1082.27683 | 1 | 9.69E-08 | 0.74  | 2.51   | -     | 740.0    |
| gi 16933542 ref NP_002017.1 | fibronectin 1 isoform 1 preproprotein; cold-insoluble globulin [Homo sapiens] |            |   | 2.97E-12 | 6.04  | 70.23  | 5.30  | 259222.8 |
| AHQ-4-1, 4682               | R.IITYGETGNSPVQEFTVPGSK.S                                                     | 2169.33354 | 2 | 1.45E-04 | 0.85  | 3.83   | -     | 449.9    |
| AHQ-4-2, 6330               | R.NTFAEVTGLSPGVTYFYK.V                                                        | 1995.21983 | 2 | 5.95E-06 | 0.91  | 4.12   | -     | 680.3    |
| AHQ-4-1, 6187 - 6255        | R.NTFAEVTGLSPGVTYFYK.V                                                        | 1995.21983 | 2 | 2.88E-05 | 0.81  | 3.64   | -     | 520.3    |
| AHQ-4-3, 6323               | R.NTFAEVTGLSPGVTYFYK.V                                                        | 1995.21983 | 2 | 1.38E-04 | 0.71  | 3.16   | -     | 415.9    |
| AHQ-4-1, 6741               | R.NTFAEVTGLSPGVTYFYK.V                                                        | 1995.21983 | 2 | 3.70E-11 | 0.90  | 4.56   | -     | 445.8    |
| AHQ-4-1, 4479               | R.TKTETITGFQVDVAPANGQPTIQR.T                                                  | 2573.84359 | 2 | 1.18E-04 | 0.72  | 2.92   | -     | 474.7    |
| AHQ-4-1, 4074 - 4077        | R.VDVIPVPLNGEHEGQR.L                                                          | 1630.82981 | 2 | 7.94E-09 | 0.90  | 3.55   | -     | 851.7    |
| AHQ-4-1, 3459 - 3482        | R.VPGTSTSATLTLGLTR.G                                                          | 1462.63098 | 2 | 4.66E-07 | 0.90  | 3.34   | -     | 767.6    |
| AHQ-4-2, 7330               | R.VTWAPPPSIDLTLNFLVR.Y                                                        | 1927.23500 | 2 | 2.62E-05 | 0.76  | 3.13   | -     | 370.3    |
| AHQ-4-3, 7311               | R.VTWAPPPSIDLTLNFLVR.Y                                                        | 1927.23500 | 2 | 2.97E-12 | 0.85  | 3.70   | -     | 456.7    |
| AHQ-4-1, 7102               | R.VTWAPPPSIDLTLNFLVR.Y                                                        | 1927.23500 | 2 | 2.98E-05 | 0.82  | 3.11   | -     | 535.9    |
| AHQ-4-1, 3973               | K.YSFCSDHTVLVQTR.G                                                            | 1728.90717 | 2 | 9.15E-08 | 0.92  | 3.81   | -     | 1172.2   |
| gi 50136135 ref NP_005498.1 | cofilin 1 (non-muscle) [Homo sapiens]                                         |            |   | 3.18E-12 | 11.08 | 120.41 | 60.80 | 18502.4  |
| AHQ-4-13, 3638              | K.AVLFCLSEDKK.N                                                               | 1311.52930 | 2 | 5.17E-04 | 0.70  | 2.74   | -     | 633.0    |
| AHQ-4-12, 3313 - 3383       | K.AVLFCLSEDKK.N                                                               | 1311.52930 | 2 | 3.73E-04 | 0.79  | 3.36   | -     | 557.5    |
| AHQ-4-13, 3501              | K.AVLFCLSEDKK.N                                                               | 1311.52930 | 2 | 1.23E-07 | 0.82  | 2.73   | -     | 835.5    |
| AHQ-4-12, 6967              | K.EDLVFIFWAPESAPLK.S                                                          | 1863.14454 | 2 | 4.09E-09 | 0.98  | 5.23   | -     | 1924.2   |
| AHQ-4-12, 5549 - 5617       | K.EILVGDVGQTVDDPYATFVK.M                                                      | 2167.40069 | 2 | 2.37E-06 | 0.97  | 5.60   | -     | 1294.5   |
| AHQ-4-12, 5434              | K.EILVGDVGQTVDDPYATFVK.M                                                      | 2167.40069 | 2 | 9.92E-06 | 0.94  | 4.58   | -     | 1078.6   |
| AHQ-4-12, 5685 - 5749       | K.EILVGDVGQTVDDPYATFVK.M                                                      | 2167.40069 | 2 | 1.16E-10 | 0.97  | 5.26   | -     | 1529.8   |
| AHQ-4-14, 5582              | K.EILVGDVGQTVDDPYATFVK.M                                                      | 2167.40069 | 2 | 7.94E-05 | 0.96  | 5.13   | -     | 1058.1   |
| AHQ-4-12, 5787 - 5857       | K.EILVGDVGQTVDDPYATFVK.M                                                      | 2167.40069 | 2 | 1.32E-09 | 0.96  | 4.98   | -     | 1238.0   |
| AHQ-4-12, 5829              | K.EILVGDVGQTVDDPYATFVK.M                                                      | 2167.40069 | 2 | 3.18E-12 | 0.97  | 5.37   | -     | 1617.3   |
| AHQ-4-13, 5658 - 5736       | K.EILVGDVGQTVDDPYATFVK.M                                                      | 2167.40069 | 2 | 3.34E-07 | 0.97  | 5.66   | -     | 1177.2   |
| AHQ-4-13, 5613 - 5616       | K.EILVGDVGQTVDDPYATFVK.M                                                      | 2167.40069 | 2 | 1.72E-11 | 0.98  | 5.89   | -     | 1508.8   |
| AHQ-4-12, 6014 - 6093       | K.ESKKEDLVFIFWAPESAPLK.S                                                      | 2335.68256 | 2 | 8.06E-05 | 0.77  | 3.22   | -     | 518.7    |
| AHQ-4-12, 5966 - 6029       | K.ESKKEDLVFIFWAPESAPLK.S                                                      | 2335.68256 | 3 | 1.84E-07 | 0.91  | 4.71   | -     | 725.8    |
| AHQ-4-14, 2399 - 2459       | K.HELOQANCYEEVKDR.C                                                           | 1792.90812 | 3 | 3.61E-06 | 0.68  | 3.34   | -     | 476.7    |
| AHQ-4-12, 2491              | K.HELOQANCYEEVKDR.C                                                           | 1792.90812 | 3 | 6.25E-06 | 0.90  | 3.70   | -     | 1295.5   |
| AHQ-4-12, 2309 - 2378       | K.HELOQANCYEEVKDR.C                                                           | 1792.90812 | 2 | 6.47E-07 | 0.97  | 5.46   | -     | 1155.6   |
| AHQ-4-12, 2822              | K.KAVLFCSEDKK.N                                                               | 1439.70221 | 3 | 8.16E-04 | 0.92  | 3.88   | -     | 1504.9   |
| AHQ-4-12, 2818              | K.KAVLFCSEDKK.N                                                               | 1439.70221 | 2 | 2.46E-05 | 0.92  | 4.09   | -     | 960.2    |
| AHQ-4-12, 2821 - 2825       | K.KAVLFCSEDKK.N                                                               | 1439.70221 | 1 | 1.20E-04 | 0.24  | 2.63   | -     | 344.5    |
| AHQ-4-12, 6519 - 6581       | K.KEDLVFIFWAPESAPLK.S                                                         | 1991.31745 | 2 | 2.35E-05 | 0.97  | 5.02   | -     | 1333.9   |
| AHQ-4-13, 6477              | K.KEDLVFIFWAPESAPLK.S                                                         | 1991.31745 | 3 | 3.43E-04 | 0.96  | 5.60   | -     | 1376.5   |
| AHQ-4-12, 6421 - 6454       | K.KEDLVFIFWAPESAPLK.S                                                         | 1991.31745 | 2 | 7.79E-07 | 0.97  | 5.59   | -     | 1587.8   |
| AHQ-4-14, 6327 - 6329       | K.KEDLVFIFWAPESAPLK.S                                                         | 1991.31745 | 2 | 8.17E-11 | 0.98  | 5.31   | -     | 2044.1   |
| AHQ-4-13, 6464              | K.KEDLVFIFWAPESAPLK.S                                                         | 1991.31745 | 2 | 3.10E-06 | 0.97  | 5.13   | -     | 1107.6   |
| AHQ-4-12, 6425 - 6491       | K.KEDLVFIFWAPESAPLK.S                                                         | 1991.31745 | 3 | 1.64E-07 | 0.96  | 5.20   | -     | 1501.5   |
| AHQ-4-11, 6234              | K.KEDLVFIFWAPESAPLK.S                                                         | 1991.31745 | 2 | 2.07E-05 | 0.96  | 4.72   | -     | 1354.9   |
| AHQ-4-12, 5810              | K.KEDLVFIFWAPESAPLK.S                                                         | 2206.56802 | 2 | 2.60E-05 | 0.94  | 4.53   | -     | 914.3    |
| AHQ-4-12, 6510 - 6575       | K.KNIILEEKGKILVGDVGQTVDDPYATFVK.M                                             | 3192.60499 | 3 | 2.47E-07 | 0.97  | 6.22   | -     | 1919.8   |
| AHQ-4-12, 3998              | K.LGGSAVISLEGGKPL                                                             | 1341.57848 | 2 | 3.98E-04 | 0.95  | 3.77   | -     | 1831.2   |
| AHQ-4-12, 5122              | K.LGGSAVISLEGGKPL                                                             | 1341.57848 | 2 | 1.14E-04 | 0.88  | 3.33   | -     | 964.8    |
| AHQ-4-12, 5033              | K.LGGSAVISLEGGKPL                                                             | 1341.57848 | 2 | 3.02E-04 | 0.88  | 3.42   | -     | 1022.3   |
| AHQ-4-12, 4258 - 4333       | K.LGGSAVISLEGGKPL                                                             | 1341.57848 | 2 | 9.20E-05 | 0.93  | 3.85   | -     | 1301.9   |
| AHQ-4-12, 4361              | K.LGGSAVISLEGGKPL                                                             | 1341.57848 | 1 | 4.19E-04 | 0.57  | 2.68   | -     | 428.6    |
| AHQ-4-12, 4793 - 4863       | K.LGGSAVISLEGGKPL                                                             | 1341.57848 | 2 | 1.68E-06 | 0.96  | 4.68   | -     | 1317.9   |
| AHQ-4-12, 4373 - 4441       | K.LGGSAVISLEGGKPL                                                             | 1341.57848 | 2 | 2.70E-08 | 0.95  | 4.62   | -     | 1218.2   |
| AHQ-4-12, 4457 - 4525       | K.LGGSAVISLEGGKPL                                                             | 1341.57848 | 2 | 1.22E-04 | 0.96  | 4.80   | -     | 1427.2   |
| AHQ-4-12, 4599 - 4666       | K.LGGSAVISLEGGKPL                                                             | 1341.57848 | 2 | 3.09E-06 | 0.93  | 4.36   | -     | 942.3    |
| AHQ-4-12, 4657 - 4729       | K.LGGSAVISLEGGKPL                                                             | 1341.57848 | 2 | 4.01E-08 | 0.95  | 4.31   | -     | 1106.3   |
| AHQ-4-12, 6817 - 6837       | K.NIILEEKGKILVGDVGQTVDDPYATFVK.M                                              | 3064.43208 | 3 | 1.18E-09 | 0.98  | 7.24   | -     | 2018.2   |
| AHQ-4-13, 6756              | K.NIILEEKGKILVGDVGQTVDDPYATFVK.M                                              | 3064.43208 | 3 | 1.97E-11 | 0.98  | 7.69   | -     | 2103.7   |
| AHQ-4-11, 6520              | K.NIILEEKGKILVGDVGQTVDDPYATFVK.M                                              | 3064.43208 | 3 | 5.99E-04 | 0.91  | 4.52   | -     | 995.1    |
| AHQ-4-12, 6481              | K.NIILEEKGKILVGDVGQTVDDPYATFVK.M                                              | 3064.43208 | 3 | 9.30E-08 | 0.97  | 6.68   | -     | 1553.6   |
| AHQ-4-12, 7061 - 7127       | K.NIILEEKGKILVGDVGQTVDDPYATFVK.M                                              | 3064.43208 | 3 | 1.24E-06 | 0.96  | 6.40   | -     | 1208.5   |
| AHQ-4-12, 6977 - 7045       | K.NIILEEKGKILVGDVGQTVDDPYATFVK.M                                              | 3064.43208 | 3 | 1.06E-07 | 0.96  | 5.98   | -     | 1382.5   |
| AHQ-4-14, 6554 - 6623       | K.NIILEEKGKILVGDVGQTVDDPYATFVK.M                                              | 3064.43208 | 3 | 9.67E-05 | 0.57  | 3.53   | -     | 490.8    |
| AHQ-4-12, 6721 - 6758       | K.NIILEEKGKILVGDVGQTVDDPYATFVK.M                                              | 3064.43208 | 3 | 2.19E-05 | 0.93  | 5.20   | -     | 973.2    |
| AHQ-4-13, 6672 - 6673       | K.NIILEEKGKILVGDVGQTVDDPYATFVK.M                                              | 3064.43208 | 3 | 6.66E-12 | 0.98  | 8.16   | -     | 1670.9   |
| AHQ-4-12, 3110 - 3178       | R.YALYDATYETK.E                                                               | 1338.44364 | 1 | 2.64E-08 | 0.70  | 2.93   | -     | 384.1    |
| AHQ-4-13, 3260              | R.YALYDATYETK.E                                                               | 1338.44364 | 2 | 4.41E-07 | 0.95  | 3.68   | -     | 1233.8   |
| AHQ-4-13, 3358 - 3421       | R.YALYDATYETK.E                                                               | 1338.44364 | 2 | 8.52E-05 | 0.90  | 3.35   | -     | 1172.4   |
| AHQ-4-13, 3262              | R.YALYDATYETK.E                                                               | 1338.44364 | 1 | 1.47E-04 | 0.41  | 2.55   | -     | 315.8    |
| gi 21361198 ref NP_000286.2 | serine (or cysteine) proteinase inhibitor, clade A (alpha-1) antiprotelin     |            |   | 3.29E-12 | 0.95  | 10.23  | 4.30  | 46722.2  |
| AHQ-4-7, 4505 - 4582        | K.VFNSGADLGSVTEEAPLK.L                                                        | 1835.00476 | 2 | 3.29E-12 | 0.95  | 4.68   | -     | 1139.9   |
| gi 4501893 ref NP_001094.1  | actinin, alpha 2 [Homo sapiens]                                               |            |   | 3.45E-12 | 8.58  | 100.27 | 12.60 | 103853.1 |
| AHQ-4-1, 5153               | K.COLEINFNTLQTK.L                                                             | 1610.81373 | 2 | 2.38E-04 | 0.86  | 3.28   | -     | 864.2    |
| AHQ-4-5, 5129               | K.COLEINFNTLQTK.L                                                             | 1610.81373 | 2 | 6.15E-05 | 0.96  | 4.52   | -     | 1327.9   |
| AHQ-4-5, 5295               | K.COLEINFNTLQTK.L                                                             | 1610.81373 | 2 | 9.85E-05 | 0.86  | 3.97   | -     | 669.5    |
| AHQ-4-5, 5021 - 5089        | K.COLEINFNTLQTK.L                                                             | 1610.81373 | 2 | 3.73E-05 | 0.94  | 4.55   | -     | 932.2    |
| AHQ-4-4, 5008               | K.EGELLWCQR.K                                                                 | 1176.37031 | 2 | 3.72E-04 | 0.84  | 3.14   | -     | 670.7    |
| AHQ-4-4, 4282               | R.FAIQDISVEETSAK.E                                                            | 1538.68108 | 2 | 4.52E-09 | 0.91  | 4.27   | -     | 705.8    |
| AHQ-4-6, 4015               | R.FAIQDISVEETSAK.E                                                            | 1538.68108 | 2 | 3.45E-12 | 0.97  | 5.08   | -     | 1606.1   |
| AHQ-4-11, 4016 - 4028       | R.FAIQDISVEETSAK.E                                                            | 1538.68108 | 2 | 1.03E-08 | 0.92  | 4.10   | -     | 872.5    |
| AHQ-4-1, 4409               | R.FAIQDISVEETSAK.E                                                            | 1538.68108 | 2 | 1.56E-05 | 0.81  | 3.15   | -     | 650.6    |
| AHQ-4-5, 4129 - 4202        | R.FAIQDISVEETSAK.E                                                            | 1538.68108 | 2 | 8.66E-05 | 0.60  | 2.69   | -     | 358.0    |

|                             |                                                                         |            |   |          |       |        |       |          |
|-----------------------------|-------------------------------------------------------------------------|------------|---|----------|-------|--------|-------|----------|
| AHQ-4-5, 4030 - 4101        | R.FAIQDISVEETSAK.E                                                      | 1538.68108 | 2 | 7.36E-10 | 0.95  | 4.33   | -     | 1280.3   |
| AHQ-4-12, 4159              | R.FAIQDISVEETSAK.E                                                      | 1538.68108 | 2 | 1.35E-07 | 0.86  | 3.03   | -     | 936.2    |
| AHQ-4-1, 6222               | K.GYEEWLLNEIR.R                                                         | 1422.56701 | 2 | 1.74E-06 | 0.94  | 3.92   | -     | 1356.0   |
| AHQ-4-7, 5961 - 5966        | K.GYEEWLLNEIR.R                                                         | 1422.56701 | 1 | 1.26E-04 | 0.06  | 2.10   | -     | 139.5    |
| AHQ-4-6, 5990               | K.GYEEWLLNEIR.R                                                         | 1422.56701 | 1 | 6.16E-06 | 0.42  | 2.61   | -     | 165.8    |
| AHQ-4-6, 5970 - 5991        | K.GYEEWLLNEIR.R                                                         | 1422.56701 | 2 | 2.99E-07 | 0.97  | 4.29   | -     | 2043.3   |
| AHQ-4-6, 5931 - 5994        | K.GYEEWLLNEIR.R                                                         | 1422.56701 | 1 | 1.45E-04 | 0.32  | 2.40   | -     | 257.6    |
| AHQ-4-5, 6226               | K.GYEEWLLNEIR.R                                                         | 1422.56701 | 1 | 9.04E-10 | 0.31  | 2.42   | -     | 153.5    |
| AHQ-4-5, 6218               | K.GYEEWLLNEIR.R                                                         | 1422.56701 | 2 | 6.80E-05 | 0.85  | 2.58   | -     | 1221.5   |
| AHQ-4-5, 6053               | K.GYEEWLLNEIR.R                                                         | 1422.56701 | 1 | 5.17E-06 | 0.34  | 2.42   | -     | 146.9    |
| AHQ-4-4, 6254               | K.GYEEWLLNEIR.R                                                         | 1422.56701 | 1 | 4.19E-05 | 0.38  | 2.23   | -     | 359.5    |
| AHQ-4-4, 6246               | K.GYEEWLLNEIR.R                                                         | 1422.56701 | 2 | 3.21E-06 | 0.96  | 4.09   | -     | 1805.8   |
| AHQ-4-5, 6049 - 6093        | K.GYEEWLLNEIR.R                                                         | 1422.56701 | 2 | 4.57E-07 | 0.98  | 5.15   | -     | 2266.7   |
| AHQ-4-5, 2011               | K.HEAFESDLAAHQDR.V                                                      | 1626.66861 | 2 | 7.59E-10 | 0.98  | 4.78   | -     | 1849.3   |
| AHQ-4-5, 1532               | K.HNTYTMHEIR.V                                                          | 1302.44449 | 3 | 5.85E-06 | 0.81  | 3.17   | -     | 985.4    |
| AHQ-4-5, 3618               | R.KAGTQIENIEEDFR.N                                                      | 1650.77152 | 2 | 5.52E-06 | 0.94  | 4.18   | -     | 930.3    |
| AHQ-4-3, 1913               | R.KHEAFESDLAAHQDR.V                                                     | 1754.84152 | 2 | 3.16E-08 | 0.92  | 3.91   | -     | 834.5    |
| AHQ-4-5, 1655               | R.KHEAFESDLAAHQDR.V                                                     | 1754.84152 | 2 | 6.31E-07 | 0.89  | 3.16   | -     | 952.3    |
| AHQ-4-5, 1671               | R.KHEAFESDLAAHQDR.V                                                     | 1754.84152 | 3 | 2.18E-08 | 0.92  | 5.02   | -     | 964.8    |
| AHQ-4-5, 1673               | R.KHEAFESDLAAHQDR.V                                                     | 1754.84152 | 2 | 7.26E-11 | 0.98  | 5.32   | -     | 1684.0   |
| AHQ-4-5, 2570               | R.KTFTAWCNSHLR.K                                                        | 1522.71309 | 2 | 9.53E-10 | 0.87  | 3.45   | -     | 918.6    |
| AHQ-4-5, 4791 - 4863        | K.LVLSIGAAEIVDGNVK.M                                                    | 1543.74400 | 2 | 2.07E-04 | 0.93  | 4.08   | -     | 1172.5   |
| AHQ-4-5, 4662 - 4738        | K.LVLSIGAAEIVDGNVK.M                                                    | 1543.74400 | 2 | 8.32E-07 | 0.96  | 4.29   | -     | 1272.0   |
| gi 5031987 ref NP_005720.1  | peptidylprolyl isomerase F (cyclophilin F) [Homo sapiens]               |            |   | 3.52E-12 | 4.23  | 50.29  | 41.50 | 22040.1  |
| AHQ-4-12, 3722 - 3795       | R.FPDENFLTK.H                                                           | 1111.22866 | 2 | 1.01E-04 | 0.80  | 2.84   | -     | 649.8    |
| AHQ-4-12, 5169 - 5179       | K.GSGDPPSSSSGNPLVYLDVDANGKPLGR.V                                        | 2834.99028 | 2 | 6.58E-09 | 0.73  | 3.03   | -     | 426.1    |
| AHQ-4-12, 5151 - 5213       | K.GSGDPPSSSSGNPLVYLDVDANGKPLGR.V                                        | 2834.99028 | 3 | 6.98E-12 | 0.94  | 4.67   | -     | 1333.7   |
| AHQ-4-11, 4949              | K.GSGDPPSSSSGNPLVYLDVDANGKPLGR.V                                        | 2834.99028 | 3 | 3.52E-12 | 0.91  | 4.25   | -     | 987.1    |
| AHQ-4-12, 5429 - 5469       | K.HVGPGLVLSM^ANAGPNTNGSQFFICTIK.T                                       | 2836.19605 | 3 | 6.89E-07 | 0.74  | 3.36   | -     | 704.8    |
| AHQ-4-12, 5894 - 5967       | K.HVGPGLVLSM^ANAGPNTNGSQFFICTIK.T                                       | 2820.19665 | 2 | 7.03E-07 | 0.97  | 5.69   | -     | 1218.6   |
| AHQ-4-14-, 5759             | K.HVGPGLVLSM^ANAGPNTNGSQFFICTIK.T                                       | 2820.19665 | 3 | 8.95E-05 | 0.87  | 4.23   | -     | 838.3    |
| AHQ-4-12, 4699              | R.VIPSFMCQAQDFTNHNHTGGK.S                                               | 2240.46178 | 2 | 2.20E-04 | 0.82  | 3.42   | -     | 660.0    |
| gi 5453607 ref NP_006420.1  | chaperonin containing TCP1, subunit 7 (eta); chaperonin containing t-co |            |   | 4.12E-12 | 0.97  | 10.22  | 2.60  | 59366.3  |
| AHQ-4-7, 4990 - 5001        | K.LPIGDVATQYFADR.D                                                      | 1566.73935 | 2 | 4.12E-12 | 0.97  | 4.32   | -     | 1566.6   |
| gi 5453549 ref NP_006397.1  | thioredoxin peroxidase; thioredoxin peroxidase (antioxidant enzyme) [Ho |            |   | 4.28E-12 | 2.85  | 30.25  | 18.50 | 30539.7  |
| AHQ-4-10, 3452              | K.DYGVLYEDSGHTLR.G                                                      | 1625.72052 | 2 | 4.42E-10 | 0.91  | 3.32   | -     | 1111.7   |
| AHQ-4-10, 3815              | K.HGEVCPAGWKPGETIIPDPAGK.L                                              | 2405.67144 | 2 | 1.05E-07 | 0.96  | 4.91   | -     | 1448.5   |
| AHQ-4-10, 3809              | K.HGEVCPAGWKPGETIIPDPAGK.L                                              | 2405.67144 | 3 | 2.29E-05 | 0.71  | 3.30   | -     | 748.4    |
| AHQ-4-10, 4504              | R.IPLLSDLTHQISK.D                                                       | 1465.71961 | 2 | 4.28E-12 | 0.98  | 4.92   | -     | 1938.6   |
| gi 54507149 ref NP_000445.1 | superoxide dismutase 1, soluble (amyotrophic lateral sclerosis 1 (adult |            |   | 4.52E-12 | 3.71  | 40.38  | 57.80 | 15935.7  |
| AHQ-4-12, 5359 - 5363       | K.AVVCVLKGDGPVQGINFEQK.E                                                | 2174.50602 | 2 | 3.22E-06 | 0.98  | 5.97   | -     | 1439.2   |
| AHQ-4-12, 4326 - 4339       | K.GDGPVQGINFEQK.E                                                       | 1502.65366 | 2 | 1.30E-09 | 0.80  | 2.96   | -     | 589.1    |
| AHQ-4-12, 4870              | K.GLTEGLHGFHVEHFGDNTAGCTSAGPHFNPLSR.K                                   | 3522.76733 | 3 | 1.19E-05 | 0.95  | 5.18   | -     | 1291.3   |
| AHQ-4-11, 4661              | K.GLTEGLHGFHVEHFGDNTAGCTSAGPHFNPLSR.K                                   | 3522.76733 | 3 | 7.93E-06 | 0.96  | 5.99   | -     | 1274.3   |
| AHQ-4-12, 5939 - 5954       | R.HVGDGLGNVTADKGVADVSIEDSVISLSDGHCIGR.T                                 | 3724.02282 | 3 | 4.52E-12 | 0.98  | 7.58   | -     | 2104.9   |
| AHQ-4-11, 5756              | R.HVGDGLGNVTADKGVADVSIEDSVISLSDGHCIGR.T                                 | 3724.02282 | 3 | 4.92E-07 | 0.96  | 5.99   | -     | 1053.8   |
| gi 28269681 ref NP_783313.1 | NADH-ubiquinone oxidoreductase subunit B14.7 [Homo sapiens]             |            |   | 4.85E-12 | 1.82  | 20.27  | 27.00 | 14852.0  |
| AHQ-4-13-, 6568             | R.EKPPDPLNLYLGGCAGGLTLGAR.T                                             | 2423.68676 | 3 | 4.85E-12 | 0.97  | 5.32   | -     | 1741.6   |
| AHQ-4-13, 6638 - 6654       | R.EKPPDPLNLYLGGCAGGLTLGAR.T                                             | 2423.68676 | 3 | 2.48E-05 | 0.93  | 4.26   | -     | 1584.9   |
| AHQ-4-13-, 4908 - 4984      | R.VTLNPGPTFLEGVAK.V                                                     | 1543.78883 | 2 | 3.56E-06 | 0.86  | 3.15   | -     | 578.3    |
| gi 4557395 ref NP_000058.1  | carbonic anhydrase II; carbonate dehydratase II; carbonic dehydratase;  |            |   | 4.90E-12 | 4.02  | 50.24  | 21.50 | 29245.8  |
| AHQ-4-10, 6383 - 6384       | K.AVQPPDGLAVLIGLK.V                                                     | 1669.98899 | 2 | 3.18E-05 | 0.93  | 4.66   | -     | 586.3    |
| AHQ-4-10, 2968              | K.EPISVSSQVLK.V                                                         | 1316.48265 | 1 | 1.75E-04 | 0.35  | 2.87   | -     | 224.4    |
| AHQ-4-10, 3800 - 3857       | R.ILNNGHAFNVFEFDDSQDK.A                                                 | 2064.15751 | 2 | 4.51E-07 | 0.94  | 4.54   | -     | 1032.8   |
| AHQ-4-10, 3895 - 3956       | R.ILNNGHAFNVFEFDDSQDK.A                                                 | 2064.15751 | 2 | 4.19E-09 | 0.97  | 4.76   | -     | 1519.3   |
| AHQ-4-10, 3475              | K.VVDVLSIK.T                                                            | 988.16011  | 2 | 1.11E-05 | 0.80  | 3.10   | -     | 531.6    |
| AHQ-4-10, 3199 - 3280       | K.YAAELHLVHWNTK.Y                                                       | 1582.78684 | 2 | 4.90E-12 | 0.98  | 4.83   | -     | 2271.5   |
| gi 4502549 ref NP_001734.1  | calmodulin 2 (phosphorylase kinase, delta); phosphorylase kinase delta  |            |   | 5.17E-12 | 1.86  | 20.23  | 10.70 | 16837.5  |
| AHQ-4-11, 3965              | K.EAFSLFDKDDGGTITTK.E                                                   | 1845.98441 | 2 | 1.52E-06 | 0.94  | 4.19   | -     | 1002.9   |
| AHQ-4-11, 4068 - 4146       | K.EAFSLFDKDDGGTITTK.E                                                   | 1845.98441 | 2 | 1.44E-04 | 0.71  | 2.88   | -     | 614.8    |
| AHQ-4-12, 4083 - 4149       | K.EAFSLFDKDDGGTITTK.E                                                   | 1845.98441 | 2 | 7.11E-07 | 0.91  | 4.33   | -     | 850.9    |
| AHQ-4-12, 4217 - 4250       | K.EAFSLFDKDDGGTITTK.E                                                   | 1845.98441 | 2 | 1.31E-05 | 0.85  | 3.94   | -     | 640.1    |
| AHQ-4-12, 3905 - 3974       | R.VFDKDGNGYISAAELR.H                                                    | 1755.90933 | 2 | 3.27E-10 | 0.93  | 4.58   | -     | 1111.1   |
| AHQ-4-12, 3874              | R.VFDKDGNGYISAAELR.H                                                    | 1755.90933 | 3 | 8.76E-04 | 0.87  | 3.44   | -     | 1456.4   |
| AHQ-4-12, 3775 - 3841       | R.VFDKDGNGYISAAELR.H                                                    | 1755.90933 | 2 | 3.60E-10 | 0.96  | 4.62   | -     | 1442.4   |
| AHQ-4-11, 3714 - 3785       | R.VFDKDGNGYISAAELR.H                                                    | 1755.90933 | 2 | 5.17E-12 | 0.95  | 4.59   | -     | 1197.4   |
| gi 4501891 ref NP_001093.1  | actinin, alpha 1 [Homo sapiens]                                         |            |   | 5.51E-12 | 37.60 | 430.33 | 52.10 | 103056.9 |
| AHQ-4-5, 7458 - 7525        | R.AAFPNNWM^EGAM^EDLQDFTVHTIEEIQGLTTAHEQFK.A                             | 4396.81902 | 3 | 2.89E-06 | 0.89  | 4.85   | -     | 626.2    |
| AHQ-4-5, 7593               | R.AAFPNNWM^EGAM^EDLQDFTVHTIEEIQGLTTAHEQFK.A                             | 4364.82022 | 3 | 6.42E-09 | 0.93  | 4.91   | -     | 1087.0   |
| AHQ-4-11, 5056              | K.AGTQIENIEEDFRDLGLK.L                                                  | 1936.06918 | 2 | 1.31E-05 | 0.71  | 3.83   | -     | 667.6    |
| AHQ-4-5, 5238               | K.AGTQIENIEEDFRDLGLK.L                                                  | 1936.06918 | 3 | 1.61E-05 | 0.58  | 3.39   | -     | 462.6    |
| AHQ-4-5, 5234 - 5257        | K.AGTQIENIEEDFRDLGLK.L                                                  | 1936.06918 | 2 | 8.42E-05 | 0.70  | 4.13   | -     | 616.8    |
| AHQ-4-12, 5298              | K.AGTQIENIEEDFRDLGLK.L                                                  | 1936.06918 | 2 | 2.78E-05 | 0.65  | 3.94   | -     | 507.4    |
| AHQ-4-5, 4627               | K.AGTQIENIEEDFRDLGLK.L                                                  | 1936.06918 | 2 | 4.40E-06 | 0.82  | 4.37   | -     | 805.3    |
| AHQ-4-6, 5186               | K.AGTQIENIEEDFRDLGLK.L                                                  | 1936.06918 | 2 | 5.99E-05 | 0.79  | 4.18   | -     | 669.0    |
| AHQ-4-1, 5639               | K.AGTQIENIEEDFRDLGLK.L                                                  | 1936.06918 | 2 | 3.75E-05 | 0.63  | 3.91   | -     | 536.8    |
| AHQ-4-4, 5488               | K.AGTQIENIEEDFRDLGLK.L                                                  | 1936.06918 | 2 | 5.01E-05 | 0.85  | 4.54   | -     | 832.2    |
| AHQ-4-5, 6455 - 6461        | K.AIMTYVSSFYHAFSGAQK.A                                                  | 2009.27323 | 3 | 1.73E-06 | 0.74  | 3.33   | -     | 654.7    |
| AHQ-4-5, 6438               | K.AIMTYVSSFYHAFSGAQK.A                                                  | 2009.27323 | 2 | 2.87E-10 | 0.94  | 4.89   | -     | 844.7    |
| AHQ-4-5, 5397               | K.AIMTYVSSFYHAFSGAQK.A                                                  | 2025.27263 | 2 | 2.09E-10 | 0.95  | 5.03   | -     | 675.6    |
| AHQ-4-6, 6383               | K.AIMTYVSSFYHAFSGAQK.A                                                  | 2009.27323 | 2 | 1.60E-11 | 0.94  | 4.76   | -     | 740.7    |
| AHQ-4-5, 3029 - 3031        | R.ASFNHFRDRHSGLGPEEFK.A                                                 | 2292.40855 | 2 | 1.54E-04 | 0.96  | 4.15   | -     | 1622.2   |
| AHQ-4-5, 3023               | R.ASFNHFRDRHSGLGPEEFK.A                                                 | 2292.40855 | 3 | 2.25E-05 | 0.96  | 4.15   | -     | 2490.4   |
| AHQ-4-6, 1946               | K.ASIHEAWTDGK.E                                                         | 1215.29697 | 2 | 3.58E-07 | 0.86  | 2.68   | -     | 973.1    |
| AHQ-4-5, 1853 - 1930        | K.ASIHEAWTDGK.E                                                         | 1215.29697 | 2 | 3.99E-05 | 0.82  | 2.88   | -     | 794.7    |
| AHQ-4-6, 5626               | K.DDPLTNLNTAFDVAEK.Y                                                    | 1763.88340 | 2 | 1.71E-06 | 0.95  | 4.64   | -     | 1183.7   |
| AHQ-4-5, 5738 - 5813        | K.DDPLTNLNTAFDVAEK.Y                                                    | 1763.88340 | 2 | 1.14E-11 | 0.97  | 5.76   | -     | 1276.0   |
| AHQ-4-5, 5217               | K.DDPLTNLNTAFDVAEK.Y                                                    | 1763.88340 | 2 | 7.13E-08 | 0.85  | 3.64   | -     | 630.3    |
| AHQ-4-5, 6117               | K.DDPLTNLNTAFDVAEK.Y                                                    | 1763.88340 | 2 | 2.80E-08 | 0.93  | 3.95   | -     | 973.7    |
| AHQ-4-4, 5872               | K.DDPLTNLNTAFDVAEK.Y                                                    | 1763.88340 | 2 | 1.28E-05 | 0.97  | 4.67   | -     | 1506.4   |
| AHQ-4-1, 5881               | K.DDPLTNLNTAFDVAEK.Y                                                    | 1763.88340 | 2 | 4.60E-07 | 0.94  | 4.50   | -     | 989.4    |
| AHQ-4-5, 4783 - 4833        | K.DGLGFCALHR.H                                                          | 1260.44730 | 2 | 2.03E-04 | 0.88  | 2.89   | -     | 1078.6   |
| AHQ-4-6, 2263               | R.DHSGTLGPEEFK.A                                                        | 1317.38606 | 2 | 1.60E-04 | 0.82  | 2.67   | -     | 730.2    |
| AHQ-4-5, 3655               | K.DYETATLSEIK.A                                                         | 1270.36761 | 2 | 2.01E-04 | 0.85  | 2.61   | -     | 1245.7   |
| AHQ-4-5, 3407 - 3477        | R.ELPPDQAEYCIAR.M                                                       | 1563.71392 | 2 | 5.35E-07 | 0.66  | 2.50   | -     | 168.5    |
| AHQ-4-5, 3315 - 3397        | R.ELPPDQAEYCIAR.M                                                       | 1563.71392 | 2 | 2.40E-06 | 0.66  | 2.53   | -     | 231.3    |
| AHQ-4-5, 4397               | R.ETADTDADQVMASFK.I                                                     | 1730.83208 | 2 | 5.68E-07 | 0.96  | 4.90   | -     | 1403.8   |
| AHQ-4-4, 4558               | R.ETADTDADQVMASFK.I                                                     | 1730.83208 | 2 | 2.84E-06 | 0.85  | 3.40   | -     | 734.4    |
| AHQ-4-5, 3790               | R.ETADTDADQVMASFK.I                                                     | 1730.83208 | 2 | 5.17E-07 | 0.95  | 4.32   | -     | 1386.3   |
| AHQ-4-13-, 4350             | R.ETADTDADQVMASFK.I                                                     | 1730.83208 | 2 | 2.41E-06 | 0.97  | 5.00   | -     | 1520.3   |
| AHQ-4-11, 4236 - 4300       | R.ETADTDADQVMASFK.I                                                     | 1730.83208 | 2 | 5.69E-05 | 0.82  | 2.86   | -     | 1022.6   |
| AHQ-4-5, 4518               | R.ETADTDADQVMASFK.I                                                     | 1730.83208 | 2 | 5.44E-04 | 0.80  | 2.79   | -     | 895.3    |
| AHQ-4-13, 3335              | R.ETADTDADQVM^ASF.K.I                                                   | 1746.83148 | 2 | 9.50E-07 | 0.93  | 3.77   | -     | 1087.4   |
| AHQ-4-13-, 3197             | R.ETADTDADQVM^ASF.K.I                                                   | 1746.83148 | 2 | 6.03E-06 | 0.71  | 3.17   | -     | 447.7    |
| AHQ-4-14-, 4278             | R.ETADTDADQVMASFK.I                                                     | 1730.83208 | 2 | 4.04E-05 | 0.87  | 3.73   | -     | 757.3    |
| AHQ-4-1, 4635               | R.ETADTDADQVMASFK.I                                                     | 1730.83208 | 2 | 4.74E-04 | 0.93  | 4.17   | -     | 1030.5   |
| AHQ-4-6, 4315 - 4320        | R.ETADTDADQVMASFK.I                                                     | 1730.83208 | 2 | 6.06E-08 | 0.94  | 4.49   | -     | 1081.6   |

|                       |                                |            |   |          |      |      |   |        |
|-----------------------|--------------------------------|------------|---|----------|------|------|---|--------|
| AHQ-4-10, 4013        | R.ETADTDTADQVMASFK.I           | 1730.83208 | 2 | 1.75E-05 | 0.86 | 3.50 | - | 762.1  |
| AHQ-4-5, 2747 - 2750  | K.GISQEQMNEFR.A                | 1339.45991 | 1 | 5.51E-07 | 0.43 | 2.93 | - | 120.4  |
| AHQ-4-5, 2025         | K.GISQEQMNEFR.A                | 1355.45931 | 2 | 2.46E-05 | 0.69 | 2.79 | - | 637.2  |
| AHQ-4-6, 2738         | K.GISQEQMNEFR.A                | 1339.45991 | 2 | 1.37E-05 | 0.82 | 3.18 | - | 707.9  |
| AHQ-4-5, 2723 - 2725  | K.GISQEQMNEFR.A                | 1339.45991 | 2 | 5.28E-07 | 0.87 | 3.15 | - | 903.7  |
| AHQ-4-4, 2030         | R.HRPELIDYK.L                  | 1228.38202 | 2 | 1.69E-04 | 0.89 | 3.41 | - | 612.7  |
| AHQ-4-5, 1790         | R.HRPELIDYK.L                  | 1228.38202 | 3 | 7.36E-06 | 0.93 | 3.81 | - | 1138.5 |
| AHQ-4-5, 1770 - 1813  | R.HRPELIDYK.L                  | 1228.38202 | 2 | 1.72E-04 | 0.94 | 3.99 | - | 736.5  |
| AHQ-4-2, 5147         | K.ICDQWDNLGALTQK.R             | 1663.83349 | 2 | 1.73E-06 | 0.94 | 3.43 | - | 1962.3 |
| AHQ-4-5, 4849 - 4921  | K.ICDQWDNLGALTQK.R             | 1663.83349 | 2 | 5.93E-09 | 0.98 | 4.81 | - | 2530.0 |
| AHQ-4-5, 4625         | K.ICDQWDNLGALTQK.R             | 1663.83349 | 2 | 4.88E-09 | 0.96 | 4.45 | - | 1585.6 |
| AHQ-4-6, 4830         | K.ICDQWDNLGALTQK.R             | 1663.83349 | 2 | 5.12E-06 | 0.96 | 3.62 | - | 2067.8 |
| AHQ-4-4, 5066         | K.ICDQWDNLGALTQK.R             | 1663.83349 | 2 | 1.80E-05 | 0.95 | 3.95 | - | 1596.9 |
| AHQ-4-7, 4857         | K.ICDQWDNLGALTQK.R             | 1663.83349 | 2 | 7.41E-09 | 0.97 | 4.46 | - | 2341.4 |
| AHQ-4-3, 5129         | K.ICDQWDNLGALTQK.R             | 1663.83349 | 2 | 5.56E-07 | 0.97 | 4.68 | - | 2023.9 |
| AHQ-4-5, 5802 - 5877  | K.IDQLEGDHQLIQEALIFDNK.H       | 2340.57447 | 2 | 1.25E-07 | 0.98 | 6.69 | - | 1294.5 |
| AHQ-4-10, 5248 - 5313 | K.IDQLEGDHQLIQEALIFDNK.H       | 2340.57447 | 2 | 5.33E-05 | 0.91 | 3.77 | - | 918.8  |
| AHQ-4-6, 5795 - 5868  | K.IDQLEGDHQLIQEALIFDNK.H       | 2340.57447 | 3 | 1.89E-10 | 0.91 | 4.64 | - | 1223.2 |
| AHQ-4-5, 3902 - 3973  | K.ILAGDKNYITMDEL.R             | 1753.01353 | 2 | 5.51E-12 | 0.96 | 4.60 | - | 1222.7 |
| AHQ-4-5, 4813 - 4886  | R.ISIEMHGTLEDQLSHLR.Q          | 1980.23497 | 2 | 7.52E-07 | 0.93 | 4.16 | - | 1040.3 |
| AHQ-4-5, 4141         | R.ISIEMHGTLEDQLSHLR.Q          | 1996.23637 | 3 | 1.00E-03 | 0.96 | 4.36 | - | 1959.4 |
| AHQ-4-5, 4786         | K.IVQTYHVNMAGTNPYTTITPQEINGK.W | 2892.23635 | 3 | 4.28E-04 | 0.74 | 3.56 | - | 505.5  |
| AHQ-4-5, 4578         | R.KAGTQIENIEEDFRDGLK.L         | 2064.24210 | 3 | 8.88E-06 | 0.93 | 5.57 | - | 1357.5 |
| AHQ-4-6, 4734         | R.KDDPLTNLNTAFDVAEK.Y          | 1892.05631 | 2 | 9.91E-08 | 0.97 | 4.88 | - | 1609.5 |
| AHQ-4-1, 5093         | R.KDDPLTNLNTAFDVAEK.Y          | 1892.05631 | 2 | 2.11E-04 | 0.97 | 4.62 | - | 1462.1 |
| AHQ-4-5, 4989         | R.KDDPLTNLNTAFDVAEK.Y          | 1892.05631 | 2 | 1.19E-07 | 0.94 | 4.70 | - | 854.5  |
| AHQ-4-5, 4330 - 4333  | R.KDDPLTNLNTAFDVAEK.Y          | 1892.05631 | 2 | 1.22E-10 | 0.98 | 5.49 | - | 1785.9 |
| AHQ-4-8, 4427         | R.KDDPLTNLNTAFDVAEK.Y          | 1892.05631 | 2 | 5.57E-06 | 0.93 | 4.13 | - | 883.9  |
| AHQ-4-4, 4988         | R.KDDPLTNLNTAFDVAEK.Y          | 1892.05631 | 2 | 3.28E-04 | 0.86 | 3.85 | - | 538.0  |
| AHQ-4-5, 4775 - 4801  | R.KDDPLTNLNTAFDVAEK.Y          | 1892.05631 | 2 | 7.63E-09 | 0.97 | 5.48 | - | 1058.9 |
| AHQ-4-9, 3644         | R.KQFGAQAQVIGPWQTK.M           | 1887.17410 | 2 | 3.20E-04 | 0.91 | 4.27 | - | 806.7  |
| AHQ-4-5, 4086         | R.KQFGAQAQVIGPWQTK.M           | 1887.17410 | 2 | 4.58E-06 | 0.93 | 4.32 | - | 860.7  |
| AHQ-4-6, 2936 - 3018  | R.LAILGIHNEVSK.I               | 1294.52505 | 2 | 2.21E-06 | 0.95 | 3.63 | - | 1288.2 |
| AHQ-4-5, 3009         | R.LAILGIHNEVSK.I               | 1294.52505 | 1 | 5.06E-05 | 0.70 | 2.22 | - | 566.4  |
| AHQ-4-5, 3005 - 3006  | R.LAILGIHNEVSK.I               | 1294.52505 | 2 | 1.20E-06 | 0.95 | 4.27 | - | 1096.4 |
| AHQ-4-6, 3442 - 3514  | R.LAILGIHNEVSK.I               | 1294.52505 | 2 | 2.80E-05 | 0.96 | 3.49 | - | 1722.7 |
| AHQ-4-8, 2746         | R.LAILGIHNEVSK.I               | 1294.52505 | 2 | 7.31E-08 | 0.89 | 2.90 | - | 941.6  |
| AHQ-4-5, 5953 - 6017  | K.LASDLLEWIR.R                 | 1216.41115 | 2 | 1.20E-07 | 0.98 | 4.82 | - | 2107.2 |
| AHQ-4-7, 5917         | K.LASDLLEWIR.R                 | 1216.41115 | 2 | 8.46E-06 | 0.91 | 2.89 | - | 1525.6 |
| AHQ-4-5, 5957 - 6022  | K.LASDLLEWIR.R                 | 1216.41115 | 1 | 1.69E-04 | 0.69 | 2.81 | - | 477.9  |
| AHQ-4-6, 5910         | K.LASDLLEWIR.R                 | 1216.41115 | 2 | 2.31E-06 | 0.95 | 3.44 | - | 1957.9 |
| AHQ-4-1, 6282         | K.LASDLLEWIR.R                 | 1216.41115 | 2 | 2.99E-08 | 0.96 | 4.02 | - | 2003.6 |
| AHQ-4-6, 5922         | K.LASDLLEWIR.R                 | 1216.41115 | 1 | 5.79E-06 | 0.27 | 2.34 | - | 257.6  |
| AHQ-4-3, 6829         | K.LLETIDQLYLEYAK.R             | 1712.96427 | 2 | 8.99E-04 | 0.91 | 3.31 | - | 1142.7 |
| AHQ-4-4, 6786         | K.LLETIDQLYLEYAK.R             | 1712.96427 | 2 | 8.29E-04 | 0.95 | 3.81 | - | 1518.5 |
| AHQ-4-7, 6670         | K.LLETIDQLYLEYAK.R             | 1712.96427 | 2 | 7.03E-07 | 0.96 | 4.35 | - | 1246.9 |
| AHQ-4-5, 6878 - 6906  | K.LLETIDQLYLEYAK.R             | 1712.96427 | 2 | 3.59E-07 | 0.97 | 4.43 | - | 1677.7 |
| AHQ-4-5, 6649 - 6733  | K.LLETIDQLYLEYAK.R             | 1712.96427 | 2 | 1.25E-07 | 0.97 | 5.36 | - | 1288.1 |
| AHQ-4-6, 6515 - 6596  | K.LLETIDQLYLEYAK.R             | 1712.96427 | 2 | 2.10E-08 | 0.97 | 5.66 | - | 1329.2 |
| AHQ-4-6, 6463 - 6530  | K.LLETIDQLYLEYAK.R             | 1712.96427 | 2 | 1.58E-08 | 0.97 | 5.38 | - | 1460.2 |
| AHQ-4-2, 6831         | K.LLETIDQLYLEYAK.R             | 1712.96427 | 2 | 6.78E-07 | 0.95 | 4.22 | - | 1258.8 |
| AHQ-4-1, 6714         | K.LLETIDQLYLEYAK.R             | 1712.96427 | 2 | 1.25E-05 | 0.97 | 4.32 | - | 1745.7 |
| AHQ-4-5, 6981 - 7046  | K.LLETIDQLYLEYAK.R             | 1712.96427 | 2 | 1.78E-04 | 0.79 | 2.70 | - | 645.7  |
| AHQ-4-5, 6782 - 6801  | K.LLETIDQLYLEYAK.R             | 1712.96427 | 2 | 7.82E-09 | 0.97 | 5.27 | - | 1460.1 |
| AHQ-4-6, 2355         | R.LSNRPAFMPSEGR.M              | 1462.65941 | 2 | 5.76E-05 | 0.81 | 3.39 | - | 638.2  |
| AHQ-4-6, 3740 - 3750  | K.MLDAEDIVGTARPDEK.A           | 1760.94769 | 2 | 3.84E-05 | 0.91 | 3.93 | - | 935.9  |
| AHQ-4-4, 3583 - 3584  | K.MLDAEDIVGTARPDEK.A           | 1776.94709 | 2 | 1.23E-04 | 0.91 | 3.66 | - | 951.0  |
| AHQ-4-9, 3413         | K.MLDAEDIVGTARPDEK.A           | 1760.94769 | 2 | 5.41E-05 | 0.85 | 3.98 | - | 589.2  |
| AHQ-4-4, 3994         | K.MLDAEDIVGTARPDEK.A           | 1760.94769 | 2 | 9.48E-05 | 0.84 | 3.57 | - | 832.9  |
| AHQ-4-6, 3746         | K.MLDAEDIVGTARPDEK.A           | 1760.94769 | 3 | 4.20E-07 | 0.79 | 3.79 | - | 544.8  |
| AHQ-4-7, 3702 - 3714  | K.MLDAEDIVGTARPDEK.A           | 1760.94769 | 2 | 3.67E-06 | 0.80 | 3.82 | - | 616.6  |
| AHQ-4-8, 3606         | K.MLDAEDIVGTARPDEK.A           | 1760.94769 | 3 | 3.42E-09 | 0.76 | 3.34 | - | 605.6  |
| AHQ-4-8, 3597         | K.MLDAEDIVGTARPDEK.A           | 1760.94769 | 2 | 3.02E-05 | 0.93 | 4.64 | - | 803.7  |
| AHQ-4-5, 3381 - 3386  | K.MLDAEDIVGTARPDEK.A           | 1776.94709 | 2 | 9.58E-07 | 0.94 | 4.39 | - | 830.5  |
| AHQ-4-5, 3382         | K.MLDAEDIVGTARPDEK.A           | 1776.94709 | 3 | 2.01E-04 | 0.78 | 3.25 | - | 789.4  |
| AHQ-4-1, 3686 - 3753  | K.MLDAEDIVGTARPDEK.A           | 1776.94709 | 2 | 5.19E-04 | 0.82 | 3.64 | - | 447.4  |
| AHQ-4-5, 3813         | K.MLDAEDIVGTARPDEK.A           | 1776.94709 | 2 | 8.04E-05 | 0.63 | 3.28 | - | 443.2  |
| AHQ-4-5, 3793         | K.MLDAEDIVGTARPDEK.A           | 1760.94769 | 2 | 2.63E-06 | 0.91 | 4.35 | - | 784.8  |
| AHQ-4-6, 5455 - 5526  | R.MVSDINNAWGCLQVEK.G           | 1995.22333 | 2 | 2.90E-08 | 0.98 | 5.95 | - | 1634.0 |
| AHQ-4-6, 5046 - 5051  | R.MVSDINNAWGCLQVEK.G           | 2011.22273 | 2 | 2.42E-05 | 0.93 | 3.87 | - | 951.0  |
| AHQ-4-6, 5311         | R.MVSDINNAWGCLQVEK.G           | 1995.22333 | 2 | 6.13E-08 | 0.95 | 4.22 | - | 1311.9 |
| AHQ-4-6, 5195 - 5248  | R.MVSDINNAWGCLQVEK.G           | 2011.22273 | 2 | 8.58E-08 | 0.96 | 4.77 | - | 1155.6 |
| AHQ-4-5, 5154         | R.MVSDINNAWGCLQVEK.G           | 2011.22273 | 2 | 6.46E-08 | 0.96 | 4.87 | - | 1194.1 |
| AHQ-4-5, 5250 - 5317  | R.MVSDINNAWGCLQVEK.G           | 2011.22273 | 2 | 3.82E-05 | 0.82 | 3.90 | - | 654.2  |
| AHQ-4-5, 6069 - 6129  | R.MVSDINNAWGCLQVEK.G           | 1995.22333 | 2 | 2.94E-08 | 0.92 | 4.23 | - | 1125.8 |
| AHQ-4-4, 5816         | R.MVSDINNAWGCLQVEK.G           | 1995.22333 | 2 | 6.61E-04 | 0.70 | 3.37 | - | 499.0  |
| AHQ-4-5, 5986 - 5993  | R.MVSDINNAWGCLQVEK.G           | 1995.22333 | 2 | 3.13E-08 | 0.97 | 4.87 | - | 1558.5 |
| AHQ-4-5, 5407         | R.MVSDINNAWGCLQVEK.G           | 1995.22333 | 2 | 1.80E-10 | 0.94 | 4.45 | - | 840.5  |
| AHQ-4-5, 5523 - 5554  | R.MVSDINNAWGCLQVEK.G           | 1995.22333 | 2 | 5.74E-08 | 0.96 | 4.73 | - | 1395.8 |
| AHQ-4-1, 5582         | R.MVSDINNAWGCLQVEK.G           | 2011.22273 | 2 | 1.19E-09 | 0.84 | 3.72 | - | 504.8  |
| AHQ-4-5, 5869 - 5945  | R.MVSDINNAWGCLQVEK.G           | 1995.22333 | 2 | 2.44E-10 | 0.97 | 4.55 | - | 1707.1 |
| AHQ-4-5, 5555 - 5583  | R.MVSDINNAWGCLQVEK.G           | 2011.22273 | 2 | 8.13E-07 | 0.98 | 5.48 | - | 1832.5 |
| AHQ-4-5, 5621         | R.MVSDINNAWGCLQVEK.G           | 1995.22333 | 2 | 6.61E-06 | 0.97 | 5.01 | - | 1447.6 |
| AHQ-4-5, 5122         | K.NVNIQNFIHSWK.D               | 1500.68583 | 2 | 2.29E-07 | 0.95 | 4.04 | - | 1250.7 |
| AHQ-4-6, 4459         | K.NVNIQNFIHSWK.D               | 1500.68583 | 2 | 1.96E-06 | 0.76 | 2.71 | - | 725.4  |
| AHQ-4-5, 4437 - 4513  | K.NVNIQNFIHSWK.D               | 1500.68583 | 2 | 1.38E-06 | 0.95 | 4.02 | - | 1450.8 |
| AHQ-4-1, 4966         | K.NVNIQNFIHSWK.D               | 1500.68583 | 2 | 1.22E-06 | 0.94 | 4.02 | - | 1178.0 |
| AHQ-4-5, 3495         | K.NYITMDEL.R                   | 1155.30648 | 2 | 1.34E-04 | 0.73 | 2.63 | - | 611.8  |
| AHQ-4-5, 4975 - 4977  | K.QFGAQAQVIGPWQTK.M            | 1759.00118 | 2 | 2.06E-04 | 0.65 | 3.12 | - | 605.4  |
| AHQ-4-5, 2693         | R.QKDYETATLSEIK.A              | 1526.67030 | 2 | 9.01E-05 | 0.39 | 2.77 | - | 201.9  |
| AHQ-4-5, 2895 - 2941  | R.TINEVENQILTR.D               | 1430.58898 | 2 | 6.26E-04 | 0.70 | 2.67 | - | 846.5  |
| AHQ-4-4, 3950         | R.TINEVENQILTR.D               | 1430.58898 | 2 | 5.10E-05 | 0.78 | 3.10 | - | 826.1  |
| AHQ-4-5, 3509 - 3511  | R.TINEVENQILTR.D               | 1430.58898 | 2 | 8.79E-04 | 0.56 | 2.72 | - | 342.0  |
| AHQ-4-5, 3759 - 3839  | R.TINEVENQILTR.D               | 1430.58898 | 2 | 8.27E-04 | 0.74 | 2.83 | - | 893.0  |
| AHQ-4-6, 3718 - 3727  | R.TINEVENQILTR.D               | 1430.58898 | 2 | 5.36E-08 | 0.90 | 3.91 | - | 858.2  |
| AHQ-4-5, 3770         | R.TINEVENQILTR.D               | 1430.58898 | 1 | 3.75E-04 | 0.27 | 2.39 | - | 112.1  |
| AHQ-4-3, 4007         | R.TINEVENQILTR.D               | 1430.58898 | 2 | 1.83E-07 | 0.82 | 3.51 | - | 683.2  |
| AHQ-4-1, 4099 - 4102  | R.TINEVENQILTR.D               | 1430.58898 | 2 | 5.30E-05 | 0.90 | 3.32 | - | 1074.6 |
| AHQ-4-5, 3946         | R.TINEVENQILTR.D               | 1430.58898 | 1 | 5.80E-06 | 0.27 | 2.39 | - | 273.8  |
| AHQ-4-8, 3585 - 3654  | R.TINEVENQILTR.D               | 1430.58898 | 2 | 2.09E-05 | 0.88 | 3.42 | - | 840.1  |
| AHQ-4-5, 7026 - 7039  | R.VEQIAAIAQELNELDYDPSVNR.C     | 2810.02233 | 3 | 1.57E-04 | 0.83 | 3.51 | - | 1080.2 |
| AHQ-4-3, 6891         | R.VGVEQLLTIAR.T                | 1387.60894 | 2 | 3.54E-04 | 0.95 | 4.15 | - | 1353.1 |
| AHQ-4-6, 6562 - 6578  | R.VGVEQLLTIAR.T                | 1387.60894 | 2 | 2.71E-07 | 0.97 | 4.50 | - | 1919.9 |
| AHQ-4-1, 6831         | R.VGVEQLLTIAR.T                | 1387.60894 | 2 | 3.18E-06 | 0.90 | 3.27 | - | 1099.0 |
| AHQ-4-7, 6590         | R.VGVEQLLTIAR.T                | 1387.60894 | 2 | 8.14E-09 | 0.95 | 4.00 | - | 1395.2 |
| AHQ-4-14-, 6365       | R.VGVEQLLTIAR.T                | 1387.60894 | 2 | 4.74E-08 | 0.94 | 3.98 | - | 1306.9 |
| AHQ-4-9, 5976 - 5981  | R.VGVEQLLTIAR.T                | 1387.60894 | 2 | 4.82E-07 | 0.96 | 4.45 | - | 1616.3 |

|                             |                                            |            |   |          |       |        |       |          |
|-----------------------------|--------------------------------------------|------------|---|----------|-------|--------|-------|----------|
| AHQ-4-11, 6272 - 6273       | R.VGWEQLLTIAR.T                            | 1387.60894 | 2 | 1.17E-06 | 0.93  | 3.65   | -     | 1362.5   |
| AHQ-4-2, 6923               | R.VGWEQLLTIAR.T                            | 1387.60894 | 2 | 8.23E-11 | 0.94  | 4.07   | -     | 1193.6   |
| AHQ-4-5, 6621 - 6690        | R.VGWEQLLTIAR.T                            | 1387.60894 | 2 | 8.46E-07 | 0.97  | 4.86   | -     | 1902.2   |
| AHQ-4-10, 5948              | R.VGWEQLLTIAR.T                            | 1387.60894 | 2 | 9.36E-06 | 0.94  | 3.76   | -     | 1366.5   |
| AHQ-4-8, 6278               | R.VGWEQLLTIAR.T                            | 1387.60894 | 2 | 2.93E-07 | 0.90  | 3.48   | -     | 1064.4   |
| AHQ-4-4, 6863 - 6890        | R.VGWEQLLTIAR.T                            | 1387.60894 | 2 | 7.65E-09 | 0.94  | 3.81   | -     | 1417.0   |
| AHQ-4-8, 3817               | K.VLAVNQENQMLMEDYEK.L                      | 2053.23635 | 2 | 9.12E-05 | 0.94  | 4.44   | -     | 1001.8   |
| AHQ-4-5, 3419 - 3491        | K.VLAVNQENQMLMEDYEK.L                      | 2069.23575 | 2 | 2.56E-09 | 0.97  | 5.39   | -     | 1447.0   |
| AHQ-4-4, 3619 - 3655        | K.VLAVNQENQMLMEDYEK.L                      | 2069.23575 | 2 | 1.58E-07 | 0.90  | 4.03   | -     | 833.8    |
| AHQ-4-5, 3591 - 3665        | K.VLAVNQENQMLMEDYEK.L                      | 2069.23575 | 2 | 1.60E-10 | 0.96  | 5.17   | -     | 1006.2   |
| AHQ-4-7, 4058               | K.VLAVNQENQMLMEDYEK.L                      | 2053.23635 | 2 | 3.13E-04 | 0.95  | 4.92   | -     | 1106.0   |
| AHQ-4-3, 4416               | K.VLAVNQENQMLMEDYEK.L                      | 2053.23635 | 2 | 3.17E-04 | 0.60  | 3.05   | -     | 537.3    |
| AHQ-4-5, 4097 - 4165        | K.VLAVNQENQMLMEDYEK.L                      | 2053.23635 | 2 | 3.19E-09 | 0.97  | 5.83   | -     | 1593.5   |
| AHQ-4-5, 4233 - 4307        | K.VLAVNQENQMLMEDYEK.L                      | 2053.23635 | 2 | 1.01E-10 | 0.96  | 5.00   | -     | 1205.3   |
| AHQ-4-5, 4377 - 4449        | K.VLAVNQENQMLMEDYEK.L                      | 2053.23635 | 2 | 9.18E-12 | 0.96  | 5.13   | -     | 1274.6   |
| AHQ-4-5, 4537               | K.VLAVNQENQMLMEDYEK.L                      | 2053.23635 | 2 | 3.91E-08 | 0.96  | 4.79   | -     | 1308.3   |
| AHQ-4-5, 4622               | K.VLAVNQENQMLMEDYEK.L                      | 2053.23635 | 2 | 6.35E-08 | 0.96  | 4.69   | -     | 1401.7   |
| AHQ-4-6, 3416               | K.VLAVNQENQMLMEDYEK.L                      | 2069.23575 | 2 | 2.13E-07 | 0.95  | 4.32   | -     | 1138.0   |
| AHQ-4-1, 4473               | K.VLAVNQENQMLMEDYEK.L                      | 2053.23635 | 2 | 4.92E-10 | 0.93  | 4.27   | -     | 1187.1   |
| AHQ-4-6, 4432 - 4512        | K.VLAVNQENQMLMEDYEK.L                      | 2053.23635 | 2 | 7.83E-10 | 0.96  | 4.87   | -     | 1026.4   |
| AHQ-4-1, 3749               | K.VLAVNQENQMLMEDYEK.L                      | 2069.23575 | 2 | 4.99E-04 | 0.94  | 4.46   | -     | 1049.1   |
| AHQ-4-6, 4078               | K.VLAVNQENQMLMEDYEK.L                      | 2053.23635 | 2 | 4.37E-07 | 0.96  | 4.95   | -     | 1131.6   |
| gj[4758606]ref[NP_004508.1] | integrin-linked kinase [Homo sapiens]      |            |   | 5.81E-12 | 8.51  | 110.28 | 28.50 | 51418.9  |
| AHQ-4-10, 5184              | R.EVFPADLSNEMGMK.V                         | 1681.95558 | 2 | 9.75E-04 | 0.57  | 3.03   | -     | 260.7    |
| AHQ-4-7, 5450               | K.FDMIVPILEK.M                             | 1205.49168 | 2 | 6.08E-06 | 0.84  | 3.25   | -     | 638.0    |
| AHQ-4-7, 5451               | K.FDMIVPILEK.M                             | 1205.49168 | 1 | 1.04E-04 | 0.64  | 2.70   | -     | 572.2    |
| AHQ-4-7, 4770 - 4842        | R.GM*AFHLTLEPLIPR.H                        | 1611.93301 | 2 | 3.41E-06 | 0.90  | 3.44   | -     | 1037.7   |
| AHQ-4-9, 5175               | R.GMAFLHTLEPLIPR.H                         | 1595.93361 | 2 | 1.49E-05 | 0.96  | 5.06   | -     | 971.7    |
| AHQ-4-10, 4620 - 4632       | R.GM*AFHLTLEPLIPR.H                        | 1611.93301 | 2 | 4.34E-05 | 0.87  | 3.82   | -     | 627.6    |
| AHQ-4-7, 2207 - 2210        | K.LNENHSGELWK.G                            | 1327.42732 | 2 | 7.78E-06 | 0.71  | 3.17   | -     | 529.1    |
| AHQ-4-7, 2205               | K.LNENHSGELWK.G                            | 1327.42732 | 1 | 2.41E-08 | 0.70  | 2.34   | -     | 550.2    |
| AHQ-4-7, 1985 - 1987        | K.LNENHSGELWK.G                            | 1327.42732 | 2 | 1.79E-05 | 0.82  | 3.71   | -     | 647.3    |
| AHQ-4-7, 6231               | R.LWLDNTENDLNQGGDDHGFSPHWACR.E             | 3113.28217 | 3 | 7.71E-10 | 0.94  | 4.91   | -     | 1338.6   |
| AHQ-4-7, 6014 - 6017        | R.LWLDNTENDLNQGGDDHGFSPHWACR.E             | 3113.28217 | 3 | 1.03E-11 | 0.97  | 5.66   | -     | 1763.1   |
| AHQ-4-13, 4382 - 4421       | R.M*YAPAWVAPEALQK.K                        | 1591.85542 | 2 | 4.91E-08 | 0.93  | 4.05   | -     | 793.8    |
| AHQ-4-10, 3856 - 3919       | R.M*YAPAWVAPEALQK.K                        | 1591.85542 | 2 | 6.48E-04 | 0.84  | 3.41   | -     | 542.6    |
| AHQ-4-11, 4569              | R.MYAPAWVAPEALQK.K                         | 1575.85602 | 2 | 1.15E-06 | 0.85  | 3.22   | -     | 694.3    |
| AHQ-4-7, 1549               | K.SRDFNEECPRL.L                            | 1311.36321 | 2 | 6.37E-04 | 0.49  | 2.62   | -     | 230.5    |
| AHQ-4-7, 4253 - 4323        | K.VALEGLRPTIPPGISPHVCK.L                   | 2143.53829 | 2 | 7.71E-04 | 0.95  | 5.07   | -     | 732.4    |
| AHQ-4-13, 4688              | K.VALEGLRPTIPPGISPHVCK.L                   | 2143.53829 | 2 | 8.79E-05 | 0.87  | 3.55   | -     | 595.4    |
| AHQ-4-7, 4255 - 4270        | K.VALEGLRPTIPPGISPHVCK.L                   | 2143.53829 | 3 | 5.81E-12 | 0.94  | 4.57   | -     | 961.8    |
| AHQ-4-7, 2662               | R.WQGDNDIVK.V                              | 1059.20012 | 1 | 8.85E-05 | 0.35  | 2.01   | -     | 483.3    |
| gj[4759212]ref[NP_004598.1] | beta-tubulin cofactor A [Homo sapiens]     |            |   | 6.64E-12 | 2.86  | 30.31  | 26.90 | 12854.8  |
| AHQ-4-13, 3651              | R.ILENEKDLLEEAEYK.E                        | 1852.97372 | 2 | 3.62E-04 | 0.95  | 4.06   | -     | 1378.2   |
| AHQ-4-13, 3341              | R.ILENEKDLLEEAEYK.E                        | 2209.35284 | 3 | 6.64E-12 | 0.97  | 6.24   | -     | 1431.6   |
| AHQ-4-13, 3481              | R.ILENEKDLLEEAEYK.E                        | 2209.35284 | 2 | 6.38E-06 | 0.87  | 4.11   | -     | 576.5    |
| AHQ-4-13, 3478              | R.ILENEKDLLEEAEYK.E                        | 2209.35284 | 3 | 1.26E-08 | 0.95  | 5.47   | -     | 1228.9   |
| AHQ-4-13, 3502              | R.RLEAAYLDLQR.I                            | 1348.53280 | 2 | 1.98E-07 | 0.94  | 4.12   | -     | 872.6    |
| gj[5031857]ref[NP_005557.1] | lactate dehydrogenase A [Homo sapiens]     |            |   | 8.11E-12 | 5.77  | 70.29  | 23.80 | 36688.5  |
| AHQ-4-9, 6667               | K.DDFVLSVPCILGGNGISDLVK.V                  | 2291.60655 | 2 | 1.81E-05 | 0.63  | 3.27   | -     | 275.0    |
| AHQ-4-9, 6419               | K.DLADELALVDVIEDK.L                        | 1658.82864 | 2 | 8.40E-07 | 0.91  | 3.77   | -     | 1246.3   |
| AHQ-4-13, 6788 - 6793       | K.DLADELALVDVIEDK.L                        | 1658.82864 | 2 | 2.96E-10 | 0.98  | 5.61   | -     | 1674.2   |
| AHQ-4-14, 6579              | K.DLADELALVDVIEDK.L                        | 1658.82864 | 2 | 5.69E-05 | 0.94  | 4.10   | -     | 1327.2   |
| AHQ-4-13, 6688 - 6693       | K.DLADELALVDVIEDK.L                        | 1658.82864 | 2 | 8.11E-12 | 0.98  | 5.89   | -     | 1831.5   |
| AHQ-4-9, 6629               | K.DLADELALVDVIEDK.L                        | 1900.15980 | 2 | 2.01E-09 | 0.96  | 5.17   | -     | 1197.0   |
| AHQ-4-9, 6656               | K.GLYGIKDDVFLSVPICLGGNGISDLVK.V            | 2923.37318 | 2 | 6.62E-06 | 0.83  | 3.78   | -     | 390.4    |
| AHQ-4-13, 2923              | K.LVIITAGAR.Q                              | 914.12760  | 2 | 4.76E-04 | 0.90  | 3.25   | -     | 925.5    |
| AHQ-4-9, 2120               | K.TLHPDLGTDKDKQWQK.E                       | 1912.09245 | 2 | 3.83E-06 | 0.62  | 2.74   | -     | 431.3    |
| AHQ-4-11, 2028              | K.VTLTSEEEAR.L                             | 1135.20693 | 2 | 3.20E-04 | 0.85  | 2.51   | -     | 1138.7   |
| gj[4504745]ref[NP_000410.1] | integrin alpha 2b precursor [Homo sapiens] |            |   | 8.16E-12 | 31.60 | 380.33 | 40.70 | 113374.2 |
| AHQ-4-4, 1662 - 1726        | R.AEAQVELR.G                               | 916.01408  | 2 | 6.38E-04 | 0.84  | 2.95   | -     | 965.9    |
| AHQ-4-4, 1642 - 1755        | R.AEAQVELR.G                               | 916.01408  | 1 | 2.36E-05 | 0.31  | 2.37   | -     | 234.1    |
| AHQ-4-7, 5107               | R.AEGGQCPSSLDFDLR.D                        | 1564.74505 | 2 | 5.56E-07 | 0.92  | 4.40   | -     | 700.2    |
| AHQ-4-10, 4713              | R.AEGGQCPSSLDFDLR.D                        | 1564.74505 | 2 | 9.55E-07 | 0.94  | 4.23   | -     | 1025.2   |
| AHQ-4-11, 5006              | R.AEGGQCPSSLDFDLR.D                        | 1564.74505 | 2 | 1.84E-05 | 0.93  | 4.24   | -     | 787.4    |
| AHQ-4-5, 5150 - 5206        | R.AEGGQCPSSLDFDLR.D                        | 1564.74505 | 2 | 9.13E-05 | 0.86  | 3.17   | -     | 732.3    |
| AHQ-4-3, 5433               | R.AEGGQCPSSLDFDLR.D                        | 1564.74505 | 2 | 1.83E-05 | 0.92  | 3.73   | -     | 849.3    |
| AHQ-4-4, 5570 - 5582        | R.AEGGQCPSSLDFDLR.D                        | 1564.74505 | 2 | 5.98E-08 | 0.95  | 4.04   | -     | 1179.5   |
| AHQ-4-4, 5356 - 5439        | R.AEGGQCPSSLDFDLR.D                        | 1564.74505 | 2 | 2.47E-10 | 0.95  | 4.93   | -     | 938.8    |
| AHQ-4-6, 5095 - 5123        | R.AEGGQCPSSLDFDLR.D                        | 1564.74505 | 2 | 7.08E-05 | 0.91  | 3.43   | -     | 901.3    |
| AHQ-4-13, 5198              | R.AEGGQCPSSLDFDLR.D                        | 1564.74505 | 2 | 1.33E-06 | 0.86  | 3.14   | -     | 713.6    |
| AHQ-4-4, 5006               | R.AEGGQCPSSLDFDLR.D                        | 2066.23814 | 2 | 7.49E-04 | 0.27  | 2.99   | -     | 263.4    |
| AHQ-4-4, 4892               | R.AEGGQCPSSLDFDLR.D                        | 2066.23814 | 3 | 4.97E-07 | 0.88  | 3.79   | -     | 951.7    |
| AHQ-4-4, 2707 - 2783        | R.ALSNVEGFER.L                             | 1122.21308 | 1 | 5.90E-07 | 0.66  | 2.03   | -     | 59.8     |
| AHQ-4-6, 2578               | R.ALSNVEGFER.L                             | 1122.21308 | 2 | 1.14E-05 | 0.86  | 2.87   | -     | 854.2    |
| AHQ-4-3, 2745               | R.ALSNVEGFER.L                             | 1122.21308 | 2 | 1.38E-06 | 0.87  | 3.04   | -     | 897.9    |
| AHQ-4-2, 2776               | R.ALSNVEGFER.L                             | 1122.21308 | 2 | 4.92E-05 | 0.86  | 3.47   | -     | 760.2    |
| AHQ-4-4, 3102               | R.ALSNVEGFER.L                             | 1122.21308 | 1 | 5.53E-05 | 0.27  | 2.51   | -     | 206.0    |
| AHQ-4-4, 2696 - 2738        | R.ALSNVEGFER.L                             | 1122.21308 | 2 | 8.60E-04 | 0.87  | 3.18   | -     | 820.8    |
| AHQ-4-5, 4917 - 4933        | K.ASVQLLVQDSLNPVAVK.S                      | 1682.94293 | 2 | 4.93E-06 | 0.90  | 3.82   | -     | 1049.1   |
| AHQ-4-5, 5019 - 5090        | K.ASVQLLVQDSLNPVAVK.S                      | 1682.94293 | 2 | 5.98E-04 | 0.72  | 3.05   | -     | 724.7    |
| AHQ-4-4, 5094 - 5163        | K.ASVQLLVQDSLNPVAVK.S                      | 1682.94293 | 2 | 4.10E-05 | 0.92  | 4.58   | -     | 853.2    |
| AHQ-4-4, 5234 - 5303        | K.ASVQLLVQDSLNPVAVK.S                      | 1682.94293 | 2 | 4.86E-06 | 0.93  | 4.29   | -     | 898.0    |
| AHQ-4-4, 5524 - 5530        | K.ASVQLLVQDSLNPVAVK.S                      | 1682.94293 | 2 | 4.03E-05 | 0.87  | 3.84   | -     | 674.4    |
| AHQ-4-4, 3431               | R.DETRNVSQTLQTFK.A                         | 1724.85363 | 2 | 1.02E-07 | 0.56  | 2.76   | -     | 426.7    |
| AHQ-4-4, 2994               | R.DETRNVSQTLQTFK.A                         | 1724.85363 | 2 | 2.47E-05 | 0.85  | 3.27   | -     | 977.4    |
| AHQ-4-3, 4028               | R.DGYNDIAVAAPYGGPSGR.G                     | 1780.87574 | 2 | 1.42E-04 | 0.89  | 3.94   | -     | 759.1    |
| AHQ-4-4, 4151               | R.DGYNDIAVAAPYGGPSGR.G                     | 1780.87574 | 2 | 2.35E-04 | 0.89  | 4.24   | -     | 578.8    |
| AHQ-4-2, 4046               | R.DGYNDIAVAAPYGGPSGR.G                     | 1780.87574 | 2 | 2.01E-09 | 0.82  | 4.00   | -     | 835.9    |
| AHQ-4-4, 4547               | R.FGSAIAPLGLDLR.D                          | 1332.48700 | 1 | 1.17E-04 | 0.94  | 3.30   | -     | 566.5    |
| AHQ-4-4, 4538 - 4540        | R.FGSAIAPLGLDLR.D                          | 1332.48700 | 2 | 1.06E-07 | 0.90  | 3.77   | -     | 904.0    |
| AHQ-4-7, 5626 - 5698        | R.FGSAIAPLGLDLRDRDGYNDIAVAAPYGGPSGR.G      | 3094.34015 | 3 | 5.14E-04 | 0.87  | 3.87   | -     | 1022.5   |
| AHQ-4-3, 6175 - 6245        | R.FGSAIAPLGLDLRDRDGYNDIAVAAPYGGPSGR.G      | 3094.34015 | 3 | 8.07E-08 | 0.84  | 3.99   | -     | 791.1    |
| AHQ-4-5, 5790 - 5857        | R.FGSAIAPLGLDLRDRDGYNDIAVAAPYGGPSGR.G      | 3094.34015 | 3 | 9.88E-08 | 0.91  | 4.92   | -     | 737.1    |
| AHQ-4-3, 5999 - 6069        | R.FGSAIAPLGLDLRDRDGYNDIAVAAPYGGPSGR.G      | 3094.34015 | 3 | 3.72E-06 | 0.90  | 4.51   | -     | 911.9    |
| AHQ-4-5, 6001 - 6075        | R.FGSAIAPLGLDLRDRDGYNDIAVAAPYGGPSGR.G      | 3094.34015 | 3 | 5.75E-06 | 0.72  | 3.21   | -     | 622.9    |
| AHQ-4-4, 5839 - 5907        | R.FGSAIAPLGLDLRDRDGYNDIAVAAPYGGPSGR.G      | 3094.34015 | 3 | 1.41E-06 | 0.92  | 4.74   | -     | 684.9    |
| AHQ-4-4, 6174 - 6243        | R.FGSAIAPLGLDLRDRDGYNDIAVAAPYGGPSGR.G      | 3094.34015 | 3 | 6.19E-05 | 0.78  | 3.50   | -     | 945.1    |
| AHQ-4-1, 5989 - 6069        | R.FGSAIAPLGLDLRDRDGYNDIAVAAPYGGPSGR.G      | 3094.34015 | 3 | 6.40E-04 | 0.86  | 4.20   | -     | 700.5    |
| AHQ-4-4, 5974 - 6042        | R.FGSAIAPLGLDLRDRDGYNDIAVAAPYGGPSGR.G      | 3094.34015 | 3 | 1.67E-08 | 0.84  | 4.23   | -     | 730.1    |
| AHQ-4-7, 5697 - 5775        | R.FGSAIAPLGLDLRDRDGYNDIAVAAPYGGPSGR.G      | 3094.34015 | 3 | 4.11E-05 | 0.56  | 3.55   | -     | 574.2    |
| AHQ-4-4, 6999 - 7063        | R.GAVDIDDNGYDPLIVGAYGANQVAVYR.A            | 2827.05458 | 3 | 2.54E-08 | 0.89  | 4.49   | -     | 883.9    |
| AHQ-4-4, 7575 - 7634        | R.GAVDIDDNGYDPLIVGAYGANQVAVYR.A            | 2827.05458 | 2 | 1.78E-05 | 0.80  | 3.83   | -     | 326.2    |
| AHQ-4-4, 6930 - 6950        | R.GAVDIDDNGYDPLIVGAYGANQVAVYR.A            | 2827.05458 | 2 | 4.60E-06 | 0.92  | 4.68   | -     | 473.6    |
| AHQ-4-4, 7436 - 7508        | R.GAVDIDDNGYDPLIVGAYGANQVAVYR.A            | 2827.05458 | 2 | 7.93E-07 | 0.94  | 5.13   | -     | 544.4    |
| AHQ-4-4, 7351 - 7415        | R.GAVDIDDNGYDPLIVGAYGANQVAVYR.A            | 2827.05458 | 2 | 9.87E-07 | 0.92  | 4.68   | -     | 512.8    |
| AHQ-4-4, 7218 - 7283        | R.GAVDIDDNGYDPLIVGAYGANQVAVYR.A            | 2827.05458 | 2 | 1.78E-07 | 0.91  | 4.50   | -     | 571.2    |



|                       |                                 |            |   |          |      |      |   |        |
|-----------------------|---------------------------------|------------|---|----------|------|------|---|--------|
| AHQ-4-4, 6795 - 6866  | R.GAVDIDDNGYDPLIVGAYGANQVAVYR.A | 2827.05458 | 2 | 9.42E-05 | 0.93 | 4.27 | - | 781.2  |
| AHQ-4-4, 6662 - 6726  | R.GAVDIDDNGYDPLIVGAYGANQVAVYR.A | 2827.05458 | 2 | 1.29E-06 | 0.95 | 5.04 | - | 794.3  |
| AHQ-4-4, 6376 - 6442  | R.GAVDIDDNGYDPLIVGAYGANQVAVYR.A | 2827.05458 | 2 | 1.47E-07 | 0.91 | 4.21 | - | 572.5  |
| AHQ-4-4, 7027 - 7092  | R.GAVDIDDNGYDPLIVGAYGANQVAVYR.A | 2827.05458 | 2 | 9.27E-08 | 0.94 | 5.11 | - | 483.2  |
| AHQ-4-4, 7130 - 7194  | R.GAVDIDDNGYDPLIVGAYGANQVAVYR.A | 2827.05458 | 2 | 1.58E-06 | 0.96 | 5.35 | - | 835.9  |
| AHQ-4-11, 4752        | R.GEAQVWTQLLR.A                 | 1301.47614 | 2 | 3.97E-07 | 0.94 | 4.23 | - | 1154.8 |
| AHQ-4-1, 5286         | R.GEAQVWTQLLR.A                 | 1301.47614 | 2 | 6.65E-05 | 0.91 | 3.47 | - | 1136.8 |
| AHQ-4-10, 4425 - 4451 | R.GEAQVWTQLLR.A                 | 1301.47614 | 2 | 9.56E-07 | 0.95 | 4.31 | - | 1168.0 |
| AHQ-4-4, 5634 - 5706  | R.GNSFPASLVAAEEGER.E            | 1733.86053 | 2 | 6.76E-10 | 0.94 | 4.73 | - | 892.3  |
| AHQ-4-4, 5490 - 5563  | R.GNSFPASLVAAEEGER.E            | 1733.86053 | 2 | 2.08E-09 | 0.92 | 4.44 | - | 645.8  |
| AHQ-4-4, 5352 - 5423  | R.GNSFPASLVAAEEGER.E            | 1733.86053 | 2 | 7.90E-05 | 0.84 | 3.78 | - | 613.6  |
| AHQ-4-11, 5304 - 5377 | R.GNSFPASLVAAEEGER.E            | 1733.86053 | 2 | 1.46E-09 | 0.76 | 2.97 | - | 721.6  |
| AHQ-4-4, 5910         | R.GNSFPASLVAAEEGER.E            | 1733.86053 | 2 | 1.28E-11 | 0.95 | 4.14 | - | 1218.0 |
| AHQ-4-4, 6859         | R.GNSFPASLVAAEEGEREQNSLDSWGP.V  | 2976.16043 | 2 | 2.02E-05 | 0.35 | 2.50 | - | 301.3  |
| AHQ-4-4, 6835 - 6903  | R.GNSFPASLVAAEEGEREQNSLDSWGP.V  | 2976.16043 | 3 | 8.29E-09 | 0.78 | 4.11 | - | 401.6  |
| AHQ-4-4, 6564 - 6643  | R.GNSFPASLVAAEEGEREQNSLDSWGP.V  | 2976.16043 | 3 | 2.74E-09 | 0.72 | 3.66 | - | 296.1  |
| AHQ-4-4, 6696 - 6770  | R.GNSFPASLVAAEEGEREQNSLDSWGP.V  | 2976.16043 | 3 | 5.01E-05 | 0.92 | 5.12 | - | 510.4  |
| AHQ-4-1, 5451         | R.GPHALGAPSLLLTGTLQYGR.F        | 2023.32431 | 3 | 3.97E-04 | 0.92 | 3.78 | - | 1272.5 |
| AHQ-4-5, 4957         | R.GPHALGAPSLLLTGTLQYGR.F        | 2023.32431 | 2 | 2.03E-08 | 0.94 | 4.63 | - | 820.8  |
| AHQ-4-4, 5047         | R.GPHALGAPSLLLTGTLQYGR.F        | 2023.32431 | 2 | 2.28E-07 | 0.95 | 4.85 | - | 721.3  |
| AHQ-4-6, 4918         | R.GPHALGAPSLLLTGTLQYGR.F        | 2023.32431 | 2 | 8.58E-05 | 0.93 | 4.88 | - | 605.5  |
| AHQ-4-1, 5445 - 5453  | R.GPHALGAPSLLLTGTLQYGR.F        | 2023.32431 | 2 | 6.51E-07 | 0.97 | 5.81 | - | 908.5  |
| AHQ-4-4, 5179 - 5224  | R.GPHALGAPSLLLTGTLQYGR.F        | 2023.32431 | 3 | 1.65E-04 | 0.90 | 4.03 | - | 1256.1 |
| AHQ-4-4, 5171 - 5242  | R.GPHALGAPSLLLTGTLQYGR.F        | 2023.32431 | 2 | 1.92E-06 | 0.97 | 5.42 | - | 1024.1 |
| AHQ-4-7, 4737         | R.GPHALGAPSLLLTGTLQYGR.F        | 2023.32431 | 2 | 4.65E-06 | 0.93 | 4.28 | - | 937.5  |
| AHQ-4-3, 5233 - 5304  | R.GPHALGAPSLLLTGTLQYGR.F        | 2023.32431 | 2 | 1.11E-06 | 0.96 | 5.30 | - | 886.9  |
| AHQ-4-4, 5070 - 5139  | R.GQVFLVFGQSEGLR.S              | 1503.72793 | 2 | 2.18E-07 | 0.97 | 5.78 | - | 1312.4 |
| AHQ-4-1, 5227         | R.GQVFLVFGQSEGLR.S              | 1503.72793 | 2 | 1.27E-08 | 0.96 | 4.94 | - | 1235.7 |
| AHQ-4-4, 5180 - 5251  | R.GQVFLVFGQSEGLR.S              | 1503.72793 | 2 | 1.16E-08 | 0.97 | 5.05 | - | 1517.5 |
| AHQ-4-3, 5151         | R.GQVFLVFGQSEGLR.S              | 1503.72793 | 2 | 1.21E-08 | 0.97 | 4.92 | - | 1394.3 |
| AHQ-4-4, 5368 - 5440  | R.GQVFLVFGQSEGLR.S              | 1503.72793 | 2 | 8.77E-05 | 0.88 | 3.03 | - | 1185.1 |
| AHQ-4-3, 4473         | R.HDLLVGLAPLYMESR.A             | 1601.85188 | 2 | 1.69E-06 | 0.93 | 2.99 | - | 1404.7 |
| AHQ-4-6, 4095         | R.HDLLVGLAPLYMESR.A             | 1601.85188 | 2 | 6.26E-06 | 0.91 | 3.52 | - | 934.1  |
| AHQ-4-5, 4155         | R.HDLLVGLAPLYMESR.A             | 1601.85188 | 2 | 1.10E-07 | 0.96 | 4.35 | - | 1441.4 |
| AHQ-4-4, 4382         | R.HDLLVGLAPLYMESR.A             | 1601.85188 | 2 | 5.17E-10 | 0.97 | 4.92 | - | 1539.8 |
| AHQ-4-4, 3618 - 3630  | K.HSPICHTTMAFLR.D               | 1572.83705 | 2 | 3.40E-09 | 0.76 | 2.93 | - | 370.1  |
| AHQ-4-4, 2960 - 2995  | K.HSPICHTTMAFLR.D               | 1572.83705 | 2 | 2.99E-04 | 0.76 | 2.66 | - | 613.5  |
| AHQ-4-3, 3668         | K.HSPICHTTMAFLR.D               | 1572.83705 | 2 | 1.25E-09 | 0.68 | 2.70 | - | 399.5  |
| AHQ-4-11, 4168        | K.IVLLDVPVRA                    | 1024.28196 | 2 | 9.42E-04 | 0.90 | 3.87 | - | 742.5  |
| AHQ-4-5, 4183         | K.IVLLDVPVRA                    | 1024.28196 | 2 | 7.88E-04 | 0.87 | 3.50 | - | 743.7  |
| AHQ-4-12, 4305        | K.IVLLDVPVRA                    | 1024.28196 | 2 | 3.71E-05 | 0.92 | 3.37 | - | 1086.1 |
| AHQ-4-3, 4501         | K.IVLLDVPVRA                    | 1024.28196 | 2 | 1.74E-04 | 0.84 | 3.27 | - | 780.6  |
| AHQ-4-6, 4111         | K.IVLLDVPVRA                    | 1024.28196 | 2 | 4.82E-04 | 0.87 | 3.61 | - | 767.8  |
| AHQ-4-4, 4390 - 4464  | K.IVLLDVPVRA                    | 1024.28196 | 2 | 3.04E-05 | 0.94 | 3.58 | - | 1276.3 |
| AHQ-4-4, 4499         | R.IYVENDFSWDK.R                 | 1416.51610 | 2 | 7.69E-08 | 0.89 | 3.34 | - | 848.8  |
| AHQ-4-4, 4508 - 4512  | R.IYVENDFSWDK.R                 | 1416.51610 | 1 | 3.06E-06 | 0.33 | 2.12 | - | 315.6  |
| AHQ-4-4, 4179 - 4183  | R.IYVENDFSWDKR.Y                | 1572.70245 | 2 | 5.71E-10 | 0.90 | 3.95 | - | 1006.8 |
| AHQ-4-4, 3962 - 4038  | R.IYVENDFSWDKR.Y                | 1572.70245 | 2 | 1.99E-07 | 0.96 | 4.07 | - | 1456.6 |
| AHQ-4-10, 5483 - 5489 | R.LQDPVLVSCDSAPCTVVQCCLQEMAR.G  | 2996.36144 | 2 | 1.11E-04 | 0.71 | 3.31 | - | 348.4  |
| AHQ-4-10, 6351 - 6353 | R.LQDPVLVSCDSAPCTVVQCCLQEMAR.G  | 2996.36144 | 2 | 1.63E-05 | 0.56 | 2.92 | - | 230.3  |
| AHQ-4-10, 6203        | R.LQDPVLVSCDSAPCTVVQCCLQEMAR.G  | 2996.36144 | 2 | 2.13E-04 | 0.68 | 3.03 | - | 273.8  |
| AHQ-4-10, 6199 - 6261 | R.LQDPVLVSCDSAPCTVVQCCLQEMAR.G  | 2996.36144 | 2 | 7.80E-06 | 0.94 | 5.25 | - | 428.1  |
| AHQ-4-4, 4862         | K.LSLNAELQLDR.Q                 | 1272.43310 | 2 | 4.60E-06 | 0.95 | 4.00 | - | 1509.1 |
| AHQ-4-4, 4698         | K.LSLNAELQLDR.Q                 | 1272.43310 | 2 | 7.63E-08 | 0.92 | 3.92 | - | 982.8  |
| AHQ-4-4, 4780         | K.LSLNAELQLDR.Q                 | 1272.43310 | 2 | 1.83E-07 | 0.90 | 3.64 | - | 1013.3 |
| AHQ-4-4, 4563         | K.LSLNAELQLDR.Q                 | 1272.43310 | 2 | 3.99E-05 | 0.75 | 2.88 | - | 662.5  |
| AHQ-4-12, 2763        | R.NVGSQTLQTFK.A                 | 1223.36055 | 2 | 2.88E-06 | 0.91 | 3.64 | - | 628.5  |
| AHQ-4-5, 2537 - 2541  | R.NVGSQTLQTFK.A                 | 1223.36055 | 2 | 1.56E-09 | 0.90 | 3.69 | - | 522.7  |
| AHQ-4-6, 2566 - 2567  | R.NVGSQTLQTFK.A                 | 1223.36055 | 2 | 3.88E-06 | 0.89 | 3.59 | - | 576.4  |
| AHQ-4-4, 3230         | R.NVGSQTLQTFK.A                 | 1223.36055 | 1 | 4.12E-05 | 0.10 | 2.00 | - | 205.3  |
| AHQ-4-4, 2686 - 2754  | R.NVGSQTLQTFK.A                 | 1223.36055 | 2 | 3.97E-05 | 0.91 | 3.63 | - | 565.5  |
| AHQ-4-7, 2493         | R.NVGSQTLQTFK.A                 | 1223.36055 | 2 | 1.35E-04 | 0.89 | 3.53 | - | 612.0  |
| AHQ-4-4, 6638 - 6702  | R.PSQVLDSPPTGSAFGFSLR.G         | 2111.34205 | 2 | 6.20E-07 | 0.95 | 4.92 | - | 968.5  |
| AHQ-4-10, 4437        | R.QIFLPEPEQPSR.L                | 1441.61346 | 1 | 1.59E-04 | 0.21 | 2.16 | - | 244.3  |
| AHQ-4-4, 5842         | R.SRPSQVLDSPPTGSAFGFSLR.G       | 2354.60606 | 2 | 9.51E-04 | 0.37 | 2.54 | - | 278.2  |
| AHQ-4-13, 5996        | R.SRPSQVLDSPPTGSAFGFSLR.G       | 2354.60606 | 3 | 1.98E-04 | 0.96 | 4.42 | - | 1996.0 |
| AHQ-4-6, 5887 - 5950  | R.SRPSQVLDSPPTGSAFGFSLR.G       | 2354.60606 | 3 | 6.72E-05 | 0.88 | 4.47 | - | 1015.4 |
| AHQ-4-4, 6270 - 6351  | R.SRPSQVLDSPPTGSAFGFSLR.G       | 2354.60606 | 2 | 4.75E-09 | 0.96 | 5.31 | - | 694.2  |
| AHQ-4-5, 5921 - 5922  | R.SRPSQVLDSPPTGSAFGFSLR.G       | 2354.60606 | 3 | 2.40E-10 | 0.97 | 6.60 | - | 1322.3 |
| AHQ-4-4, 6138 - 6206  | R.SRPSQVLDSPPTGSAFGFSLR.G       | 2354.60606 | 3 | 1.75E-09 | 0.96 | 6.46 | - | 1086.8 |
| AHQ-4-4, 6135 - 6203  | R.SRPSQVLDSPPTGSAFGFSLR.G       | 2354.60606 | 2 | 7.79E-04 | 0.90 | 4.46 | - | 505.6  |
| AHQ-4-4, 6234 - 6255  | R.SRPSQVLDSPPTGSAFGFSLR.G       | 2354.60606 | 3 | 5.32E-08 | 0.96 | 5.76 | - | 1470.2 |
| AHQ-4-3, 6243         | R.SRPSQVLDSPPTGSAFGFSLR.G       | 2354.60606 | 3 | 2.89E-11 | 0.96 | 6.18 | - | 1190.1 |
| AHQ-4-1, 6257         | R.SRPSQVLDSPPTGSAFGFSLR.G       | 2354.60606 | 3 | 4.49E-07 | 0.96 | 5.79 | - | 1368.9 |
| AHQ-4-4, 6356         | R.SRPSQVLDSPPTGSAFGFSLR.G       | 2354.60606 | 3 | 2.96E-07 | 0.95 | 5.40 | - | 1166.8 |
| AHQ-4-4, 3627 - 3698  | K.TEEAEKTPVGSCLAQEPESGR.R       | 2295.46902 | 2 | 3.11E-05 | 0.88 | 4.02 | - | 477.4  |
| AHQ-4-4, 3842         | K.TEEAEKTPVGSCLAQEPESGR.R       | 2295.46902 | 2 | 6.44E-05 | 0.76 | 3.09 | - | 422.0  |
| AHQ-4-10, 3368 - 3369 | K.TEEAEKTPVGSCLAQEPESGR.R       | 2295.46902 | 2 | 2.80E-06 | 0.94 | 4.75 | - | 666.1  |
| AHQ-4-7, 3411         | K.TEEAEKTPVGSCLAQEPESGR.R       | 2295.46902 | 2 | 6.42E-06 | 0.81 | 3.52 | - | 502.4  |
| AHQ-4-11, 3518 - 3522 | K.TEEAEKTPVGSCLAQEPESGR.R       | 2295.46902 | 2 | 3.92E-06 | 0.92 | 4.19 | - | 742.8  |
| AHQ-4-5, 3499         | K.TEEAEKTPVGSCLAQEPESGR.R       | 2295.46902 | 2 | 4.20E-07 | 0.91 | 4.29 | - | 534.6  |
| AHQ-4-4, 3279 - 3352  | K.TEEAEKTPVGSCLAQEPESGR.R       | 2451.65537 | 3 | 7.58E-04 | 0.63 | 3.42 | - | 346.1  |
| AHQ-4-13, 5472 - 5536 | R.TLGPSEQEETGGVFLCPWR.A         | 2036.25364 | 2 | 6.21E-05 | 0.89 | 3.50 | - | 993.0  |
| AHQ-4-6, 5474 - 5494  | R.TLGPSEQEETGGVFLCPWR.A         | 2036.25364 | 2 | 3.53E-05 | 0.95 | 4.32 | - | 1178.1 |
| AHQ-4-7, 5446         | R.TLGPSEQEETGGVFLCPWR.A         | 2036.25364 | 2 | 1.33E-07 | 0.95 | 4.90 | - | 948.9  |
| AHQ-4-3, 5753 - 5823  | R.TLGPSEQEETGGVFLCPWR.A         | 2036.25364 | 2 | 1.17E-05 | 0.96 | 5.01 | - | 1170.0 |
| AHQ-4-11, 5250 - 5332 | R.TLGPSEQEETGGVFLCPWR.A         | 2036.25364 | 2 | 3.27E-06 | 0.93 | 4.42 | - | 1194.9 |
| AHQ-4-4, 5690 - 5772  | R.TLGPSEQEETGGVFLCPWR.A         | 2036.25364 | 2 | 2.87E-06 | 0.97 | 5.56 | - | 1100.2 |
| AHQ-4-12, 5533        | R.TLGPSEQEETGGVFLCPWR.A         | 2036.25364 | 2 | 5.97E-06 | 0.94 | 4.33 | - | 998.3  |
| AHQ-4-4, 5838 - 5906  | R.TLGPSEQEETGGVFLCPWR.A         | 2036.25364 | 2 | 3.42E-07 | 0.87 | 3.87 | - | 834.7  |
| AHQ-4-5, 5550         | R.TLGPSEQEETGGVFLCPWR.A         | 2036.25364 | 2 | 2.28E-06 | 0.95 | 4.83 | - | 969.5  |
| AHQ-4-1, 5790 - 5854  | R.TLGPSEQEETGGVFLCPWR.A         | 2036.25364 | 2 | 4.50E-07 | 0.95 | 5.28 | - | 933.4  |
| AHQ-4-10, 4919 - 4991 | R.TLGPSEQEETGGVFLCPWR.A         | 2036.25364 | 2 | 1.13E-06 | 0.93 | 4.56 | - | 909.1  |
| AHQ-4-5, 3597         | K.TPVGSCFLAQEPESGR.R            | 1607.76993 | 2 | 5.96E-06 | 0.93 | 4.06 | - | 881.5  |
| AHQ-4-7, 3510         | K.TPVGSCFLAQEPESGR.R            | 1607.76993 | 2 | 1.36E-05 | 0.90 | 3.89 | - | 631.9  |
| AHQ-4-4, 3746 - 3747  | K.TPVGSCFLAQEPESGR.R            | 1607.76993 | 2 | 6.07E-07 | 0.93 | 4.37 | - | 794.2  |
| AHQ-4-3, 3793 - 3816  | K.TPVGSCFLAQEPESGR.R            | 1607.76993 | 2 | 2.65E-05 | 0.95 | 4.28 | - | 1060.2 |
| AHQ-4-4, 3932         | K.TPVGSCFLAQEPESGR.R            | 1607.76993 | 2 | 1.94E-07 | 0.85 | 3.45 | - | 641.0  |
| AHQ-4-6, 3518         | K.TPVGSCFLAQEPESGR.R            | 1607.76993 | 2 | 1.54E-07 | 0.86 | 3.22 | - | 799.5  |
| AHQ-4-2, 3843 - 3851  | K.TPVGSCFLAQEPESGR.R            | 1607.76993 | 2 | 1.91E-06 | 0.93 | 3.97 | - | 844.7  |
| AHQ-4-10, 3404        | K.TPVGSCFLAQEPESGR.R            | 1607.76993 | 2 | 2.23E-07 | 0.83 | 3.24 | - | 616.0  |
| AHQ-4-1, 3901         | K.TPVGSCFLAQEPESGR.R            | 1607.76993 | 2 | 4.25E-06 | 0.93 | 3.98 | - | 1060.1 |
| AHQ-4-12, 3673        | K.TPVGSCFLAQEPESGR.R            | 1607.76993 | 2 | 2.62E-06 | 0.89 | 3.14 | - | 1004.8 |
| AHQ-4-6, 4331         | K.TPVSCFNQM'CVGATGHNIPQK.L      | 2478.81062 | 3 | 3.27E-06 | 0.88 | 3.69 | - | 1138.7 |
| AHQ-4-4, 4874 - 4875  | K.TPVSCFNQM'CVGATGHNIPQK.L      | 2478.81062 | 3 | 3.73E-06 | 0.75 | 3.59 | - | 559.5  |
| AHQ-4-4, 4876         | K.TPVSCFNQM'CVGATGHNIPQK.L      | 2462.81122 | 3 | 3.43E-06 | 0.96 | 5.60 | - | 1422.7 |
| AHQ-4-4, 5074         | K.TPVSCFNQM'CVGATGHNIPQK.L      | 2462.81122 | 3 | 4.67E-04 | 0.95 | 4.83 | - | 1192.8 |

|                             |                                                                        |            |   |          |       |        |       |          |
|-----------------------------|------------------------------------------------------------------------|------------|---|----------|-------|--------|-------|----------|
| AHQ-4-4, 5175 - 5254        | K.TPVSCFNQMCGVATGHNIPQK.L                                              | 2462.81122 | 3 | 2.49E-06 | 0.95  | 5.11   | -     | 1481.9   |
| AHQ-4-4, 5479               | K.TPVSCFNQMCGVATGHNIPQK.L                                              | 2462.81122 | 3 | 1.66E-04 | 0.94  | 4.93   | -     | 1146.8   |
| AHQ-4-4, 4690               | K.TPVSCFNQMCGVATGHNIPQK.L                                              | 2478.81062 | 3 | 8.16E-12 | 0.92  | 4.20   | -     | 1385.8   |
| AHQ-4-4, 4595 - 4615        | K.TPVSCFNQMCGVATGHNIPQK.L                                              | 2478.81062 | 3 | 1.90E-07 | 0.98  | 6.48   | -     | 2968.5   |
| AHQ-4-5, 2338               | R.VAIVVGAPR.T                                                          | 882.08560  | 2 | 1.41E-05 | 0.94  | 3.40   | -     | 1356.8   |
| AHQ-4-13, 2734              | R.VAIVVGAPR.T                                                          | 882.08560  | 2 | 1.01E-04 | 0.93  | 3.34   | -     | 1278.9   |
| AHQ-4-6, 2338               | R.VAIVVGAPR.T                                                          | 882.08560  | 2 | 1.55E-06 | 0.89  | 3.20   | -     | 1019.2   |
| AHQ-4-4, 2472               | R.VAIVVGAPR.T                                                          | 882.08560  | 2 | 1.36E-07 | 0.94  | 3.62   | -     | 1367.3   |
| AHQ-4-13-, 2629             | R.VAIVVGAPR.T                                                          | 882.08560  | 2 | 7.83E-07 | 0.93  | 3.04   | -     | 1406.0   |
| AHQ-4-12, 2531              | R.VAIVVGAPR.T                                                          | 882.08560  | 2 | 5.14E-05 | 0.92  | 3.36   | -     | 1159.8   |
| AHQ-4-4, 6894 - 6956        | R.VLLGSSQQAQTLLNLDLGGK.H                                               | 1999.29783 | 2 | 5.15E-07 | 0.97  | 5.79   | -     | 1353.3   |
| AHQ-4-4, 6764 - 6830        | R.VLLGSSQQAQTLLNLDLGGK.H                                               | 1999.29783 | 2 | 2.54E-08 | 0.97  | 5.38   | -     | 1625.5   |
| AHQ-4-4, 6534 - 6607        | R.VLLGSSQQAQTLLNLDLGGK.H                                               | 1999.29783 | 2 | 1.04E-05 | 0.96  | 5.36   | -     | 1401.9   |
| AHQ-4-4, 7028 - 7103        | R.VLLGSSQQAQTLLNLDLGGK.H                                               | 1999.29783 | 2 | 5.10E-11 | 0.97  | 5.73   | -     | 1268.6   |
| AHQ-4-4, 6058 - 6100        | R.VLLGSSQQAQTLLNLDLGGK.H                                               | 1999.29783 | 2 | 4.74E-05 | 0.93  | 4.99   | -     | 854.5    |
| AHQ-4-4, 5915 - 5987        | R.VLLGSSQQAQTLLNLDLGGK.H                                               | 1999.29783 | 2 | 3.51E-07 | 0.95  | 4.59   | -     | 1205.2   |
| AHQ-4-4, 5831 - 5899        | R.VLLGSSQQAQTLLNLDLGGK.H                                               | 1999.29783 | 2 | 5.07E-05 | 0.98  | 5.90   | -     | 1920.3   |
| AHQ-4-4, 7166 - 7230        | R.VLLGSSQQAQTLLNLDLGGK.H                                               | 1999.29783 | 2 | 8.90E-11 | 0.98  | 6.14   | -     | 2203.3   |
| AHQ-4-4, 7300 - 7380        | R.VLLGSSQQAQTLLNLDLGGK.H                                               | 1999.29783 | 2 | 2.66E-04 | 0.96  | 5.18   | -     | 1269.1   |
| AHQ-4-4, 7527 - 7590        | R.VLLGSSQQAQTLLNLDLGGK.H                                               | 1999.29783 | 2 | 2.15E-06 | 0.96  | 5.22   | -     | 1268.5   |
| AHQ-4-3, 6145               | R.VLLGSSQQAQTLLNLDLGGK.H                                               | 1999.29783 | 2 | 4.19E-04 | 0.89  | 4.09   | -     | 719.6    |
| AHQ-4-4, 6248 - 6314        | R.VLLGSSQQAQTLLNLDLGGK.H                                               | 1999.29783 | 2 | 1.99E-04 | 0.96  | 5.43   | -     | 998.4    |
| AHQ-4-4, 6960 - 7022        | R.VLLGSSQQAQTLLNLDLGGK.H                                               | 1999.29783 | 2 | 7.17E-11 | 0.98  | 6.64   | -     | 2102.5   |
| AHQ-4-4, 6155 - 6178        | R.VLLGSSQQAQTLLNLDLGGK.H                                               | 1999.29783 | 2 | 1.82E-07 | 0.98  | 6.47   | -     | 1573.1   |
| AHQ-4-6, 3894 - 3899        | R.VVLCELGNPMK.K                                                        | 1261.53692 | 2 | 3.73E-06 | 0.94  | 3.87   | -     | 1185.0   |
| AHQ-4-6, 3108               | R.VVLCELGNPMK.K                                                        | 1277.53632 | 2 | 5.95E-04 | 0.77  | 2.62   | -     | 968.1    |
| AHQ-4-4, 4147               | R.VVLCELGNPMK.K                                                        | 1261.53692 | 1 | 3.66E-07 | 0.83  | 3.43   | -     | 732.5    |
| AHQ-4-4, 4135               | R.VVLCELGNPMK.K                                                        | 1261.53692 | 2 | 4.88E-05 | 0.95  | 4.11   | -     | 1290.0   |
| AHQ-4-4, 3316               | R.VVLCELGNPMK.K                                                        | 1277.53632 | 2 | 1.57E-04 | 0.90  | 3.80   | -     | 1005.3   |
| AHQ-4-5, 3977 - 4001        | R.VVLCELGNPMK.K                                                        | 1261.53692 | 2 | 1.08E-04 | 0.95  | 3.84   | -     | 1317.1   |
| AHQ-4-5, 3154               | R.VVLCELGNPMK.K                                                        | 1277.53632 | 2 | 4.87E-04 | 0.75  | 2.97   | -     | 678.5    |
| AHQ-4-4, 4150               | R.VYLFQPR.G                                                            | 1036.25129 | 2 | 2.71E-06 | 0.96  | 4.01   | -     | 1401.5   |
| AHQ-4-3, 4241               | R.VYLFQPR.G                                                            | 1036.25129 | 2 | 4.91E-06 | 0.94  | 3.60   | -     | 1120.4   |
| AHQ-4-6, 3876               | R.VYLFQPR.G                                                            | 1036.25129 | 2 | 3.45E-05 | 0.94  | 3.54   | -     | 1294.2   |
| AHQ-4-5, 3911 - 3925        | R.VYLFQPR.G                                                            | 1036.25129 | 2 | 3.79E-05 | 0.96  | 4.02   | -     | 1206.2   |
| gi 27498332 ref XP_212565.1 | similar to tubulin, beta 5 [Homo sapiens]                              |            |   | 8.36E-12 | 4.64  | 50.25  | 9.90  | 49670.5  |
| AHQ-4-8, 5187               | R.ALTVPQLTQQVFDK.N                                                     | 1660.89259 | 2 | 3.79E-09 | 0.86  | 3.46   | -     | 389.8    |
| AHQ-4-11, 5408 - 5470       | R.ALTVPQLTQQVFDK.N                                                     | 1660.89259 | 2 | 1.06E-05 | 0.72  | 3.01   | -     | 377.8    |
| AHQ-4-7, 3279 - 3286        | R.IMNTFSSVPPSPK.V                                                      | 1336.58217 | 2 | 1.23E-08 | 0.92  | 3.48   | -     | 1036.3   |
| AHQ-4-7, 3755               | R.IMNTFSSVPPSPK.V                                                      | 1320.58277 | 2 | 2.04E-09 | 0.95  | 3.40   | -     | 1433.7   |
| AHQ-4-7, 3541 - 3573        | R.IMNTFSSVPPSPK.V                                                      | 1320.58277 | 2 | 9.69E-05 | 0.97  | 4.21   | -     | 1943.6   |
| AHQ-4-7, 7121               | K.MAVTFIGNSTAIQELFK.R                                                  | 1871.19002 | 2 | 2.84E-06 | 0.86  | 3.55   | -     | 562.0    |
| AHQ-4-7, 7206 - 7281        | K.MAVTFIGNSTAIQELFK.R                                                  | 1871.19002 | 2 | 2.19E-10 | 0.95  | 4.87   | -     | 952.2    |
| AHQ-4-7, 6974 - 7054        | K.MAVTFIGNSTAIQELFK.R                                                  | 1871.19002 | 2 | 3.17E-04 | 0.89  | 3.73   | -     | 992.5    |
| AHQ-4-9, 5849               | K.M*AVTFIGNSTAIQELFK.R                                                 | 1887.18942 | 2 | 5.51E-04 | 0.68  | 2.88   | -     | 435.5    |
| AHQ-4-7, 6918 - 6934        | K.M*AVTFIGNSTAIQELFK.R                                                 | 1887.18942 | 2 | 8.36E-12 | 0.97  | 4.79   | -     | 1472.5   |
| AHQ-4-12, 6702              | K.M*AVTFIGNSTAIQELFK.R                                                 | 1887.18942 | 2 | 1.79E-08 | 0.94  | 4.43   | -     | 923.4    |
| AHQ-4-13, 6410              | K.M*AVTFIGNSTAIQELFK.R                                                 | 1887.18942 | 2 | 7.90E-05 | 0.95  | 4.61   | -     | 1191.6   |
| AHQ-4-13, 6717 - 6722       | K.M*AVTFIGNSTAIQELFK.R                                                 | 1887.18942 | 2 | 6.62E-11 | 0.97  | 4.96   | -     | 1222.3   |
| AHQ-4-13-, 6318             | K.M*AVTFIGNSTAIQELFK.R                                                 | 1887.18942 | 2 | 4.38E-07 | 0.94  | 4.46   | -     | 928.6    |
| AHQ-4-13-, 6537 - 6608      | K.M*AVTFIGNSTAIQELFK.R                                                 | 1887.18942 | 2 | 9.93E-04 | 0.61  | 3.08   | -     | 413.7    |
| AHQ-4-14-, 6191 - 6205      | K.M*AVTFIGNSTAIQELFK.R                                                 | 1887.18942 | 2 | 2.02E-05 | 0.96  | 4.54   | -     | 1090.2   |
| AHQ-4-14-, 6386 - 6401      | K.M*AVTFIGNSTAIQELFK.R                                                 | 1887.18942 | 2 | 1.47E-04 | 0.91  | 4.40   | -     | 729.2    |
| AHQ-4-14-, 6487             | K.M*AVTFIGNSTAIQELFK.R                                                 | 1887.18942 | 2 | 6.84E-06 | 0.90  | 3.61   | -     | 694.7    |
| AHQ-4-14-, 6526             | K.MAVTFIGNSTAIQELFK.R                                                  | 1871.19002 | 2 | 7.68E-04 | 0.88  | 3.74   | -     | 719.2    |
| gi 4507643 ref NP_003279.1  | tumor protein D52-like 2; hD54 [Homo sapiens]                          |            |   | 8.41E-12 | 0.96  | 10.28  | 14.60 | 22209.6  |
| AHQ-4-10, 6488              | R.TPAVEGLTEAEELAEELTKVEEIVTLR.Q                                        | 3385.71879 | 3 | 8.41E-12 | 0.96  | 5.66   | -     | 1125.0   |
| gi 27500274 ref XP_113950.3 | similar to Munc13-4 protein [Homo sapiens]                             |            |   | 1.01E-11 | 5.98  | 70.28  | 10.80 | 123281.1 |
| AHQ-4-5, 7541               | K.AFGELCPNTAPLQVTEALQTGTTEWFLHK.Q                                      | 3472.91108 | 3 | 1.34E-05 | 0.75  | 3.51   | -     | 474.5    |
| AHQ-4-4, 6556               | R.ALLYEDALYTVLHR.L                                                     | 1677.92484 | 2 | 5.94E-10 | 0.96  | 4.77   | -     | 1326.6   |
| AHQ-4-4, 4928 - 4930        | R.AVQM*DELVPLGELTK.H                                                   | 1659.92638 | 2 | 5.79E-08 | 0.70  | 2.89   | -     | 491.3    |
| AHQ-4-4, 3974               | R.CREDQWYPLEPR.T                                                       | 1650.79650 | 2 | 5.68E-05 | 0.81  | 3.28   | -     | 590.0    |
| AHQ-4-6, 4351               | K.HSTSAVDLSTCFQAISHTAR.Q                                               | 2191.36726 | 3 | 3.23E-04 | 0.78  | 3.10   | -     | 1054.4   |
| AHQ-4-4, 4732               | K.HSTSAVDLSTCFQAISHTAR.Q                                               | 2191.36726 | 3 | 2.01E-10 | 0.98  | 5.60   | -     | 2231.1   |
| AHQ-4-5, 4399               | K.HSTSAVDLSTCFQAISHTAR.Q                                               | 2191.36726 | 3 | 1.01E-11 | 0.95  | 4.97   | -     | 1501.4   |
| AHQ-4-4, 5548 - 5558        | K.LPAQLAWALEQR.V                                                       | 1525.73360 | 2 | 1.53E-11 | 0.97  | 5.03   | -     | 1605.5   |
| AHQ-4-4, 4130               | R.SVFLSVSDSPAR.L                                                       | 1362.51311 | 2 | 1.75E-04 | 0.82  | 2.81   | -     | 1142.5   |
| gi 29568101 ref NP_006467.3 | ATP synthase, H+ transporting, mitochondrial F0 complex, subunit g; AT |            |   | 1.03E-11 | 3.24  | 40.22  | 35.90 | 11400.3  |
| AHQ-4-14-, 4427             | R.LATFWYYAK.V                                                          | 1163.34840 | 2 | 1.84E-06 | 0.82  | 2.69   | -     | 396.8    |
| AHQ-4-14-, 3590 - 3593      | K.TPALVNAAVYYSK.P                                                      | 1335.53080 | 2 | 1.03E-11 | 0.97  | 4.49   | -     | 1876.2   |
| AHQ-4-14-, 3498 - 3566      | K.TPALVNAAVYYSKPR.L                                                    | 1588.83283 | 3 | 1.92E-08 | 0.91  | 3.37   | -     | 1399.5   |
| AHQ-4-14, 4510 - 4577       | K.TPALVNAAVYYSKPR.L                                                    | 1588.83283 | 3 | 8.11E-09 | 0.88  | 3.34   | -     | 1021.5   |
| AHQ-4-14, 5386 - 5420       | K.VELVPPTAEIPIR.L                                                      | 1418.66294 | 2 | 1.03E-04 | 0.57  | 2.84   | -     | 375.6    |
| gi 17921989 ref NP_005991.1 | tubulin, alpha 1; testis-specific alpha tubulin; tubulin alpha-1 chain |            |   | 1.07E-11 | 11.83 | 140.24 | 38.60 | 49924.1  |
| AHQ-4-12, 4607 - 4679       | R.AFVHWYVGEEM*EEGEFSEAR.E                                              | 2347.50435 | 3 | 6.26E-04 | 0.96  | 4.41   | -     | 2078.6   |
| AHQ-4-14-, 5917             | R.AVCMLSNTTAAIEAWAR.L                                                  | 1867.13992 | 2 | 7.06E-08 | 0.93  | 4.11   | -     | 1137.7   |
| AHQ-4-14-, 5147 - 5226      | R.AVCM*LSNTTAAIEAWAR.L                                                 | 1883.13932 | 2 | 2.30E-08 | 0.92  | 4.00   | -     | 1271.5   |
| AHQ-4-13, 5577              | R.AVCM*LSNTTAAIEAWAR.L                                                 | 1883.13932 | 2 | 8.95E-10 | 0.92  | 3.77   | -     | 1089.1   |
| AHQ-4-13, 5416              | R.AVCM*LSNTTAAIEAWAR.L                                                 | 1883.13932 | 2 | 2.24E-04 | 0.84  | 3.47   | -     | 622.1    |
| AHQ-4-13, 5320              | R.AVCM*LSNTTAAIEAWAR.L                                                 | 1883.13932 | 2 | 7.29E-06 | 0.97  | 4.86   | -     | 1710.9   |
| AHQ-4-7, 6889               | R.AVCM*LSNTTAAIEAWAR.L                                                 | 1867.13992 | 2 | 7.91E-06 | 0.71  | 3.11   | -     | 475.6    |
| AHQ-4-12, 6033 - 6114       | R.AVCM*LSNTTAAIEAWAR.L                                                 | 1867.13992 | 2 | 8.94E-08 | 0.94  | 3.93   | -     | 1479.4   |
| AHQ-4-10, 5565              | R.AVFDLEPTVIDEIR.N                                                     | 1716.95615 | 2 | 7.33E-07 | 0.88  | 3.70   | -     | 1173.5   |
| AHQ-4-9, 5575               | R.AVFDLEPTVIDEIR.N                                                     | 1716.95615 | 2 | 5.60E-06 | 0.84  | 3.45   | -     | 1137.9   |
| AHQ-4-12, 6066 - 6075       | R.AVFDLEPTVIDEIR.N                                                     | 1716.95615 | 2 | 2.88E-07 | 0.77  | 3.04   | -     | 967.5    |
| AHQ-4-7, 6027 - 6099        | R.AVFDLEPTVIDEIR.N                                                     | 1716.95615 | 2 | 1.49E-06 | 0.93  | 4.17   | -     | 1298.2   |
| AHQ-4-12, 3350              | K.DVNAAIAIAIK.T                                                        | 986.14745  | 2 | 1.30E-04 | 0.95  | 3.62   | -     | 1538.0   |
| AHQ-4-12, 3343 - 3349       | K.DVNAAIAIAIK.T                                                        | 986.14745  | 1 | 1.29E-04 | 0.71  | 2.65   | -     | 820.3    |
| AHQ-4-12, 3019              | K.DVNAAIAIAIK.T                                                        | 986.14745  | 1 | 2.38E-04 | 0.76  | 2.35   | -     | 976.1    |
| AHQ-4-7, 2922               | K.DVNAAIAIAIK.T                                                        | 986.14745  | 1 | 1.64E-04 | 0.68  | 2.47   | -     | 728.9    |
| AHQ-4-7, 3382               | K.DVNAAIAIAIK.T                                                        | 986.14745  | 1 | 6.06E-07 | 0.72  | 2.57   | -     | 740.1    |
| AHQ-4-7, 3150 - 3153        | K.DVNAAIAIAIK.T                                                        | 986.14745  | 1 | 3.71E-04 | 0.52  | 2.20   | -     | 491.5    |
| AHQ-4-11, 3276              | K.DVNAAIAIAIK.T                                                        | 986.14745  | 1 | 2.29E-04 | 0.27  | 1.95   | -     | 571.4    |
| AHQ-4-7, 3038 - 3041        | K.FDLMYAK.R                                                            | 888.06574  | 1 | 2.69E-04 | 0.61  | 2.58   | -     | 304.0    |
| AHQ-4-7, 4587 - 4667        | R.IHFPLATYAPVISAIAEK.A                                                 | 1758.05310 | 2 | 9.92E-05 | 0.87  | 3.44   | -     | 738.0    |
| AHQ-4-7, 4685 - 4766        | R.IHFPLATYAPVISAIAEK.A                                                 | 1758.05310 | 2 | 6.58E-05 | 0.94  | 4.23   | -     | 604.2    |
| AHQ-4-10, 4564 - 4629       | R.IHFPLATYAPVISAIAEK.A                                                 | 1758.05310 | 2 | 1.09E-04 | 0.96  | 4.40   | -     | 993.1    |
| AHQ-4-1, 5483               | R.IHFPLATYAPVISAIAEK.A                                                 | 1758.05310 | 2 | 1.54E-04 | 0.92  | 3.88   | -     | 648.7    |
| AHQ-4-11, 4880 - 4942       | R.IHFPLATYAPVISAIAEK.A                                                 | 1758.05310 | 2 | 1.47E-04 | 0.88  | 3.60   | -     | 663.3    |
| AHQ-4-9, 4424               | R.IHFPLATYAPVISAIAEK.A                                                 | 1758.05310 | 2 | 3.01E-04 | 0.96  | 4.63   | -     | 924.6    |
| AHQ-4-8, 4433               | R.IHFPLATYAPVISAIAEK.A                                                 | 1758.05310 | 2 | 1.61E-05 | 0.91  | 3.92   | -     | 845.5    |
| AHQ-4-8, 4414 - 4485        | R.IHFPLATYAPVISAIAEK.A                                                 | 1758.05310 | 2 | 1.41E-04 | 0.81  | 3.08   | -     | 575.9    |
| AHQ-4-14-, 6546             | R.LISQIVSSITASLR.F                                                     | 1488.75471 | 2 | 2.43E-09 | 0.93  | 4.01   | -     | 975.5    |
| AHQ-4-7, 6945 - 7025        | R.LISQIVSSITASLR.F                                                     | 1488.75471 | 2 | 3.46E-10 | 0.97  | 4.74   | -     | 1290.6   |
| AHQ-4-7, 7078 - 7141        | R.LISQIVSSITASLR.F                                                     | 1488.75471 | 2 | 1.07E-11 | 0.97  | 4.70   | -     | 1384.1   |
| AHQ-4-7, 7203               | R.LISQIVSSITASLR.F                                                     | 1488.75471 | 2 | 9.16E-08 | 0.95  | 4.04   | -     | 1263.0   |
| AHQ-4-10, 6197              | R.LISQIVSSITASLR.F                                                     | 1488.75471 | 2 | 3.59E-04 | 0.50  | 2.55   | -     | 476.6    |

|                             |                                                                         |            |   |          |       |        |       |         |
|-----------------------------|-------------------------------------------------------------------------|------------|---|----------|-------|--------|-------|---------|
| AHQ-4-8, 2873               | R.NLDIERPTYNLNLR.L                                                      | 1719.88022 | 2 | 1.60E-04 | 0.44  | 2.74   | -     | 283.8   |
| AHQ-4-9, 2899               | R.NLDIERPTYNLNLR.L                                                      | 1719.88022 | 2 | 2.32E-05 | 0.73  | 3.22   | -     | 499.2   |
| AHQ-4-10, 3147              | R.NLDIERPTYNLNLR.L                                                      | 1719.88022 | 2 | 7.55E-06 | 0.40  | 2.70   | -     | 296.6   |
| AHQ-4-13-, 3440 - 3441      | R.NLDIERPTYNLNLR.L                                                      | 1719.88022 | 2 | 7.77E-09 | 0.70  | 3.26   | -     | 327.5   |
| AHQ-4-14, 4357              | R.NLDIERPTYNLNLR.L                                                      | 1719.88022 | 2 | 3.26E-07 | 0.42  | 2.63   | -     | 279.2   |
| AHQ-4-5, 3278               | R.NLDIERPTYNLNLR.L                                                      | 1719.88022 | 2 | 5.32E-07 | 0.42  | 2.77   | -     | 282.4   |
| AHQ-4-13, 3570              | R.NLDIERPTYNLNLR.L                                                      | 1719.88022 | 2 | 2.77E-05 | 0.67  | 3.03   | -     | 470.2   |
| AHQ-4-6, 3210               | R.NLDIERPTYNLNLR.L                                                      | 1719.88022 | 2 | 6.19E-06 | 0.66  | 3.22   | -     | 394.2   |
| AHQ-4-7, 3109 - 3185        | R.NLDIERPTYNLNLR.L                                                      | 1719.88022 | 2 | 1.39E-06 | 0.75  | 3.76   | -     | 266.2   |
| AHQ-4-12, 5705 - 5730       | R.SIQFVDWCPTGFK.V                                                       | 1586.79232 | 2 | 4.20E-08 | 0.95  | 3.86   | -     | 1278.6  |
| AHQ-4-13-, 5645 - 5646      | R.SIQFVDWCPTGFK.V                                                       | 1586.79232 | 2 | 1.99E-07 | 0.94  | 4.49   | -     | 921.6   |
| AHQ-4-3, 6033               | R.SIQFVDWCPTGFK.V                                                       | 1586.79232 | 2 | 1.11E-06 | 0.89  | 3.10   | -     | 960.5   |
| AHQ-4-13, 5784 - 5788       | R.SIQFVDWCPTGFK.V                                                       | 1586.79232 | 2 | 1.20E-05 | 0.94  | 4.04   | -     | 947.0   |
| AHQ-4-14-, 5613             | R.SIQFVDWCPTGFK.V                                                       | 1586.79232 | 2 | 2.19E-04 | 0.71  | 2.62   | -     | 572.9   |
| AHQ-4-7, 5641 - 5711        | R.SIQFVDWCPTGFK.V                                                       | 1586.79232 | 2 | 5.48E-06 | 0.92  | 3.55   | -     | 957.3   |
| AHQ-4-11, 5505              | R.SIQFVDWCPTGFK.V                                                       | 1586.79232 | 2 | 4.37E-04 | 0.86  | 2.97   | -     | 877.5   |
| AHQ-4-5, 5787               | R.SIQFVDWCPTGFK.V                                                       | 1586.79232 | 2 | 4.64E-04 | 0.88  | 3.11   | -     | 994.8   |
| AHQ-4-6, 5696               | R.SIQFVDWCPTGFK.V                                                       | 1586.79232 | 2 | 2.32E-04 | 0.92  | 3.79   | -     | 781.2   |
| AHQ-4-9, 5200 - 5207        | K.TIGGGDDSFITFFCETGAGK.H                                                | 2070.17889 | 2 | 9.52E-08 | 0.85  | 4.05   | -     | 461.9   |
| AHQ-4-7, 5738               | K.TIGGGDDSFITFFCETGAGK.H                                                | 2070.17889 | 2 | 3.60E-08 | 0.78  | 3.42   | -     | 460.0   |
| AHQ-4-13-, 5590             | K.TIGGGDDSFITFFCETGAGK.H                                                | 2070.17889 | 2 | 6.46E-09 | 0.72  | 3.18   | -     | 460.0   |
| AHQ-4-13, 5694 - 5734       | K.TIGGGDDSFITFFCETGAGK.H                                                | 2070.17889 | 2 | 2.14E-08 | 0.66  | 3.28   | -     | 404.6   |
| AHQ-4-12, 5673 - 5674       | K.TIGGGDDSFITFFCETGAGK.H                                                | 2070.17889 | 2 | 2.32E-07 | 0.89  | 3.91   | -     | 652.6   |
| AHQ-4-14-, 5550             | K.TIGGGDDSFITFFCETGAGK.H                                                | 2070.17889 | 2 | 3.43E-09 | 0.86  | 3.70   | -     | 563.3   |
| AHQ-4-4, 4691               | K.VGINYQPPTVPPGGDLAK.V                                                  | 1826.08584 | 2 | 8.72E-04 | 0.13  | 2.52   | -     | 166.2   |
| AHQ-4-8, 4034 - 4110        | K.VGINYQPPTVPPGGDLAK.V                                                  | 1826.08584 | 2 | 2.53E-04 | 0.42  | 2.56   | -     | 314.2   |
| AHQ-4-13, 4558 - 4582       | K.VGINYQPPTVPPGGDLAK.V                                                  | 1826.08584 | 2 | 1.46E-06 | 0.64  | 3.17   | -     | 372.8   |
| AHQ-4-13, 4441 - 4508       | K.VGINYQPPTVPPGGDLAK.V                                                  | 1826.08584 | 2 | 6.36E-06 | 0.62  | 3.21   | -     | 285.2   |
| AHQ-4-14, 5453 - 5513       | K.VGINYQPPTVPPGGDLAK.V                                                  | 1826.08584 | 2 | 1.20E-04 | 0.80  | 3.23   | -     | 403.5   |
| AHQ-4-7, 4485               | K.VGINYQPPTVPPGGDLAK.V                                                  | 1826.08584 | 2 | 5.59E-07 | 0.64  | 3.08   | -     | 334.2   |
| AHQ-4-13-, 4340 - 4357      | K.VGINYQPPTVPPGGDLAK.V                                                  | 1826.08584 | 2 | 1.61E-07 | 0.48  | 3.17   | -     | 275.4   |
| AHQ-4-13-, 4424             | K.VGINYQPPTVPPGGDLAK.V                                                  | 1826.08584 | 2 | 4.47E-06 | 0.70  | 2.94   | -     | 432.9   |
| AHQ-4-12, 4395 - 4466       | K.VGINYQPPTVPPGGDLAK.V                                                  | 1826.08584 | 2 | 1.49E-10 | 0.81  | 3.50   | -     | 382.7   |
| AHQ-4-7, 4215 - 4289        | K.VGINYQPPTVPPGGDLAK.V                                                  | 1826.08584 | 2 | 1.94E-07 | 0.77  | 3.29   | -     | 340.3   |
| AHQ-4-14-, 4277 - 4341      | K.VGINYQPPTVPPGGDLAK.V                                                  | 1826.08584 | 2 | 2.01E-06 | 0.67  | 3.14   | -     | 315.6   |
| AHQ-4-14-, 4331             | K.VGINYQPPTVPPGGDLAK.V                                                  | 1826.08584 | 2 | 4.96E-05 | 0.81  | 3.36   | -     | 494.5   |
| AHQ-4-4, 4543 - 4622        | K.VGINYQPPTVPPGGDLAK.V                                                  | 1826.08584 | 2 | 7.40E-05 | 0.68  | 3.51   | -     | 254.7   |
| AHQ-4-11, 4285 - 4353       | K.VGINYQPPTVPPGGDLAK.V                                                  | 1826.08584 | 2 | 4.40E-06 | 0.79  | 3.33   | -     | 401.3   |
| AHQ-4-12, 3942              | K.YM*ACCLLYR.G                                                          | 1268.50864 | 2 | 2.64E-04 | 0.76  | 2.57   | -     | 552.7   |
| AHQ-4-7, 4349               | K.YMACCLLYR.G                                                           | 1252.50864 | 2 | 3.68E-06 | 0.94  | 3.53   | -     | 951.7   |
| AHQ-4-12, 4446              | K.YMACCLLYR.G                                                           | 1252.50864 | 2 | 9.42E-06 | 0.93  | 2.93   | -     | 1117.0  |
| gj 1399415 ref NP_066272.1  | PDZ and LIM domain 1 (elfin); carboxy terminal LIM domain protein 1 [H  |            |   | 1.23E-11 | 15.15 | 180.27 | 55.00 | 36071.5 |
| AHQ-4-14-, 6618             | K.AALANLCIGDVIDAIGDENTSNMTHLEAQR.I                                      | 3315.63867 | 3 | 4.17E-06 | 0.90  | 4.49   | -     | 694.4   |
| AHQ-4-14-, 6559 - 6621      | K.AALANLCIGDVIDAIGDENTSNMTHLEAQR.I                                      | 3331.63807 | 3 | 1.70E-09 | 0.88  | 4.60   | -     | 645.1   |
| AHQ-4-14-, 6414 - 6494      | K.AALANLCIGDVIDAIGDENTSNMTHLEAQR.I                                      | 3331.63807 | 3 | 1.09E-07 | 0.86  | 4.37   | -     | 410.1   |
| AHQ-4-14-, 5997 - 6021      | K.AALANLCIGDVIDAIGDENTSNMTHLEAQR.I                                      | 3331.63807 | 3 | 3.42E-05 | 0.88  | 4.16   | -     | 683.3   |
| AHQ-4-13, 6680 - 6694       | K.AALANLCIGDVIDAIGDENTSNMTHLEAQR.I                                      | 3331.63807 | 3 | 9.80E-05 | 0.78  | 3.50   | -     | 510.9   |
| AHQ-4-12, 6901              | K.AALANLCIGDVIDAIGDENTSNMTHLEAQR.I                                      | 3315.63867 | 3 | 1.23E-11 | 0.91  | 5.17   | -     | 572.5   |
| AHQ-4-12, 6678 - 6690       | K.AALANLCIGDVIDAIGDENTSNMTHLEAQR.I                                      | 3331.63807 | 3 | 1.19E-04 | 0.88  | 4.85   | -     | 410.8   |
| AHQ-4-13-, 6624             | K.AALANLCIGDVIDAIGDENTSNMTHLEAQR.I                                      | 3331.63807 | 3 | 2.07E-05 | 0.83  | 4.22   | -     | 732.7   |
| AHQ-4-13-, 6742             | K.AALANLCIGDVIDAIGDENTSNMTHLEAQR.I                                      | 3315.63867 | 3 | 6.64E-11 | 0.93  | 4.90   | -     | 802.8   |
| AHQ-4-13-, 3621 - 3646      | K.DFEQPLAIR.V                                                           | 1176.30388 | 2 | 1.45E-04 | 0.87  | 2.64   | -     | 1048.2  |
| AHQ-4-14, 4582 - 4602       | K.DFEQPLAIR.V                                                           | 1176.30388 | 2 | 2.36E-04 | 0.76  | 2.82   | -     | 677.1   |
| AHQ-4-13, 3781 - 3792       | K.DFEQPLAIR.V                                                           | 1176.30388 | 2 | 8.68E-06 | 0.90  | 3.24   | -     | 958.4   |
| AHQ-4-12, 3581              | K.DFEQPLAIR.V                                                           | 1176.30388 | 2 | 2.63E-04 | 0.94  | 3.43   | -     | 1315.8  |
| AHQ-4-14-, 3553 - 3561      | K.DFEQPLAIR.V                                                           | 1176.30388 | 2 | 4.31E-06 | 0.94  | 3.94   | -     | 1093.5  |
| AHQ-4-14-, 3557 - 3631      | K.DFEQPLAIR.V                                                           | 1176.30388 | 1 | 5.67E-06 | 0.62  | 2.47   | -     | 370.0   |
| AHQ-4-14-, 3301             | K.GCTDNLTTLVAR.S                                                        | 1322.47058 | 2 | 2.55E-05 | 0.87  | 3.72   | -     | 831.2   |
| AHQ-4-13-, 3370 - 3373      | K.GCTDNLTTLVAR.S                                                        | 1322.47058 | 2 | 6.09E-04 | 0.82  | 3.29   | -     | 751.6   |
| AHQ-4-13, 3518              | K.GCTDNLTTLVAR.S                                                        | 1322.47058 | 2 | 5.45E-05 | 0.74  | 3.20   | -     | 647.3   |
| AHQ-4-14-, 3861 - 3875      | K.GHFFVEDQIQEK.H                                                        | 1673.82684 | 2 | 8.81E-04 | 0.96  | 4.01   | -     | 1377.5  |
| AHQ-4-13, 4144              | K.GHFFVEDQIQEK.H                                                        | 1673.82684 | 2 | 3.64E-04 | 0.96  | 3.90   | -     | 1589.0  |
| AHQ-4-12, 3965 - 4037       | K.GHFFVEDQIQEK.H                                                        | 1673.82684 | 2 | 9.31E-07 | 0.95  | 4.34   | -     | 1080.7  |
| AHQ-4-12, 3975              | K.GHFFVEDQIQEK.H                                                        | 1673.82684 | 3 | 2.23E-04 | 0.87  | 3.89   | -     | 940.1   |
| AHQ-4-13-, 4001 - 4065      | K.GHFFVEDQIQEK.H                                                        | 1673.82684 | 2 | 3.20E-04 | 0.97  | 4.77   | -     | 1447.8  |
| AHQ-4-12, 2562              | R.HRHPECYVCTDCGNTLK.Q                                                   | 2151.34648 | 2 | 5.56E-04 | 0.66  | 3.16   | -     | 305.1   |
| AHQ-4-13-, 2685             | R.HRHPECYVCTDCGNTLK.Q                                                   | 2151.34648 | 3 | 4.36E-08 | 0.97  | 5.46   | -     | 1705.2  |
| AHQ-4-13, 2794              | R.HRHPECYVCTDCGNTLK.Q                                                   | 2151.34648 | 3 | 7.69E-08 | 0.96  | 5.18   | -     | 1346.8  |
| AHQ-4-13, 3371              | R.IKGCTDNLTTLVAR.S                                                      | 1563.80174 | 2 | 4.42E-06 | 0.92  | 3.81   | -     | 769.1   |
| AHQ-4-14-, 2994             | R.IKGCTDNLTTLVAR.S                                                      | 1563.80174 | 2 | 2.11E-10 | 0.95  | 4.13   | -     | 1233.7  |
| AHQ-4-13, 3218              | R.IKGCTDNLTTLVAR.S                                                      | 1563.80174 | 2 | 6.49E-10 | 0.92  | 4.22   | -     | 727.9   |
| AHQ-4-13-, 3242             | R.IKGCTDNLTTLVAR.S                                                      | 1563.80174 | 2 | 3.64E-07 | 0.95  | 4.19   | -     | 1132.4  |
| AHQ-4-11, 3006              | R.IKGCTDNLTTLVAR.S                                                      | 1563.80174 | 2 | 4.38E-09 | 0.93  | 3.72   | -     | 1074.8  |
| AHQ-4-12, 3059              | R.IKGCTDNLTTLVAR.S                                                      | 1563.80174 | 2 | 6.55E-10 | 0.94  | 4.25   | -     | 960.5   |
| AHQ-4-13-, 5214             | K.LPMDCKCGTIVGVFVK.L                                                    | 1884.27358 | 3 | 2.55E-06 | 0.81  | 3.67   | -     | 775.4   |
| AHQ-4-12, 4722 - 4774       | K.LPM*CDKCGTIVGVFVK.L                                                   | 1900.27298 | 2 | 6.57E-04 | 0.89  | 3.37   | -     | 839.8   |
| AHQ-4-14, 4668 - 4741       | R.LVGGKDFEQLAIR.V                                                       | 1630.86972 | 2 | 1.48E-08 | 0.96  | 5.24   | -     | 1166.9  |
| AHQ-4-14-, 3649             | R.LVGGKDFEQLAIR.V                                                       | 1630.86972 | 2 | 1.10E-09 | 0.94  | 4.48   | -     | 877.7   |
| AHQ-4-13, 3914              | R.LVGGKDFEQLAIR.V                                                       | 1630.86972 | 2 | 9.41E-10 | 0.96  | 5.01   | -     | 1287.2  |
| AHQ-4-13-, 3698 - 3704      | K.M*NLASEPQEVLIHIGSAHNR.S                                               | 2120.33559 | 3 | 1.65E-07 | 0.81  | 3.51   | -     | 698.3   |
| AHQ-4-13, 3655              | K.M*NLASEPQEVLIHIGSAHNR.S                                               | 2120.33559 | 3 | 3.83E-05 | 0.72  | 3.06   | -     | 752.9   |
| AHQ-4-13, 3833              | K.M*NLASEPQEVLIHIGSAHNR.S                                               | 2120.33559 | 2 | 5.84E-07 | 0.86  | 3.46   | -     | 559.3   |
| AHQ-4-12, 3991              | K.MNLASEPQEVLIHIGSAHNR.S                                                | 2104.33619 | 2 | 1.01E-05 | 0.88  | 4.00   | -     | 559.3   |
| AHQ-4-13-, 6629             | K.QSTSFLVLQEIIESEEK.G                                                   | 1981.18977 | 2 | 9.32E-08 | 0.97  | 5.01   | -     | 1905.1  |
| AHQ-4-13, 6710              | K.QSTSFLVLQEIIESEEK.G                                                   | 1981.18977 | 2 | 5.01E-10 | 0.94  | 4.25   | -     | 1126.2  |
| AHQ-4-12, 6689 - 6706       | K.QSTSFLVLQEIIESEEK.G                                                   | 1981.18977 | 2 | 6.15E-09 | 0.95  | 4.28   | -     | 1558.8  |
| AHQ-4-12, 6101              | K.QSTSFLVLQEIIESEEK.GDPNKPSGFR.S                                        | 3037.32681 | 3 | 8.66E-05 | 0.73  | 3.35   | -     | 494.0   |
| AHQ-4-13, 6222              | K.QSTSFLVLQEIIESEEK.GDPNKPSGFR.S                                        | 3037.32681 | 3 | 5.47E-06 | 0.81  | 3.34   | -     | 847.9   |
| AHQ-4-13-, 2442 - 2456      | R.SAM*PFTASPASSTTAR.V                                                   | 1599.74799 | 2 | 2.70E-04 | 0.91  | 3.49   | -     | 1068.3  |
| AHQ-4-11, 2896              | R.SAMPFTASPASSTTAR.V                                                    | 1583.74859 | 2 | 1.39E-08 | 0.43  | 2.65   | -     | 354.7   |
| AHQ-4-13, 3125              | R.SAMPFTASPASSTTAR.V                                                    | 1583.74859 | 2 | 7.38E-06 | 0.46  | 2.77   | -     | 391.7   |
| AHQ-4-12, 2373              | R.SAM*PFTASPASSTTAR.V                                                   | 1599.74799 | 2 | 2.02E-04 | 0.89  | 3.42   | -     | 865.2   |
| AHQ-4-12, 2941              | R.SAMPFTASPASSTTAR.V                                                    | 1583.74859 | 2 | 3.04E-04 | 0.58  | 2.67   | -     | 458.8   |
| AHQ-4-13, 3679 - 3812       | K.VVWSPLVTEEGKR.H                                                       | 1245.40612 | 1 | 1.89E-05 | 0.37  | 2.33   | -     | 573.9   |
| AHQ-4-13, 3206              | K.VVWSPLVTEEGKR.H                                                       | 1401.59247 | 2 | 9.21E-09 | 0.87  | 3.07   | -     | 1050.7  |
| AHQ-4-14-, 2943             | K.VVWSPLVTEEGKR.H                                                       | 1401.59247 | 2 | 4.75E-08 | 0.85  | 2.62   | -     | 1100.6  |
| AHQ-4-12, 2982              | K.VVWSPLVTEEGKR.H                                                       | 1401.59247 | 2 | 3.47E-07 | 0.88  | 2.68   | -     | 952.1   |
| gj 5729842 ref NP_006699.1  | glyoxalase 1; lactoyl glutathione lyase; lactoylglutathione lyase [Homo |            |   | 1.31E-11 | 0.97  | 10.30  | 10.90 | 20719.6 |
| AHQ-4-11, 6661 - 6724       | K.GLAFIQDPDGVWIELNPNK.M                                                 | 2304.58542 | 2 | 1.31E-11 | 0.97  | 6.08   | -     | 926.5   |
| gj 4885609 ref NP_005408.1  | v-src sarcoma (Schmidt-Ruppin A-2) viral oncogene homolog; Protooncogen |            |   | 1.37E-11 | 3.57  | 40.35  | 13.20 | 59834.4 |
| AHQ-4-7, 3593               | K.LFGGNSDSTVTPQRA                                                       | 1713.82931 | 2 | 3.06E-07 | 0.90  | 3.15   | -     | 1343.7  |
| AHQ-4-7, 7445               | R.LPQLVDMAAQIASGMAYVER.M                                                | 2164.53485 | 2 | 1.37E-11 | 0.99  | 6.92   | -     | 2894.9  |
| AHQ-4-7, 5470               | K.TLKPMTMSEAFQEAQVMK.K                                                  | 2207.59964 | 2 | 2.55E-05 | 0.78  | 3.95   | -     | 794.0   |
| AHQ-4-7, 6314               | R.TQFNSLQQLVAYYSK.H                                                     | 1790.99681 | 2 | 3.45E-08 | 0.94  | 4.08   | -     | 1229.7  |
| AHQ-4-7, 6154               | R.TQFNSLQQLVAYYSK.H                                                     | 1790.99681 | 2 | 2.78E-11 | 0.91  | 4.06   | -     | 746.1   |
| gj 29741246 ref XP_294070.1 | similar to Glyceroldehyde 3-phosphate dehydrogenase, liver (GAPDH) [Ho  |            |   | 1.41E-11 | 3.28  | 40.22  | 14.60 | 35032.0 |
| AHQ-4-13-, 5296             | K.AENGLVINGNPITFIQER.D                                                  | 2114.39062 | 2 | 4.71E-09 | 0.54  | 3.03   | -     | 290.5   |

|                            |                                                                          |            |   |          |       |        |       |         |
|----------------------------|--------------------------------------------------------------------------|------------|---|----------|-------|--------|-------|---------|
| AHQ-4-9, 4685 - 4751       | K.AENGLKLVINGNPITIFQER.D                                                 | 2114.39062 | 2 | 6.32E-09 | 0.85  | 3.89   | -     | 652.3   |
| AHQ-4-9, 4831              | K.AENGLKLVINGNPITIFQER.D                                                 | 2114.39062 | 2 | 1.26E-04 | 0.85  | 3.79   | -     | 641.5   |
| AHQ-4-13, 5429             | K.AENGLKLVINGNPITIFQER.D                                                 | 2114.39062 | 2 | 7.97E-08 | 0.42  | 3.02   | -     | 344.3   |
| AHQ-4-9, 4996 - 5071       | K.LVINGNPITIFQER.D                                                       | 1614.87029 | 2 | 7.59E-11 | 0.96  | 4.02   | -     | 1565.8  |
| AHQ-4-13-, 5576 - 5644     | K.LVINGNPITIFQER.D                                                       | 1614.87029 | 2 | 9.85E-10 | 0.85  | 3.69   | -     | 672.6   |
| AHQ-4-14-, 5537 - 5602     | K.LVINGNPITIFQER.D                                                       | 1614.87029 | 2 | 1.72E-10 | 0.94  | 3.76   | -     | 1081.7  |
| AHQ-4-11, 5520 - 5601      | K.LVINGNPITIFQER.D                                                       | 1614.87029 | 2 | 1.21E-04 | 0.85  | 2.77   | -     | 1183.6  |
| AHQ-4-12, 5655 - 5722      | K.LVINGNPITIFQER.D                                                       | 1614.87029 | 2 | 1.31E-08 | 0.89  | 3.86   | -     | 762.4   |
| AHQ-4-10, 5120 - 5127      | K.LVINGNPITIFQER.D                                                       | 1614.87029 | 2 | 1.41E-11 | 0.95  | 4.17   | -     | 1091.8  |
| AHQ-4-9, 5087 - 5163       | K.LVINGNPITIFQER.D                                                       | 1614.87029 | 2 | 1.74E-10 | 0.95  | 4.12   | -     | 1192.2  |
| AHQ-4-13, 5708 - 5776      | K.LVINGNPITIFQER.D                                                       | 1614.87029 | 2 | 1.18E-05 | 0.88  | 3.40   | -     | 999.0   |
| AHQ-4-11, 5384 - 5456      | K.LVINGNPITIFQER.D                                                       | 1614.87029 | 2 | 5.35E-04 | 0.82  | 2.52   | -     | 931.6   |
| AHQ-4-9, 4609 - 4675       | K.LVINGNPITIFQERDPSK.I                                                   | 2042.32440 | 2 | 5.31E-10 | 0.88  | 3.80   | -     | 587.9   |
| AHQ-4-10, 6397             | K.VLHDNFGIVKGLMTTVHAITATQK.T                                             | 2596.04531 | 2 | 1.09E-06 | 0.90  | 4.23   | -     | 1181.5  |
| gi 5802974 ref NP_006784.1 | peroxiredoxin 3; antioxidant protein 1; thioredoxin-dependent peroxidase |            |   | 1.57E-11 | 4.42  | 50.26  | 28.90 | 27692.5 |
| AHQ-4-10, 4156             | K.AFYQVETHGEVCPANWTPDPTIKPSAASK.E                                        | 3388.70790 | 3 | 1.81E-05 | 0.94  | 5.19   | -     | 888.6   |
| AHQ-4-11, 4440             | K.AFYQVETHGEVCPANWTPDPTIKPSAASK.E                                        | 3388.70790 | 3 | 1.12E-05 | 0.95  | 5.25   | -     | 999.5   |
| AHQ-4-11, 5290             | R.DYGVLLGSGGLALR.G                                                       | 1463.66058 | 2 | 1.57E-11 | 0.97  | 5.24   | -     | 1890.2  |
| AHQ-4-10, 4984 - 5055      | R.DYGVLLGSGGLALR.G                                                       | 1463.66058 | 2 | 1.43E-04 | 0.88  | 3.52   | -     | 707.7   |
| AHQ-4-11, 5212             | R.GLFIIDPNGVIK.H                                                         | 1286.54452 | 2 | 4.76E-06 | 0.82  | 3.16   | -     | 922.6   |
| AHQ-4-11, 5476             | R.GLFIIDPNGVIK.H                                                         | 1286.54452 | 2 | 1.37E-04 | 0.85  | 3.44   | -     | 846.6   |
| AHQ-4-11, 5473             | R.GLFIIDPNGVIK.H                                                         | 1286.54452 | 1 | 6.16E-05 | 0.16  | 1.86   | -     | 339.1   |
| AHQ-4-11, 2877 - 2882      | K.HLSVNDLPVGR.S                                                          | 1027.36435 | 2 | 1.63E-04 | 0.92  | 3.43   | -     | 752.6   |
| AHQ-4-10, 4761 - 4820      | R.KNGGLGHMNIALLSDLTK.Q                                                   | 1883.20557 | 2 | 1.13E-06 | 0.76  | 3.42   | -     | 445.8   |
| gi 4503689 ref NP_000499.1 | fibrinogen, alpha chain isoform alpha-E preproprotein [Homo sapiens] [M  |            |   | 1.63E-11 | 18.21 | 230.29 | 33.00 | 94972.5 |
| AHQ-4-6, 5830 - 5842       | K.DSDWPFCSDEDWNYK.C                                                      | 1965.98609 | 2 | 3.60E-06 | 0.94  | 3.94   | -     | 848.5   |
| AHQ-4-9, 5359 - 5360       | K.DSDWPFCSDEDWNYK.C                                                      | 1965.98609 | 2 | 1.90E-04 | 0.87  | 3.44   | -     | 578.8   |
| AHQ-4-7, 5945              | K.DSDWPFCSDEDWNYK.C                                                      | 1965.98609 | 2 | 4.62E-05 | 0.96  | 4.55   | -     | 865.1   |
| AHQ-4-9, 5005 - 5015       | K.DSHSLTTNIMEILR.G                                                       | 1630.84839 | 2 | 2.13E-05 | 0.95  | 4.01   | -     | 1214.2  |
| AHQ-4-11, 5480 - 5486      | K.DSHSLTTNIMEILR.G                                                       | 1630.84839 | 2 | 3.59E-07 | 0.96  | 4.61   | -     | 1196.9  |
| AHQ-4-7, 4627              | K.DSHSLTTNIMEILR.G                                                       | 1646.84779 | 2 | 5.64E-06 | 0.78  | 3.55   | -     | 632.4   |
| AHQ-4-10, 5131 - 5137      | K.DSHSLTTNIMEILR.G                                                       | 1630.84839 | 2 | 1.29E-04 | 0.94  | 3.78   | -     | 1229.1  |
| AHQ-4-4, 2203              | K.ESSSHHPGIAEFFPSR.G                                                     | 1638.72252 | 2 | 2.76E-07 | 0.84  | 3.19   | -     | 654.3   |
| AHQ-4-6, 2011              | K.ESSSHHPGIAEFFPSR.G                                                     | 1638.72252 | 2 | 9.91E-04 | 0.84  | 3.05   | -     | 728.2   |
| AHQ-4-8, 2235              | R.EVDLKYEDQQK.Q                                                          | 1510.58460 | 2 | 1.35E-04 | 0.64  | 2.84   | -     | 503.0   |
| AHQ-4-13, 2742             | R.EVDLKYEDQQK.Q                                                          | 1510.58460 | 2 | 1.33E-07 | 0.87  | 3.22   | -     | 795.1   |
| AHQ-4-9, 2279 - 2289       | R.EVDLKYEDQQK.Q                                                          | 1510.58460 | 2 | 2.57E-08 | 0.86  | 3.45   | -     | 689.8   |
| AHQ-4-11, 2468             | R.EVDLKYEDQQK.Q                                                          | 1510.58460 | 2 | 3.52E-08 | 0.62  | 2.59   | -     | 554.0   |
| AHQ-4-6, 2342 - 2379       | R.EVDLKYEDQQK.Q                                                          | 1510.58460 | 2 | 5.48E-05 | 0.76  | 3.02   | -     | 642.7   |
| AHQ-4-3, 2515              | R.EVDLKYEDQQK.Q                                                          | 1510.58460 | 2 | 8.97E-09 | 0.87  | 3.46   | -     | 686.2   |
| AHQ-4-1, 2687              | R.EVDLKYEDQQK.Q                                                          | 1510.58460 | 2 | 4.30E-08 | 0.84  | 3.17   | -     | 721.7   |
| AHQ-4-4, 2511              | R.EVDLKYEDQQK.Q                                                          | 1510.58460 | 2 | 1.13E-05 | 0.76  | 2.92   | -     | 719.1   |
| AHQ-4-13-, 2636 - 2637     | R.EVDLKYEDQQK.Q                                                          | 1510.58460 | 2 | 7.57E-07 | 0.91  | 3.68   | -     | 878.8   |
| AHQ-4-14-, 2545            | R.EVDLKYEDQQK.Q                                                          | 1510.58460 | 2 | 3.80E-09 | 0.83  | 2.67   | -     | 913.1   |
| AHQ-4-10, 2428 - 2431      | R.EVDLKYEDQQK.Q                                                          | 1510.58460 | 2 | 1.50E-06 | 0.90  | 3.77   | -     | 804.1   |
| AHQ-4-13, 6017 - 6021      | K.EVVTSEDSGSDCPEAM*DLGTLSGIGTLDGFR.H                                     | 3147.34877 | 3 | 6.39E-05 | 0.96  | 5.66   | -     | 1469.8  |
| AHQ-4-7, 6955              | K.EVVTSEDSGSDCPEAMDLGTLSGIGTLDGFR.H                                      | 3131.34937 | 3 | 1.00E-04 | 0.91  | 3.93   | -     | 1267.4  |
| AHQ-4-13-, 6102 - 6165     | K.EVVTSEDSGSDCPEAM*DLGTLSGIGTLDGFR.H                                     | 3147.34877 | 3 | 1.41E-04 | 0.93  | 4.80   | -     | 1023.0  |
| AHQ-4-13, 6420 - 6425      | K.EVVTSEDSGSDCPEAMDLGTLSGIGTLDGFR.H                                      | 3131.34937 | 3 | 5.06E-10 | 0.78  | 3.61   | -     | 1007.8  |
| AHQ-4-13, 6509             | K.EVVTSEDSGSDCPEAMDLGTLSGIGTLDGFR.H                                      | 3131.34937 | 3 | 6.54E-05 | 0.84  | 3.54   | -     | 996.8   |
| AHQ-4-13, 6602 - 6672      | K.EVVTSEDSGSDCPEAMDLGTLSGIGTLDGFR.H                                      | 3131.34937 | 3 | 1.02E-04 | 0.58  | 3.44   | -     | 545.6   |
| AHQ-4-6, 6535              | K.EVVTSEDSGSDCPEAMDLGTLSGIGTLDGFR.H                                      | 3131.34937 | 3 | 2.91E-04 | 0.88  | 4.20   | -     | 845.3   |
| AHQ-4-13-, 5896 - 5912     | K.EVVTSEDSGSDCPEAM*DLGTLSGIGTLDGFR.H                                     | 3147.34877 | 3 | 4.22E-05 | 0.97  | 5.66   | -     | 1574.7  |
| AHQ-4-13-, 6386            | K.EVVTSEDSGSDCPEAMDLGTLSGIGTLDGFR.H                                      | 3131.34937 | 3 | 7.69E-07 | 0.86  | 3.82   | -     | 962.0   |
| AHQ-4-1, 6261              | K.EVVTSEDSGSDCPEAM*DLGTLSGIGTLDGFR.H                                     | 3147.34877 | 3 | 5.66E-05 | 0.88  | 4.38   | -     | 689.7   |
| AHQ-4-13-, 6560 - 6630     | K.EVVTSEDSGSDCPEAMDLGTLSGIGTLDGFR.H                                      | 3131.34937 | 3 | 1.01E-07 | 0.95  | 5.24   | -     | 1280.6  |
| AHQ-4-8, 3979              | K.GLIDEVNDQFTNR.I                                                        | 1521.61384 | 2 | 7.34E-07 | 0.92  | 3.42   | -     | 913.6   |
| AHQ-4-2, 4963              | K.GLIDEVNDQFTNR.I                                                        | 1521.61384 | 2 | 1.01E-05 | 0.94  | 4.07   | -     | 978.1   |
| AHQ-4-13, 4805             | K.GLIDEVNDQFTNR.I                                                        | 1521.61384 | 2 | 7.08E-06 | 0.92  | 3.46   | -     | 1133.8  |
| AHQ-4-6, 4647              | K.GLIDEVNDQFTNR.I                                                        | 1521.61384 | 2 | 2.85E-05 | 0.84  | 2.94   | -     | 822.7   |
| AHQ-4-3, 4928              | K.GLIDEVNDQFTNR.I                                                        | 1521.61384 | 2 | 8.33E-07 | 0.87  | 3.31   | -     | 857.5   |
| AHQ-4-1, 4901              | K.GLIDEVNDQFTNR.I                                                        | 1521.61384 | 2 | 9.88E-10 | 0.97  | 4.92   | -     | 1379.6  |
| AHQ-4-7, 4615 - 4694       | K.GLIDEVNDQFTNR.I                                                        | 1521.61384 | 2 | 8.28E-08 | 0.94  | 4.16   | -     | 1045.7  |
| AHQ-4-9, 3696              | K.GLIDEVNDQFTNR.I                                                        | 1521.61384 | 2 | 5.62E-04 | 0.81  | 3.20   | -     | 584.3   |
| AHQ-4-5, 4765              | K.GLIDEVNDQFTNR.I                                                        | 1521.61384 | 2 | 2.07E-07 | 0.84  | 3.18   | -     | 983.4   |
| AHQ-4-10, 4291 - 4293      | K.GLIDEVNDQFTNR.I                                                        | 1521.61384 | 2 | 2.28E-05 | 0.92  | 4.02   | -     | 976.5   |
| AHQ-4-9, 4219              | K.GLIDEVNDQFTNR.I                                                        | 1521.61384 | 2 | 1.03E-07 | 0.93  | 3.78   | -     | 1074.7  |
| AHQ-4-12, 4701 - 4703      | K.GLIDEVNDQFTNR.I                                                        | 1521.61384 | 2 | 4.15E-08 | 0.95  | 4.46   | -     | 1021.8  |
| AHQ-4-13-, 4653            | K.GLIDEVNDQFTNR.I                                                        | 1521.61384 | 2 | 4.38E-08 | 0.87  | 3.15   | -     | 992.5   |
| AHQ-4-4, 4895 - 4910       | K.GLIDEVNDQFTNR.I                                                        | 1521.61384 | 2 | 6.68E-06 | 0.91  | 3.71   | -     | 929.9   |
| AHQ-4-1, 2329              | R.GSESGIFTNTK.E                                                          | 1141.21317 | 1 | 3.03E-04 | 0.20  | 2.12   | -     | 408.4   |
| AHQ-4-6, 1950              | R.GSESGIFTNTK.E                                                          | 1141.21317 | 1 | 8.68E-05 | 0.19  | 2.06   | -     | 275.5   |
| AHQ-4-13-, 2292 - 2293     | R.GSESGIFTNTK.E                                                          | 1141.21317 | 2 | 3.36E-04 | 0.68  | 2.64   | -     | 768.2   |
| AHQ-4-1, 2326              | R.GSESGIFTNTK.E                                                          | 1141.21317 | 2 | 3.65E-04 | 0.84  | 2.92   | -     | 1078.7  |
| AHQ-4-13-, 2276 - 2288     | R.GSESGIFTNTK.E                                                          | 1141.21317 | 1 | 7.97E-08 | 0.47  | 2.47   | -     | 384.6   |
| AHQ-4-13, 2413             | R.GSESGIFTNTK.E                                                          | 1141.21317 | 2 | 4.06E-04 | 0.81  | 2.59   | -     | 996.4   |
| AHQ-4-12, 3001             | R.HPDEAAFFDASTGK.T                                                       | 1594.66329 | 2 | 1.59E-04 | 0.77  | 3.10   | -     | 583.4   |
| AHQ-4-13-, 3068            | R.HPDEAAFFDASTGK.T                                                       | 1594.66329 | 2 | 2.47E-04 | 0.78  | 3.28   | -     | 405.2   |
| AHQ-4-13, 3193             | R.HPDEAAFFDASTGK.T                                                       | 1594.66329 | 2 | 5.86E-05 | 0.78  | 3.18   | -     | 575.0   |
| AHQ-4-13-, 2617 - 2650     | R.HRHPDEAAFFDASTGK.T                                                     | 1887.98954 | 3 | 9.25E-04 | 0.94  | 4.37   | -     | 1388.9  |
| AHQ-4-3, 2417              | R.HRHPDEAAFFDASTGK.T                                                     | 1887.98954 | 2 | 8.08E-04 | 0.96  | 4.96   | -     | 1170.0  |
| AHQ-4-13, 2741             | R.HRHPDEAAFFDASTGK.T                                                     | 1887.98954 | 2 | 4.50E-06 | 0.97  | 5.05   | -     | 1490.4  |
| AHQ-4-6, 2184 - 2258       | R.HRHPDEAAFFDASTGK.T                                                     | 1887.98954 | 3 | 7.97E-05 | 0.94  | 4.27   | -     | 1756.1  |
| AHQ-4-5, 2250              | R.HRHPDEAAFFDASTGK.T                                                     | 1887.98954 | 2 | 1.13E-05 | 0.95  | 4.63   | -     | 741.0   |
| AHQ-4-7, 2201 - 2203       | R.HRHPDEAAFFDASTGK.T                                                     | 1887.98954 | 2 | 6.88E-06 | 0.95  | 4.40   | -     | 984.0   |
| AHQ-4-9, 2156 - 2157       | R.HRHPDEAAFFDASTGK.T                                                     | 1887.98954 | 2 | 6.70E-07 | 0.98  | 5.27   | -     | 1904.4  |
| AHQ-4-12, 2469             | R.HRHPDEAAFFDASTGK.T                                                     | 1887.98954 | 2 | 1.57E-06 | 0.98  | 5.73   | -     | 1931.7  |
| AHQ-4-13-, 2618 - 2624     | R.HRHPDEAAFFDASTGK.T                                                     | 1887.98954 | 2 | 1.54E-06 | 0.97  | 5.29   | -     | 1417.8  |
| AHQ-4-9, 2425              | K.LKNSLFEYQK.N                                                           | 1270.45881 | 2 | 1.48E-04 | 0.27  | 2.60   | -     | 244.5   |
| AHQ-4-6, 2380              | R.MELERPGGNEITR.G                                                        | 1502.67870 | 2 | 7.26E-04 | 0.82  | 3.42   | -     | 712.8   |
| AHQ-4-8, 2851 - 2855       | K.M*KPVPDLVPGNFK.S                                                       | 1458.75054 | 2 | 2.31E-04 | 0.80  | 3.34   | -     | 449.8   |
| AHQ-4-7, 3102              | K.M*KPVPDLVPGNFK.S                                                       | 1458.75054 | 2 | 3.49E-04 | 0.65  | 2.81   | -     | 458.2   |
| AHQ-4-10, 3188             | K.M*KPVPDLVPGNFK.S                                                       | 1458.75054 | 2 | 3.49E-04 | 0.77  | 3.11   | -     | 372.5   |
| AHQ-4-9, 4631              | K.NNKDSHSLTTNIMEILR.G                                                    | 1987.22751 | 2 | 9.25E-08 | 0.90  | 4.16   | -     | 742.5   |
| AHQ-4-7, 3067              | R.NPSSAGTGGTATWKPSSGGPGSTGSWNSGSSGTGSTGNQNPSPR.P                         | 4123.15285 | 3 | 6.82E-05 | 0.72  | 3.29   | -     | 565.9   |
| AHQ-4-7, 1942              | R.NPSSAGTGGTATWKPSSGGPGSTGNR.N                                           | 1964.94443 | 2 | 2.21E-06 | 0.27  | 2.67   | -     | 162.3   |
| AHQ-4-4, 2179              | R.NPSSAGTGGTATWKPSSGGPGSTGNR.N                                           | 1964.94443 | 2 | 3.25E-05 | 0.87  | 3.70   | -     | 422.7   |
| AHQ-4-7, 2046              | R.NPSSAGTGGTATWKPSSGGPGSTGNR.N                                           | 1964.94443 | 2 | 1.63E-11 | 0.93  | 4.41   | -     | 701.0   |
| AHQ-4-9, 1929              | R.NPSSAGTGGTATWKPSSGGPGSTGNR.N                                           | 1964.94443 | 2 | 8.95E-09 | 0.94  | 4.54   | -     | 783.6   |
| AHQ-4-7, 3097              | K.NSLFEYQK.N                                                             | 1029.12765 | 1 | 1.29E-04 | 0.43  | 2.14   | -     | 386.0   |
| AHQ-4-1, 2897              | K.NSLFEYQK.N                                                             | 1029.12765 | 1 | 2.37E-04 | 0.29  | 2.31   | -     | 250.3   |
| AHQ-4-6, 1956              | R.PGSTGTWNPSSSER.G                                                       | 1433.46515 | 2 | 1.57E-05 | 0.82  | 3.52   | -     | 584.0   |
| AHQ-4-11, 2110             | R.PGSTGTWNPSSSER.G                                                       | 1433.46515 | 2 | 4.65E-06 | 0.70  | 2.71   | -     | 712.5   |
| AHQ-4-8, 1837              | R.PGSTGTWNPSSSER.G                                                       | 1433.46515 | 2 | 1.19E-05 | 0.91  | 3.66   | -     | 740.6   |
| AHQ-4-1, 2291              | R.PGSTGTWNPSSSER.G                                                       | 1433.46515 | 2 | 1.28E-04 | 0.74  | 3.23   | -     | 442.0   |
| AHQ-4-3, 4980              | R.PNNPDWGTFFEEVSGNVPSTGR.R                                               | 2261.34962 | 2 | 4.95E-07 | 0.76  | 3.44   | -     | 360.2   |
| AHQ-4-13-, 4710            | R.PNNPDWGTFFEEVSGNVPSTGR.R                                               | 2261.34962 | 2 | 6.60E-09 | 0.90  | 3.71   | -     | 777.0   |

|                              |                                                                                  |            |   |          |       |        |       |          |
|------------------------------|----------------------------------------------------------------------------------|------------|---|----------|-------|--------|-------|----------|
| AHQ-4-11, 4588               | R.PNPDWGTFFEEVSGNVSPGTR.R                                                        | 2261.34962 | 2 | 1.59E-09 | 0.93  | 4.61   | -     | 696.2    |
| AHQ-4-7, 4670 - 4677         | R.PNPDWGTFFEEVSGNVSPGTR.R                                                        | 2261.34962 | 2 | 4.60E-08 | 0.97  | 5.26   | -     | 1613.8   |
| AHQ-4-9, 4241                | R.PNPDWGTFFEEVSGNVSPGTR.R                                                        | 2261.34962 | 2 | 5.96E-05 | 0.95  | 4.67   | -     | 943.1    |
| AHQ-4-6, 4680                | R.PNPDWGTFFEEVSGNVSPGTR.R                                                        | 2261.34962 | 2 | 2.64E-09 | 0.97  | 5.43   | -     | 1085.2   |
| AHQ-4-10, 6183               | K.TFPGFFSPMLGEFVSETESR.G                                                         | 2282.51372 | 2 | 6.41E-04 | 0.76  | 3.49   | -     | 270.6    |
| AHQ-4-13-, 6668              | K.TFPGFFSPMLGEFVSETESR.G                                                         | 2282.51372 | 2 | 8.15E-04 | 0.90  | 4.22   | -     | 356.8    |
| AHQ-4-9, 6663                | K.TFPGFFSPMLGEFVSETESR.G                                                         | 2266.51432 | 2 | 1.91E-06 | 0.87  | 3.72   | -     | 407.3    |
| AHQ-4-12, 7025 - 7026        | K.TFPGFFSPMLGEFVSETESR.G                                                         | 2266.51432 | 2 | 8.29E-08 | 0.90  | 4.19   | -     | 484.1    |
| AHQ-4-11, 6777               | K.TFPGFFSPMLGEFVSETESR.G                                                         | 2266.51432 | 2 | 1.75E-07 | 0.82  | 3.49   | -     | 357.0    |
| AHQ-4-1, 7021                | K.TFPGFFSPMLGEFVSETESR.G                                                         | 2282.51372 | 2 | 1.69E-04 | 0.69  | 2.87   | -     | 328.7    |
| AHQ-4-11, 6468               | K.TFPGFFSPMLGEFVSETESR.G                                                         | 2282.51372 | 2 | 1.66E-04 | 0.51  | 2.78   | -     | 168.3    |
| AHQ-4-1, 7206                | K.TFPGFFSPMLGEFVSETESR.G                                                         | 2266.51432 | 2 | 1.96E-05 | 0.85  | 3.85   | -     | 315.9    |
| AHQ-4-2, 7182 - 7186         | K.TFPGFFSPMLGEFVSETESR.G                                                         | 2282.51372 | 2 | 5.02E-05 | 0.50  | 2.58   | -     | 216.4    |
| AHQ-4-2, 7484                | K.TFPGFFSPMLGEFVSETESR.G                                                         | 2266.51432 | 2 | 7.01E-06 | 0.80  | 3.58   | -     | 303.6    |
| AHQ-4-10, 6467               | K.TFPGFFSPMLGEFVSETESR.G                                                         | 2266.51432 | 2 | 1.22E-05 | 0.83  | 3.78   | -     | 352.9    |
| AHQ-4-13-, 6836 - 6900       | K.TFPGFFSPMLGEFVSETESR.G                                                         | 2266.51432 | 2 | 3.73E-08 | 0.94  | 4.55   | -     | 580.1    |
| AHQ-4-14-, 6539              | K.TFPGFFSPMLGEFVSETESR.G                                                         | 2282.51372 | 2 | 3.72E-05 | 0.44  | 2.69   | -     | 141.6    |
| AHQ-4-6, 6846 - 6854         | K.TFPGFFSPMLGEFVSETESR.G                                                         | 2282.51372 | 2 | 8.90E-06 | 0.59  | 3.03   | -     | 228.3    |
| AHQ-4-9, 6264                | K.TFPGFFSPMLGEFVSETESR.G                                                         | 2282.51372 | 2 | 1.01E-04 | 0.67  | 3.38   | -     | 254.7    |
| AHQ-4-6, 7210                | K.TFPGFFSPMLGEFVSETESR.G                                                         | 2266.51432 | 2 | 2.95E-07 | 0.91  | 4.39   | -     | 425.6    |
| AHQ-4-3, 7484                | K.TFPGFFSPMLGEFVSETESR.G                                                         | 2266.51432 | 2 | 6.14E-08 | 0.79  | 3.33   | -     | 358.4    |
| AHQ-4-5, 7390                | K.TFPGFFSPMLGEFVSETESR.G                                                         | 2266.51432 | 2 | 2.98E-05 | 0.63  | 3.31   | -     | 281.0    |
| AHQ-4-6, 2030                | K.VQHIQLLQK.N                                                                    | 1107.33106 | 1 | 3.82E-04 | 0.59  | 2.39   | -     | 660.4    |
| AHQ-4-4, 2246                | K.VQHIQLLQK.N                                                                    | 1107.33106 | 1 | 7.07E-04 | 0.60  | 2.22   | -     | 632.1    |
| AHQ-4-13-, 2385              | K.VQHIQLLQK.N                                                                    | 1107.33106 | 1 | 8.36E-04 | 0.42  | 2.31   | -     | 533.4    |
| AHQ-4-6, 2038                | K.VQHIQLLQK.N                                                                    | 1107.33106 | 1 | 8.92E-04 | 0.37  | 2.33   | -     | 310.5    |
| AHQ-4-7, 1965                | K.VQHIQLLQK.N                                                                    | 1107.33106 | 1 | 3.30E-04 | 0.29  | 2.50   | -     | 207.4    |
| AHQ-4-8, 1863 - 1865         | K.VQHIQLLQK.N                                                                    | 1107.33106 | 2 | 6.90E-05 | 0.89  | 3.52   | -     | 827.5    |
| AHQ-4-8, 1871                | K.VQHIQLLQK.N                                                                    | 1107.33106 | 1 | 5.77E-04 | 0.34  | 2.15   | -     | 199.9    |
| AHQ-4-9, 1971                | K.VQHIQLLQK.N                                                                    | 1107.33106 | 2 | 9.64E-04 | 0.75  | 2.70   | -     | 618.9    |
| AHQ-4-13, 2509               | K.VQHIQLLQK.N                                                                    | 1107.33106 | 1 | 3.82E-04 | 0.56  | 2.36   | -     | 664.4    |
| AHQ-4-10, 2123               | K.VQHIQLLQK.N                                                                    | 1107.33106 | 1 | 1.50E-04 | 0.79  | 3.14   | -     | 550.1    |
| AHQ-4-11, 2204               | K.VQHIQLLQK.N                                                                    | 1107.33106 | 1 | 3.82E-04 | 0.70  | 2.41   | -     | 803.6    |
| AHQ-4-1, 2490                | K.VQHIQLLQK.N                                                                    | 1107.33106 | 2 | 1.72E-04 | 0.87  | 2.82   | -     | 971.1    |
| AHQ-4-11, 2217               | K.VQHIQLLQK.N                                                                    | 1107.33106 | 1 | 1.39E-04 | 0.50  | 2.66   | -     | 435.8    |
| gj4502051[ref][NP_000688.1]  | arachidonate 12-lipoxygenase; 12(S)-lipoxygenase [Homo sapiens]                  |            |   | 1.78E-11 | 10.39 | 120.28 | 26.20 | 75721.8  |
| AHQ-4-6, 4835 - 4850         | R.AAAQLTYCSLCPDDLADR.G                                                           | 2140.33708 | 2 | 6.60E-08 | 0.83  | 3.74   | -     | 419.5    |
| AHQ-4-6, 2070                | K.AVSTGGGGVHQLLR.R                                                               | 1352.52468 | 2 | 2.90E-10 | 0.88  | 3.69   | -     | 861.8    |
| AHQ-4-6, 3524 - 3526         | K.EGLPLTIAADR.K                                                                  | 1156.31411 | 2 | 3.26E-05 | 0.88  | 3.26   | -     | 656.0    |
| AHQ-4-6, 2998 - 2999         | R.EITEVGLCQAQD.G                                                                 | 1520.64745 | 2 | 8.99E-06 | 0.89  | 3.81   | -     | 635.4    |
| AHQ-4-6, 3254                | K.GDPELQAWCR.E                                                                   | 1233.33558 | 2 | 9.77E-07 | 0.81  | 2.61   | -     | 603.3    |
| AHQ-4-6, 7127                | R.GEEEFDDHVAEDLGLLQFVR.L                                                         | 2448.58352 | 2 | 1.78E-11 | 0.98  | 5.53   | -     | 2237.5   |
| AHQ-4-6, 5312                | R.GLLGLPGALYAHADR.L                                                              | 1637.90708 | 3 | 3.66E-05 | 0.79  | 3.45   | -     | 877.1    |
| AHQ-4-6, 5298 - 5307         | R.GLLGLPGALYAHADR.L                                                              | 1637.90708 | 2 | 1.60E-09 | 0.89  | 3.87   | -     | 655.3    |
| AHQ-4-6, 5122 - 5187         | R.ITVQGGPACAEVAFPCYR.W                                                           | 1999.25659 | 2 | 9.34E-06 | 0.86  | 3.56   | -     | 1007.1   |
| AHQ-4-6, 4454                | R.LPGDNDLDMFQK.H                                                                 | 1349.53784 | 2 | 2.35E-07 | 0.96  | 4.47   | -     | 1294.6   |
| AHQ-4-6, 3896                | R.TQLISDGGIFDK.A                                                                 | 1294.43554 | 2 | 2.42E-05 | 0.92  | 3.40   | -     | 1224.8   |
| AHQ-4-10, 4539               | R.WVQGEDILSLPEGTAR.L                                                             | 1771.95190 | 2 | 6.65E-04 | 0.58  | 2.98   | -     | 471.7    |
| AHQ-4-6, 4760                | R.YVEGIVHFLFYQR.D                                                                | 1524.74730 | 2 | 6.00E-05 | 0.90  | 2.80   | -     | 1186.6   |
| gj12025678[ref][NP_004915.2] | actinin, alpha 4 [Homo sapiens]                                                  |            |   | 1.93E-11 | 3.51  | 40.28  | 7.80  | 104853.3 |
| AHQ-4-5, 2773 - 2795         | K.GISQEQMQEFA.A                                                                  | 1353.48658 | 2 | 5.35E-07 | 0.77  | 3.00   | -     | 1171.2   |
| AHQ-4-5, 4709                | K.ICDQWDLGSLTHSR.R                                                               | 1760.90926 | 2 | 5.47E-07 | 0.94  | 4.05   | -     | 1302.5   |
| AHQ-4-5, 4098                | R.MAPYQGPDAVPGALDYK.S                                                            | 1794.02097 | 2 | 9.67E-07 | 0.85  | 3.42   | -     | 893.7    |
| AHQ-4-6, 7054                | R.SIVDYKPNLDLEQQHQLIQEALIFDNK.H                                                  | 3326.74423 | 3 | 6.67E-08 | 0.87  | 4.74   | -     | 647.0    |
| AHQ-4-5, 7203 - 7247         | R.SIVDYKPNLDLEQQHQLIQEALIFDNK.H                                                  | 3326.74423 | 3 | 1.93E-11 | 0.95  | 5.66   | -     | 1053.8   |
| gj4502695[ref][NP_001779.1]  | cell division cycle 10 (homolog to CDC10 of S.c                                  |            |   | 2.04E-11 | 2.68  | 30.26  | 13.60 | 48786.6  |
| AHQ-4-8, 3617                | K.IYEFPETDEEENKLVK.K                                                             | 2099.23685 | 2 | 1.92E-06 | 0.79  | 3.47   | -     | 443.3    |
| AHQ-4-13, 5528               | K.NLEGYVGFANLPGVYR.K                                                             | 1955.16216 | 2 | 4.15E-04 | 0.80  | 3.45   | -     | 599.2    |
| AHQ-4-14-, 5366 - 5415       | K.NLEGYVGFANLPGVYR.K                                                             | 1955.16216 | 2 | 2.04E-11 | 0.95  | 5.17   | -     | 927.2    |
| AHQ-4-8, 5119                | K.NLEGYVGFANLPGVYR.K                                                             | 1955.16216 | 2 | 1.15E-05 | 0.95  | 4.95   | -     | 977.5    |
| AHQ-4-14-, 6390              | K.STLINSFLDLYSPEYGPSSHR.I                                                        | 2608.88640 | 3 | 3.89E-11 | 0.93  | 5.18   | -     | 471.7    |
| AHQ-4-14-, 6177              | K.STLINSFLDLYSPEYGPSSHR.I                                                        | 2608.88640 | 3 | 2.21E-08 | 0.74  | 3.33   | -     | 335.7    |
| gj21361657[ref][NP_005304.3] | glucose regulated protein, 58kDa; glucose regulated protein, 58kD [Homo sapiens] |            |   | 2.30E-11 | 12.82 | 160.36 | 39.20 | 56782.0  |
| AHQ-4-7, 2118                | K.DPNIVIAK.M                                                                     | 870.02845  | 1 | 7.72E-04 | 0.17  | 1.85   | -     | 299.5    |
| AHQ-4-7, 5809                | R.ELSDFISYLQR.E                                                                  | 1371.52000 | 2 | 1.15E-05 | 0.94  | 3.89   | -     | 1213.3   |
| AHQ-4-7, 6615 - 6681         | R.FAHTNVELSVNYYDDNGEGILFR.P                                                      | 2753.96046 | 2 | 3.51E-04 | 0.83  | 3.46   | -     | 677.9    |
| AHQ-4-7, 6395 - 6462         | R.FAHTNVELSVNYYDDNGEGILFR.P                                                      | 2753.96046 | 2 | 1.88E-05 | 0.90  | 4.31   | -     | 603.9    |
| AHQ-4-7, 5385                | K.FIQENIFGICPHMTEDNKDLIQGK.D                                                     | 2850.21952 | 3 | 1.01E-06 | 0.87  | 4.56   | -     | 628.9    |
| AHQ-4-7, 5394 - 5398         | K.FIQENIFGICPHMTEDNKDLIQGK.D                                                     | 2850.21952 | 2 | 4.05E-04 | 0.64  | 2.98   | -     | 489.1    |
| AHQ-4-7, 7249                | K.FISDKDASIVGFDSSFAHSEFLK.A                                                      | 2940.16492 | 3 | 2.30E-11 | 0.98  | 6.44   | -     | 3110.4   |
| AHQ-4-7, 4618                | R.FLQDYFDGNLKR.R                                                                 | 1360.49568 | 2 | 5.12E-04 | 0.85  | 3.19   | -     | 960.3    |
| AHQ-4-7, 2271                | K.FVM*QEFSR.D                                                                    | 1189.32290 | 2 | 7.10E-04 | 0.85  | 2.70   | -     | 869.6    |
| AHQ-4-7, 4325                | R.GPFTIYFSPANK.K                                                                 | 1342.52349 | 1 | 5.78E-04 | 0.78  | 3.35   | -     | 509.7    |
| AHQ-4-7, 5610 - 5611         | R.KTFSHELSDFGLESTAGEIPVVAIR.T                                                    | 2705.01562 | 2 | 1.28E-09 | 0.97  | 5.61   | -     | 1428.7   |
| AHQ-4-7, 2075 - 2157         | R.LAPEYEAATR.L                                                                   | 1192.30331 | 2 | 4.01E-06 | 0.74  | 2.75   | -     | 340.2    |
| AHQ-4-7, 2378                | K.LNFAVASR.K                                                                     | 878.01067  | 2 | 1.57E-04 | 0.76  | 2.54   | -     | 709.8    |
| AHQ-4-7, 2006                | K.LSKDPNIVIAK.M                                                                  | 1198.43727 | 2 | 4.42E-06 | 0.84  | 3.13   | -     | 798.6    |
| AHQ-4-7, 3339                | K.MDATANDVPSPYEVYR.G                                                             | 1665.80646 | 2 | 2.34E-05 | 0.87  | 3.79   | -     | 551.2    |
| AHQ-4-7, 3451                | K.MDATANDVPSPYEVYR.G                                                             | 1665.80646 | 2 | 4.58E-05 | 0.79  | 3.43   | -     | 524.0    |
| AHQ-4-7, 1890                | K.RLAPEYEAATR.L                                                                  | 1348.48966 | 2 | 1.54E-08 | 0.95  | 4.22   | -     | 887.6    |
| AHQ-4-10, 5676               | K.TFSHELSDFGLESTAGEIPVVAIR.T                                                     | 2576.84271 | 2 | 4.22E-06 | 0.86  | 3.49   | -     | 621.8    |
| AHQ-4-7, 6263 - 6265         | K.TFSHELSDFGLESTAGEIPVVAIR.T                                                     | 2576.84271 | 2 | 1.80E-06 | 0.99  | 7.22   | -     | 2262.2   |
| AHQ-4-7, 2818                | K.YVSGYPTLK.I                                                                    | 1085.23435 | 1 | 4.23E-05 | 0.36  | 2.36   | -     | 278.3    |
| gj7705296[ref][NP_057271.1]  | bridging integrator 2; bridging integrator-2; breast cancer associated           |            |   | 2.38E-11 | 3.28  | 40.24  | 11.00 | 61746.8  |
| AHQ-4-10, 5488 - 5551        | K.AIVWNNDLLWEDYEELK.L                                                            | 2038.20157 | 2 | 6.33E-08 | 0.93  | 4.28   | -     | 1000.0   |
| AHQ-4-10, 5607 - 5671        | K.AIVWNNDLLWEDYEELK.L                                                            | 2038.20157 | 2 | 2.38E-11 | 0.93  | 4.16   | -     | 1050.1   |
| AHQ-4-14-, 6438              | R.IGCYVTFIQNISNLR.D                                                              | 1800.07167 | 2 | 2.51E-07 | 0.95  | 4.75   | -     | 906.2    |
| AHQ-4-11, 6381               | R.IGCYVTFIQNISNLR.D                                                              | 1800.07167 | 2 | 7.63E-07 | 0.85  | 3.84   | -     | 610.4    |
| AHQ-4-10, 5905               | R.IGCYVTFIQNISNLR.D                                                              | 1800.07167 | 2 | 2.66E-04 | 0.45  | 2.60   | -     | 396.3    |
| AHQ-4-9, 6184 - 6187         | R.IGCYVTFIQNISNLR.D                                                              | 1800.07167 | 2 | 4.66E-04 | 0.94  | 4.69   | -     | 892.6    |
| AHQ-4-10, 2640               | K.LNHNLYEVMK.L                                                                   | 1348.55307 | 2 | 2.17E-05 | 0.94  | 3.85   | -     | 1127.7   |
| AHQ-4-10, 4505 - 4531        | R.VSETLQEISSEWDGHEELK.A                                                          | 2380.50595 | 2 | 8.33E-04 | 0.47  | 2.63   | -     | 356.8    |
| gj4504183[ref][NP_000843.1]  | glutathione transferase; deafness, X-linked 7; fatty acid ethyl ester s          |            |   | 2.45E-11 | 6.34  | 70.27  | 48.60 | 23355.7  |
| AHQ-4-10, 4904               | K.AFLASPEYVNLPIPINGNGKQ                                                          | 2033.27283 | 2 | 7.12E-05 | 0.58  | 2.77   | -     | 762.1    |
| AHQ-4-11, 5144 - 5204        | K.AFLASPEYVNLPIPINGNGKQ                                                          | 2033.27283 | 2 | 1.06E-05 | 0.85  | 3.31   | -     | 990.1    |
| AHQ-4-13-, 5369              | K.ALPGQLKPFETLLSQNQGK.T                                                          | 2127.42930 | 2 | 1.14E-05 | 0.89  | 3.76   | -     | 528.7    |
| AHQ-4-11, 5124               | K.ALPGQLKPFETLLSQNQGK.T                                                          | 2127.42930 | 2 | 1.81E-05 | 0.93  | 4.28   | -     | 546.1    |
| AHQ-4-11, 5217 - 5230        | K.ALPGQLKPFETLLSQNQGK.T                                                          | 2127.42930 | 2 | 2.47E-05 | 0.80  | 3.54   | -     | 406.6    |
| AHQ-4-11, 5129               | K.ALPGQLKPFETLLSQNQGK.T                                                          | 2127.42930 | 2 | 7.66E-09 | 0.82  | 3.49   | -     | 455.0    |
| AHQ-4-11, 3073               | K.ASCLYGLPKP.F                                                                   | 1138.31884 | 2 | 5.67E-06 | 0.79  | 2.82   | -     | 651.6    |
| AHQ-4-11, 3008 - 3076        | K.ASCLYGLPKP.F                                                                   | 1138.31884 | 2 | 3.05E-06 | 0.86  | 3.27   | -     | 786.5    |
| AHQ-4-11, 5284 - 5288        | K.DQEEAALVDMVNDGVEDLR.C                                                          | 2118.26843 | 2 | 1.83E-07 | 0.97  | 5.42   | -     | 1550.9   |
| AHQ-4-13, 6514               | K.DQEEAALVDMVNDGVEDLR.C                                                          | 2118.26843 | 2 | 1.92E-04 | 0.84  | 3.22   | -     | 881.9    |
| AHQ-4-11, 5120 - 5122        | K.DQEEAALVDMVNDGVEDLR.C                                                          | 2134.26783 | 2 | 2.12E-08 | 0.96  | 5.40   | -     | 967.4    |
| AHQ-4-14-, 6218 - 6291       | K.DQEEAALVDMVNDGVEDLR.C                                                          | 2118.26843 | 2 | 1.32E-06 | 0.86  | 3.64   | -     | 786.6    |
| AHQ-4-11, 6244               | K.DQEEAALVDMVNDGVEDLR.C                                                          | 2118.26843 | 2 | 9.48E-06 | 0.91  | 3.92   | -     | 835.6    |
| AHQ-4-11, 4402               | K.DQEEAALVDMVNDGVEDLR.C                                                          | 2134.26783 | 2 | 2.98E-07 | 0.93  | 4.65   | -     | 675.1    |

|                           |                                                                         |            |   |          |       |        |       |          |
|---------------------------|-------------------------------------------------------------------------|------------|---|----------|-------|--------|-------|----------|
| AHQ-4-11, 4910 - 4972     | K.FQDGDLTLYQSNTILR.H                                                    | 1885.06701 | 2 | 2.76E-10 | 0.96  | 5.29   | -     | 1044.2   |
| AHQ-4-11, 4828 - 4844     | K.FQDGDLTLYQSNTILR.H                                                    | 1885.06701 | 2 | 8.86E-09 | 0.95  | 4.82   | -     | 1025.0   |
| AHQ-4-11, 4700 - 4780     | K.FQDGDLTLYQSNTILR.H                                                    | 1885.06701 | 2 | 2.45E-11 | 0.95  | 4.96   | -     | 968.5    |
| AHQ-4-10, 4515            | K.FQDGDLTLYQSNTILR.H                                                    | 1885.06701 | 2 | 2.69E-06 | 0.95  | 4.09   | -     | 1256.7   |
| AHQ-4-13, 5036 - 5040     | K.FQDGDLTLYQSNTILR.H                                                    | 1885.06701 | 2 | 2.18E-04 | 0.72  | 3.49   | -     | 380.8    |
| AHQ-4-14, 6113            | K.FQDGDLTLYQSNTILR.H                                                    | 1885.06701 | 2 | 2.63E-06 | 0.87  | 3.94   | -     | 785.3    |
| AHQ-4-14-, 4881           | K.FQDGDLTLYQSNTILR.H                                                    | 1885.06701 | 2 | 2.73E-11 | 0.96  | 5.30   | -     | 908.9    |
| AHQ-4-11, 4506            | K.YISLIYTNYEAGKDDYVK.A                                                  | 2156.37637 | 2 | 1.03E-08 | 0.92  | 4.28   | -     | 649.4    |
| AHQ-4-11, 4369 - 4376     | K.YISLIYTNYEAGKDDYVK.A                                                  | 2156.37637 | 2 | 5.11E-06 | 0.84  | 3.69   | -     | 494.5    |
| AHQ-4-10, 4117 - 4159     | K.YISLIYTNYEAGKDDYVK.A                                                  | 2156.37637 | 2 | 7.35E-07 | 0.83  | 3.85   | -     | 279.5    |
| gj4506413 ref NP_002875.1 | RAP1A, member of RAS oncogene family; RAS-related protein RAP1A [Homo s |            |   | 2.51E-11 | 6.14  | 70.27  | 27.70 | 20987.1  |
| AHQ-4-11, 2384            | K.CDLEDERVVGK.E                                                         | 1321.43945 | 2 | 4.10E-04 | 0.80  | 3.01   | -     | 931.3    |
| AHQ-4-11, 6536 - 6616     | K.INVNEIFYDLVR.Q                                                        | 1495.70427 | 2 | 6.68E-08 | 0.94  | 4.57   | -     | 1038.0   |
| AHQ-4-14-, 6629 - 6701    | K.INVNEIFYDLVR.Q                                                        | 1495.70427 | 2 | 1.58E-07 | 0.95  | 4.92   | -     | 1076.4   |
| AHQ-4-14-, 6478           | K.INVNEIFYDLVR.Q                                                        | 1495.70427 | 2 | 1.64E-09 | 0.94  | 4.17   | -     | 1417.5   |
| AHQ-4-14-, 5809           | K.INVNEIFYDLVR.Q                                                        | 1495.70427 | 2 | 1.55E-06 | 0.95  | 3.97   | -     | 1384.2   |
| AHQ-4-13-, 6744           | K.INVNEIFYDLVR.Q                                                        | 1495.70427 | 2 | 3.48E-08 | 0.89  | 3.34   | -     | 931.8    |
| AHQ-4-13, 6840            | K.INVNEIFYDLVR.Q                                                        | 1495.70427 | 2 | 4.49E-06 | 0.96  | 4.60   | -     | 1155.4   |
| AHQ-4-11, 6732            | K.INVNEIFYDLVR.Q                                                        | 1495.70427 | 1 | 1.13E-06 | 0.30  | 2.62   | -     | 314.5    |
| AHQ-4-11, 6709 - 6718     | K.INVNEIFYDLVR.Q                                                        | 1495.70427 | 2 | 1.87E-07 | 0.94  | 4.35   | -     | 1306.4   |
| AHQ-4-11, 6548 - 6609     | K.INVNEIFYDLVR.Q                                                        | 1495.70427 | 1 | 1.55E-04 | 0.47  | 3.14   | -     | 213.6    |
| AHQ-4-11, 5696 - 5760     | K.INVNEIFYDLVR.Q                                                        | 1495.70427 | 2 | 7.67E-07 | 0.89  | 3.96   | -     | 924.7    |
| AHQ-4-11, 5698            | K.INVNEIFYDLVR.Q                                                        | 1495.70427 | 1 | 2.80E-09 | 0.13  | 1.91   | -     | 172.5    |
| AHQ-4-11, 6545 - 6674     | K.INVNEIFYDLVR.Q                                                        | 1495.70427 | 1 | 8.29E-07 | 0.43  | 3.01   | -     | 293.6    |
| AHQ-4-14-, 6630 - 6631    | K.INVNEIFYDLVR.Q                                                        | 1495.70427 | 1 | 1.28E-06 | 0.51  | 3.16   | -     | 175.6    |
| AHQ-4-11, 6405            | K.INVNEIFYDLVR.Q                                                        | 1495.70427 | 1 | 8.69E-07 | 0.20  | 1.96   | -     | 226.3    |
| AHQ-4-11, 6400            | K.INVNEIFYDLVR.Q                                                        | 1495.70427 | 2 | 4.99E-07 | 0.87  | 3.07   | -     | 983.4    |
| AHQ-4-12, 2685            | K.LVVLGSGGGVKG.S                                                        | 986.19059  | 2 | 6.35E-05 | 0.88  | 3.26   | -     | 887.9    |
| AHQ-4-11, 2656            | K.LVVLGSGGGVKG.S                                                        | 986.19059  | 2 | 1.76E-06 | 0.92  | 3.64   | -     | 1068.7   |
| AHQ-4-13-, 2776           | K.LVVLGSGGGVKG.S                                                        | 986.19059  | 1 | 2.07E-05 | 0.84  | 3.10   | -     | 812.6    |
| AHQ-4-11, 2536 - 2604     | K.LVVLGSGGGVKG.S                                                        | 986.19059  | 2 | 7.25E-05 | 0.92  | 3.50   | -     | 1118.0   |
| AHQ-4-11, 2560 - 2770     | K.LVVLGSGGGVKG.S                                                        | 986.19059  | 1 | 7.93E-04 | 0.72  | 3.04   | -     | 582.0    |
| AHQ-4-11, 6240 - 6312     | K.SALTVOFVQGFIFVEK.Y                                                    | 1666.94196 | 2 | 3.13E-04 | 0.95  | 5.06   | -     | 1093.4   |
| AHQ-4-11, 6493 - 6572     | K.SALTVOFVQGFIFVEK.Y                                                    | 1666.94196 | 2 | 1.69E-06 | 0.96  | 4.77   | -     | 1761.6   |
| AHQ-4-14-, 5951 - 6013    | K.SALTVOFVQGFIFVEK.Y                                                    | 1666.94196 | 2 | 4.36E-04 | 0.93  | 3.24   | -     | 1595.3   |
| AHQ-4-11, 6120 - 6182     | K.SALTVOFVQGFIFVEK.Y                                                    | 1666.94196 | 2 | 1.81E-04 | 0.96  | 5.10   | -     | 1700.3   |
| AHQ-4-11, 5646            | K.SALTVOFVQGFIFVEK.Y                                                    | 1666.94196 | 2 | 2.62E-06 | 0.93  | 4.27   | -     | 1151.5   |
| AHQ-4-11, 6636 - 6642     | K.SALTVOFVQGFIFVEK.Y                                                    | 1666.94196 | 2 | 8.46E-07 | 0.94  | 3.84   | -     | 1521.6   |
| AHQ-4-14-, 6037 - 6081    | K.SALTVOFVQGFIFVEK.Y                                                    | 1666.94196 | 2 | 4.95E-04 | 0.93  | 3.85   | -     | 1438.3   |
| AHQ-4-11, 6360 - 6433     | K.SALTVOFVQGFIFVEK.Y                                                    | 1666.94196 | 2 | 1.16E-07 | 0.97  | 5.43   | -     | 1801.4   |
| AHQ-4-11, 5945 - 5990     | K.SALTVOFVQGFIFVEK.Y                                                    | 1666.94196 | 2 | 1.36E-05 | 0.87  | 3.68   | -     | 966.0    |
| AHQ-4-11, 6737 - 6813     | K.SALTVOFVQGFIFVEK.Y                                                    | 1666.94196 | 2 | 4.27E-08 | 0.97  | 4.47   | -     | 1920.3   |
| AHQ-4-11, 6900            | K.SALTVOFVQGFIFVEK.Y                                                    | 1666.94196 | 2 | 8.90E-07 | 0.96  | 5.06   | -     | 1602.2   |
| AHQ-4-11, 5245 - 5253     | K.SKINVNEIFYDLVR.Q                                                      | 1710.95483 | 2 | 3.80E-10 | 0.94  | 4.39   | -     | 1018.7   |
| AHQ-4-11, 6313            | K.SKINVNEIFYDLVR.Q                                                      | 1710.95483 | 2 | 4.25E-09 | 0.92  | 3.74   | -     | 951.5    |
| AHQ-4-11, 5068 - 5084     | K.SKINVNEIFYDLVR.Q                                                      | 1710.95483 | 2 | 1.95E-08 | 0.86  | 3.73   | -     | 602.6    |
| AHQ-4-11, 5924            | K.SKINVNEIFYDLVR.Q                                                      | 1710.95483 | 2 | 8.09E-08 | 0.91  | 3.72   | -     | 935.6    |
| AHQ-4-14-, 6063           | K.SKINVNEIFYDLVR.Q                                                      | 1710.95483 | 3 | 3.11E-06 | 0.95  | 4.81   | -     | 1638.7   |
| AHQ-4-11, 5605            | K.SKINVNEIFYDLVR.Q                                                      | 1710.95483 | 2 | 1.17E-09 | 0.73  | 3.01   | -     | 687.4    |
| AHQ-4-14-, 6057           | K.SKINVNEIFYDLVR.Q                                                      | 1710.95483 | 2 | 1.31E-10 | 0.96  | 4.82   | -     | 1169.7   |
| AHQ-4-11, 5902            | K.SKINVNEIFYDLVR.Q                                                      | 1710.95483 | 3 | 2.52E-08 | 0.94  | 4.00   | -     | 1534.5   |
| AHQ-4-11, 5701            | K.SKINVNEIFYDLVR.Q                                                      | 1710.95483 | 2 | 2.18E-05 | 0.94  | 4.45   | -     | 956.3    |
| AHQ-4-11, 5834 - 5896     | K.SKINVNEIFYDLVR.Q                                                      | 1710.95483 | 2 | 2.51E-11 | 0.95  | 4.59   | -     | 1132.7   |
| AHQ-4-11, 2752            | K.YDPTIEDSYR.K                                                          | 1259.30338 | 2 | 1.16E-06 | 0.79  | 2.62   | -     | 396.9    |
| AHQ-4-13-, 2744 - 2821    | K.YDPTIEDSYR.K                                                          | 1259.30338 | 2 | 2.02E-07 | 0.81  | 2.76   | -     | 479.0    |
| AHQ-4-14-, 2697 - 2699    | K.YDPTIEDSYR.K                                                          | 1259.30338 | 2 | 2.46E-05 | 0.79  | 2.58   | -     | 551.8    |
| AHQ-4-13, 2550            | K.YDPTIEDSYR.K                                                          | 1387.47629 | 2 | 1.60E-06 | 0.74  | 2.81   | -     | 395.7    |
| AHQ-4-11, 2276 - 2308     | K.YDPTIEDSYR.Q                                                          | 1387.47629 | 2 | 2.14E-05 | 0.83  | 2.66   | -     | 544.0    |
| AHQ-4-13-, 2432 - 2444    | K.YDPTIEDSYR.Q                                                          | 1387.47629 | 2 | 5.02E-06 | 0.82  | 2.89   | -     | 569.3    |
| gj4504391 ref NP_000179.1 | hexokinase 1 isoform HKI; brain form hexokinase [Homo sapiens]          |            |   | 2.64E-11 | 7.34  | 80.25  | 11.80 | 102502.4 |
| AHQ-4-4, 6324             | R.AILQQLGLNSTDSDSILVK.T                                                 | 2090.38419 | 2 | 6.86E-06 | 0.90  | 4.03   | -     | 858.4    |
| AHQ-4-4, 4484 - 4486      | K.ATDCVGHHDVVTLLR.D                                                     | 1557.75406 | 2 | 2.64E-11 | 0.96  | 4.41   | -     | 1174.3   |
| AHQ-4-4, 5718             | K.GDFIALDLGGSSFR.I                                                      | 1455.59700 | 2 | 8.80E-07 | 0.97  | 4.49   | -     | 1825.2   |
| AHQ-4-4, 2478             | R.GKFNSTSVSAIEK.N                                                       | 1396.52786 | 2 | 1.38E-06 | 0.77  | 3.03   | -     | 744.6    |
| AHQ-4-4, 2147             | R.HIDLVEGDEGR.M                                                         | 1240.30483 | 2 | 7.06E-08 | 0.95  | 4.04   | -     | 1090.6   |
| AHQ-4-4, 5506 - 5508      | K.KLPVGFTFSPFCQSQK.I                                                    | 1873.16425 | 2 | 7.19E-06 | 0.96  | 4.96   | -     | 1054.1   |
| AHQ-4-4, 6094             | K.LPVGFTFSPFCQSQK.I                                                     | 1744.99134 | 2 | 5.39E-05 | 0.90  | 3.80   | -     | 751.3    |
| AHQ-4-4, 6408             | R.TPDGTENGDFLALDLGGTNFR.V                                               | 2211.33051 | 2 | 1.42E-05 | 0.91  | 4.21   | -     | 775.0    |
| AHQ-4-4, 6291 - 6311      | R.TPDGTENGDFLALDLGGTNFR.V                                               | 2211.33051 | 2 | 2.64E-06 | 0.94  | 4.35   | -     | 942.9    |
| gj4507651 ref NP_003281.1 | tropomyosin 4 [Homo sapiens]                                            |            |   | 2.84E-11 | 2.81  | 30.29  | 14.50 | 28521.6  |
| AHQ-4-9, 3517 - 3579      | R.AEVSELKCGDLEELK.N                                                     | 1851.02256 | 2 | 2.58E-05 | 0.89  | 4.29   | -     | 723.9    |
| AHQ-4-9, 4600             | R.AEVSELKCGDLEELKKNVTNLIK.S                                             | 2634.89893 | 3 | 1.12E-07 | 0.88  | 4.82   | -     | 805.2    |
| AHQ-4-9, 5413 - 5425      | R.AEVSELKCGDLEELKKNVTNLIK.S                                             | 2634.89893 | 3 | 2.84E-11 | 0.96  | 5.88   | -     | 1401.0   |
| AHQ-4-9, 1907             | K.YSEKEDKYEIEIK.L                                                       | 1690.78605 | 3 | 8.24E-05 | 0.95  | 5.06   | -     | 1383.9   |
| AHQ-4-9, 1780             | K.YSEKEDKYEIEIK.L                                                       | 1690.78605 | 2 | 2.04E-04 | 0.76  | 3.32   | -     | 696.4    |
| gj4502905 ref NP_001822.1 | clusterin; complement-associated protein SP-40 [Homo sapiens]           |            |   | 2.94E-11 | 2.45  | 30.31  | 12.50 | 52494.3  |
| AHQ-4-8, 2723             | R.EILSDVDCSTNPNQSAK.L                                                   | 1764.89299 | 2 | 1.17E-05 | 0.67  | 2.86   | -     | 582.4    |
| AHQ-4-11, 5282            | K.LFSDPITVTVPEVSR.K                                                     | 1875.11203 | 2 | 8.09E-05 | 0.81  | 3.42   | -     | 596.0    |
| AHQ-4-11, 3396 - 3401     | R.VTTVASHSTSDSDVPSGVTEVVK.L                                             | 2315.52008 | 2 | 2.94E-11 | 0.97  | 6.23   | -     | 1255.8   |
| AHQ-4-9, 2980 - 2984      | R.VTTVASHSTSDSDVPSGVTEVVK.L                                             | 2315.52008 | 2 | 2.87E-04 | 0.97  | 6.15   | -     | 1197.1   |
| gj4826898 ref NP_005013.1 | profilin 1; profilin-1 [Homo sapiens]                                   |            |   | 2.97E-11 | 16.30 | 190.29 | 77.90 | 15054.2  |
| AHQ-4-13, 5116 - 5138     | K.CSVIRDSLQDGFESM*DLR.T                                                 | 2259.50329 | 3 | 1.22E-06 | 0.96  | 5.70   | -     | 1295.1   |
| AHQ-4-12, 2334            | K.CYEMASHLR.R                                                           | 1168.32854 | 2 | 3.09E-07 | 0.94  | 3.09   | -     | 1635.1   |
| AHQ-4-13, 2431 - 2510     | K.CYEMASHLR.R                                                           | 1168.32854 | 2 | 4.33E-04 | 0.95  | 3.12   | -     | 1832.3   |
| AHQ-4-13, 2065 - 2122     | K.CYEM*ASHLR.R                                                          | 1184.32794 | 2 | 1.79E-05 | 0.93  | 2.64   | -     | 1607.5   |
| AHQ-4-13, 1949 - 2009     | K.CYEM*ASHLR.R                                                          | 1184.32794 | 2 | 3.54E-05 | 0.90  | 2.93   | -     | 1229.7   |
| AHQ-4-13-, 1673 - 1737    | K.CYEM*ASHLR.R                                                          | 1184.32794 | 2 | 3.47E-06 | 0.91  | 3.11   | -     | 1273.2   |
| AHQ-4-13-, 1742 - 1800    | K.CYEM*ASHLR.R                                                          | 1184.32794 | 2 | 3.02E-04 | 0.88  | 2.96   | -     | 1262.0   |
| AHQ-4-13-, 1873 - 1936    | K.CYEM*ASHLR.R                                                          | 1184.32794 | 2 | 3.25E-04 | 0.85  | 2.64   | -     | 1133.8   |
| AHQ-4-13-, 2404 - 2468    | K.CYEMASHLR.R                                                           | 1168.32854 | 2 | 5.49E-04 | 0.96  | 3.31   | -     | 2136.3   |
| AHQ-4-13-, 2314 - 2384    | K.CYEMASHLR.R                                                           | 1168.32854 | 2 | 5.50E-05 | 0.95  | 3.34   | -     | 1842.3   |
| AHQ-4-13-, 1920 - 2000    | K.CYEM*ASHLR.R                                                          | 1184.32794 | 2 | 2.85E-06 | 0.85  | 3.09   | -     | 727.1    |
| AHQ-4-13, 4206            | K.DRSSFYVNGLTGGQK.C                                                     | 1742.91379 | 3 | 1.93E-07 | 0.82  | 3.81   | -     | 756.4    |
| AHQ-4-13-, 4193 - 4194    | K.DRSSFYVNGLTGGQK.C                                                     | 1742.91379 | 2 | 7.79E-08 | 0.94  | 4.54   | -     | 923.3    |
| AHQ-4-13, 4196 - 4274     | K.DRSSFYVNGLTGGQK.C                                                     | 1742.91379 | 2 | 1.59E-07 | 0.98  | 5.75   | -     | 1692.1   |
| AHQ-4-12, 4931 - 4942     | R.DSLQLDGFESM*DLR.T                                                     | 1642.76963 | 2 | 6.28E-05 | 0.87  | 3.07   | -     | 1256.6   |
| AHQ-4-12, 5318 - 5389     | R.DSLQLDGFESM*DLR.T                                                     | 1626.77023 | 2 | 5.72E-09 | 0.95  | 4.00   | -     | 1482.6   |
| AHQ-4-12, 5506 - 5570     | R.DSLQLDGFESM*DLR.T                                                     | 1626.77023 | 2 | 1.26E-08 | 0.95  | 3.90   | -     | 1545.5   |
| AHQ-4-12, 5595 - 5667     | R.DSLQLDGFESM*DLR.T                                                     | 1626.77023 | 2 | 5.56E-07 | 0.96  | 3.64   | -     | 2044.1   |
| AHQ-4-12, 5745            | R.DSLQLDGFESM*DLR.T                                                     | 1626.77023 | 2 | 1.60E-07 | 0.94  | 3.53   | -     | 1449.5   |
| AHQ-4-13-, 5456 - 5520    | R.DSLQLDGFESM*DLR.T                                                     | 1626.77023 | 2 | 1.82E-10 | 0.98  | 5.24   | -     | 2075.9   |
| AHQ-4-12, 5835 - 5907     | R.DSLQLDGFESM*DLR.T                                                     | 1626.77023 | 2 | 5.02E-04 | 0.80  | 3.34   | -     | 564.4    |
| AHQ-4-13-, 5393 - 5469    | R.DSLQLDGFESM*DLR.T                                                     | 1642.76963 | 2 | 2.05E-05 | 0.87  | 3.52   | -     | 1118.1   |
| AHQ-4-13-, 5584 - 5650    | R.DSLQLDGFESM*DLR.T                                                     | 1626.77023 | 2 | 2.97E-11 | 0.98  | 4.86   | -     | 2154.7   |
| AHQ-4-13-, 5822 - 5904    | R.DSLQLDGFESM*DLR.T                                                     | 1626.77023 | 2 | 4.03E-09 | 0.98  | 5.03   | -     | 2852.4   |
| AHQ-4-14-, 4582 - 4589    | R.DSLQLDGFESM*DLR.T                                                     | 1642.76963 | 2 | 3.36E-08 | 0.96  | 4.69   | -     | 1585.5   |
| AHQ-4-14-, 5347 - 5369    | R.DSLQLDGFESM*DLR.T                                                     | 1626.77023 | 2 | 8.58E-10 | 0.97  | 4.68   | -     | 1962.7   |

|                             |                                                                         |            |   |          |      |       |       |         |
|-----------------------------|-------------------------------------------------------------------------|------------|---|----------|------|-------|-------|---------|
| AHQ-4-12, 4687 - 4769       | R.DSLLQDGEFSM*DLR.T                                                     | 1642.76963 | 2 | 7.67E-09 | 0.95 | 3.48  | -     | 1758.5  |
| AHQ-4-14-, 4467 - 4470      | R.DSLLQDGEFSM*DLR.T                                                     | 1642.76963 | 2 | 1.73E-08 | 0.95 | 4.15  | -     | 1194.2  |
| AHQ-4-13-, 5352 - 5420      | R.DSLLQDGEFSMDLR.T                                                      | 1626.77023 | 2 | 1.45E-09 | 0.98 | 5.32  | -     | 1939.0  |
| AHQ-4-13-, 5201 - 5276      | R.DSLLQDGEFSMDLR.T                                                      | 1626.77023 | 2 | 1.80E-09 | 0.94 | 3.87  | -     | 1536.2  |
| AHQ-4-13-, 5102             | R.DSLLQDGEFSMDLR.T                                                      | 1626.77023 | 2 | 5.79E-05 | 0.93 | 3.86  | -     | 1212.8  |
| AHQ-4-13-, 4913 - 4962      | R.DSLLQDGEFSM*DLR.T                                                     | 1642.76963 | 2 | 2.22E-09 | 0.96 | 4.16  | -     | 1700.7  |
| AHQ-4-13-, 4692 - 4756      | R.DSLLQDGEFSM*DLR.T                                                     | 1642.76963 | 2 | 6.29E-09 | 0.97 | 4.91  | -     | 1745.6  |
| AHQ-4-13-, 4661             | R.DSLLQDGEFSM*DLR.T                                                     | 1642.76963 | 3 | 3.17E-06 | 0.96 | 4.32  | -     | 2474.3  |
| AHQ-4-14, 5764 - 5825       | R.DSLLQDGEFSM*DLR.T                                                     | 1642.76963 | 2 | 6.11E-11 | 0.94 | 3.90  | -     | 1570.7  |
| AHQ-4-13, 6981              | R.DSLLQDGEFSMDLR.T                                                      | 1626.77023 | 2 | 2.48E-07 | 0.95 | 3.82  | -     | 1716.9  |
| AHQ-4-12, 4550              | R.DSLLQDGEFSM*DLR.T                                                     | 1642.76963 | 2 | 9.51E-05 | 0.92 | 3.18  | -     | 1392.9  |
| AHQ-4-13, 6185 - 6249       | R.DSLLQDGEFSMDLR.T                                                      | 1626.77023 | 2 | 1.00E-07 | 0.96 | 4.51  | -     | 1754.2  |
| AHQ-4-13, 5917 - 5981       | R.DSLLQDGEFSMDLR.T                                                      | 1626.77023 | 2 | 1.44E-04 | 0.61 | 2.73  | -     | 661.5   |
| AHQ-4-13-, 4466 - 4532      | R.DSLLQDGEFSM*DLR.T                                                     | 1642.76963 | 2 | 4.85E-08 | 0.96 | 4.63  | -     | 1255.5  |
| AHQ-4-14-, 5435             | R.DSLLQDGEFSMDLR.T                                                      | 1626.77023 | 2 | 4.39E-05 | 0.83 | 2.87  | -     | 958.8   |
| AHQ-4-13-, 6001             | R.DSLLQDGEFSMDLR.T                                                      | 1626.77023 | 2 | 9.31E-04 | 0.97 | 4.61  | -     | 2015.4  |
| AHQ-4-13, 5696 - 5765       | R.DSLLQDGEFSMDLR.T                                                      | 1626.77023 | 2 | 1.41E-07 | 0.97 | 4.54  | -     | 1779.6  |
| AHQ-4-13-, 4556 - 4621      | R.DSLLQDGEFSM*DLR.T                                                     | 1642.76963 | 2 | 1.89E-09 | 0.97 | 5.01  | -     | 1859.2  |
| AHQ-4-13, 5444 - 5513       | R.DSLLQDGEFSMDLR.T                                                      | 1626.77023 | 2 | 1.29E-08 | 0.97 | 4.50  | -     | 1666.3  |
| AHQ-4-13, 4517              | R.DSLLQDGEFSM*DLR.T                                                     | 1642.76963 | 2 | 2.18E-06 | 0.96 | 4.30  | -     | 1417.9  |
| AHQ-4-13, 5333 - 5396       | R.DSLLQDGEFSMDLR.T                                                      | 1626.77023 | 2 | 1.38E-09 | 0.96 | 4.54  | -     | 1464.9  |
| AHQ-4-13, 4604 - 4672       | R.DSLLQDGEFSM*DLR.T                                                     | 1642.76963 | 2 | 1.17E-10 | 0.96 | 4.53  | -     | 1456.5  |
| AHQ-4-13, 4736 - 4812       | R.DSLLQDGEFSM*DLR.T                                                     | 1642.76963 | 2 | 1.27E-07 | 0.96 | 3.93  | -     | 1745.5  |
| AHQ-4-13, 4864              | R.DSLLQDGEFSM*DLR.T                                                     | 1642.76963 | 2 | 3.28E-10 | 0.97 | 4.78  | -     | 2057.5  |
| AHQ-4-13, 4878 - 4954       | R.DSLLQDGEFSM*DLR.T                                                     | 1642.76963 | 2 | 3.20E-04 | 0.93 | 4.02  | -     | 1179.5  |
| AHQ-4-13, 5104              | R.DSLLQDGEFSM*DLR.T                                                     | 1642.76963 | 2 | 5.66E-07 | 0.95 | 3.38  | -     | 1774.9  |
| AHQ-4-13-, 6953             | R.DSLLQDGEFSMDLR.T                                                      | 1626.77023 | 2 | 2.02E-04 | 0.87 | 2.63  | -     | 1619.4  |
| AHQ-4-13, 5252              | R.DSLLQDGEFSMDLR.T                                                      | 1626.77023 | 2 | 1.14E-04 | 0.95 | 4.11  | -     | 1479.6  |
| AHQ-4-13, 5297 - 5366       | R.DSLLQDGEFSM*DLR.T                                                     | 1642.76963 | 2 | 4.41E-04 | 0.86 | 3.09  | -     | 1116.4  |
| AHQ-4-13-, 3512 - 3641      | K.DSPSVWAAVPGK.T                                                        | 1214.35211 | 1 | 2.73E-04 | 0.21 | 2.42  | -     | 387.8   |
| AHQ-4-13-, 3640 - 3652      | K.DSPSVWAAVPGK.T                                                        | 1214.35211 | 2 | 1.61E-06 | 0.91 | 3.95  | -     | 860.0   |
| AHQ-4-12, 3545 - 3549       | K.DSPSVWAAVPGK.T                                                        | 1214.35211 | 2 | 1.31E-07 | 0.86 | 2.96  | -     | 1171.2  |
| AHQ-4-13, 3505              | K.DSPSVWAAVPGK.T                                                        | 1214.35211 | 1 | 1.98E-04 | 0.42 | 2.51  | -     | 505.4   |
| AHQ-4-13, 3669 - 3713       | K.DSPSVWAAVPGK.T                                                        | 1214.35211 | 2 | 5.35E-07 | 0.91 | 3.75  | -     | 947.6   |
| AHQ-4-13, 3764 - 3840       | K.DSPSVWAAVPGK.T                                                        | 1214.35211 | 2 | 5.44E-07 | 0.89 | 3.26  | -     | 1017.6  |
| AHQ-4-13, 3905 - 3972       | K.DSPSVWAAVPGK.T                                                        | 1214.35211 | 2 | 2.91E-05 | 0.87 | 3.13  | -     | 1004.0  |
| AHQ-4-13-, 3513 - 3588      | K.DSPSVWAAVPGK.T                                                        | 1214.35211 | 2 | 2.49E-05 | 0.90 | 3.84  | -     | 965.3   |
| AHQ-4-13-, 6498 - 6556      | K.DSPSVWAAVPGKTFVNIPTAEVGLVKG.D                                         | 2840.26581 | 3 | 4.46E-08 | 0.93 | 4.66  | -     | 1605.5  |
| AHQ-4-13-, 6700             | K.DSPSVWAAVPGKTFVNIPTAEVGLVKG.D                                         | 2840.26581 | 3 | 6.41E-05 | 0.89 | 4.05  | -     | 1352.7  |
| AHQ-4-13, 1851 - 1885       | K.EGVHGLINK.K                                                           | 1024.15577 | 1 | 4.01E-04 | 0.32 | 2.17  | -     | 215.3   |
| AHQ-4-14-, 4213 - 4214      | R.SSFYVNGLTGGQK.C                                                       | 1471.63957 | 1 | 1.13E-07 | 0.61 | 2.76  | -     | 376.2   |
| AHQ-4-14-, 4423 - 4542      | R.SSFYVNGLTGGQK.C                                                       | 1471.63957 | 1 | 7.25E-08 | 0.61 | 2.60  | -     | 417.9   |
| AHQ-4-13-, 4512 - 4549      | R.SSFYVNGLTGGQK.C                                                       | 1471.63957 | 2 | 1.87E-06 | 0.95 | 4.25  | -     | 1278.9  |
| AHQ-4-14, 5404 - 5432       | R.SSFYVNGLTGGQK.C                                                       | 1471.63957 | 2 | 3.11E-10 | 0.89 | 3.40  | -     | 698.0   |
| AHQ-4-14, 5545 - 5581       | R.SSFYVNGLTGGQK.C                                                       | 1471.63957 | 2 | 1.02E-04 | 0.92 | 3.98  | -     | 946.2   |
| AHQ-4-13, 4385 - 4712       | R.SSFYVNGLTGGQK.C                                                       | 1471.63957 | 1 | 9.89E-08 | 0.72 | 2.88  | -     | 567.6   |
| AHQ-4-13-, 4244 - 4304      | R.SSFYVNGLTGGQK.C                                                       | 1471.63957 | 2 | 4.40E-10 | 0.96 | 4.75  | -     | 1003.8  |
| AHQ-4-13-, 4248 - 4601      | R.SSFYVNGLTGGQK.C                                                       | 1471.63957 | 1 | 1.29E-09 | 0.65 | 2.75  | -     | 535.3   |
| AHQ-4-12, 4514 - 4526       | R.SSFYVNGLTGGQK.C                                                       | 1471.63957 | 2 | 7.61E-08 | 0.97 | 4.68  | -     | 1442.4  |
| AHQ-4-12, 4455 - 4529       | R.SSFYVNGLTGGQK.C                                                       | 1471.63957 | 1 | 5.13E-06 | 0.64 | 2.90  | -     | 427.4   |
| AHQ-4-12, 4285              | R.SSFYVNGLTGGQK.C                                                       | 1471.63957 | 1 | 2.26E-09 | 0.58 | 2.64  | -     | 417.8   |
| AHQ-4-12, 4283              | R.SSFYVNGLTGGQK.C                                                       | 1471.63957 | 2 | 1.43E-05 | 0.94 | 4.27  | -     | 785.8   |
| AHQ-4-14-, 4210 - 4219      | R.SSFYVNGLTGGQK.C                                                       | 1471.63957 | 2 | 2.00E-07 | 0.94 | 4.17  | -     | 847.7   |
| AHQ-4-13, 4468 - 4532       | R.SSFYVNGLTGGQK.C                                                       | 1471.63957 | 2 | 5.56E-09 | 0.94 | 4.14  | -     | 907.5   |
| AHQ-4-13, 4384 - 4444       | R.SSFYVNGLTGGQK.C                                                       | 1471.63957 | 2 | 1.48E-06 | 0.91 | 4.09  | -     | 624.6   |
| AHQ-4-13-, 4249 - 4592      | R.SSFYVNGLTGGQK.C                                                       | 1471.63957 | 1 | 7.19E-04 | 0.37 | 2.91  | -     | 265.1   |
| AHQ-4-13, 4600 - 4676       | R.SSFYVNGLTGGQK.C                                                       | 1471.63957 | 2 | 8.36E-07 | 0.96 | 5.05  | -     | 1084.0  |
| AHQ-4-13, 3447              | K.STGGAPTFNVVTK.T                                                       | 1380.52843 | 1 | 3.43E-07 | 0.34 | 2.34  | -     | 431.2   |
| AHQ-4-13-, 3065 - 3128      | K.STGGAPTFNVVTK.T                                                       | 1380.52843 | 2 | 4.88E-07 | 0.75 | 2.89  | -     | 431.7   |
| AHQ-4-13-, 3188 - 3254      | K.STGGAPTFNVVTK.T                                                       | 1380.52843 | 2 | 2.85E-07 | 0.75 | 3.00  | -     | 387.3   |
| AHQ-4-13-, 3002             | K.STGGAPTFNVVTK.T                                                       | 1380.52843 | 1 | 1.28E-07 | 0.57 | 2.35  | -     | 451.3   |
| AHQ-4-13-, 2948 - 3025      | K.STGGAPTFNVVTK.T                                                       | 1380.52843 | 2 | 1.79E-07 | 0.89 | 3.83  | -     | 546.8   |
| AHQ-4-12, 3035              | K.STGGAPTFNVVTK.T                                                       | 1380.52843 | 2 | 2.52E-04 | 0.81 | 3.22  | -     | 441.9   |
| AHQ-4-13, 3209 - 3337       | K.STGGAPTFNVVTK.T                                                       | 1380.52843 | 1 | 5.23E-06 | 0.70 | 2.97  | -     | 471.1   |
| AHQ-4-14-, 2993             | K.STGGAPTFNVVTK.T                                                       | 1380.52843 | 1 | 2.34E-06 | 0.79 | 3.67  | -     | 420.7   |
| AHQ-4-13, 3067 - 3130       | K.STGGAPTFNVVTK.T                                                       | 1380.52843 | 2 | 3.49E-04 | 0.84 | 3.31  | -     | 503.9   |
| AHQ-4-14-, 2989             | K.STGGAPTFNVVTK.T                                                       | 1380.52843 | 2 | 1.01E-08 | 0.82 | 3.17  | -     | 476.7   |
| AHQ-4-13, 3077 - 3474       | K.STGGAPTFNVVTK.T                                                       | 1380.52843 | 1 | 8.43E-04 | 0.13 | 2.01  | -     | 265.6   |
| AHQ-4-13, 3201 - 3271       | K.STGGAPTFNVVTK.T                                                       | 1380.52843 | 2 | 6.78E-07 | 0.86 | 3.23  | -     | 534.2   |
| AHQ-4-13-, 3034             | K.STGGAPTFNVVTKTDK.T                                                    | 1724.89354 | 2 | 2.67E-04 | 0.81 | 3.73  | -     | 426.6   |
| AHQ-4-13-, 2844             | K.STGGAPTFNVVTKTDK.T                                                    | 1724.89354 | 2 | 9.89E-06 | 0.60 | 2.71  | -     | 451.4   |
| AHQ-4-13, 2957              | K.STGGAPTFNVVTKTDK.T                                                    | 1724.89354 | 2 | 4.17E-04 | 0.88 | 3.70  | -     | 609.0   |
| AHQ-4-13-, 3542             | K.TDKTLVLLMGK.E                                                         | 1219.51989 | 3 | 6.23E-05 | 0.93 | 3.95  | -     | 1665.7  |
| AHQ-4-13-, 2868             | K.TDKTLVLLMGK.E                                                         | 1219.51989 | 2 | 6.25E-05 | 0.93 | 3.66  | -     | 1046.3  |
| AHQ-4-12, 3439              | K.TDKTLVLLMGK.E                                                         | 1219.51989 | 2 | 9.45E-06 | 0.93 | 3.48  | -     | 1240.1  |
| AHQ-4-13, 5944 - 6013       | K.TFVNITPAEVGLVKG.D                                                     | 1644.93630 | 2 | 1.48E-05 | 0.90 | 4.05  | -     | 754.9   |
| AHQ-4-13, 5836 - 5896       | K.TFVNITPAEVGLVKG.D                                                     | 1644.93630 | 2 | 6.82E-04 | 0.91 | 4.43  | -     | 602.7   |
| AHQ-4-13, 5834              | K.TFVNITPAEVGLVKG.D                                                     | 1644.93630 | 3 | 1.57E-09 | 0.98 | 5.82  | -     | 2528.8  |
| AHQ-4-12, 5971              | K.TFVNITPAEVGLVKG.D                                                     | 1644.93630 | 2 | 1.96E-05 | 0.89 | 3.15  | -     | 1125.3  |
| AHQ-4-12, 5881 - 5951       | K.TFVNITPAEVGLVKG.D                                                     | 1644.93630 | 2 | 2.23E-09 | 0.93 | 4.68  | -     | 780.1   |
| AHQ-4-12, 5777 - 5841       | K.TFVNITPAEVGLVKG.D                                                     | 1644.93630 | 2 | 1.90E-09 | 0.93 | 4.86  | -     | 698.3   |
| AHQ-4-13-, 6546             | K.TFVNITPAEVGLVKG.D                                                     | 1644.93630 | 2 | 1.01E-04 | 0.75 | 3.00  | -     | 646.5   |
| AHQ-4-13, 5918              | K.TFVNITPAEVGLVKG.D                                                     | 1644.93630 | 3 | 2.12E-10 | 0.98 | 5.58  | -     | 2583.1  |
| AHQ-4-13-, 5706 - 5781      | K.TFVNITPAEVGLVKG.D                                                     | 1644.93630 | 3 | 5.75E-09 | 0.97 | 5.89  | -     | 1317.5  |
| AHQ-4-13-, 5712 - 5768      | K.TFVNITPAEVGLVKG.D                                                     | 1644.93630 | 2 | 3.66E-06 | 0.92 | 4.23  | -     | 768.8   |
| AHQ-4-13-, 5808 - 5872      | K.TFVNITPAEVGLVKG.D                                                     | 1644.93630 | 2 | 1.21E-05 | 0.94 | 4.63  | -     | 990.6   |
| AHQ-4-13, 5566 - 5608       | K.TFVNITPAEVGLVKG.D                                                     | 1644.93630 | 2 | 6.33E-04 | 0.84 | 3.75  | -     | 510.1   |
| AHQ-4-13-, 5988             | K.TFVNITPAEVGLVKG.D                                                     | 1644.93630 | 2 | 1.08E-05 | 0.90 | 4.02  | -     | 781.0   |
| AHQ-4-6, 5866 - 5867        | K.TFVNITPAEVGLVKG.D                                                     | 1644.93630 | 2 | 2.59E-04 | 0.93 | 4.08  | -     | 1018.7  |
| AHQ-4-14-, 5765             | K.TFVNITPAEVGLVKG.D                                                     | 1644.93630 | 2 | 5.24E-06 | 0.86 | 3.87  | -     | 703.5   |
| AHQ-4-13-, 5373             | K.TFVNITPAEVGLVKGDR.S                                                   | 1916.21052 | 2 | 9.42E-09 | 0.88 | 4.03  | -     | 630.9   |
| AHQ-4-13, 5476 - 5492       | K.TFVNITPAEVGLVKGDR.S                                                   | 1916.21052 | 3 | 1.78E-07 | 0.77 | 3.53  | -     | 798.5   |
| AHQ-4-13, 5478              | K.TFVNITPAEVGLVKGDR.S                                                   | 1916.21052 | 2 | 7.92E-07 | 0.90 | 3.89  | -     | 789.3   |
| AHQ-4-13, 6284              | K.TFVNITPAEVGLVKGDR.S                                                   | 1916.21052 | 2 | 7.70E-04 | 0.60 | 3.10  | -     | 624.2   |
| AHQ-4-13-, 2769 - 2824      | R.TKSTGGAPTFNVVTK.T                                                     | 1609.80568 | 2 | 5.12E-05 | 0.93 | 3.96  | -     | 1006.3  |
| AHQ-4-12, 2669              | R.TKSTGGAPTFNVVTK.T                                                     | 1609.80568 | 2 | 7.00E-04 | 0.90 | 3.89  | -     | 766.3   |
| AHQ-4-13, 2867 - 2931       | R.TKSTGGAPTFNVVTK.T                                                     | 1609.80568 | 2 | 3.12E-04 | 0.90 | 3.85  | -     | 598.8   |
| AHQ-4-13-, 3732 - 3733      | K.TLVLLMGK.E                                                            | 875.15478  | 2 | 2.45E-05 | 0.84 | 3.08  | -     | 565.8   |
| AHQ-4-12, 2846              | K.TLVLLMGK.E                                                            | 891.15418  | 1 | 7.22E-04 | 0.07 | 1.83  | -     | 106.3   |
| AHQ-4-12, 2845              | K.TLVLLMGK.E                                                            | 891.15418  | 2 | 5.28E-04 | 0.79 | 2.55  | -     | 712.4   |
| AHQ-4-13-, 3605 - 3669      | K.TLVLLMGK.E                                                            | 875.15478  | 2 | 4.45E-05 | 0.83 | 3.28  | -     | 486.3   |
| AHQ-4-13, 3760 - 3826       | K.TLVLLMGK.E                                                            | 875.15478  | 2 | 2.48E-04 | 0.84 | 2.91  | -     | 521.0   |
| AHQ-4-13, 3758 - 3825       | K.TLVLLMGK.E                                                            | 875.15478  | 1 | 1.94E-04 | 0.24 | 2.46  | -     | 265.9   |
| gi 17986001 ref NP_005505.2 | major histocompatibility complex, class I, B; HLA class I histocompati  |            |   | 3.28E-11 | 0.95 | 10.23 | 3.90  | 40459.8 |
| AHQ-4-14-, 4803 - 4873      | R.APWIEQEGPEYVDR.N                                                      | 1776.88556 | 2 | 6.74E-11 | 0.95 | 4.49  | -     | 1194.9  |
| AHQ-4-8, 4445               | R.APWIEQEGPEYVDR.N                                                      | 1776.88556 | 2 | 3.28E-11 | 0.95 | 4.59  | -     | 1088.6  |
| gi 4504523 ref NP_002148.1  | heat shock 10kDa protein 1 (chaperonin 10); heat shock 10kD protein 1 ( |            |   | 3.69E-11 | 1.87 | 20.20 | 25.50 | 10931.6 |

|                             |                                                                         |            |   |          |      |      |       |         |
|-----------------------------|-------------------------------------------------------------------------|------------|---|----------|------|------|-------|---------|
| AHQ-4-14-, 2679             | K.VLQATVVAVGSGSK.G                                                      | 1316.52902 | 2 | 3.88E-07 | 0.96 | 3.93 | -     | 1782.1  |
| AHQ-4-14, 3705              | K.VLQATVVAVGSGSK.G                                                      | 1316.52902 | 2 | 7.55E-07 | 0.76 | 2.58 | -     | 933.2   |
| AHQ-4-14-, 4925             | K.VVLDKDYFLFR.D                                                         | 1530.74861 | 2 | 3.69E-11 | 0.91 | 3.27 | -     | 776.8   |
| AHQ-4-14, 6344 - 6348       | K.VVLDKDYFLFR.D                                                         | 1530.74861 | 2 | 2.54E-07 | 0.95 | 3.98 | -     | 1320.3  |
| gi 21956645 ref NP_065807.1 | myotrophin; granule cell differentiation protein [Homo sapiens]         |            |   |          |      |      | 49.20 | 12894.7 |
| AHQ-4-13-, 4358             | K.GADINAPDKHHITPLL SAVYEGHVSCVK.L                                       | 3031.39193 | 3 | 9.20E-05 | 0.98 | 6.17 | -     | 2012.0  |
| AHQ-4-14, 5004 - 5044       | K.GPDGLTAFEATDNQAIK.A                                                   | 1748.87196 | 2 | 7.17E-04 | 0.96 | 4.42 | -     | 1346.5  |
| AHQ-4-13-, 4132 - 4133      | K.GPDGLTAFEATDNQAIK.A                                                   | 1748.87196 | 2 | 3.23E-10 | 0.97 | 5.66 | -     | 1509.6  |
| AHQ-4-13-, 3996 - 4069      | K.GPDGLTAFEATDNQAIK.A                                                   | 1748.87196 | 2 | 1.94E-08 | 0.98 | 6.37 | -     | 1526.9  |
| AHQ-4-13, 4136 - 4213       | K.GPDGLTAFEATDNQAIK.A                                                   | 1748.87196 | 2 | 3.72E-11 | 0.98 | 6.48 | -     | 1994.3  |
| AHQ-4-13, 4252              | K.GPDGLTAFEATDNQAIK.A                                                   | 1748.87196 | 2 | 1.13E-07 | 0.95 | 4.79 | -     | 1105.2  |
| AHQ-4-14-, 3823 - 3869      | K.GPDGLTAFEATDNQAIK.A                                                   | 1748.87196 | 2 | 6.19E-05 | 0.98 | 5.47 | -     | 1882.0  |
| AHQ-4-14, 4944 - 5000       | K.GPDGLTAFEATDNQAIK.A                                                   | 1748.87196 | 2 | 3.05E-05 | 0.97 | 5.18 | -     | 1706.7  |
| AHQ-4-14, 4849 - 4925       | K.GPDGLTAFEATDNQAIK.A                                                   | 1748.87196 | 2 | 5.40E-04 | 0.95 | 4.90 | -     | 889.1   |
| AHQ-4-13, 4118 - 4122       | K.HHITPLL SAVYEGHVSCVK.L                                                | 2149.45825 | 3 | 1.71E-08 | 0.98 | 6.56 | -     | 2844.4  |
| AHQ-4-13-, 3984             | K.HHITPLL SAVYEGHVSCVK.L                                                | 2149.45825 | 3 | 3.68E-06 | 0.98 | 5.63 | -     | 2319.0  |
| AHQ-4-13, 4116              | K.HHITPLL SAVYEGHVSCVK.L                                                | 2149.45825 | 2 | 5.31E-05 | 0.96 | 5.32 | -     | 1213.7  |
| AHQ-4-13-, 3696 - 3717      | K.NGDLDEVKDYVAK.G                                                       | 1466.57496 | 2 | 1.13E-09 | 0.93 | 3.78 | -     | 1274.2  |
| AHQ-4-13-, 3597             | K.NGDLDEVKDYVAK.G                                                       | 1466.57496 | 2 | 2.21E-08 | 0.90 | 3.52 | -     | 996.8   |
| AHQ-4-14, 4501              | K.NGDLDEVKDYVAK.G                                                       | 1466.57496 | 2 | 3.45E-08 | 0.91 | 3.57 | -     | 1019.9  |
| AHQ-4-14, 4610              | K.NGDLDEVKDYVAK.G                                                       | 1466.57496 | 2 | 1.64E-07 | 0.93 | 3.73 | -     | 1204.6  |
| AHQ-4-13, 3868              | K.NGDLDEVKDYVAK.G                                                       | 1466.57496 | 1 | 5.81E-09 | 0.72 | 3.35 | -     | 435.9   |
| AHQ-4-14-, 3517             | K.NGDLDEVKDYVAK.G                                                       | 1466.57496 | 1 | 1.52E-04 | 0.44 | 2.01 | -     | 433.9   |
| AHQ-4-14-, 3518             | K.NGDLDEVKDYVAK.G                                                       | 1466.57496 | 2 | 4.99E-08 | 0.94 | 3.84 | -     | 1268.4  |
| AHQ-4-14-, 3614             | K.NGDLDEVKDYVAK.G                                                       | 1466.57496 | 2 | 1.04E-09 | 0.90 | 3.39 | -     | 829.4   |
| AHQ-4-13, 3856 - 3858       | K.NGDLDEVKDYVAK.G                                                       | 1466.57496 | 2 | 8.40E-09 | 0.96 | 4.53 | -     | 1629.0  |
| gi 4507357 ref NP_003555.1  | transgelin 2; SM22-alpha homolog [Homo sapiens]                         |            |   |          |      |      | 70.90 | 22391.3 |
| AHQ-4-13, 5921 - 5992       | R.DDGLFSGDPNWFPPK.K                                                     | 1595.69288 | 2 | 1.09E-04 | 0.94 | 4.07 | -     | 1218.1  |
| AHQ-4-12, 5805 - 5882       | R.DDGLFSGDPNWFPPK.K                                                     | 1595.69288 | 2 | 2.02E-08 | 0.97 | 4.70 | -     | 1538.5  |
| AHQ-4-12, 5937 - 6013       | R.DDGLFSGDPNWFPPK.K                                                     | 1595.69288 | 2 | 2.27E-07 | 0.96 | 4.81 | -     | 1309.0  |
| AHQ-4-12, 6077              | R.DDGLFSGDPNWFPPK.K                                                     | 1595.69288 | 2 | 1.02E-06 | 0.96 | 4.74 | -     | 1306.7  |
| AHQ-4-12, 6161 - 6167       | R.DDGLFSGDPNWFPPK.K                                                     | 1595.69288 | 2 | 1.23E-04 | 0.93 | 3.90 | -     | 1044.4  |
| AHQ-4-11, 5808 - 5868       | R.DDGLFSGDPNWFPPK.K                                                     | 1595.69288 | 2 | 3.65E-04 | 0.97 | 4.81 | -     | 1366.5  |
| AHQ-4-11, 5969              | R.DDGLFSGDPNWFPPK.K                                                     | 1595.69288 | 2 | 4.41E-04 | 0.88 | 3.22 | -     | 953.2   |
| AHQ-4-11, 5656 - 5724       | R.DDGLFSGDPNWFPPK.K                                                     | 1595.69288 | 2 | 6.88E-06 | 0.96 | 4.44 | -     | 1315.0  |
| AHQ-4-12, 5071              | R.DDGLFSGDPNWFPPK.S                                                     | 1723.86579 | 2 | 4.80E-04 | 0.69 | 2.92 | -     | 612.5   |
| AHQ-4-12, 6310              | K.DGTVLCEINALYPEGQAPVK.K                                                | 2289.59066 | 2 | 2.93E-06 | 0.83 | 3.82 | -     | 490.2   |
| AHQ-4-11, 6845 - 6852       | K.DGTVLCEINALYPEGQAPVK.K                                                | 2289.59066 | 3 | 5.20E-06 | 0.63 | 3.57 | -     | 594.6   |
| AHQ-4-14-, 6113 - 6174      | K.DGTVLCEINALYPEGQAPVK.K                                                | 2289.59066 | 2 | 5.24E-06 | 0.83 | 3.99 | -     | 312.5   |
| AHQ-4-13, 6562              | K.DGTVLCEINALYPEGQAPVK.K                                                | 2289.59066 | 2 | 3.24E-04 | 0.53 | 3.00 | -     | 405.0   |
| AHQ-4-13-, 6217             | K.DGTVLCEINALYPEGQAPVK.K                                                | 2289.59066 | 2 | 3.05E-04 | 0.93 | 4.36 | -     | 830.5   |
| AHQ-4-11, 6324              | K.DGTVLCEINALYPEGQAPVK.K                                                | 2289.59066 | 2 | 8.77E-09 | 0.93 | 4.09 | -     | 983.3   |
| AHQ-4-13, 6961              | K.DGTVLCEINALYPEGQAPVK.K                                                | 2417.76357 | 2 | 3.55E-04 | 0.62 | 3.23 | -     | 584.1   |
| AHQ-4-11, 6769              | K.DGTVLCEINALYPEGQAPVK.K                                                | 2417.76357 | 2 | 1.16E-04 | 0.32 | 2.63 | -     | 368.1   |
| AHQ-4-11, 6772              | K.DGTVLCEINALYPEGQAPVK.K                                                | 2417.76357 | 3 | 7.12E-08 | 0.88 | 4.28 | -     | 1716.0  |
| AHQ-4-13, 6956              | K.DGTVLCEINALYPEGQAPVK.K                                                | 2417.76357 | 3 | 7.90E-10 | 0.93 | 4.95 | -     | 839.3   |
| AHQ-4-13-, 6834 - 6840      | K.DGTVLCEINALYPEGQAPVK.K                                                | 2417.76357 | 3 | 2.03E-08 | 0.91 | 4.55 | -     | 825.1   |
| AHQ-4-13-, 6838             | K.DGTVLCEINALYPEGQAPVK.K                                                | 2417.76357 | 2 | 5.73E-07 | 0.80 | 4.03 | -     | 593.6   |
| AHQ-4-11, 5798 - 5800       | K.DGTVLCEINALYPEGQAPVK.K                                                | 2417.76357 | 2 | 1.07E-05 | 0.81 | 3.60 | -     | 535.9   |
| AHQ-4-12, 7010 - 7017       | K.DGTVLCEINALYPEGQAPVK.K                                                | 2417.76357 | 3 | 1.86E-09 | 0.90 | 4.76 | -     | 962.3   |
| AHQ-4-14-, 6729             | K.DGTVLCEINALYPEGQAPVK.K                                                | 2417.76357 | 3 | 7.26E-08 | 0.84 | 4.07 | -     | 744.3   |
| AHQ-4-12, 5762              | K.DGTVLCEINALYPEGQAPVK.K                                                | 2417.76357 | 3 | 1.47E-09 | 0.87 | 3.99 | -     | 895.7   |
| AHQ-4-14-, 6731 - 6734      | K.DGTVLCEINALYPEGQAPVK.K                                                | 2417.76357 | 2 | 1.97E-07 | 0.90 | 4.72 | -     | 670.5   |
| AHQ-4-12, 5761              | K.DGTVLCEINALYPEGQAPVK.K                                                | 2417.76357 | 2 | 8.26E-08 | 0.74 | 3.53 | -     | 387.9   |
| AHQ-4-11, 2597 - 2598       | R.GASQAGMTGYGMPR.Q                                                      | 1384.56732 | 2 | 9.25E-06 | 0.79 | 2.97 | -     | 758.1   |
| AHQ-4-12, 1902 - 1961       | R.GPAYGLSR.E                                                            | 820.91599  | 2 | 4.01E-04 | 0.86 | 2.83 | -     | 930.8   |
| AHQ-4-11, 2410              | K.IQASTMAFQ.Q                                                           | 997.19374  | 1 | 8.80E-05 | 0.72 | 2.74 | -     | 601.3   |
| AHQ-4-11, 2370              | R.NFSDNQLQEGK.N                                                         | 1280.32582 | 2 | 3.89E-06 | 0.92 | 3.07 | -     | 1490.7  |
| AHQ-4-13-, 2277             | R.NFSDNQLQEGK.N                                                         | 1280.32582 | 1 | 9.97E-05 | 0.57 | 2.82 | -     | 334.1   |
| AHQ-4-12, 2577              | R.NFSDNQLQEGK.N                                                         | 1280.32582 | 2 | 1.28E-04 | 0.93 | 3.52 | -     | 1256.5  |
| AHQ-4-12, 2414              | R.NFSDNQLQEGK.N                                                         | 1280.32582 | 2 | 8.31E-06 | 0.94 | 3.63 | -     | 1341.1  |
| AHQ-4-12, 2313              | R.NFSDNQLQEGK.N                                                         | 1280.32582 | 1 | 1.32E-06 | 0.25 | 2.32 | -     | 214.6   |
| AHQ-4-12, 2113 - 2193       | R.NFSDNQLQEGK.N                                                         | 1280.32582 | 1 | 1.30E-04 | 0.06 | 1.99 | -     | 192.4   |
| AHQ-4-11, 2236 - 2250       | K.NVIGLQM*GTNR.G                                                        | 1219.39691 | 2 | 1.83E-04 | 0.94 | 3.41 | -     | 1097.2  |
| AHQ-4-13-, 5414             | K.QMEQISQFLQAAER.Y                                                      | 1679.87950 | 2 | 2.70E-09 | 0.95 | 4.56 | -     | 1164.1  |
| AHQ-4-12, 5451 - 5461       | K.QMEQISQFLQAAER.Y                                                      | 1679.87950 | 2 | 6.52E-07 | 0.94 | 4.42 | -     | 1049.1  |
| AHQ-4-13, 5549              | K.QMEQISQFLQAAER.Y                                                      | 1679.87950 | 2 | 4.27E-05 | 0.93 | 3.97 | -     | 1124.0  |
| AHQ-4-12, 4697              | K.QM*EQISQFLQAAER.Y                                                     | 1695.87890 | 2 | 2.77E-05 | 0.83 | 3.47 | -     | 662.2   |
| AHQ-4-11, 5210 - 5218       | K.QMEQISQFLQAAER.Y                                                      | 1679.87950 | 2 | 1.35E-04 | 0.96 | 4.66 | -     | 1287.8  |
| AHQ-4-13-, 6008             | K.QMEQISQFLQAAER.Y                                                      | 1679.87950 | 2 | 6.98E-07 | 0.87 | 2.98 | -     | 1538.7  |
| AHQ-4-11, 3440 - 3456       | R.TLM*NLGGLAVAR.D                                                       | 1232.47872 | 2 | 3.74E-04 | 0.92 | 4.04 | -     | 884.8   |
| AHQ-4-12, 4790              | R.TLMNLGGLAVAR.D                                                        | 1216.47932 | 2 | 8.18E-07 | 0.93 | 3.89 | -     | 1252.7  |
| AHQ-4-12, 4413 - 4437       | R.TLMNLGGLAVAR.D                                                        | 1216.47932 | 2 | 1.08E-06 | 0.94 | 4.33 | -     | 1296.9  |
| AHQ-4-13, 4570              | R.TLMNLGGLAVAR.D                                                        | 1216.47932 | 2 | 1.14E-04 | 0.87 | 3.78 | -     | 846.3   |
| AHQ-4-12, 3993              | R.TLM*NLGGLAVAR.D                                                       | 1232.47872 | 2 | 2.20E-06 | 0.86 | 3.24 | -     | 817.6   |
| AHQ-4-11, 4280 - 4344       | R.TLMNLGGLAVAR.D                                                        | 1216.47932 | 2 | 7.87E-04 | 0.87 | 3.74 | -     | 960.0   |
| AHQ-4-12, 3525 - 3593       | R.TLM*NLGGLAVAR.D                                                       | 1232.47872 | 2 | 4.35E-06 | 0.94 | 4.40 | -     | 937.8   |
| AHQ-4-11, 3873              | R.TLM*NLGGLAVAR.D                                                       | 1232.47872 | 2 | 9.50E-05 | 0.91 | 3.23 | -     | 1128.6  |
| AHQ-4-13, 6869              | R.YGINTTDFQTVDLWEGK.N                                                   | 2101.30080 | 2 | 4.24E-11 | 0.96 | 5.33 | -     | 983.6   |
| AHQ-4-11, 6217 - 6253       | R.YGINTTDFQTVDLWEGK.N                                                   | 2101.30080 | 2 | 3.21E-06 | 0.91 | 4.25 | -     | 926.8   |
| AHQ-4-11, 6317              | R.YGINTTDFQTVDLWEGK.N                                                   | 2101.30080 | 2 | 3.07E-08 | 0.90 | 4.29 | -     | 589.7   |
| AHQ-4-11, 6602 - 6681       | R.YGINTTDFQTVDLWEGK.N                                                   | 2101.30080 | 2 | 1.63E-08 | 0.97 | 5.52 | -     | 1513.7  |
| AHQ-4-12, 6961 - 7034       | R.YGINTTDFQTVDLWEGK.N                                                   | 2101.30080 | 2 | 6.75E-11 | 0.98 | 6.07 | -     | 1427.0  |
| AHQ-4-11, 6682              | R.YGINTTDFQTVDLWEGK.N                                                   | 2101.30080 | 3 | 1.50E-06 | 0.83 | 3.59 | -     | 670.5   |
| AHQ-4-12, 6829 - 6893       | R.YGINTTDFQTVDLWEGK.N                                                   | 2101.30080 | 2 | 7.01E-08 | 0.94 | 4.78 | -     | 850.8   |
| AHQ-4-13-, 6756 - 6757      | R.YGINTTDFQTVDLWEGK.N                                                   | 2101.30080 | 2 | 1.95E-09 | 0.97 | 5.32 | -     | 1033.0  |
| AHQ-4-12, 6726 - 6770       | R.YGINTTDFQTVDLWEGK.N                                                   | 2101.30080 | 2 | 4.51E-09 | 0.96 | 5.12 | -     | 988.8   |
| AHQ-4-14-, 6594 - 6657      | R.YGINTTDFQTVDLWEGK.N                                                   | 2101.30080 | 2 | 3.35E-08 | 0.96 | 5.14 | -     | 1139.0  |
| AHQ-4-12, 6467 - 6539       | R.YGINTTDFQTVDLWEGK.N                                                   | 2101.30080 | 2 | 8.55E-08 | 0.94 | 4.24 | -     | 1131.2  |
| AHQ-4-12, 7113 - 7175       | R.YGINTTDFQTVDLWEGK.N                                                   | 2101.30080 | 2 | 2.85E-10 | 0.96 | 4.63 | -     | 1019.5  |
| AHQ-4-12, 6898              | R.YGINTTDFQTVDLWEGKNMACVQR.T                                            | 2962.30673 | 3 | 1.07E-10 | 0.94 | 4.89 | -     | 1241.7  |
| AHQ-4-12, 6693              | R.YGINTTDFQTVDLWEGKNMACVQR.T                                            | 2978.30613 | 3 | 7.11E-05 | 0.89 | 4.40 | -     | 622.0   |
| gi 4507677 ref NP_003290.1  | tumor rejection antigen (gp96) 1; Tumor rejection antigen-1 (gp96); glu |            |   |          |      |      | 15.30 | 92468.2 |
| AHQ-4-5, 6389               | R.EAVEKEFEPFLNWMK.D                                                     | 1864.15434 | 2 | 5.20E-06 | 0.89 | 3.97 | -     | 633.2   |
| AHQ-4-5, 3695               | R.FQSSHPTDITSLDQYVVER.M                                                 | 2261.39276 | 2 | 1.04E-04 | 0.94 | 4.54 | -     | 1041.9  |
| AHQ-4-1, 4163               | R.FQSSHPTDITSLDQYVVER.M                                                 | 2261.39276 | 2 | 3.38E-04 | 0.73 | 3.12 | -     | 578.9   |
| AHQ-4-5, 3974               | K.GVVDSDLLPLNVS.R.E                                                     | 1486.60940 | 1 | 2.21E-05 | 0.15 | 2.01 | -     | 280.6   |
| AHQ-4-5, 3970               | K.GVVDSDLLPLNVS.R.E                                                     | 1486.60940 | 2 | 7.31E-05 | 0.61 | 2.82 | -     | 639.2   |
| AHQ-4-5, 6905 - 6907        | K.GYEVIVLTPEDVEYCIQALPEFDGKR.F                                          | 3107.43557 | 3 | 4.45E-05 | 0.86 | 4.02 | -     | 690.3   |
| AHQ-4-5, 3458               | K.IADDKYNDFWYK.E                                                        | 1516.63566 | 2 | 4.33E-11 | 0.93 | 3.69 | -     | 1178.2  |
| AHQ-4-5, 6263               | K.KYSQFINPIYWSSK.T                                                      | 2008.30657 | 2 | 6.03E-09 | 0.96 | 4.71 | -     | 1554.1  |
| AHQ-4-5, 3301               | R.LSLNIDPPAK.V                                                          | 1086.22065 | 1 | 1.94E-05 | 0.59 | 2.39 | -     | 818.1   |
| AHQ-4-5, 3878               | K.SILFVPTSAPR.G                                                         | 1188.40094 | 2 | 2.53E-04 | 0.87 | 2.95 | -     | 1111.5  |
| AHQ-4-6, 6750 - 6812        | K.YSQFINPIYWSSK.T                                                       | 1880.13366 | 2 | 1.03E-04 | 0.86 | 3.58 | -     | 679.4   |
| AHQ-4-5, 6922 - 6927        | K.YSQFINPIYWSSK.T                                                       | 1880.13366 | 2 | 2.91E-08 | 0.98 | 6.22 | -     | 1631.1  |
| gi 4758638 ref NP_004896.1  | peroxiredoxin 6; antioxidant protein 2; non-selenium glutathione perox  |            |   |          |      |      | 43.80 | 25034.8 |
| AHQ-4-10, 4149              | K.DGDSVM*VLPTIFEEAAK.K                                                  | 1847.03409 | 2 | 3.72E-05 | 0.49 | 2.57 | -     | 361.7   |



|                             |                                                                          |            |   |          |       |        |       |         |
|-----------------------------|--------------------------------------------------------------------------|------------|---|----------|-------|--------|-------|---------|
| AHQ-4-10, 4689 - 4725       | R.ELAILLGM*LDPAEKDEK.G                                                   | 1902.19916 | 2 | 6.30E-04 | 0.96  | 5.08   | -     | 1107.3  |
| AHQ-4-10, 5651              | R.ELAILLGM*LDPAEKDEK.G                                                   | 1886.19976 | 2 | 6.35E-05 | 0.95  | 4.68   | -     | 1055.5  |
| AHQ-4-10, 5839 - 5840       | R.FHDFLGDSWGILF*SHPR.D                                                   | 2032.24831 | 3 | 6.97E-09 | 0.96  | 4.87   | -     | 1365.7  |
| AHQ-4-10, 5835 - 5865       | R.FHDFLGDSWGILF*SHPR.D                                                   | 2032.24831 | 2 | 4.84E-11 | 0.99  | 6.64   | -     | 2910.1  |
| AHQ-4-14-, 6290             | R.FHDFLGDSWGILF*SHPR.D                                                   | 2032.24831 | 3 | 3.67E-07 | 0.94  | 4.76   | -     | 1017.5  |
| AHQ-4-10, 5724              | R.FHDFLGDSWGILF*SHPR.D                                                   | 2032.24831 | 2 | 3.97E-06 | 0.96  | 4.56   | -     | 1329.9  |
| AHQ-4-14-, 5854             | K.LIALSIDSVEDHLAWSK.D                                                    | 1898.14883 | 3 | 2.71E-06 | 0.60  | 3.16   | -     | 332.6   |
| AHQ-4-10, 5441 - 5512       | K.LIALSIDSVEDHLAWSK.D                                                    | 1898.14883 | 2 | 1.19E-10 | 0.97  | 5.09   | -     | 1580.2  |
| AHQ-4-14-, 5853             | K.LIALSIDSVEDHLAWSK.D                                                    | 1898.14883 | 2 | 4.56E-08 | 0.98  | 5.96   | -     | 1943.2  |
| AHQ-4-10, 4112 - 4113       | K.LPFFPIIDDR.N                                                           | 1086.26548 | 2 | 4.06E-06 | 0.91  | 3.88   | -     | 724.3   |
| AHQ-4-10, 4120              | K.LPFFPIIDDR.N                                                           | 1086.26548 | 1 | 7.56E-07 | 0.32  | 2.20   | -     | 227.4   |
| AHQ-4-10, 3263              | K.LSILYPATTGR.N                                                          | 1192.38959 | 2 | 5.92E-06 | 0.77  | 2.94   | -     | 625.4   |
| AHQ-4-10, 3489              | R.VVVFVFGPDK.L                                                           | 1008.19471 | 1 | 3.63E-04 | 0.62  | 1.95   | -     | 1023.1  |
| AHQ-4-10, 2777              | R.VVVFVFGPDK.L                                                           | 1136.36763 | 2 | 1.48E-04 | 0.85  | 2.97   | -     | 956.4   |
| gi 20270343 ref NP_020150.1 | hypothetical protein BC015408 [Homo sapiens]                             |            |   | 5.05E-11 | 3.49  | 40.28  | 29.00 | 21415.8 |
| AHQ-4-11, 3884 - 3896       | R.DLPGALDEKELIEK.M                                                       | 1570.76622 | 2 | 6.00E-04 | 0.69  | 3.17   | -     | 312.4   |
| AHQ-4-11, 5262              | R.GVSAIVYMVAADQEK.I                                                      | 1696.90360 | 2 | 8.72E-08 | 0.86  | 3.75   | -     | 725.8   |
| AHQ-4-11, 5833              | K.NELHNLDDKPOLQGIPVLLGNK.R                                               | 2553.98492 | 2 | 3.53E-07 | 0.96  | 5.27   | -     | 1216.9  |
| AHQ-4-11, 5474              | K.NELHNLDDKPOLQGIPVLLGNK.R                                               | 2710.17128 | 3 | 5.05E-11 | 0.98  | 5.66   | -     | 2088.2  |
| gi 4505257 ref NP_002435.1  | moesin [Homo sapiens]                                                    |            |   | 5.19E-11 | 10.94 | 120.29 | 25.60 | 67819.5 |
| AHQ-4-6, 2303               | K.ALTSSELANAR.D                                                          | 1046.15975 | 2 | 4.71E-04 | 0.87  | 3.06   | -     | 817.0   |
| AHQ-4-6, 2095 - 2171        | K.AQMVQEDLEK.T                                                           | 1191.33713 | 2 | 2.84E-04 | 0.79  | 3.21   | -     | 422.9   |
| AHQ-4-6, 7182               | K.EGILNDDIYCPPEAVLLASAYVQSK.Y                                            | 2869.19288 | 3 | 2.77E-07 | 0.92  | 5.24   | -     | 782.0   |
| AHQ-4-6, 6187               | R.EVWFFGLQYQDTK.G                                                        | 1661.83760 | 2 | 2.05E-08 | 0.97  | 3.78   | -     | 1885.4  |
| AHQ-4-11, 6693              | K.FYPEDVSEELIQDITQR.L                                                    | 2083.24065 | 2 | 1.13E-07 | 0.92  | 3.92   | -     | 897.9   |
| AHQ-4-6, 7110               | K.FYPEDVSEELIQDITQR.L                                                    | 2083.24065 | 3 | 9.07E-06 | 0.96  | 4.80   | -     | 1756.1  |
| AHQ-4-6, 7102 - 7103        | K.FYPEDVSEELIQDITQR.L                                                    | 2083.24065 | 2 | 3.89E-10 | 0.96  | 5.31   | -     | 1023.9  |
| AHQ-4-13, 6861              | K.FYPEDVSEELIQDITQR.L                                                    | 2083.24065 | 2 | 5.26E-06 | 0.95  | 4.33   | -     | 1138.8  |
| AHQ-4-10, 6388              | K.FYPEDVSEELIQDITQR.L                                                    | 2083.24065 | 2 | 6.59E-04 | 0.60  | 3.36   | -     | 461.1   |
| AHQ-4-6, 6148               | K.IAQDLEMYGVNYSIK.N                                                      | 1892.16455 | 2 | 2.61E-04 | 0.76  | 2.65   | -     | 684.4   |
| AHQ-4-6, 1634               | R.IQVWHEEHR.G                                                            | 1234.34835 | 2 | 2.84E-05 | 0.92  | 3.05   | -     | 1359.4  |
| AHQ-4-6, 4490               | K.KTQEQLALEM*ELTAR.I                                                     | 1833.10018 | 2 | 2.78E-09 | 0.97  | 4.66   | -     | 1759.9  |
| AHQ-4-6, 3434               | K.TAMSTPHVAEPAENEQDEQDENGAEASADLR.A                                      | 3314.36856 | 3 | 1.07E-09 | 0.95  | 5.44   | -     | 1367.4  |
| AHQ-4-6, 3298 - 3366        | K.TAMSTPHVAEPAENEQDEQDENGAEASADLR.A                                      | 3314.36856 | 3 | 1.12E-07 | 0.94  | 4.60   | -     | 1528.0  |
| AHQ-4-6, 3079               | K.TAM*STPHVAEPAENEQDEQDENGAEASADLR.A                                     | 3330.36796 | 3 | 5.19E-11 | 0.89  | 4.20   | -     | 1031.9  |
| AHQ-4-6, 5183               | K.TQEQLALEM*ELTAR.I                                                      | 1704.92727 | 2 | 2.63E-08 | 0.98  | 5.85   | -     | 1924.1  |
| AHQ-4-6, 3796               | K.TQEQLALEM*ELTAR.I                                                      | 1720.92667 | 2 | 3.73E-05 | 0.96  | 4.73   | -     | 1428.9  |
| gi 4504515 ref NP_002146.1  | heat shock 70kDa protein 6 (HSP70B); heat shock 70kDa protein 6 (HSP70B) |            |   | 5.23E-11 | 3.27  | 50.25  | 8.20  | 70853.4 |
| AHQ-4-6, 4755               | R.IINEPTAAAIAYGLDR.R                                                     | 1688.90603 | 3 | 2.30E-05 | 0.92  | 3.81   | -     | 1670.4  |
| AHQ-4-6, 4743 - 4744        | R.IINEPTAAAIAYGLDR.R                                                     | 1688.90603 | 2 | 5.23E-11 | 0.97  | 5.00   | -     | 1445.5  |
| AHQ-4-7, 4687               | R.IINEPTAAAIAYGLDR.R                                                     | 1688.90603 | 2 | 1.58E-05 | 0.92  | 3.77   | -     | 945.6   |
| AHQ-4-6, 4248 - 4319        | K.LLQDFFNK.E                                                             | 1082.23369 | 1 | 5.59E-04 | 0.18  | 2.07   | -     | 226.0   |
| AHQ-4-6, 4191 - 4202        | K.LLQDFFNKELNK.S                                                         | 1566.78249 | 2 | 3.92E-04 | 0.92  | 4.03   | -     | 1138.3  |
| AHQ-4-6, 3199               | R.TTTPSYVAFDTER.L                                                        | 1488.58062 | 1 | 2.06E-04 | 0.12  | 2.30   | -     | 118.2   |
| AHQ-4-12, 3366              | R.TTTPSYVAFDTER.L                                                        | 1488.58062 | 2 | 1.95E-05 | 0.73  | 2.59   | -     | 563.3   |
| AHQ-4-6, 1866               | R.VEILANDQGNR.T                                                          | 1229.32518 | 1 | 3.72E-04 | 0.47  | 2.43   | -     | 261.0   |
| gi 4505733 ref NP_002610.1  | platelet factor 4 (chemokine (C-X-C motif) ligand 4); platelet factor 4  |            |   | 5.24E-11 | 5.56  | 60.27  | 38.60 | 10844.9 |
| AHQ-4-14, 5384 - 5454       | K.AGPHCPTAQIATLTK.N                                                      | 1579.84600 | 2 | 6.01E-09 | 0.92  | 4.20   | -     | 772.9   |
| AHQ-4-12, 4002 - 4079       | K.AGPHCPTAQIATLTK.N                                                      | 1579.84600 | 2 | 2.64E-04 | 0.88  | 3.59   | -     | 703.7   |
| AHQ-4-14-, 3897 - 3919      | K.AGPHCPTAQIATLTK.N                                                      | 1579.84600 | 2 | 1.20E-07 | 0.95  | 4.08   | -     | 1204.4  |
| AHQ-4-14-, 3905 - 3915      | K.AGPHCPTAQIATLTK.N                                                      | 1579.84600 | 3 | 3.48E-04 | 0.91  | 4.24   | -     | 1223.0  |
| AHQ-4-14-, 4162 - 4226      | K.AGPHCPTAQIATLTK.N                                                      | 1579.84600 | 2 | 3.59E-04 | 0.72  | 3.11   | -     | 476.2   |
| AHQ-4-14-, 4055 - 4130      | K.AGPHCPTAQIATLTK.N                                                      | 1579.84600 | 3 | 7.39E-05 | 0.83  | 3.87   | -     | 990.6   |
| AHQ-4-14-, 4010 - 4090      | K.AGPHCPTAQIATLTK.N                                                      | 1579.84600 | 2 | 6.92E-07 | 0.92  | 3.71   | -     | 949.0   |
| AHQ-4-13-, 4136 - 4157      | K.AGPHCPTAQIATLTK.N                                                      | 1579.84600 | 3 | 3.85E-04 | 0.81  | 3.98   | -     | 815.4   |
| AHQ-4-13-, 4116 - 4140      | K.AGPHCPTAQIATLTK.N                                                      | 1579.84600 | 2 | 1.07E-04 | 0.92  | 3.68   | -     | 895.8   |
| AHQ-4-14, 5481              | K.AGPHCPTAQIATLTK.N                                                      | 1579.84600 | 3 | 5.95E-04 | 0.87  | 3.67   | -     | 1019.7  |
| AHQ-4-14, 5288 - 5338       | K.AGPHCPTAQIATLTK.N                                                      | 1579.84600 | 3 | 1.75E-05 | 0.61  | 3.46   | -     | 617.9   |
| AHQ-4-14, 5249 - 5325       | K.AGPHCPTAQIATLTK.N                                                      | 1579.84600 | 2 | 6.28E-04 | 0.93  | 4.07   | -     | 779.9   |
| AHQ-4-14, 5122 - 5186       | K.AGPHCPTAQIATLTK.N                                                      | 1579.84600 | 2 | 1.08E-06 | 0.90  | 3.56   | -     | 690.2   |
| AHQ-4-14, 5765              | K.AGPHCPTAQIATLTK.N                                                      | 1579.84600 | 2 | 1.21E-05 | 0.87  | 3.73   | -     | 600.9   |
| AHQ-4-14, 4929              | K.AGPHCPTAQIATLTKNGR.K                                                   | 1907.18700 | 3 | 5.13E-08 | 0.97  | 4.91   | -     | 2126.3  |
| AHQ-4-14, 4948              | K.AGPHCPTAQIATLTKNGR.K                                                   | 1907.18700 | 2 | 1.34E-08 | 0.96  | 4.57   | -     | 1180.8  |
| AHQ-4-14, 5090              | K.AGPHCPTAQIATLTKNGR.K                                                   | 1907.18700 | 2 | 1.26E-10 | 0.95  | 4.32   | -     | 1069.9  |
| AHQ-4-14, 4812 - 4821       | K.AGPHCPTAQIATLTKNGR.K                                                   | 1907.18700 | 3 | 6.04E-10 | 0.97  | 5.41   | -     | 1796.8  |
| AHQ-4-14, 5214              | K.AGPHCPTAQIATLTKNGR.K                                                   | 1907.18700 | 2 | 3.25E-07 | 0.91  | 3.71   | -     | 971.3   |
| AHQ-4-14-, 3829 - 3854      | K.AGPHCPTAQIATLTKNGR.K                                                   | 1907.18700 | 3 | 1.55E-09 | 0.97  | 5.28   | -     | 1991.0  |
| AHQ-4-13-, 4036             | K.AGPHCPTAQIATLTKNGR.K                                                   | 1907.18700 | 3 | 5.24E-11 | 0.96  | 4.24   | -     | 2053.0  |
| AHQ-4-14-, 3847             | K.AGPHCPTAQIATLTKNGR.K                                                   | 1907.18700 | 2 | 9.20E-08 | 0.95  | 5.09   | -     | 876.0   |
| AHQ-4-13-, 4054             | K.AGPHCPTAQIATLTKNGR.K                                                   | 1907.18700 | 2 | 8.48E-07 | 0.94  | 3.94   | -     | 1166.3  |
| AHQ-4-13, 4160              | K.AGPHCPTAQIATLTKNGR.K                                                   | 1907.18700 | 3 | 5.51E-06 | 0.97  | 4.81   | -     | 2519.1  |
| AHQ-4-14-, 3741             | K.AGPHCPTAQIATLTKNGR.K                                                   | 1907.18700 | 3 | 4.16E-08 | 0.96  | 5.08   | -     | 1806.7  |
| AHQ-4-14, 4816              | K.AGPHCPTAQIATLTKNGR.K                                                   | 1907.18700 | 2 | 9.73E-05 | 0.94  | 4.49   | -     | 948.2   |
| AHQ-4-13-, 3904             | K.AGPHCPTAQIATLTKNGR.K                                                   | 1907.18700 | 3 | 2.56E-06 | 0.96  | 4.54   | -     | 2091.7  |
| AHQ-4-14, 4529 - 4532       | K.AGPHCPTAQIATLTKNGR.K                                                   | 2035.35992 | 3 | 7.43E-10 | 0.95  | 4.77   | -     | 1433.7  |
| AHQ-4-14-, 3599             | K.AGPHCPTAQIATLTKNGR.K                                                   | 2035.35992 | 3 | 6.76E-08 | 0.87  | 3.77   | -     | 733.0   |
| AHQ-4-14-, 2482 - 2541      | R.HITSLEVIK.A                                                            | 1040.23825 | 2 | 1.16E-05 | 0.90  | 3.23   | -     | 644.4   |
| AHQ-4-13-, 2569 - 2632      | R.HITSLEVIK.A                                                            | 1040.23825 | 2 | 2.15E-06 | 0.90  | 3.43   | -     | 671.6   |
| AHQ-4-14-, 2357 - 2421      | R.HITSLEVIK.A                                                            | 1040.23825 | 2 | 2.18E-08 | 0.92  | 3.90   | -     | 607.1   |
| AHQ-4-14, 3557 - 3620       | R.HITSLEVIK.A                                                            | 1040.23825 | 2 | 1.45E-06 | 0.87  | 3.07   | -     | 546.1   |
| AHQ-4-14, 3436 - 3496       | R.HITSLEVIK.A                                                            | 1040.23825 | 2 | 5.37E-06 | 0.81  | 3.04   | -     | 488.7   |
| AHQ-4-14, 3333 - 3400       | R.HITSLEVIK.A                                                            | 1040.23825 | 2 | 2.85E-04 | 0.79  | 3.06   | -     | 528.8   |
| AHQ-4-13, 2698 - 2725       | R.HITSLEVIK.A                                                            | 1040.23825 | 2 | 4.81E-05 | 0.86  | 2.96   | -     | 590.3   |
| AHQ-4-14-, 2358             | R.HITSLEVIK.A                                                            | 1040.23825 | 1 | 9.12E-05 | 0.36  | 2.20   | -     | 389.0   |
| AHQ-4-14-, 4845 - 4909      | K.ICLDLQAPLYK.K                                                          | 1335.59400 | 2 | 2.91E-07 | 0.98  | 4.54   | -     | 2458.6  |
| AHQ-4-13-, 4909             | K.ICLDLQAPLYK.K                                                          | 1335.59400 | 2 | 1.37E-04 | 0.96  | 4.17   | -     | 1721.8  |
| AHQ-4-13, 5037              | K.ICLDLQAPLYK.K                                                          | 1335.59400 | 2 | 2.58E-05 | 0.95  | 4.03   | -     | 1549.6  |
| AHQ-4-14, 6382              | K.ICLDLQAPLYK.K                                                          | 1335.59400 | 2 | 1.41E-04 | 0.95  | 4.10   | -     | 1146.1  |
| AHQ-4-14, 6165 - 6228       | K.ICLDLQAPLYK.K                                                          | 1335.59400 | 2 | 3.97E-06 | 0.97  | 4.23   | -     | 2281.7  |
| AHQ-4-13-, 4404 - 4405      | R.KICLDLQAPLYK.K                                                         | 1463.76691 | 2 | 4.50E-08 | 0.97  | 5.02   | -     | 1606.2  |
| AHQ-4-14, 6037              | R.KICLDLQAPLYK.K                                                         | 1463.76691 | 2 | 1.59E-07 | 0.95  | 4.29   | -     | 1076.0  |
| AHQ-4-14, 5790 - 5864       | R.KICLDLQAPLYK.K                                                         | 1463.76691 | 2 | 3.05E-05 | 0.96  | 4.15   | -     | 1467.1  |
| AHQ-4-14, 5686 - 5745       | R.KICLDLQAPLYK.K                                                         | 1463.76691 | 2 | 6.65E-04 | 0.87  | 3.88   | -     | 544.1   |
| AHQ-4-14, 5549 - 5612       | R.KICLDLQAPLYK.K                                                         | 1463.76691 | 2 | 4.72E-07 | 0.98  | 5.33   | -     | 2156.1  |
| AHQ-4-13, 4545              | R.KICLDLQAPLYK.K                                                         | 1463.76691 | 1 | 1.33E-05 | 0.84  | 3.21   | -     | 807.2   |
| AHQ-4-13, 4541              | R.KICLDLQAPLYK.K                                                         | 1463.76691 | 3 | 5.88E-06 | 0.93  | 4.29   | -     | 1195.0  |
| AHQ-4-13, 4533              | R.KICLDLQAPLYK.K                                                         | 1463.76691 | 2 | 2.66E-05 | 0.97  | 4.61   | -     | 1543.8  |
| AHQ-4-14-, 4218             | R.KICLDLQAPLYK.K                                                         | 1463.76691 | 2 | 1.15E-05 | 0.96  | 4.37   | -     | 1433.0  |
| AHQ-4-14-, 4349 - 4421      | R.KICLDLQAPLYK.K                                                         | 1463.76691 | 2 | 8.29E-08 | 0.97  | 4.56   | -     | 1620.2  |
| AHQ-4-14-, 4361 - 4439      | R.KICLDLQAPLYK.K                                                         | 1463.76691 | 3 | 1.94E-06 | 0.94  | 4.25   | -     | 1572.2  |
| AHQ-4-14-, 4446             | R.KICLDLQAPLYK.K                                                         | 1463.76691 | 1 | 4.15E-08 | 0.83  | 3.49   | -     | 543.8   |
| AHQ-4-14-, 4485 - 4558      | R.KICLDLQAPLYK.K                                                         | 1463.76691 | 2 | 2.99E-05 | 0.95  | 4.29   | -     | 1297.8  |
| AHQ-4-8, 3942               | R.KICLDLQAPLYK.K                                                         | 1463.76691 | 2 | 2.95E-04 | 0.85  | 2.72   | -     | 962.3   |
| gi 18104967 ref NP_000953.2 | prostaglandin-endoperoxide synthase 1 isoform 1 precursor; prostaglandin |            |   | 6.10E-11 | 6.00  | 70.27  | 24.40 | 68686.0 |
| AHQ-4-6, 3726               | K.AEHPWTGDEQLFQTTTR.L                                                    | 1917.02765 | 2 | 2.28E-07 | 0.87  | 3.67   | -     | 686.3   |
| AHQ-4-6, 3730 - 3748        | K.AEHPWTGDEQLFQTTTR.L                                                    | 1917.02765 | 3 | 9.96E-04 | 0.84  | 3.46   | -     | 1227.7  |
| AHQ-4-6, 3647 - 3728        | K.ALGHGVLDLGHYDNLER.Q                                                    | 2037.10524 | 3 | 7.84E-05 | 0.87  | 3.43   | -     | 1195.7  |

|                             |                                                                         |            |   |          |       |        |       |         |
|-----------------------------|-------------------------------------------------------------------------|------------|---|----------|-------|--------|-------|---------|
| AHQ-4-6, 3646               | K.ALGHGVDLGHYDNLER.Q                                                    | 1937.10524 | 2 | 2.84E-04 | 0.97  | 5.13   | -     | 1423.5  |
| AHQ-4-6, 7303               | K.EM*AAEELLYGDIDALEFYPLGLLLEK.C                                         | 2989.33908 | 2 | 3.12E-06 | 0.68  | 3.18   | -     | 347.8   |
| AHQ-4-6, 4947               | R.FGMKPYTSQELVGEK.E                                                     | 1862.13845 | 2 | 1.88E-07 | 0.94  | 4.24   | -     | 767.1   |
| AHQ-4-6, 6979 - 7012        | K.GLLGNPCISPEYWKPFSTFGGEVFNIVK.T                                        | 3069.47853 | 3 | 1.49E-06 | 0.80  | 4.16   | -     | 427.2   |
| AHQ-4-6, 3591               | R.NSLRPPSFTFHLLTHGR.W                                                   | 2068.32687 | 3 | 3.65E-04 | 0.90  | 3.80   | -     | 1284.3  |
| AHQ-4-6, 5800 - 5814        | K.YQVLDGEMYPSPVSEEPVLMHYPR.G                                            | 2822.20799 | 3 | 6.10E-11 | 0.93  | 5.34   | -     | 631.1   |
| gi 4504349 ref NP_000509.1  | beta globin [Homo sapiens]                                              |            |   | 6.65E-11 | 8.07  | 100.29 | 73.50 | 15998.3 |
| AHQ-4-14, 6240              | R.FFESFGDLSTPDAMV*GNPK.V                                                | 2076.27158 | 2 | 5.00E-06 | 0.89  | 4.31   | -     | 605.4   |
| AHQ-4-14-, 4970 - 4973      | R.FFESFGDLSTPDAMV*GNPK.V                                                | 2076.27158 | 2 | 2.03E-05 | 0.95  | 4.84   | -     | 901.4   |
| AHQ-4-13-, 5125 - 5137      | R.FFESFGDLSTPDAMV*GNPK.V                                                | 2076.27158 | 2 | 6.17E-06 | 0.90  | 4.05   | -     | 642.2   |
| AHQ-4-13-, 5044             | R.FFESFGDLSTPDAMV*GNPK.V                                                | 2076.27158 | 2 | 1.25E-04 | 0.57  | 2.83   | -     | 390.5   |
| AHQ-4-13-, 4954 - 5020      | R.FFESFGDLSTPDAMV*GNPK.V                                                | 2076.27158 | 2 | 1.01E-05 | 0.90  | 4.36   | -     | 532.7   |
| AHQ-4-13-, 5553 - 5568      | R.FFESFGDLSTPDAMVGNPK.V                                                 | 2060.27218 | 2 | 3.56E-06 | 0.96  | 4.86   | -     | 1173.1  |
| AHQ-4-13-, 5372             | R.FFESFGDLSTPDAMVGNPK.V                                                 | 2060.27218 | 2 | 8.80E-05 | 0.90  | 4.04   | -     | 624.9   |
| AHQ-4-13, 5673 - 5740       | R.FFESFGDLSTPDAMVGNPK.V                                                 | 2060.27218 | 2 | 4.10E-07 | 0.95  | 4.94   | -     | 923.9   |
| AHQ-4-13, 5030 - 5044       | R.FFESFGDLSTPDAMV*GNPK.V                                                | 2076.27158 | 2 | 9.53E-06 | 0.89  | 4.02   | -     | 649.3   |
| AHQ-4-13, 5128 - 5192       | R.FFESFGDLSTPDAMV*GNPK.V                                                | 2076.27158 | 2 | 3.60E-06 | 0.88  | 4.16   | -     | 497.6   |
| AHQ-4-13, 5140              | R.FFESFGDLSTPDAMV*GNPK.V                                                | 2076.27158 | 3 | 1.83E-04 | 0.89  | 3.50   | -     | 1386.9  |
| AHQ-4-13-, 3500             | K.GTFATLSLHCDK.L                                                        | 1480.62492 | 2 | 2.00E-08 | 0.86  | 3.75   | -     | 585.6   |
| AHQ-4-13-, 4992 - 5000      | K.GTFATLSLHCDKLVHPENFR.L                                                | 2588.83687 | 3 | 1.02E-10 | 0.93  | 4.67   | -     | 1077.4  |
| AHQ-4-13, 4873              | K.KVLGAFSDGLAHLHLDNLK.G                                                 | 1799.06362 | 2 | 7.02E-06 | 0.96  | 5.24   | -     | 1168.5  |
| AHQ-4-13-, 4770             | K.KVLGAFSDGLAHLHLDNLK.G                                                 | 1799.06362 | 3 | 1.60E-09 | 0.97  | 5.90   | -     | 1382.3  |
| AHQ-4-13-, 6572             | R.LLGNVLVCLVAHFFGK.E                                                    | 1779.14197 | 3 | 9.25E-06 | 0.64  | 3.18   | -     | 443.0   |
| AHQ-4-13-, 3438 - 3442      | K.SAVTALWGK.V                                                           | 933.08624  | 2 | 5.37E-05 | 0.65  | 2.51   | -     | 595.0   |
| AHQ-4-13, 3577 - 3582       | K.SAVTALWGK.V                                                           | 933.08624  | 2 | 2.23E-06 | 0.80  | 2.55   | -     | 823.6   |
| AHQ-4-13-, 4941             | K.VLGFASDGLAHLHLDNLK.G                                                  | 1670.89071 | 2 | 3.96E-08 | 0.97  | 5.60   | -     | 1404.4  |
| AHQ-4-13, 5132 - 5212       | K.VLGFASDGLAHLHLDNLK.G                                                  | 1670.89071 | 2 | 6.65E-11 | 0.97  | 5.27   | -     | 1431.8  |
| AHQ-4-13-, 5109 - 5176      | K.VLGFASDGLAHLHLDNLK.G                                                  | 1670.89071 | 2 | 8.62E-08 | 0.97  | 4.99   | -     | 1703.2  |
| AHQ-4-13, 5216              | K.VLGFASDGLAHLHLDNLK.G                                                  | 1670.89071 | 3 | 8.61E-07 | 0.74  | 3.16   | -     | 525.5   |
| AHQ-4-14-, 5078             | K.VLGFASDGLAHLHLDNLK.G                                                  | 1670.89071 | 2 | 6.27E-09 | 0.97  | 4.32   | -     | 1862.4  |
| AHQ-4-13-, 3250             | K.VNVDEVGGEALGR.L                                                       | 1315.41484 | 1 | 4.43E-07 | 0.45  | 2.55   | -     | 265.0   |
| AHQ-4-13, 3378              | K.VNVDEVGGEALGR.L                                                       | 1315.41484 | 2 | 1.11E-04 | 0.97  | 4.86   | -     | 1635.8  |
| AHQ-4-13, 3503              | K.VNVDEVGGEALGR.L                                                       | 1315.41484 | 2 | 6.56E-05 | 0.97  | 4.35   | -     | 2231.5  |
| AHQ-4-14-, 3206             | K.VNVDEVGGEALGR.L                                                       | 1315.41484 | 2 | 1.46E-04 | 0.87  | 3.28   | -     | 954.6   |
| AHQ-4-13, 3381              | K.VNVDEVGGEALGR.L                                                       | 1315.41484 | 1 | 1.71E-06 | 0.52  | 2.75   | -     | 373.8   |
| AHQ-4-13-, 3253             | K.VNVDEVGGEALGR.L                                                       | 1315.41484 | 1 | 1.49E-05 | 0.74  | 3.38   | -     | 325.3   |
| AHQ-4-13-, 2177             | K.VVAGVANALAHK.Y                                                        | 1150.35593 | 2 | 2.87E-07 | 0.96  | 4.20   | -     | 1522.1  |
| AHQ-4-13, 2790              | K.VVAGVANALAHK.Y                                                        | 1150.35593 | 2 | 1.13E-07 | 0.96  | 3.83   | -     | 1581.7  |
| AHQ-4-13, 2467 - 2546       | K.VVAGVANALAHK.Y                                                        | 1150.35593 | 2 | 7.48E-04 | 0.82  | 3.21   | -     | 721.5   |
| AHQ-4-13, 2302              | K.VVAGVANALAHK.Y                                                        | 1150.35593 | 1 | 7.99E-08 | 0.61  | 2.56   | -     | 576.6   |
| AHQ-4-13-, 2684             | K.VVAGVANALAHK.Y                                                        | 1150.35593 | 2 | 1.27E-05 | 0.96  | 3.76   | -     | 1531.9  |
| gi 29732955 ref XP_291603.1 | similar to glyceraldehyde 3-phosphate dehydrogenase [Homo sapiens] [MA  |            |   | 6.68E-11 | 0.88  | 10.23  | 16.80 | 11173.0 |
| AHQ-4-10, 3656 - 3713       | K.NISNASCTTNCIAPLAK.M                                                   | 1838.05353 | 2 | 5.70E-04 | 0.51  | 2.80   | -     | 750.2   |
| AHQ-4-10, 3899 - 3964       | K.NISNASCTTNCIAPLAK.M                                                   | 1838.05353 | 2 | 1.85E-04 | 0.73  | 2.90   | -     | 940.7   |
| AHQ-4-11, 3828 - 3881       | K.NISNASCTTNCIAPLAK.M                                                   | 1838.05353 | 2 | 1.99E-06 | 0.81  | 4.02   | -     | 1010.9  |
| AHQ-4-11, 4197              | K.NISNASCTTNCIAPLAK.M                                                   | 1838.05353 | 2 | 1.79E-05 | 0.91  | 3.57   | -     | 985.5   |
| AHQ-4-9, 3692 - 3707        | K.NISNASCTTNCIAPLAK.M                                                   | 1838.05353 | 2 | 6.68E-11 | 0.88  | 4.61   | -     | 953.2   |
| gi 4758504 ref NP_004484.1  | hydroxyacyl-Coenzyme A dehydrogenase, type II [Homo sapiens]            |            |   | 7.16E-11 | 1.83  | 20.22  | 18.80 | 26922.9 |
| AHQ-4-10, 6516              | R.LGDPAEYAHVQAIINPFLNGEVIR.L                                            | 2880.24689 | 2 | 7.16E-11 | 0.93  | 4.15   | -     | 1039.7  |
| AHQ-4-10, 4567 - 4640       | R.LVQGGSASVLDLPLNPSGGEAQAK.K                                            | 2196.44680 | 2 | 5.11E-09 | 0.90  | 4.44   | -     | 553.4   |
| gi 4557305 ref NP_000025.1  | aldolase A; fructose-bisphosphate aldolase; Aldolase A, fructose-bispho |            |   | 7.81E-11 | 11.13 | 130.27 | 54.10 | 39419.7 |
| AHQ-4-8, 1867 - 1945        | R.ALANSACQGGK.Y                                                         | 1134.28859 | 2 | 2.06E-05 | 0.74  | 2.82   | -     | 747.9   |
| AHQ-4-8, 4306               | R.ALANSACQGGKYTPSQGAGAAASELSFVSNHAY                                     | 3344.61352 | 3 | 2.32E-10 | 0.59  | 3.22   | -     | 503.7   |
| AHQ-4-8, 3721               | K.ALSDHHIYLEGTLKPNMVTPGHACTQK.F                                         | 3134.57879 | 3 | 4.24E-06 | 0.95  | 5.43   | -     | 1112.2  |
| AHQ-4-8, 3822               | K.ALSDHHIYLEGTLKPNMVTPGHACTQK.F                                         | 3134.57879 | 3 | 1.94E-04 | 0.86  | 4.10   | -     | 723.6   |
| AHQ-4-8, 5802 - 5825        | K.CPLLKPWALTFSYGR.A                                                     | 1811.13929 | 2 | 2.86E-05 | 0.86  | 3.80   | -     | 588.4   |
| AHQ-4-8, 3813               | K.FSHEEIAMATVTLR.R                                                      | 1676.91875 | 2 | 7.46E-09 | 0.95  | 4.44   | -     | 1355.3  |
| AHQ-4-13, 3015              | K.GILAADESTGSIAR.K                                                      | 1333.47008 | 2 | 1.52E-10 | 0.97  | 4.39   | -     | 1636.7  |
| AHQ-4-8, 2537               | K.GILAADESTGSIAR.K                                                      | 1333.47008 | 1 | 9.71E-06 | 0.54  | 3.15   | -     | 271.1   |
| AHQ-4-8, 2534               | K.GILAADESTGSIAR.K                                                      | 1333.47008 | 2 | 5.73E-08 | 0.97  | 4.58   | -     | 1584.3  |
| AHQ-4-12, 2863              | K.GILAADESTGSIAR.K                                                      | 1333.47008 | 4 | 4.29E-04 | 0.87  | 3.41   | -     | 861.0   |
| AHQ-4-11, 2813              | K.GILAADESTGSIAR.K                                                      | 1333.47008 | 2 | 8.05E-07 | 0.96  | 4.16   | -     | 1433.0  |
| AHQ-4-13-, 2901             | K.GILAADESTGSIAR.K                                                      | 1333.47008 | 2 | 3.55E-09 | 0.96  | 4.13   | -     | 1700.4  |
| AHQ-4-1, 4839               | K.GVVPLAGTNGETTTQGLDGLSER.C                                             | 2273.44329 | 2 | 6.14E-06 | 0.50  | 3.73   | -     | 221.1   |
| AHQ-4-10, 4224              | K.GVVPLAGTNGETTTQGLDGLSER.C                                             | 2273.44329 | 2 | 6.05E-08 | 0.51  | 3.75   | -     | 296.0   |
| AHQ-4-8, 4058 - 4138        | K.GVVPLAGTNGETTTQGLDGLSER.C                                             | 2273.44329 | 2 | 7.81E-11 | 0.88  | 5.16   | -     | 750.7   |
| AHQ-4-9, 4151               | K.GVVPLAGTNGETTTQGLDGLSER.C                                             | 2273.44329 | 2 | 1.52E-07 | 0.79  | 4.80   | -     | 443.5   |
| AHQ-4-9, 4016 - 4080        | K.GVVPLAGTNGETTTQGLDGLSER.C                                             | 2273.44329 | 2 | 5.64E-08 | 0.77  | 4.45   | -     | 515.5   |
| AHQ-4-9, 3897 - 3920        | K.GVVPLAGTNGETTTQGLDGLSER.C                                             | 2273.44329 | 2 | 2.08E-07 | 0.91  | 4.31   | -     | 681.2   |
| AHQ-4-9, 4753               | K.IGEHTPSALAMENANVLAR.Y                                                 | 2108.40788 | 2 | 6.10E-04 | 0.93  | 4.61   | -     | 749.5   |
| AHQ-4-8, 4862 - 4869        | K.IGEHTPSALAMENANVLAR.Y                                                 | 2108.40788 | 2 | 2.33E-04 | 0.97  | 5.42   | -     | 1228.5  |
| AHQ-4-8, 3754               | K.VDKGVVPLAGTNGETTTQGLDGLSER.C                                          | 2615.83564 | 3 | 7.51E-05 | 0.66  | 3.76   | -     | 842.5   |
| AHQ-4-8, 6039               | R.VNPCIGVILFHETLYQK.A                                                   | 2090.43072 | 2 | 7.87E-06 | 0.94  | 4.07   | -     | 941.4   |
| AHQ-4-8, 5837               | R.YASICQQNGIVPIPEILPDGDHDLKR.R                                          | 3023.36334 | 3 | 1.05E-04 | 0.91  | 5.28   | -     | 614.1   |
| AHQ-4-8, 5135               | R.YASICQQNGIVPIPEILPDGDHDLKR.C                                          | 3179.54969 | 3 | 6.53E-05 | 0.81  | 3.97   | -     | 558.0   |
| AHQ-4-8, 4087 - 4169        | K.YTPSQGAGAAASELSFVSNHAY                                                | 2229.34753 | 2 | 3.02E-10 | 0.88  | 4.17   | -     | 405.0   |
| AHQ-4-8, 4306               | K.YTPSQGAGAAASELSFVSNHAY                                                | 2229.34753 | 2 | 2.34E-08 | 0.91  | 3.97   | -     | 719.5   |
| gi 4885063 ref NP_005156.1  | aldolase C, fructose-bisphosphate; Aldolase C, fructose-bisphosphatase  |            |   | 8.73E-11 | 1.75  | 20.27  | 7.10  | 39455.6 |
| AHQ-4-8, 4211               | K.GVVPLAGTNGETTTQGLDGLSER.C                                             | 2274.42806 | 2 | 4.42E-08 | 0.95  | 4.46   | -     | 999.4   |
| AHQ-4-8, 4317 - 4385        | K.GVVPLAGTNGETTTQGLDGLSER.C                                             | 2274.42806 | 2 | 1.25E-09 | 0.85  | 5.31   | -     | 535.4   |
| AHQ-4-8, 3991 - 4059        | K.VDKGVVPLAGTNGETTTQGLDGLSER.C                                          | 2616.82041 | 3 | 8.73E-11 | 0.90  | 5.14   | -     | 1230.7  |
| gi 4507109 ref NP_000336.1  | alpha-synuclein isoform NACP140; non A4 component of amyloid precursor  |            |   | 9.29E-11 | 3.61  | 50.28  | 37.90 | 14460.1 |
| AHQ-4-12, 2142 - 2214       | K.EGVVHGAVTVAEK.T                                                       | 1296.45466 | 2 | 4.86E-04 | 0.48  | 2.69   | -     | 396.8   |
| AHQ-4-13, 4724              | K.EQVTNVGGAVVTGVTAVAQK.T                                                | 1929.16446 | 2 | 9.29E-11 | 0.96  | 5.59   | -     | 903.0   |
| AHQ-4-13-, 4617             | K.EQVTNVGGAVVTGVTAVAQK.T                                                | 1929.16446 | 2 | 4.50E-04 | 0.91  | 4.32   | -     | 650.0   |
| AHQ-4-12, 4659              | K.EQVTNVGGAVVTGVTAVAQK.T                                                | 1929.16446 | 2 | 1.59E-04 | 0.95  | 4.68   | -     | 1047.3  |
| AHQ-4-12, 4681              | K.EQVTNVGGAVVTGVTAVAQK.T                                                | 1929.16446 | 3 | 4.84E-04 | 0.96  | 5.28   | -     | 1637.7  |
| AHQ-4-14, 5792              | K.EQVTNVGGAVVTGVTAVAQK.T                                                | 1929.16446 | 2 | 4.32E-05 | 0.91  | 4.07   | -     | 830.7   |
| AHQ-4-14-, 4575             | K.EQVTNVGGAVVTGVTAVAQK.T                                                | 1929.16446 | 2 | 1.15E-05 | 0.96  | 5.54   | -     | 869.3   |
| AHQ-4-12, 2033 - 2035       | K.TKEGVVHGAVTVAEK.T                                                     | 1525.73191 | 2 | 1.81E-06 | 0.96  | 4.77   | -     | 1388.3  |
| AHQ-4-13, 4334              | K.TKEQVTNVGGAVVTGVTAVAQK.T                                              | 2158.44170 | 3 | 8.36E-05 | 0.84  | 3.47   | -     | 1369.7  |
| AHQ-4-13-, 4221             | K.TKEQVTNVGGAVVTGVTAVAQK.T                                              | 2158.44170 | 2 | 4.71E-07 | 0.97  | 5.64   | -     | 1508.4  |
| AHQ-4-14, 5504              | K.TKEQVTNVGGAVVTGVTAVAQK.T                                              | 2158.44170 | 2 | 1.88E-06 | 0.97  | 5.22   | -     | 1255.6  |
| AHQ-4-14-, 4137             | K.TKEQVTNVGGAVVTGVTAVAQK.T                                              | 2158.44170 | 3 | 5.43E-07 | 0.89  | 4.51   | -     | 992.5   |
| AHQ-4-14-, 4142             | K.TKEQVTNVGGAVVTGVTAVAQK.T                                              | 2158.44170 | 2 | 4.88E-07 | 0.97  | 5.64   | -     | 1799.4  |
| AHQ-4-13, 4338              | K.TKEQVTNVGGAVVTGVTAVAQK.T                                              | 2158.44170 | 2 | 7.98E-10 | 0.97  | 5.41   | -     | 1415.8  |
| AHQ-4-12, 4126              | K.TVEGAGSIAAATGFVK.K                                                    | 1479.66001 | 1 | 4.88E-06 | 0.25  | 2.28   | -     | 357.2   |
| gi 5803133 ref NP_006825.1  | RAB32, member RAS oncogene family [Homo sapiens]                        |            |   | 9.75E-11 | 1.61  | 20.15  | 12.40 | 24997.1 |
| AHQ-4-10, 4405              | K.VHLPNGSPPIAVLLANK.C                                                   | 1741.07044 | 2 | 9.75E-11 | 0.73  | 2.96   | -     | 332.5   |
| AHQ-4-10, 2281              | R.YVHQLFSQHYR.A                                                         | 1478.63872 | 2 | 6.69E-08 | 0.88  | 2.64   | -     | 1106.1  |
| gi 17986258 ref NP_066299.2 | smooth muscle and non-muscle myosin alkali light chain isoform 1 [Homo  |            |   | 1.05E-10 | 7.15  | 80.26  | 37.10 | 16930.0 |
| AHQ-4-14, 5284 - 5321       | K.DQGTYEDYVEGLR.V                                                       | 1545.58904 | 2 | 7.74E-06 | 0.62  | 2.90   | -     | 611.5   |
| AHQ-4-12, 4273 - 4343       | K.DQGTYEDYVEGLR.V                                                       | 1545.58904 | 2 | 7.32E-08 | 0.96  | 4.13   | -     | 1346.6  |
| AHQ-4-12, 3843 - 3925       | K.EAFLQFDR.T                                                            | 1026.12699 | 1 | 9.28E-04 | 0.12  | 1.97   | -     | 100.0   |
| AHQ-4-12, 3847 - 3914       | K.EAFLQFDR.T                                                            | 1026.12699 | 2 | 4.83E-04 | 0.80  | 3.45   | -     | 556.9   |
| AHQ-4-12, 2237              | R.HVLTVLGEK.M                                                           | 996.18547  | 2 | 1.00E-05 | 0.87  | 3.48   | -     | 488.4   |
| AHQ-4-13-, 2284             | R.HVLTVLGEK.M                                                           | 996.18547  | 2 | 1.19E-06 | 0.89  | 3.27   | -     | 678.2   |

|                             |                                                                         |            |   |          |      |       |       |          |
|-----------------------------|-------------------------------------------------------------------------|------------|---|----------|------|-------|-------|----------|
| AHQ-4-12, 2149 - 2209       | R.HVLVTLGEK.M                                                           | 996.18547  | 1 | 2.48E-05 | 0.78 | 3.51  | -     | 570.1    |
| AHQ-4-13, 2418              | R.HVLVTLGEK.M                                                           | 996.18547  | 1 | 7.26E-04 | 0.64 | 2.91  | -     | 565.7    |
| AHQ-4-12, 2145 - 2225       | R.HVLVTLGEK.M                                                           | 996.18547  | 1 | 6.49E-04 | 0.78 | 2.57  | -     | 850.3    |
| AHQ-4-13-, 2289             | R.HVLVTLGEK.M                                                           | 996.18547  | 1 | 5.06E-04 | 0.78 | 2.83  | -     | 720.3    |
| AHQ-4-13-, 2309             | R.HVLVTLGEK.M                                                           | 996.18547  | 1 | 7.83E-06 | 0.54 | 3.19  | -     | 232.4    |
| AHQ-4-13, 2409              | R.HVLVTLGEK.M                                                           | 996.18547  | 2 | 2.34E-06 | 0.90 | 3.53  | -     | 620.1    |
| AHQ-4-12, 2143 - 2210       | R.HVLVTLGEK.M                                                           | 996.18547  | 2 | 3.35E-06 | 0.93 | 3.83  | -     | 935.7    |
| AHQ-4-12, 4017              | K.NKDQGTEDYVEGLR.V                                                      | 1787.86505 | 2 | 1.36E-09 | 0.94 | 4.31  | -     | 1204.5   |
| AHQ-4-14-, 3629             | K.NKDQGTEDYVEGLR.V                                                      | 1787.86505 | 3 | 2.28E-05 | 0.92 | 3.69  | -     | 1627.8   |
| AHQ-4-13-, 4052             | K.NKDQGTEDYVEGLR.V                                                      | 1787.86505 | 2 | 2.15E-07 | 0.80 | 3.09  | -     | 764.5    |
| AHQ-4-13-, 3752             | K.NKDQGTEDYVEGLR.V                                                      | 1787.86505 | 2 | 2.07E-06 | 0.91 | 3.92  | -     | 1017.2   |
| AHQ-4-13-, 3737 - 3756      | K.NKDQGTEDYVEGLR.V                                                      | 1787.86505 | 3 | 4.19E-04 | 0.64 | 3.07  | -     | 606.9    |
| AHQ-4-12, 3885 - 3889       | K.NKDQGTEDYVEGLR.V                                                      | 1787.86505 | 2 | 2.10E-09 | 0.88 | 3.61  | -     | 820.6    |
| AHQ-4-12, 3719 - 3801       | K.NKDQGTEDYVEGLR.V                                                      | 1787.86505 | 2 | 7.47E-04 | 0.88 | 3.74  | -     | 830.4    |
| AHQ-4-12, 3585 - 3661       | K.NKDQGTEDYVEGLR.V                                                      | 1787.86505 | 2 | 1.39E-09 | 0.93 | 4.20  | -     | 1034.3   |
| AHQ-4-12, 3590 - 3605       | K.NKDQGTEDYVEGLR.V                                                      | 1787.86505 | 3 | 9.54E-07 | 0.93 | 4.20  | -     | 1253.9   |
| AHQ-4-13, 3890 - 3892       | K.NKDQGTEDYVEGLR.V                                                      | 1787.86505 | 2 | 1.05E-10 | 0.94 | 4.22  | -     | 1162.6   |
| AHQ-4-12, 3714              | K.NKDQGTEDYVEGLR.V                                                      | 1787.86505 | 3 | 1.20E-04 | 0.91 | 4.08  | -     | 1257.6   |
| AHQ-4-14, 4654              | K.NKDQGTEDYVEGLR.V                                                      | 1787.86505 | 2 | 1.00E-08 | 0.92 | 4.16  | -     | 1029.5   |
| AHQ-4-13, 3379 - 3455       | R.VFDKEGNGTVMGAEIR.H                                                    | 1723.93228 | 2 | 2.12E-07 | 0.92 | 3.96  | -     | 1038.5   |
| AHQ-4-13, 2783              | R.VFDKEGNGTVMGAEIR.H                                                    | 1739.93168 | 2 | 2.09E-05 | 0.83 | 3.26  | -     | 757.8    |
| AHQ-4-12, 3169 - 3237       | R.VFDKEGNGTVMGAEIR.H                                                    | 1723.93228 | 2 | 8.79E-10 | 0.95 | 4.21  | -     | 1240.3   |
| AHQ-4-13, 6386 - 6401       | K.VLDFEHFLPMQLQTVAK.N                                                   | 1905.24957 | 2 | 8.22E-04 | 0.92 | 4.24  | -     | 765.5    |
| AHQ-4-12, 6874 - 6875       | K.VLDFEHFLPMQLQTVAK.N                                                   | 1889.25017 | 3 | 7.46E-04 | 0.92 | 3.84  | -     | 1646.2   |
| AHQ-4-12, 6838 - 6897       | K.VLDFEHFLPMQLQTVAK.N                                                   | 1889.25017 | 2 | 6.29E-09 | 0.95 | 5.01  | -     | 922.7    |
| AHQ-4-12, 6289 - 6370       | K.VLDFEHFLPMQLQTVAK.N                                                   | 1905.24957 | 3 | 5.61E-06 | 0.84 | 3.43  | -     | 752.8    |
| AHQ-4-13-, 6326             | K.VLDFEHFLPMQLQTVAK.N                                                   | 1905.24957 | 3 | 4.26E-05 | 0.81 | 3.28  | -     | 871.1    |
| AHQ-4-13-, 6753             | K.VLDFEHFLPMQLQTVAK.N                                                   | 1889.25017 | 2 | 9.78E-07 | 0.95 | 4.98  | -     | 769.0    |
| AHQ-4-12, 6279 - 6341       | K.VLDFEHFLPMQLQTVAK.N                                                   | 1905.24957 | 2 | 1.67E-05 | 0.95 | 5.20  | -     | 961.9    |
| AHQ-4-14-, 6185             | K.VLDFEHFLPMQLQTVAK.N                                                   | 1905.24957 | 3 | 2.20E-05 | 0.89 | 4.05  | -     | 747.8    |
| AHQ-4-14-, 6189             | K.VLDFEHFLPMQLQTVAK.N                                                   | 1905.24957 | 2 | 1.96E-04 | 0.92 | 4.49  | -     | 657.2    |
| AHQ-4-14-, 6641 - 6645      | K.VLDFEHFLPMQLQTVAK.N                                                   | 1889.25017 | 2 | 1.13E-10 | 0.95 | 5.05  | -     | 848.6    |
| AHQ-4-14-, 6643             | K.VLDFEHFLPMQLQTVAK.N                                                   | 1889.25017 | 3 | 2.78E-05 | 0.93 | 4.44  | -     | 1211.1   |
| gi 30159830 ref XP_302246.1 | similar to HSPC280 [Homo sapiens]                                       |            |   | 1.06E-10 | 1.91 | 20.27 | 3.90  | 45644.4  |
| AHQ-4-13, 6948              | K.CANLFEALVGT.LK.A                                                      | 1437.68632 | 2 | 8.75E-08 | 0.97 | 4.86  | -     | 1448.9   |
| AHQ-4-13-, 6828 - 6829      | K.CANLFEALVGT.LK.A                                                      | 1437.68632 | 2 | 9.54E-07 | 0.97 | 5.40  | -     | 1498.3   |
| AHQ-4-14-, 6723             | K.CANLFEALVGT.LK.A                                                      | 1437.68632 | 2 | 7.18E-08 | 0.95 | 4.31  | -     | 1225.0   |
| AHQ-4-14-, 6670             | R.DDKCANLFEALVGT.LK.A                                                   | 1796.03496 | 2 | 1.06E-10 | 0.96 | 4.79  | -     | 1364.8   |
| AHQ-4-14-, 6673             | R.DDKCANLFEALVGT.LK.A                                                   | 1796.03496 | 3 | 1.17E-04 | 0.97 | 4.81  | -     | 2526.8   |
| AHQ-4-13-, 6778             | R.DDKCANLFEALVGT.LK.A                                                   | 1796.03496 | 2 | 1.42E-09 | 0.96 | 4.60  | -     | 1615.4   |
| AHQ-4-13, 6880              | R.DDKCANLFEALVGT.LK.A                                                   | 1796.03496 | 2 | 2.08E-07 | 0.93 | 3.84  | -     | 1182.8   |
| gi 10863927 ref NP_066953.1 | peptidylprolyl isomerase A (cyclophilin A) [Homo sapiens]               |            |   | 1.15E-10 | 5.30 | 60.29 | 30.90 | 18012.4  |
| AHQ-4-12, 3870 - 3946       | K.FEDENFILK.H                                                           | 1155.28144 | 2 | 2.56E-04 | 0.74 | 3.31  | -     | 501.2    |
| AHQ-4-12, 4013 - 4019       | K.FEDENFILK.H                                                           | 1155.28144 | 2 | 3.46E-04 | 0.84 | 3.49  | -     | 585.1    |
| AHQ-4-14-, 3282             | K.KITIADCGQLE                                                           | 1249.41637 | 2 | 6.51E-04 | 0.85 | 3.33  | -     | 816.9    |
| AHQ-4-12, 3361 - 3434       | K.KITIADCGQLE                                                           | 1249.41637 | 2 | 1.05E-06 | 0.92 | 3.91  | -     | 824.9    |
| AHQ-4-13-, 3361             | K.KITIADCGQLE                                                           | 1249.41637 | 2 | 2.06E-05 | 0.93 | 3.18  | -     | 1262.7   |
| AHQ-4-12, 4583 - 4650       | K.SIYGKGFEDENFILK.H                                                     | 1833.03047 | 2 | 8.18E-08 | 0.95 | 4.81  | -     | 1124.1   |
| AHQ-4-14, 6025 - 6084       | K.SIYGKGFEDENFILK.H                                                     | 1833.03047 | 2 | 2.65E-06 | 0.91 | 3.94  | -     | 992.7    |
| AHQ-4-14-, 4630             | K.SIYGKGFEDENFILK.H                                                     | 1833.03047 | 2 | 3.85E-09 | 0.96 | 4.70  | -     | 1482.6   |
| AHQ-4-12, 4641 - 4717       | K.SIYGKGFEDENFILK.H                                                     | 1833.03047 | 2 | 4.50E-10 | 0.97 | 5.48  | -     | 1271.5   |
| AHQ-4-13, 4748              | K.SIYGKGFEDENFILK.H                                                     | 1833.03047 | 2 | 1.15E-10 | 0.97 | 5.76  | -     | 1333.1   |
| AHQ-4-12, 3490              | K.VKEGMNVIVAMER.F                                                       | 1506.77390 | 2 | 1.14E-07 | 0.89 | 4.22  | -     | 964.6    |
| AHQ-4-12, 2830              | K.VKEGMNVIVAMER.F                                                       | 1522.77330 | 2 | 1.86E-05 | 0.88 | 3.79  | -     | 871.3    |
| AHQ-4-12, 4290              | R.VSFLFADKVPK.T                                                         | 1380.61317 | 2 | 7.80E-08 | 0.89 | 3.58  | -     | 1071.9   |
| AHQ-4-12, 4501              | R.VSFLFADKVPK.T                                                         | 1380.61317 | 2 | 1.71E-05 | 0.78 | 3.24  | -     | 732.5    |
| gi 27478749 ref XP_208411.1 | similar to L-lactate dehydrogenase A chain (LDH-A) (LDH muscle subunit) |            |   | 1.22E-10 | 1.43 | 20.20 | 8.70  | 25628.5  |
| AHQ-4-9, 4048               | K.GEMMDLQHSFLR.T                                                        | 1634.90537 | 2 | 1.22E-10 | 0.93 | 4.01  | -     | 1180.8   |
| AHQ-4-13, 2534 - 2537       | R.NVNIFK.F                                                              | 734.86623  | 1 | 7.96E-04 | 0.49 | 2.32  | -     | 504.8    |
| gi 4557731 ref NP_000618.1  | latent transforming growth factor beta binding protein 1 precursor [Hom |            |   | 1.23E-10 | 8.04 | 90.26 | 8.90  | 152790.9 |
| AHQ-4-3, 3696               | R.ASLGDHCDINECLEDK.S                                                    | 2065.13910 | 2 | 4.94E-08 | 0.95 | 4.80  | -     | 1381.6   |
| AHQ-4-2, 3740               | R.ASLGDHCDINECLEDK.S                                                    | 2065.13910 | 2 | 2.49E-05 | 0.96 | 4.87  | -     | 1379.4   |
| AHQ-4-1, 3761               | R.ASLGDHCDINECLEDK.S                                                    | 2065.13910 | 2 | 4.15E-05 | 0.95 | 4.92  | -     | 1164.9   |
| AHQ-4-4, 3668               | R.ASLGDHCDINECLEDK.S                                                    | 2065.13910 | 2 | 4.00E-04 | 0.94 | 4.33  | -     | 1281.6   |
| AHQ-4-1, 2641               | R.CTGGQYQLSAAK.D                                                        | 1446.58862 | 2 | 9.57E-07 | 0.91 | 3.60  | -     | 826.5    |
| AHQ-4-1, 4230               | K.CVDIDECTVQOHLCSQGR.C                                                  | 2209.38110 | 2 | 2.25E-06 | 0.97 | 5.29  | -     | 1379.8   |
| AHQ-4-1, 3437               | K.EAQPGSQSVYQGLPVQK.T                                                   | 1945.12244 | 2 | 1.23E-10 | 0.90 | 4.02  | -     | 654.0    |
| AHQ-4-1, 3289               | K.EAQPGSQSVYQGLPVQK.T                                                   | 1945.12244 | 2 | 2.30E-04 | 0.70 | 3.08  | -     | 333.2    |
| AHQ-4-1, 2866 - 2869        | K.GFVPAGESSEAGGENYK.D                                                   | 1786.83392 | 2 | 1.51E-06 | 0.95 | 4.42  | -     | 1145.1   |
| AHQ-4-1, 3102               | K.LCQIPVHGASVPK.L                                                       | 1407.66344 | 2 | 5.12E-05 | 0.74 | 2.82  | -     | 450.9    |
| AHQ-4-1, 2963               | R.TSTDLDVVDQPK.E                                                        | 1433.50014 | 2 | 6.68E-06 | 0.85 | 3.45  | -     | 788.8    |
| AHQ-4-2, 2592 - 2596        | R.TSTDLDVVDQPK.EE.K                                                     | 1819.90213 | 2 | 8.52E-07 | 0.94 | 4.60  | -     | 1170.5   |
| AHQ-4-3, 2581               | R.TSTDLDVVDQPK.EE.K                                                     | 1819.90213 | 2 | 7.57E-05 | 0.91 | 3.61  | -     | 1400.0   |
| AHQ-4-1, 2739               | R.TSTDLDVVDQPK.EE.K                                                     | 1819.90213 | 2 | 7.40E-09 | 0.89 | 3.76  | -     | 1093.3   |
| AHQ-4-1, 3673               | R.YTICICYGYR.F                                                          | 1387.51964 | 2 | 1.22E-04 | 0.87 | 2.83  | -     | 676.4    |
| gi 21464101 ref NP_036611.2 | tyrosine 3-monooxygenase/tryptophan 5-monooxygenase activation protein  |            |   | 1.24E-10 | 4.60 | 50.27 | 30.80 | 28302.4  |
| AHQ-4-10, 6597 - 6629       | K.ELEAVQCQDLSLDNYLIK.N                                                  | 2237.55566 | 2 | 1.66E-06 | 0.96 | 4.93  | -     | 1248.1   |
| AHQ-4-10, 3868              | R.NLLSVAYKNVVGAR.R                                                      | 1504.75906 | 2 | 1.24E-10 | 0.92 | 3.72  | -     | 1016.9   |
| AHQ-4-14, 3940              | K.NVTELNEPLSNEER.N                                                      | 1644.72215 | 2 | 1.27E-04 | 0.78 | 2.91  | -     | 607.8    |
| AHQ-4-14-, 2921             | K.NVTELNEPLSNEER.N                                                      | 1644.72215 | 2 | 8.57E-09 | 0.90 | 3.35  | -     | 980.7    |
| AHQ-4-10, 5457              | K.TAFDDAIAELDTLNEDSYK.D                                                 | 2132.22370 | 2 | 3.58E-04 | 0.69 | 3.21  | -     | 505.3    |
| AHQ-4-10, 6024 - 6095       | K.TAFDDAIAELDTLNEDSYK.D                                                 | 2132.22370 | 2 | 5.46E-10 | 0.97 | 5.30  | -     | 1226.8   |
| AHQ-4-12, 6638              | K.TAFDDAIAELDTLNEDSYK.D                                                 | 2132.22370 | 2 | 2.55E-05 | 0.81 | 3.32  | -     | 762.7    |
| AHQ-4-13, 6669              | K.TAFDDAIAELDTLNEDSYK.D                                                 | 2132.22370 | 2 | 4.53E-09 | 0.94 | 4.63  | -     | 1084.7   |
| AHQ-4-9, 6219               | K.TAFDDAIAELDTLNEDSYK.D                                                 | 2132.22370 | 2 | 1.40E-04 | 0.67 | 2.80  | -     | 744.2    |
| AHQ-4-10, 2115              | R.YLAEVATGEK.R                                                          | 1081.20087 | 1 | 6.24E-04 | 0.49 | 2.29  | -     | 751.6    |
| AHQ-4-10, 2128              | R.YLAEVATGEK.R                                                          | 1081.20087 | 2 | 2.37E-06 | 0.84 | 2.99  | -     | 859.5    |
| AHQ-4-10, 2132              | R.YLAEVATGEK.R                                                          | 1081.20087 | 1 | 1.32E-05 | 0.50 | 2.79  | -     | 270.2    |
| gi 10835187 ref NP_000627.1 | superoxide dismutase 2, mitochondrial [Homo sapiens]                    |            |   | 1.28E-10 | 5.44 | 60.26 | 56.80 | 24733.0  |
| AHQ-4-14-, 6045             | K.AIWNVINWENYTER.Y                                                      | 1744.93137 | 2 | 7.44E-08 | 0.95 | 4.57  | -     | 1101.0   |
| AHQ-4-13, 6256 - 6274       | K.AIWNVINWENYTER.Y                                                      | 1744.93137 | 2 | 7.21E-07 | 0.95 | 4.53  | -     | 1228.7   |
| AHQ-4-11, 6261              | K.AIWNVINWENYTER.Y                                                      | 1744.93137 | 2 | 5.33E-06 | 0.90 | 3.45  | -     | 1111.7   |
| AHQ-4-13-, 6172             | K.AIWNVINWENYTER.Y                                                      | 1744.93137 | 2 | 6.18E-06 | 0.92 | 3.51  | -     | 1230.6   |
| AHQ-4-11, 5964              | K.AIWNVINWENYTER.Y                                                      | 1744.93137 | 3 | 5.94E-06 | 0.93 | 4.30  | -     | 1121.9   |
| AHQ-4-11, 5920 - 5980       | K.AIWNVINWENYTER.Y                                                      | 1744.93137 | 2 | 1.28E-10 | 0.97 | 5.28  | -     | 1288.5   |
| AHQ-4-11, 5640              | K.AIWNVINWENYTER.Y                                                      | 1744.93137 | 2 | 5.71E-05 | 0.61 | 2.66  | -     | 598.2    |
| AHQ-4-12, 6179              | K.AIWNVINWENYTER.Y                                                      | 1744.93137 | 2 | 8.00E-05 | 0.94 | 4.19  | -     | 1098.4   |
| AHQ-4-11, 4378              | K.FNGGGHNSIFWTLNSPNGGPEK.G                                              | 2638.83761 | 2 | 5.56E-07 | 0.90 | 4.19  | -     | 680.0    |
| AHQ-4-11, 3745 - 3808       | K.GDVTAQIALQPAK.F                                                       | 1425.65548 | 1 | 2.70E-06 | 0.84 | 3.78  | -     | 791.6    |
| AHQ-4-11, 3726 - 3788       | K.GDVTAQIALQPAK.F                                                       | 1425.65548 | 1 | 7.32E-05 | 0.64 | 2.55  | -     | 917.4    |
| AHQ-4-11, 3937              | K.GDVTAQIALQPAK.F                                                       | 1425.65548 | 2 | 1.16E-06 | 0.91 | 3.42  | -     | 1165.6   |
| AHQ-4-11, 6830              | R.GHLQIAACPNDPLQGTGLIPLLGIDVWEHAYYLQYK.N                                | 4296.85327 | 3 | 1.46E-05 | 0.80 | 3.86  | -     | 693.0    |
| AHQ-4-11, 2264 - 2338       | K.HHAAVYNNLNVTTEK.Y                                                     | 1739.86999 | 2 | 1.27E-09 | 0.91 | 3.60  | -     | 1018.7   |
| AHQ-4-11, 2172              | K.HHAAVYNNLNVTTEK.Y                                                     | 1739.86999 | 3 | 4.69E-04 | 0.96 | 4.82  | -     | 1745.2   |
| AHQ-4-11, 6086              | K.LTAASVGVQSGWGLGFNFK.E                                                 | 2036.27841 | 2 | 1.07E-05 | 0.90 | 3.56  | -     | 1055.9   |
| AHQ-4-11, 5993              | K.LTAASVGVQSGWGLGFNFK.E                                                 | 2036.27841 | 2 | 5.38E-05 | 0.82 | 3.72  | -     | 540.7    |
| AHQ-4-11, 6577 - 6644       | K.LTAASVGVQSGWGLGFNFK.E                                                 | 2036.27841 | 2 | 1.58E-07 | 0.95 | 4.92  | -     | 1103.8   |



|                             |                                                                                   |            |   |          |      |       |       |         |
|-----------------------------|-----------------------------------------------------------------------------------|------------|---|----------|------|-------|-------|---------|
| AHQ-4-3, 1928 - 1999        | K.GSGDSSQVTVSPQR.I                                                                | 1533.58302 | 2 | 3.61E-05 | 0.93 | 3.85  | -     | 1229.2  |
| AHQ-4-3, 2433               | K.HVLTLDQVTR.F                                                                    | 1283.45912 | 2 | 8.54E-07 | 0.90 | 3.29  | -     | 805.5   |
| AHQ-4-8, 2244               | K.HVLTLDQVTR.F                                                                    | 1283.45912 | 1 | 4.70E-06 | 0.13 | 1.84  | -     | 161.3   |
| AHQ-4-3, 2544 - 2615        | K.HVLTLDQVTR.F                                                                    | 1283.45912 | 2 | 6.80E-08 | 0.94 | 3.87  | -     | 857.3   |
| AHQ-4-8, 2241               | K.HVLTLDQVTR.F                                                                    | 1283.45912 | 2 | 1.84E-07 | 0.81 | 3.06  | -     | 459.6   |
| AHQ-4-7, 2361               | K.HVLTLDQVTR.F                                                                    | 1283.45912 | 2 | 1.72E-04 | 0.93 | 3.42  | -     | 851.4   |
| AHQ-4-4, 2560               | K.HVLTLDQVTR.F                                                                    | 1283.45912 | 2 | 2.67E-05 | 0.93 | 3.91  | -     | 717.0   |
| AHQ-4-4, 2576               | K.HVLTLDQVTR.F                                                                    | 1283.45912 | 1 | 4.29E-04 | 0.64 | 3.15  | -     | 319.6   |
| AHQ-4-6, 2399 - 2406        | K.HVLTLDQVTR.F                                                                    | 1283.45912 | 2 | 9.45E-06 | 0.85 | 3.06  | -     | 589.8   |
| AHQ-4-1, 2790               | K.HVLTLDQVTR.F                                                                    | 1283.45912 | 2 | 5.11E-06 | 0.89 | 3.34  | -     | 575.5   |
| AHQ-4-5, 2411 - 2433        | K.HVLTLDQVTR.F                                                                    | 1283.45912 | 2 | 9.03E-08 | 0.91 | 3.52  | -     | 681.4   |
| AHQ-4-4, 4991               | K.IGDTSVFSIEAK.V                                                                  | 1267.41009 | 2 | 1.90E-04 | 0.66 | 2.81  | -     | 609.9   |
| AHQ-4-2, 3902               | R.NDASHLLVFTTDAK.T                                                                | 1532.67977 | 2 | 1.23E-08 | 0.94 | 4.19  | -     | 1102.2  |
| AHQ-4-4, 3807 - 3820        | R.NDASHLLVFTTDAK.T                                                                | 1532.67977 | 2 | 1.47E-09 | 0.94 | 4.42  | -     | 1044.9  |
| AHQ-4-4, 4379               | R.NDASHLLVFTTDAK.T                                                                | 1532.67977 | 2 | 1.17E-07 | 0.92 | 3.91  | -     | 954.4   |
| AHQ-4-6, 3515               | R.NDASHLLVFTTDAK.T                                                                | 1532.67977 | 2 | 1.02E-07 | 0.97 | 5.40  | -     | 1322.1  |
| AHQ-4-6, 4130               | R.NDASHLLVFTTDAK.T                                                                | 1532.67977 | 2 | 8.06E-06 | 0.79 | 3.08  | -     | 862.3   |
| AHQ-4-3, 4435               | R.NDASHLLVFTTDAK.T                                                                | 1532.67977 | 2 | 2.26E-07 | 0.82 | 3.02  | -     | 818.1   |
| AHQ-4-7, 3447 - 3459        | R.NDASHLLVFTTDAK.T                                                                | 1532.67977 | 2 | 1.84E-08 | 0.96 | 4.40  | -     | 1175.1  |
| AHQ-4-6, 3444 - 3522        | R.NDASHLLVFTTDAK.T                                                                | 1532.67977 | 2 | 2.52E-05 | 0.93 | 3.91  | -     | 875.3   |
| AHQ-4-1, 4527               | R.NDASHLLVFTTDAK.T                                                                | 1532.67977 | 2 | 2.21E-08 | 0.94 | 4.16  | -     | 1042.5  |
| AHQ-4-1, 4023               | R.NDASHLLVFTTDAK.T                                                                | 1532.67977 | 2 | 9.27E-04 | 0.70 | 2.62  | -     | 777.3   |
| AHQ-4-3, 3836 - 3888        | R.NDASHLLVFTTDAK.T                                                                | 1532.67977 | 2 | 4.75E-08 | 0.97 | 4.41  | -     | 1588.6  |
| AHQ-4-5, 2949               | K.SFTIKPVGFK.D                                                                    | 1124.35685 | 2 | 1.14E-05 | 0.73 | 2.88  | -     | 753.2   |
| AHQ-4-3, 3228               | K.SFTIKPVGFK.D                                                                    | 1124.35685 | 2 | 7.80E-06 | 0.75 | 2.61  | -     | 850.2   |
| AHQ-4-3, 4491 - 4508        | K.SILYVVEEPECPK.G                                                                 | 1564.78173 | 2 | 1.42E-04 | 0.79 | 3.04  | -     | 834.7   |
| AHQ-4-1, 2875               | R.TDTCM*SSNGLLCSGR.G                                                              | 1677.81726 | 2 | 6.98E-08 | 0.91 | 3.46  | -     | 1324.8  |
| AHQ-4-3, 3048               | R.TDTCM*SSNGLLCSGR.G                                                              | 1677.81726 | 2 | 7.77E-07 | 0.87 | 3.14  | -     | 993.8   |
| AHQ-4-3, 2955 - 3035        | R.TDTCM*SSNGLLCSGR.G                                                              | 1677.81726 | 2 | 1.95E-10 | 0.90 | 3.27  | -     | 1065.0  |
| AHQ-4-4, 2940               | R.TDTCM*SSNGLLCSGR.G                                                              | 1677.81726 | 2 | 3.55E-07 | 0.88 | 2.89  | -     | 1174.9  |
| AHQ-4-3, 3684 - 3719        | R.TDTCMSSNGLLCSGR.G                                                               | 1661.81786 | 2 | 1.94E-07 | 0.88 | 3.20  | -     | 1012.3  |
| AHQ-4-3, 1469 - 1537        | K.THIALDGR.L                                                                      | 882.98732  | 1 | 9.75E-04 | 0.13 | 1.98  | -     | 146.0   |
| AHQ-4-1, 2045               | R.VLEDRPLSDK.G                                                                    | 1172.31354 | 2 | 1.24E-05 | 0.85 | 3.51  | -     | 775.5   |
| AHQ-4-3, 1684 - 1751        | R.VLEDRPLSDK.G                                                                    | 1172.31354 | 2 | 2.07E-05 | 0.90 | 3.85  | -     | 790.1   |
| AHQ-4-6, 2558               | R.VLEDRPLSDKSGDSSQVTVSPQR.I                                                       | 2686.87396 | 3 | 7.72E-08 | 0.96 | 5.00  | -     | 1861.3  |
| AHQ-4-3, 2747               | R.VLEDRPLSDKSGDSSQVTVSPQR.I                                                       | 2686.87396 | 3 | 3.14E-07 | 0.94 | 4.63  | -     | 1290.1  |
| AHQ-4-3, 3268 - 3269        | K.WDTANNPLYK.E                                                                    | 1222.33111 | 2 | 1.41E-07 | 0.56 | 2.67  | -     | 423.7   |
| AHQ-4-4, 3260               | K.WDTANNPLYK.E                                                                    | 1222.33111 | 2 | 5.21E-05 | 0.67 | 2.92  | -     | 583.4   |
| AHQ-4-6, 3582 - 3584        | K.YCECDDFSCVR.Y                                                                   | 1514.59674 | 2 | 3.12E-06 | 0.95 | 4.12  | -     | 1030.4  |
| AHQ-4-4, 3722               | K.YCECDDFSCVR.Y                                                                   | 1514.59674 | 2 | 2.53E-06 | 0.92 | 3.38  | -     | 1146.7  |
| AHQ-4-1, 3745 - 3746        | K.YCECDDFSCVR.Y                                                                   | 1514.59674 | 2 | 4.36E-09 | 0.97 | 4.29  | -     | 1353.0  |
| AHQ-4-5, 3670 - 3673        | K.YCECDDFSCVR.Y                                                                   | 1514.59674 | 2 | 4.11E-09 | 0.94 | 3.84  | -     | 1048.0  |
| AHQ-4-3, 3749 - 3776        | K.YCECDDFSCVR.Y                                                                   | 1514.59674 | 2 | 7.35E-07 | 0.93 | 3.52  | -     | 1038.0  |
| AHQ-4-2, 3788               | K.YCECDDFSCVR.Y                                                                   | 1514.59674 | 2 | 4.45E-07 | 0.89 | 3.34  | -     | 802.4   |
| gj 13518026 ref NP_004978.2 | LIM and senescent cell antigen-like domains 1 [Homo sapiens]                      |            |   | 2.03E-10 | 3.42 | 40.26 | 13.80 | 37251.2 |
| AHQ-4-8, 4081               | K.CHAIDEQPLIFK.N                                                                  | 1585.84900 | 3 | 9.40E-07 | 0.95 | 4.88  | -     | 1426.5  |
| AHQ-4-8, 4065 - 4073        | K.CHAIDEQPLIFK.N                                                                  | 1585.84900 | 2 | 7.12E-04 | 0.96 | 4.81  | -     | 1538.8  |
| AHQ-4-9, 3936 - 3939        | K.CHAIDEQPLIFK.N                                                                  | 1585.84900 | 2 | 2.61E-04 | 0.96 | 4.84  | -     | 1348.7  |
| AHQ-4-14-, 3898             | K.CYEKFLLEK.K                                                                     | 1328.55832 | 2 | 3.16E-04 | 0.72 | 2.66  | -     | 751.2   |
| AHQ-4-8, 2798               | K.MGVPIGACR.R                                                                     | 1123.35250 | 2 | 6.94E-05 | 0.80 | 2.91  | -     | 482.8   |
| AHQ-4-11, 3380 - 3382       | R.VIEGDVVSALNK.A                                                                  | 1244.41966 | 2 | 3.82E-08 | 0.97 | 5.14  | -     | 1225.2  |
| AHQ-4-14, 4502              | R.VIEGDVVSALNK.A                                                                  | 1244.41966 | 2 | 5.45E-08 | 0.90 | 2.98  | -     | 974.7   |
| AHQ-4-14-, 3469             | R.VIEGDVVSALNK.A                                                                  | 1244.41966 | 2 | 2.45E-09 | 0.97 | 4.73  | -     | 1556.2  |
| AHQ-4-8, 3014               | R.VIEGDVVSALNK.A                                                                  | 1244.41966 | 2 | 2.03E-10 | 0.96 | 4.39  | -     | 1251.9  |
| AHQ-4-9, 3015               | R.VIEGDVVSALNK.A                                                                  | 1244.41966 | 2 | 2.70E-05 | 0.90 | 3.47  | -     | 1014.4  |
| gj 14251209 ref NP_001279.2 | chloride intracellular channel 1; p64CLCP; chloride channel ABP [Homo sapiens]    |            |   | 2.04E-10 | 7.63 | 90.29 | 47.30 | 26922.5 |
| AHQ-4-9, 5805 - 5868        | K.FLDGNELTADCNLLPK.L                                                              | 1935.18752 | 2 | 1.08E-05 | 0.87 | 3.94  | -     | 1132.9  |
| AHQ-4-9, 2875               | K.GVTFNVTVDTK.R                                                                   | 1282.42476 | 2 | 5.65E-08 | 0.88 | 3.52  | -     | 830.9   |
| AHQ-4-13, 3545              | K.GVTFNVTVDTK.R                                                                   | 1282.42476 | 2 | 6.58E-06 | 0.93 | 3.62  | -     | 1111.9  |
| AHQ-4-13, 2586 - 2593       | K.IGNCPFSQR.L                                                                     | 1080.19948 | 2 | 8.41E-05 | 0.75 | 2.56  | -     | 681.1   |
| AHQ-4-12, 5687              | R.KFLDGNELTADCNLLPK.L                                                             | 2063.36044 | 2 | 9.99E-05 | 0.61 | 3.75  | -     | 554.0   |
| AHQ-4-9, 5367               | R.KFLDGNELTADCNLLPK.L                                                             | 2063.36044 | 2 | 2.74E-04 | 0.82 | 4.61  | -     | 656.6   |
| AHQ-4-9, 5129 - 5203        | R.KFLDGNELTADCNLLPK.L                                                             | 2063.36044 | 2 | 1.74E-06 | 0.94 | 5.39  | -     | 1304.9  |
| AHQ-4-13, 5440              | K.LAALNPESNTAGLDIFAK.F                                                            | 1846.07392 | 2 | 3.05E-05 | 0.97 | 5.36  | -     | 1007.5  |
| AHQ-4-9, 4983               | K.LAALNPESNTAGLDIFAK.F                                                            | 1846.07392 | 2 | 5.67E-08 | 0.94 | 4.52  | -     | 749.1   |
| AHQ-4-9, 4836 - 4907        | K.LAALNPESNTAGLDIFAK.F                                                            | 1846.07392 | 2 | 4.82E-07 | 0.92 | 4.40  | -     | 611.3   |
| AHQ-4-13-, 5316 - 5324      | K.LAALNPESNTAGLDIFAK.F                                                            | 1846.07392 | 2 | 4.52E-04 | 0.96 | 5.18  | -     | 1072.6  |
| AHQ-4-9, 4752 - 4759        | K.LAALNPESNTAGLDIFAK.F                                                            | 1846.07392 | 2 | 8.55E-06 | 0.96 | 5.07  | -     | 965.6   |
| AHQ-4-11, 5165 - 5168       | K.LAALNPESNTAGLDIFAK.F                                                            | 1846.07392 | 2 | 1.26E-07 | 0.97 | 5.72  | -     | 909.7   |
| AHQ-4-13-, 5460             | K.LAALNPESNTAGLDIFAK.F                                                            | 1846.07392 | 2 | 1.30E-09 | 0.96 | 5.27  | -     | 880.4   |
| AHQ-4-12, 5399              | K.LAALNPESNTAGLDIFAK.F                                                            | 1846.07392 | 2 | 4.10E-04 | 0.95 | 5.00  | -     | 889.8   |
| AHQ-4-9, 5139 - 5140        | K.LCPGGQPLFLLYGTEVHTDNK.I                                                         | 2462.76290 | 2 | 3.31E-05 | 0.75 | 4.11  | -     | 457.1   |
| AHQ-4-13-, 5685             | R.LFM*VLWLK.G                                                                     | 1066.38391 | 2 | 8.36E-04 | 0.92 | 2.85  | -     | 1239.5  |
| AHQ-4-12, 2667              | K.LHIVQVCK.K                                                                      | 1097.35623 | 1 | 2.64E-05 | 0.75 | 2.23  | -     | 858.5   |
| AHQ-4-9, 2319               | K.LHIVQVCK.K                                                                      | 1097.35623 | 1 | 1.40E-05 | 0.64 | 2.54  | -     | 512.6   |
| AHQ-4-9, 4829 - 4875        | K.VLDNYLTSPLPEEVDETSAEDEGVSR.K                                                    | 2994.12446 | 2 | 9.08E-04 | 0.89 | 4.32  | -     | 457.0   |
| AHQ-4-10, 4829              | K.VLDNYLTSPLPEEVDETSAEDEGVSR.K                                                    | 2994.12446 | 2 | 2.04E-10 | 0.91 | 4.79  | -     | 374.1   |
| AHQ-4-12, 5297              | K.VLDNYLTSPLPEEVDETSAEDEGVSR.K                                                    | 2994.12446 | 2 | 1.02E-06 | 0.85 | 4.03  | -     | 450.8   |
| gj 4504077 ref NP_000165.1  | glycoprotein IX (platelet) [Homo sapiens]                                         |            |   | 2.14E-10 | 4.43 | 50.21 | 27.10 | 19046.0 |
| AHQ-4-11, 4881              | R.ALETMGLWVDCR.G                                                                  | 1452.68135 | 2 | 4.42E-08 | 0.87 | 3.17  | -     | 966.3   |
| AHQ-4-11, 4072              | R.ALETM*GLWVDCR.G                                                                 | 1468.68075 | 2 | 4.09E-05 | 0.91 | 2.98  | -     | 1249.8  |
| AHQ-4-12, 2605 - 2645       | R.CASPSLAHGPLGR.L                                                                 | 1395.56962 | 2 | 2.14E-10 | 0.93 | 4.22  | -     | 918.0   |
| AHQ-4-14, 3578 - 3605       | R.CASPSLAHGPLGR.L                                                                 | 1395.56962 | 2 | 1.42E-04 | 0.88 | 3.05  | -     | 868.7   |
| AHQ-4-11, 2582              | R.CASPSLAHGPLGR.L                                                                 | 1395.56962 | 1 | 4.72E-05 | 0.78 | 3.26  | -     | 351.6   |
| AHQ-4-11, 2556 - 2602       | R.CASPSLAHGPLGR.L                                                                 | 1395.56962 | 2 | 1.56E-08 | 0.91 | 3.49  | -     | 1051.6  |
| AHQ-4-11, 3192 - 3264       | R.GHGLTALPALPAR.T                                                                 | 1274.49706 | 2 | 8.24E-05 | 0.93 | 3.84  | -     | 940.9   |
| AHQ-4-12, 3278              | R.GHGLTALPALPAR.T                                                                 | 1274.49706 | 1 | 1.83E-05 | 0.72 | 2.96  | -     | 327.1   |
| AHQ-4-12, 3229 - 3297       | R.GHGLTALPALPAR.T                                                                 | 1274.49706 | 2 | 9.11E-05 | 0.91 | 3.55  | -     | 761.2   |
| AHQ-4-11, 3222              | R.GHGLTALPALPAR.T                                                                 | 1274.49706 | 1 | 1.48E-05 | 0.83 | 3.35  | -     | 355.8   |
| AHQ-4-11, 2973 - 3040       | R.TPEALLQVR.C                                                                     | 1027.19957 | 2 | 1.91E-04 | 0.88 | 3.33  | -     | 922.2   |
| AHQ-4-14, 4145              | R.TPEALLQVR.C                                                                     | 1027.19957 | 2 | 3.83E-06 | 0.89 | 2.53  | -     | 1307.0  |
| AHQ-4-14-, 3025             | R.TPEALLQVR.C                                                                     | 1027.19957 | 2 | 1.83E-05 | 0.92 | 3.20  | -     | 1377.5  |
| AHQ-4-12, 3031 - 3089       | R.TPEALLQVR.C                                                                     | 1027.19957 | 2 | 6.07E-05 | 0.87 | 3.13  | -     | 858.0   |
| gj 29730023 ref XP_291482.1 | similar to 78 kDa glucose-regulated protein precursor (GRP 78) [Immunoglobulin G] |            |   | 2.22E-10 | 5.88 | 70.22 | 14.10 | 63563.0 |
| AHQ-4-6, 4348               | K.ELEEIVQPIISK.L                                                                  | 1398.62680 | 1 | 1.20E-07 | 0.69 | 2.94  | -     | 299.0   |
| AHQ-4-5, 4675               | R.IINKPTAAAIAYGLDKR.E                                                             | 1659.95097 | 2 | 1.16E-09 | 0.84 | 4.12  | -     | 805.7   |
| AHQ-4-6, 4184               | R.IINKPTAAAIAYGLDKR.E                                                             | 1816.13732 | 2 | 2.41E-08 | 0.76 | 3.99  | -     | 751.1   |
| AHQ-4-10, 3980              | R.IINKPTAAAIAYGLDKR.E                                                             | 1816.13732 | 2 | 2.36E-04 | 0.33 | 2.64  | -     | 493.1   |
| AHQ-4-5, 3289               | K.KKELEEIVQPIISK.L                                                                | 1654.97263 | 2 | 3.63E-05 | 0.92 | 4.20  | -     | 1040.5  |
| AHQ-4-5, 3439               | K.LYGSAGPPPTGEEDTAEKDEL                                                           | 2177.26447 | 2 | 1.40E-09 | 0.90 | 4.41  | -     | 594.0   |
| AHQ-4-7, 3373               | K.LYGSAGPPPTGEEDTAEKDEL                                                           | 2177.26447 | 2 | 1.72E-04 | 0.55 | 3.08  | -     | 213.6   |
| AHQ-4-6, 3364 - 3440        | K.LYGSAGPPPTGEEDTAEKDEL                                                           | 2177.26447 | 2 | 8.96E-05 | 0.87 | 4.35  | -     | 434.2   |
| AHQ-4-5, 3331               | K.NQLTSNPKNTVFDAR.R                                                               | 1677.84011 | 2 | 3.55E-09 | 0.86 | 4.32  | -     | 815.3   |
| AHQ-4-6, 5534               | K.TFAPKEISAMVLT.K.M                                                               | 1536.86124 | 2 | 2.22E-10 | 0.91 | 3.61  | -     | 1424.8  |
| AHQ-4-5, 5586               | K.TFAPKEISAMVLT.K.M                                                               | 1536.86124 | 2 | 4.64E-09 | 0.90 | 4.06  | -     | 1262.5  |
| gj 4507645 ref NP_000356.1  | triosephosphate isomerase 1 [Homo sapiens]                                        |            |   | 2.33E-10 | 4.29 | 50.32 | 38.60 | 26669.3 |
| AHQ-4-10, 3551 - 3617       | K.DCGATWVVLGHSE.R                                                                 | 1588.72671 | 2 | 2.47E-06 | 0.92 | 3.75  | -     | 1033.8  |

|                             |                                                                         |            |   |          |       |        |       |          |
|-----------------------------|-------------------------------------------------------------------------|------------|---|----------|-------|--------|-------|----------|
| AHQ-4-10, 6311              | K.ELASQPDVDGFLVGGASLKPEFVDIINAK.Q                                       | 3031.40532 | 3 | 7.03E-05 | 0.67  | 3.42   | -     | 252.3    |
| AHQ-4-14-, 6603             | K.ELASQPDVDGFLVGGASLKPEFVDIINAK.Q                                       | 3031.40532 | 3 | 2.86E-10 | 0.49  | 3.29   | -     | 174.4    |
| AHQ-4-10, 6059 - 6124       | K.ELASQPDVDGFLVGGASLKPEFVDIINAK.Q                                       | 3031.40532 | 3 | 9.30E-05 | 0.78  | 4.08   | -     | 214.7    |
| AHQ-4-10, 6205 - 6256       | K.ELASQPDVDGFLVGGASLKPEFVDIINAK.Q                                       | 3031.40532 | 3 | 3.53E-04 | 0.72  | 3.95   | -     | 229.1    |
| AHQ-4-10, 3743              | R.KQSLGELIGLITNAAK.V                                                    | 1543.79037 | 2 | 2.41E-04 | 0.91  | 3.62   | -     | 1104.0   |
| AHQ-4-10, 4889 - 4901       | K.VAHALAEGLGVACIGEK.L                                                   | 1810.10800 | 2 | 2.33E-10 | 0.99  | 6.47   | -     | 2674.7   |
| AHQ-4-10, 5039 - 5059       | K.VPADTEVVCAPPYAYIDFAR.Q                                                | 2194.44943 | 2 | 8.34E-06 | 0.98  | 6.29   | -     | 1098.3   |
| gi 29742410 ref XP_291183.1 | similar to TREM-like transcript 1 [Homo sapiens]                        |            |   | 2.37E-10 | 0.92  | 10.21  | 5.10  | 32678.3  |
| AHQ-4-13-, 4168 - 4192      | R.FLPEGCQPLVSSAVDR.R                                                    | 1776.99174 | 2 | 1.51E-08 | 0.76  | 3.37   | -     | 372.6    |
| AHQ-4-13-, 4260 - 4324      | R.FLPEGCQPLVSSAVDR.R                                                    | 1776.99174 | 2 | 2.37E-10 | 0.92  | 4.13   | -     | 699.1    |
| AHQ-4-11, 4204              | R.FLPEGCQPLVSSAVDR.R                                                    | 1776.99174 | 2 | 1.30E-07 | 0.81  | 3.25   | -     | 431.2    |
| gi 13129150 ref NP_005339.1 | heat shock 90kDa protein 1, alpha; heat shock 90kD protein 1, alpha [H  |            |   | 2.45E-10 | 2.66  | 30.25  | 5.20  | 84659.1  |
| AHQ-4-5, 2759               | K.ELHINLIPNKQDR.T                                                       | 1590.80882 | 2 | 3.70E-06 | 0.81  | 3.46   | -     | 525.8    |
| AHQ-4-5, 4009 - 4033        | R.NPDDITNEEYGEFYK.S                                                     | 1834.87381 | 2 | 2.45E-10 | 0.96  | 4.99   | -     | 1139.7   |
| AHQ-4-5, 3810 - 3817        | R.RAPFDLFENR.K                                                          | 1265.40235 | 2 | 9.80E-06 | 0.89  | 3.60   | -     | 662.6    |
| gi 20070125 ref NP_000909.2 | prolyl 4-hydroxylase, beta subunit; v-erb-a avian erythroblastic leuke  |            |   | 2.58E-10 | 3.59  | 60.24  | 17.50 | 57115.9  |
| AHQ-4-7, 4831               | K.HNQLPLVIEFTQATPK.I                                                    | 1966.22639 | 2 | 3.30E-04 | 0.94  | 4.51   | -     | 741.7    |
| AHQ-4-12, 5814              | K.QPVKVLVKG.N                                                           | 968.21840  | 1 | 2.13E-04 | 0.25  | 2.03   | -     | 422.3    |
| AHQ-4-7, 7521               | R.TGPAATTLPGDAAAESLVESSEVAVIGFFK.D                                      | 2937.24716 | 3 | 2.58E-10 | 0.94  | 4.72   | -     | 1446.4   |
| AHQ-4-7, 3625               | K.THILLFLPK.S                                                           | 1082.36310 | 1 | 3.41E-04 | 0.26  | 2.06   | -     | 302.0    |
| AHQ-4-7, 1943               | K.YKPESEELTAER.I                                                        | 1452.54828 | 1 | 5.24E-07 | 0.31  | 2.64   | -     | 201.5    |
| AHQ-4-7, 1933 - 1941        | K.YKPESEELTAER.I                                                        | 1452.54828 | 2 | 9.75E-05 | 0.65  | 2.61   | -     | 293.7    |
| AHQ-4-7, 3770               | K.YQLDKDQVLLFK.K                                                        | 1425.65394 | 2 | 4.53E-05 | 0.91  | 3.86   | -     | 1056.8   |
| gi 12408656 ref NP_005177.2 | calpain 1, large subunit; calpain, large polypeptide L1; calcium-activ  |            |   | 2.61E-10 | 10.24 | 130.34 | 19.00 | 81889.4  |
| AHQ-4-6, 5018               | K.APSDLYQILK.A                                                          | 1261.49183 | 2 | 3.96E-09 | 0.97  | 3.92   | -     | 1954.5   |
| AHQ-4-6, 6306 - 6310        | R.DM*ETIGFAYVEVPELVGQPAVHLK.R                                           | 2757.15391 | 3 | 8.37E-09 | 0.81  | 3.54   | -     | 816.3    |
| AHQ-4-6, 6684 - 6686        | R.DMETIGFAYVEVPELVGQPAVHLK.R                                            | 2741.15451 | 3 | 5.80E-09 | 0.93  | 4.13   | -     | 1470.4   |
| AHQ-4-6, 6023               | R.FRLPPGEYVVPSTFEPNKEGDFVLR.F                                           | 2994.39160 | 3 | 3.89E-08 | 0.97  | 6.89   | -     | 1513.4   |
| AHQ-4-6, 4104 - 4108        | R.KAPSDLYQILK.A                                                         | 1389.66474 | 2 | 2.88E-07 | 0.94  | 4.43   | -     | 960.6    |
| AHQ-4-6, 4802 - 4863        | R.LEICNLTPDLK.S                                                         | 1388.61207 | 2 | 2.32E-04 | 0.83  | 3.18   | -     | 989.1    |
| AHQ-4-6, 4684 - 4748        | R.LPPGEYVVPSTFEPNKE                                                     | 1874.12573 | 2 | 7.07E-04 | 0.66  | 3.06   | -     | 518.6    |
| AHQ-4-6, 5659 - 5662        | R.LPPGEYVVPSTFEPNKEGDFVLR.F                                             | 2691.03055 | 3 | 1.32E-09 | 0.91  | 4.41   | -     | 743.9    |
| AHQ-4-5, 5733               | R.LPPGEYVVPSTFEPNKEGDFVLR.F                                             | 2691.03055 | 3 | 2.61E-10 | 0.70  | 3.21   | -     | 522.6    |
| AHQ-4-6, 6355 - 6418        | K.LVFWHSAEGNEFWSALLEK.A                                                 | 1277.44364 | 2 | 1.16E-05 | 0.93  | 4.37   | -     | 883.3    |
| AHQ-4-6, 5054               | R.NYPATFVWVNPQFK.I                                                      | 1612.81141 | 2 | 2.50E-04 | 0.90  | 3.02   | -     | 1043.1   |
| AHQ-4-6, 2858               | R.SEQFINLR.E                                                            | 1007.12521 | 1 | 6.48E-06 | 0.16  | 1.83   | -     | 250.2    |
| AHQ-4-6, 2862 - 2867        | R.SEQFINLR.E                                                            | 1007.12521 | 2 | 2.11E-04 | 0.92  | 3.32   | -     | 1185.4   |
| AHQ-4-6, 4158               | K.WNTTLYEGTWR.R                                                         | 1427.54534 | 2 | 1.97E-05 | 0.75  | 2.57   | -     | 655.0    |
| AHQ-4-6, 3071 - 3122        | K.YLGDQYEQLR.V                                                          | 1285.38720 | 2 | 8.36E-07 | 0.69  | 2.83   | -     | 427.1    |
| gi 21361621 ref NP_002624.2 | phosphoglucosylase 1 [Homo sapiens]                                     |            |   | 2.79E-10 | 3.04  | 40.20  | 12.10 | 61448.7  |
| AHQ-4-6, 3690               | K.ADNFEYSDPVDGSGISR.N                                                   | 1772.80725 | 2 | 2.05E-06 | 0.69  | 2.75   | -     | 660.5    |
| AHQ-4-6, 3607               | K.FNISNGGPAEITDK.I                                                      | 1631.76820 | 2 | 2.79E-10 | 0.95  | 4.07   | -     | 1421.4   |
| AHQ-4-6, 3842 - 3844        | K.IALYETPTGWK.F                                                         | 1279.46570 | 2 | 3.59E-05 | 0.64  | 2.79   | -     | 649.3    |
| AHQ-4-6, 7324               | K.VFQSSANYAENFIQSIISTVEPAQR.Q                                           | 2801.06026 | 3 | 1.21E-04 | 0.75  | 3.14   | -     | 782.0    |
| gi 10834976 ref NP_000572.1 | glutathione peroxidase 1 [Homo sapiens]                                 |            |   | 2.91E-10 | 7.45  | 100.27 | 59.70 | 21909.0  |
| AHQ-4-11, 5232              | K.CEVNGAGAHPLFAFLR.E                                                    | 1760.99723 | 2 | 2.91E-10 | 0.94  | 4.12   | -     | 1046.1   |
| AHQ-4-11, 2728 - 2793       | R.DYTQMNELQR.R                                                          | 1298.40778 | 2 | 6.92E-04 | 0.84  | 3.05   | -     | 783.4    |
| AHQ-4-11, 4234              | K.FLVGPDGVPPLR.R                                                        | 1170.38561 | 2 | 6.24E-06 | 0.94  | 3.35   | -     | 1283.1   |
| AHQ-4-11, 3964              | K.FLVGPDGVPPLR.R                                                        | 1170.38561 | 2 | 3.81E-05 | 0.85  | 2.63   | -     | 903.9    |
| AHQ-4-11, 4812              | R.GLVVLGFPNCDFGHQENAK.N                                                 | 2117.37312 | 2 | 1.47E-04 | 0.55  | 2.96   | -     | 356.1    |
| AHQ-4-11, 4966              | R.GLVVLGFPNCDFGHQENAK.N                                                 | 2117.37312 | 2 | 1.58E-05 | 0.30  | 2.57   | -     | 218.5    |
| AHQ-4-11, 3774 - 3802       | R.LAAAAAQVYFASAR.P                                                      | 1497.68025 | 2 | 1.97E-04 | 0.92  | 3.66   | -     | 1334.8   |
| AHQ-4-11, 3128              | R.NDVAWNFEK.F                                                           | 1123.19953 | 1 | 2.03E-04 | 0.26  | 1.93   | -     | 262.2    |
| AHQ-4-11, 3221              | K.NEEILNSL.K.Y                                                          | 1060.18319 | 1 | 1.64E-04 | 0.38  | 2.29   | -     | 271.1    |
| AHQ-4-11, 5453              | R.PGGGFEPNFMFEK.C                                                       | 1570.79310 | 2 | 9.28E-05 | 0.97  | 4.94   | -     | 1130.1   |
| AHQ-4-13-, 3948             | R.PLAGGEPVLSGSLR.G                                                      | 1353.54935 | 2 | 1.83E-04 | 0.88  | 3.11   | -     | 789.7    |
| AHQ-4-14-, 3734 - 3797      | R.PLAGGEPVLSGSLR.G                                                      | 1353.54935 | 2 | 1.02E-09 | 0.94  | 3.75   | -     | 1120.7   |
| AHQ-4-11, 3649 - 3725       | R.PLAGGEPVLSGSLR.G                                                      | 1353.54935 | 2 | 1.50E-07 | 0.95  | 4.94   | -     | 957.5    |
| AHQ-4-11, 3789              | R.PLAGGEPVLSGSLR.G                                                      | 1353.54935 | 2 | 4.51E-08 | 0.95  | 4.10   | -     | 1397.1   |
| AHQ-4-11, 3476              | R.PLAGGEPVLSGSLR.G                                                      | 1353.54935 | 2 | 1.16E-06 | 0.94  | 3.97   | -     | 1134.8   |
| AHQ-4-13, 4090              | R.PLAGGEPVLSGSLR.G                                                      | 1353.54935 | 2 | 8.79E-05 | 0.87  | 3.35   | -     | 774.0    |
| AHQ-4-14, 4880 - 4898       | R.PLAGGEPVLSGSLR.G                                                      | 1353.54935 | 2 | 6.09E-06 | 0.91  | 3.76   | -     | 737.6    |
| AHQ-4-11, 5102              | K.YVRPGGGFEPNFMFEK.C                                                    | 1989.28515 | 3 | 2.30E-06 | 0.96  | 5.46   | -     | 1368.0   |
| AHQ-4-11, 5096              | K.YVRPGGGFEPNFMFEK.C                                                    | 1989.28515 | 2 | 1.37E-05 | 0.96  | 4.90   | -     | 1202.9   |
| gi 4557597 ref NP_001449.1  | gamma filamin; filamin 2; filamin C, gamma (actin-binding protein-280); |            |   | 3.18E-10 | 2.01  | 30.26  | 1.70  | 288897.4 |
| AHQ-4-1, 4793               | R.GQHVPSPGFQFTVGPLGEGGAHK.V                                             | 2305.53673 | 2 | 1.35E-05 | 0.91  | 4.55   | -     | 482.2    |
| AHQ-4-1, 4794 - 4813        | R.GQHVPSPGFQFTVGPLGEGGAHK.V                                             | 2305.53673 | 3 | 2.36E-07 | 0.86  | 4.33   | -     | 450.2    |
| AHQ-4-7, 4053 - 4066        | R.GQHVPSPGFQFTVGPLGEGGAHK.V                                             | 2305.53673 | 2 | 1.08E-06 | 0.93  | 5.19   | -     | 386.5    |
| AHQ-4-7, 4017 - 4057        | R.GQHVPSPGFQFTVGPLGEGGAHK.V                                             | 2305.53673 | 3 | 3.18E-10 | 0.90  | 4.37   | -     | 880.0    |
| AHQ-4-6, 4166               | R.GQHVPSPGFQFTVGPLGEGGAHK.V                                             | 2305.53673 | 2 | 2.12E-04 | 0.87  | 3.95   | -     | 476.7    |
| AHQ-4-2, 4690               | R.GQHVPSPGFQFTVGPLGEGGAHK.V                                             | 2305.53673 | 3 | 7.36E-06 | 0.93  | 4.70   | -     | 763.1    |
| AHQ-4-3, 4663               | R.GQHVPSPGFQFTVGPLGEGGAHK.V                                             | 2305.53673 | 3 | 1.40E-05 | 0.90  | 4.73   | -     | 569.6    |
| AHQ-4-4, 4587               | R.GQHVPSPGFQFTVGPLGEGGAHK.V                                             | 2305.53673 | 3 | 4.69E-08 | 0.88  | 4.24   | -     | 540.6    |
| AHQ-4-5, 4201               | R.GQHVPSPGFQFTVGPLGEGGAHK.V                                             | 2305.53673 | 2 | 5.86E-04 | 0.89  | 4.39   | -     | 411.5    |
| AHQ-4-9, 3753               | R.GQHVPSPGFQFTVGPLGEGGAHK.V                                             | 2305.53673 | 2 | 4.57E-05 | 0.93  | 4.71   | -     | 484.9    |
| AHQ-4-2, 1747 - 1792        | K.IECCDDKDGSDCVR.Y                                                      | 1628.67809 | 2 | 1.08E-05 | 0.83  | 2.89   | -     | 854.2    |
| AHQ-4-2, 1864               | K.IECCDDKDGSDCVR.Y                                                      | 1628.67809 | 2 | 2.17E-04 | 0.87  | 2.87   | -     | 1042.3   |
| AHQ-4-2, 2023               | K.NDNDTFTVK.Y                                                           | 1054.09237 | 1 | 6.71E-06 | 0.28  | 1.83   | -     | 347.3    |
| gi 5803225 ref NP_006752.1  | tyrosine 3/tryptophan 5-monoxygenase activation protein, epsilon poly   |            |   | 3.21E-10 | 2.93  | 50.27  | 27.10 | 29173.7  |
| AHQ-4-13-, 6677             | K.AAFDDAIAELDLSEESYK.D                                                  | 2089.19882 | 2 | 1.07E-08 | 0.97  | 5.43   | -     | 1477.5   |
| AHQ-4-13, 6772              | K.AAFDDAIAELDLSEESYK.D                                                  | 2089.19882 | 2 | 1.57E-04 | 0.97  | 5.26   | -     | 1280.5   |
| AHQ-4-9, 6343               | K.AAFDDAIAELDLSEESYK.D                                                  | 2089.19882 | 2 | 2.58E-07 | 0.86  | 2.99   | -     | 1072.3   |
| AHQ-4-10, 6237 - 6239       | K.AAFDDAIAELDLSEESYK.D                                                  | 2089.19882 | 2 | 4.03E-05 | 0.63  | 3.19   | -     | 480.8    |
| AHQ-4-14-, 6563             | K.AAFDDAIAELDLSEESYK.D                                                  | 2089.19882 | 2 | 3.21E-10 | 0.96  | 4.73   | -     | 1081.2   |
| AHQ-4-9, 6875 - 6877        | K.AAFDDAIAELDLSEESYKDLSTLIMQLLR.D                                       | 3260.61486 | 3 | 5.76E-07 | 0.54  | 3.09   | -     | 608.0    |
| AHQ-4-9, 3137               | K.AASDIAMTELPTTHPIR.L                                                   | 1821.09110 | 2 | 7.75E-04 | 0.30  | 2.74   | -     | 215.6    |
| AHQ-4-9, 2241               | K.EAAENSLVAYK.A                                                         | 1195.30397 | 2 | 9.62E-06 | 0.61  | 2.95   | -     | 578.1    |
| AHQ-4-9, 1551 - 1553        | K.HLIPAAANTGESK.V                                                       | 1238.37521 | 1 | 3.75E-05 | 0.53  | 2.39   | -     | 558.4    |
| gi 4503327 ref NP_000389.1  | cytochrome b5 reductase membrane-bound isoform; diaphorase (NADH) [Homo |            |   | 3.29E-10 | 6.35  | 80.35  | 36.20 | 34234.6  |
| AHQ-4-9, 4188 - 4199        | K.DILLRPELELR.N                                                         | 1496.73370 | 2 | 3.46E-05 | 0.88  | 3.43   | -     | 872.8    |
| AHQ-4-9, 5507 - 5571        | R.FALPSPQHILGLPVGQHIYLSAR.I                                             | 2515.94007 | 2 | 1.65E-06 | 0.94  | 4.67   | -     | 703.5    |
| AHQ-4-9, 5508               | R.FALPSPQHILGLPVGQHIYLSAR.I                                             | 2515.94007 | 3 | 1.66E-09 | 0.95  | 4.90   | -     | 1327.2   |
| AHQ-4-9, 2543               | R.GPSGLLVYGGK.G                                                         | 1119.29547 | 1 | 4.04E-05 | 0.77  | 3.16   | -     | 439.9    |
| AHQ-4-9, 5388 - 5463        | R.IDGNLVRVPTPISSDDDKGFVDLVK.V                                           | 2977.35765 | 3 | 3.23E-07 | 0.98  | 7.03   | -     | 1782.2   |
| AHQ-4-9, 4699               | R.PYTPISSDDDKGFVDLVK.V                                                  | 2110.34914 | 2 | 3.18E-04 | 0.93  | 4.38   | -     | 1048.7   |
| AHQ-4-9, 3148               | R.STPAITLESPIK.Y                                                        | 1372.54621 | 1 | 3.08E-05 | 0.61  | 3.33   | -     | 400.5    |
| AHQ-4-9, 4035 - 4051        | R.STPAITLESPIK.Y                                                        | 1902.18061 | 2 | 3.29E-10 | 0.92  | 4.35   | -     | 648.0    |
| AHQ-4-9, 4515               | K.SVGMAGGTGIPM*LQVIR.A                                                  | 1918.31483 | 2 | 1.23E-05 | 0.31  | 2.78   | -     | 334.7    |
| gi 5031593 ref NP_005708.1  | actin related protein 2/3 complex subunit 5; Arp2/3 protein complex sub |            |   | 3.65E-10 | 5.53  | 60.26  | 53.60 | 16320.3  |
| AHQ-4-12, 2914 - 2935       | K.ALAAGGVGSIVR.V                                                        | 1071.25558 | 2 | 1.70E-05 | 0.98  | 4.62   | -     | 2493.0   |
| AHQ-4-14-, 2902             | K.ALAAGGVGSIVR.V                                                        | 1071.25558 | 2 | 4.20E-06 | 0.97  | 3.98   | -     | 2367.9   |
| AHQ-4-12, 3467              | K.AVQSLDKNGVDLLM*K.Y                                                    | 1647.91883 | 2 | 1.19E-05 | 0.85  | 3.61   | -     | 629.7    |
| AHQ-4-12, 4030 - 4098       | K.AVQSLDKNGVDLLM*K.Y                                                    | 1631.91943 | 2 | 2.61E-08 | 0.96  | 5.15   | -     | 1377.7   |
| AHQ-4-12, 4243 - 4254       | K.GFESPSDSSAM*LLQWHEK.A                                                 | 2180.33989 | 2 | 3.63E-08 | 0.91  | 3.94   | -     | 668.7    |
| AHQ-4-12, 4573 - 4574       | K.GFESPSDSSAM*LLQWHEK.A                                                 | 2164.34049 | 2 | 3.65E-10 | 0.95  | 4.76   | -     | 1051.6   |
| AHQ-4-12, 4753              | K.GFESPSDSSAM*LLQWHEK.A                                                 | 2164.34049 | 2 | 1.33E-05 | 0.81  | 3.56   | -     | 525.4    |
| AHQ-4-12, 4141              | K.GFESPSDSSAM*LLQWHEK.A                                                 | 2180.33989 | 2 | 1.20E-06 | 0.86  | 3.47   | -     | 798.5    |

|                             |                                                                          |            |   |          |       |        |       |         |
|-----------------------------|--------------------------------------------------------------------------|------------|---|----------|-------|--------|-------|---------|
| AHQ-4-12, 4391 - 4462       | R.KVDVDEYDENKFDVEEDGGDQAGPDEGEVDSCLR.Q                                   | 3890.92031 | 3 | 3.46E-05 | 0.89  | 4.92   | -     | 628.4   |
| gi 30159310 ref XP_301899.1 | similar to beta-actin [Homo sapiens]                                     |            |   | 3.71E-10 | 1.53  | 20.18  | 9.20  | 32376.4 |
| AHQ-4-5, 1496               | K.DSYVGNQAGSK.R                                                          | 1198.22158 | 1 | 5.82E-04 | 0.49  | 2.25   | -     | 338.0   |
| AHQ-4-8, 1419 - 1792        | K.DSYVGNQAGSK.R                                                          | 1198.22158 | 1 | 3.71E-10 | 0.65  | 2.87   | -     | 376.8   |
| AHQ-4-8, 1451 - 1526        | K.DSYVGNQAGSK.R                                                          | 1198.22158 | 2 | 7.19E-05 | 0.58  | 2.55   | -     | 620.9   |
| AHQ-4-12, 1871              | K.DSYVGNQAGSK.R                                                          | 1198.22158 | 1 | 1.26E-04 | 0.14  | 1.89   | -     | 210.4   |
| AHQ-4-9, 1499               | K.DSYVGNQAGSK.R                                                          | 1198.22158 | 1 | 3.65E-05 | 0.45  | 2.37   | -     | 329.3   |
| AHQ-4-13, 1775 - 1899       | K.DSYVGNQAGSK.R                                                          | 1198.22158 | 1 | 1.54E-09 | 0.43  | 2.20   | -     | 377.1   |
| AHQ-4-12, 1631 - 1766       | K.DSYVGNQAGSK.R                                                          | 1198.22158 | 1 | 2.41E-07 | 0.71  | 2.74   | -     | 531.3   |
| AHQ-4-12, 4905 - 4939       | K.SYKLLDQVITIGNER.F                                                      | 1807.04092 | 2 | 4.54E-04 | 0.60  | 2.88   | -     | 354.7   |
| AHQ-4-10, 4125 - 4127       | K.SYKLLDQVITIGNER.F                                                      | 1807.04092 | 2 | 2.64E-05 | 0.72  | 2.90   | -     | 522.0   |
| AHQ-4-8, 4519 - 4597        | K.SYKLLDQVITIGNER.F                                                      | 1807.04092 | 2 | 1.94E-05 | 0.88  | 3.55   | -     | 770.4   |
| gi 4504345 ref NP_000508.1  | alpha 2 globin [Homo sapiens]                                            |            |   | 3.94E-10 | 3.79  | 40.32  | 50.70 | 15257.4 |
| AHQ-4-13, 4372              | K.FLASVSTVLTSK.Y                                                         | 1253.46970 | 2 | 2.05E-04 | 0.80  | 2.70   | -     | 899.4   |
| AHQ-4-13-, 4240 - 4246      | K.FLASVSTVLTSK.Y                                                         | 1253.46970 | 2 | 4.41E-09 | 0.93  | 3.87   | -     | 1296.5  |
| AHQ-4-13, 4125              | K.TYFPHFDLSHGSAQVK.G                                                     | 1835.01138 | 3 | 5.19E-06 | 0.90  | 4.06   | -     | 975.8   |
| AHQ-4-13-, 4002             | K.TYFPHFDLSHGSAQVK.G                                                     | 1835.01138 | 3 | 1.87E-09 | 0.91  | 3.65   | -     | 977.4   |
| AHQ-4-13-, 4005 - 4008      | K.TYFPHFDLSHGSAQVK.G                                                     | 1835.01138 | 2 | 3.94E-10 | 0.95  | 4.33   | -     | 1097.1  |
| AHQ-4-13, 4124              | K.TYFPHFDLSHGSAQVK.G                                                     | 1835.01138 | 2 | 2.18E-07 | 0.90  | 3.74   | -     | 695.4   |
| AHQ-4-13-, 5532             | K.VADALTNAVAHVDDMPNALSALSDLHAHK.L                                        | 3014.31995 | 3 | 5.93E-05 | 0.96  | 5.88   | -     | 1391.6  |
| AHQ-4-13-, 2549             | K.VGAHAGEYGAEALER.M                                                      | 1530.62397 | 2 | 7.87E-10 | 0.95  | 4.20   | -     | 1229.4  |
| AHQ-4-13, 2669              | K.VGAHAGEYGAEALER.M                                                      | 1530.62397 | 3 | 7.66E-06 | 0.98  | 6.34   | -     | 2321.7  |
| AHQ-4-13, 2653              | K.VGAHAGEYGAEALER.M                                                      | 1530.62397 | 2 | 1.97E-08 | 0.97  | 4.25   | -     | 1588.7  |
| gi 7705855 ref NP_057226.1  | steroid dehydrogenase homolog; likely ortholog of mouse Kik1 steroid de  |            |   | 4.00E-10 | 0.97  | 10.21  | 4.80  | 34323.9 |
| AHQ-4-9, 5680               | K.TFVDFSSQLCHEEYR.S                                                      | 1980.14540 | 2 | 4.00E-10 | 0.97  | 4.26   | -     | 1709.3  |
| gi 5174731 ref NP_005990.1  | translin-associated factor X; translin-like protein [Homo sapiens] [MAS  |            |   | 4.19E-10 | 0.95  | 10.23  | 6.60  | 33112.2 |
| AHQ-4-9, 6844               | R.VTPVYLLGVADLTGELMR.M                                                   | 2063.40379 | 2 | 4.19E-10 | 0.95  | 4.62   | -     | 966.3   |
| gi 14211923 ref NP_115982.1 | PKC1-1-related HIT protein [Homo sapiens]                                |            |   | 4.24E-10 | 2.25  | 30.29  | 32.50 | 17161.6 |
| AHQ-4-13, 3406              | K.AQAQATPQGAAPTIFSR.I                                                    | 1573.73512 | 2 | 1.43E-09 | 0.83  | 3.65   | -     | 401.1   |
| AHQ-4-13, 6252              | R.ISQAEEDDQQLLGHLLVAK.Q                                                  | 2235.52293 | 3 | 4.15E-08 | 0.85  | 3.78   | -     | 756.0   |
| AHQ-4-13, 6253 - 6257       | R.ISQAEEDDQQLLGHLLVAK.Q                                                  | 2235.52293 | 2 | 4.33E-08 | 0.96  | 5.56   | -     | 1032.6  |
| AHQ-4-13-, 6196             | R.ISQAEEDDQQLLGHLLVAK.Q                                                  | 2235.52293 | 3 | 4.24E-10 | 0.79  | 3.22   | -     | 868.0   |
| AHQ-4-13-, 6209             | R.ISQAEEDDQQLLGHLLVAK.Q                                                  | 2235.52293 | 2 | 1.29E-07 | 0.96  | 5.70   | -     | 1147.7  |
| AHQ-4-13-, 6184 - 6198      | K.SLPADILYEDQQCLVFR.D                                                    | 2069.32354 | 2 | 5.29E-04 | 0.83  | 3.36   | -     | 616.5   |
| AHQ-4-13, 6213 - 6278       | K.SLPADILYEDQQCLVFR.D                                                    | 2069.32354 | 2 | 7.53E-05 | 0.63  | 3.05   | -     | 162.8   |
| gi 4502295 ref NP_001677.1  | ATP synthase, H+ transporting, mitochondrial F1 complex, beta polypepti  |            |   | 4.56E-10 | 10.74 | 130.27 | 31.20 | 57955.2 |
| AHQ-4-7, 5538 - 5561        | R.AIAELGIYPAVDPLDSTR.I                                                   | 1989.21513 | 2 | 2.46E-04 | 0.58  | 2.95   | -     | 361.9   |
| AHQ-4-7, 6047               | R.FLSQFPQVAEYVFTGHMGK.L                                                  | 2024.33104 | 3 | 6.37E-05 | 0.83  | 4.04   | -     | 423.9   |
| AHQ-4-7, 4258 - 4281        | R.FTQAGSEVALLGR.I                                                        | 1436.59522 | 2 | 3.15E-07 | 0.96  | 4.66   | -     | 1393.7  |
| AHQ-4-7, 7278               | K.GFQQILAGEYDHLPEQAFYM*VGPIEEAVAK.A                                      | 3368.75991 | 3 | 4.56E-10 | 0.95  | 4.82   | -     | 1313.3  |
| AHQ-4-7, 7414               | K.GFQQILAGEYDHLPEQAFYM*VGPIEEAVAK.A                                      | 3352.76051 | 3 | 2.82E-09 | 0.94  | 5.47   | -     | 863.8   |
| AHQ-4-7, 3379               | R.IMDPNVIGSEHYDVAR.G                                                     | 1817.01617 | 2 | 5.60E-07 | 0.87  | 3.82   | -     | 639.5   |
| AHQ-4-7, 3578               | R.IMNVIGEPIDER.I                                                         | 1386.59962 | 2 | 1.83E-04 | 0.91  | 3.40   | -     | 1070.2  |
| AHQ-4-7, 2635               | K.IPVGPETLGR.I                                                           | 1039.21035 | 2 | 2.87E-04 | 0.87  | 2.86   | -     | 736.5   |
| AHQ-4-7, 2639               | K.IPVGPETLGR.I                                                           | 1039.21035 | 1 | 1.04E-05 | 0.36  | 2.02   | -     | 229.4   |
| AHQ-4-7, 3941               | R.LVLEVAQLHGESTVR.T                                                      | 1651.88893 | 2 | 1.49E-08 | 0.97  | 4.71   | -     | 1452.7  |
| AHQ-4-7, 3223               | K.VALVYQGMNQPPGAR.A                                                      | 1601.85511 | 2 | 2.21E-07 | 0.91  | 3.79   | -     | 836.5   |
| AHQ-4-7, 2651               | K.VALVYQGM*NPQPPGAR.A                                                    | 1617.85451 | 2 | 5.92E-04 | 0.77  | 3.09   | -     | 609.5   |
| AHQ-4-7, 4494               | K.VLDSGAPKIPVGPETLGR.I                                                   | 1920.24231 | 2 | 1.34E-06 | 0.88  | 4.28   | -     | 385.7   |
| AHQ-4-7, 3734               | K.VVDLLAPYAK.G                                                           | 1089.30927 | 2 | 7.05E-04 | 0.81  | 2.64   | -     | 867.6   |
| gi 29739414 ref XP_294015.1 | similar to Glyceraldehyde 3-phosphate dehydrogenase, liver (GAPDH) [Ho   |            |   | 4.80E-10 | 2.57  | 30.24  | 17.70 | 26916.7 |
| AHQ-4-12, 4001              | K.IISNASCTTNCLAPLAK.V                                                    | 1837.10868 | 2 | 8.61E-07 | 0.56  | 3.29   | -     | 711.3   |
| AHQ-4-9, 3465 - 3507        | K.IISNASCTTNCLAPLAK.V                                                    | 1837.10868 | 2 | 1.24E-06 | 0.91  | 4.28   | -     | 1380.4  |
| AHQ-4-9, 3568 - 3639        | K.IISNASCTTNCLAPLAK.V                                                    | 1837.10868 | 2 | 8.70E-09 | 0.82  | 3.90   | -     | 1081.1  |
| AHQ-4-9, 3788 - 3856        | K.IISNASCTTNCLAPLAK.V                                                    | 1837.10868 | 2 | 5.58E-06 | 0.90  | 3.61   | -     | 1303.3  |
| AHQ-4-9, 3899 - 3969        | K.IISNASCTTNCLAPLAK.V                                                    | 1837.10868 | 2 | 2.27E-06 | 0.89  | 4.15   | -     | 1334.9  |
| AHQ-4-11, 4050              | K.IISNASCTTNCLAPLAK.V                                                    | 1837.10868 | 2 | 4.97E-06 | 0.80  | 3.49   | -     | 1090.9  |
| AHQ-4-9, 4732               | K.LISWYDNEFGYSNR.V                                                       | 1764.87478 | 2 | 7.63E-04 | 0.65  | 2.96   | -     | 429.3   |
| AHQ-4-14-, 4929             | K.LISWYDNEFGYSNR.V                                                       | 1764.87478 | 2 | 2.06E-08 | 0.97  | 4.73   | -     | 1743.3  |
| AHQ-4-9, 4445 - 4507        | K.LISWYDNEFGYSNR.V                                                       | 1764.87478 | 2 | 2.09E-09 | 0.94  | 4.38   | -     | 938.6   |
| AHQ-4-9, 4635               | K.LISWYDNEFGYSNR.V                                                       | 1764.87478 | 2 | 4.22E-08 | 0.93  | 4.18   | -     | 814.1   |
| AHQ-4-11, 4742 - 4804       | K.LISWYDNEFGYSNR.V                                                       | 1764.87478 | 2 | 5.17E-07 | 0.84  | 3.28   | -     | 852.6   |
| AHQ-4-11, 4878 - 4950       | K.LISWYDNEFGYSNR.V                                                       | 1764.87478 | 2 | 3.42E-07 | 0.95  | 4.21   | -     | 949.6   |
| AHQ-4-10, 4548              | K.LISWYDNEFGYSNR.V                                                       | 1764.87478 | 2 | 4.62E-08 | 0.96  | 4.44   | -     | 1396.9  |
| AHQ-4-13, 5102              | K.LISWYDNEFGYSNR.V                                                       | 1764.87478 | 2 | 5.14E-08 | 0.96  | 4.46   | -     | 1323.5  |
| AHQ-4-14, 6296 - 6297       | K.LISWYDNEFGYSNR.V                                                       | 1764.87478 | 2 | 4.80E-10 | 0.96  | 4.62   | -     | 1150.1  |
| AHQ-4-13-, 4980             | K.LISWYDNEFGYSNR.V                                                       | 1764.87478 | 2 | 7.23E-09 | 0.96  | 4.43   | -     | 1337.6  |
| AHQ-4-9, 1941               | R.VVDLMAHIM*ASKE                                                         | 1347.58686 | 1 | 1.75E-05 | 0.78  | 3.11   | -     | 352.6   |
| gi 7656991 ref NP_055140.1  | coronin, actin binding protein, 1C; coronin, actin-binding protein, 1C;  |            |   | 4.83E-10 | 7.23  | 90.27  | 25.70 | 53248.7 |
| AHQ-4-6, 5823 - 5862        | R.AIFLDAGNVFTGFSSR.M                                                     | 1716.91793 | 2 | 1.79E-05 | 0.96  | 4.64   | -     | 1281.7  |
| AHQ-4-6, 5980 - 5986        | R.AIFLDAGNVFTGFSSR.M                                                     | 1716.91793 | 2 | 4.65E-06 | 0.97  | 4.63   | -     | 1775.2  |
| AHQ-4-6, 3688               | K.CDLISIPK.K                                                             | 947.13128  | 2 | 6.58E-05 | 0.80  | 2.82   | -     | 700.0   |
| AHQ-4-6, 2908               | R.HVFGQAVKNDQCYYDIR.V                                                    | 2067.22783 | 2 | 5.12E-09 | 0.95  | 5.21   | -     | 880.1   |
| AHQ-4-6, 3019               | R.KCEPIIMTVPR.K                                                          | 1345.65706 | 2 | 1.57E-04 | 0.81  | 2.83   | -     | 587.9   |
| AHQ-4-7, 2926               | R.KCEPIIMTVPR.K                                                          | 1345.65706 | 2 | 1.95E-04 | 0.71  | 2.67   | -     | 629.1   |
| AHQ-4-6, 7122               | R.KSDFLQDDLYPDTAGPEAALEAEWFEGK.N                                         | 3273.46087 | 3 | 4.83E-10 | 0.95  | 5.36   | -     | 1114.3  |
| AHQ-4-7, 7313               | R.KSDFLQDDLYPDTAGPEAALEAEWFEGK.N                                         | 3273.46087 | 3 | 2.36E-09 | 0.95  | 5.32   | -     | 1165.6  |
| AHQ-4-6, 3714               | K.NADPILISLK.H                                                           | 1084.29103 | 1 | 2.01E-04 | 0.11  | 2.09   | -     | 233.8   |
| AHQ-4-6, 2120               | K.NDQCYDIR.V                                                             | 1200.21762 | 2 | 1.11E-04 | 0.89  | 3.20   | -     | 1177.7  |
| AHQ-4-6, 2660               | R.VGIVAWHPTAR.N                                                          | 1207.40918 | 3 | 2.83E-04 | 0.82  | 3.52   | -     | 719.6   |
| AHQ-4-7, 6010               | R.YFEITDESPYVHYLNTFSSK.E                                                 | 2441.63258 | 3 | 4.85E-08 | 0.92  | 4.34   | -     | 801.2   |
| AHQ-4-7, 5997 - 6001        | R.YFEITDESPYVHYLNTFSSK.E                                                 | 2441.63258 | 2 | 4.74E-04 | 0.74  | 2.81   | -     | 729.1   |
| AHQ-4-10, 5497 - 5501       | R.YFEITDESPYVHYLNTFSSK.E                                                 | 2441.63258 | 3 | 3.67E-06 | 0.79  | 3.73   | -     | 688.8   |
| AHQ-4-6, 6060 - 6064        | R.YFEITDESPYVHYLNTFSSK.E                                                 | 2441.63258 | 2 | 1.63E-07 | 0.94  | 4.83   | -     | 786.3   |
| gi 4507521 ref NP_001055.1  | transketolase [Homo sapiens]                                             |            |   | 4.87E-10 | 0.90  | 10.19  | 3.00  | 67877.3 |
| AHQ-4-6, 4574               | K.ILATPPQEDAPSVDIANIR.M                                                  | 2021.26036 | 2 | 4.87E-10 | 0.90  | 3.83   | -     | 613.8   |
| gi 30148492 ref XP_293610.2 | similar to Heat shock cognate 71 kDa protein [Homo sapiens]              |            |   | 4.89E-10 | 1.76  | 20.23  | 2.60  | 72113.4 |
| AHQ-4-6, 4598 - 4606        | R.IINEPTAAAIAYGLDK.K                                                     | 1660.89259 | 2 | 4.85E-07 | 0.88  | 4.29   | -     | 917.9   |
| AHQ-4-7, 4554               | R.IINEPTAAAIAYGLDK.K                                                     | 1660.89259 | 2 | 4.89E-10 | 0.95  | 4.66   | -     | 816.6   |
| AHQ-4-6, 4026               | R.IINEPTAAAIAYGLDK.K                                                     | 1789.06550 | 3 | 9.27E-09 | 0.81  | 3.53   | -     | 449.7   |
| gi 4505735 ref NP_002611.1  | platelet factor 4 variant 1; Platelet factor 4, variant 1 (PF4-like) [H  |            |   | 4.93E-10 | 0.97  | 10.25  | 14.40 | 11552.6 |
| AHQ-4-14, 4801 - 4881       | R.AEAEEDGDLQCLCVK.T                                                      | 1739.86036 | 2 | 1.00E-09 | 0.94  | 4.28   | -     | 1194.2  |
| AHQ-4-14-, 3685 - 3762      | R.AEAEEDGDLQCLCVK.T                                                      | 1739.86036 | 2 | 4.93E-10 | 0.97  | 4.94   | -     | 1372.0  |
| AHQ-4-14, 4693 - 4697       | R.AEAEEDGDLQCLCVK.T                                                      | 1739.86036 | 2 | 2.11E-06 | 0.93  | 4.09   | -     | 851.3   |
| gi 4502969 ref NP_000745.1  | catechol-O-methyltransferase isoform MB-COMT [Homo sapiens]              |            |   | 4.94E-10 | 0.94  | 10.21  | 5.50  | 30036.9 |
| AHQ-4-10, 6065 - 6072       | R.YLPDTHLLLECGLLR.K                                                      | 1807.10089 | 2 | 4.94E-10 | 0.94  | 4.14   | -     | 1234.2  |
| gi 6857820 ref NP_005019.2  | phosphatidylinositol 4-phosphatase 5-kinase type II alpha; 1-phosphatidy |            |   | 5.51E-10 | 1.93  | 20.28  | 7.60  | 46224.3 |
| AHQ-4-7, 4546 - 4547        | R.FGIDDQDFGNLSLR.S                                                       | 1656.73462 | 2 | 5.51E-10 | 0.95  | 4.83   | -     | 1390.4  |
| AHQ-4-7, 2469 - 2471        | K.HGAGAEISTVNPQEYSK.R                                                    | 1788.89618 | 2 | 2.79E-07 | 0.98  | 5.53   | -     | 2044.8  |
| gi 11559923 ref NP_071496.1 | eukaryotic translation initiation factor 4H isoform 1 [Homo sapiens] [   |            |   | 5.83E-10 | 0.93  | 10.26  | 11.70 | 27384.8 |
| AHQ-4-11, 6832              | K.ELTPPEPYAYVGNLPFNTVQGDIDAIK.F                                          | 3211.56532 | 3 | 5.83E-10 | 0.93  | 5.23   | -     | 841.9   |
| gi 5729997 ref NP_004154.2  | RAB27B, member RAS oncogene family [Homo sapiens]                        |            |   | 5.94E-10 | 6.11  | 70.24  | 34.90 | 24607.7 |
| AHQ-4-11, 6500              | K.AVETLLDIMK.R                                                           | 1246.54211 | 2 | 3.68E-05 | 0.88  | 3.73   | -     | 719.4   |
| AHQ-4-11, 5588              | K.AVETLLDIMK.R                                                           | 1262.54151 | 2 | 1.64E-05 | 0.87  | 2.91   | -     | 1150.6  |
| AHQ-4-10, 5229              | K.AVETLLDIMK.R                                                           | 1262.54151 | 2 | 1.44E-05 | 0.84  | 3.23   | -     | 669.8   |
| AHQ-4-10, 6167              | K.AVETLLDIMK.R                                                           | 1246.54211 | 2 | 1.50E-06 | 0.86  | 3.80   | -     | 561.2   |
| AHQ-4-13, 3159              | K.LLALGDSGVGK.T                                                          | 1030.20023 | 1 | 1.45E-04 | 0.76  | 2.58   | -     | 746.4   |

|                             |                                                                         |            |   |          |      |       |       |          |
|-----------------------------|-------------------------------------------------------------------------|------------|---|----------|------|-------|-------|----------|
| AHQ-4-10, 5928 - 5929       | R.NWMSQLQANAYCENPDIVLIGNK.A                                             | 2680.99772 | 2 | 4.05E-07 | 0.86 | 3.95  | -     | 565.4    |
| AHQ-4-10, 5215              | R.NWM*SQLQANAYCENPDIVLIGNK.A                                            | 2696.99712 | 2 | 3.41E-06 | 0.87 | 3.59  | -     | 688.8    |
| AHQ-4-11, 6226              | R.NWMSQLQANAYCENPDIVLIGNK.A                                             | 2680.99772 | 2 | 2.61E-04 | 0.78 | 3.15  | -     | 767.4    |
| AHQ-4-10, 5743              | R.NWMSQLQANAYCENPDIVLIGNK.A                                             | 2680.99772 | 2 | 8.24E-05 | 0.89 | 4.08  | -     | 641.1    |
| AHQ-4-11, 3461              | K.VHLQLWDTAGQER.F                                                       | 1553.70390 | 2 | 8.83E-07 | 0.96 | 4.16  | -     | 1524.5   |
| AHQ-4-10, 3303              | K.VHLQLWDTAGQER.F                                                       | 1553.70390 | 2 | 1.27E-08 | 0.96 | 4.41  | -     | 1535.0   |
| AHQ-4-10, 4056 - 4088       | K.YGIPYFETSAAATGQNVK.A                                                  | 1976.13177 | 2 | 3.10E-05 | 0.76 | 2.66  | -     | 783.9    |
| AHQ-4-12, 4495 - 4561       | K.YGIPYFETSAAATGQNVK.A                                                  | 1976.13177 | 2 | 3.76E-04 | 0.55 | 2.61  | -     | 661.2    |
| AHQ-4-10, 4147 - 4225       | K.YGIPYFETSAAATGQNVK.A                                                  | 1976.13177 | 2 | 5.94E-10 | 0.95 | 4.80  | -     | 718.8    |
| AHQ-4-11, 4389              | K.YGIPYFETSAAATGQNVK.A                                                  | 1976.13177 | 2 | 1.21E-09 | 0.95 | 4.30  | -     | 1285.2   |
| gj 4503747 ref NP_001448.1  | filamin B, beta (actin binding protein 278); beta filamin; filamin 1 (a |            |   | 6.01E-10 | 3.91 | 50.25 | 1.40  | 278191.4 |
| AHQ-4-1, 3630 - 3715        | K.DLAEDAPWK.K                                                           | 1045.12708 | 1 | 2.46E-06 | 0.34 | 1.97  | -     | 495.3    |
| AHQ-4-1, 3731               | K.DLAEDAPWK.K                                                           | 1045.12708 | 2 | 1.49E-04 | 0.86 | 2.96  | -     | 894.0    |
| AHQ-4-4, 3603               | K.DLAEDAPWK.K                                                           | 1045.12708 | 1 | 1.47E-06 | 0.36 | 1.83  | -     | 677.7    |
| AHQ-4-3, 3635               | K.DLAEDAPWK.K                                                           | 1045.12708 | 1 | 4.88E-06 | 0.45 | 2.18  | -     | 523.7    |
| AHQ-4-2, 3656               | K.DLAEDAPWK.K                                                           | 1045.12708 | 1 | 6.50E-06 | 0.33 | 2.08  | -     | 499.8    |
| AHQ-4-2, 3674               | K.DLAEDAPWK.K                                                           | 1045.12708 | 1 | 5.69E-06 | 0.65 | 2.69  | -     | 630.5    |
| AHQ-4-5, 3459 - 3466        | K.DLAEDAPWK.K                                                           | 1045.12708 | 1 | 5.74E-06 | 0.38 | 2.33  | -     | 543.2    |
| AHQ-4-1, 3083               | K.DLAEDAPWK.K                                                           | 1173.29999 | 2 | 1.66E-04 | 0.76 | 2.76  | -     | 876.8    |
| AHQ-4-6, 6290               | R.LIALLEVLQSK.R                                                         | 1227.51852 | 2 | 7.56E-08 | 0.96 | 4.30  | -     | 1093.2   |
| AHQ-4-3, 6585 - 6616        | R.LIALLEVLQSK.R                                                         | 1227.51852 | 2 | 1.94E-07 | 0.97 | 5.02  | -     | 1226.9   |
| AHQ-4-1, 6598               | R.LIALLEVLQSK.R                                                         | 1227.51852 | 2 | 1.26E-08 | 0.97 | 4.50  | -     | 1455.5   |
| AHQ-4-4, 6570               | R.LIALLEVLQSK.R                                                         | 1227.51852 | 2 | 4.39E-07 | 0.97 | 4.99  | -     | 1405.1   |
| AHQ-4-2, 6648               | R.LIALLEVLQSK.R                                                         | 1227.51852 | 2 | 6.01E-10 | 0.97 | 4.98  | -     | 1378.8   |
| AHQ-4-11, 6000              | R.LIALLEVLQSK.R                                                         | 1227.51852 | 2 | 1.62E-08 | 0.96 | 4.38  | -     | 1233.5   |
| AHQ-4-5, 6298 - 6363        | R.LIALLEVLQSK.R                                                         | 1227.51852 | 2 | 5.58E-07 | 0.97 | 4.70  | -     | 1339.3   |
| AHQ-4-2, 6675 - 6743        | R.QM*QLENVSALEFLDR.E                                                    | 1909.15348 | 2 | 8.58E-06 | 0.88 | 4.35  | -     | 652.4    |
| AHQ-4-1, 7162 - 7167        | R.QM*QLENVSALEFLDR.E                                                    | 1893.15408 | 2 | 7.39E-04 | 0.94 | 4.59  | -     | 866.0    |
| gj 13775198 ref NP_112576.1 | SH3 domain binding glutamic acid-rich protein like 3; SH3BGL3-like pr   |            |   | 6.03E-10 | 4.24 | 50.29 | 32.30 | 10437.7  |
| AHQ-4-14, 4638              | R.IYQYQLVDSQDNALR.D                                                     | 1776.97168 | 2 | 6.03E-10 | 0.96 | 4.72  | -     | 1822.8   |
| AHQ-4-13, 4684 - 4697       | R.IYQYQLVDSQDNALR.D                                                     | 1776.97168 | 2 | 9.40E-09 | 0.97 | 5.73  | -     | 1525.9   |
| AHQ-4-13, 4766 - 4833       | R.IYQYQLVDSQDNALR.D                                                     | 1776.97168 | 2 | 8.97E-08 | 0.95 | 4.69  | -     | 1415.7   |
| AHQ-4-14, 5876 - 5942       | R.IYQYQLVDSQDNALR.D                                                     | 1776.97168 | 2 | 4.26E-04 | 0.95 | 3.80  | -     | 1856.8   |
| AHQ-4-13, 4729 - 4808       | R.IYQYQLVDSQDNALR.D                                                     | 1776.97168 | 2 | 1.92E-05 | 0.97 | 4.78  | -     | 1659.7   |
| AHQ-4-13, 4704              | R.IYQYQLVDSQDNALR.D                                                     | 1776.97168 | 3 | 1.35E-07 | 0.97 | 5.55  | -     | 2047.2   |
| AHQ-4-13, 5049 - 5113       | R.IYQYQLVDSQDNALRDEM.R.A                                                | 2308.55751 | 2 | 8.28E-04 | 0.91 | 4.47  | -     | 692.2    |
| AHQ-4-13, 5177 - 5248       | R.IYQYQLVDSQDNALRDEM.R.A                                                | 2308.55751 | 3 | 1.54E-06 | 0.80 | 3.91  | -     | 498.7    |
| AHQ-4-14, 5602 - 5680       | R.IYQYQLVDSQDNALRDEM*R.A                                                | 2324.55691 | 3 | 1.50E-06 | 0.77 | 3.46  | -     | 520.9    |
| AHQ-4-14, 5690 - 5770       | R.IYQYQLVDSQDNALRDEM*R.A                                                | 2324.55691 | 3 | 4.93E-07 | 0.75 | 3.47  | -     | 541.6    |
| AHQ-4-13, 4605              | R.IYQYQLVDSQDNALRDEM*R.A                                                | 2324.55691 | 3 | 2.74E-07 | 0.72 | 3.19  | -     | 514.1    |
| AHQ-4-13, 5028 - 5096       | R.IYQYQLVDSQDNALRDEM.R.A                                                | 2308.55751 | 3 | 6.90E-06 | 0.76 | 3.40  | -     | 635.5    |
| AHQ-4-13, 4898 - 4964       | R.IYQYQLVDSQDNALRDEM.R.A                                                | 2308.55751 | 3 | 1.22E-04 | 0.73 | 3.23  | -     | 528.1    |
| AHQ-4-14, 4917 - 4977       | R.IYQYQLVDSQDNALRDEM.R.A                                                | 2308.55751 | 3 | 1.02E-06 | 0.74 | 3.62  | -     | 378.6    |
| AHQ-4-13, 5088 - 5122       | R.IYQYQLVDSQDNALRDEM.R.A                                                | 2308.55751 | 2 | 2.26E-04 | 0.90 | 4.34  | -     | 580.9    |
| AHQ-4-13, 4208              | R.IYQYQLVDSQDNALRDEM*R.A                                                | 2324.55691 | 3 | 5.91E-06 | 0.76 | 3.13  | -     | 733.2    |
| AHQ-4-13, 4305 - 4384       | R.IYQYQLVDSQDNALRDEM*R.A                                                | 2324.55691 | 3 | 9.55E-04 | 0.72 | 3.04  | -     | 343.6    |
| AHQ-4-13, 4397 - 4460       | R.IYQYQLVDSQDNALRDEM*R.A                                                | 2324.55691 | 3 | 1.75E-05 | 0.77 | 3.10  | -     | 619.5    |
| AHQ-4-13, 4537              | R.IYQYQLVDSQDNALRDEM*R.A                                                | 2324.55691 | 3 | 1.09E-06 | 0.70 | 3.05  | -     | 653.1    |
| AHQ-4-14, 4463              | R.IYQYQLVDSQDNALRDEM*R.A                                                | 2324.55691 | 3 | 1.91E-05 | 0.72 | 3.29  | -     | 372.0    |
| AHQ-4-13, 4692              | R.IYQYQLVDSQDNALRDEM*R.A                                                | 2324.55691 | 3 | 6.17E-08 | 0.67 | 3.27  | -     | 372.9    |
| AHQ-4-13, 4373              | K.RIQYQLVDSQDNALR.D                                                     | 1933.15803 | 2 | 1.04E-05 | 0.94 | 4.84  | -     | 864.8    |
| AHQ-4-13, 1608 - 1672       | R.VYSTSVTGSR.E                                                          | 1057.13940 | 2 | 2.02E-07 | 0.91 | 3.63  | -     | 879.2    |
| AHQ-4-13, 1732 - 1797       | R.VYSTSVTGSR.E                                                          | 1057.13940 | 2 | 8.15E-08 | 0.93 | 3.46  | -     | 1151.1   |
| AHQ-4-13, 2074 - 2137       | R.VYSTSVTGSR.E                                                          | 1057.13940 | 2 | 1.21E-05 | 0.89 | 2.93  | -     | 1056.6   |
| AHQ-4-13, 1856 - 1861       | R.VYSTSVTGSR.E                                                          | 1057.13940 | 2 | 9.88E-07 | 0.92 | 3.30  | -     | 984.0    |
| AHQ-4-13, 1944 - 2004       | R.VYSTSVTGSR.E                                                          | 1057.13940 | 2 | 1.46E-06 | 0.85 | 2.72  | -     | 922.1    |
| AHQ-4-13, 1933 - 1998       | R.VYSTSVTGSR.E                                                          | 1057.13940 | 2 | 4.22E-05 | 0.85 | 2.98  | -     | 780.7    |
| gj 30151108 ref XP_301187.1 | similar to actin beta, cytoskeletal - Kenyan clawed frog [Homo sapiens  |            |   | 6.44E-10 | 2.64 | 30.33 | 7.40  | 32164.8  |
| AHQ-4-1, 5017               | K.DLYANTVLSGGTTM*YPIADR.M                                               | 2232.45624 | 2 | 1.89E-09 | 0.94 | 4.80  | -     | 863.4    |
| AHQ-4-1, 5165               | K.DLYANTVLSGGTTM*YPIADR.M                                               | 2232.45624 | 2 | 1.23E-06 | 0.93 | 4.66  | -     | 839.7    |
| AHQ-4-1, 5523               | K.DLYANTVLSGGTTM*YPIADR.M                                               | 2216.45684 | 2 | 9.48E-04 | 0.83 | 3.80  | -     | 513.2    |
| AHQ-4-2, 5250 - 5251        | K.DLYANTVLSGGTTM*YPIADR.M                                               | 2232.45624 | 2 | 4.18E-04 | 0.92 | 4.69  | -     | 717.5    |
| AHQ-4-2, 5763               | K.DLYANTVLSGGTTM*YPIADR.M                                               | 2216.45684 | 2 | 5.48E-06 | 0.92 | 4.36  | -     | 705.9    |
| AHQ-4-3, 5095               | K.DLYANTVLSGGTTM*YPIADR.M                                               | 2232.45624 | 2 | 4.83E-05 | 0.93 | 4.39  | -     | 888.5    |
| AHQ-4-3, 5229 - 5231        | K.DLYANTVLSGGTTM*YPIADR.M                                               | 2232.45624 | 2 | 3.93E-05 | 0.93 | 4.75  | -     | 717.9    |
| AHQ-4-3, 5576               | K.DLYANTVLSGGTTM*YPIADR.M                                               | 2216.45684 | 2 | 3.64E-09 | 0.92 | 4.86  | -     | 529.5    |
| AHQ-4-4, 5054               | K.DLYANTVLSGGTTM*YPIADR.M                                               | 2232.45624 | 2 | 2.84E-07 | 0.93 | 4.73  | -     | 632.4    |
| AHQ-4-4, 5183 - 5188        | K.DLYANTVLSGGTTM*YPIADR.M                                               | 2232.45624 | 2 | 1.22E-04 | 0.94 | 5.44  | -     | 608.5    |
| AHQ-4-4, 5267               | K.DLYANTVLSGGTTM*YPIADR.M                                               | 2232.45624 | 2 | 6.78E-05 | 0.80 | 3.47  | -     | 585.7    |
| AHQ-4-4, 5531 - 5556        | K.DLYANTVLSGGTTM*YPIADR.M                                               | 2216.45684 | 2 | 2.96E-07 | 0.78 | 3.49  | -     | 562.3    |
| AHQ-4-5, 5011 - 5086        | K.DLYANTVLSGGTTM*YPIADR.M                                               | 2232.45624 | 2 | 2.05E-06 | 0.93 | 4.43  | -     | 828.2    |
| AHQ-4-6, 4974               | K.DLYANTVLSGGTTM*YPIADR.M                                               | 2232.45624 | 2 | 3.20E-06 | 0.90 | 4.21  | -     | 653.4    |
| AHQ-4-7, 4930               | K.DLYANTVLSGGTTM*YPIADR.M                                               | 2232.45624 | 2 | 1.07E-04 | 0.86 | 4.31  | -     | 470.7    |
| AHQ-4-14, 5349 - 5413       | K.DLYANTVLSGGTTM*YPIADR.M                                               | 2216.45684 | 2 | 9.24E-04 | 0.86 | 3.85  | -     | 742.5    |
| AHQ-4-8, 4774 - 4853        | K.DLYANTVLSGGTTM*YPIADR.M                                               | 2232.45624 | 2 | 4.19E-06 | 0.96 | 5.22  | -     | 1079.8   |
| AHQ-4-8, 4921 - 4985        | K.DLYANTVLSGGTTM*YPIADR.M                                               | 2232.45624 | 2 | 2.02E-07 | 0.95 | 5.14  | -     | 781.3    |
| AHQ-4-8, 5025 - 5097        | K.DLYANTVLSGGTTM*YPIADR.M                                               | 2232.45624 | 2 | 1.78E-06 | 0.96 | 5.48  | -     | 1073.2   |
| AHQ-4-14, 5235 - 5250       | K.DLYANTVLSGGTTM*YPIADR.M                                               | 2216.45684 | 2 | 2.66E-06 | 0.95 | 5.15  | -     | 906.5    |
| AHQ-4-8, 5098 - 5169        | K.DLYANTVLSGGTTM*YPIADR.M                                               | 2216.45684 | 2 | 1.47E-07 | 0.98 | 6.56  | -     | 1347.0   |
| AHQ-4-8, 5446 - 5525        | K.DLYANTVLSGGTTM*YPIADR.M                                               | 2216.45684 | 2 | 2.05E-04 | 0.97 | 6.19  | -     | 1034.7   |
| AHQ-4-8, 5589 - 5654        | K.DLYANTVLSGGTTM*YPIADR.M                                               | 2216.45684 | 2 | 1.76E-04 | 0.97 | 5.54  | -     | 1059.9   |
| AHQ-4-8, 5717 - 5786        | K.DLYANTVLSGGTTM*YPIADR.M                                               | 2216.45684 | 2 | 6.62E-06 | 0.96 | 5.76  | -     | 824.9    |
| AHQ-4-8, 5853 - 5917        | K.DLYANTVLSGGTTM*YPIADR.M                                               | 2216.45684 | 2 | 2.09E-04 | 0.96 | 5.34  | -     | 1096.2   |
| AHQ-4-8, 5985 - 6054        | K.DLYANTVLSGGTTM*YPIADR.M                                               | 2216.45684 | 2 | 2.09E-05 | 0.97 | 6.28  | -     | 1011.0   |
| AHQ-4-8, 6117 - 6181        | K.DLYANTVLSGGTTM*YPIADR.M                                               | 2216.45684 | 2 | 8.86E-06 | 0.95 | 5.42  | -     | 914.1    |
| AHQ-4-8, 6254 - 6321        | K.DLYANTVLSGGTTM*YPIADR.M                                               | 2216.45684 | 2 | 4.99E-04 | 0.94 | 4.82  | -     | 963.0    |
| AHQ-4-8, 6385 - 6454        | K.DLYANTVLSGGTTM*YPIADR.M                                               | 2216.45684 | 2 | 4.22E-06 | 0.95 | 4.97  | -     | 871.9    |
| AHQ-4-8, 6469 - 6533        | K.DLYANTVLSGGTTM*YPIADR.M                                               | 2216.45684 | 2 | 1.45E-04 | 0.92 | 3.98  | -     | 1018.6   |
| AHQ-4-8, 6557 - 6622        | K.DLYANTVLSGGTTM*YPIADR.M                                               | 2216.45684 | 2 | 4.25E-05 | 0.95 | 5.19  | -     | 987.1    |
| AHQ-4-8, 6687 - 6757        | K.DLYANTVLSGGTTM*YPIADR.M                                               | 2216.45684 | 2 | 7.44E-06 | 0.95 | 5.25  | -     | 834.1    |
| AHQ-4-8, 7071 - 7142        | K.DLYANTVLSGGTTM*YPIADR.M                                               | 2216.45684 | 2 | 1.21E-04 | 0.90 | 4.50  | -     | 608.6    |
| AHQ-4-8, 7213 - 7289        | K.DLYANTVLSGGTTM*YPIADR.M                                               | 2216.45684 | 2 | 1.44E-04 | 0.95 | 4.71  | -     | 928.4    |
| AHQ-4-8, 7355 - 7373        | K.DLYANTVLSGGTTM*YPIADR.M                                               | 2216.45684 | 2 | 1.20E-06 | 0.94 | 5.16  | -     | 618.3    |
| AHQ-4-9, 4427 - 4505        | K.DLYANTVLSGGTTM*YPIADR.M                                               | 2232.45624 | 2 | 5.55E-06 | 0.92 | 4.46  | -     | 817.9    |
| AHQ-4-9, 4833 - 4844        | K.DLYANTVLSGGTTM*YPIADR.M                                               | 2216.45684 | 2 | 2.65E-04 | 0.93 | 4.90  | -     | 737.3    |
| AHQ-4-10, 4421 - 4500       | K.DLYANTVLSGGTTM*YPIADR.M                                               | 2232.45624 | 2 | 6.44E-10 | 0.94 | 4.64  | -     | 998.0    |
| AHQ-4-10, 4491 - 4547       | K.DLYANTVLSGGTTM*YPIADR.M                                               | 2232.45624 | 2 | 1.84E-06 | 0.95 | 5.03  | -     | 1069.7   |
| AHQ-4-10, 4603 - 4605       | K.DLYANTVLSGGTTM*YPIADR.M                                               | 2232.45624 | 2 | 2.05E-05 | 0.96 | 4.79  | -     | 1240.3   |
| AHQ-4-10, 4695 - 4756       | K.DLYANTVLSGGTTM*YPIADR.M                                               | 2232.45624 | 2 | 1.52E-04 | 0.91 | 3.96  | -     | 828.6    |
| AHQ-4-10, 4796 - 4801       | K.DLYANTVLSGGTTM*YPIADR.M                                               | 2216.45684 | 2 | 8.23E-07 | 0.93 | 4.35  | -     | 804.6    |
| AHQ-4-10, 4943 - 5007       | K.DLYANTVLSGGTTM*YPIADR.M                                               | 2216.45684 | 2 | 4.10E-06 | 0.96 | 5.50  | -     | 849.0    |
| AHQ-4-10, 5068 - 5128       | K.DLYANTVLSGGTTM*YPIADR.M                                               | 2216.45684 | 2 | 2.01E-06 | 0.81 | 3.56  | -     | 697.5    |
| AHQ-4-10, 5412 - 5413       | K.DLYANTVLSGGTTM*YPIADR.M                                               | 2216.45684 | 2 | 2.00E-06 | 0.85 | 4.34  | -     | 508.5    |
| AHQ-4-11, 4693              | K.DLYANTVLSGGTTM*YPIADR.M                                               | 2232.45624 | 2 | 4.24E-07 | 0.89 | 4.01  | -     | 660.4    |
| AHQ-4-11, 4808 - 4824       | K.DLYANTVLSGGTTM*YPIADR.M                                               | 2232.45624 | 2 | 3.23E-04 | 0.95 | 5.29  | -     | 779.9    |
| AHQ-4-11, 5104              | K.DLYANTVLSGGTTM*YPIADR.M                                               | 2216.45684 | 2 | 3.83E-07 | 0.94 | 4.81  | -     | 882.5    |
| AHQ-4-11, 5258 - 5334       | K.DLYANTVLSGGTTM*YPIADR.M                                               | 2216.45684 | 2 | 1.81E-04 | 0.93 | 4.75  | -     | 751.2    |



|                            |                                                                         |            |       |          |       |         |   |        |
|----------------------------|-------------------------------------------------------------------------|------------|-------|----------|-------|---------|---|--------|
| AHQ-4-12, 4861 - 4934      | K.DLYANTVLSGGTTM*YPGIADR.M                                              | 2232.45624 | 2     | 2.27E-09 | 0.94  | 4.62    | - | 929.2  |
| AHQ-4-12, 4990 - 4997      | K.DLYANTVLSGGTTM*YPGIADR.M                                              | 2232.45624 | 2     | 8.07E-05 | 0.92  | 4.28    | - | 967.1  |
| AHQ-4-12, 5295             | K.DLYANTVLSGGTTM*YPGIADR.M                                              | 2216.45684 | 2     | 4.87E-08 | 0.95  | 5.07    | - | 1149.0 |
| AHQ-4-12, 5441 - 5442      | K.DLYANTVLSGGTTM*YPGIADR.M                                              | 2216.45684 | 2     | 2.40E-07 | 0.91  | 4.57    | - | 696.1  |
| AHQ-4-13, 4841             | K.DLYANTVLSGGTTM*YPGIADR.M                                              | 2232.45624 | 2     | 5.06E-06 | 0.90  | 4.48    | - | 536.6  |
| AHQ-4-13, 4936 - 5004      | K.DLYANTVLSGGTTM*YPGIADR.M                                              | 2232.45624 | 2     | 2.66E-04 | 0.94  | 4.73    | - | 854.3  |
| AHQ-4-13, 5028 - 5093      | K.DLYANTVLSGGTTM*YPGIADR.M                                              | 2232.45624 | 2     | 9.80E-04 | 0.95  | 4.95    | - | 1175.5 |
| AHQ-4-13, 5157 - 5225      | K.DLYANTVLSGGTTM*YPGIADR.M                                              | 2232.45624 | 2     | 2.54E-04 | 0.92  | 4.02    | - | 975.2  |
| AHQ-4-13, 5165             | K.DLYANTVLSGGTTM*YPGIADR.M                                              | 2232.45624 | 2     | 2.30E-06 | 0.97  | 5.77    | - | 1097.7 |
| AHQ-4-13, 5321 - 5322      | K.DLYANTVLSGGTTM*YPGIADR.M                                              | 2232.45624 | 2     | 2.83E-04 | 0.90  | 4.12    | - | 891.4  |
| AHQ-4-13, 5653 - 5689      | K.DLYANTVLSGGTTM*YPGIADR.M                                              | 2216.45684 | 2     | 2.80E-07 | 0.97  | 6.17    | - | 918.4  |
| AHQ-4-14, 5758 - 5817      | K.DLYANTVLSGGTTM*YPGIADR.M                                              | 2232.45624 | 2     | 6.93E-10 | 0.95  | 4.89    | - | 1023.1 |
| AHQ-4-14, 5888 - 5948      | K.DLYANTVLSGGTTM*YPGIADR.M                                              | 2232.45624 | 2     | 5.09E-04 | 0.91  | 4.24    | - | 713.3  |
| AHQ-4-14, 6016             | K.DLYANTVLSGGTTM*YPGIADR.M                                              | 2232.45624 | 2     | 1.64E-04 | 0.97  | 5.73    | - | 1064.9 |
| AHQ-4-14, 6086 - 6144      | K.DLYANTVLSGGTTM*YPGIADR.M                                              | 2232.45624 | 2     | 8.43E-06 | 0.91  | 4.05    | - | 811.0  |
| AHQ-4-14, 6208 - 6278      | K.DLYANTVLSGGTTM*YPGIADR.M                                              | 2232.45624 | 2     | 1.55E-04 | 0.89  | 4.11    | - | 616.4  |
| AHQ-4-14, 6253 - 6326      | K.DLYANTVLSGGTTM*YPGIADR.M                                              | 2216.45684 | 2     | 3.36E-05 | 0.95  | 4.87    | - | 1171.6 |
| AHQ-4-14, 6384 - 6456      | K.DLYANTVLSGGTTM*YPGIADR.M                                              | 2216.45684 | 2     | 3.63E-04 | 0.97  | 6.13    | - | 975.6  |
| AHQ-4-14, 6457 - 6536      | K.DLYANTVLSGGTTM*YPGIADR.M                                              | 2232.45624 | 2     | 2.47E-04 | 0.91  | 4.32    | - | 671.5  |
| AHQ-4-14, 6505 - 6581      | K.DLYANTVLSGGTTM*YPGIADR.M                                              | 2216.45684 | 2     | 1.49E-04 | 0.95  | 5.30    | - | 904.1  |
| AHQ-4-13-, 4725 - 4805     | K.DLYANTVLSGGTTM*YPGIADR.M                                              | 2232.45624 | 2     | 2.55E-06 | 0.96  | 5.28    | - | 1087.6 |
| AHQ-4-13-, 4873 - 4936     | K.DLYANTVLSGGTTM*YPGIADR.M                                              | 2232.45624 | 2     | 1.76E-05 | 0.96  | 5.78    | - | 995.3  |
| AHQ-4-13-, 5084            | K.DLYANTVLSGGTTM*YPGIADR.M                                              | 2232.45624 | 2     | 3.00E-04 | 0.95  | 4.78    | - | 1080.5 |
| AHQ-4-13-, 5140 - 5205     | K.DLYANTVLSGGTTM*YPGIADR.M                                              | 2216.45684 | 2     | 5.72E-05 | 0.96  | 4.82    | - | 1231.3 |
| AHQ-4-13-, 5173 - 5178     | K.DLYANTVLSGGTTM*YPGIADR.M                                              | 2232.45624 | 2     | 3.90E-06 | 0.77  | 3.72    | - | 448.2  |
| AHQ-4-13-, 5293 - 5362     | K.DLYANTVLSGGTTM*YPGIADR.M                                              | 2216.45684 | 2     | 2.71E-04 | 0.95  | 5.05    | - | 828.3  |
| AHQ-4-13-, 5421 - 5433     | K.DLYANTVLSGGTTM*YPGIADR.M                                              | 2216.45684 | 2     | 8.24E-06 | 0.96  | 5.93    | - | 779.0  |
| AHQ-4-13-, 5504 - 5569     | K.DLYANTVLSGGTTM*YPGIADR.M                                              | 2216.45684 | 2     | 5.98E-04 | 0.94  | 4.57    | - | 1001.7 |
| AHQ-4-14-, 4671            | K.DLYANTVLSGGTTM*YPGIADR.M                                              | 2232.45624 | 2     | 7.08E-08 | 0.95  | 4.64    | - | 950.4  |
| AHQ-4-14-, 4763 - 4825     | K.DLYANTVLSGGTTM*YPGIADR.M                                              | 2232.45624 | 2     | 1.12E-05 | 0.94  | 4.98    | - | 826.6  |
| AHQ-4-14-, 4886 - 4955     | K.DLYANTVLSGGTTM*YPGIADR.M                                              | 2232.45624 | 2     | 1.92E-05 | 0.96  | 4.99    | - | 1040.4 |
| AHQ-4-14-, 5017            | K.DLYANTVLSGGTTM*YPGIADR.M                                              | 2232.45624 | 2     | 6.45E-08 | 0.97  | 5.88    | - | 1138.8 |
| AHQ-4-14-, 5083 - 5162     | K.DLYANTVLSGGTTM*YPGIADR.M                                              | 2216.45684 | 2     | 7.86E-06 | 0.97  | 6.11    | - | 1124.7 |
| AHQ-4-14-, 5115 - 5141     | K.DLYANTVLSGGTTM*YPGIADR.M                                              | 2232.45624 | 2     | 4.39E-08 | 0.93  | 4.64    | - | 768.3  |
| AHQ-4-14-, 5477 - 5541     | K.DLYANTVLSGGTTM*YPGIADR.M                                              | 2216.45684 | 2     | 6.36E-04 | 0.90  | 4.48    | - | 600.3  |
| AHQ-4-8, 3993 - 4066       | K.YPIEHSITNWDMMCK.I                                                     | 1992.19784 | 2     | 9.01E-04 | 0.28  | 2.71    | - | 358.7  |
| AHQ-4-8, 5046              | K.YPIEHSITNWDMMCK.I                                                     | 1992.19784 | 2     | 6.92E-05 | 0.77  | 3.64    | - | 527.8  |
| gj5902128 ref NP_008880.1  | syntaxin binding protein 2; Hunc18b [Homo sapiens]                      | 6.77E-10   | 9.42  | 100.31   | 26.10 | 66438.1 |   |        |
| AHQ-4-6, 6286              | K.AAHIFDTCPEPLFSELGR.S                                                  | 2310.57011 | 2     | 6.54E-08 | 0.97  | 6.15    | - | 1234.9 |
| AHQ-4-6, 6574              | R.EPIPSLEAIYLLSPTEK.S                                                   | 1901.18939 | 2     | 1.36E-04 | 0.87  | 3.90    | - | 676.3  |
| AHQ-4-6, 2930              | R.KGPEDTAQLAHAVLAK.L                                                    | 1649.87303 | 3     | 6.77E-10 | 0.97  | 5.29    | - | 1743.7 |
| AHQ-4-6, 2919 - 2932       | R.KGPEDTAQLAHAVLAK.L                                                    | 1649.87303 | 2     | 1.36E-05 | 0.93  | 4.44    | - | 955.8  |
| AHQ-4-6, 2150              | K.LIQHANVQAHSLIR.N                                                      | 1687.92773 | 2     | 1.42E-05 | 0.97  | 4.27    | - | 1831.1 |
| AHQ-4-6, 6342 - 6362       | K.LIVPVLDAAVPAYDK.I                                                     | 1698.03911 | 2     | 2.03E-08 | 0.97  | 4.34    | - | 1974.1 |
| AHQ-4-6, 3058              | R.NLEQLGGTVTPNGSGTSSR.L                                                 | 1933.02693 | 2     | 4.00E-09 | 0.95  | 4.95    | - | 923.8  |
| AHQ-4-6, 5344 - 5378       | R.NLWPFVSDPATASSQAQAVSAR.F                                              | 2273.48981 | 2     | 1.44E-05 | 0.94  | 4.53    | - | 839.3  |
| AHQ-4-6, 5879              | R.REPIPSLEAIYLLSPTEK.S                                                  | 2057.37574 | 3     | 1.13E-04 | 0.84  | 3.68    | - | 999.3  |
| AHQ-4-6, 5871              | R.REPIPSLEAIYLLSPTEK.S                                                  | 2057.37574 | 2     | 5.23E-06 | 0.96  | 5.25    | - | 1345.5 |
| AHQ-4-6, 4611              | K.WEVLGSHLTPTR.F                                                        | 1709.97007 | 2     | 9.84E-07 | 0.94  | 3.95    | - | 1085.1 |
| AHQ-4-6, 2552              | K.YSTHLHLDLDCMK.H                                                       | 1592.77877 | 3     | 2.14E-04 | 0.88  | 3.35    | - | 1164.5 |
| gj4506925 ref NP_003013.1  | SH3 domain binding glutamic acid-rich protein like; SH3-binding domain  | 7.60E-10   | 3.62  | 40.35    | 50.00 | 12774.2 |   |        |
| AHQ-4-13-, 6268 - 6330     | R.ENNAVYAFGLTAPPGSK.E                                                   | 1850.06426 | 2     | 2.86E-04 | 0.80  | 3.57    | - | 643.4  |
| AHQ-4-13-, 5980 - 6049     | R.ENNAVYAFGLTAPPGSK.E                                                   | 1850.06426 | 2     | 6.96E-05 | 0.92  | 4.53    | - | 653.7  |
| AHQ-4-13-, 6068 - 6144     | R.ENNAVYAFGLTAPPGSK.E                                                   | 1850.06426 | 2     | 8.40E-05 | 0.93  | 3.57    | - | 1264.9 |
| AHQ-4-13, 6080 - 6144      | R.ENNAVYAFGLTAPPGSK.E                                                   | 1850.06426 | 2     | 3.96E-06 | 0.82  | 3.76    | - | 448.9  |
| AHQ-4-13, 5080 - 5144      | R.ENVPENSRPATGYPLPPQIFNESQYR.G                                          | 3005.24660 | 3     | 1.78E-08 | 0.97  | 6.94    | - | 1257.2 |
| AHQ-4-13, 4966 - 5032      | R.ENVPENSRPATGYPLPPQIFNESQYR.G                                          | 3005.24660 | 3     | 5.77E-08 | 0.90  | 4.60    | - | 679.2  |
| AHQ-4-13-, 4896 - 4976     | R.ENVPENSRPATGYPLPPQIFNESQYR.G                                          | 3005.24660 | 3     | 7.60E-10 | 0.96  | 6.08    | - | 1157.0 |
| AHQ-4-13-, 5040 - 5104     | R.ENVPENSRPATGYPLPPQIFNESQYR.G                                          | 3005.24660 | 3     | 1.24E-09 | 0.96  | 6.42    | - | 1063.4 |
| AHQ-4-13-, 5133            | R.ENVPENSRPATGYPLPPQIFNESQYR.G                                          | 3005.24660 | 3     | 1.12E-08 | 0.95  | 5.51    | - | 965.5  |
| AHQ-4-13, 5173             | R.ENVPENSRPATGYPLPPQIFNESQYR.G                                          | 3005.24660 | 3     | 5.65E-04 | 0.84  | 3.52    | - | 805.3  |
| AHQ-4-13, 4210 - 4272      | R.GDYDAFFEAR.E                                                          | 1191.23073 | 2     | 2.37E-04 | 0.87  | 3.06    | - | 927.3  |
| AHQ-4-13-, 2364 - 2434     | R.VYIASSSGSTAIA.K                                                       | 1284.44065 | 2     | 6.95E-04 | 0.88  | 3.64    | - | 1101.3 |
| AHQ-4-13, 2479 - 2487      | R.VYIASSSGSTAIA.K                                                       | 1284.44065 | 2     | 2.73E-04 | 0.97  | 4.33    | - | 2389.0 |
| gj27478053 ref XP_015334.4 | similar to heat shock 70kD protein binding protein; progesterone recep  | 7.68E-10   | 0.98  | 10.28    | 11.60 | 16603.8 |   |        |
| AHQ-4-7, 4697              | R.LLGHWEAAHLDALACK.L                                                    | 1936.18044 | 2     | 7.68E-10 | 0.98  | 5.61    | - | 2239.1 |
| gj22043610 ref XP_171081.1 | similar to ras-related C3 botulinum toxin substrate 1 isoform Rac1; rh  | 7.80E-10   | 3.38  | 50.25    | 28.60 | 21543.1 |   |        |
| AHQ-4-11, 2541             | R.AVLCPPPVK.K                                                           | 982.22199  | 1     | 5.56E-05 | 0.12  | 2.02    | - | 167.4  |
| AHQ-4-11, 2657 - 2660      | R.HHCNPNTPIILVGTK.L                                                     | 1588.85612 | 2     | 7.67E-04 | 0.82  | 3.25    | - | 581.0  |
| AHQ-4-11, 3730 - 3800      | K.KLTPITYPQGLAMAK.E                                                     | 1632.99216 | 2     | 1.15E-04 | 0.83  | 4.15    | - | 371.5  |
| AHQ-4-11, 4196             | K.KLTPITYPQGLAMAK.E                                                     | 1504.81924 | 2     | 7.53E-04 | 0.63  | 2.98    | - | 321.2  |
| AHQ-4-11, 4688             | K.PVNLGLWDTAGQEDYDR.L                                                   | 1950.05441 | 2     | 7.80E-10 | 0.98  | 4.91    | - | 2030.1 |
| gj4502011 ref NP_000467.1  | adenylate kinase 1 [Homo sapiens]                                       | 7.81E-10   | 6.08  | 70.24    | 42.30 | 21634.7 |   |        |
| AHQ-4-11, 6824             | K.GQLVPLETLDMLR.D                                                       | 1584.90590 | 2     | 7.81E-10 | 0.94  | 4.62    | - | 616.8  |
| AHQ-4-11, 5137             | R.IGQPITLLLYVDAGPETM*QTR.L                                              | 2220.53174 | 2     | 9.03E-06 | 0.75  | 3.23    | - | 602.6  |
| AHQ-4-11, 5648             | R.IGQPITLLLYVDAGPETM*QTR.L                                              | 2204.53234 | 2     | 7.57E-07 | 0.95  | 4.80    | - | 938.1  |
| AHQ-4-11, 3342             | K.IIFVVGPGGSGK.G                                                        | 1131.34939 | 1     | 2.91E-04 | 0.77  | 2.27    | - | 1121.0 |
| AHQ-4-11, 6178             | R.KVNAEGSVDSVFSQVCTHLDALK                                               | 2506.77407 | 3     | 3.96E-07 | 0.97  | 4.75    | - | 2422.9 |
| AHQ-4-11, 6320 - 6354      | R.KVNAEGSVDSVFSQVCTHLDALK                                               | 2378.60116 | 2     | 3.08E-06 | 0.78  | 3.18    | - | 583.6  |
| AHQ-4-11, 3624             | K.YGYTHLSTGDLR.S                                                        | 1496.64912 | 2     | 1.77E-06 | 0.93  | 3.51    | - | 1071.5 |
| gj4504111 ref NP_002077.1  | growth factor receptor-bound protein 2 [Homo sapiens]                   | 8.01E-10   | 1.27  | 20.16    | 11.10 | 25206.2 |   |        |
| AHQ-4-10, 3639 - 3705      | K.FNSLNELVDYHR.S                                                        | 1507.63200 | 2     | 2.11E-04 | 0.40  | 2.54    | - | 452.7  |
| AHQ-4-10, 3233             | K.VLNEECQDNWYK.A                                                        | 1599.70313 | 2     | 8.01E-10 | 0.86  | 3.28    | - | 778.0  |
| gj4758988 ref NP_004152.1  | RAB1A, member RAS oncogene family; RAB1, member RAS oncogene family [Ho | 8.11E-10   | 3.57  | 40.26    | 25.40 | 22677.6 |   |        |
| AHQ-4-11, 6096 - 6158      | K.EFADSLGIPPLETSAK.N                                                    | 1725.91990 | 2     | 5.58E-05 | 0.70  | 3.13    | - | 467.6  |
| AHQ-4-13, 6338 - 6413      | K.EFADSLGIPPLETSAK.N                                                    | 1725.91990 | 2     | 1.38E-04 | 0.73  | 3.53    | - | 414.1  |
| AHQ-4-12, 6266             | K.EFADSLGIPPLETSAK.N                                                    | 1725.91990 | 2     | 2.62E-05 | 0.60  | 3.12    | - | 517.6  |
| AHQ-4-11, 5977 - 6037      | K.EFADSLGIPPLETSAK.N                                                    | 1725.91990 | 2     | 1.25E-07 | 0.91  | 4.59    | - | 611.3  |
| AHQ-4-11, 5981 - 6061      | R.FADDTYESYISTIGVDFK.I                                                  | 2173.31742 | 2     | 1.23E-08 | 0.97  | 5.16    | - | 1234.3 |
| AHQ-4-11, 5554             | R.FADDTYESYISTIGVDFK.I                                                  | 2173.31742 | 2     | 3.60E-05 | 0.74  | 3.04    | - | 738.8  |
| AHQ-4-14-, 5835 - 5902     | R.FADDTYESYISTIGVDFK.I                                                  | 2173.31742 | 2     | 1.47E-06 | 0.95  | 4.05    | - | 1315.2 |
| AHQ-4-11, 6185 - 6264      | R.FADDTYESYISTIGVDFK.I                                                  | 2173.31742 | 2     | 1.10E-06 | 0.96  | 4.45    | - | 1228.1 |
| AHQ-4-11, 6810             | R.FADDTYESYISTIGVDFK.I                                                  | 2173.31742 | 2     | 3.60E-05 | 0.85  | 3.50    | - | 607.6  |
| AHQ-4-11, 6905             | R.FADDTYESYISTIGVDFK.I                                                  | 2173.31742 | 2     | 2.68E-06 | 0.92  | 3.95    | - | 912.0  |
| AHQ-4-11, 6122 - 6197      | R.FADDTYESYISTIGVDFK.I                                                  | 2173.31742 | 2     | 8.11E-10 | 0.94  | 4.01    | - | 1262.7 |
| AHQ-4-11, 5848 - 5916      | R.FADDTYESYISTIGVDFK.I                                                  | 2173.31742 | 2     | 5.72E-08 | 0.95  | 4.40    | - | 1100.5 |
| AHQ-4-11, 3953             | K.NATNVEQSFMT*TM*AAEIK.K                                                | 1918.13902 | 2     | 2.06E-04 | 0.92  | 4.06    | - | 1060.7 |
| AHQ-4-11, 4750             | K.NATNVEQSFMT*TM*AAEIK.K                                                | 1902.13962 | 2     | 2.63E-04 | 0.79  | 3.91    | - | 968.5  |
| gj5729877 ref NP_006588.1  | heat shock 70kDa protein 8 isoform 1; heat shock cognate protein, 71-kD | 8.22E-10   | 10.40 | 120.27   | 22.30 | 70897.6 |   |        |
| AHQ-4-6, 4107 - 4134       | R.ARFEELNADLFR.G                                                        | 1481.63768 | 2     | 2.28E-06 | 0.89  | 3.58    | - | 746.3  |
| AHQ-4-6, 4244              | R.ARFEELNADLFR.G                                                        | 1481.63768 | 2     | 1.81E-08 | 0.94  | 3.84    | - | 1076.7 |
| AHQ-4-6, 4551              | R.FEELNADLFR.G                                                          | 1254.37310 | 2     | 6.57E-05 | 0.93  | 3.64    | - | 1350.4 |
| AHQ-4-6, 4552              | R.FEELNADLFR.G                                                          | 1254.37310 | 1     | 6.44E-07 | 0.26  | 2.02    | - | 361.3  |
| AHQ-4-14-, 5165            | K.GPAVGIDLGTYYSCVGVFQHGK.V                                              | 2265.53088 | 3     | 1.80E-07 | 0.86  | 3.88    | - | 688.3  |
| AHQ-4-6, 5178              | K.GPAVGIDLGTYYSCVGVFQHGK.V                                              | 2265.53088 | 3     | 8.22E-10 | 0.93  | 4.92    | - | 893.0  |
| AHQ-4-6, 5182 - 5198       | K.GPAVGIDLGTYYSCVGVFQHGK.V                                              | 2265.53088 | 2     | 1.85E-08 | 0.97  | 5.40    | - | 1334.3 |
| AHQ-4-6, 5263              | K.GPAVGIDLGTYYSCVGVFQHGK.V                                              | 2265.53088 | 3     | 1.05E-04 | 0.68  | 3.20    | - | 585.0  |

|                             |                                                                         |            |   |          |      |        |       |          |
|-----------------------------|-------------------------------------------------------------------------|------------|---|----------|------|--------|-------|----------|
| AHQ-4-6, 3282               | K.LDKSQIHDLVGGSTR.I                                                     | 1839.08615 | 2 | 3.88E-06 | 0.90 | 3.92   | -     | 755.5    |
| AHQ-4-6, 2627 - 2628        | K.MKEIAEAYLGK.T                                                         | 1253.49320 | 1 | 1.35E-05 | 0.52 | 2.28   | -     | 485.5    |
| AHQ-4-6, 2630               | K.MKEIAEAYLGK.T                                                         | 1253.49320 | 2 | 6.63E-07 | 0.91 | 3.68   | -     | 965.7    |
| AHQ-4-6, 2235               | K.M*KEIAEAYLGK.T                                                        | 1269.49260 | 2 | 1.08E-06 | 0.91 | 3.73   | -     | 1041.2   |
| AHQ-4-6, 3712               | K.NQVAMNPTNTVFDK.R                                                      | 1650.83816 | 2 | 1.44E-05 | 0.90 | 3.68   | -     | 799.0    |
| AHQ-4-6, 2434               | R.RFDDAVVQSDMK.H                                                        | 1411.56603 | 2 | 5.95E-06 | 0.96 | 4.40   | -     | 1568.5   |
| AHQ-4-6, 5062 - 5130        | K.SFYPEEVSSMLVTK.M                                                      | 1617.84485 | 2 | 2.25E-09 | 0.89 | 3.66   | -     | 492.5    |
| AHQ-4-7, 6957               | K.SINPDEAVAYGAOVAAILSGDK.S                                              | 2261.47411 | 2 | 7.08E-06 | 0.94 | 4.71   | -     | 1020.9   |
| AHQ-4-6, 6798 - 6800        | K.SINPDEAVAYGAOVAAILSGDK.S                                              | 2261.47411 | 2 | 7.35E-09 | 0.95 | 4.60   | -     | 995.4    |
| AHQ-4-6, 6806 - 6818        | K.SINPDEAVAYGAOVAAILSGDK.S                                              | 2261.47411 | 3 | 2.47E-07 | 0.95 | 5.47   | -     | 1340.9   |
| AHQ-4-6, 7056               | K.SINPDEAVAYGAOVAAILSGDK.S                                              | 2261.47411 | 2 | 3.19E-06 | 0.87 | 4.15   | -     | 483.1    |
| AHQ-4-6, 2780               | K.SQIHDLVGGSTR.I                                                        | 1482.66712 | 2 | 9.72E-07 | 0.97 | 4.29   | -     | 2059.5   |
| AHQ-4-7, 2691               | K.SQIHDLVGGSTR.I                                                        | 1482.66712 | 2 | 3.28E-06 | 0.96 | 4.42   | -     | 1435.2   |
| AHQ-4-6, 4623 - 4691        | K.TVTNAVTVTPAYFNDSQR.Q                                                  | 1983.17068 | 2 | 3.33E-05 | 0.87 | 3.83   | -     | 497.1    |
| gi 5031599 ref NP_005722.1  | actin related protein 2/3 complex subunit 2; ARP2/3 protein complex sub |            |   | 8.33E-10 | 1.88 | 30.29  | 19.00 | 34332.8  |
| AHQ-4-9, 3389 - 3391        | R.DNTINLIHTR.D                                                          | 1344.50101 | 1 | 9.74E-05 | 0.08 | 1.87   | -     | 227.2    |
| AHQ-4-10, 3660              | R.DNTINLIHTR.D                                                          | 1344.50101 | 2 | 1.55E-04 | 0.90 | 3.22   | -     | 1003.4   |
| AHQ-4-9, 2332               | K.ELQAHGADLEK.R                                                         | 1324.46487 | 2 | 1.93E-04 | 0.84 | 3.31   | -     | 865.8    |
| AHQ-4-14-, 6598             | K.FENAAAGNKPEAVVTFADFDGVLVHISNPGDK.T                                    | 3638.89648 | 3 | 8.33E-10 | 0.96 | 5.70   | -     | 1279.6   |
| gi 29568111 ref NP_006088.2 | myosin, light polypeptide 9, regulatory; myosin regulatory light chain  |            |   | 8.35E-10 | 1.89 | 30.17  | 12.20 | 19827.1  |
| AHQ-4-11, 3336              | R.FTDEEVDDEMYR.E                                                        | 1434.51009 | 1 | 5.06E-06 | 0.27 | 2.02   | -     | 449.4    |
| AHQ-4-11, 3348              | R.FTDEEVDDEMYR.E                                                        | 1434.51009 | 1 | 8.35E-10 | 0.60 | 2.65   | -     | 320.7    |
| AHQ-4-13, 3610              | R.FTDEEVDDEMYR.E                                                        | 1434.51009 | 2 | 1.58E-07 | 0.93 | 3.32   | -     | 1256.5   |
| AHQ-4-11, 2640              | R.FTDEEVDDEMYR.E                                                        | 1450.50949 | 2 | 6.01E-06 | 0.94 | 3.31   | -     | 1317.2   |
| AHQ-4-13, 4054 - 4065       | K.GNFNYVFTR.I                                                           | 1247.34066 | 2 | 5.09E-06 | 0.79 | 2.67   | -     | 764.4    |
| AHQ-4-11, 3918              | K.GNFNYVFTR.I                                                           | 1247.34066 | 1 | 2.42E-08 | 0.36 | 2.01   | -     | 462.0    |
| gi 4758442 ref NP_004115.1  | glia maturation factor, beta [Homo sapiens]                             |            |   | 9.24E-10 | 1.46 | 20.19  | 19.00 | 16713.1  |
| AHQ-4-12, 6570              | R.VSYPVLCFIFSSPVGCKPEQQM*MYAGSK.N                                       | 3131.61197 | 3 | 6.29E-05 | 0.64 | 3.84   | -     | 588.5    |
| AHQ-4-12, 6781 - 6859       | R.VSYPVLCFIFSSPVGCKPEQQM*MYAGSK.N                                       | 3115.61257 | 3 | 9.24E-10 | 0.82 | 3.68   | -     | 513.2    |
| AHQ-4-12, 6423 - 6499       | R.VSYPVLCFIFSSPVGCKPEQQM*MYAGSK.N                                       | 3131.61197 | 3 | 8.67E-05 | 0.42 | 3.01   | -     | 423.5    |
| gi 5729887 ref NP_006624.1  | IQ motif containing GTPase activating protein 2 [Homo sapiens]          |            |   | 9.68E-10 | 4.75 | 50.27  | 4.80  | 180611.0 |
| AHQ-4-5, 3481               | K.AWVNQLETQTEGASK.L                                                     | 1662.78230 | 2 | 7.97E-06 | 0.97 | 5.34   | -     | 1650.5   |
| AHQ-4-13, 5613              | K.GVLLDIDDLQTNQF.N                                                      | 1719.91690 | 2 | 5.61E-04 | 0.69 | 2.73   | -     | 738.8    |
| AHQ-4-13-, 5484 - 5494      | K.GVLLDIDDLQTNQF.N                                                      | 1719.91690 | 2 | 2.71E-05 | 0.96 | 4.12   | -     | 1732.5   |
| AHQ-4-3, 5951               | K.LGIAPQIQDLQK.V                                                        | 1366.63117 | 2 | 4.53E-06 | 0.87 | 3.23   | -     | 588.4    |
| AHQ-4-4, 4940               | K.LPYDVTTEGALTYPEVK.N                                                   | 1968.19269 | 2 | 3.77E-06 | 0.96 | 4.34   | -     | 1408.8   |
| AHQ-4-3, 4967               | K.LPYDVTTEGALTYPEVK.N                                                   | 1968.19269 | 2 | 9.68E-10 | 0.97 | 5.25   | -     | 1751.9   |
| AHQ-4-4, 4258               | K.VDQVQDQIVGNPTVIK.M                                                    | 1726.95257 | 2 | 6.65E-06 | 0.93 | 3.89   | -     | 1235.7   |
| AHQ-4-3, 4303               | K.VDQVQDQIVGNPTVIK.M                                                    | 1726.95257 | 2 | 1.91E-08 | 0.97 | 5.40   | -     | 1470.8   |
| gi 4507725 ref NP_000362.1  | transthyretin (prealbumin, amyloidosis type I); Transthyretin (prealbum |            |   | 9.78E-10 | 4.69 | 50.30  | 53.10 | 15886.9  |
| AHQ-4-13, 3962              | K.AADDTWEPFASGK.T                                                       | 1395.45529 | 2 | 2.76E-06 | 0.86 | 3.71   | -     | 534.4    |
| AHQ-4-13-, 3816             | K.AADDTWEPFASGK.T                                                       | 1395.45529 | 2 | 2.66E-07 | 0.96 | 4.45   | -     | 1155.2   |
| AHQ-4-12, 3717              | K.AADDTWEPFASGK.T                                                       | 1395.45529 | 2 | 7.47E-06 | 0.91 | 3.78   | -     | 832.9    |
| AHQ-4-13, 4137              | R.GSPAINVAHVFR.K                                                        | 1367.58095 | 2 | 7.46E-09 | 0.92 | 4.04   | -     | 948.2    |
| AHQ-4-13-, 4012 - 4013      | R.GSPAINVAHVFR.K                                                        | 1367.58095 | 2 | 1.90E-08 | 0.94 | 4.26   | -     | 1115.9   |
| AHQ-4-12, 5919              | R.RYTIALLSPYSYSTAVVTNPKE                                                | 2646.97608 | 2 | 1.20E-04 | 0.96 | 4.79   | -     | 1474.0   |
| AHQ-4-12, 5557              | K.TSESGELHGLTTEEFVEGIYK.V                                               | 2456.60073 | 3 | 2.47E-05 | 0.95 | 5.02   | -     | 1401.1   |
| AHQ-4-12, 5547              | K.TSESGELHGLTTEEFVEGIYK.V                                               | 2456.60073 | 2 | 9.78E-10 | 0.97 | 5.61   | -     | 1395.9   |
| AHQ-4-13-, 5509 - 5510      | K.TSESGELHGLTTEEFVEGIYK.V                                               | 2456.60073 | 3 | 5.45E-07 | 0.97 | 5.97   | -     | 1693.2   |
| AHQ-4-13, 5612              | K.TSESGELHGLTTEEFVEGIYK.V                                               | 2456.60073 | 2 | 3.17E-06 | 0.88 | 3.67   | -     | 923.4    |
| AHQ-4-13-, 6465             | K.TSESGELHGLTTEEFVEGIYKVEIDT.K                                          | 3142.37019 | 3 | 3.30E-08 | 0.88 | 4.48   | -     | 652.8    |
| gi 25188179 ref NP_005653.3 | voltage-dependent anion channel 3 [Homo sapiens]                        |            |   | 9.92E-10 | 3.53 | 60.21  | 20.50 | 30658.4  |
| AHQ-4-10, 3008 - 3176       | K.LSQNNFALGYK.A                                                         | 1255.40424 | 1 | 6.23E-05 | 0.22 | 2.07   | -     | 283.6    |
| AHQ-4-10, 4535              | K.LTLDTIFVPNTGK.K                                                       | 1419.64771 | 1 | 7.82E-06 | 0.33 | 2.56   | -     | 360.2    |
| AHQ-4-10, 3965              | K.LTLDTIFVPNTGK.S                                                       | 1547.82062 | 2 | 3.92E-05 | 0.62 | 3.39   | -     | 758.0    |
| AHQ-4-9, 3651 - 3713        | K.LTLDTIFVPNTGK.S                                                       | 1547.82062 | 2 | 3.75E-04 | 0.87 | 3.15   | -     | 488.4    |
| AHQ-4-10, 3381              | K.VCNYGLTFTQK.W                                                         | 1332.50706 | 1 | 4.19E-04 | 0.42 | 2.92   | -     | 236.4    |
| AHQ-4-9, 4213               | K.VNNASLIGLGYTOTLRPGVK.L                                                | 2102.42298 | 2 | 6.65E-08 | 0.73 | 3.59   | -     | 378.3    |
| AHQ-4-9, 3769               | K.VNNASLIGLGYTOTLRPGVK.L                                                | 2102.42298 | 2 | 2.12E-08 | 0.90 | 4.13   | -     | 523.0    |
| AHQ-4-9, 4032               | K.VNNASLIGLGYTOTLRPGVK.L                                                | 2102.42298 | 2 | 2.77E-09 | 0.62 | 3.18   | -     | 451.4    |
| AHQ-4-10, 3991              | K.VNNASLIGLGYTOTLRPGVK.L                                                | 2102.42298 | 2 | 9.92E-10 | 0.80 | 3.64   | -     | 496.0    |
| AHQ-4-10, 3995              | K.VNNASLIGLGYTOTLRPGVK.L                                                | 2102.42298 | 3 | 5.38E-07 | 0.79 | 3.23   | -     | 759.2    |
| AHQ-4-10, 4165              | K.VNNASLIGLGYTOTLRPGVK.L                                                | 2102.42298 | 2 | 4.09E-05 | 0.84 | 3.55   | -     | 574.6    |
| AHQ-4-10, 4331 - 4335       | K.VNNASLIGLGYTOTLRPGVK.L                                                | 2102.42298 | 2 | 5.89E-09 | 0.84 | 3.96   | -     | 574.5    |
| AHQ-4-14, 5769              | K.VNNASLIGLGYTOTLRPGVK.L                                                | 2102.42298 | 2 | 1.27E-06 | 0.84 | 3.99   | -     | 561.7    |
| AHQ-4-10, 3555 - 3616       | K.YKVCNYGLTFTQK.W                                                       | 1623.85410 | 2 | 4.26E-08 | 0.93 | 3.46   | -     | 1231.8   |
| gi 4507953 ref NP_003397.1  | tyrosine 3/trpophan 5-monoxygenase activation protein, zeta polypep     |            |   | 1.10E-09 | 9.07 | 120.32 | 50.60 | 27744.9  |
| AHQ-4-10, 1693 - 1711       | R.EKIELETR.D                                                            | 1018.14631 | 2 | 1.83E-05 | 0.53 | 2.56   | -     | 579.5    |
| AHQ-4-10, 6533              | R.EKIELETRDNDVLSLLEK.F                                                  | 2419.73463 | 3 | 1.11E-07 | 0.86 | 3.74   | -     | 903.9    |
| AHQ-4-10, 5629              | R.EKIELETRDNDVLSLLEK.F                                                  | 2419.73463 | 2 | 2.52E-06 | 0.62 | 3.03   | -     | 465.5    |
| AHQ-4-11, 3388              | K.FLIPNASQAESK.V                                                        | 1305.46156 | 1 | 1.50E-06 | 0.35 | 2.06   | -     | 443.5    |
| AHQ-4-10, 2945 - 3337       | K.FLIPNASQAESK.V                                                        | 1305.46156 | 1 | 4.97E-06 | 0.65 | 2.79   | -     | 481.9    |
| AHQ-4-9, 2989 - 3053        | K.FLIPNASQAESK.V                                                        | 1305.46156 | 1 | 9.58E-08 | 0.30 | 2.02   | -     | 584.9    |
| AHQ-4-10, 2981 - 3043       | K.FLIPNASQAESK.V                                                        | 1305.46156 | 2 | 6.50E-05 | 0.79 | 3.18   | -     | 471.4    |
| AHQ-4-10, 2943 - 3003       | K.FLIPNASQAESK.V                                                        | 1305.46156 | 2 | 1.91E-05 | 0.65 | 2.73   | -     | 367.0    |
| AHQ-4-9, 6695               | K.IETELRDNDVLSLLEK.F                                                    | 2162.44718 | 2 | 3.78E-05 | 0.89 | 4.73   | -     | 1086.4   |
| AHQ-4-9, 5757               | K.IETELRDNDVLSLLEK.F                                                    | 2162.44718 | 2 | 1.16E-08 | 0.96 | 4.71   | -     | 1538.0   |
| AHQ-4-10, 5695              | K.IETELRDNDVLSLLEK.F                                                    | 2162.44718 | 2 | 1.62E-07 | 0.93 | 4.83   | -     | 1091.9   |
| AHQ-4-10, 6505              | R.LGLALNFSVFYIEILNSPEK.A                                                | 2318.65200 | 2 | 2.83E-06 | 0.86 | 4.43   | -     | 325.5    |
| AHQ-4-14-, 2163 - 2231      | K.SVTEQGAELSNEER.N                                                      | 1549.57922 | 2 | 4.61E-05 | 0.95 | 4.62   | -     | 1327.2   |
| AHQ-4-13-, 2328 - 2340      | K.SVTEQGAELSNEER.N                                                      | 1549.57922 | 2 | 3.27E-06 | 0.87 | 3.22   | -     | 1263.7   |
| AHQ-4-10, 2191 - 2251       | K.SVTEQGAELSNEER.N                                                      | 1549.57922 | 2 | 5.44E-09 | 0.92 | 3.45   | -     | 1283.3   |
| AHQ-4-1, 2427               | K.SVTEQGAELSNEER.N                                                      | 1549.57922 | 2 | 6.18E-07 | 0.62 | 2.95   | -     | 612.5    |
| AHQ-4-10, 4657 - 4669       | K.SVTEQGAELSNEER.N                                                      | 1549.57922 | 2 | 1.65E-04 | 0.74 | 3.17   | -     | 406.0    |
| AHQ-4-10, 6356 - 6415       | K.TAFDEAIAELDTLSEESYK.D                                                 | 2133.25160 | 2 | 6.14E-08 | 0.98 | 6.05   | -     | 1627.0   |
| AHQ-4-9, 6517 - 6595        | K.TAFDEAIAELDTLSEESYK.D                                                 | 2133.25160 | 2 | 7.28E-08 | 0.96 | 5.42   | -     | 1112.0   |
| AHQ-4-13, 6890              | K.TAFDEAIAELDTLSEESYK.D                                                 | 2133.25160 | 3 | 2.99E-05 | 0.92 | 4.24   | -     | 1181.7   |
| AHQ-4-13, 6888              | K.TAFDEAIAELDTLSEESYK.D                                                 | 2133.25160 | 2 | 5.19E-09 | 0.97 | 5.62   | -     | 1456.9   |
| AHQ-4-13-, 6776 - 6777      | K.TAFDEAIAELDTLSEESYK.D                                                 | 2133.25160 | 2 | 3.50E-08 | 0.98 | 6.36   | -     | 1832.3   |
| AHQ-4-12, 6957 - 6959       | K.TAFDEAIAELDTLSEESYK.D                                                 | 2133.25160 | 2 | 5.37E-07 | 0.97 | 5.34   | -     | 1293.9   |
| AHQ-4-10, 5688              | K.TAFDEAIAELDTLSEESYK.D                                                 | 2133.25160 | 2 | 1.72E-04 | 0.67 | 3.10   | -     | 564.3    |
| AHQ-4-11, 6721              | K.TAFDEAIAELDTLSEESYK.D                                                 | 2133.25160 | 2 | 1.88E-08 | 0.97 | 5.40   | -     | 1456.9   |
| AHQ-4-14-, 6677 - 6747      | K.TAFDEAIAELDTLSEESYK.D                                                 | 2133.25160 | 2 | 1.72E-06 | 0.96 | 4.90   | -     | 1195.7   |
| AHQ-4-10, 6527 - 6568       | K.TAFDEAIAELDTLSEESYKDSLIM*QLLR.D                                       | 3320.66704 | 3 | 5.87E-06 | 0.65 | 3.69   | -     | 668.2    |
| AHQ-4-10, 6525 - 6600       | K.TAFDEAIAELDTLSEESYKDSLIM*QLLR.D                                       | 3304.66764 | 3 | 5.06E-07 | 0.94 | 5.20   | -     | 1258.8   |
| AHQ-4-9, 6761 - 6839        | K.TAFDEAIAELDTLSEESYKDSLIM*QLLR.D                                       | 3320.66704 | 3 | 1.10E-09 | 0.92 | 4.56   | -     | 1104.8   |
| AHQ-4-10, 2399 - 2459       | R.YDDMAACMK.S                                                           | 1106.27579 | 1 | 6.22E-08 | 0.11 | 1.80   | -     | 295.5    |
| AHQ-4-10, 1801 - 1883       | R.YLAEVAAGDDKK.G                                                        | 1280.40887 | 2 | 2.83E-05 | 0.96 | 3.83   | -     | 1776.2   |
| AHQ-4-13-, 2068             | R.YLAEVAAGDDKK.G                                                        | 1280.40887 | 2 | 9.74E-07 | 0.95 | 3.46   | -     | 1700.6   |
| AHQ-4-13, 2170 - 2209       | R.YLAEVAAGDDKK.G                                                        | 1280.40887 | 2 | 9.44E-07 | 0.95 | 3.37   | -     | 1826.6   |
| AHQ-4-11, 1889 - 1918       | R.YLAEVAAGDDKK.G                                                        | 1280.40887 | 2 | 1.63E-05 | 0.93 | 2.91   | -     | 1447.4   |
| gi 4557801 ref NP_000261.1  | purine nucleoside phosphorylase [Homo sapiens]                          |            |   | 1.12E-09 | 7.29 | 80.29  | 41.20 | 32147.7  |
| AHQ-4-9, 3837 - 3907        | R.DHINLPFSGQNPLR.G                                                      | 1665.83425 | 2 | 2.28E-04 | 0.88 | 4.20   | -     | 462.7    |
| AHQ-4-9, 3915               | R.FHMYEGYPLWK.V                                                         | 1471.70636 | 1 | 1.15E-07 | 0.91 | 3.69   | -     | 922.7    |
| AHQ-4-13-, 4009             | K.HRPQVAVICGSLGLGLTDK.L                                                 | 1981.26589 | 3 | 1.12E-09 | 0.98 | 5.44   | -     | 3989.6   |
| AHQ-4-13, 7024              | K.LEQFVSILMASIPLPK.A                                                    | 1902.28716 | 2 | 5.39E-04 | 0.79 | 3.31   | -     | 615.3    |
| AHQ-4-9, 6720               | K.LEQFVSILMASIPLPK.A                                                    | 1902.28716 | 2 | 5.69E-04 | 0.96 | 5.08   | -     | 1056.5   |

|                              |                                                                         |            |   |          |      |       |       |         |
|------------------------------|-------------------------------------------------------------------------|------------|---|----------|------|-------|-------|---------|
| AHQ-4-13-, 6877              | K.LEQFVSILMASIPLDK.A                                                    | 1902.28716 | 2 | 1.34E-05 | 0.97 | 5.70  | -     | 1234.9  |
| AHQ-4-13, 4317               | K.LGADAVGM*STVPEVIVAR.H                                                 | 1802.08606 | 2 | 2.33E-05 | 0.92 | 4.22  | -     | 710.3   |
| AHQ-4-13-, 4188              | K.LGADAVGM*STVPEVIVAR.H                                                 | 1802.08606 | 2 | 1.62E-04 | 0.92 | 4.71  | -     | 563.4   |
| AHQ-4-9, 4423                | K.LGADAVGM*STVPEVIVAR.H                                                 | 1786.08666 | 2 | 5.52E-06 | 0.88 | 3.36  | -     | 808.3   |
| AHQ-4-9, 3720                | K.LGADAVGM*STVPEVIVAR.H                                                 | 1802.08606 | 2 | 5.78E-04 | 0.95 | 4.25  | -     | 1310.2  |
| AHQ-4-13-, 5865              | K.LTQAQIFDYSEIPNFR.S                                                    | 2040.26383 | 2 | 6.63E-06 | 0.80 | 3.60  | -     | 472.3   |
| AHQ-4-13, 5972               | K.LTQAQIFDYSEIPNFR.S                                                    | 2040.26383 | 2 | 4.35E-04 | 0.90 | 3.82  | -     | 642.2   |
| AHQ-4-9, 5371 - 5433         | R.VFHLLGVDTLVTNAAGGLNPK.F                                               | 2236.59890 | 2 | 1.20E-06 | 0.97 | 5.53  | -     | 1310.6  |
| AHQ-4-9, 5573                | R.VFHLLGVDTLVTNAAGGLNPK.F                                               | 2236.59890 | 2 | 2.87E-07 | 0.95 | 4.82  | -     | 1199.2  |
| gj4505989[ref][NP_000299.1]  | protective protein for beta-galactosidase; Protective protein for beta- |            |   |          |      |       |       |         |
| AHQ-4-10, 4927 - 4929        | K.CNFYDNKDLCEVNTLQEVAR.I                                                | 2491.69642 | 2 | 2.48E-06 | 0.91 | 4.29  | -     | 762.3   |
| AHQ-4-12, 3473               | K.YGDSGEQIAGFVK.E                                                       | 1371.47686 | 2 | 1.17E-09 | 0.98 | 4.49  | -     | 2559.8  |
| AHQ-4-11, 3392               | K.YGDSGEQIAGFVK.E                                                       | 1371.47686 | 2 | 8.19E-08 | 0.97 | 4.53  | -     | 2133.0  |
| gj6005846[ref][NP_009215.1]  | PTK9L protein tyrosine kinase 9-like (A6-related protein); protein tyro |            |   |          |      |       |       |         |
| AHQ-4-13-, 6532 - 6541       | R.AVPLLLDAQQPCYLLYR.L                                                   | 2035.39506 | 2 | 3.49E-07 | 0.97 | 6.25  | -     | 922.8   |
| AHQ-4-12, 6610               | R.AVPLLLDAQQPCYLLYR.L                                                   | 2035.39506 | 3 | 1.20E-09 | 0.93 | 4.78  | -     | 1251.4  |
| AHQ-4-12, 6597 - 6598        | R.AVPLLLDAQQPCYLLYR.L                                                   | 2035.39506 | 2 | 1.03E-08 | 0.97 | 6.44  | -     | 952.0   |
| AHQ-4-12, 6515               | R.AVPLLLDAQQPCYLLYR.L                                                   | 2035.39506 | 2 | 4.98E-06 | 0.85 | 3.52  | -     | 451.5   |
| AHQ-4-14-, 6394 - 6405       | R.AVPLLLDAQQPCYLLYR.L                                                   | 2035.39506 | 2 | 4.84E-08 | 0.96 | 5.20  | -     | 858.5   |
| AHQ-4-12, 5931               | K.EFGGGHKIDLVGTNKDDLFSFAGYQK.H                                          | 2860.12617 | 3 | 1.68E-04 | 0.94 | 4.45  | -     | 1485.8  |
| AHQ-4-11, 4029 - 4102        | R.ETIELVHTEPTDVAQLPSR.V                                                 | 2136.34822 | 2 | 8.88E-06 | 0.91 | 4.11  | -     | 809.4   |
| AHQ-4-10, 3824               | R.ETIELVHTEPTDVAQLPSR.V                                                 | 2136.34822 | 2 | 1.12E-04 | 0.76 | 3.80  | -     | 548.2   |
| AHQ-4-11, 4188               | K.HQTQLQGLAFPLQPEAQR.A                                                  | 1935.17562 | 2 | 2.02E-09 | 0.96 | 4.93  | -     | 1174.6  |
| AHQ-4-11, 5533               | K.HTHEGDPLESVVFIYSMPGYK.C                                               | 2407.68601 | 2 | 5.84E-07 | 0.85 | 3.39  | -     | 595.5   |
| AHQ-4-11, 6338               | K.KIEIGDGAELTAEFLYDEVHPK.Q                                              | 2475.73515 | 3 | 1.70E-04 | 0.97 | 5.45  | -     | 1857.5  |
| AHQ-4-11, 6136               | K.KIEIGDGAELTAEFLYDEVHPK.Q                                              | 2475.73515 | 3 | 2.22E-06 | 0.96 | 5.24  | -     | 1638.3  |
| AHQ-4-13-, 4685              | K.VVIEDEQLVLGASQEPVGR.W                                                 | 2039.27568 | 2 | 1.80E-08 | 0.97 | 4.28  | -     | 2052.5  |
| AHQ-4-12, 4759               | K.VVIEDEQLVLGASQEPVGR.W                                                 | 2039.27568 | 3 | 4.64E-06 | 0.97 | 5.24  | -     | 2333.8  |
| AHQ-4-12, 4743               | K.VVIEDEQLVLGASQEPVGR.W                                                 | 2039.27568 | 2 | 2.65E-05 | 0.95 | 3.76  | -     | 1871.5  |
| AHQ-4-13, 4822               | K.VVIEDEQLVLGASQEPVGR.W                                                 | 2039.27568 | 2 | 3.36E-05 | 0.84 | 3.03  | -     | 1119.5  |
| gj4759082[ref][NP_004648.1]  | serum deprivation response protein; serum deprivation response; phospho |            |   |          |      |       |       |         |
| AHQ-4-10, 5817 - 5821        | R.DNSQVNAVTLTLLDK.L                                                     | 1730.94122 | 2 | 6.06E-06 | 0.96 | 4.53  | -     | 1598.1  |
| AHQ-4-11, 6165               | R.DNSQVNAVTLTLLDK.L                                                     | 1730.94122 | 2 | 1.05E-04 | 0.95 | 3.75  | -     | 1554.1  |
| AHQ-4-12, 6343 - 6409        | R.DNSQVNAVTLTLLDK.L                                                     | 1730.94122 | 2 | 5.41E-05 | 0.97 | 4.86  | -     | 1827.5  |
| AHQ-4-9, 6059                | R.DNSQVNAVTLTLLDK.L                                                     | 1730.94122 | 2 | 8.78E-06 | 0.97 | 4.79  | -     | 1949.9  |
| AHQ-4-9, 5887 - 5947         | R.DNSQVNAVTLTLLDK.L                                                     | 1730.94122 | 2 | 1.23E-09 | 0.97 | 4.94  | -     | 1444.1  |
| AHQ-4-11, 3394               | K.LVNMLDAVQENQHK.M                                                      | 1639.85851 | 2 | 1.03E-06 | 0.75 | 3.43  | -     | 610.8   |
| AHQ-4-12, 3454 - 3523        | K.LVNMLDAVQENQHK.M                                                      | 1639.85851 | 2 | 3.70E-04 | 0.90 | 4.06  | -     | 962.9   |
| AHQ-4-9, 5587 - 5655         | K.VLIFQEENEIPASVFK.Q                                                    | 1963.26241 | 2 | 8.09E-06 | 0.95 | 4.85  | -     | 1108.0  |
| AHQ-4-9, 5716 - 5783         | K.VLIFQEENEIPASVFK.Q                                                    | 1963.26241 | 2 | 3.26E-05 | 0.84 | 3.74  | -     | 582.9   |
| AHQ-4-11, 5876 - 5904        | K.VLIFQEENEIPASVFK.Q                                                    | 1963.26241 | 2 | 4.81E-07 | 0.92 | 4.65  | -     | 666.3   |
| AHQ-4-11, 6053               | K.VLIFQEENEIPASVFK.Q                                                    | 1963.26241 | 2 | 2.61E-06 | 0.91 | 4.28  | -     | 712.5   |
| AHQ-4-8, 5950                | K.VLIFQEENEIPASVFK.Q                                                    | 1963.26241 | 2 | 1.64E-05 | 0.96 | 5.25  | -     | 1025.2  |
| AHQ-4-6, 6202                | K.VLIFQEENEIPASVFK.Q                                                    | 1963.26241 | 2 | 7.52E-04 | 0.93 | 3.98  | -     | 964.4   |
| AHQ-4-10, 5595               | K.VLIFQEENEIPASVFK.Q                                                    | 1963.26241 | 2 | 1.96E-04 | 0.95 | 5.00  | -     | 935.8   |
| AHQ-4-12, 6085 - 6153        | K.VLIFQEENEIPASVFK.Q                                                    | 1963.26241 | 2 | 9.75E-08 | 0.96 | 5.20  | -     | 971.1   |
| AHQ-4-9, 5869 - 5877         | K.VLIFQEENEIPASVFK.Q                                                    | 1963.26241 | 2 | 9.68E-06 | 0.96 | 4.86  | -     | 1098.0  |
| AHQ-4-13-, 6093              | K.VLIFQEENEIPASVFK.Q                                                    | 1963.26241 | 2 | 4.50E-09 | 0.96 | 4.89  | -     | 986.5   |
| AHQ-4-14-, 5973 - 5977       | K.VLIFQEENEIPASVFK.Q                                                    | 1963.26241 | 2 | 4.71E-06 | 0.97 | 5.91  | -     | 1052.6  |
| gj5031573[ref][NP_005712.1]  | ARP3 actin-related protein 3 homolog; ARP3 (actin-related protein 3, ye |            |   |          |      |       |       |         |
| AHQ-4-7, 7478 - 7479         | R.DITYFIQQLLR.D                                                         | 1410.64250 | 2 | 1.09E-06 | 0.97 | 4.95  | -     | 1688.4  |
| AHQ-4-7, 7477                | R.DITYFIQQLLR.D                                                         | 1410.64250 | 1 | 2.47E-04 | 0.22 | 2.32  | -     | 222.5   |
| AHQ-4-7, 7553 - 7557         | R.FLGFPIFFPEFANPDFTPQPISEVVDEVIQNCPIDVR.R                               | 4193.79733 | 3 | 6.04E-08 | 0.91 | 5.39  | -     | 793.9   |
| AHQ-4-7, 5791                | K.GVDDLDFGDEIAEKPTATK.W                                                 | 2445.66268 | 3 | 4.11E-07 | 0.70 | 3.24  | -     | 501.3   |
| AHQ-4-9, 5656                | K.LGYAGNTEPQFIIPSCIAIK.E                                                | 2194.53570 | 2 | 2.00E-04 | 0.35 | 3.00  | -     | 355.3   |
| AHQ-4-7, 6378                | K.LGYAGNTEPQFIIPSCIAIK.E                                                | 2194.53570 | 2 | 4.16E-06 | 0.78 | 3.65  | -     | 479.2   |
| AHQ-4-7, 6498 - 6501         | K.LGYAGNTEPQFIIPSCIAIK.E                                                | 2194.53570 | 2 | 1.08E-06 | 0.74 | 3.74  | -     | 463.2   |
| AHQ-4-7, 2522                | R.LKPKPIDVQVITTHMQR.Y                                                   | 2041.45264 | 3 | 1.30E-09 | 0.77 | 3.79  | -     | 439.8   |
| AHQ-4-7, 3545                | R.LPACVDCGTYGTYK.L                                                      | 1543.74421 | 2 | 7.62E-04 | 0.89 | 3.76  | -     | 750.7   |
| AHQ-4-1, 6746                | R.TLTGTVIDSGDGVTHVIPVAEGYVIGSCK.H                                       | 3061.45302 | 3 | 5.40E-04 | 0.85 | 3.87  | -     | 742.6   |
| AHQ-4-7, 6769                | R.TLTGTVIDSGDGVTHVIPVAEGYVIGSCK.H                                       | 3061.45302 | 3 | 3.18E-06 | 0.93 | 5.47  | -     | 741.1   |
| AHQ-4-9, 5995 - 6060         | R.TLTGTVIDSGDGVTHVIPVAEGYVIGSCK.H                                       | 3061.45302 | 3 | 1.56E-04 | 0.91 | 4.56  | -     | 866.1   |
| gj9910542[ref][NP_064535.1]  | SAR1a gene homolog 1; SAR1 protein [Homo sapiens]                       |            |   |          |      |       |       |         |
| AHQ-4-11, 6054 - 6082        | R.LGQHVLPHTHPTSEELTIAGMTFTFDLGGHEQAR.R                                  | 3694.08659 | 3 | 4.00E-05 | 0.93 | 5.35  | -     | 850.1   |
| AHQ-4-11, 3652               | K.LREIFGLYQGTGK.G                                                       | 1583.81305 | 2 | 3.89E-04 | 0.97 | 4.53  | -     | 1728.3  |
| AHQ-4-11, 6780               | K.NYLPAINIGVFLVDCADHSR.L                                                | 2276.55690 | 2 | 1.36E-09 | 0.97 | 4.62  | -     | 1632.6  |
| AHQ-4-11, 6414               | K.NYLPAINIGVFLVDCADHSR.L                                                | 2276.55690 | 2 | 6.99E-07 | 0.80 | 3.36  | -     | 649.9   |
| AHQ-4-11, 6549               | K.VELNALM*TDETISNVPIILGNK.I                                             | 2514.92088 | 2 | 6.41E-05 | 0.92 | 4.13  | -     | 800.4   |
| gj4504071[ref][NP_000164.1]  | platelet glycoprotein Ib alpha polypeptide precursor [Homo sapiens] [MA |            |   |          |      |       |       |         |
| AHQ-4-4, 5032                | R.GLGLQELYLK.G                                                          | 1263.46458 | 2 | 1.57E-04 | 0.95 | 3.80  | -     | 1408.5  |
| AHQ-4-1, 5142                | R.GLGLQELYLK.G                                                          | 1263.46458 | 2 | 2.55E-05 | 0.94 | 4.07  | -     | 1153.5  |
| AHQ-4-3, 5069                | R.GLGLQELYLK.G                                                          | 1263.46458 | 2 | 2.00E-05 | 0.93 | 3.88  | -     | 1168.7  |
| AHQ-4-12, 4018 - 4046        | R.GQDLLSTVSIR.Y                                                         | 1189.34410 | 2 | 1.50E-06 | 0.95 | 3.67  | -     | 1365.1  |
| AHQ-4-13-, 4078 - 4086       | R.GQDLLSTVSIR.Y                                                         | 1189.34410 | 2 | 2.17E-06 | 0.96 | 3.96  | -     | 1561.3  |
| AHQ-4-1, 4287 - 4290         | R.GQDLLSTVSIR.Y                                                         | 1189.34410 | 2 | 3.46E-07 | 0.95 | 4.22  | -     | 1143.4  |
| AHQ-4-14-, 3899              | R.GQDLLSTVSIR.Y                                                         | 1189.34410 | 2 | 4.11E-05 | 0.91 | 2.66  | -     | 1404.1  |
| AHQ-4-3, 4175                | R.GQDLLSTVSIR.Y                                                         | 1189.34410 | 2 | 4.42E-04 | 0.94 | 3.83  | -     | 1204.7  |
| AHQ-4-13, 4212 - 4216        | R.GQDLLSTVSIR.Y                                                         | 1189.34410 | 2 | 7.88E-07 | 0.90 | 3.56  | -     | 909.5   |
| AHQ-4-4, 1974                | R.GVLQGHLESSR.N                                                         | 1183.29965 | 1 | 3.36E-04 | 0.30 | 2.12  | -     | 424.1   |
| AHQ-4-4, 1983                | R.GVLQGHLESSR.N                                                         | 1183.29965 | 2 | 7.83E-04 | 0.78 | 3.05  | -     | 611.4   |
| AHQ-4-5, 1754                | R.GVLQGHLESSR.N                                                         | 1183.29965 | 2 | 3.43E-04 | 0.88 | 3.16  | -     | 929.4   |
| AHQ-4-3, 1944 - 1969         | R.GVLQGHLESSR.N                                                         | 1183.29965 | 2 | 3.77E-05 | 0.87 | 3.33  | -     | 862.0   |
| AHQ-4-3, 2512                | R.LTQLNLDRC                                                             | 973.10877  | 2 | 1.86E-04 | 0.68 | 2.51  | -     | 797.1   |
| AHQ-4-4, 3592 - 3596         | R.LTQLNLDRCCLTK.L                                                       | 1605.83862 | 2 | 8.64E-05 | 0.80 | 3.90  | -     | 564.4   |
| AHQ-4-1, 3785                | R.LTQLNLDRCCLTK.L                                                       | 1605.83862 | 2 | 9.33E-04 | 0.63 | 3.14  | -     | 669.1   |
| AHQ-4-3, 3607 - 3628         | R.LTQLNLDRCCLTK.L                                                       | 1605.83862 | 2 | 2.42E-04 | 0.80 | 3.38  | -     | 665.7   |
| AHQ-4-3, 5328                | R.WLQDNVAENVVVK.Q                                                       | 1665.82948 | 2 | 1.43E-09 | 0.97 | 4.54  | -     | 2187.4  |
| AHQ-4-1, 5053 - 5057         | R.WLQDNVAENVVVK.Q                                                       | 1665.82948 | 2 | 2.16E-04 | 0.93 | 4.14  | -     | 1277.4  |
| gj4503477[ref][NP_001950.1]  | eukaryotic translation elongation factor 1 beta 2; eukaryotic translati |            |   |          |      |       |       |         |
| AHQ-4-9, 4049                | K.SPAGLQVLDNYLADK.S                                                     | 1604.78589 | 2 | 1.44E-09 | 0.90 | 10.22 | 6.70  | 24763.6 |
| gj16507237[ref][NP_005338.1] | heat shock 70kDa protein 5 (glucose-regulated protein, 78kDa); BIP; he  |            |   |          |      |       |       |         |
| AHQ-4-6, 4775                | R.AKFEELNMDLFR.S                                                        | 1513.74309 | 2 | 8.54E-05 | 0.92 | 3.28  | -     | 1102.6  |
| AHQ-4-5, 3971                | R.AKFEELNMDLFR.S                                                        | 1529.74249 | 2 | 5.52E-04 | 0.89 | 2.82  | -     | 1278.9  |
| AHQ-4-6, 5508                | K.DNHLGLTDFDLTGIIPAPR.G                                                 | 1935.17239 | 2 | 2.62E-07 | 0.90 | 3.79  | -     | 735.1   |
| AHQ-4-6, 6062                | R.IEIESFYEGEDFSETLTRA                                                   | 2166.28328 | 2 | 2.86E-05 | 0.92 | 4.17  | -     | 787.1   |
| AHQ-4-6, 4614                | K.IEWLESHQADIEDFPK.A                                                    | 1976.08864 | 2 | 1.49E-07 | 0.98 | 5.95  | -     | 2102.4  |
| AHQ-4-5, 4681 - 4690         | K.IEWLESHQADIEDFPK.A                                                    | 1976.08864 | 2 | 6.76E-09 | 0.98 | 5.67  | -     | 1763.7  |
| AHQ-4-5, 3713                | R.ITPSYVAFTPEGER.L                                                      | 1567.72412 | 2 | 8.96E-06 | 0.70 | 2.99  | -     | 488.2   |
| AHQ-4-6, 3491                | K.KSDIDEIVLGGSTR.I                                                      | 1589.77277 | 2 | 1.46E-09 | 0.97 | 4.96  | -     | 2095.1  |
| AHQ-4-5, 3638                | K.SQIFSTASDNQOPTVIK.V                                                   | 1838.00865 | 2 | 3.53E-05 | 0.94 | 4.33  | -     | 1137.2  |
| AHQ-4-6, 3656                | K.SQIFSTASDNQOPTVIK.V                                                   | 1838.00865 | 2 | 2.78E-07 | 0.91 | 3.91  | -     | 905.5   |
| AHQ-4-6, 2712                | K.TKPYIQVDDGGGQTK.T                                                     | 1605.81703 | 2 | 8.71E-07 | 0.85 | 2.99  | -     | 913.2   |
| gj30150022[ref][XP_300862.1] | similar to beta-tubulin 4Q [Homo sapiens]                               |            |   |          |      |       |       |         |
| AHQ-4-7, 6309 - 6375         | K.EAESCDCLQGFQLTHSLGGGTGSGMGLTLLSK.I                                    | 3315.65550 | 3 | 1.47E-09 | 0.76 | 80.23 | 24.80 | 33545.2 |
| AHQ-4-7, 6445 - 6521         | K.EAESCDCLQGFQLTHSLGGGTGSGMGLTLLSK.I                                    | 3315.65550 | 3 | 2.91E-05 | 0.78 | 3.45  | -     | 703.0   |
| AHQ-4-7, 3161 - 3231         | R.FPGQLNADLR.K                                                          | 1131.26634 | 2 | 5.41E-05 | 0.87 | 3.34  | -     | 741.7   |
| AHQ-4-8, 2842                | R.FPGQLNADLR.K                                                          | 1131.26634 | 2 | 9.12E-05 | 0.77 | 2.51  | -     | 854.6   |

|                             |                                                                         |            |   |          |      |       |       |          |
|-----------------------------|-------------------------------------------------------------------------|------------|---|----------|------|-------|-------|----------|
| AHQ-4-7, 3017 - 3093        | R.FPQQLNADLR.K                                                          | 1131.26634 | 2 | 3.29E-05 | 0.90 | 3.06  | -     | 926.2    |
| AHQ-4-9, 2873               | R.FPQQLNADLR.K                                                          | 1131.26634 | 2 | 9.55E-06 | 0.83 | 2.93  | -     | 687.7    |
| AHQ-4-7, 2703               | R.FPQQLNADLR.L                                                          | 1259.43925 | 2 | 1.07E-04 | 0.74 | 2.69  | -     | 859.1    |
| AHQ-4-7, 1458               | K.IREEYPRD.I                                                            | 1078.16030 | 2 | 8.37E-04 | 0.87 | 3.18  | -     | 829.7    |
| AHQ-4-7, 3482 - 3503        | R.KLAVNMVPPFR.L                                                         | 1272.58771 | 2 | 1.05E-08 | 0.96 | 4.53  | -     | 1361.6   |
| AHQ-4-7, 3486 - 3567        | K.LAVNMVPPFR.L                                                          | 1160.41420 | 2 | 5.32E-06 | 0.94 | 3.76  | -     | 1021.9   |
| AHQ-4-8, 3903               | K.LAVNMVPPFR.L                                                          | 1144.41480 | 2 | 5.35E-04 | 0.88 | 2.95  | -     | 788.2    |
| AHQ-4-7, 4158 - 4166        | K.LAVNMVPPFR.L                                                          | 1144.41480 | 2 | 1.91E-05 | 0.91 | 4.09  | -     | 659.5    |
| AHQ-4-9, 3849               | K.LAVNMVPPFR.L                                                          | 1144.41480 | 2 | 3.30E-04 | 0.84 | 2.86  | -     | 833.3    |
| AHQ-4-7, 5445               | R.LHFFMPGFAPLTSR.G                                                      | 1621.92962 | 2 | 8.95E-07 | 0.94 | 3.97  | -     | 819.6    |
| AHQ-4-9, 4991 - 4993        | R.LHFFMPGFAPLTSR.G                                                      | 1621.92962 | 2 | 1.47E-09 | 0.94 | 3.83  | -     | 836.1    |
| gi 4505667 ref NP_001074.1  | phosphodiesterase 5A isoform 1; cGMP-binding cGMP-specific 3',5'-cyclic |            |   | 1.52E-09 | 0.94 | 10.23 | 1.90  | 100012.4 |
| AHQ-4-5, 4145 - 4151        | R.FPWTTTENTGNVQQCIR.S                                                   | 2067.22783 | 2 | 1.52E-09 | 0.94 | 4.61  | -     | 1058.6   |
| gi 6912638 ref NP_036557.1  | ras suppressor protein 1 [Homo sapiens]                                 |            |   | 1.56E-09 | 6.57 | 80.26 | 41.50 | 31540.1  |
| AHQ-4-10, 6495 - 6500       | K.AENNPWVTPADQFQLGVSHVFEYR.S                                            | 3032.35678 | 3 | 1.12E-05 | 0.69 | 3.38  | -     | 463.8    |
| AHQ-4-12, 7065              | K.AENNPWVTPADQFQLGVSHVFEYR.S                                            | 3032.35678 | 3 | 4.70E-06 | 0.88 | 4.30  | -     | 523.8    |
| AHQ-4-10, 5644 - 5703       | R.ALYLSDNDFFLPPDQIGK.L                                                  | 2021.25559 | 2 | 5.34E-05 | 0.92 | 4.41  | -     | 543.0    |
| AHQ-4-10, 3640              | R.DNDLISLPK.E                                                           | 1015.14242 | 2 | 4.89E-04 | 0.86 | 3.16  | -     | 1012.8   |
| AHQ-4-10, 3399 - 3459       | R.DNDLISLPK.E                                                           | 1015.14242 | 2 | 9.67E-04 | 0.84 | 3.11  | -     | 940.6    |
| AHQ-4-10, 6477              | R.GISNMLDVNGLFTLSHITQLVLSHNK.L                                          | 2853.28963 | 3 | 6.92E-08 | 0.87 | 4.50  | -     | 624.2    |
| AHQ-4-10, 6472              | R.GISNMLDVNGLFTLSHITQLVLSHNK.L                                          | 2853.28963 | 3 | 7.89E-04 | 0.68 | 3.66  | -     | 182.8    |
| AHQ-4-10, 6420              | R.GISNM*LDVNGLFTLSHITQLVLSHNK.L                                         | 2869.28903 | 3 | 1.27E-05 | 0.74 | 3.41  | -     | 609.6    |
| AHQ-4-10, 5275              | K.LQILSLRDNLDLISLPK.E                                                   | 1839.16919 | 2 | 8.99E-08 | 0.96 | 5.23  | -     | 1788.4   |
| AHQ-4-10, 5359 - 5417       | K.LQILSLRDNLDLISLPK.E                                                   | 1839.16919 | 2 | 2.41E-08 | 0.92 | 4.47  | -     | 1263.2   |
| AHQ-4-10, 4267              | K.LTMVPPNIAELK.N                                                        | 1326.63045 | 1 | 5.32E-05 | 0.46 | 2.77  | -     | 416.7    |
| AHQ-4-11, 5702 - 5768       | R.LTVLPPPELGNLDTGQK.Q                                                   | 1809.09672 | 2 | 1.56E-09 | 0.90 | 3.69  | -     | 673.6    |
| AHQ-4-10, 5375 - 5400       | R.LTVLPPPELGNLDTGQK.Q                                                   | 1809.09672 | 2 | 5.38E-05 | 0.84 | 3.75  | -     | 448.8    |
| AHQ-4-10, 5431 - 5459       | R.LTVLPPPELGNLDTGQK.Q                                                   | 1809.09672 | 2 | 2.86E-08 | 0.95 | 5.07  | -     | 594.4    |
| AHQ-4-13-, 5873 - 5898      | R.LTVLPPPELGNLDTGQK.Q                                                   | 1809.09672 | 2 | 1.34E-04 | 0.89 | 3.87  | -     | 563.1    |
| gi 4758970 ref NP_004150.1  | proteasome beta 8 subunit isoform E1 proprotein; proteasome subunit, be |            |   | 1.59E-09 | 0.83 | 10.14 | 5.10  | 29769.4  |
| AHQ-4-11, 3933 - 4008       | K.VESTDVSLLHQYR.E                                                       | 1662.78230 | 2 | 1.59E-09 | 0.83 | 2.86  | -     | 954.3    |
| gi 6996010 ref NP_002038.1  | glycyl-tRNA synthetase; GlyRS; glycine tRNA ligase [Homo sapiens]       |            |   | 1.61E-09 | 0.89 | 10.14 | 1.90  | 77530.3  |
| AHQ-4-5, 4509               | K.LPFAAAQIGNSFR.N                                                       | 1392.58727 | 2 | 1.61E-09 | 0.89 | 2.86  | -     | 1237.9   |
| gi 4507171 ref NP_003109.1  | secreted protein, acidic, cysteine-rich (osteonectin); Osteonectin (sec |            |   | 1.63E-09 | 3.19 | 40.21 | 13.20 | 34632.0  |
| AHQ-4-8, 2695               | R.LEAGDHPVELLAR.D                                                       | 1420.59579 | 2 | 4.89E-09 | 0.96 | 4.27  | -     | 1404.0   |
| AHQ-4-8, 2818               | K.LHLDYIGPK.Y                                                           | 1217.41920 | 2 | 1.65E-05 | 0.81 | 2.95  | -     | 612.6    |
| AHQ-4-8, 2301               | K.RLEAGDHPVELLAR.D                                                      | 1576.78214 | 2 | 1.35E-04 | 0.85 | 3.59  | -     | 518.7    |
| AHQ-4-8, 2296               | K.RLEAGDHPVELLAR.D                                                      | 1576.78214 | 3 | 1.63E-09 | 0.89 | 3.24  | -     | 1258.7   |
| AHQ-4-9, 5923 - 5924        | K.YIPPCDSELTEFFPLR.M                                                    | 1952.21655 | 2 | 2.55E-07 | 0.52 | 2.55  | -     | 210.8    |
| AHQ-4-10, 5841              | K.YIPPCDSELTEFFPLR.M                                                    | 1952.21655 | 2 | 5.30E-05 | 0.37 | 2.61  | -     | 125.4    |
| AHQ-4-8, 6237 - 6239        | K.YIPPCDSELTEFFPLR.M                                                    | 1952.21655 | 2 | 2.22E-06 | 0.53 | 2.61  | -     | 222.3    |
| gi 4557419 ref NP_000063.1  | CD36 antigen (collagen type I receptor, thrombospondin receptor); CD36  |            |   | 1.68E-09 | 2.76 | 30.24 | 10.20 | 53052.1  |
| AHQ-4-1, 4902               | K.AFASPVENPDNYCFCTEK.I                                                  | 2152.30319 | 2 | 3.35E-07 | 0.83 | 3.13  | -     | 635.5    |
| AHQ-4-6, 5438               | K.SQVLQFFSSDICR.S                                                       | 1588.76661 | 2 | 1.54E-04 | 0.95 | 4.19  | -     | 1172.3   |
| AHQ-4-5, 5482 - 5489        | K.SQVLQFFSSDICR.S                                                       | 1588.76661 | 2 | 1.68E-09 | 0.97 | 4.89  | -     | 1325.7   |
| AHQ-4-5, 7225 - 7253        | R.TYLDIQIPITGFTLOFAK.R                                                  | 1957.25787 | 2 | 1.01E-07 | 0.97 | 4.74  | -     | 1367.2   |
| gi 6005942 ref NP_009057.1  | valosin-containing protein; yeast Cdc48p homolog; transitional endoplas |            |   | 1.68E-09 | 7.49 | 90.26 | 13.60 | 89321.3  |
| AHQ-4-5, 3617               | K.GVLYFGPPCGCG.T                                                        | 1253.45154 | 2 | 6.03E-05 | 0.53 | 2.74  | -     | 757.3    |
| AHQ-4-5, 2566               | R.KYEM*FAQTLQQR.S.G                                                     | 1646.84948 | 2 | 1.60E-05 | 0.92 | 3.63  | -     | 947.2    |
| AHQ-4-5, 3045               | R.KYEM*FAQTLQQR.S.G                                                     | 1630.85008 | 2 | 3.26E-08 | 0.97 | 4.94  | -     | 1669.4   |
| AHQ-4-5, 5675               | R.LDQLYIPLPDEK.S                                                        | 1557.81228 | 2 | 3.86E-06 | 0.94 | 4.39  | -     | 915.5    |
| AHQ-4-5, 2782               | R.LEILQIHTK.N                                                           | 1095.31705 | 1 | 6.44E-06 | 0.42 | 2.09  | -     | 460.7    |
| AHQ-4-5, 5227               | R.LIVDEAINEDSVVLSLQPK.M                                                 | 2171.39088 | 2 | 1.87E-04 | 0.83 | 3.77  | -     | 410.8    |
| AHQ-4-5, 7393 - 7399        | K.NAPAIIFDELDAIPK.R                                                     | 1812.09907 | 2 | 1.68E-09 | 0.97 | 5.24  | -     | 1579.0   |
| AHQ-4-5, 6255               | R.RIVSLLTMDGLK.Q                                                        | 1587.95293 | 2 | 2.08E-04 | 0.95 | 4.64  | -     | 1080.6   |
| AHQ-4-5, 3291               | R.WALSQNSPALR.E                                                         | 1330.47434 | 2 | 2.02E-07 | 0.94 | 4.00  | -     | 1297.5   |
| gi 24797067 ref NP_002107.3 | major histocompatibility complex, class I, A precursor; HLA-A1 class I  |            |   | 1.69E-09 | 2.82 | 30.28 | 11.50 | 40840.5  |
| AHQ-4-14-, 4913 - 4914      | R.FIAVGYVDDTQFYR.F                                                      | 1630.82504 | 2 | 4.64E-09 | 0.98 | 5.52  | -     | 2079.9   |
| AHQ-4-14, 6152 - 6226       | R.FIAVGYVDDTQFYR.F                                                      | 1630.82504 | 2 | 4.27E-05 | 0.92 | 3.74  | -     | 916.3    |
| AHQ-4-8, 1836               | R.YLENGKELQR.T                                                          | 1351.49032 | 2 | 2.68E-04 | 0.90 | 2.97  | -     | 1286.2   |
| AHQ-4-8, 2713               | R.YTCHVQHEGLPKPLTLR.W                                                   | 2051.35781 | 3 | 2.95E-05 | 0.96 | 5.01  | -     | 2342.3   |
| AHQ-4-8, 2711 - 2717        | R.YTCHVQHEGLPKPLTLR.W                                                   | 2051.35781 | 2 | 1.69E-09 | 0.94 | 5.06  | -     | 1061.6   |
| gi 24119203 ref NP_705935.1 | tropomyosin 3 [Homo sapiens]                                            |            |   | 1.73E-09 | 5.42 | 60.26 | 16.10 | 29032.5  |
| AHQ-4-9, 3103               | R.IQLVEEELDR.A                                                          | 1244.37653 | 2 | 4.54E-06 | 0.89 | 3.63  | -     | 847.8    |
| AHQ-4-10, 3356              | R.IQLVEEELDR.A                                                          | 1244.37653 | 1 | 3.64E-04 | 0.26 | 2.43  | -     | 453.0    |
| AHQ-4-10, 3360              | R.IQLVEEELDR.A                                                          | 1244.37653 | 2 | 8.24E-07 | 0.91 | 3.28  | -     | 1069.7   |
| AHQ-4-9, 2457 - 2463        | K.IQVLQQQADDAEER.A                                                      | 1643.73738 | 2 | 1.73E-09 | 0.97 | 4.64  | -     | 1682.0   |
| AHQ-4-9, 2137 - 2207        | R.KIQVLQQQADDAEER.A                                                     | 1771.91030 | 2 | 3.84E-04 | 0.98 | 5.23  | -     | 1752.7   |
| AHQ-4-9, 2224               | R.KIQVLQQQADDAEER.A                                                     | 1771.91030 | 3 | 5.59E-09 | 0.86 | 3.26  | -     | 1437.7   |
| AHQ-4-9, 2739 - 2761        | R.RIQLVEEELDR.A                                                         | 1400.56288 | 2 | 2.88E-08 | 0.97 | 5.06  | -     | 1707.6   |
| AHQ-4-9, 3128 - 3136        | R.RIQLVEEELDR.AQER.L                                                    | 1885.07177 | 3 | 2.63E-04 | 0.93 | 4.39  | -     | 1232.7   |
| AHQ-4-9, 2668               | K.TIDDELKLC.C                                                           | 1190.32563 | 2 | 6.16E-06 | 0.79 | 3.24  | -     | 543.8    |
| gi 4885387 ref NP_005318.1  | L-3-hydroxyacyl-Coenzyme A dehydrogenase, short chain; L-3-hydroxyacyl- |            |   | 1.73E-09 | 0.93 | 10.24 | 9.60  | 34286.3  |
| AHQ-4-9, 6799               | K.LTSTIATSDAASVVHSTDLVVEAIVENLK.V                                       | 3086.43759 | 3 | 1.73E-09 | 0.93 | 4.75  | -     | 1028.9   |
| gi 4507869 ref NP_003361.1  | vasodilator-stimulated phosphoprotein [Homo sapiens]                    |            |   | 1.74E-09 | 3.61 | 40.29 | 14.50 | 39829.4  |
| AHQ-4-7, 3461               | R.KMQPDQQVINCIVR.G                                                      | 1901.24418 | 2 | 4.49E-04 | 0.96 | 4.85  | -     | 1110.9   |
| AHQ-4-7, 6019 - 6025        | K.VKKEIEAFVQELR.K                                                       | 1703.96061 | 2 | 1.74E-09 | 0.98 | 5.85  | -     | 1646.0   |
| AHQ-4-7, 6030               | K.VKKEIEAFVQELR.K                                                       | 1703.96061 | 2 | 7.88E-06 | 0.94 | 3.06  | -     | 2121.6   |
| AHQ-4-13-, 2832 - 2906      | R.VQIYHNPTANSFR.V                                                       | 1547.69936 | 2 | 7.57E-07 | 0.54 | 2.51  | -     | 465.7    |
| AHQ-4-7, 2531               | R.VQIYHNPTANSFR.V                                                       | 1547.69936 | 2 | 2.16E-07 | 0.92 | 3.61  | -     | 1177.4   |
| AHQ-4-14, 3692 - 3714       | R.VQIYHNPTANSFR.V                                                       | 1547.69936 | 2 | 2.35E-04 | 0.56 | 2.90  | -     | 294.4    |
| AHQ-4-7, 2439               | R.VQIYHNPTANSFR.V                                                       | 1547.69936 | 2 | 3.48E-04 | 0.69 | 2.86  | -     | 584.4    |
| AHQ-4-7, 2591               | K.YNQATPNFHQWR.D                                                        | 1562.67258 | 2 | 4.72E-05 | 0.76 | 2.86  | -     | 530.9    |
| gi 4885281 ref NP_005262.1  | glutamate dehydrogenase 1 [Homo sapiens]                                |            |   | 1.87E-09 | 0.88 | 10.19 | 2.90  | 61397.5  |
| AHQ-4-7, 3603 - 3611        | K.HGGTIPIVPTAEFQDR.I                                                    | 1738.92514 | 2 | 1.87E-09 | 0.88 | 3.72  | -     | 560.0    |
| gi 13569962 ref NP_112243.1 | RAB1B, member RAS oncogene family; small GTP-binding protein [Homo sap  |            |   | 1.87E-09 | 3.63 | 40.31 | 26.40 | 22171.0  |
| AHQ-4-11, 4341 - 4405       | R.GAHGIIVVYDVTQESYANVK.Q                                                | 2279.49113 | 2 | 6.67E-08 | 0.98 | 5.93  | -     | 1689.8   |
| AHQ-4-11, 4626 - 4677       | R.GAHGIIVVYDVTQESYANVK.Q                                                | 2279.49113 | 2 | 4.99E-08 | 0.97 | 5.38  | -     | 1846.6   |
| AHQ-4-11, 2024              | R.M*GPGAASGGGERPNLK.I                                                   | 1458.62590 | 2 | 1.34E-05 | 0.75 | 3.24  | -     | 537.1    |
| AHQ-4-11, 2014 - 2016       | R.MGPGAASGGGERPNLK.I                                                    | 1442.62650 | 2 | 1.87E-09 | 0.93 | 3.97  | -     | 1213.5   |
| AHQ-4-11, 1678              | R.M*GPGAASGGGERPNLK.I                                                   | 1458.62590 | 2 | 1.02E-04 | 0.48 | 2.84  | -     | 424.9    |
| AHQ-4-11, 6524              | K.NATNVEQAFMTMAAEIK.K                                                   | 1870.14079 | 2 | 1.49E-07 | 0.98 | 6.16  | -     | 1643.7   |
| gi 4757812 ref NP_004880.1  | ATP synthase, H+ transporting, mitochondrial F0 complex, subunit f, iso |            |   | 2.09E-09 | 2.74 | 30.22 | 25.50 | 10917.8  |
| AHQ-4-13, 6098              | R.DFSPSGIFGAFQR.G                                                       | 1429.56124 | 2 | 3.05E-07 | 0.89 | 3.34  | -     | 917.5    |
| AHQ-4-13-, 5996 - 6009      | R.DFSPSGIFGAFQR.G                                                       | 1429.56124 | 2 | 2.09E-09 | 0.95 | 4.34  | -     | 1142.2   |
| AHQ-4-14-, 5885             | R.DFSPSGIFGAFQR.G                                                       | 1429.56124 | 2 | 1.26E-06 | 0.84 | 2.91  | -     | 890.6    |
| AHQ-4-14-, 5457             | K.LGELPSWILM*R.D                                                        | 1331.60876 | 2 | 1.71E-06 | 0.95 | 4.00  | -     | 829.7    |
| AHQ-4-13-, 5513             | K.LGELPSWILM*R.D                                                        | 1331.60876 | 2 | 8.18E-07 | 0.92 | 3.81  | -     | 576.5    |
| AHQ-4-14-, 5907             | K.LGELPSWILM*R.D                                                        | 1315.60936 | 2 | 1.08E-06 | 0.93 | 3.97  | -     | 796.8    |
| AHQ-4-13, 5634              | K.LGELPSWILM*R.D                                                        | 1331.60876 | 2 | 1.87E-07 | 0.86 | 2.88  | -     | 565.8    |
| gi 4507745 ref NP_003320.1  | thioredoxin [Homo sapiens]                                              |            |   | 2.14E-09 | 2.18 | 30.19 | 22.90 | 11693.3  |
| AHQ-4-13-, 3908             | K.EKLEATINELV                                                           | 1259.43110 | 2 | 4.60E-05 | 0.92 | 2.82  | -     | 1560.9   |
| AHQ-4-13-, 4177             | K.EKLEATINELV                                                           | 1002.14365 | 1 | 2.58E-04 | 0.34 | 1.84  | -     | 392.8    |
| AHQ-4-13, 4010              | K.TAFQEALDAAGDK.L                                                       | 1337.41728 | 1 | 5.45E-07 | 0.76 | 3.17  | -     | 705.6    |
| AHQ-4-14, 4828 - 4846       | K.TAFQEALDAAGDK.L                                                       | 1337.41728 | 2 | 1.84E-06 | 0.88 | 3.34  | -     | 1187.4   |
| AHQ-4-13, 3934 - 3996       | K.TAFQEALDAAGDK.L                                                       | 1337.41728 | 2 | 2.72E-07 | 0.92 | 3.37  | -     | 1304.0   |
| AHQ-4-13-, 3844 - 3845      | K.TAFQEALDAAGDK.L                                                       | 1337.41728 | 2 | 1.21E-07 | 0.90 | 3.39  | -     | 1279.4   |

|                             |                                                                             |            |   |          |      |       |      |         |
|-----------------------------|-----------------------------------------------------------------------------|------------|---|----------|------|-------|------|---------|
| AHQ-4-13-, 3861             | K.TAFQEALDAAGDK.L                                                           | 1337.41728 | 1 | 3.48E-04 | 0.67 | 2.96  | -    | 669.9   |
| AHQ-4-13-, 3880             | K.TAFQEALDAAGDK.L                                                           | 1337.41728 | 2 | 2.98E-08 | 0.92 | 3.10  | -    | 1523.2  |
| AHQ-4-13-, 2808             | K.TAFQEALDAAGDK.L                                                           | 1337.41728 | 2 | 1.51E-07 | 0.87 | 3.41  | -    | 1127.2  |
| AHQ-4-13, 3992 - 4066       | K.TAFQEALDAAGDK.L                                                           | 1337.41728 | 2 | 2.14E-09 | 0.92 | 3.63  | -    | 1218.7  |
| AHQ-4-13, 2937              | K.TAFQEALDAAGDK.L                                                           | 1337.41728 | 2 | 3.57E-05 | 0.67 | 2.58  | -    | 856.7   |
| AHQ-4-14-, 3735             | K.TAFQEALDAAGDK.L                                                           | 1337.41728 | 2 | 1.42E-08 | 0.95 | 3.85  | -    | 1609.2  |
| gi 23110944 ref NP_002782.1 | proteasome alpha 6 subunit; prosomal P27K protein; proteasome subunit       |            |   |          |      |       |      |         |
| AHQ-4-10, 2529              | R.HITIFSEPEGR.L                                                             | 1157.30379 | 2 | 9.48E-04 | 0.81 | 2.78  | -    | 618.4   |
| AHQ-4-10, 3999              | K.LLSDSSTVTHLFK.I                                                           | 1361.56825 | 2 | 2.31E-09 | 0.79 | 3.10  | -    | 602.7   |
| gi 10716563 ref NP_001737.1 | calnexin [Homo sapiens]                                                     |            |   |          |      |       |      |         |
| AHQ-4-5, 4907               | K.APVPTGEVYFADSFDR.G                                                        | 1771.90722 | 2 | 2.43E-09 | 0.91 | 3.49  | -    | 1276.2  |
| AHQ-4-5, 4866 - 4889        | K.APVPTGEVYFADSFDR.G                                                        | 1771.90722 | 2 | 5.06E-05 | 0.94 | 3.96  | -    | 1056.8  |
| AHQ-4-1, 5154               | K.APVPTGEVYFADSFDR.G                                                        | 1771.90722 | 2 | 2.65E-05 | 0.94 | 4.14  | -    | 1177.0  |
| AHQ-4-5, 6875               | K.IPNPDFFEDLEPFR.M                                                          | 1736.90447 | 2 | 1.97E-05 | 0.78 | 3.26  | -    | 478.5   |
| AHQ-4-1, 6923               | K.IPNPDFFEDLEPFR.M                                                          | 1736.90447 | 2 | 3.01E-06 | 0.83 | 3.21  | -    | 656.3   |
| AHQ-4-9, 5568               | R.KIPNPDFFEDLEPFR.M                                                         | 1865.07739 | 2 | 3.39E-04 | 0.77 | 3.41  | -    | 487.9   |
| AHQ-4-5, 6250               | R.KIPNPDFFEDLEPFR.M                                                         | 1865.07739 | 2 | 6.66E-04 | 0.93 | 3.83  | -    | 989.2   |
| gi 4504973 ref NP_002292.1  | lactate dehydrogenase C [Homo sapiens]                                      |            |   |          |      |       |      |         |
| AHQ-4-11, 2353              | R.VIGSGCNLDSAR.F                                                            | 1250.36445 | 2 | 8.02E-08 | 0.86 | 3.34  | -    | 695.8   |
| AHQ-4-9, 2193               | R.VIGSGCNLDSAR.F                                                            | 1250.36445 | 2 | 2.44E-09 | 0.94 | 3.91  | -    | 815.7   |
| gi 21314617 ref NP_000433.2 | platelet/endothelial cell adhesion molecule (CD31 antigen); platelet/e      |            |   |          |      |       |      |         |
| AHQ-4-5, 5901 - 5911        | R.CESISGTLPIISYQLLK.T                                                       | 1811.08954 | 2 | 2.74E-05 | 0.66 | 3.09  | -    | 316.8   |
| AHQ-4-4, 6626               | K.CTIQVTHLAQEFPEIIIQK.D                                                     | 2270.63371 | 2 | 1.75E-06 | 0.96 | 5.30  | -    | 925.9   |
| AHQ-4-1, 6606               | K.CTIQVTHLAQEFPEIIIQK.D                                                     | 2270.63371 | 2 | 8.66E-07 | 0.84 | 3.56  | -    | 818.5   |
| AHQ-4-3, 6676               | K.CTIQVTHLAQEFPEIIIQK.D                                                     | 2270.63371 | 2 | 7.19E-07 | 0.96 | 5.24  | -    | 988.3   |
| AHQ-4-8, 6111               | K.CTIQVTHLAQEFPEIIIQK.D                                                     | 2270.63371 | 2 | 3.07E-04 | 0.89 | 3.82  | -    | 817.6   |
| AHQ-4-1, 6358               | R.DQNFVILEFPVEEQDR.V                                                        | 1979.13566 | 2 | 2.42E-06 | 0.88 | 4.35  | -    | 777.3   |
| AHQ-4-5, 6306               | R.DQNFVILEFPVEEQDR.V                                                        | 1979.13566 | 2 | 3.00E-04 | 0.81 | 3.82  | -    | 618.8   |
| AHQ-4-4, 6406               | R.DQNFVILEFPVEEQDR.V                                                        | 1979.13566 | 2 | 1.65E-04 | 0.53 | 3.62  | -    | 437.7   |
| AHQ-4-4, 3598               | K.EQEGEYCYTAFNR.A                                                           | 1668.72232 | 2 | 2.03E-05 | 0.87 | 3.11  | -    | 723.3   |
| AHQ-4-4, 4102               | K.STESYFIPEVR.I                                                             | 1328.45199 | 2 | 7.28E-04 | 0.88 | 3.37  | -    | 820.0   |
| AHQ-4-4, 4107               | K.STESYFIPEVR.I                                                             | 1328.45199 | 1 | 1.70E-05 | 0.32 | 2.51  | -    | 178.6   |
| AHQ-4-1, 5723               | K.VIAPVDEVQISILSSK.V                                                        | 1698.98227 | 2 | 1.04E-05 | 0.70 | 2.61  | -    | 483.0   |
| AHQ-4-4, 5606 - 5608        | K.VIAPVDEVQISILSSK.V                                                        | 1698.98227 | 2 | 2.48E-09 | 0.87 | 3.42  | -    | 543.3   |
| gi 21361478 ref NP_055944.2 | septin 6 isoform B; septin 2 [Homo sapiens]                                 |            |   |          |      |       |      |         |
| AHQ-4-7, 3787 - 3789        | K.FEGEPATHTQPGVLMQDSNTYDLQESNVR.L                                           | 3147.31508 | 3 | 2.49E-09 | 0.97 | 5.80  | -    | 1629.1  |
| AHQ-4-7, 3450               | K.SLDDEVNAFK.Q                                                              | 1138.20928 | 1 | 7.34E-04 | 0.57 | 2.26  | -    | 618.8   |
| AHQ-4-7, 2897               | K.TAAELLQSQSGQAGGSQTLK.R                                                    | 1976.13485 | 2 | 8.80E-07 | 0.96 | 4.49  | -    | 1858.0  |
| AHQ-4-7, 4889               | R.TVPLAGHVGFDSLPDQLVNK.S                                                    | 2108.38284 | 2 | 4.47E-08 | 0.96 | 5.06  | -    | 1050.9  |
| gi 4503725 ref NP_000792.1  | FK506-binding protein 1A; FK506-binding protein                             |            |   |          |      |       |      |         |
| AHQ-4-13, 4044 - 4068       | R.GWEEGVAQMSVGGQ.R.A                                                        | 1534.67926 | 2 | 3.00E-04 | 0.91 | 3.70  | -    | 1364.7  |
| AHQ-4-13-, 3892 - 3893      | R.GWEEGVAQMSVGGQ.R.A                                                        | 1534.67926 | 2 | 9.38E-09 | 0.95 | 4.07  | -    | 1292.5  |
| AHQ-4-13-, 2980 - 2981      | R.GWEEGVAQMSVGGQ.R.A                                                        | 1550.67866 | 2 | 2.57E-09 | 0.97 | 5.02  | -    | 1282.8  |
| AHQ-4-13, 3105 - 3177       | R.GWEEGVAQMSVGGQ.R.A                                                        | 1550.67866 | 2 | 7.60E-04 | 0.95 | 4.11  | -    | 1241.6  |
| AHQ-4-13-, 2622             | K.RGQTCVVHYTGMLEDGKK.F                                                      | 2097.36199 | 3 | 1.66E-04 | 0.85 | 3.85  | -    | 654.2   |
| gi 4508047 ref NP_003452.1  | zyxin [Homo sapiens]                                                        |            |   |          |      |       |      |         |
| AHQ-4-8, 7129               | K.EVELEQLTQQLMQDMEHPQR.Q                                                    | 2612.87876 | 2 | 4.40E-07 | 0.77 | 3.43  | -    | 419.5   |
| AHQ-4-9, 6611               | K.EVELEQLTQQLMQDMEHPQR.Q                                                    | 2612.87876 | 2 | 1.36E-05 | 0.69 | 2.76  | -    | 545.3   |
| AHQ-4-8, 3577               | K.LGHPPEALSAGTGPSPPFTYAQQR.E                                                | 2598.81170 | 2 | 2.61E-09 | 0.90 | 4.03  | -    | 655.7   |
| gi 4759140 ref NP_004243.1  | solute carrier family 9 (sodium/hydrogen exchanger), isoform 3 regulato     |            |   |          |      |       |      |         |
| AHQ-4-13-, 3806             | R.LLVVDPTEDEQLK.L                                                           | 1627.81777 | 2 | 2.67E-09 | 0.89 | 3.56  | -    | 665.6   |
| AHQ-4-13, 3949 - 3950       | R.LLVVDPTEDEQLK.L                                                           | 1627.81777 | 2 | 7.04E-07 | 0.92 | 4.06  | -    | 733.2   |
| gi 1886900 ref NP_002834.2  | protein tyrosine phosphatase, receptor type, J precursor; protein tyro      |            |   |          |      |       |      |         |
| AHQ-4-1, 4447               | K.AYAVILTGEAGHPADVLK.Y                                                      | 2014.26782 | 3 | 2.17E-08 | 0.93 | 3.78  | -    | 1308.2  |
| AHQ-4-1, 4605               | K.DFIATQGPLNTLK.D                                                           | 1515.73548 | 2 | 5.93E-04 | 0.79 | 3.13  | -    | 779.7   |
| AHQ-4-1, 2814               | K.FSGFEASHGPIK.A                                                            | 1277.40990 | 2 | 2.07E-06 | 0.89 | 3.08  | -    | 947.2   |
| AHQ-4-1, 5309               | K.GLIDGAEYSVSFSR.Y                                                          | 1501.62253 | 2 | 2.69E-09 | 0.95 | 3.84  | -    | 1572.2  |
| AHQ-4-1, 5825 - 5845        | K.SFCTDPASMASFDCVVPK.E                                                      | 2151.38014 | 2 | 3.82E-04 | 0.91 | 3.97  | -    | 813.6   |
| AHQ-4-1, 5407 - 5477        | K.SPDGASEYVYHLVIESK.H                                                       | 1895.05866 | 2 | 2.79E-08 | 0.90 | 3.99  | -    | 790.9   |
| AHQ-4-1, 4545               | R.VENFEAYFK.K                                                               | 1147.26100 | 2 | 4.08E-06 | 0.86 | 3.61  | -    | 563.2   |
| AHQ-4-1, 4353               | K.VITEPIPVSDLR.V                                                            | 1339.56259 | 2 | 2.09E-04 | 0.71 | 2.59  | -    | 576.4   |
| AHQ-4-1, 3869 - 3897        | R.VLLESIGSHEELTQDSR.L                                                       | 1914.06352 | 2 | 1.29E-05 | 0.91 | 3.68  | -    | 922.5   |
| AHQ-4-1, 3903               | R.VLLESIGSHEELTQDSR.L                                                       | 1914.06352 | 3 | 2.32E-08 | 0.80 | 3.19  | -    | 826.5   |
| gi 5803227 ref NP_006817.1  | tyrosine 3-trypthophan 5-monoxygenase activation protein, theta polype      |            |   |          |      |       |      |         |
| AHQ-4-10, 3353              | R.KQITIDNSQGAQYAFDYSK.K                                                     | 2144.28408 | 2 | 2.81E-05 | 0.97 | 5.21  | -    | 1361.1  |
| AHQ-4-13-, 6642             | K.TAFDEAIAELDLTNEYSYK.D                                                     | 2146.25037 | 2 | 3.14E-06 | 0.92 | 4.08  | -    | 936.8   |
| AHQ-4-14-, 6514 - 6515      | K.TAFDEAIAELDLTNEYSYK.D                                                     | 2146.25037 | 2 | 4.22E-08 | 0.96 | 5.23  | -    | 1208.4  |
| AHQ-4-11, 2542              | K.YLIANATNPESK.V                                                            | 1321.46099 | 2 | 4.81E-05 | 0.74 | 2.89  | -    | 635.3   |
| AHQ-4-10, 2597              | K.YLIANATNPESK.V                                                            | 1321.46099 | 1 | 5.44E-08 | 0.44 | 2.41  | -    | 503.9   |
| AHQ-4-10, 2485              | K.YLIANATNPESK.V                                                            | 1321.46099 | 1 | 2.82E-09 | 0.89 | 4.17  | -    | 586.4   |
| AHQ-4-10, 2484              | K.YLIANATNPESK.V                                                            | 1321.46099 | 2 | 6.90E-05 | 0.93 | 3.40  | -    | 1488.2  |
| gi 29727565 ref XP_291384.1 | similar to Cytochrome c, somatic [Homo sapiens]                             |            |   |          |      |       |      |         |
| AHQ-4-13-, 6394 - 6400      | K.GIIWGEDTLM'EYLENPK.K                                                      | 2025.26771 | 2 | 3.21E-09 | 0.98 | 5.70  | -    | 1873.0  |
| AHQ-4-13, 6485              | K.GIIWGEDTLM'EYLENPK.K                                                      | 2025.26771 | 2 | 2.93E-04 | 0.96 | 4.78  | -    | 1219.7  |
| gi 23200010 ref NP_112585.2 | Williams Beuren syndrome chromosome region 21 isoform 4 [Homo sapiens]      |            |   |          |      |       |      |         |
| AHQ-4-10, 6532              | R.LLDGEEALPAVVFHLGFGSK.T                                                    | 2155.52425 | 2 | 3.21E-09 | 0.71 | 3.18  | -    | 278.4   |
| gi 4827050 ref NP_005142.1  | ubiquitin specific protease 14 [Homo sapiens]                               |            |   |          |      |       |      |         |
| AHQ-4-13-, 4257             | K.AQLFALTGVQPAR.Q                                                           | 1372.59750 | 2 | 3.38E-09 | 0.96 | 10.21 | 2.60 | 56068.8 |
| gi 6005749 ref NP_009193.1  | RNA-binding protein regulatory subunit; oncogene DJ1 [Homo sapiens] [MA     |            |   |          |      |       |      |         |
| AHQ-4-10, 2413 - 2492       | K.DGLILTSR.G                                                                | 875.00510  | 1 | 2.72E-04 | 0.28 | 2.64  | -    | 130.2   |
| AHQ-4-10, 3192              | R.DVVICPDASLEDAAK.E                                                         | 1661.85581 | 2 | 2.81E-04 | 0.71 | 3.12  | -    | 525.4   |
| AHQ-4-11, 3321              | R.DVVICPDASLEDAAK.E                                                         | 1661.85581 | 2 | 4.99E-05 | 0.86 | 3.67  | -    | 596.3   |
| AHQ-4-10, 2953              | K.VTVAGLAGKDPVQCSR.D                                                        | 1659.88952 | 2 | 3.38E-09 | 0.82 | 3.27  | -    | 548.2   |
| gi 21361122 ref NP_001440.2 | four and a half LIM domains 1; Four-and-a-half LIM domains 1 [Homo sap      |            |   |          |      |       |      |         |
| AHQ-4-9, 2205               | K.AIVAGDQNVYK.G                                                             | 1307.43431 | 1 | 1.10E-05 | 0.31 | 2.58  | -    | 488.8   |
| AHQ-4-11, 2378              | K.AIVAGDQNVYK.G                                                             | 1307.43431 | 2 | 8.64E-05 | 0.89 | 3.87  | -    | 620.0   |
| AHQ-4-9, 2813               | K.CLHPLANETFVAK.D                                                           | 1501.73210 | 2 | 5.54E-04 | 0.65 | 2.77  | -    | 319.4   |
| AHQ-4-12, 3287              | K.CLHPLANETFVAK.D                                                           | 1501.73210 | 2 | 4.32E-08 | 0.80 | 2.89  | -    | 517.9   |
| AHQ-4-13-, 3810             | R.FVHQEQVYCHPDCAK.K                                                         | 1931.13758 | 2 | 4.40E-09 | 0.98 | 5.41  | -    | 1818.6  |
| AHQ-4-9, 2699 - 2712        | K.GEDFYCVTCYCTK.F                                                           | 1648.75260 | 2 | 2.64E-04 | 0.88 | 3.28  | -    | 876.1   |
| AHQ-4-9, 2043               | K.NPITGFGK.G                                                                | 833.95467  | 1 | 3.90E-04 | 0.13 | 1.88  | -    | 144.8   |
| gi 29729616 ref XP_292963.1 | similar to peptidylprolyl isomerase A (cyclophilin A) [Homo sapiens] [      |            |   |          |      |       |      |         |
| AHQ-4-12, 4865 - 4929       | K.HTGPGLISM'ANAGPNTNGSQFFICTAK.S                                            | 2810.11545 | 2 | 8.98E-04 | 0.63 | 2.71  | -    | 516.1   |
| AHQ-4-12, 4877 - 4949       | K.HTGPGLISM'ANAGPNTNGSQFFICTAK.S                                            | 2810.11545 | 3 | 1.84E-06 | 0.95 | 6.02  | -    | 1180.2  |
| AHQ-4-12, 5002 - 5066       | K.HTGPGLISM'ANAGPNTNGSQFFICTAK.S                                            | 2810.11545 | 2 | 9.38E-05 | 0.89 | 4.27  | -    | 592.6   |
| AHQ-4-12, 5162              | K.HTGPGLISM'ANAGPNTNGSQFFICTAK.S                                            | 2810.11545 | 2 | 1.65E-05 | 0.57 | 2.70  | -    | 333.4   |
| AHQ-4-12, 5459 - 5522       | K.HTGPGLISMANAGPNTNGSQFFICTAK.S                                             | 2794.11605 | 3 | 8.30E-06 | 0.78 | 4.09  | -    | 796.5   |
| AHQ-4-12, 5517 - 5593       | K.HTGPGLISMANAGPNTNGSQFFICTAK.S                                             | 2794.11605 | 2 | 7.20E-06 | 0.89 | 4.52  | -    | 512.2   |
| AHQ-4-12, 5657              | K.HTGPGLISMANAGPNTNGSQFFICTAK.S                                             | 2794.11605 | 2 | 2.80E-05 | 0.83 | 3.97  | -    | 612.6   |
| AHQ-4-13, 5088              | K.HTGPGLISM'ANAGPNTNGSQFFICTAK.S                                            | 2810.11545 | 3 | 4.43E-09 | 0.81 | 3.79  | -    | 796.7   |
| AHQ-4-13, 5586              | K.HTGPGLISMANAGPNTNGSQFFICTAK.S                                             | 2794.11605 | 3 | 2.71E-05 | 0.78 | 3.74  | -    | 892.2   |
| AHQ-4-13-, 4852             | K.HTGPGLISM'ANAGPNTNGSQFFICTAK.S                                            | 2810.11545 | 3 | 2.45E-07 | 0.94 | 4.81  | -    | 1284.0  |
| AHQ-4-13-, 5476             | K.HTGPGLISMANAGPNTNGSQFFICTAK.S                                             | 2794.11605 | 3 | 2.91E-05 | 0.77 | 3.65  | -    | 791.9   |
| AHQ-4-14-, 4813             | K.HTGPGLISM'ANAGPNTNGSQFFICTAK.S                                            | 2810.11545 | 3 | 1.75E-04 | 0.93 | 5.44  | -    | 948.0   |
| gi 5031677 ref NP_005681.1  | dynamitin 1-like protein isoform 3; dynamitin-like protein [Homo sapiens] [ |            |   |          |      |       |      |         |
| AHQ-4-14, 6125 - 6133       | K.ALQGASQIAEIR.E                                                            | 1370.57991 | 2 | 1.60E-08 | 0.95 | 3.73  | -    | 1916.9  |
| AHQ-4-13-, 4745             | K.ALQGASQIAEIR.E                                                            | 1370.57991 | 2 | 2.42E-08 | 0.90 | 3.41  | -    | 1434.9  |

|                             |                                                                         |            |   |          |      |       |       |         |
|-----------------------------|-------------------------------------------------------------------------|------------|---|----------|------|-------|-------|---------|
| AHQ-4-13-, 4378             | K.GHAVNLLDVPVVAR.K                                                      | 1557.82197 | 2 | 1.06E-05 | 0.95 | 4.14  | -     | 1180.5  |
| AHQ-4-5, 7059 - 7062        | K.IFSPNVNLLTVDLPGMTK.V                                                  | 2059.45828 | 2 | 1.03E-08 | 0.97 | 5.10  | -     | 1449.0  |
| AHQ-4-11, 6529              | K.IFSPNVNLLTVDLPGMTK.V                                                  | 2059.45828 | 2 | 1.42E-06 | 0.79 | 3.04  | -     | 688.6   |
| AHQ-4-6, 6843 - 6914        | K.IFSPNVNLLTVDLPGMTK.V                                                  | 2059.45828 | 2 | 1.01E-04 | 0.85 | 3.14  | -     | 940.2   |
| AHQ-4-5, 6495               | K.IFSPNVNLLTVDLPGMTK.V                                                  | 2075.45768 | 2 | 1.48E-05 | 0.65 | 2.97  | -     | 637.7   |
| AHQ-4-6, 6376               | K.IFSPNVNLLTVDLPGMTK.V                                                  | 2075.45768 | 2 | 2.86E-05 | 0.85 | 3.67  | -     | 703.9   |
| AHQ-4-5, 3054               | R.IIQHCNSYVQQLLR.F                                                      | 1864.07262 | 2 | 1.94E-05 | 0.95 | 4.70  | -     | 1104.2  |
| AHQ-4-7, 6150               | K.LYTFDFEIRQEIENETER.I                                                  | 2301.40883 | 2 | 2.82E-05 | 0.50 | 2.71  | -     | 363.5   |
| AHQ-4-6, 6131               | K.LYTFDFEIRQEIENETER.I                                                  | 2301.40883 | 2 | 3.47E-04 | 0.24 | 2.70  | -     | 203.9   |
| AHQ-4-14-, 6093 - 6103      | K.SLLDLLLSEEDMAQR.R                                                     | 1940.07638 | 2 | 6.39E-09 | 0.94 | 4.56  | -     | 1150.5  |
| AHQ-4-14-, 6689             | K.SLLDLLLSEEDMAQR.R                                                     | 1924.07698 | 2 | 3.38E-05 | 0.97 | 4.96  | -     | 1443.1  |
| AHQ-4-13-, 6250             | K.SLLDLLLSEEDMAQR.R                                                     | 1940.07638 | 2 | 4.53E-09 | 0.86 | 3.46  | -     | 886.3   |
| AHQ-4-13, 6318 - 6322       | K.SLLDLLLSEEDMAQR.R                                                     | 1940.07638 | 2 | 4.49E-04 | 0.97 | 4.62  | -     | 1693.4  |
| AHQ-4-6, 4639               | K.SVTSIRDEYAFLLQK.K                                                     | 1772.93666 | 2 | 1.00E-05 | 0.82 | 3.53  | -     | 759.7   |
| AHQ-4-7, 4594               | K.SVTSIRDEYAFLLQK.K                                                     | 1772.93666 | 2 | 9.04E-05 | 0.92 | 4.15  | -     | 1007.6  |
| AHQ-4-6, 7202 - 7203        | R.TLESVDPLGLNLTIDILTAIR.N                                               | 2212.52928 | 2 | 1.00E-06 | 0.96 | 4.55  | -     | 1252.0  |
| gi 15723376 ref NP_277050.1 | MacGAP protein [Homo sapiens]                                           |            |   | 4.60E-09 | 0.95 | 10.18 | 2.10  | 70163.1 |
| AHQ-4-5, 3070               | R.FLSQESGVAQTLK.K                                                       | 1408.58178 | 2 | 4.60E-09 | 0.95 | 3.51  | -     | 1763.3  |
| gi 5453555 ref NP_006316.1  | ras-related nuclear protein [Homo sapiens]                              |            |   | 4.68E-09 | 1.78 | 20.22 | 14.40 | 24422.9 |
| AHQ-4-10, 5175 - 5176       | K.SNYNFEPFLWLAR.K                                                       | 1786.02509 | 2 | 4.68E-09 | 0.90 | 4.35  | -     | 526.5   |
| AHQ-4-10, 5637              | K.SNYNFEPFLWLAR.K                                                       | 1786.02509 | 2 | 1.83E-07 | 0.52 | 2.84  | -     | 275.4   |
| AHQ-4-10, 4568              | R.VCENIPIVLGKNVDIK.D                                                    | 1974.33162 | 2 | 2.72E-04 | 0.87 | 4.06  | -     | 489.6   |
| gi 5031601 ref NP_005711.1  | actin related protein 2/3 complex subunit 1B; ARP2/3 protein complex su |            |   | 4.73E-09 | 0.84 | 10.16 | 3.80  | 40949.5 |
| AHQ-4-8, 2104               | K.EVEERPAPTPWGSK.M                                                      | 1583.72678 | 2 | 4.73E-09 | 0.84 | 3.15  | -     | 613.5   |
| gi 4759270 ref NP_004613.2  | translin; recombination hotspot associated factor; recombination hotspo |            |   | 4.87E-09 | 0.96 | 10.24 | 7.00  | 26182.8 |
| AHQ-4-10, 5884              | R.PLHSTFINELDSGFR.L                                                     | 1847.06360 | 2 | 4.87E-09 | 0.96 | 4.71  | -     | 1429.3  |
| gi 5729875 ref NP_006658.1  | progesterone receptor membrane component 1; progesterone binding protei |            |   | 4.98E-09 | 2.60 | 30.21 | 17.90 | 21671.0 |
| AHQ-4-10, 4171              | K.FYGPPEGYGVFAGR.D                                                      | 1517.66849 | 2 | 4.03E-05 | 0.91 | 3.36  | -     | 971.8   |
| AHQ-4-11, 4414 - 4430       | K.FYGPPEGYGVFAGR.D                                                      | 1517.66849 | 2 | 9.08E-04 | 0.87 | 3.36  | -     | 645.9   |
| AHQ-4-11, 2850              | R.GDQPAASGDSDDEPPPLPR.L                                                 | 2037.04410 | 2 | 4.98E-09 | 0.88 | 3.61  | -     | 772.5   |
| AHQ-4-11, 3906              | R.KFYGPPEGYGVFAGR.D                                                     | 1645.84140 | 2 | 4.71E-04 | 0.94 | 4.13  | -     | 1032.0  |
| AHQ-4-10, 3745              | R.KFYGPPEGYGVFAGR.D                                                     | 1645.84140 | 2 | 4.23E-04 | 0.82 | 3.13  | -     | 601.7   |
| gi 22042381 ref XP_065237.3 | similar to FKSG30 [Homo sapiens]                                        |            |   | 5.00E-09 | 1.41 | 20.18 | 8.30  | 42016.0 |
| AHQ-4-5, 2827               | K.QEYDESGPSIVHR.K                                                       | 1517.58206 | 2 | 3.54E-04 | 0.46 | 2.54  | -     | 465.9   |
| AHQ-4-8, 2015 - 2059        | K.QEYDESGPSIVHR.K                                                       | 1517.58206 | 2 | 2.98E-07 | 0.63 | 2.80  | -     | 333.7   |
| AHQ-4-13-, 2396 - 2420      | K.QEYDESGPSIVHR.K                                                       | 1517.58206 | 2 | 6.61E-07 | 0.79 | 2.96  | -     | 415.9   |
| AHQ-4-13, 2513 - 2517       | K.QEYDESGPSIVHR.K                                                       | 1517.58206 | 2 | 5.00E-09 | 0.72 | 3.13  | -     | 414.3   |
| AHQ-4-14-, 2265 - 2275      | K.QEYDESGPSIVHR.K                                                       | 1517.58206 | 2 | 2.35E-07 | 0.65 | 2.82  | -     | 388.6   |
| AHQ-4-8, 3298 - 3370        | R.VAPEEHPILLTEAPLNPK.A                                                  | 1969.27019 | 2 | 3.20E-05 | 0.45 | 2.79  | -     | 244.8   |
| AHQ-4-8, 3161 - 3230        | R.VAPEEHPILLTEAPLNPK.A                                                  | 1969.27019 | 2 | 2.71E-04 | 0.26 | 2.67  | -     | 208.3   |
| AHQ-4-10, 3477 - 3541       | R.VAPEEHPILLTEAPLNPK.A                                                  | 1969.27019 | 2 | 7.84E-05 | 0.68 | 3.19  | -     | 372.3   |
| AHQ-4-12, 3763 - 3787       | R.VAPEEHPILLTEAPLNPK.A                                                  | 1969.27019 | 2 | 3.09E-07 | 0.69 | 3.61  | -     | 310.5   |
| gi 6041669 ref NP_004538.2  | NADH dehydrogenase (ubiquinone) 1 beta subcomplex, 4, 15kDa; NADH dehyd |            |   | 5.12E-09 | 0.88 | 10.19 | 14.00 | 15208.5 |
| AHQ-4-13-, 4804             | R.TLPETLDAEYVNPETR.R                                                    | 2047.20831 | 2 | 5.12E-09 | 0.88 | 3.79  | -     | 639.6   |
| AHQ-4-13, 4929              | R.TLPETLDAEYVNPETR.R                                                    | 2047.20831 | 2 | 4.54E-05 | 0.77 | 2.78  | -     | 656.6   |
| gi 4507789 ref NP_003338.1  | ubiquitin-conjugating enzyme E2L 3 [Homo sapiens]                       |            |   | 5.26E-09 | 0.92 | 10.21 | 9.70  | 17861.5 |
| AHQ-4-12, 5265              | R.IEINFPAEYFPKPK.I                                                      | 1791.08155 | 3 | 5.26E-09 | 0.92 | 4.26  | -     | 1092.1  |
| AHQ-4-13, 5362              | R.IEINFPAEYFPKPK.I                                                      | 1791.08155 | 2 | 2.09E-04 | 0.60 | 2.97  | -     | 560.4   |
| AHQ-4-12, 5219 - 5281       | R.IEINFPAEYFPKPK.I                                                      | 1791.08155 | 2 | 9.73E-09 | 0.91 | 4.03  | -     | 982.0   |
| gi 29742827 ref XP_294099.1 | similar to myosin:SUBUNIT=regulatory light chain [Homo sapiens]         |            |   | 5.33E-09 | 2.50 | 30.23 | 14.20 | 17094.0 |
| AHQ-4-11, 2844              | K.EAFNMIDQNR.D                                                          | 1238.35558 | 2 | 4.08E-06 | 0.83 | 3.42  | -     | 714.1   |
| AHQ-4-11, 2197 - 2206       | K.EAFNMIDQNR.D                                                          | 1254.35498 | 2 | 2.51E-04 | 0.70 | 3.26  | -     | 458.0   |
| AHQ-4-11, 3633 - 3696       | R.FTDEEVDLYR.E                                                          | 1416.47127 | 2 | 3.40E-08 | 0.96 | 4.19  | -     | 1674.2  |
| AHQ-4-11, 3700 - 3764       | R.FTDEEVDLYR.E                                                          | 1416.47127 | 1 | 2.12E-07 | 0.31 | 1.80  | -     | 457.7   |
| AHQ-4-11, 3708 - 3772       | R.FTDEEVDLYR.E                                                          | 1416.47127 | 1 | 4.52E-08 | 0.70 | 2.72  | -     | 524.4   |
| AHQ-4-12, 3821              | R.FTDEEVDLYR.E                                                          | 1416.47127 | 2 | 4.61E-08 | 0.97 | 4.37  | -     | 1860.3  |
| AHQ-4-12, 3831              | R.FTDEEVDLYR.E                                                          | 1416.47127 | 1 | 9.01E-07 | 0.56 | 2.65  | -     | 422.8   |
| AHQ-4-13, 3937 - 4016       | R.FTDEEVDLYR.E                                                          | 1416.47127 | 2 | 4.48E-05 | 0.87 | 3.25  | -     | 1198.4  |
| AHQ-4-13, 4020 - 4093       | R.FTDEEVDLYR.E                                                          | 1416.47127 | 2 | 5.57E-09 | 0.90 | 3.02  | -     | 1085.6  |
| AHQ-4-14, 4805              | R.FTDEEVDLYR.E                                                          | 1416.47127 | 2 | 5.33E-09 | 0.96 | 3.91  | -     | 1827.2  |
| AHQ-4-13-, 3869 - 3873      | R.FTDEEVDLYR.E                                                          | 1416.47127 | 2 | 6.03E-09 | 0.97 | 4.62  | -     | 1853.3  |
| AHQ-4-14-, 3763             | R.FTDEEVDLYR.E                                                          | 1416.47127 | 2 | 1.15E-08 | 0.97 | 4.15  | -     | 1787.2  |
| gi 7706497 ref NP_057392.1  | UMP-CMP kinase [Homo sapiens]                                           |            |   | 5.40E-09 | 6.21 | 70.28 | 32.90 | 25854.7 |
| AHQ-4-11, 5928              | R.IQTYLQSTKPIIDLYEEMGK.V                                                | 2371.73502 | 2 | 2.59E-05 | 0.90 | 4.29  | -     | 576.8   |
| AHQ-4-11, 5041 - 5049       | R.IQTYLQSTKPIIDLYEEM*GK.V                                               | 2387.73442 | 2 | 4.22E-04 | 0.88 | 4.00  | -     | 403.6   |
| AHQ-4-11, 5890              | K.IVPVEITISLLK.R                                                        | 1325.66210 | 2 | 9.44E-05 | 0.67 | 2.81  | -     | 203.9   |
| AHQ-4-11, 2476              | R.KNPDSSQYGELIEK.Y                                                      | 1521.65375 | 2 | 2.66E-08 | 0.87 | 3.52  | -     | 715.9   |
| AHQ-4-11, 6834              | K.SVDEVFDEVVQIFDK.E                                                     | 1769.92954 | 2 | 4.82E-07 | 0.97 | 5.56  | -     | 1364.1  |
| AHQ-4-11, 6841 - 6842       | K.SVDEVFDEVVQIFDK.E                                                     | 1956.09563 | 2 | 1.18E-05 | 0.95 | 4.85  | -     | 1169.6  |
| AHQ-4-11, 3644              | K.YGYTHLSAGELLR.D                                                       | 1480.64969 | 2 | 5.40E-09 | 0.96 | 4.23  | -     | 1502.6  |
| gi 10346135 ref NP_055083.1 | microtubule-associated protein, RP/EB family, member 2; T-cell activat  |            |   | 5.56E-09 | 1.92 | 20.26 | 9.80  | 37031.1 |
| AHQ-4-9, 6385               | R.FQDNLDFIQWFK.K                                                        | 1601.78539 | 2 | 1.54E-06 | 0.93 | 3.72  | -     | 1018.8  |
| AHQ-4-12, 6849 - 6857       | R.FQDNLDFIQWFK.K                                                        | 1601.78539 | 2 | 5.56E-09 | 0.97 | 5.15  | -     | 1253.9  |
| AHQ-4-12, 4911              | K.SDKDLETQVQLNEQVHSLK.L                                                 | 2325.56134 | 3 | 3.27E-04 | 0.94 | 4.83  | -     | 1324.6  |
| AHQ-4-9, 4227               | K.SDKDLETQVQLNEQVHSLK.L                                                 | 2325.56134 | 2 | 5.95E-06 | 0.95 | 5.14  | -     | 791.0   |
| gi 16933567 ref NP_005361.2 | mel transforming oncogene; ras-associated protein RAB8 [Homo sapiens]   |            |   | 5.84E-09 | 0.93 | 10.21 | 6.80  | 23668.1 |
| AHQ-4-11, 5892              | K.ANINVENAFFTLAR.D                                                      | 1580.76926 | 2 | 1.75E-08 | 0.92 | 4.07  | -     | 745.9   |
| AHQ-4-14-, 5839             | K.ANINVENAFFTLAR.D                                                      | 1580.76926 | 2 | 4.32E-05 | 0.86 | 3.30  | -     | 753.8   |
| AHQ-4-11, 5034              | K.ANINVENAFFTLAR.D                                                      | 1580.76926 | 2 | 5.84E-09 | 0.93 | 4.19  | -     | 937.2   |
| gi 21735621 ref NP_005909.2 | mitochondrial malate dehydrogenase precursor [Homo sapiens]             |            |   | 5.89E-09 | 4.44 | 50.26 | 29.00 | 35503.0 |
| AHQ-4-14-, 6033             | K.GYLGPQDPDCLKGCDVVIPAGVPR.K                                            | 2813.24211 | 3 | 6.87E-05 | 0.65 | 3.46  | -     | 490.0   |
| AHQ-4-9, 5016               | R.LTYLDIAHTPVAADLSHIETK.A                                               | 2366.65506 | 3 | 6.45E-06 | 0.96 | 5.07  | -     | 1505.3  |
| AHQ-4-11, 5372 - 5382       | K.SQETECTYFSTPLLLGK.K                                                   | 1976.19328 | 2 | 5.89E-09 | 0.97 | 5.11  | -     | 1369.1  |
| AHQ-4-9, 4976               | K.SQETECTYFSTPLLLGK.K                                                   | 1976.19328 | 2 | 5.28E-08 | 0.96 | 4.57  | -     | 1328.6  |
| AHQ-4-9, 6068               | K.VAVLGASGGIGQPLSLLK.N                                                  | 1794.17156 | 2 | 4.36E-05 | 0.97 | 4.84  | -     | 1657.7  |
| AHQ-4-11, 4792 - 4793       | K.VDFPQDQLTALTGR.I                                                      | 1561.72111 | 2 | 1.63E-04 | 0.73 | 2.81  | -     | 619.5   |
| AHQ-4-9, 4464 - 4469        | K.VDFPQDQLTALTGR.I                                                      | 1561.72111 | 2 | 1.04E-07 | 0.90 | 3.97  | -     | 826.8   |
| gi 5902134 ref NP_009005.1  | coronin, actin binding protein, 1A; coronin, actin-binding, 1A; coronin |            |   | 5.93E-09 | 4.03 | 50.23 | 18.70 | 51026.0 |
| AHQ-4-7, 4150               | R.DAGPLLSLK.D                                                           | 1027.23948 | 1 | 2.99E-04 | 0.59 | 2.89  | -     | 383.3   |
| AHQ-4-7, 1946 - 1959        | R.KLQATVQELQK.R                                                         | 1286.50292 | 2 | 4.38E-05 | 0.96 | 4.22  | -     | 1638.8  |
| AHQ-4-6, 6947 - 6959        | R.KSDLFQEDLYPPTAGDPALTAEEWLGGR.D                                        | 3175.44994 | 3 | 5.93E-09 | 0.90 | 4.46  | -     | 682.4   |
| AHQ-4-7, 7062               | R.KSDLFQEDLYPPTAGDPALTAEEWLGGR.D                                        | 3175.44994 | 3 | 1.42E-05 | 0.91 | 4.69  | -     | 535.4   |
| AHQ-4-7, 4005               | R.VSQTTWDSGFCVAVNPK.F                                                   | 1798.95426 | 2 | 4.28E-06 | 0.87 | 3.73  | -     | 752.8   |
| AHQ-4-13-, 4161             | R.VSQTTWDSGFCVAVNPK.F                                                   | 1798.95426 | 2 | 2.52E-07 | 0.80 | 3.24  | -     | 633.0   |
| AHQ-4-6, 4014               | R.VSQTTWDSGFCVAVNPK.F                                                   | 1798.95426 | 2 | 3.02E-05 | 0.91 | 4.23  | -     | 678.0   |
| AHQ-4-7, 7389               | R.YFEITSEAPFLHYLSMFSSK.E                                                | 2398.71748 | 2 | 3.96E-04 | 0.78 | 3.09  | -     | 443.9   |
| gi 4507143 ref NP_003786.1  | sorting nexin 3 isoform a; sorting nexin 3A [Homo sapiens]              |            |   | 6.09E-09 | 0.93 | 10.18 | 8.60  | 18762.2 |
| AHQ-4-12, 5061              | R.GDDGIFDDNFIIEER.K                                                     | 1642.66158 | 2 | 6.09E-09 | 0.93 | 3.69  | -     | 1086.6  |
| gi 4759300 ref NP_004772.1  | vesicle-associated membrane protein 3 (cellubrevin); vesicle-associated |            |   | 6.20E-09 | 2.90 | 30.29 | 33.00 | 11309.0 |
| AHQ-4-14-, 3493             | R.ADALQAGASQFETSAAK.L                                                   | 1666.77095 | 2 | 4.41E-06 | 0.94 | 4.38  | -     | 944.8   |
| AHQ-4-14, 4489 - 4493       | R.ADALQAGASQFETSAAK.L                                                   | 1666.77095 | 2 | 5.50E-04 | 0.74 | 3.47  | -     | 548.9   |
| AHQ-4-13-, 3564             | R.ADALQAGASQFETSAAK.L                                                   | 1666.77095 | 2 | 6.71E-09 | 0.92 | 4.35  | -     | 920.3   |
| AHQ-4-13, 3717 - 3728       | R.ADALQAGASQFETSAAK.L                                                   | 1666.77095 | 2 | 6.20E-09 | 0.96 | 5.12  | -     | 987.1   |
| AHQ-4-13-, 3720 - 3721      | R.LQQTQNVQDEVVDIMR.V                                                    | 1933.13344 | 2 | 4.75E-06 | 0.97 | 5.79  | -     | 1282.2  |
| AHQ-4-13, 4985              | R.LQQTQNVQDEVVDIMR.V                                                    | 1917.13404 | 2 | 2.06E-05 | 0.98 | 5.21  | -     | 1971.3  |
| gi 10835002 ref NP_001166.1 | Rho GDP dissociation inhibitor (GDI) beta; Ly-GDI [Homo sapiens]        |            |   | 6.65E-09 | 6.02 | 70.24 | 42.30 | 22987.8 |
| AHQ-4-10, 2344              | K.APEPHVEEDDDDELDSK.L                                                   | 1940.90995 | 3 | 1.33E-06 | 0.96 | 4.87  | -     | 1560.4  |

|                             |                                                                          |            |   |          |      |        |       |          |
|-----------------------------|--------------------------------------------------------------------------|------------|---|----------|------|--------|-------|----------|
| AHQ-4-10, 2277 - 2339       | K.APEPHVEEDDDDELSDLK.L                                                   | 1940.90995 | 2 | 2.00E-04 | 0.93 | 4.55   | -     | 897.2    |
| AHQ-4-13-, 5552             | K.ATFM*VGSYGRPRPEEYFLTPVEEAPK.G                                          | 2962.27864 | 3 | 6.33E-05 | 0.87 | 3.69   | -     | 944.7    |
| AHQ-4-12, 5618              | K.ATFM*VGSYGRPRPEEYFLTPVEEAPK.G                                          | 2962.27864 | 3 | 1.66E-04 | 0.85 | 4.19   | -     | 723.0    |
| AHQ-4-10, 5255 - 5315       | K.ATFMVGSYGRPRPEEYFLTPVEEAPK.G                                           | 2946.27924 | 2 | 6.25E-05 | 0.91 | 4.35   | -     | 694.5    |
| AHQ-4-10, 5291              | K.ATFMVGSYGRPRPEEYFLTPVEEAPK.G                                           | 2946.27924 | 2 | 6.70E-05 | 0.89 | 4.27   | -     | 600.9    |
| AHQ-4-14-, 5505             | K.ATFM*VGSYGRPRPEEYFLTPVEEAPK.G                                          | 2962.27864 | 3 | 2.91E-04 | 0.86 | 3.66   | -     | 780.0    |
| AHQ-4-11, 5616              | K.ATFMVGSYGRPRPEEYFLTPVEEAPK.G                                           | 2946.27924 | 3 | 2.94E-04 | 0.82 | 3.92   | -     | 493.9    |
| AHQ-4-10, 2919 - 2921       | K.ELQEMDKDDESLIK.Y                                                       | 1693.85489 | 2 | 3.59E-04 | 0.89 | 3.97   | -     | 776.4    |
| AHQ-4-10, 5845 - 5903       | R.LTLVCSAPGPITM*DLTGDLEALKK.E                                            | 2691.11214 | 3 | 1.74E-06 | 0.64 | 3.38   | -     | 317.0    |
| AHQ-4-10, 6123 - 6157       | R.LTLVCSAPGPITM*DLTGDLEALKK.E                                            | 2675.11274 | 3 | 6.65E-09 | 0.86 | 3.76   | -     | 800.6    |
| AHQ-4-10, 3629              | K.SLKLQEMDKDDESLIK.Y                                                     | 2022.26370 | 2 | 3.10E-04 | 0.90 | 3.82   | -     | 1006.0   |
| gi 7657431 ref NP_055205.1  | EBNA-2 co-activator (100kD) [Homo sapiens]                               |            |   | 7.85E-09 | 1.81 | 20.20  | 3.80  | 99689.7  |
| AHQ-4-4, 6640               | R.NLPLVQEGEPFSEEAATLFTK.E                                                | 2307.54125 | 2 | 7.85E-09 | 0.88 | 3.93   | -     | 415.2    |
| AHQ-4-5, 6518 - 6525        | R.NLPLVQEGEPFSEEAATLFTK.E                                                | 2307.54125 | 2 | 6.51E-05 | 0.90 | 4.06   | -     | 450.7    |
| AHQ-4-6, 6391               | R.NLPLVQEGEPFSEEAATLFTK.E                                                | 2307.54125 | 2 | 3.65E-05 | 0.77 | 3.38   | -     | 371.5    |
| AHQ-4-4, 3042               | R.SSHYDELLAAEAR.A                                                        | 1462.54640 | 2 | 1.23E-08 | 0.93 | 2.93   | -     | 2193.3   |
| gi 4503785 ref NP_000135.1  | frataxin; Friedreich ataxia (frataxin) [Homo sapiens]                    |            |   | 8.47E-09 | 0.94 | 10.21  | 5.70  | 23218.1  |
| AHQ-4-13-, 3761             | K.LGGDLGTYVINK.Q                                                         | 1250.42590 | 2 | 8.47E-09 | 0.94 | 4.15   | -     | 959.3    |
| gi 4503821 ref NP_001456.1  | FYN binding protein (FYN-120/130); FYN-binding protein (FYN-120/130) [H] |            |   | 8.79E-09 | 0.93 | 10.27  | 2.60  | 85450.5  |
| AHQ-4-12, 4153              | R.DLQVKPGESELEVIQTDDTK.V                                                 | 2217.41641 | 2 | 1.32E-07 | 0.93 | 4.47   | -     | 719.4    |
| AHQ-4-13, 4269              | R.DLQVKPGESELEVIQTDDTK.V                                                 | 2217.41641 | 2 | 1.08E-06 | 0.96 | 5.34   | -     | 749.9    |
| AHQ-4-10, 3823              | R.DLQVKPGESELEVIQTDDTK.V                                                 | 2217.41641 | 2 | 8.79E-09 | 0.93 | 4.52   | -     | 498.4    |
| gi 29737978 ref XP_290747.1 | similar to Myosin heavy chain, nonmuscle type B (Cellular myosin heavy   |            |   | 9.47E-09 | 3.65 | 40.26  | 1.50  | 191380.7 |
| AHQ-4-6, 3658               | K.ADFCIIHYAGK.V                                                          | 1296.47641 | 2 | 1.41E-07 | 0.96 | 3.82   | -     | 1390.4   |
| AHQ-4-5, 3730               | K.ADFCIIHYAGK.V                                                          | 1296.47641 | 1 | 5.26E-06 | 0.62 | 2.77   | -     | 485.1    |
| AHQ-4-5, 3714 - 3751        | K.ADFCIIHYAGK.V                                                          | 1296.47641 | 2 | 2.80E-07 | 0.91 | 3.23   | -     | 1057.6   |
| AHQ-4-2, 4006               | K.ADFCIIHYAGK.V                                                          | 1296.47641 | 1 | 8.24E-05 | 0.88 | 3.47   | -     | 662.0    |
| AHQ-4-2, 3994 - 3999        | K.ADFCIIHYAGK.V                                                          | 1296.47641 | 2 | 8.89E-07 | 0.97 | 4.31   | -     | 2181.8   |
| AHQ-4-4, 3924               | K.ADFCIIHYAGK.V                                                          | 1296.47641 | 2 | 4.53E-04 | 0.80 | 2.97   | -     | 1012.8   |
| AHQ-4-3, 3963               | K.ADFCIIHYAGK.V                                                          | 1296.47641 | 2 | 3.53E-06 | 0.89 | 3.16   | -     | 937.3    |
| AHQ-4-2, 2798               | R.AGVLAHLEEEER.D                                                         | 1224.34854 | 1 | 2.57E-04 | 0.58 | 2.83   | -     | 624.8    |
| AHQ-4-2, 2728 - 2795        | R.AGVLAHLEEEER.D                                                         | 1224.34854 | 2 | 4.79E-08 | 0.96 | 4.24   | -     | 1590.9   |
| AHQ-4-3, 2739 - 2807        | R.AGVLAHLEEEER.D                                                         | 1224.34854 | 2 | 2.24E-06 | 0.95 | 4.17   | -     | 1454.1   |
| AHQ-4-4, 2822               | R.AGVLAHLEEEER.D                                                         | 1224.34854 | 2 | 3.32E-06 | 0.94 | 3.55   | -     | 1437.7   |
| AHQ-4-2, 2866               | R.AGVLAHLEEEER.D                                                         | 1224.34854 | 2 | 5.40E-07 | 0.96 | 4.28   | -     | 1741.7   |
| AHQ-4-1, 2983 - 3061        | R.AGVLAHLEEEER.D                                                         | 1224.34854 | 2 | 3.75E-08 | 0.97 | 4.42   | -     | 1987.2   |
| AHQ-4-1, 3853               | K.DKADFCIIHYAGK.V                                                        | 1539.73719 | 2 | 9.47E-09 | 0.96 | 4.54   | -     | 1551.1   |
| AHQ-4-2, 3758               | K.DKADFCIIHYAGK.V                                                        | 1539.73719 | 3 | 4.97E-06 | 0.89 | 4.15   | -     | 946.9    |
| AHQ-4-4, 3679               | K.DKADFCIIHYAGK.V                                                        | 1539.73719 | 2 | 1.02E-08 | 0.97 | 4.74   | -     | 1620.0   |
| AHQ-4-2, 3751               | K.DKADFCIIHYAGK.V                                                        | 1539.73719 | 2 | 3.44E-06 | 0.96 | 4.58   | -     | 1328.1   |
| AHQ-4-1, 3854               | K.DKADFCIIHYAGK.V                                                        | 1539.73719 | 3 | 2.65E-07 | 0.86 | 3.79   | -     | 897.2    |
| AHQ-4-3, 3695               | K.DKADFCIIHYAGK.V                                                        | 1539.73719 | 2 | 5.24E-08 | 0.98 | 5.19   | -     | 1976.5   |
| AHQ-4-5, 4530               | K.LDPHLVLDQLR.C                                                          | 1319.53460 | 3 | 1.90E-06 | 0.76 | 3.22   | -     | 611.0    |
| AHQ-4-3, 4775               | K.LDPHLVLDQLR.C                                                          | 1319.53460 | 2 | 2.33E-05 | 0.82 | 2.61   | -     | 766.0    |
| gi 21624607 ref NP_066972.1 | coactosin-like 1 [Homo sapiens]                                          |            |   | 9.61E-09 | 2.70 | 40.31  | 21.80 | 15944.9  |
| AHQ-4-12, 2138              | R.AAYNLVR.D                                                              | 806.93245  | 2 | 4.76E-04 | 0.92 | 2.74   | -     | 1067.9   |
| AHQ-4-13-, 2092 - 2182      | K.EVVQNFAK.E                                                             | 935.05900  | 1 | 1.94E-04 | 0.25 | 2.65   | -     | 109.7    |
| AHQ-4-13-, 6772 - 6774      | K.FALITWIGENVSGLQR.A                                                     | 1805.06986 | 2 | 1.53E-04 | 0.98 | 6.22   | -     | 2427.0   |
| AHQ-4-13, 6882 - 6884       | K.FALITWIGENVSGLQR.A                                                     | 1805.06986 | 2 | 3.82E-05 | 0.98 | 6.01   | -     | 2317.1   |
| AHQ-4-12, 6937 - 6939       | K.FALITWIGENVSGLQR.A                                                     | 1805.06986 | 2 | 9.61E-09 | 0.97 | 5.54   | -     | 1754.7   |
| AHQ-4-13, 2945              | R.KELEEDFIK.S                                                            | 1151.29110 | 1 | 1.29E-04 | 0.56 | 2.80   | -     | 541.1    |
| AHQ-4-13, 2942              | R.KELEEDFIK.S                                                            | 1151.29110 | 2 | 6.52E-04 | 0.74 | 2.90   | -     | 684.2    |
| gi 7657176 ref NP_055070.1  | transmembrane protein 4 [Homo sapiens]                                   |            |   | 9.62E-09 | 0.87 | 10.18  | 8.80  | 20652.1  |
| AHQ-4-11, 3529 - 3536       | R.INPDGQSQSVVEVYAR.S                                                     | 1731.88777 | 2 | 9.62E-09 | 0.87 | 3.66   | -     | 660.0    |
| gi 4758208 ref NP_004081.1  | dual specificity phosphatase 3; vaccinia virus phosphatase VH1-related;  |            |   | 9.70E-09 | 2.70 | 30.24  | 24.30 | 20478.2  |
| AHQ-4-11, 5933 - 6005       | R.EIGPNDGFLAQLQLNDR.L                                                    | 2062.24949 | 2 | 7.31E-05 | 0.94 | 4.85   | -     | 931.9    |
| AHQ-4-14-, 5987             | R.EIGPNDGFLAQLQLNDR.L                                                    | 2062.24949 | 2 | 2.60E-06 | 0.92 | 3.67   | -     | 1376.3   |
| AHQ-4-11, 4048              | R.IYVGNASVADQIPK.L                                                       | 1475.67136 | 2 | 9.70E-09 | 0.89 | 3.63   | -     | 880.6    |
| AHQ-4-11, 2929              | K.LGITHVLNAEAGR.S                                                        | 1351.53669 | 2 | 6.26E-05 | 0.88 | 3.15   | -     | 975.3    |
| gi 4506877 ref NP_002996.1  | selectin P precursor; Selectin P (granulocyte membrane protein, 140kD;   |            |   | 9.74E-09 | 6.58 | 80.27  | 21.80 | 90844.7  |
| AHQ-4-3, 4903               | K.AVQCQHLEAPSEGTM*DCVHPLTAFAYGSSCK.F                                     | 3472.80519 | 3 | 4.43E-04 | 0.83 | 3.96   | -     | 542.1    |
| AHQ-4-2, 6883               | R.CDNLQGWTPAPVQCALQCQDLVPVNEAR.V                                         | 3131.64431 | 3 | 3.02E-05 | 0.75 | 4.04   | -     | 366.0    |
| AHQ-4-3, 6083               | R.CIDSHGWSAPLPTCEAISCEPLESPVHGSM*DCSPSLR.A                               | 4162.54346 | 3 | 2.79E-04 | 0.95 | 5.43   | -     | 1152.1   |
| AHQ-4-3, 6281 - 6360        | K.LECLASGIWTKNPPQCLAAQCPLKIPER.G                                         | 3352.89300 | 3 | 5.04E-08 | 0.50 | 3.16   | -     | 587.7    |
| AHQ-4-3, 3067 - 3076        | R.PSGQWAVTAPACR.A                                                        | 2142.58672 | 2 | 4.65E-07 | 0.95 | 3.98   | -     | 1210.1   |
| AHQ-4-3, 5049 - 5067        | K.STCQFCIDEGYLSGPER.L                                                    | 1209.23671 | 2 | 9.74E-09 | 0.94 | 4.74   | -     | 930.0    |
| AHQ-4-1, 5013 - 5027        | K.STCQFCIDEGYLSGPER.L                                                    | 2109.23671 | 2 | 2.86E-05 | 0.77 | 3.13   | -     | 712.1    |
| AHQ-4-2, 5074 - 5080        | K.STCQFCIDEGYLSGPER.L                                                    | 2109.23671 | 2 | 7.52E-08 | 0.95 | 4.66   | -     | 917.8    |
| AHQ-4-4, 5015               | K.STCQFCIDEGYLSGPER.L                                                    | 2109.23671 | 2 | 1.02E-07 | 0.95 | 4.81   | -     | 967.6    |
| AHQ-4-3, 6475 - 6485        | K.VLPYSSYYWIGIR.K                                                        | 1781.04522 | 2 | 3.83E-08 | 0.94 | 4.49   | -     | 765.3    |
| AHQ-4-3, 2812               | R.YTDLVAIQNK.N                                                           | 1165.32100 | 1 | 4.53E-04 | 0.72 | 2.78   | -     | 628.4    |
| gi 5174727 ref NP_005989.1  | chaperonin containing TCP1, subunit 3 (gamma); TCP1 (t-complex-1) ring   |            |   | 9.87E-09 | 4.41 | 50.20  | 11.40 | 60330.4  |
| AHQ-4-6, 3558               | R.AVAQALEVIPR.T                                                          | 1167.38326 | 2 | 9.28E-05 | 0.94 | 3.53   | -     | 1774.1   |
| AHQ-4-6, 4419 - 4488        | K.GISDLAQHYLMR.A                                                         | 1404.61986 | 2 | 1.01E-08 | 0.84 | 2.82   | -     | 1186.9   |
| AHQ-4-6, 4338               | K.IPGGIIEDSCVLR.G                                                        | 1430.65218 | 2 | 3.91E-05 | 0.90 | 3.72   | -     | 998.0    |
| AHQ-4-6, 2658               | R.TLIQNCGASTIR.L                                                         | 1335.51249 | 2 | 8.16E-04 | 0.78 | 2.70   | -     | 769.7    |
| AHQ-4-6, 5396               | R.WSSLACNIALDAVK.M                                                       | 1549.77353 | 2 | 9.87E-09 | 0.94 | 4.06   | -     | 1286.5   |
| gi 5453605 ref NP_006421.1  | chaperonin containing TCP1, subunit 4 (delta); chaperonin containing t-  |            |   | 1.01E-08 | 1.84 | 20.23  | 4.80  | 57838.8  |
| AHQ-4-7, 6530               | R.DALSDLALHLNK.M                                                         | 1457.65603 | 2 | 1.01E-08 | 0.97 | 4.63   | -     | 1782.0   |
| AHQ-4-7, 3369               | K.VIDPATATSVDLR.D                                                        | 1358.52277 | 2 | 8.12E-04 | 0.87 | 3.27   | -     | 859.2    |
| gi 30160191 ref XP_294035.2 | similar to Pyruvate kinase, M1 isozyme (Pyruvate kinase muscle isozyme   |            |   | 1.08E-08 | 0.96 | 10.20  | 2.80  | 50222.2  |
| AHQ-4-7, 5071 - 5143        | K.IYVDDGLISLQVK.Q                                                        | 1463.70048 | 2 | 1.08E-08 | 0.96 | 3.96   | -     | 1713.3   |
| gi 4758304 ref NP_004902.1  | protein disulfide isomerase related protein (calcium-binding protein, i  |            |   | 1.09E-08 | 6.64 | 80.21  | 13.00 | 72931.9  |
| AHQ-4-6, 6044 - 6046        | R.EVSQPDWTPPPPEVTLVLTKE                                                  | 2137.41772 | 2 | 2.69E-04 | 0.70 | 3.55   | -     | 261.2    |
| AHQ-4-6, 3699               | K.FAM*EPEEFDSDLTR.E                                                      | 1703.80830 | 2 | 4.93E-06 | 0.80 | 3.18   | -     | 506.6    |
| AHQ-4-6, 4547               | K.FAMEPEEFDSDLTR.E                                                       | 1687.80890 | 2 | 1.09E-08 | 0.84 | 3.37   | -     | 502.5    |
| AHQ-4-6, 3482               | R.FDVSQYPTIK.I                                                           | 1127.27123 | 2 | 4.38E-07 | 0.91 | 2.90   | -     | 1310.0   |
| AHQ-4-6, 2752               | K.IDATSASVLASR.F                                                         | 1191.31686 | 2 | 5.62E-08 | 0.90 | 3.39   | -     | 1293.0   |
| AHQ-4-6, 2739               | K.VSQGQLVVMQPEK.F                                                        | 1443.69431 | 2 | 7.48E-07 | 0.95 | 3.86   | -     | 1681.8   |
| AHQ-4-6, 2262               | K.VSQGQLVVM*QPEK.F                                                       | 1459.69371 | 2 | 4.85E-07 | 0.78 | 3.24   | -     | 705.4    |
| AHQ-4-6, 2744               | K.VSQGQLVVMQPEK.F                                                        | 1443.69431 | 1 | 2.50E-07 | 0.76 | 3.12   | -     | 705.2    |
| AHQ-4-6, 5078               | K.YGIVDYMIEQSGPPSK.E                                                     | 1785.01085 | 2 | 7.52E-06 | 0.95 | 4.15   | -     | 1336.8   |
| gi 4502201 ref NP_001649.1  | ADP-ribosylation factor 1 [Homo sapiens]                                 |            |   | 1.11E-08 | 8.53 | 100.30 | 58.60 | 20696.6  |
| AHQ-4-12, 4603 - 4827       | R.DAVLLVFANK.Q                                                           | 1090.29726 | 1 | 2.50E-05 | 0.82 | 2.79   | -     | 933.8    |
| AHQ-4-12, 4655 - 4725       | R.DAVLLVFANK.Q                                                           | 1090.29726 | 2 | 2.16E-05 | 0.97 | 4.26   | -     | 2192.9   |
| AHQ-4-12, 5201              | R.HYFQNTQGLFVVDNDR.E                                                     | 2154.32702 | 2 | 7.41E-07 | 0.97 | 5.50   | -     | 1443.2   |
| AHQ-4-12, 5097              | R.HYFQNTQGLFVVDNDR.E                                                     | 2154.32702 | 2 | 2.61E-04 | 0.98 | 5.97   | -     | 1965.6   |
| AHQ-4-12, 5545              | R.HYFQNTQGLFVVDNDR.E                                                     | 2154.32702 | 2 | 1.26E-06 | 0.69 | 2.89   | -     | 168.9    |
| AHQ-4-12, 5305              | R.HYFQNTQGLFVVDNDR.E                                                     | 2154.32702 | 2 | 1.08E-06 | 0.97 | 4.95   | -     | 1782.6   |
| AHQ-4-12, 5446              | R.HYFQNTQGLFVVDNDR.E                                                     | 2154.32702 | 2 | 9.30E-06 | 0.98 | 5.28   | -     | 1972.4   |
| AHQ-4-12, 4715              | R.HYFQNTQGLFVVDNDRER.V                                                   | 2439.62792 | 3 | 4.40E-05 | 0.59 | 3.08   | -     | 343.3    |
| AHQ-4-12, 3645 - 3715       | R.IILMVGLDAAGK.T                                                         | 1088.34632 | 2 | 5.95E-06 | 0.94 | 4.27   | -     | 1074.9   |
| AHQ-4-11, 3045              | R.IILMVGLDAAGK.T                                                         | 1104.34572 | 2 | 7.03E-05 | 0.95 | 3.12   | -     | 1993.9   |
| AHQ-4-12, 3086 - 3091       | R.IILMVGLDAAGK.T                                                         | 1104.34572 | 2 | 1.63E-06 | 0.95 | 3.79   | -     | 1520.3   |
| AHQ-4-13, 6469 - 6478       | K.LGEIVTITPTIGFNVTVEYK.N                                                 | 2324.65485 | 2 | 8.21E-04 | 0.73 | 3.97   | -     | 224.1    |
| AHQ-4-14-, 6245 - 6246      | K.LGEIVTITPTIGFNVTVEYK.N                                                 | 2324.65485 | 2 | 7.13E-04 | 0.53 | 2.93   | -     | 176.2    |
| AHQ-4-11, 6221 - 6289       | K.LGEIVTITPTIGFNVTVEYK.N                                                 | 2324.65485 | 2 | 6.72E-05 | 0.80 | 4.08   | -     | 224.2    |

|                             |                                                                          |            |   |          |      |       |       |          |
|-----------------------------|--------------------------------------------------------------------------|------------|---|----------|------|-------|-------|----------|
| AHQ-4-12, 6643 - 6719       | K.LGEIVTTIPTIGFNVETVEYK.N                                                | 2324.65485 | 2 | 5.70E-05 | 0.53 | 2.90  | -     | 209.1    |
| AHQ-4-12, 2109              | K.LGLHSLR.H                                                              | 795.95280  | 2 | 6.52E-04 | 0.85 | 2.93  | -     | 864.3    |
| AHQ-4-12, 6942              | R.M*LAEDELRLDAVLLVFANK.Q                                                 | 2064.39175 | 2 | 2.63E-05 | 0.88 | 4.01  | -     | 628.0    |
| AHQ-4-14-, 6679             | R.M*LAEDELRLDAVLLVFANK.Q                                                 | 2064.39175 | 2 | 4.89E-04 | 0.65 | 2.80  | -     | 545.5    |
| AHQ-4-12, 5101 - 5173       | K.NISFTVWDVGGQDK.I                                                       | 1566.69621 | 2 | 1.41E-04 | 0.94 | 4.28  | -     | 998.9    |
| AHQ-4-13, 5189 - 5196       | K.NISFTVWDVGGQDK.I                                                       | 1566.69621 | 2 | 3.33E-05 | 0.92 | 4.13  | -     | 725.8    |
| AHQ-4-11, 4902              | K.NISFTVWDVGGQDK.I                                                       | 1566.69621 | 2 | 1.68E-04 | 0.95 | 3.96  | -     | 1251.4   |
| AHQ-4-13-, 5072             | K.NISFTVWDVGGQDK.I                                                       | 1566.69621 | 2 | 5.20E-06 | 0.86 | 3.18  | -     | 780.1    |
| AHQ-4-14-, 5018 - 5085      | K.NISFTVWDVGGQDK.I                                                       | 1566.69621 | 2 | 4.71E-08 | 0.91 | 3.76  | -     | 765.2    |
| AHQ-4-12, 5017 - 5089       | K.NISFTVWDVGGQDK.I                                                       | 1566.69621 | 2 | 2.92E-05 | 0.89 | 3.97  | -     | 678.1    |
| AHQ-4-12, 3653 - 3733       | K.QDLPNAMNAEITDK.L                                                       | 1631.79001 | 2 | 1.11E-08 | 0.93 | 4.09  | -     | 839.5    |
| AHQ-4-12, 3891 - 3958       | K.QDLPNAMNAEITDK.L                                                       | 1631.79001 | 2 | 9.50E-05 | 0.89 | 4.00  | -     | 727.6    |
| gi 4758018 ref NP_004359.1  | calponin 2; Calonin 2 [Homo sapiens]                                     |            |   | 1.17E-08 | 2.71 | 30.28 | 12.60 | 33696.9  |
| AHQ-4-12, 5105              | K.DGTILCTLMNK.L                                                          | 1267.49833 | 2 | 2.24E-06 | 0.90 | 3.33  | -     | 1008.2   |
| AHQ-4-12, 2797 - 2798       | K.GLQSGVDIGVK.Y                                                          | 1073.22510 | 2 | 1.23E-05 | 0.92 | 3.65  | -     | 1199.7   |
| AHQ-4-13, 2999              | K.GLQSGVDIGVK.Y                                                          | 1073.22510 | 2 | 2.16E-05 | 0.92 | 3.09  | -     | 1377.1   |
| AHQ-4-13-, 2877             | K.GLQSGVDIGVK.Y                                                          | 1073.22510 | 2 | 1.23E-06 | 0.88 | 3.04  | -     | 1089.7   |
| AHQ-4-12, 6530              | R.TWIEGLTGLSIGPDPFQK.G                                                   | 1863.10294 | 2 | 4.89E-05 | 0.95 | 4.39  | -     | 1174.5   |
| AHQ-4-12, 6391 - 6453       | R.TWIEGLTGLSIGPDPFQK.G                                                   | 1863.10294 | 2 | 2.32E-08 | 0.97 | 4.53  | -     | 1879.1   |
| AHQ-4-11, 6186 - 6189       | R.TWIEGLTGLSIGPDPFQK.G                                                   | 1863.10294 | 2 | 9.06E-07 | 0.97 | 4.86  | -     | 2020.6   |
| AHQ-4-13, 6393 - 6456       | R.TWIEGLTGLSIGPDPFQK.G                                                   | 1863.10294 | 2 | 5.78E-07 | 0.94 | 4.33  | -     | 967.9    |
| AHQ-4-10, 5872 - 5873       | R.TWIEGLTGLSIGPDPFQK.G                                                   | 1863.10294 | 2 | 1.78E-05 | 0.97 | 5.38  | -     | 1275.6   |
| AHQ-4-13-, 6360             | R.TWIEGLTGLSIGPDPFQK.G                                                   | 1863.10294 | 2 | 9.81E-08 | 0.97 | 5.67  | -     | 1164.8   |
| AHQ-4-14-, 6235             | R.TWIEGLTGLSIGPDPFQK.G                                                   | 1863.10294 | 2 | 1.17E-08 | 0.93 | 3.82  | -     | 1092.5   |
| gi 21361322 ref NP_006078.2 | tubulin, beta, 5 [Homo sapiens]                                          |            |   | 1.18E-08 | 1.85 | 20.23 | 9.90  | 49585.5  |
| AHQ-4-7, 2821               | R.EIVHLQAGQCNGQIQAQ.F                                                    | 1825.03962 | 2 | 1.18E-08 | 0.93 | 4.01  | -     | 1069.0   |
| AHQ-4-12, 2899              | R.EIVHLQAGQCNGQIQAQ.F                                                    | 1825.03962 | 2 | 3.95E-05 | 0.83 | 3.42  | -     | 596.9    |
| AHQ-4-7, 2677               | R.EIVHLQAGQCNGQIQAQ.F                                                    | 1825.03962 | 3 | 5.12E-04 | 0.89 | 3.50  | -     | 1583.1   |
| AHQ-4-7, 5291               | K.FWEIVSDEHGIDPTGYHGDSDLQLER.I                                           | 3118.27220 | 3 | 6.56E-05 | 0.92 | 4.64  | -     | 974.2    |
| gi 30150448 ref XP_293066.2 | similar to Stress-70 protein, mitochondrial precursor (75 kDa glucose    |            |   | 1.18E-08 | 0.95 | 10.22 | 2.90  | 58788.2  |
| AHQ-4-6, 4492               | R.VINEPTAALAYGLDK.S                                                      | 1646.86592 | 2 | 1.18E-08 | 0.95 | 4.49  | -     | 929.7    |
| gi 9966867 ref NP_065123.1  | eIF-5A2 protein; eIF5AII [Homo sapiens]                                  |            |   | 1.19E-08 | 3.56 | 40.30 | 19.60 | 16793.1  |
| AHQ-4-12, 3617              | K.KYEDICPSTHNMVDVPIK.R                                                   | 2163.41723 | 2 | 4.03E-05 | 0.78 | 3.42  | -     | 422.2    |
| AHQ-4-12, 3610 - 3619       | K.KYEDICPSTHNMVDVPIK.R                                                   | 2163.41723 | 3 | 2.10E-06 | 0.96 | 5.37  | -     | 1459.1   |
| AHQ-4-12, 2983              | K.KYEDICPSTHNMVDVPIK.R                                                   | 2179.41663 | 3 | 1.61E-04 | 0.97 | 5.95  | -     | 1715.5   |
| AHQ-4-12, 4797              | K.VHLVGDIFDTGK.K                                                         | 1299.54329 | 2 | 1.19E-08 | 0.94 | 3.70  | -     | 1100.3   |
| AHQ-4-12, 4799 - 4802       | K.VHLVGDIFDTGK.K                                                         | 1299.54329 | 1 | 1.00E-07 | 0.85 | 3.13  | -     | 931.6    |
| AHQ-4-12, 3301              | K.YEDICPSTHNMVDVPIK.R                                                    | 2051.24372 | 2 | 4.04E-04 | 0.69 | 2.90  | -     | 671.7    |
| gi 18201905 ref NP_000166.2 | glucose phosphate isomerase; neuroleukin; glucose-6-phosphate isomerases |            |   | 1.20E-08 | 2.66 | 30.22 | 7.90  | 63146.7  |
| AHQ-4-7, 6698               | K.IILLANFLAQTEALM.R.G                                                    | 1721.05778 | 2 | 5.65E-05 | 0.79 | 3.51  | -     | 368.4    |
| AHQ-4-7, 2754 - 2757        | K.TFTTQETITNAETAQ.E                                                      | 1656.77283 | 2 | 1.20E-08 | 0.95 | 4.33  | -     | 1360.2   |
| AHQ-4-7, 3561               | R.VWVYVNSDGTTHIAK.T                                                      | 1603.80282 | 2 | 5.06E-07 | 0.92 | 3.52  | -     | 945.7    |
| gi 20357552 ref NP_005222.2 | contactin isoform a; oncogene EMS1 [Homo sapiens]                        |            |   | 1.28E-08 | 0.89 | 10.18 | 2.20  | 61585.7  |
| AHQ-4-13, 5456 - 5466       | R.YGLFPANYVELR.Q                                                         | 1442.64306 | 2 | 3.39E-06 | 0.84 | 3.25  | -     | 514.7    |
| AHQ-4-12, 5357 - 5366       | R.YGLFPANYVELR.Q                                                         | 1442.64306 | 2 | 1.28E-08 | 0.89 | 3.51  | -     | 630.9    |
| gi 4507231 ref NP_003134.1  | single-stranded DNA binding protein; single-stranded DNA-binding protei  |            |   | 1.31E-08 | 3.15 | 40.22 | 25.70 | 17259.5  |
| AHQ-4-13, 2559              | R.DVAYQYVK.K                                                             | 986.10277  | 1 | 1.29E-04 | 0.36 | 2.28  | -     | 398.1    |
| AHQ-4-13, 6066 - 6137       | K.NPVTFISLATNEM*WR.S                                                     | 1796.04007 | 2 | 1.13E-04 | 0.94 | 4.19  | -     | 1179.7   |
| AHQ-4-13, 6778              | K.NPVTFISLATNEM*WR.S                                                     | 1780.04067 | 2 | 1.31E-08 | 0.91 | 3.31  | -     | 978.4    |
| AHQ-4-13-, 3208 - 3221      | R.SGDSEVYQLGDVDSQK.T                                                     | 1612.67692 | 2 | 7.85E-08 | 0.93 | 4.12  | -     | 1022.9   |
| AHQ-4-13, 3331 - 3334       | R.SGDSEVYQLGDVDSQK.T                                                     | 1612.67692 | 2 | 7.39E-06 | 0.95 | 4.34  | -     | 1320.3   |
| gi 5031597 ref NP_005710.1  | actin related protein 2/3 complex subunit 3; ARP2/3 protein complex sub  |            |   | 1.42E-08 | 4.31 | 50.29 | 32.60 | 20546.5  |
| AHQ-4-11, 6373              | K.DTDIVDEAIYFKA.K                                                        | 1592.72721 | 2 | 3.11E-08 | 0.89 | 3.62  | -     | 867.4    |
| AHQ-4-13, 6673              | K.DTDIVDEAIYFKA.K                                                        | 1592.72721 | 2 | 4.68E-07 | 0.90 | 3.77  | -     | 970.1    |
| AHQ-4-12, 6630 - 6637       | K.DTDIVDEAIYFKA.K                                                        | 1592.72721 | 2 | 1.42E-08 | 0.97 | 5.75  | -     | 1550.2   |
| AHQ-4-14-, 6421             | K.DTDIVDEAIYFKA.K                                                        | 1592.72721 | 2 | 1.06E-04 | 0.95 | 4.04  | -     | 1648.3   |
| AHQ-4-12, 6981 - 6982       | K.EM*YTLGTFNPIPGEPGFPLNAIYAK.P                                           | 2871.29861 | 2 | 2.87E-05 | 0.83 | 3.78  | -     | 382.2    |
| AHQ-4-11, 6745 - 6790       | K.EM*YTLGTFNPIPGEPGFPLNAIYAK.P                                           | 2871.29861 | 2 | 4.80E-05 | 0.89 | 4.15  | -     | 455.9    |
| AHQ-4-11, 5806              | R.ETKDTDIVDEAIYFKA.A                                                     | 1921.11899 | 2 | 8.23E-08 | 0.72 | 3.15  | -     | 718.1    |
| AHQ-4-12, 4193              | K.LIGNM*ALLPIR.S                                                         | 1227.54522 | 2 | 7.88E-05 | 0.89 | 3.75  | -     | 988.4    |
| AHQ-4-11, 6664              | K.SQGEKEM*YTLGITNPIPGEPGFPLNAIYAK.P                                      | 3400.84505 | 3 | 7.18E-04 | 0.89 | 4.90  | -     | 420.4    |
| gi 4507949 ref NP_003395.1  | tyrosine 3-monooxygenase/tryptophan 5-monooxygenase activation protein,  |            |   | 1.43E-08 | 4.35 | 50.27 | 33.30 | 28082.2  |
| AHQ-4-10, 1644 - 1703       | K.AVTEQGHLSLNEER.N                                                       | 1599.64147 | 2 | 7.88E-06 | 0.81 | 3.92  | -     | 491.3    |
| AHQ-4-10, 6580              | K.IEAEQLDQICNDVLELDDK.Y                                                  | 2132.37471 | 2 | 1.43E-08 | 0.97 | 5.41  | -     | 1280.1   |
| AHQ-4-10, 3752 - 3757       | K.QTTVSNQQAYQEAFAISK.K                                                   | 2160.28351 | 2 | 4.92E-04 | 0.77 | 3.75  | -     | 367.1    |
| AHQ-4-14-, 6522 - 6601      | K.TAFDEAIAELDTLNEESYK.D                                                  | 2160.27705 | 2 | 5.21E-04 | 0.89 | 3.82  | -     | 473.4    |
| AHQ-4-10, 6447 - 6517       | K.TAFDEAIAELDTLNEESYK.D                                                  | 2160.27705 | 2 | 6.47E-04 | 0.51 | 3.18  | -     | 328.5    |
| AHQ-4-10, 6195              | K.TAFDEAIAELDTLNEESYK.D                                                  | 2160.27705 | 2 | 6.65E-06 | 0.95 | 4.82  | -     | 1284.6   |
| AHQ-4-14-, 6762 - 6765      | K.TAFDEAIAELDTLNEESYK.D                                                  | 2160.27705 | 2 | 2.92E-04 | 0.47 | 3.11  | -     | 298.5    |
| AHQ-4-10, 2667              | K.YLIPNATQPEK.V                                                          | 1361.52512 | 1 | 6.97E-04 | 0.21 | 2.22  | -     | 422.3    |
| AHQ-4-10, 2687 - 2688       | K.YLIPNATQPEK.V                                                          | 1361.52512 | 2 | 4.23E-04 | 0.85 | 3.04  | -     | 757.0    |
| AHQ-4-10, 2853              | K.YLIPNATQPEK.V                                                          | 1361.52512 | 1 | 2.09E-05 | 0.77 | 2.22  | -     | 1045.0   |
| AHQ-4-10, 2753 - 2763       | K.YLIPNATQPEK.V                                                          | 1361.52512 | 1 | 1.31E-06 | 0.86 | 3.06  | -     | 816.3    |
| gi 27480104 ref XP_208215.1 | similar to triosephosphate isomerase 1 [Homo sapiens]                    |            |   | 1.45E-08 | 5.00 | 60.24 | 26.10 | 26942.6  |
| AHQ-4-10, 2725              | R.HVFGESDELIGQK.V                                                        | 1459.58565 | 1 | 4.47E-06 | 0.86 | 3.78  | -     | 785.8    |
| AHQ-4-12, 2937              | R.HVFGESDELIGQK.V                                                        | 1459.58565 | 2 | 1.45E-08 | 0.93 | 3.74  | -     | 721.8    |
| AHQ-4-10, 2063 - 2200       | K.IAVAAQNCYK.V                                                           | 1139.30684 | 1 | 3.26E-07 | 0.39 | 2.86  | -     | 172.3    |
| AHQ-4-10, 2560              | R.IIYGGSVVTGATCK.E                                                       | 1328.51672 | 1 | 2.89E-05 | 0.70 | 3.15  | -     | 359.5    |
| AHQ-4-10, 2556              | R.IIYGGSVVTGATCK.E                                                       | 1328.51672 | 2 | 8.10E-07 | 0.88 | 3.28  | -     | 691.9    |
| AHQ-4-10, 2443              | R.RHVFGESDELIGQK.V                                                       | 1615.77200 | 2 | 1.29E-04 | 0.96 | 4.89  | -     | 1294.8   |
| AHQ-4-10, 1976              | K.SNVSDAVAQSTR.I                                                         | 1235.28659 | 2 | 1.22E-07 | 0.94 | 3.75  | -     | 1399.0   |
| AHQ-4-10, 3480 - 3485       | K.VTNGAFTGEISPGM*IK.D                                                    | 1638.86726 | 2 | 3.76E-04 | 0.91 | 3.43  | -     | 1076.6   |
| gi 4506505 ref NP_002916.1  | regulator of G-protein signaling 10 [Homo sapiens]                       |            |   | 1.49E-08 | 4.13 | 50.20 | 32.90 | 19607.9  |
| AHQ-4-11, 3452 - 3532       | K.ILEEPHPLMFQK.L                                                         | 1482.77213 | 2 | 3.71E-06 | 0.92 | 3.97  | -     | 845.5    |
| AHQ-4-11, 4613              | K.LQDQIFNLMK.Y                                                           | 1250.49254 | 2 | 6.31E-05 | 0.84 | 3.49  | -     | 586.2    |
| AHQ-4-11, 2486              | R.TEEEEEDLPDAQTAQK.R                                                     | 1776.79097 | 2 | 1.49E-08 | 0.81 | 3.58  | -     | 506.1    |
| AHQ-4-11, 5845              | K.WAASLENLLEDPEGVK.R                                                     | 1771.94867 | 2 | 4.07E-05 | 0.77 | 3.15  | -     | 897.1    |
| AHQ-4-11, 5276              | K.WAASLENLLEDPEGVK.R                                                     | 1928.13502 | 2 | 1.05E-07 | 0.79 | 4.05  | -     | 386.4    |
| gi 4505813 ref NP_003737.1  | cytoplasmic dynein light polypeptide; dynein, cytoplasmic, light chain   |            |   | 1.54E-08 | 1.63 | 20.19 | 24.70 | 10365.8  |
| AHQ-4-14-, 2245             | R.NFGSYVTHETK.H                                                          | 1283.37131 | 2 | 1.54E-08 | 0.85 | 3.25  | -     | 724.3    |
| AHQ-4-13-, 3504             | K.YNPTWHCIVGR.N                                                          | 1404.57820 | 2 | 4.90E-05 | 0.76 | 3.19  | -     | 369.3    |
| AHQ-4-14-, 3501 - 3514      | K.YNPTWHCIVGR.N                                                          | 1404.57820 | 2 | 1.34E-07 | 0.78 | 2.87  | -     | 467.4    |
| AHQ-4-13, 3649              | K.YNPTWHCIVGR.N                                                          | 1404.57820 | 2 | 1.28E-04 | 0.71 | 2.63  | -     | 549.8    |
| gi 14249348 ref NP_116120.1 | hypothetical protein MGC14353 [Homo sapiens]                             |            |   | 1.61E-08 | 0.89 | 10.17 | 11.40 | 13940.7  |
| AHQ-4-13-, 4080             | K.SWCPDCVQAEPPVVR.E                                                      | 1705.89366 | 2 | 1.61E-08 | 0.89 | 3.41  | -     | 882.3    |
| AHQ-4-13, 4193 - 4224       | K.SWCPDCVQAEPPVVR.E                                                      | 1705.89366 | 2 | 1.61E-08 | 0.89 | 3.27  | -     | 1027.6   |
| gi 27597085 ref NP_000357.3 | tropomyosin 1 (alpha) [Homo sapiens]                                     |            |   | 1.83E-08 | 1.92 | 20.25 | 9.50  | 32865.7  |
| AHQ-4-9, 2656               | R.AQKDEEKMEIQEIQLK.E                                                     | 1961.22673 | 2 | 3.15E-05 | 0.96 | 5.08  | -     | 1451.3   |
| AHQ-4-9, 2759               | R.KLVIIESDLER.A                                                          | 1315.54103 | 2 | 1.83E-08 | 0.95 | 4.16  | -     | 1389.8   |
| AHQ-4-9, 2748               | R.KLVIIESDLER.A                                                          | 1315.54103 | 1 | 4.01E-05 | 0.39 | 1.90  | -     | 486.3    |
| gi 4502285 ref NP_001672.1  | ATPase, Ca++ transporting, cardiac muscle, slow twitch 2 isoform 2; ATP  |            |   | 1.88E-08 | 2.07 | 30.21 | 5.10  | 109690.3 |
| AHQ-4-1, 6639               | K.DIVPGDVEIAGDKVPADIR.L                                                  | 2192.49806 | 2 | 7.85E-04 | 0.62 | 2.69  | -     | 640.9    |
| AHQ-4-1, 4526               | R.VDQSILTGESVVIK.H                                                       | 1575.78600 | 2 | 5.02E-05 | 0.50 | 2.65  | -     | 642.1    |
| AHQ-4-1, 4830 - 4835        | K.VGEATETALTCLVEK.M                                                      | 1622.81958 | 2 | 1.88E-08 | 0.95 | 4.16  | -     | 1416.1   |
| gi 4557235 ref NP_000009.1  | acyl-Coenzyme A dehydrogenase, very long chain precursor [Homo sapiens]  |            |   | 1.94E-08 | 1.67 | 20.21 | 4.70  | 70389.7  |
| AHQ-4-6, 5174               | R.AGLGSLSLSGLVHPELSR.S                                                   | 1851.09693 | 2 | 1.94E-08 | 0.73 | 3.22  | -     | 560.4    |
| AHQ-4-6, 3814               | R.ALEQFATVVEAK.L                                                         | 1306.48946 | 2 | 1.28E-05 | 0.94 | 4.29  | -     | 1247.9   |









|                             |                                                                             |            |   |          |      |       |       |          |
|-----------------------------|-----------------------------------------------------------------------------|------------|---|----------|------|-------|-------|----------|
| AHQ-4-10, 5015              | R.TLYDFPGNDAEDLPFK.K                                                        | 1842.98222 | 2 | 1.97E-04 | 0.78 | 3.27  | -     | 371.5    |
| AHQ-4-10, 4899              | R.YPSPPMGSV SAPNLP TAEDNLEYVR.T                                             | 2705.98075 | 2 | 1.69E-05 | 0.60 | 2.99  | -     | 336.8    |
| AHQ-4-10, 4553 - 4556       | R.YPSPPM*GSV SAPNLP TAEDNLEYVR.T                                            | 2721.98015 | 2 | 1.62E-05 | 0.74 | 3.38  | -     | 567.1    |
| gi 12545410 ref NP_031394.1 | RAS p21 protein activator 3; GTPase activating protein III; Ins(1,3,4,      |            |   | 1.28E-07 | 1.74 | 20.21 | 5.80  | 95912.5  |
| AHQ-4-5, 5109               | R.APSDSAPGCSPTCGGLPANIQLDIDGDRETER.I                                        | 3360.54658 | 3 | 6.83E-06 | 0.80 | 3.86  | -     | 509.9    |
| AHQ-4-5, 6421 - 6422        | K.SLCFYPGEDFYCEIPR.S                                                        | 2056.26024 | 2 | 1.28E-07 | 0.93 | 4.26  | -     | 732.4    |
| gi 7705704 ref NP_057001.1  | glutathione S-transferase subunit 13 homolog [Homo sapiens]                 |            |   | 1.29E-07 | 2.81 | 30.28 | 19.90 | 25496.7  |
| AHQ-4-11, 3324              | K.AGMSAEQAQGLLEK.I                                                          | 1433.61314 | 2 | 6.06E-07 | 0.94 | 3.89  | -     | 1499.2   |
| AHQ-4-11, 4417 - 4420       | R.FLTAVNLEPEMLEK.A                                                          | 1772.05845 | 2 | 1.29E-07 | 0.98 | 5.57  | -     | 1731.7   |
| AHQ-4-11, 4476              | R.NEDITPEQSIILAAEK.A                                                        | 1729.86695 | 2 | 5.36E-04 | 0.89 | 4.15  | -     | 545.7    |
| gi 7661922 ref NP_055814.1  | RAB21, member RAS oncogene family [Homo sapiens]                            |            |   | 1.42E-07 | 0.98 | 10.31 | 7.60  | 24347.4  |
| AHQ-4-10, 3921 - 3924       | R.HVSIQEAESYAESVGAH.H                                                       | 1805.92351 | 2 | 1.42E-07 | 0.98 | 6.23  | -     | 1456.6   |
| gi 30147105 ref XP_210550.2 | similar to Chain , Aldose Reductase (E.C.1.1.1.21) Mutant With Tyr 48       |            |   | 1.59E-07 | 0.95 | 10.22 | 2.20  | 61339.9  |
| AHQ-4-5, 4061               | K.ADLINNLGIAK.S                                                             | 1243.43490 | 2 | 1.59E-07 | 0.95 | 4.45  | -     | 1079.4   |
| gi 7662338 ref NP_054735.1  | suppressor of actin 1 [Homo sapiens]                                        |            |   | 1.61E-07 | 1.68 | 20.19 | 6.80  | 66966.5  |
| AHQ-4-1, 4278               | R.GIDSEGHAAVFVETEIQVHYHNGSK.A                                               | 2603.74197 | 3 | 1.61E-07 | 0.86 | 3.72  | -     | 1009.8   |
| AHQ-4-1, 4331               | R.LSNTSPFQEM*SLLER.A                                                        | 1898.08433 | 2 | 6.65E-05 | 0.82 | 3.45  | -     | 530.0    |
| gi 4507487 ref NP_003238.1  | thrombospondin 2 [Homo sapiens]                                             |            |   | 1.61E-07 | 1.78 | 20.22 | 2.60  | 129954.5 |
| AHQ-4-1, 5350 - 5358        | R.DDDYAGFVFGYQSSSR.F                                                        | 1814.84582 | 2 | 1.61E-07 | 0.95 | 4.46  | -     | 1152.6   |
| AHQ-4-1, 3037               | R.NALWHTGNTPGQVR.T                                                          | 1551.69124 | 2 | 1.07E-04 | 0.91 | 3.73  | -     | 884.6    |
| AHQ-4-2, 2520               | R.NALWHTGNTPGQVR.T                                                          | 1551.69124 | 2 | 2.85E-04 | 0.85 | 3.10  | -     | 868.2    |
| AHQ-4-2, 3084               | R.NALWHTGNTPGQVR.T                                                          | 1551.69124 | 2 | 8.56E-04 | 0.68 | 3.01  | -     | 614.5    |
| AHQ-4-4, 2824               | R.NALWHTGNTPGQVR.T                                                          | 1551.69124 | 2 | 6.02E-06 | 0.92 | 3.85  | -     | 961.6    |
| AHQ-4-6, 2842               | R.NALWHTGNTPGQVR.T                                                          | 1551.69124 | 2 | 6.47E-06 | 0.78 | 2.69  | -     | 871.9    |
| AHQ-4-7, 2554               | R.NALWHTGNTPGQVR.T                                                          | 1551.69124 | 2 | 9.85E-05 | 0.88 | 3.78  | -     | 680.9    |
| AHQ-4-8, 2147               | R.NALWHTGNTPGQVR.T                                                          | 1551.69124 | 2 | 7.24E-07 | 0.81 | 3.25  | -     | 826.4    |
| AHQ-4-11, 2744              | R.NALWHTGNTPGQVR.T                                                          | 1551.69124 | 2 | 5.61E-06 | 0.68 | 2.76  | -     | 801.3    |
| AHQ-4-13-, 2708             | R.NALWHTGNTPGQVR.T                                                          | 1551.69124 | 2 | 4.56E-07 | 0.83 | 3.17  | -     | 887.2    |
| gi 4502021 ref NP_003680.1  | aldo-keto reductase family 7, member A2 (afatoxin aldehyde reductase);      |            |   | 1.62E-07 | 1.65 | 20.23 | 10.30 | 36648.3  |
| AHQ-4-9, 3360               | K.ALQAAYGASAPSVTSAALR.W                                                     | 1806.01302 | 2 | 1.65E-04 | 0.69 | 3.01  | -     | 435.0    |
| AHQ-4-9, 4955 - 4956        | R.FYAYNPLAGLLTGK.Y                                                          | 1585.82741 | 2 | 1.62E-07 | 0.96 | 4.69  | -     | 1237.9   |
| gi 19923483 ref NP_057406.2 | GTPase Rab14 [Homo sapiens]                                                 |            |   | 1.62E-07 | 5.89 | 80.21 | 50.20 | 23896.8  |
| AHQ-4-11, 4202              | R.GAAGALMVYDITR.R                                                           | 1338.55819 | 2 | 1.22E-04 | 0.90 | 3.18  | -     | 1273.1   |
| AHQ-4-10, 3583              | K.IYQNIQDGLDLNAAESGVHQKPSAPQGGRL                                            | 3152.38123 | 3 | 1.09E-06 | 0.84 | 4.03  | -     | 819.4    |
| AHQ-4-10, 4592              | R.NLTNPNTVILIGNK.A                                                          | 1624.90662 | 2 | 3.58E-04 | 0.87 | 3.48  | -     | 562.2    |
| AHQ-4-11, 4884              | R.NLTNPNTVILIGNK.A                                                          | 1624.90662 | 2 | 1.20E-05 | 0.70 | 2.93  | -     | 620.2    |
| AHQ-4-11, 3084              | K.SCLLHQFTEK.K                                                              | 1264.43272 | 2 | 3.18E-05 | 0.93 | 3.48  | -     | 1085.1   |
| AHQ-4-10, 2985              | K.SCLLHQFTEK.K                                                              | 1264.43272 | 2 | 7.58E-06 | 0.90 | 3.48  | -     | 772.9    |
| AHQ-4-10, 3880              | R.STYNNHSSWLTDA.R.N                                                         | 1651.76121 | 2 | 9.59E-04 | 0.86 | 2.90  | -     | 903.7    |
| AHQ-4-11, 4390 - 4393       | K.TGENVEDAFLEAAK.K                                                          | 1494.58517 | 2 | 1.62E-07 | 0.93 | 4.27  | -     | 828.2    |
| AHQ-4-10, 4137              | K.TGENVEDAFLEAAK.K                                                          | 1494.58517 | 2 | 4.56E-07 | 0.84 | 3.52  | -     | 583.6    |
| AHQ-4-10, 3784              | K.TGENVEDAFLEAAK.K                                                          | 1622.75808 | 2 | 2.45E-05 | 0.27 | 2.62  | -     | 234.3    |
| AHQ-4-10, 3915              | K.YIIIGDMGVGK.S                                                             | 1166.41554 | 1 | 7.37E-04 | 0.50 | 2.01  | -     | 1012.7   |
| gi 5802966 ref NP_006861.1  | desmin (actin depolymerizing factor); desmin [Homo sapiens]                 |            |   | 1.64E-07 | 0.64 | 10.15 | 6.70  | 18056.6  |
| AHQ-4-12, 3726              | R.YALYDASFETK.E                                                             | 1308.41754 | 1 | 1.64E-07 | 0.64 | 2.97  | -     | 387.3    |
| gi 5902016 ref NP_008939.1  | reticulin 4; neuroendocrine-specific protein C like (foocen) [Homo sapiens] |            |   | 1.64E-07 | 1.59 | 20.23 | 14.10 | 22395.3  |
| AHQ-4-1, 3158 - 3226        | R.HQAQIDHYLGLANK.N                                                          | 1608.78270 | 2 | 9.95E-06 | 0.93 | 3.56  | -     | 1304.9   |
| AHQ-4-12, 2931              | R.HQAQIDHYLGLANK.N                                                          | 1608.78270 | 2 | 1.46E-05 | 0.92 | 3.90  | -     | 908.0    |
| AHQ-4-1, 3005               | K.YSNSALGHVYNTIK.E                                                          | 1565.73305 | 2 | 1.64E-07 | 0.65 | 2.53  | -     | 812.3    |
| gi 7657007 ref NP_055210.1  | dual adaptor of phosphotyrosine and 3-phosphoinositides [Homo sapiens]      |            |   | 1.76E-07 | 2.71 | 30.20 | 15.70 | 32044.2  |
| AHQ-4-13-, 3874 - 3876      | R.DSNETTGLYSLSVR.A                                                          | 1542.62982 | 2 | 1.98E-04 | 0.58 | 3.15  | -     | 555.5    |
| AHQ-4-13, 4036              | R.DSNETTGLYSLSVR.A                                                          | 1542.62982 | 2 | 3.18E-06 | 0.87 | 3.56  | -     | 898.1    |
| AHQ-4-13-, 5994             | R.SDGEALLDQJLWYHGNLNR.H                                                     | 2275.41943 | 2 | 1.76E-07 | 0.90 | 4.10  | -     | 873.8    |
| AHQ-4-13-, 3420             | K.TGVEAEDWKI.Y                                                              | 1148.24730 | 2 | 2.22E-06 | 0.93 | 2.98  | -     | 1625.7   |
| gi 18104989 ref NP_002822.2 | protein tyrosine phosphatase, non-receptor type 6 isoform 1; protein-t      |            |   | 1.78E-07 | 2.20 | 30.16 | 7.70  | 67560.7  |
| AHQ-4-6, 4956               | R.DLSGLDAETLLK.G                                                            | 1275.43053 | 2 | 1.35E-06 | 0.86 | 2.91  | -     | 1154.4   |
| AHQ-4-6, 6695 - 6718        | R.ESLSQPQDFVLSVLSQPK.A                                                      | 2047.25144 | 2 | 3.09E-05 | 0.77 | 3.29  | -     | 342.4    |
| AHQ-4-6, 3927               | R.IQNSGDFDYLYGGEK.F                                                         | 1706.79040 | 2 | 1.78E-07 | 0.57 | 2.88  | -     | 548.4    |
| gi 4557871 ref NP_001054.1  | transferrin [Homo sapiens]                                                  |            |   | 1.79E-07 | 0.94 | 10.23 | 2.70  | 77049.5  |
| AHQ-4-5, 7330               | R.SAGWNIPILLYCDLPEPR.K                                                      | 2173.47658 | 2 | 1.79E-07 | 0.94 | 4.64  | -     | 756.0    |
| gi 7657649 ref NP_055362.1  | tropomodulin 3 (ubiquitous) [Homo sapiens]                                  |            |   | 1.81E-07 | 0.96 | 10.24 | 5.40  | 39594.5  |
| AHQ-4-11, 5038              | K.YKDLDEDELLGNLSETEK.Q                                                      | 2225.39217 | 2 | 1.81E-07 | 0.96 | 4.73  | -     | 1330.8   |
| gi 4507295 ref NP_003560.1  | syntaxin 7 [Homo sapiens]                                                   |            |   | 1.81E-07 | 1.76 | 20.20 | 9.60  | 29845.3  |
| AHQ-4-13-, 2529 - 2533      | K.ITQCSVEIR.Q                                                               | 1235.39292 | 2 | 1.94E-04 | 0.83 | 3.32  | -     | 1038.6   |
| AHQ-4-13, 3489              | R.TLNQLGTPQDPSPELR.Q                                                        | 1669.81798 | 2 | 3.73E-05 | 0.76 | 3.23  | -     | 411.9    |
| AHQ-4-13-, 3360             | R.TLNQLGTPQDPSPELR.Q                                                        | 1669.81798 | 2 | 6.65E-06 | 0.77 | 3.04  | -     | 464.5    |
| AHQ-4-10, 3095 - 3096       | R.TLNQLGTPQDPSPELR.Q                                                        | 1669.81798 | 2 | 1.81E-07 | 0.93 | 4.10  | -     | 849.0    |
| gi 4826848 ref NP_004991.1  | NADH dehydrogenase (ubiquinone) 1 alpha subcomplex, 5; NADH dehydrogena     |            |   | 1.84E-07 | 0.98 | 10.37 | 22.40 | 13458.6  |
| AHQ-4-13, 6908              | K.KLEDDQQLGGQLEEVILQAEHLNLR.K                                               | 2975.30339 | 3 | 1.84E-07 | 0.98 | 7.45  | -     | 2068.1   |
| gi 5453603 ref NP_006422.1  | chaperonin containing TCP1, subunit 2 (beta); chaperonin containing t-c     |            |   | 1.85E-07 | 2.74 | 30.21 | 7.90  | 57487.9  |
| AHQ-4-7, 2874               | R.EALLSVAVDHGSDEVK.F                                                        | 1657.76083 | 2 | 1.85E-07 | 0.93 | 3.95  | -     | 1380.3   |
| AHQ-4-7, 2934               | R.GATQJILDEAER.S                                                            | 1331.41427 | 2 | 8.65E-06 | 0.87 | 3.45  | -     | 840.8    |
| AHQ-4-7, 5490               | R.SLHDALCVLAQTVK.D                                                          | 1556.80920 | 2 | 5.85E-04 | 0.95 | 3.03  | -     | 1967.2   |
| gi 5123454 ref NP_005336.2  | heat shock 70kDa protein 1A; heat shock 70kD protein 1A; heat shock-ind     |            |   | 1.86E-07 | 5.43 | 60.23 | 16.40 | 70037.7  |
| AHQ-4-6, 2942               | K.AQIHLDLVVGGSSTR.I                                                         | 1466.66769 | 2 | 1.89E-07 | 0.95 | 3.68  | -     | 1661.8   |
| AHQ-4-6, 4732               | K.DAGVIAGLNLVR.I                                                            | 1198.39736 | 2 | 1.47E-06 | 0.97 | 3.46  | -     | 2494.4   |
| AHQ-4-6, 6210 - 6222        | K.ELEQVCNPIISGLYQGAGGPGGGFQAQPK.G                                           | 3058.37100 | 3 | 3.41E-04 | 0.93 | 4.62  | -     | 1551.5   |
| AHQ-4-6, 3004               | R.LVNHVFVEEFK.R                                                             | 1262.43837 | 2 | 1.86E-07 | 0.73 | 2.50  | -     | 627.1    |
| AHQ-4-6, 3516               | K.NQVALNPQNTVFDAAK.R                                                        | 1659.82478 | 2 | 8.86E-04 | 0.94 | 3.38  | -     | 775.7    |
| AHQ-4-6, 6792               | K.SINPDEAVAYGAAVAQAILM*GDK.S                                                | 2321.59293 | 2 | 4.19E-04 | 0.92 | 3.81  | -     | 1204.0   |
| gi 20149594 ref NP_031381.2 | heat shock 90kDa protein 1, beta; heat shock 90kD protein 1, beta; Hea      |            |   | 1.86E-07 | 5.66 | 60.24 | 9.40  | 83263.6  |
| AHQ-4-5, 2989 - 2990        | R.ELISNASDALDK.I                                                            | 1276.37539 | 2 | 1.86E-07 | 0.91 | 4.01  | -     | 809.1    |
| AHQ-4-5, 5418               | K.HSQFIFGYPITLYLEK.E                                                        | 1810.08487 | 2 | 2.08E-06 | 0.96 | 4.65  | -     | 1108.4   |
| AHQ-4-5, 4106 - 4118        | R.NPDDITQEEYGEFYK.S                                                         | 1848.90048 | 2 | 4.00E-06 | 0.95 | 4.72  | -     | 1124.6   |
| AHQ-4-5, 3771               | K.SLTNDWEDHVAVK.H                                                           | 1528.64798 | 2 | 8.32E-07 | 0.92 | 4.17  | -     | 917.6    |
| AHQ-4-5, 4138               | R.TLTLVDTGIGM*TK.A                                                          | 1350.60718 | 2 | 1.45E-06 | 0.95 | 3.63  | -     | 1297.1   |
| AHQ-4-5, 3473               | R.TLTLVDTGIGM*TK.A                                                          | 1366.60658 | 2 | 9.97E-05 | 0.96 | 3.59  | -     | 1528.4   |
| gi 21361370 ref NP_002853.2 | phosphorylase, glycogen; brain [Homo sapiens]                               |            |   | 1.87E-07 | 4.37 | 50.28 | 8.90  | 96695.3  |
| AHQ-4-5, 3598               | R.GLAGLDVAEVR.K                                                             | 1157.30210 | 2 | 9.26E-05 | 0.97 | 4.09  | -     | 2022.1   |
| AHQ-4-6, 3330               | R.HLDHVAALFPDGDVDR.L                                                        | 1662.83036 | 2 | 1.19E-06 | 0.85 | 3.01  | -     | 869.6    |
| AHQ-4-7, 3265 - 3266        | R.HLDHVAALFPDGDVDR.L                                                        | 1662.83036 | 2 | 7.31E-04 | 0.89 | 3.90  | -     | 738.9    |
| AHQ-4-5, 5761 - 5791        | K.LLPLVSEVDFIR.D                                                            | 1401.67552 | 2 | 1.87E-07 | 0.64 | 2.53  | -     | 450.0    |
| AHQ-4-5, 6613               | K.WLDTQVVLAMPYDTPVPGYK.N                                                    | 2294.65394 | 2 | 1.64E-05 | 0.94 | 4.82  | -     | 707.6    |
| AHQ-4-5, 6659               | R.WLLLCNPLGADTIVEK.I                                                        | 1844.16436 | 2 | 1.88E-04 | 0.97 | 5.53  | -     | 1577.9   |
| gi 7657056 ref NP_055415.1  | EH-domain containing 3; EH domain containing 3 [Homo sapiens]               |            |   | 2.05E-07 | 3.11 | 40.24 | 14.40 | 60886.7  |
| AHQ-4-7, 3293               | R.EHQISPGDFPNLK.R                                                           | 1482.62245 | 2 | 5.04E-05 | 0.41 | 2.69  | -     | 555.1    |
| AHQ-4-7, 5519               | R.FHFHSPALEADAFDNKPMVLLVGGYQSTGK.T                                          | 3394.75749 | 3 | 4.61E-05 | 0.92 | 4.88  | -     | 742.1    |
| AHQ-4-13-, 5326             | K.LADIDKDGMLDDDEFALANHLIK.V                                                 | 2589.86003 | 3 | 2.05E-07 | 0.90 | 3.96  | -     | 1361.7   |
| AHQ-4-8, 4394               | R.YLLEQDFPGMR.I                                                             | 1369.57075 | 2 | 6.86E-05 | 0.88 | 3.49  | -     | 1019.8   |
| gi 4758158 ref NP_004395.1  | neural precursor cell expressed, developmentally down-regulated 5 [Homo     |            |   | 2.06E-07 | 0.94 | 10.26 | 6.40  | 41487.2  |
| AHQ-4-8, 5806               | R.TMLITHMQDLEQVTQDLHYENFR.S                                                 | 2864.20650 | 3 | 2.06E-07 | 0.94 | 5.26  | -     | 992.1    |
| gi 21618359 ref NP_004095.3 | fatty acid synthase [Homo sapiens]                                          |            |   | 2.07E-07 | 1.91 | 20.27 | 1.70  | 273262.0 |
| AHQ-4-1, 6166 - 6169        | R.LFDHPESPPTNPTEPLFLAQAEVYK.E                                               | 2842.15075 | 3 | 7.36E-06 | 0.93 | 5.10  | -     | 774.8    |
| AHQ-4-3, 7045 - 7127        | K.LPEDPILLSGLLDSPALK.A                                                      | 1779.06739 | 2 | 1.48E-05 | 0.69 | 2.85  | -     | 633.2    |
| AHQ-4-1, 6957 - 6973        | K.LPEDPILLSGLLDSPALK.A                                                      | 1779.06739 | 2 | 2.07E-07 | 0.98 | 5.39  | -     | 2083.8   |
| gi 8393638 ref NP_058642.1  | F11 receptor isoform a precursor; platelet F11 receptor; platelet adhes     |            |   | 2.11E-07 | 0.80 | 10.16 | 7.70  | 32582.9  |
| AHQ-4-8, 4449               | K.LIVLVPPSKPTVNIPISSATIGNR.A                                                | 2374.80814 | 2 | 2.11E-07 | 0.80 | 3.00  | -     | 453.9    |



|                             |                                                                         |            |   |          |      |       |       |          |
|-----------------------------|-------------------------------------------------------------------------|------------|---|----------|------|-------|-------|----------|
| AHQ-4-13, 4886 - 4956       | K.GINTLVTYDMVPEPK.I                                                     | 1677.94342 | 2 | 3.81E-07 | 0.97 | 4.23  | -     | 1744.5   |
| gi 5174539 ref NP_005908.1  | cytosolic malate dehydrogenase; soluble malate dehydrogenase [Homo sapi |            |   | 3.86E-07 | 1.50 | 20.16 | 8.40  | 36425.9  |
| AHQ-4-13, 3134              | K.DVIATDKEDVAFK.D                                                       | 1451.60343 | 2 | 1.81E-05 | 0.78 | 2.71  | -     | 841.4    |
| AHQ-4-9, 4637               | K.EVGVYEAALKDDSWLK.G                                                    | 1752.94535 | 2 | 3.86E-07 | 0.73 | 3.07  | -     | 800.2    |
| gi 22059949 ref XP_114617.2 | similar to tubulin, beta 5 [Homo sapiens]                               |            |   | 3.86E-07 | 1.38 | 20.31 | 13.00 | 22810.8  |
| AHQ-4-7, 5317               | K.FWEVSEDEHGDIDPTGTYYHGSDSLQLDR.I                                       | 3104.24553 | 3 | 2.40E-05 | 0.95 | 5.65  | -     | 1172.6   |
| AHQ-4-13, 5233              | K.FWEVSEDEHGDIDPTGTYYHGSDSLQLDR.I                                       | 3104.24553 | 3 | 7.62E-05 | 0.78 | 3.78  | -     | 677.3    |
| AHQ-4-12, 5342 - 5354       | K.FWEVSEDEHGDIDPTGTYYHGSDSLQLDR.I                                       | 3104.24553 | 3 | 2.85E-05 | 0.95 | 5.36  | -     | 1428.9   |
| AHQ-4-13, 5390              | K.FWEVSEDEHGDIDPTGTYYHGSDSLQLDR.I                                       | 3104.24553 | 3 | 6.06E-04 | 0.91 | 4.50  | -     | 1019.3   |
| AHQ-4-14, 5194              | K.FWEVSEDEHGDIDPTGTYYHGSDSLQLDR.I                                       | 3104.24553 | 3 | 4.94E-06 | 0.97 | 6.18  | -     | 1552.0   |
| AHQ-4-13, 2862              | R.ISVYVNEATGGK.Y                                                        | 1302.41453 | 1 | 3.86E-07 | 0.41 | 2.50  | -     | 256.4    |
| AHQ-4-12, 2703              | R.ISVYVNEATGGK.Y                                                        | 1302.41453 | 2 | 3.22E-04 | 0.78 | 2.71  | -     | 762.8    |
| AHQ-4-7, 2453               | R.ISVYVNEATGGK.Y                                                        | 1302.41453 | 2 | 1.22E-06 | 0.84 | 2.53  | -     | 845.8    |
| gi 16950601 ref NP_005956.2 | myosin light chain kinase isoform 6; myosin light chain kinase [Homo s  |            |   | 4.09E-07 | 1.21 | 20.19 | 2.60  | 110074.8 |
| AHQ-4-6, 4856               | R.STSFNVQDLLPDHEYK.F                                                    | 1894.03076 | 2 | 1.79E-06 | 0.32 | 2.59  | -     | 336.0    |
| AHQ-4-6, 3316               | K.VSDFYDIEER.L                                                          | 1273.33005 | 2 | 4.09E-07 | 0.89 | 2.62  | -     | 1061.8   |
| gi 4504521 ref NP_002147.1  | heat shock 60kDa protein 1 (chaperonin); mitochondrial matrix protein P |            |   | 4.10E-07 | 0.93 | 10.20 | 4.90  | 61024.2  |
| AHQ-4-14, 6833              | R.TALLDAAGVALLTAEVAVVTEIPKEEK.D                                         | 2870.28530 | 3 | 4.10E-07 | 0.93 | 3.97  | -     | 1467.3   |
| gi 18765729 ref NP_003816.2 | synaptosomal-associated protein 23 isoform SNAP23A; synaptosomal-assoc  |            |   | 4.17E-07 | 0.95 | 10.18 | 6.60  | 23353.9  |
| AHQ-4-12, 4459              | R.IILGLAIESQDAIGK.T                                                     | 1428.65614 | 2 | 4.17E-07 | 0.95 | 3.63  | -     | 1451.2   |
| gi 4502013 ref NP_001616.1  | adenylate kinase 2 isoform a; adenylate kinase, mitochondrial; adenylat |            |   | 4.37E-07 | 2.01 | 30.19 | 21.80 | 26477.6  |
| AHQ-4-10, 6127              | K.EKLDVSEIFSPDLSLLIR.R                                                  | 2075.39107 | 2 | 1.08E-04 | 0.85 | 3.79  | -     | 707.1    |
| AHQ-4-10, 3623 - 3680       | R.LQAYHTQTTLPIEYYR.K                                                    | 1998.22695 | 2 | 1.59E-05 | 0.88 | 3.77  | -     | 829.4    |
| AHQ-4-10, 5519              | K.NLETPLCKNGFLLDGFPFR.T                                                 | 2093.39146 | 2 | 4.37E-07 | 0.28 | 2.65  | -     | 354.4    |
| gi 19923262 ref NP_004153.2 | RAB5A, member RAS oncogene family; RAS-associated protein RAB5A [Homo   |            |   | 4.38E-07 | 0.92 | 10.21 | 5.10  | 23658.5  |
| AHQ-4-10, 3239 - 3241       | K.LVLLGESAVGK.S                                                         | 1086.30692 | 2 | 4.38E-07 | 0.92 | 4.25  | -     | 1052.3   |
| gi 4507747 ref NP_003321.1  | thioredoxin reductase 1 [Homo sapiens]                                  |            |   | 4.48E-07 | 0.95 | 10.27 | 7.20  | 54419.1  |
| AHQ-4-7, 7421 - 7423        | K.IPVTEDEQTNPVYIAGDILEDKVELTTPVAIQAGR.L                                 | 3972.44634 | 3 | 4.48E-07 | 0.95 | 5.47  | -     | 1019.1   |
| gi 4505409 ref NP_002503.1  | non-metastatic cells 2, protein (NM23B) expressed in; Non-metastatic ce |            |   | 4.66E-07 | 1.77 | 20.20 | 12.50 | 17297.9  |
| AHQ-4-12, 6071 - 6149       | K.EISLWFKPEELVDYK.S                                                     | 1897.15929 | 2 | 5.20E-04 | 0.92 | 4.04  | -     | 842.0    |
| AHQ-4-12, 6166 - 6238       | K.EISLWFKPEELVDYK.S                                                     | 1897.15929 | 2 | 4.66E-07 | 0.90 | 3.70  | -     | 747.3    |
| AHQ-4-12, 5794              | K.SAEKEISLWFKPEELVDYK.S                                                 | 2312.60263 | 3 | 7.16E-04 | 0.86 | 3.85  | -     | 620.3    |
| gi 4506417 ref NP_002877.1  | RAP2B, member of RAS oncogene family [Homo sapiens]                     |            |   | 4.73E-07 | 5.18 | 60.23 | 39.90 | 20494.2  |
| AHQ-4-11, 5026 - 5028       | K.ALAAEEWSCPFMETSAN.N                                                   | 1859.06988 | 2 | 8.37E-05 | 0.95 | 4.52  | -     | 969.8    |
| AHQ-4-11, 6033              | K.ASVDELFAEIVR.Q                                                        | 1349.51434 | 2 | 2.19E-06 | 0.93 | 3.54  | -     | 1435.9   |
| AHQ-4-11, 2633              | K.VDLEGEREVSYGEGK.A                                                     | 1667.75571 | 2 | 2.95E-04 | 0.92 | 3.79  | -     | 984.5    |
| AHQ-4-11, 3022              | R.VPMILVGNK.V                                                           | 971.24256  | 2 | 2.18E-05 | 0.87 | 2.66  | -     | 791.2    |
| AHQ-4-11, 2285              | K.VVVLGSGGVGK.S                                                         | 972.16391  | 2 | 1.18E-05 | 0.77 | 2.97  | -     | 767.9    |
| AHQ-4-11, 4122              | K.YDPTIEDFYR.K                                                          | 1319.40042 | 2 | 4.73E-07 | 0.75 | 2.61  | -     | 421.3    |
| gi 5453714 ref NP_006448.1  | LIM protein (similar to rat protein kinase C-binding enigma) [Homo sapi |            |   | 5.16E-07 | 0.65 | 10.17 | 2.50  | 64027.9  |
| AHQ-4-13, 2846              | K.EVVKPVIPSPAVSK.V                                                      | 1551.85241 | 2 | 7.35E-05 | 0.82 | 3.32  | -     | 366.2    |
| AHQ-4-13, 2961              | K.EVVKPVIPSPAVSK.V                                                      | 1551.85241 | 2 | 5.16E-07 | 0.65 | 2.81  | -     | 274.8    |
| gi 4885183 ref NP_005210.1  | diaphanous 1; deafness, autosomal dominant 1; hDia1 [Homo sapiens] [MAS |            |   | 5.17E-07 | 3.64 | 50.24 | 5.90  | 138977.7 |
| AHQ-4-3, 5348               | K.LVAEDLSQDCFWTK.V                                                      | 1713.88927 | 2 | 2.09E-06 | 0.82 | 3.28  | -     | 613.1    |
| AHQ-4-3, 7607               | R.M*EMDDFNEVFQILLNTVK.D                                                 | 2203.52145 | 2 | 9.18E-06 | 0.85 | 4.58  | -     | 912.0    |
| AHQ-4-3, 6037               | K.TAQNLSIFLGSFR.M                                                       | 1454.65537 | 2 | 2.35E-05 | 0.62 | 2.76  | -     | 467.6    |
| AHQ-4-3, 7540               | K.VGCLQLINALITPAEELDFR.V                                                | 2274.62236 | 2 | 5.17E-07 | 0.95 | 4.82  | -     | 768.3    |
| AHQ-4-3, 7540               | K.VGCLQLINALITPAEELDFR.V                                                | 2274.62236 | 3 | 6.27E-04 | 0.40 | 3.03  | -     | 178.9    |
| gi 4505585 ref NP_002563.1  | platelet-activating factor acetylhydrolase, isoform Ib, beta subunit 30 |            |   | 5.19E-07 | 0.96 | 10.23 | 8.70  | 25569.1  |
| AHQ-4-10, 6355              | K.ICKPLHELIMQLLEETPEEK.Q                                                | 2452.87287 | 2 | 5.19E-07 | 0.96 | 4.65  | -     | 1475.1   |
| gi 30151001 ref XP_170195.2 | similar to ADP/ATP carrier protein, fibroblast isoform (ADP/ATP transi  |            |   | 5.56E-07 | 0.72 | 10.14 | 2.60  | 46758.9  |
| AHQ-4-10, 3429              | R.AAYFGIYDTAK.G                                                         | 1220.35512 | 2 | 1.22E-06 | 0.91 | 2.68  | -     | 1118.4   |
| AHQ-4-10, 3393 - 3423       | R.AAYFGIYDTAK.G                                                         | 1220.35512 | 1 | 5.56E-07 | 0.72 | 2.75  | -     | 487.9    |
| gi 18201911 ref NP_000629.2 | vitronectin precursor; serum spreading factor; somatomedin B; compleme  |            |   | 5.57E-07 | 0.93 | 10.22 | 3.10  | 54335.4  |
| AHQ-4-13, 5769 - 5838       | R.SIAQYWLGCAPAGHL                                                       | 1671.90045 | 2 | 5.57E-07 | 0.93 | 4.42  | -     | 651.9    |
| gi 7705501 ref NP_057546.1  | hypothetical protein HSPC194 [Homo sapiens]                             |            |   | 5.69E-07 | 2.64 | 30.21 | 41.10 | 11564.5  |
| AHQ-4-14, 6807              | K.AGVSPLSALAGLLFGSLAGLGLYQLSQDPR.N                                      | 2818.17710 | 2 | 5.69E-07 | 0.71 | 3.37  | -     | 514.9    |
| AHQ-4-14, 6273 - 6293       | K.FMPAGLIAGASLLM*VAK.V                                                  | 1707.13765 | 2 | 9.65E-06 | 0.95 | 4.00  | -     | 1269.4   |
| AHQ-4-14, 5857              | K.FM*PAGLIAGASLLM*VAK.V                                                 | 1723.13705 | 2 | 4.32E-06 | 0.98 | 4.25  | -     | 2460.7   |
| gi 5031571 ref NP_005713.1  | actin-related protein 2; ARP2 (actin-related protein 2, yeast) homolog  |            |   | 5.86E-07 | 7.05 | 80.27 | 29.90 | 44760.5  |
| AHQ-4-8, 5522               | K.CGAGSNFPEHIFPALVGRPIIR.S                                              | 2573.95654 | 3 | 1.56E-05 | 0.83 | 3.89  | -     | 939.2    |
| AHQ-4-8, 3481 - 3549        | K.DLMVGDSEALS.R                                                         | 1335.46633 | 2 | 2.76E-05 | 0.91 | 3.35  | -     | 1095.9   |
| AHQ-4-8, 2794               | R.GYAFNHSADFETVR.M                                                      | 1614.69943 | 2 | 5.86E-07 | 0.90 | 3.72  | -     | 983.7    |
| AHQ-4-10, 3080              | R.GYAFNHSADFETVR.M                                                      | 1614.69943 | 2 | 1.63E-04 | 0.87 | 3.65  | -     | 734.6    |
| AHQ-4-8, 3418               | K.HIVLSGGSTMYPGLPSR.L                                                   | 1773.04967 | 2 | 1.76E-05 | 0.98 | 5.33  | -     | 2102.8   |
| AHQ-4-8, 3706               | K.HLWDYTFGPEK.L                                                         | 1393.52736 | 2 | 3.84E-06 | 0.90 | 3.35  | -     | 697.4    |
| AHQ-4-8, 2497               | R.KVVVCDNGTGFKV.C                                                       | 1424.64764 | 2 | 3.79E-05 | 0.93 | 3.95  | -     | 1036.2   |
| AHQ-4-8, 3550 - 3557        | K.LCYVGYNIEQEQL.L                                                       | 1645.81494 | 2 | 1.33E-06 | 0.96 | 4.23  | -     | 1315.3   |
| AHQ-4-8, 4069 - 4147        | R.SM*LEVNYPMENGIVR.N                                                    | 1769.03643 | 2 | 1.32E-05 | 0.65 | 3.41  | -     | 489.8    |
| gi 5453970 ref NP_006245.1  | protein kinase C, delta [Homo sapiens]                                  |            |   | 6.33E-07 | 0.64 | 10.15 | 1.80  | 77476.6  |
| AHQ-4-6, 3895               | K.LLAEALNQVTR.Q                                                         | 1356.55324 | 2 | 6.33E-07 | 0.64 | 2.62  | -     | 833.4    |
| gi 5453760 ref NP_006147.1  | neural precursor cell expressed, developmentally down-regulated 8 [Homo |            |   | 6.57E-07 | 0.77 | 10.17 | 17.30 | 9071.5   |
| AHQ-4-14, 3609              | K.EIEIDIEPTDKVER.I                                                      | 1686.84208 | 2 | 6.57E-07 | 0.77 | 3.48  | -     | 345.5    |
| gi 7705266 ref NP_057537.1  | SH3 protein interacting with Nck, 90 kDa; SH3 protein; SH3 protein inte |            |   | 6.67E-07 | 0.97 | 10.26 | 2.80  | 78959.8  |
| AHQ-4-13, 6821              | R.SAEPNALFAAAGETFLVLR.S                                                 | 2107.35171 | 2 | 6.67E-07 | 0.97 | 5.26  | -     | 1674.7   |
| gi 21614499 ref NP_003370.2 | villin 2; Villin-2; cytovillin [Homo sapiens]                           |            |   | 6.85E-07 | 2.65 | 30.21 | 3.40  | 69412.3  |
| AHQ-4-6, 4138               | K.APDFVYAPR.L                                                           | 1183.33971 | 2 | 1.33E-06 | 0.98 | 4.26  | -     | 2025.8   |
| AHQ-4-6, 4946 - 4971        | K.IGFWFSEIR.N                                                           | 1105.27049 | 2 | 1.05E-04 | 0.90 | 2.90  | -     | 972.4    |
| AHQ-4-6, 3460               | K.KAPDFVYAPR.L                                                          | 1311.51262 | 2 | 6.85E-07 | 0.77 | 2.86  | -     | 594.4    |
| gi 17450333 ref XP_060887.1 | similar to peptidyl-Pro cis trans isomerase [Homo sapiens]              |            |   | 6.87E-07 | 0.97 | 10.24 | 11.00 | 17503.9  |
| AHQ-4-12, 6701              | -.M*VNPTVFADVAGKPLGR.V                                                  | 1946.26009 | 2 | 6.87E-07 | 0.97 | 4.84  | -     | 1655.1   |
| AHQ-4-14, 6278              | -.M*VNPTVFADVAGKPLGR.V                                                  | 1946.26009 | 2 | 8.95E-04 | 0.74 | 3.01  | -     | 551.0    |
| AHQ-4-12, 6477 - 6497       | -.M*VNPTVFADVAGKPLGR.V                                                  | 1946.26009 | 2 | 4.35E-06 | 0.81 | 3.44  | -     | 560.6    |
| gi 4503481 ref NP_001395.1  | eukaryotic translation elongation factor 1 gamma; elongation factor 1-g |            |   | 6.92E-07 | 0.91 | 10.19 | 3.20  | 50118.5  |
| AHQ-4-12, 2582              | R.KLDPGSEETQLVLR.E                                                      | 1573.73020 | 2 | 1.21E-06 | 0.71 | 3.39  | -     | 380.0    |
| AHQ-4-8, 2249               | R.KLDPGSEETQLVLR.E                                                      | 1573.73020 | 2 | 6.92E-07 | 0.91 | 3.78  | -     | 630.4    |
| gi 4557385 ref NP_000055.1  | complement component 3 precursor; acylation-stimulating protein cleavag |            |   | 6.98E-07 | 0.80 | 10.19 | 1.00  | 187162.3 |
| AHQ-4-6, 4716               | R.SGPIVTSYQIHFTK.T                                                      | 1789.06720 | 2 | 6.98E-07 | 0.80 | 3.23  | -     | 522.4    |
| gi 7706314 ref NP_057107.1  | CGI-77 protein [Homo sapiens]                                           |            |   | 7.17E-07 | 0.85 | 10.21 | 9.70  | 33425.0  |
| AHQ-4-11, 6668              | R.ALSHLQTPTEIILQADSPPIIVGEEYSK.K                                        | 3063.49045 | 3 | 7.17E-07 | 0.85 | 4.28  | -     | 815.9    |
| gi 20551618 ref XP_167021.1 | similar to calponin 2; Calonin 2 [Homo sapiens]                         |            |   | 7.24E-07 | 1.87 | 20.26 | 3.70  | 47327.9  |
| AHQ-4-12, 5649 - 5650       | R.SMQNWHQLENLSNFIK.A                                                    | 1990.23155 | 2 | 8.96E-06 | 0.96 | 5.25  | -     | 1093.9   |
| AHQ-4-12, 5306 - 5385       | R.SM*QNWHLQLENLSNFIK.A                                                  | 2006.23095 | 2 | 7.24E-07 | 0.91 | 3.98  | -     | 786.1    |
| gi 14765644 ref XP_037574.1 | similar to PTPL 1-associated RhoGAP 1 [Homo sapiens]                    |            |   | 7.29E-07 | 0.91 | 10.22 | 2.90  | 124613.7 |
| AHQ-4-13, 6896              | R.SPLTAAAPGELPTGAGPDVVEDISHLADVAR.F                                     | 3286.59214 | 3 | 7.29E-07 | 0.91 | 4.35  | -     | 828.5    |
| gi 4502097 ref NP_001142.1  | solute carrier family 25 (mitochondrial carrier; adenine nucleotide tra |            |   | 7.48E-07 | 2.29 | 30.15 | 16.80 | 33148.4  |
| AHQ-4-10, 3103              | R.AAYFGVYDTAK.G                                                         | 1206.32845 | 2 | 2.83E-06 | 0.75 | 2.71  | -     | 577.2    |
| AHQ-4-10, 6431              | R.YFAGNLASGGAAGATSLCFVYPLDFAR.T                                         | 2799.10926 | 2 | 2.84E-05 | 0.69 | 3.10  | -     | 444.7    |
| AHQ-4-14, 5679              | R.YFPTQALNFAFK.D                                                        | 1447.66130 | 2 | 2.67E-05 | 0.86 | 2.90  | -     | 681.0    |
| AHQ-4-10, 5172 - 5191       | R.YFPTQALNFAFK.D                                                        | 1447.66130 | 2 | 7.48E-07 | 0.85 | 3.06  | -     | 614.4    |
| gi 5453710 ref NP_006139.1  | LIM and SH3 protein 1; Lasp-1 [Homo sapiens]                            |            |   | 7.56E-07 | 0.88 | 10.17 | 5.00  | 29717.0  |
| AHQ-4-13, 4094              | K.GFSVADTPELQR.I                                                        | 1419.56466 | 1 | 4.15E-04 | 0.07 | 2.11  | -     | 172.7    |
| AHQ-4-13, 4084              | K.GFSVADTPELQR.I                                                        | 1419.56466 | 2 | 7.56E-07 | 0.88 | 3.31  | -     | 954.9    |
| gi 4758076 ref NP_004068.1  | citrate synthase precursor; Citrate synthase, mitochondrial [Homo sapie |            |   | 7.66E-07 | 1.67 | 20.16 | 5.80  | 51706.2  |
| AHQ-4-8, 4378               | K.GLVYETSVLDPDEGIR.F                                                    | 1763.92654 | 2 | 3.45E-06 | 0.82 | 3.27  | -     | 628.8    |
| AHQ-4-8, 2997               | K.IVPNVLLQEGK.A                                                         | 1210.44805 | 2 | 7.66E-07 | 0.85 | 2.73  | -     | 476.3    |
| gi 20270259 ref NP_620061.1 | phosphoglycerate kinase 2; phosphoglycerate kinase 1, pseudogene 2 [Ho  |            |   | 7.89E-07 | 0.90 | 10.19 | 3.60  | 44895.0  |

|                             |                                                                           |            |   |          |      |       |       |         |
|-----------------------------|---------------------------------------------------------------------------|------------|---|----------|------|-------|-------|---------|
| AHQ-4-8, 3191 - 3234        | K.LGDVYVNDAFGTAHRA                                                        | 1635.76178 | 2 | 7.89E-07 | 0.90 | 3.78  | -     | 821.5   |
| gi 28827809 ref NP_789797.1 | nucleoside diphosphate kinase B-like [Homo sapiens]                       |            |   | 8.04E-07 | 3.14 | 50.19 | 29.20 | 15529.0 |
| AHQ-4-12, 3339              | R.GDFCIVQVGR.N                                                            | 1053.17404 | 2 | 6.90E-05 | 0.92 | 3.64  | -     | 1046.3  |
| AHQ-4-12, 3355              | R.GDFCIVQVGR.N                                                            | 1053.17404 | 1 | 7.33E-06 | 0.26 | 1.99  | -     | 271.9   |
| AHQ-4-12, 1651              | R.NIIHGSDSVK.S                                                            | 1070.18131 | 1 | 8.29E-04 | 0.40 | 1.99  | -     | 340.5   |
| AHQ-4-12, 2090              | R.NIIHGSDSVKSAEK.E                                                        | 1485.62464 | 2 | 9.27E-07 | 0.83 | 3.70  | -     | 828.8   |
| AHQ-4-12, 2089              | R.NIIHGSDSVKSAEK.E                                                        | 1485.62464 | 1 | 1.24E-04 | 0.66 | 3.43  | -     | 470.8   |
| AHQ-4-12, 2758 - 2837       | R.VMLGETNPADSKPGTIR.G                                                     | 1787.03151 | 2 | 2.76E-05 | 0.79 | 3.88  | -     | 455.3   |
| AHQ-4-12, 2573              | R.VM*LGNETPADSKPGTIR.G                                                    | 1803.03091 | 3 | 8.04E-07 | 0.86 | 3.67  | -     | 681.2   |
| AHQ-4-12, 2571              | R.VM*LGNETPADSKPGTIR.G                                                    | 1803.03091 | 2 | 1.40E-04 | 0.51 | 2.83  | -     | 515.9   |
| gi 4506765 ref NP_002952.1  | S100 calcium-binding protein A4; 18A2; 42A; S100 calcium-binding protein  |            |   | 8.04E-07 | 1.92 | 20.19 | 10.90 | 11728.5 |
| AHQ-4-14-, 3371             | K.ALDVMVSTFK.Y                                                            | 1248.47665 | 2 | 2.58E-05 | 0.96 | 3.88  | -     | 1657.9  |
| AHQ-4-14-, 2757 - 2769      | K.ALDVM*VSTFK.Y                                                           | 1264.47605 | 2 | 8.04E-07 | 0.96 | 3.81  | -     | 1535.0  |
| gi 4826659 ref NP_004921.1  | F-actin capping protein beta subunit; Cap Z [Homo sapiens]                |            |   | 8.23E-07 | 1.84 | 20.20 | 10.30 | 30628.5 |
| AHQ-4-9, 3587               | K.GCWDSIHVVEVQEK.S                                                        | 1687.85505 | 2 | 8.23E-07 | 0.93 | 3.97  | -     | 1387.4  |
| AHQ-4-10, 3148              | R.KLEVEANNAFQYR.D                                                         | 1697.82988 | 2 | 3.81E-05 | 0.91 | 3.26  | -     | 1178.6  |
| gi 4502693 ref NP_001760.1  | CD9 antigen; motility related protein; leukocyte antigen MIC3; antigen    |            |   | 8.28E-07 | 1.73 | 20.30 | 10.10 | 25415.9 |
| AHQ-4-6, 3035 - 3080        | K.KDVLVETFTV.K                                                            | 1180.37558 | 2 | 7.70E-04 | 0.59 | 2.64  | -     | 661.0   |
| AHQ-4-10, 3016              | K.KDVLVETFTV.K                                                            | 1180.37558 | 2 | 3.62E-05 | 0.84 | 3.00  | -     | 863.1   |
| AHQ-4-11, 3134              | K.KDVLVETFTV.K                                                            | 1180.37558 | 2 | 7.61E-05 | 0.85 | 3.23  | -     | 904.5   |
| AHQ-4-12, 3215              | K.KDVLVETFTV.K                                                            | 1180.37558 | 2 | 8.28E-07 | 0.86 | 2.97  | -     | 912.0   |
| AHQ-4-13-, 3396             | K.KDVLVETFTV.K                                                            | 1180.37558 | 2 | 2.30E-04 | 0.76 | 2.54  | -     | 814.6   |
| AHQ-4-13, 3527              | K.KDVLVETFTV.K                                                            | 1180.37558 | 2 | 4.60E-04 | 0.89 | 2.95  | -     | 1078.9  |
| AHQ-4-1, 3529               | K.KDVLVETFTV.K                                                            | 1180.37558 | 2 | 1.24E-05 | 0.75 | 2.75  | -     | 791.5   |
| AHQ-4-12, 3755              | K.SCPDAIKEVDFNK.F                                                         | 1524.67770 | 2 | 3.94E-04 | 0.87 | 3.46  | -     | 773.6   |
| gi 22538465 ref NP_002786.2 | proteasome beta 3 subunit; proteasome theta chain; proteasome chain 13    |            |   | 8.32E-07 | 1.80 | 20.24 | 16.60 | 22948.8 |
| AHQ-4-10, 4728 - 4735       | R.FGYPYETPIVAGLDPK.T                                                      | 1768.00162 | 2 | 8.32E-07 | 0.84 | 3.08  | -     | 859.6   |
| AHQ-4-10, 5783              | R.LYIGLAGLATDVQTVAQR.L                                                    | 1890.17306 | 2 | 8.56E-05 | 0.96 | 4.80  | -     | 1731.9  |
| gi 4557327 ref NP_000033.1  | beta-2-glycoprotein I precursor [Homo sapiens]                            |            |   | 8.33E-07 | 0.76 | 10.18 | 7.20  | 38312.0 |
| AHQ-4-7, 7379 - 7383        | K.WSPELPCVACIICPPSPTFATLR.V                                               | 2823.32174 | 2 | 8.33E-07 | 0.76 | 3.64  | -     | 387.7   |
| gi 6912238 ref NP_036226.1  | peroxiredoxin 5; antioxidant enzyme B166 [Homo sapiens]                   |            |   | 8.42E-07 | 4.22 | 50.25 | 16.80 | 22026.2 |
| AHQ-4-12, 3875              | R.FSMVVQDGIK.A                                                            | 1223.46709 | 2 | 8.42E-07 | 0.96 | 3.75  | -     | 1502.4  |
| AHQ-4-12, 5307 - 5369       | K.GVLFVGPVGAFTPGCSK.T                                                     | 1595.84389 | 2 | 3.35E-04 | 0.65 | 2.72  | -     | 453.7   |
| AHQ-4-12, 4667              | K.KGVLFVGPVGAFTPGCSK.T                                                    | 1724.01680 | 2 | 4.71E-04 | 0.95 | 5.00  | -     | 779.8   |
| AHQ-4-12, 3399              | R.LLADPTGAFGK.E                                                           | 1090.25413 | 2 | 1.38E-05 | 0.79 | 3.25  | -     | 466.9   |
| AHQ-4-12, 4749              | K.VNLAELFK.G                                                              | 934.11414  | 2 | 5.35E-05 | 0.86 | 2.91  | -     | 849.7   |
| gi 10880136 ref NP_004032.2 | arrestin beta 1 isoform A [Homo sapiens]                                  |            |   | 8.42E-07 | 1.87 | 20.24 | 10.50 | 47065.3 |
| AHQ-4-7, 4391               | K.CPVAMEADDTVPSSFTCK.V                                                    | 2218.42489 | 2 | 4.68E-06 | 0.93 | 4.79  | -     | 839.6   |
| AHQ-4-7, 7255 - 7333        | R.DFVDHIDLVDPDVGVLVDPEYK.E                                                | 2713.03129 | 2 | 8.42E-07 | 0.95 | 4.47  | -     | 1004.8  |
| gi 4504483 ref NP_000185.1  | hypoxanthine phosphoribosyltransferase 1 [Homo sapiens]                   |            |   | 8.48E-07 | 3.58 | 40.30 | 33.00 | 24579.2 |
| AHQ-4-10, 4997              | K.NVLVEDIIDTGG.K                                                          | 1429.64090 | 1 | 3.11E-04 | 0.83 | 3.43  | -     | 717.7   |
| AHQ-4-10, 6359              | R.SPGVSDDEPGYDLDFCIPNHYAEDLER.V                                           | 3438.67572 | 3 | 8.48E-07 | 0.95 | 6.07  | -     | 797.3   |
| AHQ-4-10, 4355              | R.SVGYKPDFVGFPIPK.F                                                       | 1799.01571 | 2 | 5.55E-06 | 0.93 | 4.30  | -     | 790.4   |
| AHQ-4-10, 3417              | K.VIGGDLLSTLTK.N                                                          | 1276.41852 | 2 | 7.32E-05 | 0.86 | 3.16  | -     | 602.3   |
| gi 7706675 ref NP_057661.1  | RAB6B, member RAS oncogene family; small GTPase RAB6B [Homo sapiens] [M   |            |   | 8.78E-07 | 4.13 | 50.23 | 23.60 | 23461.5 |
| AHQ-4-11, 4577              | R.GSDVIIMLVGNK.T                                                          | 1246.50220 | 2 | 7.37E-05 | 0.94 | 3.84  | -     | 1407.4  |
| AHQ-4-11, 3241 - 3300       | R.LQLWDTAGGER.F                                                           | 1317.43243 | 2 | 1.33E-06 | 0.93 | 3.68  | -     | 988.2   |
| AHQ-4-11, 3488 - 3516       | K.LVFLGSEQSVK.T                                                           | 1177.37492 | 2 | 8.78E-07 | 0.86 | 2.98  | -     | 876.8   |
| AHQ-4-11, 2673              | R.RVASALPQMGVNVQEK.S                                                      | 1629.86363 | 2 | 1.19E-05 | 0.95 | 4.63  | -     | 1030.1  |
| AHQ-4-11, 2984              | R.VASALPQMGVNVQEK.S                                                       | 1473.67727 | 2 | 5.69E-06 | 0.46 | 2.62  | -     | 212.1   |
| gi 22749499 ref NP_689979.1 | hypothetical protein MGCA40107 [Homo sapiens]                             |            |   | 9.05E-07 | 0.97 | 10.30 | 24.80 | 11741.6 |
| AHQ-4-14-, 5595             | R.LGALSGAALGFASYGAHGAQFPDAYG.K                                            | 2669.93152 | 2 | 1.64E-04 | 0.95 | 4.52  | -     | 1501.5  |
| AHQ-4-14-, 5581 - 5594      | R.LGALSGAALGFASYGAHGAQFPDAYG.K                                            | 2669.93152 | 3 | 9.05E-07 | 0.97 | 5.94  | -     | 1438.7  |
| gi 5803135 ref NP_006852.1  | RAB35, member RAS oncogene family; ras-related protein rab-1c (GTP-bind   |            |   | 9.40E-07 | 9.94 | 10.19 | 5.50  | 23025.1 |
| AHQ-4-11, 3658              | K.LLIIGDSGVGK.S                                                           | 1072.28025 | 2 | 3.18E-04 | 0.92 | 3.37  | -     | 1092.8  |
| AHQ-4-13, 3921              | K.LLIIGDSGVGK.S                                                           | 1072.28025 | 2 | 1.66E-04 | 0.81 | 3.14  | -     | 664.5   |
| AHQ-4-13-, 3788             | K.LLIIGDSGVGK.S                                                           | 1072.28025 | 2 | 9.40E-07 | 0.94 | 3.74  | -     | 1335.4  |
| AHQ-4-11, 3556 - 3584       | K.LLIIGDSGVGK.S                                                           | 1072.28025 | 2 | 7.34E-05 | 0.94 | 3.79  | -     | 1223.4  |
| gi 4758484 ref NP_004823.1  | glutathione-S-transferase family; glutathione transferase omega [Homo sap |            |   | 9.42E-07 | 1.03 | 20.18 | 3.70  | 27565.7 |
| AHQ-4-9, 2239               | K.GSAPPVGPVEGSIR.I                                                        | 1321.46422 | 1 | 1.37E-04 | 0.12 | 2.15  | -     | 158.6   |
| AHQ-4-10, 2551              | R.HEVINILNK.N                                                             | 1080.26247 | 2 | 9.42E-07 | 0.91 | 3.50  | -     | 788.0   |
| gi 4502297 ref NP_001678.1  | ATP synthase, H+ transporting, mitochondrial F1 complex, delta subunit    |            |   | 9.54E-07 | 1.72 | 20.23 | 13.70 | 17489.8 |
| AHQ-4-13-, 2525 - 2528      | K.AQAELVTGADEATR.A                                                        | 1432.51860 | 2 | 1.13E-06 | 0.95 | 4.63  | -     | 1142.0  |
| AHQ-4-13, 2639 - 2641       | K.AQAELVTGADEATR.A                                                        | 1432.51860 | 1 | 3.42E-05 | 0.49 | 2.91  | -     | 193.6   |
| AHQ-4-12, 2479              | K.AQAELVTGADEATR.A                                                        | 1432.51860 | 2 | 9.54E-07 | 0.91 | 4.00  | -     | 627.9   |
| AHQ-4-13, 2429              | R.IEANEALVK.A                                                             | 987.13221  | 2 | 2.54E-04 | 0.81 | 3.23  | -     | 573.3   |
| gi 30158489 ref XP_301421.1 | similar to Chloride intracellular channel protein 1 (Nuclear chloride     |            |   | 9.73E-07 | 0.76 | 10.19 | 6.60  | 28267.5 |
| AHQ-4-12, 6107 - 6111       | K.FLNGNELTLADCNLKP.L                                                      | 1934.20276 | 2 | 9.73E-07 | 0.76 | 3.57  | -     | 603.1   |
| AHQ-4-9, 5663 - 5732        | K.FLNGNELTLADCNLKP.L                                                      | 1934.20276 | 2 | 1.37E-05 | 0.90 | 3.73  | -     | 1336.9  |
| gi 18105037 ref NP_004709.2 | cytochrome c oxidase subunit VIIa polypeptide 2 like; estrogen recepto    |            |   | 1.03E-06 | 0.92 | 10.26 | 28.90 | 12614.6 |
| AHQ-4-13-, 6134             | K.LAGAWASEAYSPQGLKPVVSTEAPPIIFATPTK.L                                     | 3399.87995 | 3 | 1.03E-06 | 0.92 | 4.83  | -     | 792.7   |
| AHQ-4-14-, 6007             | K.LAGAWASEAYSPQGLKPVVSTEAPPIIFATPTK.L                                     | 3399.87995 | 3 | 6.55E-04 | 0.83 | 4.14  | -     | 657.5   |
| AHQ-4-13, 6212              | K.LAGAWASEAYSPQGLKPVVSTEAPPIIFATPTK.L                                     | 3399.87995 | 3 | 7.49E-05 | 0.93 | 5.23  | -     | 574.4   |
| gi 5453597 ref NP_006126.1  | F-actin capping protein alpha-1 subunit; Cap Z [Homo sapiens]             |            |   | 1.08E-06 | 2.23 | 30.19 | 19.90 | 32925.2 |
| AHQ-4-9, 3737 - 3796        | R.EGAAHAFQYNMDFQTPVK.I                                                    | 2126.33709 | 2 | 5.46E-05 | 0.72 | 3.10  | -     | 393.1   |
| AHQ-4-9, 4275 - 4279        | K.FITHAPPGFNEVFNDR.V                                                      | 2090.28294 | 2 | 3.23E-05 | 0.67 | 3.13  | -     | 283.4   |
| AHQ-4-10, 4949              | K.TIDGQQTIIACIESHQFQPK.N                                                  | 2316.57620 | 2 | 5.19E-05 | 0.69 | 3.08  | -     | 379.4   |
| AHQ-4-9, 4860 - 4932        | K.TIDGQQTIIACIESHQFQPK.N                                                  | 2316.57620 | 2 | 1.08E-06 | 0.84 | 3.82  | -     | 469.0   |
| gi 21361547 ref NP_002930.2 | ribonuclease/angiogenin inhibitor; Placental ribonuclease inhibitor [H    |            |   | 1.10E-06 | 0.90 | 10.19 | 3.30  | 49973.3 |
| AHQ-4-14-, 6366             | R.WAELLPLLQCCQVVR.L                                                       | 1855.19360 | 2 | 1.10E-06 | 0.90 | 3.79  | -     | 733.7   |
| gi 10835035 ref NP_003157.1 | sulfotransferase family, cytosolic, 1A, phenol-preferring, member 3; t    |            |   | 1.14E-06 | 2.48 | 30.21 | 22.70 | 34196.0 |
| AHQ-4-9, 5093 - 5132        | K.SHLPLALLPQTLLDQK.V                                                      | 1788.12388 | 2 | 2.81E-04 | 0.83 | 3.54  | -     | 652.9   |
| AHQ-4-9, 4592               | R.VPFLVNDPGEPSGLETLDKTPPPR.L                                              | 2706.00309 | 3 | 2.78E-06 | 0.79 | 3.75  | -     | 528.8   |
| AHQ-4-9, 6037 - 6116        | K.YFAEALGPLQSFQARPDDLLINTYPK.S                                            | 2969.33891 | 3 | 1.14E-06 | 0.85 | 4.07  | -     | 547.1   |
| gi 19923457 ref NP_057447.2 | glycoprotein VI (platelet); platelet glycoprotein VI [Homo sapiens] [M    |            |   | 1.23E-06 | 0.96 | 10.25 | 3.20  | 67308.6 |
| AHQ-4-7, 5387               | K.PSLQALPSSVLPLEKPVTLR.C                                                  | 2146.55880 | 2 | 5.32E-05 | 0.92 | 4.30  | -     | 775.2   |
| AHQ-4-7, 5383               | K.PSLQALPSSVLPLEKPVTLR.C                                                  | 2146.55880 | 3 | 1.23E-06 | 0.96 | 5.01  | -     | 1552.0  |
| gi 4557797 ref NP_000260.1  | non-metastatic cells 1 protein [Homo sapiens]                             |            |   | 1.24E-06 | 3.23 | 40.20 | 21.70 | 17148.6 |
| AHQ-4-12, 4006              | K.DRPFVAGLVK.Y                                                            | 1150.35439 | 2 | 2.60E-05 | 0.77 | 2.80  | -     | 851.3   |
| AHQ-4-12, 3181              | R.GLVGEIIR.R                                                              | 829.01947  | 2 | 6.04E-04 | 0.72 | 3.06  | -     | 510.4   |
| AHQ-4-12, 2802              | R.GLVGEIIR.F                                                              | 985.20582  | 2 | 3.71E-05 | 0.85 | 2.72  | -     | 771.4   |
| AHQ-4-12, 2025 - 2091       | R.NIIHGSDSVSAEK.E                                                         | 1486.56627 | 1 | 1.24E-06 | 0.88 | 4.02  | -     | 505.2   |
| gi 21361565 ref NP_001679.2 | ATP synthase, H+ transporting, mitochondrial F0 complex, subunit b, is    |            |   | 1.25E-06 | 1.83 | 20.22 | 9.00  | 28908.4 |
| AHQ-4-11, 2804              | R.HYLFVQR.N                                                               | 1078.20513 | 2 | 1.25E-06 | 0.92 | 2.91  | -     | 1260.4  |
| AHQ-4-11, 6858              | R.YGLIPEEFFFLYPK.T                                                        | 1892.18434 | 2 | 1.02E-05 | 0.91 | 4.32  | -     | 462.9   |
| gi 10880989 ref NP_067075.1 | RAB18, member RAS oncogene family; RAB18 small GTPase [Homo sapiens] [    |            |   | 1.27E-06 | 1.71 | 20.24 | 14.10 | 22976.9 |
| AHQ-4-11, 3628              | K.IIQTPLWESENGK.G                                                         | 1757.92522 | 2 | 4.29E-05 | 0.77 | 2.89  | -     | 531.0   |
| AHQ-4-11, 6141              | K.LDNWLNLETTYCTR.N                                                        | 1828.98037 | 2 | 1.27E-06 | 0.94 | 4.88  | -     | 655.7   |
| gi 4506063 ref NP_002725.1  | protein kinase, cAMP-dependent, regulatory, type I, alpha; tissue-speci   |            |   | 1.30E-06 | 2.37 | 30.21 | 10.80 | 42981.4 |
| AHQ-4-7, 5077 - 5085        | R.LTVADALEPVQFEDGQK.I                                                     | 1861.04222 | 2 | 1.73E-05 | 0.91 | 4.17  | -     | 568.5   |
| AHQ-4-7, 2859 - 2883        | K.NVLFSHLDDNER.S                                                          | 1459.54574 | 2 | 4.86E-05 | 0.73 | 2.78  | -     | 610.8   |
| AHQ-4-7, 4922 - 4993        | K.VSILES�DKWER.L                                                          | 1475.67136 | 2 | 1.30E-06 | 0.73 | 2.74  | -     | 627.5   |
| gi 11496885 ref NP_005442.2 | enigma protein; LIM domain protein [Homo sapiens]                         |            |   | 1.32E-06 | 1.82 | 20.18 | 7.20  | 49844.4 |
| AHQ-4-11, 4644              | K.VVLEGPAPWGFR.L                                                          | 1328.54318 | 2 | 1.94E-06 | 0.92 | 3.26  | -     | 1065.8  |
| AHQ-4-13-, 4828 - 4830      | K.VVLEGPAPWGFR.L                                                          | 1328.54318 | 2 | 1.32E-06 | 0.92 | 3.37  | -     | 985.0   |
| AHQ-4-14-, 4787             | K.VVLEGPAPWGFR.L                                                          | 1328.54318 | 2 | 2.65E-06 | 0.75 | 2.62  | -     | 818.6   |
| AHQ-4-10, 4160              | R.YLVALGHAYHPPEEFVCSQCGK.V                                                | 2468.74928 | 2 | 1.65E-06 | 0.89 | 3.67  | -     | 721.3   |







|                             |                                                                         |            |   |          |      |       |       |          |
|-----------------------------|-------------------------------------------------------------------------|------------|---|----------|------|-------|-------|----------|
| AHQ-4-8, 2381 - 2400        | K.EITALAPSSM*K.I                                                        | 1164.35479 | 1 | 7.09E-06 | 0.70 | 2.79  | -     | 364.4    |
| gi 10863873 ref NP_000651.1 | transforming growth factor, beta 1 (Camurati-Engelmann disease); trans  |            |   | 7.16E-06 | 3.53 | 40.20 | 11.80 | 44422.0  |
| AHQ-4-13, 3330              | R.ALDTNYCFSSSTEK.N                                                      | 1537.63010 | 2 | 7.16E-06 | 0.87 | 3.24  | -     | 680.5    |
| AHQ-4-13, 3473              | R.ALDTNYCFSSSTEK.N                                                      | 1537.63010 | 2 | 7.70E-05 | 0.88 | 3.61  | -     | 645.0    |
| AHQ-4-13, 6512 - 6577       | K.GYHANFLCGLPCPCYIWSLDTQYSK.V                                           | 2781.07085 | 3 | 2.74E-04 | 0.86 | 3.83  | -     | 993.2    |
| AHQ-4-13, 3488              | K.VEQLSNMIVR.S                                                          | 1189.41074 | 2 | 1.84E-05 | 0.95 | 4.02  | -     | 1547.1   |
| AHQ-4-13, 2653 - 2702       | K.VEQLSNMIVR.S                                                          | 1205.41014 | 2 | 3.38E-04 | 0.84 | 3.32  | -     | 710.2    |
| AHQ-4-13, 3621 - 3635       | K.VEQLSNMIVR.S                                                          | 1189.41074 | 2 | 4.66E-04 | 0.92 | 3.51  | -     | 1440.4   |
| gi 18375652 ref NP_002826.2 | protein tyrosine phosphatase, non-receptor type 12; protein-tyrosine p  |            |   | 7.38E-06 | 0.93 | 10.20 | 2.10  | 88119.9  |
| AHQ-4-7, 7163 - 7166        | R.YWPLYGEDPITFAPFK.I                                                    | 1945.20411 | 2 | 7.38E-06 | 0.93 | 3.98  | -     | 817.7    |
| gi 4557241 ref NP_001095.1  | skeletal muscle specific actinin, alpha 3 [Homo sapiens]                |            |   | 7.42E-06 | 0.90 | 10.16 | 0.90  | 103293.7 |
| AHQ-4-9, 2480               | K.ALDFIASK.G                                                            | 865.00867  | 1 | 2.75E-04 | 0.51 | 2.31  | -     | 435.5    |
| AHQ-4-10, 2669              | K.ALDFIASK.G                                                            | 865.00867  | 1 | 1.75E-04 | 0.50 | 2.36  | -     | 425.2    |
| AHQ-4-5, 2638               | K.ALDFIASK.G                                                            | 865.00867  | 2 | 7.42E-06 | 0.90 | 3.21  | -     | 761.0    |
| gi 27481323 ref XP_208234.1 | similar to unactive progesterone receptor, 23 kD; likely ortholog of m  |            |   | 7.43E-06 | 0.71 | 10.14 | 8.10  | 18694.3  |
| AHQ-4-11, 4380 - 4425       | K.LTFSCGGSDNFH.H                                                        | 1447.59493 | 2 | 7.43E-06 | 0.71 | 2.76  | -     | 597.3    |
| gi 4504107 ref NP_002076.1  | glutathione peroxidase 4; phospholipid hydroperoxidase; sperm nucleus g |            |   | 7.51E-06 | 0.90 | 10.19 | 7.10  | 22137.7  |
| AHQ-4-12, 4074 - 4077       | K.TEVNYTQLVDLHAR.Y                                                      | 1659.82478 | 2 | 7.51E-06 | 0.90 | 3.75  | -     | 1009.2   |
| gi 4505185 ref NP_002406.1  | macrophage migration inhibitory factor (glycosylation-inhibiting factor |            |   | 7.85E-06 | 0.96 | 10.21 | 7.80  | 12476.2  |
| AHQ-4-13, 4529              | K.LLCLLAER.L                                                            | 1046.26608 | 2 | 4.13E-05 | 0.93 | 3.50  | -     | 1059.1   |
| AHQ-4-14, 4489 - 4498       | K.LLCLLAER.L                                                            | 1046.26608 | 2 | 4.51E-05 | 0.94 | 3.56  | -     | 1128.8   |
| AHQ-4-14, 5700              | K.LLCLLAER.L                                                            | 1046.26608 | 2 | 7.85E-06 | 0.96 | 4.15  | -     | 1168.5   |
| gi 5730118 ref NP_006514.1  | X-prolyl aminopeptidase (aminopeptidase P) 1, soluble; X-prolyl aminope |            |   | 7.95E-06 | 0.92 | 10.20 | 2.60  | 69858.4  |
| AHQ-4-6, 6195 - 6264        | R.GSLTFEPFLTPIQTK.M                                                     | 1745.05263 | 2 | 7.95E-06 | 0.92 | 3.94  | -     | 730.5    |
| gi 6005786 ref NP_009214.1  | monoglyceride lipase; lysophospholipase-like [Homo sapiens]             |            |   | 8.07E-06 | 2.30 | 30.24 | 14.40 | 34292.3  |
| AHQ-4-14, 5985 - 6001       | K.LTVPFLLQQGSADR.L                                                      | 1530.79329 | 2 | 4.27E-04 | 0.67 | 2.63  | -     | 546.2    |
| AHQ-4-9, 5743               | R.TPQSIPIYQDLPHLVNADGQYLFRCR.Y                                          | 2835.14314 | 3 | 2.24E-04 | 0.69 | 3.94  | -     | 390.4    |
| AHQ-4-9, 6591               | K.VLNLVLPNLSLGPIDSSVLSR.N                                               | 2207.59900 | 2 | 2.58E-05 | 0.93 | 4.71  | -     | 854.7    |
| AHQ-4-9, 6583               | K.VLNLVLPNLSLGPIDSSVLSR.N                                               | 2207.59900 | 2 | 8.07E-06 | 0.94 | 4.68  | -     | 685.9    |
| gi 20483052 ref XP_166241.1 | similar to PTD015 protein [Homo sapiens]                                |            |   | 8.38E-06 | 0.76 | 10.13 | 8.20  | 13332.1  |
| AHQ-4-13, 2738              | K.VPSSTVEYLK.K                                                          | 1123.28089 | 2 | 8.38E-06 | 0.76 | 2.51  | -     | 739.7    |
| gi 4507879 ref NP_003365.1  | voltage-dependent anion channel 1 [Homo sapiens]                        |            |   | 9.15E-06 | 0.61 | 10.15 | 3.90  | 30772.3  |
| AHQ-4-9, 3916               | R.WTEYGLTFTEK.W                                                         | 1375.50711 | 1 | 9.15E-06 | 0.61 | 3.08  | -     | 297.3    |
| gi 23957682 ref NP_705840.1 | heparan sulfate 3-OST-5 [Homo sapiens]                                  |            |   | 9.28E-06 | 0.01 | 10.13 | 6.90  | 20812.0  |
| AHQ-4-14, 6369 - 6386       | K.FYQITGRTLNP.W                                                         | 1496.69395 | 1 | 9.28E-06 | 0.01 | 1.85  | -     | 73.7     |
| gi 4506045 ref NP_002718.1  | proteoglycan 1, secretory granule; Proteoglycan 1, secretory granule (p |            |   | 9.61E-06 | 0.85 | 10.16 | 8.20  | 17623.6  |
| AHQ-4-1, 4181               | K.GPM*FELLPGESNK.I                                                      | 1435.62747 | 2 | 9.61E-06 | 0.85 | 3.20  | -     | 632.3    |
| gi 28178832 ref NP_002159.2 | isocitrate dehydrogenase 2 (NADP+), mitochondrial precursor; isocitrat  |            |   | 9.85E-06 | 3.47 | 40.23 | 11.50 | 50909.0  |
| AHQ-4-8, 3614 - 3685        | K.DLAGCIHGLSNVK.L                                                       | 1385.57150 | 2 | 2.00E-04 | 0.90 | 3.41  | -     | 933.5    |
| AHQ-4-8, 3686               | K.DLAGCIHGLSNVK.L                                                       | 1385.57150 | 1 | 2.19E-04 | 0.49 | 2.47  | -     | 366.1    |
| AHQ-4-8, 3699               | R.LIDDM*VAQVLK.S                                                        | 1261.51361 | 2 | 8.50E-04 | 0.89 | 3.76  | -     | 798.0    |
| AHQ-4-8, 4382 - 4383        | R.NILGGTVFREPICK.N                                                      | 1719.04170 | 2 | 1.56E-05 | 0.92 | 4.26  | -     | 804.5    |
| AHQ-4-8, 1600 - 1639        | K.TIEAEAAHGTVTR.H                                                       | 1356.46696 | 2 | 9.85E-06 | 0.76 | 2.94  | -     | 635.5    |
| gi 14780596 ref XP_033004.1 | hypothetical protein BC005107 [Homo sapiens]                            |            |   | 1.00E-05 | 0.30 | 10.13 | 5.00  | 18127.9  |
| AHQ-4-2, 2012               | R.EQIIAKA.K                                                             | 901.08569  | 1 | 2.31E-04 | 0.42 | 2.27  | -     | 360.6    |
| AHQ-4-3, 1663 - 1871        | R.EQIIAKA.K                                                             | 901.08569  | 1 | 1.79E-04 | 0.25 | 2.41  | -     | 248.2    |
| AHQ-4-5, 1611               | R.EQIIAKA.K                                                             | 901.08569  | 1 | 1.00E-05 | 0.30 | 2.41  | -     | 294.5    |
| AHQ-4-2, 1710 - 1848        | R.EQIIAKA.K                                                             | 901.08569  | 1 | 1.18E-04 | 0.34 | 2.68  | -     | 248.8    |
| gi 15011904 ref NP_036222.2 | microfilament and actin filament cross-linker protein isoform a; 620 k  |            |   | 1.05E-05 | 0.73 | 10.15 | 0.40  | 620320.6 |
| AHQ-4-1, 4833 - 4834        | K.IQGSLSSLTSPAEGVLSK.I                                                  | 2032.23832 | 2 | 1.05E-05 | 0.73 | 3.01  | -     | 623.8    |
| gi 7705819 ref NP_057181.1  | HSPC039 protein [Homo sapiens]                                          |            |   | 1.06E-05 | 0.96 | 10.22 | 24.40 | 8968.7   |
| AHQ-4-14, 5027              | K.NIGWGTQQGIGGFGEPEGK.S                                                 | 2033.18655 | 2 | 1.06E-05 | 0.96 | 4.48  | -     | 1583.5   |
| gi 21361388 ref NP_008868.2 | SMT3 suppressor of mif two 3 homolog 2; SMT3 (suppressor of mif two 3,  |            |   | 1.08E-05 | 0.82 | 10.16 | 12.60 | 10870.2  |
| AHQ-4-12, 2567              | K.VAQGDGSSVQFK.I                                                        | 1235.37133 | 2 | 1.08E-05 | 0.82 | 3.12  | -     | 722.7    |
| gi 4506363 ref NP_002861.1  | RAB13, member RAS oncogene family; RAS-associated protein RAB13 [Homo s |            |   | 1.11E-05 | 0.76 | 10.17 | 5.40  | 22774.0  |
| AHQ-4-11, 2901              | K.LQVWDATGQER.F                                                         | 1303.40576 | 2 | 1.11E-05 | 0.76 | 2.98  | -     | 872.7    |
| gi 5902726 ref NP_005800.1  | peroxiredoxin 2; thioredoxin-dependent peroxide reductase 1 (thiol-spec |            |   | 1.12E-05 | 1.69 | 20.24 | 9.10  | 21856.8  |
| AHQ-4-11, 6538              | K.EGGGLPLNLLADVTR.R                                                     | 1736.00583 | 2 | 7.51E-04 | 0.75 | 3.33  | -     | 341.7    |
| AHQ-4-11, 5972              | R.KEGGLPLNLLADVTR.R                                                     | 1864.17875 | 2 | 1.12E-05 | 0.94 | 4.75  | -     | 719.1    |
| gi 15306356 ref XP_035638.2 | similar to interleukin 25; lymphocyte antigen 6 complex, locus E ligan  |            |   | 1.13E-05 | 1.65 | 20.18 | 6.90  | 18795.1  |
| AHQ-4-13, 3464              | R.ESDVPLKTEEFVTK.T                                                      | 1751.91253 | 2 | 4.17E-04 | 0.86 | 3.45  | -     | 543.6    |
| AHQ-4-12, 3374              | R.ESDVPLKTEEFVTK.T                                                      | 1751.91253 | 2 | 1.13E-05 | 0.87 | 3.68  | -     | 583.7    |
| AHQ-4-13, 3627              | R.GAEIYAMAYSK.A                                                         | 1333.49204 | 2 | 9.16E-05 | 0.78 | 2.82  | -     | 960.5    |
| gi 488539 ref NP_005380.1   | protein-L-isoaspartate (D-aspartate) O-methyltransferase [Homo sapiens] |            |   | 1.23E-05 | 1.26 | 20.18 | 15.90 | 24632.6  |
| AHQ-4-11, 5089 - 5154       | K.ALVDGSGSGILTACFAR.M                                                   | 1696.90662 | 2 | 1.23E-05 | 0.63 | 3.22  | -     | 747.6    |
| AHQ-4-11, 4525              | R.LILPVGPGAGNQML*LEQYDK.L                                               | 2060.35997 | 2 | 2.98E-04 | 0.63 | 3.33  | -     | 161.7    |
| gi 20127486 ref NP_005808.2 | cargo selection protein (mannose 6 phosphate receptor binding pr [Homo  |            |   | 1.23E-05 | 0.76 | 10.18 | 3.90  | 47046.6  |
| AHQ-4-10, 4067              | R.IATSLDGFVDVAVSQQR.Q                                                   | 1835.99599 | 2 | 1.23E-05 | 0.76 | 3.66  | -     | 611.7    |
| gi 30157216 ref XP_292133.2 | similar to genothinin 1 [Homo sapiens]                                  |            |   | 1.34E-05 | 0.73 | 10.20 | 4.50  | 39693.8  |
| AHQ-4-3, 4643 - 4655        | K.TITLEVFKPSDIENVK.A                                                    | 1788.03268 | 2 | 9.07E-04 | 0.42 | 3.89  | -     | 246.3    |
| AHQ-4-14, 5448 - 5514       | K.TITLEVFKPSDIENVK.A                                                    | 1788.03268 | 2 | 6.70E-04 | 0.63 | 3.97  | -     | 406.9    |
| AHQ-4-14, 4379              | K.TITLEVFKPSDIENVK.A                                                    | 1788.03268 | 2 | 1.34E-05 | 0.73 | 3.42  | -     | 556.2    |
| AHQ-4-2, 4652               | K.TITLEVFKPSDIENVK.A                                                    | 1788.03268 | 2 | 2.19E-04 | 0.51 | 3.08  | -     | 398.8    |
| gi 4758440 ref NP_004868.1  | glia maturation factor, gamma [Homo sapiens]                            |            |   | 1.38E-05 | 1.87 | 20.25 | 12.70 | 16801.2  |
| AHQ-4-12, 6039              | R.QMVLLEEFQNISPEELK.M                                                   | 2163.43385 | 2 | 1.38E-05 | 0.97 | 5.06  | -     | 1824.7   |
| AHQ-4-12, 5609 - 5614       | R.QM*VVLEEFQNISPEELK.M                                                  | 2179.43325 | 2 | 1.29E-04 | 0.91 | 4.23  | -     | 849.5    |
| gi 4505329 ref NP_003818.1  | N-ethylmaleimide-sensitive factor attachment protein, alpha; alpha-SNAP |            |   | 1.39E-05 | 0.97 | 10.23 | 4.40  | 33246.6  |
| AHQ-4-9, 3983               | K.VAGYAALLEQYQK.A                                                       | 1454.65214 | 2 | 1.39E-05 | 0.97 | 4.67  | -     | 1578.5   |
| gi 14249382 ref NP_116139.1 | hypothetical protein MGC15429 [Homo sapiens]                            |            |   | 1.47E-05 | 0.96 | 10.19 | 4.80  | 22345.5  |
| AHQ-4-11, 4233              | R.FSVLLLLHGR.F                                                          | 1155.41731 | 2 | 1.47E-05 | 0.96 | 3.65  | -     | 1559.9   |
| gi 5453998 ref NP_006382.1  | importin 7; RAN-binding protein 7 [Homo sapiens]                        |            |   | 1.48E-05 | 0.89 | 10.19 | 1.40  | 119515.7 |
| AHQ-4-4, 6854               | R.ENIVEAIHSPELIR.V                                                      | 1733.98994 | 2 | 1.48E-05 | 0.89 | 3.80  | -     | 737.1    |
| gi 19923233 ref NP_002970.2 | sterol carrier protein 2 [Homo sapiens]                                 |            |   | 1.49E-05 | 1.76 | 20.18 | 4.20  | 58993.3  |
| AHQ-4-13, 2667              | K.KLEEEGEQVLR.K                                                         | 1336.47242 | 2 | 4.73E-04 | 0.89 | 3.35  | -     | 834.2    |
| AHQ-4-13, 2688              | K.LQNLQQLQPGNAK.L                                                       | 1324.51124 | 2 | 1.49E-05 | 0.87 | 3.69  | -     | 788.0    |
| gi 22748683 ref NP_689522.1 | hypothetical protein FLJ35564 [Homo sapiens]                            |            |   | 1.50E-05 | 0.04 | 10.11 | 1.80  | 70407.8  |
| AHQ-4-7, 2117               | K.HGHYPNTIAEK.H                                                         | 1267.37511 | 1 | 1.50E-05 | 0.04 | 1.95  | -     | 125.7    |
| gi 5453892 ref NP_006209.1  | phosphoinositide-3-kinase, catalytic, alpha polypeptide; phosphatidylin |            |   | 1.57E-05 | 0.75 | 10.16 | 1.50  | 124411.5 |
| AHQ-4-9, 5809 - 5864        | R.QVEAMEKLINLTDLK.Q                                                     | 1859.22068 | 2 | 1.57E-05 | 0.75 | 3.14  | -     | 912.1    |
| gi 30153966 ref XP_293932.2 | similar to hypothetical protein BC013073 [Homo sapiens]                 |            |   | 1.59E-05 | 0.76 | 10.21 | 9.00  | 21711.3  |
| AHQ-4-1, 4254 - 4257        | R.MIFTLFTINVKDIRHH                                                      | 2073.44997 | 3 | 1.59E-05 | 0.76 | 3.48  | -     | 871.7    |
| AHQ-4-2, 3746 - 3747        | R.MIFTLFTINVKDIRHH                                                      | 2073.44997 | 2 | 8.23E-04 | 0.39 | 2.89  | -     | 317.7    |
| AHQ-4-2, 4031               | R.MIFTLFTINVKDIRHH                                                      | 2073.44997 | 2 | 4.53E-04 | 0.30 | 2.97  | -     | 376.1    |
| AHQ-4-5, 4021 - 4022        | R.MIFTLFTINVKDIRHH                                                      | 2073.44997 | 2 | 8.31E-05 | 0.57 | 2.92  | -     | 593.8    |
| AHQ-4-5, 4123               | R.MIFTLFTINVKDIRHH                                                      | 2073.44997 | 2 | 6.94E-04 | 0.74 | 3.61  | -     | 474.5    |
| AHQ-4-6, 3942               | R.MIFTLFTINVKDIRHH                                                      | 2073.44997 | 2 | 8.28E-05 | 0.76 | 3.72  | -     | 522.3    |
| AHQ-4-8, 3755               | R.MIFTLFTINVKDIRHH                                                      | 2073.44997 | 2 | 4.79E-05 | 0.46 | 2.92  | -     | 463.5    |
| AHQ-4-1, 4245 - 4313        | R.MIFTLFTINVKDIRHH                                                      | 2073.44997 | 2 | 5.17E-04 | 0.47 | 3.11  | -     | 435.9    |
| gi 4501865 ref NP_001087.1  | ATP citrate lyase [Homo sapiens]                                        |            |   | 1.63E-05 | 0.98 | 10.33 | 2.00  | 121419.0 |
| AHQ-4-4, 6327               | R.LLQDHPWLLSQNLVVKPDQIK.R                                               | 2599.06730 | 3 | 1.63E-05 | 0.98 | 6.58  | -     | 1789.6   |
| gi 14589893 ref NP_001785.2 | cadherin 4, type 1 preproprotein; cadherin 4, R-cadherin (retinal); R-  |            |   | 1.72E-05 | 0.21 | 10.14 | 2.00  | 100279.9 |
| AHQ-4-3, 4872               | K.VENPIDLIYVIDM*NDNR.P                                                  | 2213.45293 | 2 | 1.72E-05 | 0.21 | 2.74  | -     | 288.3    |
| gi 30158852 ref XP_301583.1 | similar to actin CA15 - sea squirt (Styela clava) (fragments) [Homo sa  |            |   | 1.74E-05 | 0.79 | 10.17 | 6.50  | 19197.0  |
| AHQ-4-8, 2253 - 2332        | K.IWHHTFYNKLR.V                                                         | 1515.74533 | 2 | 1.74E-05 | 0.79 | 3.49  | -     | 834.6    |
| gi 5902090 ref NP_008862.1  | solute carrier family 2 (facilitated glucose transporter), member 3; GL |            |   | 1.74E-05 | 0.85 | 10.19 | 3.00  | 53924.0  |
| AHQ-4-1, 5291               | R.LWGTQDVSQDIQEMK.D                                                     | 1778.96471 | 2 | 1.74E-05 | 0.85 | 3.82  | -     | 524.8    |
| gi 27479531 ref XP_208746.1 | similar to golgi complex associated protein 1; golgi resident protein   |            |   | 1.76E-05 | 0.95 | 10.24 | 5.50  | 35740.3  |

|                             |                                                                         |            |   |          |      |       |       |          |
|-----------------------------|-------------------------------------------------------------------------|------------|---|----------|------|-------|-------|----------|
| AHQ-4-10, 3892 - 3960       | R.DVQAGSHDYPEGEGYLLK.F                                                  | 1963.13623 | 2 | 1.76E-05 | 0.95 | 4.71  | -     | 955.3    |
| gi 6912586 ref NP_036220.1  | 6-phosphogluconolactonase [Homo sapiens]                                |            |   | 1.80E-05 | 2.36 | 30.26 | 24.00 | 27546.7  |
| AHQ-4-10, 3883              | R.ILEDQEENPLPAALVQPTGK.L                                                | 2300.55348 | 2 | 9.11E-05 | 0.67 | 3.59  | -     | 336.5    |
| AHQ-4-10, 2424              | K.IVAPISDSPKPPPPQ.R.V                                                   | 1602.85951 | 2 | 2.88E-05 | 0.79 | 3.25  | -     | 547.6    |
| AHQ-4-10, 6085              | R.LPIPESQVITINPELPEVEAAEDYAK.K                                          | 2867.19683 | 2 | 1.80E-05 | 0.90 | 5.21  | -     | 369.4    |
| gi 6005902 ref NP_009043.1  | thrombospondin 3 [Homo sapiens]                                         |            |   | 1.87E-05 | 1.51 | 20.14 | 0.70  | 104200.6 |
| AHQ-4-2, 4092               | R.FYVVM*WK.Q                                                            | 989.21487  | 2 | 4.65E-04 | 0.78 | 2.63  | -     | 580.2    |
| AHQ-4-2, 4695 - 4768        | R.FYVVMWK.Q                                                             | 973.21547  | 1 | 7.70E-04 | 0.62 | 2.06  | -     | 862.6    |
| AHQ-4-3, 4669 - 4749        | R.FYVVMWK.Q                                                             | 973.21547  | 1 | 7.25E-04 | 0.84 | 2.54  | -     | 944.0    |
| AHQ-4-4, 4627               | R.FYVVMWK.Q                                                             | 973.21547  | 1 | 1.23E-04 | 0.75 | 2.43  | -     | 758.1    |
| AHQ-4-6, 4262               | R.FYVVMWK.Q                                                             | 973.21547  | 1 | 2.28E-04 | 0.68 | 2.15  | -     | 795.4    |
| AHQ-4-7, 4107 - 4177        | R.FYVVMWK.Q                                                             | 973.21547  | 1 | 1.55E-04 | 0.83 | 2.14  | -     | 1061.3   |
| AHQ-4-9, 3812               | R.FYVVMWK.Q                                                             | 973.21547  | 1 | 3.46E-04 | 0.73 | 2.19  | -     | 942.2    |
| AHQ-4-9, 3816               | R.FYVVMWK.Q                                                             | 973.21547  | 1 | 6.00E-04 | 0.56 | 2.58  | -     | 355.3    |
| AHQ-4-11, 4289              | R.FYVVMWK.Q                                                             | 973.21547  | 1 | 4.59E-04 | 0.80 | 2.26  | -     | 1028.2   |
| AHQ-4-11, 4301              | R.FYVVMWK.Q                                                             | 973.21547  | 2 | 1.86E-04 | 0.79 | 2.54  | -     | 604.4    |
| AHQ-4-11, 4306              | R.FYVVMWK.Q                                                             | 973.21547  | 1 | 1.87E-05 | 0.73 | 2.34  | -     | 743.0    |
| gi 5803217 ref NP_006821.1  | ubiquinol-cytochrome c reductase (6.4kD) subunit [Homo sapiens]         |            |   | 1.89E-05 | 0.86 | 10.17 | 21.40 | 6569.6   |
| AHQ-4-14-, 6182             | R.LILDWVYPYINGK.F                                                       | 1431.70332 | 2 | 1.89E-05 | 0.86 | 3.42  | -     | 711.3    |
| gi 4507509 ref NP_003245.1  | tissue inhibitor of metalloproteinase 1 precursor; Erythroid-potential  |            |   | 1.90E-05 | 1.83 | 20.26 | 21.30 | 23170.8  |
| AHQ-4-9, 6501 - 6503        | K.LQDGLLHITTCFSVAPWNSLSLAQR.R                                           | 2830.21117 | 2 | 3.47E-05 | 0.87 | 3.92  | -     | 694.4    |
| AHQ-4-9, 4027               | K.LQSGTHCLWTDQLQGSEK.G                                                  | 2203.41795 | 2 | 1.90E-05 | 0.96 | 5.25  | -     | 1301.7   |
| gi 24497612 ref NP_116262.2 | nm23-phosphorylated unknown substrate; SH3 domain-containing 70 kDa pr  |            |   | 1.91E-05 | 2.81 | 40.23 | 9.40  | 72699.6  |
| AHQ-4-6, 4080               | R.EYVLYLRPTGPLAQK.L                                                     | 1749.04621 | 2 | 4.66E-04 | 0.96 | 4.51  | -     | 1249.7   |
| AHQ-4-6, 6634               | K.LGCDVWATIFSR.D                                                        | 1426.62208 | 2 | 1.91E-05 | 0.89 | 2.73  | -     | 1001.1   |
| AHQ-4-6, 3011               | K.LSDFWQSQK.Q                                                           | 1139.24210 | 1 | 4.03E-04 | 0.19 | 2.19  | -     | 284.4    |
| AHQ-4-6, 6080               | R.RPYEDQQLGETPLTIICQPMQPLR.V                                            | 2916.32264 | 3 | 3.57E-04 | 0.77 | 3.37  | -     | 671.0    |
| gi 4506077 ref NP_002734.1  | protein kinase C substrate 80K-H; glucosidase II, beta subunit; AGE-bin |            |   | 2.00E-05 | 0.89 | 10.16 | 1.90  | 59296.0  |
| AHQ-4-5, 3205               | K.LWEEQLAAAK.A                                                          | 1159.31646 | 2 | 2.00E-05 | 0.89 | 3.30  | -     | 811.1    |
| gi 7657647 ref NP_055363.1  | tropomodulin 2 (neuronal) [Homo sapiens]                                |            |   | 2.01E-05 | 0.82 | 10.14 | 3.10  | 39594.8  |
| AHQ-4-11, 3154              | K.FGYQFTKQGR.P.T                                                        | 1329.48804 | 2 | 2.01E-05 | 0.82 | 2.77  | -     | 709.8    |
| gi 29736026 ref XP_085123.3 | similar to Ras-related protein Rab-15 [Homo sapiens]                    |            |   | 2.02E-05 | 0.92 | 10.19 | 5.30  | 23517.8  |
| AHQ-4-14-, 3414             | R.IQIWDTAGQER.Y                                                         | 1317.43243 | 2 | 2.02E-05 | 0.92 | 3.73  | -     | 954.7    |
| gi 7705767 ref NP_057086.1  | CGI-49 protein [Homo sapiens]                                           |            |   | 2.04E-05 | 0.87 | 10.24 | 6.80  | 46920.8  |
| AHQ-4-1, 7255               | K.GPEAGYVATPIAM*VQAAMTLLSDASHLPK.A                                      | 2957.41485 | 3 | 2.04E-05 | 0.87 | 4.87  | -     | 722.3    |
| gi 4507383 ref NP_001052.1  | thromboxane A synthase 1 (platelet, cytochrome P450, family 5, subfamI  |            |   | 2.13E-05 | 1.92 | 20.23 | 5.80  | 60675.3  |
| AHQ-4-12, 4359              | R.FQACPETQVPLQLESK.S                                                    | 1877.10807 | 2 | 4.95E-04 | 0.95 | 4.28  | -     | 1265.4   |
| AHQ-4-7, 4221 - 4277        | R.FQACPETQVPLQLESK.S                                                    | 1877.10807 | 2 | 4.60E-05 | 0.96 | 4.22  | -     | 1384.0   |
| AHQ-4-1, 4633               | R.FQACPETQVPLQLESK.S                                                    | 1877.10807 | 2 | 5.32E-05 | 0.89 | 3.25  | -     | 1006.8   |
| AHQ-4-7, 3698               | R.HSASPMGMQDFDIVR.D                                                     | 1659.84828 | 2 | 2.13E-05 | 0.96 | 4.60  | -     | 1292.3   |
| gi 5453599 ref NP_006127.1  | capping protein (actin filament) muscle Z-line, alpha 2; F-actin cappin |            |   | 2.21E-05 | 1.50 | 20.24 | 11.90 | 32948.9  |
| AHQ-4-9, 4176 - 4179        | R.EGAAHFAQYNLDQFTPVK.I                                                  | 2108.29826 | 2 | 1.14E-04 | 0.96 | 4.76  | -     | 1237.5   |
| AHQ-4-9, 4664               | K.FTITPSTTQVVGILK.I                                                     | 1605.90007 | 2 | 2.21E-05 | 0.55 | 3.02  | -     | 212.3    |
| gi 4507649 ref NP_003280.1  | tropomyosin 2 (beta) [Homo sapiens]                                     |            |   | 2.33E-05 | 0.91 | 10.18 | 4.60  | 32989.6  |
| AHQ-4-9, 2403               | K.ATDAEADVASLNR.R                                                       | 1333.38703 | 2 | 2.33E-05 | 0.91 | 3.07  | -     | 1236.6   |
| gi 4503291 ref NP_001346.1  | D-dopachrome tautomerase [Homo sapiens]                                 |            |   | 2.34E-05 | 0.90 | 10.17 | 9.30  | 12711.7  |
| AHQ-4-14-, 5538             | R.FFPLESWQIGK.I                                                         | 1352.56151 | 2 | 2.34E-05 | 0.90 | 3.41  | -     | 666.9    |
| AHQ-4-13, 5728              | R.FFPLESWQIGK.I                                                         | 1352.56151 | 2 | 3.09E-05 | 0.79 | 2.71  | -     | 768.5    |
| gi 2306552 ref NP_000840.2  | glutathione S-transferase M3; glutathione S-transferase, Mu-3; brain G  |            |   | 2.38E-05 | 0.82 | 10.17 | 6.20  | 26559.4  |
| AHQ-4-10, 3848              | K.LKPQYLEELPGQLK.Q                                                      | 1656.94708 | 2 | 2.38E-05 | 0.82 | 3.12  | -     | 580.8    |
| AHQ-4-10, 3765 - 3839       | K.LKPQYLEELPGQLK.Q                                                      | 1656.94708 | 2 | 2.73E-04 | 0.83 | 3.30  | -     | 576.3    |
| gi 8922804 ref NP_060760.1  | hypothetical protein FLJ10983 [Homo sapiens]                            |            |   | 2.39E-05 | 0.90 | 10.17 | 1.60  | 68268.9  |
| AHQ-4-6, 3260               | R.LDQETAQWLR.W                                                          | 1260.38088 | 2 | 2.39E-05 | 0.90 | 3.34  | -     | 1104.3   |
| gi 4506193 ref NP_002784.1  | proteasome beta 1 subunit; proteasome subunit HC5; proteasome component |            |   | 2.41E-05 | 2.71 | 30.33 | 22.00 | 26489.2  |
| AHQ-4-11, 5572              | K.AGGSASAMQLPLLDNQVGFK.N                                                | 2005.28443 | 2 | 3.34E-04 | 0.87 | 4.23  | -     | 377.1    |
| AHQ-4-11, 2922 - 2924       | K.NM*QNVEHVPLSLDR.A                                                     | 1668.85668 | 2 | 2.41E-05 | 0.86 | 3.69  | -     | 872.8    |
| AHQ-4-11, 6550              | R.RFFFYVYVNIIGGLDEEGK.G                                                 | 2281.55031 | 2 | 4.83E-05 | 0.98 | 6.66  | -     | 1891.9   |
| gi 9966825 ref NP_065089.1  | HEF like Protein [Homo sapiens]                                         |            |   | 2.44E-05 | 0.97 | 10.26 | 2.80  | 86696.2  |
| AHQ-4-13, 4301              | K.AISAFHGLSSSQPAEITQSK.L                                                | 2260.48935 | 2 | 2.44E-05 | 0.97 | 5.23  | -     | 1417.3   |
| gi 4502565 ref NP_001740.1  | calpain, small subunit 1; calpain, small polypeptide; calcium-dependent |            |   | 2.44E-05 | 1.44 | 20.22 | 7.10  | 28315.5  |
| AHQ-4-11, 6437 - 6496       | R.YSDESGNM*DFDNFISCLVR.L                                                | 2287.42568 | 2 | 2.44E-05 | 0.52 | 3.06  | -     | 210.2    |
| AHQ-4-12, 6941              | R.YSDESGNM*DFDNFISCLVR.L                                                | 2271.42628 | 2 | 3.75E-05 | 0.92 | 4.37  | -     | 993.5    |
| AHQ-4-10, 6152              | R.YSDESGNM*DFDNFISCLVR.L                                                | 2287.42568 | 2 | 3.72E-04 | 0.87 | 3.89  | -     | 584.8    |
| gi 16904381 ref NP_006717.1 | LPS-responsive vesicle trafficking, beach and anchor containing; vesic  |            |   | 2.48E-05 | 0.72 | 10.21 | 0.50  | 319158.3 |
| AHQ-4-4, 3796               | R.VGVGTSFGLPQTR.R                                                       | 1319.49146 | 2 | 2.48E-05 | 0.72 | 2.79  | -     | 744.7    |
| gi 4502861 ref NP_001275.1  | adaptor-related protein complex 3, sigma 1 subunit; clathrin-associated |            |   | 2.58E-05 | 0.87 | 10.17 | 7.80  | 21730.2  |
| AHQ-4-12, 3895              | K.FYQPYSEDQIQIIR.E                                                      | 1917.06756 | 2 | 2.58E-05 | 0.87 | 3.39  | -     | 785.1    |
| gi 5803013 ref NP_006808.1  | endoplasmic reticulum protein 29 precursor; endoplasmic reticulum lumen |            |   | 2.59E-05 | 1.35 | 20.17 | 11.50 | 28993.2  |
| AHQ-4-10, 3628              | R.DGDFENPVYTGAVK.V                                                      | 1609.71786 | 2 | 3.75E-05 | 0.62 | 3.34  | -     | 346.5    |
| AHQ-4-10, 3691              | K.ILDQGEDFPASEMTR.I                                                     | 1709.85924 | 2 | 2.59E-05 | 0.74 | 2.83  | -     | 572.0    |
| gi 8923812 ref NP_060943.1  | uncharacterized hypothalamus protein HT012 [Homo sapiens]               |            |   | 2.67E-05 | 0.92 | 10.17 | 8.60  | 14960.4  |
| AHQ-4-13, 4181 - 4246       | K.LTAFTSVDLTNK.A                                                        | 1310.47811 | 2 | 2.67E-05 | 0.92 | 3.39  | -     | 1286.5   |
| gi 27499559 ref XP_062669.7 | similar to lactate dehydrogenase A -like [Homo sapiens]                 |            |   | 2.81E-05 | 0.91 | 10.25 | 5.60  | 33376.6  |
| AHQ-4-9, 6707               | K.LIIVSNPDLITYVAWK.L                                                    | 1945.33337 | 2 | 2.81E-05 | 0.91 | 4.91  | -     | 704.2    |
| gi 21624643 ref NP_660202.1 | similar to CG3714 gene product [Homo sapiens]                           |            |   | 2.83E-05 | 0.62 | 10.13 | 9.00  | 14620.8  |
| AHQ-4-7, 2971               | R.SPAQYQVLSER.L                                                         | 1377.52778 | 2 | 2.83E-05 | 0.62 | 2.52  | -     | 558.9    |
| gi 6005854 ref NP_009204.1  | repressor of estrogen receptor activity; B-cell associated protein [Hom |            |   | 2.86E-05 | 1.78 | 20.19 | 10.70 | 33296.1  |
| AHQ-4-9, 6439               | R.IPWFYPIIIDIR.A                                                        | 1725.02480 | 2 | 4.78E-05 | 0.91 | 3.41  | -     | 1125.2   |
| AHQ-4-9, 6035               | R.IYLADNLVNLQDESFT.R.G                                                  | 2226.47137 | 2 | 2.86E-05 | 0.87 | 3.90  | -     | 680.1    |
| gi 4759086 ref NP_004883.1  | vesicle trafficking protein sec22b [Homo sapiens]                       |            |   | 2.97E-05 | 0.74 | 10.17 | 6.50  | 24740.4  |
| AHQ-4-12, 3939              | R.NLGSINTELQDVQR.I                                                      | 1587.71696 | 2 | 2.97E-05 | 0.74 | 3.31  | -     | 682.3    |
| gi 21361456 ref NP_055425.2 | alpha glucosidase II alpha subunit; likely ortholog of mouse G2an alph  |            |   | 3.01E-05 | 1.51 | 20.20 | 3.30  | 109437.2 |
| AHQ-4-5, 4311               | R.LSFQHPDTPSVLVR.K                                                      | 1741.96893 | 2 | 3.01E-05 | 0.90 | 4.05  | -     | 702.6    |
| AHQ-4-5, 3571               | R.VVIIGAGKPAVVLQTK.G                                                    | 1665.05702 | 2 | 1.05E-04 | 0.61 | 2.65  | -     | 673.2    |
| gi 11993943 ref NP_055419.1 | Tax interaction protein 1 [Homo sapiens]                                |            |   | 3.04E-05 | 0.89 | 10.18 | 13.70 | 13734.6  |
| AHQ-4-13-, 4110             | R.VSEGGPAEIALGLQIGDK.I                                                  | 1641.80454 | 2 | 1.04E-04 | 0.92 | 3.59  | -     | 1164.1   |
| AHQ-4-13, 4241              | R.VSEGGPAEIALGLQIGDK.I                                                  | 1641.80454 | 2 | 3.04E-05 | 0.89 | 3.69  | -     | 872.1    |
| gi 15718761 ref NP_004976.2 | c-K-ras2 protein isoform b; Kirsten rat sarcoma-2 viral (v-Ki-ras2) on  |            |   | 3.19E-05 | 0.86 | 10.21 | 8.00  | 21424.4  |
| AHQ-4-11, 3582              | R.VKDSEDVPM*VLVGNK.C                                                    | 1646.88770 | 2 | 3.19E-05 | 0.86 | 4.17  | -     | 675.5    |
| gi 4504041 ref NP_002061.1  | guanine nucleotide binding protein (G protein), alpha inhibiting activi |            |   | 3.39E-05 | 0.72 | 10.16 | 4.20  | 40450.7  |
| AHQ-4-10, 3721              | R.IAQSDYPTQQDVL.R.T                                                     | 1747.93034 | 2 | 1.61E-04 | 0.64 | 3.00  | -     | 373.3    |
| AHQ-4-8, 3689               | R.IAQSDYPTQQDVL.R.T                                                     | 1747.93034 | 2 | 3.39E-05 | 0.72 | 3.28  | -     | 281.4    |
| gi 4504061 ref NP_002067.1  | glucosamine (N-acetyl)-6-sulfatase precursor; N-acetylglucosamine-6-sul |            |   | 3.40E-05 | 0.41 | 10.15 | 3.30  | 62081.8  |
| AHQ-4-4, 5383               | K.RWQTLSSVDDLVEKLVKR.L                                                  | 2199.58179 | 2 | 8.62E-05 | 0.10 | 2.58  | -     | 181.9    |
| AHQ-4-5, 5385               | K.RWQTLSSVDDLVEKLVKR.L                                                  | 2199.58179 | 2 | 3.40E-05 | 0.41 | 3.05  | -     | 236.3    |
| AHQ-4-3, 5420 - 5473        | K.RWQTLSSVDDLVEKLVKR.L                                                  | 2199.58179 | 2 | 6.00E-05 | 0.38 | 2.60  | -     | 277.5    |
| gi 2138937 ref NP_653164.1  | ribose 5-phosphate isomerase A (ribose 5-phosphate epimerase); RIBOSE   |            |   | 3.41E-05 | 0.95 | 10.25 | 8.00  | 26090.9  |
| AHQ-4-10, 3696              | R.NNQVLGIGSGSTIVHAVQR.I                                                 | 1951.17659 | 2 | 3.41E-05 | 0.95 | 4.91  | -     | 890.5    |
| gi 4506427 ref NP_002880.1  | retinoic acid receptor responder (tazarotene induced) 2 [Homo sapiens]  |            |   | 3.58E-05 | 0.87 | 10.17 | 6.70  | 18617.5  |
| AHQ-4-12, 3638              | R.GLQVAEEFHK.H                                                          | 1271.44680 | 2 | 3.58E-05 | 0.87 | 3.32  | -     | 1110.0   |
| gi 21264318 ref NP_004028.3 | adenosine monophosphate deaminase 2 (isoform L) [Homo sapiens]          |            |   | 3.62E-05 | 0.76 | 10.14 | 2.00  | 100687.2 |
| AHQ-4-5, 5519               | R.SAPYFEPEESPIEQLEER.R                                                  | 2151.27185 | 2 | 3.62E-05 | 0.76 | 2.88  | -     | 563.5    |
| gi 5453559 ref NP_006347.1  | ATP synthase, H+ transporting, mitochondrial F0 complex, subunit d; ATP |            |   | 3.62E-05 | 1.57 | 20.20 | 18.60 | 18491.1  |
| AHQ-4-11, 4105 - 4184       | K.KYPYPWHPPIELN                                                         | 1685.90553 | 2 | 3.62E-05 | 0.67 | 3.16  | -     | 401.6    |
| AHQ-4-11, 5402              | R.LAALPENPAIDWAYYK.A                                                    | 1933.19486 | 2 | 1.83E-04 | 0.91 | 4.05  | -     | 533.8    |
| gi 29732725 ref XP_291587.1 | similar to Endoplasmic precursor (94 kDa glucose-regulated protein) (G  |            |   | 3.69E-05 | 0.59 | 10.14 | 2.70  | 37967.5  |
| AHQ-4-5, 3066               | R.GLFDEYGSK.K                                                           | 1016.08574 | 1 | 3.69E-05 | 0.59 | 2.74  | -     | 348.2    |







|                             |                                                                         |            |   |          |      |       |       |          |
|-----------------------------|-------------------------------------------------------------------------|------------|---|----------|------|-------|-------|----------|
| AHQ-4-7, 3414               | R.GDLGIEIPAEK.V                                                         | 1142.28420 | 1 | 5.29E-04 | 0.62 | 2.76  | -     | 504.5    |
| gi 19923231 ref NP_002860.2 | RAB6A, member RAS oncogene family; Oncogene RAB6; RAB6, member RAS onc  |            |   | 5.41E-04 | 0.83 | 10.15 | 6.70  | 23548.6  |
| AHQ-4-11, 2849              | R.VAAALPGMESTQDR.S                                                      | 1446.61192 | 2 | 5.41E-04 | 0.83 | 3.07  | -     | 593.8    |
| gi 4505941 ref NP_000929.1  | DNA directed RNA polymerase II polypeptide B; polymerase (RNA) II (DNA  |            |   | 5.42E-04 | 0.33 | 10.13 | 1.40  | 133895.7 |
| AHQ-4-11, 5161 - 5172       | K.FIDRGRKDRNLELAIKTR.I                                                  | 2037.35099 | 2 | 5.42E-04 | 0.33 | 2.68  | -     | 453.0    |
| gi 19913441 ref NP_002140.2 | hippocalcin-like 1; visinin-like protein 3; calcium-binding protein BD  |            |   | 5.46E-04 | 0.89 | 10.18 | 7.80  | 22313.1  |
| AHQ-4-11, 4161              | R.ENTEFTDHELEQEWYK.G                                                    | 1970.04095 | 2 | 5.46E-04 | 0.89 | 3.52  | -     | 947.1    |
| gi 27544939 ref NP_060932.2 | uncharacterized hematopoietic stem/progenitor cells protein MDS027 [Ho  |            |   | 5.68E-04 | 1.60 | 20.15 | 32.00 | 8744.9   |
| AHQ-4-14, 6017              | R.EYIEIITSSIK.K                                                         | 1296.49134 | 2 | 5.68E-04 | 0.78 | 2.83  | -     | 941.5    |
| AHQ-4-14-, 5031             | K.IADFLNSFDM*SCR.S                                                      | 1593.76350 | 2 | 7.74E-04 | 0.82 | 2.92  | -     | 801.7    |
| gi 28557683 ref NP_787068.1 | hypothetical protein FLJ38451 [Homo sapiens]                            |            |   | 5.87E-04 | 0.05 | 10.09 | 7.20  | 19531.9  |
| AHQ-4-9, 4920               | K.FFNQSSSLNHR.R                                                         | 1451.52853 | 1 | 5.87E-04 | 0.05 | 1.89  | -     | 258.2    |
| gi 7669501 ref NP_005552.2  | lysosomal-associated membrane protein 1 [Homo sapiens]                  |            |   | 5.93E-04 | 0.94 | 10.23 | 3.80  | 44772.8  |
| AHQ-4-4, 7198               | R.FFLQGIQLNTLIPDAR.D                                                    | 1847.14988 | 2 | 5.93E-04 | 0.94 | 4.52  | -     | 1002.8   |
| gi 28557709 ref NP_787082.1 | hypothetical protein LOC221823 [Homo sapiens]                           |            |   | 6.15E-04 | 0.92 | 10.21 | 5.30  | 34839.1  |
| AHQ-4-9, 4348 - 4352        | R.VYAILTHGIFSGPAISR.I                                                   | 1803.09710 | 2 | 6.15E-04 | 0.92 | 4.23  | -     | 703.7    |
| gi 22907039 ref NP_055323.2 | apolipoprotein B mRNA editing enzyme, catalytic polypeptide-like 3C [H  |            |   | 6.46E-04 | 0.59 | 10.15 | 7.40  | 22825.7  |
| AHQ-4-11, 4997 - 5061       | R.LYFYFQPCYQEGQLR.S                                                     | 1902.11778 | 2 | 6.46E-04 | 0.59 | 3.07  | -     | 431.6    |
| gi 4885263 ref NP_005252.1  | GTP binding protein overexpressed in skeletal muscle; GTP-binding prote |            |   | 6.67E-04 | 0.47 | 10.14 | 3.40  | 33943.3  |
| AHQ-4-13, 4145              | R.ASFKEASER.L                                                           | 1138.25565 | 2 | 6.67E-04 | 0.47 | 2.72  | -     | 502.3    |
| gi 20536114 ref XP_031223.2 | similar to Hypothetical protein KIAA1034 [Homo sapiens]                 |            |   | 6.85E-04 | 0.09 | 10.10 | 1.40  | 82555.0  |
| AHQ-4-12, 3515 - 3639       | R.YHVKHGHGKLE                                                           | 1247.47653 | 1 | 6.85E-04 | 0.09 | 1.92  | -     | 275.9    |
| gi 4759316 ref NP_004175.1  | tryptophanyl-tRNA synthetase; interferon-induced protein 53 [Homo sapie |            |   | 6.93E-04 | 0.54 | 10.13 | 3.40  | 53087.0  |
| AHQ-4-7, 5190               | K.ALIEVLQPLIAEHQAR.R                                                    | 1802.11065 | 2 | 6.93E-04 | 0.54 | 2.64  | -     | 395.3    |
| gi 4505705 ref NP_003759.1  | phosphoprotein enriched in astrocytes 15; Phosphoprotein enriched in as |            |   | 7.04E-04 | 0.88 | 10.19 | 13.10 | 15040.0  |
| AHQ-4-12, 6095              | K.LDKDNLSYIEHFEISR.R                                                    | 2093.32504 | 2 | 7.04E-04 | 0.88 | 3.84  | -     | 655.4    |
| gi 21361409 ref NP_036515.2 | osteoclast stimulating factor 1 [Homo sapiens]                          |            |   | 7.41E-04 | 0.68 | 10.16 | 11.50 | 24063.9  |
| AHQ-4-10, 4957              | R.TGLIPSNVYAEQAESIDNPLHEAAK.R                                           | 2668.89701 | 2 | 7.41E-04 | 0.68 | 3.27  | -     | 319.1    |
| gi 29732170 ref XP_291550.1 | similar to Heat shock protein HSP 90-alpha (HSP 86) [Homo sapiens] [MA  |            |   | 7.45E-04 | 0.96 | 10.24 | 12.70 | 13262.9  |
| AHQ-4-5, 3875               | K.HLEINPDHSIETLR.Q                                                      | 1787.99770 | 3 | 7.45E-04 | 0.96 | 4.71  | -     | 1839.6   |
| gi 22538387 ref NP_005742.4 | A kinase anchor protein 9 isoform 2; yotiao; A-kinase anchoring protei  |            |   | 7.70E-04 | 0.37 | 20.15 | 0.80  | 452984.5 |
| AHQ-4-10, 4740              | K.DNLITKQNLILEISK.L                                                     | 1871.16805 | 2 | 8.10E-04 | 0.18 | 2.61  | -     | 239.1    |
| AHQ-4-14-, 5053 - 5061      | R.GEEESATSDPFPKKIK.G                                                    | 1753.88851 | 2 | 7.70E-04 | 0.19 | 3.05  | -     | 317.8    |
| gi 4505301 ref NP_002463.1  | myosin, heavy polypeptide 8, skeletal muscle, perinatal [Homo sapiens]  |            |   | 7.75E-04 | 0.57 | 10.17 | 1.40  | 222660.8 |
| AHQ-4-5, 3591 - 3665        | K.AGLLGLLEEM*RDEKLAQIITRTQAVCR.G                                        | 3103.60765 | 3 | 7.75E-04 | 0.57 | 3.32  | -     | 360.1    |
| gi 6912240 ref NP_036227.1  | adaptor-related protein complex 3, mu 1 subunit; mu-adaptin 3A; AP-3 ad |            |   | 7.82E-04 | 0.61 | 10.16 | 5.50  | 46938.9  |
| AHQ-4-10, 4357              | K.GLVNLQSGAPKPEENPSLNIQFK.I                                             | 2481.78929 | 2 | 7.82E-04 | 0.61 | 3.23  | -     | 257.1    |
| gi 27479431 ref XP_050793.2 | similar to KIAA1393 protein [Homo sapiens]                              |            |   | 7.89E-04 | 0.26 | 10.12 | 1.60  | 58245.9  |
| AHQ-4-5, 4705               | -.M*VLWLWRP                                                             | 1133.43358 | 1 | 7.89E-04 | 0.26 | 1.87  | -     | 524.5    |
| gi 4758032 ref NP_004757.1  | coatomer protein complex, subunit beta 2 (beta prime); coatomer binding |            |   | 8.17E-04 | 0.67 | 10.15 | 2.10  | 102486.5 |
| AHQ-4-5, 6453               | K.AAESLADPTVENLFPGLKE                                                   | 2066.25322 | 2 | 8.17E-04 | 0.67 | 3.01  | -     | 416.4    |
| gi 7770075 ref NP_054702.1  | tachykinin 1 isoform alpha precursor; neurokinin A; neurokinin alpha; t |            |   | 8.18E-04 | 0.41 | 10.13 | 12.60 | 13035.8  |
| AHQ-4-1, 6245 - 6318        | K.MAYERSAM*QNYERRR.R                                                    | 1822.01952 | 2 | 8.18E-04 | 0.41 | 2.53  | -     | 433.2    |
| gi 4507795 ref NP_003340.1  | ubiquitin-conjugating enzyme E2 variant 1 isoform b; DNA-binding protei |            |   | 8.24E-04 | 0.77 | 10.16 | 4.10  | 25796.6  |
| AHQ-4-12, 3358              | K.YEAPPFVRF.F                                                           | 1076.22914 | 2 | 8.24E-04 | 0.77 | 3.18  | -     | 481.1    |
| gi 8922297 ref NP_060502.1  | LUC7-like; sarcoplasmic reticulum protein LUC7B1 [Homo sapiens]         |            |   | 8.27E-04 | 0.08 | 10.10 | 2.20  | 38405.1  |
| AHQ-4-9, 2935               | R.EKLDQLR.K                                                             | 902.03054  | 1 | 8.27E-04 | 0.08 | 2.02  | -     | 320.8    |
| gi 22129786 ref NP_059980.1 | gpp25L2 protein [Homo sapiens]                                          |            |   | 8.35E-04 | 0.64 | 10.20 | 5.10  | 25104.5  |
| AHQ-4-10, 2901              | R.QLVEQVIEQIK.E                                                         | 1342.52334 | 2 | 8.35E-04 | 0.64 | 3.16  | -     | 454.4    |
| gi 4505273 ref NP_002442.1  | 5'-methylthioadenosine phosphorylase [Homo sapiens]                     |            |   | 8.39E-04 | 0.91 | 10.17 | 6.40  | 31249.9  |
| AHQ-4-9, 5035               | K.IGIIGGTGLDDPPEILEGR.T                                                 | 1826.04101 | 2 | 8.39E-04 | 0.91 | 3.44  | -     | 1068.8   |
| gi 29725611 ref NP_066954.2 | regulatory subunit PR 53 of protein phosphatase 2A isoform b; phospho   |            |   | 8.40E-04 | 0.90 | 10.23 | 9.00  | 36775.0  |
| AHQ-4-8, 7143               | K.LDEEAENLVATVVPHTLAAAVPEVAVYLK.E                                       | 3063.49045 | 3 | 8.40E-04 | 0.90 | 4.63  | -     | 960.2    |
| gi 24119274 ref NP_443099.1 | voltage gated channel like 1; four repeat voltage-gated ion channel [H  |            |   | 8.51E-04 | 0.18 | 10.14 | 0.50  | 200329.3 |
| AHQ-4-14-, 3707             | K.FPNRPQMVK.I                                                           | 1117.34944 | 1 | 8.51E-04 | 0.18 | 2.09  | -     | 208.4    |
| gi 4502989 ref NP_001856.1  | cytochrome c oxidase subunit VIIa polypeptide 2 (liver) precursor; hepa |            |   | 8.58E-04 | 0.80 | 10.14 | 15.70 | 9395.9   |
| AHQ-4-14-, 5233             | K.LFQEDDEIPLYLKG                                                        | 1623.82758 | 2 | 8.58E-04 | 0.80 | 2.85  | -     | 1188.5   |
| gi 30147267 ref XP_304295.1 | hypothetical protein XP_304295 [Homo sapiens]                           |            |   | 8.58E-04 | 0.49 | 10.13 | 0.00  | 38558.9  |
| AHQ-4-13-, 5956 - 5957      | K.PLGWIGQMGEK.A                                                         | 1344.56442 | 2 | 8.58E-04 | 0.49 | 2.51  | -     | 561.2    |
| gi 21361290 ref NP_005596.2 | protein phosphatase 3 (formerly 2B), catalytic subunit, gamma isoform   |            |   | 8.67E-04 | 0.31 | 10.13 | 3.10  | 58129.1  |
| AHQ-4-12, 6537              | -.M*SGRRFHLSTDRVIK.A                                                    | 1921.21709 | 2 | 8.67E-04 | 0.31 | 2.56  | -     | 359.4    |
| gi 7656894 ref NP_055093.1  | heat shock protein (hsp110 family) [Homo sapiens]                       |            |   | 8.68E-04 | 0.88 | 10.16 | 1.70  | 94504.9  |
| AHQ-4-4, 5590 - 5591        | R.GCALQCALSPAFK.V                                                       | 1538.81393 | 2 | 8.68E-04 | 0.88 | 3.29  | -     | 1175.8   |
| gi 4506675 ref NP_002941.1  | ribophorin I [Homo sapiens]                                             |            |   | 8.70E-04 | 0.63 | 10.21 | 1.50  | 68569.0  |
| AHQ-4-1, 2301               | R.LAHLGVQVK.G                                                           | 965.17461  | 1 | 8.70E-04 | 0.63 | 2.41  | -     | 610.3    |
| gi 21361470 ref NP_056286.2 | DKFZP566O1646 protein [Homo sapiens]                                    |            |   | 8.85E-04 | 0.87 | 10.23 | 6.00  | 32129.7  |
| AHQ-4-13-, 6696 - 6701      | K.ILECVIKTKAKQELK.Q                                                     | 2029.51654 | 3 | 8.85E-04 | 0.87 | 4.70  | -     | 1175.1   |
| gi 30155210 ref XP_305433.1 | hypothetical protein XP_305433 [Homo sapiens]                           |            |   | 9.00E-04 | 0.13 | 10.14 | 6.80  | 31248.6  |
| AHQ-4-11, 6634 - 6692       | K.VGPPPTTYPNEASQFLTKR.N                                                 | 2104.35106 | 2 | 9.00E-04 | 0.13 | 2.81  | -     | 195.0    |
| gi 13699868 ref NP_005947.2 | methylenetetrahydrofolate dehydrogenase (NADP+ dependent), methenyltet  |            |   | 9.28E-04 | 0.05 | 10.12 | 0.90  | 101530.5 |
| AHQ-4-4, 4127 - 4139        | K.ATHIKLPR.T                                                            | 936.13649  | 1 | 9.28E-04 | 0.05 | 2.02  | -     | 89.8     |
| gi 4506677 ref NP_002942.1  | ribophorin II [Homo sapiens]                                            |            |   | 9.43E-04 | 0.74 | 10.21 | 2.90  | 69301.6  |
| AHQ-4-1, 6705 - 6771        | K.TSFTPVGDVFEINFM*NVK.F                                                 | 2062.33118 | 2 | 9.43E-04 | 0.74 | 3.38  | -     | 503.5    |
| gi 27481006 ref XP_117198.2 | hypothetical protein XP_117198 [Homo sapiens]                           |            |   | 9.60E-04 | 0.14 | 10.12 | 0.40  | 251738.6 |
| AHQ-4-3, 3219 - 3220        | K.EDELQEM*M*VK.D                                                        | 1284.43954 | 1 | 9.60E-04 | 0.14 | 2.42  | -     | 354.6    |
| gi 9055270 ref NP_061027.1  | low density lipoprotein-related protein 1B (deleted in tumors); low den |            |   | 9.71E-04 | 0.37 | 10.17 | 0.60  | 515514.6 |
| AHQ-4-2, 4479               | R.QPDVSKHLCLMNINGGCSHLCLLAPGK.T                                         | 2911.35097 | 3 | 9.71E-04 | 0.37 | 3.07  | -     | 311.2    |
| gi 4885057 ref NP_005152.1  | angiotensin II receptor-like 1; angiotensin receptor-like 1 [Homo sapie |            |   | 9.97E-04 | 0.16 | 10.11 | 2.10  | 42660.3  |
| AHQ-4-2, 4388               | R.KERIEGLR.K                                                            | 1001.16535 | 1 | 9.97E-04 | 0.16 | 2.06  | -     | 211.0    |

| Reference                 | Peptide                                            | MH+        | z | P (pro)  | Sf    | Score  | Coverage | MW      |
|---------------------------|----------------------------------------------------|------------|---|----------|-------|--------|----------|---------|
| File, Scan(s)             |                                                    |            |   | P (pep)  | Sf    | XC     |          | Sp      |
| gi4501885 ref NP_001092.1 | beta actin; beta cytoskeletal actin [Homo sapiens] |            |   | 1.00E-30 | 14.86 | 160.41 | 33.30    | 41736.5 |
| AHQ-5-14-, 6527           | R.CPEALFQPSFLGM*ESCGIHETTFNSIMK.C                  | 3251.67648 | 3 | 2.57E-04 | 0.65  | 3.65   | -        | 421.1   |
| AHQ-5-14-, 6346 - 6405    | R.CPEALFQPSFLGM*ESCGIHETTFNSIMK.C                  | 3251.67648 | 3 | 7.72E-05 | 0.87  | 4.48   | -        | 886.2   |
| AHQ-5-14-, 5934           | R.CPEALFQPSFLGM*ESCGIHETTFNSIMK.C                  | 3267.67588 | 3 | 2.30E-04 | 0.92  | 4.73   | -        | 601.5   |
| AHQ-5-13-, 6608           | R.CPEALFQPSFLGM*ESCGIHETTFNSIMK.C                  | 3251.67648 | 3 | 1.99E-08 | 0.66  | 3.71   | -        | 630.8   |
| AHQ-5-13-, 6527           | R.CPEALFQPSFLGM*ESCGIHETTFNSIMK.C                  | 3251.67648 | 3 | 3.09E-04 | 0.62  | 3.65   | -        | 391.7   |
| AHQ-5-13-, 6428 - 6491    | R.CPEALFQPSFLGM*ESCGIHETTFNSIMK.C                  | 3251.67648 | 3 | 7.01E-07 | 0.87  | 5.41   | -        | 517.1   |
| AHQ-5-13-, 6332 - 6344    | R.CPEALFQPSFLGM*ESCGIHETTFNSIMK.C                  | 3251.67648 | 3 | 4.81E-06 | 0.82  | 3.74   | -        | 442.6   |
| AHQ-5-13-, 6156           | R.CPEALFQPSFLGM*ESCGIHETTFNSIMK.C                  | 3267.67588 | 3 | 2.05E-09 | 0.86  | 4.15   | -        | 485.1   |
| AHQ-5-2, 7261 - 7294      | R.CPEALFQPSFLGM*ESCGIHETTFNSIMK.C                  | 3235.67708 | 3 | 5.13E-06 | 0.86  | 3.82   | -        | 536.3   |
| AHQ-5-13-, 6011 - 6071    | R.CPEALFQPSFLGM*ESCGIHETTFNSIMK.C                  | 3267.67588 | 3 | 6.29E-04 | 0.88  | 4.13   | -        | 669.2   |
| AHQ-5-13, 6404 - 6409     | R.CPEALFQPSFLGM*ESCGIHETTFNSIMK.C                  | 3251.67648 | 3 | 8.12E-09 | 0.93  | 4.87   | -        | 786.8   |
| AHQ-5-13, 6140 - 6168     | R.CPEALFQPSFLGM*ESCGIHETTFNSIMK.C                  | 3267.67588 | 3 | 3.13E-05 | 0.92  | 4.95   | -        | 560.9   |
| AHQ-5-8, 6417 - 6485      | R.CPEALFQPSFLGM*ESCGIHETTFNSIMK.C                  | 3251.67648 | 3 | 9.72E-06 | 0.57  | 3.55   | -        | 299.3   |
| AHQ-5-8, 6552 - 6620      | R.CPEALFQPSFLGM*ESCGIHETTFNSIMK.C                  | 3251.67648 | 3 | 1.20E-05 | 0.80  | 4.17   | -        | 626.8   |
| AHQ-5-3, 7238 - 7306      | R.CPEALFQPSFLGM*ESCGIHETTFNSIMK.C                  | 3235.67708 | 3 | 2.26E-05 | 0.77  | 3.77   | -        | 536.1   |
| AHQ-5-8, 6636 - 6702      | R.CPEALFQPSFLGM*ESCGIHETTFNSIMK.C                  | 3251.67648 | 3 | 9.79E-05 | 0.68  | 3.68   | -        | 482.0   |
| AHQ-5-10, 6328 - 6395     | R.CPEALFQPSFLGM*ESCGIHETTFNSIMK.C                  | 3235.67708 | 3 | 7.85E-09 | 0.94  | 5.19   | -        | 841.4   |
| AHQ-5-9, 6386             | R.CPEALFQPSFLGM*ESCGIHETTFNSIMK.C                  | 3235.67708 | 3 | 5.56E-08 | 0.94  | 5.15   | -        | 725.7   |
| AHQ-5-8, 6774 - 6846      | R.CPEALFQPSFLGM*ESCGIHETTFNSIMK.C                  | 3235.67708 | 3 | 9.22E-05 | 0.91  | 4.68   | -        | 757.7   |
| AHQ-5-4, 7256 - 7326      | R.CPEALFQPSFLGM*ESCGIHETTFNSIMK.C                  | 3235.67708 | 3 | 1.85E-04 | 0.93  | 4.60   | -        | 1003.8  |
| AHQ-5-8, 6882 - 6948      | R.CPEALFQPSFLGM*ESCGIHETTFNSIMK.C                  | 3235.67708 | 3 | 2.98E-06 | 0.95  | 5.44   | -        | 870.7   |
| AHQ-5-9, 6239 - 6318      | R.CPEALFQPSFLGM*ESCGIHETTFNSIMK.C                  | 3235.67708 | 3 | 8.93E-10 | 0.92  | 4.41   | -        | 990.4   |
| AHQ-5-7, 7119 - 7123      | R.CPEALFQPSFLGM*ESCGIHETTFNSIMK.C                  | 3235.67708 | 3 | 5.36E-07 | 0.93  | 4.99   | -        | 792.8   |
| AHQ-5-8, 6030             | R.CPEALFQPSFLGM*ESCGIHETTFNSIMK.C                  | 3267.67588 | 3 | 1.96E-04 | 0.83  | 3.79   | -        | 571.1   |
| AHQ-5-8, 7296 - 7365      | R.CPEALFQPSFLGM*ESCGIHETTFNSIMK.C                  | 3235.67708 | 3 | 3.38E-10 | 0.94  | 5.55   | -        | 613.3   |
| AHQ-5-5, 7159             | R.CPEALFQPSFLGM*ESCGIHETTFNSIMK.C                  | 3235.67708 | 3 | 2.68E-06 | 0.85  | 4.00   | -        | 574.6   |
| AHQ-5-5, 7249             | R.CPEALFQPSFLGM*ESCGIHETTFNSIMK.C                  | 3235.67708 | 3 | 1.37E-08 | 0.90  | 4.55   | -        | 704.6   |
| AHQ-5-8, 7012 - 7081      | R.CPEALFQPSFLGM*ESCGIHETTFNSIMK.C                  | 3235.67708 | 3 | 1.99E-09 | 0.95  | 5.35   | -        | 946.2   |
| AHQ-5-8, 7148 - 7225      | R.CPEALFQPSFLGM*ESCGIHETTFNSIMK.C                  | 3235.67708 | 3 | 2.62E-10 | 0.96  | 5.44   | -        | 1046.8  |
| AHQ-5-8, 7204 - 7273      | K.EKLYVALDFEQEMATAASSSSLEK.S                       | 2810.10410 | 2 | 3.08E-07 | 0.84  | 3.68   | -        | 661.2   |
| AHQ-5-8, 7161 - 7184      | K.EKLYVALDFEQEMATAASSSSLEK.S                       | 2810.10410 | 3 | 1.05E-07 | 0.89  | 4.63   | -        | 1033.7  |
| AHQ-5-8, 7260 - 7330      | K.EKLYVALDFEQEMATAASSSSLEK.S                       | 2810.10410 | 3 | 8.64E-10 | 0.95  | 5.63   | -        | 1173.1  |
| AHQ-5-8, 7054 - 7136      | K.EKLYVALDFEQEMATAASSSSLEK.S                       | 2810.10410 | 2 | 2.01E-06 | 0.91  | 4.53   | -        | 701.8   |
| AHQ-5-8, 7038 - 7109      | K.EKLYVALDFEQEMATAASSSSLEK.S                       | 2810.10410 | 3 | 1.99E-07 | 0.84  | 4.10   | -        | 730.2   |
| AHQ-5-8, 7290 - 7344      | K.EKLYVALDFEQEMATAASSSSLEK.S                       | 2810.10410 | 2 | 4.50E-07 | 0.93  | 5.09   | -        | 902.1   |
| AHQ-5-8, 6941 - 7008      | K.EKLYVALDFEQEMATAASSSSLEK.S                       | 2810.10410 | 3 | 2.86E-06 | 0.94  | 5.61   | -        | 1115.5  |
| AHQ-5-8, 6934 - 6998      | K.EKLYVALDFEQEMATAASSSSLEK.S                       | 2810.10410 | 2 | 2.46E-06 | 0.80  | 3.44   | -        | 661.7   |
| AHQ-5-8, 7401 - 7404      | K.EKLYVALDFEQEMATAASSSSLEK.S                       | 2810.10410 | 3 | 9.70E-06 | 0.93  | 5.37   | -        | 778.8   |
| AHQ-5-4, 7340 - 7345      | K.EKLYVALDFEQEMATAASSSSLEK.S                       | 2810.10410 | 3 | 6.95E-05 | 0.89  | 4.63   | -        | 1024.4  |
| AHQ-5-9, 6342 - 6402      | K.EKLYVALDFEQEMATAASSSSLEK.S                       | 2810.10410 | 2 | 4.76E-08 | 0.93  | 4.45   | -        | 946.6   |
| AHQ-5-10, 6384 - 6426     | K.EKLYVALDFEQEMATAASSSSLEK.S                       | 2810.10410 | 2 | 1.00E-05 | 0.81  | 3.14   | -        | 822.3   |
| AHQ-5-8, 6580             | K.EKLYVALDFEQEMATAASSSSLEK.S                       | 2810.10410 | 3 | 7.96E-05 | 0.81  | 3.76   | -        | 865.7   |
| AHQ-5-10, 6418 - 6420     | K.EKLYVALDFEQEMATAASSSSLEK.S                       | 2810.10410 | 3 | 2.16E-04 | 0.85  | 4.25   | -        | 839.9   |
| AHQ-5-8, 6541 - 6609      | K.EKLYVALDFEQEMATAASSSSLEK.S                       | 2810.10410 | 2 | 1.61E-04 | 0.62  | 3.13   | -        | 421.5   |
| AHQ-5-11, 6692            | K.EKLYVALDFEQEMATAASSSSLEK.S                       | 2810.10410 | 2 | 6.65E-05 | 0.87  | 3.37   | -        | 915.8   |
| AHQ-5-8, 7345 - 7416      | K.EKLYVALDFEQEMATAASSSSLEK.S                       | 2810.10410 | 2 | 2.09E-07 | 0.92  | 4.38   | -        | 791.7   |
| AHQ-5-8, 5388 - 5457      | K.EKLYVALDFEQEM*ATAASSSSLEK.S                      | 2826.10350 | 3 | 1.20E-07 | 0.86  | 3.70   | -        | 1203.1  |
| AHQ-5-8, 5242 - 5312      | K.EKLYVALDFEQEM*ATAASSSSLEK.S                      | 2826.10350 | 3 | 1.18E-04 | 0.85  | 4.04   | -        | 878.1   |
| AHQ-5-8, 6166 - 6252      | R.FRCPALFQPSFLGM*ESCGIHETTFNSIMK.C                 | 3555.03753 | 3 | 8.83E-04 | 0.84  | 4.76   | -        | 657.2   |
| AHQ-5-8, 7185 - 7258      | R.FRCPALFQPSFLGM*ESCGIHETTFNSIMK.C                 | 3539.03813 | 3 | 7.09E-10 | 0.98  | 6.50   | -        | 2081.7  |
| AHQ-5-8, 6824 - 6897      | R.FRCPALFQPSFLGM*ESCGIHETTFNSIMK.C                 | 3539.03813 | 3 | 1.33E-09 | 0.96  | 6.80   | -        | 845.4   |
| AHQ-5-8, 6692 - 6757      | R.FRCPALFQPSFLGM*ESCGIHETTFNSIMK.C                 | 3539.03813 | 3 | 2.24E-13 | 0.98  | 7.40   | -        | 1408.2  |
| AHQ-5-9, 5892 - 5959      | R.FRCPALFQPSFLGM*ESCGIHETTFNSIMK.C                 | 3555.03753 | 3 | 3.83E-06 | 0.85  | 4.38   | -        | 569.1   |
| AHQ-5-9, 6314             | R.FRCPALFQPSFLGM*ESCGIHETTFNSIMK.C                 | 3539.03813 | 3 | 4.26E-07 | 0.95  | 5.55   | -        | 1023.2  |
| AHQ-5-8, 6554 - 6629      | R.FRCPALFQPSFLGM*ESCGIHETTFNSIMK.C                 | 3539.03813 | 3 | 4.81E-04 | 0.96  | 5.23   | -        | 1514.4  |
| AHQ-5-8, 6320 - 6398      | R.FRCPALFQPSFLGM*ESCGIHETTFNSIMK.C                 | 3555.03753 | 3 | 4.63E-07 | 0.96  | 6.14   | -        | 864.7   |
| AHQ-5-8, 6960 - 7024      | R.FRCPALFQPSFLGM*ESCGIHETTFNSIMK.C                 | 3539.03813 | 3 | 1.53E-13 | 0.98  | 8.20   | -        | 2127.8  |
| AHQ-5-1, 2613             | R.GYSFTTTAER.E                                     | 1133.19273 | 2 | 1.33E-04 | 0.95  | 3.36   | -        | 1200.9  |
| AHQ-5-8, 2172 - 2240      | R.GYSFTTTAER.E                                     | 1133.19273 | 2 | 2.77E-05 | 0.89  | 2.71   | -        | 1123.8  |
| AHQ-5-13, 2711            | R.GYSFTTTAER.E                                     | 1133.19273 | 2 | 4.73E-04 | 0.88  | 2.72   | -        | 1096.2  |
| AHQ-5-12, 2448            | R.GYSFTTTAER.E                                     | 1133.19273 | 2 | 2.25E-04 | 0.92  | 3.16   | -        | 1009.8  |
| AHQ-5-4, 2412             | R.GYSFTTTAER.E                                     | 1133.19273 | 2 | 1.52E-05 | 0.83  | 2.87   | -        | 879.2   |
| AHQ-5-14-, 2423           | R.GYSFTTTAER.E                                     | 1133.19273 | 2 | 1.04E-04 | 0.91  | 3.06   | -        | 867.5   |
| AHQ-5-6, 2270             | R.GYSFTTTAER.E                                     | 1133.19273 | 2 | 1.66E-04 | 0.88  | 2.83   | -        | 983.4   |
| AHQ-5-2, 2397             | R.GYSFTTTAER.E                                     | 1133.19273 | 2 | 9.57E-06 | 0.94  | 3.21   | -        | 1196.8  |
| AHQ-5-3, 2449 - 2454      | R.GYSFTTTAER.E                                     | 1133.19273 | 2 | 8.28E-04 | 0.93  | 3.40   | -        | 1129.5  |
| AHQ-5-7, 2248             | R.GYSFTTTAER.E                                     | 1133.19273 | 2 | 4.94E-04 | 0.86  | 2.96   | -        | 843.1   |
| AHQ-5-13-, 4219 - 4279    | R.KDLYANTVLSGGTTM*YPGIADR.M                        | 2360.62916 | 3 | 4.70E-05 | 0.84  | 3.69   | -        | 566.3   |
| AHQ-5-8, 4348 - 4357      | R.KDLYANTVLSGGTTM*YPGIADR.M                        | 2344.62976 | 3 | 1.37E-04 | 0.93  | 4.88   | -        | 1302.0  |
| AHQ-5-10, 3874 - 3875     | R.KDLYANTVLSGGTTM*YPGIADR.M                        | 2360.62916 | 2 | 1.09E-04 | 0.95  | 4.43   | -        | 1206.1  |
| AHQ-5-10, 4242            | R.KDLYANTVLSGGTTM*YPGIADR.M                        | 2344.62976 | 2 | 4.52E-06 | 0.82  | 3.11   | -        | 564.0   |
| AHQ-5-8, 3825 - 3826      | R.KDLYANTVLSGGTTM*YPGIADR.M                        | 2360.62916 | 3 | 1.76E-06 | 0.97  | 6.33   | -        | 1220.7  |
| AHQ-5-14, 5712            | R.KDLYANTVLSGGTTM*YPGIADR.M                        | 2344.62976 | 2 | 2.96E-04 | 0.82  | 2.91   | -        | 706.2   |
| AHQ-5-13, 4781 - 4784     | R.KDLYANTVLSGGTTM*YPGIADR.M                        | 2344.62976 | 2 | 1.44E-06 | 0.96  | 4.72   | -        | 1293.4  |
| AHQ-5-14-, 4611 - 4661    | R.KDLYANTVLSGGTTM*YPGIADR.M                        | 2344.62976 | 2 | 1.66E-08 | 0.95  | 4.24   | -        | 1259.4  |
| AHQ-5-8, 4668 - 4669      | R.KDLYANTVLSGGTTM*YPGIADR.M                        | 2344.62976 | 2 | 3.45E-06 | 0.90  | 4.01   | -        | 1079.8  |
| AHQ-5-14, 5518 - 5576     | R.KDLYANTVLSGGTTM*YPGIADR.M                        | 2344.62976 | 2 | 4.20E-04 | 0.92  | 4.14   | -        | 827.5   |
| AHQ-5-9, 6398 - 6463      | K.LCYVALDFEQEMATAASSSSLEK.S                        | 2552.81665 | 2 | 1.13E-05 | 0.94  | 4.58   | -        | 1127.4  |
| AHQ-5-8, 7408             | K.LCYVALDFEQEMATAASSSSLEK.S                        | 2552.81665 | 2 | 7.48E-09 | 0.98  | 6.39   | -        | 2212.7  |
| AHQ-5-7, 5690             | R.TTGIVMDSGGVTHVPIYEGYALPHAIR.L                    | 3185.59928 | 3 | 3.59E-07 | 0.94  | 5.05   | -        | 1096.3  |
| AHQ-5-6, 5864 - 5905      | R.TTGIVMDSGGVTHVPIYEGYALPHAIR.L                    | 3185.59928 | 3 | 7.01E-06 | 0.90  | 4.58   | -        | 669.8   |
| AHQ-5-6, 5690             | R.TTGIVMDSGGVTHVPIYEGYALPHAIR.L                    | 3185.59928 | 3 | 3.40E-12 | 0.97  | 5.91   | -        | 1943.4  |
| AHQ-5-7, 5774             | R.TTGIVMDSGGVTHVPIYEGYALPHAIR.L                    | 3185.59928 | 3 | 7.32E-07 | 0.94  | 5.08   | -        | 1194.3  |
| AHQ-5-7, 5190             | R.TTGIVMDSGGVTHVPIYEGYALPHAIR.L                    | 3201.59868 | 3 | 1.78E-07 | 0.94  | 4.93   | -        | 1333.1  |
| AHQ-5-14-, 5615 - 5697    | R.TTGIVMDSGGVTHVPIYEGYALPHAIR.L                    | 3185.59928 | 3 | 2.22E-16 | 0.98  | 6.46   | -        | 2070.2  |
| AHQ-5-14-, 5439           | R.TTGIVMDSGGVTHVPIYEGYALPHAIR.L                    | 3201.59868 | 3 | 5.36E-06 | 0.97  | 6.17   | -        | 1682.3  |
| AHQ-5-5, 5919             | R.TTGIVMDSGGVTHVPIYEGYALPHAIR.L                    | 3185.59928 | 3 | 5.35E-11 | 0.97  | 6.00   | -        | 1768.7  |
| AHQ-5-5, 5717 - 5797      | R.TTGIVMDSGGVTHVPIYEGYALPHAIR.L                    | 3185.59928 | 3 | 3.42E-09 | 0.97  | 6.21   | -        | 1310.2  |
| AHQ-5-5, 5515             | R.TTGIVMDSGGVTHVPIYEGYALPHAIR.L                    | 3201.59868 | 3 | 2.95E-07 | 0.95  | 5.60   | -        | 1217.9  |
| AHQ-5-6, 5385 - 5388      | R.TTGIVMDSGGVTHVPIYEGYALPHAIR.L                    | 3201.59868 | 3 | 1.94E-06 | 0.95  | 5.70   | -        | 1003.9  |
| AHQ-5-14-, 5357           | R.TTGIVMDSGGVTHVPIYEGYALPHAIR.L                    | 3201.59868 | 3 | 7.20E-06 | 0.97  | 6.24   | -        | 1276.3  |
| AHQ-5-8, 4829 - 4900      | R.TTGIVMDSGGVTHVPIYEGYALPHAIR.L                    | 3201.59868 | 3 | 1.52E-08 | 0.96  | 5.67   | -        | 1423.2  |
| AHQ-5-9, 4643 - 4714      | R.TTGIVMDSGGVTHVPIYEGYALPHAIR.L                    | 3201.59868 | 3 | 2.57E-05 | 0.72  | 3.47   | -        | 578.6   |
| AHQ-5-9, 4788 - 4820      | R.TTGIVMDSGGVTHVPIYEGYALPHAIR.L                    | 3201.59868 | 3 | 3.14E-06 | 0.96  | 5.75   | -        | 1202.7  |
| AHQ-5-9, 4998 - 5078      | R.TTGIVMDSGGVTHVPIYEGYALPHAIR.L                    | 3185.59928 | 3 | 1.29E-07 | 0.97  | 6.08   | -        | 1663.8  |
| AHQ-5-9, 5128 - 5150      | R.TTGIVMDSGGVTHVPIYEGYALPHAIR.L                    | 3201.59868 | 3 | 3.38E-04 | 0.42  | 3.21   | -        | 431.6   |
| AHQ-5-9, 5134 - 5190      | R.TTGIVMDSGGVTHVPIYEGYALPHAIR.L                    | 3185.59928 | 3 | 1.67E-15 | 0.98  | 6.87   | -        | 1674.3  |
| AHQ-5-9, 5246 - 5323      | R.TTGIVMDSGGVTHV                                   |            |   |          |       |        |          |         |



|                            |                                                                         |            |   |          |        |         |       |          |
|----------------------------|-------------------------------------------------------------------------|------------|---|----------|--------|---------|-------|----------|
| AHQ-5-1, 6191 - 6200       | R.TTGIVMDSGGDVHTVPIYEGYALPHAILR.L                                       | 3185.59928 | 3 | 7.20E-07 | 0.96   | 5.96    | -     | 1390.3   |
| AHQ-5-8, 5072 - 5138       | R.TTGIVMDSGGDVHTVPIYEGYALPHAILR.L                                       | 3201.59868 | 3 | 9.28E-08 | 0.96   | 5.62    | -     | 1239.3   |
| AHQ-5-8, 5116 - 5194       | R.TTGIVMDSGGDVHTVPIYEGYALPHAILR.L                                       | 3185.59928 | 3 | 4.99E-11 | 0.96   | 5.91    | -     | 1290.8   |
| AHQ-5-10, 4786 - 4854      | R.TTGIVMDSGGDVHTVPIYEGYALPHAILR.L                                       | 3201.59868 | 3 | 1.39E-05 | 0.97   | 5.68    | -     | 1680.8   |
| AHQ-5-10, 4923 - 4992      | R.TTGIVMDSGGDVHTVPIYEGYALPHAILR.L                                       | 3201.59868 | 3 | 2.82E-08 | 0.96   | 5.53    | -     | 1709.6   |
| AHQ-5-10, 5135 - 5202      | R.TTGIVMDSGGDVHTVPIYEGYALPHAILR.L                                       | 3185.59928 | 3 | 1.28E-14 | 0.98   | 7.05    | -     | 1767.9   |
| AHQ-5-10, 5262 - 5323      | R.TTGIVMDSGGDVHTVPIYEGYALPHAILR.L                                       | 3185.59928 | 3 | 5.55E-16 | 0.98   | 7.14    | -     | 1722.1   |
| AHQ-5-10, 5386             | R.TTGIVMDSGGDVHTVPIYEGYALPHAILR.L                                       | 3185.59928 | 3 | 4.22E-14 | 0.97   | 6.25    | -     | 1802.0   |
| AHQ-5-10, 5519             | R.TTGIVMDSGGDVHTVPIYEGYALPHAILR.L                                       | 3185.59928 | 3 | 1.85E-04 | 0.88   | 3.96    | -     | 1067.0   |
| AHQ-5-4, 5646              | R.TTGIVMDSGGDVHTVPIYEGYALPHAILR.L                                       | 3201.59868 | 3 | 8.19E-07 | 0.95   | 5.37    | -     | 1182.4   |
| AHQ-5-13-, 5753 - 5760     | R.TTGIVMDSGGDVHTVPIYEGYALPHAILR.L                                       | 3185.59928 | 3 | 2.03E-11 | 0.98   | 7.05    | -     | 2086.6   |
| AHQ-5-3, 6195 - 6213       | R.TTGIVMDSGGDVHTVPIYEGYALPHAILR.L                                       | 3185.59928 | 3 | 5.55E-15 | 0.97   | 6.43    | -     | 1726.1   |
| AHQ-5-13-, 5657            | R.TTGIVMDSGGDVHTVPIYEGYALPHAILR.L                                       | 3185.59928 | 3 | 2.39E-07 | 0.97   | 5.51    | -     | 1691.8   |
| AHQ-5-11, 5363             | R.TTGIVMDSGGDVHTVPIYEGYALPHAILR.L                                       | 3201.59868 | 3 | 1.77E-06 | 0.92   | 4.85    | -     | 1239.8   |
| AHQ-5-11, 5538 - 5618      | R.TTGIVMDSGGDVHTVPIYEGYALPHAILR.L                                       | 3185.59928 | 3 | 5.60E-07 | 0.96   | 5.47    | -     | 1750.0   |
| AHQ-5-11, 5690             | R.TTGIVMDSGGDVHTVPIYEGYALPHAILR.L                                       | 3185.59928 | 3 | 3.23E-09 | 0.95   | 4.88    | -     | 1600.9   |
| AHQ-5-3, 6089 - 6125       | R.TTGIVMDSGGDVHTVPIYEGYALPHAILR.L                                       | 3185.59928 | 3 | 1.77E-11 | 0.97   | 5.80    | -     | 1665.0   |
| AHQ-5-8, 5753 - 5824       | R.TTGIVMDSGGDVHTVPIYEGYALPHAILR.L                                       | 3185.59928 | 3 | 1.94E-14 | 0.97   | 6.12    | -     | 1523.9   |
| AHQ-5-13-, 5455            | R.TTGIVMDSGGDVHTVPIYEGYALPHAILR.L                                       | 3201.59868 | 3 | 2.48E-08 | 0.94   | 4.96    | -     | 1201.2   |
| AHQ-5-12, 5438             | R.TTGIVMDSGGDVHTVPIYEGYALPHAILR.L                                       | 3201.59868 | 3 | 1.05E-05 | 0.95   | 5.29    | -     | 1283.4   |
| AHQ-5-12, 5522             | R.TTGIVMDSGGDVHTVPIYEGYALPHAILR.L                                       | 3201.59868 | 3 | 2.69E-06 | 0.89   | 4.31    | -     | 815.8    |
| AHQ-5-12, 5740 - 5813      | R.TTGIVMDSGGDVHTVPIYEGYALPHAILR.L                                       | 3185.59928 | 3 | 7.16E-08 | 0.97   | 5.80    | -     | 1526.3   |
| AHQ-5-8, 5616 - 5685       | R.TTGIVMDSGGDVHTVPIYEGYALPHAILR.L                                       | 3185.59928 | 3 | 1.67E-15 | 0.97   | 5.90    | -     | 1610.1   |
| AHQ-5-13-, 5371            | R.TTGIVMDSGGDVHTVPIYEGYALPHAILR.L                                       | 3201.59868 | 3 | 4.66E-05 | 0.93   | 5.00    | -     | 983.9    |
| AHQ-5-8, 5532 - 5596       | R.TTGIVMDSGGDVHTVPIYEGYALPHAILR.L                                       | 3185.59928 | 3 | 1.00E-30 | 0.98   | 6.63    | -     | 1739.1   |
| AHQ-5-13, 5438             | R.TTGIVMDSGGDVHTVPIYEGYALPHAILR.L                                       | 3201.59868 | 3 | 8.10E-09 | 0.95   | 5.36    | -     | 1145.1   |
| AHQ-5-13, 5713             | R.TTGIVMDSGGDVHTVPIYEGYALPHAILR.L                                       | 3185.59928 | 3 | 1.02E-10 | 0.96   | 6.21    | -     | 1266.5   |
| AHQ-5-13, 5810             | R.TTGIVMDSGGDVHTVPIYEGYALPHAILR.L                                       | 3185.59928 | 3 | 8.76E-06 | 0.90   | 4.48    | -     | 676.6    |
| AHQ-5-3, 5675 - 5746       | R.TTGIVMDSGGDVHTVPIYEGYALPHAILR.L                                       | 3201.59868 | 3 | 4.66E-05 | 0.96   | 5.96    | -     | 1164.7   |
| AHQ-5-8, 5260 - 5328       | R.TTGIVMDSGGDVHTVPIYEGYALPHAILR.L                                       | 3185.59928 | 3 | 1.25E-11 | 0.98   | 6.92    | -     | 1830.1   |
| AHQ-5-8, 5425 - 5458       | R.TTGIVMDSGGDVHTVPIYEGYALPHAILR.L                                       | 3201.59868 | 3 | 1.85E-04 | 0.90   | 4.50    | -     | 830.1    |
| AHQ-5-8, 5400 - 5468       | R.TTGIVMDSGGDVHTVPIYEGYALPHAILR.L                                       | 3185.59928 | 3 | 3.39E-11 | 0.97   | 6.11    | -     | 1611.2   |
| AHQ-5-14, 6040 - 6110      | R.TTGIVMDSGGDVHTVPIYEGYALPHAILR.L                                       | 3201.59868 | 3 | 7.27E-08 | 0.96   | 5.90    | -     | 1123.7   |
| AHQ-5-14, 6292 - 6304      | R.TTGIVMDSGGDVHTVPIYEGYALPHAILR.L                                       | 3185.59928 | 3 | 5.61E-05 | 0.96   | 5.69    | -     | 1321.8   |
| AHQ-5-14, 6374             | R.TTGIVMDSGGDVHTVPIYEGYALPHAILR.L                                       | 3185.59928 | 3 | 7.09E-05 | 0.80   | 3.76    | -     | 772.0    |
| AHQ-5-7, 5480 - 5484       | R.TTGIVMDSGGDVHTVPIYEGYALPHAILR.L                                       | 3185.59928 | 3 | 1.05E-12 | 0.97   | 5.96    | -     | 1498.2   |
| AHQ-5-3, 3927 - 3998       | R.VAPEEHVLLTEAPLNPK.A                                                   | 1955.24351 | 2 | 1.43E-04 | 0.90   | 4.41    | -     | 625.4    |
| AHQ-5-13, 3996 - 3997      | R.VAPEEHVLLTEAPLNPK.A                                                   | 1955.24351 | 2 | 2.77E-04 | 0.87   | 4.27    | -     | 570.8    |
| AHQ-5-12, 3740 - 3808      | R.VAPEEHVLLTEAPLNPK.A                                                   | 1955.24351 | 2 | 4.25E-05 | 0.93   | 4.80    | -     | 990.0    |
| AHQ-5-11, 3686             | R.VAPEEHVLLTEAPLNPK.A                                                   | 1955.24351 | 2 | 3.18E-04 | 0.94   | 4.67    | -     | 1002.9   |
| AHQ-5-8, 3592              | R.VAPEEHVLLTEAPLNPK.A                                                   | 1955.24351 | 2 | 2.49E-04 | 0.83   | 3.55    | -     | 720.7    |
| AHQ-5-8, 3452 - 3525       | R.VAPEEHVLLTEAPLNPK.A                                                   | 1955.24351 | 2 | 8.07E-06 | 0.86   | 3.90    | -     | 569.9    |
| AHQ-5-2, 3866 - 3931       | R.VAPEEHVLLTEAPLNPK.A                                                   | 1955.24351 | 3 | 9.42E-04 | 0.68   | 3.29    | -     | 762.0    |
| AHQ-5-8, 3340 - 3406       | R.VAPEEHVLLTEAPLNPK.A                                                   | 1955.24351 | 3 | 3.02E-06 | 0.73   | 4.17    | -     | 491.0    |
| AHQ-5-10, 3471 - 3526      | R.VAPEEHVLLTEAPLNPK.A                                                   | 1955.24351 | 2 | 1.89E-05 | 0.92   | 4.70    | -     | 853.9    |
| AHQ-5-8, 3322 - 3388       | R.VAPEEHVLLTEAPLNPK.A                                                   | 1955.24351 | 2 | 2.90E-04 | 0.93   | 4.85    | -     | 783.5    |
| AHQ-5-8, 3224 - 3273       | R.VAPEEHVLLTEAPLNPK.A                                                   | 1955.24351 | 3 | 2.05E-04 | 0.80   | 4.41    | -     | 754.1    |
| AHQ-5-8, 3096 - 3142       | R.VAPEEHVLLTEAPLNPK.A                                                   | 1955.24351 | 2 | 1.90E-06 | 0.89   | 4.27    | -     | 730.7    |
| AHQ-5-9, 3330              | R.VAPEEHVLLTEAPLNPK.A                                                   | 1955.24351 | 2 | 6.73E-07 | 0.90   | 4.30    | -     | 725.6    |
| AHQ-5-9, 3214 - 3274       | R.VAPEEHVLLTEAPLNPK.A                                                   | 1955.24351 | 2 | 2.36E-05 | 0.96   | 5.51    | -     | 1019.3   |
| AHQ-5-8, 3033 - 3061       | R.VAPEEHVLLTEAPLNPK.A                                                   | 1955.24351 | 3 | 8.09E-04 | 0.51   | 3.38    | -     | 453.6    |
| AHQ-5-6, 3569              | R.VAPEEHVLLTEAPLNPK.A                                                   | 1955.24351 | 2 | 2.76E-05 | 0.86   | 4.03    | -     | 591.1    |
| AHQ-5-1, 4081              | R.VAPEEHVLLTEAPLNPK.A                                                   | 1955.24351 | 2 | 2.25E-04 | 0.82   | 4.29    | -     | 386.3    |
| AHQ-5-1, 4033 - 4099       | R.VAPEEHVLLTEAPLNPK.A                                                   | 1955.24351 | 2 | 2.85E-05 | 0.90   | 3.83    | -     | 880.6    |
| AHQ-5-13-, 3923 - 3949     | R.VAPEEHVLLTEAPLNPK.A                                                   | 1955.24351 | 2 | 2.43E-06 | 0.89   | 4.18    | -     | 755.0    |
| gi4504517 ref NP_001531.1  | heat shock 27kDa protein 1; heat shock 27kD protein 1 [Homo sapiens] [M |            |   | 1.00E-30 | 5.73   | 70.37   | 43.90 | 2272.3   |
| AHQ-5-11, 2159             | K.DGVVEITGK.H                                                           | 918.02674  | 1 | 3.96E-04 | 0.11   | 1.82    | -     | 321.1    |
| AHQ-5-14, 5650             | K.LATQSNITIPVTFESR.A                                                    | 1907.11412 | 2 | 2.30E-04 | 0.49   | 2.82    | -     | 294.7    |
| AHQ-5-10, 4480             | K.LATQSNITIPVTFESR.A                                                    | 1907.11412 | 2 | 7.43E-07 | 0.67   | 3.62    | -     | 285.8    |
| AHQ-5-13, 4944             | K.LATQSNITIPVTFESR.A                                                    | 1907.11412 | 2 | 1.40E-04 | 0.72   | 3.27    | -     | 417.6    |
| AHQ-5-11, 4782 - 4799      | K.LATQSNITIPVTFESR.A                                                    | 1907.11412 | 2 | 6.51E-10 | 0.92   | 4.70    | -     | 403.0    |
| AHQ-5-13-, 4785 - 4857     | K.LATQSNITIPVTFESR.A                                                    | 1907.11412 | 2 | 6.66E-10 | 0.87   | 3.89    | -     | 385.5    |
| AHQ-5-11, 4654 - 4675      | K.LATQSNITIPVTFESR.A                                                    | 1907.11412 | 2 | 3.84E-06 | 0.53   | 2.80    | -     | 239.1    |
| AHQ-5-10, 4187             | R.LFDQAFGLPLR.L                                                         | 1164.33793 | 2 | 3.56E-05 | 0.96   | 4.15    | -     | 1436.0   |
| AHQ-5-11, 4496             | R.LFDQAFGLPLR.L                                                         | 1164.33793 | 2 | 6.44E-07 | 0.96   | 4.47    | -     | 1518.9   |
| AHQ-5-11, 6504 - 6512      | R.LPEEWSQWLGGSSWPYGYR.P                                                 | 2235.44173 | 2 | 6.38E-07 | 0.95   | 4.64    | -     | 1109.3   |
| AHQ-5-10, 6231             | R.LPEEWSQWLGGSSWPYGYR.P                                                 | 2235.44173 | 2 | 3.06E-08 | 0.95   | 4.84    | -     | 1074.9   |
| AHQ-5-10, 6430             | R.LPEEWSQWLGGSSWPYGYRPLPPAAIESPAVAAPAYSRA                               | 4095.56787 | 3 | 3.33E-15 | 0.98   | 7.34    | -     | 1369.2   |
| AHQ-5-11, 6706             | R.LPEEWSQWLGGSSWPYGYRPLPPAAIESPAVAAPAYSRA                               | 4095.56787 | 3 | 1.00E-30 | 0.97   | 6.55    | -     | 1472.2   |
| AHQ-5-11, 4036             | R.PLPPAAIESPAVAAPAYSRA                                                  | 1879.14874 | 2 | 5.48E-09 | 0.84   | 3.22    | -     | 469.7    |
| AHQ-5-13, 4677             | R.VSLDVFHFADELTVK.T                                                     | 1784.99058 | 2 | 2.97E-07 | 0.93   | 4.69    | -     | 905.3    |
| AHQ-5-11, 4700             | R.VSLDVFHFADELTVK.T                                                     | 1784.99058 | 2 | 1.21E-08 | 0.93   | 4.27    | -     | 1090.6   |
| AHQ-5-11, 4520 - 4546      | R.VSLDVFHFADELTVK.T                                                     | 1784.99058 | 2 | 3.63E-10 | 0.95   | 4.54    | -     | 1158.7   |
| AHQ-5-14, 5388 - 5450      | R.VSLDVFHFADELTVK.T                                                     | 1784.99058 | 2 | 1.40E-08 | 0.96   | 5.25    | -     | 1247.7   |
| AHQ-5-10, 4346             | R.VSLDVFHFADELTVK.T                                                     | 1784.99058 | 2 | 1.50E-04 | 0.75   | 3.10    | -     | 535.3    |
| AHQ-5-10, 4190 - 4192      | R.VSLDVFHFADELTVK.T                                                     | 1784.99058 | 2 | 9.61E-08 | 0.92   | 4.26    | -     | 837.3    |
| AHQ-5-13-, 4845            | R.VSLDVFHFADELTVK.T                                                     | 1784.99058 | 2 | 1.26E-10 | 0.97   | 5.21    | -     | 1807.0   |
| gi4504345 ref NP_000508.1  | alpha 2 globin [Homo sapiens]                                           |            |   | 1.00E-30 | 4.78   | 50.35   | 50.70 | 15257.4  |
| AHQ-5-13-, 4223            | K.FLAVSVTLTSK.Y                                                         | 1253.46970 | 2 | 3.11E-07 | 0.91   | 3.35    | -     | 1019.8   |
| AHQ-5-13, 4085 - 4092      | K.TYFPHFDLSHGSAQVK.G                                                    | 1835.01138 | 2 | 8.46E-09 | 0.96   | 4.60    | -     | 1133.7   |
| AHQ-5-13, 4097 - 4109      | K.TYFPHFDLSHGSAQVK.G                                                    | 1835.01138 | 3 | 4.10E-08 | 0.81   | 3.41    | -     | 595.3    |
| AHQ-5-13-, 4012            | K.TYFPHFDLSHGSAQVK.G                                                    | 1835.01138 | 2 | 2.88E-09 | 0.91   | 3.90    | -     | 798.5    |
| AHQ-5-14, 4788             | K.TYFPHFDLSHGSAQVK.G                                                    | 1835.01138 | 2 | 6.55E-04 | 0.88   | 3.41    | -     | 983.1    |
| AHQ-5-14-, 3865 - 3866     | K.TYFPHFDLSHGSAQVK.G                                                    | 1835.01138 | 3 | 2.71E-09 | 0.84   | 3.69    | -     | 653.9    |
| AHQ-5-14-, 3863 - 3877     | K.TYFPHFDLSHGSAQVK.G                                                    | 1835.01138 | 2 | 4.20E-10 | 0.95   | 4.45    | -     | 992.3    |
| AHQ-5-14-, 5951 - 5999     | K.VADALTNVAHVDDMPNALSALSDLHAHK.L                                        | 2998.32055 | 3 | 4.11E-13 | 0.96   | 6.18    | -     | 1240.0   |
| AHQ-5-14-, 6202 - 6283     | K.VADALTNVAHVDDMPNALSALSDLHAHK.L                                        | 2998.32055 | 3 | 1.00E-30 | 0.98   | 6.94    | -     | 2108.3   |
| AHQ-5-13-, 6317            | K.VADALTNVAHVDDMPNALSALSDLHAHK.L                                        | 2998.32055 | 3 | 9.24E-08 | 0.97   | 6.02    | -     | 1453.4   |
| AHQ-5-14-, 5490            | K.VADALTNVAHVDDMPNALSALSDLHAHK.L                                        | 3014.31995 | 3 | 7.22E-07 | 0.97   | 6.24    | -     | 1525.4   |
| AHQ-5-14, 6138 - 6200      | K.VADALTNVAHVDDMPNALSALSDLHAHK.L                                        | 3014.31995 | 3 | 2.47E-05 | 0.97   | 5.83    | -     | 1600.4   |
| AHQ-5-14-, 2478            | K.VGAHAGEYGAELER.M                                                      | 1530.62397 | 2 | 5.32E-10 | 0.97   | 4.42    | -     | 2077.1   |
| AHQ-5-13-, 2560            | K.VGAHAGEYGAELER.M                                                      | 1530.62397 | 3 | 2.17E-04 | 0.96   | 5.45    | -     | 1945.9   |
| AHQ-5-13-, 2559 - 2561     | K.VGAHAGEYGAELER.M                                                      | 1530.62397 | 2 | 3.97E-12 | 0.97   | 4.14    | -     | 1853.5   |
| AHQ-5-14, 3253             | K.VGAHAGEYGAELER.M                                                      | 1530.62397 | 2 | 1.27E-04 | 0.89   | 3.16    | -     | 989.2    |
| AHQ-5-13, 2701             | K.VGAHAGEYGAELER.M                                                      | 1530.62397 | 2 | 2.00E-11 | 0.97   | 4.46    | -     | 1896.8   |
| AHQ-5-14-, 2483            | K.VGAHAGEYGAELER.M                                                      | 1530.62397 | 3 | 6.30E-04 | 0.98   | 5.50    | -     | 2819.1   |
| gi4885387 ref NP_005318.1  | L-3-hydroxyacyl-Coenzyme A dehydrogenase, short chain; L-3-hydroxyacyl- |            |   | 2.22E-16 | 0.95   | 10.28   | 9.60  | 34286.3  |
| AHQ-5-12, 7156 - 7158      | K.TLSTIATSDAASVHSTDLVVEAIVENLK.V                                        | 3086.43759 | 3 | 5.10E-08 | 0.94   | 4.90    | -     | 1226.9   |
| AHQ-5-9, 6598 - 6599       | K.TLSTIATSDAASVHSTDLVVEAIVENLK.V                                        | 3086.43759 | 3 | 2.22E-16 | 0.95   | 5.60    | -     | 1038.5   |
| gi16753233 ref NP_006280.2 | talin 1 [Homo sapiens]                                                  |            |   | 5.55E-16 | 114.11 | 1300.40 | 56.20 | 269665.3 |
| AHQ-5-1, 3239              | K.AAAFEQEENETVVVK.E                                                     | 1664.79496 | 2 | 2.13E-04 | 0.85   | 3.81    | -     | 854.0    |
| AHQ-5-2, 3410              | K.AAAFEQEENETVVVK.E                                                     | 1664.79496 | 2 | 2.17E-04 | 0.95   | 4.27    | -     | 1429.6   |
| AHQ-5-2, 3158              | K.AAAFEQEENETVVVK.E                                                     | 1664.79496 | 2 | 1.97E-06 | 0.93   | 4.27    | -     | 1280.7   |
| AHQ-5-4, 3338 - 3350       | K.AAAFEQEENETVVVK.E                                                     | 1664.79496 | 2 | 2.69E-07 | 0.95   | 4.68    | -     | 1236.3   |
| AHQ-5-3, 3211              | K.AAAFEQEENETVVVK.E                                                     | 1664.79496 | 2 | 8.37E-04 | 0.91   | 4.26    | -     | 853.2    |
| AHQ-5-5, 2929              | R.AAMEPIVISA.K                                                          | 1130.38320 | 1 | 2.40E-04 | 0.15   | 1.87    | -     | 488.8    |
| AHQ-5-2, 2430              | R.AAMEPIVISA.K                                                          | 1146.38260 | 1 | 1.73E-04 | 0.49   | 2.68    | -     | 203.3    |

|                      |                                     |            |   |          |      |      |   |        |
|----------------------|-------------------------------------|------------|---|----------|------|------|---|--------|
| AHQ-5-2, 2433        | R.AAM*EPIVISAQ.T                    | 1146.38260 | 2 | 3.83E-06 | 0.75 | 2.79 | - | 589.8  |
| AHQ-5-4, 3120 - 3145 | R.AAMEPIVISAQ.T                     | 1130.38320 | 2 | 1.42E-06 | 0.80 | 2.79 | - | 642.0  |
| AHQ-5-4, 2460 - 2465 | R.AAM*EPIVISAQ.T                    | 1146.38260 | 2 | 9.73E-06 | 0.74 | 2.65 | - | 864.8  |
| AHQ-5-1, 3315        | R.AAMEPIVISAQ.T                     | 1130.38320 | 2 | 1.44E-05 | 0.74 | 2.54 | - | 735.1  |
| AHQ-5-3, 2489 - 2495 | R.AAM*EPIVISAQ.T                    | 1146.38260 | 2 | 1.40E-07 | 0.83 | 2.61 | - | 946.9  |
| AHQ-5-3, 2486        | R.AAM*EPIVISAQ.T                    | 1146.38260 | 1 | 3.88E-04 | 0.69 | 2.87 | - | 286.7  |
| AHQ-5-6, 2920        | R.AAMEPIVISAQ.T                     | 1130.38320 | 1 | 1.90E-04 | 0.19 | 2.11 | - | 544.6  |
| AHQ-5-3, 3149 - 3150 | R.AAMEPIVISAQ.T                     | 1130.38320 | 2 | 1.08E-05 | 0.77 | 2.91 | - | 484.9  |
| AHQ-5-4, 1833 - 1838 | K.ADAEGESDLENSR.K                   | 1393.35296 | 2 | 1.65E-04 | 0.87 | 3.07 | - | 998.1  |
| AHQ-5-5, 1718        | K.ADAEGESDLENSR.K                   | 1393.35296 | 2 | 1.18E-05 | 0.86 | 2.71 | - | 1065.6 |
| AHQ-5-2, 1830        | K.ADAEGESDLENSR.K                   | 1393.35296 | 2 | 3.85E-06 | 0.93 | 3.60 | - | 1191.3 |
| AHQ-5-5, 2458        | K.AGALQCSPPSDAYTK.K                 | 1470.58689 | 1 | 4.64E-09 | 0.79 | 3.54 | - | 510.2  |
| AHQ-5-3, 2591        | K.AGALQCSPPSDAYTK.K                 | 1470.58689 | 1 | 5.41E-08 | 0.83 | 3.43 | - | 682.8  |
| AHQ-5-2, 2525        | K.AGALQCSPPSDAYTK.K                 | 1470.58689 | 2 | 5.64E-04 | 0.94 | 3.96 | - | 1021.5 |
| AHQ-5-2, 2533        | K.AGALQCSPPSDAYTK.K                 | 1470.58689 | 1 | 6.15E-07 | 0.89 | 3.95 | - | 748.3  |
| AHQ-5-1, 2720        | K.AGALQCSPPSDAYTK.K                 | 1470.58689 | 2 | 9.87E-04 | 0.89 | 3.60 | - | 756.5  |
| AHQ-5-4, 2545 - 2550 | K.AGALQCSPPSDAYTK.K                 | 1470.58689 | 2 | 2.28E-05 | 0.91 | 3.98 | - | 848.1  |
| AHQ-5-4, 2564        | K.AGALQCSPPSDAYTK.K                 | 1470.58689 | 1 | 1.61E-06 | 0.79 | 3.04 | - | 684.6  |
| AHQ-5-2, 2523        | K.AGALQCSPPSDAYTK.K                 | 1470.58689 | 1 | 3.53E-04 | 0.40 | 2.46 | - | 507.2  |
| AHQ-5-3, 2301        | K.AGALQCSPPSDAYTK.K.E               | 1598.75981 | 2 | 6.55E-04 | 0.79 | 3.15 | - | 701.6  |
| AHQ-5-8, 5830 - 5848 | K.AGFLDLKDFLPK.E                    | 1364.61374 | 2 | 3.49E-04 | 0.90 | 3.53 | - | 1027.4 |
| AHQ-5-1, 4204        | K.AIAVTQEMVTK.S                     | 1290.55498 | 2 | 9.13E-09 | 0.94 | 4.18 | - | 1214.6 |
| AHQ-5-3, 4145        | K.AIAVTQEMVTK.S                     | 1290.55498 | 2 | 1.50E-05 | 0.95 | 4.27 | - | 1253.4 |
| AHQ-5-3, 4025        | K.AIAVTQEMVTK.S                     | 1290.55498 | 2 | 1.91E-04 | 0.95 | 4.36 | - | 1113.2 |
| AHQ-5-4, 3968 - 3980 | K.AIAVTQEMVTK.S                     | 1290.55498 | 2 | 2.69E-08 | 0.96 | 4.85 | - | 1131.8 |
| AHQ-5-2, 2406        | K.ALDGAFTEENR.A                     | 1223.27427 | 2 | 2.17E-06 | 0.94 | 3.64 | - | 1498.4 |
| AHQ-5-4, 2414        | K.ALDGAFTEENR.A                     | 1223.27427 | 2 | 5.30E-07 | 0.90 | 3.10 | - | 1312.5 |
| AHQ-5-3, 2443 - 2450 | K.ALDGAFTEENR.A                     | 1223.27427 | 2 | 5.14E-07 | 0.95 | 3.80 | - | 1554.4 |
| AHQ-5-1, 2729        | K.ALDGAFTEENR.A                     | 1223.27427 | 2 | 5.80E-05 | 0.97 | 4.39 | - | 1816.0 |
| AHQ-5-2, 2522 - 2546 | K.ALDGAFTEENR.A                     | 1223.27427 | 2 | 1.13E-04 | 0.96 | 4.27 | - | 1651.3 |
| AHQ-5-7, 3555        | K.ALDYYMLR.N                        | 1045.23686 | 2 | 4.21E-06 | 0.94 | 3.29 | - | 954.4  |
| AHQ-5-13-, 3947      | K.ALDYYMLR.N                        | 1045.23686 | 2 | 1.40E-04 | 0.93 | 2.86 | - | 1041.2 |
| AHQ-5-13, 3433       | K.ALDYYM*LR.N                       | 1061.23626 | 2 | 1.91E-05 | 0.91 | 3.14 | - | 890.6  |
| AHQ-5-7, 2944        | K.ALDYYM*LR.N                       | 1061.23626 | 2 | 6.52E-05 | 0.90 | 2.68 | - | 1001.1 |
| AHQ-5-13, 4049       | K.ALDYYMLR.N                        | 1045.23686 | 2 | 7.97E-07 | 0.93 | 3.57 | - | 761.6  |
| AHQ-5-2, 1743 - 1782 | R.ALEATTEHIR.Q                      | 1141.25953 | 2 | 6.35E-07 | 0.90 | 3.35 | - | 1219.5 |
| AHQ-5-5, 1634 - 1655 | R.ALEATTEHIR.Q                      | 1141.25953 | 1 | 7.68E-05 | 0.20 | 2.02 | - | 235.3  |
| AHQ-5-5, 1631        | R.ALEATTEHIR.Q                      | 1141.25953 | 2 | 3.04E-04 | 0.86 | 2.87 | - | 1206.9 |
| AHQ-5-4, 1786 - 1849 | R.ALEATTEHIR.Q                      | 1141.25953 | 2 | 1.21E-04 | 0.85 | 3.06 | - | 1025.9 |
| AHQ-5-3, 3445        | K.ALGDILISATK.A                     | 989.14811  | 2 | 4.91E-06 | 0.94 | 3.65 | - | 909.1  |
| AHQ-5-5, 3245        | K.ALGDILISATK.A                     | 989.14811  | 2 | 2.44E-06 | 0.94 | 3.94 | - | 900.7  |
| AHQ-5-4, 3408 - 3478 | K.ALGDILISATK.A                     | 989.14811  | 2 | 1.58E-04 | 0.94 | 3.95 | - | 864.9  |
| AHQ-5-2, 3362 - 3439 | K.ALGDILISATK.A                     | 989.14811  | 2 | 9.93E-06 | 0.92 | 3.83 | - | 753.3  |
| AHQ-5-6, 3197 - 3213 | K.ALGDILISATK.A                     | 989.14811  | 2 | 9.29E-05 | 0.93 | 3.59 | - | 842.3  |
| AHQ-5-3, 3442        | K.ALGDILISATK.A                     | 989.14811  | 1 | 4.89E-05 | 0.52 | 2.40 | - | 578.8  |
| AHQ-5-1, 3532        | K.ALGDILISATK.A                     | 989.14811  | 2 | 3.77E-06 | 0.94 | 3.81 | - | 907.6  |
| AHQ-5-5, 2426        | K.ALSTDPAAPNLK.S                    | 1198.35099 | 2 | 2.24E-07 | 0.67 | 2.88 | - | 585.6  |
| AHQ-5-2, 2489        | K.ALSTDPAAPNLK.S                    | 1198.35099 | 2 | 1.03E-07 | 0.84 | 3.05 | - | 803.6  |
| AHQ-5-4, 2538 - 2573 | K.ALSTDPAAPNLK.S                    | 1198.35099 | 2 | 2.28E-06 | 0.57 | 2.84 | - | 658.1  |
| AHQ-5-3, 2559        | K.ALSTDPAAPNLK.S                    | 1198.35099 | 2 | 8.69E-04 | 0.82 | 3.05 | - | 664.4  |
| AHQ-5-1, 2716        | K.ALSTDPAAPNLK.S                    | 1198.35099 | 2 | 2.34E-05 | 0.74 | 2.83 | - | 583.7  |
| AHQ-5-5, 2427 - 2429 | K.ALSTDPAAPNLK.S                    | 1198.35099 | 1 | 2.94E-06 | 0.06 | 1.98 | - | 239.2  |
| AHQ-5-2, 2498        | K.ALSTDPAAPNLK.S                    | 1198.35099 | 1 | 9.74E-06 | 0.18 | 2.19 | - | 347.7  |
| AHQ-5-3, 3570        | K.ALSTDPAAPNLKSQLAAAAA.R            | 1967.21592 | 2 | 3.58E-04 | 0.59 | 2.79 | - | 339.8  |
| AHQ-5-2, 6809 - 6886 | R.ANOAIQMACQSLGEPGCTQAQVLSAATIVAK.H | 3220.64522 | 3 | 3.27E-06 | 0.95 | 5.54 | - | 982.8  |
| AHQ-5-2, 5713        | K.APGQLECEATAIALNSCLR.D             | 2077.32566 | 2 | 1.01E-10 | 0.97 | 5.45 | - | 1655.8 |
| AHQ-5-1, 6423        | K.APGQLECEATAIALNSCLR.D             | 2077.32566 | 2 | 8.61E-06 | 0.97 | 5.14 | - | 1218.1 |
| AHQ-5-2, 6387        | K.APGQLECEATAIALNSCLR.D             | 2077.32566 | 2 | 8.42E-06 | 0.97 | 5.28 | - | 1275.7 |
| AHQ-5-3, 5749        | K.APGQLECEATAIALNSCLR.D             | 2077.32566 | 2 | 2.16E-08 | 0.94 | 4.38 | - | 1026.5 |
| AHQ-5-2, 6699        | K.APGQLECEATAIALNSCLR.D             | 2077.32566 | 2 | 1.78E-11 | 0.94 | 4.29 | - | 1003.0 |
| AHQ-5-4, 6436        | K.APGQLECEATAIALNSCLR.D             | 2077.32566 | 2 | 7.25E-07 | 0.97 | 4.93 | - | 1414.6 |
| AHQ-5-5, 6913 - 6914 | K.AQEAQCGPLEMDSALSVVQNLK.D          | 2391.66165 | 3 | 1.44E-06 | 0.97 | 5.43 | - | 2080.0 |
| AHQ-5-3, 7085        | K.AQEAQCGPLEMDSALSVVQNLK.D          | 2391.66165 | 3 | 6.09E-04 | 0.48 | 3.16 | - | 497.5  |
| AHQ-5-4, 7040 - 7044 | K.AQEAQCGPLEMDSALSVVQNLK.D          | 2391.66165 | 3 | 1.15E-05 | 0.97 | 5.09 | - | 2200.3 |
| AHQ-5-2, 7045 - 7046 | K.AQEAQCGPLEMDSALSVVQNLK.D          | 2391.66165 | 3 | 1.41E-05 | 0.95 | 4.65 | - | 1871.5 |
| AHQ-5-1, 7007        | K.AQEAQCGPLEMDSALSVVQNLK.D          | 2391.66165 | 3 | 5.27E-07 | 0.97 | 5.80 | - | 1674.6 |
| AHQ-5-2, 2773 - 2841 | K.ASAGPQPLLVQSCA.A                  | 1457.67763 | 2 | 6.42E-08 | 0.70 | 2.91 | - | 370.6  |
| AHQ-5-5, 2630 - 2653 | K.ASAGPQPLLVQSCA.A                  | 1457.67763 | 2 | 2.72E-09 | 0.85 | 3.53 | - | 521.6  |
| AHQ-5-5, 2670        | K.ASAGPQPLLVQSCA.A                  | 1457.67763 | 1 | 2.07E-08 | 0.68 | 3.34 | - | 346.8  |
| AHQ-5-1, 3040        | K.ASAGPQPLLVQSCA.A                  | 1457.67763 | 1 | 6.93E-07 | 0.71 | 3.26 | - | 446.5  |
| AHQ-5-6, 2702        | K.ASAGPQPLLVQSCA.A                  | 1457.67763 | 1 | 1.96E-08 | 0.58 | 3.18 | - | 336.9  |
| AHQ-5-2, 2747 - 2822 | K.ASAGPQPLLVQSCA.A                  | 1457.67763 | 1 | 8.09E-08 | 0.73 | 3.38 | - | 499.9  |
| AHQ-5-3, 2873        | K.ASAGPQPLLVQSCA.A                  | 1457.67763 | 1 | 6.78E-07 | 0.66 | 3.60 | - | 310.3  |
| AHQ-5-3, 2862 - 2893 | K.ASAGPQPLLVQSCA.A                  | 1457.67763 | 2 | 1.81E-06 | 0.84 | 3.43 | - | 480.9  |
| AHQ-5-4, 2845        | K.ASAGPQPLLVQSCA.A                  | 1457.67763 | 1 | 2.24E-08 | 0.49 | 3.12 | - | 279.3  |
| AHQ-5-4, 2808 - 2878 | K.ASAGPQPLLVQSCA.A                  | 1457.67763 | 2 | 1.72E-06 | 0.83 | 3.67 | - | 376.0  |
| AHQ-5-4, 4302 - 4372 | K.ASVPTIQDQASAMQLSQCAK.N            | 2136.39332 | 2 | 1.12E-04 | 0.90 | 4.24 | - | 510.7  |
| AHQ-5-3, 4370 - 4441 | K.ASVPTIQDQASAMQLSQCAK.N            | 2136.39332 | 2 | 3.82E-13 | 0.94 | 4.56 | - | 815.2  |
| AHQ-5-2, 3546        | K.ASVPTIQDQASAM*QLSQCAK.N           | 2152.39272 | 2 | 7.41E-04 | 0.73 | 3.04 | - | 521.7  |
| AHQ-5-1, 3840        | K.ASVPTIQDQASAM*QLSQCAK.N           | 2152.39272 | 2 | 2.53E-04 | 0.82 | 3.50 | - | 573.3  |
| AHQ-5-6, 4110        | K.ASVPTIQDQASAMQLSQCAK.N            | 2136.39332 | 2 | 1.63E-06 | 0.83 | 4.08 | - | 420.5  |
| AHQ-5-3, 3785        | K.ASVPTIQDQASAM*QLSQCAK.N           | 2152.39272 | 2 | 2.87E-05 | 0.88 | 3.95 | - | 470.9  |
| AHQ-5-2, 4019        | K.ASVPTIQDQASAM*QLSQCAK.N           | 2152.39272 | 2 | 9.61E-04 | 0.44 | 2.68 | - | 332.9  |
| AHQ-5-2, 3734 - 3737 | K.ASVPTIQDQASAM*QLSQCAK.N           | 2152.39272 | 2 | 1.38E-08 | 0.90 | 4.20 | - | 635.5  |
| AHQ-5-7, 4012        | K.ASVPTIQDQASAMQLSQCAK.N            | 2136.39332 | 2 | 2.29E-05 | 0.86 | 3.99 | - | 433.9  |
| AHQ-5-2, 4306 - 4377 | K.ASVPTIQDQASAMQLSQCAK.N            | 2136.39332 | 2 | 2.75E-08 | 0.95 | 5.04 | - | 831.4  |
| AHQ-5-4, 3746        | K.ASVPTIQDQASAM*QLSQCAK.N           | 2152.39272 | 2 | 2.48E-04 | 0.83 | 3.46 | - | 535.8  |
| AHQ-5-2, 4451 - 4522 | K.ASVPTIQDQASAMQLSQCAK.N            | 2136.39332 | 2 | 2.81E-05 | 0.83 | 3.87 | - | 405.5  |
| AHQ-5-5, 4190 - 4195 | K.ASVPTIQDQASAMQLSQCAK.N            | 2136.39332 | 2 | 9.08E-07 | 0.94 | 4.98 | - | 627.7  |
| AHQ-5-5, 3593 - 3595 | K.ASVPTIQDQASAM*QLSQCAK.N           | 2152.39272 | 2 | 2.96E-06 | 0.89 | 4.33 | - | 490.9  |
| AHQ-5-1, 4427 - 4500 | K.ASVPTIQDQASAMQLSQCAK.N            | 2136.39332 | 2 | 2.08E-07 | 0.94 | 4.53 | - | 817.7  |
| AHQ-5-4, 4453        | K.ASVPTIQDQASAMQLSQCAK.N            | 2136.39332 | 2 | 3.47E-06 | 0.82 | 3.98 | - | 423.4  |
| AHQ-5-3, 5082        | K.AVAEQIPLLVQGV.R.G                 | 1493.77619 | 1 | 2.37E-05 | 0.41 | 3.07 | - | 165.8  |
| AHQ-5-3, 5057 - 5129 | K.AVAEQIPLLVQGV.R.G                 | 1493.77619 | 2 | 2.23E-06 | 0.92 | 4.04 | - | 638.4  |
| AHQ-5-6, 4746 - 4760 | K.AVAEQIPLLVQGV.R.G                 | 1493.77619 | 2 | 1.71E-05 | 0.84 | 3.59 | - | 489.6  |
| AHQ-5-2, 5027        | K.AVAEQIPLLVQGV.R.G                 | 1493.77619 | 3 | 8.30E-05 | 0.96 | 4.76 | - | 1973.2 |
| AHQ-5-2, 5005        | K.AVAEQIPLLVQGV.R.G                 | 1493.77619 | 1 | 5.40E-06 | 0.79 | 3.77 | - | 300.6  |
| AHQ-5-1, 5107 - 5177 | K.AVAEQIPLLVQGV.R.G                 | 1493.77619 | 2 | 1.59E-05 | 0.92 | 4.30 | - | 642.3  |
| AHQ-5-1, 5128        | K.AVAEQIPLLVQGV.R.G                 | 1493.77619 | 1 | 6.90E-06 | 0.79 | 3.49 | - | 464.6  |
| AHQ-5-2, 4969 - 5038 | K.AVAEQIPLLVQGV.R.G                 | 1493.77619 | 2 | 7.00E-06 | 0.96 | 5.18 | - | 904.2  |
| AHQ-5-5, 4786 - 4794 | K.AVAEQIPLLVQGV.R.G                 | 1493.77619 | 2 | 1.74E-06 | 0.88 | 4.02 | - | 557.0  |
| AHQ-5-4, 5028 - 5030 | K.AVAEQIPLLVQGV.R.G                 | 1493.77619 | 1 | 9.91E-05 | 0.30 | 2.95 | - | 273.8  |
| AHQ-5-5, 4814        | K.AVAEQIPLLVQGV.R.G                 | 1493.77619 | 1 | 1.19E-09 | 0.29 | 2.54 | - | 108.7  |
| AHQ-5-4, 3797        | K.AVASAAAALVLK.A                    | 1085.32216 | 2 | 9.85E-06 | 0.94 | 3.32 | - | 1628.7 |
| AHQ-5-4, 3880        | K.AVASAAAALVLK.A                    | 1085.32216 | 2 | 4.18E-05 | 0.96 | 3.97 | - | 1649.6 |
| AHQ-5-2, 4047        | K.AVASAAAALVLK.A                    | 1085.32216 | 2 | 8.39E-05 | 0.94 | 3.62 | - | 1424.1 |
| AHQ-5-1, 4003        | K.AVASAAAALVLK.A                    | 1085.32216 | 2 | 1.10E-05 | 0.96 | 4.24 | - | 1474.3 |

|                       |                                         |            |   |          |      |      |   |        |
|-----------------------|-----------------------------------------|------------|---|----------|------|------|---|--------|
| AHQ-5-2, 3810         | K.AVASAAAALVLK.A                        | 1085.32216 | 2 | 3.55E-06 | 0.96 | 4.02 | - | 1555.3 |
| AHQ-5-1, 4184 - 4256  | K.AVEGCVSASQAATEDGGQLLR.G               | 2064.22056 | 2 | 8.20E-06 | 0.85 | 4.06 | - | 695.2  |
| AHQ-5-3, 4158 - 4177  | K.AVEGCVSASQAATEDGGQLLR.G               | 2064.22056 | 2 | 3.61E-08 | 0.94 | 4.34 | - | 1282.3 |
| AHQ-5-2, 4125 - 4202  | K.AVEGCVSASQAATEDGGQLLR.G               | 2064.22056 | 2 | 3.17E-06 | 0.74 | 3.13 | - | 853.4  |
| AHQ-5-2, 4893         | K.AVEGCVSASQAATEDGGQLLR.G               | 2064.22056 | 2 | 6.69E-04 | 0.63 | 2.90 | - | 797.0  |
| AHQ-5-4, 4269         | K.AVEGCVSASQAATEDGGQLLR.G               | 2064.22056 | 2 | 2.34E-08 | 0.86 | 3.83 | - | 999.7  |
| AHQ-5-1, 3899 - 3973  | K.AVEGCVSASQAATEDGGQLLR.G               | 2064.22056 | 2 | 8.74E-05 | 0.97 | 5.22 | - | 2073.6 |
| AHQ-5-3, 4246 - 4317  | K.AVEGCVSASQAATEDGGQLLR.G               | 2064.22056 | 2 | 2.03E-05 | 0.77 | 3.31 | - | 676.9  |
| AHQ-5-2, 4362 - 4441  | K.AVEGCVSASQAATEDGGQLLR.G               | 2064.22056 | 2 | 1.75E-04 | 0.90 | 3.97 | - | 689.2  |
| AHQ-5-1, 4541         | K.AVEGCVSASQAATEDGGQLLR.G               | 2064.22056 | 2 | 1.50E-06 | 0.53 | 3.02 | - | 503.7  |
| AHQ-5-2, 3873         | K.AVEGCVSASQAATEDGGQLLR.G               | 2064.22056 | 2 | 3.18E-06 | 0.96 | 4.58 | - | 1387.2 |
| AHQ-5-2, 4719 - 4743  | K.AVEGCVSASQAATEDGGQLLR.G               | 2064.22056 | 2 | 2.08E-05 | 0.84 | 3.81 | - | 901.0  |
| AHQ-5-1, 4339 - 4411  | K.AVEGCVSASQAATEDGGQLLR.G               | 2064.22056 | 2 | 3.01E-07 | 0.96 | 4.91 | - | 1498.1 |
| AHQ-5-2, 4277 - 4286  | K.AVEGCVSASQAATEDGGQLLR.G               | 2064.22056 | 2 | 4.23E-07 | 0.97 | 4.85 | - | 2247.5 |
| AHQ-5-2, 5689         | K.AVEGCVSASQAATEDGGQLLR.G               | 2064.22056 | 2 | 3.93E-04 | 0.74 | 3.70 | - | 852.9  |
| AHQ-5-3, 7406         | K.AVSSAIAQLLGEVAQGNENYAGIAAR.D          | 2574.83158 | 3 | 1.41E-09 | 0.96 | 5.29 | - | 1746.8 |
| AHQ-5-6, 7209         | K.AVSSAIAQLLGEVAQGNENYAGIAAR.D          | 2574.83158 | 3 | 2.11E-07 | 0.97 | 5.85 | - | 1726.0 |
| AHQ-5-2, 4869         | R.AVTDNSINQLITMCTQQAPGQK.E              | 2306.60312 | 2 | 2.69E-08 | 0.91 | 4.23 | - | 652.5  |
| AHQ-5-3, 5865         | R.AVTDNSINQLITMCTQQAPGQK.E              | 2322.60252 | 2 | 3.49E-04 | 0.69 | 3.13 | - | 578.1  |
| AHQ-5-1, 5879 - 5880  | R.AVTDNSINQLITMCTQQAPGQK.E              | 2322.60252 | 2 | 2.63E-08 | 0.86 | 4.07 | - | 515.4  |
| AHQ-5-2, 5741 - 5810  | R.AVTDNSINQLITMCTQQAPGQK.E              | 2322.60252 | 2 | 3.50E-06 | 0.77 | 3.62 | - | 414.0  |
| AHQ-5-4, 4873         | R.AVTDNSINQLITMCTQQAPGQK.E              | 2306.60312 | 2 | 5.68E-07 | 0.87 | 4.37 | - | 389.4  |
| AHQ-5-5, 6127         | R.AVTDNSINQLITMCTQQAPGQK.E              | 2306.60312 | 2 | 1.49E-06 | 0.85 | 4.06 | - | 521.0  |
| AHQ-5-2, 6253 - 6323  | R.AVTDNSINQLITMCTQQAPGQKCEDNALR.E       | 3166.51128 | 3 | 1.18E-06 | 0.89 | 4.04 | - | 1082.9 |
| AHQ-5-2, 5867 - 5933  | R.AVTDNSINQLITMCTQQAPGQKCEDNALR.E       | 3182.51068 | 3 | 3.91E-11 | 0.92 | 4.62 | - | 1026.7 |
| AHQ-5-3, 6033         | R.AVTDNSINQLITMCTQQAPGQKCEDNALR.E       | 3182.51068 | 3 | 1.19E-06 | 0.93 | 4.78 | - | 1157.5 |
| AHQ-5-1, 5995         | R.AVTDNSINQLITMCTQQAPGQKCEDNALR.E       | 3182.51068 | 3 | 4.86E-05 | 0.93 | 4.59 | - | 1257.9 |
| AHQ-5-4, 6270 - 6337  | R.AVTDNSINQLITMCTQQAPGQKCEDNALR.E       | 3166.51128 | 3 | 5.80E-11 | 0.94 | 5.41 | - | 778.7  |
| AHQ-5-3, 6337 - 6413  | R.AVTDNSINQLITMCTQQAPGQKCEDNALR.E       | 3166.51128 | 3 | 5.32E-11 | 0.89 | 4.36 | - | 951.2  |
| AHQ-5-1, 6263 - 6299  | R.AVTDNSINQLITMCTQQAPGQKCEDNALR.E       | 3166.51128 | 3 | 1.98E-13 | 0.89 | 4.42 | - | 983.2  |
| AHQ-5-5, 6181         | R.AVTDNSINQLITMCTQQAPGQKCEDNALR.E       | 3166.51128 | 3 | 1.24E-11 | 0.93 | 4.87 | - | 1384.6 |
| AHQ-5-4, 7241 - 7317  | R.AVTDNSINQLITMCTQQAPGQKCEDNALRELETVR.E | 3894.32086 | 3 | 2.02E-06 | 0.77 | 3.81 | - | 677.7  |
| AHQ-5-1, 2533         | R.CVSCPLPQGR.D                          | 1079.23309 | 1 | 6.60E-04 | 0.28 | 1.93 | - | 170.3  |
| AHQ-5-7, 3216 - 3286  | R.DDLNLSHPVVSFDK.A                      | 1544.64741 | 2 | 3.75E-09 | 0.92 | 3.88 | - | 852.5  |
| AHQ-5-8, 3337 - 3417  | R.DDLNLSHPVVSFDK.A                      | 1544.64741 | 2 | 1.05E-08 | 0.94 | 3.77 | - | 1294.8 |
| AHQ-5-10, 3363        | R.DDLNLSHPVVSFDK.A                      | 1544.64741 | 2 | 5.27E-05 | 0.78 | 3.23 | - | 707.7  |
| AHQ-5-4, 3553         | R.DDLNLSHPVVSFDK.A                      | 1544.64741 | 2 | 2.49E-07 | 0.87 | 3.57 | - | 721.1  |
| AHQ-5-8, 3152         | R.DDLNLSHPVVSFDK.A                      | 1544.64741 | 2 | 9.74E-07 | 0.96 | 3.91 | - | 1484.6 |
| AHQ-5-7, 3444 - 3516  | R.DDLNLSHPVVSFDK.A                      | 1544.64741 | 2 | 3.85E-08 | 0.92 | 4.39 | - | 828.9  |
| AHQ-5-7, 4659         | K.DHFLGEGDEESTMLEDSVSPK.K               | 2323.43307 | 2 | 3.06E-07 | 0.97 | 5.46 | - | 1507.2 |
| AHQ-5-3, 5414 - 5486  | R.DKAPGQLECECTAIAALNSCLR.D              | 2320.58644 | 2 | 3.35E-11 | 0.88 | 3.58 | - | 727.6  |
| AHQ-5-5, 6026 - 6094  | R.DKAPGQLECECTAIAALNSCLR.D              | 2320.58644 | 2 | 1.10E-10 | 0.95 | 4.64 | - | 993.2  |
| AHQ-5-1, 5449 - 5480  | R.DKAPGQLECECTAIAALNSCLR.D              | 2320.58644 | 2 | 8.66E-13 | 0.96 | 4.80 | - | 1295.9 |
| AHQ-5-5, 6070         | R.DKAPGQLECECTAIAALNSCLR.D              | 2320.58644 | 2 | 1.26E-08 | 0.93 | 4.32 | - | 885.5  |
| AHQ-5-6, 5982         | R.DKAPGQLECECTAIAALNSCLR.D              | 2320.58644 | 2 | 3.60E-09 | 0.94 | 4.58 | - | 941.4  |
| AHQ-5-2, 6185 - 6261  | R.DKAPGQLECECTAIAALNSCLR.D              | 2320.58644 | 2 | 4.58E-09 | 0.97 | 5.07 | - | 1441.4 |
| AHQ-5-7, 5834         | R.DKAPGQLECECTAIAALNSCLR.D              | 2320.58644 | 2 | 7.74E-10 | 0.93 | 4.40 | - | 824.0  |
| AHQ-5-4, 6217 - 6233  | R.DKAPGQLECECTAIAALNSCLR.D              | 2320.58644 | 2 | 4.14E-13 | 0.97 | 4.86 | - | 1461.9 |
| AHQ-5-3, 6491         | R.DKAPGQLECECTAIAALNSCLR.D              | 2320.58644 | 2 | 9.15E-09 | 0.88 | 3.49 | - | 845.5  |
| AHQ-5-4, 6393 - 6470  | R.DKAPGQLECECTAIAALNSCLR.D              | 2320.58644 | 2 | 8.93E-07 | 0.95 | 5.12 | - | 912.5  |
| AHQ-5-3, 6335 - 6415  | R.DKAPGQLECECTAIAALNSCLR.D              | 2320.58644 | 2 | 2.59E-08 | 0.93 | 4.11 | - | 1059.5 |
| AHQ-5-4, 6476         | R.DKAPGQLECECTAIAALNSCLR.D              | 2320.58644 | 2 | 1.27E-11 | 0.95 | 4.32 | - | 1103.9 |
| AHQ-5-3, 6245 - 6265  | R.DKAPGQLECECTAIAALNSCLR.D              | 2320.58644 | 3 | 1.09E-07 | 0.94 | 5.22 | - | 1115.5 |
| AHQ-5-2, 5919         | R.DKAPGQLECECTAIAALNSCLR.D              | 2320.58644 | 2 | 1.99E-07 | 0.78 | 3.54 | - | 566.9  |
| AHQ-5-10, 5430        | R.DKAPGQLECECTAIAALNSCLR.D              | 2320.58644 | 2 | 1.77E-10 | 0.91 | 3.88 | - | 866.8  |
| AHQ-5-1, 6227         | R.DKAPGQLECECTAIAALNSCLR.D              | 2320.58644 | 2 | 7.33E-10 | 0.96 | 5.08 | - | 1270.5 |
| AHQ-5-2, 5361 - 5442  | R.DKAPGQLECECTAIAALNSCLR.D              | 2320.58644 | 2 | 9.14E-12 | 0.95 | 4.51 | - | 1136.6 |
| AHQ-5-2, 6354         | R.DKAPGQLECECTAIAALNSCLR.D              | 2320.58644 | 2 | 6.33E-07 | 0.95 | 4.72 | - | 1026.4 |
| AHQ-5-9, 5291 - 5294  | R.DKAPGQLECECTAIAALNSCLR.D              | 2320.58644 | 2 | 1.40E-07 | 0.93 | 4.48 | - | 871.9  |
| AHQ-5-3, 6242 - 6254  | R.DKAPGQLECECTAIAALNSCLR.D              | 2320.58644 | 2 | 5.92E-09 | 0.96 | 5.19 | - | 1134.2 |
| AHQ-5-11, 5704        | R.DKAPGQLECECTAIAALNSCLR.D              | 2320.58644 | 2 | 5.91E-10 | 0.94 | 4.26 | - | 1076.2 |
| AHQ-5-4, 5416 - 5490  | R.DKAPGQLECECTAIAALNSCLR.D              | 2320.58644 | 2 | 1.14E-12 | 0.90 | 4.15 | - | 803.2  |
| AHQ-5-3, 5806 - 5873  | R.DKAPGQLECECTAIAALNSCLR.D              | 2320.58644 | 2 | 9.15E-07 | 0.56 | 3.26 | - | 546.0  |
| AHQ-5-2, 5413 - 5482  | R.DLDQASLAAVSQQLAPR.E                   | 1783.96422 | 2 | 2.63E-07 | 0.97 | 4.55 | - | 1750.3 |
| AHQ-5-4, 5428 - 5501  | R.DLDQASLAAVSQQLAPR.E                   | 1783.96422 | 2 | 1.71E-10 | 0.93 | 4.33 | - | 972.1  |
| AHQ-5-4, 5445 - 5456  | R.DLDQASLAAVSQQLAPR.E                   | 1783.96422 | 3 | 2.89E-08 | 0.96 | 4.55 | - | 2122.1 |
| AHQ-5-1, 5436         | R.DLDQASLAAVSQQLAPR.E                   | 1783.96422 | 2 | 2.52E-05 | 0.87 | 3.61 | - | 656.2  |
| AHQ-5-2, 5426 - 5454  | R.DLDQASLAAVSQQLAPR.E                   | 1783.96422 | 3 | 1.49E-04 | 0.92 | 4.15 | - | 1775.1 |
| AHQ-5-3, 5475 - 5483  | R.DLDQASLAAVSQQLAPR.E                   | 1783.96422 | 3 | 2.60E-05 | 0.94 | 4.89 | - | 1556.9 |
| AHQ-5-3, 5454 - 5530  | R.DLDQASLAAVSQQLAPR.E                   | 1783.96422 | 2 | 1.50E-04 | 0.88 | 3.86 | - | 648.2  |
| AHQ-5-1, 3684 - 3685  | R.DPPSWSVLGAHRSR.T                      | 1409.53156 | 2 | 5.24E-10 | 0.93 | 4.11 | - | 751.7  |
| AHQ-5-4, 3520         | R.DPPSWSVLGAHRSR.T                      | 1409.53156 | 3 | 1.29E-06 | 0.87 | 3.98 | - | 588.3  |
| AHQ-5-4, 3496 - 3509  | R.DPPSWSVLGAHRSR.T                      | 1409.53156 | 2 | 6.53E-10 | 0.87 | 3.49 | - | 533.7  |
| AHQ-5-2, 3471         | R.DPPSWSVLGAHRSR.T                      | 1409.53156 | 3 | 1.46E-08 | 0.92 | 4.45 | - | 759.4  |
| AHQ-5-2, 3449 - 3497  | R.DPPSWSVLGAHRSR.T                      | 1409.53156 | 2 | 1.66E-09 | 0.96 | 4.28 | - | 850.1  |
| AHQ-5-3, 3530 - 3539  | R.DPPSWSVLGAHRSR.T                      | 1409.53156 | 2 | 2.19E-09 | 0.92 | 3.69 | - | 576.1  |
| AHQ-5-10, 4667        | R.DPVQLNLLYVQAR.D                       | 1529.76539 | 2 | 1.26E-06 | 0.97 | 4.67 | - | 1631.2 |
| AHQ-5-7, 5024 - 5083  | R.DPVQLNLLYVQAR.D                       | 1529.76539 | 2 | 5.77E-08 | 0.93 | 4.06 | - | 885.4  |
| AHQ-5-3, 2391         | K.EAAYHPEVAPDVR.L                       | 1454.56910 | 1 | 8.80E-06 | 0.77 | 2.62 | - | 524.3  |
| AHQ-5-6, 2206         | K.EAAYHPEVAPDVR.L                       | 1454.56910 | 2 | 3.31E-06 | 0.75 | 3.12 | - | 600.6  |
| AHQ-5-2, 2326         | K.EAAYHPEVAPDVR.L                       | 1454.56910 | 1 | 2.75E-08 | 0.73 | 3.13 | - | 335.2  |
| AHQ-5-5, 2242         | K.EAAYHPEVAPDVR.L                       | 1454.56910 | 1 | 4.63E-06 | 0.61 | 2.61 | - | 338.6  |
| AHQ-5-5, 2229 - 2239  | K.EAAYHPEVAPDVR.L                       | 1454.56910 | 2 | 6.75E-06 | 0.82 | 2.80 | - | 867.1  |
| AHQ-5-4, 2353         | K.EAAYHPEVAPDVR.L                       | 1454.56910 | 1 | 7.44E-10 | 0.86 | 3.13 | - | 547.2  |
| AHQ-5-5, 6011 - 6085  | K.EADESNFEEQILEAAK.S                    | 1937.05072 | 2 | 5.74E-06 | 0.96 | 5.26 | - | 1392.9 |
| AHQ-5-1, 6113 - 6168  | K.EADESNFEEQILEAAK.S                    | 1937.05072 | 2 | 3.33E-05 | 0.89 | 4.14 | - | 827.0  |
| AHQ-5-5, 6153         | K.EADESNFEEQILEAAK.S                    | 1937.05072 | 2 | 1.45E-06 | 0.86 | 3.88 | - | 876.3  |
| AHQ-5-4, 5920 - 5926  | K.EADESNFEEQILEAAK.S                    | 1937.05072 | 2 | 2.12E-07 | 0.87 | 3.53 | - | 871.8  |
| AHQ-5-4, 6137 - 6208  | K.EADESNFEEQILEAAK.S                    | 1937.05072 | 2 | 4.39E-05 | 0.92 | 4.47 | - | 1084.8 |
| AHQ-5-2, 7338         | K.EADESNFEEQILEAAK.S                    | 1937.05072 | 2 | 2.89E-04 | 0.61 | 3.04 | - | 705.9  |
| AHQ-5-4, 6248 - 6317  | K.EADESNFEEQILEAAK.S                    | 1937.05072 | 2 | 1.77E-05 | 0.92 | 3.96 | - | 1121.8 |
| AHQ-5-8, 5849         | K.EADESNFEEQILEAAK.S                    | 1937.05072 | 2 | 3.11E-06 | 0.83 | 3.29 | - | 866.4  |
| AHQ-5-4, 6333 - 6386  | K.EADESNFEEQILEAAK.S                    | 1937.05072 | 2 | 3.11E-06 | 0.97 | 5.75 | - | 1822.0 |
| AHQ-5-4, 6512         | K.EADESNFEEQILEAAK.S                    | 1937.05072 | 2 | 1.10E-05 | 0.61 | 3.06 | - | 843.7  |
| AHQ-5-4, 6657         | K.EADESNFEEQILEAAK.S                    | 1937.05072 | 2 | 1.01E-05 | 0.40 | 2.70 | - | 366.3  |
| AHQ-5-2, 6614 - 6686  | K.EADESNFEEQILEAAK.S                    | 1937.05072 | 2 | 7.73E-05 | 0.96 | 4.63 | - | 1909.2 |
| AHQ-5-1, 6235 - 6315  | K.EADESNFEEQILEAAK.S                    | 1937.05072 | 2 | 1.98E-07 | 0.96 | 5.03 | - | 1352.4 |
| AHQ-5-3, 6443         | K.EADESNFEEQILEAAK.S                    | 1937.05072 | 2 | 1.03E-08 | 0.87 | 3.56 | - | 813.1  |
| AHQ-5-2, 6355         | K.EADESNFEEQILEAAK.S                    | 1937.05072 | 2 | 1.81E-05 | 0.89 | 3.49 | - | 1205.2 |
| AHQ-5-3, 6301 - 6369  | K.EADESNFEEQILEAAK.S                    | 1937.05072 | 2 | 4.91E-08 | 0.96 | 4.98 | - | 1382.8 |
| AHQ-5-3, 6198 - 6273  | K.EADESNFEEQILEAAK.S                    | 1937.05072 | 2 | 2.53E-06 | 0.94 | 4.51 | - | 1302.6 |
| AHQ-5-6, 5952 - 5953  | K.EADESNFEEQILEAAK.S                    | 1937.05072 | 2 | 7.76E-06 | 0.95 | 5.02 | - | 1276.7 |
| AHQ-5-9, 5279         | K.EADESNFEEQILEAAK.S                    | 1937.05072 | 2 | 1.56E-04 | 0.86 | 3.54 | - | 999.0  |
| AHQ-5-10, 5358 - 5418 | K.EADESNFEEQILEAAK.S                    | 1937.05072 | 2 | 2.10E-06 | 0.73 | 3.70 | - | 594.2  |
| AHQ-5-2, 6213 - 6282  | K.EADESNFEEQILEAAK.S                    | 1937.05072 | 2 | 4.95E-09 | 0.96 | 4.94 | - | 1395.1 |
| AHQ-5-6, 6072 - 6148  | K.EADESNFEEQILEAAK.S                    | 1937.05072 | 2 | 1.91E-06 | 0.90 | 3.91 | - | 1268.6 |
| AHQ-5-2, 6066 - 6146  | K.EADESNFEEQILEAAK.S                    | 1937.05072 | 2 | 2.18E-07 | 0.94 | 4.64 | - | 1063.4 |

|                        |                                      |            |   |          |      |      |   |        |
|------------------------|--------------------------------------|------------|---|----------|------|------|---|--------|
| AHQ-5-11, 5655         | K.EADESLNFEEQILEAAK.S                | 1937.05072 | 2 | 2.91E-05 | 0.70 | 3.14 | - | 548.7  |
| AHQ-5-3, 7518          | R.ECANGYLELDDHVLTLQKPSPELK.Q         | 2883.30906 | 3 | 1.43E-04 | 0.95 | 5.34 | - | 1227.1 |
| AHQ-5-1, 7339          | R.ECANGYLELDDHVLTLQKPSPELK.Q         | 2883.30906 | 3 | 8.24E-07 | 0.95 | 5.52 | - | 1265.4 |
| AHQ-5-9, 6491 - 6503   | R.ECANGYLELDDHVLTLQKPSPELK.Q         | 2883.30906 | 2 | 2.71E-04 | 0.66 | 3.04 | - | 482.3  |
| AHQ-5-4, 7469 - 7470   | R.ECANGYLELDDHVLTLQKPSPELK.Q         | 2883.30906 | 3 | 9.21E-14 | 0.95 | 5.90 | - | 1051.1 |
| AHQ-5-5, 7413          | R.ECANGYLELDDHVLTLQKPSPELK.Q         | 2883.30906 | 3 | 4.55E-06 | 0.88 | 4.13 | - | 862.4  |
| AHQ-5-2, 7501 - 7503   | R.ECANGYLELDDHVLTLQKPSPELK.Q         | 2883.30906 | 3 | 5.22E-14 | 0.96 | 6.19 | - | 1310.8 |
| AHQ-5-2, 7483 - 7554   | R.EGISQEAALHTQMLTAVQEISHLIEPLANAAR.A | 3372.79804 | 3 | 1.15E-10 | 0.98 | 6.46 | - | 2112.7 |
| AHQ-5-5, 7337          | R.EGISQEAALHTQMLTAVQEISHLIEPLANAAR.A | 3388.79744 | 3 | 1.52E-04 | 0.88 | 4.29 | - | 832.3  |
| AHQ-5-10, 6606         | R.EGISQEAALHTQMLTAVQEISHLIEPLANAAR.A | 3372.79804 | 3 | 1.84E-09 | 0.96 | 5.87 | - | 1542.3 |
| AHQ-5-3, 7598          | R.EGISQEAALHTQMLTAVQEISHLIEPLANAAR.A | 3372.79804 | 3 | 9.42E-04 | 0.85 | 3.78 | - | 913.9  |
| AHQ-5-8, 7284          | R.EGISQEAALHTQMLTAVQEISHLIEPLANAAR.A | 3372.79804 | 3 | 9.44E-09 | 0.97 | 6.14 | - | 2011.4 |
| AHQ-5-3, 7514          | R.EGISQEAALHTQMLTAVQEISHLIEPLANAAR.A | 3372.79804 | 3 | 5.98E-04 | 0.77 | 3.53 | - | 599.4  |
| AHQ-5-4, 7502 - 7529   | R.EGISQEAALHTQMLTAVQEISHLIEPLANAAR.A | 3372.79804 | 3 | 6.79E-12 | 0.97 | 6.46 | - | 1428.1 |
| AHQ-5-7, 7370          | R.EGISQEAALHTQMLTAVQEISHLIEPLANAAR.A | 3372.79804 | 3 | 1.93E-08 | 0.97 | 6.55 | - | 1687.3 |
| AHQ-5-6, 7356          | R.EGISQEAALHTQMLTAVQEISHLIEPLANAAR.A | 3372.79804 | 3 | 8.93E-10 | 0.95 | 5.54 | - | 1157.5 |
| AHQ-5-4, 7372          | R.EGISQEAALHTQMLTAVQEISHLIEPLANAAR.A | 3388.79744 | 3 | 6.33E-04 | 0.94 | 5.26 | - | 975.1  |
| AHQ-5-5, 7449 - 7470   | R.EGISQEAALHTQMLTAVQEISHLIEPLANAAR.A | 3372.79804 | 3 | 2.00E-12 | 0.97 | 6.46 | - | 1293.6 |
| AHQ-5-4, 7225 - 7226   | R.ELLENPVQINDM*SYFGCLDSVM*ENSK.V     | 3148.48814 | 3 | 2.37E-08 | 0.79 | 4.41 | - | 378.6  |
| AHQ-5-2, 6973 - 7037   | R.ELLENPVQINDM*SYFGCLDSVM*ENSK.V     | 3148.48814 | 3 | 7.26E-04 | 0.95 | 5.47 | - | 1080.3 |
| AHQ-5-1, 7259          | R.ELLENPVQINDM*SYFGCLDSVM*ENSK.V     | 3132.48874 | 3 | 3.27E-04 | 0.95 | 5.62 | - | 885.4  |
| AHQ-5-1, 7033          | R.ELLENPVQINDM*SYFGCLDSVM*ENSK.V     | 3148.48814 | 3 | 5.78E-07 | 0.75 | 3.63 | - | 448.7  |
| AHQ-5-8, 2566 - 2636   | R.EQGVEEHETLLLR.R                    | 1553.69898 | 2 | 8.24E-10 | 0.87 | 3.67 | - | 441.1  |
| AHQ-5-14, 6177 - 6178  | R.ERIEAPAGPPSDFGLFLSDDDPK.K          | 2571.77979 | 3 | 7.78E-04 | 0.91 | 4.41 | - | 991.9  |
| AHQ-5-7, 5322 - 5338   | R.ERIEAPAGPPSDFGLFLSDDDPK.K          | 2571.77979 | 3 | 9.13E-08 | 0.97 | 6.26 | - | 1869.7 |
| AHQ-5-14-, 5441        | R.ERIEAPAGPPSDFGLFLSDDDPK.K          | 2571.77979 | 3 | 4.86E-04 | 0.97 | 5.79 | - | 2067.0 |
| AHQ-5-13, 5553         | R.ERIEAPAGPPSDFGLFLSDDDPK.K          | 2571.77979 | 3 | 8.44E-07 | 0.97 | 5.89 | - | 1319.1 |
| AHQ-5-13-, 5479        | R.ERIEAPAGPPSDFGLFLSDDDPK.K          | 2571.77979 | 3 | 5.00E-15 | 0.98 | 6.53 | - | 2553.9 |
| AHQ-5-8, 5106          | R.ERIEAPAGPPSDFGLFLSDDDPK.K          | 2571.77979 | 3 | 7.96E-10 | 0.97 | 5.89 | - | 1656.2 |
| AHQ-5-14, 5936         | R.ERIEAPAGPPSDFGLFLSDDDPK.K.G        | 2699.95270 | 3 | 1.46E-06 | 0.98 | 6.55 | - | 2035.7 |
| AHQ-5-13, 5206         | R.ERIEAPAGPPSDFGLFLSDDDPK.K.G        | 2699.95270 | 3 | 4.85E-12 | 0.98 | 6.79 | - | 1858.9 |
| AHQ-5-14-, 5071        | R.ERIEAPAGPPSDFGLFLSDDDPK.K.G        | 2699.95270 | 3 | 5.36E-07 | 0.98 | 8.05 | - | 2362.5 |
| AHQ-5-13-, 5063 - 5136 | R.ERIEAPAGPPSDFGLFLSDDDPK.K.G        | 2699.95270 | 3 | 2.42E-09 | 0.98 | 6.57 | - | 2856.2 |
| AHQ-5-7, 4844 - 4858   | R.ERIEAPAGPPSDFGLFLSDDDPK.K.G        | 2699.95270 | 3 | 1.96E-08 | 0.98 | 7.17 | - | 1501.1 |
| AHQ-5-11, 4972         | R.ERIEAPAGPPSDFGLFLSDDDPK.K.G        | 2699.95270 | 3 | 2.51E-05 | 0.93 | 4.48 | - | 1256.1 |
| AHQ-5-4, 2260          | K.EVANSTANLVK.T                      | 1146.27608 | 2 | 4.36E-05 | 0.86 | 2.81 | - | 938.5  |
| AHQ-5-3, 2061 - 2143   | K.EVANSTANLVK.T                      | 1146.27608 | 1 | 3.66E-04 | 0.20 | 2.42 | - | 140.8  |
| AHQ-5-4, 2046 - 2064   | K.EVANSTANLVK.T                      | 1146.27608 | 2 | 5.61E-04 | 0.91 | 3.28 | - | 1131.3 |
| AHQ-5-2, 2115 - 2257   | K.EVANSTANLVK.T                      | 1146.27608 | 1 | 2.79E-04 | 0.13 | 2.12 | - | 135.2  |
| AHQ-5-8, 4216          | K.EVIQEWLNTNIK.R                     | 1487.68214 | 2 | 2.63E-07 | 0.94 | 4.43 | - | 1105.1 |
| AHQ-5-13-, 4663 - 4735 | K.EVIQEWLNTNIK.R                     | 1487.68214 | 2 | 8.38E-04 | 0.59 | 2.51 | - | 714.8  |
| AHQ-5-12, 4617 - 4697  | K.EVIQEWLNTNIK.R                     | 1487.68214 | 2 | 2.84E-04 | 0.88 | 3.71 | - | 927.7  |
| AHQ-5-8, 3656          | K.EVIQEWLNTNIK.R.W                   | 1643.86849 | 2 | 5.43E-07 | 0.18 | 2.55 | - | 284.3  |
| AHQ-5-8, 2696          | K.FFYSDQNVDSR.D                      | 1378.42795 | 2 | 7.42E-06 | 0.84 | 2.98 | - | 770.6  |
| AHQ-5-7, 2755          | K.FFYSDQNVDSR.D                      | 1378.42795 | 2 | 6.32E-06 | 0.92 | 3.46 | - | 1149.6 |
| AHQ-5-7, 5842          | K.FFYSDQNVDSRDPVQLNLLYVQAR.D         | 2889.17074 | 3 | 5.55E-16 | 0.98 | 6.90 | - | 2215.1 |
| AHQ-5-8, 5796          | K.FFYSDQNVDSRDPVQLNLLYVQAR.D         | 2889.17074 | 3 | 5.09E-11 | 0.97 | 5.74 | - | 2179.7 |
| AHQ-5-7, 5964          | K.FFYSDQNVDSRDPVQLNLLYVQAR.D         | 2889.17074 | 3 | 2.24E-04 | 0.67 | 3.43 | - | 628.7  |
| AHQ-5-2, 7385          | R.FGQDFSTFLAAGVEMAGQAPSQEDR.A        | 2718.89265 | 3 | 5.95E-04 | 0.77 | 3.60 | - | 510.7  |
| AHQ-5-3, 6567 - 6638   | R.FGQDFSTFLAAGVEMAGQAPSQEDR.A        | 2734.89265 | 2 | 3.96E-07 | 0.93 | 4.16 | - | 1197.4 |
| AHQ-5-1, 6504 - 6571   | R.FGQDFSTFLAAGVEMAGQAPSQEDR.A        | 2734.89265 | 3 | 3.53E-13 | 0.95 | 5.10 | - | 1173.2 |
| AHQ-5-3, 6581 - 6653   | R.FGQDFSTFLAAGVEMAGQAPSQEDR.A        | 2734.89265 | 3 | 3.83E-08 | 0.88 | 4.67 | - | 584.0  |
| AHQ-5-1, 7191          | R.FGQDFSTFLAAGVEMAGQAPSQEDR.A        | 2718.89325 | 3 | 1.44E-08 | 0.90 | 4.54 | - | 679.3  |
| AHQ-5-3, 7638 - 7698   | R.FGQDFSTFLAAGVEMAGQAPSQEDR.A        | 2718.89325 | 3 | 3.56E-05 | 0.81 | 3.40 | - | 798.9  |
| AHQ-5-2, 6585 - 6653   | R.FGQDFSTFLAAGVEMAGQAPSQEDR.A        | 2734.89265 | 3 | 7.90E-05 | 0.83 | 3.93 | - | 618.2  |
| AHQ-5-3, 7402          | R.FGQDFSTFLAAGVEMAGQAPSQEDR.A        | 2718.89325 | 2 | 1.66E-04 | 0.86 | 3.53 | - | 928.3  |
| AHQ-5-2, 7462          | R.FGQDFSTFLAAGVEMAGQAPSQEDR.A        | 2718.89325 | 2 | 2.67E-05 | 0.94 | 4.83 | - | 933.0  |
| AHQ-5-4, 7333          | R.FGQDFSTFLAAGVEMAGQAPSQEDR.A        | 2718.89325 | 3 | 1.27E-04 | 0.78 | 3.55 | - | 480.3  |
| AHQ-5-2, 7642 - 7705   | R.FGQDFSTFLAAGVEMAGQAPSQEDR.A        | 2718.89325 | 3 | 2.73E-11 | 0.93 | 5.21 | - | 650.9  |
| AHQ-5-4, 2629          | K.FLPSERLDEH                         | 1243.35032 | 2 | 3.17E-06 | 0.62 | 2.84 | - | 290.3  |
| AHQ-5-7, 4674          | K.GLAGAVSELLR.S                      | 1086.26701 | 2 | 6.10E-07 | 0.97 | 5.13 | - | 1901.5 |
| AHQ-5-2, 5155 - 5193   | K.GLAGAVSELLR.S                      | 1086.26701 | 2 | 2.18E-06 | 0.98 | 4.86 | - | 2269.4 |
| AHQ-5-5, 4949 - 4962   | K.GLAGAVSELLR.S                      | 1086.26701 | 2 | 1.73E-07 | 0.97 | 4.96 | - | 1826.9 |
| AHQ-5-1, 5292          | K.GLAGAVSELLR.S                      | 1086.26701 | 2 | 1.17E-07 | 0.97 | 4.41 | - | 1957.8 |
| AHQ-5-4, 5156          | K.GLAGAVSELLR.S                      | 1086.26701 | 2 | 1.92E-06 | 0.98 | 5.23 | - | 2451.5 |
| AHQ-5-3, 5238          | K.GLAGAVSELLR.S                      | 1086.26701 | 2 | 3.95E-07 | 0.98 | 4.91 | - | 2083.5 |
| AHQ-5-8, 4494          | K.GLAGAVSELLR.S                      | 1086.26701 | 2 | 5.66E-07 | 0.97 | 5.06 | - | 1835.2 |
| AHQ-5-6, 4901          | K.GLAGAVSELLR.S                      | 1086.26701 | 2 | 2.31E-05 | 0.97 | 4.19 | - | 1855.0 |
| AHQ-5-5, 6662 - 6727   | R.GSQAOPDPSAQLALIAASQSFLQPGGK.M      | 2756.02103 | 2 | 5.42E-05 | 0.93 | 5.13 | - | 649.4  |
| AHQ-5-2, 6789 - 6865   | R.GSQAOPDPSAQLALIAASQSFLQPGGK.M      | 2756.02103 | 3 | 5.74E-07 | 0.95 | 5.64 | - | 1399.7 |
| AHQ-5-1, 6773 - 6843   | R.GSQAOPDPSAQLALIAASQSFLQPGGK.M      | 2756.02103 | 3 | 1.04E-05 | 0.94 | 5.40 | - | 971.4  |
| AHQ-5-9, 5856          | R.GSQAOPDPSAQLALIAASQSFLQPGGK.M      | 2756.02103 | 2 | 1.91E-06 | 0.53 | 2.87 | - | 306.7  |
| AHQ-5-5, 6665 - 6689   | R.GSQAOPDPSAQLALIAASQSFLQPGGK.M      | 2756.02103 | 3 | 4.04E-07 | 0.94 | 5.48 | - | 883.1  |
| AHQ-5-3, 6865 - 6933   | R.GSQAOPDPSAQLALIAASQSFLQPGGK.M      | 2756.02103 | 3 | 3.56E-05 | 0.82 | 3.99 | - | 756.2  |
| AHQ-5-1, 6752 - 6812   | R.GSQAOPDPSAQLALIAASQSFLQPGGK.M      | 2756.02103 | 2 | 6.81E-04 | 0.72 | 3.27 | - | 413.1  |
| AHQ-5-2, 6793 - 6861   | R.GSQAOPDPSAQLALIAASQSFLQPGGK.M      | 2756.02103 | 2 | 6.48E-04 | 0.93 | 4.69 | - | 936.4  |
| AHQ-5-4, 6966          | R.GSQAOPDPSAQLALIAASQSFLQPGGK.M      | 2756.02103 | 3 | 8.86E-04 | 0.67 | 3.35 | - | 717.0  |
| AHQ-5-4, 6824 - 6892   | R.GSQAOPDPSAQLALIAASQSFLQPGGK.M      | 2756.02103 | 2 | 5.09E-07 | 0.95 | 4.96 | - | 1046.3 |
| AHQ-5-6, 6592 - 6612   | R.GSQAOPDPSAQLALIAASQSFLQPGGK.M      | 2756.02103 | 3 | 6.38E-04 | 0.87 | 4.63 | - | 738.2  |
| AHQ-5-6, 6594          | R.GSQAOPDPSAQLALIAASQSFLQPGGK.M      | 2756.02103 | 2 | 1.27E-04 | 0.82 | 3.75 | - | 533.9  |
| AHQ-5-2, 6934          | R.GSQAOPDPSAQLALIAASQSFLQPGGK.M      | 2756.02103 | 3 | 3.82E-04 | 0.71 | 3.29 | - | 412.1  |
| AHQ-5-13-, 6883        | K.GTEWVDPEDPTVIAENELLGAAAAIEAAAK.K   | 3053.32301 | 3 | 2.63E-06 | 0.93 | 4.91 | - | 1297.8 |
| AHQ-5-7, 7402 - 7406   | K.GTEWVDPEDPTVIAENELLGAAAAIEAAAK.K   | 3053.32301 | 3 | 4.17E-12 | 0.97 | 6.72 | - | 1758.1 |
| AHQ-5-4, 7480 - 7557   | K.GTEWVDPEDPTVIAENELLGAAAAIEAAAK.K   | 3053.32301 | 3 | 6.18E-09 | 0.98 | 7.01 | - | 1538.1 |
| AHQ-5-6, 7408 - 7410   | K.GTEWVDPEDPTVIAENELLGAAAAIEAAAK.K   | 3053.32301 | 3 | 6.92E-11 | 0.97 | 6.01 | - | 1709.9 |
| AHQ-5-5, 7463 - 7505   | K.GTEWVDPEDPTVIAENELLGAAAAIEAAAK.K   | 3053.32301 | 3 | 5.98E-11 | 0.96 | 5.91 | - | 1316.6 |
| AHQ-5-9, 6586 - 6587   | K.GTEWVDPEDPTVIAENELLGAAAAIEAAAK.K   | 3053.32301 | 3 | 2.70E-09 | 0.96 | 5.72 | - | 1668.4 |
| AHQ-5-2, 7522 - 7601   | K.GTEWVDPEDPTVIAENELLGAAAAIEAAAK.K   | 3053.32301 | 3 | 1.61E-14 | 0.96 | 5.92 | - | 1319.3 |
| AHQ-5-3, 7461 - 7462   | R.GVAALTSDPVAQVILDTASDVLDK.A         | 2470.75835 | 3 | 2.11E-13 | 0.99 | 7.92 | - | 3489.9 |
| AHQ-5-1, 7284 - 7285   | R.GVAALTSDPVAQVILDTASDVLDK.A         | 2470.75835 | 3 | 4.22E-06 | 0.98 | 7.37 | - | 2577.6 |
| AHQ-5-2, 7453 - 7454   | R.GVAALTSDPVAQVILDTASDVLDK.A         | 2470.75835 | 3 | 3.94E-11 | 0.98 | 7.43 | - | 2015.2 |
| AHQ-5-5, 7353 - 7354   | R.GVAALTSDPVAQVILDTASDVLDK.A         | 2470.75835 | 3 | 3.24E-04 | 0.97 | 6.20 | - | 1807.5 |
| AHQ-5-4, 7413 - 7416   | R.GVAALTSDPVAQVILDTASDVLDK.A         | 2470.75835 | 3 | 9.36E-08 | 0.99 | 7.73 | - | 2835.8 |
| AHQ-5-9, 6439 - 6440   | R.GVAALTSDPVAQVILDTASDVLDK.A         | 2470.75835 | 2 | 9.04E-04 | 0.58 | 3.25 | - | 184.0  |
| AHQ-5-5, 7410          | R.GVGAATAVTQALNELLQHVK.A             | 2092.38495 | 3 | 1.40E-07 | 0.92 | 4.52 | - | 893.3  |
| AHQ-5-3, 7521 - 7526   | R.GVGAATAVTQALNELLQHVK.A             | 2092.38495 | 2 | 2.81E-07 | 0.95 | 5.13 | - | 1248.3 |
| AHQ-5-3, 7522 - 7523   | R.GVGAATAVTQALNELLQHVK.A             | 2092.38495 | 3 | 2.50E-09 | 0.96 | 5.66 | - | 1334.8 |
| AHQ-5-6, 5549          | R.GVGAATAVTQALNELLQHVK.A             | 2092.38495 | 2 | 2.42E-12 | 0.89 | 4.12 | - | 727.2  |
| AHQ-5-1, 7344          | R.GVGAATAVTQALNELLQHVK.A             | 2092.38495 | 3 | 1.28E-04 | 0.89 | 3.79 | - | 1012.6 |
| AHQ-5-2, 7505          | R.GVGAATAVTQALNELLQHVK.A             | 2092.38495 | 3 | 4.04E-08 | 0.94 | 4.28 | - | 1342.6 |
| AHQ-5-4, 5832          | R.GVGAATAVTQALNELLQHVK.A             | 2092.38495 | 2 | 2.24E-10 | 0.95 | 5.38 | - | 919.2  |
| AHQ-5-1, 7343 - 7347   | R.GVGAATAVTQALNELLQHVK.A             | 2092.38495 | 2 | 3.04E-06 | 0.96 | 5.63 | - | 946.2  |
| AHQ-5-5, 7409          | R.GVGAATAVTQALNELLQHVK.A             | 2092.38495 | 2 | 2.29E-10 | 0.95 | 5.38 | - | 913.6  |
| AHQ-5-4, 7472 - 7473   | R.GVGAATAVTQALNELLQHVK.A             | 2092.38495 | 3 | 1.23E-06 | 0.93 | 4.74 | - | 1210.4 |
| AHQ-5-6, 7324          | R.GVGAATAVTQALNELLQHVK.A             | 2092.38495 | 3 | 2.53E-07 | 0.83 | 3.52 | - | 938.4  |
| AHQ-5-4, 7476          | R.GVGAATAVTQALNELLQHVK.A             | 2092.38495 | 2 | 2.06E-09 | 0.93 | 5.06 | - | 721.5  |
| AHQ-5-8, 7226          | R.GVGAATAVTQALNELLQHVK.A             | 2092.38495 | 3 | 4.48E-05 | 0.85 | 4.02 | - | 904.3  |

|                        |                            |            |   |          |      |      |   |        |
|------------------------|----------------------------|------------|---|----------|------|------|---|--------|
| AHQ-5-7, 7310 - 7311   | R.GVGAAATAVTQALNELLOHVK.A  | 2092.38495 | 2 | 1.18E-06 | 0.94 | 5.21 | - | 929.3  |
| AHQ-5-8, 7224 - 7229   | R.GVGAAATAVTQALNELLOHVK.A  | 2092.38495 | 2 | 5.35E-07 | 0.96 | 5.49 | - | 1066.3 |
| AHQ-5-2, 5790          | R.GVGAAATAVTQALNELLOHVK.A  | 2092.38495 | 3 | 1.37E-07 | 0.92 | 4.67 | - | 936.5  |
| AHQ-5-3, 5893          | R.GVGAAATAVTQALNELLOHVK.A  | 2092.38495 | 2 | 2.69E-11 | 0.95 | 5.18 | - | 894.3  |
| AHQ-5-2, 7506 - 7526   | R.GVGAAATAVTQALNELLOHVK.A  | 2092.38495 | 2 | 4.43E-06 | 0.93 | 4.81 | - | 731.7  |
| AHQ-5-5, 5550          | R.GVGAAATAVTQALNELLOHVK.A  | 2092.38495 | 2 | 1.05E-07 | 0.96 | 5.18 | - | 1102.7 |
| AHQ-5-9, 6494          | R.GVGAAATAVTQALNELLOHVK.A  | 2092.38495 | 2 | 3.94E-06 | 0.94 | 5.17 | - | 766.6  |
| AHQ-5-2, 5791          | R.GVGAAATAVTQALNELLOHVK.A  | 2092.38495 | 2 | 1.00E-06 | 0.95 | 4.83 | - | 1103.3 |
| AHQ-5-6, 7325 - 7326   | R.GVGAAATAVTQALNELLOHVK.A  | 2092.38495 | 2 | 3.78E-07 | 0.95 | 5.14 | - | 1104.6 |
| AHQ-5-11, 3166         | R.IGITNHDEYSLSVR.E         | 1517.66833 | 2 | 7.99E-06 | 0.87 | 3.37 | - | 1011.2 |
| AHQ-5-8, 3225 - 3304   | R.IGITNHDEYSLSVR.E         | 1517.66833 | 2 | 1.28E-04 | 0.96 | 4.41 | - | 1365.1 |
| AHQ-5-13, 3780 - 3798  | R.IGITNHDEYSLSVR.E         | 1517.66833 | 2 | 5.39E-07 | 0.90 | 3.59 | - | 1008.5 |
| AHQ-5-13-, 3328        | R.IGITNHDEYSLSVR.E         | 1517.66833 | 3 | 1.27E-10 | 0.94 | 4.47 | - | 1029.1 |
| AHQ-5-7, 3063          | R.IGITNHDEYSLSVR.E         | 1517.66833 | 2 | 1.89E-05 | 0.82 | 2.99 | - | 934.9  |
| AHQ-5-7, 3238 - 3314   | R.IGITNHDEYSLSVR.E         | 1517.66833 | 2 | 2.54E-10 | 0.94 | 3.89 | - | 1377.3 |
| AHQ-5-10, 3020         | R.IGITNHDEYSLSVR.E         | 1517.66833 | 2 | 1.83E-05 | 0.92 | 3.84 | - | 1013.6 |
| AHQ-5-7, 2904          | R.IGITNHDEYSLSVR.E         | 1517.66833 | 2 | 7.66E-09 | 0.94 | 3.91 | - | 1358.8 |
| AHQ-5-7, 3439          | R.IGITNHDEYSLSVR.E         | 1517.66833 | 2 | 5.33E-11 | 0.93 | 3.66 | - | 1191.5 |
| AHQ-5-13-, 3700        | R.IGITNHDEYSLSVR.E         | 1517.66833 | 2 | 6.26E-09 | 0.95 | 4.15 | - | 1223.9 |
| AHQ-5-13-, 3327        | R.IGITNHDEYSLSVR.E         | 1517.66833 | 2 | 3.04E-11 | 0.93 | 3.84 | - | 1079.3 |
| AHQ-5-8, 4493 - 4498   | R.ILAQATSDLVNAIK.A         | 1457.69748 | 2 | 7.83E-10 | 0.97 | 5.11 | - | 1870.1 |
| AHQ-5-4, 4166          | R.ILAQATSDLVNAIK.A         | 1457.69748 | 2 | 1.92E-05 | 0.96 | 4.33 | - | 1767.1 |
| AHQ-5-4, 4178          | R.ILAQATSDLVNAIK.A         | 1457.69748 | 1 | 2.29E-04 | 0.42 | 2.44 | - | 407.9  |
| AHQ-5-2, 5118          | R.ILAQATSDLVNAIK.A         | 1457.69748 | 1 | 2.83E-06 | 0.69 | 3.56 | - | 424.9  |
| AHQ-5-4, 4454          | R.ILAQATSDLVNAIK.A         | 1457.69748 | 2 | 4.24E-07 | 0.96 | 4.08 | - | 1640.3 |
| AHQ-5-5, 4922          | R.ILAQATSDLVNAIK.A         | 1457.69748 | 2 | 3.01E-08 | 0.96 | 4.31 | - | 1991.2 |
| AHQ-5-6, 4872 - 4888   | R.ILAQATSDLVNAIK.A         | 1457.69748 | 2 | 8.42E-08 | 0.97 | 4.63 | - | 1704.4 |
| AHQ-5-7, 4706 - 4715   | R.ILAQATSDLVNAIK.A         | 1457.69748 | 2 | 4.42E-07 | 0.97 | 4.85 | - | 1974.7 |
| AHQ-5-2, 5109 - 5110   | R.ILAQATSDLVNAIK.A         | 1457.69748 | 2 | 5.80E-09 | 0.98 | 5.62 | - | 1881.5 |
| AHQ-5-7, 4716 - 4719   | R.ILAQATSDLVNAIK.A         | 1457.69748 | 1 | 7.18E-04 | 0.42 | 2.66 | - | 433.4  |
| AHQ-5-4, 5120          | R.ILAQATSDLVNAIK.A         | 1457.69748 | 1 | 6.11E-07 | 0.59 | 2.94 | - | 535.7  |
| AHQ-5-2, 4630          | R.ILAQATSDLVNAIK.A         | 1457.69748 | 2 | 4.16E-07 | 0.98 | 5.16 | - | 2285.9 |
| AHQ-5-2, 4434          | R.ILAQATSDLVNAIK.A         | 1457.69748 | 2 | 2.38E-09 | 0.98 | 5.37 | - | 1951.4 |
| AHQ-5-3, 5197          | R.ILAQATSDLVNAIK.A         | 1457.69748 | 1 | 9.55E-05 | 0.89 | 3.92 | - | 729.0  |
| AHQ-5-3, 5177          | R.ILAQATSDLVNAIK.A         | 1457.69748 | 2 | 1.71E-09 | 0.98 | 4.85 | - | 2173.2 |
| AHQ-5-1, 5199          | R.ILAQATSDLVNAIK.A         | 1457.69748 | 2 | 4.53E-09 | 0.98 | 5.70 | - | 2888.5 |
| AHQ-5-2, 4149          | R.ILAQATSDLVNAIK.A         | 1457.69748 | 2 | 2.11E-08 | 0.98 | 4.64 | - | 2155.4 |
| AHQ-5-1, 4303 - 4305   | R.ILAQATSDLVNAIK.A         | 1457.69748 | 2 | 4.70E-06 | 0.96 | 3.93 | - | 1745.1 |
| AHQ-5-3, 4234          | R.ILAQATSDLVNAIK.A         | 1457.69748 | 2 | 5.70E-07 | 0.97 | 4.49 | - | 2006.9 |
| AHQ-5-7, 5832 - 5903   | R.IPEAPAGPPSDFGLFLSDDPK.K  | 2286.47890 | 2 | 6.40E-06 | 0.97 | 5.07 | - | 1421.3 |
| AHQ-5-13, 5900 - 5924  | R.IPEAPAGPPSDFGLFLSDDPK.K  | 2286.47890 | 2 | 1.95E-05 | 0.97 | 5.68 | - | 1267.0 |
| AHQ-5-8, 5754          | R.IPEAPAGPPSDFGLFLSDDPK.K  | 2286.47890 | 2 | 5.02E-04 | 0.91 | 4.01 | - | 816.2  |
| AHQ-5-13-, 5812 - 5860 | R.IPEAPAGPPSDFGLFLSDDPK.K  | 2286.47890 | 2 | 4.91E-04 | 0.96 | 5.28 | - | 1078.2 |
| AHQ-5-13-, 5340 - 5373 | R.IPEAPAGPPSDFGLFLSDDPK.K  | 2286.47890 | 3 | 8.54E-07 | 0.94 | 4.40 | - | 1533.7 |
| AHQ-5-12, 5425 - 5468  | R.IPEAPAGPPSDFGLFLSDDPK.K  | 2414.65181 | 3 | 2.52E-04 | 0.81 | 3.87 | - | 1050.7 |
| AHQ-5-14, 6057 - 6094  | R.IPEAPAGPPSDFGLFLSDDPK.K  | 2414.65181 | 3 | 1.63E-06 | 0.92 | 4.03 | - | 1367.3 |
| AHQ-5-8, 4972 - 5040   | R.IPEAPAGPPSDFGLFLSDDPK.K  | 2414.65181 | 3 | 7.89E-06 | 0.96 | 4.55 | - | 2116.8 |
| AHQ-5-8, 4885 - 4953   | R.IPEAPAGPPSDFGLFLSDDPK.K  | 2414.65181 | 3 | 5.62E-06 | 0.87 | 3.82 | - | 945.1  |
| AHQ-5-11, 5224 - 5302  | R.IPEAPAGPPSDFGLFLSDDPK.K  | 2414.65181 | 3 | 1.69E-08 | 0.90 | 4.30 | - | 1072.8 |
| AHQ-5-13, 2974         | K.ISIGNVVK.T               | 830.00746  | 2 | 1.70E-04 | 0.70 | 2.54 | - | 503.9  |
| AHQ-5-7, 1494 - 1554   | K.KEEITGLR.K               | 1047.18765 | 1 | 3.48E-04 | 0.42 | 2.37 | - | 329.9  |
| AHQ-5-7, 2352          | R.KFFYSDQNVDSR.D           | 1506.60087 | 2 | 5.94E-05 | 0.66 | 3.08 | - | 521.2  |
| AHQ-5-8, 2222          | R.KFFYSDQNVDSR.D           | 1506.60087 | 2 | 4.96E-05 | 0.88 | 3.35 | - | 758.8  |
| AHQ-5-13, 2717         | K.KGIWLEAGK.A              | 1002.19171 | 2 | 2.34E-04 | 0.92 | 3.24 | - | 1055.4 |
| AHQ-5-7, 2078          | K.KGIWLEAGK.A              | 1002.19171 | 1 | 2.88E-04 | 0.07 | 2.01 | - | 249.5  |
| AHQ-5-7, 2403 - 2483   | K.LAQAAQSSVATITR.L         | 1417.59344 | 2 | 2.97E-04 | 0.96 | 4.21 | - | 1548.1 |
| AHQ-5-13-, 2715 - 2716 | K.LAQAAQSSVATITR.L         | 1417.59344 | 2 | 5.47E-05 | 0.86 | 3.70 | - | 1216.5 |
| AHQ-5-3, 2473          | K.LAQAAQSSVATITR.L         | 1417.59344 | 2 | 2.30E-08 | 0.94 | 3.68 | - | 1270.7 |
| AHQ-5-13, 2849         | K.LAQAAQSSVATITR.L         | 1417.59344 | 2 | 1.00E-04 | 0.77 | 2.76 | - | 1024.0 |
| AHQ-5-6, 2472 - 2550   | K.LAQAAQSSVATITR.L         | 1417.59344 | 2 | 1.83E-11 | 0.97 | 4.18 | - | 1738.4 |
| AHQ-5-5, 2465          | K.LAQAAQSSVATITR.L         | 1417.59344 | 2 | 1.94E-09 | 0.97 | 4.68 | - | 1899.4 |
| AHQ-5-4, 2445          | K.LAQAAQSSVATITR.L         | 1417.59344 | 2 | 1.70E-06 | 0.92 | 3.26 | - | 1236.3 |
| AHQ-5-2, 2630 - 2659   | K.LAQAAQSSVATITR.L         | 1417.59344 | 2 | 1.92E-04 | 0.91 | 3.67 | - | 1091.1 |
| AHQ-5-1, 2649 - 2656   | K.LAQAAQSSVATITR.L         | 1417.59344 | 2 | 7.64E-06 | 0.96 | 3.80 | - | 1786.7 |
| AHQ-5-1, 2787 - 2812   | K.LAQAAQSSVATITR.L         | 1417.59344 | 2 | 1.58E-11 | 0.97 | 4.72 | - | 2015.4 |
| AHQ-5-3, 2634 - 2670   | K.LAQAAQSSVATITR.L         | 1417.59344 | 2 | 8.14E-11 | 0.97 | 4.72 | - | 1462.3 |
| AHQ-5-2, 2347 - 2425   | K.LAQAAQSSVATITR.L         | 1417.59344 | 2 | 2.68E-10 | 0.96 | 5.14 | - | 1332.0 |
| AHQ-5-2, 2519 - 2593   | K.LAQAAQSSVATITR.L         | 1417.59344 | 2 | 6.21E-10 | 0.98 | 5.71 | - | 2185.5 |
| AHQ-5-4, 2592 - 2628   | K.LAQAAQSSVATITR.L         | 1417.59344 | 2 | 4.00E-10 | 0.97 | 5.04 | - | 1678.2 |
| AHQ-5-5, 2330          | K.LAQAAQSSVATITR.L         | 1417.59344 | 2 | 8.08E-11 | 0.96 | 4.56 | - | 1499.7 |
| AHQ-5-14-, 2654 - 2655 | K.LAQAAQSSVATITR.L         | 1417.59344 | 2 | 4.22E-09 | 0.95 | 4.30 | - | 1493.6 |
| AHQ-5-10, 2472         | K.LAQAAQSSVATITR.L         | 1417.59344 | 2 | 7.70E-06 | 0.78 | 2.58 | - | 703.9  |
| AHQ-5-3, 2927          | R.LASEAKPAVAANEIEIGSHIK.H  | 2236.46779 | 2 | 7.42E-05 | 0.96 | 5.05 | - | 1049.9 |
| AHQ-5-4, 3101          | R.LASEAKPAVAANEIEIGSHIK.H  | 2236.46779 | 3 | 4.30E-06 | 0.97 | 5.75 | - | 1964.2 |
| AHQ-5-6, 2902          | R.LASEAKPAVAANEIEIGSHIK.H  | 2236.46779 | 2 | 4.01E-09 | 0.96 | 5.16 | - | 766.9  |
| AHQ-5-3, 3137 - 3143   | R.LASEAKPAVAANEIEIGSHIK.H  | 2236.46779 | 2 | 1.84E-05 | 0.91 | 4.92 | - | 480.3  |
| AHQ-5-4, 3105 - 3121   | R.LASEAKPAVAANEIEIGSHIK.H  | 2236.46779 | 2 | 1.23E-06 | 0.97 | 5.84 | - | 1091.6 |
| AHQ-5-2, 2862          | R.LASEAKPAVAANEIEIGSHIK.H  | 2236.46779 | 2 | 3.06E-11 | 0.94 | 4.36 | - | 1014.7 |
| AHQ-5-5, 2909          | R.LASEAKPAVAANEIEIGSHIK.H  | 2236.46779 | 2 | 9.48E-08 | 0.92 | 4.60 | - | 586.1  |
| AHQ-5-2, 3053          | R.LASEAKPAVAANEIEIGSHIK.H  | 2236.46779 | 2 | 1.65E-06 | 0.96 | 5.44 | - | 733.4  |
| AHQ-5-6, 2732          | R.LASEAKPAVAANEIEIGSHIK.H  | 2236.46779 | 3 | 7.27E-07 | 0.82 | 3.41 | - | 1218.0 |
| AHQ-5-1, 3303          | R.LASEAKPAVAANEIEIGSHIK.H  | 2236.46779 | 3 | 1.74E-07 | 0.97 | 5.30 | - | 2162.9 |
| AHQ-5-3, 3458          | R.LASEAKPAVAANEIEIGSHIK.H  | 2236.46779 | 2 | 1.55E-10 | 0.94 | 4.17 | - | 885.5  |
| AHQ-5-5, 2902          | R.LASEAKPAVAANEIEIGSHIK.H  | 2236.46779 | 3 | 1.64E-07 | 0.97 | 5.51 | - | 1969.9 |
| AHQ-5-1, 3307          | R.LASEAKPAVAANEIEIGSHIK.H  | 2236.46779 | 2 | 4.75E-06 | 0.95 | 5.34 | - | 698.4  |
| AHQ-5-6, 2840 - 2908   | R.LASEAKPAVAANEIEIGSHIK.H  | 2236.46779 | 3 | 2.88E-10 | 0.97 | 5.84 | - | 2088.2 |
| AHQ-5-1, 5643          | K.LGAASLGAEDPETQVVLINAVK.D | 2196.48671 | 3 | 1.69E-06 | 0.92 | 3.72 | - | 1613.5 |
| AHQ-5-1, 5357 - 5424   | K.LGAASLGAEDPETQVVLINAVK.D | 2196.48671 | 2 | 1.32E-10 | 0.95 | 4.62 | - | 1073.0 |
| AHQ-5-2, 5505 - 5507   | K.LGAASLGAEDPETQVVLINAVK.D | 2196.48671 | 2 | 5.37E-04 | 0.96 | 5.37 | - | 933.4  |
| AHQ-5-1, 5491          | K.LGAASLGAEDPETQVVLINAVK.D | 2196.48671 | 2 | 8.93E-07 | 0.82 | 3.83 | - | 563.6  |
| AHQ-5-3, 5609 - 5621   | K.LGAASLGAEDPETQVVLINAVK.D | 2196.48671 | 3 | 7.78E-07 | 0.98 | 5.71 | - | 2425.0 |
| AHQ-5-13-, 5268        | K.LGAASLGAEDPETQVVLINAVK.D | 2196.48671 | 2 | 1.45E-06 | 0.98 | 5.74 | - | 1661.2 |
| AHQ-5-4, 5357 - 5432   | K.LGAASLGAEDPETQVVLINAVK.D | 2196.48671 | 2 | 2.69E-11 | 0.96 | 5.21 | - | 1180.5 |
| AHQ-5-2, 5358 - 5433   | K.LGAASLGAEDPETQVVLINAVK.D | 2196.48671 | 2 | 2.12E-07 | 0.96 | 5.14 | - | 994.5  |
| AHQ-5-4, 5468 - 5542   | K.LGAASLGAEDPETQVVLINAVK.D | 2196.48671 | 2 | 7.31E-07 | 0.96 | 5.04 | - | 1169.1 |
| AHQ-5-14-, 5222        | K.LGAASLGAEDPETQVVLINAVK.D | 2196.48671 | 2 | 5.29E-05 | 0.95 | 4.70 | - | 972.8  |
| AHQ-5-4, 5576          | K.LGAASLGAEDPETQVVLINAVK.D | 2196.48671 | 3 | 1.70E-04 | 0.81 | 3.30 | - | 1039.5 |
| AHQ-5-2, 5638 - 5706   | K.LGAASLGAEDPETQVVLINAVK.D | 2196.48671 | 2 | 1.47E-05 | 0.97 | 5.84 | - | 983.9  |
| AHQ-5-5, 5217 - 5218   | K.LGAASLGAEDPETQVVLINAVK.D | 2196.48671 | 2 | 4.21E-12 | 0.95 | 4.97 | - | 997.0  |
| AHQ-5-6, 5500          | K.LGAASLGAEDPETQVVLINAVK.D | 2196.48671 | 2 | 7.09E-07 | 0.92 | 4.48 | - | 722.7  |
| AHQ-5-13-, 5259        | K.LGAASLGAEDPETQVVLINAVK.D | 2196.48671 | 2 | 9.56E-04 | 0.80 | 3.04 | - | 686.5  |
| AHQ-5-2, 5757          | K.LGAASLGAEDPETQVVLINAVK.D | 2196.48671 | 2 | 1.48E-09 | 0.93 | 4.52 | - | 725.4  |
| AHQ-5-7, 5115 - 5186   | K.LGAASLGAEDPETQVVLINAVK.D | 2196.48671 | 2 | 2.11E-05 | 0.92 | 4.15 | - | 873.8  |
| AHQ-5-14-, 5035 - 5047 | K.LGAASLGAEDPETQVVLINAVK.D | 2196.48671 | 2 | 3.47E-07 | 0.91 | 4.80 | - | 570.4  |
| AHQ-5-6, 5260 - 5333   | K.LGAASLGAEDPETQVVLINAVK.D | 2196.48671 | 2 | 1.52E-10 | 0.97 | 5.49 | - | 1330.6 |
| AHQ-5-1, 5641          | K.LGAASLGAEDPETQVVLINAVK.D | 2196.48671 | 2 | 1.02E-05 | 0.97 | 5.20 | - | 1477.0 |
| AHQ-5-7, 5016 - 5018   | K.LGAASLGAEDPETQVVLINAVK.D | 2196.48671 | 2 | 6.17E-08 | 0.96 | 4.50 | - | 1450.3 |

|                       |                                      |            |   |          |      |      |   |        |
|-----------------------|--------------------------------------|------------|---|----------|------|------|---|--------|
| AHQ-5-6, 5148         | K.LGAASLGAEDPETQVVLINAVK.D           | 2196.48671 | 2 | 1.22E-04 | 0.91 | 3.74 | - | 1001.2 |
| AHQ-5-5, 5547 - 5567  | K.LGAASLGAEDPETQVVLINAVK.D           | 2196.48671 | 2 | 5.73E-11 | 0.96 | 5.40 | - | 921.9  |
| AHQ-5-4, 5612 - 5680  | K.LGAASLGAEDPETQVVLINAVK.D           | 2196.48671 | 2 | 3.66E-06 | 0.97 | 5.30 | - | 1443.6 |
| AHQ-5-5, 5385 - 5398  | K.LGAASLGAEDPETQVVLINAVK.D           | 2196.48671 | 3 | 1.07E-07 | 0.98 | 5.84 | - | 2604.0 |
| AHQ-5-1, 5773 - 5851  | K.LGAASLGAEDPETQVVLINAVK.D           | 2196.48671 | 2 | 1.78E-07 | 0.95 | 5.04 | - | 865.1  |
| AHQ-5-4, 5749         | K.LGAASLGAEDPETQVVLINAVK.D           | 2196.48671 | 2 | 1.05E-04 | 0.94 | 4.78 | - | 938.5  |
| AHQ-5-5, 5373         | K.LGAASLGAEDPETQVVLINAVK.D           | 2196.48671 | 2 | 7.50E-06 | 0.96 | 4.96 | - | 1232.9 |
| AHQ-5-8, 3484         | K.LHTDDELNLWLDHGR.T                  | 1721.81153 | 2 | 5.02E-06 | 0.64 | 3.13 | - | 136.3  |
| AHQ-5-9, 3143         | K.LHTDDELNLWLDHGR.T                  | 1721.81153 | 2 | 3.08E-05 | 0.98 | 5.01 | - | 2461.7 |
| AHQ-5-10, 3292 - 3371 | K.LHTDDELNLWLDHGR.T                  | 1721.81153 | 2 | 1.65E-09 | 0.97 | 4.87 | - | 1844.0 |
| AHQ-5-8, 3028         | K.LHTDDELNLWLDHGR.T                  | 1721.81153 | 2 | 3.55E-07 | 0.97 | 4.83 | - | 1778.1 |
| AHQ-5-7, 3343 - 3358  | K.LHTDDELNLWLDHGR.T                  | 1721.81153 | 3 | 1.86E-07 | 0.92 | 4.59 | - | 988.2  |
| AHQ-5-5, 5070         | K.LLAALLEDEGGSGRPLLOAAK.G            | 2123.43896 | 2 | 2.63E-09 | 0.97 | 5.87 | - | 1485.7 |
| AHQ-5-8, 4490 - 4516  | K.LLAALLEDEGGSGRPLLOAAK.G            | 2123.43896 | 2 | 9.38E-10 | 0.96 | 5.60 | - | 1276.8 |
| AHQ-5-2, 5269 - 5270  | K.LLAALLEDEGGSGRPLLOAAK.G            | 2123.43896 | 3 | 1.41E-05 | 0.97 | 5.51 | - | 1880.8 |
| AHQ-5-6, 5042 - 5052  | K.LLAALLEDEGGSGRPLLOAAK.G            | 2123.43896 | 2 | 1.20E-09 | 0.98 | 6.82 | - | 1297.4 |
| AHQ-5-12, 5173        | K.LLAALLEDEGGSGRPLLOAAK.G            | 2123.43896 | 2 | 5.20E-12 | 0.98 | 5.94 | - | 1926.8 |
| AHQ-5-12, 5164        | K.LLAALLEDEGGSGRPLLOAAK.G            | 2123.43896 | 3 | 9.70E-08 | 0.95 | 4.84 | - | 1342.9 |
| AHQ-5-5, 5065 - 5133  | K.LLAALLEDEGGSGRPLLOAAK.G            | 2123.43896 | 3 | 6.23E-07 | 0.96 | 5.31 | - | 1497.2 |
| AHQ-5-9, 4466         | K.LLAALLEDEGGSGRPLLOAAK.G            | 2123.43896 | 2 | 2.07E-12 | 0.98 | 6.19 | - | 1597.8 |
| AHQ-5-4, 5313         | K.LLAALLEDEGGSGRPLLOAAK.G            | 2123.43896 | 2 | 1.09E-10 | 0.98 | 6.37 | - | 1579.7 |
| AHQ-5-3, 5365 - 5393  | K.LLAALLEDEGGSGRPLLOAAK.G            | 2123.43896 | 2 | 4.35E-09 | 0.98 | 6.61 | - | 1534.4 |
| AHQ-5-2, 5265         | K.LLAALLEDEGGSGRPLLOAAK.G            | 2123.43896 | 2 | 4.87E-07 | 0.97 | 6.25 | - | 1208.3 |
| AHQ-5-4, 5312 - 5317  | K.LLAALLEDEGGSGRPLLOAAK.G            | 2123.43896 | 3 | 7.06E-10 | 0.97 | 5.75 | - | 1427.0 |
| AHQ-5-8, 4508         | K.LLAALLEDEGGSGRPLLOAAK.G            | 2123.43896 | 3 | 9.94E-08 | 0.95 | 5.05 | - | 1233.2 |
| AHQ-5-3, 5367         | K.LLAALLEDEGGSGRPLLOAAK.G            | 2123.43896 | 3 | 6.61E-08 | 0.96 | 5.27 | - | 1457.6 |
| AHQ-5-11, 4979        | K.LLAALLEDEGGSGRPLLOAAK.G            | 2123.43896 | 3 | 5.89E-08 | 0.97 | 5.64 | - | 1975.9 |
| AHQ-5-7, 4828         | K.LLAALLEDEGGSGRPLLOAAK.G            | 2123.43896 | 2 | 3.83E-06 | 0.98 | 6.21 | - | 1736.4 |
| AHQ-5-7, 4827 - 4851  | K.LLAALLEDEGGSGRPLLOAAK.G            | 2123.43896 | 3 | 5.97E-06 | 0.97 | 5.86 | - | 1572.9 |
| AHQ-5-6, 5045         | K.LLAALLEDEGGSGRPLLOAAK.G            | 2123.43896 | 3 | 3.81E-06 | 0.84 | 3.71 | - | 880.0  |
| AHQ-5-1, 5411         | K.LLAALLEDEGGSGRPLLOAAK.G            | 2123.43896 | 2 | 8.21E-12 | 0.98 | 6.74 | - | 1932.9 |
| AHQ-5-9, 4472         | K.LLAALLEDEGGSGRPLLOAAK.G            | 2123.43896 | 3 | 1.53E-09 | 0.91 | 4.18 | - | 915.2  |
| AHQ-5-1, 5412         | K.LLAALLEDEGGSGRPLLOAAK.G            | 2123.43896 | 3 | 2.24E-06 | 0.96 | 5.26 | - | 1594.7 |
| AHQ-5-1, 5420         | K.LLAALLEDEGGSGRPLLOAAKGLAGAVSELLR.S | 3190.68337 | 3 | 8.30E-04 | 0.63 | 3.88 | - | 552.3  |
| AHQ-5-2, 4481 - 4559  | R.LLSDSLPPSTGTGFQEAQSR.L             | 2035.20076 | 2 | 1.64E-05 | 0.84 | 3.62 | - | 408.6  |
| AHQ-5-1, 4467 - 4535  | R.LLSDSLPPSTGTGFQEAQSR.L             | 2035.20076 | 2 | 3.59E-05 | 0.62 | 2.96 | - | 231.2  |
| AHQ-5-2, 4341 - 4410  | R.LLSDSLPPSTGTGFQEAQSR.L             | 2035.20076 | 2 | 3.94E-11 | 0.93 | 4.59 | - | 406.0  |
| AHQ-5-1, 4331 - 4399  | R.LLSDSLPPSTGTGFQEAQSR.L             | 2035.20076 | 2 | 2.42E-06 | 0.86 | 3.81 | - | 378.5  |
| AHQ-5-3, 4462 - 4533  | R.LLSDSLPPSTGTGFQEAQSR.L             | 2035.20076 | 2 | 2.92E-04 | 0.70 | 3.09 | - | 241.4  |
| AHQ-5-4, 4428 - 4430  | R.LLSDSLPPSTGTGFQEAQSR.L             | 2035.20076 | 2 | 7.24E-04 | 0.82 | 3.68 | - | 333.0  |
| AHQ-5-5, 4085 - 4165  | R.LLSDSLPPSTGTGFQEAQSR.L             | 2035.20076 | 2 | 3.53E-05 | 0.85 | 3.87 | - | 409.2  |
| AHQ-5-2, 4201 - 4270  | R.LLSDSLPPSTGTGFQEAQSR.L             | 2035.20076 | 2 | 4.36E-10 | 0.88 | 3.98 | - | 416.7  |
| AHQ-5-4, 4288 - 4360  | R.LLSDSLPPSTGTGFQEAQSR.L             | 2035.20076 | 2 | 1.42E-05 | 0.90 | 4.00 | - | 518.9  |
| AHQ-5-1, 4232 - 4308  | R.LLSDSLPPSTGTGFQEAQSR.L             | 2035.20076 | 2 | 1.77E-04 | 0.83 | 3.85 | - | 293.7  |
| AHQ-5-4, 4152 - 4220  | R.LLSDSLPPSTGTGFQEAQSR.L             | 2035.20076 | 2 | 2.62E-07 | 0.76 | 3.39 | - | 291.6  |
| AHQ-5-3, 4193 - 4262  | R.LLSDSLPPSTGTGFQEAQSR.L             | 2035.20076 | 2 | 1.17E-06 | 0.92 | 4.32 | - | 461.9  |
| AHQ-5-3, 4333 - 4413  | R.LLSDSLPPSTGTGFQEAQSR.L             | 2035.20076 | 2 | 1.99E-06 | 0.94 | 5.01 | - | 461.2  |
| AHQ-5-5, 4238         | R.LLSDSLPPSTGTGFQEAQSR.L             | 2035.20076 | 2 | 5.55E-04 | 0.59 | 3.07 | - | 216.3  |
| AHQ-5-3, 6086         | R.LNEAAAQLNQAATELVQASR.G             | 2028.21299 | 3 | 1.95E-06 | 0.95 | 5.03 | - | 1447.5 |
| AHQ-5-5, 4362         | R.LNEAAAQLNQAATELVQASR.G             | 2028.21299 | 2 | 8.51E-07 | 0.96 | 5.08 | - | 1006.9 |
| AHQ-5-2, 5409         | R.LNEAAAQLNQAATELVQASR.G             | 2028.21299 | 2 | 3.91E-08 | 0.97 | 5.82 | - | 1589.6 |
| AHQ-5-6, 5812         | R.LNEAAAQLNQAATELVQASR.G             | 2028.21299 | 2 | 5.72E-08 | 0.88 | 3.64 | - | 690.0  |
| AHQ-5-3, 4530 - 4541  | R.LNEAAAQLNQAATELVQASR.G             | 2028.21299 | 2 | 6.05E-14 | 0.97 | 5.33 | - | 1234.1 |
| AHQ-5-8, 5028 - 5029  | R.LNEAAAQLNQAATELVQASR.G             | 2028.21299 | 2 | 1.37E-08 | 0.98 | 5.84 | - | 1886.8 |
| AHQ-5-2, 4471 - 4501  | R.LNEAAAQLNQAATELVQASR.G             | 2028.21299 | 2 | 1.70E-09 | 0.93 | 4.79 | - | 671.9  |
| AHQ-5-4, 5628 - 5677  | R.LNEAAAQLNQAATELVQASR.G             | 2028.21299 | 2 | 2.70E-09 | 0.97 | 5.47 | - | 1432.3 |
| AHQ-5-4, 5636         | R.LNEAAAQLNQAATELVQASR.G             | 2028.21299 | 3 | 5.52E-04 | 0.96 | 4.71 | - | 2090.7 |
| AHQ-5-1, 5761         | R.LNEAAAQLNQAATELVQASR.G             | 2028.21299 | 3 | 5.73E-04 | 0.97 | 5.82 | - | 1879.2 |
| AHQ-5-3, 6069 - 6083  | R.LNEAAAQLNQAATELVQASR.G             | 2028.21299 | 2 | 5.25E-12 | 0.98 | 5.40 | - | 2101.5 |
| AHQ-5-3, 5685         | R.LNEAAAQLNQAATELVQASR.G             | 2028.21299 | 2 | 3.25E-09 | 0.98 | 6.12 | - | 1764.3 |
| AHQ-5-4, 5868         | R.LNEAAAQLNQAATELVQASR.G             | 2028.21299 | 2 | 3.60E-12 | 0.97 | 5.01 | - | 1513.7 |
| AHQ-5-5, 5410         | R.LNEAAAQLNQAATELVQASR.G             | 2028.21299 | 2 | 1.35E-04 | 0.94 | 4.36 | - | 1241.6 |
| AHQ-5-9, 4768         | R.LNEAAAQLNQAATELVQASR.G             | 2028.21299 | 2 | 1.26E-05 | 0.93 | 3.92 | - | 1179.0 |
| AHQ-5-2, 5575 - 5627  | R.LNEAAAQLNQAATELVQASR.G             | 2028.21299 | 3 | 3.93E-04 | 0.97 | 5.93 | - | 1986.8 |
| AHQ-5-4, 6004         | R.LNEAAAQLNQAATELVQASR.G             | 2028.21299 | 2 | 1.08E-10 | 0.97 | 5.27 | - | 1401.9 |
| AHQ-5-3, 5470         | R.LNEAAAQLNQAATELVQASR.G             | 2028.21299 | 2 | 1.10E-08 | 0.93 | 4.52 | - | 816.7  |
| AHQ-5-4, 6010         | R.LNEAAAQLNQAATELVQASR.G             | 2028.21299 | 3 | 1.10E-05 | 0.94 | 4.64 | - | 1223.2 |
| AHQ-5-5, 5609 - 5622  | R.LNEAAAQLNQAATELVQASR.G             | 2028.21299 | 2 | 2.64E-04 | 0.79 | 3.23 | - | 729.1  |
| AHQ-5-1, 4575 - 4652  | R.LNEAAAQLNQAATELVQASR.G             | 2028.21299 | 2 | 3.14E-07 | 0.92 | 4.26 | - | 765.6  |
| AHQ-5-6, 5400         | R.LNEAAAQLNQAATELVQASR.G             | 2028.21299 | 2 | 1.12E-10 | 0.97 | 5.27 | - | 1540.1 |
| AHQ-5-4, 4508         | R.LNEAAAQLNQAATELVQASR.G             | 2028.21299 | 2 | 4.04E-08 | 0.95 | 5.34 | - | 799.9  |
| AHQ-5-3, 5595 - 5665  | R.LNEAAAQLNQAATELVQASR.G             | 2028.21299 | 2 | 2.84E-13 | 0.98 | 5.81 | - | 1853.5 |
| AHQ-5-2, 5535 - 5605  | R.LNEAAAQLNQAATELVQASR.G             | 2028.21299 | 2 | 7.98E-12 | 0.98 | 5.79 | - | 2026.5 |
| AHQ-5-5, 5817 - 5890  | R.LNEAAAQLNQAATELVQASR.G             | 2028.21299 | 2 | 1.15E-11 | 0.98 | 5.79 | - | 1989.8 |
| AHQ-5-2, 5763 - 5793  | R.LNEAAAQLNQAATELVQASR.G             | 2028.21299 | 2 | 5.76E-13 | 0.98 | 5.91 | - | 1755.8 |
| AHQ-5-1, 5748 - 5816  | R.LNEAAAQLNQAATELVQASR.G             | 2028.21299 | 2 | 2.61E-12 | 0.96 | 4.74 | - | 1466.8 |
| AHQ-5-1, 6044         | R.LNEAAAQLNQAATELVQASR.G             | 2028.21299 | 2 | 7.92E-08 | 0.94 | 3.96 | - | 1138.3 |
| AHQ-5-7, 5218         | R.LNEAAAQLNQAATELVQASR.G             | 2028.21299 | 2 | 6.77E-08 | 0.95 | 4.69 | - | 1246.5 |
| AHQ-5-3, 5925         | R.LNEAAAQLNQAATELVQASR.G             | 2028.21299 | 2 | 1.96E-08 | 0.97 | 5.14 | - | 1331.5 |
| AHQ-5-2, 1834 - 1867  | R.MATNAAAQNAIK                       | 1204.38227 | 2 | 3.73E-05 | 0.86 | 3.79 | - | 676.8  |
| AHQ-5-1, 4145 - 4217  | R.M*VAATNNLCEAANAAVQGHASQEK.L        | 2574.79038 | 3 | 4.78E-09 | 0.94 | 5.29 | - | 1049.3 |
| AHQ-5-1, 4404         | R.MVAATNNLCEAANAAVQGHASQEK.L         | 2558.79098 | 3 | 5.95E-05 | 0.82 | 3.61 | - | 870.1  |
| AHQ-5-5, 3898         | R.M*VAATNNLCEAANAAVQGHASQEK.L        | 2574.79038 | 3 | 1.76E-08 | 0.94 | 5.34 | - | 953.8  |
| AHQ-5-4, 3872         | R.MVAATNNLCEAANAAVQGHASQEK.L         | 2558.79098 | 3 | 6.69E-08 | 0.92 | 4.56 | - | 1185.7 |
| AHQ-5-7, 3923         | R.MVAATNNLCEAANAAVQGHASQEK.L         | 2558.79098 | 3 | 1.02E-04 | 0.76 | 3.01 | - | 748.3  |
| AHQ-5-2, 4357         | R.MVAATNNLCEAANAAVQGHASQEK.L         | 2558.79098 | 2 | 4.22E-11 | 0.93 | 4.68 | - | 736.8  |
| AHQ-5-4, 4061         | R.M*VAATNNLCEAANAAVQGHASQEK.L        | 2574.79038 | 3 | 5.69E-09 | 0.91 | 4.10 | - | 1027.1 |
| AHQ-5-3, 4339         | R.MVAATNNLCEAANAAVQGHASQEK.L         | 2558.79098 | 3 | 7.00E-09 | 0.90 | 4.26 | - | 780.6  |
| AHQ-5-2, 4271 - 4343  | R.MVAATNNLCEAANAAVQGHASQEK.L         | 2558.79098 | 3 | 3.77E-07 | 0.95 | 5.12 | - | 1307.8 |
| AHQ-5-8, 3754 - 3757  | R.MVAATNNLCEAANAAVQGHASQEK.L         | 2558.79098 | 3 | 1.98E-07 | 0.96 | 5.42 | - | 1275.2 |
| AHQ-5-2, 4097         | R.M*VAATNNLCEAANAAVQGHASQEK.L        | 2574.79038 | 3 | 6.02E-10 | 0.94 | 5.49 | - | 969.1  |
| AHQ-5-10, 3788 - 3842 | R.MVAATNNLCEAANAAVQGHASQEK.L         | 2558.79098 | 3 | 1.65E-05 | 0.90 | 4.43 | - | 815.5  |
| AHQ-5-2, 4082         | R.M*VAATNNLCEAANAAVQGHASQEK.L        | 2574.79038 | 2 | 2.13E-04 | 0.67 | 2.82 | - | 519.9  |
| AHQ-5-4, 4694         | R.MVAATNNLCEAANAAVQGHASQEK.L         | 2558.79098 | 3 | 2.20E-04 | 0.87 | 3.73 | - | 853.0  |
| AHQ-5-2, 4558         | R.MVAATNNLCEAANAAVQGHASQEK.L         | 2558.79098 | 3 | 9.17E-07 | 0.96 | 5.07 | - | 1610.8 |
| AHQ-5-4, 7130         | K.MVGGIAQIIAAQEEMLR.K                | 1831.19407 | 3 | 8.53E-10 | 0.98 | 6.86 | - | 2937.7 |
| AHQ-5-10, 5948        | K.M*VGGIAQIIAAQEEMLR.K               | 1847.19347 | 2 | 3.51E-04 | 0.95 | 4.99 | - | 949.6  |
| AHQ-5-4, 7116 - 7128  | K.MVGGIAQIIAAQEEMLR.K                | 1831.19407 | 2 | 3.29E-08 | 0.97 | 5.60 | - | 1532.9 |
| AHQ-5-4, 6825         | K.M*VGGIAQIIAAQEEMLR.K               | 1847.19347 | 2 | 4.33E-07 | 0.98 | 5.67 | - | 1656.5 |
| AHQ-5-2, 6430         | K.MVGGIAQIIAAQEEM*LR.K               | 1847.19347 | 2 | 6.32E-10 | 0.98 | 5.41 | - | 1866.8 |
| AHQ-5-8, 6610         | K.MVGGIAQIIAAQEEMLR.K                | 1831.19407 | 2 | 6.22E-04 | 0.93 | 3.59 | - | 1421.7 |
| AHQ-5-4, 6433 - 6513  | K.MVGGIAQIIAAQEEM*LR.K               | 1847.19347 | 2 | 2.19E-09 | 0.97 | 5.68 | - | 1367.6 |
| AHQ-5-7, 6810         | K.MVGGIAQIIAAQEEMLR.K                | 1831.19407 | 2 | 4.33E-08 | 0.94 | 4.62 | - | 1274.8 |
| AHQ-5-2, 6790         | K.M*VGGIAQIIAAQEEMLR.K               | 1847.19347 | 2 | 1.43E-06 | 0.96 | 4.53 | - | 1484.4 |
| AHQ-5-3, 7161 - 7178  | K.MVGGIAQIIAAQEEMLR.K                | 1831.19407 | 2 | 2.80E-07 | 0.97 | 5.31 | - | 1806.9 |
| AHQ-5-2, 7109 - 7174  | K.MVGGIAQIIAAQEEMLR.K                | 1831.19407 | 2 | 9.55E-14 | 0.98 | 6.12 | - | 2194.3 |
| AHQ-5-9, 6096         | K.MVGGIAQIIAAQEEMLR.K                | 1831.19407 | 2 | 3.00E-06 | 0.96 | 4.96 | - | 1505.0 |

|                       |                                         |            |   |          |      |      |   |        |
|-----------------------|-----------------------------------------|------------|---|----------|------|------|---|--------|
| AHQ-5-2, 7130         | K.MVGGIAQIAAQEEMLR.K                    | 1831.19407 | 3 | 3.07E-10 | 0.98 | 6.89 | - | 2776.3 |
| AHQ-5-2, 7270         | K.MVGGIAQIAAQEEMLR.K                    | 1831.19407 | 2 | 4.17E-06 | 0.95 | 4.18 | - | 1481.8 |
| AHQ-5-6, 6881         | K.MVGGIAQIAAQEEMLR.K                    | 1831.19407 | 2 | 3.18E-06 | 0.98 | 5.61 | - | 1702.7 |
| AHQ-5-6, 6586         | K.M.VGGIAQIAAQEEMLR.K                   | 1847.19347 | 2 | 2.45E-07 | 0.97 | 5.78 | - | 1553.8 |
| AHQ-5-5, 6967 - 6970  | K.MVGGIAQIAAQEEMLR.K                    | 1831.19407 | 2 | 8.74E-10 | 0.97 | 5.37 | - | 1783.7 |
| AHQ-5-1, 7105         | K.MVGGIAQIAAQEEMLR.K                    | 1831.19407 | 2 | 5.04E-07 | 0.97 | 5.61 | - | 1449.8 |
| AHQ-5-13, 6474        | K.M.VGGIAQIAAQEEMLR.K                   | 1847.19347 | 2 | 5.00E-05 | 0.90 | 4.00 | - | 969.4  |
| AHQ-5-2, 6094         | K.M.VGGIAQIAAQEEM*LR.K                  | 1863.19287 | 2 | 2.85E-06 | 0.97 | 5.56 | - | 1616.0 |
| AHQ-5-8, 2028         | K.NCGQMSIEIAK.V                         | 1268.40005 | 2 | 1.20E-05 | 0.79 | 2.79 | - | 1048.0 |
| AHQ-5-3, 4777 - 4779  | K.NGNLPEFGDAISTASK.A                    | 1621.73018 | 2 | 3.39E-07 | 0.93 | 4.53 | - | 632.5  |
| AHQ-5-1, 4564 - 4580  | K.NGNLPEFGDAISTASK.A                    | 1621.73018 | 2 | 2.11E-05 | 0.82 | 3.56 | - | 426.1  |
| AHQ-5-1, 4729 - 4801  | K.NGNLPEFGDAISTASK.A                    | 1621.73018 | 2 | 1.13E-04 | 0.57 | 2.65 | - | 394.4  |
| AHQ-5-6, 4577 - 4578  | K.NGNLPEFGDAISTASK.A                    | 1621.73018 | 2 | 5.40E-06 | 0.83 | 3.47 | - | 492.2  |
| AHQ-5-4, 4073 - 4076  | K.NLGTALALR.T                           | 1058.21367 | 2 | 7.09E-05 | 0.91 | 3.50 | - | 1022.4 |
| AHQ-5-1, 4289 - 4293  | K.NLGTALALR.T                           | 1058.21367 | 2 | 8.40E-05 | 0.88 | 3.52 | - | 849.5  |
| AHQ-5-5, 3853         | K.NLGTALALR.T                           | 1058.21367 | 2 | 3.48E-04 | 0.91 | 3.64 | - | 1041.7 |
| AHQ-5-2, 4041 - 4057  | K.NLGTALALR.T                           | 1058.21367 | 2 | 1.90E-04 | 0.90 | 3.67 | - | 884.9  |
| AHQ-5-4, 2577 - 2578  | K.PAAVAEENEEIGSHIK.H                    | 1636.78798 | 2 | 8.44E-10 | 0.98 | 5.69 | - | 2560.3 |
| AHQ-5-1, 2789         | K.PAAVAEENEEIGSHIK.H                    | 1636.78798 | 2 | 2.10E-05 | 0.97 | 5.08 | - | 1557.5 |
| AHQ-5-5, 2433         | K.PAAVAEENEEIGSHIK.H                    | 1636.78798 | 3 | 5.96E-11 | 0.97 | 5.52 | - | 1561.1 |
| AHQ-5-4, 2576         | K.PAAVAEENEEIGSHIK.H                    | 1636.78798 | 3 | 6.51E-09 | 0.98 | 5.61 | - | 2388.4 |
| AHQ-5-6, 2416         | K.PAAVAEENEEIGSHIK.H                    | 1636.78798 | 2 | 7.47E-05 | 0.97 | 5.27 | - | 1506.3 |
| AHQ-5-6, 2420 - 2421  | K.PAAVAEENEEIGSHIK.H                    | 1636.78798 | 3 | 4.55E-11 | 0.98 | 6.12 | - | 2236.1 |
| AHQ-5-2, 2518         | K.PAAVAEENEEIGSHIK.H                    | 1636.78798 | 2 | 7.27E-09 | 0.98 | 5.59 | - | 2033.0 |
| AHQ-5-2, 2521         | K.PAAVAEENEEIGSHIK.H                    | 1636.78798 | 3 | 1.84E-10 | 0.98 | 6.05 | - | 1915.8 |
| AHQ-5-3, 2621         | K.PAAVAEENEEIGSHIK.H                    | 1636.78798 | 3 | 2.30E-09 | 0.96 | 5.19 | - | 1492.3 |
| AHQ-5-3, 2617         | K.PAAVAEENEEIGSHIK.H                    | 1636.78798 | 2 | 8.25E-08 | 0.98 | 6.08 | - | 2275.6 |
| AHQ-5-5, 2435         | K.PAAVAEENEEIGSHIK.H                    | 1636.78798 | 2 | 1.23E-06 | 0.98 | 6.09 | - | 2052.0 |
| AHQ-5-7, 2831         | K.QAAASATQTIAAAQHAASTPK.A               | 1996.17099 | 2 | 5.54E-04 | 0.68 | 3.38 | - | 312.1  |
| AHQ-5-4, 3162         | K.QAAASATQTIAAAQHAASTPK.A               | 1996.17099 | 2 | 6.09E-06 | 0.86 | 4.01 | - | 499.5  |
| AHQ-5-1, 3348         | K.QAAASATQTIAAAQHAASTPK.A               | 1996.17099 | 2 | 6.36E-06 | 0.95 | 4.88 | - | 933.1  |
| AHQ-5-5, 2945 - 2946  | K.QAAASATQTIAAAQHAASTPK.A               | 1996.17099 | 2 | 2.97E-05 | 0.93 | 4.60 | - | 735.8  |
| AHQ-5-6, 2936 - 2942  | K.QAAASATQTIAAAQHAASTPK.A               | 1996.17099 | 2 | 2.76E-06 | 0.94 | 4.79 | - | 760.2  |
| AHQ-5-2, 3113         | K.QAAASATQTIAAAQHAASTPK.A               | 1996.17099 | 2 | 5.79E-04 | 0.87 | 3.92 | - | 667.2  |
| AHQ-5-3, 3198 - 3199  | K.QAAASATQTIAAAQHAASTPK.A               | 1996.17099 | 2 | 1.92E-07 | 0.93 | 4.75 | - | 793.0  |
| AHQ-5-4, 3161         | K.QAAASATQTIAAAQHAASTPK.A               | 1996.17099 | 3 | 4.05E-04 | 0.78 | 3.18 | - | 763.3  |
| AHQ-5-5, 3857         | R.QELAVFCSPEPPAK.T                      | 1574.77985 | 2 | 4.32E-05 | 0.76 | 2.64 | - | 747.6  |
| AHQ-5-2, 3994 - 3998  | R.QELAVFCSPEPPAK.T                      | 1574.77985 | 2 | 5.93E-07 | 0.94 | 4.06 | - | 1151.3 |
| AHQ-5-1, 4149 - 4152  | R.QELAVFCSPEPPAK.T                      | 1574.77985 | 2 | 2.29E-07 | 0.94 | 3.96 | - | 1117.8 |
| AHQ-5-8, 3638         | R.QELAVFCSPEPPAK.T                      | 1574.77985 | 2 | 2.47E-05 | 0.75 | 2.70 | - | 674.5  |
| AHQ-5-2, 7493 - 7541  | R.QNLLQAAGNVGQASGELLQIGESDTPHFQDMLQAK.A | 4138.52644 | 3 | 1.08E-05 | 0.89 | 5.02 | - | 529.0  |
| AHQ-5-3, 7505 - 7549  | R.QNLLQAAGNVGQASGELLQIGESDTPHFQDMLQAK.A | 4138.52644 | 3 | 2.67E-09 | 0.95 | 5.79 | - | 1009.2 |
| AHQ-5-5, 7401 - 7445  | R.QNLLQAAGNVGQASGELLQIGESDTPHFQDMLQAK.A | 4138.52644 | 3 | 4.44E-15 | 0.96 | 6.08 | - | 950.9  |
| AHQ-5-2, 7473         | R.QNLLQAAGNVGQASGELLQIGESDTPHFQDMLQAK.A | 4154.52584 | 3 | 2.13E-07 | 0.91 | 5.01 | - | 902.0  |
| AHQ-5-6, 7308 - 7348  | R.QNLLQAAGNVGQASGELLQIGESDTPHFQDMLQAK.A | 4138.52644 | 3 | 3.69E-08 | 0.94 | 5.83 | - | 695.8  |
| AHQ-5-9, 6478         | R.QNLLQAAGNVGQASGELLQIGESDTPHFQDMLQAK.A | 4138.52644 | 3 | 1.12E-04 | 0.96 | 5.75 | - | 1132.9 |
| AHQ-5-7, 7295 - 7343  | R.QNLLQAAGNVGQASGELLQIGESDTPHFQDMLQAK.A | 4138.52644 | 3 | 3.17E-12 | 0.96 | 5.72 | - | 962.8  |
| AHQ-5-2, 3765         | K.QVAASTAQLLVACK.V                      | 1461.70942 | 2 | 8.15E-08 | 0.90 | 3.09 | - | 739.7  |
| AHQ-5-3, 3814         | K.QVAASTAQLLVACK.V                      | 1461.70942 | 2 | 8.65E-11 | 0.89 | 3.65 | - | 577.5  |
| AHQ-5-1, 3933 - 3935  | K.QVAASTAQLLVACK.V                      | 1461.70942 | 2 | 3.05E-06 | 0.95 | 4.13 | - | 826.2  |
| AHQ-5-8, 5094         | K.RVAGSVTELIQAAEAMK.G                   | 1775.06387 | 2 | 2.40E-06 | 0.95 | 4.73 | - | 892.4  |
| AHQ-5-1, 6119         | K.RVAGSVTELIQAAEAMK.G                   | 1775.06387 | 2 | 1.56E-05 | 0.96 | 4.73 | - | 1471.9 |
| AHQ-5-4, 5921         | K.RVAGSVTELIQAAEAMK.G                   | 1775.06387 | 2 | 7.90E-06 | 0.98 | 6.03 | - | 1572.1 |
| AHQ-5-2, 4846         | K.RVAGSVTELIQAAEAM*K.G                  | 1791.06327 | 2 | 1.29E-04 | 0.84 | 3.99 | - | 399.3  |
| AHQ-5-3, 5991         | K.RVAGSVTELIQAAEAMK.G                   | 1775.06387 | 2 | 1.36E-05 | 0.98 | 6.51 | - | 2296.2 |
| AHQ-5-2, 4929         | K.RVAGSVTELIQAAEAM*K.G                  | 1791.06327 | 2 | 9.20E-05 | 0.88 | 3.80 | - | 455.1  |
| AHQ-5-5, 5610         | K.RVAGSVTELIQAAEAMK.G                   | 1775.06387 | 2 | 1.88E-05 | 0.98 | 5.53 | - | 2243.3 |
| AHQ-5-2, 5874 - 5883  | K.RVAGSVTELIQAAEAMK.G                   | 1775.06387 | 2 | 2.49E-06 | 0.98 | 6.24 | - | 1978.3 |
| AHQ-5-1, 3084         | K.SIAAATSALVY.A                         | 1032.21612 | 2 | 3.27E-05 | 0.89 | 3.09 | - | 924.5  |
| AHQ-5-4, 2852         | K.SIAAATSALVY.A                         | 1032.21612 | 2 | 6.56E-04 | 0.77 | 3.07 | - | 602.8  |
| AHQ-5-2, 2809         | K.SIAAATSALVY.A                         | 1032.21612 | 2 | 5.65E-05 | 0.87 | 3.25 | - | 869.8  |
| AHQ-5-7, 3999         | K.SKDFHGLEGDEESTMLEDSVSPK.K             | 2538.68364 | 2 | 9.30E-06 | 0.94 | 4.25 | - | 1177.9 |
| AHQ-5-8, 3822 - 3828  | K.SKDFHGLEGDEESTMLEDSVSPK.K             | 2538.68364 | 2 | 9.30E-10 | 0.96 | 4.57 | - | 1641.9 |
| AHQ-5-7, 3938 - 4008  | K.SKDFHGLEGDEESTMLEDSVSPK.K             | 2538.68364 | 3 | 8.32E-07 | 0.90 | 4.10 | - | 1252.3 |
| AHQ-5-9, 3748         | K.SKDFHGLEGDEESTMLEDSVSPK.K             | 2538.68364 | 2 | 1.08E-05 | 0.88 | 3.25 | - | 1018.5 |
| AHQ-5-8, 3810         | K.SKDFHGLEGDEESTMLEDSVSPK.K             | 2538.68364 | 3 | 7.77E-05 | 0.86 | 3.41 | - | 1138.8 |
| AHQ-5-6, 5100 - 5129  | K.SNTSPEELGPLANQLTSDYGR.L               | 2250.36505 | 2 | 1.49E-06 | 0.91 | 4.21 | - | 636.8  |
| AHQ-5-2, 5125         | K.SNTSPEELGPLANQLTSDYGR.L               | 2250.36505 | 2 | 4.23E-08 | 0.89 | 4.34 | - | 484.4  |
| AHQ-5-4, 5584         | K.SNTSPEELGPLANQLTSDYGR.L               | 2250.36505 | 2 | 1.54E-08 | 0.82 | 3.45 | - | 416.6  |
| AHQ-5-5, 5335 - 5341  | K.SNTSPEELGPLANQLTSDYGR.L               | 2250.36505 | 2 | 2.69E-07 | 0.89 | 4.25 | - | 470.5  |
| AHQ-5-1, 4768         | K.SNTSPEELGPLANQLTSDYGR.L               | 2250.36505 | 2 | 4.55E-08 | 0.84 | 3.75 | - | 457.4  |
| AHQ-5-5, 4582         | K.SNTSPEELGPLANQLTSDYGR.L               | 2250.36505 | 2 | 3.32E-09 | 0.87 | 4.04 | - | 468.4  |
| AHQ-5-4, 4729         | K.SNTSPEELGPLANQLTSDYGR.L               | 2250.36505 | 2 | 2.22E-09 | 0.86 | 4.09 | - | 446.8  |
| AHQ-5-4, 5484 - 5513  | K.SNTSPEELGPLANQLTSDYGR.L               | 2250.36505 | 2 | 1.25E-06 | 0.83 | 3.79 | - | 466.0  |
| AHQ-5-7, 4971         | K.SNTSPEELGPLANQLTSDYGR.L               | 2250.36505 | 2 | 2.10E-06 | 0.77 | 3.14 | - | 442.5  |
| AHQ-5-2, 4718 - 4721  | K.SNTSPEELGPLANQLTSDYGR.L               | 2250.36505 | 2 | 5.37E-09 | 0.93 | 4.40 | - | 672.8  |
| AHQ-5-4, 5308 - 5377  | K.SNTSPEELGPLANQLTSDYGR.L               | 2250.36505 | 2 | 2.35E-05 | 0.87 | 3.79 | - | 446.7  |
| AHQ-5-2, 5431 - 5503  | K.SNTSPEELGPLANQLTSDYGR.L               | 2250.36505 | 2 | 3.39E-08 | 0.84 | 3.90 | - | 421.3  |
| AHQ-5-1, 5355 - 5423  | K.SNTSPEELGPLANQLTSDYGR.L               | 2250.36505 | 2 | 3.88E-06 | 0.74 | 3.49 | - | 346.0  |
| AHQ-5-5, 5151 - 5169  | K.SNTSPEELGPLANQLTSDYGR.L               | 2250.36505 | 2 | 5.05E-07 | 0.89 | 3.90 | - | 528.3  |
| AHQ-5-1, 5492 - 5549  | K.SNTSPEELGPLANQLTSDYGR.L               | 2250.36505 | 2 | 4.56E-04 | 0.36 | 2.87 | - | 166.7  |
| AHQ-5-3, 5613         | K.SNTSPEELGPLANQLTSDYGR.L               | 2250.36505 | 2 | 4.82E-05 | 0.77 | 3.55 | - | 340.3  |
| AHQ-5-1, 5581 - 5623  | K.SNTSPEELGPLANQLTSDYGR.L               | 2250.36505 | 2 | 2.34E-07 | 0.89 | 4.25 | - | 493.5  |
| AHQ-5-3, 5513 - 5541  | K.SNTSPEELGPLANQLTSDYGR.L               | 2250.36505 | 2 | 1.75E-06 | 0.90 | 4.15 | - | 592.6  |
| AHQ-5-2, 5559 - 5633  | K.SNTSPEELGPLANQLTSDYGR.L               | 2250.36505 | 2 | 7.79E-06 | 0.90 | 3.92 | - | 604.2  |
| AHQ-5-3, 5433         | K.SNTSPEELGPLANQLTSDYGR.L               | 2250.36505 | 2 | 4.82E-05 | 0.78 | 3.45 | - | 380.7  |
| AHQ-5-2, 5273 - 5341  | K.SNTSPEELGPLANQLTSDYGR.L               | 2250.36505 | 2 | 3.61E-06 | 0.77 | 3.37 | - | 375.3  |
| AHQ-5-4, 5137         | K.SNTSPEELGPLANQLTSDYGR.L               | 2250.36505 | 2 | 2.47E-06 | 0.79 | 3.06 | - | 629.6  |
| AHQ-5-3, 5337 - 5409  | K.SNTSPEELGPLANQLTSDYGR.L               | 2250.36505 | 2 | 6.09E-06 | 0.87 | 4.23 | - | 427.6  |
| AHQ-5-3, 5199         | K.SNTSPEELGPLANQLTSDYGR.L               | 2250.36505 | 2 | 4.54E-05 | 0.85 | 3.66 | - | 504.9  |
| AHQ-5-5, 5478 - 5553  | K.SNTSPEELGPLANQLTSDYGR.L               | 2250.36505 | 2 | 1.29E-11 | 0.91 | 4.00 | - | 650.1  |
| AHQ-5-2, 4949         | K.SNTSPEELGPLANQLTSDYGR.L               | 2250.36505 | 2 | 1.88E-09 | 0.85 | 3.81 | - | 445.7  |
| AHQ-5-2, 7439 - 7447  | R.TEDSGLQTVIAAATQCALSTSQLVACTK.V        | 3056.37009 | 3 | 2.44E-12 | 0.98 | 6.59 | - | 2260.6 |
| AHQ-5-6, 7238         | R.TEDSGLQTVIAAATQCALSTSQLVACTK.V        | 3056.37009 | 3 | 3.30E-11 | 0.97 | 6.13 | - | 1766.1 |
| AHQ-5-13, 6816        | R.TEDSGLQTVIAAATQCALSTSQLVACTK.V        | 3056.37009 | 3 | 2.69E-05 | 0.96 | 5.17 | - | 1738.5 |
| AHQ-5-3, 7446         | R.TEDSGLQTVIAAATQCALSTSQLVACTK.V        | 3056.37009 | 3 | 1.85E-13 | 0.97 | 6.43 | - | 1683.9 |
| AHQ-5-7, 7226         | R.TEDSGLQTVIAAATQCALSTSQLVACTK.V        | 3056.37009 | 3 | 1.06E-07 | 0.96 | 5.03 | - | 1690.6 |
| AHQ-5-1, 7471 - 7505  | R.TEDSGLQTVIAAATQCALSTSQLVACTK.V        | 3056.37009 | 3 | 6.65E-04 | 0.66 | 3.21 | - | 645.1  |
| AHQ-5-4, 7620 - 7665  | R.TEDSGLQTVIAAATQCALSTSQLVACTK.V        | 3056.37009 | 3 | 6.13E-04 | 0.77 | 3.39 | - | 1037.8 |
| AHQ-5-2, 7665 - 7671  | R.TEDSGLQTVIAAATQCALSTSQLVACTK.V        | 3056.37009 | 3 | 1.36E-05 | 0.97 | 5.99 | - | 1453.4 |
| AHQ-5-1, 7204 - 7271  | R.TEDSGLQTVIAAATQCALSTSQLVACTK.V        | 3056.37009 | 3 | 1.89E-08 | 0.96 | 5.66 | - | 1488.3 |
| AHQ-5-13-, 4229       | K.TKEVIEQWNLNLIK.R                      | 1716.95938 | 2 | 8.67E-06 | 0.97 | 5.02 | - | 1612.9 |
| AHQ-5-10, 3838        | K.TKEVIEQWNLNLIK.R                      | 1716.95938 | 2 | 2.95E-05 | 0.97 | 5.03 | - | 1775.4 |
| AHQ-5-7, 3868         | K.TKEVIEQWNLNLIK.R                      | 1716.95938 | 3 | 2.85E-05 | 0.89 | 4.34 | - | 1201.9 |
| AHQ-5-7, 3878         | K.TKEVIEQWNLNLIK.R                      | 1716.95938 | 2 | 3.30E-07 | 0.98 | 5.47 | - | 1927.0 |
| AHQ-5-12, 4214 - 4216 | K.TKEVIEQWNLNLIK.R                      | 1716.95938 | 2 | 6.63E-07 | 0.91 | 4.19 | - | 1008.9 |
| AHQ-5-11, 4095        | K.TKEVIEQWNLNLIK.R                      | 1716.95938 | 2 | 2.61E-06 | 0.97 | 4.88 | - | 1972.2 |

|                       |                             |            |   |          |      |      |   |        |
|-----------------------|-----------------------------|------------|---|----------|------|------|---|--------|
| AHQ-5-8, 3708         | K.TKEVIQEWLNTNIK.R          | 1716.95938 | 2 | 5.54E-08 | 0.97 | 4.69 | - | 1862.3 |
| AHQ-5-5, 6461 - 6493  | K.TLAESALQLLYTAK.E          | 1522.76793 | 2 | 5.82E-06 | 0.90 | 3.14 | - | 960.0  |
| AHQ-5-2, 6541 - 6610  | K.TLAESALQLLYTAK.E          | 1522.76793 | 2 | 1.13E-08 | 0.97 | 5.45 | - | 1284.1 |
| AHQ-5-1, 6621 - 6653  | K.TLAESALQLLYTAK.E          | 1522.76793 | 2 | 1.81E-07 | 0.97 | 5.19 | - | 1373.9 |
| AHQ-5-11, 6082        | K.TLAESALQLLYTAK.E          | 1522.76793 | 2 | 2.13E-06 | 0.94 | 4.24 | - | 849.5  |
| AHQ-5-2, 6681         | K.TLAESALQLLYTAK.E          | 1522.76793 | 2 | 5.24E-08 | 0.90 | 2.69 | - | 1176.5 |
| AHQ-5-4, 6612 - 6680  | K.TLAESALQLLYTAK.E          | 1522.76793 | 2 | 9.89E-09 | 0.97 | 5.55 | - | 1373.6 |
| AHQ-5-3, 6782         | K.TLAESALQLLYTAK.E          | 1522.76793 | 2 | 2.38E-04 | 0.80 | 2.83 | - | 825.5  |
| AHQ-5-3, 6637 - 6709  | K.TLAESALQLLYTAK.E          | 1522.76793 | 2 | 2.97E-07 | 0.97 | 5.31 | - | 1222.0 |
| AHQ-5-1, 3304 - 3308  | K.TLSHPQQMALLDQTK.T         | 1711.96464 | 3 | 7.20E-06 | 0.93 | 4.37 | - | 1157.9 |
| AHQ-5-4, 3102 - 3106  | K.TLSHPQQMALLDQTK.T         | 1711.96464 | 3 | 6.32E-05 | 0.95 | 5.15 | - | 1435.2 |
| AHQ-5-4, 3096         | K.TLSHPQQMALLDQTK.T         | 1711.96464 | 2 | 3.23E-05 | 0.95 | 4.55 | - | 907.4  |
| AHQ-5-1, 3292         | K.TLSHPQQMALLDQTK.T         | 1711.96464 | 2 | 7.37E-05 | 0.96 | 5.31 | - | 808.4  |
| AHQ-5-9, 2715         | K.TLSHPQQMALLDQTK.T         | 1711.96464 | 2 | 1.12E-05 | 0.96 | 5.47 | - | 839.0  |
| AHQ-5-2, 3017 - 3085  | K.TLSHPQQMALLDQTK.T         | 1711.96464 | 2 | 1.59E-08 | 0.95 | 5.09 | - | 885.7  |
| AHQ-5-6, 2889 - 2890  | K.TLSHPQQMALLDQTK.T         | 1711.96464 | 2 | 1.32E-04 | 0.96 | 5.22 | - | 870.8  |
| AHQ-5-3, 3050 - 3125  | K.TLSHPQQMALLDQTK.T         | 1711.96464 | 2 | 9.59E-04 | 0.90 | 3.91 | - | 608.9  |
| AHQ-5-2, 3099         | K.TLSHPQQMALLDQTK.T         | 1711.96464 | 2 | 1.80E-04 | 0.90 | 3.87 | - | 635.8  |
| AHQ-5-2, 3051         | K.TLSHPQQMALLDQTK.T         | 1711.96464 | 3 | 1.20E-05 | 0.94 | 4.73 | - | 1271.5 |
| AHQ-5-3, 3146         | K.TLSHPQQMALLDQTK.T         | 1711.96464 | 3 | 1.56E-05 | 0.95 | 4.98 | - | 1377.6 |
| AHQ-5-8, 2638         | K.TLSHPQQMALLDQTK.T         | 1711.96464 | 2 | 7.68E-08 | 0.95 | 4.49 | - | 913.4  |
| AHQ-5-1, 3591         | K.TM*LESAGGLIQTAR.A         | 1464.67035 | 2 | 4.59E-07 | 0.96 | 4.54 | - | 1493.7 |
| AHQ-5-6, 4068 - 4069  | K.TMLESAGGLIQTAR.A          | 1448.67095 | 2 | 1.43E-04 | 0.80 | 2.75 | - | 1223.4 |
| AHQ-5-1, 4459         | K.TMLESAGGLIQTAR.A          | 1448.67095 | 2 | 2.14E-10 | 0.94 | 3.90 | - | 1770.9 |
| AHQ-5-5, 4138         | K.TMLESAGGLIQTAR.A          | 1448.67095 | 2 | 1.28E-09 | 0.93 | 4.55 | - | 1262.9 |
| AHQ-5-4, 3460 - 3477  | K.TM*LESAGGLIQTAR.A         | 1464.67035 | 2 | 2.50E-06 | 0.96 | 4.27 | - | 1665.7 |
| AHQ-5-4, 4308 - 4334  | K.TMLESAGGLIQTAR.A          | 1448.67095 | 2 | 2.97E-06 | 0.94 | 3.41 | - | 1880.3 |
| AHQ-5-2, 4325 - 4394  | K.TMLESAGGLIQTAR.A          | 1448.67095 | 2 | 9.72E-05 | 0.84 | 3.03 | - | 1322.8 |
| AHQ-5-2, 3429         | K.TM*LESAGGLIQTAR.A         | 1464.67035 | 2 | 1.16E-10 | 0.97 | 4.42 | - | 1988.6 |
| AHQ-5-3, 4381 - 4394  | K.TMLESAGGLIQTAR.A          | 1448.67095 | 2 | 6.14E-09 | 0.96 | 5.04 | - | 1745.4 |
| AHQ-5-3, 4381 - 4394  | K.TMLESAGGLIQTARALAVNPR.D   | 2170.52235 | 3 | 5.59E-04 | 0.43 | 3.06 | - | 401.5  |
| AHQ-5-13-, 4775       | K.TMQFEPSTMVYDACR.I         | 1838.07571 | 2 | 5.14E-04 | 0.87 | 3.68 | - | 600.5  |
| AHQ-5-13, 4861        | K.TMQFEPSTMVYDACR.I         | 1838.07571 | 2 | 2.04E-04 | 0.91 | 4.65 | - | 512.9  |
| AHQ-5-14-, 4211       | K.TM*QFEPSTMVYDACR.I        | 1854.07511 | 2 | 2.11E-04 | 0.93 | 4.52 | - | 640.6  |
| AHQ-5-14-, 4733       | K.TMQFEPSTMVYDACR.I         | 1838.07571 | 2 | 4.18E-04 | 0.75 | 3.46 | - | 432.7  |
| AHQ-5-13, 4300        | K.TM*QFEPSTMVYDACR.I        | 1854.07511 | 2 | 6.35E-05 | 0.90 | 4.12 | - | 621.6  |
| AHQ-5-7, 4050         | K.TM*QFEPSTMVYDACR.I        | 1854.07511 | 2 | 3.71E-04 | 0.81 | 3.31 | - | 552.2  |
| AHQ-5-13-, 4203       | K.TM*QFEPSTMVYDACR.I        | 1854.07511 | 2 | 2.21E-06 | 0.92 | 3.87 | - | 698.4  |
| AHQ-5-2, 2939         | K.TSTPEDFIR.M               | 1066.14629 | 1 | 1.34E-04 | 0.10 | 1.84 | - | 169.7  |
| AHQ-5-13, 4305        | K.TVTDMLMTCAR.I             | 1429.70947 | 2 | 2.57E-05 | 0.71 | 3.15 | - | 817.4  |
| AHQ-5-13, 3774 - 3844 | K.TVTDMLMTCAR.I             | 1445.70887 | 2 | 3.00E-07 | 0.82 | 3.21 | - | 623.9  |
| AHQ-5-13-, 5345       | K.TVTDMLMTCAR.I             | 1413.71007 | 2 | 2.21E-06 | 0.81 | 2.74 | - | 889.2  |
| AHQ-5-8, 4601         | K.TVTDMLMTCAR.I             | 1429.70947 | 2 | 9.19E-04 | 0.80 | 3.06 | - | 989.6  |
| AHQ-5-8, 4582 - 4592  | K.TYGVSFVLVK.E              | 1161.37395 | 2 | 5.97E-04 | 0.91 | 3.56 | - | 742.5  |
| AHQ-5-11, 5048        | K.TYGVSFVLVK.E              | 1161.37395 | 2 | 7.87E-05 | 0.79 | 3.18 | - | 492.0  |
| AHQ-5-1, 5529         | K.TYGVSFVLVK.E              | 1161.37395 | 2 | 4.48E-04 | 0.90 | 3.49 | - | 701.8  |
| AHQ-5-7, 4867         | K.TYGVSFVLVK.E              | 1161.37395 | 2 | 1.74E-04 | 0.89 | 3.52 | - | 719.2  |
| AHQ-5-1, 5487 - 5555  | R.VAGSVTELIQAAEAM*K.G       | 1634.87692 | 2 | 8.64E-07 | 0.95 | 4.54 | - | 1165.2 |
| AHQ-5-4, 5405         | R.VAGSVTELIQAAEAM*K.G       | 1634.87692 | 2 | 1.47E-04 | 0.75 | 2.69 | - | 885.4  |
| AHQ-5-10, 5691 - 5708 | R.VAGSVTELIQAAEAM.K.G       | 1618.87752 | 2 | 4.36E-07 | 0.95 | 4.31 | - | 1377.0 |
| AHQ-5-6, 6281         | R.VAGSVTELIQAAEAM.K.G       | 1618.87752 | 2 | 1.44E-05 | 0.95 | 3.89 | - | 1489.7 |
| AHQ-5-3, 6506 - 6578  | R.VAGSVTELIQAAEAM.K.G       | 1618.87752 | 2 | 1.77E-13 | 0.97 | 5.46 | - | 1509.1 |
| AHQ-5-9, 5518         | R.VAGSVTELIQAAEAM.K.G       | 1618.87752 | 2 | 1.69E-08 | 0.97 | 5.47 | - | 1508.4 |
| AHQ-5-3, 5459 - 5482  | R.VAGSVTELIQAAEAM*K.G       | 1634.87692 | 2 | 8.74E-06 | 0.94 | 4.39 | - | 1057.4 |
| AHQ-5-1, 6533 - 6559  | R.VAGSVTELIQAAEAM.K.G       | 1618.87752 | 2 | 7.86E-08 | 0.97 | 5.12 | - | 1388.3 |
| AHQ-5-2, 6407 - 6486  | R.VAGSVTELIQAAEAM.K.G       | 1618.87752 | 2 | 1.41E-11 | 0.98 | 5.78 | - | 1711.0 |
| AHQ-5-2, 5351 - 5421  | R.VAGSVTELIQAAEAM*K.G       | 1634.87692 | 2 | 2.01E-06 | 0.96 | 4.95 | - | 1218.7 |
| AHQ-5-8, 5969         | R.VAGSVTELIQAAEAM.K.G       | 1618.87752 | 2 | 8.50E-07 | 0.97 | 4.38 | - | 1993.9 |
| AHQ-5-4, 6525 - 6532  | R.VAGSVTELIQAAEAM.K.G       | 1618.87752 | 2 | 2.11E-08 | 0.98 | 5.66 | - | 2068.0 |
| AHQ-5-6, 5833 - 5902  | K.VGAIPANALDDGQWSQGLISAAR.M | 2311.53959 | 2 | 1.69E-07 | 0.90 | 4.29 | - | 504.5  |
| AHQ-5-10, 5080 - 5107 | K.VGAIPANALDDGQWSQGLISAAR.M | 2311.53959 | 2 | 8.73E-05 | 0.44 | 3.38 | - | 447.6  |
| AHQ-5-6, 5658         | K.VGAIPANALDDGQWSQGLISAAR.M | 2311.53959 | 2 | 3.87E-07 | 0.95 | 4.73 | - | 861.6  |
| AHQ-5-5, 6115 - 6142  | K.VGAIPANALDDGQWSQGLISAAR.M | 2311.53959 | 2 | 2.22E-11 | 0.98 | 5.65 | - | 1537.3 |
| AHQ-5-5, 5854 - 5934  | K.VGAIPANALDDGQWSQGLISAAR.M | 2311.53959 | 2 | 2.47E-12 | 0.95 | 5.29 | - | 616.8  |
| AHQ-5-7, 5726 - 5758  | K.VGAIPANALDDGQWSQGLISAAR.M | 2311.53959 | 2 | 2.89E-11 | 0.96 | 4.62 | - | 1159.8 |
| AHQ-5-8, 5549 - 5621  | K.VGAIPANALDDGQWSQGLISAAR.M | 2311.53959 | 2 | 9.90E-09 | 0.96 | 5.41 | - | 913.0  |
| AHQ-5-8, 5397         | K.VGAIPANALDDGQWSQGLISAAR.M | 2311.53959 | 2 | 7.59E-09 | 0.94 | 4.53 | - | 1032.5 |
| AHQ-5-9, 5027         | K.VGAIPANALDDGQWSQGLISAAR.M | 2311.53959 | 2 | 1.16E-05 | 0.88 | 3.79 | - | 661.4  |
| AHQ-5-9, 5174         | K.VGAIPANALDDGQWSQGLISAAR.M | 2311.53959 | 2 | 9.24E-11 | 0.93 | 4.10 | - | 709.4  |
| AHQ-5-4, 5836 - 5908  | K.VGAIPANALDDGQWSQGLISAAR.M | 2311.53959 | 2 | 3.92E-09 | 0.95 | 5.31 | - | 742.3  |
| AHQ-5-3, 6082 - 6162  | K.VGAIPANALDDGQWSQGLISAAR.M | 2311.53959 | 2 | 4.39E-09 | 0.96 | 5.66 | - | 951.1  |
| AHQ-5-2, 6174 - 6242  | K.VGAIPANALDDGQWSQGLISAAR.M | 2311.53959 | 2 | 5.32E-09 | 0.82 | 3.86 | - | 487.9  |
| AHQ-5-4, 6006 - 6072  | K.VGAIPANALDDGQWSQGLISAAR.M | 2311.53959 | 2 | 2.08E-07 | 0.88 | 4.12 | - | 396.8  |
| AHQ-5-2, 6037 - 6107  | K.VGAIPANALDDGQWSQGLISAAR.M | 2311.53959 | 2 | 5.71E-10 | 0.92 | 4.59 | - | 601.0  |
| AHQ-5-2, 6010 - 6079  | K.VGAIPANALDDGQWSQGLISAAR.M | 2311.53959 | 3 | 6.69E-09 | 0.96 | 5.20 | - | 1958.4 |
| AHQ-5-2, 5901 - 5971  | K.VGAIPANALDDGQWSQGLISAAR.M | 2311.53959 | 2 | 7.56E-08 | 0.96 | 5.05 | - | 909.6  |
| AHQ-5-3, 5895 - 5973  | K.VGAIPANALDDGQWSQGLISAAR.M | 2311.53959 | 2 | 2.38E-06 | 0.97 | 5.46 | - | 1123.2 |
| AHQ-5-2, 5818 - 5834  | K.VGAIPANALDDGQWSQGLISAAR.M | 2311.53959 | 2 | 1.70E-06 | 0.92 | 4.70 | - | 565.2  |
| AHQ-5-2, 5721         | K.VGAIPANALDDGQWSQGLISAAR.M | 2311.53959 | 2 | 7.15E-05 | 0.37 | 2.72 | - | 347.2  |
| AHQ-5-12, 5796        | K.VGAIPANALDDGQWSQGLISAAR.M | 2311.53959 | 2 | 8.97E-06 | 0.91 | 4.84 | - | 665.3  |
| AHQ-5-1, 5860 - 5912  | K.VGAIPANALDDGQWSQGLISAAR.M | 2311.53959 | 2 | 1.30E-07 | 0.90 | 4.17 | - | 537.5  |
| AHQ-5-1, 5928         | K.VGAIPANALDDGQWSQGLISAAR.M | 2311.53959 | 2 | 3.02E-04 | 0.73 | 3.49 | - | 354.9  |
| AHQ-5-1, 6051         | K.VGAIPANALDDGQWSQGLISAAR.M | 2311.53959 | 2 | 6.87E-05 | 0.92 | 4.45 | - | 671.0  |
| AHQ-5-10, 5254 - 5316 | K.VGAIPANALDDGQWSQGLISAAR.M | 2311.53959 | 2 | 5.61E-10 | 0.87 | 4.00 | - | 427.0  |
| AHQ-5-11, 5610        | K.VGAIPANALDDGQWSQGLISAAR.M | 2311.53959 | 2 | 1.57E-09 | 0.96 | 5.06 | - | 1113.7 |
| AHQ-5-1, 6135 - 6203  | K.VGAIPANALDDGQWSQGLISAAR.M | 2311.53959 | 2 | 6.34E-13 | 0.96 | 5.04 | - | 1185.2 |
| AHQ-5-4, 6140 - 6141  | K.VGAIPANALDDGQWSQGLISAAR.M | 2311.53959 | 2 | 2.00E-06 | 0.96 | 5.43 | - | 909.2  |
| AHQ-5-7, 5546 - 5550  | K.VGAIPANALDDGQWSQGLISAAR.M | 2311.53959 | 2 | 6.80E-07 | 0.95 | 4.99 | - | 978.5  |
| AHQ-5-1, 6060 - 6141  | K.VGAIPANALDDGQWSQGLISAAR.M | 2311.53959 | 3 | 2.14E-07 | 0.96 | 5.52 | - | 1618.9 |
| AHQ-5-4, 3772         | K.VGDDPAVWQLK.N             | 1228.37879 | 1 | 9.53E-04 | 0.61 | 2.43 | - | 640.4  |
| AHQ-5-2, 3751         | K.VGDDPAVWQLK.N             | 1228.37879 | 2 | 3.17E-08 | 0.91 | 3.63 | - | 980.5  |
| AHQ-5-6, 3504         | K.VGDDPAVWQLK.N             | 1228.37879 | 2 | 1.98E-09 | 0.93 | 4.02 | - | 886.2  |
| AHQ-5-3, 3810         | K.VGDDPAVWQLK.N             | 1228.37879 | 2 | 1.92E-06 | 0.89 | 3.62 | - | 655.9  |
| AHQ-5-2, 3733 - 3801  | K.VGDDPAVWQLK.N             | 1228.37879 | 2 | 7.75E-09 | 0.86 | 3.29 | - | 731.5  |
| AHQ-5-1, 3936         | K.VGDDPAVWQLK.N             | 1228.37879 | 2 | 8.17E-08 | 0.93 | 3.77 | - | 875.7  |
| AHQ-5-4, 3760 - 3785  | K.VGDDPAVWQLK.N             | 1228.37879 | 2 | 1.01E-08 | 0.94 | 4.14 | - | 865.1  |
| AHQ-5-5, 3546         | K.VGDDPAVWQLK.N             | 1228.37879 | 2 | 1.75E-08 | 0.94 | 4.02 | - | 937.0  |
| AHQ-5-2, 3117         | K.VGDDPAVWQLKNSAK.V         | 1628.81068 | 2 | 1.85E-07 | 0.89 | 3.70 | - | 762.4  |
| AHQ-5-4, 3154         | K.VGDDPAVWQLKNSAK.V         | 1628.81068 | 2 | 4.18E-11 | 0.88 | 3.60 | - | 786.3  |
| AHQ-5-3, 3187         | K.VGDDPAVWQLKNSAK.V         | 1628.81068 | 2 | 3.38E-06 | 0.78 | 3.27 | - | 542.3  |
| AHQ-5-2, 2275 - 2278  | K.VLGEAM*TGISQNAK.N         | 1435.62901 | 1 | 5.76E-04 | 0.10 | 1.84 | - | 67.9   |
| AHQ-5-2, 2270 - 2342  | K.VLGEAM*TGISQNAK.N         | 1435.62901 | 2 | 8.76E-04 | 0.97 | 4.84 | - | 1518.4 |
| AHQ-5-1, 3219         | K.VLGEAM*TGISQNAK.N         | 1419.62961 | 2 | 1.37E-05 | 0.96 | 4.27 | - | 1685.8 |
| AHQ-5-6, 2882         | K.VLGEAM*TGISQNAK.N         | 1419.62961 | 2 | 3.48E-04 | 0.84 | 3.12 | - | 1026.5 |
| AHQ-5-3, 3094         | K.VLGEAM*TGISQNAK.N         | 1419.62961 | 1 | 3.33E-08 | 0.85 | 3.80 | - | 432.3  |
| AHQ-5-3, 3083 - 3153  | K.VLGEAM*TGISQNAK.N         | 1419.62961 | 1 | 3.30E-04 | 0.26 | 1.90 | - | 372.4  |
| AHQ-5-6, 2172         | K.VLGEAM*TGISQNAK.N         | 1435.62901 | 2 | 8.51E-04 | 0.95 | 3.78 | - | 1568.4 |



|                        |                                     |            |   |          |      |      |   |        |
|------------------------|-------------------------------------|------------|---|----------|------|------|---|--------|
| AHQ-5-2, 3005          | K.VLGEAMTGISQNAK.N                  | 1419.62961 | 2 | 6.41E-08 | 0.77 | 2.85 | - | 1151.2 |
| AHQ-5-3, 3081 - 3159   | K.VLGEAMTGISQNAK.N                  | 1419.62961 | 2 | 2.43E-13 | 0.98 | 5.39 | - | 2007.3 |
| AHQ-5-2, 3031          | K.VLGEAMTGISQNAK.N                  | 1419.62961 | 1 | 6.26E-05 | 0.73 | 3.50 | - | 328.3  |
| AHQ-5-2, 3115          | K.VLGEAMTGISQNAK.N                  | 1419.62961 | 1 | 9.40E-04 | 0.23 | 1.93 | - | 316.5  |
| AHQ-5-3, 3275          | K.VLGEAMTGISQNAK.N                  | 1419.62961 | 2 | 1.64E-07 | 0.93 | 3.27 | - | 1426.9 |
| AHQ-5-1, 3244          | K.VLGEAMTGISQNAK.N                  | 1419.62961 | 1 | 1.45E-04 | 0.35 | 2.64 | - | 299.6  |
| AHQ-5-4, 3064          | K.VLGEAMTGISQNAK.N                  | 1419.62961 | 1 | 8.84E-09 | 0.76 | 3.39 | - | 333.4  |
| AHQ-5-4, 3053 - 3126   | K.VLGEAMTGISQNAK.N                  | 1419.62961 | 2 | 3.26E-12 | 0.98 | 5.39 | - | 2107.0 |
| AHQ-5-5, 2894          | K.VLGEAMTGISQNAK.N                  | 1419.62961 | 2 | 3.60E-09 | 0.98 | 4.76 | - | 2155.0 |
| AHQ-5-1, 2581          | K.VLGEAM*TGISQNAK.N                 | 1435.62901 | 2 | 2.99E-04 | 0.65 | 2.63 | - | 627.6  |
| AHQ-5-2, 3195          | K.VLGEAMTGISQNAK.N                  | 1419.62961 | 2 | 5.12E-07 | 0.89 | 2.82 | - | 1121.8 |
| AHQ-5-4, 2280 - 2297   | K.VLGEAM*TGISQNAK.N                 | 1435.62901 | 2 | 5.70E-05 | 0.95 | 4.30 | - | 1175.9 |
| AHQ-5-4, 3238          | K.VLGEAMTGISQNAK.N                  | 1419.62961 | 2 | 2.20E-08 | 0.97 | 3.93 | - | 2326.2 |
| AHQ-5-2, 5446 - 5526   | K.VLGEAMTGISQNAKNGNLPEFGDAISTASK.A  | 3022.33719 | 3 | 1.14E-08 | 0.94 | 5.77 | - | 648.8  |
| AHQ-5-1, 5496 - 5565   | K.VLGEAMTGISQNAKNGNLPEFGDAISTASK.A  | 3022.33719 | 3 | 4.40E-06 | 0.85 | 4.18 | - | 634.1  |
| AHQ-5-1, 4944 - 5021   | K.VLGEAM*TGISQNAKNGNLPEFGDAISTASK.A | 3038.33659 | 3 | 2.15E-07 | 0.93 | 5.25 | - | 602.3  |
| AHQ-5-4, 5465 - 5544   | K.VLGEAMTGISQNAKNGNLPEFGDAISTASK.A  | 3022.33719 | 3 | 4.97E-10 | 0.92 | 5.43 | - | 485.1  |
| AHQ-5-2, 1689          | K.VLVQNAAGSQEK.L                    | 1244.37976 | 2 | 2.37E-05 | 0.83 | 3.29 | - | 640.2  |
| AHQ-5-2, 1794          | K.VLVQNAAGSQEK.L                    | 1244.37976 | 2 | 2.96E-04 | 0.88 | 2.98 | - | 1016.8 |
| AHQ-5-4, 1720 - 1790   | K.VLVQNAAGSQEK.L                    | 1244.37976 | 2 | 1.76E-07 | 0.93 | 3.83 | - | 998.1  |
| AHQ-5-4, 1780          | K.VLVQNAAGSQEK.L                    | 1244.37976 | 1 | 1.76E-06 | 0.65 | 2.19 | - | 620.0  |
| AHQ-5-1, 1881          | K.VLVQNAAGSQEK.L                    | 1244.37976 | 2 | 1.58E-06 | 0.92 | 3.67 | - | 1039.1 |
| AHQ-5-4, 1618 - 1624   | K.VLVQNAAGSQEK.L                    | 1244.37976 | 2 | 8.68E-05 | 0.79 | 3.25 | - | 610.5  |
| AHQ-5-3, 1547 - 1611   | K.VLVQNAAGSQEK.L                    | 1244.37976 | 2 | 9.66E-04 | 0.90 | 3.63 | - | 902.4  |
| AHQ-5-3, 1670          | K.VLVQNAAGSQEK.L                    | 1244.37976 | 1 | 2.99E-10 | 0.45 | 2.35 | - | 350.5  |
| AHQ-5-2, 1546 - 1613   | K.VLVQNAAGSQEK.L                    | 1244.37976 | 2 | 6.34E-06 | 0.94 | 3.72 | - | 1075.7 |
| AHQ-5-4, 1534 - 1557   | K.VLVQNAAGSQEK.L                    | 1244.37976 | 2 | 4.63E-09 | 0.91 | 3.60 | - | 833.5  |
| AHQ-5-2, 4666          | K.VMVTNVTSLLK.T                     | 1205.49322 | 2 | 5.72E-06 | 0.88 | 3.73 | - | 736.6  |
| AHQ-5-2, 4281 - 4299   | K.VM*VTNVTSLLK.T                    | 1221.49262 | 2 | 2.58E-06 | 0.90 | 3.70 | - | 776.0  |
| AHQ-5-4, 4693 - 4697   | K.VMVTNVTSLLK.T                     | 1205.49322 | 2 | 4.96E-06 | 0.95 | 4.14 | - | 990.2  |
| AHQ-5-3, 4389          | K.VM*VTNVTSLLK.T                    | 1221.49262 | 2 | 2.18E-04 | 0.86 | 3.21 | - | 794.9  |
| AHQ-5-6, 4370 - 4378   | K.VMVTNVTSLLK.T                     | 1205.49322 | 2 | 9.53E-05 | 0.90 | 4.08 | - | 695.3  |
| AHQ-5-8, 3921          | K.VMVTNVTSLLK.T                     | 1205.49322 | 2 | 8.91E-06 | 0.88 | 3.38 | - | 916.4  |
| AHQ-5-4, 4310          | K.VM*VTNVTSLLK.T                    | 1221.49262 | 2 | 6.44E-05 | 0.84 | 3.12 | - | 919.7  |
| AHQ-5-3, 4769          | K.VMVTNVTSLLK.T                     | 1205.49322 | 2 | 3.30E-06 | 0.95 | 4.42 | - | 960.8  |
| AHQ-5-1, 4481          | K.VM*VTNVTSLLK.T                    | 1221.49262 | 2 | 4.40E-04 | 0.89 | 3.49 | - | 774.7  |
| AHQ-5-7, 4172          | K.VMVTNVTSLLK.T                     | 1205.49322 | 2 | 2.87E-06 | 0.91 | 4.03 | - | 836.1  |
| AHQ-5-1, 4852          | K.VMVTNVTSLLK.T                     | 1205.49322 | 2 | 6.88E-05 | 0.90 | 4.00 | - | 853.2  |
| AHQ-5-5, 4427          | K.VMVTNVTSLLK.T                     | 1205.49322 | 2 | 3.71E-04 | 0.92 | 3.84 | - | 874.6  |
| AHQ-5-4, 2721          | R.VOELGHGCAALVTK.A                  | 1484.70307 | 2 | 6.18E-05 | 0.87 | 3.11 | - | 898.1  |
| AHQ-5-2, 2617          | R.VOELGHGCAALVTK.A                  | 1484.70307 | 2 | 3.48E-04 | 0.93 | 3.81 | - | 1133.8 |
| AHQ-5-2, 2633          | R.VOELGHGCAALVTK.A                  | 1484.70307 | 1 | 2.19E-06 | 0.84 | 3.56 | - | 569.9  |
| AHQ-5-1, 2873          | R.VOELGHGCAALVTK.A                  | 1484.70307 | 2 | 1.00E-08 | 0.98 | 5.11 | - | 1759.3 |
| AHQ-5-6, 2524 - 2541   | R.VOELGHGCAALVTK.A                  | 1484.70307 | 2 | 4.12E-04 | 0.97 | 4.40 | - | 1827.1 |
| AHQ-5-6, 2521          | R.VOELGHGCAALVTK.A                  | 1484.70307 | 1 | 3.17E-08 | 0.93 | 3.68 | - | 955.1  |
| AHQ-5-3, 2694          | R.VOELGHGCAALVTK.A                  | 1484.70307 | 2 | 3.91E-04 | 0.96 | 4.33 | - | 1530.4 |
| AHQ-5-4, 2658          | R.VOELGHGCAALVTK.A                  | 1484.70307 | 1 | 1.06E-06 | 0.84 | 3.38 | - | 596.6  |
| AHQ-5-5, 2454 - 2521   | R.VOELGHGCAALVTK.A                  | 1484.70307 | 2 | 5.47E-10 | 0.98 | 4.71 | - | 2082.5 |
| AHQ-5-5, 2511          | R.VOELGHGCAALVTK.A                  | 1484.70307 | 1 | 2.72E-05 | 0.82 | 2.84 | - | 826.3  |
| AHQ-5-4, 2566 - 2648   | R.VOELGHGCAALVTK.A                  | 1484.70307 | 2 | 2.69E-09 | 0.97 | 5.03 | - | 1641.6 |
| AHQ-5-4, 2526          | K.VSHVLAALQAGNR.G                   | 1336.52525 | 1 | 1.96E-07 | 0.72 | 3.27 | - | 209.6  |
| AHQ-5-3, 2534 - 2593   | K.VSHVLAALQAGNR.G                   | 1336.52525 | 2 | 1.11E-04 | 0.96 | 4.12 | - | 1656.4 |
| AHQ-5-3, 2542          | K.VSHVLAALQAGNR.G                   | 1336.52525 | 1 | 3.44E-06 | 0.72 | 3.10 | - | 284.3  |
| AHQ-5-3, 2679          | K.VSHVLAALQAGNR.G                   | 1336.52525 | 1 | 5.11E-06 | 0.65 | 2.61 | - | 433.1  |
| AHQ-5-5, 2362          | K.VSHVLAALQAGNR.G                   | 1336.52525 | 1 | 1.08E-04 | 0.48 | 2.38 | - | 157.3  |
| AHQ-5-5, 2357          | K.VSHVLAALQAGNR.G                   | 1336.52525 | 2 | 3.18E-10 | 0.98 | 5.07 | - | 2071.8 |
| AHQ-5-1, 2791          | K.VSHVLAALQAGNR.G                   | 1336.52525 | 2 | 1.55E-08 | 0.98 | 4.67 | - | 2078.2 |
| AHQ-5-5, 2355          | K.VSHVLAALQAGNR.G                   | 1336.52525 | 1 | 8.15E-06 | 0.87 | 3.31 | - | 466.5  |
| AHQ-5-6, 2357          | K.VSHVLAALQAGNR.G                   | 1336.52525 | 1 | 4.87E-04 | 0.59 | 2.40 | - | 362.4  |
| AHQ-5-7, 2311          | K.VSHVLAALQAGNR.G                   | 1336.52525 | 2 | 2.62E-08 | 0.96 | 4.12 | - | 1676.6 |
| AHQ-5-4, 2520          | K.VSHVLAALQAGNR.G                   | 1336.52525 | 1 | 5.41E-07 | 0.86 | 3.48 | - | 410.7  |
| AHQ-5-7, 2306          | K.VSHVLAALQAGNR.G                   | 1336.52525 | 1 | 3.42E-04 | 0.85 | 3.05 | - | 520.9  |
| AHQ-5-2, 2455 - 2527   | K.VSHVLAALQAGNR.G                   | 1336.52525 | 2 | 5.35E-09 | 0.97 | 4.31 | - | 1977.5 |
| AHQ-5-2, 2454 - 2530   | K.VSHVLAALQAGNR.G                   | 1336.52525 | 1 | 2.81E-04 | 0.70 | 3.12 | - | 314.4  |
| AHQ-5-6, 2360          | K.VSHVLAALQAGNR.G                   | 1336.52525 | 1 | 6.89E-07 | 0.65 | 2.60 | - | 289.6  |
| AHQ-5-1, 2783          | K.VSHVLAALQAGNR.G                   | 1336.52525 | 1 | 2.52E-05 | 0.86 | 3.28 | - | 632.7  |
| AHQ-5-1, 6111 - 6112   | K.VSQM*QYFEPPLTAAVGAASK.T           | 2199.51253 | 2 | 1.90E-06 | 0.96 | 5.31 | - | 970.2  |
| AHQ-5-6, 5729          | K.VSQM*QYFEPPLTAAVGAASK.T           | 2199.51253 | 2 | 3.38E-07 | 0.97 | 5.37 | - | 1093.4 |
| AHQ-5-9, 5938 - 5942   | K.VSQMAQYFEPPLTAAVGAASK.T           | 2183.51313 | 2 | 5.68E-06 | 0.95 | 5.26 | - | 852.6  |
| AHQ-5-4, 6837 - 6917   | K.VSQMAQYFEPPLTAAVGAASK.T           | 2183.51313 | 2 | 7.86E-07 | 0.98 | 6.57 | - | 1360.3 |
| AHQ-5-1, 6864 - 6928   | K.VSQMAQYFEPPLTAAVGAASK.T           | 2183.51313 | 2 | 1.26E-05 | 0.95 | 4.71 | - | 1061.2 |
| AHQ-5-4, 6918 - 6938   | K.VSQMAQYFEPPLTAAVGAASK.T           | 2183.51313 | 3 | 8.32E-08 | 0.94 | 4.89 | - | 1409.3 |
| AHQ-5-3, 6966 - 7033   | K.VSQMAQYFEPPLTAAVGAASK.T           | 2183.51313 | 2 | 3.98E-08 | 0.97 | 6.27 | - | 943.3  |
| AHQ-5-3, 6866 - 6945   | K.VSQMAQYFEPPLTAAVGAASK.T           | 2183.51313 | 2 | 1.82E-06 | 0.97 | 5.81 | - | 1137.8 |
| AHQ-5-3, 6065 - 6066   | K.VSQM*QYFEPPLTAAVGAASK.T           | 2199.51253 | 2 | 6.97E-05 | 0.96 | 4.84 | - | 1319.9 |
| AHQ-5-4, 6980          | K.VSQMAQYFEPPLTAAVGAASK.T           | 2183.51313 | 2 | 1.04E-05 | 0.97 | 5.90 | - | 798.4  |
| AHQ-5-7, 5539          | K.VSQM*QYFEPPLTAAVGAASK.T           | 2199.51253 | 2 | 7.98E-05 | 0.93 | 4.25 | - | 997.0  |
| AHQ-5-7, 6622 - 6630   | K.VSQMAQYFEPPLTAAVGAASK.T           | 2183.51313 | 2 | 1.22E-05 | 0.97 | 5.84 | - | 962.3  |
| AHQ-5-11, 6358         | K.VSQMAQYFEPPLTAAVGAASK.T           | 2183.51313 | 2 | 6.29E-05 | 0.92 | 4.78 | - | 698.2  |
| AHQ-5-8, 6402          | K.VSQMAQYFEPPLTAAVGAASK.T           | 2183.51313 | 2 | 4.31E-07 | 0.96 | 5.46 | - | 990.0  |
| AHQ-5-5, 6781 - 6785   | K.VSQMAQYFEPPLTAAVGAASK.T           | 2183.51313 | 2 | 5.60E-06 | 0.97 | 5.62 | - | 1147.6 |
| AHQ-5-5, 5753 - 5787   | K.VSQM*QYFEPPLTAAVGAASK.T           | 2199.51253 | 2 | 3.34E-05 | 0.90 | 3.95 | - | 911.5  |
| AHQ-5-14, 6441         | K.VSQM*QYFEPPLTAAVGAASK.T           | 2199.51253 | 2 | 2.45E-04 | 0.50 | 3.14 | - | 182.3  |
| AHQ-5-1, 6115          | K.VSQM*QYFEPPLTAAVGAASK.T           | 2199.51253 | 3 | 4.30E-07 | 0.94 | 4.72 | - | 1766.2 |
| AHQ-5-2, 6899 - 6903   | K.VSQMAQYFEPPLTAAVGAASK.T           | 2183.51313 | 3 | 5.00E-09 | 0.97 | 5.75 | - | 1534.1 |
| AHQ-5-2, 6797 - 6863   | K.VSQMAQYFEPPLTAAVGAASK.T           | 2183.51313 | 2 | 6.70E-05 | 0.96 | 5.14 | - | 1088.0 |
| AHQ-5-2, 5970 - 5973   | K.VSQM*QYFEPPLTAAVGAASK.T           | 2199.51253 | 3 | 2.61E-06 | 0.94 | 5.08 | - | 1364.1 |
| AHQ-5-2, 5962 - 6030   | K.VSQM*QYFEPPLTAAVGAASK.T           | 2199.51253 | 2 | 1.49E-07 | 0.96 | 4.88 | - | 1132.9 |
| AHQ-5-4, 5993 - 6066   | K.VSQM*QYFEPPLTAAVGAASK.T           | 2199.51253 | 2 | 1.21E-07 | 0.96 | 5.60 | - | 1003.0 |
| AHQ-5-1, 6908          | K.VSQMAQYFEPPLTAAVGAASK.T           | 2183.51313 | 3 | 4.54E-06 | 0.96 | 5.37 | - | 1406.2 |
| AHQ-5-14-, 6399        | K.VSQMAQYFEPPLTAAVGAASK.T           | 2183.51313 | 2 | 2.74E-08 | 0.97 | 6.09 | - | 1351.0 |
| AHQ-5-2, 4727 - 4797   | K.VVAPTISSPVCEQLVEAGR.L             | 2142.41919 | 2 | 9.09E-06 | 0.96 | 5.26 | - | 923.7  |
| AHQ-5-2, 4601          | K.VVAPTISSPVCEQLVEAGR.L             | 2142.41919 | 2 | 5.52E-05 | 0.77 | 3.64 | - | 235.1  |
| AHQ-5-2, 4922          | K.VVAPTISSPVCEQLVEAGR.L             | 2142.41919 | 2 | 5.83E-05 | 0.76 | 3.74 | - | 271.5  |
| AHQ-5-3, 4666          | K.VVAPTISSPVCEQLVEAGR.L             | 2142.41919 | 2 | 5.45E-08 | 0.93 | 4.85 | - | 460.3  |
| AHQ-5-3, 4786 - 4822   | K.VVAPTISSPVCEQLVEAGR.L             | 2142.41919 | 2 | 2.00E-07 | 0.95 | 5.06 | - | 629.9  |
| AHQ-5-4, 4616          | K.VVAPTISSPVCEQLVEAGR.L             | 2142.41919 | 2 | 1.12E-06 | 0.95 | 4.73 | - | 667.3  |
| AHQ-5-4, 4757          | K.VVAPTISSPVCEQLVEAGR.L             | 2142.41919 | 2 | 1.33E-08 | 0.95 | 4.83 | - | 814.2  |
| AHQ-5-12, 4562         | K.VVAPTISSPVCEQLVEAGR.L             | 2142.41919 | 2 | 2.99E-05 | 0.89 | 3.64 | - | 747.5  |
| AHQ-5-5, 4478          | K.VVAPTISSPVCEQLVEAGR.L             | 2142.41919 | 2 | 1.45E-05 | 0.93 | 4.27 | - | 702.0  |
| AHQ-5-5, 4585 - 4653   | K.VVAPTISSPVCEQLVEAGR.L             | 2142.41919 | 2 | 6.70E-11 | 0.97 | 6.02 | - | 897.2  |
| AHQ-5-6, 4413          | K.VVAPTISSPVCEQLVEAGR.L             | 2142.41919 | 2 | 7.00E-05 | 0.83 | 4.08 | - | 275.8  |
| AHQ-5-6, 4516 - 4517   | K.VVAPTISSPVCEQLVEAGR.L             | 2142.41919 | 2 | 1.29E-05 | 0.95 | 5.11 | - | 777.2  |
| AHQ-5-14-, 4402 - 4471 | K.VVAPTISSPVCEQLVEAGR.L             | 2142.41919 | 2 | 1.63E-05 | 0.93 | 4.51 | - | 705.8  |
| AHQ-5-1, 4800          | K.VVAPTISSPVCEQLVEAGR.L             | 2142.41919 | 2 | 2.65E-06 | 0.88 | 3.58 | - | 590.1  |
| AHQ-5-7, 4378 - 4442   | K.VVAPTISSPVCEQLVEAGR.L             | 2142.41919 | 2 | 3.39E-06 | 0.72 | 3.31 | - | 446.5  |
| AHQ-5-8, 4312          | K.VVAPTISSPVCEQLVEAGR.L             | 2142.41919 | 2 | 6.93E-09 | 0.97 | 5.07 | - | 1261.5 |

|                            |                                                                         |            |   |          |       |        |       |         |
|----------------------------|-------------------------------------------------------------------------|------------|---|----------|-------|--------|-------|---------|
| AHQ-5-8, 4328 - 4332       | K.VVAPTISSPVCQEQLVEAGR.L                                                | 2142.41919 | 3 | 4.03E-06 | 0.89  | 4.36   | -     | 1040.2  |
| AHQ-5-9, 4058 - 4066       | K.VVAPTISSPVCQEQLVEAGR.L                                                | 2142.41919 | 2 | 1.02E-06 | 0.95  | 5.22   | -     | 834.8   |
| AHQ-5-13-, 4521            | K.VVAPTISSPVCQEQLVEAGR.L                                                | 2142.41919 | 2 | 5.59E-06 | 0.59  | 2.93   | -     | 304.2   |
| gi 4503571 ref NP_001419.1 | enolase 1; phosphopyruvate hydratase; MYC promoter-binding protein 1; n |            |   | 5.55E-16 | 12.28 | 150.37 | 44.70 | 47168.7 |
| AHQ-5-14-, 5202            | R.AAVPSGASTGIYEALELR.D                                                  | 1806.00979 | 2 | 1.10E-04 | 0.73  | 2.80   | -     | 382.5   |
| AHQ-5-13-, 5249 - 5280     | R.AAVPSGASTGIYEALELR.D                                                  | 1806.00979 | 2 | 4.20E-04 | 0.95  | 5.19   | -     | 580.9   |
| AHQ-5-12, 5308             | R.AAVPSGASTGIYEALELR.D                                                  | 1806.00979 | 2 | 1.05E-12 | 0.95  | 5.02   | -     | 498.2   |
| AHQ-5-13, 5353 - 5417      | R.AAVPSGASTGIYEALELR.D                                                  | 1806.00979 | 2 | 9.57E-12 | 0.97  | 5.60   | -     | 663.2   |
| AHQ-5-11, 5104             | R.AAVPSGASTGIYEALELR.D                                                  | 1806.00979 | 2 | 2.04E-04 | 0.68  | 2.93   | -     | 332.0   |
| AHQ-5-8, 4938 - 5010       | R.AAVPSGASTGIYEALELR.D                                                  | 1806.00979 | 2 | 2.76E-05 | 0.92  | 4.40   | -     | 498.2   |
| AHQ-5-14, 5996 - 6004      | R.AAVPSGASTGIYEALELR.D                                                  | 1806.00979 | 2 | 5.21E-04 | 0.95  | 4.77   | -     | 738.5   |
| AHQ-5-8, 4774 - 4841       | R.AAVPSGASTGIYEALELR.D                                                  | 1806.00979 | 2 | 8.77E-14 | 0.97  | 5.69   | -     | 841.2   |
| AHQ-5-8, 4292 - 4360       | K.DATNVGDEGGFAPNILENKE                                                  | 1962.06350 | 2 | 1.30E-08 | 0.94  | 5.01   | -     | 872.6   |
| AHQ-5-8, 5856 - 5889       | K.DATNVGDEGGFAPNILENKEGLELLK.T                                          | 2744.99178 | 3 | 5.55E-16 | 0.86  | 4.30   | -     | 1127.4  |
| AHQ-5-8, 5838 - 5918       | K.DATNVGDEGGFAPNILENKEGLELLK.T                                          | 2744.99178 | 2 | 2.23E-09 | 0.58  | 3.78   | -     | 399.7   |
| AHQ-5-9, 6242              | K.DYPVVSIEDPFDQDDWGAWQK.F                                               | 2511.63977 | 2 | 5.34E-06 | 0.45  | 2.67   | -     | 423.8   |
| AHQ-5-8, 4389              | K.FTASAGIQVVDLTVTNPK.R                                                  | 2034.25590 | 2 | 3.98E-06 | 0.87  | 3.83   | -     | 745.8   |
| AHQ-5-13, 4313             | R.GNPTVEVDLFTSK.G                                                       | 1407.55065 | 2 | 1.09E-06 | 0.85  | 3.25   | -     | 834.8   |
| AHQ-5-8, 3813              | R.GNPTVEVDLFTSK.G                                                       | 1407.55065 | 1 | 5.06E-09 | 0.73  | 3.53   | -     | 610.1   |
| AHQ-5-13-, 4213            | R.GNPTVEVDLFTSK.G                                                       | 1407.55065 | 1 | 4.23E-04 | 0.31  | 1.92   | -     | 571.1   |
| AHQ-5-8, 5668 - 5740       | R.HIADLGNSEVILPVPFNVINGGSHAGNKL                                         | 3013.35654 | 3 | 6.16E-08 | 0.91  | 4.76   | -     | 893.4   |
| AHQ-5-8, 5120              | K.LAMQEFMILPVGAAANFR.E                                                  | 1941.30692 | 2 | 1.19E-05 | 0.93  | 3.93   | -     | 1030.5  |
| AHQ-5-10, 6263             | K.LAMQEFMILPVGAAANFR.E                                                  | 1909.30812 | 2 | 1.18E-04 | 0.87  | 3.92   | -     | 626.1   |
| AHQ-5-8, 6690 - 6752       | K.LAMQEFMILPVGAAANFR.E                                                  | 1909.30812 | 2 | 4.81E-05 | 0.96  | 4.84   | -     | 1090.2  |
| AHQ-5-8, 5728 - 5749       | K.LAMQEFMILPVGAAANFR.E                                                  | 1925.30752 | 2 | 3.05E-05 | 0.89  | 4.22   | -     | 957.5   |
| AHQ-5-8, 6768 - 6769       | K.SFIKDYPPVVSIEDPFDQDDWGAWQK.F                                          | 2987.22328 | 3 | 3.25E-09 | 0.98  | 7.42   | -     | 2642.5  |
| AHQ-5-8, 6766 - 6780       | K.SFIKDYPPVVSIEDPFDQDDWGAWQK.F                                          | 2987.22328 | 2 | 1.71E-04 | 0.81  | 3.91   | -     | 521.3   |
| AHQ-5-8, 2090              | R.SGKYDLDFK.S                                                           | 1073.18043 | 2 | 1.44E-05 | 0.72  | 2.53   | -     | 701.4   |
| AHQ-5-8, 1949              | K.TIAPALVSK.K                                                           | 900.90769  | 1 | 6.53E-04 | 0.24  | 2.03   | -     | 256.0   |
| AHQ-5-8, 3364 - 3429       | K.VNQIGSVTESLQACK.L                                                     | 1635.82159 | 2 | 1.25E-05 | 0.89  | 3.66   | -     | 965.9   |
| AHQ-5-14, 4504 - 4568      | K.VNQIGSVTESLQACK.L                                                     | 1635.82159 | 2 | 2.40E-06 | 0.90  | 4.28   | -     | 644.8   |
| AHQ-5-8, 4474 - 4480       | R.YISPDQLADLYK.S                                                        | 1426.59557 | 2 | 3.48E-09 | 0.95  | 4.98   | -     | 839.0   |
| AHQ-5-9, 4296              | R.YISPDQLADLYK.S                                                        | 1426.59557 | 2 | 4.14E-06 | 0.87  | 3.45   | -     | 634.7   |
| gi 4505879 ref NP_002655.1 | pleckstrin; p47 [Homo sapiens]                                          |            |   | 5.55E-16 | 11.13 | 130.43 | 52.00 | 40082.5 |
| AHQ-5-1, 6053              | R.EDPAYLHYYPAGAEPLGAIHLR.G                                              | 2684.89982 | 3 | 1.69E-05 | 0.87  | 4.09   | -     | 709.9   |
| AHQ-5-10, 5126             | R.EDPAYLHYYPAGAEPLGAIHLR.G                                              | 2684.89982 | 3 | 5.69E-09 | 0.95  | 5.87   | -     | 902.2   |
| AHQ-5-12, 5664 - 5680      | R.EDPAYLHYYPAGAEPLGAIHLR.G                                              | 2684.89982 | 3 | 1.39E-06 | 0.95  | 5.60   | -     | 1075.2  |
| AHQ-5-13, 5661             | R.EDPAYLHYYPAGAEPLGAIHLR.G                                              | 2684.89982 | 3 | 1.49E-04 | 0.94  | 5.39   | -     | 1012.2  |
| AHQ-5-13-, 5585            | R.EDPAYLHYYPAGAEPLGAIHLR.G                                              | 2684.89982 | 2 | 2.60E-05 | 0.65  | 2.73   | -     | 474.4   |
| AHQ-5-13-, 5573 - 5584     | R.EDPAYLHYYPAGAEPLGAIHLR.G                                              | 2684.89982 | 3 | 7.83E-10 | 0.97  | 6.37   | -     | 1639.9  |
| AHQ-5-14, 6204             | R.EDPAYLHYYPAGAEPLGAIHLR.G                                              | 2684.89982 | 3 | 1.33E-08 | 0.94  | 5.17   | -     | 1238.3  |
| AHQ-5-14, 6210             | R.EDPAYLHYYPAGAEPLGAIHLR.G                                              | 2684.89982 | 2 | 2.90E-05 | 0.67  | 3.12   | -     | 185.8   |
| AHQ-5-8, 5305              | R.EDPAYLHYYPAGAEPLGAIHLR.G                                              | 2684.89982 | 3 | 2.97E-07 | 0.97  | 6.17   | -     | 1709.2  |
| AHQ-5-8, 5308              | R.EDPAYLHYYPAGAEPLGAIHLR.G                                              | 2684.89982 | 2 | 1.82E-07 | 0.68  | 2.88   | -     | 368.5   |
| AHQ-5-8, 2269              | R.GCVVTSVESNSNGR.K                                                      | 1467.54464 | 2 | 8.78E-08 | 0.91  | 3.44   | -     | 1053.5  |
| AHQ-5-13-, 2507            | R.GCVVTSVESNSNGR.K                                                      | 1467.54464 | 2 | 1.60E-07 | 0.84  | 3.25   | -     | 724.2   |
| AHQ-5-8, 2818              | K.GSTLTPCQDFGK.R                                                        | 1399.50867 | 1 | 3.58E-05 | 0.23  | 2.18   | -     | 267.2   |
| AHQ-5-8, 2276              | K.GSTLTPCQDFGK.R                                                        | 1555.69502 | 2 | 7.56E-06 | 0.62  | 2.82   | -     | 507.3   |
| AHQ-5-13-, 2881            | K.GSTLTPCQDFGK.R                                                        | 1555.69502 | 2 | 8.40E-08 | 0.68  | 3.04   | -     | 448.3   |
| AHQ-5-8, 7338 - 7342       | K.GSVFNTPKMMVVLLLEDGIEFYK.K                                             | 2760.20112 | 2 | 1.12E-05 | 0.82  | 3.73   | -     | 342.1   |
| AHQ-5-9, 6351 - 6418       | K.IFNHCTGNVCIDWLVSNQSVR.N                                               | 2669.97641 | 2 | 5.02E-06 | 0.94  | 4.28   | -     | 1298.2  |
| AHQ-5-10, 6342             | K.IFNHCTGNVCIDWLVSNQSVR.N                                               | 2669.97641 | 2 | 4.45E-09 | 0.98  | 5.74   | -     | 1508.8  |
| AHQ-5-8, 7104 - 7178       | K.IFNHCTGNVCIDWLVSNQSVR.N                                               | 2669.97641 | 2 | 1.44E-13 | 0.98  | 6.63   | -     | 1569.1  |
| AHQ-5-8, 7021 - 7034       | K.IFNHCTGNVCIDWLVSNQSVR.N                                               | 2669.97641 | 2 | 7.69E-09 | 0.97  | 5.10   | -     | 1390.7  |
| AHQ-5-11, 6851             | R.KSEENLFEIITAEVHYFLQAATPK.E                                            | 3024.32650 | 3 | 1.82E-08 | 0.98  | 7.64   | -     | 2764.5  |
| AHQ-5-8, 7146              | R.KSEENLFEIITAEVHYFLQAATPK.E                                            | 3024.32650 | 3 | 1.12E-07 | 0.97  | 6.68   | -     | 1972.3  |
| AHQ-5-8, 7252 - 7320       | R.KSEENLFEIITAEVHYFLQAATPK.E                                            | 3024.32650 | 3 | 1.11E-07 | 0.98  | 7.09   | -     | 1998.7  |
| AHQ-5-14-, 6797 - 6798     | R.KSEENLFEIITAEVHYFLQAATPK.E                                            | 3024.32650 | 3 | 5.55E-16 | 0.98  | 8.13   | -     | 2445.9  |
| AHQ-5-12, 7080 - 7084      | R.KSEENLFEIITAEVHYFLQAATPK.E                                            | 3024.32650 | 3 | 8.02E-13 | 0.99  | 8.55   | -     | 3524.3  |
| AHQ-5-8, 7389              | R.KSEENLFEIITAEVHYFLQAATPK.E                                            | 3024.32650 | 3 | 2.79E-11 | 0.99  | 8.56   | -     | 3796.7  |
| AHQ-5-13-, 6847 - 6921     | R.KSEENLFEIITAEVHYFLQAATPK.E                                            | 3024.32650 | 3 | 8.55E-12 | 0.99  | 7.74   | -     | 2869.4  |
| AHQ-5-9, 6519              | R.KSEENLFEIITAEVHYFLQAATPK.E                                            | 3024.32650 | 3 | 6.19E-07 | 0.98  | 6.71   | -     | 2342.7  |
| AHQ-5-10, 6567             | R.KSEENLFEIITAEVHYFLQAATPK.E                                            | 3024.32650 | 3 | 6.50E-12 | 0.98  | 7.21   | -     | 1837.4  |
| AHQ-5-9, 5886              | R.LPETIDLGALYLSMK.D                                                     | 1664.98779 | 2 | 2.97E-04 | 0.98  | 4.54   | -     | 2109.7  |
| AHQ-5-8, 6366 - 6432       | R.LPETIDLGALYLSMK.D                                                     | 1664.98779 | 2 | 3.33E-07 | 0.97  | 4.23   | -     | 2052.1  |
| AHQ-5-12, 6474 - 6480      | R.LPETIDLGALYLSMK.D                                                     | 1664.98779 | 2 | 2.76E-08 | 0.98  | 5.02   | -     | 1994.7  |
| AHQ-5-12, 5752 - 5761      | R.LPETIDLGALYLSM*K.D                                                    | 1680.98719 | 2 | 5.55E-07 | 0.97  | 5.08   | -     | 1341.1  |
| AHQ-5-10, 5982 - 5987      | R.LPETIDLGALYLSMK.D                                                     | 1664.98779 | 2 | 3.40E-06 | 0.98  | 4.92   | -     | 2018.5  |
| AHQ-5-8, 6526 - 6593       | R.LPETIDLGALYLSMK.D                                                     | 1664.98779 | 2 | 9.64E-06 | 0.97  | 4.63   | -     | 2079.5  |
| AHQ-5-9, 5991              | R.LPETIDLGALYLSMK.D                                                     | 1664.98779 | 2 | 8.53E-04 | 0.76  | 2.77   | -     | 918.1   |
| AHQ-5-8, 5413              | R.LPETIDLGALYLSM*K.D                                                    | 1680.98719 | 2 | 2.49E-04 | 0.94  | 4.10   | -     | 1229.1  |
| AHQ-5-8, 4822 - 4893       | R.LPETIDLGALYLSM*KDTEK.G                                                | 2154.46684 | 2 | 3.73E-04 | 0.91  | 3.98   | -     | 868.9   |
| AHQ-5-8, 4828              | R.LPETIDLGALYLSM*KDTEK.G                                                | 2154.46684 | 3 | 4.62E-10 | 0.93  | 4.82   | -     | 825.4   |
| AHQ-5-12, 5309             | R.LPETIDLGALYLSM*KDTEK.G                                                | 2154.46684 | 3 | 1.83E-04 | 0.93  | 4.73   | -     | 1135.0  |
| AHQ-5-8, 5908 - 5977       | R.NRQEGMIASLLNEGYLQAPAGDMSK.S                                           | 2824.18382 | 3 | 1.87E-04 | 0.90  | 4.34   | -     | 928.0   |
| AHQ-5-8, 5773 - 5844       | R.NRQEGMIASLLNEGYLQAPAGDMSK.S                                           | 2824.18382 | 3 | 4.30E-05 | 0.89  | 4.17   | -     | 748.3   |
| AHQ-5-8, 5814 - 5894       | R.NRQEGMIASLLNEGYLQAPAGDMSK.S                                           | 2824.18382 | 2 | 5.03E-05 | 0.98  | 6.20   | -     | 1610.8  |
| AHQ-5-10, 5556 - 5558      | R.NRQEGMIASLLNEGYLQAPAGDMSK.S                                           | 2824.18382 | 2 | 1.28E-06 | 0.98  | 6.01   | -     | 1539.3  |
| AHQ-5-8, 5917 - 5984       | R.NRQEGMIASLLNEGYLQAPAGDMSK.S                                           | 2824.18382 | 2 | 2.29E-04 | 0.98  | 6.14   | -     | 1784.1  |
| AHQ-5-8, 6200 - 6220       | R.NRQEGMIASLLNEGYLQAPAGDMSK.S                                           | 2824.18382 | 2 | 5.80E-05 | 0.97  | 5.34   | -     | 1497.7  |
| AHQ-5-9, 5402 - 5410       | R.NRQEGMIASLLNEGYLQAPAGDMSK.S                                           | 2824.18382 | 2 | 1.95E-05 | 0.97  | 5.68   | -     | 1229.2  |
| AHQ-5-8, 5722 - 5744       | R.NRQEGMIASLLNEGYLQAPAGDMSK.S                                           | 2824.18382 | 2 | 6.30E-08 | 0.96  | 5.54   | -     | 692.0   |
| AHQ-5-8, 4118 - 4128       | K.QQDHFQAAFLFLEER.D                                                     | 1766.89390 | 2 | 9.41E-06 | 0.41  | 2.53   | -     | 115.5   |
| AHQ-5-12, 4510             | K.QQDHFQAAFLFLEER.D                                                     | 1766.89390 | 2 | 5.97E-10 | 0.78  | 3.20   | -     | 269.7   |
| AHQ-5-8, 3890              | K.QQDHFQAAFLFLEER.D                                                     | 1766.89390 | 2 | 6.22E-08 | 0.84  | 3.60   | -     | 170.0   |
| AHQ-5-10, 6631 - 6699      | K.SEEENLFEIITAEVHYFLQAATPK.E                                            | 2896.15359 | 3 | 3.63E-10 | 0.89  | 4.52   | -     | 682.6   |
| AHQ-5-9, 6582              | K.SEEENLFEIITAEVHYFLQAATPK.E                                            | 2896.15359 | 3 | 6.62E-10 | 0.93  | 5.03   | -     | 925.7   |
| AHQ-5-12, 7144             | K.SEEENLFEIITAEVHYFLQAATPK.E                                            | 2896.15359 | 2 | 1.57E-08 | 0.82  | 4.28   | -     | 407.9   |
| AHQ-5-12, 7140 - 7141      | K.SEEENLFEIITAEVHYFLQAATPK.E                                            | 2896.15359 | 3 | 3.87E-08 | 0.92  | 4.69   | -     | 1028.1  |
| AHQ-5-10, 6630             | K.SEEENLFEIITAEVHYFLQAATPK.E                                            | 2896.15359 | 2 | 7.30E-06 | 0.31  | 2.77   | -     | 415.1   |
| AHQ-5-13-, 6891 - 6892     | K.SEEENLFEIITAEVHYFLQAATPK.E                                            | 2896.15359 | 3 | 4.06E-07 | 0.79  | 3.52   | -     | 586.4   |
| AHQ-5-8, 7321 - 7337       | K.SEEENLFEIITAEVHYFLQAATPK.E                                            | 2896.15359 | 3 | 5.77E-08 | 0.92  | 4.90   | -     | 944.5   |
| AHQ-5-14-, 6837            | K.SEEENLFEIITAEVHYFLQAATPK.E                                            | 2896.15359 | 3 | 3.89E-12 | 0.94  | 5.08   | -     | 980.1   |
| gi 4507953 ref NP_003397.1 | tyrosine 3/tryptophan 5 - monoxygenase activation protein, zeta polypep |            |   | 5.55E-16 | 7.95  | 100.29 | 46.50 | 27744.9 |
| AHQ-5-9, 2830              | K.FLIPNASQAESK.V                                                        | 1305.46156 | 1 | 2.66E-06 | 0.64  | 2.81   | -     | 467.8   |
| AHQ-5-10, 3183 - 3230      | K.FLIPNASQAESK.V                                                        | 1305.46156 | 1 | 6.26E-04 | 0.28  | 2.54   | -     | 432.6   |
| AHQ-5-10, 3171 - 3315      | K.FLIPNASQAESK.V                                                        | 1305.46156 | 1 | 2.18E-06 | 0.44  | 2.22   | -     | 433.3   |
| AHQ-5-10, 3010             | K.FLIPNASQAESK.V                                                        | 1305.46156 | 2 | 2.09E-07 | 0.83  | 2.83   | -     | 684.7   |
| AHQ-5-11, 3119             | K.FLIPNASQAESK.V                                                        | 1305.46156 | 2 | 2.84E-04 | 0.52  | 2.58   | -     | 346.2   |
| AHQ-5-10, 2944 - 3007      | K.FLIPNASQAESK.V                                                        | 1305.46156 | 1 | 8.71E-04 | 0.18  | 2.32   | -     | 347.9   |
| AHQ-5-10, 6507 - 6574      | K.IETELRDICNDVLSLLEK.F                                                  | 2162.44718 | 2 | 3.58E-04 | 0.97  | 5.48   | -     | 1540.9  |
| AHQ-5-10, 5734             | K.IETELRDICNDVLSLLEK.F                                                  | 2162.44718 | 2 | 5.74E-08 | 0.95  | 5.16   | -     | 1349.6  |
| AHQ-5-10, 6564 - 6579      | R.LGLALNFVVFYIILNSPEK.A                                                 | 2318.65200 | 2 | 4.11E-06 | 0.88  | 4.44   | -     | 538.1   |
| AHQ-5-13-, 2321            | K.SVTEGGAELSNEER.N                                                      | 1549.57922 | 2 | 2.66E-05 | 0.91  | 3.83   | -     | 1059.1  |
| AHQ-5-14-, 2206 - 2275     | K.SVTEGGAELSNEER.N                                                      | 1549.57922 | 2 | 2.38E-10 | 0.95  | 4.46   | -     | 1420.0  |
| AHQ-5-9, 2171              | K.SVTEGGAELSNEER.N                                                      | 1549.57922 | 2 | 3.70E-04 | 0.93  | 3.70   | -     | 991.1   |
| AHQ-5-13, 2479             | K.SVTEGGAELSNEER.N                                                      | 1549.57922 | 2 | 8.44E-07 | 0.93  | 3.74   | -     | 1381.9  |

|                              |                                                                        |            |   |          |       |        |       |          |
|------------------------------|------------------------------------------------------------------------|------------|---|----------|-------|--------|-------|----------|
| AHQ-5-10, 2159 - 2238        | K.SVTEQGAELSNEER.N                                                     | 1549.57922 | 2 | 3.89E-06 | 0.95  | 4.56   | -     | 1217.6   |
| AHQ-5-10, 4656               | K.SVTEQGAELSNEERLLSVAYK.N                                              | 2438.63331 | 2 | 8.25E-05 | 0.59  | 3.18   | -     | 317.9    |
| AHQ-5-10, 5727               | K.TAFDEAIAELDLTSEESYK.D                                                | 2133.25160 | 2 | 1.93E-05 | 0.82  | 3.47   | -     | 547.7    |
| AHQ-5-10, 6406 - 6470        | K.TAFDEAIAELDLTSEESYK.D                                                | 2133.25160 | 2 | 4.43E-09 | 0.98  | 5.90   | -     | 1444.1   |
| AHQ-5-9, 6414                | K.TAFDEAIAELDLTSEESYK.D                                                | 2133.25160 | 2 | 6.54E-07 | 0.96  | 4.89   | -     | 1347.1   |
| AHQ-5-13-, 6744 - 6747       | K.TAFDEAIAELDLTSEESYK.D                                                | 2133.25160 | 2 | 6.84E-09 | 0.97  | 5.33   | -     | 1473.4   |
| AHQ-5-13, 6812 - 6838        | K.TAFDEAIAELDLTSEESYK.D                                                | 2133.25160 | 3 | 3.02E-05 | 0.90  | 4.21   | -     | 763.9    |
| AHQ-5-13, 6809 - 6868        | K.TAFDEAIAELDLTSEESYK.D                                                | 2133.25160 | 2 | 1.02E-09 | 0.97  | 5.47   | -     | 1430.9   |
| AHQ-5-12, 6960               | K.TAFDEAIAELDLTSEESYK.D                                                | 2133.25160 | 2 | 1.54E-08 | 0.96  | 5.29   | -     | 1163.0   |
| AHQ-5-14-, 6701              | K.TAFDEAIAELDLTSEESYK.D                                                | 2133.25160 | 2 | 1.05E-11 | 0.97  | 5.59   | -     | 1120.2   |
| AHQ-5-11, 6742               | K.TAFDEAIAELDLTSEESYK.D                                                | 2133.25160 | 2 | 5.54E-09 | 0.96  | 4.89   | -     | 1279.1   |
| AHQ-5-10, 6686               | K.TAFDEAIAELDLTSEESYKDSLIM*QLLR.D                                      | 3320.66704 | 3 | 5.55E-16 | 0.93  | 4.94   | -     | 1070.4   |
| AHQ-5-9, 6568 - 6639         | K.TAFDEAIAELDLTSEESYKDSLIM*QLLR.D                                      | 3320.66704 | 3 | 9.44E-08 | 0.92  | 4.77   | -     | 773.1    |
| AHQ-5-10, 6583 - 6586        | K.TAFDEAIAELDLTSEESYKDSLIM*QLLR.D                                      | 3320.66704 | 3 | 2.60E-10 | 0.87  | 4.52   | -     | 688.9    |
| AHQ-5-10, 2370 - 2430        | R.YDDMAACMK.S                                                          | 1106.27579 | 1 | 5.75E-05 | 0.36  | 2.30   | -     | 318.1    |
| AHQ-5-10, 4124               | R.YDDMAACMKSVTEQGAELSNEER.N                                            | 2636.83241 | 2 | 7.81E-04 | 0.54  | 2.95   | -     | 237.1    |
| AHQ-5-13-, 2049              | R.YLAEVAAGDDKK.G                                                       | 1280.40887 | 2 | 7.62E-05 | 0.89  | 3.11   | -     | 1248.7   |
| AHQ-5-13, 2225               | R.YLAEVAAGDDKK.G                                                       | 1280.40887 | 2 | 8.11E-04 | 0.89  | 3.33   | -     | 990.7    |
| AHQ-5-11, 1907 - 1914        | R.YLAEVAAGDDKK.G                                                       | 1280.40887 | 2 | 1.47E-05 | 0.96  | 3.69   | -     | 1932.3   |
| AHQ-5-10, 1807 - 1867        | R.YLAEVAAGDDKK.G                                                       | 1280.40887 | 1 | 2.23E-04 | 0.88  | 3.59   | -     | 903.1    |
| AHQ-5-10, 1800 - 1852        | R.YLAEVAAGDDKK.G                                                       | 1280.40887 | 2 | 1.08E-05 | 0.96  | 3.71   | -     | 1814.9   |
| AHQ-5-12, 1970               | R.YLAEVAAGDDKK.G                                                       | 1280.40887 | 2 | 1.36E-07 | 0.95  | 3.35   | -     | 1816.7   |
| gj[21361755]ref[NP_004090.3] | stomatin; erythrocyte membrane protein band 7.2 (stomatin) [Homo sapie |            |   | 5.55E-16 | 7.46  | 80.33  | 39.20 | 31708.5  |
| AHQ-5-9, 4103 - 4104         | K.EASMVITESPAALQLR.Y                                                   | 1716.98119 | 2 | 9.42E-04 | 0.47  | 2.89   | -     | 462.9    |
| AHQ-5-13, 4180               | K.EASMVITESPAALQLR.Y                                                   | 1732.98059 | 2 | 4.79E-04 | 0.81  | 3.56   | -     | 662.0    |
| AHQ-5-1, 4341                | K.EASMVITESPAALQLR.Y                                                   | 1732.98059 | 2 | 3.66E-06 | 0.93  | 4.04   | -     | 1097.1   |
| AHQ-5-14-, 4581 - 4583       | K.EASMVITESPAALQLR.Y                                                   | 1716.98119 | 2 | 3.75E-06 | 0.94  | 4.62   | -     | 1173.5   |
| AHQ-5-1, 4856 - 4927         | K.EASMVITESPAALQLR.Y                                                   | 1716.98119 | 2 | 7.78E-06 | 0.92  | 3.93   | -     | 1201.7   |
| AHQ-5-10, 6511               | K.GPGLFFILPCTDSFIK.V                                                   | 1814.13672 | 2 | 1.65E-04 | 0.95  | 4.33   | -     | 944.6    |
| AHQ-5-1, 7307 - 7309         | K.GPGLFFILPCTDSFIK.V                                                   | 1814.13672 | 2 | 1.23E-04 | 0.94  | 4.63   | -     | 791.6    |
| AHQ-5-9, 6451 - 6454         | K.GPGLFFILPCTDSFIK.V                                                   | 1814.13672 | 2 | 2.49E-07 | 0.95  | 5.22   | -     | 719.4    |
| AHQ-5-13, 6880               | K.GPGLFFILPCTDSFIK.V                                                   | 1814.13672 | 2 | 3.90E-04 | 0.88  | 3.84   | -     | 538.9    |
| AHQ-5-3, 7489                | K.GPGLFFILPCTDSFIK.V                                                   | 1814.13672 | 2 | 7.77E-06 | 0.93  | 4.67   | -     | 711.5    |
| AHQ-5-4, 7441                | K.GPGLFFILPCTDSFIK.V                                                   | 1814.13672 | 2 | 4.54E-04 | 0.92  | 3.93   | -     | 838.9    |
| AHQ-5-1, 6265                | K.NLSQILSDREEIAHNM*QSTLDDATDAWGK.V                                     | 3389.65279 | 3 | 6.39E-05 | 0.93  | 4.54   | -     | 1525.0   |
| AHQ-5-1, 7235                | K.NLSQILSDREEIAHNM*QSTLDDATDAWGK.V                                     | 3373.65339 | 3 | 2.51E-05 | 0.97  | 6.60   | -     | 1369.5   |
| AHQ-5-9, 6379                | K.NLSQILSDREEIAHNM*QSTLDDATDAWGK.V                                     | 3373.65339 | 3 | 1.15E-07 | 0.97  | 6.39   | -     | 1727.6   |
| AHQ-5-10, 6354 - 6434        | K.NLSQILSDREEIAHNM*QSTLDDATDAWGK.V                                     | 3373.65339 | 3 | 1.30E-10 | 0.97  | 6.68   | -     | 1440.4   |
| AHQ-5-9, 6590 - 6592         | K.NSTIVFPLPIDMLQGIIAGK.H                                               | 2128.56375 | 2 | 6.67E-05 | 0.83  | 3.75   | -     | 420.6    |
| AHQ-5-1, 7419                | K.NSTIVFPLPIDMLQGIIAGK.H                                               | 2128.56375 | 2 | 5.49E-04 | 0.92  | 4.26   | -     | 582.3    |
| AHQ-5-10, 3608               | R.VQNTLAVANITNADSATR.L                                                 | 1931.09731 | 2 | 7.78E-10 | 0.90  | 3.98   | -     | 853.9    |
| AHQ-5-1, 4699                | R.VQNTLAVANITNADSATR.L                                                 | 1931.09731 | 2 | 9.07E-08 | 0.94  | 4.46   | -     | 1039.0   |
| AHQ-5-1, 4196                | R.VQNTLAVANITNADSATR.L                                                 | 1931.09731 | 2 | 5.78E-05 | 0.95  | 4.59   | -     | 1128.1   |
| AHQ-5-2, 3894                | R.VQNTLAVANITNADSATR.L                                                 | 1931.09731 | 2 | 1.16E-04 | 0.88  | 3.60   | -     | 748.5    |
| AHQ-5-1, 3949 - 4024         | R.VQNTLAVANITNADSATR.L                                                 | 1931.09731 | 2 | 5.55E-16 | 0.97  | 6.36   | -     | 1150.0   |
| AHQ-5-10, 4075               | R.VQNTLAVANITNADSATR.L                                                 | 1931.09731 | 2 | 3.29E-08 | 0.81  | 3.51   | -     | 563.5    |
| AHQ-5-14-, 3741              | R.YLQTLTTIAAEK.N                                                       | 1352.55813 | 2 | 1.79E-06 | 0.94  | 4.15   | -     | 1097.4   |
| AHQ-5-13-, 3843              | R.YLQTLTTIAAEK.N                                                       | 1352.55813 | 2 | 2.02E-04 | 0.95  | 3.79   | -     | 1378.5   |
| gj[4507485]ref[NP_003237.1]  | thrombospondin 1 [Homo sapiens]                                        |            |   | 1.67E-15 | 33.02 | 400.32 | 38.40 | 129351.8 |
| AHQ-5-4, 4258                | K.AGTLDL.SLTVGQK.Q                                                     | 1303.48711 | 2 | 1.95E-05 | 0.80  | 2.63   | -     | 901.4    |
| AHQ-5-2, 4206                | K.AGTLDL.SLTVGQK.Q                                                     | 1303.48711 | 2 | 4.51E-09 | 0.89  | 3.15   | -     | 1415.7   |
| AHQ-5-11, 3846               | K.AGTLDL.SLTVGQK.Q                                                     | 1303.48711 | 2 | 2.37E-07 | 0.90  | 3.65   | -     | 1124.5   |
| AHQ-5-4, 2152                | R.AQYSGLSVK.V                                                          | 1010.12587 | 1 | 1.86E-05 | 0.16  | 2.38   | -     | 226.5    |
| AHQ-5-6, 2508                | R.AQYIDCEK.M                                                           | 1141.27636 | 1 | 3.07E-05 | 0.12  | 1.86   | -     | 394.1    |
| AHQ-5-3, 2657                | R.AQYIDCEK.M                                                           | 1141.27636 | 1 | 9.46E-04 | 0.16  | 1.81   | -     | 553.1    |
| AHQ-5-9, 5682                | R.AQYIDCEK.MENALDVPISQVFR.D                                            | 2972.33983 | 2 | 1.68E-07 | 0.83  | 3.48   | -     | 571.4    |
| AHQ-5-10, 5900               | R.AQYIDCEK.MENALDVPISQVFR.D                                            | 2972.33983 | 2 | 1.38E-04 | 0.74  | 2.97   | -     | 574.6    |
| AHQ-5-3, 6806 - 6819         | R.AQYIDCEK.MENALDVPISQVFR.D                                            | 2972.33983 | 2 | 1.04E-04 | 0.84  | 3.39   | -     | 752.1    |
| AHQ-5-2, 6230                | R.AQYIDCEK.MENALDVPISQVFR.D                                            | 2988.33923 | 3 | 5.26E-07 | 0.94  | 5.27   | -     | 921.3    |
| AHQ-5-3, 4049                | R.CENTDPGYNCLPCPPR.F                                                   | 1954.10800 | 2 | 8.68E-05 | 0.88  | 3.79   | -     | 576.1    |
| AHQ-5-1, 3931                | R.CENTDPGYNCLPCPPR.F                                                   | 1954.10800 | 2 | 9.57E-07 | 0.87  | 3.77   | -     | 505.9    |
| AHQ-5-2, 3867 - 3938         | R.CENTDPGYNCLPCPPR.F                                                   | 1954.10800 | 2 | 4.44E-04 | 0.64  | 3.13   | -     | 659.6    |
| AHQ-5-3, 4070 - 4146         | R.CENTDPGYNCLPCPPR.F                                                   | 1954.10800 | 2 | 2.02E-13 | 0.90  | 3.85   | -     | 605.2    |
| AHQ-5-4, 4148 - 4202         | R.CENTDPGYNCLPCPPR.F                                                   | 1954.10800 | 2 | 1.10E-04 | 0.74  | 3.05   | -     | 351.8    |
| AHQ-5-3, 4217                | R.CENTDPGYNCLPCPPR.F                                                   | 1954.10800 | 2 | 4.83E-06 | 0.75  | 3.29   | -     | 389.9    |
| AHQ-5-5, 3873 - 3954         | R.CENTDPGYNCLPCPPR.F                                                   | 1954.10800 | 2 | 1.72E-05 | 0.85  | 3.35   | -     | 524.9    |
| AHQ-5-4, 4029                | R.CENTDPGYNCLPCPPR.F                                                   | 1954.10800 | 2 | 1.35E-07 | 0.94  | 4.50   | -     | 719.0    |
| AHQ-5-2, 4669                | K.CGACAPVSGNGIGQCTDVECKEVPDACFNHNGEHR.C                                | 4115.32052 | 3 | 5.92E-04 | 0.72  | 3.50   | -     | 454.5    |
| AHQ-5-4, 3844 - 3848         | K.CNYLGHYSDFPMYR.C                                                     | 1677.84222 | 2 | 2.44E-09 | 0.94  | 4.11   | -     | 819.6    |
| AHQ-5-4, 4074                | K.CNYLGHYSDFPMYR.C                                                     | 1677.84222 | 2 | 8.09E-08 | 0.80  | 2.90   | -     | 670.2    |
| AHQ-5-2, 3831 - 3857         | K.CNYLGHYSDFPMYR.C                                                     | 1677.84222 | 2 | 8.57E-08 | 0.95  | 4.29   | -     | 1057.2   |
| AHQ-5-1, 3985 - 3991         | K.CNYLGHYSDFPMYR.C                                                     | 1677.84222 | 2 | 3.27E-08 | 0.95  | 4.30   | -     | 871.4    |
| AHQ-5-4, 3364 - 3434         | K.DCVGQVTEGICNK.Q                                                      | 1654.75869 | 2 | 8.69E-05 | 0.88  | 3.31   | -     | 977.0    |
| AHQ-5-3, 3462                | K.DCVGQVTEGICNK.Q                                                      | 1654.75869 | 2 | 5.63E-05 | 0.92  | 3.98   | -     | 870.0    |
| AHQ-5-2, 3467                | K.DCVGQVTEGICNK.Q                                                      | 1654.75869 | 2 | 3.86E-06 | 0.94  | 4.30   | -     | 1074.0   |
| AHQ-5-6, 6310                | K.DDFDHSDVPDIDDICPENVDISETDFR.R                                        | 3183.22991 | 3 | 2.11E-04 | 0.94  | 4.58   | -     | 1237.8   |
| AHQ-5-5, 2631 - 2703         | K.DHSGQVFSVSNK.A                                                       | 1461.56164 | 2 | 2.86E-05 | 0.83  | 2.72   | -     | 794.6    |
| AHQ-5-6, 2536 - 2614         | K.DHSGQVFSVSNK.A                                                       | 1461.56164 | 2 | 1.08E-07 | 0.92  | 3.82   | -     | 887.3    |
| AHQ-5-3, 2687                | K.DHSGQVFSVSNK.A                                                       | 1461.56164 | 2 | 5.65E-08 | 0.90  | 3.87   | -     | 858.3    |
| AHQ-5-13-, 2740              | K.DHSGQVFSVSNK.A                                                       | 1461.56164 | 2 | 5.16E-08 | 0.91  | 3.65   | -     | 921.3    |
| AHQ-5-2, 3371 - 3385         | R.DNCQVYVNVQDR.D                                                       | 1575.64166 | 2 | 4.46E-07 | 0.94  | 3.88   | -     | 1218.7   |
| AHQ-5-3, 3121                | R.DNCQVYVNVQDR.D                                                       | 1575.64166 | 2 | 6.11E-05 | 0.94  | 4.25   | -     | 1132.4   |
| AHQ-5-4, 3104                | R.DNCQVYVNVQDR.D                                                       | 1575.64166 | 2 | 1.38E-04 | 0.90  | 3.94   | -     | 821.4    |
| AHQ-5-5, 3030 - 3031         | R.DNCQVYVNVQDR.D                                                       | 1575.64166 | 2 | 1.54E-07 | 0.95  | 4.68   | -     | 1125.6   |
| AHQ-5-1, 3180                | R.DNCQVYVNVQDR.D                                                       | 1575.64166 | 2 | 1.43E-05 | 0.65  | 2.83   | -     | 553.3    |
| AHQ-5-2, 3106                | R.DNCQVYVNVQDR.D                                                       | 1575.64166 | 2 | 9.59E-05 | 0.88  | 3.67   | -     | 884.0    |
| AHQ-5-4, 6145 - 6206         | K.DSDGQVGRGQDCKDDFDHSDVPDIDDICPENVDISETDFR.R                           | 4418.43100 | 3 | 1.78E-05 | 0.72  | 3.78   | -     | 412.2    |
| AHQ-5-5, 4151                | R.DTMDGVDGQDCDNCPLHNPQLDSDSDR.I                                        | 3324.31882 | 3 | 8.29E-05 | 0.82  | 3.76   | -     | 451.2    |
| AHQ-5-4, 3894 - 3922         | R.DTMDGVDGQDCDNCPLHNPQLDSDSDR.I                                        | 3340.31822 | 3 | 6.98E-10 | 0.91  | 4.84   | -     | 616.6    |
| AHQ-5-1, 4284 - 4301         | R.DTMDGVDGQDCDNCPLHNPQLDSDSDR.I                                        | 3324.31882 | 3 | 9.37E-09 | 0.95  | 5.71   | -     | 616.8    |
| AHQ-5-4, 4172                | R.DTMDGVDGQDCDNCPLHNPQLDSDSDR.I                                        | 3324.31882 | 3 | 1.65E-05 | 0.90  | 4.57   | -     | 594.7    |
| AHQ-5-2, 4279 - 4353         | R.DTMDGVDGQDCDNCPLHNPQLDSDSDR.I                                        | 3324.31882 | 3 | 7.43E-06 | 0.94  | 5.23   | -     | 901.3    |
| AHQ-5-4, 4261                | R.DTMDGVDGQDCDNCPLHNPQLDSDSDR.I                                        | 3324.31882 | 3 | 1.51E-09 | 0.89  | 4.32   | -     | 523.6    |
| AHQ-5-5, 4255 - 4271         | R.DTMDGVDGQDCDNCPLHNPQLDSDSDR.I                                        | 3324.31882 | 3 | 2.80E-04 | 0.87  | 4.53   | -     | 408.2    |
| AHQ-5-3, 4271 - 4349         | R.DTMDGVDGQDCDNCPLHNPQLDSDSDR.I                                        | 3324.31882 | 3 | 1.67E-15 | 0.94  | 5.64   | -     | 632.5    |
| AHQ-5-2, 3913 - 3987         | R.DTMDGVDGQDCDNCPLHNPQLDSDSDR.I                                        | 3340.31822 | 3 | 5.13E-08 | 0.89  | 4.28   | -     | 736.2    |
| AHQ-5-1, 3896                | R.DTMDGVDGQDCDNCPLHNPQLDSDSDR.I                                        | 3340.31822 | 3 | 3.85E-07 | 0.88  | 4.56   | -     | 640.2    |
| AHQ-5-2, 4194                | R.DTMDGVDGQDCDNCPLHNPQLDSDSDR.I                                        | 3324.31882 | 3 | 3.10E-08 | 0.92  | 4.73   | -     | 921.0    |
| AHQ-5-5, 3865 - 3867         | R.DTMDGVDGQDCDNCPLHNPQLDSDSDR.I                                        | 3340.31822 | 3 | 9.71E-07 | 0.77  | 3.44   | -     | 532.1    |
| AHQ-5-3, 3915 - 3926         | R.DTMDGVDGQDCDNCPLHNPQLDSDSDR.I                                        | 3340.31822 | 3 | 1.31E-10 | 0.89  | 4.27   | -     | 790.7    |
| AHQ-5-2, 3577                | K.FQDLVDAVR.A                                                          | 1063.18877 | 2 | 8.96E-08 | 0.90  | 3.15   | -     | 1076.5   |
| AHQ-5-4, 3598                | K.FQDLVDAVR.A                                                          | 1063.18877 | 1 | 8.31E-05 | 0.12  | 1.97   | -     | 234.2    |
| AHQ-5-10, 3215               | K.FQDLVDAVR.A                                                          | 1063.18877 | 1 | 1.51E-05 | 0.21  | 2.17   | -     | 283.6    |
| AHQ-5-2, 4185                | R.FQMIPLDPK.G                                                          | 1089.33277 | 2 | 4.58E-06 | 0.83  | 3.61   | -     | 677.8    |
| AHQ-5-4, 4221                | R.FQMIPLDPK.G                                                          | 1089.33277 | 2 | 1.74E-05 | 0.76  | 2.82   | -     | 765.9    |
| AHQ-5-4, 2848                | R.FTGSOPFGQVGEHATANK.Q                                                 | 1877.00666 | 2 | 2.14E-06 | 0.89  | 4.14   | -     | 468.5    |
| AHQ-5-1, 2916 - 2927         | R.FTGSOPFGQVGEHATANK.Q                                                 | 1877.00666 | 2 | 1.02E-06 | 0.88  | 4.28   | -     | 515.7    |

|                        |                            |            |   |          |      |      |   |        |
|------------------------|----------------------------|------------|---|----------|------|------|---|--------|
| AHQ-5-3, 2817 - 2886   | R.FTGSOPFGQGVHEATANK.Q     | 1877.00666 | 2 | 4.30E-09 | 0.96 | 5.53 | - | 704.6  |
| AHQ-5-5, 2621          | R.FTGSOPFGQGVHEATANK.Q     | 1877.00666 | 2 | 6.72E-10 | 0.93 | 4.18 | - | 798.1  |
| AHQ-5-2, 2647 - 2649   | R.FTGSOPFGQGVHEATANK.Q     | 1877.00666 | 2 | 5.66E-04 | 0.84 | 3.99 | - | 393.2  |
| AHQ-5-6, 2552          | R.FTGSOPFGQGVHEATANK.Q     | 1877.00666 | 2 | 4.52E-07 | 0.86 | 4.11 | - | 436.3  |
| AHQ-5-2, 2654 - 2657   | R.FTGSOPFGQGVHEATANK.Q     | 1877.00666 | 3 | 9.13E-06 | 0.67 | 3.44 | - | 435.3  |
| AHQ-5-2, 2761          | R.FTGSOPFGQGVHEATANK.Q     | 1877.00666 | 2 | 1.07E-09 | 0.85 | 3.83 | - | 489.4  |
| AHQ-5-9, 2466          | R.FTGSOPFGQGVHEATANK.Q     | 1877.00666 | 2 | 7.25E-04 | 0.66 | 2.90 | - | 437.6  |
| AHQ-5-10, 4838         | R.FVFGTTPEDILR.N           | 1395.58470 | 1 | 5.47E-04 | 0.40 | 2.49 | - | 243.9  |
| AHQ-5-10, 4852         | R.FVFGTTPEDILR.N           | 1395.58470 | 1 | 6.33E-07 | 0.13 | 2.44 | - | 74.5   |
| AHQ-5-2, 5574          | R.FVFGTTPEDILR.N           | 1395.58470 | 1 | 2.67E-04 | 0.20 | 2.41 | - | 117.7  |
| AHQ-5-9, 4736          | R.FVFGTTPEDILR.N           | 1395.58470 | 1 | 3.03E-06 | 0.33 | 2.62 | - | 174.6  |
| AHQ-5-3, 5654 - 5678   | R.FVFGTTPEDILR.N           | 1395.58470 | 2 | 7.56E-04 | 0.83 | 2.79 | - | 870.3  |
| AHQ-5-5, 5414          | R.FVFGTTPEDILR.N           | 1395.58470 | 1 | 1.06E-04 | 0.08 | 2.21 | - | 127.2  |
| AHQ-5-4, 5645          | R.FVFGTTPEDILR.N           | 1395.58470 | 1 | 1.59E-07 | 0.33 | 2.55 | - | 131.8  |
| AHQ-5-6, 5384          | R.FVFGTTPEDILR.N           | 1395.58470 | 1 | 8.88E-06 | 0.27 | 2.69 | - | 76.6   |
| AHQ-5-3, 5659          | R.FVFGTTPEDILR.N           | 1395.58470 | 1 | 2.02E-07 | 0.28 | 2.63 | - | 105.8  |
| AHQ-5-7, 4062 - 4063   | K.GGVNDFQGVVLQNV.R.F       | 1617.74799 | 2 | 4.71E-05 | 0.91 | 4.43 | - | 643.2  |
| AHQ-5-10, 3923 - 3991  | K.GGVNDFQGVVLQNV.R.F       | 1617.74799 | 2 | 1.42E-06 | 0.83 | 3.39 | - | 783.3  |
| AHQ-5-5, 4505 - 4517   | K.GGVNDFQGVVLQNV.R.F       | 1617.74799 | 2 | 4.74E-05 | 0.94 | 4.42 | - | 1085.1 |
| AHQ-5-10, 4220         | K.GGVNDFQGVVLQNV.R.F       | 1617.74799 | 2 | 4.42E-07 | 0.85 | 3.48 | - | 828.8  |
| AHQ-5-10, 4326 - 4364  | K.GGVNDFQGVVLQNV.R.F       | 1617.74799 | 2 | 1.96E-06 | 0.54 | 2.78 | - | 553.4  |
| AHQ-5-6, 4597          | K.GGVNDFQGVVLQNV.R.F       | 1617.74799 | 2 | 1.29E-05 | 0.92 | 3.97 | - | 946.6  |
| AHQ-5-6, 4394 - 4460   | K.GGVNDFQGVVLQNV.R.F       | 1617.74799 | 2 | 5.64E-08 | 0.92 | 4.30 | - | 967.0  |
| AHQ-5-9, 3794          | K.GGVNDFQGVVLQNV.R.F       | 1617.74799 | 2 | 4.32E-04 | 0.70 | 3.27 | - | 506.7  |
| AHQ-5-4, 4566 - 4648   | K.GGVNDFQGVVLQNV.R.F       | 1617.74799 | 2 | 7.21E-07 | 0.90 | 3.78 | - | 963.0  |
| AHQ-5-6, 4212 - 4214   | K.GGVNDFQGVVLQNV.R.F       | 1617.74799 | 2 | 5.26E-05 | 0.92 | 4.92 | - | 775.1  |
| AHQ-5-4, 4482 - 4545   | K.GGVNDFQGVVLQNV.R.F       | 1617.74799 | 2 | 7.38E-05 | 0.77 | 3.60 | - | 543.3  |
| AHQ-5-2, 4725          | K.GGVNDFQGVVLQNV.R.F       | 1617.74799 | 2 | 7.01E-04 | 0.94 | 4.22 | - | 1257.0 |
| AHQ-5-5, 4162          | K.GGVNDFQGVVLQNV.R.F       | 1617.74799 | 2 | 3.86E-06 | 0.56 | 2.78 | - | 571.5  |
| AHQ-5-1, 4723          | K.GGVNDFQGVVLQNV.R.F       | 1617.74799 | 2 | 1.69E-06 | 0.91 | 4.04 | - | 783.9  |
| AHQ-5-2, 4586 - 4657   | K.GGVNDFQGVVLQNV.R.F       | 1617.74799 | 2 | 6.11E-10 | 0.95 | 4.85 | - | 1097.0 |
| AHQ-5-3, 4537          | K.GGVNDFQGVVLQNV.R.F       | 1617.74799 | 2 | 4.10E-05 | 0.87 | 3.65 | - | 759.6  |
| AHQ-5-3, 4701 - 4781   | K.GGVNDFQGVVLQNV.R.F       | 1617.74799 | 2 | 8.85E-06 | 0.92 | 4.11 | - | 1035.1 |
| AHQ-5-2, 4487          | K.GGVNDFQGVVLQNV.R.F       | 1617.74799 | 2 | 9.57E-04 | 0.91 | 4.47 | - | 749.1  |
| AHQ-5-10, 3832 - 3836  | K.GGVNDFQGVVLQNV.R.F       | 1617.74799 | 2 | 6.58E-05 | 0.84 | 3.09 | - | 1041.2 |
| AHQ-5-9, 3999 - 4006   | K.GGVNDFQGVVLQNV.R.F       | 1617.74799 | 2 | 3.72E-09 | 0.91 | 3.78 | - | 1014.6 |
| AHQ-5-1, 4617          | K.GGVNDFQGVVLQNV.R.F       | 1617.74799 | 2 | 8.08E-06 | 0.76 | 3.37 | - | 584.4  |
| AHQ-5-7, 4307 - 4322   | K.GGVNDFQGVVLQNV.R.F       | 1617.74799 | 2 | 5.92E-08 | 0.80 | 3.72 | - | 619.5  |
| AHQ-5-5, 4282 - 4294   | K.GGVNDFQGVVLQNV.R.F       | 1617.74799 | 2 | 3.80E-04 | 0.84 | 3.67 | - | 753.2  |
| AHQ-5-5, 1922          | K.GPDPSSPAFR.I             | 1031.10364 | 2 | 1.76E-04 | 0.67 | 2.68 | - | 465.3  |
| AHQ-5-3, 2075          | K.GPDPSSPAFR.I             | 1031.10364 | 2 | 4.57E-04 | 0.70 | 2.76 | - | 444.4  |
| AHQ-5-1, 2289          | K.GPDPSSPAFR.I             | 1031.10364 | 2 | 2.02E-04 | 0.65 | 2.51 | - | 456.1  |
| AHQ-5-2, 2042          | K.GPDPSSPAFR.I             | 1031.10364 | 2 | 7.85E-05 | 0.81 | 2.82 | - | 673.1  |
| AHQ-5-2, 2834          | R.GTLALER.K                | 873.03234  | 2 | 1.54E-04 | 0.93 | 3.55 | - | 1210.9 |
| AHQ-5-5, 2695          | R.GTLALER.K                | 873.03234  | 2 | 3.77E-04 | 0.87 | 3.30 | - | 943.1  |
| AHQ-5-4, 2905          | R.GTLALER.K                | 873.03234  | 2 | 2.13E-04 | 0.92 | 3.65 | - | 983.6  |
| AHQ-5-4, 2536 - 2544   | K.GTSQNDPNWVVR.H           | 1373.45608 | 2 | 1.81E-04 | 0.76 | 2.98 | - | 1046.6 |
| AHQ-5-3, 2561 - 2563   | K.GTSQNDPNWVVR.H           | 1373.45608 | 2 | 5.43E-04 | 0.68 | 2.94 | - | 608.3  |
| AHQ-5-14-, 6209        | R.IEDANLIPYPDDKFQDLVDAVR.A | 2580.87450 | 2 | 4.78E-06 | 0.69 | 3.14 | - | 238.1  |
| AHQ-5-14-, 6335 - 6385 | R.IEDANLIPYPDDKFQDLVDAVR.A | 2580.87450 | 3 | 1.38E-04 | 0.83 | 4.26 | - | 272.6  |
| AHQ-5-7, 6478 - 6502   | R.IEDANLIPYPDDKFQDLVDAVR.A | 2580.87450 | 3 | 9.36E-09 | 0.76 | 3.65 | - | 472.5  |
| AHQ-5-3, 6777          | R.IEDANLIPYPDDKFQDLVDAVR.A | 2580.87450 | 2 | 4.13E-07 | 0.80 | 3.56 | - | 343.1  |
| AHQ-5-3, 6974          | R.IEDANLIPYPDDKFQDLVDAVR.A | 2580.87450 | 3 | 1.07E-06 | 0.74 | 3.25 | - | 388.5  |
| AHQ-5-3, 6773          | R.IEDANLIPYPDDKFQDLVDAVR.A | 2580.87450 | 3 | 1.65E-04 | 0.84 | 3.57 | - | 502.7  |
| AHQ-5-3, 6762 - 6829   | R.IEDANLIPYPDDKFQDLVDAVR.A | 2580.87450 | 2 | 5.92E-08 | 0.66 | 2.89 | - | 376.1  |
| AHQ-5-9, 5775 - 5828   | R.IEDANLIPYPDDKFQDLVDAVR.A | 2580.87450 | 2 | 4.48E-05 | 0.49 | 2.82 | - | 220.3  |
| AHQ-5-5, 6586          | R.IEDANLIPYPDDKFQDLVDAVR.A | 2580.87450 | 2 | 2.83E-07 | 0.85 | 3.85 | - | 271.6  |
| AHQ-5-13-, 6283        | R.IEDANLIPYPDDKFQDLVDAVR.A | 2580.87450 | 2 | 6.86E-06 | 0.78 | 3.44 | - | 263.1  |
| AHQ-5-8, 6253 - 6254   | R.IEDANLIPYPDDKFQDLVDAVR.A | 2580.87450 | 2 | 1.37E-06 | 0.80 | 3.86 | - | 260.1  |
| AHQ-5-1, 6725 - 6803   | R.IEDANLIPYPDDKFQDLVDAVR.A | 2580.87450 | 3 | 2.93E-05 | 0.82 | 3.99 | - | 459.3  |
| AHQ-5-1, 6728 - 6807   | R.IEDANLIPYPDDKFQDLVDAVR.A | 2580.87450 | 2 | 5.89E-06 | 0.47 | 2.90 | - | 193.5  |
| AHQ-5-13, 6348         | R.IEDANLIPYPDDKFQDLVDAVR.A | 2580.87450 | 2 | 1.50E-04 | 0.77 | 3.28 | - | 276.2  |
| AHQ-5-2, 6878 - 6941   | R.IEDANLIPYPDDKFQDLVDAVR.A | 2580.87450 | 3 | 6.37E-07 | 0.75 | 3.78 | - | 413.7  |
| AHQ-5-2, 6713 - 6783   | R.IEDANLIPYPDDKFQDLVDAVR.A | 2580.87450 | 3 | 1.99E-10 | 0.90 | 4.50 | - | 489.9  |
| AHQ-5-10, 5828 - 5886  | R.IEDANLIPYPDDKFQDLVDAVR.A | 2580.87450 | 3 | 3.15E-10 | 0.70 | 3.46 | - | 293.2  |
| AHQ-5-10, 5850 - 5910  | R.IEDANLIPYPDDKFQDLVDAVR.A | 2580.87450 | 2 | 1.63E-04 | 0.71 | 3.47 | - | 291.4  |
| AHQ-5-10, 5950 - 6026  | R.IEDANLIPYPDDKFQDLVDAVR.A | 2580.87450 | 2 | 6.69E-08 | 0.83 | 3.67 | - | 356.5  |
| AHQ-5-13, 6337 - 6340  | R.IEDANLIPYPDDKFQDLVDAVR.A | 2580.87450 | 3 | 1.48E-08 | 0.77 | 3.59 | - | 437.3  |
| AHQ-5-10, 6022         | R.IEDANLIPYPDDKFQDLVDAVR.A | 2580.87450 | 3 | 4.32E-05 | 0.82 | 3.79 | - | 313.7  |
| AHQ-5-14-, 6201 - 6266 | R.IEDANLIPYPDDKFQDLVDAVR.A | 2580.87450 | 3 | 1.43E-06 | 0.78 | 3.79 | - | 371.0  |
| AHQ-5-4, 6692 - 6760   | R.IEDANLIPYPDDKFQDLVDAVR.A | 2580.87450 | 2 | 2.47E-05 | 0.76 | 3.56 | - | 265.2  |
| AHQ-5-12, 6373 - 6377  | R.IEDANLIPYPDDKFQDLVDAVR.A | 2580.87450 | 3 | 8.99E-14 | 0.85 | 4.41 | - | 383.7  |
| AHQ-5-11, 6180 - 6188  | R.IEDANLIPYPDDKFQDLVDAVR.A | 2580.87450 | 2 | 2.78E-08 | 0.73 | 3.55 | - | 264.1  |
| AHQ-5-6, 6433 - 6510   | R.IEDANLIPYPDDKFQDLVDAVR.A | 2580.87450 | 3 | 1.37E-04 | 0.83 | 3.81 | - | 418.1  |
| AHQ-5-5, 6801 - 6869   | R.IEDANLIPYPDDKFQDLVDAVR.A | 2580.87450 | 3 | 4.86E-05 | 0.59 | 3.16 | - | 408.9  |
| AHQ-5-4, 6736          | R.IEDANLIPYPDDKFQDLVDAVR.A | 2580.87450 | 3 | 1.41E-10 | 0.64 | 3.44 | - | 336.2  |
| AHQ-5-4, 6754          | R.IEDANLIPYPDDKFQDLVDAVR.A | 2580.87450 | 2 | 5.77E-08 | 0.74 | 3.46 | - | 271.1  |
| AHQ-5-4, 6850 - 6921   | R.IEDANLIPYPDDKFQDLVDAVR.A | 2580.87450 | 3 | 1.13E-06 | 0.82 | 3.73 | - | 485.8  |
| AHQ-5-6, 6606 - 6685   | R.IEDANLIPYPDDKFQDLVDAVR.A | 2580.87450 | 3 | 1.27E-05 | 0.84 | 4.08 | - | 490.7  |
| AHQ-5-6, 2384          | K.IMADSGPIYDK.T            | 1210.38204 | 2 | 5.33E-07 | 0.89 | 3.32 | - | 717.6  |
| AHQ-5-2, 2478          | K.IMADSGPIYDK.T            | 1210.38204 | 2 | 3.27E-05 | 0.90 | 3.52 | - | 734.5  |
| AHQ-5-14-, 2277        | K.IMADSGPIYDK.T            | 1226.38144 | 2 | 5.04E-05 | 0.85 | 3.22 | - | 586.8  |
| AHQ-5-2, 2254 - 2331   | K.IMADSGPIYDK.T            | 1226.38144 | 2 | 1.42E-04 | 0.86 | 3.04 | - | 723.9  |
| AHQ-5-7, 2344          | K.IMADSGPIYDK.T            | 1210.38204 | 2 | 6.98E-06 | 0.89 | 3.29 | - | 871.2  |
| AHQ-5-11, 2490 - 2499  | K.IMADSGPIYDK.T            | 1210.38204 | 2 | 2.15E-06 | 0.93 | 3.74 | - | 808.2  |
| AHQ-5-6, 6872 - 6936   | R.IPESGGDINSVDFIFELTGAAR.K | 2196.35899 | 2 | 7.00E-10 | 0.97 | 5.85 | - | 1305.2 |
| AHQ-5-11, 6511 - 6586  | R.IPESGGDINSVDFIFELTGAAR.K | 2196.35899 | 2 | 3.00E-14 | 0.98 | 6.20 | - | 1509.9 |
| AHQ-5-10, 6366 - 6374  | R.IPESGGDINSVDFIFELTGAAR.K | 2196.35899 | 2 | 3.71E-08 | 0.97 | 6.30 | - | 1223.9 |
| AHQ-5-10, 6239 - 6316  | R.IPESGGDINSVDFIFELTGAAR.K | 2196.35899 | 2 | 3.81E-12 | 0.97 | 5.68 | - | 1174.5 |
| AHQ-5-4, 7152 - 7220   | R.IPESGGDINSVDFIFELTGAAR.K | 2196.35899 | 2 | 3.68E-09 | 0.97 | 5.29 | - | 1151.2 |
| AHQ-5-12, 6754         | R.IPESGGDINSVDFIFELTGAAR.K | 2196.35899 | 2 | 1.26E-10 | 0.96 | 4.74 | - | 1397.0 |
| AHQ-5-14-, 6558 - 6625 | R.IPESGGDINSVDFIFELTGAAR.K | 2196.35899 | 2 | 4.34E-11 | 0.98 | 6.01 | - | 1578.6 |
| AHQ-5-2, 7147 - 7215   | R.IPESGGDINSVDFIFELTGAAR.K | 2196.35899 | 2 | 1.39E-10 | 0.97 | 5.79 | - | 1200.5 |
| AHQ-5-13, 6629 - 6698  | R.IPESGGDINSVDFIFELTGAAR.K | 2196.35899 | 2 | 2.41E-11 | 0.98 | 6.03 | - | 1433.3 |
| AHQ-5-1, 7100 - 7177   | R.IPESGGDINSVDFIFELTGAAR.K | 2196.35899 | 2 | 3.11E-14 | 0.97 | 5.26 | - | 1465.8 |
| AHQ-5-2, 7281          | R.IPESGGDINSVDFIFELTGAAR.K | 2196.35899 | 2 | 2.67E-10 | 0.97 | 5.80 | - | 1305.2 |
| AHQ-5-2, 7310 - 7373   | R.IPESGGDINSVDFIFELTGAAR.K | 2196.35899 | 2 | 2.07E-11 | 0.98 | 6.26 | - | 1481.1 |
| AHQ-5-9, 6231 - 6287   | R.IPESGGDINSVDFIFELTGAAR.K | 2196.35899 | 2 | 1.21E-07 | 0.95 | 4.87 | - | 888.4  |
| AHQ-5-13-, 6648        | R.IPESGGDINSVDFIFELTGAAR.K | 2196.35899 | 2 | 1.05E-06 | 0.95 | 4.89 | - | 985.6  |
| AHQ-5-10, 6226 - 6306  | R.IPESGGDINSVDFIFELTGAAR.K | 2196.35899 | 2 | 1.90E-07 | 0.98 | 6.26 | - | 1426.9 |
| AHQ-5-9, 6118          | R.IPESGGDINSVDFIFELTGAAR.K | 2196.35899 | 2 | 4.54E-07 | 0.95 | 4.69 | - | 948.2  |
| AHQ-5-7, 6862          | R.IPESGGDINSVDFIFELTGAAR.K | 2196.35899 | 2 | 3.88E-09 | 0.93 | 4.76 | - | 709.2  |
| AHQ-5-7, 7043          | R.IPESGGDINSVDFIFELTGAAR.K | 2196.35899 | 2 | 1.16E-08 | 0.93 | 4.11 | - | 1047.4 |
| AHQ-5-4, 7288          | R.IPESGGDINSVDFIFELTGAAR.K | 2196.35899 | 2 | 5.29E-11 | 0.96 | 5.38 | - | 835.8  |
| AHQ-5-3, 7189 - 7262   | R.IPESGGDINSVDFIFELTGAAR.K | 2196.35899 | 2 | 1.79E-06 | 0.95 | 4.97 | - | 883.7  |
| AHQ-5-3, 7329          | R.IPESGGDINSVDFIFELTGAAR.K | 2196.35899 | 2 | 1.23E-09 | 0.97 | 5.76 | - | 1235.3 |
| AHQ-5-5, 7011 - 7021   | R.IPESGGDINSVDFIFELTGAAR.K | 2196.35899 | 2 | 1.36E-12 | 0.96 | 5.20 | - | 1121.6 |

|                                                                                                    |                                     |            |   |          |       |         |       |          |
|----------------------------------------------------------------------------------------------------|-------------------------------------|------------|---|----------|-------|---------|-------|----------|
| AHQ-5-10, 2087 - 2128                                                                              | R.KDHSGQVFSVVSNGK.A                 | 1589.73455 | 2 | 7.05E-07 | 0.83  | 3.44    | -     | 533.4    |
| AHQ-5-4, 2209                                                                                      | R.KDHSGQVFSVVSNGK.A                 | 1589.73455 | 2 | 4.20E-07 | 0.82  | 3.56    | -     | 648.8    |
| AHQ-5-6, 2101 - 2102                                                                               | R.KDHSGQVFSVVSNGK.A                 | 1589.73455 | 2 | 6.77E-09 | 0.77  | 3.33    | -     | 533.4    |
| AHQ-5-5, 2059                                                                                      | R.KDHSGQVFSVVSNGK.A                 | 1589.73455 | 2 | 2.31E-07 | 0.89  | 3.81    | -     | 816.0    |
| AHQ-5-3, 2219 - 2294                                                                               | R.KDHSGQVFSVVSNGK.A                 | 1589.73455 | 2 | 2.49E-11 | 0.72  | 3.05    | -     | 630.0    |
| AHQ-5-5, 2151                                                                                      | R.KDHSGQVFSVVSNGK.A                 | 1589.73455 | 2 | 3.98E-11 | 0.84  | 3.20    | -     | 710.9    |
| AHQ-5-13-, 2347                                                                                    | R.KDHSGQVFSVVSNGK.A                 | 1589.73455 | 2 | 2.69E-12 | 0.88  | 3.68    | -     | 803.2    |
| AHQ-5-2, 2187 - 2197                                                                               | R.KDHSGQVFSVVSNGK.A                 | 1589.73455 | 2 | 8.10E-10 | 0.90  | 3.72    | -     | 797.9    |
| AHQ-5-2, 2273                                                                                      | R.KDHSGQVFSVVSNGK.A                 | 1589.73455 | 2 | 1.78E-10 | 0.93  | 3.60    | -     | 1384.1   |
| AHQ-5-13, 2513                                                                                     | R.KDHSGQVFSVVSNGK.A                 | 1589.73455 | 2 | 7.22E-07 | 0.87  | 3.46    | -     | 827.3    |
| AHQ-5-4, 2265                                                                                      | K.KIMADSGPIYDK.T                    | 1338.55496 | 1 | 6.24E-05 | 0.73  | 2.84    | -     | 584.0    |
| AHQ-5-2, 2263                                                                                      | K.KIMADSGPIYDK.T                    | 1338.55496 | 2 | 3.09E-06 | 0.95  | 3.98    | -     | 1097.5   |
| AHQ-5-2, 2226                                                                                      | R.KVTEENKELANELR.R                  | 1673.84976 | 3 | 3.65E-08 | 0.84  | 3.95    | -     | 692.8    |
| AHQ-5-2, 2214                                                                                      | R.KVTEENKELANELR.R                  | 1673.84976 | 2 | 6.95E-08 | 0.96  | 5.19    | -     | 1669.7   |
| AHQ-5-9, 2100 - 2102                                                                               | R.KVTEENKELANELR.R                  | 1673.84976 | 2 | 4.21E-08 | 0.94  | 4.85    | -     | 1282.9   |
| AHQ-5-5, 2206                                                                                      | R.KVTEENKELANELR.R                  | 1673.84976 | 2 | 6.43E-09 | 0.92  | 4.17    | -     | 876.6    |
| AHQ-5-4, 2318                                                                                      | R.KVTEENKELANELR.R                  | 1673.84976 | 2 | 1.86E-10 | 0.96  | 4.99    | -     | 1504.3   |
| AHQ-5-6, 1818                                                                                      | R.KVTEENKELANELR.R                  | 1673.84976 | 2 | 2.80E-05 | 0.89  | 3.92    | -     | 881.8    |
| AHQ-5-2, 1971                                                                                      | R.KVTEENKELANELR.R                  | 1673.84976 | 2 | 4.81E-05 | 0.96  | 4.52    | -     | 1777.4   |
| AHQ-5-5, 2082 - 2089                                                                               | R.KVTEENKELANELR.R                  | 1673.84976 | 2 | 7.27E-04 | 0.95  | 5.09    | -     | 1137.4   |
| AHQ-5-1, 2468                                                                                      | R.KVTEENKELANELR.R                  | 1673.84976 | 2 | 2.19E-10 | 0.93  | 4.07    | -     | 1158.7   |
| AHQ-5-4, 2225                                                                                      | R.KVTEENKELANELR.R                  | 1673.84976 | 2 | 2.03E-11 | 0.94  | 4.44    | -     | 1268.7   |
| AHQ-5-3, 2250 - 2318                                                                               | R.KVTEENKELANELR.R                  | 1673.84976 | 2 | 5.85E-11 | 0.93  | 4.27    | -     | 1214.0   |
| AHQ-5-7, 2022                                                                                      | R.KVTEENKELANELR.R                  | 1673.84976 | 2 | 3.25E-10 | 0.95  | 4.91    | -     | 1341.6   |
| AHQ-5-3, 2365                                                                                      | R.KVTEENKELANELR.R                  | 1673.84976 | 2 | 1.50E-07 | 0.94  | 5.06    | -     | 1200.3   |
| AHQ-5-6, 2065                                                                                      | R.KVTEENKELANELR.R                  | 1673.84976 | 2 | 5.68E-06 | 0.94  | 4.64    | -     | 1450.0   |
| AHQ-5-2, 2310                                                                                      | R.KVTEENKELANELR.R                  | 1673.84976 | 2 | 2.65E-09 | 0.96  | 5.07    | -     | 1439.1   |
| AHQ-5-3, 2497                                                                                      | R.LCNSPSPQMMNGKPCGEAR.E             | 2135.34557 | 2 | 4.76E-09 | 0.87  | 3.74    | -     | 563.6    |
| AHQ-5-5, 2046                                                                                      | R.LCNSPSPQM*NGKPCGEAR.E             | 2151.34497 | 2 | 2.14E-05 | 0.82  | 3.74    | -     | 585.5    |
| AHQ-5-5, 2397                                                                                      | R.LCNSPSPQMMNGKPCGEAR.E             | 2135.34557 | 2 | 2.13E-06 | 0.87  | 4.25    | -     | 442.7    |
| AHQ-5-4, 2476 - 2477                                                                               | R.LCNSPSPQMMNGKPCGEAR.E             | 2135.34557 | 2 | 1.69E-09 | 0.86  | 4.10    | -     | 483.6    |
| AHQ-5-6, 2378                                                                                      | R.LCNSPSPQMMNGKPCGEAR.E             | 2135.34557 | 2 | 1.25E-09 | 0.89  | 4.03    | -     | 524.9    |
| AHQ-5-2, 2466                                                                                      | R.LCNSPSPQMMNGKPCGEAR.E             | 2135.34557 | 2 | 5.20E-05 | 0.66  | 3.58    | -     | 356.7    |
| AHQ-5-3, 2613                                                                                      | R.LCNSPSPQMMNGKPCGEAR.E             | 2135.34557 | 2 | 4.94E-05 | 0.51  | 2.93    | -     | 343.1    |
| AHQ-5-5, 5506                                                                                      | K.MENAEALDVPQISVFTR.D               | 1850.08607 | 2 | 1.27E-05 | 0.83  | 3.74    | -     | 433.2    |
| AHQ-5-7, 5299 - 5310                                                                               | K.MENAEALDVPQISVFTR.D               | 1850.08607 | 2 | 1.69E-06 | 0.92  | 4.53    | -     | 496.3    |
| AHQ-5-1, 5596 - 5601                                                                               | K.M*ENAEALDVPQISVFTR.D              | 1866.08547 | 2 | 3.53E-10 | 0.92  | 4.15    | -     | 677.4    |
| AHQ-5-10, 4954 - 4955                                                                              | K.MENAEALDVPQISVFTR.D               | 1850.08607 | 2 | 1.74E-06 | 0.92  | 4.16    | -     | 663.2    |
| AHQ-5-3, 5797 - 5805                                                                               | K.MENAEALDVPQISVFTR.D               | 1850.08607 | 2 | 8.42E-05 | 0.92  | 4.38    | -     | 548.2    |
| AHQ-5-1, 5847                                                                                      | K.MENAEALDVPQISVFTR.D               | 1850.08607 | 2 | 9.19E-06 | 0.87  | 3.63    | -     | 582.4    |
| AHQ-5-6, 5477                                                                                      | K.MENAEALDVPQISVFTR.D               | 1850.08607 | 2 | 2.39E-04 | 0.71  | 3.11    | -     | 554.0    |
| AHQ-5-2, 5709                                                                                      | K.MENAEALDVPQISVFTR.D               | 1850.08607 | 2 | 4.04E-04 | 0.63  | 2.73    | -     | 509.2    |
| AHQ-5-2, 5471 - 5487                                                                               | K.M*ENAEALDVPQISVFTR.D              | 1866.08547 | 2 | 1.02E-07 | 0.95  | 4.83    | -     | 808.4    |
| AHQ-5-5, 5667                                                                                      | K.MENAEALDVPQISVFTR.D               | 1850.08607 | 2 | 7.16E-05 | 0.52  | 2.71    | -     | 280.8    |
| AHQ-5-10, 5071                                                                                     | K.MENAEALDVPQISVFTR.D               | 1850.08607 | 2 | 5.61E-04 | 0.58  | 2.53    | -     | 363.4    |
| AHQ-5-4, 5732                                                                                      | K.MENAEALDVPQISVFTR.D               | 1850.08607 | 2 | 3.50E-04 | 0.88  | 4.05    | -     | 397.9    |
| AHQ-5-2, 5841 - 5909                                                                               | K.MENAEALDVPQISVFTR.D               | 1850.08607 | 2 | 3.62E-08 | 0.84  | 3.71    | -     | 397.1    |
| AHQ-5-11, 5327 - 5387                                                                              | K.MENAEALDVPQISVFTR.D               | 1850.08607 | 2 | 8.37E-04 | 0.57  | 2.77    | -     | 500.1    |
| AHQ-5-4, 5881                                                                                      | K.MENAEALDVPQISVFTR.D               | 1850.08607 | 2 | 7.86E-05 | 0.82  | 3.15    | -     | 527.9    |
| AHQ-5-6, 5618                                                                                      | K.MENAEALDVPQISVFTR.D               | 1850.08607 | 2 | 1.20E-05 | 0.82  | 3.50    | -     | 545.5    |
| AHQ-5-3, 3062                                                                                      | K.QVTQSYWDTNPTR.A                   | 1596.68241 | 2 | 8.72E-05 | 0.71  | 2.78    | -     | 609.6    |
| AHQ-5-4, 2958 - 3028                                                                               | K.QVTQSYWDTNPTR.A                   | 1596.68241 | 2 | 3.41E-07 | 0.76  | 2.87    | -     | 706.9    |
| AHQ-5-5, 2873 - 2878                                                                               | K.QVTQSYWDTNPTR.A                   | 1596.68241 | 2 | 1.09E-05 | 0.53  | 2.85    | -     | 280.9    |
| AHQ-5-2, 3001                                                                                      | K.QVTQSYWDTNPTR.A                   | 1596.68241 | 2 | 4.03E-07 | 0.89  | 3.48    | -     | 759.5    |
| AHQ-5-2, 2459                                                                                      | R.RPPLCYHNGVQYR.N                   | 1661.86889 | 2 | 2.04E-09 | 0.94  | 3.69    | -     | 977.3    |
| AHQ-5-6, 2356                                                                                      | R.RPPLCYHNGVQYR.N                   | 1661.86889 | 2 | 7.72E-05 | 0.81  | 2.97    | -     | 566.7    |
| AHQ-5-2, 2635 - 2710                                                                               | R.RPPLCYHNGVQYR.N                   | 1661.86889 | 2 | 4.19E-07 | 0.92  | 3.98    | -     | 739.9    |
| AHQ-5-4, 2660 - 2736                                                                               | R.RPPLCYHNGVQYR.N                   | 1661.86889 | 2 | 2.18E-07 | 0.91  | 3.79    | -     | 752.5    |
| AHQ-5-3, 2718 - 2791                                                                               | R.RPPLCYHNGVQYR.N                   | 1661.86889 | 2 | 2.13E-07 | 0.91  | 3.74    | -     | 742.7    |
| AHQ-5-2, 2231                                                                                      | R.SCDSLNRRCEGSSVQTR.T               | 1973.04966 | 2 | 2.09E-07 | 0.53  | 2.89    | -     | 287.7    |
| AHQ-5-4, 3818                                                                                      | K.SITLQVQEDR.A                      | 1208.34588 | 2 | 3.97E-07 | 0.92  | 3.38    | -     | 1188.6   |
| AHQ-5-5, 3635                                                                                      | K.SITLQVQEDR.A                      | 1208.34588 | 2 | 1.06E-06 | 0.91  | 3.21    | -     | 1255.6   |
| AHQ-5-1, 3992                                                                                      | K.SITLQVQEDR.A                      | 1208.34588 | 2 | 7.39E-07 | 0.95  | 3.74    | -     | 1490.1   |
| AHQ-5-2, 3822                                                                                      | K.SITLQVQEDR.A                      | 1208.34588 | 2 | 3.59E-06 | 0.96  | 3.91    | -     | 1513.5   |
| AHQ-5-13, 3954                                                                                     | K.SITLQVQEDR.A                      | 1208.34588 | 2 | 2.69E-06 | 0.94  | 3.31    | -     | 1449.7   |
| AHQ-5-3, 3858 - 3866                                                                               | K.SITLQVQEDR.A                      | 1208.34588 | 2 | 7.38E-06 | 0.92  | 3.65    | -     | 1071.1   |
| AHQ-5-12, 3730                                                                                     | K.SITLQVQEDR.A                      | 1208.34588 | 2 | 1.43E-06 | 0.92  | 3.56    | -     | 1245.3   |
| AHQ-5-6, 4156                                                                                      | R.TIVTLLQDSIR.K                     | 1247.42355 | 1 | 5.74E-05 | 0.04  | 1.87    | -     | 85.6     |
| AHQ-5-12, 4292                                                                                     | R.TIVTLLQDSIR.K                     | 1247.42355 | 2 | 1.37E-05 | 0.94  | 3.95    | -     | 1101.0   |
| AHQ-5-9, 3759 - 3780                                                                               | R.TIVTLLQDSIR.K                     | 1247.42355 | 2 | 1.07E-04 | 0.92  | 3.68    | -     | 1023.3   |
| AHQ-5-1, 4589 - 4592                                                                               | R.TIVTLLQDSIR.K                     | 1247.42355 | 2 | 2.03E-06 | 0.96  | 3.81    | -     | 1570.1   |
| AHQ-5-6, 3108                                                                                      | R.TIVTLLQDSIR.K                     | 1247.42355 | 2 | 1.02E-04 | 0.95  | 3.40    | -     | 1557.6   |
| AHQ-5-2, 3263                                                                                      | R.TIVTLLQDSIR.K                     | 1247.42355 | 2 | 9.83E-08 | 0.96  | 3.28    | -     | 1915.6   |
| AHQ-5-13, 4358                                                                                     | R.TIVTLLQDSIR.K                     | 1247.42355 | 2 | 2.90E-05 | 0.96  | 3.72    | -     | 1752.6   |
| AHQ-5-2, 4545                                                                                      | R.TIVTLLQDSIR.K                     | 1247.42355 | 2 | 1.06E-04 | 0.96  | 3.75    | -     | 1695.4   |
| AHQ-5-5, 4202 - 4227                                                                               | R.TIVTLLQDSIR.K                     | 1247.42355 | 2 | 1.26E-06 | 0.97  | 4.43    | -     | 1677.1   |
| AHQ-5-7, 4004 - 4015                                                                               | R.TIVTLLQDSIR.K                     | 1247.42355 | 2 | 1.71E-05 | 0.96  | 3.84    | -     | 1475.5   |
| AHQ-5-2, 4402 - 4473                                                                               | R.TIVTLLQDSIR.K                     | 1247.42355 | 2 | 5.93E-06 | 0.97  | 4.02    | -     | 2028.2   |
| AHQ-5-6, 4136                                                                                      | R.TIVTLLQDSIR.K                     | 1247.42355 | 2 | 8.28E-07 | 0.96  | 4.05    | -     | 1534.7   |
| AHQ-5-3, 4481 - 4518                                                                               | R.TIVTLLQDSIR.K                     | 1247.42355 | 2 | 5.13E-06 | 0.97  | 3.84    | -     | 1729.3   |
| AHQ-5-4, 4404 - 4484                                                                               | R.TIVTLLQDSIR.K                     | 1247.42355 | 2 | 3.63E-04 | 0.97  | 3.92    | -     | 2069.0   |
| AHQ-5-2, 2393                                                                                      | K.VTEENKELANELR.R                   | 1545.67685 | 2 | 1.03E-07 | 0.92  | 3.76    | -     | 1116.3   |
| AHQ-5-1, 2648                                                                                      | K.VTEENKELANELR.R                   | 1545.67685 | 2 | 1.31E-04 | 0.62  | 2.82    | -     | 695.9    |
| AHQ-5-6, 2288 - 2297                                                                               | K.VTEENKELANELR.R                   | 1545.67685 | 2 | 1.58E-05 | 0.91  | 3.85    | -     | 1044.8   |
| AHQ-5-7, 2258                                                                                      | K.VTEENKELANELR.R                   | 1545.67685 | 2 | 9.63E-05 | 0.80  | 3.36    | -     | 785.8    |
| AHQ-5-3, 2457                                                                                      | K.VTEENKELANELR.R                   | 1545.67685 | 2 | 3.78E-08 | 0.86  | 3.86    | -     | 764.7    |
| gj4502295]ref[NP_001677.1] ATP synthase, H+ transporting, mitochondrial F1 complex, beta polypepti |                                     |            |   | 2.22E-15 | 13.82 | 160.28  | 42.70 | 57955.2  |
| AHQ-5-7, 7410                                                                                      | R.DQEGQDVLFFIDNIFR.F                | 1923.11524 | 2 | 4.06E-12 | 0.96  | 5.18    | -     | 1099.8   |
| AHQ-5-7, 5958                                                                                      | R.FLSQPFQVAEFTGHMGK.L               | 2024.33104 | 3 | 1.68E-09 | 0.86  | 4.28    | -     | 387.7    |
| AHQ-5-7, 4194                                                                                      | R.FTQAGSEVSALLGR.I                  | 1436.59522 | 1 | 1.92E-04 | 0.52  | 2.96    | -     | 108.6    |
| AHQ-5-7, 4183                                                                                      | R.FTQAGSEVSALLGR.I                  | 1436.59522 | 2 | 1.48E-11 | 0.94  | 4.02    | -     | 1249.4   |
| AHQ-5-7, 7280                                                                                      | K.GFQQLAGEYDHLPEQAFYM*VPPIEEAAVAK.A | 3352.76051 | 3 | 3.30E-09 | 0.73  | 3.53    | -     | 488.7    |
| AHQ-5-7, 7162                                                                                      | K.GFQQLAGEYDHLPEQAFYM*VPPIEEAAVAK.A | 3368.75991 | 3 | 2.22E-15 | 0.96  | 5.53    | -     | 1192.0   |
| AHQ-5-7, 3347                                                                                      | R.IMDPNIVGSEHYDVAR.G                | 1817.01617 | 2 | 6.77E-12 | 0.94  | 3.94    | -     | 929.1    |
| AHQ-5-7, 3535 - 3606                                                                               | R.IMNVIQEPIDR.G                     | 1386.59962 | 2 | 1.34E-05 | 0.90  | 3.80    | -     | 929.2    |
| AHQ-5-7, 4416 - 4491                                                                               | R.IPSAVGYQPTLATDMGTMQER.I           | 2267.56880 | 2 | 4.98E-06 | 0.92  | 4.40    | -     | 439.8    |
| AHQ-5-7, 3799                                                                                      | R.IPSAVGYQPTLATDM*GTMQER.I          | 2283.56820 | 2 | 1.65E-05 | 0.66  | 4.37    | -     | 370.1    |
| AHQ-5-7, 2611                                                                                      | K.IPVGPETLGR.I                      | 1039.21035 | 2 | 4.33E-05 | 0.90  | 2.75    | -     | 944.2    |
| AHQ-5-7, 3890                                                                                      | R.LVLEVAQHLGESTVRT                  | 1651.88893 | 2 | 2.27E-08 | 0.97  | 4.79    | -     | 1820.3   |
| AHQ-5-7, 7298                                                                                      | K.SLDIIAIIAGMDELSEEDKLTVSR.A        | 2677.02230 | 2 | 3.18E-06 | 0.88  | 4.31    | -     | 438.6    |
| AHQ-5-7, 4920                                                                                      | R.TREGNDLYHEMIESGVINL.K.D           | 2319.58030 | 3 | 1.18E-05 | 0.95  | 4.38    | -     | 1901.3   |
| AHQ-5-7, 3199                                                                                      | K.VALVYGMQNPAPPAR.A                 | 1601.85511 | 2 | 3.67E-09 | 0.90  | 3.91    | -     | 672.1    |
| AHQ-5-7, 4427 - 4463                                                                               | K.VLDSGAPIKIPVGPETLGR.I             | 1920.24231 | 2 | 3.90E-05 | 0.61  | 3.33    | -     | 241.6    |
| AHQ-5-7, 3695                                                                                      | K.VLDDLPAPYAK.G                     | 1089.30927 | 1 | 2.69E-05 | 0.74  | 2.59    | -     | 900.8    |
| gj4503745]ref[NP_001447.1] filamin 1 (actin-binding protein-280); filamin 1; filamin A, alpha (act |                                     |            |   | 2.78E-15 | 96.94 | 1150.36 | 54.50 | 280757.4 |
| AHQ-5-4, 5353 - 5426                                                                               | R.AEAGVPAEFSIWTR.E                  | 1534.69735 | 2 | 3.70E-05 | 0.83  | 3.78    | -     | 490.7    |
| AHQ-5-7, 4935 - 4942                                                                               | R.AEAGVPAEFSIWTR.E                  | 1534.69735 | 2 | 1.70E-04 | 0.78  | 3.39    | -     | 353.5    |

|                        |                                     |            |   |          |      |      |   |        |
|------------------------|-------------------------------------|------------|---|----------|------|------|---|--------|
| AHQ-5-2, 2174 - 2178   | R.AEFTVETR.S                        | 953.03118  | 2 | 8.16E-04 | 0.88 | 2.78 | - | 985.5  |
| AHQ-5-2, 2129          | R.AEFTVETR.S                        | 953.03118  | 1 | 7.82E-04 | 0.14 | 1.93 | - | 253.6  |
| AHQ-5-2, 2469 - 2470   | K.AFGPGLGGGAGSPAR.F                 | 1430.55077 | 2 | 9.40E-08 | 0.97 | 4.40 | - | 1970.3 |
| AHQ-5-4, 2516          | K.AFGPGLGGGAGSPAR.F                 | 1430.55077 | 2 | 7.10E-09 | 0.95 | 4.27 | - | 1136.9 |
| AHQ-5-3, 2735          | K.AFGPGLGGGAGSPAR.F                 | 1430.55077 | 2 | 3.52E-06 | 0.88 | 3.43 | - | 908.4  |
| AHQ-5-1, 2699 - 2769   | K.AFGPGLGGGAGSPAR.F                 | 1430.55077 | 2 | 4.11E-08 | 0.93 | 3.55 | - | 1238.4 |
| AHQ-5-6, 2385          | K.AFGPGLGGGAGSPAR.F                 | 1430.55077 | 2 | 3.12E-06 | 0.88 | 3.25 | - | 1032.1 |
| AHQ-5-3, 2562          | K.AFGPGLGGGAGSPAR.F                 | 1430.55077 | 1 | 5.02E-06 | 0.27 | 2.71 | - | 140.8  |
| AHQ-5-3, 2537 - 2610   | K.AFGPGLGGGAGSPAR.F                 | 1430.55077 | 2 | 1.67E-08 | 0.94 | 3.73 | - | 1302.2 |
| AHQ-5-2, 2474          | K.AFGPGLGGGAGSPAR.F                 | 1430.55077 | 1 | 1.08E-06 | 0.28 | 2.59 | - | 189.2  |
| AHQ-5-2, 2686          | K.AFGPGLGGGAGSPAR.F                 | 1430.55077 | 2 | 4.52E-04 | 0.64 | 3.08 | - | 830.2  |
| AHQ-5-14, 4333         | K.AGNMMLLVGVHGPR.T                  | 1435.68033 | 2 | 1.12E-04 | 0.70 | 2.86 | - | 590.2  |
| AHQ-5-14, 4206 - 4276  | K.AGNMMLLVGVHGPR.T                  | 1435.68033 | 2 | 9.20E-07 | 0.78 | 3.27 | - | 793.4  |
| AHQ-5-14-, 3335 - 3399 | K.AGNMMLLVGVHGPR.T                  | 1435.68033 | 3 | 8.09E-05 | 0.88 | 3.87 | - | 1006.5 |
| AHQ-5-14, 3626 - 3688  | K.AGNMMLLVGVHGPR.T                  | 1451.67973 | 2 | 4.02E-08 | 0.80 | 2.94 | - | 710.3  |
| AHQ-5-14-, 3067        | K.AGNMMLLVGVHGPR.T                  | 1435.68033 | 1 | 1.48E-04 | 0.19 | 2.24 | - | 167.9  |
| AHQ-5-14-, 3405        | K.AGNMMLLVGVHGPR.T                  | 1435.68033 | 2 | 1.72E-08 | 0.87 | 3.24 | - | 819.3  |
| AHQ-5-14-, 2934        | K.AGNMMLLVGVHGPR.T                  | 1451.67973 | 2 | 3.28E-06 | 0.66 | 2.53 | - | 735.8  |
| AHQ-5-14-, 2753        | K.AGNMMLLVGVHGPR.T                  | 1451.67973 | 2 | 3.31E-05 | 0.89 | 3.29 | - | 841.7  |
| AHQ-5-14-, 2665 - 2743 | K.AGNMMLLVGVHGPR.T                  | 1451.67973 | 2 | 1.50E-05 | 0.84 | 3.15 | - | 770.6  |
| AHQ-5-14-, 3061        | K.AGNMMLLVGVHGPR.T                  | 1435.68033 | 2 | 4.36E-05 | 0.79 | 3.14 | - | 734.6  |
| AHQ-5-11, 3016         | K.AGNMMLLVGVHGPR.T                  | 1435.68033 | 3 | 3.53E-06 | 0.88 | 3.38 | - | 1442.5 |
| AHQ-5-14-, 2666 - 2739 | K.AGNMMLLVGVHGPR.T                  | 1451.67973 | 3 | 1.93E-05 | 0.89 | 4.04 | - | 845.5  |
| AHQ-5-14, 3469 - 3546  | K.AGNMMLLVGVHGPR.T                  | 1451.67973 | 2 | 3.60E-05 | 0.87 | 3.62 | - | 760.8  |
| AHQ-5-14-, 3058 - 3065 | K.AGNMMLLVGVHGPR.T                  | 1435.68033 | 3 | 2.17E-05 | 0.91 | 3.88 | - | 1451.5 |
| AHQ-5-2, 1549          | R.AGQSAAGAPGGGVDDTR.D               | 1443.50471 | 2 | 8.15E-04 | 0.75 | 3.05 | - | 554.4  |
| AHQ-5-2, 2125          | K.AGVAPLOQV.V                       | 883.07036  | 2 | 7.50E-05 | 0.79 | 2.54 | - | 636.1  |
| AHQ-5-3, 2187          | K.AGVAPLOQV.V                       | 883.07036  | 2 | 3.77E-05 | 0.76 | 2.71 | - | 565.0  |
| AHQ-5-1, 2400          | K.AGVAPLOQV.V                       | 883.07036  | 2 | 2.88E-05 | 0.81 | 2.76 | - | 600.9  |
| AHQ-5-4, 2178          | K.AGVAPLOQV.V                       | 883.07036  | 2 | 7.16E-06 | 0.85 | 2.80 | - | 722.8  |
| AHQ-5-1, 7416 - 7439   | K.AHEPTYFTVDCAEAGQGDVIGIK.C         | 2567.76960 | 2 | 4.59E-05 | 0.70 | 3.22 | - | 595.4  |
| AHQ-5-1, 7421 - 7485   | K.AHEPTYFTVDCAEAGQGDVIGIK.C         | 2567.76960 | 3 | 2.91E-06 | 0.96 | 5.96 | - | 1465.2 |
| AHQ-5-2, 7679 - 7691   | K.AHEPTYFTVDCAEAGQGDVIGIK.C         | 2567.76960 | 3 | 1.78E-06 | 0.96 | 5.58 | - | 1516.6 |
| AHQ-5-1, 7508          | K.AHEPTYFTVDCAEAGQGDVIGIK.C         | 2567.76960 | 3 | 1.03E-04 | 0.91 | 4.08 | - | 1100.1 |
| AHQ-5-3, 7670          | K.AHEPTYFTVDCAEAGQGDVIGIK.C         | 2567.76960 | 3 | 1.09E-04 | 0.84 | 3.93 | - | 936.8  |
| AHQ-5-3, 2517          | K.AHVVPFCFDASK.V                    | 1232.39073 | 2 | 1.59E-06 | 0.79 | 2.69 | - | 651.9  |
| AHQ-5-4, 2500          | K.AHVVPFCFDASK.V                    | 1232.39073 | 2 | 4.06E-05 | 0.79 | 2.63 | - | 679.8  |
| AHQ-5-4, 6300 - 6372   | R.ALGLALVDSAPGLCPDWSDWSDASKPVTNAR.E | 3233.53437 | 3 | 2.84E-05 | 0.91 | 4.94 | - | 707.0  |
| AHQ-5-2, 6345 - 6414   | R.ALGLALVDSAPGLCPDWSDWSDASKPVTNAR.E | 3233.53437 | 3 | 7.57E-13 | 0.95 | 5.56 | - | 859.7  |
| AHQ-5-1, 6408 - 6477   | R.ALGLALVDSAPGLCPDWSDWSDASKPVTNAR.E | 3233.53437 | 3 | 9.06E-09 | 0.93 | 5.00 | - | 678.2  |
| AHQ-5-2, 6489 - 6557   | R.ALGLALVDSAPGLCPDWSDWSDASKPVTNAR.E | 3233.53437 | 3 | 4.70E-09 | 0.95 | 5.96 | - | 823.2  |
| AHQ-5-4, 6389 - 6460   | R.ALGLALVDSAPGLCPDWSDWSDASKPVTNAR.E | 3233.53437 | 3 | 2.22E-11 | 0.93 | 4.96 | - | 867.1  |
| AHQ-5-2, 6621 - 6695   | R.ALGLALVDSAPGLCPDWSDWSDASKPVTNAR.E | 3233.53437 | 3 | 1.40E-12 | 0.93 | 5.54 | - | 716.4  |
| AHQ-5-4, 6542          | R.ALGLALVDSAPGLCPDWSDWSDASKPVTNAR.E | 3233.53437 | 3 | 2.50E-07 | 0.82 | 4.31 | - | 352.6  |
| AHQ-5-9, 5498          | R.ALGLALVDSAPGLCPDWSDWSDASKPVTNAR.E | 3233.53437 | 3 | 2.42E-08 | 0.93 | 5.07 | - | 740.8  |
| AHQ-5-10, 5634         | R.ALGLALVDSAPGLCPDWSDWSDASKPVTNAR.E | 3233.53437 | 3 | 3.82E-06 | 0.76 | 3.60 | - | 612.1  |
| AHQ-5-1, 6232 - 6281   | R.ALGLALVDSAPGLCPDWSDWSDASKPVTNAR.E | 3233.53437 | 3 | 4.61E-08 | 0.84 | 4.11 | - | 588.4  |
| AHQ-5-3, 6493 - 6574   | R.ALGLALVDSAPGLCPDWSDWSDASKPVTNAR.E | 3233.53437 | 3 | 1.04E-08 | 0.93 | 5.02 | - | 907.4  |
| AHQ-5-8, 6004 - 6005   | R.ALGLALVDSAPGLCPDWSDWSDASKPVTNAR.E | 3233.53437 | 3 | 1.08E-10 | 0.89 | 4.46 | - | 556.5  |
| AHQ-5-6, 6109 - 6180   | R.ALGLALVDSAPGLCPDWSDWSDASKPVTNAR.E | 3233.53437 | 3 | 4.11E-07 | 0.92 | 5.33 | - | 529.2  |
| AHQ-5-5, 6453          | R.ALGLALVDSAPGLCPDWSDWSDASKPVTNAR.E | 3233.53437 | 3 | 2.89E-14 | 0.80 | 3.79 | - | 533.8  |
| AHQ-5-8, 6146          | R.ALGLALVDSAPGLCPDWSDWSDASKPVTNAR.E | 3233.53437 | 3 | 8.16E-08 | 0.70 | 3.73 | - | 400.1  |
| AHQ-5-5, 6341 - 6407   | R.ALGLALVDSAPGLCPDWSDWSDASKPVTNAR.E | 3233.53437 | 3 | 1.53E-08 | 0.89 | 4.61 | - | 662.5  |
| AHQ-5-6, 6244 - 6246   | R.ALGLALVDSAPGLCPDWSDWSDASKPVTNAR.E | 3233.53437 | 3 | 9.29E-09 | 0.94 | 5.71 | - | 600.4  |
| AHQ-5-7, 6110          | R.ALGLALVDSAPGLCPDWSDWSDASKPVTNAR.E | 3233.53437 | 3 | 7.99E-14 | 0.94 | 5.65 | - | 657.3  |
| AHQ-5-3, 6409 - 6435   | R.ALGLALVDSAPGLCPDWSDWSDASKPVTNAR.E | 3233.53437 | 3 | 9.24E-13 | 0.85 | 3.68 | - | 701.6  |
| AHQ-5-3, 6589 - 6657   | R.ALGLALVDSAPGLCPDWSDWSDASKPVTNAR.E | 3233.53437 | 3 | 9.82E-12 | 0.91 | 4.96 | - | 736.8  |
| AHQ-5-9, 5640 - 5642   | R.ALGLALVDSAPGLCPDWSDWSDASKPVTNAR.E | 3233.53437 | 3 | 9.03E-10 | 0.94 | 5.42 | - | 907.2  |
| AHQ-5-5, 6207 - 6274   | R.ALGLALVDSAPGLCPDWSDWSDASKPVTNAR.E | 3233.53437 | 3 | 4.40E-08 | 0.91 | 4.60 | - | 704.9  |
| AHQ-5-1, 6539 - 6613   | R.ALGLALVDSAPGLCPDWSDWSDASKPVTNAR.E | 3233.53437 | 3 | 1.58E-13 | 0.95 | 5.80 | - | 629.3  |
| AHQ-5-7, 6271 - 6342   | R.ALGLALVDSAPGLCPDWSDWSDASKPVTNAR.E | 3233.53437 | 3 | 2.16E-08 | 0.89 | 4.65 | - | 490.2  |
| AHQ-5-6, 3060 - 3133   | R.ANLPQSFQVDTSK.A                   | 1435.56409 | 2 | 3.23E-09 | 0.85 | 3.63 | - | 523.1  |
| AHQ-5-4, 3288          | R.ANLPQSFQVDTSK.A                   | 1435.56409 | 1 | 6.60E-08 | 0.52 | 2.95 | - | 331.5  |
| AHQ-5-2, 3186 - 3206   | R.ANLPQSFQVDTSK.A                   | 1435.56409 | 2 | 6.20E-09 | 0.84 | 3.32 | - | 502.4  |
| AHQ-5-3, 3285          | R.ANLPQSFQVDTSK.A                   | 1435.56409 | 1 | 3.86E-08 | 0.76 | 3.18 | - | 517.0  |
| AHQ-5-3, 3279          | R.ANLPQSFQVDTSK.A                   | 1435.56409 | 1 | 4.26E-05 | 0.24 | 2.27 | - | 399.9  |
| AHQ-5-8, 2836          | R.ANLPQSFQVDTSK.A                   | 1435.56409 | 2 | 6.52E-08 | 0.88 | 3.37 | - | 565.8  |
| AHQ-5-3, 3277          | R.ANLPQSFQVDTSK.A                   | 1435.56409 | 2 | 1.80E-05 | 0.82 | 3.09 | - | 619.8  |
| AHQ-5-1, 3395 - 3397   | R.ANLPQSFQVDTSK.A                   | 1435.56409 | 2 | 3.38E-09 | 0.93 | 3.70 | - | 807.8  |
| AHQ-5-1, 3387          | R.ANLPQSFQVDTSK.A                   | 1435.56409 | 1 | 2.82E-05 | 0.37 | 2.62 | - | 284.9  |
| AHQ-5-5, 3038 - 3111   | R.ANLPQSFQVDTSK.A                   | 1435.56409 | 2 | 6.16E-09 | 0.90 | 3.76 | - | 658.8  |
| AHQ-5-5, 3091 - 3095   | R.ANLPQSFQVDTSK.A                   | 1435.56409 | 1 | 7.10E-04 | 0.73 | 2.74 | - | 502.0  |
| AHQ-5-2, 3193          | R.ANLPQSFQVDTSK.A                   | 1435.56409 | 1 | 2.49E-08 | 0.60 | 2.92 | - | 371.1  |
| AHQ-5-4, 3256          | R.ANLPQSFQVDTSK.A                   | 1435.56409 | 2 | 1.44E-05 | 0.69 | 2.79 | - | 410.0  |
| AHQ-5-2, 4591          | R.ANLPQSFQVDTSKAGVAPLOQV.V          | 2299.61185 | 2 | 5.22E-07 | 0.92 | 4.45 | - | 949.7  |
| AHQ-5-3, 4675          | R.ANLPQSFQVDTSKAGVAPLOQV.V          | 2299.61185 | 2 | 3.67E-05 | 0.94 | 4.87 | - | 937.5  |
| AHQ-5-1, 3527          | R.APSVANVGSCHDLSLK.I                | 1656.84249 | 2 | 4.78E-05 | 0.93 | 4.53 | - | 681.3  |
| AHQ-5-5, 3150 - 3154   | R.APSVANVGSCHDLSLK.I                | 1656.84249 | 2 | 2.10E-09 | 0.95 | 4.86 | - | 637.7  |
| AHQ-5-3, 1643          | K.ATCAPQHAGPGGPADASK.V              | 1791.92336 | 2 | 4.75E-04 | 0.91 | 3.94 | - | 657.9  |
| AHQ-5-5, 1526          | K.ATCAPQHAGPGGPADASK.V              | 1791.92336 | 2 | 5.00E-08 | 0.94 | 4.13 | - | 896.8  |
| AHQ-5-4, 1653          | K.ATCAPQHAGPGGPADASK.V              | 1791.92336 | 2 | 3.67E-05 | 0.90 | 4.04 | - | 703.0  |
| AHQ-5-3, 3637 - 3638   | R.AWGPGLGEGVVVGK.S                  | 1227.39403 | 2 | 3.17E-08 | 0.95 | 4.26 | - | 942.3  |
| AHQ-5-6, 3356 - 3364   | R.AWGPGLGEGVVVGK.S                  | 1227.39403 | 2 | 5.43E-07 | 0.91 | 3.76 | - | 771.3  |
| AHQ-5-5, 3406 - 3425   | R.AWGPGLGEGVVVGK.S                  | 1227.39403 | 2 | 1.91E-07 | 0.92 | 3.50 | - | 972.8  |
| AHQ-5-4, 3622          | R.AWGPGLGEGVVVGK.S                  | 1227.39403 | 2 | 5.06E-06 | 0.92 | 3.74 | - | 990.1  |
| AHQ-5-7, 3260          | R.AWGPGLGEGVVVGK.S                  | 1227.39403 | 2 | 5.02E-05 | 0.87 | 3.23 | - | 899.3  |
| AHQ-5-2, 3578 - 3661   | R.AWGPGLGEGVVVGK.S                  | 1227.39403 | 2 | 8.95E-08 | 0.89 | 3.49 | - | 941.5  |
| AHQ-5-1, 3756 - 3829   | R.AWGPGLGEGVVVGK.S                  | 1227.39403 | 2 | 7.13E-06 | 0.91 | 3.51 | - | 781.8  |
| AHQ-5-4, 3082 - 3156   | R.AYGPGEPTGNMVK.K                   | 1434.64274 | 1 | 4.32E-04 | 0.44 | 2.79 | - | 280.9  |
| AHQ-5-3, 3179          | R.AYGPGEPTGNMVK.K                   | 1434.64274 | 1 | 1.65E-04 | 0.56 | 2.78 | - | 416.9  |
| AHQ-5-2, 2465          | R.AYGPGEPTGNMVK.K                   | 1450.64214 | 2 | 4.61E-04 | 0.67 | 2.63 | - | 450.7  |
| AHQ-5-2, 3299 - 3313   | R.AYGPGEPTGNMVK.K                   | 1434.64274 | 2 | 5.34E-04 | 0.56 | 2.95 | - | 547.7  |
| AHQ-5-5, 2887 - 2957   | R.AYGPGEPTGNMVK.K                   | 1434.64274 | 2 | 1.96E-04 | 0.74 | 2.99 | - | 555.0  |
| AHQ-5-5, 2954          | R.AYGPGEPTGNMVK.K                   | 1434.64274 | 2 | 3.17E-05 | 0.88 | 4.24 | - | 457.2  |
| AHQ-5-3, 3375 - 3454   | R.AYGPGEPTGNMVK.K                   | 1434.64274 | 2 | 7.79E-04 | 0.81 | 3.07 | - | 646.4  |
| AHQ-5-3, 3383 - 3453   | R.AYGPGEPTGNMVK.K                   | 1434.64274 | 1 | 1.77E-04 | 0.72 | 2.98 | - | 542.3  |
| AHQ-5-7, 2846          | R.AYGPGEPTGNMVK.K                   | 1434.64274 | 2 | 2.10E-06 | 0.79 | 3.10 | - | 627.6  |
| AHQ-5-2, 3398 - 3399   | R.AYGPGEPTGNMVK.K                   | 1434.64274 | 2 | 9.97E-04 | 0.92 | 4.18 | - | 741.4  |
| AHQ-5-1, 3283 - 3325   | R.AYGPGEPTGNMVK.K                   | 1434.64274 | 2 | 2.18E-05 | 0.52 | 2.69 | - | 448.0  |
| AHQ-5-2, 3403          | R.AYGPGEPTGNMVK.K                   | 1434.64274 | 1 | 4.86E-04 | 0.54 | 2.61 | - | 509.8  |
| AHQ-5-2, 6409          | K.CAPGVVGAEDADIDFIIR.N              | 2017.24863 | 2 | 4.76E-08 | 0.94 | 4.35 | - | 684.4  |
| AHQ-5-2, 6534          | K.CAPGVVGAEDADIDFIIR.N              | 2017.24863 | 2 | 1.42E-05 | 0.62 | 2.66 | - | 410.1  |
| AHQ-5-1, 6340          | K.CAPGVVGAEDADIDFIIR.N              | 2017.24863 | 3 | 3.78E-12 | 0.96 | 4.97 | - | 1736.4 |
| AHQ-5-1, 6325 - 6401   | K.CAPGVVGAEDADIDFIIR.N              | 2017.24863 | 2 | 5.18E-07 | 0.94 | 5.13 | - | 479.6  |
| AHQ-5-6, 6190          | K.CAPGVVGAEDADIDFIIR.N              | 2017.24863 | 2 | 6.01E-05 | 0.77 | 3.31 | - | 467.0  |
| AHQ-5-2, 6346 - 6374   | K.CAPGVVGAEDADIDFIIR.N              | 2017.24863 | 3 | 8.11E-12 | 0.97 | 5.86 | - | 1957.2 |
| AHQ-5-3, 6389 - 6465   | K.CAPGVVGAEDADIDFIIR.N              | 2017.24863 | 2 | 5.65E-09 | 0.96 | 4.94 | - | 948.8  |

|                        |                                 |            |   |          |      |      |   |        |
|------------------------|---------------------------------|------------|---|----------|------|------|---|--------|
| AHQ-5-2, 6283 - 6341   | K.CAPGVVGAPEADIDFDIIR.N         | 2017.24863 | 2 | 1.43E-11 | 0.95 | 4.92 | - | 733.6  |
| AHQ-5-2, 6162 - 6175   | K.CAPGVVGAPEADIDFDIIR.N         | 2017.24863 | 2 | 1.18E-10 | 0.94 | 4.35 | - | 976.2  |
| AHQ-5-5, 6290          | K.CAPGVVGAPEADIDFDIIR.N         | 2017.24863 | 2 | 4.07E-04 | 0.86 | 3.57 | - | 504.5  |
| AHQ-5-4, 6373 - 6452   | K.CAPGVVGAPEADIDFDIIR.N         | 2017.24863 | 2 | 1.30E-06 | 0.92 | 4.13 | - | 751.9  |
| AHQ-5-3, 6227          | K.CAPGVVGAPEADIDFDIIR.N         | 2017.24863 | 2 | 1.08E-07 | 0.88 | 4.07 | - | 554.5  |
| AHQ-5-4, 6605          | K.CAPGVVGAPEADIDFDIIRNDNDFTVK.Y | 3052.31840 | 3 | 6.78E-04 | 0.82 | 3.91 | - | 331.4  |
| AHQ-5-2, 6959 - 7035   | K.CAPGVVGAPEADIDFDIIRNDNDFTVK.Y | 3052.31840 | 3 | 8.98E-07 | 0.62 | 3.17 | - | 508.3  |
| AHQ-5-2, 7209 - 7277   | K.CAPGVVGAPEADIDFDIIRNDNDFTVK.Y | 3052.31840 | 3 | 5.76E-05 | 0.83 | 4.23 | - | 503.8  |
| AHQ-5-3, 6702 - 6731   | K.CAPGVVGAPEADIDFDIIRNDNDFTVK.Y | 3052.31840 | 3 | 1.68E-05 | 0.55 | 3.41 | - | 395.1  |
| AHQ-5-1, 6657 - 6721   | K.CAPGVVGAPEADIDFDIIRNDNDFTVK.Y | 3052.31840 | 3 | 1.04E-05 | 0.55 | 3.28 | - | 433.0  |
| AHQ-5-2, 6705 - 6742   | K.CAPGVVGAPEADIDFDIIRNDNDFTVK.Y | 3052.31840 | 3 | 1.70E-09 | 0.70 | 3.60 | - | 377.9  |
| AHQ-5-3, 6619 - 6633   | K.CAPGVVGAPEADIDFDIIRNDNDFTVK.Y | 3052.31840 | 3 | 1.49E-06 | 0.80 | 4.01 | - | 362.1  |
| AHQ-5-3, 2937 - 2949   | K.CSGPGLSPGMVR.A                | 1219.41699 | 2 | 2.56E-06 | 0.71 | 2.96 | - | 490.4  |
| AHQ-5-2, 2858 - 2881   | K.CSGPGLSPGMVR.A                | 1219.41699 | 2 | 3.57E-05 | 0.85 | 3.24 | - | 647.7  |
| AHQ-5-3, 2947          | K.CSGPGLSPGMVR.A                | 1219.41699 | 1 | 9.20E-05 | 0.57 | 2.85 | - | 216.3  |
| AHQ-5-4, 2917          | K.CSGPGLSPGMVR.A                | 1219.41699 | 2 | 3.25E-06 | 0.67 | 2.79 | - | 501.7  |
| AHQ-5-5, 5239          | R.CSYQPTMEGVHTVHVFAGVPIPR.S     | 2686.06233 | 2 | 3.87E-09 | 0.95 | 4.27 | - | 1170.4 |
| AHQ-5-2, 5415 - 5466   | R.CSYQPTMEGVHTVHVFAGVPIPR.S     | 2686.06233 | 2 | 9.90E-11 | 0.96 | 5.26 | - | 989.7  |
| AHQ-5-1, 5563 - 5583   | R.CSYQPTMEGVHTVHVFAGVPIPR.S     | 2686.06233 | 3 | 1.08E-10 | 0.93 | 4.78 | - | 682.9  |
| AHQ-5-1, 5564 - 5576   | R.CSYQPTMEGVHTVHVFAGVPIPR.S     | 2686.06233 | 2 | 1.99E-09 | 0.97 | 5.65 | - | 1188.7 |
| AHQ-5-2, 5411 - 5485   | R.CSYQPTMEGVHTVHVFAGVPIPR.S     | 2686.06233 | 3 | 9.27E-09 | 0.92 | 4.67 | - | 704.2  |
| AHQ-5-3, 5497 - 5499   | R.CSYQPTMEGVHTVHVFAGVPIPR.S     | 2686.06233 | 2 | 1.39E-11 | 0.95 | 4.77 | - | 981.2  |
| AHQ-5-1, 5047 - 5061   | R.CSYQPTMEGVHTVHVFAGVPIPR.S     | 2702.06173 | 3 | 1.39E-07 | 0.89 | 4.07 | - | 716.8  |
| AHQ-5-2, 4938          | R.CSYQPTMEGVHTVHVFAGVPIPR.S     | 2702.06173 | 3 | 2.44E-05 | 0.88 | 4.23 | - | 597.3  |
| AHQ-5-5, 4759 - 4766   | R.CSYQPTMEGVHTVHVFAGVPIPR.S     | 2702.06173 | 3 | 3.82E-04 | 0.80 | 4.40 | - | 473.3  |
| AHQ-5-3, 5025 - 5026   | R.CSYQPTMEGVHTVHVFAGVPIPR.S     | 2702.06173 | 3 | 1.75E-05 | 0.89 | 4.48 | - | 419.1  |
| AHQ-5-4, 5480          | R.CSYQPTMEGVHTVHVFAGVPIPR.S     | 2686.06233 | 3 | 3.44E-14 | 0.95 | 5.22 | - | 862.8  |
| AHQ-5-1, 5053          | R.CSYQPTMEGVHTVHVFAGVPIPR.S     | 2702.06173 | 2 | 9.82E-04 | 0.91 | 4.01 | - | 828.6  |
| AHQ-5-5, 5227 - 5246   | R.CSYQPTMEGVHTVHVFAGVPIPR.S     | 2686.06233 | 3 | 2.47E-04 | 0.75 | 3.21 | - | 494.1  |
| AHQ-5-4, 5476          | R.CSYQPTMEGVHTVHVFAGVPIPR.S     | 2686.06233 | 2 | 1.38E-08 | 0.96 | 4.47 | - | 1213.2 |
| AHQ-5-2, 3977          | R.DAEMPATEKDLAEDAPWK.K          | 2034.18987 | 2 | 8.23E-04 | 0.80 | 3.39 | - | 545.3  |
| AHQ-5-2, 4599          | R.DAEMPATEKDLAEDAPWK.K          | 2018.19047 | 2 | 2.69E-05 | 0.89 | 3.65 | - | 915.5  |
| AHQ-5-1, 4688          | R.DAEMPATEKDLAEDAPWK.K          | 2018.19047 | 2 | 4.65E-04 | 0.88 | 3.68 | - | 877.6  |
| AHQ-5-5, 4457          | R.DAEMPATEKDLAEDAPWK.K          | 2018.19047 | 2 | 1.40E-04 | 0.84 | 3.66 | - | 578.0  |
| AHQ-5-1, 4116          | R.DAEMPATEKDLAEDAPWK.K          | 2034.18987 | 2 | 4.74E-04 | 0.68 | 3.28 | - | 365.8  |
| AHQ-5-2, 4079          | R.DAEMPATEKDLAEDAPWK.K          | 2146.36338 | 3 | 1.64E-06 | 0.85 | 4.01 | - | 519.0  |
| AHQ-5-5, 3925 - 3993   | K.DAGEGGLSLAIEGSPK.A            | 1501.62084 | 2 | 6.18E-04 | 0.90 | 3.75 | - | 1220.4 |
| AHQ-5-3, 4089 - 4159   | K.DAGEGGLSLAIEGSPK.A            | 1501.62084 | 2 | 1.20E-04 | 0.86 | 3.96 | - | 941.0  |
| AHQ-5-1, 4361          | K.DAGEGGLSLAIEGSPK.A            | 1501.62084 | 2 | 1.49E-07 | 0.89 | 4.33 | - | 611.7  |
| AHQ-5-1, 4103 - 4173   | K.DAGEGGLSLAIEGSPK.A            | 1501.62084 | 2 | 7.50E-06 | 0.95 | 4.69 | - | 1258.7 |
| AHQ-5-4, 4041 - 4101   | K.DAGEGGLSLAIEGSPK.A            | 1501.62084 | 2 | 1.34E-04 | 0.86 | 3.44 | - | 1041.3 |
| AHQ-5-2, 4389 - 4457   | K.DAGEGLLAVQITDEGPKP.K          | 1939.15612 | 3 | 6.56E-08 | 0.91 | 4.62 | - | 977.6  |
| AHQ-5-3, 4465 - 4539   | K.DAGEGLLAVQITDEGPKP.K          | 1939.15612 | 3 | 3.05E-07 | 0.82 | 3.49 | - | 946.8  |
| AHQ-5-8, 3820          | K.DAGEGLLAVQITDEGPKP.K          | 1939.15612 | 2 | 7.33E-08 | 0.91 | 4.23 | - | 1013.2 |
| AHQ-5-10, 3866 - 3867  | K.DAGEGLLAVQITDEGPKP.K          | 1939.15612 | 2 | 2.91E-04 | 0.93 | 3.98 | - | 1218.9 |
| AHQ-5-1, 4524 - 4596   | K.DAGEGLLAVQITDEGPKP.K          | 1939.15612 | 3 | 5.97E-09 | 0.94 | 4.03 | - | 1376.2 |
| AHQ-5-1, 4587 - 4656   | K.DAGEGLLAVQITDEGPKP.K          | 1939.15612 | 2 | 1.70E-06 | 0.95 | 4.53 | - | 1329.1 |
| AHQ-5-2, 4517 - 4590   | K.DAGEGLLAVQITDEGPKP.K          | 1939.15612 | 2 | 4.09E-06 | 0.91 | 4.28 | - | 934.4  |
| AHQ-5-3, 4449 - 4529   | K.DAGEGLLAVQITDEGPKP.K          | 1939.15612 | 2 | 7.88E-08 | 0.93 | 4.20 | - | 1173.8 |
| AHQ-5-3, 4611          | K.DAGEGLLAVQITDEGPKP.K          | 1939.15612 | 2 | 4.65E-07 | 0.89 | 3.73 | - | 953.7  |
| AHQ-5-6, 4113 - 4133   | K.DAGEGLLAVQITDEGPKP.K          | 1939.15612 | 2 | 4.25E-05 | 0.82 | 3.68 | - | 908.3  |
| AHQ-5-4, 4461          | K.DAGEGLLAVQITDEGPKP.K          | 1939.15612 | 2 | 1.14E-05 | 0.96 | 5.28 | - | 1284.9 |
| AHQ-5-5, 4281          | K.DAGEGLLAVQITDEGPKP.K          | 1939.15612 | 2 | 2.13E-09 | 0.95 | 4.53 | - | 1342.7 |
| AHQ-5-9, 3746 - 3747   | K.DAGEGLLAVQITDEGPKP.K          | 1939.15612 | 2 | 3.50E-05 | 0.93 | 4.60 | - | 1044.6 |
| AHQ-5-1, 4488 - 4555   | K.DAGEGLLAVQITDEGPKP.K          | 1939.15612 | 2 | 1.03E-08 | 0.93 | 4.63 | - | 993.0  |
| AHQ-5-4, 4376 - 4380   | K.DAGEGLLAVQITDEGPKP.K          | 1939.15612 | 2 | 4.42E-07 | 0.95 | 4.74 | - | 1286.8 |
| AHQ-5-4, 4389          | K.DAGEGLLAVQITDEGPKP.K          | 1939.15612 | 3 | 4.74E-07 | 0.80 | 3.20 | - | 923.9  |
| AHQ-5-2, 4746          | K.DAGEGLLAVQITDEGPKP.K          | 1939.15612 | 2 | 1.06E-04 | 0.92 | 4.39 | - | 886.5  |
| AHQ-5-7, 3918 - 3998   | K.DAGEGLLAVQITDEGPKP.K          | 1939.15612 | 2 | 7.44E-04 | 0.84 | 3.77 | - | 706.3  |
| AHQ-5-5, 4145 - 4201   | K.DAGEGLLAVQITDEGPKP.K          | 1939.15612 | 2 | 8.64E-07 | 0.93 | 3.98 | - | 1171.8 |
| AHQ-5-1, 4753          | K.DAGEGLLAVQITDEGPKP.K          | 1939.15612 | 2 | 1.62E-06 | 0.94 | 4.29 | - | 1229.6 |
| AHQ-5-2, 4379 - 4449   | K.DAGEGLLAVQITDEGPKP.K          | 1939.15612 | 2 | 2.62E-06 | 0.89 | 3.98 | - | 946.3  |
| AHQ-5-2, 4661          | K.DAGEGLLAVQITDEGPKP.K          | 1939.15612 | 2 | 2.91E-07 | 0.93 | 4.15 | - | 1100.9 |
| AHQ-5-1, 4685          | R.DAGYGGLSLSIEGSPK.V            | 1551.67986 | 2 | 9.06E-11 | 0.91 | 4.08 | - | 969.4  |
| AHQ-5-4, 4646 - 4716   | R.DAGYGGLSLSIEGSPK.V            | 1551.67986 | 2 | 1.34E-06 | 0.86 | 3.21 | - | 1119.7 |
| AHQ-5-5, 4537 - 4609   | R.DAGYGGLSLSIEGSPK.V            | 1551.67986 | 2 | 7.79E-05 | 0.83 | 2.96 | - | 1129.1 |
| AHQ-5-5, 4683 - 4755   | R.DAGYGGLSLSIEGSPK.V            | 1551.67986 | 2 | 3.37E-09 | 0.88 | 3.73 | - | 985.9  |
| AHQ-5-2, 4717          | R.DAGYGGLSLSIEGSPK.V            | 1551.67986 | 2 | 1.79E-05 | 0.70 | 2.82 | - | 870.9  |
| AHQ-5-2, 1694 - 1766   | R.DAPQDFHPR.V                   | 1198.22650 | 2 | 3.10E-05 | 0.61 | 3.04 | - | 386.8  |
| AHQ-5-1, 2060          | R.DAPQDFHPR.V                   | 1198.22650 | 2 | 4.76E-06 | 0.77 | 3.14 | - | 545.7  |
| AHQ-5-6, 4837 - 4912   | K.DGSCGVAYVQEPGDYEVSVK.F        | 2260.41990 | 2 | 3.20E-06 | 0.91 | 4.54 | - | 582.7  |
| AHQ-5-5, 4915 - 4929   | K.DGSCGVAYVQEPGDYEVSVK.F        | 2260.41990 | 2 | 1.74E-04 | 0.90 | 4.39 | - | 721.8  |
| AHQ-5-4, 5228          | K.DGSCGVAYVQEPGDYEVSVK.F        | 2260.41990 | 2 | 2.07E-06 | 0.67 | 3.15 | - | 396.6  |
| AHQ-5-3, 5022 - 5029   | K.DGSCGVAYVQEPGDYEVSVK.F        | 2260.41990 | 2 | 8.27E-05 | 0.82 | 4.14 | - | 514.7  |
| AHQ-5-8, 4690          | K.DGSCGVAYVQEPGDYEVSVK.F        | 2260.41990 | 2 | 6.21E-04 | 0.47 | 2.57 | - | 313.7  |
| AHQ-5-4, 5056 - 5125   | K.DGSCGVAYVQEPGDYEVSVK.F        | 2260.41990 | 2 | 1.02E-04 | 0.91 | 4.44 | - | 645.7  |
| AHQ-5-4, 4954 - 4986   | K.DGSCGVAYVQEPGDYEVSVK.F        | 2260.41990 | 2 | 1.99E-05 | 0.90 | 4.12 | - | 725.6  |
| AHQ-5-5, 5173 - 5177   | K.DGSCGVAYVQEPGDYEVSVK.F        | 2260.41990 | 2 | 1.38E-04 | 0.87 | 4.39 | - | 540.3  |
| AHQ-5-2, 5001          | K.DGSCGVAYVQEPGDYEVSVK.F        | 2260.41990 | 2 | 1.64E-05 | 0.75 | 3.46 | - | 544.8  |
| AHQ-5-1, 4971 - 5049   | K.DGSCGVAYVQEPGDYEVSVK.F        | 2260.41990 | 2 | 2.49E-06 | 0.87 | 4.02 | - | 646.1  |
| AHQ-5-5, 4998          | K.DGSCGVAYVQEPGDYEVSVK.F        | 2260.41990 | 2 | 3.02E-06 | 0.84 | 4.08 | - | 531.3  |
| AHQ-5-14-, 2363        | K.DKGEYTLVVK.W                  | 1152.32223 | 1 | 4.80E-04 | 0.28 | 2.10 | - | 468.2  |
| AHQ-5-14, 3233         | K.DKGEYTLVVK.W                  | 1152.32223 | 1 | 1.80E-04 | 0.10 | 2.00 | - | 356.1  |
| AHQ-5-14-, 2353 - 2359 | K.DKGEYTLVVK.W                  | 1152.32223 | 2 | 2.70E-07 | 0.82 | 3.06 | - | 655.8  |
| AHQ-5-5, 2195          | K.DKGEYTLVVK.W                  | 1152.32223 | 1 | 2.80E-05 | 0.26 | 2.28 | - | 444.3  |
| AHQ-5-4, 2977 - 2980   | R.DVDIIDHDNTYTVK.Y              | 1785.89230 | 3 | 2.72E-04 | 0.53 | 3.06 | - | 405.6  |
| AHQ-5-3, 3258          | R.DVDIIDHDNTYTVK.Y              | 1785.89230 | 2 | 3.14E-05 | 0.88 | 3.73 | - | 763.3  |
| AHQ-5-3, 2942 - 3013   | R.DVDIIDHDNTYTVK.Y              | 1785.89230 | 2 | 1.23E-05 | 0.86 | 3.28 | - | 767.6  |
| AHQ-5-2, 3089          | R.DVDIIDHDNTYTVK.Y              | 1785.89230 | 2 | 4.72E-07 | 0.92 | 3.84 | - | 962.0  |
| AHQ-5-2, 2889 - 2958   | R.DVDIIDHDNTYTVK.Y              | 1785.89230 | 2 | 1.31E-08 | 0.95 | 4.14 | - | 1182.7 |
| AHQ-5-2, 3197 - 3271   | R.DVDIIDHDNTYTVK.Y              | 1785.89230 | 2 | 9.84E-05 | 0.95 | 4.38 | - | 1181.4 |
| AHQ-5-1, 3065 - 3137   | R.DVDIIDHDNTYTVK.Y              | 1785.89230 | 2 | 6.38E-06 | 0.93 | 4.16 | - | 1024.3 |
| AHQ-5-1, 3164          | R.DVDIIDHDNTYTVK.Y              | 1785.89230 | 2 | 3.61E-05 | 0.87 | 3.76 | - | 651.1  |
| AHQ-5-1, 3203          | R.DVDIIDHDNTYTVK.Y              | 1785.89230 | 2 | 1.04E-07 | 0.93 | 3.88 | - | 1057.4 |
| AHQ-5-3, 3118          | R.DVDIIDHDNTYTVK.Y              | 1785.89230 | 2 | 1.32E-11 | 0.94 | 4.13 | - | 1073.6 |
| AHQ-5-1, 3331          | R.DVDIIDHDNTYTVK.Y              | 1785.89230 | 2 | 4.13E-05 | 0.87 | 3.49 | - | 786.1  |
| AHQ-5-4, 2966 - 3046   | R.DVDIIDHDNTYTVK.Y              | 1785.89230 | 2 | 7.70E-09 | 0.96 | 4.57 | - | 1428.5 |
| AHQ-5-7, 3054          | R.EAGAGGLAIAIEGSPK.A            | 1427.58510 | 1 | 1.26E-09 | 0.86 | 3.71 | - | 436.2  |
| AHQ-5-1, 3485 - 3555   | R.EAGAGGLAIAIEGSPK.A            | 1427.58510 | 1 | 1.21E-06 | 0.97 | 5.29 | - | 1427.2 |
| AHQ-5-1, 3507          | R.EAGAGGLAIAIEGSPK.A            | 1427.58510 | 1 | 7.06E-06 | 0.59 | 3.38 | - | 301.9  |
| AHQ-5-5, 5231          | R.EAGAGGLAIAIEGSPK.A            | 1427.58510 | 1 | 2.83E-04 | 0.37 | 2.36 | - | 309.6  |
| AHQ-5-6, 3165          | R.EAGAGGLAIAIEGSPK.A            | 1427.58510 | 1 | 1.39E-06 | 0.51 | 2.89 | - | 290.6  |
| AHQ-5-7, 3140          | R.EAGAGGLAIAIEGSPK.A            | 1427.58510 | 1 | 2.63E-04 | 0.08 | 1.96 | - | 217.2  |
| AHQ-5-5, 3199          | R.EAGAGGLAIAIEGSPK.A            | 1427.58510 | 1 | 3.79E-06 | 0.65 | 3.57 | - | 286.8  |
| AHQ-5-13, 3491         | R.EAGAGGLAIAIEGSPK.A            | 1427.58510 | 2 | 2.85E-04 | 0.90 | 3.36 | - | 1246.1 |
| AHQ-5-1, 2687 - 2688   | R.EATTEFSVDAR.A                 | 1226.27493 | 2 | 5.73E-05 | 0.85 | 3.10 | - | 759.3  |
| AHQ-5-2, 2598 - 2599   | R.EATTEFSVDAR.A                 | 1226.27493 | 2 | 4.67E-06 | 0.85 | 2.97 | - | 846.4  |

|                       |                                       |            |   |          |      |      |   |        |
|-----------------------|---------------------------------------|------------|---|----------|------|------|---|--------|
| AHQ-5-2, 6525 - 6594  | R.EEGPYEVEVTDGVPVPGSPFFLEAVAPT KPSK.V | 3487.85286 | 3 | 5.68E-08 | 0.94 | 5.81 | - | 653.8  |
| AHQ-5-4, 6456 - 6526  | R.EEGPYEVEVTDGVPVPGSPFFLEAVAPT KPSK.V | 3487.85286 | 3 | 1.07E-06 | 0.95 | 5.66 | - | 1079.3 |
| AHQ-5-5, 6351 - 6433  | R.EEGPYEVEVTDGVPVPGSPFFLEAVAPT KPSK.V | 3487.85286 | 3 | 3.48E-08 | 0.94 | 5.95 | - | 626.1  |
| AHQ-5-1, 6425 - 6507  | R.EEGPYEVEVTDGVPVPGSPFFLEAVAPT KPSK.V | 3487.85286 | 3 | 1.55E-07 | 0.93 | 5.12 | - | 640.2  |
| AHQ-5-4, 6540 - 6604  | R.EEGPYEVEVTDGVPVPGSPFFLEAVAPT KPSK.V | 3487.85286 | 3 | 2.72E-07 | 0.92 | 5.24 | - | 684.2  |
| AHQ-5-2, 6389 - 6457  | R.EEGPYEVEVTDGVPVPGSPFFLEAVAPT KPSK.V | 3487.85286 | 3 | 4.79E-12 | 0.91 | 4.63 | - | 850.1  |
| AHQ-5-6, 6264 - 6340  | R.EEGPYEVEVTDGVPVPGSPFFLEAVAPT KPSK.V | 3487.85286 | 3 | 3.07E-05 | 0.94 | 5.41 | - | 905.7  |
| AHQ-5-3, 6471 - 6545  | R.EEGPYEVEVTDGVPVPGSPFFLEAVAPT KPSK.V | 3487.85286 | 3 | 4.06E-10 | 0.95 | 5.85 | - | 784.7  |
| AHQ-5-2, 6661         | R.EEGPYEVEVTDGVPVPGSPFFLEAVAPT KPSK.V | 3487.85286 | 3 | 4.30E-10 | 0.86 | 4.37 | - | 461.8  |
| AHQ-5-3, 6575 - 6641  | R.EEGPYEVEVTDGVPVPGSPFFLEAVAPT KPSK.V | 3487.85286 | 3 | 1.05E-08 | 0.91 | 4.87 | - | 650.8  |
| AHQ-5-1, 6555 - 6583  | R.EEGPYEVEVTDGVPVPGSPFFLEAVAPT KPSK.V | 3487.85286 | 3 | 6.39E-09 | 0.94 | 5.63 | - | 669.5  |
| AHQ-5-10, 4540        | R.EGPYSISVLVGDDEEVP.R.S               | 1911.05809 | 2 | 3.49E-05 | 0.82 | 3.45 | - | 1034.5 |
| AHQ-5-2, 4887 - 4889  | R.EGPYSISVLVGDDEEVP.R.S               | 1911.05809 | 2 | 5.35E-04 | 0.71 | 3.47 | - | 621.3  |
| AHQ-5-5, 5021 - 5050  | R.EGPYSISVLVGDDEEVP.R.S               | 1911.05809 | 2 | 2.39E-07 | 0.90 | 4.09 | - | 613.4  |
| AHQ-5-4, 5188 - 5261  | R.EGPYSISVLVGDDEEVP.R.S               | 1911.05809 | 2 | 6.78E-06 | 0.47 | 2.69 | - | 570.5  |
| AHQ-5-1, 5260         | R.EGPYSISVLVGDDEEVP.R.S               | 1911.05809 | 3 | 3.34E-09 | 0.97 | 5.27 | - | 1671.1 |
| AHQ-5-3, 5255         | R.EGPYSISVLVGDDEEVP.R.S               | 1911.05809 | 3 | 4.21E-07 | 0.97 | 5.39 | - | 1941.4 |
| AHQ-5-1, 5191 - 5259  | R.EGPYSISVLVGDDEEVP.R.S               | 1911.05809 | 2 | 2.10E-07 | 0.92 | 4.37 | - | 993.7  |
| AHQ-5-6, 4981 - 4985  | R.EGPYSISVLVGDDEEVP.R.S               | 1911.05809 | 2 | 3.22E-07 | 0.92 | 3.97 | - | 842.3  |
| AHQ-5-8, 4662 - 4732  | R.EGPYSISVLVGDDEEVP.R.S               | 1911.05809 | 2 | 2.33E-08 | 0.92 | 4.13 | - | 889.2  |
| AHQ-5-2, 5233         | R.EGPYSISVLVGDDEEVP.R.S               | 1911.05809 | 2 | 6.04E-09 | 0.94 | 4.62 | - | 1116.6 |
| AHQ-5-3, 5221 - 5289  | R.EGPYSISVLVGDDEEVP.R.S               | 1911.05809 | 2 | 1.19E-07 | 0.93 | 4.42 | - | 1006.1 |
| AHQ-5-2, 5147 - 5217  | R.EGPYSISVLVGDDEEVP.R.S               | 1911.05809 | 2 | 5.51E-11 | 0.96 | 4.62 | - | 1307.6 |
| AHQ-5-1, 4889 - 4959  | R.EGPYSISVLVGDDEEVP.R.S               | 1911.05809 | 2 | 4.57E-04 | 0.32 | 2.55 | - | 374.8  |
| AHQ-5-1, 4056         | R.ENGVYLVK.F                          | 1150.30633 | 1 | 4.24E-04 | 0.04 | 1.84 | - | 258.8  |
| AHQ-5-5, 3970         | R.ENGVYLVK.F                          | 1150.30633 | 1 | 1.90E-05 | 0.17 | 1.99 | - | 274.5  |
| AHQ-5-6, 3792         | R.ENGVYLVK.F                          | 1150.30633 | 1 | 9.64E-04 | 0.21 | 2.26 | - | 270.2  |
| AHQ-5-8, 2846         | K.FADQHVPGSPFVK.V                     | 1516.68203 | 2 | 1.22E-04 | 0.74 | 3.05 | - | 447.6  |
| AHQ-5-2, 3377         | K.FADQHVPGSPFVK.V                     | 1516.68203 | 2 | 6.52E-07 | 0.72 | 2.78 | - | 409.0  |
| AHQ-5-4, 3420         | K.FADQHVPGSPFVK.V                     | 1516.68203 | 3 | 1.97E-04 | 0.94 | 4.03 | - | 1350.5 |
| AHQ-5-12, 3316        | K.FADQHVPGSPFVK.V                     | 1516.68203 | 2 | 2.52E-06 | 0.78 | 3.38 | - | 364.3  |
| AHQ-5-3, 3450         | K.FADQHVPGSPFVK.V                     | 1516.68203 | 2 | 3.36E-08 | 0.79 | 3.05 | - | 476.4  |
| AHQ-5-5, 3177         | K.FADQHVPGSPFVK.V                     | 1516.68203 | 3 | 2.58E-04 | 0.94 | 4.25 | - | 1542.0 |
| AHQ-5-1, 3567         | K.FADQHVPGSPFVK.V                     | 1516.68203 | 2 | 7.26E-10 | 0.85 | 3.26 | - | 573.9  |
| AHQ-5-5, 3162 - 3233  | K.FADQHVPGSPFVK.V                     | 1516.68203 | 2 | 4.29E-07 | 0.78 | 3.93 | - | 405.9  |
| AHQ-5-1, 3585         | K.FADQHVPGSPFVK.V                     | 1516.68203 | 3 | 1.52E-07 | 0.93 | 4.31 | - | 940.0  |
| AHQ-5-13, 3417        | K.FADQHVPGSPFVK.V                     | 1516.68203 | 2 | 6.46E-08 | 0.76 | 2.99 | - | 420.0  |
| AHQ-5-1, 3599 - 3651  | K.FADQHVPGSPFVK.V                     | 1516.68203 | 2 | 1.75E-06 | 0.86 | 3.55 | - | 541.8  |
| AHQ-5-13, 3523 - 3530 | K.FADQHVPGSPFVK.V                     | 1516.68203 | 2 | 2.89E-05 | 0.91 | 4.09 | - | 619.2  |
| AHQ-5-4, 5696         | R.FGGEHVPNSPFQVTLALAGDQPSVOPPLR.S     | 2947.25342 | 3 | 7.31E-09 | 0.88 | 4.24 | - | 935.3  |
| AHQ-5-4, 5618 - 5693  | R.FGGEHVPNSPFQVTLALAGDQPSVOPPLR.S     | 2947.25342 | 2 | 4.26E-08 | 0.97 | 5.96 | - | 882.7  |
| AHQ-5-6, 5364         | R.FGGEHVPNSPFQVTLALAGDQPSVOPPLR.S     | 2947.25342 | 3 | 1.75E-05 | 0.91 | 4.45 | - | 908.9  |
| AHQ-5-8, 4981         | R.FGGEHVPNSPFQVTLALAGDQPSVOPPLR.S     | 2947.25342 | 2 | 2.50E-04 | 0.86 | 3.67 | - | 580.6  |
| AHQ-5-1, 5819         | R.FGGEHVPNSPFQVTLALAGDQPSVOPPLR.S     | 2947.25342 | 2 | 6.24E-07 | 0.95 | 4.92 | - | 1010.5 |
| AHQ-5-7, 5198 - 5204  | R.FGGEHVPNSPFQVTLALAGDQPSVOPPLR.S     | 2947.25342 | 2 | 1.11E-06 | 0.97 | 5.49 | - | 1309.6 |
| AHQ-5-4, 5596 - 5676  | R.FGGEHVPNSPFQVTLALAGDQPSVOPPLR.S     | 2947.25342 | 3 | 1.24E-06 | 0.92 | 4.72 | - | 869.9  |
| AHQ-5-3, 5714 - 5715  | R.FGGEHVPNSPFQVTLALAGDQPSVOPPLR.S     | 2947.25342 | 2 | 7.98E-08 | 0.98 | 6.77 | - | 1036.6 |
| AHQ-5-10, 4888        | R.FGGEHVPNSPFQVTLALAGDQPSVOPPLR.S     | 2947.25342 | 2 | 4.20E-05 | 0.89 | 3.63 | - | 845.7  |
| AHQ-5-8, 4989 - 4996  | R.FGGEHVPNSPFQVTLALAGDQPSVOPPLR.S     | 2947.25342 | 3 | 1.93E-07 | 0.86 | 4.41 | - | 555.1  |
| AHQ-5-9, 4762         | R.FGGEHVPNSPFQVTLALAGDQPSVOPPLR.S     | 2947.25342 | 2 | 2.14E-05 | 0.96 | 5.29 | - | 1208.7 |
| AHQ-5-1, 5807 - 5875  | R.FGGEHVPNSPFQVTLALAGDQPSVOPPLR.S     | 2947.25342 | 3 | 4.49E-08 | 0.92 | 5.02 | - | 783.7  |
| AHQ-5-13, 5381 - 5412 | R.FGGEHVPNSPFQVTLALAGDQPSVOPPLR.S     | 2947.25342 | 3 | 2.37E-06 | 0.90 | 4.50 | - | 698.3  |
| AHQ-5-11, 5223 - 5250 | R.FGGEHVPNSPFQVTLALAGDQPSVOPPLR.S     | 2947.25342 | 3 | 2.58E-05 | 0.91 | 4.66 | - | 854.8  |
| AHQ-5-2, 5657 - 5726  | R.FGGEHVPNSPFQVTLALAGDQPSVOPPLR.S     | 2947.25342 | 3 | 5.50E-08 | 0.93 | 5.11 | - | 1049.8 |
| AHQ-5-3, 5566 - 5645  | R.FGGEHVPNSPFQVTLALAGDQPSVOPPLR.S     | 2947.25342 | 2 | 1.31E-05 | 0.96 | 5.44 | - | 1145.5 |
| AHQ-5-5, 5393         | R.FGGEHVPNSPFQVTLALAGDQPSVOPPLR.S     | 2947.25342 | 2 | 7.10E-05 | 0.94 | 4.81 | - | 801.1  |
| AHQ-5-13, 5313 - 5315 | R.FGGEHVPNSPFQVTLALAGDQPSVOPPLR.S     | 2947.25342 | 3 | 7.11E-04 | 0.94 | 4.90 | - | 1009.0 |
| AHQ-5-6, 5373 - 5432  | R.FGGEHVPNSPFQVTLALAGDQPSVOPPLR.S     | 2947.25342 | 2 | 3.59E-06 | 0.93 | 3.73 | - | 1484.9 |
| AHQ-5-2, 5531 - 5603  | R.FGGEHVPNSPFQVTLALAGDQPSVOPPLR.S     | 2947.25342 | 2 | 7.87E-08 | 0.97 | 5.94 | - | 1227.8 |
| AHQ-5-5, 5389 - 5415  | R.FGGEHVPNSPFQVTLALAGDQPSVOPPLR.S     | 2947.25342 | 3 | 3.22E-06 | 0.93 | 4.65 | - | 1126.7 |
| AHQ-5-1, 5679 - 5743  | R.FGGEHVPNSPFQVTLALAGDQPSVOPPLR.S     | 2947.25342 | 3 | 1.58E-06 | 0.92 | 4.88 | - | 792.6  |
| AHQ-5-9, 4742         | R.FGGEHVPNSPFQVTLALAGDQPSVOPPLR.S     | 2947.25342 | 2 | 2.40E-04 | 0.93 | 4.29 | - | 956.7  |
| AHQ-5-12, 5408        | R.FGGEHVPNSPFQVTLALAGDQPSVOPPLR.S     | 2947.25342 | 2 | 1.52E-07 | 0.95 | 5.05 | - | 1041.4 |
| AHQ-5-3, 5638 - 5710  | R.FGGEHVPNSPFQVTLALAGDQPSVOPPLR.S     | 2947.25342 | 3 | 8.33E-08 | 0.96 | 5.71 | - | 1262.3 |
| AHQ-5-2, 5458 - 5538  | R.FGGEHVPNSPFQVTLALAGDQPSVOPPLR.S     | 2947.25342 | 3 | 6.91E-06 | 0.92 | 4.93 | - | 712.3  |
| AHQ-5-1, 5680 - 5756  | R.FGGEHVPNSPFQVTLALAGDQPSVOPPLR.S     | 2947.25342 | 2 | 2.82E-07 | 0.96 | 5.45 | - | 995.1  |
| AHQ-5-5, 4987 - 5057  | K.FNEEHIPDSPFVVPVSPSGDAR.R            | 2468.66280 | 2 | 6.04E-06 | 0.91 | 4.38 | - | 600.6  |
| AHQ-5-1, 5324         | K.FNEEHIPDSPFVVPVSPSGDAR.R            | 2468.66280 | 2 | 1.08E-06 | 0.87 | 3.61 | - | 623.0  |
| AHQ-5-7, 4806         | K.FNEEHIPDSPFVVPVSPSGDAR.R            | 2468.66280 | 2 | 2.24E-05 | 0.90 | 4.38 | - | 637.3  |
| AHQ-5-5, 3534         | K.FNGTHIPGSPFK.I                      | 1302.46259 | 2 | 2.00E-05 | 0.86 | 3.52 | - | 598.7  |
| AHQ-5-3, 3818         | K.FNGTHIPGSPFK.I                      | 1302.46259 | 2 | 1.64E-05 | 0.66 | 2.77 | - | 540.8  |
| AHQ-5-4, 3765         | K.FNGTHIPGSPFK.I                      | 1302.46259 | 1 | 3.07E-04 | 0.57 | 2.17 | - | 507.0  |
| AHQ-5-1, 3923         | K.FNGTHIPGSPFK.I                      | 1302.46259 | 2 | 9.42E-06 | 0.76 | 3.23 | - | 596.9  |
| AHQ-5-4, 3764         | K.FNGTHIPGSPFK.I                      | 1302.46259 | 2 | 9.11E-08 | 0.65 | 3.14 | - | 423.3  |
| AHQ-5-7, 3408         | K.FNGTHIPGSPFK.I                      | 1302.46259 | 1 | 7.99E-04 | 0.10 | 1.82 | - | 250.7  |
| AHQ-5-7, 3587         | K.FNGTHIPGSPFK.I                      | 1302.46259 | 2 | 7.10E-06 | 0.57 | 2.53 | - | 543.8  |
| AHQ-5-1, 3831         | K.FNGTHIPGSPFK.I                      | 1302.46259 | 2 | 6.41E-07 | 0.80 | 2.58 | - | 731.7  |
| AHQ-5-5, 2671 - 2675  | R.FVPAEMGTHTVSVK.Y                    | 1503.74821 | 2 | 6.87E-11 | 0.89 | 3.72 | - | 570.4  |
| AHQ-5-3, 2930         | R.FVPAEMGTHTVSVK.Y                    | 1503.74821 | 2 | 5.73E-06 | 0.79 | 3.12 | - | 431.7  |
| AHQ-5-4, 2885         | R.FVPAEMGTHTVSVK.Y                    | 1503.74821 | 2 | 1.61E-06 | 0.94 | 4.24 | - | 719.6  |
| AHQ-5-4, 6909 - 6974  | R.GAGSYTIMVLFADQATPTSPIR.V            | 2297.61623 | 2 | 3.38E-05 | 0.85 | 4.14 | - | 650.8  |
| AHQ-5-3, 6229 - 6297  | R.GAGSYTIMVLFADQATPTSPIR.V            | 2313.61563 | 2 | 4.61E-04 | 0.84 | 4.29 | - | 659.3  |
| AHQ-5-2, 3238 - 3309  | R.GAGTGGLGLAVEGSPSEAK.M               | 1571.71430 | 2 | 5.26E-06 | 0.93 | 4.74 | - | 724.9  |
| AHQ-5-4, 3316 - 3332  | R.GAGTGGLGLAVEGSPSEAK.M               | 1571.71430 | 2 | 3.58E-06 | 0.91 | 4.00 | - | 778.3  |
| AHQ-5-1, 3617 - 3623  | R.GAGTGGLGLAVEGSPSEAK.M               | 1571.71430 | 2 | 9.54E-06 | 0.80 | 3.24 | - | 698.9  |
| AHQ-5-2, 3329 - 3397  | R.GAGTGGLGLAVEGSPSEAK.M               | 1571.71430 | 2 | 2.84E-05 | 0.85 | 3.19 | - | 882.1  |
| AHQ-5-3, 3341 - 3413  | R.GAGTGGLGLAVEGSPSEAK.M               | 1571.71430 | 2 | 1.56E-05 | 0.93 | 4.18 | - | 870.0  |
| AHQ-5-2, 3659         | R.GAGTGGLGLAVEGSPSEAK.M               | 1571.71430 | 2 | 5.11E-07 | 0.87 | 3.26 | - | 921.3  |
| AHQ-5-2, 3509         | R.GAGTGGLGLAVEGSPSEAK.M               | 1571.71430 | 2 | 1.67E-05 | 0.74 | 2.92 | - | 616.1  |
| AHQ-5-1, 3431 - 3500  | R.GAGTGGLGLAVEGSPSEAK.M               | 1571.71430 | 2 | 1.70E-05 | 0.87 | 4.10 | - | 564.4  |
| AHQ-5-8, 2844 - 2853  | R.GAGTGGLGLAVEGSPSEAK.M               | 1571.71430 | 2 | 2.46E-05 | 0.72 | 3.35 | - | 676.3  |
| AHQ-5-6, 3096         | R.GAGTGGLGLAVEGSPSEAK.M               | 1571.71430 | 2 | 2.60E-06 | 0.86 | 3.45 | - | 795.4  |
| AHQ-5-3, 3331 - 3407  | K.KGLDVQFSGLTG.G                      | 1293.49392 | 2 | 5.57E-07 | 0.89 | 3.97 | - | 714.1  |
| AHQ-5-1, 3493         | K.KGLDVQFSGLTG.G                      | 1293.49392 | 2 | 8.28E-05 | 0.91 | 3.67 | - | 1052.9 |
| AHQ-5-2, 3419         | K.KGLDVQFSGLTG.G                      | 1293.49392 | 2 | 2.37E-06 | 0.87 | 3.44 | - | 869.3  |
| AHQ-5-2, 3209         | K.KGLDVQFSGLTG.G                      | 1293.49392 | 2 | 4.91E-06 | 0.92 | 3.73 | - | 998.3  |
| AHQ-5-3, 3330         | K.KGLDVQFSGLTG.G                      | 1293.49392 | 1 | 1.47E-04 | 0.31 | 2.02 | - | 383.9  |
| AHQ-5-9, 4396         | K.GLVEPVDVVDNADGTQTVNYPVSR.E          | 2545.74387 | 2 | 8.56E-05 | 0.74 | 3.24 | - | 560.3  |
| AHQ-5-1, 5227 - 5295  | K.GLVEPVDVVDNADGTQTVNYPVSR.E          | 2545.74387 | 2 | 4.19E-07 | 0.97 | 6.07 | - | 1544.5 |
| AHQ-5-2, 5157 - 5225  | K.GLVEPVDVVDNADGTQTVNYPVSR.E          | 2545.74387 | 3 | 9.11E-10 | 0.94 | 5.25 | - | 1120.1 |
| AHQ-5-2, 5153 - 5222  | K.GLVEPVDVVDNADGTQTVNYPVSR.E          | 2545.74387 | 2 | 1.02E-07 | 0.96 | 5.79 | - | 1024.4 |
| AHQ-5-3, 5186 - 5334  | K.GLVEPVDVVDNADGTQTVNYPVSR.E          | 2545.74387 | 2 | 6.11E-15 | 0.98 | 6.98 | - | 1686.2 |
| AHQ-5-1, 5087 - 5159  | K.GLVEPVDVVDNADGTQTVNYPVSR.E          | 2545.74387 | 2 | 9.37E-12 | 0.98 | 6.55 | - | 1560.5 |
| AHQ-5-2, 2078         | K.GTVEPQLEAR.G                        | 1100.20741 | 2 | 2.74E-06 | 0.84 | 3.30 | - | 582.5  |
| AHQ-5-4, 2121         | K.GTVEPQLEAR.G                        | 1100.20741 | 2 | 1.57E-06 | 0.89 | 3.67 | - | 624.2  |
| AHQ-5-6, 1960         | K.GTVEPQLEAR.G                        | 1100.20741 | 2 | 8.66E-05 | 0.67 | 2.87 | - | 420.6  |
| AHQ-5-3, 2129 - 2131  | K.GTVEPQLEAR.G                        | 1100.20741 | 2 | 2.19E-05 | 0.82 | 3.05 | - | 517.4  |



|                       |                               |            |   |          |      |      |   |        |
|-----------------------|-------------------------------|------------|---|----------|------|------|---|--------|
| AHQ-5-1, 2332         | K.GTVEPQLEAR.G                | 1100.20741 | 2 | 3.46E-04 | 0.74 | 2.92 | - | 440.5  |
| AHQ-5-3, 5531 - 5601  | K.HTAMVSWGVSIPNSPFR.V         | 1944.20601 | 2 | 3.15E-05 | 0.97 | 5.06 | - | 1287.5 |
| AHQ-5-2, 5135         | K.HTAMVSWGVSIPNSPFR.V         | 1960.20541 | 3 | 1.37E-06 | 0.74 | 3.67 | - | 651.7  |
| AHQ-5-3, 5798 - 5814  | K.HTAMVSWGVSIPNSPFR.V         | 1944.20601 | 2 | 1.87E-06 | 0.93 | 4.12 | - | 878.8  |
| AHQ-5-1, 5323         | K.HTAMVSWGVSIPNSPFR.V         | 1960.20541 | 2 | 2.98E-04 | 0.96 | 4.70 | - | 1337.2 |
| AHQ-5-2, 5123 - 5202  | K.HTAMVSWGVSIPNSPFR.V         | 1960.20541 | 2 | 1.85E-04 | 0.95 | 4.67 | - | 1067.2 |
| AHQ-5-3, 5225 - 5294  | K.HTAMVSWGVSIPNSPFR.V         | 1960.20541 | 2 | 1.41E-04 | 0.95 | 4.77 | - | 972.1  |
| AHQ-5-2, 5514 - 5525  | K.HTAMVSWGVSIPNSPFR.V         | 1944.20601 | 2 | 2.24E-10 | 0.98 | 6.35 | - | 1336.7 |
| AHQ-5-4, 5141         | K.HTAMVSWGVSIPNSPFR.V         | 1960.20541 | 2 | 7.71E-06 | 0.93 | 4.41 | - | 923.4  |
| AHQ-5-4, 5564 - 5565  | K.HTAMVSWGVSIPNSPFR.V         | 1944.20601 | 2 | 1.15E-04 | 0.98 | 5.68 | - | 1342.9 |
| AHQ-5-5, 5330         | K.HTAMVSWGVSIPNSPFR.V         | 1944.20601 | 2 | 5.72E-07 | 0.97 | 5.42 | - | 1305.1 |
| AHQ-5-4, 3858 - 3866  | R.IANLQTDLSGGLR.L             | 1416.56231 | 2 | 1.17E-07 | 0.87 | 3.63 | - | 1057.7 |
| AHQ-5-5, 3706         | R.IANLQTDLSGGLR.L             | 1416.56231 | 2 | 8.84E-08 | 0.92 | 3.53 | - | 1057.7 |
| AHQ-5-3, 3889         | R.IANLQTDLSGGLR.L             | 1416.56231 | 2 | 7.46E-05 | 0.89 | 3.46 | - | 875.5  |
| AHQ-5-1, 4584         | R.IANLQTDLSGGLR.L             | 1416.56231 | 2 | 2.40E-05 | 0.89 | 3.63 | - | 899.2  |
| AHQ-5-11, 3983        | R.IANLQTDLSGGLR.L             | 1416.56231 | 2 | 1.04E-04 | 0.94 | 3.98 | - | 1021.8 |
| AHQ-5-12, 4093        | R.IANLQTDLSGGLR.L             | 1416.56231 | 2 | 3.79E-05 | 0.95 | 4.49 | - | 1004.1 |
| AHQ-5-4, 4249         | R.IANLQTDLSGGLR.L             | 1416.56231 | 2 | 1.62E-04 | 0.88 | 3.52 | - | 801.6  |
| AHQ-5-1, 4363 - 4431  | R.IANLQTDLSGGLR.L             | 1416.56231 | 2 | 1.08E-04 | 0.93 | 3.91 | - | 1174.7 |
| AHQ-5-3, 4301 - 4377  | R.IANLQTDLSGGLR.L             | 1416.56231 | 2 | 5.25E-06 | 0.94 | 4.31 | - | 1051.9 |
| AHQ-5-2, 3833 - 3914  | R.IANLQTDLSGGLR.L             | 1416.56231 | 2 | 1.41E-07 | 0.92 | 3.95 | - | 915.5  |
| AHQ-5-1, 3971         | R.IANLQTDLSGGLR.L             | 1416.56231 | 2 | 3.52E-07 | 0.96 | 4.57 | - | 1341.3 |
| AHQ-5-5, 4053         | R.IANLQTDLSGGLR.L             | 1416.56231 | 2 | 1.56E-05 | 0.94 | 3.89 | - | 1142.9 |
| AHQ-5-7, 3876         | R.IANLQTDLSGGLR.L             | 1416.56231 | 2 | 1.77E-07 | 0.84 | 3.00 | - | 920.1  |
| AHQ-5-6, 3609 - 3682  | R.IANLQTDLSGGLR.L             | 1416.56231 | 2 | 3.33E-04 | 0.55 | 2.65 | - | 474.3  |
| AHQ-5-5, 4057 - 4058  | R.IANLQTDLSGGLR.L             | 1416.56231 | 1 | 8.99E-04 | 0.63 | 2.98 | - | 311.5  |
| AHQ-5-2, 4217 - 4289  | R.IANLQTDLSGGLR.L             | 1416.56231 | 2 | 5.86E-04 | 0.86 | 3.76 | - | 739.6  |
| AHQ-5-1, 4264         | R.IANLQTDLSGGLR.L             | 1416.56231 | 2 | 2.94E-06 | 0.95 | 4.29 | - | 987.7  |
| AHQ-5-2, 4229         | R.IANLQTDLSGGLR.L             | 1416.56231 | 1 | 8.05E-04 | 0.41 | 2.54 | - | 284.7  |
| AHQ-5-8, 3738         | R.IANLQTDLSGGLR.L             | 1416.56231 | 2 | 3.03E-08 | 0.95 | 3.95 | - | 1206.5 |
| AHQ-5-2, 4399 - 4479  | R.IANLQTDLSGGLR.L             | 1416.56231 | 2 | 5.01E-07 | 0.87 | 3.74 | - | 718.0  |
| AHQ-5-9, 3643         | R.IANLQTDLSGGLR.L             | 1416.56231 | 2 | 1.59E-06 | 0.88 | 2.95 | - | 1008.6 |
| AHQ-5-5, 5439 - 5457  | K.IPEISIQDMTAQVTSPSGK.T       | 2003.26361 | 3 | 3.98E-08 | 0.96 | 5.67 | - | 1167.9 |
| AHQ-5-4, 5616 - 5617  | K.IPEISIQDMTAQVTSPSGK.T       | 2003.26361 | 2 | 7.66E-11 | 0.98 | 5.63 | - | 1807.0 |
| AHQ-5-5, 5418 - 5498  | K.IPEISIQDMTAQVTSPSGK.T       | 2003.26361 | 2 | 5.74E-08 | 0.97 | 4.83 | - | 1658.6 |
| AHQ-5-6, 5378         | K.IPEISIQDMTAQVTSPSGK.T       | 2003.26361 | 2 | 6.93E-09 | 0.98 | 5.29 | - | 1581.3 |
| AHQ-5-5, 5017         | K.IPEISIQDMTAQVTSPSGK.T       | 2003.26361 | 2 | 1.48E-05 | 0.90 | 4.53 | - | 554.3  |
| AHQ-5-7, 3864         | K.IPEISIQDMTAQVTSPSGK.T       | 2019.26301 | 2 | 9.23E-05 | 0.94 | 4.18 | - | 1291.4 |
| AHQ-5-1, 5712         | K.IPEISIQDMTAQVTSPSGK.T       | 2003.26361 | 3 | 9.06E-07 | 0.88 | 4.30 | - | 771.6  |
| AHQ-5-3, 5649         | K.IPEISIQDMTAQVTSPSGK.T       | 2003.26361 | 2 | 5.76E-07 | 0.97 | 5.35 | - | 1537.9 |
| AHQ-5-11, 5156 - 5215 | K.IPEISIQDMTAQVTSPSGK.T       | 2003.26361 | 2 | 2.62E-07 | 0.94 | 4.51 | - | 1014.3 |
| AHQ-5-5, 4021 - 4069  | K.IPEISIQDMTAQVTSPSGK.T       | 2019.26301 | 2 | 5.31E-07 | 0.98 | 5.37 | - | 2091.0 |
| AHQ-5-1, 4253 - 4323  | K.IPEISIQDMTAQVTSPSGK.T       | 2019.26301 | 2 | 3.26E-05 | 0.97 | 5.18 | - | 1370.7 |
| AHQ-5-6, 3966 - 3993  | K.IPEISIQDMTAQVTSPSGK.T       | 2019.26301 | 2 | 2.08E-05 | 0.97 | 5.00 | - | 1583.9 |
| AHQ-5-8, 5060         | K.IPEISIQDMTAQVTSPSGK.T       | 2003.26361 | 2 | 4.95E-09 | 0.98 | 5.70 | - | 1527.1 |
| AHQ-5-4, 4177 - 4188  | K.IPEISIQDMTAQVTSPSGK.T       | 2019.26301 | 2 | 1.21E-04 | 0.97 | 5.02 | - | 2028.6 |
| AHQ-5-1, 5691         | K.IPEISIQDMTAQVTSPSGK.T       | 2003.26361 | 2 | 2.14E-09 | 0.97 | 5.01 | - | 1510.2 |
| AHQ-5-3, 2477         | K.IVGPSSAAVPCV.V              | 1157.36530 | 2 | 2.86E-06 | 0.90 | 3.19 | - | 1012.3 |
| AHQ-5-1, 2636         | K.IVGPSSAAVPCV.V              | 1157.36530 | 2 | 8.49E-09 | 0.94 | 3.98 | - | 1108.9 |
| AHQ-5-4, 2456         | K.IVGPSSAAVPCV.V              | 1157.36530 | 2 | 2.07E-08 | 0.77 | 2.90 | - | 635.2  |
| AHQ-5-5, 4034         | K.IVGPSSAAVPCV.V              | 2451.78478 | 3 | 8.31E-10 | 0.96 | 5.14 | - | 1534.0 |
| AHQ-5-1, 4292 - 4372  | K.IVGPSSAAVPCV.V              | 2451.78478 | 2 | 3.74E-05 | 0.92 | 4.74 | - | 422.0  |
| AHQ-5-2, 4174 - 4189  | K.IVGPSSAAVPCV.V              | 2451.78478 | 3 | 2.02E-06 | 0.92 | 4.72 | - | 1062.8 |
| AHQ-5-1, 4383 - 4451  | K.IVGPSSAAVPCV.V              | 2451.78478 | 2 | 6.03E-09 | 0.95 | 5.11 | - | 721.3  |
| AHQ-5-3, 4253 - 4322  | K.IVGPSSAAVPCV.V              | 2451.78478 | 3 | 7.67E-09 | 0.95 | 5.41 | - | 1223.1 |
| AHQ-5-3, 4257 - 4329  | K.IVGPSSAAVPCV.V              | 2451.78478 | 2 | 7.76E-06 | 0.94 | 5.62 | - | 415.9  |
| AHQ-5-1, 4295 - 4364  | K.IVGPSSAAVPCV.V              | 2451.78478 | 3 | 9.58E-11 | 0.92 | 4.75 | - | 969.2  |
| AHQ-5-2, 4258 - 4330  | K.IVGPSSAAVPCV.V              | 2451.78478 | 3 | 6.70E-11 | 0.88 | 4.04 | - | 1129.4 |
| AHQ-5-4, 4217 - 4293  | K.IVGPSSAAVPCV.V              | 2451.78478 | 2 | 2.19E-06 | 0.87 | 4.13 | - | 418.5  |
| AHQ-5-2, 4178 - 4249  | K.IVGPSSAAVPCV.V              | 2451.78478 | 2 | 1.99E-04 | 0.90 | 4.17 | - | 426.8  |
| AHQ-5-4, 4214 - 4289  | K.IVGPSSAAVPCV.V              | 2451.78478 | 3 | 3.55E-07 | 0.75 | 3.51 | - | 564.3  |
| AHQ-5-2, 4318         | K.IVGPSSAAVPCV.V              | 2451.78478 | 2 | 4.76E-05 | 0.84 | 3.56 | - | 442.4  |
| AHQ-5-6, 3972         | K.IVGPSSAAVPCV.V              | 2451.78478 | 3 | 4.90E-06 | 0.92 | 4.80 | - | 958.3  |
| AHQ-5-3, 4361         | K.IVGPSSAAVPCV.V              | 2451.78478 | 3 | 5.25E-09 | 0.74 | 3.37 | - | 675.3  |
| AHQ-5-5, 4277 - 4301  | R.KDGSQCVAYVQEPGDYEVSVK.F     | 2388.59282 | 3 | 4.40E-04 | 0.88 | 3.95 | - | 1278.9 |
| AHQ-5-1, 4501         | K.KNGQHVAASPPIVVISQSEIGDASR.V | 2577.83547 | 2 | 4.93E-04 | 0.72 | 3.35 | - | 315.0  |
| AHQ-5-6, 3952 - 4029  | K.KNGQHVAASPPIVVISQSEIGDASR.V | 2577.83547 | 2 | 1.29E-06 | 0.91 | 4.31 | - | 538.5  |
| AHQ-5-4, 4248 - 4330  | K.KNGQHVAASPPIVVISQSEIGDASR.V | 2577.83547 | 3 | 1.33E-09 | 0.97 | 6.04 | - | 1892.2 |
| AHQ-5-5, 3955         | K.KNGQHVAASPPIVVISQSEIGDASR.V | 2577.83547 | 2 | 2.23E-04 | 0.82 | 3.22 | - | 532.4  |
| AHQ-5-3, 4357 - 4429  | K.KNGQHVAASPPIVVISQSEIGDASR.V | 2577.83547 | 3 | 5.12E-11 | 0.97 | 5.81 | - | 2143.0 |
| AHQ-5-6, 3958 - 4024  | K.KNGQHVAASPPIVVISQSEIGDASR.V | 2577.83547 | 3 | 7.61E-07 | 0.94 | 4.86 | - | 1531.3 |
| AHQ-5-7, 3846 - 3914  | K.KNGQHVAASPPIVVISQSEIGDASR.V | 2577.83547 | 2 | 4.22E-05 | 0.61 | 2.88 | - | 307.9  |
| AHQ-5-5, 3998 - 4070  | K.KNGQHVAASPPIVVISQSEIGDASR.V | 2577.83547 | 3 | 2.74E-09 | 0.97 | 5.93 | - | 2236.7 |
| AHQ-5-8, 3736         | K.KNGQHVAASPPIVVISQSEIGDASR.V | 2577.83547 | 2 | 1.58E-05 | 0.89 | 3.94 | - | 540.1  |
| AHQ-5-4, 4254 - 4324  | K.KNGQHVAASPPIVVISQSEIGDASR.V | 2577.83547 | 2 | 4.05E-05 | 0.84 | 3.89 | - | 457.4  |
| AHQ-5-2, 4294         | K.KNGQHVAASPPIVVISQSEIGDASR.V | 2577.83547 | 3 | 7.94E-09 | 0.96 | 5.10 | - | 1687.5 |
| AHQ-5-1, 3475 - 3501  | K.KTHIQDNHDGTYTVAYVPDVTGR.Y   | 2588.77367 | 3 | 5.01E-05 | 0.92 | 4.09 | - | 1168.1 |
| AHQ-5-1, 3503         | K.KTHIQDNHDGTYTVAYVPDVTGR.Y   | 2588.77367 | 2 | 1.90E-06 | 0.96 | 5.51 | - | 911.2  |
| AHQ-5-6, 3025         | K.KTHIQDNHDGTYTVAYVPDVTGR.Y   | 2588.77367 | 3 | 4.33E-09 | 0.94 | 4.04 | - | 1494.1 |
| AHQ-5-1, 3604 - 3681  | K.KTHIQDNHDGTYTVAYVPDVTGR.Y   | 2588.77367 | 3 | 2.58E-04 | 0.93 | 4.77 | - | 973.9  |
| AHQ-5-1, 3635 - 3707  | K.KTHIQDNHDGTYTVAYVPDVTGR.Y   | 2588.77367 | 2 | 1.63E-06 | 0.94 | 4.66 | - | 836.6  |
| AHQ-5-4, 3474         | K.KTHIQDNHDGTYTVAYVPDVTGR.Y   | 2588.77367 | 3 | 1.58E-07 | 0.89 | 3.93 | - | 926.5  |
| AHQ-5-4, 3472         | K.KTHIQDNHDGTYTVAYVPDVTGR.Y   | 2588.77367 | 2 | 2.02E-04 | 0.86 | 3.57 | - | 534.2  |
| AHQ-5-3, 3287 - 3357  | K.KTHIQDNHDGTYTVAYVPDVTGR.Y   | 2588.77367 | 2 | 8.38E-04 | 0.90 | 4.37 | - | 423.4  |
| AHQ-5-3, 3397 - 3471  | K.KTHIQDNHDGTYTVAYVPDVTGR.Y   | 2588.77367 | 3 | 2.38E-04 | 0.93 | 4.41 | - | 1058.4 |
| AHQ-5-5, 3061         | K.KTHIQDNHDGTYTVAYVPDVTGR.Y   | 2588.77367 | 3 | 1.35E-09 | 0.93 | 4.23 | - | 1279.7 |
| AHQ-5-3, 3425 - 3503  | K.KTHIQDNHDGTYTVAYVPDVTGR.Y   | 2588.77367 | 2 | 4.21E-09 | 0.94 | 4.71 | - | 743.2  |
| AHQ-5-2, 3407 - 3433  | K.KTHIQDNHDGTYTVAYVPDVTGR.Y   | 2588.77367 | 2 | 6.41E-04 | 0.72 | 3.35 | - | 259.3  |
| AHQ-5-2, 3305 - 3378  | K.KTHIQDNHDGTYTVAYVPDVTGR.Y   | 2588.77367 | 3 | 2.85E-06 | 0.95 | 5.11 | - | 1240.4 |
| AHQ-5-3, 3557         | K.KTHIQDNHDGTYTVAYVPDVTGR.Y   | 2588.77367 | 3 | 9.47E-04 | 0.79 | 3.10 | - | 1002.1 |
| AHQ-5-3, 3578         | K.KTHIQDNHDGTYTVAYVPDVTGR.Y   | 2588.77367 | 2 | 1.44E-06 | 0.88 | 3.53 | - | 769.1  |
| AHQ-5-2, 3167 - 3230  | K.KTHIQDNHDGTYTVAYVPDVTGR.Y   | 2588.77367 | 3 | 3.55E-06 | 0.94 | 4.91 | - | 922.4  |
| AHQ-5-4, 3912         | K.LDVQFSLGTLK.G               | 1108.26945 | 1 | 3.27E-04 | 0.16 | 2.05 | - | 253.8  |
| AHQ-5-3, 3949         | K.LDVQFSLGTLK.G               | 1108.26945 | 2 | 2.46E-04 | 0.92 | 3.84 | - | 912.9  |
| AHQ-5-3, 3953         | K.LDVQFSLGTLK.G               | 1108.26945 | 1 | 1.28E-04 | 0.36 | 2.30 | - | 272.2  |
| AHQ-5-4, 3926         | K.LDVQFSLGTLK.G               | 1108.26945 | 2 | 3.11E-06 | 0.83 | 2.99 | - | 712.9  |
| AHQ-5-1, 4051         | K.LDVQFSLGTLK.G               | 1108.26945 | 2 | 3.35E-06 | 0.93 | 3.66 | - | 1129.3 |
| AHQ-5-2, 3909         | K.LDVQFSLGTLK.G               | 1108.26945 | 1 | 1.70E-04 | 0.54 | 2.63 | - | 347.0  |
| AHQ-5-2, 3897         | K.LDVQFSLGTLK.G               | 1108.26945 | 2 | 1.58E-04 | 0.94 | 3.84 | - | 926.3  |
| AHQ-5-2, 7018         | R.LLGIWQNKLPQLPITNFSR.D       | 2239.64761 | 2 | 2.05E-05 | 0.90 | 4.88 | - | 464.7  |
| AHQ-5-2, 7023         | R.LLGIWQNKLPQLPITNFSR.D       | 2239.64761 | 3 | 3.79E-05 | 0.93 | 4.91 | - | 1150.5 |
| AHQ-5-1, 5016         | K.LPQLPITNFSR.D               | 1286.50461 | 1 | 6.68E-04 | 0.56 | 2.21 | - | 339.4  |
| AHQ-5-1, 5003 - 5027  | K.LPQLPITNFSR.D               | 1286.50461 | 2 | 1.68E-05 | 0.85 | 2.63 | - | 717.6  |
| AHQ-5-4, 4924         | K.LPQLPITNFSR.D               | 1286.50461 | 2 | 3.01E-04 | 0.79 | 2.77 | - | 634.1  |
| AHQ-5-2, 5106 - 5119  | K.LPQLPITNFSR.D               | 1286.50461 | 2 | 1.91E-04 | 0.66 | 2.76 | - | 476.6  |
| AHQ-5-2, 4841 - 4917  | K.LPQLPITNFSR.D               | 1286.50461 | 2 | 1.05E-05 | 0.92 | 3.20 | - | 864.8  |
| AHQ-5-3, 5271         | K.LPQLPITNFSR.D               | 1286.50461 | 2 | 4.18E-06 | 0.70 | 2.89 | - | 368.7  |

|                       |                                   |            |   |          |      |      |   |        |
|-----------------------|-----------------------------------|------------|---|----------|------|------|---|--------|
| AHQ-5-5, 5058         | K.LPQLPITNFSR.D                   | 1286.50461 | 2 | 1.10E-04 | 0.75 | 2.61 | - | 506.0  |
| AHQ-5-2, 4847 - 4918  | K.LPQLPITNFSR.D                   | 1286.50461 | 1 | 3.45E-05 | 0.59 | 2.49 | - | 270.7  |
| AHQ-5-3, 4962         | K.LPQLPITNFSR.D                   | 1286.50461 | 2 | 1.18E-04 | 0.82 | 3.02 | - | 516.1  |
| AHQ-5-9, 4136         | K.LPQLPITNFSR.D                   | 1286.50461 | 2 | 3.20E-04 | 0.86 | 2.87 | - | 665.5  |
| AHQ-5-2, 5189         | K.LPQLPITNFSR.D                   | 1286.50461 | 2 | 1.38E-04 | 0.84 | 2.94 | - | 616.3  |
| AHQ-5-1, 5687         | K.LQVEPAVDTSGVQCYGPGIEGGGVFR.E    | 2766.03597 | 2 | 2.44E-08 | 0.91 | 3.86 | - | 786.5  |
| AHQ-5-1, 5599 - 5667  | K.LQVEPAVDTSGVQCYGPGIEGGGVFR.E    | 2766.03597 | 3 | 1.55E-12 | 0.98 | 7.22 | - | 2650.9 |
| AHQ-5-4, 5574 - 5644  | K.LQVEPAVDTSGVQCYGPGIEGGGVFR.E    | 2766.03597 | 2 | 1.55E-07 | 0.93 | 4.34 | - | 766.5  |
| AHQ-5-2, 5665 - 5737  | K.LQVEPAVDTSGVQCYGPGIEGGGVFR.E    | 2766.03597 | 2 | 2.51E-10 | 0.97 | 6.28 | - | 808.2  |
| AHQ-5-9, 4787         | K.LQVEPAVDTSGVQCYGPGIEGGGVFR.E    | 2766.03597 | 2 | 2.32E-04 | 0.82 | 3.50 | - | 524.0  |
| AHQ-5-3, 5582 - 5663  | K.LQVEPAVDTSGVQCYGPGIEGGGVFR.E    | 2766.03597 | 2 | 1.99E-09 | 0.93 | 4.46 | - | 803.4  |
| AHQ-5-12, 5358        | K.LQVEPAVDTSGVQCYGPGIEGGGVFR.E    | 2766.03597 | 2 | 7.84E-06 | 0.95 | 4.98 | - | 963.4  |
| AHQ-5-2, 5581 - 5649  | K.LQVEPAVDTSGVQCYGPGIEGGGVFR.E    | 2766.03597 | 3 | 3.82E-07 | 0.97 | 5.77 | - | 1533.4 |
| AHQ-5-1, 5589 - 5659  | K.LQVEPAVDTSGVQCYGPGIEGGGVFR.E    | 2766.03597 | 2 | 1.37E-08 | 0.95 | 5.56 | - | 723.5  |
| AHQ-5-2, 5529 - 5601  | K.LQVEPAVDTSGVQCYGPGIEGGGVFR.E    | 2766.03597 | 2 | 2.76E-08 | 0.97 | 6.12 | - | 901.5  |
| AHQ-5-6, 5386 - 5402  | K.LQVEPAVDTSGVQCYGPGIEGGGVFR.E    | 2766.03597 | 2 | 3.13E-06 | 0.88 | 3.72 | - | 661.4  |
| AHQ-5-1, 2976         | R.LRNGHVGISFVPPK.E                | 1424.67564 | 2 | 1.11E-04 | 0.82 | 2.84 | - | 630.5  |
| AHQ-5-4, 2976         | R.LRNGHVGISFVPPK.E                | 1424.67564 | 2 | 4.82E-06 | 0.75 | 2.92 | - | 586.1  |
| AHQ-5-5, 2613 - 2619  | R.LRNGHVGISFVPPK.E                | 1424.67564 | 2 | 1.12E-04 | 0.64 | 2.61 | - | 493.3  |
| AHQ-5-3, 3010 - 3086  | R.LRNGHVGISFVPPK.E                | 1424.67564 | 2 | 2.12E-04 | 0.71 | 2.84 | - | 612.7  |
| AHQ-5-5, 2726 - 2727  | R.LRNGHVGISFVPPK.E                | 1424.67564 | 2 | 1.48E-04 | 0.76 | 2.90 | - | 581.9  |
| AHQ-5-5, 2505         | R.LRNGHVGISFVPPK.E                | 1424.67564 | 2 | 8.57E-04 | 0.78 | 2.83 | - | 507.0  |
| AHQ-5-1, 4143         | R.LSPFMADIR.D                     | 1050.25664 | 2 | 4.91E-05 | 0.71 | 2.55 | - | 556.2  |
| AHQ-5-5, 3115 - 3169  | R.LTVSSLQESGLK.V                  | 1262.43499 | 2 | 3.73E-05 | 0.74 | 2.61 | - | 514.9  |
| AHQ-5-3, 3422         | R.LTVSSLQESGLK.V                  | 1262.43499 | 2 | 9.11E-05 | 0.91 | 3.13 | - | 1055.9 |
| AHQ-5-6, 3126 - 3132  | R.LTVSSLQESGLK.V                  | 1262.43499 | 2 | 9.04E-07 | 0.88 | 3.29 | - | 891.1  |
| AHQ-5-14, 5202        | R.LVSNHSLHETSSVFVDSLTK.A          | 2201.42190 | 2 | 2.56E-05 | 0.70 | 3.37 | - | 287.4  |
| AHQ-5-2, 4087         | R.LVSNHSLHETSSVFVDSLTK.A          | 2201.42190 | 2 | 1.20E-04 | 0.92 | 4.09 | - | 918.0  |
| AHQ-5-7, 3664         | R.LVSNHSLHETSSVFVDSLTK.A          | 2201.42190 | 3 | 3.09E-05 | 0.97 | 5.09 | - | 1889.2 |
| AHQ-5-1, 4619 - 4625  | R.LVSNHSLHETSSVFVDSLTK.A          | 2201.42190 | 3 | 1.45E-08 | 0.95 | 5.23 | - | 1088.1 |
| AHQ-5-5, 4159 - 4231  | R.LVSNHSLHETSSVFVDSLTK.A          | 2201.42190 | 3 | 1.48E-08 | 0.94 | 4.24 | - | 1300.3 |
| AHQ-5-5, 4157 - 4230  | R.LVSNHSLHETSSVFVDSLTK.A          | 2201.42190 | 2 | 2.10E-08 | 0.97 | 5.14 | - | 1307.6 |
| AHQ-5-12, 4010        | R.LVSNHSLHETSSVFVDSLTK.A          | 2201.42190 | 2 | 1.14E-05 | 0.90 | 4.18 | - | 620.3  |
| AHQ-5-3, 4174         | R.LVSNHSLHETSSVFVDSLTK.A          | 2201.42190 | 2 | 4.58E-05 | 0.97 | 5.94 | - | 1180.5 |
| AHQ-5-1, 4601 - 4608  | R.LVSNHSLHETSSVFVDSLTK.A          | 2201.42190 | 2 | 1.29E-10 | 0.97 | 5.32 | - | 1531.6 |
| AHQ-5-1, 4309         | R.LVSNHSLHETSSVFVDSLTK.A          | 2201.42190 | 3 | 4.05E-06 | 0.97 | 5.79 | - | 1841.7 |
| AHQ-5-5, 3841 - 3915  | R.LVSNHSLHETSSVFVDSLTK.A          | 2201.42190 | 3 | 2.83E-05 | 0.95 | 4.54 | - | 1398.9 |
| AHQ-5-8, 3609         | R.LVSNHSLHETSSVFVDSLTK.A          | 2201.42190 | 3 | 1.60E-05 | 0.90 | 4.07 | - | 972.1  |
| AHQ-5-11, 4171        | R.LVSNHSLHETSSVFVDSLTK.A          | 2201.42190 | 3 | 3.38E-04 | 0.89 | 3.89 | - | 928.1  |
| AHQ-5-4, 4429         | R.LVSNHSLHETSSVFVDSLTK.A          | 2201.42190 | 2 | 4.55E-10 | 0.96 | 5.70 | - | 858.6  |
| AHQ-5-8, 3612         | R.LVSNHSLHETSSVFVDSLTK.A          | 2201.42190 | 2 | 3.46E-10 | 0.98 | 6.12 | - | 1668.2 |
| AHQ-5-13-, 4072       | R.LVSNHSLHETSSVFVDSLTK.A          | 2201.42190 | 2 | 2.47E-07 | 0.96 | 5.24 | - | 1059.8 |
| AHQ-5-11, 4164        | R.LVSNHSLHETSSVFVDSLTK.A          | 2201.42190 | 2 | 1.87E-10 | 0.95 | 4.47 | - | 1100.1 |
| AHQ-5-6, 4137         | R.LVSNHSLHETSSVFVDSLTK.A          | 2201.42190 | 2 | 2.58E-04 | 0.88 | 3.30 | - | 654.1  |
| AHQ-5-5, 3702         | R.LVSNHSLHETSSVFVDSLTK.A          | 2201.42190 | 2 | 9.42E-05 | 0.87 | 3.76 | - | 601.4  |
| AHQ-5-3, 4525         | R.LVSNHSLHETSSVFVDSLTK.A          | 2201.42190 | 2 | 7.11E-06 | 0.91 | 4.14 | - | 879.5  |
| AHQ-5-7, 3656         | R.LVSNHSLHETSSVFVDSLTK.A          | 2201.42190 | 2 | 2.29E-05 | 0.92 | 4.40 | - | 880.0  |
| AHQ-5-1, 4424         | R.LVSNHSLHETSSVFVDSLTK.A          | 2201.42190 | 3 | 4.57E-05 | 0.88 | 3.54 | - | 965.9  |
| AHQ-5-5, 3821 - 3897  | R.LVSNHSLHETSSVFVDSLTK.A          | 2201.42190 | 2 | 7.85E-07 | 0.98 | 6.30 | - | 1463.3 |
| AHQ-5-7, 3980         | R.LVSNHSLHETSSVFVDSLTK.A          | 2201.42190 | 2 | 1.71E-06 | 0.95 | 5.00 | - | 824.3  |
| AHQ-5-1, 4421         | R.LVSNHSLHETSSVFVDSLTK.A          | 2201.42190 | 2 | 7.02E-08 | 0.93 | 4.08 | - | 1189.1 |
| AHQ-5-14, 4829        | R.LVSNHSLHETSSVFVDSLTK.A          | 2201.42190 | 2 | 4.88E-05 | 0.93 | 4.71 | - | 812.7  |
| AHQ-5-4, 4081 - 4149  | R.LVSNHSLHETSSVFVDSLTK.A          | 2201.42190 | 2 | 3.78E-08 | 0.97 | 5.28 | - | 1266.2 |
| AHQ-5-13, 4156 - 4161 | R.LVSNHSLHETSSVFVDSLTK.A          | 2201.42190 | 3 | 4.47E-13 | 0.98 | 6.11 | - | 1725.7 |
| AHQ-5-6, 3796         | R.LVSNHSLHETSSVFVDSLTK.A          | 2201.42190 | 2 | 1.01E-06 | 0.97 | 5.30 | - | 1337.9 |
| AHQ-5-4, 4066         | R.LVSNHSLHETSSVFVDSLTK.A          | 2201.42190 | 3 | 4.48E-09 | 0.97 | 5.45 | - | 1579.6 |
| AHQ-5-1, 4280         | R.LVSNHSLHETSSVFVDSLTK.A          | 2201.42190 | 2 | 7.46E-06 | 0.97 | 5.62 | - | 1057.3 |
| AHQ-5-13, 4157        | R.LVSNHSLHETSSVFVDSLTK.A          | 2201.42190 | 2 | 4.22E-09 | 0.97 | 5.36 | - | 1472.4 |
| AHQ-5-4, 4065         | R.LVSNHSLHETSSVFVDSLTK.A          | 2201.42190 | 2 | 1.66E-08 | 0.96 | 5.32 | - | 1068.0 |
| AHQ-5-5, 3967         | R.LVSNHSLHETSSVFVDSLTK.A          | 2201.42190 | 2 | 6.27E-06 | 0.69 | 3.47 | - | 364.5  |
| AHQ-5-11, 3887 - 3888 | R.LVSNHSLHETSSVFVDSLTK.A          | 2201.42190 | 2 | 3.34E-05 | 0.96 | 5.24 | - | 865.1  |
| AHQ-5-5, 2378         | K.MDCQCEPEGYR.V                   | 1447.55375 | 2 | 6.98E-08 | 0.91 | 3.37 | - | 871.6  |
| AHQ-5-4, 2438 - 2509  | K.MDCQCEPEGYR.V                   | 1447.55375 | 2 | 9.80E-06 | 0.89 | 3.61 | - | 701.9  |
| AHQ-5-5, 2383         | K.MDCQCEPEGYR.V                   | 1447.55375 | 1 | 1.23E-06 | 0.34 | 2.33 | - | 158.5  |
| AHQ-5-4, 2981         | R.NGHVGISFVPPK.E                  | 1155.33104 | 1 | 6.23E-07 | 0.39 | 2.17 | - | 473.1  |
| AHQ-5-4, 3201         | R.NGHVGISFVPPK.E                  | 1155.33104 | 2 | 9.39E-05 | 0.75 | 2.84 | - | 711.6  |
| AHQ-5-5, 2762         | R.NGHVGISFVPPK.E                  | 1155.33104 | 1 | 3.36E-07 | 0.61 | 2.54 | - | 436.8  |
| AHQ-5-4, 3188         | R.NGHVGISFVPPK.E                  | 1155.33104 | 1 | 1.38E-06 | 0.40 | 2.31 | - | 291.2  |
| AHQ-5-5, 2981 - 2982  | R.NGHVGISFVPPK.E                  | 1155.33104 | 1 | 5.62E-05 | 0.21 | 2.08 | - | 271.1  |
| AHQ-5-1, 5037         | K.NGOHVASSPIPVVISQSEIGDASR.V      | 2449.66256 | 2 | 1.06E-05 | 0.55 | 2.54 | - | 393.6  |
| AHQ-5-4, 4846         | K.NGOHVASSPIPVVISQSEIGDASR.V      | 2449.66256 | 3 | 1.28E-04 | 0.93 | 4.21 | - | 1819.0 |
| AHQ-5-1, 4901         | K.NGOHVASSPIPVVISQSEIGDASR.V      | 2449.66256 | 2 | 3.74E-06 | 0.95 | 4.26 | - | 1123.9 |
| AHQ-5-2, 1799         | K.RAEFTVETR.S                     | 1109.21754 | 2 | 1.08E-05 | 0.89 | 3.38 | - | 703.7  |
| AHQ-5-1, 2157         | K.RAEFTVETR.S                     | 1109.21754 | 2 | 1.27E-05 | 0.94 | 3.70 | - | 1025.3 |
| AHQ-5-5, 2682 - 2755  | R.RAPSVANVGSCHDSLK.I              | 1813.02884 | 3 | 6.22E-04 | 0.93 | 4.10 | - | 1459.7 |
| AHQ-5-1, 3940         | K.RIANLQTLDSL DGLR.L              | 1572.74866 | 2 | 1.02E-06 | 0.94 | 4.14 | - | 1136.3 |
| AHQ-5-2, 3710 - 3773  | K.RIANLQTLDSL DGLR.L              | 1572.74866 | 2 | 5.95E-09 | 0.88 | 4.10 | - | 472.7  |
| AHQ-5-4, 2798 - 2809  | R.RLTVSSLQESGLK.V                 | 1418.62134 | 2 | 4.29E-04 | 0.96 | 4.48 | - | 1284.1 |
| AHQ-5-2, 2853         | R.RLTVSSLQESGLK.V                 | 1418.62134 | 2 | 5.92E-05 | 0.97 | 4.87 | - | 2089.0 |
| AHQ-5-7, 2567 - 2570  | R.RLTVSSLQESGLK.V                 | 1418.62134 | 2 | 5.48E-05 | 0.98 | 4.57 | - | 2363.0 |
| AHQ-5-1, 3095         | R.RLTVSSLQESGLK.V                 | 1418.62134 | 2 | 3.42E-04 | 0.97 | 4.51 | - | 2238.5 |
| AHQ-5-4, 2898         | R.RLTVSSLQESGLK.V                 | 1418.62134 | 2 | 6.72E-06 | 0.98 | 4.57 | - | 2833.1 |
| AHQ-5-1, 7460 - 7468  | K.SADFFVVEAIGDDVGTGLGFSVEGSPQAK.I | 2696.90399 | 3 | 1.19E-05 | 0.95 | 5.45 | - | 1341.7 |
| AHQ-5-3, 7622 - 7687  | K.SADFFVVEAIGDDVGTGLGFSVEGSPQAK.I | 2696.90399 | 3 | 4.42E-07 | 0.78 | 3.85 | - | 709.0  |
| AHQ-5-1, 7317 - 7397  | K.SADFFVVEAIGDDVGTGLGFSVEGSPQAK.I | 2696.90399 | 3 | 2.58E-08 | 0.87 | 4.34 | - | 815.8  |
| AHQ-5-2, 3829 - 3901  | R.SAGQGEVLVYVEDPAGHQEEAK.V        | 2314.45074 | 3 | 1.73E-10 | 0.97 | 5.31 | - | 1974.3 |
| AHQ-5-3, 3898 - 3969  | R.SAGQGEVLVYVEDPAGHQEEAK.V        | 2314.45074 | 2 | 5.48E-05 | 0.88 | 3.99 | - | 583.2  |
| AHQ-5-2, 3823 - 3893  | R.SAGQGEVLVYVEDPAGHQEEAK.V        | 2314.45074 | 2 | 2.33E-06 | 0.94 | 4.89 | - | 729.6  |
| AHQ-5-5, 3753         | R.SAGQGEVLVYVEDPAGHQEEAK.V        | 2314.45074 | 2 | 5.96E-06 | 0.78 | 3.52 | - | 469.9  |
| AHQ-5-3, 4170         | R.SAGQGEVLVYVEDPAGHQEEAK.V        | 2314.45074 | 2 | 6.31E-07 | 0.85 | 3.86 | - | 631.3  |
| AHQ-5-1, 4015 - 4083  | R.SAGQGEVLVYVEDPAGHQEEAK.V        | 2314.45074 | 2 | 6.78E-07 | 0.88 | 4.24 | - | 624.3  |
| AHQ-5-2, 4051         | R.SAGQGEVLVYVEDPAGHQEEAK.V        | 2314.45074 | 3 | 3.79E-06 | 0.86 | 3.54 | - | 967.3  |
| AHQ-5-5, 3733         | R.SAGQGEVLVYVEDPAGHQEEAK.V        | 2314.45074 | 3 | 1.22E-08 | 0.93 | 4.21 | - | 1147.7 |
| AHQ-5-9, 3340         | R.SAGQGEVLVYVEDPAGHQEEAK.V        | 2314.45074 | 2 | 2.28E-04 | 0.63 | 2.94 | - | 439.5  |
| AHQ-5-3, 3907         | R.SAGQGEVLVYVEDPAGHQEEAK.V        | 2314.45074 | 3 | 2.10E-06 | 0.96 | 4.59 | - | 1690.6 |
| AHQ-5-2, 4043 - 4118  | R.SAGQGEVLVYVEDPAGHQEEAK.V        | 2314.45074 | 2 | 9.10E-06 | 0.95 | 5.29 | - | 631.9  |
| AHQ-5-1, 4151 - 4220  | R.SAGQGEVLVYVEDPAGHQEEAK.V        | 2314.45074 | 2 | 1.21E-05 | 0.89 | 4.30 | - | 611.0  |
| AHQ-5-4, 3868 - 3937  | R.SAGQGEVLVYVEDPAGHQEEAK.V        | 2314.45074 | 2 | 5.30E-08 | 0.92 | 4.47 | - | 677.8  |
| AHQ-5-3, 3990         | R.SAGQGEVLVYVEDPAGHQEEAK.V        | 2314.45074 | 3 | 9.62E-07 | 0.84 | 3.60 | - | 754.5  |
| AHQ-5-2, 4218         | R.SAGQGEVLVYVEDPAGHQEEAK.V        | 2314.45074 | 2 | 5.74E-07 | 0.78 | 3.73 | - | 445.0  |
| AHQ-5-1, 4017 - 4087  | R.SAGQGEVLVYVEDPAGHQEEAK.V        | 2314.45074 | 3 | 5.13E-06 | 0.96 | 5.41 | - | 1489.6 |
| AHQ-5-3, 4053         | R.SAGQGEVLVYVEDPAGHQEEAK.V        | 2314.45074 | 2 | 5.60E-05 | 0.85 | 3.48 | - | 644.3  |
| AHQ-5-5, 3582 - 3654  | R.SAGQGEVLVYVEDPAGHQEEAK.V        | 2314.45074 | 3 | 2.29E-09 | 0.89 | 3.58 | - | 1202.6 |
| AHQ-5-8, 3441         | R.SAGQGEVLVYVEDPAGHQEEAK.V        | 2314.45074 | 2 | 3.37E-07 | 0.90 | 4.09 | - | 639.7  |
| AHQ-5-2, 4037         | R.SAGQGEVLVYVEDPAGHQEEAK.V        | 2314.45074 | 2 | 2.23E-07 | 0.93 | 5.10 | - | 606.4  |
| AHQ-5-2, 3961         | R.SAGQGEVLVYVEDPAGHQEEAK.V        | 2314.45074 | 2 | 6.53E-07 | 0.91 | 4.79 | - | 620.0  |
| AHQ-5-5, 3661         | R.SAGQGEVLVYVEDPAGHQEEAK.V        | 2314.45074 | 2 | 1.23E-07 | 0.94 | 5.30 | - | 630.3  |

|                        |                              |            |   |          |      |      |   |        |
|------------------------|------------------------------|------------|---|----------|------|------|---|--------|
| AHQ-5-4, 3869 - 3948   | R.SAGQGEVLVYVEDPAGHQEEAK.V   | 2314.45074 | 3 | 6.18E-09 | 0.92 | 4.27 | - | 1129.9 |
| AHQ-5-6, 3128          | K.SPFVEYVDK.S                | 1084.20321 | 1 | 2.39E-05 | 0.80 | 3.20 | - | 583.5  |
| AHQ-5-7, 2995          | K.SPFVEYVDK.S                | 1084.20321 | 1 | 2.49E-04 | 0.11 | 1.82 | - | 205.8  |
| AHQ-5-5, 3157          | K.SPFVEYVDK.S                | 1084.20321 | 2 | 1.38E-05 | 0.86 | 2.84 | - | 1579.9 |
| AHQ-5-5, 3149 - 3173   | K.SPFVEYVDK.S                | 1084.20321 | 1 | 1.27E-04 | 0.60 | 1.88 | - | 1007.7 |
| AHQ-5-4, 3341          | K.SPFVEYVDK.S                | 1084.20321 | 1 | 8.55E-05 | 0.82 | 2.99 | - | 778.8  |
| AHQ-5-2, 3255 - 3326   | K.SPFVEYVDK.S                | 1084.20321 | 1 | 4.04E-06 | 0.87 | 3.44 | - | 829.0  |
| AHQ-5-4, 3342          | K.SPFVEYVDK.S                | 1084.20321 | 2 | 1.46E-05 | 0.89 | 3.23 | - | 835.2  |
| AHQ-5-3, 3358          | K.SPFVEYVDK.S                | 1084.20321 | 2 | 4.31E-06 | 0.92 | 3.29 | - | 1132.6 |
| AHQ-5-2, 3247 - 3317   | K.SPFVEYVDK.S                | 1084.20321 | 1 | 3.32E-04 | 0.69 | 2.41 | - | 960.6  |
| AHQ-5-2, 3254 - 3325   | K.SPFVEYVDK.S                | 1084.20321 | 2 | 5.45E-06 | 0.93 | 3.34 | - | 1086.8 |
| AHQ-5-1, 3435 - 3492   | K.SPFVEYVDK.S                | 1084.20321 | 2 | 9.89E-06 | 0.94 | 3.51 | - | 1167.0 |
| AHQ-5-3, 3346          | K.SPFVEYVDK.S                | 1084.20321 | 1 | 7.92E-04 | 0.72 | 2.99 | - | 666.6  |
| AHQ-5-4, 3329          | K.SPFVEYVDK.S                | 1084.20321 | 1 | 3.75E-06 | 0.69 | 2.37 | - | 882.0  |
| AHQ-5-1, 3105          | K.SPFVEYVDK.S                | 1757.87886 | 2 | 1.29E-04 | 0.96 | 4.37 | - | 1539.5 |
| AHQ-5-3, 2977          | K.SPFVEYVDK.S                | 1757.87886 | 2 | 4.19E-04 | 0.80 | 3.26 | - | 639.9  |
| AHQ-5-3, 5077 - 5157   | K.SPFVAVPSLDLSK.I            | 1534.73557 | 2 | 3.26E-07 | 0.93 | 4.65 | - | 751.5  |
| AHQ-5-3, 4933          | K.SPFVAVPSLDLSK.I            | 1534.73557 | 2 | 1.38E-04 | 0.73 | 3.52 | - | 517.6  |
| AHQ-5-4, 5029 - 5102   | K.SPFVAVPSLDLSK.I            | 1534.73557 | 2 | 1.25E-07 | 0.93 | 4.23 | - | 1002.4 |
| AHQ-5-2, 4873          | K.SPFVAVPSLDLSK.I            | 1534.73557 | 2 | 8.58E-05 | 0.87 | 3.76 | - | 697.8  |
| AHQ-5-2, 5010 - 5077   | K.SPFVAVPSLDLSK.I            | 1534.73557 | 2 | 1.31E-06 | 0.95 | 3.96 | - | 1271.7 |
| AHQ-5-4, 3448 - 3468   | R.SPYTTVTGGACNPSACR.A        | 1871.04208 | 2 | 8.95E-06 | 0.93 | 4.35 | - | 580.4  |
| AHQ-5-6, 3252          | R.SPYTTVTGGACNPSACR.A        | 1871.04208 | 2 | 1.15E-06 | 0.93 | 4.48 | - | 611.1  |
| AHQ-5-1, 3504 - 3579   | R.SPYTTVTGGACNPSACR.A        | 1871.04208 | 2 | 6.47E-04 | 0.91 | 4.31 | - | 552.4  |
| AHQ-5-2, 3501          | R.SPYTTVTGGACNPSACR.A        | 1871.04208 | 2 | 4.41E-06 | 0.94 | 4.76 | - | 772.5  |
| AHQ-5-5, 3247 - 3321   | R.SPYTTVTGGACNPSACR.A        | 1871.04208 | 2 | 8.45E-06 | 0.92 | 4.26 | - | 535.6  |
| AHQ-5-3, 3427 - 3481   | R.SPYTTVTGGACNPSACR.A        | 1871.04208 | 2 | 7.30E-06 | 0.93 | 4.32 | - | 695.7  |
| AHQ-5-1, 2891          | K.SQGDASKVTAQPGPLEPSGNIANK.T | 2327.49419 | 2 | 3.89E-07 | 0.38 | 2.56 | - | 196.0  |
| AHQ-5-14-, 2107 - 2187 | K.SSFTVDCSK.A                | 1032.10676 | 1 | 9.54E-05 | 0.35 | 2.41 | - | 169.6  |
| AHQ-5-14, 2930         | K.SSFTVDCSK.A                | 1032.10676 | 1 | 4.19E-04 | 0.30 | 1.92 | - | 331.6  |
| AHQ-5-6, 4732          | R.TFSVWYVPEVTGTHK.V          | 1751.96228 | 3 | 6.50E-06 | 0.76 | 3.40 | - | 451.4  |
| AHQ-5-2, 4963          | R.TFSVWYVPEVTGTHK.V          | 1751.96228 | 3 | 3.83E-05 | 0.73 | 3.51 | - | 523.3  |
| AHQ-5-4, 5018          | R.TFSVWYVPEVTGTHK.V          | 1751.96228 | 3 | 1.29E-05 | 0.76 | 3.48 | - | 468.4  |
| AHQ-5-5, 2769          | K.TGVAVNKPAFTVDAK.H          | 1647.85391 | 3 | 7.04E-06 | 0.80 | 3.17 | - | 772.1  |
| AHQ-5-2, 2863 - 2899   | K.TGVAVNKPAFTVDAK.H          | 1647.85391 | 3 | 4.31E-09 | 0.92 | 4.16 | - | 954.9  |
| AHQ-5-3, 2965          | K.TGVAVNKPAFTVDAK.H          | 1647.85391 | 3 | 3.32E-09 | 0.93 | 3.97 | - | 991.5  |
| AHQ-5-1, 3257          | K.TGVAVNKPAFTVDAK.H          | 1647.85391 | 2 | 5.92E-04 | 0.26 | 2.69 | - | 277.1  |
| AHQ-5-4, 2945          | K.TGVAVNKPAFTVDAK.H          | 1647.85391 | 3 | 5.41E-08 | 0.84 | 3.68 | - | 564.7  |
| AHQ-5-3, 2929 - 2954   | K.TGVAVNKPAFTVDAK.H          | 1647.85391 | 2 | 4.57E-04 | 0.86 | 3.63 | - | 667.1  |
| AHQ-5-1, 2892          | R.TGVELGKPTHFTVNAK.A         | 1699.93205 | 2 | 1.48E-04 | 0.91 | 4.18 | - | 609.5  |
| AHQ-5-3, 2703          | R.TGVELGKPTHFTVNAK.A         | 1699.93205 | 3 | 2.83E-06 | 0.42 | 3.20 | - | 533.5  |
| AHQ-5-1, 3001 - 3077   | R.TGVELGKPTHFTVNAK.A         | 1699.93205 | 2 | 2.54E-04 | 0.76 | 3.25 | - | 526.4  |
| AHQ-5-2, 2825          | R.TGVELGKPTHFTVNAK.A         | 1699.93205 | 2 | 5.17E-06 | 0.83 | 3.49 | - | 616.4  |
| AHQ-5-2, 2571          | R.TGVELGKPTHFTVNAK.A         | 1699.93205 | 2 | 2.20E-05 | 0.92 | 4.26 | - | 634.4  |
| AHQ-5-4, 2657          | R.TGVELGKPTHFTVNAK.A         | 1699.93205 | 3 | 1.29E-04 | 0.81 | 3.54 | - | 777.1  |
| AHQ-5-5, 2766 - 2838   | K.THEAIEVEGENHTYCI.R.F       | 2060.19046 | 2 | 3.44E-07 | 0.98 | 6.41 | - | 1760.8 |
| AHQ-5-4, 3000 - 3012   | K.THEAIEVEGENHTYCI.R.F       | 2060.19046 | 2 | 4.56E-11 | 0.98 | 5.68 | - | 1887.0 |
| AHQ-5-3, 3045          | K.THEAIEVEGENHTYCI.R.F       | 2060.19046 | 2 | 2.10E-10 | 0.97 | 4.70 | - | 2135.5 |
| AHQ-5-1, 3129          | K.THEAIEVEGENHTYCI.R.F       | 2060.19046 | 2 | 6.57E-09 | 0.97 | 5.08 | - | 1668.7 |
| AHQ-5-6, 2756 - 2834   | K.THEAIEVEGENHTYCI.R.F       | 2060.19046 | 3 | 9.77E-12 | 0.94 | 4.76 | - | 1037.7 |
| AHQ-5-1, 3135 - 3140   | K.THEAIEVEGENHTYCI.R.F       | 2060.19046 | 3 | 8.66E-05 | 0.91 | 3.99 | - | 934.1  |
| AHQ-5-2, 2974          | K.THEAIEVEGENHTYCI.R.F       | 2060.19046 | 2 | 5.25E-07 | 0.92 | 4.24 | - | 905.1  |
| AHQ-5-1, 3260          | K.THEAIEVEGENHTYCI.R.F       | 2060.19046 | 2 | 6.77E-12 | 0.98 | 5.54 | - | 2257.0 |
| AHQ-5-7, 2760          | K.THEAIEVEGENHTYCI.R.F       | 2060.19046 | 2 | 1.38E-06 | 0.95 | 4.46 | - | 923.3  |
| AHQ-5-7, 2671 - 2744   | K.THEAIEVEGENHTYCI.R.F       | 2060.19046 | 2 | 7.45E-06 | 0.98 | 5.84 | - | 1500.4 |
| AHQ-5-4, 2938 - 3017   | K.THEAIEVEGENHTYCI.R.F       | 2060.19046 | 3 | 6.85E-13 | 0.94 | 4.63 | - | 1176.8 |
| AHQ-5-6, 2833 - 2848   | K.THEAIEVEGENHTYCI.R.F       | 2060.19046 | 2 | 4.86E-07 | 0.97 | 5.26 | - | 1549.1 |
| AHQ-5-1, 3924          | K.THQDNDHGTYYVAVPDTGR.Y      | 2460.60076 | 3 | 2.11E-04 | 0.82 | 3.62 | - | 559.4  |
| AHQ-5-13-, 3043        | R.TPCEEILVK.H                | 1090.27249 | 2 | 6.17E-06 | 0.89 | 3.19 | - | 1018.5 |
| AHQ-5-5, 2907          | R.TPCEEILVK.H                | 1090.27249 | 1 | 8.50E-04 | 0.74 | 3.22 | - | 528.3  |
| AHQ-5-13, 3173 - 3175  | R.TPCEEILVK.H                | 1090.27249 | 2 | 5.35E-06 | 0.87 | 3.53 | - | 772.5  |
| AHQ-5-7, 2806          | R.TPCEEILVK.H                | 1090.27249 | 2 | 6.35E-04 | 0.70 | 2.84 | - | 563.7  |
| AHQ-5-2, 3041          | R.TPCEEILVK.H                | 1090.27249 | 2 | 1.05E-04 | 0.71 | 2.62 | - | 630.1  |
| AHQ-5-14-, 2981 - 2995 | R.TPCEEILVK.H                | 1090.27249 | 2 | 5.04E-05 | 0.92 | 3.25 | - | 1025.5 |
| AHQ-5-14, 3849 - 3904  | R.TPCEEILVK.H                | 1090.27249 | 1 | 5.46E-06 | 0.44 | 2.51 | - | 372.5  |
| AHQ-5-14, 3840 - 3896  | R.TPCEEILVK.H                | 1090.27249 | 2 | 3.17E-06 | 0.84 | 3.32 | - | 606.2  |
| AHQ-5-1, 3216 - 3217   | R.TPCEEILVK.H                | 1090.27249 | 2 | 2.75E-04 | 0.88 | 3.22 | - | 858.3  |
| AHQ-5-4, 3058          | R.TPCEEILVK.H                | 1090.27249 | 2 | 2.25E-06 | 0.86 | 2.99 | - | 843.5  |
| AHQ-5-4, 3061          | R.TPCEEILVK.H                | 1090.27249 | 1 | 1.23E-05 | 0.38 | 2.57 | - | 418.4  |
| AHQ-5-6, 2892          | R.TPCEEILVK.H                | 1090.27249 | 2 | 2.19E-05 | 0.76 | 2.95 | - | 633.4  |
| AHQ-5-2, 3026          | R.TPCEEILVK.H                | 1090.27249 | 1 | 1.03E-05 | 0.26 | 2.25 | - | 390.2  |
| AHQ-5-3, 3241 - 3309   | R.VANPSGNLTETYVQDR.G         | 1764.87462 | 2 | 2.93E-09 | 0.95 | 4.76 | - | 1036.7 |
| AHQ-5-2, 3175 - 3245   | R.VANPSGNLTETYVQDR.G         | 1764.87462 | 2 | 9.43E-11 | 0.91 | 3.70 | - | 658.9  |
| AHQ-5-2, 3023 - 3093   | R.VANPSGNLTETYVQDR.G         | 1764.87462 | 2 | 8.04E-10 | 0.95 | 4.40 | - | 1100.3 |
| AHQ-5-4, 3462 - 3470   | R.VANPSGNLTETYVQDR.G         | 1764.87462 | 2 | 2.26E-12 | 0.94 | 4.30 | - | 866.5  |
| AHQ-5-5, 3109          | R.VANPSGNLTETYVQDR.G         | 1764.87462 | 2 | 4.96E-13 | 0.96 | 4.92 | - | 969.2  |
| AHQ-5-2, 3541          | R.VANPSGNLTETYVQDR.G         | 1764.87462 | 2 | 1.03E-12 | 0.87 | 3.52 | - | 608.5  |
| AHQ-5-4, 3277          | R.VANPSGNLTETYVQDR.G         | 1764.87462 | 2 | 8.04E-11 | 0.94 | 4.25 | - | 1002.7 |
| AHQ-5-2, 3401 - 3469   | R.VANPSGNLTETYVQDR.G         | 1764.87462 | 2 | 3.60E-12 | 0.94 | 4.26 | - | 979.8  |
| AHQ-5-3, 3426 - 3501   | R.VANPSGNLTETYVQDR.G         | 1764.87462 | 2 | 5.15E-11 | 0.94 | 4.39 | - | 981.1  |
| AHQ-5-6, 3045          | R.VANPSGNLTETYVQDR.G         | 1764.87462 | 2 | 1.91E-08 | 0.93 | 4.01 | - | 890.8  |
| AHQ-5-1, 3519 - 3589   | R.VANPSGNLTETYVQDR.G         | 1764.87462 | 2 | 1.43E-09 | 0.96 | 4.76 | - | 1266.8 |
| AHQ-5-2, 3315 - 3330   | R.VANPSGNLTETYVQDR.G         | 1764.87462 | 2 | 1.62E-09 | 0.95 | 4.44 | - | 1058.6 |
| AHQ-5-3, 3577          | R.VANPSGNLTETYVQDR.G         | 1764.87462 | 2 | 7.39E-06 | 0.89 | 3.65 | - | 732.2  |
| AHQ-5-1, 3345 - 3415   | R.VANPSGNLTETYVQDR.G         | 1764.87462 | 2 | 8.12E-12 | 0.94 | 4.52 | - | 786.5  |
| AHQ-5-1, 3221          | R.VANPSGNLTETYVQDR.G         | 1764.87462 | 2 | 2.68E-09 | 0.93 | 4.19 | - | 831.6  |
| AHQ-5-4, 2738 - 2741   | K.VAQPITDNDKDGTVTVR.Y        | 1816.00621 | 2 | 4.68E-08 | 0.90 | 3.85 | - | 739.6  |
| AHQ-5-13-, 2625        | K.VAQPITDNDKDGTVTVR.Y        | 1816.00621 | 2 | 8.50E-05 | 0.77 | 3.31 | - | 515.1  |
| AHQ-5-5, 2401          | K.VAQPITDNDKDGTVTVR.Y        | 1816.00621 | 2 | 3.48E-07 | 0.87 | 3.86 | - | 476.8  |
| AHQ-5-2, 2731          | K.VAQPITDNDKDGTVTVR.Y        | 1816.00621 | 2 | 2.63E-07 | 0.86 | 3.87 | - | 456.3  |
| AHQ-5-1, 2899          | K.VAQPITDNDKDGTVTVR.Y        | 1816.00621 | 3 | 4.68E-04 | 0.72 | 3.14 | - | 431.8  |
| AHQ-5-5, 2567          | K.VAQPITDNDKDGTVTVR.Y        | 1816.00621 | 2 | 5.29E-07 | 0.87 | 3.85 | - | 599.9  |
| AHQ-5-1, 2893 - 2900   | K.VAQPITDNDKDGTVTVR.Y        | 1816.00621 | 2 | 2.81E-07 | 0.91 | 4.33 | - | 613.2  |
| AHQ-5-10, 2399         | K.VAQPITDNDKDGTVTVR.Y        | 1816.00621 | 2 | 4.21E-04 | 0.85 | 3.64 | - | 564.0  |
| AHQ-5-10, 2556 - 2559  | K.VAQPITDNDKDGTVTVR.Y        | 1816.00621 | 2 | 2.04E-10 | 0.87 | 3.85 | - | 635.0  |
| AHQ-5-4, 2514          | K.VAQPITDNDKDGTVTVR.Y        | 1816.00621 | 2 | 4.82E-06 | 0.87 | 4.08 | - | 585.5  |
| AHQ-5-12, 2738         | K.VAQPITDNDKDGTVTVR.Y        | 1816.00621 | 2 | 2.95E-05 | 0.73 | 3.04 | - | 495.6  |
| AHQ-5-3, 2794          | K.VAQPITDNDKDGTVTVR.Y        | 1816.00621 | 2 | 1.96E-05 | 0.87 | 3.87 | - | 616.4  |
| AHQ-5-8, 2230          | K.VAQPITDNDKDGTVTVR.Y        | 1816.00621 | 2 | 4.02E-04 | 0.75 | 3.00 | - | 527.3  |
| AHQ-5-11, 2676 - 2688  | K.VAQPITDNDKDGTVTVR.Y        | 1816.00621 | 2 | 8.83E-04 | 0.82 | 3.63 | - | 435.4  |
| AHQ-5-1, 3823          | K.VDINTEDELDGTCR.V           | 1638.69283 | 2 | 3.03E-07 | 0.89 | 3.14 | - | 980.2  |
| AHQ-5-8, 3386 - 3396   | K.VDINTEDELDGTCR.V           | 1638.69283 | 2 | 1.44E-04 | 0.90 | 3.70 | - | 1062.5 |
| AHQ-5-2, 3423          | K.VDINTEDELDGTCR.V           | 1638.69283 | 2 | 1.75E-04 | 0.89 | 3.90 | - | 765.4  |
| AHQ-5-1, 3717          | K.VDINTEDELDGTCR.V           | 1638.69283 | 2 | 1.56E-06 | 0.96 | 4.82 | - | 1138.7 |
| AHQ-5-7, 3434 - 3435   | K.VDINTEDELDGTCR.V           | 1638.69283 | 2 | 8.85E-07 | 0.92 | 3.78 | - | 1013.7 |
| AHQ-5-5, 3422          | K.VDINTEDELDGTCR.V           | 1638.69283 | 2 | 2.56E-05 | 0.88 | 3.34 | - | 869.9  |
| AHQ-5-4, 3644          | K.VDINTEDELDGTCR.V           | 1638.69283 | 2 | 9.28E-05 | 0.91 | 4.03 | - | 893.2  |

|                      |                                             |            |   |          |      |      |   |        |
|----------------------|---------------------------------------------|------------|---|----------|------|------|---|--------|
| AHQ-5-1, 3439        | K.VDINTEDLEDGTCR.V                          | 1638.69283 | 2 | 1.95E-06 | 0.95 | 4.35 | - | 1195.6 |
| AHQ-5-6, 3492        | K.VDINTEDLEDGTCR.V                          | 1638.69283 | 2 | 8.56E-07 | 0.94 | 4.00 | - | 1180.0 |
| AHQ-5-5, 3545        | K.VDINTEDLEDGTCR.V                          | 1638.69283 | 2 | 7.25E-08 | 0.94 | 4.25 | - | 1104.4 |
| AHQ-5-5, 3646 - 3721 | K.VDINTEDLEDGTCR.V                          | 1638.69283 | 2 | 1.36E-08 | 0.92 | 3.61 | - | 990.6  |
| AHQ-5-3, 3670        | K.VDINTEDLEDGTCR.V                          | 1638.69283 | 2 | 7.88E-07 | 0.89 | 3.30 | - | 1171.7 |
| AHQ-5-4, 3788 - 3789 | K.VDINTEDLEDGTCR.V                          | 1638.69283 | 2 | 2.55E-09 | 0.93 | 3.89 | - | 817.8  |
| AHQ-5-3, 2463        | K.VDVGKDQEFVTK.S                            | 1365.51377 | 1 | 5.36E-04 | 0.50 | 3.21 | - | 319.7  |
| AHQ-5-4, 2436        | K.VDVGKDQEFVTK.S                            | 1365.51377 | 2 | 1.36E-06 | 0.91 | 3.72 | - | 762.1  |
| AHQ-5-2, 2413        | K.VDVGKDQEFVTK.S                            | 1365.51377 | 3 | 1.55E-04 | 0.62 | 3.07 | - | 425.0  |
| AHQ-5-2, 2410        | K.VDVGKDQEFVTK.S                            | 1365.51377 | 1 | 6.60E-06 | 0.24 | 2.66 | - | 261.7  |
| AHQ-5-2, 2401        | K.VDVGKDQEFVTK.S                            | 1365.51377 | 2 | 3.77E-08 | 0.91 | 3.99 | - | 678.2  |
| AHQ-5-5, 2322        | K.VDVGKDQEFVTK.S                            | 1365.51377 | 2 | 9.82E-09 | 0.81 | 3.34 | - | 539.9  |
| AHQ-5-6, 2312        | K.VDVGKDQEFVTK.S                            | 1365.51377 | 2 | 1.66E-09 | 0.87 | 3.72 | - | 576.3  |
| AHQ-5-1, 2639        | K.VDVGKDQEFVTK.S                            | 1365.51377 | 2 | 8.74E-07 | 0.87 | 3.36 | - | 606.3  |
| AHQ-5-4, 2442        | K.VDVGKDQEFVTK.S                            | 1365.51377 | 1 | 1.27E-06 | 0.49 | 3.06 | - | 327.8  |
| AHQ-5-3, 2650 - 2674 | K.VEPGLGADNSVVR.F                           | 1313.44209 | 2 | 3.86E-09 | 0.75 | 2.65 | - | 245.3  |
| AHQ-5-1, 2831        | K.VEPGLGADNSVVR.F                           | 1313.44209 | 1 | 8.26E-05 | 0.06 | 1.90 | - | 160.1  |
| AHQ-5-2, 2577 - 2646 | K.VEPGLGADNSVVR.F                           | 1313.44209 | 2 | 2.94E-05 | 0.65 | 2.53 | - | 226.1  |
| AHQ-5-1, 2792 - 2864 | K.VEPGLGADNSVVR.F                           | 1313.44209 | 2 | 4.27E-04 | 0.65 | 3.24 | - | 237.7  |
| AHQ-5-3, 2646 - 2721 | K.VEPGLGADNSVVR.F                           | 1313.44209 | 1 | 7.33E-04 | 0.13 | 1.89 | - | 250.6  |
| AHQ-5-2, 2587        | K.VEPGLGADNSVVR.F                           | 1313.44209 | 1 | 5.59E-05 | 0.47 | 2.38 | - | 254.7  |
| AHQ-5-3, 6473 - 6541 | K.VEYTPYEEGLHSVDVTDYDGSVPSSPFQVPVTEGCDPSR.V | 4300.57494 | 3 | 6.50E-07 | 0.95 | 5.56 | - | 1060.7 |
| AHQ-5-4, 6517        | K.VEYTPYEEGLHSVDVTDYDGSVPSSPFQVPVTEGCDPSR.V | 4300.57494 | 3 | 1.15E-05 | 0.93 | 5.42 | - | 681.2  |
| AHQ-5-4, 6381 - 6448 | K.VEYTPYEEGLHSVDVTDYDGSVPSSPFQVPVTEGCDPSR.V | 4300.57494 | 3 | 2.94E-04 | 0.85 | 4.68 | - | 649.6  |
| AHQ-5-2, 6381 - 6449 | K.VEYTPYEEGLHSVDVTDYDGSVPSSPFQVPVTEGCDPSR.V | 4300.57494 | 3 | 2.64E-06 | 0.96 | 6.16 | - | 1069.2 |
| AHQ-5-7, 7266 - 7271 | K.VGSAADIPINISSETDLSLLTATVPPSGR.E           | 2895.25495 | 2 | 8.34E-06 | 0.92 | 4.62 | - | 634.3  |
| AHQ-5-1, 7260 - 7327 | K.VGSAADIPINISSETDLSLLTATVPPSGR.E           | 2895.25495 | 2 | 3.03E-06 | 0.90 | 3.82 | - | 1007.6 |
| AHQ-5-5, 7269        | K.VGSAADIPINISSETDLSLLTATVPPSGR.E           | 2895.25495 | 2 | 9.54E-05 | 0.44 | 2.52 | - | 304.0  |
| AHQ-5-5, 7365        | K.VGSAADIPINISSETDLSLLTATVPPSGR.E           | 2895.25495 | 3 | 9.61E-04 | 0.83 | 4.07 | - | 519.4  |
| AHQ-5-4, 7428        | K.VGSAADIPINISSETDLSLLTATVPPSGR.E           | 2895.25495 | 2 | 8.71E-05 | 0.64 | 2.74 | - | 540.4  |
| AHQ-5-8, 7182        | K.VGSAADIPINISSETDLSLLTATVPPSGR.E           | 2895.25495 | 3 | 2.23E-04 | 0.63 | 3.01 | - | 316.6  |
| AHQ-5-8, 7118 - 7193 | K.VGSAADIPINISSETDLSLLTATVPPSGR.E           | 2895.25495 | 2 | 3.71E-07 | 0.94 | 5.14 | - | 768.5  |
| AHQ-5-6, 4161        | K.VHSPSGALEECYVTEIDQDK.Y                    | 2279.42322 | 2 | 7.73E-11 | 0.97 | 5.33 | - | 1588.4 |
| AHQ-5-4, 4433 - 4440 | K.VHSPSGALEECYVTEIDQDK.Y                    | 2279.42322 | 2 | 2.99E-09 | 0.96 | 5.52 | - | 1216.1 |
| AHQ-5-7, 4022        | K.VHSPSGALEECYVTEIDQDK.Y                    | 2279.42322 | 2 | 2.34E-06 | 0.96 | 4.78 | - | 1548.6 |
| AHQ-5-5, 4209 - 4278 | K.VHSPSGALEECYVTEIDQDK.Y                    | 2279.42322 | 2 | 1.85E-07 | 0.97 | 5.41 | - | 1512.3 |
| AHQ-5-1, 4567        | K.VHSPSGALEECYVTEIDQDK.Y                    | 2279.42322 | 3 | 1.88E-07 | 0.95 | 4.93 | - | 1789.3 |
| AHQ-5-7, 4295        | K.VHSPSGALEECYVTEIDQDKYAVR.F                | 2768.99349 | 2 | 6.04E-08 | 0.94 | 4.24 | - | 1133.9 |
| AHQ-5-3, 4838 - 4850 | K.VHSPSGALEECYVTEIDQDKYAVR.F                | 2768.99349 | 3 | 6.92E-06 | 0.93 | 4.90 | - | 799.3  |
| AHQ-5-8, 4150        | K.VHSPSGALEECYVTEIDQDKYAVR.F                | 2768.99349 | 2 | 5.11E-04 | 0.89 | 3.24 | - | 1061.1 |
| AHQ-5-8, 4144        | K.VHSPSGALEECYVTEIDQDKYAVR.F                | 2768.99349 | 3 | 2.78E-15 | 0.91 | 4.59 | - | 657.4  |
| AHQ-5-1, 4880        | K.VHSPSGALEECYVTEIDQDKYAVR.F                | 2768.99349 | 2 | 1.64E-07 | 0.93 | 4.34 | - | 1167.6 |
| AHQ-5-5, 4513 - 4591 | K.VHSPSGALEECYVTEIDQDKYAVR.F                | 2768.99349 | 3 | 6.98E-10 | 0.92 | 5.01 | - | 625.7  |
| AHQ-5-5, 4518        | K.VHSPSGALEECYVTEIDQDKYAVR.F                | 2768.99349 | 2 | 4.25E-06 | 0.86 | 3.38 | - | 985.5  |
| AHQ-5-7, 4294        | K.VHSPSGALEECYVTEIDQDKYAVR.F                | 2768.99349 | 3 | 2.06E-09 | 0.90 | 4.61 | - | 504.5  |
| AHQ-5-4, 4794 - 4805 | K.VHSPSGALEECYVTEIDQDKYAVR.F                | 2768.99349 | 2 | 3.67E-13 | 0.94 | 4.27 | - | 1299.6 |
| AHQ-5-6, 4485        | K.VHSPSGALEECYVTEIDQDKYAVR.F                | 2768.99349 | 2 | 2.33E-07 | 0.73 | 3.22 | - | 589.2  |
| AHQ-5-6, 4472        | K.VHSPSGALEECYVTEIDQDKYAVR.F                | 2768.99349 | 3 | 4.90E-09 | 0.86 | 4.13 | - | 511.9  |
| AHQ-5-9, 4020        | K.VHSPSGALEECYVTEIDQDKYAVR.F                | 2768.99349 | 2 | 2.89E-08 | 0.83 | 3.64 | - | 723.6  |
| AHQ-5-4, 4772        | K.VHSPSGALEECYVTEIDQDKYAVR.F                | 2768.99349 | 3 | 3.94E-10 | 0.88 | 4.35 | - | 481.2  |
| AHQ-5-5, 3701        | K.VNQPASFAVSLNGAK.G                         | 1503.68480 | 2 | 1.06E-06 | 0.93 | 4.35 | - | 604.3  |
| AHQ-5-1, 3997        | K.VNQPASFAVSLNGAK.G                         | 1503.68480 | 2 | 5.53E-06 | 0.84 | 3.25 | - | 573.5  |
| AHQ-5-1, 3852 - 3929 | K.VNQPASFAVSLNGAK.G                         | 1503.68480 | 2 | 2.11E-09 | 0.89 | 4.27 | - | 481.6  |
| AHQ-5-8, 3418 - 3420 | K.VNQPASFAVSLNGAK.G                         | 1503.68480 | 2 | 1.76E-06 | 0.81 | 3.53 | - | 360.9  |
| AHQ-5-4, 3816 - 3884 | K.VNQPASFAVSLNGAK.G                         | 1503.68480 | 2 | 1.17E-08 | 0.88 | 3.76 | - | 644.4  |
| AHQ-5-6, 3568        | K.VNQPASFAVSLNGAK.G                         | 1503.68480 | 2 | 2.21E-07 | 0.88 | 3.52 | - | 634.1  |
| AHQ-5-7, 3398        | K.VNQPASFAVSLNGAK.G                         | 1503.68480 | 2 | 1.33E-07 | 0.89 | 3.66 | - | 639.0  |
| AHQ-5-3, 3845 - 3925 | K.VNQPASFAVSLNGAK.G                         | 1503.68480 | 2 | 1.85E-07 | 0.87 | 3.71 | - | 532.6  |
| AHQ-5-8, 3289        | K.VNQPASFAVSLNGAK.G                         | 1503.68480 | 2 | 3.06E-08 | 0.86 | 3.67 | - | 465.7  |
| AHQ-5-2, 3731 - 3805 | K.VNQPASFAVSLNGAK.G                         | 1503.68480 | 2 | 4.41E-08 | 0.87 | 3.32 | - | 613.6  |
| AHQ-5-2, 1494        | K.VPVDVTDASK.V                              | 1168.28175 | 2 | 2.72E-06 | 0.94 | 2.99 | - | 1447.1 |
| AHQ-5-5, 1466        | K.VPVDVTDASK.V                              | 1168.28175 | 2 | 3.81E-09 | 0.84 | 2.81 | - | 829.4  |
| AHQ-5-2, 4293        | R.VQVQDNEGCPVEALVK.D                        | 1786.98493 | 2 | 4.12E-07 | 0.87 | 4.32 | - | 746.1  |
| AHQ-5-1, 4248 - 4321 | R.VQVQDNEGCPVEALVK.D                        | 1786.98493 | 2 | 3.97E-06 | 0.97 | 5.05 | - | 1682.8 |
| AHQ-5-2, 4121 - 4126 | R.VQVQDNEGCPVEALVK.D                        | 1786.98493 | 2 | 7.27E-06 | 0.96 | 5.37 | - | 1043.9 |
| AHQ-5-3, 4354        | R.VQVQDNEGCPVEALVK.D                        | 1786.98493 | 2 | 9.52E-07 | 0.92 | 4.44 | - | 872.3  |
| AHQ-5-5, 3982        | R.VQVQDNEGCPVEALVK.D                        | 1786.98493 | 2 | 5.10E-06 | 0.96 | 4.98 | - | 1124.6 |
| AHQ-5-3, 4189 - 4197 | R.VQVQDNEGCPVEALVK.D                        | 1786.98493 | 2 | 3.60E-07 | 0.96 | 5.11 | - | 1066.8 |
| AHQ-5-1, 4391 - 4436 | R.VQVQDNEGCPVEALVK.D                        | 1786.98493 | 2 | 2.03E-10 | 0.97 | 4.89 | - | 1528.7 |
| AHQ-5-4, 4133        | R.VQVQDNEGCPVEALVK.D                        | 1786.98493 | 2 | 5.81E-06 | 0.93 | 4.66 | - | 790.5  |
| AHQ-5-4, 4234 - 4305 | R.VQVQDNEGCPVEALVK.D                        | 1786.98493 | 2 | 1.25E-09 | 0.91 | 4.24 | - | 874.6  |
| AHQ-5-2, 5461        | R.VQVQDNEGCPVEALVKDNGNGTYSYVPR.K            | 3359.60342 | 3 | 1.76E-06 | 0.87 | 3.65 | - | 1088.2 |
| AHQ-5-1, 5367 - 5435 | R.VQVQDNEGCPVEALVKDNGNGTYSYVPR.K            | 3359.60342 | 3 | 5.43E-09 | 0.95 | 4.79 | - | 1919.9 |
| AHQ-5-1, 4913 - 4923 | R.VSGQGLHEGHTFPAEFIIDTR.D                   | 2441.64058 | 3 | 1.99E-10 | 0.97 | 6.03 | - | 1564.6 |
| AHQ-5-2, 4698 - 4759 | R.VSGQGLHEGHTFPAEFIIDTR.D                   | 2441.64058 | 3 | 7.04E-08 | 0.96 | 5.77 | - | 1311.7 |
| AHQ-5-3, 4845        | R.VSGQGLHEGHTFPAEFIIDTR.D                   | 2441.64058 | 2 | 7.59E-04 | 0.82 | 3.09 | - | 692.3  |
| AHQ-5-4, 4748 - 4820 | R.VSGQGLHEGHTFPAEFIIDTR.D                   | 2441.64058 | 2 | 8.47E-05 | 0.92 | 4.42 | - | 704.8  |
| AHQ-5-4, 4720 - 4788 | R.VSGQGLHEGHTFPAEFIIDTR.D                   | 2441.64058 | 3 | 1.94E-07 | 0.94 | 5.18 | - | 969.7  |
| AHQ-5-3, 4851        | R.VSGQGLHEGHTFPAEFIIDTR.D                   | 2441.64058 | 3 | 6.46E-06 | 0.93 | 5.07 | - | 945.7  |
| AHQ-5-6, 4417 - 4465 | R.VSGQGLHEGHTFPAEFIIDTR.D                   | 2441.64058 | 3 | 6.86E-05 | 0.94 | 4.76 | - | 1076.6 |
| AHQ-5-12, 4620       | R.VSGQGLHEGHTFPAEFIIDTR.D                   | 2441.64058 | 2 | 2.90E-04 | 0.87 | 3.95 | - | 615.2  |
| AHQ-5-5, 4423 - 4494 | R.VSGQGLHEGHTFPAEFIIDTR.D                   | 2441.64058 | 2 | 3.09E-10 | 0.98 | 6.91 | - | 1079.2 |
| AHQ-5-8, 3873        | R.VSGQGLHEGHTFPAEFIIDTR.D                   | 2441.64058 | 3 | 3.25E-07 | 0.93 | 4.76 | - | 1023.9 |
| AHQ-5-9, 3951        | R.VSGQGLHEGHTFPAEFIIDTR.D                   | 2441.64058 | 3 | 2.65E-04 | 0.92 | 4.43 | - | 859.7  |
| AHQ-5-5, 4405 - 4477 | R.VSGQGLHEGHTFPAEFIIDTR.D                   | 2441.64058 | 3 | 5.09E-06 | 0.93 | 4.86 | - | 957.9  |
| AHQ-5-1, 4915        | R.VSGQGLHEGHTFPAEFIIDTR.D                   | 2441.64058 | 2 | 7.43E-07 | 0.94 | 4.50 | - | 955.1  |
| AHQ-5-7, 2402        | K.VTAQGPGLPSGNIANK.T                        | 1653.81855 | 2 | 1.08E-04 | 0.37 | 2.60 | - | 297.5  |
| AHQ-5-2, 2538 - 2569 | K.VTAQGPGLPSGNIANK.T                        | 1653.81855 | 2 | 1.11E-05 | 0.86 | 3.69 | - | 593.5  |
| AHQ-5-6, 2592        | K.VTAQGPGLPSGNIANK.T                        | 1653.81855 | 2 | 1.68E-04 | 0.52 | 2.76 | - | 379.3  |
| AHQ-5-3, 2810        | K.VTAQGPGLPSGNIANK.T                        | 1653.81855 | 2 | 6.30E-07 | 0.75 | 3.26 | - | 588.4  |
| AHQ-5-2, 2713 - 2786 | K.VTAQGPGLPSGNIANK.T                        | 1653.81855 | 2 | 1.39E-04 | 0.91 | 4.36 | - | 617.1  |
| AHQ-5-5, 2469 - 2473 | K.VTAQGPGLPSGNIANK.T                        | 1653.81855 | 2 | 1.25E-04 | 0.77 | 3.69 | - | 467.8  |
| AHQ-5-13, 2701       | K.VTAQGPGLPSGNIANK.T                        | 1653.81855 | 2 | 9.09E-04 | 0.65 | 2.73 | - | 641.2  |
| AHQ-5-5, 2607 - 2610 | K.VTAQGPGLPSGNIANK.T                        | 1653.81855 | 2 | 7.29E-07 | 0.81 | 4.01 | - | 468.8  |
| AHQ-5-1, 2767 - 2912 | K.VTAQGPGLPSGNIANK.T                        | 1653.81855 | 2 | 9.37E-06 | 0.90 | 4.36 | - | 571.7  |
| AHQ-5-4, 2728        | K.VTAQGPGLPSGNIANK.T                        | 1653.81855 | 2 | 2.24E-09 | 0.70 | 3.15 | - | 347.1  |
| AHQ-5-1, 3272        | K.VTVLFAQHQIAK.S                            | 1284.53185 | 1 | 1.75E-04 | 0.66 | 2.84 | - | 475.7  |
| AHQ-5-2, 2911        | K.VTVLFAQHQIAK.S                            | 1284.53185 | 1 | 6.89E-04 | 0.65 | 3.11 | - | 469.9  |
| AHQ-5-4, 3020        | K.VTVLFAQHQIAK.S                            | 1284.53185 | 2 | 2.16E-04 | 0.82 | 3.12 | - | 660.4  |
| AHQ-5-2, 2905 - 2981 | K.VTVLFAQHQIAK.S                            | 1284.53185 | 2 | 2.57E-06 | 0.94 | 4.05 | - | 1104.8 |
| AHQ-5-5, 2773 - 2794 | K.VTVLFAQHQIAK.S                            | 1284.53185 | 2 | 7.97E-06 | 0.94 | 3.98 | - | 1091.3 |
| AHQ-5-6, 2817 - 2829 | K.VTVLFAQHQIAK.S                            | 1284.53185 | 1 | 7.67E-04 | 0.45 | 2.55 | - | 452.1  |
| AHQ-5-6, 2810        | K.VTVLFAQHQIAK.S                            | 1284.53185 | 2 | 5.50E-06 | 0.89 | 3.54 | - | 799.7  |
| AHQ-5-7, 2647 - 2652 | K.VTVLFAQHQIAK.S                            | 1284.53185 | 1 | 1.43E-04 | 0.58 | 2.66 | - | 459.2  |
| AHQ-5-1, 3252        | K.VTVLFAQHQIAK.S                            | 1284.53185 | 2 | 3.54E-07 | 0.93 | 3.91 | - | 891.3  |
| AHQ-5-5, 5166        | R.VTYCPTPEPNYIINIK.F                        | 1884.14221 | 2 | 8.19E-11 | 0.89 | 4.04 | - | 493.4  |
| AHQ-5-3, 5090        | R.VTYCPTPEPNYIINIK.F                        | 1884.14221 | 2 | 1.85E-05 | 0.88 | 3.42 | - | 614.9  |

|                        |                                |            |   |          |      |      |   |        |
|------------------------|--------------------------------|------------|---|----------|------|------|---|--------|
| AHQ-5-5, 4842 - 4913   | R.VTYCPTPEPGNYIINIK.F          | 1884.14221 | 2 | 9.53E-07 | 0.83 | 3.45 | - | 421.7  |
| AHQ-5-4, 5136 - 5142   | R.VTYCPTPEPGNYIINIK.F          | 1884.14221 | 2 | 6.49E-04 | 0.93 | 4.65 | - | 452.0  |
| AHQ-5-3, 5203          | R.VTYCPTPEPGNYIINIK.F          | 1884.14221 | 2 | 2.76E-05 | 0.77 | 3.30 | - | 301.2  |
| AHQ-5-4, 5340          | R.VTYCPTPEPGNYIINIK.F          | 1884.14221 | 2 | 3.49E-06 | 0.74 | 3.04 | - | 368.0  |
| AHQ-5-1, 5204 - 5284   | R.VTYCPTPEPGNYIINIK.F          | 1884.14221 | 2 | 6.26E-06 | 0.90 | 3.99 | - | 530.7  |
| AHQ-5-2, 5134          | R.VTYCPTPEPGNYIINIK.F          | 1884.14221 | 2 | 1.88E-05 | 0.76 | 3.31 | - | 350.7  |
| AHQ-5-5, 4981          | R.VTYCPTPEPGNYIINIK.F          | 1884.14221 | 2 | 2.77E-05 | 0.94 | 4.24 | - | 691.6  |
| AHQ-5-8, 4606 - 4673   | R.VTYCPTPEPGNYIINIK.F          | 1884.14221 | 2 | 1.06E-04 | 0.92 | 4.23 | - | 499.4  |
| AHQ-5-1, 5052          | R.VTYCPTPEPGNYIINIK.F          | 1884.14221 | 2 | 1.25E-04 | 0.53 | 2.96 | - | 221.3  |
| AHQ-5-4, 5064          | R.VTYTPM'APGSYLSIK.Y           | 1758.07165 | 2 | 2.15E-04 | 0.85 | 3.03 | - | 671.8  |
| AHQ-5-3, 5629          | R.VTYTPM'APGSYLSIK.Y           | 1742.07225 | 2 | 4.10E-04 | 0.77 | 3.10 | - | 655.1  |
| AHQ-5-14, 6084         | R.VTYTPM'APGSYLSIK.Y           | 1742.07225 | 2 | 9.14E-05 | 0.76 | 3.25 | - | 450.5  |
| AHQ-5-4, 5586 - 5592   | R.VTYTPM'APGSYLSIK.Y           | 1742.07225 | 2 | 1.89E-05 | 0.87 | 3.64 | - | 606.0  |
| AHQ-5-13, 5433 - 5436  | R.VTYTPM'APGSYLSIK.Y           | 1742.07225 | 2 | 3.52E-05 | 0.90 | 3.44 | - | 939.4  |
| AHQ-5-13-, 5343        | R.VTYTPM'APGSYLSIK.Y           | 1742.07225 | 2 | 4.90E-07 | 0.80 | 3.27 | - | 529.1  |
| AHQ-5-1, 5703 - 5705   | R.VTYTPM'APGSYLSIK.Y           | 1742.07225 | 2 | 1.02E-04 | 0.89 | 3.47 | - | 693.8  |
| AHQ-5-5, 5310 - 5349   | R.VTYTPM'APGSYLSIK.Y           | 1742.07225 | 2 | 1.23E-04 | 0.94 | 3.81 | - | 1118.9 |
| AHQ-5-8, 4881          | R.VTYTPM'APGSYLSIK.Y           | 1742.07225 | 2 | 2.98E-04 | 0.84 | 3.56 | - | 602.9  |
| AHQ-5-9, 4614 - 4695   | R.VTYTPM'APGSYLSIK.Y           | 1742.07225 | 2 | 1.54E-04 | 0.52 | 2.67 | - | 427.7  |
| AHQ-5-2, 5549          | R.VTYTPM'APGSYLSIK.Y           | 1742.07225 | 2 | 3.48E-04 | 0.81 | 3.46 | - | 452.0  |
| AHQ-5-10, 4812         | R.VTYTPM'APGSYLSIK.Y           | 1742.07225 | 2 | 9.63E-05 | 0.78 | 3.19 | - | 468.9  |
| AHQ-5-6, 5320 - 5332   | R.VTYTPM'APGSYLSIK.Y           | 1742.07225 | 2 | 1.37E-04 | 0.81 | 3.16 | - | 630.1  |
| AHQ-5-7, 5138 - 5139   | R.VTYTPM'APGSYLSIK.Y           | 1742.07225 | 2 | 3.30E-05 | 0.59 | 2.79 | - | 341.0  |
| AHQ-5-14-, 4829 - 4831 | R.VTYTPM'APGSYLSIK.Y           | 1758.07165 | 2 | 3.06E-04 | 0.80 | 3.37 | - | 450.3  |
| AHQ-5-13, 3465         | R.YAPSEAGLHEM'DIR.Y            | 1589.75482 | 2 | 4.83E-04 | 0.87 | 2.81 | - | 1018.0 |
| AHQ-5-10, 3022         | R.YAPSEAGLHEM'DIR.Y            | 1589.75482 | 2 | 3.19E-05 | 0.88 | 3.11 | - | 887.1  |
| AHQ-5-5, 3047 - 3117   | R.YAPSEAGLHEM'DIR.Y            | 1589.75482 | 2 | 1.19E-05 | 0.91 | 4.04 | - | 664.7  |
| AHQ-5-11, 3190         | R.YAPSEAGLHEM'DIR.Y            | 1589.75482 | 2 | 3.45E-04 | 0.88 | 3.11 | - | 1034.0 |
| AHQ-5-4, 2529 - 2530   | R.YAPSEAGLHEM'DIR.Y            | 1605.75422 | 2 | 5.04E-04 | 0.79 | 2.54 | - | 901.2  |
| AHQ-5-1, 2739          | R.YAPSEAGLHEM'DIR.Y            | 1605.75422 | 2 | 1.34E-04 | 0.77 | 2.71 | - | 731.9  |
| AHQ-5-4, 3306 - 3349   | R.YAPSEAGLHEM'DIR.Y            | 1589.75482 | 2 | 2.12E-06 | 0.94 | 3.67 | - | 1183.3 |
| AHQ-5-7, 2946          | R.YAPSEAGLHEM'DIR.Y            | 1589.75482 | 2 | 6.47E-04 | 0.64 | 2.70 | - | 611.7  |
| AHQ-5-1, 4392 - 4463   | K.YGGDEIFPSPYR.V               | 1401.50466 | 2 | 7.19E-05 | 0.80 | 3.24 | - | 562.0  |
| AHQ-5-2, 4274          | K.YGGDEIFPSPYR.V               | 1401.50466 | 1 | 2.48E-06 | 0.46 | 2.62 | - | 422.9  |
| AHQ-5-2, 4259 - 4329   | K.YGGDEIFPSPYR.V               | 1401.50466 | 2 | 1.79E-04 | 0.84 | 3.78 | - | 583.5  |
| AHQ-5-3, 4353          | K.YGGDEIFPSPYR.V               | 1401.50466 | 1 | 3.93E-06 | 0.17 | 2.34 | - | 344.6  |
| AHQ-5-1, 4397 - 4401   | K.YGGDEIFPSPYR.V               | 1401.50466 | 1 | 4.28E-04 | 0.29 | 2.40 | - | 440.5  |
| AHQ-5-4, 3225 - 3228   | K.YGGPYHIGGSPFK.A              | 1380.53182 | 1 | 1.92E-04 | 0.78 | 2.88 | - | 531.0  |
| AHQ-5-3, 3263          | K.YGGPYHIGGSPFK.A              | 1380.53182 | 2 | 1.75E-10 | 0.97 | 4.41 | - | 1909.2 |
| AHQ-5-4, 3240          | K.YGGPYHIGGSPFK.A              | 1380.53182 | 3 | 1.14E-05 | 0.86 | 3.64 | - | 664.9  |
| AHQ-5-5, 3062          | K.YGGPYHIGGSPFK.A              | 1380.53182 | 2 | 7.56E-09 | 0.96 | 4.53 | - | 1469.2 |
| AHQ-5-2, 3178          | K.YGGPYHIGGSPFK.A              | 1380.53182 | 2 | 4.95E-05 | 0.94 | 4.04 | - | 1047.0 |
| AHQ-5-8, 2724 - 2746   | K.YGGPYHIGGSPFK.A              | 1380.53182 | 1 | 1.51E-04 | 0.70 | 2.65 | - | 464.7  |
| AHQ-5-9, 2796          | K.YGGPYHIGGSPFK.A              | 1380.53182 | 2 | 1.14E-07 | 0.94 | 3.87 | - | 1217.5 |
| AHQ-5-5, 3023          | K.YGGPYHIGGSPFK.A              | 1380.53182 | 3 | 2.09E-07 | 0.87 | 3.85 | - | 678.0  |
| AHQ-5-5, 3006          | K.YGGPYHIGGSPFK.A              | 1380.53182 | 1 | 7.46E-09 | 0.88 | 4.05 | - | 430.8  |
| AHQ-5-5, 2927 - 2993   | K.YGGPYHIGGSPFK.A              | 1380.53182 | 2 | 1.49E-08 | 0.96 | 3.75 | - | 1785.3 |
| AHQ-5-1, 3388          | K.YGGPYHIGGSPFK.A              | 1380.53182 | 2 | 5.00E-08 | 0.96 | 3.76 | - | 1864.9 |
| AHQ-5-11, 3120         | K.YGGPYHIGGSPFK.A              | 1380.53182 | 2 | 4.35E-09 | 0.97 | 4.16 | - | 2358.7 |
| AHQ-5-7, 2874          | K.YGGPYHIGGSPFK.A              | 1380.53182 | 1 | 2.48E-06 | 0.77 | 3.26 | - | 408.2  |
| AHQ-5-4, 3221 - 3229   | K.YGGPYHIGGSPFK.A              | 1380.53182 | 2 | 1.65E-12 | 0.97 | 4.40 | - | 2017.2 |
| AHQ-5-1, 3256          | K.YGGQV'PNFNSK.L               | 1291.43658 | 2 | 5.02E-04 | 0.78 | 3.11 | - | 404.0  |
| AHQ-5-1, 3096 - 3163   | K.YGGQV'PNFNSK.L               | 1291.43658 | 2 | 5.84E-05 | 0.91 | 3.18 | - | 702.2  |
| AHQ-5-6, 2776 - 2802   | K.YGGQV'PNFNSK.L               | 1291.43658 | 2 | 1.81E-04 | 0.83 | 2.64 | - | 568.1  |
| AHQ-5-2, 2918 - 2989   | K.YGGQV'PNFNSK.L               | 1291.43658 | 2 | 2.00E-04 | 0.87 | 3.29 | - | 431.9  |
| AHQ-5-4, 2961          | K.YGGQV'PNFNSK.L               | 1291.43658 | 2 | 9.84E-05 | 0.92 | 3.51 | - | 546.5  |
| AHQ-5-2, 2922          | K.YGGQV'PNFNSK.L               | 1291.43658 | 2 | 2.41E-07 | 0.90 | 3.63 | - | 515.3  |
| AHQ-5-3, 2991 - 2993   | K.YGGQV'PNFNSK.L               | 1291.43658 | 2 | 7.72E-05 | 0.92 | 3.71 | - | 598.9  |
| AHQ-5-6, 3848          | K.YKQH'VPGSPFQFTV'GPLGEGGAHK.V | 2596.88377 | 3 | 4.06E-05 | 0.76 | 3.25 | - | 700.7  |
| AHQ-5-3, 4319          | K.YKQH'VPGSPFQFTV'GPLGEGGAHK.V | 2596.88377 | 3 | 1.70E-07 | 0.88 | 4.34 | - | 715.9  |
| AHQ-5-4, 4182          | K.YKQH'VPGSPFQFTV'GPLGEGGAHK.V | 2596.88377 | 3 | 1.34E-07 | 0.88 | 4.15 | - | 797.6  |
| AHQ-5-1, 4440 - 4507   | K.YKQH'VPGSPFQFTV'GPLGEGGAHK.V | 2596.88377 | 3 | 1.27E-04 | 0.79 | 3.80 | - | 476.5  |
| AHQ-5-5, 3910 - 3913   | K.YKQH'VPGSPFQFTV'GPLGEGGAHK.V | 2596.88377 | 3 | 4.01E-06 | 0.84 | 4.32 | - | 584.3  |
| AHQ-5-7, 3639 - 3718   | K.YKQH'VPGSPFQFTV'GPLGEGGAHK.V | 2596.88377 | 3 | 1.84E-04 | 0.79 | 3.44 | - | 787.8  |
| AHQ-5-1, 4456          | K.YKQH'VPGSPFQFTV'GPLGEGGAHK.V | 2596.88377 | 2 | 1.70E-04 | 0.84 | 3.78 | - | 415.0  |
| AHQ-5-8, 2260          | K.YNEQH'VPGSPFTAR.V            | 1603.71978 | 2 | 9.22E-05 | 0.78 | 3.32 | - | 312.2  |
| AHQ-5-13-, 2845        | K.YNEQH'VPGSPFTAR.V            | 1603.71978 | 2 | 1.10E-06 | 0.46 | 2.57 | - | 327.4  |
| AHQ-5-2, 2986 - 2995   | K.YNEQH'VPGSPFTAR.V            | 1603.71978 | 2 | 1.40E-05 | 0.84 | 3.45 | - | 432.6  |
| AHQ-5-1, 2908          | K.YNEQH'VPGSPFTAR.V            | 1603.71978 | 3 | 2.40E-06 | 0.90 | 4.18 | - | 1019.0 |
| AHQ-5-4, 2677 - 2692   | K.YNEQH'VPGSPFTAR.V            | 1603.71978 | 2 | 3.25E-07 | 0.87 | 3.34 | - | 583.7  |
| AHQ-5-7, 2479          | K.YNEQH'VPGSPFTAR.V            | 1603.71978 | 2 | 8.32E-05 | 0.65 | 3.10 | - | 390.0  |
| AHQ-5-1, 2896 - 2897   | K.YNEQH'VPGSPFTAR.V            | 1603.71978 | 2 | 1.43E-08 | 0.88 | 3.51 | - | 484.0  |
| AHQ-5-3, 2729 - 2730   | K.YNEQH'VPGSPFTAR.V            | 1603.71978 | 2 | 1.89E-07 | 0.67 | 2.73 | - | 428.3  |
| AHQ-5-1, 3173 - 3175   | K.YNEQH'VPGSPFTAR.V            | 1603.71978 | 2 | 4.75E-06 | 0.93 | 3.61 | - | 716.0  |
| AHQ-5-5, 2522 - 2537   | K.YNEQH'VPGSPFTAR.V            | 1603.71978 | 2 | 7.07E-05 | 0.88 | 3.51 | - | 599.1  |
| AHQ-5-5, 2531          | K.YNEQH'VPGSPFTAR.V            | 1603.71978 | 3 | 3.78E-07 | 0.94 | 4.24 | - | 1391.7 |
| AHQ-5-10, 2538 - 2540  | K.YNEQH'VPGSPFTAR.V            | 1603.71978 | 2 | 1.61E-05 | 0.85 | 3.10 | - | 601.9  |
| AHQ-5-2, 2655 - 2666   | K.YNEQH'VPGSPFTAR.V            | 1603.71978 | 2 | 6.70E-07 | 0.90 | 3.73 | - | 600.8  |
| AHQ-5-6, 2556          | K.YNEQH'VPGSPFTAR.V            | 1603.71978 | 2 | 8.68E-08 | 0.92 | 4.64 | - | 513.3  |
| AHQ-5-2, 4638 - 4689   | K.YTPVQQ'G'PVGNVNTY'GGDPIPK.S  | 2287.55640 | 2 | 2.37E-06 | 0.92 | 4.59 | - | 656.6  |
| AHQ-5-2, 4577 - 4621   | K.YTPVQQ'G'PVGNVNTY'GGDPIPK.S  | 2287.55640 | 2 | 1.42E-06 | 0.88 | 4.14 | - | 535.7  |
| AHQ-5-2, 4426 - 4437   | K.YTPVQQ'G'PVGNVNTY'GGDPIPK.S  | 2287.55640 | 2 | 6.19E-08 | 0.90 | 4.23 | - | 703.5  |
| AHQ-5-2, 4781 - 4794   | K.YTPVQQ'G'PVGNVNTY'GGDPIPK.S  | 2287.55640 | 2 | 1.71E-10 | 0.95 | 4.60 | - | 1028.0 |
| AHQ-5-6, 4418 - 4424   | K.YTPVQQ'G'PVGNVNTY'GGDPIPK.S  | 2287.55640 | 2 | 2.74E-06 | 0.93 | 4.15 | - | 863.1  |
| AHQ-5-4, 4633 - 4710   | K.YTPVQQ'G'PVGNVNTY'GGDPIPK.S  | 2287.55640 | 2 | 3.14E-05 | 0.95 | 4.96 | - | 769.0  |
| AHQ-5-3, 4774 - 4847   | K.YTPVQQ'G'PVGNVNTY'GGDPIPK.S  | 2287.55640 | 2 | 5.32E-10 | 0.96 | 5.01 | - | 1095.4 |
| AHQ-5-9, 3971          | K.YTPVQQ'G'PVGNVNTY'GGDPIPK.S  | 2287.55640 | 2 | 1.83E-04 | 0.85 | 3.72 | - | 582.5  |
| AHQ-5-3, 4485          | K.YTPVQQ'G'PVGNVNTY'GGDPIPK.S  | 2287.55640 | 2 | 9.98E-05 | 0.88 | 3.85 | - | 705.2  |
| AHQ-5-7, 4270          | K.YTPVQQ'G'PVGNVNTY'GGDPIPK.S  | 2287.55640 | 2 | 2.01E-07 | 0.94 | 4.45 | - | 846.5  |
| AHQ-5-5, 4475 - 4487   | K.YTPVQQ'G'PVGNVNTY'GGDPIPK.S  | 2287.55640 | 2 | 1.01E-05 | 0.90 | 4.43 | - | 614.2  |
| AHQ-5-3, 4635 - 4706   | K.YTPVQQ'G'PVGNVNTY'GGDPIPK.S  | 2287.55640 | 2 | 2.59E-06 | 0.94 | 4.69 | - | 891.4  |
| AHQ-5-8, 4141 - 4142   | K.YTPVQQ'G'PVGNVNTY'GGDPIPK.S  | 2287.55640 | 2 | 2.12E-07 | 0.92 | 4.62 | - | 607.1  |
| AHQ-5-1, 4655 - 4719   | K.YTPVQQ'G'PVGNVNTY'GGDPIPK.S  | 2287.55640 | 2 | 1.90E-06 | 0.89 | 3.99 | - | 709.2  |
| AHQ-5-1, 4829 - 4899   | K.YTPVQQ'G'PVGNVNTY'GGDPIPK.S  | 2287.55640 | 2 | 5.14E-10 | 0.94 | 4.82 | - | 814.1  |
| AHQ-5-1, 6499 - 6579   | R.YWPQEA'G'AVH'VLCNS'EDIR.L    | 2538.73318 | 2 | 3.50E-09 | 0.92 | 4.34 | - | 863.9  |
| AHQ-5-1, 6715          | R.YWPQEA'G'AVH'VLCNS'EDIR.L    | 2538.73318 | 3 | 1.71E-09 | 0.70 | 3.06 | - | 440.1  |
| AHQ-5-1, 6844 - 6907   | R.YWPQEA'G'AVH'VLCNS'EDIR.L    | 2538.73318 | 2 | 4.61E-05 | 0.93 | 3.95 | - | 947.7  |
| AHQ-5-2, 6441 - 6469   | R.YWPQEA'G'AVH'VLCNS'EDIR.L    | 2538.73318 | 2 | 4.12E-09 | 0.87 | 2.71 | - | 1204.5 |
| AHQ-5-2, 6711          | R.YWPQEA'G'AVH'VLCNS'EDIR.L    | 2538.73318 | 2 | 1.03E-05 | 0.87 | 3.61 | - | 811.6  |
| AHQ-5-2, 6751 - 6829   | R.YWPQEA'G'AVH'VLCNS'EDIR.L    | 2538.73318 | 2 | 1.17E-09 | 0.94 | 4.32 | - | 866.1  |
| AHQ-5-2, 6819 - 6885   | R.YWPQEA'G'AVH'VLCNS'EDIR.L    | 2538.73318 | 3 | 3.21E-09 | 0.68 | 3.01 | - | 402.8  |
| AHQ-5-2, 6898          | R.YWPQEA'G'AVH'VLCNS'EDIR.L    | 2538.73318 | 2 | 1.78E-10 | 0.95 | 5.09 | - | 829.7  |
| AHQ-5-3, 6533 - 6550   | R.YWPQEA'G'AVH'VLCNS'EDIR.L    | 2538.73318 | 2 | 1.31E-10 | 0.91 | 3.81 | - | 971.2  |
| AHQ-5-3, 6901 - 6975   | R.YWPQEA'G'AVH'VLCNS'EDIR.L    | 2538.73318 | 3 | 4.86E-11 | 0.73 | 3.26 | - | 475.0  |
| AHQ-5-4, 6536          | R.YWPQEA'G'AVH'VLCNS'EDIR.L    | 2538.73318 | 2 | 3.91E-04 | 0.84 | 3.46 | - | 809.8  |
| AHQ-5-4, 6861 - 6889   | R.YWPQEA'G'AVH'VLCNS'EDIR.L    | 2538.73318 | 2 | 2.37E-06 | 0.95 | 4.60 | - | 966.2  |
| AHQ-5-3, 6889 - 6958   | R.YWPQEA'G'AVH'VLCNS'EDIR.L    | 2538.73318 | 2 | 2.88E-04 | 0.64 | 3.22 | - | 413.1  |

|                             |                                                                |            |   |          |       |        |       |          |  |
|-----------------------------|----------------------------------------------------------------|------------|---|----------|-------|--------|-------|----------|--|
| gj 13124879 ref NP_002465.1 | smooth muscle myosin heavy chain 11 isoform SM1 [Homo sapiens] |            |   |          |       |        |       |          |  |
| AHQ-5-2, 4897               | R.DLGEELAEAK.T                                                 | 1117.23151 | 2 | 5.55E-15 | 7.72  | 100.35 | 5.10  | 227336.7 |  |
| AHQ-5-1, 4952               | R.DLGEELAEAK.T                                                 | 1117.23151 | 2 | 8.67E-07 | 0.93  | 3.65   |       | 981.8    |  |
| AHQ-5-3, 4951               | R.DLGEELAEAK.T                                                 | 1117.23151 | 1 | 1.43E-04 | 0.84  | 3.19   |       | 683.7    |  |
| AHQ-5-6, 2622 - 2626        | R.EDQSILCTGEGSAGK.T                                            | 1553.63107 | 2 | 1.00E-04 | 0.31  | 2.72   |       | 358.0    |  |
| AHQ-5-1, 2955               | K.FDQLLAEK.N                                                   | 1093.21165 | 2 | 6.07E-04 | 0.84  | 3.58   |       | 499.5    |  |
| AHQ-5-2, 2737               | K.FDQLLAEK.N                                                   | 1093.21165 | 2 | 3.79E-05 | 0.91  | 3.11   |       | 1399.8   |  |
| AHQ-5-2, 2734 - 2755        | K.FDQLLAEK.N                                                   | 1093.21165 | 1 | 2.04E-06 | 0.57  | 2.40   |       | 761.9    |  |
| AHQ-5-2, 2729               | K.FDQLLAEK.N                                                   | 1093.21165 | 2 | 2.63E-05 | 0.89  | 3.23   |       | 1273.1   |  |
| AHQ-5-1, 2924 - 2951        | K.FDQLLAEK.N                                                   | 1093.21165 | 1 | 4.74E-04 | 0.79  | 2.54   |       | 1129.2   |  |
| AHQ-5-4, 2609               | R.KFDQLLAEK.N                                                  | 1093.21165 | 1 | 2.11E-05 | 0.64  | 2.07   |       | 985.5    |  |
| AHQ-5-6, 2464               | R.KFDQLLAEK.N                                                  | 1221.38456 | 2 | 4.28E-04 | 0.90  | 3.32   |       | 1138.1   |  |
| AHQ-5-1, 6208               | K.LLQQLFNHTMFILQEEYQR.E                                        | 1221.38456 | 1 | 6.94E-06 | 0.55  | 1.97   |       | 767.1    |  |
| AHQ-5-1, 6215               | K.LLQQLFNHTMFILQEEYQR.E                                        | 2468.77258 | 3 | 1.38E-07 | 0.98  | 6.24   |       | 2982.7   |  |
| AHQ-5-5, 6202 - 6266        | K.LLQQLFNHTMFILQEEYQR.E                                        | 2468.77258 | 2 | 1.81E-08 | 0.97  | 5.15   |       | 1740.1   |  |
| AHQ-5-3, 6179               | K.LLQQLFNHTMFILQEEYQR.E                                        | 2468.77258 | 2 | 6.43E-05 | 0.72  | 2.85   |       | 709.8    |  |
| AHQ-5-1, 5523               | K.LLQQLFNHTMFILQEEYQR.E                                        | 2468.77258 | 3 | 2.32E-04 | 0.81  | 3.64   |       | 924.4    |  |
| AHQ-5-2, 5267               | K.LLQQLFNHTMFILQEEYQR.E                                        | 2484.77198 | 2 | 7.61E-06 | 0.88  | 2.77   |       | 1213.7   |  |
| AHQ-5-2, 5406 - 5407        | K.LLQQLFNHTMFILQEEYQR.E                                        | 2484.77198 | 3 | 2.04E-07 | 0.99  | 6.79   |       | 3673.5   |  |
| AHQ-5-4, 6126               | K.LLQQLFNHTMFILQEEYQR.E                                        | 2484.77198 | 2 | 9.01E-07 | 0.89  | 3.78   |       | 882.5    |  |
| AHQ-5-2, 6397               | K.LLQQLFNHTMFILQEEYQR.E                                        | 2468.77258 | 2 | 3.07E-07 | 0.90  | 2.87   |       | 1183.5   |  |
| AHQ-5-2, 6395 - 6471        | K.LLQQLFNHTMFILQEEYQR.E                                        | 2468.77258 | 3 | 5.74E-12 | 0.98  | 5.93   |       | 2777.0   |  |
| AHQ-5-2, 6054 - 6134        | K.LLQQLFNHTMFILQEEYQR.E                                        | 2468.77258 | 2 | 4.24E-11 | 0.98  | 5.49   |       | 2214.2   |  |
| AHQ-5-2, 6057 - 6126        | K.LLQQLFNHTMFILQEEYQR.E                                        | 2468.77258 | 2 | 2.30E-07 | 0.97  | 4.92   |       | 1872.0   |  |
| AHQ-5-2, 6161 - 6206        | K.LLQQLFNHTMFILQEEYQR.E                                        | 2468.77258 | 3 | 6.97E-08 | 0.98  | 6.70   |       | 3099.8   |  |
| AHQ-5-2, 6171               | K.LLQQLFNHTMFILQEEYQR.E                                        | 2468.77258 | 2 | 6.68E-09 | 0.95  | 4.54   |       | 1381.9   |  |
| AHQ-5-2, 6263               | K.LLQQLFNHTMFILQEEYQR.E                                        | 2468.77258 | 3 | 5.55E-15 | 0.98  | 6.48   |       | 2500.6   |  |
| AHQ-5-2, 2535               | R.NCAAYLK.L                                                    | 2468.77258 | 3 | 2.99E-11 | 0.99  | 6.91   |       | 3477.8   |  |
| AHQ-5-3, 4555               | R.NWQWVLR.L                                                    | 840.96726  | 1 | 2.86E-04 | 0.56  | 1.96   |       | 739.6    |  |
| AHQ-5-2, 6458 - 6461        | K.LLQQLANPILEAFGNAK.T                                          | 976.07459  | 1 | 1.95E-04 | 0.35  | 2.09   |       | 191.4    |  |
| AHQ-5-6, 6288               | K.LLQQLANPILEAFGNAK.T                                          | 1727.98540 | 2 | 7.80E-07 | 0.95  | 4.29   |       | 1140.3   |  |
| AHQ-5-7, 5926 - 5935        | K.LLQQLANPILEAFGNAK.T                                          | 1727.98540 | 2 | 1.15E-05 | 0.90  | 4.15   |       | 675.0    |  |
| AHQ-5-9, 5371               | K.LLQQLANPILEAFGNAK.T                                          | 1727.98540 | 2 | 9.67E-06 | 0.94  | 4.46   |       | 921.8    |  |
| AHQ-5-6, 6112 - 6114        | K.LLQQLANPILEAFGNAK.T                                          | 1727.98540 | 2 | 2.78E-04 | 0.81  | 3.43   |       | 573.6    |  |
| AHQ-5-1, 6393 - 6463        | K.LLQQLANPILEAFGNAK.T                                          | 1727.98540 | 2 | 2.91E-09 | 0.94  | 4.16   |       | 839.3    |  |
| AHQ-5-5, 6139 - 6201        | K.LLQQLANPILEAFGNAK.T                                          | 1727.98540 | 2 | 2.63E-10 | 0.96  | 4.74   |       | 948.9    |  |
| AHQ-5-4, 6376 - 6396        | K.LLQQLANPILEAFGNAK.T                                          | 1727.98540 | 2 | 9.48E-04 | 0.96  | 4.53   |       | 1211.5   |  |
| AHQ-5-3, 6410 - 6429        | K.LLQQLANPILEAFGNAK.T                                          | 1727.98540 | 2 | 6.32E-12 | 0.97  | 5.35   |       | 1063.5   |  |
| AHQ-5-2, 6235 - 6317        | K.LLQQLANPILEAFGNAK.T                                          | 1727.98540 | 2 | 2.30E-08 | 0.96  | 4.54   |       | 1150.2   |  |
| AHQ-5-1, 6557               | K.LLQQLANPILEAFGNAK.T                                          | 1727.98540 | 2 | 4.96E-10 | 0.96  | 4.93   |       | 1136.1   |  |
| AHQ-5-10, 5520 - 5538       | K.LLQQLANPILEAFGNAK.T                                          | 1727.98540 | 2 | 3.79E-04 | 0.81  | 3.04   |       | 690.8    |  |
| AHQ-5-4, 5825 - 5829        | K.TOLEELEDQATEDAK.L                                            | 1727.98540 | 2 | 3.83E-05 | 0.97  | 4.67   |       | 1536.5   |  |
| AHQ-5-2, 4077               | K.TOLEELEDQATEDAK.L                                            | 1963.04334 | 2 | 2.53E-06 | 0.98  | 6.12   |       | 567.6    |  |
| AHQ-5-5, 5619 - 5689        | K.TOLEELEDQATEDAK.L                                            | 1963.04334 | 2 | 2.88E-10 | 0.96  | 5.41   |       | 1247.3   |  |
| AHQ-5-3, 5897               | K.TOLEELEDQATEDAK.L                                            | 1963.04334 | 2 | 7.37E-08 | 0.98  | 6.86   |       | 2023.3   |  |
| AHQ-5-3, 5877 - 5901        | K.TOLEELEDQATEDAK.L                                            | 1963.04334 | 3 | 3.74E-05 | 0.95  | 4.94   |       | 1165.1   |  |
| AHQ-5-1, 5925               | K.TOLEELEDQATEDAK.L                                            | 1963.04334 | 2 | 4.85E-06 | 0.98  | 6.16   |       | 1992.5   |  |
| AHQ-5-1, 5915 - 5919        | K.TOLEELEDQATEDAK.L                                            | 1963.04334 | 3 | 2.20E-09 | 0.96  | 5.23   |       | 1340.6   |  |
| AHQ-5-6, 5602               | K.TOLEELEDQATEDAK.L                                            | 1963.04334 | 2 | 3.66E-06 | 0.98  | 6.33   |       | 2813.6   |  |
| AHQ-5-2, 5797 - 5878        | K.TOLEELEDQATEDAK.L                                            | 1963.04334 | 2 | 1.27E-11 | 0.98  | 6.56   |       | 2295.0   |  |
| AHQ-5-3, 4110               | K.TOLEELEDQATEDAK.L                                            | 1963.04334 | 2 | 1.88E-04 | 0.98  | 6.15   |       | 2456.3   |  |
| AHQ-5-2, 5826               | K.TOLEELEDQATEDAK.L                                            | 1963.04334 | 2 | 1.39E-04 | 0.84  | 3.77   |       | 644.6    |  |
| AHQ-5-2, 5887 - 5953        | K.TOLEELEDQATEDAK.L                                            | 1963.04334 | 3 | 8.24E-09 | 0.94  | 5.00   |       | 996.4    |  |
| AHQ-5-4, 5861               | K.TOLEELEDQATEDAK.L                                            | 1963.04334 | 2 | 1.56E-04 | 0.92  | 3.85   |       | 1208.4   |  |
| gj 4826898 ref NP_005013.1  | profilin 1; profilin-1 [Homo sapiens]                          |            |   |          |       |        |       |          |  |
| AHQ-5-13, 4899              | K.CSVIRDSLLQDGFESM*DLR.T                                       | 2259.50329 | 3 | 7.22E-15 | 17.77 | 210.32 | 71.40 | 15054.2  |  |
| AHQ-5-13, 5528 - 5588       | K.CSVIRDSLLQDGFESMDLR.T                                        | 2243.50389 | 3 | 3.22E-07 | 0.96  | 5.79   |       | 1516.7   |  |
| AHQ-5-13, 4991              | K.CSVIRDSLLQDGFESM*DLR.T                                       | 2259.50329 | 3 | 4.21E-05 | 0.95  | 4.50   |       | 1706.0   |  |
| AHQ-5-13, 1653 - 1711       | K.CYEM*ASHLR.R                                                 | 1184.32794 | 2 | 4.63E-04 | 0.82  | 3.67   |       | 869.2    |  |
| AHQ-5-13, 1687 - 1767       | K.CYEM*ASHLR.R                                                 | 1184.32794 | 2 | 6.68E-05 | 0.86  | 2.53   |       | 1278.8   |  |
| AHQ-5-13, 1823 - 1892       | K.CYEM*ASHLR.R                                                 | 1184.32794 | 2 | 3.05E-06 | 0.93  | 3.59   |       | 1063.4   |  |
| AHQ-5-13, 2039              | K.CYEM*ASHLR.R                                                 | 1184.32794 | 2 | 2.34E-05 | 0.94  | 3.83   |       | 1124.4   |  |
| AHQ-5-13, 2295 - 2371       | K.CYEMASHLR.R                                                  | 1184.32794 | 2 | 4.18E-05 | 0.86  | 2.94   |       | 1031.5   |  |
| AHQ-5-13, 2379 - 2500       | K.CYEMASHLR.R                                                  | 1168.32854 | 2 | 4.75E-05 | 0.96  | 3.97   |       | 1969.9   |  |
| AHQ-5-13, 2383 - 2443       | K.CYEMASHLR.R                                                  | 1168.32854 | 1 | 2.10E-06 | 0.53  | 2.98   |       | 237.9    |  |
| AHQ-5-13, 2467 - 2533       | K.CYEMASHLR.R                                                  | 1168.32854 | 2 | 5.16E-04 | 0.95  | 3.26   |       | 1855.2   |  |
| AHQ-5-14, 2341              | K.CYEMASHLR.R                                                  | 1168.32854 | 2 | 2.69E-04 | 0.93  | 2.54   |       | 1870.8   |  |
| AHQ-5-13, 2057 - 2118       | K.CYEM*ASHLR.R                                                 | 1168.32854 | 2 | 3.15E-05 | 0.95  | 3.31   |       | 1742.6   |  |
| AHQ-5-13, 2601 - 2617       | K.CYEMASHLR.R                                                  | 1184.32794 | 2 | 2.50E-05 | 0.91  | 3.26   |       | 1370.7   |  |
| AHQ-5-13, 4183              | K.DRSSFYVNGTLGGQK.C                                            | 1168.32854 | 2 | 2.87E-06 | 0.97  | 3.80   |       | 2092.3   |  |
| AHQ-5-13, 4148 - 4150       | K.DRSSFYVNGTLGGQK.C                                            | 1742.91379 | 2 | 4.29E-06 | 0.96  | 5.00   |       | 1157.4   |  |
| AHQ-5-13, 4055 - 4119       | K.DRSSFYVNGTLGGQK.C                                            | 1742.91379 | 2 | 1.31E-10 | 0.97  | 5.29   |       | 1293.3   |  |
| AHQ-5-12, 4049              | K.DRSSFYVNGTLGGQK.C                                            | 1742.91379 | 2 | 2.16E-10 | 0.97  | 5.62   |       | 1151.8   |  |
| AHQ-5-13, 4281              | K.DRSSFYVNGTLGGQK.C                                            | 1742.91379 | 2 | 7.22E-15 | 0.97  | 4.86   |       | 1295.6   |  |
| AHQ-5-12, 5666 - 5689       | R.DSLLQDGFESMDLR.T                                             | 1742.91379 | 2 | 1.09E-09 | 0.96  | 5.86   |       | 859.1    |  |
| AHQ-5-12, 5782 - 5860       | R.DSLLQDGFESMDLR.T                                             | 1626.77023 | 2 | 7.96E-04 | 0.88  | 3.72   |       | 622.4    |  |
| AHQ-5-13, 4827 - 4903       | R.DSLLQDGFESM*DLR.T                                            | 1626.77023 | 2 | 4.15E-11 | 0.90  | 3.73   |       | 1034.7   |  |
| AHQ-5-13, 4691 - 4755       | R.DSLLQDGFESM*DLR.T                                            | 1642.76963 | 2 | 3.03E-10 | 0.97  | 4.66   |       | 1919.0   |  |
| AHQ-5-13, 4636              | R.DSLLQDGFESM*DLR.T                                            | 1642.76963 | 2 | 1.42E-08 | 0.97  | 4.82   |       | 2103.5   |  |
| AHQ-5-13, 4563 - 4628       | R.DSLLQDGFESM*DLR.T                                            | 1642.76963 | 3 | 4.29E-07 | 0.96  | 4.93   |       | 1899.0   |  |
| AHQ-5-12, 5576 - 5613       | R.DSLLQDGFESMDLR.T                                             | 1642.76963 | 2 | 9.33E-07 | 0.95  | 4.02   |       | 1766.3   |  |
| AHQ-5-13, 4449 - 4515       | R.DSLLQDGFESM*DLR.T                                            | 1626.77023 | 2 | 2.62E-07 | 0.95  | 4.31   |       | 1360.1   |  |
| AHQ-5-12, 5448 - 5524       | R.DSLLQDGFESMDLR.T                                             | 1642.76963 | 2 | 3.94E-11 | 0.96  | 4.68   |       | 1260.7   |  |
| AHQ-5-13, 4343              | R.DSLLQDGFESM*DLR.T                                            | 1626.77023 | 2 | 1.47E-04 | 0.88  | 3.98   |       | 753.9    |  |
| AHQ-5-12, 5306 - 5385       | R.DSLLQDGFESMDLR.T                                             | 1642.76963 | 2 | 2.21E-07 | 0.93  | 3.77   |       | 1074.8   |  |
| AHQ-5-12, 4690 - 4725       | R.DSLLQDGFESM*DLR.T                                            | 1626.77023 | 2 | 1.83E-09 | 0.96  | 4.48   |       | 1548.5   |  |
| AHQ-5-13, 5791 - 5872       | R.DSLLQDGFESMDLR.T                                             | 1642.76963 | 2 | 2.06E-08 | 0.95  | 3.73   |       | 1719.4   |  |
| AHQ-5-12, 4581 - 4582       | R.DSLLQDGFESM*DLR.T                                            | 1626.77023 | 2 | 7.42E-05 | 0.94  | 3.17   |       | 1699.3   |  |
| AHQ-5-13, 5091 - 5092       | R.DSLLQDGFESMDLR.T                                             | 1642.76963 | 2 | 4.77E-07 | 0.93  | 4.06   |       | 1020.4   |  |
| AHQ-5-13, 5189 - 5271       | R.DSLLQDGFESMDLR.T                                             | 1626.77023 | 2 | 4.44E-09 | 0.96  | 4.62   |       | 1450.2   |  |
| AHQ-5-13, 5205 - 5287       | R.DSLLQDGFESM*DLR.T                                            | 1626.77023 | 2 | 3.99E-10 | 0.94  | 4.12   |       | 1387.1   |  |
| AHQ-5-13, 5381 - 5443       | R.DSLLQDGFESM*DLR.T                                            | 1642.76963 | 2 | 4.86E-09 | 0.91  | 3.59   |       | 1029.4   |  |
| AHQ-5-13, 5387 - 5456       | R.DSLLQDGFESMDLR.T                                             | 1626.77023 | 2 | 6.98E-06 | 0.98  | 5.25   |       | 2043.5   |  |
| AHQ-5-13, 5393              | R.DSLLQDGFESM*DLR.T                                            | 1642.76963 | 2 | 1.93E-04 | 0.95  | 3.88   |       | 1899.7   |  |
| AHQ-5-13, 5473 - 5539       | R.DSLLQDGFESMDLR.T                                             | 1642.76963 | 2 | 9.92E-06 | 0.97  | 4.11   |       | 2274.8   |  |
| AHQ-5-14, 4578 - 4595       | R.DSLLQDGFESM*DLR.T                                            | 1626.77023 | 2 | 2.72E-05 | 0.93  | 3.07   |       | 1631.1   |  |
| AHQ-5-14, 5417              | R.DSLLQDGFESM*DLR.T                                            | 1642.76963 | 2 | 1.69E-07 | 0.96  | 4.69   |       | 1567.3   |  |
| AHQ-5-13, 6906              | R.DSLLQDGFESMDLR.T                                             | 1642.76963 | 2 | 4.72E-05 | 0.95  | 3.73   |       | 1575.5   |  |
| AHQ-5-13, 6658              | R.DSLLQDGFESMDLR.T                                             | 1626.77023 | 2 | 5.10E-05 | 0.94  | 3.59   |       | 1478.0   |  |
| AHQ-5-13, 6502 - 6562       | R.DSLLQDGFESMDLR.T                                             | 1626.77023 | 2 | 2.46E-10 | 0.92  | 3.75   |       | 1155.5   |  |
| AHQ-5-13, 6209 - 6282       | R.DSLLQDGFESMDLR.T                                             | 1626.77023 | 2 | 4.70E-06 | 0.95  | 4.30   |       | 1596.5   |  |

|                            |                                                                        |            |   |          |       |        |       |         |
|----------------------------|------------------------------------------------------------------------|------------|---|----------|-------|--------|-------|---------|
| AHQ-5-13, 5548 - 5613      | R.DSLQLDGEFSMDLR.T                                                     | 1626.77023 | 2 | 3.75E-10 | 0.98  | 4.67   | -     | 2609.7  |
| AHQ-5-13-, 5571 - 5607     | R.DSLQLDGEFSMDLR.T                                                     | 1626.77023 | 2 | 1.90E-09 | 0.98  | 5.38   | -     | 1805.4  |
| AHQ-5-13, 4549 - 4613      | R.DSLQLDGEFSM*DLR.T                                                    | 1642.76963 | 2 | 1.41E-08 | 0.95  | 4.07   | -     | 1230.7  |
| AHQ-5-13, 5448 - 5486      | R.DSLQLDGEFSMDLR.T                                                     | 1626.77023 | 2 | 2.90E-11 | 0.97  | 5.30   | -     | 1704.7  |
| AHQ-5-13, 4676 - 4740      | R.DSLQLDGEFSM*DLR.T                                                    | 1642.76963 | 2 | 2.85E-09 | 0.96  | 4.00   | -     | 1888.3  |
| AHQ-5-13, 4780 - 4844      | R.DSLQLDGEFSM*DLR.T                                                    | 1642.76963 | 2 | 2.71E-07 | 0.95  | 4.00   | -     | 1692.5  |
| AHQ-5-13, 4929 - 4982      | R.DSLQLDGEFSM*DLR.T                                                    | 1642.76963 | 2 | 5.84E-08 | 0.96  | 5.03   | -     | 1588.2  |
| AHQ-5-13, 5329 - 5393      | R.DSLQLDGEFSM*DLR.T                                                    | 1642.76963 | 2 | 2.12E-04 | 0.84  | 3.15   | -     | 1166.8  |
| AHQ-5-13, 5050 - 5120      | R.DSLQLDGEFSM*DLR.T                                                    | 1642.76963 | 2 | 3.08E-05 | 0.95  | 4.43   | -     | 1552.0  |
| AHQ-5-13, 5146 - 5210      | R.DSLQLDGEFSMDLR.T                                                     | 1626.77023 | 2 | 3.03E-06 | 0.94  | 4.09   | -     | 1354.8  |
| AHQ-5-13, 5249 - 5324      | R.DSLQLDGEFSMDLR.T                                                     | 1626.77023 | 2 | 2.75E-10 | 0.97  | 4.84   | -     | 1589.4  |
| AHQ-5-13, 5310 - 5384      | R.DSLQLDGEFSMDLR.T                                                     | 1626.77023 | 2 | 1.09E-10 | 0.97  | 4.75   | -     | 1701.5  |
| AHQ-5-13-, 4217            | R.DSLQLDGEFSM*DLR.TK.S                                                 | 1872.04688 | 2 | 8.56E-04 | 0.71  | 3.19   | -     | 340.2   |
| AHQ-5-13, 3615 - 3689      | K.DSPSWAAV*PGK.T                                                       | 1214.35211 | 2 | 1.21E-07 | 0.92  | 3.78   | -     | 978.8   |
| AHQ-5-13-, 3663 - 3741     | K.DSPSWAAV*PGK.T                                                       | 1214.35211 | 2 | 1.05E-05 | 0.89  | 3.50   | -     | 924.3   |
| AHQ-5-13, 3932 - 3993      | K.DSPSWAAV*PGK.T                                                       | 1214.35211 | 2 | 1.40E-05 | 0.80  | 2.75   | -     | 943.3   |
| AHQ-5-13, 3735 - 3796      | K.DSPSWAAV*PGK.T                                                       | 1214.35211 | 2 | 8.46E-04 | 0.90  | 3.32   | -     | 1051.5  |
| AHQ-5-13, 3469             | K.DSPSWAAV*PGK.T                                                       | 1214.35211 | 2 | 2.20E-05 | 0.87  | 3.11   | -     | 923.6   |
| AHQ-5-13-, 3495 - 3620     | K.DSPSWAAV*PGK.T                                                       | 1214.35211 | 1 | 6.69E-04 | 0.27  | 2.54   | -     | 297.3   |
| AHQ-5-12, 3545 - 3578      | K.DSPSWAAV*PGK.T                                                       | 1214.35211 | 2 | 8.61E-08 | 0.93  | 3.15   | -     | 1390.7  |
| AHQ-5-13-, 3491 - 3555     | K.DSPSWAAV*PGK.T                                                       | 1214.35211 | 2 | 6.39E-05 | 0.90  | 3.73   | -     | 885.3   |
| AHQ-5-13, 2355             | K.KCYEMASHLR.R                                                         | 1296.50145 | 2 | 2.93E-04 | 0.80  | 2.56   | -     | 1097.6  |
| AHQ-5-13, 4322 - 4384      | R.SSFYVNLGLTGGQK.C                                                     | 1471.63957 | 2 | 1.03E-08 | 0.94  | 4.11   | -     | 790.0   |
| AHQ-5-13, 4324 - 4388      | R.SSFYVNLGLTGGQK.C                                                     | 1471.63957 | 1 | 3.68E-06 | 0.69  | 2.89   | -     | 449.3   |
| AHQ-5-13, 4432 - 4506      | R.SSFYVNLGLTGGQK.C                                                     | 1471.63957 | 2 | 1.68E-08 | 0.96  | 4.24   | -     | 1276.1  |
| AHQ-5-13, 4476 - 4673      | R.SSFYVNLGLTGGQK.C                                                     | 1471.63957 | 1 | 2.53E-05 | 0.48  | 2.51   | -     | 382.8   |
| AHQ-5-14-, 4473            | R.SSFYVNLGLTGGQK.C                                                     | 1471.63957 | 2 | 2.15E-07 | 0.95  | 3.33   | -     | 1442.2  |
| AHQ-5-12, 4289             | R.SSFYVNLGLTGGQK.C                                                     | 1471.63957 | 1 | 6.20E-11 | 0.44  | 2.14   | -     | 397.6   |
| AHQ-5-12, 4461 - 4528      | R.SSFYVNLGLTGGQK.C                                                     | 1471.63957 | 1 | 1.46E-08 | 0.77  | 3.02   | -     | 637.8   |
| AHQ-5-13, 4660 - 4724      | R.SSFYVNLGLTGGQK.C                                                     | 1471.63957 | 2 | 1.05E-05 | 0.68  | 2.57   | -     | 599.3   |
| AHQ-5-14-, 4423 - 4554     | R.SSFYVNLGLTGGQK.C                                                     | 1471.63957 | 1 | 4.48E-06 | 0.51  | 2.55   | -     | 416.8   |
| AHQ-5-13-, 4225 - 4701     | R.SSFYVNLGLTGGQK.C                                                     | 1471.63957 | 1 | 3.10E-07 | 0.68  | 2.94   | -     | 425.2   |
| AHQ-5-14, 5113 - 5126      | R.SSFYVNLGLTGGQK.C                                                     | 1471.63957 | 2 | 5.28E-04 | 0.91  | 3.78   | -     | 757.3   |
| AHQ-5-14, 5128             | R.SSFYVNLGLTGGQK.C                                                     | 1471.63957 | 1 | 7.09E-08 | 0.50  | 2.04   | -     | 512.1   |
| AHQ-5-14, 5282 - 5362      | R.SSFYVNLGLTGGQK.C                                                     | 1471.63957 | 1 | 3.31E-06 | 0.70  | 2.68   | -     | 499.7   |
| AHQ-5-13-, 4439 - 4511     | R.SSFYVNLGLTGGQK.C                                                     | 1471.63957 | 2 | 4.49E-06 | 0.97  | 4.78   | -     | 1440.4  |
| AHQ-5-13-, 4220 - 4293     | R.SSFYVNLGLTGGQK.C                                                     | 1471.63957 | 2 | 4.01E-08 | 0.96  | 4.56   | -     | 1201.3  |
| AHQ-5-14-, 4238            | R.SSFYVNLGLTGGQK.C                                                     | 1471.63957 | 1 | 2.72E-10 | 0.75  | 2.71   | -     | 548.1   |
| AHQ-5-13-, 4347 - 4415     | R.SSFYVNLGLTGGQK.C                                                     | 1471.63957 | 2 | 1.49E-05 | 0.93  | 3.79   | -     | 957.2   |
| AHQ-5-14-, 4237 - 4257     | R.SSFYVNLGLTGGQK.C                                                     | 1471.63957 | 2 | 2.83E-08 | 0.95  | 4.22   | -     | 1154.5  |
| AHQ-5-13-, 4852            | R.SSFYVNLGLTGGQKCSVIR.D                                                | 2088.37322 | 2 | 6.57E-04 | 0.23  | 2.82   | -     | 204.6   |
| AHQ-5-13, 4937 - 5014      | R.SSFYVNLGLTGGQKCSVIR.D                                                | 2088.37322 | 2 | 5.29E-04 | 0.75  | 3.72   | -     | 414.5   |
| AHQ-5-13, 3066 - 3125      | K.STGGAPTFNNV*VTK.T                                                    | 1380.52843 | 2 | 2.63E-07 | 0.87  | 3.54   | -     | 516.8   |
| AHQ-5-13, 3098             | K.STGGAPTFNNV*VTK.T                                                    | 1380.52843 | 1 | 3.10E-05 | 0.50  | 2.61   | -     | 441.6   |
| AHQ-5-13, 3189 - 3399      | K.STGGAPTFNNV*VTK.T                                                    | 1380.52843 | 1 | 9.89E-04 | 0.63  | 2.75   | -     | 418.9   |
| AHQ-5-13, 3278 - 3341      | K.STGGAPTFNNV*VTK.T                                                    | 1380.52843 | 2 | 2.47E-07 | 0.65  | 2.70   | -     | 461.6   |
| AHQ-5-13, 3401 - 3473      | K.STGGAPTFNNV*VTK.T                                                    | 1380.52843 | 2 | 2.98E-09 | 0.79  | 3.05   | -     | 399.8   |
| AHQ-5-14, 3912             | K.STGGAPTFNNV*VTK.T                                                    | 1380.52843 | 1 | 1.14E-04 | 0.20  | 2.39   | -     | 332.6   |
| AHQ-5-13-, 2948 - 3013     | K.STGGAPTFNNV*VTK.T                                                    | 1380.52843 | 2 | 4.75E-09 | 0.91  | 4.38   | -     | 501.2   |
| AHQ-5-13-, 2952 - 3380     | K.STGGAPTFNNV*VTK.T                                                    | 1380.52843 | 1 | 4.00E-04 | 0.31  | 2.52   | -     | 276.9   |
| AHQ-5-13-, 3080            | K.STGGAPTFNNV*VTK.T                                                    | 1380.52843 | 2 | 1.85E-05 | 0.74  | 3.04   | -     | 405.4   |
| AHQ-5-13-, 3179 - 3245     | K.STGGAPTFNNV*VTK.T                                                    | 1380.52843 | 2 | 5.39E-09 | 0.81  | 3.12   | -     | 480.0   |
| AHQ-5-13-, 3307 - 3384     | K.STGGAPTFNNV*VTK.T                                                    | 1380.52843 | 2 | 2.05E-09 | 0.77  | 3.33   | -     | 309.8   |
| AHQ-5-12, 3052             | K.STGGAPTFNNV*VTK.T                                                    | 1380.52843 | 2 | 3.10E-07 | 0.87  | 3.38   | -     | 449.4   |
| AHQ-5-12, 3048             | K.STGGAPTFNNV*VTK.T                                                    | 1380.52843 | 1 | 4.77E-05 | 0.39  | 2.45   | -     | 422.7   |
| AHQ-5-12, 3046 - 3126      | K.STGGAPTFNNV*VTK.T                                                    | 1380.52843 | 2 | 4.01E-05 | 0.68  | 2.80   | -     | 354.2   |
| AHQ-5-12, 2978 - 3029      | K.STGGAPTFNNV*VTK.T                                                    | 1380.52843 | 1 | 5.97E-04 | 0.57  | 2.46   | -     | 513.0   |
| AHQ-5-12, 2913 - 2982      | K.STGGAPTFNNV*VTK.T                                                    | 1380.52843 | 2 | 2.09E-05 | 0.81  | 3.09   | -     | 485.6   |
| AHQ-5-13, 3537             | K.STGGAPTFNNV*VTK.T                                                    | 1380.52843 | 2 | 6.25E-06 | 0.67  | 2.87   | -     | 401.6   |
| AHQ-5-14-, 3042            | K.STGGAPTFNNV*VTK.T                                                    | 1380.52843 | 1 | 3.28E-04 | 0.51  | 2.91   | -     | 481.7   |
| AHQ-5-13, 3129             | K.STGGAPTFNNV*VTK.TDK.T                                                | 1724.89354 | 2 | 1.02E-04 | 0.92  | 3.98   | -     | 712.6   |
| AHQ-5-13, 2981             | K.STGGAPTFNNV*VTK.TDK.T                                                | 1724.89354 | 2 | 5.21E-05 | 0.84  | 3.52   | -     | 497.9   |
| AHQ-5-13-, 2859 - 2863     | K.STGGAPTFNNV*VTK.TDK.T                                                | 1724.89354 | 2 | 4.23E-04 | 0.89  | 3.92   | -     | 620.1   |
| AHQ-5-13-, 2875 - 2887     | K.TDKTLVLLM*GK.E                                                       | 1235.51929 | 2 | 1.23E-04 | 0.93  | 3.79   | -     | 1029.0  |
| AHQ-5-13-, 3449 - 3515     | K.TDKTLVLLM*GK.E                                                       | 1219.51989 | 2 | 5.00E-09 | 0.95  | 4.31   | -     | 1243.3  |
| AHQ-5-13, 3567 - 3645      | K.TDKTLVLLM*GK.E                                                       | 1219.51989 | 2 | 1.03E-08 | 0.96  | 4.41   | -     | 1309.4  |
| AHQ-5-13, 2931 - 3007      | K.TDKTLVLLM*GK.E                                                       | 1235.51929 | 2 | 6.46E-04 | 0.91  | 3.49   | -     | 927.2   |
| AHQ-5-13-, 5763 - 5823     | K.TFVNITPAEVLV*GK.D                                                    | 1644.93630 | 2 | 2.10E-05 | 0.93  | 4.08   | -     | 1035.8  |
| AHQ-5-12, 5892 - 5964      | K.TFVNITPAEVLV*GK.D                                                    | 1644.93630 | 2 | 1.18E-07 | 0.91  | 4.17   | -     | 750.2   |
| AHQ-5-12, 5837             | K.TFVNITPAEVLV*GK.D                                                    | 1644.93630 | 3 | 7.51E-07 | 0.97  | 5.40   | -     | 1544.8  |
| AHQ-5-12, 5790 - 5856      | K.TFVNITPAEVLV*GK.D                                                    | 1644.93630 | 2 | 3.56E-08 | 0.96  | 5.07   | -     | 1079.4  |
| AHQ-5-13-, 5664 - 5681     | K.TFVNITPAEVLV*GK.D                                                    | 1644.93630 | 3 | 8.51E-08 | 0.98  | 6.34   | -     | 1918.2  |
| AHQ-5-12, 6005             | K.TFVNITPAEVLV*GK.D                                                    | 1644.93630 | 2 | 1.13E-04 | 0.80  | 3.07   | -     | 879.5   |
| AHQ-5-13-, 5751 - 5816     | K.TFVNITPAEVLV*GK.D                                                    | 1644.93630 | 3 | 9.76E-10 | 0.96  | 5.55   | -     | 1272.9  |
| AHQ-5-13, 6588             | K.TFVNITPAEVLV*GK.D                                                    | 1644.93630 | 2 | 2.44E-04 | 0.71  | 3.59   | -     | 333.1   |
| AHQ-5-13-, 6524 - 6529     | K.TFVNITPAEVLV*GK.D                                                    | 1644.93630 | 2 | 1.71E-06 | 0.90  | 4.24   | -     | 808.7   |
| AHQ-5-14-, 5726 - 5753     | K.TFVNITPAEVLV*GK.D                                                    | 1644.93630 | 2 | 1.37E-04 | 0.93  | 4.58   | -     | 877.5   |
| AHQ-5-13, 5956 - 6024      | K.TFVNITPAEVLV*GK.D                                                    | 1644.93630 | 2 | 1.04E-06 | 0.94  | 4.82   | -     | 923.2   |
| AHQ-5-13-, 5648 - 5707     | K.TFVNITPAEVLV*GK.D                                                    | 1644.93630 | 2 | 1.27E-06 | 0.83  | 3.74   | -     | 791.2   |
| AHQ-5-13, 5820 - 5898      | K.TFVNITPAEVLV*GK.D                                                    | 1644.93630 | 2 | 1.14E-08 | 0.93  | 4.40   | -     | 906.0   |
| AHQ-5-13, 5788 - 5853      | K.TFVNITPAEVLV*GK.D                                                    | 1644.93630 | 3 | 2.60E-08 | 0.96  | 5.05   | -     | 1615.8  |
| AHQ-5-13, 5604 - 5672      | K.TFVNITPAEVLV*GK.D                                                    | 1644.93630 | 2 | 8.54E-05 | 0.81  | 3.44   | -     | 653.0   |
| AHQ-5-13-, 5867 - 5929     | K.TFVNITPAEVLV*GK.D                                                    | 1644.93630 | 2 | 1.11E-08 | 0.93  | 4.57   | -     | 781.3   |
| AHQ-5-13-, 5991 - 6051     | K.TFVNITPAEVLV*GK.D                                                    | 1644.93630 | 2 | 3.34E-06 | 0.91  | 4.08   | -     | 872.0   |
| AHQ-5-4, 6162              | K.TFVNITPAEVLV*GK.D                                                    | 1644.93630 | 2 | 1.83E-04 | 0.57  | 2.97   | -     | 386.3   |
| AHQ-5-13-, 5357 - 5431     | K.TFVNITPAEVLV*GKDR.S                                                  | 1916.21052 | 2 | 2.51E-04 | 0.88  | 3.89   | -     | 602.5   |
| AHQ-5-12, 5433 - 5442      | K.TFVNITPAEVLV*GKDR.S                                                  | 1916.21052 | 2 | 1.28E-07 | 0.80  | 3.69   | -     | 551.1   |
| AHQ-5-13, 6238             | K.TFVNITPAEVLV*GKDR.S                                                  | 1916.21052 | 2 | 1.70E-04 | 0.77  | 3.10   | -     | 763.0   |
| AHQ-5-13, 5444             | K.TFVNITPAEVLV*GKDR.S                                                  | 1916.21052 | 3 | 9.39E-05 | 0.60  | 3.06   | -     | 518.4   |
| AHQ-5-13, 5454 - 5522      | K.TFVNITPAEVLV*GKDR.S                                                  | 1916.21052 | 2 | 5.97E-06 | 0.89  | 3.70   | -     | 783.9   |
| AHQ-5-13-, 2719 - 2795     | R.TKSTGGAPTFNNV*VTK.T                                                  | 1609.80568 | 3 | 1.06E-06 | 0.90  | 4.41   | -     | 740.6   |
| AHQ-5-13-, 2783 - 2784     | R.TKSTGGAPTFNNV*VTK.T                                                  | 1609.80568 | 2 | 5.46E-06 | 0.89  | 4.11   | -     | 617.0   |
| AHQ-5-12, 2656             | R.TKSTGGAPTFNNV*VTK.T                                                  | 1609.80568 | 2 | 1.62E-05 | 0.94  | 4.27   | -     | 850.8   |
| AHQ-5-13, 2817 - 2890      | R.TKSTGGAPTFNNV*VTK.T                                                  | 1609.80568 | 2 | 1.74E-04 | 0.94  | 4.34   | -     | 876.5   |
| AHQ-5-13, 2923 - 2943      | R.TKSTGGAPTFNNV*VTK.T                                                  | 1609.80568 | 3 | 9.05E-05 | 0.67  | 3.48   | -     | 633.5   |
| AHQ-5-14-, 2715            | R.TKSTGGAPTFNNV*VTK.T                                                  | 1609.80568 | 2 | 7.67E-07 | 0.97  | 5.08   | -     | 1299.5  |
| AHQ-5-13, 2926             | R.TKSTGGAPTFNNV*VTK.T                                                  | 1609.80568 | 2 | 2.29E-04 | 0.89  | 3.36   | -     | 839.1   |
| AHQ-5-13, 3701 - 3772      | K.TLVLLM*GK.E                                                          | 875.15478  | 2 | 9.45E-05 | 0.77  | 2.53   | -     | 519.0   |
| AHQ-5-13-, 3699 - 3763     | K.TLVLLM*GK.E                                                          | 875.15478  | 2 | 3.71E-06 | 0.81  | 3.12   | -     | 445.1   |
| AHQ-5-12, 3568 - 3569      | K.TLVLLM*GK.E                                                          | 875.15478  | 2 | 5.72E-04 | 0.84  | 3.12   | -     | 624.7   |
| AHQ-5-12, 2841             | K.TLVLLM*GK.E                                                          | 891.15418  | 2 | 6.94E-04 | 0.76  | 2.85   | -     | 520.1   |
| AHQ-5-13, 3982             | K.TLVLLM*GK.E                                                          | 875.15478  | 2 | 9.58E-06 | 0.77  | 3.05   | -     | 482.6   |
| AHQ-5-13, 3062 - 3123      | K.TLVLLM*GK.E                                                          | 891.15418  | 2 | 1.27E-04 | 0.84  | 2.83   | -     | 862.2   |
| AHQ-5-13-, 3572 - 3636     | K.TLVLLM*GK.E                                                          | 875.15478  | 2 | 2.24E-05 | 0.80  | 3.20   | -     | 425.2   |
| gi 7661678 ref NP_056461.1 | RAP1B, member of RAS oncogene family; K-REV; RAS-related protein RAP1B |            |   | 9.44E-15 | 10.89 | 120.30 | 35.90 | 20824.7 |
| AHQ-5-11, 4270             | K.DTDDVPMLV*GNK.C                                                      | 1417.61048 | 2 | 1.63E-08 | 0.89  | 3.10   | -     | 970.9   |
| AHQ-5-11, 6523             | R.KQVEVDAQQCMLEILDAGTEQFTAM*R.D                                        | 3131.50548 | 3 | 5.85E-05 | 0.94  | 4.74   | -     | 1282.4  |

|                            |                                                        |            |        |          |       |          |   |        |
|----------------------------|--------------------------------------------------------|------------|--------|----------|-------|----------|---|--------|
| AHQ-5-11, 6439 - 6462      | R.KQVEVDAQQCMLLEILDAGTEQFTAMR.D                        | 3131.50548 | 3      | 8.25E-08 | 0.97  | 5.53     | - | 2262.9 |
| AHQ-5-11, 5127             | R.KQVEVDAQQCMLLEILDAGTEQFTAMR.D                        | 3147.50488 | 3      | 1.14E-10 | 0.95  | 5.52     | - | 1377.7 |
| AHQ-5-13-, 6540 - 6611     | R.KQVEVDAQQCMLLEILDAGTEQFTAMR.D                        | 3131.50548 | 3      | 7.39E-04 | 0.90  | 4.38     | - | 1245.4 |
| AHQ-5-11, 6694 - 6695      | R.KQVEVDAQQCMLLEILDAGTEQFTAMR.D                        | 3115.50608 | 3      | 2.42E-09 | 0.95  | 5.57     | - | 1052.2 |
| AHQ-5-11, 6719             | K.QVEVDAQQCMLLEILDAGTEQFTAMR.D                         | 3003.33257 | 3      | 3.15E-04 | 0.77  | 3.38     | - | 750.2  |
| AHQ-5-11, 6778 - 6780      | K.QVEVDAQQCMLLEILDAGTEQFTAMR.D                         | 2987.33317 | 2      | 2.05E-08 | 0.87  | 4.12     | - | 658.6  |
| AHQ-5-11, 3859 - 3920      | R.QWNNAFLLESSAK.S                                      | 1556.68148 | 2      | 1.10E-06 | 0.68  | 3.51     | - | 180.8  |
| AHQ-5-11, 4106 - 4175      | R.QWNNAFLLESSAK.S                                      | 1556.68148 | 2      | 7.09E-08 | 0.77  | 3.48     | - | 377.3  |
| AHQ-5-13-, 3869            | R.VKDIDDVPMILVGNK.C                                    | 1644.91497 | 2      | 1.13E-06 | 0.98  | 5.82     | - | 1921.6 |
| AHQ-5-13, 3950 - 3952      | R.VKDIDDVPMILVGNK.C                                    | 1644.91497 | 2      | 4.25E-06 | 0.96  | 4.55     | - | 1406.7 |
| AHQ-5-13, 3966             | R.VKDIDDVPMILVGNK.C                                    | 1644.91497 | 3      | 1.15E-04 | 0.92  | 3.83     | - | 1473.2 |
| AHQ-5-11, 3159 - 3226      | R.VKDIDDVPMILVGNK.C                                    | 1660.91437 | 2      | 8.70E-04 | 0.95  | 4.14     | - | 1299.1 |
| AHQ-5-11, 3794             | R.VKDIDDVPMILVGNK.C                                    | 1644.91497 | 2      | 1.76E-08 | 0.96  | 4.35     | - | 1457.8 |
| AHQ-5-11, 3591 - 3654      | R.VKDIDDVPMILVGNK.C                                    | 1644.91497 | 3      | 1.85E-06 | 0.94  | 4.66     | - | 1438.7 |
| AHQ-5-11, 3586 - 3650      | R.VKDIDDVPMILVGNK.C                                    | 1644.91497 | 2      | 2.77E-10 | 0.98  | 6.07     | - | 1894.1 |
| AHQ-5-13-, 3885            | R.VKDIDDVPMILVGNK.C                                    | 1644.91497 | 3      | 1.43E-06 | 0.91  | 3.75     | - | 1429.0 |
| AHQ-5-13, 4522             | R.VKDIDDVPMILVGNKCDLEDER.V                             | 2563.84420 | 3      | 3.01E-07 | 0.84  | 4.06     | - | 677.3  |
| AHQ-5-11, 4396 - 4459      | R.VKDIDDVPMILVGNKCDLEDER.V                             | 2563.84420 | 2      | 9.44E-15 | 0.94  | 4.15     | - | 1243.3 |
| AHQ-5-11, 4314 - 4395      | R.VKDIDDVPMILVGNKCDLEDER.V                             | 2563.84420 | 3      | 5.11E-10 | 0.93  | 4.93     | - | 1009.2 |
| AHQ-5-11, 4252 - 4323      | R.VKDIDDVPMILVGNKCDLEDER.V                             | 2563.84420 | 2      | 5.06E-08 | 0.94  | 4.55     | - | 900.6  |
| AHQ-5-11, 4474 - 4540      | R.VKDIDDVPMILVGNKCDLEDER.V                             | 2563.84420 | 3      | 4.12E-12 | 0.95  | 5.23     | - | 1265.6 |
| AHQ-5-11, 4179 - 4244      | R.VKDIDDVPMILVGNKCDLEDER.V                             | 2563.84420 | 3      | 7.93E-07 | 0.70  | 3.35     | - | 694.9  |
| AHQ-5-11, 4090             | R.VKDIDDVPMILVGNKCDLEDER.V                             | 2579.84360 | 3      | 8.40E-09 | 0.96  | 5.55     | - | 1566.2 |
| AHQ-5-13-, 4459            | R.VKDIDDVPMILVGNKCDLEDER.V                             | 2563.84420 | 3      | 1.88E-07 | 0.91  | 4.30     | - | 1115.9 |
| AHQ-5-11, 4462             | R.VKDIDDVPMILVGNKCDLEDERVVGK.E                         | 2947.33182 | 3      | 1.78E-04 | 0.90  | 4.59     | - | 1036.6 |
| g 12667788 ref NP_002464.1 | myosin, heavy polypeptide 9, non-muscle [Homo sapiens] | 9.99E-15   | 103.21 | 1170.39  | 47.70 | 226529.8 |   |        |
| AHQ-5-2, 1815 - 1886       | R.ALEEAEMEQK.A                                         | 1049.18068 | 2      | 8.52E-05 | 0.87  | 3.49     | - | 760.0  |
| AHQ-5-3, 1833 - 1897       | R.ALEEAEMEQK.A                                         | 1049.18068 | 1      | 8.13E-04 | 0.32  | 2.37     | - | 520.5  |
| AHQ-5-2, 3839              | K.ALELDSNLYR.I                                         | 1194.31920 | 2      | 2.20E-06 | 0.90  | 3.47     | - | 936.9  |
| AHQ-5-4, 3721 - 3722       | K.ALELDSNLYR.I                                         | 1194.31920 | 2      | 2.14E-06 | 0.95  | 4.21     | - | 1246.3 |
| AHQ-5-5, 3525              | K.ALELDSNLYR.I                                         | 1194.31920 | 2      | 1.95E-06 | 0.91  | 3.67     | - | 966.6  |
| AHQ-5-2, 3713 - 3727       | K.ALELDSNLYR.I                                         | 1194.31920 | 2      | 1.38E-06 | 0.95  | 3.93     | - | 1395.2 |
| AHQ-5-3, 3750              | K.ALELDSNLYR.I                                         | 1194.31920 | 2      | 6.41E-08 | 0.95  | 4.24     | - | 1326.4 |
| AHQ-5-3, 3755 - 3811       | K.ALELDSNLYR.I                                         | 1194.31920 | 1      | 2.85E-06 | 0.42  | 2.54     | - | 247.9  |
| AHQ-5-1, 3876 - 3883       | K.ALELDSNLYR.I                                         | 1194.31920 | 2      | 5.52E-06 | 0.94  | 3.87     | - | 1217.8 |
| AHQ-5-3, 2785 - 2799       | R.ALEQQVEEMK.T                                         | 1205.36380 | 2      | 3.68E-05 | 0.93  | 4.29     | - | 1186.2 |
| AHQ-5-5, 2589              | R.ALEQQVEEMK.T                                         | 1205.36380 | 2      | 1.63E-04 | 0.89  | 3.59     | - | 1168.4 |
| AHQ-5-2, 2717              | R.ALEQQVEEMK.T                                         | 1205.36380 | 2      | 1.51E-05 | 0.92  | 4.02     | - | 1088.0 |
| AHQ-5-1, 2939              | R.ALEQQVEEMK.T                                         | 1205.36380 | 2      | 9.47E-05 | 0.89  | 3.59     | - | 1011.6 |
| AHQ-5-3, 2039              | R.ALEQQVEEMK.T                                         | 1221.36320 | 2      | 4.00E-05 | 0.58  | 2.79     | - | 603.1  |
| AHQ-5-6, 2609              | R.ALEQQVEEMK.T                                         | 1205.36380 | 2      | 1.57E-04 | 0.84  | 3.09     | - | 1014.0 |
| AHQ-5-5, 6523              | R.ALEQQVEEM*KTQLEEELEDELQATEDAK.L                      | 3165.38394 | 3      | 4.05E-04 | 0.96  | 4.88     | - | 1823.2 |
| AHQ-5-3, 6694              | R.ALEQQVEEM*KTQLEEELEDELQATEDAK.L                      | 3165.38394 | 3      | 1.54E-10 | 0.98  | 6.94     | - | 1718.9 |
| AHQ-5-6, 7273              | R.ALEQQVEEM*KTQLEEELEDELQATEDAK.L                      | 3149.38454 | 3      | 4.49E-04 | 0.95  | 5.29     | - | 1302.5 |
| AHQ-5-2, 7431              | R.ALEQQVEEM*KTQLEEELEDELQATEDAK.L                      | 3149.38454 | 3      | 3.44E-07 | 0.96  | 6.03     | - | 1213.8 |
| AHQ-5-2, 6654              | R.ALEQQVEEM*KTQLEEELEDELQATEDAK.L                      | 3165.38394 | 3      | 3.33E-12 | 0.97  | 6.16     | - | 1758.8 |
| AHQ-5-6, 6476              | R.ALEQQVEEM*KTQLEEELEDELQATEDAK.L                      | 3165.38394 | 3      | 1.09E-08 | 0.97  | 6.72     | - | 1324.3 |
| AHQ-5-1, 6648 - 6663       | R.ALEQQVEEM*KTQLEEELEDELQATEDAK.L                      | 3165.38394 | 3      | 1.45E-04 | 0.98  | 7.13     | - | 1845.1 |
| AHQ-5-4, 7424 - 7425       | R.ALEQQVEEM*KTQLEEELEDELQATEDAK.L                      | 3149.38454 | 3      | 3.09E-07 | 0.97  | 6.53     | - | 1531.4 |
| AHQ-5-6, 4968 - 4976       | K.ANLQIQINTDLNLER.S                                    | 1871.04187 | 2      | 4.09E-08 | 0.96  | 5.02     | - | 1235.3 |
| AHQ-5-1, 5229 - 5307       | K.ANLQIQINTDLNLER.S                                    | 1871.04187 | 2      | 2.98E-06 | 0.97  | 5.64     | - | 1361.2 |
| AHQ-5-2, 5294              | K.ANLQIQINTDLNLER.S                                    | 1871.04187 | 2      | 3.80E-09 | 0.97  | 5.91     | - | 1349.1 |
| AHQ-5-9, 4431 - 4435       | K.ANLQIQINTDLNLER.S                                    | 1871.04187 | 2      | 4.49E-07 | 0.96  | 5.05     | - | 1315.6 |
| AHQ-5-2, 5150 - 5223       | K.ANLQIQINTDLNLER.S                                    | 1871.04187 | 2      | 1.45E-08 | 0.98  | 6.15     | - | 1594.8 |
| AHQ-5-2, 4985              | K.ANLQIQINTDLNLER.S                                    | 1871.04187 | 2      | 2.26E-07 | 0.94  | 4.56     | - | 839.9  |
| AHQ-5-1, 5484              | K.ANLQIQINTDLNLER.S                                    | 1871.04187 | 2      | 6.41E-10 | 0.98  | 6.45     | - | 1248.3 |
| AHQ-5-2, 5382 - 5459       | K.ANLQIQINTDLNLER.S                                    | 1871.04187 | 2      | 1.84E-08 | 0.97  | 5.39     | - | 1569.9 |
| AHQ-5-3, 5030              | K.ANLQIQINTDLNLER.S                                    | 1871.04187 | 2      | 7.32E-05 | 0.91  | 4.42     | - | 673.4  |
| AHQ-5-5, 5030 - 5045       | K.ANLQIQINTDLNLER.S                                    | 1871.04187 | 2      | 3.62E-08 | 0.97  | 5.31     | - | 1518.3 |
| AHQ-5-3, 5315              | K.ANLQIQINTDLNLER.S                                    | 1871.04187 | 2      | 1.79E-10 | 0.97  | 5.49     | - | 1134.8 |
| AHQ-5-3, 5479              | K.ANLQIQINTDLNLER.S                                    | 1871.04187 | 2      | 2.68E-07 | 0.94  | 4.84     | - | 764.3  |
| AHQ-5-4, 2233              | K.ASITALEAK.I                                          | 904.04321  | 2      | 1.51E-05 | 0.93  | 3.12     | - | 1210.6 |
| AHQ-5-1, 2469              | K.ASITALEAK.I                                          | 904.04321  | 2      | 6.93E-06 | 0.95  | 3.43     | - | 1565.5 |
| AHQ-5-3, 2246              | K.ASITALEAK.I                                          | 904.04321  | 2      | 2.61E-04 | 0.92  | 3.35     | - | 1060.7 |
| AHQ-5-2, 2194              | K.ASITALEAK.I                                          | 904.04321  | 2      | 6.70E-06 | 0.94  | 3.41     | - | 1432.7 |
| AHQ-5-2, 1859              | R.ASREIILAQAK.E                                        | 1216.36955 | 2      | 3.68E-05 | 0.92  | 3.46     | - | 1491.8 |
| AHQ-5-3, 1906              | R.ASREIILAQAK.E                                        | 1216.36955 | 2      | 5.61E-07 | 0.94  | 3.37     | - | 1739.7 |
| AHQ-5-4, 1921              | R.ASREIILAQAK.E                                        | 1216.36955 | 2      | 1.29E-05 | 0.95  | 3.69     | - | 1817.9 |
| AHQ-5-2, 3379              | R.DELADEIANSSGGK.G                                     | 1349.38323 | 1      | 9.49E-07 | 0.75  | 2.81     | - | 511.8  |
| AHQ-5-3, 3217 - 3222       | R.DELADEIANSSGGK.G                                     | 1349.38323 | 1      | 1.21E-06 | 0.65  | 2.71     | - | 465.8  |
| AHQ-5-2, 2879              | R.DELADEIANSSGGK.G                                     | 1349.38323 | 1      | 2.66E-09 | 0.72  | 2.48     | - | 581.4  |
| AHQ-5-1, 3268              | R.DELADEIANSSGGK.G                                     | 1349.38323 | 2      | 6.42E-04 | 0.92  | 3.79     | - | 1078.6 |
| AHQ-5-2, 3198 - 3205       | R.DELADEIANSSGGK.G                                     | 1349.38323 | 2      | 2.87E-08 | 0.94  | 3.91     | - | 1281.9 |
| AHQ-5-2, 3191              | R.DELADEIANSSGGK.G                                     | 1349.38323 | 1      | 1.54E-04 | 0.25  | 2.08     | - | 570.4  |
| AHQ-5-2, 3203              | R.DELADEIANSSGGK.G                                     | 1349.38323 | 1      | 2.96E-06 | 0.70  | 2.89     | - | 391.5  |
| AHQ-5-1, 7140 - 7141       | K.DFSALESQLQDQTQELLQEENR.Q                             | 2494.61059 | 3      | 3.26E-07 | 0.97  | 5.77     | - | 2034.9 |
| AHQ-5-2, 7081 - 7145       | K.DFSALESQLQDQTQELLQEENR.Q                             | 2494.61059 | 3      | 4.63E-10 | 0.98  | 6.71     | - | 1701.5 |
| AHQ-5-3, 7270              | K.DFSALESQLQDQTQELLQEENR.Q                             | 2494.61059 | 3      | 2.50E-06 | 0.93  | 4.11     | - | 1641.1 |
| AHQ-5-1, 6999 - 7000       | K.DFSALESQLQDQTQELLQEENR.Q                             | 2494.61059 | 3      | 1.47E-11 | 0.98  | 7.08     | - | 2368.4 |
| AHQ-5-4, 7070              | K.DFSALESQLQDQTQELLQEENR.Q                             | 2494.61059 | 3      | 1.74E-10 | 0.97  | 6.25     | - | 1590.6 |
| AHQ-5-6, 6880              | K.DFSALESQLQDQTQELLQEENR.Q                             | 2494.61059 | 3      | 4.17E-05 | 0.95  | 5.30     | - | 1374.3 |
| AHQ-5-3, 7109 - 7121       | K.DFSALESQLQDQTQELLQEENR.Q                             | 2494.61059 | 3      | 1.25E-09 | 0.97  | 6.12     | - | 1632.6 |
| AHQ-5-2, 6649              | K.DFSALESQLQDQTQELLQEENRQK.L                           | 2750.91328 | 2      | 3.22E-13 | 0.85  | 3.62     | - | 610.6  |
| AHQ-5-3, 6682              | K.DFSALESQLQDQTQELLQEENRQK.L                           | 2750.91328 | 2      | 4.93E-11 | 0.67  | 2.93     | - | 397.3  |
| AHQ-5-2, 6645              | K.DFSALESQLQDQTQELLQEENRQK.L                           | 2750.91328 | 3      | 3.87E-10 | 0.85  | 3.89     | - | 646.4  |
| AHQ-5-4, 2032              | K.DLEAHIDSANK.N                                        | 1213.27938 | 2      | 1.48E-05 | 0.98  | 4.17     | - | 2957.3 |
| AHQ-5-2, 1998 - 2029       | K.DLEAHIDSANK.N                                        | 1213.27938 | 2      | 1.91E-07 | 0.98  | 4.29     | - | 2588.8 |
| AHQ-5-3, 2037              | K.DLEAHIDSANK.N                                        | 1213.27938 | 2      | 2.70E-07 | 0.98  | 4.17     | - | 2739.5 |
| AHQ-5-1, 2272              | K.DLEAHIDSANK.N                                        | 1213.27938 | 2      | 2.67E-06 | 0.98  | 4.49     | - | 2815.6 |
| AHQ-5-2, 1949 - 2013       | K.DLEAHIDSANK.N                                        | 1213.27938 | 1      | 5.61E-04 | 0.59  | 1.87     | - | 756.1  |
| AHQ-5-2, 2379              | K.DLEAHIDSANKNRDEAIK.Q                                 | 2040.18063 | 2      | 3.44E-05 | 0.91  | 4.09     | - | 877.6  |
| AHQ-5-5, 7473 - 7474       | R.DLGEELKTELEDTLDSTAAQQELR.S                           | 3019.21860 | 3      | 3.60E-08 | 0.97  | 6.18     | - | 1797.2 |
| AHQ-5-2, 7529              | R.DLGEELKTELEDTLDSTAAQQELR.S                           | 3019.21860 | 3      | 2.78E-09 | 0.96  | 5.45     | - | 1393.6 |
| AHQ-5-7, 7371              | R.DLGEELKTELEDTLDSTAAQQELR.S                           | 3019.21860 | 3      | 1.44E-08 | 0.94  | 4.32     | - | 1876.7 |
| AHQ-5-1, 7351              | R.DLGEELKTELEDTLDSTAAQQELR.S                           | 3019.21860 | 3      | 2.40E-07 | 0.95  | 5.19     | - | 1503.2 |
| AHQ-5-2, 7641              | R.DLGEELKTELEDTLDSTAAQQELR.S                           | 3019.21860 | 3      | 7.69E-10 | 0.96  | 5.06     | - | 1573.3 |
| AHQ-5-10, 6603             | R.DLGEELKTELEDTLDSTAAQQELR.S                           | 3019.21860 | 3      | 1.02E-05 | 0.79  | 3.69     | - | 844.6  |
| AHQ-5-4, 7526              | R.DLGEELKTELEDTLDSTAAQQELR.S                           | 3019.21860 | 3      | 6.60E-10 | 0.97  | 5.61     | - | 1873.2 |
| AHQ-5-2, 3386              | K.DVLLQVDDER.R                                         | 1202.29650 | 1      | 5.39E-08 | 0.24  | 2.34     | - | 176.7  |
| AHQ-5-2, 3381              | K.DVLLQVDDER.R                                         | 1202.29650 | 2      | 1.87E-07 | 0.95  | 3.54     | - | 1666.0 |
| AHQ-5-1, 2971 - 2972       | K.DVLLQVDDER.R                                         | 1358.48286 | 2      | 9.77E-05 | 0.82  | 3.43     | - | 790.5  |
| AHQ-5-1, 2044              | R.EEILAQAK.E                                           | 902.02731  | 1      | 5.79E-05 | 0.14  | 2.19     | - | 269.6  |
| AHQ-5-4, 2833 - 2914       | R.ELEDATETADAMNR.E                                     | 1566.63006 | 2      | 3.07E-10 | 0.95  | 4.94     | - | 1018.7 |
| AHQ-5-5, 2753              | R.ELEDATETADAMNR.E                                     | 1566.63006 | 2      | 6.67E-07 | 0.85  | 3.50     | - | 853.0  |
| AHQ-5-6, 2725              | R.ELEDATETADAMNR.E                                     | 1566.63006 | 2      | 1.12E-06 | 0.88  | 3.15     | - | 1180.5 |
| AHQ-5-1, 2928              | R.ELEDATETADAMNR.E                                     | 1566.63006 | 2      | 2.67E-04 | 0.89  | 3.44     | - | 991.0  |
| AHQ-5-3, 2850              | R.ELEDATETADAMNR.E                                     | 1566.63006 | 2      | 8.25E-09 | 0.93  | 3.93     | - | 1206.4 |



|                       |                                  |            |   |          |      |      |   |        |
|-----------------------|----------------------------------|------------|---|----------|------|------|---|--------|
| AHQ-5-2, 2815         | R.ELEDATETADAMNR.E               | 1566.63006 | 2 | 4.34E-08 | 0.94 | 4.26 | - | 1058.6 |
| AHQ-5-3, 3798         | R.ELEDATETADAMNREVSSLK.N         | 2210.36264 | 2 | 6.49E-07 | 0.70 | 3.01 | - | 353.9  |
| AHQ-5-3, 5970 - 6042  | R.ELESQISELQEDLESE.A             | 2035.10956 | 3 | 1.24E-05 | 0.98 | 5.61 | - | 2717.7 |
| AHQ-5-2, 6319         | R.ELESQISELQEDLESE.A             | 2035.10956 | 2 | 1.07E-08 | 0.94 | 4.17 | - | 1218.3 |
| AHQ-5-1, 6043         | R.ELESQISELQEDLESE.A             | 2035.10956 | 2 | 1.82E-09 | 0.94 | 4.44 | - | 1003.6 |
| AHQ-5-2, 4681         | R.ELESQISELQEDLESE.A             | 2035.10956 | 2 | 5.46E-06 | 0.92 | 3.91 | - | 923.8  |
| AHQ-5-2, 5949 - 5981  | R.ELESQISELQEDLESE.A             | 2035.10956 | 2 | 6.47E-11 | 0.97 | 5.52 | - | 1252.5 |
| AHQ-5-4, 5956         | R.ELESQISELQEDLESE.A             | 2035.10956 | 2 | 1.52E-07 | 0.96 | 5.25 | - | 1122.4 |
| AHQ-5-1, 5959 - 6027  | R.ELESQISELQEDLESE.A             | 2035.10956 | 2 | 3.92E-05 | 0.91 | 4.44 | - | 933.1  |
| AHQ-5-1, 6040         | R.ELESQISELQEDLESE.A             | 2035.10956 | 3 | 6.40E-06 | 0.98 | 5.62 | - | 2641.5 |
| AHQ-5-2, 5966 - 5969  | R.ELESQISELQEDLESE.A             | 2035.10956 | 3 | 3.13E-09 | 0.98 | 5.98 | - | 2626.4 |
| AHQ-5-2, 5506 - 5582  | R.ELESQISELQEDLESE.A             | 2035.10956 | 2 | 2.45E-07 | 0.93 | 4.38 | - | 797.3  |
| AHQ-5-3, 6029         | R.ELESQISELQEDLESE.A             | 2035.10956 | 2 | 4.01E-10 | 0.96 | 5.15 | - | 1171.4 |
| AHQ-5-5, 5833 - 5841  | R.ELESQISELQEDLESE.A             | 2035.10956 | 2 | 3.35E-07 | 0.93 | 4.47 | - | 855.5  |
| AHQ-5-2, 2070         | R.EMAELEDERK.Q                   | 1379.47597 | 1 | 7.07E-04 | 0.24 | 2.36 | - | 177.3  |
| AHQ-5-1, 2308         | R.EMAELEDERK.Q                   | 1379.47597 | 2 | 4.36E-06 | 0.92 | 3.42 | - | 1288.4 |
| AHQ-5-4, 2093         | R.EMAELEDERK.Q                   | 1379.47597 | 2 | 2.01E-05 | 0.86 | 3.11 | - | 927.3  |
| AHQ-5-3, 2101         | R.EMAELEDERK.Q                   | 1379.47597 | 2 | 1.47E-05 | 0.93 | 3.25 | - | 1474.5 |
| AHQ-5-2, 2063         | R.EMAELEDERK.Q                   | 1379.47597 | 2 | 1.39E-05 | 0.91 | 3.24 | - | 1183.1 |
| AHQ-5-2, 4453 - 4525  | K.EQADFAIEALAK.A                 | 1306.44632 | 2 | 9.40E-04 | 0.80 | 2.78 | - | 583.9  |
| AHQ-5-1, 4552 - 4623  | K.EQADFAIEALAK.A                 | 1306.44632 | 2 | 4.92E-04 | 0.62 | 2.58 | - | 605.2  |
| AHQ-5-1, 2499         | R.EQLEEEEEAKHNLEK.Q              | 1855.93770 | 2 | 1.75E-07 | 0.86 | 3.98 | - | 540.1  |
| AHQ-5-6, 2169         | R.EQLEEEEEAKHNLEK.Q              | 1855.93770 | 2 | 5.98E-04 | 0.83 | 3.83 | - | 700.1  |
| AHQ-5-4, 2276         | R.EQLEEEEEAKHNLEK.Q              | 1855.93770 | 2 | 8.78E-06 | 0.87 | 4.19 | - | 527.2  |
| AHQ-5-3, 2310         | R.EQLEEEEEAKHNLEK.Q              | 1855.93770 | 2 | 3.47E-04 | 0.89 | 3.92 | - | 832.8  |
| AHQ-5-2, 2261         | R.EQLEEEEEAKHNLEK.Q              | 1855.93770 | 2 | 8.06E-04 | 0.89 | 4.14 | - | 706.9  |
| AHQ-5-3, 3465         | R.FLSNGHVTIPGQQDK.D              | 1641.80946 | 2 | 3.14E-06 | 0.93 | 4.00 | - | 788.4  |
| AHQ-5-2, 5927 - 6009  | R.FLSNGHVTIPGQQDKDMFQETMEAMR.I   | 3012.39100 | 3 | 1.06E-05 | 0.95 | 5.60 | - | 886.5  |
| AHQ-5-2, 5198 - 5238  | R.FLSNGHVTIPGQQDKDMFQETMEAMR.R.I | 3028.39040 | 3 | 4.19E-05 | 0.90 | 5.65 | - | 909.0  |
| AHQ-5-4, 6101         | R.FLSNGHVTIPGQQDKDMFQETMEAMR.I   | 3012.39100 | 3 | 7.95E-07 | 0.88 | 4.62 | - | 719.2  |
| AHQ-5-9, 5136         | R.FLSNGHVTIPGQQDKDMFQETMEAMR.I   | 3012.39100 | 3 | 1.39E-05 | 0.71 | 3.34 | - | 624.3  |
| AHQ-5-2, 5374         | R.FLSNGHVTIPGQQDKDM*FQETMEAMR.I  | 3028.39040 | 3 | 2.35E-04 | 0.87 | 5.22 | - | 795.5  |
| AHQ-5-3, 6059 - 6130  | R.FLSNGHVTIPGQQDKDMFQETMEAMR.I   | 3012.39100 | 3 | 5.79E-06 | 0.91 | 5.02 | - | 585.4  |
| AHQ-5-5, 5873         | R.FLSNGHVTIPGQQDKDMFQETMEAMR.I   | 3012.39100 | 3 | 3.82E-04 | 0.91 | 4.55 | - | 723.1  |
| AHQ-5-3, 3623         | K.FVSELWK.D                      | 909.06314  | 1 | 3.08E-04 | 0.56 | 2.43 | - | 791.8  |
| AHQ-5-4, 2673         | K.HEAMITDLEER.L                  | 1344.47646 | 2 | 1.22E-05 | 0.97 | 4.33 | - | 1392.3 |
| AHQ-5-2, 2594 - 2665  | K.HEAMITDLEER.L                  | 1344.47646 | 2 | 2.62E-07 | 0.97 | 4.43 | - | 1315.2 |
| AHQ-5-3, 2741         | K.HEAMITDLEER.L                  | 1344.47646 | 2 | 8.03E-05 | 0.97 | 4.08 | - | 1551.2 |
| AHQ-5-2, 2662         | K.HEAMITDLEER.L                  | 1344.47646 | 1 | 1.28E-04 | 0.84 | 3.47 | - | 638.0  |
| AHQ-5-1, 2925         | K.HEAMITDLEER.L                  | 1344.47646 | 2 | 7.97E-06 | 0.97 | 4.30 | - | 1635.6 |
| AHQ-5-2, 2658         | K.HEAMITDLEER.L                  | 1344.47646 | 1 | 8.01E-05 | 0.50 | 2.27 | - | 700.8  |
| AHQ-5-2, 3413 - 3481  | R.HEMPPHYAITDAYR.S               | 1916.14944 | 2 | 1.57E-06 | 0.89 | 3.38 | - | 887.9  |
| AHQ-5-2, 3595         | R.HEMPPHYAITDAYR.S               | 1916.14944 | 3 | 1.63E-08 | 0.97 | 4.63 | - | 2366.9 |
| AHQ-5-10, 3115        | R.HEMPPHYAITDAYR.S               | 1916.14944 | 2 | 4.98E-04 | 0.91 | 3.50 | - | 834.6  |
| AHQ-5-5, 3223 - 3295  | R.HEMPPHYAITDAYR.S               | 1916.14944 | 2 | 4.25E-05 | 0.90 | 3.97 | - | 805.3  |
| AHQ-5-4, 3508         | R.HEMPPHYAITDAYR.S               | 1916.14944 | 2 | 5.10E-05 | 0.89 | 3.37 | - | 832.6  |
| AHQ-5-3, 3185         | R.HEMPPHYAITDAYR.S               | 1932.14884 | 2 | 2.45E-04 | 0.81 | 2.95 | - | 667.7  |
| AHQ-5-1, 3352         | R.HEMPPHYAITDAYR.S               | 1932.14884 | 2 | 3.54E-05 | 0.89 | 3.00 | - | 859.9  |
| AHQ-5-2, 3506         | R.HEMPPHYAITDAYR.S               | 1916.14944 | 3 | 1.94E-09 | 0.98 | 4.93 | - | 3262.8 |
| AHQ-5-4, 3158         | R.HEMPPHYAITDAYR.S               | 1932.14884 | 2 | 1.31E-04 | 0.80 | 2.60 | - | 774.8  |
| AHQ-5-2, 3663         | R.HEMPPHYAITDAYR.S               | 1916.14944 | 2 | 6.90E-04 | 0.86 | 3.02 | - | 935.6  |
| AHQ-5-2, 3549         | R.HEMPPHYAITDAYR.S               | 1916.14944 | 2 | 7.48E-06 | 0.92 | 3.42 | - | 889.6  |
| AHQ-5-1, 3749         | R.HEMPPHYAITDAYR.S               | 1916.14944 | 2 | 2.10E-06 | 0.93 | 4.10 | - | 616.0  |
| AHQ-5-3, 4553         | K.HSQAVEELAEQLEQTK.R             | 1840.96940 | 3 | 2.77E-07 | 0.97 | 5.56 | - | 2158.7 |
| AHQ-5-4, 4485         | K.HSQAVEELAEQLEQTK.R             | 1840.96940 | 2 | 2.08E-13 | 0.98 | 5.77 | - | 2353.3 |
| AHQ-5-2, 4469 - 4541  | K.HSQAVEELAEQLEQTK.R             | 1840.96940 | 2 | 2.57E-12 | 0.98 | 5.99 | - | 2443.5 |
| AHQ-5-1, 4676 - 4693  | K.HSQAVEELAEQLEQTK.R             | 1840.96940 | 3 | 4.28E-07 | 0.97 | 5.12 | - | 2124.0 |
| AHQ-5-3, 4545 - 4618  | K.HSQAVEELAEQLEQTK.R             | 1840.96940 | 2 | 2.06E-10 | 0.98 | 6.44 | - | 2217.1 |
| AHQ-5-2, 4477         | K.HSQAVEELAEQLEQTK.R             | 1840.96940 | 3 | 1.90E-08 | 0.97 | 5.50 | - | 2015.4 |
| AHQ-5-4, 4497         | K.HSQAVEELAEQLEQTK.R             | 1840.96940 | 3 | 4.19E-06 | 0.97 | 5.36 | - | 2086.2 |
| AHQ-5-1, 4667 - 4671  | K.HSQAVEELAEQLEQTK.R             | 1840.96940 | 2 | 1.93E-06 | 0.97 | 5.50 | - | 1795.0 |
| AHQ-5-1, 4240 - 4249  | K.HSQAVEELAEQLEQTKR.V            | 1997.15575 | 2 | 8.37E-11 | 0.98 | 5.91 | - | 2078.0 |
| AHQ-5-2, 3959 - 4009  | K.HSQAVEELAEQLEQTKR.V            | 1997.15575 | 3 | 3.96E-07 | 0.98 | 7.29 | - | 2419.8 |
| AHQ-5-3, 4063 - 4097  | K.HSQAVEELAEQLEQTKR.V            | 1997.15575 | 2 | 2.99E-09 | 0.98 | 6.09 | - | 2481.4 |
| AHQ-5-5, 3791         | K.HSQAVEELAEQLEQTKR.V            | 1997.15575 | 2 | 1.19E-09 | 0.98 | 6.07 | - | 2176.3 |
| AHQ-5-4, 4028         | K.HSQAVEELAEQLEQTKR.V            | 1997.15575 | 3 | 8.76E-06 | 0.98 | 6.62 | - | 1730.9 |
| AHQ-5-2, 3958 - 3997  | K.HSQAVEELAEQLEQTKR.V            | 1997.15575 | 2 | 1.80E-09 | 0.98 | 5.80 | - | 2142.4 |
| AHQ-5-5, 3782         | K.HSQAVEELAEQLEQTKR.V            | 1997.15575 | 3 | 5.25E-09 | 0.94 | 5.11 | - | 1001.8 |
| AHQ-5-1, 4239 - 4263  | K.HSQAVEELAEQLEQTKR.V            | 1997.15575 | 3 | 2.83E-06 | 0.97 | 5.51 | - | 1645.9 |
| AHQ-5-4, 4032         | K.HSQAVEELAEQLEQTKR.V            | 1997.15575 | 2 | 1.73E-07 | 0.98 | 5.98 | - | 2145.5 |
| AHQ-5-3, 4062         | K.HSQAVEELAEQLEQTKR.V            | 1997.15575 | 3 | 2.14E-05 | 0.97 | 6.32 | - | 1516.1 |
| AHQ-5-5, 3537 - 3539  | R.IAEFTNLTETEEEEK.S              | 1654.75371 | 2 | 2.24E-09 | 0.91 | 3.76 | - | 1402.9 |
| AHQ-5-2, 4003 - 4005  | R.IAEFTNLTETEEEEK.S              | 1654.75371 | 2 | 7.67E-08 | 0.98 | 4.97 | - | 2556.3 |
| AHQ-5-2, 4491         | R.IAEFTNLTETEEEEK.S              | 1654.75371 | 2 | 1.08E-05 | 0.92 | 3.77 | - | 1528.7 |
| AHQ-5-2, 4403         | R.IAEFTNLTETEEEEK.S              | 1654.75371 | 2 | 1.80E-06 | 0.88 | 3.04 | - | 1334.8 |
| AHQ-5-2, 3853 - 3927  | R.IAEFTNLTETEEEEK.S              | 1654.75371 | 2 | 4.63E-09 | 0.96 | 4.35 | - | 2014.2 |
| AHQ-5-2, 4089 - 4158  | R.IAEFTNLTETEEEEK.S              | 1654.75371 | 2 | 3.43E-06 | 0.95 | 4.11 | - | 1470.3 |
| AHQ-5-4, 3670 - 3741  | R.IAEFTNLTETEEEEK.S              | 1654.75371 | 2 | 1.56E-07 | 0.97 | 5.15 | - | 1818.5 |
| AHQ-5-1, 3847 - 3915  | R.IAEFTNLTETEEEEK.S              | 1654.75371 | 2 | 3.13E-07 | 0.90 | 3.82 | - | 1471.1 |
| AHQ-5-1, 3984         | R.IAEFTNLTETEEEEK.S              | 1654.75371 | 2 | 9.09E-09 | 0.92 | 3.59 | - | 1488.9 |
| AHQ-5-6, 3476         | R.IAEFTNLTETEEEEK.S              | 1654.75371 | 2 | 2.86E-09 | 0.97 | 4.57 | - | 1975.2 |
| AHQ-5-4, 3813         | R.IAEFTNLTETEEEEK.S              | 1654.75371 | 2 | 9.85E-07 | 0.93 | 3.67 | - | 1661.4 |
| AHQ-5-3, 3734 - 3805  | R.IAEFTNLTETEEEEK.S              | 1654.75371 | 2 | 9.15E-10 | 0.98 | 5.38 | - | 1827.8 |
| AHQ-5-1, 4068         | R.IAEFTNLTETEEEEK.S              | 1654.75371 | 2 | 3.55E-07 | 0.95 | 4.73 | - | 1155.5 |
| AHQ-5-4, 3978 - 4056  | R.IAEFTNLTETEEEEK.S              | 1654.75371 | 2 | 6.85E-08 | 0.97 | 4.34 | - | 2002.1 |
| AHQ-5-3, 3865 - 3933  | R.IAEFTNLTETEEEEK.S              | 1654.75371 | 2 | 1.59E-08 | 0.96 | 4.44 | - | 1559.9 |
| AHQ-5-3, 3985 - 4002  | R.IAEFTNLTETEEEEK.S              | 1654.75371 | 2 | 9.15E-10 | 0.97 | 4.69 | - | 1815.5 |
| AHQ-5-2, 3711 - 3785  | R.IAEFTNLTETEEEEK.S              | 1654.75371 | 2 | 7.72E-12 | 0.98 | 5.06 | - | 2163.0 |
| AHQ-5-2, 3227         | R.IAEFTNLTETEEEEKSK.S            | 1870.00428 | 2 | 9.93E-06 | 0.85 | 3.59 | - | 654.0  |
| AHQ-5-3, 3326         | R.IAEFTNLTETEEEEKSK.S            | 1870.00428 | 2 | 8.19E-10 | 0.87 | 3.75 | - | 770.3  |
| AHQ-5-2, 3569         | R.IAEFTNLTETEEEEKSKSLAKL         | 2269.49132 | 2 | 4.30E-04 | 0.81 | 3.73 | - | 697.7  |
| AHQ-5-5, 3175 - 3205  | K.IAQLLEQLDNETK.E                | 1531.64695 | 2 | 4.43E-05 | 0.92 | 4.01 | - | 1066.6 |
| AHQ-5-2, 3775         | K.IAQLLEQLDNETK.E                | 1531.64695 | 2 | 1.07E-05 | 0.89 | 3.17 | - | 1074.2 |
| AHQ-5-2, 3319 - 3389  | K.IAQLLEQLDNETK.E                | 1531.64695 | 2 | 3.10E-05 | 0.93 | 3.83 | - | 1081.3 |
| AHQ-5-3, 2914         | K.IAQLLEQLDNETK.E                | 1531.64695 | 2 | 6.50E-04 | 0.87 | 2.86 | - | 1008.0 |
| AHQ-5-1, 3601         | K.IAQLLEQLDNETK.E                | 1531.64695 | 2 | 1.78E-05 | 0.84 | 3.29 | - | 819.3  |
| AHQ-5-5, 3041         | K.IAQLLEQLDNETK.E                | 1531.64695 | 2 | 6.36E-06 | 0.76 | 3.12 | - | 615.0  |
| AHQ-5-9, 2928 - 2935  | K.IAQLLEQLDNETK.E                | 1531.64695 | 2 | 4.44E-05 | 0.93 | 4.19 | - | 925.7  |
| AHQ-5-2, 3466         | K.IAQLLEQLDNETK.E                | 1531.64695 | 2 | 1.31E-07 | 0.95 | 4.20 | - | 1439.8 |
| AHQ-5-2, 3098         | K.IAQLLEQLDNETK.E                | 1531.64695 | 2 | 1.57E-06 | 0.91 | 3.91 | - | 1030.1 |
| AHQ-5-3, 3474         | K.IAQLLEQLDNETK.E                | 1531.64695 | 2 | 3.27E-04 | 0.77 | 2.97 | - | 761.0  |
| AHQ-5-1, 3233 - 3235  | K.IAQLLEQLDNETK.E                | 1531.64695 | 2 | 4.16E-09 | 0.97 | 4.99 | - | 1713.8 |
| AHQ-5-2, 2867         | K.IAQLLEQLDNETK.E                | 1531.64695 | 2 | 8.37E-05 | 0.95 | 4.21 | - | 1194.2 |
| AHQ-5-7, 3048         | K.IAQLLEQLDNETK.E                | 1531.64695 | 2 | 5.78E-06 | 0.92 | 3.83 | - | 1042.0 |
| AHQ-5-6, 3125 - 3144  | K.IAQLLEQLDNETK.E                | 1531.64695 | 2 | 8.97E-10 | 0.97 | 5.29 | - | 1440.3 |
| AHQ-5-11, 3192        | K.IAQLLEQLDNETK.E                | 1531.64695 | 2 | 8.89E-09 | 0.96 | 4.03 | - | 1623.3 |
| AHQ-5-10, 3046 - 3048 | K.IAQLLEQLDNETK.E                | 1531.64695 | 2 | 1.63E-05 | 0.92 | 3.48 | - | 1263.6 |

|                       |                             |            |   |          |      |      |   |        |
|-----------------------|-----------------------------|------------|---|----------|------|------|---|--------|
| AHQ-5-1, 3445         | K.IAQLEEQLDNETK.E           | 1531.64695 | 2 | 1.44E-06 | 0.93 | 3.52 | - | 1284.8 |
| AHQ-5-3, 3161         | K.IAQLEEQLDNETK.E           | 1531.64695 | 2 | 6.20E-08 | 0.95 | 4.71 | - | 1370.7 |
| AHQ-5-6, 3000         | K.IAQLEEQLDNETK.E           | 1531.64695 | 2 | 5.44E-05 | 0.82 | 3.33 | - | 515.4  |
| AHQ-5-2, 2997         | K.IAQLEEQLDNETKER.Q         | 1816.94784 | 3 | 2.97E-08 | 0.82 | 3.54 | - | 877.1  |
| AHQ-5-2, 3418 - 3493  | K.IAQLEEQLDNETKER.Q         | 1816.94784 | 2 | 9.77E-09 | 0.95 | 4.51 | - | 1321.8 |
| AHQ-5-2, 2977         | K.IAQLEEQLDNETKER.Q         | 1816.94784 | 2 | 9.17E-04 | 0.62 | 2.81 | - | 683.5  |
| AHQ-5-2, 6739 - 6806  | R.IIGLDQVAGMSETALPGAFK.T    | 2019.35101 | 3 | 2.42E-04 | 0.94 | 5.31 | - | 995.8  |
| AHQ-5-2, 6665 - 6733  | R.IIGLDQVAGMSETALPGAFK.T    | 2019.35101 | 2 | 1.44E-07 | 0.98 | 6.15 | - | 1562.3 |
| AHQ-5-2, 6019 - 6085  | R.IIGLDQVAGMSETALPGAFK.T    | 2019.35101 | 2 | 5.58E-06 | 0.97 | 5.22 | - | 1437.0 |
| AHQ-5-1, 5895 - 5963  | R.IIGLDQVAGMSETALPGAFK.T    | 2035.35041 | 3 | 2.32E-04 | 0.85 | 4.17 | - | 801.1  |
| AHQ-5-13, 6361        | R.IIGLDQVAGMSETALPGAFK.T    | 2019.35101 | 2 | 2.35E-05 | 0.94 | 4.28 | - | 1140.8 |
| AHQ-5-14-, 6213       | R.IIGLDQVAGMSETALPGAFK.T    | 2019.35101 | 2 | 3.74E-06 | 0.92 | 3.55 | - | 1122.4 |
| AHQ-5-2, 6801 - 6879  | R.IIGLDQVAGMSETALPGAFK.T    | 2019.35101 | 2 | 2.40E-06 | 0.95 | 4.82 | - | 1230.3 |
| AHQ-5-7, 6508 - 6522  | R.IIGLDQVAGMSETALPGAFK.T    | 2019.35101 | 2 | 1.71E-06 | 0.96 | 4.55 | - | 1296.6 |
| AHQ-5-2, 5853 - 5913  | R.IIGLDQVAGMSETALPGAFK.T    | 2035.35041 | 2 | 1.02E-05 | 0.96 | 5.12 | - | 965.0  |
| AHQ-5-14, 6108 - 6182 | R.IIGLDQVAGMSETALPGAFK.T    | 2035.35041 | 2 | 4.15E-04 | 0.86 | 3.45 | - | 640.4  |
| AHQ-5-1, 6127         | R.IIGLDQVAGMSETALPGAFK.T    | 2019.35101 | 2 | 1.49E-06 | 0.88 | 3.84 | - | 854.5  |
| AHQ-5-4, 6748 - 6780  | R.IIGLDQVAGMSETALPGAFK.T    | 2019.35101 | 2 | 6.10E-05 | 0.96 | 5.12 | - | 919.4  |
| AHQ-5-4, 6766 - 6768  | R.IIGLDQVAGMSETALPGAFK.T    | 2019.35101 | 3 | 4.56E-04 | 0.96 | 5.78 | - | 1325.5 |
| AHQ-5-6, 6544         | R.IIGLDQVAGMSETALPGAFK.T    | 2019.35101 | 2 | 3.97E-06 | 0.95 | 4.56 | - | 1060.5 |
| AHQ-5-6, 6466 - 6537  | R.IIGLDQVAGMSETALPGAFK.T    | 2019.35101 | 2 | 7.32E-06 | 0.96 | 5.33 | - | 1102.1 |
| AHQ-5-2, 5397 - 5405  | R.IIGLDQVAGMSETALPGAFK.T    | 2035.35041 | 2 | 3.01E-05 | 0.94 | 4.93 | - | 738.0  |
| AHQ-5-3, 6785 - 6853  | R.IIGLDQVAGMSETALPGAFK.T    | 2019.35101 | 2 | 2.62E-05 | 0.96 | 5.30 | - | 1042.1 |
| AHQ-5-3, 6795 - 6797  | R.IIGLDQVAGMSETALPGAFK.T    | 2019.35101 | 3 | 1.87E-08 | 0.95 | 5.62 | - | 1155.1 |
| AHQ-5-5, 6617         | R.IIGLDQVAGMSETALPGAFK.T    | 2019.35101 | 2 | 2.32E-06 | 0.96 | 4.89 | - | 1143.9 |
| AHQ-5-1, 6731         | R.IIGLDQVAGMSETALPGAFK.T    | 2019.35101 | 3 | 6.64E-04 | 0.96 | 5.05 | - | 1453.4 |
| AHQ-5-8, 6312         | R.IIGLDQVAGMSETALPGAFK.T    | 2019.35101 | 2 | 1.51E-06 | 0.97 | 5.68 | - | 1404.4 |
| AHQ-5-1, 5440         | R.IIGLDQVAGMSETALPGAFK.T    | 2035.35041 | 2 | 7.61E-04 | 0.82 | 3.63 | - | 501.3  |
| AHQ-5-8, 4789         | R.IMGIFEEQMGLLR.V           | 1616.92826 | 2 | 7.08E-05 | 0.69 | 2.81 | - | 432.4  |
| AHQ-5-4, 5372         | R.IMGIFEEQMGLLR.V           | 1616.92826 | 2 | 6.73E-07 | 0.90 | 3.69 | - | 517.0  |
| AHQ-5-5, 5189         | R.IMGIFEEQMGLLR.V           | 1616.92826 | 2 | 2.02E-04 | 0.73 | 3.07 | - | 325.6  |
| AHQ-5-1, 4101         | R.IM*GPIEEEQMGLLR.V         | 1648.92706 | 2 | 2.27E-04 | 0.71 | 2.65 | - | 547.2  |
| AHQ-5-2, 5317 - 5319  | R.IMGIFEEQMGLLR.V           | 1616.92826 | 2 | 5.18E-09 | 0.93 | 4.37 | - | 699.7  |
| AHQ-5-3, 5401 - 5410  | R.IMGIFEEQMGLLR.V           | 1616.92826 | 2 | 5.03E-10 | 0.90 | 3.78 | - | 529.9  |
| AHQ-5-2, 4750         | R.IM*GPIEEEQMGLLR.V         | 1632.92766 | 2 | 1.60E-05 | 0.93 | 4.07 | - | 780.2  |
| AHQ-5-1, 6033 - 6052  | K.IRELESQISELOEDLESER.A     | 2304.45416 | 3 | 3.31E-09 | 0.98 | 6.78 | - | 2649.8 |
| AHQ-5-2, 5886 - 5905  | K.IRELESQISELOEDLESER.A     | 2304.45416 | 3 | 4.45E-10 | 0.98 | 7.84 | - | 2304.0 |
| AHQ-5-4, 5913 - 5914  | K.IRELESQISELOEDLESER.A     | 2304.45416 | 3 | 1.27E-09 | 0.98 | 6.32 | - | 2448.2 |
| AHQ-5-2, 6219 - 6225  | K.IRELESQISELOEDLESER.A     | 2304.45416 | 2 | 5.92E-04 | 0.89 | 3.27 | - | 870.5  |
| AHQ-5-3, 5974 - 5993  | K.IRELESQISELOEDLESER.A     | 2304.45416 | 3 | 3.03E-06 | 0.97 | 5.82 | - | 2073.0 |
| AHQ-5-5, 5706 - 5775  | K.IRELESQISELOEDLESER.A     | 2304.45416 | 2 | 1.04E-10 | 0.98 | 6.65 | - | 1402.1 |
| AHQ-5-6, 5582 - 5644  | K.IRELESQISELOEDLESER.A     | 2304.45416 | 2 | 2.60E-04 | 0.98 | 6.31 | - | 1408.0 |
| AHQ-5-2, 5831 - 5897  | K.IRELESQISELOEDLESER.A     | 2304.45416 | 2 | 2.43E-04 | 0.99 | 7.12 | - | 2035.5 |
| AHQ-5-4, 5909         | K.IRELESQISELOEDLESER.A     | 2304.45416 | 2 | 3.88E-08 | 0.97 | 6.16 | - | 1000.9 |
| AHQ-5-3, 4453         | K.KANLQIDQINTDLNLER.S       | 1999.21478 | 2 | 3.24E-11 | 0.97 | 5.61 | - | 1107.3 |
| AHQ-5-5, 4333         | K.KANLQIDQINTDLNLER.S       | 1999.21478 | 2 | 2.10E-05 | 0.95 | 4.51 | - | 1575.9 |
| AHQ-5-6, 4250         | K.KANLQIDQINTDLNLER.S       | 1999.21478 | 2 | 3.33E-08 | 0.97 | 6.40 | - | 1344.6 |
| AHQ-5-2, 4381         | K.KANLQIDQINTDLNLER.S       | 1999.21478 | 2 | 5.65E-11 | 0.96 | 5.48 | - | 1018.2 |
| AHQ-5-2, 4834         | K.KANLQIDQINTDLNLER.S       | 1999.21478 | 2 | 1.31E-06 | 0.96 | 5.13 | - | 1180.8 |
| AHQ-5-2, 4997         | K.KANLQIDQINTDLNLER.S       | 1999.21478 | 2 | 1.07E-04 | 0.94 | 4.59 | - | 1048.1 |
| AHQ-5-1, 4537         | K.KANLQIDQINTDLNLER.S       | 1999.21478 | 2 | 1.83E-06 | 0.83 | 4.03 | - | 609.1  |
| AHQ-5-4, 4570 - 4600  | K.KANLQIDQINTDLNLER.S       | 1999.21478 | 2 | 9.45E-05 | 0.97 | 5.66 | - | 1565.1 |
| AHQ-5-2, 4557         | K.KANLQIDQINTDLNLER.S       | 1999.21478 | 3 | 3.11E-06 | 0.87 | 4.34 | - | 864.2  |
| AHQ-5-3, 2414 - 2490  | R.KKVEAQQLQKQV.F            | 1541.81761 | 2 | 1.20E-06 | 0.97 | 5.12 | - | 1697.0 |
| AHQ-5-4, 2385 - 2396  | R.KKVEAQQLQKQV.F            | 1541.81761 | 2 | 1.64E-08 | 0.98 | 5.50 | - | 1896.3 |
| AHQ-5-1, 2628 - 2631  | R.KKVEAQQLQKQV.F            | 1541.81761 | 2 | 4.30E-08 | 0.97 | 5.20 | - | 1772.7 |
| AHQ-5-2, 2338 - 2345  | R.KKVEAQQLQKQV.F            | 1541.81761 | 2 | 2.41E-08 | 0.98 | 5.52 | - | 2167.3 |
| AHQ-5-5, 2249         | R.KKVEAQQLQKQV.F            | 1541.81761 | 2 | 6.63E-06 | 0.96 | 4.46 | - | 1460.5 |
| AHQ-5-1, 3548         | K.KLEEEQIILEDQNK.L          | 1891.08992 | 2 | 1.12E-09 | 0.98 | 5.70 | - | 1646.4 |
| AHQ-5-2, 3675         | K.KLEEEQIILEDQNK.L          | 1891.08992 | 2 | 5.18E-05 | 0.98 | 5.49 | - | 2189.2 |
| AHQ-5-3, 3525         | K.KLEEEQIILEDQNK.L          | 1891.08992 | 2 | 1.52E-10 | 0.98 | 5.95 | - | 1645.8 |
| AHQ-5-3, 3958         | K.KLEEEQIILEDQNK.L          | 1891.08992 | 2 | 5.66E-04 | 0.88 | 3.65 | - | 710.0  |
| AHQ-5-3, 3369 - 3438  | K.KLEEEQIILEDQNK.L          | 1891.08992 | 2 | 9.95E-06 | 0.98 | 5.85 | - | 1760.8 |
| AHQ-5-1, 3649 - 3660  | K.KLEEEQIILEDQNK.L          | 1891.08992 | 2 | 2.11E-06 | 0.98 | 5.47 | - | 1935.4 |
| AHQ-5-3, 3730         | K.KLEEEQIILEDQNK.L          | 1891.08992 | 2 | 1.69E-07 | 0.98 | 5.50 | - | 2185.6 |
| AHQ-5-2, 3342 - 3390  | K.KLEEEQIILEDQNK.L          | 1891.08992 | 3 | 1.39E-10 | 0.89 | 4.17 | - | 1073.1 |
| AHQ-5-4, 3393         | K.KLEEEQIILEDQNK.L          | 1891.08992 | 2 | 5.71E-05 | 0.98 | 5.67 | - | 2154.2 |
| AHQ-5-2, 3582         | K.KLEEEQIILEDQNK.L          | 1891.08992 | 2 | 4.08E-10 | 0.98 | 5.52 | - | 1981.2 |
| AHQ-5-2, 3373 - 3445  | K.KLEEEQIILEDQNK.L          | 1891.08992 | 2 | 1.54E-07 | 0.97 | 5.19 | - | 1573.4 |
| AHQ-5-2, 3483 - 3513  | K.KLEEEQIILEDQNK.L          | 1891.08992 | 2 | 1.74E-05 | 0.98 | 5.89 | - | 1728.2 |
| AHQ-5-3, 3643         | K.KLEEEQIILEDQNK.L          | 1891.08992 | 2 | 5.29E-09 | 0.93 | 4.30 | - | 752.5  |
| AHQ-5-2, 3558 - 3587  | K.KLEEEQIILEDQNK.L          | 1891.08992 | 3 | 7.93E-04 | 0.67 | 3.12 | - | 867.5  |
| AHQ-5-4, 3500         | K.KLEEEQIILEDQNK.L          | 1891.08992 | 2 | 4.04E-11 | 0.98 | 6.32 | - | 2215.7 |
| AHQ-5-5, 7209 - 7211  | R.KLEGGDSDLSDQIAELQAIAELK.M | 2616.86032 | 3 | 5.62E-09 | 0.93 | 5.64 | - | 784.4  |
| AHQ-5-3, 7334 - 7338  | R.KLEGGDSDLSDQIAELQAIAELK.M | 2616.86032 | 2 | 6.32E-07 | 0.97 | 6.15 | - | 1173.6 |
| AHQ-5-1, 7195         | R.KLEGGDSDLSDQIAELQAIAELK.M | 2616.86032 | 3 | 4.85E-07 | 0.92 | 5.39 | - | 842.8  |
| AHQ-5-2, 7309 - 7377  | R.KLEGGDSDLSDQIAELQAIAELK.M | 2616.86032 | 3 | 9.16E-06 | 0.94 | 5.26 | - | 1100.6 |
| AHQ-5-2, 7279 - 7345  | R.KLEGGDSDLSDQIAELQAIAELK.M | 2616.86032 | 2 | 6.27E-07 | 0.97 | 6.29 | - | 1363.7 |
| AHQ-5-5, 7206         | R.KLEGGDSDLSDQIAELQAIAELK.M | 2616.86032 | 2 | 8.74E-11 | 0.97 | 5.75 | - | 1505.0 |
| AHQ-5-3, 7337 - 7349  | R.KLEGGDSDLSDQIAELQAIAELK.M | 2616.86032 | 3 | 1.18E-08 | 0.91 | 5.13 | - | 798.5  |
| AHQ-5-1, 7196 - 7408  | R.KLEGGDSDLSDQIAELQAIAELK.M | 2616.86032 | 2 | 1.07E-06 | 0.98 | 7.24 | - | 1470.7 |
| AHQ-5-7, 7066         | R.KLEGGDSDLSDQIAELQAIAELK.M | 2616.86032 | 2 | 7.06E-04 | 0.86 | 3.82 | - | 680.0  |
| AHQ-5-4, 7297         | R.KLEGGDSDLSDQIAELQAIAELK.M | 2616.86032 | 3 | 6.54E-07 | 0.91 | 5.02 | - | 943.5  |
| AHQ-5-3, 6390         | R.KLEGGDSDLSDQIAELQAIAELK.M | 2616.86032 | 3 | 5.77E-05 | 0.68 | 3.51 | - | 741.9  |
| AHQ-5-2, 2495         | K.KLVVWPSDK.S               | 1072.28194 | 1 | 1.88E-04 | 0.40 | 2.33 | - | 515.0  |
| AHQ-5-13-, 2812       | K.KLVVWPSDK.S               | 1072.28194 | 1 | 1.97E-04 | 0.64 | 2.52 | - | 399.3  |
| AHQ-5-2, 2501         | K.KLVVWPSDK.S               | 1072.28194 | 2 | 1.54E-05 | 0.87 | 3.17 | - | 959.6  |
| AHQ-5-6, 2397         | K.KLVVWPSDK.S               | 1072.28194 | 1 | 6.72E-05 | 0.46 | 2.07 | - | 543.2  |
| AHQ-5-2, 3565         | K.KMEDSVGCLETAEEVK.R        | 1827.02450 | 2 | 2.75E-05 | 0.95 | 4.71 | - | 1181.0 |
| AHQ-5-3, 3593         | K.KMEDSVGCLETAEEVK.R        | 1827.02450 | 2 | 7.63E-04 | 0.93 | 4.05 | - | 1274.7 |
| AHQ-5-2, 3042         | K.KM*EDSVGCLETAEEVK.R       | 1843.02390 | 2 | 3.43E-06 | 0.89 | 3.74 | - | 732.1  |
| AHQ-5-3, 2814         | K.KM*EDSVGCLETAEEVK.R       | 1999.21025 | 2 | 1.37E-04 | 0.86 | 3.80 | - | 592.4  |
| AHQ-5-3, 2818 - 2819  | K.KM*EDSVGCLETAEEVK.R       | 1999.21025 | 3 | 3.37E-06 | 0.94 | 5.20 | - | 899.8  |
| AHQ-5-2, 2722         | K.KM*EDSVGCLETAEEVK.R       | 1999.21025 | 3 | 2.68E-07 | 0.88 | 4.41 | - | 816.2  |
| AHQ-5-1, 3343         | K.KMEDSVGCLETAEEVK.R        | 1983.21085 | 2 | 5.18E-09 | 0.95 | 4.16 | - | 1294.3 |
| AHQ-5-4, 3196         | K.KMEDSVGCLETAEEVK.R        | 1983.21085 | 3 | 2.11E-07 | 0.93 | 4.88 | - | 974.3  |
| AHQ-5-1, 3337         | K.KMEDSVGCLETAEEVK.R        | 1983.21085 | 3 | 2.06E-12 | 0.96 | 5.51 | - | 1626.9 |
| AHQ-5-2, 3135 - 3141  | K.KMEDSVGCLETAEEVK.R        | 1983.21085 | 2 | 2.31E-08 | 0.97 | 5.14 | - | 1331.0 |
| AHQ-5-2, 2726 - 2727  | K.KM*EDSVGCLETAEEVK.R       | 1999.21025 | 2 | 2.34E-05 | 0.78 | 3.54 | - | 448.7  |
| AHQ-5-4, 3190         | K.KMEDSVGCLETAEEVK.R        | 1983.21085 | 2 | 8.72E-10 | 0.95 | 4.38 | - | 1331.8 |
| AHQ-5-3, 3205         | K.KMEDSVGCLETAEEVK.R        | 1983.21085 | 3 | 5.33E-10 | 0.97 | 5.77 | - | 1546.7 |
| AHQ-5-3, 3206         | K.KMEDSVGCLETAEEVK.R        | 1983.21085 | 2 | 4.21E-11 | 0.97 | 5.15 | - | 1437.5 |
| AHQ-5-3, 4930         | K.KM*QNIQIELEEQLEEEESAR.Q   | 2478.63294 | 3 | 8.41E-05 | 0.93 | 4.41 | - | 1564.5 |
| AHQ-5-2, 4861         | K.KM*QNIQIELEEQLEEEESAR.Q   | 2478.63294 | 2 | 2.79E-05 | 0.75 | 3.12 | - | 474.5  |
| AHQ-5-4, 5373         | K.KM*QNIQIELEEQLEEEESAR.Q   | 2462.63354 | 2 | 1.53E-06 | 0.82 | 3.56 | - | 616.3  |
| AHQ-5-1, 4981         | K.KM*QNIQIELEEQLEEEESAR.Q   | 2478.63294 | 3 | 7.03E-04 | 0.93 | 4.39 | - | 1521.3 |
| AHQ-5-2, 5310 - 5347  | K.KM*QNIQIELEEQLEEEESAR.Q   | 2462.63354 | 2 | 4.40E-08 | 0.98 | 6.16 | - | 1521.9 |

|                        |                             |            |   |          |      |      |   |        |
|------------------------|-----------------------------|------------|---|----------|------|------|---|--------|
| AHQ-5-1, 4144 - 4215   | K.KQEEIICHDLAR.V            | 1771.93036 | 2 | 9.54E-07 | 0.97 | 5.04 | - | 1782.2 |
| AHQ-5-5, 3825          | K.KQEEIICHDLAR.V            | 1771.93036 | 2 | 4.40E-05 | 0.97 | 4.99 | - | 1829.8 |
| AHQ-5-4, 4022          | K.KQEEIICHDLAR.V            | 1771.93036 | 2 | 3.38E-07 | 0.97 | 4.87 | - | 1808.0 |
| AHQ-5-5, 3818 - 3831   | K.KQEEIICHDLAR.V            | 1771.93036 | 3 | 4.15E-04 | 0.95 | 4.73 | - | 1690.8 |
| AHQ-5-6, 3786          | K.KQEEIICHDLAR.V            | 1771.93036 | 2 | 1.07E-04 | 0.96 | 4.44 | - | 1655.0 |
| AHQ-5-1, 4211          | K.KQEEIICHDLAR.V            | 1771.93036 | 3 | 1.25E-04 | 0.96 | 5.44 | - | 1727.5 |
| AHQ-5-2, 4013 - 4073   | K.KQEEIICHDLAR.V            | 1771.93036 | 2 | 3.34E-04 | 0.96 | 4.95 | - | 1651.5 |
| AHQ-5-2, 4010 - 4081   | K.KQEEIICHDLAR.V            | 1771.93036 | 3 | 4.23E-04 | 0.97 | 5.71 | - | 1949.4 |
| AHQ-5-4, 2725          | K.KVEAQLQELQVK.F            | 1413.64470 | 2 | 3.60E-06 | 0.97 | 4.77 | - | 1703.0 |
| AHQ-5-1, 2984 - 2985   | K.KVEAQLQELQVK.F            | 1413.64470 | 1 | 1.44E-06 | 0.16 | 2.39 | - | 321.4  |
| AHQ-5-2, 2673          | K.KVEAQLQELQVK.F            | 1413.64470 | 2 | 2.36E-05 | 0.97 | 5.20 | - | 1694.6 |
| AHQ-5-1, 2983          | K.KVEAQLQELQVK.F            | 1413.64470 | 2 | 2.31E-06 | 0.96 | 4.72 | - | 1586.2 |
| AHQ-5-3, 2759 - 2766   | K.KVEAQLQELQVK.F            | 1413.64470 | 2 | 6.08E-04 | 0.97 | 4.93 | - | 1861.0 |
| AHQ-5-3, 2767 - 2769   | K.KVEAQLQELQVK.F            | 1413.64470 | 1 | 1.71E-05 | 0.32 | 2.53 | - | 380.2  |
| AHQ-5-2, 2681          | K.KVEAQLQELQVK.F            | 1413.64470 | 1 | 1.76E-05 | 0.75 | 3.37 | - | 523.7  |
| AHQ-5-5, 2541          | K.KVEAQLQELQVK.F            | 1413.64470 | 2 | 1.11E-06 | 0.97 | 5.37 | - | 1510.0 |
| AHQ-5-2, 3803 - 3813   | K.LEEEIILQDQCK.L            | 1762.91700 | 2 | 2.83E-08 | 0.96 | 5.20 | - | 1095.9 |
| AHQ-5-4, 3977          | K.LEEEIILQDQCK.L            | 1762.91700 | 2 | 2.57E-05 | 0.94 | 4.20 | - | 1175.5 |
| AHQ-5-3, 4005          | K.LEEEIILQDQCK.L            | 1762.91700 | 2 | 7.02E-10 | 0.97 | 5.47 | - | 1611.9 |
| AHQ-5-3, 3861 - 3935   | K.LEEEIILQDQCK.L            | 1762.91700 | 2 | 3.71E-08 | 0.97 | 5.73 | - | 1321.8 |
| AHQ-5-4, 3824 - 3829   | K.LEEEIILQDQCK.L            | 1762.91700 | 2 | 4.38E-08 | 0.96 | 5.20 | - | 1057.1 |
| AHQ-5-2, 3906 - 3982   | K.LEEEIILQDQCK.L            | 1762.91700 | 2 | 3.09E-09 | 0.96 | 4.96 | - | 1168.0 |
| AHQ-5-1, 4005          | K.LEEEIILQDQCK.L            | 1762.91700 | 2 | 8.49E-10 | 0.88 | 3.96 | - | 684.0  |
| AHQ-5-4, 7400          | K.LEGSDTDLSDQIAELQAQIAELK.M | 2488.68740 | 2 | 4.87E-09 | 0.96 | 5.26 | - | 1028.1 |
| AHQ-5-2, 7437 - 7438   | K.LEGSDTDLSDQIAELQAQIAELK.M | 2488.68740 | 2 | 1.22E-08 | 0.97 | 5.89 | - | 1115.2 |
| AHQ-5-1, 7268          | K.LEGSDTDLSDQIAELQAQIAELK.M | 2488.68740 | 3 | 3.30E-07 | 0.94 | 5.36 | - | 1268.0 |
| AHQ-5-3, 3463          | R.LEVNLQAMK.A               | 1046.26630 | 2 | 5.62E-06 | 0.81 | 3.16 | - | 574.1  |
| AHQ-5-1, 3600          | R.LEVNLQAMK.A               | 1046.26630 | 2 | 3.16E-05 | 0.83 | 3.25 | - | 615.9  |
| AHQ-5-2, 3361          | R.LEVNLQAMK.A               | 1046.26630 | 2 | 3.16E-05 | 0.92 | 3.73 | - | 779.1  |
| AHQ-5-2, 3707          | R.LEVNLQAMK.A               | 1046.26630 | 1 | 4.94E-05 | 0.28 | 2.76 | - | 318.4  |
| AHQ-5-1, 3543          | K.LKDVLLQVDDER.R            | 1443.62767 | 2 | 8.10E-09 | 0.97 | 4.27 | - | 1942.0 |
| AHQ-5-2, 3294          | K.LKDVLLQVDDER.R            | 1443.62767 | 2 | 6.84E-08 | 0.95 | 4.13 | - | 1366.3 |
| AHQ-5-2, 3257          | K.LKDVLLQVDDER.R            | 1443.62767 | 1 | 3.89E-05 | 0.21 | 2.14 | - | 347.3  |
| AHQ-5-4, 3376 - 3378   | K.LKDVLLQVDDER.R            | 1443.62767 | 2 | 5.75E-09 | 0.96 | 4.05 | - | 1737.4 |
| AHQ-5-3, 2923          | K.LKDVLLQVDDERR.N           | 1599.81402 | 2 | 2.66E-04 | 0.86 | 3.53 | - | 1037.9 |
| AHQ-5-11, 2852         | K.LKDVLLQVDDERR.N           | 1599.81402 | 2 | 1.02E-04 | 0.82 | 2.98 | - | 1067.1 |
| AHQ-5-5, 2649          | K.LKDVLLQVDDERR.N           | 1599.81402 | 2 | 2.16E-05 | 0.91 | 3.89 | - | 1181.2 |
| AHQ-5-2, 2814 - 2850   | K.LKDVLLQVDDERR.N           | 1599.81402 | 2 | 2.59E-05 | 0.86 | 3.54 | - | 970.2  |
| AHQ-5-1, 3088          | K.LKDVLLQVDDERR.N           | 1599.81402 | 2 | 3.67E-04 | 0.95 | 3.78 | - | 1585.9 |
| AHQ-5-3, 2691          | K.LKNKHEAMITDLEER.L         | 1828.08363 | 2 | 1.58E-10 | 0.91 | 3.60 | - | 921.1  |
| AHQ-5-3, 7699          | K.LLQELQQLQAETELCAEAELR.A   | 2503.72536 | 3 | 1.69E-06 | 0.87 | 3.89 | - | 1128.1 |
| AHQ-5-2, 7651          | K.LLQELQQLQAETELCAEAELR.A   | 2503.72536 | 3 | 1.06E-05 | 0.92 | 4.13 | - | 1455.2 |
| AHQ-5-2, 6063 - 6133   | R.LQQLDLDLVLDDHQR.Q         | 1951.12699 | 2 | 2.06E-09 | 0.97 | 5.14 | - | 1663.4 |
| AHQ-5-10, 5416         | R.LQQLDLDLVLDDHQR.Q         | 1951.12699 | 2 | 3.30E-05 | 0.88 | 3.70 | - | 1023.7 |
| AHQ-5-2, 5009          | R.LQQLDLDLVLDDHQR.Q         | 1951.12699 | 3 | 7.96E-07 | 0.70 | 3.37 | - | 637.8  |
| AHQ-5-6, 5934          | R.LQQLDLDLVLDDHQR.Q         | 1951.12699 | 3 | 3.69E-04 | 0.88 | 3.99 | - | 800.0  |
| AHQ-5-2, 6098 - 6169   | R.LQQLDLDLVLDDHQR.Q         | 1951.12699 | 3 | 1.49E-05 | 0.93 | 4.83 | - | 856.4  |
| AHQ-5-3, 5677          | R.LQQLDLDLVLDDHQR.Q         | 1951.12699 | 2 | 1.60E-04 | 0.91 | 3.82 | - | 800.5  |
| AHQ-5-1, 6259          | R.LQQLDLDLVLDDHQR.Q         | 1951.12699 | 2 | 1.90E-09 | 0.97 | 5.14 | - | 1643.5 |
| AHQ-5-6, 5933          | R.LQQLDLDLVLDDHQR.Q         | 1951.12699 | 2 | 2.76E-10 | 0.97 | 5.49 | - | 1784.7 |
| AHQ-5-1, 6260          | R.LQQLDLDLVLDDHQR.Q         | 1951.12699 | 3 | 7.62E-04 | 0.90 | 4.26 | - | 778.7  |
| AHQ-5-4, 6161          | R.LQQLDLDLVLDDHQR.Q         | 1951.12699 | 3 | 8.89E-08 | 0.91 | 4.38 | - | 882.1  |
| AHQ-5-7, 5822          | R.LQQLDLDLVLDDHQR.Q         | 1951.12699 | 2 | 1.10E-10 | 0.95 | 4.41 | - | 1191.7 |
| AHQ-5-2, 5011          | R.LQQLDLDLVLDDHQR.Q         | 1951.12699 | 2 | 2.60E-09 | 0.95 | 4.61 | - | 1210.9 |
| AHQ-5-3, 6233 - 6259   | R.LQQLDLDLVLDDHQR.Q         | 1951.12699 | 3 | 6.87E-07 | 0.94 | 5.15 | - | 943.4  |
| AHQ-5-2, 6165          | R.LQQLDLDLVLDDHQR.Q         | 1951.12699 | 2 | 3.10E-10 | 0.97 | 5.02 | - | 1709.4 |
| AHQ-5-3, 6231 - 6303   | R.LQQLDLDLVLDDHQR.Q         | 1951.12699 | 2 | 3.44E-11 | 0.96 | 4.90 | - | 1323.9 |
| AHQ-5-5, 5978 - 6049   | R.LQQLDLDLVLDDHQR.Q         | 1951.12699 | 3 | 1.69E-05 | 0.91 | 4.50 | - | 791.6  |
| AHQ-5-2, 5587          | R.LQQLDLDLVLDDHQR.Q         | 1951.12699 | 2 | 1.46E-08 | 0.85 | 3.26 | - | 744.5  |
| AHQ-5-4, 6160 - 6165   | R.LQQLDLDLVLDDHQR.Q         | 1951.12699 | 2 | 6.66E-11 | 0.96 | 4.68 | - | 1417.1 |
| AHQ-5-5, 6038 - 6039   | R.LQQLDLDLVLDDHQR.Q         | 1951.12699 | 2 | 6.02E-11 | 0.97 | 5.69 | - | 1396.7 |
| AHQ-5-3, 6090 - 6157   | K.LQVELDNVTGLLSQSDSK.S      | 1947.13342 | 2 | 9.99E-15 | 0.98 | 6.40 | - | 1513.9 |
| AHQ-5-2, 5869 - 5938   | K.LQVELDNVTGLLSQSDSK.S      | 1947.13342 | 2 | 7.56E-12 | 0.98 | 6.73 | - | 1757.0 |
| AHQ-5-2, 6005 - 6073   | K.LQVELDNVTGLLSQSDSK.S      | 1947.13342 | 2 | 4.20E-11 | 0.98 | 6.14 | - | 1383.5 |
| AHQ-5-3, 6225          | K.LQVELDNVTGLLSQSDSK.S      | 1947.13342 | 2 | 1.80E-09 | 0.97 | 5.29 | - | 1392.9 |
| AHQ-5-2, 6141 - 6205   | K.LQVELDNVTGLLSQSDSK.S      | 1947.13342 | 2 | 2.11E-07 | 0.97 | 6.02 | - | 1307.6 |
| AHQ-5-1, 5951 - 6019   | K.LQVELDNVTGLLSQSDSK.S      | 1947.13342 | 2 | 7.55E-14 | 0.98 | 7.00 | - | 1613.6 |
| AHQ-5-3, 6307 - 6379   | K.LQVELDNVTGLLSQSDSK.S      | 1947.13342 | 2 | 1.51E-11 | 0.97 | 6.25 | - | 1124.3 |
| AHQ-5-5, 5782 - 5827   | K.LQVELDNVTGLLSQSDSK.S      | 1947.13342 | 2 | 1.96E-06 | 0.97 | 5.11 | - | 1267.6 |
| AHQ-5-2, 6226 - 6302   | K.LQVELDNVTGLLSQSDSK.S      | 1947.13342 | 2 | 4.21E-08 | 0.97 | 5.39 | - | 1299.5 |
| AHQ-5-3, 6017 - 6085   | K.LQVELDNVTGLLSQSDSK.S      | 1947.13342 | 2 | 3.00E-10 | 0.98 | 6.71 | - | 1930.8 |
| AHQ-5-3, 7030          | K.LQVELDNVTGLLSQSDSK.S      | 1947.13342 | 2 | 7.21E-06 | 0.87 | 3.74 | - | 883.4  |
| AHQ-5-5, 5901 - 5971   | K.LQVELDNVTGLLSQSDSK.S      | 1947.13342 | 2 | 9.73E-04 | 0.94 | 4.53 | - | 1226.8 |
| AHQ-5-2, 6454 - 6533   | K.LQVELDNVTGLLSQSDSK.S      | 1947.13342 | 2 | 1.02E-07 | 0.98 | 6.15 | - | 1792.2 |
| AHQ-5-1, 6088          | K.LQVELDNVTGLLSQSDSK.S      | 1947.13342 | 2 | 6.53E-09 | 0.97 | 6.02 | - | 983.7  |
| AHQ-5-2, 7225          | K.LQVELDNVTGLLSQSDSK.S      | 1947.13342 | 2 | 2.40E-05 | 0.93 | 4.51 | - | 717.1  |
| AHQ-5-4, 5893 - 5965   | K.LQVELDNVTGLLSQSDSK.S      | 1947.13342 | 2 | 5.26E-08 | 0.98 | 5.60 | - | 1737.6 |
| AHQ-5-2, 6602 - 6683   | K.LQVELDNVTGLLSQSDSK.S      | 1947.13342 | 2 | 1.67E-09 | 0.98 | 6.08 | - | 1355.9 |
| AHQ-5-3, 5919 - 5989   | K.LQVELDNVTGLLSQSDSK.S      | 1947.13342 | 2 | 1.74E-13 | 0.98 | 6.16 | - | 1423.7 |
| AHQ-5-1, 6173          | K.LQVELDNVTGLLSQSDSK.S      | 1947.13342 | 2 | 1.14E-10 | 0.97 | 5.36 | - | 1611.3 |
| AHQ-5-2, 4107          | K.LRLEVNLAQAMK.A            | 1315.61090 | 2 | 2.87E-05 | 0.94 | 3.74 | - | 1312.5 |
| AHQ-5-4, 4042          | K.LRLEVNLAQAMK.A            | 1315.61090 | 2 | 5.16E-04 | 0.92 | 3.55 | - | 1086.3 |
| AHQ-5-1, 3697          | R.LTEM*ETLQSQLM*AEK.L       | 1785.03091 | 2 | 3.54E-04 | 0.67 | 3.35 | - | 606.3  |
| AHQ-5-3, 5305 - 5313   | R.LTEM*ETLQSQLM*AEK.L       | 1753.03211 | 2 | 6.02E-08 | 0.92 | 3.86 | - | 1251.1 |
| AHQ-5-3, 5193          | R.LTEM*ETLQSQLM*AEK.L       | 1753.03211 | 2 | 1.22E-04 | 0.97 | 5.10 | - | 1758.5 |
| AHQ-5-2, 4571 - 4589   | R.LTEM*ETLQSQLM*AEK.L       | 1769.03151 | 2 | 5.82E-04 | 0.96 | 5.32 | - | 1222.0 |
| AHQ-5-2, 5237 - 5250   | R.LTEM*ETLQSQLM*AEK.L       | 1753.03211 | 2 | 2.36E-04 | 0.89 | 3.59 | - | 1128.6 |
| AHQ-5-4, 4581          | R.LTEM*ETLQSQLM*AEK.L       | 1769.03151 | 2 | 2.38E-04 | 0.89 | 3.80 | - | 957.5  |
| AHQ-5-2, 3451 - 3530   | R.LTEM*ETLQSQLM*AEK.L       | 1785.03091 | 2 | 1.02E-04 | 0.94 | 4.30 | - | 1110.2 |
| AHQ-5-2, 5121 - 5137   | R.LTEM*ETLQSQLM*AEK.L       | 1753.03211 | 2 | 8.51E-10 | 0.98 | 5.86 | - | 1675.1 |
| AHQ-5-4, 5128          | R.LTEM*ETLQSQLM*AEK.L       | 1753.03211 | 2 | 1.19E-04 | 0.97 | 4.89 | - | 1767.6 |
| AHQ-5-3, 3982          | K.MEDSVGCLTAEEVKR.R         | 1698.85159 | 2 | 4.56E-07 | 0.91 | 4.24 | - | 646.5  |
| AHQ-5-2, 3934          | K.MEDSVGCLTAEEVKR.R         | 1698.85159 | 2 | 2.07E-06 | 0.66 | 2.94 | - | 599.7  |
| AHQ-5-4, 3504          | K.MEDSVGCLTAEEVKR.K         | 1855.03794 | 2 | 3.04E-09 | 0.88 | 3.76 | - | 577.1  |
| AHQ-5-3, 3191          | K.M*EDSVGCLTAEEVKR.K        | 1871.03734 | 2 | 7.92E-07 | 0.87 | 3.47 | - | 596.9  |
| AHQ-5-2, 3137          | K.M*EDSVGCLTAEEVKR.K        | 1871.03734 | 2 | 1.00E-05 | 0.93 | 3.86 | - | 881.2  |
| AHQ-5-3, 3538          | K.MEDSVGCLTAEEVKR.K         | 1855.03794 | 2 | 3.00E-08 | 0.76 | 3.01 | - | 548.9  |
| AHQ-5-2, 3510          | K.MEDSVGCLTAEEVKR.K         | 1855.03794 | 3 | 1.28E-07 | 0.69 | 3.18 | - | 574.0  |
| AHQ-5-2, 5626 - 5645   | K.MQNNQIELEELQEEESAR.Q      | 2334.46063 | 3 | 9.54E-12 | 0.97 | 6.95 | - | 1672.5 |
| AHQ-5-13-, 5148 - 5167 | K.NFINNPLAQADWAAK.K         | 1673.85315 | 2 | 2.54E-08 | 0.96 | 5.44 | - | 1076.0 |
| AHQ-5-7, 4954          | K.NFINNPLAQADWAAK.K         | 1673.85315 | 2 | 3.79E-04 | 0.96 | 4.94 | - | 1128.2 |
| AHQ-5-5, 5178 - 5201   | K.NFINNPLAQADWAAK.K         | 1673.85315 | 2 | 7.72E-10 | 0.96 | 4.70 | - | 1186.0 |
| AHQ-5-2, 5321 - 5393   | K.NFINNPLAQADWAAK.K         | 1673.85315 | 2 | 5.47E-11 | 0.95 | 4.83 | - | 948.9  |
| AHQ-5-13, 5252 - 5253  | K.NFINNPLAQADWAAK.K         | 1673.85315 | 2 | 3.68E-09 | 0.96 | 4.79 | - | 1236.1 |
| AHQ-5-1, 5452 - 5461   | K.NFINNPLAQADWAAK.K         | 1673.85315 | 2 | 3.32E-06 | 0.92 | 4.21 | - | 940.2  |
| AHQ-5-3, 6127          | K.NFINNPLAQADWAAK.K         | 1673.85315 | 2 | 1.11E-05 | 0.91 | 3.95 | - | 790.1  |
| AHQ-5-9, 4544          | K.NFINNPLAQADWAAK.K         | 1673.85315 | 2 | 6.19E-05 | 0.72 | 3.02 | - | 600.2  |

|                        |                               |            |   |          |      |      |   |        |
|------------------------|-------------------------------|------------|---|----------|------|------|---|--------|
| AHQ-5-4, 6086          | K.NFINNPLAQADWAAK.K           | 1673.85315 | 2 | 8.18E-09 | 0.92 | 4.24 | - | 779.5  |
| AHQ-5-12, 5209         | K.NFINNPLAQADWAAK.K           | 1673.85315 | 2 | 2.90E-04 | 0.66 | 2.59 | - | 760.1  |
| AHQ-5-2, 5498          | K.NFINNPLAQADWAAK.K           | 1673.85315 | 2 | 1.11E-08 | 0.87 | 3.80 | - | 648.7  |
| AHQ-5-2, 6045          | K.NFINNPLAQADWAAK.K           | 1673.85315 | 2 | 2.71E-08 | 0.91 | 4.03 | - | 853.0  |
| AHQ-5-1, 6085 - 6100   | K.NFINNPLAQADWAAK.K           | 1673.85315 | 2 | 7.07E-06 | 0.94 | 4.38 | - | 948.4  |
| AHQ-5-10, 5298         | K.NFINNPLAQADWAAK.K           | 1673.85315 | 2 | 3.40E-05 | 0.80 | 3.58 | - | 641.9  |
| AHQ-5-3, 5413          | K.NFINNPLAQADWAAK.K           | 1673.85315 | 2 | 1.85E-05 | 0.96 | 4.89 | - | 1227.4 |
| AHQ-5-2, 5746          | K.NFINNPLAQADWAAK.K           | 1673.85315 | 2 | 5.38E-08 | 0.95 | 4.27 | - | 1284.3 |
| AHQ-5-14-, 5115        | K.NFINNPLAQADWAAK.K           | 1673.85315 | 2 | 2.74E-08 | 0.93 | 4.14 | - | 1081.9 |
| AHQ-5-6, 5120          | K.NFINNPLAQADWAAK.K           | 1673.85315 | 2 | 6.56E-07 | 0.94 | 4.53 | - | 1038.1 |
| AHQ-5-4, 5382          | K.NFINNPLAQADWAAK.K           | 1673.85315 | 2 | 3.73E-11 | 0.96 | 5.14 | - | 1173.4 |
| AHQ-5-4, 2370          | K.NKHEAMITDLEER.L             | 1586.75247 | 2 | 3.77E-08 | 0.91 | 3.08 | - | 1322.2 |
| AHQ-5-5, 2250          | K.NKHEAMITDLEER.L             | 1586.75247 | 2 | 8.63E-08 | 0.89 | 3.68 | - | 781.9  |
| AHQ-5-3, 2405          | K.NKHEAMITDLEER.L             | 1586.75247 | 2 | 3.41E-09 | 0.91 | 3.41 | - | 1083.8 |
| AHQ-5-1, 2627          | K.NKHEAMITDLEER.L             | 1586.75247 | 2 | 1.26E-05 | 0.88 | 3.09 | - | 911.0  |
| AHQ-5-2, 2337 - 2349   | K.NKHEAMITDLEER.L             | 1586.75247 | 2 | 2.92E-06 | 0.93 | 3.73 | - | 1248.4 |
| AHQ-5-2, 5177 - 5181   | K.NLPIYSEEIVEM*YK.G           | 1744.98660 | 2 | 2.88E-05 | 0.96 | 4.73 | - | 1169.7 |
| AHQ-5-1, 5311          | K.NLPIYSEEIVEM*YK.G           | 1744.98660 | 2 | 6.05E-06 | 0.92 | 3.96 | - | 817.1  |
| AHQ-5-6, 5573 - 5597   | K.NLPIYSEEIVEM*YK.G           | 1728.98720 | 2 | 6.05E-04 | 0.90 | 3.78 | - | 622.9  |
| AHQ-5-1, 5967          | K.NLPIYSEEIVEM*YK.G           | 1728.98720 | 2 | 2.64E-04 | 0.90 | 3.54 | - | 766.9  |
| AHQ-5-13, 5662         | K.NLPIYSEEIVEM*YK.G           | 1728.98720 | 2 | 4.15E-05 | 0.95 | 4.25 | - | 950.2  |
| AHQ-5-4, 5225 - 5300   | K.NLPIYSEEIVEM*YK.G           | 1744.98660 | 2 | 9.51E-05 | 0.94 | 4.65 | - | 797.0  |
| AHQ-5-12, 5626         | K.NLPIYSEEIVEM*YK.G           | 1728.98720 | 2 | 6.36E-05 | 0.70 | 2.97 | - | 475.9  |
| AHQ-5-3, 5898 - 5909   | K.NLPIYSEEIVEM*YK.G           | 1728.98720 | 2 | 8.92E-05 | 0.91 | 3.88 | - | 760.4  |
| AHQ-5-13-, 5561        | K.NLPIYSEEIVEM*YK.G           | 1728.98720 | 2 | 8.04E-05 | 0.88 | 3.14 | - | 726.8  |
| AHQ-5-11, 5435 - 5442  | K.NLPIYSEEIVEM*YK.G           | 1728.98720 | 2 | 7.84E-06 | 0.93 | 4.27 | - | 711.4  |
| AHQ-5-10, 5056         | K.NLPIYSEEIVEM*YK.G           | 1728.98720 | 2 | 7.02E-05 | 0.77 | 3.23 | - | 524.5  |
| AHQ-5-7, 5374 - 5384   | K.NLPIYSEEIVEM*YK.G           | 1728.98720 | 2 | 9.84E-04 | 0.86 | 3.75 | - | 465.3  |
| AHQ-5-3, 6207          | K.NMDPLNDNIATLLHQSSDK.F       | 2127.32169 | 2 | 3.82E-05 | 0.65 | 2.94 | - | 497.1  |
| AHQ-5-2, 5795          | K.NMDPLNDNIATLLHQSSDK.F       | 2127.32169 | 2 | 1.36E-07 | 0.96 | 5.06 | - | 1038.4 |
| AHQ-5-4, 5548          | K.NMDPLNDNIATLLHQSSDK.F       | 2127.32169 | 2 | 8.73E-05 | 0.94 | 4.77 | - | 915.4  |
| AHQ-5-2, 5630          | K.NMDPLNDNIATLLHQSSDK.F       | 2127.32169 | 2 | 4.11E-08 | 0.95 | 4.13 | - | 1048.5 |
| AHQ-5-2, 5509          | K.NMDPLNDNIATLLHQSSDK.F       | 2127.32169 | 3 | 5.47E-05 | 0.69 | 3.22 | - | 355.2  |
| AHQ-5-3, 5889 - 5962   | K.NMDPLNDNIATLLHQSSDK.F       | 2127.32169 | 2 | 7.82E-10 | 0.92 | 3.85 | - | 841.9  |
| AHQ-5-3, 5727          | K.NMDPLNDNIATLLHQSSDK.F       | 2127.32169 | 2 | 1.33E-05 | 0.90 | 4.15 | - | 584.8  |
| AHQ-5-5, 5321          | K.NMDPLNDNIATLLHQSSDK.F       | 2127.32169 | 2 | 3.39E-05 | 0.82 | 3.65 | - | 672.1  |
| AHQ-5-3, 5589 - 5607   | K.NMDPLNDNIATLLHQSSDK.F       | 2127.32169 | 2 | 2.40E-04 | 0.88 | 4.07 | - | 622.3  |
| AHQ-5-6, 5242 - 5296   | K.NMDPLNDNIATLLHQSSDK.F       | 2127.32169 | 2 | 7.04E-07 | 0.81 | 3.63 | - | 590.6  |
| AHQ-5-3, 5227          | K.NM*DPLNDNIATLLHQSSDK.F      | 2143.32109 | 2 | 3.81E-05 | 0.80 | 3.65 | - | 677.3  |
| AHQ-5-3, 5131          | K.NM*DPLNDNIATLLHQSSDK.F      | 2143.32109 | 2 | 5.19E-07 | 0.85 | 3.34 | - | 921.1  |
| AHQ-5-1, 5597 - 5676   | K.NMDPLNDNIATLLHQSSDK.F       | 2127.32169 | 2 | 2.21E-04 | 0.94 | 4.49 | - | 825.9  |
| AHQ-5-2, 5034          | K.NM*DPLNDNIATLLHQSSDK.F      | 2143.32109 | 2 | 4.01E-08 | 0.93 | 4.27 | - | 831.3  |
| AHQ-5-1, 5777          | K.NMDPLNDNIATLLHQSSDK.F       | 2127.32169 | 2 | 4.67E-05 | 0.91 | 3.97 | - | 700.6  |
| AHQ-5-2, 5490 - 5558   | K.NMDPLNDNIATLLHQSSDK.F       | 2127.32169 | 2 | 1.63E-05 | 0.90 | 3.80 | - | 898.5  |
| AHQ-5-1, 5183          | K.NM*DPLNDNIATLLHQSSDK.F      | 2143.32109 | 3 | 1.20E-07 | 0.87 | 3.63 | - | 848.2  |
| AHQ-5-2, 5041 - 5051   | K.NM*DPLNDNIATLLHQSSDK.F      | 2143.32109 | 3 | 9.30E-09 | 0.91 | 4.11 | - | 1053.2 |
| AHQ-5-1, 5176          | K.NM*DPLNDNIATLLHQSSDK.F      | 2143.32109 | 2 | 1.11E-04 | 0.88 | 3.50 | - | 867.6  |
| AHQ-5-3, 7558          | K.PAGP*G*LLALDEECCWFPK.A      | 2112.43315 | 2 | 3.85E-06 | 0.98 | 5.56 | - | 2053.6 |
| AHQ-5-6, 7361          | K.PAGP*G*LLALDEECCWFPK.A      | 2112.43315 | 2 | 2.51E-04 | 0.97 | 5.96 | - | 1364.9 |
| AHQ-5-2, 7545          | K.PAGP*G*LLALDEECCWFPK.A      | 2112.43315 | 2 | 8.33E-08 | 0.98 | 5.94 | - | 2019.3 |
| AHQ-5-2, 3066          | R.QAQQRDELADAEIANSSGK.G       | 2090.15168 | 2 | 5.04E-04 | 0.89 | 3.72 | - | 612.8  |
| AHQ-5-3, 2782          | R.QAQQRDELADAEIANSSGK.G       | 2090.15168 | 2 | 4.98E-04 | 0.78 | 3.57 | - | 536.5  |
| AHQ-5-3, 3109 - 3115   | R.QAQQRDELADAEIANSSGK.G       | 2090.15168 | 2 | 2.84E-06 | 0.85 | 3.78 | - | 504.8  |
| AHQ-5-1, 3259          | R.QAQQRDELADAEIANSSGK.G       | 2090.15168 | 3 | 1.97E-05 | 0.93 | 4.27 | - | 1208.8 |
| AHQ-5-2, 4546          | R.QELEEEIEAQR.A               | 1643.75744 | 2 | 9.33E-06 | 0.92 | 3.95 | - | 831.6  |
| AHQ-5-2, 1927          | R.QELEEEIEAQR.A               | 1332.35590 | 2 | 3.62E-06 | 0.80 | 3.20 | - | 577.8  |
| AHQ-5-2, 2782          | R.QTLENERGELANEV.K            | 1730.85818 | 3 | 1.71E-04 | 0.53 | 3.01 | - | 322.2  |
| AHQ-5-10, 3111         | R.RGDL*PFV*V*P*P.R            | 1156.36217 | 2 | 6.65E-05 | 0.94 | 3.83 | - | 1049.3 |
| AHQ-5-6, 3142 - 3148   | R.RGDL*PFV*V*P*P.R            | 1156.36217 | 2 | 1.20E-04 | 0.92 | 3.60 | - | 967.1  |
| AHQ-5-2, 3266 - 3337   | R.RGDL*PFV*V*P*P.R            | 1156.36217 | 2 | 3.19E-06 | 0.94 | 3.94 | - | 1093.3 |
| AHQ-5-11, 3304         | R.RGDL*PFV*V*P*P.R            | 1156.36217 | 2 | 3.64E-06 | 0.94 | 3.87 | - | 1244.5 |
| AHQ-5-4, 3397 - 3406   | R.RGDL*PFV*V*P*P.R            | 1156.36217 | 2 | 2.17E-05 | 0.96 | 3.92 | - | 1577.4 |
| AHQ-5-1, 3636 - 3643   | R.RGDL*PFV*V*P*P.R            | 1156.36217 | 2 | 2.65E-06 | 0.97 | 4.18 | - | 1553.5 |
| AHQ-5-3, 3433 - 3443   | R.RGDL*PFV*V*P*P.R            | 1156.36217 | 2 | 5.33E-04 | 0.91 | 3.51 | - | 1014.0 |
| AHQ-5-2, 2701          | K.RHEM*P*PHI*Y*IT*DT*Y*R.S    | 2088.33519 | 3 | 1.65E-05 | 0.95 | 4.30 | - | 1631.0 |
| AHQ-5-1, 6924          | R.RKLEGDSTDLSDQIAELQAQIAELK.M | 2773.04667 | 3 | 2.17E-10 | 0.96 | 5.85 | - | 1375.4 |
| AHQ-5-2, 6887 - 6954   | R.RKLEGDSTDLSDQIAELQAQIAELK.M | 2773.04667 | 3 | 1.86E-11 | 0.96 | 6.06 | - | 1327.3 |
| AHQ-5-4, 6932          | R.RKLEGDSTDLSDQIAELQAQIAELK.M | 2773.04667 | 3 | 3.52E-06 | 0.95 | 5.33 | - | 1571.2 |
| AHQ-5-2, 2758          | K.RQAQQRDELADAEIANSSGK.G      | 2246.33803 | 2 | 8.35E-04 | 0.41 | 2.76 | - | 266.3  |
| AHQ-5-3, 1871          | K.RQLEEEIEAQR.A               | 1488.54225 | 2 | 2.14E-04 | 0.97 | 4.88 | - | 1838.8 |
| AHQ-5-2, 1837          | K.RQLEEEIEAQR.A               | 1488.54225 | 2 | 1.24E-05 | 0.98 | 5.35 | - | 2926.1 |
| AHQ-5-3, 6469          | K.SGFEPASLKEEVGEEAIVLVENGKK.V | 2790.07246 | 3 | 1.10E-07 | 0.92 | 4.78 | - | 855.3  |
| AHQ-5-4, 6345          | K.SGFEPASLKEEVGEEAIVLVENGKK.V | 2790.07246 | 3 | 2.00E-07 | 0.76 | 3.55 | - | 537.2  |
| AHQ-5-2, 6459 - 6531   | K.SGFEPASLKEEVGEEAIVLVENGKK.V | 2790.07246 | 3 | 1.79E-08 | 0.96 | 6.05 | - | 1089.1 |
| AHQ-5-13-, 6021 - 6089 | K.SGFEPASLKEEVGEEAIVLVENGKK.V | 2790.07246 | 3 | 1.13E-06 | 0.86 | 4.13 | - | 698.3  |
| AHQ-5-13-, 5903        | K.SGFEPASLKEEVGEEAIVLVENGKK.V | 2790.07246 | 3 | 9.70E-09 | 0.96 | 5.58 | - | 1496.3 |
| AHQ-5-2, 6221 - 6301   | K.SGFEPASLKEEVGEEAIVLVENGKK.V | 2790.07246 | 3 | 8.15E-09 | 0.94 | 5.24 | - | 927.6  |
| AHQ-5-5, 6218 - 6293   | K.SGFEPASLKEEVGEEAIVLVENGKK.V | 2790.07246 | 3 | 4.79E-09 | 0.92 | 4.77 | - | 1005.1 |
| AHQ-5-1, 6449          | K.SGFEPASLKEEVGEEAIVLVENGKK.V | 2790.07246 | 3 | 7.78E-08 | 0.95 | 5.16 | - | 1429.6 |
| AHQ-5-1, 6303 - 6365   | K.SGFEPASLKEEVGEEAIVLVENGKK.V | 2790.07246 | 3 | 7.43E-05 | 0.97 | 5.73 | - | 2149.2 |
| AHQ-5-2, 6679          | K.SGFEPASLKEEVGEEAIVLVENGKK.V | 2790.07246 | 3 | 2.37E-08 | 0.94 | 5.26 | - | 1000.4 |
| AHQ-5-10, 5562         | K.SGFEPASLKEEVGEEAIVLVENGKK.V | 2790.07246 | 3 | 8.12E-08 | 0.93 | 4.45 | - | 999.0  |
| AHQ-5-3, 6373          | K.SGFEPASLKEEVGEEAIVLVENGKK.V | 2790.07246 | 3 | 6.77E-10 | 0.93 | 4.81 | - | 1073.5 |
| AHQ-5-13, 6170         | K.SGFEPASLKEEVGEEAIVLVENGKK.V | 2790.07246 | 3 | 2.73E-04 | 0.87 | 4.13 | - | 807.5  |
| AHQ-5-2, 6370          | K.SGFEPASLKEEVGEEAIVLVENGKK.V | 2790.07246 | 3 | 9.01E-09 | 0.83 | 3.68 | - | 739.8  |
| AHQ-5-4, 6970 - 7042   | K.SMEAEIMQLQEELAAAER.A        | 2050.30064 | 2 | 2.93E-04 | 0.91 | 3.88 | - | 1152.4 |
| AHQ-5-1, 6009          | K.SM*EAEM*IQ*QEELAAAER.A      | 2066.30004 | 3 | 5.28E-04 | 0.86 | 4.30 | - | 1253.6 |
| AHQ-5-2, 4817          | K.SM*EAEM*IQ*QEELAAAER.A      | 2082.29944 | 2 | 5.95E-07 | 0.97 | 5.28 | - | 1534.4 |
| AHQ-5-4, 5901 - 5974   | K.SM*EAEM*IQ*QEELAAAER.A      | 2066.30004 | 2 | 1.19E-05 | 0.88 | 4.64 | - | 923.9  |
| AHQ-5-7, 6710          | K.SMEAEIMQLQEELAAAER.A        | 2050.30064 | 2 | 5.56E-09 | 0.96 | 5.07 | - | 1181.6 |
| AHQ-5-3, 7065          | K.SM*EAEM*IQ*QEELAAAER.A      | 2082.29944 | 2 | 8.12E-04 | 0.89 | 3.70 | - | 999.9  |
| AHQ-5-2, 7005 - 7077   | K.SMEAEIMQLQEELAAAER.A        | 2050.30064 | 2 | 2.42E-04 | 0.97 | 5.64 | - | 1841.2 |
| AHQ-5-3, 7055          | K.SMEAEIMQLQEELAAAER.A        | 2050.30064 | 3 | 1.92E-05 | 0.96 | 4.44 | - | 2062.5 |
| AHQ-5-2, 7014 - 7015   | K.SM*EAEM*IQ*QEELAAAER.A      | 2082.29944 | 2 | 1.65E-08 | 0.95 | 5.08 | - | 1224.1 |
| AHQ-5-3, 7045          | K.SMEAEIMQLQEELAAAER.A        | 2050.30064 | 2 | 4.41E-06 | 0.96 | 4.86 | - | 1630.7 |
| AHQ-5-5, 6877 - 6951   | K.SMEAEIMQLQEELAAAER.A        | 2050.30064 | 2 | 1.83E-04 | 0.97 | 5.62 | - | 1481.8 |
| AHQ-5-1, 6984          | K.SMEAEIMQLQEELAAAER.A        | 2050.30064 | 3 | 9.68E-11 | 0.97 | 4.89 | - | 2697.0 |
| AHQ-5-3, 4870          | K.SM*EAEM*IQ*QEELAAAER.A      | 2082.29944 | 2 | 2.32E-08 | 0.97 | 5.08 | - | 1645.7 |
| AHQ-5-1, 5689          | K.SMEAEIMQLQEELAAAER.A        | 2066.30004 | 2 | 2.90E-07 | 0.92 | 4.37 | - | 1412.4 |
| AHQ-5-2, 7143 - 7217   | K.SMEAEIMQLQEELAAAER.A        | 2050.30064 | 2 | 1.64E-05 | 0.96 | 4.58 | - | 1839.1 |
| AHQ-5-3, 7041 - 7110   | K.SMEAEIMQLQEELAAAER.A        | 2050.30064 | 2 | 6.64E-04 | 0.97 | 5.55 | - | 1980.4 |
| AHQ-5-1, 4872          | K.SM*EAEM*IQ*QEELAAAER.A      | 2082.29944 | 2 | 2.50E-08 | 0.98 | 5.38 | - | 1837.1 |
| AHQ-5-3, 5949 - 6027   | K.SM*EAEM*IQ*QEELAAAER.A      | 2066.30004 | 2 | 5.43E-08 | 0.94 | 4.87 | - | 1716.3 |
| AHQ-5-1, 3607          | R.SMMQDRDQSI*CT*GESGAGK.T     | 2302.50687 | 2 | 3.70E-05 | 0.98 | 5.85 | - | 1548.8 |
| AHQ-5-3, 3495          | R.SMMQDRDQSI*CT*GESGAGK.T     | 2302.50687 | 2 | 3.92E-09 | 0.96 | 5.10 | - | 1694.0 |
| AHQ-5-6, 3248          | R.SMMQDRDQSI*CT*GESGAGK.T     | 2302.50687 | 2 | 6.33E-07 | 0.96 | 5.89 | - | 1381.3 |
| AHQ-5-4, 3458          | R.SMMQDRDQSI*CT*GESGAGK.T     | 2302.50687 | 2 | 2.20E-06 | 0.95 | 4.98 | - | 1494.6 |

|                       |                           |            |   |          |      |      |   |        |
|-----------------------|---------------------------|------------|---|----------|------|------|---|--------|
| AHQ-5-2, 3437         | R.SMMQDREDQSICTGESGAGK.T  | 2302.50687 | 2 | 1.44E-06 | 0.97 | 6.11 | - | 1264.7 |
| AHQ-5-5, 3293         | R.SMMQDREDQSICTGESGAGK.T  | 2302.50687 | 2 | 2.15E-04 | 0.97 | 5.67 | - | 1508.5 |
| AHQ-5-1, 3807 - 3816  | K.TDLLLEPYNK.Y            | 1206.36989 | 2 | 1.28E-04 | 0.90 | 3.92 | - | 958.1  |
| AHQ-5-7, 3291 - 3292  | K.TDLLLEPYNK.Y            | 1206.36989 | 2 | 1.70E-04 | 0.79 | 2.84 | - | 963.6  |
| AHQ-5-4, 3677         | K.TDLLLEPYNK.Y            | 1206.36989 | 1 | 8.27E-04 | 0.05 | 1.87 | - | 231.1  |
| AHQ-5-4, 3669         | K.TDLLLEPYNK.Y            | 1206.36989 | 2 | 1.43E-06 | 0.88 | 3.57 | - | 916.3  |
| AHQ-5-3, 3693 - 3694  | K.TDLLLEPYNK.Y            | 1206.36989 | 2 | 7.76E-05 | 0.92 | 4.01 | - | 992.1  |
| AHQ-5-5, 3461         | K.TDLLLEPYNK.Y            | 1206.36989 | 2 | 5.38E-06 | 0.95 | 3.67 | - | 1520.1 |
| AHQ-5-6, 3397         | K.TDLLLEPYNK.Y            | 1206.36989 | 2 | 5.46E-07 | 0.94 | 4.20 | - | 1096.2 |
| AHQ-5-2, 3615 - 3697  | K.TDLLLEPYNK.Y            | 1206.36989 | 2 | 2.30E-05 | 0.94 | 4.12 | - | 1202.1 |
| AHQ-5-2, 3795 - 3799  | K.TDLLLEPYNK.Y.F          | 1525.73037 | 2 | 8.29E-07 | 0.92 | 4.14 | - | 905.9  |
| AHQ-5-2, 3943         | K.TDLLLEPYNK.Y.F          | 1525.73037 | 2 | 1.84E-06 | 0.63 | 2.65 | - | 669.3  |
| AHQ-5-4, 4438         | K.TELEDTLDDSTAAQQLR.S     | 1921.00969 | 2 | 4.95E-06 | 0.95 | 4.51 | - | 1278.6 |
| AHQ-5-1, 4432 - 4480  | K.TELEDTLDDSTAAQQLR.S     | 1921.00969 | 2 | 7.83E-07 | 0.96 | 4.79 | - | 1224.4 |
| AHQ-5-3, 4457 - 4470  | K.TELEDTLDDSTAAQQLR.S     | 1921.00969 | 2 | 2.91E-08 | 0.94 | 4.43 | - | 1173.0 |
| AHQ-5-5, 4302         | K.TELEDTLDDSTAAQQLR.S     | 1921.00969 | 2 | 1.78E-06 | 0.96 | 4.55 | - | 1645.8 |
| AHQ-5-2, 3029         | R.TEMEDLMSK.D             | 1171.32449 | 2 | 6.12E-05 | 0.92 | 3.35 | - | 1002.8 |
| AHQ-5-1, 3184 - 3185  | R.TEMEDLMSK.D             | 1171.32449 | 2 | 2.15E-04 | 0.87 | 3.06 | - | 782.7  |
| AHQ-5-4, 3050         | R.TEMEDLMSK.D             | 1171.32449 | 2 | 1.02E-05 | 0.87 | 2.82 | - | 971.6  |
| AHQ-5-4, 3325 - 3358  | R.TEMEDLMSKDDVGK.S        | 1685.85626 | 2 | 1.64E-07 | 0.90 | 3.97 | - | 1009.1 |
| AHQ-5-3, 3343         | R.TEMEDLMSKDDVGK.S        | 1685.85626 | 2 | 1.05E-04 | 0.92 | 3.53 | - | 1170.0 |
| AHQ-5-5, 3151         | R.TEMEDLMSKDDVGK.S        | 1685.85626 | 2 | 1.76E-07 | 0.91 | 3.89 | - | 1067.4 |
| AHQ-5-2, 3297         | R.TEMEDLMSKDDVGK.S        | 1685.85626 | 2 | 4.86E-09 | 0.95 | 4.43 | - | 1168.2 |
| AHQ-5-1, 3240         | R.TEMEDLMSKDDVGK.S        | 1685.85626 | 2 | 5.25E-06 | 0.86 | 3.43 | - | 983.0  |
| AHQ-5-6, 3106         | R.TEMEDLMSKDDVGK.S        | 1685.85626 | 2 | 1.19E-06 | 0.69 | 2.82 | - | 828.7  |
| AHQ-5-2, 6709         | R.TFHIFYLLSGAGEHLK.T      | 1997.28378 | 2 | 1.01E-06 | 0.98 | 5.50 | - | 1747.4 |
| AHQ-5-7, 5924 - 5966  | R.TFHIFYLLSGAGEHLK.T      | 1997.28378 | 2 | 2.01E-05 | 0.81 | 3.36 | - | 834.2  |
| AHQ-5-6, 6286         | R.TFHIFYLLSGAGEHLK.T      | 1997.28378 | 2 | 6.31E-05 | 0.97 | 4.81 | - | 1938.4 |
| AHQ-5-3, 6605         | R.TFHIFYLLSGAGEHLK.T      | 1997.28378 | 2 | 1.54E-07 | 0.98 | 5.63 | - | 1887.0 |
| AHQ-5-2, 6438 - 6478  | R.TFHIFYLLSGAGEHLK.T      | 1997.28378 | 3 | 1.62E-07 | 0.96 | 5.48 | - | 1230.6 |
| AHQ-5-4, 6585         | R.TFHIFYLLSGAGEHLK.T      | 1997.28378 | 3 | 3.68E-07 | 0.96 | 4.99 | - | 1360.9 |
| AHQ-5-2, 6433 - 6479  | R.TFHIFYLLSGAGEHLK.T      | 1997.28378 | 2 | 1.69E-04 | 0.98 | 5.41 | - | 1779.7 |
| AHQ-5-6, 6290         | R.TFHIFYLLSGAGEHLK.T      | 1997.28378 | 3 | 3.12E-08 | 0.96 | 4.90 | - | 1354.0 |
| AHQ-5-4, 1750         | K.VAAYDKLEK.T             | 1037.19123 | 2 | 3.03E-05 | 0.68 | 2.56 | - | 551.9  |
| AHQ-5-2, 3149         | K.VEAQLQELQVK.F           | 1285.47179 | 2 | 1.32E-06 | 0.92 | 3.66 | - | 1195.1 |
| AHQ-5-4, 3202         | K.VEAQLQELQVK.F           | 1285.47179 | 2 | 1.13E-05 | 0.95 | 3.86 | - | 1499.2 |
| AHQ-5-3, 3227 - 3233  | K.VEAQLQELQVK.F           | 1285.47179 | 2 | 2.59E-06 | 0.96 | 4.11 | - | 1605.4 |
| AHQ-5-5, 3034         | K.VEAQLQELQVK.F           | 1285.47179 | 2 | 9.45E-06 | 0.92 | 3.44 | - | 1250.9 |
| AHQ-5-1, 3365 - 3368  | K.VEAQLQELQVK.F           | 1285.47179 | 2 | 9.49E-07 | 0.96 | 4.17 | - | 1321.8 |
| AHQ-5-10, 4658        | K.VEDM*AELTCLNEASVLHNLK.E | 2304.58397 | 2 | 6.14E-06 | 0.90 | 4.25 | - | 645.4  |
| AHQ-5-2, 6014         | K.VEDM*AELTCLNEASVLHNLK.E | 2288.58457 | 2 | 7.58E-13 | 0.94 | 5.17 | - | 599.2  |
| AHQ-5-6, 5106 - 5109  | K.VEDM*AELTCLNEASVLHNLK.E | 2304.58397 | 3 | 1.12E-05 | 0.93 | 4.19 | - | 1166.9 |
| AHQ-5-6, 5108         | K.VEDM*AELTCLNEASVLHNLK.E | 2304.58397 | 2 | 5.17E-05 | 0.85 | 3.61 | - | 763.5  |
| AHQ-5-13, 5144 - 5145 | K.VEDM*AELTCLNEASVLHNLK.E | 2304.58397 | 3 | 1.58E-09 | 0.95 | 4.78 | - | 1547.7 |
| AHQ-5-10, 5246        | K.VEDM*AELTCLNEASVLHNLK.E | 2288.58457 | 2 | 5.41E-08 | 0.92 | 4.42 | - | 795.7  |
| AHQ-5-11, 5599 - 5612 | K.VEDM*AELTCLNEASVLHNLK.E | 2288.58457 | 2 | 7.99E-08 | 0.89 | 4.20 | - | 723.5  |
| AHQ-5-2, 6013 - 6018  | K.VEDM*AELTCLNEASVLHNLK.E | 2288.58457 | 3 | 1.72E-08 | 0.95 | 5.24 | - | 857.2  |
| AHQ-5-6, 5689 - 5761  | K.VEDM*AELTCLNEASVLHNLK.E | 2288.58457 | 2 | 1.19E-11 | 0.93 | 4.39 | - | 985.0  |
| AHQ-5-6, 5700 - 5777  | K.VEDM*AELTCLNEASVLHNLK.E | 2288.58457 | 3 | 6.44E-08 | 0.81 | 3.56 | - | 612.8  |
| AHQ-5-6, 5782 - 5861  | K.VEDM*AELTCLNEASVLHNLK.E | 2288.58457 | 2 | 4.92E-09 | 0.91 | 4.26 | - | 776.0  |
| AHQ-5-2, 6289         | K.VEDM*AELTCLNEASVLHNLK.E | 2288.58457 | 2 | 1.67E-08 | 0.85 | 4.28 | - | 537.0  |
| AHQ-5-2, 6294         | K.VEDM*AELTCLNEASVLHNLK.E | 2288.58457 | 3 | 6.08E-10 | 0.88 | 3.96 | - | 1044.2 |
| AHQ-5-1, 6124 - 6144  | K.VEDM*AELTCLNEASVLHNLK.E | 2288.58457 | 2 | 8.60E-08 | 0.90 | 3.74 | - | 688.0  |
| AHQ-5-4, 6064 - 6076  | K.VEDM*AELTCLNEASVLHNLK.E | 2288.58457 | 2 | 2.77E-09 | 0.95 | 4.90 | - | 862.6  |
| AHQ-5-4, 6077         | K.VEDM*AELTCLNEASVLHNLK.E | 2288.58457 | 3 | 1.06E-07 | 0.86 | 3.45 | - | 1043.9 |
| AHQ-5-2, 5283 - 5306  | K.VEDM*AELTCLNEASVLHNLK.E | 2304.58397 | 2 | 1.45E-09 | 0.88 | 4.02 | - | 567.9  |
| AHQ-5-2, 5985 - 6053  | K.VEDM*AELTCLNEASVLHNLK.E | 2288.58457 | 2 | 2.00E-11 | 0.97 | 5.55 | - | 1048.5 |
| AHQ-5-3, 6138         | K.VEDM*AELTCLNEASVLHNLK.E | 2288.58457 | 3 | 1.33E-08 | 0.89 | 4.31 | - | 701.0  |
| AHQ-5-3, 6133         | K.VEDM*AELTCLNEASVLHNLK.E | 2288.58457 | 2 | 1.16E-09 | 0.95 | 4.69 | - | 1063.4 |
| AHQ-5-1, 6143         | K.VEDM*AELTCLNEASVLHNLK.E | 2288.58457 | 3 | 1.93E-04 | 0.75 | 3.07 | - | 759.4  |
| AHQ-5-13, 5746        | K.VEDM*AELTCLNEASVLHNLK.E | 2288.58457 | 2 | 2.35E-09 | 0.92 | 4.33 | - | 756.6  |
| AHQ-5-1, 5443 - 5512  | K.VEDM*AELTCLNEASVLHNLK.E | 2304.58397 | 2 | 1.70E-04 | 0.77 | 3.78 | - | 427.3  |
| AHQ-5-9, 5106 - 5107  | K.VEDM*AELTCLNEASVLHNLK.E | 2288.58457 | 2 | 4.52E-12 | 0.96 | 4.75 | - | 1432.1 |
| AHQ-5-5, 5159         | K.VEDM*AELTCLNEASVLHNLK.E | 2304.58397 | 2 | 8.87E-04 | 0.31 | 2.96 | - | 306.9  |
| AHQ-5-13, 5229        | K.VEDM*AELTCLNEASVLHNLK.E | 2304.58397 | 2 | 9.29E-05 | 0.68 | 3.25 | - | 379.0  |
| AHQ-5-5, 5757 - 5825  | K.VEDM*AELTCLNEASVLHNLK.E | 2288.58457 | 2 | 3.34E-10 | 0.94 | 5.02 | - | 729.0  |
| AHQ-5-5, 5915         | K.VEDM*AELTCLNEASVLHNLK.E | 2288.58457 | 2 | 8.49E-09 | 0.92 | 4.54 | - | 687.7  |
| AHQ-5-2, 5309 - 5311  | K.VEDM*AELTCLNEASVLHNLK.E | 2304.58397 | 3 | 4.94E-09 | 0.96 | 5.63 | - | 1083.6 |
| AHQ-5-7, 5631         | K.VEDM*AELTCLNEASVLHNLK.E | 2288.58457 | 3 | 1.00E-05 | 0.69 | 3.02 | - | 489.1  |
| AHQ-5-7, 5623         | K.VEDM*AELTCLNEASVLHNLK.E | 2288.58457 | 2 | 1.82E-09 | 0.89 | 3.88 | - | 705.8  |
| AHQ-5-2, 1910         | R.VEEEAQKMLK.K            | 1461.66649 | 1 | 5.96E-04 | 0.24 | 1.87 | - | 433.1  |
| AHQ-5-4, 1900         | R.VEEEEERCQHLQAEK.K       | 1916.01642 | 2 | 9.28E-05 | 0.70 | 3.18 | - | 741.4  |
| AHQ-5-2, 1858         | R.VEEEEERCQHLQAEK.K       | 1916.01642 | 2 | 4.56E-05 | 0.85 | 3.57 | - | 843.3  |
| AHQ-5-10, 3438        | K.VIQYLAYVASSHK.S         | 1479.70484 | 2 | 1.97E-05 | 0.86 | 3.43 | - | 841.6  |
| AHQ-5-7, 3404         | K.VIQYLAYVASSHK.S         | 1479.70484 | 2 | 5.24E-06 | 0.93 | 3.36 | - | 1254.8 |
| AHQ-5-2, 3821         | K.VIQYLAYVASSHK.S         | 1479.70484 | 3 | 8.57E-05 | 0.81 | 3.70 | - | 519.8  |
| AHQ-5-4, 3873 - 3878  | K.VIQYLAYVASSHK.S         | 1479.70484 | 2 | 5.97E-04 | 0.96 | 4.19 | - | 1604.7 |
| AHQ-5-6, 3520         | K.VIQYLAYVASSHK.S         | 1479.70484 | 2 | 3.11E-04 | 0.96 | 3.98 | - | 1708.6 |
| AHQ-5-3, 3903 - 3914  | K.VIQYLAYVASSHK.S         | 1479.70484 | 2 | 8.36E-07 | 0.96 | 4.29 | - | 1388.7 |
| AHQ-5-1, 4053 - 4128  | K.VIQYLAYVASSHK.S         | 1479.70484 | 2 | 4.47E-05 | 0.92 | 3.74 | - | 1208.6 |
| AHQ-5-2, 3818         | K.VIQYLAYVASSHK.S         | 1479.70484 | 2 | 4.61E-07 | 0.96 | 3.88 | - | 1617.3 |
| AHQ-5-2, 6543 - 6590  | R.VISGVQLGNIVFK.K         | 1487.81155 | 1 | 4.46E-06 | 0.46 | 3.20 | - | 343.2  |
| AHQ-5-6, 6393 - 6461  | R.VISGVQLGNIVFK.K         | 1487.81155 | 2 | 9.06E-10 | 0.98 | 4.83 | - | 2086.4 |
| AHQ-5-3, 6655 - 6730  | R.VISGVQLGNIVFK.K         | 1487.81155 | 2 | 6.43E-09 | 0.97 | 5.59 | - | 1449.8 |
| AHQ-5-3, 6754         | R.VISGVQLGNIVFK.K         | 1487.81155 | 2 | 7.84E-05 | 0.92 | 2.95 | - | 1608.1 |
| AHQ-5-2, 6551 - 6633  | R.VISGVQLGNIVFK.K         | 1487.81155 | 2 | 6.77E-09 | 0.97 | 5.39 | - | 1814.5 |
| AHQ-5-2, 6677         | R.VISGVQLGNIVFK.K         | 1487.81155 | 1 | 2.93E-07 | 0.61 | 2.93 | - | 440.1  |
| AHQ-5-13, 6330        | R.VISGVQLGNIVFK.K         | 1487.81155 | 2 | 1.19E-04 | 0.96 | 4.64 | - | 1288.9 |
| AHQ-5-2, 6701         | R.VISGVQLGNIVFK.K         | 1487.81155 | 2 | 5.38E-05 | 0.97 | 3.65 | - | 2173.4 |
| AHQ-5-5, 6465 - 6541  | R.VISGVQLGNIVFK.K         | 1487.81155 | 2 | 1.62E-04 | 0.97 | 4.50 | - | 1642.0 |
| AHQ-5-7, 6150 - 6167  | R.VISGVQLGNIVFK.K         | 1487.81155 | 2 | 2.94E-07 | 0.96 | 4.51 | - | 1454.0 |
| AHQ-5-2, 6443         | R.VISGVQLGNIVFK.K         | 1487.81155 | 2 | 1.10E-09 | 0.97 | 5.39 | - | 1281.9 |
| AHQ-5-1, 6647 - 6667  | R.VISGVQLGNIVFK.K         | 1487.81155 | 2 | 5.03E-04 | 0.90 | 3.38 | - | 1049.2 |
| AHQ-5-5, 6490         | R.VISGVQLGNIVFK.K         | 1487.81155 | 1 | 4.31E-04 | 0.60 | 3.34 | - | 249.8  |
| AHQ-5-6, 6404 - 6410  | R.VISGVQLGNIVFK.K         | 1487.81155 | 1 | 2.92E-04 | 0.48 | 2.94 | - | 612.3  |
| AHQ-5-1, 6047         | R.VISGVQLGNIVFKK.E        | 1615.98446 | 2 | 7.83E-08 | 0.90 | 3.64 | - | 955.2  |
| AHQ-5-3, 2191 - 2205  | K.VKPLQVSR.Q              | 1040.28462 | 2 | 1.35E-05 | 0.48 | 2.52 | - | 305.1  |
| AHQ-5-5, 4657 - 4659  | K.VSHLLGINVDFTR.G         | 1572.79026 | 2 | 4.11E-09 | 0.93 | 4.28 | - | 1153.5 |
| AHQ-5-4, 4932 - 4940  | K.VSHLLGINVDFTR.G         | 1572.79026 | 2 | 2.63E-10 | 0.97 | 5.32 | - | 1617.2 |
| AHQ-5-2, 4842 - 4913  | K.VSHLLGINVDFTR.G         | 1572.79026 | 2 | 2.60E-10 | 0.96 | 4.54 | - | 1453.6 |
| AHQ-5-5, 4671         | K.VSHLLGINVDFTR.G         | 1572.79026 | 3 | 8.96E-05 | 0.88 | 3.78 | - | 1217.6 |
| AHQ-5-1, 5069 - 5071  | K.VSHLLGINVDFTR.G         | 1572.79026 | 3 | 1.17E-04 | 0.87 | 3.73 | - | 989.6  |
| AHQ-5-1, 5055         | K.VSHLLGINVDFTR.G         | 1572.79026 | 2 | 3.02E-11 | 0.97 | 5.21 | - | 1604.4 |
| AHQ-5-2, 5111         | K.VSHLLGINVDFTR.G         | 1572.79026 | 2 | 2.29E-04 | 0.94 | 4.16 | - | 1157.2 |
| AHQ-5-6, 4596         | K.VSHLLGINVDFTR.G         | 1572.79026 | 2 | 7.42E-11 | 0.97 | 4.49 | - | 1663.4 |
| AHQ-5-3, 4985 - 4991  | K.VSHLLGINVDFTR.G         | 1572.79026 | 2 | 6.10E-11 | 0.97 | 5.02 | - | 1530.6 |
| AHQ-5-3, 5011         | K.VSHLLGINVDFTR.G         | 1572.79026 | 3 | 6.34E-04 | 0.92 | 4.14 | - | 1210.1 |

|                            |                                                                        |            |   |          |      |        |       |         |
|----------------------------|------------------------------------------------------------------------|------------|---|----------|------|--------|-------|---------|
| AHQ-5-6, 4601              | K.VSHLLGINVDTFR.G                                                      | 1572.79026 | 3 | 3.52E-05 | 0.80 | 3.64   | -     | 906.6   |
| AHQ-5-2, 2929 - 3002       | R.VVFEFR.Q                                                             | 925.06580  | 2 | 2.69E-04 | 0.84 | 2.52   | -     | 677.6   |
| AHQ-5-2, 3946              | R.YEILTPNSIPK.G                                                        | 1275.47536 | 2 | 1.30E-07 | 0.91 | 3.78   | -     | 1013.4  |
| AHQ-5-4, 3996 - 4012       | R.YEILTPNSIPK.G                                                        | 1275.47536 | 2 | 2.15E-06 | 0.92 | 3.49   | -     | 1134.7  |
| AHQ-5-4, 4001 - 4004       | R.YEILTPNSIPK.G                                                        | 1275.47536 | 1 | 3.34E-05 | 0.39 | 2.64   | -     | 386.6   |
| AHQ-5-2, 4091              | R.YEILTPNSIPK.G                                                        | 1275.47536 | 2 | 1.34E-04 | 0.83 | 2.90   | -     | 907.2   |
| AHQ-5-5, 3802 - 3819       | R.YEILTPNSIPK.G                                                        | 1275.47536 | 2 | 7.73E-05 | 0.90 | 3.37   | -     | 1058.6  |
| AHQ-5-3, 4026 - 4027       | R.YEILTPNSIPK.G                                                        | 1275.47536 | 2 | 1.55E-05 | 0.89 | 3.32   | -     | 1182.6  |
| AHQ-5-2, 6245              | K.YLYVDKNFINNPLAQADWAAK.K                                              | 2455.75199 | 3 | 5.62E-09 | 0.96 | 5.00   | -     | 1786.9  |
| AHQ-5-10, 5451             | K.YLYVDKNFINNPLAQADWAAK.K                                              | 2455.75199 | 2 | 6.62E-09 | 0.92 | 4.05   | -     | 795.8   |
| AHQ-5-1, 6293              | K.YLYVDKNFINNPLAQADWAAK.K                                              | 2455.75199 | 3 | 8.85E-09 | 0.94 | 4.92   | -     | 1087.0  |
| gj4506877[ref]NP_002996.1  | selectin P precursor; Selectin P (granulocyte membrane protein, 140kD; |            |   | 1.44E-14 | 8.85 | 100.30 | 24.00 | 90844.7 |
| AHQ-5-2, 5377 - 5394       | K.AVQCQHLEAPSEGTMDCVHPLTAFAYGSSCK.F                                    | 3456.80579 | 3 | 8.46E-04 | 0.83 | 4.18   | -     | 519.9   |
| AHQ-5-3, 4926 - 4931       | K.AVQCQHLEAPSEGTM*DCVHPLTAFAYGSSCK.F                                   | 3472.80519 | 3 | 2.65E-05 | 0.91 | 4.68   | -     | 752.3   |
| AHQ-5-4, 6860              | R.CDNLQGWTA PAPVCQALQCQDLPVFNAR.V                                      | 3313.64431 | 3 | 5.41E-06 | 0.87 | 4.61   | -     | 722.1   |
| AHQ-5-2, 6273              | R.CIDSGHWSAPLPTCEAISCEPLESPVHGSMDCSPSLR.A                              | 4146.54406 | 3 | 6.07E-06 | 0.97 | 6.07   | -     | 1429.8  |
| AHQ-5-3, 6329              | R.CIDSGHWSAPLPTCEAISCEPLESPVHGSMDCSPSLR.A                              | 4146.54406 | 3 | 1.75E-04 | 0.95 | 4.89   | -     | 1526.9  |
| AHQ-5-3, 4749 - 4751       | K.CPELFAPEEGSLDCSDTR.G                                                 | 2085.21515 | 2 | 1.18E-05 | 0.93 | 4.31   | -     | 598.0   |
| AHQ-5-2, 4726              | K.CPELFAPEEGSLDCSDTR.G                                                 | 2085.21515 | 2 | 1.26E-04 | 0.91 | 4.03   | -     | 751.8   |
| AHQ-5-3, 6298              | K.LECLASGIWTKNPPQCLAAQCPLKIPER.G                                       | 3352.89300 | 3 | 1.44E-14 | 0.93 | 4.54   | -     | 1105.0  |
| AHQ-5-3, 3066              | R.PSGQWTA VTPACR.A                                                     | 1432.58672 | 2 | 1.74E-05 | 0.83 | 3.03   | -     | 788.9   |
| AHQ-5-2, 3007              | R.PSGQWTA VTPACR.A                                                     | 1432.58672 | 2 | 3.44E-05 | 0.86 | 3.06   | -     | 765.7   |
| AHQ-5-2, 5039              | K.STCQFCDEEYSLSGPER.L                                                  | 2109.23671 | 2 | 2.71E-09 | 0.95 | 4.47   | -     | 1039.1  |
| AHQ-5-1, 5044 - 5051       | K.STCQFCDEEYSLSGPER.L                                                  | 2109.23671 | 2 | 5.44E-12 | 0.95 | 4.41   | -     | 1162.3  |
| AHQ-5-4, 5033              | K.STCQFCDEEYSLSGPER.L                                                  | 2109.23671 | 2 | 1.37E-07 | 0.94 | 4.43   | -     | 931.1   |
| AHQ-5-3, 5058 - 5069       | K.STCQFCDEEYSLSGPER.L                                                  | 2109.23671 | 2 | 4.02E-08 | 0.94 | 4.13   | -     | 1030.7  |
| AHQ-5-3, 6517              | K.VLPYSSYYWIGIR.K                                                      | 1781.04522 | 2 | 8.13E-12 | 0.95 | 4.69   | -     | 865.5   |
| AHQ-5-2, 2738              | R.YTDLVAIQNK.N                                                         | 1165.32100 | 1 | 1.76E-04 | 0.68 | 2.68   | -     | 632.9   |
| gj30151108[ref]XP_301187.1 | similar to actin beta, cytoskeletal - Kenyan clawed frog [Homo sapiens |            |   | 1.44E-14 | 2.40 | 30.31  | 13.10 | 32164.8 |
| AHQ-5-1, 5064              | K.DLYANTVLSGGTMYPGIADR.M                                               | 2232.45624 | 2 | 9.47E-08 | 0.96 | 5.24   | -     | 980.7   |
| AHQ-5-1, 5208 - 5280       | K.DLYANTVLSGGTMYPGIADR.M                                               | 2232.45624 | 2 | 7.59E-06 | 0.91 | 4.19   | -     | 763.1   |
| AHQ-5-1, 5544 - 5556       | K.DLYANTVLSGGTMYPGIADR.M                                               | 2216.45684 | 2 | 1.42E-04 | 0.96 | 5.44   | -     | 1055.2  |
| AHQ-5-1, 5760 - 5795       | K.DLYANTVLSGGTMYPGIADR.M                                               | 2216.45684 | 2 | 4.07E-05 | 0.93 | 5.05   | -     | 701.3   |
| AHQ-5-2, 5209 - 5213       | K.DLYANTVLSGGTMYPGIADR.M                                               | 2232.45624 | 2 | 5.31E-06 | 0.96 | 5.46   | -     | 752.3   |
| AHQ-5-2, 5733              | K.DLYANTVLSGGTMYPGIADR.M                                               | 2216.45684 | 2 | 9.73E-04 | 0.80 | 3.59   | -     | 567.3   |
| AHQ-5-3, 5241 - 5242       | K.DLYANTVLSGGTMYPGIADR.M                                               | 2232.45624 | 2 | 2.33E-05 | 0.86 | 3.86   | -     | 625.9   |
| AHQ-5-3, 5577              | K.DLYANTVLSGGTMYPGIADR.M                                               | 2216.45684 | 2 | 1.96E-06 | 0.95 | 5.37   | -     | 860.2   |
| AHQ-5-3, 5773 - 5842       | K.DLYANTVLSGGTMYPGIADR.M                                               | 2216.45684 | 2 | 4.07E-04 | 0.74 | 3.30   | -     | 551.4   |
| AHQ-5-4, 5088              | K.DLYANTVLSGGTMYPGIADR.M                                               | 2232.45624 | 2 | 3.92E-07 | 0.95 | 5.13   | -     | 895.2   |
| AHQ-5-4, 5205              | K.DLYANTVLSGGTMYPGIADR.M                                               | 2232.45624 | 2 | 3.33E-04 | 0.72 | 3.14   | -     | 633.6   |
| AHQ-5-4, 5217              | K.DLYANTVLSGGTMYPGIADR.M                                               | 2232.45624 | 2 | 1.28E-07 | 0.93 | 5.19   | -     | 667.0   |
| AHQ-5-4, 5552              | K.DLYANTVLSGGTMYPGIADR.M                                               | 2216.45684 | 2 | 4.97E-06 | 0.95 | 4.79   | -     | 1180.2  |
| AHQ-5-4, 5708 - 5729       | K.DLYANTVLSGGTMYPGIADR.M                                               | 2216.45684 | 2 | 6.89E-04 | 0.94 | 4.63   | -     | 1001.1  |
| AHQ-5-5, 5025 - 5105       | K.DLYANTVLSGGTMYPGIADR.M                                               | 2232.45624 | 2 | 5.97E-05 | 0.94 | 5.15   | -     | 748.2   |
| AHQ-5-5, 5455              | K.DLYANTVLSGGTMYPGIADR.M                                               | 2216.45684 | 2 | 4.81E-09 | 0.97 | 5.66   | -     | 1300.9  |
| AHQ-5-6, 5024              | K.DLYANTVLSGGTMYPGIADR.M                                               | 2232.45624 | 2 | 3.43E-07 | 0.94 | 4.83   | -     | 885.4   |
| AHQ-5-6, 5369 - 5392       | K.DLYANTVLSGGTMYPGIADR.M                                               | 2216.45684 | 2 | 1.72E-08 | 0.95 | 5.15   | -     | 1038.9  |
| AHQ-5-6, 5510 - 5530       | K.DLYANTVLSGGTMYPGIADR.M                                               | 2216.45684 | 2 | 2.57E-04 | 0.90 | 4.20   | -     | 941.2   |
| AHQ-5-14-, 5473 - 5489     | K.DLYANTVLSGGTMYPGIADR.M                                               | 2216.45684 | 2 | 9.25E-13 | 0.94 | 5.59   | -     | 633.0   |
| AHQ-5-8, 4588              | K.DLYANTVLSGGTMYPGIADR.M                                               | 2232.45624 | 2 | 7.83E-04 | 0.80 | 3.79   | -     | 348.8   |
| AHQ-5-8, 4701 - 4772       | K.DLYANTVLSGGTMYPGIADR.M                                               | 2232.45624 | 2 | 2.68E-05 | 0.97 | 6.13   | -     | 1153.1  |
| AHQ-5-8, 4730 - 4798       | K.DLYANTVLSGGTMYPGIADR.M                                               | 2232.45624 | 2 | 4.36E-05 | 0.95 | 5.01   | -     | 1013.4  |
| AHQ-5-8, 4868 - 4940       | K.DLYANTVLSGGTMYPGIADR.M                                               | 2232.45624 | 2 | 1.06E-05 | 0.95 | 4.75   | -     | 933.7   |
| AHQ-5-8, 5008 - 5078       | K.DLYANTVLSGGTMYPGIADR.M                                               | 2216.45684 | 2 | 2.22E-06 | 0.92 | 4.18   | -     | 806.3   |
| AHQ-5-8, 5104 - 5145       | K.DLYANTVLSGGTMYPGIADR.M                                               | 2232.45624 | 2 | 5.96E-05 | 0.92 | 4.68   | -     | 618.5   |
| AHQ-5-8, 5221 - 5253       | K.DLYANTVLSGGTMYPGIADR.M                                               | 2216.45684 | 2 | 2.38E-07 | 0.97 | 6.12   | -     | 1376.9  |
| AHQ-5-8, 5230 - 5245       | K.DLYANTVLSGGTMYPGIADR.M                                               | 2232.45624 | 2 | 2.45E-05 | 0.85 | 3.95   | -     | 636.3   |
| AHQ-5-8, 5320 - 5385       | K.DLYANTVLSGGTMYPGIADR.M                                               | 2216.45684 | 2 | 9.49E-06 | 0.97 | 5.57   | -     | 1108.5  |
| AHQ-5-8, 5452 - 5520       | K.DLYANTVLSGGTMYPGIADR.M                                               | 2216.45684 | 2 | 3.94E-05 | 0.96 | 5.25   | -     | 1042.3  |
| AHQ-5-8, 5552 - 5617       | K.DLYANTVLSGGTMYPGIADR.M                                               | 2216.45684 | 2 | 5.30E-06 | 0.95 | 4.72   | -     | 1113.4  |
| AHQ-5-8, 5681 - 5752       | K.DLYANTVLSGGTMYPGIADR.M                                               | 2216.45684 | 2 | 9.38E-06 | 0.97 | 5.71   | -     | 1085.8  |
| AHQ-5-8, 5768 - 5836       | K.DLYANTVLSGGTMYPGIADR.M                                               | 2216.45684 | 2 | 6.87E-06 | 0.96 | 5.33   | -     | 977.5   |
| AHQ-5-8, 5900 - 5966       | K.DLYANTVLSGGTMYPGIADR.M                                               | 2216.45684 | 2 | 3.47E-04 | 0.94 | 5.47   | -     | 646.4   |
| AHQ-5-8, 6032 - 6096       | K.DLYANTVLSGGTMYPGIADR.M                                               | 2216.45684 | 2 | 2.23E-05 | 0.96 | 5.09   | -     | 1081.8  |
| AHQ-5-8, 6161 - 6240       | K.DLYANTVLSGGTMYPGIADR.M                                               | 2216.45684 | 2 | 3.29E-07 | 0.97 | 5.93   | -     | 967.2   |
| AHQ-5-8, 6309 - 6376       | K.DLYANTVLSGGTMYPGIADR.M                                               | 2216.45684 | 2 | 3.29E-05 | 0.96 | 5.36   | -     | 838.1   |
| AHQ-5-8, 6430 - 6504       | K.DLYANTVLSGGTMYPGIADR.M                                               | 2216.45684 | 2 | 6.66E-06 | 0.86 | 3.47   | -     | 812.6   |
| AHQ-5-8, 6568 - 6632       | K.DLYANTVLSGGTMYPGIADR.M                                               | 2216.45684 | 2 | 1.44E-04 | 0.84 | 3.71   | -     | 603.5   |
| AHQ-5-8, 6696 - 6765       | K.DLYANTVLSGGTMYPGIADR.M                                               | 2216.45684 | 2 | 6.49E-06 | 0.92 | 4.44   | -     | 785.9   |
| AHQ-5-8, 6801 - 6864       | K.DLYANTVLSGGTMYPGIADR.M                                               | 2216.45684 | 2 | 5.40E-05 | 0.84 | 3.15   | -     | 894.4   |
| AHQ-5-8, 7334 - 7405       | K.DLYANTVLSGGTMYPGIADR.M                                               | 2216.45684 | 2 | 4.25E-04 | 0.93 | 4.76   | -     | 920.9   |
| AHQ-5-9, 4398 - 4470       | K.DLYANTVLSGGTMYPGIADR.M                                               | 2232.45624 | 2 | 7.36E-08 | 0.96 | 5.31   | -     | 899.8   |
| AHQ-5-10, 4434 - 4484      | K.DLYANTVLSGGTMYPGIADR.M                                               | 2232.45624 | 2 | 3.21E-06 | 0.95 | 5.08   | -     | 726.2   |
| AHQ-5-10, 4538 - 4599      | K.DLYANTVLSGGTMYPGIADR.M                                               | 2232.45624 | 2 | 6.99E-06 | 0.96 | 5.45   | -     | 948.8   |
| AHQ-5-10, 4704             | K.DLYANTVLSGGTMYPGIADR.M                                               | 2232.45624 | 2 | 1.43E-04 | 0.92 | 4.34   | -     | 734.0   |
| AHQ-5-10, 4951 - 5026      | K.DLYANTVLSGGTMYPGIADR.M                                               | 2216.45684 | 2 | 3.79E-05 | 0.94 | 4.85   | -     | 793.9   |
| AHQ-5-10, 5487 - 5550      | K.DLYANTVLSGGTMYPGIADR.M                                               | 2216.45684 | 2 | 9.73E-04 | 0.88 | 3.92   | -     | 704.3   |
| AHQ-5-11, 4718             | K.DLYANTVLSGGTMYPGIADR.M                                               | 2232.45624 | 2 | 1.18E-06 | 0.92 | 4.62   | -     | 735.0   |
| AHQ-5-11, 5126             | K.DLYANTVLSGGTMYPGIADR.M                                               | 2216.45684 | 2 | 2.32E-07 | 0.98 | 5.82   | -     | 1980.4  |
| AHQ-5-12, 4862 - 4929      | K.DLYANTVLSGGTMYPGIADR.M                                               | 2232.45624 | 2 | 4.69E-10 | 0.93 | 4.56   | -     | 777.0   |
| AHQ-5-12, 4992 - 5000      | K.DLYANTVLSGGTMYPGIADR.M                                               | 2232.45624 | 2 | 4.43E-04 | 0.94 | 4.73   | -     | 879.1   |
| AHQ-5-12, 5286             | K.DLYANTVLSGGTMYPGIADR.M                                               | 2216.45684 | 2 | 1.44E-14 | 0.97 | 5.40   | -     | 1884.4  |
| AHQ-5-12, 5428 - 5496      | K.DLYANTVLSGGTMYPGIADR.M                                               | 2216.45684 | 2 | 4.16E-05 | 0.84 | 3.88   | -     | 617.3   |
| AHQ-5-13, 4820 - 4889      | K.DLYANTVLSGGTMYPGIADR.M                                               | 2232.45624 | 2 | 3.19E-08 | 0.97 | 5.18   | -     | 1305.4  |
| AHQ-5-13, 5046 - 5121      | K.DLYANTVLSGGTMYPGIADR.M                                               | 2232.45624 | 2 | 4.20E-04 | 0.52 | 2.52   | -     | 522.5   |
| AHQ-5-13, 5172 - 5180      | K.DLYANTVLSGGTMYPGIADR.M                                               | 2232.45624 | 2 | 7.75E-07 | 0.96 | 5.62   | -     | 1069.5  |
| AHQ-5-13, 5236 - 5309      | K.DLYANTVLSGGTMYPGIADR.M                                               | 2216.45684 | 2 | 3.61E-06 | 0.95 | 5.29   | -     | 914.4   |
| AHQ-5-13, 5270 - 5277      | K.DLYANTVLSGGTMYPGIADR.M                                               | 2232.45624 | 2 | 6.86E-06 | 0.91 | 4.18   | -     | 920.9   |
| AHQ-5-13, 5320 - 5394      | K.DLYANTVLSGGTMYPGIADR.M                                               | 2216.45684 | 2 | 9.11E-06 | 0.91 | 4.27   | -     | 690.1   |
| AHQ-5-13, 5460 - 5524      | K.DLYANTVLSGGTMYPGIADR.M                                               | 2216.45684 | 2 | 3.36E-04 | 0.94 | 5.02   | -     | 692.8   |
| AHQ-5-13, 5588 - 5660      | K.DLYANTVLSGGTMYPGIADR.M                                               | 2216.45684 | 2 | 6.92E-04 | 0.93 | 4.70   | -     | 742.4   |
| AHQ-5-14, 5440             | K.DLYANTVLSGGTMYPGIADR.M                                               | 2232.45624 | 2 | 1.83E-09 | 0.96 | 5.14   | -     | 1031.9  |
| AHQ-5-14, 5533 - 5581      | K.DLYANTVLSGGTMYPGIADR.M                                               | 2232.45624 | 2 | 9.07E-05 | 0.95 | 5.09   | -     | 849.3   |
| AHQ-5-14, 5640 - 5696      | K.DLYANTVLSGGTMYPGIADR.M                                               | 2232.45624 | 2 | 5.72E-05 | 0.90 | 4.11   | -     | 776.9   |
| AHQ-5-14, 5722 - 5754      | K.DLYANTVLSGGTMYPGIADR.M                                               | 2232.45624 | 2 | 1.97E-05 | 0.96 | 5.61   | -     | 965.6   |
| AHQ-5-14, 5808 - 5885      | K.DLYANTVLSGGTMYPGIADR.M                                               | 2216.45684 | 2 | 2.01E-07 | 0.96 | 4.99   | -     | 1244.3  |
| AHQ-5-14, 5944 - 6006      | K.DLYANTVLSGGTMYPGIADR.M                                               | 2216.45684 | 2 | 5.25E-04 | 0.93 | 4.48   | -     | 1099.7  |
| AHQ-5-14, 6082 - 6141      | K.DLYANTVLSGGTMYPGIADR.M                                               | 2216.45684 | 2 | 4.64E-04 | 0.84 | 3.87   | -     | 541.7   |
| AHQ-5-13-, 4692 - 4739     | K.DLYANTVLSGGTMYPGIADR.M                                               | 2232.45624 | 2 | 9.58E-07 | 0.96 | 4.68   | -     | 1267.8  |
| AHQ-5-13-, 4803 - 4872     | K.DLYANTVLSGGTMYPGIADR.M                                               | 2232.45624 | 2 | 1.55E-06 | 0.97 | 5.55   | -     | 1269.9  |
| AHQ-5-13-, 4935            | K.DLYANTVLSGGTMYPGIADR.M                                               | 2232.45624 | 2 | 3.72E-05 | 0.91 | 3.96   | -     | 804.5   |
| AHQ-5-13-, 5047            | K.DLYANTVLSGGTMYPGIADR.M                                               | 2232.45624 | 2 | 7.10E-09 | 0.94 | 4.82   | -     | 852.9   |
| AHQ-5-13-, 5140            | K.DLYANTVLSGGTMYPGIADR.M                                               | 2216.45684 | 2 | 4.06E-09 | 0.97 | 5.42   | -     | 1283.0  |
| AHQ-5-13-, 5277 - 5339     | K.DLYANTVLSGGTMYPGIADR.M                                               | 2216.45684 | 2 | 6.06E-06 | 0.95 | 5.34   | -     | 769.1   |
| AHQ-5-13-, 5375 - 5435     | K.DLYANTVLSGGTMYPGIADR.M                                               | 2216.45684 | 2 | 1.41E-05 | 0.94 | 4.75   | -     | 930.1   |
| AHQ-5-14-, 4662 - 4725     | K.DLYANTVLSGGTMYPGIADR.M                                               | 2232.45624 | 2 | 8.12E-07 | 0.97 | 5.76   | -     | 1235.6  |
| AHQ-5-14-, 4763 - 4825     | K.DLYANTVLSGGTMYPGIADR.M                                               | 2232.45624 | 2 | 3.07E-04 | 0.97 | 5.88   | -     | 1339.5  |

|                                                                                           |                                     |            |   |          |       |        |       |          |
|-------------------------------------------------------------------------------------------|-------------------------------------|------------|---|----------|-------|--------|-------|----------|
| AHQ-5-14-, 4890                                                                           | K.DLYANTVLSGGTTM*YPGIADR.M          | 2232.45624 | 2 | 3.34E-06 | 0.96  | 5.50   | -     | 1023.2   |
| AHQ-5-14-, 4993 - 5053                                                                    | K.DLYANTVLSGGTTM*YPGIADR.M          | 2232.45624 | 2 | 5.91E-05 | 0.94  | 4.80   | -     | 886.0    |
| AHQ-5-14-, 5063 - 5129                                                                    | K.DLYANTVLSGGTTM*YPGIADR.M          | 2216.45684 | 2 | 4.79E-07 | 0.97  | 5.86   | -     | 1332.2   |
| AHQ-5-14-, 5117 - 5118                                                                    | K.DLYANTVLSGGTTM*YPGIADR.M          | 2232.45624 | 2 | 4.98E-08 | 0.95  | 4.81   | -     | 1124.8   |
| AHQ-5-14-, 5153 - 5221                                                                    | K.DLYANTVLSGGTTM*YPGIADR.M          | 2216.45684 | 2 | 1.55E-04 | 0.94  | 4.98   | -     | 874.4    |
| AHQ-5-14-, 5269                                                                           | K.DLYANTVLSGGTTM*YPGIADR.M          | 2232.45624 | 2 | 2.69E-04 | 0.90  | 4.42   | -     | 506.8    |
| AHQ-5-14-, 5297 - 5361                                                                    | K.DLYANTVLSGGTTM*YPGIADR.M          | 2216.45684 | 2 | 6.96E-05 | 0.92  | 4.79   | -     | 670.5    |
| AHQ-5-14-, 5345 - 5425                                                                    | K.DLYANTVLSGGTTM*YPGIADR.M          | 2216.45684 | 2 | 3.41E-05 | 0.96  | 5.66   | -     | 804.2    |
| AHQ-5-14-, 5497 - 5571                                                                    | K.DLYANTVLSGGTTM*YPGIADR.M          | 2216.45684 | 2 | 6.66E-06 | 0.96  | 4.97   | -     | 1036.6   |
| AHQ-5-8, 3176                                                                             | K.YPIEHSITNWDDMEK.I                 | 1992.19784 | 2 | 6.30E-04 | 0.50  | 2.91   | -     | 526.2    |
| gi 4504165 ref NP_000168.1  getsolin (amyloidosis, Finnish type); Getsolin [Homo sapiens] |                                     |            |   | 2.00E-14 | 20.36 | 230.39 | 38.60 | 85696.9  |
| AHQ-5-5, 3610 - 3686                                                                      | K.AGALNSNDAFVLK.T                   | 1320.47622 | 2 | 9.69E-08 | 0.91  | 4.24   | -     | 731.9    |
| AHQ-5-5, 3682 - 3754                                                                      | K.AGALNSNDAFVLK.T                   | 1320.47622 | 1 | 3.07E-06 | 0.30  | 2.07   | -     | 394.6    |
| AHQ-5-5, 3699                                                                             | K.AGALNSNDAFVLK.T                   | 1320.47622 | 1 | 2.29E-04 | 0.44  | 2.58   | -     | 385.4    |
| AHQ-5-7, 3259                                                                             | K.AGALNSNDAFVLK.T                   | 1320.47622 | 2 | 4.68E-04 | 0.85  | 3.79   | -     | 490.9    |
| AHQ-5-5, 3607                                                                             | K.AGALNSNDAFVLK.T                   | 1320.47622 | 1 | 2.41E-07 | 0.44  | 2.66   | -     | 358.1    |
| AHQ-5-6, 3660                                                                             | K.AGALNSNDAFVLK.T                   | 1320.47622 | 2 | 4.35E-04 | 0.89  | 3.77   | -     | 596.6    |
| AHQ-5-6, 3298 - 3368                                                                      | K.AGALNSNDAFVLK.T                   | 1320.47622 | 2 | 3.24E-08 | 0.89  | 3.87   | -     | 732.9    |
| AHQ-5-4, 5942                                                                             | R.AQPVQVAEGSEPDGFWEALGGK.A          | 2273.44345 | 2 | 2.64E-05 | 0.87  | 3.56   | -     | 596.9    |
| AHQ-5-5, 5573                                                                             | R.AQPVQVAEGSEPDGFWEALGGK.A          | 2273.44345 | 2 | 4.97E-06 | 0.95  | 5.75   | -     | 617.6    |
| AHQ-5-3, 6022                                                                             | R.AQPVQVAEGSEPDGFWEALGGK.A          | 2273.44345 | 2 | 3.79E-06 | 0.96  | 5.60   | -     | 721.4    |
| AHQ-5-5, 5718 - 5742                                                                      | R.AQPVQVAEGSEPDGFWEALGGK.A          | 2273.44345 | 2 | 3.13E-10 | 0.97  | 5.72   | -     | 888.0    |
| AHQ-5-5, 5809                                                                             | R.AQPVQVAEGSEPDGFWEALGGK.A          | 2273.44345 | 2 | 9.79E-08 | 0.95  | 5.60   | -     | 713.7    |
| AHQ-5-2, 5954                                                                             | R.AQPVQVAEGSEPDGFWEALGGK.A          | 2273.44345 | 2 | 5.41E-05 | 0.93  | 4.60   | -     | 682.5    |
| AHQ-5-7, 5563                                                                             | R.AQPVQVAEGSEPDGFWEALGGK.A          | 2273.44345 | 2 | 6.10E-06 | 0.87  | 4.27   | -     | 474.8    |
| AHQ-5-1, 6057 - 6069                                                                      | R.AQPVQVAEGSEPDGFWEALGGK.A          | 2273.44345 | 2 | 3.52E-04 | 0.93  | 4.55   | -     | 737.3    |
| AHQ-5-10, 5004                                                                            | R.AQPVQVAEGSEPDGFWEALGGK.A          | 2273.44345 | 2 | 8.18E-06 | 0.86  | 4.38   | -     | 376.9    |
| AHQ-5-1, 5865                                                                             | R.AQPVQVAEGSEPDGFWEALGGK.A          | 2273.44345 | 2 | 1.59E-04 | 0.86  | 3.99   | -     | 440.4    |
| AHQ-5-9, 5024 - 5034                                                                      | R.AQPVQVAEGSEPDGFWEALGGK.A          | 2273.44345 | 2 | 5.10E-06 | 0.95  | 5.45   | -     | 597.1    |
| AHQ-5-8, 5380 - 5382                                                                      | R.AQPVQVAEGSEPDGFWEALGGK.A          | 2273.44345 | 2 | 8.98E-07 | 0.95  | 5.17   | -     | 743.9    |
| AHQ-5-8, 5209                                                                             | R.AQPVQVAEGSEPDGFWEALGGK.A          | 2273.44345 | 2 | 7.87E-04 | 0.55  | 2.92   | -     | 282.7    |
| AHQ-5-5, 5899 - 5909                                                                      | R.AQPVQVAEGSEPDGFWEALGGK.A          | 2273.44345 | 2 | 4.03E-06 | 0.92  | 4.85   | -     | 560.8    |
| AHQ-5-6, 5524                                                                             | R.AQPVQVAEGSEPDGFWEALGGK.A          | 2273.44345 | 2 | 9.06E-05 | 0.92  | 4.62   | -     | 486.3    |
| AHQ-5-5, 5893                                                                             | R.DPDQTDGLGLSLYSSHIANVER.V          | 2388.53285 | 3 | 4.47E-05 | 0.83  | 3.25   | -     | 1204.6   |
| AHQ-5-6, 5596                                                                             | R.DPDQTDGLGLSLYSSHIANVER.V          | 2388.53285 | 3 | 5.21E-08 | 0.91  | 4.36   | -     | 993.1    |
| AHQ-5-5, 5629 - 5645                                                                      | R.DPDQTDGLGLSLYSSHIANVER.V          | 2388.53285 | 3 | 6.48E-09 | 0.96  | 4.81   | -     | 1588.6   |
| AHQ-5-13, 2389                                                                            | K.DSQEEEEKTEALTSAK.R                | 1666.72289 | 3 | 1.64E-07 | 0.97  | 4.18   | -     | 2591.6   |
| AHQ-5-13, 2385                                                                            | K.DSQEEEEKTEALTSAK.R                | 1666.72289 | 2 | 1.48E-07 | 0.90  | 3.57   | -     | 1078.7   |
| AHQ-5-5, 2097                                                                             | K.DSQEEEEKTEALTSAK.R                | 1666.72289 | 2 | 1.21E-06 | 0.92  | 3.91   | -     | 1128.5   |
| AHQ-5-10, 2048                                                                            | K.DSQEEEEKTEALTSAK.R                | 1666.72289 | 2 | 2.15E-06 | 0.86  | 3.55   | -     | 879.0    |
| AHQ-5-5, 1997 - 2007                                                                      | K.DSQEEEEKTEALTSAK.R                | 1666.72289 | 3 | 7.79E-07 | 0.97  | 5.28   | -     | 1988.6   |
| AHQ-5-5, 1993 - 2029                                                                      | K.DSQEEEEKTEALTSAK.R                | 1666.72289 | 2 | 5.17E-07 | 0.92  | 3.59   | -     | 1294.9   |
| AHQ-5-6, 1992                                                                             | K.DSQEEEEKTEALTSAK.R                | 1666.72289 | 3 | 1.46E-05 | 0.90  | 3.73   | -     | 1416.3   |
| AHQ-5-6, 1980                                                                             | K.DSQEEEEKTEALTSAK.R                | 1666.72289 | 2 | 1.51E-07 | 0.93  | 4.14   | -     | 1220.4   |
| AHQ-5-1, 2336                                                                             | K.DSQEEEEKTEALTSAK.R                | 1666.72289 | 2 | 2.41E-06 | 0.80  | 3.14   | -     | 1093.0   |
| AHQ-5-3, 2145 - 2149                                                                      | K.DSQEEEEKTEALTSAK.R                | 1666.72289 | 2 | 1.14E-07 | 0.88  | 3.30   | -     | 1175.7   |
| AHQ-5-8, 1884 - 1885                                                                      | K.DSQEEEEKTEALTSAK.R                | 1666.72289 | 2 | 2.66E-06 | 0.93  | 3.65   | -     | 1513.9   |
| AHQ-5-13-, 2227 - 2228                                                                    | K.DSQEEEEKTEALTSAK.R                | 1666.72289 | 2 | 1.58E-06 | 0.95  | 4.22   | -     | 1341.0   |
| AHQ-5-5, 5098                                                                             | K.EPAHMLSLFGGKPMIYK.G               | 2033.48916 | 2 | 1.16E-04 | 0.89  | 4.02   | -     | 652.5    |
| AHQ-5-5, 6902                                                                             | R.EVQGFESATFLGYFK.S                 | 1723.90570 | 2 | 2.13E-05 | 0.82  | 2.52   | -     | 1018.7   |
| AHQ-5-13-, 6104                                                                           | R.EVQGFESATFLGYFK.S                 | 1723.90570 | 2 | 7.30E-06 | 0.96  | 4.39   | -     | 1463.8   |
| AHQ-5-5, 6391 - 6466                                                                      | R.EVQGFESATFLGYFK.S                 | 1723.90570 | 2 | 1.21E-06 | 0.96  | 4.58   | -     | 1283.3   |
| AHQ-5-13, 6180 - 6244                                                                     | R.EVQGFESATFLGYFK.S                 | 1723.90570 | 2 | 1.18E-05 | 0.91  | 3.48   | -     | 1201.4   |
| AHQ-5-5, 7163                                                                             | R.EVQGFESATFLGYFK.S                 | 1723.90570 | 2 | 1.30E-04 | 0.77  | 2.59   | -     | 837.6    |
| AHQ-5-14-, 5991 - 6001                                                                    | R.EVQGFESATFLGYFK.S                 | 1723.90570 | 2 | 9.39E-05 | 0.96  | 4.60   | -     | 1548.0   |
| AHQ-5-9, 6540 - 6566                                                                      | K.FDLVPVPTNLYGDFFTGDAYVILK.T        | 2706.08359 | 2 | 2.16E-05 | 0.68  | 2.80   | -     | 443.4    |
| AHQ-5-5, 7438 - 7511                                                                      | K.FDLVPVPTNLYGDFFTGDAYVILK.T        | 2706.08359 | 2 | 2.00E-04 | 0.93  | 4.25   | -     | 732.0    |
| AHQ-5-12, 2242                                                                            | K.HVVPNEVVQR.L                      | 1276.46981 | 2 | 5.31E-06 | 0.93  | 3.33   | -     | 695.4    |
| AHQ-5-5, 2275                                                                             | K.HVVPNEVVQR.L                      | 1276.46981 | 1 | 1.34E-05 | 0.44  | 1.85   | -     | 415.9    |
| AHQ-5-6, 2054                                                                             | K.HVVPNEVVQR.L                      | 1276.46981 | 2 | 5.21E-06 | 0.74  | 2.87   | -     | 364.3    |
| AHQ-5-8, 1904                                                                             | K.HVVPNEVVQR.L                      | 1276.46981 | 2 | 1.39E-05 | 0.89  | 2.76   | -     | 801.1    |
| AHQ-5-7, 2014 - 2016                                                                      | K.HVVPNEVVQR.L                      | 1276.46981 | 2 | 4.97E-09 | 0.90  | 3.60   | -     | 519.4    |
| AHQ-5-5, 2073                                                                             | K.HVVPNEVVQR.L                      | 1276.46981 | 1 | 3.56E-06 | 0.25  | 2.61   | -     | 165.1    |
| AHQ-5-11, 2186                                                                            | K.HVVPNEVVQR.L                      | 1276.46981 | 2 | 8.50E-09 | 0.90  | 3.44   | -     | 573.7    |
| AHQ-5-5, 2018 - 2090                                                                      | K.HVVPNEVVQR.L                      | 1276.46981 | 1 | 3.45E-07 | 0.28  | 2.17   | -     | 342.4    |
| AHQ-5-5, 2061                                                                             | K.HVVPNEVVQR.L                      | 1276.46981 | 2 | 4.66E-06 | 0.91  | 3.32   | -     | 640.0    |
| AHQ-5-5, 6835 - 6883                                                                      | R.IEGSNKVPDPATYGGQFYGGDSYIILYNR.H   | 3401.72499 | 3 | 7.99E-08 | 0.89  | 3.68   | -     | 1139.2   |
| AHQ-5-5, 6462                                                                             | R.IEGSNKVPDPATYGGQFYGGDSYIILYNR.H   | 3401.72499 | 3 | 7.39E-08 | 0.96  | 5.34   | -     | 1500.8   |
| AHQ-5-5, 6310 - 6381                                                                      | R.IEGSNKVPDPATYGGQFYGGDSYIILYNR.H   | 3401.72499 | 3 | 3.92E-07 | 0.96  | 4.75   | -     | 1702.4   |
| AHQ-5-5, 6182                                                                             | K.NWRDPDQTDGLGLSLYSSHIANVER.V       | 2845.03323 | 3 | 2.96E-13 | 0.95  | 5.44   | -     | 1124.9   |
| AHQ-5-6, 5476 - 5484                                                                      | K.NWRDPDQTDGLGLSLYSSHIANVER.V       | 2845.03323 | 3 | 1.13E-09 | 0.98  | 7.44   | -     | 1978.7   |
| AHQ-5-3, 5769 - 5837                                                                      | K.NWRDPDQTDGLGLSLYSSHIANVER.V       | 2845.03323 | 3 | 2.07E-05 | 0.79  | 3.67   | -     | 577.2    |
| AHQ-5-5, 5475 - 5545                                                                      | K.NWRDPDQTDGLGLSLYSSHIANVER.V       | 2845.03323 | 3 | 2.00E-14 | 0.98  | 6.98   | -     | 2033.2   |
| AHQ-5-7, 5252                                                                             | K.NWRDPDQTDGLGLSLYSSHIANVER.V       | 2845.03323 | 3 | 1.54E-06 | 0.95  | 5.35   | -     | 1210.8   |
| AHQ-5-5, 5215                                                                             | K.NWRDPDQTDGLGLSLYSSHIANVER.V       | 2845.03323 | 3 | 4.49E-05 | 0.95  | 4.98   | -     | 1330.2   |
| AHQ-5-5, 5561 - 5631                                                                      | K.NWRDPDQTDGLGLSLYSSHIANVER.V       | 2845.03323 | 3 | 3.32E-04 | 0.94  | 4.74   | -     | 1087.8   |
| AHQ-5-5, 2297                                                                             | K.PALPAGTDTAKEDAANR.K               | 1827.93072 | 2 | 7.34E-06 | 0.89  | 4.06   | -     | 598.6    |
| AHQ-5-6, 2285                                                                             | K.PALPAGTDTAKEDAANR.K               | 1827.93072 | 2 | 2.10E-04 | 0.76  | 3.50   | -     | 300.4    |
| AHQ-5-5, 2106                                                                             | K.PALPAGTDTAKEDAANR.L               | 1956.10363 | 2 | 3.64E-05 | 0.62  | 2.81   | -     | 414.9    |
| AHQ-5-6, 2769                                                                             | K.SEDCFILDHGK.D                     | 1322.42590 | 2 | 1.12E-06 | 0.91  | 3.76   | -     | 905.0    |
| AHQ-5-5, 2754 - 2757                                                                      | K.SEDCFILDHGK.D                     | 1322.42590 | 2 | 1.84E-06 | 0.95  | 3.81   | -     | 1190.5   |
| AHQ-5-8, 1846                                                                             | K.TGAQELLR.V                        | 888.00387  | 2 | 8.66E-06 | 0.73  | 2.72   | -     | 703.1    |
| AHQ-5-5, 1926 - 1937                                                                      | K.TGAQELLR.V                        | 888.00387  | 2 | 7.25E-05 | 0.93  | 3.18   | -     | 1285.1   |
| AHQ-5-5, 4602                                                                             | K.TPSAAYLWVGTAASEAEK.T              | 1838.99510 | 2 | 7.77E-05 | 0.96  | 4.94   | -     | 1266.9   |
| AHQ-5-5, 4450 - 4527                                                                      | K.TPSAAYLWVGTAASEAEK.T              | 1838.99510 | 2 | 4.04E-05 | 0.94  | 3.87   | -     | 1196.7   |
| AHQ-5-5, 4313 - 4381                                                                      | K.TPSAAYLWVGTAASEAEK.T              | 1838.99510 | 2 | 6.25E-05 | 0.96  | 4.81   | -     | 1036.8   |
| AHQ-5-5, 4198                                                                             | K.TPSAAYLWVGTAASEAEK.T              | 1838.99510 | 2 | 9.42E-04 | 0.93  | 4.17   | -     | 1089.3   |
| AHQ-5-5, 4818                                                                             | R.VHVSEEGTEPEAMLQVLGPK.P            | 2151.42630 | 2 | 1.28E-07 | 0.96  | 5.32   | -     | 1033.8   |
| AHQ-5-6, 4761                                                                             | R.VHVSEEGTEPEAMLQVLGPK.P            | 2151.42630 | 2 | 4.65E-05 | 0.97  | 5.12   | -     | 1201.4   |
| AHQ-5-6, 5044                                                                             | R.VHVSEEGTEPEAMLQVLGPKPALPAGTDTAK.E | 3303.68611 | 3 | 4.32E-10 | 0.94  | 5.30   | -     | 904.3    |
| AHQ-5-5, 4178 - 4182                                                                      | R.VHVSEEGTEPEAMLQVLGPKPALPAGTDTAK.E | 3319.68551 | 3 | 6.06E-07 | 0.95  | 5.72   | -     | 826.5    |
| AHQ-5-5, 5078 - 5087                                                                      | R.VHVSEEGTEPEAMLQVLGPKPALPAGTDTAK.E | 3303.68611 | 3 | 1.71E-12 | 0.95  | 5.61   | -     | 996.2    |
| AHQ-5-5, 3385 - 3457                                                                      | R.VPFDATLHTSTAMAAQHGM*DDDGTTGQK.Q   | 2891.10081 | 3 | 2.09E-04 | 0.93  | 5.67   | -     | 1274.1   |
| AHQ-5-5, 3469                                                                             | R.VPFDATLHTSTAMAAQHGM*DDDGTTGQK.Q   | 2891.10081 | 3 | 2.81E-06 | 0.94  | 5.56   | -     | 1690.4   |
| AHQ-5-5, 3845 - 3846                                                                      | R.VPFDATLHTSTAMAAQHGM*DDDGTTGQK.Q   | 2875.10141 | 3 | 9.22E-12 | 0.99  | 7.81   | -     | 2750.1   |
| AHQ-5-5, 3863                                                                             | R.VPFDATLHTSTAMAAQHGM*DDDGTTGQK.Q   | 2875.10141 | 2 | 1.23E-05 | 0.92  | 4.28   | -     | 728.8    |
| AHQ-5-5, 6765 - 6838                                                                      | K.VPVPDPATYGGQFYGGDSYIILYNR.H       | 2773.04698 | 3 | 5.63E-04 | 0.83  | 4.15   | -     | 646.1    |
| AHQ-5-5, 7170 - 7250                                                                      | K.VPVPDPATYGGQFYGGDSYIILYNR.H       | 2773.04698 | 2 | 1.99E-04 | 0.53  | 2.54   | -     | 470.9    |
| AHQ-5-5, 6161 - 6242                                                                      | K.VSNGAGTMSVSLVADENPFAQGALK.S       | 2464.73740 | 3 | 7.52E-09 | 0.97  | 6.67   | -     | 1868.2   |
| AHQ-5-5, 6305 - 6375                                                                      | K.VSNGAGTMSVSLVADENPFAQGALK.S       | 2464.73740 | 2 | 1.20E-05 | 0.36  | 2.81   | -     | 268.0    |
| gi 4504745 ref NP_000410.1  integrin alpha 2b precursor [Homo sapiens]                    |                                     |            |   | 2.39E-14 | 32.84 | 380.34 | 42.30 | 113374.2 |
| AHQ-5-4, 1636 - 1937                                                                      | R.AEAQVELR.G                        | 916.01408  | 1 | 8.69E-04 | 0.30  | 2.00   | -     | 345.2    |
| AHQ-5-1, 5416 - 5479                                                                      | R.AEGGQCPSSLFDLR.D                  | 1564.74505 | 2 | 9.44E-05 | 0.93  | 3.87   | -     | 898.9    |
| AHQ-5-4, 5082                                                                             | R.AEGGQCPSSLFDLR.D                  | 1564.74505 | 2 | 1.02E-04 | 0.88  | 3.14   | -     | 1105.5   |
| AHQ-5-13, 5293                                                                            | R.AEGGQCPSSLFDLR.D                  | 1564.74505 | 2 | 2.88E-05 | 0.88  | 3.46   | -     | 853.6    |
| AHQ-5-10, 4702                                                                            | R.AEGGQCPSSLFDLR.D                  | 1564.74505 | 2 | 9.31E-07 | 0.90  | 3.70   | -     | 921.4    |
| AHQ-5-4, 5368 - 5440                                                                      | R.AEGGQCPSSLFDLR.D                  | 1564.74505 | 2 | 2.34E-07 | 0.95  | 4.19   | -     | 973.4    |

|                       |                                      |            |   |          |      |      |   |        |
|-----------------------|--------------------------------------|------------|---|----------|------|------|---|--------|
| AHQ-5-12, 5158 - 5220 | R.AEGGQCP5LLFLDR.D                   | 1564.74505 | 2 | 8.43E-05 | 0.89 | 3.57 | - | 736.9  |
| AHQ-5-7, 5014         | R.AEGGQCP5LLFLDR.D                   | 1564.74505 | 2 | 1.48E-04 | 0.86 | 3.42 | - | 757.3  |
| AHQ-5-4, 5464         | R.AEGGQCP5LLFLDR.D                   | 1564.74505 | 2 | 2.85E-05 | 0.91 | 3.69 | - | 848.3  |
| AHQ-5-5, 5221         | R.AEGGQCP5LLFLDR.D                   | 1564.74505 | 2 | 6.04E-06 | 0.94 | 3.54 | - | 1208.2 |
| AHQ-5-3, 5446         | R.AEGGQCP5LLFLDR.D                   | 1564.74505 | 2 | 9.72E-06 | 0.93 | 3.84 | - | 1035.2 |
| AHQ-5-4, 2773         | R.ALSNVGFER.L                        | 1122.21308 | 2 | 2.53E-05 | 0.87 | 2.93 | - | 913.2  |
| AHQ-5-4, 2688 - 2756  | R.ALSNVGFER.L                        | 1122.21308 | 2 | 7.52E-07 | 0.87 | 3.19 | - | 837.4  |
| AHQ-5-3, 2761 - 2762  | R.ALSNVGFER.L                        | 1122.21308 | 2 | 2.59E-06 | 0.86 | 3.31 | - | 833.8  |
| AHQ-5-5, 2561         | R.ALSNVGFER.L                        | 1122.21308 | 2 | 1.66E-04 | 0.86 | 2.92 | - | 1008.0 |
| AHQ-5-4, 5104 - 5172  | K.ASVQLVQD5LNPAVK.S                  | 1682.94293 | 2 | 4.40E-04 | 0.91 | 4.50 | - | 667.3  |
| AHQ-5-5, 4930 - 4939  | K.ASVQLVQD5LNPAVK.S                  | 1682.94293 | 2 | 9.97E-05 | 0.77 | 3.28 | - | 574.3  |
| AHQ-5-4, 5361 - 5378  | K.ASVQLVQD5LNPAVK.S                  | 1682.94293 | 2 | 1.63E-04 | 0.94 | 4.76 | - | 930.4  |
| AHQ-5-4, 5212 - 5288  | K.ASVQLVQD5LNPAVK.S                  | 1682.94293 | 2 | 1.28E-06 | 0.92 | 4.47 | - | 670.6  |
| AHQ-5-4, 2982         | R.DETRNVG5QLTQTFK.A                  | 1724.85363 | 2 | 9.11E-06 | 0.90 | 4.12 | - | 882.0  |
| AHQ-5-4, 3122 - 3200  | R.DETRNVG5QLTQTFK.A                  | 1724.85363 | 2 | 3.67E-06 | 0.78 | 3.15 | - | 530.8  |
| AHQ-5-5, 3885 - 3886  | R.DGYNDIAVAAPYGGPSGR.G               | 1780.87574 | 2 | 1.32E-08 | 0.94 | 4.84 | - | 737.8  |
| AHQ-5-4, 4174         | R.DGYNDIAVAAPYGGPSGR.G               | 1780.87574 | 2 | 1.88E-04 | 0.88 | 3.35 | - | 899.4  |
| AHQ-5-4, 3982         | R.DGYNDIAVAAPYGGPSGR.G               | 1780.87574 | 2 | 5.56E-05 | 0.72 | 3.23 | - | 573.3  |
| AHQ-5-4, 3021 - 3024  | R.EQNSLDSWGPVK.V                     | 1261.32250 | 1 | 9.54E-06 | 0.10 | 1.94 | - | 196.6  |
| AHQ-5-4, 4532 - 4537  | R.FGSAIAPLGD5LDR.D                   | 1332.48700 | 2 | 1.16E-08 | 0.95 | 4.09 | - | 1130.7 |
| AHQ-5-4, 4390         | R.FGSAIAPLGD5LDR.D                   | 1332.48700 | 2 | 3.05E-04 | 0.69 | 2.87 | - | 781.5  |
| AHQ-5-4, 4557         | R.FGSAIAPLGD5LDR.D                   | 1332.48700 | 1 | 3.29E-08 | 0.80 | 3.25 | - | 512.3  |
| AHQ-5-5, 5813 - 5882  | R.FGSAIAPLGD5LDRDGYNDIAVAAPYGGPSGR.G | 3094.34015 | 3 | 1.96E-08 | 0.94 | 5.47 | - | 1030.6 |
| AHQ-5-3, 6053 - 6109  | R.FGSAIAPLGD5LDRDGYNDIAVAAPYGGPSGR.G | 3094.34015 | 3 | 4.06E-09 | 0.91 | 4.92 | - | 944.2  |
| AHQ-5-6, 5737 - 5802  | R.FGSAIAPLGD5LDRDGYNDIAVAAPYGGPSGR.G | 3094.34015 | 3 | 1.50E-06 | 0.79 | 4.01 | - | 817.9  |
| AHQ-5-4, 6016 - 6080  | R.FGSAIAPLGD5LDRDGYNDIAVAAPYGGPSGR.G | 3094.34015 | 3 | 2.31E-09 | 0.93 | 5.40 | - | 797.7  |
| AHQ-5-5, 5949 - 6025  | R.FGSAIAPLGD5LDRDGYNDIAVAAPYGGPSGR.G | 3094.34015 | 3 | 2.55E-04 | 0.86 | 4.27 | - | 852.9  |
| AHQ-5-4, 5878 - 5948  | R.FGSAIAPLGD5LDRDGYNDIAVAAPYGGPSGR.G | 3094.34015 | 3 | 1.12E-08 | 0.91 | 5.18 | - | 578.6  |
| AHQ-5-4, 7212 - 7280  | R.GAVDIDDNGYPLD5VYGAYGANQVAVYR.A     | 2827.05458 | 2 | 2.00E-06 | 0.95 | 5.04 | - | 699.3  |
| AHQ-5-4, 6420 - 6488  | R.GAVDIDDNGYPLD5VYGAYGANQVAVYR.A     | 2827.05458 | 2 | 1.47E-07 | 0.95 | 5.29 | - | 680.8  |
| AHQ-5-4, 6901 - 6965  | R.GAVDIDDNGYPLD5VYGAYGANQVAVYR.A     | 2827.05458 | 3 | 8.33E-07 | 0.90 | 4.67 | - | 1265.0 |
| AHQ-5-4, 6874 - 6933  | R.GAVDIDDNGYPLD5VYGAYGANQVAVYR.A     | 2827.05458 | 2 | 1.84E-10 | 0.97 | 5.93 | - | 967.5  |
| AHQ-5-4, 6553 - 6622  | R.GAVDIDDNGYPLD5VYGAYGANQVAVYR.A     | 2827.05458 | 2 | 1.41E-06 | 0.89 | 4.04 | - | 526.5  |
| AHQ-5-4, 6945 - 7016  | R.GAVDIDDNGYPLD5VYGAYGANQVAVYR.A     | 2827.05458 | 2 | 4.26E-05 | 0.96 | 5.03 | - | 1038.7 |
| AHQ-5-5, 6921 - 7001  | R.GAVDIDDNGYPLD5VYGAYGANQVAVYR.A     | 2827.05458 | 2 | 2.29E-04 | 0.79 | 3.43 | - | 460.7  |
| AHQ-5-4, 6668 - 6732  | R.GAVDIDDNGYPLD5VYGAYGANQVAVYR.A     | 2827.05458 | 2 | 3.63E-04 | 0.74 | 3.50 | - | 327.9  |
| AHQ-5-4, 6800 - 6868  | R.GAVDIDDNGYPLD5VYGAYGANQVAVYR.A     | 2827.05458 | 2 | 1.73E-06 | 0.91 | 4.04 | - | 647.2  |
| AHQ-5-4, 7080 - 7145  | R.GAVDIDDNGYPLD5VYGAYGANQVAVYR.A     | 2827.05458 | 2 | 4.17E-08 | 0.95 | 5.15 | - | 590.1  |
| AHQ-5-10, 4411 - 4436 | R.GEAQVWTQLLR.A                      | 1301.47614 | 2 | 7.93E-07 | 0.95 | 4.19 | - | 1141.4 |
| AHQ-5-11, 4787 - 4850 | R.GEAQVWTQLLR.A                      | 1301.47614 | 2 | 5.34E-05 | 0.84 | 3.50 | - | 646.7  |
| AHQ-5-4, 5960         | R.GNSFPASLVAAEEGER.E                 | 1733.86053 | 2 | 7.93E-09 | 0.87 | 3.74 | - | 894.6  |
| AHQ-5-4, 5332 - 5404  | R.GNSFPASLVAAEEGER.E                 | 1733.86053 | 2 | 1.68E-11 | 0.86 | 3.91 | - | 699.9  |
| AHQ-5-4, 5806 - 5872  | R.GNSFPASLVAAEEGER.E                 | 1733.86053 | 2 | 1.03E-07 | 0.67 | 2.99 | - | 560.9  |
| AHQ-5-4, 5630 - 5710  | R.GNSFPASLVAAEEGER.E                 | 1733.86053 | 2 | 4.55E-09 | 0.94 | 4.37 | - | 841.8  |
| AHQ-5-4, 5545 - 5560  | R.GNSFPASLVAAEEGER.E                 | 1733.86053 | 2 | 2.67E-04 | 0.91 | 4.19 | - | 732.7  |
| AHQ-5-4, 5448 - 5492  | R.GNSFPASLVAAEEGER.E                 | 1733.86053 | 2 | 9.44E-06 | 0.81 | 3.74 | - | 563.6  |
| AHQ-5-4, 6905 - 6969  | R.GNSFPASLVAAEEGEREQNSLDSWGPVK.V     | 2976.16043 | 3 | 1.40E-08 | 0.79 | 4.26 | - | 427.6  |
| AHQ-5-4, 6841 - 6912  | R.GNSFPASLVAAEEGEREQNSLDSWGPVK.V     | 2976.16043 | 2 | 1.22E-07 | 0.55 | 3.28 | - | 214.9  |
| AHQ-5-4, 6716 - 6785  | R.GNSFPASLVAAEEGEREQNSLDSWGPVK.V     | 2976.16043 | 3 | 5.98E-07 | 0.87 | 4.57 | - | 445.1  |
| AHQ-5-4, 5065         | R.GPHALGAP5LLTGTQLYGR.F              | 2023.32431 | 2 | 9.78E-06 | 0.85 | 3.72 | - | 499.1  |
| AHQ-5-5, 4974 - 4997  | R.GPHALGAP5LLTGTQLYGR.F              | 2023.32431 | 2 | 4.19E-07 | 0.97 | 5.50 | - | 1310.8 |
| AHQ-5-4, 5185 - 5252  | R.GPHALGAP5LLTGTQLYGR.F              | 2023.32431 | 2 | 2.86E-06 | 0.97 | 6.05 | - | 998.4  |
| AHQ-5-3, 5317 - 5341  | R.GPHALGAP5LLTGTQLYGR.F              | 2023.32431 | 2 | 1.13E-04 | 0.97 | 5.73 | - | 1148.7 |
| AHQ-5-4, 5265 - 5320  | R.GPHALGAP5LLTGTQLYGR.F              | 2023.32431 | 2 | 2.39E-14 | 0.98 | 5.82 | - | 1312.8 |
| AHQ-5-4, 5284         | R.GPHALGAP5LLTGTQLYGR.F              | 2023.32431 | 3 | 6.29E-05 | 0.90 | 3.84 | - | 1129.1 |
| AHQ-5-6, 4948         | R.GPHALGAP5LLTGTQLYGR.F              | 2023.32431 | 2 | 1.77E-08 | 0.98 | 5.98 | - | 1232.0 |
| AHQ-5-3, 5319 - 5322  | R.GPHALGAP5LLTGTQLYGR.F              | 2023.32431 | 3 | 6.67E-04 | 0.88 | 3.88 | - | 919.1  |
| AHQ-5-4, 5080 - 5152  | R.GQVLVFLGQSEGLR.S                   | 1503.72793 | 2 | 7.21E-08 | 0.98 | 5.29 | - | 1897.8 |
| AHQ-5-4, 5168 - 5238  | R.GQVLVFLGQSEGLR.S                   | 1503.72793 | 2 | 2.43E-08 | 0.96 | 4.33 | - | 1285.5 |
| AHQ-5-3, 5195         | R.GQVLVFLGQSEGLR.S                   | 1503.72793 | 2 | 4.09E-07 | 0.95 | 3.84 | - | 1257.6 |
| AHQ-5-4, 4377 - 4448  | R.HDLLVGAP5LME5R.A                   | 1601.85188 | 2 | 5.01E-06 | 0.97 | 4.32 | - | 1738.3 |
| AHQ-5-3, 4487         | R.HDLLVGAP5LME5R.A                   | 1601.85188 | 2 | 2.06E-08 | 0.96 | 4.35 | - | 1436.1 |
| AHQ-5-5, 4179         | R.HDLLVGAP5LME5R.A                   | 1601.85188 | 2 | 9.02E-08 | 0.94 | 3.26 | - | 1478.2 |
| AHQ-5-4, 4385         | R.HDLLVGAP5LME5R.A                   | 1601.85188 | 3 | 1.79E-06 | 0.94 | 4.04 | - | 1328.0 |
| AHQ-5-4, 3604 - 3676  | K.HSPICHTM5AFLR.D                    | 1572.83705 | 2 | 3.34E-08 | 0.81 | 3.02 | - | 477.0  |
| AHQ-5-2, 4439         | K.IVLLDVPYR.A                        | 1024.28196 | 2 | 1.43E-04 | 0.92 | 3.37 | - | 1229.4 |
| AHQ-5-5, 4211 - 4229  | K.IVLLDVPYR.A                        | 1024.28196 | 2 | 8.25E-04 | 0.92 | 3.78 | - | 939.8  |
| AHQ-5-11, 4195        | K.IVLLDVPYR.A                        | 1024.28196 | 2 | 2.66E-05 | 0.93 | 3.44 | - | 1268.1 |
| AHQ-5-6, 4142         | K.IVLLDVPYR.A                        | 1024.28196 | 2 | 1.52E-05 | 0.93 | 3.63 | - | 1060.3 |
| AHQ-5-12, 4313        | K.IVLLDVPYR.A                        | 1024.28196 | 2 | 6.53E-04 | 0.91 | 3.48 | - | 982.4  |
| AHQ-5-4, 4388 - 4456  | K.IVLLDVPYR.A                        | 1024.28196 | 2 | 6.92E-04 | 0.93 | 3.94 | - | 960.2  |
| AHQ-5-4, 4525         | R.IYVENDFSWDK.R                      | 1416.51610 | 1 | 3.36E-08 | 0.33 | 2.13 | - | 377.9  |
| AHQ-5-4, 4516 - 4518  | R.IYVENDFSWDK.R                      | 1416.51610 | 2 | 2.49E-06 | 0.86 | 3.38 | - | 549.8  |
| AHQ-5-4, 3921         | R.IYVENDFSWDKR.Y                     | 1572.70245 | 3 | 9.65E-05 | 0.68 | 3.24 | - | 468.7  |
| AHQ-5-4, 3885 - 3965  | R.IYVENDFSWDKR.Y                     | 1572.70245 | 2 | 9.89E-07 | 0.94 | 4.04 | - | 1253.4 |
| AHQ-5-11, 6502 - 6560 | R.LQDPVLV5CDSAPCTVVQCDLQEMAR.G       | 2996.36144 | 2 | 1.61E-04 | 0.73 | 3.32 | - | 298.1  |
| AHQ-5-10, 6404        | R.LQDPVLV5CDSAPCTVVQCDLQEMAR.G       | 2996.36144 | 2 | 4.56E-04 | 0.81 | 3.58 | - | 291.9  |
| AHQ-5-10, 6238 - 6299 | R.LQDPVLV5CDSAPCTVVQCDLQEMAR.G       | 2996.36144 | 2 | 1.73E-08 | 0.90 | 4.23 | - | 396.4  |
| AHQ-5-10, 6114 - 6179 | R.LQDPVLV5CDSAPCTVVQCDLQEMAR.G       | 2996.36144 | 2 | 9.09E-06 | 0.67 | 2.76 | - | 428.2  |
| AHQ-5-4, 4878         | K.LSLNAELQLDR.Q                      | 1272.43310 | 2 | 6.39E-08 | 0.92 | 3.84 | - | 1131.5 |
| AHQ-5-4, 4730 - 4809  | K.LSLNAELQLDR.Q                      | 1272.43310 | 2 | 5.86E-06 | 0.94 | 3.77 | - | 1484.1 |
| AHQ-5-11, 2068        | R.NRPPLEEDDEEGE                      | 1529.50164 | 2 | 2.39E-05 | 0.92 | 3.12 | - | 1380.9 |
| AHQ-5-7, 2490         | R.NVGSQTLQTFK.A                      | 1223.36055 | 2 | 7.10E-04 | 0.86 | 3.32 | - | 491.4  |
| AHQ-5-6, 2565         | R.NVGSQTLQTFK.A                      | 1223.36055 | 2 | 2.76E-07 | 0.92 | 3.52 | - | 796.4  |
| AHQ-5-4, 2625 - 2696  | R.NVGSQTLQTFK.A                      | 1223.36055 | 2 | 1.14E-05 | 0.95 | 4.10 | - | 816.8  |
| AHQ-5-12, 2761        | R.NVGSQTLQTFK.A                      | 1223.36055 | 2 | 4.77E-07 | 0.80 | 3.00 | - | 510.8  |
| AHQ-5-4, 6664 - 6728  | R.PSQVLDSPPFTGSAF5GFSR.LG            | 2111.34205 | 2 | 1.21E-06 | 0.95 | 5.07 | - | 975.0  |
| AHQ-5-4, 7570 - 7645  | R.QGLGASV5WS5DVIVACAPWQHWNVLEK.T     | 3139.53208 | 3 | 3.64E-07 | 0.93 | 5.54 | - | 763.5  |
| AHQ-5-4, 7397 - 7468  | R.QGLGASV5WS5DVIVACAPWQHWNVLEK.T     | 3139.53208 | 3 | 3.48E-10 | 0.95 | 5.75 | - | 916.0  |
| AHQ-5-4, 6244 - 6313  | R.SRPSQVLDSP5PFTGSAF5GFSR.LG         | 2354.60606 | 3 | 5.12E-05 | 0.97 | 6.57 | - | 1599.4 |
| AHQ-5-4, 6284 - 6285  | R.SRPSQVLDSP5PFTGSAF5GFSR.LG         | 2354.60606 | 2 | 1.93E-09 | 0.97 | 6.28 | - | 842.0  |
| AHQ-5-4, 6148 - 6216  | R.SRPSQVLDSP5PFTGSAF5GFSR.LG         | 2354.60606 | 2 | 1.07E-10 | 0.96 | 5.31 | - | 746.7  |
| AHQ-5-3, 6263 - 6295  | R.SRPSQVLDSP5PFTGSAF5GFSR.LG         | 2354.60606 | 3 | 3.79E-04 | 0.91 | 4.85 | - | 1430.8 |
| AHQ-5-4, 6001 - 6070  | R.SRPSQVLDSP5PFTGSAF5GFSR.LG         | 2354.60606 | 3 | 2.97E-04 | 0.79 | 3.35 | - | 1294.0 |
| AHQ-5-4, 6149 - 6220  | R.SRPSQVLDSP5PFTGSAF5GFSR.LG         | 2354.60606 | 3 | 5.04E-12 | 0.98 | 6.69 | - | 2245.7 |
| AHQ-5-6, 5914 - 5929  | R.SRPSQVLDSP5PFTGSAF5GFSR.LG         | 2354.60606 | 3 | 5.74E-08 | 0.97 | 6.42 | - | 1482.8 |
| AHQ-5-14-, 5806       | R.SRPSQVLDSP5PFTGSAF5GFSR.LG         | 2354.60606 | 3 | 8.72E-06 | 0.92 | 4.78 | - | 1111.9 |
| AHQ-5-5, 5947 - 5986  | R.SRPSQVLDSP5PFTGSAF5GFSR.LG         | 2354.60606 | 3 | 5.56E-10 | 0.98 | 6.69 | - | 1870.6 |
| AHQ-5-1, 6287         | R.SRPSQVLDSP5PFTGSAF5GFSR.LG         | 2354.60606 | 3 | 3.51E-08 | 0.94 | 4.99 | - | 1020.1 |
| AHQ-5-7, 5779         | R.SRPSQVLDSP5PFTGSAF5GFSR.LG         | 2354.60606 | 3 | 4.37E-04 | 0.93 | 4.31 | - | 1366.5 |
| AHQ-5-7, 3367         | K.TEEAEKTPV5G5CFLAQPESGR.R           | 2295.46902 | 2 | 4.77E-04 | 0.89 | 3.85 | - | 590.4  |
| AHQ-5-3, 3745         | K.TEEAEKTPV5G5CFLAQPESGR.R           | 2295.46902 | 2 | 1.28E-04 | 0.84 | 3.60 | - | 490.8  |
| AHQ-5-6, 3452         | K.TEEAEKTPV5G5CFLAQPESGR.R           | 2295.46902 | 2 | 6.18E-07 | 0.92 | 4.08 | - | 636.6  |
| AHQ-5-4, 3640 - 3714  | K.TEEAEKTPV5G5CFLAQPESGR.R           | 2295.46902 | 2 | 3.25E-07 | 0.96 | 5.39 | - | 866.8  |
| AHQ-5-11, 3538        | K.TEEAEKTPV5G5CFLAQPESGR.R           | 2295.46902 | 2 | 1.47E-04 | 0.87 | 4.02 | - | 413.1  |
| AHQ-5-10, 3336        | K.TEEAEKTPV5G5CFLAQPESGR.R           | 2295.46902 | 2 | 1.50E-04 | 0.92 | 3.98 | - | 743.2  |
| AHQ-5-5, 3502         | K.TEEAEKTPV5G5CFLAQPESGR.R           | 2295.46902 | 2 | 1.87E-05 | 0.94 | 4.56 | - | 653.3  |



|                                                                                                               |                                   |            |   |          |      |        |       |         |
|---------------------------------------------------------------------------------------------------------------|-----------------------------------|------------|---|----------|------|--------|-------|---------|
| AHQ-5-4, 5702 - 5773                                                                                          | R.TLGPSQEETGGVFLCPWR.A            | 2036.25364 | 2 | 5.08E-07 | 0.97 | 5.37   | -     | 1378.2  |
| AHQ-5-6, 5513                                                                                                 | R.TLGPSQEETGGVFLCPWR.A            | 2036.25364 | 2 | 1.92E-04 | 0.85 | 3.27   | -     | 759.9   |
| AHQ-5-4, 5670 - 5748                                                                                          | R.TLGPSQEETGGVFLCPWR.A            | 2036.25364 | 3 | 2.75E-07 | 0.92 | 4.33   | -     | 1379.4  |
| AHQ-5-1, 5825 - 5891                                                                                          | R.TLGPSQEETGGVFLCPWR.A            | 2036.25364 | 2 | 9.76E-08 | 0.91 | 4.60   | -     | 730.9   |
| AHQ-5-11, 5343 - 5362                                                                                         | R.TLGPSQEETGGVFLCPWR.A            | 2036.25364 | 2 | 2.01E-09 | 0.96 | 5.24   | -     | 1132.0  |
| AHQ-5-10, 4919 - 4994                                                                                         | R.TLGPSQEETGGVFLCPWR.A            | 2036.25364 | 2 | 4.41E-04 | 0.95 | 4.91   | -     | 1159.4  |
| AHQ-5-13-, 5459                                                                                               | R.TLGPSQEETGGVFLCPWR.A            | 2036.25364 | 2 | 6.46E-06 | 0.93 | 4.68   | -     | 828.6   |
| AHQ-5-13, 5550 - 5564                                                                                         | R.TLGPSQEETGGVFLCPWR.A            | 2036.25364 | 2 | 3.96E-07 | 0.95 | 4.66   | -     | 1028.6  |
| AHQ-5-5, 5557 - 5558                                                                                          | R.TLGPSQEETGGVFLCPWR.A            | 2036.25364 | 2 | 2.10E-08 | 0.97 | 4.94   | -     | 1405.5  |
| AHQ-5-9, 4862 - 4876                                                                                          | R.TLGPSQEETGGVFLCPWR.A            | 2036.25364 | 2 | 5.04E-05 | 0.89 | 4.25   | -     | 719.7   |
| AHQ-5-3, 5822 - 5890                                                                                          | R.TLGPSQEETGGVFLCPWR.A            | 2036.25364 | 2 | 5.85E-09 | 0.96 | 5.16   | -     | 1118.0  |
| AHQ-5-7, 5342                                                                                                 | R.TLGPSQEETGGVFLCPWR.A            | 2036.25364 | 2 | 4.28E-07 | 0.94 | 4.58   | -     | 1052.4  |
| AHQ-5-12, 5520                                                                                                | R.TLGPSQEETGGVFLCPWR.A            | 2036.25364 | 2 | 6.62E-08 | 0.94 | 4.42   | -     | 1033.4  |
| AHQ-5-7, 3462 - 3531                                                                                          | K.TPVGSCFLAQPESGR.R               | 1607.76993 | 2 | 4.37E-05 | 0.88 | 3.51   | -     | 754.4   |
| AHQ-5-6, 3536 - 3540                                                                                          | K.TPVGSCFLAQPESGR.R               | 1607.76993 | 2 | 4.04E-09 | 0.90 | 3.89   | -     | 697.9   |
| AHQ-5-1, 3901                                                                                                 | K.TPVGSCFLAQPESGR.R               | 1607.76993 | 2 | 9.70E-08 | 0.87 | 3.43   | -     | 823.6   |
| AHQ-5-5, 3609                                                                                                 | K.TPVGSCFLAQPESGR.R               | 1607.76993 | 2 | 3.12E-07 | 0.95 | 4.35   | -     | 1023.5  |
| AHQ-5-2, 3789                                                                                                 | K.TPVGSCFLAQPESGR.R               | 1607.76993 | 2 | 2.29E-07 | 0.84 | 3.01   | -     | 664.7   |
| AHQ-5-11, 3572                                                                                                | K.TPVGSCFLAQPESGR.R               | 1607.76993 | 2 | 3.37E-07 | 0.92 | 3.95   | -     | 774.7   |
| AHQ-5-4, 3752 - 3820                                                                                          | K.TPVGSCFLAQPESGR.R               | 1607.76993 | 2 | 5.49E-08 | 0.93 | 4.14   | -     | 747.2   |
| AHQ-5-3, 3807                                                                                                 | K.TPVGSCFLAQPESGR.R               | 1607.76993 | 2 | 4.44E-06 | 0.89 | 3.66   | -     | 840.6   |
| AHQ-5-5, 4395                                                                                                 | K.TPVSCFNQM*CVGATGHNIPQK.L        | 2478.81062 | 3 | 3.65E-09 | 0.90 | 3.97   | -     | 1122.3  |
| AHQ-5-3, 4679 - 4683                                                                                          | K.TPVSCFNQM*CVGATGHNIPQK.L        | 2478.81062 | 3 | 4.21E-07 | 0.82 | 3.51   | -     | 906.5   |
| AHQ-5-4, 4588                                                                                                 | K.TPVSCFNQM*CVGATGHNIPQK.L        | 2478.81062 | 3 | 1.34E-08 | 0.96 | 5.16   | -     | 1760.0  |
| AHQ-5-4, 5069 - 5118                                                                                          | K.TPVSCFNQM*CVGATGHNIPQK.L        | 2462.81122 | 3 | 3.98E-07 | 0.94 | 5.14   | -     | 1185.7  |
| AHQ-5-4, 5336 - 5406                                                                                          | K.TPVSCFNQM*CVGATGHNIPQK.L        | 2462.81122 | 3 | 9.42E-06 | 0.94 | 4.62   | -     | 1560.6  |
| AHQ-5-4, 5493                                                                                                 | K.TPVSCFNQM*CVGATGHNIPQK.L        | 2462.81122 | 3 | 2.23E-04 | 0.94 | 4.68   | -     | 1209.1  |
| AHQ-5-4, 5688                                                                                                 | K.TPVSCFNQM*CVGATGHNIPQK.L        | 2462.81122 | 3 | 3.11E-04 | 0.93 | 4.62   | -     | 1257.8  |
| AHQ-5-4, 5833 - 5904                                                                                          | K.TPVSCFNQM*CVGATGHNIPQK.L        | 2462.81122 | 3 | 6.70E-04 | 0.35 | 2.60   | -     | 311.3   |
| AHQ-5-4, 5856 - 5929                                                                                          | K.TPVSCFNQM*CVGATGHNIPQK.L        | 2462.81122 | 3 | 1.02E-08 | 0.96 | 5.20   | -     | 1490.3  |
| AHQ-5-4, 6273                                                                                                 | K.TPVSCFNQM*CVGATGHNIPQK.L        | 2462.81122 | 3 | 1.29E-05 | 0.89 | 4.38   | -     | 798.2   |
| AHQ-5-4, 5945                                                                                                 | K.TPVSCFNQM*CVGATGHNIPQK.L        | 2462.81122 | 3 | 9.81E-07 | 0.95 | 4.62   | -     | 1532.0  |
| AHQ-5-4, 7061                                                                                                 | K.TPVSCFNQM*CVGATGHNIPQK.L        | 2462.81122 | 3 | 1.58E-06 | 0.96 | 5.33   | -     | 1575.2  |
| AHQ-5-4, 6032                                                                                                 | K.TPVSCFNQM*CVGATGHNIPQK.L        | 2462.81122 | 3 | 9.05E-10 | 0.97 | 5.85   | -     | 1902.2  |
| AHQ-5-4, 6465                                                                                                 | K.TPVSCFNQM*CVGATGHNIPQK.L        | 2462.81122 | 3 | 1.46E-06 | 0.96 | 4.79   | -     | 1970.2  |
| AHQ-5-12, 2534                                                                                                | R.VAIVVGAPR.T                     | 882.08560  | 2 | 7.93E-06 | 0.92 | 3.16   | -     | 1364.9  |
| AHQ-5-3, 2514                                                                                                 | R.VAIVVGAPR.T                     | 882.08560  | 2 | 8.22E-05 | 0.94 | 3.27   | -     | 1425.5  |
| AHQ-5-13-, 2631                                                                                               | R.VAIVVGAPR.T                     | 882.08560  | 2 | 1.38E-05 | 0.93 | 3.34   | -     | 1248.0  |
| AHQ-5-5, 2345                                                                                                 | R.VAIVVGAPR.T                     | 882.08560  | 2 | 5.71E-06 | 0.94 | 3.30   | -     | 1437.5  |
| AHQ-5-11, 2478                                                                                                | R.VAIVVGAPR.T                     | 882.08560  | 2 | 3.37E-04 | 0.78 | 2.65   | -     | 880.1   |
| AHQ-5-13, 2778                                                                                                | R.VAIVVGAPR.T                     | 882.08560  | 2 | 2.60E-06 | 0.89 | 2.93   | -     | 1037.3  |
| AHQ-5-4, 7081 - 7161                                                                                          | R.VLLGGSQQAAGTTLNLDLGGK.H         | 1999.29783 | 2 | 7.34E-07 | 0.98 | 6.77   | -     | 2344.6  |
| AHQ-5-6, 6837                                                                                                 | R.VLLGGSQQAAGTTLNLDLGGK.H         | 1999.29783 | 2 | 2.39E-04 | 0.89 | 3.61   | -     | 1023.4  |
| AHQ-5-4, 6020 - 6089                                                                                          | R.VLLGGSQQAAGTTLNLDLGGK.H         | 1999.29783 | 2 | 2.85E-10 | 0.98 | 6.51   | -     | 1704.5  |
| AHQ-5-4, 7536 - 7613                                                                                          | R.VLLGGSQQAAGTTLNLDLGGK.H         | 1999.29783 | 2 | 2.21E-13 | 0.98 | 6.50   | -     | 2118.1  |
| AHQ-5-4, 7664                                                                                                 | R.VLLGGSQQAAGTTLNLDLGGK.H         | 1999.29783 | 2 | 2.64E-07 | 0.97 | 6.23   | -     | 1126.7  |
| AHQ-5-4, 6952 - 7017                                                                                          | R.VLLGGSQQAAGTTLNLDLGGK.H         | 1999.29783 | 2 | 8.59E-07 | 0.97 | 5.90   | -     | 1511.4  |
| AHQ-5-4, 6157 - 6229                                                                                          | R.VLLGGSQQAAGTTLNLDLGGK.H         | 1999.29783 | 2 | 1.02E-09 | 0.98 | 5.88   | -     | 1752.3  |
| AHQ-5-4, 6296 - 6370                                                                                          | R.VLLGGSQQAAGTTLNLDLGGK.H         | 1999.29783 | 2 | 7.85E-07 | 0.97 | 5.81   | -     | 1509.5  |
| AHQ-5-4, 5912 - 5953                                                                                          | R.VLLGGSQQAAGTTLNLDLGGK.H         | 1999.29783 | 2 | 4.21E-06 | 0.96 | 5.85   | -     | 804.0   |
| AHQ-5-4, 6838 - 6906                                                                                          | R.VLLGGSQQAAGTTLNLDLGGK.H         | 1999.29783 | 2 | 1.33E-08 | 0.98 | 6.30   | -     | 1676.4  |
| AHQ-5-4, 7230 - 7261                                                                                          | R.VLLGGSQQAAGTTLNLDLGGK.H         | 1999.29783 | 2 | 1.40E-06 | 0.98 | 6.52   | -     | 1470.9  |
| AHQ-5-4, 6684 - 6749                                                                                          | R.VLLGGSQQAAGTTLNLDLGGK.H         | 1999.29783 | 2 | 2.36E-07 | 0.95 | 5.24   | -     | 1208.2  |
| AHQ-5-4, 4144 - 4213                                                                                          | R.VVLCELGNPMK.K                   | 1261.53692 | 2 | 4.41E-06 | 0.96 | 4.18   | -     | 1338.0  |
| AHQ-5-2, 4177                                                                                                 | R.VVLCELGNPMK.K                   | 1261.53692 | 2 | 1.62E-04 | 0.91 | 3.19   | -     | 1025.6  |
| AHQ-5-3, 4239                                                                                                 | R.VVLCELGNPMK.K                   | 1261.53692 | 2 | 6.49E-06 | 0.94 | 4.01   | -     | 1044.8  |
| AHQ-5-4, 3308                                                                                                 | R.VVLCELGNPMK.K                   | 1277.53632 | 2 | 1.87E-04 | 0.78 | 2.92   | -     | 681.4   |
| AHQ-5-5, 3997 - 4013                                                                                          | R.VVLCELGNPMK.K                   | 1261.53692 | 2 | 8.88E-08 | 0.96 | 3.93   | -     | 1674.2  |
| AHQ-5-4, 4150                                                                                                 | R.VVLCELGNPMK.K                   | 1261.53692 | 1 | 3.09E-04 | 0.88 | 3.53   | -     | 998.6   |
| AHQ-5-6, 3928 - 3930                                                                                          | R.VVLCELGNPMK.K                   | 1261.53692 | 2 | 1.29E-05 | 0.91 | 3.83   | -     | 910.1   |
| AHQ-5-5, 3331                                                                                                 | R.VVLCELGNPMK.N                   | 1389.70984 | 2 | 1.46E-04 | 0.90 | 3.02   | -     | 1099.1  |
| AHQ-5-4, 3544 - 3573                                                                                          | R.VVLCELGNPMK.N                   | 1389.70984 | 2 | 9.53E-08 | 0.85 | 2.90   | -     | 1048.7  |
| AHQ-5-4, 4132 - 4210                                                                                          | R.VVLFQPR.G                       | 1036.25129 | 2 | 6.49E-06 | 0.95 | 3.65   | -     | 1426.1  |
| AHQ-5-6, 3893                                                                                                 | R.VVLFQPR.G                       | 1036.25129 | 2 | 4.19E-05 | 0.96 | 4.19   | -     | 1355.7  |
| gj 5902128 ref NP_008880.1  syntaxin binding protein 2; Hunc18b [Homo sapiens]                                |                                   |            |   | 2.72E-14 | 6.73 | 80.29  | 21.40 | 66438.1 |
| AHQ-5-6, 6348                                                                                                 | K.AAHIFFTDTCPEPLFSELGR.S          | 2310.57011 | 2 | 2.72E-14 | 0.97 | 5.88   | -     | 1254.7  |
| AHQ-5-6, 6624                                                                                                 | R.EPIPSLEAIYLLSPTK.S              | 1901.18939 | 2 | 3.44E-05 | 0.71 | 3.19   | -     | 523.5   |
| AHQ-5-6, 2938                                                                                                 | R.KGPEDTAQLAHAVLAK.L              | 1649.87303 | 3 | 4.08E-07 | 0.97 | 5.48   | -     | 1855.1  |
| AHQ-5-6, 2929                                                                                                 | R.KGPEDTAQLAHAVLAK.L              | 1649.87303 | 2 | 3.63E-08 | 0.80 | 2.86   | -     | 906.0   |
| AHQ-5-6, 6394                                                                                                 | K.LIVPLVLLDAAVPAYDK.I             | 1698.03911 | 2 | 2.80E-05 | 0.96 | 3.67   | -     | 1721.9  |
| AHQ-5-6, 3072                                                                                                 | R.NLEQLGGTVTNPGGSGTSSR.L          | 1933.02693 | 2 | 1.66E-06 | 0.85 | 3.89   | -     | 488.7   |
| AHQ-5-6, 5348 - 5416                                                                                          | R.NLWVPSPDAPTASSQAAVSAR.F         | 2273.48981 | 2 | 9.10E-05 | 0.76 | 3.20   | -     | 635.6   |
| AHQ-5-6, 5904                                                                                                 | R.REPIPSLEAIYLLSPTK.S             | 2057.37574 | 3 | 2.34E-07 | 0.74 | 3.08   | -     | 800.6   |
| AHQ-5-6, 4642                                                                                                 | K.WEVILGSSHLTPTR.F                | 1709.97007 | 2 | 4.21E-08 | 0.93 | 3.93   | -     | 1105.4  |
| gj 5907215 ref NP_061816.1  tubulin, alpha-like 2; tubulin, alpha 8 [Homo sapiens]                            |                                   |            |   | 3.16E-14 | 2.36 | 30.22  | 9.80  | 50093.2 |
| AHQ-5-7, 3236                                                                                                 | K.DVNVIAIAIK.T                    | 1014.20080 | 1 | 2.22E-05 | 0.49 | 2.64   | -     | 332.0   |
| AHQ-5-9, 4836                                                                                                 | R.IHFPLVYAPIIAEAK.A               | 1800.13312 | 2 | 6.08E-05 | 0.80 | 3.28   | -     | 484.0   |
| AHQ-5-7, 5248 - 5278                                                                                          | R.IHFPLVYAPIIAEAK.A               | 1800.13312 | 2 | 1.12E-07 | 0.94 | 4.44   | -     | 616.9   |
| AHQ-5-14-, 5211                                                                                               | K.INDDDSFTTFFSETGNGK.H            | 1996.03358 | 2 | 3.16E-14 | 0.93 | 4.22   | -     | 861.2   |
| AHQ-5-14-, 5435                                                                                               | K.INDDDSFTTFFSETGNGK.H            | 1996.03358 | 2 | 3.62E-10 | 0.77 | 3.56   | -     | 286.1   |
| AHQ-5-13, 5402                                                                                                | K.INDDDSFTTFFSETGNGK.H            | 1996.03358 | 2 | 7.49E-12 | 0.85 | 3.75   | -     | 561.3   |
| gj 21361657 ref NP_005304.3  glucose regulated protein, 58kDa; glucose regulated protein, 58kD [Homo sapiens] |                                   |            |   | 3.50E-14 | 8.76 | 110.35 | 28.50 | 56782.0 |
| AHQ-5-7, 2120                                                                                                 | K.DPNVIAIK.M                      | 870.02845  | 1 | 2.75E-04 | 0.30 | 1.92   | -     | 352.1   |
| AHQ-5-7, 5720 - 5730                                                                                          | R.ELDSFISYLQR.E                   | 1371.52000 | 2 | 5.72E-06 | 0.96 | 4.26   | -     | 1507.0  |
| AHQ-5-7, 6346                                                                                                 | R.FAHTNIVSELVNEYDDNGEILFR.P       | 2753.96046 | 2 | 3.94E-06 | 0.95 | 5.04   | -     | 844.8   |
| AHQ-5-7, 7136 - 7139                                                                                          | K.FISDKDASIVGFDDSFSEAHSEFLK.A     | 2940.16492 | 3 | 3.50E-14 | 0.98 | 7.10   | -     | 2224.2  |
| AHQ-5-7, 7138                                                                                                 | K.FISDKDASIVGFDDSFSEAHSEFLK.A     | 2940.16492 | 2 | 2.78E-09 | 0.95 | 4.03   | -     | 1480.1  |
| AHQ-5-9, 6348                                                                                                 | K.FISDKDASIVGFDDSFSEAHSEFLK.A     | 2940.16492 | 3 | 3.31E-05 | 0.82 | 4.03   | -     | 891.5   |
| AHQ-5-7, 4526                                                                                                 | R.FLDQYFDGNLK.R                   | 1360.49568 | 1 | 2.29E-04 | 0.10 | 1.80   | -     | 361.8   |
| AHQ-5-7, 4520                                                                                                 | R.FLDQYFDGNLK.R                   | 1360.49568 | 2 | 7.06E-05 | 0.93 | 3.56   | -     | 1454.5  |
| AHQ-5-7, 5510                                                                                                 | R.KTFSHELSDFGLESTAGEIPVVAIR.T     | 2705.01562 | 2 | 4.92E-05 | 0.96 | 4.86   | -     | 1322.2  |
| AHQ-5-7, 2384                                                                                                 | K.LNFVAASR.K                      | 878.01067  | 2 | 9.28E-04 | 0.79 | 2.63   | -     | 794.0   |
| AHQ-5-7, 2027 - 2100                                                                                          | K.LSKDPNVIAIK.M                   | 1198.43727 | 2 | 2.68E-06 | 0.70 | 2.69   | -     | 734.6   |
| AHQ-5-7, 3222 - 3296                                                                                          | K.MDATANDVSPSYEVR.G               | 1665.80646 | 2 | 7.47E-05 | 0.73 | 3.63   | -     | 388.8   |
| AHQ-5-7, 2162                                                                                                 | K.SEPIPESNDGPVK.V                 | 1369.45928 | 1 | 3.92E-04 | 0.32 | 2.26   | -     | 372.2   |
| AHQ-5-7, 2312                                                                                                 | K.SEPIPESNDGPVK.V                 | 1369.45928 | 1 | 1.77E-04 | 0.48 | 1.95   | -     | 569.7   |
| AHQ-5-9, 5546 - 5554                                                                                          | K.TFSHELSDFGLESTAGEIPVVAIR.T      | 2576.84271 | 2 | 8.05E-07 | 0.98 | 5.37   | -     | 2375.6  |
| AHQ-5-7, 6156 - 6162                                                                                          | K.TFSHELSDFGLESTAGEIPVVAIR.T      | 2576.84271 | 3 | 5.29E-06 | 0.89 | 4.57   | -     | 568.2   |
| gj 5031987 ref NP_005720.1  peptidylprolyl isomerase F (cyclophilin F) [Homo sapiens]                         |                                   |            |   | 4.94E-14 | 3.91 | 50.26  | 41.50 | 22040.1 |
| AHQ-5-12, 3714 - 3786                                                                                         | R.FPDENFTLK.H                     | 1111.22866 | 2 | 2.27E-04 | 0.61 | 2.55   | -     | 549.0   |
| AHQ-5-12, 3993                                                                                                | R.FPDENFTLK.H                     | 1111.22866 | 2 | 5.29E-04 | 0.85 | 2.88   | -     | 705.0   |
| AHQ-5-11, 5050                                                                                                | K.GSGDPSSSSSSGNPLVYLDVDANGKPLGR.V | 2834.99028 | 3 | 1.09E-11 | 0.87 | 4.27   | -     | 802.3   |
| AHQ-5-12, 5194 - 5234                                                                                         | K.GSGDPSSSSSSGNPLVYLDVDANGKPLGR.V | 2834.99028 | 3 | 4.94E-14 | 0.84 | 3.95   | -     | 746.7   |
| AHQ-5-12, 5049 - 5128                                                                                         | K.GSGDPSSSSSSGNPLVYLDVDANGKPLGR.V | 2834.99028 | 3 | 1.00E-06 | 0.83 | 3.48   | -     | 994.2   |
| AHQ-5-12, 5154 - 5222                                                                                         | K.GSGDPSSSSSSGNPLVYLDVDANGKPLGR.V | 2834.99028 | 2 | 2.47E-06 | 0.64 | 2.92   | -     | 278.8   |
| AHQ-5-12, 5297 - 5360                                                                                         | K.HVGPVGLSM*ANAGPNTNGSQFFICTIK.T  | 2836.19605 | 2 | 4.69E-04 | 0.72 | 3.48   | -     | 238.7   |
| AHQ-5-12, 5844 - 5904                                                                                         | K.HVGPVGLSMANAGPNTNGSQFFICTIK.T   | 2820.19665 | 2 | 1.62E-06 | 0.89 | 3.86   | -     | 659.7   |

|                              |                                           |            |   |          |       |        |       |         |
|------------------------------|-------------------------------------------|------------|---|----------|-------|--------|-------|---------|
| AHQ-5-12, 5850 - 5913        | K.HVGPVGLSMANAGPNTNGSOFFICTIK.T           | 2820.19665 | 3 | 2.01E-06 | 0.95  | 5.25   | -     | 1435.9  |
| AHQ-5-12, 5969               | K.HVGPVGLSMANAGPNTNGSOFFICTIK.T           | 2820.19665 | 2 | 7.20E-06 | 0.77  | 3.21   | -     | 527.9   |
| AHQ-5-14-, 5843 - 5874       | K.HVGPVGLSMANAGPNTNGSOFFICTIK.T           | 2820.19665 | 3 | 1.04E-04 | 0.90  | 4.46   | -     | 1108.7  |
| AHQ-5-12, 4616 - 4688        | R.VIPSFMCQAGDFTNHNGTGGK.S                 | 2240.46178 | 2 | 1.12E-06 | 0.84  | 3.39   | -     | 719.2   |
| gl 13562114[ref NP_110400.1] | beta tubulin 1, class VI [Homo sapiens]   |            |   | 5.88E-14 | 18.43 | 210.37 | 59.20 | 50326.6 |
| AHQ-5-7, 7246                | K.AFVHWYITSEGMDINEFGEAENNIHDLVSEYQQQDAK.A | 4364.62586 | 3 | 1.22E-04 | 0.97  | 6.72   | -     | 1086.2  |
| AHQ-5-13, 6272 - 6278        | R.ALSVAELTQQMFADAR.N                      | 1680.90740 | 2 | 1.55E-05 | 0.95  | 4.52   | -     | 1456.7  |
| AHQ-5-3, 6618                | R.ALSVAELTQQMFADAR.N                      | 1680.90740 | 2 | 4.47E-06 | 0.96  | 4.57   | -     | 1517.9  |
| AHQ-5-9, 5551 - 5564         | R.ALSVAELTQQMFADAR.N                      | 1680.90740 | 2 | 4.34E-07 | 0.97  | 5.27   | -     | 1439.1  |
| AHQ-5-7, 6111 - 6186         | R.ALSVAELTQQMFADAR.N                      | 1680.90740 | 2 | 3.74E-07 | 0.98  | 5.69   | -     | 1812.8  |
| AHQ-5-14-, 6097 - 6099       | R.ALSVAELTQQMFADAR.N                      | 1680.90740 | 2 | 2.56E-06 | 0.96  | 5.09   | -     | 1371.3  |
| AHQ-5-4, 6588                | R.ALSVAELTQQMFADAR.N                      | 1680.90740 | 2 | 1.98E-04 | 0.30  | 2.69   | -     | 494.6   |
| AHQ-5-11, 6018 - 6035        | R.ALSVAELTQQMFADAR.N                      | 1680.90740 | 2 | 2.17E-04 | 0.91  | 3.73   | -     | 1241.8  |
| AHQ-5-10, 5747               | R.ALSVAELTQQMFADAR.N                      | 1680.90740 | 2 | 3.00E-05 | 0.87  | 3.61   | -     | 1017.9  |
| AHQ-5-5, 6447                | R.ALSVAELTQQMFADAR.N                      | 1680.90740 | 2 | 8.47E-04 | 0.93  | 3.99   | -     | 1256.2  |
| AHQ-5-2, 6538                | R.ALSVAELTQQMFADAR.N                      | 1680.90740 | 2 | 1.61E-05 | 0.95  | 4.57   | -     | 1413.3  |
| AHQ-5-13-, 4127 - 4128       | R.AVLVLEPDTMDSIR.S                        | 1632.86102 | 2 | 8.16E-04 | 0.72  | 3.27   | -     | 510.2   |
| AHQ-5-3, 5155                | R.AVLVLEPDTMDSIR.S                        | 1616.86162 | 2 | 2.80E-04 | 0.76  | 2.96   | -     | 489.0   |
| AHQ-5-7, 4584 - 4656         | R.AVLVLEPDTMDSIR.S                        | 1616.86162 | 2 | 1.83E-05 | 0.88  | 3.89   | -     | 651.9   |
| AHQ-5-7, 3503 - 3574         | R.EIVHIQIQCGNQIGAK.F                      | 1867.11965 | 2 | 5.28E-04 | 0.92  | 4.33   | -     | 835.1   |
| AHQ-5-8, 3449                | R.EIVHIQIQCGNQIGAK.F                      | 1867.11965 | 2 | 5.18E-05 | 0.90  | 3.91   | -     | 760.2   |
| AHQ-5-7, 3678 - 3747         | R.EIVHIQIQCGNQIGAK.F                      | 1867.11965 | 2 | 3.67E-08 | 0.94  | 4.24   | -     | 1061.3  |
| AHQ-5-9, 2870                | K.EVDQQLSVQTR.N                           | 1416.56231 | 2 | 2.07E-05 | 0.90  | 3.77   | -     | 892.2   |
| AHQ-5-8, 2857 - 2858         | K.EVDQQLSVQTR.N                           | 1416.56231 | 2 | 3.95E-08 | 0.76  | 3.56   | -     | 521.9   |
| AHQ-5-7, 2964 - 2983         | K.EVDQQLSVQTR.N                           | 1416.56231 | 2 | 5.57E-06 | 0.78  | 3.25   | -     | 706.9   |
| AHQ-5-13, 5266               | K.FWEMIGEEHGIDLAGSDR.G                    | 2063.23616 | 3 | 1.19E-06 | 0.92  | 4.25   | -     | 1403.3  |
| AHQ-5-14-, 5105 - 5106       | K.FWEMIGEEHGIDLAGSDR.G                    | 2063.23616 | 2 | 6.77E-14 | 0.99  | 6.47   | -     | 2411.1  |
| AHQ-5-14, 5472 - 5546        | K.FWEMIGEEHGIDLAGSDR.G                    | 2079.23556 | 2 | 7.75E-04 | 0.91  | 4.07   | -     | 779.5   |
| AHQ-5-14, 5940 - 5942        | K.FWEMIGEEHGIDLAGSDR.G                    | 2063.23616 | 2 | 3.12E-12 | 0.99  | 6.24   | -     | 3147.7  |
| AHQ-5-13-, 5169 - 5171       | K.FWEMIGEEHGIDLAGSDR.G                    | 2063.23616 | 2 | 5.88E-14 | 0.98  | 6.21   | -     | 2289.4  |
| AHQ-5-13, 5221 - 5289        | K.FWEMIGEEHGIDLAGSDR.G                    | 2063.23616 | 2 | 6.51E-05 | 0.95  | 4.62   | -     | 1236.0  |
| AHQ-5-7, 5028 - 5071         | K.FWEMIGEEHGIDLAGSDR.G                    | 2063.23616 | 2 | 7.97E-09 | 0.98  | 6.01   | -     | 1657.3  |
| AHQ-5-7, 5146 - 5148         | K.FWEMIGEEHGIDLAGSDR.G                    | 2063.23616 | 2 | 1.23E-07 | 0.97  | 5.03   | -     | 1661.0  |
| AHQ-5-7, 5330                | K.FWEMIGEEHGIDLAGSDR.G                    | 2063.23616 | 2 | 3.16E-07 | 0.94  | 4.55   | -     | 1013.9  |
| AHQ-5-14-, 4567              | K.FWEMIGEEHGIDLAGSDR.G                    | 2079.23556 | 2 | 1.11E-04 | 0.96  | 4.78   | -     | 1194.3  |
| AHQ-5-12, 5204 - 5269        | K.FWEMIGEEHGIDLAGSDR.G                    | 2063.23616 | 2 | 2.88E-05 | 0.93  | 4.37   | -     | 674.0   |
| AHQ-5-13-, 5173              | K.FWEMIGEEHGIDLAGSDR.G                    | 2063.23616 | 3 | 1.11E-08 | 0.95  | 4.46   | -     | 1473.7  |
| AHQ-5-10, 4698 - 4736        | K.FWEMIGEEHGIDLAGSDR.G                    | 2063.23616 | 2 | 9.62E-08 | 0.97  | 5.18   | -     | 1800.5  |
| AHQ-5-7, 6726 - 6794         | K.GHYTEGAEALIENLVVVR.H                    | 2029.23935 | 2 | 8.88E-09 | 0.99  | 7.30   | -     | 2791.4  |
| AHQ-5-7, 6734 - 6804         | K.GHYTEGAEALIENLVVVR.H                    | 2029.23935 | 3 | 3.87E-06 | 0.90  | 4.45   | -     | 1618.0  |
| AHQ-5-11, 6506               | K.GHYTEGAEALIENLVVVR.H                    | 2029.23935 | 3 | 1.28E-04 | 0.71  | 3.35   | -     | 995.6   |
| AHQ-5-11, 6499               | K.GHYTEGAEALIENLVVVR.H                    | 2029.23935 | 2 | 6.88E-11 | 0.98  | 6.53   | -     | 2484.0  |
| AHQ-5-7, 6890                | K.GHYTEGAEALIENLVVVR.H                    | 2029.23935 | 2 | 1.89E-08 | 0.98  | 5.90   | -     | 2108.8  |
| AHQ-5-7, 7075                | K.GHYTEGAEALIENLVVVR.H                    | 2029.23935 | 2 | 2.44E-06 | 0.95  | 5.30   | -     | 1072.3  |
| AHQ-5-13-, 6668              | K.GHYTEGAEALIENLVVVR.H                    | 2029.23935 | 2 | 3.96E-08 | 0.99  | 7.21   | -     | 2719.5  |
| AHQ-5-10, 6196               | K.GHYTEGAEALIENLVVVR.H                    | 2029.23935 | 2 | 1.98E-06 | 0.98  | 6.24   | -     | 1915.4  |
| AHQ-5-12, 6724               | K.GHYTEGAEALIENLVVVR.H                    | 2029.23935 | 3 | 7.58E-04 | 0.89  | 4.13   | -     | 1503.4  |
| AHQ-5-13, 6705               | K.GHYTEGAEALIENLVVVR.H                    | 2029.23935 | 2 | 2.13E-08 | 0.98  | 7.25   | -     | 2212.3  |
| AHQ-5-12, 6716 - 6720        | K.GHYTEGAEALIENLVVVR.H                    | 2029.23935 | 2 | 5.37E-09 | 0.98  | 6.95   | -     | 2172.5  |
| AHQ-5-9, 6078                | K.GHYTEGAEALIENLVVVR.H                    | 2029.23935 | 2 | 3.05E-08 | 0.98  | 6.65   | -     | 2720.8  |
| AHQ-5-4, 7149                | K.GHYTEGAEALIENLVVVR.H                    | 2029.23935 | 2 | 8.00E-13 | 0.99  | 7.05   | -     | 2876.3  |
| AHQ-5-14-, 6569              | K.GHYTEGAEALIENLVVVR.H                    | 2029.23935 | 3 | 2.53E-05 | 0.95  | 4.51   | -     | 1767.9  |
| AHQ-5-3, 7186                | K.GHYTEGAEALIENLVVVR.H                    | 2029.23935 | 2 | 6.75E-06 | 0.98  | 5.99   | -     | 2388.7  |
| AHQ-5-13, 6709               | K.GHYTEGAEALIENLVVVR.H                    | 2029.23935 | 3 | 1.11E-04 | 0.90  | 3.94   | -     | 1749.8  |
| AHQ-5-8, 6521 - 6584         | K.GHYTEGAEALIENLVVVR.H                    | 2029.23935 | 2 | 2.11E-06 | 0.97  | 4.63   | -     | 1999.4  |
| AHQ-5-8, 6545                | K.GHYTEGAEALIENLVVVR.H                    | 2029.23935 | 3 | 3.69E-04 | 0.81  | 3.62   | -     | 1251.7  |
| AHQ-5-14-, 6570              | K.GHYTEGAEALIENLVVVR.H                    | 2029.23935 | 2 | 1.90E-10 | 0.98  | 6.68   | -     | 2358.7  |
| AHQ-5-13-, 6448              | R.GLSM*AATFIGNNTAIQEIFNR.V                | 2285.56551 | 2 | 5.08E-07 | 0.79  | 3.20   | -     | 771.4   |
| AHQ-5-7, 7140 - 7211         | R.GLSM*AATFIGNNTAIQEIFNR.V                | 2269.56611 | 2 | 5.79E-08 | 0.94  | 5.09   | -     | 773.3   |
| AHQ-5-14-, 6319 - 6321       | R.GLSM*AATFIGNNTAIQEIFNR.V                | 2285.56551 | 2 | 8.09E-09 | 0.91  | 4.64   | -     | 705.2   |
| AHQ-5-13, 6500               | R.GLSM*AATFIGNNTAIQEIFNR.V                | 2285.56551 | 2 | 3.45E-07 | 0.91  | 4.66   | -     | 691.0   |
| AHQ-5-9, 5910                | R.GLSM*AATFIGNNTAIQEIFNR.V                | 2285.56551 | 2 | 1.74E-04 | 0.66  | 3.28   | -     | 379.7   |
| AHQ-5-7, 6602 - 6672         | R.GLSM*AATFIGNNTAIQEIFNR.V                | 2285.56551 | 2 | 3.44E-08 | 0.91  | 4.57   | -     | 609.6   |
| AHQ-5-8, 3650                | R.IMNSFVMPSPK.V                           | 1338.62160 | 2 | 1.94E-06 | 0.93  | 3.53   | -     | 999.9   |
| AHQ-5-7, 3692                | R.IMNSFVMPSPK.V                           | 1338.62160 | 2 | 1.77E-06 | 0.92  | 3.54   | -     | 873.6   |
| AHQ-5-7, 3428 - 3515         | R.IMNSFVMPSPK.V                           | 1338.62160 | 1 | 1.47E-05 | 0.37  | 2.76   | -     | 229.6   |
| AHQ-5-7, 3852                | R.IMNSFVMPSPK.V                           | 1338.62160 | 2 | 4.55E-06 | 0.94  | 3.67   | -     | 1320.5  |
| AHQ-5-7, 2752                | R.IMNSFVMPSPK.V                           | 1354.62100 | 2 | 2.85E-05 | 0.75  | 2.88   | -     | 683.0   |
| AHQ-5-7, 3842                | R.IMNSFVMPSPK.V                           | 1338.62160 | 1 | 8.17E-05 | 0.13  | 1.83   | -     | 308.7   |
| AHQ-5-7, 3490 - 3502         | R.IMNSFVMPSPK.V                           | 1338.62160 | 2 | 3.53E-05 | 0.94  | 3.85   | -     | 1285.7  |
| AHQ-5-7, 2895                | R.ISVYYNEAYGR.K                           | 1335.44622 | 1 | 5.80E-09 | 0.29  | 2.09   | -     | 135.4   |
| AHQ-5-14-, 3049              | R.ISVYYNEAYGR.K                           | 1335.44622 | 2 | 4.76E-08 | 0.93  | 3.01   | -     | 1340.1  |
| AHQ-5-13-, 3229              | R.ISVYYNEAYGR.K                           | 1335.44622 | 2 | 8.23E-08 | 0.93  | 3.60   | -     | 1105.7  |
| AHQ-5-7, 2883 - 2899         | R.ISVYYNEAYGR.K                           | 1335.44622 | 2 | 6.98E-07 | 0.93  | 3.66   | -     | 1036.6  |
| AHQ-5-8, 2788                | R.ISVYYNEAYGR.K                           | 1335.44622 | 2 | 3.44E-06 | 0.89  | 2.81   | -     | 1160.2  |
| AHQ-5-7, 4840                | K.LGALFQPDSPFVHGNSSGAGNNWAK.G             | 2388.58260 | 3 | 3.54E-07 | 0.90  | 4.31   | -     | 904.8   |
| AHQ-5-12, 5208               | K.LGALFQPDSPFVHGNSSGAGNNWAK.G             | 2388.58260 | 3 | 7.39E-04 | 0.60  | 3.04   | -     | 596.3   |
| AHQ-5-12, 5142               | K.LGALFQPDSPFVHGNSSGAGNNWAK.G             | 2388.58260 | 2 | 9.02E-04 | 0.64  | 2.77   | -     | 642.3   |
| AHQ-5-7, 4642 - 4643         | K.LGALFQPDSPFVHGNSSGAGNNWAK.G             | 2388.58260 | 3 | 3.04E-09 | 0.90  | 4.54   | -     | 701.8   |
| AHQ-5-11, 5611               | R.LHFFMPGFAPLTAQGSQQYR.A                  | 2297.62284 | 2 | 8.50E-05 | 0.96  | 5.16   | -     | 814.3   |
| AHQ-5-10, 5219               | R.LHFFMPGFAPLTAQGSQQYR.A                  | 2297.62284 | 2 | 1.98E-05 | 0.96  | 4.68   | -     | 986.1   |
| AHQ-5-14-, 5734              | R.LHFFMPGFAPLTAQGSQQYR.A                  | 2297.62284 | 3 | 4.15E-08 | 0.87  | 3.48   | -     | 1252.0  |
| AHQ-5-9, 4954 - 4956         | R.LHFFMPGFAPLTAQGSQQYR.A                  | 2297.62284 | 2 | 5.26E-09 | 0.97  | 5.74   | -     | 907.3   |
| AHQ-5-9, 4426 - 4428         | R.LHFFM*PGFAPLTAQGSQQYR.A                 | 2313.62224 | 2 | 1.93E-05 | 0.97  | 5.28   | -     | 1020.7  |
| AHQ-5-8, 5152                | R.LHFFMPGFAPLTAQGSQQYR.A                  | 2297.62284 | 2 | 1.34E-07 | 0.97  | 5.48   | -     | 757.1   |
| AHQ-5-12, 5805               | R.LHFFMPGFAPLTAQGSQQYR.A                  | 2297.62284 | 2 | 3.44E-08 | 0.97  | 5.76   | -     | 937.4   |
| AHQ-5-7, 5459 - 5530         | R.LHFFMPGFAPLTAQGSQQYR.A                  | 2297.62284 | 3 | 1.42E-04 | 0.98  | 6.08   | -     | 2181.9  |
| AHQ-5-7, 5455 - 5527         | R.LHFFMPGFAPLTAQGSQQYR.A                  | 2297.62284 | 2 | 1.46E-04 | 0.96  | 5.44   | -     | 777.2   |
| AHQ-5-6, 5744                | R.LHFFMPGFAPLTAQGSQQYR.A                  | 2297.62284 | 2 | 2.54E-07 | 0.95  | 4.79   | -     | 816.6   |
| AHQ-5-5, 5762                | R.LHFFMPGFAPLTAQGSQQYR.A                  | 2297.62284 | 2 | 5.92E-04 | 0.93  | 4.57   | -     | 719.6   |
| AHQ-5-11, 4970               | R.LHFFM*PGFAPLTAQGSQQYR.A                 | 2313.62224 | 3 | 3.78E-05 | 0.96  | 5.33   | -     | 1605.7  |
| AHQ-5-8, 7189 - 7197         | K.LLTPPTYGDLNHLVSLTMSGITSLR.F             | 2693.06979 | 2 | 6.64E-07 | 0.94  | 5.06   | -     | 730.6   |
| AHQ-5-7, 6819                | K.LLTPPTYGDLNHLVSLTMSGITSLR.F             | 2693.06979 | 3 | 1.04E-07 | 0.88  | 4.21   | -     | 869.5   |
| AHQ-5-7, 6839                | K.LLTPPTYGDLNHLVSLTMSGITSLR.F             | 2709.06919 | 3 | 6.20E-05 | 0.90  | 4.50   | -     | 890.0   |
| AHQ-5-14-, 6475 - 6554       | K.LLTPPTYGDLNHLVSLTMSGITSLR.F             | 2709.06919 | 3 | 9.29E-06 | 0.92  | 4.71   | -     | 924.8   |
| AHQ-5-3, 7475 - 7493         | K.LLTPPTYGDLNHLVSLTMSGITSLR.F             | 2693.06979 | 2 | 1.41E-06 | 0.92  | 5.19   | -     | 598.8   |
| AHQ-5-10, 6518               | K.LLTPPTYGDLNHLVSLTMSGITSLR.F             | 2693.06979 | 2 | 6.67E-06 | 0.91  | 4.35   | -     | 716.8   |
| AHQ-5-7, 7203 - 7247         | K.LLTPPTYGDLNHLVSLTMSGITSLR.F             | 2693.06979 | 2 | 2.93E-05 | 0.93  | 5.08   | -     | 712.0   |
| AHQ-5-7, 7270 - 7272         | K.LLTPPTYGDLNHLVSLTMSGITSLR.F             | 2693.06979 | 3 | 5.81E-07 | 0.93  | 4.86   | -     | 1184.3  |
| AHQ-5-7, 7326                | K.LLTPPTYGDLNHLVSLTMSGITSLR.F             | 2693.06979 | 2 | 7.33E-05 | 0.85  | 3.54   | -     | 703.7   |
| AHQ-5-9, 6460                | K.LLTPPTYGDLNHLVSLTMSGITSLR.F             | 2693.06979 | 3 | 2.18E-07 | 0.85  | 4.59   | -     | 767.5   |
| AHQ-5-9, 6436 - 6486         | K.LLTPPTYGDLNHLVSLTMSGITSLR.F             | 2693.06979 | 2 | 2.87E-09 | 0.95  | 5.08   | -     | 837.0   |
| AHQ-5-9, 6074                | K.LLTPPTYGDLNHLVSLTMSGITSLR.F             | 2693.06979 | 3 | 1.12E-07 | 0.90  | 4.15   | -     | 928.9   |
| AHQ-5-8, 7192                | K.LLTPPTYGDLNHLVSLTMSGITSLR.F             | 2693.06979 | 3 | 3.12E-07 | 0.79  | 3.84   | -     | 815.0   |
| AHQ-5-8, 6660                | K.LLTPPTYGDLNHLVSLTMSGITSLR.F             | 2693.06979 | 3 | 1.02E-08 | 0.87  | 4.17   | -     | 800.9   |
| AHQ-5-8, 6661 - 6662         | K.LLTPPTYGDLNHLVSLTMSGITSLR.F             | 2693.06979 | 2 | 2.69E-09 | 0.95  | 5.01   | -     | 1043.8  |
| AHQ-5-3, 7494                | K.LLTPPTYGDLNHLVSLTMSGITSLR.F             | 2693.06979 | 3 | 1.52E-05 | 0.88  | 4.41   | -     | 823.1   |

|                            |                                                                         |            |   |          |       |        |       |         |
|----------------------------|-------------------------------------------------------------------------|------------|---|----------|-------|--------|-------|---------|
| AHQ-5-11, 5720             | R.NSSCFVEWIPNNVK.V                                                      | 1695.87718 | 2 | 1.98E-08 | 0.82  | 3.07   | -     | 802.3   |
| AHQ-5-11, 5207             | R.NSSCFVEWIPNNVK.V                                                      | 1695.87718 | 2 | 1.86E-05 | 0.33  | 2.53   | -     | 309.7   |
| AHQ-5-12, 5314             | R.NSSCFVEWIPNNVK.V                                                      | 1695.87718 | 2 | 1.50E-04 | 0.73  | 3.05   | -     | 487.4   |
| AHQ-5-7, 5010 - 5031       | R.YLTVACIFR.F                                                           | 1144.36822 | 2 | 1.11E-06 | 0.92  | 3.57   | -     | 844.9   |
| gi 4502549 ref NP_001734.1 | calmodulin 2 (phosphorylase kinase, delta); phosphorylase kinase delta  |            |   | 6.27E-14 | 4.02  | 50.23  | 47.00 | 16837.5 |
| AHQ-5-12, 3493 - 3497      | K.DTDSSEIEIRAFR.V                                                       | 1597.62234 | 2 | 5.95E-04 | 0.47  | 2.54   | -     | 447.4   |
| AHQ-5-12, 5920 - 5938      | R.EADIDGGQVNYEEFVQM*MTAK                                                | 2507.69302 | 3 | 9.52E-06 | 0.91  | 4.32   | -     | 1937.5  |
| AHQ-5-12, 4088 - 4156      | K.EAFSLFDKGGDGTITTK.E                                                   | 1845.98441 | 2 | 4.91E-05 | 0.93  | 4.11   | -     | 997.2   |
| AHQ-5-11, 3984 - 3990      | K.EAFSLFDKGGDGTITTK.E                                                   | 1845.98441 | 2 | 4.53E-06 | 0.95  | 4.55   | -     | 1241.4  |
| AHQ-5-12, 3192             | K.MKDTDSSEIEIRAFR.V                                                     | 1856.99233 | 2 | 1.49E-10 | 0.72  | 3.25   | -     | 463.3   |
| AHQ-5-12, 3892 - 3969      | R.VFDKDGNGYISAAELR.H                                                    | 1755.90933 | 2 | 3.15E-11 | 0.96  | 4.61   | -     | 1481.0  |
| AHQ-5-12, 3905             | R.VFDKDGNGYISAAELR.H                                                    | 1755.90933 | 3 | 3.18E-05 | 0.95  | 3.89   | -     | 2135.2  |
| AHQ-5-12, 3760 - 3824      | R.VFDKDGNGYISAAELR.H                                                    | 1755.90933 | 2 | 6.27E-14 | 0.96  | 4.62   | -     | 1257.9  |
| AHQ-5-12, 3886             | R.VFDKDGNGYISAAELR.H                                                    | 1755.90933 | 2 | 1.25E-08 | 0.93  | 3.38   | -     | 1765.5  |
| AHQ-5-11, 3731 - 3756      | R.VFDKDGNGYISAAELR.H                                                    | 1755.90933 | 2 | 6.88E-12 | 0.94  | 4.09   | -     | 1150.9  |
| AHQ-5-13, 3946             | R.VFDKDGNGYISAAELR.H                                                    | 1755.90933 | 2 | 4.28E-08 | 0.95  | 4.43   | -     | 1203.4  |
| AHQ-5-14, 4608             | R.VFDKDGNGYISAAELR.H                                                    | 1755.90933 | 2 | 2.80E-09 | 0.93  | 3.52   | -     | 1174.1  |
| AHQ-5-13-, 3852            | R.VFDKDGNGYISAAELR.H                                                    | 1755.90933 | 2 | 6.32E-11 | 0.95  | 4.30   | -     | 1379.1  |
| gi 4501881 ref NP_001091.1 | alpha 1 actin precursor; alpha skeletal muscle actin [Homo sapiens] [MA |            |   | 6.88E-14 | 15.49 | 200.30 | 44.30 | 42050.8 |
| AHQ-5-4, 1772              | K.AGFAGDDAPR.A                                                          | 977.01283  | 2 | 9.67E-06 | 0.87  | 3.05   | -     | 943.0   |
| AHQ-5-12, 1904 - 1977      | K.AGFAGDDAPR.A                                                          | 977.01283  | 2 | 2.01E-04 | 0.68  | 2.71   | -     | 838.5   |
| AHQ-5-8, 1589 - 1652       | K.AGFAGDDAPR.A                                                          | 977.01283  | 2 | 9.88E-04 | 0.90  | 2.80   | -     | 1444.7  |
| AHQ-5-8, 1712 - 1773       | K.AGFAGDDAPR.A                                                          | 977.01283  | 2 | 6.90E-05 | 0.88  | 2.73   | -     | 1050.5  |
| AHQ-5-13, 2095 - 2154      | K.AGFAGDDAPR.A                                                          | 977.01283  | 2 | 5.48E-05 | 0.88  | 3.31   | -     | 1001.3  |
| AHQ-5-8, 2908 - 2986       | R.AVFPISVIGR.P                                                          | 946.12815  | 2 | 9.50E-04 | 0.78  | 2.51   | -     | 711.8   |
| AHQ-5-11, 3022 - 3096      | R.AVFPISVIGRPR.H                                                        | 1199.43018 | 2 | 1.77E-04 | 0.39  | 2.53   | -     | 387.4   |
| AHQ-5-8, 2572              | R.AVFPISVIGRPR.H                                                        | 1199.43018 | 2 | 5.96E-05 | 0.86  | 3.01   | -     | 810.7   |
| AHQ-5-9, 2646 - 2702       | R.AVFPISVIGRPR.H                                                        | 1199.43018 | 2 | 1.06E-05 | 0.79  | 3.01   | -     | 751.3   |
| AHQ-5-10, 4016             | R.DLTDYLMK.I                                                            | 999.16326  | 2 | 1.51E-04 | 0.81  | 3.06   | -     | 458.6   |
| AHQ-5-10, 4336 - 4344      | R.DLTDYLMK.I                                                            | 999.16326  | 1 | 7.02E-04 | 0.30  | 2.12   | -     | 348.2   |
| AHQ-5-7, 4323              | R.DLTDYLMK.I                                                            | 999.16326  | 1 | 9.28E-04 | 0.21  | 2.45   | -     | 218.0   |
| AHQ-5-1, 3904              | R.DLTDYLMK.I                                                            | 1015.16266 | 2 | 2.14E-04 | 0.79  | 2.56   | -     | 644.4   |
| AHQ-5-8, 3508 - 3576       | R.DLTDYLMK.I                                                            | 1015.16266 | 1 | 3.68E-04 | 0.27  | 1.81   | -     | 123.9   |
| AHQ-5-14-, 4290            | R.DLTDYLMK.I                                                            | 999.16326  | 1 | 5.23E-04 | 0.26  | 1.91   | -     | 511.3   |
| AHQ-5-14, 5217             | R.DLTDYLMK.I                                                            | 999.16326  | 1 | 6.38E-04 | 0.21  | 2.37   | -     | 221.9   |
| AHQ-5-12, 3693             | R.DLTDYLMK.I                                                            | 1015.16266 | 1 | 8.37E-04 | 0.23  | 2.16   | -     | 132.4   |
| AHQ-5-13, 4444             | R.DLTDYLMK.I                                                            | 999.16326  | 1 | 4.37E-04 | 0.46  | 2.10   | -     | 604.5   |
| AHQ-5-5, 4481              | R.DLTDYLMK.I                                                            | 999.16326  | 1 | 1.62E-05 | 0.47  | 2.22   | -     | 653.0   |
| AHQ-5-14-, 4833 - 4838     | K.DLYANNVMSGGTTM*YPIADR.M                                               | 2263.49384 | 2 | 2.38E-04 | 0.56  | 3.15   | -     | 527.7   |
| AHQ-5-12, 1552 - 1608      | K.DSYVGEAQSKR.R                                                         | 1199.20634 | 2 | 8.93E-05 | 0.79  | 3.01   | -     | 446.9   |
| AHQ-5-8, 1430              | K.DSYVGEAQSKR.G                                                         | 1355.39270 | 2 | 4.43E-09 | 0.79  | 2.90   | -     | 669.1   |
| AHQ-5-14-, 2770 - 2897     | K.EITALAPSTMK.I                                                         | 1162.38206 | 1 | 1.80E-05 | 0.55  | 2.70   | -     | 281.9   |
| AHQ-5-14, 3621 - 3792      | K.EITALAPSTMK.I                                                         | 1162.38206 | 1 | 6.54E-04 | 0.64  | 3.22   | -     | 259.0   |
| AHQ-5-14-, 2765 - 2837     | K.EITALAPSTMK.I                                                         | 1162.38206 | 2 | 4.70E-04 | 0.84  | 3.59   | -     | 468.1   |
| AHQ-5-13, 2526 - 2589      | K.EITALAPSTMK.I                                                         | 1178.38146 | 2 | 3.93E-05 | 0.84  | 2.88   | -     | 778.1   |
| AHQ-5-8, 1962 - 2037       | K.EITALAPSTMK.I                                                         | 1178.38146 | 2 | 2.43E-04 | 0.80  | 3.00   | -     | 694.7   |
| AHQ-5-14-, 2301 - 2374     | K.EITALAPSTMK.I                                                         | 1178.38146 | 2 | 1.12E-04 | 0.86  | 3.23   | -     | 705.7   |
| AHQ-5-13-, 2355 - 2432     | K.EITALAPSTMK.I                                                         | 1178.38146 | 2 | 4.03E-04 | 0.87  | 3.69   | -     | 636.8   |
| AHQ-5-13-, 2868 - 2932     | K.EITALAPSTMK.I                                                         | 1162.38206 | 2 | 2.13E-04 | 0.86  | 3.44   | -     | 594.0   |
| AHQ-5-8, 2308 - 2377       | K.EITALAPSTMK.I                                                         | 1162.38206 | 2 | 3.87E-05 | 0.79  | 2.96   | -     | 538.1   |
| AHQ-5-13, 3034 - 3038      | K.EITALAPSTMK.I                                                         | 1162.38206 | 2 | 3.34E-04 | 0.78  | 2.89   | -     | 596.3   |
| AHQ-5-13-, 2911 - 2913     | K.EITALAPSTMK.I                                                         | 1162.38206 | 1 | 2.21E-08 | 0.62  | 2.70   | -     | 362.1   |
| AHQ-5-2, 2835              | K.EITALAPSTMK.I                                                         | 1162.38206 | 1 | 9.04E-05 | 0.31  | 1.87   | -     | 346.2   |
| AHQ-5-6, 2741              | K.EITALAPSTMK.I                                                         | 1162.38206 | 1 | 2.19E-04 | 0.74  | 3.21   | -     | 324.0   |
| AHQ-5-13-, 2921 - 2929     | K.EITALAPSTMK.I                                                         | 1178.38146 | 2 | 4.97E-04 | 0.59  | 3.00   | -     | 392.1   |
| AHQ-5-9, 2570              | K.EITALAPSTMK.I                                                         | 1162.38206 | 1 | 1.02E-06 | 0.60  | 2.90   | -     | 331.5   |
| AHQ-5-8, 7076              | K.EKLYVALDFENEM*ATAASSSSLEK.S                                           | 2812.07683 | 3 | 9.44E-07 | 0.78  | 3.62   | -     | 709.9   |
| AHQ-5-8, 7394 - 7414       | K.EKLYVALDFENEM*ATAASSSSLEK.S                                           | 2812.07683 | 2 | 4.42E-05 | 0.79  | 3.59   | -     | 401.7   |
| AHQ-5-1, 7225              | K.EKLYVALDFENEM*ATAASSSSLEK.S                                           | 2812.07683 | 3 | 1.42E-06 | 0.79  | 3.41   | -     | 832.9   |
| AHQ-5-6, 2653 - 2664       | K.IWHHTFYNELR.V                                                         | 1516.68695 | 2 | 4.14E-06 | 0.74  | 3.33   | -     | 771.4   |
| AHQ-5-9, 2502 - 2558       | K.IWHHTFYNELR.V                                                         | 1516.68695 | 2 | 8.44E-06 | 0.85  | 3.58   | -     | 972.1   |
| AHQ-5-3, 2901 - 2969       | K.IWHHTFYNELR.V                                                         | 1516.68695 | 2 | 1.19E-05 | 0.70  | 3.20   | -     | 700.6   |
| AHQ-5-9, 2511 - 2519       | K.IWHHTFYNELR.V                                                         | 1516.68695 | 3 | 2.20E-05 | 0.93  | 4.31   | -     | 1783.4  |
| AHQ-5-12, 2849 - 2920      | K.IWHHTFYNELR.V                                                         | 1516.68695 | 2 | 2.70E-07 | 0.90  | 3.72   | -     | 1110.1  |
| AHQ-5-12, 2852 - 2869      | K.IWHHTFYNELR.V                                                         | 1516.68695 | 3 | 6.02E-05 | 0.96  | 4.69   | -     | 1410.0  |
| AHQ-5-10, 2568 - 2618      | K.IWHHTFYNELR.V                                                         | 1516.68695 | 2 | 3.27E-04 | 0.81  | 3.05   | -     | 611.5   |
| AHQ-5-5, 2617 - 2625       | K.IWHHTFYNELR.V                                                         | 1516.68695 | 2 | 3.52E-08 | 0.80  | 3.26   | -     | 832.9   |
| AHQ-5-8, 2388 - 2468       | K.IWHHTFYNELR.V                                                         | 1516.68695 | 2 | 7.45E-04 | 0.86  | 2.99   | -     | 864.8   |
| AHQ-5-8, 2389 - 2457       | K.IWHHTFYNELR.V                                                         | 1516.68695 | 3 | 1.54E-05 | 0.95  | 4.49   | -     | 2105.3  |
| AHQ-5-12, 3013             | K.IWHHTFYNELR.V                                                         | 1516.68695 | 2 | 6.03E-08 | 0.93  | 3.79   | -     | 1057.7  |
| AHQ-5-8, 2580 - 2582       | K.IWHHTFYNELR.V                                                         | 1516.68695 | 3 | 3.38E-04 | 0.95  | 4.18   | -     | 1789.3  |
| AHQ-5-8, 2749 - 2829       | K.IWHHTFYNELR.V                                                         | 1516.68695 | 2 | 3.70E-07 | 0.91  | 3.37   | -     | 883.3   |
| AHQ-5-13, 3162             | K.IWHHTFYNELR.V                                                         | 1516.68695 | 3 | 3.94E-05 | 0.94  | 4.57   | -     | 1879.3  |
| AHQ-5-1, 3297              | K.IWHHTFYNELR.V                                                         | 1516.68695 | 2 | 1.40E-06 | 0.72  | 2.78   | -     | 653.7   |
| AHQ-5-8, 2252 - 2330       | K.IWHHTFYNELR.V                                                         | 1516.68695 | 2 | 2.63E-06 | 0.73  | 3.28   | -     | 702.2   |
| AHQ-5-13-, 3024 - 3029     | K.IWHHTFYNELR.V                                                         | 1516.68695 | 2 | 1.90E-08 | 0.77  | 3.29   | -     | 792.9   |
| AHQ-5-1, 3085              | K.IWHHTFYNELR.V                                                         | 1516.68695 | 2 | 1.47E-06 | 0.66  | 2.83   | -     | 591.5   |
| AHQ-5-8, 4929 - 4966       | R.LDLAGRDLTDYLMK.I                                                      | 1624.88375 | 2 | 3.26E-04 | 0.76  | 3.33   | -     | 696.4   |
| AHQ-5-8, 4802 - 4873       | R.LDLAGRDLTDYLMK.I                                                      | 1624.88375 | 2 | 4.13E-06 | 0.72  | 3.58   | -     | 367.4   |
| AHQ-5-1, 4791              | K.SYELPDGGVITIGNER.F                                                    | 1791.93998 | 2 | 8.46E-09 | 0.90  | 3.43   | -     | 907.4   |
| AHQ-5-8, 4252 - 4333       | K.SYELPDGGVITIGNER.F                                                    | 1791.93998 | 2 | 1.85E-13 | 0.97  | 5.30   | -     | 1281.7  |
| AHQ-5-8, 4396 - 4468       | K.SYELPDGGVITIGNER.F                                                    | 1791.93998 | 2 | 1.11E-12 | 0.96  | 5.34   | -     | 891.7   |
| AHQ-5-8, 4412 - 4481       | K.SYELPDGGVITIGNER.F                                                    | 1791.93998 | 2 | 6.88E-14 | 0.95  | 4.41   | -     | 1041.0  |
| AHQ-5-8, 4148 - 4222       | K.SYELPDGGVITIGNER.F                                                    | 1791.93998 | 2 | 1.36E-10 | 0.97  | 5.39   | -     | 1360.5  |
| AHQ-5-8, 4548 - 4624       | K.SYELPDGGVITIGNER.F                                                    | 1791.93998 | 2 | 7.81E-11 | 0.96  | 4.71   | -     | 1233.1  |
| AHQ-5-1, 4883 - 4955       | K.SYELPDGGVITIGNER.F                                                    | 1791.93998 | 2 | 1.77E-11 | 0.95  | 4.60   | -     | 978.6   |
| AHQ-5-8, 4670 - 4744       | K.SYELPDGGVITIGNER.F                                                    | 1791.93998 | 2 | 1.41E-08 | 0.96  | 4.72   | -     | 1164.7  |
| AHQ-5-1, 5160 - 5175       | K.SYELPDGGVITIGNER.F                                                    | 1791.93998 | 2 | 1.69E-10 | 0.95  | 4.68   | -     | 1024.0  |
| AHQ-5-1, 5335 - 5404       | K.SYELPDGGVITIGNER.F                                                    | 1791.93998 | 2 | 3.26E-08 | 0.96  | 4.82   | -     | 1037.3  |
| AHQ-5-8, 4545 - 4613       | K.SYELPDGGVITIGNER.F                                                    | 1791.93998 | 3 | 3.07E-08 | 0.94  | 4.33   | -     | 1459.6  |
| AHQ-5-8, 4808 - 4884       | K.SYELPDGGVITIGNER.F                                                    | 1791.93998 | 2 | 8.87E-13 | 0.95  | 4.69   | -     | 977.1   |
| AHQ-5-13-, 4997 - 5059     | K.SYELPDGGVITIGNER.F                                                    | 1791.93998 | 2 | 5.76E-13 | 0.96  | 4.84   | -     | 1033.4  |
| AHQ-5-8, 4998              | K.SYELPDGGVITIGNER.F                                                    | 1791.93998 | 3 | 3.64E-09 | 0.92  | 4.31   | -     | 1448.4  |
| AHQ-5-13-, 4835 - 4873     | K.SYELPDGGVITIGNER.F                                                    | 1791.93998 | 2 | 1.56E-11 | 0.96  | 5.04   | -     | 1155.4  |
| AHQ-5-13-, 4568            | K.SYELPDGGVITIGNER.F                                                    | 1791.93998 | 2 | 9.57E-06 | 0.90  | 3.71   | -     | 861.1   |
| AHQ-5-13-, 4453            | K.SYELPDGGVITIGNER.F                                                    | 1791.93998 | 2 | 8.27E-08 | 0.92  | 3.99   | -     | 805.5   |
| AHQ-5-2, 4729              | K.SYELPDGGVITIGNER.F                                                    | 1791.93998 | 2 | 1.50E-11 | 0.94  | 4.37   | -     | 917.3   |
| AHQ-5-7, 4722              | K.SYELPDGGVITIGNER.F                                                    | 1791.93998 | 2 | 2.46E-07 | 0.96  | 4.84   | -     | 905.2   |
| AHQ-5-6, 5160              | K.SYELPDGGVITIGNER.F                                                    | 1791.93998 | 2 | 1.55E-07 | 0.84  | 3.14   | -     | 691.1   |
| AHQ-5-6, 5076              | K.SYELPDGGVITIGNER.F                                                    | 1791.93998 | 2 | 3.83E-06 | 0.93  | 4.14   | -     | 793.4   |
| AHQ-5-6, 4862              | K.SYELPDGGVITIGNER.F                                                    | 1791.93998 | 2 | 2.56E-07 | 0.90  | 3.88   | -     | 803.6   |
| AHQ-5-2, 5089              | K.SYELPDGGVITIGNER.F                                                    | 1791.93998 | 2 | 5.89E-06 | 0.87  | 3.68   | -     | 757.3   |
| AHQ-5-2, 5295              | K.SYELPDGGVITIGNER.F                                                    | 1791.93998 | 2 | 2.94E-07 | 0.93  | 3.87   | -     | 934.6   |
| AHQ-5-9, 3958 - 4027       | K.SYELPDGGVITIGNER.F                                                    | 1791.93998 | 2 | 1.22E-11 | 0.94  | 4.55   | -     | 1046.6  |
| AHQ-5-3, 4761 - 4765       | K.SYELPDGGVITIGNER.F                                                    | 1791.93998 | 2 | 5.35E-07 | 0.93  | 4.05   | -     | 847.9   |
| AHQ-5-9, 4191              | K.SYELPDGGVITIGNER.F                                                    | 1791.93998 | 2 | 9.12E-10 | 0.93  | 3.94   | -     | 1046.7  |
| AHQ-5-9, 4300 - 4358       | K.SYELPDGGVITIGNER.F                                                    | 1791.93998 | 2 | 1.00E-11 | 0.95  | 4.91   | -     | 880.7   |

|                             |                                                                        |            |   |          |       |        |       |         |
|-----------------------------|------------------------------------------------------------------------|------------|---|----------|-------|--------|-------|---------|
| AHQ-5-3, 4909               | K.SYELPDGQVITIGNER.F                                                   | 1791.93998 | 2 | 1.83E-06 | 0.92  | 3.39   | -     | 1107.8  |
| AHQ-5-9, 4498 - 4574        | K.SYELPDGQVITIGNER.F                                                   | 1791.93998 | 2 | 5.22E-07 | 0.94  | 4.16   | -     | 951.0   |
| AHQ-5-6, 4500               | K.SYELPDGQVITIGNER.F                                                   | 1791.93998 | 2 | 4.62E-08 | 0.90  | 3.58   | -     | 770.7   |
| AHQ-5-13, 5186              | K.SYELPDGQVITIGNER.F                                                   | 1791.93998 | 2 | 4.74E-06 | 0.90  | 3.27   | -     | 1121.4  |
| AHQ-5-10, 4094 - 4171       | K.SYELPDGQVITIGNER.F                                                   | 1791.93998 | 2 | 5.00E-13 | 0.92  | 3.97   | -     | 852.2   |
| AHQ-5-10, 4230 - 4266       | K.SYELPDGQVITIGNER.F                                                   | 1791.93998 | 2 | 9.07E-11 | 0.93  | 3.91   | -     | 917.8   |
| AHQ-5-5, 5227 - 5246        | K.SYELPDGQVITIGNER.F                                                   | 1791.93998 | 2 | 9.72E-04 | 0.65  | 2.63   | -     | 361.0   |
| AHQ-5-10, 4354 - 4416       | K.SYELPDGQVITIGNER.F                                                   | 1791.93998 | 2 | 4.66E-11 | 0.96  | 4.61   | -     | 1293.1  |
| AHQ-5-10, 4460 - 4519       | K.SYELPDGQVITIGNER.F                                                   | 1791.93998 | 2 | 3.29E-05 | 0.82  | 3.30   | -     | 660.3   |
| AHQ-5-10, 4603 - 4666       | K.SYELPDGQVITIGNER.F                                                   | 1791.93998 | 2 | 1.76E-11 | 0.97  | 4.80   | -     | 1946.4  |
| AHQ-5-5, 4897 - 4965        | K.SYELPDGQVITIGNER.F                                                   | 1791.93998 | 2 | 2.26E-08 | 0.94  | 4.20   | -     | 1089.2  |
| AHQ-5-11, 4315              | K.SYELPDGQVITIGNER.F                                                   | 1791.93998 | 2 | 2.84E-04 | 0.86  | 3.49   | -     | 581.7   |
| AHQ-5-11, 4399 - 4402       | K.SYELPDGQVITIGNER.F                                                   | 1791.93998 | 2 | 8.74E-13 | 0.97  | 5.22   | -     | 1163.5  |
| AHQ-5-11, 4538              | K.SYELPDGQVITIGNER.F                                                   | 1791.93998 | 2 | 3.47E-07 | 0.83  | 3.14   | -     | 602.5   |
| AHQ-5-11, 4916 - 4978       | K.SYELPDGQVITIGNER.F                                                   | 1791.93998 | 2 | 6.39E-08 | 0.95  | 4.13   | -     | 1105.2  |
| AHQ-5-5, 4565               | K.SYELPDGQVITIGNER.F                                                   | 1791.93998 | 2 | 1.57E-11 | 0.90  | 3.46   | -     | 840.5   |
| AHQ-5-5, 4482               | K.SYELPDGQVITIGNER.F                                                   | 1791.93998 | 2 | 1.67E-05 | 0.80  | 3.13   | -     | 586.2   |
| AHQ-5-13, 5101 - 5164       | K.SYELPDGQVITIGNER.F                                                   | 1791.93998 | 2 | 3.17E-13 | 0.96  | 4.79   | -     | 1098.7  |
| AHQ-5-13, 4932 - 4996       | K.SYELPDGQVITIGNER.F                                                   | 1791.93998 | 2 | 2.28E-07 | 0.96  | 5.06   | -     | 983.3   |
| AHQ-5-4, 5354 - 5369        | K.SYELPDGQVITIGNER.F                                                   | 1791.93998 | 2 | 2.60E-11 | 0.96  | 4.80   | -     | 1094.4  |
| AHQ-5-13, 4657              | K.SYELPDGQVITIGNER.F                                                   | 1791.93998 | 2 | 2.18E-06 | 0.76  | 2.95   | -     | 528.7   |
| AHQ-5-13, 4546              | K.SYELPDGQVITIGNER.F                                                   | 1791.93998 | 2 | 2.52E-07 | 0.92  | 3.56   | -     | 825.9   |
| AHQ-5-3, 5147               | K.SYELPDGQVITIGNER.F                                                   | 1791.93998 | 2 | 3.93E-06 | 0.80  | 2.97   | -     | 649.7   |
| AHQ-5-12, 4537              | K.SYELPDGQVITIGNER.F                                                   | 1791.93998 | 2 | 2.54E-12 | 0.94  | 4.28   | -     | 827.0   |
| AHQ-5-3, 5330 - 5397        | K.SYELPDGQVITIGNER.F                                                   | 1791.93998 | 2 | 2.63E-06 | 0.88  | 3.62   | -     | 633.1   |
| AHQ-5-4, 4617               | K.SYELPDGQVITIGNER.F                                                   | 1791.93998 | 2 | 1.84E-08 | 0.80  | 3.07   | -     | 845.3   |
| AHQ-5-12, 4909 - 4940       | K.SYELPDGQVITIGNER.F                                                   | 1791.93998 | 2 | 1.34E-05 | 0.93  | 3.92   | -     | 881.2   |
| AHQ-5-4, 4728               | K.SYELPDGQVITIGNER.F                                                   | 1791.93998 | 2 | 4.73E-10 | 0.94  | 4.06   | -     | 914.6   |
| AHQ-5-12, 5085 - 5148       | K.SYELPDGQVITIGNER.F                                                   | 1791.93998 | 2 | 5.73E-05 | 0.86  | 3.66   | -     | 762.9   |
| AHQ-5-8, 4733               | K.SYELPDGQVITIGNER.F.R                                                 | 2095.30102 | 2 | 4.46E-05 | 0.76  | 3.79   | -     | 277.5   |
| AHQ-5-5, 3653               | R.VAPEEHPTLLTEAPLNPK.A                                                 | 1957.21627 | 2 | 8.87E-04 | 0.81  | 3.39   | -     | 500.3   |
| AHQ-5-3, 3942 - 3945        | R.VAPEEHPTLLTEAPLNPK.A                                                 | 1957.21627 | 3 | 2.73E-04 | 0.61  | 3.17   | -     | 747.6   |
| AHQ-5-12, 4566              | K.YPIEHGITTWDDMEK.I                                                    | 1962.17174 | 2 | 1.32E-08 | 0.86  | 3.90   | -     | 656.0   |
| AHQ-5-12, 4412              | K.YPIEHGITTWDDMEK.I                                                    | 1962.17174 | 2 | 3.85E-06 | 0.87  | 3.99   | -     | 772.6   |
| AHQ-5-13, 4474              | K.YPIEHGITTWDDMEK.I                                                    | 1962.17174 | 3 | 8.75E-04 | 0.87  | 3.81   | -     | 1128.2  |
| AHQ-5-12, 3973 - 4053       | K.YPIEHGITTWDDMEK.I                                                    | 1978.17114 | 2 | 6.26E-04 | 0.86  | 4.09   | -     | 611.5   |
| AHQ-5-13, 4649              | K.YPIEHGITTWDDMEK.I                                                    | 1962.17174 | 2 | 1.06E-06 | 0.83  | 3.20   | -     | 597.8   |
| AHQ-5-4, 4577               | K.YPIEHGITTWDDMEK.I                                                    | 1962.17174 | 2 | 5.82E-05 | 0.83  | 3.63   | -     | 713.9   |
| AHQ-5-12, 4701              | K.YPIEHGITTWDDMEK.I                                                    | 1962.17174 | 2 | 5.90E-04 | 0.62  | 2.84   | -     | 706.9   |
| AHQ-5-5, 4347               | K.YPIEHGITTWDDMEK.I                                                    | 1962.17174 | 2 | 2.42E-04 | 0.86  | 4.21   | -     | 639.8   |
| AHQ-5-6, 4261               | K.YPIEHGITTWDDMEK.I                                                    | 1962.17174 | 2 | 7.40E-05 | 0.85  | 3.58   | -     | 708.7   |
| AHQ-5-9, 4439               | K.YPIEHGITTWDDMEK.I                                                    | 1962.17174 | 2 | 1.06E-08 | 0.85  | 3.82   | -     | 554.9   |
| AHQ-5-9, 4026 - 4099        | K.YPIEHGITTWDDMEK.I                                                    | 1962.17174 | 2 | 8.91E-06 | 0.86  | 4.25   | -     | 565.0   |
| AHQ-5-3, 4649 - 4651        | K.YPIEHGITTWDDMEK.I                                                    | 1962.17174 | 2 | 7.67E-04 | 0.85  | 3.97   | -     | 690.9   |
| AHQ-5-4, 4768               | K.YPIEHGITTWDDMEK.I                                                    | 1962.17174 | 2 | 2.38E-04 | 0.79  | 3.79   | -     | 644.0   |
| AHQ-5-9, 3818 - 3887        | K.YPIEHGITTWDDMEK.I                                                    | 1962.17174 | 2 | 3.67E-04 | 0.93  | 4.55   | -     | 766.2   |
| AHQ-5-9, 3632               | K.YPIEHGITTWDDMEK.I                                                    | 1962.17174 | 2 | 5.69E-04 | 0.79  | 3.62   | -     | 669.4   |
| AHQ-5-8, 3814 - 3885        | K.YPIEHGITTWDDMEK.I                                                    | 1962.17174 | 3 | 9.77E-04 | 0.80  | 4.09   | -     | 712.8   |
| AHQ-5-8, 3956 - 4032        | K.YPIEHGITTWDDMEK.I                                                    | 1962.17174 | 3 | 8.62E-06 | 0.87  | 4.01   | -     | 1108.4  |
| AHQ-5-8, 4188 - 4192        | K.YPIEHGITTWDDMEK.I                                                    | 1962.17174 | 2 | 6.32E-06 | 0.82  | 3.97   | -     | 447.3   |
| AHQ-5-8, 4590               | K.YPIEHGITTWDDMEK.I                                                    | 1962.17174 | 2 | 2.42E-05 | 0.80  | 3.64   | -     | 654.1   |
| AHQ-5-8, 4052 - 4121        | K.YPIEHGITTWDDMEK.I                                                    | 1962.17174 | 2 | 4.83E-04 | 0.86  | 3.99   | -     | 832.4   |
| AHQ-5-12, 5050              | K.YPIEHGITTWDDMEK.I                                                    | 1962.17174 | 2 | 4.53E-08 | 0.83  | 3.90   | -     | 533.8   |
| AHQ-5-8, 4676 - 4677        | K.YPIEHGITTWDDMEK.I                                                    | 1962.17174 | 2 | 5.45E-08 | 0.84  | 3.95   | -     | 565.4   |
| AHQ-5-8, 4069 - 4136        | K.YPIEHGITTWDDMEK.I                                                    | 1962.17174 | 3 | 4.84E-04 | 0.73  | 3.59   | -     | 731.0   |
| AHQ-5-8, 6440 - 6508        | K.YPIEHGITTWDDMEKIWHHTFYNELR.V                                         | 3459.83609 | 3 | 4.33E-09 | 0.92  | 5.36   | -     | 721.1   |
| AHQ-5-8, 5077               | K.YPIEHGITTWDDMEKIWHHTFYNELR.V                                         | 3475.83549 | 3 | 7.01E-07 | 0.95  | 5.98   | -     | 1030.1  |
| gj 10834976 ref NP_000572.1 | glutathione peroxidase 1 [Homo sapiens]                                |            |   | 7.83E-14 | 9.09  | 110.26 | 59.20 | 21909.0 |
| AHQ-5-11, 5364              | K.CEVNGAGAHPLFAFLR.E                                                   | 1760.99723 | 2 | 7.83E-14 | 0.94  | 3.62   | -     | 1528.5  |
| AHQ-5-11, 5292              | K.CEVNGAGAHPLFAFLR.E                                                   | 1760.99723 | 3 | 2.02E-07 | 0.70  | 3.03   | -     | 644.3   |
| AHQ-5-11, 5259 - 5303       | K.CEVNGAGAHPLFAFLR.E                                                   | 1760.99723 | 2 | 5.56E-10 | 0.92  | 3.87   | -     | 953.5   |
| AHQ-5-11, 4246              | K.FLVGPDGVPPLR.R                                                       | 1170.38561 | 2 | 3.71E-07 | 0.91  | 3.41   | -     | 939.2   |
| AHQ-5-11, 3951 - 3994       | K.FLVGPDGVPPLR.R                                                       | 1170.38561 | 2 | 7.15E-04 | 0.89  | 3.08   | -     | 1191.3  |
| AHQ-5-11, 5035              | R.GLVLVGPPCNQFGHQENAK.N                                                | 2117.37312 | 2 | 2.58E-06 | 0.66  | 3.46   | -     | 280.2   |
| AHQ-5-11, 4868 - 4936       | R.GLVLVGPPCNQFGHQENAK.N                                                | 2117.37312 | 2 | 7.75E-05 | 0.93  | 4.86   | -     | 602.7   |
| AHQ-5-11, 5935              | R.GLVLVGPPCNQFGHQENAKNEEILNSLK.Y                                       | 3158.53371 | 3 | 3.06E-07 | 0.74  | 3.58   | -     | 249.7   |
| AHQ-5-11, 3838              | R.LAAAAQSVYAFSAR.P                                                     | 1497.68025 | 2 | 1.93E-05 | 0.97  | 4.27   | -     | 1817.8  |
| AHQ-5-11, 3759 - 3780       | K.LITWSPVCR.N                                                          | 1133.34543 | 2 | 5.20E-04 | 0.74  | 2.51   | -     | 714.7   |
| AHQ-5-11, 5495              | K.LITWSPVCRNDVAWNFEK.F                                                 | 2237.52236 | 2 | 2.78E-05 | 0.95  | 4.64   | -     | 1018.5  |
| AHQ-5-11, 3144              | R.NDVAWNFEK.F                                                          | 1123.19953 | 1 | 4.53E-04 | 0.36  | 2.10   | -     | 400.8   |
| AHQ-5-11, 5491 - 5496       | R.PGGGFEPNFMFLFEK.C                                                    | 1570.79310 | 2 | 1.41E-06 | 0.96  | 4.74   | -     | 851.1   |
| AHQ-5-11, 3740 - 3803       | R.PLAGGEPVLSGLR.G                                                      | 1353.54935 | 2 | 3.76E-06 | 0.96  | 4.78   | -     | 1113.7  |
| AHQ-5-14-, 3831 - 3834      | R.PLAGGEPVLSGLR.G                                                      | 1353.54935 | 2 | 7.43E-08 | 0.95  | 3.91   | -     | 1412.5  |
| AHQ-5-14, 4720              | R.PLAGGEPVLSGLR.G                                                      | 1353.54935 | 2 | 2.75E-08 | 0.93  | 4.16   | -     | 867.4   |
| AHQ-5-11, 5131 - 5146       | K.YVRPGGGFEPNFMFLFEK.C                                                 | 1989.28515 | 2 | 2.75E-04 | 0.97  | 5.28   | -     | 1802.4  |
| AHQ-5-11, 5138              | K.YVRPGGGFEPNFMFLFEK.C                                                 | 1989.28515 | 3 | 1.81E-07 | 0.94  | 4.38   | -     | 1345.5  |
| AHQ-5-10, 4759 - 4776       | K.YVRPGGGFEPNFMFLFEK.C                                                 | 1989.28515 | 2 | 8.07E-04 | 0.86  | 3.86   | -     | 685.0   |
| gj 4503631 ref NP_000120.1  | coagulation factor XIII A1 subunit precursor; Coagulation factor XIII, |            |   | 1.14E-13 | 21.49 | 240.29 | 36.90 | 83232.8 |
| AHQ-5-5, 5353 - 5429        | R.AVPPNNSNAEEDDLPVTELQGVVPR.G                                          | 2603.82656 | 2 | 3.51E-06 | 0.78  | 3.85   | -     | 233.5   |
| AHQ-5-11, 5202 - 5268       | R.AVPPNNSNAEEDDLPVTELQGVVPR.G                                          | 2603.82656 | 2 | 4.64E-05 | 0.58  | 3.10   | -     | 181.2   |
| AHQ-5-13, 5370              | R.AVPPNNSNAEEDDLPVTELQGVVPR.G                                          | 2603.82656 | 2 | 9.91E-10 | 0.60  | 2.71   | -     | 239.7   |
| AHQ-5-5, 5489 - 5565        | R.AVPPNNSNAEEDDLPVTELQGVVPR.G                                          | 2603.82656 | 2 | 5.34E-05 | 0.76  | 4.24   | -     | 189.5   |
| AHQ-5-5, 2339               | K.DGTHVVENVVATHIGK.L                                                   | 1692.81163 | 3 | 2.56E-05 | 0.94  | 4.70   | -     | 1176.7  |
| AHQ-5-6, 2325               | K.DGTHVVENVVATHIGK.L                                                   | 1692.81163 | 2 | 2.63E-06 | 0.94  | 4.16   | -     | 1022.6  |
| AHQ-5-11, 5460 - 5522       | K.ETFVDVTEPLSFK.K                                                      | 1526.71190 | 2 | 4.35E-05 | 0.42  | 2.54   | -     | 527.1   |
| AHQ-5-5, 5738 - 5805        | K.ETFVDVTEPLSFK.K                                                      | 1526.71190 | 2 | 1.10E-06 | 0.93  | 4.16   | -     | 1118.2  |
| AHQ-5-5, 4861 - 4881        | K.ETFVDVTEPLSFK.K                                                      | 1654.88482 | 2 | 1.08E-08 | 0.80  | 3.22   | -     | 560.1   |
| AHQ-5-5, 6857               | R.GTQVVGSMDTVTVQFTNPLK.E                                               | 2123.41609 | 2 | 4.13E-10 | 0.95  | 4.42   | -     | 1241.9  |
| AHQ-5-5, 7175 - 7199        | R.GTQVVGSMDTVTVQFTNPLK.E                                               | 2123.41609 | 2 | 1.18E-13 | 0.98  | 5.55   | -     | 2000.9  |
| AHQ-5-5, 6961 - 7031        | R.GTQVVGSMDTVTVQFTNPLK.E                                               | 2123.41609 | 2 | 1.67E-12 | 0.98  | 5.47   | -     | 2874.9  |
| AHQ-5-8, 5097               | K.GTYIPVIVSELQSGK.W                                                    | 1688.94594 | 2 | 9.24E-04 | 0.67  | 2.62   | -     | 419.2   |
| AHQ-5-5, 5521 - 5593        | K.GTYIPVIVSELQSGK.W                                                    | 1688.94594 | 2 | 9.31E-07 | 0.80  | 3.20   | -     | 421.0   |
| AHQ-5-10, 5018              | K.GTYIPVIVSELQSGK.W                                                    | 1688.94594 | 2 | 1.18E-06 | 0.45  | 2.72   | -     | 209.8   |
| AHQ-5-6, 6996 - 7006        | R.GVNLQEFLNVTSVHLFK.E                                                  | 1946.23831 | 2 | 3.02E-08 | 0.94  | 4.42   | -     | 1017.8  |
| AHQ-5-6, 7089               | R.GVNLQEFLNVTSVHLFK.E                                                  | 1946.23831 | 2 | 4.95E-04 | 0.68  | 2.98   | -     | 554.5   |
| AHQ-5-10, 6335 - 6336       | R.GVNLQEFLNVTSVHLFK.E                                                  | 1946.23831 | 2 | 2.58E-04 | 0.96  | 4.51   | -     | 1347.6  |
| AHQ-5-9, 6176 - 6190        | R.GVNLQEFLNVTSVHLFK.E                                                  | 1946.23831 | 2 | 3.05E-07 | 0.94  | 4.78   | -     | 890.2   |
| AHQ-5-5, 7169 - 7235        | R.GVNLQEFLNVTSVHLFK.E                                                  | 1946.23831 | 2 | 8.04E-07 | 0.96  | 4.88   | -     | 1362.7  |
| AHQ-5-11, 6572              | R.GVNLQEFLNVTSVHLFK.E                                                  | 1946.23831 | 3 | 4.67E-07 | 0.77  | 3.45   | -     | 747.1   |
| AHQ-5-5, 7074 - 7147        | R.GVNLQEFLNVTSVHLFK.E                                                  | 1946.23831 | 3 | 2.45E-09 | 0.90  | 4.81   | -     | 814.1   |
| AHQ-5-12, 6777 - 6842       | R.GVNLQEFLNVTSVHLFK.E                                                  | 1946.23831 | 2 | 3.61E-07 | 0.96  | 4.89   | -     | 1463.2  |
| AHQ-5-11, 6567              | R.GVNLQEFLNVTSVHLFK.E                                                  | 1946.23831 | 2 | 2.19E-10 | 0.97  | 5.02   | -     | 1434.7  |
| AHQ-5-5, 7073 - 7145        | R.GVNLQEFLNVTSVHLFK.E                                                  | 1946.23831 | 2 | 4.28E-07 | 0.97  | 5.79   | -     | 1405.7  |
| AHQ-5-13, 6744 - 6745       | R.GVNLQEFLNVTSVHLFK.E                                                  | 1946.23831 | 2 | 1.91E-07 | 0.95  | 4.62   | -     | 1251.7  |
| AHQ-5-7, 6915 - 6926        | R.GVNLQEFLNVTSVHLFK.E                                                  | 1946.23831 | 2 | 1.68E-05 | 0.96  | 5.10   | -     | 1084.3  |
| AHQ-5-1, 7193 - 7199        | R.GVNLQEFLNVTSVHLFK.E                                                  | 1946.23831 | 2 | 2.52E-04 | 0.84  | 3.60   | -     | 655.0   |
| AHQ-5-14-, 6634             | R.GVNLQEFLNVTSVHLFK.E                                                  | 1946.23831 | 2 | 1.75E-08 | 0.96  | 4.97   | -     | 1256.6  |

|                             |                                                         |            |   |          |       |        |       |         |
|-----------------------------|---------------------------------------------------------|------------|---|----------|-------|--------|-------|---------|
| AHQ-5-5, 5258               | R.HVYGELDVQIQR.R                                        | 1457.61612 | 2 | 1.39E-04 | 0.68  | 2.62   | -     | 525.0   |
| AHQ-5-5, 3399 - 3470        | R.HVYGELDVQIQR.R                                        | 1457.61612 | 2 | 1.88E-07 | 0.89  | 3.01   | -     | 868.9   |
| AHQ-5-5, 7141 - 7215        | R.IVTNYFSAHDNDANLQMDIFLEEDGNVNSK.L                      | 3415.64559 | 3 | 1.40E-07 | 0.94  | 5.37   | -     | 972.6   |
| AHQ-5-5, 7462               | R.IVTNYFSAHDNDANLQMDIFLEEDGNVNSK.L                      | 3415.64559 | 3 | 9.56E-05 | 0.85  | 4.36   | -     | 650.3   |
| AHQ-5-5, 7323               | R.IVTNYFSAHDNDANLQMDIFLEEDGNVNSK.L                      | 3415.64559 | 3 | 5.79E-06 | 0.94  | 5.08   | -     | 1141.0  |
| AHQ-5-7, 1907               | K.KDGTTHVVENVDATHIGK.L                                  | 1820.98455 | 2 | 5.50E-05 | 0.95  | 4.14   | -     | 1325.2  |
| AHQ-5-5, 1966               | K.KDGTTHVVENVDATHIGK.L                                  | 1820.98455 | 2 | 9.92E-07 | 0.95  | 4.08   | -     | 1192.3  |
| AHQ-5-6, 1961 - 1965        | K.KDGTTHVVENVDATHIGK.L                                  | 1820.98455 | 2 | 3.76E-08 | 0.96  | 4.72   | -     | 1342.0  |
| AHQ-5-11, 4910              | K.KETFDVTLLEPLSFK.K                                     | 1654.88482 | 2 | 1.43E-07 | 0.97  | 4.90   | -     | 1659.1  |
| AHQ-5-5, 4978 - 4985        | K.KETFDVTLLEPLSFK.K                                     | 1654.88482 | 2 | 1.96E-04 | 0.97  | 4.64   | -     | 2033.4  |
| AHQ-5-5, 2423 - 2493        | R.KLIASMSDLSLR.H                                        | 1308.53039 | 2 | 3.80E-04 | 0.87  | 3.72   | -     | 924.1   |
| AHQ-5-5, 1742               | K.KPLNTEGVMK.S                                          | 1117.34452 | 1 | 2.81E-04 | 0.44  | 2.55   | -     | 213.7   |
| AHQ-5-5, 1528               | K.KPLNTEGVMK.S                                          | 1117.34452 | 1 | 8.04E-05 | 0.54  | 2.44   | -     | 385.6   |
| AHQ-5-5, 4741               | R.LALETALMYGAK.K                                        | 1281.54655 | 2 | 9.50E-08 | 0.95  | 3.71   | -     | 1679.4  |
| AHQ-5-5, 4587 - 4666        | R.LALETALMYGAK.K                                        | 1281.54655 | 2 | 7.99E-08 | 0.96  | 4.29   | -     | 1497.9  |
| AHQ-5-5, 4826               | R.LALETALMYGAK.K                                        | 1281.54655 | 2 | 2.83E-06 | 0.96  | 3.71   | -     | 1763.6  |
| AHQ-5-6, 4544 - 4622        | R.LALETALMYGAK.K                                        | 1281.54655 | 2 | 2.48E-05 | 0.96  | 3.66   | -     | 1733.1  |
| AHQ-5-5, 2031 - 2037        | K.LIASMSSDLSLR.H                                        | 1196.35688 | 2 | 5.36E-05 | 0.95  | 3.78   | -     | 1194.5  |
| AHQ-5-14-, 2219             | K.LIASMSSDLSLR.H                                        | 1196.35688 | 2 | 7.17E-05 | 0.87  | 2.72   | -     | 829.4   |
| AHQ-5-7, 2699               | K.LIASMSSDLSLR.H                                        | 1180.35748 | 2 | 6.63E-05 | 0.91  | 2.92   | -     | 1041.6  |
| AHQ-5-11, 2886 - 2887       | K.LIASMSSDLSLR.H                                        | 1180.35748 | 2 | 6.22E-05 | 0.89  | 3.17   | -     | 936.6   |
| AHQ-5-5, 2785 - 2806        | K.LIASMSSDLSLR.H                                        | 1180.35748 | 2 | 7.11E-06 | 0.95  | 3.76   | -     | 1387.0  |
| AHQ-5-5, 6105 - 6137        | R.MYVAVWTPYGVLR.T                                       | 1555.86794 | 2 | 1.32E-06 | 0.95  | 4.76   | -     | 981.3   |
| AHQ-5-6, 5478               | R.MYVAVWTPYGVLR.T                                       | 1571.86734 | 2 | 6.80E-06 | 0.93  | 3.54   | -     | 1218.9  |
| AHQ-5-6, 6073               | R.MYVAVWTPYGVLR.T                                       | 1555.86794 | 2 | 2.65E-05 | 0.94  | 3.77   | -     | 993.4   |
| AHQ-5-9, 5367 - 5378        | R.MYVAVWTPYGVLR.T                                       | 1555.86794 | 2 | 1.49E-05 | 0.94  | 4.26   | -     | 991.6   |
| AHQ-5-5, 6214 - 6283        | R.MYVAVWTPYGVLR.T                                       | 1555.86794 | 2 | 4.44E-07 | 0.95  | 4.24   | -     | 992.4   |
| AHQ-5-5, 5477 - 5502        | R.MYVAVWTPYGVLR.T                                       | 1571.86734 | 2 | 1.84E-06 | 0.95  | 4.20   | -     | 984.5   |
| AHQ-5-11, 5346 - 5399       | R.MYVAVWTPYGVLR.T                                       | 1571.86734 | 2 | 3.66E-04 | 0.87  | 3.33   | -     | 589.8   |
| AHQ-5-5, 6754               | R.NPETDYILFNPWCEDDAVYLDNEKER.E                          | 3349.53903 | 3 | 4.69E-11 | 0.91  | 4.03   | -     | 1290.0  |
| AHQ-5-5, 6859               | R.NPETDYILFNPWCEDDAVYLDNEKER.E                          | 3349.53903 | 3 | 1.25E-07 | 0.92  | 4.51   | -     | 1017.8  |
| AHQ-5-7, 6626               | R.NPETDYILFNPWCEDDAVYLDNEKER.E                          | 3349.53903 | 3 | 1.14E-13 | 0.88  | 4.05   | -     | 981.3   |
| AHQ-5-6, 6660               | R.NPETDYILFNPWCEDDAVYLDNEKER.E                          | 3349.53903 | 3 | 4.85E-08 | 0.95  | 5.30   | -     | 1082.4  |
| AHQ-5-5, 3387               | R.NVWVHLDGPGVTR.P                                       | 1450.62682 | 2 | 5.20E-07 | 0.94  | 3.70   | -     | 1269.6  |
| AHQ-5-11, 3370 - 3450       | R.NVWVHLDGPGVTR.P                                       | 1450.62682 | 2 | 9.79E-05 | 0.76  | 2.83   | -     | 783.5   |
| AHQ-5-5, 3370               | R.NVWVHLDGPGVTRPMK.K                                    | 1807.11248 | 3 | 3.38E-06 | 0.83  | 3.76   | -     | 779.0   |
| AHQ-5-8, 2904               | R.NVWVHLDGPGVTRPMK.K                                    | 1807.11248 | 2 | 2.65E-04 | 0.77  | 2.82   | -     | 594.9   |
| AHQ-5-6, 3272 - 3326        | R.NVWVHLDGPGVTRPMK.K                                    | 1807.11248 | 2 | 1.09E-04 | 0.94  | 3.77   | -     | 1013.5  |
| AHQ-5-5, 3369               | R.NVWVHLDGPGVTRPMK.K                                    | 1807.11248 | 2 | 1.36E-05 | 0.93  | 3.78   | -     | 941.6   |
| AHQ-5-5, 5338 - 5382        | R.SNVDMDFEVENAVLKG.D                                    | 1767.93869 | 2 | 7.62E-10 | 0.98  | 5.78   | -     | 2489.7  |
| AHQ-5-5, 4622               | R.SNVDMDFEVENAVLKG.D                                    | 1783.93809 | 2 | 1.46E-08 | 0.97  | 4.99   | -     | 1915.3  |
| AHQ-5-5, 5638 - 5713        | K.STVLTPIIHK.V                                          | 1327.63485 | 2 | 1.21E-07 | 0.95  | 3.78   | -     | 1643.3  |
| gi 29742410 ref XP_291183.1 | similar to TREM-like transcript 1 [Homo sapiens]        |            |   | 1.31E-13 | 2.69  | 30.30  | 21.20 | 32678.3 |
| AHQ-5-13-, 4157 - 4159      | R.FLPEGCOPLVSSAVDR.R                                    | 1776.99174 | 2 | 2.34E-05 | 0.93  | 4.23   | -     | 633.0   |
| AHQ-5-10, 3946 - 3962       | R.FLPEGCOPLVSSAVDR.R                                    | 1776.99174 | 2 | 6.15E-04 | 0.76  | 2.95   | -     | 409.8   |
| AHQ-5-11, 4218              | R.FLPEGCOPLVSSAVDR.R                                    | 1776.99174 | 2 | 1.35E-06 | 0.68  | 3.20   | -     | 294.1   |
| AHQ-5-13-, 4189 - 4319      | R.FLPEGCOPLVSSAVDR.R                                    | 1776.99174 | 2 | 1.31E-13 | 0.82  | 3.34   | -     | 519.2   |
| AHQ-5-9, 4475               | K.VLVCSPKPVYATVIFPGGNK.G                                | 2152.54196 | 2 | 7.47E-04 | 0.89  | 4.52   | -     | 477.6   |
| AHQ-5-9, 4471               | R.VSGMNPSSVHVHSDSGPAAELPLDVPHIR.L                       | 3106.46224 | 3 | 3.86E-08 | 0.97  | 6.10   | -     | 1411.1  |
| gi 4827056 ref NP_005103.1  | WD repeat-containing protein 1 isoform 2 [Homo sapiens] |            |   | 1.88E-13 | 10.91 | 130.33 | 46.40 | 58009.9 |
| AHQ-5-7, 4650               | K.AHDGGIYAIWSVSPDSTHLLSASGDK.T                          | 2586.75455 | 2 | 1.17E-04 | 0.93  | 4.78   | -     | 671.1   |
| AHQ-5-9, 4275               | K.AHDGGIYAIWSVSPDSTHLLSASGDK.T                          | 2586.75455 | 2 | 3.35E-08 | 0.94  | 4.72   | -     | 914.3   |
| AHQ-5-6, 5890 - 5962        | K.CFSIDNPGYEPVWVAVHPGGDTVAIGGVDGNVR.L                   | 3400.67708 | 3 | 5.73E-05 | 0.76  | 3.96   | -     | 561.4   |
| AHQ-5-10, 5140              | K.CFSIDNPGYEPVWVAVHPGGDTVAIGGVDGNVR.L                   | 3400.67708 | 3 | 6.98E-13 | 0.93  | 4.76   | -     | 952.6   |
| AHQ-5-6, 5753 - 5820        | K.CFSIDNPGYEPVWVAVHPGGDTVAIGGVDGNVR.L                   | 3400.67708 | 3 | 1.88E-13 | 0.96  | 5.70   | -     | 1253.2  |
| AHQ-5-9, 5043               | K.CFSIDNPGYEPVWVAVHPGGDTVAIGGVDGNVR.L                   | 3400.67708 | 3 | 3.16E-10 | 0.91  | 4.46   | -     | 666.7   |
| AHQ-5-1, 5952               | K.CFSIDNPGYEPVWVAVHPGGDTVAIGGVDGNVR.L                   | 3400.67708 | 3 | 1.65E-10 | 0.90  | 4.32   | -     | 931.5   |
| AHQ-5-6, 5656 - 5676        | K.CFSIDNPGYEPVWVAVHPGGDTVAIGGVDGNVR.L                   | 3400.67708 | 3 | 4.46E-13 | 0.95  | 5.37   | -     | 894.7   |
| AHQ-5-7, 5570 - 5600        | K.CFSIDNPGYEPVWVAVHPGGDTVAIGGVDGNVR.L                   | 3400.67708 | 3 | 1.43E-08 | 0.90  | 4.79   | -     | 653.0   |
| AHQ-5-6, 5562               | K.FGAVFLWDSGSSVGEITGHNK.V                               | 2209.40259 | 2 | 1.94E-05 | 0.87  | 3.49   | -     | 818.5   |
| AHQ-5-6, 5525               | K.FGAVFLWDSGSSVGEITGHNK.V                               | 2209.40259 | 3 | 5.93E-04 | 0.91  | 5.01   | -     | 879.9   |
| AHQ-5-6, 4740               | K.GPVTDVAYSHDGAFLAVCDASK.V                              | 2282.47194 | 2 | 5.36E-06 | 0.94  | 4.38   | -     | 1195.2  |
| AHQ-5-10, 4226              | K.GPVTDVAYSHDGAFLAVCDASK.V                              | 2282.47194 | 2 | 1.62E-07 | 0.96  | 4.69   | -     | 1367.6  |
| AHQ-5-9, 4114               | K.GPVTDVAYSHDGAFLAVCDASK.V                              | 2282.47194 | 2 | 8.45E-05 | 0.95  | 4.87   | -     | 1068.6  |
| AHQ-5-6, 4589 - 4662        | K.GPVTDVAYSHDGAFLAVCDASK.V                              | 2282.47194 | 2 | 7.91E-08 | 0.96  | 4.55   | -     | 1389.5  |
| AHQ-5-6, 2032               | K.IKIDIAWTEDESKR.I                                      | 1462.63267 | 2 | 6.34E-07 | 0.92  | 4.08   | -     | 963.4   |
| AHQ-5-6, 2030               | K.IKIDIAWTEDESKR.I                                      | 1462.63267 | 3 | 1.21E-05 | 0.87  | 3.86   | -     | 838.0   |
| AHQ-5-6, 5708 - 5724        | R.LATGSDDNCAAFFEGPPFK.F                                 | 2046.20216 | 2 | 4.30E-07 | 0.69  | 3.82   | -     | 446.5   |
| AHQ-5-6, 5532 - 5598        | R.LATGSDDNCAAFFEGPPFK.F                                 | 2046.20216 | 2 | 2.93E-09 | 0.83  | 3.35   | -     | 958.6   |
| AHQ-5-6, 5433 - 5509        | R.LATGSDDNCAAFFEGPPFK.F                                 | 2046.20216 | 2 | 1.36E-07 | 0.95  | 5.33   | -     | 997.3   |
| AHQ-5-11, 5330              | R.LATGSDDNCAAFFEGPPFK.F                                 | 2046.20216 | 2 | 3.84E-04 | 0.86  | 3.65   | -     | 787.7   |
| AHQ-5-13, 4106              | R.LYSILGTLTKDEGK.L                                      | 1538.76736 | 2 | 1.31E-04 | 0.89  | 3.40   | -     | 912.2   |
| AHQ-5-10, 3578              | R.LYSILGTLTKDEGK.L                                      | 1538.76736 | 2 | 3.82E-05 | 0.93  | 3.89   | -     | 1186.0  |
| AHQ-5-6, 3648               | R.LYSILGTLTKDEGK.L                                      | 1538.76736 | 2 | 2.18E-04 | 0.92  | 4.05   | -     | 979.4   |
| AHQ-5-6, 5005 - 5016        | R.MTVDESQGLISCSMDTTR.V                                  | 2146.36365 | 2 | 2.08E-05 | 0.82  | 3.80   | -     | 518.6   |
| AHQ-5-10, 3860              | R.NIDNPALADIYTEHAHQVWAK.Y                               | 2419.67805 | 2 | 7.46E-05 | 0.85  | 3.55   | -     | 842.2   |
| AHQ-5-6, 4060               | R.NIDNPALADIYTEHAHQVWAK.Y                               | 2419.67805 | 2 | 2.96E-06 | 0.84  | 3.55   | -     | 821.3   |
| AHQ-5-6, 4141               | K.SYIYSGSHDGHINYWDSSETGENSFAGK.G                        | 3138.17570 | 3 | 2.95E-08 | 0.97  | 6.60   | -     | 862.5   |
| AHQ-5-6, 2109               | K.VINSVDIK.Q                                            | 888.04378  | 1 | 3.61E-04 | 0.26  | 2.31   | -     | 391.8   |
| AHQ-5-1, 4133               | K.YAPSGFYIASGDVSGK.L                                    | 1619.75589 | 2 | 5.76E-08 | 0.81  | 3.48   | -     | 555.5   |
| AHQ-5-6, 3700 - 3770        | K.YAPSGFYIASGDVSGK.L                                    | 1619.75589 | 2 | 1.16E-09 | 0.93  | 4.00   | -     | 806.8   |
| AHQ-5-12, 3900              | K.YAPSGFYIASGDVSGK.L                                    | 1619.75589 | 2 | 1.35E-09 | 0.92  | 3.70   | -     | 739.6   |
| AHQ-5-14-, 3817             | K.YAPSGFYIASGDVSGK.L                                    | 1619.75589 | 2 | 3.42E-05 | 0.94  | 4.15   | -     | 829.9   |
| AHQ-5-6, 2589               | K.YEQYFPAGK.I                                           | 1103.20822 | 2 | 7.20E-04 | 0.68  | 2.59   | -     | 504.2   |
| gi 4504349 ref NP_000509.1  | beta globin [Homo sapiens]                              |            |   | 3.01E-13 | 10.22 | 120.30 | 70.70 | 15998.3 |
| AHQ-5-14-, 3027 - 3033      | K.EFTPPVQAAYQK.V                                        | 1379.54213 | 2 | 1.57E-04 | 0.84  | 3.10   | -     | 817.6   |
| AHQ-5-14-, 4958 - 5037      | R.FFESFGDLSTPDVAVMGNPK.V                                | 2076.27158 | 2 | 2.64E-06 | 0.89  | 4.25   | -     | 586.1   |
| AHQ-5-14-, 5537             | R.FFESFGDLSTPDVAVMGNPK.V                                | 2060.27218 | 2 | 3.01E-13 | 0.98  | 5.95   | -     | 1817.1  |
| AHQ-5-13-, 5688             | R.FFESFGDLSTPDVAVMGNPK.V                                | 2060.27218 | 2 | 4.00E-04 | 0.93  | 4.63   | -     | 870.0   |
| AHQ-5-13, 5766              | R.FFESFGDLSTPDVAVMGNPK.V                                | 2060.27218 | 2 | 2.93E-06 | 0.93  | 4.46   | -     | 818.6   |
| AHQ-5-13, 5677              | R.FFESFGDLSTPDVAVMGNPK.V                                | 2076.27158 | 2 | 6.46E-04 | 0.36  | 2.59   | -     | 472.3   |
| AHQ-5-13, 5634 - 5700       | R.FFESFGDLSTPDVAVMGNPK.V                                | 2060.27218 | 2 | 8.52E-07 | 0.94  | 4.50   | -     | 882.7   |
| AHQ-5-13-, 5544 - 5555      | R.FFESFGDLSTPDVAVMGNPK.V                                | 2060.27218 | 2 | 4.12E-05 | 0.94  | 4.43   | -     | 797.1   |
| AHQ-5-13-, 4995 - 5068      | R.FFESFGDLSTPDVAVMGNPK.V                                | 2076.27158 | 2 | 6.99E-05 | 0.91  | 4.29   | -     | 566.3   |
| AHQ-5-13, 5464              | R.FFESFGDLSTPDVAVMGNPK.V                                | 2060.27218 | 2 | 6.58E-07 | 0.94  | 4.58   | -     | 720.5   |
| AHQ-5-13, 5090 - 5156       | R.FFESFGDLSTPDVAVMGNPK.V                                | 2076.27158 | 2 | 2.13E-04 | 0.92  | 4.23   | -     | 675.9   |
| AHQ-5-13, 5100              | R.FFESFGDLSTPDVAVMGNPK.V                                | 2076.27158 | 3 | 2.22E-04 | 0.89  | 3.71   | -     | 1022.0  |
| AHQ-5-14, 6196              | R.FFESFGDLSTPDVAVMGNPK.V                                | 2060.27218 | 2 | 1.06E-07 | 0.93  | 4.49   | -     | 727.8   |
| AHQ-5-13, 3601              | K.GTFATLSELHCDK.L                                       | 1480.62492 | 2 | 8.23E-07 | 0.41  | 2.78   | -     | 377.6   |
| AHQ-5-13-, 3475 - 3479      | K.GTFATLSELHCDK.L                                       | 1480.62492 | 2 | 6.83E-07 | 0.92  | 4.10   | -     | 646.9   |
| AHQ-5-13, 5068 - 5133       | K.GTFATLSELHCDKLVDPENFR.L                               | 2588.83687 | 3 | 2.92E-08 | 0.91  | 4.42   | -     | 856.0   |
| AHQ-5-13-, 4984             | K.GTFATLSELHCDKLVDPENFR.L                               | 2588.83687 | 3 | 4.97E-10 | 0.92  | 4.38   | -     | 1141.7  |
| AHQ-5-13-, 4773             | K.KVLGAFSDGLAHLDNLK.G                                   | 1799.06362 | 3 | 2.21E-10 | 0.97  | 5.98   | -     | 1705.9  |
| AHQ-5-13-, 4776             | K.KVLGAFSDGLAHLDNLK.G                                   | 1799.06362 | 2 | 7.90E-09 | 0.97  | 5.42   | -     | 1716.4  |
| AHQ-5-13, 4860              | K.KVLGAFSDGLAHLDNLK.G                                   | 1799.06362 | 2 | 1.92E-08 | 0.97  | 5.78   | -     | 1302.0  |
| AHQ-5-13, 4862              | K.KVLGAFSDGLAHLDNLK.G                                   | 1799.06362 | 3 | 1.54E-07 | 0.96  | 5.08   | -     | 1547.0  |
| AHQ-5-13-, 2793             | K.LHVPENFR.L                                            | 1127.23455 | 1 | 2.27E-04 | 0.22  | 1.88   | -     | 329.9   |

|                             |                                                                         |            |   |          |      |       |       |         |
|-----------------------------|-------------------------------------------------------------------------|------------|---|----------|------|-------|-------|---------|
| AHQ-5-13-, 2775             | K.LHVDPENFR.L                                                           | 1127.23455 | 2 | 2.14E-04 | 0.82 | 2.93  | -     | 877.5   |
| AHQ-5-13, 6593              | R.LLGNVLVCLAHFFGK.E                                                     | 1779.14197 | 2 | 1.24E-04 | 0.89 | 3.58  | -     | 970.5   |
| AHQ-5-13, 3551              | K.SAVTALWVK.V                                                           | 933.08624  | 2 | 1.10E-04 | 0.81 | 2.51  | -     | 736.6   |
| AHQ-5-13-, 3427 - 3452      | K.SAVTALWVK.V                                                           | 933.08624  | 2 | 9.77E-06 | 0.76 | 2.63  | -     | 663.4   |
| AHQ-5-13-, 3432             | K.SAVTALWVK.V                                                           | 933.08624  | 1 | 1.35E-04 | 0.06 | 2.10  | -     | 122.5   |
| AHQ-5-13-, 5104 - 5123      | K.VLGFASDGLAHLNDLNLK.G                                                  | 1670.89071 | 3 | 2.55E-07 | 0.83 | 3.63  | -     | 599.3   |
| AHQ-5-13, 4965 - 5028       | K.VLGFASDGLAHLNDLNLK.G                                                  | 1670.89071 | 2 | 5.13E-11 | 0.97 | 5.66  | -     | 1248.1  |
| AHQ-5-14, 5874 - 5937       | K.VLGFASDGLAHLNDLNLK.G                                                  | 1670.89071 | 2 | 5.85E-13 | 0.95 | 4.77  | -     | 1238.0  |
| AHQ-5-13-, 4941             | K.VLGFASDGLAHLNDLNLK.G                                                  | 1670.89071 | 3 | 2.51E-10 | 0.82 | 3.68  | -     | 497.0   |
| AHQ-5-13, 5217              | K.VLGFASDGLAHLNDLNLK.G                                                  | 1670.89071 | 2 | 2.32E-11 | 0.96 | 4.57  | -     | 1314.1  |
| AHQ-5-13, 5189              | K.VLGFASDGLAHLNDLNLK.G                                                  | 1670.89071 | 3 | 5.91E-09 | 0.84 | 3.43  | -     | 605.4   |
| AHQ-5-13-, 4936 - 5008      | K.VLGFASDGLAHLNDLNLK.G                                                  | 1670.89071 | 2 | 6.71E-11 | 0.96 | 4.89  | -     | 1473.9  |
| AHQ-5-14-, 5069             | K.VLGFASDGLAHLNDLNLK.G                                                  | 1670.89071 | 2 | 8.79E-05 | 0.97 | 5.14  | -     | 1471.7  |
| AHQ-5-13, 5116 - 5184       | K.VLGFASDGLAHLNDLNLK.G                                                  | 1670.89071 | 2 | 8.02E-11 | 0.98 | 5.54  | -     | 2050.1  |
| AHQ-5-13, 5029              | K.VLGFASDGLAHLNDLNLK.G                                                  | 1670.89071 | 3 | 3.77E-07 | 0.78 | 3.31  | -     | 474.8   |
| AHQ-5-13-, 5103 - 5107      | K.VLGFASDGLAHLNDLNLK.G                                                  | 1670.89071 | 2 | 9.61E-12 | 0.98 | 6.04  | -     | 1993.3  |
| AHQ-5-13-, 3247             | K.VNVDEVGGEALGR.L                                                       | 1315.41484 | 1 | 2.45E-08 | 0.44 | 2.39  | -     | 312.3   |
| AHQ-5-13-, 3244 - 3249      | K.VNVDEVGGEALGR.L                                                       | 1315.41484 | 2 | 3.70E-06 | 0.97 | 4.79  | -     | 1791.5  |
| AHQ-5-13, 3351 - 3354       | K.VNVDEVGGEALGR.L                                                       | 1315.41484 | 2 | 3.29E-06 | 0.97 | 4.88  | -     | 1983.2  |
| AHQ-5-14-, 3175             | K.VNVDEVGGEALGR.L                                                       | 1315.41484 | 2 | 1.01E-05 | 0.94 | 3.82  | -     | 1480.4  |
| AHQ-5-13-, 3256             | K.VNVDEVGGEALGR.L                                                       | 1315.41484 | 1 | 1.61E-06 | 0.62 | 2.97  | -     | 254.9   |
| AHQ-5-13-, 2671             | K.VVAGVANALAHK.Y                                                        | 1150.35593 | 2 | 2.73E-06 | 0.94 | 3.52  | -     | 1369.4  |
| AHQ-5-13, 2813              | K.VVAGVANALAHK.Y                                                        | 1150.35593 | 2 | 9.72E-05 | 0.96 | 3.95  | -     | 1848.1  |
| AHQ-5-13, 2343              | K.VVAGVANALAHK.Y                                                        | 1150.35593 | 1 | 9.05E-07 | 0.83 | 2.80  | -     | 810.6   |
| gi 17986273 ref NP_524144.1 | fast skeletal myosin alkali light chain 1 isoform 1f; A1 catalytic; A2  |            |   | 3.31E-13 | 0.95 | 10.21 | 8.20  | 21145.0 |
| AHQ-5-12, 3160 - 3184       | R.VFDKEGNGTVMGAELR.H                                                    | 1723.93228 | 3 | 3.52E-04 | 0.90 | 3.71  | -     | 1317.4  |
| AHQ-5-12, 3282 - 3350       | R.VFDKEGNGTVMGAELR.H                                                    | 1723.93228 | 2 | 3.31E-13 | 0.95 | 3.94  | -     | 1342.3  |
| AHQ-5-13, 3430              | R.VFDKEGNGTVMGAELR.H                                                    | 1723.93228 | 2 | 1.19E-10 | 0.93 | 3.49  | -     | 1095.3  |
| AHQ-5-13-, 3312             | R.VFDKEGNGTVMGAELR.H                                                    | 1723.93228 | 2 | 8.63E-12 | 0.94 | 4.12  | -     | 1187.0  |
| AHQ-5-12, 3157 - 3226       | R.VFDKEGNGTVMGAELR.H                                                    | 1723.93228 | 2 | 2.29E-11 | 0.96 | 4.18  | -     | 1388.7  |
| gi 4757826 ref NP_004039.1  | beta-2-microglobulin [Homo sapiens]                                     |            |   | 3.99E-13 | 2.45 | 30.23 | 30.30 | 13714.5 |
| AHQ-5-14-, 6389             | K.SNFLNCYVSGFHPSDIEVDLLK.N                                              | 2556.83155 | 2 | 7.54E-06 | 0.84 | 3.70  | -     | 527.4   |
| AHQ-5-14-, 6601             | K.SNFLNCYVSGFHPSDIEVDLLK.N                                              | 2556.83155 | 3 | 3.16E-06 | 0.87 | 4.53  | -     | 456.6   |
| AHQ-5-14-, 6333             | K.SNFLNCYVSGFHPSDIEVDLLKNGER.I                                          | 3013.28710 | 3 | 7.63E-09 | 0.85 | 4.15  | -     | 1017.1  |
| AHQ-5-14-, 6563             | K.SNFLNCYVSGFHPSDIEVDLLKNGER.I                                          | 3013.28710 | 3 | 3.99E-13 | 0.89 | 4.31  | -     | 854.2   |
| AHQ-5-14-, 1887 - 1951      | R.VNHVTLSPQK.I                                                          | 1123.28735 | 2 | 6.55E-05 | 0.74 | 2.59  | -     | 563.5   |
| AHQ-5-14-, 1821 - 1970      | R.VNHVTLSPQK.I                                                          | 1123.28735 | 1 | 5.43E-07 | 0.68 | 3.23  | -     | 295.2   |
| AHQ-5-14, 2449              | R.VNHVTLSPQK.I                                                          | 1123.28735 | 1 | 6.56E-04 | 0.13 | 1.93  | -     | 275.5   |
| gi 6005846 ref NP_009215.1  | PTK9L protein tyrosine kinase 9-like (A6-related protein); protein tyro |            |   | 4.54E-13 | 6.53 | 70.31 | 38.70 | 39547.7 |
| AHQ-5-14-, 6410 - 6418      | R.AVLPDLDAQPCYLLYR.L                                                    | 2035.39506 | 2 | 1.28E-08 | 0.97 | 6.02  | -     | 987.1   |
| AHQ-5-9, 5986               | R.AVLPDLDAQPCYLLYR.L                                                    | 2035.39506 | 2 | 2.93E-05 | 0.95 | 4.59  | -     | 904.6   |
| AHQ-5-12, 6504              | R.AVLPDLDAQPCYLLYR.L                                                    | 2035.39506 | 2 | 3.55E-05 | 0.81 | 3.81  | -     | 355.0   |
| AHQ-5-13-, 6520             | R.AVLPDLDAQPCYLLYR.L                                                    | 2035.39506 | 2 | 6.37E-11 | 0.97 | 5.52  | -     | 1010.5  |
| AHQ-5-12, 6588              | R.AVLPDLDAQPCYLLYR.L                                                    | 2035.39506 | 2 | 2.85E-09 | 0.95 | 5.19  | -     | 707.8   |
| AHQ-5-13, 6569 - 6580       | R.AVLPDLDAQPCYLLYR.L                                                    | 2035.39506 | 2 | 2.01E-09 | 0.96 | 5.18  | -     | 956.2   |
| AHQ-5-12, 6604              | R.AVLPDLDAQPCYLLYR.L                                                    | 2035.39506 | 3 | 2.27E-09 | 0.96 | 5.14  | -     | 1544.6  |
| AHQ-5-12, 5930              | K.EFGGGHIDELFTGVKDDLSFAGYQK.H                                           | 2860.12617 | 3 | 1.54E-05 | 0.92 | 4.72  | -     | 864.6   |
| AHQ-5-10, 3802              | R.ETIELVHTPTDVAQLPSR.V                                                  | 2136.34822 | 2 | 3.28E-06 | 0.93 | 4.40  | -     | 757.9   |
| AHQ-5-11, 4048              | R.ETIELVHTPTDVAQLPSR.V                                                  | 2136.34822 | 2 | 5.91E-06 | 0.93 | 4.67  | -     | 782.2   |
| AHQ-5-9, 3687               | R.ETIELVHTPTDVAQLPSR.V                                                  | 2136.34822 | 2 | 7.39E-05 | 0.90 | 4.29  | -     | 799.8   |
| AHQ-5-11, 4224              | K.HQTLQGLAFPLQPEAQR.A                                                   | 1935.17562 | 3 | 4.21E-05 | 0.83 | 3.19  | -     | 1080.3  |
| AHQ-5-11, 4202              | K.HQTLQGLAFPLQPEAQR.A                                                   | 1935.17562 | 2 | 2.14E-11 | 0.98 | 5.49  | -     | 1913.8  |
| AHQ-5-10, 3928              | K.HQTLQGLAFPLQPEAQR.A                                                   | 1935.17562 | 2 | 4.54E-13 | 0.96 | 5.02  | -     | 1040.2  |
| AHQ-5-11, 6183              | K.KIEIGDGAELTAFLYDEVHPK.Q                                               | 2475.73515 | 3 | 5.28E-11 | 0.98 | 6.23  | -     | 2347.6  |
| AHQ-5-11, 5120              | R.LLDSVEQDFHLEIAK.K                                                     | 1757.96513 | 2 | 1.60E-06 | 0.84 | 3.42  | -     | 666.3   |
| AHQ-5-13-, 4684             | K.VVIEDQLVLGASQEPVGR.W                                                  | 2039.27568 | 2 | 2.73E-10 | 0.94 | 3.56  | -     | 1822.2  |
| AHQ-5-13, 4777              | K.VVIEDQLVLGASQEPVGR.W                                                  | 2039.27568 | 2 | 6.16E-05 | 0.96 | 4.35  | -     | 1775.2  |
| AHQ-5-12, 4736              | K.VVIEDQLVLGASQEPVGR.W                                                  | 2039.27568 | 2 | 4.62E-09 | 0.97 | 4.68  | -     | 1945.2  |
| AHQ-5-12, 4749              | K.VVIEDQLVLGASQEPVGR.W                                                  | 2039.27568 | 3 | 5.59E-04 | 0.96 | 4.58  | -     | 2122.5  |
| gi 4507729 ref NP_001060.1  | tubulin, beta polypeptide [Homo sapiens]                                |            |   | 4.62E-13 | 7.39 | 90.36 | 31.20 | 49906.7 |
| AHQ-5-7, 2788 - 2790        | R.EIVHQAGCGGNQIGAK.F                                                    | 1825.03962 | 2 | 6.09E-07 | 0.96 | 4.68  | -     | 1443.9  |
| AHQ-5-7, 2816               | K.EVDEGMNLVGNK.N                                                        | 1447.59668 | 1 | 1.18E-04 | 0.26 | 2.36  | -     | 260.9   |
| AHQ-5-7, 2683               | K.EVDEGMNLVGNK.N                                                        | 1447.59668 | 1 | 1.07E-08 | 0.49 | 3.11  | -     | 229.7   |
| AHQ-5-8, 6053               | K.GHYTEGAEVLDSVLDVVR.K                                                  | 1960.13388 | 2 | 3.87E-09 | 0.98 | 5.92  | -     | 2316.0  |
| AHQ-5-14-, 6159             | K.GHYTEGAEVLDSVLDVVR.K                                                  | 1960.13388 | 2 | 3.31E-06 | 0.99 | 6.95  | -     | 3047.4  |
| AHQ-5-13-, 6284             | K.GHYTEGAEVLDSVLDVVR.K                                                  | 1960.13388 | 3 | 2.92E-04 | 0.71 | 3.10  | -     | 930.9   |
| AHQ-5-13-, 6271 - 6277      | K.GHYTEGAEVLDSVLDVVR.K                                                  | 1960.13388 | 2 | 2.38E-12 | 0.99 | 7.24  | -     | 3060.8  |
| AHQ-5-10, 5770              | K.GHYTEGAEVLDSVLDVVR.K                                                  | 1960.13388 | 2 | 1.63E-08 | 0.98 | 6.06  | -     | 2147.9  |
| AHQ-5-13, 6324              | K.GHYTEGAEVLDSVLDVVR.K                                                  | 1960.13388 | 2 | 1.71E-08 | 0.98 | 5.88  | -     | 2427.4  |
| AHQ-5-11, 5995 - 6064       | K.GHYTEGAEVLDSVLDVVR.K                                                  | 1960.13388 | 2 | 2.20E-08 | 0.99 | 7.16  | -     | 3141.8  |
| AHQ-5-7, 6056 - 6122        | K.GHYTEGAEVLDSVLDVVR.K                                                  | 1960.13388 | 2 | 4.67E-07 | 0.99 | 7.17  | -     | 2574.2  |
| AHQ-5-13, 6320 - 6338       | K.GHYTEGAEVLDSVLDVVR.K                                                  | 1960.13388 | 3 | 4.12E-06 | 0.92 | 5.08  | -     | 1077.8  |
| AHQ-5-7, 6087 - 6164        | K.GHYTEGAEVLDSVLDVVR.K                                                  | 1960.13388 | 3 | 2.99E-05 | 0.80 | 4.41  | -     | 754.3   |
| AHQ-5-7, 6190               | K.GHYTEGAEVLDSVLDVVR.K                                                  | 1960.13388 | 2 | 7.37E-06 | 0.98 | 6.30  | -     | 2664.3  |
| AHQ-5-9, 5526 - 5562        | K.GHYTEGAEVLDSVLDVVR.K                                                  | 1960.13388 | 2 | 2.53E-06 | 0.98 | 5.12  | -     | 2256.0  |
| AHQ-5-12, 6225              | K.GHYTEGAEVLDSVLDVVR.K                                                  | 1960.13388 | 2 | 5.14E-07 | 0.99 | 6.57  | -     | 2827.8  |
| AHQ-5-12, 6237              | K.GHYTEGAEVLDSVLDVVR.K                                                  | 1960.13388 | 3 | 8.80E-05 | 0.82 | 3.74  | -     | 819.3   |
| AHQ-5-13-, 4399             | R.ISEQFTAMFR.R                                                          | 1230.41818 | 2 | 8.40E-06 | 0.89 | 3.79  | -     | 932.9   |
| AHQ-5-7, 4296 - 4312        | R.ISEQFTAMFR.R                                                          | 1230.41818 | 2 | 1.16E-06 | 0.95 | 3.41  | -     | 1774.4  |
| AHQ-5-10, 6435              | K.LTTPPTYGDLNHLVSATMSGVTTCLR.F                                          | 2711.06527 | 2 | 2.39E-06 | 0.89 | 4.13  | -     | 688.2   |
| AHQ-5-9, 6374               | K.LTTPPTYGDLNHLVSATMSGVTTCLR.F                                          | 2711.06527 | 3 | 2.08E-04 | 0.87 | 4.04  | -     | 930.8   |
| AHQ-5-7, 7115 - 7166        | K.LTTPPTYGDLNHLVSATMSGVTTCLR.F                                          | 2711.06527 | 2 | 3.95E-10 | 0.95 | 5.22  | -     | 794.2   |
| AHQ-5-7, 6034               | K.LTTPPTYGDLNHLVSATMSGVTTCLR.F                                          | 2727.06467 | 3 | 1.29E-06 | 0.69 | 3.32  | -     | 587.1   |
| AHQ-5-7, 6196               | K.LTTPPTYGDLNHLVSATMSGVTTCLR.F                                          | 2711.06527 | 3 | 4.58E-04 | 0.74 | 3.29  | -     | 753.6   |
| AHQ-5-9, 5555               | K.LTTPPTYGDLNHLVSATMSGVTTCLR.F                                          | 2711.06527 | 2 | 1.79E-10 | 0.94 | 4.50  | -     | 956.1   |
| AHQ-5-8, 7073               | K.LTTPPTYGDLNHLVSATMSGVTTCLR.F                                          | 2711.06527 | 3 | 1.22E-05 | 0.63 | 3.19  | -     | 800.3   |
| AHQ-5-8, 7077               | K.LTTPPTYGDLNHLVSATMSGVTTCLR.F                                          | 2711.06527 | 2 | 9.43E-08 | 0.95 | 5.42  | -     | 695.8   |
| AHQ-5-7, 6191               | K.LTTPPTYGDLNHLVSATMSGVTTCLR.F                                          | 2711.06527 | 2 | 1.55E-06 | 0.89 | 3.74  | -     | 753.0   |
| AHQ-5-7, 5940               | K.M*SATFIGNSTAIQELFK.R                                                  | 1875.13550 | 2 | 1.64E-07 | 0.90 | 4.31  | -     | 1195.4  |
| AHQ-5-7, 6528               | K.M*SATFIGNSTAIQELFK.R                                                  | 1875.13550 | 2 | 7.93E-09 | 0.84 | 3.95  | -     | 945.0   |
| AHQ-5-7, 5900               | K.NSSYFVFEWIPNNVK.T                                                     | 1697.87148 | 2 | 1.08E-04 | 0.69 | 3.08  | -     | 617.1   |
| AHQ-5-7, 5376               | K.NSSYFVFEWIPNNVK.T                                                     | 1697.87148 | 2 | 4.84E-06 | 0.83 | 2.97  | -     | 855.9   |
| AHQ-5-7, 5294               | K.NSSYFVFEWIPNNVK.T                                                     | 1697.87148 | 2 | 1.71E-04 | 0.93 | 4.09  | -     | 887.0   |
| AHQ-5-12, 5429 - 5434       | K.NSSYFVFEWIPNNVK.T                                                     | 1697.87148 | 2 | 4.05E-04 | 0.88 | 3.78  | -     | 705.4   |
| AHQ-5-7, 6059 - 6132        | K.NSSYFVFEWIPNNVK.T                                                     | 1697.87148 | 2 | 9.79E-07 | 0.57 | 2.99  | -     | 516.8   |
| AHQ-5-7, 5127 - 5202        | K.NSSYFVFEWIPNNVK.T                                                     | 1697.87148 | 2 | 2.53E-05 | 0.88 | 3.98  | -     | 634.0   |
| AHQ-5-7, 6431 - 6504        | R.SGPFQGIIFRPDNFVFGQSGAGNNWAK.G                                         | 2800.03898 | 2 | 2.11E-10 | 0.97 | 5.60  | -     | 1136.8  |
| AHQ-5-11, 6080              | R.SGPFQGIIFRPDNFVFGQSGAGNNWAK.G                                         | 2800.03898 | 2 | 8.34E-07 | 0.94 | 4.81  | -     | 800.7   |
| AHQ-5-11, 6091 - 6152       | R.SGPFQGIIFRPDNFVFGQSGAGNNWAK.G                                         | 2800.03898 | 3 | 7.59E-10 | 0.97 | 5.70  | -     | 1849.1  |
| AHQ-5-11, 6166              | R.SGPFQGIIFRPDNFVFGQSGAGNNWAK.G                                         | 2800.03898 | 2 | 6.38E-12 | 0.96 | 5.36  | -     | 890.0   |
| AHQ-5-7, 6442 - 6506        | R.SGPFQGIIFRPDNFVFGQSGAGNNWAK.G                                         | 2800.03898 | 3 | 5.69E-12 | 0.97 | 6.11  | -     | 1903.2  |
| AHQ-5-12, 6217 - 6228       | R.SGPFQGIIFRPDNFVFGQSGAGNNWAK.G                                         | 2800.03898 | 3 | 3.09E-07 | 0.97 | 6.27  | -     | 1888.9  |
| AHQ-5-7, 6354 - 6418        | R.SGPFQGIIFRPDNFVFGQSGAGNNWAK.G                                         | 2800.03898 | 2 | 1.24E-06 | 0.96 | 5.70  | -     | 963.2   |
| AHQ-5-7, 6214 - 6287        | R.SGPFQGIIFRPDNFVFGQSGAGNNWAK.G                                         | 2800.03898 | 2 | 2.73E-05 | 0.95 | 4.98  | -     | 849.2   |
| AHQ-5-12, 6348              | R.SGPFQGIIFRPDNFVFGQSGAGNNWAK.G                                         | 2800.03898 | 2 | 1.45E-07 | 0.96 | 5.46  | -     | 828.1   |
| AHQ-5-10, 5772 - 5852       | R.SGPFQGIIFRPDNFVFGQSGAGNNWAK.G                                         | 2800.03898 | 3 | 3.33E-09 | 0.97 | 6.27  | -     | 1509.0  |
| AHQ-5-7, 6572               | R.SGPFQGIIFRPDNFVFGQSGAGNNWAK.G                                         | 2800.03898 | 2 | 1.86E-05 | 0.95 | 5.16  | -     | 986.7   |

|                            |                                                                         |            |   |          |       |        |       |         |
|----------------------------|-------------------------------------------------------------------------|------------|---|----------|-------|--------|-------|---------|
| AHQ-5-9, 5763 - 5779       | R.SGPFQGIIFRPDNFVFGQSGAGNNWAK.G                                         | 2800.03898 | 2 | 9.01E-08 | 0.94  | 4.91   | -     | 844.1   |
| AHQ-5-9, 5720 - 5727       | R.SGPFQGIIFRPDNFVFGQSGAGNNWAK.G                                         | 2800.03898 | 3 | 2.13E-09 | 0.97  | 5.40   | -     | 1967.5  |
| AHQ-5-9, 5680 - 5719       | R.SGPFQGIIFRPDNFVFGQSGAGNNWAK.G                                         | 2800.03898 | 2 | 5.81E-05 | 0.83  | 3.21   | -     | 637.2   |
| AHQ-5-14-, 6106 - 6185     | R.SGPFQGIIFRPDNFVFGQSGAGNNWAK.G                                         | 2800.03898 | 3 | 4.62E-13 | 0.97  | 7.03   | -     | 1472.2  |
| AHQ-5-8, 6241              | R.SGPFQGIIFRPDNFVFGQSGAGNNWAK.G                                         | 2800.03898 | 2 | 2.92E-06 | 0.84  | 3.50   | -     | 543.9   |
| AHQ-5-14-, 6277            | R.SGPFQGIIFRPDNFVFGQSGAGNNWAK.G                                         | 2800.03898 | 3 | 6.06E-09 | 0.94  | 5.08   | -     | 1260.4  |
| gi 4758606 ref NP_004508.1 | integrin-linked kinase [Homo sapiens]                                   |            |   | 4.75E-13 | 13.32 | 150.29 | 29.40 | 51418.9 |
| AHQ-5-13, 5244             | R.EVPFADLSNMEIGM.K.V                                                    | 1697.95498 | 2 | 8.08E-06 | 0.92  | 3.55   | -     | 1145.9  |
| AHQ-5-13-, 5612            | R.EVPFADLSNMEIGM.K.V                                                    | 1681.95558 | 2 | 1.19E-04 | 0.83  | 2.69   | -     | 526.5   |
| AHQ-5-7, 4091              | R.EVPFADLSNMEIGM.K.V                                                    | 1713.95438 | 2 | 7.29E-05 | 0.81  | 2.90   | -     | 602.3   |
| AHQ-5-7, 5347              | K.FDMIVPILEK.M                                                          | 1205.49168 | 2 | 2.33E-06 | 0.85  | 3.14   | -     | 694.5   |
| AHQ-5-7, 4179 - 4208       | K.FDMIVPILEK.M                                                          | 1221.49108 | 2 | 1.28E-06 | 0.83  | 2.92   | -     | 703.1   |
| AHQ-5-12, 2062             | R.GDDTPLHLAASHGHR.D                                                     | 1584.67809 | 2 | 1.69E-11 | 0.96  | 4.44   | -     | 1377.8  |
| AHQ-5-11, 4984             | R.GM*AFHLTLEPLIPR.H                                                     | 1611.93301 | 2 | 1.29E-04 | 0.88  | 2.98   | -     | 976.1   |
| AHQ-5-10, 4616             | R.GM*AFHLTLEPLIPR.H                                                     | 1611.93301 | 2 | 1.35E-06 | 0.83  | 3.32   | -     | 616.2   |
| AHQ-5-5, 5925              | R.GMAFLHTLEPLIPR.H                                                      | 1595.93361 | 2 | 1.44E-07 | 0.87  | 3.57   | -     | 762.9   |
| AHQ-5-7, 5552 - 5630       | R.GMAFLHTLEPLIPR.H                                                      | 1595.93361 | 2 | 4.44E-10 | 0.97  | 4.71   | -     | 1471.6  |
| AHQ-5-7, 5491 - 5558       | R.GMAFLHTLEPLIPR.H                                                      | 1595.93361 | 2 | 1.13E-04 | 0.75  | 2.98   | -     | 529.6   |
| AHQ-5-7, 5568              | R.GMAFLHTLEPLIPR.H                                                      | 1595.93361 | 3 | 1.12E-07 | 0.88  | 3.87   | -     | 1061.2  |
| AHQ-5-7, 2003              | K.LNENHSGELWK.G                                                         | 1327.42732 | 2 | 1.21E-04 | 0.90  | 3.71   | -     | 996.7   |
| AHQ-5-7, 5914 - 5990       | R.LWLDNTENDLNQGDHDFSPHWAACR.E                                           | 3113.28217 | 3 | 4.75E-13 | 0.96  | 5.74   | -     | 1247.8  |
| AHQ-5-7, 6102              | R.LWLDNTENDLNQGDHDFSPHWAACR.E                                           | 3113.28217 | 3 | 1.13E-08 | 0.94  | 5.09   | -     | 938.1   |
| AHQ-5-14-, 5850            | R.LWLDNTENDLNQGDHDFSPHWAACR.E                                           | 3113.28217 | 3 | 6.00E-09 | 0.94  | 5.17   | -     | 1127.3  |
| AHQ-5-10, 4252             | R.MYAPAWVAPEALQK.K                                                      | 1575.85602 | 2 | 2.56E-06 | 0.87  | 3.29   | -     | 879.2   |
| AHQ-5-7, 4414              | R.MYAPAWVAPEALQK.K                                                      | 1575.85602 | 2 | 4.78E-11 | 0.96  | 4.43   | -     | 1077.9  |
| AHQ-5-11, 4596             | R.MYAPAWVAPEALQK.K                                                      | 1575.85602 | 2 | 1.15E-06 | 0.97  | 4.22   | -     | 1575.5  |
| AHQ-5-7, 3963 - 4014       | R.M*YAPAWVAPEALQK.K                                                     | 1591.85542 | 2 | 1.19E-06 | 0.95  | 4.33   | -     | 1018.4  |
| AHQ-5-13, 4793             | R.MYAPAWVAPEALQK.K                                                      | 1575.85602 | 2 | 6.34E-04 | 0.65  | 2.63   | -     | 804.1   |
| AHQ-5-13, 4253 - 4321      | R.M*YAPAWVAPEALQK.K                                                     | 1591.85542 | 2 | 5.93E-04 | 0.95  | 3.97   | -     | 1007.8  |
| AHQ-5-7, 4367              | R.SAVVEMLIMR.G                                                          | 1149.45316 | 2 | 5.89E-08 | 0.92  | 3.65   | -     | 1211.6  |
| AHQ-5-7, 4180 - 4258       | K.VALEGLRPTIPPGISPHVCK.L                                                | 2143.53829 | 3 | 7.44E-10 | 0.89  | 3.50   | -     | 1227.3  |
| AHQ-5-9, 3963              | K.VALEGLRPTIPPGISPHVCK.L                                                | 2143.53829 | 2 | 8.34E-04 | 0.91  | 4.32   | -     | 559.2   |
| AHQ-5-13, 4653             | K.VALEGLRPTIPPGISPHVCK.L                                                | 2143.53829 | 3 | 3.09E-07 | 0.83  | 3.60   | -     | 657.7   |
| AHQ-5-7, 2682              | R.WQGDNDIVV.K                                                           | 1059.20012 | 1 | 1.61E-05 | 0.74  | 2.30   | -     | 854.1   |
| gi 4758970 ref NP_004150.1 | proteasome beta 8 subunit isoform E1 propeptide; proteasome subunit, be |            |   | 5.63E-13 | 2.69  | 30.24  | 14.70 | 29769.4 |
| AHQ-5-11, 2383             | K.FQHGVIAVDSR.A                                                         | 1300.44824 | 2 | 1.92E-05 | 0.78  | 2.58   | -     | 837.0   |
| AHQ-5-11, 2280             | K.KGPGLYVYDEHGR.L                                                       | 1592.73690 | 2 | 4.63E-10 | 0.97  | 4.79   | -     | 1330.8  |
| AHQ-5-11, 4042             | K.VESTDVSDDLHQYR.E                                                      | 1662.78230 | 2 | 5.63E-13 | 0.95  | 4.11   | -     | 1255.3  |
| AHQ-5-11, 3959 - 4022      | K.VESTDVSDDLHQYR.E                                                      | 1662.78230 | 2 | 1.88E-08 | 0.93  | 3.96   | -     | 1053.5  |
| gi 5729877 ref NP_006588.1 | heat shock 70kDa protein 8 isoform 1; heat shock cognate protein, 71-kD |            |   | 5.99E-13 | 12.89 | 140.33 | 24.60 | 70897.6 |
| AHQ-5-6, 4584              | R.FEELNADLFR.G                                                          | 1254.37310 | 2 | 4.39E-05 | 0.91  | 4.00   | -     | 1052.0  |
| AHQ-5-6, 5481              | K.GPAVGIDLGTTCVGVFQHGK.V                                                | 2265.53088 | 2 | 1.07E-05 | 0.71  | 3.73   | -     | 766.7   |
| AHQ-5-6, 5213 - 5280       | K.GPAVGIDLGTTCVGVFQHGK.V                                                | 2265.53088 | 3 | 6.37E-12 | 0.96  | 6.60   | -     | 819.4   |
| AHQ-5-6, 5201 - 5268       | K.GPAVGIDLGTTCVGVFQHGK.V                                                | 2265.53088 | 2 | 1.05E-06 | 0.96  | 5.04   | -     | 970.9   |
| AHQ-5-14-, 5155            | K.GPAVGIDLGTTCVGVFQHGK.V                                                | 2265.53088 | 3 | 1.01E-07 | 0.82  | 3.84   | -     | 418.5   |
| AHQ-5-6, 3644              | K.HWPFMVMVNDAGRPK.V                                                     | 1654.91970 | 2 | 8.49E-04 | 0.92  | 3.32   | -     | 1002.7  |
| AHQ-5-6, 5566              | K.ILDKCNEINWLDK.N                                                       | 1776.04688 | 2 | 7.47E-10 | 0.94  | 4.92   | -     | 1140.7  |
| AHQ-5-6, 3250 - 3277       | K.LDKSQIHDIVLVGGSTR.I                                                   | 1839.08615 | 2 | 2.85E-06 | 0.92  | 4.03   | -     | 808.4   |
| AHQ-5-6, 3734              | K.NQVMNPTNTVFDAR.R                                                      | 1650.83816 | 2 | 8.63E-05 | 0.70  | 2.61   | -     | 689.8   |
| AHQ-5-6, 3328 - 3365       | K.NQVMNPTNTVFDAR.R                                                      | 1666.83756 | 2 | 8.69E-06 | 0.90  | 3.66   | -     | 921.8   |
| AHQ-5-6, 3309 - 3317       | K.NQVMNPTNTVFDAR.R                                                      | 1650.83816 | 2 | 1.92E-08 | 0.85  | 3.51   | -     | 570.1   |
| AHQ-5-6, 4004              | K.NQVMNPTNTVFDAR.R                                                      | 1650.83816 | 2 | 8.65E-10 | 0.93  | 4.48   | -     | 781.8   |
| AHQ-5-6, 2781 - 2793       | K.NQVMNPTNTVFDAR.R                                                      | 1666.83756 | 2 | 1.51E-04 | 0.93  | 3.96   | -     | 868.7   |
| AHQ-5-6, 4652              | K.NSLESYAFNMK.A                                                         | 1304.45393 | 1 | 8.42E-04 | 0.31  | 2.16   | -     | 303.3   |
| AHQ-5-6, 3837 - 3885       | K.NSLESYAFNMK.A                                                         | 1304.45393 | 2 | 7.31E-05 | 0.86  | 3.20   | -     | 876.1   |
| AHQ-5-6, 1932 - 1934       | R.RFDDAVVQSDM.K.H                                                       | 1427.56543 | 2 | 4.37E-04 | 0.93  | 3.32   | -     | 940.8   |
| AHQ-5-6, 2428 - 2430       | R.RFDDAVVQSDM.K.H                                                       | 1411.56603 | 2 | 1.12E-06 | 0.95  | 4.34   | -     | 1314.4  |
| AHQ-5-6, 5102 - 5168       | K.SFYEEVSMVLTK.M                                                        | 1617.84485 | 2 | 1.08E-11 | 0.91  | 3.87   | -     | 616.6   |
| AHQ-5-6, 7125              | K.SINPDEAVYGAQAAILSGDK.S                                                | 2261.47411 | 2 | 5.99E-13 | 0.94  | 5.03   | -     | 783.5   |
| AHQ-5-6, 6864 - 6930       | K.SINPDEAVYGAQAAILSGDK.S                                                | 2261.47411 | 2 | 3.46E-08 | 0.97  | 5.53   | -     | 1139.3  |
| AHQ-5-7, 6838              | K.SINPDEAVYGAQAAILSGDK.S                                                | 2261.47411 | 2 | 1.81E-05 | 0.92  | 4.49   | -     | 706.5   |
| AHQ-5-7, 2691 - 2700       | K.SQIHDIVLVGGSTR.I                                                      | 1482.66712 | 2 | 1.54E-07 | 0.95  | 3.75   | -     | 1525.2  |
| AHQ-5-6, 2788              | K.SQIHDIVLVGGSTR.I                                                      | 1482.66712 | 1 | 2.25E-07 | 0.84  | 3.73   | -     | 433.1   |
| AHQ-5-6, 2780              | K.SQIHDIVLVGGSTR.I                                                      | 1482.66712 | 2 | 2.81E-06 | 0.96  | 4.18   | -     | 1652.9  |
| AHQ-5-6, 4666 - 4736       | K.TVTNAVVTVPYFNDSSQR.Q                                                  | 1983.17068 | 2 | 1.97E-07 | 0.87  | 3.79   | -     | 503.9   |
| gi 9966764 ref NP_009191.1 | lysophospholipase II; acyl-protein thioesterase [Homo sapiens]          |            |   | 6.94E-13 | 0.97  | 10.26  | 11.30 | 24736.8 |
| AHQ-5-10, 6436             | R.ETAAVIFHLGLDGTGHSWADALSTR.L                                           | 2740.02329 | 3 | 6.94E-13 | 0.97  | 5.15   | -     | 2459.3  |
| gi 7669492 ref NP_002037.2 | glyceraldehyde-3-phosphate dehydrogenase [Homo sapiens]                 |            |   | 7.03E-13 | 8.68  | 100.34 | 39.70 | 36053.0 |
| AHQ-5-10, 3298             | R.GALQNIIPASTGA.A.A                                                     | 1412.61680 | 1 | 7.43E-06 | 0.48  | 3.05   | -     | 243.8   |
| AHQ-5-9, 3079 - 3138       | R.GALQNIIPASTGA.A.A                                                     | 1412.61680 | 1 | 2.16E-05 | 0.78  | 3.71   | -     | 407.6   |
| AHQ-5-9, 3083 - 3142       | R.GALQNIIPASTGA.A.A                                                     | 1412.61680 | 2 | 3.28E-04 | 0.73  | 3.45   | -     | 432.7   |
| AHQ-5-11, 3503             | R.GALQNIIPASTGA.A.A                                                     | 1412.61680 | 1 | 3.38E-09 | 0.80  | 3.41   | -     | 519.4   |
| AHQ-5-9, 5466 - 5530       | K.GILGYTEHQVSSDFNSDTHSSTFDAGAGIALNDHFVK.L                               | 4039.28524 | 3 | 1.18E-06 | 0.95  | 5.94   | -     | 1177.1  |
| AHQ-5-9, 5239              | K.GILGYTEHQVSSDFNSDTHSSTFDAGAGIALNDHFVK.L                               | 4039.28524 | 3 | 1.61E-12 | 0.87  | 4.58   | -     | 599.6   |
| AHQ-5-9, 5699 - 5758       | K.GILGYTEHQVSSDFNSDTHSSTFDAGAGIALNDHFVK.L                               | 4039.28524 | 3 | 1.88E-04 | 0.96  | 5.90   | -     | 1056.6  |
| AHQ-5-9, 6286 - 6358       | K.GILGYTEHQVSSDFNSDTHSSTFDAGAGIALNDHFVK.L                               | 4039.28524 | 3 | 2.96E-08 | 0.97  | 6.19   | -     | 1719.2  |
| AHQ-5-9, 6168 - 6226       | K.GILGYTEHQVSSDFNSDTHSSTFDAGAGIALNDHFVK.L                               | 4039.28524 | 3 | 1.86E-05 | 0.90  | 4.95   | -     | 707.4   |
| AHQ-5-9, 5899 - 5956       | K.GILGYTEHQVSSDFNSDTHSSTFDAGAGIALNDHFVK.L                               | 4039.28524 | 3 | 1.68E-04 | 0.72  | 3.87   | -     | 501.5   |
| AHQ-5-9, 5572 - 5632       | K.GILGYTEHQVSSDFNSDTHSSTFDAGAGIALNDHFVK.L                               | 4039.28524 | 3 | 7.03E-13 | 0.96  | 6.02   | -     | 1195.7  |
| AHQ-5-9, 5651 - 5728       | K.VIHDNFGIVEGLM.TTVHAITATQK.T                                           | 2612.98634 | 3 | 2.19E-11 | 0.97  | 6.50   | -     | 2272.6  |
| AHQ-5-11, 6722             | K.VIHDNFGIVEGLM.TTVHAITATQK.T                                           | 2596.98694 | 3 | 8.68E-10 | 0.95  | 6.06   | -     | 1671.8  |
| AHQ-5-10, 6450             | K.VIHDNFGIVEGLM.TTVHAITATQK.T                                           | 2596.98694 | 3 | 1.15E-11 | 0.95  | 6.77   | -     | 1441.2  |
| AHQ-5-11, 6726             | K.VIHDNFGIVEGLM.TTVHAITATQK.T                                           | 2596.98694 | 2 | 8.69E-09 | 0.96  | 6.36   | -     | 1319.0  |
| AHQ-5-9, 6322 - 6378       | K.VIHDNFGIVEGLM.TTVHAITATQK.T                                           | 2596.98694 | 2 | 2.54E-07 | 0.97  | 6.82   | -     | 1811.7  |
| AHQ-5-10, 6452             | K.VIHDNFGIVEGLM.TTVHAITATQK.T                                           | 2596.98694 | 2 | 1.73E-10 | 0.98  | 6.85   | -     | 1648.2  |
| AHQ-5-9, 4284 - 4288       | R.VIISAPSADAPMFVGMVGNHEK.Y                                              | 2214.59387 | 2 | 1.09E-04 | 0.83  | 3.66   | -     | 469.8   |
| AHQ-5-9, 4106              | R.VIISAPSADAPMFVGMVGNHEK.Y                                              | 2230.59327 | 2 | 1.58E-07 | 0.64  | 3.11   | -     | 628.4   |
| AHQ-5-10, 4675             | R.VIISAPSADAPMFVGMVGNHEK.Y                                              | 2214.59387 | 2 | 2.99E-08 | 0.70  | 3.09   | -     | 364.9   |
| AHQ-5-9, 4022              | R.VIISAPSADAPMFVGMVGNHEK.Y                                              | 2230.59327 | 2 | 2.34E-07 | 0.70  | 3.55   | -     | 730.4   |
| AHQ-5-12, 5040 - 5045      | R.VIISAPSADAPMFVGMVGNHEK.Y                                              | 2214.59387 | 3 | 8.51E-07 | 0.54  | 3.07   | -     | 311.3   |
| AHQ-5-9, 3944 - 4023       | R.VIISAPSADAPMFVGMVGNHEK.Y                                              | 2230.59327 | 2 | 6.57E-04 | 0.31  | 3.07   | -     | 305.8   |
| AHQ-5-10, 3992             | R.VIISAPSADAPMFVGMVGNHEK.Y                                              | 2230.59327 | 2 | 3.21E-04 | 0.44  | 3.21   | -     | 357.2   |
| AHQ-5-10, 4466             | R.VIISAPSADAPMFVGMVGNHEK.Y                                              | 2214.59387 | 2 | 4.68E-05 | 0.82  | 3.44   | -     | 586.7   |
| AHQ-5-9, 4507              | R.VIISAPSADAPMFVGMVGNHEK.Y                                              | 2214.59387 | 2 | 7.05E-09 | 0.91  | 3.97   | -     | 654.0   |
| AHQ-5-4, 4270              | R.VPTANVSVDLTCR.L                                                       | 1532.74450 | 2 | 1.82E-08 | 0.91  | 3.53   | -     | 891.3   |
| AHQ-5-11, 3982 - 4046      | R.VPTANVSVDLTCR.L                                                       | 1532.74450 | 2 | 1.19E-08 | 0.90  | 3.83   | -     | 756.9   |
| AHQ-5-11, 3792             | R.VPTANVSVDLTCR.L                                                       | 1532.74450 | 2 | 5.81E-05 | 0.89  | 3.06   | -     | 940.0   |
| AHQ-5-12, 4117 - 4148      | R.VPTANVSVDLTCR.L                                                       | 1532.74450 | 2 | 2.74E-10 | 0.95  | 4.21   | -     | 1254.3  |
| AHQ-5-14, 4845 - 4846      | R.VPTANVSVDLTCR.L                                                       | 1532.74450 | 2 | 5.47E-10 | 0.93  | 4.00   | -     | 961.6   |
| AHQ-5-9, 4004              | R.VPTANVSVDLTCR.L                                                       | 1532.74450 | 2 | 1.70E-07 | 0.90  | 3.82   | -     | 900.8   |
| AHQ-5-9, 3902              | R.VPTANVSVDLTCR.L                                                       | 1532.74450 | 2 | 5.92E-06 | 0.89  | 3.39   | -     | 833.6   |
| AHQ-5-9, 3734 - 3815       | R.VPTANVSVDLTCR.L                                                       | 1532.74450 | 2 | 3.25E-09 | 0.94  | 4.17   | -     | 1006.1  |
| AHQ-5-9, 3619              | R.VPTANVSVDLTCR.L                                                       | 1532.74450 | 2 | 3.25E-06 | 0.87  | 3.12   | -     | 941.2   |
| AHQ-5-10, 3760 - 3824      | R.VPTANVSVDLTCR.L                                                       | 1532.74450 | 2 | 8.16E-05 | 0.83  | 2.96   | -     | 817.2   |
| AHQ-5-9, 3618 - 3678       | R.VPTANVSVDLTCR.L                                                       | 1532.74450 | 2 | 5.85E-09 | 0.96  | 4.69   | -     | 1174.0  |
| AHQ-5-9, 3487              | R.VPTANVSVDLTCR.L                                                       | 1532.74450 | 2 | 7.06E-09 | 0.94  | 3.98   | -     | 1152.6  |
| AHQ-5-13, 4188             | R.VPTANVSVDLTCR.L                                                       | 1532.74450 | 2 | 1.28E-07 | 0.93  | 3.71   | -     | 1037.8  |

|                             |                                                                        |            |   |          |       |        |       |         |
|-----------------------------|------------------------------------------------------------------------|------------|---|----------|-------|--------|-------|---------|
| AHQ-5-13-, 4099             | R.VPTANVSVVDTLCR.L                                                     | 1532.74450 | 2 | 2.07E-09 | 0.95  | 4.27   | -     | 1079.9  |
| AHQ-5-9, 6646               | K.WGDAGAEYVVESTGVFTTMEK.A                                              | 2278.48027 | 2 | 3.13E-06 | 0.86  | 3.78   | -     | 635.5   |
| AHQ-5-9, 6539 - 6610        | K.WGDAGAEYVVESTGVFTTMEK.A                                              | 2278.48027 | 2 | 3.23E-06 | 0.94  | 4.45   | -     | 918.0   |
| AHQ-5-9, 6403 - 6470        | K.WGDAGAEYVVESTGVFTTMEK.A                                              | 2278.48027 | 2 | 1.30E-05 | 0.94  | 4.50   | -     | 952.6   |
| AHQ-5-9, 6260               | K.WGDAGAEYVVESTGVFTTMEK.A                                              | 2294.47967 | 2 | 5.45E-04 | 0.65  | 3.44   | -     | 380.4   |
| AHQ-5-9, 6251 - 6315        | K.WGDAGAEYVVESTGVFTTMEK.A                                              | 2278.48027 | 2 | 7.66E-06 | 0.89  | 4.18   | -     | 557.9   |
| AHQ-5-9, 6120 - 6192        | K.WGDAGAEYVVESTGVFTTMEK.A                                              | 2278.48027 | 2 | 2.13E-07 | 0.94  | 4.18   | -     | 1049.8  |
| AHQ-5-9, 5992 - 6059        | K.WGDAGAEYVVESTGVFTTMEK.A                                              | 2278.48027 | 2 | 1.56E-05 | 0.90  | 3.61   | -     | 1001.2  |
| AHQ-5-9, 5870 - 5934        | K.WGDAGAEYVVESTGVFTTMEK.A                                              | 2278.48027 | 2 | 1.87E-07 | 0.95  | 4.38   | -     | 1122.5  |
| AHQ-5-9, 5752 - 5814        | K.WGDAGAEYVVESTGVFTTMEK.A                                              | 2278.48027 | 2 | 9.97E-08 | 0.95  | 4.62   | -     | 1057.4  |
| AHQ-5-9, 5672 - 5744        | K.WGDAGAEYVVESTGVFTTMEK.A                                              | 2294.47967 | 2 | 4.18E-04 | 0.84  | 3.49   | -     | 738.7   |
| AHQ-5-13, 6208 - 6281       | K.WGDAGAEYVVESTGVFTTMEK.A                                              | 2278.48027 | 2 | 9.04E-07 | 0.93  | 4.19   | -     | 938.8   |
| AHQ-5-9, 5667 - 5691        | K.WGDAGAEYVVESTGVFTTMEK.A                                              | 2278.48027 | 2 | 1.23E-07 | 0.91  | 4.02   | -     | 825.3   |
| AHQ-5-10, 5832              | K.WGDAGAEYVVESTGVFTTMEK.A                                              | 2278.48027 | 2 | 3.37E-04 | 0.82  | 3.79   | -     | 507.3   |
| AHQ-5-13-, 6015 - 6091      | K.WGDAGAEYVVESTGVFTTMEK.A                                              | 2278.48027 | 2 | 1.83E-07 | 0.95  | 5.25   | -     | 829.0   |
| AHQ-5-13-, 6111 - 6172      | K.WGDAGAEYVVESTGVFTTMEK.A                                              | 2278.48027 | 2 | 9.34E-07 | 0.96  | 5.23   | -     | 1189.1  |
| AHQ-5-13-, 6241             | K.WGDAGAEYVVESTGVFTTMEK.A                                              | 2278.48027 | 2 | 4.14E-06 | 0.87  | 3.89   | -     | 564.1   |
| gi 29739414 ref XP_294015.1 | similar to Glyceraldehyde 3-phosphate dehydrogenase, liver (GAPDH) [Ho |            |   | 7.10E-13 | 3.25  | 40.24  | 17.70 | 26916.7 |
| AHQ-5-11, 3971              | K.IISNASCTTNCPLAPLAK.V                                                 | 1837.10868 | 2 | 5.55E-07 | 0.73  | 3.51   | -     | 1026.7  |
| AHQ-5-10, 3638 - 3700       | K.IISNASCTTNCPLAPLAK.V                                                 | 1837.10868 | 2 | 1.14E-07 | 0.90  | 4.15   | -     | 1390.4  |
| AHQ-5-9, 3514 - 3578        | K.IISNASCTTNCPLAPLAK.V                                                 | 1837.10868 | 2 | 7.10E-13 | 0.91  | 4.83   | -     | 1282.5  |
| AHQ-5-9, 3635 - 3696        | K.IISNASCTTNCPLAPLAK.V                                                 | 1837.10868 | 2 | 2.42E-09 | 0.88  | 4.11   | -     | 1335.5  |
| AHQ-5-10, 3844 - 3900       | K.IISNASCTTNCPLAPLAK.V                                                 | 1837.10868 | 2 | 2.85E-06 | 0.30  | 2.62   | -     | 499.3   |
| AHQ-5-9, 4671               | K.LISWYDNEFGYSNR.V                                                     | 1764.87478 | 2 | 1.76E-06 | 0.85  | 3.76   | -     | 671.8   |
| AHQ-5-9, 4826               | K.LISWYDNEFGYSNR.V                                                     | 1764.87478 | 2 | 8.85E-06 | 0.84  | 3.52   | -     | 806.7   |
| AHQ-5-13-, 4971             | K.LISWYDNEFGYSNR.V                                                     | 1764.87478 | 2 | 7.73E-06 | 0.89  | 3.30   | -     | 895.8   |
| AHQ-5-9, 4542 - 4604        | K.LISWYDNEFGYSNR.V                                                     | 1764.87478 | 2 | 7.92E-06 | 0.94  | 4.40   | -     | 771.8   |
| AHQ-5-9, 4430 - 4486        | K.LISWYDNEFGYSNR.V                                                     | 1764.87478 | 2 | 9.64E-08 | 0.96  | 4.41   | -     | 1184.5  |
| AHQ-5-14-, 4923 - 4931      | K.LISWYDNEFGYSNR.V                                                     | 1764.87478 | 2 | 1.70E-10 | 0.96  | 4.87   | -     | 1303.1  |
| AHQ-5-14, 5829 - 5832       | K.LISWYDNEFGYSNR.V                                                     | 1764.87478 | 2 | 1.53E-08 | 0.93  | 4.08   | -     | 1011.6  |
| AHQ-5-10, 4550 - 4592       | K.LISWYDNEFGYSNR.V                                                     | 1764.87478 | 2 | 3.97E-09 | 0.90  | 3.48   | -     | 992.3   |
| AHQ-5-11, 4819 - 4879       | K.LISWYDNEFGYSNR.V                                                     | 1764.87478 | 2 | 2.59E-07 | 0.93  | 4.06   | -     | 805.9   |
| AHQ-5-11, 4952              | K.LISWYDNEFGYSNR.V                                                     | 1764.87478 | 2 | 5.95E-06 | 0.90  | 3.54   | -     | 883.9   |
| AHQ-5-12, 5022 - 5077       | K.LISWYDNEFGYSNR.V                                                     | 1764.87478 | 2 | 2.51E-08 | 0.96  | 4.36   | -     | 1339.4  |
| AHQ-5-13, 5076              | K.LISWYDNEFGYSNR.V                                                     | 1764.87478 | 2 | 8.07E-08 | 0.89  | 3.49   | -     | 720.1   |
| AHQ-5-9, 2492               | R.VVDLMAHMASK.E                                                        | 1202.47292 | 2 | 6.08E-04 | 0.93  | 3.15   | -     | 1237.9  |
| AHQ-5-11, 2786              | R.VVDLMAHMASK.E                                                        | 1202.47292 | 2 | 1.80E-07 | 0.96  | 3.93   | -     | 1439.2  |
| AHQ-5-9, 2598 - 2676        | R.VVDLMAHMASK.E                                                        | 1331.58746 | 1 | 7.08E-04 | 0.42  | 2.60   | -     | 297.1   |
| gi 30159830 ref XP_302246.1 | similar to HSPC280 [Homo sapiens]                                      |            |   | 8.45E-13 | 1.93  | 20.25  | 3.90  | 45644.4 |
| AHQ-5-14-, 6745             | K.CANLFEALVGTLK.A                                                      | 1437.68632 | 2 | 4.40E-06 | 0.97  | 4.91   | -     | 1491.8  |
| AHQ-5-14-, 6725             | R.DDKCANLFEALVGTLK.A                                                   | 1796.03496 | 2 | 8.45E-13 | 0.96  | 4.92   | -     | 1618.7  |
| AHQ-5-14-, 6693 - 6694      | R.DDKCANLFEALVGTLK.A                                                   | 1796.03496 | 3 | 1.00E-05 | 0.94  | 4.64   | -     | 1720.5  |
| AHQ-5-14-, 6643             | R.DDKCANLFEALVGTLK.A                                                   | 1796.03496 | 2 | 8.16E-09 | 0.93  | 3.82   | -     | 1155.5  |
| gi 4507645 ref NP_000356.1  | triosephosphate isomerase 1 [Homo sapiens]                             |            |   | 8.60E-13 | 5.43  | 60.33  | 38.60 | 26669.3 |
| AHQ-5-10, 3522 - 3580       | K.DCGATVWVVGHSER.R                                                     | 1588.72671 | 2 | 7.92E-06 | 0.93  | 3.97   | -     | 1117.3  |
| AHQ-5-10, 6222 - 6278       | K.ELASQPDVDFGLVGGASLKPEFVDIINAK.Q                                      | 3031.40532 | 3 | 8.32E-05 | 0.79  | 3.99   | -     | 262.2   |
| AHQ-5-10, 6079 - 6086       | K.ELASQPDVDFGLVGGASLKPEFVDIINAK.Q                                      | 3031.40532 | 3 | 3.96E-07 | 0.81  | 4.28   | -     | 214.1   |
| AHQ-5-10, 6338 - 6412       | K.ELASQPDVDFGLVGGASLKPEFVDIINAK.Q                                      | 3031.40532 | 3 | 6.75E-08 | 0.71  | 3.86   | -     | 242.3   |
| AHQ-5-10, 3714              | R.KQSLGELIGTLNAAK.V                                                    | 1543.79037 | 2 | 4.92E-06 | 0.96  | 4.49   | -     | 1342.9  |
| AHQ-5-10, 3931 - 3939       | R.KQSLGELIGTLNAAK.V                                                    | 1543.79037 | 2 | 8.26E-04 | 0.93  | 3.71   | -     | 1350.0  |
| AHQ-5-10, 4748              | K.QSLGELIGTLNAAK.V                                                     | 1415.61746 | 2 | 1.41E-06 | 0.90  | 3.27   | -     | 918.8   |
| AHQ-5-10, 4882 - 4950       | K.VAHALAEGLVIAICIGEK.L                                                 | 1810.10800 | 2 | 8.60E-13 | 0.99  | 6.54   | -     | 3019.7  |
| AHQ-5-10, 5046 - 5110       | K.VPADTEVVCAPPYATIDFAR.Q                                               | 2194.44943 | 2 | 5.72E-04 | 0.94  | 4.68   | -     | 801.8   |
| AHQ-5-14-, 5470             | K.VPADTEVVCAPPYATIDFAR.Q                                               | 2194.44943 | 2 | 5.57E-04 | 0.94  | 4.76   | -     | 751.4   |
| gi 28626504 ref NP_113659.3 | UNC-112 related protein 2 [Homo sapiens]                               |            |   | 1.14E-12 | 24.28 | 280.34 | 55.80 | 75429.7 |
| AHQ-5-6, 2957 - 2958        | K.AGDALWLR.F                                                           | 902.03223  | 2 | 1.30E-04 | 0.93  | 3.98   | -     | 1225.9  |
| AHQ-5-14-, 6387 - 6394      | R.ARGEELEDLFLQLTGGHEAF                                                 | 2348.51032 | 2 | 1.76E-08 | 0.97  | 5.22   | -     | 1410.8  |
| AHQ-5-10, 5978 - 6056       | R.ARGEELEDLFLQLTGGHEAF                                                 | 2348.51032 | 2 | 1.30E-05 | 0.61  | 2.57   | -     | 769.8   |
| AHQ-5-6, 6752 - 6821        | R.ASFSOPLFOAVAIICR.L                                                   | 1768.02967 | 2 | 2.65E-10 | 0.95  | 4.61   | -     | 926.3   |
| AHQ-5-6, 6668 - 6732        | R.ASFSOPLFOAVAIICR.L                                                   | 1768.02967 | 2 | 7.36E-09 | 0.96  | 5.07   | -     | 1038.4  |
| AHQ-5-7, 6667 - 6695        | R.ASFSOPLFOAVAIICR.L                                                   | 1768.02967 | 2 | 4.12E-05 | 0.91  | 3.95   | -     | 824.3   |
| AHQ-5-1, 6987 - 6991        | R.ASFSOPLFOAVAIICR.L                                                   | 1768.02967 | 2 | 7.12E-07 | 0.95  | 4.22   | -     | 1171.3  |
| AHQ-5-12, 6630              | R.ASFSOPLFOAVAIICR.L                                                   | 1768.02967 | 2 | 1.29E-05 | 0.89  | 3.45   | -     | 787.6   |
| AHQ-5-4, 7013               | R.ASFSOPLFOAVAIICR.L                                                   | 1768.02967 | 2 | 2.00E-05 | 0.95  | 4.51   | -     | 983.3   |
| AHQ-5-9, 5966 - 6027        | R.ASFSOPLFOAVAIICR.L                                                   | 1768.02967 | 2 | 3.84E-04 | 0.94  | 4.36   | -     | 699.4   |
| AHQ-5-11, 6400 - 6478       | R.ASFSOPLFOAVAIICR.L                                                   | 1768.02967 | 2 | 7.75E-04 | 0.79  | 3.35   | -     | 524.1   |
| AHQ-5-3, 7046               | R.ASFSOPLFOAVAIICR.L                                                   | 1768.02967 | 2 | 1.04E-10 | 0.96  | 4.94   | -     | 909.1   |
| AHQ-5-5, 6867 - 6870        | R.ASFSOPLFOAVAIICR.L                                                   | 1768.02967 | 2 | 2.01E-09 | 0.96  | 5.07   | -     | 1035.4  |
| AHQ-5-6, 6984 - 7062        | R.ASFSOPLFOAVAIICR.L                                                   | 1768.02967 | 2 | 7.73E-04 | 0.91  | 4.00   | -     | 700.1   |
| AHQ-5-10, 6091              | R.ASFSOPLFOAVAIICR.L                                                   | 1768.02967 | 2 | 9.58E-06 | 0.90  | 3.73   | -     | 890.6   |
| AHQ-5-6, 6713               | R.ASFSOPLFOAVAIICR.L                                                   | 1768.02967 | 3 | 1.61E-05 | 0.92  | 4.38   | -     | 1017.0  |
| AHQ-5-11, 3451 - 3474       | K.EKEPEEELYDLSK.V                                                      | 1609.71294 | 2 | 3.93E-05 | 0.79  | 3.48   | -     | 392.8   |
| AHQ-5-9, 3107               | K.EKEPEEELYDLSK.V                                                      | 1609.71294 | 2 | 1.60E-07 | 0.92  | 4.06   | -     | 595.4   |
| AHQ-5-6, 3273 - 3344        | K.EKEPEEELYDLSK.V                                                      | 1609.71294 | 2 | 1.00E-05 | 0.76  | 3.21   | -     | 457.6   |
| AHQ-5-3, 7317               | R.FIQAWQSLPDFGISYVM*VR.F                                               | 2274.62593 | 2 | 1.92E-04 | 0.95  | 5.13   | -     | 547.3   |
| AHQ-5-1, 7185               | R.FIQAWQSLPDFGISYVM*VR.F                                               | 2274.62593 | 2 | 4.62E-04 | 0.63  | 3.18   | -     | 209.4   |
| AHQ-5-12, 6824 - 6832       | R.FIQAWQSLPDFGISYVM*VR.F                                               | 2274.62593 | 2 | 7.73E-05 | 0.95  | 5.13   | -     | 664.6   |
| AHQ-5-13, 6724              | R.FIQAWQSLPDFGISYVM*VR.F                                               | 2274.62593 | 2 | 1.92E-05 | 0.85  | 4.10   | -     | 428.6   |
| AHQ-5-11, 6628              | R.FIQAWQSLPDFGISYVM*VR.F                                               | 2274.62593 | 2 | 7.67E-04 | 0.78  | 3.54   | -     | 331.4   |
| AHQ-5-9, 6422 - 6423        | R.FIQAWQSLPDFGISYVM*VR.F                                               | 2258.62653 | 2 | 2.18E-05 | 0.94  | 5.34   | -     | 439.7   |
| AHQ-5-10, 6346              | R.FIQAWQSLPDFGISYVM*VR.F                                               | 2274.62593 | 2 | 6.50E-04 | 0.87  | 4.28   | -     | 320.5   |
| AHQ-5-6, 7058 - 7076        | R.FIQAWQSLPDFGISYVM*VR.F                                               | 2274.62593 | 3 | 2.67E-04 | 0.95  | 4.76   | -     | 1565.4  |
| AHQ-5-6, 7240               | R.FIQAWQSLPDFGISYVM*VR.F                                               | 2258.62653 | 2 | 4.46E-06 | 0.95  | 5.05   | -     | 765.3   |
| AHQ-5-9, 2890               | K.GCEVVPDNNVSGQK.F                                                     | 1489.63335 | 1 | 5.16E-07 | 0.88  | 3.74   | -     | 849.4   |
| AHQ-5-11, 3139              | K.GCEVVPDNNVSGQK.F                                                     | 1489.63335 | 1 | 2.44E-04 | 0.76  | 2.33   | -     | 1105.6  |
| AHQ-5-13, 3358 - 3417       | K.GCEVVPDNNVSGQK.F                                                     | 1489.63335 | 2 | 9.15E-04 | 0.66  | 2.52   | -     | 603.9   |
| AHQ-5-6, 3086               | K.GCEVVPDNNVSGQK.F                                                     | 1489.63335 | 1 | 1.77E-06 | 0.82  | 3.08   | -     | 840.9   |
| AHQ-5-13, 6776              | R.GEELEDLFLQLTGGHEAF                                                   | 2121.24574 | 2 | 8.41E-05 | 0.82  | 3.81   | -     | 676.6   |
| AHQ-5-14-, 6669             | R.GEELEDLFLQLTGGHEAF                                                   | 2121.24574 | 2 | 7.47E-07 | 0.95  | 4.91   | -     | 1000.3  |
| AHQ-5-6, 7180 - 7249        | R.GEELEDLFLQLTGGHEAF                                                   | 2121.24574 | 2 | 1.76E-07 | 0.89  | 4.44   | -     | 453.9   |
| AHQ-5-6, 3788 - 3797        | R.GMPAHFSDSAQTEACYHMLSR.P                                              | 2398.64117 | 3 | 1.14E-12 | 0.94  | 5.25   | -     | 904.5   |
| AHQ-5-3, 3957               | R.IDLAVGDVVK.T                                                         | 1029.21223 | 1 | 4.17E-05 | 0.24  | 1.93   | -     | 404.0   |
| AHQ-5-6, 3641 - 3712        | R.IDLAVGDVVK.T                                                         | 1029.21223 | 1 | 3.58E-05 | 0.30  | 2.10   | -     | 439.7   |
| AHQ-5-6, 3638 - 3708        | R.IDLAVGDVVK.T                                                         | 1029.21223 | 2 | 5.63E-06 | 0.92  | 3.33   | -     | 1248.4  |
| AHQ-5-9, 3382               | R.IDLAVGDVVK.T                                                         | 1029.21223 | 1 | 3.62E-05 | 0.54  | 2.47   | -     | 452.4   |
| AHQ-5-14, 4654              | R.IDLAVGDVVK.T                                                         | 1029.21223 | 1 | 1.76E-04 | 0.42  | 2.10   | -     | 520.8   |
| AHQ-5-4, 4618               | R.ILEAHQNVLAQLSLAEQRL.F                                                | 2105.38372 | 2 | 1.74E-05 | 0.98  | 6.41   | -     | 2100.9  |
| AHQ-5-12, 4426              | R.ILEAHQNVLAQLSLAEQRL.F                                                | 2105.38372 | 3 | 5.65E-06 | 0.92  | 4.79   | -     | 1358.6  |
| AHQ-5-11, 4271              | R.ILEAHQNVLAQLSLAEQRL.F                                                | 2105.38372 | 2 | 3.30E-04 | 0.98  | 6.53   | -     | 2067.8  |
| AHQ-5-9, 3811 - 3870        | R.ILEAHQNVLAQLSLAEQRL.F                                                | 2105.38372 | 2 | 7.43E-06 | 0.91  | 4.33   | -     | 826.9   |
| AHQ-5-11, 4267              | R.ILEAHQNVLAQLSLAEQRL.F                                                | 2105.38372 | 3 | 6.96E-06 | 0.95  | 5.42   | -     | 1144.7  |
| AHQ-5-1, 4727               | R.ILEAHQNVLAQLSLAEQRL.F                                                | 2105.38372 | 2 | 1.12E-11 | 0.98  | 6.18   | -     | 2234.1  |
| AHQ-5-7, 4107               | R.ILEAHQNVLAQLSLAEQRL.F                                                | 2105.38372 | 2 | 1.97E-07 | 0.97  | 5.57   | -     | 1443.7  |
| AHQ-5-13-, 4448             | R.ILEAHQNVLAQLSLAEQRL.F                                                | 2105.38372 | 2 | 5.40E-12 | 0.98  | 6.55   | -     | 2181.5  |
| AHQ-5-3, 4677               | R.ILEAHQNVLAQLSLAEQRL.F                                                | 2105.38372 | 2 | 1.16E-06 | 0.98  | 6.77   | -     | 2005.8  |
| AHQ-5-4, 4609               | R.ILEAHQNVLAQLSLAEQRL.F                                                | 2105.38372 | 3 | 3.56E-04 | 0.70  | 3.77   | -     | 880.2   |
| AHQ-5-12, 4425              | R.ILEAHQNVLAQLSLAEQRL.F                                                | 2105.38372 | 2 | 8.37E-11 | 0.98  | 5.86   | -     | 2046.0  |



|                                                                                                    |                                    |            |   |          |       |        |       |         |
|----------------------------------------------------------------------------------------------------|------------------------------------|------------|---|----------|-------|--------|-------|---------|
| AHQ-5-6, 4410 - 4477                                                                               | R.ILEAHQNVQALSIAEAQLR.F            | 2105.38372 | 2 | 9.07E-07 | 0.98  | 6.10   | -     | 1814.2  |
| AHQ-5-6, 4270 - 4340                                                                               | R.ILEAHQNVQALSIAEAQLR.F            | 2105.38372 | 2 | 3.45E-12 | 0.98  | 6.13   | -     | 1971.5  |
| AHQ-5-6, 1550                                                                                      | K.IVEQINR.K                        | 872.00444  | 2 | 9.81E-04 | 0.73  | 2.52   | -     | 675.8   |
| AHQ-5-12, 2537                                                                                     | R.KDEILGIANNR.L                    | 1243.39499 | 1 | 1.05E-05 | 0.25  | 1.94   | -     | 333.6   |
| AHQ-5-12, 2532 - 2541                                                                              | R.KDEILGIANNR.L                    | 1243.39499 | 2 | 5.09E-05 | 0.90  | 3.38   | -     | 1010.7  |
| AHQ-5-11, 2484                                                                                     | R.KDEILGIANNR.L                    | 1243.39499 | 2 | 2.75E-04 | 0.85  | 2.98   | -     | 899.2   |
| AHQ-5-6, 2324 - 2329                                                                               | R.KDEILGIANNR.L                    | 1243.39499 | 2 | 1.32E-04 | 0.95  | 3.65   | -     | 1465.2  |
| AHQ-5-6, 2500 - 2568                                                                               | R.KDEILGIANNR.L                    | 1243.39499 | 2 | 2.21E-04 | 0.83  | 3.35   | -     | 1042.6  |
| AHQ-5-6, 2413 - 2414                                                                               | R.KDEILGIANNR.L                    | 1243.39499 | 1 | 2.73E-08 | 0.46  | 1.90   | -     | 420.6   |
| AHQ-5-6, 2408 - 2412                                                                               | R.KDEILGIANNR.L                    | 1243.39499 | 2 | 3.09E-05 | 0.91  | 3.86   | -     | 1101.7  |
| AHQ-5-6, 2326                                                                                      | R.KDEILGIANNR.L                    | 1243.39499 | 1 | 4.52E-05 | 0.33  | 2.31   | -     | 239.0   |
| AHQ-5-13, 2814 - 2875                                                                              | R.KDEILGIANNR.L                    | 1243.39499 | 2 | 1.64E-05 | 0.92  | 3.69   | -     | 1125.5  |
| AHQ-5-9, 2322                                                                                      | R.KDEILGIANNR.L                    | 1243.39499 | 2 | 3.91E-06 | 0.92  | 3.21   | -     | 1248.9  |
| AHQ-5-7, 3615                                                                                      | R.KQDWSHAIWWEQK.R                  | 1858.00504 | 2 | 6.73E-05 | 0.85  | 3.72   | -     | 591.9   |
| AHQ-5-6, 6600 - 6653                                                                               | K.LEGSAPTDVLDLSLTTIPELK.D          | 2100.35256 | 2 | 1.56E-06 | 0.91  | 4.19   | -     | 648.3   |
| AHQ-5-7, 6671 - 6694                                                                               | K.LEGSAPTDVLDLSLTTIPELK.D          | 2100.35256 | 2 | 7.51E-05 | 0.96  | 5.64   | -     | 899.0   |
| AHQ-5-6, 6704 - 6768                                                                               | K.LEGSAPTDVLDLSLTTIPELK.D          | 2100.35256 | 2 | 5.87E-05 | 0.94  | 4.82   | -     | 716.2   |
| AHQ-5-5, 6853 - 6855                                                                               | K.LEGSAPTDVLDLSLTTIPELK.D          | 2100.35256 | 2 | 3.30E-05 | 0.83  | 4.02   | -     | 446.2   |
| AHQ-5-9, 5983                                                                                      | K.LEGSAPTDVLDLSLTTIPELK.D          | 2100.35256 | 2 | 7.77E-04 | 0.94  | 4.94   | -     | 670.7   |
| AHQ-5-6, 6792 - 6854                                                                               | K.LEGSAPTDVLDLSLTTIPELK.D          | 2100.35256 | 2 | 3.13E-06 | 0.92  | 4.34   | -     | 709.7   |
| AHQ-5-6, 5616                                                                                      | K.LEGSAPTDVLDLSLTTIPELK.D          | 2100.35256 | 2 | 3.50E-08 | 0.92  | 4.25   | -     | 811.1   |
| AHQ-5-14-, 6415 - 6462                                                                             | K.LEGSAPTDVLDLSLTTIPELK.D          | 2100.35256 | 2 | 8.51E-04 | 0.79  | 3.75   | -     | 370.2   |
| AHQ-5-6, 6436 - 6509                                                                               | K.LEGSAPTDVLDLSLTTIPELK.D          | 2100.35256 | 2 | 1.67E-06 | 0.89  | 3.82   | -     | 684.0   |
| AHQ-5-3, 5939                                                                                      | K.LEGSAPTDVLDLSLTTIPELK.D          | 2100.35256 | 2 | 3.22E-04 | 0.45  | 3.03   | -     | 290.5   |
| AHQ-5-8, 6492 - 6500                                                                               | K.LEGSAPTDVLDLSLTTIPELK.D          | 2100.35256 | 2 | 7.10E-05 | 0.94  | 4.43   | -     | 825.6   |
| AHQ-5-6, 6385                                                                                      | K.LEGSAPTDVLDLSLTTIPELK.DHLR.I     | 2621.92493 | 3 | 9.47E-08 | 0.79  | 3.45   | -     | 457.1   |
| AHQ-5-14-, 5677 - 5702                                                                             | K.LLVPSPEGMSEIYLR.C                | 1705.01201 | 2 | 6.04E-06 | 0.70  | 2.76   | -     | 363.0   |
| AHQ-5-9, 5122                                                                                      | K.LLVPSPEGMSEIYLR.C                | 1705.01201 | 2 | 5.03E-06 | 0.71  | 2.88   | -     | 267.4   |
| AHQ-5-12, 5780 - 5789                                                                              | K.LLVPSPEGMSEIYLR.C                | 1705.01201 | 2 | 3.13E-06 | 0.64  | 2.69   | -     | 267.4   |
| AHQ-5-6, 5696 - 5769                                                                               | K.LLVPSPEGMSEIYLR.C                | 1705.01201 | 2 | 2.51E-09 | 0.64  | 2.76   | -     | 389.4   |
| AHQ-5-1, 6159                                                                                      | K.LLVPSPEGMSEIYLR.C                | 1705.01201 | 2 | 1.78E-05 | 0.66  | 2.56   | -     | 275.7   |
| AHQ-5-6, 5836 - 5840                                                                               | K.LLVPSPEGMSEIYLR.C                | 1705.01201 | 2 | 2.74E-09 | 0.77  | 3.18   | -     | 386.9   |
| AHQ-5-6, 4694 - 4765                                                                               | K.LLVPSPEGMSEIYLR.C                | 1721.01141 | 2 | 2.56E-05 | 0.62  | 2.82   | -     | 307.3   |
| AHQ-5-11, 5598 - 5615                                                                              | K.LLVPSPEGMSEIYLR.C                | 1705.01201 | 2 | 2.76E-05 | 0.70  | 2.97   | -     | 417.9   |
| AHQ-5-3, 6145                                                                                      | K.LLVPSPEGMSEIYLR.C                | 1705.01201 | 2 | 5.49E-07 | 0.72  | 3.02   | -     | 354.2   |
| AHQ-5-1, 7139                                                                                      | K.LSQSGEYGEPAGTDPGLDLDLVALSNLEVK.L | 3027.24073 | 3 | 3.31E-08 | 0.94  | 5.00   | -     | 1172.7  |
| AHQ-5-8, 6772                                                                                      | K.LSQSGEYGEPAGTDPGLDLDLVALSNLEVK.L | 3027.24073 | 3 | 5.38E-06 | 0.89  | 4.19   | -     | 1210.4  |
| AHQ-5-6, 7020                                                                                      | K.LSQSGEYGEPAGTDPGLDLDLVALSNLEVK.L | 3027.24073 | 3 | 2.18E-05 | 0.94  | 4.31   | -     | 1646.3  |
| AHQ-5-6, 6928 - 6957                                                                               | K.LSQSGEYGEPAGTDPGLDLDLVALSNLEVK.L | 3027.24073 | 3 | 1.80E-11 | 0.91  | 4.75   | -     | 968.9   |
| AHQ-5-9, 2144                                                                                      | R.LTLQYEQAR.W                      | 1122.25622 | 2 | 3.91E-05 | 0.91  | 3.41   | -     | 1027.4  |
| AHQ-5-7, 2095 - 2108                                                                               | R.LTLQYEQAR.W                      | 1122.25622 | 2 | 5.13E-06 | 0.88  | 3.25   | -     | 1130.8  |
| AHQ-5-6, 2117 - 2124                                                                               | R.LTLQYEQAR.W                      | 1122.25622 | 2 | 2.18E-05 | 0.91  | 3.86   | -     | 1013.5  |
| AHQ-5-13, 2535                                                                                     | R.LTLQYEQAR.W                      | 1122.25622 | 2 | 5.47E-04 | 0.80  | 2.71   | -     | 783.4   |
| AHQ-5-11, 3934                                                                                     | K.SQDEAPGDPIQQLNLK.G               | 1753.89174 | 2 | 3.87E-09 | 0.88  | 3.87   | -     | 570.1   |
| AHQ-5-12, 4042 - 4048                                                                              | K.SQDEAPGDPIQQLNLK.G               | 1753.89174 | 2 | 3.12E-08 | 0.88  | 4.30   | -     | 426.0   |
| AHQ-5-4, 4173                                                                                      | K.SQDEAPGDPIQQLNLK.G               | 1753.89174 | 2 | 5.82E-04 | 0.82  | 3.54   | -     | 432.2   |
| AHQ-5-13-, 4060 - 4124                                                                             | K.SQDEAPGDPIQQLNLK.G               | 1753.89174 | 2 | 6.71E-08 | 0.92  | 4.33   | -     | 623.2   |
| AHQ-5-6, 3877 - 3957                                                                               | K.SQDEAPGDPIQQLNLK.G               | 1753.89174 | 2 | 8.43E-10 | 0.93  | 4.43   | -     | 588.5   |
| AHQ-5-6, 4104 - 4178                                                                               | K.TASGDYIDSSWELR.V                 | 1600.66783 | 2 | 2.39E-09 | 0.89  | 3.58   | -     | 746.3   |
| AHQ-5-9, 3864 - 3872                                                                               | K.TASGDYIDSSWELR.V                 | 1600.66783 | 2 | 4.30E-07 | 0.94  | 3.89   | -     | 985.5   |
| AHQ-5-6, 4248 - 4316                                                                               | K.TASGDYIDSSWELR.V                 | 1600.66783 | 2 | 1.61E-09 | 0.95  | 4.27   | -     | 1000.2  |
| AHQ-5-6, 4468 - 4549                                                                               | K.TASGDYIDSSWELR.V                 | 1600.66783 | 2 | 6.88E-05 | 0.87  | 3.15   | -     | 901.5   |
| AHQ-5-8, 4105                                                                                      | K.TASGDYIDSSWELR.V                 | 1600.66783 | 2 | 1.20E-05 | 0.84  | 3.28   | -     | 757.6   |
| AHQ-5-14-, 4253                                                                                    | K.TASGDYIDSSWELR.V                 | 1600.66783 | 2 | 9.32E-08 | 0.95  | 3.92   | -     | 1326.8  |
| AHQ-5-7, 4135                                                                                      | K.TASGDYIDSSWELR.V                 | 1600.66783 | 2 | 7.40E-05 | 0.82  | 3.31   | -     | 623.8   |
| AHQ-5-4, 3893                                                                                      | R.TGSGGPGNHPHGPDAEAGLNPNYGLVAPR.F  | 2783.95312 | 3 | 3.41E-06 | 0.97  | 6.13   | -     | 1444.8  |
| AHQ-5-10, 3487                                                                                     | R.TGSGGPGNHPHGPDAEAGLNPNYGLVAPR.F  | 2783.95312 | 2 | 2.10E-05 | 0.87  | 3.87   | -     | 542.7   |
| AHQ-5-6, 3546 - 3617                                                                               | R.TGSGGPGNHPHGPDAEAGLNPNYGLVAPR.F  | 2783.95312 | 2 | 3.55E-04 | 0.95  | 5.31   | -     | 739.0   |
| AHQ-5-3, 3941 - 3946                                                                               | R.TGSGGPGNHPHGPDAEAGLNPNYGLVAPR.F  | 2783.95312 | 3 | 1.94E-04 | 0.93  | 5.46   | -     | 829.1   |
| AHQ-5-5, 3657                                                                                      | R.TGSGGPGNHPHGPDAEAGLNPNYGLVAPR.F  | 2783.95312 | 2 | 8.17E-04 | 0.88  | 4.54   | -     | 407.5   |
| AHQ-5-6, 3612 - 3692                                                                               | R.TGSGGPGNHPHGPDAEAGLNPNYGLVAPR.F  | 2783.95312 | 3 | 4.05E-07 | 0.94  | 5.63   | -     | 985.0   |
| AHQ-5-1, 4084                                                                                      | R.TGSGGPGNHPHGPDAEAGLNPNYGLVAPR.F  | 2783.95312 | 2 | 2.00E-07 | 0.90  | 4.15   | -     | 648.4   |
| AHQ-5-9, 3310                                                                                      | R.TGSGGPGNHPHGPDAEAGLNPNYGLVAPR.F  | 2783.95312 | 2 | 2.62E-04 | 0.95  | 5.21   | -     | 718.6   |
| AHQ-5-1, 4076                                                                                      | R.TGSGGPGNHPHGPDAEAGLNPNYGLVAPR.F  | 2783.95312 | 3 | 7.73E-06 | 0.95  | 5.40   | -     | 1082.7  |
| AHQ-5-11, 3672                                                                                     | R.TGSGGPGNHPHGPDAEAGLNPNYGLVAPR.F  | 2783.95312 | 2 | 1.72E-04 | 0.92  | 4.66   | -     | 591.0   |
| AHQ-5-5, 3649                                                                                      | R.TGSGGPGNHPHGPDAEAGLNPNYGLVAPR.F  | 2783.95312 | 3 | 7.90E-04 | 0.89  | 4.65   | -     | 1005.3  |
| AHQ-5-11, 3668                                                                                     | R.TGSGGPGNHPHGPDAEAGLNPNYGLVAPR.F  | 2783.95312 | 3 | 5.02E-04 | 0.96  | 5.60   | -     | 1275.9  |
| AHQ-5-3, 4157                                                                                      | R.VFVGEEDPEAESVTLR.V               | 1777.91007 | 2 | 4.11E-06 | 0.84  | 3.15   | -     | 892.3   |
| AHQ-5-11, 3882                                                                                     | R.VFVGEEDPEAESVTLR.V               | 1777.91007 | 2 | 2.94E-05 | 0.93  | 4.31   | -     | 1033.0  |
| AHQ-5-6, 3873 - 3940                                                                               | R.VFVGEEDPEAESVTLR.V               | 1777.91007 | 2 | 9.75E-10 | 0.93  | 4.26   | -     | 1080.5  |
| AHQ-5-6, 4010                                                                                      | R.VFVGEEDPEAESVTLR.V               | 1777.91007 | 2 | 2.03E-06 | 0.97  | 4.67   | -     | 2131.8  |
| AHQ-5-14-, 3861                                                                                    | R.VFVGEEDPEAESVTLR.V               | 1777.91007 | 2 | 7.34E-09 | 0.95  | 4.53   | -     | 1269.7  |
| AHQ-5-13-, 3969                                                                                    | R.VFVGEEDPEAESVTLR.V               | 1777.91007 | 2 | 3.55E-07 | 0.97  | 4.67   | -     | 1428.0  |
| AHQ-5-4, 4104 - 4180                                                                               | R.VFVGEEDPEAESVTLR.V               | 1777.91007 | 2 | 6.48E-05 | 0.96  | 4.36   | -     | 1620.9  |
| AHQ-5-1, 4199                                                                                      | R.VFVGEEDPEAESVTLR.V               | 1777.91007 | 2 | 2.28E-05 | 0.91  | 4.28   | -     | 908.2   |
| AHQ-5-2, 4106                                                                                      | R.VFVGEEDPEAESVTLR.V               | 1777.91007 | 2 | 2.59E-08 | 0.95  | 4.47   | -     | 1228.8  |
| AHQ-5-9, 3538 - 3595                                                                               | R.VFVGEEDPEAESVTLR.V               | 1777.91007 | 2 | 9.75E-05 | 0.91  | 4.14   | -     | 999.9   |
| AHQ-5-13, 4064                                                                                     | R.VFVGEEDPEAESVTLR.V               | 1777.91007 | 2 | 3.66E-06 | 0.97  | 4.99   | -     | 1549.0  |
| AHQ-5-12, 3981                                                                                     | R.VFVGEEDPEAESVTLR.V               | 1777.91007 | 2 | 2.08E-07 | 0.94  | 4.55   | -     | 935.4   |
| AHQ-5-8, 3680                                                                                      | R.VFVGEEDPEAESVTLR.V               | 1777.91007 | 2 | 7.39E-08 | 0.95  | 4.42   | -     | 1288.3  |
| AHQ-5-5, 3961                                                                                      | R.VFVGEEDPEAESVTLR.V               | 1777.91007 | 2 | 1.80E-07 | 0.94  | 4.30   | -     | 1542.8  |
| AHQ-5-7, 3788                                                                                      | R.VFVGEEDPEAESVTLR.V               | 1777.91007 | 2 | 2.44E-05 | 0.89  | 3.76   | -     | 1028.2  |
| AHQ-5-9, 2430                                                                                      | R.VTGESHIGVLLK.I                   | 1310.52448 | 1 | 1.49E-09 | 0.81  | 3.31   | -     | 818.9   |
| AHQ-5-7, 2406                                                                                      | R.VTGESHIGVLLK.I                   | 1310.52448 | 2 | 1.17E-08 | 0.98  | 4.89   | -     | 2764.8  |
| AHQ-5-11, 2674 - 2736                                                                              | R.VTGESHIGVLLK.I                   | 1310.52448 | 2 | 2.13E-06 | 0.88  | 3.61   | -     | 960.8   |
| AHQ-5-8, 2249                                                                                      | R.VTGESHIGVLLK.I                   | 1310.52448 | 2 | 1.23E-07 | 0.94  | 3.67   | -     | 1474.9  |
| AHQ-5-14-, 2745                                                                                    | R.VTGESHIGVLLK.I                   | 1310.52448 | 2 | 1.98E-09 | 0.97  | 4.51   | -     | 2295.6  |
| AHQ-5-13, 2982                                                                                     | R.VTGESHIGVLLK.I                   | 1310.52448 | 2 | 2.58E-09 | 0.92  | 3.69   | -     | 1262.7  |
| AHQ-5-11, 2680                                                                                     | R.VTGESHIGVLLK.I                   | 1310.52448 | 1 | 2.63E-04 | 0.80  | 2.56   | -     | 961.9   |
| AHQ-5-9, 2379 - 2434                                                                               | R.VTGESHIGVLLK.I                   | 1310.52448 | 2 | 1.27E-09 | 0.93  | 3.60   | -     | 1381.7  |
| AHQ-5-6, 2462                                                                                      | R.VTGESHIGVLLK.I                   | 1310.52448 | 2 | 1.54E-07 | 0.91  | 3.45   | -     | 1365.0  |
| AHQ-5-1, 5083                                                                                      | K.VVLGAGVAPALFR.G                  | 1270.54832 | 2 | 7.10E-08 | 0.98  | 5.07   | -     | 2181.6  |
| AHQ-5-6, 4625                                                                                      | K.VVLGAGVAPALFR.G                  | 1270.54832 | 1 | 2.63E-04 | 0.24  | 2.25   | -     | 146.0   |
| AHQ-5-11, 4659 - 4664                                                                              | K.VVLGAGVAPALFR.G                  | 1270.54832 | 2 | 7.14E-07 | 0.96  | 4.39   | -     | 1409.3  |
| AHQ-5-6, 4617 - 4688                                                                               | K.VVLGAGVAPALFR.G                  | 1270.54832 | 1 | 9.79E-04 | 0.70  | 2.79   | -     | 222.0   |
| AHQ-5-6, 4612 - 4685                                                                               | K.VVLGAGVAPALFR.G                  | 1270.54832 | 2 | 1.33E-07 | 0.96  | 5.09   | -     | 1385.9  |
| AHQ-5-5, 4726                                                                                      | K.VVLGAGVAPALFR.G                  | 1270.54832 | 2 | 1.21E-08 | 0.97  | 5.00   | -     | 1786.0  |
| AHQ-5-10, 4304                                                                                     | K.VVLGAGVAPALFR.G                  | 1270.54832 | 2 | 7.26E-08 | 0.92  | 3.59   | -     | 1402.2  |
| AHQ-5-4, 4969 - 5001                                                                               | K.VVLGAGVAPALFR.G                  | 1270.54832 | 2 | 3.18E-06 | 0.95  | 3.91   | -     | 1500.0  |
| AHQ-5-9, 4056 - 4135                                                                               | K.VVLGAGVAPALFR.G                  | 1270.54832 | 2 | 5.60E-06 | 0.87  | 3.13   | -     | 1208.7  |
| AHQ-5-7, 4458 - 4472                                                                               | K.VVLGAGVAPALFR.G                  | 1270.54832 | 2 | 4.53E-08 | 0.96  | 4.33   | -     | 1791.1  |
| AHQ-5-6, 2300                                                                                      | K.YGILADAR.L                       | 878.99544  | 2 | 8.39E-05 | 0.94  | 3.20   | -     | 1327.8  |
| AHQ-5-6, 5245                                                                                      | K.YYSFFDLDPK.T                     | 1295.42046 | 2 | 2.33E-04 | 0.76  | 3.22   | -     | 667.2   |
| gi4505839[ref]NP_002645.1] pyruvate kinase, muscle; Pyruvate kinase-3; Thyroid hormone-binding pro |                                    |            |   | 1.37E-12 | 15.51 | 170.31 | 41.40 | 57913.6 |
| AHQ-5-7, 6038 - 6040                                                                               | R.AGKPVICATQMLESIMIK.K             | 1879.29869 | 2 | 8.83E-06 | 0.96  | 4.48   | -     | 1188.3  |
| AHQ-5-7, 5291                                                                                      | K.CDENILWLDYK.N                    | 1470.62849 | 1 | 1.03E-07 | 0.83  | 3.65   | -     | 466.7   |
| AHQ-5-7, 5679 - 5751                                                                               | R.EAEAAIYHLQFLFELR.R               | 1933.15326 | 2 | 1.68E-04 | 0.96  | 4.48   | -     | 1134.1  |

|                                                                                                     |                                     |            |   |          |       |        |       |         |
|-----------------------------------------------------------------------------------------------------|-------------------------------------|------------|---|----------|-------|--------|-------|---------|
| AHQ-5-7, 5038 - 5068                                                                                | R.EAEAIIHLQLFEELRR.L                | 2089.33962 | 2 | 6.52E-06 | 0.85  | 4.14   | -     | 313.2   |
| AHQ-5-7, 7344                                                                                       | K.FGVEQDVMVFASFIR.K                 | 1861.11055 | 2 | 4.96E-08 | 0.97  | 5.09   | -     | 1557.5  |
| AHQ-5-7, 7442                                                                                       | K.FGVEQDVMVFASFIR.K                 | 1861.11055 | 2 | 7.27E-12 | 0.96  | 5.01   | -     | 1211.9  |
| AHQ-5-7, 7276                                                                                       | K.FGVEQDVMVFASFIR.K                 | 1877.10995 | 2 | 2.34E-08 | 0.97  | 4.96   | -     | 1450.2  |
| AHQ-5-7, 4747 - 4816                                                                                | K.GADFLVTEVENGGSLGSK.K              | 1780.91396 | 2 | 3.50E-06 | 0.95  | 4.76   | -     | 1134.3  |
| AHQ-5-7, 4952 - 5011                                                                                | K.GADFLVTEVENGGSLGSK.K              | 1780.91396 | 2 | 4.68E-05 | 0.95  | 4.42   | -     | 1373.8  |
| AHQ-5-7, 4536 - 4607                                                                                | K.GADFLVTEVENGGSLGSK.K              | 1780.91396 | 2 | 5.33E-05 | 0.84  | 3.89   | -     | 734.9   |
| AHQ-5-7, 4419 - 4492                                                                                | K.GADFLVTEVENGGSLGSK.K              | 1780.91396 | 2 | 6.70E-04 | 0.63  | 3.23   | -     | 478.9   |
| AHQ-5-11, 6398                                                                                      | R.GIFPVLCKDPVQEAWAEDVDLR.V          | 2559.87857 | 2 | 3.67E-04 | 0.75  | 3.12   | -     | 618.3   |
| AHQ-5-7, 6798                                                                                       | R.GIFPVLCKDPVQEAWAEDVDLR.V          | 2559.87857 | 3 | 2.32E-04 | 0.96  | 4.85   | -     | 2079.4  |
| AHQ-5-8, 6576 - 6641                                                                                | R.GIFPVLCKDPVQEAWAEDVDLR.V          | 2559.87857 | 2 | 5.65E-08 | 0.91  | 4.11   | -     | 773.0   |
| AHQ-5-9, 6018                                                                                       | R.GIFPVLCKDPVQEAWAEDVDLR.V          | 2559.87857 | 3 | 1.15E-04 | 0.91  | 4.10   | -     | 1325.6  |
| AHQ-5-7, 6639 - 6706                                                                                | R.GIFPVLCKDPVQEAWAEDVDLR.V          | 2559.87857 | 2 | 1.28E-09 | 0.97  | 5.99   | -     | 894.9   |
| AHQ-5-13, 6608                                                                                      | R.GIFPVLCKDPVQEAWAEDVDLR.V          | 2559.87857 | 3 | 2.48E-07 | 0.96  | 4.87   | -     | 1636.6  |
| AHQ-5-7, 6690 - 6735                                                                                | R.GIFPVLCKDPVQEAWAEDVDLR.V          | 2559.87857 | 3 | 1.32E-10 | 0.97  | 5.22   | -     | 2415.3  |
| AHQ-5-14-, 6382 - 6453                                                                              | R.GIFPVLCKDPVQEAWAEDVDLR.V          | 2559.87857 | 3 | 1.37E-12 | 0.97  | 6.00   | -     | 2132.3  |
| AHQ-5-13-, 6552                                                                                     | R.GIFPVLCKDPVQEAWAEDVDLR.V          | 2559.87857 | 3 | 7.56E-09 | 0.94  | 4.85   | -     | 1281.5  |
| AHQ-5-7, 6770                                                                                       | R.GIFPVLCKDPVQEAWAEDVDLR.V          | 2559.87857 | 2 | 2.68E-04 | 0.85  | 3.35   | -     | 690.7   |
| AHQ-5-1, 6995                                                                                       | R.GIFPVLCKDPVQEAWAEDVDLR.V          | 2559.87857 | 3 | 7.93E-08 | 0.95  | 5.02   | -     | 1410.4  |
| AHQ-5-7, 4355 - 4426                                                                                | K.GVNLPGAAVDLPAVSEK.D               | 1637.85902 | 2 | 4.56E-06 | 0.89  | 3.56   | -     | 629.6   |
| AHQ-5-7, 2887 - 2948                                                                                | K.ITLDNAYMEK.C                      | 1198.37126 | 2 | 4.28E-06 | 0.74  | 2.86   | -     | 542.2   |
| AHQ-5-7, 3782 - 3787                                                                                | K.KGVNLPGAAVDLPAVSEK.D              | 1766.03194 | 2 | 8.17E-04 | 0.97  | 5.67   | -     | 1027.3  |
| AHQ-5-7, 3803                                                                                       | K.KGVNLPGAAVDLPAVSEK.D              | 1766.03194 | 3 | 5.16E-06 | 0.95  | 5.07   | -     | 1379.4  |
| AHQ-5-7, 4979 - 4980                                                                                | K.KGVNLPGAAVDLPAVSEKDIQDLK.F        | 2478.82685 | 3 | 9.63E-08 | 0.97  | 6.17   | -     | 1760.9  |
| AHQ-5-7, 6140                                                                                       | R.LAPITSDPTEATAVGAVEASF.K.C         | 2176.40912 | 2 | 3.72E-06 | 0.96  | 5.25   | -     | 1023.9  |
| AHQ-5-7, 5850 - 5918                                                                                | R.LAPITSDPTEATAVGAVEASF.K.C         | 2176.40912 | 2 | 2.20E-08 | 0.96  | 5.09   | -     | 1158.9  |
| AHQ-5-7, 5282                                                                                       | R.LAPITSDPTEATAVGAVEASF.K.C         | 2176.40912 | 2 | 1.78E-07 | 0.96  | 4.59   | -     | 1141.1  |
| AHQ-5-7, 5986                                                                                       | R.LAPITSDPTEATAVGAVEASF.K.C         | 2176.40912 | 2 | 4.38E-05 | 0.94  | 4.29   | -     | 964.6   |
| AHQ-5-7, 6075 - 6147                                                                                | R.LAPITSDPTEATAVGAVEASF.K.C         | 2176.40912 | 2 | 7.33E-06 | 0.86  | 3.31   | -     | 837.9   |
| AHQ-5-12, 5785                                                                                      | R.LAPITSDPTEATAVGAVEASF.K.C         | 2176.40912 | 2 | 1.32E-07 | 0.96  | 4.26   | -     | 1120.5  |
| AHQ-5-7, 6780 - 6820                                                                                | R.LAPITSDPTEATAVGAVEASF.K.C         | 2176.40912 | 2 | 2.61E-05 | 0.88  | 4.05   | -     | 563.1   |
| AHQ-5-7, 5714 - 5782                                                                                | R.LAPITSDPTEATAVGAVEASF.K.C         | 2176.40912 | 2 | 7.67E-09 | 0.97  | 5.04   | -     | 1351.2  |
| AHQ-5-7, 6239 - 6250                                                                                | R.LAPITSDPTEATAVGAVEASF.K.C         | 2176.40912 | 2 | 2.80E-05 | 0.94  | 4.80   | -     | 891.3   |
| AHQ-5-10, 5328                                                                                      | R.LAPITSDPTEATAVGAVEASF.K.C         | 2176.40912 | 2 | 1.57E-07 | 0.94  | 4.28   | -     | 960.1   |
| AHQ-5-12, 3381                                                                                      | R.LDIDSPPIAR.N                      | 1198.35099 | 2 | 6.76E-05 | 0.86  | 2.98   | -     | 864.0   |
| AHQ-5-13, 3527 - 3534                                                                               | R.LDIDSPPIAR.N                      | 1198.35099 | 2 | 7.28E-04 | 0.86  | 3.47   | -     | 764.5   |
| AHQ-5-6, 3282                                                                                       | R.LDIDSPPIAR.N                      | 1198.35099 | 2 | 5.32E-05 | 0.84  | 2.64   | -     | 991.7   |
| AHQ-5-7, 3167                                                                                       | R.LDIDSPPIAR.N                      | 1198.35099 | 1 | 6.96E-04 | 0.14  | 2.12   | -     | 210.6   |
| AHQ-5-11, 3334                                                                                      | R.LDIDSPPIAR.N                      | 1198.35099 | 2 | 6.99E-06 | 0.91  | 3.70   | -     | 920.9   |
| AHQ-5-7, 2092                                                                                       | R.LNFSHGTHEYHAETIK.N                | 1885.02879 | 3 | 2.59E-04 | 0.95  | 4.65   | -     | 1425.0  |
| AHQ-5-7, 2083 - 2086                                                                                | R.LNFSHGTHEYHAETIK.N                | 1885.02879 | 2 | 1.86E-04 | 0.92  | 4.28   | -     | 825.9   |
| AHQ-5-7, 3114 - 3188                                                                                | R.NTGIICTIGPASR.S                   | 1361.54994 | 2 | 1.35E-04 | 0.89  | 3.58   | -     | 875.1   |
| AHQ-5-7, 3123 - 3200                                                                                | R.NTGIICTIGPASR.S                   | 1361.54994 | 1 | 1.00E-04 | 0.65  | 2.97   | -     | 160.8   |
| AHQ-5-7, 3862 - 3867                                                                                | R.NTGIICTIGPASR.S                   | 1361.54994 | 2 | 2.11E-04 | 0.75  | 2.96   | -     | 747.6   |
| AHQ-5-14-, 3407                                                                                     | R.NTGIICTIGPASR.S                   | 1361.54994 | 2 | 6.32E-05 | 0.87  | 3.40   | -     | 1003.2  |
| AHQ-5-13, 3550                                                                                      | R.NTGIICTIGPASR.S                   | 1361.54994 | 2 | 4.20E-06 | 0.94  | 4.04   | -     | 1079.0  |
| AHQ-5-13-, 3431                                                                                     | R.NTGIICTIGPASR.S                   | 1361.54994 | 2 | 1.04E-04 | 0.92  | 3.88   | -     | 1057.4  |
| AHQ-5-11, 3331                                                                                      | R.NTGIICTIGPASR.S                   | 1361.54994 | 2 | 1.74E-04 | 0.84  | 3.44   | -     | 885.7   |
| AHQ-5-12, 5710                                                                                      | R.TATESFASDPILYRPVAALDTK.G          | 2466.77140 | 2 | 3.20E-05 | 0.57  | 3.14   | -     | 166.8   |
| AHQ-5-7, 5392 - 5463                                                                                | R.TATESFASDPILYRPVAALDTK.G          | 2466.77140 | 3 | 1.06E-05 | 0.93  | 4.82   | -     | 1037.0  |
| AHQ-5-7, 5430                                                                                       | R.TATESFASDPILYRPVAALDTK.G          | 2466.77140 | 2 | 6.71E-06 | 0.77  | 3.91   | -     | 229.1   |
| AHQ-5-13, 5729                                                                                      | R.TATESFASDPILYRPVAALDTK.G          | 2466.77140 | 2 | 1.10E-04 | 0.63  | 2.92   | -     | 429.6   |
| gj[4504351]ref[NP_000510.1] delta globin [Homo sapiens]                                             |                                     |            |   | 1.44E-12 | 0.95  | 10.23  | 12.90 | 16055.4 |
| AHQ-5-13-, 5513                                                                                     | R.FFESFGDLSPPDAVMGNPK.V             | 2046.24551 | 2 | 5.11E-08 | 0.93  | 4.31   | -     | 1144.4  |
| AHQ-5-13, 5624                                                                                      | R.FFESFGDLSPPDAVMGNPK.V             | 2046.24551 | 2 | 1.44E-12 | 0.95  | 4.68   | -     | 1201.8  |
| gj[5453595]ref[NP_006358.1] adenylyl cyclase-associated protein [Homo sapiens]                      |                                     |            |   | 1.52E-12 | 9.40  | 110.30 | 31.20 | 51672.7 |
| AHQ-5-8, 2480                                                                                       | R.ALLVTASQCQQPAENK.L                | 1759.96271 | 2 | 1.76E-07 | 0.94  | 4.49   | -     | 851.7   |
| AHQ-5-13-, 2807 - 2811                                                                              | R.ALLVTASQCQQPAENK.L                | 1759.96271 | 2 | 1.32E-08 | 0.97  | 5.01   | -     | 1298.0  |
| AHQ-5-7, 2530                                                                                       | R.ALLVTASQCQQPAENK.L                | 1759.96271 | 2 | 2.99E-06 | 0.95  | 5.14   | -     | 819.0   |
| AHQ-5-13, 2946                                                                                      | R.ALLVTASQCQQPAENK.L                | 1759.96271 | 2 | 2.47E-04 | 0.93  | 4.01   | -     | 1039.1  |
| AHQ-5-7, 6558                                                                                       | R.ALLVTASQCQQPAENK.LSDDLAPISQIK.E   | 3168.60826 | 3 | 4.63E-07 | 0.93  | 4.75   | -     | 1273.0  |
| AHQ-5-7, 2627                                                                                       | K.EFHITGLAWSK.T                     | 1277.40990 | 1 | 6.64E-04 | 0.76  | 3.39   | -     | 455.9   |
| AHQ-5-7, 2323 - 2330                                                                                | K.KEPAVLELEG.K                      | 1213.40557 | 2 | 6.08E-07 | 0.85  | 3.00   | -     | 491.5   |
| AHQ-5-7, 7432 - 7499                                                                                | K.LGLVFDVVGIVIIINSK.D               | 1931.26186 | 2 | 1.52E-12 | 0.98  | 5.99   | -     | 1519.7  |
| AHQ-5-12, 5052                                                                                      | K.LSDLLAPISQIK.E                    | 1427.66814 | 2 | 9.27E-05 | 0.93  | 4.15   | -     | 1130.0  |
| AHQ-5-7, 4758                                                                                       | K.LSDLLAPISQIK.E                    | 1427.66814 | 2 | 1.93E-04 | 0.73  | 2.97   | -     | 560.7   |
| AHQ-5-13, 5089                                                                                      | K.LSDLLAPISQIK.E                    | 1427.66814 | 2 | 6.29E-05 | 0.87  | 2.76   | -     | 1045.5  |
| AHQ-5-14-, 4966                                                                                     | K.LSDLLAPISQIK.E                    | 1427.66814 | 2 | 3.95E-04 | 0.84  | 3.07   | -     | 797.0   |
| AHQ-5-7, 4767                                                                                       | K.LSDLLAPISQIK.E                    | 1427.66814 | 1 | 1.48E-05 | 0.67  | 3.01   | -     | 498.9   |
| AHQ-5-7, 4614                                                                                       | R.SALFAQINQGESITHALK.H              | 1929.16615 | 2 | 1.13E-09 | 0.89  | 4.22   | -     | 587.4   |
| AHQ-5-7, 4480                                                                                       | R.SALFAQINQGESITHALK.H              | 1929.16615 | 2 | 1.06E-06 | 0.84  | 3.88   | -     | 469.7   |
| AHQ-5-9, 4035 - 4107                                                                                | R.SALFAQINQGESITHALK.H              | 1929.16615 | 2 | 4.90E-05 | 0.91  | 4.50   | -     | 515.2   |
| AHQ-5-8, 4196                                                                                       | R.SALFAQINQGESITHALK.H              | 1929.16615 | 2 | 1.78E-04 | 0.77  | 4.00   | -     | 326.3   |
| AHQ-5-7, 4330 - 4398                                                                                | R.SALFAQINQGESITHALK.H              | 1929.16615 | 2 | 3.28E-08 | 0.92  | 5.31   | -     | 521.3   |
| AHQ-5-7, 4332 - 4354                                                                                | R.SALFAQINQGESITHALK.H              | 1929.16615 | 3 | 5.69E-05 | 0.84  | 3.96   | -     | 660.9   |
| AHQ-5-7, 1874 - 1875                                                                                | R.SGPKPFSAPKQTSPPSK.R               | 1839.08461 | 2 | 8.12E-06 | 0.94  | 4.29   | -     | 1066.6  |
| AHQ-5-7, 1871 - 1880                                                                                | R.SGPKPFSAPKQTSPPSK.R               | 1839.08461 | 3 | 1.40E-05 | 0.93  | 4.14   | -     | 1369.4  |
| AHQ-5-8, 6596                                                                                       | K.SSEMNVLIPTGGDFNEFPVPEQFK.T        | 2813.08809 | 2 | 2.10E-05 | 0.75  | 3.56   | -     | 273.2   |
| AHQ-5-13, 6577                                                                                      | K.SSEMNVLIPTGGDFNEFPVPEQFK.T        | 2813.08809 | 2 | 1.87E-04 | 0.32  | 2.54   | -     | 152.0   |
| AHQ-5-14-, 6314 - 6386                                                                              | K.SSEMNVLIPTGGDFNEFPVPEQFK.T        | 2813.08809 | 2 | 2.56E-06 | 0.80  | 3.46   | -     | 380.7   |
| AHQ-5-14-, 5969                                                                                     | K.SSEMNVLIPTGGDFNEFPVPEQFK.T        | 2829.08749 | 2 | 5.82E-05 | 0.71  | 3.40   | -     | 230.8   |
| AHQ-5-10, 6102 - 6123                                                                               | K.SSEMNVLIPTGGDFNEFPVPEQFK.T        | 2813.08809 | 2 | 4.15E-05 | 0.41  | 2.79   | -     | 167.3   |
| AHQ-5-11, 6316 - 6386                                                                               | K.SSEMNVLIPTGGDFNEFPVPEQFK.T        | 2813.08809 | 2 | 5.86E-04 | 0.83  | 3.79   | -     | 273.5   |
| AHQ-5-14-, 6067 - 6070                                                                              | K.SSEMNVLIPTGGDFNEFPVPEQFK.T        | 2829.08749 | 2 | 9.02E-07 | 0.70  | 3.58   | -     | 158.6   |
| AHQ-5-12, 6624 - 6626                                                                               | K.SSEMNVLIPTGGDFNEFPVPEQFK.T        | 2813.08809 | 2 | 5.34E-04 | 0.48  | 2.77   | -     | 208.9   |
| AHQ-5-7, 6614 - 6687                                                                                | K.SSEMNVLIPTGGDFNEFPVPEQFK.T        | 2813.08809 | 2 | 1.75E-04 | 0.43  | 2.59   | -     | 222.7   |
| AHQ-5-13, 4836                                                                                      | R.VENQENVSNLVIEDTELK.Q              | 2074.23206 | 2 | 1.11E-04 | 0.88  | 4.51   | -     | 515.6   |
| AHQ-5-10, 4300 - 4303                                                                               | R.VENQENVSNLVIEDTELK.Q              | 2074.23206 | 2 | 5.44E-07 | 0.93  | 4.53   | -     | 755.1   |
| AHQ-5-8, 4404                                                                                       | R.VENQENVSNLVIEDTELK.Q              | 2074.23206 | 2 | 2.28E-07 | 0.91  | 4.50   | -     | 581.9   |
| AHQ-5-7, 4850 - 4918                                                                                | R.VENQENVSNLVIEDTELK.Q              | 2074.23206 | 2 | 8.46E-08 | 0.92  | 4.40   | -     | 641.8   |
| AHQ-5-13-, 4760                                                                                     | R.VENQENVSNLVIEDTELK.Q              | 2074.23206 | 2 | 1.95E-05 | 0.96  | 4.93   | -     | 1148.2  |
| AHQ-5-7, 4728                                                                                       | R.VENQENVSNLVIEDTELK.Q              | 2074.23206 | 2 | 4.86E-08 | 0.92  | 4.25   | -     | 802.9   |
| AHQ-5-7, 4638                                                                                       | R.VENQENVSNLVIEDTELK.Q              | 2074.23206 | 2 | 5.23E-05 | 0.90  | 3.78   | -     | 881.3   |
| AHQ-5-7, 4510 - 4582                                                                                | R.VENQENVSNLVIEDTELK.Q              | 2074.23206 | 2 | 1.73E-06 | 0.93  | 4.56   | -     | 759.4   |
| AHQ-5-4, 4929 - 4956                                                                                | R.VENQENVSNLVIEDTELK.Q              | 2074.23206 | 2 | 4.51E-04 | 0.63  | 3.00   | -     | 422.8   |
| gj[21361785]ref[NP_543010.2] histidyl-tRNA synthetase 2; histidyl-tRNA synthetase; bA379J5.3; chrom |                                     |            |   | 1.59E-12 | 0.98  | 10.34  | 12.70 | 24013.4 |
| AHQ-5-10, 6423                                                                                      | K.GNKPDLHAMPTEQAEGFYSFLQLR.K        | 3141.46192 | 3 | 1.59E-12 | 0.98  | 6.71   | -     | 2351.8  |
| gj[13994151]ref[NP_066272.1] PDZ and LIM domain 1 (elfin); coxy terminal LIM domain protein 1 [H    |                                     |            |   | 1.64E-12 | 16.59 | 200.33 | 64.10 | 36071.5 |
| AHQ-5-14-, 6642                                                                                     | K.AALANLCIGDVITAIDGENTSNMTHLEAQNR.I | 3315.63867 | 3 | 1.70E-10 | 0.85  | 4.27   | -     | 536.4   |
| AHQ-5-12, 6672 - 6677                                                                               | K.AALANLCIGDVITAIDGENTSNMTHLEAQNR.I | 3331.63807 | 3 | 1.28E-05 | 0.79  | 3.87   | -     | 404.8   |
| AHQ-5-9, 6335                                                                                       | K.AALANLCIGDVITAIDGENTSNMTHLEAQNR.I | 3315.63867 | 3 | 2.65E-07 | 0.69  | 3.87   | -     | 387.5   |
| AHQ-5-14-, 6545 - 6618                                                                              | K.AALANLCIGDVITAIDGENTSNMTHLEAQNR.I | 3331.63807 | 3 | 2.15E-07 | 0.89  | 5.06   | -     | 362.8   |
| AHQ-5-13, 6761                                                                                      | K.AALANLCIGDVITAIDGENTSNMTHLEAQNR.I | 3315.63867 | 3 | 1.64E-12 | 0.93  | 4.97   | -     | 815.4   |
| AHQ-5-13, 6641                                                                                      | K.AALANLCIGDVITAIDGENTSNMTHLEAQNR.I | 3331.63807 | 3 | 2.47E-06 | 0.89  | 4.60   | -     | 517.6   |
| AHQ-5-14-, 6435 - 6485                                                                              | K.AALANLCIGDVITAIDGENTSNMTHLEAQNR.I | 3331.63807 | 3 | 6.50E-06 | 0.79  | 3.60   | -     | 402.8   |
| AHQ-5-11, 6686                                                                                      | K.AALANLCIGDVITAIDGENTSNMTHLEAQNR.I | 3315.63867 | 3 | 1.16E-10 | 0.91  | 4.63   | -     | 646.2   |
| AHQ-5-14-, 6263 - 6339                                                                              | K.AALANLCIGDVITAIDGENTSNMTHLEAQNR.I | 3315.63867 | 3 | 1.02E-11 | 0.93  | 4.79   | -     | 1068.2  |

|                             |                                                                         |            |   |          |       |        |       |          |
|-----------------------------|-------------------------------------------------------------------------|------------|---|----------|-------|--------|-------|----------|
| AHQ-5-12, 6901              | K.AALANLCIGDVITAIDGENTSNMTHLEAQRN.I                                     | 3315.63867 | 3 | 6.65E-10 | 0.89  | 4.39   | -     | 574.4    |
| AHQ-5-13-, 6711 - 6712      | K.AALANLCIGDVITAIDGENTSNMTHLEAQRN.I                                     | 3315.63867 | 3 | 7.59E-10 | 0.97  | 6.65   | -     | 1362.7   |
| AHQ-5-13-, 6348             | K.AALANLCIGDVITAIDGENTSNMTHLEAQRN.I                                     | 3315.63867 | 3 | 2.14E-05 | 0.86  | 4.07   | -     | 701.1    |
| AHQ-5-12, 4462              | K.CGTGIVGVFVK.L                                                         | 1138.36198 | 2 | 5.14E-05 | 0.91  | 2.71   | -     | 1329.8   |
| AHQ-5-13, 4520              | K.CGTGIVGVFVK.L                                                         | 1138.36198 | 2 | 8.28E-04 | 0.87  | 2.77   | -     | 1101.5   |
| AHQ-5-13-, 3611 - 3643      | K.DFEQPLAISR.V                                                          | 1176.30388 | 2 | 1.00E-03 | 0.87  | 3.03   | -     | 1037.2   |
| AHQ-5-13, 3731              | K.DFEQPLAISR.V                                                          | 1176.30388 | 2 | 1.45E-05 | 0.95  | 3.76   | -     | 1199.5   |
| AHQ-5-12, 3585 - 3588       | K.DFEQPLAISR.V                                                          | 1176.30388 | 2 | 4.75E-06 | 0.93  | 4.02   | -     | 903.6    |
| AHQ-5-12, 3584              | K.DFEQPLAISR.V                                                          | 1176.30388 | 1 | 3.21E-05 | 0.47  | 1.90   | -     | 326.2    |
| AHQ-5-13, 3485              | K.GCTDNLLTVAR.S                                                         | 1322.47058 | 2 | 6.58E-07 | 0.78  | 2.94   | -     | 757.8    |
| AHQ-5-13-, 3363             | K.GCTDNLLTVAR.S                                                         | 1322.47058 | 2 | 3.66E-07 | 0.73  | 3.36   | -     | 594.0    |
| AHQ-5-13, 4104              | K.GHFFVEDQIQYCEK.H                                                      | 1673.82684 | 2 | 3.62E-04 | 0.94  | 4.02   | -     | 1015.0   |
| AHQ-5-12, 3962 - 4028       | K.GHFFVEDQIQYCEK.H                                                      | 1673.82684 | 2 | 1.34E-04 | 0.96  | 4.37   | -     | 1373.5   |
| AHQ-5-13-, 3996 - 4059      | K.GHFFVEDQIQYCEK.H                                                      | 1673.82684 | 2 | 4.19E-06 | 0.96  | 3.86   | -     | 1467.9   |
| AHQ-5-13, 4212              | K.GHFFVEDQIQYCEK.H                                                      | 1673.82684 | 2 | 2.11E-05 | 0.92  | 3.08   | -     | 1163.6   |
| AHQ-5-12, 2960              | R.HPECYVCTDCGTLNK.Q                                                     | 1858.02023 | 2 | 1.54E-05 | 0.72  | 2.87   | -     | 430.5    |
| AHQ-5-13-, 2676 - 2696      | R.HRHPECYVCTDCGTLNK.Q                                                   | 2151.34648 | 3 | 1.31E-06 | 0.97  | 5.44   | -     | 1369.9   |
| AHQ-5-13, 2819 - 2829       | R.HRHPECYVCTDCGTLNK.Q                                                   | 2151.34648 | 3 | 4.58E-07 | 0.93  | 4.40   | -     | 1239.7   |
| AHQ-5-12, 2561              | R.HRHPECYVCTDCGTLNK.Q                                                   | 2151.34648 | 2 | 1.26E-04 | 0.72  | 3.21   | -     | 397.2    |
| AHQ-5-13-, 2687             | R.HRHPECYVCTDCGTLNK.Q                                                   | 2151.34648 | 2 | 9.29E-04 | 0.84  | 3.43   | -     | 541.2    |
| AHQ-5-11, 3027              | R.IKGGTDNLLTVAR.S                                                       | 1563.80174 | 2 | 1.36E-08 | 0.94  | 4.11   | -     | 986.2    |
| AHQ-5-14, 3869 - 3944       | R.IKGGTDNLLTVAR.S                                                       | 1563.80174 | 2 | 2.86E-10 | 0.91  | 3.77   | -     | 888.5    |
| AHQ-5-12, 3069              | R.IKGGTDNLLTVAR.S                                                       | 1563.80174 | 2 | 5.06E-08 | 0.92  | 3.57   | -     | 1054.7   |
| AHQ-5-14-, 3050             | R.IKGGTDNLLTVAR.S                                                       | 1563.80174 | 2 | 1.75E-10 | 0.95  | 4.38   | -     | 1026.2   |
| AHQ-5-13, 3190              | R.IKGGTDNLLTVAR.S                                                       | 1563.80174 | 2 | 5.10E-09 | 0.93  | 3.92   | -     | 1009.4   |
| AHQ-5-13, 4849              | K.LPMDKCGTIVGVFVK.L                                                     | 1900.27298 | 3 | 5.75E-04 | 0.90  | 4.14   | -     | 1076.8   |
| AHQ-5-14, 4490 - 4532       | R.LVGGKDFEQPLAISR.V                                                     | 1630.86972 | 2 | 2.91E-07 | 0.93  | 4.20   | -     | 1109.1   |
| AHQ-5-13, 3868 - 3876       | R.LVGGKDFEQPLAISR.V                                                     | 1630.86972 | 2 | 5.16E-09 | 0.96  | 4.92   | -     | 1314.4   |
| AHQ-5-13, 3790              | K.MNLASEPQEVHLHIGSAHNR.S                                                | 2120.33559 | 2 | 3.25E-05 | 0.92  | 3.93   | -     | 708.9    |
| AHQ-5-13, 3786              | K.MNLASEPQEVHLHIGSAHNR.S                                                | 2120.33559 | 3 | 8.06E-05 | 0.77  | 3.09   | -     | 758.4    |
| AHQ-5-13-, 3723             | K.MNLASEPQEVHLHIGSAHNR.S                                                | 2120.33559 | 2 | 4.67E-05 | 0.91  | 4.17   | -     | 568.6    |
| AHQ-5-11, 3424              | K.MNLASEPQEVHLHIGSAHNR.S                                                | 2120.33559 | 2 | 2.08E-06 | 0.85  | 3.59   | -     | 450.2    |
| AHQ-5-9, 3442               | K.MNLASEPQEVHLHIGSAHNR.S                                                | 2104.33619 | 2 | 8.85E-08 | 0.85  | 4.28   | -     | 465.1    |
| AHQ-5-12, 3994              | K.MNLASEPQEVHLHIGSAHNR.S                                                | 2104.33619 | 2 | 1.72E-06 | 0.87  | 4.24   | -     | 559.1    |
| AHQ-5-13, 4162              | K.MNLASEPQEVHLHIGSAHNR.S                                                | 2104.33619 | 2 | 6.82E-11 | 0.96  | 4.79   | -     | 1234.7   |
| AHQ-5-13-, 4097             | K.MNLASEPQEVHLHIGSAHNR.S                                                | 2104.33619 | 2 | 1.16E-05 | 0.95  | 4.93   | -     | 784.5    |
| AHQ-5-12, 6676              | K.QSTSLVFLVQELISEEK.G                                                   | 1981.18977 | 2 | 1.14E-08 | 0.97  | 4.73   | -     | 1701.1   |
| AHQ-5-13, 6653              | K.QSTSLVFLVQELISEEK.G                                                   | 1981.18977 | 2 | 3.39E-08 | 0.96  | 4.15   | -     | 1708.2   |
| AHQ-5-13-, 6597             | K.QSTSLVFLVQELISEEK.G                                                   | 1981.18977 | 2 | 7.58E-06 | 0.97  | 5.34   | -     | 1502.9   |
| AHQ-5-12, 6096              | K.QSTSLVFLVQELISEEKGDPNKPSGFR.S                                         | 3037.32681 | 3 | 9.01E-04 | 0.83  | 3.88   | -     | 717.9    |
| AHQ-5-13, 2593 - 2595       | R.SAMPFTASPASSTTAR.V                                                    | 1599.74799 | 2 | 4.05E-05 | 0.81  | 3.21   | -     | 720.5    |
| AHQ-5-9, 2634               | R.SAMPFTASPASSTTAR.V                                                    | 1583.74859 | 2 | 2.61E-04 | 0.53  | 2.76   | -     | 395.2    |
| AHQ-5-12, 2361 - 2374       | R.SAMPFTASPASSTTAR.V                                                    | 1599.74799 | 2 | 1.91E-04 | 0.89  | 3.41   | -     | 989.3    |
| AHQ-5-13-, 2448 - 2451      | R.SAMPFTASPASSTTAR.V                                                    | 1599.74799 | 2 | 6.56E-07 | 0.92  | 3.62   | -     | 1162.2   |
| AHQ-5-10, 3668 - 3688       | K.TAASGVVEANSRPLDHAQPPSSLVIDKESSEVYK.M                                  | 3397.69458 | 3 | 2.01E-04 | 0.91  | 5.02   | -     | 664.4    |
| AHQ-5-11, 3928              | K.TAASGVVEANSRPLDHAQPPSSLVIDKESSEVYK.M                                  | 3397.69458 | 3 | 7.04E-04 | 0.90  | 4.56   | -     | 791.8    |
| AHQ-5-13, 1666              | K.VAASIGNAOK.L                                                          | 959.08209  | 1 | 5.42E-04 | 0.15  | 2.21   | -     | 183.6    |
| AHQ-5-13-, 3063             | K.VWSPLVTEEGKR.H                                                        | 1401.59247 | 2 | 4.85E-06 | 0.58  | 2.64   | -     | 514.4    |
| AHQ-5-13, 3185              | K.VWSPLVTEEGKR.H                                                        | 1401.59247 | 2 | 1.69E-07 | 0.66  | 2.73   | -     | 555.5    |
| gi 29740995 ref XP_291768.1 | similar to Proteasome activator complex subunit 2 (Proteasome activato  |            |   | 1.82E-12 | 0.98  | 10.28  | 9.60  | 19192.6  |
| AHQ-5-10, 6323              | R.AFYAEYHISSNLEK.T                                                      | 1899.13528 | 2 | 1.82E-12 | 0.98  | 5.64   | -     | 1786.0   |
| gi 13775198 ref NP_112576.1 | SH3 domain binding glutamic acid-rich protein like 3; SH3BGR3-like pr   |            |   | 1.95E-12 | 4.75  | 60.32  | 35.50 | 10437.7  |
| AHQ-5-14, 5545 - 5550       | R.IQYQLVDISQDNALR.D                                                     | 1776.97168 | 2 | 1.72E-04 | 0.78  | 3.33   | -     | 846.9    |
| AHQ-5-13-, 4768 - 4833      | R.IQYQLVDISQDNALR.D                                                     | 1776.97168 | 2 | 1.14E-10 | 0.98  | 6.19   | -     | 2067.4   |
| AHQ-5-13-, 4683 - 4708      | R.IQYQLVDISQDNALR.D                                                     | 1776.97168 | 2 | 1.95E-12 | 0.98  | 5.33   | -     | 2210.9   |
| AHQ-5-14-, 4779 - 4790      | R.IQYQLVDISQDNALR.D                                                     | 1776.97168 | 2 | 7.79E-05 | 0.90  | 3.75   | -     | 1182.4   |
| AHQ-5-13-, 4535             | R.IQYQLVDISQDNALR.D                                                     | 1776.97168 | 2 | 3.00E-07 | 0.97  | 4.88   | -     | 2003.1   |
| AHQ-5-13, 4776 - 4837       | R.IQYQLVDISQDNALR.D                                                     | 1776.97168 | 2 | 5.74E-11 | 0.98  | 6.39   | -     | 1822.2   |
| AHQ-5-13, 4790              | R.IQYQLVDISQDNALR.D                                                     | 1776.97168 | 3 | 5.37E-08 | 0.95  | 5.05   | -     | 1677.3   |
| AHQ-5-13, 4917              | R.IQYQLVDISQDNALR.D                                                     | 1776.97168 | 2 | 3.81E-09 | 0.97  | 5.50   | -     | 1539.5   |
| AHQ-5-14, 5458 - 5464       | R.IQYQLVDISQDNALR.D                                                     | 1776.97168 | 2 | 5.87E-07 | 0.97  | 4.78   | -     | 2087.5   |
| AHQ-5-14-, 4630 - 4691      | R.IQYQLVDISQDNALR.D                                                     | 1776.97168 | 2 | 6.21E-10 | 0.95  | 3.90   | -     | 1800.1   |
| AHQ-5-14-, 4903 - 4985      | R.IQYQLVDISQDNALRDEM.R.A                                                | 2308.55751 | 3 | 1.99E-06 | 0.89  | 4.79   | -     | 591.4    |
| AHQ-5-13-, 4517             | R.IQYQLVDISQDNALRDEM.R.A                                                | 2324.55691 | 3 | 4.16E-04 | 0.60  | 3.08   | -     | 355.3    |
| AHQ-5-13-, 4193             | R.IQYQLVDISQDNALRDEM.R.A                                                | 2324.55691 | 3 | 8.45E-06 | 0.84  | 3.88   | -     | 504.7    |
| AHQ-5-13, 4928 - 4933       | R.IQYQLVDISQDNALRDEM.R.A                                                | 2308.55751 | 3 | 1.60E-07 | 0.78  | 3.60   | -     | 517.8    |
| AHQ-5-13, 5113 - 5173       | R.IQYQLVDISQDNALRDEM.R.A                                                | 2308.55751 | 3 | 1.26E-11 | 0.83  | 3.66   | -     | 702.0    |
| AHQ-5-13-, 4909 - 4979      | R.IQYQLVDISQDNALRDEM.R.A                                                | 2308.55751 | 3 | 1.52E-07 | 0.84  | 3.36   | -     | 569.6    |
| AHQ-5-13, 4197              | K.RIQYQLVDISQDNALRDEM.R.A                                               | 2480.74326 | 3 | 4.06E-04 | 0.79  | 3.46   | -     | 547.9    |
| AHQ-5-13-, 1685 - 1763      | R.VYSTSVTGSR.E                                                          | 1057.13940 | 2 | 2.58E-06 | 0.89  | 3.03   | -     | 963.7    |
| AHQ-5-13-, 1783 - 1843      | R.VYSTSVTGSR.E                                                          | 1057.13940 | 2 | 5.39E-06 | 0.88  | 2.79   | -     | 1016.6   |
| AHQ-5-13, 2105 - 2183       | R.VYSTSVTGSR.E                                                          | 1057.13940 | 2 | 1.92E-06 | 0.89  | 2.75   | -     | 1066.7   |
| AHQ-5-13, 1986 - 2045       | R.VYSTSVTGSR.E                                                          | 1057.13940 | 2 | 9.16E-07 | 0.70  | 2.55   | -     | 555.9    |
| AHQ-5-13-, 1903 - 1968      | R.VYSTSVTGSR.E                                                          | 1057.13940 | 2 | 4.38E-06 | 0.85  | 2.85   | -     | 934.8    |
| AHQ-5-13-, 2073             | R.VYSTSVTGSR.E                                                          | 1057.13940 | 2 | 1.21E-05 | 0.82  | 2.52   | -     | 710.2    |
| AHQ-5-13, 1847 - 1927       | R.VYSTSVTGSR.E                                                          | 1057.13940 | 2 | 9.73E-04 | 0.81  | 2.62   | -     | 964.0    |
| AHQ-5-13, 2409              | R.VYSTSVTGSREIK.S                                                       | 1427.58510 | 2 | 2.41E-04 | 0.54  | 2.94   | -     | 468.9    |
| AHQ-5-13-, 2256             | R.VYSTSVTGSREIK.S                                                       | 1427.58510 | 2 | 1.68E-05 | 0.62  | 2.80   | -     | 566.8    |
| gi 4507907 ref NP_000543.1  | von Willebrand factor precursor; Coagulation factor VIII VWF (von Wille |            |   | 2.01E-12 | 29.36 | 330.30 | 17.00 | 309296.7 |
| AHQ-5-1, 5059               | K.AFVLLSSVELEQQR.D                                                      | 1621.77332 | 2 | 4.58E-06 | 0.94  | 3.50   | -     | 1612.2   |
| AHQ-5-3, 4038               | R.CLPSACEVVTGSPR.G                                                      | 1535.72531 | 2 | 6.59E-06 | 0.88  | 3.66   | -     | 869.9    |
| AHQ-5-1, 4311               | R.CLPTACTIQLR.G                                                         | 1335.57568 | 2 | 7.18E-04 | 0.61  | 2.87   | -     | 475.1    |
| AHQ-5-1, 5196 - 5203        | R.EGGPSQIGDALGFAVR.Y                                                    | 1574.71988 | 2 | 7.42E-06 | 0.72  | 3.38   | -     | 490.6    |
| AHQ-5-3, 5187               | R.EGGPSQIGDALGFAVR.Y                                                    | 1574.71988 | 2 | 6.00E-06 | 0.61  | 3.03   | -     | 511.0    |
| AHQ-5-3, 5810               | R.EQAPNLVYMMVTGNPASDEIK.R                                               | 2177.42062 | 2 | 3.51E-07 | 0.74  | 3.11   | -     | 479.5    |
| AHQ-5-1, 5787 - 5852        | R.EQAPNLVYMMVTGNPASDEIK.R                                               | 2177.42062 | 2 | 3.93E-06 | 0.80  | 3.22   | -     | 624.9    |
| AHQ-5-1, 5871               | R.EQAPNLVYMMVTGNPASDEIK.R                                               | 2177.42062 | 2 | 9.69E-06 | 0.90  | 3.89   | -     | 729.4    |
| AHQ-5-2, 5735               | R.EQAPNLVYMMVTGNPASDEIK.R                                               | 2177.42062 | 2 | 2.92E-05 | 0.65  | 3.27   | -     | 271.2    |
| AHQ-5-1, 4869               | R.EQAPNLVYMMVTGNPASDEIK.R                                               | 2193.42002 | 2 | 1.82E-07 | 0.91  | 4.35   | -     | 508.3    |
| AHQ-5-1, 4180 - 4188        | K.EQDLEVLHNGACSPGAR.Q                                                   | 1968.13770 | 2 | 2.09E-10 | 0.92  | 3.99   | -     | 903.1    |
| AHQ-5-1, 4487 - 4556        | K.EQDLEVLHNGACSPGAR.Q                                                   | 1968.13770 | 2 | 6.33E-08 | 0.78  | 3.75   | -     | 531.7    |
| AHQ-5-1, 6417               | R.IEDLPTMTVLGNSFLHK.L                                                   | 1916.23079 | 3 | 1.12E-05 | 0.85  | 3.70   | -     | 684.7    |
| AHQ-5-1, 5955               | R.IEDLPTMTVLGNSFLHK.L                                                   | 1916.23079 | 2 | 2.01E-12 | 0.96  | 5.07   | -     | 1182.4   |
| AHQ-5-1, 5209               | R.IEDLPTMTVLGNSFLHK.L                                                   | 1932.23019 | 2 | 7.93E-08 | 0.90  | 4.66   | -     | 820.0    |
| AHQ-5-1, 7291 - 7292        | R.IGWPNAPILIQDFETLPR.E                                                  | 2081.40223 | 2 | 1.48E-08 | 0.96  | 5.51   | -     | 834.0    |
| AHQ-5-2, 7457 - 7458        | R.IGWPNAPILIQDFETLPR.E                                                  | 2081.40223 | 2 | 4.50E-09 | 0.95  | 4.89   | -     | 815.4    |
| AHQ-5-1, 7296               | R.IGWPNAPILIQDFETLPR.E                                                  | 2081.40223 | 3 | 7.62E-07 | 0.94  | 5.02   | -     | 1042.5   |
| AHQ-5-3, 7394 - 7467        | R.IGWPNAPILIQDFETLPR.E                                                  | 2081.40223 | 2 | 5.31E-04 | 0.70  | 2.81   | -     | 409.8    |
| AHQ-5-1, 7161               | R.IGWPNAPILIQDFETLPR.E                                                  | 2081.40223 | 2 | 2.62E-04 | 0.83  | 3.08   | -     | 840.0    |
| AHQ-5-1, 2679               | R.ILAGPAGDSNVVK.L                                                       | 1241.41901 | 2 | 8.31E-07 | 0.95  | 3.89   | -     | 1290.7   |
| AHQ-5-3, 2522               | R.ILAGPAGDSNVVK.L                                                       | 1241.41901 | 2 | 6.84E-04 | 0.75  | 2.96   | -     | 570.4    |
| AHQ-5-1, 3848               | R.IILSDVFQDCKN.L                                                        | 1441.58869 | 2 | 3.84E-09 | 0.94  | 4.30   | -     | 913.5    |
| AHQ-5-1, 4312               | R.LSEAEFELV.K.A                                                         | 1165.31777 | 2 | 5.95E-07 | 0.93  | 3.58   | -     | 1254.5   |
| AHQ-5-1, 4268 - 4281        | K.LTGCSSYVLFQNK.E                                                       | 1518.71629 | 2 | 1.26E-07 | 0.94  | 4.61   | -     | 1015.4   |
| AHQ-5-4, 5166 - 5177        | R.NSQWICSNEECPGCELVGQSHFK.S                                             | 2872.07402 | 3 | 4.02E-06 | 0.83  | 3.92   | -     | 595.1    |
| AHQ-5-2, 5494               | K.RLPGDIQVPIGVGNANVQELER.I                                              | 2571.91720 | 3 | 7.10E-07 | 0.98  | 5.61   | -     | 2222.1   |
| AHQ-5-1, 5580 - 5605        | K.RLPGDIQVPIGVGNANVQELER.I                                              | 2571.91720 | 2 | 5.57E-05 | 0.97  | 5.67   | -     | 1076.0   |

|                            |                                                                         |            |   |          |       |        |       |          |
|----------------------------|-------------------------------------------------------------------------|------------|---|----------|-------|--------|-------|----------|
| AHQ-5-3, 4214              | R.SFSIGDFQNGKR.V                                                        | 1469.62690 | 2 | 1.82E-06 | 0.90  | 3.15   | -     | 1136.6   |
| AHQ-5-1, 4000 - 4055       | R.SGFTYVVLHEGECCGR.C                                                    | 1774.91285 | 2 | 8.48E-07 | 0.92  | 3.33   | -     | 1319.2   |
| AHQ-5-1, 3392 - 3401       | R.SKEFMEEVIQR.M                                                         | 1396.59450 | 2 | 1.49E-04 | 0.86  | 3.37   | -     | 747.5    |
| AHQ-5-4, 5050              | K.SVGSQWASPENPCLINECVR.V                                                | 2306.51832 | 2 | 1.44E-04 | 0.55  | 2.85   | -     | 248.0    |
| AHQ-5-3, 5102 - 5105       | K.SVGSQWASPENPCLINECVR.V                                                | 2306.51832 | 2 | 9.40E-06 | 0.85  | 4.21   | -     | 340.1    |
| AHQ-5-1, 4999 - 5076       | K.SVGSQWASPENPCLINECVR.V                                                | 2306.51832 | 2 | 6.34E-07 | 0.89  | 4.25   | -     | 539.7    |
| AHQ-5-2, 5055              | K.SVGSQWASPENPCLINECVR.V                                                | 2306.51832 | 2 | 1.48E-06 | 0.83  | 3.94   | -     | 489.0    |
| AHQ-5-4, 5698              | K.TGCLCGNYNGQGGDFLTSPGLAEPR.V                                           | 2816.97516 | 2 | 6.24E-04 | 0.70  | 2.92   | -     | 514.6    |
| AHQ-5-1, 5004              | R.TPDFCAMSCPPSLVYNNHCEHGCP.R.H                                          | 2898.20140 | 3 | 1.14E-07 | 0.91  | 4.38   | -     | 818.2    |
| AHQ-5-1, 5800 - 5868       | K.TYGLCGICDENGANDFM*LR.D                                                | 2225.42231 | 2 | 8.06E-11 | 0.92  | 4.41   | -     | 605.3    |
| AHQ-5-2, 6298              | K.TYGLCGICDENGANDFM*LR.D                                                | 2209.42291 | 2 | 3.74E-06 | 0.88  | 4.16   | -     | 547.1    |
| AHQ-5-1, 6136 - 6207       | K.TYGLCGICDENGANDFM*LR.D                                                | 2209.42291 | 2 | 5.42E-04 | 0.46  | 2.68   | -     | 531.9    |
| AHQ-5-1, 6251              | K.TYGLCGICDENGANDFM*LR.D                                                | 2209.42291 | 2 | 5.14E-07 | 0.90  | 4.22   | -     | 644.3    |
| AHQ-5-1, 3605              | R.VAVVEYHDGSHAYIGLK.D                                                   | 1859.07438 | 2 | 6.46E-04 | 0.95  | 4.13   | -     | 1397.7   |
| AHQ-5-1, 2475 - 2481       | R.VKEEVFIQQR.N                                                          | 1276.46658 | 2 | 5.18E-07 | 0.83  | 3.26   | -     | 677.7    |
| AHQ-5-1, 4720              | R.VTVFPIGIDR.Y                                                          | 1174.37426 | 2 | 2.51E-06 | 0.94  | 3.85   | -     | 1134.6   |
| AHQ-5-1, 3615              | R.WTGPCVCTGSGSTR.H                                                      | 1575.72645 | 2 | 2.66E-07 | 0.91  | 3.30   | -     | 888.5    |
| AHQ-5-3, 2839              | K.YAGSQVASTSEVLK.Y                                                      | 1440.58064 | 2 | 2.61E-06 | 0.94  | 3.57   | -     | 1305.8   |
| AHQ-5-2, 2775              | K.YAGSQVASTSEVLK.Y                                                      | 1440.58064 | 2 | 1.41E-05 | 0.93  | 4.03   | -     | 918.2    |
| AHQ-5-1, 2964              | K.YAGSQVASTSEVLK.Y                                                      | 1440.58064 | 2 | 1.45E-08 | 0.96  | 4.26   | -     | 1417.3   |
| AHQ-5-3, 7458              | R.YFTFSGICQYLLAR.D                                                      | 1741.00269 | 2 | 6.87E-06 | 0.92  | 3.56   | -     | 979.6    |
| AHQ-5-1, 6847              | K.YLFPGEQCYVVLQDYCGSNPGTFR.I                                            | 2874.15305 | 3 | 6.77E-07 | 0.92  | 3.90   | -     | 1563.0   |
| AHQ-5-1, 3400              | R.YLSDHSLVLSQGDR.E                                                      | 1624.73576 | 2 | 1.55E-07 | 0.96  | 4.34   | -     | 1605.9   |
| AHQ-5-2, 3183              | R.YLSDHSLVLSQGDR.E                                                      | 1624.73576 | 2 | 1.57E-05 | 0.92  | 3.67   | -     | 1190.3   |
| AHQ-5-1, 6145              | K.YTLFQIFSK.I                                                           | 1147.34728 | 2 | 6.67E-06 | 0.95  | 3.21   | -     | 1400.7   |
| gi 4758012 ref NP_004850.1 | clathrin heavy chain; clathrin, heavy polypeptide-like 2 [Homo sapiens] |            |   | 2.04E-12 | 21.22 | 240.40 | 21.90 | 191612.6 |
| AHQ-5-3, 7554              | K.AFMATADLPNELIELLEK.I                                                  | 1948.26956 | 2 | 2.06E-10 | 0.94  | 4.63   | -     | 757.1    |
| AHQ-5-3, 7513 - 7515       | K.AFM*TDLPNELIELLEK.I                                                   | 1964.26896 | 2 | 6.15E-05 | 0.93  | 4.68   | -     | 650.5    |
| AHQ-5-3, 4494              | R.ALEHFTLDYDIK.R                                                        | 1465.63179 | 2 | 1.15E-04 | 0.94  | 3.64   | -     | 1125.4   |
| AHQ-5-1, 4604              | R.ALEHFTLDYDIK.R                                                        | 1465.63179 | 2 | 6.98E-05 | 0.80  | 2.79   | -     | 837.6    |
| AHQ-5-5, 4171              | R.CNEPAAVWSQLAK.A                                                       | 1404.57328 | 1 | 1.44E-04 | 0.70  | 3.17   | -     | 334.5    |
| AHQ-5-3, 7555              | R.FQSVPAQPGGOTSPLLQYFGILLDQGLNK.Y                                       | 3189.60926 | 3 | 1.60E-05 | 0.95  | 5.41   | -     | 1135.1   |
| AHQ-5-4, 7505              | R.FQSVPAQPGGOTSPLLQYFGILLDQGLNK.Y                                       | 3189.60926 | 3 | 4.50E-07 | 0.94  | 5.02   | -     | 1195.0   |
| AHQ-5-1, 7367              | R.FQSVPAQPGGOTSPLLQYFGILLDQGLNK.Y                                       | 3189.60926 | 3 | 8.31E-12 | 0.94  | 4.67   | -     | 1305.1   |
| AHQ-5-3, 4957              | R.GQFSTDELVAEVEK.R                                                      | 1552.66462 | 2 | 1.61E-07 | 0.93  | 3.78   | -     | 1204.7   |
| AHQ-5-4, 4930              | R.GQFSTDELVAEVEK.R                                                      | 1552.66462 | 2 | 4.24E-04 | 0.69  | 2.88   | -     | 947.5    |
| AHQ-5-3, 4821 - 4899       | R.GQFSTDELVAEVEKR.N                                                     | 1708.85097 | 2 | 2.11E-09 | 0.92  | 3.83   | -     | 1182.3   |
| AHQ-5-4, 4778 - 4796       | R.GQFSTDELVAEVEKR.N                                                     | 1708.85097 | 2 | 1.75E-09 | 0.94  | 4.34   | -     | 1050.9   |
| AHQ-5-3, 3219              | K.HDVVFLITK.Y                                                           | 1072.28194 | 2 | 1.24E-07 | 0.96  | 3.85   | -     | 1339.6   |
| AHQ-5-3, 3406              | R.HSSLAGCQIINYR.T                                                       | 1520.69551 | 2 | 9.98E-04 | 0.96  | 3.96   | -     | 1343.7   |
| AHQ-5-4, 3529              | K.IVLDNSVFSSEHR.N                                                       | 1416.56400 | 2 | 9.24E-09 | 0.92  | 3.06   | -     | 1469.6   |
| AHQ-5-3, 3519 - 3574       | K.IVLDNSVFSSEHR.N                                                       | 1416.56400 | 2 | 3.84E-08 | 0.85  | 2.82   | -     | 940.1    |
| AHQ-5-3, 6459              | K.KAVDVFPPAQNDFFVAMQISEK.H                                              | 2709.06938 | 3 | 2.21E-05 | 0.95  | 4.60   | -     | 1582.4   |
| AHQ-5-3, 7293 - 7295       | R.KFDVNTSAVQVLIEHIGNLDR.A                                               | 2369.66218 | 3 | 5.76E-11 | 0.98  | 6.32   | -     | 2244.6   |
| AHQ-5-3, 3521 - 3523       | R.KFNALFAQQNYSEAAK.V                                                    | 1759.94281 | 2 | 2.04E-12 | 0.97  | 5.07   | -     | 1556.2   |
| AHQ-5-3, 4559 - 4573       | R.LASTLVHLGEYQAAVDGAR.K                                                 | 1972.19103 | 2 | 1.02E-04 | 0.94  | 4.49   | -     | 976.0    |
| AHQ-5-1, 4669 - 4691       | R.LASTLVHLGEYQAAVDGAR.K                                                 | 1972.19103 | 2 | 3.37E-05 | 0.93  | 3.78   | -     | 1283.8   |
| AHQ-5-3, 4583              | R.LASTLVHLGEYQAAVDGAR.K                                                 | 1972.19103 | 3 | 1.35E-07 | 0.80  | 3.36   | -     | 999.2    |
| AHQ-5-3, 4386 - 4458       | K.LHIEVGTPTPNQPPFK.K                                                    | 1946.23831 | 2 | 1.27E-05 | 0.92  | 4.47   | -     | 486.3    |
| AHQ-5-3, 7381              | R.LLEMLMHAPQVADAILGNQMFTHYDR.A                                          | 3130.61385 | 3 | 5.90E-09 | 0.98  | 7.95   | -     | 2103.3   |
| AHQ-5-3, 3887              | K.LLYNNVSNFGR.L                                                         | 1297.44435 | 2 | 2.45E-05 | 0.86  | 2.87   | -     | 770.8    |
| AHQ-5-3, 6466              | R.NLNLILLITAIK.A                                                        | 1354.66353 | 2 | 1.53E-04 | 0.97  | 5.16   | -     | 1596.0   |
| AHQ-5-5, 2375              | R.RPISADSAIMNPASK.V                                                     | 1558.78540 | 2 | 3.98E-06 | 0.93  | 4.07   | -     | 993.4    |
| AHQ-5-3, 2513              | R.RPISADSAIMNPASK.V                                                     | 1558.78540 | 2 | 2.23E-07 | 0.92  | 4.03   | -     | 1078.0   |
| AHQ-5-3, 7082 - 7111       | R.RPLIDQVQTALSETQDPPEEVSVTVK.A                                          | 2883.20103 | 2 | 7.38E-04 | 0.91  | 4.29   | -     | 401.3    |
| AHQ-5-4, 7066              | R.RPLIDQVQTALSETQDPPEEVSVTVK.A                                          | 2883.20103 | 3 | 7.09E-06 | 0.96  | 5.99   | -     | 1318.0   |
| AHQ-5-3, 5161              | R.TSIDAYDNFNISLAQR.L                                                    | 1944.04818 | 2 | 7.86E-12 | 0.97  | 5.51   | -     | 1741.8   |
| AHQ-5-3, 4894              | R.TSIDAYDNFNISLAQR.L                                                    | 1944.04818 | 2 | 9.84E-04 | 0.71  | 2.79   | -     | 629.8    |
| AHQ-5-4, 5109              | R.TSIDAYDNFNISLAQR.L                                                    | 1944.04818 | 2 | 3.29E-07 | 0.92  | 3.97   | -     | 945.9    |
| AHQ-5-4, 7205              | K.VGYTPDWIFLLR.N                                                        | 1480.73443 | 2 | 1.24E-05 | 0.77  | 3.21   | -     | 430.1    |
| AHQ-5-3, 7235              | K.VGYTPDWIFLLR.N                                                        | 1480.73443 | 2 | 2.11E-10 | 0.92  | 4.01   | -     | 676.4    |
| AHQ-5-1, 7163              | K.VGYTPDWIFLLR.N                                                        | 1480.73443 | 2 | 1.73E-10 | 0.77  | 3.32   | -     | 380.7    |
| AHQ-5-3, 3093              | K.VIQCFEAETGQVQK.I                                                      | 1509.70940 | 2 | 1.29E-07 | 0.97  | 4.31   | -     | 2265.2   |
| AHQ-5-3, 3505 - 3506       | K.VSQPIEGHAASFAQFK.M                                                    | 1717.90593 | 2 | 3.71E-04 | 0.17  | 2.51   | -     | 352.8    |
| gi 4505981 ref NP_002695.1 | pro-platelet basic protein (includes platelet basic protein, bet; Pro-p |            |   | 2.18E-12 | 8.36  | 100.31 | 53.90 | 13884.1  |
| AHQ-5-14-, 4767            | K.EESLSDSLEYAELR.C                                                      | 1540.61070 | 2 | 5.32E-04 | 0.90  | 3.69   | -     | 703.6    |
| AHQ-5-14, 5481 - 5552      | K.EESLSDSLEYAELR.C                                                      | 1540.61070 | 2 | 7.33E-05 | 0.92  | 3.89   | -     | 978.3    |
| AHQ-5-14, 5162             | K.EESLSDSLEYAELR.C                                                      | 1540.61070 | 2 | 2.09E-04 | 0.48  | 2.56   | -     | 400.7    |
| AHQ-5-14-, 4434            | K.EESLSDSLEYAELR.C                                                      | 1540.61070 | 2 | 5.94E-05 | 0.88  | 3.00   | -     | 1120.3   |
| AHQ-5-14-, 4641 - 4701     | K.EESLSDSLEYAELR.C                                                      | 1540.61070 | 2 | 1.61E-05 | 0.97  | 4.59   | -     | 1519.7   |
| AHQ-5-14-, 4610            | K.GKEESLSDSLEYAELR.C                                                    | 1725.83517 | 2 | 1.52E-06 | 0.98  | 4.41   | -     | 2889.8   |
| AHQ-5-14-, 3698            | K.GKEESLSDSLEYAELR.C                                                    | 1725.83517 | 2 | 1.69E-07 | 0.98  | 5.34   | -     | 2264.3   |
| AHQ-5-14-, 4443 - 4513     | K.GKEESLSDSLEYAELR.C                                                    | 1725.83517 | 2 | 9.21E-10 | 0.98  | 5.71   | -     | 2851.5   |
| AHQ-5-13, 4276             | K.GKEESLSDSLEYAELR.C                                                    | 1725.83517 | 3 | 7.44E-05 | 0.76  | 3.21   | -     | 961.4    |
| AHQ-5-14, 5896             | K.GKEESLSDSLEYAELR.C                                                    | 1725.83517 | 2 | 2.04E-05 | 0.97  | 4.72   | -     | 2133.2   |
| AHQ-5-14-, 4291 - 4357     | K.GKEESLSDSLEYAELR.C                                                    | 1725.83517 | 2 | 7.13E-09 | 0.98  | 5.18   | -     | 2782.7   |
| AHQ-5-14-, 4169 - 4229     | K.GKEESLSDSLEYAELR.C                                                    | 1725.83517 | 2 | 1.11E-09 | 0.98  | 5.48   | -     | 2635.4   |
| AHQ-5-13, 4272 - 4273      | K.GKEESLSDSLEYAELR.C                                                    | 1725.83517 | 2 | 6.91E-11 | 0.98  | 5.40   | -     | 2839.5   |
| AHQ-5-14-, 4129 - 4197     | K.GKEESLSDSLEYAELR.C                                                    | 1725.83517 | 3 | 1.90E-06 | 0.81  | 3.61   | -     | 854.2    |
| AHQ-5-14, 5528             | K.GKEESLSDSLEYAELR.C                                                    | 1725.83517 | 2 | 4.58E-07 | 0.97  | 4.53   | -     | 2237.7   |
| AHQ-5-14-, 4073 - 4141     | K.GKEESLSDSLEYAELR.C                                                    | 1725.83517 | 2 | 7.35E-11 | 0.98  | 6.28   | -     | 2675.0   |
| AHQ-5-12, 4145             | K.GKEESLSDSLEYAELR.C                                                    | 1725.83517 | 2 | 3.12E-07 | 0.97  | 5.17   | -     | 1874.8   |
| AHQ-5-14-, 3973 - 4049     | K.GKEESLSDSLEYAELR.C                                                    | 1725.83517 | 3 | 2.00E-06 | 0.89  | 4.03   | -     | 1161.6   |
| AHQ-5-14, 5385 - 5456      | K.GKEESLSDSLEYAELR.C                                                    | 1725.83517 | 2 | 1.78E-08 | 0.98  | 5.72   | -     | 2580.8   |
| AHQ-5-14-, 3950 - 4018     | K.GKEESLSDSLEYAELR.C                                                    | 1725.83517 | 2 | 2.18E-12 | 0.98  | 6.03   | -     | 2261.2   |
| AHQ-5-14, 5337 - 5397      | K.GKEESLSDSLEYAELR.C                                                    | 1725.83517 | 2 | 1.49E-06 | 0.97  | 4.75   | -     | 2182.0   |
| AHQ-5-14, 5241 - 5305      | K.GKEESLSDSLEYAELR.C                                                    | 1725.83517 | 2 | 4.53E-08 | 0.98  | 5.62   | -     | 2680.0   |
| AHQ-5-14-, 3823 - 3901     | K.GKEESLSDSLEYAELR.C                                                    | 1725.83517 | 3 | 3.90E-04 | 0.80  | 3.64   | -     | 885.0    |
| AHQ-5-14, 5637 - 5702      | K.GKEESLSDSLEYAELR.C                                                    | 1725.83517 | 2 | 9.35E-05 | 0.97  | 4.61   | -     | 1721.7   |
| AHQ-5-14-, 3821 - 3886     | K.GKEESLSDSLEYAELR.C                                                    | 1725.83517 | 2 | 7.50E-12 | 0.98  | 5.92   | -     | 2149.1   |
| AHQ-5-14, 5124 - 5182      | K.GKEESLSDSLEYAELR.C                                                    | 1725.83517 | 2 | 2.14E-09 | 0.98  | 5.41   | -     | 2533.2   |
| AHQ-5-14, 5008 - 5069      | K.GKEESLSDSLEYAELR.C                                                    | 1725.83517 | 2 | 5.46E-08 | 0.98  | 5.62   | -     | 2869.9   |
| AHQ-5-14, 4690 - 4752      | K.GKEESLSDSLEYAELR.C                                                    | 1725.83517 | 2 | 1.20E-11 | 0.98  | 5.20   | -     | 2502.3   |
| AHQ-5-14, 4812 - 4873      | K.GKEESLSDSLEYAELR.C                                                    | 1725.83517 | 2 | 4.52E-11 | 0.98  | 6.08   | -     | 2344.2   |
| AHQ-5-14, 4920 - 4980      | K.GKEESLSDSLEYAELR.C                                                    | 1725.83517 | 2 | 1.47E-07 | 0.98  | 5.06   | -     | 2664.7   |
| AHQ-5-13-, 4171            | K.GKEESLSDSLEYAELR.C                                                    | 1725.83517 | 2 | 5.03E-10 | 0.98  | 6.07   | -     | 2517.1   |
| AHQ-5-14-, 3737 - 3805     | K.GTHCNQVEVIATLK.D                                                      | 1571.78073 | 2 | 2.43E-11 | 0.98  | 5.35   | -     | 2018.9   |
| AHQ-5-14, 4672 - 4746      | K.GTHCNQVEVIATLK.D                                                      | 1571.78073 | 2 | 7.07E-05 | 0.98  | 4.72   | -     | 2254.3   |
| AHQ-5-14, 5021 - 5089      | K.GTHCNQVEVIATLK.D                                                      | 1571.78073 | 2 | 1.27E-05 | 0.96  | 4.41   | -     | 1402.2   |
| AHQ-5-14, 4560 - 4616      | K.GTHCNQVEVIATLK.D                                                      | 1571.78073 | 2 | 2.57E-07 | 0.97  | 4.87   | -     | 1732.3   |
| AHQ-5-14, 4445 - 4500      | K.GTHCNQVEVIATLK.D                                                      | 1571.78073 | 2 | 6.12E-07 | 0.96  | 4.47   | -     | 1467.5   |
| AHQ-5-14, 4348 - 4408      | K.GTHCNQVEVIATLK.D                                                      | 1571.78073 | 2 | 4.83E-10 | 0.97  | 5.09   | -     | 1848.2   |
| AHQ-5-14, 5272             | K.GTHCNQVEVIATLK.D                                                      | 1571.78073 | 2 | 2.02E-04 | 0.87  | 3.61   | -     | 672.1    |
| AHQ-5-14-, 3869 - 3935     | K.GTHCNQVEVIATLK.D                                                      | 1571.78073 | 2 | 7.48E-11 | 0.97  | 5.12   | -     | 1541.4   |
| AHQ-5-14, 4224 - 4297      | K.GTHCNQVEVIATLK.D                                                      | 1571.78073 | 2 | 3.44E-05 | 0.97  | 4.94   | -     | 1789.0   |
| AHQ-5-14, 4100 - 4166      | K.GTHCNQVEVIATLK.D                                                      | 1571.78073 | 2 | 1.96E-06 | 0.97  | 4.77   | -     | 1649.7   |
| AHQ-5-14, 4012             | K.GTHCNQVEVIATLK.D                                                      | 1571.78073 | 2 | 4.52E-07 | 0.95  | 4.07   | -     | 1243.4   |

|                            |                                                                         |            |   |          |       |        |       |          |
|----------------------------|-------------------------------------------------------------------------|------------|---|----------|-------|--------|-------|----------|
| AHQ-5-14-, 4133 - 4194     | K.GTHCNQVEVIATLK.D                                                      | 1571.78073 | 2 | 9.23E-09 | 0.98  | 4.58   | -     | 2293.2   |
| AHQ-5-14, 5642             | K.GTHCNQVEVIATLK.D                                                      | 1571.78073 | 2 | 2.57E-04 | 0.56  | 2.64   | -     | 483.9    |
| AHQ-5-14, 5802             | K.GTHCNQVEVIATLK.D                                                      | 1571.78073 | 2 | 1.34E-04 | 0.89  | 3.49   | -     | 881.8    |
| AHQ-5-14-, 4342            | K.GTHCNQVEVIATLK.D                                                      | 1571.78073 | 2 | 2.14E-04 | 0.94  | 3.81   | -     | 1291.3   |
| AHQ-5-13-, 3293 - 3367     | K.GTHCNQVEVIATLK.D                                                      | 1571.78073 | 2 | 1.70E-06 | 0.96  | 4.24   | -     | 1761.2   |
| AHQ-5-14-, 4475            | K.GTHCNQVEVIATLK.D                                                      | 1571.78073 | 2 | 9.78E-06 | 0.95  | 3.82   | -     | 1392.6   |
| AHQ-5-14, 4830             | K.GTHCNQVEVIATLK.D                                                      | 1571.78073 | 2 | 2.66E-07 | 0.96  | 4.32   | -     | 1645.5   |
| AHQ-5-14-, 3605 - 3670     | K.GTHCNQVEVIATLK.D                                                      | 1571.78073 | 2 | 6.68E-12 | 0.98  | 5.25   | -     | 1748.6   |
| AHQ-5-14-, 3513 - 3585     | K.GTHCNQVEVIATLK.D                                                      | 1571.78073 | 2 | 6.14E-09 | 0.98  | 5.53   | -     | 2045.1   |
| AHQ-5-14-, 3429 - 3477     | K.GTHCNQVEVIATLK.D                                                      | 1571.78073 | 2 | 1.62E-04 | 0.98  | 5.47   | -     | 1907.2   |
| AHQ-5-14-, 3365 - 3395     | K.GTHCNQVEVIATLK.D                                                      | 1571.78073 | 2 | 1.05E-09 | 0.97  | 5.51   | -     | 1561.6   |
| AHQ-5-14-, 3251 - 3302     | K.GTHCNQVEVIATLK.D                                                      | 1571.78073 | 2 | 2.59E-06 | 0.97  | 4.29   | -     | 1706.6   |
| AHQ-5-14, 3930 - 3988      | K.GTHCNQVEVIATLK.DGR.K                                                  | 1900.10650 | 2 | 2.44E-06 | 0.98  | 5.71   | -     | 2094.7   |
| AHQ-5-14-, 2945            | K.GTHCNQVEVIATLK.DGR.K                                                  | 1900.10650 | 2 | 9.65E-07 | 0.97  | 4.87   | -     | 1610.6   |
| AHQ-5-14-, 2947 - 3025     | K.GTHCNQVEVIATLK.DGR.K                                                  | 1900.10650 | 3 | 1.38E-09 | 0.95  | 4.78   | -     | 1300.1   |
| AHQ-5-14, 3804 - 3860      | K.GTHCNQVEVIATLK.DGR.K                                                  | 1900.10650 | 2 | 3.95E-06 | 0.98  | 5.42   | -     | 1839.0   |
| AHQ-5-14-, 3235 - 3305     | K.GTHCNQVEVIATLK.DGR.K                                                  | 1900.10650 | 3 | 1.91E-06 | 0.89  | 4.41   | -     | 678.9    |
| AHQ-5-14, 4334 - 4394      | K.GTHCNQVEVIATLK.DGR.K                                                  | 1900.10650 | 2 | 3.39E-04 | 0.93  | 4.66   | -     | 500.6    |
| AHQ-5-14-, 3486 - 3499     | K.GTHCNQVEVIATLK.DGR.K                                                  | 1900.10650 | 2 | 3.24E-05 | 0.94  | 4.65   | -     | 506.7    |
| AHQ-5-14-, 3367            | K.GTHCNQVEVIATLK.DGR.K                                                  | 1900.10650 | 3 | 1.99E-06 | 0.92  | 4.71   | -     | 877.2    |
| AHQ-5-14-, 3454            | K.GTHCNQVEVIATLK.DGR.K                                                  | 1900.10650 | 3 | 1.74E-07 | 0.95  | 4.92   | -     | 1188.5   |
| AHQ-5-14-, 2670 - 2679     | K.GTHCNQVEVIATLK.DGRK.I                                                 | 2028.27941 | 3 | 1.25E-06 | 0.93  | 4.06   | -     | 1382.4   |
| AHQ-5-14-, 2677            | K.GTHCNQVEVIATLK.DGRK.I                                                 | 2028.27941 | 2 | 4.61E-05 | 0.96  | 5.50   | -     | 1016.3   |
| AHQ-5-14, 3538 - 3596      | K.GTHCNQVEVIATLK.DGRK.I                                                 | 2028.27941 | 2 | 2.76E-07 | 0.94  | 4.42   | -     | 1012.4   |
| AHQ-5-14, 3524 - 3602      | K.GTHCNQVEVIATLK.DGRK.I                                                 | 2028.27941 | 3 | 2.45E-04 | 0.81  | 3.72   | -     | 510.9    |
| AHQ-5-14-, 2766 - 2841     | K.ICLDPDAPR.I                                                           | 1058.19059 | 2 | 1.95E-04 | 0.89  | 3.68   | -     | 918.0    |
| AHQ-5-14, 3636 - 3698      | K.ICLDPDAPR.I                                                           | 1058.19059 | 2 | 2.54E-05 | 0.77  | 3.09   | -     | 839.7    |
| AHQ-5-14-, 2457 - 2517     | R.KICLDPDAPR.I                                                          | 1186.36350 | 1 | 3.46E-05 | 0.20  | 2.28   | -     | 164.2    |
| AHQ-5-14, 3198 - 3273      | R.KICLDPDAPR.I                                                          | 1186.36350 | 2 | 5.52E-05 | 0.80  | 2.97   | -     | 769.7    |
| AHQ-5-14, 3030 - 3093      | R.KICLDPDAPR.I                                                          | 1186.36350 | 2 | 6.60E-04 | 0.20  | 2.63   | -     | 327.1    |
| AHQ-5-14-, 2445 - 2505     | R.KICLDPDAPR.I                                                          | 1186.36350 | 2 | 7.11E-05 | 0.92  | 3.70   | -     | 1010.7   |
| AHQ-5-14-, 2529 - 2589     | R.KICLDPDAPR.I                                                          | 1186.36350 | 2 | 7.81E-05 | 0.88  | 3.28   | -     | 1003.2   |
| AHQ-5-14, 3492 - 3552      | R.KICLDPDAPR.I                                                          | 1186.36350 | 2 | 3.14E-05 | 0.59  | 3.09   | -     | 474.2    |
| AHQ-5-14, 1932             | K.KLAGDESAD                                                             | 905.92969  | 1 | 2.51E-04 | 0.41  | 2.10   | -     | 332.3    |
| AHQ-5-14, 1398 - 1453      | K.KLAGDESAD                                                             | 905.92969  | 1 | 2.32E-04 | 0.44  | 2.07   | -     | 444.0    |
| AHQ-5-14-, 4114            | K.NIQSLEVIK.G                                                           | 1101.27845 | 1 | 5.45E-04 | 0.34  | 2.30   | -     | 420.3    |
| AHQ-5-14, 4065 - 4136      | K.NIQSLEVIK.G                                                           | 1101.27845 | 2 | 3.20E-05 | 0.78  | 2.97   | -     | 621.5    |
| AHQ-5-14, 4180 - 4240      | K.NIQSLEVIK.G                                                           | 1101.27845 | 2 | 1.84E-06 | 0.85  | 3.40   | -     | 597.6    |
| AHQ-5-14, 4296 - 4362      | K.NIQSLEVIK.G                                                           | 1101.27845 | 2 | 4.59E-04 | 0.71  | 2.82   | -     | 549.2    |
| AHQ-5-12, 3218             | K.NIQSLEVIK.G                                                           | 1101.27845 | 2 | 1.38E-06 | 0.92  | 3.65   | -     | 1066.9   |
| AHQ-5-14, 4958             | K.NIQSLEVIK.G                                                           | 1101.27845 | 1 | 5.00E-05 | 0.56  | 2.83   | -     | 502.2    |
| AHQ-5-13-, 3331            | K.NIQSLEVIK.G                                                           | 1101.27845 | 2 | 3.94E-05 | 0.82  | 2.97   | -     | 713.7    |
| AHQ-5-14-, 3665            | K.NIQSLEVIK.G                                                           | 1101.27845 | 1 | 1.78E-04 | 0.48  | 2.53   | -     | 304.4    |
| AHQ-5-14-, 3102 - 3179     | K.NIQSLEVIK.G                                                           | 1101.27845 | 2 | 2.80E-04 | 0.88  | 3.36   | -     | 761.8    |
| AHQ-5-14, 4465             | K.NIQSLEVIK.G                                                           | 1101.27845 | 1 | 7.41E-04 | 0.51  | 2.94   | -     | 276.2    |
| AHQ-5-14, 4409             | K.TTSGIHPKNIQSLEVIK.G                                                   | 1923.20305 | 2 | 5.66E-05 | 0.82  | 4.08   | -     | 199.9    |
| gi4506413 ref NP_002875.1  | RAP1A, member of RAS oncogene family; RAS-related protein RAP1A [Homo s |            |   | 2.19E-12 | 5.94  | 70.26  | 33.20 | 20987.1  |
| AHQ-5-11, 2390 - 2455      | K.CLEDERVVGK.E                                                          | 1321.43945 | 2 | 1.70E-05 | 0.77  | 2.71   | -     | 903.3    |
| AHQ-5-14-, 6645 - 6721     | K.INVNEIFYDLVR.Q                                                        | 1495.70427 | 2 | 7.15E-10 | 0.96  | 5.07   | -     | 1087.7   |
| AHQ-5-14-, 6483 - 6491     | K.INVNEIFYDLVR.Q                                                        | 1495.70427 | 2 | 2.94E-04 | 0.79  | 2.98   | -     | 654.6    |
| AHQ-5-10, 6396             | K.INVNEIFYDLVR.Q                                                        | 1495.70427 | 2 | 3.77E-08 | 0.94  | 4.27   | -     | 1098.5   |
| AHQ-5-10, 6392 - 6400      | K.INVNEIFYDLVR.Q                                                        | 1495.70427 | 1 | 8.86E-05 | 0.20  | 2.55   | -     | 220.4    |
| AHQ-5-14-, 5813            | K.INVNEIFYDLVR.Q                                                        | 1495.70427 | 2 | 1.15E-07 | 0.91  | 3.61   | -     | 985.3    |
| AHQ-5-13-, 6721            | K.INVNEIFYDLVR.Q                                                        | 1495.70427 | 2 | 1.45E-07 | 0.95  | 4.28   | -     | 1150.0   |
| AHQ-5-13, 6774             | K.INVNEIFYDLVR.Q                                                        | 1495.70427 | 2 | 8.00E-07 | 0.96  | 5.14   | -     | 1188.5   |
| AHQ-5-12, 6876             | K.INVNEIFYDLVR.Q                                                        | 1495.70427 | 1 | 3.50E-09 | 0.38  | 3.36   | -     | 174.5    |
| AHQ-5-12, 6874             | K.INVNEIFYDLVR.Q                                                        | 1495.70427 | 2 | 2.52E-07 | 0.94  | 4.72   | -     | 1063.1   |
| AHQ-5-11, 6618 - 6750      | K.INVNEIFYDLVR.Q                                                        | 1495.70427 | 1 | 2.83E-04 | 0.25  | 3.04   | -     | 196.6    |
| AHQ-5-11, 5726 - 5727      | K.INVNEIFYDLVR.Q                                                        | 1495.70427 | 1 | 5.24E-06 | 0.13  | 2.16   | -     | 182.8    |
| AHQ-5-11, 6568 - 6639      | K.INVNEIFYDLVR.Q                                                        | 1495.70427 | 2 | 2.48E-07 | 0.96  | 4.76   | -     | 1191.7   |
| AHQ-5-11, 6431 - 6434      | K.INVNEIFYDLVR.Q                                                        | 1495.70427 | 1 | 1.76E-06 | 0.14  | 2.33   | -     | 149.2    |
| AHQ-5-11, 6428             | K.INVNEIFYDLVR.Q                                                        | 1495.70427 | 2 | 7.65E-08 | 0.89  | 3.66   | -     | 868.0    |
| AHQ-5-14-, 6649            | K.INVNEIFYDLVR.Q                                                        | 1495.70427 | 1 | 5.20E-06 | 0.45  | 2.92   | -     | 245.3    |
| AHQ-5-12, 2685             | K.LVVLGSGGVGK.S                                                         | 986.19059  | 2 | 6.20E-05 | 0.91  | 3.53   | -     | 1137.3   |
| AHQ-5-13, 2907             | K.LVVLGSGGVGK.S                                                         | 986.19059  | 2 | 3.48E-07 | 0.89  | 3.52   | -     | 956.9    |
| AHQ-5-11, 2574 - 2643      | K.LVVLGSGGVGK.S                                                         | 986.19059  | 2 | 7.13E-05 | 0.92  | 3.56   | -     | 1210.5   |
| AHQ-5-11, 5974 - 6054      | K.SALTQFVQGIIFVEK.Y                                                     | 1666.94196 | 2 | 6.86E-05 | 0.96  | 4.58   | -     | 1525.8   |
| AHQ-5-14-, 6017 - 6095     | K.SALTQFVQGIIFVEK.Y                                                     | 1666.94196 | 2 | 1.40E-04 | 0.96  | 4.55   | -     | 1777.4   |
| AHQ-5-11, 6495 - 6559      | K.SALTQFVQGIIFVEK.Y                                                     | 1666.94196 | 2 | 9.00E-04 | 0.96  | 4.90   | -     | 1509.0   |
| AHQ-5-11, 6354 - 6415      | K.SALTQFVQGIIFVEK.Y                                                     | 1666.94196 | 2 | 3.35E-04 | 0.96  | 4.73   | -     | 1601.1   |
| AHQ-5-11, 5684             | K.SALTQFVQGIIFVEK.Y                                                     | 1666.94196 | 2 | 6.25E-06 | 0.95  | 4.67   | -     | 1171.5   |
| AHQ-5-11, 6624 - 6691      | K.SALTQFVQGIIFVEK.Y                                                     | 1666.94196 | 2 | 2.91E-04 | 0.97  | 4.74   | -     | 2118.6   |
| AHQ-5-11, 6880             | K.SALTQFVQGIIFVEK.Y                                                     | 1666.94196 | 2 | 3.14E-06 | 0.95  | 4.64   | -     | 1410.5   |
| AHQ-5-11, 6964             | K.SALTQFVQGIIFVEK.Y                                                     | 1666.94196 | 2 | 4.42E-07 | 0.95  | 4.60   | -     | 1386.4   |
| AHQ-5-11, 6258 - 6334      | K.SALTQFVQGIIFVEK.Y                                                     | 1666.94196 | 2 | 7.82E-04 | 0.96  | 5.11   | -     | 1461.2   |
| AHQ-5-13, 6256 - 6322      | K.SALTQFVQGIIFVEK.Y                                                     | 1666.94196 | 2 | 4.07E-04 | 0.91  | 3.95   | -     | 1159.3   |
| AHQ-5-13-, 6184            | K.SALTQFVQGIIFVEK.Y                                                     | 1666.94196 | 2 | 5.22E-04 | 0.94  | 3.92   | -     | 1422.5   |
| AHQ-5-11, 6118 - 6196      | K.SALTQFVQGIIFVEK.Y                                                     | 1666.94196 | 2 | 7.79E-08 | 0.97  | 5.21   | -     | 1510.3   |
| AHQ-5-11, 5283 - 5290      | K.SKINVNEIFYDLVR.Q                                                      | 1710.95483 | 2 | 2.76E-10 | 0.93  | 4.23   | -     | 859.4    |
| AHQ-5-14-, 6055 - 6061     | K.SKINVNEIFYDLVR.Q                                                      | 1710.95483 | 2 | 2.19E-12 | 0.96  | 5.06   | -     | 1212.2   |
| AHQ-5-14-, 6053            | K.SKINVNEIFYDLVR.Q                                                      | 1710.95483 | 3 | 1.72E-06 | 0.93  | 4.32   | -     | 1397.2   |
| AHQ-5-11, 6355             | K.SKINVNEIFYDLVR.Q                                                      | 1710.95483 | 2 | 4.77E-12 | 0.95  | 4.36   | -     | 1225.4   |
| AHQ-5-11, 5094 - 5106      | K.SKINVNEIFYDLVR.Q                                                      | 1710.95483 | 2 | 3.91E-09 | 0.89  | 3.96   | -     | 666.1    |
| AHQ-5-11, 5931             | K.SKINVNEIFYDLVR.Q                                                      | 1710.95483 | 2 | 6.66E-11 | 0.92  | 4.28   | -     | 818.4    |
| AHQ-5-11, 5934             | K.SKINVNEIFYDLVR.Q                                                      | 1710.95483 | 3 | 1.20E-09 | 0.96  | 4.79   | -     | 1539.0   |
| AHQ-5-11, 2510             | K.YDPTIEDSYR.K                                                          | 1259.30338 | 2 | 5.65E-09 | 0.76  | 2.66   | -     | 421.1    |
| AHQ-5-14-, 2729 - 2741     | K.YDPTIEDSYR.K                                                          | 1259.30338 | 2 | 3.69E-07 | 0.81  | 2.95   | -     | 409.3    |
| AHQ-5-11, 2698 - 2762      | K.YDPTIEDSYR.K                                                          | 1259.30338 | 2 | 8.61E-05 | 0.75  | 2.65   | -     | 356.5    |
| AHQ-5-12, 2768 - 2770      | K.YDPTIEDSYR.K                                                          | 1259.30338 | 2 | 1.82E-05 | 0.71  | 2.68   | -     | 376.4    |
| AHQ-5-13-, 2813            | K.YDPTIEDSYR.K                                                          | 1259.30338 | 2 | 1.12E-06 | 0.85  | 2.93   | -     | 477.8    |
| AHQ-5-11, 2187             | K.YDPTIEDSYR.K                                                          | 1387.47629 | 2 | 1.70E-05 | 0.63  | 2.51   | -     | 454.9    |
| AHQ-5-11, 2268 - 2332      | K.YDPTIEDSYR.K                                                          | 1387.47629 | 2 | 2.60E-05 | 0.57  | 2.65   | -     | 307.6    |
| AHQ-5-13-, 2441            | K.YDPTIEDSYR.K                                                          | 1387.47629 | 2 | 8.46E-05 | 0.70  | 2.52   | -     | 447.0    |
| gi24431935 ref NP_065393.1 | reticulon 3; neuroendocrine-specific protein C like (focren) [Homo sap  |            |   | 2.19E-12 | 0.97  | 10.33  | 2.80  | 129930.9 |
| AHQ-5-14-, 5961            | K.YQVFRPEDEEEEEEEEEDEDEDELEEVLER.K                                      | 4189.14063 | 3 | 2.19E-12 | 0.97  | 6.57   | -     | 1574.4   |
| AHQ-5-13, 6128             | K.YQVFRPEDEEEEEEEEEDEDEDELEEVLER.K                                      | 4189.14063 | 3 | 1.81E-09 | 0.97  | 6.05   | -     | 1782.5   |
| gi4501891 ref NP_001093.1  | actinin, alpha 1 [Homo sapiens]                                         |            |   | 2.36E-12 | 40.28 | 460.31 | 52.00 | 103056.9 |
| AHQ-5-5, 7439 - 7510       | R.AAPFNWMEGAM*EDLQDTFIVHTIEEIQGLTTAHEQFK.A                              | 4380.81962 | 3 | 5.82E-06 | 0.74  | 4.05   | -     | 937.5    |
| AHQ-5-6, 7358              | R.AAPFNWMEGAM*EDLQDTFIVHTIEEIQGLTTAHEQFK.A                              | 4380.81962 | 3 | 8.51E-04 | 0.82  | 3.98   | -     | 772.8    |
| AHQ-5-5, 7451              | R.AAPFNWMEGAM*EDLQDTFIVHTIEEIQGLTTAHEQFK.A                              | 4380.81962 | 3 | 1.83E-09 | 0.92  | 4.44   | -     | 1074.5   |
| AHQ-5-5, 7583              | R.AAPFNWMEGAMEDLQDTFIVHTIEEIQGLTTAHEQFK.A                               | 4364.82022 | 3 | 2.21E-04 | 0.95  | 5.68   | -     | 992.5    |
| AHQ-5-9, 4600              | K.AGTQIENIEDFRDGLK.L                                                    | 1936.06918 | 2 | 4.95E-04 | 0.22  | 2.92   | -     | 184.0    |
| AHQ-5-1, 5624              | K.AGTQIENIEDFRDGLK.L                                                    | 1936.06918 | 2 | 1.82E-07 | 0.86  | 4.45   | -     | 891.3    |
| AHQ-5-3, 5546              | K.AGTQIENIEDFRDGLK.L                                                    | 1936.06918 | 2 | 1.61E-05 | 0.77  | 4.13   | -     | 759.0    |
| AHQ-5-5, 4674 - 4678       | K.AGTQIENIEDFRDGLK.L                                                    | 1936.06918 | 2 | 2.06E-07 | 0.87  | 4.84   | -     | 778.2    |
| AHQ-5-6, 5208              | K.AGTQIENIEDFRDGLK.L                                                    | 1936.06918 | 2 | 1.15E-04 | 0.84  | 4.35   | -     | 468.6    |
| AHQ-5-5, 5241 - 5261       | K.AGTQIENIEDFRDGLK.L                                                    | 1936.06918 | 2 | 2.19E-05 | 0.84  | 4.58   | -     | 943.4    |

|                      |                              |            |   |          |      |      |   |        |
|----------------------|------------------------------|------------|---|----------|------|------|---|--------|
| AHQ-5-4, 5500        | K.AGTQIENIEEDFRDGLK.L        | 1936.06918 | 2 | 8.81E-05 | 0.89 | 4.97 | - | 927.4  |
| AHQ-5-5, 5614        | K.AIMTYVSSFFYHAFSGAQK.A      | 2009.27323 | 2 | 1.86E-08 | 0.75 | 3.80 | - | 469.6  |
| AHQ-5-5, 5411        | K.AIMTYVSSFFYHAFSGAQK.A      | 2025.27263 | 3 | 4.92E-04 | 0.76 | 3.28 | - | 932.1  |
| AHQ-5-5, 5405 - 5473 | K.AIMTYVSSFFYHAFSGAQK.A      | 2025.27263 | 2 | 1.56E-06 | 0.87 | 4.09 | - | 493.0  |
| AHQ-5-6, 6437        | K.AIMTYVSSFFYHAFSGAQK.A      | 2009.27323 | 2 | 1.30E-09 | 0.87 | 4.02 | - | 629.2  |
| AHQ-5-4, 6690 - 6701 | K.AIMTYVSSFFYHAFSGAQK.A      | 2009.27323 | 2 | 8.04E-09 | 0.94 | 4.66 | - | 797.5  |
| AHQ-5-5, 6497 - 6561 | K.AIMTYVSSFFYHAFSGAQK.A      | 2009.27323 | 2 | 1.23E-07 | 0.93 | 4.68 | - | 768.9  |
| AHQ-5-5, 3289 - 3357 | R.ASFNFHFRDRHSGLGPEEFK.A     | 2292.40855 | 2 | 6.29E-05 | 0.91 | 3.62 | - | 919.1  |
| AHQ-5-5, 3043        | R.ASFNFHFRDRHSGLGPEEFK.A     | 2292.40855 | 3 | 6.91E-07 | 0.96 | 4.35 | - | 2258.3 |
| AHQ-5-5, 1886 - 1953 | K.ASIEHAWTDGK.E              | 1215.29697 | 2 | 4.28E-07 | 0.82 | 2.68 | - | 1001.8 |
| AHQ-5-5, 4963        | R.CQKICDQWNLGALTQK.R         | 2081.31600 | 2 | 4.60E-09 | 0.93 | 4.57 | - | 839.4  |
| AHQ-5-1, 5936 - 5997 | K.DDPLTNLNTAFDVAEK.Y         | 1763.88340 | 2 | 5.79E-07 | 0.95 | 5.07 | - | 1052.9 |
| AHQ-5-3, 5954        | K.DDPLTNLNTAFDVAEK.Y         | 1763.88340 | 2 | 1.34E-09 | 0.95 | 5.34 | - | 889.7  |
| AHQ-5-6, 5678 - 5684 | K.DDPLTNLNTAFDVAEK.Y         | 1763.88340 | 2 | 8.89E-09 | 0.96 | 5.07 | - | 1086.6 |
| AHQ-5-4, 5890 - 5892 | K.DDPLTNLNTAFDVAEK.Y         | 1763.88340 | 2 | 2.35E-09 | 0.96 | 4.62 | - | 1539.9 |
| AHQ-5-5, 5229        | K.DDPLTNLNTAFDVAEK.Y         | 1763.88340 | 2 | 7.58E-09 | 0.95 | 4.34 | - | 1290.5 |
| AHQ-5-5, 5741 - 5807 | K.DDPLTNLNTAFDVAEK.Y         | 1763.88340 | 2 | 2.21E-09 | 0.97 | 5.77 | - | 1280.5 |
| AHQ-5-6, 4793        | K.DGLGFCALHR.H               | 1260.44730 | 2 | 3.47E-06 | 0.91 | 3.04 | - | 1326.9 |
| AHQ-5-5, 5079        | K.DGLGFCALHR.H               | 1260.44730 | 2 | 7.20E-07 | 0.89 | 2.93 | - | 1423.5 |
| AHQ-5-4, 5014 - 5017 | K.DGLGFCALHR.H               | 1260.44730 | 2 | 1.84E-05 | 0.92 | 3.02 | - | 1267.6 |
| AHQ-5-5, 2279        | R.DHSGTLGPEEFK.A             | 1317.38606 | 1 | 3.08E-07 | 0.62 | 3.26 | - | 251.5  |
| AHQ-5-5, 2273 - 2274 | R.DHSGTLGPEEFK.A             | 1317.38606 | 2 | 6.89E-07 | 0.88 | 3.63 | - | 624.3  |
| AHQ-5-6, 2273        | R.DHSGTLGPEEFK.A             | 1317.38606 | 2 | 5.11E-04 | 0.79 | 3.04 | - | 551.1  |
| AHQ-5-4, 3837        | K.DYETATLSEIK.A              | 1270.36761 | 2 | 1.00E-04 | 0.91 | 3.35 | - | 1277.0 |
| AHQ-5-10, 3996       | R.ETADTDADQVMASFK.I          | 1730.83208 | 2 | 1.05E-06 | 0.94 | 4.31 | - | 1089.1 |
| AHQ-5-9, 3927        | R.ETADTDADQVMASFK.I          | 1730.83208 | 2 | 3.25E-04 | 0.58 | 2.55 | - | 694.2  |
| AHQ-5-4, 3232        | R.ETADTDADQVMASFK.I          | 1746.83148 | 2 | 1.46E-05 | 0.92 | 4.19 | - | 834.4  |
| AHQ-5-2, 4579        | R.ETADTDADQVMASFK.I          | 1730.83208 | 2 | 2.92E-05 | 0.74 | 2.67 | - | 812.9  |
| AHQ-5-1, 4651        | R.ETADTDADQVMASFK.I          | 1730.83208 | 2 | 2.11E-06 | 0.94 | 4.17 | - | 1223.1 |
| AHQ-5-13-, 4335      | R.ETADTDADQVMASFK.I          | 1730.83208 | 2 | 5.44E-09 | 0.98 | 5.57 | - | 1918.2 |
| AHQ-5-4, 4565        | R.ETADTDADQVMASFK.I          | 1730.83208 | 2 | 5.28E-07 | 0.95 | 3.96 | - | 1106.9 |
| AHQ-5-11, 4238       | R.ETADTDADQVMASFK.I          | 1730.83208 | 2 | 2.65E-08 | 0.81 | 2.95 | - | 966.8  |
| AHQ-5-6, 4364        | R.ETADTDADQVMASFK.I          | 1730.83208 | 2 | 4.17E-06 | 0.95 | 3.69 | - | 1633.7 |
| AHQ-5-5, 4397 - 4426 | R.ETADTDADQVMASFK.I          | 1730.83208 | 2 | 2.35E-10 | 0.94 | 3.94 | - | 1295.1 |
| AHQ-5-13, 3310       | R.ETADTDADQVMASFK.I          | 1746.83148 | 2 | 3.59E-08 | 0.95 | 4.66 | - | 1102.0 |
| AHQ-5-3, 4615        | R.ETADTDADQVMASFK.I          | 1730.83208 | 2 | 2.56E-07 | 0.86 | 3.48 | - | 913.5  |
| AHQ-5-5, 2749        | K.GISQEQMNEFR.A              | 1355.45931 | 2 | 2.05E-05 | 0.87 | 3.11 | - | 866.9  |
| AHQ-5-6, 2740        | K.GISQEQMNEFR.A              | 1339.45991 | 2 | 1.00E-04 | 0.89 | 3.42 | - | 906.1  |
| AHQ-5-5, 2039        | K.GISQEQMNEFR.A              | 1355.45931 | 2 | 4.92E-04 | 0.80 | 3.09 | - | 704.5  |
| AHQ-5-4, 2884 - 2896 | K.GISQEQMNEFR.A              | 1339.45991 | 2 | 3.29E-08 | 0.90 | 3.20 | - | 973.9  |
| AHQ-5-5, 2486 - 2495 | K.GISQEQMNEFR.A              | 1339.45991 | 2 | 6.44E-06 | 0.64 | 2.67 | - | 589.8  |
| AHQ-5-5, 2721 - 2786 | K.GISQEQMNEFR.A              | 1339.45991 | 2 | 3.76E-05 | 0.88 | 3.24 | - | 879.3  |
| AHQ-5-4, 2025        | R.HRPELIDYDK.L               | 1228.38202 | 2 | 2.61E-04 | 0.89 | 3.69 | - | 581.2  |
| AHQ-5-5, 1811        | R.HRPELIDYDK.L               | 1228.38202 | 1 | 1.22E-04 | 0.16 | 1.84 | - | 203.3  |
| AHQ-5-5, 4937        | K.ICDQWNLGALTQK.R            | 1663.83349 | 2 | 5.17E-06 | 0.98 | 5.07 | - | 2261.9 |
| AHQ-5-6, 4869        | K.ICDQWNLGALTQK.R            | 1663.83349 | 2 | 7.29E-07 | 0.97 | 4.31 | - | 2104.6 |
| AHQ-5-4, 5078        | K.ICDQWNLGALTQK.R            | 1663.83349 | 2 | 1.12E-04 | 0.95 | 3.37 | - | 1955.9 |
| AHQ-5-6, 4797 - 4873 | K.ICDQWNLGALTQK.R            | 1663.83349 | 2 | 8.60E-05 | 0.88 | 3.63 | - | 1122.6 |
| AHQ-5-3, 5142        | K.ICDQWNLGALTQK.R            | 1663.83349 | 2 | 7.21E-08 | 0.97 | 4.48 | - | 1833.5 |
| AHQ-5-5, 5838 - 5905 | K.IDQLEGDHQLIQEALIFDNK.H     | 2340.57447 | 2 | 4.79E-07 | 0.87 | 3.59 | - | 870.5  |
| AHQ-5-5, 5965 - 6033 | K.IDQLEGDHQLIQEALIFDNK.H     | 2340.57447 | 3 | 7.34E-07 | 0.94 | 4.90 | - | 1184.2 |
| AHQ-5-9, 5142 - 5212 | K.IDQLEGDHQLIQEALIFDNK.H     | 2340.57447 | 2 | 1.87E-06 | 0.93 | 4.57 | - | 941.1  |
| AHQ-5-6, 5828        | K.IDQLEGDHQLIQEALIFDNK.H     | 2340.57447 | 3 | 5.44E-06 | 0.88 | 3.25 | - | 1398.9 |
| AHQ-5-5, 4181        | K.ILAGDKNYITMDELR.R          | 1753.01353 | 2 | 1.77E-08 | 0.96 | 4.81 | - | 1086.0 |
| AHQ-5-5, 3999        | K.ILAGDKNYITMDELR.R          | 1753.01353 | 3 | 3.90E-07 | 0.93 | 4.73 | - | 976.4  |
| AHQ-5-5, 3986        | K.ILAGDKNYITMDELR.R          | 1753.01353 | 2 | 1.42E-05 | 0.91 | 4.14 | - | 703.1  |
| AHQ-5-5, 2597        | R.IMSIVDPNR.L                | 1045.23840 | 2 | 1.53E-05 | 0.85 | 3.01 | - | 774.4  |
| AHQ-5-5, 4161 - 4169 | R.ISIEMHGTELDQLSHLR.Q        | 1996.23437 | 2 | 2.28E-05 | 0.93 | 4.38 | - | 716.7  |
| AHQ-5-5, 6199        | R.ISIEMHGTELDQLSHLR.Q        | 1980.23497 | 2 | 2.39E-07 | 0.78 | 3.27 | - | 516.8  |
| AHQ-5-5, 4838        | R.ISIEMHGTELDQLSHLR.Q        | 1980.23497 | 3 | 2.91E-10 | 0.96 | 5.35 | - | 1680.3 |
| AHQ-5-5, 4833 - 4905 | R.ISIEMHGTELDQLSHLR.Q        | 1980.23497 | 2 | 1.04E-04 | 0.89 | 3.70 | - | 968.7  |
| AHQ-5-5, 4163        | R.ISIEMHGTELDQLSHLR.Q        | 1996.23437 | 3 | 1.54E-05 | 0.94 | 5.24 | - | 1150.1 |
| AHQ-5-5, 4557 - 4637 | K.IVQTYHVMAGTNPYTTITPQINGK.W | 2892.23635 | 3 | 6.35E-04 | 0.59 | 3.55 | - | 332.8  |
| AHQ-5-5, 4562 - 4613 | K.IVQTYHVMAGTNPYTTITPQINGK.W | 2892.23635 | 2 | 1.93E-07 | 0.93 | 4.68 | - | 786.7  |
| AHQ-5-6, 4505        | K.IVQTYHVMAGTNPYTTITPQINGK.W | 2892.23635 | 3 | 4.27E-04 | 0.71 | 3.56 | - | 343.2  |
| AHQ-5-4, 4812        | K.IVQTYHVMAGTNPYTTITPQINGK.W | 2892.23635 | 2 | 4.99E-06 | 0.93 | 4.55 | - | 865.0  |
| AHQ-5-5, 4695        | K.IVQTYHVMAGTNPYTTITPQINGK.W | 2892.23635 | 2 | 8.31E-06 | 0.89 | 3.85 | - | 792.4  |
| AHQ-5-5, 4242        | K.IVQTYHVMAGTNPYTTITPQINGK.W | 2908.23575 | 2 | 6.87E-04 | 0.46 | 2.62 | - | 234.0  |
| AHQ-5-5, 4615 - 4638 | R.KAGTQIENIEEDFRDGLK.L       | 2064.24210 | 3 | 1.33E-04 | 0.95 | 6.24 | - | 1385.3 |
| AHQ-5-5, 5106        | R.KDDPLTNLNTAFDVAEK.Y        | 1892.05631 | 2 | 1.09E-10 | 0.98 | 5.80 | - | 1792.4 |
| AHQ-5-9, 4228        | R.KDDPLTNLNTAFDVAEK.Y        | 1892.05631 | 2 | 3.13E-07 | 0.96 | 4.79 | - | 1110.6 |
| AHQ-5-6, 4768 - 4769 | R.KDDPLTNLNTAFDVAEK.Y        | 1892.05631 | 2 | 6.36E-09 | 0.97 | 4.99 | - | 1447.7 |
| AHQ-5-2, 5013        | R.KDDPLTNLNTAFDVAEK.Y        | 1892.05631 | 2 | 6.16E-05 | 0.96 | 5.08 | - | 1154.5 |
| AHQ-5-1, 5100        | R.KDDPLTNLNTAFDVAEK.Y        | 1892.05631 | 2 | 4.38E-04 | 0.97 | 5.08 | - | 1366.1 |
| AHQ-5-5, 4802 - 4803 | R.KDDPLTNLNTAFDVAEK.Y        | 1892.05631 | 2 | 1.19E-05 | 0.97 | 5.45 | - | 1247.3 |
| AHQ-5-5, 4337        | R.KDDPLTNLNTAFDVAEK.Y        | 1892.05631 | 2 | 7.58E-08 | 0.97 | 5.33 | - | 1602.4 |
| AHQ-5-4, 5000        | R.KDDPLTNLNTAFDVAEK.Y        | 1892.05631 | 2 | 4.40E-06 | 0.96 | 5.24 | - | 1121.3 |
| AHQ-5-5, 4067 - 4142 | R.KQFGQAQNVIGPWIQT.K.M       | 1887.17410 | 2 | 4.14E-04 | 0.96 | 4.55 | - | 1505.0 |
| AHQ-5-5, 2995 - 3077 | R.LAILGIHNEVSK.I             | 1294.52505 | 2 | 1.66E-08 | 0.95 | 3.75 | - | 1560.7 |
| AHQ-5-5, 3017        | R.LAILGIHNEVSK.I             | 1294.52505 | 1 | 8.72E-04 | 0.45 | 1.98 | - | 429.8  |
| AHQ-5-5, 3598        | R.LAILGIHNEVSK.I             | 1294.52505 | 2 | 5.49E-07 | 0.82 | 2.69 | - | 896.3  |
| AHQ-5-6, 3024        | R.LAILGIHNEVSK.I             | 1294.52505 | 2 | 2.32E-07 | 0.96 | 3.85 | - | 1329.0 |
| AHQ-5-4, 3268 - 3270 | R.LAILGIHNEVSK.I             | 1294.52505 | 1 | 3.95E-06 | 0.23 | 2.30 | - | 308.7  |
| AHQ-5-4, 3265 - 3300 | R.LAILGIHNEVSK.I             | 1294.52505 | 2 | 3.30E-05 | 0.82 | 3.34 | - | 806.8  |
| AHQ-5-5, 3035        | R.LAILGIHNEVSK.I             | 1294.52505 | 1 | 4.69E-05 | 0.75 | 3.07 | - | 366.9  |
| AHQ-5-5, 3555 - 3562 | R.LAILGIHNEVSK.I             | 1294.52505 | 2 | 2.26E-04 | 0.88 | 2.83 | - | 878.2  |
| AHQ-5-5, 3499 - 3571 | R.LAILGIHNEVSK.I             | 1294.52505 | 1 | 2.93E-04 | 0.32 | 2.14 | - | 475.9  |
| AHQ-5-1, 6323        | K.LASDLLEWIR.R               | 1216.41115 | 2 | 4.55E-08 | 0.96 | 3.92 | - | 1671.3 |
| AHQ-5-4, 6222        | K.LASDLLEWIR.R               | 1216.41115 | 2 | 8.24E-08 | 0.97 | 4.02 | - | 2031.9 |
| AHQ-5-6, 5950 - 5956 | K.LASDLLEWIR.R               | 1216.41115 | 2 | 2.16E-07 | 0.97 | 4.41 | - | 2251.3 |
| AHQ-5-5, 5969 - 6037 | K.LASDLLEWIR.R               | 1216.41115 | 2 | 7.87E-08 | 0.96 | 4.25 | - | 1771.0 |
| AHQ-5-3, 6311        | K.LASDLLEWIR.R               | 1216.41115 | 2 | 1.39E-06 | 0.96 | 4.29 | - | 1629.2 |
| AHQ-5-5, 6582 - 6657 | K.LLETIDQLYLEYAK.R           | 1712.96427 | 2 | 1.21E-08 | 0.97 | 5.43 | - | 1305.9 |
| AHQ-5-5, 6709 - 6773 | K.LLETIDQLYLEYAK.R           | 1712.96427 | 2 | 1.57E-07 | 0.97 | 5.36 | - | 1356.8 |
| AHQ-5-3, 6854        | K.LLETIDQLYLEYAK.R           | 1712.96427 | 2 | 4.55E-07 | 0.96 | 4.04 | - | 1508.2 |
| AHQ-5-5, 6919 - 6993 | K.LLETIDQLYLEYAK.R           | 1712.96427 | 2 | 1.37E-04 | 0.95 | 4.36 | - | 1169.6 |
| AHQ-5-5, 7061        | K.LLETIDQLYLEYAK.R           | 1712.96427 | 2 | 5.66E-07 | 0.95 | 4.43 | - | 1160.8 |
| AHQ-5-7, 6579        | K.LLETIDQLYLEYAK.R           | 1712.96427 | 2 | 2.22E-06 | 0.93 | 3.69 | - | 1028.4 |
| AHQ-5-1, 6784 - 6787 | K.LLETIDQLYLEYAK.R           | 1712.96427 | 2 | 1.16E-08 | 0.98 | 5.56 | - | 1493.5 |
| AHQ-5-14-, 6267      | K.LLETIDQLYLEYAK.R           | 1712.96427 | 2 | 7.95E-06 | 0.81 | 2.99 | - | 827.8  |
| AHQ-5-4, 6793 - 6866 | K.LLETIDQLYLEYAK.R           | 1712.96427 | 2 | 2.36E-08 | 0.95 | 4.51 | - | 1089.8 |
| AHQ-5-5, 6837 - 6839 | K.LLETIDQLYLEYAK.R           | 1712.96427 | 2 | 2.29E-08 | 0.96 | 4.42 | - | 1555.4 |
| AHQ-5-6, 6580 - 6648 | K.LLETIDQLYLEYAK.R           | 1712.96427 | 2 | 9.43E-09 | 0.98 | 5.62 | - | 1629.1 |
| AHQ-5-6, 2341        | R.LSNRPAFMPSEGR.M            | 1462.65941 | 2 | 1.85E-04 | 0.72 | 3.10 | - | 689.9  |
| AHQ-5-4, 2505        | R.LSNRPAFMPSEGR.M            | 1462.65941 | 2 | 4.08E-04 | 0.84 | 3.36 | - | 701.3  |
| AHQ-5-5, 2341        | R.LSNRPAFMPSEGR.M            | 1462.65941 | 2 | 3.48E-04 | 0.73 | 3.15 | - | 506.3  |
| AHQ-5-9, 3458        | K.MLDAEDIVGTARPDEK.A         | 1760.94769 | 2 | 8.76E-07 | 0.73 | 3.57 | - | 543.0  |

|                            |                                       |            |   |          |       |        |       |         |
|----------------------------|---------------------------------------|------------|---|----------|-------|--------|-------|---------|
| AHQ-5-5, 3806              | K.MLDAEDIVGTARPDEK.A                  | 1760.94769 | 3 | 6.28E-05 | 0.79  | 3.47   | -     | 502.0   |
| AHQ-5-5, 3809 - 3810       | K.MLDAEDIVGTARPDEK.A                  | 1760.94769 | 2 | 2.72E-05 | 0.89  | 4.44   | -     | 834.1   |
| AHQ-5-4, 3992              | K.MLDAEDIVGTARPDEK.A                  | 1760.94769 | 2 | 9.75E-05 | 0.83  | 3.45   | -     | 832.5   |
| AHQ-5-4, 3990 - 3997       | K.MLDAEDIVGTARPDEK.A                  | 1760.94769 | 3 | 6.14E-08 | 0.80  | 3.83   | -     | 524.9   |
| AHQ-5-6, 3738 - 3777       | K.MLDAEDIVGTARPDEK.A                  | 1760.94769 | 2 | 2.52E-09 | 0.83  | 3.79   | -     | 703.3   |
| AHQ-5-8, 3610 - 3621       | K.MLDAEDIVGTARPDEK.A                  | 1760.94769 | 2 | 2.07E-09 | 0.94  | 4.52   | -     | 1084.1  |
| AHQ-5-5, 3403              | K.M*LD AEDIVGTARPDEK.A                | 1776.94709 | 3 | 2.49E-04 | 0.84  | 3.49   | -     | 764.3   |
| AHQ-5-7, 3659 - 3660       | K.MLDAEDIVGTARPDEK.A                  | 1760.94769 | 2 | 8.40E-09 | 0.91  | 4.54   | -     | 650.9   |
| AHQ-5-5, 3395 - 3401       | K.M*LD AEDIVGTARPDEK.A                | 1776.94709 | 2 | 6.10E-06 | 0.92  | 3.75   | -     | 1027.9  |
| AHQ-5-1, 4157              | K.MLDAEDIVGTARPDEK.A                  | 1760.94769 | 2 | 1.51E-05 | 0.90  | 3.89   | -     | 950.3   |
| AHQ-5-6, 3769              | K.MLDAEDIVGTARPDEK.A                  | 1760.94769 | 3 | 5.06E-05 | 0.69  | 3.71   | -     | 506.8   |
| AHQ-5-4, 3592              | K.M*LD AEDIVGTARPDEK.A                | 1776.94709 | 2 | 6.20E-07 | 0.91  | 3.78   | -     | 951.8   |
| AHQ-5-6, 3337              | K.M*LD AEDIVGTARPDEK.A                | 1776.94709 | 2 | 3.33E-04 | 0.83  | 2.96   | -     | 770.3   |
| AHQ-5-5, 5889              | R.MVSDINNAWGCLEQVEK.G                 | 1995.22333 | 2 | 3.94E-07 | 0.96  | 4.61   | -     | 1328.9  |
| AHQ-5-4, 5570              | R.MVSDINNAWGCLEQVEK.G                 | 1995.22333 | 2 | 3.92E-07 | 0.94  | 4.13   | -     | 1243.4  |
| AHQ-5-5, 5711              | R.MVSDINNAWGCLEQVEK.G                 | 1995.22333 | 2 | 4.31E-04 | 0.74  | 3.08   | -     | 660.4   |
| AHQ-5-5, 5983              | R.MVSDINNAWGCLEQVEK.G                 | 1995.22333 | 2 | 7.43E-10 | 0.94  | 4.08   | -     | 1113.0  |
| AHQ-5-5, 6134 - 6147       | R.MVSDINNAWGCLEQVEK.G                 | 1995.22333 | 2 | 1.53E-10 | 0.94  | 4.24   | -     | 1505.7  |
| AHQ-5-4, 5816 - 5821       | R.MVSDINNAWGCLEQVEK.G                 | 1995.22333 | 2 | 3.71E-04 | 0.85  | 3.58   | -     | 655.1   |
| AHQ-5-6, 5824 - 5897       | R.MVSDINNAWGCLEQVEK.G                 | 1995.22333 | 2 | 5.51E-08 | 0.96  | 4.73   | -     | 1301.5  |
| AHQ-5-5, 5566 - 5637       | R.MVSDINNAWGCLEQVEK.G                 | 1995.22333 | 2 | 2.15E-05 | 0.98  | 5.30   | -     | 1862.3  |
| AHQ-5-6, 5508 - 5576       | R.MVSDINNAWGCLEQVEK.G                 | 1995.22333 | 2 | 2.99E-04 | 0.98  | 5.39   | -     | 1579.3  |
| AHQ-5-5, 5562 - 5574       | R.M*VSDINNAWGCLEQVEK.G                | 2011.22273 | 2 | 4.21E-10 | 0.96  | 5.14   | -     | 1121.9  |
| AHQ-5-6, 5356              | R.MVSDINNAWGCLEQVEK.G                 | 1995.22333 | 2 | 6.93E-08 | 0.97  | 5.36   | -     | 1285.4  |
| AHQ-5-7, 5440              | R.MVSDINNAWGCLEQVEK.G                 | 1995.22333 | 2 | 2.99E-05 | 0.94  | 4.35   | -     | 917.7   |
| AHQ-5-5, 5255 - 5329       | R.M*VSDINNAWGCLEQVEK.G                | 2011.22273 | 2 | 9.57E-07 | 0.96  | 4.61   | -     | 1097.3  |
| AHQ-5-6, 5286              | R.M*VSDINNAWGCLEQVEK.G                | 2011.22273 | 2 | 3.35E-09 | 0.94  | 4.99   | -     | 771.0   |
| AHQ-5-5, 5157 - 5187       | R.M*VSDINNAWGCLEQVEK.G                | 2011.22273 | 2 | 7.08E-05 | 0.91  | 4.17   | -     | 722.0   |
| AHQ-5-4, 5446              | R.M*VSDINNAWGCLEQVEK.G                | 2011.22273 | 2 | 7.15E-07 | 0.91  | 3.84   | -     | 1088.5  |
| AHQ-5-4, 5730              | R.MVSDINNAWGCLEQVEK.G                 | 1995.22333 | 2 | 5.97E-04 | 0.81  | 3.07   | -     | 768.9   |
| AHQ-5-5, 4463 - 4491       | K.NVNIQNFHISWK.D                      | 1500.68583 | 2 | 2.44E-06 | 0.94  | 3.48   | -     | 1342.8  |
| AHQ-5-5, 4570              | K.NVNIQNFHISWK.D                      | 1500.68583 | 2 | 4.22E-07 | 0.83  | 2.75   | -     | 966.0   |
| AHQ-5-1, 4953              | K.NVNIQNFHISWK.D                      | 1500.68583 | 2 | 9.47E-07 | 0.97  | 4.52   | -     | 2004.2  |
| AHQ-5-5, 5135              | K.NVNIQNFHISWK.D                      | 1500.68583 | 2 | 3.79E-07 | 0.93  | 3.73   | -     | 1095.7  |
| AHQ-5-10, 4144             | K.NVNIQNFHISWK.D                      | 1500.68583 | 2 | 3.19E-04 | 0.84  | 3.37   | -     | 812.9   |
| AHQ-5-3, 4879              | K.NVNIQNFHISWK.D                      | 1500.68583 | 2 | 3.45E-05 | 0.91  | 3.28   | -     | 1139.6  |
| AHQ-5-4, 3702              | K.NYITMDEL.R                          | 1155.30648 | 2 | 2.49E-05 | 0.64  | 2.60   | -     | 505.3   |
| AHQ-5-5, 3501 - 3515       | K.NYITMDEL.R                          | 1155.30648 | 2 | 1.52E-05 | 0.84  | 2.92   | -     | 686.6   |
| AHQ-5-5, 5005              | K.QFGAQAQNVGVPWIQT.K.M                | 1759.00118 | 2 | 5.00E-05 | 0.89  | 4.69   | -     | 535.2   |
| AHQ-5-5, 2691              | R.QKDYEATLSSEIK.A                     | 1526.67030 | 2 | 1.42E-05 | 0.61  | 3.02   | -     | 347.6   |
| AHQ-5-3, 4013              | R.TINEVENQILTR.D                      | 1430.58898 | 2 | 3.84E-04 | 0.85  | 3.22   | -     | 931.4   |
| AHQ-5-1, 4109              | R.TINEVENQILTR.D                      | 1430.58898 | 2 | 4.08E-07 | 0.89  | 3.89   | -     | 827.0   |
| AHQ-5-2, 3949              | R.TINEVENQILTR.D                      | 1430.58898 | 2 | 1.39E-07 | 0.85  | 3.79   | -     | 794.8   |
| AHQ-5-5, 3966 - 4038       | R.TINEVENQILTR.D                      | 1430.58898 | 2 | 1.34E-05 | 0.88  | 3.83   | -     | 815.0   |
| AHQ-5-4, 3961              | R.TINEVENQILTR.D                      | 1430.58898 | 2 | 7.91E-05 | 0.89  | 3.63   | -     | 892.5   |
| AHQ-5-5, 2937              | R.TINEVENQILTR.D                      | 1430.58898 | 1 | 7.51E-05 | 0.29  | 2.42   | -     | 242.5   |
| AHQ-5-5, 3421              | R.TINEVENQILTR.D                      | 1430.58898 | 2 | 8.18E-07 | 0.61  | 2.73   | -     | 415.9   |
| AHQ-5-5, 3973 - 4041       | R.TINEVENQILTR.D                      | 1430.58898 | 1 | 1.86E-05 | 0.17  | 2.04   | -     | 283.7   |
| AHQ-5-8, 3590              | R.TINEVENQILTR.D                      | 1430.58898 | 2 | 5.46E-06 | 0.93  | 3.68   | -     | 1049.3  |
| AHQ-5-5, 7133 - 7203       | R.VEQIAIAAQLNELDYDPSVNR.C             | 2810.02233 | 3 | 1.78E-04 | 0.85  | 3.49   | -     | 1149.9  |
| AHQ-5-5, 7085 - 7149       | R.VEQIAIAAQLNELDYDPSVNR.C             | 2810.02233 | 2 | 6.44E-07 | 0.90  | 3.79   | -     | 804.6   |
| AHQ-5-5, 7038 - 7106       | R.VEQIAIAAQLNELDYDPSVNR.C             | 2810.02233 | 3 | 6.89E-04 | 0.92  | 4.61   | -     | 956.6   |
| AHQ-5-5, 6983 - 7049       | R.VEQIAIAAQLNELDYDPSVNR.C             | 2810.02233 | 2 | 9.76E-06 | 0.91  | 4.61   | -     | 754.3   |
| AHQ-5-1, 7137              | R.VEQIAIAAQLNELDYDPSVNR.C             | 2810.02233 | 3 | 2.11E-08 | 0.94  | 5.18   | -     | 1119.2  |
| AHQ-5-4, 7193 - 7197       | R.VEQIAIAAQLNELDYDPSVNR.C             | 2810.02233 | 3 | 2.55E-05 | 0.96  | 5.51   | -     | 1375.5  |
| AHQ-5-14-, 6373            | R.VGWQEQLLTIAR.T                      | 1387.60894 | 2 | 3.33E-09 | 0.95  | 4.16   | -     | 1457.8  |
| AHQ-5-9, 5836              | R.VGWQEQLLTIAR.T                      | 1387.60894 | 2 | 1.79E-04 | 0.89  | 3.61   | -     | 910.4   |
| AHQ-5-10, 5995             | R.VGWQEQLLTIAR.T                      | 1387.60894 | 2 | 1.98E-07 | 0.97  | 5.31   | -     | 1729.1  |
| AHQ-5-5, 6653 - 6673       | R.VGWQEQLLTIAR.T                      | 1387.60894 | 2 | 1.44E-07 | 0.97  | 4.96   | -     | 2070.6  |
| AHQ-5-4, 6869 - 6896       | R.VGWQEQLLTIAR.T                      | 1387.60894 | 2 | 1.59E-08 | 0.97  | 4.97   | -     | 1487.5  |
| AHQ-5-11, 6310             | R.VGWQEQLLTIAR.T                      | 1387.60894 | 2 | 4.22E-08 | 0.93  | 3.73   | -     | 1194.6  |
| AHQ-5-6, 6621 - 6644       | R.VGWQEQLLTIAR.T                      | 1387.60894 | 2 | 3.36E-08 | 0.96  | 4.03   | -     | 1658.6  |
| AHQ-5-3, 6927              | R.VGWQEQLLTIAR.T                      | 1387.60894 | 2 | 1.66E-08 | 0.94  | 3.73   | -     | 1389.3  |
| AHQ-5-2, 6862              | R.VGWQEQLLTIAR.T                      | 1387.60894 | 2 | 4.31E-06 | 0.91  | 3.71   | -     | 1036.7  |
| AHQ-5-5, 6737              | R.VGWQEQLLTIAR.T                      | 1387.60894 | 2 | 1.55E-06 | 0.94  | 3.98   | -     | 1323.0  |
| AHQ-5-7, 6510 - 6515       | R.VGWQEQLLTIAR.T                      | 1387.60894 | 2 | 6.58E-08 | 0.96  | 4.81   | -     | 1400.4  |
| AHQ-5-1, 6892 - 6900       | R.VGWQEQLLTIAR.T                      | 1387.60894 | 2 | 3.29E-06 | 0.97  | 4.88   | -     | 2080.7  |
| AHQ-5-8, 6313              | R.VGWQEQLLTIAR.T                      | 1387.60894 | 2 | 1.11E-09 | 0.97  | 4.79   | -     | 1700.1  |
| AHQ-5-6, 4484              | K.VLAVNQENEQLMEDIYEK.L                | 2053.23635 | 2 | 7.89E-11 | 0.91  | 4.13   | -     | 661.9   |
| AHQ-5-8, 3812              | K.VLAVNQENEQLMEDIYEK.L                | 2053.23635 | 2 | 3.86E-07 | 0.96  | 4.97   | -     | 1400.4  |
| AHQ-5-6, 4390              | K.VLAVNQENEQLMEDIYEK.L                | 2053.23635 | 2 | 8.36E-08 | 0.89  | 3.89   | -     | 552.4   |
| AHQ-5-6, 4108 - 4176       | K.VLAVNQENEQLMEDIYEK.L                | 2053.23635 | 2 | 1.55E-06 | 0.95  | 4.95   | -     | 1052.1  |
| AHQ-5-6, 3408 - 3440       | K.VLAVNQENEQLMEDIYEK.L                | 2069.23575 | 2 | 1.53E-07 | 0.96  | 5.44   | -     | 1098.5  |
| AHQ-5-5, 4682              | K.VLAVNQENEQLMEDIYEK.L                | 2053.23635 | 2 | 1.78E-05 | 0.86  | 4.04   | -     | 628.1   |
| AHQ-5-5, 4379 - 4451       | K.VLAVNQENEQLMEDIYEK.L                | 2053.23635 | 2 | 2.36E-12 | 0.97  | 5.08   | -     | 1394.1  |
| AHQ-5-5, 4217 - 4286       | K.VLAVNQENEQLMEDIYEK.L                | 2053.23635 | 2 | 2.48E-07 | 0.97  | 4.72   | -     | 1670.9  |
| AHQ-5-5, 4114 - 4185       | K.VLAVNQENEQLMEDIYEK.L                | 2053.23635 | 2 | 1.10E-05 | 0.97  | 5.46   | -     | 1494.7  |
| AHQ-5-5, 3677              | K.VLAVNQENEQLMEDIYEK.L                | 2069.23575 | 2 | 1.54E-10 | 0.96  | 5.05   | -     | 939.1   |
| AHQ-5-5, 3585              | K.VLAVNQENEQLMEDIYEK.L                | 2069.23575 | 2 | 1.37E-05 | 0.92  | 4.33   | -     | 881.9   |
| AHQ-5-5, 3445 - 3498       | K.VLAVNQENEQLMEDIYEK.L                | 2069.23575 | 2 | 5.50E-06 | 0.95  | 4.83   | -     | 1199.7  |
| AHQ-5-4, 4706              | K.VLAVNQENEQLMEDIYEK.L                | 2053.23635 | 2 | 1.33E-05 | 0.93  | 3.94   | -     | 1070.5  |
| AHQ-5-4, 3654              | K.VLAVNQENEQLMEDIYEK.L                | 2069.23575 | 2 | 1.44E-06 | 0.88  | 3.76   | -     | 1093.3  |
| AHQ-5-3, 4423              | K.VLAVNQENEQLMEDIYEK.L                | 2053.23635 | 2 | 1.05E-06 | 0.92  | 3.97   | -     | 1126.9  |
| AHQ-5-2, 4711              | K.VLAVNQENEQLMEDIYEK.L                | 2053.23635 | 2 | 1.59E-05 | 0.90  | 3.81   | -     | 665.4   |
| AHQ-5-1, 4472              | K.VLAVNQENEQLMEDIYEK.L                | 2053.23635 | 2 | 3.44E-08 | 0.95  | 5.23   | -     | 968.2   |
| AHQ-5-5, 4546 - 4603       | K.VLAVNQENEQLMEDIYEK.L                | 2053.23635 | 2 | 4.08E-11 | 0.97  | 5.09   | -     | 1261.4  |
| gi 5031635 ref NP_005498.1 | cofilin 1 (non-muscle) [Homo sapiens] |            |   | 2.69E-12 | 10.24 | 110.35 | 59.00 | 18502.4 |
| AHQ-5-12, 4158             | K.AVLFCLSEDK.K                        | 1183.35638 | 2 | 1.07E-06 | 0.91  | 3.37   | -     | 857.7   |
| AHQ-5-13-, 3480            | K.AVLFCLSEDK.K                        | 1311.52930 | 2 | 3.86E-06 | 0.89  | 3.15   | -     | 930.2   |
| AHQ-5-12, 3289 - 3368      | K.AVLFCLSEDK.K                        | 1311.52930 | 2 | 1.29E-04 | 0.90  | 3.29   | -     | 953.4   |
| AHQ-5-12, 6968             | K.EDLVFVIFWAPESAPLK.S                 | 1863.14454 | 2 | 7.18E-06 | 0.96  | 4.11   | -     | 1717.0  |
| AHQ-5-12, 5696 - 5760      | K.EILVGDVGGQVDDPYATFVK.M              | 2167.40069 | 2 | 5.02E-07 | 0.97  | 5.50   | -     | 1505.2  |
| AHQ-5-12, 5558 - 5628      | K.EILVGDVGGQVDDPYATFVK.M              | 2167.40069 | 2 | 9.56E-10 | 0.97  | 5.41   | -     | 1435.3  |
| AHQ-5-12, 5830 - 5909      | K.EILVGDVGGQVDDPYATFVK.M              | 2167.40069 | 2 | 6.69E-10 | 0.96  | 4.81   | -     | 1344.1  |
| AHQ-5-14, 6205             | K.EILVGDVGGQVDDPYATFVK.M              | 2167.40069 | 2 | 6.40E-08 | 0.96  | 4.30   | -     | 1492.4  |
| AHQ-5-13, 5688             | K.EILVGDVGGQVDDPYATFVK.M              | 2167.40069 | 2 | 1.39E-07 | 0.94  | 4.03   | -     | 996.1   |
| AHQ-5-13-, 5597            | K.EILVGDVGGQVDDPYATFVK.M              | 2167.40069 | 2 | 1.66E-08 | 0.97  | 5.11   | -     | 1642.4  |
| AHQ-5-14-, 5583 - 5589     | K.EILVGDVGGQVDDPYATFVK.M              | 2167.40069 | 2 | 2.59E-08 | 0.98  | 5.76   | -     | 2232.7  |
| AHQ-5-11, 5551             | K.EILVGDVGGQVDDPYATFVK.M              | 2167.40069 | 2 | 9.94E-07 | 0.95  | 4.35   | -     | 1220.5  |
| AHQ-5-12, 5440             | K.EILVGDVGGQVDDPYATFVK.M              | 2167.40069 | 2 | 3.75E-06 | 0.96  | 4.45   | -     | 1463.1  |
| AHQ-5-5, 5902              | K.EILVGDVGGQVDDPYATFVK.M              | 2167.40069 | 2 | 3.95E-06 | 0.73  | 3.06   | -     | 660.6   |
| AHQ-5-12, 2285 - 2336      | K.HELQANCYEEVKDR.C                    | 1792.90812 | 2 | 2.96E-05 | 0.97  | 4.95   | -     | 1585.8  |
| AHQ-5-12, 2301 - 2372      | K.HELQANCYEEVKDR.C                    | 1792.90812 | 3 | 4.53E-09 | 0.98  | 6.09   | -     | 2218.4  |
| AHQ-5-12, 2444 - 2514      | K.HELQANCYEEVKDR.C                    | 1792.90812 | 2 | 1.92E-07 | 0.96  | 4.34   | -     | 1409.5  |
| AHQ-5-13-, 2405            | K.HELQANCYEEVKDR.C                    | 1792.90812 | 3 | 8.40E-06 | 0.80  | 3.61   | -     | 705.0   |
| AHQ-5-13-, 2573            | K.HELQANCYEEVKDR.C                    | 1792.90812 | 3 | 9.65E-05 | 0.72  | 3.43   | -     | 569.6   |
| AHQ-5-12, 2817             | K.KAVLFCLSEDK.K                       | 1439.70221 | 3 | 1.20E-05 | 0.94  | 4.38   | -     | 1297.8  |

|                             |                                                                        |            |   |          |       |        |       |         |
|-----------------------------|------------------------------------------------------------------------|------------|---|----------|-------|--------|-------|---------|
| AHQ-5-12, 2816              | K.KAVLFLCLSEDKK.N                                                      | 1439.70221 | 2 | 9.02E-05 | 0.94  | 3.87   | -     | 1262.0  |
| AHQ-5-12, 2820              | K.KAVLFLCLSEDKK.N                                                      | 1439.70221 | 1 | 5.91E-05 | 0.37  | 2.41   | -     | 451.7   |
| AHQ-5-14-, 6337             | K.KEDLVFIFWAPESAPLK.S                                                  | 1991.31745 | 3 | 2.13E-05 | 0.97  | 6.44   | -     | 1491.6  |
| AHQ-5-13-, 6449             | K.KEDLVFIFWAPESAPLK.S                                                  | 1991.31745 | 2 | 8.96E-09 | 0.97  | 5.12   | -     | 1481.7  |
| AHQ-5-13, 6494              | K.KEDLVFIFWAPESAPLK.S                                                  | 1991.31745 | 2 | 1.18E-04 | 0.96  | 4.82   | -     | 1190.7  |
| AHQ-5-13-, 6452             | K.KEDLVFIFWAPESAPLK.S                                                  | 1991.31745 | 3 | 2.17E-04 | 0.95  | 4.67   | -     | 1512.1  |
| AHQ-5-12, 6396 - 6464       | K.KEDLVFIFWAPESAPLK.S                                                  | 1991.31745 | 2 | 1.70E-05 | 0.98  | 5.81   | -     | 2070.8  |
| AHQ-5-12, 6397 - 6469       | K.KEDLVFIFWAPESAPLK.S                                                  | 1991.31745 | 3 | 1.18E-10 | 0.96  | 5.58   | -     | 1312.7  |
| AHQ-5-13, 6490              | K.KEDLVFIFWAPESAPLK.S                                                  | 1991.31745 | 3 | 6.84E-05 | 0.96  | 4.87   | -     | 1641.2  |
| AHQ-5-12, 6524 - 6585       | K.KEDLVFIFWAPESAPLK.S                                                  | 1991.31745 | 2 | 2.04E-07 | 0.97  | 5.36   | -     | 1293.9  |
| AHQ-5-11, 6278              | K.KEDLVFIFWAPESAPLK.S                                                  | 1991.31745 | 2 | 2.06E-06 | 0.96  | 4.55   | -     | 1180.4  |
| AHQ-5-14-, 6330             | K.KEDLVFIFWAPESAPLK.S                                                  | 1991.31745 | 2 | 2.95E-04 | 0.96  | 5.08   | -     | 1058.3  |
| AHQ-5-12, 5829              | K.KEDLVFIFWAPESAPLK.S                                                  | 2206.56802 | 2 | 7.65E-05 | 0.96  | 4.77   | -     | 1185.4  |
| AHQ-5-13-, 4372             | K.LGGSAVISLEGKPL                                                       | 1341.57848 | 2 | 1.31E-04 | 0.90  | 3.81   | -     | 949.5   |
| AHQ-5-12, 4350 - 4420       | K.LGGSAVISLEGKPL                                                       | 1341.57848 | 2 | 1.03E-04 | 0.94  | 4.26   | -     | 1234.4  |
| AHQ-5-12, 4646 - 4726       | K.LGGSAVISLEGKPL                                                       | 1341.57848 | 2 | 1.83E-04 | 0.96  | 4.61   | -     | 1184.2  |
| AHQ-5-12, 4460 - 4500       | K.LGGSAVISLEGKPL                                                       | 1341.57848 | 2 | 1.17E-08 | 0.96  | 4.40   | -     | 1232.9  |
| AHQ-5-12, 4788 - 4853       | K.LGGSAVISLEGKPL                                                       | 1341.57848 | 2 | 9.09E-08 | 0.96  | 4.40   | -     | 1297.9  |
| AHQ-5-12, 4564 - 4588       | K.LGGSAVISLEGKPL                                                       | 1341.57848 | 2 | 2.74E-07 | 0.96  | 4.66   | -     | 1267.5  |
| AHQ-5-12, 4989              | K.LGGSAVISLEGKPL                                                       | 1341.57848 | 2 | 4.77E-05 | 0.96  | 4.33   | -     | 1398.0  |
| AHQ-5-12, 4478 - 4609       | K.LGGSAVISLEGKPL                                                       | 1341.57848 | 1 | 9.90E-04 | 0.53  | 2.85   | -     | 336.1   |
| AHQ-5-12, 4905              | K.LGGSAVISLEGKPL                                                       | 1341.57848 | 2 | 1.31E-04 | 0.93  | 3.60   | -     | 1092.6  |
| AHQ-5-14-, 6573 - 6641      | K.NIIIEEGKELVGDVGQTVDDPYATFVK.M                                        | 3064.43208 | 3 | 2.55E-06 | 0.96  | 5.51   | -     | 1559.5  |
| AHQ-5-12, 6708 - 6772       | K.NIIIEEGKELVGDVGQTVDDPYATFVK.M                                        | 3064.43208 | 3 | 4.85E-07 | 0.98  | 6.74   | -     | 1836.6  |
| AHQ-5-13-, 6639 - 6651      | K.NIIIEEGKELVGDVGQTVDDPYATFVK.M                                        | 3064.43208 | 3 | 3.98E-08 | 0.98  | 7.05   | -     | 2374.1  |
| AHQ-5-12, 7196              | K.NIIIEEGKELVGDVGQTVDDPYATFVK.M                                        | 3064.43208 | 3 | 2.90E-07 | 0.96  | 6.01   | -     | 1204.0  |
| AHQ-5-12, 7110 - 7136       | K.NIIIEEGKELVGDVGQTVDDPYATFVK.M                                        | 3064.43208 | 3 | 2.69E-12 | 0.97  | 6.27   | -     | 1744.1  |
| AHQ-5-12, 6820 - 6888       | K.NIIIEEGKELVGDVGQTVDDPYATFVK.M                                        | 3064.43208 | 3 | 6.86E-09 | 0.97  | 7.10   | -     | 1462.9  |
| AHQ-5-12, 6477 - 6554       | K.NIIIEEGKELVGDVGQTVDDPYATFVK.M                                        | 3064.43208 | 3 | 1.29E-05 | 0.97  | 6.59   | -     | 1417.1  |
| AHQ-5-13, 3374              | R.YALYDATYETK.E                                                        | 1338.44364 | 1 | 1.42E-07 | 0.76  | 3.19   | -     | 452.2   |
| AHQ-5-13, 3331 - 3393       | R.YALYDATYETK.E                                                        | 1338.44364 | 2 | 6.84E-07 | 0.93  | 3.81   | -     | 875.2   |
| AHQ-5-12, 3106 - 3173       | R.YALYDATYETK.E                                                        | 1338.44364 | 1 | 1.22E-09 | 0.75  | 3.10   | -     | 516.8   |
| AHQ-5-12, 3076 - 3148       | R.YALYDATYETK.E                                                        | 1338.44364 | 2 | 1.42E-08 | 0.95  | 3.97   | -     | 1197.2  |
| AHQ-5-13-, 3228 - 3292      | R.YALYDATYETK.E                                                        | 1338.44364 | 2 | 1.88E-05 | 0.91  | 3.24   | -     | 948.8   |
| AHQ-5-13-, 3297             | R.YALYDATYETK.E                                                        | 1338.44364 | 1 | 1.41E-04 | 0.24  | 2.52   | -     | 295.2   |
| gi 29732955 ref XP_291603.1 | similar to glyceraldehyde 3-phosphate dehydrogenase [Homo sapiens] [MA |            |   | 2.78E-12 | 0.94  | 10.21  | 16.80 | 11173.0 |
| AHQ-5-9, 3862 - 3919        | K.NISNASCTTNCIAPLAK.M                                                  | 1838.05353 | 2 | 7.55E-11 | 0.87  | 4.16   | -     | 1163.1  |
| AHQ-5-9, 3980               | K.NISNASCTTNCIAPLAK.M                                                  | 1838.05353 | 2 | 6.98E-09 | 0.86  | 3.75   | -     | 1141.4  |
| AHQ-5-10, 3759              | K.NISNASCTTNCIAPLAK.M                                                  | 1838.05353 | 2 | 2.95E-10 | 0.67  | 3.74   | -     | 777.9   |
| AHQ-5-11, 3843 - 3908       | K.NISNASCTTNCIAPLAK.M                                                  | 1838.05353 | 2 | 8.61E-10 | 0.95  | 4.29   | -     | 1589.2  |
| AHQ-5-11, 4072 - 4074       | K.NISNASCTTNCIAPLAK.M                                                  | 1838.05353 | 2 | 2.78E-12 | 0.94  | 4.21   | -     | 1123.7  |
| AHQ-5-11, 4200              | K.NISNASCTTNCIAPLAK.M                                                  | 1838.05353 | 2 | 1.49E-06 | 0.75  | 3.34   | -     | 1055.4  |
| AHQ-5-9, 3768 - 3802        | K.NISNASCTTNCIAPLAK.M                                                  | 1838.05353 | 2 | 2.54E-08 | 0.78  | 3.79   | -     | 1043.7  |
| gi 29741246 ref XP_294070.1 | similar to Glyceraldehyde 3-phosphate dehydrogenase, liver (GAPDH) [Ho |            |   | 3.18E-12 | 4.08  | 50.39  | 14.60 | 35032.0 |
| AHQ-5-9, 4636 - 4694        | K.AENGLVINGNPITIFQER.D                                                 | 2114.39062 | 2 | 1.08E-07 | 0.79  | 3.46   | -     | 773.6   |
| AHQ-5-13, 5390              | K.AENGLVINGNPITIFQER.D                                                 | 2114.39062 | 2 | 5.85E-05 | 0.64  | 3.16   | -     | 395.4   |
| AHQ-5-14-, 5259             | K.AENGLVINGNPITIFQER.D                                                 | 2114.39062 | 2 | 6.17E-06 | 0.63  | 2.86   | -     | 401.8   |
| AHQ-5-13-, 5285             | K.AENGLVINGNPITIFQER.D                                                 | 2114.39062 | 2 | 1.58E-04 | 0.44  | 2.72   | -     | 345.7   |
| AHQ-5-13-, 5563 - 5632      | K.LVINGNPITIFQER.D                                                     | 1614.87029 | 2 | 6.39E-07 | 0.84  | 3.15   | -     | 641.2   |
| AHQ-5-14-, 5542 - 5609      | K.LVINGNPITIFQER.D                                                     | 1614.87029 | 2 | 1.78E-09 | 0.93  | 3.52   | -     | 1180.2  |
| AHQ-5-9, 5038 - 5094        | K.LVINGNPITIFQER.D                                                     | 1614.87029 | 2 | 2.89E-09 | 0.93  | 4.10   | -     | 1056.9  |
| AHQ-5-9, 4911 - 4990        | K.LVINGNPITIFQER.D                                                     | 1614.87029 | 2 | 1.16E-10 | 0.92  | 4.05   | -     | 1013.1  |
| AHQ-5-12, 5665 - 5738       | K.LVINGNPITIFQER.D                                                     | 1614.87029 | 2 | 7.88E-08 | 0.88  | 3.32   | -     | 729.3   |
| AHQ-5-13, 5668 - 5736       | K.LVINGNPITIFQER.D                                                     | 1614.87029 | 2 | 1.78E-08 | 0.92  | 3.81   | -     | 963.9   |
| AHQ-5-13-, 5191             | K.LVINGNPITIFQERDPSK.I                                                 | 2042.32440 | 2 | 1.04E-07 | 0.45  | 2.79   | -     | 303.6   |
| AHQ-5-9, 4562 - 4632        | K.LVINGNPITIFQERDPSK.I                                                 | 2042.32440 | 2 | 1.75E-05 | 0.83  | 3.37   | -     | 591.5   |
| AHQ-5-9, 6434               | K.VLHDNFGVIGGLMTTVHAITATQK.T                                           | 2596.04531 | 2 | 2.73E-06 | 0.97  | 5.64   | -     | 2101.5  |
| AHQ-5-9, 6366 - 6435        | K.VLHDNFGVIGGLMTTVHAITATQK.T                                           | 2596.04531 | 3 | 3.18E-12 | 0.98  | 7.75   | -     | 2502.4  |
| AHQ-5-9, 5639 - 5711        | K.VLHDNFGVIGGLMTTVHAITATQK.T                                           | 2612.04471 | 2 | 3.37E-05 | 0.94  | 5.53   | -     | 1303.0  |
| AHQ-5-11, 6154              | K.VLHDNFGVIGGLMTTVHAITATQK.T                                           | 2612.04471 | 3 | 1.18E-05 | 0.95  | 5.81   | -     | 1739.7  |
| AHQ-5-10, 6455              | K.VLHDNFGVIGGLMTTVHAITATQK.T                                           | 2596.04531 | 2 | 1.39E-04 | 0.92  | 3.43   | -     | 1435.6  |
| gi 4507357 ref NP_003555.1  | transgelin 2; SM22-alpha homolog [Homo sapiens]                        |            |   | 3.52E-12 | 16.69 | 210.30 | 88.40 | 22391.3 |
| AHQ-5-12, 5848 - 5888       | R.DDGLFSGDPNWWFPK.K                                                    | 1595.69288 | 2 | 6.42E-09 | 0.93  | 3.99   | -     | 966.7   |
| AHQ-5-11, 5627 - 5674       | R.DDGLFSGDPNWWFPK.K                                                    | 1595.69288 | 2 | 9.96E-08 | 0.96  | 3.91   | -     | 1458.4  |
| AHQ-5-11, 5739 - 5802       | R.DDGLFSGDPNWWFPK.K                                                    | 1595.69288 | 2 | 2.67E-07 | 0.96  | 4.82   | -     | 1246.6  |
| AHQ-5-11, 5823 - 5883       | R.DDGLFSGDPNWWFPK.K                                                    | 1595.69288 | 2 | 8.06E-07 | 0.96  | 4.22   | -     | 1334.2  |
| AHQ-5-14-, 5774 - 5842      | R.DDGLFSGDPNWWFPK.K                                                    | 1595.69288 | 2 | 4.73E-06 | 0.95  | 4.51   | -     | 1176.7  |
| AHQ-5-12, 6060              | R.DDGLFSGDPNWWFPK.K                                                    | 1595.69288 | 2 | 2.67E-04 | 0.92  | 3.18   | -     | 1260.3  |
| AHQ-5-12, 6305              | K.DGTVLCELINALYPEGQAPVK.K                                              | 2289.59066 | 2 | 1.58E-06 | 0.96  | 4.96   | -     | 1018.5  |
| AHQ-5-13-, 6851             | K.DGTVLCELINALYPEGQAPVK.K                                              | 2289.59066 | 3 | 1.37E-04 | 0.81  | 4.20   | -     | 624.4   |
| AHQ-5-13, 6288              | K.DGTVLCELINALYPEGQAPVK.K                                              | 2289.59066 | 2 | 2.33E-07 | 0.92  | 4.67   | -     | 698.9   |
| AHQ-5-12, 7094              | K.DGTVLCELINALYPEGQAPVK.K                                              | 2289.59066 | 2 | 4.35E-05 | 0.94  | 5.11   | -     | 673.2   |
| AHQ-5-12, 7074 - 7076       | K.DGTVLCELINALYPEGQAPVK.K                                              | 2289.59066 | 2 | 9.36E-05 | 0.86  | 4.61   | -     | 438.0   |
| AHQ-5-11, 6338              | K.DGTVLCELINALYPEGQAPVK.K                                              | 2289.59066 | 2 | 4.04E-04 | 0.75  | 3.55   | -     | 364.1   |
| AHQ-5-13-, 6195             | K.DGTVLCELINALYPEGQAPVK.K                                              | 2289.59066 | 2 | 1.62E-07 | 0.91  | 4.09   | -     | 732.8   |
| AHQ-5-13-, 6843 - 6845      | K.DGTVLCELINALYPEGQAPVK.K                                              | 2289.59066 | 2 | 2.68E-05 | 0.91  | 4.62   | -     | 483.9   |
| AHQ-5-14-, 6117 - 6173      | K.DGTVLCELINALYPEGQAPVK.K                                              | 2289.59066 | 2 | 9.01E-06 | 0.73  | 3.40   | -     | 333.0   |
| AHQ-5-11, 6868              | K.DGTVLCELINALYPEGQAPVK.K                                              | 2289.59066 | 3 | 4.66E-08 | 0.90  | 4.79   | -     | 780.0   |
| AHQ-5-11, 6856              | K.DGTVLCELINALYPEGQAPVK.K                                              | 2289.59066 | 2 | 9.02E-04 | 0.78  | 3.86   | -     | 477.5   |
| AHQ-5-13-, 6800 - 6869      | K.DGTVLCELINALYPEGQAPVK.K                                              | 2417.76357 | 3 | 3.96E-07 | 0.82  | 3.57   | -     | 884.7   |
| AHQ-5-11, 6794 - 6796       | K.DGTVLCELINALYPEGQAPVK.K                                              | 2417.76357 | 3 | 3.57E-09 | 0.91  | 4.07   | -     | 1075.9  |
| AHQ-5-13, 6888              | K.DGTVLCELINALYPEGQAPVK.K                                              | 2417.76357 | 2 | 3.45E-08 | 0.90  | 4.62   | -     | 634.5   |
| AHQ-5-12, 5773              | K.DGTVLCELINALYPEGQAPVK.K                                              | 2417.76357 | 2 | 2.37E-08 | 0.87  | 3.50   | -     | 749.2   |
| AHQ-5-11, 5822 - 5848       | K.DGTVLCELINALYPEGQAPVK.K                                              | 2417.76357 | 2 | 4.60E-05 | 0.71  | 3.53   | -     | 414.8   |
| AHQ-5-12, 5777              | K.DGTVLCELINALYPEGQAPVK.K                                              | 2417.76357 | 3 | 2.16E-09 | 0.85  | 3.71   | -     | 1019.2  |
| AHQ-5-11, 5826              | K.DGTVLCELINALYPEGQAPVK.K                                              | 2417.76357 | 3 | 2.74E-06 | 0.91  | 4.46   | -     | 862.5   |
| AHQ-5-13, 6884 - 6886       | K.DGTVLCELINALYPEGQAPVK.K                                              | 2417.76357 | 3 | 1.80E-08 | 0.94  | 5.17   | -     | 1054.4  |
| AHQ-5-12, 7012 - 7017       | K.DGTVLCELINALYPEGQAPVK.K                                              | 2417.76357 | 2 | 9.12E-04 | 0.57  | 2.57   | -     | 608.3   |
| AHQ-5-14-, 6749 - 6759      | K.DGTVLCELINALYPEGQAPVK.K                                              | 2417.76357 | 3 | 3.66E-08 | 0.83  | 3.48   | -     | 981.3   |
| AHQ-5-13-, 6804             | K.DGTVLCELINALYPEGQAPVK.K                                              | 2417.76357 | 2 | 1.84E-05 | 0.81  | 3.23   | -     | 779.5   |
| AHQ-5-11, 6790 - 6792       | K.DGTVLCELINALYPEGQAPVK.K                                              | 2417.76357 | 2 | 8.02E-10 | 0.90  | 4.75   | -     | 614.0   |
| AHQ-5-12, 7013 - 7025       | K.DGTVLCELINALYPEGQAPVK.K                                              | 2417.76357 | 3 | 2.76E-09 | 0.93  | 5.03   | -     | 792.3   |
| AHQ-5-12, 7132              | R.ENFNQWLKDGTVLCELINALYPEGQAPVK.K                                      | 3349.75795 | 3 | 2.21E-04 | 0.54  | 3.25   | -     | 351.3   |
| AHQ-5-11, 2366              | K.ENPRNFSDNQLQEGK.N                                                    | 1776.84549 | 2 | 1.87E-04 | 0.76  | 3.34   | -     | 572.3   |
| AHQ-5-11, 2599 - 2626       | R.GASQAGMTGYGMPR.Q                                                     | 1384.56732 | 2 | 4.02E-04 | 0.85  | 3.24   | -     | 778.9   |
| AHQ-5-11, 2056 - 2060       | R.GPAYGLSREVQQK.I                                                      | 1433.59456 | 2 | 1.18E-05 | 0.91  | 4.31   | -     | 935.0   |
| AHQ-5-11, 2410              | K.IQASTMAFK.Q                                                          | 997.19374  | 1 | 7.25E-05 | 0.68  | 2.14   | -     | 864.1   |
| AHQ-5-12, 2465              | K.IQASTMAFK.Q                                                          | 997.19374  | 2 | 1.54E-06 | 0.49  | 2.70   | -     | 224.6   |
| AHQ-5-12, 2040              | K.IQASTMAFK.Q                                                          | 1013.19314 | 1 | 7.58E-04 | 0.21  | 2.06   | -     | 65.9    |
| AHQ-5-11, 2114 - 2119       | K.KIQASTMAFK.Q                                                         | 1125.36665 | 2 | 5.93E-04 | 0.85  | 3.30   | -     | 931.7   |
| AHQ-5-12, 2406              | R.NFSDNQLQEGK.N                                                        | 1280.32582 | 2 | 1.82E-04 | 0.90  | 3.34   | -     | 1041.4  |
| AHQ-5-12, 2405              | R.NFSDNQLQEGK.N                                                        | 1280.32582 | 1 | 8.04E-06 | 0.56  | 3.03   | -     | 327.0   |
| AHQ-5-12, 2562              | R.NFSDNQLQEGK.N                                                        | 1280.32582 | 1 | 1.54E-05 | 0.24  | 1.89   | -     | 404.6   |
| AHQ-5-11, 2158 - 2224       | R.NFSDNQLQEGK.N                                                        | 1280.32582 | 2 | 8.17E-04 | 0.80  | 2.90   | -     | 754.5   |
| AHQ-5-13, 2429              | R.NFSDNQLQEGK.N                                                        | 1280.32582 | 2 | 8.92E-05 | 0.85  | 3.45   | -     | 618.9   |
| AHQ-5-13-, 2272             | R.NFSDNQLQEGK.N                                                        | 1280.32582 | 1 | 2.26E-04 | 0.44  | 2.39   | -     | 263.0   |
| AHQ-5-11, 2275 - 2363       | R.NFSDNQLQEGK.N                                                        | 1280.32582 | 1 | 1.37E-08 | 0.43  | 2.79   | -     | 271.1   |



|                             |                                                                         |            |   |          |       |        |       |         |
|-----------------------------|-------------------------------------------------------------------------|------------|---|----------|-------|--------|-------|---------|
| AHQ-5-11, 2364              | R.NFSDNQLQEGK.N                                                         | 1280.32582 | 2 | 9.62E-06 | 0.92  | 3.56   | -     | 1020.7  |
| AHQ-5-12, 2290              | R.NFSDNQLQEGK.N                                                         | 1280.32582 | 1 | 1.84E-04 | 0.15  | 2.12   | -     | 267.7   |
| AHQ-5-12, 2088              | R.NFSDNQLQEGK.N                                                         | 1280.32582 | 2 | 7.40E-05 | 0.83  | 3.20   | -     | 809.4   |
| AHQ-5-11, 2542              | R.NFSDNQLQEGK.N                                                         | 1280.32582 | 1 | 5.37E-05 | 0.18  | 2.02   | -     | 321.1   |
| AHQ-5-11, 3200              | K.NVIGLQMG.TNR.G                                                        | 1203.39751 | 2 | 1.41E-07 | 0.91  | 3.10   | -     | 1563.6  |
| AHQ-5-11, 2234 - 2235       | K.NVIGLQMG.TNR.G                                                        | 1219.39691 | 2 | 4.57E-06 | 0.96  | 4.28   | -     | 1284.1  |
| AHQ-5-11, 2966              | K.NVIGLQMG.TNR.G                                                        | 1203.39751 | 2 | 2.37E-05 | 0.94  | 3.88   | -     | 1341.6  |
| AHQ-5-11, 2975              | K.NVIGLQMG.TNR.G                                                        | 1219.39691 | 2 | 2.40E-04 | 0.88  | 2.85   | -     | 973.0   |
| AHQ-5-13-, 4716 - 4717      | K.QM*EQISQFLQAAER.Y                                                     | 1695.87890 | 2 | 2.22E-05 | 0.84  | 3.69   | -     | 517.5   |
| AHQ-5-14-, 4670             | K.QM*EQISQFLQAAER.Y                                                     | 1695.87890 | 2 | 5.99E-04 | 0.93  | 3.74   | -     | 874.8   |
| AHQ-5-13-, 5400 - 5408      | K.QMEQISQFLQAAER.Y                                                      | 1679.87950 | 2 | 1.14E-04 | 0.95  | 4.62   | -     | 1065.5  |
| AHQ-5-12, 5456              | K.QMEQISQFLQAAER.Y                                                      | 1679.87950 | 3 | 9.72E-07 | 0.96  | 4.56   | -     | 2021.4  |
| AHQ-5-14-, 5346 - 5363      | K.QMEQISQFLQAAER.Y                                                      | 1679.87950 | 2 | 3.91E-04 | 0.96  | 4.60   | -     | 1200.0  |
| AHQ-5-12, 4704              | K.QM*EQISQFLQAAER.Y                                                     | 1695.87890 | 2 | 2.61E-04 | 0.94  | 4.16   | -     | 963.8   |
| AHQ-5-11, 5234 - 5266       | K.QMEQISQFLQAAER.Y                                                      | 1679.87950 | 2 | 2.05E-04 | 0.96  | 4.94   | -     | 1334.3  |
| AHQ-5-12, 7116              | K.QYDADLEQIQLWITTCR.K                                                   | 2396.66131 | 3 | 6.73E-08 | 0.95  | 4.97   | -     | 1574.7  |
| AHQ-5-13-, 6867             | K.QYDADLEQIQLWITTCR.K                                                   | 2396.66131 | 3 | 1.12E-08 | 0.95  | 4.69   | -     | 1683.2  |
| AHQ-5-11, 4647              | R.TLMNLGGLAVAR.D                                                        | 1216.47932 | 2 | 1.63E-06 | 0.92  | 3.73   | -     | 1310.3  |
| AHQ-5-11, 4286 - 4355       | R.TLMNLGGLAVAR.D                                                        | 1216.47932 | 2 | 7.53E-07 | 0.93  | 4.47   | -     | 977.8   |
| AHQ-5-12, 3989              | R.TLM*NLGGLAVAR.D                                                       | 1232.47872 | 2 | 3.91E-04 | 0.76  | 2.90   | -     | 718.9   |
| AHQ-5-11, 3459 - 3462       | R.TLM*NLGGLAVAR.D                                                       | 1232.47872 | 2 | 3.94E-07 | 0.94  | 4.39   | -     | 953.2   |
| AHQ-5-13, 4528 - 4545       | R.TLMNLGGLAVAR.D                                                        | 1216.47932 | 2 | 3.45E-07 | 0.93  | 4.15   | -     | 1196.0  |
| AHQ-5-12, 4421 - 4489       | R.TLMNLGGLAVAR.D                                                        | 1216.47932 | 2 | 6.27E-07 | 0.91  | 4.21   | -     | 938.0   |
| AHQ-5-13-, 4436 - 4452      | R.TLMNLGGLAVAR.D                                                        | 1216.47932 | 2 | 8.47E-06 | 0.94  | 4.26   | -     | 1253.8  |
| AHQ-5-12, 4786              | R.TLMNLGGLAVAR.D                                                        | 1216.47932 | 1 | 2.78E-04 | 0.12  | 1.99   | -     | 256.4   |
| AHQ-5-12, 4590              | R.TLMNLGGLAVAR.D                                                        | 1216.47932 | 2 | 2.17E-05 | 0.87  | 3.24   | -     | 997.4   |
| AHQ-5-13-, 3509             | R.TLM*NLGGLAVAR.D                                                       | 1232.47872 | 2 | 7.39E-04 | 0.76  | 3.04   | -     | 846.4   |
| AHQ-5-11, 3902              | R.TLM*NLGGLAVAR.D                                                       | 1232.47872 | 2 | 9.22E-08 | 0.84  | 3.21   | -     | 872.4   |
| AHQ-5-12, 6674 - 6736       | R.YGINTTDFIQTVDLWEGK.N                                                  | 2101.30080 | 2 | 9.85E-08 | 0.94  | 4.73   | -     | 1034.6  |
| AHQ-5-12, 6912 - 7058       | R.YGINTTDFIQTVDLWEGK.N                                                  | 2101.30080 | 2 | 2.59E-09 | 0.96  | 5.26   | -     | 1239.2  |
| AHQ-5-11, 6927              | R.YGINTTDFIQTVDLWEGK.N                                                  | 2101.30080 | 2 | 3.40E-08 | 0.95  | 4.87   | -     | 823.0   |
| AHQ-5-13-, 6723             | R.YGINTTDFIQTVDLWEGK.N                                                  | 2101.30080 | 2 | 8.20E-08 | 0.97  | 5.48   | -     | 1372.5  |
| AHQ-5-11, 6840              | R.YGINTTDFIQTVDLWEGK.N                                                  | 2101.30080 | 2 | 1.82E-05 | 0.91  | 4.08   | -     | 923.6   |
| AHQ-5-11, 6698 - 6756       | R.YGINTTDFIQTVDLWEGK.N                                                  | 2101.30080 | 2 | 6.28E-08 | 0.97  | 5.29   | -     | 1221.2  |
| AHQ-5-11, 6490              | R.YGINTTDFIQTVDLWEGK.N                                                  | 2101.30080 | 2 | 3.52E-12 | 0.96  | 4.59   | -     | 1251.2  |
| AHQ-5-11, 6270 - 6279       | R.YGINTTDFIQTVDLWEGK.N                                                  | 2101.30080 | 2 | 3.03E-08 | 0.97  | 5.22   | -     | 1258.3  |
| AHQ-5-12, 7146 - 7160       | R.YGINTTDFIQTVDLWEGK.N                                                  | 2101.30080 | 2 | 3.16E-08 | 0.93  | 4.12   | -     | 845.5   |
| AHQ-5-12, 6829 - 6897       | R.YGINTTDFIQTVDLWEGK.N                                                  | 2101.30080 | 2 | 2.44E-10 | 0.98  | 5.12   | -     | 1754.9  |
| AHQ-5-14-, 6595 - 6674      | R.YGINTTDFIQTVDLWEGK.N                                                  | 2101.30080 | 2 | 5.09E-09 | 0.97  | 5.90   | -     | 1335.5  |
| AHQ-5-12, 6568 - 6632       | R.YGINTTDFIQTVDLWEGK.N                                                  | 2101.30080 | 2 | 5.59E-05 | 0.64  | 2.87   | -     | 542.1   |
| AHQ-5-1, 7241               | R.YGINTTDFIQTVDLWEGK.N                                                  | 2101.30080 | 2 | 1.96E-05 | 0.92  | 4.39   | -     | 795.7   |
| AHQ-5-12, 6902              | R.YGINTTDFIQTVDLWEGKNMACVQR.T                                           | 2962.30673 | 3 | 8.45E-10 | 0.92  | 4.94   | -     | 936.0   |
| AHQ-5-12, 6680 - 6684       | R.YGINTTDFIQTVDLWEGKNMACVQR.T                                           | 2978.30613 | 3 | 9.16E-07 | 0.64  | 3.72   | -     | 403.2   |
| gij17986260[ref]NP_524147.1 | smooth muscle and non-muscle myosin alkali light chain isoform 2 [Homo  |            |   | 3.68E-12 | 3.25  | 40.31  | 23.30 | 12969.7 |
| AHQ-5-12, 5868 - 5933       | K.M*TEEEVEMVLVAGHEDSNGCINYEELVR.M                                       | 3172.42496 | 3 | 1.09E-04 | 0.83  | 4.70   | -     | 779.3   |
| AHQ-5-12, 5974 - 6037       | K.M*TEEEVEMVLVAGHEDSNGCINYEELVR.M                                       | 3156.42556 | 3 | 5.41E-07 | 0.97  | 5.96   | -     | 1802.1  |
| AHQ-5-12, 6080 - 6145       | K.M*TEEEVEMVLVAGHEDSNGCINYEELVR.M                                       | 3172.42496 | 3 | 3.27E-09 | 0.92  | 5.54   | -     | 1501.9  |
| AHQ-5-12, 6100 - 6169       | K.M*TEEEVEMVLVAGHEDSNGCINYEELVR.M                                       | 3156.42556 | 3 | 1.02E-05 | 0.97  | 5.36   | -     | 2003.6  |
| AHQ-5-12, 6208 - 6270       | K.M*TEEEVEMVLVAGHEDSNGCINYEELVR.M                                       | 3172.42496 | 3 | 9.82E-07 | 0.84  | 4.74   | -     | 602.0   |
| AHQ-5-12, 6233 - 6297       | K.M*TEEEVEMVLVAGHEDSNGCINYEELVR.M                                       | 3156.42556 | 3 | 9.77E-09 | 0.98  | 6.07   | -     | 2254.4  |
| AHQ-5-12, 6362              | K.M*TEEEVEMVLVAGHEDSNGCINYEELVR.M                                       | 3156.42556 | 3 | 1.48E-04 | 0.95  | 5.33   | -     | 1613.9  |
| AHQ-5-12, 6701              | K.M*TEEEVEMVLVAGHEDSNGCINYEELVR.M                                       | 3156.42556 | 3 | 2.50E-04 | 0.96  | 5.52   | -     | 2259.9  |
| AHQ-5-12, 6712              | K.M*TEEEVEMVLVAGHEDSNGCINYEELVR.M                                       | 3172.42496 | 3 | 4.55E-10 | 0.37  | 3.23   | -     | 401.2   |
| AHQ-5-12, 7121              | K.M*TEEEVEMVLVAGHEDSNGCINYEELVR.M                                       | 3172.42496 | 3 | 2.99E-06 | 0.78  | 3.99   | -     | 394.2   |
| AHQ-5-14, 6073              | K.M*TEEEVEMVLVAGHEDSNGCINYEELVR.M                                       | 3188.42436 | 3 | 3.10E-06 | 0.95  | 5.00   | -     | 1309.2  |
| AHQ-5-14-, 5785             | K.M*TEEEVEMVLVAGHEDSNGCINYEELVR.M                                       | 3172.42496 | 3 | 1.05E-06 | 0.61  | 3.36   | -     | 530.6   |
| AHQ-5-14-, 5881 - 5894      | K.M*TEEEVEMVLVAGHEDSNGCINYEELVR.M                                       | 3172.42496 | 3 | 3.68E-12 | 0.96  | 6.26   | -     | 1905.6  |
| gij4557677[ref]NP_000203.1  | integrin beta chain, beta 3 precursor; platelet glycoprotein IIIa precu |            |   | 3.84E-12 | 20.20 | 250.27 | 39.10 | 87185.6 |
| AHQ-5-6, 2662               | R.AKWDTANNPLYK.E                                                        | 1421.58225 | 2 | 1.38E-08 | 0.81  | 3.18   | -     | 580.6   |
| AHQ-5-3, 2875               | R.AKWDTANNPLYK.E                                                        | 1421.58225 | 1 | 1.31E-06 | 0.73  | 3.10   | -     | 421.6   |
| AHQ-5-3, 2869               | R.AKWDTANNPLYK.E                                                        | 1421.58225 | 2 | 2.18E-05 | 0.91  | 3.32   | -     | 817.7   |
| AHQ-5-3, 5458 - 5529        | R.CDLKENLLKDNCAPEISIEFFVSEAR.V                                          | 2938.23689 | 3 | 6.16E-06 | 0.95  | 5.41   | -     | 1249.5  |
| AHQ-5-3, 5553 - 5614        | R.CDLKENLLKDNCAPEISIEFFVSEAR.V                                          | 2938.23689 | 2 | 9.79E-09 | 0.93  | 4.71   | -     | 655.5   |
| AHQ-5-3, 5457 - 5525        | R.CDLKENLLKDNCAPEISIEFFVSEAR.V                                          | 2938.23689 | 2 | 5.66E-05 | 0.77  | 3.61   | -     | 457.6   |
| AHQ-5-1, 4503               | R.CGPGWLGSQCCESEEDYRPSQQDECSPR.E                                        | 3380.49342 | 3 | 4.99E-06 | 0.83  | 3.67   | -     | 573.7   |
| AHQ-5-4, 4406 - 4476        | R.CGPGWLGSQCCESEEDYRPSQQDECSPR.E                                        | 3380.49342 | 3 | 5.88E-05 | 0.65  | 3.40   | -     | 491.0   |
| AHQ-5-3, 4534 - 4607        | R.CGPGWLGSQCCESEEDYRPSQQDECSPR.E                                        | 3380.49342 | 3 | 4.66E-06 | 0.66  | 3.28   | -     | 479.1   |
| AHQ-5-5, 4378               | R.CGPGWLGSQCCESEEDYRPSQQDECSPR.E                                        | 3380.49342 | 3 | 9.71E-05 | 0.72  | 3.16   | -     | 483.2   |
| AHQ-5-6, 4304               | R.CGPGWLGSQCCESEEDYRPSQQDECSPR.E                                        | 3380.49342 | 3 | 2.36E-04 | 0.64  | 3.40   | -     | 395.6   |
| AHQ-5-2, 4497 - 4519        | R.CGPGWLGSQCCESEEDYRPSQQDECSPR.E                                        | 3380.49342 | 3 | 3.65E-06 | 0.81  | 3.89   | -     | 548.6   |
| AHQ-5-3, 4447 - 4517        | R.CGPGWLGSQCCESEEDYRPSQQDECSPR.E                                        | 3380.49342 | 3 | 8.63E-05 | 0.53  | 3.06   | -     | 343.0   |
| AHQ-5-3, 7714               | R.DAPEGGFDAIMQATVCDEK.I                                                 | 2056.21716 | 2 | 1.34E-07 | 0.78  | 3.39   | -     | 437.3   |
| AHQ-5-3, 6998 - 7079        | R.DAPEGGFDAIMQATVCDEK.I                                                 | 2056.21716 | 2 | 7.93E-04 | 0.91  | 3.86   | -     | 757.0   |
| AHQ-5-3, 6670 - 6739        | R.DAPEGGFDAIMQATVCDEK.I                                                 | 2056.21716 | 2 | 1.67E-06 | 0.90  | 3.44   | -     | 769.4   |
| AHQ-5-1, 6061               | R.DAPEGGFDAIMQATVCDEK.I                                                 | 2056.21716 | 2 | 4.29E-08 | 0.88  | 3.65   | -     | 580.8   |
| AHQ-5-3, 6526 - 6602        | R.DAPEGGFDAIMQATVCDEK.I                                                 | 2056.21716 | 2 | 3.77E-06 | 0.83  | 3.59   | -     | 555.9   |
| AHQ-5-3, 6367 - 6439        | R.DAPEGGFDAIMQATVCDEK.I                                                 | 2056.21716 | 2 | 5.43E-04 | 0.94  | 4.50   | -     | 900.1   |
| AHQ-5-3, 6281 - 6350        | R.DAPEGGFDAIMQATVCDEK.I                                                 | 2056.21716 | 2 | 7.48E-06 | 0.96  | 5.19   | -     | 1032.5  |
| AHQ-5-3, 6131 - 6210        | R.DAPEGGFDAIMQATVCDEK.I                                                 | 2056.21716 | 2 | 6.29E-07 | 0.96  | 4.98   | -     | 993.5   |
| AHQ-5-1, 4624               | R.DAPEGGFDAIM*QATVCDEK.I                                                | 2072.21656 | 2 | 1.21E-05 | 0.91  | 3.88   | -     | 817.3   |
| AHQ-5-4, 4644               | R.DAPEGGFDAIM*QATVCDEK.I                                                | 2072.21656 | 2 | 3.05E-06 | 0.86  | 3.48   | -     | 545.2   |
| AHQ-5-1, 6240               | R.DAPEGGFDAIMQATVCDEK.I                                                 | 2056.21716 | 2 | 1.11E-04 | 0.87  | 3.38   | -     | 637.9   |
| AHQ-5-3, 4626 - 4627        | R.DAPEGGFDAIM*QATVCDEK.I                                                | 2072.21656 | 2 | 1.44E-05 | 0.93  | 4.03   | -     | 796.7   |
| AHQ-5-9, 4326               | K.DDLWSIQNLG.TK.L                                                       | 1390.52332 | 1 | 1.99E-05 | 0.49  | 2.32   | -     | 373.6   |
| AHQ-5-1, 5089               | K.DDLWSIQNLG.TK.L                                                       | 1390.52332 | 2 | 1.41E-06 | 0.93  | 4.03   | -     | 962.5   |
| AHQ-5-6, 4849 - 4853        | K.DDLWSIQNLG.TK.L                                                       | 1390.52332 | 2 | 1.71E-04 | 0.88  | 3.16   | -     | 983.9   |
| AHQ-5-6, 4861               | K.DDLWSIQNLG.TK.L                                                       | 1390.52332 | 1 | 1.11E-04 | 0.47  | 2.36   | -     | 444.7   |
| AHQ-5-3, 5073               | K.DDLWSIQNLG.TK.L                                                       | 1390.52332 | 2 | 6.85E-07 | 0.94  | 4.11   | -     | 931.9   |
| AHQ-5-3, 5075               | K.DDLWSIQNLG.TK.L                                                       | 1390.52332 | 1 | 2.59E-09 | 0.36  | 2.51   | -     | 273.0   |
| AHQ-5-3, 4763               | K.DNCAPEISIEFFVSEAR.V                                                   | 1822.93099 | 2 | 1.01E-04 | 0.91  | 3.60   | -     | 1257.8  |
| AHQ-5-5, 4425 - 4438        | K.DNCAPEISIEFFVSEAR.V                                                   | 1822.93099 | 2 | 1.60E-04 | 0.77  | 3.29   | -     | 711.5   |
| AHQ-5-3, 3323               | K.EATSTFTNITYR.G                                                        | 1404.50685 | 2 | 8.25E-06 | 0.70  | 3.21   | -     | 507.9   |
| AHQ-5-1, 3432               | K.EATSTFTNITYR.G                                                        | 1404.50685 | 2 | 4.68E-05 | 0.84  | 2.95   | -     | 704.4   |
| AHQ-5-3, 3255 - 3327        | K.EATSTFTNITYR.G                                                        | 1404.50685 | 2 | 1.06E-07 | 0.60  | 2.69   | -     | 496.0   |
| AHQ-5-3, 2258               | R.FQYEDSSGK.S                                                           | 1224.25749 | 1 | 2.96E-05 | 0.65  | 2.56   | -     | 516.9   |
| AHQ-5-3, 2253 - 2281        | R.FQYEDSSGK.S                                                           | 1224.25749 | 2 | 4.44E-04 | 0.58  | 2.92   | -     | 384.1   |
| AHQ-5-1, 3731 - 3733        | R.GECLCGQCVCHSSDFGK.I                                                   | 2006.16137 | 2 | 1.50E-05 | 0.97  | 4.51   | -     | 1993.2  |
| AHQ-5-6, 3473               | R.GECLCGQCVCHSSDFGK.I                                                   | 2006.16137 | 2 | 2.24E-04 | 0.82  | 3.35   | -     | 908.9   |
| AHQ-5-3, 3598 - 3677        | R.GECLCGQCVCHSSDFGK.I                                                   | 2006.16137 | 2 | 1.11E-06 | 0.96  | 4.56   | -     | 1759.3  |
| AHQ-5-3, 3663 - 3743        | R.GECLCGQCVCHSSDFGK.I                                                   | 2006.16137 | 2 | 2.61E-08 | 0.74  | 2.96   | -     | 663.6   |
| AHQ-5-2, 3669               | R.GECLCGQCVCHSSDFGK.I                                                   | 2006.16137 | 2 | 3.44E-07 | 0.86  | 3.92   | -     | 730.2   |
| AHQ-5-3, 3831 - 3839        | R.GECLCGQCVCHSSDFGK.I                                                   | 2006.16137 | 2 | 1.65E-05 | 0.92  | 4.06   | -     | 966.6   |
| AHQ-5-3, 3674               | R.GECLCGQCVCHSSDFGK.I                                                   | 2006.16137 | 3 | 1.79E-06 | 0.88  | 3.83   | -     | 843.0   |
| AHQ-5-5, 3518               | R.GECLCGQCVCHSSDFGK.I                                                   | 2006.16137 | 2 | 9.45E-06 | 0.90  | 3.39   | -     | 1249.7  |
| AHQ-5-4, 3638               | R.GECLCGQCVCHSSDFGK.I                                                   | 2006.16137 | 2 | 2.61E-06 | 0.85  | 3.72   | -     | 668.3   |
| AHQ-5-4, 3646               | R.GECLCGQCVCHSSDFGK.I                                                   | 2006.16137 | 3 | 9.04E-05 | 0.68  | 3.14   | -     | 562.7   |
| AHQ-5-3, 4798 - 4805        | R.GKCEGSCVCIOPGSGYDTEKCPDCTCFK.K                                        | 3900.25293 | 3 | 4.77E-06 | 0.92  | 5.02   | -     | 756.6   |

|                            |                                                                        |            |   |          |       |        |       |          |
|----------------------------|------------------------------------------------------------------------|------------|---|----------|-------|--------|-------|----------|
| AHQ-5-3, 4399 - 4405       | R.GKCEGSCVCIQPGSYGDTCEKCPDCTPDACTFKK.E                                 | 4028.42584 | 3 | 1.99E-04 | 0.87  | 4.46   | -     | 769.6    |
| AHQ-5-3, 1974 - 2043       | K.GSGDSSQVTVQSPQR.I                                                    | 1533.58302 | 2 | 8.68E-04 | 0.52  | 2.53   | -     | 634.7    |
| AHQ-5-3, 1765 - 1775       | K.GSGDSSQVTVQSPQR.I                                                    | 1533.58302 | 2 | 6.98E-05 | 0.65  | 2.95   | -     | 759.5    |
| AHQ-5-6, 1634              | K.GSGDSSQVTVQSPQR.I                                                    | 1533.58302 | 2 | 2.10E-04 | 0.71  | 3.02   | -     | 701.7    |
| AHQ-5-5, 1642              | K.GSGDSSQVTVQSPQR.I                                                    | 1533.58302 | 2 | 2.29E-04 | 0.78  | 3.04   | -     | 798.8    |
| AHQ-5-3, 2567              | K.HVLTLDQVTR.F                                                         | 1283.45912 | 1 | 8.95E-06 | 0.76  | 3.43   | -     | 334.9    |
| AHQ-5-1, 2777              | K.HVLTLDQVTR.F                                                         | 1283.45912 | 2 | 1.10E-04 | 0.85  | 3.26   | -     | 546.1    |
| AHQ-5-3, 2558 - 2629       | K.HVLTLDQVTR.F                                                         | 1283.45912 | 2 | 7.05E-06 | 0.91  | 3.43   | -     | 704.7    |
| AHQ-5-3, 2447              | K.HVLTLDQVTR.F                                                         | 1283.45912 | 2 | 6.72E-05 | 0.90  | 3.32   | -     | 829.0    |
| AHQ-5-4, 2553 - 2557       | K.HVLTLDQVTR.F                                                         | 1283.45912 | 2 | 8.21E-06 | 0.95  | 3.95   | -     | 890.4    |
| AHQ-5-6, 2396 - 2400       | K.HVLTLDQVTR.F                                                         | 1283.45912 | 2 | 3.45E-07 | 0.87  | 3.26   | -     | 567.4    |
| AHQ-5-6, 2405              | K.HVLTLDQVTR.F                                                         | 1283.45912 | 1 | 2.01E-04 | 0.20  | 2.04   | -     | 264.1    |
| AHQ-5-7, 2356 - 2367       | K.HVLTLDQVTR.F                                                         | 1283.45912 | 2 | 3.78E-04 | 0.90  | 3.30   | -     | 743.5    |
| AHQ-5-5, 2417              | K.HVLTLDQVTR.F                                                         | 1283.45912 | 2 | 1.05E-05 | 0.88  | 3.26   | -     | 605.3    |
| AHQ-5-3, 5127              | K.IGDTVSFSIEAK.V                                                       | 1267.41009 | 2 | 9.80E-06 | 0.82  | 2.92   | -     | 668.7    |
| AHQ-5-3, 3657              | K.ITGKYCECDFFSCVRY                                                     | 1914.08378 | 2 | 1.46E-04 | 0.69  | 3.04   | -     | 564.7    |
| AHQ-5-3, 5517 - 5586       | R.LAGIVQPNDDGQCHVSGSDNHYSASTTMDYPSGLMTEK.L                             | 3997.35517 | 3 | 4.24E-04 | 0.92  | 5.30   | -     | 574.6    |
| AHQ-5-3, 3562              | R.NDASHLLVFTTDAK.T                                                     | 1532.67977 | 2 | 1.17E-05 | 0.92  | 3.75   | -     | 961.1    |
| AHQ-5-7, 3372 - 3442       | R.NDASHLLVFTTDAK.T                                                     | 1532.67977 | 2 | 2.89E-05 | 0.90  | 3.94   | -     | 893.7    |
| AHQ-5-5, 3506 - 3579       | R.NDASHLLVFTTDAK.T                                                     | 1532.67977 | 2 | 4.63E-09 | 0.95  | 3.90   | -     | 1391.2   |
| AHQ-5-6, 3458 - 3528       | R.NDASHLLVFTTDAK.T                                                     | 1532.67977 | 2 | 4.97E-10 | 0.95  | 4.03   | -     | 1414.5   |
| AHQ-5-3, 3782 - 3854       | R.NDASHLLVFTTDAK.T                                                     | 1532.67977 | 2 | 3.66E-07 | 0.96  | 4.59   | -     | 1296.1   |
| AHQ-5-3, 3873              | R.NDASHLLVFTTDAK.T                                                     | 1532.67977 | 3 | 3.99E-07 | 0.95  | 4.75   | -     | 1166.7   |
| AHQ-5-3, 4281 - 4351       | R.NDASHLLVFTTDAK.T                                                     | 1532.67977 | 2 | 2.03E-04 | 0.92  | 3.75   | -     | 889.8    |
| AHQ-5-1, 4019              | R.NDASHLLVFTTDAK.T                                                     | 1532.67977 | 2 | 1.10E-09 | 0.95  | 4.52   | -     | 973.9    |
| AHQ-5-1, 4525              | R.NDASHLLVFTTDAK.T                                                     | 1532.67977 | 2 | 1.26E-10 | 0.94  | 3.87   | -     | 1222.4   |
| AHQ-5-4, 3821 - 3828       | R.NDASHLLVFTTDAK.T                                                     | 1532.67977 | 2 | 3.41E-09 | 0.95  | 4.58   | -     | 998.8    |
| AHQ-5-4, 4401              | R.NDASHLLVFTTDAK.T                                                     | 1532.67977 | 2 | 4.17E-10 | 0.93  | 3.95   | -     | 1033.2   |
| AHQ-5-3, 4450              | R.NDASHLLVFTTDAK.T                                                     | 1532.67977 | 2 | 5.85E-06 | 0.94  | 4.17   | -     | 1167.0   |
| AHQ-5-2, 3161              | K.SFTIKPVGF.K.D                                                        | 1124.35685 | 2 | 8.08E-04 | 0.79  | 2.61   | -     | 1100.0   |
| AHQ-5-5, 2961 - 2974       | K.SFTIKPVGF.K.D                                                        | 1124.35685 | 2 | 3.52E-05 | 0.80  | 2.67   | -     | 944.3    |
| AHQ-5-3, 3231 - 3242       | K.SFTIKPVGF.K.D                                                        | 1124.35685 | 2 | 4.59E-05 | 0.90  | 2.92   | -     | 1367.6   |
| AHQ-5-6, 3406 - 3456       | R.TDTCMSSNGLLCSGR.G                                                    | 1661.81786 | 2 | 1.94E-11 | 0.89  | 3.33   | -     | 938.4    |
| AHQ-5-4, 3682              | R.TDTCMSSNGLLCSGR.G                                                    | 1661.81786 | 2 | 5.76E-07 | 0.85  | 3.23   | -     | 1418.4   |
| AHQ-5-3, 2957 - 2967       | R.TDTCMSSNGLLCSGR.G                                                    | 1677.81726 | 2 | 2.32E-07 | 0.86  | 3.04   | -     | 1032.5   |
| AHQ-5-1, 3625              | R.TDTCMSSNGLLCSGR.G                                                    | 1661.81786 | 2 | 7.76E-09 | 0.94  | 3.80   | -     | 1080.3   |
| AHQ-5-1, 3723              | R.TDTCMSSNGLLCSGR.G                                                    | 1661.81786 | 2 | 1.54E-10 | 0.96  | 4.09   | -     | 1569.0   |
| AHQ-5-3, 2853 - 2854       | R.TDTCMSSNGLLCSGR.G                                                    | 1677.81726 | 2 | 3.50E-07 | 0.91  | 3.75   | -     | 1026.9   |
| AHQ-5-3, 3806              | R.TDTCMSSNGLLCSGR.G                                                    | 1661.81786 | 2 | 1.32E-08 | 0.68  | 2.71   | -     | 772.1    |
| AHQ-5-4, 3569 - 3580       | R.TDTCMSSNGLLCSGR.G                                                    | 1661.81786 | 2 | 4.42E-07 | 0.91  | 3.68   | -     | 975.3    |
| AHQ-5-4, 2854              | R.TDTCMSSNGLLCSGR.G                                                    | 1677.81726 | 2 | 1.34E-07 | 0.89  | 3.25   | -     | 1037.4   |
| AHQ-5-3, 3690 - 3766       | R.TDTCMSSNGLLCSGR.G                                                    | 1661.81786 | 2 | 3.84E-12 | 0.96  | 4.52   | -     | 1444.8   |
| AHQ-5-4, 2946              | R.TDTCMSSNGLLCSGR.G                                                    | 1677.81726 | 2 | 1.00E-06 | 0.72  | 2.66   | -     | 590.2    |
| AHQ-5-3, 1714 - 1783       | R.VLEDRPLSDK.G                                                         | 1172.31354 | 2 | 1.81E-05 | 0.92  | 3.58   | -     | 962.1    |
| AHQ-5-3, 2742              | R.VLEDRPLSDKSGDSSQVTVQSPQR.I                                           | 2686.87396 | 3 | 5.73E-08 | 0.93  | 4.30   | -     | 1473.6   |
| AHQ-5-3, 3265              | K.WDTANNPLYK.E                                                         | 1222.33111 | 2 | 4.25E-04 | 0.50  | 2.83   | -     | 493.6    |
| AHQ-5-5, 3669              | K.YCECDFFSCVRY                                                         | 1514.59674 | 2 | 2.63E-06 | 0.95  | 3.51   | -     | 1383.1   |
| AHQ-5-1, 3785              | K.YCECDFFSCVRY                                                         | 1514.59674 | 2 | 9.79E-06 | 0.87  | 3.01   | -     | 847.2    |
| AHQ-5-6, 3624              | K.YCECDFFSCVRY                                                         | 1514.59674 | 2 | 5.51E-05 | 0.91  | 3.38   | -     | 986.7    |
| AHQ-5-2, 3769              | K.YCECDFFSCVRY                                                         | 1514.59674 | 2 | 3.85E-06 | 0.95  | 3.57   | -     | 1359.7   |
| AHQ-5-4, 3732 - 3733       | K.YCECDFFSCVRY                                                         | 1514.59674 | 2 | 3.11E-05 | 0.89  | 3.06   | -     | 1047.3   |
| AHQ-5-3, 3749 - 3827       | K.YCECDFFSCVRY                                                         | 1514.59674 | 2 | 1.02E-07 | 0.95  | 4.05   | -     | 1122.7   |
| gj10863927 ref NP_066953.1 | peptidylprolyl isomerase A (cyclophilin A) [Homo sapiens]              |            |   | 4.24E-12 | 6.48  | 80.27  | 30.90 | 18012.4  |
| AHQ-5-12, 3108 - 3117      | K.EGMNIVEAMER.F                                                        | 1295.46882 | 2 | 1.13E-04 | 0.66  | 2.85   | -     | 397.8    |
| AHQ-5-12, 4094 - 4096      | K.EGMNIVEAMER.F                                                        | 1279.46942 | 2 | 3.85E-05 | 0.85  | 3.58   | -     | 569.1    |
| AHQ-5-13, 4096             | K.FEDENFLK.H                                                           | 1155.28144 | 2 | 3.73E-04 | 0.71  | 2.95   | -     | 526.2    |
| AHQ-5-12, 3865 - 3929      | K.FEDENFLK.H                                                           | 1155.28144 | 2 | 1.15E-04 | 0.85  | 3.77   | -     | 595.6    |
| AHQ-5-12, 4005             | K.FEDENFLK.H                                                           | 1155.28144 | 2 | 3.34E-05 | 0.88  | 3.42   | -     | 740.3    |
| AHQ-5-13, 3478 - 3479      | K.KITADCGGLE                                                           | 1249.41637 | 2 | 3.23E-04 | 0.74  | 3.19   | -     | 822.2    |
| AHQ-5-12, 3649             | K.KITADCGGLE                                                           | 1249.41637 | 2 | 3.07E-04 | 0.80  | 3.46   | -     | 952.1    |
| AHQ-5-12, 3354             | K.KITADCGGLE                                                           | 1249.41637 | 2 | 1.50E-04 | 0.63  | 3.14   | -     | 709.4    |
| AHQ-5-12, 4586 - 4660      | K.SIYGEKFEDENFLK.H                                                     | 1833.03047 | 2 | 2.10E-09 | 0.96  | 5.44   | -     | 1177.6   |
| AHQ-5-14-, 4618            | K.SIYGEKFEDENFLK.H                                                     | 1833.03047 | 2 | 8.72E-10 | 0.95  | 5.01   | -     | 1008.2   |
| AHQ-5-14, 5509 - 5578      | K.SIYGEKFEDENFLK.H                                                     | 1833.03047 | 2 | 2.17E-05 | 0.96  | 4.78   | -     | 1265.7   |
| AHQ-5-12, 4577 - 4648      | K.SIYGEKFEDENFLK.H                                                     | 1833.03047 | 2 | 5.46E-11 | 0.95  | 5.09   | -     | 986.0    |
| AHQ-5-12, 4712 - 4754      | K.SIYGEKFEDENFLK.H                                                     | 1833.03047 | 2 | 4.24E-12 | 0.93  | 3.61   | -     | 1364.6   |
| AHQ-5-12, 2830             | K.VKEGMNIVEAMER.F                                                      | 1522.77330 | 2 | 1.59E-04 | 0.79  | 3.44   | -     | 780.7    |
| AHQ-5-12, 4366             | R.VSFFELFADK.V                                                         | 1056.19300 | 1 | 1.63E-04 | 0.68  | 2.50   | -     | 633.7    |
| AHQ-5-12, 4457             | R.VSFFELFADK.V                                                         | 1056.19300 | 2 | 4.87E-06 | 0.87  | 3.36   | -     | 1007.7   |
| AHQ-5-12, 4297             | R.VSFFELFADKVPK.T                                                      | 1380.61317 | 2 | 3.23E-07 | 0.87  | 3.59   | -     | 884.1    |
| AHQ-5-12, 4508             | R.VSFFELFADKVPK.T                                                      | 1380.61317 | 2 | 8.97E-07 | 0.78  | 3.09   | -     | 619.0    |
| AHQ-5-12, 4593             | R.VSFFELFADKVPK.T                                                      | 1380.61317 | 2 | 6.83E-06 | 0.88  | 3.42   | -     | 887.1    |
| gj14504391 ref NP_000179.1 | hexokinase 1 isoform HK1; brain form hexokinase [Homo sapiens]         |            |   | 5.30E-12 | 9.37  | 110.26 | 15.50 | 102504.2 |
| AHQ-5-4, 6348              | R.AILQLGLNSTCCDDSLVK.T                                                 | 2090.38419 | 2 | 3.02E-04 | 0.82  | 3.65   | -     | 493.6    |
| AHQ-5-4, 4480              | K.ATDCVGHDDVTLRL.D                                                     | 1557.75406 | 2 | 9.80E-11 | 0.95  | 4.49   | -     | 1132.5   |
| AHQ-5-5, 4270              | K.ATDCVGHDDVTLRL.D                                                     | 1557.75406 | 2 | 2.93E-10 | 0.84  | 2.99   | -     | 807.3    |
| AHQ-5-4, 2654              | K.FLSQIESDR.L                                                          | 1095.18763 | 1 | 8.09E-05 | 0.19  | 2.15   | -     | 210.2    |
| AHQ-5-4, 3182              | K.GAALITAVGVRL                                                         | 1028.23070 | 2 | 3.91E-05 | 0.97  | 3.98   | -     | 2304.5   |
| AHQ-5-4, 5665 - 5734       | K.GDFIALDLGGSSFR.I                                                     | 1455.59700 | 1 | 2.65E-05 | 0.44  | 2.04   | -     | 372.0    |
| AHQ-5-4, 5733              | K.GDFIALDLGGSSFR.I                                                     | 1455.59700 | 2 | 1.01E-09 | 0.98  | 5.26   | -     | 2163.5   |
| AHQ-5-4, 2142 - 2222       | R.HIDLVEGDEGR.M                                                        | 1240.30483 | 2 | 2.21E-08 | 0.94  | 4.03   | -     | 992.3    |
| AHQ-5-4, 5512              | K.KLPVGFTFSPCCQSK.I                                                    | 1873.16425 | 2 | 5.46E-04 | 0.94  | 4.54   | -     | 893.5    |
| AHQ-5-4, 6100              | K.LPVGFTFSPCCQSK.I                                                     | 1744.99134 | 2 | 1.15E-06 | 0.96  | 4.42   | -     | 1131.2   |
| AHQ-5-4, 5928              | R.LSDETLIDIMTR.F                                                       | 1407.61560 | 2 | 7.51E-06 | 0.81  | 2.59   | -     | 1195.8   |
| AHQ-5-4, 7377              | R.SANLVAALGAILNR.L                                                     | 1484.72615 | 2 | 3.37E-04 | 0.88  | 3.27   | -     | 1091.4   |
| AHQ-5-4, 6316 - 6380       | R.TPDGTENGDFLALDLGGTNR.V                                               | 2211.33051 | 2 | 5.30E-12 | 0.94  | 4.37   | -     | 925.6    |
| gj17921989 ref NP_005991.1 | tubulin, alpha 1; testis-specific alpha tubulin; tubulin alpha-1 chain |            |   | 5.96E-12 | 13.18 | 160.26 | 42.90 | 49924.1  |
| AHQ-5-13-, 5135 - 5143     | R.AFVHWYVGEEMEEGFSEAR.E                                                | 2331.50495 | 3 | 6.39E-04 | 0.94  | 4.66   | -     | 1308.2   |
| AHQ-5-7, 5892 - 5967       | R.AFVHWYVGEEMEEGFSEAR.E                                                | 2331.50495 | 2 | 5.44E-04 | 0.85  | 2.86   | -     | 909.1    |
| AHQ-5-12, 5165             | R.AFVHWYVGEEMEEGFSEAR.E                                                | 2331.50495 | 2 | 3.95E-05 | 0.91  | 3.65   | -     | 1027.6   |
| AHQ-5-13-, 5183 - 5188     | R.AVCMLSNNTAIAEAWAR.L                                                  | 1883.13932 | 2 | 9.37E-08 | 0.96  | 4.70   | -     | 1534.6   |
| AHQ-5-13-, 6009 - 6076     | R.AVCMLSNNTAIAEAWAR.L                                                  | 1867.13992 | 2 | 1.16E-08 | 0.94  | 4.51   | -     | 1185.1   |
| AHQ-5-7, 6054 - 6128       | R.AVCMLSNNTAIAEAWAR.L                                                  | 1867.13992 | 2 | 1.61E-05 | 0.83  | 3.39   | -     | 785.3    |
| AHQ-5-14-, 5142            | R.AVCMLSNNTAIAEAWAR.L                                                  | 1883.13932 | 2 | 3.53E-08 | 0.92  | 3.96   | -     | 1293.1   |
| AHQ-5-7, 6712 - 6778       | R.AVCMLSNNTAIAEAWAR.L                                                  | 1867.13992 | 2 | 7.65E-05 | 0.37  | 2.67   | -     | 511.5    |
| AHQ-5-13, 6194 - 6266      | R.AVCMLSNNTAIAEAWAR.L                                                  | 1867.13992 | 2 | 6.74E-04 | 0.94  | 4.47   | -     | 1122.7   |
| AHQ-5-13, 6113             | R.AVCMLSNNTAIAEAWAR.L                                                  | 1867.13992 | 2 | 6.56E-06 | 0.93  | 3.94   | -     | 1240.7   |
| AHQ-5-7, 6847 - 6884       | R.AVCMLSNNTAIAEAWAR.L                                                  | 1867.13992 | 2 | 1.02E-06 | 0.67  | 3.67   | -     | 189.9    |
| AHQ-5-13, 5537             | R.AVCMLSNNTAIAEAWAR.L                                                  | 1883.13932 | 2 | 5.96E-12 | 0.95  | 4.00   | -     | 1391.9   |
| AHQ-5-13, 5222 - 5296      | R.AVCMLSNNTAIAEAWAR.L                                                  | 1883.13932 | 2 | 1.07E-05 | 0.94  | 3.98   | -     | 1368.7   |
| AHQ-5-7, 5078 - 5151       | R.AVCMLSNNTAIAEAWAR.L                                                  | 1883.13932 | 2 | 1.50E-04 | 0.96  | 4.06   | -     | 1700.3   |
| AHQ-5-12, 5786             | R.AVCMLSNNTAIAEAWAR.L                                                  | 1867.13992 | 2 | 1.39E-04 | 0.45  | 2.67   | -     | 396.6    |
| AHQ-5-12, 5466 - 5532      | R.AVCMLSNNTAIAEAWAR.L                                                  | 1883.13932 | 2 | 7.77E-05 | 0.68  | 2.98   | -     | 521.3    |
| AHQ-5-7, 6198 - 6267       | R.AVCMLSNNTAIAEAWAR.L                                                  | 1867.13992 | 2 | 2.46E-04 | 0.92  | 4.28   | -     | 1201.4   |
| AHQ-5-12, 6032 - 6102      | R.AVCMLSNNTAIAEAWAR.L                                                  | 1867.13992 | 2 | 2.44E-07 | 0.92  | 4.66   | -     | 1091.8   |
| AHQ-5-14-, 5937            | R.AVFVDELEPTVIDEIR.N                                                   | 1716.95615 | 2 | 9.29E-06 | 0.85  | 2.82   | -     | 1530.2   |
| AHQ-5-13-, 6028 - 6037     | R.AVFVDELEPTVIDEIR.N                                                   | 1716.95615 | 2 | 7.06E-11 | 0.93  | 3.84   | -     | 1587.1   |

|                            |                                                                         |            |   |          |      |        |       |         |
|----------------------------|-------------------------------------------------------------------------|------------|---|----------|------|--------|-------|---------|
| AHQ-5-12, 6064             | R.AVFVDELEPTVIDEIR.N                                                    | 1716.95615 | 2 | 2.12E-05 | 0.90 | 2.93   | -     | 1802.6  |
| AHQ-5-7, 5995 - 6070       | R.AVFVDELEPTVIDEIR.N                                                    | 1716.95615 | 2 | 7.96E-09 | 0.95 | 4.47   | -     | 1643.1  |
| AHQ-5-6, 6205              | R.AVFVDELEPTVIDEIR.N                                                    | 1716.95615 | 2 | 1.55E-05 | 0.86 | 3.25   | -     | 1367.8  |
| AHQ-5-3, 6483              | R.AVFVDELEPTVIDEIR.N                                                    | 1716.95615 | 2 | 1.21E-06 | 0.75 | 3.04   | -     | 987.3   |
| AHQ-5-11, 5891             | R.AVFVDELEPTVIDEIR.N                                                    | 1716.95615 | 2 | 1.00E-05 | 0.82 | 3.18   | -     | 968.6   |
| AHQ-5-10, 5583 - 5591      | R.AVFVDELEPTVIDEIR.N                                                    | 1716.95615 | 2 | 1.46E-06 | 0.84 | 3.39   | -     | 1061.4  |
| AHQ-5-7, 4972              | K.AYHEQLSVAEITNACFEPANQMVK.C                                            | 2753.06070 | 2 | 4.97E-06 | 0.92 | 4.28   | -     | 778.7   |
| AHQ-5-7, 5888              | K.AYHEQLSVAEITNACFEPANQMVK.C                                            | 2753.06070 | 2 | 8.04E-06 | 0.95 | 4.50   | -     | 1068.2  |
| AHQ-5-7, 6552 - 6624       | K.AYHEQLSVAEITNACFEPANQMVK.C                                            | 2753.06070 | 2 | 5.98E-04 | 0.76 | 3.31   | -     | 677.9   |
| AHQ-5-7, 5152 - 5168       | K.AYHEQLSVAEITNACFEPANQMVK.C                                            | 2753.06070 | 2 | 8.96E-06 | 0.92 | 3.61   | -     | 1323.7  |
| AHQ-5-12, 3012             | K.DVNAIAIAIK.T                                                          | 986.14745  | 1 | 3.79E-06 | 0.80 | 2.66   | -     | 1019.9  |
| AHQ-5-7, 2886              | K.DVNAIAIAIK.T                                                          | 986.14745  | 1 | 2.70E-06 | 0.79 | 2.57   | -     | 909.2   |
| AHQ-5-8, 2970              | K.DVNAIAIAIK.T                                                          | 986.14745  | 1 | 4.91E-04 | 0.29 | 2.00   | -     | 249.4   |
| AHQ-5-5, 3282              | K.DVNAIAIAIK.T                                                          | 986.14745  | 1 | 5.36E-04 | 0.08 | 1.93   | -     | 329.4   |
| AHQ-5-12, 3348             | K.DVNAIAIAIK.T                                                          | 986.14745  | 2 | 1.50E-04 | 0.93 | 3.71   | -     | 1092.8  |
| AHQ-5-7, 3335              | K.DVNAIAIAIK.T                                                          | 986.14745  | 1 | 3.92E-05 | 0.80 | 2.91   | -     | 757.0   |
| AHQ-5-12, 3338 - 3349      | K.DVNAIAIAIK.T                                                          | 986.14745  | 1 | 4.00E-05 | 0.84 | 2.83   | -     | 1003.8  |
| AHQ-5-7, 3226 - 3248       | K.EIIDPVLDR.I                                                           | 1070.22122 | 2 | 1.74E-04 | 0.68 | 2.62   | -     | 438.7   |
| AHQ-5-9, 2916 - 2983       | K.FDLMYAK.R                                                             | 888.06574  | 1 | 9.39E-04 | 0.25 | 1.85   | -     | 445.0   |
| AHQ-5-13, 3514             | K.FDLMYAK.R                                                             | 888.06574  | 2 | 7.74E-04 | 0.79 | 2.90   | -     | 813.6   |
| AHQ-5-13-, 3404            | K.FDLMYAK.R                                                             | 888.06574  | 2 | 6.24E-04 | 0.80 | 2.66   | -     | 833.8   |
| AHQ-5-1, 5417              | R.IHFPLATYAPVISAIAEK.A                                                  | 1758.05310 | 2 | 2.75E-05 | 0.91 | 3.81   | -     | 597.3   |
| AHQ-5-6, 5017              | R.IHFPLATYAPVISAIAEK.A                                                  | 1758.05310 | 2 | 2.81E-04 | 0.90 | 3.40   | -     | 852.5   |
| AHQ-5-4, 5262              | R.IHFPLATYAPVISAIAEK.A                                                  | 1758.05310 | 2 | 3.15E-06 | 0.91 | 3.99   | -     | 583.6   |
| AHQ-5-7, 4595 - 4670       | R.IHFPLATYAPVISAIAEK.A                                                  | 1758.05310 | 2 | 1.19E-08 | 0.96 | 5.03   | -     | 801.1   |
| AHQ-5-7, 4708 - 4778       | R.IHFPLATYAPVISAIAEK.A                                                  | 1758.05310 | 2 | 4.96E-04 | 0.94 | 4.12   | -     | 754.9   |
| AHQ-5-11, 4891 - 4956      | R.IHFPLATYAPVISAIAEK.A                                                  | 1758.05310 | 2 | 8.70E-05 | 0.90 | 3.61   | -     | 631.3   |
| AHQ-5-3, 5293 - 5314       | R.IHFPLATYAPVISAIAEK.A                                                  | 1758.05310 | 2 | 8.95E-05 | 0.93 | 4.00   | -     | 653.3   |
| AHQ-5-10, 4547 - 4608      | R.IHFPLATYAPVISAIAEK.A                                                  | 1758.05310 | 2 | 4.69E-05 | 0.94 | 4.17   | -     | 750.4   |
| AHQ-5-9, 4423 - 4496       | R.IHFPLATYAPVISAIAEK.A                                                  | 1758.05310 | 2 | 1.29E-08 | 0.88 | 3.98   | -     | 508.8   |
| AHQ-5-9, 4390              | R.IHFPLATYAPVISAIAEK.A                                                  | 1758.05310 | 2 | 6.92E-06 | 0.87 | 3.42   | -     | 583.6   |
| AHQ-5-6, 4934 - 5004       | R.IHFPLATYAPVISAIAEK.A                                                  | 1758.05310 | 2 | 5.35E-04 | 0.90 | 3.99   | -     | 607.0   |
| AHQ-5-8, 6701              | R.LISQIVSITASLR.F                                                       | 1488.75471 | 2 | 2.50E-07 | 0.92 | 3.51   | -     | 977.9   |
| AHQ-5-7, 5786              | R.LISQIVSITASLR.F                                                       | 1488.75471 | 2 | 3.61E-07 | 0.87 | 2.98   | -     | 976.2   |
| AHQ-5-7, 6818 - 6883       | R.LISQIVSITASLR.F                                                       | 1488.75471 | 2 | 8.91E-09 | 0.97 | 5.19   | -     | 1386.7  |
| AHQ-5-7, 6947 - 7012       | R.LISQIVSITASLR.F                                                       | 1488.75471 | 2 | 1.04E-08 | 0.94 | 4.60   | -     | 908.7   |
| AHQ-5-10, 6248             | R.LISQIVSITASLR.F                                                       | 1488.75471 | 2 | 1.26E-04 | 0.90 | 3.33   | -     | 1098.1  |
| AHQ-5-7, 7164              | R.LISQIVSITASLR.F                                                       | 1488.75471 | 2 | 2.67E-05 | 0.96 | 4.63   | -     | 1260.7  |
| AHQ-5-7, 7074              | R.LISQIVSITASLR.F                                                       | 1488.75471 | 2 | 1.87E-07 | 0.94 | 3.76   | -     | 1359.1  |
| AHQ-5-9, 6114 - 6172       | R.LISQIVSITASLR.F                                                       | 1488.75471 | 2 | 1.15E-06 | 0.94 | 3.76   | -     | 1146.7  |
| AHQ-5-5, 3271              | R.NLDIERPTYTNLNR.L                                                      | 1719.88022 | 2 | 5.37E-07 | 0.78 | 2.92   | -     | 674.6   |
| AHQ-5-7, 3098 - 3166       | R.NLDIERPTYTNLNR.L                                                      | 1719.88022 | 2 | 2.59E-06 | 0.42 | 2.95   | -     | 267.8   |
| AHQ-5-9, 2959 - 2966       | R.NLDIERPTYTNLNR.L                                                      | 1719.88022 | 2 | 1.22E-07 | 0.59 | 3.39   | -     | 354.7   |
| AHQ-5-8, 2892              | R.NLDIERPTYTNLNR.L                                                      | 1719.88022 | 2 | 5.16E-06 | 0.51 | 3.14   | -     | 355.6   |
| AHQ-5-13, 3545 - 3547      | R.NLDIERPTYTNLNR.L                                                      | 1719.88022 | 2 | 2.21E-04 | 0.68 | 2.93   | -     | 460.1   |
| AHQ-5-14, 4253             | R.NLDIERPTYTNLNR.L                                                      | 1719.88022 | 2 | 3.77E-05 | 0.67 | 3.30   | -     | 269.0   |
| AHQ-5-13, 5741             | R.SIQFVWCPTGFK.V                                                        | 1586.79232 | 2 | 8.13E-04 | 0.77 | 2.60   | -     | 850.0   |
| AHQ-5-12, 5713             | R.SIQFVWCPTGFK.V                                                        | 1586.79232 | 2 | 5.31E-04 | 0.93 | 4.12   | -     | 878.1   |
| AHQ-5-13-, 5629 - 5631     | R.SIQFVWCPTGFK.V                                                        | 1586.79232 | 2 | 2.29E-08 | 0.95 | 4.27   | -     | 1094.8  |
| AHQ-5-4, 5992              | R.SIQFVWCPTGFK.V                                                        | 1586.79232 | 2 | 2.18E-04 | 0.93 | 3.84   | -     | 1002.6  |
| AHQ-5-7, 5534 - 5603       | R.SIQFVWCPTGFK.V                                                        | 1586.79232 | 2 | 3.08E-06 | 0.96 | 4.87   | -     | 972.2   |
| AHQ-5-3, 6057              | R.SIQFVWCPTGFK.V                                                        | 1586.79232 | 2 | 2.42E-04 | 0.89 | 3.68   | -     | 778.1   |
| AHQ-5-7, 5818 - 5898       | K.TIGGGDDSFITFFCETGAGK.H                                                | 2070.17889 | 2 | 1.10E-08 | 0.87 | 3.94   | -     | 530.2   |
| AHQ-5-14, 6268             | K.TIGGGDDSFITFFCETGAGK.H                                                | 2070.17889 | 2 | 5.60E-08 | 0.61 | 2.85   | -     | 448.0   |
| AHQ-5-7, 6068              | K.TIGGGDDSFITFFCETGAGK.H                                                | 2070.17889 | 2 | 1.85E-06 | 0.61 | 2.96   | -     | 363.6   |
| AHQ-5-13-, 5543 - 5577     | K.TIGGGDDSFITFFCETGAGK.H                                                | 2070.17889 | 2 | 8.51E-07 | 0.59 | 3.03   | -     | 376.2   |
| AHQ-5-12, 5681             | K.TIGGGDDSFITFFCETGAGK.H                                                | 2070.17889 | 2 | 7.78E-09 | 0.90 | 4.02   | -     | 751.7   |
| AHQ-5-12, 5688             | K.TIGGGDDSFITFFCETGAGK.H                                                | 2070.17889 | 2 | 3.58E-06 | 0.81 | 3.42   | -     | 592.4   |
| AHQ-5-3, 6005              | K.TIGGGDDSFITFFCETGAGK.H                                                | 2070.17889 | 2 | 6.40E-08 | 0.83 | 3.73   | -     | 480.9   |
| AHQ-5-7, 5734              | K.TIGGGDDSFITFFCETGAGK.H                                                | 2070.17889 | 2 | 7.44E-08 | 0.74 | 3.38   | -     | 378.9   |
| AHQ-5-1, 6028 - 6029       | K.TIGGGDDSFITFFCETGAGK.H                                                | 2070.17889 | 2 | 6.86E-08 | 0.81 | 3.73   | -     | 480.4   |
| AHQ-5-9, 5100 - 5170       | K.TIGGGDDSFITFFCETGAGK.H                                                | 2070.17889 | 2 | 2.27E-05 | 0.64 | 2.92   | -     | 393.2   |
| AHQ-5-6, 5720 - 5765       | K.TIGGGDDSFITFFCETGAGK.H                                                | 2070.17889 | 2 | 1.36E-09 | 0.86 | 3.74   | -     | 556.1   |
| AHQ-5-14-, 5549            | K.TIGGGDDSFITFFCETGAGK.H                                                | 2070.17889 | 2 | 6.09E-09 | 0.77 | 3.52   | -     | 486.0   |
| AHQ-5-7, 5596 - 5666       | K.TIGGGDDSFITFFCETGAGK.H                                                | 2070.17889 | 2 | 1.96E-09 | 0.84 | 3.71   | -     | 513.4   |
| AHQ-5-13, 5621 - 5696      | K.TIGGGDDSFITFFCETGAGK.H                                                | 2070.17889 | 2 | 4.83E-07 | 0.83 | 3.66   | -     | 528.1   |
| AHQ-5-7, 6371              | K.TIGGGDDSFITFFCETGAGK.H                                                | 2070.17889 | 2 | 9.57E-06 | 0.50 | 2.96   | -     | 268.8   |
| AHQ-5-7, 5724 - 5802       | K.TIGGGDDSFITFFCETGAGK.H                                                | 2070.17889 | 2 | 1.42E-08 | 0.94 | 4.69   | -     | 796.0   |
| AHQ-5-13, 4488 - 4562      | K.VGINYPPTVPPGGDLAK.V                                                   | 1826.08584 | 2 | 7.32E-07 | 0.78 | 3.72   | -     | 316.2   |
| AHQ-5-13, 4404 - 4420      | K.VGINYPPTVPPGGDLAK.V                                                   | 1826.08584 | 2 | 2.98E-04 | 0.45 | 2.72   | -     | 276.1   |
| AHQ-5-9, 4064              | K.VGINYPPTVPPGGDLAK.V                                                   | 1826.08584 | 2 | 1.52E-04 | 0.54 | 2.86   | -     | 195.9   |
| AHQ-5-7, 4140 - 4210       | K.VGINYPPTVPPGGDLAK.V                                                   | 1826.08584 | 2 | 5.31E-06 | 0.72 | 3.18   | -     | 320.4   |
| AHQ-5-7, 4238 - 4306       | K.VGINYPPTVPPGGDLAK.V                                                   | 1826.08584 | 2 | 5.11E-06 | 0.43 | 2.81   | -     | 285.2   |
| AHQ-5-12, 4532             | K.VGINYPPTVPPGGDLAK.V                                                   | 1826.08584 | 2 | 1.64E-05 | 0.63 | 2.81   | -     | 406.6   |
| AHQ-5-10, 3959 - 4026      | K.VGINYPPTVPPGGDLAK.V                                                   | 1826.08584 | 2 | 1.27E-05 | 0.88 | 4.22   | -     | 398.6   |
| AHQ-5-13-, 4321 - 4387     | K.VGINYPPTVPPGGDLAK.V                                                   | 1826.08584 | 2 | 2.44E-04 | 0.83 | 3.62   | -     | 458.1   |
| AHQ-5-13-, 4408            | K.VGINYPPTVPPGGDLAK.V                                                   | 1826.08584 | 2 | 1.27E-05 | 0.57 | 2.72   | -     | 354.6   |
| AHQ-5-4, 4553 - 4625       | K.VGINYPPTVPPGGDLAK.V                                                   | 1826.08584 | 2 | 6.60E-05 | 0.79 | 4.02   | -     | 287.2   |
| AHQ-5-12, 4397 - 4464      | K.VGINYPPTVPPGGDLAK.V                                                   | 1826.08584 | 2 | 9.78E-07 | 0.50 | 2.55   | -     | 303.9   |
| AHQ-5-14-, 4333            | K.VGINYPPTVPPGGDLAK.V                                                   | 1826.08584 | 2 | 1.32E-05 | 0.57 | 2.62   | -     | 351.5   |
| AHQ-5-11, 4236 - 4316      | K.VGINYPPTVPPGGDLAK.V                                                   | 1826.08584 | 2 | 5.35E-06 | 0.61 | 3.10   | -     | 336.6   |
| AHQ-5-7, 4374 - 4375       | K.VGINYPPTVPPGGDLAK.V                                                   | 1826.08584 | 2 | 2.70E-07 | 0.76 | 3.25   | -     | 384.0   |
| AHQ-5-12, 3945             | K.YM*ACCLLYR.G                                                          | 1268.50804 | 2 | 1.03E-05 | 0.81 | 2.55   | -     | 592.8   |
| AHQ-5-12, 4433             | K.YM*ACCLLYR.G                                                          | 1268.50804 | 2 | 8.31E-06 | 0.95 | 3.59   | -     | 1194.5  |
| AHQ-5-7, 3746 - 3748       | K.YM*ACCLLYR.G                                                          | 1268.50804 | 2 | 1.18E-06 | 0.74 | 2.95   | -     | 472.3   |
| AHQ-5-7, 4254              | K.YM*ACCLLYR.G                                                          | 1268.50804 | 2 | 3.38E-05 | 0.96 | 3.70   | -     | 1335.7  |
| AHQ-5-7, 4256              | K.YM*ACCLLYR.G                                                          | 1268.50804 | 1 | 2.46E-06 | 0.43 | 2.67   | -     | 177.2   |
| gj 4503327 ref NP_000389.1 | cytochrome b5 reductase membrane-bound isoform; diaphorase (NADH) [Homo |            |   | 6.03E-12 | 7.91 | 100.30 | 49.50 | 34234.6 |
| AHQ-5-9, 3924              | R.AIMKDPDHTVCHLLFANQTEK.D                                               | 2585.89793 | 3 | 2.46E-07 | 0.92 | 4.36   | -     | 1114.6  |
| AHQ-5-9, 4999 - 5067       | R.APEAWDYGGQVNEEMIR.D                                                   | 2113.29517 | 2 | 5.71E-04 | 0.93 | 4.39   | -     | 848.7   |
| AHQ-5-9, 4182 - 4194       | K.DILLRPELEELR.N                                                        | 1496.73370 | 2 | 1.68E-08 | 0.77 | 3.27   | -     | 659.3   |
| AHQ-5-11, 4668             | K.DILLRPELEELR.N                                                        | 1496.73370 | 2 | 1.43E-05 | 0.77 | 3.07   | -     | 819.7   |
| AHQ-5-9, 5380              | R.FALPSPQHILGLPVGQHIYSAR.I                                              | 2515.94007 | 2 | 8.26E-07 | 0.87 | 3.60   | -     | 813.6   |
| AHQ-5-9, 5383 - 5386       | R.FALPSPQHILGLPVGQHIYSAR.I                                              | 2515.94007 | 3 | 6.03E-12 | 0.96 | 6.04   | -     | 1083.9  |
| AHQ-5-9, 2616              | R.GPSGLLYQGK.G                                                          | 1119.29547 | 2 | 2.87E-05 | 0.94 | 3.69   | -     | 1186.7  |
| AHQ-5-9, 2619              | R.GPSGLLYQGK.G                                                          | 1119.29547 | 1 | 3.19E-07 | 0.62 | 3.04   | -     | 385.9   |
| AHQ-5-9, 5284 - 5354       | R.IDGNLVRPYPITSSDDDKGFVLDVIK.V                                          | 2977.35765 | 3 | 7.91E-07 | 0.91 | 4.97   | -     | 1093.2  |
| AHQ-5-9, 3203              | R.STPAITLESPIK.Y                                                        | 1372.54621 | 1 | 1.82E-05 | 0.51 | 2.80   | -     | 378.8   |
| AHQ-5-9, 4044              | R.STPAITLESPIK.Y                                                        | 1902.18061 | 2 | 8.24E-09 | 0.83 | 3.85   | -     | 455.3   |
| AHQ-5-9, 4467 - 4492       | K.SVMGIAGGTITPM*LQVIR.A                                                 | 1918.31483 | 2 | 2.14E-05 | 0.77 | 3.59   | -     | 492.6   |
| AHQ-5-9, 5238              | K.SVMGIAGGTITPM*LQVIR.A                                                 | 1902.31543 | 2 | 3.79E-04 | 0.68 | 3.45   | -     | 446.9   |
| gj 4505257 ref NP_002435.1 | moesin [Homo sapiens]                                                   |            |   | 6.53E-12 | 9.00 | 100.27 | 24.80 | 67819.5 |
| AHQ-5-6, 2304              | K.ALTSELANAR.D                                                          | 1046.15975 | 2 | 4.21E-05 | 0.90 | 3.86   | -     | 756.8   |
| AHQ-5-6, 2186              | K.ALTSELANARDESK.K                                                      | 1505.61272 | 2 | 1.62E-07 | 0.93 | 3.92   | -     | 1097.7  |
| AHQ-5-6, 2100              | K.AQMVQEDLEK.T                                                          | 1191.33713 | 2 | 1.71E-05 | 0.76 | 2.94   | -     | 622.5   |
| AHQ-5-13, 6840             | K.EGLNDDIYCPPEAVLLASAVQSK.Y                                             | 2869.19288 | 3 | 8.55E-07 | 0.75 | 3.49   | -     | 799.5   |
| AHQ-5-14-, 5867 - 5906     | R.EVWFFGLQYQDTK.G                                                       | 1661.83760 | 2 | 1.03E-05 | 0.96 | 4.31   | -     | 1198.2  |

|                            |                                                                             |            |   |          |       |        |       |          |
|----------------------------|-----------------------------------------------------------------------------|------------|---|----------|-------|--------|-------|----------|
| AHQ-5-13-, 6733            | K.FYPEDVSEELIQDITQR.L                                                       | 2083.24065 | 2 | 8.87E-04 | 0.91  | 3.80   | -     | 704.5    |
| AHQ-5-9, 6384              | K.FYPEDVSEELIQDITQR.L                                                       | 2083.24065 | 2 | 7.38E-06 | 0.85  | 3.19   | -     | 984.2    |
| AHQ-5-6, 7184              | K.FYPEDVSEELIQDITQR.L                                                       | 2083.24065 | 2 | 4.10E-08 | 0.95  | 4.56   | -     | 1026.6   |
| AHQ-5-6, 7193              | K.FYPEDVSEELIQDITQR.L                                                       | 2083.24065 | 3 | 5.95E-09 | 0.89  | 4.39   | -     | 791.5    |
| AHQ-5-7, 7179              | K.FYPEDVSEELIQDITQR.L                                                       | 2083.24065 | 2 | 3.50E-06 | 0.95  | 4.52   | -     | 1101.6   |
| AHQ-5-6, 5517 - 5518       | K.IAQDLEM*YGVNYSIK.N                                                        | 1908.16395 | 2 | 5.57E-07 | 0.97  | 5.02   | -     | 1726.5   |
| AHQ-5-6, 4521              | K.KTQEQLALEMAELTAR.I                                                        | 1833.10018 | 2 | 1.86E-05 | 0.97  | 5.09   | -     | 1650.5   |
| AHQ-5-6, 3308 - 3377       | K.TAMSTPHVAEPAENEQDEQDENGAEASADLR.A                                         | 3314.36856 | 3 | 6.53E-12 | 0.89  | 4.77   | -     | 1071.0   |
| AHQ-5-6, 3446 - 3518       | K.TAMSTPHVAEPAENEQDEQDENGAEASADLR.A                                         | 3314.36856 | 3 | 4.51E-08 | 0.95  | 5.41   | -     | 1485.2   |
| AHQ-5-6, 5212              | K.TQEQLALEMAELTAR.I                                                         | 1704.92727 | 2 | 8.60E-08 | 0.98  | 5.10   | -     | 2109.8   |
| gj4507521 ref NP_001055.1  | transketolase [Homo sapiens]                                                |            |   | 6.89E-12 | 1.76  | 20.24  | 5.90  | 67877.3  |
| AHQ-5-6, 4608              | K.ILATPPQEDAPSVDIANIR.M                                                     | 2021.26036 | 2 | 6.89E-12 | 0.93  | 4.45   | -     | 510.9    |
| AHQ-5-6, 4630              | K.ILATPPQEDAPSVDIANIR.M                                                     | 2021.26036 | 3 | 4.74E-04 | 0.95  | 4.85   | -     | 1428.5   |
| AHQ-5-6, 3304              | R.LGQSDPAPLQHQMIDIYQK.R                                                     | 2070.31497 | 2 | 2.81E-04 | 0.83  | 3.40   | -     | 655.0    |
| gj5901944 ref NP_008977.1  | elastin microfibril interface located protein; TNF? elastin microfibril     |            |   | 7.40E-12 | 5.48  | 60.24  | 11.20 | 106694.7 |
| AHQ-5-3, 3559 - 3561       | R.APAPASAPPGPSELLR.Q                                                        | 1660.85268 | 2 | 2.85E-06 | 0.86  | 3.83   | -     | 426.8    |
| AHQ-5-4, 2985              | R.GLEEGQAQAGQCPSLEGR.L                                                      | 1888.99421 | 2 | 7.16E-04 | 0.89  | 3.87   | -     | 900.7    |
| AHQ-5-3, 3029 - 3030       | R.GTELGGAAAGGGHPPGYTSLASR.L                                                 | 2142.27464 | 2 | 2.95E-07 | 0.91  | 4.86   | -     | 447.6    |
| AHQ-5-3, 3622              | R.LDTVAGLQGLR.E                                                             | 1200.37012 | 2 | 8.17E-07 | 0.96  | 3.96   | -     | 1518.0   |
| AHQ-5-3, 2763              | R.LVSGSLHTVEAAGEAR.Q                                                        | 1567.72888 | 2 | 7.40E-12 | 0.96  | 4.21   | -     | 1474.1   |
| AHQ-5-3, 3705              | R.PARP.NL.SGSSAGSPL.SGLGGEGPGESEK.V                                         | 2596.74928 | 3 | 3.91E-06 | 0.91  | 4.56   | -     | 862.7    |
| gj4506925 ref NP_003013.1  | SH3 domain binding glutamic acid-rich protein like; SH3-binding domain      |            |   | 7.51E-12 | 3.81  | 40.32  | 58.80 | 12774.2  |
| AHQ-5-14-, 5898            | R.ENNAVAYFLGLTAPPGSK.E                                                      | 1850.06426 | 2 | 2.07E-06 | 0.76  | 3.64   | -     | 554.3    |
| AHQ-5-13-, 5967 - 6031     | R.ENNAVAYFLGLTAPPGSK.E                                                      | 1850.06426 | 2 | 2.45E-07 | 0.96  | 4.87   | -     | 955.3    |
| AHQ-5-13, 6293 - 6352      | R.ENNAVAYFLGLTAPPGSK.E                                                      | 1850.06426 | 2 | 7.35E-07 | 0.82  | 3.20   | -     | 802.5    |
| AHQ-5-13, 6132 - 6204      | R.ENNAVAYFLGLTAPPGSK.E                                                      | 1850.06426 | 2 | 2.65E-05 | 0.85  | 3.54   | -     | 667.3    |
| AHQ-5-13, 6048 - 6116      | R.ENNAVAYFLGLTAPPGSK.E                                                      | 1850.06426 | 2 | 9.81E-06 | 0.87  | 4.08   | -     | 502.5    |
| AHQ-5-13-, 6219 - 6265     | R.ENNAVAYFLGLTAPPGSK.E                                                      | 1850.06426 | 2 | 2.24E-05 | 0.92  | 4.05   | -     | 869.8    |
| AHQ-5-13, 4978 - 5048      | R.ENVPENSRPATGYPLPPQIFNESQYR.G                                              | 3005.24660 | 3 | 2.23E-08 | 0.94  | 5.29   | -     | 1090.6   |
| AHQ-5-13-, 4904 - 4927     | R.ENVPENSRPATGYPLPPQIFNESQYR.G                                              | 3005.24660 | 3 | 1.30E-05 | 0.96  | 5.63   | -     | 1475.3   |
| AHQ-5-13-, 4983 - 5056     | R.ENVPENSRPATGYPLPPQIFNESQYR.G                                              | 3005.24660 | 3 | 7.51E-12 | 0.97  | 6.47   | -     | 1372.2   |
| AHQ-5-13-, 5119            | R.ENVPENSRPATGYPLPPQIFNESQYR.G                                              | 3005.24660 | 3 | 1.44E-06 | 0.92  | 5.14   | -     | 863.6    |
| AHQ-5-13, 5074 - 5148      | R.ENVPENSRPATGYPLPPQIFNESQYR.G                                              | 3005.24660 | 3 | 4.42E-07 | 0.93  | 4.75   | -     | 1054.2   |
| AHQ-5-13, 4204 - 4224      | R.GDYDAFFEAR.E                                                              | 1191.23073 | 2 | 4.43E-06 | 0.93  | 3.67   | -     | 1071.9   |
| AHQ-5-13-, 2352            | R.VYIASSSGSTAIA.K                                                           | 1284.44065 | 2 | 1.98E-05 | 0.95  | 3.77   | -     | 1958.1   |
| AHQ-5-13, 2515             | R.VYIASSSGSTAIA.K                                                           | 1284.44065 | 2 | 8.48E-05 | 0.93  | 3.24   | -     | 1739.2   |
| gj5803149 ref NP_006806.1  | coated vesicle membrane protein [Homo sapiens]                              |            |   | 7.70E-12 | 0.96  | 10.29  | 13.90 | 22761.1  |
| AHQ-5-11, 6806             | K.GQDMETEAHQNKLEEMINELAVAMTAVK.H                                            | 3132.53686 | 3 | 7.70E-12 | 0.96  | 5.72   | -     | 1296.5   |
| gj21361456 ref NP_055425.2 | alpha glucosidase II alpha subunit; likely ortholog of mouse G2an alph      |            |   | 7.77E-12 | 3.63  | 40.24  | 6.80  | 109437.2 |
| AHQ-5-5, 4742              | R.FGAVVTDGNTAEWDHLK.I                                                       | 1948.08335 | 2 | 1.76E-05 | 0.86  | 3.75   | -     | 616.4    |
| AHQ-5-5, 4335 - 4339       | R.LSFQHPDTPSIVLVR.LK                                                        | 1741.96893 | 2 | 1.35E-08 | 0.87  | 4.15   | -     | 625.0    |
| AHQ-5-4, 3810              | K.MMDYLQSGSGTPTQDVR.W                                                       | 1929.12196 | 2 | 7.72E-06 | 0.95  | 4.85   | -     | 1065.2   |
| AHQ-5-4, 3889 - 3892       | R.VVIIGAGPAVVLTQK.G                                                         | 1665.05702 | 2 | 7.77E-12 | 0.95  | 4.89   | -     | 834.6    |
| gj27500274 ref XP_113950.3 | similar to Munc13-4 protein [Homo sapiens]                                  |            |   | 8.47E-12 | 10.78 | 120.30 | 20.00 | 123281.1 |
| AHQ-5-5, 7534 - 7535       | K.AFGELCPNTPAPLQVTEALQTGTTEWFHLK.Q                                          | 3472.91108 | 3 | 9.44E-06 | 0.90  | 4.62   | -     | 549.5    |
| AHQ-5-4, 7580              | K.AFGELCPNTPAPLQVTEALQTGTTEWFHLK.Q                                          | 3472.91108 | 3 | 3.62E-11 | 0.77  | 3.68   | -     | 435.4    |
| AHQ-5-4, 7380              | K.ALLGLQDVIGDLHQCCR.T                                                       | 2037.32944 | 3 | 1.96E-06 | 0.94  | 4.14   | -     | 1451.7   |
| AHQ-5-4, 6566              | R.ALLYEDALTYVLR.L                                                           | 1677.92484 | 2 | 5.04E-11 | 0.96  | 4.13   | -     | 1562.2   |
| AHQ-5-4, 4698              | K.HSTSAVDLSTCFQAISHTAR.Q                                                    | 2191.36726 | 3 | 7.71E-10 | 0.97  | 5.91   | -     | 1806.4   |
| AHQ-5-4, 3498              | K.LGELTDLHGLR.R                                                             | 1224.39168 | 2 | 6.08E-04 | 0.85  | 3.32   | -     | 1018.9   |
| AHQ-5-4, 3052              | R.LGHPENPHVTEASELLR.Y                                                       | 1900.08490 | 2 | 1.68E-04 | 0.80  | 3.46   | -     | 615.6    |
| AHQ-5-4, 5568              | K.LPAQLAWALEQR.V                                                            | 1525.73360 | 2 | 8.47E-12 | 0.98  | 5.03   | -     | 1641.8   |
| AHQ-5-6, 5290              | K.LPAQLAWALEQR.V                                                            | 1525.73360 | 2 | 4.23E-04 | 0.85  | 3.12   | -     | 713.5    |
| AHQ-5-4, 7426 - 7444       | R.LPLTYPAPNGDPIQLLEGR.K                                                     | 2178.51621 | 2 | 1.58E-05 | 0.87  | 4.19   | -     | 537.7    |
| AHQ-5-4, 4126              | R.SVFLPSVSDSPAR.L                                                           | 1362.51311 | 2 | 9.69E-08 | 0.88  | 3.13   | -     | 925.5    |
| AHQ-5-4, 7293              | R.VGAVLEGGQLQNTLHAQLQSALAGLGHIE.R                                           | 3153.54178 | 3 | 3.07E-06 | 0.96  | 5.80   | -     | 1738.5   |
| AHQ-5-4, 6384              | R.WFQAPISWLVK.T                                                             | 1501.75533 | 2 | 1.80E-07 | 0.83  | 3.17   | -     | 505.1    |
| AHQ-5-4, 3401 - 3424       | R.YLQEAHFVPEEQHQQTQR.V                                                      | 2383.56113 | 3 | 2.47E-08 | 0.97  | 5.80   | -     | 1823.5   |
| gj7706497 ref NP_057392.1  | UMP-CMP kinase [Homo sapiens]                                               |            |   | 1.05E-11 | 3.98  | 50.22  | 26.80 | 25854.7  |
| AHQ-5-11, 5955 - 5980      | R.IQTYLQSTKPIDLYEEMGK.V                                                     | 2371.73502 | 2 | 2.48E-06 | 0.91  | 4.29   | -     | 645.1    |
| AHQ-5-11, 5062             | R.IQTYLQSTKPIDLYEEM*GK.V                                                    | 2387.73442 | 2 | 9.10E-04 | 0.35  | 2.54   | -     | 224.1    |
| AHQ-5-11, 2496             | R.RKNPDSQYGLIEK.Y                                                           | 1521.65375 | 2 | 1.42E-04 | 0.93  | 4.09   | -     | 814.1    |
| AHQ-5-14-, 6794            | K.SVDEVFVQVQIFDK.E                                                          | 1769.92954 | 2 | 1.35E-04 | 0.83  | 3.50   | -     | 652.6    |
| AHQ-5-11, 3660             | K.YGYTHLSAELLR.D                                                            | 1480.64969 | 2 | 1.05E-11 | 0.96  | 4.42   | -     | 1248.7   |
| gj4759082 ref NP_004648.1  | serum deprivation response protein; serum deprivation response; phosphatase |            |   | 1.25E-11 | 4.12  | 60.26  | 24.20 | 47172.9  |
| AHQ-5-9, 5798 - 5855       | R.DNSQVNAVTVLTLDDK.L                                                        | 1730.94122 | 2 | 7.58E-04 | 0.94  | 4.31   | -     | 1346.6   |
| AHQ-5-11, 6162 - 6168      | R.DNSQVNAVTVLTLDDK.L                                                        | 1730.94122 | 2 | 9.70E-10 | 0.96  | 4.74   | -     | 1355.4   |
| AHQ-5-13, 6369             | R.DNSQVNAVTVLTLDDK.L                                                        | 1730.94122 | 2 | 7.70E-07 | 0.97  | 4.81   | -     | 1623.7   |
| AHQ-5-6, 6524 - 6532       | R.DNSQVNAVTVLTLDDK.L                                                        | 1730.94122 | 2 | 3.77E-04 | 0.91  | 3.67   | -     | 1018.8   |
| AHQ-5-7, 6416              | R.DNSQVNAVTVLTLDDK.L                                                        | 1730.94122 | 2 | 8.80E-06 | 0.94  | 3.53   | -     | 1327.5   |
| AHQ-5-12, 6344 - 6356      | R.DNSQVNAVTVLTLDDK.L                                                        | 1730.94122 | 2 | 2.46E-04 | 0.95  | 4.39   | -     | 1261.8   |
| AHQ-5-10, 5868             | R.DNSQVNAVTVLTLDDK.L                                                        | 1730.94122 | 2 | 1.82E-07 | 0.96  | 4.38   | -     | 1478.7   |
| AHQ-5-9, 5683 - 5742       | R.DNSQVNAVTVLTLDDK.L                                                        | 1730.94122 | 2 | 3.60E-06 | 0.95  | 3.66   | -     | 1468.6   |
| AHQ-5-11, 1895             | R.LENNHAQLLR.R                                                              | 1208.35234 | 1 | 4.66E-08 | 0.10  | 2.22   | -     | 150.3    |
| AHQ-5-12, 3470             | K.LVNNMLDAVQENQHK.M                                                         | 1639.85851 | 2 | 3.91E-08 | 0.49  | 2.89   | -     | 369.9    |
| AHQ-5-9, 3767              | R.QEKPSPPMPSPSTPSPSLNLGNTTEAIR.D                                            | 3040.30937 | 3 | 6.54E-05 | 0.89  | 4.24   | -     | 1127.0   |
| AHQ-5-13-, 3355            | R.SDGDVPQVAVLQVHQTS                                                         | 1778.90130 | 2 | 1.84E-04 | 0.63  | 2.71   | -     | 541.9    |
| AHQ-5-6, 3221              | R.SDGDVPQVAVLQVHQTS                                                         | 1778.90130 | 2 | 1.13E-07 | 0.73  | 3.18   | -     | 676.1    |
| AHQ-5-11, 5876 - 5922      | K.VLIFQEENEIPASVFKV.Q                                                       | 1963.26241 | 2 | 1.60E-09 | 0.96  | 5.28   | -     | 1059.5   |
| AHQ-5-9, 5706 - 5766       | K.VLIFQEENEIPASVFKV.Q                                                       | 1963.26241 | 2 | 2.23E-04 | 0.90  | 4.00   | -     | 739.8    |
| AHQ-5-9, 5463 - 5522       | K.VLIFQEENEIPASVFKV.Q                                                       | 1963.26241 | 2 | 1.25E-11 | 0.96  | 5.22   | -     | 1103.5   |
| AHQ-5-8, 5968 - 5970       | K.VLIFQEENEIPASVFKV.Q                                                       | 1963.26241 | 2 | 1.25E-06 | 0.96  | 5.15   | -     | 1028.6   |
| AHQ-5-13, 6126 - 6130      | K.VLIFQEENEIPASVFKV.Q                                                       | 1963.26241 | 2 | 3.18E-04 | 0.94  | 4.78   | -     | 818.9    |
| AHQ-5-6, 6248              | K.VLIFQEENEIPASVFKV.Q                                                       | 1963.26241 | 2 | 3.55E-06 | 0.95  | 4.59   | -     | 993.6    |
| AHQ-5-4, 6510              | K.VLIFQEENEIPASVFKV.Q                                                       | 1963.26241 | 2 | 4.33E-05 | 0.76  | 2.91   | -     | 771.2    |
| AHQ-5-10, 5618 - 5619      | K.VLIFQEENEIPASVFKV.Q                                                       | 1963.26241 | 2 | 2.89E-04 | 0.93  | 4.30   | -     | 712.2    |
| AHQ-5-14-, 5977            | K.VLIFQEENEIPASVFKV.Q                                                       | 1963.26241 | 2 | 3.86E-04 | 0.92  | 4.30   | -     | 766.8    |
| gj30159310 ref XP_301899.1 | similar to beta-actin [Homo sapiens]                                        |            |   | 1.27E-11 | 1.45  | 20.17  | 9.20  | 32376.4  |
| AHQ-5-5, 1498              | K.DSYVGNEAQS.KR                                                             | 1198.22158 | 1 | 1.11E-05 | 0.41  | 2.20   | -     | 330.1    |
| AHQ-5-8, 1418 - 1882       | K.DSYVGNEAQS.KR                                                             | 1198.22158 | 1 | 1.07E-09 | 0.65  | 2.69   | -     | 374.0    |
| AHQ-5-8, 1453 - 1522       | K.DSYVGNEAQS.KR                                                             | 1198.22158 | 2 | 4.67E-05 | 0.80  | 3.15   | -     | 731.9    |
| AHQ-5-8, 1593 - 1658       | K.DSYVGNEAQS.KR                                                             | 1198.22158 | 2 | 5.12E-05 | 0.76  | 3.38   | -     | 577.3    |
| AHQ-5-8, 1736 - 1789       | K.DSYVGNEAQS.KR                                                             | 1198.22158 | 2 | 3.28E-05 | 0.80  | 2.99   | -     | 730.6    |
| AHQ-5-12, 1866             | K.DSYVGNEAQS.KR                                                             | 1198.22158 | 1 | 1.27E-05 | 0.32  | 2.17   | -     | 407.9    |
| AHQ-5-13, 1917             | K.DSYVGNEAQS.KR                                                             | 1198.22158 | 1 | 1.27E-11 | 0.58  | 2.51   | -     | 371.7    |
| AHQ-5-12, 1669             | K.DSYVGNEAQS.KR                                                             | 1198.22158 | 2 | 5.75E-06 | 0.83  | 3.19   | -     | 960.9    |
| AHQ-5-12, 1596 - 1652      | K.DSYVGNEAQS.KR                                                             | 1198.22158 | 1 | 4.18E-07 | 0.50  | 2.43   | -     | 373.2    |
| AHQ-5-8, 4160 - 4169       | K.SYKLLDGVITIGNER.F                                                         | 1807.04092 | 2 | 4.49E-05 | 0.56  | 2.61   | -     | 396.0    |
| AHQ-5-8, 4414              | K.SYKLLDGVITIGNER.F                                                         | 1807.04092 | 2 | 2.25E-09 | 0.87  | 3.45   | -     | 936.7    |
| AHQ-5-8, 4504 - 4580       | K.SYKLLDGVITIGNER.F                                                         | 1807.04092 | 2 | 9.31E-04 | 0.77  | 3.13   | -     | 674.0    |
| gj4505763 ref NP_000282.1  | phosphoglycerate kinase 1 [Homo sapiens]                                    |            |   | 1.28E-11 | 5.95  | 70.28  | 29.70 | 44614.4  |
| AHQ-5-8, 5461              | K.ACANPAAGSVILLENLR.F                                                       | 1771.03187 | 2 | 3.36E-05 | 0.92  | 4.26   | -     | 830.7    |
| AHQ-5-9, 5196              | K.ACANPAAGSVILLENLR.F                                                       | 1771.03187 | 2 | 2.53E-06 | 0.91  | 4.32   | -     | 770.0    |
| AHQ-5-11, 5656             | K.ACANPAAGSVILLENLR.F                                                       | 1771.03187 | 2 | 1.55E-06 | 0.96  | 4.68   | -     | 1542.6   |
| AHQ-5-8, 2086              | R.AHSSMVGVLNLPQK.A                                                          | 1368.58752 | 2 | 9.77E-08 | 0.95  | 4.20   | -     | 1388.4   |
| AHQ-5-8, 2085              | R.AHSSMVGVLNLPQK.A                                                          | 1368.58752 | 1 | 1.23E-05 | 0.61  | 2.24   | -     | 611.8    |
| AHQ-5-8, 4842              | K.ALESPPERFLAIGGAK.V                                                        | 1770.06542 | 2 | 1.30E-07 | 0.97  | 5.53   | -     | 1398.5   |

|                             |                                                   |            |   |          |       |        |       |          |
|-----------------------------|---------------------------------------------------|------------|---|----------|-------|--------|-------|----------|
| AHQ-5-10, 4863              | K.ALESERPFLAILGGAK.V                              | 1770.06542 | 2 | 1.28E-11 | 0.94  | 4.97   | -     | 922.5    |
| AHQ-5-9, 4691 - 4700        | K.ALESERPFLAILGGAK.V                              | 1770.06542 | 2 | 1.90E-04 | 0.97  | 5.59   | -     | 1795.3   |
| AHQ-5-10, 4279              | K.DVLFKDCVGPVEK.A                                 | 1750.00620 | 2 | 4.95E-04 | 0.85  | 4.01   | -     | 577.0    |
| AHQ-5-8, 4382 - 4390        | K.DVLFKDCVGPVEK.A                                 | 1750.00620 | 2 | 1.69E-04 | 0.91  | 3.87   | -     | 1066.8   |
| AHQ-5-8, 5114               | K.ITLPVDFVTADKFDENAK.T                            | 2024.25948 | 2 | 3.32E-08 | 0.65  | 3.09   | -     | 414.7    |
| AHQ-5-11, 5218              | K.ITLPVDFVTADKFDENAK.T                            | 2024.25948 | 2 | 1.21E-06 | 0.71  | 3.50   | -     | 387.0    |
| AHQ-5-8, 4448               | K.TGQATVASGIPAGWMLDGGPESKK.Y                      | 2607.90190 | 2 | 9.88E-08 | 0.85  | 4.21   | -     | 247.0    |
| AHQ-5-8, 4453               | K.TGQATVASGIPAGWMLDGGPESKK.Y                      | 2607.90190 | 3 | 5.51E-05 | 0.85  | 3.69   | -     | 739.0    |
| AHQ-5-8, 4853               | K.VLNNMEIGTSLFDEEGAK.I                            | 1968.17459 | 2 | 9.04E-04 | 0.89  | 3.89   | -     | 657.1    |
| AHQ-5-8, 5105               | K.VLNNMEIGTSLFDEEGAK.I                            | 1968.17459 | 2 | 6.12E-07 | 0.70  | 2.83   | -     | 470.1    |
| gi 10880136 ref NP_004032.2 | arrestin beta 1 isoform A [Homo sapiens]          |            |   | 1.29E-11 | 2.61  | 30.25  | 13.40 | 47065.3  |
| AHQ-5-7, 7194 - 7206        | R.DFVDHIDLVDVPGVVLVDPEYLK.E                       | 2713.03129 | 2 | 3.39E-05 | 0.94  | 4.99   | -     | 791.4    |
| AHQ-5-7, 2178               | K.VQYAPERPGPQPTAETTR.Q                            | 1999.17334 | 2 | 5.44E-04 | 0.72  | 3.22   | -     | 372.5    |
| AHQ-5-7, 5124               | R.YGRELDVLGLTFR.K                                 | 1654.84814 | 2 | 1.29E-11 | 0.95  | 4.35   | -     | 1541.7   |
| gi 14149734 ref NP_065174.1 | coronin, actin binding protein, 1B [Homo sapiens] |            |   | 1.55E-11 | 1.71  | 20.24  | 8.20  | 54234.4  |
| AHQ-5-6, 2838               | R.KCEPIVMTVPR.K                                   | 1331.63039 | 2 | 7.42E-06 | 0.76  | 2.71   | -     | 628.1    |
| AHQ-5-6, 7010 - 7088        | R.KSDFLQDDLYPDTAGPEAALEAEVWVSGR.D                 | 3211.39431 | 3 | 1.55E-11 | 0.95  | 4.76   | -     | 1344.2   |
| gi 4507877 ref NP_003364.1  | vinculin isoform VCL [Homo sapiens]               |            |   | 1.69E-11 | 50.38 | 600.33 | 48.30 | 116721.6 |
| AHQ-5-14-, 6807             | K.AIPDLTAPVAAVQAAVSNLVR.V                         | 2077.41342 | 2 | 2.30E-10 | 0.96  | 5.28   | -     | 960.1    |
| AHQ-5-4, 7508 - 7509        | K.AIPDLTAPVAAVQAAVSNLVR.V                         | 2077.41342 | 2 | 3.36E-09 | 0.97  | 5.52   | -     | 1179.8   |
| AHQ-5-13-, 6856             | K.AIPDLTAPVAAVQAAVSNLVR.V                         | 2077.41342 | 2 | 1.69E-11 | 0.97  | 5.35   | -     | 1072.4   |
| AHQ-5-5, 7302 - 7377        | K.AIPDLTAPVAAVQAAVSNLVR.V                         | 2077.41342 | 2 | 4.19E-05 | 0.87  | 3.39   | -     | 669.1    |
| AHQ-5-12, 7100              | K.AIPDLTAPVAAVQAAVSNLVR.V                         | 2077.41342 | 2 | 1.23E-07 | 0.96  | 5.10   | -     | 1026.0   |
| AHQ-5-5, 7453               | K.AIPDLTAPVAAVQAAVSNLVR.V                         | 2077.41342 | 2 | 3.36E-07 | 0.97  | 5.34   | -     | 1205.1   |
| AHQ-5-11, 6864              | K.AIPDLTAPVAAVQAAVSNLVR.V                         | 2077.41342 | 2 | 2.52E-07 | 0.97  | 5.36   | -     | 1198.1   |
| AHQ-5-10, 6587              | K.AIPDLTAPVAAVQAAVSNLVR.V                         | 2077.41342 | 2 | 1.40E-07 | 0.96  | 4.91   | -     | 1040.0   |
| AHQ-5-9, 6538               | K.AIPDLTAPVAAVQAAVSNLVR.V                         | 2077.41342 | 2 | 2.08E-05 | 0.96  | 4.85   | -     | 1123.3   |
| AHQ-5-8, 7268               | K.AIPDLTAPVAAVQAAVSNLVR.V                         | 2077.41342 | 2 | 1.29E-05 | 0.97  | 5.41   | -     | 1375.4   |
| AHQ-5-3, 7487 - 7562        | K.AIPDLTAPVAAVQAAVSNLVR.V                         | 2077.41342 | 2 | 1.50E-08 | 0.96  | 5.21   | -     | 1020.2   |
| AHQ-5-6, 7365 - 7369        | K.AIPDLTAPVAAVQAAVSNLVR.V                         | 2077.41342 | 2 | 2.11E-06 | 0.97  | 5.71   | -     | 970.3    |
| AHQ-5-7, 7350               | K.AIPDLTAPVAAVQAAVSNLVR.V                         | 2077.41342 | 2 | 9.39E-11 | 0.96  | 5.35   | -     | 1015.6   |
| AHQ-5-1, 7375               | K.AIPDLTAPVAAVQAAVSNLVR.V                         | 2077.41342 | 2 | 2.55E-09 | 0.95  | 4.53   | -     | 941.5    |
| AHQ-5-4, 3298               | R.ALASQLQDSSLK.D                                  | 1174.32943 | 2 | 1.11E-05 | 0.94  | 3.88   | -     | 1257.7   |
| AHQ-5-1, 3419               | R.ALASQLQDSSLK.D                                  | 1174.32943 | 2 | 5.94E-04 | 0.89  | 3.16   | -     | 1086.4   |
| AHQ-5-4, 3337               | R.ALASQLQDSSLK.D                                  | 1174.32943 | 2 | 9.36E-05 | 0.92  | 3.68   | -     | 1111.6   |
| AHQ-5-6, 2990 - 3061        | R.ALASQLQDSSLK.D                                  | 1174.32943 | 2 | 1.33E-05 | 0.88  | 3.02   | -     | 1048.7   |
| AHQ-5-2, 3231               | R.ALASQLQDSSLK.D                                  | 1174.32943 | 2 | 3.15E-04 | 0.93  | 3.85   | -     | 1000.5   |
| AHQ-5-4, 3484 - 3552        | K.AOQVSGQLDLVLTAK.V                               | 1458.64233 | 1 | 7.31E-04 | 0.69  | 3.12   | -     | 458.1    |
| AHQ-5-7, 3194               | K.AOQVSGQLDLVLTAK.V                               | 1458.64233 | 2 | 1.60E-10 | 0.97  | 4.41   | -     | 1464.7   |
| AHQ-5-4, 3533               | K.AOQVSGQLDLVLTAK.V                               | 1458.64233 | 1 | 2.70E-04 | 0.69  | 3.52   | -     | 369.1    |
| AHQ-5-5, 3335               | K.AOQVSGQLDLVLTAK.V                               | 1458.64233 | 1 | 2.66E-07 | 0.48  | 3.36   | -     | 209.8    |
| AHQ-5-8, 2964               | K.AOQVSGQLDLVLTAK.V                               | 1458.64233 | 2 | 2.68E-04 | 0.91  | 3.15   | -     | 1124.8   |
| AHQ-5-1, 3725               | K.AOQVSGQLDLVLTAK.V                               | 1458.64233 | 2 | 1.08E-08 | 0.96  | 3.96   | -     | 1462.8   |
| AHQ-5-4, 3485 - 3557        | K.AOQVSGQLDLVLTAK.V                               | 1458.64233 | 2 | 1.84E-09 | 0.97  | 4.58   | -     | 1615.5   |
| AHQ-5-2, 3489 - 3562        | K.AOQVSGQLDLVLTAK.V                               | 1458.64233 | 2 | 2.72E-09 | 0.96  | 4.66   | -     | 1387.0   |
| AHQ-5-6, 3292 - 3296        | K.AOQVSGQLDLVLTAK.V                               | 1458.64233 | 2 | 6.13E-08 | 0.95  | 4.61   | -     | 1307.5   |
| AHQ-5-5, 2282 - 2310        | K.AVAGNISDPGLQK.S                                 | 1270.41721 | 2 | 4.68E-05 | 0.92  | 3.73   | -     | 937.3    |
| AHQ-5-6, 2272               | K.AVAGNISDPGLQK.S                                 | 1270.41721 | 1 | 4.00E-06 | 0.47  | 2.45   | -     | 401.4    |
| AHQ-5-2, 2386               | K.AVAGNISDPGLQK.S                                 | 1270.41721 | 2 | 6.83E-04 | 0.87  | 3.39   | -     | 773.0    |
| AHQ-5-6, 2269               | K.AVAGNISDPGLQK.S                                 | 1270.41721 | 2 | 2.27E-06 | 0.79  | 3.38   | -     | 591.8    |
| AHQ-5-7, 2236               | K.AVAGNISDPGLQK.S                                 | 1270.41721 | 2 | 4.06E-06 | 0.74  | 3.07   | -     | 473.7    |
| AHQ-5-3, 2437               | K.AVAGNISDPGLQK.S                                 | 1270.41721 | 2 | 2.29E-06 | 0.93  | 3.83   | -     | 869.6    |
| AHQ-5-1, 2584               | K.AVAGNISDPGLQK.S                                 | 1270.41721 | 2 | 1.07E-05 | 0.63  | 2.93   | -     | 439.4    |
| AHQ-5-4, 2388 - 2400        | K.AVAGNISDPGLQK.S                                 | 1270.41721 | 2 | 1.32E-05 | 0.82  | 3.10   | -     | 714.0    |
| AHQ-5-8, 2126               | K.AVAGNISDPGLQK.S                                 | 1270.41721 | 2 | 7.52E-05 | 0.60  | 2.51   | -     | 547.0    |
| AHQ-5-4, 6122               | K.CDRVDQLTAQLADLAAR.G                             | 1918.12182 | 3 | 1.33E-05 | 0.93  | 4.24   | -     | 1608.4   |
| AHQ-5-8, 5729 - 5736        | K.CDRVDQLTAQLADLAAR.G                             | 1918.12182 | 2 | 3.20E-05 | 0.93  | 3.92   | -     | 1200.1   |
| AHQ-5-5, 5962 - 6017        | K.CDRVDQLTAQLADLAAR.G                             | 1918.12182 | 2 | 4.59E-05 | 0.95  | 3.77   | -     | 1555.0   |
| AHQ-5-1, 6171               | K.CDRVDQLTAQLADLAAR.G                             | 1918.12182 | 2 | 3.85E-05 | 0.94  | 4.09   | -     | 1319.4   |
| AHQ-5-1, 6161               | K.CDRVDQLTAQLADLAAR.G                             | 1918.12182 | 3 | 6.01E-05 | 0.63  | 3.12   | -     | 904.0    |
| AHQ-5-4, 6120 - 6121        | K.CDRVDQLTAQLADLAAR.G                             | 1918.12182 | 2 | 6.75E-05 | 0.95  | 3.83   | -     | 1620.8   |
| AHQ-5-5, 5981               | K.CDRVDQLTAQLADLAAR.G                             | 1918.12182 | 3 | 8.96E-06 | 0.93  | 4.53   | -     | 1319.9   |
| AHQ-5-6, 5920               | K.CDRVDQLTAQLADLAAR.G                             | 1918.12182 | 3 | 3.67E-08 | 0.87  | 4.09   | -     | 1208.8   |
| AHQ-5-5, 2226               | R.DPSASPGDAGEQAIR.Q                               | 1471.51169 | 1 | 4.49E-07 | 0.27  | 2.31   | -     | 168.2    |
| AHQ-5-4, 2214 - 2284        | R.DPSASPGDAGEQAIR.Q                               | 1471.51169 | 2 | 3.48E-08 | 0.92  | 3.72   | -     | 917.5    |
| AHQ-5-3, 2323               | R.DPSASPGDAGEQAIR.Q                               | 1471.51169 | 2 | 6.83E-07 | 0.89  | 3.91   | -     | 501.7    |
| AHQ-5-2, 2298               | R.DPSASPGDAGEQAIR.Q                               | 1471.51169 | 2 | 2.62E-07 | 0.84  | 3.69   | -     | 482.5    |
| AHQ-5-4, 2286               | R.DPSASPGDAGEQAIR.Q                               | 1471.51169 | 1 | 1.57E-09 | 0.40  | 2.32   | -     | 192.0    |
| AHQ-5-5, 2143 - 2215        | R.DPSASPGDAGEQAIR.Q                               | 1471.51169 | 2 | 2.41E-06 | 0.91  | 3.70   | -     | 845.8    |
| AHQ-5-1, 2453               | R.DPSASPGDAGEQAIR.Q                               | 1471.51169 | 2 | 1.49E-04 | 0.69  | 2.69   | -     | 515.0    |
| AHQ-5-4, 2484               | R.DYLDGSR.G                                       | 939.00451  | 1 | 6.31E-05 | 0.18  | 2.08   | -     | 223.4    |
| AHQ-5-4, 2504               | R.DYLDGSR.G                                       | 939.00451  | 1 | 1.50E-05 | 0.54  | 2.82   | -     | 294.6    |
| AHQ-5-4, 5990 - 6013        | K.ELLPVLSAMK.I                                    | 1214.54325 | 2 | 2.25E-05 | 0.87  | 3.24   | -     | 779.3    |
| AHQ-5-5, 5709               | K.ELLPVLSAMK.I                                    | 1214.54325 | 2 | 2.03E-05 | 0.84  | 3.23   | -     | 633.0    |
| AHQ-5-11, 5591              | K.ELLPVLSAMK.I                                    | 1214.54325 | 2 | 3.38E-06 | 0.62  | 2.93   | -     | 432.6    |
| AHQ-5-1, 6183               | K.ELLPVLSAMK.I                                    | 1214.54325 | 2 | 8.29E-05 | 0.71  | 2.75   | -     | 495.8    |
| AHQ-5-4, 2596               | R.ELTPQVVSAAR.I                                   | 1171.32878 | 2 | 8.18E-04 | 0.93  | 3.31   | -     | 1404.7   |
| AHQ-5-5, 2915               | K.ETVQTTFEDQIKR.D                                 | 1405.53306 | 1 | 1.20E-05 | 0.12  | 2.28   | -     | 110.3    |
| AHQ-5-6, 2744 - 2752        | K.ETVQTTFEDQIKR.D                                 | 1561.71942 | 2 | 9.46E-06 | 0.88  | 3.37   | -     | 921.6    |
| AHQ-5-5, 2719               | K.ETVQTTFEDQIKR.D                                 | 1561.71942 | 2 | 3.46E-06 | 0.71  | 2.98   | -     | 500.4    |
| AHQ-5-4, 2897               | K.ETVQTTFEDQIKR.D                                 | 1561.71942 | 2 | 1.29E-07 | 0.76  | 3.19   | -     | 639.0    |
| AHQ-5-4, 7105               | R.GILSGTSDLLLTFDEAEVR.K                           | 2037.25656 | 2 | 6.63E-05 | 0.89  | 4.35   | -     | 493.8    |
| AHQ-5-6, 7145               | R.GILSGTSDLLLTFDEAEVR.K                           | 2037.25656 | 2 | 2.67E-04 | 0.82  | 3.52   | -     | 660.2    |
| AHQ-5-5, 7225 - 7298        | R.GILSGTSDLLLTFDEAEVR.K                           | 2037.25656 | 2 | 4.37E-09 | 0.96  | 5.38   | -     | 1130.6   |
| AHQ-5-11, 6675              | R.GILSGTSDLLLTFDEAEVR.K                           | 2037.25656 | 2 | 2.07E-08 | 0.93  | 4.89   | -     | 715.1    |
| AHQ-5-5, 7574               | R.GILSGTSDLLLTFDEAEVR.K                           | 2037.25656 | 2 | 8.91E-04 | 0.26  | 2.95   | -     | 245.7    |
| AHQ-5-4, 7620 - 7665        | R.GILSGTSDLLLTFDEAEVR.K                           | 2037.25656 | 2 | 1.87E-04 | 0.88  | 4.10   | -     | 599.3    |
| AHQ-5-4, 6756               | R.GILSGTSDLLLTFDEAEVRK.I                          | 2165.42947 | 2 | 1.97E-09 | 0.94  | 4.25   | -     | 1146.4   |
| AHQ-5-4, 2000               | K.GNDIIAAAK.R                                     | 872.98920  | 1 | 2.49E-05 | 0.26  | 2.11   | -     | 542.6    |
| AHQ-5-5, 3354 - 3355        | K.GWLRDPSASPGDAGEQAIR.Q                           | 1984.11876 | 2 | 4.67E-08 | 0.94  | 4.53   | -     | 991.2    |
| AHQ-5-5, 1991               | K.IAELCDDPKER.D                                   | 1347.47690 | 2 | 3.90E-04 | 0.83  | 3.03   | -     | 863.1    |
| AHQ-5-4, 2118 - 2154        | K.IAELCDDPKER.D                                   | 1347.47690 | 2 | 2.98E-05 | 0.84  | 3.10   | -     | 776.2    |
| AHQ-5-5, 3238               | K.IAELCDDPKERDILLR.S                              | 1960.15548 | 2 | 8.05E-04 | 0.54  | 3.01   | -     | 350.2    |
| AHQ-5-5, 3250               | K.IAELCDDPKERDILLR.S                              | 1960.15548 | 3 | 2.37E-07 | 0.89  | 3.83   | -     | 1246.1   |
| AHQ-5-4, 3446 - 3514        | K.IAELCDDPKERDILLR.S                              | 1960.15548 | 3 | 5.94E-05 | 0.79  | 3.02   | -     | 1384.6   |
| AHQ-5-6, 2846               | R.IPTISTQLK.I                                     | 1001.20202 | 2 | 2.92E-04 | 0.78  | 2.66   | -     | 738.5    |
| AHQ-5-4, 3001 - 3002        | R.IPTISTQLK.I                                     | 1001.20202 | 2 | 1.57E-06 | 0.87  | 2.57   | -     | 1020.5   |
| AHQ-5-12, 2990              | R.IPTISTQLK.I                                     | 1001.20202 | 1 | 1.52E-05 | 0.41  | 2.57   | -     | 349.5    |
| AHQ-5-4, 2024               | R.KIAELCDDPKER.D                                  | 1475.64981 | 3 | 4.08E-08 | 0.87  | 3.65   | -     | 1182.9   |
| AHQ-5-4, 4381 - 4420        | K.KIDAAQNWLADPNGGPEGEEQIR.G                       | 2509.67332 | 3 | 3.71E-10 | 0.97  | 6.59   | -     | 1440.3   |
| AHQ-5-5, 4205 - 4273        | K.KIDAAQNWLADPNGGPEGEEQIR.G                       | 2509.67332 | 2 | 1.20E-08 | 0.91  | 4.48   | -     | 708.9    |
| AHQ-5-5, 4183 - 4259        | K.KIDAAQNWLADPNGGPEGEEQIR.G                       | 2509.67332 | 3 | 3.73E-07 | 0.97  | 5.82   | -     | 1752.8   |
| AHQ-5-5, 2583 - 2602        | R.LANVMM*GYPYR.Q                                  | 1168.41500 | 2 | 1.44E-04 | 0.80  | 2.83   | -     | 816.4    |
| AHQ-5-6, 2636               | R.LANVMM*GYPYR.Q                                  | 1168.41500 | 2 | 6.76E-05 | 0.88  | 3.70   | -     | 917.3    |
| AHQ-5-4, 2153               | R.LANVMM*GYPYR.Q                                  | 1184.41440 | 2 | 1.78E-05 | 0.88  | 3.40   | -     | 756.8    |
| AHQ-5-4, 3282               | R.LANVMM*GYPYR.Q                                  | 1152.41560 | 2 | 6.04E-04 | 0.86  | 3.33   | -     | 660.3    |
| AHQ-5-4, 2776               | R.LANVMM*GYPYR.Q                                  | 1168.41500 | 2 | 3.92E-05 | 0.79  | 3.44   | -     | 677.1    |

|                        |                                      |            |   |          |      |      |   |        |
|------------------------|--------------------------------------|------------|---|----------|------|------|---|--------|
| AHQ-5-5, 3013 - 3014   | K.LLAVAATAPPDAPNR.E                  | 1477.69048 | 2 | 3.64E-05 | 0.92 | 4.52 | - | 501.5  |
| AHQ-5-3, 4409          | K.LLAVAATAPPDAPNREEVFDER.A           | 2382.61458 | 3 | 9.65E-05 | 0.87 | 3.81 | - | 868.3  |
| AHQ-5-6, 4100          | K.LLAVAATAPPDAPNREEVFDER.A           | 2382.61458 | 3 | 1.47E-06 | 0.68 | 3.26 | - | 632.4  |
| AHQ-5-2, 4342          | K.LLAVAATAPPDAPNREEVFDER.A           | 2382.61458 | 3 | 4.12E-05 | 0.84 | 3.65 | - | 674.1  |
| AHQ-5-4, 4276 - 4345   | K.LLAVAATAPPDAPNREEVFDER.A           | 2382.61458 | 3 | 2.71E-05 | 0.78 | 3.89 | - | 625.5  |
| AHQ-5-1, 4471          | K.LLAVAATAPPDAPNREEVFDER.A           | 2382.61458 | 3 | 8.79E-06 | 0.84 | 3.56 | - | 702.8  |
| AHQ-5-4, 4561 - 4632   | R.LTDELAPPKPLPEGEVPPRPPEEKDEEFPEQK.A | 4028.46845 | 3 | 8.98E-07 | 0.84 | 4.26 | - | 466.8  |
| AHQ-5-4, 4701 - 4702   | R.LTDELAPPKPLPEGEVPPRPPEEKDEEFPEQK.A | 4028.46845 | 3 | 9.80E-08 | 0.88 | 4.43 | - | 722.6  |
| AHQ-5-3, 4694 - 4770   | R.LTDELAPPKPLPEGEVPPRPPEEKDEEFPEQK.A | 4028.46845 | 3 | 2.51E-05 | 0.81 | 3.79 | - | 533.6  |
| AHQ-5-1, 4757          | K.LVQAAQMLQSDPYVSPAR.D               | 1975.25833 | 2 | 5.92E-04 | 0.77 | 2.98 | - | 485.5  |
| AHQ-5-4, 3792          | K.LVQAAQMLQSDPYVSPAR.D               | 1991.25773 | 3 | 2.44E-07 | 0.97 | 5.23 | - | 1963.7 |
| AHQ-5-8, 4140          | K.LVQAAQMLQSDPYVSPAR.D               | 1975.25833 | 2 | 2.77E-05 | 0.92 | 4.31 | - | 712.6  |
| AHQ-5-4, 3753          | K.LVQAAQMLQSDPYVSPAR.D               | 1991.25773 | 2 | 5.37E-07 | 0.88 | 4.05 | - | 588.4  |
| AHQ-5-6, 3532          | K.LVQAAQMLQSDPYVSPAR.D               | 1991.25773 | 2 | 2.89E-09 | 0.94 | 4.66 | - | 719.8  |
| AHQ-5-11, 4359         | K.LVQAAQMLQSDPYVSPAR.D               | 1975.25833 | 3 | 9.45E-08 | 0.91 | 4.10 | - | 1101.6 |
| AHQ-5-11, 3554 - 3627  | K.LVQAAQMLQSDPYVSPAR.D               | 1991.25773 | 2 | 7.51E-04 | 0.75 | 2.86 | - | 671.0  |
| AHQ-5-4, 4645          | K.LVQAAQMLQSDPYVSPAR.D               | 1975.25833 | 3 | 3.14E-06 | 0.95 | 4.97 | - | 1480.1 |
| AHQ-5-4, 4317          | R.MALLMAEMSR.L                       | 1153.46531 | 2 | 1.32E-07 | 0.95 | 4.21 | - | 1502.1 |
| AHQ-5-12, 3146         | R.MALLMAEMSR.L                       | 1169.46471 | 2 | 5.43E-06 | 0.94 | 3.58 | - | 1336.0 |
| AHQ-5-12, 4192         | R.MALLMAEMSR.L                       | 1153.46531 | 2 | 3.87E-04 | 0.95 | 3.95 | - | 1520.9 |
| AHQ-5-2, 4205          | K.M.LGQMTDQVADLR.A                   | 1478.72055 | 2 | 3.98E-10 | 0.95 | 4.63 | - | 1398.7 |
| AHQ-5-5, 4017 - 4027   | K.M.LGQMTDQVADLR.A                   | 1478.72055 | 2 | 5.07E-07 | 0.95 | 4.47 | - | 1284.6 |
| AHQ-5-4, 4209          | K.M.LGQMTDQVADLR.A                   | 1478.72055 | 1 | 2.54E-05 | 0.58 | 2.81 | - | 392.3  |
| AHQ-5-9, 3620          | K.M.LGQMTDQVADLR.A                   | 1478.72055 | 2 | 4.09E-05 | 0.86 | 3.15 | - | 1122.7 |
| AHQ-5-5, 4031 - 4109   | K.M.LGQMTDQVADLR.A                   | 1510.71935 | 2 | 9.33E-05 | 0.95 | 3.74 | - | 1539.7 |
| AHQ-5-7, 3850 - 3860   | K.M.LGQMTDQVADLR.A                   | 1478.72055 | 2 | 2.14E-06 | 0.95 | 4.27 | - | 1563.1 |
| AHQ-5-4, 3756          | K.M.LGQMTDQVADLR.A                   | 1494.71995 | 2 | 1.15E-06 | 0.97 | 4.25 | - | 2091.8 |
| AHQ-5-8, 3721          | K.M.LGQMTDQVADLR.A                   | 1478.72055 | 2 | 1.19E-07 | 0.92 | 3.29 | - | 1454.7 |
| AHQ-5-1, 4325          | K.M.LGQMTDQVADLR.A                   | 1478.72055 | 2 | 2.61E-06 | 0.96 | 4.27 | - | 1861.0 |
| AHQ-5-4, 4189          | K.M.LGQMTDQVADLR.A                   | 1478.72055 | 2 | 2.51E-06 | 0.95 | 4.13 | - | 1614.6 |
| AHQ-5-4, 3260          | K.M.LGQMTDQVADLR.A                   | 1494.71995 | 2 | 2.08E-07 | 0.94 | 4.06 | - | 1572.8 |
| AHQ-5-6, 3969          | K.M.LGQMTDQVADLR.A                   | 1478.72055 | 2 | 4.49E-06 | 0.91 | 3.94 | - | 1190.3 |
| AHQ-5-5, 3126 - 3130   | K.M.LGQMTDQVADLR.A                   | 1494.71995 | 2 | 4.21E-05 | 0.97 | 4.32 | - | 2194.0 |
| AHQ-5-4, 2842          | K.M.LGQMTDQVADLR.A                   | 1510.71935 | 2 | 2.02E-04 | 0.96 | 3.89 | - | 1916.0 |
| AHQ-5-3, 4258          | K.M.LGQMTDQVADLR.A                   | 1478.72055 | 2 | 6.44E-04 | 0.93 | 3.62 | - | 1529.0 |
| AHQ-5-5, 2898          | K.M.SAEINEIIR.V                      | 1192.36823 | 2 | 8.61E-08 | 0.90 | 2.91 | - | 1108.8 |
| AHQ-5-4, 3072          | K.M.SAEINEIIR.V                      | 1192.36823 | 2 | 6.31E-07 | 0.94 | 3.10 | - | 1514.4 |
| AHQ-5-5, 2893          | K.M.TGLVDEAIDTK.S                    | 1309.46876 | 2 | 6.95E-07 | 0.95 | 4.11 | - | 1329.8 |
| AHQ-5-6, 3329          | K.M.TGLVDEAIDTK.S                    | 1293.46936 | 2 | 4.35E-04 | 0.96 | 3.30 | - | 1703.5 |
| AHQ-5-4, 3560 - 3637   | K.M.TGLVDEAIDTK.S                    | 1293.46936 | 2 | 2.78E-04 | 0.97 | 4.25 | - | 1877.7 |
| AHQ-5-4, 3048          | K.M.TGLVDEAIDTK.S                    | 1309.46876 | 2 | 1.32E-07 | 0.94 | 3.62 | - | 1231.8 |
| AHQ-5-4, 2849 - 2857   | R.NPQNQAAYEHFETMK.N                  | 1737.87437 | 2 | 8.53E-09 | 0.91 | 3.90 | - | 890.4  |
| AHQ-5-4, 2865          | R.NPQNQAAYEHFETMK.N                  | 1737.87437 | 3 | 3.33E-05 | 0.68 | 3.37 | - | 469.8  |
| AHQ-5-5, 2639 - 2645   | R.NPQNQAAYEHFETMK.N                  | 1737.87437 | 2 | 5.23E-05 | 0.92 | 3.68 | - | 1080.8 |
| AHQ-5-4, 2364          | R.NPQNQAAYEHFETMK.N                  | 1753.87377 | 2 | 9.46E-04 | 0.91 | 3.92 | - | 689.2  |
| AHQ-5-6, 2668 - 2669   | R.NPQNQAAYEHFETMK.N                  | 1737.87437 | 2 | 8.48E-07 | 0.81 | 3.82 | - | 417.6  |
| AHQ-5-4, 2829          | K.NQWIDNVEK.M                        | 1146.23464 | 2 | 1.03E-04 | 0.61 | 2.70 | - | 451.4  |
| AHQ-5-4, 2834          | K.NQWIDNVEK.M                        | 1146.23464 | 1 | 5.23E-05 | 0.33 | 2.34 | - | 190.8  |
| AHQ-5-5, 2694          | K.NQWIDNVEK.M                        | 1146.23464 | 1 | 1.17E-04 | 0.74 | 2.72 | - | 332.6  |
| AHQ-5-5, 3010          | K.NQWIDNVEK.M                        | 1146.23464 | 1 | 5.88E-05 | 0.13 | 1.95 | - | 272.1  |
| AHQ-5-4, 2749          | K.VQATALQNLQTK.T                     | 1315.50112 | 2 | 2.93E-04 | 0.88 | 3.70 | - | 583.8  |
| AHQ-5-4, 2706 - 2785   | K.VQATALQNLQTK.T                     | 1315.50112 | 2 | 5.82E-04 | 0.90 | 3.47 | - | 724.7  |
| AHQ-5-6, 3170          | R.SLGEISALTSK.L                      | 1106.25186 | 1 | 2.22E-04 | 0.17 | 2.23 | - | 102.7  |
| AHQ-5-5, 3191          | R.SLGEISALTSK.L                      | 1106.25186 | 1 | 4.65E-04 | 0.47 | 2.82 | - | 132.9  |
| AHQ-5-5, 3193          | R.SLGEISALTSK.L                      | 1106.25186 | 2 | 2.96E-05 | 0.93 | 3.76 | - | 847.6  |
| AHQ-5-1, 3580          | R.SLGEISALTSK.L                      | 1106.25186 | 1 | 2.72E-04 | 0.20 | 2.03 | - | 368.3  |
| AHQ-5-4, 3388          | R.SLGEISALTSK.L                      | 1106.25186 | 1 | 6.19E-06 | 0.52 | 2.87 | - | 180.7  |
| AHQ-5-7, 3059          | R.SLGEISALTSK.L                      | 1106.25186 | 1 | 3.12E-05 | 0.29 | 2.34 | - | 92.5   |
| AHQ-5-6, 3049          | K.SLLDASEEAIK.D                      | 1304.47187 | 2 | 3.09E-05 | 0.66 | 2.63 | - | 625.1  |
| AHQ-5-4, 3262          | K.SLLDASEEAIK.D                      | 1304.47187 | 1 | 3.71E-04 | 0.10 | 2.10 | - | 357.3  |
| AHQ-5-4, 3248 - 3296   | K.SLLDASEEAIK.D                      | 1304.47187 | 2 | 1.76E-06 | 0.84 | 2.95 | - | 920.2  |
| AHQ-5-5, 3070 - 3086   | K.SLLDASEEAIK.D                      | 1304.47187 | 2 | 1.29E-04 | 0.82 | 2.77 | - | 822.9  |
| AHQ-5-4, 2228 - 2296   | K.STVEGIQASVK.T                      | 1119.25064 | 2 | 4.85E-06 | 0.90 | 3.05 | - | 886.1  |
| AHQ-5-6, 2160          | K.STVEGIQASVK.T                      | 1119.25064 | 2 | 1.04E-05 | 0.81 | 2.61 | - | 789.9  |
| AHQ-5-5, 2166          | K.STVEGIQASVK.T                      | 1119.25064 | 2 | 6.02E-07 | 0.89 | 2.95 | - | 1012.3 |
| AHQ-5-5, 7398          | R.TIESILEPVAQQISHLVMHEEGEVDGK.A      | 3103.49334 | 3 | 9.76E-04 | 0.71 | 3.46 | - | 547.6  |
| AHQ-5-3, 7378          | R.TNISDEESEQATEMLVHNAQNLMSQVK.E      | 3048.31017 | 3 | 2.03E-05 | 0.81 | 3.80 | - | 507.4  |
| AHQ-5-14-, 6582 - 6653 | R.TNISDEESEQATEMLVHNAQNLMSQVK.E      | 3048.31017 | 3 | 7.23E-05 | 0.91 | 4.93 | - | 552.7  |
| AHQ-5-14-, 6442        | R.TNISDEESEQATEMLVHNAQNLMSQVK.E      | 3064.30957 | 3 | 4.04E-07 | 0.58 | 3.26 | - | 526.1  |
| AHQ-5-5, 7233 - 7234   | R.TNISDEESEQATEMLVHNAQNLMSQVK.E      | 3048.31017 | 3 | 2.55E-10 | 0.93 | 5.36 | - | 622.6  |
| AHQ-5-13-, 6705        | R.TNISDEESEQATEMLVHNAQNLMSQVK.E      | 3048.31017 | 3 | 3.72E-11 | 0.91 | 5.26 | - | 419.4  |
| AHQ-5-13-, 6496 - 6573 | R.TNISDEESEQATEMLVHNAQNLMSQVK.E      | 3064.30957 | 3 | 1.94E-04 | 0.65 | 3.30 | - | 524.2  |
| AHQ-5-12, 6581 - 6644  | R.TNISDEESEQATEMLVHNAQNLMSQVK.E      | 3064.30957 | 3 | 6.00E-07 | 0.77 | 4.05 | - | 623.2  |
| AHQ-5-12, 6384         | R.TNISDEESEQATEMLVHNAQNLMSQVK.E      | 3064.30957 | 3 | 1.65E-04 | 0.77 | 4.05 | - | 620.6  |
| AHQ-5-12, 5869 - 5932  | R.TNISDEESEQATEMLVHNAQNLMSQVK.E      | 3064.30957 | 3 | 2.76E-05 | 0.74 | 3.91 | - | 458.9  |
| AHQ-5-12, 5542         | R.TNISDEESEQATEMLVHNAQNLMSQVK.E      | 3080.30897 | 3 | 2.45E-06 | 0.72 | 3.48 | - | 556.5  |
| AHQ-5-12, 5416 - 5497  | R.TNISDEESEQATEMLVHNAQNLMSQVK.E      | 3080.30897 | 3 | 6.29E-06 | 0.88 | 4.57 | - | 372.8  |
| AHQ-5-11, 6680 - 6712  | R.TNISDEESEQATEMLVHNAQNLMSQVK.E      | 3048.31017 | 3 | 2.72E-06 | 0.91 | 4.73 | - | 693.5  |
| AHQ-5-6, 6100          | R.TNISDEESEQATEMLVHNAQNLMSQVK.E      | 3048.31017 | 3 | 1.94E-10 | 0.88 | 4.07 | - | 592.5  |
| AHQ-5-4, 6301 - 6308   | R.TNISDEESEQATEMLVHNAQNLMSQVK.E      | 3064.30957 | 3 | 1.88E-06 | 0.88 | 5.12 | - | 480.5  |
| AHQ-5-4, 6306          | R.TNISDEESEQATEMLVHNAQNLMSQVK.E      | 3048.31017 | 3 | 5.67E-05 | 0.79 | 4.19 | - | 434.9  |
| AHQ-5-2, 7366          | R.TNISDEESEQATEMLVHNAQNLMSQVK.E      | 3048.31017 | 3 | 6.69E-07 | 0.86 | 4.37 | - | 508.6  |
| AHQ-5-4, 6989 - 7052   | R.TNISDEESEQATEMLVHNAQNLMSQVK.E      | 3064.30957 | 3 | 8.52E-08 | 0.77 | 4.78 | - | 484.3  |
| AHQ-5-10, 6403         | R.TNISDEESEQATEMLVHNAQNLMSQVK.E      | 3048.31017 | 3 | 2.04E-05 | 0.87 | 4.12 | - | 777.7  |
| AHQ-5-10, 5475         | R.TNISDEESEQATEMLVHNAQNLMSQVK.E      | 3048.31017 | 3 | 6.88E-05 | 0.61 | 3.53 | - | 428.2  |
| AHQ-5-4, 7129 - 7141   | R.TNISDEESEQATEMLVHNAQNLMSQVK.E      | 3048.31017 | 3 | 3.19E-05 | 0.56 | 3.32 | - | 386.3  |
| AHQ-5-4, 7249 - 7268   | R.TNISDEESEQATEMLVHNAQNLMSQVK.E      | 3048.31017 | 3 | 2.05E-06 | 0.89 | 4.83 | - | 598.3  |
| AHQ-5-1, 7215 - 7216   | R.TNISDEESEQATEMLVHNAQNLMSQVK.E      | 3048.31017 | 3 | 1.14E-06 | 0.84 | 4.18 | - | 502.3  |
| AHQ-5-4, 7337          | R.TNISDEESEQATEMLVHNAQNLMSQVK.E      | 3048.31017 | 3 | 9.76E-05 | 0.87 | 4.56 | - | 508.8  |
| AHQ-5-12, 3102         | R.TNLLQVCER.I                        | 1134.28859 | 2 | 4.74E-06 | 0.95 | 3.88 | - | 1460.2 |
| AHQ-5-14-, 3095        | R.TNLLQVCER.I                        | 1134.28859 | 2 | 4.55E-05 | 0.86 | 3.25 | - | 896.6  |
| AHQ-5-4, 3141 - 3212   | R.TNLLQVCER.I                        | 1134.28859 | 2 | 2.90E-04 | 0.78 | 2.78 | - | 730.5  |
| AHQ-5-5, 5953 - 5987   | K.VAMANIOPQMLVAGATSIAR.R             | 2043.44398 | 2 | 3.29E-04 | 0.92 | 4.40 | - | 665.0  |
| AHQ-5-5, 5958          | K.VAMANIOPQMLVAGATSIAR.R             | 2043.44398 | 3 | 3.54E-06 | 0.93 | 4.38 | - | 1330.9 |
| AHQ-5-5, 5453          | K.VAMANIOPQMLVAGATSIAR.R             | 2059.44338 | 2 | 1.90E-04 | 0.92 | 4.47 | - | 691.3  |
| AHQ-5-5, 5313          | K.VAMANIOPQMLVAGATSIAR.R             | 2059.44338 | 3 | 4.31E-07 | 0.94 | 4.78 | - | 1873.0 |
| AHQ-5-5, 4845          | K.VAMANIOPQMLVAGATSIAR.R             | 2075.44278 | 2 | 1.28E-06 | 0.95 | 4.85 | - | 860.5  |
| AHQ-5-4, 5701          | K.VAMANIOPQMLVAGATSIAR.R             | 2059.44338 | 3 | 2.58E-07 | 0.95 | 5.35 | - | 1671.8 |
| AHQ-5-7, 5776 - 5787   | K.VAMANIOPQMLVAGATSIAR.R             | 2043.44398 | 2 | 6.51E-05 | 0.76 | 3.50 | - | 658.8  |
| AHQ-5-1, 5612          | K.VAMANIOPQMLVAGATSIAR.R             | 2059.44338 | 2 | 1.05E-06 | 0.96 | 5.19 | - | 1007.8 |
| AHQ-5-4, 6156          | K.VAMANIOPQMLVAGATSIAR.R             | 2043.44398 | 3 | 6.14E-09 | 0.96 | 4.65 | - | 2092.0 |
| AHQ-5-4, 5025          | K.VAMANIOPQMLVAGATSIAR.R             | 2075.44278 | 2 | 3.84E-05 | 0.94 | 4.64 | - | 834.2  |
| AHQ-5-5, 5290 - 5294   | K.VAMANIOPQMLVAGATSIAR.R             | 2059.44338 | 2 | 2.46E-05 | 0.79 | 3.43 | - | 796.2  |
| AHQ-5-4, 5517          | K.VAMANIOPQMLVAGATSIAR.R             | 2059.44338 | 3 | 9.24E-11 | 0.95 | 4.98 | - | 1855.6 |
| AHQ-5-5, 4993          | R.VDQLTAQLADLAAR.G                   | 1485.66778 | 2 | 2.26E-10 | 0.98 | 5.02 | - | 2865.8 |
| AHQ-5-4, 5140          | R.VDQLTAQLADLAAR.G                   | 1485.66778 | 2 | 5.84E-06 | 0.98 | 5.00 | - | 2469.6 |
| AHQ-5-4, 5540 - 5613   | R.VLQLTSWDEDAWASK.D                  | 1749.90156 | 2 | 1.77E-06 | 0.98 | 5.03 | - | 1919.2 |

|                            |                                                                         |            |   |          |       |        |       |          |
|----------------------------|-------------------------------------------------------------------------|------------|---|----------|-------|--------|-------|----------|
| AHQ-5-4, 5681              | R.VLQLTSWDEDAWASK.D                                                     | 1749.90156 | 2 | 1.45E-05 | 0.94  | 4.39   | -     | 906.5    |
| AHQ-5-6, 5304              | R.VLQLTSWDEDAWASK.D                                                     | 1749.90156 | 2 | 6.80E-07 | 0.96  | 4.38   | -     | 1214.3   |
| AHQ-5-5, 5295 - 5365       | R.VLQLTSWDEDAWASK.D                                                     | 1749.90156 | 2 | 7.64E-06 | 0.97  | 5.51   | -     | 1363.9   |
| AHQ-5-3, 5594              | R.VLQLTSWDEDAWASK.D                                                     | 1749.90156 | 2 | 1.20E-06 | 0.94  | 3.95   | -     | 1223.8   |
| AHQ-5-5, 5443              | R.VLQLTSWDEDAWASK.D                                                     | 1749.90156 | 2 | 1.19E-04 | 0.88  | 3.16   | -     | 1042.3   |
| AHQ-5-1, 5644              | R.VLQLTSWDEDAWASK.D                                                     | 1749.90156 | 2 | 1.20E-07 | 0.96  | 4.79   | -     | 1020.6   |
| AHQ-5-4, 5458              | R.VLQLTSWDEDAWASK.D                                                     | 1749.90156 | 2 | 4.34E-06 | 0.88  | 3.67   | -     | 707.2    |
| AHQ-5-4, 2357 - 2360       | R.VMLVNSMNTVK.E                                                         | 1252.53021 | 2 | 2.88E-06 | 0.94  | 3.67   | -     | 1227.9   |
| AHQ-5-5, 2926              | R.VMLVNSMNTVK.E                                                         | 1236.53081 | 2 | 7.23E-07 | 0.95  | 3.62   | -     | 1534.5   |
| AHQ-5-4, 3116 - 3192       | R.VMLVNSMNTVK.E                                                         | 1236.53081 | 2 | 5.03E-05 | 0.94  | 3.93   | -     | 1115.7   |
| AHQ-5-4, 3205              | R.VMLVNSMNTVK.E                                                         | 1236.53081 | 2 | 3.04E-04 | 0.91  | 3.14   | -     | 1049.9   |
| AHQ-5-5, 3045              | R.VMLVNSMNTVK.E                                                         | 1236.53081 | 2 | 5.84E-07 | 0.83  | 3.02   | -     | 798.5    |
| AHQ-5-4, 2813 - 2828       | R.WIDNPTVDDR.G                                                          | 1231.29640 | 2 | 2.27E-04 | 0.94  | 3.55   | -     | 1138.8   |
| AHQ-5-1, 2992              | R.WIDNPTVDDR.G                                                          | 1231.29640 | 2 | 1.05E-04 | 0.95  | 3.62   | -     | 1675.2   |
| gi 5032161 ref NP_005639.1 | elongin C; transcription elongation factor B (SIII), polypeptide 1 (15K |            |   | 1.78E-11 | 3.79  | 40.29  | 41.10 | 12473.1  |
| AHQ-5-13, 4293             | K.AM*LSGPGQFAENETNEVNF.R.E                                              | 2228.38455 | 2 | 1.04E-09 | 0.95  | 4.53   | -     | 1387.3   |
| AHQ-5-13, 4548             | K.AM*LSGPGQFAENETNEVNF.R.E                                              | 2228.38455 | 2 | 7.05E-07 | 0.96  | 5.00   | -     | 1435.7   |
| AHQ-5-13, 4640             | K.AM*LSGPGQFAENETNEVNF.R.E                                              | 2228.38455 | 2 | 7.87E-05 | 0.94  | 4.51   | -     | 915.8    |
| AHQ-5-13, 4909             | K.AM*LSGPGQFAENETNEVNF.R.E                                              | 2212.38515 | 2 | 1.78E-11 | 0.98  | 5.84   | -     | 1874.9   |
| AHQ-5-13-, 4553            | K.AM*LSGPGQFAENETNEVNF.R.E                                              | 2228.38455 | 2 | 1.59E-04 | 0.92  | 4.28   | -     | 856.5    |
| AHQ-5-13-, 3045            | K.LISSDGHEFIVK.R                                                        | 1345.52569 | 2 | 4.34E-07 | 0.89  | 3.65   | -     | 891.7    |
| AHQ-5-13, 3161             | K.LISSDGHEFIVK.R                                                        | 1345.52569 | 2 | 1.43E-08 | 0.92  | 3.78   | -     | 922.8    |
| AHQ-5-13-, 2708            | K.TYGGEGPDAM*YVK.L                                                      | 1565.70692 | 2 | 3.27E-06 | 0.93  | 4.34   | -     | 756.6    |
| gi 6005942 ref NP_009057.1 | valosin-containing protein; yeast Cdc48p homolog; transitional endoplas |            |   | 1.79E-11 | 9.57  | 120.35 | 23.60 | 89321.3  |
| AHQ-5-5, 3561              | R.ELQELVQYVPEHPDK.F                                                     | 1825.01157 | 2 | 5.06E-04 | 0.69  | 2.77   | -     | 510.4    |
| AHQ-5-5, 6257              | R.ETVVEVPQVTWEDIGGLEDEVKR.E                                             | 2499.75825 | 3 | 1.74E-05 | 0.75  | 3.48   | -     | 571.8    |
| AHQ-5-5, 3631              | K.GVLFYGPFGCGK.T                                                        | 1253.45154 | 2 | 8.15E-06 | 0.83  | 3.07   | -     | 834.9    |
| AHQ-5-5, 6821 - 6822       | R.IVSQLTLMDGLK.Q                                                        | 1431.76657 | 2 | 1.59E-06 | 0.97  | 4.94   | -     | 1414.6   |
| AHQ-5-5, 3058              | R.KYEMFAQTQQSR.G                                                        | 1630.85008 | 2 | 6.91E-09 | 0.97  | 4.58   | -     | 1875.7   |
| AHQ-5-5, 5682 - 5759       | R.LDQLYIPLPDEK.S                                                        | 1557.81228 | 2 | 3.00E-06 | 0.96  | 5.19   | -     | 980.6    |
| AHQ-5-5, 2793              | R.LEILQHTK.N                                                            | 1095.31705 | 1 | 2.11E-04 | 0.54  | 2.43   | -     | 340.9    |
| AHQ-5-5, 5074 - 5099       | R.LIVDEAINEDNSVVSLSQPK.M                                                | 2171.39088 | 2 | 1.34E-07 | 0.99  | 6.91   | -     | 2257.9   |
| AHQ-5-5, 7390              | K.NAPAIIFDELDAIAPK.R                                                    | 1812.09907 | 2 | 1.79E-11 | 0.96  | 4.71   | -     | 1210.9   |
| AHQ-5-5, 7414              | R.QAAPCVLFDLDSIAK.A                                                     | 1926.17909 | 2 | 8.30E-04 | 0.31  | 2.61   | -     | 215.4    |
| AHQ-5-5, 4894              | K.VVETDPSPYCVAPDVIHCEGEPIKR.E                                           | 3085.45473 | 3 | 3.61E-05 | 0.68  | 3.71   | -     | 382.9    |
| AHQ-5-5, 3298 - 3305       | R.WALSSNPSALR.E                                                         | 1330.47434 | 2 | 5.49E-07 | 0.93  | 3.66   | -     | 1318.5   |
| gi 4505733 ref NP_002610.1 | platelet factor 4 (chemokine (C-X-C motif) ligand 4); platelet factor 4 |            |   | 2.06E-11 | 5.58  | 60.26  | 38.60 | 10844.9  |
| AHQ-5-13-, 4140 - 4151     | K.AGPHCPAQLIATLK.N                                                      | 1579.84600 | 2 | 8.68E-04 | 0.94  | 4.14   | -     | 845.8    |
| AHQ-5-12, 4081             | K.AGPHCPAQLIATLK.N                                                      | 1579.84600 | 2 | 1.39E-05 | 0.90  | 3.86   | -     | 712.4    |
| AHQ-5-14, 5090 - 5164      | K.AGPHCPAQLIATLK.N                                                      | 1579.84600 | 2 | 4.03E-04 | 0.87  | 3.76   | -     | 682.1    |
| AHQ-5-14-, 4035 - 4098     | K.AGPHCPAQLIATLK.N                                                      | 1579.84600 | 2 | 5.34E-06 | 0.92  | 4.05   | -     | 772.9    |
| AHQ-5-14-, 3953 - 4034     | K.AGPHCPAQLIATLK.N                                                      | 1579.84600 | 3 | 2.36E-04 | 0.79  | 3.70   | -     | 909.1    |
| AHQ-5-14-, 3949 - 3967     | K.AGPHCPAQLIATLK.N                                                      | 1579.84600 | 2 | 1.86E-07 | 0.91  | 3.89   | -     | 857.2    |
| AHQ-5-14, 4960 - 5032      | K.AGPHCPAQLIATLK.N                                                      | 1579.84600 | 2 | 8.06E-08 | 0.94  | 3.99   | -     | 950.5    |
| AHQ-5-14-, 3786 - 3795     | K.AGPHCPAQLIATLKNGR.K                                                   | 1907.18700 | 2 | 3.10E-05 | 0.96  | 4.89   | -     | 1081.6   |
| AHQ-5-13-, 3901            | K.AGPHCPAQLIATLKNGR.K                                                   | 1907.18700 | 3 | 4.56E-07 | 0.90  | 3.74   | -     | 1656.9   |
| AHQ-5-14, 4689             | K.AGPHCPAQLIATLKNGR.K                                                   | 1907.18700 | 2 | 3.07E-07 | 0.90  | 4.05   | -     | 768.6    |
| AHQ-5-14, 4801 - 4860      | K.AGPHCPAQLIATLKNGR.K                                                   | 1907.18700 | 2 | 1.08E-04 | 0.95  | 4.50   | -     | 991.4    |
| AHQ-5-14, 4809             | K.AGPHCPAQLIATLKNGR.K                                                   | 1907.18700 | 3 | 2.06E-11 | 0.96  | 5.05   | -     | 1717.5   |
| AHQ-5-14-, 3873 - 3914     | K.AGPHCPAQLIATLKNGR.K                                                   | 1907.18700 | 3 | 1.76E-10 | 0.97  | 5.17   | -     | 2387.9   |
| AHQ-5-14-, 3891            | K.AGPHCPAQLIATLKNGR.K                                                   | 1907.18700 | 2 | 3.07E-10 | 0.95  | 4.64   | -     | 861.4    |
| AHQ-5-14, 4548             | K.AGPHCPAQLIATLKNGR.K                                                   | 2035.35992 | 3 | 2.07E-04 | 0.83  | 4.09   | -     | 696.8    |
| AHQ-5-14, 4436             | K.AGPHCPAQLIATLKNGR.K                                                   | 2035.35992 | 2 | 6.21E-08 | 0.96  | 4.83   | -     | 1314.0   |
| AHQ-5-14-, 3443 - 3498     | K.AGPHCPAQLIATLKNGR.K                                                   | 2035.35992 | 3 | 1.45E-06 | 0.94  | 4.45   | -     | 1415.2   |
| AHQ-5-14, 4552             | K.AGPHCPAQLIATLKNGR.K                                                   | 2035.35992 | 2 | 2.94E-05 | 0.96  | 5.16   | -     | 968.8    |
| AHQ-5-14, 3245 - 3320      | R.HITSLEVIK.A                                                           | 1040.23825 | 2 | 2.73E-04 | 0.71  | 2.95   | -     | 385.1    |
| AHQ-5-14, 3376 - 3432      | R.HITSLEVIK.A                                                           | 1040.23825 | 2 | 8.22E-07 | 0.82  | 3.17   | -     | 466.2    |
| AHQ-5-14, 3488 - 3554      | R.HITSLEVIK.A                                                           | 1040.23825 | 2 | 1.56E-04 | 0.86  | 3.49   | -     | 471.8    |
| AHQ-5-13-, 2593 - 2665     | R.HITSLEVIK.A                                                           | 1040.23825 | 2 | 1.78E-05 | 0.90  | 3.67   | -     | 583.9    |
| AHQ-5-13, 2753             | R.HITSLEVIK.A                                                           | 1040.23825 | 2 | 3.17E-04 | 0.81  | 3.08   | -     | 458.0    |
| AHQ-5-12, 2453             | R.HITSLEVIK.A                                                           | 1040.23825 | 2 | 3.29E-04 | 0.81  | 2.86   | -     | 493.7    |
| AHQ-5-14-, 2545            | R.HITSLEVIK.A                                                           | 1040.23825 | 1 | 2.91E-04 | 0.42  | 2.18   | -     | 455.7    |
| AHQ-5-14-, 2417 - 2481     | R.HITSLEVIK.A                                                           | 1040.23825 | 2 | 2.19E-06 | 0.90  | 3.69   | -     | 567.2    |
| AHQ-5-14-, 2527 - 2590     | R.HITSLEVIK.A                                                           | 1040.23825 | 2 | 5.76E-06 | 0.75  | 2.75   | -     | 500.5    |
| AHQ-5-13-, 4915 - 4916     | K.ICLDLQAPLYK.K                                                         | 1335.59400 | 2 | 2.56E-05 | 0.97  | 4.19   | -     | 2105.9   |
| AHQ-5-14, 5732             | K.ICLDLQAPLYK.K                                                         | 1335.59400 | 1 | 1.62E-05 | 0.66  | 2.94   | -     | 536.5    |
| AHQ-5-14, 5700 - 5761      | K.ICLDLQAPLYK.K                                                         | 1335.59400 | 2 | 3.91E-05 | 0.95  | 4.17   | -     | 1537.4   |
| AHQ-5-14-, 4739            | K.ICLDLQAPLYK.K                                                         | 1335.59400 | 2 | 2.00E-05 | 0.92  | 3.56   | -     | 1173.4   |
| AHQ-5-14-, 4846 - 4869     | K.ICLDLQAPLYK.K                                                         | 1335.59400 | 2 | 2.59E-06 | 0.96  | 4.53   | -     | 1713.0   |
| AHQ-5-14, 5288 - 5350      | R.KICLDLQAPLYK.K                                                        | 1463.76691 | 1 | 3.94E-04 | 0.78  | 3.18   | -     | 714.1    |
| AHQ-5-14, 5281 - 5344      | R.KICLDLQAPLYK.K                                                        | 1463.76691 | 2 | 8.89E-06 | 0.97  | 4.96   | -     | 1490.0   |
| AHQ-5-14, 5312             | R.KICLDLQAPLYK.K                                                        | 1463.76691 | 1 | 5.38E-06 | 0.93  | 4.08   | -     | 980.3    |
| AHQ-5-14-, 4365 - 4397     | R.KICLDLQAPLYK.K                                                        | 1463.76691 | 2 | 1.45E-04 | 0.98  | 4.72   | -     | 1914.4   |
| AHQ-5-14-, 4374 - 4437     | R.KICLDLQAPLYK.K                                                        | 1463.76691 | 1 | 1.56E-04 | 0.79  | 2.94   | -     | 841.1    |
| AHQ-5-14-, 4378 - 4445     | R.KICLDLQAPLYK.K                                                        | 1463.76691 | 3 | 2.48E-05 | 0.94  | 4.49   | -     | 1320.4   |
| AHQ-5-14-, 4382 - 4447     | R.KICLDLQAPLYK.K                                                        | 1463.76691 | 1 | 1.03E-07 | 0.93  | 4.42   | -     | 680.1    |
| AHQ-5-14-, 4457            | R.KICLDLQAPLYK.K                                                        | 1463.76691 | 2 | 2.59E-07 | 0.96  | 4.11   | -     | 1561.3   |
| AHQ-5-14, 5404             | R.KICLDLQAPLYK.K                                                        | 1463.76691 | 2 | 1.21E-04 | 0.94  | 4.21   | -     | 1247.7   |
| AHQ-5-13, 4494             | R.KICLDLQAPLYK.K                                                        | 1463.76691 | 2 | 2.67E-05 | 0.94  | 4.44   | -     | 1037.0   |
| gi 6681259 ref NP_031377.1 | multimerin [Homo sapiens]                                               |            |   | 2.21E-11 | 20.18 | 240.31 | 24.80 | 138070.8 |
| AHQ-5-3, 2273              | R.AQEQQSLIHTNOAESHAVGR.G                                                | 2306.43830 | 3 | 9.02E-04 | 0.91  | 4.45   | -     | 1022.8   |
| AHQ-5-3, 2362              | R.AQEQQSLIHTNOAESHAVGR.G                                                | 2306.43830 | 2 | 6.49E-10 | 0.90  | 4.69   | -     | 667.8    |
| AHQ-5-2, 2233              | R.AQEQQSLIHTNOAESHAVGR.G                                                | 2306.43830 | 2 | 1.65E-06 | 0.93  | 4.69   | -     | 679.8    |
| AHQ-5-3, 2266              | R.AQEQQSLIHTNOAESHAVGR.G                                                | 2306.43830 | 2 | 5.56E-05 | 0.94  | 4.94   | -     | 688.1    |
| AHQ-5-3, 7369              | K.CTSDMETILTFIPQFHR.L                                                   | 2098.38838 | 3 | 6.61E-06 | 0.85  | 3.64   | -     | 747.1    |
| AHQ-5-3, 7365 - 7367       | K.CTSDMETILTFIPQFHR.L                                                   | 2098.38838 | 2 | 9.37E-06 | 0.85  | 3.75   | -     | 652.4    |
| AHQ-5-3, 6562              | K.CTSDM*ETILTFIPQFHR.L                                                  | 2114.38778 | 2 | 7.60E-06 | 0.73  | 3.42   | -     | 462.9    |
| AHQ-5-3, 4115 - 4119       | R.DQALQLVLSNSR.F                                                        | 1385.55144 | 2 | 6.20E-07 | 0.97  | 4.49   | -     | 1882.8   |
| AHQ-5-3, 1878 - 1889       | K.ETLSTIKDNSEIHK.C                                                      | 1752.90698 | 2 | 6.54E-06 | 0.42  | 2.71   | -     | 285.1    |
| AHQ-5-3, 2725              | K.EVHEGLLSTEQVSDQK.N                                                    | 1870.99550 | 2 | 3.43E-04 | 0.94  | 4.00   | -     | 1165.7   |
| AHQ-5-13, 6246 - 6261      | K.FPPVTFSGYLLR.Y                                                        | 1661.92388 | 2 | 6.18E-04 | 0.85  | 3.16   | -     | 667.3    |
| AHQ-5-10, 5723 - 5739      | K.FPPVTFSGYLLR.Y                                                        | 1661.92388 | 2 | 5.55E-06 | 0.93  | 3.63   | -     | 896.4    |
| AHQ-5-14-, 6079 - 6098     | K.FPPVTFSGYLLR.Y                                                        | 1661.92388 | 2 | 5.31E-06 | 0.96  | 4.31   | -     | 995.4    |
| AHQ-5-3, 5981 - 6055       | K.FVLVQENRPTLTDIVELR.N                                                  | 2143.47187 | 2 | 3.76E-05 | 0.86  | 4.25   | -     | 484.9    |
| AHQ-5-3, 5985              | K.FVLVQENRPTLTDIVELR.N                                                  | 2143.47187 | 3 | 1.46E-08 | 0.96  | 5.56   | -     | 1271.2   |
| AHQ-5-4, 5938              | K.FVLVQENRPTLTDIVELR.N                                                  | 2143.47187 | 3 | 3.65E-05 | 0.95  | 4.37   | -     | 1278.7   |
| AHQ-5-3, 6289 - 6313       | K.GLTFEVEPIQIK.T                                                        | 1487.76518 | 2 | 7.46E-05 | 0.91  | 3.83   | -     | 878.2    |
| AHQ-5-1, 6295 - 6297       | K.GLTFEVEPIQIK.T                                                        | 1487.76518 | 2 | 2.38E-04 | 0.91  | 4.02   | -     | 858.8    |
| AHQ-5-4, 6269              | K.GLTFEVEPIQIK.T                                                        | 1487.76518 | 1 | 1.83E-04 | 0.14  | 1.99   | -     | 358.5    |
| AHQ-5-3, 2627 - 2645       | K.GPGCVTGGSCPQR.S                                                       | 1422.52885 | 2 | 1.42E-05 | 0.92  | 3.52   | -     | 1042.3   |
| AHQ-5-3, 4245 - 4255       | K.GSVVTNERDQALQLVLSNSR.F                                                | 2228.45212 | 2 | 4.46E-06 | 0.90  | 4.36   | -     | 826.6    |
| AHQ-5-3, 2049              | R.GVAEQQQQQCGDPEVM*QK.M                                                 | 2135.27911 | 2 | 3.67E-04 | 0.91  | 4.03   | -     | 777.8    |
| AHQ-5-4, 3750 - 3825       | K.HSLPDIQLLQK.G                                                         | 1292.50915 | 2 | 1.75E-04 | 0.64  | 2.78   | -     | 442.6    |
| AHQ-5-3, 3757              | K.HSLPDIQLLQK.G                                                         | 1292.50915 | 2 | 1.39E-06 | 0.93  | 3.47   | -     | 1071.8   |
| AHQ-5-1, 3965 - 3976       | K.HSLPDIQLLQK.G                                                         | 1292.50915 | 2 | 9.49E-07 | 0.84  | 3.13   | -     | 709.9    |
| AHQ-5-1, 6656 - 6735       | K.IFQNDMQETVAQLFK.T                                                     | 1813.06743 | 2 | 2.60E-04 | 0.94  | 4.29   | -     | 1237.3   |
| AHQ-5-4, 6729 - 6773       | K.IFQNDMQETVAQLFK.T                                                     | 1813.06743 | 2 | 2.04E-04 | 0.96  | 4.50   | -     | 1407.5   |

|                             |                                                                         |            |   |          |      |        |       |          |
|-----------------------------|-------------------------------------------------------------------------|------------|---|----------|------|--------|-------|----------|
| AHQ-5-3, 6743 - 6769        | K.IFQNDMQETVAQLFK.T                                                     | 1813.06743 | 2 | 1.04E-06 | 0.97 | 4.97   | -     | 1853.7   |
| AHQ-5-3, 5583               | K.KIENLTSVAVNSLNFIIK.E                                                  | 1905.22764 | 2 | 5.39E-11 | 0.97 | 5.03   | -     | 1977.5   |
| AHQ-5-3, 4966               | R.KKIENLTSVAVNSLNFIIK.E                                                 | 2033.40055 | 2 | 2.21E-11 | 0.94 | 4.24   | -     | 1174.8   |
| AHQ-5-3, 2683 - 2757        | K.LKKEVHEQLLSTEQVSDQK.N                                                 | 2112.32666 | 2 | 3.51E-06 | 0.98 | 6.14   | -     | 1353.8   |
| AHQ-5-2, 2674               | K.LKKEVHEQLLSTEQVSDQK.N                                                 | 2112.32666 | 2 | 4.30E-04 | 0.95 | 4.84   | -     | 1120.9   |
| AHQ-5-10, 3406              | K.LVVEENALAPDFSK.G                                                      | 1433.58810 | 1 | 2.45E-06 | 0.74 | 3.70   | -     | 403.9    |
| AHQ-5-3, 7533 - 7534        | K.MSEQLNLDLYTMEIQLPLLEQGASLR.Q                                          | 3009.40182 | 3 | 2.99E-04 | 0.77 | 3.66   | -     | 778.1    |
| AHQ-5-3, 2633               | R.QEMTLTCEKPIK.E                                                        | 1479.74501 | 2 | 1.81E-05 | 0.64 | 3.13   | -     | 319.7    |
| AHQ-5-3, 7501 - 7502        | K.TMTIINNAIDFIQDNYALK.E                                                 | 2199.51256 | 2 | 1.56E-06 | 0.95 | 5.51   | -     | 698.5    |
| AHQ-5-3, 7438               | K.TMTIINNAIDFIQDNYALK.E                                                 | 2215.51196 | 2 | 3.20E-09 | 0.95 | 4.80   | -     | 1013.4   |
| AHQ-5-3, 7199 - 7265        | K.TMTIINNAIDFIQDNYALK.E                                                 | 2199.51256 | 2 | 3.72E-09 | 0.94 | 5.11   | -     | 901.7    |
| AHQ-5-3, 3405 - 3423        | K.TVSSLSSEDLSTR.Q                                                       | 1424.49324 | 1 | 8.73E-04 | 0.14 | 1.90   | -     | 165.7    |
| AHQ-5-3, 4034               | R.YNFVLQVAK.T                                                           | 1082.27683 | 2 | 5.07E-06 | 0.93 | 3.32   | -     | 993.5    |
| gi 4502051 ref NP_000688.1  | arachidonate 12-lipoxygenase; 12(S)-lipoxygenase [Homo sapiens]         |            |   | 2.47E-11 | 4.35 | 50.26  | 10.90 | 75721.8  |
| AHQ-5-6, 3542               | K.EGLPLTIAADR.K                                                         | 1156.31411 | 2 | 8.95E-04 | 0.81 | 2.98   | -     | 644.8    |
| AHQ-5-6, 7212               | R.GEEEFHDVAEDLGLLQFVR.L                                                 | 2448.58352 | 2 | 2.47E-11 | 0.97 | 5.00   | -     | 2023.8   |
| AHQ-5-6, 5324               | R.GLLGLP GALYAHDA LR.L                                                  | 1637.90708 | 2 | 3.69E-10 | 0.87 | 3.65   | -     | 554.9    |
| AHQ-5-6, 4496               | R.LPGDNALDMFQK.H                                                        | 1349.53784 | 2 | 1.48E-05 | 0.90 | 4.08   | -     | 807.9    |
| AHQ-5-6, 3920               | R.TQLISDGGFDK.A                                                         | 1294.43554 | 2 | 1.58E-05 | 0.80 | 3.05   | -     | 739.9    |
| gi 4757810 ref NP_004037.1  | ATP synthase, H+ transporting, mitochondrial F1 complex, alpha subunit, |            |   | 2.69E-11 | 5.47 | 60.29  | 15.70 | 59750.3  |
| AHQ-5-7, 3530 - 3554        | R.EAYPGDVFYLHSR.L                                                       | 1554.68713 | 2 | 7.51E-07 | 0.74 | 2.98   | -     | 428.2    |
| AHQ-5-7, 5290               | K.FENAFLSHVVSQHQALLGTIR.A                                               | 2368.67911 | 3 | 2.69E-11 | 0.96 | 5.75   | -     | 1611.2   |
| AHQ-5-7, 3103 - 3106        | K.HALIYDDLKQ.K                                                          | 1288.47413 | 2 | 2.96E-09 | 0.95 | 3.71   | -     | 1320.8   |
| AHQ-5-7, 3611 - 3632        | R.ILGADTSDVLEETGR.V                                                     | 1576.68772 | 2 | 6.41E-10 | 0.93 | 3.75   | -     | 1156.5   |
| AHQ-5-14-, 6259 - 6275      | K.LKEIVTNFLAGFEA                                                        | 1552.79572 | 2 | 1.58E-06 | 0.92 | 3.22   | -     | 1085.7   |
| AHQ-5-7, 3478               | K.TGTAEMSSILEER.I                                                       | 1424.55988 | 2 | 3.64E-06 | 0.97 | 4.41   | -     | 2076.9   |
| gi 4501893 ref NP_001094.1  | actinin, alpha 2 [Homo sapiens]                                         |            |   | 2.70E-11 | 9.96 | 110.26 | 12.60 | 103853.1 |
| AHQ-5-5, 4359               | K.AGTQIENIEEDFR.N                                                       | 1522.59861 | 2 | 2.10E-06 | 0.82 | 3.39   | -     | 801.2    |
| AHQ-5-5, 5022 - 5093        | K.CQLEINFNTLQTK.L                                                       | 1610.81373 | 2 | 2.10E-04 | 0.95 | 4.32   | -     | 1167.2   |
| AHQ-5-5, 5163 - 5234        | K.CQLEINFNTLQTK.L                                                       | 1610.81373 | 2 | 5.67E-10 | 0.96 | 4.20   | -     | 1686.8   |
| AHQ-5-5, 5303               | K.CQLEINFNTLQTK.L                                                       | 1610.81373 | 2 | 9.37E-04 | 0.84 | 3.34   | -     | 618.3    |
| AHQ-5-4, 5133 - 5206        | K.CQLEINFNTLQTK.L                                                       | 1610.81373 | 2 | 5.15E-08 | 0.87 | 3.92   | -     | 596.2    |
| AHQ-5-5, 4846               | R.DLLLDPAWEK.Q                                                          | 1200.36535 | 2 | 7.17E-04 | 0.66 | 2.67   | -     | 741.4    |
| AHQ-5-5, 4805 - 4849        | K.EGLLLWCQR.K                                                           | 1176.37031 | 2 | 2.24E-05 | 0.93 | 3.65   | -     | 937.3    |
| AHQ-5-4, 5005 - 5021        | K.EGLLLWCQR.K                                                           | 1176.37031 | 2 | 2.00E-04 | 0.92 | 3.11   | -     | 971.7    |
| AHQ-5-11, 4038              | R.FAIQDISVEETSAAK.E                                                     | 1538.68108 | 2 | 1.26E-04 | 0.81 | 2.91   | -     | 938.0    |
| AHQ-5-4, 4285 - 4304        | R.FAIQDISVEETSAAK.E                                                     | 1538.68108 | 2 | 2.70E-11 | 0.94 | 4.13   | -     | 1143.9   |
| AHQ-5-6, 3973 - 4045        | R.FAIQDISVEETSAAK.E                                                     | 1538.68108 | 2 | 2.21E-09 | 0.88 | 3.59   | -     | 841.6    |
| AHQ-5-5, 3995 - 4030        | R.FAIQDISVEETSAAK.E                                                     | 1538.68108 | 2 | 2.47E-04 | 0.89 | 3.24   | -     | 1195.8   |
| AHQ-5-5, 4106 - 4177        | R.FAIQDISVEETSAAK.E                                                     | 1538.68108 | 2 | 1.45E-07 | 0.95 | 4.23   | -     | 1195.3   |
| AHQ-5-1, 4400 - 4405        | R.FAIQDISVEETSAAK.E                                                     | 1538.68108 | 2 | 9.12E-09 | 0.94 | 4.12   | -     | 1095.3   |
| AHQ-5-8, 3788               | R.FAIQDISVEETSAAK.E                                                     | 1538.68108 | 2 | 2.04E-04 | 0.62 | 3.25   | -     | 397.8    |
| AHQ-5-12, 4162 - 4186       | R.FAIQDISVEETSAAK.E                                                     | 1538.68108 | 2 | 6.89E-07 | 0.94 | 3.71   | -     | 1168.4   |
| AHQ-5-5, 6058 - 6125        | K.GYEEWLLNEIR.R                                                         | 1422.56701 | 1 | 5.71E-04 | 0.61 | 2.82   | -     | 373.3    |
| AHQ-5-6, 6005               | K.GYEEWLLNEIR.R                                                         | 1422.56701 | 1 | 5.84E-07 | 0.27 | 2.50   | -     | 126.6    |
| AHQ-5-6, 6004               | K.GYEEWLLNEIR.R                                                         | 1422.56701 | 1 | 6.06E-04 | 0.38 | 2.39   | -     | 331.4    |
| AHQ-5-6, 5397 - 5409        | K.GYEEWLLNEIR.R                                                         | 1422.56701 | 1 | 3.43E-07 | 0.26 | 2.02   | -     | 230.0    |
| AHQ-5-4, 6265 - 6276        | K.GYEEWLLNEIR.R                                                         | 1422.56701 | 2 | 2.04E-07 | 0.97 | 5.13   | -     | 1666.9   |
| AHQ-5-1, 6272 - 6273        | K.GYEEWLLNEIR.R                                                         | 1422.56701 | 2 | 7.66E-06 | 0.92 | 3.88   | -     | 920.0    |
| AHQ-5-5, 2033               | K.HEAFESDLAAHQDR.V                                                      | 1626.66861 | 2 | 6.80E-08 | 0.97 | 4.61   | -     | 1451.4   |
| AHQ-5-5, 3641               | R.KAGTQIENIEEDFR.N                                                      | 1650.77152 | 2 | 1.55E-06 | 0.96 | 5.19   | -     | 1086.0   |
| AHQ-5-4, 1933               | R.KHEAFESDLAAHQDR.V                                                     | 1754.84152 | 2 | 9.93E-09 | 0.95 | 3.95   | -     | 1416.2   |
| AHQ-5-5, 1709               | R.KHEAFESDLAAHQDR.V                                                     | 1754.84152 | 2 | 3.01E-08 | 0.97 | 4.81   | -     | 1380.0   |
| AHQ-5-6, 1760               | R.KHEAFESDLAAHQDR.V                                                     | 1754.84152 | 2 | 2.74E-09 | 0.92 | 4.01   | -     | 870.2    |
| AHQ-5-5, 2571               | R.KTFTAWCNSHLR.K                                                        | 1522.71309 | 2 | 1.20E-09 | 0.90 | 3.38   | -     | 921.7    |
| AHQ-5-5, 2798               | R.KTFTAWCNSHLR.K                                                        | 1522.71309 | 2 | 1.02E-05 | 0.91 | 3.78   | -     | 938.3    |
| AHQ-5-5, 5199               | K.LVVISGAEIVDGNVK.M                                                     | 1543.74400 | 2 | 8.20E-06 | 0.93 | 4.28   | -     | 1068.7   |
| AHQ-5-5, 4489 - 4559        | K.LVVISGAEIVDGNVK.M                                                     | 1543.74400 | 2 | 4.76E-05 | 0.86 | 3.00   | -     | 979.0    |
| AHQ-5-5, 4633               | K.LVVISGAEIVDGNVK.M                                                     | 1543.74400 | 2 | 1.11E-06 | 0.93 | 3.48   | -     | 1333.2   |
| gi 13489087 ref NP_109591.1 | serine (or cysteine) proteinase inhibitor, clade B (ovalbumin), member  |            |   | 2.94E-11 | 5.46 | 60.30  | 29.00 | 42741.5  |
| AHQ-5-9, 4520               | K.IPELLASGMVDMNTK.L                                                     | 1619.92892 | 2 | 3.17E-04 | 0.89 | 3.27   | -     | 1153.8   |
| AHQ-5-8, 4020               | R.LGVQDLFNSK.A                                                          | 1208.34588 | 2 | 5.93E-07 | 0.89 | 3.01   | -     | 1065.3   |
| AHQ-5-9, 4906               | K.LHEWTKPENLDFIEVNVSLPR.F                                               | 2537.85454 | 2 | 6.70E-06 | 0.93 | 4.21   | -     | 655.0    |
| AHQ-5-13, 4118              | K.TYGADLASVDFOHASEDAR.K                                                 | 2054.11949 | 2 | 8.05E-07 | 0.79 | 3.55   | -     | 435.9    |
| AHQ-5-8, 3678 - 3753        | K.TYGADLASVDFOHASEDAR.K                                                 | 2054.11949 | 2 | 2.94E-11 | 0.96 | 4.97   | -     | 1151.2   |
| AHQ-5-8, 3677               | K.TYGADLASVDFOHASEDAR.K                                                 | 2054.11949 | 3 | 4.20E-08 | 0.75 | 3.64   | -     | 476.8    |
| AHQ-5-13-, 6169             | K.TYNFLPEFLVSTQK.T                                                      | 1687.91650 | 2 | 1.11E-04 | 0.84 | 3.49   | -     | 483.4    |
| AHQ-5-8, 7173 - 7174        | R.VLPLEPYOGEEELSMVILLPDDIEDESTGLKK.I                                    | 3375.82891 | 3 | 3.51E-06 | 0.95 | 5.99   | -     | 628.3    |
| gi 14149680 ref NP_056107.1 | KIAA0747 protein [Homo sapiens]                                         |            |   | 3.09E-11 | 3.62 | 40.25  | 5.70  | 122855.6 |
| AHQ-5-12, 5538              | R.FEWELPLDEAQR.R                                                        | 1533.66622 | 2 | 1.36E-07 | 0.84 | 3.20   | -     | 645.8    |
| AHQ-5-4, 7269 - 7276        | R.LLVLPLVDQDVAQLR.S                                                     | 1790.13977 | 2 | 1.23E-05 | 0.84 | 3.31   | -     | 609.4    |
| AHQ-5-12, 3988              | R.LTHVDSPLAEPAGPLGQVK.L                                                 | 1930.19405 | 2 | 6.35E-07 | 0.97 | 4.97   | -     | 1463.4   |
| AHQ-5-12, 4498 - 4514       | K.VQLDLAETDLSQGVAR.W                                                    | 1715.88665 | 2 | 3.09E-11 | 0.97 | 4.95   | -     | 2066.5   |
| gi 4505759 ref NP_002622.1  | phosphogluconate dehydrogenase; 6-phosphogluconate dehydrogenase [Homo  |            |   | 3.37E-11 | 3.76 | 40.28  | 12.80 | 53151.7  |
| AHQ-5-8, 7100 - 7106        | K.DAFDRNPQLQLLLDDFFK.S                                                  | 2311.53482 | 2 | 2.27E-06 | 0.98 | 5.38   | -     | 1804.2   |
| AHQ-5-8, 6453               | K.IKDAFDRNPQLQLLLDDFFK.S                                                | 2552.86598 | 3 | 3.37E-11 | 0.94 | 5.05   | -     | 1399.1   |
| AHQ-5-8, 6048               | K.LVPLLDTGDIIDGGNSEYR.D                                                 | 2161.39768 | 2 | 3.24E-08 | 0.97 | 5.53   | -     | 1450.6   |
| AHQ-5-8, 4108 - 4110        | K.VGTGPECCDWWGDEGAGHFVK.M                                               | 2280.43619 | 2 | 3.56E-07 | 0.87 | 4.03   | -     | 552.4    |
| gi 5453898 ref NP_006212.1  | protein (peptidyl-prolyl) cis/trans isomerase NIMA-interacting 1; doo;  |            |   | 3.42E-11 | 1.68 | 20.21  | 21.50 | 18243.2  |
| AHQ-5-12, 5453              | K.SGEEDFESLASQFSDCSSAK.A                                                | 2183.20603 | 2 | 2.15E-04 | 0.73 | 2.84   | -     | 586.8    |
| AHQ-5-12, 4061              | R.TKEEALDELINGYIQK.I                                                    | 1749.98614 | 2 | 3.42E-11 | 0.95 | 4.18   | -     | 1420.0   |
| gi 5031857 ref NP_005557.1  | lactate dehydrogenase A [Homo sapiens]                                  |            |   | 3.45E-11 | 4.20 | 60.30  | 22.00 | 36688.5  |
| AHQ-5-9, 6468               | K.DDVFLSVPICLQNGISDLVK.V                                                | 2291.60655 | 2 | 8.35E-04 | 0.24 | 2.59   | -     | 224.2    |
| AHQ-5-13-, 6656 - 6659      | K.DLADELALVDIEDK.L                                                      | 1658.82864 | 2 | 3.45E-11 | 0.98 | 5.76   | -     | 1811.5   |
| AHQ-5-14-, 6593             | K.DLADELALVDIEDK.L                                                      | 1658.82864 | 2 | 2.06E-10 | 0.98 | 5.40   | -     | 2029.7   |
| AHQ-5-13, 6714 - 6716       | K.DLADELALVDIEDK.L                                                      | 1658.82864 | 2 | 1.70E-09 | 0.98 | 5.96   | -     | 1974.9   |
| AHQ-5-9, 6438               | K.DLADELALVDIEDK.L                                                      | 1900.15980 | 2 | 1.42E-10 | 0.96 | 5.20   | -     | 1482.3   |
| AHQ-5-13, 5150              | K.DQLIYNLLK.E                                                           | 1120.32337 | 2 | 5.42E-04 | 0.70 | 2.61   | -     | 754.7    |
| AHQ-5-9, 6464               | K.GLYGIKDDVFLSVPICLQNGISDLVK.V                                          | 2923.37318 | 2 | 1.28E-06 | 0.86 | 4.11   | -     | 397.8    |
| AHQ-5-9, 6604               | K.GYTSVAIGLSVADLAESIMK.N                                                | 2113.41967 | 2 | 4.30E-05 | 0.46 | 3.11   | -     | 369.8    |
| gi 4507793 ref NP_003339.1  | ubiquitin-conjugating enzyme E2N (UBC13 homolog, yeast); ubiquitin-conj |            |   | 3.46E-11 | 3.83 | 50.24  | 36.80 | 17137.7  |
| AHQ-5-12, 5266 - 5317       | K.LELFLPEEYPM*AAPK.V                                                    | 1765.06265 | 2 | 3.48E-05 | 0.85 | 3.91   | -     | 420.0    |
| AHQ-5-13, 5369 - 5376       | K.LELFLPEEYPM*AAPK.V                                                    | 1765.06265 | 2 | 1.18E-07 | 0.86 | 3.88   | -     | 519.2    |
| AHQ-5-12, 5812 - 5814       | K.LELFLPEEYPM*AAPK.V                                                    | 1749.06325 | 2 | 5.54E-06 | 0.75 | 4.11   | -     | 413.1    |
| AHQ-5-13, 5772              | K.LELFLPEEYPM*AAPK.V                                                    | 1749.06325 | 2 | 2.79E-07 | 0.83 | 3.69   | -     | 566.8    |
| AHQ-5-12, 3232              | R.LLAEPVPGIK.A                                                          | 1037.27750 | 1 | 1.18E-04 | 0.30 | 2.14   | -     | 437.0    |
| AHQ-5-12, 3222              | R.LLAEPVPGIK.A                                                          | 1037.27750 | 2 | 1.67E-04 | 0.65 | 2.90   | -     | 455.1    |
| AHQ-5-13, 2393 - 2394       | K.TNEAQAIETAR.A                                                         | 1204.27249 | 2 | 6.87E-05 | 0.90 | 3.35   | -     | 1259.1   |
| AHQ-5-12, 2130              | K.TNEAQAIETAR.A                                                         | 1204.27249 | 2 | 3.46E-05 | 0.88 | 3.50   | -     | 1016.1   |
| AHQ-5-12, 5245 - 5248       | R.YFHVVIAGPQDSPFEGGTFK.L                                                | 2197.43341 | 3 | 3.46E-11 | 0.95 | 4.81   | -     | 1481.0   |
| gi 5729997 ref NP_004154.2  | RAB27B, member RAS oncogene family [Homo sapiens]                       |            |   | 3.74E-11 | 4.98 | 60.24  | 40.80 | 24607.7  |
| AHQ-5-10, 5243              | K.AVETLLDLIM*K.R                                                        | 1262.54151 | 2 | 3.77E-05 | 0.89 | 3.42   | -     | 904.3    |
| AHQ-5-11, 5620              | K.AVETLLDLIM*K.R                                                        | 1262.54151 | 2 | 1.16E-04 | 0.88 | 3.71   | -     | 621.7    |
| AHQ-5-10, 6212              | K.AVETLLDLIM.K                                                          | 1246.54211 | 2 | 1.09E-07 | 0.87 | 3.76   | -     | 564.8    |
| AHQ-5-10, 5786              | R.NWMSQLQANAYCENPDIVLIGNK.A                                             | 2680.99772 | 2 | 1.09E-05 | 0.84 | 3.20   | -     | 662.3    |
| AHQ-5-11, 6252              | R.NWMSQLQANAYCENPDIVLIGNK.A                                             | 2680.99772 | 2 | 7.64E-09 | 0.91 | 4.59   | -     | 586.2    |
| AHQ-5-10, 5906 - 5966       | R.NWMSQLQANAYCENPDIVLIGNK.A                                             | 2680.99772 | 2 | 2.83E-06 | 0.91 | 4.10   | -     | 836.0    |



|                             |                                                                         |            |   |          |       |        |       |         |
|-----------------------------|-------------------------------------------------------------------------|------------|---|----------|-------|--------|-------|---------|
| AHQ-5-10, 2466 - 2543       | K.TQIPDVTNNGNSGNLDGKPEKK.C                                              | 2496.67285 | 2 | 9.61E-04 | 0.65  | 3.18   | -     | 422.7   |
| AHQ-5-10, 3268              | K.VHLQLWDTAGQER.F                                                       | 1553.70390 | 2 | 3.74E-11 | 0.98  | 4.90   | -     | 1918.8  |
| AHQ-5-13-, 4564             | K.YGIPYFETAAGQNVK.A                                                     | 1976.13177 | 2 | 1.04E-07 | 0.68  | 2.79   | -     | 550.4   |
| AHQ-5-10, 4106              | K.YGIPYFETAAGQNVK.A                                                     | 1976.13177 | 2 | 1.51E-07 | 0.96  | 4.79   | -     | 1115.8  |
| gl 11761631 ref NP_005132.1 | fibrinogen, beta chain preproprotein [Homo sapiens]                     |            |   | 3.77E-11 | 24.18 | 290.27 | 51.90 | 55901.8 |
| AHQ-5-7, 2058               | K.AHYGGFTVQNEANK.Y                                                      | 1536.63020 | 2 | 3.93E-09 | 0.93  | 3.97   | -     | 971.3   |
| AHQ-5-6, 2256               | K.AHYGGFTVQNEANK.Y                                                      | 1536.63020 | 2 | 1.08E-07 | 0.94  | 3.86   | -     | 1297.5  |
| AHQ-5-6, 2097               | K.AHYGGFTVQNEANK.Y                                                      | 1536.63020 | 2 | 1.67E-06 | 0.94  | 3.98   | -     | 1255.4  |
| AHQ-5-11, 2238              | K.AHYGGFTVQNEANK.Y                                                      | 1536.63020 | 2 | 1.66E-09 | 0.93  | 3.93   | -     | 1026.2  |
| AHQ-5-7, 2227 - 2228        | K.AHYGGFTVQNEANK.Y                                                      | 1536.63020 | 2 | 3.69E-05 | 0.95  | 4.25   | -     | 1186.4  |
| AHQ-5-7, 3458               | K.AHYGGFTVQNEANKYQISVNK.Y                                               | 2369.57759 | 2 | 4.06E-05 | 0.84  | 3.39   | -     | 656.5   |
| AHQ-5-10, 3748 - 3803       | K.DNENVVNEYSSELEK.H                                                     | 1769.80167 | 2 | 1.34E-07 | 0.85  | 3.68   | -     | 654.3   |
| AHQ-5-9, 3722 - 3727        | K.DNENVVNEYSSELEK.H                                                     | 1769.80167 | 2 | 1.48E-05 | 0.86  | 3.93   | -     | 741.5   |
| AHQ-5-7, 3978 - 3979        | K.DNENVVNEYSSELEK.H                                                     | 1769.80167 | 2 | 1.11E-06 | 0.93  | 4.29   | -     | 921.7   |
| AHQ-5-12, 4133              | K.DNENVVNEYSSELEK.H                                                     | 1769.80167 | 2 | 6.01E-04 | 0.50  | 2.77   | -     | 413.0   |
| AHQ-5-4, 4296               | K.DNENVVNEYSSELEK.H                                                     | 1769.80167 | 2 | 1.47E-06 | 0.87  | 3.70   | -     | 771.3   |
| AHQ-5-7, 3328               | K.DNENVVNEYSSELEK.H                                                     | 1769.80167 | 2 | 5.30E-05 | 0.78  | 3.20   | -     | 532.9   |
| AHQ-5-11, 4020 - 4030       | K.DNENVVNEYSSELEK.H                                                     | 1769.80167 | 2 | 6.07E-07 | 0.91  | 4.13   | -     | 882.4   |
| AHQ-5-6, 3384               | K.DNENVVNEYSSELEK.H                                                     | 1769.80167 | 2 | 2.56E-05 | 0.85  | 3.52   | -     | 635.1   |
| AHQ-5-2, 4310 - 4331        | K.DNENVVNEYSSELEK.H                                                     | 1769.80167 | 2 | 1.42E-04 | 0.33  | 2.58   | -     | 362.0   |
| AHQ-5-6, 4365 - 4384        | K.DNENVVNEYSSELEK.H                                                     | 1769.80167 | 2 | 8.39E-08 | 0.92  | 4.14   | -     | 911.1   |
| AHQ-5-6, 4021 - 4092        | K.DNENVVNEYSSELEK.H                                                     | 1769.80167 | 2 | 7.88E-10 | 0.93  | 4.49   | -     | 851.3   |
| AHQ-5-12, 3533              | K.EDGGGWVWYNR.C                                                         | 1240.26508 | 2 | 1.43E-04 | 0.75  | 2.74   | -     | 590.0   |
| AHQ-5-6, 3424               | K.EDGGGWVWYNR.C                                                         | 1240.26508 | 2 | 4.36E-05 | 0.76  | 3.05   | -     | 553.3   |
| AHQ-5-7, 3039               | R.EEAPSLRPAPPISGGGYR.A                                                  | 1952.15981 | 3 | 3.76E-04 | 0.79  | 3.69   | -     | 720.8   |
| AHQ-5-6, 3157 - 3172        | R.EEAPSLRPAPPISGGGYR.A                                                  | 1952.15981 | 2 | 3.95E-09 | 0.54  | 3.22   | -     | 306.7   |
| AHQ-5-6, 3953               | K.GGETSEMYLIQPDSSVKPYR.V                                                | 2258.49373 | 3 | 8.32E-07 | 0.69  | 3.11   | -     | 1049.0  |
| AHQ-5-6, 3425               | K.GGETSEMYLIQPDSSVKPYR.V                                                | 2274.49313 | 2 | 9.26E-05 | 0.64  | 3.55   | -     | 324.3   |
| AHQ-5-8, 3672               | K.GGETSEMYLIQPDSSVKPYR.V                                                | 2258.49373 | 3 | 6.22E-05 | 0.80  | 3.41   | -     | 1060.4  |
| AHQ-5-7, 3778               | K.GGETSEMYLIQPDSSVKPYR.V                                                | 2258.49373 | 2 | 3.59E-07 | 0.77  | 3.56   | -     | 519.5   |
| AHQ-5-9, 3543               | K.GGETSEMYLIQPDSSVKPYR.V                                                | 2258.49373 | 2 | 1.60E-05 | 0.89  | 3.87   | -     | 655.0   |
| AHQ-5-8, 3669               | K.GGETSEMYLIQPDSSVKPYR.V                                                | 2258.49373 | 2 | 1.10E-06 | 0.80  | 3.67   | -     | 468.8   |
| AHQ-5-6, 3884 - 3956        | K.GGETSEMYLIQPDSSVKPYR.V                                                | 2258.49373 | 2 | 2.62E-05 | 0.93  | 4.86   | -     | 625.4   |
| AHQ-5-6, 3242 - 3312        | K.HGTDDGVVWMMNWK.G                                                      | 1561.70314 | 2 | 1.19E-05 | 0.96  | 3.75   | -     | 1571.2  |
| AHQ-5-11, 4067              | K.HGTDDGVVWMMNWK.G                                                      | 1545.70374 | 2 | 9.36E-09 | 0.94  | 3.76   | -     | 1200.7  |
| AHQ-5-6, 4000 - 4002        | K.HGTDDGVVWMMNWK.G                                                      | 1545.70374 | 2 | 6.81E-09 | 0.98  | 5.04   | -     | 1709.2  |
| AHQ-5-7, 3863               | K.HGTDDGVVWMMNWK.G                                                      | 1545.70374 | 2 | 1.47E-08 | 0.96  | 4.92   | -     | 1188.5  |
| AHQ-5-7, 6298 - 6332        | R.KAPDAGGCLHAPDPLGVLCPTGCQLQALLQQR.P                                    | 3723.12454 | 3 | 1.33E-08 | 0.84  | 4.29   | -     | 529.3   |
| AHQ-5-11, 6004              | R.KAPDAGGCLHAPDPLGVLCPTGCQLQALLQQR.P                                    | 4089.58482 | 3 | 1.21E-05 | 0.49  | 3.19   | -     | 261.1   |
| AHQ-5-6, 3376               | R.KGGETSEMYLIQPDSSVKPYR.V                                               | 2386.66664 | 3 | 2.83E-09 | 0.82  | 3.94   | -     | 494.4   |
| AHQ-5-7, 3266               | R.KGGETSEMYLIQPDSSVKPYR.V                                               | 2386.66664 | 3 | 1.16E-04 | 0.91  | 4.78   | -     | 713.9   |
| AHQ-5-7, 3254 - 3322        | R.KGGETSEMYLIQPDSSVKPYR.V                                               | 2386.66664 | 2 | 3.37E-05 | 0.95  | 5.05   | -     | 973.0   |
| AHQ-5-9, 3088               | R.KGGETSEMYLIQPDSSVKPYR.V                                               | 2386.66664 | 2 | 2.38E-06 | 0.91  | 4.30   | -     | 727.3   |
| AHQ-5-8, 2997               | R.KGGETSEMYLIQPDSSVKPYR.V                                               | 2386.66664 | 2 | 6.68E-04 | 0.94  | 4.48   | -     | 1088.5  |
| AHQ-5-8, 2982               | R.KGGETSEMYLIQPDSSVKPYR.V                                               | 2386.66664 | 3 | 2.13E-05 | 0.86  | 4.63   | -     | 571.4   |
| AHQ-5-6, 3380 - 3389        | R.KGGETSEMYLIQPDSSVKPYR.V                                               | 2386.66664 | 2 | 4.22E-05 | 0.94  | 5.22   | -     | 839.7   |
| AHQ-5-7, 2862               | R.KGGETSEM*YLIQPDSSVKPYR.V                                              | 2402.66604 | 2 | 6.08E-05 | 0.79  | 3.44   | -     | 371.8   |
| AHQ-5-6, 2980               | R.KGGETSEM*YLIQPDSSVKPYR.V                                              | 2402.66604 | 2 | 6.09E-04 | 0.67  | 2.79   | -     | 484.8   |
| AHQ-5-6, 2513               | K.KREEAPSLRPAPPISGGGYR.A                                                | 2236.51908 | 3 | 4.85E-06 | 0.90  | 3.94   | -     | 1103.0  |
| AHQ-5-6, 6442 - 6460        | R.M*GPTELLIEMEDWK.G                                                     | 1708.97776 | 2 | 9.76E-10 | 0.96  | 4.79   | -     | 1455.5  |
| AHQ-5-8, 6786               | R.MGPTELLIEMEDWK.G                                                      | 1692.97836 | 2 | 9.04E-05 | 0.89  | 3.76   | -     | 781.0   |
| AHQ-5-9, 6179               | R.MGPTELLIEMEDWK.G                                                      | 1692.97836 | 2 | 3.66E-08 | 0.85  | 3.23   | -     | 970.1   |
| AHQ-5-11, 6548              | R.MGPTELLIEMEDWK.G                                                      | 1692.97836 | 2 | 1.95E-06 | 0.95  | 4.28   | -     | 1256.5  |
| AHQ-5-6, 6952 - 7016        | R.MGPTELLIEMEDWK.G                                                      | 1692.97836 | 2 | 4.40E-07 | 0.95  | 4.53   | -     | 1123.3  |
| AHQ-5-6, 5214 - 5282        | R.MGPTELLIEM*EDWK.G                                                     | 1708.97776 | 2 | 3.01E-04 | 0.90  | 3.79   | -     | 739.6   |
| AHQ-5-10, 6294              | R.MGPTELLIEMEDWK.G                                                      | 1692.97836 | 2 | 1.95E-04 | 0.89  | 3.66   | -     | 805.2   |
| AHQ-5-7, 6988               | R.MGPTELLIEMEDWK.G                                                      | 1692.97836 | 2 | 6.18E-05 | 0.95  | 3.98   | -     | 1529.3  |
| AHQ-5-10, 5819              | R.M*GPTELLIEMEDWK.G                                                     | 1708.97776 | 2 | 7.46E-07 | 0.94  | 4.21   | -     | 1176.4  |
| AHQ-5-11, 4686 - 4719       | R.M*GPTELLIEM*EDWK.G                                                    | 1724.97716 | 2 | 2.04E-05 | 0.88  | 3.56   | -     | 840.3   |
| AHQ-5-7, 6902 - 6967        | R.MGPTELLIEMEDWK.G                                                      | 1692.97836 | 2 | 1.05E-09 | 0.97  | 5.37   | -     | 1297.1  |
| AHQ-5-7, 6294 - 6302        | R.M*GPTELLIEMEDWK.G                                                     | 1708.97776 | 2 | 2.55E-07 | 0.96  | 4.84   | -     | 1409.5  |
| AHQ-5-8, 6021               | R.MGPTELLIEMEDWKGDK.V                                                   | 1993.29069 | 3 | 4.09E-06 | 0.87  | 4.01   | -     | 621.3   |
| AHQ-5-7, 6080 - 6160        | R.MGPTELLIEMEDWKGDK.V                                                   | 1993.29069 | 2 | 7.71E-05 | 0.82  | 3.52   | -     | 497.7   |
| AHQ-5-6, 5830               | K.NYCGLPGEYWLGNDK.I                                                     | 1787.92994 | 2 | 1.95E-07 | 0.89  | 3.89   | -     | 390.4   |
| AHQ-5-6, 5162 - 5173        | K.NYCGLPGEYWLGNDK.I                                                     | 1787.92994 | 2 | 3.73E-04 | 0.92  | 4.18   | -     | 470.0   |
| AHQ-5-6, 5293 - 5360        | K.NYCGLPGEYWLGNDK.I                                                     | 1787.92994 | 2 | 3.77E-11 | 0.95  | 4.91   | -     | 606.3   |
| AHQ-5-7, 5859               | K.NYCGLPGEYWLGNDKISQLTR.M                                               | 2486.74455 | 2 | 2.73E-07 | 0.84  | 3.43   | -     | 531.2   |
| AHQ-5-6, 5750 - 5817        | R.TMTHIHMGMFFSTYDRDNDGWLTSDDPR.K                                        | 3079.32935 | 3 | 8.33E-04 | 0.72  | 4.11   | -     | 226.3   |
| AHQ-5-8, 3577 - 3581        | R.TPCTVSNIPVSSGK.E                                                      | 1621.85811 | 2 | 6.24E-06 | 0.89  | 3.61   | -     | 777.4   |
| AHQ-5-6, 3710 - 3784        | R.TPCTVSNIPVSSGK.E                                                      | 1621.85811 | 2 | 3.25E-05 | 0.92  | 3.90   | -     | 713.5   |
| AHQ-5-7, 3610 - 3647        | R.TPCTVSNIPVSSGK.E                                                      | 1621.85811 | 2 | 8.19E-05 | 0.83  | 3.59   | -     | 490.5   |
| AHQ-5-8, 4622 - 4628        | R.TPCTVSNIPVSSGKECEEIIR.K                                               | 2552.88440 | 3 | 2.63E-09 | 0.94  | 4.38   | -     | 1450.4  |
| AHQ-5-7, 4786               | R.TPCTVSNIPVSSGKECEEIIR.K                                               | 2552.88440 | 3 | 5.94E-07 | 0.90  | 3.79   | -     | 1272.9  |
| AHQ-5-6, 5036               | R.TPCTVSNIPVSSGKECEEIIR.K                                               | 2552.88440 | 3 | 2.76E-05 | 0.73  | 3.54   | -     | 593.4   |
| AHQ-5-3, 5179 - 5198        | R.TPCTVSNIPVSSGKECEEIIR.K                                               | 2552.88440 | 3 | 8.33E-04 | 0.87  | 3.82   | -     | 931.3   |
| AHQ-5-6, 4876 - 4950        | R.TPCTVSNIPVSSGKECEEIIR.K                                               | 2552.88440 | 3 | 3.26E-08 | 0.95  | 4.89   | -     | 1347.9  |
| AHQ-5-6, 4881 - 4952        | R.TPCTVSNIPVSSGKECEEIIR.K                                               | 2552.88440 | 2 | 1.47E-08 | 0.71  | 3.25   | -     | 289.8   |
| AHQ-5-4, 5121               | R.TPCTVSNIPVSSGKECEEIIR.K                                               | 2552.88440 | 3 | 2.18E-06 | 0.90  | 4.50   | -     | 1040.9  |
| AHQ-5-9, 4370               | R.TPCTVSNIPVSSGKECEEIIR.K                                               | 2552.88440 | 3 | 9.15E-05 | 0.86  | 3.47   | -     | 955.4   |
| AHQ-5-9, 4088               | R.VYCDMNTENGGWTVIQR.Q                                                   | 2159.34553 | 2 | 5.10E-09 | 0.94  | 4.55   | -     | 1153.0  |
| AHQ-5-8, 4354               | R.VYCDMNTENGGWTVIQR.Q                                                   | 2159.34553 | 2 | 1.41E-08 | 0.93  | 4.54   | -     | 707.2   |
| AHQ-5-7, 4560 - 4636        | R.VYCDMNTENGGWTVIQR.Q                                                   | 2159.34553 | 2 | 4.60E-07 | 0.91  | 4.56   | -     | 518.2   |
| AHQ-5-7, 4415 - 4495        | R.VYCDMNTENGGWTVIQR.Q                                                   | 2159.34553 | 2 | 1.53E-08 | 0.96  | 4.67   | -     | 1363.7  |
| AHQ-5-7, 3951               | R.VYCDM*NTENGGWTVIQR.Q                                                  | 2175.34493 | 2 | 3.65E-06 | 0.91  | 3.74   | -     | 889.2   |
| AHQ-5-6, 4522 - 4540        | R.VYCDMNTENGGWTVIQR.Q                                                   | 2159.34553 | 2 | 1.94E-06 | 0.93  | 4.15   | -     | 890.6   |
| AHQ-5-6, 4649               | R.VYCDMNTENGGWTVIQR.Q                                                   | 2159.34553 | 2 | 1.80E-07 | 0.83  | 3.25   | -     | 770.8   |
| AHQ-5-6, 4033               | R.VYCDM*NTENGGWTVIQR.Q                                                  | 2175.34493 | 2 | 4.47E-06 | 0.94  | 4.04   | -     | 1008.7  |
| AHQ-5-7, 1775               | K.YQISVNK.Y                                                             | 851.96999  | 1 | 6.15E-05 | 0.36  | 2.49   | -     | 296.4   |
| AHQ-5-6, 1814 - 1820        | K.YQISVNK.Y                                                             | 851.96999  | 1 | 7.62E-04 | 0.44  | 2.14   | -     | 488.2   |
| AHQ-5-11, 4890              | R.YYWGQYTWDM.AK.H                                                       | 1669.84009 | 2 | 6.54E-04 | 0.92  | 3.13   | -     | 1192.0  |
| AHQ-5-6, 4350 - 4420        | R.YYWGQYTWDM*AK.H                                                       | 1685.83949 | 2 | 2.82E-05 | 0.88  | 3.30   | -     | 815.1   |
| AHQ-5-6, 5028               | R.YYWGQYTWDM.AK.H                                                       | 1669.84009 | 2 | 8.93E-05 | 0.96  | 4.36   | -     | 1253.6  |
| AHQ-5-6, 4998 - 5068        | R.YYWGQYTWDM.AK.H                                                       | 1669.84009 | 2 | 1.75E-05 | 0.94  | 3.92   | -     | 947.9   |
| AHQ-5-12, 5065 - 5130       | R.YYWGQYTWDM.AK.H                                                       | 1669.84009 | 2 | 2.16E-04 | 0.93  | 3.88   | -     | 924.8   |
| AHQ-5-14-, 4427 - 4497      | R.YYWGQYTWDM*AK.H                                                       | 1685.83949 | 2 | 9.66E-07 | 0.91  | 2.98   | -     | 1048.0  |
| AHQ-5-14-, 4971             | R.YYWGQYTWDM.AK.H                                                       | 1669.84009 | 2 | 7.13E-06 | 0.96  | 3.49   | -     | 1572.2  |
| gl 4504183 ref NP_000843.1  | glutathione transferase; deafness, X-linked 7; fatty acid ethyl ester s |            |   | 3.93E-11 | 4.63  | 50.30  | 39.50 | 23355.7 |
| AHQ-5-11, 5256 - 5286       | K.ALPGQLKPPETLLSQNGGK.T                                                 | 2127.42930 | 2 | 1.06E-05 | 0.86  | 3.99   | -     | 468.5   |
| AHQ-5-10, 4788              | K.ALPGQLKPPETLLSQNGGK.T                                                 | 2127.42930 | 2 | 2.18E-05 | 0.85  | 3.54   | -     | 441.6   |
| AHQ-5-11, 5162 - 5211       | K.ALPGQLKPPETLLSQNGGK.T                                                 | 2127.42930 | 2 | 2.78E-08 | 0.92  | 4.19   | -     | 490.9   |
| AHQ-5-12, 5398              | K.ALPGQLKPPETLLSQNGGK.T                                                 | 2127.42930 | 2 | 1.55E-05 | 0.59  | 3.14   | -     | 296.0   |
| AHQ-5-11, 5164 - 5168       | K.ALPGQLKPPETLLSQNGGK.T                                                 | 2127.42930 | 3 | 6.46E-06 | 0.60  | 3.44   | -     | 710.2   |
| AHQ-5-11, 3098              | K.ASCLYGQLPK.F                                                          | 1138.31884 | 2 | 3.23E-06 | 0.91  | 3.30   | -     | 917.2   |
| AHQ-5-11, 3030 - 3099       | K.ASCLYGQLPK.F                                                          | 1138.31884 | 2 | 1.10E-06 | 0.87  | 2.97   | -     | 930.4   |
| AHQ-5-13, 6476              | K.DQQAALVDMVNDGVEDLR.C                                                  | 2118.26843 | 2 | 2.69E-07 | 0.91  | 4.05   | -     | 855.5   |
| AHQ-5-11, 6227 - 6290       | K.DQQAALVDMVNDGVEDLR.C                                                  | 2118.26843 | 2 | 1.84E-08 | 0.95  | 4.35   | -     | 1224.9  |
| AHQ-5-14-, 6294 - 6305      | K.DQQAALVDMVNDGVEDLR.C                                                  | 2118.26843 | 2 | 1.38E-06 | 0.96  | 5.12   | -     | 1040.2  |

|                             |                                                                                 |            |   |          |      |      |       |         |
|-----------------------------|---------------------------------------------------------------------------------|------------|---|----------|------|------|-------|---------|
| AHQ-5-10, 5999 - 6002       | K.DQQAALVDMVNDGVEDLR.C                                                          | 2118.26843 | 2 | 8.82E-06 | 0.97 | 5.92 | -     | 1213.6  |
| AHQ-5-11, 6275 - 6276       | K.DQQAALVDMVNDGVEDLR.C                                                          | 2118.26843 | 3 | 2.59E-06 | 0.97 | 5.22 | -     | 2002.5  |
| AHQ-5-11, 6455              | K.DQQAALVDMVNDGVEDLR.C                                                          | 2118.26843 | 2 | 1.83E-06 | 0.90 | 3.71 | -     | 858.9   |
| AHQ-5-11, 4947              | K.FQDGDLLTYQSNITLR.H                                                            | 1885.06701 | 2 | 7.55E-08 | 0.93 | 4.49 | -     | 787.5   |
| AHQ-5-11, 4858              | K.FQDGDLLTYQSNITLR.H                                                            | 1885.06701 | 2 | 1.18E-08 | 0.93 | 4.44 | -     | 872.0   |
| AHQ-5-11, 4731 - 4795       | K.FQDGDLLTYQSNITLR.H                                                            | 1885.06701 | 2 | 3.18E-10 | 0.96 | 4.87 | -     | 1026.3  |
| AHQ-5-14-, 4881             | K.FQDGDLLTYQSNITLR.H                                                            | 1885.06701 | 2 | 1.27E-06 | 0.95 | 4.93 | -     | 982.3   |
| AHQ-5-13-, 4919             | K.FQDGDLLTYQSNITLR.H                                                            | 1885.06701 | 2 | 2.61E-05 | 0.91 | 4.74 | -     | 531.6   |
| AHQ-5-14, 5721              | K.FQDGDLLTYQSNITLR.H                                                            | 1885.06701 | 2 | 5.04E-06 | 0.95 | 3.95 | -     | 1276.9  |
| AHQ-5-13, 5005 - 5009       | K.FQDGDLLTYQSNITLR.H                                                            | 1885.06701 | 2 | 6.81E-04 | 0.72 | 3.28 | -     | 484.2   |
| AHQ-5-10, 4502              | K.FQDGDLLTYQSNITLR.H                                                            | 1885.06701 | 2 | 6.54E-06 | 0.95 | 4.88 | -     | 935.1   |
| AHQ-5-13-, 4589             | K.YISLIYNTYEAAGKDDYVK.A                                                         | 2156.37637 | 2 | 3.93E-11 | 0.93 | 4.67 | -     | 597.1   |
| AHQ-5-11, 4512              | K.YISLIYNTYEAAGKDDYVK.A                                                         | 2156.37637 | 2 | 1.49E-07 | 0.93 | 4.49 | -     | 786.9   |
| AHQ-5-11, 4620              | K.YISLIYNTYEAAGKDDYVK.A                                                         | 2156.37637 | 2 | 9.58E-05 | 0.93 | 4.70 | -     | 685.7   |
| AHQ-5-13, 4669              | K.YISLIYNTYEAAGKDDYVK.A                                                         | 2156.37637 | 2 | 2.53E-09 | 0.95 | 4.51 | -     | 960.9   |
| AHQ-5-11, 4392 - 4403       | K.YISLIYNTYEAAGKDDYVK.A                                                         | 2156.37637 | 2 | 8.17E-07 | 0.83 | 3.84 | -     | 434.7   |
| gi 27498267 ref XP_209737.1 | similar to tyrosine 3/tryptophan 5-monooxygenase activation protein,            |            |   |          |      |      |       |         |
| AHQ-5-14-, 6702 - 6714      | R.DICNDVLSLLEK.F                                                                | 1420.61093 | 2 | 1.13E-06 | 0.97 | 5.00 | 33.70 | 11063.6 |
| AHQ-5-10, 6464 - 6479       | R.DICNDVLSLLEK.F                                                                | 1420.61093 | 2 | 1.43E-06 | 0.97 | 4.97 | -     | 2248.9  |
| AHQ-5-10, 6463 - 6527       | R.DICNDVLSLLEK.F                                                                | 1420.61093 | 1 | 3.75E-04 | 0.79 | 3.05 | -     | 701.0   |
| AHQ-5-9, 5511               | R.DICNDVLSLLEK.F                                                                | 1420.61093 | 1 | 6.45E-09 | 0.24 | 2.12 | -     | 558.2   |
| AHQ-5-9, 6431 - 6432        | R.DICNDVLSLLEK.F                                                                | 1420.61093 | 2 | 2.28E-07 | 0.96 | 4.61 | -     | 1495.4  |
| AHQ-5-9, 6475               | R.DICNDVLSLLEK.F                                                                | 1420.61093 | 1 | 3.35E-04 | 0.63 | 2.78 | -     | 591.0   |
| AHQ-5-10, 5587              | R.DICNDVLSLLEK.F                                                                | 1420.61093 | 1 | 9.71E-09 | 0.37 | 2.59 | -     | 531.0   |
| AHQ-5-10, 5586 - 5594       | R.DICNDVLSLLEK.F                                                                | 1420.61093 | 2 | 7.98E-07 | 0.95 | 4.40 | -     | 1279.7  |
| AHQ-5-10, 5582              | R.DICNDVLSLLEK.F                                                                | 1420.61093 | 1 | 7.55E-10 | 0.44 | 2.27 | -     | 630.4   |
| AHQ-5-11, 5875              | R.DICNDVLSLLEK.F                                                                | 1420.61093 | 2 | 7.20E-05 | 0.97 | 3.99 | -     | 1933.4  |
| AHQ-5-10, 4664 - 4722       | K.GIVDQSQQAYQEAFAEISK.K                                                         | 2042.19176 | 2 | 1.16E-08 | 0.98 | 5.69 | -     | 1488.5  |
| AHQ-5-10, 4710              | K.GIVDQSQQAYQEAFAEISK.K                                                         | 2042.19176 | 3 | 1.01E-09 | 0.98 | 5.52 | -     | 2436.9  |
| AHQ-5-10, 4754 - 4814       | K.GIVDQSQQAYQEAFAEISK.K                                                         | 2042.19176 | 2 | 8.85E-10 | 0.97 | 5.40 | -     | 1384.4  |
| AHQ-5-10, 4878 - 4938       | K.GIVDQSQQAYQEAFAEISK.K                                                         | 2042.19176 | 2 | 4.32E-10 | 0.97 | 5.58 | -     | 1472.3  |
| AHQ-5-10, 4998 - 5058       | K.GIVDQSQQAYQEAFAEISK.K                                                         | 2042.19176 | 2 | 1.16E-07 | 0.96 | 5.01 | -     | 1207.6  |
| AHQ-5-10, 5134 - 5210       | K.GIVDQSQQAYQEAFAEISK.K                                                         | 2042.19176 | 2 | 2.29E-06 | 0.97 | 5.13 | -     | 1531.0  |
| AHQ-5-10, 4431 - 4494       | K.GIVDQSQQAYQEAFAEISK.K                                                         | 2042.19176 | 2 | 4.51E-10 | 0.97 | 5.39 | -     | 1569.3  |
| AHQ-5-10, 5458 - 5463       | K.GIVDQSQQAYQEAFAEISK.K                                                         | 2042.19176 | 2 | 9.60E-07 | 0.97 | 4.64 | -     | 1607.0  |
| AHQ-5-10, 5564 - 5627       | K.GIVDQSQQAYQEAFAEISK.K                                                         | 2042.19176 | 2 | 3.27E-08 | 0.97 | 5.28 | -     | 1189.7  |
| AHQ-5-10, 5566              | K.GIVDQSQQAYQEAFAEISK.K                                                         | 2042.19176 | 2 | 1.19E-06 | 0.84 | 3.76 | -     | 624.0   |
| AHQ-5-10, 4272 - 4332       | K.GIVDQSQQAYQEAFAEISK.K                                                         | 2042.19176 | 2 | 8.73E-10 | 0.96 | 5.11 | -     | 1299.2  |
| AHQ-5-13-, 5079 - 5083      | K.GIVDQSQQAYQEAFAEISK.K                                                         | 2042.19176 | 2 | 1.23E-06 | 0.97 | 5.44 | -     | 1555.6  |
| AHQ-5-14-, 5033             | K.GIVDQSQQAYQEAFAEISK.K                                                         | 2042.19176 | 2 | 4.33E-09 | 0.97 | 5.60 | -     | 1207.1  |
| AHQ-5-10, 5830 - 5896       | K.GIVDQSQQAYQEAFAEISK.K                                                         | 2042.19176 | 2 | 5.14E-04 | 0.88 | 3.84 | -     | 953.9   |
| AHQ-5-10, 5958 - 6028       | K.GIVDQSQQAYQEAFAEISK.K                                                         | 2042.19176 | 2 | 2.58E-06 | 0.88 | 3.64 | -     | 980.4   |
| AHQ-5-10, 6266 - 6331       | K.GIVDQSQQAYQEAFAEISK.K                                                         | 2042.19176 | 2 | 3.44E-06 | 0.94 | 4.11 | -     | 1133.0  |
| AHQ-5-10, 6388              | K.GIVDQSQQAYQEAFAEISK.K                                                         | 2042.19176 | 2 | 4.14E-04 | 0.78 | 3.43 | -     | 395.3   |
| AHQ-5-9, 4674               | K.GIVDQSQQAYQEAFAEISK.K                                                         | 2042.19176 | 2 | 3.61E-08 | 0.96 | 4.63 | -     | 1337.0  |
| AHQ-5-6, 5238 - 5241        | K.GIVDQSQQAYQEAFAEISK.K                                                         | 2042.19176 | 2 | 6.87E-08 | 0.97 | 5.31 | -     | 1652.5  |
| AHQ-5-11, 4732              | K.GIVDQSQQAYQEAFAEISK.K                                                         | 2042.19176 | 2 | 3.70E-07 | 0.93 | 4.29 | -     | 822.5   |
| AHQ-5-11, 5014 - 5015       | K.GIVDQSQQAYQEAFAEISK.K                                                         | 2042.19176 | 2 | 3.93E-11 | 0.97 | 5.00 | -     | 1463.4  |
| AHQ-5-11, 5031              | K.GIVDQSQQAYQEAFAEISK.K                                                         | 2042.19176 | 3 | 9.02E-10 | 0.98 | 6.61 | -     | 2590.7  |
| AHQ-5-10, 5367 - 5395       | K.GIVDQSQQAYQEAFAEISK.K                                                         | 2042.19176 | 2 | 1.03E-10 | 0.97 | 5.75 | -     | 1188.6  |
| AHQ-5-12, 5180 - 5246       | K.GIVDQSQQAYQEAFAEISK.K                                                         | 2042.19176 | 2 | 4.87E-09 | 0.96 | 4.62 | -     | 1341.4  |
| AHQ-5-13, 5200              | K.GIVDQSQQAYQEAFAEISK.K                                                         | 2042.19176 | 2 | 1.60E-09 | 0.97 | 5.46 | -     | 1164.9  |
| AHQ-5-5, 5311               | K.GIVDQSQQAYQEAFAEISK.K                                                         | 2042.19176 | 2 | 8.06E-09 | 0.94 | 4.84 | -     | 747.7   |
| AHQ-5-10, 4268 - 4271       | K.GIVDQSQQAYQEAFAEISKK.E                                                        | 2170.36467 | 2 | 1.29E-05 | 0.90 | 3.88 | -     | 1049.7  |
| AHQ-5-10, 4080 - 4151       | K.GIVDQSQQAYQEAFAEISKK.K                                                        | 2170.36467 | 2 | 6.88E-06 | 0.95 | 5.05 | -     | 815.9   |
| AHQ-5-13-, 4581             | K.GIVDQSQQAYQEAFAEISKK.K                                                        | 2170.36467 | 2 | 2.56E-06 | 0.97 | 5.31 | -     | 1477.8  |
| gi 4758208 ref NP_004081.1  | dual specificity phosphatase 3; vaccinia virus phosphatase VH1-related;         |            |   |          |      |      |       |         |
| AHQ-5-11, 4096 - 4166       | R.AADFIQALAQK.N                                                                 | 1291.43488 | 1 | 6.59E-07 | 0.45 | 2.69 | 45.90 | 20478.2 |
| AHQ-5-11, 5359 - 5390       | K.ANDTQEFNLSAYFER.A                                                             | 1805.88207 | 2 | 7.12E-09 | 0.94 | 4.09 | -     | 1248.7  |
| AHQ-5-11, 6103 - 6119       | R.EIGPNDGFLAQLCOLNDR.L                                                          | 2062.24949 | 2 | 4.15E-11 | 0.93 | 4.59 | -     | 866.8   |
| AHQ-5-11, 5958 - 6023       | R.EIGPNDGFLAQLCOLNDR.L                                                          | 2062.24949 | 2 | 9.53E-06 | 0.94 | 4.45 | -     | 1006.4  |
| AHQ-5-11, 3638              | R.YIVDGHQQLDFDYHR.I                                                             | 1475.67136 | 2 | 4.08E-04 | 0.94 | 3.79 | -     | 1095.1  |
| AHQ-5-11, 3271 - 3275       | K.LGITHVLNAAEGR.S                                                               | 1351.53669 | 2 | 4.58E-08 | 0.93 | 3.73 | -     | 1177.3  |
| AHQ-5-11, 2938              | K.LGITHVLNAAEGR.S                                                               | 1351.53669 | 2 | 2.04E-05 | 0.84 | 2.82 | -     | 944.1   |
| AHQ-5-11, 3498              | R.SFMHVNNTANFYK.D                                                               | 1573.75708 | 2 | 2.66E-05 | 0.93 | 3.40 | -     | 1213.8  |
| gi 7661818 ref NP_054900.1  | HSPC159 protein [Homo sapiens]                                                  |            |   |          |      |      |       |         |
| AHQ-5-14-, 6631             | R.GEEQSAIPIYFPPIQPFR.V                                                          | 2239.47029 | 2 | 3.20E-05 | 0.82 | 3.99 | -     | 255.6   |
| AHQ-5-13-, 6628 - 6691      | R.GEEQSAIPIYFPPIQPFR.V                                                          | 2239.47029 | 2 | 3.84E-08 | 0.88 | 3.97 | -     | 397.0   |
| AHQ-5-13, 6736              | R.GEEQSAIPIYFPPIQPFR.V                                                          | 2239.47029 | 2 | 2.02E-07 | 0.86 | 3.78 | -     | 382.4   |
| AHQ-5-12, 6773 - 6836       | R.GEEQSAIPIYFPPIQPFR.V                                                          | 2239.47029 | 2 | 3.52E-04 | 0.29 | 2.59 | -     | 209.0   |
| AHQ-5-11, 6623 - 6630       | R.GEEQSAIPIYFPPIQPFR.V                                                          | 2239.47029 | 2 | 1.41E-06 | 0.87 | 3.76 | -     | 437.3   |
| AHQ-5-14-, 6633             | R.GEEQSAIPIYFPPIQPFR.V                                                          | 2239.47029 | 2 | 4.97E-06 | 0.91 | 4.19 | -     | 491.5   |
| AHQ-5-12, 2522              | K.INGDLQTK.L                                                                    | 1002.14688 | 1 | 2.24E-05 | 0.54 | 2.13 | -     | 491.6   |
| AHQ-5-13, 3793              | R.IQTLASIDTIK.I                                                                 | 1203.41068 | 2 | 6.21E-04 | 0.69 | 2.80 | -     | 502.0   |
| AHQ-5-11, 4759              | K.LDDGHLNNSLSPVQADVYFPR.L                                                       | 2445.62923 | 2 | 6.64E-07 | 0.97 | 5.69 | -     | 1186.9  |
| AHQ-5-11, 4903 - 4971       | K.LDDGHLNNSLSPVQADVYFPR.L                                                       | 2445.62923 | 2 | 2.94E-10 | 0.98 | 6.69 | -     | 1861.1  |
| AHQ-5-8, 5952               | R.VEILCEYPRFRVFDVGHQLDFDYHR.I                                                   | 3245.65958 | 3 | 6.81E-04 | 0.70 | 3.23 | -     | 734.0   |
| AHQ-5-11, 4694              | R.VFVDGHQQLDFDYHR.I                                                             | 1780.96540 | 3 | 8.89E-10 | 0.87 | 4.02 | -     | 551.8   |
| AHQ-5-11, 4687 - 4696       | R.VFVDGHQQLDFDYHR.I                                                             | 1780.96540 | 2 | 4.50E-11 | 0.96 | 4.55 | -     | 1405.0  |
| AHQ-5-11, 4796              | R.VFVDGHQQLDFDYHR.I                                                             | 1780.96540 | 2 | 6.81E-04 | 0.93 | 3.94 | -     | 943.9   |
| AHQ-5-12, 4873              | R.VFVDGHQQLDFDYHR.I                                                             | 1780.96540 | 2 | 1.14E-10 | 0.94 | 3.75 | -     | 1535.3  |
| gi 5729887 ref NP_006624.1  | IQ motif containing GTPase activating protein 2 [Homo sapiens]                  |            |   |          |      |      |       |         |
| AHQ-5-5, 3485               | K.AWVNQLETQTGEASK.L                                                             | 1662.78230 | 2 | 1.03E-07 | 0.91 | 4.08 | -     | 858.3   |
| AHQ-5-3, 5869               | K.GVLLDIDDLQTNQFK.N                                                             | 1719.91690 | 2 | 1.85E-06 | 0.96 | 4.86 | -     | 1379.1  |
| AHQ-5-6, 7436               | K.IGGILANELSVDEAALHAAVIAINEAVEK.G                                               | 2932.31842 | 3 | 1.25E-09 | 0.92 | 4.90 | -     | 1000.2  |
| AHQ-5-3, 5998               | K.LGIAPQIDLLGK.V                                                                | 1366.63117 | 2 | 2.67E-05 | 0.84 | 3.50 | -     | 497.6   |
| AHQ-5-3, 4989               | K.LPYDVTTTEQALTYPEVK.N                                                          | 1968.19269 | 2 | 4.55E-08 | 0.95 | 4.56 | -     | 1280.6  |
| AHQ-5-2, 4942 - 4951        | K.LPYDVTTTEQALTYPEVK.N                                                          | 1968.19269 | 2 | 4.51E-11 | 0.94 | 4.46 | -     | 1091.0  |
| AHQ-5-4, 4952               | K.LPYDVTTTEQALTYPEVK.N                                                          | 1968.19269 | 2 | 6.52E-09 | 0.97 | 5.07 | -     | 1763.1  |
| AHQ-5-5, 6943               | R.NQPGNTLLEILETPATAQQEVDHATDMVSR.A                                              | 3268.51558 | 3 | 2.03E-06 | 0.84 | 3.93 | -     | 465.8   |
| AHQ-5-3, 7115               | R.NQPGNTLLEILETPATAQQEVDHATDMVSR.A                                              | 3268.51558 | 3 | 3.54E-08 | 0.89 | 4.26 | -     | 597.4   |
| AHQ-5-3, 3022               | R.SPAIGLNLDK.A                                                                  | 1142.28743 | 1 | 2.33E-04 | 0.56 | 2.66 | -     | 423.8   |
| AHQ-5-4, 4264               | K.VDQGDIVTGNPTVIK.M                                                             | 1726.95257 | 2 | 2.40E-07 | 0.95 | 4.94 | -     | 1228.4  |
| gi 293023 ref NP_291482.1   | similar to 78 kDa glucose-regulated protein precursor (GRP 78) (Immunoglobulin) |            |   |          |      |      |       |         |
| AHQ-5-8, 4376               | R.IINKPTAAAIYGLDK.R                                                             | 1659.95097 | 2 | 4.69E-06 | 0.80 | 3.15 | -     | 890.2   |
| AHQ-5-7, 4476 - 4487        | R.IINKPTAAAIYGLDK.R                                                             | 1659.95097 | 2 | 4.81E-05 | 0.84 | 3.47 | -     | 829.0   |
| AHQ-5-6, 4198 - 4209        | R.IINKPTAAAIYGLDK.R                                                             | 1816.13732 | 2 | 8.50E-07 | 0.88 | 4.64 | -     | 1036.5  |
| AHQ-5-6, 3228               | K.KKELEEIVPIISK.L                                                               | 1654.97263 | 2 | 1.91E-06 | 0.88 | 4.39 | -     | 567.9   |
| AHQ-5-5, 3451 - 3481        | K.LYGSAGPPPTGEEEDTAEKDEL                                                        | 2177.26447 | 2 | 5.87E-06 | 0.90 | 4.47 | -     | 660.7   |
| AHQ-5-7, 3210               | K.NQLTSPNPKNTVFDK.R                                                             | 1677.84011 | 2 | 1.10E-05 | 0.52 | 3.50 | -     | 256.5   |
| AHQ-5-5, 3345               | K.NQLTSPNPKNTVFDK.R                                                             | 1677.84011 | 2 | 4.75E-11 | 0.86 | 3.88 | -     | 918.9   |
| AHQ-5-6, 5560 - 5572        | K.TFAPKESAMVLT.K.M                                                              | 1536.86124 | 2 | 4.55E-11 | 0.87 | 3.23 | -     | 1104.0  |
| gi 4507677 ref NP_003290.1  | tumor rejection antigen (gp96) 1; Tumor rejection antigen-1 (gp96); glu         |            |   |          |      |      |       |         |
| AHQ-5-5, 6454               | R.EAVEKEFELNWMK.D                                                               | 1864.15434 | 2 | 1.38E-05 | 0.92 | 4.13 | -     | 722.7   |
| AHQ-5-5, 4461               | K.EEASDYLEDLTIK.N                                                               | 1526.62393 | 2 | 1.07E-04 | 0.58 | 2.79 | -     | 584.8   |
| AHQ-5-5, 3711 - 3713        | R.FQSSHPTDITSLDQYVER.M                                                          | 2261.39276 | 2 | 8.52E-06 | 0.96 | 5.23 | -     | 1142.6  |
| AHQ-5-1, 4135               | R.FQSSHPTDITSLDQYVER.M                                                          | 2261.39276 | 2 | 2.67E-04 | 0.77 | 3.46 | -     | 488.2   |

|                             |                                                                         |            |   |          |      |       |       |        |
|-----------------------------|-------------------------------------------------------------------------|------------|---|----------|------|-------|-------|--------|
| AHQ-5-5, 3985 - 3989        | K.GVVDSDLLPLNVS.R.E                                                     | 1486.60940 | 1 | 8.63E-04 | 0.55 | 2.83  | -     | 381.1  |
| AHQ-5-5, 6917               | K.GYEVVYLETPEVDEYCIQALPEFDGKR.F                                         | 3107.43557 | 3 | 9.08E-09 | 0.81 | 3.96  | -     | 498.4  |
| AHQ-5-5, 3475               | K.IADDKYNDFTWK.E                                                        | 1516.63566 | 2 | 5.23E-07 | 0.92 | 3.60  | -     | 958.5  |
| AHQ-5-5, 6321               | K.KYQSFNFPIYVWSSK.T                                                     | 2008.30657 | 2 | 8.31E-09 | 0.97 | 4.46  | -     | 1790.3 |
| AHQ-5-5, 5269               | R.LISLTDENALSGNEELTVK.I                                                 | 2047.24975 | 2 | 4.75E-11 | 0.94 | 4.51  | -     | 1034.3 |
| AHQ-5-5, 3889 - 3901        | K.SILFVPTSAPR.G                                                         | 1188.40094 | 2 | 5.10E-05 | 0.88 | 3.40  | -     | 1088.6 |
| AHQ-5-5, 6941 - 6945        | K.YSQFINFPIYVWSSK.T                                                     | 1880.13366 | 2 | 1.58E-07 | 0.97 | 5.60  | -     | 1337.5 |
| gj 4885413 ref NP_005331.1  | histidine triad nucleotide binding protein 1; Histidine triad nucleotid |            |   |          |      |       |       |        |
| AHQ-5-13-, 2345             | K.CAADLGLNK.G                                                           | 963.09080  | 2 | 4.89E-11 | 3.68 | 40.30 | 47.60 | 1380.1 |
| AHQ-5-13-, 5515 - 5549      | R.CLAFHDISPQAPTHFLVIPK.K                                                | 2293.67220 | 3 | 2.07E-07 | 0.97 | 5.34  | -     | 1810.5 |
| AHQ-5-13-, 6072             | K.IIFEDDRCLAFLHDISPQAPTHFLVIPK.K                                        | 3182.64001 | 3 | 5.16E-06 | 0.96 | 5.90  | -     | 1291.7 |
| AHQ-5-13, 6136              | K.IIFEDDRCLAFLHDISPQAPTHFLVIPK.K                                        | 3182.64001 | 3 | 1.21E-05 | 0.96 | 5.47  | -     | 1331.8 |
| AHQ-5-13-, 3865             | R.MVVNEGSDGGQSVYHVLHVLGG.R.Q                                            | 2548.82255 | 3 | 4.89E-11 | 0.94 | 4.58  | -     | 1382.0 |
| gj 7657007 ref NP_055210.1  | dual adaptor of phosphotyrosine and 3-phosphoinositides [Homo sapiens]  |            |   |          |      |       |       |        |
| AHQ-5-13-, 3876 - 3881      | R.DSNETTGLYLSVLR.A                                                      | 1542.62982 | 2 | 1.36E-05 | 0.71 | 2.95  | -     | 574.2  |
| AHQ-5-12, 5113              | R.HAAEALLSNGCDGSGYLLR.D                                                 | 2062.29263 | 2 | 4.93E-11 | 0.93 | 3.93  | -     | 1134.9 |
| gj 4557419 ref NP_000063.1  | CD36 antigen (collagen type I receptor, thrombospondin receptor); CD36  |            |   |          |      |       |       |        |
| AHQ-5-5, 4709 - 4747        | K.AFASPVENPDNYCFCTEK.I                                                  | 2152.30319 | 2 | 1.07E-06 | 0.91 | 3.91  | -     | 755.7  |
| AHQ-5-4, 4872               | K.AFASPVENPDNYCFCTEK.I                                                  | 2152.30319 | 2 | 2.45E-04 | 0.71 | 3.45  | -     | 362.5  |
| AHQ-5-3, 4917               | K.AFASPVENPDNYCFCTEK.I                                                  | 2152.30319 | 2 | 1.55E-07 | 0.76 | 3.30  | -     | 483.0  |
| AHQ-5-1, 4919 - 4929        | K.AFASPVENPDNYCFCTEK.I                                                  | 2152.30319 | 2 | 3.99E-05 | 0.84 | 3.57  | -     | 645.8  |
| AHQ-5-5, 2994 - 2998        | R.LQVNLVLPKSEK.I                                                        | 1368.64707 | 2 | 3.37E-05 | 0.90 | 3.35  | -     | 1313.7 |
| AHQ-5-4, 5728 - 5738        | K.SQVLQFFSSDICR.S                                                       | 1588.76661 | 2 | 1.45E-08 | 0.95 | 3.94  | -     | 1182.2 |
| AHQ-5-5, 5481 - 5487        | K.SQVLQFFSSDICR.S                                                       | 1588.76661 | 2 | 2.79E-08 | 0.96 | 4.62  | -     | 1340.5 |
| AHQ-5-1, 5843               | K.SQVLQFFSSDICR.S                                                       | 1588.76661 | 2 | 2.85E-04 | 0.75 | 2.59  | -     | 695.6  |
| AHQ-5-6, 5473               | K.SQVLQFFSSDICR.S                                                       | 1588.76661 | 2 | 3.82E-09 | 0.96 | 4.42  | -     | 1442.3 |
| AHQ-5-5, 7255 - 7265        | R.TYLDIPIPTGTLQFAK.R                                                    | 1957.25787 | 2 | 4.96E-11 | 0.96 | 4.92  | -     | 1323.2 |
| AHQ-5-1, 7223               | R.TYLDIPIPTGTLQFAK.R                                                    | 1957.25787 | 2 | 1.77E-10 | 0.97 | 4.86  | -     | 1484.6 |
| gj 5453607 ref NP_006420.1  | chaperonin containing TCP1, subunit 7 (eta); chaperonin containing t-co |            |   |          |      |       |       |        |
| AHQ-5-7, 4903 - 4906        | K.LPIGDVATQYFADR.D                                                      | 1566.73935 | 2 | 5.00E-11 | 0.96 | 4.64  | -     | 1313.8 |
| AHQ-5-7, 7023 - 7096        | K.SQDAEVDGGTTSVTLAAEFLK.Q                                               | 2253.44875 | 2 | 3.16E-04 | 0.68 | 3.12  | -     | 494.2  |
| gj 10346135 ref NP_055083.1 | microtubule-associated protein, RP/EB family, member 2; T-cell activat  |            |   |          |      |       |       |        |
| AHQ-5-9, 6219               | R.FQDNLDFIQWFK.K                                                        | 1601.78539 | 2 | 1.33E-06 | 0.96 | 4.20  | -     | 1426.4 |
| AHQ-5-12, 6846 - 6853       | R.FQDNLDFIQWFK.K                                                        | 1601.78539 | 2 | 2.42E-08 | 0.96 | 4.71  | -     | 1220.1 |
| AHQ-5-14-, 6639             | R.FQDNLDFIQWFK.K                                                        | 1601.78539 | 2 | 1.48E-09 | 0.92 | 3.50  | -     | 1121.4 |
| AHQ-5-12, 4914              | K.SDKLLETQVIQLNEQVHSLK.L                                                | 2325.56134 | 2 | 3.42E-08 | 0.94 | 4.46  | -     | 1082.7 |
| AHQ-5-12, 4900              | K.SDKLLETQVIQLNEQVHSLK.L                                                | 2325.56134 | 3 | 2.58E-07 | 0.79 | 3.76  | -     | 772.2  |
| AHQ-5-9, 4212 - 4214        | K.SDKLLETQVIQLNEQVHSLK.L                                                | 2325.56134 | 2 | 5.73E-11 | 0.98 | 6.34  | -     | 1261.3 |
| gj 4758304 ref NP_004902.1  | protein disulfide isomerase related protein (calcium-binding protein, i |            |   |          |      |       |       |        |
| AHQ-5-6, 4620               | K.DLGLSESGEDVNAAILDESGKK.F                                              | 2248.38737 | 2 | 5.90E-11 | 0.96 | 5.09  | -     | 1315.1 |
| AHQ-5-6, 3742               | K.FAM*EPEEFDSDTLR.E                                                     | 1703.80830 | 2 | 1.31E-04 | 0.85 | 3.26  | -     | 612.8  |
| AHQ-5-6, 4585               | K.FAMEPEEFDSDTLR.E                                                      | 1687.80890 | 2 | 8.01E-08 | 0.82 | 3.92  | -     | 522.3  |
| AHQ-5-6, 3845               | K.GESDPAYQQQDAANNLR.E                                                   | 2041.08081 | 2 | 9.52E-11 | 0.89 | 4.26  | -     | 623.8  |
| AHQ-5-6, 2768               | K.IDATSASVLSR.F                                                         | 1191.31686 | 2 | 3.10E-06 | 0.94 | 3.71  | -     | 1375.2 |
| AHQ-5-6, 2746               | K.VSQGQLVVMQPEK.F                                                       | 1443.69431 | 1 | 2.52E-06 | 0.58 | 2.84  | -     | 519.1  |
| gj 7705296 ref NP_057271.1  | bridging integrator 2; bridging integrator-2; breast cancer associated  |            |   |          |      |       |       |        |
| AHQ-5-7, 6135               | K.AIVWNNLLWEDYEEL.L                                                     | 2038.20157 | 2 | 2.38E-07 | 0.90 | 3.69  | -     | 1004.0 |
| AHQ-5-10, 5567 - 5643       | K.AIVWNNLLWEDYEEL.L                                                     | 2038.20157 | 2 | 6.06E-11 | 0.90 | 3.76  | -     | 914.6  |
| AHQ-5-7, 7378 - 7383        | K.AQTVFEDLNQELLELPYNSR.I                                                | 2736.02649 | 2 | 1.20E-07 | 0.82 | 3.75  | -     | 480.2  |
| AHQ-5-10, 2544              | R.FEQSASNFYQQQAEGHK.L                                                   | 2000.07352 | 2 | 8.56E-06 | 0.83 | 3.37  | -     | 492.9  |
| AHQ-5-6, 6812               | R.IGCYVTFIQNISNL.R.D                                                    | 1800.07167 | 2 | 1.08E-04 | 0.93 | 3.99  | -     | 1045.0 |
| AHQ-5-9, 5963 - 6035        | R.IGCYVTFIQNISNL.R.D                                                    | 1800.07167 | 2 | 2.27E-07 | 0.94 | 4.43  | -     | 1007.8 |
| AHQ-5-10, 6067 - 6130       | R.IGCYVTFIQNISNL.R.D                                                    | 1800.07167 | 2 | 2.62E-08 | 0.95 | 5.21  | -     | 811.0  |
| AHQ-5-10, 2598              | K.LNHNLYEVMK.L                                                          | 1348.55307 | 2 | 6.78E-05 | 0.71 | 2.77  | -     | 694.5  |
| AHQ-5-10, 4496 - 4555       | R.VSETLQEIYSSEWDGHEELK.A                                                | 2380.50595 | 2 | 8.82E-06 | 0.49 | 2.80  | -     | 318.0  |
| gj 5803227 ref NP_006817.1  | tyrosine 3-tryptophan 5-monoxygenase activation protein, theta polype   |            |   |          |      |       |       |        |
| AHQ-5-10, 1522              | K.EMQPTPIR.L                                                            | 1109.28418 | 1 | 1.59E-05 | 0.09 | 1.89  | -     | 71.7   |
| AHQ-5-10, 3536              | R.KQTDINSQAGYQAEAFDISK.K                                                | 2144.28408 | 2 | 5.37E-04 | 0.88 | 3.91  | -     | 566.4  |
| AHQ-5-10, 6451              | R.SICTTVLELLDK.Y                                                        | 1393.62862 | 2 | 9.89E-05 | 0.89 | 3.61  | -     | 870.5  |
| AHQ-5-13-, 6615 - 6621      | K.TAFDEAIAELDTLNEDSYK.D                                                 | 2146.25037 | 2 | 3.44E-09 | 0.97 | 5.48  | -     | 1214.0 |
| AHQ-5-13, 6677              | K.TAFDEAIAELDTLNEDSYK.D                                                 | 2146.25037 | 2 | 1.48E-06 | 0.96 | 4.63  | -     | 1294.5 |
| AHQ-5-14-, 6521             | K.TAFDEAIAELDTLNEDSYK.D                                                 | 2146.25037 | 2 | 1.34E-07 | 0.98 | 5.87  | -     | 1702.1 |
| AHQ-5-10, 6548 - 6622       | K.TAFDEAIAELDTLNEDSYK.DSTLIM*QLLR.D                                     | 3333.66581 | 3 | 6.23E-11 | 0.95 | 5.59  | -     | 1078.2 |
| AHQ-5-10, 2458              | K.YLIANATNPESK.V                                                        | 1321.46099 | 2 | 4.62E-05 | 0.96 | 4.03  | -     | 1560.0 |
| AHQ-5-10, 2459              | K.YLIANATNPESK.V                                                        | 1321.46099 | 1 | 8.48E-07 | 0.91 | 4.26  | -     | 724.8  |
| AHQ-5-10, 2572 - 2574       | K.YLIANATNPESK.V                                                        | 1321.46099 | 1 | 1.48E-07 | 0.82 | 3.00  | -     | 769.5  |
| gj 4503445 ref NP_001944.1  | endothelial cell growth factor 1 (platelet-derived); thymidine phosphor |            |   |          |      |       |       |        |
| AHQ-5-7, 6503               | R.ALPLALVHLHLAGR.S                                                      | 1530.83966 | 2 | 6.36E-11 | 0.98 | 5.69  | -     | 1511.0 |
| AHQ-5-7, 7399               | R.DLVTTLLGGALLWLSGHAGTQAQGAAR.V                                         | 2565.86952 | 3 | 1.24E-04 | 0.92 | 4.04  | -     | 1205.9 |
| AHQ-5-7, 7318 - 7398        | R.DLVTTLLGGALLWLSGHAGTQAQGAAR.V                                         | 2565.86952 | 2 | 1.90E-05 | 0.80 | 3.07  | -     | 681.1  |
| AHQ-5-7, 2826               | K.FGGAAPFPNQEAR.E                                                       | 1492.62056 | 2 | 1.77E-04 | 0.67 | 2.68  | -     | 754.1  |
| AHQ-5-7, 2840               | R.VAAALTAMDKPLGR.C                                                      | 1414.69933 | 2 | 6.79E-05 | 0.93 | 3.32  | -     | 1285.5 |
| gj 12025678 ref NP_004915.2 | actinin, alpha 4 [Homo sapiens]                                         |            |   |          |      |       |       |        |
| AHQ-5-5, 4401               | K.AGTQINIEDFRDGLK.L                                                     | 1922.04251 | 2 | 1.15E-06 | 0.93 | 4.67  | -     | 1018.4 |
| AHQ-5-4, 4856               | R.ETTDTDADQVIASFV.K                                                     | 1742.81936 | 2 | 2.29E-06 | 0.90 | 3.63  | -     | 1020.8 |
| AHQ-5-5, 2778 - 2782        | K.GISQEQMFER.A                                                          | 1353.48658 | 2 | 1.04E-07 | 0.73 | 3.14  | -     | 978.1  |
| AHQ-5-5, 4051               | K.MLDAEDIVNTARPDEK.A                                                    | 1817.99924 | 3 | 7.56E-11 | 0.88 | 4.06  | -     | 595.2  |
| AHQ-5-5, 4046               | K.MLDAEDIVNTARPDEK.A                                                    | 1817.99924 | 2 | 6.53E-06 | 0.90 | 4.08  | -     | 753.1  |
| AHQ-5-5, 3937 - 3962        | K.MVSDINNGWQHLEQAEK.G                                                   | 2000.18160 | 2 | 5.26E-09 | 0.37 | 2.52  | -     | 370.6  |
| AHQ-5-5, 7221               | R.SIVDYKPNLDLLEQQHQLIQEALIFDNK.H                                        | 3326.74423 | 3 | 3.49E-07 | 0.89 | 4.57  | -     | 834.7  |
| AHQ-5-6, 7129               | R.SIVDYKPNLDLLEQQHQLIQEALIFDNK.H                                        | 3326.74423 | 3 | 7.17E-06 | 0.90 | 4.93  | -     | 743.3  |
| AHQ-5-7, 7082               | R.SIVDYKPNLDLLEQQHQLIQEALIFDNK.H                                        | 3326.74423 | 3 | 6.54E-05 | 0.78 | 4.23  | -     | 508.2  |
| AHQ-5-5, 6513 - 6594        | R.VEQIAIAAQLNELDYDHSNVNTR.C                                             | 2907.09810 | 3 | 1.23E-08 | 0.92 | 4.98  | -     | 720.6  |
| gj 4503821 ref NP_001456.1  | FYN binding protein (FYN-120/130); FYN-binding protein (FYN-120/130) [H |            |   |          |      |       |       |        |
| AHQ-5-12, 4157              | R.DLVQVKGESLEVIQTDDTK.V                                                 | 2217.41641 | 2 | 7.63E-11 | 0.93 | 4.84  | -     | 537.4  |
| AHQ-5-10, 3806              | R.DLVQVKGESLEVIQTDDTK.V                                                 | 2217.41641 | 2 | 5.39E-06 | 0.83 | 3.68  | -     | 396.3  |
| gj 4503715 ref NP_000500.1  | fibrinogen, gamma chain isoform gamma-A precursor [Homo sapiens]        |            |   |          |      |       |       |        |
| AHQ-5-8, 4177 - 4178        | K.AIQLTYNPDESSKPNMIDAATLK.S                                             | 2521.82886 | 2 | 4.96E-04 | 0.88 | 4.21  | -     | 452.4  |
| AHQ-5-9, 4040               | K.AIQLTYNPDESSKPNMIDAATLK.S                                             | 2521.82886 | 2 | 2.21E-05 | 0.55 | 3.19  | -     | 236.0  |
| AHQ-5-7, 4308 - 4390        | K.AIQLTYNPDESSKPNMIDAATLK.S                                             | 2521.82886 | 3 | 2.19E-05 | 0.89 | 4.45  | -     | 532.5  |
| AHQ-5-1, 4332               | K.AIQLTYNPDESSKPNMIDAATLK.S                                             | 2537.82826 | 3 | 9.22E-04 | 0.59 | 3.00  | -     | 371.6  |
| AHQ-5-7, 4543 - 4623        | K.AIQLTYNPDESSKPNMIDAATLK.S                                             | 2521.82886 | 2 | 2.87E-04 | 0.73 | 3.54  | -     | 391.0  |
| AHQ-5-11, 4590              | K.AIQLTYNPDESSKPNMIDAATLK.S                                             | 2521.82886 | 2 | 3.87E-05 | 0.53 | 2.78  | -     | 258.2  |
| AHQ-5-5, 4581               | K.AIQLTYNPDESSKPNMIDAATLK.S                                             | 2521.82886 | 2 | 5.74E-09 | 0.84 | 3.87  | -     | 465.1  |
| AHQ-5-5, 4578               | K.AIQLTYNPDESSKPNMIDAATLK.S                                             | 2521.82886 | 3 | 2.95E-07 | 0.87 | 4.05  | -     | 606.6  |
| AHQ-5-7, 4402 - 4474        | K.AIQLTYNPDESSKPNMIDAATLK.S                                             | 2521.82886 | 2 | 6.47E-05 | 0.84 | 3.98  | -     | 406.7  |
| AHQ-5-3, 4866               | K.AIQLTYNPDESSKPNMIDAATLK.S                                             | 2521.82886 | 3 | 3.69E-04 | 0.57 | 3.03  | -     | 402.3  |
| AHQ-5-7, 6908 - 6976        | K.ANQQLFVYCEIDGSGNGWTVFQK.R                                             | 2663.90221 | 2 | 1.39E-08 | 0.45 | 2.80  | -     | 276.2  |
| AHQ-5-7, 7039 - 7106        | K.ANQQLFVYCEIDGSGNGWTVFQK.R                                             | 2663.90221 | 2 | 1.74E-06 | 0.81 | 3.82  | -     | 487.3  |
| AHQ-5-7, 5422 - 5490        | K.ASTPNGYDNGIIVATWK.T                                                   | 1895.06358 | 2 | 4.41E-10 | 0.75 | 3.05  | -     | 606.7  |
| AHQ-5-13, 5493 - 5562       | K.ASTPNGYDNGIIVATWK.T                                                   | 1895.06358 | 2 | 5.94E-08 | 0.39 | 2.53  | -     | 442.3  |
| AHQ-5-14-, 5327 - 5393      | K.ASTPNGYDNGIIVATWK.T                                                   | 1895.06358 | 2 | 5.99E-06 | 0.80 | 3.21  | -     | 679.1  |
| AHQ-5-7, 5559 - 5636        | K.ASTPNGYDNGIIVATWK.T                                                   | 1895.06358 | 2 | 6.36E-07 | 0.81 | 3.24  | -     | 534.2  |
| AHQ-5-4, 5894               | K.ASTPNGYDNGIIVATWK.T                                                   | 1895.06358 | 2 | 4.68E-06 | 0.71 | 3.09  | -     | 329.6  |
| AHQ-5-4, 5720               | K.ASTPNGYDNGIIVATWK.T                                                   | 1895.06358 | 2 | 9.23E-08 | 0.84 | 3.41  | -     | 700.0  |
| AHQ-5-14, 6124 - 6136       | K.ASTPNGYDNGIIVATWK.T                                                   | 1895.06358 | 2 | 1.68E-05 | 0.63 | 3.12  | -     | 324.9  |
| AHQ-5-5, 2499</             |                                                                         |            |   |          |      |       |       |        |

|                             |                                                                         |            |   |          |      |       |       |            |
|-----------------------------|-------------------------------------------------------------------------|------------|---|----------|------|-------|-------|------------|
| AHQ-5-13, 2861              | K.CHAGHLNGVYVYGGTYSK.A                                                  | 2014.16662 | 2 | 3.27E-06 | 0.93 | 4.75  | -     | 732.9      |
| AHQ-5-13, 2865 - 2941       | K.CHAGHLNGVYVYGGTYSK.A                                                  | 2014.16662 | 3 | 1.40E-05 | 0.96 | 4.23  | -     | 2118.5     |
| AHQ-5-7, 2422 - 2495        | K.CHAGHLNGVYVYGGTYSK.A                                                  | 2014.16662 | 2 | 7.51E-07 | 0.97 | 5.38  | -     | 1397.6     |
| AHQ-5-14-, 2661             | K.CHAGHLNGVYVYGGTYSK.A                                                  | 2014.16662 | 2 | 7.66E-07 | 0.95 | 4.23  | -     | 1274.6     |
| AHQ-5-13-, 2724             | K.CHAGHLNGVYVYGGTYSK.A                                                  | 2014.16662 | 3 | 3.95E-07 | 0.97 | 5.08  | -     | 2414.3     |
| AHQ-5-13-, 2728 - 2799      | K.CHAGHLNGVYVYGGTYSK.A                                                  | 2014.16662 | 2 | 3.37E-10 | 0.97 | 5.43  | -     | 1099.7     |
| AHQ-5-4, 5422               | K.EFGFHLSPGTTFTEFWLGNEK.I                                               | 2208.37146 | 3 | 5.13E-04 | 0.92 | 4.21  | -     | 1545.9     |
| AHQ-5-5, 5326 - 5339        | K.EFGFHLSPGTTFTEFWLGNEK.I                                               | 2208.37146 | 2 | 3.38E-05 | 0.89 | 3.94  | -     | 900.0      |
| AHQ-5-4, 5424               | K.EFGFHLSPGTTFTEFWLGNEK.I                                               | 2208.37146 | 2 | 8.43E-04 | 0.87 | 3.90  | -     | 595.6      |
| AHQ-5-1, 5527               | K.EFGFHLSPGTTFTEFWLGNEK.I                                               | 2208.37146 | 3 | 3.03E-05 | 0.87 | 3.57  | -     | 1365.3     |
| AHQ-5-12, 5214              | K.EFGFHLSPGTTFTEFWLGNEK.I                                               | 2208.37146 | 3 | 6.14E-05 | 0.92 | 4.13  | -     | 1542.6     |
| AHQ-5-3, 5453               | K.EFGFHLSPGTTFTEFWLGNEK.I                                               | 2208.37146 | 2 | 9.56E-05 | 0.93 | 4.70  | -     | 2208.37146 |
| AHQ-5-10, 4682              | K.EFGFHLSPGTTFTEFWLGNEK.I                                               | 2208.37146 | 2 | 4.12E-05 | 0.86 | 3.67  | -     | 589.9      |
| AHQ-5-9, 4667               | K.EFGFHLSPGTTFTEFWLGNEK.I                                               | 2208.37146 | 2 | 2.37E-07 | 0.71 | 3.50  | -     | 454.6      |
| AHQ-5-7, 5051 - 5126        | K.EFGFHLSPGTTFTEFWLGNEK.I                                               | 2208.37146 | 2 | 2.51E-08 | 0.96 | 5.21  | -     | 1019.6     |
| AHQ-5-8, 4749 - 4750        | K.EFGFHLSPGTTFTEFWLGNEK.I                                               | 2208.37146 | 2 | 1.28E-04 | 0.91 | 4.19  | -     | 684.8      |
| AHQ-5-6, 5116               | K.EFGFHLSPGTTFTEFWLGNEK.I                                               | 2208.37146 | 2 | 2.98E-05 | 0.92 | 4.35  | -     | 681.7      |
| AHQ-5-7, 4910 - 4978        | K.EFGFHLSPGTTFTEFWLGNEK.I                                               | 2208.37146 | 2 | 1.09E-04 | 0.94 | 4.68  | -     | 698.0      |
| AHQ-5-11, 6378 - 6379       | R.FGYSYPTTCGIADFLSTYQTK.V                                               | 2420.65656 | 2 | 1.87E-07 | 0.73 | 3.00  | -     | 481.3      |
| AHQ-5-12, 6609              | R.FGYSYPTTCGIADFLSTYQTK.V                                               | 2420.65656 | 3 | 5.95E-06 | 0.82 | 4.18  | -     | 439.5      |
| AHQ-5-14-, 6406 - 6409      | R.FGYSYPTTCGIADFLSTYQTK.V                                               | 2420.65656 | 2 | 4.69E-05 | 0.88 | 3.78  | -     | 658.1      |
| AHQ-5-12, 6612              | R.FGYSYPTTCGIADFLSTYQTK.V                                               | 2420.65656 | 2 | 9.65E-07 | 0.85 | 4.02  | -     | 504.9      |
| AHQ-5-13, 6597 - 6601       | R.FGYSYPTTCGIADFLSTYQTK.V                                               | 2420.65656 | 2 | 8.87E-04 | 0.82 | 3.54  | -     | 535.8      |
| AHQ-5-1, 6959 - 6960        | R.FGYSYPTTCGIADFLSTYQTK.V                                               | 2420.65656 | 3 | 8.21E-05 | 0.60 | 3.43  | -     | 576.4      |
| AHQ-5-13-, 6503             | R.FGYSYPTTCGIADFLSTYQTK.V                                               | 2420.65656 | 2 | 2.45E-05 | 0.92 | 3.60  | -     | 1030.9     |
| AHQ-5-10, 6066 - 6128       | R.FGYSYPTTCGIADFLSTYQTK.V                                               | 2420.65656 | 2 | 7.19E-05 | 0.86 | 4.16  | -     | 667.9      |
| AHQ-5-5, 4402               | K.IHLISTQSAIPLYALR.V                                                    | 1683.97576 | 2 | 1.87E-07 | 0.91 | 3.55  | -     | 985.8      |
| AHQ-5-8, 3857 - 3858        | K.IHLISTQSAIPLYALR.V                                                    | 1683.97576 | 2 | 8.16E-11 | 0.97 | 4.97  | -     | 1334.4     |
| AHQ-5-7, 4080 - 4159        | K.IHLISTQSAIPLYALR.V                                                    | 1683.97576 | 2 | 1.12E-09 | 0.97 | 5.29  | -     | 1287.4     |
| AHQ-5-4, 4610 - 4684        | K.IHLISTQSAIPLYALR.V                                                    | 1683.97576 | 2 | 4.39E-04 | 0.96 | 4.82  | -     | 1216.8     |
| AHQ-5-2, 4649               | K.IHLISTQSAIPLYALR.V                                                    | 1683.97576 | 2 | 5.17E-09 | 0.96 | 4.84  | -     | 1335.4     |
| AHQ-5-4, 4680               | K.IHLISTQSAIPLYALR.V                                                    | 1683.97576 | 2 | 2.62E-09 | 0.96 | 4.90  | -     | 1323.5     |
| AHQ-5-3, 4753               | K.IHLISTQSAIPLYALR.V                                                    | 1683.97576 | 2 | 8.41E-08 | 0.94 | 4.44  | -     | 910.0      |
| AHQ-5-9, 3787 - 3846        | K.IHLISTQSAIPLYALR.V                                                    | 1683.97576 | 2 | 1.50E-06 | 0.94 | 4.40  | -     | 1085.4     |
| AHQ-5-9, 3878               | K.IHLISTQSAIPLYALR.V                                                    | 1683.97576 | 2 | 6.41E-05 | 0.95 | 4.04  | -     | 1233.7     |
| AHQ-5-7, 1671               | R.LDGSVDFKK.N                                                           | 1009.13788 | 2 | 3.63E-05 | 0.41 | 2.64  | -     | 437.4      |
| AHQ-5-4, 1973               | R.LTIGEGQQHHLGGAK.Q                                                     | 1546.71290 | 2 | 9.04E-09 | 0.88 | 3.53  | -     | 861.7      |
| AHQ-5-7, 1768 - 1836        | R.LTIGEGQQHHLGGAK.Q                                                     | 1546.71290 | 2 | 8.81E-04 | 0.82 | 3.62  | -     | 478.4      |
| AHQ-5-11, 1975              | R.LTIGEGQQHHLGGAK.Q                                                     | 1546.71290 | 2 | 8.96E-06 | 0.87 | 3.55  | -     | 799.3      |
| AHQ-5-14-, 2101             | R.LTIGEGQQHHLGGAK.Q                                                     | 1546.71290 | 2 | 1.34E-04 | 0.96 | 4.53  | -     | 1224.8     |
| AHQ-5-13-, 2139             | R.LTIGEGQQHHLGGAK.Q                                                     | 1546.71290 | 2 | 3.63E-06 | 0.93 | 4.00  | -     | 1066.0     |
| AHQ-5-13, 2303              | R.LTIGEGQQHHLGGAK.Q                                                     | 1546.71290 | 2 | 1.67E-08 | 0.95 | 4.48  | -     | 1351.5     |
| AHQ-5-9, 2632               | R.TSTADYAMFK.V                                                          | 1135.27203 | 1 | 7.10E-04 | 0.17 | 2.15  | -     | 161.9      |
| AHQ-5-7, 3662               | K.VAQLEAQCQEPCKDVTQIHDITGK.D                                            | 2772.06211 | 3 | 5.97E-07 | 0.81 | 3.89  | -     | 638.0      |
| AHQ-5-1, 4129               | K.VAQLEAQCQEPCKDVTQIHDITGK.D                                            | 2772.06211 | 3 | 5.33E-07 | 0.92 | 4.70  | -     | 848.4      |
| AHQ-5-5, 3843               | K.VAQLEAQCQEPCKDVTQIHDITGK.D                                            | 2772.06211 | 3 | 1.19E-04 | 0.94 | 4.78  | -     | 1020.7     |
| AHQ-5-5, 4065               | K.VAQLEAQCQEPCKDVTQIHDITGKDCQDIANK.G                                    | 3718.05993 | 3 | 5.77E-05 | 0.95 | 5.65  | -     | 1395.4     |
| AHQ-5-7, 3832 - 3902        | K.VAQLEAQCQEPCKDVTQIHDITGKDCQDIANK.G                                    | 3718.05993 | 3 | 2.91E-05 | 0.97 | 6.70  | -     | 1202.8     |
| AHQ-5-1, 4355 - 4365        | K.VAQLEAQCQEPCKDVTQIHDITGKDCQDIANK.G                                    | 3718.05993 | 3 | 2.81E-09 | 0.96 | 5.76  | -     | 1335.2     |
| AHQ-5-9, 3639               | K.VAQLEAQCQEPCKDVTQIHDITGKDCQDIANK.G                                    | 3718.05993 | 3 | 4.92E-07 | 0.98 | 6.77  | -     | 1943.9     |
| AHQ-5-8, 3729               | K.VAQLEAQCQEPCKDVTQIHDITGKDCQDIANK.G                                    | 3718.05993 | 3 | 7.46E-08 | 0.96 | 6.13  | -     | 1308.7     |
| AHQ-5-5, 3135               | R.VELEDDWNGR.T                                                          | 1118.18129 | 2 | 1.06E-06 | 0.91 | 2.87  | -     | 1310.3     |
| AHQ-5-11, 2882              | K.YEASILTDDSSIR.Y                                                       | 1492.61564 | 2 | 3.43E-07 | 0.74 | 3.19  | -     | 474.0      |
| AHQ-5-3, 2961               | K.YEASILTDDSSIR.Y                                                       | 1492.61564 | 2 | 1.38E-07 | 0.83 | 2.99  | -     | 597.9      |
| AHQ-5-9, 2592 - 2599        | K.YEASILTDDSSIR.Y                                                       | 1492.61564 | 2 | 2.05E-04 | 0.85 | 3.04  | -     | 788.2      |
| AHQ-5-12, 2917              | K.YEASILTDDSSIR.Y                                                       | 1492.61564 | 2 | 3.78E-07 | 0.90 | 3.88  | -     | 695.3      |
| AHQ-5-5, 2722 - 2751        | K.YEASILTDDSSIR.Y                                                       | 1492.61564 | 2 | 4.66E-07 | 0.86 | 3.04  | -     | 795.1      |
| AHQ-5-7, 2610 - 2612        | K.YEASILTDDSSIR.Y                                                       | 1492.61564 | 1 | 9.31E-04 | 0.42 | 2.26  | -     | 360.7      |
| AHQ-5-7, 2596 - 2667        | K.YEASILTDDSSIR.Y                                                       | 1492.61564 | 2 | 1.23E-08 | 0.93 | 3.92  | -     | 898.7      |
| AHQ-5-1, 3099               | K.YEASILTDDSSIR.Y                                                       | 1492.61564 | 2 | 3.33E-08 | 0.86 | 3.23  | -     | 698.4      |
| AHQ-5-1, 2889               | R.YLQEIYNSNNQK.I                                                        | 1514.62131 | 2 | 8.34E-06 | 0.90 | 3.93  | -     | 1007.4     |
| gi 9966867 ref NP_065123.1  | eIF-5A2 protein; eIF5AII [Homo sapiens]                                 |            |   | 8.51E-11 | 3.75 | 40.31 | 19.60 | 16793.1    |
| AHQ-5-11, 3534              | K.KYEDICPSTHNMMDVPIK.R                                                  | 2163.41723 | 3 | 1.53E-07 | 0.97 | 5.75  | -     | 2118.7     |
| AHQ-5-12, 3612 - 3613       | K.KYEDICPSTHNMMDVPIK.R                                                  | 2163.41723 | 2 | 2.10E-04 | 0.92 | 4.16  | -     | 876.6      |
| AHQ-5-12, 2992              | K.KYEDICPSTHNMMDVPIK.R                                                  | 2179.41663 | 3 | 1.38E-06 | 0.95 | 4.66  | -     | 1546.4     |
| AHQ-5-12, 3609              | K.KYEDICPSTHNMMDVPIK.R                                                  | 2163.41723 | 3 | 8.51E-11 | 0.98 | 6.17  | -     | 2507.0     |
| AHQ-5-12, 4818              | K.VHLVGDIFTGK.K                                                         | 1299.54329 | 1 | 2.35E-08 | 0.96 | 4.11  | -     | 1380.4     |
| AHQ-5-12, 4796 - 4798       | K.VHLVGDIFTGK.K                                                         | 1299.54329 | 2 | 1.13E-07 | 0.96 | 4.52  | -     | 1306.1     |
| AHQ-5-12, 4797              | K.VHLVGDIFTGK.K                                                         | 1299.54329 | 1 | 2.16E-06 | 0.65 | 1.82  | -     | 1092.7     |
| AHQ-5-11, 4680              | K.VHLVGDIFTGK.K                                                         | 1299.54329 | 2 | 1.97E-09 | 0.91 | 3.14  | -     | 1100.5     |
| AHQ-5-12, 3937              | K.YEDICPSTHNMMDVPIK.R                                                   | 2035.24432 | 2 | 6.47E-07 | 0.91 | 4.21  | -     | 691.2      |
| gi 21735621 ref NP_005909.2 | mitochondrial malate dehydrogenase precursor [Homo sapiens]             |            |   | 8.90E-11 | 4.16 | 50.31 | 29.00 | 35503.0    |
| AHQ-5-9, 5619               | K.GYLGPQLDCLKGDVVIPAGVPR.K                                              | 2813.24211 | 3 | 5.48E-04 | 0.64 | 3.36  | -     | 420.6      |
| AHQ-5-9, 4916 - 4919        | R.LTLYDIAHPGVAADLSHIETK.A                                               | 2366.65506 | 2 | 3.93E-08 | 0.91 | 4.59  | -     | 597.5      |
| AHQ-5-9, 4932               | R.LTLYDIAHPGVAADLSHIETK.A                                               | 2366.65506 | 3 | 1.49E-06 | 0.97 | 6.20  | -     | 1600.4     |
| AHQ-5-9, 4890               | K.SQETECTYFSTPLLLGK.K                                                   | 1976.19328 | 2 | 1.40E-08 | 0.96 | 4.33  | -     | 1436.3     |
| AHQ-5-11, 5402              | K.SQETECTYFSTPLLLGK.K                                                   | 1976.19328 | 2 | 8.90E-11 | 0.95 | 4.52  | -     | 1159.0     |
| AHQ-5-9, 5922 - 5926        | K.VAVLGASGGIGQPLSLLLK.N                                                 | 1794.17156 | 2 | 5.07E-07 | 0.98 | 5.65  | -     | 1423.5     |
| AHQ-5-13, 6482 - 6561       | K.VAVLGASGGIGQPLSLLLK.N                                                 | 1794.17156 | 2 | 5.20E-05 | 0.93 | 4.17  | -     | 1126.1     |
| AHQ-5-9, 4450               | K.VDFPDQLTALTR.I                                                        | 1561.72111 | 2 | 3.10E-06 | 0.68 | 3.02  | -     | 812.5      |
| gi 17986001 ref NP_005505.2 | major histocompatibility complex, class I, B; HLA class I histocompati  |            |   | 9.19E-11 | 1.92 | 20.28 | 7.70  | 40459.8    |
| AHQ-5-8, 4456               | R.APWIEQGEPEYVDR.N                                                      | 1776.88556 | 2 | 9.19E-11 | 0.98 | 5.51  | -     | 1580.3     |
| AHQ-5-8, 4678               | R.FISVGYVDDTQVRF.F                                                      | 1646.82447 | 2 | 1.59E-06 | 0.95 | 3.92  | -     | 1416.3     |
| gi 21956645 ref NP_665807.1 | myotrophin; granule cell differentiation protein [Homo sapiens]         |            |   | 9.66E-11 | 4.74 | 50.37 | 66.90 | 12894.7    |
| AHQ-5-14, 5354 - 5364       | K.GADINAPDKHITPLLSAVYEGHVSCVK.L                                         | 3031.39193 | 3 | 1.30E-05 | 0.98 | 7.46  | -     | 2147.5     |
| AHQ-5-14-, 3819 - 3889      | K.GPDGLTAFEATDNQAIK.A                                                   | 1748.87196 | 2 | 9.91E-11 | 0.98 | 6.36  | -     | 1629.6     |
| AHQ-5-14, 4760 - 4836       | K.GPDGLTAFEATDNQAIK.A                                                   | 1748.87196 | 2 | 1.98E-04 | 0.97 | 5.53  | -     | 1499.1     |
| AHQ-5-14-, 3905 - 3974      | K.GPDGLTAFEATDNQAIK.A                                                   | 1748.87196 | 2 | 2.72E-06 | 0.97 | 4.89  | -     | 1537.4     |
| AHQ-5-13, 4136 - 4206       | K.GPDGLTAFEATDNQAIK.A                                                   | 1748.87196 | 2 | 6.26E-08 | 0.96 | 4.56  | -     | 1334.1     |
| AHQ-5-13-, 3952 - 4015      | K.GPDGLTAFEATDNQAIK.A                                                   | 1748.87196 | 2 | 1.10E-09 | 0.98 | 6.28  | -     | 1714.7     |
| AHQ-5-13-, 4075             | K.GPDGLTAFEATDNQAIK.A                                                   | 1748.87196 | 2 | 6.69E-05 | 0.95 | 4.30  | -     | 1073.9     |
| AHQ-5-13-, 3995             | K.HHITPLLSAVYEGHVSCVK.L                                                 | 2149.45825 | 3 | 5.53E-07 | 0.97 | 5.18  | -     | 2101.3     |
| AHQ-5-14-, 6718 - 6723      | R.KPLHYAADCGLEILEFLLLK.G                                                | 2473.91510 | 3 | 2.16E-08 | 0.96 | 5.46  | -     | 1399.1     |
| AHQ-5-14-, 3617             | K.NGDLDVVKDYVAK.G                                                       | 1466.57496 | 2 | 3.13E-08 | 0.92 | 3.49  | -     | 1090.0     |
| AHQ-5-14, 4452              | K.NGDLDVVKDYVAK.G                                                       | 1466.57496 | 1 | 3.81E-04 | 0.61 | 2.67  | -     | 403.0      |
| AHQ-5-14, 4440 - 4450       | K.NGDLDVVKDYVAK.G                                                       | 1466.57496 | 2 | 3.04E-08 | 0.97 | 4.25  | -     | 1750.4     |
| AHQ-5-14-, 3526 - 3595      | K.NGDLDVVKDYVAK.G                                                       | 1466.57496 | 1 | 9.66E-11 | 0.85 | 3.52  | -     | 489.0      |
| AHQ-5-14-, 3518 - 3599      | K.NGDLDVVKDYVAK.G                                                       | 1466.57496 | 2 | 3.13E-08 | 0.94 | 3.70  | -     | 1364.7     |
| gi 10863977 ref NP_067000.1 | LSM2 homolog, U6 small nuclear RNA associated; U6 snRNA-associated Sm-  |            |   | 1.07E-10 | 1.91 | 20.24 | 40.00 | 10834.5    |
| AHQ-5-14-, 6585             | K.NDLSICGTLHSVDQYLNK.L                                                  | 2192.43507 | 2 | 1.50E-06 | 0.95 | 4.72  | -     | 1255.7     |
| AHQ-5-14-, 6591             | K.NDLSICGTLHSVDQYLNK.L                                                  | 2192.43507 | 3 | 1.91E-05 | 0.88 | 3.78  | -     | 709.7      |
| AHQ-5-14-, 5241 - 5321      | R.YVQLPADEVDTQLLQDAAR.K                                                 | 2146.34311 | 2 | 1.07E-10 | 0.96 | 4.41  | -     | 1401.3     |
| AHQ-5-14, 6029 - 6064       | R.YVQLPADEVDTQLLQDAAR.K                                                 | 2146.34311 | 2 | 1.95E-10 | 0.95 | 4.72  | -     | 1116.8     |
| gi 5453722 ref NP_006321.1  | lysophospholipase I; lysophospholipase 1; lysophospholipid-specific lys |            |   | 1.07E-10 | 1.91 | 20.22 | 12.60 | 24669.5    |
| AHQ-5-11, 2943              | K.ALIDQEVKNGPISNR.I                                                     | 1654.84968 | 2 | 1.07E-10 | 0.95 | 4.32  | -     | 1124.4     |
| AHQ-5-11, 6454              | K.LAGVTLSCWPLR.A                                                        | 1558.86992 | 2 | 5.59E-05 | 0.96 | 4.43  | -     | 1374.7     |
| gi 7706244 ref NP_057005.1  | divalent cation tolerant protein CUTA [Homo sapiens]                    |            |   | 1.11E-10 | 2.35 | 30.36 | 37.80 | 16832.5    |

|                             |                                                   |            |   |          |       |        |       |         |
|-----------------------------|---------------------------------------------------|------------|---|----------|-------|--------|-------|---------|
| AHQ-5-13, 4257              | K.GKIEEDSEVLM*MIK.T                               | 1638.92898 | 2 | 2.48E-05 | 0.43  | 2.66   | -     | 524.5   |
| AHQ-5-13-, 6749             | R.LAACVNLIPIQITSIYEWK.G                           | 2121.48472 | 2 | 1.11E-10 | 0.94  | 4.64   | -     | 579.7   |
| AHQ-5-13, 6849 - 6850       | R.SVHPYEAIEVIALPVEEQGNFPYLQWVR.Q                  | 3142.55428 | 3 | 7.05E-09 | 0.98  | 7.16   | -     | 2180.0  |
| AHQ-5-12, 6989              | R.SVHPYEAIEVIALPVEEQGNFPYLQWVR.Q                  | 3142.55428 | 3 | 2.34E-06 | 0.95  | 5.11   | -     | 1690.0  |
| gi 21361621 ref NP_002624.2 | phosphoglucomutase 1 [Homo sapiens]               |            |   | 1.14E-10 | 2.77  | 30.23  | 10.70 | 61448.7 |
| AHQ-5-6, 3636 - 3640        | K.FNINSGGPAPEAITDK.I                              | 1631.76820 | 2 | 1.14E-10 | 0.97  | 4.59   | -     | 1886.7  |
| AHQ-5-6, 6457               | R.LVIGQNGILSTPAVSCIIR.K                           | 2013.39093 | 2 | 4.34E-10 | 0.91  | 4.31   | -     | 710.4   |
| AHQ-5-14-, 6841             | K.VFQSSANYAENFIQSIISTVEPAQR.Q                     | 2801.06026 | 3 | 9.75E-05 | 0.90  | 4.10   | -     | 813.4   |
| gi 4502027 ref NP_000468.1  | albumin precursor; PRO0883 protein [Homo sapiens] |            |   | 1.17E-10 | 27.25 | 330.34 | 57.00 | 69366.4 |
| AHQ-5-6, 2344 - 2345        | K.AAFTECCQAADK.A                                  | 1374.47927 | 2 | 6.48E-07 | 0.90  | 3.57   | -     | 847.2   |
| AHQ-5-6, 1617 - 1684        | K.AEFAEVS.K.L                                     | 880.96496  | 1 | 7.05E-04 | 0.09  | 1.97   | -     | 358.2   |
| AHQ-5-1, 5781               | K.AVMDDDFAAFVEK.C                                 | 1343.53006 | 2 | 3.57E-06 | 0.83  | 2.98   | -     | 841.8   |
| AHQ-5-5, 5518               | K.AVMDDDFAAFVEK.C                                 | 1343.53006 | 1 | 2.89E-07 | 0.86  | 3.74   | -     | 824.1   |
| AHQ-5-13, 5505              | K.AVMDDDFAAFVEK.C                                 | 1343.53006 | 2 | 1.57E-05 | 0.93  | 3.98   | -     | 983.6   |
| AHQ-5-12, 5469              | K.AVMDDDFAAFVEK.C                                 | 1343.53006 | 2 | 4.61E-06 | 0.90  | 3.28   | -     | 1159.0  |
| AHQ-5-5, 5503               | K.AVMDDDFAAFVEK.C                                 | 1343.53006 | 2 | 6.22E-09 | 0.94  | 3.64   | -     | 1229.4  |
| AHQ-5-14-, 5335             | K.AVMDDDFAAFVEK.C                                 | 1343.53006 | 2 | 2.84E-09 | 0.95  | 3.87   | -     | 1380.7  |
| AHQ-5-6, 5474               | K.AVMDDDFAAFVEK.C                                 | 1343.53006 | 1 | 1.40E-06 | 0.88  | 4.06   | -     | 801.0   |
| AHQ-5-6, 5462               | K.AVMDDDFAAFVEK.C                                 | 1343.53006 | 2 | 1.70E-08 | 0.95  | 3.85   | -     | 1439.0  |
| AHQ-5-6, 4409               | K.AVM*DDFAAFVEK.C                                 | 1359.52946 | 1 | 4.41E-04 | 0.42  | 2.48   | -     | 285.0   |
| AHQ-5-5, 4462               | K.AVM*DDFAAFVEK.C                                 | 1359.52946 | 2 | 3.97E-07 | 0.94  | 3.38   | -     | 1223.9  |
| AHQ-5-5, 2026 - 2030        | K.CCAAADPHCYAK.V                                  | 1556.67999 | 2 | 2.72E-07 | 0.77  | 3.24   | -     | 611.4   |
| AHQ-5-6, 2313               | K.CCTESLVNR.R                                     | 1141.25805 | 2 | 3.84E-06 | 0.88  | 2.84   | -     | 1058.4  |
| AHQ-5-6, 6165               | K.EFNAETFTFHADICTLSEK.E                           | 2262.43749 | 2 | 3.74E-06 | 0.84  | 4.11   | -     | 381.0   |
| AHQ-5-5, 6729               | K.EFNAETFTFHADICTLSEK.E                           | 2262.43749 | 2 | 5.97E-10 | 0.77  | 3.48   | -     | 470.1   |
| AHQ-5-5, 6254               | K.EFNAETFTFHADICTLSEK.E                           | 2262.43749 | 2 | 7.91E-05 | 0.59  | 2.84   | -     | 337.7   |
| AHQ-5-5, 6845               | K.EFNAETFTFHADICTLSEK.E                           | 2262.43749 | 2 | 3.79E-04 | 0.80  | 3.46   | -     | 516.7   |
| AHQ-5-6, 2542               | R.ETYGEMADCCAK.Q                                  | 1437.55563 | 1 | 3.05E-04 | 0.42  | 2.86   | -     | 143.6   |
| AHQ-5-5, 3842               | R.ETYGEMADCCAKQEPERNECFLQHK.D                     | 3135.38952 | 3 | 7.91E-04 | 0.72  | 3.45   | -     | 583.7   |
| AHQ-5-6, 2373               | R.FKDLGEENFK.A                                    | 1227.34766 | 2 | 2.16E-06 | 0.79  | 2.84   | -     | 679.5   |
| AHQ-5-13, 2858 - 2859       | R.FKDLGEENFK.A                                    | 1227.34766 | 1 | 7.99E-05 | 0.45  | 2.33   | -     | 421.4   |
| AHQ-5-14-, 2650             | R.FKDLGEENFK.A                                    | 1227.34766 | 2 | 1.26E-04 | 0.83  | 3.15   | -     | 714.1   |
| AHQ-5-13, 2853              | R.FKDLGEENFK.A                                    | 1227.34766 | 2 | 2.74E-04 | 0.72  | 2.87   | -     | 543.9   |
| AHQ-5-5, 2390               | R.FKDLGEENFK.A                                    | 1227.34766 | 2 | 6.34E-06 | 0.85  | 3.31   | -     | 667.0   |
| AHQ-5-6, 2682               | K.FQNALVLR.Y                                      | 961.14282  | 2 | 7.02E-04 | 0.90  | 3.23   | -     | 957.8   |
| AHQ-5-6, 6565               | R.HPYFYAPPELLFFAK.R                               | 1744.02658 | 3 | 2.48E-08 | 0.97  | 5.39   | -     | 1476.4  |
| AHQ-5-5, 2317               | K.KQTALVELVK.H                                    | 1129.37494 | 1 | 5.32E-04 | 0.09  | 1.87   | -     | 281.8   |
| AHQ-5-5, 2319               | K.KQTALVELVK.H                                    | 1129.37494 | 2 | 5.72E-06 | 0.84  | 3.29   | -     | 759.2   |
| AHQ-5-8, 2886 - 2888        | K.KVPQVSTPTLVEVSR.N                               | 1640.90605 | 2 | 7.57E-06 | 0.92  | 3.79   | -     | 842.4   |
| AHQ-5-5, 3279               | K.KVPQVSTPTLVEVSR.N                               | 1640.90605 | 3 | 8.90E-07 | 0.92  | 4.44   | -     | 1103.5  |
| AHQ-5-6, 3217 - 3288        | K.KVPQVSTPTLVEVSR.N                               | 1640.90605 | 2 | 8.97E-06 | 0.91  | 3.70   | -     | 838.7   |
| AHQ-5-9, 2978 - 3059        | K.KVPQVSTPTLVEVSR.N                               | 1640.90605 | 2 | 5.20E-04 | 0.54  | 3.16   | -     | 506.4   |
| AHQ-5-4, 3536               | K.KVPQVSTPTLVEVSR.N                               | 1640.90605 | 2 | 2.35E-08 | 0.92  | 3.89   | -     | 754.6   |
| AHQ-5-7, 3087               | K.KVPQVSTPTLVEVSR.N                               | 1640.90605 | 2 | 8.57E-06 | 0.79  | 3.28   | -     | 453.4   |
| AHQ-5-5, 3267 - 3327        | K.KVPQVSTPTLVEVSR.N                               | 1640.90605 | 2 | 7.29E-05 | 0.86  | 2.83   | -     | 879.5   |
| AHQ-5-2, 3505               | K.KVPQVSTPTLVEVSR.N                               | 1640.90605 | 2 | 2.87E-08 | 0.91  | 3.53   | -     | 907.2   |
| AHQ-5-11, 3372 - 3440       | K.KVPQVSTPTLVEVSR.N                               | 1640.90605 | 2 | 4.50E-05 | 0.43  | 2.82   | -     | 415.2   |
| AHQ-5-3, 3569 - 3581        | K.KVPQVSTPTLVEVSR.N                               | 1640.90605 | 2 | 9.73E-08 | 0.93  | 3.76   | -     | 859.7   |
| AHQ-5-10, 3155              | K.KVPQVSTPTLVEVSR.N                               | 1640.90605 | 2 | 3.06E-08 | 0.90  | 3.91   | -     | 617.6   |
| AHQ-5-1, 3727               | K.KVPQVSTPTLVEVSR.N                               | 1640.90605 | 2 | 4.78E-05 | 0.68  | 3.18   | -     | 567.9   |
| AHQ-5-13, 3405              | K.LVNEVTEFAK.T                                    | 1150.30633 | 2 | 5.44E-05 | 0.83  | 3.04   | -     | 656.5   |
| AHQ-5-5, 3029 - 3105        | K.LVNEVTEFAK.T                                    | 1150.30633 | 2 | 6.01E-06 | 0.80  | 3.13   | -     | 547.7   |
| AHQ-5-6, 3016 - 3085        | K.LVNEVTEFAK.T                                    | 1150.30633 | 2 | 8.26E-07 | 0.88  | 2.80   | -     | 896.8   |
| AHQ-5-6, 5632 - 5649        | R.LVRPEVDVDMCTAFHDNEETFLK.K                       | 2652.98428 | 3 | 8.63E-06 | 0.98  | 6.54   | -     | 3067.7  |
| AHQ-5-4, 5937               | R.LVRPEVDVDMCTAFHDNEETFLK.K                       | 2652.98428 | 3 | 3.85E-05 | 0.96  | 5.28   | -     | 1751.5  |
| AHQ-5-6, 5224               | R.LVRPEVDVDMCTAFHDNEETFLK.K.Y                     | 2781.15719 | 3 | 1.61E-06 | 0.98  | 6.80   | -     | 1795.5  |
| AHQ-5-5, 7419               | R.MPCAEDYLSVVLNQLCVLHEK.T                         | 2521.91535 | 3 | 1.93E-06 | 0.95  | 4.54   | -     | 1319.3  |
| AHQ-5-6, 4989 - 4996        | K.QNCELFEQLGEYK.F                                 | 1659.79847 | 2 | 2.18E-05 | 0.92  | 3.81   | -     | 817.1   |
| AHQ-5-6, 3649               | R.RHPDYSVVLLLR.L                                  | 1468.72842 | 3 | 6.93E-05 | 0.95  | 4.61   | -     | 1754.0  |
| AHQ-5-5, 3722               | R.RHPDYSVVLLLR.L                                  | 1468.72842 | 3 | 2.67E-06 | 0.97  | 4.88   | -     | 2575.9  |
| AHQ-5-6, 3652               | R.RHPDYSVVLLLR.L                                  | 1468.72842 | 2 | 6.13E-06 | 0.88  | 3.38   | -     | 764.1   |
| AHQ-5-10, 5311              | R.RHPYFYAPELFFAK.R                                | 1900.21293 | 2 | 2.61E-04 | 0.96  | 4.89   | -     | 1539.9  |
| AHQ-5-6, 5752               | R.RHPYFYAPELFFAK.R                                | 1900.21293 | 2 | 1.17E-10 | 0.98  | 5.01   | -     | 2492.2  |
| AHQ-5-6, 5756               | R.RHPYFYAPELFFAK.R                                | 1900.21293 | 3 | 8.86E-08 | 0.96  | 4.87   | -     | 1782.2  |
| AHQ-5-5, 5699 - 5777        | R.RHPYFYAPELFFAK.R                                | 1900.21293 | 2 | 1.61E-10 | 0.98  | 5.57   | -     | 2812.8  |
| AHQ-5-5, 7361               | K.RMPCAEDYLSVVLNQLCVLHEK.T                        | 2678.10170 | 3 | 2.94E-04 | 0.95  | 5.22   | -     | 1339.9  |
| AHQ-5-5, 7330               | K.RMPCAEDYLSVVLNQLCVLHEK.T                        | 2694.10110 | 3 | 4.03E-06 | 0.92  | 5.12   | -     | 861.4   |
| AHQ-5-6, 7272               | K.RMPCAEDYLSVVLNQLCVLHEK.T                        | 2678.10170 | 3 | 1.22E-04 | 0.94  | 5.41   | -     | 1071.8  |
| AHQ-5-6, 7228 - 7234        | K.RMPCAEDYLSVVLNQLCVLHEK.T                        | 2694.10110 | 3 | 6.26E-08 | 0.96  | 5.88   | -     | 1411.9  |
| AHQ-5-12, 4686 - 4694       | R.RPCFSALEVDETYVPK.E                              | 1913.14041 | 2 | 7.70E-04 | 0.83  | 3.62   | -     | 542.0   |
| AHQ-5-13-, 4685             | R.RPCFSALEVDETYVPK.E                              | 1913.14041 | 2 | 2.00E-04 | 0.88  | 3.71   | -     | 581.0   |
| AHQ-5-13-, 4688             | R.RPCFSALEVDETYVPK.E                              | 1913.14041 | 3 | 1.10E-04 | 0.86  | 3.87   | -     | 784.6   |
| AHQ-5-10, 4243              | R.RPCFSALEVDETYVPK.E                              | 1913.14041 | 2 | 4.00E-05 | 0.90  | 3.78   | -     | 579.5   |
| AHQ-5-5, 4661 - 4737        | R.RPCFSALEVDETYVPK.E                              | 1913.14041 | 2 | 3.33E-04 | 0.94  | 4.25   | -     | 951.7   |
| AHQ-5-13, 4773              | R.RPCFSALEVDETYVPK.E                              | 1913.14041 | 2 | 1.68E-04 | 0.84  | 3.86   | -     | 493.5   |
| AHQ-5-9, 4123               | R.RPCFSALEVDETYVPK.E                              | 1913.14041 | 2 | 5.14E-05 | 0.88  | 3.81   | -     | 500.0   |
| AHQ-5-1, 4980               | R.RPCFSALEVDETYVPK.E                              | 1913.14041 | 2 | 6.26E-06 | 0.91  | 4.15   | -     | 729.0   |
| AHQ-5-4, 4888               | R.RPCFSALEVDETYVPK.E                              | 1913.14041 | 2 | 6.59E-05 | 0.78  | 3.85   | -     | 354.9   |
| AHQ-5-7, 4456               | R.RPCFSALEVDETYVPK.E                              | 1913.14041 | 2 | 1.96E-07 | 0.88  | 3.86   | -     | 660.8   |
| AHQ-5-5, 6474 - 6477        | K.SHCIAEVNDEM*PADLPSLAADFVESK.D                   | 2993.22637 | 3 | 2.02E-05 | 0.93  | 5.31   | -     | 730.7   |
| AHQ-5-6, 6892 - 6938        | K.SHCIAEVNDEM*PADLPSLAADFVESK.D                   | 2977.22697 | 3 | 8.51E-08 | 0.96  | 5.79   | -     | 1342.7  |
| AHQ-5-6, 6897 - 6960        | K.SHCIAEVNDEM*PADLPSLAADFVESK.D                   | 2977.22697 | 2 | 6.48E-09 | 0.96  | 4.66   | -     | 1187.7  |
| AHQ-5-5, 6973 - 7037        | K.SHCIAEVNDEM*PADLPSLAADFVESK.D                   | 2977.22697 | 3 | 1.03E-08 | 0.94  | 5.58   | -     | 854.4   |
| AHQ-5-7, 6307               | K.SHCIAEVNDEM*PADLPSLAADFVESK.D                   | 2993.22637 | 3 | 7.41E-04 | 0.86  | 4.40   | -     | 445.0   |
| AHQ-5-3, 7170 - 7245        | K.SHCIAEVNDEM*PADLPSLAADFVESK.D                   | 2977.22697 | 2 | 6.56E-05 | 0.92  | 4.18   | -     | 703.3   |
| AHQ-5-7, 6871               | K.SHCIAEVNDEM*PADLPSLAADFVESK.D                   | 2977.22697 | 2 | 1.19E-07 | 0.85  | 4.13   | -     | 322.5   |
| AHQ-5-3, 7175 - 7237        | K.SHCIAEVNDEM*PADLPSLAADFVESK.D                   | 2977.22697 | 3 | 6.11E-05 | 0.94  | 5.47   | -     | 766.8   |
| AHQ-5-5, 2314               | K.SHLTLFGDK.L                                     | 1018.14800 | 1 | 1.56E-04 | 0.32  | 2.64   | -     | 269.6   |
| AHQ-5-5, 4914               | K.SHLTLFGDKLCTVATLR.E                             | 1934.24913 | 3 | 5.58E-05 | 0.80  | 3.36   | -     | 713.0   |
| AHQ-5-14, 5914              | K.SHLTLFGDKLCTVATLR.E                             | 1934.24913 | 2 | 1.79E-04 | 0.94  | 4.20   | -     | 866.9   |
| AHQ-5-5, 5011               | K.SHLTLFGDKLCTVATLR.E                             | 1934.24913 | 2 | 2.17E-04 | 0.52  | 2.83   | -     | 296.1   |
| AHQ-5-6, 5792               | K.VFDEFKPLVEEPQNLK.Q                              | 2046.35142 | 2 | 1.51E-04 | 0.89  | 4.22   | -     | 393.3   |
| AHQ-5-5, 5618               | K.VFDEFKPLVEEPQNLK.Q                              | 2046.35142 | 2 | 1.96E-06 | 0.83  | 4.05   | -     | 397.1   |
| AHQ-5-9, 5098               | K.VFDEFKPLVEEPQNLK.Q                              | 2046.35142 | 2 | 1.15E-05 | 0.88  | 4.19   | -     | 367.7   |
| AHQ-5-5, 5803 - 5870        | K.VFDEFKPLVEEPQNLK.Q                              | 2046.35142 | 2 | 2.26E-04 | 0.90  | 4.02   | -     | 452.8   |
| AHQ-5-3, 6102               | K.VFDEFKPLVEEPQNLK.Q                              | 2046.35142 | 2 | 2.46E-04 | 0.92  | 4.24   | -     | 553.0   |
| AHQ-5-10, 5215              | K.VFDEFKPLVEEPQNLK.Q                              | 2046.35142 | 2 | 4.16E-04 | 0.69  | 3.26   | -     | 318.9   |
| AHQ-5-5, 5810 - 5867        | K.VFDEFKPLVEEPQNLK.Q                              | 2046.35142 | 3 | 2.77E-07 | 0.95  | 4.44   | -     | 1360.9  |
| AHQ-5-1, 6103               | K.VFDEFKPLVEEPQNLK.Q                              | 2046.35142 | 2 | 3.45E-04 | 0.90  | 4.55   | -     | 416.7   |
| AHQ-5-6, 5892               | K.VFDEFKPLVEEPQNLK.Q                              | 2046.35142 | 2 | 5.18E-04 | 0.87  | 4.13   | -     | 435.7   |
| AHQ-5-7, 5607 - 5608        | K.VFDEFKPLVEEPQNLK.Q                              | 2046.35142 | 2 | 8.86E-05 | 0.93  | 4.79   | -     | 458.2   |
| AHQ-5-6, 5732 - 5801        | K.VFDEFKPLVEEPQNLK.Q                              | 2046.35142 | 3 | 4.53E-06 | 0.97  | 5.21   | -     | 1711.9  |
| AHQ-5-6, 2901 - 2953        | K.VHTECCHGDLLECADDR.A                             | 2091.20307 | 2 | 2.43E-05 | 0.91  | 3.63   | -     | 1213.9  |
| AHQ-5-5, 2919 - 2969        | K.VHTECCHGDLLECADDR.A                             | 2091.20307 | 2 | 7.32E-06 | 0.93  | 4.46   | -     | 1152.2  |
| AHQ-5-7, 3438 - 3440        | K.VHTECCHGDLLECADDRADLAK.Y                        | 2589.77855 | 2 | 2.48E-05 | 0.51  | 2.66   | -     | 547.7   |
| AHQ-5-1, 3912               | K.VHTECCHGDLLECADDRADLAK.Y                        | 2589.77855 | 3 | 2.98E-05 | 0.77  | 3.74   | -     | 514.2   |
| AHQ-5-6, 3737               | K.VPQVSTPTLVEVSR.N                                | 1512.73313 | 2 | 7.87E-07 | 0.91  | 2.96   | -     | 1044.6  |

|                             |                                                                             |            |   |          |      |        |       |          |
|-----------------------------|-----------------------------------------------------------------------------|------------|---|----------|------|--------|-------|----------|
| AHQ-5-6, 2196               | K.YICENQDSISSK.L                                                            | 1445.53420 | 2 | 2.43E-05 | 0.82 | 3.05   | -     | 515.6    |
| AHQ-5-6, 2402               | K.YICENQDSISSK.L                                                            | 1445.53420 | 1 | 2.28E-04 | 0.39 | 1.95   | -     | 457.9    |
| AHQ-5-5, 2221               | K.YICENQDSISSK.L                                                            | 1445.53420 | 1 | 2.88E-07 | 0.63 | 2.99   | -     | 360.7    |
| AHQ-5-6, 2200               | K.YICENQDSISSK.L                                                            | 1445.53420 | 1 | 8.36E-06 | 0.49 | 2.57   | -     | 337.3    |
| gi 4885063 ref NP_005156.1  | aldolase C, fructose-bisphosphate; Aldolase C, fructose-bisphosphatase      |            |   | 1.24E-10 | 1.85 | 20.29  | 7.10  | 39455.6  |
| AHQ-5-9, 4072 - 4150        | K.GVVPVPLAGTDGETTTTQGLDGLSER.C                                              | 2274.42806 | 2 | 1.24E-10 | 0.97 | 5.75   | -     | 820.7    |
| AHQ-5-8, 4325 - 4393        | K.GVVPVPLAGTDGETTTTQGLDGLSER.C                                              | 2274.42806 | 2 | 5.03E-08 | 0.89 | 5.27   | -     | 778.1    |
| AHQ-5-12, 4638              | K.GVVPVPLAGTDGETTTTQGLDGLSER.C                                              | 2274.42806 | 2 | 1.68E-09 | 0.94 | 5.09   | -     | 521.2    |
| AHQ-5-8, 4058               | K.VDKGVVPLAGTDGETTTTQGLDGLSER.C                                             | 2616.82041 | 3 | 5.71E-10 | 0.89 | 5.03   | -     | 1024.5   |
| AHQ-5-8, 4057               | K.VDKGVVPLAGTDGETTTTQGLDGLSER.C                                             | 2616.82041 | 2 | 4.60E-04 | 0.62 | 3.28   | -     | 175.7    |
| gi 18201905 ref NP_000166.2 | glucose phosphate isomerase; neuroleukin; glucose-6-phosphate isomerases    |            |   | 1.32E-10 | 5.52 | 70.29  | 24.20 | 63146.7  |
| AHQ-5-7, 1754               | K.HFVALSTNTTK.V                                                             | 1219.37190 | 1 | 1.25E-05 | 0.31 | 1.94   | -     | 355.6    |
| AHQ-5-7, 7312               | K.IILLANFLAQTEALMR.G                                                        | 1705.05838 | 2 | 2.71E-10 | 0.97 | 5.43   | -     | 1375.0   |
| AHQ-5-7, 7252               | K.TITDVINIGIGGSDLGPLMVTEALPKPYSSGGPR.V                                      | 3330.79783 | 3 | 1.32E-10 | 0.93 | 5.22   | -     | 668.2    |
| AHQ-5-7, 5936 - 5946        | K.TLAQLNPESLFIASK.T                                                         | 1833.11828 | 2 | 4.45E-04 | 0.84 | 4.22   | -     | 328.8    |
| AHQ-5-7, 5312               | R.VDHTQGPVWVWEGPTNGQHAFYQLIHQGT.K.M                                         | 3317.61777 | 3 | 9.43E-04 | 0.89 | 5.70   | -     | 844.5    |
| AHQ-5-7, 2951               | K.VFEGNRPNTSIVFTK.L                                                         | 1709.92693 | 2 | 5.89E-04 | 0.65 | 3.22   | -     | 516.7    |
| AHQ-5-7, 3538               | R.VVWVSNIDGTTHIAK.T                                                         | 1603.80282 | 2 | 8.84E-09 | 0.93 | 3.68   | -     | 1137.0   |
| gi 4557305 ref NP_000025.1  | aldolase A; fructose-bisphosphate aldolase; Aldolase A, fructose-bisphospho |            |   | 1.32E-10 | 8.42 | 100.28 | 39.60 | 39419.7  |
| AHQ-5-8, 1888               | R.ALANSLACQK.Y                                                              | 1134.28859 | 2 | 1.12E-04 | 0.82 | 3.21   | -     | 808.5    |
| AHQ-5-13, 2441              | R.ALANSLACQK.Y                                                              | 1134.28859 | 2 | 2.77E-07 | 0.79 | 3.02   | -     | 812.7    |
| AHQ-5-8, 5610 - 5682        | R.ALANSLACQK.YTPSQGAGAAASESLFVSNHAY                                         | 3344.61352 | 3 | 6.52E-06 | 0.49 | 3.06   | -     | 415.6    |
| AHQ-5-8, 5973               | R.ALANSLACQK.YTPSQGAGAAASESLFVSNHAY                                         | 3344.61352 | 3 | 7.14E-07 | 0.33 | 3.21   | -     | 265.9    |
| AHQ-5-8, 3716               | K.A.LSDHIIYLEGTLKPNMVTPEGHACTQK.F                                           | 3134.57879 | 3 | 2.03E-08 | 0.96 | 5.69   | -     | 1055.3   |
| AHQ-5-8, 5826 - 5893        | K.CPLLPKWPALTFSYGR.A                                                        | 1811.13929 | 2 | 4.45E-05 | 0.68 | 2.85   | -     | 393.1    |
| AHQ-5-8, 5862               | K.CPLLPKWPALTFSYGR.A                                                        | 1811.13929 | 3 | 1.03E-06 | 0.96 | 5.14   | -     | 1444.3   |
| AHQ-5-9, 5364               | K.CPLLPKWPALTFSYGR.A                                                        | 1811.13929 | 2 | 2.58E-04 | 0.83 | 3.58   | -     | 483.2    |
| AHQ-5-8, 3748 - 3817        | K.FSHEEIAMATVTLR.R                                                          | 1676.91875 | 2 | 2.13E-06 | 0.90 | 3.48   | -     | 1220.3   |
| AHQ-5-8, 3980               | K.FSHEEIAMATVTLR.R                                                          | 1676.91875 | 2 | 2.75E-05 | 0.58 | 2.56   | -     | 630.9    |
| AHQ-5-8, 2542               | K.GILAADESTGSIK.R                                                           | 1333.47008 | 2 | 1.54E-09 | 0.98 | 4.67   | -     | 1818.1   |
| AHQ-5-12, 2862              | K.GILAADESTGSIK.R                                                           | 1333.47008 | 2 | 1.37E-07 | 0.97 | 4.16   | -     | 2000.1   |
| AHQ-5-9, 2607               | K.GILAADESTGSIK.R                                                           | 1333.47008 | 1 | 3.15E-04 | 0.35 | 2.69   | -     | 323.2    |
| AHQ-5-8, 2541               | K.GILAADESTGSIK.R                                                           | 1333.47008 | 1 | 1.79E-05 | 0.68 | 2.97   | -     | 383.8    |
| AHQ-5-8, 4046 - 4054        | K.GVVPVPLAGTNGETTTTQGLDGLSER.C                                              | 2273.44329 | 2 | 1.03E-06 | 0.84 | 4.97   | -     | 594.0    |
| AHQ-5-10, 4214 - 4216       | K.GVVPVPLAGTNGETTTTQGLDGLSER.C                                              | 2273.44329 | 2 | 1.44E-10 | 0.83 | 4.80   | -     | 568.1    |
| AHQ-5-8, 4138               | K.GVVPVPLAGTNGETTTTQGLDGLSER.C                                              | 2273.44329 | 2 | 1.76E-09 | 0.92 | 5.20   | -     | 1150.7   |
| AHQ-5-9, 4014 - 4078        | K.GVVPVPLAGTNGETTTTQGLDGLSER.C                                              | 2273.44329 | 2 | 5.58E-08 | 0.78 | 4.54   | -     | 607.8    |
| AHQ-5-9, 3920               | K.GVVPVPLAGTNGETTTTQGLDGLSER.C                                              | 2273.44329 | 2 | 2.18E-08 | 0.63 | 3.72   | -     | 399.2    |
| AHQ-5-8, 4565               | K.IGEHTPSALAIMENANVLAR.Y                                                    | 2108.40788 | 2 | 1.32E-10 | 0.96 | 5.16   | -     | 1051.2   |
| AHQ-5-9, 4698               | K.IGEHTPSALAIMENANVLAR.Y                                                    | 2108.40788 | 2 | 2.90E-05 | 0.88 | 4.35   | -     | 474.7    |
| AHQ-5-8, 4872               | K.IGEHTPSALAIMENANVLAR.Y                                                    | 2108.40788 | 2 | 2.05E-08 | 0.97 | 5.51   | -     | 1027.4   |
| AHQ-5-10, 4836              | K.IGEHTPSALAIMENANVLAR.Y                                                    | 2108.40788 | 2 | 5.61E-04 | 0.94 | 4.87   | -     | 754.2    |
| AHQ-5-9, 4444               | K.IGEHTPSALAIMENANVLAR.Y                                                    | 2108.40788 | 2 | 6.49E-10 | 0.93 | 4.14   | -     | 925.5    |
| AHQ-5-8, 6056               | R.VNPCIQGVILFHETLYQK.A                                                      | 2090.43072 | 2 | 1.22E-04 | 0.93 | 3.83   | -     | 969.8    |
| AHQ-5-8, 6265               | R.VNPCIQGVILFHETLYQK.A                                                      | 2090.43072 | 2 | 3.32E-05 | 0.89 | 3.49   | -     | 904.6    |
| AHQ-5-8, 4104 - 4172        | K.YTPSQGAGAAASESLFVSNHAY                                                    | 2229.34753 | 2 | 2.47E-05 | 0.82 | 3.72   | -     | 236.5    |
| gi 14765644 ref XP_037574.1 | similar to PTP1-associated RhoGAP 1 [Homo sapiens]                          |            |   | 1.48E-10 | 0.74 | 10.17  | 2.90  | 124613.7 |
| AHQ-5-7, 7367               | R.SPLTAASPGELPTEGAGPDVVEDISHLADVAR.F                                        | 3286.59214 | 3 | 1.48E-10 | 0.74 | 3.40   | -     | 374.6    |
| gi 27498332 ref XP_212565.1 | similar to tubulin, beta 5 [Homo sapiens]                                   |            |   | 1.49E-10 | 2.87 | 30.28  | 6.50  | 49670.5  |
| AHQ-5-7, 3599               | R.IMNTFVSPVSPK.V                                                            | 1320.58277 | 2 | 2.05E-04 | 0.60 | 2.80   | -     | 560.3    |
| AHQ-5-7, 3691               | R.IMNTFVSPVSPK.V                                                            | 1320.58277 | 2 | 2.57E-06 | 0.93 | 3.68   | -     | 988.6    |
| AHQ-5-7, 3708               | R.IMNTFVSPVSPK.V                                                            | 1320.58277 | 1 | 3.46E-06 | 0.17 | 1.96   | -     | 348.0    |
| AHQ-5-7, 3498 - 3572        | R.IMNTFVSPVSPK.V                                                            | 1320.58277 | 2 | 4.87E-04 | 0.95 | 3.87   | -     | 1544.8   |
| AHQ-5-7, 6814               | K.M*AVTFIGNSTAIQELFK.R                                                      | 1887.18942 | 2 | 8.31E-06 | 0.97 | 4.92   | -     | 1131.3   |
| AHQ-5-7, 6858 - 6928        | K.MAVTFIGNSTAIQELFK.R                                                       | 1871.19002 | 2 | 4.30E-08 | 0.97 | 5.55   | -     | 1345.0   |
| AHQ-5-7, 7159               | K.MAVTFIGNSTAIQELFK.R                                                       | 1871.19002 | 2 | 6.19E-07 | 0.95 | 4.54   | -     | 1071.9   |
| AHQ-5-12, 6694 - 6698       | K.M*AVTFIGNSTAIQELFK.R                                                      | 1887.18942 | 2 | 1.11E-04 | 0.94 | 4.00   | -     | 980.9    |
| AHQ-5-13, 6374 - 6392       | K.M*AVTFIGNSTAIQELFK.R                                                      | 1887.18942 | 2 | 1.84E-05 | 0.96 | 4.78   | -     | 975.5    |
| AHQ-5-13, 6660              | K.M*AVTFIGNSTAIQELFK.R                                                      | 1887.18942 | 2 | 1.49E-10 | 0.97 | 5.06   | -     | 989.0    |
| AHQ-5-14-, 6505             | K.M*AVTFIGNSTAIQELFK.R                                                      | 1887.18942 | 2 | 1.61E-06 | 0.75 | 2.72   | -     | 728.6    |
| gi 13899317 ref NP_113657.1 | SH3 domain binding glutamic acid-rich protein like 2 [Homo sapiens] [M      |            |   | 1.63E-10 | 5.45 | 60.30  | 72.00 | 12326.0  |
| AHQ-5-14-, 5319 - 5389      | K.ESNTVFSFLGKLP.R.L                                                         | 1595.82383 | 2 | 2.64E-08 | 0.74 | 3.46   | -     | 428.9    |
| AHQ-5-14-, 5671 - 5678      | K.ESNTVFSFLGKLP.R.L                                                         | 1595.82383 | 3 | 5.78E-05 | 0.83 | 3.59   | -     | 657.6    |
| AHQ-5-14, 5877              | K.ESNTVFSFLGKLP.R.L                                                         | 1595.82383 | 2 | 1.36E-05 | 0.59 | 2.92   | -     | 405.4    |
| AHQ-5-14, 6242 - 6276       | K.ESNTVFSFLGKLP.R.L                                                         | 1595.82383 | 2 | 1.41E-09 | 0.76 | 3.47   | -     | 453.6    |
| AHQ-5-14-, 5365             | K.ESNTVFSFLGKLP.R.L                                                         | 1595.82383 | 2 | 1.01E-08 | 0.82 | 3.63   | -     | 424.5    |
| AHQ-5-14, 6333              | K.ESNTVFSFLGKLP.R.L                                                         | 1595.82383 | 2 | 5.65E-08 | 0.67 | 3.10   | -     | 440.9    |
| AHQ-5-14-, 4889 - 4901      | R.FLEANKIEFEVDITM*SEEQR.Q                                                   | 2574.80223 | 3 | 1.63E-10 | 0.97 | 6.05   | -     | 1753.0   |
| AHQ-5-14-, 4893 - 4899      | R.FLEANKIEFEVDITM*SEEQR.Q                                                   | 2574.80223 | 2 | 1.58E-04 | 0.92 | 4.57   | -     | 831.1    |
| AHQ-5-14-, 4977 - 4998      | R.FLEANKIEFEVDITM*SEEQR.Q                                                   | 2574.80223 | 3 | 2.60E-07 | 0.98 | 5.71   | -     | 2287.0   |
| AHQ-5-14-, 4191             | K.IEFEVDITM*SEEQR.Q                                                         | 1872.00051 | 2 | 6.76E-06 | 0.94 | 3.83   | -     | 1222.6   |
| AHQ-5-14, 4636              | K.KPTQGNPLPPQIFNGDR.Y                                                       | 1880.09682 | 2 | 9.14E-05 | 0.60 | 2.93   | -     | 464.6    |
| AHQ-5-14-, 3643             | K.KPTQGNPLPPQIFNGDR.Y                                                       | 1880.09682 | 2 | 2.46E-04 | 0.81 | 3.19   | -     | 843.4    |
| AHQ-5-14, 4520 - 4566       | K.KPTQGNPLPPQIFNGDR.Y                                                       | 1880.09682 | 2 | 1.07E-07 | 0.89 | 3.39   | -     | 952.8    |
| AHQ-5-14, 6288 - 6358       | K.KPTQGNPLPPQIFNGDR.YCGDYDFFESK.E                                           | 3380.64432 | 3 | 3.90E-05 | 0.91 | 4.83   | -     | 893.0    |
| AHQ-5-14, 6428              | K.KPTQGNPLPPQIFNGDR.YCGDYDFFESK.E                                           | 3380.64432 | 3 | 6.12E-04 | 0.85 | 4.46   | -     | 536.7    |
| AHQ-5-14-, 5781 - 5854      | K.KPTQGNPLPPQIFNGDR.YCGDYDFFESK.E                                           | 3380.64432 | 3 | 5.18E-04 | 0.87 | 4.32   | -     | 650.8    |
| AHQ-5-14, 5430              | R.VFIASSSGFVAIK.K                                                           | 1326.56551 | 1 | 5.98E-05 | 0.48 | 2.59   | -     | 491.1    |
| AHQ-5-14-, 4285             | R.VFIASSSGFVAIK.K                                                           | 1326.56551 | 2 | 1.38E-06 | 0.96 | 3.43   | -     | 2135.4   |
| AHQ-5-14-, 4619             | R.VFIASSSGFVAIK.K                                                           | 1326.56551 | 2 | 5.19E-08 | 0.98 | 4.05   | -     | 3290.5   |
| gi 21624607 ref NP_066972.1 | coactosin-like 1 [Homo sapiens]                                             |            |   | 1.65E-10 | 4.37 | 60.30  | 50.00 | 15944.9  |
| AHQ-5-13, 2421 - 2422       | R.AAYNLV.R.D                                                                | 806.93245  | 2 | 1.63E-04 | 0.88 | 3.04   | -     | 843.4    |
| AHQ-5-13-, 2240             | R.AAYNLV.R.D                                                                | 806.93245  | 2 | 1.74E-05 | 0.92 | 2.58   | -     | 1326.8   |
| AHQ-5-12, 2108              | R.AAYNLV.R.D                                                                | 806.93245  | 2 | 3.67E-04 | 0.92 | 2.71   | -     | 1142.9   |
| AHQ-5-13-, 5292             | R.DDGSVAVVWTFK.Y                                                            | 1338.49001 | 2 | 2.95E-08 | 0.96 | 4.71   | -     | 1361.9   |
| AHQ-5-13, 2306              | K.EVVQNF.AK.E                                                               | 935.05900  | 1 | 8.26E-04 | 0.09 | 2.00   | -     | 149.3    |
| AHQ-5-12, 6936 - 6937       | K.FALITWIGENVSLQR.A                                                         | 1805.06986 | 2 | 8.11E-08 | 0.98 | 5.92   | -     | 1786.7   |
| AHQ-5-13, 6808              | K.FALITWIGENVSLQR.A                                                         | 1805.06986 | 2 | 1.03E-07 | 0.97 | 5.48   | -     | 1528.7   |
| AHQ-5-13-, 6743             | K.FALITWIGENVSLQR.A                                                         | 1805.06986 | 2 | 1.29E-04 | 0.98 | 5.42   | -     | 2090.1   |
| AHQ-5-13, 2967              | R.KELEEDFIK.S                                                               | 1151.29110 | 2 | 2.65E-04 | 0.85 | 3.20   | -     | 881.0    |
| AHQ-5-12, 2689 - 2722       | R.KELEEDFIK.S                                                               | 1151.29110 | 2 | 4.49E-04 | 0.76 | 2.74   | -     | 728.3    |
| AHQ-5-13-, 2827 - 2829      | R.KELEEDFIK.S                                                               | 1151.29110 | 2 | 1.73E-04 | 0.71 | 2.62   | -     | 707.7    |
| AHQ-5-13-, 2840             | R.KELEEDFIK.S                                                               | 1151.29110 | 1 | 5.77E-04 | 0.35 | 2.55   | -     | 352.3    |
| AHQ-5-13, 2970 - 2971       | R.KELEEDFIK.S                                                               | 1151.29110 | 1 | 8.36E-04 | 0.45 | 2.62   | -     | 420.6    |
| AHQ-5-12, 5368              | K.YDGSIVPGEQGAEYQHFIQCTDDV.R.L                                              | 3116.27790 | 3 | 1.38E-07 | 0.81 | 3.90   | -     | 392.6    |
| AHQ-5-13, 5344 - 5413       | K.YDGSIVPGEQGAEYQHFIQCTDDV.R.L                                              | 3116.27790 | 3 | 1.65E-10 | 0.71 | 3.50   | -     | 365.6    |
| gi 7657486 ref NP_055217.1  | low molecular mass ubiquinone-binding protein [Homo sapiens]                |            |   | 1.67E-10 | 0.96 | 10.25  | 14.00 | 11316.3  |
| AHQ-5-14-, 3818             | R.HVSIYSLSPFEQR.A                                                           | 1563.73870 | 2 | 1.67E-10 | 0.96 | 4.90   | -     | 1044.5   |
| AHQ-5-14, 4744 - 4753       | R.HVSIYSLSPFEQR.A                                                           | 1563.73870 | 2 | 7.78E-08 | 0.95 | 4.39   | -     | 1179.6   |
| gi 4758460 ref NP_004479.1  | glycoprotein V (platelet) [Homo sapiens]                                    |            |   | 1.72E-10 | 5.45 | 60.29  | 22.30 | 60958.9  |
| AHQ-5-6, 5453               | R.CAGPGAAGLPLWALPGGDAECPGPR.G                                               | 2587.87539 | 3 | 3.68E-04 | 0.76 | 3.42   | -     | 834.6    |
| AHQ-5-5, 5469               | R.CAGPGAAGLPLWALPGGDAECPGPR.G                                               | 2587.87539 | 3 | 1.02E-07 | 0.83 | 4.22   | -     | 589.0    |
| AHQ-5-6, 5449               | R.CAGPGAAGLPLWALPGGDAECPGPR.G                                               | 2587.87539 | 2 | 2.58E-05 | 0.87 | 3.60   | -     | 756.8    |
| AHQ-5-5, 4630 - 4702        | R.GVLQSQSFGMLTVLQR.L                                                        | 1738.99008 | 2 | 2.44E-07 | 0.94 | 3.77   | -     | 1462.5   |
| AHQ-5-5, 5725               | R.LMISDSHISAVAPGTFSDLIK.L                                                   | 2203.54435 | 2 | 7.73E-04 | 0.95 | 4.73   | -     | 1026.9   |
| AHQ-5-5, 4530               | R.LPNLSSLTLSR.N                                                             | 1201.39802 | 2 | 8.28E-07 | 0.95 | 3.59   | -     | 1671.2   |
| AHQ-5-6, 7381 - 7417        | K.LVNLQELALNQNQLDFLPSALFTNLENL.K.L                                          | 3314.77659 | 3 | 2.29E-05 | 0.96 | 5.78   | -     | 1080.8   |

|                             |                                                                         |            |   |          |      |       |       |         |
|-----------------------------|-------------------------------------------------------------------------|------------|---|----------|------|-------|-------|---------|
| AHQ-5-5, 7374               | R.LVSLDSSLNLSGALTELQFHR.N                                               | 2384.71675 | 3 | 1.72E-10 | 0.83 | 4.00  | -     | 671.1   |
| gi 7656991 ref NP_055140.1  | coronin, actin binding protein, 1C; coronin, actin-binding protein, 1C; |            |   | 1.76E-10 | 5.48 | 70.34 | 27.80 | 53248.7 |
| AHQ-5-6, 5984 - 6050        | R.AIFLADGNVFTTGFSSR.M                                                   | 1716.91793 | 2 | 1.54E-05 | 0.96 | 4.97  | -     | 1411.6  |
| AHQ-5-7, 5819 - 5895        | R.AIFLADGNVFTTGFSSR.M                                                   | 1716.91793 | 2 | 9.80E-08 | 0.95 | 3.73  | -     | 1489.5  |
| AHQ-5-6, 5900 - 5980        | R.AIFLADGNVFTTGFSSR.M                                                   | 1716.91793 | 2 | 2.37E-10 | 0.97 | 5.25  | -     | 1347.3  |
| AHQ-5-6, 3037 - 3040        | R.KCEPIMTVPR.K                                                          | 1345.65706 | 2 | 3.31E-06 | 0.87 | 3.11  | -     | 807.2   |
| AHQ-5-6, 7200               | R.KSDLFQDDLYPDTAPGAALAEAEWFEKG.N                                        | 3273.46087 | 3 | 1.76E-10 | 0.98 | 6.77  | -     | 2058.0  |
| AHQ-5-6, 3724               | K.NADPILSLK.H                                                           | 1084.29103 | 1 | 1.31E-04 | 0.32 | 2.21  | -     | 273.7   |
| AHQ-5-6, 7253 - 7256        | K.NMQEQIALHEMDSNGVLLFPYDPTSIYLCCGK.G                                    | 3885.39261 | 3 | 6.90E-06 | 0.60 | 3.24  | -     | 349.7   |
| AHQ-5-6, 2213               | K.SIKDTICQDDE.I                                                         | 1480.58332 | 2 | 1.56E-06 | 0.84 | 2.77  | -     | 1164.7  |
| AHQ-5-6, 6116 - 6129        | R.YFEITDESPYVHYLNTFSSK.E                                                | 2441.63258 | 3 | 2.04E-06 | 0.91 | 4.51  | -     | 707.5   |
| AHQ-5-7, 5906               | R.YFEITDESPYVHYLNTFSSK.E                                                | 2441.63258 | 3 | 2.55E-05 | 0.88 | 3.44  | -     | 1044.0  |
| gi 17986258 ref NP_066299.2 | smooth muscle and non-muscle myosin alkali light chain isoform 1 [Homo  |            |   | 1.85E-10 | 6.78 | 80.26 | 42.40 | 16930.0 |
| AHQ-5-13, 4326 - 4380       | K.DQGTEDYVEGLR.V                                                        | 1545.58904 | 2 | 1.87E-08 | 0.81 | 2.95  | -     | 752.4   |
| AHQ-5-12, 4290              | K.DQGTEDYVEGLR.V                                                        | 1545.58904 | 2 | 8.14E-05 | 0.84 | 2.75  | -     | 1025.5  |
| AHQ-5-12, 4193 - 4264       | K.DQGTEDYVEGLR.V                                                        | 1545.58904 | 2 | 3.42E-09 | 0.92 | 3.66  | -     | 1031.6  |
| AHQ-5-13-, 4201             | K.DQGTEDYVEGLR.V                                                        | 1545.58904 | 2 | 2.31E-04 | 0.89 | 3.59  | -     | 926.4   |
| AHQ-5-12, 3840 - 3916       | K.EAFQLFDR.T                                                            | 1026.12699 | 2 | 1.28E-04 | 0.63 | 2.57  | -     | 508.8   |
| AHQ-5-12, 3946              | K.EAFQLFDR.T                                                            | 1026.12699 | 2 | 5.53E-04 | 0.63 | 2.50  | -     | 510.7   |
| AHQ-5-12, 2121 - 2176       | R.HVLVTLGEK.M                                                           | 996.18547  | 1 | 8.81E-04 | 0.67 | 3.19  | -     | 447.2   |
| AHQ-5-13-, 2279 - 2305      | R.HVLVTLGEK.M                                                           | 996.18547  | 2 | 7.06E-04 | 0.87 | 3.01  | -     | 664.0   |
| AHQ-5-12, 2224              | R.HVLVTLGEK.M                                                           | 996.18547  | 2 | 6.54E-05 | 0.82 | 2.96  | -     | 475.9   |
| AHQ-5-14-, 2238             | R.HVLVTLGEK.M                                                           | 996.18547  | 2 | 2.00E-07 | 0.84 | 2.73  | -     | 586.7   |
| AHQ-5-12, 2116 - 2180       | R.HVLVTLGEK.M                                                           | 996.18547  | 2 | 6.47E-06 | 0.91 | 3.62  | -     | 705.1   |
| AHQ-5-13, 2462              | R.HVLVTLGEK.M                                                           | 996.18547  | 2 | 9.08E-05 | 0.93 | 3.40  | -     | 909.5   |
| AHQ-5-12, 3882              | K.NKDDQGTEDYVEGLR.V                                                     | 1787.86505 | 2 | 9.42E-10 | 0.92 | 4.19  | -     | 1215.1  |
| AHQ-5-12, 3586 - 3652       | K.NKDDQGTEDYVEGLR.V                                                     | 1787.86505 | 3 | 2.50E-08 | 0.95 | 5.19  | -     | 1175.6  |
| AHQ-5-13-, 3717 - 3779      | K.NKDDQGTEDYVEGLR.V                                                     | 1787.86505 | 3 | 1.65E-05 | 0.89 | 3.29  | -     | 1291.3  |
| AHQ-5-12, 3576 - 3640       | K.NKDDQGTEDYVEGLR.V                                                     | 1787.86505 | 2 | 1.96E-09 | 0.90 | 3.80  | -     | 784.1   |
| AHQ-5-14, 4516              | K.NKDDQGTEDYVEGLR.V                                                     | 1787.86505 | 2 | 8.22E-07 | 0.95 | 4.33  | -     | 1155.8  |
| AHQ-5-14-, 3649             | K.NKDDQGTEDYVEGLR.V                                                     | 1787.86505 | 2 | 2.20E-07 | 0.92 | 4.45  | -     | 830.9   |
| AHQ-5-13-, 3755             | K.NKDDQGTEDYVEGLR.V                                                     | 1787.86505 | 2 | 3.62E-10 | 0.93 | 4.18  | -     | 1087.0  |
| AHQ-5-12, 3986 - 4056       | K.NKDDQGTEDYVEGLR.V                                                     | 1787.86505 | 2 | 1.85E-10 | 0.90 | 3.86  | -     | 879.0   |
| AHQ-5-13, 3860              | K.NKDDQGTEDYVEGLR.V                                                     | 1787.86505 | 2 | 4.90E-07 | 0.92 | 3.97  | -     | 1005.1  |
| AHQ-5-12, 3284              | R.VFDKEGNGTVMGAEIR.H                                                    | 1723.93228 | 3 | 2.80E-07 | 0.88 | 3.73  | -     | 1205.9  |
| AHQ-5-12, 2581 - 2649       | R.VFDKEGNGTVMGAEIR.H                                                    | 1739.93168 | 2 | 4.50E-05 | 0.70 | 3.12  | -     | 468.9   |
| AHQ-5-12, 3180              | R.VFDKEGNGTVMGAEIR.H                                                    | 1739.93168 | 2 | 2.58E-04 | 0.77 | 3.11  | -     | 767.9   |
| AHQ-5-14-, 2617             | R.VFDKEGNGTVMGAEIR.H                                                    | 1739.93168 | 2 | 8.12E-06 | 0.80 | 3.60  | -     | 610.6   |
| AHQ-5-12, 6193 - 6272       | K.VLDFEHFLPMLQTVAK.N                                                    | 1905.24957 | 2 | 6.49E-05 | 0.89 | 3.92  | -     | 766.0   |
| AHQ-5-12, 6336              | K.VLDFEHFLPMLQTVAK.N                                                    | 1905.24957 | 2 | 2.01E-05 | 0.91 | 4.26  | -     | 546.9   |
| AHQ-5-13, 6765              | K.VLDFEHFLPMLQTVAK.N                                                    | 1889.25017 | 2 | 1.45E-05 | 0.95 | 4.77  | -     | 884.0   |
| AHQ-5-13-, 6316             | K.VLDFEHFLPMLQTVAK.N                                                    | 1905.24957 | 3 | 3.79E-05 | 0.89 | 3.58  | -     | 965.8   |
| AHQ-5-13-, 6716 - 6717      | K.VLDFEHFLPMLQTVAK.N                                                    | 1889.25017 | 2 | 3.32E-10 | 0.97 | 5.13  | -     | 1352.9  |
| AHQ-5-13, 6376              | K.VLDFEHFLPMLQTVAK.N                                                    | 1905.24957 | 3 | 3.80E-06 | 0.84 | 3.30  | -     | 819.7   |
| AHQ-5-12, 6869              | K.VLDFEHFLPMLQTVAK.N                                                    | 1889.25017 | 3 | 6.19E-05 | 0.84 | 3.46  | -     | 1348.4  |
| AHQ-5-12, 6273 - 6352       | K.VLDFEHFLPMLQTVAK.N                                                    | 1905.24957 | 3 | 2.72E-05 | 0.81 | 3.04  | -     | 770.2   |
| AHQ-5-12, 6868 - 6881       | K.VLDFEHFLPMLQTVAK.N                                                    | 1889.25017 | 2 | 1.63E-07 | 0.96 | 4.91  | -     | 1128.5  |
| AHQ-5-14-, 6199             | K.VLDFEHFLPMLQTVAK.N                                                    | 1905.24957 | 2 | 3.86E-04 | 0.82 | 3.40  | -     | 602.5   |
| AHQ-5-14-, 6203             | K.VLDFEHFLPMLQTVAK.N                                                    | 1905.24957 | 3 | 1.80E-04 | 0.87 | 3.71  | -     | 909.7   |
| AHQ-5-14-, 6661             | K.VLDFEHFLPMLQTVAK.N                                                    | 1889.25017 | 2 | 1.83E-07 | 0.96 | 5.14  | -     | 1067.4  |
| gi 5453740 ref NP_006462.1  | myosin regulatory light chain MRCL3; myosin, light polypeptide, regulat |            |   | 1.91E-10 | 6.53 | 80.32 | 38.60 | 19794.0 |
| AHQ-5-12, 5465 - 5470       | R.ATSNVFMFDQSQIQEFK.E                                                   | 2108.31681 | 2 | 4.30E-08 | 0.95 | 4.62  | -     | 1113.4  |
| AHQ-5-11, 5878              | R.ATSNVFMFDQSQIQEFK.E                                                   | 2092.31741 | 2 | 5.21E-04 | 0.62 | 2.94  | -     | 393.1   |
| AHQ-5-14-, 5367             | R.ATSNVFMFDQSQIQEFK.E                                                   | 2108.31681 | 2 | 4.19E-08 | 0.96 | 4.84  | -     | 1150.7  |
| AHQ-5-11, 5275              | R.ATSNVFMFDQSQIQEFK.E                                                   | 2108.31681 | 2 | 5.78E-05 | 0.90 | 3.59  | -     | 975.6   |
| AHQ-5-14, 6061              | R.ATSNVFMFDQSQIQEFK.E                                                   | 2108.31681 | 2 | 2.51E-08 | 0.88 | 4.03  | -     | 430.7   |
| AHQ-5-12, 6094 - 6172       | R.ATSNVFMFDQSQIQEFK.E                                                   | 2092.31741 | 2 | 2.99E-06 | 0.90 | 4.14  | -     | 790.0   |
| AHQ-5-11, 5990 - 6058       | R.ATSNVFMFDQSQIQEFK.E                                                   | 2092.31741 | 2 | 1.12E-05 | 0.98 | 5.41  | -     | 1757.6  |
| AHQ-5-11, 5695 - 5734       | R.DGFIDKEDLHMLASLGK.N                                                   | 2005.23806 | 3 | 1.66E-08 | 0.95 | 4.56  | -     | 1589.2  |
| AHQ-5-11, 5824 - 5834       | R.DGFIDKEDLHMLASLGK.N                                                   | 2005.23806 | 2 | 5.50E-07 | 0.98 | 6.31  | -     | 1740.7  |
| AHQ-5-11, 5832 - 5844       | R.DGFIDKEDLHMLASLGK.N                                                   | 2005.23806 | 3 | 4.99E-06 | 0.96 | 4.64  | -     | 1715.6  |
| AHQ-5-14-, 5801             | R.DGFIDKEDLHMLASLGK.N                                                   | 2005.23806 | 3 | 1.98E-10 | 0.91 | 4.01  | -     | 1136.5  |
| AHQ-5-11, 5688 - 5750       | R.DGFIDKEDLHMLASLGK.N                                                   | 2005.23806 | 2 | 1.03E-08 | 0.97 | 5.54  | -     | 1631.3  |
| AHQ-5-13-, 5900             | R.DGFIDKEDLHMLASLGK.N                                                   | 2005.23806 | 3 | 2.80E-09 | 0.94 | 4.10  | -     | 1720.4  |
| AHQ-5-12, 4569              | R.DGFIDKEDLHMLASLGK.N                                                   | 2021.23746 | 2 | 1.66E-04 | 0.90 | 4.37  | -     | 618.0   |
| AHQ-5-12, 5917              | R.DGFIDKEDLHMLASLGK.N                                                   | 2005.23806 | 2 | 1.91E-10 | 0.97 | 5.11  | -     | 1700.4  |
| AHQ-5-12, 5922              | R.DGFIDKEDLHMLASLGK.N                                                   | 2005.23806 | 3 | 2.04E-08 | 0.93 | 4.15  | -     | 1405.4  |
| AHQ-5-14-, 5802             | R.DGFIDKEDLHMLASLGK.N                                                   | 2005.23806 | 2 | 3.22E-09 | 0.95 | 4.78  | -     | 923.3   |
| AHQ-5-11, 6142 - 6215       | K.EAFNMIDQNRDGFIDKEDLHMLASLGK.N                                         | 3224.57104 | 3 | 4.20E-05 | 0.95 | 5.15  | -     | 1310.2  |
| AHQ-5-11, 6243              | K.EAFNMIDQNRDGFIDKEDLHMLASLGK.N                                         | 3224.57104 | 3 | 6.34E-06 | 0.96 | 5.63  | -     | 1648.2  |
| AHQ-5-12, 2605              | R.ELLTTMGDR.F                                                           | 1036.18513 | 1 | 6.99E-04 | 0.23 | 1.81  | -     | 130.1   |
| AHQ-5-11, 2539              | R.ELLTTMGDR.F                                                           | 1036.18513 | 1 | 8.24E-05 | 0.24 | 1.97  | -     | 73.9    |
| AHQ-5-11, 4243              | K.GNFNIEFTR.I                                                           | 1261.36733 | 1 | 2.06E-04 | 0.37 | 2.06  | -     | 391.6   |
| AHQ-5-11, 4239              | K.GNFNIEFTR.I                                                           | 1261.36733 | 2 | 6.72E-05 | 0.70 | 3.15  | -     | 674.6   |
| AHQ-5-13-, 4196             | K.GNFNIEFTR.I                                                           | 1261.36733 | 2 | 1.79E-05 | 0.77 | 2.79  | -     | 754.2   |
| AHQ-5-11, 4107              | K.GNFNIEFTR.I                                                           | 1261.36733 | 1 | 3.18E-04 | 0.34 | 2.24  | -     | 263.6   |
| AHQ-5-11, 4002 - 4070       | K.GNFNIEFTR.I                                                           | 1261.36733 | 2 | 5.47E-05 | 0.79 | 3.06  | -     | 720.8   |
| AHQ-5-12, 4152              | K.GNFNIEFTR.I                                                           | 1261.36733 | 2 | 3.98E-04 | 0.82 | 2.96  | -     | 918.0   |
| AHQ-5-11, 3380              | K.GNFNIEFTR.I                                                           | 1389.54025 | 2 | 3.99E-07 | 0.92 | 2.97  | -     | 1034.6  |
| gi 4502219 ref NP_001656.1  | ras homolog gene family, member G (rho G); RhoG [Homo sapiens]          |            |   | 1.94E-10 | 1.67 | 20.20 | 18.80 | 21338.4 |
| AHQ-5-11, 4878 - 4895       | K.EYIPTVFDNYSQAQSAVDGR.T                                                | 2133.25975 | 2 | 7.74E-04 | 0.75 | 3.41  | -     | 381.2   |
| AHQ-5-11, 4826              | R.TVNLNLWDGAEQYDR.L                                                     | 2025.12129 | 2 | 1.94E-10 | 0.92 | 3.99  | -     | 1157.1  |
| gi 6912638 ref NP_036557.1  | ras suppressor protein 1 [Homo sapiens]                                 |            |   | 1.99E-10 | 5.39 | 60.27 | 45.80 | 31540.1 |
| AHQ-5-10, 6492 - 6562       | K.AENNPWVTPIDQFQLGVSHVFEYIR.S                                           | 3032.35678 | 3 | 1.02E-09 | 0.77 | 3.79  | -     | 560.6   |
| AHQ-5-12, 7068 - 7069       | K.AENNPWVTPIDQFQLGVSHVFEYIR.S                                           | 3032.35678 | 3 | 3.57E-05 | 0.80 | 4.02  | -     | 416.5   |
| AHQ-5-10, 5694 - 5754       | R.ALYLSDNDFEILPPDIGK.L                                                  | 2021.25559 | 2 | 2.30E-04 | 0.85 | 3.83  | -     | 431.5   |
| AHQ-5-10, 5814 - 5879       | R.ALYLSDNDFEILPPDIGK.L                                                  | 2021.25559 | 2 | 1.99E-10 | 0.92 | 4.52  | -     | 494.3   |
| AHQ-5-13-, 6119 - 6181      | R.ALYLSDNDFEILPPDIGK.L                                                  | 2021.25559 | 2 | 4.28E-04 | 0.70 | 2.86  | -     | 402.8   |
| AHQ-5-11, 6024 - 6086       | R.ALYLSDNDFEILPPDIGK.L                                                  | 2021.25559 | 2 | 9.27E-04 | 0.49 | 3.03  | -     | 308.2   |
| AHQ-5-12, 6282              | R.ALYLSDNDFEILPPDIGK.L                                                  | 2021.25559 | 2 | 4.91E-06 | 0.77 | 3.44  | -     | 362.5   |
| AHQ-5-10, 6530 - 6532       | R.GISNMLDVNGLFTLSHITQLVLSHKN.L                                          | 2853.28963 | 2 | 1.72E-05 | 0.82 | 4.10  | -     | 295.7   |
| AHQ-5-10, 6531              | R.GISNMLDVNGLFTLSHITQLVLSHKN.L                                          | 2853.28963 | 3 | 3.61E-09 | 0.86 | 4.30  | -     | 698.0   |
| AHQ-5-10, 5379 - 5438       | K.LQLSLRDNLDLISLPK.E                                                    | 1839.16919 | 2 | 1.88E-05 | 0.91 | 4.31  | -     | 1270.5  |
| AHQ-5-10, 5290              | K.LQLSLRDNLDLISLPK.E                                                    | 1839.16919 | 2 | 1.19E-06 | 0.93 | 4.85  | -     | 1185.7  |
| AHQ-5-10, 5431              | R.LTVLPPPELGNLDLTGQK.Q                                                  | 1809.09672 | 3 | 3.20E-07 | 0.97 | 5.40  | -     | 2076.9  |
| AHQ-5-11, 5798              | R.LTVLPPPELGNLDLTGQK.Q                                                  | 1809.09672 | 2 | 4.49E-06 | 0.81 | 3.59  | -     | 420.1   |
| AHQ-5-11, 5676 - 5738       | R.LTVLPPPELGNLDLTGQK.Q                                                  | 1809.09672 | 2 | 5.27E-05 | 0.79 | 3.48  | -     | 408.1   |
| AHQ-5-13-, 5859 - 5887      | R.LTVLPPPELGNLDLTGQK.Q                                                  | 1809.09672 | 2 | 9.87E-05 | 0.94 | 4.83  | -     | 626.5   |
| AHQ-5-10, 6432 - 6498       | K.NLELVNFFNNQIEELPTQISSLQK.L                                            | 2820.14663 | 2 | 6.83E-06 | 0.94 | 5.28  | -     | 680.0   |
| AHQ-5-14-, 6757 - 6829      | K.NLELVNFFNNQIEELPTQISSLQK.L                                            | 2820.14663 | 3 | 6.49E-04 | 0.90 | 4.45  | -     | 741.3   |
| AHQ-5-13, 6822 - 6892       | K.NLELVNFFNNQIEELPTQISSLQK.L                                            | 2820.14663 | 3 | 1.05E-04 | 0.93 | 5.37  | -     | 656.5   |
| gi 27482573 ref XP_208709.1 | similar to Ubiquitin-conjugating enzyme E2-18 kDa UbcH7 (Ubiquitin-pro  |            |   | 2.22E-10 | 2.04 | 30.27 | 31.80 | 17874.0 |
| AHQ-5-12, 4880 - 4892       | K.GQVCLPISVAENWPKAT.T                                                   | 2000.30757 | 2 | 2.22E-10 | 0.96 | 5.41  | -     | 775.1</ |





|                            |                                                                         |            |   |          |       |        |       |         |
|----------------------------|-------------------------------------------------------------------------|------------|---|----------|-------|--------|-------|---------|
| AHQ-5-10, 2115             | R.YLAEVATGEK.R                                                          | 1081.20087 | 2 | 1.08E-06 | 0.88  | 3.14   | -     | 960.6   |
| gi 4503689 ref NP_000499.1 | fibrinogen, alpha chain isoform alpha-E preproprotein [Homo sapiens] [M |            |   | 3.56E-10 | 17.51 | 220.29 | 28.80 | 94972.5 |
| AHQ-5-6, 5885              | K.DSDWPFCSDDEDWNYK.C                                                    | 1965.98609 | 2 | 2.98E-06 | 0.90  | 3.56   | -     | 652.1   |
| AHQ-5-7, 5839 - 5848       | K.DSDWPFCSDDEDWNYK.C                                                    | 1965.98609 | 2 | 4.72E-05 | 0.80  | 3.13   | -     | 462.6   |
| AHQ-5-1, 6075              | K.DSDWPFCSDDEDWNYK.C                                                    | 1965.98609 | 2 | 1.60E-07 | 0.85  | 3.34   | -     | 466.7   |
| AHQ-5-6, 5901 - 5973       | K.DSDWPFCSDDEDWNYK.C                                                    | 1965.98609 | 2 | 4.68E-06 | 0.94  | 4.22   | -     | 697.0   |
| AHQ-5-10, 5131 - 5151      | K.DSHSLTTNIMEILR.G                                                      | 1630.84839 | 2 | 5.03E-04 | 0.96  | 4.37   | -     | 1474.7  |
| AHQ-5-9, 4915              | K.DSHSLTTNIMEILR.G                                                      | 1630.84839 | 2 | 3.38E-06 | 0.94  | 3.98   | -     | 1024.6  |
| AHQ-5-8, 5153              | K.DSHSLTTNIMEILR.G                                                      | 1630.84839 | 2 | 2.92E-04 | 0.96  | 4.60   | -     | 1166.3  |
| AHQ-5-10, 4371             | K.DSHSLTTNIMEILR.G                                                      | 1646.84779 | 2 | 1.09E-04 | 0.91  | 3.73   | -     | 1047.7  |
| AHQ-5-6, 5628              | K.DSHSLTTNIMEILR.G                                                      | 1630.84839 | 2 | 2.15E-06 | 0.96  | 4.02   | -     | 1675.5  |
| AHQ-5-11, 2167 - 2172      | K.ESSSHHPGIAEPPSR.G                                                     | 1638.72252 | 2 | 1.26E-07 | 0.86  | 3.01   | -     | 761.4   |
| AHQ-5-12, 2234             | K.ESSSHHPGIAEPPSR.G                                                     | 1638.72252 | 2 | 7.11E-05 | 0.76  | 2.66   | -     | 663.2   |
| AHQ-5-8, 2226              | R.EVDLKDYEYDQKQ.Q                                                       | 1510.58460 | 2 | 1.43E-07 | 0.80  | 3.12   | -     | 574.3   |
| AHQ-5-4, 2497              | R.EVDLKDYEYDQKQ.Q                                                       | 1510.58460 | 2 | 8.63E-06 | 0.87  | 3.38   | -     | 710.9   |
| AHQ-5-13-, 2633 - 2640     | R.EVDLKDYEYDQKQ.Q                                                       | 1510.58460 | 2 | 7.31E-08 | 0.88  | 3.56   | -     | 664.0   |
| AHQ-5-7, 2339 - 2343       | R.EVDLKDYEYDQKQ.Q                                                       | 1510.58460 | 2 | 3.02E-04 | 0.85  | 3.24   | -     | 732.4   |
| AHQ-5-9, 2355              | R.EVDLKDYEYDQKQ.Q                                                       | 1510.58460 | 2 | 4.63E-06 | 0.86  | 3.02   | -     | 805.9   |
| AHQ-5-3, 2529              | R.EVDLKDYEYDQKQ.Q                                                       | 1510.58460 | 2 | 1.59E-05 | 0.70  | 2.87   | -     | 500.1   |
| AHQ-5-14-, 2587            | R.EVDLKDYEYDQKQ.Q                                                       | 1510.58460 | 2 | 2.67E-09 | 0.90  | 3.84   | -     | 619.6   |
| AHQ-5-6, 2376              | R.EVDLKDYEYDQKQ.Q                                                       | 1510.58460 | 2 | 1.25E-07 | 0.66  | 2.62   | -     | 544.3   |
| AHQ-5-13, 2774             | R.EVDLKDYEYDQKQ.Q                                                       | 1510.58460 | 2 | 1.25E-04 | 0.70  | 2.72   | -     | 707.8   |
| AHQ-5-6, 6598 - 6622       | K.EVVTSEDDGSDCPAAMDGLTSLGIGTLDGFR.H                                     | 3131.34937 | 3 | 3.13E-08 | 0.95  | 5.41   | -     | 1040.9  |
| AHQ-5-6, 6852 - 6917       | K.EVVTSEDDGSDCPAAMDGLTSLGIGTLDGFR.H                                     | 3131.34937 | 3 | 1.14E-06 | 0.96  | 5.30   | -     | 1674.2  |
| AHQ-5-1, 6757 - 6800       | K.EVVTSEDDGSDCPAAMDGLTSLGIGTLDGFR.H                                     | 3131.34937 | 3 | 1.53E-07 | 0.76  | 3.44   | -     | 885.4   |
| AHQ-5-13-, 6275            | K.EVVTSEDDGSDCPAAMDGLTSLGIGTLDGFR.H                                     | 3131.34937 | 3 | 3.85E-06 | 0.94  | 5.16   | -     | 977.5   |
| AHQ-5-13, 6232 - 6234      | K.EVVTSEDDGSDCPAAMDGLTSLGIGTLDGFR.H                                     | 3147.34877 | 3 | 1.14E-06 | 0.88  | 4.70   | -     | 819.4   |
| AHQ-5-6, 1549              | R.GGSTSYGTGSETESPR.N                                                    | 1573.55765 | 2 | 9.06E-06 | 0.62  | 3.14   | -     | 466.7   |
| AHQ-5-10, 4296             | K.GLIDEVNDQFTNR.I                                                       | 1521.61384 | 2 | 1.60E-06 | 0.83  | 3.71   | -     | 760.3   |
| AHQ-5-3, 4949              | K.GLIDEVNDQFTNR.I                                                       | 1521.61384 | 2 | 1.22E-04 | 0.91  | 3.91   | -     | 949.5   |
| AHQ-5-6, 4580              | K.GLIDEVNDQFTNR.I                                                       | 1521.61384 | 2 | 5.12E-05 | 0.48  | 2.59   | -     | 532.5   |
| AHQ-5-9, 4216              | K.GLIDEVNDQFTNR.I                                                       | 1521.61384 | 2 | 1.45E-04 | 0.83  | 2.77   | -     | 1125.8  |
| AHQ-5-6, 4676 - 4700       | K.GLIDEVNDQFTNR.I                                                       | 1521.61384 | 2 | 2.42E-07 | 0.92  | 3.81   | -     | 875.0   |
| AHQ-5-1, 4939              | K.GLIDEVNDQFTNR.I                                                       | 1521.61384 | 2 | 1.43E-07 | 0.89  | 3.67   | -     | 782.0   |
| AHQ-5-5, 4795              | K.GLIDEVNDQFTNR.I                                                       | 1521.61384 | 2 | 4.03E-10 | 0.96  | 4.86   | -     | 1330.2  |
| AHQ-5-2, 4921              | K.GLIDEVNDQFTNR.I                                                       | 1521.61384 | 2 | 6.66E-07 | 0.92  | 3.65   | -     | 949.0   |
| AHQ-5-13, 4734             | K.GLIDEVNDQFTNR.I                                                       | 1521.61384 | 2 | 9.55E-05 | 0.90  | 3.28   | -     | 1103.8  |
| AHQ-5-7, 4512 - 4587       | K.GLIDEVNDQFTNR.I                                                       | 1521.61384 | 2 | 2.38E-07 | 0.92  | 3.74   | -     | 1026.1  |
| AHQ-5-12, 4696             | K.GLIDEVNDQFTNR.I                                                       | 1521.61384 | 2 | 2.68E-06 | 0.93  | 3.43   | -     | 1229.8  |
| AHQ-5-4, 4909              | K.GLIDEVNDQFTNR.I                                                       | 1521.61384 | 2 | 2.77E-06 | 0.92  | 3.38   | -     | 1159.5  |
| AHQ-5-8, 4454              | K.GLIDEVNDQFTNR.I                                                       | 1521.61384 | 2 | 4.93E-10 | 0.94  | 3.91   | -     | 1032.3  |
| AHQ-5-8, 3966              | K.GLIDEVNDQFTNR.I                                                       | 1521.61384 | 2 | 1.12E-05 | 0.84  | 3.33   | -     | 676.8   |
| AHQ-5-13-, 4635 - 4664     | K.GLIDEVNDQFTNR.I                                                       | 1521.61384 | 2 | 1.12E-06 | 0.91  | 3.80   | -     | 997.8   |
| AHQ-5-4, 2141              | R.GSESGIFTN.K.E                                                         | 1141.21317 | 1 | 3.13E-04 | 0.11  | 1.80   | -     | 221.5   |
| AHQ-5-6, 1998              | R.GSESGIFTN.K.E                                                         | 1141.21317 | 1 | 1.20E-04 | 0.25  | 2.21   | -     | 217.1   |
| AHQ-5-13-, 2296            | R.GSESGIFTN.K.E                                                         | 1141.21317 | 2 | 4.83E-04 | 0.90  | 3.48   | -     | 1202.1  |
| AHQ-5-6, 2089              | R.GSESGIFTN.K.E                                                         | 1141.21317 | 1 | 3.79E-04 | 0.29  | 2.19   | -     | 399.9   |
| AHQ-5-13, 2467             | R.GSESGIFTN.K.E                                                         | 1141.21317 | 2 | 6.53E-05 | 0.69  | 2.62   | -     | 1001.1  |
| AHQ-5-12, 3006             | R.HPDEAAFFDTASTGK.T                                                     | 1594.66329 | 2 | 2.27E-05 | 0.69  | 3.10   | -     | 422.2   |
| AHQ-5-13-, 3052            | R.HPDEAAFFDTASTGK.T                                                     | 1594.66329 | 2 | 3.56E-10 | 0.81  | 3.51   | -     | 300.3   |
| AHQ-5-9, 4180              | R.HQSAACKSDSWPFCSDDEDWNYK.C                                             | 2678.76438 | 2 | 1.46E-06 | 0.62  | 2.56   | -     | 516.1   |
| AHQ-5-10, 2308             | R.HRHPEAAFFDTASTGK.T                                                    | 1887.98954 | 2 | 2.51E-06 | 0.97  | 5.26   | -     | 1297.8  |
| AHQ-5-7, 2216              | R.HRHPEAAFFDTASTGK.T                                                    | 1887.98954 | 2 | 5.62E-06 | 0.93  | 4.21   | -     | 839.1   |
| AHQ-5-13, 2791 - 2797      | R.HRHPEAAFFDTASTGK.T                                                    | 1887.98954 | 2 | 6.58E-09 | 0.97  | 5.33   | -     | 1367.7  |
| AHQ-5-12, 2462             | R.HRHPEAAFFDTASTGK.T                                                    | 1887.98954 | 2 | 1.21E-06 | 0.98  | 5.74   | -     | 1734.8  |
| AHQ-5-11, 2408             | R.HRHPEAAFFDTASTGK.T                                                    | 1887.98954 | 3 | 4.65E-07 | 0.97  | 5.36   | -     | 1849.9  |
| AHQ-5-11, 2396             | R.HRHPEAAFFDTASTGK.T                                                    | 1887.98954 | 2 | 3.94E-08 | 0.96  | 5.26   | -     | 1010.5  |
| AHQ-5-13-, 2641            | R.HRHPEAAFFDTASTGK.T                                                    | 1887.98954 | 2 | 2.85E-08 | 0.97  | 4.83   | -     | 1330.2  |
| AHQ-5-9, 2238              | R.HRHPEAAFFDTASTGK.T                                                    | 1887.98954 | 2 | 1.97E-04 | 0.95  | 4.36   | -     | 1063.9  |
| AHQ-5-6, 2237              | R.HRHPEAAFFDTASTGK.T                                                    | 1887.98954 | 2 | 8.72E-04 | 0.97  | 4.95   | -     | 1663.8  |
| AHQ-5-7, 2315              | R.MELERPPGGNEITR.G                                                      | 1502.67870 | 2 | 5.86E-04 | 0.67  | 3.07   | -     | 462.4   |
| AHQ-5-9, 2950 - 2951       | K.M*KPVPDLVPGNFK.S                                                      | 1458.75054 | 2 | 1.75E-05 | 0.86  | 3.27   | -     | 598.2   |
| AHQ-5-6, 3200              | K.M*KPVPDLVPGNFK.S                                                      | 1458.75054 | 2 | 3.39E-04 | 0.33  | 2.56   | -     | 223.7   |
| AHQ-5-9, 4582              | K.NNKDSHSLTTNIMEILR.G                                                   | 1987.22751 | 2 | 1.31E-05 | 0.87  | 3.56   | -     | 929.3   |
| AHQ-5-1, 2367              | R.NPSSAGSWNSGSSGPGSTGNR.N                                               | 1964.94443 | 2 | 3.85E-07 | 0.80  | 3.30   | -     | 480.8   |
| AHQ-5-7, 2051 - 2054       | R.NPSSAGSWNSGSSGPGSTGNR.N                                               | 1964.94443 | 2 | 9.28E-08 | 0.89  | 3.86   | -     | 670.0   |
| AHQ-5-7, 1936              | R.NPSSAGSWNSGSSGPGSTGNR.N                                               | 1964.94443 | 2 | 4.93E-07 | 0.88  | 3.89   | -     | 669.5   |
| AHQ-5-6, 1953              | R.NPSSAGSWNSGSSGPGSTGNR.N                                               | 1964.94443 | 2 | 2.70E-05 | 0.88  | 3.93   | -     | 614.3   |
| AHQ-5-7, 3058              | K.NSLFEYQK.N                                                            | 1029.12765 | 1 | 8.71E-05 | 0.14  | 1.89   | -     | 202.1   |
| AHQ-5-8, 2954              | K.NSLFEYQK.N                                                            | 1029.12765 | 1 | 1.04E-04 | 0.13  | 1.80   | -     | 184.0   |
| AHQ-5-9, 4224              | R.PNNPDWGTFFEEVSGNVSPGTR.R                                              | 2261.34962 | 2 | 1.73E-06 | 0.94  | 4.51   | -     | 979.4   |
| AHQ-5-10, 4306             | R.PNNPDWGTFFEEVSGNVSPGTR.R                                              | 2261.34962 | 2 | 3.38E-07 | 0.96  | 4.85   | -     | 1093.8  |
| AHQ-5-11, 4603             | R.PNNPDWGTFFEEVSGNVSPGTR.R                                              | 2261.34962 | 2 | 7.81E-06 | 0.95  | 4.62   | -     | 1121.3  |
| AHQ-5-12, 4768             | R.PNNPDWGTFFEEVSGNVSPGTR.R                                              | 2261.34962 | 2 | 4.16E-09 | 0.95  | 4.78   | -     | 952.7   |
| AHQ-5-6, 4644 - 4724       | R.PNNPDWGTFFEEVSGNVSPGTR.R                                              | 2261.34962 | 2 | 1.76E-07 | 0.95  | 4.19   | -     | 1274.6  |
| AHQ-5-3, 7503              | K.TFPGFFSPMLGEFVSETESR.G                                                | 2266.51432 | 2 | 1.14E-05 | 0.83  | 3.51   | -     | 322.4   |
| AHQ-5-7, 7223 - 7278       | K.TFPGFFSPMLGEFVSETESR.G                                                | 2266.51432 | 2 | 3.41E-06 | 0.21  | 2.55   | -     | 250.5   |
| AHQ-5-1, 7319 - 7392       | K.TFPGFFSPMLGEFVSETESR.G                                                | 2266.51432 | 2 | 3.00E-05 | 0.82  | 3.69   | -     | 304.3   |
| AHQ-5-13-, 6803 - 6868     | K.TFPGFFSPMLGEFVSETESR.G                                                | 2266.51432 | 2 | 9.53E-07 | 0.88  | 4.04   | -     | 537.0   |
| AHQ-5-11, 6498             | K.TFPGFFSPMLGEFVSETESR.G                                                | 2282.51372 | 2 | 8.08E-04 | 0.66  | 3.22   | -     | 191.6   |
| AHQ-5-11, 6739 - 6799      | K.TFPGFFSPMLGEFVSETESR.G                                                | 2266.51432 | 2 | 1.36E-08 | 0.92  | 4.21   | -     | 534.7   |
| AHQ-5-4, 7452              | K.TFPGFFSPMLGEFVSETESR.G                                                | 2266.51432 | 2 | 3.60E-06 | 0.82  | 3.63   | -     | 312.1   |
| AHQ-5-13, 6897             | K.TFPGFFSPMLGEFVSETESR.G                                                | 2266.51432 | 2 | 1.36E-05 | 0.84  | 3.89   | -     | 279.4   |
| AHQ-5-6, 7292              | K.TFPGFFSPMLGEFVSETESR.G                                                | 2266.51432 | 2 | 4.21E-07 | 0.87  | 3.73   | -     | 550.2   |
| AHQ-5-6, 6908              | K.TFPGFFSPMLGEFVSETESR.G                                                | 2282.51372 | 2 | 7.23E-05 | 0.73  | 3.64   | -     | 145.9   |
| AHQ-5-9, 6462              | K.TFPGFFSPMLGEFVSETESR.G                                                | 2266.51432 | 2 | 1.28E-06 | 0.85  | 3.34   | -     | 559.7   |
| AHQ-5-12, 6733             | K.TFPGFFSPMLGEFVSETESR.G                                                | 2282.51372 | 2 | 6.52E-04 | 0.54  | 2.68   | -     | 226.3   |
| AHQ-5-12, 7028             | K.TFPGFFSPMLGEFVSETESR.G                                                | 2266.51432 | 2 | 9.40E-06 | 0.90  | 3.94   | -     | 499.7   |
| AHQ-5-2, 7179              | K.TFPGFFSPMLGEFVSETESR.G                                                | 2282.51372 | 2 | 1.15E-04 | 0.76  | 3.02   | -     | 312.7   |
| AHQ-5-13, 6693             | K.TFPGFFSPMLGEFVSETESR.G                                                | 2282.51372 | 2 | 3.87E-04 | 0.83  | 3.66   | -     | 330.0   |
| AHQ-5-5, 7389 - 7391       | K.TFPGFFSPMLGEFVSETESR.G                                                | 2266.51432 | 2 | 3.16E-07 | 0.86  | 3.64   | -     | 466.9   |
| AHQ-5-6, 1990 - 2033       | K.VQHIQLLQK.N                                                           | 1107.33106 | 2 | 1.23E-04 | 0.65  | 2.66   | -     | 565.9   |
| AHQ-5-6, 2029              | K.VQHIQLLQK.N                                                           | 1107.33106 | 1 | 6.19E-04 | 0.41  | 2.41   | -     | 565.5   |
| AHQ-5-6, 2040              | K.VQHIQLLQK.N                                                           | 1107.33106 | 1 | 6.95E-04 | 0.61  | 2.75   | -     | 521.0   |
| AHQ-5-7, 1986              | K.VQHIQLLQK.N                                                           | 1107.33106 | 2 | 8.75E-05 | 0.70  | 2.83   | -     | 572.8   |
| AHQ-5-7, 1987              | K.VQHIQLLQK.N                                                           | 1107.33106 | 1 | 1.89E-04 | 0.35  | 2.71   | -     | 223.8   |
| AHQ-5-8, 1876              | K.VQHIQLLQK.N                                                           | 1107.33106 | 2 | 3.23E-05 | 0.73  | 2.69   | -     | 608.9   |
| AHQ-5-3, 2251              | K.VQHIQLLQK.N                                                           | 1107.33106 | 1 | 2.27E-04 | 0.49  | 2.36   | -     | 625.1   |
| AHQ-5-9, 2062              | K.VQHIQLLQK.N                                                           | 1107.33106 | 1 | 1.29E-04 | 0.72  | 2.70   | -     | 724.8   |
| AHQ-5-9, 2068 - 2074       | K.VQHIQLLQK.N                                                           | 1107.33106 | 2 | 7.18E-05 | 0.80  | 3.03   | -     | 689.6   |
| AHQ-5-1, 2495              | K.VQHIQLLQK.N                                                           | 1107.33106 | 1 | 3.23E-05 | 0.49  | 2.58   | -     | 624.1   |
| AHQ-5-10, 2098             | K.VQHIQLLQK.N                                                           | 1107.33106 | 1 | 3.23E-04 | 0.78  | 3.13   | -     | 539.1   |
| AHQ-5-8, 1880              | K.VQHIQLLQK.N                                                           | 1107.33106 | 1 | 5.28E-04 | 0.52  | 2.67   | -     | 204.0   |
| gi 7705767 ref NP_057086.1 | CGI-49 protein [Homo sapiens]                                           |            |   | 4.26E-10 | 0.67  | 10.19  | 6.80  | 46920.8 |
| AHQ-5-1, 7429              | K.GPEAGYVATPIAMVQAAM*TLSSDASHLPK.A                                      | 2957.41485 | 3 | 4.26E-10 | 0.67  | 3.89   | -     | 569.9   |
| gi 4502565 ref NP_001740.1 | calpain, small subunit 1; calpain, small polypeptide; calcium-dependent |            |   | 4.       |       |        |       |         |

|                             |                                                                             |            |   |          |      |      |   |        |
|-----------------------------|-----------------------------------------------------------------------------|------------|---|----------|------|------|---|--------|
| AHQ-5-12, 2734 - 2742       | R.SMVAVMDSDDTGG.L                                                           | 1342.52228 | 2 | 6.08E-06 | 0.93 | 3.47 | - | 1183.0 |
| AHQ-5-11, 2223              | R.THYSNIEANSESEVR.Q                                                         | 1778.81502 | 3 | 4.68E-07 | 0.95 | 4.22 | - | 1632.8 |
| AHQ-5-12, 6650 - 6685       | R.YSDESGNMDFDNFISCLVR.L                                                     | 2287.42568 | 2 | 3.20E-09 | 0.92 | 4.14 | - | 882.9  |
| AHQ-5-12, 6945              | R.YSDESGNMDFDNFISCLVR.L                                                     | 2271.42628 | 2 | 6.95E-10 | 0.92 | 4.42 | - | 775.1  |
| AHQ-5-14-, 6514             | R.YSDESGNMDFDNFISCLVR.L                                                     | 2287.42568 | 2 | 4.37E-10 | 0.93 | 4.42 | - | 1093.9 |
| AHQ-5-11, 6451 - 6464       | R.YSDESGNMDFDNFISCLVR.L                                                     | 2287.42568 | 2 | 1.77E-08 | 0.94 | 3.81 | - | 1347.4 |
| gi 28373103 ref NP_005164.2 | sarco/endoplasmic reticulum Ca2+ -ATPase isoform a; ATPase, Ca(2+)-tra      |            |   |          |      |      |   |        |
| AHQ-5-1, 3909               | R.HFSVTAEGGLSPAQVTGAR.E                                                     | 1886.05823 | 2 | 4.41E-10 | 0.96 | 4.66 | - | 1549.5 |
| gi 10835187 ref NP_000627.1 | superoxide dismutase 2, mitochondrial [Homo sapiens]                        |            |   |          |      |      |   |        |
| AHQ-5-11, 5894 - 5967       | K.AIWNVINWENVTER.Y                                                          | 1744.93137 | 2 | 2.05E-07 | 0.93 | 3.92 | - | 903.3  |
| AHQ-5-13-, 6165             | K.AIWNVINWENVTER.Y                                                          | 1744.93137 | 2 | 1.09E-04 | 0.93 | 3.95 | - | 1120.5 |
| AHQ-5-12, 6174              | K.AIWNVINWENVTER.Y                                                          | 1744.93137 | 2 | 1.50E-06 | 0.92 | 3.88 | - | 896.3  |
| AHQ-5-11, 6116 - 6194       | K.AIWNVINWENVTER.Y                                                          | 1744.93137 | 2 | 4.32E-09 | 0.96 | 4.28 | - | 1549.6 |
| AHQ-5-11, 6027              | K.AIWNVINWENVTER.Y                                                          | 1744.93137 | 2 | 1.30E-09 | 0.94 | 3.92 | - | 1280.3 |
| AHQ-5-14-, 6042 - 6110      | K.AIWNVINWENVTER.Y                                                          | 1744.93137 | 2 | 1.89E-06 | 0.96 | 4.50 | - | 1338.9 |
| AHQ-5-11, 4407              | K.FNNGGGINHSIFWTNLSPNGGGEK.G                                                | 2638.83761 | 2 | 7.47E-08 | 0.92 | 4.45 | - | 1380.9 |
| AHQ-5-11, 4502 - 4527       | K.FNNGGGINHSIFWTNLSPNGGGEK.G                                                | 2638.83761 | 2 | 2.75E-04 | 0.87 | 4.22 | - | 634.1  |
| AHQ-5-11, 3739 - 3874       | K.GDVTAQIALQPAK.F                                                           | 1425.65548 | 1 | 1.76E-04 | 0.52 | 2.45 | - | 775.6  |
| AHQ-5-11, 3736 - 3799       | K.GDVTAQIALQPAK.F                                                           | 1425.65548 | 2 | 2.44E-07 | 0.91 | 4.13 | - | 808.1  |
| AHQ-5-11, 3750 - 3810       | K.GDVTAQIALQPAK.F                                                           | 1425.65548 | 1 | 2.57E-04 | 0.72 | 3.10 | - | 768.5  |
| AHQ-5-11, 6824 - 6854       | R.GHLQAACPNQDPLQGTGLIPLLDIVWEHAYLYQK.N                                      | 4296.85327 | 3 | 4.55E-10 | 0.97 | 5.68 | - | 1857.4 |
| AHQ-5-11, 2274 - 2354       | K.HHAAYVNNLNVTTEK.Y                                                         | 1739.86999 | 3 | 3.78E-05 | 0.89 | 4.18 | - | 1127.6 |
| AHQ-5-11, 2174              | K.HHAAYVNNLNVTTEK.Y                                                         | 1739.86999 | 3 | 2.43E-04 | 0.89 | 4.23 | - | 1128.5 |
| AHQ-5-11, 2270 - 2335       | K.HHAAYVNNLNVTTEK.Y                                                         | 1739.86999 | 2 | 4.35E-09 | 0.97 | 4.32 | - | 1814.6 |
| AHQ-5-11, 2170              | K.HHAAYVNNLNVTTEK.Y                                                         | 1739.86999 | 2 | 6.25E-07 | 0.97 | 4.52 | - | 1907.8 |
| AHQ-5-11, 6028 - 6056       | K.LTAASVGVGGSGWGLGFNK.E                                                     | 2036.27841 | 2 | 4.96E-06 | 0.96 | 5.04 | - | 990.0  |
| AHQ-5-11, 6895 - 6971       | K.LTAASVGVGGSGWGLGFNK.E                                                     | 2036.27841 | 2 | 2.95E-08 | 0.92 | 4.58 | - | 628.3  |
| gi 4506193 ref NP_002784.1  | proteasome beta 1 subunit; proteasome subunit HC5; proteasome component     |            |   |          |      |      |   |        |
| AHQ-5-11, 6774              | R.FFPYVYVNIIGLDEEGK.G                                                       | 2125.36396 | 2 | 4.55E-10 | 0.93 | 4.19 | - | 765.2  |
| AHQ-5-11, 3935              | K.GAVYSFDPVGSYQR.D                                                          | 1546.66500 | 2 | 3.70E-05 | 0.88 | 3.50 | - | 949.9  |
| AHQ-5-11, 3408              | K.NMGNVHVLPLSLDR.A                                                          | 1652.85728 | 2 | 6.25E-06 | 0.88 | 4.07 | - | 612.6  |
| AHQ-5-11, 2942              | K.NM*QNVHVLPLSLDR.A                                                         | 1668.85668 | 2 | 2.90E-04 | 0.72 | 2.77 | - | 745.6  |
| AHQ-5-11, 6591              | R.RFFPYVYVNIIGLDEEGK.G                                                      | 2281.55031 | 2 | 6.61E-08 | 0.98 | 5.88 | - | 1710.0 |
| gi 5031677 ref NP_005681.1  | dynamitin 1-like protein isoform 3; dynamitin-like protein [Homo sapiens] [ |            |   |          |      |      |   |        |
| AHQ-5-13-, 4745             | K.ALQGGASQIAIE.R                                                            | 1370.57991 | 2 | 4.27E-04 | 0.90 | 3.76 | - | 1189.8 |
| AHQ-5-13, 4832 - 4834       | K.ALQGGASQIAIE.R                                                            | 1370.57991 | 2 | 1.81E-04 | 0.89 | 3.65 | - | 1326.8 |
| AHQ-5-13, 5269 - 5280       | K.DTLQSELVGLQYK.S                                                           | 1494.67144 | 2 | 3.74E-06 | 0.87 | 3.10 | - | 986.0  |
| AHQ-5-13, 4398 - 4460       | K.GHAVNLLDVPVVAR.K                                                          | 1557.82197 | 2 | 1.91E-06 | 0.75 | 2.86 | - | 678.8  |
| AHQ-5-5, 7070               | K.IFSPNVNLLTVDLPGMTK.V                                                      | 2059.45828 | 2 | 1.73E-06 | 0.94 | 4.59 | - | 980.7  |
| AHQ-5-6, 6962               | K.IFSPNVNLLTVDLPGMTK.V                                                      | 2059.45828 | 2 | 3.71E-05 | 0.90 | 3.48 | - | 1006.9 |
| AHQ-5-6, 3032               | R.IIQHCSNSTYQELLR.F                                                         | 1864.07262 | 2 | 1.46E-04 | 0.94 | 4.64 | - | 779.2  |
| AHQ-5-6, 7312 - 7314        | K.LQDVFNTVGDWGLFQPLQVIVVGTQSSGK.S                                           | 2928.32977 | 2 | 9.76E-07 | 0.81 | 4.10 | - | 366.8  |
| AHQ-5-6, 6204               | K.LYTFDFEIRQEINETER.I                                                       | 2301.40883 | 2 | 3.00E-04 | 0.40 | 2.61 | - | 297.0  |
| AHQ-5-13, 6826 - 6889       | K.SSLDDLLTLESEDM*AQR.R                                                      | 1924.07698 | 2 | 3.69E-06 | 0.88 | 3.88 | - | 700.4  |
| AHQ-5-13, 6285              | K.SSLDDLLTLESEDM*AQR.R                                                      | 1940.07638 | 2 | 1.08E-07 | 0.92 | 3.94 | - | 947.7  |
| AHQ-5-14-, 6094             | K.SSLDDLLTLESEDM*AQR.R                                                      | 1940.07638 | 2 | 2.14E-06 | 0.97 | 4.84 | - | 2042.9 |
| AHQ-5-14-, 6709 - 6779      | K.SSLDDLLTLESEDM*AQR.R                                                      | 1924.07698 | 2 | 1.04E-09 | 0.93 | 4.32 | - | 947.1  |
| AHQ-5-6, 7284               | R.TLESVPLDGLLNTDILTAR.N                                                     | 2212.52928 | 2 | 4.59E-10 | 0.97 | 5.31 | - | 1364.3 |
| gi 4758638 ref NP_004896.1  | peroxiredoxin 6; antioxidant protein 2; non-selenium glutathione peroxi     |            |   |          |      |      |   |        |
| AHQ-5-10, 4595 - 4668       | R.ELAILLGM*LDPAEKDEK.G                                                      | 1902.19916 | 2 | 6.13E-04 | 0.94 | 4.31 | - | 911.4  |
| AHQ-5-10, 5628 - 5686       | R.ELAILLGM*LDPAEKDEK.G                                                      | 1886.19976 | 2 | 7.29E-06 | 0.96 | 5.03 | - | 1100.3 |
| AHQ-5-10, 5878 - 5890       | R.FHDFLGDGWSGILFSHPR.D                                                      | 2032.24831 | 3 | 3.21E-09 | 0.95 | 5.08 | - | 1077.6 |
| AHQ-5-10, 5894              | R.FHDFLGDGWSGILFSHPR.D                                                      | 2032.24831 | 2 | 9.33E-07 | 0.98 | 5.96 | - | 2152.4 |
| AHQ-5-10, 5806 - 5870       | R.FHDFLGDGWSGILFSHPR.D                                                      | 2032.24831 | 2 | 2.44E-07 | 0.98 | 6.51 | - | 2334.7 |
| AHQ-5-10, 5456 - 5530       | K.LIALSIDSVEDHLAWSK.D                                                       | 1898.14883 | 2 | 5.01E-10 | 0.97 | 5.17 | - | 1525.9 |
| AHQ-5-14-, 5858             | K.LIALSIDSVEDHLAWSK.D                                                       | 1898.14883 | 3 | 2.25E-04 | 0.61 | 3.88 | - | 296.5  |
| AHQ-5-10, 5588 - 5647       | K.LIALSIDSVEDHLAWSK.D                                                       | 1898.14883 | 2 | 8.56E-08 | 0.94 | 4.51 | - | 1003.6 |
| AHQ-5-10, 5498              | K.LIALSIDSVEDHLAWSK.D                                                       | 1898.14883 | 3 | 4.05E-06 | 0.77 | 4.18 | - | 382.9  |
| AHQ-5-14-, 5857             | K.LIALSIDSVEDHLAWSK.D                                                       | 1898.14883 | 2 | 3.34E-06 | 0.96 | 4.42 | - | 1581.0 |
| AHQ-5-10, 4082              | K.LFPPIIDDR.N                                                               | 1086.26548 | 2 | 1.79E-05 | 0.93 | 3.28 | - | 1238.0 |
| AHQ-5-10, 2476              | R.VATPVDWK.D                                                                | 916.05568  | 1 | 3.82E-04 | 0.47 | 2.34 | - | 401.5  |
| AHQ-5-10, 5102 - 5170       | R.VATPVDWKDGSVMVLPTIPEEEAK.K                                                | 2728.06777 | 2 | 3.80E-06 | 0.92 | 4.50 | - | 687.9  |
| AHQ-5-10, 3455              | R.VVVFVGPDK.K                                                               | 1008.19471 | 1 | 2.39E-04 | 0.68 | 2.22 | - | 1202.2 |
| AHQ-5-10, 2728              | R.VVVFVGPDK.L                                                               | 1136.36763 | 2 | 1.79E-06 | 0.85 | 3.02 | - | 759.5  |
| gi 4759096 ref NP_004252.1  | 15 kDa selenoprotein [Homo sapiens]                                         |            |   |          |      |      |   |        |
| AHQ-5-12, 6118              | K.LLDDNGIAEELSILK.W                                                         | 1757.96344 | 2 | 5.04E-10 | 0.94 | 3.86 | - | 1138.6 |
| gi 22749499 ref NP_689979.1 | hypothetical protein MGC40107 [Homo sapiens]                                |            |   |          |      |      |   |        |
| AHQ-5-14-, 5494             | R.LGALSGAALGFASYGAHGAQFPDAYGK.E                                             | 2669.93152 | 3 | 2.03E-05 | 0.96 | 5.27 | - | 1840.1 |
| AHQ-5-14-, 5581 - 5582      | R.LGALSGAALGFASYGAHGAQFPDAYGK.E                                             | 2669.93152 | 3 | 5.07E-10 | 0.98 | 6.62 | - | 1989.5 |
| AHQ-5-14, 6253              | R.LGALSGAALGFASYGAHGAQFPDAYGK.E                                             | 2669.93152 | 3 | 1.84E-05 | 0.84 | 3.93 | - | 745.4  |
| gi 4503423 ref NP_001939.1  | dUTP pyrophosphatase [Homo sapiens]                                         |            |   |          |      |      |   |        |
| AHQ-5-11, 5475 - 5480       | R.FIYPEIEEVQALDDTER.G                                                       | 2068.22598 | 2 | 5.39E-10 | 0.97 | 4.73 | - | 1517.2 |
| gi 29742827 ref XP_294099.1 | similar to myosin:SUBUNIT=regulatory light chain [Homo sapiens]             |            |   |          |      |      |   |        |
| AHQ-5-11, 2731 - 2811       | K.EAFNMIDQNR.D                                                              | 1238.35558 | 2 | 4.36E-05 | 0.73 | 2.82 | - | 525.3  |
| AHQ-5-11, 2802 - 2858       | K.EAFNMIDQNR.D                                                              | 1238.35558 | 1 | 4.16E-06 | 0.19 | 1.91 | - | 230.8  |
| AHQ-5-11, 2198 - 2243       | K.EAFNM*IDQNR.D                                                             | 1254.35498 | 2 | 1.03E-04 | 0.64 | 2.68 | - | 537.4  |
| AHQ-5-11, 3126 - 3128       | R.FTDEEVDELYR.E                                                             | 1416.47127 | 2 | 9.18E-10 | 0.96 | 4.46 | - | 1468.8 |
| AHQ-5-11, 3651 - 3718       | R.FTDEEVDELYR.E                                                             | 1416.47127 | 2 | 4.77E-07 | 0.95 | 3.80 | - | 1439.6 |
| AHQ-5-11, 3710 - 3774       | R.FTDEEVDELYR.E                                                             | 1416.47127 | 1 | 2.16E-06 | 0.40 | 1.85 | - | 475.3  |
| AHQ-5-11, 3715 - 3778       | R.FTDEEVDELYR.E                                                             | 1416.47127 | 1 | 5.39E-10 | 0.60 | 2.63 | - | 464.5  |
| AHQ-5-11, 3783              | R.FTDEEVDELYR.E                                                             | 1416.47127 | 2 | 2.94E-08 | 0.97 | 4.59 | - | 1655.8 |
| AHQ-5-12, 3812 - 3825       | R.FTDEEVDELYR.E                                                             | 1416.47127 | 2 | 1.38E-07 | 0.97 | 4.67 | - | 1504.2 |
| AHQ-5-12, 3813              | R.FTDEEVDELYR.E                                                             | 1416.47127 | 1 | 6.89E-06 | 0.14 | 1.83 | - | 363.3  |
| AHQ-5-13, 3980              | R.FTDEEVDELYR.E                                                             | 1416.47127 | 2 | 7.06E-07 | 0.94 | 3.48 | - | 1353.0 |
| AHQ-5-14, 4632 - 4633       | R.FTDEEVDELYR.E                                                             | 1416.47127 | 2 | 7.81E-08 | 0.90 | 3.46 | - | 1102.1 |
| AHQ-5-13-, 3868             | R.FTDEEVDELYR.E                                                             | 1416.47127 | 2 | 6.17E-07 | 0.96 | 4.62 | - | 1203.5 |
| AHQ-5-14-, 3774             | R.FTDEEVDELYR.E                                                             | 1416.47127 | 2 | 1.05E-08 | 0.97 | 4.20 | - | 1706.5 |
| gi 4503725 ref NP_000792.1  | FK506-binding protein 1A; FK506-binding protei                              |            |   |          |      |      |   |        |
| AHQ-5-13, 4013              | R.GWEEGVAQMSVGQR.A                                                          | 1534.67926 | 2 | 1.92E-06 | 0.95 | 4.21 | - | 1275.8 |
| AHQ-5-14, 4661 - 4673       | R.GWEEGVAQMSVGQR.A                                                          | 1534.67926 | 2 | 1.02E-04 | 0.88 | 3.82 | - | 904.4  |
| AHQ-5-13-, 2977             | R.GWEEGVAQM*SVGQR.A                                                         | 1550.67866 | 2 | 1.69E-08 | 0.96 | 4.79 | - | 1234.2 |
| AHQ-5-13-, 3891             | R.GWEEGVAQMSVGQR.A                                                          | 1534.67926 | 2 | 2.65E-05 | 0.87 | 3.19 | - | 1193.6 |
| AHQ-5-14-, 3790 - 3798      | R.GWEEGVAQMSVGQR.A                                                          | 1534.67926 | 2 | 1.79E-05 | 0.94 | 3.87 | - | 1532.3 |
| AHQ-5-13, 3110              | R.GWEEGVAQM*SVGQR.A                                                         | 1550.67866 | 2 | 5.40E-10 | 0.93 | 3.63 | - | 1182.1 |
| gi 9910542 ref NP_064535.1  | SAR1a gene homolog 1; SAR1 protein [Homo sapiens]                           |            |   |          |      |      |   |        |
| AHQ-5-11, 3614              | R.EIFGLYQTTGGK.G                                                            | 1314.46845 | 1 | 3.71E-05 | 0.68 | 3.45 | - | 233.2  |
| AHQ-5-11, 3599 - 3611       | R.EIFGLYQTTGGK.G                                                            | 1314.46845 | 2 | 9.44E-04 | 0.92 | 3.56 | - | 937.7  |
| AHQ-5-11, 6084              | R.LGQHVPVTLPTSEELIAGMTFTFDLGGHEQAR.R                                        | 3694.08659 | 3 | 6.01E-04 | 0.88 | 4.74 | - | 677.3  |
| AHQ-5-11, 3671              | K.LREIFGLYQTTGGK.G                                                          | 1583.81305 | 2 | 6.26E-10 | 0.98 | 5.03 | - | 2861.9 |
| AHQ-5-11, 6803              | K.NYLPAINGVFLVDCADHSR.L                                                     | 2276.55690 | 2 | 2.23E-07 | 0.90 | 3.56 | - | 1056.7 |
| AHQ-5-11, 6423 - 6430       | K.NYLPAINGVFLVDCADHSR.L                                                     | 2276.55690 | 2 | 1.91E-06 | 0.93 | 4.25 | - | 734.3  |
| gi 4557731 ref NP_000618.1  | latent transforming growth factor beta binding protein 1 precursor [Hom     |            |   |          |      |      |   |        |
| AHQ-5-3, 3726               | R.ASLGDHCHDINECLEDK.S                                                       | 2065.13910 | 2 | 9.31E-05 | 0.96 | 4.96 | - | 1189.9 |
| AHQ-5-1, 3775               | R.ASLGDHCHDINECLEDK.S                                                       | 2065.13910 | 2 | 2.06E-07 | 0.95 | 5.18 | - | 1088.8 |
| AHQ-5-1, 6719 - 6732        | K.CLCLPGVPSDPKPNYCTPLNTALNLEK.D                                             | 3142.56947 | 3 | 4.85E-08 | 0.87 | 4.28 | - | 654.6  |
| AHQ-5-1, 2592 - 2663        | R.CTCGGGYQLSAAK.D                                                           | 1446.58862 | 2 | 5.93E-05 | 0.86 | 3.80 | - | 543.3  |
| AHQ-5-1, 4241 - 4260        | K.CVDIDICTQVQLCSQ                                                           |            |   |          |      |      |   |        |

|                              |                                                                         |            |   |          |       |        |       |          |
|------------------------------|-------------------------------------------------------------------------|------------|---|----------|-------|--------|-------|----------|
| AHQ-5-2, 4203                | K.CVDIDECTQVQHLCSSQGR.C                                                 | 2209.38110 | 2 | 9.02E-04 | 0.85  | 3.83   | -     | 396.3    |
| AHQ-5-3, 4219                | K.CVDIDECTQVQHLCSSQGR.C                                                 | 2209.38110 | 2 | 5.45E-08 | 0.92  | 4.47   | -     | 690.2    |
| AHQ-5-1, 2232                | K.DQCEIDECQHR.H                                                         | 1607.61898 | 2 | 4.34E-05 | 0.77  | 3.17   | -     | 642.2    |
| AHQ-5-1, 3263 - 3276         | K.EAQPQQSQVSYQGLPVQK.T                                                  | 1945.12244 | 2 | 5.14E-05 | 0.89  | 3.80   | -     | 527.1    |
| AHQ-5-1, 3433                | K.EAQPQQSQVSYQGLPVQK.T                                                  | 1945.12244 | 2 | 1.03E-06 | 0.95  | 4.38   | -     | 943.6    |
| AHQ-5-1, 4020                | K.EEPEALFTRSR.E                                                         | 1278.39297 | 2 | 7.97E-04 | 0.82  | 2.86   | -     | 660.1    |
| AHQ-5-1, 2257                | K.HPPEASVQIHQVSR.I                                                      | 1585.74913 | 2 | 1.51E-08 | 0.57  | 2.73   | -     | 324.7    |
| AHQ-5-1, 6128                | K.IGFQDPPTFSSCVDPVPPVISEEKGPCYR.L                                       | 3112.43550 | 3 | 6.23E-05 | 0.89  | 4.19   | -     | 729.8    |
| AHQ-5-2, 6121                | K.IGFQDPPTFSSCVDPVPPVISEEKGPCYR.L                                       | 3112.43550 | 3 | 8.85E-06 | 0.92  | 5.06   | -     | 877.2    |
| AHQ-5-3, 6183                | K.IGFQDPPTFSSCVDPVPPVISEEKGPCYR.L                                       | 3112.43550 | 3 | 1.81E-04 | 0.94  | 4.71   | -     | 1285.4   |
| AHQ-5-1, 3357                | K.TQTHSTYSHQQVPHVYPVAAK.T                                               | 2606.92010 | 3 | 2.22E-05 | 0.93  | 4.79   | -     | 1090.4   |
| AHQ-5-1, 2969                | R.TSTDLDVVDVDPKPK.E                                                     | 1433.50014 | 2 | 1.14E-06 | 0.79  | 3.24   | -     | 855.2    |
| AHQ-5-1, 2755                | R.TSTDLDVVDVDPKPEEK.K                                                   | 1819.90213 | 2 | 1.73E-06 | 0.86  | 3.66   | -     | 1057.2   |
| AHQ-5-3, 2594                | R.TSTDLDVVDVDPKPEEK.K                                                   | 1819.90213 | 2 | 7.19E-07 | 0.86  | 3.65   | -     | 1081.6   |
| AHQ-5-4, 2561                | R.TSTDLDVVDVDPKPEEK.K                                                   | 1819.90213 | 2 | 2.19E-07 | 0.77  | 3.39   | -     | 847.9    |
| AHQ-5-1, 3683                | R.YTCICYEYGR.F                                                          | 1387.51964 | 2 | 2.91E-04 | 0.79  | 2.77   | -     | 517.5    |
| gj4507109[ref][NP_000336.1]  | alpha-synuclein isoform NACP140; non A4 component of amyloid precursor  |            |   | 6.50E-10 | 5.57  | 60.32  | 45.70 | 14460.1  |
| AHQ-5-12, 2149               | K.EGVVHGVAATVAEK.T                                                      | 1296.45466 | 1 | 1.96E-07 | 0.85  | 3.53   | -     | 455.7    |
| AHQ-5-13-, 2179 - 2239       | K.EGVVHGVAATVAEK.T                                                      | 1296.45466 | 2 | 4.88E-05 | 0.69  | 2.81   | -     | 483.9    |
| AHQ-5-13-, 4633              | K.EQVTNVGGAVVTGVTAVAQK.T                                                | 1929.16446 | 2 | 3.58E-06 | 0.94  | 4.78   | -     | 776.2    |
| AHQ-5-12, 4765               | K.EQVTNVGGAVVTGVTAVAQK.T                                                | 1929.16446 | 2 | 6.41E-08 | 0.94  | 4.95   | -     | 681.7    |
| AHQ-5-14-, 4577 - 4582       | K.EQVTNVGGAVVTGVTAVAQK.T                                                | 1929.16446 | 2 | 1.63E-08 | 0.98  | 6.44   | -     | 1389.8   |
| AHQ-5-14, 5390               | K.EQVTNVGGAVVTGVTAVAQK.T                                                | 1929.16446 | 2 | 2.61E-05 | 0.89  | 4.17   | -     | 606.1    |
| AHQ-5-13, 4698               | K.EQVTNVGGAVVTGVTAVAQK.T                                                | 1929.16446 | 3 | 2.85E-04 | 0.96  | 5.52   | -     | 1542.4   |
| AHQ-5-12, 4654               | K.EQVTNVGGAVVTGVTAVAQK.T                                                | 1929.16446 | 2 | 5.22E-06 | 0.95  | 4.61   | -     | 1017.2   |
| AHQ-5-12, 4673               | K.EQVTNVGGAVVTGVTAVAQK.T                                                | 1929.16446 | 3 | 8.78E-05 | 0.98  | 5.91   | -     | 2448.9   |
| AHQ-5-13, 4686               | K.EQVTNVGGAVVTGVTAVAQK.T                                                | 1929.16446 | 2 | 2.64E-07 | 0.95  | 5.15   | -     | 925.1    |
| AHQ-5-12, 2012               | K.TKEGVLVVGSK.T                                                         | 1181.36357 | 2 | 1.42E-06 | 0.86  | 2.82   | -     | 811.6    |
| AHQ-5-12, 2004               | K.TKEGVVHGVAATVAEK.T                                                    | 1525.73191 | 2 | 6.50E-10 | 0.97  | 5.38   | -     | 1551.8   |
| AHQ-5-13, 4280 - 4288        | K.TKEQVTNVGGAVVTGVTAVAQK.T                                              | 2158.44170 | 3 | 3.21E-04 | 0.95  | 5.61   | -     | 1513.8   |
| AHQ-5-13, 4284               | K.TKEQVTNVGGAVVTGVTAVAQK.T                                              | 2158.44170 | 2 | 2.18E-08 | 0.96  | 5.65   | -     | 1116.2   |
| AHQ-5-13, 4205 - 4282        | K.TKEQVTNVGGAVVTGVTAVAQK.T                                              | 2158.44170 | 2 | 1.35E-07 | 0.95  | 4.78   | -     | 934.2    |
| AHQ-5-12, 4204 - 4210        | K.TKEQVTNVGGAVVTGVTAVAQK.T                                              | 2158.44170 | 3 | 6.20E-08 | 0.93  | 4.80   | -     | 1622.4   |
| AHQ-5-14, 5029               | K.TKEQVTNVGGAVVTGVTAVAQK.T                                              | 2158.44170 | 2 | 5.09E-06 | 0.96  | 4.95   | -     | 1345.2   |
| AHQ-5-12, 4196 - 4228        | K.TKEQVTNVGGAVVTGVTAVAQK.T                                              | 2158.44170 | 2 | 2.62E-07 | 0.98  | 5.54   | -     | 1758.1   |
| AHQ-5-14-, 4179 - 4193       | K.TKEQVTNVGGAVVTGVTAVAQK.T                                              | 2158.44170 | 2 | 8.17E-09 | 0.98  | 6.22   | -     | 1878.6   |
| AHQ-5-13-, 4195              | K.TKEQVTNVGGAVVTGVTAVAQK.T                                              | 2158.44170 | 3 | 4.46E-06 | 0.95  | 4.92   | -     | 1594.0   |
| AHQ-5-13-, 4199 - 4204       | K.TKEQVTNVGGAVVTGVTAVAQK.T                                              | 2158.44170 | 2 | 1.55E-08 | 0.98  | 5.73   | -     | 1803.0   |
| AHQ-5-14-, 4177              | K.TKEQVTNVGGAVVTGVTAVAQK.T                                              | 2158.44170 | 3 | 1.33E-05 | 0.93  | 4.68   | -     | 1611.5   |
| AHQ-5-12, 4136               | K.TVEGAGSIAAATGFVK.K                                                    | 1479.66001 | 1 | 8.03E-07 | 0.58  | 2.99   | -     | 369.4    |
| AHQ-5-12, 4122 - 4140        | K.TVEGAGSIAAATGFVK.K                                                    | 1479.66001 | 2 | 1.98E-05 | 0.93  | 3.59   | -     | 1335.8   |
| AHQ-5-13, 4232 - 4310        | K.TVEGAGSIAAATGFVK.K                                                    | 1479.66001 | 2 | 3.10E-09 | 0.92  | 4.22   | -     | 938.0    |
| gj5803225[ref][NP_006752.1]  | tyrosine 3/tryptophan 5- monooxygenase activation protein, epsilon poly |            |   | 6.56E-10 | 1.91  | 20.29  | 11.40 | 29173.7  |
| AHQ-5-13, 6620 - 6700        | K.AAFDDAIAELDTLSEESYK.D                                                 | 2089.19882 | 2 | 9.97E-07 | 0.96  | 5.76   | -     | 804.9    |
| AHQ-5-10, 6286 - 6288        | K.AAFDDAIAELDTLSEESYK.D                                                 | 2089.19882 | 2 | 1.41E-05 | 0.95  | 4.48   | -     | 1263.4   |
| AHQ-5-9, 6178 - 6183         | K.AAFDDAIAELDTLSEESYK.D                                                 | 2089.19882 | 2 | 6.56E-10 | 0.96  | 4.95   | -     | 1145.3   |
| AHQ-5-9, 6670 - 6671         | K.AAFDDAIAELDTLSEESYK.D                                                 | 3260.61486 | 3 | 3.06E-06 | 0.95  | 5.48   | -     | 1197.6   |
| gj25306267[ref][NP_001700.2] | brain-derived neurotrophic factor isoform a preproprotein [Homo sapien  |            |   | 6.76E-10 | 0.98  | 10.29  | 6.10  | 27817.8  |
| AHQ-5-13-, 3692 - 3695       | K.TAVDMSGGTVTLEK.V                                                      | 1508.71993 | 2 | 6.76E-10 | 0.98  | 5.85   | -     | 1901.7   |
| AHQ-5-13, 3784               | K.TAVDMSGGTVTLEK.V                                                      | 1508.71993 | 2 | 3.89E-05 | 0.88  | 3.08   | -     | 1075.0   |
| gj4505989[ref][NP_000299.1]  | protective protein for beta-galactosidase; Protective protein for beta- |            |   | 7.30E-10 | 0.98  | 10.23  | 2.70  | 54495.8  |
| AHQ-5-12, 3481               | K.YGDSGEQIAGFVK.E                                                       | 1371.47686 | 2 | 7.30E-10 | 0.98  | 4.51   | -     | 2464.3   |
| gj27478749[ref][XP_208411.1] | similar to L-lactate dehydrogenase A chain (LDH-A) (LDH muscle subunit  |            |   | 7.34E-10 | 1.90  | 20.27  | 13.40 | 25628.5  |
| AHQ-5-9, 4047                | K.GEMMDLQHGSFLR.T                                                       | 1634.90537 | 2 | 7.34E-10 | 0.97  | 4.85   | -     | 1467.8   |
| AHQ-5-11, 6846               | K.LLIVSNPVDILTYAVAK.I                                                   | 1945.33337 | 2 | 7.39E-06 | 0.94  | 5.37   | -     | 814.5    |
| gj4757812[ref][NP_004880.1]  | ATP synthase, H+ transporting, mitochondrial F0 complex, subunit f, iso |            |   | 8.32E-10 | 2.84  | 30.23  | 25.50 | 10917.8  |
| AHQ-5-14-, 5899              | R.DFSPSGIFGAFQR.G                                                       | 1429.56124 | 1 | 3.18E-06 | 0.10  | 2.02   | -     | 178.6    |
| AHQ-5-14-, 5885 - 5897       | R.DFSPSGIFGAFQR.G                                                       | 1429.56124 | 2 | 8.58E-08 | 0.94  | 4.34   | -     | 1043.3   |
| AHQ-5-13, 6076               | R.DFSPSGIFGAFQR.G                                                       | 1429.56124 | 2 | 8.32E-10 | 0.96  | 4.69   | -     | 1198.5   |
| AHQ-5-14-, 5905              | K.LGELPSWILMR.D                                                         | 1315.60936 | 2 | 7.82E-08 | 0.94  | 4.47   | -     | 865.1    |
| AHQ-5-14-, 5455              | K.LGELPSWILMR.D                                                         | 1331.60876 | 2 | 7.38E-06 | 0.94  | 4.07   | -     | 675.9    |
| gj16933542[ref][NP_002017.1] | fibronectin 1 isoform 1 preproprotein; cold-insoluble globulin [Homo s  |            |   | 9.19E-10 | 3.03  | 40.21  | 3.40  | 259222.8 |
| AHQ-5-1, 4991                | K.GLKPGVYVEGQLISIQYGHQEVTR.F                                            | 2801.14977 | 3 | 1.90E-05 | 0.87  | 4.26   | -     | 621.9    |
| AHQ-5-1, 4583                | R.ITYGETGGNSPVQEFVTPGSK.S                                               | 2169.33354 | 2 | 1.33E-05 | 0.48  | 2.63   | -     | 378.8    |
| AHQ-5-1, 5017 - 5096         | R.NLQPASEYTVLSVAIK.G                                                    | 1733.98671 | 2 | 2.72E-04 | 0.80  | 3.08   | -     | 491.1    |
| AHQ-5-2, 7321                | R.VTWAPPSPIDLTNLFVR.Y                                                   | 1927.23500 | 2 | 9.19E-10 | 0.88  | 3.71   | -     | 522.9    |
| AHQ-5-1, 7205                | R.VTWAPPSPIDLTNLFVR.Y                                                   | 1927.23500 | 2 | 4.94E-08 | 0.81  | 3.33   | -     | 479.8    |
| gj29568111[ref][NP_006088.2] | myosin, light polypeptide 9, regulatory; myosin regulatory light chain  |            |   | 9.67E-10 | 2.90  | 40.25  | 23.80 | 19827.1  |
| AHQ-5-11, 3366               | R.FTDEEVDEMYR.E                                                         | 1434.51009 | 1 | 3.32E-06 | 0.64  | 2.68   | -     | 426.7    |
| AHQ-5-11, 2651               | R.FTDEEVDEMYR.E                                                         | 1450.50949 | 2 | 3.89E-06 | 0.95  | 3.47   | -     | 1366.5   |
| AHQ-5-11, 3952               | K.GNFNVYEFTR.I                                                          | 1247.34066 | 1 | 7.60E-06 | 0.37  | 2.19   | -     | 264.4    |
| AHQ-5-11, 3942 - 3964        | K.GNFNVYEFTR.I                                                          | 1247.34066 | 2 | 1.07E-04 | 0.84  | 3.31   | -     | 777.4    |
| AHQ-5-11, 5774 - 5840        | R.NAFACFDEEASGFHEDHLR.E                                                 | 2367.49548 | 2 | 9.67E-10 | 0.94  | 4.93   | -     | 726.0    |
| gj4505753[ref][NP_002620.1]  | phosphoglycerate mutase 1 (brain); Phosphoglycerate mutase A, nonmuscle |            |   | 9.91E-10 | 5.57  | 70.21  | 38.20 | 28803.7  |
| AHQ-5-10, 3650               | R.FSGWYDADLSPAGHEEAK.R                                                  | 1981.06697 | 2 | 3.98E-06 | 0.92  | 4.06   | -     | 883.9    |
| AHQ-5-10, 3296               | R.FSGWYDADLSPAGHEEAK.R                                                  | 2137.25332 | 2 | 3.12E-07 | 0.85  | 3.76   | -     | 610.8    |
| AHQ-5-10, 3818               | K.NLKPQIMQGLDEEIVR.K                                                    | 2116.46992 | 2 | 2.09E-06 | 0.93  | 4.14   | -     | 778.5    |
| AHQ-5-10, 4046               | R.SYDVPVPPMPEDPHPFYSNISK.D                                              | 2418.66566 | 2 | 9.91E-10 | 0.55  | 2.72   | -     | 275.5    |
| AHQ-5-10, 3731               | R.SYDVPVPPMPEDPHPFYSNISK.D                                              | 2434.66506 | 2 | 6.09E-05 | 0.64  | 2.87   | -     | 277.8    |
| AHQ-5-10, 6660               | R.TLWTLDAIDQM*WLPVVR.T                                                  | 2173.56304 | 2 | 1.32E-04 | 0.76  | 3.41   | -     | 500.6    |
| AHQ-5-10, 4572 - 4590        | R.YADLTEDQLPSCESLKDIIAR.A                                               | 2427.62735 | 3 | 2.66E-06 | 0.92  | 3.98   | -     | 1299.2   |
| gj4502201[ref][NP_001649.1]  | ADP-ribosylation factor 1 [Homo sapiens]                                |            |   | 1.01E-09 | 10.53 | 120.31 | 47.00 | 20696.6  |
| AHQ-5-12, 4662 - 4730        | R.DAVLLVFANK.Q                                                          | 1090.29726 | 2 | 1.12E-07 | 0.97  | 4.44   | -     | 2180.5   |
| AHQ-5-12, 4605 - 4869        | R.DAVLLVFANK.Q                                                          | 1090.29726 | 1 | 5.44E-04 | 0.76  | 2.87   | -     | 777.6    |
| AHQ-5-12, 5545 - 5624        | R.HYFQNTQGLFVVDNSDR.E                                                   | 2154.32702 | 2 | 1.77E-04 | 0.95  | 4.97   | -     | 687.1    |
| AHQ-5-12, 5402               | R.HYFQNTQGLFVVDNSDR.E                                                   | 2154.32702 | 2 | 1.32E-07 | 0.97  | 5.66   | -     | 1545.5   |
| AHQ-5-12, 5278               | R.HYFQNTQGLFVVDNSDR.E                                                   | 2154.32702 | 2 | 2.39E-09 | 0.98  | 6.26   | -     | 2518.7   |
| AHQ-5-12, 5174               | R.HYFQNTQGLFVVDNSDR.E                                                   | 2154.32702 | 2 | 5.72E-07 | 0.98  | 6.04   | -     | 2433.1   |
| AHQ-5-12, 5757               | R.HYFQNTQGLFVVDNSDR.E                                                   | 2154.32702 | 2 | 6.17E-04 | 0.93  | 3.99   | -     | 1058.4   |
| AHQ-5-12, 4894 - 4965        | R.HYFQNTQGLFVVDNSDR.E                                                   | 2154.32702 | 2 | 1.32E-04 | 0.98  | 5.66   | -     | 2059.0   |
| AHQ-5-12, 5032 - 5101        | R.HYFQNTQGLFVVDNSDR.E                                                   | 2154.32702 | 2 | 1.10E-06 | 0.98  | 6.27   | -     | 2300.8   |
| AHQ-5-12, 5016 - 5086        | R.HYFQNTQGLFVVDNSDRER.V                                                 | 2439.62792 | 3 | 2.53E-09 | 0.93  | 4.58   | -     | 1131.2   |
| AHQ-5-12, 4676 - 4741        | R.HYFQNTQGLFVVDNSDRER.V                                                 | 2439.62792 | 3 | 1.64E-05 | 0.90  | 3.83   | -     | 1041.3   |
| AHQ-5-12, 4540 - 4608        | R.HYFQNTQGLFVVDNSDRER.V                                                 | 2439.62792 | 3 | 3.63E-09 | 0.95  | 5.35   | -     | 1038.7   |
| AHQ-5-12, 3645 - 3708        | R.ILMVGDLAAGK.T                                                         | 1088.34632 | 1 | 9.40E-04 | 0.77  | 2.33   | -     | 1388.8   |
| AHQ-5-12, 3088               | R.ILM*VGLDAAGK.T                                                        | 1104.34572 | 1 | 2.57E-04 | 0.58  | 2.65   | -     | 194.1    |
| AHQ-5-12, 3084               | R.ILM*VGLDAAGK.T                                                        | 1104.34572 | 2 | 2.41E-05 | 0.91  | 2.98   | -     | 1113.0   |
| AHQ-5-11, 3568               | R.ILMVGDLAAGK.T                                                         | 1088.34632 | 1 | 7.15E-04 | 0.86  | 2.85   | -     | 1171.9   |
| AHQ-5-11, 3567               | R.ILMVGDLAAGK.T                                                         | 1088.34632 | 2 | 7.07E-05 | 0.92  | 3.65   | -     | 1024.2   |
| AHQ-5-12, 3642 - 3660        | R.ILMVGDLAAGK.T                                                         | 1088.34632 | 2 | 1.17E-07 | 0.95  | 4.26   | -     | 1228.2   |
| AHQ-5-12, 3669               | R.ILMVGDLAAGK.T                                                         | 1088.34632 | 1 | 7.21E-05 | 0.87  | 3.80   | -     | 597.8    |
| AHQ-5-12, 6448 - 6522        | K.LGIEVITTIPTIGFNVETVEYK.N                                              | 2324.65485 | 3 | 1.23E-04 | 0.96  | 5.49   | -     | 1127.2   |
| AHQ-5-12, 6382 - 6437        | K.LGIEVITTIPTIGFNVETVEYK.N                                              | 2324.65485 | 2 | 2.25E-05 | 0.69  | 3.58   | -     | 216.6    |
| AHQ-5-11, 6248 - 6306        | K.LGIEVITTIPTIGFNVETVEYK.N                                              | 2324.65485 | 2 | 3.83E-04 | 0.81  | 3.79   | -     | 231.6    |
| AHQ-5-12, 6500 - 6560        | K.LGIEVITTIPTIGFNVETVEYK.N                                              | 2324.65485 | 2 | 5.65E-05 | 0.86  | 3.89   | -     | 317.0    |
| AHQ-5-12, 2077               | K.LGLHSLR.H                                                             | 795.95280  | 2 | 3.94E-04 | 0.84  | 2.76   | -     | 853.5    |
| AHQ-5-12, 2544 - 2545        | R.MLADELRL.D                                                            | 977.11769  | 2 | 2.53E-04 | 0.87  | 2.93   | -     | 994.4    |

|                              |                                                                         |            |   |          |       |        |       |          |
|------------------------------|-------------------------------------------------------------------------|------------|---|----------|-------|--------|-------|----------|
| AHQ-5-14-, 6699 - 6733       | R.M*LAEDLRDAVLLVFANK.Q                                                  | 2064.39175 | 2 | 1.22E-04 | 0.78  | 3.26   | -     | 527.0    |
| AHQ-5-11, 4892 - 4955        | K.NISFTYVDVGGGDK.I                                                      | 1566.69621 | 2 | 7.67E-04 | 0.85  | 3.73   | -     | 626.1    |
| AHQ-5-12, 5068 - 5133        | K.NISFTYVDVGGGDK.I                                                      | 1566.69621 | 2 | 1.01E-09 | 0.93  | 4.09   | -     | 951.3    |
| AHQ-5-14-, 5017              | K.NISFTYVDVGGGDK.I                                                      | 1566.69621 | 2 | 4.65E-04 | 0.90  | 3.67   | -     | 687.4    |
| AHQ-5-13-, 5067 - 5073       | K.NISFTYVDVGGGDK.I                                                      | 1566.69621 | 2 | 3.45E-07 | 0.96  | 4.35   | -     | 1203.1   |
| AHQ-5-12, 5196 - 5197        | K.NISFTYVDVGGGDK.I                                                      | 1566.69621 | 2 | 2.22E-08 | 0.93  | 4.13   | -     | 844.3    |
| AHQ-5-14, 5929               | K.NISFTYVDVGGGDK.I                                                      | 1566.69621 | 2 | 3.61E-04 | 0.55  | 2.82   | -     | 456.4    |
| AHQ-5-12, 3648 - 3720        | K.QDLPNAMNAEITDK.L                                                      | 1631.79001 | 2 | 2.07E-08 | 0.94  | 4.60   | -     | 885.4    |
| AHQ-5-12, 3896 - 3964        | K.QDLPNAMNAEITDK.L                                                      | 1631.79001 | 2 | 9.74E-05 | 0.94  | 4.25   | -     | 1060.0   |
| AHQ-5-12, 3064               | K.QDLPNAM*NAEITDK.L                                                     | 1647.78941 | 2 | 3.21E-04 | 0.73  | 3.12   | -     | 530.2    |
| gj14557597[ref][NP_001449.1] | gamma filamin; filamin 2; filamin C, gamma (actin-binding protein-280); |            |   | 1.04E-09 | 1.75  | 30.28  | 1.70  | 288897.4 |
| AHQ-5-4, 4568                | R.GQHVPGSPFQFTVGPLGEGGAHK.V                                             | 2305.53673 | 2 | 1.11E-05 | 0.94  | 4.83   | -     | 642.7    |
| AHQ-5-1, 4751 - 4776         | R.GQHVPGSPFQFTVGPLGEGGAHK.V                                             | 2305.53673 | 3 | 4.24E-09 | 0.91  | 4.94   | -     | 591.4    |
| AHQ-5-1, 4765 - 4767         | R.GQHVPGSPFQFTVGPLGEGGAHK.V                                             | 2305.53673 | 2 | 8.34E-09 | 0.95  | 5.60   | -     | 493.4    |
| AHQ-5-7, 4035                | R.GQHVPGSPFQFTVGPLGEGGAHK.V                                             | 2305.53673 | 2 | 1.04E-09 | 0.93  | 5.03   | -     | 535.0    |
| AHQ-5-7, 3955 - 4028         | R.GQHVPGSPFQFTVGPLGEGGAHK.V                                             | 2305.53673 | 3 | 9.21E-04 | 0.93  | 4.37   | -     | 811.1    |
| AHQ-5-3, 4678                | R.GQHVPGSPFQFTVGPLGEGGAHK.V                                             | 2305.53673 | 3 | 5.82E-04 | 0.51  | 3.09   | -     | 285.1    |
| AHQ-5-6, 4193                | R.GQHVPGSPFQFTVGPLGEGGAHK.V                                             | 2305.53673 | 2 | 1.01E-07 | 0.95  | 5.36   | -     | 561.6    |
| AHQ-5-8, 3798                | R.GQHVPGSPFQFTVGPLGEGGAHK.V                                             | 2305.53673 | 2 | 1.43E-05 | 0.96  | 5.39   | -     | 969.6    |
| AHQ-5-4, 4612                | R.GQHVPGSPFQFTVGPLGEGGAHK.V                                             | 2305.53673 | 3 | 4.16E-06 | 0.79  | 4.06   | -     | 374.5    |
| AHQ-5-5, 4214 - 4285         | R.GQHVPGSPFQFTVGPLGEGGAHK.V                                             | 2305.53673 | 3 | 6.13E-05 | 0.87  | 4.31   | -     | 461.8    |
| AHQ-5-5, 4241 - 4310         | R.GQHVPGSPFQFTVGPLGEGGAHK.V                                             | 2305.53673 | 2 | 2.25E-04 | 0.95  | 5.17   | -     | 627.5    |
| AHQ-5-2, 1718 - 1781         | K.IECCDDKGDGSCDVR.Y                                                     | 1628.67809 | 2 | 7.97E-04 | 0.80  | 2.99   | -     | 680.0    |
| AHQ-5-4, 1793                | K.IECCDDKGDGSCDVR.Y                                                     | 1628.67809 | 2 | 1.01E-04 | 0.50  | 2.58   | -     | 381.2    |
| AHQ-5-1, 2561                | K.NDNDTFTVK.Y                                                           | 1054.09237 | 1 | 8.60E-04 | 0.04  | 1.81   | -     | 161.6    |
| AHQ-5-2, 1803 - 1997         | K.NDNDTFTVK.Y                                                           | 1054.09237 | 1 | 2.15E-05 | 0.33  | 2.23   | -     | 227.8    |
| gj16507237[ref][NP_005338.1] | heat shock 70kDa protein 5 (glucose-regulated protein, 78kDa); BiP; hsp |            |   | 1.07E-09 | 10.93 | 120.27 | 25.40 | 72332.5  |
| AHQ-5-6, 4809 - 4820         | R.AKFELNMDLFR.S                                                         | 1513.74309 | 2 | 1.74E-09 | 0.94  | 4.13   | -     | 1264.1   |
| AHQ-5-6, 3808                | K.DAGTLAGLVNMI.I                                                        | 1218.40894 | 2 | 4.40E-04 | 0.94  | 3.74   | -     | 1066.0   |
| AHQ-5-6, 5468 - 5545         | K.DNHLGTFFDLTGIPAPP.R                                                   | 1935.17239 | 2 | 1.73E-06 | 0.92  | 4.44   | -     | 697.3    |
| AHQ-5-6, 6117                | R.IEIESFYEGEDFSETLTRA                                                   | 2166.28328 | 2 | 4.09E-08 | 0.93  | 4.51   | -     | 878.3    |
| AHQ-5-6, 4641                | K.IEWLSEHQDADIEDFK.A                                                    | 1976.08864 | 2 | 3.05E-07 | 0.97  | 5.30   | -     | 1704.2   |
| AHQ-5-6, 3669 - 3716         | R.ITPYSVAFTEPEGER.L                                                     | 1567.72412 | 2 | 6.37E-08 | 0.68  | 2.94   | -     | 492.5    |
| AHQ-5-6, 3490                | K.KSDIDEIVLVGGSTR.I                                                     | 1589.77277 | 2 | 1.07E-09 | 0.96  | 4.86   | -     | 1564.8   |
| AHQ-5-6, 3026                | K.KSQIFSTASDNQPTVTIK.V                                                  | 1966.18156 | 2 | 1.20E-05 | 0.97  | 5.03   | -     | 1362.1   |
| AHQ-5-6, 3020                | K.KSQIFSTASDNQPTVTIK.V                                                  | 1966.18156 | 3 | 1.88E-04 | 0.79  | 3.45   | -     | 772.7    |
| AHQ-5-6, 2092                | K.MKETAELYGLK.K                                                         | 1241.43928 | 2 | 4.39E-05 | 0.87  | 3.19   | -     | 729.3    |
| AHQ-5-5, 3645                | K.SQIFSTASDNQPTVTIK.V                                                   | 1838.00865 | 2 | 8.48E-04 | 0.95  | 4.51   | -     | 1109.2   |
| AHQ-5-6, 2700                | K.TKPYQVDDIGGGQTK.T                                                     | 1605.81703 | 2 | 2.74E-06 | 0.90  | 3.49   | -     | 956.9    |
| AHQ-5-5, 3766                | K.VTHAVTVPAYFNDAQR.Q                                                    | 1889.10372 | 2 | 8.76E-06 | 0.68  | 3.06   | -     | 323.2    |
| AHQ-5-6, 3622                | K.VTHAVTVPAYFNDAQR.Q                                                    | 1889.10372 | 3 | 5.10E-06 | 0.90  | 4.41   | -     | 783.4    |
| AHQ-5-6, 3832                | K.VTHAVTVPAYFNDAQR.Q                                                    | 1889.10372 | 2 | 2.70E-05 | 0.84  | 3.68   | -     | 446.6    |
| gj20357552[ref][NP_005222.2] | cartactin isoform a; oncogene EMS1 [Homo sapiens]                       |            |   | 1.08E-09 | 2.65  | 30.23  | 7.80  | 61585.7  |
| AHQ-5-12, 3968               | R.LPSSPVYEDAASFKA                                                       | 1511.65733 | 2 | 1.87E-05 | 0.91  | 2.96   | -     | 1035.6   |
| AHQ-5-13-, 3993              | R.LPSSPVYEDAASFKA                                                       | 1511.65733 | 2 | 2.16E-05 | 0.88  | 3.57   | -     | 633.8    |
| AHQ-5-11, 3868 - 3930        | R.LPSSPVYEDAASFKA                                                       | 1511.65733 | 2 | 1.97E-05 | 0.69  | 2.58   | -     | 613.1    |
| AHQ-5-13, 4021               | K.NASTFEDVTVQSSVYQK.T                                                   | 1875.97061 | 2 | 4.16E-04 | 0.82  | 3.10   | -     | 868.2    |
| AHQ-5-12, 5349 - 5356        | R.YGLFPANYYELR.Q                                                        | 1442.64306 | 1 | 4.05E-04 | 0.31  | 2.91   | -     | 141.7    |
| AHQ-5-12, 5333 - 5344        | R.YGLFPANYYELR.Q                                                        | 1442.64306 | 2 | 1.08E-09 | 0.92  | 3.99   | -     | 587.8    |
| gj4502011[ref][NP_000467.1]  | adenylate kinase 1 [Homo sapiens]                                       |            |   | 1.08E-09 | 4.71  | 50.29  | 42.30 | 21634.7  |
| AHQ-5-11, 6842 - 6843        | K.GQLVPLETLDMLR.D                                                       | 1584.90590 | 2 | 1.08E-09 | 0.97  | 5.71   | -     | 669.5    |
| AHQ-5-11, 5660               | R.IGQPTLLLYVDAAGPETMTQR.L                                               | 2204.53234 | 2 | 2.33E-05 | 0.91  | 4.27   | -     | 697.2    |
| AHQ-5-11, 3362               | K.IIFVGGPGSGK.G                                                         | 1131.34939 | 2 | 2.07E-04 | 0.96  | 3.82   | -     | 1875.9   |
| AHQ-5-11, 5924               | R.KVNAEGSVDSVFSQVCTHLDALK                                               | 2506.77407 | 3 | 9.30E-06 | 0.97  | 5.83   | -     | 1933.9   |
| AHQ-5-11, 3646               | K.YGYTHLSTGDLR.S                                                        | 1496.64912 | 1 | 6.98E-06 | 0.79  | 3.03   | -     | 402.8    |
| AHQ-5-11, 3639               | K.YGYTHLSTGDLR.S                                                        | 1496.64912 | 2 | 2.97E-08 | 0.91  | 3.38   | -     | 926.6    |
| gj20547107[ref][XP_114482.1] | similar to HEAT SHOCK 70 KDA PROTEIN 4 (HEAT SHOCK 70-RELATED PROTEIN   |            |   | 1.11E-09 | 0.95  | 10.25  | 2.10  | 94330.3  |
| AHQ-5-4, 6777 - 6786         | K.SNLAYDIVQLPTLGTGK.V                                                   | 1904.19651 | 2 | 1.11E-09 | 0.95  | 5.09   | -     | 885.9    |
| gj4507171[ref][NP_003109.1]  | secreted protein, acidic, cysteine-rich (osteonectin); Osteonectin (sec |            |   | 1.24E-09 | 3.25  | 40.32  | 24.10 | 34632.0  |
| AHQ-5-9, 2751                | R.LEAGDHPVELLAR.D                                                       | 1420.59579 | 2 | 1.24E-09 | 0.96  | 4.37   | -     | 1426.9   |
| AHQ-5-8, 2713                | R.LEAGDHPVELLAR.D                                                       | 1420.59579 | 2 | 6.52E-08 | 0.93  | 3.83   | -     | 1067.5   |
| AHQ-5-9, 2875 - 2876         | K.LHLDYIGPK.Y                                                           | 1217.41920 | 1 | 1.48E-04 | 0.81  | 2.42   | -     | 1149.9   |
| AHQ-5-8, 2770 - 2845         | K.LHLDYIGPK.Y                                                           | 1217.41920 | 2 | 7.02E-04 | 0.80  | 3.16   | -     | 617.5    |
| AHQ-5-9, 6336 - 6338         | K.NYNYMIFPPVHWQGLDQHPIDGYSHTLAPLRA                                      | 4102.58560 | 3 | 4.84E-05 | 0.96  | 6.41   | -     | 1020.8   |
| AHQ-5-10, 5880               | K.YIPPCLDSELTFFPLR.M                                                    | 1952.21655 | 2 | 3.16E-04 | 0.42  | 2.56   | -     | 112.7    |
| AHQ-5-9, 5770 - 5840         | K.YIPPCLDSELTFFPLR.M                                                    | 1952.21655 | 2 | 1.01E-04 | 0.52  | 2.81   | -     | 106.5    |
| gj5031571[ref][NP_005713.1]  | actin-related protein 2; ARP2 (actin-related protein 2, yeast) homolog  |            |   | 1.29E-09 | 6.49  | 70.26  | 26.60 | 44760.5  |
| AHQ-5-8, 5514                | K.CGYGAGSNFPEHIFPALVGRPIR.S                                             | 2573.95654 | 3 | 6.77E-05 | 0.90  | 4.16   | -     | 1014.5   |
| AHQ-5-8, 3476 - 3544         | K.DLMVGDSEASLR.S                                                        | 1335.46633 | 2 | 7.69E-05 | 0.93  | 3.81   | -     | 1084.9   |
| AHQ-5-8, 3541 - 3546         | K.DLMVGDSEASLR.S                                                        | 1335.46633 | 1 | 7.25E-04 | 0.11  | 2.01   | -     | 231.2    |
| AHQ-5-8, 2824                | R.GYAFNHSADFETVR.M                                                      | 1614.69943 | 2 | 3.58E-05 | 0.92  | 3.47   | -     | 1185.6   |
| AHQ-5-8, 3445                | K.HIVLGGSTMYPLPSRL                                                      | 1773.04967 | 2 | 7.43E-05 | 0.98  | 5.28   | -     | 1635.1   |
| AHQ-5-8, 3730 - 3732         | K.HLWDYTFGPEK.L                                                         | 1393.52736 | 1 | 5.41E-05 | 0.81  | 3.18   | -     | 608.7    |
| AHQ-5-8, 3720                | K.HLWDYTFGPEK.L                                                         | 1393.52736 | 2 | 7.13E-08 | 0.89  | 3.85   | -     | 473.6    |
| AHQ-5-8, 3568                | K.LCYGVYNIQEQK.L                                                        | 1645.81494 | 2 | 6.43E-07 | 0.96  | 4.34   | -     | 1650.2   |
| AHQ-5-8, 4689                | R.SMLEVYPMENGVNR.N                                                      | 1753.03703 | 2 | 1.29E-09 | 0.91  | 3.98   | -     | 833.3    |
| gj21361370[ref][NP_002853.2] | phosphorylase, glycogen; brain [Homo sapiens]                           |            |   | 1.38E-09 | 1.93  | 20.28  | 3.30  | 96695.3  |
| AHQ-5-5, 3402                | R.HLDHVAALPGDVEDR.L                                                     | 1662.83036 | 2 | 1.38E-09 | 0.97  | 5.28   | -     | 1670.5   |
| AHQ-5-5, 6217                | K.IGEEFLTDLSQLK.K                                                       | 1493.68345 | 2 | 1.21E-04 | 0.96  | 4.03   | -     | 1696.2   |
| gj20149570[ref][NP_005816.2] | RAS guanyl releasing protein 2 isoform 1; calcium and diacylglycerol-r  |            |   | 1.43E-09 | 1.73  | 20.21  | 5.20  | 75547.0  |
| AHQ-5-6, 5270                | K.ILFQDYSFVTHGCTVDNPVLER.F                                              | 2750.03824 | 3 | 1.43E-09 | 0.91  | 4.30   | -     | 901.4    |
| AHQ-5-6, 3002 - 3028         | K.LDQALVVEHIEK.M                                                        | 1394.59824 | 2 | 8.20E-09 | 0.83  | 3.51   | -     | 685.1    |
| gj21361399[ref][NP_055040.2] | protein phosphatase 2 (formerly 2A), regulatory subunit A (PR 65), alp  |            |   | 1.44E-09 | 1.88  | 20.32  | 7.10  | 65308.3  |
| AHQ-5-6, 7294                | K.DNTIEHLPLFLAQLKDECEPEVR.L                                             | 2753.12348 | 3 | 1.44E-09 | 0.99  | 6.49   | -     | 3657.5   |
| AHQ-5-6, 5772 - 5784         | K.SEIIPMFNSLASDEQDSVR.L                                                 | 2139.32924 | 2 | 5.11E-08 | 0.90  | 4.03   | -     | 607.3    |
| gj14251209[ref][NP_001279.2] | chloride intracellular channel 1; p64CLCP; chloride channel ABP [Homo   |            |   | 1.55E-09 | 5.11  | 70.29  | 44.00 | 26922.5  |
| AHQ-5-9, 5274 - 5335         | R.EEFASTCPDDEEIELAYEQVAK.A                                              | 2575.69730 | 2 | 8.04E-06 | 0.71  | 3.44   | -     | 247.7    |
| AHQ-5-14-, 5651              | R.EEFASTCPDDEEIELAYEQVAK.A                                              | 2575.69730 | 2 | 4.08E-07 | 0.37  | 2.53   | -     | 273.5    |
| AHQ-5-9, 5739                | K.FLDGNELTLADCNLLPK.L                                                   | 1935.18752 | 2 | 2.09E-05 | 0.35  | 2.89   | -     | 482.0    |
| AHQ-5-14-, 3353              | K.GVTFNVTYVDTK.R                                                        | 1282.42476 | 2 | 1.53E-06 | 0.94  | 4.07   | -     | 1143.2   |
| AHQ-5-13, 3521 - 3525        | K.GVTFNVTYVDTK.R                                                        | 1282.42476 | 2 | 4.04E-08 | 0.96  | 4.29   | -     | 1499.3   |
| AHQ-5-13-, 3403              | K.GVTFNVTYVDTK.R                                                        | 1282.42476 | 2 | 7.89E-07 | 0.89  | 3.37   | -     | 856.3    |
| AHQ-5-9, 5023 - 5096         | R.KFLDGNELTLADCNLLPK.L                                                  | 2063.36044 | 2 | 2.91E-06 | 0.91  | 4.98   | -     | 1128.0   |
| AHQ-5-10, 4779 - 4819        | K.LAALNPESNTAGLDIFAK.F                                                  | 1846.07392 | 2 | 5.03E-04 | 0.93  | 4.74   | -     | 727.5    |
| AHQ-5-10, 5028               | K.LAALNPESNTAGLDIFAK.F                                                  | 1846.07392 | 2 | 1.63E-07 | 0.87  | 3.49   | -     | 633.5    |
| AHQ-5-14-, 5275              | K.LAALNPESNTAGLDIFAK.F                                                  | 1846.07392 | 2 | 8.97E-06 | 0.95  | 4.95   | -     | 651.3    |
| AHQ-5-11, 5194 - 5196        | K.LAALNPESNTAGLDIFAK.F                                                  | 1846.07392 | 2 | 1.20E-06 | 0.94  | 4.92   | -     | 587.0    |
| AHQ-5-14-, 5418              | K.LAALNPESNTAGLDIFAK.F                                                  | 1846.07392 | 2 | 1.67E-05 | 0.95  | 4.66   | -     | 811.3    |
| AHQ-5-13-, 5447              | K.LAALNPESNTAGLDIFAK.F                                                  | 1846.07392 | 2 | 1.31E-06 | 0.94  | 4.50   | -     | 783.9    |
| AHQ-5-13-, 5311 - 5331       | K.LAALNPESNTAGLDIFAK.F                                                  | 1846.07392 | 2 | 5.59E-04 | 0.94  | 4.90   | -     | 727.1    |
| AHQ-5-12, 5386               | K.LAALNPESNTAGLDIFAK.F                                                  | 1846.07392 | 2 | 1.51E-06 | 0.95  | 4.62   | -     | 799.3    |
| AHQ-5-9, 4696 - 4699         | K.LAALNPESNTAGLDIFAK.F                                                  | 1846.07392 | 2 | 1.55E-09 | 0.96  | 5.38   | -     | 758.5    |
| AHQ-5-13, 5400 - 5406        | K.LAALNPESNTAGLDIFAK.F                                                  | 1846.07392 | 2 | 4.12E-07 | 0.97  | 5.71   | -     | 1040.6   |
| AHQ-5-13, 5533               | K.LAALNPESNTAGLDIFAK.F                                                  | 1846.07392 | 2 | 5.56E-07 |       |        |       |          |

|                             |                                                                          |            |   |          |      |        |       |          |
|-----------------------------|--------------------------------------------------------------------------|------------|---|----------|------|--------|-------|----------|
| AHQ-5-12, 2673              | K.LHIVQVVKC.K                                                            | 1097.35623 | 1 | 4.15E-06 | 0.78 | 2.51   | -     | 931.7    |
| AHQ-5-9, 2399               | K.LHIVQVVKC.K                                                            | 1097.35623 | 1 | 7.47E-05 | 0.70 | 2.95   | -     | 393.7    |
| AHQ-5-9, 4786 - 4854        | K.VLDNLYTSLPPEEVDSETSAEDEGVSSQR.K                                        | 2994.12446 | 2 | 7.43E-09 | 0.84 | 3.81   | -     | 433.6    |
| AHQ-5-12, 5261 - 5289       | K.VLDNLYTSLPPEEVDSETSAEDEGVSSQR.K                                        | 2994.12446 | 2 | 1.59E-04 | 0.69 | 3.06   | -     | 354.8    |
| AHQ-5-11, 5148              | K.VLDNLYTSLPPEEVDSETSAEDEGVSSQR.K                                        | 2994.12446 | 2 | 3.37E-09 | 0.79 | 3.65   | -     | 369.2    |
| gi 5729875 ref NP_006658.1  | progesterone receptor membrane component 1; progesterone binding protein |            |   | 1.56E-09 | 2.81 | 30.24  | 17.90 | 21671.0  |
| AHQ-5-10, 4147              | K.FYGPPEGYGVFAGR.D                                                       | 1517.66849 | 2 | 3.93E-04 | 0.87 | 3.10   | -     | 686.1    |
| AHQ-5-11, 4468              | K.FYGPPEGYGVFAGR.D                                                       | 1517.66849 | 2 | 1.56E-09 | 0.92 | 3.75   | -     | 1022.9   |
| AHQ-5-11, 2862              | R.GDQPAASGSDDDDEPPPLPR.L                                                 | 2037.04410 | 2 | 2.75E-08 | 0.92 | 4.18   | -     | 752.1    |
| AHQ-5-11, 3947              | R.KFYGPPEGYGVFAGR.D                                                      | 1645.84140 | 2 | 6.10E-06 | 0.96 | 4.68   | -     | 1336.0   |
| AHQ-5-10, 3702              | R.KFYGPPEGYGVFAGR.D                                                      | 1645.84140 | 2 | 1.80E-09 | 0.96 | 4.79   | -     | 1207.1   |
| gi 18860900 ref NP_002834.2 | protein tyrosine phosphatase, receptor type, J precursor; protein tyro   |            |   | 1.59E-09 | 9.20 | 100.25 | 12.90 | 145926.2 |
| AHQ-5-1, 3469 - 3473        | R.AGSPTAPVHDESLVGPVDPSSGQQR.D                                            | 2576.71806 | 2 | 8.62E-06 | 0.93 | 4.46   | -     | 659.4    |
| AHQ-5-1, 3488               | R.AGSPTAPVHDESLVGPVDPSSGQQR.D                                            | 2576.71806 | 3 | 2.56E-04 | 0.86 | 4.07   | -     | 737.9    |
| AHQ-5-1, 5948               | K.AVISISPTNVLTKW.S                                                       | 1529.80530 | 2 | 4.97E-09 | 0.83 | 3.08   | -     | 614.5    |
| AHQ-5-1, 4443               | K.AYAVILTTGEAGHPSADVLK.Y                                                 | 2014.26782 | 3 | 1.59E-09 | 0.96 | 5.08   | -     | 1611.6   |
| AHQ-5-1, 5348               | K.GLIDGAEYSVFSR.Y                                                        | 1501.62253 | 2 | 2.99E-08 | 0.96 | 4.68   | -     | 1424.1   |
| AHQ-5-1, 3937               | K.KDFIATQGPLNTLK.D                                                       | 1643.90840 | 2 | 2.64E-05 | 0.97 | 5.04   | -     | 1636.8   |
| AHQ-5-1, 5835 - 5899        | K.SFCTDPASMASFDCVVPK.E                                                   | 2151.38014 | 2 | 2.94E-05 | 0.88 | 3.53   | -     | 829.4    |
| AHQ-5-1, 5349 - 5371        | K.SPDGASEYVHLVIESK.H                                                     | 1895.05866 | 2 | 1.07E-07 | 0.94 | 4.07   | -     | 1086.7   |
| AHQ-5-1, 2741               | K.TKGDPLTGETGLDASNTER.S                                                  | 1918.99702 | 2 | 1.02E-05 | 0.92 | 4.16   | -     | 969.5    |
| AHQ-5-1, 4344 - 4347        | K.VITEPIPVSLR.V                                                          | 1339.56259 | 2 | 5.32E-06 | 0.91 | 3.50   | -     | 865.2    |
| AHQ-5-1, 3841 - 3889        | R.VLLESIGSHEELTQDSR.L                                                    | 1914.06352 | 2 | 3.31E-07 | 0.90 | 4.00   | -     | 878.8    |
| gi 28077085 ref NP_004559.3 | serine (or cysteine) proteinase inhibitor, clade B (ovalbumin), member   |            |   | 1.61E-09 | 0.92 | 10.22  | 5.30  | 42586.7  |
| AHQ-5-9, 4158               | K.SGGGGDIHQGFQSLTENVK.T                                                  | 2045.19887 | 2 | 4.43E-05 | 0.87 | 4.18   | -     | 725.3    |
| AHQ-5-8, 4370 - 4378        | K.SGGGGDIHQGFQSLTENVK.T                                                  | 2045.19887 | 2 | 1.61E-09 | 0.92 | 4.46   | -     | 795.2    |
| gi 4758790 ref NP_004543.1  | NADH dehydrogenase (ubiquinone) Fe-S protein 5, 15kDa (NADH-coenzyme Q   |            |   | 1.74E-09 | 0.94 | 10.19  | 11.30 | 12517.4  |
| AHQ-5-13, 6652              | K.IEYDDFVECLLR.Q                                                         | 1573.74872 | 2 | 1.74E-09 | 0.94 | 3.75   | -     | 1138.1   |
| gi 4885609 ref NP_005408.1  | v-src sarcoma (Schmidt-Ruppin A-2) viral oncogene homolog; Protooncogen  |            |   | 1.78E-09 | 4.02 | 50.23  | 15.90 | 59834.4  |
| AHQ-5-7, 6835 - 6903        | R.AGPLAGGVTTFFVALYDYSR.T                                                 | 2088.30526 | 2 | 2.43E-04 | 0.89 | 3.80   | -     | 923.8    |
| AHQ-5-7, 2378               | R.GPSAAFAAPAEPK.L                                                        | 1285.43034 | 1 | 2.99E-04 | 0.47 | 2.35   | -     | 487.0    |
| AHQ-5-7, 3808 - 3874        | K.LFGFGNSSDTIVTSPQR.A                                                    | 1713.82931 | 2 | 3.80E-08 | 0.78 | 3.19   | -     | 736.0    |
| AHQ-5-7, 3542               | K.LFGFGNSSDTIVTSPQR.A                                                    | 1713.82931 | 2 | 6.22E-06 | 0.87 | 3.25   | -     | 892.1    |
| AHQ-5-13, 4062              | K.LFGFGNSSDTIVTSPQR.A                                                    | 1713.82931 | 2 | 4.56E-04 | 0.33 | 2.54   | -     | 436.5    |
| AHQ-5-7, 5336 - 5406        | K.TLPGTMSPEAFLOEAQVMK.K                                                  | 2207.59964 | 2 | 1.81E-04 | 0.93 | 4.16   | -     | 851.9    |
| AHQ-5-7, 5399               | K.TLPGTMSPEAFLOEAQVMK.K                                                  | 2207.59964 | 3 | 4.05E-04 | 0.63 | 3.39   | -     | 718.0    |
| AHQ-5-7, 6202               | R.TQFNLSQLLVAYYSK.H                                                      | 1790.99681 | 2 | 1.78E-09 | 0.94 | 3.86   | -     | 1348.9   |
| AHQ-5-7, 6042               | R.TQFNLSQLLVAYYSK.H                                                      | 1790.99681 | 2 | 3.80E-08 | 0.76 | 2.71   | -     | 801.5    |
| gi 21361478 ref NP_055944.2 | septin 6 isoform B; septin 2 [Homo sapiens]                              |            |   | 1.79E-09 | 2.84 | 30.25  | 15.90 | 49713.6  |
| AHQ-5-7, 3726 - 3800        | K.FEGEPATHTPQGVLQSNITYDLQESNVR.L                                         | 3147.31508 | 3 | 1.47E-06 | 0.93 | 4.72   | -     | 942.4    |
| AHQ-5-7, 2694               | R.KTAAELLQSQGSQAGGSQTLK.R                                                | 2104.30776 | 2 | 1.08E-04 | 0.96 | 4.88   | -     | 1127.6   |
| AHQ-5-10, 4591              | R.TVPLAGHVGFDSLDPQLVVK.S                                                 | 2108.38284 | 2 | 1.58E-05 | 0.88 | 4.03   | -     | 576.0    |
| AHQ-5-7, 4815               | R.TVPLAGHVGFDSLDPQLVVK.S                                                 | 2108.38284 | 2 | 1.79E-09 | 0.95 | 4.92   | -     | 981.9    |
| gi 29568101 ref NP_006467.3 | ATP synthase, H+ transporting, mitochondrial F0 complex, subunit g; AT   |            |   | 1.82E-09 | 1.89 | 20.24  | 14.60 | 11400.3  |
| AHQ-5-14-, 3613             | K.TPALVNAAVTYSK.P                                                        | 1335.53080 | 2 | 1.80E-06 | 0.94 | 3.62   | -     | 1168.5   |
| AHQ-5-14-, 3541 - 3597      | K.TPALVNAAVTYSKPR.L                                                      | 1588.83283 | 3 | 1.82E-09 | 0.95 | 4.88   | -     | 1135.3   |
| AHQ-5-14-, 3537             | K.TPALVNAAVTYSKPR.L                                                      | 1588.83283 | 2 | 1.77E-04 | 0.95 | 4.31   | -     | 1342.7   |
| AHQ-5-14, 4444              | K.TPALVNAAVTYSKPR.L                                                      | 1588.83283 | 2 | 3.45E-08 | 0.96 | 4.47   | -     | 1286.3   |
| gi 4508047 ref NP_003452.1  | zyxin [Homo sapiens]                                                     |            |   | 1.88E-09 | 3.45 | 40.26  | 16.80 | 61277.0  |
| AHQ-5-9, 6426 - 6488        | K.EVEELEQLTQLMQDMHEPQR.Q                                                 | 2612.87876 | 2 | 3.49E-04 | 0.55 | 2.61   | -     | 354.4    |
| AHQ-5-8, 7144               | K.EVEELEQLTQLMQDMHEPQR.Q                                                 | 2612.87876 | 3 | 1.88E-09 | 0.79 | 3.59   | -     | 816.3    |
| AHQ-5-8, 7145               | K.EVEELEQLTQLMQDMHEPQR.Q                                                 | 2612.87876 | 2 | 2.33E-08 | 0.96 | 5.12   | -     | 875.4    |
| AHQ-5-9, 6427               | K.EVEELEQLTQLMQDMHEPQR.Q                                                 | 2612.87876 | 3 | 1.56E-04 | 0.85 | 3.56   | -     | 740.2    |
| AHQ-5-12, 3877              | K.LGHPEALSAGTGSPPPSFTYAQQR.E                                             | 2598.81170 | 3 | 1.86E-04 | 0.89 | 4.73   | -     | 807.5    |
| AHQ-5-8, 3584 - 3642        | K.LGHPEALSAGTGSPPPSFTYAQQR.E                                             | 2598.81170 | 2 | 5.44E-05 | 0.94 | 4.66   | -     | 767.9    |
| AHQ-5-6, 3748               | K.LGHPEALSAGTGSPPPSFTYAQQR.E                                             | 2598.81170 | 3 | 1.43E-05 | 0.79 | 3.82   | -     | 680.7    |
| AHQ-5-10, 3575              | K.LGHPEALSAGTGSPPPSFTYAQQR.E                                             | 2598.81170 | 2 | 4.58E-05 | 0.91 | 4.56   | -     | 684.1    |
| AHQ-5-11, 3796              | K.LGHPEALSAGTGSPPPSFTYAQQR.E                                             | 2598.81170 | 3 | 5.74E-07 | 0.88 | 4.40   | -     | 715.9    |
| AHQ-5-13-, 3889             | K.LGHPEALSAGTGSPPPSFTYAQQR.E                                             | 2598.81170 | 3 | 9.26E-05 | 0.94 | 4.64   | -     | 1230.4   |
| AHQ-5-9, 3491               | K.SPSSSQPLQVPAQAQSQTFHVPQPPQK.P                                          | 3223.54419 | 3 | 1.02E-05 | 0.85 | 4.37   | -     | 506.6    |
| AHQ-5-10, 6628              | K.VSSIDLEIDSLSSLLDDMTK.N                                                 | 2182.43225 | 2 | 1.47E-07 | 0.94 | 4.87   | -     | 725.9    |
| gi 5802974 ref NP_006784.1  | peroxiredoxin 3; antioxidant protein 1; thioredoxin-dependent peroxide   |            |   | 2.38E-09 | 2.63 | 30.27  | 20.70 | 27692.5  |
| AHQ-5-10, 4138              | K.AFYQYVTHEGVCANWTPDSPTIKPSPAASK.E                                       | 3388.70790 | 3 | 9.32E-09 | 0.95 | 5.41   | -     | 1161.7   |
| AHQ-5-11, 4475              | K.AFYQYVTHEGVCANWTPDSPTIKPSPAASK.E                                       | 3388.70790 | 3 | 2.38E-09 | 0.91 | 4.85   | -     | 826.0    |
| AHQ-5-11, 3948              | K.DLSLDDFK.G                                                             | 953.02795  | 1 | 3.98E-05 | 0.37 | 2.15   | -     | 454.7    |
| AHQ-5-10, 3732              | K.DLSLDDFK.G                                                             | 953.02795  | 1 | 4.94E-07 | 0.74 | 2.85   | -     | 485.7    |
| AHQ-5-11, 5312              | R.DYGVLLLEGGSLALR.G                                                      | 1463.66058 | 2 | 4.70E-07 | 0.98 | 4.64   | -     | 2134.5   |
| gi 4504523 ref NP_002148.1  | heat shock 10kDa protein 1 (chaperonin 10); heat shock 10kDa protein 1 ( |            |   | 2.76E-09 | 1.18 | 20.17  | 11.80 | 10931.6  |
| AHQ-5-14-, 2971             | K.VLLPEYGGTK.V                                                           | 1077.25535 | 1 | 3.97E-04 | 0.26 | 2.01   | -     | 223.3    |
| AHQ-5-14-, 4929 - 4937      | K.VVLDKDYFLFR.D                                                          | 1530.74861 | 3 | 1.16E-07 | 0.88 | 3.03   | -     | 772.2    |
| AHQ-5-14, 5866              | K.VVLDKDYFLFR.D                                                          | 1530.74861 | 2 | 2.76E-09 | 0.92 | 3.35   | -     | 1129.9   |
| gi 13385594 ref NP_085056.1 | cytochrome b5 outer mitochondrial membrane precursor; type 2 cyt-b5 [H   |            |   | 2.82E-09 | 0.93 | 10.23  | 23.30 | 16332.0  |
| AHQ-5-11, 5942              | R.FLNEHPGEEVLLLEQAGVDASESFEDVGHSSDAR.E                                   | 3629.75848 | 3 | 2.82E-09 | 0.93 | 4.66   | -     | 1014.7   |
| gi 22538814 ref NP_002976.2 | small inducible cytokine A5 precursor; T-cell specific protein p288; T   |            |   | 2.94E-09 | 0.88 | 10.15  | 12.10 | 9989.6   |
| AHQ-5-14-, 3719             | K.CSNPAVVVTR.K                                                           | 1251.43718 | 2 | 2.94E-09 | 0.88 | 3.07   | -     | 846.2    |
| gi 4557871 ref NP_001054.1  | transferrin [Homo sapiens]                                               |            |   | 2.95E-09 | 0.96 | 10.26  | 2.70  | 77049.5  |
| AHQ-5-5, 7325               | R.SAGWNIPGLLYCDLPEPR.K                                                   | 2173.47658 | 2 | 2.95E-09 | 0.96 | 5.14   | -     | 831.8    |
| gi 5453714 ref NP_006448.1  | LIM protein (similar to rat protein kinase C-binding enigma) [Homo sapi  |            |   | 2.96E-09 | 1.73 | 20.21  | 4.90  | 64027.9  |
| AHQ-5-13-, 2011             | R.ASAAPKPEPVQK.G                                                         | 1419.65094 | 2 | 6.45E-04 | 0.81 | 2.83   | -     | 755.6    |
| AHQ-5-13-, 2844 - 2848      | K.EVVKPVPITSPAVSK.V                                                      | 1551.85241 | 2 | 2.96E-09 | 0.92 | 4.15   | -     | 485.3    |
| gi 4758086 ref NP_004069.1  | cysteine and glycine-rich protein 1; cysteine-rich protein; LIM-domain   |            |   | 3.11E-09 | 6.44 | 70.26  | 46.10 | 20567.3  |
| AHQ-5-11, 4082              | K.GFGFGGAGALVHSE                                                         | 1434.53788 | 1 | 3.10E-06 | 0.30 | 2.43   | -     | 459.7    |
| AHQ-5-13, 4304              | K.GFGFGGAGALVHSE                                                         | 1434.53788 | 2 | 4.48E-06 | 0.95 | 4.22   | -     | 1083.3   |
| AHQ-5-13-, 4209             | K.GFGFGGAGALVHSE                                                         | 1434.53788 | 2 | 1.16E-07 | 0.92 | 3.59   | -     | 1099.4   |
| AHQ-5-12, 3290 - 3298       | K.GLESTLADKDGIEYCK.G                                                     | 1902.06957 | 2 | 3.28E-07 | 0.88 | 4.25   | -     | 642.2    |
| AHQ-5-10, 3063              | K.GLESTLADKDGIEYCK.G                                                     | 1902.06957 | 2 | 1.97E-07 | 0.91 | 4.37   | -     | 667.7    |
| AHQ-5-11, 2475              | K.GYGYGGAGTLSTDK.G                                                       | 1475.54194 | 2 | 3.87E-08 | 0.95 | 3.90   | -     | 1347.9   |
| AHQ-5-10, 3259              | K.GYGYGGAGTLSTDKGESLGIK.H                                                | 2160.32665 | 2 | 6.09E-05 | 0.35 | 2.66   | -     | 172.1    |
| AHQ-5-13, 3721              | K.GYGYGGAGTLSTDKGESLGIK.H                                                | 2160.32665 | 2 | 3.11E-09 | 0.91 | 4.45   | -     | 671.1    |
| AHQ-5-11, 3548              | K.GYGYGGAGTLSTDKGESLGIK.H                                                | 2160.32665 | 2 | 7.14E-07 | 0.87 | 3.88   | -     | 534.0    |
| AHQ-5-11, 3427              | K.GYGYGGAGTLSTDKGESLGIK.H                                                | 2160.32665 | 2 | 3.35E-06 | 0.86 | 3.86   | -     | 708.7    |
| AHQ-5-13-, 3637             | K.GYGYGGAGTLSTDKGESLGIK.H                                                | 2160.32665 | 2 | 2.06E-05 | 0.83 | 4.14   | -     | 506.4    |
| AHQ-5-12, 3505              | K.GYGYGGAGTLSTDKGESLGIK.H                                                | 2160.32665 | 2 | 5.33E-07 | 0.75 | 3.81   | -     | 342.0    |
| AHQ-5-11, 2922              | K.KNLDSTTVAVHGEIYCK.S                                                    | 2066.27805 | 2 | 9.86E-06 | 0.89 | 3.96   | -     | 494.0    |
| AHQ-5-14, 4316              | K.KNLDSTTVAVHGEIYCK.S                                                    | 1938.10514 | 2 | 1.26E-07 | 0.91 | 4.25   | -     | 715.8    |
| AHQ-5-11, 3390 - 3464       | K.KNLDSTTVAVHGEIYCK.S                                                    | 1938.10514 | 2 | 2.36E-05 | 0.97 | 4.59   | -     | 1375.2   |
| AHQ-5-11, 3891              | K.TVYFAEEVQCEGNSFHK.S                                                    | 2047.19015 | 2 | 1.96E-07 | 0.95 | 4.57   | -     | 928.2    |
| AHQ-5-11, 4172              | K.TVYFAEEVQCEGNSFHK.S                                                    | 2047.19015 | 2 | 9.43E-06 | 0.94 | 4.70   | -     | 798.7    |
| AHQ-5-11, 4071              | K.TVYFAEEVQCEGNSFHK.S                                                    | 2047.19015 | 2 | 5.06E-06 | 0.82 | 3.72   | -     | 500.5    |
| gi 18543899 ref XP_086916.1 | similar to Phosphatidylethanolamine-binding protein (PEBP) (Prostatic    |            |   | 3.17E-09 | 1.85 | 20.21  | 19.80 | 21265.8  |
| AHQ-5-11, 3230              | K.NRPTSISWDDGLDGLK.L                                                     | 1633.74419 | 2 | 3.06E-04 | 0.94 | 4.25   | -     | 988.1    |
| AHQ-5-11, 5142 - 5212       | R.YVWVLYEQDRPLKDEPILSNR.S                                                | 2796.15005 | 3 | 3.17E-09 | 0.91 | 4.14   | -     | 864.1    |
| gi 27480104 ref XP_208215.1 | similar to triosephosphate isomerase 1 [Homo sapiens]                    |            |   | 3.22E-09 | 5.53 | 70.25  | 26.90 | 26942.6  |
| AHQ-5-10, 2692              | R.HVFGESDELIGQK.V                                                        | 1459.58565 | 1 | 3.22E-09 | 0.85 | 3.80   | -     | 662.5    |
| AHQ-5-10, 2687              | R.HVFGESDELIGQK.V                                                        | 1459.58565 | 2 | 1.11E-04 | 0.97 | 4.78   | -     | 1124.0   |
| AHQ-5-10, 2044 - 2108       | K.IAVAAQNCYK.V                                                           | 1139.30684 | 1 | 9.05E-04 | 0.14 | 2.28   | -     | 98.9     |
| AHQ-5-10, 2412 - 2416       | R.RHVFGESDELIGQK.V                                                       | 1615.77200 | 2 | 8.19E-09 | 0.97 | 4.97   | -     | 1566.4   |

|                            |                                                                         |            |   |          |      |       |      |         |
|----------------------------|-------------------------------------------------------------------------|------------|---|----------|------|-------|------|---------|
| AHQ-5-10, 1958 - 1960      | K.SNVSDAVAQSTR.I                                                        | 1235.28659 | 1 | 7.54E-04 | 0.18 | 2.37  | -    | 258.8   |
| AHQ-5-10, 1976 - 1988      | K.SNVSDAVAQSTR.I                                                        | 1235.28659 | 2 | 4.18E-05 | 0.95 | 3.78  | -    | 1891.1  |
| AHQ-5-10, 4059             | K.VTNGAFTGEISPQMIK.D                                                    | 1622.86786 | 2 | 6.13E-04 | 0.92 | 4.35  | -    | 910.0   |
| AHQ-5-10, 3466             | K.VTNGAFTGEISPQMIK.D                                                    | 1638.86726 | 2 | 7.75E-04 | 0.89 | 3.22  | -    | 1060.7  |
| AHQ-5-10, 4914 - 4946      | K.VVLYAPEVVAIGTGK.T                                                     | 1603.88587 | 2 | 4.24E-05 | 0.80 | 3.11  | -    | 781.3   |
| gj13518026[ref]NP_004978.2 | LIM and senescence cell antigen-like domains 1 [Homo sapiens]           |            |   |          |      |       |      |         |
| AHQ-5-8, 4060 - 4065       | K.CHAIDEQPLIFK.N                                                        | 1585.84900 | 2 | 1.23E-07 | 0.95 | 4.84  | -    | 1256.0  |
| AHQ-5-11, 4380             | K.CHAIDEQPLIFK.N                                                        | 1585.84900 | 2 | 3.26E-04 | 0.95 | 4.48  | -    | 1230.6  |
| AHQ-5-9, 3942 - 3946       | K.CHAIDEQPLIFK.N                                                        | 1585.84900 | 2 | 3.74E-04 | 0.96 | 4.81  | -    | 1472.3  |
| AHQ-5-9, 2895              | R.ELKGELYCLPCHDK.M                                                      | 1765.00101 | 2 | 6.29E-07 | 0.82 | 3.02  | -    | 893.7   |
| AHQ-5-13, 3926 - 3930      | K.FVEFDMPKPVCK.K                                                        | 1401.67594 | 2 | 4.05E-04 | 0.86 | 3.61  | -    | 1045.3  |
| AHQ-5-9, 4454              | R.KGLAYCETHYNQLFGDVCVFCN.R.V                                            | 2894.17088 | 3 | 7.17E-05 | 0.65 | 3.12  | -    | 335.9   |
| AHQ-5-11, 3399             | R.VIEGDVVVALNK.A                                                        | 1244.41966 | 2 | 3.23E-09 | 0.95 | 4.11  | -    | 1247.9  |
| AHQ-5-9, 3060 - 3064       | R.VIEGDVVVALNK.A                                                        | 1244.41966 | 1 | 2.12E-04 | 0.45 | 2.16  | -    | 688.2   |
| AHQ-5-8, 3022              | R.VIEGDVVVALNK.A                                                        | 1244.41966 | 2 | 1.46E-06 | 0.94 | 3.87  | -    | 1075.3  |
| AHQ-5-9, 3070 - 3072       | R.VIEGDVVVALNK.A                                                        | 1244.41966 | 2 | 4.56E-07 | 0.96 | 4.46  | -    | 1132.1  |
| AHQ-5-13, 3467 - 3543      | R.VIEGDVVVALNK.A                                                        | 1244.41966 | 2 | 7.10E-09 | 0.96 | 4.59  | -    | 1306.8  |
| AHQ-5-14, 3478             | R.VIEGDVVVALNK.A                                                        | 1244.41966 | 2 | 6.48E-08 | 0.97 | 4.54  | -    | 1423.6  |
| gj4507295[ref]NP_003560.1  | syntaxin 7 [Homo sapiens]                                               |            |   |          |      |       |      |         |
| AHQ-5-13, 3352             | R.TLNQLGTPQDPSPELR.Q                                                    | 1669.81798 | 2 | 4.41E-04 | 0.76 | 3.09  | -    | 519.2   |
| AHQ-5-13, 3467             | R.TLNQLGTPQDPSPELR.Q                                                    | 1669.81798 | 2 | 3.34E-09 | 0.88 | 3.52  | -    | 745.1   |
| gj10716563[ref]NP_001737.1 | calnexin [Homo sapiens]                                                 |            |   |          |      |       |      |         |
| AHQ-5-12, 4928             | K.APVPTGEVYFADSFDR.G                                                    | 1771.90722 | 2 | 7.59E-05 | 0.82 | 3.04  | -    | 661.9   |
| AHQ-5-5, 4901 - 4970       | K.APVPTGEVYFADSFDR.G                                                    | 1771.90722 | 2 | 3.46E-09 | 0.96 | 4.39  | -    | 1738.6  |
| AHQ-5-6, 4877 - 4956       | K.APVPTGEVYFADSFDR.G                                                    | 1771.90722 | 2 | 9.35E-05 | 0.75 | 3.32  | -    | 857.6   |
| AHQ-5-5, 4213              | R.GTSLGWILSK.A                                                          | 1062.24392 | 2 | 1.33E-06 | 0.89 | 3.24  | -    | 831.5   |
| AHQ-5-5, 3887              | K.IPDPEAVKPDWDDEAPAK.I                                                  | 2109.23496 | 2 | 2.50E-04 | 0.83 | 3.57  | -    | 541.7   |
| AHQ-5-5, 6887              | K.IPNPDFFEDLEPFR.M                                                      | 1736.90447 | 2 | 2.03E-06 | 0.79 | 3.10  | -    | 566.3   |
| AHQ-5-5, 6285 - 6355       | R.KIPNPDFFEDLEPFR.M                                                     | 1865.07739 | 2 | 1.16E-07 | 0.91 | 3.84  | -    | 768.5   |
| gj4557801[ref]NP_000261.1  | purine nucleoside phosphorylase [Homo sapiens]                          |            |   |          |      |       |      |         |
| AHQ-5-9, 3910 - 3922       | R.DHINLPGFSGQNPLR.G                                                     | 1665.83425 | 2 | 4.13E-09 | 0.92 | 4.65  | -    | 540.0   |
| AHQ-5-10, 4008             | R.DHINLPGFSGQNPLR.G                                                     | 1665.83425 | 2 | 7.69E-04 | 0.83 | 3.20  | -    | 687.7   |
| AHQ-5-9, 3912              | R.FHMYEGYPLWK.V                                                         | 1471.70636 | 1 | 1.44E-04 | 0.77 | 2.36  | -    | 991.2   |
| AHQ-5-13, 4017             | K.HRPQVAICGSGGLGGLTDK.L                                                 | 1981.26589 | 2 | 2.80E-06 | 0.96 | 5.08  | -    | 1055.4  |
| AHQ-5-14, 4792             | K.HRPQVAICGSGGLGGLTDK.L                                                 | 1981.26589 | 2 | 9.45E-06 | 0.94 | 4.51  | -    | 756.5   |
| AHQ-5-13, 4023             | K.HRPQVAICGSGGLGGLTDK.L                                                 | 1981.26589 | 3 | 3.47E-09 | 0.97 | 4.83  | -    | 2556.9  |
| AHQ-5-13, 4098             | K.HRPQVAICGSGGLGGLTDK.L                                                 | 1981.26589 | 3 | 1.62E-05 | 0.97 | 5.15  | -    | 2562.4  |
| AHQ-5-9, 6522 - 6523       | K.LEQFVSLIMASIPLPDK.A                                                   | 1902.28716 | 2 | 3.59E-06 | 0.93 | 4.38  | -    | 710.0   |
| AHQ-5-13, 6780 - 6844      | K.LEQFVSLIMASIPLPDK.A                                                   | 1902.28716 | 2 | 1.19E-04 | 0.94 | 4.75  | -    | 801.9   |
| AHQ-5-11, 4803             | K.LGADAVGMSTVPEVIVAR.H                                                  | 1786.08666 | 2 | 2.38E-05 | 0.74 | 2.82  | -    | 731.9   |
| AHQ-5-13, 4250 - 4256      | K.LGADAVGMSTVPEVIVAR.H                                                  | 1802.08606 | 2 | 1.17E-05 | 0.92 | 4.04  | -    | 905.7   |
| AHQ-5-13, 4179             | K.LGADAVGMSTVPEVIVAR.H                                                  | 1802.08606 | 2 | 1.81E-04 | 0.93 | 4.48  | -    | 849.3   |
| AHQ-5-9, 3750              | K.LGADAVGMSTVPEVIVAR.H                                                  | 1802.08606 | 2 | 7.73E-04 | 0.90 | 3.75  | -    | 768.6   |
| AHQ-5-13, 5848             | K.LTQAQIFDYSEIPNFR.S                                                    | 2040.26383 | 2 | 2.81E-04 | 0.88 | 4.16  | -    | 515.1   |
| AHQ-5-13, 5912 - 5937      | K.LTQAQIFDYSEIPNFR.S                                                    | 2040.26383 | 2 | 1.51E-05 | 0.92 | 4.35  | -    | 603.0   |
| AHQ-5-9, 5302              | K.LTQAQIFDYSEIPNFR.S                                                    | 2040.26383 | 2 | 1.53E-05 | 0.92 | 4.30  | -    | 724.0   |
| AHQ-5-9, 5259 - 5272       | R.VFHLLGVDLTVVNAAGGLNPK.F                                               | 2236.59890 | 2 | 5.86E-05 | 0.98 | 5.93  | -    | 2383.0  |
| AHQ-5-9, 5343              | R.VFHLLGVDLTVVNAAGGLNPK.F                                               | 2236.59890 | 2 | 4.13E-08 | 0.98 | 6.61  | -    | 2386.5  |
| gj4505871[ref]NP_000436.1  | plectin 1, intermediate filament binding protein 500kDa; plectin 1, int |            |   |          |      |       |      |         |
| AHQ-5-1, 2776              | R.AALHSEEVASQVAATK.T                                                    | 1784.94898 | 2 | 1.95E-08 | 0.96 | 4.75  | -    | 1187.2  |
| AHQ-5-3, 3813              | K.AGVVPELHEQLLSAEK.A                                                    | 1777.99958 | 2 | 4.61E-04 | 0.93 | 3.95  | -    | 1268.2  |
| AHQ-5-3, 5211              | R.APVASSELLASGVLSR.A                                                    | 1567.81193 | 2 | 4.13E-06 | 0.96 | 4.37  | -    | 1203.6  |
| AHQ-5-1, 5855              | R.ESADPLGAWLQDAR.R                                                      | 1529.63597 | 2 | 3.48E-04 | 0.79 | 2.90  | -    | 746.8   |
| AHQ-5-1, 6873 - 6953       | K.SEEM*QTVQEQQLQETQALQQSFLSEK.D                                         | 3198.46199 | 3 | 1.05E-06 | 0.92 | 4.18  | -    | 1241.6  |
| AHQ-5-1, 2993              | R.SLQEEHVAAQLR.L                                                        | 1480.65123 | 2 | 3.52E-09 | 0.97 | 4.83  | -    | 1850.2  |
| gj6005749[ref]NP_009193.1  | RNA-binding protein regulatory subunit; oncogene DJ1 [Homo sapiens] [MA |            |   |          |      |       |      |         |
| AHQ-5-10, 3166 - 3167      | R.DVVICPDASLEDAK.E                                                      | 1661.85581 | 2 | 1.03E-04 | 0.84 | 2.98  | -    | 867.3   |
| AHQ-5-11, 3346 - 3347      | R.DVVICPDASLEDAK.E                                                      | 1661.85581 | 2 | 9.14E-04 | 0.91 | 3.70  | -    | 905.8   |
| AHQ-5-11, 3446             | K.GAEEM*ETVYVDMV*MR.R                                                   | 1708.93613 | 2 | 9.25E-05 | 0.64 | 2.90  | -    | 405.6   |
| AHQ-5-11, 3074             | K.VTVAGLAGKDPVQCSR.D                                                    | 1659.88952 | 2 | 4.97E-07 | 0.78 | 3.33  | -    | 580.1   |
| AHQ-5-10, 2916 - 2920      | K.VTVAGLAGKDPVQCSR.D                                                    | 1659.88952 | 2 | 3.61E-09 | 0.90 | 3.61  | -    | 743.2   |
| gj25188179[ref]NP_005653.3 | voltage-dependent anion channel 3 [Homo sapiens]                        |            |   |          |      |       |      |         |
| AHQ-5-10, 3072 - 3151      | K.LSQNNFALGYK.A                                                         | 1255.40424 | 1 | 1.30E-06 | 0.51 | 2.59  | -    | 328.8   |
| AHQ-5-10, 4544             | K.LTLDTLFIVPNTGK.K                                                      | 1419.64771 | 1 | 3.35E-07 | 0.78 | 2.95  | -    | 635.4   |
| AHQ-5-11, 4882 - 4887      | K.LTLDTLFIVPNTGK.K                                                      | 1419.64771 | 2 | 1.61E-04 | 0.85 | 3.21  | -    | 711.9   |
| AHQ-5-9, 4192 - 4203       | K.VNNSASLIGLGYTQLRPGVK.L                                                | 2102.42298 | 2 | 7.08E-07 | 0.78 | 3.67  | -    | 485.8   |
| AHQ-5-10, 3970             | K.VNNSASLIGLGYTQLRPGVK.L                                                | 2102.42298 | 3 | 6.27E-04 | 0.80 | 3.52  | -    | 738.0   |
| AHQ-5-10, 4142             | K.VNNSASLIGLGYTQLRPGVK.L                                                | 2102.42298 | 2 | 2.06E-06 | 0.88 | 3.94  | -    | 719.0   |
| AHQ-5-10, 4314             | K.VNNSASLIGLGYTQLRPGVK.L                                                | 2102.42298 | 2 | 2.94E-07 | 0.82 | 3.86  | -    | 511.5   |
| AHQ-5-10, 3963             | K.VNNSASLIGLGYTQLRPGVK.L                                                | 2102.42298 | 2 | 8.76E-06 | 0.80 | 3.63  | -    | 405.0   |
| AHQ-5-14, 5280             | K.VNNSASLIGLGYTQLRPGVK.L                                                | 2102.42298 | 2 | 3.74E-06 | 0.50 | 2.78  | -    | 384.1   |
| AHQ-5-9, 3798              | K.VNNSASLIGLGYTQLRPGVK.L                                                | 2102.42298 | 2 | 3.80E-07 | 0.84 | 3.63  | -    | 517.8   |
| AHQ-5-14, 5670             | K.VNNSASLIGLGYTQLRPGVK.L                                                | 2102.42298 | 2 | 3.72E-09 | 0.43 | 2.87  | -    | 430.9   |
| AHQ-5-10, 3523             | K.YKVCNYGLTFTQK.W                                                       | 1623.85410 | 2 | 3.83E-09 | 0.96 | 4.39  | -    | 1211.3  |
| gj4759212[ref]NP_004598.1  | beta-tubulin cofactor A [Homo sapiens]                                  |            |   |          |      |       |      |         |
| AHQ-5-13, 3470             | R.ILENEKDLEEAEEYKEAR.L                                                  | 2209.35284 | 3 | 3.79E-09 | 0.98 | 7.34  | -    | 2471.6  |
| AHQ-5-13, 3349             | R.ILENEKDLEEAEEYKEAR.L                                                  | 2209.35284 | 2 | 1.05E-07 | 0.97 | 5.13  | -    | 1491.9  |
| AHQ-5-13, 3351             | R.ILENEKDLEEAEEYKEAR.L                                                  | 2209.35284 | 3 | 1.68E-07 | 0.95 | 5.14  | -    | 1165.9  |
| AHQ-5-13, 3857 - 3862      | R.LEAAYLDLQR.I                                                          | 1192.34645 | 1 | 2.00E-04 | 0.35 | 2.63  | -    | 375.7   |
| AHQ-5-13, 3841 - 3848      | R.LEAAYLDLQR.I                                                          | 1192.34645 | 2 | 5.42E-06 | 0.97 | 4.00  | -    | 1794.2  |
| AHQ-5-13, 3369             | R.LEAAYLDLQR.I                                                          | 1348.53280 | 2 | 3.31E-06 | 0.91 | 3.65  | -    | 724.1   |
| AHQ-5-13, 3458             | R.LEAAYLDLQR.I                                                          | 1348.53280 | 2 | 2.77E-07 | 0.93 | 4.14  | -    | 691.0   |
| gj30150271[ref]XP_292964.2 | similar to Heat shock protein HSP 90-beta (HSP 84) (Tumor specific tra  |            |   |          |      |       |      |         |
| AHQ-5-5, 4717              | K.CLELFSLEADKKNYK.F                                                     | 2117.40810 | 2 | 3.81E-09 | 0.82 | 10.19 | 4.10 | 47348.8 |
| gj28827809[ref]NP_789797.1 | nucleoside diphosphate kinase B-like [Homo sapiens]                     |            |   |          |      |       |      |         |
| AHQ-5-12, 3328             | R.GDFCIQVGR.N                                                           | 1053.17404 | 1 | 2.52E-05 | 0.37 | 2.22  | -    | 239.9   |
| AHQ-5-12, 3337             | R.GDFCIQVGR.N                                                           | 1053.17404 | 1 | 8.60E-05 | 0.36 | 2.44  | -    | 231.1   |
| AHQ-5-12, 3336             | R.GDFCIQVGR.N                                                           | 1053.17404 | 2 | 1.62E-06 | 0.93 | 3.39  | -    | 1414.6  |
| AHQ-5-12, 1609             | R.NIIHGSDSVSK.S                                                         | 1070.18131 | 1 | 3.45E-06 | 0.59 | 2.41  | -    | 478.9   |
| AHQ-5-12, 2064             | R.NIIHGSDSVSKSAEK.E                                                     | 1485.62464 | 1 | 1.86E-05 | 0.69 | 3.30  | -    | 415.8   |
| AHQ-5-12, 2756 - 2826      | R.VMLGETNPADSKPGTIR.G                                                   | 1787.03151 | 2 | 3.71E-06 | 0.74 | 3.49  | -    | 564.0   |
| AHQ-5-12, 2752 - 2753      | R.VMLGETNPADSKPGTIR.G                                                   | 1787.03151 | 3 | 4.40E-09 | 0.86 | 3.55  | -    | 819.7   |
| AHQ-5-12, 2568 - 2569      | R.VM*LGENTPADSKPGTIR.G                                                  | 1803.03091 | 2 | 1.48E-05 | 0.83 | 3.30  | -    | 713.9   |
| AHQ-5-12, 6924 - 6994      | K.YM*NSGPVAMVWGLNVVK.T                                                  | 2110.48562 | 2 | 3.92E-07 | 0.93 | 5.00  | -    | 627.2   |
| gj14211923[ref]NP_115982.1 | PKC1-related HIT protein [Homo sapiens]                                 |            |   |          |      |       |      |         |
| AHQ-5-13, 3377 - 3386      | K.AQAQATPGGAAPTIFSR.I                                                   | 1573.73512 | 2 | 2.07E-06 | 0.89 | 3.86  | -    | 476.1   |
| AHQ-5-13, 3272 - 3279      | K.AQAQATPGGAAPTIFSR.I                                                   | 1573.73512 | 2 | 2.83E-06 | 0.87 | 4.05  | -    | 395.2   |
| AHQ-5-13, 4757 - 4763      | R.DVAPQAPVHFLVPIK.K                                                     | 1631.94245 | 2 | 6.64E-04 | 0.59 | 3.16  | -    | 373.9   |
| AHQ-5-13, 6177 - 6187      | R.ISQAEEEDQQLLGHLLLVAK.Q                                                | 2235.52293 | 2 | 3.93E-08 | 0.97 | 6.15  | -    | 1469.4  |
| AHQ-5-13, 6229             | R.ISQAEEEDQQLLGHLLLVAK.Q                                                | 2235.52293 | 2 | 1.96E-05 | 0.96 | 5.01  | -    | 1631.7  |
| AHQ-5-13, 6175             | R.ISQAEEEDQQLLGHLLLVAK.Q                                                | 2235.52293 | 3 | 4.81E-09 | 0.87 | 3.84  | -    | 816.2   |
| AHQ-5-13, 6225             | R.ISQAEEEDQQLLGHLLLVAK.Q                                                | 2235.52293 | 3 | 2.43E-07 | 0.77 | 3.12  | -    | 809.7   |
| AHQ-5-13, 6155 - 6215      | K.SLPADILYEDQQCLVFR.D                                                   | 2069.32354 | 2 | 2.71E-04 | 0.94 | 4.15  | -    | 1173.1  |
| AHQ-5-13, 6166 - 6240      | K.SLPADILYEDQQCLVFR.D                                                   | 2069.32354 | 2 | 2.54E-04 | 0.70 | 3.17  | -    | 283.8   |
| gj4502695[ref]NP_001779.1  | cell division cycle 10; cell division cycle 10 (homolog to CDC10 of S.c |            |   |          |      |       |      |         |
| AHQ-5-8, 3632              | K.IYFEPETDDEEENKLVK.K                                                   | 2099.23685 | 3 | 1.37E-04 | 0.57 | 3.04  | -    | 380.5   |
| AHQ-5-8, 3628              | K.IYFEPETDDEEENKLVK.K                                                   | 2099.23685 | 2 | 4.71E-04 | 0.60 | 3.04  | -    | 341.9   |

|                             |                                                                         |            |   |          |      |       |       |          |
|-----------------------------|-------------------------------------------------------------------------|------------|---|----------|------|-------|-------|----------|
| AHQ-5-13, 5485              | K.NLEGVVGFANLPNQVYR.K                                                   | 1955.16216 | 2 | 1.94E-05 | 0.73 | 3.53  | -     | 445.5    |
| AHQ-5-14-, 5359             | K.NLEGVVGFANLPNQVYR.K                                                   | 1955.16216 | 2 | 9.83E-05 | 0.93 | 4.60  | -     | 850.2    |
| AHQ-5-8, 5098               | K.NLEGVVGFANLPNQVYR.K                                                   | 1955.16216 | 2 | 2.11E-04 | 0.94 | 4.76  | -     | 978.0    |
| AHQ-5-14-, 6401             | K.STLINSFLTDLYSPEYGPSPHR.I                                              | 2608.88640 | 3 | 4.81E-09 | 0.85 | 4.14  | -     | 484.1    |
| gi 4502205 ref NP_001651.1  | ADP-ribosylation factor 4 [Homo sapiens]                                |            |   | 4.85E-09 | 1.79 | 20.22 | 13.30 | 20510.6  |
| AHQ-5-11, 2426              | R.IQEADELQK.M                                                           | 1173.29830 | 2 | 6.97E-04 | 0.85 | 3.54  | -     | 624.8    |
| AHQ-5-12, 5518              | K.NICFTVVDVGGQDR.I                                                      | 1668.81182 | 2 | 4.85E-09 | 0.94 | 4.48  | -     | 774.7    |
| AHQ-5-11, 5335              | K.NICFTVVDVGGQDR.I                                                      | 1668.81182 | 2 | 9.89E-07 | 0.89 | 3.37  | -     | 898.5    |
| gi 4503747 ref NP_001448.1  | filamin B, beta (actin binding protein 278); beta filamin; filamin 1 (a |            |   | 4.92E-09 | 4.12 | 50.26 | 1.40  | 278191.4 |
| AHQ-5-3, 3634               | K.DLAEDAPWK.K                                                           | 1045.12708 | 1 | 4.15E-05 | 0.41 | 1.98  | -     | 605.7    |
| AHQ-5-2, 3545 - 3617        | K.DLAEDAPWK.K                                                           | 1045.12708 | 1 | 2.70E-06 | 0.36 | 1.88  | -     | 627.3    |
| AHQ-5-5, 3467               | K.DLAEDAPWK.K                                                           | 1045.12708 | 1 | 2.17E-04 | 0.33 | 1.99  | -     | 526.7    |
| AHQ-5-1, 3037               | K.DLAEDAPWK.I                                                           | 1173.29999 | 2 | 7.09E-05 | 0.89 | 3.11  | -     | 1099.3   |
| AHQ-5-13, 6312              | R.LIALLEVLVLSQK.R                                                       | 1227.51852 | 2 | 1.89E-04 | 0.96 | 4.13  | -     | 1439.8   |
| AHQ-5-1, 6623               | R.LIALLEVLVLSQK.R                                                       | 1227.51852 | 2 | 3.55E-07 | 0.96 | 4.34  | -     | 1393.7   |
| AHQ-5-3, 6614               | R.LIALLEVLVLSQK.R                                                       | 1227.51852 | 2 | 4.11E-08 | 0.95 | 4.07  | -     | 1112.1   |
| AHQ-5-4, 6581               | R.LIALLEVLVLSQK.R                                                       | 1227.51852 | 2 | 1.64E-05 | 0.97 | 5.07  | -     | 1295.9   |
| AHQ-5-11, 6036              | R.LIALLEVLVLSQK.R                                                       | 1227.51852 | 2 | 6.50E-08 | 0.96 | 4.21  | -     | 1419.5   |
| AHQ-5-2, 6473 - 6514        | R.LIALLEVLVLSQK.R                                                       | 1227.51852 | 2 | 1.94E-08 | 0.97 | 4.78  | -     | 1452.3   |
| AHQ-5-5, 6349 - 6358        | R.LIALLEVLVLSQK.R                                                       | 1227.51852 | 2 | 3.24E-08 | 0.98 | 5.10  | -     | 1568.8   |
| AHQ-5-6, 6329               | R.LIALLEVLVLSQK.R                                                       | 1227.51852 | 2 | 4.92E-09 | 0.97 | 4.86  | -     | 1501.8   |
| AHQ-5-7, 6079               | R.LIALLEVLVLSQK.R                                                       | 1227.51852 | 2 | 6.10E-07 | 0.96 | 4.11  | -     | 1486.8   |
| AHQ-5-14-, 6157             | R.LIALLEVLVLSQK.R                                                       | 1227.51852 | 2 | 2.10E-04 | 0.92 | 3.27  | -     | 1260.0   |
| AHQ-5-1, 7155 - 7156        | R.QMQLENSVALEFLDR.E                                                     | 1893.15408 | 2 | 3.54E-05 | 0.94 | 4.09  | -     | 1267.8   |
| AHQ-5-2, 6646 - 6718        | R.QMQLENSVALEFLDR.E                                                     | 1909.15348 | 2 | 5.04E-07 | 0.95 | 4.55  | -     | 1147.9   |
| gi 22043610 ref XP_171081.1 | similar to ras-related C3 botulinum toxin substrate 1 isoform Rac1; rh  |            |   | 5.02E-09 | 2.70 | 30.26 | 24.00 | 21543.1  |
| AHQ-5-11, 2678 - 2687       | R.HHCPNTPILLVTGK.L                                                      | 1588.85612 | 3 | 9.28E-06 | 0.79 | 3.15  | -     | 1004.6   |
| AHQ-5-11, 3356 - 3363       | K.KLPTITYPQGLAM*AK.E                                                    | 1648.99156 | 2 | 7.71E-05 | 0.93 | 3.90  | -     | 985.1    |
| AHQ-5-11, 4711              | K.PVNLGLWDTAGQEDYDR.L                                                   | 1950.05441 | 2 | 5.02E-09 | 0.98 | 5.18  | -     | 2364.7   |
| gi 27477800 ref XP_208313.1 | similar to tropomyosin 4 [Homo sapiens]                                 |            |   | 5.10E-09 | 0.94 | 10.26 | 10.10 | 18426.7  |
| AHQ-5-9, 4572 - 4631        | K.CGDLEELKKNVTNLLK.S                                                    | 1878.05124 | 2 | 1.33E-07 | 0.97 | 5.27  | -     | 1520.3   |
| AHQ-5-9, 4942 - 5011        | K.CGDLEELKKNVTNLLK.S                                                    | 1878.05124 | 2 | 9.35E-05 | 0.97 | 4.91  | -     | 1694.5   |
| AHQ-5-9, 5175 - 5234        | K.CGDLEELKKNVTNLLK.S                                                    | 1878.05124 | 2 | 5.10E-09 | 0.94 | 4.40  | -     | 1206.6   |
| AHQ-5-9, 4126 - 4127        | K.CGDLEELKKNVTNLLK.S                                                    | 1878.05124 | 2 | 2.04E-06 | 0.95 | 4.50  | -     | 1342.2   |
| gi 12545410 ref NP_031394.1 | RAS p21 protein activator 3; GTPase activating protein III; Ins(1,3,4,  |            |   | 5.45E-09 | 1.68 | 20.24 | 4.30  | 95912.5  |
| AHQ-5-5, 5153               | K.SADVEPYSASAAHILGEVCR.E                                                | 2070.26993 | 2 | 5.45E-09 | 0.95 | 4.81  | -     | 960.9    |
| AHQ-5-5, 6417               | K.SLPCFYGEDFYCEIPR.S                                                    | 2056.26024 | 2 | 3.37E-04 | 0.73 | 2.64  | -     | 573.5    |
| gi 10835002 ref NP_001166.1 | Rho GDP dissociation inhibitor (GDI) beta; Ly-GDI [Homo sapiens]        |            |   | 5.51E-09 | 5.96 | 70.27 | 47.30 | 22987.8  |
| AHQ-5-10, 2315              | K.APEPHVEEDDDDELDSK.L                                                   | 1940.90995 | 2 | 5.51E-09 | 0.97 | 5.43  | -     | 1419.5   |
| AHQ-5-13, 5632              | K.ATFMV*GSGYGRPEEYEFLLTPVEEAPK.G                                        | 2962.27864 | 3 | 1.10E-04 | 0.83 | 3.96  | -     | 869.5    |
| AHQ-5-12, 5822              | K.ATFMV*GSGYGRPEEYEFLLTPVEEAPK.G                                        | 2946.27924 | 2 | 2.60E-04 | 0.76 | 3.37  | -     | 362.2    |
| AHQ-5-12, 5821              | K.ATFMV*GSGYGRPEEYEFLLTPVEEAPK.G                                        | 2946.27924 | 3 | 1.22E-04 | 0.86 | 4.06  | -     | 652.6    |
| AHQ-5-10, 5074              | K.ATFMV*GSGYGRPEEYEFLLTPVEEAPK.G                                        | 2962.27864 | 3 | 8.38E-07 | 0.88 | 3.97  | -     | 815.8    |
| AHQ-5-10, 5279 - 5338       | K.ATFMV*GSGYGRPEEYEFLLTPVEEAPK.G                                        | 2946.27924 | 2 | 6.26E-04 | 0.91 | 4.53  | -     | 619.4    |
| AHQ-5-10, 5284 - 5350       | K.ATFMV*GSGYGRPEEYEFLLTPVEEAPK.G                                        | 2946.27924 | 3 | 1.06E-04 | 0.89 | 4.69  | -     | 634.4    |
| AHQ-5-12, 5629              | K.ATFMV*GSGYGRPEEYEFLLTPVEEAPK.G                                        | 2962.27864 | 3 | 1.42E-08 | 0.83 | 4.02  | -     | 671.5    |
| AHQ-5-11, 5647 - 5650       | K.ATFMV*GSGYGRPEEYEFLLTPVEEAPK.G                                        | 2946.27924 | 3 | 1.12E-04 | 0.87 | 4.45  | -     | 587.0    |
| AHQ-5-14-, 5513 - 5514      | K.ATFMV*GSGYGRPEEYEFLLTPVEEAPK.G                                        | 2962.27864 | 3 | 7.97E-08 | 0.96 | 5.27  | -     | 1331.8   |
| AHQ-5-10, 2894 - 2895       | K.ELQEMDKDDESILK.Y                                                      | 1693.85489 | 2 | 1.34E-06 | 0.92 | 4.25  | -     | 759.6    |
| AHQ-5-10, 2903              | K.ELQEMDKDDESILK.Y                                                      | 1693.85489 | 2 | 5.04E-04 | 0.81 | 3.33  | -     | 785.1    |
| AHQ-5-10, 6166 - 6186       | R.LTLVCSAPGPITMDLTGDLEALKK.E                                            | 2675.11274 | 3 | 8.49E-08 | 0.87 | 4.21  | -     | 581.2    |
| AHQ-5-12, 6436              | R.LTLVCSAPGPITMDLTGDLEALKK.E                                            | 2691.11214 | 3 | 2.14E-04 | 0.77 | 3.35  | -     | 621.9    |
| AHQ-5-12, 6692 - 6700       | R.LTLVCSAPGPITMDLTGDLEALKK.E                                            | 2675.11274 | 3 | 7.52E-09 | 0.86 | 4.38  | -     | 579.1    |
| AHQ-5-11, 6484 - 6488       | R.LTLVCSAPGPITMDLTGDLEALKK.E                                            | 2675.11274 | 3 | 7.50E-09 | 0.66 | 3.36  | -     | 604.7    |
| AHQ-5-10, 6178              | R.LTLVCSAPGPITMDLTGDLEALKK.E                                            | 2675.11274 | 2 | 9.11E-07 | 0.84 | 3.83  | -     | 366.5    |
| AHQ-5-10, 3024 - 3086       | K.LLLGDGPPVTPDK.A                                                       | 1312.49400 | 2 | 7.78E-08 | 0.92 | 3.46  | -     | 1034.7   |
| gi 4507777 ref NP_003331.1  | ubiquitin-conjugating enzyme E2D 3 (UBC4/5 homolog, yeast); UbcH5C; ubi |            |   | 5.69E-09 | 0.93 | 10.21 | 12.20 | 16687.1  |
| AHQ-5-13, 5404              | R.IYHPNINSNGSICLDILR.S                                                  | 2101.37199 | 2 | 5.69E-09 | 0.93 | 4.27  | -     | 780.4    |
| gi 30148492 ref XP_293610.2 | similar to Heat shock cognate 71 kDa protein [Homo sapiens]             |            |   | 5.82E-09 | 2.70 | 30.22 | 4.30  | 72113.4  |
| AHQ-5-6, 2774               | R.FDDAVVQSDMK.H                                                         | 1255.37968 | 2 | 5.82E-09 | 0.92 | 3.32  | -     | 1071.1   |
| AHQ-5-6, 4632 - 4701        | R.IINEPTAAAIYGLDK.K                                                     | 1660.89259 | 2 | 9.07E-07 | 0.88 | 4.40  | -     | 934.1    |
| AHQ-5-10, 4286 - 4288       | R.IINEPTAAAIYGLDK.K                                                     | 1660.89259 | 2 | 1.47E-06 | 0.89 | 4.33  | -     | 979.6    |
| AHQ-5-7, 3944               | R.IINEPTAAAIYGLDKK.V                                                    | 1789.06550 | 2 | 8.18E-06 | 0.69 | 3.01  | -     | 442.7    |
| AHQ-5-6, 4052               | R.IINEPTAAAIYGLDKK.V                                                    | 1789.06550 | 2 | 2.12E-06 | 0.90 | 4.11  | -     | 584.4    |
| AHQ-5-6, 4049               | R.IINEPTAAAIYGLDKK.V                                                    | 1789.06550 | 3 | 3.03E-04 | 0.76 | 3.33  | -     | 413.4    |
| gi 4507383 ref NP_001052.1  | thromboxane A synthase 1 (platelet, cytochrome P450, family 5, subfamI  |            |   | 6.25E-09 | 5.41 | 60.24 | 12.70 | 60675.3  |
| AHQ-5-7, 4139 - 4218        | R.FQACPETQVPLQLESK.S                                                    | 1877.10807 | 2 | 4.19E-05 | 0.96 | 4.54  | -     | 1099.3   |
| AHQ-5-1, 4636               | R.FQACPETQVPLQLESK.S                                                    | 1877.10807 | 2 | 5.64E-08 | 0.93 | 4.13  | -     | 992.9    |
| AHQ-5-7, 3668               | R.HSASPMPGQDFDIVR.D                                                     | 1659.84828 | 2 | 3.93E-08 | 0.97 | 4.80  | -     | 1443.8   |
| AHQ-5-7, 4195               | R.KLYGPLCGYYLGR.R                                                       | 1561.82914 | 2 | 6.66E-04 | 0.78 | 2.93  | -     | 815.1    |
| AHQ-5-7, 4924               | K.LYGPLCGYYLGR.R                                                        | 1433.65622 | 2 | 1.16E-06 | 0.91 | 2.97  | -     | 1035.9   |
| AHQ-5-7, 5838               | K.PSPFINGLTFFR.Q                                                        | 1396.61752 | 2 | 6.25E-09 | 0.86 | 2.81  | -     | 816.4    |
| AHQ-5-7, 2815               | R.YAESGDAFDIQR.C                                                        | 1372.42172 | 2 | 2.20E-07 | 0.96 | 4.23  | -     | 1722.5   |
| gi 29732170 ref XP_291550.1 | similar to Heat shock protein HSP 90-alpha (HSP 86) [Homo sapiens] [MA  |            |   | 6.26E-09 | 0.96 | 10.23 | 12.70 | 13262.9  |
| AHQ-5-6, 3830               | K.HLEINPDHSIIETLR.Q                                                     | 1787.99770 | 2 | 2.30E-04 | 0.77 | 3.66  | -     | 478.3    |
| AHQ-5-5, 3877               | K.HLEINPDHSIIETLR.Q                                                     | 1787.99770 | 2 | 6.26E-09 | 0.96 | 4.66  | -     | 1100.4   |
| gi 21614520 ref NP_000393.2 | glucose-6-phosphate dehydrogenase [Homo sapiens]                        |            |   | 6.32E-09 | 0.87 | 10.23 | 2.90  | 59257.4  |
| AHQ-5-14-, 5545             | R.DGLLPENTFIVGYAR.S                                                     | 1665.87093 | 2 | 6.32E-09 | 0.87 | 3.87  | -     | 498.6    |
| gi 4505621 ref NP_002558.1  | prostatic binding protein; phosphatidylethanolamine binding protein [Ho |            |   | 6.41E-09 | 2.90 | 30.29 | 37.40 | 21056.6  |
| AHQ-5-11, 4926 - 5006       | R.APVAGTCYQAEWDDYVPK.L                                                  | 2072.23961 | 2 | 6.41E-09 | 0.98 | 5.86  | -     | 1717.5   |
| AHQ-5-11, 4530              | K.GNDISSGTVLSDYVSGGPPK.G                                                | 1951.08062 | 2 | 1.54E-08 | 0.97 | 5.08  | -     | 1401.1   |
| AHQ-5-11, 4259 - 4264       | K.GNDISSGTVLSDYVSGGPPK.G                                                | 1951.08062 | 2 | 4.49E-04 | 0.93 | 4.44  | -     | 1063.5   |
| AHQ-5-11, 5310 - 5370       | K.WSGPLSLQEVDEQPQHLVHYTAGAAVDELKGV                                      | 3473.79274 | 3 | 1.88E-08 | 0.95 | 5.32  | -     | 1280.2   |
| gi 4504505 ref NP_000405.1  | hydroxysteroid (17-beta) dehydrogenase 4 [Homo sapiens]                 |            |   | 6.48E-09 | 0.90 | 10.23 | 3.70  | 79685.9  |
| AHQ-5-6, 5436               | K.VAVAIINRPPDAVLTDTSLNQAALYR.L                                          | 2868.23765 | 3 | 6.48E-09 | 0.90 | 4.62  | -     | 761.2    |
| gi 4507949 ref NP_003395.1  | tyrosine 3-monooxygenase/tryptophan 5-monooxygenase activation protein, |            |   | 7.14E-09 | 4.10 | 50.31 | 33.30 | 28082.2  |
| AHQ-5-10, 1716              | K.AVTEQGHLSNEER.N                                                       | 1599.64147 | 2 | 2.98E-05 | 0.85 | 3.76  | -     | 492.2    |
| AHQ-5-10, 6634 - 6635       | K.IEAELQDQINDVLELLDK.Y                                                  | 2132.37471 | 2 | 2.88E-06 | 0.97 | 6.20  | -     | 1155.0   |
| AHQ-5-10, 3734              | K.QTTVNSQQAYQEAFAISK.K                                                  | 2160.28351 | 2 | 1.34E-04 | 0.87 | 4.27  | -     | 408.9    |
| AHQ-5-10, 3974              | K.QTTVNSQQAYQEAFAISK.K                                                  | 2160.28351 | 2 | 7.14E-09 | 0.93 | 4.86  | -     | 676.4    |
| AHQ-5-10, 6230 - 6235       | K.TAFDEAIAELDTLNEESYK.D                                                 | 2160.27705 | 2 | 3.09E-05 | 0.93 | 4.04  | -     | 1447.4   |
| AHQ-5-10, 2822              | K.YLIPNATOPESK.V                                                        | 1361.52512 | 1 | 1.07E-05 | 0.42 | 2.03  | -     | 602.1    |
| AHQ-5-10, 2726              | K.YLIPNATOPESK.V                                                        | 1361.52512 | 1 | 2.89E-05 | 0.53 | 2.12  | -     | 657.0    |
| gi 20127528 ref NP_037459.2 | parvin, beta; CGI-56 protein; beta-parvin [Homo sapiens]                |            |   | 7.87E-09 | 6.64 | 80.25 | 32.10 | 41714.0  |
| AHQ-5-13, 3573 - 3579       | K.ARPEDVNLDLK.S                                                         | 1369.54878 | 2 | 1.71E-05 | 0.93 | 4.50  | -     | 842.2    |
| AHQ-5-9, 2946 - 2970        | K.ARPEDVNLDLK.S                                                         | 1369.54878 | 2 | 8.54E-06 | 0.96 | 5.07  | -     | 1051.8   |
| AHQ-5-9, 2960               | K.ARPEDVNLDLK.S                                                         | 1369.54878 | 1 | 2.15E-05 | 0.51 | 2.96  | -     | 233.5    |
| AHQ-5-10, 3126              | K.ARPEDVNLDLK.S                                                         | 1369.54878 | 2 | 1.87E-04 | 0.93 | 4.57  | -     | 840.8    |
| AHQ-5-14-, 3431             | K.ARPEDVNLDLK.S                                                         | 1369.54878 | 2 | 8.68E-04 | 0.89 | 3.85  | -     | 588.4    |
| AHQ-5-9, 4726               | R.DAFDFTLFDHAPDKLSVVK.K                                                 | 2019.24293 | 2 | 9.53E-08 | 0.93 | 4.67  | -     | 756.7    |
| AHQ-5-9, 5064 - 5135        | R.EGLLHSSHISEELTTTMMMMGR.F                                              | 2591.92450 | 2 | 6.57E-04 | 0.79 | 3.64  | -     | 446.3    |
| AHQ-5-9, 5194               | R.EGLLHSSHISEELTTTMMMMGR.F                                              | 2591.92450 | 2 | 2.27E-04 | 0.61 | 3.38  | -     | 222.0    |
| AHQ-5-9, 4946               | R.EGLLHSSHISEELTTTMMMMGR.F                                              | 2591.92450 | 2 | 2.29E-04 | 0.74 | 3.86  | -     | 259.9    |
| AHQ-5-9, 2350               | K.KSLITFVNH.H                                                           | 1050.27627 | 1 | 9.00E-04 | 0.48 | 2.59  | -     | 375.6    |
| AHQ-5-1, 3964               | K.LNVAEVTQSEIGQK.Q                                                      | 1516.67865 | 2 | 7.87E-09 | 0.92 | 3.78  | -     | 1255.7   |
| AHQ-5-13, 3877              | K.LNVAEVTQSEIGQK.Q                                                      | 1516.67865 | 2 | 3.29E-05 | 0.97 | 4.56  | -     | 1538.6   |
| AHQ-5-9, 3218 - 3236        | K.LNVAEVTQSEIGQK.Q                                                      | 1516.67865 | 2 | 3.18E-06 | 0.90 | 4.04  | -     | 766.5    |

|                             |                                                                         |            |   |          |      |        |       |         |
|-----------------------------|-------------------------------------------------------------------------|------------|---|----------|------|--------|-------|---------|
| AHQ-5-9, 3318               | R.LPEHVTQVVVVR.K                                                        | 1475.76086 | 2 | 1.19E-08 | 0.88 | 3.61   | -     | 908.9   |
| AHQ-5-9, 3602               | K.QLEEDLDYDGGVLQK.L                                                     | 1678.82164 | 2 | 6.00E-05 | 0.93 | 4.19   | -     | 1077.9  |
| AHQ-5-9, 6415               | K.VLLDWINDVLVEER.I                                                      | 1713.95549 | 2 | 1.86E-05 | 0.96 | 4.62   | -     | 1598.2  |
| AHQ-5-9, 5610 - 5666        | K.VLLDWINDVLVEER.I                                                      | 1713.95549 | 2 | 8.03E-06 | 0.91 | 3.69   | -     | 97.4    |
| gi 4758040 ref NP_004365.1  | cytochrome c oxidase subunit VIc proprotein; cytochrome c oxidase subun |            |   | 7.91E-09 | 0.91 | 10.17  | 16.00 | 8781.4  |
| AHQ-5-14-, 4646             | R.NYDVMKDFEEMR.K                                                        | 1577.76431 | 2 | 7.91E-09 | 0.91 | 3.49   | -     | 781.6   |
| gi 4502107 ref NP_001145.1  | annexin V; endonexin II; anchorin CII; lipocortin V; placental anticoag |            |   | 8.04E-09 | 3.57 | 40.23  | 21.60 | 35936.5 |
| AHQ-5-9, 5859               | R.DLLDDLKSELTKG.F                                                       | 1447.61309 | 2 | 8.04E-09 | 0.97 | 4.70   | -     | 1751.7  |
| AHQ-5-9, 5858 - 5863        | R.DLLDDLKSELTKG.F                                                       | 1447.61309 | 1 | 4.21E-04 | 0.40 | 2.45   | -     | 339.1   |
| AHQ-5-9, 6352               | R.DPDAGIDEAQVEQDAQALFQAGELK.W                                           | 2659.80061 | 2 | 1.45E-08 | 0.78 | 3.39   | -     | 380.5   |
| AHQ-5-9, 6362               | R.ETSGNLEQLLAVVK.S                                                      | 1614.86536 | 2 | 6.68E-05 | 0.87 | 3.76   | -     | 683.0   |
| AHQ-5-9, 6138 - 6144        | K.GLGTDEESILTLTSR.S                                                     | 1705.88853 | 2 | 1.35E-08 | 0.95 | 4.62   | -     | 1192.2  |
| gi 5803181 ref NP_006810.1  | stress-induced-phosphoprotein 1 (Hsp70/Hsp90-organizing protein) [Homo  |            |   | 8.91E-09 | 0.93 | 10.24  | 3.50  | 62638.9 |
| AHQ-5-13, 6378              | K.ALSVGNIDDLQCYSEAIK.L                                                  | 2069.27871 | 2 | 8.57E-05 | 0.39 | 2.68   | -     | 380.6   |
| AHQ-5-6, 6528               | K.ALSVGNIDDLQCYSEAIK.L                                                  | 2069.27871 | 2 | 8.91E-09 | 0.93 | 4.78   | -     | 592.0   |
| gi 30150022 ref XP_300862.1 | similar to beta-tubulin 4Q [Homo sapiens]                               |            |   | 8.96E-09 | 4.46 | 50.28  | 17.50 | 33545.2 |
| AHQ-5-12, 6140              | K.EAESCDLQGFQLTHSLGGGTGSGMGLTLLIK.I                                     | 3315.65550 | 3 | 9.23E-06 | 0.88 | 4.21   | -     | 972.2   |
| AHQ-5-7, 3074 - 3142        | R.FPGQLNADLR.K                                                          | 1131.26634 | 2 | 8.29E-06 | 0.89 | 3.24   | -     | 876.6   |
| AHQ-5-7, 3214 - 3290        | R.FPGQLNADLR.K                                                          | 1131.26634 | 2 | 1.05E-04 | 0.88 | 3.38   | -     | 637.8   |
| AHQ-5-8, 2854               | R.FPGQLNADLR.K                                                          | 1131.26634 | 2 | 4.45E-06 | 0.78 | 2.86   | -     | 553.4   |
| AHQ-5-7, 2990 - 3062        | R.FPGQLNADLR.K                                                          | 1131.26634 | 2 | 4.82E-04 | 0.89 | 3.43   | -     | 675.2   |
| AHQ-5-7, 3467               | R.KLAVNMVFPFR.L                                                         | 1160.41420 | 2 | 9.98E-07 | 0.96 | 4.03   | -     | 1631.3  |
| AHQ-5-7, 3466 - 3470        | R.KLAVNMVFPFR.L                                                         | 1160.41420 | 2 | 3.38E-04 | 0.96 | 3.94   | -     | 1327.7  |
| AHQ-5-8, 3804 - 3877        | R.KLAVNMVFPFR.L                                                         | 1144.41480 | 2 | 1.25E-06 | 0.85 | 3.11   | -     | 623.2   |
| AHQ-5-9, 3851               | R.KLAVNMVFPFR.L                                                         | 1144.41480 | 2 | 8.49E-05 | 0.45 | 2.60   | -     | 461.3   |
| AHQ-5-4, 4654               | R.KLAVNMVFPFR.L                                                         | 1144.41480 | 2 | 8.96E-09 | 0.89 | 3.16   | -     | 764.0   |
| AHQ-5-7, 4094               | R.KLAVNMVFPFR.L                                                         | 1144.41480 | 2 | 4.70E-06 | 0.90 | 3.25   | -     | 748.7   |
| gi 4505735 ref NP_002611.1  | platelet factor 4 variant 1; Platelet factor 4, variant 1 (PF4-like) [H |            |   | 8.99E-09 | 1.92 | 20.25  | 26.00 | 11552.6 |
| AHQ-5-14-, 3773 - 3842      | R.AEAEEEDGLQCLCVK.T                                                     | 1739.86036 | 2 | 8.99E-09 | 0.96 | 4.68   | -     | 1307.8  |
| AHQ-5-14-, 3682             | R.AEAEEEDGLQCLCVK.T                                                     | 1739.86036 | 2 | 3.90E-07 | 0.95 | 4.68   | -     | 870.9   |
| AHQ-5-14-, 5750 - 5758      | R.KICLDLQALLYK.K                                                        | 1479.80948 | 2 | 5.42E-05 | 0.96 | 4.94   | -     | 1091.5  |
| gi 4506365 ref NP_002856.1  | RAB2, member RAS oncogene family [Homo sapiens]                         |            |   | 9.04E-09 | 2.96 | 40.21  | 23.10 | 23545.4 |
| AHQ-5-11, 5382 - 5410       | R.DTFNHLTTWLEDAR.Q                                                      | 1719.83554 | 2 | 4.03E-06 | 0.89 | 3.81   | -     | 952.0   |
| AHQ-5-11, 4308              | K.LQIWDTAGGESFR.S                                                       | 1551.68478 | 2 | 9.04E-09 | 0.97 | 4.10   | -     | 2115.6  |
| AHQ-5-11, 4188              | K.SCLLLOFTDKR.F                                                         | 1382.61075 | 2 | 6.70E-04 | 0.85 | 2.86   | -     | 1056.6  |
| AHQ-5-11, 3404 - 3410       | K.YIIIGDTGVGK.S                                                         | 1136.32280 | 2 | 9.00E-04 | 0.91 | 4.03   | -     | 1088.1  |
| AHQ-5-11, 3398              | K.YIIIGDTGVGK.S                                                         | 1136.32280 | 1 | 3.93E-05 | 0.25 | 2.02   | -     | 553.6   |
| gi 7661728 ref NP_054736.1  | HSPC003 protein [Homo sapiens]                                          |            |   | 9.19E-09 | 0.75 | 10.17  | 21.60 | 13507.4 |
| AHQ-5-14-, 5501             | R.VTAAIASNIWAAYDRNGNQAFNEDNLK.F                                         | 2968.18636 | 3 | 9.19E-09 | 0.75 | 3.35   | -     | 571.6   |
| gi 4758950 ref NP_000933.1  | peptidylprolyl isomerase B (cyclophilin B) [Homo sapiens]               |            |   | 9.38E-09 | 8.54 | 110.24 | 39.40 | 23742.4 |
| AHQ-5-11, 3675              | K.DFM*IQGGDFTR.G                                                        | 1303.42600 | 2 | 2.45E-04 | 0.85 | 3.34   | -     | 838.0   |
| AHQ-5-12, 4188 - 4194       | K.DFM*IQGGDFTR.G                                                        | 1287.42660 | 1 | 4.01E-04 | 0.47 | 2.61   | -     | 224.6   |
| AHQ-5-12, 4184              | K.DFM*IQGGDFTR.G                                                        | 1287.42660 | 2 | 2.03E-04 | 0.89 | 3.04   | -     | 1180.9  |
| AHQ-5-11, 2836              | R.DKPLKDVIIADCGK.I                                                      | 1573.83653 | 3 | 2.21E-06 | 0.94 | 4.46   | -     | 1526.8  |
| AHQ-5-11, 2826              | R.DKPLKDVIIADCGK.I                                                      | 1573.83653 | 2 | 1.13E-08 | 0.93 | 3.36   | -     | 1368.1  |
| AHQ-5-12, 2889              | R.DKPLKDVIIADCGK.I                                                      | 1573.83653 | 3 | 5.08E-05 | 0.86 | 3.70   | -     | 915.1   |
| AHQ-5-12, 2872              | R.DKPLKDVIIADCGK.I                                                      | 1573.83653 | 2 | 9.38E-09 | 0.91 | 3.46   | -     | 987.5   |
| AHQ-5-12, 4368 - 4408       | K.DTNGSQFFITVK.T                                                        | 1458.59766 | 2 | 6.37E-06 | 0.91 | 3.67   | -     | 1191.0  |
| AHQ-5-11, 4207 - 4280       | K.DTNGSQFFITVK.T                                                        | 1458.59766 | 1 | 6.96E-05 | 0.37 | 2.50   | -     | 417.2   |
| AHQ-5-11, 4203 - 4275       | K.DTNGSQFFITVK.T                                                        | 1458.59766 | 2 | 5.29E-04 | 0.93 | 3.69   | -     | 1419.9  |
| AHQ-5-12, 4394              | K.DTNGSQFFITVK.T                                                        | 1458.59766 | 1 | 5.81E-06 | 0.26 | 2.26   | -     | 322.5   |
| AHQ-5-11, 2371              | K.DVVIADCGK.I                                                           | 992.12891  | 1 | 3.53E-06 | 0.67 | 2.14   | -     | 608.2   |
| AHQ-5-12, 2397              | K.DVVIADCGK.I                                                           | 992.12891  | 1 | 3.99E-05 | 0.70 | 2.20   | -     | 669.0   |
| AHQ-5-11, 2915 - 2991       | K.HYGPQWVSMANAGK.D                                                      | 1475.65664 | 2 | 1.15E-04 | 0.95 | 3.93   | -     | 1173.8  |
| AHQ-5-12, 3008              | K.HYGPQWVSMANAGK.D                                                      | 1475.65664 | 2 | 1.20E-05 | 0.97 | 4.70   | -     | 1272.9  |
| AHQ-5-14-, 4318             | K.TVDNFVALATGEK.G                                                       | 1365.51377 | 2 | 9.86E-06 | 0.92 | 3.89   | -     | 924.1   |
| AHQ-5-11, 4222 - 4227       | K.TVDNFVALATGEK.G                                                       | 1365.51377 | 2 | 7.19E-07 | 0.87 | 3.42   | -     | 836.8   |
| AHQ-5-12, 4340 - 4356       | K.TVDNFVALATGEK.G                                                       | 1365.51377 | 2 | 3.20E-06 | 0.90 | 3.85   | -     | 835.9   |
| AHQ-5-12, 4342              | K.TVDNFVALATGEK.G                                                       | 1365.51377 | 1 | 2.42E-04 | 0.17 | 1.83   | -     | 325.6   |
| AHQ-5-12, 4349              | K.TVDNFVALATGEK.G                                                       | 1365.51377 | 1 | 1.14E-04 | 0.51 | 2.94   | -     | 323.6   |
| AHQ-5-12, 4805 - 4809       | R.VIFGLFGK.T                                                            | 881.09607  | 2 | 9.42E-04 | 0.84 | 2.58   | -     | 535.8   |
| AHQ-5-12, 4810              | R.VIFGLFGK.T                                                            | 881.09607  | 1 | 2.01E-04 | 0.52 | 2.58   | -     | 619.4   |
| AHQ-5-12, 3686 - 3737       | R.VIKDFM*IQGGDFTR.G                                                     | 1643.88873 | 2 | 4.34E-04 | 0.74 | 2.91   | -     | 565.8   |
| AHQ-5-12, 4138              | R.VIKDFM*IQGGDFTR.G                                                     | 1627.88933 | 2 | 3.21E-06 | 0.95 | 4.60   | -     | 1318.6  |
| AHQ-5-12, 2961 - 2964       | K.VLEGMEVVR.K                                                           | 1032.23962 | 2 | 2.05E-06 | 0.91 | 3.84   | -     | 824.9   |
| gi 5174389 ref NP_005882.1  | acetyl-Coenzyme A acetyltransferase 2; acetoacetyl Coenzyme A thiolase  |            |   | 9.65E-09 | 0.63 | 10.16  | 6.80  | 41295.5 |
| AHQ-5-14-, 6495             | R.ATVAPEDVSEVIFGHVLAAGCGQNPVR.Q                                         | 2796.10845 | 3 | 9.65E-09 | 0.63 | 3.20   | -     | 345.4   |
| gi 4758756 ref NP_004528.1  | nucleosome assembly protein 1-like 1; HSP22-like protein interacting pr |            |   | 1.04E-08 | 1.62 | 20.30  | 7.40  | 45373.8 |
| AHQ-5-7, 7158               | K.GIPEFWLTVFK.N                                                         | 1337.58999 | 2 | 1.04E-08 | 0.65 | 2.80   | -     | 228.4   |
| AHQ-5-9, 4804               | K.NVDLLSDMVQEHDPEILK.H                                                  | 2096.34751 | 2 | 1.42E-06 | 0.89 | 4.00   | -     | 792.0   |
| AHQ-5-7, 5247               | K.NVDLLSDMVQEHDPEILK.H                                                  | 2096.34751 | 2 | 7.50E-08 | 0.97 | 5.94   | -     | 1267.3  |
| gi 4757900 ref NP_004334.1  | calreticulin precursor; Sicca syndrome antigen A (autoantigen Ro; calre |            |   | 1.11E-08 | 8.20 | 100.29 | 39.60 | 48141.1 |
| AHQ-5-7, 3160               | R.AKIDDPDTSKPEDWPKPEHIPPDAK.K                                           | 2961.14253 | 2 | 7.91E-06 | 0.69 | 3.17   | -     | 392.5   |
| AHQ-5-7, 5811               | R.CKDDEFTHLYTLIVRPDNTYEYK.I                                             | 2859.15977 | 2 | 2.93E-04 | 0.58 | 2.74   | -     | 373.6   |
| AHQ-5-7, 5664               | R.CKDDEFTHLYTLIVRPDNTYEYK.I                                             | 2859.15977 | 2 | 2.37E-04 | 0.94 | 4.33   | -     | 1070.5  |
| AHQ-5-7, 5814               | R.CKDDEFTHLYTLIVRPDNTYEYK.I                                             | 2859.15977 | 3 | 2.09E-05 | 0.91 | 3.96   | -     | 1394.2  |
| AHQ-5-7, 5662 - 5702        | R.CKDDEFTHLYTLIVRPDNTYEYK.I                                             | 2859.15977 | 3 | 1.87E-07 | 0.95 | 5.77   | -     | 835.8   |
| AHQ-5-7, 3710 - 3716        | K.EQFLDGGDWTSR.W                                                        | 1411.45795 | 2 | 1.54E-04 | 0.89 | 3.02   | -     | 1073.1  |
| AHQ-5-7, 5176 - 5254        | R.FYALSASFEPFSNK.G                                                      | 1608.77470 | 2 | 2.41E-04 | 0.95 | 3.57   | -     | 1788.0  |
| AHQ-5-14-, 5287 - 5354      | R.FYALSASFEPFSNK.G                                                      | 1608.77470 | 2 | 1.44E-08 | 0.96 | 4.19   | -     | 1549.0  |
| AHQ-5-7, 1903               | K.HEQNIDCGGGYVK.L                                                       | 1478.56912 | 1 | 1.11E-08 | 0.87 | 3.96   | -     | 648.9   |
| AHQ-5-13, 2381              | K.HEQNIDCGGGYVK.L                                                       | 1478.56912 | 2 | 9.33E-04 | 0.95 | 4.09   | -     | 1267.3  |
| AHQ-5-7, 5103               | K.IDNSQVESGLEDWDFLPPKK.I                                                | 2520.68965 | 3 | 2.70E-07 | 0.85 | 3.92   | -     | 681.9   |
| AHQ-5-7, 2232               | K.IKDPDASKPEWDWDER.A                                                    | 1801.89173 | 2 | 8.50E-05 | 0.93 | 4.02   | -     | 947.8   |
| AHQ-5-7, 1988               | K.KVHVFNYK.G                                                            | 1148.38164 | 1 | 5.07E-07 | 0.78 | 2.69   | -     | 561.3   |
| AHQ-5-13, 5994              | K.LFPNSLDQDGM*HMGSEYNIMFGPDICPGTK.K                                     | 3475.78447 | 3 | 1.48E-07 | 0.78 | 4.01   | -     | 801.0   |
| AHQ-5-7, 2354               | K.VHVFNYK.G                                                             | 1020.20872 | 1 | 5.61E-04 | 0.49 | 2.19   | -     | 574.2   |
| gi 4507789 ref NP_003338.1  | ubiquitin-conjugating enzyme E2L 3 [Homo sapiens]                       |            |   | 1.12E-08 | 0.96 | 10.25  | 9.70  | 17861.5 |
| AHQ-5-12, 5249              | R.IEINFPAEYFPKPKK.I                                                     | 1791.08155 | 3 | 1.12E-08 | 0.96 | 4.99   | -     | 1502.1  |
| AHQ-5-12, 5205 - 5276       | R.IEINFPAEYFPKPKK.I                                                     | 1791.08155 | 2 | 2.14E-08 | 0.91 | 3.87   | -     | 979.1   |
| gi 4758018 ref NP_004359.1  | calponin 2; Calonin 2 [Homo sapiens]                                    |            |   | 1.20E-08 | 1.89 | 20.26  | 9.10  | 33696.9 |
| AHQ-5-12, 2789              | K.GLQSGVDIGVK.Y                                                         | 1073.22510 | 2 | 6.51E-06 | 0.89 | 3.12   | -     | 1044.6  |
| AHQ-5-13-, 2872             | K.GLQSGVDIGVK.Y                                                         | 1073.22510 | 2 | 3.71E-06 | 0.92 | 3.21   | -     | 1333.1  |
| AHQ-5-12, 6498              | R.TWIEGLTGLSIGPDFQK.G                                                   | 1863.10294 | 2 | 1.55E-04 | 0.93 | 3.48   | -     | 1282.3  |
| AHQ-5-13, 6365 - 6424       | R.TWIEGLTGLSIGPDFQK.G                                                   | 1863.10294 | 2 | 5.76E-07 | 0.96 | 4.65   | -     | 1249.7  |
| AHQ-5-12, 6365 - 6429       | R.TWIEGLTGLSIGPDFQK.G                                                   | 1863.10294 | 2 | 1.20E-08 | 0.97 | 5.19   | -     | 1581.7  |
| AHQ-5-14-, 6233 - 6250      | R.TWIEGLTGLSIGPDFQK.G                                                   | 1863.10294 | 2 | 1.12E-05 | 0.90 | 3.29   | -     | 1298.0  |
| AHQ-5-9, 5827 - 5890        | R.TWIEGLTGLSIGPDFQK.G                                                   | 1863.10294 | 2 | 4.68E-04 | 0.86 | 3.36   | -     | 1093.3  |
| gi 4759086 ref NP_004883.1  | vesicle trafficking protein sec22b [Homo sapiens]                       |            |   | 1.22E-08 | 0.90 | 10.19  | 6.50  | 24740.4 |
| AHQ-5-12, 3941              | R.NLGSINTELQDVQR.I                                                      | 1587.71696 | 2 | 1.22E-08 | 0.90 | 3.75   | -     | 1129.4  |
| gi 4502491 ref NP_001203.1  | complement component 1, q subcomponent binding protein precursor; hyalu |            |   | 1.26E-08 | 0.71 | 10.19  | 10.60 | 31362.0 |
| AHQ-5-9, 6630 - 6675        | R.GVDNTFADELVELSTALEHQEYITFLEDLK.S                                      | 3441.73936 | 3 | 1.26E-08 | 0.71 | 3.81   | -     | 464.0   |
| gi 4557297 ref NP_000022.1  | delta-aminolevulinic acid dehydratase; porphobilinogen synthase; aminol |            |   | 1.26E-08 | 0.94 | 10.20  | 5.80  | 36294.7 |
| AHQ-5-9, 4348 - 4375        | R.GSAADESESAIEAHLR.K                                                    | 1967.12642 | 2 | 1.26E-08 | 0.94 | 4.09   | -     | 1115.5  |
| gi 4507651 ref NP_003281.1  | tropomyosin 4 [Homo sapiens]                                            |            |   | 1.27E-08 | 2.89 | 40.26  | 15.30 | 28521.6 |
| AHQ-5-9, 5298 - 5299        | R.AEVSELKCGDLEELKKNVTNLLK.S                                             | 2634.89893 | 2 | 9.95E-04 | 0.79 | 3.36   | -     | 820.1   |
| AHQ-5-9, 4478 - 4555        | R.AEVSELKCGDLEELKKNVTNLLK.S                                             | 2634.89893 | 3 | 3.42E-07 | 0.72 | 3.65   | -     | 817.0   |



|                             |                                                                         |            |   |          |      |       |      |         |
|-----------------------------|-------------------------------------------------------------------------|------------|---|----------|------|-------|------|---------|
| AHQ-5-9, 4543               | R.AEVSEKCGDLEELKKNVTNLLK.S                                              | 2634.89893 | 2 | 4.66E-04 | 0.28 | 2.69  | -    | 210.5   |
| AHQ-5-9, 5295               | R.AEVSEKCGDLEELKKNVTNLLK.S                                              | 2634.89893 | 3 | 2.52E-07 | 0.90 | 4.73  | -    | 993.8   |
| AHQ-5-9, 1716               | R.EKAEGDVAALNR.R                                                        | 1273.37796 | 1 | 2.56E-04 | 0.05 | 1.87  | -    | 75.2    |
| AHQ-5-13-, 2637             | K.IQALQQQAQDEAEDR.A                                                     | 1615.68404 | 2 | 6.85E-06 | 0.97 | 4.77  | -    | 1709.3  |
| AHQ-5-11, 2504 - 2508       | K.IQALQQQAQDEAEDR.A                                                     | 1615.68404 | 2 | 1.23E-05 | 0.94 | 3.95  | -    | 1320.5  |
| AHQ-5-9, 2382               | K.IQALQQQAQDEAEDR.A                                                     | 1615.68404 | 2 | 8.58E-07 | 0.97 | 4.87  | -    | 1860.8  |
| AHQ-5-10, 2226              | R.KIQALQQQAQDEAEDR.A                                                    | 1743.85695 | 2 | 1.27E-08 | 0.97 | 5.22  | -    | 1873.0  |
| gi 4502303 ref NP_001888.1  | mitochondrial ATP synthase, O subunit; ATP synthase, H+ transporting, m |            |   |          |      |       |      |         |
| AHQ-5-11, 6659 - 6663       | R.FSPLTNLILNLAENGR.L                                                    | 1874.13050 | 2 | 6.35E-07 | 0.93 | 4.25  | -    | 1269.3  |
| AHQ-5-13, 5666              | R.GEVPCTVTSASPLEEATLSELK.T                                              | 2320.55669 | 2 | 3.18E-08 | 0.95 | 4.92  | -    | 914.8   |
| AHQ-5-14, 6118 - 6168       | R.GEVPCTVTSASPLEEATLSELK.T                                              | 2320.55669 | 2 | 1.28E-08 | 0.94 | 4.71  | -    | 855.1   |
| AHQ-5-14-, 5530             | R.GEVPCTVTSASPLEEATLSELK.T                                              | 2320.55669 | 2 | 1.13E-05 | 0.95 | 5.00  | -    | 817.6   |
| AHQ-5-11, 3507              | K.LVRPPVQVYIEGR.Y                                                       | 1583.85942 | 2 | 9.29E-04 | 0.88 | 3.46  | -    | 782.3   |
| gi 4502905 ref NP_001822.1  | clusterin; complement-associated protein SP-40 [Homo sapiens]           |            |   |          |      |       |      |         |
| AHQ-5-9, 5191               | R.ASSIDELFQDR.F                                                         | 1394.51197 | 1 | 1.44E-07 | 0.32 | 2.80  | -    | 223.7   |
| AHQ-5-11, 3411              | R.VTTVASHTSDDVPSGVTEVVVK.L                                              | 2315.52008 | 2 | 1.34E-08 | 0.95 | 5.36  | -    | 783.1   |
| gi 13489091 ref NP_066949.1 | 3-mercaptopurinate sulfurtransferase [Homo sapiens]                     |            |   |          |      |       |      |         |
| AHQ-5-9, 5846 - 5902        | R.AGQPLQLLDASWYLPK.L                                                    | 1801.07798 | 2 | 1.34E-08 | 0.97 | 4.87  | -    | 1690.9  |
| AHQ-5-9, 6354 - 6355        | R.DGIEPGHIPGTVNIPFTDFLSQEGLEK.S                                         | 2912.19939 | 2 | 9.52E-05 | 0.72 | 3.43  | -    | 320.5   |
| gi 7657431 ref NP_055205.1  | EBNA-2 co-activator (100kD) [Homo sapiens]                              |            |   |          |      |       |      |         |
| AHQ-5-5, 6530 - 6543        | R.NLPLGLVQEGEPFSEEAFLFTK.E                                              | 2307.54125 | 2 | 5.98E-07 | 0.86 | 3.71  | -    | 387.2   |
| AHQ-5-6, 6446               | R.NLPLGLVQEGEPFSEEAFLFTK.E                                              | 2307.54125 | 2 | 1.47E-04 | 0.83 | 3.59  | -    | 425.5   |
| AHQ-5-4, 6653               | R.NLPLGLVQEGEPFSEEAFLFTK.E                                              | 2307.54125 | 2 | 1.36E-08 | 0.93 | 5.06  | -    | 557.8   |
| gi 12408656 ref NP_005177.2 | calpain 1, large subunit; calpain, large polypeptide L1; calcium-activ  |            |   |          |      |       |      |         |
| AHQ-5-6, 5048               | K.APSDLYQIILK.A                                                         | 1261.49183 | 2 | 1.37E-08 | 0.90 | 3.72  | -    | 910.8   |
| AHQ-5-6, 3453               | R.DFFLANASR.A                                                           | 1041.14166 | 1 | 2.78E-04 | 0.18 | 2.14  | -    | 194.8   |
| AHQ-5-6, 3460               | R.DFFLANASR.A                                                           | 1041.14166 | 2 | 3.62E-05 | 0.91 | 2.83  | -    | 1278.7  |
| AHQ-5-6, 6212 - 6289        | K.IRLDETDDDDYGDRESGCSFVLMQK.H                                           | 3248.50119 | 3 | 1.91E-05 | 0.52 | 3.06  | -    | 519.6   |
| AHQ-5-6, 4128 - 4148        | R.KAPSDLYQIILK.A                                                        | 1389.66474 | 2 | 3.27E-04 | 0.93 | 3.75  | -    | 1015.1  |
| AHQ-5-6, 4848 - 4926        | R.LEICNLTPDALK.S                                                        | 1388.61207 | 1 | 9.61E-04 | 0.21 | 2.58  | -    | 265.2   |
| AHQ-5-6, 5673 - 5712        | R.LPPGGEYVVPSTFEPNKEGDFVLR.F                                            | 2691.03055 | 2 | 5.30E-05 | 0.76 | 3.56  | -    | 297.7   |
| AHQ-5-6, 5960 - 5966        | R.LPPGGEYVVPSTFEPNKEGDFVLR.F                                            | 2691.03055 | 3 | 5.45E-06 | 0.61 | 3.25  | -    | 337.6   |
| AHQ-5-6, 6482               | K.LLVFVHSAEGNEFWSALLEK.A                                                | 2177.44364 | 2 | 8.40E-04 | 0.98 | 5.53  | -    | 2003.0  |
| AHQ-5-6, 6478 - 6498        | K.LLVFVHSAEGNEFWSALLEK.A                                                | 2177.44364 | 3 | 3.04E-05 | 0.90 | 3.98  | -    | 950.2   |
| AHQ-5-6, 5085 - 5165        | R.NYPATFVWVNPQFK.I                                                      | 1612.81141 | 2 | 6.78E-08 | 0.97 | 4.67  | -    | 1500.9  |
| AHQ-5-6, 4072               | K.RPTELLSNPQFIVDGATR.T                                                  | 2015.25904 | 2 | 9.33E-05 | 0.91 | 4.74  | -    | 407.7   |
| AHQ-5-6, 4356               | K.RPTELLSNPQFIVDGATR.T                                                  | 2015.25904 | 3 | 3.20E-06 | 0.95 | 5.00  | -    | 1344.2  |
| AHQ-5-6, 2861               | R.SEQFINLR.E                                                            | 1007.12521 | 1 | 2.66E-05 | 0.36 | 2.23  | -    | 321.0   |
| AHQ-5-6, 3136 - 3210        | K.YLGDQYEQLR.V                                                          | 1285.38720 | 2 | 7.24E-08 | 0.88 | 3.28  | -    | 641.7   |
| AHQ-5-6, 3141               | K.YLGDQYEQLR.V                                                          | 1285.38720 | 1 | 6.51E-04 | 0.06 | 1.81  | -    | 201.2   |
| gi 21361122 ref NP_001440.2 | four and a half LIM domains 1; Four-and-a-half LIM domains 1 [Homo sap  |            |   |          |      |       |      |         |
| AHQ-5-12, 2430              | K.AIVAGQDNVEYK.G                                                        | 1307.43431 | 2 | 6.95E-04 | 0.80 | 2.92  | -    | 905.2   |
| AHQ-5-9, 2808 - 2883        | K.CLHPLANETVFAK.D                                                       | 1501.73210 | 2 | 1.85E-07 | 0.94 | 3.69  | -    | 764.5   |
| AHQ-5-13-, 3395             | K.CLHPLANETVFAK.D                                                       | 1501.73210 | 2 | 9.28E-07 | 0.78 | 2.73  | -    | 487.2   |
| AHQ-5-13-, 3821             | R.FVFHQEQVYCPDCAK.K                                                     | 1931.13758 | 2 | 4.61E-07 | 0.98 | 5.65  | -    | 2126.0  |
| AHQ-5-13, 3913              | R.FVFHQEQVYCPDCAK.K                                                     | 1931.13758 | 2 | 1.27E-07 | 0.97 | 4.93  | -    | 1744.0  |
| AHQ-5-14, 4533              | R.FVFHQEQVYCPDCAK.K                                                     | 1931.13758 | 2 | 1.39E-08 | 0.96 | 4.30  | -    | 1692.9  |
| AHQ-5-9, 3347 - 3355        | R.FVFHQEQVYCPDCAK.K                                                     | 1931.13758 | 2 | 3.37E-08 | 0.98 | 5.77  | -    | 1708.5  |
| AHQ-5-12, 3718              | R.FVFHQEQVYCPDCAK.K                                                     | 1931.13758 | 2 | 2.86E-08 | 0.97 | 4.46  | -    | 1819.1  |
| AHQ-5-9, 2772 - 2783        | K.GEDFYCYTCHETK.F                                                       | 1648.75260 | 2 | 1.25E-05 | 0.83 | 3.62  | -    | 519.7   |
| gi 5123454 ref NP_005336.2  | heat shock 70kDa protein 1A; heat shock 70kD protein 1A; heat shock-ind |            |   |          |      |       |      |         |
| AHQ-5-6, 5346               | K.AAAIIGDGLGTTYSVGVFQHGK.V                                              | 2267.54677 | 2 | 4.41E-05 | 0.29 | 2.97  | -    | 382.9   |
| AHQ-5-6, 2885 - 2965        | K.AQIHDLVLVGGSTR.I                                                      | 1466.66769 | 2 | 6.60E-07 | 0.83 | 2.86  | -    | 1216.4  |
| AHQ-5-6, 4762               | K.DAGVIAGLNLVR.I                                                        | 1198.39736 | 2 | 1.14E-05 | 0.96 | 3.25  | -    | 2011.7  |
| AHQ-5-6, 6278               | K.ELEQVCNPIISGLYQAGGPGPGGGAQPGK.G                                       | 3058.37100 | 3 | 1.41E-08 | 0.98 | 6.70  | -    | 2390.3  |
| AHQ-5-6, 3010               | R.LVNHVFVEEFK.R                                                         | 1262.43837 | 2 | 1.03E-05 | 0.94 | 3.17  | -    | 1563.3  |
| AHQ-5-6, 6853               | K.SINPDEAVYGAQAAILM*GDK.S                                               | 2321.59293 | 2 | 1.10E-05 | 0.94 | 4.47  | -    | 955.8   |
| gi 15306356 ref XP_035638.2 | similar to interleukin 25; lymphocyte antigen 6 complex, locus E ligan  |            |   |          |      |       |      |         |
| AHQ-5-13, 3558              | R.ESDVPKLTTEFEVTK.T                                                     | 1751.91253 | 2 | 5.90E-05 | 0.68 | 2.74  | -    | 421.1   |
| AHQ-5-13-, 3443 - 3451      | R.ESDVPKLTTEFEVTK.T                                                     | 1751.91253 | 2 | 4.05E-04 | 0.88 | 3.45  | -    | 728.0   |
| AHQ-5-12, 3377 - 3382       | R.ESDVPKLTTEFEVTK.T                                                     | 1751.91253 | 2 | 1.45E-08 | 0.86 | 3.96  | -    | 470.6   |
| AHQ-5-13-, 3456             | R.GAEIYAMAYSK.A                                                         | 1333.49204 | 2 | 3.30E-06 | 0.95 | 4.13  | -    | 1377.6  |
| gi 4557032 ref NP_002291.1  | lactate dehydrogenase B [Homo sapiens]                                  |            |   |          |      |       |      |         |
| AHQ-5-9, 3830               | K.FIIPQKY.V                                                             | 958.22198  | 1 | 4.35E-04 | 0.34 | 2.44  | -    | 416.4   |
| AHQ-5-9, 3739               | K.GEM*MDLQHGSLFLQTPK.I                                                  | 1949.24111 | 2 | 3.27E-04 | 0.68 | 3.86  | -    | 702.7   |
| AHQ-5-9, 4184 - 4190        | K.GEMMDLQHGSLFLQTPK.I                                                   | 1933.24171 | 2 | 6.31E-05 | 0.93 | 4.41  | -    | 957.7   |
| AHQ-5-13, 2317 - 2362       | K.IVADKDYSVTANSK.I                                                      | 1511.65887 | 2 | 1.50E-08 | 0.94 | 3.69  | -    | 1190.7  |
| AHQ-5-13, 2747              | K.IVVVTAGVR.Q                                                           | 914.12760  | 2 | 3.21E-04 | 0.88 | 3.13  | -    | 923.6   |
| AHQ-5-13, 3585              | K.LIAPVAEEEAATVPNNK.I                                                   | 1695.89534 | 2 | 2.50E-05 | 0.84 | 3.28  | -    | 594.6   |
| AHQ-5-14-, 3466             | K.LIAPVAEEEAATVPNNK.I                                                   | 1695.89534 | 2 | 4.99E-05 | 0.89 | 3.57  | -    | 769.8   |
| AHQ-5-13, 3493              | K.LIAPVAEEEAATVPNNK.I                                                   | 1695.89534 | 2 | 5.47E-04 | 0.73 | 3.07  | -    | 606.1   |
| AHQ-5-9, 1963 - 1964        | K.LKDDVEAQLK.K                                                          | 1159.31477 | 2 | 4.84E-05 | 0.75 | 2.86  | -    | 632.3   |
| AHQ-5-9, 3935               | K.LKGMMDLQHGSLFLQTPK.I                                                  | 2174.57288 | 2 | 1.58E-07 | 0.96 | 5.21  | -    | 1366.2  |
| AHQ-5-9, 3387 - 3394        | K.MVVSAYEVIK.L                                                          | 1268.50463 | 2 | 4.19E-08 | 0.95 | 4.32  | -    | 980.6   |
| AHQ-5-14-, 3799 - 3802      | K.MVVSAYEVIK.L                                                          | 1268.50463 | 2 | 1.17E-07 | 0.93 | 3.87  | -    | 953.0   |
| AHQ-5-13-, 3912             | K.MVVSAYEVIK.L                                                          | 1268.50463 | 2 | 4.88E-07 | 0.91 | 3.17  | -    | 1147.9  |
| AHQ-5-13-, 6631 - 6632      | K.SLADELALVDVLEDK.L                                                     | 1630.81843 | 2 | 3.96E-08 | 0.96 | 5.35  | -    | 1137.2  |
| AHQ-5-13, 6690              | K.SLADELALVDVLEDK.L                                                     | 1630.81843 | 2 | 1.13E-05 | 0.98 | 5.57  | -    | 1758.6  |
| AHQ-5-14-, 6493 - 6557      | K.SLADELALVDVLEDK.L                                                     | 1630.81843 | 2 | 3.09E-05 | 0.97 | 4.70  | -    | 2079.4  |
| AHQ-5-13, 6798              | K.SLADELALVDVLEDKL.K                                                    | 1872.14959 | 2 | 9.87E-05 | 0.94 | 4.07  | -    | 1208.8  |
| AHQ-5-9, 6346 - 6382        | K.SLADELALVDVLEDKL.K                                                    | 1872.14959 | 2 | 1.84E-04 | 0.92 | 3.60  | -    | 1182.4  |
| AHQ-5-14-, 6619 - 6691      | K.SLADELALVDVLEDKL.K                                                    | 1872.14959 | 2 | 3.72E-05 | 0.96 | 4.62  | -    | 1578.0  |
| gi 24431969 ref NP_037473.2 | hypothetical protein PT004; homologous yeast-44.2 protein [Homo sapie   |            |   |          |      |       |      |         |
| AHQ-5-8, 7129               | K.IPAFLNVVDIAGLVK.G                                                     | 1569.91256 | 2 | 1.50E-08 | 0.96 | 10.24 | 3.80 | 44683.2 |
| gi 19923483 ref NP_057406.2 | GTPase Rab14 [Homo sapiens]                                             |            |   |          |      |       |      |         |
| AHQ-5-10, 3548              | K.IYQNIQDGSLLDAAESGVQHKPSAPQGG.R                                        | 3152.38123 | 3 | 1.17E-06 | 0.78 | 3.57  | -    | 606.4   |
| AHQ-5-10, 4516 - 4574       | R.NLNTNPNTVILIGNK.A                                                     | 1624.90662 | 2 | 2.64E-04 | 0.79 | 2.87  | -    | 624.5   |
| AHQ-5-10, 2952              | K.SCLLHQFTEK.K                                                          | 1264.43272 | 2 | 3.57E-06 | 0.91 | 3.65  | -    | 789.2   |
| AHQ-5-10, 3854              | R.STYNHLSWLTAR.N                                                        | 1651.76121 | 2 | 2.01E-06 | 0.94 | 3.93  | -    | 1101.3  |
| AHQ-5-10, 3766              | R.STYNHLSWLTAR.N                                                        | 1651.76121 | 2 | 1.51E-04 | 0.95 | 4.12  | -    | 1373.6  |
| AHQ-5-10, 4119              | K.TGENVEDAFLEAAK.K                                                      | 1494.58517 | 1 | 1.52E-08 | 0.62 | 3.01  | -    | 532.7   |
| gi 20270343 ref NP_620150.1 | hypothetical protein BC015408 [Homo sapiens]                            |            |   |          |      |       |      |         |
| AHQ-5-11, 3932 - 3936       | R.DLPGALDEKELIEK.M                                                      | 1570.76622 | 2 | 2.99E-08 | 0.77 | 3.33  | -    | 456.5   |
| AHQ-5-11, 5862 - 5863       | K.NELNLLDKPQLQGIPVLVLGNK.R                                              | 2553.98492 | 2 | 5.61E-05 | 0.96 | 5.57  | -    | 1031.3  |
| AHQ-5-11, 5860 - 5912       | K.NELNLLDKPQLQGIPVLVLGNK.R                                              | 2553.98492 | 3 | 1.68E-08 | 0.96 | 5.97  | -    | 910.4   |
| gi 4759140 ref NP_004243.1  | solute carrier family 9 (sodium/hydrogen exchanger), isoform 3 regulato |            |   |          |      |       |      |         |
| AHQ-5-13-, 3812             | R.LLVVDPETDEQLQK.L                                                      | 1627.81777 | 2 | 1.71E-08 | 0.89 | 10.18 | 3.90 | 38868.2 |
| AHQ-5-13, 3908              | R.LLVVDPETDEQLQK.L                                                      | 1627.81777 | 2 | 6.46E-04 | 0.91 | 3.70  | -    | 612.7   |
| gi 4507855 ref NP_003472.1  | Ubiquitin isopeptidase T; Ubiquitin-specific protease-5 (ubiquitin isop |            |   |          |      |       |      |         |
| AHQ-5-5, 7186               | R.IGEWELIQESVPLKPLFGPGYTGIR.N                                           | 2858.28283 | 3 | 1.72E-08 | 0.93 | 4.31  | -    | 1497.4  |
| gi 14249348 ref NP_116120.1 | hypothetical protein MGC14353 [Homo sapiens]                            |            |   |          |      |       |      |         |
| AHQ-5-13-, 4065             | K.SWPCDCVQAEPPVVR.E                                                     | 1705.89366 | 2 | 1.80E-08 | 0.91 | 3.07  | -    | 1054.2  |
| AHQ-5-13, 4166              | K.SWPCDCVQAEPPVVR.E                                                     | 1705.89366 | 2 | 1.54E-04 | 0.90 | 3.11  | -    | 1219.0  |
| gi 4885417 ref NP_005330.1  | huntingtin interacting protein 2; ubiquitin-conjugating enzyme E2-25 KD |            |   |          |      |       |      |         |
| AHQ-5-11, 4619              | K.VDLVDENFTELR.G                                                        | 1450.57553 | 2 | 1.98E-08 | 0.92 | 3.46  | -    | 1017.8  |
| gi 29737978 ref XP_290747.1 | similar to Myosin heavy chain, nonmuscle type B (Cellular myosin heavy  |            |   |          |      |       |      |         |
| AHQ-5-6, 3668 - 3680        | K.ADFCIIHYAGK.V                                                         | 1296.47641 | 2 | 2.56E-05 | 0.89 | 3.02  | -    | 1010.5  |

|                             |                                                                         |            |   |          |      |       |       |         |
|-----------------------------|-------------------------------------------------------------------------|------------|---|----------|------|-------|-------|---------|
| AHQ-5-4, 3949 - 3950        | K.ADFCIHYAGK.V                                                          | 1296.47641 | 1 | 4.23E-04 | 0.72 | 2.58  | -     | 685.2   |
| AHQ-5-1, 4091               | K.ADFCIHYAGK.V                                                          | 1296.47641 | 2 | 4.06E-06 | 0.95 | 3.65  | -     | 1282.9  |
| AHQ-5-2, 3905 - 3917        | K.ADFCIHYAGK.V                                                          | 1296.47641 | 2 | 2.16E-05 | 0.96 | 3.78  | -     | 1621.3  |
| AHQ-5-3, 3970 - 3993        | K.ADFCIHYAGK.V                                                          | 1296.47641 | 2 | 6.08E-07 | 0.96 | 3.94  | -     | 1741.5  |
| AHQ-5-2, 3918               | K.ADFCIHYAGK.V                                                          | 1296.47641 | 1 | 9.98E-08 | 0.72 | 3.16  | -     | 512.6   |
| AHQ-5-4, 2690 - 2761        | R.AGVLAHLEEEER.D                                                        | 1224.34854 | 1 | 6.86E-04 | 0.12 | 2.08  | -     | 271.4   |
| AHQ-5-3, 2750 - 2821        | R.AGVLAHLEEEER.D                                                        | 1224.34854 | 2 | 1.74E-06 | 0.94 | 3.89  | -     | 1398.1  |
| AHQ-5-4, 2764               | R.AGVLAHLEEEER.D                                                        | 1224.34854 | 2 | 1.98E-08 | 0.92 | 4.01  | -     | 1093.2  |
| AHQ-5-2, 2690 - 2762        | R.AGVLAHLEEEER.D                                                        | 1224.34854 | 2 | 1.74E-06 | 0.96 | 4.27  | -     | 1738.4  |
| AHQ-5-2, 2693               | R.AGVLAHLEEEER.D                                                        | 1224.34854 | 1 | 3.48E-05 | 0.48 | 2.56  | -     | 507.6   |
| AHQ-5-1, 2944 - 3011        | R.AGVLAHLEEEER.D                                                        | 1224.34854 | 2 | 7.50E-07 | 0.93 | 3.76  | -     | 1186.1  |
| AHQ-5-3, 3701               | K.KDAFDCIHYAGK.V                                                        | 1539.73719 | 2 | 1.24E-05 | 0.97 | 4.58  | -     | 1606.6  |
| AHQ-5-2, 3662               | K.KDAFDCIHYAGK.V                                                        | 1539.73719 | 2 | 1.19E-06 | 0.97 | 4.60  | -     | 1708.0  |
| AHQ-5-5, 3447               | K.KDAFDCIHYAGK.V                                                        | 1539.73719 | 2 | 1.89E-07 | 0.95 | 4.15  | -     | 1437.2  |
| AHQ-5-1, 3856               | K.KDAFDCIHYAGK.V                                                        | 1539.73719 | 2 | 4.68E-07 | 0.96 | 4.42  | -     | 1690.7  |
| AHQ-5-2, 3671               | K.KDAFDCIHYAGK.V                                                        | 1539.73719 | 3 | 6.78E-05 | 0.94 | 4.41  | -     | 1304.5  |
| AHQ-5-4, 4744               | K.LDPHLVLDQLR.C                                                         | 1319.53460 | 2 | 2.13E-05 | 0.75 | 2.63  | -     | 631.9   |
| AHQ-5-3, 4797               | K.LDPHLVLDQLR.C                                                         | 1319.53460 | 2 | 2.06E-07 | 0.78 | 2.73  | -     | 649.4   |
| AHQ-5-5, 4538               | K.LDPHLVLDQLR.C                                                         | 1319.53460 | 2 | 5.19E-07 | 0.82 | 2.85  | -     | 537.2   |
| AHQ-5-5, 4554               | K.LDPHLVLDQLR.C                                                         | 1319.53460 | 3 | 1.17E-06 | 0.92 | 3.75  | -     | 1135.8  |
| AHQ-5-1, 4888               | K.LDPHLVLDQLR.C                                                         | 1319.53460 | 3 | 1.60E-04 | 0.87 | 3.45  | -     | 795.9   |
| AHQ-5-1, 4875 - 4876        | K.LDPHLVLDQLR.C                                                         | 1319.53460 | 2 | 6.36E-07 | 0.71 | 2.62  | -     | 590.4   |
| gi 4503785 ref NP_000135.1  | frataxin; Friedreich ataxia (frataxin) [Homo sapiens]                   |            |   | 2.03E-08 | 0.95 | 10.22 | 5.70  | 23218.1 |
| AHQ-5-13-, 3767 - 3771      | K.LGGDLGTYVINK.Q                                                        | 1250.42590 | 2 | 2.30E-08 | 0.95 | 4.41  | -     | 1054.1  |
| AHQ-5-13, 3864 - 3866       | K.LGGDLGTYVINK.Q                                                        | 1250.42590 | 2 | 2.03E-08 | 0.95 | 4.48  | -     | 1117.2  |
| gi 4506713 ref NP_002945.1  | ubiquitin and ribosomal protein S27a precursor; ubiquitin carboxyl exte |            |   | 2.03E-08 | 0.79 | 10.19 | 10.30 | 17964.8 |
| AHQ-5-14-, 4490             | K.TITLEVPSDTIENVK.A                                                     | 1788.97431 | 2 | 4.31E-06 | 0.86 | 3.38  | -     | 613.3   |
| AHQ-5-14-, 4230 - 4305      | K.TITLEVPSDTIENVK.A                                                     | 1788.97431 | 2 | 2.03E-08 | 0.79 | 3.83  | -     | 628.2   |
| gi 4507951 ref NP_003396.1  | tyrosine 3/tryptophan 5-monoxygenase activation protein, eta polypept   |            |   | 2.07E-08 | 3.66 | 40.23 | 20.70 | 28218.5 |
| AHQ-5-14-, 2909 - 2974      | K.AVTELNEPLSNEDR.N                                                      | 1587.67060 | 2 | 1.20E-04 | 0.77 | 3.36  | -     | 530.7   |
| AHQ-5-10, 2838              | K.AVTELNEPLSNEDR.N                                                      | 1587.67060 | 2 | 2.07E-08 | 0.90 | 4.23  | -     | 664.6   |
| AHQ-5-10, 2696              | K.AVTELNEPLSNEDR.N                                                      | 1587.67060 | 2 | 7.02E-08 | 0.88 | 3.94  | -     | 519.2   |
| AHQ-5-14-, 6665 - 6666      | K.ELETVCNDVLSLDDK.F                                                     | 1749.96137 | 2 | 5.67E-07 | 0.92 | 4.31  | -     | 788.5   |
| AHQ-5-10, 2483 - 2551       | K.NSVVEASEAAYK.E                                                        | 1268.35495 | 1 | 5.16E-04 | 0.31 | 2.17  | -     | 300.6   |
| AHQ-5-10, 2755 - 2758       | K.NSVVEASEAAYK.E                                                        | 1268.35495 | 1 | 1.59E-04 | 0.83 | 3.46  | -     | 589.7   |
| AHQ-5-10, 2371              | K.NSVVEASEAAYK.E                                                        | 1268.35495 | 2 | 2.05E-04 | 0.82 | 3.27  | -     | 627.9   |
| AHQ-5-13-, 2592             | K.NSVVEASEAAYK.E                                                        | 1268.35495 | 2 | 3.72E-08 | 0.94 | 3.61  | -     | 1129.7  |
| AHQ-5-10, 2020              | R.YLAEVASGGEK.K                                                         | 1067.17419 | 2 | 6.36E-07 | 0.89 | 3.01  | -     | 944.3   |
| AHQ-5-10, 2010              | R.YLAEVASGGEK.K                                                         | 1067.17419 | 1 | 2.30E-05 | 0.49 | 2.86  | -     | 205.8   |
| AHQ-5-10, 2003              | R.YLAEVASGGEK.K                                                         | 1067.17419 | 1 | 1.42E-04 | 0.39 | 2.09  | -     | 622.4   |
| AHQ-5-13, 2391              | R.YLAEVASGGEK.K                                                         | 1067.17419 | 1 | 4.40E-05 | 0.15 | 2.06  | -     | 385.4   |
| gi 4506505 ref NP_002916.1  | regulator of G-protein signaling 10 [Homo sapiens]                      |            |   | 2.13E-08 | 1.71 | 20.22 | 16.20 | 19607.9 |
| AHQ-5-11, 4639 - 4650       | K.LQDQIFNLMK.Y                                                          | 1250.49254 | 2 | 2.82E-04 | 0.85 | 3.71  | -     | 561.5   |
| AHQ-5-11, 5306 - 5326       | K.WAASLENLEDEPEGVKR.F                                                   | 1928.13502 | 2 | 2.13E-08 | 0.86 | 4.33  | -     | 423.6   |
| gi 4557395 ref NP_000058.1  | carbonic anhydrase II; carbonate dehydratase II; carbonic dehydratase;  |            |   | 2.28E-08 | 6.07 | 70.25 | 30.40 | 29248.5 |
| AHQ-5-10, 6442              | K.AVQQPDGLAVLGFILK.V                                                    | 1669.98899 | 2 | 1.39E-05 | 0.94 | 5.05  | -     | 568.3   |
| AHQ-5-10, 2956              | K.EPISVSSEQVLK.F                                                        | 1316.48265 | 1 | 2.07E-06 | 0.60 | 2.87  | -     | 241.4   |
| AHQ-5-10, 3780 - 3843       | R.ILNNGHAFNVFEFDDSDQK.A                                                 | 2064.15751 | 2 | 4.27E-06 | 0.93 | 4.59  | -     | 950.1   |
| AHQ-5-10, 3899              | R.ILNNGHAFNVFEFDDSDQK.A                                                 | 2064.15751 | 2 | 1.38E-07 | 0.93 | 3.93  | -     | 1283.4  |
| AHQ-5-10, 2803              | K.YAAELHLVHWNTK.Y                                                       | 1710.95976 | 2 | 2.09E-05 | 0.97 | 3.75  | -     | 2285.7  |
| AHQ-5-10, 3062              | K.SADFTNFDPR.G                                                          | 1170.21306 | 2 | 2.20E-05 | 0.88 | 3.22  | -     | 906.6   |
| AHQ-5-10, 3440 - 3450       | K.VVDVLDLSIK.T                                                          | 988.16011  | 2 | 1.51E-04 | 0.79 | 2.91  | -     | 436.6   |
| AHQ-5-10, 3160              | K.YAAELHLVHWNTK.Y                                                       | 1582.78684 | 2 | 2.28E-08 | 0.96 | 3.90  | -     | 1786.8  |
| gi 30150448 ref XP_293066.2 | similar to Stress-70 protein, mitochondrial precursor (75 kDa glucose   |            |   | 2.36E-08 | 0.92 | 10.21 | 2.90  | 58788.2 |
| AHQ-5-6, 4530               | R.VINEPTAAALAYGLDK.S                                                    | 1646.86592 | 2 | 2.36E-08 | 0.92 | 4.21  | -     | 630.4   |
| gi 4506005 ref NP_002700.1  | protein phosphatase 1, catalytic subunit, beta isoform [Homo sapiens] [ |            |   | 2.46E-08 | 3.81 | 40.25 | 20.80 | 37186.6 |
| AHQ-5-9, 3434               | R.AHQQVEDGIEFFAK.R                                                      | 1640.77679 | 2 | 1.20E-04 | 0.97 | 4.32  | -     | 1527.6  |
| AHQ-5-14-, 6737             | R.EIFLSOPILLELEAPL.I                                                    | 1954.33857 | 2 | 3.20E-06 | 0.92 | 4.33  | -     | 576.2   |
| AHQ-5-9, 6442 - 6444        | R.EIFLSOPILLELEAPL.I                                                    | 1954.33857 | 2 | 2.46E-08 | 0.95 | 4.92  | -     | 656.1   |
| AHQ-5-9, 4627               | K.IFCCHGSLSPDLQSMQIR.R                                                  | 2251.54930 | 2 | 1.95E-06 | 0.95 | 4.43  | -     | 1316.5  |
| AHQ-5-9, 6387               | K.TFTDCFNCLPIAAIVDEK.I                                                  | 2117.38502 | 2 | 2.96E-05 | 0.94 | 4.30  | -     | 862.0   |
| AHQ-5-9, 6212               | K.TFTDCFNCLPIAAIVDEK.I                                                  | 2117.38502 | 2 | 2.25E-05 | 0.95 | 3.97  | -     | 1269.2  |
| gi 14042953 ref NP_114420.1 | FKSG17 [Homo sapiens]                                                   |            |   | 2.47E-08 | 0.92 | 10.17 | 6.10  | 23305.9 |
| AHQ-5-11, 4587              | K.NILFVITKPDVYK.S                                                       | 1550.86611 | 2 | 2.47E-08 | 0.92 | 3.48  | -     | 1136.7  |
| gi 4557471 ref NP_001274.1  | adaptor-related protein complex 1, sigma 1 subunit isoform 1; clathrin- |            |   | 2.48E-08 | 0.98 | 10.29 | 10.10 | 18732.9 |
| AHQ-5-12, 3566              | K.AIEQADLLQEEDSPR.S                                                     | 1843.92692 | 2 | 2.48E-08 | 0.98 | 5.78  | -     | 1739.5  |
| gi 4557377 ref NP_000052.1  | Bruton agammaglobulinemia tyrosine kinase [Homo sapiens]                |            |   | 2.54E-08 | 1.81 | 20.23 | 6.20  | 76280.8 |
| AHQ-5-6, 7332               | R.PFYPFQVYVDEGPLYVFSPTTEELR.K                                           | 2894.22412 | 2 | 2.46E-06 | 0.84 | 3.81  | -     | 663.2   |
| AHQ-5-6, 3426               | R.HYVVCSTPQSQYLAEK.H                                                    | 2075.28663 | 2 | 2.54E-08 | 0.97 | 4.68  | -     | 1325.5  |
| gi 28178832 ref NP_002159.2 | isocitrate dehydrogenase 2 (NADP+), mitochondrial precursor; isocitrat  |            |   | 2.60E-08 | 4.65 | 50.24 | 14.80 | 50909.0 |
| AHQ-5-8, 3624 - 3692        | K.DLQAGCIHLSNVK.L                                                       | 1385.57150 | 2 | 9.51E-08 | 0.97 | 4.63  | -     | 2005.3  |
| AHQ-5-13-, 3688 - 3751      | R.DQTDHQTIVDSALATQK.Y                                                   | 1849.93146 | 2 | 3.02E-04 | 0.86 | 3.33  | -     | 915.0   |
| AHQ-5-8, 1817 - 1890        | R.GKLDGNQDLIR.F                                                         | 1229.36832 | 2 | 7.57E-07 | 0.89 | 3.06  | -     | 1057.5  |
| AHQ-5-8, 4985               | R.LIDDMVAQLK.S                                                          | 1245.51421 | 2 | 4.99E-06 | 0.96 | 4.79  | -     | 1233.7  |
| AHQ-5-8, 4402               | R.NILGGTVFREPIICK.N                                                     | 1719.04170 | 2 | 2.60E-08 | 0.96 | 4.71  | -     | 1188.4  |
| gi 24119203 ref NP_705935.1 | tropomyosin 3 [Homo sapiens]                                            |            |   | 2.74E-08 | 4.35 | 50.24 | 14.50 | 29032.5 |
| AHQ-5-6, 3474               | R.IQLVEEELDR.A                                                          | 1244.37653 | 2 | 5.25E-06 | 0.88 | 2.85  | -     | 1120.2  |
| AHQ-5-10, 3332 - 3334       | R.IQLVEEELDR.A                                                          | 1244.37653 | 2 | 1.27E-07 | 0.87 | 3.53  | -     | 748.5   |
| AHQ-5-11, 3523              | R.IQLVEEELDR.A                                                          | 1244.37653 | 2 | 1.84E-05 | 0.89 | 3.45  | -     | 839.9   |
| AHQ-5-9, 3159               | R.IQLVEEELDR.A                                                          | 1244.37653 | 2 | 2.68E-06 | 0.89 | 3.53  | -     | 842.8   |
| AHQ-5-10, 2583              | K.IQLVQQQADDAEER.A                                                      | 1643.73738 | 2 | 2.29E-07 | 0.84 | 3.07  | -     | 878.5   |
| AHQ-5-9, 2526               | K.IQLVQQQADDAEER.A                                                      | 1643.73738 | 2 | 8.95E-08 | 0.79 | 2.93  | -     | 761.1   |
| AHQ-5-10, 2327 - 2334       | R.KIQLVQQQADDAEER.A                                                     | 1771.91030 | 2 | 9.05E-04 | 0.94 | 4.45  | -     | 715.1   |
| AHQ-5-11, 2420              | R.KIQLVQQQADDAEER.A                                                     | 1771.91030 | 2 | 6.82E-05 | 0.91 | 4.21  | -     | 545.5   |
| AHQ-5-10, 2998 - 3000       | R.RIQLVEEELDR.A                                                         | 1400.56288 | 2 | 2.74E-08 | 0.97 | 4.78  | -     | 1603.5  |
| AHQ-5-9, 2806 - 2814        | R.RIQLVEEELDR.A                                                         | 1400.56288 | 2 | 1.19E-07 | 0.96 | 4.18  | -     | 1547.0  |
| AHQ-5-9, 2688 - 2747        | K.TIDDLKCLK.C                                                           | 1190.32563 | 2 | 2.40E-06 | 0.81 | 3.15  | -     | 610.7   |
| gi 4504077 ref NP_000165.1  | glycoprotein IX (platelet) [Homo sapiens]                               |            |   | 2.76E-08 | 3.64 | 40.23 | 19.80 | 19046.0 |
| AHQ-5-11, 4898              | R.ALETMGLWVDCR.G                                                        | 1452.68135 | 2 | 1.55E-06 | 0.94 | 3.13  | -     | 1504.7  |
| AHQ-5-11, 2586              | R.CASPSLAAHGPLGR.L                                                      | 1395.56962 | 1 | 7.59E-04 | 0.70 | 2.71  | -     | 380.9   |
| AHQ-5-12, 2600              | R.CASPSLAAHGPLGR.L                                                      | 1395.56962 | 2 | 5.20E-06 | 0.86 | 3.32  | -     | 801.4   |
| AHQ-5-11, 2570              | R.CASPSLAAHGPLGR.L                                                      | 1395.56962 | 2 | 2.76E-08 | 0.91 | 3.40  | -     | 1071.7  |
| AHQ-5-11, 3262              | R.GHGLTALPALPAR.T                                                       | 1274.49706 | 1 | 2.35E-04 | 0.69 | 3.12  | -     | 396.4   |
| AHQ-5-11, 3214 - 3279       | R.GHGLTALPALPAR.T                                                       | 1274.49706 | 2 | 1.88E-04 | 0.92 | 4.03  | -     | 758.4   |
| AHQ-5-12, 3220 - 3288       | R.GHGLTALPALPAR.T                                                       | 1274.49706 | 2 | 1.59E-04 | 0.95 | 4.56  | -     | 816.4   |
| AHQ-5-11, 3219 - 3294       | R.GHGLTALPALPAR.T                                                       | 1274.49706 | 1 | 6.84E-05 | 0.85 | 3.60  | -     | 449.5   |
| AHQ-5-12, 3081              | R.TPEALLQVR.C                                                           | 1027.19957 | 2 | 8.94E-06 | 0.94 | 3.01  | -     | 1412.7  |
| AHQ-5-14-, 3089             | R.TPEALLQVR.C                                                           | 1027.19957 | 2 | 9.59E-04 | 0.86 | 3.03  | -     | 816.1   |
| AHQ-5-14-, 3094             | R.TPEALLQVR.C                                                           | 1027.19957 | 1 | 1.69E-04 | 0.57 | 2.10  | -     | 207.3   |
| AHQ-5-11, 3056              | R.TPEALLQVR.C                                                           | 1027.19957 | 2 | 1.09E-04 | 0.95 | 3.58  | -     | 1539.4  |
| gi 6598323 ref NP_001485.2  | GDP dissociation inhibitor 2; rab GDP-dissociation inhibitor, beta [Hm  |            |   | 2.82E-08 | 3.54 | 40.32 | 15.10 | 50662.9 |
| AHQ-5-6, 3360               | K.MLLYTEVTR.Y                                                           | 1126.35141 | 2 | 9.28E-06 | 0.81 | 2.62  | -     | 813.5   |
| AHQ-5-8, 4465               | R.NPYVGGESASITPLEDLYKR.F                                                | 2274.47135 | 2 | 2.82E-08 | 0.77 | 3.63  | -     | 345.6   |
| AHQ-5-7, 6800               | K.SPYLYPLYGLGELPQGFAR.L                                                 | 2142.44089 | 2 | 1.80E-06 | 0.95 | 4.75  | -     | 939.9   |
| AHQ-5-8, 6642               | K.SPYLYPLYGLGELPQGFAR.L                                                 | 2142.44089 | 2 | 3.99E-06 | 0.95 | 4.95  | -     | 796.0   |
| AHQ-5-9, 6090 - 6091        | K.SPYLYPLYGLGELPQGFAR.L                                                 | 2142.44089 | 2 | 5.07E-05 | 0.96 | 5.18  | -     | 906.0   |
| AHQ-5-6, 6888 - 6896        | K.SPYLYPLYGLGELPQGFAR.L                                                 | 2142.44089 | 2 | 7.57E-07 | 0.98 | 6.37  | -     | 1163.9  |

|                            |                                                                         |            |   |          |      |       |       |          |
|----------------------------|-------------------------------------------------------------------------|------------|---|----------|------|-------|-------|----------|
| AHQ-5-8, 7257              | K.VPSTAEALASSMLGLFEK.R                                                  | 1981.25641 | 2 | 4.45E-06 | 0.98 | 6.43  | -     | 1837.5   |
| gi4757952 ref NP_001782.1  | cell division cycle 42 isoform 1; cell division cycle 42 (GTP-binding p |            |   | 2.88E-08 | 4.44 | 50.28 | 32.50 | 21258.5  |
| AHQ-5-11, 2242             | K.CVVVGDGAVGK.T                                                         | 1062.22237 | 2 | 1.70E-04 | 0.75 | 2.60  | -     | 922.8    |
| AHQ-5-11, 6575 - 6644      | K.NVFDLALALEPPEPK.K                                                     | 1854.09282 | 3 | 1.46E-05 | 0.96 | 5.62  | -     | 1338.3   |
| AHQ-5-11, 3835 - 3842      | K.TCLLLSYTTNK.F                                                         | 1315.51795 | 2 | 9.75E-04 | 0.93 | 3.72  | -     | 1376.1   |
| AHQ-5-11, 5784             | K.TPFLLVGTQIDLR.D                                                       | 1473.74174 | 2 | 5.58E-04 | 0.98 | 4.87  | -     | 2135.8   |
| AHQ-5-11, 5646 - 5708      | K.TPFLLVGTQIDLR.D                                                       | 1473.74174 | 2 | 8.43E-07 | 0.94 | 4.09  | -     | 1228.3   |
| AHQ-5-11, 2470             | K.YVECSALTOQ.G                                                          | 1200.34381 | 2 | 2.88E-08 | 0.86 | 2.96  | -     | 700.5    |
| gi29729616 ref XP_292963.1 | similar to peptidylprolyl isomerase A (cyclophilin A) [Homo sapiens] [  |            |   | 2.95E-08 | 1.84 | 20.35 | 16.40 | 18025.4  |
| AHQ-5-12, 4874 - 4954      | K.HTGPGILSM*ANAGPNTNGSQFFICTAK.S                                        | 2810.11545 | 3 | 1.58E-07 | 0.95 | 5.72  | -     | 1113.4   |
| AHQ-5-12, 5018 - 5080      | K.HTGPGILSM*ANAGPNTNGSQFFICTAK.S                                        | 2810.11545 | 2 | 2.22E-04 | 0.91 | 4.08  | -     | 689.0    |
| AHQ-5-12, 5485 - 5548      | K.HTGPGILSMANAGPNTNGSQFFICTAK.S                                         | 2794.11605 | 2 | 1.45E-05 | 0.86 | 3.79  | -     | 498.8    |
| AHQ-5-12, 5612 - 5676      | K.HTGPGILSMANAGPNTNGSQFFICTAK.S                                         | 2794.11605 | 2 | 3.13E-07 | 0.89 | 4.45  | -     | 618.5    |
| AHQ-5-13, 4936             | K.HTGPGILSM*ANAGPNTNGSQFFICTAK.S                                        | 2810.11545 | 3 | 1.09E-05 | 0.95 | 5.54  | -     | 1222.1   |
| AHQ-5-13, 4949             | K.HTGPGILSM*ANAGPNTNGSQFFICTAK.S                                        | 2810.11545 | 2 | 4.27E-05 | 0.82 | 3.83  | -     | 477.2    |
| AHQ-5-13, 5538 - 5565      | K.HTGPGILSMANAGPNTNGSQFFICTAK.S                                         | 2794.11605 | 3 | 7.57E-04 | 0.91 | 5.40  | -     | 958.5    |
| AHQ-5-13-, 5467 - 5532     | K.HTGPGILSMANAGPNTNGSQFFICTAK.S                                         | 2794.11605 | 3 | 2.95E-08 | 0.95 | 6.98  | -     | 1065.1   |
| AHQ-5-14-, 4945            | K.HTGPGILSM*ANAGPNTNGSQFFICTAK.S                                        | 2810.11545 | 3 | 1.05E-07 | 0.89 | 4.87  | -     | 766.7    |
| gi18640750 ref NP_570138.1 | regulator of G-protein signalling 18; regulator of G-protein signaling  |            |   | 2.96E-08 | 0.71 | 10.18 | 8.90  | 27582.0  |
| AHQ-5-11, 4128             | K.EVITNSITQPTLHLSFDAAQSR.V                                              | 2316.51300 | 2 | 2.96E-08 | 0.71 | 3.51  | -     | 351.3    |
| AHQ-5-10, 3831             | K.EVITNSITQPTLHLSFDAAQSR.V                                              | 2316.51300 | 2 | 2.87E-04 | 0.63 | 3.12  | -     | 381.5    |
| gi5174613 ref NP_005960.1  | nucleosome assembly protein 1-like 4; nucleosome assembly protein 2 [Ho |            |   | 2.98E-08 | 1.90 | 20.30 | 7.50  | 42823.1  |
| AHQ-5-7, 2630              | K.FYEEVHDLER.K                                                          | 1337.41897 | 2 | 2.63E-06 | 0.93 | 3.16  | -     | 1405.8   |
| AHQ-5-7, 7176 - 7180       | R.NVMDLSSELVQEYDEPIK.H                                                  | 2136.40840 | 2 | 2.98E-08 | 0.98 | 6.04  | -     | 1498.8   |
| gi21389549 ref NP_653263.1 | hypothetical protein MGC26605 [Homo sapiens]                            |            |   | 3.22E-08 | 1.83 | 20.25 | 14.90 | 26927.8  |
| AHQ-5-10, 5112 - 5118      | R.ATVFSPOGHLFQVEYAQEA.VK.K                                              | 2450.73052 | 2 | 5.35E-07 | 0.96 | 5.06  | -     | 1186.4   |
| AHQ-5-10, 4262             | K.LTVDEPVTVEYITR.F                                                      | 1635.83990 | 2 | 3.22E-08 | 0.88 | 3.78  | -     | 598.2    |
| gi4758038 ref NP_004246.1  | cytochrome c oxidase subunit Va precursor; cytochrome c oxidase polypep |            |   | 3.35E-08 | 2.48 | 30.26 | 40.70 | 16774.1  |
| AHQ-5-13, 6806 - 6885      | K.EIYPYQELRPTLNELGISTPEELGLDKV                                          | 3430.88913 | 3 | 5.85E-06 | 0.92 | 5.29  | -     | 554.0    |
| AHQ-5-13-, 4779 - 4844     | K.GINTLVTYDMVPEPK.I                                                     | 1677.94342 | 2 | 2.82E-04 | 0.93 | 3.57  | -     | 1238.2   |
| AHQ-5-13, 4856 - 4924      | K.GINTLVTYDMVPEPK.I                                                     | 1677.94342 | 2 | 2.69E-04 | 0.62 | 2.87  | -     | 497.6    |
| AHQ-5-14-, 5729            | R.WVTVYFNPKDIDIAWELR.K                                                  | 2054.29220 | 2 | 3.35E-08 | 0.94 | 4.54  | -     | 786.6    |
| gi24497612 ref NP_116262.2 | nm23-phosphorylated unknown substrate; SH3 domain-containing 70 kDa pr  |            |   | 3.38E-08 | 2.61 | 30.18 | 7.90  | 72695.6  |
| AHQ-5-6, 4096              | R.EYVYLRLPTGPLAQK.L                                                     | 1749.04621 | 2 | 7.10E-04 | 0.89 | 3.69  | -     | 533.7    |
| AHQ-5-6, 6692              | K.LGCDVWATIFSR.D                                                        | 1426.62208 | 2 | 3.38E-08 | 0.91 | 3.28  | -     | 1094.1   |
| AHQ-5-6, 7276              | R.SVQAACDWLFSHVGDPLDPLR.E                                               | 2745.01846 | 2 | 3.28E-05 | 0.80 | 3.12  | -     | 478.5    |
| gi30158489 ref XP_301421.1 | similar to Chloride intracellular channel protein 1 (Nuclear chloride   |            |   | 3.39E-08 | 1.78 | 30.21 | 11.60 | 28267.5  |
| AHQ-5-9, 5479 - 5550       | K.FLNGNELTLADCNLLPK.L                                                   | 1934.20276 | 2 | 2.31E-06 | 0.86 | 4.23  | -     | 974.4    |
| AHQ-5-12, 6112 - 6121      | K.FLNGNELTLADCNLLPK.L                                                   | 1934.20276 | 2 | 3.39E-08 | 0.82 | 3.82  | -     | 961.2    |
| AHQ-5-10, 5223             | R.KFLNGNELTLADCNLLPK.L                                                  | 2062.37568 | 2 | 2.75E-05 | 0.77 | 3.61  | -     | 866.6    |
| AHQ-5-10, 2423             | K.NSNPALNDNLQK.G                                                        | 1328.41362 | 1 | 2.28E-04 | 0.02 | 2.19  | -     | 101.4    |
| AHQ-5-9, 2080              | K.NSNPALNDNLQK.G                                                        | 1328.41362 | 1 | 1.59E-04 | 0.19 | 2.19  | -     | 198.5    |
| gi10835035 ref NP_003157.1 | sulfotransferase family, cytosolic, 1A, phenol-preferring, member 3; t  |            |   | 3.57E-08 | 0.88 | 10.25 | 8.80  | 34196.0  |
| AHQ-5-9, 5972              | K.YFAEALGPLQSFQARPDLLINTYPK.S                                           | 2969.33891 | 3 | 3.57E-08 | 0.88 | 4.30  | -     | 607.0    |
| gi4826659 ref NP_004921.1  | F-actin capping protein beta subunit; Cap Z [Homo sapiens]              |            |   | 3.88E-08 | 3.16 | 40.24 | 25.00 | 30628.5  |
| AHQ-5-10, 3752             | K.GCWDSIHVVEVQEK.S                                                      | 1687.85505 | 2 | 5.41E-04 | 0.87 | 3.22  | -     | 1224.1   |
| AHQ-5-9, 3630              | K.GCWDSIHVVEVQEK.S                                                      | 1687.85505 | 2 | 3.88E-08 | 0.90 | 3.79  | -     | 1224.0   |
| AHQ-5-9, 2939 - 2962       | R.KLEVEANNAFDQYR.D                                                      | 1697.82988 | 2 | 1.23E-06 | 0.96 | 4.75  | -     | 1555.2   |
| AHQ-5-9, 2911              | R.QMEKDETVSDCSPIANIAGR.L                                                | 2289.48951 | 2 | 3.55E-04 | 0.53 | 2.84  | -     | 304.1    |
| AHQ-5-9, 3599              | R.SPWSNKYDPPLEDGAMP SAR.L                                               | 2219.41928 | 2 | 5.85E-06 | 0.76 | 3.52  | -     | 403.3    |
| gi19923457 ref NP_057447.2 | glycoprotein VI (platelet); platelet glycoprotein VI [Homo sapiens] [M  |            |   | 4.01E-08 | 0.96 | 10.24 | 3.20  | 67308.6  |
| AHQ-5-7, 5295              | K.PSLQALPSSLVPLEKPVTLR.C                                                | 2146.55880 | 2 | 4.31E-06 | 0.90 | 4.35  | -     | 490.1    |
| AHQ-5-7, 5292              | K.PSLQALPSSLVPLEKPVTLR.C                                                | 2146.55880 | 3 | 4.01E-08 | 0.96 | 4.81  | -     | 1653.1   |
| gi5031593 ref NP_005708.1  | actin related protein 2/3 complex subunit 5; Arp2/3 protein complex sub |            |   | 4.03E-08 | 5.20 | 60.26 | 39.10 | 16320.3  |
| AHQ-5-12, 2912             | K.ALAAAGVGSIVR.V                                                        | 1071.25558 | 2 | 3.36E-05 | 0.97 | 4.14  | -     | 1849.5   |
| AHQ-5-12, 4032 - 4101      | K.AVQSLDKNGVDLLMK.Y                                                     | 1631.91943 | 2 | 2.06E-07 | 0.96 | 4.86  | -     | 1373.5   |
| AHQ-5-12, 3520 - 3590      | K.AVQSLDKNGVDLLMK.Y                                                     | 1647.91883 | 2 | 2.53E-07 | 0.87 | 3.77  | -     | 600.2    |
| AHQ-5-12, 4570 - 4584      | K.GFESPDSNSAMLLQWHEK.A                                                  | 2164.34049 | 2 | 4.03E-08 | 0.97 | 5.14  | -     | 1435.1   |
| AHQ-5-12, 4249             | K.GFESPDSNSAMLLQWHEK.A                                                  | 2180.33989 | 2 | 1.18E-07 | 0.85 | 3.73  | -     | 494.2    |
| AHQ-5-12, 4160             | K.GFESPDSNSAMLLQWHEK.A                                                  | 2180.33989 | 2 | 7.18E-08 | 0.78 | 3.32  | -     | 504.0    |
| AHQ-5-12, 4164             | R.QGNMATAALQAALK.N                                                      | 1317.54052 | 2 | 3.38E-06 | 0.65 | 2.89  | -     | 437.0    |
| gi29788766 ref NP_064424.2 | tubulin, beta polypeptide 4, member Q [Homo sapiens]                    |            |   | 4.05E-08 | 0.96 | 10.28 | 7.40  | 48377.2  |
| AHQ-5-8, 6072              | K.EAESDCDCLGFQLTHSLGGGTGSGMGTLLLSK.I                                    | 3315.65550 | 3 | 2.93E-05 | 0.91 | 4.25  | -     | 991.2    |
| AHQ-5-11, 5975 - 5984      | K.EAESDCDCLGFQLTHSLGGGTGSGMGTLLLSK.I                                    | 3315.65550 | 3 | 4.05E-08 | 0.96 | 5.59  | -     | 1516.7   |
| AHQ-5-7, 6146 - 6206       | K.EAESDCDCLGFQLTHSLGGGTGSGMGTLLLSK.I                                    | 3315.65550 | 3 | 2.26E-07 | 0.86 | 3.67  | -     | 1217.0   |
| gi4501993 ref NP_003650.1  | alkylglycerone phosphate synthase precursor [Homo sapiens]              |            |   | 4.08E-08 | 0.86 | 10.17 | 2.60  | 72911.4  |
| AHQ-5-6, 6017              | R.GISDPLTVFEQTEAAR.E                                                    | 1805.96665 | 2 | 4.08E-08 | 0.86 | 3.46  | -     | 813.5    |
| gi30147857 ref XP_293007.2 | similar to peptidylprolyl isomerase A (cyclophilin A) [Homo sapiens] [  |            |   | 4.13E-08 | 0.60 | 10.15 | 5.90  | 20789.8  |
| AHQ-5-12, 3266 - 3281      | K.KITADCGLQ.Q                                                           | 1248.43160 | 2 | 4.13E-08 | 0.60 | 3.05  | -     | 691.6    |
| gi4507745 ref NP_003320.1  | thioredoxin [Homo sapiens]                                              |            |   | 4.34E-08 | 1.89 | 20.19 | 22.90 | 11693.3  |
| AHQ-5-13, 5052             | K.EKLEATINELV                                                           | 1259.43110 | 2 | 1.10E-05 | 0.96 | 3.58  | -     | 2081.1   |
| AHQ-5-14, 4656             | K.TAFQEALDAAGDK.L                                                       | 1337.41728 | 2 | 3.47E-05 | 0.91 | 3.11  | -     | 1313.8   |
| AHQ-5-13-, 3851            | K.TAFQEALDAAGDK.L                                                       | 1337.41728 | 2 | 1.22E-06 | 0.94 | 3.73  | -     | 1462.9   |
| AHQ-5-14-, 3745 - 3746     | K.TAFQEALDAAGDK.L                                                       | 1337.41728 | 2 | 4.34E-08 | 0.93 | 3.48  | -     | 1435.9   |
| AHQ-5-13, 3968 - 3986      | K.TAFQEALDAAGDK.L                                                       | 1337.41728 | 2 | 1.71E-06 | 0.93 | 3.56  | -     | 1362.0   |
| gi21361670 ref NP_054782.2 | src homology 3 domain-containing protein HIP-55; HIP-55 protein [Homo   |            |   | 4.40E-08 | 0.65 | 10.17 | 4.60  | 48294.0  |
| AHQ-5-10, 5244             | R.VAGTGEGGLEEMVEELNSGK.V                                                | 2007.16599 | 2 | 4.40E-08 | 0.65 | 3.43  | -     | 246.4    |
| gi28269681 ref NP_783313.1 | NADH-ubiquinone oxidoreductase subunit B14.7 [Homo sapiens]             |            |   | 4.41E-08 | 1.72 | 20.27 | 27.00 | 14852.0  |
| AHQ-5-14-, 6434 - 6438     | R.EKPDDPLNYFLGGCAGGLTGAR.T                                              | 2423.68676 | 3 | 4.41E-08 | 0.95 | 5.37  | -     | 1229.7   |
| AHQ-5-13, 4988 - 5064      | R.VTLNPPGTFLGVAK.V                                                      | 1543.78883 | 2 | 5.95E-04 | 0.78 | 2.93  | -     | 438.3    |
| gi9845511 ref NP_008839.2  | ras-related C3 botulinum toxin substrate 1 isoform Rac1; rho family, sm |            |   | 4.62E-08 | 0.97 | 10.19 | 5.20  | 21450.0  |
| AHQ-5-11, 3083             | K.YLECSALTQR.G                                                          | 1242.38392 | 2 | 4.62E-08 | 0.97 | 3.72  | -     | 1866.2   |
| AHQ-5-11, 2979 - 3046      | K.YLECSALTQR.G                                                          | 1242.38392 | 2 | 1.13E-06 | 0.91 | 3.35  | -     | 1025.8   |
| gi4758988 ref NP_004152.1  | RAB1A, member RAS oncogene family; RAB1, member RAS oncogene family [Ho |            |   | 4.71E-08 | 2.61 | 30.27 | 17.60 | 22677.6  |
| AHQ-5-11, 5923             | K.EFADSLGIPFLETS.AK.N                                                   | 1725.91990 | 2 | 9.70E-04 | 0.73 | 3.22  | -     | 440.3    |
| AHQ-5-11, 5847 - 5911      | R.FADDDTYTESYISTIGVDFK.I                                                | 2173.31742 | 2 | 5.71E-06 | 0.91 | 3.88  | -     | 886.1    |
| AHQ-5-11, 5542 - 5607      | R.FADDDTYTESYISTIGVDFK.I                                                | 2173.31742 | 2 | 3.11E-05 | 0.95 | 4.33  | -     | 1390.9   |
| AHQ-5-11, 5970 - 6042      | R.FADDDTYTESYISTIGVDFK.I                                                | 2173.31742 | 2 | 2.30E-07 | 0.98 | 4.85  | -     | 1935.9   |
| AHQ-5-14-, 5607            | R.FADDDTYTESYISTIGVDFK.I                                                | 2173.31742 | 2 | 1.18E-05 | 0.88 | 3.66  | -     | 960.4    |
| AHQ-5-11, 6107 - 6171      | R.FADDDTYTESYISTIGVDFK.I                                                | 2173.31742 | 2 | 1.15E-06 | 0.97 | 5.04  | -     | 1426.1   |
| AHQ-5-11, 6110             | R.FADDDTYTESYISTIGVDFK.I                                                | 2173.31742 | 2 | 3.51E-06 | 0.77 | 3.27  | -     | 538.9    |
| AHQ-5-11, 6234 - 6302      | R.FADDDTYTESYISTIGVDFK.I                                                | 2173.31742 | 2 | 1.58E-04 | 0.95 | 4.14  | -     | 1238.4   |
| AHQ-5-11, 6830 - 6903      | R.FADDDTYTESYISTIGVDFK.I                                                | 2173.31742 | 2 | 7.88E-04 | 0.76 | 3.05  | -     | 562.6    |
| AHQ-5-11, 6967 - 6978      | R.FADDDTYTESYISTIGVDFK.I                                                | 2173.31742 | 2 | 3.00E-04 | 0.96 | 4.92  | -     | 1194.2   |
| AHQ-5-14-, 5845 - 5909     | R.FADDDTYTESYISTIGVDFK.I                                                | 2173.31742 | 2 | 4.71E-08 | 0.97 | 5.43  | -     | 1544.2   |
| AHQ-5-11, 6030             | K.NATNVEGSMFMMAAEIK.K                                                   | 1886.14022 | 2 | 4.80E-06 | 0.91 | 4.23  | -     | 1325.2   |
| gi5174393 ref NP_006001.1  | arginine-rich, mutated in early stage tumors; arginine-rich protein [Ho |            |   | 4.72E-08 | 2.40 | 30.27 | 13.70 | 26962.2  |
| AHQ-5-12, 4626             | K.DRDVTFSPATIENELIK.F                                                   | 1949.15100 | 2 | 9.06E-07 | 0.97 | 5.35  | -     | 1453.8   |
| AHQ-5-12, 5601 - 5677      | K.DRDVTFSPATIENELIK.F                                                   | 1949.15100 | 2 | 6.11E-04 | 0.94 | 4.72  | -     | 1076.0   |
| AHQ-5-12, 5156             | R.DVTFSPATIENELIK.F                                                     | 1677.87678 | 2 | 4.72E-08 | 0.62 | 2.64  | -     | 477.1    |
| AHQ-5-12, 6184             | R.DVTFSPATIENELIK.F                                                     | 1677.87678 | 2 | 4.64E-06 | 0.70 | 3.31  | -     | 445.5    |
| AHQ-5-12, 3144 - 3217      | K.ILDDWGETCKGCAEK.S                                                     | 1784.94596 | 2 | 1.26E-06 | 0.82 | 3.29  | -     | 518.0    |
| gi4504743 ref NP_002194.1  | integrin alpha 2 precursor; Integrin, alpha-2 (CD49B; alpha-2 subunit o |            |   | 5.05E-08 | 2.56 | 30.25 | 4.60  | 129294.4 |
| AHQ-5-3, 4641              | K.GILGQHQLFLEGEPIENTR.F                                                 | 2096.28902 | 2 | 2.01E-04 | 0.94 | 4.94  | -     | 878.0    |
| AHQ-5-3, 3317              | K.TQVGLIQUANPR.V                                                        | 1474.64668 | 2 | 5.05E-08 | 0.82 | 2.96  | -     | 1160.4   |
| AHQ-5-2, 5241              | R.VDISLENPGTSPALEAYSETAK.V                                              | 2293.46974 | 2 | 4.56E-04 | 0.42 | 2.52  | -     | 398.9    |
| AHQ-5-3, 5277 - 5302       | R.VDISLENPGTSPALEAYSETAK.V                                              | 2293.46974 | 2 | 5.51E-04 | 0.91 | 3.99  | -     | 636.3    |

|                            |                                                                          |            |   |          |      |       |       |         |
|----------------------------|--------------------------------------------------------------------------|------------|---|----------|------|-------|-------|---------|
| AHQ-5-4, 5254              | R.VDISLENPGTSPALEAYSETAK.V                                               | 2293.46974 | 2 | 1.60E-05 | 0.85 | 3.76  | -     | 603.2   |
| AHQ-5-1, 5291              | R.VDISLENPGTSPALEAYSETAK.V                                               | 2293.46974 | 2 | 3.13E-07 | 0.80 | 3.57  | -     | 568.4   |
| gi4502171 ref NP_000476.1  | adenine phosphoribosyltransferase; AMP pyrophosphorylase; AMP diphospho  |            |   | 5.16E-08 | 2.61 | 30.21 | 22.80 | 19607.6 |
| AHQ-5-11, 4998             | R.GKLPGLTLWASYSLEYGK.A                                                   | 1968.24075 | 2 | 4.96E-05 | 0.79 | 3.40  | -     | 523.5   |
| AHQ-5-11, 3495             | R.IDYIAGLDSR.G                                                           | 1123.24098 | 2 | 5.16E-08 | 0.96 | 4.27  | -     | 1677.6  |
| AHQ-5-11, 5584 - 5602      | R.SFPDPFPGVVF.R.D                                                        | 1466.66462 | 1 | 6.78E-04 | 0.06 | 1.82  | -     | 136.3   |
| AHQ-5-11, 5575 - 5583      | R.SFPDPFPGVVF.R.D                                                        | 1466.66462 | 2 | 2.78E-04 | 0.86 | 2.90  | -     | 726.8   |
| gi18104967 ref NP_000953.2 | prostaglandin-endoperoxide synthase 1 isoform 1 precursor; prostaglandin |            |   | 5.27E-08 | 8.19 | 90.27 | 23.20 | 68686.0 |
| AHQ-5-6, 3753 - 3826       | K.AEHPWTWGDQLQFQTR.L                                                     | 1917.02765 | 2 | 2.28E-04 | 0.92 | 3.76  | -     | 846.3   |
| AHQ-5-6, 3674 - 3754       | K.ALGHGVDLGHYGDNLER.Q                                                    | 1937.10524 | 2 | 8.72E-04 | 0.86 | 3.76  | -     | 639.2   |
| AHQ-5-7, 3579              | K.ALGHGVDLGHYGDNLER.Q                                                    | 1937.10524 | 2 | 5.89E-06 | 0.96 | 4.76  | -     | 1298.3  |
| AHQ-5-6, 4973              | R.FGMKPYTSFQELVGEK.E                                                     | 1862.13845 | 2 | 5.27E-08 | 0.94 | 4.56  | -     | 570.3   |
| AHQ-5-6, 4234              | R.FGM*KPYSFQELVGEK.E                                                     | 1878.13785 | 2 | 2.35E-05 | 0.88 | 3.56  | -     | 561.5   |
| AHQ-5-6, 7050              | K.GLLGNPICSPYWKSTFGGEVGFNIVK.T                                           | 3069.47853 | 3 | 9.59E-05 | 0.88 | 4.64  | -     | 480.0   |
| AHQ-5-6, 3585              | R.NSLRSPSPFTHLLTHGR.W                                                    | 2068.32687 | 3 | 1.62E-04 | 0.89 | 4.18  | -     | 860.0   |
| AHQ-5-6, 3244 - 3313       | R.VPDASQDDGPAVERPSTEL                                                    | 1984.06747 | 2 | 6.21E-07 | 0.96 | 5.38  | -     | 962.5   |
| AHQ-5-6, 5832              | K.YQVLDDGEMYPSPVEEAPVLMHYPR.G                                            | 2822.20799 | 3 | 3.91E-05 | 0.93 | 4.80  | -     | 795.3   |
| AHQ-5-6, 5312              | K.YQVLDDGEMYPSPVEEAPVLM*HYPR.G                                           | 2838.20739 | 3 | 3.92E-06 | 0.84 | 4.10  | -     | 750.2   |
| gi4507231 ref NP_003134.1  | single-stranded DNA binding protein; single-stranded DNA-binding protei  |            |   | 5.41E-08 | 4.17 | 50.27 | 37.80 | 17259.5 |
| AHQ-5-13, 2597             | R.DVAYGYVK.K                                                             | 986.10277  | 1 | 1.72E-05 | 0.35 | 1.96  | -     | 634.7   |
| AHQ-5-13, 5969 - 6040      | K.NPVTIFSLATNEM*WR.S                                                     | 1796.04007 | 2 | 2.35E-06 | 0.97 | 5.16  | -     | 1119.0  |
| AHQ-5-13, 6672 - 6673      | K.NPVTIFSLATNEMWR.S                                                      | 1780.04067 | 2 | 7.36E-06 | 0.98 | 5.35  | -     | 2074.1  |
| AHQ-5-13, 6053             | R.QATTIADIINIFLSQDTK.E                                                   | 1993.24692 | 2 | 2.08E-06 | 0.94 | 4.22  | -     | 892.1   |
| AHQ-5-13, 6133             | R.QATTIADIINIFLSQDTK.E                                                   | 1993.24692 | 2 | 1.11E-06 | 0.96 | 5.42  | -     | 1078.9  |
| AHQ-5-13, 3191             | R.SGDSSEVYQLGDVVSQK.T                                                    | 1612.67692 | 2 | 2.79E-07 | 0.93 | 4.01  | -     | 1092.1  |
| AHQ-5-13, 3293             | R.SGDSSEVYQLGDVVSQK.T                                                    | 1612.67692 | 2 | 5.41E-08 | 0.91 | 4.16  | -     | 889.4   |
| gi4503971 ref NP_001484.1  | GDP dissociation inhibitor 1; mental retardation, X-linked 41; mental r  |            |   | 5.57E-08 | 1.88 | 20.28 | 8.50  | 50582.4 |
| AHQ-5-7, 5088              | R.NPYYGGESSITPLEELYK.R                                                   | 2148.31110 | 2 | 1.95E-04 | 0.89 | 3.36  | -     | 885.7   |
| AHQ-5-6, 5198 - 5248       | R.NPYYGGESSITPLEELYK.R                                                   | 2148.31110 | 2 | 1.35E-07 | 0.91 | 4.13  | -     | 750.6   |
| AHQ-5-7, 7118 - 7122       | K.VPSTETALASNLGMFKEK.R                                                   | 2056.34679 | 2 | 5.57E-08 | 0.97 | 5.24  | -     | 1490.3  |
| AHQ-5-6, 7160              | K.VPSTETALASNLGMFKEK.R                                                   | 2056.34679 | 2 | 5.81E-06 | 0.98 | 5.69  | -     | 1668.3  |
| gi7657124 ref NP_055165.1  | TNF-induced protein [Homo sapiens]                                       |            |   | 5.62E-08 | 0.96 | 10.26 | 10.50 | 22047.4 |
| AHQ-5-12, 7056 - 7120      | K.SIATTLIDTSSVEVLDLYR.V                                                  | 2242.42274 | 2 | 5.62E-08 | 0.96 | 5.20  | -     | 1124.1  |
| gi4502687 ref NP_003865.1  | CD84 antigen (leukocyte antigen); leukocyte antigen CD84 [Homo sapiens]  |            |   | 5.67E-08 | 0.96 | 10.22 | 4.90  | 36870.6 |
| AHQ-5-7, 4570              | R.IHALGNPNVNLVSDLR.M                                                     | 1796.06296 | 2 | 5.67E-08 | 0.96 | 4.33  | -     | 1320.5  |
| gi4505329 ref NP_003818.1  | N-ethylmaleimide-sensitive factor attachment protein, alpha; alpha-SNAP  |            |   | 5.73E-08 | 2.16 | 30.27 | 14.20 | 33246.6 |
| AHQ-5-9, 4583              | K.AALCHFCIDMLNAK.L                                                       | 1666.96721 | 2 | 7.65E-08 | 0.96 | 4.91  | -     | 1267.8  |
| AHQ-5-9, 3631              | K.HDAATPCFVDAGNAFK.K                                                     | 1625.74381 | 2 | 5.73E-08 | 0.98 | 5.36  | -     | 3250.7  |
| AHQ-5-9, 3984              | K.VAGYAALEEQYQK.A                                                        | 1454.65214 | 1 | 7.86E-05 | 0.22 | 2.20  | -     | 600.4   |
| gi4506285 ref NP_003470.1  | protein tyrosine phosphatase type IVA, member 2 isoform 1; protein tyro  |            |   | 5.76E-08 | 0.88 | 10.16 | 8.40  | 19127.1 |
| AHQ-5-11, 2854 - 2906      | R.FLITHNPTNATLNK.F                                                       | 1584.80104 | 2 | 5.76E-08 | 0.88 | 3.23  | -     | 1150.8  |
| gi5729873 ref NP_006656.1  | heparanase; heparanase-1 [Homo sapiens]                                  |            |   | 5.83E-08 | 3.52 | 40.22 | 8.30  | 61176.4 |
| AHQ-5-8, 7254              | R.EDFLNPDVLDIFISSVQK.V                                                   | 2080.32304 | 2 | 8.44E-05 | 0.93 | 4.33  | -     | 744.7   |
| AHQ-5-7, 7339 - 7340       | R.EDFLNPDVLDIFISSVQK.V                                                   | 2080.32304 | 2 | 4.38E-05 | 0.91 | 4.12  | -     | 533.8   |
| AHQ-5-9, 6520              | R.EDFLNPDVLDIFISSVQK.V                                                   | 2080.32304 | 2 | 1.07E-05 | 0.90 | 4.33  | -     | 607.1   |
| AHQ-5-7, 7244              | R.TATREDFLNPDVLDIFISSVQK.V                                               | 2509.79627 | 2 | 2.90E-05 | 0.83 | 3.11  | -     | 630.4   |
| AHQ-5-14, 4897             | K.TDFLIFDPK.K                                                            | 1096.25713 | 1 | 1.49E-04 | 0.35 | 2.31  | -     | 374.9   |
| AHQ-5-14, 4910             | K.TDFLIFDPK.K                                                            | 1096.25713 | 2 | 7.85E-06 | 0.85 | 2.53  | -     | 1129.5  |
| AHQ-5-7, 3363              | K.YLLRPLGPHGLLSK.S                                                       | 1564.89924 | 2 | 5.83E-08 | 0.94 | 3.60  | -     | 1263.7  |
| gi5031573 ref NP_005712.1  | ARP3 actin-related protein 3 homolog; ARP3 (actin-related protein 3, ye  |            |   | 5.85E-08 | 7.87 | 90.26 | 33.50 | 47370.9 |
| AHQ-5-9, 4411              | R.AEPEDHYFLLETPPLNTPENR.E                                                | 2483.67423 | 2 | 1.62E-04 | 0.66 | 3.37  | -     | 494.0   |
| AHQ-5-7, 4731              | R.AEPEDHYFLLETPPLNTPENR.E                                                | 2483.67423 | 2 | 6.50E-05 | 0.81 | 3.57  | -     | 447.7   |
| AHQ-5-8, 7266              | R.DITYFIQQLLR.D                                                          | 1410.64250 | 2 | 1.26E-05 | 0.93 | 3.97  | -     | 1145.8  |
| AHQ-5-9, 6531              | R.DITYFIQQLLR.D                                                          | 1410.64250 | 1 | 3.48E-04 | 0.07 | 2.01  | -     | 182.2   |
| AHQ-5-8, 2700              | R.DREVGIPEQSLQLETA.K                                                     | 1769.93431 | 2 | 4.77E-04 | 0.95 | 4.97  | -     | 954.7   |
| AHQ-5-8, 6228 - 6296       | K.LGYAGNTEPQFIHPSICIAIK.E                                                | 2194.53570 | 2 | 1.85E-05 | 0.92 | 4.74  | -     | 698.6   |
| AHQ-5-10, 5684             | K.LGYAGNTEPQFIHPSICIAIK.E                                                | 2194.53570 | 2 | 5.53E-05 | 0.86 | 4.09  | -     | 447.2   |
| AHQ-5-9, 5523              | K.LGYAGNTEPQFIHPSICIAIK.E                                                | 2194.53570 | 2 | 1.67E-04 | 0.47 | 3.10  | -     | 267.3   |
| AHQ-5-12, 6156             | K.LGYAGNTEPQFIHPSICIAIK.E                                                | 2194.53570 | 2 | 4.60E-04 | 0.59 | 3.02  | -     | 322.9   |
| AHQ-5-7, 6127 - 6136       | K.LGYAGNTEPQFIHPSICIAIK.E                                                | 2194.53570 | 2 | 3.79E-04 | 0.85 | 4.26  | -     | 460.6   |
| AHQ-5-8, 2272              | R.LKPKPIDVQVITHMQR.Y                                                     | 2041.45264 | 2 | 1.03E-05 | 0.94 | 4.30  | -     | 1056.0  |
| AHQ-5-13, 3677             | R.LPACVDCGTGYTK.L                                                        | 1543.74421 | 2 | 1.88E-07 | 0.93 | 3.93  | -     | 1004.9  |
| AHQ-5-13, 4047             | K.NIVLSGGSTMF.R.D                                                        | 1282.49463 | 2 | 5.85E-08 | 0.89 | 3.09  | -     | 1199.4  |
| AHQ-5-8, 6341 - 6360       | R.TLTGTVIDSDGDGVTHVIPVAEGYVIGSCIK.H                                      | 3061.45302 | 3 | 2.65E-04 | 0.94 | 5.28  | -     | 784.2   |
| AHQ-5-7, 6518 - 6563       | R.TLTGTVIDSDGDGVTHVIPVAEGYVIGSCIK.H                                      | 3061.45302 | 3 | 2.82E-05 | 0.92 | 4.61  | -     | 1025.6  |
| AHQ-5-9, 5860              | R.TLTGTVIDSDGDGVTHVIPVAEGYVIGSCIK.H                                      | 3061.45302 | 3 | 3.74E-05 | 0.90 | 4.53  | -     | 792.4   |
| AHQ-5-9, 3363              | R.YSYVCPDLV.K.E                                                          | 1245.42618 | 1 | 1.13E-06 | 0.57 | 2.55  | -     | 601.4   |
| gi11321601 ref NP_002618.1 | phosphofruktokinase, platelet; Phosphofruktokinase, platelet type [Hom   |            |   | 5.91E-08 | 5.74 | 60.33 | 13.40 | 85595.6 |
| AHQ-5-5, 3521              | K.AIGVLTSGDGAQGMNAAVR.A                                                  | 1789.00750 | 2 | 5.91E-08 | 0.98 | 6.58  | -     | 2211.7  |
| AHQ-5-6, 3193              | R.DLQSNVEHLETK.M                                                         | 1413.51529 | 2 | 4.20E-06 | 0.89 | 3.93  | -     | 877.3   |
| AHQ-5-5, 3249              | R.DLQSNVEHLETK.M                                                         | 1413.51529 | 2 | 3.67E-06 | 0.91 | 3.38  | -     | 1131.7  |
| AHQ-5-5, 6109              | K.EIGWTDVGGVGTGGGSILGTR.R                                                | 2120.30735 | 2 | 7.57E-06 | 0.96 | 4.80  | -     | 1255.1  |
| AHQ-5-6, 6021 - 6025       | K.EIGWTDVGGVGTGGGSILGTR.R                                                | 2120.30735 | 2 | 1.18E-05 | 0.89 | 4.17  | -     | 553.3   |
| AHQ-5-7, 5894 - 5932       | K.EIGWTDVGGVGTGGGSILGTR.R                                                | 2120.30735 | 2 | 3.45E-05 | 0.71 | 3.34  | -     | 466.9   |
| AHQ-5-5, 6529              | R.GITNLVCVIGDGSLTGANLFR.K                                                | 2137.40264 | 2 | 1.78E-07 | 0.95 | 5.11  | -     | 806.9   |
| AHQ-5-13, 6270             | R.GITNLVCVIGDGSLTGANLFR.K                                                | 2137.40264 | 2 | 7.79E-06 | 0.92 | 4.36  | -     | 718.3   |
| AHQ-5-5, 4902              | R.LPLMECVMTQDVQK.A                                                       | 1822.16087 | 2 | 8.71E-06 | 0.97 | 4.68  | -     | 2211.1  |
| AHQ-5-5, 3313              | K.NVLGHMQGGGAPSPFDR.N                                                    | 1812.00285 | 2 | 1.66E-06 | 0.95 | 4.03  | -     | 1644.3  |
| gi4502985 ref NP_001854.1  | cytochrome c oxidase subunit Vlb; human cytochrome oxidase subunit Vlb   |            |   | 5.92E-08 | 0.97 | 10.25 | 20.90 | 10192.3 |
| AHQ-5-14, 6107             | R.VYQSLCPTSQVWTDWDEQR.A                                                  | 2272.43560 | 2 | 5.92E-08 | 0.97 | 5.03  | -     | 1493.6  |
| gi17986283 ref NP_006000.2 | tubulin, alpha 3; tubulin, alpha, brain-specific; hum-a-tub1; hum-a-tu   |            |   | 6.10E-08 | 0.95 | 10.26 | 3.30  | 50135.3 |
| AHQ-5-2, 5959              | R.AVFVDLEPTVIDEVR.T                                                      | 1702.92947 | 2 | 3.12E-04 | 0.83 | 3.56  | -     | 736.9   |
| AHQ-5-3, 6047              | R.AVFVDLEPTVIDEVR.T                                                      | 1702.92947 | 2 | 1.27E-06 | 0.93 | 4.72  | -     | 755.1   |
| AHQ-5-4, 5980              | R.AVFVDLEPTVIDEVR.T                                                      | 1702.92947 | 2 | 1.67E-04 | 0.89 | 4.22  | -     | 668.7   |
| AHQ-5-7, 5524 - 5594       | R.AVFVDLEPTVIDEVR.T                                                      | 1702.92947 | 2 | 6.10E-08 | 0.95 | 5.14  | -     | 1066.7  |
| AHQ-5-11, 5523 - 5535      | R.AVFVDLEPTVIDEVR.T                                                      | 1702.92947 | 2 | 1.33E-06 | 0.83 | 4.36  | -     | 466.6   |
| AHQ-5-12, 5705             | R.AVFVDLEPTVIDEVR.T                                                      | 1702.92947 | 2 | 1.37E-04 | 0.89 | 4.16  | -     | 701.2   |
| AHQ-5-13, 5708             | R.AVFVDLEPTVIDEVR.T                                                      | 1702.92947 | 2 | 2.38E-05 | 0.90 | 4.55  | -     | 561.6   |
| AHQ-5-13, 5603             | R.AVFVDLEPTVIDEVR.T                                                      | 1702.92947 | 2 | 5.07E-05 | 0.93 | 4.04  | -     | 1012.0  |
| AHQ-5-14, 5585 - 5590      | R.AVFVDLEPTVIDEVR.T                                                      | 1702.92947 | 2 | 1.48E-05 | 0.94 | 4.68  | -     | 987.6   |
| gi7706675 ref NP_057661.1  | RAB6B, member RAS oncogene family; small GTPase RAB6B [Homo sapiens] [M  |            |   | 6.21E-08 | 2.76 | 30.26 | 16.30 | 23461.5 |
| AHQ-5-11, 4612             | R.GSDVIMLVGNK.T                                                          | 1246.50220 | 2 | 3.09E-07 | 0.94 | 3.99  | -     | 1522.3  |
| AHQ-5-14, 3421             | R.LQLWDTAGQER.F                                                          | 1317.43243 | 2 | 6.21E-08 | 0.89 | 3.41  | -     | 846.9   |
| AHQ-5-11, 3310             | R.LQLWDTAGQER.F                                                          | 1317.43243 | 1 | 7.37E-04 | 0.13 | 2.20  | -     | 232.0   |
| AHQ-5-12, 3318 - 3390      | R.LQLWDTAGQER.F                                                          | 1317.43243 | 2 | 1.37E-05 | 0.78 | 2.78  | -     | 720.5   |
| AHQ-5-13, 3377 - 3453      | R.LQLWDTAGQER.F                                                          | 1317.43243 | 2 | 4.40E-05 | 0.89 | 3.31  | -     | 883.6   |
| AHQ-5-14, 3349 - 3425      | R.LQLWDTAGQER.F                                                          | 1317.43243 | 2 | 1.21E-04 | 0.86 | 3.26  | -     | 857.4   |
| AHQ-5-10, 3088 - 3148      | R.LQLWDTAGQER.F                                                          | 1317.43243 | 2 | 3.55E-06 | 0.89 | 3.23  | -     | 906.5   |
| AHQ-5-11, 3504 - 3526      | K.LVFLGEQSVGK.T                                                          | 1177.37492 | 2 | 2.45E-06 | 0.93 | 3.54  | -     | 1363.6  |
| gi4557361 ref NP_001187.1  | BH3 interacting domain death agonist; BH3-interacting domain death agon  |            |   | 6.34E-08 | 1.88 | 20.24 | 21.00 | 21994.6 |
| AHQ-5-11, 6138 - 6174      | R.IEADALGHELPLVLAQWEGYDELQTDGNR.S                                        | 3167.38790 | 3 | 6.34E-08 | 0.94 | 4.88  | -     | 1109.1  |
| AHQ-5-11, 2682             | R.IEADSEQLDIIR.N                                                         | 1505.56635 | 2 | 2.13E-04 | 0.95 | 3.19  | -     | 2147.4  |
| gi12408675 ref NP_036226.2 | peroxiredoxin 2 [Homo sapiens]                                           |            |   | 6.38E-08 | 0.83 | 10.17 | 7.80  | 16647.7 |
| AHQ-5-12, 3702             | K.IIETLQQLQAK.G                                                          | 1386.61    |   |          |      |       |       |         |

|                             |                                                                         |            |   |          |      |       |       |         |
|-----------------------------|-------------------------------------------------------------------------|------------|---|----------|------|-------|-------|---------|
| AHQ-5-12, 4666 - 4680       | K.KGVLFVGPVGAFTPGCSK.T                                                  | 1724.01680 | 2 | 5.74E-07 | 0.94 | 4.44  | -     | 842.4   |
| AHQ-5-12, 3406              | R.LLADPTGAFGK.E                                                         | 1090.25413 | 1 | 9.46E-04 | 0.08 | 1.85  | -     | 181.5   |
| AHQ-5-12, 3402 - 3422       | R.LLADPTGAFGK.E                                                         | 1090.25413 | 2 | 1.47E-05 | 0.89 | 3.72  | -     | 606.8   |
| AHQ-5-12, 4177 - 4232       | K.THLPGFVEQAEALKA                                                       | 1540.74504 | 2 | 6.38E-08 | 0.93 | 4.08  | -     | 494.4   |
| AHQ-5-12, 4908 - 4982       | K.VGDAIPAVEVFEGEPGNK.V                                                  | 1829.00022 | 2 | 7.36E-05 | 0.91 | 4.15  | -     | 517.7   |
| AHQ-5-12, 4777 - 4844       | K.VGDAIPAVEVFEGEPGNK.V                                                  | 1829.00022 | 2 | 1.01E-06 | 0.86 | 4.20  | -     | 369.6   |
| AHQ-5-12, 6909              | K.VGDAIPAVEVFEGEPGNK.VNLAELFK.G                                         | 2744.09176 | 2 | 1.09E-07 | 0.84 | 3.27  | -     | 508.5   |
| gi 9966825 ref NP_065089.1  | HEF like Protein [Homo sapiens]                                         |            |   | 6.39E-08 | 1.87 | 20.31 | 4.30  | 86696.2 |
| AHQ-5-13, 4241              | K.AISAFHGLSLSSSQPAEIIQSK.L                                              | 2260.48935 | 3 | 2.06E-04 | 0.91 | 4.26  | -     | 999.7   |
| AHQ-5-13, 4245              | K.AISAFHGLSLSSSQPAEIIQSK.L                                              | 2260.48935 | 2 | 2.60E-04 | 0.98 | 6.20  | -     | 1669.3  |
| AHQ-5-13-, 4165             | K.AISAFHGLSLSSSQPAEIIQSK.L                                              | 2260.48935 | 2 | 7.46E-04 | 0.97 | 5.71  | -     | 1469.8  |
| AHQ-5-13-, 3428             | K.LVDTLCMETQER.D                                                        | 1496.68930 | 2 | 6.39E-08 | 0.96 | 4.64  | -     | 1148.9  |
| AHQ-5-13, 3559 - 3571       | K.LVDTLCMETQER.D                                                        | 1496.68930 | 2 | 2.92E-05 | 0.89 | 2.66  | -     | 923.8   |
| gi 4757768 ref NP_004300.1  | Rho GDP dissociation inhibitor (GDI) alpha [Homo sapiens]               |            |   | 6.59E-08 | 2.75 | 30.23 | 15.70 | 23206.9 |
| AHQ-5-12, 4632              | R.AEEYFELTPVEEAPK.G                                                     | 1752.89898 | 2 | 1.42E-05 | 0.85 | 3.34  | -     | 805.5   |
| AHQ-5-10, 4170              | R.AEEYFELTPVEEAPK.G                                                     | 1752.89898 | 2 | 1.01E-06 | 0.91 | 3.88  | -     | 813.3   |
| AHQ-5-14-, 4586             | R.AEEYFELTPVEEAPK.G                                                     | 1752.89898 | 2 | 6.59E-08 | 0.88 | 3.99  | -     | 744.3   |
| AHQ-5-10, 3503              | K.SIQEIQLDKDDESLR.K                                                     | 1919.03693 | 2 | 4.56E-06 | 0.94 | 3.87  | -     | 1223.9  |
| AHQ-5-10, 3476 - 3534       | K.SIQEIQLDKDDESLR.K                                                     | 1919.03693 | 2 | 1.10E-05 | 0.95 | 4.42  | -     | 1445.8  |
| AHQ-5-10, 3090              | K.SIQEIQLDKDDESLR.K.Y                                                   | 2047.20984 | 2 | 1.58E-05 | 0.93 | 4.65  | -     | 810.2   |
| gi 4757786 ref NP_004306.1  | N-acylsphingosine amidohydrolase (acid ceramidase) 1; N-acylsphingosine |            |   | 6.62E-08 | 2.17 | 30.24 | 14.20 | 44649.3 |
| AHQ-5-14-, 6234 - 6295      | R.GAVPWYITINLDDPPYK.R                                                   | 1848.13310 | 2 | 8.28E-04 | 0.73 | 3.38  | -     | 475.7   |
| AHQ-5-14-, 6407 - 6422      | K.LPGLLGNFPFEEEMK.G                                                     | 1876.16512 | 2 | 6.62E-08 | 0.96 | 4.78  | -     | 1273.5  |
| AHQ-5-9, 5674               | R.TSQENISFETMYDVLSTKPVLNK.L                                             | 2645.96676 | 2 | 4.67E-05 | 0.48 | 2.90  | -     | 368.0   |
| gi 4503477 ref NP_001950.1  | eukaryotic translation elongation factor 1 beta 2; eukaryotic translati |            |   | 6.73E-08 | 1.73 | 20.22 | 14.70 | 24763.6 |
| AHQ-5-9, 4732               | K.SPAGLQVLNDYLADK.S                                                     | 1604.78589 | 2 | 6.61E-07 | 0.92 | 4.40  | -     | 762.5   |
| AHQ-5-9, 4050               | K.SPAGLQVLNDYLADK.S                                                     | 1604.78589 | 2 | 6.45E-06 | 0.74 | 3.33  | -     | 375.5   |
| AHQ-5-9, 4484               | K.SLLLDVVKPWDEDTDMAK.L                                                  | 2064.30228 | 2 | 6.73E-08 | 0.81 | 3.62  | -     | 427.0   |
| gi 4504515 ref NP_002146.1  | heat shock 70kDa protein 6 (HSP70B); heat shock 70kD protein 6 (HSP70B) |            |   | 7.01E-08 | 5.85 | 70.23 | 12.60 | 70853.4 |
| AHQ-5-6, 4884 - 4890        | R.ARFEELCSDFR.S                                                         | 1544.71384 | 2 | 5.85E-07 | 0.95 | 4.14  | -     | 1160.7  |
| AHQ-5-6, 2244 - 2246        | K.ATAGDTHLGGEDFQNR.L                                                    | 1676.68279 | 2 | 8.68E-07 | 0.97 | 4.66  | -     | 1499.6  |
| AHQ-5-6, 4778               | R.IINEPTAAIAYGLDR.R                                                     | 1688.90603 | 2 | 1.82E-07 | 0.91 | 3.87  | -     | 967.5   |
| AHQ-5-6, 4284 - 4393        | K.LLQDFNFKG.E                                                           | 1082.23369 | 1 | 5.17E-04 | 0.28 | 2.38  | -     | 310.0   |
| AHQ-5-6, 4236 - 4309        | K.LLQDFNFKGELNK.S                                                       | 1566.78249 | 2 | 8.79E-08 | 0.94 | 4.24  | -     | 1352.2  |
| AHQ-5-13-, 3435 - 3436      | R.TTPSYVAFTDTER.L                                                       | 1488.58062 | 2 | 7.01E-08 | 0.90 | 2.94  | -     | 1133.8  |
| AHQ-5-6, 2050               | R.VEILANDQGNR.T                                                         | 1229.32518 | 2 | 2.34E-06 | 0.90 | 3.32  | -     | 1157.7  |
| AHQ-5-6, 2021 - 2088        | R.VEILANDQGNR.T                                                         | 1229.32518 | 1 | 3.70E-04 | 0.37 | 2.05  | -     | 358.3   |
| gi 24234688 ref NP_004125.3 | heat shock 70kDa protein 9B precursor; heat shock 70kD protein 9; stre  |            |   | 7.06E-08 | 2.58 | 30.19 | 6.20  | 73680.1 |
| AHQ-5-6, 5586               | R.AQFEGIVTDLIR.R                                                        | 1362.55625 | 2 | 9.34E-08 | 0.95 | 3.74  | -     | 1577.1  |
| AHQ-5-6, 6037               | K.STNGDFTLGGEDFDQALLR.H                                                 | 2057.16328 | 2 | 7.06E-08 | 0.79 | 3.40  | -     | 450.4   |
| AHQ-5-6, 3497               | K.VQQTQVDLFGRA.A                                                        | 1291.43811 | 2 | 1.95E-04 | 0.84 | 3.12  | -     | 1042.6  |
| gi 5729980 ref NP_006547.1  | phosphomevalonate kinase [Homo sapiens]                                 |            |   | 7.28E-08 | 1.81 | 20.20 | 15.10 | 21994.8 |
| AHQ-5-11, 5282              | K.IVEGISQPIWLVSDTR.R                                                    | 1814.07506 | 2 | 7.28E-08 | 0.91 | 3.97  | -     | 650.9   |
| AHQ-5-11, 6632              | R.LEEQENLIEFIR.S                                                        | 1646.86592 | 2 | 4.21E-05 | 0.90 | 3.81  | -     | 1051.6  |
| gi 24308263 ref NP_067045.1 | TcD37 homolog; prune [Homo sapiens]                                     |            |   | 7.55E-08 | 0.96 | 10.24 | 3.80  | 50199.3 |
| AHQ-5-7, 7458               | K.LLPLLEALSAYFDSMK.I                                                    | 1940.29226 | 2 | 7.55E-08 | 0.96 | 4.78  | -     | 1243.9  |
| gi 4507143 ref NP_003786.1  | sorting nexin 3 isoform a; sorting nexin 3A [Homo sapiens]              |            |   | 7.68E-08 | 0.96 | 10.22 | 8.60  | 18762.2 |
| AHQ-5-12, 5057 - 5058       | R.GDDGIFDDNFIER.K                                                       | 1642.66158 | 2 | 7.68E-08 | 0.96 | 4.35  | -     | 1159.0  |
| gi 4506417 ref NP_002877.1  | RAP2B, member of RAS oncogene family [Homo sapiens]                     |            |   | 7.87E-08 | 3.31 | 40.19 | 23.00 | 20494.2 |
| AHQ-5-11, 6070              | K.ASVDELFAEIVR.Q                                                        | 1349.51434 | 2 | 2.03E-04 | 0.91 | 3.73  | -     | 1207.6  |
| AHQ-5-11, 3051              | R.VPMILVGNK.V                                                           | 971.24256  | 2 | 5.01E-06 | 0.89 | 2.83  | -     | 873.8   |
| AHQ-5-11, 2291              | K.VVVLGSGGVGK.S                                                         | 972.16391  | 2 | 4.64E-04 | 0.86 | 3.23  | -     | 890.5   |
| AHQ-5-11, 2286              | K.VVVLGSGGVGK.S                                                         | 972.16391  | 1 | 3.02E-04 | 0.73 | 2.39  | -     | 803.2   |
| AHQ-5-11, 4140              | K.YDPTIEDFYR.K                                                          | 1319.40042 | 2 | 7.87E-08 | 0.78 | 2.88  | -     | 335.8   |
| gi 4504073 ref NP_000398.1  | glycoprotein Ib beta polypeptide precursor [Homo sapiens]               |            |   | 8.32E-08 | 2.68 | 30.20 | 15.50 | 21717.6 |
| AHQ-5-1, 4932               | R.LLPLYAEDELRA.A                                                        | 1332.52691 | 2 | 3.11E-06 | 0.82 | 3.10  | -     | 482.1   |
| AHQ-5-3, 4901 - 4913        | R.LLPLYAEDELRA.A                                                        | 1332.52691 | 2 | 8.32E-08 | 0.83 | 2.82  | -     | 578.0   |
| AHQ-5-6, 4565               | R.LLPLYAEDELRA.A                                                        | 1332.52691 | 2 | 6.47E-07 | 0.78 | 2.62  | -     | 542.4   |
| AHQ-5-7, 4366               | R.LLPLYAEDELRA.A                                                        | 1332.52691 | 2 | 1.78E-04 | 0.82 | 2.99  | -     | 471.6   |
| AHQ-5-8, 4213               | R.LLPLYAEDELRA.A                                                        | 1332.52691 | 2 | 3.82E-04 | 0.82 | 3.21  | -     | 360.8   |
| AHQ-5-13, 4721              | R.LLPLYAEDELRA.A                                                        | 1332.52691 | 2 | 5.88E-06 | 0.84 | 3.22  | -     | 612.8   |
| AHQ-5-11, 4479 - 4499       | R.LLPLYAEDELRA.A                                                        | 1332.52691 | 2 | 4.18E-06 | 0.84 | 2.91  | -     | 479.1   |
| AHQ-5-10, 4150 - 4210       | R.LLPLYAEDELRA.A                                                        | 1332.52691 | 2 | 2.34E-05 | 0.75 | 3.12  | -     | 388.8   |
| AHQ-5-10, 4159              | R.LLPLYAEDELRA.A                                                        | 1332.52691 | 1 | 9.82E-06 | 0.47 | 2.77  | -     | 235.8   |
| AHQ-5-13-, 4631 - 4632      | R.LLPLYAEDELRA.A                                                        | 1332.52691 | 2 | 2.52E-07 | 0.90 | 3.48  | -     | 735.2   |
| AHQ-5-10, 3882 - 3883       | R.LSLTDPVAER.A                                                          | 1214.39356 | 2 | 1.05E-06 | 0.92 | 3.81  | -     | 1057.4  |
| AHQ-5-11, 4142 - 4156       | R.LSLTDPVAER.A                                                          | 1214.39356 | 2 | 2.77E-06 | 0.96 | 3.94  | -     | 1389.3  |
| AHQ-5-10, 2103              | R.TAHLGANPWR.C                                                          | 1123.24913 | 2 | 9.42E-04 | 0.78 | 3.07  | -     | 476.4   |
| AHQ-5-11, 2207              | R.TAHLGANPWR.C                                                          | 1123.24913 | 2 | 7.33E-07 | 0.92 | 3.55  | -     | 946.2   |
| gi 4758984 ref NP_004654.1  | RAB11A, member RAS oncogene family; RAB 11A, member oncogene family [Ho |            |   | 8.36E-08 | 5.32 | 60.30 | 22.70 | 24393.3 |
| AHQ-5-11, 2686 - 2767       | K.AQIWDTAGGER.Y                                                         | 1275.35241 | 2 | 4.88E-04 | 0.94 | 3.38  | -     | 1403.2  |
| AHQ-5-12, 2741              | K.AQIWDTAGGER.Y                                                         | 1275.35241 | 2 | 1.11E-06 | 0.95 | 3.95  | -     | 1423.4  |
| AHQ-5-11, 4092 - 4115       | R.DHADSNVIM*LVGNK.S                                                     | 1642.85914 | 2 | 3.11E-04 | 0.98 | 4.90  | -     | 2391.6  |
| AHQ-5-11, 4715 - 4778       | R.DHADSNVIM*LVGNK.S                                                     | 1626.85974 | 2 | 1.09E-06 | 0.97 | 4.51  | -     | 1944.6  |
| AHQ-5-11, 4922 - 4982       | R.GAVGALLVYDIAK.H                                                       | 1290.53317 | 2 | 8.36E-08 | 0.98 | 6.00  | -     | 2197.5  |
| AHQ-5-13-, 5112             | R.GAVGALLVYDIAK.H                                                       | 1290.53317 | 2 | 8.97E-08 | 0.89 | 2.93  | -     | 1209.9  |
| AHQ-5-11, 1934              | K.HLTYENVER.W                                                           | 1161.24931 | 1 | 7.69E-04 | 0.55 | 2.16  | -     | 531.4   |
| AHQ-5-11, 2984              | K.STIGVEFATR.S                                                          | 1081.20410 | 2 | 4.80E-06 | 0.88 | 2.72  | -     | 832.6   |
| gi 4885281 ref NP_005262.1  | glutamate dehydrogenase 1 [Homo sapiens]                                |            |   | 8.55E-08 | 1.36 | 20.21 | 6.60  | 61397.5 |
| AHQ-5-7, 3596 - 3598        | K.HGGTIPIVPTAEFQDR.I                                                    | 1738.92514 | 2 | 8.55E-08 | 0.92 | 4.23  | -     | 550.2   |
| AHQ-5-7, 4156               | K.IIAEGANGPTTPEADKIFLER.N                                               | 2243.50193 | 2 | 3.53E-04 | 0.44 | 2.76  | -     | 339.4   |
| gi 29729950 ref XP_293759.1 | similar to Heat shock protein HSP 90-alpha (HSP 86) [Homo sapiens] [MA  |            |   | 8.66E-08 | 0.94 | 10.21 | 5.00  | 39776.4 |
| AHQ-5-5, 4887               | K.CLELFTLAEDKENYK.K                                                     | 2132.37640 | 2 | 8.66E-08 | 0.94 | 4.28  | -     | 1135.5  |
| gi 5031985 ref NP_005787.1  | nuclear transport factor 2; placental protein 15 [Homo sapiens]         |            |   | 8.89E-08 | 4.49 | 50.28 | 63.00 | 14478.4 |
| AHQ-5-14-, 5689             | K.ADEDPIM*GFHQMFLK.N                                                    | 1909.21859 | 2 | 6.70E-04 | 0.75 | 3.58  | -     | 453.1   |
| AHQ-5-14-, 5421             | K.IQHSITAQDHOPTDSCIISM*VVGQLK.A                                         | 3022.40358 | 3 | 5.85E-04 | 0.95 | 5.42  | -     | 1284.8  |
| AHQ-5-14-, 5981 - 5997      | K.IQHSITAQDHOPTDSCIISM*VVGQLK.A                                         | 3006.40418 | 3 | 8.56E-07 | 0.96 | 5.25  | -     | 1740.9  |
| AHQ-5-14, 6140 - 6197       | K.IQHSITAQDHOPTDSCIISM*VVGQLK.A                                         | 3022.40358 | 3 | 8.89E-08 | 0.96 | 5.50  | -     | 1652.6  |
| AHQ-5-14-, 5278             | K.NINDAWVCTNDMFLR.L                                                     | 1757.92888 | 2 | 1.42E-04 | 0.93 | 4.13  | -     | 885.7   |
| AHQ-5-14-, 6309             | R.TQLGAIYIDASCLTWEQQQFGK.A                                              | 2616.88699 | 2 | 7.93E-06 | 0.88 | 3.51  | -     | 1011.3  |
| gi 4557703 ref NP_000414.1  | keratin 2a [Homo sapiens]                                               |            |   | 9.38E-08 | 3.69 | 40.28 | 12.40 | 65864.9 |
| AHQ-5-1, 7081 - 7084        | R.FGGFGPGVGGVGLGGPGGPGVGGIHEVSNQLLQPLNVK.V                              | 4094.54151 | 3 | 6.47E-05 | 0.94 | 5.56  | -     | 1131.5  |
| AHQ-5-14-, 2937             | R.FLEQQNQLVQTK.W                                                        | 1476.65935 | 2 | 9.08E-05 | 0.97 | 4.51  | -     | 2202.7  |
| AHQ-5-4, 2998               | R.FLEQQNQLVQTK.W                                                        | 1476.65935 | 2 | 7.24E-05 | 0.94 | 3.94  | -     | 1428.0  |
| AHQ-5-6, 2825               | R.FLEQQNQLVQTK.W                                                        | 1476.65935 | 2 | 9.38E-08 | 0.92 | 3.94  | -     | 903.7   |
| AHQ-5-1, 3073 - 3148        | R.FLEQQNQLVQTK.W                                                        | 1476.65935 | 2 | 9.23E-07 | 0.97 | 3.99  | -     | 2433.1  |
| AHQ-5-14-, 5939             | R.NLDDLSIIAEV.K                                                         | 1330.50933 | 2 | 9.15E-06 | 0.95 | 3.82  | -     | 1302.8  |
| AHQ-5-1, 6264               | K.VDLLNQIEIFLK.V                                                        | 1461.68459 | 2 | 6.54E-07 | 0.89 | 3.77  | -     | 861.8   |
| gi 4826848 ref NP_004991.1  | NADH dehydrogenase (ubiquinone) 1 alpha subcomplex, 5; NADH dehydrogena |            |   | 9.69E-08 | 0.98 | 10.39 | 22.40 | 13458.6 |
| AHQ-5-14-, 6713             | K.KLEDQLGGQLEEVLAQHEHLNLR.K                                             | 2975.30339 | 3 | 9.69E-08 | 0.98 | 7.76  | -     | 2745.8  |
| gi 6912494 ref NP_036457.1  | microtubule-associated protein, RP/EB family, member 1; ADENOMATOUS POL |            |   | 9.99E-08 | 3.80 | 40.27 | 21.60 | 29998.9 |
| AHQ-5-12, 3980              | K.FFDANYDGKDYPVAAR.Q                                                    | 1965.06754 | 2 | 9.99E-08 | 0.92 | 4.53  | -     | 527.1   |
| AHQ-5-12, 6592              | K.FQDNFVQVWF.K                                                          | 1635.80184 | 2 | 1.53E-05 | 0.97 | 4.98  | -     | 1368.2  |
| AHQ-5-13-, 3260             | K.LTVLEDEKER.D                                                          | 1232.36575 | 2 | 1.01E-06 | 0.95 | 3.76  | -     | 1375.5  |
| AHQ-5-13-, 4428             | R.NIELICQENEGENDPVLQR.I                                                 | 2272.43545 | 2 | 2.97E-05 | 0.97 | 5.34  | -     | 1361.2  |
| AHQ-5-13, 4509              | R.NIELICQENEGENDPVLQR.I                                                 | 2272.43545 | 2 | 3.24E-04 | 0.97 | 5.33  | -     | 1600.9  |
| gi 4502643 ref NP_001753.1  | chaperonin containing TCP1, subunit 6A (zeta 1); chaperonin containing  |            |   | 1.02E-07 | 1.83 | 20.26 | 7.00  | 58023.9 |

|                             |                                                                         |            |   |          |      |       |       |          |
|-----------------------------|-------------------------------------------------------------------------|------------|---|----------|------|-------|-------|----------|
| AHQ-5-6, 4718               | K.DGNVLLHEMGIQHPTASLIAK.V                                               | 2316.66592 | 3 | 1.02E-07 | 0.95 | 5.29  | -     | 966.0    |
| AHQ-5-6, 4582               | K.VLQAQNSGFDLQETLVK.I                                                   | 1762.98491 | 2 | 2.39E-06 | 0.88 | 3.63  | -     | 804.7    |
| gi 11496885 ref NP_005442.2 | enigma protein; LIM domain protein [Homo sapiens]                       |            |   | 1.02E-07 | 1.54 | 20.21 | 9.40  | 49844.4  |
| AHQ-5-14-, 6135             | K.AAAQAVAGVDWVLSIDGENAGSLTHIEAQNK.I                                     | 3123.37980 | 3 | 7.66E-04 | 0.65 | 3.14  | -     | 454.3    |
| AHQ-5-13-, 4824             | K.VVLEGPAPWGFRL.L                                                       | 1328.54318 | 2 | 1.19E-06 | 0.89 | 3.55  | -     | 790.7    |
| AHQ-5-13, 4910              | K.VVLEGPAPWGFRL.L                                                       | 1328.54318 | 2 | 1.02E-07 | 0.89 | 3.57  | -     | 845.3    |
| AHQ-5-11, 4622 - 4684       | K.VVLEGPAPWGFRL.L                                                       | 1328.54318 | 2 | 7.22E-04 | 0.81 | 3.13  | -     | 644.5    |
| gi 5453549 ref NP_006397.1  | thioredoxin peroxidase; thioredoxin peroxidase (antioxidant enzyme) [Ho |            |   | 1.06E-07 | 1.88 | 20.22 | 13.70 | 30539.7  |
| AHQ-5-10, 3423              | K.DYGVVLEDSGHTLR.G                                                      | 1625.72052 | 2 | 1.06E-07 | 0.95 | 3.99  | -     | 1113.7   |
| AHQ-5-10, 3790              | K.HGEVCPAGWPGSETIIPDPAGK.L                                              | 2405.67144 | 3 | 2.88E-05 | 0.93 | 4.38  | -     | 1267.4   |
| gi 6857820 ref NP_005019.2  | phosphatidylinositol-4-phosphate 5-kinase type II alpha; 1-phosphatidyl |            |   | 1.07E-07 | 2.78 | 30.24 | 11.30 | 46224.3  |
| AHQ-5-7, 4462               | R.FGIDDDQDFQNSLTR.S                                                     | 1656.73462 | 2 | 3.07E-07 | 0.87 | 3.69  | -     | 932.6    |
| AHQ-5-7, 4311               | R.FGIDDDQDFQNSLTR.S                                                     | 1656.73462 | 2 | 5.38E-07 | 0.66 | 3.04  | -     | 666.2    |
| AHQ-5-7, 2470               | K.HGAGAEISTVNPPEQYSK.R                                                  | 1788.89618 | 2 | 1.07E-07 | 0.96 | 4.88  | -     | 1434.0   |
| AHQ-5-7, 3930               | K.TITSEDAEMHNILK.K                                                      | 1701.92338 | 2 | 4.86E-07 | 0.95 | 4.42  | -     | 1202.8   |
| gi 28395033 ref NP_786886.1 | ras homolog gene family, member C; Aplysia RAS-related homolog 9 (onco  |            |   | 1.10E-07 | 2.44 | 30.23 | 25.40 | 22006.2  |
| AHQ-5-10, 6575 - 6578       | K.DQFPVEVYPTVFENYIADIEVDGK.Q                                            | 2789.04149 | 2 | 2.09E-06 | 0.91 | 4.57  | -     | 436.7    |
| AHQ-5-10, 4163              | K.HFCPNVPIILVGNK.K                                                      | 1609.91693 | 2 | 1.10E-07 | 0.97 | 4.53  | -     | 1712.8   |
| AHQ-5-10, 2508 - 2510       | K.LVIVGGGACGK.T                                                         | 1090.27572 | 1 | 6.33E-05 | 0.55 | 2.21  | -     | 578.4    |
| gi 4502297 ref NP_001678.1  | ATP synthase, H+ transporting, mitochondrial F1 complex, delta subunit  |            |   | 1.12E-07 | 1.44 | 20.18 | 13.70 | 17489.8  |
| AHQ-5-13, 2679              | K.AQAEVLTGDAEATR.A                                                      | 1432.51860 | 2 | 1.36E-06 | 0.92 | 3.68  | -     | 941.5    |
| AHQ-5-13, 2683              | K.AQAEVLTGDAEATR.A                                                      | 1432.51860 | 1 | 3.84E-04 | 0.16 | 2.29  | -     | 217.4    |
| AHQ-5-13, 2691              | K.AQAEVLTGDAEATR.A                                                      | 1432.51860 | 1 | 1.20E-06 | 0.52 | 3.00  | -     | 168.5    |
| AHQ-5-13-, 2548             | K.AQAEVLTGDAEATR.A                                                      | 1432.51860 | 1 | 1.12E-07 | 0.71 | 3.28  | -     | 244.3    |
| AHQ-5-13, 2471              | R.IEANEALVKA.A                                                          | 987.13221  | 2 | 2.99E-04 | 0.74 | 2.83  | -     | 563.8    |
| gi 4506025 ref NP_000936.1  | protein phosphatase 3, regulatory subunit B, alpha isoform 1; protein p |            |   | 1.17E-07 | 0.81 | 10.15 | 9.40  | 19299.8  |
| AHQ-5-12, 5534              | R.VIDIFDTDGNQVDFK.E                                                     | 1784.90107 | 2 | 1.17E-07 | 0.81 | 2.96  | -     | 612.8    |
| gi 4557469 ref NP_001273.1  | adaptor-related protein complex 2, beta 1 subunit; adaptin, beta 2 (bet |            |   | 1.21E-07 | 1.81 | 20.24 | 4.10  | 104551.9 |
| AHQ-5-6, 6161               | R.CVSTLDDLIQTK.V                                                        | 1392.64385 | 2 | 7.71E-04 | 0.86 | 2.68  | -     | 1290.3   |
| AHQ-5-6, 7182               | K.KPSETQELVQQVLSLATQDSDNPDRL.D                                          | 2913.14409 | 3 | 1.21E-07 | 0.95 | 4.72  | -     | 1662.7   |
| gi 22027651 ref NP_001118.2 | adaptor-related protein complex 1 beta 1 subunit isoform a; beta-adapt  |            |   | 1.21E-07 | 0.95 | 10.28 | 2.70  | 104636.1 |
| AHQ-5-6, 7189               | K.KPTEQELVQQVLSLATQDSDNPDRL.D                                           | 2927.17076 | 2 | 6.05E-04 | 0.90 | 3.37  | -     | 1084.2   |
| AHQ-5-6, 7188               | K.KPTEQELVQQVLSLATQDSDNPDRL.D                                           | 2927.17076 | 3 | 1.21E-07 | 0.95 | 5.62  | -     | 979.1    |
| gi 4503545 ref NP_001961.1  | eukaryotic translation initiation factor 5A; eIF5A; eIF5A [Homo sapien  |            |   | 1.22E-07 | 1.75 | 20.20 | 26.00 | 16832.0  |
| AHQ-5-12, 3966              | R.EDLRLPEGLDGKEIQK.Y                                                    | 1970.17021 | 2 | 1.89E-05 | 0.82 | 4.10  | -     | 343.9    |
| AHQ-5-12, 6965              | R.NDFQLGIQDGYLSLLQDQSGEV.R.E                                            | 2581.81935 | 2 | 1.22E-07 | 0.93 | 4.08  | -     | 1209.9   |
| gi 29727565 ref XP_291384.1 | similar to Cytochrome c, somatic [Homo sapiens]                         |            |   | 1.25E-07 | 0.97 | 10.25 | 16.20 | 11621.4  |
| AHQ-5-14-, 6282             | K.GIIWGEDTLM'EYLENPK.K                                                  | 2025.26771 | 2 | 1.87E-04 | 0.96 | 4.98  | -     | 1316.7   |
| AHQ-5-13, 6454 - 6533       | K.GIIWGEDTLM'EYLENPK.K                                                  | 2025.26771 | 2 | 1.25E-07 | 0.97 | 4.84  | -     | 1794.6   |
| gi 22059949 ref XP_114617.2 | similar to tubulin, beta 5 [Homo sapiens]                               |            |   | 1.30E-07 | 1.87 | 20.32 | 18.80 | 22810.8  |
| AHQ-5-11, 5134 - 5139       | K.FWEVISDEHGIDPTGTYHGDSDLQLDR.I                                         | 3104.24553 | 3 | 2.06E-05 | 0.95 | 6.04  | -     | 1082.9   |
| AHQ-5-13-, 5265             | K.FWEVISDEHGIDPTGTYHGDSDLQLDR.I                                         | 3104.24553 | 3 | 4.44E-05 | 0.95 | 5.89  | -     | 966.2    |
| AHQ-5-7, 5363               | K.FWEVISDEHGIDPTGTYHGDSDLQLDR.I                                         | 3104.24553 | 3 | 5.30E-04 | 0.88 | 4.49  | -     | 880.2    |
| AHQ-5-14-, 5186 - 5253      | K.FWEVISDEHGIDPTGTYHGDSDLQLDR.I                                         | 3104.24553 | 3 | 7.97E-07 | 0.97 | 6.31  | -     | 1381.6   |
| AHQ-5-12, 2700              | R.ISVYYNEATGGK.Y                                                        | 1302.41453 | 2 | 1.99E-05 | 0.68 | 2.60  | -     | 545.9    |
| AHQ-5-13, 2886              | R.ISVYYNEATGGK.Y                                                        | 1302.41453 | 2 | 7.26E-06 | 0.64 | 2.77  | -     | 493.6    |
| AHQ-5-7, 2454               | R.ISVYYNEATGGK.Y                                                        | 1302.41453 | 1 | 2.07E-05 | 0.67 | 3.05  | -     | 397.4    |
| AHQ-5-7, 2447               | R.ISVYYNEATGGK.Y                                                        | 1302.41453 | 2 | 1.30E-07 | 0.90 | 2.83  | -     | 1147.0   |
| AHQ-5-11, 2644 - 2652       | R.ISVYYNEATGGK.Y                                                        | 1302.41453 | 1 | 3.00E-04 | 0.14 | 2.00  | -     | 275.2    |
| gi 7705849 ref NP_057215.1  | ras-related GTP-binding protein RAB10; ras-related GTP-binding protein  |            |   | 1.32E-07 | 1.80 | 20.23 | 15.00 | 22540.8  |
| AHQ-5-11, 6236 - 6239       | K.AFLTLAEDILR.K                                                         | 1262.47982 | 1 | 4.54E-04 | 0.11 | 2.14  | -     | 232.6    |
| AHQ-5-14-, 6318             | K.AFLTLAEDILR.K                                                         | 1262.47982 | 2 | 1.32E-07 | 0.95 | 4.29  | -     | 1691.7   |
| AHQ-5-13, 6513              | K.AFLTLAEDILR.K                                                         | 1262.47982 | 2 | 1.36E-06 | 0.94 | 4.03  | -     | 1303.1   |
| AHQ-5-11, 6235 - 6259       | K.AFLTLAEDILR.K                                                         | 1262.47982 | 2 | 4.58E-07 | 0.96 | 4.62  | -     | 1447.3   |
| AHQ-5-11, 6931              | R.FSDDAFNFTTISTIGIDFK.I                                                 | 2140.33380 | 2 | 1.66E-05 | 0.85 | 3.76  | -     | 951.6    |
| gi 20149594 ref NP_031381.2 | heat shock 90kDa protein 1, beta; heat shock 90kD protein 1, beta; Hea  |            |   | 1.45E-07 | 5.20 | 60.22 | 11.00 | 83263.6  |
| AHQ-5-5, 2353               | K.EDQTEYLEER.R                                                          | 1312.32145 | 2 | 4.42E-04 | 0.66 | 2.60  | -     | 417.3    |
| AHQ-5-5, 2978               | R.ELISNASDALDK.I                                                        | 1276.37539 | 2 | 1.32E-06 | 0.87 | 3.48  | -     | 788.2    |
| AHQ-5-5, 3414 - 3418        | K.HLEINPDHPVIVETLR.Q                                                    | 1784.00905 | 3 | 2.53E-05 | 0.93 | 3.79  | -     | 1332.7   |
| AHQ-5-5, 5447               | K.HSQIFGIPTLYLEK.E                                                      | 1810.08487 | 2 | 2.86E-04 | 0.91 | 3.94  | -     | 757.1    |
| AHQ-5-5, 4105               | R.NPDDITQEEYGEFYK.S                                                     | 1848.90048 | 2 | 3.60E-05 | 0.95 | 4.43  | -     | 1161.5   |
| AHQ-5-5, 3778 - 3794        | K.SLNTDWDHLAVK.H                                                        | 1528.64798 | 2 | 1.45E-07 | 0.88 | 3.12  | -     | 1229.2   |
| gi 18570595 ref XP_095590.1 | similar to myosin regulatory light chain [Homo sapiens]                 |            |   | 1.49E-07 | 0.94 | 10.19 | 8.90  | 13951.5  |
| AHQ-5-11, 3044 - 3110       | K.LNGTDPEDVIR.H                                                         | 1229.32195 | 2 | 1.54E-05 | 0.90 | 3.64  | -     | 859.7    |
| AHQ-5-12, 3125              | K.LNGTDPEDVIR.H                                                         | 1229.32195 | 2 | 1.49E-07 | 0.94 | 3.51  | -     | 1321.0   |
| AHQ-5-11, 2946              | K.LNGTDPEDVIR.H                                                         | 1229.32195 | 2 | 7.92E-05 | 0.93 | 3.72  | -     | 1071.0   |
| gi 6041669 ref NP_004538.2  | NADH dehydrogenase (ubiquinone) 1 beta subcomplex, 4, 15kDa; NADH dehyd |            |   | 1.56E-07 | 0.88 | 10.18 | 14.00 | 15208.5  |
| AHQ-5-13-, 4791             | R.TLPETLDPAEYNISPETR.R                                                  | 2047.20831 | 2 | 1.56E-07 | 0.88 | 3.57  | -     | 604.9    |
| AHQ-5-13, 4877              | R.TLPETLDPAEYNISPETR.R                                                  | 2047.20831 | 2 | 4.69E-06 | 0.83 | 3.45  | -     | 515.4    |
| gi 17450333 ref XP_060887.1 | similar to peptidyl-Pro cis trans isomerase [Homo sapiens]              |            |   | 1.74E-07 | 0.87 | 10.21 | 11.00 | 17503.9  |
| AHQ-5-12, 6688 - 6717       | -M'VNPTVFDIADGKPLGR.V                                                   | 1946.26009 | 2 | 4.30E-07 | 0.95 | 4.28  | -     | 1331.5   |
| AHQ-5-13-, 6616             | -M'VNPTVFDIADGKPLGR.V                                                   | 1946.26009 | 2 | 7.86E-05 | 0.90 | 3.94  | -     | 917.4    |
| AHQ-5-12, 6473 - 6552       | -M'VNPTVFDIADGKPLGR.V                                                   | 1946.26009 | 2 | 1.74E-07 | 0.87 | 3.26  | -     | 869.6    |
| gi 20127517 ref NP_009148.2 | programmed cell death 10; apoptosis-related protein 15 [Homo sapiens]   |            |   | 1.87E-07 | 0.71 | 10.17 | 11.30 | 24701.4  |
| AHQ-5-10, 4988              | R.MAADVVEEYMIERPEPEFQDLNEK.A                                            | 2900.14441 | 2 | 1.87E-07 | 0.71 | 3.42  | -     | 375.4    |
| gi 7656952 ref NP_055227.1  | calcyin binding protein [Homo sapiens]                                  |            |   | 1.88E-07 | 1.82 | 20.24 | 19.30 | 26209.8  |
| AHQ-5-10, 3862              | K.KAELLNEKPAAVVPIITGYTVK.I                                              | 2529.91377 | 3 | 3.33E-04 | 0.95 | 4.70  | -     | 1569.9   |
| AHQ-5-10, 5518 - 5522       | K.SYSMIVNLLKPIISVEGSSK.K                                                | 2167.51201 | 2 | 7.56E-05 | 0.77 | 3.63  | -     | 340.7    |
| AHQ-5-10, 4654              | K.SYSMIVNLLKPIISVEGSSK.K                                                | 2167.51201 | 2 | 1.88E-07 | 0.87 | 3.48  | -     | 620.6    |
| gi 5453597 ref NP_006126.1  | F-actin capping protein alpha-1 subunit; Cap Z [Homo sapiens]           |            |   | 1.89E-07 | 1.82 | 20.25 | 12.60 | 32922.5  |
| AHQ-5-13-, 2823             | K.DVQDSLTVSNEAQTAK.E                                                    | 1706.79025 | 2 | 1.33E-06 | 0.97 | 4.94  | -     | 1158.2   |
| AHQ-5-9, 4790 - 4855        | K.TIDGQQTIIACIESHQFPQK.N                                                | 2316.57620 | 2 | 1.89E-07 | 0.86 | 4.16  | -     | 549.0    |
| gi 13128974 ref NP_076933.1 | hypothetical protein MGC3265 [Homo sapiens]                             |            |   | 1.90E-07 | 0.96 | 10.23 | 4.50  | 46867.3  |
| AHQ-5-7, 2712               | K.ANVIHATVSVTLHSTEGK.A                                                  | 1966.18479 | 2 | 1.90E-07 | 0.96 | 4.69  | -     | 1266.0   |
| gi 9910280 ref NP_064505.1  | UDP-glucose ceramide glucosyltransferase-like 1; UDP-glucose:glycoprote |            |   | 1.93E-07 | 1.72 | 20.23 | 2.60  | 177187.7 |
| AHQ-5-3, 7039               | R.AVYLGELPHDQDVVEYIMNQPNVPR.I                                           | 2997.37416 | 2 | 1.93E-07 | 0.94 | 4.68  | -     | 1006.9   |
| AHQ-5-3, 4630               | K.LNIQSEADYAVDIR.S                                                      | 1704.86232 | 2 | 1.78E-04 | 0.78 | 3.43  | -     | 402.7    |
| gi 5031973 ref NP_005733.1  | protein disulfide isomerase-related protein [Homo sapiens]              |            |   | 2.02E-07 | 3.68 | 50.25 | 18.90 | 48121.0  |
| AHQ-5-7, 7319 - 7320        | R.ALDLFSNDAPPPELLEIINEDIAK.R                                            | 2638.95072 | 2 | 7.74E-06 | 0.86 | 3.96  | -     | 342.3    |
| AHQ-5-7, 4538               | K.GSFSEQQGNEFLR.E                                                       | 1484.59520 | 1 | 4.14E-07 | 0.02 | 2.17  | -     | 57.3     |
| AHQ-5-7, 4522               | K.GSFSEQQGNEFLR.E                                                       | 1484.59520 | 2 | 8.25E-04 | 0.86 | 3.26  | -     | 911.1    |
| AHQ-5-12, 3942 - 4021       | R.GSTAPVGGGAFTTIVER.E                                                   | 1616.79990 | 2 | 8.18E-04 | 0.69 | 2.61  | -     | 706.5    |
| AHQ-5-7, 3738 - 3739        | R.GSTAPVGGGAFTTIVER.E                                                   | 1616.79990 | 2 | 5.86E-04 | 0.86 | 3.83  | -     | 663.3    |
| AHQ-5-7, 4568 - 4574        | K.LAAVDATVNVQLASR.Y                                                     | 1528.73579 | 2 | 5.73E-06 | 0.97 | 4.98  | -     | 1710.5   |
| AHQ-5-7, 6035               | R.TGEAIVDAALALR.Q                                                       | 1387.56411 | 2 | 2.02E-07 | 0.97 | 4.45  | -     | 2182.9   |
| gi 4504071 ref NP_000164.1  | platelet glycoprotein Ib alpha polypeptide precursor [Homo sapiens] [MA |            |   | 2.02E-07 | 4.50 | 50.23 | 9.40  | 68955.0  |
| AHQ-5-3, 5087 - 5107        | R.GLGELQELYLK.G                                                         | 1263.46458 | 2 | 4.48E-05 | 0.96 | 4.70  | -     | 1481.9   |
| AHQ-5-12, 4013 - 4016       | R.GDQLLSTVSIR.Y                                                         | 1189.34410 | 2 | 3.21E-07 | 0.95 | 3.82  | -     | 932.6    |
| AHQ-5-3, 4182               | R.GDQLLSTVSIR.Y                                                         | 1189.34410 | 2 | 1.40E-05 | 0.96 | 4.24  | -     | 1343.6   |
| AHQ-5-13-, 4076             | R.GDQLLSTVSIR.Y                                                         | 1189.34410 | 2 | 2.77E-05 | 0.91 | 3.85  | -     | 906.4    |
| AHQ-5-1, 4275               | R.GDQLLSTVSIR.Y                                                         | 1189.34410 | 2 | 1.62E-05 | 0.95 | 4.01  | -     | 1395.0   |
| AHQ-5-4, 4124 - 4134        | R.GDQLLSTVSIR.Y                                                         | 1189.34410 | 2 | 5.07E-06 | 0.96 | 4.23  | -     | 1390.9   |
| AHQ-5-14-, 3945             | R.GDQLLSTVSIR.Y                                                         | 1189.34410 | 2 | 2.02E-07 | 0.95 | 3.35  | -     | 1670.5   |
| AHQ-5-3, 1957 - 1962        | R.GVLQGHLESSR.N                                                         | 1183.29965 | 2 | 1.69E-05 | 0.87 | 3.18  | -     | 815.9    |
| AHQ-5-4, 1970               | R.GVLQGHLESSR.N                                                         | 1183.29965 | 2 | 1.85E-06 | 0.90 | 3.28  | -     | 1102.5   |
| AHQ-5-3, 3617               | R.LTQLNLDRCELTK.L                                                       | 1605.83862 | 2 | 2.66E-05 | 0.81 | 3.30  | -     | 813.4    |
| AHQ-5-4, 3606 - 3609        | R.LTQLNLDRCELTK.L                                                       | 1605.83862 | 2 | 9.27E-04 | 0.92 | 3.92  | -     | 980.4    |

|                             |                                                                         |            |   |          |      |       |       |          |
|-----------------------------|-------------------------------------------------------------------------|------------|---|----------|------|-------|-------|----------|
| AHQ-5-4, 4974               | R.WLQDNAENVYVWK.Q                                                       | 1665.82948 | 2 | 3.49E-05 | 0.88 | 3.20  | -     | 1279.5   |
| gi 16950601 ref NP_005956.2 | myosin light chain kinase isoform 6; myosin light chain kinase [Homo s  |            |   | 2.05E-07 | 3.04 | 40.18 | 5.70  | 110074.8 |
| AHQ-5-5, 5606               | K.IEGYPPPEVWVWF.K                                                       | 1579.77650 | 2 | 5.84E-05 | 0.86 | 2.59  | -     | 651.4    |
| AHQ-5-6, 3448               | K.LVQCVDFAFEK.A                                                         | 1339.49637 | 2 | 3.22E-05 | 0.93 | 3.22  | -     | 1234.2   |
| AHQ-5-5, 3519               | K.SSLPPVLGTESDATVK.K                                                    | 1601.78032 | 2 | 5.78E-07 | 0.47 | 2.68  | -     | 241.1    |
| AHQ-5-5, 4919 - 4935        | R.STSFNVQDILLPDHEYK.F                                                   | 1894.03076 | 2 | 2.05E-07 | 0.79 | 3.55  | -     | 484.8    |
| gi 5453605 ref NP_006421.1  | chaperonin containing TCP1, subunit 4 (delta); chaperonin containing t- |            |   | 2.08E-07 | 1.90 | 20.24 | 4.80  | 57838.8  |
| AHQ-5-7, 6438               | R.DALSDLALHFLNK.M                                                       | 1457.65603 | 2 | 2.52E-07 | 0.97 | 4.82  | -     | 2135.5   |
| AHQ-5-7, 3334               | K.VIDPATATSVDLR.D                                                       | 1358.52277 | 2 | 2.08E-07 | 0.92 | 3.56  | -     | 985.5    |
| gi 22042381 ref XP_065237.3 | similar to FKSG30 [Homo sapiens]                                        |            |   | 2.19E-07 | 1.37 | 20.18 | 0.00  | 42016.0  |
| AHQ-5-14-, 2825 - 2889      | K.QEYDESGPSIVHR.K                                                       | 1517.58206 | 2 | 2.48E-05 | 0.57 | 2.99  | -     | 697.7    |
| AHQ-5-14-, 2333             | K.QEYDESGPSIVHR.K                                                       | 1517.58206 | 2 | 2.37E-07 | 0.74 | 2.93  | -     | 398.0    |
| AHQ-5-13, 2550              | K.QEYDESGPSIVHR.K                                                       | 1517.58206 | 2 | 2.19E-07 | 0.64 | 2.74  | -     | 333.0    |
| AHQ-5-13-, 2389 - 2411      | K.QEYDESGPSIVHR.K                                                       | 1517.58206 | 2 | 6.22E-06 | 0.83 | 3.57  | -     | 439.1    |
| AHQ-5-8, 2024 - 2088        | K.QEYDESGPSIVHR.K                                                       | 1517.58206 | 2 | 4.05E-04 | 0.53 | 2.80  | -     | 273.0    |
| AHQ-5-9, 3231 - 3291        | R.VAPEEHPILLTEAPLNPK.A                                                  | 1969.27019 | 2 | 1.61E-05 | 0.72 | 3.35  | -     | 454.7    |
| AHQ-5-8, 3112 - 3181        | R.VAPEEHPILLTEAPLNPK.A                                                  | 1969.27019 | 2 | 4.22E-04 | 0.72 | 3.69  | -     | 282.0    |
| gi 5453710 ref NP_006139.1  | LIM and SH3 protein 1; Lasp-1 [Homo sapiens]                            |            |   | 2.23E-07 | 0.91 | 10.18 | 5.00  | 29717.0  |
| AHQ-5-13-, 3951             | K.GFSVADTPELQR.I                                                        | 1419.56466 | 2 | 4.66E-04 | 0.76 | 2.77  | -     | 650.1    |
| AHQ-5-12, 3913              | K.GFSVADTPELQR.I                                                        | 1419.56466 | 2 | 2.23E-07 | 0.91 | 3.53  | -     | 1238.2   |
| gi 14043026 ref NP_003752.2 | vesicle-associated membrane protein 8; endobrevin [Homo sapiens]        |            |   | 2.30E-07 | 1.74 | 20.23 | 24.00 | 11438.2  |
| AHQ-5-13-, 2491             | R.NKTEDLEATSEHF.K.T                                                     | 1649.74039 | 3 | 2.30E-07 | 0.96 | 4.63  | -     | 1868.7   |
| AHQ-5-13-, 2493             | R.NKTEDLEATSEHF.K.T                                                     | 1649.74039 | 2 | 4.31E-05 | 0.91 | 3.41  | -     | 1122.6   |
| AHQ-5-13, 2985 - 2990       | R.NLQSEVEGVK.N                                                          | 1103.20807 | 2 | 5.08E-04 | 0.78 | 2.91  | -     | 846.9    |
| gi 4502167 ref NP_000475.1  | amyloid beta (A4) precursor protein (protease nexin-II, Alzheimer disea |            |   | 2.38E-07 | 0.92 | 10.20 | 2.10  | 86942.0  |
| AHQ-5-4, 2316               | K.YLETPGDENEHAHFQK.A                                                    | 1915.99652 | 2 | 2.38E-07 | 0.92 | 3.96  | -     | 739.6    |
| gi 5032041 ref NP_005605.1  | Ras homolog enriched in brain 2 [Homo sapiens]                          |            |   | 2.42E-07 | 0.82 | 10.23 | 8.70  | 20497.4  |
| AHQ-5-12, 5225              | K.ALAESWNAAFLESSAK.E                                                    | 1695.85389 | 2 | 2.42E-07 | 0.82 | 3.44  | -     | 470.6    |
| AHQ-5-12, 4984 - 5010       | K.ALAESWNAAFLESSAK.E                                                    | 1695.85389 | 2 | 2.87E-06 | 0.96 | 4.62  | -     | 1236.4   |
| gi 4506183 ref NP_002779.1  | proteasome alpha 3 subunit isoform 1; proteasome subunit C8; macropain  |            |   | 2.43E-07 | 0.69 | 10.13 | 3.90  | 28433.1  |
| AHQ-5-10, 2552              | K.IIIVHDEVK.D                                                           | 1229.44983 | 1 | 2.43E-07 | 0.69 | 2.57  | -     | 567.2    |
| gi 10880989 ref NP_067075.1 | RAB18, member RAS oncogene family; RAB18 small GTPase [Homo sapiens] [  |            |   | 2.49E-07 | 3.20 | 40.22 | 26.70 | 22976.9  |
| AHQ-5-11, 3634              | K.IIQTPLGVESENQK.G                                                      | 1757.92522 | 2 | 3.74E-06 | 0.73 | 3.14  | -     | 396.8    |
| AHQ-5-11, 3419              | K.LAIWDTAGQER.F                                                         | 1260.38088 | 2 | 3.76E-05 | 0.83 | 2.87  | -     | 862.2    |
| AHQ-5-11, 6170              | K.LDNWLNLELEYCTLR.N                                                     | 1828.98037 | 2 | 2.49E-07 | 0.95 | 4.34  | -     | 1033.6   |
| AHQ-5-11, 5782 - 5795       | K.TCDGVQCAFLELVK.E                                                      | 1787.94661 | 2 | 3.09E-04 | 0.69 | 3.35  | -     | 534.8    |
| gi 30147623 ref XP_293669.2 | similar to actinin, alpha 4 [Homo sapiens]                              |            |   | 2.49E-07 | 0.88 | 10.21 | 3.50  | 57794.4  |
| AHQ-5-5, 3935 - 4005        | K.LSGSNPYTTVTPQINSK.W                                                   | 1921.14079 | 2 | 2.49E-07 | 0.88 | 4.13  | -     | 625.1    |
| gi 27597085 ref NP_000357.3 | tropomyosin 1 (alpha) [Homo sapiens]                                    |            |   | 2.51E-07 | 1.92 | 20.27 | 9.50  | 32865.7  |
| AHQ-5-9, 2722 - 2723        | R.AQKDEEMKIEIQILK.E                                                     | 1961.22673 | 2 | 2.51E-07 | 0.96 | 5.30  | -     | 1419.1   |
| AHQ-5-9, 2832               | R.KLVIIESDLER.A                                                         | 1315.54103 | 2 | 8.05E-07 | 0.96 | 4.61  | -     | 1310.3   |
| AHQ-5-9, 2815 - 2819        | R.KLVIIESDLER.A                                                         | 1315.54103 | 1 | 3.83E-05 | 0.73 | 3.10  | -     | 436.3    |
| gi 7657313 ref NP_055277.1  | Lsm1 protein [Homo sapiens]                                             |            |   | 2.64E-07 | 1.62 | 20.19 | 26.30 | 15179.3  |
| AHQ-5-12, 6021              | K.ESDTPLQQVSIIEIELEEQR.V                                                | 2244.39872 | 2 | 2.64E-07 | 0.92 | 3.73  | -     | 932.5    |
| AHQ-5-12, 5914              | R.SIDQFANLVLHQTVER.I                                                    | 1871.08670 | 2 | 1.80E-04 | 0.70 | 3.20  | -     | 441.4    |
| gi 20551618 ref XP_167021.1 | similar to calponin 2; Calonin 2 [Homo sapiens]                         |            |   | 2.74E-07 | 1.83 | 20.28 | 3.70  | 47327.9  |
| AHQ-5-11, 5470              | R.SMQNWHQLELNSNFIK.A                                                    | 1990.23155 | 2 | 1.17E-04 | 0.95 | 4.61  | -     | 1187.6   |
| AHQ-5-12, 5288 - 5290       | R.SMQNWHQLELNSNFIK.A                                                    | 2006.23095 | 2 | 2.74E-07 | 0.92 | 4.18  | -     | 771.5    |
| AHQ-5-12, 5406              | R.SMQNWHQLELNSNFIK.A                                                    | 1990.23155 | 2 | 2.91E-05 | 0.94 | 4.18  | -     | 1190.9   |
| AHQ-5-12, 5648 - 5661       | R.SMQNWHQLELNSNFIK.A                                                    | 1990.23155 | 2 | 1.32E-06 | 0.97 | 5.55  | -     | 1565.0   |
| AHQ-5-12, 5654              | R.SMQNWHQLELNSNFIK.A                                                    | 1990.23155 | 3 | 3.35E-04 | 0.90 | 4.26  | -     | 1008.8   |
| AHQ-5-10, 5066 - 5067       | R.SMQNWHQLELNSNFIK.A                                                    | 1990.23155 | 2 | 7.62E-07 | 0.91 | 4.12  | -     | 747.2    |
| gi 21614499 ref NP_003370.2 | villin 2; Villin-2; cytovillin [Homo sapiens]                           |            |   | 2.80E-07 | 2.60 | 30.21 | 3.40  | 69412.3  |
| AHQ-5-6, 4165               | K.KAPDFVFYAPR.L                                                         | 1183.33971 | 2 | 2.80E-07 | 0.97 | 4.15  | -     | 1686.2   |
| AHQ-5-6, 4984               | K.IGFPPWSEIR.N                                                          | 1105.27049 | 2 | 8.53E-06 | 0.90 | 2.73  | -     | 982.0    |
| AHQ-5-7, 4770               | K.IGFPPWSEIR.N                                                          | 1105.27049 | 2 | 2.10E-06 | 0.83 | 2.83  | -     | 732.2    |
| AHQ-5-6, 3468               | K.KAPDFVFYAPR.L                                                         | 1311.51262 | 2 | 1.35E-06 | 0.80 | 3.07  | -     | 625.3    |
| gi 4757766 ref NP_004299.1  | Rho GTPase activating protein 1; RhoGAP; p50rhoGAP; CDC42 GTPase-activa |            |   | 2.96E-07 | 3.52 | 40.24 | 16.60 | 50435.4  |
| AHQ-5-14-, 5923             | K.FLLDHQGLFSPDPDPSGL                                                    | 1970.17037 | 2 | 2.26E-06 | 0.80 | 3.12  | -     | 709.1    |
| AHQ-5-8, 3702               | K.NPEQEPIPIVLR.E                                                        | 1405.62426 | 2 | 1.84E-04 | 0.86 | 3.39  | -     | 720.9    |
| AHQ-5-7, 3823               | K.NPEQEPIPIVLR.E                                                        | 1405.62426 | 2 | 9.16E-05 | 0.89 | 3.80  | -     | 940.3    |
| AHQ-5-8, 5980 - 5994        | R.VPATLQLVQLTLPENYQVLR.F                                                | 2312.65053 | 2 | 5.50E-06 | 0.88 | 4.40  | -     | 461.6    |
| AHQ-5-11, 5956              | R.VPATLQLVQLTLPENYQVLR.F                                                | 2312.65053 | 2 | 2.96E-07 | 0.95 | 4.79  | -     | 855.2    |
| AHQ-5-7, 7128               | K.YNMGPLVDFDQYNELHLPVILK.T                                              | 2691.09719 | 3 | 1.82E-05 | 0.61 | 3.25  | -     | 235.9    |
| AHQ-5-7, 7120 - 7127        | K.YNMGPLVDFDQYNELHLPVILK.T                                              | 2691.09719 | 2 | 8.67E-06 | 0.88 | 3.61  | -     | 822.6    |
| gi 4506405 ref NP_002872.1  | v-ral simian leukemia viral oncogene homolog B; RAS-like protein B; GTP |            |   | 2.98E-07 | 1.93 | 20.26 | 15.50 | 23408.4  |
| AHQ-5-10, 3290              | R.SKAEEWGVQVYVETSAK.T                                                   | 1812.95765 | 2 | 2.98E-07 | 0.97 | 4.72  | -     | 1523.6   |
| AHQ-5-10, 3124 - 3182       | R.VKAAEEDKIPLLVGNK.S                                                    | 1753.07630 | 2 | 1.15E-04 | 0.96 | 5.21  | -     | 1189.7   |
| gi 1356962 ref NP_112243.1  | RAB1B, member RAS oncogene family; small GTP-binding protein [Homo sap  |            |   | 3.03E-07 | 3.43 | 40.33 | 26.40 | 22171.0  |
| AHQ-5-11, 4387 - 4451       | R.GAHGIIVYDVTDQESYANVK.Q                                                | 2279.49113 | 2 | 3.03E-07 | 0.98 | 6.54  | -     | 2369.8   |
| AHQ-5-11, 4551              | R.GAHGIIVYDVTDQESYANVK.Q                                                | 2279.49113 | 3 | 5.40E-05 | 0.77 | 3.40  | -     | 846.1    |
| AHQ-5-11, 4714              | R.GAHGIIVYDVTDQESYANVK.Q                                                | 2279.49113 | 2 | 8.04E-06 | 0.96 | 5.09  | -     | 1117.7   |
| AHQ-5-11, 2008 - 2028       | R.MGPPGAASGGERNPK.I                                                     | 1442.62650 | 3 | 2.50E-06 | 0.81 | 3.24  | -     | 822.9    |
| AHQ-5-11, 6396 - 6466       | K.NATNVEQAFMTMAAEIK.K                                                   | 1886.14019 | 2 | 3.79E-04 | 0.68 | 3.65  | -     | 617.0    |
| AHQ-5-11, 6551              | K.NATNVEQAFMTMAAEIK.K                                                   | 1870.14079 | 2 | 8.97E-07 | 0.95 | 4.45  | -     | 1167.6   |
| AHQ-5-11, 6558              | K.NATNVEQAFMTMAAEIK.K                                                   | 1870.14079 | 3 | 2.84E-06 | 0.95 | 5.69  | -     | 1184.5   |
| AHQ-5-11, 5071 - 5143       | K.NATNVEQAFMTMAAEIK.K                                                   | 1886.14019 | 2 | 4.53E-04 | 0.79 | 3.58  | -     | 853.2    |
| gi 30158852 ref XP_301583.1 | similar to actin CA15 - sea squirt (Styela clava) (fragments) [Homo sa  |            |   | 3.08E-07 | 0.90 | 10.17 | 6.50  | 19197.0  |
| AHQ-5-4, 2768 - 2841        | K.IWHHTFYNKL.R.V                                                        | 1515.74533 | 2 | 5.70E-06 | 0.71 | 3.16  | -     | 602.0    |
| AHQ-5-8, 2401               | K.IWHHTFYNKL.R.V                                                        | 1515.74533 | 2 | 3.08E-07 | 0.90 | 3.23  | -     | 912.5    |
| AHQ-5-11, 2778 - 2859       | K.IWHHTFYNKL.R.V                                                        | 1515.74533 | 2 | 1.16E-05 | 0.44 | 2.60  | -     | 482.9    |
| AHQ-5-13, 3153              | K.IWHHTFYNKL.R.V                                                        | 1515.74533 | 2 | 5.00E-06 | 0.67 | 3.02  | -     | 683.6    |
| AHQ-5-2, 2798               | K.IWHHTFYNKL.R.V                                                        | 1515.74533 | 2 | 2.13E-05 | 0.73 | 3.36  | -     | 752.4    |
| gi 5031569 ref NP_005727.1  | ARP1 actin-related protein 1 homolog A, centractin alpha; ARP1 (actin-r |            |   | 3.09E-07 | 2.54 | 30.22 | 15.20 | 42613.4  |
| AHQ-5-8, 3608               | R.ACYLSINPOKDETELEK.A                                                   | 2141.34169 | 2 | 4.71E-05 | 0.75 | 3.27  | -     | 415.4    |
| AHQ-5-8, 5044 - 5061        | K.AQYYLPDGGSTIEIGPSR.F                                                  | 1868.03645 | 2 | 3.66E-04 | 0.92 | 4.50  | -     | 545.2    |
| AHQ-5-8, 4934               | K.DQLQTFSEEHVLLTEAPLNPR.K                                               | 2535.79382 | 2 | 3.09E-07 | 0.87 | 3.63  | -     | 601.6    |
| gi 20539300 ref XP_088391.4 | similar to tropomyosin 4 [Homo sapiens]                                 |            |   | 3.21E-07 | 1.91 | 30.24 | 16.90 | 18592.1  |
| AHQ-5-9, 2868               | R.AMKDEEKMEIQEMQLK.E                                                    | 1982.33285 | 2 | 2.88E-06 | 0.96 | 4.87  | -     | 1261.8   |
| AHQ-5-9, 3030               | R.KLVILEGELER.A                                                         | 1299.54160 | 1 | 9.70E-04 | 0.21 | 2.50  | -     | 253.2    |
| AHQ-5-9, 3120               | R.KLVILEGELER.A                                                         | 1299.54160 | 2 | 3.25E-04 | 0.80 | 2.89  | -     | 884.1    |
| AHQ-5-11, 3487              | R.KLVILEGELER.A                                                         | 1299.54160 | 2 | 3.21E-07 | 0.85 | 3.40  | -     | 932.7    |
| AHQ-5-9, 3007 - 3124        | R.KLVILEGELER.A                                                         | 1299.54160 | 1 | 2.85E-04 | 0.58 | 2.57  | -     | 510.8    |
| AHQ-5-9, 3700 - 3708        | R.KLVILEGELER.A                                                         | 1171.36868 | 1 | 7.72E-05 | 0.10 | 1.84  | -     | 210.7    |
| gi 4506671 ref NP_000995.1  | ribosomal protein P2; 60S acidic ribosomal protein P2; acidic ribosomal |            |   | 3.37E-07 | 0.88 | 10.23 | 28.70 | 11664.9  |
| AHQ-5-13-, 3744             | K.LASVPAGGAVAVSAAPGSAAPGAAGSAPAAAEK.K                                   | 2776.05225 | 2 | 3.96E-06 | 0.86 | 4.19  | -     | 461.4    |
| AHQ-5-13, 3830              | K.LASVPAGGAVAVSAAPGSAAPGAAGSAPAAAEK.K                                   | 2776.05225 | 2 | 3.37E-07 | 0.88 | 4.63  | -     | 354.4    |
| gi 4503743 ref NP_002009.1  | flightless I homolog [Homo sapiens]                                     |            |   | 3.64E-07 | 3.36 | 40.25 | 5.70  | 144750.1 |
| AHQ-5-3, 3177 - 3181        | K.AVQGAQQPSLYQIR.T                                                      | 1559.75158 | 2 | 3.64E-07 | 0.86 | 3.44  | -     | 653.3    |
| AHQ-5-3, 6547               | R.TGLCYLPEELAAQLK.L                                                     | 1707.96931 | 2 | 2.57E-04 | 0.85 | 3.63  | -     | 426.9    |
| AHQ-5-3, 7294               | R.TQSNLPTSLGLSNLADVDLSCNDLTR.V                                          | 2936.15611 | 2 | 1.85E-06 | 0.70 | 3.08  | -     | 676.8    |
| AHQ-5-4, 6810               | K.VGLGLGYLELPIQINYL.K                                                   | 1778.08432 | 2 | 1.98E-04 | 0.95 | 4.35  | -     | 993.3    |
| gi 27480842 ref XP_208238.1 | similar to bA92K2.2 (similar to ubiquitin) [Homo sapiens]               |            |   | 3.78E-07 | 0.74 | 10.13 | 5.80  | 17966.9  |
| AHQ-5-14-, 2774 - 2850      | K.ESTLHLVLR.L                                                           | 1068.25169 | 2 | 2.69E-06 | 0.80 | 2.68  | -     | 443.3    |
| AHQ-5-14, 3872              | K.ESTLHLVLR.L                                                           | 1068.25169 | 2 | 3.78E-07 | 0.74 | 2.60  | -     | 447.9    |
| gi 17318569 ref NP_006112.2 | keratin 1; Keratin-1; cytokeratin 1; hair alpha protein [Homo sapiens]  |            |   | 3.78E-07 | 1.85 | 20.23 | 4.30  | 66066.3  |
| AHQ-5-14-, 5943             | R.SLDLDSIAEIVK.A                                                        | 1303.48388 | 2 | 2.25E-06 | 0.94 | 4.33  | -     | 1191.7   |

|                             |                                                                         |            |   |          |      |       |       |          |
|-----------------------------|-------------------------------------------------------------------------|------------|---|----------|------|-------|-------|----------|
| AHQ-5-1, 6439               | R.SLDLDSIAAEVKA                                                         | 1303.48388 | 2 | 7.82E-07 | 0.95 | 4.52  | -     | 1373.0   |
| AHQ-5-14-, 6303             | R.THNLPEYFESFINNLR                                                      | 1995.18315 | 3 | 3.78E-07 | 0.90 | 4.33  | -     | 1240.4   |
| gi 10835189 ref NP_000628.1 | glutathione reductase [Homo sapiens]                                    |            |   | 3.89E-07 | 2.46 | 30.22 | 10.90 | 51700.3  |
| AHQ-5-7, 4547 - 4550        | K.ADFDNTVAIHPTSSSEELVTLR                                                | 2316.50977 | 2 | 3.89E-07 | 0.86 | 4.23  | -     | 365.8    |
| AHQ-5-7, 2272               | R.GHAAFSTDPKPTIEVSGK.K                                                  | 1843.03012 | 2 | 5.39E-06 | 0.92 | 4.41  | -     | 486.8    |
| AHQ-5-7, 3132 - 3203        | K.LGGTCVNVGVCPVK.K                                                      | 1363.58589 | 2 | 6.99E-04 | 0.68 | 2.69  | -     | 947.0    |
| gi 18104989 ref NP_002822.2 | protein tyrosine phosphatase, non-receptor type 6 isoform 1; protein-t  |            |   | 4.14E-07 | 0.89 | 10.17 | 2.00  | 67560.7  |
| AHQ-5-6, 5000 - 5010        | R.DLSGLDAETLLK.G                                                        | 1275.43053 | 2 | 4.14E-07 | 0.89 | 3.19  | -     | 1276.2   |
| gi 4505813 ref NP_003737.1  | cytoplasmic dynein light polypeptide; dynein, cytoplasmic, light chain  |            |   | 4.15E-07 | 2.24 | 30.19 | 49.40 | 10365.8  |
| AHQ-5-14, 4802 - 4805       | K.NADMSEEM*QQDSSVECATQALEK.Y                                            | 2532.67934 | 2 | 4.43E-06 | 0.64 | 3.80  | -     | 578.9    |
| AHQ-5-14-, 2289             | R.NFGSVYTHETK.H                                                         | 1283.37131 | 2 | 2.51E-06 | 0.93 | 3.48  | -     | 1033.3   |
| AHQ-5-14-, 3510             | K.YNPTWHCIVGR.N                                                         | 1404.57820 | 2 | 5.12E-05 | 0.74 | 3.00  | -     | 378.9    |
| AHQ-5-14, 4416 - 4430       | K.YNPTWHCIVGR.N                                                         | 1404.57820 | 2 | 4.15E-07 | 0.68 | 2.55  | -     | 474.5    |
| gi 4502861 ref NP_001275.1  | adaptor-related protein complex 3, sigma 1 subunit; clathrin-associated |            |   | 4.19E-07 | 0.91 | 10.18 | 7.80  | 21732.0  |
| AHQ-5-11, 3807              | K.FYQPYSEDTPQQQIIR.E                                                    | 1917.06756 | 2 | 4.19E-07 | 0.91 | 3.53  | -     | 761.6    |
| gi 10863873 ref NP_000651.1 | transforming growth factor, beta 1 (Camurati-Engelmann disease); trans  |            |   | 4.23E-07 | 2.68 | 30.21 | 5.90  | 44422.0  |
| AHQ-5-13, 3446              | R.ALDTNYCFSSSTEK.N                                                      | 1537.63010 | 2 | 4.23E-07 | 0.88 | 3.54  | -     | 740.7    |
| AHQ-5-13-, 3319             | R.ALDTNYCFSSSTEK.N                                                      | 1537.63010 | 2 | 2.40E-06 | 0.90 | 3.35  | -     | 804.0    |
| AHQ-5-13-, 2653             | K.VEQLSNM*IVR.S                                                         | 1205.41014 | 2 | 3.49E-04 | 0.82 | 3.15  | -     | 872.2    |
| AHQ-5-13, 3590 - 3591       | K.VEQLSNM*IVR.S                                                         | 1189.41074 | 2 | 1.65E-05 | 0.95 | 4.12  | -     | 1463.4   |
| AHQ-5-13-, 3468 - 3472      | K.VEQLSNM*IVR.S                                                         | 1189.41074 | 2 | 9.61E-06 | 0.92 | 3.71  | -     | 1203.2   |
| AHQ-5-13, 2714 - 2793       | K.VEQLSNM*IVR.S                                                         | 1205.41014 | 2 | 1.62E-04 | 0.87 | 3.54  | -     | 852.3    |
| gi 6005826 ref NP_009160.1  | protein kinase C and casein kinase substrate in neurons 2; pascin 2 [Ho |            |   | 4.66E-07 | 1.56 | 20.18 | 4.50  | 55904.6  |
| AHQ-5-6, 2946               | K.AIYHDEQSR.A                                                           | 1345.48578 | 2 | 1.50E-04 | 0.61 | 2.55  | -     | 591.8    |
| AHQ-5-6, 3785               | K.AYAAQLTEVAR.R                                                         | 1337.46534 | 2 | 4.66E-07 | 0.95 | 3.53  | -     | 1820.4   |
| gi 28178825 ref NP_005887.2 | isocitrate dehydrogenase 1 (NADP+), soluble; oxalosuccinate decarboxyl  |            |   | 4.87E-07 | 0.89 | 10.20 | 4.10  | 46659.0  |
| AHQ-5-8, 6481 - 6560        | K.GQETSNPIASFIFAWTR.G                                                   | 1880.05046 | 2 | 4.87E-07 | 0.89 | 4.06  | -     | 610.4    |
| gi 17149842 ref NP_004461.2 | FK506-binding protein 2 precursor; FK506-binding protein 2 (13kD); pep  |            |   | 4.87E-07 | 2.37 | 30.20 | 18.30 | 15649.2  |
| AHQ-5-13, 5038              | K.GWDQGLLGMCEGEK.R                                                      | 1581.75275 | 2 | 6.90E-04 | 0.75 | 3.03  | -     | 721.3    |
| AHQ-5-13-, 4144             | K.GWDQGLLGM*CEGEK.R                                                     | 1597.75215 | 2 | 5.33E-04 | 0.76 | 2.68  | -     | 812.4    |
| AHQ-5-13-, 4937 - 4940      | K.GWDQGLLGMCEGEK.R                                                      | 1581.75275 | 2 | 1.99E-04 | 0.94 | 3.90  | -     | 1110.1   |
| AHQ-5-13, 4172 - 4252       | K.GWDQGLLGM*CEGEK.R                                                     | 1597.75215 | 2 | 2.06E-06 | 0.56 | 2.56  | -     | 612.9    |
| AHQ-5-13-, 4163             | K.LVIPSELYGER.G                                                         | 1333.51491 | 2 | 4.87E-07 | 0.88 | 3.26  | -     | 537.5    |
| gi 4502211 ref NP_001654.1  | ADP-ribosylation factor 6 [Homo sapiens]                                |            |   | 4.88E-07 | 0.98 | 20.19 | 18.30 | 20082.0  |
| AHQ-5-12, 4036              | K.FNVWVDDGGQDK.I                                                        | 1265.35598 | 1 | 4.88E-07 | 0.15 | 2.06  | -     | 556.2    |
| AHQ-5-12, 4033              | K.FNVWVDDGGQDK.I                                                        | 1265.35598 | 2 | 4.02E-06 | 0.94 | 3.73  | -     | 1215.8   |
| AHQ-5-12, 5544 - 5609       | K.LGQSVTTIPTVGFNVETVTK.N                                                | 2255.55261 | 2 | 3.61E-04 | 0.83 | 3.82  | -     | 216.7    |
| gi 21264318 ref NP_004028.3 | adenosine monophosphate deaminase 2 (isoform L) [Homo sapiens]          |            |   | 4.98E-07 | 1.71 | 20.23 | 3.50  | 100687.2 |
| AHQ-5-5, 6057 - 6063        | K.CGVPFTDLLDAAK.S                                                       | 1408.60184 | 2 | 5.74E-07 | 0.78 | 2.71  | -     | 562.0    |
| AHQ-5-5, 5513 - 5530        | R.SAPYEFPEESPIQLEER.R                                                   | 2151.27185 | 2 | 4.98E-07 | 0.93 | 4.51  | -     | 759.9    |
| gi 24111250 ref NP_006563.2 | guanine nucleotide binding protein (G protein), alpha 13 [Homo sapiens  |            |   | 5.08E-07 | 0.80 | 10.19 | 4.50  | 44049.3  |
| AHQ-5-8, 4816               | K.LGEPDYIPSQDILLAR.R                                                    | 1929.16292 | 2 | 5.08E-07 | 0.80 | 3.84  | -     | 390.8    |
| gi 5729804 ref NP_006694.1  | nudix (nucleoside diphosphate linked moiety X)-type motif 3; diphosphoi |            |   | 5.08E-07 | 2.40 | 30.25 | 21.50 | 19470.8  |
| AHQ-5-11, 3648              | K.VLQYHKVPQASVFETLR.Q                                                   | 2080.37433 | 2 | 5.08E-07 | 0.94 | 4.90  | -     | 513.1    |
| AHQ-5-11, 4808 - 4811       | R.WIVPQGGMEPEEPSVAAVR.E                                                 | 2111.36386 | 2 | 3.90E-06 | 0.84 | 3.50  | -     | 479.0    |
| AHQ-5-11, 4368              | R.WIVPQGGMEPEEPSVAAVR.E                                                 | 2127.36326 | 2 | 6.90E-05 | 0.62 | 2.94  | -     | 338.9    |
| gi 20070156 ref NP_003565.2 | vessicle-associated membrane protein (VAMP)-associated protein of 33 k  |            |   | 5.55E-07 | 0.95 | 10.18 | 5.00  | 27317.4  |
| AHQ-5-12, 4076              | K.GPFTDVTNLK.L                                                          | 1292.46278 | 2 | 5.55E-07 | 0.95 | 3.53  | -     | 1604.0   |
| gi 4758442 ref NP_004115.1  | glia maturation factor, beta [Homo sapiens]                             |            |   | 5.66E-07 | 1.06 | 20.21 | 19.00 | 16713.1  |
| AHQ-5-12, 6562              | R.VSYPLCFIFSSPVGCKPEQQMM*YAGSK.N                                        | 3131.61197 | 3 | 2.50E-04 | 0.37 | 3.10  | -     | 312.6    |
| AHQ-5-12, 6430 - 6494       | R.VSYPLCFIFSSPVGCKPEQQM*MYAGSK.N                                        | 3131.61197 | 3 | 5.66E-07 | 0.69 | 4.16  | -     | 538.3    |
| gi 4826665 ref NP_005116.1  | copper chaperone for superoxide dismutase [Homo sapiens]                |            |   | 5.71E-07 | 0.90 | 10.21 | 10.20 | 29040.4  |
| AHQ-5-9, 5882 - 5883        | K.GMGSGQLQNLGAAVILGGPGTVQGVV.R                                          | 2609.00248 | 2 | 5.71E-07 | 0.90 | 4.26  | -     | 707.7    |
| gi 5031595 ref NP_005709.1  | actin related protein 2/3 complex subunit 4; Arp2/3 protein complex sub |            |   | 5.88E-07 | 7.21 | 80.35 | 59.50 | 19669.6  |
| AHQ-5-11, 4198              | R.AENFFILR.R                                                            | 1010.17070 | 2 | 4.72E-04 | 0.96 | 3.57  | -     | 1943.1   |
| AHQ-5-12, 4322              | R.AENFFILR.R                                                            | 1010.17070 | 2 | 1.19E-04 | 0.95 | 3.84  | -     | 1652.9   |
| AHQ-5-11, 6160 - 6219       | R.ATLQAALCLLENFSSQVVER.H                                                | 2138.38741 | 2 | 3.31E-06 | 0.91 | 4.12  | -     | 861.6    |
| AHQ-5-11, 4134              | K.ELLQPVITSR.N                                                          | 1269.51549 | 2 | 2.71E-04 | 0.87 | 3.25  | -     | 736.3    |
| AHQ-5-12, 3408 - 3416       | R.IVAEEFLK.N                                                            | 949.12558  | 2 | 3.34E-04 | 0.68 | 2.78  | -     | 380.4    |
| AHQ-5-11, 5871 - 5887       | R.KPVEGYDISFLTNHFTEQMYK.H                                               | 2662.01271 | 3 | 6.29E-06 | 0.97 | 6.97  | -     | 1285.1   |
| AHQ-5-12, 7126              | K.LVDFVHFMEEIDKEISEM*K.L                                                | 2469.85893 | 3 | 5.88E-07 | 0.94 | 5.26  | -     | 919.4    |
| AHQ-5-11, 5499 - 5503       | R.RKPKVEGYDISFLTNHFTEQMYK.H                                             | 2818.19906 | 3 | 4.63E-06 | 0.98 | 6.92  | -     | 2070.0   |
| AHQ-5-12, 3101              | K.VLIEGSINSVR.V                                                         | 1187.37134 | 2 | 3.23E-04 | 0.92 | 3.46  | -     | 1089.6   |
| AHQ-5-12, 3189              | K.VLIEGSINSVR.V                                                         | 1187.37134 | 2 | 9.84E-06 | 0.91 | 3.68  | -     | 830.9    |
| gi 18426915 ref NP_004386.2 | drebrin 1 isoform a; drebrin E; drebrin E2 [Homo sapiens] [             |            |   | 5.90E-07 | 3.02 | 40.23 | 11.40 | 71438.9  |
| AHQ-5-8, 3625               | K.KSESEVEEAAAIQRDPNPR.E                                                 | 2311.49476 | 3 | 1.08E-06 | 0.70 | 3.22  | -     | 460.3    |
| AHQ-5-13, 4060 - 4120       | K.LAASGEGGLQELSGHFENQK.V                                                | 2073.20908 | 2 | 2.50E-05 | 0.73 | 3.26  | -     | 559.1    |
| AHQ-5-13, 4129              | K.LAASGEGGLQELSGHFENQK.V                                                | 2073.20908 | 3 | 2.10E-05 | 0.60 | 3.07  | -     | 558.9    |
| AHQ-5-13-, 4028 - 4041      | K.LAASGEGGLQELSGHFENQK.V                                                | 2073.20908 | 3 | 2.70E-04 | 0.78 | 3.95  | -     | 409.0    |
| AHQ-5-13-, 3975 - 4039      | K.LAASGEGGLQELSGHFENQK.V                                                | 2073.20908 | 2 | 3.09E-04 | 0.85 | 4.04  | -     | 640.8    |
| AHQ-5-8, 2481               | R.SPSSDSTASTPVAEQIER.A                                                  | 1862.93023 | 2 | 1.18E-05 | 0.74 | 3.27  | -     | 436.7    |
| AHQ-5-13-, 5524             | K.YVLINWVGEDVPDAR.K                                                     | 1746.94404 | 2 | 1.06E-04 | 0.95 | 4.65  | -     | 1249.8   |
| AHQ-5-13, 5628              | K.YVLINWVGEDVPDAR.K                                                     | 1746.94404 | 2 | 5.90E-07 | 0.97 | 4.57  | -     | 1984.5   |
| gi 4826657 ref NP_004333.1  | caldesmon 1 isoform 3; H-CAD; L-CAD [Homo sapiens]                      |            |   | 6.06E-07 | 5.38 | 60.24 | 18.80 | 62662.9  |
| AHQ-5-6, 4961               | K.EFDPTITDASLSPSR.R                                                     | 1749.89986 | 2 | 1.11E-04 | 0.85 | 3.50  | -     | 745.2    |
| AHQ-5-13-, 2605             | K.GNVFSSPTAAGTPNK.E                                                     | 1448.56286 | 2 | 6.06E-07 | 0.92 | 4.01  | -     | 918.0    |
| AHQ-5-13-, 4575 - 4656      | K.KGFTFVKVSNQGEFMTKHLK.H                                                | 2210.54181 | 3 | 4.08E-06 | 0.83 | 4.18  | -     | 1113.8   |
| AHQ-5-13, 2947              | R.LEQYTSIAIEGTK.S                                                       | 1340.46107 | 2 | 6.42E-06 | 0.90 | 3.04  | -     | 1218.7   |
| AHQ-5-13, 2897 - 2898       | K.SAKPTKPAASDLPVPAEGVR.N                                                | 1992.26539 | 2 | 1.09E-05 | 0.95 | 4.88  | -     | 758.8    |
| AHQ-5-6, 3633               | K.TTTTNTQVEGDDEAAFLER.L                                                 | 2099.15534 | 2 | 2.76E-06 | 0.93 | 4.31  | -     | 976.6    |
| gi 4885183 ref NP_005210.1  | diaphanous 1; deafness, autosomal dominant 1; hDial [Homo sapiens] [MAS |            |   | 6.20E-07 | 4.65 | 50.26 | 7.10  | 138977.7 |
| AHQ-5-3, 3207 - 3210        | R.DVQNFPAADEKDKFVEK.M                                                   | 2082.25588 | 2 | 7.72E-04 | 0.87 | 3.94  | -     | 567.0    |
| AHQ-5-3, 2267               | K.LQDLQGGKDALHSEK.Q                                                     | 1711.85486 | 2 | 6.25E-07 | 0.93 | 4.18  | -     | 1089.1   |
| AHQ-5-3, 6726               | K.LQFSEQVENIKPEIVSVTAACEELR.K                                           | 2892.23121 | 3 | 6.20E-07 | 0.94 | 5.19  | -     | 1246.5   |
| AHQ-5-4, 5341               | K.LVAEDLSQDCFWTK.V                                                      | 1713.88927 | 2 | 4.18E-04 | 0.61 | 2.54  | -     | 573.5    |
| AHQ-5-3, 5361 - 5366        | K.LVAEDLSQDCFWTK.V                                                      | 1713.88927 | 2 | 3.70E-06 | 0.96 | 4.83  | -     | 1103.1   |
| AHQ-5-3, 5959               | K.QDLEAEVSQLTGEVAK.L                                                    | 1717.85617 | 2 | 5.18E-06 | 0.95 | 5.01  | -     | 1007.3   |
| gi 23110925 ref NP_002789.1 | proteasome beta 6 subunit; proteasome subunit Y; proteasome subunit be  |            |   | 6.48E-07 | 0.97 | 10.21 | 4.60  | 25357.6  |
| AHQ-5-11, 2362              | R.LAAIAESGVER.Q                                                         | 1116.24998 | 2 | 6.48E-07 | 0.97 | 4.29  | -     | 1725.2   |
| gi 29731325 ref XP_293023.1 | similar to peptidyl-Pro cis trans isomerase [Homo sapiens]              |            |   | 7.04E-07 | 0.66 | 10.15 | 6.00  | 28867.8  |
| AHQ-5-13, 4201              | K.AGPNTNGSQFFICTAK.T                                                    | 1714.88050 | 2 | 3.82E-06 | 0.71 | 2.86  | -     | 559.7    |
| AHQ-5-12, 4116              | K.AGPNTNGSQFFICTAK.T                                                    | 1714.88050 | 2 | 7.04E-07 | 0.66 | 2.73  | -     | 582.3    |
| gi 6912586 ref NP_036220.1  | 6-phosphogluconolactonase [Homo sapiens]                                |            |   | 7.13E-07 | 1.43 | 20.20 | 14.00 | 27546.7  |
| AHQ-5-10, 3859              | R.ILEDQEEENPLPALVQPHTK.L                                                | 2300.55348 | 2 | 7.13E-07 | 0.88 | 4.01  | -     | 614.3    |
| AHQ-5-10, 3846              | R.LVPPDHAESTYGLYR.T                                                     | 1768.94970 | 2 | 2.31E-06 | 0.55 | 2.54  | -     | 253.0    |
| gi 4506045 ref NP_002718.1  | proteoglycan 1, secretory granule; Proteoglycan 1, secretory granule (p |            |   | 7.35E-07 | 1.53 | 20.19 | 17.10 | 17623.6  |
| AHQ-5-1, 2452               | R.CNPDNSANCLEEK.G                                                       | 1640.68887 | 2 | 1.97E-06 | 0.67 | 2.95  | -     | 423.4    |
| AHQ-5-1, 4176 - 4195        | K.GPM*FELLPGESNK.I                                                      | 1435.62747 | 2 | 7.35E-07 | 0.86 | 3.88  | -     | 630.3    |
| gi 8922835 ref NP_060776.1  | hypothetical protein FLJ11036 [Homo sapiens]                            |            |   | 7.37E-07 | 0.94 | 10.21 | 6.90  | 22353.4  |
| AHQ-5-13, 6068 - 6134       | R.IHSLVQGFILPQK.F                                                       | 1627.95380 | 2 | 7.37E-07 | 0.94 | 4.23  | -     | 963.8    |
| gi 7657056 ref NP_055415.1  | EH-domain containing 3; EH domain containing 3 [Homo sapiens]           |            |   | 7.51E-07 | 3.34 | 40.24 | 12.90 | 60886.7  |
| AHQ-5-7, 5411               | R.FHEFHSPALEDADFDNKPMVLLVGGYSTGK.T                                      | 3394.75749 | 3 | 2.84E-06 | 0.91 | 4.56  | -     | 876.1    |
| AHQ-5-7, 4754               | K.LFEEAEQDLFR.D                                                         | 1397.51432 | 2 | 7.51E-07 | 0.96 | 3.37  | -     | 2328.3   |
| AHQ-5-7, 5866               | R.VYIGFSWSPHLLIPDNR.K                                                   | 2015.30234 | 2 | 2.59E-06 | 0.92 | 4.80  | -     | 559.0    |
| AHQ-5-10, 5507              | R.VYIGFSWSPHLLIPDNR.K                                                   | 2015.30234 | 2 | 2.20E-06 | 0.59 | 2.84  | -     | 513.2    |
| AHQ-5-7, 4516               | R.YLLEQDFPQMR.I                                                         | 1369.57075 | 2 | 4.84E-05 | 0.87 | 2.94  | -     | 1221.6   |
| gi 4557675 ref NP_000201.1  | integrin alpha chain, alpha 6 [Homo sapiens]                            |            |   | 7.78E-07 | 2.61 | 30.26 | 4.50  | 119509.5 |



|                             |                                                                         |            |   |          |      |       |       |          |
|-----------------------------|-------------------------------------------------------------------------|------------|---|----------|------|-------|-------|----------|
| AHQ-5-6, 3208 - 3222        | K.FGSCQQGVAATFTK.D                                                      | 1503.66172 | 2 | 4.46E-04 | 0.66 | 2.75  | -     | 538.4    |
| AHQ-5-4, 3432               | K.FGSCQQGVAATFTK.D                                                      | 1503.66172 | 2 | 7.78E-07 | 0.84 | 3.26  | -     | 706.4    |
| AHQ-5-3, 3467               | K.FGSCQQGVAATFTK.D                                                      | 1503.66172 | 2 | 2.95E-04 | 0.71 | 2.62  | -     | 707.1    |
| AHQ-5-4, 2877               | K.LETTSNQDNLAPITAK.A                                                    | 1716.87141 | 2 | 3.10E-05 | 0.80 | 3.46  | -     | 566.8    |
| AHQ-5-4, 4272 - 4280        | K.LRPIPIASVEIQEPSR.R                                                    | 1994.28128 | 2 | 1.00E-05 | 0.97 | 5.28  | -     | 1345.1   |
| AHQ-5-3, 4343 - 4410        | K.LRPIPIASVEIQEPSR.R                                                    | 1994.28128 | 2 | 6.74E-05 | 0.87 | 4.04  | -     | 655.0    |
| gi 19923437 ref NP_057366.2 | adenylate kinase 3 alpha like [Homo sapiens]                            |            |   | 7.80E-07 | 0.94 | 10.21 | 6.20  | 25565.2  |
| AHQ-5-10, 6074              | K.NLQYTSWLLDGFPR.T                                                      | 1710.91339 | 2 | 7.80E-07 | 0.94 | 4.17  | -     | 1326.2   |
| gi 5902726 ref NP_005800.1  | peroxiredoxin 2; thioredoxin-dependent peroxide reductase 1 (thiol-spec |            |   | 7.82E-07 | 1.77 | 20.23 | 9.10  | 21856.8  |
| AHQ-5-11, 6570              | K.EGGLGPLNIPLLADVTR.R                                                   | 1736.00583 | 2 | 7.82E-07 | 0.84 | 3.26  | -     | 580.6    |
| AHQ-5-11, 6007              | R.KEGGLGPLNIPLLADVTR.R                                                  | 1864.17875 | 2 | 6.71E-05 | 0.93 | 4.57  | -     | 635.1    |
| gi 18491024 ref NP_005691.2 | dipeptidylpeptidase III isoform 1; dipeptidylpeptidase III [Homo sapie  |            |   | 7.86E-07 | 1.63 | 20.17 | 5.16  | 82588.6  |
| AHQ-5-6, 7286 - 7357        | R.FPEDGELEELIQLATADAR.F                                                 | 2316.50654 | 2 | 3.39E-04 | 0.72 | 3.28  | -     | 466.5    |
| AHQ-5-6, 4581               | K.LAQDFLDSQNL SAYNTR.L                                                  | 1957.09009 | 2 | 7.86E-07 | 0.91 | 3.35  | -     | 1093.1   |
| gi 4502013 ref NP_001616.1  | adenylate kinase 2 isoform a; adenylate kinase, mitochondrial; adenylat |            |   | 7.86E-07 | 1.60 | 20.26 | 14.23 | 26477.6  |
| AHQ-5-10, 3583              | R.LQAYHTQTTPLIEYYR.K                                                    | 1998.22695 | 2 | 2.63E-06 | 0.96 | 5.29  | -     | 1176.2   |
| AHQ-5-10, 5532              | K.NLETPLCKNGFLLDGFPR.T                                                  | 2093.39146 | 2 | 7.86E-07 | 0.64 | 3.13  | -     | 336.4    |
| gi 21361388 ref NP_008868.2 | SMT3 suppressor of mif two 3 homolog 2; SMT3 (suppressor of mif two 3,  |            |   | 8.06E-07 | 0.76 | 10.15 | 12.63 | 10870.2  |
| AHQ-5-12, 2552              | K.VAGQDQGSVVQFK.I                                                       | 1235.37133 | 2 | 8.06E-07 | 0.76 | 3.05  | -     | 758.7    |
| gi 5803013 ref NP_006808.1  | endoplasmic reticulum protein 29 precursor; endoplasmic reticulum lumen |            |   | 8.07E-07 | 2.60 | 30.21 | 14.94 | 28993.2  |
| AHQ-5-10, 6486              | K.GQGVYLGMPGCLPVYDALAGEFIR.A                                            | 2601.98207 | 2 | 8.07E-07 | 0.89 | 4.21  | -     | 544.4    |
| AHQ-5-10, 6538              | K.GQGVYLGMPGCLPVYDALAGEFIR.A                                            | 2585.98267 | 2 | 5.75E-04 | 0.82 | 4.00  | -     | 500.0    |
| AHQ-5-10, 3660              | K.IILDQGEDFPASEMTR.I                                                    | 1709.85924 | 2 | 3.50E-04 | 0.89 | 3.53  | -     | 796.1    |
| gi 4758484 ref NP_004823.1  | glutathione-S-transferase like; glutathione transferase omega [Homo sap |            |   | 8.17E-07 | 2.80 | 50.17 | 34.02 | 27565.7  |
| AHQ-5-10, 3635              | K.EDPTVSALTSEK.D                                                        | 1390.51840 | 1 | 4.75E-05 | 0.31 | 2.32  | -     | 253.5    |
| AHQ-5-10, 2352              | K.GSAPPGPVPEGSIR.I                                                      | 1321.46422 | 1 | 3.52E-04 | 0.77 | 3.49  | -     | 334.4    |
| AHQ-5-10, 2502              | R.HEVININLK.N                                                           | 1080.26247 | 1 | 1.29E-04 | 0.71 | 2.82  | -     | 532.5    |
| AHQ-5-10, 2506              | R.HEVININLK.N                                                           | 1080.26247 | 2 | 8.17E-07 | 0.94 | 3.47  | -     | 1152.3   |
| AHQ-5-10, 2514              | R.HEVININLK.N                                                           | 1080.26247 | 1 | 1.16E-04 | 0.71 | 3.28  | -     | 330.6    |
| AHQ-5-9, 2416               | R.HEVININLK.N                                                           | 1080.26247 | 1 | 1.16E-04 | 0.66 | 3.20  | -     | 314.6    |
| AHQ-5-10, 6443              | K.KNPFGLVPVLENSQGLIYESAITCEYLDEAYPGKK.L                                 | 4074.56041 | 3 | 1.51E-04 | 0.65 | 3.49  | -     | 374.2    |
| AHQ-5-9, 3950               | K.VPSLVGSFIR.S                                                          | 1075.28583 | 1 | 6.60E-04 | 0.13 | 2.04  | -     | 130.9    |
| gi 4506243 ref NP_002810.1  | polypyrimidine tract-binding protein 1 isoform a; RNA-binding protein;  |            |   | 8.19E-07 | 0.92 | 10.22 | 3.59  | 59632.7  |
| AHQ-5-9, 5964               | R.KLPIDITEGEVISLGLPFGK.V                                                | 2113.48244 | 2 | 8.19E-07 | 0.92 | 4.42  | -     | 812.4    |
| gi 4503141 ref NP_001805.1  | cathepsin C isoform a preproprotein; dipeptidyl-peptidase I; dipeptidyl |            |   | 8.24E-07 | 0.97 | 10.23 | 4.10  | 51841.5  |
| AHQ-5-14-, 5385 - 5387      | R.GTDECAIESIAVAATPIPK.L                                                 | 1945.18072 | 2 | 8.24E-07 | 0.97 | 4.64  | -     | 1635.7   |
| AHQ-5-14, 6066 - 6068       | R.GTDECAIESIAVAATPIPK.L                                                 | 1945.18072 | 2 | 7.53E-04 | 0.82 | 3.45  | -     | 773.3    |
| gi 11496277 ref NP_068805.1 | mitogen-activated protein kinase kinase 1 interacting protein 1; MEK p  |            |   | 8.40E-07 | 1.76 | 20.24 | 35.48 | 13622.6  |
| AHQ-5-14-, 5405             | K.SIIYYNTYQVQVFN.R.L                                                    | 2070.31322 | 2 | 1.20E-05 | 0.91 | 3.65  | -     | 1230.7   |
| AHQ-5-14-, 5098 - 5162      | K.VANDNAPHEHALRPGFLSTFALATDQGSK.L                                       | 2929.19327 | 3 | 1.88E-04 | 0.92 | 4.87  | -     | 710.1    |
| AHQ-5-14, 6144              | K.VANDNAPHEHALRPGFLSTFALATDQGSK.L                                       | 2929.19327 | 3 | 8.40E-07 | 0.85 | 4.07  | -     | 722.3    |
| AHQ-5-14, 6026              | K.VANDNAPHEHALRPGFLSTFALATDQGSK.L                                       | 2929.19327 | 3 | 1.36E-05 | 0.90 | 4.23  | -     | 871.2    |
| gi 29747201 ref XP_290702.1 | similar to Myo16 protein [Homo sapiens]                                 |            |   | 8.81E-07 | 1.84 | 20.23 | 23.03 | 16932.3  |
| AHQ-5-14-, 3445             | R.DLEAEHVEVEDTTLNR.C                                                    | 1870.95236 | 2 | 5.11E-04 | 0.96 | 4.62  | -     | 1281.9   |
| AHQ-5-14, 4248              | R.DLEAEHVEVEDTTLNR.C                                                    | 1870.95236 | 2 | 7.24E-05 | 0.94 | 3.44  | -     | 1392.5   |
| AHQ-5-14-, 5058 - 5133      | R.VLNACLAELPHIHAFEQK.T                                                  | 2221.52124 | 3 | 8.81E-07 | 0.90 | 3.90  | -     | 1083.4   |
| gi 7705819 ref NP_057181.1  | HSPC039 protein [Homo sapiens]                                          |            |   | 8.84E-07 | 0.92 | 10.18 | 24.39 | 8968.7   |
| AHQ-5-14, 5840              | K.NIGWTDQGGIGGEEPGIK.S                                                  | 2033.18655 | 2 | 8.84E-07 | 0.92 | 3.63  | -     | 1116.1   |
| gi 5174727 ref NP_005989.1  | chaperonin containing TCP1, subunit 3 (gamma); TCP1 (t-complex-1) ring  |            |   | 8.91E-07 | 5.19 | 60.23 | 15.63 | 60330.4  |
| AHQ-5-6, 3557               | R.AVAQALEVIPR.T                                                         | 1167.38326 | 2 | 4.79E-06 | 0.95 | 4.10  | -     | 1638.4   |
| AHQ-5-6, 3560               | R.AVAQALEVIPR.T                                                         | 1167.38326 | 1 | 3.39E-05 | 0.10 | 1.97  | -     | 120.8    |
| AHQ-5-6, 5117               | K.ELGIWEPLAVK.L                                                         | 1255.48728 | 2 | 3.25E-05 | 0.84 | 3.51  | -     | 509.1    |
| AHQ-5-6, 4373               | K.IPGGIEDSCVLR.G                                                        | 1430.65218 | 2 | 8.91E-07 | 0.90 | 3.36  | -     | 1105.8   |
| AHQ-5-6, 2945               | R.NLQDAMQVCR.N                                                          | 1236.40442 | 2 | 2.79E-04 | 0.88 | 3.13  | -     | 929.7    |
| AHQ-5-6, 6245 - 6316        | R.NVLLDPQLVPGGASEMAVAHALTEK.S                                           | 2618.99091 | 3 | 1.36E-06 | 0.76 | 3.75  | -     | 556.2    |
| AHQ-5-6, 5425               | R.WSSLACNIALDAVK.M                                                      | 1549.77353 | 2 | 9.49E-05 | 0.86 | 3.31  | -     | 894.2    |
| gi 4502693 ref NP_001760.1  | CD9 antigen; motility related protein; leukocyte antigen MIC3; antigen  |            |   | 9.24E-07 | 2.54 | 30.25 | 21.05 | 25415.9  |
| AHQ-5-11, 6807              | K.AIHVALNCCGLAGGVEQFISDICPK.K                                           | 2798.16446 | 3 | 9.24E-07 | 0.74 | 3.74  | -     | 527.3    |
| AHQ-5-11, 6808              | K.AIHVALNCCGLAGGVEQFISDICPK.K                                           | 2798.16446 | 2 | 1.71E-04 | 0.96 | 4.92  | -     | 1344.1   |
| AHQ-5-14-, 3127             | K.KDVLETFVTK.S                                                          | 1180.37558 | 2 | 3.16E-04 | 0.82 | 3.34  | -     | 664.2    |
| AHQ-5-11, 3146 - 3207       | K.KDVLETFVTK.S                                                          | 1180.37558 | 2 | 4.36E-04 | 0.91 | 3.10  | -     | 1196.3   |
| AHQ-5-10, 2979              | K.KDVLETFVTK.S                                                          | 1180.37558 | 2 | 1.80E-04 | 0.81 | 2.81  | -     | 850.5    |
| AHQ-5-12, 3208              | K.KDVLETFVTK.S                                                          | 1180.37558 | 2 | 9.86E-05 | 0.87 | 3.19  | -     | 863.1    |
| AHQ-5-8, 2765               | K.KDVLETFVTK.S                                                          | 1180.37558 | 2 | 7.00E-04 | 0.92 | 3.53  | -     | 948.1    |
| AHQ-5-11, 3678              | K.SCPDAIKVEFDNK.F                                                       | 1524.67770 | 2 | 4.86E-05 | 0.93 | 3.92  | -     | 1101.5   |
| gi 21536449 ref NP_002613.2 | prefoldin 1; prefoldin subunit 1 [Homo sapiens]                         |            |   | 9.29E-07 | 0.96 | 10.21 | 9.02  | 14210.4  |
| AHQ-5-13-, 3803 - 3813      | K.LADIQIEQLNR.T                                                         | 1313.48523 | 2 | 9.29E-07 | 0.96 | 4.12  | -     | 2132.0   |
| AHQ-5-13, 3896              | K.LADIQIEQLNR.T                                                         | 1313.48523 | 2 | 7.54E-04 | 0.94 | 3.76  | -     | 1607.7   |
| gi 27478053 ref XP_015334.4 | similar to heat shock 70kD protein binding protein; progesterone recep  |            |   | 9.32E-07 | 0.97 | 10.28 | 11.64 | 16603.8  |
| AHQ-5-7, 4611               | R.LLGHWEAAHDLALACK.L                                                    | 1936.18044 | 2 | 9.32E-07 | 0.97 | 5.61  | -     | 1503.1   |
| gi 11559923 ref NP_071496.1 | eukaryotic translation initiation factor 4H isoform 1 [Homo sapiens] [  |            |   | 9.51E-07 | 0.76 | 10.18 | 8.47  | 27384.8  |
| AHQ-5-10, 4375              | R.TVATPLNQVANPNSAIFGGAR.P                                               | 2099.33604 | 2 | 9.51E-07 | 0.76 | 3.60  | -     | 410.9    |
| gi 30147105 ref XP_210550.2 | similar to Chain , Aldose Reductase (E.C.1.1.1.21) Mutant With Tyr 48   |            |   | 9.81E-07 | 0.93 | 10.20 | 2.21  | 61339.9  |
| AHQ-5-5, 4610               | K.KADLNLGTIAK.S                                                         | 1243.43490 | 2 | 3.98E-04 | 0.87 | 3.27  | -     | 679.0    |
| AHQ-5-5, 4074 - 4083        | K.KADLNLGTIAK.S                                                         | 1243.43490 | 2 | 9.81E-07 | 0.93 | 4.01  | -     | 892.3    |
| gi 14745898 ref XP_016144.2 | similar to tyrosine 3-monooxygenase/tryptophan 5-monooxygenase activat  |            |   | 9.89E-07 | 0.91 | 10.20 | 7.55  | 18201.0  |
| AHQ-5-11, 6546              | K.LLCCDILDVLDK.N                                                        | 1479.74157 | 2 | 3.57E-05 | 0.95 | 4.09  | -     | 1088.0   |
| AHQ-5-9, 6196               | K.LLCCDILDVLDK.N                                                        | 1479.74157 | 1 | 9.89E-07 | 0.91 | 3.97  | -     | 854.4    |
| gi 5453916 ref NP_006311.1  | progesterone membrane binding protein [Homo sapiens]                    |            |   | 1.04E-06 | 0.90 | 10.16 | 6.28  | 23818.3  |
| AHQ-5-10, 4514              | K.FYGPAGPYGIFAGR.D                                                      | 1473.65885 | 2 | 1.04E-06 | 0.90 | 3.14  | -     | 941.2    |
| gi 4507487 ref NP_003238.1  | thrombospondin 2 [Homo sapiens]                                         |            |   | 1.06E-06 | 0.86 | 10.20 | 1.19  | 129954.5 |
| AHQ-5-2, 2449               | R.NALWHTGNTPGQVR.T                                                      | 1551.69124 | 2 | 4.46E-04 | 0.93 | 3.92  | -     | 1047.6   |
| AHQ-5-4, 2949 - 3025        | R.NALWHTGNTPGQVR.T                                                      | 1551.69124 | 2 | 1.54E-05 | 0.72 | 2.77  | -     | 556.2    |
| AHQ-5-5, 2346               | R.NALWHTGNTPGQVR.T                                                      | 1551.69124 | 2 | 7.73E-04 | 0.87 | 3.70  | -     | 883.1    |
| AHQ-5-5, 2627               | R.NALWHTGNTPGQVR.T                                                      | 1551.69124 | 2 | 6.66E-05 | 0.89 | 3.48  | -     | 929.2    |
| AHQ-5-8, 2144               | R.NALWHTGNTPGQVR.T                                                      | 1551.69124 | 2 | 1.06E-06 | 0.86 | 3.58  | -     | 780.9    |
| AHQ-5-14-, 2642             | R.NALWHTGNTPGQVR.T                                                      | 1551.69124 | 2 | 2.07E-06 | 0.80 | 3.28  | -     | 623.2    |
| AHQ-5-1, 3005               | R.NALWHTGNTPGQVR.T                                                      | 1551.69124 | 2 | 1.26E-04 | 0.75 | 3.33  | -     | 586.3    |
| gi 30149327 ref XP_293672.2 | similar to eipP7687 [Homo sapiens]                                      |            |   | 1.08E-06 | 0.65 | 10.13 | 1.92  | 59404.3  |
| AHQ-5-5, 2591               | K.SIIYYTGESK.E                                                          | 1161.28598 | 1 | 1.08E-06 | 0.65 | 2.65  | -     | 610.1    |
| gi 4506765 ref NP_002952.1  | S100 calcium-binding protein A4; 18A2; 42A; S100 calcium-binding protei |            |   | 1.09E-06 | 0.93 | 10.18 | 10.89 | 11728.5  |
| AHQ-5-14-, 3390             | K.ALDVMVSTFHK.Y                                                         | 1248.47665 | 2 | 1.09E-06 | 0.93 | 3.69  | -     | 1092.8   |
| gi 17017988 ref NP_001853.2 | cytochrome c oxidase subunit Vb precursor; cytochrome c oxidase polype  |            |   | 1.12E-06 | 0.87 | 10.17 | 9.30  | 13695.6  |
| AHQ-5-13-, 3487             | K.KGLDPYNNLAPK.G                                                        | 1315.54272 | 2 | 1.12E-06 | 0.87 | 3.43  | -     | 729.9    |
| gi 4504973 ref NP_002292.1  | lactate dehydrogenase C [Homo sapiens]                                  |            |   | 1.14E-06 | 0.89 | 10.20 | 3.61  | 36311.0  |
| AHQ-5-9, 2274 - 2275        | R.VIGSGCNLDSAR.F                                                        | 1250.36445 | 2 | 1.14E-06 | 0.89 | 4.05  | -     | 624.8    |
| gi 13129150 ref NP_005339.1 | heat shock 90kDa protein 1, alpha; heat shock 90kD protein 1, alpha [H  |            |   | 1.14E-06 | 1.84 | 20.28 | 3.42  | 84659.1  |
| AHQ-5-5, 4022 - 4023        | R.NPDDITNEEYGEFYK.S                                                     | 1834.87381 | 2 | 1.14E-06 | 0.97 | 5.70  | -     | 1164.4   |
| AHQ-5-5, 3835               | R.RAPDFLFENR.K                                                          | 1265.40235 | 2 | 3.03E-06 | 0.87 | 3.43  | -     | 711.9    |
| gi 5454090 ref NP_006271.1  | signal sequence receptor, delta; translocon-associated protein delta [H |            |   | 1.14E-06 | 1.57 | 20.16 | 17.34 | 18998.5  |
| AHQ-5-12, 4865              | R.FFDEESYLLR.K                                                          | 1406.52121 | 2 | 1.14E-06 | 0.83 | 3.32  | -     | 699.6    |
| AHQ-5-12, 6178              | R.NNEDIISIPPLFTVSDVHR.G                                                 | 2167.40715 | 3 | 5.92E-06 | 0.74 | 3.10  | -     | 718.0    |
| gi 4503481 ref NP_001395.1  | eukaryotic translation elongation factor 1 gamma; elongation factor 1-g |            |   | 1.17E-06 | 0.90 | 10.20 | 3.20  | 50118.5  |
| AHQ-5-8, 2236 - 2238        | R.KLDPGSEETQTLVR.E                                                      | 1573.73020 | 2 | 1.17E-06 | 0.90 | 4.02  | -     | 496.1    |
| gi 22748619 ref NP_689476.1 | tropomyosin 3 [Homo sapiens]                                            |            |   | 1.18E-06 | 2.84 | 30.24 | 16.46 | 28222.6  |
| AHQ-5-9, 3362 - 3375        | R.ALKDEEKMLQEIQLK.E                                                     | 1946.25520 | 2 | 1.34E-04 | 0.95 | 4.74  | -     | 1481.8   |
| AHQ-5-9, 2843 - 2854        | R.KLVIIEGDLER.T                                                         | 1285.51492 | 2 | 1.18E-06 | 0.95 | 4.49  | -     | 1396.2   |

|                            |                                                                         |            |   |            |      |       |       |          |
|----------------------------|-------------------------------------------------------------------------|------------|---|------------|------|-------|-------|----------|
| AHQ-5-9, 1980 - 1990       | K.YSQKEDKYEIEIK.I                                                       | 1689.80129 | 2 | 6.58E-04   | 0.93 | 4.54  | -     | 1581.2   |
| gi4505273 ref NP_002442.1  | 5'-methylthioadenosine phosphorylase [Homo sapiens]                     |            |   | 1.20E-06   | 0.90 | 10.22 | 6.01  | 31249.9  |
| AHQ-5-9, 4147              | K.YVDPFPGKPSDALILGK.I                                                   | 1822.09396 | 2 | 1.20E-06   | 0.90 | 4.35  | -     | 666.5    |
| gi4504041 ref NP_002061.1  | guanine nucleotide binding protein (G protein), alpha inhibiting activi |            |   | 1.26E-06   | 0.79 | 10.17 | 4.23  | 40450.7  |
| AHQ-5-8, 3697              | R.IAQSDYIPTQQDVLRT                                                      | 1747.93034 | 2 | 1.26E-06   | 0.79 | 3.42  | -     | 365.4    |
| gi7661922 ref NP_055814.1  | RAB21, member RAS oncogene family [Homo sapiens]                        |            |   | 1.31E-06   | 0.95 | 10.21 | 7.56  | 24347.4  |
| AHQ-5-10, 3895 - 3955      | R.HVSIQAEASAEVSVGAK.H                                                   | 1805.92351 | 2 | 1.31E-06   | 0.95 | 4.25  | -     | 1246.6   |
| gi4758076 ref NP_004068.1  | citrate synthase precursor; Citrate synthase, mitochondrial [Homo sapie |            |   | 1.36E-06   | 1.64 | 20.18 | 5.79  | 51706.2  |
| AHQ-5-8, 4388              | K.GLVYETSVLDDPEGIR.F                                                    | 1763.92654 | 2 | 1.36E-06   | 0.84 | 3.55  | -     | 568.1    |
| AHQ-5-8, 3000              | K.IVNPVLLLEQGA.A                                                        | 1210.44805 | 2 | 4.45E-05   | 0.80 | 2.69  | -     | 451.2    |
| gi30154095 ref XP_293967.2 | similar to gamma actin-like protein [Homo sapiens]                      |            |   | 1.38E-06   | 1.21 | 20.20 | 12.21 | 19259.0  |
| AHQ-5-3, 5111              | K.DLYTSTVLSSGGTTM*YPGIADR.M                                             | 2235.45690 | 2 | 9.28E-04   | 0.31 | 2.76  | -     | 342.7    |
| AHQ-5-10, 4450             | K.DLYTSTVLSSGGTTM*YPGIADR.M                                             | 2235.45690 | 2 | 2.03E-04   | 0.40 | 2.68  | -     | 405.2    |
| AHQ-5-10, 4824 - 4903      | K.DLYTSTVLSSGGTTM*YPGIADR.M                                             | 2219.45750 | 2 | 3.56E-04   | 0.62 | 2.82  | -     | 543.9    |
| AHQ-5-13, 4826             | K.DLYTSTVLSSGGTTM*YPGIADR.M                                             | 2235.45690 | 2 | 4.88E-06   | 0.72 | 3.58  | -     | 451.6    |
| AHQ-5-13, 4952 - 4956      | K.DLYTSTVLSSGGTTM*YPGIADR.M                                             | 2235.45690 | 2 | 1.38E-06   | 0.36 | 2.73  | -     | 398.1    |
| AHQ-5-14, 5596 - 5661      | K.DLYTSTVLSSGGTTM*YPGIADR.M                                             | 2235.45690 | 2 | 7.63E-06   | 0.57 | 3.44  | -     | 367.1    |
| AHQ-5-13-, 4729            | K.DLYTSTVLSSGGTTM*YPGIADR.M                                             | 2235.45690 | 2 | 1.06E-05   | 0.67 | 3.03  | -     | 582.5    |
| AHQ-5-13-, 5156            | K.DLYTSTVLSSGGTTM*YPGIADR.M                                             | 2219.45750 | 2 | 1.87E-06   | 0.86 | 4.06  | -     | 496.8    |
| AHQ-5-14-, 4697            | K.DLYTSTVLSSGGTTM*YPGIADR.M                                             | 2235.45690 | 2 | 6.69E-06   | 0.88 | 4.02  | -     | 614.1    |
| AHQ-5-14-, 4793 - 4853     | K.DLYTSTVLSSGGTTM*YPGIADR.M                                             | 2235.45690 | 2 | 4.64E-06   | 0.67 | 3.17  | -     | 532.8    |
| AHQ-5-14-, 5001            | K.DLYTSTVLSSGGTTM*YPGIADR.M                                             | 2235.45690 | 2 | 5.10E-05   | 0.72 | 3.14  | -     | 682.7    |
| gi12707570 ref NP_004083.2 | mitochondrial short-chain enoyl-coenzyme A hydratase 1 precursor [Homo  |            |   | 1.39E-06   | 0.94 | 10.17 | 5.86  | 31371.2  |
| AHQ-5-10, 6560             | K.ICPVTVEAIIQCAEK.I                                                     | 1992.25744 | 2 | 1.39E-06   | 0.94 | 3.42  | -     | 1407.3   |
| gi29743324 ref XP_293276.1 | similar to Heat shock 27 kDa protein (HSP 27) (Stress-responsive prote  |            |   | 1.40E-06   | 1.87 | 20.32 | 15.98 | 21244.7  |
| AHQ-5-13, 5317 - 5380      | R.KYTLPPGVDPDKVSSSLSPGEGTLTVEAPM*PK.L                                   | 3244.70168 | 3 | 4.56E-04   | 0.94 | 6.12  | -     | 1463.5   |
| AHQ-5-13-, 5215 - 5279     | R.KYTLPPGVDPDKVSSSLSPGEGTLTVEAPM*PK.L                                   | 3244.70168 | 3 | 4.31E-05   | 0.89 | 5.65  | -     | 966.0    |
| AHQ-5-13-, 5523 - 5599     | R.KYTLPPGVDPDKVSSSLSPGEGTLTVEAPM*PK.L                                   | 3228.70228 | 3 | 2.63E-05   | 0.96 | 6.21  | -     | 1131.4   |
| AHQ-5-14-, 5210            | R.KYTLPPGVDPDKVSSSLSPGEGTLTVEAPM*PK.L                                   | 3244.70168 | 3 | 1.40E-06   | 0.91 | 6.13  | -     | 947.5    |
| AHQ-5-11, 5488 - 5506      | R.KYTLPPGVDPDKVSSSLSPGEGTLTVEAPM*PK.L                                   | 3228.70228 | 3 | 8.88E-04   | 0.94 | 6.39  | -     | 1267.6   |
| gi5729808 ref NP_006557.1  | adhesion glycoprotein; platelet and T cell activation antigen 1; DNAX a |            |   | 1.43E-06   | 1.70 | 20.22 | 11.31 | 38583.7  |
| AHQ-5-6, 4824              | K.IGTQQDSIAIFSPHTGMVIR.K                                                | 2172.49357 | 2 | 1.43E-06   | 0.94 | 4.35  | -     | 1049.4   |
| AHQ-5-6, 4822              | K.IGTQQDSIAIFSPHTGMVIR.K                                                | 2172.49357 | 2 | 1.34E-05   | 0.97 | 4.41  | -     | 2598.3   |
| AHQ-5-6, 6670              | R.WSIVIPDVTVSOSGLYR.C                                                   | 2007.27528 | 3 | 9.79E-04   | 0.76 | 3.05  | -     | 376.6    |
| gi19913424 ref NP_001681.2 | ATPase, H+ transporting, lysosomal 70kD, V1 subunit A, isoform 1; V-AT  |            |   | 1.47E-06   | 3.60 | 40.23 | 10.53 | 68303.7  |
| AHQ-5-6, 4164              | R.LAEMPQSYGYPAYLGAR.L                                                   | 1782.99819 | 2 | 1.47E-06   | 0.92 | 3.75  | -     | 961.3    |
| AHQ-5-6, 1993              | K.LPANHPLLTGQR.V                                                        | 1317.52194 | 2 | 8.31E-05   | 0.83 | 3.20  | -     | 639.2    |
| AHQ-5-6, 2905              | R.TALVANTSMPVAAR.E                                                      | 1516.74852 | 2 | 2.34E-06   | 0.92 | 3.85  | -     | 1164.2   |
| AHQ-5-6, 5237 - 5310       | R.VGSHITGGDIYGVSENSLIK.H                                                | 2160.41292 | 2 | 3.45E-05   | 0.93 | 4.54  | -     | 873.8    |
| gi4505303 ref NP_002466.1  | myosin alkali light chain 1 slow a; myosin light chain 1, slow-twitch m |            |   | 1.50E-06   | 2.58 | 30.19 | 11.54 | 22763.8  |
| AHQ-5-12, 2608 - 2736      | R.ALGNQNTNAEVLK.V                                                       | 1355.52211 | 1 | 6.40E-04   | 0.26 | 2.75  | -     | 230.5    |
| AHQ-5-12, 2612 - 2676      | R.ALGNQNTNAEVLK.V                                                       | 1355.52211 | 2 | 1.50E-06   | 0.77 | 3.46  | -     | 549.2    |
| AHQ-5-12, 2617 - 2680      | R.ALGNQNTNAEVLK.V                                                       | 1355.52211 | 1 | 3.35E-04   | 0.13 | 2.79  | -     | 222.4    |
| AHQ-5-12, 2776 - 2844      | R.ALGNQNTNAEVLK.V                                                       | 1355.52211 | 2 | 2.59E-04   | 0.75 | 3.45  | -     | 439.7    |
| AHQ-5-13-, 2679 - 2752     | R.ALGNQNTNAEVLK.V                                                       | 1355.52211 | 2 | 7.66E-05   | 0.84 | 3.89  | -     | 400.7    |
| AHQ-5-12, 2965 - 2966      | R.ALGNQNTNAEVLK.V                                                       | 1355.52211 | 2 | 1.06E-05   | 0.78 | 3.30  | -     | 401.4    |
| AHQ-5-12, 3264 - 3294      | K.IILYSQCGDVMR.A                                                        | 1343.55489 | 2 | 7.26E-04   | 0.85 | 2.99  | -     | 867.4    |
| AHQ-5-12, 2578 - 2644      | K.IILYSQCGDVMR.A                                                        | 1359.55429 | 2 | 7.04E-05   | 0.79 | 2.96  | -     | 761.4    |
| AHQ-5-14-, 2621            | K.IILYSQCGDVMR.A                                                        | 1359.55429 | 2 | 2.49E-06   | 0.91 | 2.82  | -     | 1098.6   |
| AHQ-5-14-, 3227            | K.IILYSQCGDVMR.A                                                        | 1343.55489 | 2 | 2.46E-06   | 0.91 | 3.15  | -     | 1041.1   |
| gi7705704 ref NP_057001.1  | glutathione S-transferase subunit 13 homolog [Homo sapiens]             |            |   | 1.55E-06   | 4.62 | 50.22 | 24.78 | 25496.7  |
| AHQ-5-11, 3343 - 3378      | K.AGMSAEQAQGLEK.I                                                       | 1433.61314 | 2 | 3.94E-06   | 0.90 | 3.82  | -     | 1313.4   |
| AHQ-5-11, 2558 - 2560      | K.AGM*SAEQAAGLLEK.I                                                     | 1449.61254 | 2 | 1.70E-05   | 0.94 | 3.99  | -     | 1405.4   |
| AHQ-5-11, 4442             | R.FLTVNLEHPEMLEK.A                                                      | 1772.05845 | 2 | 4.03E-05   | 0.94 | 4.40  | -     | 1196.7   |
| AHQ-5-11, 3108             | R.HHLQIPIHFPPK.D                                                        | 1367.62578 | 2 | 4.05E-05   | 0.94 | 3.52  | -     | 1320.2   |
| AHQ-5-11, 4500             | R.NEDITEPQSIILAAAEK.A                                                   | 1729.86995 | 2 | 1.55E-06   | 0.90 | 4.12  | -     | 726.2    |
| gi11321640 ref NP_066301.1 | basic beta 1 syntrophin; 59-DAP; syntrophin, beta 1; syntrophin, beta   |            |   | 1.61E-06   | 0.65 | 10.15 | 3.35  | 58060.8  |
| AHQ-5-6, 4634              | R.TAFTLDPEQVPESISNQK.R                                                  | 2005.17142 | 2 | 1.61E-06   | 0.65 | 2.95  | -     | 508.5    |
| gi4885539 ref NP_005380.1  | protein-L-isoaspartate (D-aspartate) O-methyltransferase [Homo sapiens] |            |   | 1.64E-06   | 1.36 | 20.28 | 14.54 | 24636.2  |
| AHQ-5-11, 5203             | R.LILPVGAGGMQLEQYDK.L                                                   | 2044.36057 | 2 | 7.78E-06   | 0.41 | 2.64  | -     | 231.6    |
| AHQ-5-10, 1936             | K.SGGASHSELIHNLK.K                                                      | 1478.59543 | 2 | 1.64E-06   | 0.94 | 4.07  | -     | 1181.7   |
| gi29727204 ref XP_290872.1 | similar to Pyruvate kinase, M2 isozyme [Homo sapiens]                   |            |   | 1.74E-06   | 1.62 | 20.19 | 20.13 | 16297.7  |
| AHQ-5-9, 2143              | R.APIIAVTR.N                                                            | 841.03348  | 1 | 1.77E-04   | 0.28 | 2.19  | -     | 216.1    |
| AHQ-5-7, 2067              | R.APIIAVTR.N                                                            | 841.03348  | 2 | 3.06E-05   | 0.94 | 3.09  | -     | 1232.4   |
| AHQ-5-7, 4884 - 4928       | K.KGDVIVITGWWRPQSGFTNTMR.V                                              | 2392.76561 | 3 | 1.74E-06   | 0.69 | 3.23  | -     | 658.9    |
| gi4507767 ref NP_003326.1  | ubiquitin-activating enzyme E1-like; Ubiquitin-activating enzyme-2; ubi |            |   | 1.76E-06   | 4.00 | 50.19 | 6.53  | 111719.5 |
| AHQ-5-4, 4994              | K.FOHLHGRPPQWPDVAETVGLAR.D                                              | 2824.14835 | 3 | 1.76E-06   | 0.87 | 3.74  | -     | 964.6    |
| AHQ-5-4, 7356              | R.GLNPLDQVLIPTLDPDTEHIYGDNFFSR.V                                        | 3434.79811 | 3 | 3.87E-04   | 0.67 | 3.35  | -     | 406.3    |
| AHQ-5-4, 3361              | K.LLDEEYLSR.Q                                                           | 1138.25242 | 2 | 4.24E-05   | 0.83 | 3.09  | -     | 619.6    |
| AHQ-5-4, 4282              | R.VTELVLQQLTGQAPAPGQR.V                                                 | 1894.12181 | 2 | 4.91E-04   | 0.82 | 3.16  | -     | 870.3    |
| AHQ-5-4, 4025 - 4098       | R.YFPSTAHELTQWAR.H                                                      | 1707.86959 | 2 | 2.04E-04   | 0.82 | 3.54  | -     | 424.5    |
| gi5453603 ref NP_006422.1  | chaperonin containing TCP1, subunit 2 (beta); chaperonin containing 1-c |            |   | 1.80E-06   | 2.71 | 30.20 | 9.72  | 57487.9  |
| AHQ-5-7, 2838              | R.EALLSSAVDHGSDSEVK.F                                                   | 1657.76083 | 2 | 1.80E-06   | 0.91 | 4.01  | -     | 1176.2   |
| AHQ-5-7, 5386              | R.SLHDALCVLQATVK.D                                                      | 1556.80920 | 2 | 3.99E-04   | 0.94 | 3.54  | -     | 1359.6   |
| AHQ-5-7, 6994              | R.VQDDEVDGDTTSVTVLAALLLR.E                                              | 2289.48263 | 2 | 1.48E-05   | 0.87 | 3.83  | -     | 862.1    |
| gi18201911 ref NP_000629.2 | vitronectin precursor; serum spreading factor; somatomedin B; compleme  |            |   | 1.92E-06   | 0.90 | 10.21 | 3.14  | 54335.4  |
| AHQ-5-13-, 5611 - 5689     | R.SIAQYWLGCAPAGHL                                                       | 1671.90045 | 2 | 1.92E-06   | 0.90 | 3.74  | -     | 747.8    |
| AHQ-5-13, 5728             | R.SIAQYWLGCAPAGHL                                                       | 1671.90045 | 2 | 7.72E-05   | 0.93 | 4.25  | -     | 746.6    |
| gi20127408 ref NP_000173.2 | hydroxyacyl dehydrogenase, subunit A; trifunctional protein, alpha sub  |            |   | 1.93E-06   | 1.87 | 20.25 | 5.90  | 82999.1  |
| AHQ-5-6, 7220              | K.KLDSLTTSFPGFVGAATLVDEGVDAVK.H                                         | 2838.20186 | 3 | 1.47E-05   | 0.94 | 5.09  | -     | 1184.6   |
| AHQ-5-6, 2989              | K.TGIEQGSADAGLCEQSK.F                                                   | 1844.93497 | 2 | 1.93E-06   | 0.93 | 4.46  | -     | 860.6    |
| gi5453990 ref NP_006254.1  | proteasome (prosome, macropain) activator subunit 1 (PA28 alpha); Prote |            |   | 1.96E-06   | 1.81 | 20.26 | 9.24  | 28722.9  |
| AHQ-5-10, 5675             | K.ISELDALFKPALNEANLSNLK.A                                               | 2430.73906 | 2 | 1.96E-06   | 0.94 | 5.28  | -     | 666.7    |
| AHQ-5-10, 5251 - 5256      | K.ISELDALFKPALNEANLSNLK.A                                               | 2558.91197 | 3 | 6.25E-04   | 0.87 | 4.21  | -     | 744.3    |
| gi21618359 ref NP_004095.3 | fatty acid synthase [Homo sapiens]                                      |            |   | 2.02E-06   | 1.90 | 20.28 | 1.67  | 273262.0 |
| AHQ-5-1, 6209              | R.LFDHPESPPTNPTEPLFLAQAEVYK.E                                           | 2842.15075 | 3 | 2.77E-06   | 0.93 | 5.57  | -     | 530.7    |
| AHQ-5-1, 7024              | K.LPEDPLLSGLLDSPALK.A                                                   | 1779.06739 | 2 | 2.02E-06   | 0.96 | 4.40  | -     | 1322.6   |
| gi20070125 ref NP_000909.2 | prolyl 4-hydroxylase, beta subunit; v-erb-a avian erythroblastic leuke  |            |   | 2.09E-06   | 3.63 | 40.33 | 14.37 | 57115.9  |
| AHQ-5-7, 2380              | K.LGETYKDHENIVIAK.M                                                     | 1730.94291 | 2 | 1.38E-04   | 0.83 | 3.52  | -     | 718.5    |
| AHQ-5-7, 7394              | R.TGPAATLLPDGAAAESLVESSEVAVIGFFK.D                                      | 2937.24716 | 3 | 2.09E-06   | 0.97 | 6.51  | -     | 1811.3   |
| AHQ-5-7, 7392              | R.TGPAATLLPDGAAAESLVESSEVAVIGFFK.D                                      | 2937.24716 | 2 | 3.82E-06   | 0.93 | 4.35  | -     | 1244.4   |
| AHQ-5-7, 3650 - 3651       | K.VDATEESDLAQYQVGR.G                                                    | 1781.85882 | 2 | 9.56E-06   | 0.98 | 5.07  | -     | 2123.6   |
| AHQ-5-7, 3715 - 3730       | K.YQLDKDGVVLFK.K                                                        | 1425.65394 | 2 | 1.50E-05   | 0.85 | 3.59  | -     | 865.0    |
| gi8922712 ref NP_060713.1  | hypothetical protein FLJ10849 [Homo sapiens]                            |            |   | 2.10E-06   | 2.25 | 30.25 | 11.42 | 49397.9  |
| AHQ-5-7, 2336              | K.AAAQLLQSQAQSGAQQTK.K                                                  | 1958.12276 | 2 | 1.66E-05   | 0.97 | 5.04  | -     | 1422.1   |
| AHQ-5-7, 5087              | R.NLSLSGHGVDFSLPDQLVNLK.S                                               | 2141.36970 | 2 | 2.10E-06   | 0.32 | 2.66  | -     | 288.8    |
| AHQ-5-7, 2487              | K.RNEFLGELQK.K                                                          | 1234.38656 | 2 | 3.90E-04   | 0.95 | 3.85  | -     | 1734.1   |
| gi5031611 ref NP_005859.1  | BET1 homolog; Golgi vesicular membrane trafficking protein p18; Betp h  |            |   | 2.15E-06   | 1.80 | 20.24 | 15.25 | 13289.4  |
| AHQ-5-14, 6042 - 6121      | K.LLAEMDSQFDSTTGFLGK.T                                                  | 1961.18205 | 2 | 1.74E-05   | 0.85 | 3.76  | -     | 505.7    |
| AHQ-5-14-, 4693            | K.LLAEM*DSQFDSTTGFLGK.T                                                 | 1977.18145 | 2 | 7.87E-06   | 0.95 | 4.84  | -     | 1084.3   |
| AHQ-5-14-, 5445            | K.LLAEMDSQFDSTTGFLGK.T                                                  | 1961.18205 | 2 | 3.06E-05   | 0.87 | 3.64  | -     | 685.5    |
| AHQ-5-13, 4824             | K.LLAEM*DSQFDSTTGFLGK.T                                                 | 1977.18145 | 2 | 2.15E-06</ |      |       |       |          |



|                             |                                                                           |            |   |          |      |       |       |          |
|-----------------------------|---------------------------------------------------------------------------|------------|---|----------|------|-------|-------|----------|
| AHQ-5-8, 4809               | K.AAVAWAEGKPLSIEIEVAPPK.A                                                 | 2306.64276 | 2 | 4.75E-06 | 0.95 | 5.09  | -     | 930.2    |
| gi 4503291 ref NP_001346.1  | D-dopachrome tautomerase [Homo sapiens]                                   |            |   | 5.09E-06 | 1.92 | 20.24 | 19.49 | 12711.7  |
| AHQ-5-14-, 3709             | R.LCAAASILGK.P                                                            | 1076.29219 | 2 | 1.14E-04 | 0.95 | 3.19  | -     | 1717.5   |
| AHQ-5-14-, 3838             | R.SHSAHFFFLTK.E                                                           | 1451.61004 | 2 | 5.09E-06 | 0.98 | 4.89  | -     | 1709.7   |
| AHQ-5-14, 4870              | R.SHSAHFFFLTK.E                                                           | 1451.61004 | 1 | 8.25E-06 | 0.61 | 2.63  | -     | 520.2    |
| gi 4505585 ref NP_002563.1  | platelet-activating factor acetylhydrolase, isoform Ib, beta subunit 30   |            |   | 5.11E-06 | 1.76 | 20.19 | 17.03 | 25569.1  |
| AHQ-5-10, 5482 - 5551       | R.ELFSPHLHALNFGIGDTR.H                                                    | 2046.27160 | 2 | 5.11E-06 | 0.83 | 3.74  | -     | 646.5    |
| AHQ-5-10, 6408              | K.ICKPLHELMQLLEETPEEK.Q                                                   | 2452.87287 | 2 | 6.83E-04 | 0.93 | 3.53  | -     | 1199.0   |
| gi 4505591 ref NP_002565.1  | peroxiredoxin 1; natural killer-enhancing factor A; proliferation-assoc   |            |   | 5.14E-06 | 2.44 | 30.26 | 15.58 | 22110.2  |
| AHQ-5-11, 2566              | K.ATAVMPDGGQFK.D                                                          | 1165.34450 | 2 | 6.24E-04 | 0.66 | 2.88  | -     | 418.4    |
| AHQ-5-11, 3515              | R.LVQAQFQTDK.H                                                            | 1197.36469 | 2 | 5.14E-06 | 0.92 | 3.73  | -     | 939.0    |
| AHQ-5-11, 3012 - 3020       | R.TIAQDYGVLK.A                                                            | 1108.26945 | 2 | 6.57E-04 | 0.85 | 3.27  | -     | 657.9    |
| gi 4504085 ref NP_000399.1  | glycerol-3-phosphate dehydrogenase 2 (mitochondrial) [Homo sapiens] [MA   |            |   | 5.22E-06 | 1.54 | 20.19 | 3.44  | 80814.1  |
| AHQ-5-6, 6105               | R.VIFFLPWQK.M                                                             | 1178.44934 | 2 | 1.43E-04 | 0.66 | 2.83  | -     | 492.4    |
| AHQ-5-6, 6206               | R.YGAATANYMEVSVLLK.K                                                      | 1731.00632 | 2 | 5.22E-06 | 0.87 | 3.62  | -     | 695.1    |
| gi 30148644 ref XP_293716.2 | similar to Heat shock protein HSP 90-alpha (HSP 86) [Homo sapiens] [MA    |            |   | 5.38E-06 | 0.95 | 10.17 | 1.23  | 105150.3 |
| AHQ-5-5, 4146               | R.TLTIVDTGIGMTK.A                                                         | 1350.60718 | 2 | 5.38E-06 | 0.95 | 3.38  | -     | 1417.3   |
| gi 4504937 ref NP_003928.1  | kynureninase (L-kynurenine hydrolase); l-kynurenine hydrolase [Homo sap   |            |   | 5.57E-06 | 0.64 | 10.17 | 4.73  | 52351.3  |
| AHQ-5-11, 4514              | R.MIKPREGEETLRIDILEVIEK.E                                                 | 2642.06592 | 3 | 5.57E-06 | 0.64 | 3.31  | -     | 425.5    |
| gi 4503643 ref NP_000121.1  | coagulation factor V precursor; labile factor; factor V Leiden [Homo sa   |            |   | 6.20E-06 | 1.64 | 20.18 | 1.39  | 251716.5 |
| AHQ-5-4, 4996               | R.GEYEEHGLGPIR.A                                                          | 1696.92816 | 2 | 5.19E-04 | 0.84 | 3.39  | -     | 955.3    |
| AHQ-5-3, 3714 - 3793        | K.LSEGASVLDHTFPAAK.M                                                      | 1765.90099 | 2 | 6.20E-06 | 0.80 | 3.54  | -     | 702.1    |
| gi 4885153 ref NP_005198.1  | v-crck sarcoma virus CT10 oncogene homolog (avian)-like; v-crck avian sar |            |   | 6.26E-06 | 1.71 | 20.23 | 10.89 | 33776.7  |
| AHQ-5-10, 5931 - 5954       | K.IGDQFDFHLPALLEFYK.I                                                     | 2036.27195 | 2 | 5.31E-05 | 0.94 | 4.50  | -     | 776.3    |
| AHQ-5-9, 5808               | K.IGDQFDFHLPALLEFYK.I                                                     | 2036.27195 | 2 | 6.26E-06 | 0.93 | 4.39  | -     | 890.4    |
| AHQ-5-10, 5012              | R.TLYDFPQNDALDFPK.K                                                       | 1842.98222 | 2 | 2.27E-05 | 0.78 | 3.55  | -     | 391.2    |
| gi 21361070 ref NP_002617.2 | phosphofructokinase, liver; Phosphofructokinase, liver type; human liv    |            |   | 6.29E-06 | 0.93 | 10.21 | 2.06  | 90202.5  |
| AHQ-5-5, 5375               | K.GQVQEVGWHDVAGWVLR.G                                                     | 1895.07004 | 2 | 6.29E-06 | 0.93 | 4.30  | -     | 801.0    |
| gi 5803135 ref NP_006852.1  | RAB35, member RAS oncogene family; ras-related protein rab-1c (GTP-bind   |            |   | 6.33E-06 | 0.85 | 10.17 | 5.47  | 23025.1  |
| AHQ-5-14-, 3707             | K.LLIIGDSGVGK.S                                                           | 1072.28025 | 2 | 6.33E-06 | 0.85 | 3.00  | -     | 997.1    |
| AHQ-5-11, 3574 - 3596       | K.LLIIGDSGVGK.S                                                           | 1072.28025 | 2 | 5.14E-04 | 0.91 | 3.38  | -     | 1043.3   |
| gi 20127454 ref NP_004035.2 | 5-aminoimidazole-4-carboxamide ribonucleotide formyltransferase/IMP cy    |            |   | 6.35E-06 | 0.93 | 10.20 | 2.87  | 64615.5  |
| AHQ-5-6, 4705               | K.AFTHTAQYDEAISDYFR.K                                                     | 2036.14577 | 2 | 6.35E-06 | 0.93 | 4.09  | -     | 1133.6   |
| gi 30160191 ref XP_294035.2 | similar to Pyruvate kinase, M1 isozyme (Pyruvate kinase muscle isozyme    |            |   | 6.44E-06 | 0.97 | 10.23 | 2.83  | 50222.2  |
| AHQ-5-7, 4999 - 5030        | K.IYVDDGLISLQVK.Q                                                         | 1463.70048 | 1 | 3.92E-04 | 0.64 | 2.90  | -     | 643.6    |
| AHQ-5-7, 4959 - 5026        | K.IYVDDGLISLQVK.Q                                                         | 1463.70048 | 2 | 6.44E-06 | 0.97 | 4.69  | -     | 1759.6   |
| gi 4557894 ref NP_000230.1  | lysozyme precursor [Homo sapiens]                                         |            |   | 6.46E-06 | 0.90 | 10.23 | 18.92 | 16537.0  |
| AHQ-5-13, 5989              | K.TPGAVNACHLSCSALLQDNADAVACA.R                                            | 2932.25718 | 3 | 6.46E-06 | 0.90 | 4.67  | -     | 951.5    |
| gi 5902134 ref NP_009005.1  | coronin, actin binding protein, 1A; coronin, actin-binding, 1A; coronin   |            |   | 6.50E-06 | 4.39 | 50.23 | 14.32 | 51026.0  |
| AHQ-5-7, 3220               | R.CEPIAMTVPR.K                                                            | 1175.40412 | 2 | 4.08E-05 | 0.87 | 2.94  | -     | 998.5    |
| AHQ-5-7, 1964               | R.KLQATVQELQK.R                                                           | 1286.50292 | 2 | 9.52E-04 | 0.95 | 4.59  | -     | 1399.7   |
| AHQ-5-6, 7028               | R.KSDFLQEDLYPPTAGPDPALTAEEVWLGGR.D                                        | 3175.44994 | 3 | 8.49E-06 | 0.83 | 3.91  | -     | 385.1    |
| AHQ-5-4, 7246               | R.KSDFLQEDLYPPTAGPDPALTAEEVWLGGR.D                                        | 3175.44994 | 3 | 3.18E-05 | 0.85 | 4.36  | -     | 502.9    |
| AHQ-5-7, 7042               | R.KSDFLQEDLYPPTAGPDPALTAEEVWLGGR.D                                        | 3175.44994 | 3 | 5.62E-04 | 0.76 | 3.57  | -     | 472.6    |
| AHQ-5-3, 7297               | R.KSDFLQEDLYPPTAGPDPALTAEEVWLGGR.D                                        | 3175.44994 | 3 | 6.50E-06 | 0.87 | 4.12  | -     | 511.8    |
| AHQ-5-1, 7172               | R.KSDFLQEDLYPPTAGPDPALTAEEVWLGGR.D                                        | 3175.44994 | 3 | 1.31E-05 | 0.86 | 4.14  | -     | 625.7    |
| AHQ-5-7, 6955               | R.KSDFLQEDLYPPTAGPDPALTAEEVWLGGR.D                                        | 3175.44994 | 3 | 1.70E-05 | 0.89 | 4.54  | -     | 459.1    |
| AHQ-5-7, 2222               | K.LQATVQELQK.R                                                            | 1158.33000 | 2 | 3.10E-04 | 0.81 | 2.91  | -     | 667.3    |
| AHQ-5-7, 3942 - 3962        | R.VSQTWDSGFCVAVNP.K                                                       | 1798.95426 | 2 | 3.73E-05 | 0.88 | 3.88  | -     | 602.7    |
| gi 4506363 ref NP_002861.1  | RAB13, member RAS oncogene family; RAS-associated protein RAB13 [Homo s   |            |   | 6.55E-06 | 1.56 | 20.17 | 10.84 | 22774.0  |
| AHQ-5-11, 3670              | K.LLIIGDSGVGK.T                                                           | 1072.28025 | 2 | 1.11E-05 | 0.89 | 3.26  | -     | 1000.3   |
| AHQ-5-13, 3865              | K.LLIIGDSGVGK.T                                                           | 1072.28025 | 2 | 1.55E-04 | 0.82 | 3.33  | -     | 786.2    |
| AHQ-5-13-, 3776             | K.LLIIGDSGVGK.T                                                           | 1072.28025 | 2 | 1.62E-05 | 0.93 | 3.42  | -     | 1301.6   |
| AHQ-5-11, 2919              | K.LQVWDTAGQER.F                                                           | 1303.40576 | 2 | 6.55E-06 | 0.67 | 2.68  | -     | 722.5    |
| gi 5901922 ref NP_008996.1  | CDC37 homolog [Homo sapiens]                                              |            |   | 7.41E-06 | 0.89 | 10.22 | 5.56  | 44468.0  |
| AHQ-5-8, 6532               | R.LPGGLDPVEVYSLPEELQK.C                                                   | 2270.52091 | 2 | 7.41E-06 | 0.89 | 3.91  | -     | 519.9    |
| AHQ-5-7, 6686               | R.LPGGLDPVEVYSLPEELQK.C                                                   | 2270.52091 | 2 | 1.98E-04 | 0.93 | 4.32  | -     | 630.0    |
| gi 30149555 ref XP_301154.1 | similar to heat shock protein 86 [Homo sapiens]                           |            |   | 7.47E-06 | 0.93 | 10.19 | 10.56 | 15781.6  |
| AHQ-5-5, 5615               | K.HSQFIFYPITLFEK.E                                                        | 1780.05877 | 2 | 7.47E-06 | 0.93 | 3.85  | -     | 1115.8   |
| gi 13654272 ref NP_112484.1 | hypothetical protein HT036 [Homo sapiens]                                 |            |   | 7.62E-06 | 0.67 | 10.18 | 9.80  | 22615.6  |
| AHQ-5-10, 5599              | R.ITDPQVFLDTPQQAAILQK.V                                                   | 2262.54684 | 2 | 7.62E-06 | 0.67 | 3.61  | -     | 182.3    |
| gi 4504111 ref NP_002077.1  | growth factor receptor-bound protein 2 [Homo sapiens]                     |            |   | 7.64E-06 | 1.69 | 20.17 | 11.06 | 25206.2  |
| AHQ-5-10, 3616 - 3678       | K.FNSLNELVDYHR.S                                                          | 1507.63200 | 2 | 7.64E-06 | 0.85 | 3.32  | -     | 882.7    |
| AHQ-5-10, 3211              | K.VLNEECDQNWYK.A                                                          | 1599.70313 | 2 | 4.11E-04 | 0.84 | 3.28  | -     | 559.0    |
| gi 4557705 ref NP_000217.1  | keratin 9 [Homo sapiens]                                                  |            |   | 9.17E-06 | 0.94 | 10.23 | 4.66  | 61986.9  |
| AHQ-5-14-, 6081 - 6087      | K.DIENQYEQIQTIEHEVSSSGQEVQSSA.E                                           | 3266.38667 | 3 | 9.17E-06 | 0.94 | 4.40  | -     | 1569.6   |
| gi 18152767 ref NP_542775.1 | synaptotagmin-like 4 (granophilin-a) [Homo sapiens]                       |            |   | 9.18E-06 | 0.49 | 10.15 | 2.98  | 76009.1  |
| AHQ-5-9, 4775               | R.ETVGGSLHQTQMGDIWVGR.K                                                   | 2254.51154 | 2 | 9.18E-06 | 0.49 | 3.01  | -     | 354.8    |
| gi 27501260 ref XP_210460.1 | similar to Glyceraldehyde 3-phosphate dehydrogenase, liver (GAPDH) [Ho    |            |   | 9.54E-06 | 0.63 | 10.13 | 6.77  | 26988.2  |
| AHQ-5-9, 3675               | K.IISNASCSTTSLTPLAK.N                                                     | 1840.10934 | 2 | 9.54E-06 | 0.63 | 2.66  | -     | 726.4    |
| gi 30157216 ref XP_292133.2 | similar to genethonin 1 [Homo sapiens]                                    |            |   | 9.58E-06 | 0.41 | 10.17 | 4.51  | 39693.8  |
| AHQ-5-4, 4601               | K.TITLEVKPSTDIENVK.A                                                      | 1788.03268 | 2 | 3.98E-04 | 0.58 | 3.32  | -     | 488.6    |
| AHQ-5-8, 4114 - 4116        | K.TITLEVKPSTDIENVK.A                                                      | 1788.03268 | 2 | 3.20E-04 | 0.18 | 2.64  | -     | 261.2    |
| AHQ-5-13, 4385 - 4448       | K.TITLEVKPSTDIENVK.A                                                      | 1788.03268 | 2 | 9.58E-06 | 0.41 | 2.83  | -     | 326.9    |
| AHQ-5-14, 5122 - 5181       | K.TITLEVKPSTDIENVK.A                                                      | 1788.03268 | 2 | 2.26E-04 | 0.49 | 3.46  | -     | 276.8    |
| AHQ-5-14-, 4390             | K.TITLEVKPSTDIENVK.A                                                      | 1788.03268 | 2 | 1.48E-05 | 0.68 | 3.13  | -     | 502.4    |
| AHQ-5-3, 4655 - 4658        | K.TITLEVKPSTDIENVK.A                                                      | 1788.03268 | 2 | 4.23E-05 | 0.57 | 3.40  | -     | 405.5    |
| gi 4885235 ref NP_005239.1  | Gardner-Rasheed feline sarcoma viral (v-fgr) oncogene homolog; Gardner-   |            |   | 9.61E-06 | 0.89 | 10.24 | 3.78  | 59478.3  |
| AHQ-5-7, 5387               | K.TLKPGMTSPKAFLEEAQVMK.L                                                  | 2207.64277 | 2 | 9.61E-06 | 0.89 | 4.75  | -     | 979.4    |
| gi 4507509 ref NP_003245.1  | tissue inhibitor of metalloproteinase 1 precursor; Erythroid-potentiat    |            |   | 9.69E-06 | 1.90 | 20.26 | 21.26 | 23170.8  |
| AHQ-5-10, 6407              | K.LQDGLLHITTCFSFVAPWNSLSLAQR.R                                            | 2830.21117 | 2 | 9.69E-06 | 0.94 | 4.64  | -     | 904.4    |
| AHQ-5-9, 6330               | K.LQDGLLHITTCFSFVAPWNSLSLAQR.R                                            | 2830.21117 | 2 | 1.14E-04 | 0.94 | 4.59  | -     | 901.3    |
| AHQ-5-10, 4139              | K.LQSGTHCLWTDQLLQGGSEK.G                                                  | 2203.41795 | 2 | 4.64E-05 | 0.96 | 5.26  | -     | 1130.8   |
| gi 19743813 ref NP_002202.2 | integrin beta 1 isoform 1A precursor; integrin VLA-4 beta subunit; fib    |            |   | 1.00E-05 | 0.91 | 10.27 | 2.13  | 88414.9  |
| AHQ-5-1, 5384               | K.LKPEDITIQPQQVLVLR.L                                                     | 2020.36187 | 3 | 2.56E-05 | 0.83 | 3.57  | -     | 967.4    |
| AHQ-5-3, 5354               | K.LKPEDITIQPQQVLVLR.L                                                     | 2020.36187 | 2 | 2.37E-05 | 0.93 | 4.73  | -     | 788.7    |
| AHQ-5-4, 5328               | K.LKPEDITIQPQQVLVLR.L                                                     | 2020.36187 | 2 | 1.00E-05 | 0.91 | 4.16  | -     | 912.6    |
| AHQ-5-5, 5143               | K.LKPEDITIQPQQVLVLR.L                                                     | 2020.36187 | 2 | 2.19E-04 | 0.97 | 5.40  | -     | 1377.6   |
| AHQ-5-6, 5082               | K.LKPEDITIQPQQVLVLR.L                                                     | 2020.36187 | 2 | 2.71E-04 | 0.88 | 4.40  | -     | 553.4    |
| AHQ-5-10, 4630              | K.LKPEDITIQPQQVLVLR.L                                                     | 2020.36187 | 2 | 4.72E-05 | 0.88 | 3.84  | -     | 778.1    |
| AHQ-5-1, 5381 - 5400        | K.LKPEDITIQPQQVLVLR.L                                                     | 2020.36187 | 2 | 4.09E-04 | 0.91 | 4.27  | -     | 741.2    |
| gi 4557797 ref NP_000260.1  | non-metastatic cells 1 protein [Homo sapiens]                             |            |   | 1.01E-05 | 5.28 | 70.22 | 40.79 | 17148.6  |
| AHQ-5-12, 4008              | K.DRPFAGLVK.Y                                                             | 1150.35439 | 2 | 5.48E-05 | 0.92 | 3.19  | -     | 1339.2   |
| AHQ-5-12, 3542              | K.FMQASEDLK.E                                                             | 1182.37183 | 1 | 3.03E-04 | 0.16 | 1.82  | -     | 602.6    |
| AHQ-5-12, 3177              | R.GLVGEIIR.K                                                              | 829.01947  | 2 | 2.10E-04 | 0.74 | 2.68  | -     | 607.6    |
| AHQ-5-12, 2800              | R.GLVGEIIR.F                                                              | 985.20582  | 2 | 6.14E-04 | 0.85 | 2.86  | -     | 873.2    |
| AHQ-5-12, 2066              | R.NIIHSDSVESA.EK.E                                                        | 1486.56627 | 1 | 1.01E-05 | 0.88 | 4.33  | -     | 567.6    |
| AHQ-5-12, 2886 - 2954       | R.TFIAIKPDGVQR.Y                                                          | 1345.57205 | 2 | 2.78E-05 | 0.89 | 3.53  | -     | 833.7    |
| AHQ-5-12, 6110 - 6180       | K.YM*HSGPVVAMVWGLNVVK.T                                                   | 2133.52242 | 2 | 4.92E-04 | 0.83 | 3.34  | -     | 606.6    |
| gi 15626999 ref NP_258412.1 | inosine triphosphatase; Inosine triphosphatase-A [Homo sapiens]           |            |   | 1.01E-05 | 1.71 | 20.24 | 19.59 | 21445.5  |
| AHQ-5-10, 4270              | K.IDLPEVQGEPEISIQK.C                                                      | 1975.14209 | 2 | 1.01E-05 | 0.79 | 3.70  | -     | 601.0    |
| AHQ-5-10, 5568              | K.KLEEVQILGDKFPCTLVAQK.I                                                  | 2417.84985 | 2 | 5.42E-04 | 0.92 | 4.84  | -     | 785.3    |
| gi 30147721 ref XP_060104.2 | similar to RIKEN cDNA 5430400H23 [Homo sapiens]                           |            |   | 1.03E-05 | 0.38 | 10.15 | 1.13  | 146351.4 |
| AHQ-5-12, 6261              | K.YQELQGLSKSADAEK.G                                                       | 1724.89354 | 2 | 1.03E-05 | 0.38 | 3.03  | -     | 363.4    |
| gi 6005786 ref NP_009214.1  | monoglyceride lipase; lysophospholipase-like [Homo sapiens]               |            |   | 1.03E-05 | 3.49 | 40.26 | 23.96 | 34292.3  |
| AHQ-5-14-, 5998             | K.LTVPFLQLLQGSADR.L                                                       | 1530.79329 | 2 | 3.85E-04 | 0.72 | 2.93  | -     | 654.5    |
| AHQ-5-9, 3532               | R.NKTEVDIYNSDPLICR.A                                                      | 1939.13627 | 2 | 8.68E-05 | 0.95 | 4.25  | -     | 1236.6   |



|                             |                                                                          |            |   |          |      |       |       |          |
|-----------------------------|--------------------------------------------------------------------------|------------|---|----------|------|-------|-------|----------|
| AHQ-5-3, 4959 - 4978        | R.M*KCYASDQEVLDHMGFLRQALCRLR.Q                                           | 3117.59653 | 3 | 2.77E-05 | 0.40 | 3.17  | -     | 231.7    |
| gi 6005745 ref NP_009165.1  | dynactin 3 isoform 1; dynactin light chain [Homo sapiens]                |            |   | 2.82E-05 | 0.88 | 10.16 | 5.91  | 2119.3   |
| AHQ-5-11, 2764              | K.VQVALGNISSK.R                                                          | 1116.29312 | 2 | 2.82E-05 | 0.88 | 3.23  | -     | 850.0    |
| gi 10864055 ref NP_067069.1 | megakaryocyte-enhanced gene transcript 1 protein; lymphocyte antigen-6   |            |   | 2.98E-05 | 0.82 | 10.17 | 4.71  | 40891.9  |
| AHQ-5-9, 4792               | R.AADGSPCNVLLCSVVPSSR.R                                                  | 1905.14311 | 2 | 2.98E-05 | 0.82 | 3.39  | -     | 758.4    |
| gi 4505061 ref NP_002346.1  | cation-dependent mannose-6-phosphate receptor precursor; Mr 46,000 Man6  |            |   | 3.04E-05 | 0.75 | 10.16 | 5.05  | 30993.1  |
| AHQ-5-8, 2838               | R.HTLADNFPNVSEER.G                                                       | 1629.71240 | 2 | 3.04E-05 | 0.75 | 3.20  | -     | 493.1    |
| gi 21361547 ref NP_002930.2 | ribonuclease angiogenin inhibitor; Placental ribonuclease inhibitor [H]  |            |   | 3.08E-05 | 0.82 | 10.19 | 3.25  | 49973.3  |
| AHQ-5-14-, 6383             | R.WAELLPLLQQCVVR.L                                                       | 1855.19360 | 2 | 3.08E-05 | 0.82 | 3.35  | -     | 542.2    |
| AHQ-5-7, 6615               | R.WAELLPLLQQCVVR.L                                                       | 1855.19360 | 2 | 5.23E-05 | 0.89 | 3.89  | -     | 605.5    |
| gi 5802966 ref NP_006861.1  | destrin (actin depolymerizing factor); destrin [Homo sapiens]            |            |   | 3.15E-05 | 0.98 | 10.27 | 10.30 | 18505.6  |
| AHQ-5-12, 6864              | R.KEELM*FFLWAPELAPLK.S                                                   | 2079.48962 | 2 | 3.15E-05 | 0.98 | 5.46  | -     | 2301.4   |
| gi 4502923 ref NP_001830.1  | calponin 3; calponin, acidic [Homo sapiens]                              |            |   | 3.17E-05 | 0.90 | 10.17 | 3.34  | 36413.4  |
| AHQ-5-13-, 2692             | K.GPSYGLSAEVK.N                                                          | 1108.22631 | 2 | 5.46E-04 | 0.92 | 2.85  | -     | 1424.7   |
| AHQ-5-12, 2572              | K.GPSYGLSAEVK.N                                                          | 1108.22631 | 2 | 3.17E-05 | 0.90 | 3.34  | -     | 935.2    |
| gi 4557241 ref NP_001095.1  | skeletal muscle specific actinin, alpha 3 [Homo sapiens]                 |            |   | 3.18E-05 | 0.84 | 10.15 | 0.89  | 103293.7 |
| AHQ-5-11, 2815              | K.ALDFIASK.G                                                             | 865.00867  | 1 | 2.75E-04 | 0.58 | 2.38  | -     | 683.5    |
| AHQ-5-5, 2642               | K.ALDFIASK.G                                                             | 865.00867  | 2 | 3.18E-05 | 0.84 | 3.08  | -     | 608.5    |
| gi 20543399 ref XP_116396.1 | similar to peptidylprolyl isomerase A (cyclophilin A) [Homo sapiens] [   |            |   | 3.21E-05 | 0.87 | 10.16 | 5.00  | 19852.7  |
| AHQ-5-12, 4364              | R.VSFKLFADK.F                                                            | 1055.25138 | 2 | 3.21E-05 | 0.87 | 3.27  | -     | 1020.9   |
| AHQ-5-13-, 4405             | R.VSFKLFADK.F                                                            | 1055.25138 | 1 | 3.96E-05 | 0.30 | 2.71  | -     | 315.8    |
| AHQ-5-12, 4360 - 4568       | R.VSFKLFADK.F                                                            | 1055.25138 | 1 | 6.58E-04 | 0.58 | 2.14  | -     | 909.4    |
| gi 4505145 ref NP_002387.1  | malic enzyme 2, NAD(+)-dependent, mitochondrial; Malic enzyme, mitochon  |            |   | 3.35E-05 | 1.63 | 20.18 | 8.56  | 65443.3  |
| AHQ-5-6, 7250 - 7270        | K.IDSYQEPFTHSAPESIPTFEDAVNLIKPKSTIIGVAGAGR.L                             | 4245.65187 | 3 | 1.68E-04 | 0.72 | 3.61  | -     | 437.4    |
| AHQ-5-6, 2812               | K.IETQDIQALR.F                                                           | 1187.32821 | 2 | 3.35E-05 | 0.91 | 3.14  | -     | 1282.4   |
| gi 29732725 ref XP_291587.1 | similar to Endoplasmic precursor (94 kDa glucose-regulated protein) (G   |            |   | 3.35E-05 | 0.47 | 10.13 | 2.74  | 37965.5  |
| AHQ-5-5, 3079               | R.GLDFEYGSK.K                                                            | 1016.08574 | 1 | 3.35E-05 | 0.47 | 2.61  | -     | 225.9    |
| gi 7706371 ref NP_057190.1  | vesicle transport-related protein [Homo sapiens]                         |            |   | 3.35E-05 | 0.79 | 10.17 | 2.97  | 72479.5  |
| AHQ-5-6, 6625 - 6688        | K.GSPFPVEASVQVELESYR.A                                                   | 2153.29097 | 2 | 3.35E-05 | 0.79 | 3.49  | -     | 633.0    |
| gi 4507649 ref NP_003280.1  | tropomyosin 2 (beta) [Homo sapiens]                                      |            |   | 3.48E-05 | 0.79 | 10.16 | 4.58  | 32989.6  |
| AHQ-5-9, 2472 - 2548        | K.ATDAEADVASLNR.R                                                        | 1333.38703 | 2 | 3.48E-05 | 0.79 | 2.53  | -     | 1190.5   |
| gi 8923932 ref NP_060935.1  | uncharacterized hematopoietic stem/progenitor cells protein MDS030 [Hom  |            |   | 3.51E-05 | 0.87 | 10.17 | 8.84  | 17229.3  |
| AHQ-5-12, 2725              | R.MKGEADILETEK.S                                                         | 1493.66212 | 2 | 3.51E-05 | 0.87 | 3.34  | -     | 871.5    |
| gi 4502021 ref NP_003680.1  | aldo-keto reductase family 7, member A2 (aflatoxin aldehyde reductase);  |            |   | 3.68E-05 | 0.91 | 10.18 | 4.55  | 36648.3  |
| AHQ-5-9, 4879 - 4952        | R.FYANPLAAGLLTGK.Y                                                       | 1585.82741 | 2 | 3.68E-05 | 0.91 | 3.66  | -     | 990.7    |
| gi 17402865 ref NP_003303.2 | thiosulfate sulfurtransferase; rhodanese [Homo sapiens]                  |            |   | 3.68E-05 | 0.94 | 20.15 | 10.77 | 33428.7  |
| AHQ-5-9, 3586 - 3651        | R.FLGTEPEPDVAGLDSGHIR.G                                                  | 2011.18089 | 2 | 3.68E-05 | 0.19 | 2.52  | -     | 225.8    |
| AHQ-5-9, 3792               | K.TYEQVLENLESKR.F                                                        | 1609.76254 | 2 | 6.60E-05 | 0.75 | 3.02  | -     | 426.5    |
| gi 10835121 ref NP_000289.1 | pyruvate kinase, liver and RBC; Pyruvate kinase, liver and RBC type [H   |            |   | 3.69E-05 | 0.94 | 10.18 | 1.92  | 61829.8  |
| AHQ-5-7, 3370               | R.GDLGLEIPEAK.V                                                          | 1142.28420 | 1 | 2.95E-04 | 0.26 | 2.36  | -     | 377.6    |
| AHQ-5-7, 3368 - 3399        | R.GDLGLEIPEAK.V                                                          | 1142.28420 | 2 | 3.69E-05 | 0.94 | 3.53  | -     | 1204.6   |
| gi 5902016 ref NP_008939.1  | reticulin 4; neuroendocrine-specific protein C like (foocen) [Homo sapi  |            |   | 3.76E-05 | 0.96 | 10.22 | 7.04  | 22395.3  |
| AHQ-5-12, 2941              | R.HQAQIDHYGLANK.N                                                        | 1608.78270 | 2 | 6.07E-04 | 0.96 | 4.44  | -     | 1101.8   |
| AHQ-5-14, 3778 - 3858       | R.HQAQIDHYGLANK.N                                                        | 1608.78270 | 2 | 7.67E-04 | 0.62 | 2.73  | -     | 573.8    |
| AHQ-5-1, 3104               | R.HQAQIDHYGLANK.N                                                        | 1608.78270 | 2 | 3.76E-05 | 0.96 | 4.04  | -     | 1336.8   |
| gi 21618338 ref NP_003141.2 | signal transducer and activator of transcription 3 isoform 2; acute-ph   |            |   | 3.85E-05 | 0.81 | 10.18 | 3.38  | 87980.2  |
| AHQ-5-6, 2866 - 2868        | R.LLQTAATAAQGGQANHPHTAAVVTEK.Q                                           | 2577.83547 | 3 | 3.33E-04 | 0.71 | 3.34  | -     | 677.7    |
| AHQ-5-5, 2871 - 2883        | R.LLQTAATAAQGGQANHPHTAAVVTEK.Q                                           | 2577.83547 | 3 | 3.85E-05 | 0.81 | 3.53  | -     | 757.1    |
| gi 4501865 ref NP_001087.1  | ATP citrate lyase [Homo sapiens]                                         |            |   | 3.87E-05 | 0.97 | 10.32 | 1.99  | 121419.0 |
| AHQ-5-4, 6358               | R.LLQDPWLLSQNLVVKPDQLIK.R                                                | 2599.06730 | 3 | 3.87E-05 | 0.97 | 6.37  | -     | 1670.2   |
| gi 4507795 ref NP_003340.1  | ubiquitin-conjugating enzyme E2 variant 1 isoform b; DNA-binding protei  |            |   | 3.89E-05 | 0.86 | 10.14 | 4.07  | 25796.6  |
| AHQ-5-12, 3365              | K.YEAPPFVR.F                                                             | 1076.22914 | 2 | 3.89E-05 | 0.86 | 2.84  | -     | 785.8    |
| gi 5803217 ref NP_006821.1  | ubiquinol-cytochrome c reductase (6.4kD) subunit [Homo sapiens]          |            |   | 3.94E-05 | 0.83 | 10.13 | 21.43 | 6569.6   |
| AHQ-5-14-, 6171             | R.LLDWVPYINGK.F                                                          | 1431.70332 | 2 | 3.94E-05 | 0.83 | 2.59  | -     | 775.8    |
| gi 7019485 ref NP_037364.1  | programmed cell death 6; apoptosis-linked gene 2 [Homo sapiens]          |            |   | 3.96E-05 | 0.82 | 10.15 | 6.81  | 21868.3  |
| AHQ-5-11, 5438              | K.AGVNFSFEFTGVVWV.Y                                                      | 1442.59992 | 2 | 3.96E-05 | 0.82 | 3.04  | -     | 784.0    |
| gi 30149460 ref XP_210540.2 | similar to Heat shock protein HSP 90-alpha (HSP 86) [Homo sapiens] [MA   |            |   | 4.09E-05 | 0.94 | 10.16 | 3.95  | 29287.8  |
| AHQ-5-5, 2049 - 2062        | K.HIYYITGETK.D                                                           | 1225.37490 | 2 | 4.09E-05 | 0.94 | 3.12  | -     | 1059.1   |
| gi 22045787 ref XP_166506.2 | similar to Elongation factor 1-alpha 1 (EF-1-alpha-1) (Elongation fact   |            |   | 4.24E-05 | 0.88 | 10.22 | 10.30 | 24842.7  |
| AHQ-5-7, 5270               | R.VETGVLKPGMVFVFPVNVNTEVK.S                                              | 2516.98163 | 2 | 4.24E-05 | 0.88 | 4.43  | -     | 424.3    |
| gi 27499559 ref XP_062669.7 | similar to lactate dehydrogenase A-like [Homo sapiens]                   |            |   | 4.26E-05 | 0.95 | 10.27 | 5.63  | 33375.6  |
| AHQ-5-9, 6510               | K.LIIVSNPDLITYVAWK.L                                                     | 1945.33337 | 2 | 4.26E-05 | 0.95 | 5.34  | -     | 1053.6   |
| gi 4502249 ref NP_003878.1  | development- and differentiation-enhancing factor 2; PYK2 C terminus-as  |            |   | 4.37E-05 | 0.71 | 10.14 | 1.69  | 111649.9 |
| AHQ-5-7, 3588               | R.LKHKECEELLTQALSGR.F                                                    | 2023.25963 | 2 | 4.37E-05 | 0.71 | 2.88  | -     | 746.8    |
| gi 24158492 ref NP_699179.1 | F-box only protein 29; F-box protein Fbx29 [Homo sapiens]                |            |   | 4.45E-05 | 0.46 | 10.14 | 2.51  | 67296.3  |
| AHQ-5-13-, 5044             | R.RRWQEELAAQAQAPKK.R                                                     | 1840.07906 | 2 | 4.45E-05 | 0.46 | 2.73  | -     | 432.4    |
| AHQ-5-8, 5625               | R.RRWQEELAAQAQAPKK.R                                                     | 1840.07906 | 2 | 4.60E-04 | 0.33 | 2.87  | -     | 361.6    |
| gi 5453599 ref NP_006127.1  | capping protein (actin filament) muscle Z-line, alpha 2; F-actin cappin  |            |   | 4.55E-05 | 1.72 | 20.25 | 12.24 | 32948.9  |
| AHQ-5-9, 4615               | K.FTITPSTTQVVGILK.I                                                      | 1605.90007 | 2 | 4.55E-05 | 0.77 | 3.38  | -     | 336.9    |
| AHQ-5-9, 4215               | K.KIDQGTIACIESHQFQAK.N                                                   | 2317.60733 | 2 | 6.65E-05 | 0.95 | 4.56  | -     | 966.1    |
| gi 18104988 ref NP_001119.2 | adaptor-related protein complex 1, gamma 1 subunit; gamma adaptin; cla   |            |   | 4.55E-05 | 0.97 | 10.30 | 3.27  | 91679.3  |
| AHQ-5-13-, 6755             | K.TFLQQLSPSSIVPAFNVTGTITQVIK.V                                           | 2892.33903 | 3 | 4.55E-05 | 0.97 | 6.01  | -     | 1658.7   |
| gi 7662502 ref NP_054779.1  | MCT-1 protein [Homo sapiens]                                             |            |   | 4.65E-05 | 0.96 | 10.28 | 10.50 | 20555.2  |
| AHQ-5-11, 5186              | K.FVLGSANIMCPGLTSPGAK.L                                                  | 1922.25862 | 2 | 4.65E-05 | 0.96 | 5.55  | -     | 983.0    |
| gi 4507195 ref NP_003119.1  | spectrin, beta, non-erythrocytic 1; Spectrin, beta, nonerythrocytic-1 (  |            |   | 4.74E-05 | 0.53 | 10.15 | 0.51  | 274628.5 |
| AHQ-5-3, 5543               | R.LAEISDVWEEMK.T                                                         | 1450.63894 | 1 | 4.74E-05 | 0.53 | 2.91  | -     | 547.2    |
| gi 30153966 ref XP_293932.2 | similar to hypothetical protein BC013073 [Homo sapiens]                  |            |   | 4.79E-05 | 0.31 | 10.21 | 9.04  | 21711.3  |
| AHQ-5-1, 4075               | R.MIFTLFTINVSQDIRHH                                                      | 2073.44997 | 2 | 1.61E-04 | 0.56 | 3.21  | -     | 320.2    |
| AHQ-5-1, 4247 - 4320        | R.MIFTLFTINVSQDIRHH                                                      | 2073.44997 | 2 | 2.13E-04 | 0.66 | 3.32  | -     | 562.2    |
| AHQ-5-2, 3919 - 3990        | R.MIFTLFTINVSQDIRHH                                                      | 2073.44997 | 2 | 9.46E-04 | 0.31 | 2.80  | -     | 347.1    |
| AHQ-5-2, 4182 - 4257        | R.MIFTLFTINVSQDIRHH                                                      | 2073.44997 | 2 | 7.16E-04 | 0.53 | 3.35  | -     | 359.8    |
| AHQ-5-3, 4009               | R.MIFTLFTINVSQDIRHH                                                      | 2073.44997 | 2 | 4.79E-05 | 0.31 | 2.85  | -     | 385.5    |
| AHQ-5-4, 4186               | R.MIFTLFTINVSQDIRHH                                                      | 2073.44997 | 3 | 1.96E-04 | 0.86 | 3.71  | -     | 1280.5   |
| AHQ-5-5, 4037               | R.MIFTLFTINVSQDIRHH                                                      | 2073.44997 | 2 | 1.12E-04 | 0.20 | 2.77  | -     | 248.8    |
| AHQ-5-5, 4050 - 4130        | R.MIFTLFTINVSQDIRHH                                                      | 2073.44997 | 2 | 8.06E-04 | 0.54 | 3.11  | -     | 432.8    |
| AHQ-5-6, 3662               | R.MIFTLFTINVSQDIRHH                                                      | 2073.44997 | 2 | 8.98E-04 | 0.31 | 2.80  | -     | 326.7    |
| gi 20547663 ref XP_166266.1 | similar to Esterase D [Homo sapiens]                                     |            |   | 4.87E-05 | 1.48 | 20.18 | 14.54 | 31462.6  |
| AHQ-5-9, 6252 - 6326        | R.MYSYVTEELPQLINANFPVDPQR.M                                              | 2726.05680 | 2 | 3.38E-04 | 0.64 | 3.20  | -     | 356.2    |
| AHQ-5-9, 5678 - 5679        | K.SVSFAFAPICNPVLPVWGK.K                                                  | 2006.33387 | 2 | 4.87E-05 | 0.84 | 3.69  | -     | 405.8    |
| gi 21389505 ref NP_653321.1 | hypothetical protein FLJ31564 [Homo sapiens]                             |            |   | 4.96E-05 | 0.37 | 10.15 | -     | 73208.7  |
| AHQ-5-14, 4812 - 4873       | R.DSICCKLSNGADILFEPKLFKM                                                 | 2590.03282 | 3 | 4.96E-05 | 0.37 | 3.07  | -     | 288.1    |
| gi 4505185 ref NP_002406.1  | macrophage migration inhibitory factor (glycosylation-inhibiting factor  |            |   | 5.00E-05 | 0.52 | 10.17 | 7.83  | 12476.2  |
| AHQ-5-14-, 4489 - 4501      | K.LLCCGLAER.L                                                            | 1046.26608 | 2 | 7.45E-05 | 0.94 | 3.49  | -     | 1170.3   |
| AHQ-5-14, 5412              | K.LLCCGLAER.L                                                            | 1046.26608 | 1 | 5.00E-05 | 0.52 | 2.66  | -     | 189.6    |
| gi 24308035 ref NP_056034.1 | KIAA1067 protein [Homo sapiens]                                          |            |   | 5.05E-05 | 0.92 | 10.20 | 2.14  | 74668.5  |
| AHQ-5-6, 6534               | R.HDFSTLTVFPILR.H                                                        | 1645.92598 | 2 | 5.05E-05 | 0.92 | 3.99  | -     | 1093.7   |
| gi 29740794 ref XP_294045.1 | similar to Transcriptionally controlled tumor protein (TCTP) (p23) (Hist |            |   | 5.05E-05 | 0.76 | 10.16 | 6.84  | 21098.5  |
| AHQ-5-11, 2724 - 2726       | R.VKPFMTGAEQIK.H                                                         | 1420.70234 | 2 | 5.05E-05 | 0.76 | 3.25  | -     | 513.0    |
| gi 14165439 ref NP_002131.2 | heterogeneous nuclear ribonucleoprotein K isoform a; dC-stretch bindin   |            |   | 5.30E-05 | 0.47 | 10.14 | 4.09  | 51027.9  |
| AHQ-5-6, 5110               | R.GSYDGLGGPIITQVTPIK.D                                                   | 1918.18004 | 2 | 5.30E-05 | 0.47 | 2.87  | -     | 464.7    |
| gi 4758440 ref NP_004868.1  | glia maturation factor, gamma [Homo sapiens]                             |            |   | 5.52E-05 | 0.81 | 10.21 | 9.15  | 16801.2  |
| AHQ-5-12, 4274 - 4345       | R.TTDDTEAWLQEK.L                                                         | 1550.64872 | 2 | 5.52E-05 | 0.81 | 2.95  | -     | 1282.0   |
| gi 11386183 ref NP_008921.1 | WAS protein family, member 2; suppressor of cyclic-AMP receptor (WASP-   |            |   | 5.55E-05 | 0.57 | 10.14 | 3.21  | 54283.7  |
| AHQ-5-14-, 6051             | R.SELECVNITLANVIR.Q                                                      | 1834.08473 | 2 | 5.55E-05 | 0.57 | 2.82  | -     | 405.1    |
| gi 30149013 ref XP_302138.1 | similar to alpha tubulin [Homo sapiens]                                  |            |   | 5.92E-05 | 0.88 | 10.15 | 4.62  | 22444.5  |
| AHQ-5-13, 5069              | R.EIINLVDR.I                                                             | 1085.27902 | 2 | 5.92E-05 | 0.88 | 3.09  | -     | 986.3    |
| AHQ-5-13-, 4964             | R.EIINLVDR.I                                                             | 1085.27902 | 2 | 6.37E-04 | 0.67 | 2.64  | -     | 702.0    |

|                             |                                                                         |            |   |          |      |       |       |          |
|-----------------------------|-------------------------------------------------------------------------|------------|---|----------|------|-------|-------|----------|
| AHQ-5-12, 5021              | R.EIINLVLDLR.I                                                          | 1085.27902 | 2 | 1.83E-04 | 0.66 | 3.02  | -     | 624.3    |
| gi 13786129 ref NP_112586.1 | RAB33B, member RAS oncogene family; likely ortholog of mouse RAB33b [H  |            |   | 6.08E-05 | 0.16 | 10.15 | 4.80  | 25717.4  |
| AHQ-5-11, 3435              | K.IQLWDVDTAGGER.F                                                       | 1317.43243 | 1 | 3.60E-04 | 0.40 | 3.00  | -     | 245.6    |
| AHQ-5-10, 3138              | K.IQLWDVDTAGGER.F                                                       | 1317.43243 | 1 | 6.08E-05 | 0.16 | 2.14  | -     | 264.6    |
| gi 7705855 ref NP_057226.1  | steroid dehydrogenase homolog; likely ortholog of mouse Kik1 steroid de |            |   | 6.18E-05 | 0.93 | 10.20 | 4.81  | 34323.9  |
| AHQ-5-9, 5535               | K.TFVDFFSQQLHEEYR.S                                                     | 1980.14540 | 2 | 6.18E-05 | 0.93 | 3.96  | -     | 1209.4   |
| gi 14749486 ref XP_051854.1 | similar to Mesoderm development candidate 2 [Homo sapiens]              |            |   | 6.30E-05 | 0.66 | 10.15 | 8.55  | 26076.5  |
| AHQ-5-10, 3775              | R.LLEQWEKDDDDIEEGLPEHK.R                                                | 2439.57340 | 2 | 6.30E-05 | 0.66 | 2.94  | -     | 575.1    |
| gi 45044045 ref NP_002063.1 | guanine nucleotide binding protein (G protein), q polypeptide [Homo sap |            |   | 6.30E-05 | 0.96 | 10.26 | 5.29  | 42142.8  |
| AHQ-5-9, 6443               | R.VPTTGIIIEYPFDLQSVIFR.M                                                | 2196.53000 | 2 | 4.11E-04 | 0.78 | 3.59  | -     | 528.8    |
| AHQ-5-10, 6502 - 6503       | R.VPTTGIIIEYPFDLQSVIFR.M                                                | 2196.53000 | 2 | 2.96E-04 | 0.90 | 4.03  | -     | 700.5    |
| AHQ-5-8, 7162               | R.VPTTGIIIEYPFDLQSVIFR.M                                                | 2196.53000 | 2 | 6.30E-05 | 0.96 | 5.29  | -     | 976.5    |
| gi 6005854 ref NP_009204.1  | repressor of estrogen receptor activity; B-cell associated protein [Hom |            |   | 6.40E-05 | 1.68 | 20.23 | 10.70 | 33296.1  |
| AHQ-5-9, 6282               | R.IPWQFYPIYDIR.A                                                        | 1725.02480 | 2 | 6.40E-05 | 0.96 | 4.53  | -     | 1365.2   |
| AHQ-5-9, 5830 - 5906        | R.IYLTADNLVNLQDESFT.R                                                   | 2226.47137 | 2 | 1.04E-04 | 0.72 | 3.11  | -     | 543.3    |
| gi 29738504 ref XP_292188.1 | similar to ribosomal protein L31 [Homo sapiens]                         |            |   | 6.45E-05 | 0.70 | 10.17 | 6.25  | 23740.3  |
| AHQ-5-4, 5058               | R.GITSTVICRSQDR.K                                                       | 1494.65636 | 3 | 6.45E-05 | 0.70 | 3.39  | -     | 684.4    |
| gi 20532885 ref XP_086931.2 | similar to epsilon isoform of 14-3-3 protein [Homo sapiens]             |            |   | 6.54E-05 | 1.87 | 20.24 | 10.98 | 29380.0  |
| AHQ-5-9, 3535 - 3603        | K.LAEQAERYDEMVESMK.K                                                    | 1930.14986 | 2 | 7.38E-04 | 0.91 | 4.20  | -     | 821.6    |
| AHQ-5-10, 6282              | K.LICCDLIDLVDK.H                                                        | 1479.74157 | 2 | 9.14E-04 | 0.95 | 4.27  | -     | 995.2    |
| AHQ-5-9, 6194 - 6195        | K.LICCDLIDLVDK.H                                                        | 1479.74157 | 2 | 6.54E-05 | 0.95 | 4.78  | -     | 789.1    |
| gi 4758784 ref NP_004540.1  | NADH dehydrogenase (ubiquinone) 1, subcomplex unknown, 2, 14.5kDa; NADH |            |   | 6.57E-05 | 0.88 | 10.16 | 7.56  | 14187.4  |
| AHQ-5-13-, 2737             | K.REDYLYAVR.D                                                           | 1185.31400 | 2 | 6.57E-05 | 0.88 | 3.11  | -     | 865.8    |
| gi 8922754 ref NP_060735.1  | hypothetical protein FLJ10901 [Homo sapiens]                            |            |   | 6.92E-05 | 0.59 | 10.16 | 4.52  | 72890.9  |
| AHQ-5-14-, 5642 - 5721      | R.LPTQPGPGWSRCPSSLALCALSFQKSTM*ESK.D                                    | 3380.86025 | 3 | 6.92E-05 | 0.59 | 3.13  | -     | 550.5    |
| gi 5453559 ref NP_006347.1  | ATP synthase, H+ transporting, mitochondrial F0 complex, subunit d; ATP |            |   | 6.98E-05 | 1.87 | 20.24 | 17.39 | 18491.1  |
| AHQ-5-11, 6435 - 6442       | K.TIDWFAEIIPIQNQK.A                                                     | 1874.12896 | 2 | 1.32E-04 | 0.95 | 4.74  | -     | 876.5    |
| AHQ-5-11, 4838              | K.YPYWPHQPIENL                                                          | 1557.73261 | 2 | 6.98E-05 | 0.92 | 3.40  | -     | 1173.1   |
| gi 16933540 ref NP_004451.2 | fibroblast activation protein, alpha subunit; integral membrane serine  |            |   | 7.09E-05 | 0.30 | 10.10 | 1.32  | 87711.9  |
| AHQ-5-10, 6131 - 6210       | K.FIEM*GFIDEK.R                                                         | 1245.42636 | 1 | 7.09E-05 | 0.30 | 1.94  | -     | 691.8    |
| gi 4503377 ref NP_001377.1  | dihydropyrimidinase-like 2; collapsin response mediator protein hCRMP-2 |            |   | 7.40E-05 | 2.35 | 30.21 | 10.84 | 62293.3  |
| AHQ-5-7, 3988 - 4068        | R.AITIANQTNCPYITK.V                                                     | 1823.10355 | 2 | 7.40E-05 | 0.63 | 3.16  | -     | 223.1    |
| AHQ-5-7, 5372               | R.FQMPDQGMSTADDFQGTG.K                                                  | 2152.34998 | 2 | 1.21E-04 | 0.82 | 3.18  | -     | 787.9    |
| AHQ-5-7, 4940               | R.LIDLGTGPEGHVLSRPEEVEAEAVNR.A                                          | 2902.20927 | 3 | 3.72E-04 | 0.90 | 4.18  | -     | 813.5    |
| gi 20428652 ref NP_005347.2 | lymphocyte-specific protein tyrosine kinase; oncogene LCK; membrane as  |            |   | 7.48E-05 | 0.81 | 10.18 | 1.96  | 57969.3  |
| AHQ-5-7, 2166 - 2174        | R.LIEDNEYTAR.E                                                          | 1224.30217 | 2 | 7.48E-05 | 0.81 | 3.52  | -     | 566.5    |
| gi 4503013 ref NP_003906.1  | copine I [Homo sapiens]                                                 |            |   | 7.51E-05 | 0.93 | 10.24 | 3.72  | 59058.5  |
| AHQ-5-6, 7328               | R.EALAQTVLAEVPTQLVSYFR.A                                                | 2236.55253 | 2 | 7.51E-05 | 0.93 | 4.86  | -     | 687.8    |
| gi 27481323 ref XP_208234.1 | similar to inactive progesterone receptor, 23 kD; likely ortholog of m  |            |   | 7.64E-05 | 0.73 | 10.13 | -     | 18694.3  |
| AHQ-5-11, 4406              | K.LTFSCGLGSDNF.K                                                        | 1447.59493 | 2 | 7.64E-05 | 0.73 | 2.61  | -     | 825.3    |
| gi 30156575 ref XP_301313.1 | similar to caspase 1 isoform alpha precursor; interleukin 1-beta conve  |            |   | 7.68E-05 | 0.22 | 10.11 | 7.14  | 16555.1  |
| AHQ-5-14, 4761              | K.YLALIIINTK.F                                                          | 1136.36594 | 1 | 7.68E-05 | 0.22 | 2.27  | -     | 294.4    |
| gi 5174737 ref NP_006077.1  | tubulin, beta, 4 [Homo sapiens]                                         |            |   | 7.78E-05 | 0.29 | 10.14 | 3.78  | 50517.5  |
| AHQ-5-14-, 6182 - 6218      | K.M*SSTFIGNSTAIQELFK.R                                                  | 1891.13493 | 2 | 7.78E-05 | 0.29 | 2.81  | -     | 194.4    |
| gi 14249382 ref NP_116139.1 | hypothetical protein MGC15429 [Homo sapiens]                            |            |   | 7.92E-05 | 2.51 | 30.26 | 17.14 | 22345.5  |
| AHQ-5-11, 4258              | R.FSVLLHLGIR.F                                                          | 1155.41731 | 2 | 1.26E-04 | 0.91 | 2.99  | -     | 1128.0   |
| AHQ-5-11, 6734              | K.GAGHPCLYLDKPEEWHGTLGLDFLQGLQ                                          | 2984.29058 | 3 | 7.92E-05 | 0.77 | 4.54  | -     | 363.5    |
| AHQ-5-11, 4899 - 4938       | K.TPALIVYGDQDPMGQTSFEHLK.Q                                              | 2448.73644 | 3 | 2.00E-04 | 0.82 | 3.72  | -     | 747.9    |
| gi 4503573 ref NP_001967.1  | enolase 3; enolase-3, beta, muscle; muscle specific enolase; beta enola |            |   | 8.26E-05 | 0.85 | 10.19 | 3.46  | 46958.5  |
| AHQ-5-14-, 3671 - 3681      | K.VNQIGSVTESIAQCK.L                                                     | 1635.82159 | 2 | 8.26E-05 | 0.85 | 3.15  | -     | 862.3    |
| AHQ-5-8, 2946               | K.VNQIGSVTESIAQCK.L                                                     | 1635.82159 | 2 | 8.88E-05 | 0.87 | 3.77  | -     | 654.6    |
| gi 4507287 ref NP_003755.1  | syntaxin 11 [Homo sapiens]                                              |            |   | 8.39E-05 | 2.14 | 30.23 | 14.29 | 32955.3  |
| AHQ-5-9, 4124               | R.DIRIDQDENQLLVADV.K                                                    | 1985.18488 | 2 | 8.39E-05 | 0.97 | 4.53  | -     | 1717.9   |
| AHQ-5-9, 4202               | K.EVSGDQIEDMFEQGK.W                                                     | 1712.81676 | 2 | 1.26E-04 | 0.59 | 2.89  | -     | 578.0    |
| AHQ-5-9, 3499               | R.LAELLLDSK.Q                                                           | 1002.18679 | 1 | 6.27E-04 | 0.69 | 3.06  | -     | 399.8    |
| AHQ-5-9, 3498               | R.LAELLLDSK.Q                                                           | 1002.18679 | 1 | 3.03E-04 | 0.58 | 2.56  | -     | 821.2    |
| gi 29725611 ref NP_066954.2 | regulatory subunit PR 53 of protein phosphatase 2A isoform b; phospho   |            |   | 8.66E-05 | 0.64 | 10.13 | 6.81  | 36775.0  |
| AHQ-5-9, 4878               | K.TGPFAEHSNQLWNISAVPSVSK.V                                              | 2457.68484 | 2 | 8.66E-05 | 0.64 | 2.64  | -     | 444.7    |
| gi 4502989 ref NP_001856.1  | cytochrome c oxidase subunit VIIa polypeptide 2 (liver) precursor; hepa |            |   | 8.95E-05 | 0.83 | 10.15 | 15.66 | 9395.9   |
| AHQ-5-14-, 5225 - 5257      | K.LFQEDDEIPLYL.K                                                        | 1623.82758 | 2 | 8.95E-05 | 0.83 | 3.09  | -     | 834.3    |
| AHQ-5-14, 6020              | K.LFQEDDEIPLYL.K                                                        | 1623.82758 | 2 | 9.71E-04 | 0.91 | 2.97  | -     | 1499.8   |
| gi 28376635 ref NP_783865.1 | Rab37-like [Homo sapiens]                                               |            |   | 8.96E-05 | 0.87 | 10.18 | 5.56  | 24169.2  |
| AHQ-5-10, 3712              | R.AWLTEIHEYAQR.D                                                        | 1517.67002 | 2 | 8.96E-05 | 0.87 | 3.50  | -     | 735.7    |
| gi 21450665 ref NP_659415.1 | hypothetical protein FLJ32745 [Homo sapiens]                            |            |   | 8.97E-05 | 0.31 | 10.13 | 2.11  | 76218.1  |
| AHQ-5-12, 6436              | K.KQETEEELIENDYR.V                                                      | 1796.87025 | 2 | 8.97E-05 | 0.31 | 2.51  | -     | 131.1    |
| gi 19923750 ref NP_002858.2 | RAB3B, member RAS oncogene family; Brain antigen RAB3B [Homo sapiens]   |            |   | 9.07E-05 | 0.92 | 10.17 | 5.02  | 24757.7  |
| AHQ-5-11, 3302 - 3355       | K.LQIWDVDTAGGER.Y                                                       | 1317.43243 | 2 | 9.07E-05 | 0.92 | 3.32  | -     | 979.0    |
| gi 14161692 ref NP_115706.1 | calpain small subunit 2 [Homo sapiens]                                  |            |   | 9.14E-05 | 0.99 | 20.14 | 5.65  | 27660.1  |
| AHQ-5-12, 3285              | K.LGFEEFK.Y                                                             | 869.98378  | 2 | 9.14E-05 | 0.78 | 2.55  | -     | 690.3    |
| AHQ-5-10, 3267              | K.YLWNLIK.K                                                             | 951.10326  | 1 | 3.55E-04 | 0.22 | 2.01  | -     | 298.6    |
| gi 7330335 ref NP_039234.1  | chloride intracellular channel 4; chloride intracellular channel 4 like |            |   | 9.53E-05 | 0.78 | 10.17 | 8.70  | 28771.9  |
| AHQ-5-10, 5158              | K.LDELYNSPLPDEIDENSMDIK.F                                               | 2580.76043 | 2 | 9.53E-05 | 0.78 | 3.35  | -     | 539.2    |
| gi 11993943 ref NP_055419.1 | Tax interaction protein 1 [Homo sapiens]                                |            |   | 9.80E-05 | 0.90 | 10.19 | 13.71 | 13734.6  |
| AHQ-5-13-, 4113             | R.VSEGGPAEIAGLQIGDK.I                                                   | 1641.80454 | 2 | 9.80E-05 | 0.90 | 3.18  | -     | 1243.3   |
| AHQ-5-13, 4190 - 4216       | R.VSEGGPAEIAGLQIGDK.I                                                   | 1641.80454 | 2 | 4.74E-04 | 0.88 | 3.80  | -     | 938.3    |
| gi 5803009 ref NP_006786.1  | EH-domain containing 1; homolog of Drosophila past; EH domain contain   |            |   | 9.91E-05 | 0.78 | 10.20 | 2.81  | 60844.7  |
| AHQ-5-7, 3578               | R.KKEPELFTVAEGLR.Q                                                      | 1746.00072 | 2 | 9.91E-05 | 0.78 | 3.49  | -     | 509.0    |
| gi 30157049 ref XP_301676.1 | similar to G1/S-specific cyclin D3 [Homo sapiens]                       |            |   | 9.93E-05 | 0.52 | 10.16 | 7.83  | 36968.4  |
| AHQ-5-9, 6332               | K.AGDELTELLAGVTVVTEVGLQAAAPR.L                                          | 2830.16311 | 3 | 9.93E-05 | 0.52 | 3.10  | -     | 579.2    |
| gi 4503179 ref NP_003602.1  | oral-facial-digital syndrome 1; chromosome X open reading frame 5; oral |            |   | 1.06E-04 | 0.08 | 10.14 | 0.99  | 116670.5 |
| AHQ-5-5, 5975               | K.KEELNQSVMNR.V                                                         | 1217.31440 | 1 | 1.06E-04 | 0.08 | 2.38  | -     | 201.4    |
| gi 8923733 ref NP_060055.1  | sugar transporter (SLC2A6 gene) [Homo sapiens]                          |            |   | 1.10E-04 | 0.51 | 10.16 | 6.11  | 54569.1  |
| AHQ-5-8, 6638               | R.KLSIM*FSAVPSAAGYALMAGAHGLWM*LLLR.G                                    | 3266.93502 | 3 | 1.10E-04 | 0.51 | 3.11  | -     | 384.4    |
| gi 4759302 ref NP_004729.1  | VAMP (vesicle-associated membrane protein)-associated protein B and C;  |            |   | 1.11E-04 | 1.31 | 20.14 | 11.52 | 27228.2  |
| AHQ-5-12, 4281              | K.FRGPFTDVVTTNLK.L                                                      | 1595.82383 | 2 | 1.11E-04 | 0.89 | 2.65  | -     | 1860.8   |
| AHQ-5-12, 3418              | K.VEQVLSLEPQHELK.F                                                      | 1649.86980 | 2 | 8.32E-04 | 0.43 | 2.73  | -     | 397.3    |
| gi 4506057 ref NP_002722.1  | protein kinase, cAMP-dependent, catalytic, beta [Homo sapiens]          |            |   | 1.13E-04 | 0.14 | 10.13 | 2.56  | 40622.4  |
| AHQ-5-8, 3137               | R.NLLQVDTLK.R                                                           | 1044.22690 | 1 | 1.13E-04 | 0.14 | 1.88  | -     | 193.2    |
| gi 29731460 ref XP_293027.1 | similar to ADP/ATP carrier protein, fibroblast isoform (ADP/ATP transl  |            |   | 1.16E-04 | 0.39 | 10.14 | 4.69  | 23572.2  |
| AHQ-5-10, 2042 - 2066       | K.LLLQVQHASQ.Q                                                          | 1137.35716 | 1 | 1.16E-04 | 0.39 | 2.19  | -     | 369.7    |
| gi 23110942 ref NP_002781.2 | proteasome alpha 5 subunit; proteasome component 5; macropain subunit   |            |   | 1.22E-04 | 0.93 | 10.21 | 7.88  | 26410.9  |
| AHQ-5-10, 4290              | K.GPQLFHMDSGTFVQCDDAR.A                                                 | 2165.39491 | 2 | 1.22E-04 | 0.93 | 4.15  | -     | 945.8    |
| gi 4557251 ref NP_001101.1  | a disintegrin and metalloprotease domain 10 [Homo sapiens]              |            |   | 1.24E-04 | 0.84 | 10.22 | 1.87  | 84141.7  |
| AHQ-5-5, 3978               | R.TITLQPGSFCNDFR.G                                                      | 1607.76993 | 2 | 1.24E-04 | 0.84 | 3.45  | -     | 412.3    |
| gi 11863152 ref NP_004964.2 | jumonji; jumonji (mouse) homolog [Homo sapiens]                         |            |   | 1.24E-04 | 0.42 | 10.13 | 1.04  | 138733.5 |
| AHQ-5-13-, 4523             | K.KWNKLADM*LRIPR.T                                                      | 1658.00814 | 2 | 1.24E-04 | 0.42 | 2.58  | -     | 617.7    |
| gi 19923142 ref NP_002256.2 | karyopherin beta 1; nuclear factor p97; importin 90; importin beta-1 s  |            |   | 1.26E-04 | 0.91 | 10.19 | 1.60  | 97169.7  |
| AHQ-5-5, 2577               | K.TVSPDRLEEAQK.F                                                        | 1557.73077 | 2 | 1.26E-04 | 0.91 | 3.79  | -     | 1214.1   |
| gi 15553127 ref NP_000180.2 | hexokinase 2; hexokinase-2, muscle [Homo sapiens]                       |            |   | 1.27E-04 | 1.38 | 20.16 | 2.07  | 102379.2 |
| AHQ-5-4, 2269               | K.GAAM*VTAAYR.L                                                         | 1126.31148 | 2 | 1.27E-04 | 0.92 | 3.23  | -     | 1294.2   |
| AHQ-5-4, 4312               | R.NILIDFTK.R                                                            | 964.14024  | 1 | 1.33E-04 | 0.46 | 2.23  | -     | 333.6    |
| gi 5802978 ref NP_006780.1  | apolipoprotein B mRNA editing enzyme, catalytic polypeptide-like 2; apo |            |   | 1.31E-04 | 0.53 | 10.16 | 12.50 | 25703.0  |
| AHQ-5-1, 5397 - 5419        | K.LKELIELPPEIVTGERL*PANFFKFQFR.N                                        | 3380.96783 | 3 | 1.31E-04 | 0.53 | 3.27  | -     | 261.7    |
| gi 6005717 ref NP_009031.1  | ATP synthase, H+ transporting, mitochondrial F0 complex, subunit e; ATP |            |   | 1.32E-04 | 0.16 | 10.12 | 14.49 | 7933.1   |
| AHQ-5-4, 2320               | K.KQDELKRIAR.E                                                          | 1257.46804 | 1 | 1.32E-04 | 0.16 | 2.32  | -     | 260.8    |
| gi 5803121 ref NP_006801.1  | for protein disulfide isomerase-related [Homo sapiens]                  |            |   | 1.33E-04 | 1.77 | 20.16 | 4.24  | 59594.0  |
| AHQ-5-7, 3720               | R.FHISEFTLK.Y                                                           | 1219.41350 | 2 | 1.33E-04 | 0.87 | 2.68  | -     | 995.4    |

|                            |                                                                         |            |   |          |      |       |       |          |
|----------------------------|-------------------------------------------------------------------------|------------|---|----------|------|-------|-------|----------|
| AHQ-5-7, 2860              | K.GPPLWEEDPGAK.D                                                        | 1296.40999 | 2 | 4.66E-04 | 0.90 | 3.28  | -     | 927.4    |
| gi17473323 ref XP_061930.1 | similar to Hmeobox protein DBX1 [Homo sapiens]                          |            |   | 1.34E-04 | 0.17 | 10.11 | 2.62  | 37282.8  |
| AHQ-5-11, 2814 - 2824      | R.RAVFSDVQR.K                                                           | 1078.20667 | 1 | 1.34E-04 | 0.17 | 2.16  | -     | 244.3    |
| gi4503609 ref NP_001976.1  | electron-transfer-flavoprotein, beta polypeptide; electron-transferring |            |   | 1.34E-04 | 0.95 | 10.23 | 6.27  | 27843.4  |
| AHQ-5-10, 4678             | K.HSMNPFCEIAVEAVR.L                                                     | 1891.11834 | 2 | 1.34E-04 | 0.95 | 4.58  | -     | 1012.0   |
| gi30148456 ref XP_293602.2 | similar to glutathione-S-transferase like; glutathione transferase ome  |            |   | 1.35E-04 | 0.88 | 10.16 | 3.88  | 29139.6  |
| AHQ-5-10, 4090             | K.VPSLVGFSFLR.T                                                         | 1075.28583 | 2 | 2.11E-04 | 0.89 | 3.13  | -     | 1034.4   |
| AHQ-5-11, 4443             | K.VPSLVGFSFLR.T                                                         | 1075.28583 | 2 | 1.66E-04 | 0.86 | 3.02  | -     | 821.4    |
| AHQ-5-9, 3955              | K.VPSLVGFSFLR.T                                                         | 1075.28583 | 2 | 1.35E-04 | 0.88 | 2.88  | -     | 918.9    |
| gi29741138 ref XP_291762.1 | similar to hypothetical protein MGC33214 [Homo sapiens]                 |            |   | 1.35E-04 | 0.53 | 10.17 | 3.01  | 56604.2  |
| AHQ-5-13-, 4700            | K.NSSVPCASLRVRLR.E                                                      | 1778.05092 | 3 | 1.35E-04 | 0.53 | 3.31  | -     | 668.1    |
| gi4504521 ref NP_002147.1  | heat shock 60kDa protein 1 (chaperonin); mitochondrial matrix protein P |            |   | 1.35E-04 | 1.62 | 20.20 | 3.84  | 61024.2  |
| AHQ-5-7, 5523              | K.TLNDELEIIEGMMK.F                                                      | 1505.71604 | 2 | 1.35E-04 | 0.67 | 2.79  | -     | 634.7    |
| AHQ-5-7, 2516              | K.VGLQVVAVK.A                                                           | 913.13961  | 2 | 2.11E-04 | 0.95 | 3.13  | -     | 1806.4   |
| gi4557014 ref NP_001743.1  | catalsae [Homo sapiens]                                                 |            |   | 1.37E-04 | 0.75 | 20.19 | 3.42  | 59755.8  |
| AHQ-5-7, 2362              | K.DAIFIQK.K                                                             | 963.11234  | 1 | 1.37E-04 | 0.39 | 2.10  | -     | 604.7    |
| AHQ-5-7, 3946              | R.DLFNAIATGK.Y                                                          | 1050.19000 | 1 | 9.36E-04 | 0.36 | 1.92  | -     | 552.0    |
| gi6005735 ref NP_009194.1  | coatomer protein complex, subunit epsilon [Homo sapiens]                |            |   | 1.39E-04 | 0.91 | 10.22 | 6.82  | 34493.9  |
| AHQ-5-9, 4095              | R.KFVVLDLDEIKPSSAPELQAVR.M                                              | 2284.64032 | 2 | 1.39E-04 | 0.91 | 4.33  | -     | 594.1    |
| gi24307939 ref NP_036205.1 | chaperonin containing TCP1, subunit 5 (epsilon) [Homo sapiens]          |            |   | 1.42E-04 | 0.92 | 10.17 | 3.14  | 59670.7  |
| AHQ-5-7, 7087              | R.WVWGPEIEIAIATGGR.I                                                    | 1739.99618 | 2 | 1.42E-04 | 0.92 | 3.40  | -     | 1396.7   |
| gi4502097 ref NP_001142.1  | solute carrier family 25 (mitochondrial carrier; adenine nucleotide tra |            |   | 1.44E-04 | 1.12 | 20.18 | 13.13 | 33148.9  |
| AHQ-5-10, 6476 - 6543      | R.YFAGNLASGGAGATSLCFVYPLDFAR.T                                          | 2799.10926 | 2 | 2.71E-04 | 0.83 | 3.67  | -     | 649.6    |
| AHQ-5-10, 5171 - 5174      | R.YFPTQALNFAFK.D                                                        | 1447.66130 | 1 | 1.44E-04 | 0.29 | 2.26  | -     | 453.1    |
| gi29732043 ref XP_294519.1 | similar to chromosome 15 open reading frame 2 [Homo sapiens]            |            |   | 1.45E-04 | 0.46 | 10.16 | 2.70  | 121243.9 |
| AHQ-5-7, 7150 - 7151       | R.QLAAISATSVINITGRSLIEWGVWDSVMK.K                                       | 3260.79557 | 3 | 1.45E-04 | 0.46 | 3.14  | -     | 481.1    |
| gi22065448 ref XP_084610.2 | similar to tubulin alpha-1 chain - Chinese hamster [Homo sapiens] [MAS  |            |   | 1.46E-04 | 0.88 | 10.18 | 2.41  | 41009.4  |
| AHQ-5-7, 4818 - 4834       | K.EIIDLVDLR.I                                                           | 1086.26378 | 2 | 1.46E-04 | 0.88 | 3.56  | -     | 860.2    |
| gi20149621 ref NP_056348.2 | DKFZP586B1621 protein [Homo sapiens]                                    |            |   | 1.52E-04 | 0.74 | 10.19 | 3.65  | 58984.8  |
| AHQ-5-7, 1999              | R.VAPAEQEPADSTAAGGSASK.R                                                | 1942.03059 | 2 | 1.52E-04 | 0.74 | 3.71  | -     | 322.5    |
| gi4506063 ref NP_002725.1  | protein kinase, cAMP-dependent, regulatory, type I, alpha; tissue-speci |            |   | 1.54E-04 | 0.85 | 10.20 | 4.46  | 42981.4  |
| AHQ-5-8, 4817              | R.LTVDADALEPQVDFEDGQK.I                                                 | 1861.04222 | 2 | 8.36E-04 | 0.52 | 2.87  | -     | 253.9    |
| AHQ-5-7, 4986              | R.LTVDADALEPQVDFEDGQK.I                                                 | 1861.04222 | 2 | 1.54E-04 | 0.85 | 4.00  | -     | 452.9    |
| gi5453998 ref NP_006382.1  | importin 7; RAN-binding protein 7 [Homo sapiens]                        |            |   | 1.57E-04 | 0.75 | 10.16 | 1.64  | 119515.7 |
| AHQ-5-4, 5286              | R.NPVPWYQALHGLNEEQK.R                                                   | 2056.22658 | 2 | 1.57E-04 | 0.75 | 3.29  | -     | 497.5    |
| gi20149635 ref NP_057227.2 | p47 protein [Homo sapiens]                                              |            |   | 1.58E-04 | 0.54 | 10.13 | 6.22  | 40572.5  |
| AHQ-5-8, 3345              | K.LGSTAPQLVLTSSPAQAENEA.K                                               | 2315.48018 | 2 | 1.58E-04 | 0.54 | 2.70  | -     | 363.5    |
| gi22748857 ref NP_689616.1 | hypothetical protein FLJ39155 [Homo sapiens]                            |            |   | 1.59E-04 | 0.62 | 10.14 | 1.99  | 43814.7  |
| AHQ-5-12, 2337             | K.KMSISNPK.T                                                            | 905.90784  | 2 | 1.59E-04 | 0.62 | 2.74  | -     | 501.2    |
| gi10864021 ref NP_067033.1 | MUM2 protein [Homo sapiens]                                             |            |   | 1.60E-04 | 0.87 | 10.17 | 11.03 | 16831.5  |
| AHQ-5-13, 6072 - 6141      | K.NPLCPLGQTVQSELFR.S                                                    | 1861.11187 | 2 | 1.60E-04 | 0.87 | 3.46  | -     | 546.0    |
| gi4885079 ref NP_005165.1  | ATP synthase, H+ transporting, mitochondrial F1 complex, gamma polypept |            |   | 1.61E-04 | 0.67 | 10.13 | 3.37  | 32880.7  |
| AHQ-5-9, 2967              | K.EVMVLGIGDK.I                                                          | 1061.27773 | 1 | 1.61E-04 | 0.67 | 2.63  | -     | 474.4    |
| gi23308567 ref NP_079356.2 | asparaginase-like 1 protein [Homo sapiens]                              |            |   | 1.66E-04 | 0.90 | 10.23 | 10.06 | 32084.3  |
| AHQ-5-12, 4722             | R.VGDSPLCAGGYADNDIGAVSTTGHEGSEILK.V                                     | 3021.21957 | 3 | 1.66E-04 | 0.90 | 4.66  | -     | 866.6    |
| gi16306548 ref NP_006504.2 | seryl-tRNA synthetase; serine-tRNA ligase [Homo sapiens]                |            |   | 1.70E-04 | 0.59 | 10.16 | 3.50  | 58776.9  |
| AHQ-5-7, 6315              | K.EVMQVEAQLSQFDEELYK.V                                                  | 2187.41227 | 2 | 1.70E-04 | 0.59 | 3.14  | -     | 484.6    |
| gi7657585 ref NP_055067.1  | solute carrier family 25 (mitochondrial carrier; ornithine transporter) |            |   | 1.75E-04 | 0.86 | 10.18 | 5.32  | 32736.1  |
| AHQ-5-10, 5152             | K.DGPLGFYHGLSSTLLR.E                                                    | 1733.94849 | 2 | 1.75E-04 | 0.86 | 3.56  | -     | 895.8    |
| gi22748799 ref NP_689584.1 | hypothetical protein MGC26818 [Homo sapiens]                            |            |   | 1.75E-04 | 0.82 | 10.14 | 5.56  | 21222.4  |
| AHQ-5-11, 1996             | K.HAVTGEAEVLR.S                                                         | 1182.31165 | 2 | 1.75E-04 | 0.82 | 2.78  | -     | 767.3    |
| gi8923579 ref NP_060377.1  | hypothetical protein FLJ20625 [Homo sapiens]                            |            |   | 1.79E-04 | 0.91 | 10.28 | 8.07  | 17744.7  |
| AHQ-5-12, 5401             | R.TDEQALLSILAK.T                                                        | 1389.57677 | 2 | 1.79E-04 | 0.91 | 3.30  | -     | 1049.9   |
| gi4506181 ref NP_002778.1  | proteasome alpha 2 subunit; proteasome subunit HC3; proteasome componen |            |   | 1.79E-04 | 0.95 | 10.22 | 5.98  | 25898.4  |
| AHQ-5-10, 3272 - 3280      | K.HIGLVYSGMGPDYR.V                                                      | 1565.77809 | 2 | 1.79E-04 | 0.95 | 4.32  | -     | 1132.6   |
| gi29736026 ref XP_085123.3 | similar to Ras-related protein Rab-15 [Homo sapiens]                    |            |   | 1.84E-04 | 0.74 | 10.14 | 5.29  | 23517.8  |
| AHQ-5-13, 3577             | R.IQIWDTAGQER.Y                                                         | 1317.43243 | 2 | 1.84E-04 | 0.74 | 2.90  | -     | 660.2    |
| gi30154099 ref XP_299053.2 | similar to High mobility group protein 1 (HMG-1) (Amphoterin) (Heparin  |            |   | 1.85E-04 | 0.27 | 10.10 | 1.34  | 83174.7  |
| AHQ-5-2, 3465              | R.FGALGDRAER.S                                                          | 1092.19020 | 1 | 1.85E-04 | 0.27 | 1.95  | -     | 304.4    |
| gi6005902 ref NP_009043.1  | thrombospondin 3 [Homo sapiens]                                         |            |   | 1.87E-04 | 0.55 | 10.15 | -     | 104200.6 |
| AHQ-5-1, 4796              | R.FYVVMWK.Q                                                             | 973.21547  | 1 | 4.49E-04 | 0.74 | 2.12  | -     | 1038.0   |
| AHQ-5-2, 4603              | R.FYVVMWK.Q                                                             | 973.21547  | 2 | 2.57E-04 | 0.90 | 2.99  | -     | 861.0    |
| AHQ-5-4, 4606              | R.FYVVMWK.Q                                                             | 973.21547  | 1 | 1.87E-04 | 0.55 | 1.85  | -     | 672.3    |
| AHQ-5-6, 4288              | R.FYVVMWK.Q                                                             | 973.21547  | 1 | 2.82E-04 | 0.74 | 2.18  | -     | 821.7    |
| AHQ-5-7, 4047 - 4118       | R.FYVVMWK.Q                                                             | 973.21547  | 1 | 3.86E-04 | 0.58 | 1.91  | -     | 804.3    |
| AHQ-5-9, 3832              | R.FYVVMWK.Q                                                             | 973.21547  | 1 | 8.92E-04 | 0.74 | 2.72  | -     | 575.0    |
| AHQ-5-9, 3835              | R.FYVVMWK.Q                                                             | 973.21547  | 1 | 2.59E-04 | 0.80 | 2.34  | -     | 922.7    |
| AHQ-5-10, 4028             | R.FYVVMWK.Q                                                             | 973.21547  | 1 | 5.76E-04 | 0.52 | 2.24  | -     | 400.6    |
| AHQ-5-11, 4306 - 4331      | R.FYVVMWK.Q                                                             | 973.21547  | 1 | 3.54E-04 | 0.78 | 2.32  | -     | 981.1    |
| gi14141168 ref NP_005007.2 | poly(rC)-binding protein 2 isoform a; poly(rC)-binding protein 2; alph  |            |   | 2.00E-04 | 0.80 | 10.16 | 3.55  | 38650.9  |
| AHQ-5-11, 4772             | R.IITLAGPTNAIFK.A                                                       | 1359.63864 | 2 | 2.00E-04 | 0.80 | 3.24  | -     | 497.0    |
| gi6005978 ref NP_009098.1  | zinc finger protein 258 [Homo sapiens]                                  |            |   | 2.02E-04 | 0.48 | 10.16 | 3.73  | 79098.7  |
| AHQ-5-5, 5621              | R.DFGERWGNVCKM*CSYCSQTSNPLVENR.L                                        | 3379.63995 | 3 | 2.02E-04 | 0.48 | 3.14  | -     | 194.0    |
| gi5453760 ref NP_006147.1  | neural precursor cell expressed, developmentally down-regulated 8 [Homo |            |   | 2.02E-04 | 0.25 | 10.15 | 17.28 | 90715.5  |
| AHQ-5-14, 4481 - 4510      | K.EIEIDIEPTDKVER.I                                                      | 1686.84208 | 2 | 2.02E-04 | 0.25 | 2.57  | -     | 291.6    |
| gi7669501 ref NP_005552.2  | lysosomal-associated membrane protein 1 [Homo sapiens]                  |            |   | 2.05E-04 | 0.92 | 10.20 | 3.85  | 44772.8  |
| AHQ-5-4, 7237              | R.FFLQIQILNTLIPDAR.D                                                    | 1847.14988 | 2 | 2.05E-04 | 0.92 | 4.03  | -     | 964.1    |
| gi18087855 ref NP_542408.1 | dynein light chain 2 [Homo sapiens]                                     |            |   | 2.05E-04 | 0.63 | 10.12 | 7.87  | 10349.8  |
| AHQ-5-14, 3890 - 3952      | K.DIAAIYK.K                                                             | 793.93045  | 1 | 2.05E-04 | 0.63 | 2.20  | -     | 591.1    |
| gi21359837 ref NP_003312.2 | Tu translation elongation factor, mitochondrial [Homo sapiens]          |            |   | 2.16E-04 | 0.83 | 10.19 | 4.20  | 49541.2  |
| AHQ-5-8, 6025 - 6037       | R.DLEKPFLLPVEAVYVPGR.G                                                  | 2130.47156 | 2 | 2.16E-04 | 0.83 | 3.89  | -     | 499.4    |
| gi29734623 ref XP_299768.1 | hypothetical protein XP_299768 [Homo sapiens]                           |            |   | 2.19E-04 | 0.48 | 10.12 | 7.46  | 14905.7  |
| AHQ-5-10, 3323             | K.RMVPVKIEIDL.R                                                         | 1243.50477 | 1 | 2.19E-04 | 0.48 | 2.31  | -     | 608.9    |
| gi19913373 ref NP_079536.2 | G6B protein isoform G6b-A precursor; G6B protein; immunoglobulin recep  |            |   | 2.23E-04 | 1.60 | 20.17 | 16.46 | 25002.6  |
| AHQ-5-9, 3350              | R.GPGPGETPALCGSPSPQAPPVAVHSGPC                                          | 2858.07042 | 2 | 2.23E-04 | 0.65 | 2.95  | -     | 438.3    |
| AHQ-5-12, 2402             | R.TVLHVLGDR.T                                                           | 1010.17224 | 2 | 2.60E-04 | 0.95 | 3.08  | -     | 1654.1   |
| AHQ-5-11, 2304 - 2336      | R.TVLHVLGDR.T                                                           | 1010.17224 | 2 | 3.21E-04 | 0.85 | 2.66  | -     | 1152.2   |
| gi7705011 ref NP_057546.1  | hypothetical protein HSPC194 [Homo sapiens]                             |            |   | 2.25E-04 | 0.95 | 10.19 | 15.18 | 11564.5  |
| AHQ-5-14-, 6290            | K.FMPAGLIAGASLLM*VAK.V                                                  | 1707.13765 | 2 | 2.25E-04 | 0.95 | 3.69  | -     | 1475.9   |
| gi4758158 ref NP_004395.1  | neural precursor cell expressed, developmentally down-regulated 5 [Homo |            |   | 2.26E-04 | 1.66 | 20.18 | 9.70  | 41487.2  |
| AHQ-5-8, 5605              | R.LYPWGVVEVENPEHNDFLK.L                                                 | 2286.52696 | 2 | 3.52E-04 | 0.75 | 3.03  | -     | 484.7    |
| AHQ-5-14-, 6586            | K.STLINSFLTDLYPER.V                                                     | 1883.13416 | 2 | 2.26E-04 | 0.90 | 3.70  | -     | 901.3    |
| gi4557385 ref NP_000055.1  | complement component 3 precursor; acylation-stimulating protein cleavag |            |   | 2.26E-04 | 0.94 | 10.20 | 1.32  | 187162.3 |
| AHQ-5-6, 4532              | R.VPVAQQEDTVQSLTQGDGVAK.L                                               | 2199.40432 | 2 | 2.26E-04 | 0.94 | 4.01  | -     | 930.9    |
| gi24430132 ref NP_036610.2 | WW domain binding protein 2 [Homo sapiens]                              |            |   | 2.27E-04 | 0.64 | 10.17 | 5.75  | 28086.8  |
| AHQ-5-13, 4254             | K.DCEIKQPVFGANYIK.G                                                     | 1784.02587 | 2 | 2.27E-04 | 0.64 | 2.98  | -     | 320.9    |
| gi16160851 ref XP_035527.2 | similar to KIAA1370 protein [Homo sapiens]                              |            |   | 2.30E-04 | 0.36 | 10.13 | 1.39  | 121688.8 |
| AHQ-5-13, 4709 - 4714      | R.TLKSFVMVDSSISNR.Q                                                     | 1672.88527 | 2 | 2.30E-04 | 0.36 | 2.68  | -     | 447.3    |
| gi10092691 ref NP_055243.1 | tight junction protein 3 (zona occludens 3) [Homo sapiens]              |            |   | 2.33E-04 | 0.46 | 10.15 | 2.10  | 104827.2 |
| AHQ-5-7, 7423              | R.RSPGGSEANGLALVSGFKR.L                                                 | 1961.17147 | 2 | 2.33E-04 | 0.46 | 3.04  | -     | 450.5    |
| gi22748879 ref NP_689628.1 | hypothetical protein FLJ32642 [Homo sapiens]                            |            |   | 2.49E-04 | 0.30 | 10.13 | 5.04  | 44342.1  |
| AHQ-5-13-, 2700 - 2763     | K.SASSAAAGSPGGLTSLQQQK.Q                                                | 1862.97660 | 2 | 2.49E-04 | 0.30 | 2.67  | -     | 301.3    |
| gi22048785 ref XP_047659.6 | similar to KIAA0532 protein [Homo sapiens]                              |            |   | 2.58E-04 | 0.29 | 10.15 | 1.24  | 188838.7 |
| AHQ-5-5, 3485              | K.QKPLSYLENNELTELCKVAK.G                                                | 2492.87358 | 3 | 2.58E-04 | 0.29 | 3.04  | -     | 255.5    |
| gi4759274 ref NP_004777.1  | thioredoxin-like, 32kDa; thioredoxin-related 32 kDa protein; thioredoxi |            |   | 2.65E-04 | 0.45 | 10.14 | 7.96  | 32251.1  |
| AHQ-5-9, 5262              | R.SEPTQALETTDDIKEDGIVPLR.Y                                              | 2569.80365 | 2 | 2.65E-04 | 0.45 | 2.78  | -     | 426.9    |
| gi29743626 ref XP_297123.1 | hypothetical protein XP_297123 [Homo sapiens]                           |            |   | 2.68E-04 | 0.75 | 10.15 | 13.79 | 13908.9  |



|                            |                                                                             |            |   |          |      |       |       |          |
|----------------------------|-----------------------------------------------------------------------------|------------|---|----------|------|-------|-------|----------|
| AHQ-5-13-, 6783            | R.M*EQKNVRSNNVWELAK.I                                                       | 1963.20761 | 2 | 2.68E-04 | 0.75 | 2.92  | -     | 922.2    |
| gi23308579 ref NP_006592.3 | unactive progesterone receptor, 23 kd; likely ortholog of mouse telome      |            |   | 2.82E-04 | 0.94 | 10.23 | 10.63 | 18697.3  |
| AHQ-5-11, 4695             | K.HLNEIDLHFCIDPNDK.H                                                        | 2069.24049 | 2 | 2.82E-04 | 0.94 | 4.59  | -     | 617.9    |
| gi22267436 ref NP_056284.1 | DKFZp564D177 protein [Homo sapiens]                                         |            |   | 2.86E-04 | 0.57 | 10.15 | 7.29  | 28466.4  |
| AHQ-5-10, 6054             | K.DKEWQEQLIPNLALIDK.Q                                                       | 2201.50664 | 2 | 2.86E-04 | 0.57 | 2.93  | -     | 426.6    |
| gi12707562 ref NP_073728.1 | period 2 isoform 2; period, Drosophila, homolog of, 2; period circadia      |            |   | 2.97E-04 | 0.89 | 10.17 | 0.88  | 136578.7 |
| AHQ-5-4, 4154 - 4181       | R.AEICKNGKTK.N                                                              | 1264.43426 | 2 | 2.97E-04 | 0.89 | 3.45  | -     | 861.2    |
| gi22035665 ref NP_055874.1 | talin 2 [Homo sapiens]                                                      |            |   | 2.98E-04 | 0.41 | 10.14 | 0.43  | 271552.5 |
| AHQ-5-7, 2138              | K.NCGEMSEIAEK.V                                                             | 1269.38481 | 1 | 2.98E-04 | 0.41 | 2.80  | -     | 289.5    |
| gi18375655 ref NP_055184.2 | protein tyrosine phosphatase, non-receptor type 18; brain-derived phos      |            |   | 3.01E-04 | 0.86 | 10.21 | 6.52  | 50482.1  |
| AHQ-5-13, 5093             | R.VPADQSPAGSGAYEDVAGGAQTGGGLGNLR.I                                          | 2864.03331 | 3 | 3.01E-04 | 0.86 | 4.27  | -     | 925.2    |
| gi29739581 ref XP_084467.3 | similar to eukaryotic initiation factor 5A [Homo sapiens]                   |            |   | 3.03E-04 | 0.94 | 10.20 | 8.44  | 16773.1  |
| AHQ-5-12, 2922             | R.LPEGDLGKEIEQK.Y                                                           | 1456.62321 | 2 | 3.03E-04 | 0.94 | 4.09  | -     | 1318.0   |
| gi27262622 ref NP_065176.2 | neuron navigator 1; neuron navigator-1; pore membrane and/or filament       |            |   | 3.10E-04 | 0.37 | 10.15 | 1.76  | 202078.2 |
| AHQ-5-11, 4903 - 4971      | K.LSHISRLVLESLSDEVDLKGYSMSDSLMDK.G                                          | 3671.06345 | 3 | 3.10E-04 | 0.37 | 3.04  | -     | 324.8    |
| gi22129786 ref NP_059980.1 | gp25L2 protein [Homo sapiens]                                               |            |   | 3.13E-04 | 0.91 | 10.22 | 7.94  | 25104.5  |
| AHQ-5-10, 5758 - 5759      | K.FFIEEIPDETMTVIGNYR.T                                                      | 2088.34713 | 2 | 3.13E-04 | 0.91 | 4.34  | -     | 535.3    |
| gi4757712 ref NP_004026.1  | acyl-Coenzyme A oxidase isoform a; acyl-coenzyme A oxidase 1 [Homo sapiens] |            |   | 3.20E-04 | 0.93 | 10.26 | 4.24  | 74745.4  |
| AHQ-5-6, 6861              | R.GRPEPLDLHLGMFLPTLLHQATAEQQER.F                                            | 3199.63241 | 3 | 3.20E-04 | 0.93 | 5.11  | -     | 962.9    |
| gi7019375 ref NP_037373.1  | formin homology 2 domain containing 1; FH1/FH2 domain-containing protei     |            |   | 3.21E-04 | 0.87 | 10.20 | 2.06  | 126496.5 |
| AHQ-5-7, 3712              | K.FSGVAGEAPSNPSPVAVSSGPR.G                                                  | 2227.41945 | 2 | 3.21E-04 | 0.87 | 4.05  | -     | 485.2    |
| gi13259508 ref NP_075408.1 | dynactin 1 isoform 2; dynactin 1 (p150, Glued (Drosophila) homolog); p      |            |   | 3.21E-04 | 0.21 | 10.13 | 1.22  | 127403.0 |
| AHQ-5-11, 3851             | -M*M*RAQPTARKTTTR.R                                                         | 1861.96674 | 2 | 3.21E-04 | 0.21 | 2.62  | -     | 321.2    |
| gi4506807 ref NP_000325.1  | sodium channel, voltage-gated, type IV, alpha; hyperkalemic periodic pa     |            |   | 3.24E-04 | 0.53 | 10.16 | 1.63  | 208061.0 |
| AHQ-5-11, 6524 - 6603      | K.PNKIKLITLPLMPVPGDKHICLDLIFALTK.E                                          | 3420.17196 | 3 | 3.24E-04 | 0.53 | 3.15  | -     | 391.0    |
| gi14149817 ref NP_115523.1 | hypothetical protein DKFZp434D0127 [Homo sapiens]                           |            |   | 3.37E-04 | 0.32 | 10.10 | 0.98  | 81154.7  |
| AHQ-5-14-, 3667            | R.RRILMGK.I                                                                 | 874.13334  | 1 | 3.37E-04 | 0.32 | 1.99  | -     | 296.6    |
| gi7706563 ref NP_057614.1  | RAB-8b protein [Homo sapiens]                                               |            |   | 3.55E-04 | 0.30 | 10.14 | 3.86  | 23584.0  |
| AHQ-5-11, 3191             | K.LAIDYGIK.F                                                                | 893.06202  | 1 | 3.55E-04 | 0.30 | 1.90  | -     | 513.4    |
| gi29789112 ref NP_065765.1 | KIAA1198 protein [Homo sapiens]                                             |            |   | 3.56E-04 | 0.51 | 10.13 | 2.08  | 61340.2  |
| AHQ-5-12, 3662 - 3676      | K.THTGKPFVCR.E                                                              | 1333.49829 | 2 | 3.56E-04 | 0.51 | 2.56  | -     | 615.6    |
| gi30156276 ref XP_304146.1 | hypothetical protein XP_304146 [Homo sapiens]                               |            |   | 3.72E-04 | 0.70 | 10.17 | 6.88  | 28134.9  |
| AHQ-5-7, 6024 - 6098       | -M*AAGALKAQGRNLDKWR.E                                                       | 1961.23808 | 2 | 3.72E-04 | 0.70 | 3.36  | -     | 952.6    |
| gi23397534 ref NP_694978.1 | hypothetical protein MGC45491 [Homo sapiens]                                |            |   | 3.76E-04 | 0.25 | 10.15 | 7.62  | 24260.8  |
| AHQ-5-14-, 4643            | R.KNSTKDLVTLGASSLR.E                                                        | 1778.00112 | 2 | 3.76E-04 | 0.25 | 3.04  | -     | 313.6    |
| gi30156349 ref XP_301652.1 | similar to Eukaryotic initiation factor 4A-1 (eIF-4A-1) (eIF4A-1) [         |            |   | 3.83E-04 | 0.23 | 10.15 | 9.33  | 21450.7  |
| AHQ-5-8, 4044 - 4066       | K.M*HAADLTVSALRGM*DEK.E                                                     | 1993.20912 | 2 | 3.83E-04 | 0.23 | 2.75  | -     | 321.8    |
| gi4505359 ref NP_002481.1  | NADH dehydrogenase (ubiquinone) 1 alpha subcomplex, 6, 14kDa; NADH dehy     |            |   | 3.94E-04 | 0.92 | 10.17 | 8.59  | 15136.5  |
| AHQ-5-13, 2299             | R.FFHETEAPRPK.D                                                             | 1359.51414 | 2 | 3.94E-04 | 0.92 | 3.44  | -     | 1074.3   |
| gi27479210 ref XP_212118.1 | hypothetical protein XP_212118 [Homo sapiens]                               |            |   | 3.97E-04 | 0.14 | 10.10 | 6.48  | 12593.6  |
| AHQ-5-3, 2206 - 2242       | R.LCNWPKL.L                                                                 | 932.12153  | 1 | 3.97E-04 | 0.14 | 2.06  | -     | 308.0    |
| gi17482508 ref XP_058957.1 | similar to QIL1 [Homo sapiens]                                              |            |   | 4.18E-04 | 0.78 | 10.26 | 16.95 | 13087.2  |
| AHQ-5-14-, 6663            | R.DSWNAGIM*TVMSALSVPASK.A                                                   | 2082.38744 | 2 | 4.18E-04 | 0.78 | 4.04  | -     | 666.3    |
| gi4507955 ref NP_003394.1  | YY1 transcription factor [Homo sapiens]                                     |            |   | 4.33E-04 | 0.27 | 10.10 | 2.17  | 44712.3  |
| AHQ-5-13-, 2736            | K.KFAQSTNLK.S                                                               | 1037.19446 | 1 | 4.33E-04 | 0.27 | 2.00  | -     | 222.0    |
| gi10864011 ref NP_067022.1 | sulfide dehydrogenase like; sulfide dehydrogenase like (yeast) [Homo s      |            |   | 4.54E-04 | 0.08 | 10.09 | 1.33  | 49960.4  |
| AHQ-5-4, 1976              | K.NLIEV.RA                                                                  | 743.87466  | 1 | 4.54E-04 | 0.08 | 1.89  | -     | 213.9    |
| gi27477134 ref NP_079199.2 | nucleoporin 210; nuclear pore membrane glycoprotein 210; gp210 [Homo s      |            |   | 4.63E-04 | 0.21 | 10.15 | 0.95  | 205108.8 |
| AHQ-5-2, 4169              | R.CDAIVDLIHDQIVSTTR.E                                                       | 2071.34097 | 2 | 4.63E-04 | 0.21 | 2.70  | -     | 277.9    |
| gi4506407 ref NP_002873.1  | RAN binding protein 1 [Homo sapiens]                                        |            |   | 4.70E-04 | 0.86 | 10.16 | 5.47  | 23310.0  |
| AHQ-5-10, 4064             | K.TLEEEELFK.M                                                               | 1382.45159 | 2 | 4.70E-04 | 0.86 | 3.26  | -     | 622.8    |
| gi6912340 ref NP_036277.1  | deoxythymidylate kinase (thymidylate kinase); thymidylate kinase [Homo      |            |   | 4.75E-04 | 0.63 | 10.13 | 5.69  | 23827.2  |
| AHQ-5-11, 3828             | R.YAFSGVAFTGAK.E                                                            | 1219.37036 | 2 | 4.75E-04 | 0.63 | 2.50  | -     | 743.0    |
| gi20270303 ref NP_620124.1 | mitochondrial Rho 2 [Homo sapiens]                                          |            |   | 4.80E-04 | 0.61 | 10.15 | 3.24  | 68117.5  |
| AHQ-5-5, 5789              | R.LSDQDLQDALSDEELNAFAQK.S                                                   | 2280.38792 | 2 | 4.80E-04 | 0.61 | 3.03  | -     | 359.3    |
| gi4506467 ref NP_002897.1  | radixin [Homo sapiens]                                                      |            |   | 5.16E-04 | 0.87 | 10.17 | 2.40  | 68563.4  |
| AHQ-5-6, 4016              | R.ILALCM*GNHLEYMR.R                                                         | 1739.07675 | 2 | 5.16E-04 | 0.87 | 3.32  | -     | 639.9    |
| gi21362062 ref NP_115744.2 | leucine zipper and CTNBP1 domain containing [Homo sapiens]                  |            |   | 5.21E-04 | 0.54 | 10.14 | 7.89  | 21494.4  |
| AHQ-5-11, 4035             | K.ETLEQLSEFNDSLK.I                                                          | 1781.94186 | 2 | 5.21E-04 | 0.54 | 2.68  | -     | 344.9    |
| gi20553919 ref XP_033811.2 | similar to hypothetical protein FLJ14775 [Homo sapiens]                     |            |   | 5.24E-04 | 0.46 | 10.14 | -     | 17460.4  |
| AHQ-5-13, 6097 - 6104      | R.NGSKEGNHSTQPKR.N                                                          | 1677.76352 | 2 | 5.24E-04 | 0.46 | 2.86  | -     | 525.2    |
| gi7657548 ref NP_055378.1  | spondyloepiphyseal dysplasia, late; sedlin [Homo sapiens]                   |            |   | 5.28E-04 | 0.53 | 10.14 | 10.00 | 16444.6  |
| AHQ-5-13, 5160 - 5170      | K.FSMNPFPYSPNPIR.S                                                          | 1699.91087 | 2 | 5.28E-04 | 0.53 | 2.68  | -     | 384.7    |
| gi21361794 ref NP_060918.2 | TIP120 protein [Homo sapiens]                                               |            |   | 5.32E-04 | 0.91 | 10.19 | 1.06  | 136374.7 |
| AHQ-5-4, 4501              | R.AVAALLTIPEAEK.S                                                           | 1326.56381 | 2 | 5.32E-04 | 0.91 | 3.73  | -     | 1028.0   |
| gi25121940 ref NP_004482.2 | glucocorticoid receptor DNA binding factor 1 isoform b [Homo sapiens]       |            |   | 5.40E-04 | 0.34 | 10.11 | 0.66  | 172174.1 |
| AHQ-5-7, 3151 - 3192       | R.EDTSLPSLSK.D                                                              | 1077.16739 | 1 | 5.40E-04 | 0.34 | 2.24  | -     | 456.9    |
| gi29737976 ref XP_290742.1 | similar to Phosphoribosylformylglycinamide synthase (FGAM synthase)         |            |   | 5.40E-04 | 0.81 | 10.19 | 2.09  | 144733.3 |
| AHQ-5-3, 7241 - 7303       | R.LGGTALAAQCFSQGLGHPDLDLLENLVR.A                                            | 3050.39201 | 3 | 5.40E-04 | 0.81 | 3.76  | -     | 662.2    |
| gi19923233 ref NP_002970.2 | sterol carrier protein 2 [Homo sapiens]                                     |            |   | 5.43E-04 | 0.90 | 10.17 | 2.01  | 58993.3  |
| AHQ-5-13, 2710             | K.KLEEELGQFVK.K                                                             | 1336.47242 | 2 | 5.43E-04 | 0.90 | 3.44  | -     | 884.0    |
| gi4506185 ref NP_002780.1  | proteasome alpha 4 subunit; proteasome component C9; proteasome subunit     |            |   | 5.52E-04 | 0.77 | 10.17 | 9.20  | 29483.6  |
| AHQ-5-10, 6180 - 6195      | K.LNEDMACSVAGITSDANVLTNLR.L                                                 | 2595.84629 | 2 | 5.52E-04 | 0.77 | 3.37  | -     | 405.0    |
| gi4502125 ref NP_001152.1  | nudix-type motif 2; diadenosine 5',5'-P1,P4-tetraphosphate pyrophospho      |            |   | 5.85E-04 | 0.92 | 10.22 | 9.52  | 16829.2  |
| AHQ-5-12, 6294             | R.WLGLLEAACQLAQFK.E                                                         | 1694.93232 | 2 | 5.85E-04 | 0.92 | 4.34  | -     | 731.3    |
| gi6912714 ref NP_036592.1  | translocase of inner mitochondrial membrane 9 homolog; translocase of i     |            |   | 5.85E-04 | 0.34 | 10.15 | 17.98 | 10377.9  |
| AHQ-5-14-, 6145            | K.LTETCLFDCVKDFTR.E                                                         | 2009.24656 | 3 | 5.85E-04 | 0.34 | 3.03  | -     | 327.9    |
| gi4504051 ref NP_002064.1  | guanine nucleotide binding protein, alpha z polypeptide; transducin alp     |            |   | 5.92E-04 | 0.66 | 10.14 | 4.51  | 40923.5  |
| AHQ-5-9, 5467 - 5472       | K.EYKPLIYNAIDSLTR.I                                                         | 1910.20274 | 2 | 5.92E-04 | 0.66 | 2.72  | -     | 417.6    |
| gi21361827 ref NP_062826.2 | putative methyltransferase M6A; putative methyltransferase [Homo sapie      |            |   | 5.97E-04 | 0.64 | 10.15 | 3.10  | 64473.6  |
| AHQ-5-3, 4237              | K.YVHYEIDACMDEAPGSK.D                                                       | 2074.23418 | 3 | 5.97E-04 | 0.64 | 3.10  | -     | 962.6    |
| gi7705638 ref NP_057158.1  | CGI-143 protein [Homo sapiens]                                              |            |   | 5.97E-04 | 0.70 | 10.17 | 10.95 | 14289.3  |
| AHQ-5-14-, 3978 - 4037     | R.TKLEELSPVLELR.N                                                           | 1727.98047 | 2 | 5.97E-04 | 0.70 | 3.35  | -     | 856.4    |
| gi30148290 ref XP_302053.1 | similar to transcriptionally controlled tumor protein [Homo sapiens] [MA    |            |   | 6.04E-04 | 0.16 | 10.11 | 6.09  | 13275.9  |
| AHQ-5-11, 1990 - 1995      | K.HILANFK.N                                                                 | 843.00793  | 1 | 6.04E-04 | 0.16 | 2.24  | -     | 211.0    |
| gi17440554 ref XP_067503.1 | similar to peptidyl-Pro cis trans isomerase [Homo sapiens]                  |            |   | 6.05E-04 | 0.37 | 10.18 | 7.93  | 18110.6  |
| AHQ-5-12, 3532             | R.VKEGM*DIVEAM*ER.F                                                         | 1539.75747 | 2 | 6.05E-04 | 0.37 | 2.53  | -     | 250.0    |
| gi7662518 ref NP_054756.1  | NTT5 protein [Homo sapiens]                                                 |            |   | 6.06E-04 | 0.07 | 10.10 | 1.36  | 82226.5  |
| AHQ-5-14-, 3677            | K.FGLQLQVAK.I                                                               | 1103.33918 | 1 | 6.06E-04 | 0.07 | 2.05  | -     | 134.4    |
| gi5803133 ref NP_006825.1  | RAB32, member RAS oncogene family [Homo sapiens]                            |            |   | 6.13E-04 | 0.26 | 10.13 | 4.44  | 24997.1  |
| AHQ-5-10, 2426             | K.DNINIEEAA.R.F                                                             | 1145.20505 | 1 | 6.13E-04 | 0.26 | 2.33  | -     | 228.3    |
| gi4503539 ref NP_001409.1  | eukaryotic translation initiation factor 4 gamma, 2; Eukaryotic transla     |            |   | 6.13E-04 | 0.86 | 10.18 | 1.65  | 102361.2 |
| AHQ-5-8, 5108              | K.LQDRWELTELQSSK.V                                                          | 1922.13048 | 2 | 6.13E-04 | 0.86 | 3.62  | -     | 629.1    |
| gi5032137 ref NP_005629.1  | synaptobrevin-like 1 [Homo sapiens]                                         |            |   | 6.14E-04 | 1.32 | 20.15 | 13.18 | 24934.9  |
| AHQ-5-13-, 4607 - 4672     | K.LTYSHGNYLFLHYICQDR.I                                                      | 2189.39466 | 2 | 6.14E-04 | 0.50 | 2.83  | -     | 236.8    |
| AHQ-5-13, 2889             | K.VMETQAQVDELK.G                                                            | 1391.57303 | 2 | 6.14E-04 | 0.82 | 3.10  | -     | 912.9    |
| gi28557709 ref NP_787082.1 | hypothetical protein LOC221823 [Homo sapiens]                               |            |   | 6.15E-04 | 0.80 | 10.17 | 5.35  | 34839.1  |
| AHQ-5-9, 4338 - 4351       | R.VYALITHGIFSGPAISR.I                                                       | 1803.09710 | 2 | 6.15E-04 | 0.80 | 3.39  | -     | 636.3    |
| gi30158216 ref XP_210184.2 | similar to hypothetical protein BC015353 [Homo sapiens]                     |            |   | 6.21E-04 | 0.32 | 10.15 | 1.97  | 85272.8  |
| AHQ-5-2, 2193 - 2269       | R.PCLCLCEEGRAPM*R.C                                                         | 1856.11562 | 3 | 6.21E-04 | 0.32 | 3.02  | -     | 299.2    |
| gi4504175 ref NP_000839.1  | glutathione S-transferase M2; glutathione S-transferase 4; GST, muscle;     |            |   | 6.21E-04 | 0.83 | 10.17 | 7.80  | 25744.5  |
| AHQ-5-10, 5                |                                                                             |            |   |          |      |       |       |          |

|                             |                                                                             |            |   |          |      |       |       |          |
|-----------------------------|-----------------------------------------------------------------------------|------------|---|----------|------|-------|-------|----------|
| AHQ-5-12, 2976 - 2977       | R.LLEELEEGQK.G                                                              | 1188.30974 | 2 | 6.29E-04 | 0.85 | 3.74  | -     | 837.2    |
| gi 20373153 ref NP_115997.4 | myosin XVIIIb; myosin 18B [Homo sapiens]                                    |            |   | 6.31E-04 | 0.91 | 10.21 | 0.70  | 285231.7 |
| AHQ-5-8, 6557               | R.ITAALQQLTMMLEKSRVAR.Q                                                     | 2030.42494 | 2 | 6.31E-04 | 0.91 | 4.27  | -     | 1368.9   |
| gi 22041780 ref XP_059066.2 | similar to 14-3-3 protein sigma (Stratifin) (Epithelial cell marker pr      |            |   | 6.50E-04 | 0.93 | 10.19 | -     | 27773.9  |
| AHQ-5-10, 5344 - 5414       | K.DSTLIMQLLR.D                                                              | 1190.43864 | 2 | 6.50E-04 | 0.93 | 3.83  | -     | 1353.6   |
| gi 4506569 ref NP_002932.1  | roundabout 1 isoform a; roundabout 1; axon guidance receptor [Homo sapiens] |            |   | 6.79E-04 | 0.62 | 10.16 | 1.88  | 180928.0 |
| AHQ-5-1, 7383               | K.GLKPNAIYFLVRAANAYGISDPSQISDPVK.T                                          | 3319.79806 | 3 | 6.79E-04 | 0.62 | 3.12  | -     | 699.6    |
| gi 4507783 ref NP_003335.1  | ubiquitin-conjugating enzyme E2H (UBC8 homolog, yeast); ubiquitin-conju     |            |   | 6.87E-04 | 0.58 | 10.14 | 8.20  | 20655.0  |
| AHQ-5-11, 4064              | K.FYGPQGTPYEGGVVW.K                                                         | 1686.84715 | 2 | 6.87E-04 | 0.58 | 2.83  | -     | 355.6    |
| gi 30158950 ref XP_301585.1 | similar to natural killer cell transcript 4 [Homo sapiens]                  |            |   | 7.26E-04 | 0.41 | 10.16 | 15.43 | 18547.1  |
| AHQ-5-14-, 4770 - 4849      | R.EPTVNKDIHQRTCDLSKTIEAPAER.Q                                               | 2911.19785 | 3 | 7.26E-04 | 0.41 | 3.22  | -     | 320.5    |
| gi 17452829 ref XP_071133.1 | similar to KIAA0830 protein [Homo sapiens]                                  |            |   | 7.38E-04 | 0.45 | 10.15 | 6.25  | 16522.7  |
| AHQ-5-11, 3011              | K.AGLVDDFEK.K                                                               | 994.08007  | 1 | 7.38E-04 | 0.45 | 2.20  | -     | 681.8    |
| gi 30157691 ref XP_293394.2 | similar to Nucleolar phosphoprotein p130 (Nucleolar 130 kDa protein) (      |            |   | 7.64E-04 | 0.09 | 10.10 | 1.61  | 59387.8  |
| AHQ-5-2, 1642               | R.KADSNSEK.E                                                                | 965.98512  | 1 | 7.64E-04 | 0.09 | 1.80  | -     | 200.2    |
| gi 11545777 ref NP_071349.1 | likely ortholog of mouse ubiquitin-conjugating enzyme E2-230K [Homo sa      |            |   | 7.75E-04 | 0.37 | 10.16 | 4.04  | 81876.4  |
| AHQ-5-11, 4512              | R.TTDIVIRIGNTEDGAPHKEDEQPSVGVQVAR.V                                         | 3234.48055 | 3 | 7.75E-04 | 0.37 | 3.16  | -     | 233.8    |
| gi 29745994 ref XP_290546.1 | similar to KIAA0830 protein [Homo sapiens]                                  |            |   | 7.76E-04 | 0.86 | 10.16 | 2.00  | 55016.4  |
| AHQ-5-9, 2888               | R.DRIPVYSAFRA                                                               | 1224.39337 | 2 | 7.76E-04 | 0.86 | 3.24  | -     | 690.5    |
| gi 9257195 ref NP_004733.1  | BAI1-associated protein 1; WW domain-containing protein 3; atrophin-1 i     |            |   | 7.77E-04 | 0.43 | 10.13 | 1.27  | 136990.0 |
| AHQ-5-12, 7152 - 7154       | R.CRGLKGDGLIVEVKNK.N                                                        | 1860.16856 | 2 | 7.77E-04 | 0.43 | 2.66  | -     | 483.6    |
| gi 5031855 ref NP_005556.1  | lymphocyte cytosolic protein 2; SH2 domain-containing leukocyte protein     |            |   | 7.84E-04 | 0.92 | 10.18 | 3.00  | 60187.8  |
| AHQ-5-10, 6379              | R.SEVLGWDPDSLADYFK.K                                                        | 1842.98222 | 2 | 7.84E-04 | 0.92 | 3.58  | -     | 1309.2   |
| gi 29729857 ref XP_293567.1 | similar to 60 kDa heat shock protein, mitochondrial precursor (Hsp60)       |            |   | 7.93E-04 | 0.90 | 10.16 | 3.38  | 38427.8  |
| AHQ-5-14-, 3473             | R.TVIIQSWGSPK.V                                                             | 1345.52569 | 2 | 7.93E-04 | 0.90 | 3.24  | -     | 1122.9   |
| gi 29739273 ref NP_291710.1 | similar to Ras suppressor protein 1 (Rsu-1) (RSP-1) [Homo sapiens] [MA      |            |   | 8.01E-04 | 0.86 | 10.18 | 5.39  | 18917.8  |
| AHQ-5-11, 3566              | R.DNNLSLPE                                                                  | 1014.15766 | 2 | 8.01E-04 | 0.86 | 2.98  | -     | 1115.9   |
| gi 30147267 ref XP_304295.1 | hypothetical protein XP_304295 [Homo sapiens]                               |            |   | 8.03E-04 | 0.70 | 10.14 | -     | 38558.9  |
| AHQ-5-13-, 5939 - 5941      | K.PLGWIGQMGEK.A                                                             | 1344.56442 | 2 | 8.03E-04 | 0.70 | 2.90  | -     | 660.0    |
| gi 4757818 ref NP_004879.1  | ATPase, H+ transporting, lysosomal, V1 subunit G isoform 1; vacuolar H (    |            |   | 8.31E-04 | 0.74 | 10.17 | 9.32  | 13757.4  |
| AHQ-5-13-, 2764             | K.EEAQAEIEQYR.L                                                             | 1366.41548 | 2 | 8.31E-04 | 0.74 | 3.33  | -     | 662.6    |
| gi 4506427 ref NP_002880.1  | retinoic acid receptor responder (tazarotene induced) 2 [Homo sapiens]      |            |   | 8.32E-04 | 0.82 | 10.15 | 6.75  | 18617.5  |
| AHQ-5-12, 3646              | R.GLQVALEEFHK.H                                                             | 1271.44680 | 2 | 8.32E-04 | 0.82 | 3.04  | -     | 1009.7   |
| gi 4502501 ref NP_000583.1  | complement component 4B proprotein [Homo sapiens]                           |            |   | 8.43E-04 | 0.08 | 10.14 | 0.52  | 192795.6 |
| AHQ-5-8, 4492 - 4496        | K.SCGLHQLLR.G                                                               | 1085.26240 | 1 | 8.43E-04 | 0.08 | 2.11  | -     | 63.5     |
| gi 29741003 ref XP_295854.1 | hypothetical protein XP_295854 [Homo sapiens]                               |            |   | 8.46E-04 | 0.50 | 10.15 | 25.93 | 11483.2  |
| AHQ-5-7, 7350               | -MKFLRQGIPECPSTANPLLLASPSILK.L                                              | 3112.74244 | 3 | 8.46E-04 | 0.50 | 3.02  | -     | 211.7    |
| gi 18551340 ref XP_087062.1 | similar to 60S acidic ribosomal protein P1 [Homo sapiens]                   |            |   | 8.48E-04 | 0.31 | 10.14 | 16.67 | 10090.5  |
| AHQ-5-12, 6308              | K.AAGVNVPEFPGLFAK.A                                                         | 1703.96399 | 2 | 8.48E-04 | 0.31 | 2.87  | -     | 389.3    |
| gi 14150122 ref NP_115712.1 | hypothetical protein MGC14799 [Homo sapiens]                                |            |   | 8.52E-04 | 0.25 | 10.14 | 6.28  | 26046.7  |
| AHQ-5-4, 4038               | R.LM*KIEKFFPHVLEK.E                                                         | 1776.17817 | 2 | 8.52E-04 | 0.25 | 2.71  | -     | 372.5    |
| gi 16950611 ref NP_444253.1 | myosin light chain kinase isoform 1; myosin light chain kinase [Homo s      |            |   | 8.61E-04 | 0.78 | 10.18 | 1.46  | 210771.9 |
| AHQ-5-5, 6194               | K.LESEEDVSAFLEAVAEKPHVKPYFSK.T                                              | 3208.51984 | 3 | 8.61E-04 | 0.78 | 3.61  | -     | 632.7    |
| gi 23110944 ref NP_002782.1 | proteasome alpha 6 subunit; prosomal P27K protein; proteasome subunit       |            |   | 8.66E-04 | 0.73 | 10.14 | 3.66  | 27399.3  |
| AHQ-5-10, 3470              | R.LYQVEYAFK.A                                                               | 1161.33081 | 1 | 8.66E-04 | 0.73 | 2.37  | -     | 913.0    |
| gi 6005727 ref NP_006576.1  | chaperonin containing TCP1, subunit 8 (theta); T-complex protein 1, the     |            |   | 8.68E-04 | 0.46 | 10.21 | 2.19  | 59662.4  |
| AHQ-5-7, 3562               | R.GSTDNLMDIER.V                                                             | 1366.43729 | 2 | 8.68E-04 | 0.46 | 2.58  | -     | 540.2    |
| gi 8923582 ref NP_060378.1  | hypothetical protein FLJ20626 [Homo sapiens]                                |            |   | 8.72E-04 | 0.58 | 10.15 | 2.67  | 48956.7  |
| AHQ-5-14-, 2811 - 2887      | R.AFDWKSQVLVHR.K                                                            | 1500.72897 | 2 | 8.72E-04 | 0.58 | 2.74  | -     | 633.1    |
| gi 23097308 ref NP_149062.1 | nesprin 1 isoform longest; synaptic nuclei expressed gene 1; nesprin 1      |            |   | 8.75E-04 | 0.31 | 10.15 | 0.23  | #####    |
| AHQ-5-9, 6123               | K.ELNALETSSSAMDMQISQIK.V                                                    | 2197.47364 | 2 | 8.75E-04 | 0.31 | 2.77  | -     | 246.4    |
| gi 20070272 ref NP_057110.2 | androgen-regulated short-chain dehydrogenase/reductase 1; prostate sho      |            |   | 8.79E-04 | 0.87 | 10.18 | 3.77  | 35414.1  |
| AHQ-5-13, 5054              | K.LANILFTQELAR.R                                                            | 1389.62483 | 2 | 8.79E-04 | 0.87 | 3.70  | -     | 809.4    |
| gi 5453974 ref NP_006247.1  | protein kinase C-like 2 [Homo sapiens]                                      |            |   | 9.10E-04 | 0.05 | 10.13 | 1.83  | 112033.9 |
| AHQ-5-8, 4641 - 4710        | K.LDFSDTMVQKLLDDIKDR.I                                                      | 2168.41372 | 2 | 9.10E-04 | 0.05 | 2.64  | -     | 159.6    |
| gi 4503529 ref NP_001407.1  | eukaryotic translation initiation factor 4A, isoform 1 [Homo sapiens] [     |            |   | 9.23E-04 | 0.89 | 10.19 | 3.69  | 46153.7  |
| AHQ-5-8, 3490               | K.LQMEAPHIIVGTPGR.V                                                         | 1619.91357 | 2 | 9.23E-04 | 0.89 | 3.77  | -     | 925.2    |
| gi 4503301 ref NP_001350.1  | 2,4-dienoyl CoA reductase 1 precursor; 4-enoyl-CoA reductase [Homo sapiens] |            |   | 9.24E-04 | 0.46 | 10.14 | 6.87  | 36067.5  |
| AHQ-5-9, 4823               | K.VHAIQCCDVRDPDMVQNTVSELIK.V                                                | 2670.01637 | 2 | 9.24E-04 | 0.46 | 2.78  | -     | 233.0    |
| gi 10800412 ref NP_036458.2 | microtubule-associated protein, RP/EB family, member 3; APC binding pr      |            |   | 9.40E-04 | 0.64 | 10.13 | 3.56  | 31982.0  |
| AHQ-5-9, 1999               | K.LEHEYIHNFK.V                                                              | 1330.47280 | 1 | 9.40E-04 | 0.64 | 2.58  | -     | 616.2    |
| gi 4505237 ref NP_002427.1  | palmitoylated membrane protein 1; membrane protein, palmitoylated 1 (55     |            |   | 9.46E-04 | 0.52 | 10.14 | 3.86  | 52296.2  |
| AHQ-5-9, 5328               | K.HSSIFDQLDVVSYEEVVR.L                                                      | 2123.30800 | 2 | 9.46E-04 | 0.52 | 2.82  | -     | 433.4    |
| gi 5453854 ref NP_006187.1  | poly(rC) binding protein 1; heterogeneous nuclear ribonucleoprotein X; p    |            |   | 9.47E-04 | 0.75 | 10.19 | 3.93  | 37525.7  |
| AHQ-5-11, 3907              | R.LVVPATCGSLIGK.G                                                           | 1444.72199 | 2 | 9.47E-04 | 0.75 | 3.35  | -     | 459.4    |
| gi 4885583 ref NP_005397.1  | Rho-associated, coiled-coil containing protein kinase 1; p160ROCK; p160     |            |   | 9.98E-04 | 0.56 | 10.16 | 1.18  | 158173.3 |
| AHQ-5-13-, 3359             | R.LEEANSMLTKDIEILR.R                                                        | 1876.16497 | 3 | 9.98E-04 | 0.56 | 3.13  | -     | 535.7    |

| Reference                   | File, Scan(s) | Peptide                                  | MH+        | z | P (pro)  | Sf     | Score   | Coverage | MW       |
|-----------------------------|---------------|------------------------------------------|------------|---|----------|--------|---------|----------|----------|
|                             |               |                                          |            |   | P (pep)  | Sf     | XC      |          | Sp       |
| gi 4557705 ref NP_000217.1  |               | keratin 9 [Homo sapiens]                 |            |   | 1.00E-30 | 8.98   | 100.35  | 26.80    | 61986.9  |
| AHQ-6-6, 5863 - 5879        |               | K.DIENQYETQITQIEHEVSSSGQEVQSSAK.E        | 3266.38667 | 3 | 2.72E-11 | 0.96   | 5.47    | -        | 1488.3   |
| AHQ-6-11, 5677 - 5691       |               | K.DIENQYETQITQIEHEVSSSGQEVQSSAK.E        | 3266.38667 | 3 | 8.67E-09 | 0.92   | 4.80    | -        | 951.8    |
| AHQ-6-1, 6010 - 6018        |               | K.DIENQYETQITQIEHEVSSSGQEVQSSAK.E        | 3266.38667 | 3 | 2.43E-11 | 0.98   | 6.15    | -        | 2062.3   |
| AHQ-6-10, 5292              |               | K.DIENQYETQITQIEHEVSSSGQEVQSSAK.E        | 3266.38667 | 3 | 4.03E-07 | 0.85   | 4.01    | -        | 830.1    |
| AHQ-6-7, 5722               |               | K.DIENQYETQITQIEHEVSSSGQEVQSSAK.E        | 3266.38667 | 3 | 1.11E-10 | 0.95   | 5.07    | -        | 1274.8   |
| AHQ-6-14-, 5834 - 5835      |               | K.DIENQYETQITQIEHEVSSSGQEVQSSAK.E        | 3266.38667 | 3 | 1.00E-30 | 0.98   | 6.69    | -        | 1978.3   |
| AHQ-6-2, 5983               |               | K.DIENQYETQITQIEHEVSSSGQEVQSSAK.E        | 3266.38667 | 3 | 5.68E-11 | 0.97   | 5.84    | -        | 2004.4   |
| AHQ-6-4, 5940 - 6007        |               | K.DIENQYETQITQIEHEVSSSGQEVQSSAK.E        | 3266.38667 | 3 | 1.06E-05 | 0.96   | 5.75    | -        | 1318.4   |
| AHQ-6-3, 5940 - 5941        |               | K.DIENQYETQITQIEHEVSSSGQEVQSSAK.E        | 3266.38667 | 3 | 1.68E-11 | 0.97   | 6.34    | -        | 1955.6   |
| AHQ-6-3, 4473               |               | K.EIETYHNLLEGGQEDFESSGAGK.I              | 2511.59648 | 3 | 1.27E-04 | 0.85   | 3.76    | -        | 1172.8   |
| AHQ-6-14-, 4392             |               | K.EIETYHNLLEGGQEDFESSGAGK.I              | 2511.59648 | 3 | 9.43E-04 | 0.87   | 3.68    | -        | 1055.3   |
| AHQ-6-4, 4475               |               | K.EIETYHNLLEGGQEDFESSGAGK.I              | 2511.59648 | 3 | 4.32E-08 | 0.97   | 5.84    | -        | 2065.3   |
| AHQ-6-4, 4485               |               | K.EIETYHNLLEGGQEDFESSGAGK.I              | 2511.59648 | 2 | 8.46E-04 | 0.74   | 3.18    | -        | 637.4    |
| AHQ-6-10, 4188 - 4194       |               | K.EIETYHNLLEGGQEDFESSGAGK.I              | 2511.59648 | 2 | 2.43E-04 | 0.87   | 4.08    | -        | 608.9    |
| AHQ-6-10, 4148 - 4207       |               | K.EIETYHNLLEGGQEDFESSGAGK.I              | 2511.59648 | 3 | 1.03E-07 | 0.96   | 6.50    | -        | 1320.3   |
| AHQ-6-1, 4615               |               | K.EIETYHNLLEGGQEDFESSGAGK.I              | 2511.59648 | 3 | 1.96E-04 | 0.77   | 3.02    | -        | 1092.4   |
| AHQ-6-7, 4214               |               | K.EIETYHNLLEGGQEDFESSGAGK.I              | 2511.59648 | 2 | 2.62E-05 | 0.81   | 3.82    | -        | 493.6    |
| AHQ-6-5, 4337 - 4405        |               | K.EIETYHNLLEGGQEDFESSGAGK.I              | 2511.59648 | 3 | 6.47E-06 | 0.92   | 4.30    | -        | 1374.8   |
| AHQ-6-2, 4514               |               | K.EIETYHNLLEGGQEDFESSGAGK.I              | 2511.59648 | 3 | 4.13E-05 | 0.93   | 4.79    | -        | 1352.6   |
| AHQ-6-6, 4360               |               | K.EIETYHNLLEGGQEDFESSGAGK.I              | 2511.59648 | 3 | 2.76E-05 | 0.91   | 4.69    | -        | 1062.6   |
| AHQ-6-10, 4611 - 4614       |               | R.GGGSGFGYSYGGSGGGFASLGGGFGGGS.R         | 2706.73770 | 2 | 1.77E-05 | 0.92   | 4.58    | -        | 722.5    |
| AHQ-6-4, 4956               |               | R.GGGSGFGYSYGGSGGGFASLGGGFGGGS.R         | 2706.73770 | 2 | 7.51E-04 | 0.55   | 2.50    | -        | 536.9    |
| AHQ-6-14-, 4823             |               | R.GGGSGFGYSYGGSGGGFASLGGGFGGGS.R         | 2706.73770 | 2 | 3.53E-05 | 0.91   | 3.89    | -        | 828.7    |
| AHQ-6-14-, 4983             |               | R.HGVQLELELQSLSK.K                       | 1839.03978 | 2 | 1.14E-04 | 0.76   | 2.77    | -        | 517.1    |
| AHQ-6-1, 5166               |               | R.HGVQLELELQSLSK.K                       | 1839.03978 | 3 | 1.19E-04 | 0.88   | 4.15    | -        | 1184.8   |
| AHQ-6-10, 4716 - 4788       |               | R.HGVQLELELQSLSK.K                       | 1839.03978 | 2 | 8.75E-12 | 0.98   | 6.92    | -        | 2163.9   |
| AHQ-6-10, 5194              |               | R.KDIENQYETQITQIEHEVSSSGQEVQSSAK.E       | 3394.55959 | 3 | 3.19E-06 | 0.85   | 3.95    | -        | 925.4    |
| AHQ-6-10, 6094              |               | K.NYSPYYNTIDDLKQIVDLTVGNK.T              | 2904.13412 | 3 | 4.52E-05 | 0.74   | 3.33    | -        | 410.8    |
| AHQ-6-1, 6427 - 6466        |               | K.NYSPYYNTIDDLKQIVDLTVGNK.T              | 2904.13412 | 3 | 6.80E-12 | 0.79   | 3.75    | -        | 440.5    |
| AHQ-6-13-, 6198             |               | K.SDLEM*QYETLQELM*ALK.K                  | 2204.46135 | 2 | 2.04E-04 | 0.86   | 3.53    | -        | 964.0    |
| AHQ-6-7, 6031 - 6096        |               | K.SDLEM*QYETLQELM*ALK.K                  | 2204.46135 | 2 | 2.55E-07 | 0.94   | 4.46    | -        | 1113.8   |
| AHQ-6-4, 6392 - 6448        |               | K.SDLEM*QYETLQELM*ALK.K                  | 2204.46135 | 2 | 8.34E-07 | 0.74   | 3.07    | -        | 548.7    |
| AHQ-6-13, 6232              |               | K.SDLEM*QYETLQELM*ALK.K                  | 2204.46135 | 2 | 1.13E-05 | 0.76   | 3.48    | -        | 712.9    |
| AHQ-6-5, 5848               |               | K.SDLEM*QYETLQELM*ALK.K                  | 2332.63427 | 3 | 6.04E-04 | 0.69   | 3.17    | -        | 595.8    |
| AHQ-6-7, 3027 - 3031        |               | K.TLLDIDNTR.M                            | 1061.17119 | 2 | 7.03E-06 | 0.91   | 3.27    | -        | 922.0    |
| AHQ-6-12, 3181              |               | K.TLLDIDNTR.M                            | 1061.17119 | 2 | 2.39E-04 | 0.84   | 2.71    | -        | 730.7    |
| AHQ-6-2, 3075 - 3083        |               | K.VQALEEANNLENK.I                        | 1587.67060 | 2 | 5.12E-04 | 0.96   | 4.48    | -        | 1563.6   |
| AHQ-6-3, 3054 - 3068        |               | K.VQALEEANNLENK.I                        | 1587.67060 | 2 | 7.13E-05 | 0.92   | 3.63    | -        | 1046.7   |
| AHQ-6-4, 3032               |               | K.VQALEEANNLENK.I                        | 1587.67060 | 2 | 6.30E-05 | 0.95   | 3.81    | -        | 1486.7   |
| AHQ-6-7, 2894 - 2895        |               | K.VQALEEANNLENK.I                        | 1587.67060 | 2 | 7.18E-07 | 0.97   | 4.83    | -        | 1657.8   |
| AHQ-6-5, 2981               |               | K.VQALEEANNLENK.I                        | 1587.67060 | 2 | 5.63E-08 | 0.98   | 5.37    | -        | 2101.1   |
| AHQ-6-12, 3012 - 3020       |               | K.VQALEEANNLENK.I                        | 1587.67060 | 2 | 4.50E-09 | 0.96   | 4.82    | -        | 1428.1   |
| AHQ-6-6, 2982               |               | K.VQALEEANNLENK.I                        | 1587.67060 | 2 | 4.89E-07 | 0.97   | 4.38    | -        | 1832.7   |
| gi 4507729 ref NP_001060.1  |               | tubulin, beta polypeptide [Homo sapiens] |            |   | 5.55E-16 | 6.17   | 70.34   | 21.80    | 49906.7  |
| AHQ-6-13-, 2377 - 2378      |               | K.EVDEQM*LNQNK.N                         | 1463.59608 | 2 | 2.24E-04 | 0.83   | 3.41    | -        | 905.8    |
| AHQ-6-8, 5850 - 5913        |               | K.GHYTEGAEALVSDVVR.K                     | 1960.13388 | 2 | 1.43E-11 | 0.98   | 5.68    | -        | 2771.1   |
| AHQ-6-13-, 5958             |               | K.GHYTEGAEALVSDVVR.K                     | 1960.13388 | 2 | 1.40E-05 | 0.98   | 6.66    | -        | 2432.1   |
| AHQ-6-14-, 5935 - 5995      |               | K.GHYTEGAEALVSDVVR.K                     | 1960.13388 | 2 | 5.66E-14 | 0.99   | 6.72    | -        | 2914.6   |
| AHQ-6-13, 6017              |               | K.GHYTEGAEALVSDVVR.K                     | 1960.13388 | 2 | 1.38E-05 | 0.97   | 5.52    | -        | 1585.4   |
| AHQ-6-7, 5802               |               | K.GHYTEGAEALVSDVVR.K                     | 1960.13388 | 2 | 4.44E-14 | 0.98   | 6.22    | -        | 2449.3   |
| AHQ-6-13, 6007              |               | K.GHYTEGAEALVSDVVR.K                     | 1960.13388 | 3 | 2.06E-05 | 0.77   | 4.08    | -        | 708.0    |
| AHQ-6-8, 5904               |               | K.GHYTEGAEALVSDVVR.K                     | 1960.13388 | 2 | 2.68E-06 | 0.98   | 6.37    | -        | 2926.2   |
| AHQ-6-7, 3456 - 3474        |               | R.ISEQFTAM*FR.R                          | 1246.41758 | 2 | 4.13E-04 | 0.84   | 3.05    | -        | 836.5    |
| AHQ-6-13-, 4430             |               | R.ISEQFTAM*FR.R                          | 1230.41818 | 2 | 8.61E-06 | 0.94   | 3.80    | -        | 1295.8   |
| AHQ-6-11, 4296              |               | R.ISEQFTAM*FR.R                          | 1230.41818 | 2 | 2.18E-04 | 0.85   | 2.69    | -        | 916.4    |
| AHQ-6-14-, 5727             |               | K.M*SATFIGNSTAIQELFK.R                   | 1875.13550 | 2 | 2.80E-06 | 0.77   | 4.14    | -        | 696.3    |
| AHQ-6-13-, 5962 - 6034      |               | K.M*SATFIGNSTAIQELFK.R                   | 1875.13550 | 2 | 4.50E-05 | 0.64   | 3.50    | -        | 553.0    |
| AHQ-6-7, 5602               |               | K.M*SATFIGNSTAIQELFK.R                   | 1875.13550 | 2 | 9.47E-04 | 0.65   | 3.37    | -        | 616.9    |
| AHQ-6-7, 5086 - 5146        |               | K.NSSYFVEWIPNNVK.T                       | 1697.87148 | 2 | 1.78E-06 | 0.84   | 3.55    | -        | 629.2    |
| AHQ-6-13-, 5297             |               | K.NSSYFVEWIPNNVK.T                       | 1697.87148 | 2 | 6.10E-04 | 0.88   | 3.52    | -        | 856.6    |
| AHQ-6-8, 5173               |               | K.NSSYFVEWIPNNVK.T                       | 1697.87148 | 2 | 1.22E-04 | 0.41   | 2.50    | -        | 474.8    |
| AHQ-6-7, 5495               |               | K.NSSYFVEWIPNNVK.T                       | 1697.87148 | 2 | 3.06E-04 | 0.46   | 2.62    | -        | 447.2    |
| AHQ-6-13, 5388              |               | K.NSSYFVEWIPNNVK.T                       | 1697.87148 | 2 | 9.74E-04 | 0.77   | 2.85    | -        | 685.2    |
| AHQ-6-13-, 5894 - 5956      |               | R.SGPFQGIQFRPDNFVFGQSGAGNNWAK.G          | 2800.03898 | 3 | 5.55E-16 | 0.98   | 6.33    | -        | 2149.7   |
| AHQ-6-7, 5755 - 5810        |               | R.SGPFQGIQFRPDNFVFGQSGAGNNWAK.G          | 2800.03898 | 3 | 1.06E-06 | 0.96   | 5.89    | -        | 1327.5   |
| AHQ-6-8, 5872 - 5928        |               | R.SGPFQGIQFRPDNFVFGQSGAGNNWAK.G          | 2800.03898 | 3 | 2.72E-12 | 0.97   | 5.57    | -        | 2229.6   |
| AHQ-6-12, 5815 - 5836       |               | R.SGPFQGIQFRPDNFVFGQSGAGNNWAK.G          | 2800.03898 | 3 | 3.47E-05 | 0.74   | 3.34    | -        | 722.7    |
| AHQ-6-14-, 5902 - 5960      |               | R.SGPFQGIQFRPDNFVFGQSGAGNNWAK.G          | 2800.03898 | 3 | 1.08E-05 | 0.95   | 5.60    | -        | 1290.9   |
| AHQ-6-10, 5698 - 5751       |               | R.SGPFQGIQFRPDNFVFGQSGAGNNWAK.G          | 2800.03898 | 3 | 8.00E-06 | 0.93   | 5.12    | -        | 1163.6   |
| AHQ-6-13, 6044 - 6115       |               | R.SGPFQGIQFRPDNFVFGQSGAGNNWAK.G          | 2800.03898 | 3 | 4.69E-05 | 0.84   | 4.32    | -        | 825.4    |
| gi 16753233 ref NP_006280.2 |               | talin 1 [Homo sapiens]                   |            |   | 2.78E-15 | 105.41 | 1190.37 | 53.60    | 269665.3 |
| AHQ-6-3, 3206 - 3280        |               | K.AAAFEQEENETVVVK.E                      | 1664.79496 | 2 | 2.26E-05 | 0.95   | 5.11    | -        | 1316.6   |
| AHQ-6-2, 3420 - 3491        |               | K.AAAFEQEENETVVVK.E                      | 1664.79496 | 2 | 2.68E-07 | 0.92   | 4.26    | -        | 1139.1   |
| AHQ-6-2, 3222 - 3280        |               | K.AAAFEQEENETVVVK.E                      | 1664.79496 | 2 | 7.93E-07 | 0.94   | 4.62    | -        | 1241.1   |
| AHQ-6-5, 3131 - 3200        |               | K.AAAFEQEENETVVVK.E                      | 1664.79496 | 2 | 6.66E-08 | 0.89   | 4.16    | -        | 999.0    |
| AHQ-6-1, 3387 - 3456        |               | K.AAAFEQEENETVVVK.E                      | 1664.79496 | 2 | 7.31E-07 | 0.89   | 4.26    | -        | 872.6    |
| AHQ-6-2, 3286 - 3356        |               | K.AAAFEQEENETVVVK.E                      | 1664.79496 | 2 | 6.27E-06 | 0.90   | 4.11    | -        | 1048.9   |
| AHQ-6-4, 3175 - 3225        |               | K.AAAFEQEENETVVVK.E                      | 1664.79496 | 2 | 1.61E-05 | 0.95   | 4.62    | -        | 1146.2   |
| AHQ-6-3, 2697               |               | R.AAM*EPIVISAK.T                         | 1146.38260 | 2 | 4.79E-06 | 0.78   | 2.53    | -        | 821.0    |
| AHQ-6-2, 2699               |               | R.AAM*EPIVISAK.T                         | 1146.38260 | 1 | 5.66E-04 | 0.53   | 2.93    | -        | 195.2    |
| AHQ-6-2, 3322               |               | R.AAM*EPIVISAK.T                         | 1130.38320 | 2 | 8.45E-06 | 0.77   | 2.67    | -        | 601.8    |
| AHQ-6-4, 2660               |               | R.AAM*EPIVISAK.T                         | 1146.38260 | 1 | 3.72E-05 | 0.30   | 2.00    | -        | 205.7    |
| AHQ-6-3, 2696               |               | R.AAM*EPIVISAK.T                         | 1146.38260 | 1 | 5.61E-05 | 0.15   | 1.89    | -        | 173.0    |
| AHQ-6-3, 3312 - 3320        |               | R.AAM*EPIVISAK.T                         | 1130.38320 | 2 | 1.32E-04 | 0.79   | 3.13    | -        | 510.4    |
| AHQ-6-6, 1986               |               | K.ADAEGESDLENSR.K                        | 1393.35296 | 2 | 6.04E-04 | 0.81   | 2.63    | -        | 880.9    |
| AHQ-6-5, 1988               |               | K.ADAEGESDLENSR.K                        | 1393.35296 | 2 | 1.48E-08 | 0.95   | 4.02    | -        | 1341.8   |
| AHQ-6-2, 2036               |               | K.ADAEGESDLENSR.K                        | 1393.35296 | 2 | 7.52E-08 | 0.85   | 3.03    | -        | 734.3    |
| AHQ-6-3, 2678 - 2740        |               | K.AGALQCSPDAYTK.K                        | 1470.58689 | 2 | 9.62E-04 | 0.50   | 2.61    | -        | 406.4    |
| AHQ-6-4, 2643               |               | K.AGALQCSPDAYTK.K                        | 1470.58689 | 2 | 4.06E-04 | 0.89   | 3.52    | -        | 820.1    |
| AHQ-6-2, 2668 - 2670        |               | K.AGALQCSPDAYTK.K                        | 1470.58689 | 2 | 1.25E-06 | 0.93   | 3.98    | -        | 1085.0   |
| AHQ-6-5, 2619               |               | K.AGALQCSPDAYTK.K                        | 1470.58689 | 2 | 1.78E-05 | 0.87   | 3.84    | -        | 619.7    |
| AHQ-6-2, 2451 - 2456        |               | K.AGALQCSPDAYTK.K                        | 1598.75981 | 2 | 5.69E-04 | 0.85   | 3.75    | -        | 509.9    |
| AHQ-6-4, 2948               |               | K.AIAVTVQEM*VTK.S                        | 1306.55438 | 2 | 4.82E-04 | 0.93   | 3.78    | -        | 965.5    |
| AHQ-6-2, 3000 - 3071        |               | K.AIAVTVQEM*VTK.S                        | 1306.55438 | 2 | 2.41E-04 | 0.94   | 3.85    | -        | 1095.7   |
| AHQ-6-2, 3987 - 3991        |               | K.AIAVTVQEM*VTK.S                        | 1290.55498 | 2 | 5.99E-05 | 0.97   | 4.93    | -        | 1655.7   |
| AHQ-6-1, 3180               |               | K.AIAVTVQEM*VTK.S                        | 1306.55438 | 2 | 5.71E-08 | 0.96   | 4.57    | -        | 1024.7   |
| AHQ-6-3, 3966 - 3980        |               | K.AIAVTVQEM*VTK.S                        | 1290.55    |   |          |        |         |          |          |

|                       |                                     |            |   |          |      |      |   |        |
|-----------------------|-------------------------------------|------------|---|----------|------|------|---|--------|
| AHQ-6-1, 2956         | K.ALDDGAFTEENR.A                    | 1223.27427 | 2 | 1.19E-05 | 0.97 | 3.98 | - | 1970.8 |
| AHQ-6-8, 3597         | K.ALDYMYLR.N                        | 1045.23686 | 2 | 1.56E-04 | 0.91 | 3.15 | - | 862.8  |
| AHQ-6-5, 2032         | R.ALEATTEHIR.Q                      | 1141.25953 | 2 | 6.51E-05 | 0.82 | 3.19 | - | 919.9  |
| AHQ-6-7, 2007         | R.ALEATTEHIR.Q                      | 1141.25953 | 2 | 1.77E-05 | 0.84 | 2.92 | - | 1092.3 |
| AHQ-6-3, 2114         | R.ALEATTEHIR.Q                      | 1141.25953 | 2 | 2.09E-04 | 0.83 | 3.26 | - | 954.5  |
| AHQ-6-6, 2042         | R.ALEATTEHIR.Q                      | 1141.25953 | 2 | 1.49E-04 | 0.64 | 2.86 | - | 885.6  |
| AHQ-6-4, 2059         | R.ALEATTEHIR.Q                      | 1141.25953 | 2 | 2.11E-04 | 0.88 | 2.79 | - | 1348.1 |
| AHQ-6-2, 2086 - 2159  | R.ALEATTEHIR.Q                      | 1141.25953 | 2 | 7.24E-05 | 0.93 | 2.95 | - | 1716.0 |
| AHQ-6-4, 3416         | K.ALGDLSATK.A                       | 989.14811  | 2 | 3.60E-05 | 0.88 | 3.34 | - | 746.5  |
| AHQ-6-2, 3456 - 3520  | K.ALGDLSATK.A                       | 989.14811  | 2 | 2.53E-05 | 0.89 | 3.16 | - | 948.0  |
| AHQ-6-3, 3450         | K.ALGDLSATK.A                       | 989.14811  | 2 | 7.85E-06 | 0.84 | 3.05 | - | 679.4  |
| AHQ-6-5, 3365         | K.ALGDLSATK.A                       | 989.14811  | 2 | 1.87E-06 | 0.90 | 3.22 | - | 879.8  |
| AHQ-6-6, 2654         | K.ALSTDPAPNLK.S                     | 1198.35099 | 2 | 8.04E-06 | 0.78 | 2.84 | - | 675.7  |
| AHQ-6-4, 2501         | K.ALSTDPAPNLK.S                     | 1198.35099 | 2 | 4.22E-04 | 0.61 | 2.70 | - | 558.8  |
| AHQ-6-3, 2712         | K.ALSTDPAPNLK.S                     | 1198.35099 | 2 | 7.23E-04 | 0.68 | 2.74 | - | 512.4  |
| AHQ-6-4, 2648 - 2712  | K.ALSTDPAPNLK.S                     | 1198.35099 | 2 | 5.21E-06 | 0.65 | 2.73 | - | 561.0  |
| AHQ-6-2, 2704 - 2706  | K.ALSTDPAPNLK.S                     | 1198.35099 | 2 | 5.86E-04 | 0.76 | 3.07 | - | 611.4  |
| AHQ-6-4, 5689 - 5763  | R.ANQAIQM*ACQSLGEPGCTQAVLSAATIVAK.H | 3236.64462 | 3 | 7.22E-04 | 0.74 | 3.95 | - | 503.9  |
| AHQ-6-3, 5788 - 5794  | K.APGQLECEETAIAALNSCLR.D            | 2077.32566 | 2 | 2.08E-11 | 0.97 | 5.39 | - | 1516.7 |
| AHQ-6-3, 5173 - 5229  | K.APGQLECEETAIAALNSCLR.D            | 2077.32566 | 2 | 1.46E-10 | 0.96 | 5.15 | - | 1300.0 |
| AHQ-6-2, 5824 - 5900  | K.APGQLECEETAIAALNSCLR.D            | 2077.32566 | 2 | 3.34E-05 | 0.93 | 3.94 | - | 1062.6 |
| AHQ-6-4, 5864         | K.APGQLECEETAIAALNSCLR.D            | 2077.32566 | 2 | 8.47E-07 | 0.95 | 4.39 | - | 1279.3 |
| AHQ-6-5, 6271         | K.AQEACGPLEMDSALSVVQNLK.D           | 2391.66165 | 3 | 1.30E-04 | 0.54 | 3.00 | - | 637.2  |
| AHQ-6-2, 6310         | K.AQEACGPLEMDSALSVVQNLK.D           | 2391.66165 | 3 | 2.87E-07 | 0.96 | 4.35 | - | 2040.1 |
| AHQ-6-4, 5636 - 5639  | K.AQEACGPLEM*DSALSVVQNLK.D          | 2407.66105 | 2 | 1.28E-05 | 0.95 | 4.56 | - | 1476.1 |
| AHQ-6-6, 2927 - 2934  | K.ASAGPOPILLVQSCK.A                 | 1457.67763 | 2 | 1.21E-04 | 0.42 | 2.93 | - | 317.7  |
| AHQ-6-2, 3030 - 3031  | K.ASAGPOPILLVQSCK.A                 | 1457.67763 | 1 | 1.44E-04 | 0.38 | 2.94 | - | 306.6  |
| AHQ-6-4, 3001 - 3009  | K.ASAGPOPILLVQSCK.A                 | 1457.67763 | 1 | 7.72E-04 | 0.44 | 2.51 | - | 493.9  |
| AHQ-6-1, 3244         | K.ASAGPOPILLVQSCK.A                 | 1457.67763 | 2 | 4.92E-06 | 0.72 | 2.83 | - | 434.5  |
| AHQ-6-5, 3136         | K.ASAGPOPILLVQSCK.A                 | 1457.67763 | 2 | 9.35E-05 | 0.60 | 2.58 | - | 442.7  |
| AHQ-6-3, 2997 - 3056  | K.ASAGPOPILLVQSCK.A                 | 1457.67763 | 2 | 3.58E-05 | 0.79 | 3.36 | - | 434.7  |
| AHQ-6-7, 2851 - 2852  | K.ASAGPOPILLVQSCK.A                 | 1457.67763 | 2 | 4.86E-04 | 0.80 | 3.70 | - | 386.9  |
| AHQ-6-3, 4137         | K.ASVPTIQDQASAMQLSQCAK.N            | 2136.39332 | 2 | 2.46E-04 | 0.71 | 3.11 | - | 500.1  |
| AHQ-6-5, 3577         | K.ASVPTIQDQASAM*QLSQCAK.N           | 2152.39272 | 2 | 9.84E-08 | 0.88 | 3.51 | - | 722.7  |
| AHQ-6-5, 4071         | K.ASVPTIQDQASAMQLSQCAK.N            | 2136.39332 | 2 | 4.01E-06 | 0.78 | 3.38 | - | 508.4  |
| AHQ-6-1, 3803         | K.ASVPTIQDQASAM*QLSQCAK.N           | 2152.39272 | 2 | 4.54E-06 | 0.91 | 4.27 | - | 597.9  |
| AHQ-6-6, 3554         | K.ASVPTIQDQASAM*QLSQCAK.N           | 2152.39272 | 2 | 4.65E-06 | 0.86 | 3.83 | - | 578.5  |
| AHQ-6-4, 4155 - 4156  | K.ASVPTIQDQASAMQLSQCAK.N            | 2136.39332 | 2 | 4.81E-07 | 0.93 | 4.50 | - | 601.6  |
| AHQ-6-6, 4046 - 4048  | K.ASVPTIQDQASAMQLSQCAK.N            | 2136.39332 | 2 | 2.93E-05 | 0.89 | 4.12 | - | 499.8  |
| AHQ-6-5, 4780 - 4781  | K.AVAEQIPLLVQVGR.G                  | 1493.77619 | 2 | 6.56E-07 | 0.95 | 4.81 | - | 925.9  |
| AHQ-6-4, 4851         | K.AVAEQIPLLVQVGR.G                  | 1493.77619 | 2 | 2.77E-06 | 0.82 | 3.08 | - | 713.6  |
| AHQ-6-1, 4948 - 4960  | K.AVAEQIPLLVQVGR.G                  | 1493.77619 | 2 | 1.08E-07 | 0.90 | 4.08 | - | 650.8  |
| AHQ-6-6, 4742         | K.AVAEQIPLLVQVGR.G                  | 1493.77619 | 2 | 7.00E-08 | 0.87 | 3.73 | - | 617.6  |
| AHQ-6-2, 4835 - 4895  | K.AVAEQIPLLVQVGR.G                  | 1493.77619 | 2 | 3.38E-06 | 0.85 | 3.45 | - | 680.7  |
| AHQ-6-2, 4858         | K.AVAEQIPLLVQVGR.G                  | 1493.77619 | 3 | 6.35E-04 | 0.97 | 5.01 | - | 2378.2 |
| AHQ-6-3, 4830         | K.AVAEQIPLLVQVGR.G                  | 1493.77619 | 2 | 6.31E-06 | 0.63 | 2.73 | - | 407.9  |
| AHQ-6-4, 3856 - 3859  | K.AVASAAAALVLK.A                    | 1085.32216 | 2 | 3.87E-06 | 0.97 | 4.64 | - | 1569.5 |
| AHQ-6-5, 3791 - 3869  | K.AVASAAAALVLK.A                    | 1085.32216 | 2 | 5.40E-06 | 0.96 | 4.20 | - | 1492.8 |
| AHQ-6-2, 3596         | K.AVASAAAALVLK.A                    | 1085.32216 | 2 | 5.71E-07 | 0.92 | 2.84 | - | 1419.0 |
| AHQ-6-1, 4028         | K.AVASAAAALVLK.A                    | 1085.32216 | 2 | 6.22E-05 | 0.95 | 3.86 | - | 1353.4 |
| AHQ-6-2, 3842 - 3902  | K.AVASAAAALVLK.A                    | 1085.32216 | 2 | 5.65E-06 | 0.95 | 4.01 | - | 1401.4 |
| AHQ-6-2, 3968         | K.AVASAAAALVLK.A                    | 1085.32216 | 2 | 3.37E-06 | 0.94 | 3.65 | - | 1198.4 |
| AHQ-6-3, 3757         | K.AVEGCVSASQAATEDGQLLR.G            | 2064.22056 | 2 | 1.72E-04 | 0.89 | 3.60 | - | 974.3  |
| AHQ-6-5, 3921 - 3987  | K.AVEGCVSASQAATEDGQLLR.G            | 2064.22056 | 2 | 6.82E-06 | 0.94 | 4.23 | - | 1298.5 |
| AHQ-6-4, 3968 - 4041  | K.AVEGCVSASQAATEDGQLLR.G            | 2064.22056 | 2 | 4.30E-05 | 0.88 | 4.33 | - | 456.8  |
| AHQ-6-2, 4216         | K.AVEGCVSASQAATEDGQLLR.G            | 2064.22056 | 2 | 6.51E-06 | 0.87 | 3.58 | - | 979.4  |
| AHQ-6-2, 3735 - 3802  | K.AVEGCVSASQAATEDGQLLR.G            | 2064.22056 | 2 | 1.31E-05 | 0.92 | 4.06 | - | 1147.3 |
| AHQ-6-2, 3975 - 4027  | K.AVEGCVSASQAATEDGQLLR.G            | 2064.22056 | 2 | 5.15E-07 | 0.90 | 3.93 | - | 1132.7 |
| AHQ-6-2, 4091 - 4152  | K.AVEGCVSASQAATEDGQLLR.G            | 2064.22056 | 2 | 4.92E-04 | 0.74 | 3.67 | - | 667.9  |
| AHQ-6-3, 3985 - 3986  | K.AVEGCVSASQAATEDGQLLR.G            | 2064.22056 | 2 | 5.02E-07 | 0.95 | 4.32 | - | 1447.5 |
| AHQ-6-6, 6370         | K.AVSSAIAQLLGEVAQGNENYAGIAAR.D      | 2574.83158 | 3 | 4.50E-05 | 0.90 | 3.98 | - | 1331.8 |
| AHQ-6-2, 6474 - 6475  | K.AVSSAIAQLLGEVAQGNENYAGIAAR.D      | 2574.83158 | 3 | 5.55E-15 | 0.97 | 6.15 | - | 1286.5 |
| AHQ-6-3, 6422 - 6436  | K.AVSSAIAQLLGEVAQGNENYAGIAAR.D      | 2574.83158 | 3 | 3.36E-07 | 0.95 | 5.20 | - | 1353.7 |
| AHQ-6-1, 6471         | K.AVSSAIAQLLGEVAQGNENYAGIAAR.D      | 2574.83158 | 3 | 3.37E-06 | 0.91 | 3.81 | - | 1467.3 |
| AHQ-6-2, 5354         | R.AVTDSINQLITM*CTQQAPGQK.E          | 2322.60252 | 2 | 3.23E-06 | 0.69 | 3.67 | - | 347.1  |
| AHQ-6-2, 5346         | R.AVTDSINQLITM*CTQQAPGQK.E          | 2322.60252 | 3 | 3.85E-04 | 0.85 | 4.10 | - | 633.7  |
| AHQ-6-3, 5610         | R.AVTDSINQLITMCTQQAPGQK.E           | 2306.60312 | 2 | 1.40E-04 | 0.81 | 3.54 | - | 519.5  |
| AHQ-6-2, 4559         | R.AVTDSINQLITMCTQQAPGQK.E           | 2306.60312 | 2 | 5.20E-06 | 0.67 | 3.42 | - | 321.7  |
| AHQ-6-3, 5309         | R.AVTDSINQLITM*CTQQAPGQK.E          | 2322.60252 | 2 | 7.68E-06 | 0.44 | 2.51 | - | 281.3  |
| AHQ-6-3, 5433 - 5436  | R.AVTDSINQLITM*CTQQAPGQKCEDNLR.E    | 3182.51068 | 3 | 1.26E-05 | 0.94 | 5.41 | - | 894.8  |
| AHQ-6-1, 5523         | R.AVTDSINQLITM*CTQQAPGQKCEDNLR.E    | 3182.51068 | 3 | 8.19E-04 | 0.93 | 4.79 | - | 1119.4 |
| AHQ-6-3, 5678 - 5756  | R.AVTDSINQLITMCTQQAPGQKCEDNLR.E     | 3166.51128 | 3 | 4.76E-06 | 0.64 | 3.60 | - | 513.0  |
| AHQ-6-5, 5419 - 5481  | R.AVTDSINQLITM*CTQQAPGQKCEDNLR.E    | 3182.51068 | 3 | 1.42E-04 | 0.91 | 4.57 | - | 801.3  |
| AHQ-6-2, 5471         | R.AVTDSINQLITM*CTQQAPGQKCEDNLR.E    | 3182.51068 | 3 | 3.70E-06 | 0.83 | 3.94 | - | 640.1  |
| AHQ-6-4, 5504         | R.AVTDSINQLITM*CTQQAPGQKCEDNLR.E    | 3182.51068 | 3 | 2.69E-09 | 0.91 | 4.88 | - | 801.6  |
| AHQ-6-7, 3311         | R.DDILNGSHPVSFDK.A                  | 1544.64741 | 2 | 5.95E-10 | 0.90 | 3.39 | - | 1024.3 |
| AHQ-6-10, 3322 - 3323 | R.DDILNGSHPVSFDK.A                  | 1544.64741 | 2 | 4.20E-07 | 0.91 | 3.55 | - | 1066.5 |
| AHQ-6-7, 3406         | R.DDILNGSHPVSFDK.A                  | 1544.64741 | 2 | 1.89E-08 | 0.90 | 3.62 | - | 889.3  |
| AHQ-6-8, 4432         | K.DHFGLGDEESTMLEDVSPK.K             | 2323.43307 | 2 | 1.47E-07 | 0.98 | 5.91 | - | 2549.4 |
| AHQ-6-2, 5680         | R.DKAPGQLECEETAIAALNSCLR.D          | 2320.58644 | 2 | 1.23E-06 | 0.92 | 4.31 | - | 718.4  |
| AHQ-6-4, 5703         | R.DKAPGQLECEETAIAALNSCLR.D          | 2320.58644 | 2 | 3.04E-11 | 0.93 | 4.08 | - | 1030.8 |
| AHQ-6-2, 5058         | R.DKAPGQLECEETAIAALNSCLR.D          | 2320.58644 | 2 | 4.35E-11 | 0.96 | 4.59 | - | 1347.7 |
| AHQ-6-5, 5631         | R.DKAPGQLECEETAIAALNSCLR.D          | 2320.58644 | 3 | 4.12E-05 | 0.72 | 3.77 | - | 579.7  |
| AHQ-6-4, 5073         | R.DKAPGQLECEETAIAALNSCLR.D          | 2320.58644 | 2 | 5.82E-09 | 0.89 | 4.18 | - | 719.6  |
| AHQ-6-3, 5636         | R.DKAPGQLECEETAIAALNSCLR.D          | 2320.58644 | 2 | 1.76E-04 | 0.85 | 3.42 | - | 740.7  |
| AHQ-6-5, 5639 - 5641  | R.DKAPGQLECEETAIAALNSCLR.D          | 2320.58644 | 2 | 3.45E-05 | 0.88 | 4.08 | - | 617.8  |
| AHQ-6-1, 5087         | R.DLDOASLAAV*SQLAPR.E               | 1783.96422 | 3 | 5.07E-07 | 0.96 | 5.02 | - | 1713.9 |
| AHQ-6-3, 4986         | R.DLDOASLAAV*SQLAPR.E               | 1783.96422 | 3 | 2.13E-06 | 0.97 | 5.40 | - | 2167.1 |
| AHQ-6-5, 4956         | R.DLDOASLAAV*SQLAPR.E               | 1783.96422 | 2 | 3.52E-07 | 0.94 | 4.25 | - | 1279.7 |
| AHQ-6-4, 4471         | R.DLDOASLAAV*SQLAPR.E               | 1783.96422 | 2 | 2.16E-04 | 0.88 | 3.40 | - | 1200.9 |
| AHQ-6-5, 4971 - 4984  | R.DLDOASLAAV*SQLAPR.E               | 1783.96422 | 3 | 2.55E-05 | 0.95 | 4.63 | - | 1611.0 |
| AHQ-6-4, 5031         | R.DLDOASLAAV*SQLAPR.E               | 1783.96422 | 2 | 1.12E-04 | 0.89 | 3.90 | - | 769.0  |
| AHQ-6-3, 4940 - 4996  | R.DLDOASLAAV*SQLAPR.E               | 1783.96422 | 2 | 1.52E-04 | 0.82 | 3.56 | - | 626.6  |
| AHQ-6-2, 5012         | R.DLDOASLAAV*SQLAPR.E               | 1783.96422 | 3 | 7.08E-05 | 0.95 | 4.30 | - | 1877.5 |
| AHQ-6-4, 3567         | R.DPPSWVLGHSR.T                     | 1409.53156 | 2 | 4.25E-10 | 0.89 | 3.09 | - | 601.5  |
| AHQ-6-4, 3577         | R.DPPSWVLGHSR.T                     | 1409.53156 | 3 | 3.89E-07 | 0.90 | 4.29 | - | 727.9  |
| AHQ-6-2, 3618         | R.DPPSWVLGHSR.T                     | 1409.53156 | 2 | 1.84E-10 | 0.83 | 2.86 | - | 485.1  |
| AHQ-6-2, 3628         | R.DPPSWVLGHSR.T                     | 1409.53156 | 3 | 1.77E-05 | 0.87 | 4.43 | - | 488.3  |
| AHQ-6-1, 3792         | R.DPPSWVLGHSR.T                     | 1409.53156 | 2 | 4.09E-05 | 0.58 | 2.60 | - | 312.2  |
| AHQ-6-3, 3596 - 3597  | R.DPPSWVLGHSR.T                     | 1409.53156 | 2 | 2.40E-09 | 0.91 | 3.45 | - | 620.5  |
| AHQ-6-3, 3601         | R.DPPSWVLGHSR.T                     | 1409.53156 | 3 | 2.31E-07 | 0.89 | 4.03 | - | 660.4  |
| AHQ-6-10, 4679        | R.DPVQLNLLYVQAR.D                   | 1529.76539 | 2 | 2.32E-04 | 0.94 | 3.90 | - | 1222.8 |
| AHQ-6-8, 4737         | R.DPVQLNLLYVQAR.D                   | 1529.76539 | 2 | 2.14E-06 | 0.96 | 4.33 | - | 1624.7 |
| AHQ-6-7, 4746         | R.DPVQLNLLYVQAR.D                   | 1529.76539 | 2 | 9.90E-08 | 0.95 | 4.48 | - | 1386.5 |
| AHQ-6-4, 2499         | K.EAAYHPEVAPDVR.L                   | 1454.56910 | 2 | 2.81E-04 | 0.73 | 2.54 | - | 652.1  |
| AHQ-6-3, 2546         | K.EAAYHPEVAPDVR.L                   | 1454.56910 | 2 | 1.98E-07 | 0.81 | 2.63 | - | 863.3  |
| AHQ-6-8, 5448 - 5514  | K.EADESLNFEQILEAAK.S                | 1937.05072 | 2 | 3.63E-06 | 0.86 | 3.98 | - | 725.7  |

|                        |                                       |            |   |          |      |      |   |        |
|------------------------|---------------------------------------|------------|---|----------|------|------|---|--------|
| AHQ-6-4, 5617 - 5675   | K.EADESLNFEEQILEAAK.S                 | 1937.05072 | 2 | 1.29E-09 | 0.97 | 5.51 | - | 1854.0 |
| AHQ-6-1, 5727          | K.EADESLNFEEQILEAAK.S                 | 1937.05072 | 2 | 1.85E-07 | 0.90 | 3.46 | - | 1201.1 |
| AHQ-6-1, 5588 - 5664   | K.EADESLNFEEQILEAAK.S                 | 1937.05072 | 2 | 1.64E-05 | 0.93 | 4.11 | - | 1218.9 |
| AHQ-6-7, 5370          | K.EADESLNFEEQILEAAK.S                 | 1937.05072 | 2 | 3.84E-06 | 0.94 | 4.49 | - | 1237.0 |
| AHQ-6-2, 5658 - 5714   | K.EADESLNFEEQILEAAK.S                 | 1937.05072 | 2 | 2.73E-07 | 0.97 | 5.14 | - | 1604.5 |
| AHQ-6-6, 5518 - 5583   | K.EADESLNFEEQILEAAK.S                 | 1937.05072 | 2 | 3.09E-08 | 0.96 | 5.03 | - | 1148.1 |
| AHQ-6-6, 5323          | K.EADESLNFEEQILEAAK.S                 | 1937.05072 | 2 | 1.46E-08 | 0.81 | 3.43 | - | 624.3  |
| AHQ-6-5, 5572 - 5644   | K.EADESLNFEEQILEAAK.S                 | 1937.05072 | 2 | 6.83E-07 | 0.95 | 4.98 | - | 1049.7 |
| AHQ-6-4, 5461 - 5531   | K.EADESLNFEEQILEAAK.S                 | 1937.05072 | 2 | 5.20E-06 | 0.51 | 2.67 | - | 475.5  |
| AHQ-6-2, 5776 - 5836   | K.EADESLNFEEQILEAAK.S                 | 1937.05072 | 2 | 2.82E-04 | 0.93 | 4.24 | - | 1255.3 |
| AHQ-6-3, 5700 - 5762   | K.EADESLNFEEQILEAAK.S                 | 1937.05072 | 2 | 4.61E-05 | 0.70 | 3.39 | - | 525.0  |
| AHQ-6-3, 5589 - 5645   | K.EADESLNFEEQILEAAK.S                 | 1937.05072 | 2 | 1.75E-09 | 0.97 | 5.23 | - | 1634.4 |
| AHQ-6-14-, 5506        | K.EADESLNFEEQILEAAK.S                 | 1937.05072 | 2 | 3.95E-07 | 0.97 | 4.58 | - | 2016.6 |
| AHQ-6-10, 5290 - 5291  | K.EADESLNFEEQILEAAK.S                 | 1937.05072 | 2 | 1.32E-09 | 0.96 | 4.84 | - | 1719.4 |
| AHQ-6-2, 5572 - 5639   | K.EADESLNFEEQILEAAK.S                 | 1937.05072 | 2 | 3.99E-09 | 0.96 | 5.12 | - | 1435.2 |
| AHQ-6-3, 5392          | K.EADESLNFEEQILEAAK.S                 | 1937.05072 | 2 | 1.55E-07 | 0.83 | 3.39 | - | 779.0  |
| AHQ-6-4, 5716          | K.EADESLNFEEQILEAAK.S                 | 1937.05072 | 2 | 7.45E-06 | 0.91 | 3.75 | - | 1229.9 |
| AHQ-6-2, 6542          | R.ECANGYLELLDHLVLLTQKPSPELK.Q         | 2883.30906 | 3 | 1.18E-08 | 0.94 | 5.10 | - | 1224.0 |
| AHQ-6-5, 6468          | R.EGISQEAALHTQM*LTAVQEISHLIEPLANAAR.A | 3388.79744 | 3 | 3.50E-09 | 0.94 | 5.06 | - | 900.4  |
| AHQ-6-4, 6555          | R.EGISQEAALHTQM*LTAVQEISHLIEPLANAAR.A | 3388.79744 | 3 | 2.04E-04 | 0.94 | 5.00 | - | 1077.8 |
| AHQ-6-2, 6534 - 6604   | R.EGISQEAALHTQM*LTAVQEISHLIEPLANAAR.A | 3372.79804 | 3 | 4.99E-04 | 0.67 | 3.55 | - | 465.7  |
| AHQ-6-6, 6394          | R.EGISQEAALHTQM*LTAVQEISHLIEPLANAAR.A | 3388.79744 | 3 | 2.36E-06 | 0.85 | 4.17 | - | 646.3  |
| AHQ-6-3, 6434 - 6456   | R.EGISQEAALHTQM*LTAVQEISHLIEPLANAAR.A | 3388.79744 | 3 | 2.55E-04 | 0.95 | 5.92 | - | 1265.8 |
| AHQ-6-1, 6512          | R.EGISQEAALHTQM*LTAVQEISHLIEPLANAAR.A | 3388.79744 | 3 | 5.86E-05 | 0.91 | 4.25 | - | 1266.8 |
| AHQ-6-4, 6595 - 6665   | R.EGISQEAALHTQM*LTAVQEISHLIEPLANAAR.A | 3372.79804 | 3 | 4.87E-05 | 0.81 | 3.96 | - | 675.5  |
| AHQ-6-2, 6472 - 6494   | R.EGISQEAALHTQM*LTAVQEISHLIEPLANAAR.A | 3388.79744 | 3 | 5.65E-05 | 0.95 | 5.32 | - | 1168.9 |
| AHQ-6-3, 5793 - 5814   | R.ELLENPVQIPNDM*SYFGCLDSVM*ENSK.V     | 3164.48754 | 3 | 3.44E-06 | 0.95 | 5.53 | - | 817.9  |
| AHQ-6-4, 5871 - 5941   | R.ELLENPVQIPNDM*SYFGCLDSVM*ENSK.V     | 3164.48754 | 3 | 5.02E-05 | 0.72 | 3.60 | - | 336.0  |
| AHQ-6-2, 6246 - 6304   | R.ELLENPVQIPNDM*SYFGCLDSVM*ENSK.V     | 3148.48814 | 3 | 2.12E-06 | 0.79 | 3.90 | - | 373.6  |
| AHQ-6-8, 5200          | R.ERIEAPAGPPSDFGLFLSDDDPK.K           | 2571.77979 | 3 | 2.52E-12 | 0.97 | 6.01 | - | 1869.4 |
| AHQ-6-7, 5087 - 5166   | R.ERIEAPAGPPSDFGLFLSDDDPK.K           | 2571.77979 | 3 | 1.75E-06 | 0.94 | 4.68 | - | 1349.5 |
| AHQ-6-13, 5372         | R.ERIEAPAGPPSDFGLFLSDDDPK.K           | 2571.77979 | 3 | 2.78E-06 | 0.97 | 5.58 | - | 2164.8 |
| AHQ-6-13-, 5288 - 5290 | R.ERIEAPAGPPSDFGLFLSDDDPK.K           | 2571.77979 | 3 | 1.33E-04 | 0.97 | 6.05 | - | 1399.4 |
| AHQ-6-14-, 5298        | R.ERIEAPAGPPSDFGLFLSDDDPK.K           | 2571.77979 | 3 | 1.99E-10 | 0.98 | 6.66 | - | 2280.7 |
| AHQ-6-8, 4754 - 4812   | R.ERIEAPAGPPSDFGLFLSDDDPK.K           | 2699.95270 | 3 | 1.91E-07 | 0.97 | 5.89 | - | 1860.3 |
| AHQ-6-7, 4847          | R.ERIEAPAGPPSDFGLFLSDDDPK.K           | 2699.95270 | 3 | 4.50E-05 | 0.92 | 4.28 | - | 1340.2 |
| AHQ-6-14-, 5007        | R.ERIEAPAGPPSDFGLFLSDDDPK.K           | 2699.95270 | 3 | 1.26E-04 | 0.98 | 6.39 | - | 2614.1 |
| AHQ-6-7, 4402          | K.EVIQEWLNTNIK.R                      | 1487.68214 | 2 | 9.53E-05 | 0.86 | 3.87 | - | 574.5  |
| AHQ-6-8, 4409          | K.EVIQEWLNTNIK.R                      | 1487.68214 | 2 | 7.34E-05 | 0.92 | 3.94 | - | 1205.0 |
| AHQ-6-7, 2902 - 2903   | K.FFYSQDNVDSR.D                       | 1378.42795 | 2 | 1.09E-07 | 0.94 | 3.62 | - | 1283.9 |
| AHQ-6-8, 2861 - 2862   | K.FFYSQDNVDSR.D                       | 1378.42795 | 2 | 1.38E-08 | 0.92 | 3.74 | - | 930.4  |
| AHQ-6-8, 5540          | K.FFYSQDNVDSRDPVQLNLLVYQAR.D          | 2889.17074 | 3 | 1.09E-09 | 0.98 | 7.28 | - | 2241.9 |
| AHQ-6-10, 5366         | K.FFYSQDNVDSRDPVQLNLLVYQAR.D          | 2889.17074 | 3 | 1.41E-04 | 0.68 | 3.07 | - | 582.3  |
| AHQ-6-1, 5912          | R.F.GQDFSTFLEAGVEM*AGQAPSQEDR.A       | 2734.89265 | 3 | 1.57E-06 | 0.73 | 3.41 | - | 455.9  |
| AHQ-6-3, 6382          | R.F.GQDFSTFLEAGVEM*AGQAPSQEDR.A       | 2718.89325 | 3 | 7.97E-05 | 0.83 | 3.24 | - | 1128.0 |
| AHQ-6-2, 6614 - 6676   | R.F.GQDFSTFLEAGVEM*AGQAPSQEDR.A       | 2718.89325 | 3 | 3.14E-06 | 0.91 | 5.24 | - | 830.2  |
| AHQ-6-2, 6143 - 6203   | R.F.GQDFSTFLEAGVEM*AGQAPSQEDR.A       | 2734.89265 | 3 | 4.86E-05 | 0.81 | 4.10 | - | 486.0  |
| AHQ-6-5, 6388          | R.F.GQDFSTFLEAGVEM*AGQAPSQEDR.A       | 2718.89325 | 3 | 1.53E-04 | 0.87 | 3.14 | - | 1107.2 |
| AHQ-6-3, 5844          | R.F.GQDFSTFLEAGVEM*AGQAPSQEDR.A       | 2734.89265 | 3 | 6.13E-05 | 0.85 | 3.40 | - | 796.2  |
| AHQ-6-1, 6435 - 6440   | R.F.GQDFSTFLEAGVEM*AGQAPSQEDR.A       | 2718.89325 | 3 | 4.49E-05 | 0.88 | 4.37 | - | 673.1  |
| AHQ-6-4, 6471          | R.F.GQDFSTFLEAGVEM*AGQAPSQEDR.A       | 2718.89325 | 3 | 1.93E-08 | 0.77 | 3.46 | - | 662.2  |
| AHQ-6-2, 5918 - 5975   | R.F.GQDFSTFLEAGVEM*AGQAPSQEDR.A       | 2734.89265 | 3 | 5.30E-10 | 0.96 | 5.69 | - | 1196.6 |
| AHQ-6-3, 6378 - 6384   | R.F.GQDFSTFLEAGVEM*AGQAPSQEDR.A       | 2718.89325 | 3 | 8.00E-12 | 0.92 | 4.67 | - | 705.4  |
| AHQ-6-4, 5919 - 5951   | R.F.GQDFSTFLEAGVEM*AGQAPSQEDR.A       | 2734.89265 | 3 | 3.79E-07 | 0.72 | 3.38 | - | 618.3  |
| AHQ-6-2, 5882 - 5911   | R.F.GQDFSTFLEAGVEM*AGQAPSQEDR.A       | 2734.89265 | 3 | 1.94E-06 | 0.92 | 3.87 | - | 1099.0 |
| AHQ-6-4, 2851 - 2920   | K.FLPSLELRDEH                         | 1243.35032 | 2 | 2.90E-05 | 0.58 | 2.53 | - | 291.5  |
| AHQ-6-2, 5019 - 5022   | K.GLAGAVSELLR.S                       | 1086.26701 | 2 | 8.98E-07 | 0.97 | 4.88 | - | 2039.1 |
| AHQ-6-4, 5015          | K.GLAGAVSELLR.S                       | 1086.26701 | 2 | 2.70E-07 | 0.98 | 4.80 | - | 2114.6 |
| AHQ-6-3, 5002          | K.GLAGAVSELLR.S                       | 1086.26701 | 2 | 1.81E-06 | 0.97 | 4.80 | - | 2075.3 |
| AHQ-6-5, 4952          | K.GLAGAVSELLR.S                       | 1086.26701 | 2 | 6.84E-07 | 0.96 | 4.07 | - | 1619.9 |
| AHQ-6-1, 5122          | K.GLAGAVSELLR.S                       | 1086.26701 | 2 | 1.11E-06 | 0.97 | 4.55 | - | 1975.6 |
| AHQ-6-2, 6010 - 6076   | R.GSQAQPDSPSAQLALIAASQSFLQPGGK.M      | 2756.02103 | 3 | 1.59E-10 | 0.92 | 4.94 | - | 1028.7 |
| AHQ-6-2, 6132 - 6202   | R.GSQAQPDSPSAQLALIAASQSFLQPGGK.M      | 2756.02103 | 3 | 2.02E-04 | 0.89 | 4.64 | - | 804.7  |
| AHQ-6-4, 6243 - 6324   | R.GSQAQPDSPSAQLALIAASQSFLQPGGK.M      | 2756.02103 | 3 | 9.35E-08 | 0.88 | 4.28 | - | 1022.7 |
| AHQ-6-6, 6060          | R.GSQAQPDSPSAQLALIAASQSFLQPGGK.M      | 2756.02103 | 3 | 5.27E-05 | 0.88 | 4.10 | - | 679.6  |
| AHQ-6-4, 6201          | R.GSQAQPDSPSAQLALIAASQSFLQPGGK.M      | 2756.02103 | 3 | 4.27E-05 | 0.95 | 5.15 | - | 949.1  |
| AHQ-6-5, 6125          | R.GSQAQPDSPSAQLALIAASQSFLQPGGK.M      | 2756.02103 | 3 | 3.43E-05 | 0.95 | 5.44 | - | 821.8  |
| AHQ-6-1, 6602          | K.GTEWVDPEDPTVIAENELLGAAAIAEAAA.K     | 3053.32301 | 3 | 5.41E-07 | 0.97 | 6.24 | - | 1618.8 |
| AHQ-6-9, 6207          | K.GTEWVDPEDPTVIAENELLGAAAIAEAAA.K     | 3053.32301 | 3 | 6.12E-07 | 0.95 | 5.36 | - | 1244.2 |
| AHQ-6-4, 6657 - 6659   | K.GTEWVDPEDPTVIAENELLGAAAIAEAAA.K     | 3053.32301 | 3 | 4.56E-10 | 0.92 | 4.66 | - | 1467.4 |
| AHQ-6-6, 6502 - 6503   | K.GTEWVDPEDPTVIAENELLGAAAIAEAAA.K     | 3053.32301 | 3 | 8.16E-11 | 0.96 | 6.26 | - | 1405.7 |
| AHQ-6-7, 6362          | K.GTEWVDPEDPTVIAENELLGAAAIAEAAA.K     | 3053.32301 | 3 | 3.98E-07 | 0.94 | 4.96 | - | 1415.5 |
| AHQ-6-10, 6239         | K.GTEWVDPEDPTVIAENELLGAAAIAEAAA.K     | 3053.32301 | 3 | 3.30E-05 | 0.91 | 3.71 | - | 1583.1 |
| AHQ-6-2, 6570 - 6640   | K.GTEWVDPEDPTVIAENELLGAAAIAEAAA.K     | 3053.32301 | 3 | 1.05E-05 | 0.84 | 4.24 | - | 803.5  |
| AHQ-6-5, 6581          | K.GTEWVDPEDPTVIAENELLGAAAIAEAAA.K     | 3053.32301 | 3 | 1.31E-10 | 0.97 | 6.42 | - | 1616.9 |
| AHQ-6-5, 6472          | R.GVAALTSDPVAVQAVLDTASDVLDK.A         | 2470.75835 | 3 | 2.44E-05 | 0.97 | 5.63 | - | 1752.7 |
| AHQ-6-4, 6560          | R.GVAALTSDPVAVQAVLDTASDVLDK.A         | 2470.75835 | 3 | 3.39E-07 | 0.98 | 6.99 | - | 1928.6 |
| AHQ-6-1, 6506          | R.GVAALTSDPVAVQAVLDTASDVLDK.A         | 2470.75835 | 3 | 4.42E-07 | 0.98 | 6.10 | - | 2221.2 |
| AHQ-6-2, 6500          | R.GVAALTSDPVAVQAVLDTASDVLDK.A         | 2470.75835 | 3 | 5.24E-07 | 0.98 | 6.99 | - | 2438.6 |
| AHQ-6-6, 6450          | R.GVGAATAVTOALNELLQHVK.A              | 2092.38495 | 3 | 2.65E-09 | 0.79 | 3.86 | - | 795.5  |
| AHQ-6-3, 6512          | R.GVGAATAVTOALNELLQHVK.A              | 2092.38495 | 3 | 4.35E-05 | 0.92 | 4.55 | - | 822.8  |
| AHQ-6-2, 5516          | R.GVGAATAVTOALNELLQHVK.A              | 2092.38495 | 3 | 5.84E-07 | 0.92 | 4.20 | - | 1108.4 |
| AHQ-6-2, 5527          | R.GVGAATAVTOALNELLQHVK.A              | 2092.38495 | 3 | 4.51E-07 | 0.76 | 3.57 | - | 398.9  |
| AHQ-6-4, 6611 - 6612   | R.GVGAATAVTOALNELLQHVK.A              | 2092.38495 | 3 | 4.48E-08 | 0.93 | 4.60 | - | 1157.7 |
| AHQ-6-3, 6513          | R.GVGAATAVTOALNELLQHVK.A              | 2092.38495 | 3 | 6.40E-08 | 0.92 | 4.66 | - | 715.0  |
| AHQ-6-5, 6527          | R.GVGAATAVTOALNELLQHVK.A              | 2092.38495 | 3 | 8.18E-04 | 0.87 | 3.69 | - | 959.5  |
| AHQ-6-2, 6551          | R.GVGAATAVTOALNELLQHVK.A              | 2092.38495 | 3 | 1.52E-08 | 0.92 | 4.26 | - | 989.5  |
| AHQ-6-6, 6451          | R.GVGAATAVTOALNELLQHVK.A              | 2092.38495 | 3 | 4.12E-07 | 0.94 | 4.88 | - | 742.2  |
| AHQ-6-2, 6552          | R.GVGAATAVTOALNELLQHVK.A              | 2092.38495 | 3 | 1.46E-07 | 0.94 | 5.22 | - | 870.1  |
| AHQ-6-4, 5544          | R.GVGAATAVTOALNELLQHVK.A              | 2092.38495 | 3 | 1.27E-06 | 0.93 | 4.49 | - | 1106.9 |
| AHQ-6-11, 3301         | R.IGITNHDEYSLVR.E                     | 1517.66833 | 2 | 2.33E-07 | 0.73 | 2.84 | - | 629.2  |
| AHQ-6-13-, 3422        | R.IGITNHDEYSLVR.E                     | 1517.66833 | 3 | 6.03E-06 | 0.89 | 3.58 | - | 769.6  |
| AHQ-6-8, 3153 - 3214   | R.IGITNHDEYSLVR.E                     | 1517.66833 | 2 | 1.58E-04 | 0.63 | 2.68 | - | 970.6  |
| AHQ-6-13-, 3425        | R.IGITNHDEYSLVR.E                     | 1517.66833 | 2 | 2.08E-07 | 0.92 | 3.83 | - | 1075.7 |
| AHQ-6-13-, 3666 - 3674 | R.IGITNHDEYSLVR.E                     | 1517.66833 | 2 | 9.56E-06 | 0.94 | 3.89 | - | 1112.1 |
| AHQ-6-8, 3404 - 3472   | R.IGITNHDEYSLVR.E                     | 1517.66833 | 2 | 3.56E-08 | 0.90 | 3.37 | - | 986.2  |
| AHQ-6-7, 3134 - 3194   | R.IGITNHDEYSLVR.E                     | 1517.66833 | 2 | 1.97E-05 | 0.92 | 3.73 | - | 1008.3 |
| AHQ-6-3, 4060          | R.ILAQATSDLVNAIK.A                    | 1457.69748 | 2 | 1.24E-07 | 0.97 | 4.07 | - | 2025.9 |
| AHQ-6-2, 4260          | R.ILAQATSDLVNAIK.A                    | 1457.69748 | 2 | 2.25E-09 | 0.97 | 5.07 | - | 1496.6 |
| AHQ-6-4, 4068 - 4077   | R.ILAQATSDLVNAIK.A                    | 1457.69748 | 2 | 4.21E-10 | 0.97 | 4.72 | - | 2125.5 |
| AHQ-6-7, 4638          | R.ILAQATSDLVNAIK.A                    | 1457.69748 | 2 | 1.68E-07 | 0.98 | 4.90 | - | 2175.8 |
| AHQ-6-5, 3995 - 4060   | R.ILAQATSDLVNAIK.A                    | 1457.69748 | 2 | 6.96E-07 | 0.96 | 4.27 | - | 1526.9 |
| AHQ-6-5, 4815          | R.ILAQATSDLVNAIK.A                    | 1457.69748 | 2 | 6.01E-07 | 0.96 | 4.47 | - | 1743.4 |
| AHQ-6-11, 4643         | R.ILAQATSDLVNAIK.A                    | 1457.69748 | 2 | 3.26E-04 | 0.72 | 2.74 | - | 722.7  |
| AHQ-6-2, 4579          | R.ILAQATSDLVNAIK.A                    | 1457.69748 | 2 | 4.19E-06 | 0.96 | 3.21 | - | 1974.0 |
| AHQ-6-1, 4982 - 4983   | R.ILAQATSDLVNAIK.A                    | 1457.69748 | 2 | 1.52E-09 | 0.98 | 5.57 | - | 1874.7 |
| AHQ-6-6, 4786          | R.ILAQATSDLVNAIK.A                    | 1457.69748 | 2 | 9.01E-09 | 0.97 | 4.93 | - | 1893.1 |

|                        |                            |            |   |          |      |      |   |        |
|------------------------|----------------------------|------------|---|----------|------|------|---|--------|
| AHQ-6-2, 4087          | R.LAQATSDLVNAIK.A          | 1457.69748 | 2 | 6.82E-08 | 0.98 | 4.88 | - | 2961.0 |
| AHQ-6-6, 3962          | R.LAQATSDLVNAIK.A          | 1457.69748 | 2 | 8.77E-07 | 0.97 | 4.13 | - | 1700.0 |
| AHQ-6-2, 4468 - 4483   | R.LAQATSDLVNAIK.A          | 1457.69748 | 2 | 1.99E-06 | 0.92 | 3.97 | - | 1013.6 |
| AHQ-6-3, 4864          | R.LAQATSDLVNAIK.A          | 1457.69748 | 2 | 3.83E-09 | 0.98 | 4.70 | - | 2072.1 |
| AHQ-6-1, 4219          | R.LAQATSDLVNAIK.A          | 1457.69748 | 2 | 5.40E-07 | 0.96 | 3.61 | - | 1755.8 |
| AHQ-6-4, 4889          | R.LAQATSDLVNAIK.A          | 1457.69748 | 2 | 4.21E-04 | 0.97 | 4.41 | - | 2185.2 |
| AHQ-6-13-, 5529        | R.IPEAPAGPPSDFGLFLSDDDPK.K | 2286.47890 | 2 | 8.74E-09 | 0.93 | 3.94 | - | 1071.8 |
| AHQ-6-14-, 5531        | R.IPEAPAGPPSDFGLFLSDDDPK.K | 2286.47890 | 2 | 2.55E-05 | 0.64 | 3.20 | - | 366.9  |
| AHQ-6-8, 4985 - 5050   | R.IPEAPAGPPSDFGLFLSDDDPK.K | 2414.65181 | 3 | 1.00E-08 | 0.97 | 4.94 | - | 1859.3 |
| AHQ-6-14-, 5172 - 5206 | R.IPEAPAGPPSDFGLFLSDDDPK.K | 2414.65181 | 3 | 2.63E-11 | 0.94 | 4.37 | - | 1338.4 |
| AHQ-6-14, 5802 - 5841  | R.IPEAPAGPPSDFGLFLSDDDPK.K | 2414.65181 | 3 | 5.22E-06 | 0.89 | 3.32 | - | 1431.6 |
| AHQ-6-10, 4987         | R.IPEAPAGPPSDFGLFLSDDDPK.K | 2414.65181 | 3 | 1.11E-10 | 0.92 | 3.95 | - | 1246.6 |
| AHQ-6-8, 4993 - 5053   | R.IPEAPAGPPSDFGLFLSDDDPK.K | 2414.65181 | 2 | 1.77E-05 | 0.92 | 3.91 | - | 901.1  |
| AHQ-6-8, 1767          | K.KEEITGLR.K               | 1047.18765 | 1 | 2.18E-06 | 0.34 | 2.12 | - | 344.2  |
| AHQ-6-8, 2588 - 2590   | R.KFFYSDQNVDSR.D           | 1506.60087 | 2 | 2.90E-04 | 0.93 | 3.62 | - | 1205.9 |
| AHQ-6-8, 2387          | K.KGIWLEAGK.A              | 1002.19171 | 2 | 7.86E-05 | 0.88 | 3.21 | - | 799.1  |
| AHQ-6-5, 2576          | K.LAQAAQSSVATITR.L         | 1417.59344 | 2 | 1.96E-10 | 0.97 | 5.22 | - | 1759.9 |
| AHQ-6-8, 2601          | K.LAQAAQSSVATITR.L         | 1417.59344 | 2 | 3.82E-07 | 0.90 | 2.95 | - | 1162.2 |
| AHQ-6-4, 2603          | K.LAQAAQSSVATITR.L         | 1417.59344 | 2 | 6.14E-10 | 0.96 | 4.02 | - | 1794.1 |
| AHQ-6-7, 2647          | K.LAQAAQSSVATITR.L         | 1417.59344 | 2 | 1.94E-06 | 0.86 | 3.53 | - | 590.4  |
| AHQ-6-4, 2757 - 2768   | K.LAQAAQSSVATITR.L         | 1417.59344 | 2 | 1.31E-09 | 0.96 | 3.81 | - | 1630.7 |
| AHQ-6-3, 2800          | K.LAQAAQSSVATITR.L         | 1417.59344 | 2 | 8.03E-10 | 0.97 | 4.49 | - | 1748.6 |
| AHQ-6-3, 2633          | K.LAQAAQSSVATITR.L         | 1417.59344 | 2 | 3.57E-06 | 0.86 | 2.87 | - | 954.6  |
| AHQ-6-4, 2773          | K.LAQAAQSSVATITR.L         | 1417.59344 | 1 | 1.06E-04 | 0.12 | 2.25 | - | 99.0   |
| AHQ-6-10, 2691         | K.LAQAAQSSVATITR.L         | 1417.59344 | 2 | 4.16E-05 | 0.73 | 2.53 | - | 818.4  |
| AHQ-6-1, 3022          | K.LAQAAQSSVATITR.L         | 1417.59344 | 2 | 4.22E-09 | 0.96 | 4.24 | - | 1434.2 |
| AHQ-6-2, 2626          | K.LAQAAQSSVATITR.L         | 1417.59344 | 2 | 9.42E-08 | 0.96 | 4.03 | - | 1882.5 |
| AHQ-6-6, 2723          | K.LAQAAQSSVATITR.L         | 1417.59344 | 2 | 5.63E-10 | 0.96 | 4.32 | - | 1458.4 |
| AHQ-6-6, 2584          | K.LAQAAQSSVATITR.L         | 1417.59344 | 2 | 1.27E-05 | 0.90 | 3.67 | - | 865.5  |
| AHQ-6-5, 2719          | K.LAQAAQSSVATITR.L         | 1417.59344 | 2 | 2.05E-09 | 0.96 | 4.33 | - | 1403.4 |
| AHQ-6-14-, 2784        | K.LAQAAQSSVATITR.L         | 1417.59344 | 2 | 1.19E-06 | 0.92 | 3.42 | - | 1091.7 |
| AHQ-6-4, 2772          | K.LAQAAQSSVATITR.L         | 1417.59344 | 1 | 3.02E-04 | 0.65 | 3.02 | - | 244.6  |
| AHQ-6-1, 3514 - 3530   | R.LASEAKPAVAEAENEIIGSHIK.H | 2236.46779 | 3 | 1.35E-10 | 0.98 | 5.90 | - | 2343.0 |
| AHQ-6-3, 3305 - 3306   | R.LASEAKPAVAEAENEIIGSHIK.H | 2236.46779 | 2 | 6.65E-08 | 0.93 | 5.00 | - | 592.5  |
| AHQ-6-5, 3203          | R.LASEAKPAVAEAENEIIGSHIK.H | 2236.46779 | 3 | 7.33E-06 | 0.93 | 4.68 | - | 1216.7 |
| AHQ-6-4, 3264          | R.LASEAKPAVAEAENEIIGSHIK.H | 2236.46779 | 2 | 2.02E-06 | 0.95 | 5.17 | - | 728.0  |
| AHQ-6-2, 3319          | R.LASEAKPAVAEAENEIIGSHIK.H | 2236.46779 | 2 | 4.13E-05 | 0.93 | 4.86 | - | 622.9  |
| AHQ-6-2, 3288 - 3351   | R.LASEAKPAVAEAENEIIGSHIK.H | 2236.46779 | 3 | 9.74E-07 | 0.97 | 4.99 | - | 2229.6 |
| AHQ-6-2, 3559          | R.LASEAKPAVAEAENEIIGSHIK.H | 2236.46779 | 3 | 1.11E-14 | 0.97 | 5.73 | - | 1781.7 |
| AHQ-6-4, 5065          | K.LGAASLGAEDPETQVVLINAVK.D | 2196.48671 | 3 | 1.56E-06 | 0.88 | 3.48 | - | 1481.6 |
| AHQ-6-2, 5216 - 5226   | K.LGAASLGAEDPETQVVLINAVK.D | 2196.48671 | 3 | 4.20E-05 | 0.93 | 4.06 | - | 1564.3 |
| AHQ-6-5, 5296 - 5335   | K.LGAASLGAEDPETQVVLINAVK.D | 2196.48671 | 2 | 1.44E-08 | 0.92 | 4.56 | - | 696.6  |
| AHQ-6-2, 5192 - 5250   | K.LGAASLGAEDPETQVVLINAVK.D | 2196.48671 | 2 | 8.12E-07 | 0.96 | 5.44 | - | 932.6  |
| AHQ-6-5, 4928 - 4987   | K.LGAASLGAEDPETQVVLINAVK.D | 2196.48671 | 2 | 3.19E-06 | 0.82 | 3.82 | - | 587.3  |
| AHQ-6-2, 5034          | K.LGAASLGAEDPETQVVLINAVK.D | 2196.48671 | 3 | 2.22E-06 | 0.97 | 4.50 | - | 2590.8 |
| AHQ-6-6, 5250          | K.LGAASLGAEDPETQVVLINAVK.D | 2196.48671 | 2 | 2.82E-07 | 0.87 | 4.00 | - | 532.8  |
| AHQ-6-3, 5320 - 5324   | K.LGAASLGAEDPETQVVLINAVK.D | 2196.48671 | 2 | 3.15E-10 | 0.93 | 4.84 | - | 737.3  |
| AHQ-6-5, 5163 - 5164   | K.LGAASLGAEDPETQVVLINAVK.D | 2196.48671 | 2 | 1.80E-06 | 0.97 | 5.89 | - | 1404.4 |
| AHQ-6-2, 4996 - 5064   | K.LGAASLGAEDPETQVVLINAVK.D | 2196.48671 | 2 | 1.73E-07 | 0.95 | 5.07 | - | 953.2  |
| AHQ-6-4, 5383          | K.LGAASLGAEDPETQVVLINAVK.D | 2196.48671 | 2 | 7.56E-07 | 0.96 | 4.56 | - | 1324.4 |
| AHQ-6-3, 5200          | K.LGAASLGAEDPETQVVLINAVK.D | 2196.48671 | 3 | 3.77E-09 | 0.98 | 6.17 | - | 2452.2 |
| AHQ-6-14-, 5096 - 5100 | K.LGAASLGAEDPETQVVLINAVK.D | 2196.48671 | 2 | 3.00E-07 | 0.94 | 4.81 | - | 917.8  |
| AHQ-6-3, 5169 - 5225   | K.LGAASLGAEDPETQVVLINAVK.D | 2196.48671 | 2 | 6.54E-07 | 0.95 | 4.63 | - | 1081.8 |
| AHQ-6-4, 5057          | K.LGAASLGAEDPETQVVLINAVK.D | 2196.48671 | 2 | 1.86E-07 | 0.96 | 4.90 | - | 1220.7 |
| AHQ-6-6, 4898 - 4938   | K.LGAASLGAEDPETQVVLINAVK.D | 2196.48671 | 2 | 2.56E-07 | 0.94 | 4.82 | - | 780.9  |
| AHQ-6-7, 4775          | K.LGAASLGAEDPETQVVLINAVK.D | 2196.48671 | 2 | 4.03E-07 | 0.91 | 4.14 | - | 807.8  |
| AHQ-6-6, 5123          | K.LGAASLGAEDPETQVVLINAVK.D | 2196.48671 | 2 | 6.17E-08 | 0.96 | 5.16 | - | 1061.3 |
| AHQ-6-1, 5298          | K.LGAASLGAEDPETQVVLINAVK.D | 2196.48671 | 3 | 4.04E-07 | 0.97 | 5.19 | - | 2211.1 |
| AHQ-6-4, 5248 - 5313   | K.LGAASLGAEDPETQVVLINAVK.D | 2196.48671 | 2 | 1.41E-04 | 0.95 | 5.02 | - | 973.2  |
| AHQ-6-1, 5292 - 5296   | K.LGAASLGAEDPETQVVLINAVK.D | 2196.48671 | 2 | 6.24E-05 | 0.96 | 5.03 | - | 1254.4 |
| AHQ-6-1, 5118          | K.LGAASLGAEDPETQVVLINAVK.D | 2196.48671 | 2 | 1.59E-06 | 0.84 | 3.79 | - | 561.2  |
| AHQ-6-1, 5411          | K.LGAASLGAEDPETQVVLINAVK.D | 2196.48671 | 2 | 4.05E-05 | 0.72 | 3.56 | - | 533.0  |
| AHQ-6-3, 4964 - 5010   | K.LGAASLGAEDPETQVVLINAVK.D | 2196.48671 | 2 | 6.87E-08 | 0.96 | 4.96 | - | 1091.5 |
| AHQ-6-7, 4962          | K.LGAASLGAEDPETQVVLINAVK.D | 2196.48671 | 2 | 1.62E-06 | 0.93 | 4.22 | - | 1025.2 |
| AHQ-6-7, 3618 - 3622   | K.LHTDDELNWLHDHGR.T        | 1721.81153 | 2 | 7.59E-05 | 0.95 | 4.38 | - | 1317.7 |
| AHQ-6-8, 3428 - 3496   | K.LHTDDELNWLHDHGR.T        | 1721.81153 | 3 | 4.66E-09 | 0.92 | 4.54 | - | 916.9  |
| AHQ-6-8, 3492          | K.LHTDDELNWLHDHGR.T        | 1721.81153 | 2 | 1.63E-06 | 0.96 | 4.74 | - | 1359.7 |
| AHQ-6-6, 4163          | K.LLAALLEDEGGSGR.P         | 1401.54764 | 2 | 5.98E-05 | 0.87 | 2.62 | - | 1096.2 |
| AHQ-6-4, 4267          | K.LLAALLEDEGGSGR.P         | 1401.54764 | 2 | 4.15E-06 | 0.93 | 2.68 | - | 1728.9 |
| AHQ-6-3, 5097          | K.LLAALLEDEGGSGRPLLQAAK.G  | 2123.43896 | 2 | 3.32E-08 | 0.98 | 6.62 | - | 1395.4 |
| AHQ-6-7, 4787 - 4854   | K.LLAALLEDEGGSGRPLLQAAK.G  | 2123.43896 | 2 | 2.96E-10 | 0.97 | 5.39 | - | 1439.7 |
| AHQ-6-1, 5243          | K.LLAALLEDEGGSGRPLLQAAK.G  | 2123.43896 | 2 | 4.86E-05 | 0.97 | 5.91 | - | 1437.8 |
| AHQ-6-8, 4814          | K.LLAALLEDEGGSGRPLLQAAK.G  | 2123.43896 | 3 | 2.81E-06 | 0.96 | 5.35 | - | 1512.0 |
| AHQ-6-8, 4810          | K.LLAALLEDEGGSGRPLLQAAK.G  | 2123.43896 | 2 | 1.50E-06 | 0.97 | 6.12 | - | 1172.3 |
| AHQ-6-10, 4767         | K.LLAALLEDEGGSGRPLLQAAK.G  | 2123.43896 | 3 | 6.43E-06 | 0.83 | 3.53 | - | 913.2  |
| AHQ-6-10, 4770         | K.LLAALLEDEGGSGRPLLQAAK.G  | 2123.43896 | 2 | 1.41E-06 | 0.94 | 4.69 | - | 969.3  |
| AHQ-6-1, 5232          | K.LLAALLEDEGGSGRPLLQAAK.G  | 2123.43896 | 3 | 1.12E-06 | 0.91 | 4.17 | - | 1253.2 |
| AHQ-6-6, 5026          | K.LLAALLEDEGGSGRPLLQAAK.G  | 2123.43896 | 2 | 9.02E-09 | 0.97 | 5.83 | - | 1302.4 |
| AHQ-6-6, 5018          | K.LLAALLEDEGGSGRPLLQAAK.G  | 2123.43896 | 3 | 1.42E-10 | 0.96 | 5.02 | - | 1671.5 |
| AHQ-6-7, 4855 - 4859   | K.LLAALLEDEGGSGRPLLQAAK.G  | 2123.43896 | 3 | 1.20E-06 | 0.96 | 4.51 | - | 1559.3 |
| AHQ-6-4, 5131 - 5135   | K.LLAALLEDEGGSGRPLLQAAK.G  | 2123.43896 | 3 | 1.08E-11 | 0.98 | 6.51 | - | 2028.3 |
| AHQ-6-3, 5096          | K.LLAALLEDEGGSGRPLLQAAK.G  | 2123.43896 | 3 | 4.23E-08 | 0.94 | 4.87 | - | 1211.1 |
| AHQ-6-4, 5129          | K.LLAALLEDEGGSGRPLLQAAK.G  | 2123.43896 | 2 | 5.76E-10 | 0.98 | 6.92 | - | 1686.6 |
| AHQ-6-12, 4925         | K.LLAALLEDEGGSGRPLLQAAK.G  | 2123.43896 | 2 | 2.73E-04 | 0.92 | 4.33 | - | 891.7  |
| AHQ-6-12, 4924         | K.LLAALLEDEGGSGRPLLQAAK.G  | 2123.43896 | 3 | 4.56E-05 | 0.82 | 3.48 | - | 769.1  |
| AHQ-6-2, 5086 - 5146   | K.LLAALLEDEGGSGRPLLQAAK.G  | 2123.43896 | 2 | 1.84E-04 | 0.97 | 5.59 | - | 1374.7 |
| AHQ-6-11, 4883         | K.LLAALLEDEGGSGRPLLQAAK.G  | 2123.43896 | 2 | 2.12E-06 | 0.86 | 3.62 | - | 759.7  |
| AHQ-6-5, 5061          | K.LLAALLEDEGGSGRPLLQAAK.G  | 2123.43896 | 2 | 5.66E-14 | 0.98 | 6.59 | - | 1931.0 |
| AHQ-6-2, 5114          | K.LLAALLEDEGGSGRPLLQAAK.G  | 2123.43896 | 3 | 5.65E-08 | 0.95 | 4.73 | - | 1446.3 |
| AHQ-6-5, 5057          | K.LLAALLEDEGGSGRPLLQAAK.G  | 2123.43896 | 3 | 1.29E-08 | 0.95 | 4.75 | - | 1802.9 |
| AHQ-6-5, 3943 - 4003   | R.LLSDSLPPSTGTFQEAQSR.L    | 2035.20076 | 2 | 2.06E-07 | 0.68 | 3.19 | - | 228.9  |
| AHQ-6-4, 3987 - 4051   | R.LLSDSLPPSTGTFQEAQSR.L    | 2035.20076 | 2 | 1.41E-06 | 0.70 | 3.36 | - | 380.5  |
| AHQ-6-4, 4115 - 4176   | R.LLSDSLPPSTGTFQEAQSR.L    | 2035.20076 | 2 | 2.11E-05 | 0.84 | 3.91 | - | 309.2  |
| AHQ-6-3, 3976 - 4036   | R.LLSDSLPPSTGTFQEAQSR.L    | 2035.20076 | 2 | 2.82E-05 | 0.78 | 3.39 | - | 302.5  |
| AHQ-6-1, 4211          | R.LLSDSLPPSTGTFQEAQSR.L    | 2035.20076 | 2 | 1.53E-09 | 0.83 | 3.50 | - | 401.1  |
| AHQ-6-2, 4050 - 4115   | R.LLSDSLPPSTGTFQEAQSR.L    | 2035.20076 | 2 | 1.95E-05 | 0.93 | 4.97 | - | 433.0  |
| AHQ-6-3, 4096 - 4157   | R.LLSDSLPPSTGTFQEAQSR.L    | 2035.20076 | 2 | 1.64E-05 | 0.84 | 4.07 | - | 284.5  |
| AHQ-6-4, 4240 - 4252   | R.LLSDSLPPSTGTFQEAQSR.L    | 2035.20076 | 2 | 9.13E-07 | 0.83 | 3.91 | - | 287.0  |
| AHQ-6-1, 4082 - 4152   | R.LLSDSLPPSTGTFQEAQSR.L    | 2035.20076 | 2 | 3.43E-04 | 0.44 | 2.64 | - | 219.0  |
| AHQ-6-2, 5322 - 5378   | R.LNEAAAGLNOAATLVQASR.G    | 2028.21299 | 2 | 8.31E-12 | 0.98 | 5.51 | - | 1952.4 |
| AHQ-6-4, 4280          | R.LNEAAAGLNOAATLVQASR.G    | 2028.21299 | 2 | 3.75E-10 | 0.95 | 4.43 | - | 1093.9 |
| AHQ-6-1, 5394          | R.LNEAAAGLNOAATLVQASR.G    | 2028.21299 | 3 | 2.53E-10 | 0.98 | 6.10 | - | 2008.8 |
| AHQ-6-2, 5486 - 5495   | R.LNEAAAGLNOAATLVQASR.G    | 2028.21299 | 2 | 2.18E-05 | 0.96 | 4.86 | - | 1055.3 |
| AHQ-6-5, 5267          | R.LNEAAAGLNOAATLVQASR.G    | 2028.21299 | 3 | 4.71E-06 | 0.96 | 5.21 | - | 1626.2 |
| AHQ-6-4, 5249          | R.LNEAAAGLNOAATLVQASR.G    | 2028.21299 | 2 | 2.54E-05 | 0.91 | 3.84 | - | 828.7  |
| AHQ-6-4, 5343 - 5404   | R.LNEAAAGLNOAATLVQASR.G    | 2028.21299 | 2 | 2.35E-10 | 0.98 | 6.11 | - | 2086.2 |
| AHQ-6-5, 5263 - 5324   | R.LNEAAAGLNOAATLVQASR.G    | 2028.21299 | 2 | 9.77E-09 | 0.97 | 5.38 | - | 1291.1 |

|                        |                                    |            |   |          |      |      |   |        |
|------------------------|------------------------------------|------------|---|----------|------|------|---|--------|
| AHQ-6-6, 5234          | R.LNEAAAGLNQAATELVQASR.G           | 2028.21299 | 3 | 7.60E-05 | 0.97 | 5.42 | - | 1778.1 |
| AHQ-6-6, 4162 - 4178   | R.LNEAAAGLNQAATELVQASR.G           | 2028.21299 | 2 | 3.19E-06 | 0.78 | 3.56 | - | 441.6  |
| AHQ-6-3, 5293 - 5349   | R.LNEAAAGLNQAATELVQASR.G           | 2028.21299 | 3 | 1.02E-04 | 0.97 | 5.87 | - | 1914.8 |
| AHQ-6-2, 4288 - 4356   | R.LNEAAAGLNQAATELVQASR.G           | 2028.21299 | 2 | 8.30E-08 | 0.89 | 4.26 | - | 600.1  |
| AHQ-6-2, 5599          | R.LNEAAAGLNQAATELVQASR.G           | 2028.21299 | 2 | 2.78E-15 | 0.98 | 5.59 | - | 2017.5 |
| AHQ-6-3, 4256          | R.LNEAAAGLNQAATELVQASR.G           | 2028.21299 | 2 | 2.50E-07 | 0.77 | 3.38 | - | 499.5  |
| AHQ-6-6, 5215          | R.LNEAAAGLNQAATELVQASR.G           | 2028.21299 | 2 | 2.69E-08 | 0.94 | 4.64 | - | 1032.4 |
| AHQ-6-5, 4204          | R.LNEAAAGLNQAATELVQASR.G           | 2028.21299 | 2 | 1.14E-07 | 0.94 | 4.62 | - | 827.6  |
| AHQ-6-3, 5265 - 5348   | R.LNEAAAGLNQAATELVQASR.G           | 2028.21299 | 2 | 3.93E-12 | 0.97 | 5.20 | - | 1788.1 |
| AHQ-6-3, 5558          | R.LNEAAAGLNQAATELVQASR.G           | 2028.21299 | 2 | 6.05E-14 | 0.97 | 5.28 | - | 1428.2 |
| AHQ-6-6, 5392          | R.LNEAAAGLNQAATELVQASR.G           | 2028.21299 | 2 | 3.76E-07 | 0.88 | 3.51 | - | 941.2  |
| AHQ-6-1, 5387          | R.LNEAAAGLNQAATELVQASR.G           | 2028.21299 | 2 | 1.27E-12 | 0.97 | 5.91 | - | 1510.2 |
| AHQ-6-2, 4954          | R.LNEAAAGLNQAATELVQASR.G           | 2028.21299 | 2 | 4.53E-06 | 0.95 | 4.65 | - | 1257.9 |
| AHQ-6-7, 5066 - 5067   | R.LNEAAAGLNQAATELVQASR.G           | 2028.21299 | 2 | 3.04E-06 | 0.97 | 5.80 | - | 1414.0 |
| AHQ-6-4, 5347          | R.LNEAAAGLNQAATELVQASR.G           | 2028.21299 | 3 | 1.09E-09 | 0.98 | 6.03 | - | 2296.9 |
| AHQ-6-11, 5051         | R.LNEAAAGLNQAATELVQASR.G           | 2028.21299 | 2 | 4.14E-06 | 0.91 | 4.00 | - | 929.0  |
| AHQ-6-2, 5164          | R.LNEAAAGLNQAATELVQASRGTPODLAR.A   | 2867.12501 | 3 | 2.85E-09 | 0.68 | 3.14 | - | 475.6  |
| AHQ-6-4, 5176          | R.LNEAAAGLNQAATELVQASRGTPODLAR.A   | 2867.12501 | 3 | 6.29E-04 | 0.68 | 3.50 | - | 476.7  |
| AHQ-6-2, 2131          | R.MATNAAAGNAIK.K                   | 1204.38227 | 2 | 4.38E-05 | 0.88 | 3.79 | - | 633.8  |
| AHQ-6-6, 3166          | R.MVAATNMLCEAANAAVQGHASQEK.L       | 2558.79098 | 3 | 2.09E-06 | 0.83 | 3.55 | - | 1030.7 |
| AHQ-6-4, 4025          | R.MVAATNMLCEAANAAVQGHASQEK.L       | 2574.79038 | 3 | 1.97E-07 | 0.87 | 4.06 | - | 803.1  |
| AHQ-6-2, 4071          | R.MVAATNMLCEAANAAVQGHASQEK.L       | 2558.79098 | 3 | 1.62E-07 | 0.98 | 5.65 | - | 2498.4 |
| AHQ-6-3, 4025          | R.MVAATNMLCEAANAAVQGHASQEK.L       | 2574.79038 | 3 | 1.42E-07 | 0.85 | 3.74 | - | 993.1  |
| AHQ-6-2, 4159 - 4228   | R.MVAATNMLCEAANAAVQGHASQEK.L       | 2574.79038 | 3 | 1.83E-04 | 0.89 | 4.70 | - | 807.7  |
| AHQ-6-6, 3943          | R.MVAATNMLCEAANAAVQGHASQEK.L       | 2574.79038 | 3 | 1.18E-06 | 0.82 | 3.70 | - | 804.5  |
| AHQ-6-4, 3931 - 3937   | R.MVAATNMLCEAANAAVQGHASQEK.L       | 2574.79038 | 3 | 5.01E-09 | 0.96 | 5.44 | - | 1175.5 |
| AHQ-6-3, 3934          | R.MVAATNMLCEAANAAVQGHASQEK.L       | 2574.79038 | 3 | 2.15E-06 | 0.81 | 3.38 | - | 766.0  |
| AHQ-6-2, 4064          | R.MVAATNMLCEAANAAVQGHASQEK.L       | 2574.79038 | 3 | 7.97E-11 | 0.89 | 4.36 | - | 1161.4 |
| AHQ-6-13-, 6064        | K.MVGGIAQIIAAQEMLR.K               | 1847.19347 | 2 | 1.23E-07 | 0.91 | 3.94 | - | 1009.6 |
| AHQ-6-2, 5647 - 5718   | K.MVGGIAQIIAAQEEMLR.K              | 1863.19287 | 2 | 4.65E-08 | 0.96 | 4.59 | - | 1458.2 |
| AHQ-6-14-, 6044 - 6059 | K.MVGGIAQIIAAQEMLR.K               | 1847.19347 | 2 | 5.20E-05 | 0.97 | 5.08 | - | 1521.5 |
| AHQ-6-1, 5687          | K.MVGGIAQIIAAQEEMLR.K              | 1863.19287 | 3 | 1.17E-04 | 0.90 | 3.74 | - | 1665.2 |
| AHQ-6-5, 5679          | K.MVGGIAQIIAAQEEMLR.K              | 1863.19287 | 2 | 5.51E-05 | 0.91 | 3.65 | - | 1099.3 |
| AHQ-6-2, 5724          | K.MVGGIAQIIAAQEEMLR.K              | 1863.19287 | 3 | 9.18E-06 | 0.98 | 6.29 | - | 2267.4 |
| AHQ-6-1, 5758          | K.MVGGIAQIIAAQEEMLR.K              | 1863.19287 | 2 | 5.90E-04 | 0.93 | 4.10 | - | 1098.5 |
| AHQ-6-14-, 5576 - 5587 | K.MVGGIAQIIAAQEEMLR.K              | 1863.19287 | 2 | 1.68E-07 | 0.97 | 5.00 | - | 1503.1 |
| AHQ-6-4, 5672 - 5744   | K.MVGGIAQIIAAQEEMLR.K              | 1863.19287 | 2 | 1.96E-09 | 0.98 | 5.66 | - | 1725.4 |
| AHQ-6-14-, 5508 - 5574 | K.MVGGIAQIIAAQEEMLR.K              | 1863.19287 | 3 | 2.08E-05 | 0.93 | 4.50 | - | 1400.5 |
| AHQ-6-8, 2258          | K.NCGQMSEIAK.V                     | 1268.40005 | 2 | 7.10E-07 | 0.91 | 3.23 | - | 1319.3 |
| AHQ-6-4, 4381 - 4460   | K.NGNLPEFGDAISTASK.A               | 1621.73018 | 2 | 7.27E-05 | 0.83 | 3.37 | - | 583.1  |
| AHQ-6-6, 4304          | K.NGNLPEFGDAISTASK.A               | 1621.73018 | 2 | 3.15E-08 | 0.89 | 3.41 | - | 839.8  |
| AHQ-6-3, 4230          | K.NGNLPEFGDAISTASK.A               | 1621.73018 | 2 | 9.84E-04 | 0.78 | 3.51 | - | 420.0  |
| AHQ-6-1, 4506          | K.NGNLPEFGDAISTASK.A               | 1621.73018 | 2 | 1.65E-05 | 0.83 | 3.12 | - | 532.9  |
| AHQ-6-2, 4232 - 4294   | K.NGNLPEFGDAISTASK.A               | 1621.73018 | 2 | 1.09E-05 | 0.82 | 3.59 | - | 505.9  |
| AHQ-6-5, 4343          | K.NGNLPEFGDAISTASK.A               | 1621.73018 | 2 | 4.61E-05 | 0.83 | 3.30 | - | 508.4  |
| AHQ-6-6, 4030          | K.NLGTALAE.LR.T                    | 1058.21367 | 2 | 8.56E-04 | 0.91 | 3.09 | - | 1023.6 |
| AHQ-6-1, 4318          | K.NLGTALAE.LR.T                    | 1058.21367 | 2 | 2.72E-04 | 0.86 | 3.42 | - | 786.9  |
| AHQ-6-5, 4073          | K.NLGTALAE.LR.T                    | 1058.21367 | 2 | 7.11E-04 | 0.83 | 3.17 | - | 845.0  |
| AHQ-6-2, 5230          | K.NLGTALAE.LR.T                    | 1058.21367 | 2 | 4.20E-04 | 0.90 | 3.35 | - | 1119.5 |
| AHQ-6-3, 2848          | K.PAAVAENEIEIGSHIK.H               | 1636.78798 | 2 | 3.04E-06 | 0.97 | 4.96 | - | 1629.7 |
| AHQ-6-4, 2805 - 2825   | K.PAAVAENEIEIGSHIK.H               | 1636.78798 | 3 | 1.01E-09 | 0.97 | 5.47 | - | 2003.0 |
| AHQ-6-6, 2776          | K.PAAVAENEIEIGSHIK.H               | 1636.78798 | 2 | 7.53E-05 | 0.98 | 4.74 | - | 2205.4 |
| AHQ-6-4, 2803          | K.PAAVAENEIEIGSHIK.H               | 1636.78798 | 2 | 3.10E-06 | 0.96 | 4.47 | - | 1470.2 |
| AHQ-6-5, 2771          | K.PAAVAENEIEIGSHIK.H               | 1636.78798 | 2 | 1.93E-10 | 0.97 | 4.86 | - | 1849.7 |
| AHQ-6-5, 2765 - 2776   | K.PAAVAENEIEIGSHIK.H               | 1636.78798 | 3 | 7.62E-07 | 0.98 | 5.43 | - | 2310.2 |
| AHQ-6-2, 2851          | K.PAAVAENEIEIGSHIK.H               | 1636.78798 | 3 | 1.08E-09 | 0.98 | 5.65 | - | 2337.0 |
| AHQ-6-2, 2848          | K.PAAVAENEIEIGSHIK.H               | 1636.78798 | 2 | 2.20E-04 | 0.97 | 5.16 | - | 1854.5 |
| AHQ-6-6, 2772          | K.PAAVAENEIEIGSHIK.H               | 1636.78798 | 3 | 2.72E-10 | 0.96 | 4.99 | - | 1879.6 |
| AHQ-6-3, 2850          | K.PAAVAENEIEIGSHIK.H               | 1636.78798 | 3 | 1.48E-09 | 0.97 | 5.46 | - | 1818.1 |
| AHQ-6-5, 3261          | K.QAAASATQIAAAQHAASTPK.A           | 1996.17099 | 2 | 6.13E-05 | 0.87 | 4.36 | - | 418.1  |
| AHQ-6-2, 3367 - 3376   | K.QAAASATQIAAAQHAASTPK.A           | 1996.17099 | 2 | 1.96E-06 | 0.89 | 4.27 | - | 590.6  |
| AHQ-6-3, 3348 - 3349   | K.QAAASATQIAAAQHAASTPK.A           | 1996.17099 | 2 | 1.28E-04 | 0.91 | 4.58 | - | 559.8  |
| AHQ-6-3, 3345          | K.QAAASATQIAAAQHAASTPK.A           | 1996.17099 | 3 | 7.80E-05 | 0.76 | 3.24 | - | 749.3  |
| AHQ-6-6, 3243          | K.QAAASATQIAAAQHAASTPK.A           | 1996.17099 | 2 | 7.60E-06 | 0.83 | 3.73 | - | 493.3  |
| AHQ-6-6, 3242          | K.QAAASATQIAAAQHAASTPK.A           | 1996.17099 | 3 | 1.49E-08 | 0.75 | 3.19 | - | 748.8  |
| AHQ-6-4, 3311          | K.QAAASATQIAAAQHAASTPK.A           | 1996.17099 | 2 | 2.50E-04 | 0.85 | 4.07 | - | 479.7  |
| AHQ-6-1, 3544          | K.QAAASATQIAAAQHAASTPK.A           | 1996.17099 | 3 | 8.90E-06 | 0.71 | 3.22 | - | 642.5  |
| AHQ-6-5, 3808 - 3880   | R.QLAVFCSPEPPAK.T                  | 1574.77985 | 2 | 6.06E-06 | 0.84 | 3.06 | - | 857.8  |
| AHQ-6-6, 3847 - 3850   | R.QLAVFCSPEPPAK.T                  | 1574.77985 | 2 | 4.56E-06 | 0.90 | 3.52 | - | 994.3  |
| AHQ-6-2, 3962 - 3964   | R.QLAVFCSPEPPAK.T                  | 1574.77985 | 2 | 5.49E-07 | 0.92 | 3.84 | - | 1007.3 |
| AHQ-6-6, 3658          | K.QVAASTAQLLVACK.V                 | 1461.70942 | 2 | 8.11E-06 | 0.74 | 3.13 | - | 511.4  |
| AHQ-6-2, 3795          | K.QVAASTAQLLVACK.V                 | 1461.70942 | 2 | 6.80E-04 | 0.86 | 3.50 | - | 534.7  |
| AHQ-6-13-, 3748        | K.QVAASTAQLLVACK.V                 | 1461.70942 | 2 | 1.57E-06 | 0.85 | 3.26 | - | 690.3  |
| AHQ-6-5, 3696 - 3773   | K.QVAASTAQLLVACK.V                 | 1461.70942 | 2 | 1.13E-04 | 0.85 | 3.14 | - | 622.1  |
| AHQ-6-4, 3755          | K.QVAASTAQLLVACK.V                 | 1461.70942 | 2 | 1.37E-04 | 0.78 | 3.14 | - | 463.5  |
| AHQ-6-4, 4793 - 4871   | K.RVAGSVTELIQAAEAM.K.G             | 1791.06327 | 2 | 5.60E-04 | 0.77 | 3.75 | - | 381.3  |
| AHQ-6-4, 5655          | K.RVAGSVTELIQAAEAM.K.G             | 1775.06387 | 2 | 1.20E-04 | 0.96 | 4.85 | - | 1345.6 |
| AHQ-6-2, 5650          | K.RVAGSVTELIQAAEAM.K.G             | 1775.06387 | 2 | 1.47E-04 | 0.97 | 4.72 | - | 1737.6 |
| AHQ-6-2, 3587          | R.SGASGPENFQVGSMP.PPAQQQITSGQMHR.G | 2945.19807 | 3 | 3.01E-04 | 0.59 | 3.43 | - | 447.3  |
| AHQ-6-3, 3569          | R.SGASGPENFQVGSMP.PPAQQQITSGQMHR.G | 2945.19807 | 3 | 9.66E-07 | 0.61 | 3.28 | - | 647.7  |
| AHQ-6-2, 3298          | R.SGASGPENFQVGSMP.PPAQQQITSGQMHR.G | 2961.19747 | 3 | 6.75E-04 | 0.94 | 4.95 | - | 1071.0 |
| AHQ-6-2, 3780          | R.SGASGPENFQVGSMP.PPAQQQITSGQMHR.G | 2945.19807 | 3 | 6.31E-05 | 0.55 | 3.18 | - | 308.9  |
| AHQ-6-3, 3124          | K.SIAAATSALVK.A                    | 1032.21612 | 2 | 3.48E-04 | 0.89 | 2.95 | - | 970.6  |
| AHQ-6-13-, 3774 - 3850 | K.SKDHFGLEGDEESTM.LEDSVSPK.K       | 2554.68304 | 3 | 9.06E-06 | 0.96 | 4.95 | - | 1884.4 |
| AHQ-6-8, 4014          | K.SKDHFGLEGDEESTM.LEDSVSPK.K       | 2538.68364 | 2 | 4.54E-09 | 0.92 | 3.93 | - | 998.0  |
| AHQ-6-8, 4013          | K.SKDHFGLEGDEESTM.LEDSVSPK.K       | 2538.68364 | 3 | 1.31E-05 | 0.95 | 4.73 | - | 1509.7 |
| AHQ-6-8, 3678          | K.SKDHFGLEGDEESTM.LEDSVSPK.K       | 2554.68304 | 3 | 6.69E-07 | 0.96 | 5.27 | - | 1628.4 |
| AHQ-6-5, 5081 - 5099   | K.SNTSPEELGPLANQLTSDYGR.L          | 2250.36505 | 2 | 4.74E-06 | 0.90 | 4.19 | - | 488.4  |
| AHQ-6-2, 4947 - 5018   | K.SNTSPEELGPLANQLTSDYGR.L          | 2250.36505 | 2 | 3.23E-06 | 0.89 | 3.83 | - | 501.5  |
| AHQ-6-2, 5170          | K.SNTSPEELGPLANQLTSDYGR.L          | 2250.36505 | 2 | 4.80E-06 | 0.86 | 3.82 | - | 481.5  |
| AHQ-6-2, 4444          | K.SNTSPEELGPLANQLTSDYGR.L          | 2250.36505 | 2 | 7.14E-09 | 0.88 | 4.25 | - | 437.7  |
| AHQ-6-4, 4451          | K.SNTSPEELGPLANQLTSDYGR.L          | 2250.36505 | 2 | 8.14E-08 | 0.90 | 4.14 | - | 625.3  |
| AHQ-6-3, 5113 - 5140   | K.SNTSPEELGPLANQLTSDYGR.L          | 2250.36505 | 2 | 4.95E-07 | 0.87 | 4.51 | - | 367.0  |
| AHQ-6-4, 5012 - 5071   | K.SNTSPEELGPLANQLTSDYGR.L          | 2250.36505 | 2 | 1.23E-05 | 0.69 | 3.34 | - | 301.2  |
| AHQ-6-3, 4425          | K.SNTSPEELGPLANQLTSDYGR.L          | 2250.36505 | 2 | 1.22E-07 | 0.72 | 3.20 | - | 358.0  |
| AHQ-6-6, 5082          | K.SNTSPEELGPLANQLTSDYGR.L          | 2250.36505 | 2 | 5.95E-05 | 0.77 | 3.37 | - | 353.9  |
| AHQ-6-4, 5164 - 5225   | K.SNTSPEELGPLANQLTSDYGR.L          | 2250.36505 | 2 | 1.20E-07 | 0.85 | 3.76 | - | 600.3  |
| AHQ-6-1, 5230          | K.SNTSPEELGPLANQLTSDYGR.L          | 2250.36505 | 2 | 3.10E-06 | 0.64 | 3.07 | - | 389.5  |
| AHQ-6-2, 4567          | K.SNTSPEELGPLANQLTSDYGR.L          | 2250.36505 | 2 | 1.11E-04 | 0.74 | 3.83 | - | 330.2  |
| AHQ-6-3, 4909 - 4978   | K.SNTSPEELGPLANQLTSDYGR.L          | 2250.36505 | 2 | 6.88E-08 | 0.86 | 3.72 | - | 471.2  |
| AHQ-6-3, 5020          | K.SNTSPEELGPLANQLTSDYGR.L          | 2250.36505 | 2 | 1.93E-05 | 0.78 | 3.62 | - | 309.8  |
| AHQ-6-2, 5071 - 5147   | K.SNTSPEELGPLANQLTSDYGR.L          | 2250.36505 | 2 | 5.04E-07 | 0.93 | 4.95 | - | 583.5  |
| AHQ-6-1, 4555          | K.SNTSPEELGPLANQLTSDYGR.L          | 2250.36505 | 2 | 4.50E-06 | 0.84 | 3.66 | - | 581.3  |
| AHQ-6-6, 4907 - 4962   | K.SNTSPEELGPLANQLTSDYGR.L          | 2250.36505 | 2 | 1.38E-06 | 0.82 | 3.72 | - | 449.7  |
| AHQ-6-5, 4893 - 4968   | K.SNTSPEELGPLANQLTSDYGR.L          | 2250.36505 | 2 | 3.52E-05 | 0.93 | 4.48 | - | 615.4  |
| AHQ-6-1, 5048 - 5119   | K.SNTSPEELGPLANQLTSDYGR.L          | 2250.36505 | 2 | 2.08E-06 | 0.90 | 4.08 | - | 588.0  |
| AHQ-6-2, 5258          | K.SNTSPEELGPLANQLTSDYGR.L          | 2250.36505 | 2 | 6.95E-04 | 0.53 | 3.32 | - | 214.7  |

|                        |                                     |            |   |          |      |      |   |        |
|------------------------|-------------------------------------|------------|---|----------|------|------|---|--------|
| AHQ-6-3, 4540          | K.SNTSPEELGPLANQLTSDYGR.L           | 2250.36505 | 2 | 8.69E-04 | 0.43 | 2.71 | - | 327.3  |
| AHQ-6-5, 4365          | K.SNTSPEELGPLANQLTSDYGR.L           | 2250.36505 | 2 | 9.59E-11 | 0.74 | 3.71 | - | 384.8  |
| AHQ-6-7, 4786          | K.SNTSPEELGPLANQLTSDYGR.L           | 2250.36505 | 2 | 3.58E-05 | 0.71 | 3.34 | - | 311.5  |
| AHQ-6-2, 6438 - 6515   | R.TEDSGLQTVQVIAAATQCALSTSQLVACTK.V  | 3056.37009 | 3 | 3.55E-05 | 0.59 | 3.23 | - | 480.1  |
| AHQ-6-8, 6352 - 6354   | R.TEDSGLQTVQVIAAATQCALSTSQLVACTK.V  | 3056.37009 | 3 | 2.40E-08 | 0.92 | 4.93 | - | 1071.8 |
| AHQ-6-2, 6698          | R.TEDSGLQTVQVIAAATQCALSTSQLVACTK.V  | 3056.37009 | 3 | 3.09E-10 | 0.95 | 5.18 | - | 1385.9 |
| AHQ-6-1, 6486          | R.TEDSGLQTVQVIAAATQCALSTSQLVACTK.V  | 3056.37009 | 3 | 6.49E-11 | 0.98 | 7.37 | - | 2108.7 |
| AHQ-6-8, 4025 - 4101   | K.TKEVIQEWNLITNIK.R                 | 1716.95938 | 2 | 6.61E-06 | 0.94 | 3.92 | - | 1414.5 |
| AHQ-6-7, 4096          | K.TKEVIQEWNLITNIK.R                 | 1716.95938 | 2 | 3.67E-06 | 0.94 | 3.88 | - | 1235.8 |
| AHQ-6-10, 5700 - 5710  | K.TLAESALQLLYTAK.E                  | 1522.76793 | 2 | 1.20E-05 | 0.84 | 3.00 | - | 796.0  |
| AHQ-6-8, 5892          | K.TLAESALQLLYTAK.E                  | 1522.76793 | 2 | 2.11E-07 | 0.93 | 4.01 | - | 889.3  |
| AHQ-6-14-, 5910 - 5911 | K.TLAESALQLLYTAK.E                  | 1522.76793 | 2 | 1.26E-07 | 0.94 | 3.60 | - | 1100.7 |
| AHQ-6-3, 5998          | K.TLAESALQLLYTAK.E                  | 1522.76793 | 3 | 1.43E-04 | 0.95 | 4.58 | - | 1617.9 |
| AHQ-6-6, 5927 - 5928   | K.TLAESALQLLYTAK.E                  | 1522.76793 | 2 | 2.27E-04 | 0.95 | 4.30 | - | 1068.3 |
| AHQ-6-5, 6004          | K.TLAESALQLLYTAK.E                  | 1522.76793 | 3 | 6.25E-06 | 0.96 | 4.75 | - | 1830.0 |
| AHQ-6-5, 5991          | K.TLAESALQLLYTAK.E                  | 1522.76793 | 2 | 8.50E-05 | 0.96 | 3.94 | - | 1272.5 |
| AHQ-6-3, 5992 - 5993   | K.TLAESALQLLYTAK.E                  | 1522.76793 | 2 | 3.74E-07 | 0.96 | 4.91 | - | 902.2  |
| AHQ-6-7, 5778 - 5782   | K.TLAESALQLLYTAK.E                  | 1522.76793 | 2 | 1.46E-04 | 0.94 | 3.84 | - | 1353.1 |
| AHQ-6-11, 5764 - 5768  | K.TLAESALQLLYTAK.E                  | 1522.76793 | 2 | 3.82E-04 | 0.93 | 3.32 | - | 1172.9 |
| AHQ-6-2, 6026 - 6047   | K.TLAESALQLLYTAK.E                  | 1522.76793 | 2 | 3.11E-06 | 0.94 | 4.30 | - | 950.9  |
| AHQ-6-4, 6059 - 6080   | K.TLAESALQLLYTAK.E                  | 1522.76793 | 2 | 1.35E-06 | 0.92 | 3.38 | - | 1076.3 |
| AHQ-6-4, 6071          | K.TLAESALQLLYTAK.E                  | 1522.76793 | 3 | 1.39E-07 | 0.96 | 4.60 | - | 1718.0 |
| AHQ-6-1, 6082 - 6083   | K.TLAESALQLLYTAK.E                  | 1522.76793 | 2 | 8.87E-06 | 0.96 | 4.72 | - | 1178.6 |
| AHQ-6-4, 3285 - 3297   | K.TLSHPQQMALLDQTK.T                 | 1711.96464 | 3 | 6.13E-05 | 0.95 | 4.92 | - | 1367.1 |
| AHQ-6-4, 3193 - 3271   | K.TLSHPQQMALLDQTK.T                 | 1711.96464 | 3 | 5.40E-04 | 0.76 | 3.46 | - | 443.6  |
| AHQ-6-2, 3330          | K.TLSHPQQMALLDQTK.T                 | 1711.96464 | 3 | 2.69E-06 | 0.93 | 4.85 | - | 1076.2 |
| AHQ-6-5, 3224 - 3231   | K.TLSHPQQMALLDQTK.T                 | 1711.96464 | 2 | 4.21E-05 | 0.95 | 4.95 | - | 691.9  |
| AHQ-6-6, 4056 - 4115   | K.TMLESAGGLIQTAR.A                  | 1448.67095 | 2 | 1.50E-09 | 0.90 | 3.39 | - | 1585.9 |
| AHQ-6-3, 4172 - 4204   | K.TMLESAGGLIQTAR.A                  | 1448.67095 | 2 | 1.37E-07 | 0.94 | 3.67 | - | 1621.4 |
| AHQ-6-2, 4186 - 4242   | K.TMLESAGGLIQTAR.A                  | 1448.67095 | 2 | 2.24E-08 | 0.95 | 4.15 | - | 1637.0 |
| AHQ-6-1, 3660          | K.TM*LESAGGLIQTAR.A                 | 1464.67035 | 2 | 2.80E-07 | 0.92 | 3.35 | - | 1189.6 |
| AHQ-6-2, 3486 - 3547   | K.TM*LESAGGLIQTAR.A                 | 1464.67035 | 2 | 5.22E-04 | 0.68 | 2.63 | - | 985.2  |
| AHQ-6-5, 4147          | K.TMLESAGGLIQTAR.A                  | 1448.67095 | 2 | 1.75E-07 | 0.96 | 3.68 | - | 2326.5 |
| AHQ-6-2, 3488 - 3546   | K.TM*LESAGGLIQTAR.A                 | 1464.67035 | 2 | 8.40E-09 | 0.96 | 4.93 | - | 1425.8 |
| AHQ-6-4, 4209          | K.TMLESAGGLIQTAR.A                  | 1448.67095 | 2 | 9.38E-07 | 0.90 | 3.50 | - | 1562.0 |
| AHQ-6-13, 4344         | K.TM*QFEPSTMVYDAGR.I                | 1854.07511 | 2 | 1.48E-06 | 0.86 | 3.94 | - | 492.0  |
| AHQ-6-8, 4009          | K.TM*QFEPSTMVYDAGR.I                | 1854.07511 | 2 | 8.54E-05 | 0.93 | 4.51 | - | 671.2  |
| AHQ-6-8, 4454 - 4456   | K.TMQFEPSTMVYDAGR.I                 | 1838.07571 | 2 | 3.02E-05 | 0.89 | 4.02 | - | 479.6  |
| AHQ-6-8, 5014          | K.TVTDMLMTCAR.I                     | 1413.71007 | 2 | 1.77E-05 | 0.85 | 2.69 | - | 935.3  |
| AHQ-6-8, 4026          | K.TVTDMLMTCAR.I                     | 1429.70947 | 2 | 4.87E-04 | 0.58 | 2.58 | - | 738.2  |
| AHQ-6-7, 4911          | K.TYGVSFVLVK.E                      | 1161.37395 | 2 | 2.01E-07 | 0.87 | 3.26 | - | 707.3  |
| AHQ-6-8, 4886          | K.TYGVSFVLVK.E                      | 1161.37395 | 2 | 1.26E-05 | 0.82 | 3.38 | - | 535.6  |
| AHQ-6-1, 5222          | R.VAGSVTLIQAAEAM*K.G                | 1634.87692 | 2 | 1.29E-05 | 0.83 | 2.95 | - | 920.7  |
| AHQ-6-5, 5075 - 5144   | R.VAGSVTLIQAAEAM*K.G                | 1634.87692 | 2 | 5.21E-05 | 0.75 | 2.81 | - | 890.6  |
| AHQ-6-5, 5877 - 5935   | R.VAGSVTLIQAAEAM*K.G                | 1618.87752 | 2 | 4.85E-09 | 0.95 | 4.41 | - | 1191.5 |
| AHQ-6-4, 5147 - 5148   | R.VAGSVTLIQAAEAM*K.G                | 1634.87692 | 2 | 3.25E-05 | 0.96 | 4.64 | - | 1638.1 |
| AHQ-6-6, 5042          | R.VAGSVTLIQAAEAM*K.G                | 1634.87692 | 2 | 3.18E-08 | 0.94 | 4.43 | - | 1095.7 |
| AHQ-6-7, 5720          | R.VAGSVTLIQAAEAM*K.G                | 1618.87752 | 2 | 1.96E-05 | 0.87 | 3.45 | - | 837.0  |
| AHQ-6-3, 5104          | R.VAGSVTLIQAAEAM*K.G                | 1634.87692 | 2 | 1.40E-06 | 0.95 | 3.93 | - | 1520.7 |
| AHQ-6-4, 5980 - 5993   | R.VAGSVTLIQAAEAM*K.G                | 1618.87752 | 2 | 2.91E-09 | 0.94 | 3.81 | - | 1239.0 |
| AHQ-6-2, 5080 - 5142   | R.VAGSVTLIQAAEAM*K.G                | 1634.87692 | 2 | 5.38E-06 | 0.95 | 4.08 | - | 1359.2 |
| AHQ-6-2, 5956          | R.VAGSVTLIQAAEAM*K.G                | 1618.87752 | 2 | 2.63E-09 | 0.96 | 4.43 | - | 1236.4 |
| AHQ-6-1, 6019          | R.VAGSVTLIQAAEAM*K.G                | 1618.87752 | 2 | 5.54E-06 | 0.94 | 4.43 | - | 1057.8 |
| AHQ-6-2, 5130          | R.VAGSVTLIQAAEAM*K.G                | 1634.87692 | 2 | 3.56E-05 | 0.91 | 4.29 | - | 802.5  |
| AHQ-6-7, 4883 - 4896   | R.VAGSVTLIQAAEAM*K.G                | 1634.87692 | 2 | 5.45E-04 | 0.85 | 3.85 | - | 782.0  |
| AHQ-6-8, 5802          | R.VAGSVTLIQAAEAM*K.G                | 1618.87752 | 2 | 1.53E-06 | 0.95 | 4.29 | - | 1187.8 |
| AHQ-6-3, 5921          | R.VAGSVTLIQAAEAM*K.G                | 1618.87752 | 2 | 1.46E-05 | 0.92 | 3.46 | - | 1321.7 |
| AHQ-6-6, 5850          | R.VAGSVTLIQAAEAM*K.G                | 1618.87752 | 2 | 1.20E-07 | 0.95 | 4.21 | - | 1163.7 |
| AHQ-6-6, 5490          | K.VGAI PANALDDGQWSQGLISAAR.M        | 2311.53959 | 3 | 4.10E-05 | 0.90 | 4.13 | - | 1174.6 |
| AHQ-6-6, 5415 - 5487   | K.VGAI PANALDDGQWSQGLISAAR.M        | 2311.53959 | 2 | 1.60E-07 | 0.92 | 4.26 | - | 769.0  |
| AHQ-6-6, 5331          | K.VGAI PANALDDGQWSQGLISAAR.M        | 2311.53959 | 2 | 1.10E-05 | 0.84 | 3.85 | - | 463.8  |
| AHQ-6-3, 5414 - 5481   | K.VGAI PANALDDGQWSQGLISAAR.M        | 2311.53959 | 3 | 4.80E-08 | 0.85 | 3.29 | - | 1284.3 |
| AHQ-6-3, 5478          | K.VGAI PANALDDGQWSQGLISAAR.M        | 2311.53959 | 2 | 5.27E-08 | 0.92 | 4.60 | - | 487.8  |
| AHQ-6-3, 5512 - 5568   | K.VGAI PANALDDGQWSQGLISAAR.M        | 2311.53959 | 3 | 2.32E-04 | 0.92 | 4.79 | - | 1318.6 |
| AHQ-6-9, 5182          | K.VGAI PANALDDGQWSQGLISAAR.M        | 2311.53959 | 2 | 3.33E-08 | 0.76 | 3.24 | - | 631.5  |
| AHQ-6-7, 5251          | K.VGAI PANALDDGQWSQGLISAAR.M        | 2311.53959 | 2 | 1.63E-05 | 0.53 | 2.74 | - | 230.8  |
| AHQ-6-2, 5543 - 5598   | K.VGAI PANALDDGQWSQGLISAAR.M        | 2311.53959 | 3 | 2.83E-08 | 0.96 | 4.83 | - | 2049.8 |
| AHQ-6-10, 5255         | K.VGAI PANALDDGQWSQGLISAAR.M        | 2311.53959 | 2 | 2.74E-04 | 0.70 | 3.03 | - | 449.2  |
| AHQ-6-7, 5339          | K.VGAI PANALDDGQWSQGLISAAR.M        | 2311.53959 | 2 | 4.48E-09 | 0.94 | 4.72 | - | 877.7  |
| AHQ-6-2, 5442 - 5514   | K.VGAI PANALDDGQWSQGLISAAR.M        | 2311.53959 | 3 | 5.43E-08 | 0.92 | 4.55 | - | 1385.2 |
| AHQ-6-5, 5551          | K.VGAI PANALDDGQWSQGLISAAR.M        | 2311.53959 | 3 | 7.69E-07 | 0.92 | 4.21 | - | 1308.0 |
| AHQ-6-5, 5547          | K.VGAI PANALDDGQWSQGLISAAR.M        | 2311.53959 | 2 | 1.03E-09 | 0.95 | 5.02 | - | 686.5  |
| AHQ-6-5, 5380 - 5459   | K.VGAI PANALDDGQWSQGLISAAR.M        | 2311.53959 | 2 | 3.98E-06 | 0.96 | 5.14 | - | 859.1  |
| AHQ-6-4, 5468 - 5545   | K.VGAI PANALDDGQWSQGLISAAR.M        | 2311.53959 | 2 | 2.78E-09 | 0.94 | 4.68 | - | 853.1  |
| AHQ-6-4, 5469 - 5549   | K.VGAI PANALDDGQWSQGLISAAR.M        | 2311.53959 | 3 | 3.38E-05 | 0.94 | 4.66 | - | 1533.4 |
| AHQ-6-2, 5447 - 5504   | K.VGAI PANALDDGQWSQGLISAAR.M        | 2311.53959 | 2 | 4.00E-08 | 0.85 | 3.81 | - | 523.1  |
| AHQ-6-4, 5627 - 5697   | K.VGAI PANALDDGQWSQGLISAAR.M        | 2311.53959 | 2 | 7.00E-08 | 0.95 | 4.53 | - | 1061.3 |
| AHQ-6-4, 5628 - 5629   | K.VGAI PANALDDGQWSQGLISAAR.M        | 2311.53959 | 3 | 1.35E-04 | 0.94 | 5.05 | - | 1063.7 |
| AHQ-6-2, 5538 - 5595   | K.VGAI PANALDDGQWSQGLISAAR.M        | 2311.53959 | 2 | 6.21E-10 | 0.97 | 5.83 | - | 1097.3 |
| AHQ-6-1, 5642 - 5698   | K.VGAI PANALDDGQWSQGLISAAR.M        | 2311.53959 | 2 | 1.40E-06 | 0.90 | 4.17 | - | 589.5  |
| AHQ-6-2, 5362 - 5434   | K.VGAI PANALDDGQWSQGLISAAR.M        | 2311.53959 | 2 | 5.66E-06 | 0.92 | 4.21 | - | 804.8  |
| AHQ-6-1, 3962          | K.VGDDPAVWQLK.N                     | 1228.37879 | 2 | 1.58E-07 | 0.94 | 4.16 | - | 954.1  |
| AHQ-6-7, 3574 - 3599   | K.VGDDPAVWQLK.N                     | 1228.37879 | 2 | 7.99E-06 | 0.86 | 3.26 | - | 820.9  |
| AHQ-6-3, 3785          | K.VGDDPAVWQLK.N                     | 1228.37879 | 2 | 9.42E-07 | 0.89 | 3.68 | - | 660.3  |
| AHQ-6-5, 3704 - 3711   | K.VGDDPAVWQLK.N                     | 1228.37879 | 2 | 4.77E-09 | 0.93 | 3.69 | - | 947.1  |
| AHQ-6-6, 3672          | K.VGDDPAVWQLK.N                     | 1228.37879 | 2 | 4.87E-06 | 0.81 | 2.97 | - | 723.1  |
| AHQ-6-2, 3822          | K.VGDDPAVWQLK.N                     | 1228.37879 | 2 | 2.04E-08 | 0.93 | 4.00 | - | 865.2  |
| AHQ-6-2, 3763 - 3834   | K.VGDDPAVWQLK.N                     | 1228.37879 | 2 | 7.07E-08 | 0.90 | 3.65 | - | 742.0  |
| AHQ-6-4, 3767 - 3768   | K.VGDDPAVWQLK.N                     | 1228.37879 | 2 | 5.85E-10 | 0.94 | 4.15 | - | 949.4  |
| AHQ-6-4, 3268          | K.VGDDPAVWQLKNSAK.V                 | 1628.81068 | 2 | 9.99E-10 | 0.79 | 3.09 | - | 689.7  |
| AHQ-6-6, 3200          | K.VGDDPAVWQLKNSAK.V                 | 1628.81068 | 2 | 8.60E-04 | 0.86 | 3.02 | - | 896.6  |
| AHQ-6-2, 2532          | K.VLGEAM*TGISQNAK.N                 | 1435.62901 | 2 | 1.47E-06 | 0.94 | 3.74 | - | 1352.0 |
| AHQ-6-5, 2389          | K.VLGEAM*TGISQNAK.N                 | 1435.62901 | 2 | 1.73E-06 | 0.95 | 4.13 | - | 1354.1 |
| AHQ-6-2, 2442 - 2447   | K.VLGEAM*TGISQNAK.N                 | 1435.62901 | 2 | 1.04E-04 | 0.89 | 3.48 | - | 872.6  |
| AHQ-6-3, 2537          | K.VLGEAM*TGISQNAK.N                 | 1435.62901 | 2 | 1.44E-05 | 0.94 | 3.79 | - | 1302.0 |
| AHQ-6-2, 3156          | K.VLGEAM*TGISQNAK.N                 | 1419.62961 | 2 | 8.60E-06 | 0.97 | 4.34 | - | 1864.0 |
| AHQ-6-3, 4617 - 4676   | K.VLGEAM*TGISQNAKNGNLPEFGDAISTASK.A | 3038.33659 | 3 | 3.16E-09 | 0.91 | 4.33 | - | 868.8  |
| AHQ-6-4, 5171 - 5184   | K.VLGEAM*TGISQNAKNGNLPEFGDAISTASK.A | 3022.33719 | 3 | 7.47E-05 | 0.84 | 4.15 | - | 725.6  |
| AHQ-6-3, 5109          | K.VLGEAM*TGISQNAKNGNLPEFGDAISTASK.A | 3022.33719 | 3 | 3.29E-07 | 0.90 | 4.77 | - | 754.9  |
| AHQ-6-2, 4630 - 4694   | K.VLGEAM*TGISQNAKNGNLPEFGDAISTASK.A | 3038.33659 | 3 | 2.27E-11 | 0.92 | 5.30 | - | 501.5  |
| AHQ-6-2, 4750          | K.VLGEAM*TGISQNAKNGNLPEFGDAISTASK.A | 3038.33659 | 3 | 6.69E-11 | 0.90 | 4.88 | - | 616.1  |
| AHQ-6-3, 1953 - 1993   | K.VLVQNAAGSQEK.L                    | 1244.37976 | 2 | 1.61E-05 | 0.53 | 2.53 | - | 461.5  |
| AHQ-6-5, 1856          | K.VLVQNAAGSQEK.L                    | 1244.37976 | 2 | 5.09E-06 | 0.71 | 2.84 | - | 447.7  |
| AHQ-6-3, 1854          | K.VLVQNAAGSQEK.L                    | 1244.37976 | 2 | 1.86E-05 | 0.80 | 2.93 | - | 648.9  |
| AHQ-6-4, 1781 - 1835   | K.VLVQNAAGSQEK.L                    | 1244.37976 | 2 | 3.91E-08 | 0.94 | 3.70 | - | 1122.7 |
| AHQ-6-6, 1752 - 1810   | K.VLVQNAAGSQEK.L                    | 1244.37976 | 2 | 2.14E-04 | 0.90 | 3.37 | - | 936.1  |
| AHQ-6-6, 1878          | K.VLVQNAAGSQEK.L                    | 1244.37976 | 2 | 2.03E-05 | 0.80 | 3.12 | - | 553.2  |



|                           |                                                                         |            |   |          |       |         |       |          |
|---------------------------|-------------------------------------------------------------------------|------------|---|----------|-------|---------|-------|----------|
| AHQ-6-5, 1729 - 1788      | K.VLVQNAAGSQEK.L                                                        | 1244.37976 | 2 | 1.55E-04 | 0.93  | 3.58    | -     | 1182.4   |
| AHQ-6-2, 1839 - 1894      | K.VLVQNAAGSQEK.L                                                        | 1244.37976 | 2 | 6.80E-09 | 0.92  | 3.82    | -     | 840.1    |
| AHQ-6-4, 1893 - 1917      | K.VLVQNAAGSQEK.L                                                        | 1244.37976 | 2 | 7.05E-11 | 0.90  | 3.44    | -     | 887.1    |
| AHQ-6-4, 4272 - 4291      | K.VM*VTNVTSLK.T                                                         | 1221.49262 | 2 | 5.59E-06 | 0.90  | 3.47    | -     | 998.7    |
| AHQ-6-5, 4195             | K.VM*VTNVTSLK.T                                                         | 1221.49262 | 2 | 9.36E-06 | 0.85  | 2.81    | -     | 962.3    |
| AHQ-6-4, 4600             | K.VMVTNVTSLK.T                                                          | 1205.49322 | 2 | 6.14E-06 | 0.87  | 3.49    | -     | 939.8    |
| AHQ-6-3, 4602 - 4608      | K.VMVTNVTSLK.T                                                          | 1205.49322 | 2 | 4.75E-06 | 0.90  | 4.06    | -     | 772.7    |
| AHQ-6-2, 4283             | K.VM*VTNVTSLK.T                                                         | 1221.49262 | 2 | 2.11E-05 | 0.84  | 3.29    | -     | 639.5    |
| AHQ-6-5, 4513             | K.VMVTNVTSLK.T                                                          | 1205.49322 | 2 | 3.18E-07 | 0.90  | 3.74    | -     | 801.3    |
| AHQ-6-6, 4159             | K.VM*VTNVTSLK.T                                                         | 1221.49262 | 2 | 3.31E-04 | 0.80  | 2.72    | -     | 648.7    |
| AHQ-6-3, 4268             | K.VM*VTNVTSLK.T                                                         | 1221.49262 | 2 | 1.43E-05 | 0.81  | 3.12    | -     | 611.2    |
| AHQ-6-2, 4615             | K.VMVTNVTSLK.T                                                          | 1205.49322 | 2 | 2.82E-06 | 0.83  | 3.54    | -     | 713.5    |
| AHQ-6-6, 4466             | K.VMVTNVTSLK.T                                                          | 1205.49322 | 2 | 8.72E-04 | 0.92  | 4.08    | -     | 872.3    |
| AHQ-6-7, 2742             | R.VQELGHGCAALVTK.A                                                      | 1484.70307 | 2 | 1.54E-04 | 0.97  | 4.86    | -     | 1772.0   |
| AHQ-6-3, 2904             | R.VQELGHGCAALVTK.A                                                      | 1484.70307 | 2 | 8.26E-05 | 0.98  | 5.21    | -     | 1923.0   |
| AHQ-6-2, 2904             | R.VQELGHGCAALVTK.A                                                      | 1484.70307 | 2 | 8.08E-05 | 0.97  | 5.02    | -     | 1717.2   |
| AHQ-6-4, 2855             | R.VQELGHGCAALVTK.A                                                      | 1484.70307 | 2 | 2.16E-05 | 0.95  | 4.24    | -     | 1300.0   |
| AHQ-6-5, 2823             | R.VQELGHGCAALVTK.A                                                      | 1484.70307 | 2 | 1.05E-09 | 0.97  | 5.06    | -     | 1300.9   |
| AHQ-6-6, 2823             | R.VQELGHGCAALVTK.A                                                      | 1484.70307 | 2 | 1.80E-05 | 0.97  | 4.70    | -     | 1477.9   |
| AHQ-6-4, 2837             | K.VSHVLAALQAGNR.G                                                       | 1336.52525 | 1 | 6.97E-04 | 0.56  | 2.23    | -     | 456.7    |
| AHQ-6-5, 2788             | K.VSHVLAALQAGNR.G                                                       | 1336.52525 | 2 | 4.07E-08 | 0.97  | 4.19    | -     | 1791.8   |
| AHQ-6-3, 2880 - 2882      | K.VSHVLAALQAGNR.G                                                       | 1336.52525 | 2 | 3.52E-08 | 0.98  | 4.75    | -     | 2078.0   |
| AHQ-6-2, 2887             | K.VSHVLAALQAGNR.G                                                       | 1336.52525 | 1 | 3.80E-05 | 0.41  | 2.42    | -     | 278.7    |
| AHQ-6-4, 2827             | K.VSHVLAALQAGNR.G                                                       | 1336.52525 | 2 | 3.75E-10 | 0.97  | 4.70    | -     | 1811.0   |
| AHQ-6-2, 2874             | K.VSHVLAALQAGNR.G                                                       | 1336.52525 | 2 | 8.83E-10 | 0.97  | 4.05    | -     | 2056.1   |
| AHQ-6-6, 2791             | K.VSHVLAALQAGNR.G                                                       | 1336.52525 | 2 | 2.14E-08 | 0.97  | 4.24    | -     | 1599.8   |
| AHQ-6-3, 6218 - 6221      | K.VSQMAQYFELTLAAVGAASK.T                                                | 2183.51313 | 3 | 1.27E-05 | 0.91  | 4.15    | -     | 1151.2   |
| AHQ-6-3, 6216             | K.VSQMAQYFELTLAAVGAASK.T                                                | 2183.51313 | 2 | 1.67E-06 | 0.90  | 4.08    | -     | 673.9    |
| AHQ-6-4, 6249 - 6307      | K.VSQMAQYFELTLAAVGAASK.T                                                | 2183.51313 | 2 | 4.40E-07 | 0.96  | 5.51    | -     | 1104.8   |
| AHQ-6-3, 5554 - 5560      | K.VSQM*AQYFELTLAAVGAASK.T                                               | 2199.51253 | 2 | 1.03E-05 | 0.93  | 4.52    | -     | 912.5    |
| AHQ-6-4, 6296 - 6320      | K.VSQMAQYFELTLAAVGAASK.T                                                | 2183.51313 | 3 | 3.24E-10 | 0.93  | 4.28    | -     | 1264.9   |
| AHQ-6-1, 6298             | K.VSQMAQYFELTLAAVGAASK.T                                                | 2183.51313 | 2 | 1.94E-05 | 0.79  | 3.68    | -     | 404.6    |
| AHQ-6-6, 5482             | K.VSQM*AQYFELTLAAVGAASK.T                                               | 2199.51253 | 2 | 2.39E-06 | 0.96  | 4.59    | -     | 1297.6   |
| AHQ-6-6, 5488             | K.VSQM*AQYFELTLAAVGAASK.T                                               | 2199.51253 | 3 | 7.34E-08 | 0.95  | 4.83    | -     | 1500.7   |
| AHQ-6-4, 5624             | K.VSQM*AQYFELTLAAVGAASK.T                                               | 2199.51253 | 3 | 1.22E-06 | 0.93  | 3.57    | -     | 1656.5   |
| AHQ-6-5, 6212 - 6215      | K.VSQMAQYFELTLAAVGAASK.T                                                | 2183.51313 | 2 | 1.63E-05 | 0.96  | 5.40    | -     | 908.7    |
| AHQ-6-5, 5535             | K.VSQM*AQYFELTLAAVGAASK.T                                               | 2199.51253 | 3 | 1.61E-08 | 0.92  | 3.86    | -     | 1407.2   |
| AHQ-6-5, 5532             | K.VSQM*AQYFELTLAAVGAASK.T                                               | 2199.51253 | 2 | 8.08E-07 | 0.92  | 4.15    | -     | 828.2    |
| AHQ-6-1, 5640             | K.VSQM*AQYFELTLAAVGAASK.T                                               | 2199.51253 | 2 | 6.42E-06 | 0.95  | 4.57    | -     | 988.2    |
| AHQ-6-6, 6139             | K.VSQMAQYFELTLAAVGAASK.T                                                | 2183.51313 | 2 | 1.67E-05 | 0.83  | 3.79    | -     | 499.6    |
| AHQ-6-4, 5623 - 5625      | K.VSQM*AQYFELTLAAVGAASK.T                                               | 2199.51253 | 2 | 1.05E-07 | 0.97  | 5.60    | -     | 1106.7   |
| AHQ-6-1, 5639             | K.VSQM*AQYFELTLAAVGAASK.T                                               | 2199.51253 | 3 | 1.60E-09 | 0.92  | 3.68    | -     | 1415.8   |
| AHQ-6-2, 6210 - 6266      | K.VSQMAQYFELTLAAVGAASK.T                                                | 2183.51313 | 2 | 1.84E-07 | 0.97  | 5.82    | -     | 1001.5   |
| AHQ-6-7, 5328             | K.VSQM*AQYFELTLAAVGAASK.T                                               | 2199.51253 | 2 | 2.27E-04 | 0.86  | 3.98    | -     | 631.2    |
| AHQ-6-2, 5707 - 5766      | K.VSQM*AQYFELTLAAVGAASK.T                                               | 2199.51253 | 2 | 1.77E-04 | 0.86  | 3.80    | -     | 485.5    |
| AHQ-6-2, 5592             | K.VSQM*AQYFELTLAAVGAASK.T                                               | 2199.51253 | 3 | 1.16E-06 | 0.94  | 4.16    | -     | 1515.0   |
| AHQ-6-2, 5574 - 5627      | K.VSQM*AQYFELTLAAVGAASK.T                                               | 2199.51253 | 2 | 3.06E-05 | 0.91  | 4.11    | -     | 1039.2   |
| AHQ-6-5, 4407             | K.VVAPTSSPVCQEQLVEAGR.L                                                 | 2142.41919 | 3 | 9.17E-06 | 0.89  | 3.80    | -     | 1016.3   |
| AHQ-6-5, 4392             | K.VVAPTSSPVCQEQLVEAGR.L                                                 | 2142.41919 | 2 | 7.62E-10 | 0.95  | 4.82    | -     | 944.3    |
| AHQ-6-4, 4484             | K.VVAPTSSPVCQEQLVEAGR.L                                                 | 2142.41919 | 2 | 2.23E-05 | 0.95  | 5.15    | -     | 654.1    |
| AHQ-6-4, 4391             | K.VVAPTSSPVCQEQLVEAGR.L                                                 | 2142.41919 | 2 | 1.04E-04 | 0.74  | 3.42    | -     | 368.1    |
| AHQ-6-11, 4276            | K.VVAPTSSPVCQEQLVEAGR.L                                                 | 2142.41919 | 2 | 8.72E-04 | 0.81  | 3.16    | -     | 621.4    |
| AHQ-6-2, 4378             | K.VVAPTSSPVCQEQLVEAGR.L                                                 | 2142.41919 | 2 | 6.88E-07 | 0.95  | 4.74    | -     | 620.1    |
| AHQ-6-14-, 4376           | K.VVAPTSSPVCQEQLVEAGR.L                                                 | 2142.41919 | 2 | 5.61E-07 | 0.89  | 3.97    | -     | 575.5    |
| AHQ-6-6, 4362             | K.VVAPTSSPVCQEQLVEAGR.L                                                 | 2142.41919 | 2 | 1.42E-08 | 0.92  | 4.22    | -     | 794.6    |
| AHQ-6-2, 4482             | K.VVAPTSSPVCQEQLVEAGR.L                                                 | 2142.41919 | 2 | 1.16E-07 | 0.92  | 4.61    | -     | 583.2    |
| AHQ-6-2, 4490 - 4492      | K.VVAPTSSPVCQEQLVEAGR.L                                                 | 2142.41919 | 3 | 1.27E-09 | 0.91  | 4.24    | -     | 1102.2   |
| AHQ-6-3, 4469             | K.VVAPTSSPVCQEQLVEAGR.L                                                 | 2142.41919 | 3 | 3.16E-04 | 0.85  | 3.39    | -     | 987.6    |
| AHQ-6-3, 4454 - 4488      | K.VVAPTSSPVCQEQLVEAGR.L                                                 | 2142.41919 | 2 | 1.55E-07 | 0.95  | 4.58    | -     | 888.4    |
| AHQ-6-3, 4370             | K.VVAPTSSPVCQEQLVEAGR.L                                                 | 2142.41919 | 2 | 4.00E-06 | 0.42  | 3.00    | -     | 157.6    |
| AHQ-6-8, 4248 - 4249      | K.VVAPTSSPVCQEQLVEAGR.L                                                 | 2142.41919 | 2 | 1.10E-06 | 0.96  | 5.54    | -     | 722.3    |
| AHQ-6-1, 4582             | K.VVAPTSSPVCQEQLVEAGR.L                                                 | 2142.41919 | 2 | 5.75E-06 | 0.93  | 4.34    | -     | 715.3    |
| AHQ-6-7, 4211 - 4218      | K.VVAPTSSPVCQEQLVEAGR.L                                                 | 2142.41919 | 2 | 1.62E-07 | 0.90  | 4.45    | -     | 506.9    |
| AHQ-6-4, 4489 - 4507      | K.VVAPTSSPVCQEQLVEAGR.L                                                 | 2142.41919 | 3 | 7.00E-05 | 0.82  | 3.27    | -     | 1035.5   |
| gj[4503745]refNP_001447.1 | filamin 1 (actin-binding protein-280); filamin 1; filamin A, alpha (act |            |   | 2.78E-15 | 95.35 | 1110.38 | 56.10 | 280757.4 |
| AHQ-6-7, 4848             | R.AEAGVPAEFSIWTR.E                                                      | 1534.69735 | 2 | 1.56E-04 | 0.40  | 2.58    | -     | 245.5    |
| AHQ-6-4, 5103 - 5165      | R.AEAGVPAEFSIWTR.E                                                      | 1534.69735 | 2 | 2.64E-05 | 0.75  | 3.10    | -     | 427.0    |
| AHQ-6-4, 2559             | K.AEISFEDR.K                                                            | 967.01472  | 2 | 5.35E-05 | 0.93  | 3.10    | -     | 1235.4   |
| AHQ-6-4, 2172             | K.AEISFEDR.D                                                            | 1095.18763 | 2 | 5.01E-04 | 0.79  | 2.75    | -     | 842.6    |
| AHQ-6-5, 2123             | K.AEISFEDR.D                                                            | 1095.18763 | 2 | 2.48E-04 | 0.82  | 2.86    | -     | 936.7    |
| AHQ-6-4, 2701             | K.AFGPGLQGGGAGSAGSPAR.F                                                 | 1430.55077 | 1 | 1.65E-04 | 0.26  | 2.51    | -     | 133.7    |
| AHQ-6-3, 2748             | K.AFGPGLQGGGAGSAGSPAR.F                                                 | 1430.55077 | 2 | 3.37E-08 | 0.86  | 2.81    | -     | 1075.0   |
| AHQ-6-7, 2582             | K.AFGPGLQGGGAGSAGSPAR.F                                                 | 1430.55077 | 2 | 1.48E-05 | 0.94  | 3.03    | -     | 1704.5   |
| AHQ-6-1, 2936             | K.AFGPGLQGGGAGSAGSPAR.F                                                 | 1430.55077 | 2 | 1.12E-10 | 0.94  | 3.21    | -     | 1730.3   |
| AHQ-6-4, 2683             | K.AFGPGLQGGGAGSAGSPAR.F                                                 | 1430.55077 | 2 | 2.09E-08 | 0.95  | 3.58    | -     | 1754.5   |
| AHQ-6-3, 2637 - 2709      | K.AFGPGLQGGGAGSAGSPAR.F                                                 | 1430.55077 | 2 | 5.64E-10 | 0.94  | 3.64    | -     | 1428.1   |
| AHQ-6-5, 2644             | K.AFGPGLQGGGAGSAGSPAR.F                                                 | 1430.55077 | 2 | 3.95E-09 | 0.91  | 3.13    | -     | 1350.5   |
| AHQ-6-14-, 2791 - 2846    | K.AGNM*LLVGVHGR.T                                                       | 1451.67973 | 2 | 6.34E-08 | 0.71  | 2.84    | -     | 598.8    |
| AHQ-6-14, 3608 - 3666     | K.AGNM*LLVGVHGR.T                                                       | 1451.67973 | 2 | 2.84E-05 | 0.75  | 3.19    | -     | 531.1    |
| AHQ-6-14-, 2844 - 2847    | K.AGNM*LLVGVHGR.T                                                       | 1451.67973 | 3 | 1.28E-07 | 0.87  | 4.17    | -     | 869.5    |
| AHQ-6-14, 4160 - 4162     | K.AGNM*LLVGVHGR.T                                                       | 1435.68033 | 2 | 4.92E-04 | 0.86  | 3.42    | -     | 743.3    |
| AHQ-6-14-, 2970           | K.AGNM*LLVGVHGR.T                                                       | 1451.67973 | 2 | 5.14E-06 | 0.54  | 2.51    | -     | 389.9    |
| AHQ-6-5, 2920             | K.AGNM*LLVGVHGR.T                                                       | 1451.67973 | 2 | 1.69E-04 | 0.82  | 2.94    | -     | 759.0    |
| AHQ-6-14-, 3451 - 3467    | K.AGNM*LLVGVHGR.T                                                       | 1435.68033 | 2 | 4.80E-08 | 0.91  | 3.61    | -     | 912.5    |
| AHQ-6-4, 2975 - 2976      | K.AGNM*LLVGVHGR.T                                                       | 1451.67973 | 2 | 3.43E-04 | 0.87  | 3.61    | -     | 668.6    |
| AHQ-6-14, 3733 - 3793     | K.AGNM*LLVGVHGR.T                                                       | 1451.67973 | 2 | 1.48E-04 | 0.80  | 3.01    | -     | 699.0    |
| AHQ-6-4, 1840             | R.AGQSAAGAAPGGGVDR.D                                                    | 1443.50471 | 2 | 6.75E-05 | 0.65  | 2.74    | -     | 558.3    |
| AHQ-6-2, 1843 - 1880      | R.AGQSAAGAAPGGGVDR.D                                                    | 1443.50471 | 2 | 2.40E-07 | 0.87  | 4.04    | -     | 624.3    |
| AHQ-6-2, 2414             | K.AGVAPLQVK.V                                                           | 883.07036  | 2 | 1.85E-05 | 0.80  | 2.69    | -     | 658.8    |
| AHQ-6-3, 2425             | K.AGVAPLQVK.V                                                           | 883.07036  | 2 | 1.67E-04 | 0.80  | 2.85    | -     | 563.2    |
| AHQ-6-4, 2384             | K.AGVAPLQVK.V                                                           | 883.07036  | 2 | 1.36E-05 | 0.83  | 2.82    | -     | 723.0    |
| AHQ-6-1, 2659             | K.AGVAPLQVK.V                                                           | 883.07036  | 2 | 5.98E-06 | 0.75  | 2.66    | -     | 577.1    |
| AHQ-6-2, 6659             | K.AHEPTYFTVDCAEAGQDVSIGIK.C                                             | 2567.76960 | 2 | 6.15E-04 | 0.57  | 2.59    | -     | 576.4    |
| AHQ-6-3, 6614             | K.AHEPTYFTVDCAEAGQDVSIGIK.C                                             | 2567.76960 | 3 | 3.12E-04 | 0.77  | 3.26    | -     | 827.6    |
| AHQ-6-4, 2724             | K.AHVPCFDASK.V                                                          | 1232.39073 | 1 | 1.03E-04 | 0.68  | 2.73    | -     | 520.4    |
| AHQ-6-1, 3000             | K.AHVPCFDASK.V                                                          | 1232.39073 | 2 | 2.17E-04 | 0.75  | 2.53    | -     | 694.5    |
| AHQ-6-1, 5955             | R.AL.GALV.DSCAPGLCPDWSDW.DASKPVTNAR.E                                   | 3233.53437 | 3 | 2.51E-08 | 0.90  | 4.33    | -     | 891.2    |
| AHQ-6-5, 5804 - 5867      | R.AL.GALV.DSCAPGLCPDWSDW.DASKPVTNAR.E                                   | 3233.53437 | 3 | 6.46E-11 | 0.96  | 6.08    | -     | 1079.2   |
| AHQ-6-6, 5752 - 5811      | R.AL.GALV.DSCAPGLCPDWSDW.DASKPVTNAR.E                                   | 3233.53437 | 3 | 3.36E-05 | 0.90  | 4.70    | -     | 540.3    |
| AHQ-6-7, 5599 - 5658      | R.AL.GALV.DSCAPGLCPDWSDW.DASKPVTNAR.E                                   | 3233.53437 | 3 | 8.43E-10 | 0.87  | 4.65    | -     | 586.7    |
| AHQ-6-5, 5648             | R.AL.GALV.DSCAPGLCPDWSDW.DASKPVTNAR.E                                   | 3233.53437 | 3 | 4.89E-05 | 0.73  | 3.03    | -     | 656.3    |
| AHQ-6-3, 5822 - 5876      | R.AL.GALV.DSCAPGLCPDWSDW.DASKPVTNAR.E                                   | 3233.53437 | 3 | 1.69E-10 | 0.94  | 5.14    | -     | 885.5    |
| AHQ-6-2, 5756 - 5830      | R.AL.GALV.DSCAPGLCPDWSDW.DASKPVTNAR.E                                   | 3233.53437 | 3 | 7.12E-08 | 0.91  | 4.51    | -     | 714.1    |
| AHQ-6-2, 5852 - 5922      | R.AL.GALV.DSCAPGLCPDWSDW.DASKPVTNAR.E                                   | 3233.53437 | 3 | 3.14E-07 | 0.93  | 5.31    | -     | 838.9    |
| AHQ-6-2, 1691             | R.AL.TQTGGPHVK.A                                                        | 1109.26067 | 2 | 6.63E-05 | 0.74  | 2.70    | -     | 746.5    |
| AHQ-6-2, 3414 - 3478      | R.ANLPQSFQVDTSK.A                                                       | 1435.56409 | 2 | 5.62E-10 | 0.89  | 3.56    | -     | 658.7    |
| AHQ-6-8, 3141             | R.ANLPQSFQVDTSK.A                                                       | 1435.56409 | 1 | 1.27E-05 | 0.67  | 2.64    | -     | 470.0    |

|                      |                                     |            |   |          |      |      |   |        |
|----------------------|-------------------------------------|------------|---|----------|------|------|---|--------|
| AHQ-6-5, 3172 - 3248 | R.ANLPQSFQVDTSK.A                   | 1435.56409 | 2 | 3.11E-08 | 0.89 | 3.73 | - | 720.6  |
| AHQ-6-2, 3348        | R.ANLPQSFQVDTSK.A                   | 1435.56409 | 1 | 2.44E-06 | 0.48 | 2.70 | - | 360.7  |
| AHQ-6-8, 3132        | R.ANLPQSFQVDTSK.A                   | 1435.56409 | 2 | 5.20E-07 | 0.83 | 3.43 | - | 413.5  |
| AHQ-6-4, 3413        | R.APSVANVGSCHDL.SL.K.I              | 1656.84249 | 2 | 6.14E-05 | 0.90 | 4.51 | - | 625.8  |
| AHQ-6-1, 5598 - 5675 | K.ASGPGLNTTVPASLPVEFTIDAK.D         | 2343.61826 | 3 | 1.33E-04 | 0.73 | 3.84 | - | 618.8  |
| AHQ-6-4, 1935        | K.ATCAPQHAGPAGPADASK.V              | 1791.92336 | 2 | 8.19E-05 | 0.93 | 3.76 | - | 978.6  |
| AHQ-6-7, 1891        | K.ATCAPQHAGPAGPADASK.V              | 1791.92336 | 2 | 1.10E-04 | 0.91 | 3.93 | - | 864.0  |
| AHQ-6-5, 3553        | R.AWGPGLGGVVGK.S                    | 1227.39403 | 2 | 1.18E-08 | 0.88 | 3.67 | - | 811.0  |
| AHQ-6-3, 3648        | R.AWGPGLGGVVGK.S                    | 1227.39403 | 2 | 1.23E-06 | 0.88 | 3.45 | - | 857.3  |
| AHQ-6-7, 3448        | R.AWGPGLGGVVGK.S                    | 1227.39403 | 2 | 6.14E-06 | 0.85 | 3.17 | - | 906.1  |
| AHQ-6-4, 3565 - 3632 | R.AWGPGLGGVVGK.S                    | 1227.39403 | 2 | 3.93E-04 | 0.89 | 3.23 | - | 867.4  |
| AHQ-6-1, 3819        | R.AWGPGLGGVVGK.S                    | 1227.39403 | 2 | 6.12E-05 | 0.85 | 3.20 | - | 743.0  |
| AHQ-6-2, 3663        | R.AWGPGLGGVVGK.S                    | 1227.39403 | 2 | 3.24E-06 | 0.83 | 3.51 | - | 598.1  |
| AHQ-6-2, 2818        | R.AYGPGEPTGNM*VK.K                  | 1450.64214 | 2 | 3.04E-06 | 0.71 | 3.13 | - | 371.9  |
| AHQ-6-6, 2643        | R.AYGPGEPTGNM*VK.K                  | 1450.64214 | 2 | 3.32E-04 | 0.74 | 3.08 | - | 392.4  |
| AHQ-6-3, 5688 - 5754 | K.CAPGVVPAEADIFDIIR.N               | 2017.24863 | 2 | 6.32E-05 | 0.80 | 3.28 | - | 551.8  |
| AHQ-6-2, 5726 - 5790 | K.CAPGVVPAEADIFDIIR.N               | 2017.24863 | 2 | 4.53E-04 | 0.90 | 3.99 | - | 701.4  |
| AHQ-6-4, 5789        | K.CAPGVVPAEADIFDIIR.N               | 2017.24863 | 2 | 3.61E-06 | 0.85 | 3.85 | - | 557.0  |
| AHQ-6-1, 5759        | K.CAPGVVPAEADIFDIIR.N               | 2017.24863 | 3 | 1.19E-06 | 0.95 | 4.60 | - | 1442.2 |
| AHQ-6-1, 5754        | K.CAPGVVPAEADIFDIIR.N               | 2017.24863 | 2 | 1.78E-04 | 0.68 | 3.23 | - | 353.1  |
| AHQ-6-3, 5697        | K.CAPGVVPAEADIFDIIR.N               | 2017.24863 | 3 | 6.49E-10 | 0.94 | 4.14 | - | 1662.0 |
| AHQ-6-2, 5968 - 5991 | K.CAPGVVPAEADIFDIIRNDNTFTVK.Y       | 3052.31840 | 3 | 2.25E-05 | 0.84 | 4.32 | - | 537.0  |
| AHQ-6-3, 3006        | K.CSPPGLSPGMV.R.A                   | 1219.41699 | 2 | 1.82E-06 | 0.81 | 2.86 | - | 863.1  |
| AHQ-6-3, 3002        | K.CSPPGLSPGMV.R.A                   | 1219.41699 | 2 | 7.75E-08 | 0.76 | 2.85 | - | 851.3  |
| AHQ-6-2, 4812        | R.CSYQPTM*EGVHTVHVTFAGVPIPR.S       | 2702.06173 | 3 | 6.56E-06 | 0.92 | 4.25 | - | 670.8  |
| AHQ-6-3, 4788        | R.CSYQPTM*EGVHTVHVTFAGVPIPR.S       | 2702.06173 | 3 | 1.91E-04 | 0.77 | 3.56 | - | 504.7  |
| AHQ-6-4, 4812        | R.CSYQPTM*EGVHTVHVTFAGVPIPR.S       | 2702.06173 | 3 | 3.08E-05 | 0.86 | 4.17 | - | 421.8  |
| AHQ-6-2, 4439        | R.DAEMPATEKDLAEDAPWK.K              | 2018.19047 | 2 | 5.23E-07 | 0.95 | 4.37 | - | 1248.5 |
| AHQ-6-2, 3911        | K.DAGEGGLSLAIEGPK.S.A               | 1501.62084 | 2 | 1.83E-08 | 0.89 | 3.62 | - | 946.1  |
| AHQ-6-11, 3748       | K.DAGEGGLSLAIEGPK.S.A               | 1501.62084 | 2 | 7.65E-04 | 0.84 | 3.29 | - | 836.1  |
| AHQ-6-5, 3820 - 3879 | K.DAGEGGLSLAIEGPK.S.A               | 1501.62084 | 2 | 6.30E-04 | 0.84 | 3.52 | - | 1017.9 |
| AHQ-6-8, 3689        | K.DAGEGGLSLAIEGPK.S.A               | 1501.62084 | 2 | 1.63E-06 | 0.90 | 3.86 | - | 961.9  |
| AHQ-6-13, 3989       | K.DAGEGGLSLAIEGPK.S.A               | 1501.62084 | 2 | 6.51E-05 | 0.51 | 2.65 | - | 741.3  |
| AHQ-6-5, 3872        | K.DAGEGGLSLAIEGPK.S.A               | 1501.62084 | 2 | 5.50E-07 | 0.97 | 5.06 | - | 1731.0 |
| AHQ-6-1, 4015        | K.DAGEGGLSLAIEGPK.S.A               | 1501.62084 | 2 | 7.11E-06 | 0.95 | 4.34 | - | 1524.6 |
| AHQ-6-13-, 3836      | K.DAGEGGLSLAIEGPK.S.A               | 1501.62084 | 2 | 4.07E-04 | 0.71 | 2.82 | - | 656.7  |
| AHQ-6-4, 3932 - 3988 | K.DAGEGGLSLAIEGPK.S.A               | 1501.62084 | 2 | 2.39E-04 | 0.96 | 4.75 | - | 1415.6 |
| AHQ-6-1, 4768        | K.DAGEGLLAVQITDPEGK.P               | 1713.86752 | 2 | 1.06E-08 | 0.93 | 3.53 | - | 1485.8 |
| AHQ-6-3, 4657        | K.DAGEGLLAVQITDPEGK.P               | 1713.86752 | 2 | 7.35E-08 | 0.95 | 4.18 | - | 1556.8 |
| AHQ-6-2, 4700 - 4770 | K.DAGEGLLAVQITDPEGK.P               | 1713.86752 | 2 | 3.50E-06 | 0.88 | 3.97 | - | 884.9  |
| AHQ-6-2, 4680        | K.DAGEGLLAVQITDPEGK.P               | 1713.86752 | 2 | 1.60E-08 | 0.94 | 4.29 | - | 1325.3 |
| AHQ-6-10, 4030       | K.DAGEGLLAVQITDPEGKPK.K             | 1939.15612 | 2 | 7.01E-07 | 0.87 | 3.95 | - | 826.3  |
| AHQ-6-2, 4291        | K.DAGEGLLAVQITDPEGKPK.K             | 1939.15612 | 3 | 3.34E-09 | 0.96 | 4.59 | - | 1818.3 |
| AHQ-6-5, 4191        | K.DAGEGLLAVQITDPEGKPK.K             | 1939.15612 | 2 | 4.42E-09 | 0.92 | 3.98 | - | 1200.4 |
| AHQ-6-4, 4279 - 4283 | K.DAGEGLLAVQITDPEGKPK.K             | 1939.15612 | 3 | 1.30E-07 | 0.91 | 3.64 | - | 1258.1 |
| AHQ-6-4, 4189 - 4271 | K.DAGEGLLAVQITDPEGKPK.K             | 1939.15612 | 2 | 2.90E-04 | 0.88 | 3.79 | - | 859.7  |
| AHQ-6-11, 4092       | K.DAGEGLLAVQITDPEGKPK.K             | 1939.15612 | 2 | 5.28E-07 | 0.94 | 4.23 | - | 1229.6 |
| AHQ-6-2, 4290 - 4352 | K.DAGEGLLAVQITDPEGKPK.K             | 1939.15612 | 2 | 6.28E-05 | 0.94 | 4.43 | - | 1332.6 |
| AHQ-6-1, 4423        | K.DAGEGLLAVQITDPEGKPK.K             | 1939.15612 | 3 | 2.19E-07 | 0.89 | 3.44 | - | 1165.7 |
| AHQ-6-1, 4411        | K.DAGEGLLAVQITDPEGKPK.K             | 1939.15612 | 2 | 6.10E-09 | 0.95 | 4.91 | - | 1120.2 |
| AHQ-6-6, 4164        | K.DAGEGLLAVQITDPEGKPK.K             | 1939.15612 | 3 | 1.95E-05 | 0.86 | 3.12 | - | 1235.5 |
| AHQ-6-6, 4158        | K.DAGEGLLAVQITDPEGKPK.K             | 1939.15612 | 2 | 5.29E-09 | 0.94 | 4.38 | - | 1147.9 |
| AHQ-6-3, 4261 - 4332 | K.DAGEGLLAVQITDPEGKPK.K             | 1939.15612 | 2 | 1.94E-06 | 0.90 | 3.63 | - | 1113.4 |
| AHQ-6-3, 4465        | K.DAGEGLLAVQITDPEGKPK.K             | 1939.15612 | 2 | 5.44E-07 | 0.93 | 4.01 | - | 1167.6 |
| AHQ-6-3, 4265 - 4293 | K.DAGEGLLAVQITDPEGKPK.K             | 1939.15612 | 3 | 8.52E-08 | 0.84 | 3.36 | - | 910.4  |
| AHQ-6-7, 4031        | K.DAGEGLLAVQITDPEGKPK.K             | 1939.15612 | 2 | 3.46E-04 | 0.90 | 3.86 | - | 1105.7 |
| AHQ-6-8, 4008        | K.DAGEGLLAVQITDPEGKPK.K             | 1939.15612 | 2 | 8.38E-06 | 0.94 | 4.49 | - | 1169.2 |
| AHQ-6-1, 4470 - 4471 | R.DAGYGGGLSLSIEGPK.S.V              | 1551.67986 | 2 | 2.59E-07 | 0.96 | 4.78 | - | 1383.0 |
| AHQ-6-2, 4394 - 4395 | R.DAGYGGGLSLSIEGPK.S.V              | 1551.67986 | 2 | 6.18E-09 | 0.92 | 4.04 | - | 1269.2 |
| AHQ-6-6, 4266        | R.DAGYGGGLSLSIEGPK.S.V              | 1551.67986 | 2 | 9.26E-10 | 0.86 | 3.50 | - | 990.8  |
| AHQ-6-3, 4362        | R.DAGYGGGLSLSIEGPK.S.V              | 1551.67986 | 2 | 3.53E-05 | 0.93 | 3.94 | - | 1226.9 |
| AHQ-6-5, 4223 - 4299 | R.DAGYGGGLSLSIEGPK.S.V              | 1551.67986 | 2 | 5.68E-08 | 0.97 | 5.00 | - | 1702.9 |
| AHQ-6-4, 4192        | R.DAGYGGGLSLSIEGPK.S.V              | 1551.67986 | 2 | 1.73E-06 | 0.49 | 2.88 | - | 420.5  |
| AHQ-6-7, 4132        | R.DAGYGGGLSLSIEGPK.S.V              | 1551.67986 | 2 | 5.45E-09 | 0.89 | 3.59 | - | 942.0  |
| AHQ-6-4, 4325 - 4380 | R.DAGYGGGLSLSIEGPK.S.V              | 1551.67986 | 2 | 2.42E-04 | 0.82 | 3.42 | - | 893.2  |
| AHQ-6-2, 2028        | R.DAPQDFHPRD.V                      | 1198.22650 | 2 | 3.52E-07 | 0.78 | 2.99 | - | 593.5  |
| AHQ-6-3, 2044        | R.DAPQDFHPRD.V                      | 1198.22650 | 2 | 9.34E-05 | 0.69 | 2.75 | - | 641.3  |
| AHQ-6-4, 4593 - 4655 | K.DGSCGWAYVQEPGDYEVSVK.F            | 2260.41990 | 2 | 4.55E-07 | 0.93 | 4.90 | - | 682.4  |
| AHQ-6-6, 4479 - 4518 | K.DGSCGWAYVQEPGDYEVSVK.F            | 2260.41990 | 2 | 1.15E-05 | 0.86 | 4.15 | - | 583.2  |
| AHQ-6-5, 4704        | K.DGSCGWAYVQEPGDYEVSVK.F            | 2260.41990 | 2 | 6.33E-04 | 0.51 | 3.08 | - | 360.4  |
| AHQ-6-5, 4541 - 4609 | K.DGSCGWAYVQEPGDYEVSVK.F            | 2260.41990 | 2 | 2.75E-07 | 0.90 | 4.57 | - | 626.7  |
| AHQ-6-8, 4364 - 4426 | K.DGSCGWAYVQEPGDYEVSVK.F            | 2260.41990 | 2 | 6.25E-04 | 0.58 | 3.19 | - | 315.1  |
| AHQ-6-1, 4646 - 4723 | K.DGSCGWAYVQEPGDYEVSVK.F            | 2260.41990 | 2 | 2.59E-06 | 0.91 | 4.27 | - | 809.5  |
| AHQ-6-14, 3329       | K.DKGEYTLVVK.W                      | 1152.32223 | 1 | 5.92E-05 | 0.26 | 2.05 | - | 497.0  |
| AHQ-6-4, 2543        | K.DKGEYTLVVK.W                      | 1152.32223 | 1 | 3.53E-05 | 0.10 | 1.94 | - | 334.0  |
| AHQ-6-6, 2522 - 2526 | K.DKGEYTLVVK.W                      | 1152.32223 | 2 | 8.08E-04 | 0.73 | 2.80 | - | 482.0  |
| AHQ-6-5, 2519        | K.DKGEYTLVVK.W                      | 1152.32223 | 2 | 5.19E-05 | 0.76 | 2.77 | - | 583.2  |
| AHQ-6-3, 2597        | K.DKGEYTLVVK.W                      | 1152.32223 | 2 | 6.62E-05 | 0.56 | 2.71 | - | 401.4  |
| AHQ-6-5, 3132        | K.DNNGNTYSYVPR.K                    | 1591.64109 | 2 | 5.30E-07 | 0.88 | 3.07 | - | 1036.0 |
| AHQ-6-1, 3315        | R.DVDIIDHNDNTYTVK.Y                 | 1785.89230 | 2 | 4.07E-05 | 0.94 | 3.97 | - | 1190.3 |
| AHQ-6-3, 3069 - 3132 | R.DVDIIDHNDNTYTVK.Y                 | 1785.89230 | 2 | 1.18E-06 | 0.95 | 4.37 | - | 1383.3 |
| AHQ-6-2, 3063 - 3130 | R.DVDIIDHNDNTYTVK.Y                 | 1785.89230 | 2 | 1.22E-05 | 0.93 | 3.76 | - | 1012.6 |
| AHQ-6-2, 3227 - 3302 | R.DVDIIDHNDNTYTVK.Y                 | 1785.89230 | 2 | 1.20E-07 | 0.85 | 3.71 | - | 521.6  |
| AHQ-6-3, 3222 - 3300 | R.DVDIIDHNDNTYTVK.Y                 | 1785.89230 | 2 | 5.89E-04 | 0.63 | 3.15 | - | 244.0  |
| AHQ-6-4, 3192        | R.DVDIIDHNDNTYTVK.Y                 | 1785.89230 | 2 | 2.88E-04 | 0.22 | 2.63 | - | 174.4  |
| AHQ-6-1, 3579        | R.EAGAGGLAIAVEGPK.S.A               | 1427.58510 | 2 | 5.89E-06 | 0.93 | 4.07 | - | 1106.9 |
| AHQ-6-5, 3312 - 3377 | R.EAGAGGLAIAVEGPK.S.A               | 1427.58510 | 2 | 1.09E-06 | 0.95 | 4.28 | - | 1435.6 |
| AHQ-6-4, 3369 - 3372 | R.EAGAGGLAIAVEGPK.S.A               | 1427.58510 | 2 | 3.46E-06 | 0.97 | 5.17 | - | 1298.7 |
| AHQ-6-7, 3199        | R.EAGAGGLAIAVEGPK.S.A               | 1427.58510 | 2 | 5.03E-05 | 0.84 | 3.24 | - | 951.2  |
| AHQ-6-4, 3379        | R.EAGAGGLAIAVEGPK.S.A               | 1427.58510 | 1 | 9.48E-04 | 0.23 | 2.48 | - | 312.1  |
| AHQ-6-5, 3441 - 3511 | R.EAGAGGLAIAVEGPK.S.A               | 1427.58510 | 2 | 5.62E-04 | 0.91 | 2.94 | - | 1499.1 |
| AHQ-6-2, 2600 - 2676 | R.EATTEFSVDAR.A                     | 1226.27493 | 2 | 4.58E-04 | 0.73 | 2.79 | - | 635.9  |
| AHQ-6-6, 2628 - 2648 | R.EATTEFSVDAR.A                     | 1226.27493 | 2 | 1.61E-04 | 0.84 | 3.16 | - | 706.1  |
| AHQ-6-2, 2683 - 2747 | R.EATTEFSVDAR.A                     | 1226.27493 | 2 | 1.65E-04 | 0.89 | 3.38 | - | 732.2  |
| AHQ-6-1, 2900        | R.EATTEFSVDAR.A                     | 1226.27493 | 2 | 1.26E-04 | 0.89 | 3.17 | - | 800.8  |
| AHQ-6-1, 5868 - 5922 | R.EEGPYEVEVTDGVPVPGSPFFLEAVPTKPSK.V | 3487.85286 | 3 | 2.02E-05 | 0.91 | 4.77 | - | 707.7  |
| AHQ-6-3, 5868 - 5924 | R.EEGPYEVEVTDGVPVPGSPFFLEAVPTKPSK.V | 3487.85286 | 3 | 6.38E-09 | 0.94 | 5.69 | - | 676.4  |
| AHQ-6-5, 5840 - 5899 | R.EEGPYEVEVTDGVPVPGSPFFLEAVPTKPSK.V | 3487.85286 | 3 | 3.49E-06 | 0.94 | 5.76 | - | 636.1  |
| AHQ-6-4, 5911 - 5987 | R.EEGPYEVEVTDGVPVPGSPFFLEAVPTKPSK.V | 3487.85286 | 3 | 2.20E-05 | 0.89 | 4.98 | - | 520.7  |
| AHQ-6-2, 5834 - 5890 | R.EEGPYEVEVTDGVPVPGSPFFLEAVPTKPSK.V | 3487.85286 | 3 | 7.55E-08 | 0.93 | 5.16 | - | 702.9  |
| AHQ-6-3, 5758 - 5812 | R.EEGPYEVEVTDGVPVPGSPFFLEAVPTKPSK.V | 3487.85286 | 3 | 1.18E-10 | 0.82 | 3.96 | - | 564.5  |
| AHQ-6-3, 5920 - 5984 | R.EEGPYEVEVTDGVPVPGSPFFLEAVPTKPSK.V | 3487.85286 | 3 | 3.40E-09 | 0.93 | 5.13 | - | 892.4  |
| AHQ-6-2, 5947 - 6003 | R.EEGPYEVEVTDGVPVPGSPFFLEAVPTKPSK.V | 3487.85286 | 3 | 3.49E-09 | 0.94 | 5.45 | - | 767.8  |
| AHQ-6-1, 5978 - 6035 | R.EEGPYEVEVTDGVPVPGSPFFLEAVPTKPSK.V | 3487.85286 | 3 | 2.37E-10 | 0.95 | 5.94 | - | 781.7  |
| AHQ-6-4, 4836 - 4908 | R.EGYSISVLYGDEEVP.R.S               | 1911.05809 | 2 | 1.50E-05 | 0.91 | 3.88 | - | 920.6  |
| AHQ-6-8, 4637        | R.EGYSISVLYGDEEVP.R.S               | 1911.05809 | 2 | 9.12E-06 | 0.87 | 3.41 | - | 869.2  |
| AHQ-6-10, 4574       | R.EGYSISVLYGDEEVP.R.S               | 1911.05809 | 2 | 1.96E-06 | 0.93 | 4.06 | - | 821.5  |

|                       |                                 |            |   |          |      |      |   |        |
|-----------------------|---------------------------------|------------|---|----------|------|------|---|--------|
| AHQ-6-9, 4514         | R.EGYSISVLYGDEEVR.S             | 1911.05809 | 2 | 2.54E-05 | 0.65 | 2.98 | - | 562.6  |
| AHQ-6-4, 4923         | R.EGYSISVLYGDEEVR.S             | 1911.05809 | 2 | 2.01E-07 | 0.92 | 4.38 | - | 880.1  |
| AHQ-6-6, 4799         | R.EGYSISVLYGDEEVR.S             | 1911.05809 | 2 | 6.29E-06 | 0.84 | 3.61 | - | 774.2  |
| AHQ-6-3, 4816 - 4876  | R.EGYSISVLYGDEEVR.S             | 1911.05809 | 2 | 1.56E-08 | 0.92 | 4.45 | - | 922.5  |
| AHQ-6-5, 4821 - 4832  | R.EGYSISVLYGDEEVR.S             | 1911.05809 | 2 | 1.34E-05 | 0.63 | 2.50 | - | 776.3  |
| AHQ-6-3, 4888         | R.EGYSISVLYGDEEVR.S             | 1911.05809 | 3 | 4.61E-05 | 0.96 | 5.27 | - | 1479.9 |
| AHQ-6-2, 4907         | R.EGYSISVLYGDEEVR.S             | 1911.05809 | 3 | 2.80E-04 | 0.94 | 4.49 | - | 1162.8 |
| AHQ-6-2, 4635         | R.EGYSISVLYGDEEVR.S             | 1911.05809 | 2 | 2.98E-06 | 0.84 | 3.48 | - | 669.5  |
| AHQ-6-2, 4838 - 4912  | R.EGYSISVLYGDEEVR.S             | 1911.05809 | 2 | 9.87E-06 | 0.93 | 3.95 | - | 1264.4 |
| AHQ-6-7, 3295         | K.FADQHVPGSPFSVK.V              | 1516.68203 | 2 | 8.32E-05 | 0.65 | 3.24 | - | 288.5  |
| AHQ-6-6, 3383 - 3384  | K.FADQHVPGSPFSVK.V              | 1516.68203 | 2 | 3.00E-05 | 0.91 | 3.94 | - | 597.6  |
| AHQ-6-5, 3409         | K.FADQHVPGSPFSVK.V              | 1516.68203 | 3 | 7.61E-08 | 0.92 | 3.95 | - | 1156.0 |
| AHQ-6-4, 3476         | K.FADQHVPGSPFSVK.V              | 1516.68203 | 3 | 1.74E-06 | 0.95 | 4.14 | - | 1410.2 |
| AHQ-6-4, 3468 - 3548  | K.FADQHVPGSPFSVK.V              | 1516.68203 | 2 | 7.98E-07 | 0.81 | 3.46 | - | 472.0  |
| AHQ-6-1, 3684 - 3699  | K.FADQHVPGSPFSVK.V              | 1516.68203 | 2 | 2.39E-08 | 0.88 | 3.43 | - | 565.4  |
| AHQ-6-1, 3690         | K.FADQHVPGSPFSVK.V              | 1516.68203 | 3 | 1.95E-08 | 0.94 | 4.07 | - | 1388.4 |
| AHQ-6-6, 3386         | K.FADQHVPGSPFSVK.V              | 1516.68203 | 3 | 2.97E-05 | 0.88 | 3.75 | - | 960.1  |
| AHQ-6-3, 5270         | R.FGGEHVPNSPFQVTLAGDQPSVQPPLR.S | 2947.25342 | 2 | 1.32E-04 | 0.87 | 3.55 | - | 581.1  |
| AHQ-6-6, 5174 - 5186  | R.FGGEHVPNSPFQVTLAGDQPSVQPPLR.S | 2947.25342 | 3 | 9.46E-04 | 0.72 | 3.39 | - | 567.2  |
| AHQ-6-2, 5154 - 5223  | R.FGGEHVPNSPFQVTLAGDQPSVQPPLR.S | 2947.25342 | 3 | 1.06E-05 | 0.88 | 4.72 | - | 562.7  |
| AHQ-6-3, 5364         | R.FGGEHVPNSPFQVTLAGDQPSVQPPLR.S | 2947.25342 | 3 | 1.88E-07 | 0.89 | 4.01 | - | 977.7  |
| AHQ-6-2, 5278 - 5323  | R.FGGEHVPNSPFQVTLAGDQPSVQPPLR.S | 2947.25342 | 3 | 1.12E-11 | 0.93 | 5.06 | - | 822.1  |
| AHQ-6-2, 5303         | R.FGGEHVPNSPFQVTLAGDQPSVQPPLR.S | 2947.25342 | 2 | 5.68E-06 | 0.94 | 5.05 | - | 731.3  |
| AHQ-6-2, 5382 - 5439  | R.FGGEHVPNSPFQVTLAGDQPSVQPPLR.S | 2947.25342 | 3 | 6.37E-06 | 0.88 | 4.38 | - | 762.5  |
| AHQ-6-5, 5204 - 5241  | R.FGGEHVPNSPFQVTLAGDQPSVQPPLR.S | 2947.25342 | 3 | 9.07E-06 | 0.92 | 4.59 | - | 889.4  |
| AHQ-6-1, 5320 - 5379  | R.FGGEHVPNSPFQVTLAGDQPSVQPPLR.S | 2947.25342 | 3 | 2.42E-11 | 0.95 | 5.48 | - | 1129.0 |
| AHQ-6-13, 5229        | R.FGGEHVPNSPFQVTLAGDQPSVQPPLR.S | 2947.25342 | 3 | 1.30E-05 | 0.86 | 4.45 | - | 677.4  |
| AHQ-6-4, 5296 - 5355  | R.FGGEHVPNSPFQVTLAGDQPSVQPPLR.S | 2947.25342 | 3 | 3.71E-09 | 0.94 | 5.49 | - | 874.3  |
| AHQ-6-5, 5023 - 5085  | K.FNEEHIPDPPFVVPVAVASPSGDAR.R   | 2468.66280 | 3 | 3.07E-06 | 0.91 | 4.18 | - | 1204.2 |
| AHQ-6-5, 4920         | K.FNEEHIPDPPFVVPVAVASPSGDAR.R   | 2468.66280 | 2 | 7.11E-06 | 0.89 | 4.39 | - | 442.6  |
| AHQ-6-5, 5019         | K.FNEEHIPDPPFVVPVAVASPSGDAR.R   | 2468.66280 | 2 | 4.58E-04 | 0.71 | 3.07 | - | 440.8  |
| AHQ-6-4, 5003         | K.FNEEHIPDPPFVVPVAVASPSGDAR.R   | 2468.66280 | 2 | 1.59E-06 | 0.89 | 3.88 | - | 552.8  |
| AHQ-6-3, 4976         | K.FNEEHIPDPPFVVPVAVASPSGDAR.R   | 2468.66280 | 2 | 1.28E-05 | 0.85 | 3.04 | - | 713.2  |
| AHQ-6-4, 5113         | K.FNEEHIPDPPFVVPVAVASPSGDAR.R   | 2468.66280 | 2 | 3.21E-08 | 0.92 | 4.31 | - | 752.8  |
| AHQ-6-1, 5160 - 5220  | K.FNEEHIPDPPFVVPVAVASPSGDAR.R   | 2468.66280 | 3 | 6.44E-04 | 0.88 | 4.48 | - | 704.2  |
| AHQ-6-1, 5082         | K.FNEEHIPDPPFVVPVAVASPSGDAR.R   | 2468.66280 | 2 | 4.10E-04 | 0.71 | 2.72 | - | 593.7  |
| AHQ-6-5, 3691         | K.FNGTHIPGSPFK.I                | 1302.46259 | 3 | 3.98E-05 | 0.84 | 3.44 | - | 991.8  |
| AHQ-6-3, 3130         | R.FVPAEMGTHTVSVK.Y              | 1503.74821 | 2 | 1.98E-04 | 0.78 | 2.94 | - | 543.6  |
| AHQ-6-5, 2961 - 3012  | R.FVPAEMGTHTVSVK.Y              | 1503.74821 | 2 | 4.21E-09 | 0.74 | 2.72 | - | 404.4  |
| AHQ-6-6, 2408 - 2472  | R.FVPAEMGTHTVSVK.Y              | 1519.74761 | 2 | 3.92E-04 | 0.86 | 3.51 | - | 330.6  |
| AHQ-6-6, 3014         | R.FVPAEMGTHTVSVK.Y              | 1503.74821 | 2 | 7.38E-08 | 0.79 | 2.87 | - | 509.1  |
| AHQ-6-2, 5656         | R.GAGSYTIM*VLFADQATPTSPIR.V     | 2313.61623 | 2 | 6.60E-04 | 0.38 | 2.60 | - | 298.1  |
| AHQ-6-1, 6258         | R.GAGSYTIM*VLFADQATPTSPIR.V     | 2297.61623 | 2 | 2.90E-05 | 0.57 | 3.01 | - | 385.9  |
| AHQ-6-2, 5654         | R.GAGSYTIM*VLFADQATPTSPIR.V     | 2313.61623 | 2 | 7.52E-04 | 0.50 | 2.95 | - | 392.6  |
| AHQ-6-1, 3566         | R.GAGTGLGLAVEGPSEAK.M           | 1571.71430 | 2 | 1.65E-05 | 0.87 | 3.13 | - | 943.5  |
| AHQ-6-2, 3359 - 3418  | R.GAGTGLGLAVEGPSEAK.M           | 1571.71430 | 2 | 4.65E-05 | 0.76 | 2.94 | - | 668.8  |
| AHQ-6-4, 3355         | R.GAGTGLGLAVEGPSEAK.M           | 1571.71430 | 2 | 5.32E-05 | 0.86 | 3.35 | - | 817.5  |
| AHQ-6-6, 3282         | R.GAGTGLGLAVEGPSEAK.M           | 1571.71430 | 2 | 1.08E-07 | 0.68 | 3.15 | - | 503.9  |
| AHQ-6-8, 3152         | R.GAGTGLGLAVEGPSEAK.M           | 1571.71430 | 2 | 3.66E-06 | 0.90 | 3.42 | - | 892.5  |
| AHQ-6-7, 3151 - 3190  | R.GAGTGLGLAVEGPSEAK.M           | 1571.71430 | 2 | 3.61E-04 | 0.58 | 2.69 | - | 467.3  |
| AHQ-6-5, 3299         | R.GAGTGLGLAVEGPSEAK.M           | 1571.71430 | 2 | 2.22E-06 | 0.91 | 4.13 | - | 750.7  |
| AHQ-6-1, 3714         | K.GKLDVQVFSGLT.G                | 1293.49392 | 2 | 9.77E-05 | 0.92 | 3.52 | - | 1172.0 |
| AHQ-6-3, 4696 - 4764  | K.GLVEPVDVVDNADGTQTVNYVPSR.E    | 2545.74387 | 2 | 2.57E-04 | 0.95 | 4.84 | - | 1018.5 |
| AHQ-6-2, 4938         | K.GLVEPVDVVDNADGTQTVNYVPSR.E    | 2545.74387 | 2 | 1.31E-04 | 0.91 | 3.48 | - | 1008.5 |
| AHQ-6-2, 4799 - 4876  | K.GLVEPVDVVDNADGTQTVNYVPSR.E    | 2545.74387 | 2 | 6.02E-12 | 0.98 | 6.48 | - | 1545.5 |
| AHQ-6-1, 4836 - 4864  | K.GLVEPVDVVDNADGTQTVNYVPSR.E    | 2545.74387 | 2 | 7.89E-07 | 0.93 | 4.47 | - | 809.0  |
| AHQ-6-2, 4798 - 4875  | K.GLVEPVDVVDNADGTQTVNYVPSR.E    | 2545.74387 | 3 | 4.89E-04 | 0.79 | 3.68 | - | 522.0  |
| AHQ-6-5, 4707 - 4743  | K.GLVEPVDVVDNADGTQTVNYVPSR.E    | 2545.74387 | 2 | 1.39E-06 | 0.85 | 3.46 | - | 702.5  |
| AHQ-6-3, 4573 - 4636  | K.GLVEPVDVVDNADGTQTVNYVPSR.E    | 2545.74387 | 2 | 4.49E-07 | 0.92 | 4.44 | - | 795.1  |
| AHQ-6-2, 4667 - 4739  | K.GLVEPVDVVDNADGTQTVNYVPSR.E    | 2545.74387 | 2 | 6.71E-07 | 0.97 | 6.05 | - | 1324.1 |
| AHQ-6-3, 4920         | K.GLVEPVDVVDNADGTQTVNYVPSR.E    | 2545.74387 | 2 | 2.47E-06 | 0.93 | 3.97 | - | 800.8  |
| AHQ-6-4, 4749 - 4816  | K.GLVEPVDVVDNADGTQTVNYVPSR.E    | 2545.74387 | 2 | 1.66E-07 | 0.97 | 5.27 | - | 1533.2 |
| AHQ-6-1, 4686 - 4756  | K.GLVEPVDVVDNADGTQTVNYVPSR.E    | 2545.74387 | 2 | 3.24E-05 | 0.92 | 4.12 | - | 823.7  |
| AHQ-6-2, 2315 - 2316  | K.GTVEPQLEAR.G                  | 1100.20741 | 2 | 1.54E-05 | 0.87 | 3.48 | - | 585.2  |
| AHQ-6-3, 4977 - 5056  | K.HTAM*VSWGGSIPNSPFR.V          | 1960.20541 | 2 | 7.59E-07 | 0.82 | 3.81 | - | 523.7  |
| AHQ-6-3, 4980         | K.HTAM*VSWGGSIPNSPFR.V          | 1960.20541 | 3 | 2.63E-04 | 0.73 | 3.81 | - | 712.3  |
| AHQ-6-2, 5008         | K.HTAM*VSWGGSIPNSPFR.V          | 1960.20541 | 3 | 3.87E-04 | 0.91 | 4.46 | - | 1076.0 |
| AHQ-6-4, 5017         | K.HTAM*VSWGGSIPNSPFR.V          | 1960.20541 | 2 | 2.56E-06 | 0.96 | 4.91 | - | 1365.8 |
| AHQ-6-2, 5007 - 5020  | K.HTAM*VSWGGSIPNSPFR.V          | 1960.20541 | 2 | 2.65E-06 | 0.96 | 5.12 | - | 1100.0 |
| AHQ-6-6, 4050 - 4128  | R.IANLQTDLSDGRL.L               | 1416.56231 | 2 | 4.22E-05 | 0.91 | 3.38 | - | 1072.6 |
| AHQ-6-5, 3712         | R.IANLQTDLSDGRL.L               | 1416.56231 | 2 | 2.21E-05 | 0.87 | 2.87 | - | 1032.5 |
| AHQ-6-12, 4036        | R.IANLQTDLSDGRL.L               | 1416.56231 | 2 | 1.42E-07 | 0.93 | 3.94 | - | 975.1  |
| AHQ-6-2, 3806         | R.IANLQTDLSDGRL.L               | 1416.56231 | 2 | 4.26E-08 | 0.96 | 4.42 | - | 1148.7 |
| AHQ-6-10, 3926 - 3927 | R.IANLQTDLSDGRL.L               | 1416.56231 | 2 | 3.50E-05 | 0.90 | 3.77 | - | 862.9  |
| AHQ-6-1, 3934         | R.IANLQTDLSDGRL.L               | 1416.56231 | 2 | 3.96E-05 | 0.92 | 3.92 | - | 1117.8 |
| AHQ-6-7, 3922         | R.IANLQTDLSDGRL.L               | 1416.56231 | 2 | 2.20E-05 | 0.84 | 3.28 | - | 889.8  |
| AHQ-6-4, 4151         | R.IANLQTDLSDGRL.L               | 1416.56231 | 2 | 1.25E-06 | 0.89 | 3.33 | - | 897.3  |
| AHQ-6-5, 4075 - 4077  | R.IANLQTDLSDGRL.L               | 1416.56231 | 2 | 8.19E-08 | 0.95 | 4.63 | - | 1107.6 |
| AHQ-6-3, 3774         | R.IANLQTDLSDGRL.L               | 1416.56231 | 2 | 2.00E-07 | 0.86 | 3.47 | - | 743.5  |
| AHQ-6-1, 4292         | R.IANLQTDLSDGRL.L               | 1416.56231 | 2 | 6.50E-05 | 0.95 | 4.34 | - | 1108.3 |
| AHQ-6-4, 3784         | R.IANLQTDLSDGRL.L               | 1416.56231 | 2 | 5.90E-08 | 0.94 | 4.46 | - | 1077.0 |
| AHQ-6-11, 3981 - 3983 | R.IANLQTDLSDGRL.L               | 1416.56231 | 2 | 4.47E-07 | 0.93 | 4.02 | - | 871.2  |
| AHQ-6-14-, 4060       | R.IANLQTDLSDGRL.L               | 1416.56231 | 2 | 2.42E-05 | 0.88 | 3.24 | - | 956.7  |
| AHQ-6-13, 4236        | R.IANLQTDLSDGRL.L               | 1416.56231 | 2 | 9.47E-06 | 0.88 | 3.49 | - | 772.8  |
| AHQ-6-3, 4144         | R.IANLQTDLSDGRL.L               | 1416.56231 | 2 | 1.30E-05 | 0.96 | 4.55 | - | 1138.8 |
| AHQ-6-6, 3919         | K.IPEISIQDM*TAQVTSPSGK.T        | 2019.26301 | 2 | 1.59E-08 | 0.98 | 5.50 | - | 1836.1 |
| AHQ-6-8, 4966         | K.IPEISIQDM*TAQVTSPSGK.T        | 2003.26361 | 2 | 6.09E-09 | 0.96 | 4.47 | - | 1447.2 |
| AHQ-6-4, 4004 - 4067  | K.IPEISIQDM*TAQVTSPSGK.T        | 2019.26301 | 2 | 5.28E-08 | 0.97 | 5.06 | - | 1660.0 |
| AHQ-6-3, 4001         | K.IPEISIQDM*TAQVTSPSGK.T        | 2019.26301 | 2 | 6.99E-05 | 0.93 | 3.69 | - | 1250.2 |
| AHQ-6-1, 5330         | K.IPEISIQDM*TAQVTSPSGK.T        | 2003.26361 | 3 | 2.34E-07 | 0.91 | 4.14 | - | 930.9  |
| AHQ-6-1, 5326 - 5327  | K.IPEISIQDM*TAQVTSPSGK.T        | 2003.26361 | 2 | 2.63E-10 | 0.98 | 6.64 | - | 1770.0 |
| AHQ-6-5, 5187         | K.IPEISIQDM*TAQVTSPSGK.T        | 2003.26361 | 2 | 1.66E-08 | 0.96 | 4.61 | - | 1310.1 |
| AHQ-6-5, 5201         | K.IPEISIQDM*TAQVTSPSGK.T        | 2003.26361 | 3 | 6.71E-06 | 0.87 | 3.95 | - | 929.7  |
| AHQ-6-2, 4067         | K.IPEISIQDM*TAQVTSPSGK.T        | 2019.26301 | 2 | 5.35E-05 | 0.91 | 4.27 | - | 680.9  |
| AHQ-6-7, 3803         | K.IPEISIQDM*TAQVTSPSGK.T        | 2019.26301 | 2 | 1.63E-07 | 0.95 | 4.59 | - | 1034.4 |
| AHQ-6-4, 5283         | K.IPEISIQDM*TAQVTSPSGK.T        | 2003.26361 | 2 | 4.26E-09 | 0.97 | 4.76 | - | 1507.6 |
| AHQ-6-4, 5287 - 5289  | K.IPEISIQDM*TAQVTSPSGK.T        | 2003.26361 | 3 | 2.42E-07 | 0.89 | 4.49 | - | 726.4  |
| AHQ-6-2, 5264         | K.IPEISIQDM*TAQVTSPSGK.T        | 2003.26361 | 2 | 3.53E-07 | 0.96 | 4.60 | - | 1489.0 |
| AHQ-6-5, 3939 - 4001  | K.IPEISIQDM*TAQVTSPSGK.T        | 2019.26301 | 2 | 2.71E-06 | 0.98 | 5.69 | - | 1583.2 |
| AHQ-6-6, 5159         | K.IPEISIQDM*TAQVTSPSGK.T        | 2003.26361 | 2 | 3.83E-12 | 0.96 | 5.45 | - | 1044.0 |
| AHQ-6-1, 4146         | K.IPEISIQDM*TAQVTSPSGK.T        | 2019.26301 | 2 | 1.37E-05 | 0.98 | 5.23 | - | 2043.5 |
| AHQ-6-5, 3972         | K.IPEISIQDM*TAQVTSPSGK.T        | 2019.26301 | 3 | 6.41E-04 | 0.84 | 3.84 | - | 710.5  |
| AHQ-6-3, 2608         | K.IVGPSSGAAPCK.V                | 1157.36530 | 2 | 1.76E-06 | 0.84 | 3.25 | - | 716.3  |
| AHQ-6-2, 2599 - 2604  | K.IVGPSSGAAPCK.V                | 1157.36530 | 2 | 4.11E-09 | 0.94 | 4.11 | - | 844.9  |
| AHQ-6-6, 3984         | K.IVGPSSGAAPCKVEPGLGADNSVVR.F   | 2451.78478 | 3 | 1.01E-05 | 0.91 | 4.57 | - | 971.0  |
| AHQ-6-3, 4065 - 4126  | K.IVGPSSGAAPCKVEPGLGADNSVVR.F   | 2451.78478 | 3 | 9.37E-10 | 0.94 | 5.32 | - | 853.2  |
| AHQ-6-1, 4218         | K.IVGPSSGAAPCKVEPGLGADNSVVR.F   | 2451.78478 | 2 | 3.32E-05 | 0.89 | 4.37 | - | 325.3  |

|                      |                                  |            |   |          |      |      |   |        |
|----------------------|----------------------------------|------------|---|----------|------|------|---|--------|
| AHQ-6-4, 4087        | K.IVGPSSGAAPCKVEPGLGADNSVVR.F    | 2451.78478 | 2 | 1.31E-05 | 0.81 | 3.71 | - | 402.3  |
| AHQ-6-1, 4303        | K.IVGPSSGAAPCKVEPGLGADNSVVR.F    | 2451.78478 | 3 | 3.83E-07 | 0.91 | 4.21 | - | 1160.4 |
| AHQ-6-2, 4090        | K.IVGPSSGAAPCKVEPGLGADNSVVR.F    | 2451.78478 | 3 | 2.42E-08 | 0.93 | 4.89 | - | 1217.0 |
| AHQ-6-2, 4192        | K.IVGPSSGAAPCKVEPGLGADNSVVR.F    | 2451.78478 | 3 | 1.78E-10 | 0.92 | 4.53 | - | 1146.9 |
| AHQ-6-5, 4011        | K.IVGPSSGAAPCKVEPGLGADNSVVR.F    | 2451.78478 | 3 | 3.54E-06 | 0.91 | 4.62 | - | 951.7  |
| AHQ-6-3, 4069        | K.IVGPSSGAAPCKVEPGLGADNSVVR.F    | 2451.78478 | 2 | 5.89E-06 | 0.86 | 3.72 | - | 445.5  |
| AHQ-6-4, 4081        | K.IVGPSSGAAPCKVEPGLGADNSVVR.F    | 2451.78478 | 3 | 1.98E-05 | 0.88 | 3.95 | - | 1123.6 |
| AHQ-6-1, 4210        | K.IVGPSSGAAPCKVEPGLGADNSVVR.F    | 2451.78478 | 3 | 8.85E-04 | 0.88 | 4.14 | - | 785.0  |
| AHQ-6-1, 4438        | R.KDGSQCVAYVQEPGDYEVSVK.F        | 2388.59282 | 3 | 1.81E-06 | 0.83 | 4.41 | - | 712.2  |
| AHQ-6-5, 4235        | R.KDGSQCVAYVQEPGDYEVSVK.F        | 2388.59282 | 3 | 5.13E-08 | 0.89 | 4.61 | - | 832.3  |
| AHQ-6-4, 4256 - 4319 | R.KDGSQCVAYVQEPGDYEVSVK.F        | 2388.59282 | 2 | 9.08E-05 | 0.82 | 3.70 | - | 606.1  |
| AHQ-6-5, 4115 - 4187 | K.KNGQHVASSIPVVISQSEIGDASR.V     | 2577.83547 | 3 | 1.52E-09 | 0.98 | 6.05 | - | 2227.5 |
| AHQ-6-5, 4188        | K.KNGQHVASSIPVVISQSEIGDASR.V     | 2577.83547 | 2 | 9.68E-05 | 0.77 | 3.36 | - | 448.3  |
| AHQ-6-4, 4237 - 4299 | K.KNGQHVASSIPVVISQSEIGDASR.V     | 2577.83547 | 3 | 7.18E-12 | 0.97 | 6.02 | - | 1967.4 |
| AHQ-6-1, 4435        | K.KNGQHVASSIPVVISQSEIGDASR.V     | 2577.83547 | 3 | 1.29E-11 | 0.98 | 6.03 | - | 2376.9 |
| AHQ-6-6, 4171        | K.KNGQHVASSIPVVISQSEIGDASR.V     | 2577.83547 | 2 | 4.22E-05 | 0.62 | 2.89 | - | 357.3  |
| AHQ-6-4, 4284        | K.KNGQHVASSIPVVISQSEIGDASR.V     | 2577.83547 | 2 | 9.45E-06 | 0.91 | 4.10 | - | 648.4  |
| AHQ-6-3, 4225 - 4294 | K.KNGQHVASSIPVVISQSEIGDASR.V     | 2577.83547 | 3 | 2.12E-06 | 0.97 | 5.82 | - | 1761.0 |
| AHQ-6-5, 4199        | K.KNGQHVASSIPVVISQSEIGDASR.V     | 2577.83547 | 3 | 2.91E-09 | 0.95 | 4.59 | - | 1603.3 |
| AHQ-6-4, 3419        | K.KTHIQDNHHDGTYTVAYVPDVTGR.Y     | 2588.77367 | 3 | 8.78E-06 | 0.92 | 3.91 | - | 1457.2 |
| AHQ-6-1, 3751        | K.KTHIQDNHHDGTYTVAYVPDVTGR.Y     | 2588.77367 | 3 | 3.20E-05 | 0.89 | 3.85 | - | 892.8  |
| AHQ-6-4, 3531        | K.KTHIQDNHHDGTYTVAYVPDVTGR.Y     | 2588.77367 | 3 | 9.72E-04 | 0.89 | 4.31 | - | 908.3  |
| AHQ-6-3, 3562        | K.KTHIQDNHHDGTYTVAYVPDVTGR.Y     | 2588.77367 | 3 | 4.86E-05 | 0.88 | 3.39 | - | 1334.6 |
| AHQ-6-2, 3460 - 3526 | K.KTHIQDNHHDGTYTVAYVPDVTGR.Y     | 2588.77367 | 3 | 1.43E-05 | 0.96 | 5.09 | - | 1410.7 |
| AHQ-6-3, 3456        | K.KTHIQDNHHDGTYTVAYVPDVTGR.Y     | 2588.77367 | 3 | 5.02E-09 | 0.95 | 4.87 | - | 1204.9 |
| AHQ-6-3, 3881        | K.LDVQFSGLTK.G                   | 1108.26945 | 2 | 1.38E-06 | 0.93 | 3.06 | - | 1648.2 |
| AHQ-6-4, 3888        | K.LDVQFSGLTK.G                   | 1108.26945 | 2 | 7.95E-07 | 0.89 | 3.40 | - | 752.1  |
| AHQ-6-2, 3914        | K.LDVQFSGLTK.G                   | 1108.26945 | 2 | 1.99E-06 | 0.92 | 3.44 | - | 1239.1 |
| AHQ-6-1, 4044        | K.LDVQFSGLTK.G                   | 1108.26945 | 2 | 7.78E-07 | 0.92 | 3.28 | - | 1105.8 |
| AHQ-6-2, 6318        | R.LLGGWIQKLPQLPITNFSR.D          | 2239.64761 | 3 | 2.78E-06 | 0.93 | 4.94 | - | 855.7  |
| AHQ-6-3, 4720        | K.LPQLPITNFSR.D                  | 1286.50461 | 2 | 1.66E-04 | 0.86 | 3.18 | - | 680.9  |
| AHQ-6-5, 4641 - 4708 | K.LPQLPITNFSR.D                  | 1286.50461 | 2 | 6.58E-04 | 0.84 | 3.07 | - | 693.5  |
| AHQ-6-4, 4747        | K.LPQLPITNFSR.D                  | 1286.50461 | 2 | 4.48E-06 | 0.90 | 3.08 | - | 815.0  |
| AHQ-6-1, 4990 - 4992 | K.LPQLPITNFSR.D                  | 1286.50461 | 2 | 4.89E-06 | 0.84 | 3.13 | - | 727.3  |
| AHQ-6-2, 4890        | K.LPQLPITNFSR.D                  | 1286.50461 | 2 | 1.12E-05 | 0.84 | 2.78 | - | 793.7  |
| AHQ-6-2, 4730 - 4786 | K.LPQLPITNFSR.D                  | 1286.50461 | 2 | 6.80E-04 | 0.83 | 2.87 | - | 640.8  |
| AHQ-6-6, 5090        | K.LQVEPAVDTSGVQCYGPIEGGGVFR.E    | 2766.03597 | 2 | 1.62E-07 | 0.94 | 4.80 | - | 787.6  |
| AHQ-6-5, 5135        | K.LQVEPAVDTSGVQCYGPIEGGGVFR.E    | 2766.03597 | 2 | 1.10E-08 | 0.96 | 5.85 | - | 761.8  |
| AHQ-6-4, 5212 - 5216 | K.LQVEPAVDTSGVQCYGPIEGGGVFR.E    | 2766.03597 | 2 | 1.40E-06 | 0.96 | 6.05 | - | 814.1  |
| AHQ-6-2, 5144 - 5203 | K.LQVEPAVDTSGVQCYGPIEGGGVFR.E    | 2766.03597 | 2 | 9.47E-05 | 0.79 | 3.51 | - | 382.8  |
| AHQ-6-4, 5179 - 5235 | K.LQVEPAVDTSGVQCYGPIEGGGVFR.E    | 2766.03597 | 3 | 4.73E-04 | 0.91 | 4.49 | - | 834.8  |
| AHQ-6-1, 5258 - 5331 | K.LQVEPAVDTSGVQCYGPIEGGGVFR.E    | 2766.03597 | 3 | 3.75E-13 | 0.97 | 6.52 | - | 1654.3 |
| AHQ-6-5, 5119        | K.LQVEPAVDTSGVQCYGPIEGGGVFR.E    | 2766.03597 | 2 | 3.13E-08 | 0.94 | 4.64 | - | 873.0  |
| AHQ-6-2, 5143 - 5202 | K.LQVEPAVDTSGVQCYGPIEGGGVFR.E    | 2766.03597 | 3 | 2.78E-15 | 0.99 | 7.62 | - | 2817.5 |
| AHQ-6-5, 5071 - 5127 | K.LQVEPAVDTSGVQCYGPIEGGGVFR.E    | 2766.03597 | 3 | 9.87E-05 | 0.85 | 4.18 | - | 851.9  |
| AHQ-6-5, 3156        | R.LRNGHVGISFVPK.E                | 1424.67564 | 3 | 2.97E-04 | 0.87 | 3.35 | - | 1348.4 |
| AHQ-6-1, 3480        | R.LRNGHVGISFVPK.E                | 1424.67564 | 3 | 1.35E-05 | 0.91 | 3.69 | - | 1473.0 |
| AHQ-6-5, 2973 - 3053 | R.LRNGHVGISFVPK.E                | 1424.67564 | 2 | 3.08E-04 | 0.78 | 2.81 | - | 621.7  |
| AHQ-6-2, 4039        | R.LSPFMADIR.D                    | 1050.25664 | 2 | 2.58E-05 | 0.76 | 2.85 | - | 401.6  |
| AHQ-6-5, 3941        | R.LSPFMADIR.D                    | 1050.25664 | 2 | 1.63E-05 | 0.70 | 2.59 | - | 446.0  |
| AHQ-6-5, 3389        | R.LTVSSLOESGLK.V                 | 1262.43499 | 2 | 1.69E-07 | 0.92 | 3.34 | - | 1116.2 |
| AHQ-6-1, 3639        | R.LTVSSLOESGLK.V                 | 1262.43499 | 2 | 1.38E-05 | 0.87 | 2.94 | - | 949.2  |
| AHQ-6-8, 3212 - 3217 | R.LTVSSLOESGLK.V                 | 1262.43499 | 2 | 1.86E-07 | 0.87 | 3.12 | - | 932.4  |
| AHQ-6-13-, 4092      | R.LVSNHSLHETSSVFDVSLTK.A         | 2201.42190 | 3 | 3.07E-05 | 0.97 | 5.73 | - | 1914.5 |
| AHQ-6-1, 4544        | R.LVSNHSLHETSSVFDVSLTK.A         | 2201.42190 | 3 | 6.99E-07 | 0.95 | 4.69 | - | 1137.3 |
| AHQ-6-5, 4032 - 4092 | R.LVSNHSLHETSSVFDVSLTK.A         | 2201.42190 | 3 | 1.02E-04 | 0.92 | 4.30 | - | 1025.4 |
| AHQ-6-13, 4249       | R.LVSNHSLHETSSVFDVSLTK.A         | 2201.42190 | 3 | 6.40E-05 | 0.93 | 4.12 | - | 1182.1 |
| AHQ-6-6, 4020        | R.LVSNHSLHETSSVFDVSLTK.A         | 2201.42190 | 2 | 4.91E-06 | 0.94 | 4.70 | - | 852.5  |
| AHQ-6-4, 4107 - 4108 | R.LVSNHSLHETSSVFDVSLTK.A         | 2201.42190 | 2 | 1.65E-04 | 0.97 | 5.70 | - | 1321.9 |
| AHQ-6-1, 4296        | R.LVSNHSLHETSSVFDVSLTK.A         | 2201.42190 | 3 | 1.25E-05 | 0.95 | 5.11 | - | 1240.6 |
| AHQ-6-4, 4103        | R.LVSNHSLHETSSVFDVSLTK.A         | 2201.42190 | 3 | 7.88E-11 | 0.96 | 5.59 | - | 1264.8 |
| AHQ-6-5, 4288        | R.LVSNHSLHETSSVFDVSLTK.A         | 2201.42190 | 3 | 1.97E-08 | 0.96 | 5.22 | - | 1427.5 |
| AHQ-6-6, 4019 - 4091 | R.LVSNHSLHETSSVFDVSLTK.A         | 2201.42190 | 3 | 2.64E-05 | 0.86 | 3.30 | - | 1018.5 |
| AHQ-6-4, 4373        | R.LVSNHSLHETSSVFDVSLTK.A         | 2201.42190 | 3 | 1.25E-06 | 0.94 | 4.39 | - | 1079.3 |
| AHQ-6-4, 4361 - 4424 | R.LVSNHSLHETSSVFDVSLTK.A         | 2201.42190 | 2 | 4.84E-11 | 0.95 | 4.78 | - | 973.4  |
| AHQ-6-5, 3775        | R.LVSNHSLHETSSVFDVSLTK.A         | 2201.42190 | 3 | 4.54E-04 | 0.89 | 3.70 | - | 1022.0 |
| AHQ-6-5, 4295        | R.LVSNHSLHETSSVFDVSLTK.A         | 2201.42190 | 2 | 4.38E-08 | 0.95 | 4.60 | - | 1096.0 |
| AHQ-6-5, 4033        | R.LVSNHSLHETSSVFDVSLTK.A         | 2201.42190 | 2 | 2.33E-07 | 0.95 | 4.55 | - | 1196.0 |
| AHQ-6-4, 2487        | K.MDCQCEPEGYR.V                  | 1447.55375 | 2 | 1.47E-04 | 0.68 | 2.79 | - | 612.6  |
| AHQ-6-5, 2216 - 2277 | K.M*DCQCEPEGYR.V                 | 1463.55315 | 2 | 2.15E-06 | 0.75 | 2.69 | - | 1094.9 |
| AHQ-6-1, 4710        | K.KNGQHVASSIPVVISQSEIGDASR.V     | 2449.66256 | 3 | 8.07E-07 | 0.88 | 3.69 | - | 1255.6 |
| AHQ-6-5, 4508        | K.KNGQHVASSIPVVISQSEIGDASR.V     | 2449.66256 | 2 | 7.05E-09 | 0.95 | 4.81 | - | 991.2  |
| AHQ-6-4, 4609        | K.KNGQHVASSIPVVISQSEIGDASR.V     | 2449.66256 | 2 | 1.23E-09 | 0.97 | 4.97 | - | 1714.8 |
| AHQ-6-1, 4826        | K.KNGQHVASSIPVVISQSEIGDASR.V     | 2449.66256 | 3 | 1.75E-04 | 0.88 | 3.80 | - | 1176.3 |
| AHQ-6-3, 4593        | K.KNGQHVASSIPVVISQSEIGDASR.V     | 2449.66256 | 3 | 3.13E-10 | 0.86 | 4.11 | - | 1252.6 |
| AHQ-6-2, 2163 - 2180 | K.RAEFTVETR.S                    | 1109.21754 | 2 | 1.79E-04 | 0.95 | 3.83 | - | 1012.0 |
| AHQ-6-3, 2176        | K.RAEFTVETR.S                    | 1109.21754 | 2 | 1.01E-05 | 0.92 | 3.15 | - | 907.2  |
| AHQ-6-6, 2096 - 2106 | K.RAEFTVETR.S                    | 1109.21754 | 2 | 1.59E-06 | 0.79 | 2.81 | - | 531.7  |
| AHQ-6-4, 2124        | K.RAEFTVETR.S                    | 1109.21754 | 2 | 1.34E-06 | 0.92 | 3.34 | - | 1029.2 |
| AHQ-6-5, 2080        | K.RAEFTVETR.S                    | 1109.21754 | 2 | 1.49E-05 | 0.90 | 3.04 | - | 847.9  |
| AHQ-6-1, 3372        | R.RAPSVANVGSCHDSLK.I             | 1813.02884 | 3 | 8.17E-06 | 0.97 | 5.27 | - | 1859.3 |
| AHQ-6-3, 3166        | R.RAPSVANVGSCHDSLK.I             | 1813.02884 | 3 | 1.87E-05 | 0.97 | 5.01 | - | 2230.3 |
| AHQ-6-5, 3056        | R.RAPSVANVGSCHDSLK.I             | 1813.02884 | 3 | 6.39E-04 | 0.98 | 5.65 | - | 3248.6 |
| AHQ-6-2, 3188        | R.RAPSVANVGSCHDSLK.I             | 1813.02884 | 3 | 3.45E-04 | 0.97 | 5.12 | - | 1984.4 |
| AHQ-6-2, 3848        | K.RIANLQTLSDGLR.L                | 1572.74866 | 2 | 1.85E-07 | 0.82 | 3.60 | - | 533.2  |
| AHQ-6-5, 3069        | R.RLTVSSLOESGLK.V                | 1418.62134 | 2 | 1.44E-06 | 0.96 | 4.40 | - | 1590.7 |
| AHQ-6-2, 6560 - 6620 | K.SADFVVEAIGDDVGTGLGFSVEGSPQAK.I | 2696.90399 | 2 | 5.79E-09 | 0.95 | 4.10 | - | 1491.1 |
| AHQ-6-1, 6590 - 6647 | K.SADFVVEAIGDDVGTGLGFSVEGSPQAK.I | 2696.90399 | 3 | 5.02E-06 | 0.95 | 4.86 | - | 1551.1 |
| AHQ-6-2, 6496 - 6563 | K.SADFVVEAIGDDVGTGLGFSVEGSPQAK.I | 2696.90399 | 3 | 1.82E-05 | 0.97 | 5.88 | - | 1870.8 |
| AHQ-6-1, 6599 - 6638 | K.SADFVVEAIGDDVGTGLGFSVEGSPQAK.I | 2696.90399 | 2 | 1.27E-05 | 0.88 | 3.20 | - | 1099.0 |
| AHQ-6-2, 6699        | K.SADFVVEAIGDDVGTGLGFSVEGSPQAK.I | 2696.90399 | 2 | 5.15E-04 | 0.94 | 4.49 | - | 1026.9 |
| AHQ-6-2, 6622 - 6702 | K.SADFVVEAIGDDVGTGLGFSVEGSPQAK.I | 2696.90399 | 3 | 9.07E-12 | 0.97 | 6.16 | - | 2152.7 |
| AHQ-6-1, 4039        | R.SAGGGEVLVYVEDPAGHQEAK.V        | 2314.45074 | 2 | 1.13E-07 | 0.88 | 3.91 | - | 603.6  |
| AHQ-6-6, 3771        | R.SAGGGEVLVYVEDPAGHQEAK.V        | 2314.45074 | 3 | 1.06E-07 | 0.93 | 4.48 | - | 991.5  |
| AHQ-6-4, 3863        | R.SAGGGEVLVYVEDPAGHQEAK.V        | 2314.45074 | 2 | 1.35E-08 | 0.94 | 4.91 | - | 812.7  |
| AHQ-6-4, 3864        | R.SAGGGEVLVYVEDPAGHQEAK.V        | 2314.45074 | 3 | 2.93E-07 | 0.89 | 3.89 | - | 997.9  |
| AHQ-6-7, 3656        | R.SAGGGEVLVYVEDPAGHQEAK.V        | 2314.45074 | 2 | 5.36E-06 | 0.80 | 3.76 | - | 424.4  |
| AHQ-6-7, 3662        | R.SAGGGEVLVYVEDPAGHQEAK.V        | 2314.45074 | 3 | 2.60E-07 | 0.94 | 4.00 | - | 1415.7 |
| AHQ-6-2, 4051        | R.SAGGGEVLVYVEDPAGHQEAK.V        | 2314.45074 | 2 | 2.30E-06 | 0.64 | 3.08 | - | 328.3  |
| AHQ-6-6, 3770        | R.SAGGGEVLVYVEDPAGHQEAK.V        | 2314.45074 | 2 | 1.13E-06 | 0.91 | 4.47 | - | 588.2  |
| AHQ-6-3, 3877 - 3884 | R.SAGGGEVLVYVEDPAGHQEAK.V        | 2314.45074 | 2 | 1.39E-07 | 0.93 | 4.39 | - | 784.8  |
| AHQ-6-1, 4038        | R.SAGGGEVLVYVEDPAGHQEAK.V        | 2314.45074 | 3 | 3.11E-09 | 0.90 | 3.78 | - | 1413.2 |
| AHQ-6-2, 4004        | R.SAGGGEVLVYVEDPAGHQEAK.V        | 2314.45074 | 3 | 2.04E-05 | 0.85 | 3.43 | - | 1296.1 |
| AHQ-6-5, 3804 - 3835 | R.SAGGGEVLVYVEDPAGHQEAK.V        | 2314.45074 | 3 | 3.44E-09 | 0.94 | 4.56 | - | 1124.6 |
| AHQ-6-3, 3876        | R.SAGGGEVLVYVEDPAGHQEAK.V        | 2314.45074 | 3 | 1.52E-08 | 0.90 | 4.27 | - | 988.2  |
| AHQ-6-2, 3895 - 3922 | R.SAGGGEVLVYVEDPAGHQEAK.V        | 2314.45074 | 3 | 5.81E-09 | 0.95 | 4.30 | - | 1681.4 |
| AHQ-6-5, 3803        | R.SAGGGEVLVYVEDPAGHQEAK.V        | 2314.45074 | 2 | 1.99E-05 | 0.96 | 5.35 | - | 989.6  |

|                       |                                              |            |   |          |      |      |   |        |
|-----------------------|----------------------------------------------|------------|---|----------|------|------|---|--------|
| AHQ-6-2, 3896 - 3954  | R.SAGQGEVLVYVEDPAGHQEEAK.V                   | 2314.45074 | 2 | 2.21E-05 | 0.94 | 4.76 | - | 788.9  |
| AHQ-6-5, 3345         | K.SPFEVYVDK.S                                | 1084.20321 | 1 | 2.77E-04 | 0.57 | 1.99 | - | 879.5  |
| AHQ-6-5, 3343         | K.SPFEVYVDK.S                                | 1084.20321 | 2 | 2.11E-06 | 0.94 | 3.30 | - | 1237.1 |
| AHQ-6-3, 3425         | K.SPFEVYVDK.S                                | 1084.20321 | 1 | 2.68E-07 | 0.78 | 2.55 | - | 1058.2 |
| AHQ-6-2, 3442         | K.SPFEVYVDK.S                                | 1084.20321 | 1 | 3.91E-05 | 0.81 | 2.89 | - | 807.0  |
| AHQ-6-7, 3240         | K.SPFEVYVDK.S                                | 1084.20321 | 1 | 1.38E-04 | 0.80 | 3.18 | - | 657.4  |
| AHQ-6-1, 3615         | K.SPFEVYVDK.S                                | 1084.20321 | 2 | 1.15E-05 | 0.85 | 2.93 | - | 902.1  |
| AHQ-6-3, 3424         | K.SPFEVYVDK.S                                | 1084.20321 | 2 | 1.21E-05 | 0.95 | 3.39 | - | 1268.9 |
| AHQ-6-2, 3434         | K.SPFEVYVDK.S                                | 1084.20321 | 2 | 4.71E-06 | 0.94 | 3.42 | - | 1280.5 |
| AHQ-6-4, 3396         | K.SPFEVYVDK.S                                | 1084.20321 | 2 | 9.88E-07 | 0.92 | 3.45 | - | 915.5  |
| AHQ-6-5, 4732         | K.SPFSVAVSPSLDLK.I                           | 1534.73557 | 2 | 8.18E-05 | 0.78 | 3.24 | - | 680.5  |
| AHQ-6-3, 4561 - 4620  | K.SPFSVAVSPSLDLK.I                           | 1534.73557 | 2 | 3.44E-04 | 0.85 | 3.36 | - | 635.6  |
| AHQ-6-3, 4716 - 4772  | K.SPFSVAVSPSLDLK.I                           | 1534.73557 | 2 | 1.74E-05 | 0.86 | 3.69 | - | 780.4  |
| AHQ-6-4, 4799 - 4859  | K.SPFSVAVSPSLDLK.I                           | 1534.73557 | 2 | 8.44E-06 | 0.65 | 2.99 | - | 509.3  |
| AHQ-6-7, 4546         | K.SPFSVAVSPSLDLK.I                           | 1534.73557 | 2 | 3.43E-04 | 0.73 | 3.09 | - | 632.3  |
| AHQ-6-2, 4740 - 4802  | K.SPFSVAVSPSLDLK.I                           | 1534.73557 | 2 | 1.51E-04 | 0.85 | 3.39 | - | 733.0  |
| AHQ-6-1, 3578         | R.SPYTVTGGQACNPSACR.A                        | 1871.04208 | 2 | 6.65E-06 | 0.90 | 4.03 | - | 430.8  |
| AHQ-6-2, 3431         | R.SPYTVTGGQACNPSACR.A                        | 1871.04208 | 3 | 2.07E-04 | 0.89 | 3.93 | - | 1015.3 |
| AHQ-6-7, 3226         | R.SPYTVTGGQACNPSACR.A                        | 1871.04208 | 2 | 5.47E-04 | 0.57 | 2.84 | - | 275.9  |
| AHQ-6-2, 3388 - 3450  | R.SPYTVTGGQACNPSACR.A                        | 1871.04208 | 2 | 2.70E-05 | 0.90 | 4.16 | - | 513.4  |
| AHQ-6-6, 3259 - 3322  | R.SPYTVTGGQACNPSACR.A                        | 1871.04208 | 2 | 2.51E-05 | 0.85 | 3.64 | - | 475.2  |
| AHQ-6-5, 3327         | R.SPYTVTGGQACNPSACR.A                        | 1871.04208 | 2 | 7.40E-05 | 0.88 | 3.61 | - | 562.9  |
| AHQ-6-4, 3388         | R.SPYTVTGGQACNPSACR.A                        | 1871.04208 | 2 | 3.63E-05 | 0.90 | 4.26 | - | 386.4  |
| AHQ-6-3, 3352 - 3412  | R.SPYTVTGGQACNPSACR.A                        | 1871.04208 | 2 | 4.06E-06 | 0.89 | 3.73 | - | 536.7  |
| AHQ-6-6, 4807 - 4872  | R.TFSVWYVPEVTGTHK.V                          | 1751.96228 | 2 | 1.48E-04 | 0.45 | 2.64 | - | 217.7  |
| AHQ-6-6, 4820         | R.TFSVWYVPEVTGTHK.V                          | 1751.96228 | 3 | 3.40E-07 | 0.67 | 3.37 | - | 360.8  |
| AHQ-6-1, 5020         | R.TFSVWYVPEVTGTHK.V                          | 1751.96228 | 3 | 1.71E-08 | 0.82 | 3.37 | - | 578.0  |
| AHQ-6-2, 4918         | R.TFSVWYVPEVTGTHK.V                          | 1751.96228 | 3 | 1.25E-04 | 0.77 | 3.40 | - | 508.6  |
| AHQ-6-3, 4908         | R.TFSVWYVPEVTGTHK.V                          | 1751.96228 | 3 | 6.35E-07 | 0.66 | 3.01 | - | 433.4  |
| AHQ-6-6, 3040         | K.TGVAWVNPFAEFTVDAK.H                        | 1647.85391 | 2 | 1.76E-05 | 0.87 | 3.52 | - | 777.2  |
| AHQ-6-3, 3138         | K.TGVAWVNPFAEFTVDAK.H                        | 1647.85391 | 3 | 1.03E-05 | 0.83 | 3.13 | - | 806.6  |
| AHQ-6-2, 3135         | K.TGVAWVNPFAEFTVDAK.H                        | 1647.85391 | 3 | 3.38E-10 | 0.93 | 3.81 | - | 1310.0 |
| AHQ-6-4, 3109         | K.TGVAWVNPFAEFTVDAK.H                        | 1647.85391 | 3 | 7.77E-07 | 0.85 | 3.36 | - | 768.9  |
| AHQ-6-5, 3041         | K.TGVAWVNPFAEFTVDAK.H                        | 1647.85391 | 3 | 1.07E-06 | 0.93 | 4.38 | - | 778.2  |
| AHQ-6-2, 2987 - 3066  | R.TGVELGKPTHFTVNAK.A                         | 1699.93205 | 3 | 7.61E-06 | 0.68 | 3.26 | - | 752.7  |
| AHQ-6-5, 2905         | R.TGVELGKPTHFTVNAK.A                         | 1699.93205 | 2 | 7.81E-04 | 0.84 | 3.30 | - | 584.9  |
| AHQ-6-3, 3128         | R.TGVELGKPTHFTVNAK.A                         | 1699.93205 | 2 | 2.17E-06 | 0.76 | 3.21 | - | 468.7  |
| AHQ-6-5, 3176         | K.THEAEIIVEGENHTYICR.F                       | 2060.19046 | 2 | 4.51E-12 | 0.97 | 5.39 | - | 1670.2 |
| AHQ-6-4, 3213         | K.THEAEIIVEGENHTYICR.F                       | 2060.19046 | 3 | 2.81E-11 | 0.86 | 3.69 | - | 969.6  |
| AHQ-6-1, 3356         | K.THEAEIIVEGENHTYICR.F                       | 2060.19046 | 3 | 1.67E-08 | 0.95 | 4.76 | - | 1221.5 |
| AHQ-6-5, 3043         | K.THEAEIIVEGENHTYICR.F                       | 2060.19046 | 3 | 1.16E-11 | 0.96 | 5.07 | - | 1418.0 |
| AHQ-6-6, 3034         | K.THEAEIIVEGENHTYICR.F                       | 2060.19046 | 3 | 1.39E-07 | 0.92 | 4.13 | - | 1077.3 |
| AHQ-6-4, 3093 - 3103  | K.THEAEIIVEGENHTYICR.F                       | 2060.19046 | 3 | 3.39E-11 | 0.94 | 4.57 | - | 1150.5 |
| AHQ-6-4, 3088         | K.THEAEIIVEGENHTYICR.F                       | 2060.19046 | 2 | 5.02E-05 | 0.94 | 3.84 | - | 1212.6 |
| AHQ-6-3, 3792         | K.THIQDNHDGTYVAYVPDVTGR.Y                    | 2460.60076 | 3 | 8.49E-04 | 0.78 | 3.26 | - | 744.3  |
| AHQ-6-2, 3731         | K.THIQDNHDGTYVAYVPDVTGR.Y                    | 2460.60076 | 2 | 2.31E-07 | 0.96 | 4.35 | - | 1525.8 |
| AHQ-6-2, 3823         | K.THIQDNHDGTYVAYVPDVTGR.Y                    | 2460.60076 | 3 | 1.32E-04 | 0.87 | 3.96 | - | 696.3  |
| AHQ-6-11, 3095 - 3101 | R.TPCEILVK.H                                 | 1090.27249 | 2 | 1.53E-04 | 0.77 | 3.01 | - | 765.8  |
| AHQ-6-12, 3133        | R.TPCEILVK.H                                 | 1090.27249 | 2 | 4.66E-04 | 0.88 | 2.68 | - | 888.9  |
| AHQ-6-1, 3379         | R.TPCEILVK.H                                 | 1090.27249 | 2 | 3.59E-05 | 0.76 | 2.77 | - | 715.7  |
| AHQ-6-13, 3200 - 3201 | R.TPCEILVK.H                                 | 1090.27249 | 2 | 1.24E-05 | 0.71 | 2.67 | - | 692.4  |
| AHQ-6-2, 3196         | R.TPCEILVK.H                                 | 1090.27249 | 2 | 2.54E-05 | 0.81 | 3.04 | - | 698.2  |
| AHQ-6-4, 3137         | R.TPCEILVK.H                                 | 1090.27249 | 2 | 1.96E-05 | 0.88 | 2.85 | - | 894.2  |
| AHQ-6-6, 3092 - 3094  | R.TPCEILVK.H                                 | 1090.27249 | 2 | 6.06E-06 | 0.75 | 2.68 | - | 610.8  |
| AHQ-6-5, 3089         | R.TPCEILVK.H                                 | 1090.27249 | 2 | 4.03E-04 | 0.60 | 2.63 | - | 626.9  |
| AHQ-6-3, 3368 - 3446  | R.VANPSGNLTETYVQDR.G                         | 1764.87462 | 2 | 1.04E-11 | 0.96 | 4.79 | - | 1071.5 |
| AHQ-6-6, 3287         | R.VANPSGNLTETYVQDR.G                         | 1764.87462 | 2 | 4.36E-08 | 0.89 | 3.90 | - | 700.0  |
| AHQ-6-6, 3199         | R.VANPSGNLTETYVQDR.G                         | 1764.87462 | 2 | 2.11E-10 | 0.90 | 3.80 | - | 624.8  |
| AHQ-6-2, 3218 - 3283  | R.VANPSGNLTETYVQDR.G                         | 1764.87462 | 2 | 2.03E-12 | 0.95 | 4.50 | - | 1293.8 |
| AHQ-6-5, 3307 - 3385  | R.VANPSGNLTETYVQDR.G                         | 1764.87462 | 2 | 4.22E-13 | 0.93 | 4.10 | - | 753.4  |
| AHQ-6-4, 3433         | R.VANPSGNLTETYVQDR.G                         | 1764.87462 | 2 | 5.88E-14 | 0.89 | 4.19 | - | 553.2  |
| AHQ-6-5, 3209 - 3243  | R.VANPSGNLTETYVQDR.G                         | 1764.87462 | 2 | 1.28E-11 | 0.92 | 4.05 | - | 803.3  |
| AHQ-6-3, 3152         | R.VANPSGNLTETYVQDR.G                         | 1764.87462 | 2 | 1.40E-09 | 0.78 | 3.31 | - | 594.4  |
| AHQ-6-1, 3622         | R.VANPSGNLTETYVQDR.G                         | 1764.87462 | 2 | 3.80E-09 | 0.88 | 4.08 | - | 632.9  |
| AHQ-6-4, 3257 - 3275  | R.VANPSGNLTETYVQDR.G                         | 1764.87462 | 2 | 1.80E-09 | 0.87 | 3.58 | - | 645.0  |
| AHQ-6-1, 3474 - 3540  | R.VANPSGNLTETYVQDR.G                         | 1764.87462 | 2 | 1.02E-12 | 0.96 | 4.93 | - | 1098.7 |
| AHQ-6-2, 3396 - 3474  | R.VANPSGNLTETYVQDR.G                         | 1764.87462 | 2 | 1.70E-13 | 0.95 | 4.49 | - | 1051.5 |
| AHQ-6-7, 3119         | R.VANPSGNLTETYVQDR.G                         | 1764.87462 | 2 | 4.16E-09 | 0.93 | 4.46 | - | 935.7  |
| AHQ-6-3, 3278 - 3288  | R.VANPSGNLTETYVQDR.G                         | 1764.87462 | 2 | 1.18E-10 | 0.93 | 4.30 | - | 735.0  |
| AHQ-6-2, 3346 - 3410  | R.VANPSGNLTETYVQDR.G                         | 1764.87462 | 2 | 7.60E-10 | 0.97 | 4.95 | - | 1316.3 |
| AHQ-6-4, 2653         | K.VAQPITTDNKGTVTVR.Y                         | 1816.00621 | 2 | 1.12E-04 | 0.85 | 3.65 | - | 652.0  |
| AHQ-6-8, 2633         | K.VAQPITTDNKGTVTVR.Y                         | 1816.00621 | 2 | 4.72E-05 | 0.67 | 2.65 | - | 420.0  |
| AHQ-6-6, 2822         | K.VAQPITTDNKGTVTVR.Y                         | 1816.00621 | 2 | 4.11E-04 | 0.66 | 3.23 | - | 411.4  |
| AHQ-6-4, 2760 - 2835  | K.VAQPITTDNKGTVTVR.Y                         | 1816.00621 | 2 | 9.05E-06 | 0.89 | 4.04 | - | 629.9  |
| AHQ-6-8, 2530         | K.VAQPITTDNKGTVTVR.Y                         | 1816.00621 | 2 | 2.76E-04 | 0.77 | 3.11 | - | 548.2  |
| AHQ-6-1, 3108 - 3112  | K.VAQPITTDNKGTVTVR.Y                         | 1816.00621 | 2 | 5.02E-09 | 0.90 | 4.06 | - | 588.8  |
| AHQ-6-5, 2717 - 2791  | K.VAQPITTDNKGTVTVR.Y                         | 1816.00621 | 2 | 1.41E-04 | 0.82 | 3.95 | - | 424.2  |
| AHQ-6-3, 2901         | K.VAQPITTDNKGTVTVR.Y                         | 1816.00621 | 2 | 5.89E-04 | 0.70 | 3.00 | - | 397.4  |
| AHQ-6-13, 3492        | K.VINTEDELDGTGR.V                            | 1638.69283 | 2 | 6.09E-04 | 0.74 | 2.71 | - | 777.8  |
| AHQ-6-4, 3248         | K.VINTEDELDGTGR.V                            | 1638.69283 | 2 | 2.41E-06 | 0.83 | 3.13 | - | 758.2  |
| AHQ-6-4, 3331 - 3336  | K.VINTEDELDGTGR.V                            | 1638.69283 | 2 | 7.90E-06 | 0.93 | 3.70 | - | 1188.0 |
| AHQ-6-2, 3551         | K.VINTEDELDGTGR.V                            | 1638.69283 | 2 | 3.89E-05 | 0.90 | 2.96 | - | 1195.5 |
| AHQ-6-1, 3676         | K.VINTEDELDGTGR.V                            | 1638.69283 | 2 | 4.19E-06 | 0.95 | 4.42 | - | 1236.4 |
| AHQ-6-8, 3105         | K.VINTEDELDGTGR.V                            | 1638.69283 | 2 | 1.93E-05 | 0.77 | 3.26 | - | 624.5  |
| AHQ-6-4, 3511         | K.VINTEDELDGTGR.V                            | 1638.69283 | 2 | 1.45E-07 | 0.95 | 4.45 | - | 1379.8 |
| AHQ-6-3, 3269         | K.VINTEDELDGTGR.V                            | 1638.69283 | 2 | 2.13E-04 | 0.61 | 2.78 | - | 506.6  |
| AHQ-6-1, 3439 - 3486  | K.VINTEDELDGTGR.V                            | 1638.69283 | 2 | 1.72E-05 | 0.92 | 3.41 | - | 1305.9 |
| AHQ-6-8, 3292         | K.VINTEDELDGTGR.V                            | 1638.69283 | 2 | 1.29E-04 | 0.93 | 3.74 | - | 1162.5 |
| AHQ-6-13, 3648        | K.VINTEDELDGTGR.V                            | 1638.69283 | 2 | 1.60E-05 | 0.79 | 2.83 | - | 699.2  |
| AHQ-6-6, 2602         | K.VDVGKQDEFTVK.S                             | 1365.51377 | 2 | 2.45E-06 | 0.85 | 3.17 | - | 590.6  |
| AHQ-6-4, 2623 - 2624  | K.VDVGKQDEFTVK.S                             | 1365.51377 | 2 | 8.24E-07 | 0.84 | 3.11 | - | 731.0  |
| AHQ-6-1, 2887         | K.VDVGKQDEFTVK.S                             | 1365.51377 | 2 | 5.93E-07 | 0.88 | 3.48 | - | 737.2  |
| AHQ-6-3, 2652 - 2674  | K.VDVGKQDEFTVK.S                             | 1365.51377 | 2 | 5.05E-06 | 0.87 | 3.52 | - | 694.5  |
| AHQ-6-2, 2650         | K.VDVGKQDEFTVK.S                             | 1365.51377 | 2 | 6.50E-06 | 0.90 | 3.92 | - | 738.2  |
| AHQ-6-3, 2784 - 2845  | K.VEPGLGADNSVVR.F                            | 1313.44209 | 2 | 1.37E-04 | 0.68 | 2.55 | - | 202.9  |
| AHQ-6-5, 2720 - 2728  | K.VEPGLGADNSVVR.F                            | 1313.44209 | 2 | 2.05E-05 | 0.60 | 2.56 | - | 272.1  |
| AHQ-6-2, 2768 - 2839  | K.VEPGLGADNSVVR.F                            | 1313.44209 | 2 | 1.37E-06 | 0.59 | 2.87 | - | 207.8  |
| AHQ-6-2, 5842 - 5910  | K.VEYTPYEEGLHSVDVITYDGSPPVSPFPQVPTGEGCDPSR.V | 4300.57494 | 3 | 2.72E-05 | 0.95 | 5.89 | - | 739.8  |
| AHQ-6-5, 5764 - 5823  | K.VEYTPYEEGLHSVDVITYDGSPPVSPFPQVPTGEGCDPSR.V | 4300.57494 | 3 | 1.35E-05 | 0.94 | 5.41 | - | 947.2  |
| AHQ-6-1, 5831 - 5886  | K.VEYTPYEEGLHSVDVITYDGSPPVSPFPQVPTGEGCDPSR.V | 4300.57494 | 3 | 5.31E-06 | 0.92 | 5.36 | - | 682.7  |
| AHQ-6-3, 5765 - 5820  | K.VEYTPYEEGLHSVDVITYDGSPPVSPFPQVPTGEGCDPSR.V | 4300.57494 | 3 | 7.85E-07 | 0.90 | 4.88 | - | 612.2  |
| AHQ-6-2, 6510         | K.VGSAADIPINISSETDLSLLTATVPPSGR.E            | 2895.25495 | 3 | 7.94E-04 | 0.88 | 4.59 | - | 690.1  |
| AHQ-6-8, 6394         | K.VGSAADIPINISSETDLSLLTATVPPSGR.E            | 2895.25495 | 2 | 2.94E-05 | 0.90 | 4.47 | - | 600.8  |
| AHQ-6-4, 6571         | K.VGSAADIPINISSETDLSLLTATVPPSGR.E            | 2895.25495 | 2 | 1.76E-04 | 0.80 | 3.27 | - | 679.1  |
| AHQ-6-6, 6406 - 6408  | K.VGSAADIPINISSETDLSLLTATVPPSGR.E            | 2895.25495 | 3 | 5.96E-04 | 0.84 | 4.65 | - | 503.4  |
| AHQ-6-8, 6393         | K.VGSAADIPINISSETDLSLLTATVPPSGR.E            | 2895.25495 | 3 | 9.90E-04 | 0.93 | 4.67 | - | 1073.1 |
| AHQ-6-5, 6477 - 6479  | K.VGSAADIPINISSETDLSLLTATVPPSGR.E            | 2895.25495 | 2 | 1.24E-07 | 0.93 | 4.84 | - | 584.6  |

|                        |                                     |            |   |          |      |      |   |        |
|------------------------|-------------------------------------|------------|---|----------|------|------|---|--------|
| AHQ-6-5, 4211 - 4231   | K.VHSPSGALEECYVTEIDQDK.Y            | 2279.42322 | 3 | 5.23E-09 | 0.98 | 6.12 | - | 2083.3 |
| AHQ-6-6, 4184          | K.VHSPSGALEECYVTEIDQDK.Y            | 2279.42322 | 2 | 2.46E-08 | 0.95 | 4.93 | - | 1111.1 |
| AHQ-6-6, 4107 - 4182   | K.VHSPSGALEECYVTEIDQDK.Y            | 2279.42322 | 3 | 1.11E-06 | 0.94 | 4.71 | - | 1492.1 |
| AHQ-6-1, 4464          | K.VHSPSGALEECYVTEIDQDK.Y            | 2279.42322 | 2 | 1.13E-06 | 0.77 | 3.42 | - | 597.1  |
| AHQ-6-5, 4216          | K.VHSPSGALEECYVTEIDQDK.Y            | 2279.42322 | 2 | 6.93E-08 | 0.95 | 5.33 | - | 860.6  |
| AHQ-6-4, 4292          | K.VHSPSGALEECYVTEIDQDK.Y            | 2279.42322 | 3 | 3.77E-09 | 0.95 | 4.58 | - | 1747.9 |
| AHQ-6-4, 4297 - 4315   | K.VHSPSGALEECYVTEIDQDK.Y            | 2279.42322 | 2 | 1.10E-06 | 0.97 | 5.45 | - | 1662.2 |
| AHQ-6-7, 4058          | K.VHSPSGALEECYVTEIDQDK.Y            | 2279.42322 | 2 | 6.73E-05 | 0.94 | 4.49 | - | 1010.1 |
| AHQ-6-7, 4359 - 4360   | K.VHSPSGALEECYVTEIDQDKYAVR.F        | 2768.99349 | 2 | 2.71E-04 | 0.79 | 3.53 | - | 548.8  |
| AHQ-6-1, 4758          | K.VHSPSGALEECYVTEIDQDKYAVR.F        | 2768.99349 | 3 | 1.39E-10 | 0.92 | 5.03 | - | 578.1  |
| AHQ-6-3, 4626          | K.VHSPSGALEECYVTEIDQDKYAVR.F        | 2768.99349 | 3 | 7.25E-09 | 0.88 | 4.37 | - | 563.2  |
| AHQ-6-7, 4362          | K.VHSPSGALEECYVTEIDQDKYAVR.F        | 2768.99349 | 3 | 2.29E-05 | 0.88 | 4.32 | - | 474.3  |
| AHQ-6-5, 4545          | K.VHSPSGALEECYVTEIDQDKYAVR.F        | 2768.99349 | 3 | 1.31E-12 | 0.93 | 4.96 | - | 726.1  |
| AHQ-6-2, 4670          | K.VHSPSGALEECYVTEIDQDKYAVR.F        | 2768.99349 | 3 | 1.61E-11 | 0.89 | 4.34 | - | 551.3  |
| AHQ-6-8, 4344          | K.VHSPSGALEECYVTEIDQDKYAVR.F        | 2768.99349 | 3 | 1.33E-05 | 0.92 | 4.64 | - | 687.7  |
| AHQ-6-6, 4516          | K.VHSPSGALEECYVTEIDQDKYAVR.F        | 2768.99349 | 3 | 3.45E-07 | 0.87 | 4.35 | - | 522.9  |
| AHQ-6-5, 4576          | K.VHSPSGALEECYVTEIDQDKYAVR.F        | 2768.99349 | 2 | 1.28E-11 | 0.94 | 4.33 | - | 1333.7 |
| AHQ-6-4, 4621 - 4647   | K.VHSPSGALEECYVTEIDQDKYAVR.F        | 2768.99349 | 3 | 3.90E-13 | 0.95 | 5.66 | - | 809.4  |
| AHQ-6-5, 3739 - 3805   | K.VNOPASFVSLNGAK.G                  | 1503.68480 | 2 | 3.36E-07 | 0.88 | 3.83 | - | 464.7  |
| AHQ-6-7, 3487          | K.VNOPASFVSLNGAK.G                  | 1503.68480 | 2 | 5.09E-09 | 0.87 | 3.67 | - | 562.4  |
| AHQ-6-6, 3580 - 3642   | K.VNOPASFVSLNGAK.G                  | 1503.68480 | 2 | 1.70E-05 | 0.93 | 4.20 | - | 778.6  |
| AHQ-6-6, 3695 - 3763   | K.VNOPASFVSLNGAK.G                  | 1503.68480 | 2 | 2.08E-06 | 0.87 | 3.77 | - | 445.7  |
| AHQ-6-1, 3851 - 3904   | K.VNOPASFVSLNGAK.G                  | 1503.68480 | 2 | 6.06E-09 | 0.96 | 4.44 | - | 940.4  |
| AHQ-6-4, 3672 - 3736   | K.VNOPASFVSLNGAK.G                  | 1503.68480 | 2 | 4.83E-09 | 0.87 | 3.86 | - | 533.4  |
| AHQ-6-4, 3811 - 3871   | K.VNOPASFVSLNGAK.G                  | 1503.68480 | 2 | 5.74E-08 | 0.79 | 3.37 | - | 411.7  |
| AHQ-6-2, 3728          | K.VNOPASFVSLNGAK.G                  | 1503.68480 | 2 | 6.37E-06 | 0.83 | 3.45 | - | 617.7  |
| AHQ-6-3, 3694 - 3758   | K.VNOPASFVSLNGAK.G                  | 1503.68480 | 2 | 2.67E-10 | 0.90 | 4.06 | - | 565.2  |
| AHQ-6-5, 3608 - 3671   | K.VNOPASFVSLNGAK.G                  | 1503.68480 | 2 | 1.63E-08 | 0.91 | 4.07 | - | 682.5  |
| AHQ-6-1, 4026          | K.VNOPASFVSLNGAK.G                  | 1503.68480 | 2 | 1.88E-07 | 0.85 | 3.07 | - | 682.7  |
| AHQ-6-5, 1728          | K.VPVHVDVTDAK.V                     | 1168.28175 | 2 | 8.00E-05 | 0.65 | 2.72 | - | 451.8  |
| AHQ-6-2, 1699 - 1754   | K.VPVHVDVTDAK.V                     | 1168.28175 | 2 | 2.69E-07 | 0.91 | 3.30 | - | 897.0  |
| AHQ-6-2, 1840          | K.VPVHVDVTDAK.V                     | 1168.28175 | 2 | 7.55E-07 | 0.87 | 3.11 | - | 850.3  |
| AHQ-6-3, 4162          | R.VQVQDNNEGCPVEALVK.D               | 1786.98493 | 2 | 3.78E-06 | 0.82 | 3.41 | - | 580.7  |
| AHQ-6-1, 4191 - 4264   | R.VQVQDNNEGCPVEALVK.D               | 1786.98493 | 2 | 2.03E-07 | 0.95 | 4.66 | - | 1089.0 |
| AHQ-6-4, 4033          | R.VQVQDNNEGCPVEALVK.D               | 1786.98493 | 2 | 9.19E-05 | 0.96 | 4.05 | - | 1650.0 |
| AHQ-6-3, 4030 - 4101   | R.VQVQDNNEGCPVEALVK.D               | 1786.98493 | 2 | 3.36E-06 | 0.96 | 5.05 | - | 1257.0 |
| AHQ-6-3, 3968 - 4032   | R.VQVQDNNEGCPVEALVK.D               | 1786.98493 | 2 | 1.48E-05 | 0.90 | 3.93 | - | 945.4  |
| AHQ-6-1, 4134 - 4202   | R.VQVQDNNEGCPVEALVK.D               | 1786.98493 | 2 | 9.08E-05 | 0.97 | 4.99 | - | 1571.4 |
| AHQ-6-2, 4055 - 4123   | R.VQVQDNNEGCPVEALVK.D               | 1786.98493 | 2 | 4.36E-05 | 0.97 | 5.11 | - | 1751.6 |
| AHQ-6-3, 5028          | R.VQVQDNNEGCPVEALVKDNGNGTYSCSYVPR.K | 3359.60342 | 3 | 1.04E-07 | 0.88 | 3.99 | - | 960.0  |
| AHQ-6-1, 4998 - 5054   | R.VQVQDNNEGCPVEALVKDNGNGTYSCSYVPR.K | 3359.60342 | 3 | 2.44E-11 | 0.87 | 4.17 | - | 1006.3 |
| AHQ-6-2, 5043 - 5104   | R.VQVQDNNEGCPVEALVKDNGNGTYSCSYVPR.K | 3359.60342 | 3 | 1.15E-08 | 0.84 | 3.87 | - | 1253.8 |
| AHQ-6-2, 4926 - 4982   | R.VQVQDNNEGCPVEALVKDNGNGTYSCSYVPR.K | 3359.60342 | 3 | 9.43E-10 | 0.85 | 3.71 | - | 1136.0 |
| AHQ-6-2, 4831          | R.VQVQDNNEGCPVEALVKDNGNGTYSCSYVPR.K | 3359.60342 | 3 | 7.00E-08 | 0.94 | 4.63 | - | 1452.0 |
| AHQ-6-3, 4808 - 4826   | R.VQVQDNNEGCPVEALVKDNGNGTYSCSYVPR.K | 3359.60342 | 3 | 5.04E-08 | 0.89 | 4.00 | - | 1307.4 |
| AHQ-6-5, 4591 - 4651   | R.VSQGGLHEGHTFPEAFIHDR.D            | 2441.64058 | 3 | 9.21E-07 | 0.95 | 5.31 | - | 1338.6 |
| AHQ-6-5, 4444          | R.VSQGGLHEGHTFPEAFIHDR.D            | 2441.64058 | 3 | 4.28E-04 | 0.83 | 3.52 | - | 839.4  |
| AHQ-6-4, 4699 - 4759   | R.VSQGGLHEGHTFPEAFIHDR.D            | 2441.64058 | 3 | 6.97E-08 | 0.96 | 5.27 | - | 1435.3 |
| AHQ-6-8, 4404 - 4406   | R.VSQGGLHEGHTFPEAFIHDR.D            | 2441.64058 | 2 | 5.42E-04 | 0.95 | 5.08 | - | 912.9  |
| AHQ-6-6, 4582 - 4587   | R.VSQGGLHEGHTFPEAFIHDR.D            | 2441.64058 | 2 | 3.59E-06 | 0.96 | 5.09 | - | 956.9  |
| AHQ-6-2, 4756          | R.VSQGGLHEGHTFPEAFIHDR.D            | 2441.64058 | 3 | 1.37E-05 | 0.97 | 5.80 | - | 1582.5 |
| AHQ-6-1, 4850          | R.VSQGGLHEGHTFPEAFIHDR.D            | 2441.64058 | 3 | 4.94E-07 | 0.94 | 4.83 | - | 1079.5 |
| AHQ-6-6, 4500 - 4571   | R.VSQGGLHEGHTFPEAFIHDR.D            | 2441.64058 | 3 | 2.76E-08 | 0.95 | 5.23 | - | 1328.8 |
| AHQ-6-7, 4414          | R.VSQGGLHEGHTFPEAFIHDR.D            | 2441.64058 | 3 | 6.14E-07 | 0.96 | 4.65 | - | 1560.1 |
| AHQ-6-3, 4718          | R.VSQGGLHEGHTFPEAFIHDR.D            | 2441.64058 | 3 | 7.67E-08 | 0.96 | 5.81 | - | 1392.3 |
| AHQ-6-8, 4405          | R.VSQGGLHEGHTFPEAFIHDR.D            | 2441.64058 | 3 | 1.60E-07 | 0.95 | 5.12 | - | 1154.5 |
| AHQ-6-3, 2750 - 2826   | K.VTAAQGGPLEPSGNIANK.T              | 1653.81855 | 2 | 2.51E-05 | 0.92 | 4.61 | - | 579.1  |
| AHQ-6-1, 3083          | K.VTAAQGGPLEPSGNIANK.T              | 1653.81855 | 2 | 6.83E-06 | 0.87 | 3.86 | - | 483.2  |
| AHQ-6-2, 2880 - 2882   | K.VTAAQGGPLEPSGNIANK.T              | 1653.81855 | 2 | 9.54E-09 | 0.92 | 4.63 | - | 654.5  |
| AHQ-6-7, 2614 - 2674   | K.VTAAQGGPLEPSGNIANK.T              | 1653.81855 | 2 | 8.57E-04 | 0.69 | 3.00 | - | 568.8  |
| AHQ-6-2, 2742 - 2820   | K.VTAAQGGPLEPSGNIANK.T              | 1653.81855 | 2 | 6.62E-05 | 0.93 | 4.96 | - | 563.8  |
| AHQ-6-4, 2848          | K.VTAAQGGPLEPSGNIANK.T              | 1653.81855 | 2 | 1.44E-06 | 0.58 | 2.74 | - | 402.8  |
| AHQ-6-1, 2982          | K.VTAAQGGPLEPSGNIANK.T              | 1653.81855 | 2 | 5.68E-06 | 0.83 | 3.63 | - | 631.3  |
| AHQ-6-6, 2698          | K.VTAAQGGPLEPSGNIANK.T              | 1653.81855 | 2 | 6.22E-05 | 0.83 | 3.82 | - | 559.5  |
| AHQ-6-5, 2672 - 2707   | K.VTAAQGGPLEPSGNIANK.T              | 1653.81855 | 2 | 4.92E-06 | 0.85 | 3.39 | - | 741.1  |
| AHQ-6-4, 3279          | K.VTVLFAQQHIAK.S                    | 1284.53185 | 2 | 4.32E-07 | 0.92 | 3.58 | - | 1003.4 |
| AHQ-6-5, 3217          | K.VTVLFAQQHIAK.S                    | 1284.53185 | 2 | 4.35E-10 | 0.94 | 3.94 | - | 1083.3 |
| AHQ-6-7, 3099          | K.VTVLFAQQHIAK.S                    | 1284.53185 | 2 | 5.01E-06 | 0.76 | 3.13 | - | 507.0  |
| AHQ-6-2, 3318          | K.VTVLFAQQHIAK.S                    | 1284.53185 | 2 | 3.80E-06 | 0.92 | 3.91 | - | 938.7  |
| AHQ-6-4, 3289          | K.VTVLFAQQHIAK.S                    | 1284.53185 | 1 | 6.13E-04 | 0.57 | 2.49 | - | 542.1  |
| AHQ-6-3, 3316          | K.VTVLFAQQHIAK.S                    | 1284.53185 | 2 | 3.28E-06 | 0.92 | 3.91 | - | 828.0  |
| AHQ-6-2, 3327          | K.VTVLFAQQHIAK.S                    | 1284.53185 | 3 | 1.06E-04 | 0.72 | 3.27 | - | 537.8  |
| AHQ-6-8, 2968          | K.VTVLFAQQHIAK.S                    | 1284.53185 | 2 | 7.90E-06 | 0.86 | 3.33 | - | 851.8  |
| AHQ-6-6, 4646          | R.VTYCPTPEPGNYIINIK.F               | 1884.14221 | 2 | 5.38E-06 | 0.67 | 2.79 | - | 302.5  |
| AHQ-6-1, 4963          | R.VTYCPTPEPGNYIINIK.F               | 1884.14221 | 2 | 2.50E-05 | 0.84 | 3.43 | - | 446.6  |
| AHQ-6-4, 4844 - 4903   | R.VTYCPTPEPGNYIINIK.F               | 1884.14221 | 2 | 3.52E-05 | 0.90 | 4.07 | - | 491.7  |
| AHQ-6-4, 4912          | R.VTYCPTPEPGNYIINIK.F               | 1884.14221 | 3 | 9.11E-05 | 0.90 | 4.42 | - | 783.2  |
| AHQ-6-3, 4722          | R.VTYCPTPEPGNYIINIK.F               | 1884.14221 | 2 | 3.89E-06 | 0.80 | 3.35 | - | 404.4  |
| AHQ-6-3, 4857          | R.VTYCPTPEPGNYIINIK.F               | 1884.14221 | 2 | 6.44E-04 | 0.80 | 3.26 | - | 448.1  |
| AHQ-6-5, 4675          | R.VTYCPTPEPGNYIINIK.F               | 1884.14221 | 2 | 4.69E-06 | 0.84 | 3.76 | - | 381.0  |
| AHQ-6-5, 4768 - 4835   | R.VTYCPTPEPGNYIINIK.F               | 1884.14221 | 2 | 3.77E-05 | 0.89 | 3.98 | - | 501.4  |
| AHQ-6-5, 4820          | R.VTYCPTPEPGNYIINIK.F               | 1884.14221 | 3 | 6.24E-05 | 0.92 | 4.54 | - | 901.2  |
| AHQ-6-1, 4822          | R.VTYCPTPEPGNYIINIK.F               | 1884.14221 | 2 | 7.90E-13 | 0.89 | 3.49 | - | 687.0  |
| AHQ-6-14-, 4762 - 4763 | R.VTYTPM*APGSYLISIK.Y               | 1758.07165 | 2 | 9.41E-04 | 0.90 | 3.51 | - | 852.9  |
| AHQ-6-7, 4610          | R.VTYTPM*APGSYLISIK.Y               | 1758.07165 | 2 | 1.89E-06 | 0.76 | 3.20 | - | 365.2  |
| AHQ-6-13, 5272 - 5281  | R.VTYTPM*APGSYLISIK.Y               | 1742.07225 | 2 | 1.08E-05 | 0.88 | 3.32 | - | 795.0  |
| AHQ-6-8, 3184 - 3185   | R.YAPSEAGLHEM*DIR.Y                 | 1589.75482 | 2 | 1.42E-04 | 0.91 | 3.76 | - | 1002.1 |
| AHQ-6-4, 2695          | R.YAPSEAGLHEM*DIR.Y                 | 1605.75422 | 2 | 1.96E-06 | 0.73 | 2.85 | - | 631.5  |
| AHQ-6-4, 3387          | R.YAPSEAGLHEM*DIR.Y                 | 1589.75482 | 2 | 7.16E-06 | 0.87 | 3.09 | - | 976.1  |
| AHQ-6-7, 3947          | K.YGGDEIPFSPYR.V                    | 1401.50466 | 2 | 6.26E-06 | 0.49 | 2.73 | - | 342.6  |
| AHQ-6-2, 4199 - 4208   | K.YGGDEIPFSPYR.V                    | 1401.50466 | 1 | 1.17E-04 | 0.36 | 2.52 | - | 421.3  |
| AHQ-6-4, 4168          | K.YGGDEIPFSPYR.V                    | 1401.50466 | 2 | 1.88E-06 | 0.71 | 2.67 | - | 514.9  |
| AHQ-6-3, 4160 - 4169   | K.YGGDEIPFSPYR.V                    | 1401.50466 | 2 | 3.61E-07 | 0.85 | 3.43 | - | 686.3  |
| AHQ-6-8, 3188 - 3192   | K.YGGPYHIGGSPFK.A                   | 1380.53182 | 2 | 1.02E-08 | 0.97 | 4.67 | - | 1923.3 |
| AHQ-6-4, 3395          | K.YGGPYHIGGSPFK.A                   | 1380.53182 | 2 | 1.77E-08 | 0.98 | 4.91 | - | 2151.2 |
| AHQ-6-6, 3335          | K.YGGPYHIGGSPFK.A                   | 1380.53182 | 2 | 1.44E-09 | 0.98 | 4.80 | - | 2036.1 |
| AHQ-6-4, 3407          | K.YGGPYHIGGSPFK.A                   | 1380.53182 | 3 | 7.29E-07 | 0.89 | 3.99 | - | 622.6  |
| AHQ-6-7, 3223          | K.YGGPYHIGGSPFK.A                   | 1380.53182 | 2 | 4.30E-04 | 0.96 | 4.16 | - | 1672.9 |
| AHQ-6-5, 3351          | K.YGGPYHIGGSPFK.A                   | 1380.53182 | 3 | 1.41E-04 | 0.92 | 4.60 | - | 674.9  |
| AHQ-6-13-, 3472        | K.YGGPYHIGGSPFK.A                   | 1380.53182 | 2 | 1.09E-08 | 0.96 | 3.95 | - | 1843.7 |
| AHQ-6-1, 3640          | K.YGGPYHIGGSPFK.A                   | 1380.53182 | 2 | 2.23E-06 | 0.98 | 4.44 | - | 2385.0 |
| AHQ-6-3, 3440          | K.YGGPYHIGGSPFK.A                   | 1380.53182 | 2 | 9.86E-09 | 0.92 | 3.64 | - | 1075.8 |
| AHQ-6-5, 3341          | K.YGGPYHIGGSPFK.A                   | 1380.53182 | 2 | 1.63E-09 | 0.98 | 4.35 | - | 2394.5 |
| AHQ-6-3, 3104          | K.YGGOPVPNFPK.L                     | 1291.43658 | 1 | 1.10E-04 | 0.39 | 2.64 | - | 266.9  |
| AHQ-6-3, 3092          | K.YGGOPVPNFPK.L                     | 1291.43658 | 2 | 3.36E-05 | 0.84 | 3.23 | - | 428.9  |
| AHQ-6-2, 3090          | K.YGGOPVPNFPK.L                     | 1291.43658 | 2 | 8.76E-06 | 0.92 | 3.42 | - | 638.7  |
| AHQ-6-5, 3000          | K.YGGOPVPNFPK.L                     | 1291.43658 | 2 | 1.45E-04 | 0.88 | 3.14 | - | 557.3  |

|                             |                                                               |            |   |          |       |         |       |          |
|-----------------------------|---------------------------------------------------------------|------------|---|----------|-------|---------|-------|----------|
| AHQ-6-1, 3291               | K.YGGQVPNFPK.L                                                | 1291.43658 | 2 | 3.94E-04 | 0.90  | 2.98    | -     | 713.1    |
| AHQ-6-4, 2992 - 3055        | K.YGGQVPNFPK.L                                                | 1291.43658 | 2 | 3.38E-04 | 0.74  | 2.90    | -     | 337.0    |
| AHQ-6-5, 4196               | K.YKGGHVPSPFQFTVGPLGEGGAHK.V                                  | 2596.88377 | 3 | 6.94E-06 | 0.81  | 3.61    | -     | 675.8    |
| AHQ-6-7, 4035 - 4078        | K.YKGGHVPSPFQFTVGPLGEGGAHK.V                                  | 2596.88377 | 3 | 1.50E-06 | 0.89  | 4.01    | -     | 833.0    |
| AHQ-6-3, 2949               | K.YNEQHVPSPFTAR.V                                             | 1603.71978 | 2 | 5.90E-04 | 0.92  | 3.83    | -     | 711.6    |
| AHQ-6-4, 2892               | K.YNEQHVPSPFTAR.V                                             | 1603.71978 | 2 | 3.96E-07 | 0.88  | 3.89    | -     | 566.0    |
| AHQ-6-2, 2952 - 2959        | K.YNEQHVPSPFTAR.V                                             | 1603.71978 | 2 | 6.02E-08 | 0.82  | 3.20    | -     | 461.4    |
| AHQ-6-5, 2816 - 2881        | K.YNEQHVPSPFTAR.V                                             | 1603.71978 | 2 | 7.35E-06 | 0.90  | 3.54    | -     | 577.0    |
| AHQ-6-8, 2602 - 2660        | K.YNEQHVPSPFTAR.V                                             | 1603.71978 | 2 | 3.49E-05 | 0.78  | 3.18    | -     | 483.2    |
| AHQ-6-1, 4463 - 4518        | K.YTPVQQGPVGVNVTYGGDPIK.S                                     | 2287.55640 | 2 | 8.51E-05 | 0.94  | 4.26    | -     | 869.2    |
| AHQ-6-1, 4606               | K.YTPVQQGPVGVNVTYGGDPIK.S                                     | 2287.55640 | 2 | 9.09E-07 | 0.87  | 3.59    | -     | 570.6    |
| AHQ-6-7, 4158               | K.YTPVQQGPVGVNVTYGGDPIK.S                                     | 2287.55640 | 2 | 2.13E-06 | 0.85  | 3.44    | -     | 560.8    |
| AHQ-6-3, 4334 - 4401        | K.YTPVQQGPVGVNVTYGGDPIK.S                                     | 2287.55640 | 2 | 6.29E-07 | 0.95  | 5.23    | -     | 670.8    |
| AHQ-6-6, 4290               | K.YTPVQQGPVGVNVTYGGDPIK.S                                     | 2287.55640 | 2 | 6.20E-04 | 0.84  | 3.60    | -     | 551.7    |
| AHQ-6-8, 4161               | K.YTPVQQGPVGVNVTYGGDPIK.S                                     | 2287.55640 | 2 | 2.71E-06 | 0.90  | 3.83    | -     | 703.3    |
| AHQ-6-5, 4332               | K.YTPVQQGPVGVNVTYGGDPIK.S                                     | 2287.55640 | 2 | 1.32E-04 | 0.89  | 4.19    | -     | 615.9    |
| AHQ-6-2, 4254               | K.YTPVQQGPVGVNVTYGGDPIK.S                                     | 2287.55640 | 2 | 6.27E-06 | 0.92  | 3.91    | -     | 790.9    |
| AHQ-6-4, 4420               | K.YTPVQQGPVGVNVTYGGDPIK.S                                     | 2287.55640 | 2 | 2.63E-05 | 0.94  | 4.71    | -     | 719.9    |
| AHQ-6-4, 4528               | K.YTPVQQGPVGVNVTYGGDPIK.S                                     | 2287.55640 | 2 | 1.31E-06 | 0.88  | 3.69    | -     | 617.5    |
| AHQ-6-2, 4354 - 4414        | K.YTPVQQGPVGVNVTYGGDPIK.S                                     | 2287.55640 | 2 | 1.97E-07 | 0.91  | 4.22    | -     | 698.6    |
| AHQ-6-2, 4518 - 4574        | K.YTPVQQGPVGVNVTYGGDPIK.S                                     | 2287.55640 | 2 | 1.05E-09 | 0.92  | 4.46    | -     | 638.9    |
| AHQ-6-3, 4498               | K.YTPVQQGPVGVNVTYGGDPIK.S                                     | 2287.55640 | 2 | 3.35E-09 | 0.93  | 4.42    | -     | 723.3    |
| AHQ-6-2, 6208 - 6219        | R.YWQEAAGEYAVHVLCSNEDIR.L                                     | 2538.73318 | 2 | 9.11E-06 | 0.88  | 3.65    | -     | 622.6    |
| AHQ-6-3, 6197 - 6208        | R.YWQEAAGEYAVHVLCSNEDIR.L                                     | 2538.73318 | 2 | 2.37E-07 | 0.78  | 2.92    | -     | 668.8    |
| AHQ-6-2, 6183 - 6238        | R.YWQEAAGEYAVHVLCSNEDIR.L                                     | 2538.73318 | 3 | 4.55E-06 | 0.71  | 3.07    | -     | 476.9    |
| AHQ-6-2, 5876 - 5936        | R.YWQEAAGEYAVHVLCSNEDIR.L                                     | 2538.73318 | 2 | 1.56E-07 | 0.85  | 2.99    | -     | 902.8    |
| gj[4504165]ref[NP_000168.1] | gelsolin (amyloidosis, Finnish type); Gelsolin [Homo sapiens] |            |   | 3.89E-15 | 22.16 | 250.37  | 43.50 | 85699.9  |
| AHQ-6-7, 3555 - 3632        | K.AGALNSNDAFVLK.T                                             | 1320.47622 | 2 | 7.84E-04 | 0.80  | 3.35    | -     | 770.5    |
| AHQ-6-5, 3207               | K.AGKEPGLQIWR.V                                               | 1255.45060 | 3 | 2.48E-07 | 0.88  | 3.99    | -     | 1105.2   |
| AHQ-6-5, 3201               | K.AGKEPGLQIWR.V                                               | 1255.45060 | 2 | 2.35E-04 | 0.61  | 2.55    | -     | 471.8    |
| AHQ-6-10, 5171              | R.AQPVQVAEGSEPDGFWEALGGK.A                                    | 2273.44345 | 2 | 1.74E-04 | 0.82  | 3.83    | -     | 381.9    |
| AHQ-6-5, 5449 - 5513        | R.AQPVQVAEGSEPDGFWEALGGK.A                                    | 2273.44345 | 2 | 6.92E-07 | 0.97  | 5.86    | -     | 933.7    |
| AHQ-6-6, 5406               | R.AQPVQVAEGSEPDGFWEALGGK.A                                    | 2273.44345 | 2 | 2.05E-05 | 0.94  | 4.87    | -     | 639.0    |
| AHQ-6-5, 5287 - 5289        | R.AQPVQVAEGSEPDGFWEALGGK.A                                    | 2273.44345 | 2 | 2.48E-04 | 0.95  | 5.19    | -     | 747.1    |
| AHQ-6-5, 6483               | R.ATEVPVSWESFNNGDCFDLGNNHQWCGSNSNR.Y                          | 4042.29257 | 3 | 3.89E-15 | 0.90  | 4.21    | -     | 916.3    |
| AHQ-6-6, 5338               | R.DPDQTDGLGLSYLSSHIANVER.V                                    | 2388.53285 | 3 | 1.67E-09 | 0.93  | 4.29    | -     | 1288.1   |
| AHQ-6-5, 5323 - 5385        | R.DPDQTDGLGLSYLSSHIANVER.V                                    | 2388.53285 | 3 | 1.15E-11 | 0.95  | 4.63    | -     | 1527.3   |
| AHQ-6-5, 2227 - 2299        | K.DSQEEKEALTSAR.K                                             | 1666.72289 | 2 | 2.64E-06 | 0.93  | 3.84    | -     | 1374.3   |
| AHQ-6-13, 2329              | K.DSQEEKEALTSAR.K                                             | 1666.72289 | 2 | 1.87E-06 | 0.88  | 3.23    | -     | 1132.8   |
| AHQ-6-6, 2255               | K.DSQEEKEALTSAR.K                                             | 1666.72289 | 3 | 8.90E-05 | 0.94  | 4.07    | -     | 1595.5   |
| AHQ-6-5, 2181 - 2239        | K.DSQEEKEALTSAR.K                                             | 1666.72289 | 3 | 9.33E-07 | 0.95  | 4.01    | -     | 1929.7   |
| AHQ-6-13, 2508              | K.DSQEEKEALTSAR.K                                             | 1666.72289 | 2 | 3.29E-06 | 0.83  | 3.00    | -     | 1083.9   |
| AHQ-6-6, 2246               | K.DSQEEKEALTSAR.K                                             | 1666.72289 | 2 | 5.97E-07 | 0.95  | 4.07    | -     | 1374.2   |
| AHQ-6-7, 2194               | K.DSQEEKEALTSAR.K                                             | 1666.72289 | 2 | 6.10E-08 | 0.93  | 4.02    | -     | 1284.2   |
| AHQ-6-6, 5826               | R.EVQGFESATFLGYFK.S                                           | 1723.90570 | 2 | 2.89E-08 | 0.87  | 3.49    | -     | 896.8    |
| AHQ-6-5, 5832 - 5887        | R.EVQGFESATFLGYFK.S                                           | 1723.90570 | 2 | 5.65E-10 | 0.97  | 4.99    | -     | 1791.2   |
| AHQ-6-13, 5788 - 5790       | R.EVQGFESATFLGYFK.S                                           | 1723.90570 | 2 | 4.53E-11 | 0.96  | 5.46    | -     | 972.2    |
| AHQ-6-5, 6217 - 6281        | R.EVQGFESATFLGYFK.S                                           | 1723.90570 | 2 | 7.08E-06 | 0.88  | 3.59    | -     | 845.7    |
| AHQ-6-5, 6617 - 6679        | K.FDLVPPVPTNLYGDFFTGDAYVILK.T                                 | 2706.08359 | 2 | 1.91E-07 | 0.77  | 3.37    | -     | 283.3    |
| AHQ-6-6, 6460               | K.FDLVPPVPTNLYGDFFTGDAYVILK.T                                 | 2706.08359 | 2 | 3.12E-04 | 0.81  | 3.16    | -     | 454.1    |
| AHQ-6-6, 6458               | K.FDLVPPVPTNLYGDFFTGDAYVILK.T                                 | 2706.08359 | 3 | 1.14E-08 | 0.91  | 4.32    | -     | 957.5    |
| AHQ-6-5, 6535               | K.FDLVPPVPTNLYGDFFTGDAYVILK.T                                 | 2706.08359 | 3 | 7.99E-14 | 0.96  | 5.88    | -     | 1209.4   |
| AHQ-6-11, 2391              | K.HVVPNEVVQR.L                                                | 1276.46981 | 2 | 2.14E-04 | 0.85  | 2.89    | -     | 529.3    |
| AHQ-6-5, 5865 - 5923        | R.IEGSNKVPVDPATYGFQYGGDSYIILYNYR.H                            | 3401.72499 | 3 | 1.17E-07 | 0.96  | 5.68    | -     | 1393.2   |
| AHQ-6-5, 5835               | R.IEGSNKVPVDPATYGFQYGGDSYIILYNYR.H                            | 3401.72499 | 3 | 6.83E-08 | 0.86  | 4.12    | -     | 895.2    |
| AHQ-6-5, 5107               | K.NWRDPDQTDGLGLSYLSSHIANVER.V                                 | 2845.03323 | 3 | 1.38E-09 | 0.97  | 5.94    | -     | 1502.5   |
| AHQ-6-5, 5367 - 5387        | K.NWRDPDQTDGLGLSYLSSHIANVER.V                                 | 2845.03323 | 3 | 5.00E-15 | 0.98  | 7.45    | -     | 1816.5   |
| AHQ-6-6, 5335               | K.NWRDPDQTDGLGLSYLSSHIANVER.V                                 | 2845.03323 | 3 | 7.09E-08 | 0.97  | 6.36    | -     | 1565.6   |
| AHQ-6-5, 2117 - 2121        | K.PALPAGTEDTAK.E                                              | 1171.28241 | 2 | 5.78E-07 | 0.88  | 3.07    | -     | 534.7    |
| AHQ-6-5, 2497               | K.PALPAGTEDTAKEDAANR.K                                        | 1827.93072 | 2 | 1.63E-07 | 0.90  | 3.97    | -     | 555.7    |
| AHQ-6-7, 4443 - 4448        | K.QTQVSVLPPEGGETPLFK.Q                                        | 1831.05925 | 2 | 2.03E-04 | 0.30  | 2.68    | -     | 261.5    |
| AHQ-6-6, 3062               | K.SEDCFILDHGK.D                                               | 1322.42590 | 2 | 2.56E-04 | 0.95  | 3.80    | -     | 1355.2   |
| AHQ-6-5, 3045               | K.SEDCFILDHGK.D                                               | 1322.42590 | 2 | 3.29E-05 | 0.93  | 3.22    | -     | 1547.9   |
| AHQ-6-5, 2245               | K.TGAQELLR.V                                                  | 888.00387  | 2 | 9.79E-05 | 0.86  | 2.92    | -     | 1001.1   |
| AHQ-6-5, 4200               | K.TPSAAYLWVGTGASEAEK.T                                        | 1838.99510 | 2 | 9.57E-05 | 0.92  | 3.81    | -     | 1230.9   |
| AHQ-6-5, 4307 - 4367        | K.TPSAAYLWVGTGASEAEK.T                                        | 1838.99510 | 2 | 2.97E-06 | 0.97  | 4.69    | -     | 1677.2   |
| AHQ-6-5, 4427               | K.TPSAAYLWVGTGASEAEK.T                                        | 1838.99510 | 2 | 7.77E-05 | 0.73  | 2.98    | -     | 740.9    |
| AHQ-6-10, 4130 - 4138       | K.TPSAAYLWVGTGASEAEK.T                                        | 1838.99510 | 2 | 2.72E-04 | 0.72  | 2.91    | -     | 747.5    |
| AHQ-6-5, 4788 - 4799        | R.VHVSEEGTEPEAMLQVLGPK.P                                      | 2151.42630 | 2 | 8.90E-09 | 0.97  | 5.58    | -     | 1179.7   |
| AHQ-6-5, 3649 - 3721        | R.VHVSEEGTEPEAMLQVLGPK.P                                      | 2167.42570 | 2 | 7.59E-05 | 0.91  | 4.48    | -     | 542.3    |
| AHQ-6-5, 4197               | R.VHVSEEGTEPEAMLQVLGPKPALPAGTEDTAK.E                          | 3319.68551 | 3 | 1.84E-06 | 0.93  | 5.09    | -     | 964.7    |
| AHQ-6-6, 4172               | R.VHVSEEGTEPEAMLQVLGPKPALPAGTEDTAK.E                          | 3319.68551 | 3 | 1.18E-04 | 0.86  | 4.49    | -     | 474.2    |
| AHQ-6-5, 4980 - 5043        | R.VHVSEEGTEPEAMLQVLGPKPALPAGTEDTAK.E                          | 3303.68611 | 3 | 1.82E-04 | 0.86  | 4.12    | -     | 765.1    |
| AHQ-6-5, 3912               | R.VPFDAAHLTSTAMAQAQHGMDDDGTGQK.Q                              | 2875.10141 | 3 | 2.61E-08 | 0.97  | 6.06    | -     | 1653.8   |
| AHQ-6-5, 3520 - 3580        | R.VPFDAAHLTSTAMAQAQHGMDDDGTGQK.Q                              | 2891.10081 | 3 | 4.03E-05 | 0.87  | 5.26    | -     | 1087.8   |
| AHQ-6-5, 6060 - 6079        | K.VVPDPATYGFQYGGDSYIILYNYR.H                                  | 2773.04698 | 2 | 1.24E-04 | 0.84  | 3.70    | -     | 638.8    |
| AHQ-6-5, 5985 - 6055        | K.VVSNAGTM*SVSLVADENPFAQGALK.S                                | 2773.04698 | 3 | 1.19E-04 | 0.88  | 3.25    | -     | 1272.0   |
| AHQ-6-5, 5149 - 5224        | K.VVSNAGTM*SVSLVADENPFAQGALK.S                                | 2480.73680 | 2 | 2.56E-04 | 0.67  | 2.97    | -     | 477.3    |
| AHQ-6-5, 5183 - 5207        | K.VVSNAGTM*SVSLVADENPFAQGALK.S                                | 2480.73680 | 3 | 6.25E-05 | 0.86  | 4.53    | -     | 1119.6   |
| AHQ-6-6, 5140               | K.VVSNAGTM*SVSLVADENPFAQGALK.S                                | 2480.73680 | 2 | 4.16E-09 | 0.88  | 3.76    | -     | 823.7    |
| AHQ-6-6, 5142               | K.VVSNAGTM*SVSLVADENPFAQGALK.S                                | 2480.73680 | 3 | 2.20E-05 | 0.77  | 3.39    | -     | 1255.8   |
| gj[4505257]ref[NP_002435.1] | moesin [Homo sapiens]                                         |            |   | 5.00E-15 | 12.09 | 130.28  | 25.50 | 67819.5  |
| AHQ-6-6, 2608 - 2615        | K.ALTSELANAR.D                                                | 1046.15975 | 2 | 1.85E-04 | 0.89  | 3.25    | -     | 818.8    |
| AHQ-6-6, 6391               | K.EGILNDDIYCPPEAVALLASAVQSK.Y                                 | 2869.19288 | 3 | 9.51E-08 | 0.85  | 4.19    | -     | 635.3    |
| AHQ-6-6, 5662 - 5718        | R.EVWFFGLQYQDTK.G                                             | 1661.83760 | 2 | 1.22E-05 | 0.91  | 3.43    | -     | 953.5    |
| AHQ-6-6, 6355 - 6360        | K.FYPEDVSEELQDITQR.L                                          | 2083.24065 | 2 | 3.64E-11 | 0.95  | 4.78    | -     | 1044.5   |
| AHQ-6-6, 6362               | K.FYPEDVSEELQDITQR.L                                          | 2083.24065 | 3 | 2.07E-04 | 0.88  | 3.91    | -     | 969.7    |
| AHQ-6-6, 5258               | K.IAQDLEM*GVNYFSIK.N                                          | 1908.16395 | 2 | 1.39E-05 | 0.95  | 4.56    | -     | 938.0    |
| AHQ-6-6, 5546 - 5619        | K.IAQDLEM*GVNYFSIK.N                                          | 1892.16455 | 2 | 2.93E-05 | 0.91  | 3.90    | -     | 776.3    |
| AHQ-6-6, 2070               | R.IQWHEEHR.G                                                  | 1234.34835 | 2 | 1.10E-06 | 0.91  | 3.11    | -     | 1202.1   |
| AHQ-6-6, 4579               | K.KTQEQLALEMAELTAR.I                                          | 1833.10018 | 2 | 1.78E-06 | 0.96  | 4.82    | -     | 1614.4   |
| AHQ-6-6, 3618               | K.KTQEQLALEM*AELTAR.I                                         | 1849.09958 | 3 | 4.57E-05 | 0.94  | 4.52    | -     | 1369.2   |
| AHQ-6-6, 3596               | K.KTQEQLALEM*AELTAR.I                                         | 1849.09958 | 2 | 3.69E-04 | 0.92  | 3.90    | -     | 909.3    |
| AHQ-6-6, 2048               | R.RALELEQER.K                                                 | 1144.26342 | 2 | 1.96E-04 | 0.91  | 3.52    | -     | 1313.9   |
| AHQ-6-6, 3155 - 3226        | K.TAM*STPHVAEPAENEQDEQDENGAEASADLR.A                          | 3330.36796 | 3 | 9.28E-10 | 0.97  | 5.51    | -     | 1788.6   |
| AHQ-6-6, 3023 - 3087        | K.TAM*STPHVAEPAENEQDEQDENGAEASADLR.A                          | 3330.36796 | 3 | 2.55E-09 | 0.96  | 5.67    | -     | 1619.4   |
| AHQ-6-6, 3338 - 3399        | K.TAM*STPHVAEPAENEQDEQDENGAEASADLR.A                          | 3314.36856 | 3 | 5.00E-15 | 0.96  | 5.41    | -     | 1696.4   |
| AHQ-6-6, 5104               | K.TQEQLALEMAELTAR.I                                           | 1704.92727 | 2 | 3.79E-04 | 0.96  | 4.52    | -     | 1420.9   |
| gj[1266778]ref[NP_002464.1] | myosin, heavy polypeptide 9, non-muscle [Homo sapiens]        |            |   | 6.11E-15 | 90.72 | 1060.36 | 44.00 | 226529.8 |
| AHQ-6-3, 2146               | R.ALEEAEMEQLK.A                                               | 1049.18088 | 2 | 2.53E-04 | 0.84  | 3.15    | -     | 921.3    |
| AHQ-6-3, 3722 - 3742        | K.ALELDSNLYR.I                                                | 1194.31920 | 2 | 1.17E-06 | 0.95  | 3.90    | -     | 1146.4   |
| AHQ-6-2, 3646               | K.ALELDSNLYR.I                                                | 1194.31920 | 2 | 4.45E-05 | 0.94  | 3.50    | -     | 1497.8   |
| AHQ-6-2, 3888               | K.ALELDSNLYR.I                                                | 1194.31920 | 2 | 1.84E-07 | 0.93  | 3.46    | -     | 1123.8   |
| AHQ-6-2, 3747               | K.ALELDSNLYR.I                                                | 1194.31920 | 2 | 1.72E-06 | 0.93  | 3.46    | -     | 1226.7   |
| AHQ-6-4, 3713               | K.ALELDSNLYR.I                                                | 1194.31920 | 2 | 8.34E-08 | 0.94  | 3.94    | -     | 1128.5   |
| AHQ-6-1, 3894               | K.ALELDSNLYR.I                                                | 1194.31920 | 2 | 1.43E-06 | 0.96  | 4.13    | -     | 1471.5   |
| AHQ-6-6, 3626               | K.ALELDSNLYR.I                                                | 1194.31920 | 2 | 1.79E-06 | 0.90  | 3.46    | -     | 1018.6   |

|                       |                                   |            |   |          |      |      |   |        |
|-----------------------|-----------------------------------|------------|---|----------|------|------|---|--------|
| AHQ-6-5, 3596 - 3659  | K.ALELDSNLYR.I                    | 1194.31920 | 2 | 1.84E-06 | 0.91 | 3.19 | - | 1164.8 |
| AHQ-6-4, 2176         | R.ALEQQVEEM*K.T                   | 1221.36320 | 2 | 3.32E-05 | 0.82 | 3.31 | - | 845.0  |
| AHQ-6-6, 2862         | R.ALEQQVEEMK.T                    | 1205.36380 | 2 | 5.48E-05 | 0.85 | 3.27 | - | 948.1  |
| AHQ-6-3, 2889 - 2941  | R.ALEQQVEEMK.T                    | 1205.36380 | 2 | 4.78E-05 | 0.79 | 2.91 | - | 915.0  |
| AHQ-6-2, 2950         | R.ALEQQVEEMK.T                    | 1205.36380 | 2 | 2.98E-05 | 0.91 | 3.81 | - | 1064.5 |
| AHQ-6-2, 2204         | R.ALEQQVEEM*K.T                   | 1221.36320 | 2 | 8.73E-05 | 0.81 | 3.31 | - | 826.4  |
| AHQ-6-5, 2863 - 2864  | R.ALEQQVEEMK.T                    | 1205.36380 | 2 | 6.18E-06 | 0.91 | 4.11 | - | 929.2  |
| AHQ-6-5, 5975 - 5976  | R.ALEQQVEEM*KTQLEEELEDELQATEDAK.L | 3165.38394 | 3 | 4.10E-11 | 0.97 | 6.57 | - | 1721.0 |
| AHQ-6-1, 6051         | R.ALEQQVEEM*KTQLEEELEDELQATEDAK.L | 3165.38394 | 3 | 2.05E-12 | 0.96 | 5.70 | - | 1717.0 |
| AHQ-6-6, 5836 - 5904  | R.ALEQQVEEM*KTQLEEELEDELQATEDAK.L | 3165.38394 | 3 | 9.37E-07 | 0.88 | 4.49 | - | 1088.1 |
| AHQ-6-3, 5976         | R.ALEQQVEEM*KTQLEEELEDELQATEDAK.L | 3165.38394 | 3 | 5.32E-10 | 0.97 | 6.66 | - | 1755.7 |
| AHQ-6-2, 6011 - 6066  | R.ALEQQVEEM*KTQLEEELEDELQATEDAK.L | 3165.38394 | 3 | 2.11E-14 | 0.97 | 6.35 | - | 1770.4 |
| AHQ-6-1, 5108         | K.ANLQIDQINTDLNLER.S              | 1871.04187 | 2 | 2.26E-04 | 0.94 | 4.54 | - | 1108.0 |
| AHQ-6-1, 4959         | K.ANLQIDQINTDLNLER.S              | 1871.04187 | 2 | 3.10E-09 | 0.98 | 5.27 | - | 1750.9 |
| AHQ-6-5, 4631 - 4701  | K.ANLQIDQINTDLNLER.S              | 1871.04187 | 2 | 1.86E-04 | 0.90 | 4.50 | - | 664.5  |
| AHQ-6-3, 4664         | K.ANLQIDQINTDLNLER.S              | 1871.04187 | 2 | 6.41E-05 | 0.94 | 4.64 | - | 730.8  |
| AHQ-6-7, 4634         | K.ANLQIDQINTDLNLER.S              | 1871.04187 | 2 | 6.11E-04 | 0.94 | 4.68 | - | 1093.3 |
| AHQ-6-2, 4972 - 5035  | K.ANLQIDQINTDLNLER.S              | 1871.04187 | 2 | 6.16E-08 | 0.98 | 5.82 | - | 1721.0 |
| AHQ-6-4, 4905 - 4972  | K.ANLQIDQINTDLNLER.S              | 1871.04187 | 2 | 3.12E-05 | 0.72 | 3.21 | - | 744.9  |
| AHQ-6-3, 4794 - 4862  | K.ANLQIDQINTDLNLER.S              | 1871.04187 | 2 | 1.73E-07 | 0.97 | 5.88 | - | 1282.1 |
| AHQ-6-2, 4806 - 4874  | K.ANLQIDQINTDLNLER.S              | 1871.04187 | 2 | 1.86E-04 | 0.96 | 4.21 | - | 1568.1 |
| AHQ-6-10, 4564        | K.ANLQIDQINTDLNLER.S              | 1871.04187 | 2 | 2.58E-06 | 0.96 | 4.46 | - | 1421.5 |
| AHQ-6-2, 4612 - 4690  | K.ANLQIDQINTDLNLER.S              | 1871.04187 | 2 | 8.30E-08 | 0.95 | 4.80 | - | 958.1  |
| AHQ-6-9, 4495         | K.ANLQIDQINTDLNLER.S              | 1871.04187 | 2 | 4.49E-04 | 0.80 | 3.15 | - | 729.2  |
| AHQ-6-2, 4764         | K.ANLQIDQINTDLNLER.S              | 1871.04187 | 2 | 4.27E-05 | 0.91 | 4.12 | - | 767.7  |
| AHQ-6-3, 5014         | K.ANLQIDQINTDLNLER.S              | 1871.04187 | 2 | 2.95E-08 | 0.94 | 4.67 | - | 1299.3 |
| AHQ-6-6, 4788         | K.ANLQIDQINTDLNLER.S              | 1871.04187 | 2 | 1.76E-08 | 0.98 | 5.59 | - | 1712.7 |
| AHQ-6-8, 4630         | K.ANLQIDQINTDLNLER.S              | 1871.04187 | 2 | 1.19E-06 | 0.90 | 3.88 | - | 706.7  |
| AHQ-6-3, 2468         | K.ASITALEAK.I                     | 904.04321  | 2 | 3.83E-06 | 0.93 | 3.49 | - | 1112.4 |
| AHQ-6-6, 2396         | K.ASITALEAK.I                     | 904.04321  | 2 | 6.73E-04 | 0.83 | 2.94 | - | 696.9  |
| AHQ-6-5, 2387         | K.ASITALEAK.I                     | 904.04321  | 2 | 2.65E-06 | 0.91 | 2.68 | - | 1042.1 |
| AHQ-6-4, 2423         | K.ASITALEAK.I                     | 904.04321  | 2 | 4.01E-04 | 0.92 | 3.16 | - | 1086.6 |
| AHQ-6-2, 2464 - 2466  | K.ASITALEAK.I                     | 904.04321  | 2 | 8.20E-07 | 0.94 | 3.48 | - | 1153.5 |
| AHQ-6-3, 2106 - 2178  | R.ASREEILAOQAK.E                  | 1216.36955 | 2 | 9.81E-06 | 0.93 | 3.69 | - | 1383.0 |
| AHQ-6-4, 2093 - 2136  | R.ASREEILAOQAK.E                  | 1216.36955 | 2 | 4.06E-06 | 0.92 | 3.41 | - | 1329.6 |
| AHQ-6-2, 2170         | R.ASREEILAOQAK.E                  | 1216.36955 | 2 | 6.57E-04 | 0.91 | 3.24 | - | 1422.6 |
| AHQ-6-6, 3076         | R.DELADEIANSSGK.G                 | 1349.38323 | 2 | 1.21E-05 | 0.96 | 3.99 | - | 1647.2 |
| AHQ-6-2, 2783         | R.DELADEIANSSGK.G                 | 1349.38323 | 2 | 3.55E-06 | 0.91 | 3.31 | - | 1158.6 |
| AHQ-6-2, 3159         | R.DELADEIANSSGK.G                 | 1349.38323 | 2 | 9.27E-08 | 0.95 | 4.04 | - | 1376.1 |
| AHQ-6-1, 6307         | K.DFSALESQLODQTQELLQOENR.Q        | 2494.61059 | 3 | 1.62E-05 | 0.94 | 4.53 | - | 1290.7 |
| AHQ-6-3, 6244 - 6245  | K.DFSALESQLODQTQELLQOENR.Q        | 2494.61059 | 2 | 1.26E-06 | 0.56 | 2.57 | - | 652.3  |
| AHQ-6-4, 5972 - 6032  | K.DFSALESQLODQTQELLQOENR.QK.L     | 2750.91328 | 3 | 1.38E-06 | 0.87 | 3.93 | - | 842.8  |
| AHQ-6-2, 2236 - 2252  | K.DLEAHIDSANK.N                   | 1213.27938 | 2 | 6.60E-08 | 0.97 | 4.27 | - | 2106.6 |
| AHQ-6-3, 2236         | K.DLEAHIDSANK.N                   | 1213.27938 | 2 | 3.04E-06 | 0.97 | 4.04 | - | 2159.9 |
| AHQ-6-4, 2191         | K.DLEAHIDSANK.N                   | 1213.27938 | 2 | 7.82E-08 | 0.98 | 4.49 | - | 2726.8 |
| AHQ-6-5, 2168         | K.DLEAHIDSANK.N                   | 1213.27938 | 2 | 7.85E-08 | 0.96 | 3.89 | - | 1569.4 |
| AHQ-6-3, 6536         | R.DLGEELAEALKTELEDTLDSTAAQQELR.S  | 3019.21860 | 3 | 2.13E-08 | 0.97 | 5.39 | - | 2239.0 |
| AHQ-6-2, 6578 - 6643  | R.DLGEELAEALKTELEDTLDSTAAQQELR.S  | 3019.21860 | 3 | 8.84E-09 | 0.97 | 5.26 | - | 2050.5 |
| AHQ-6-1, 6582         | R.DLGEELAEALKTELEDTLDSTAAQQELR.S  | 3019.21860 | 3 | 3.77E-09 | 0.97 | 6.11 | - | 1783.0 |
| AHQ-6-6, 6479         | R.DLGEELAEALKTELEDTLDSTAAQQELR.S  | 3019.21860 | 3 | 3.08E-06 | 0.91 | 3.69 | - | 1546.1 |
| AHQ-6-4, 6639         | R.DLGEELAEALKTELEDTLDSTAAQQELR.S  | 3019.21860 | 3 | 1.78E-05 | 0.91 | 4.33 | - | 1381.4 |
| AHQ-6-5, 2889         | K.DVLLQVDDERR.N                   | 1358.48286 | 2 | 5.20E-04 | 0.74 | 3.07 | - | 657.0  |
| AHQ-6-2, 2972         | K.DVLLQVDDERR.N                   | 1358.48286 | 2 | 3.46E-04 | 0.74 | 3.00 | - | 778.8  |
| AHQ-6-11, 2237        | R.ELEDATETADAM*NR.E               | 1562.62946 | 2 | 4.18E-04 | 0.69 | 2.55 | - | 713.7  |
| AHQ-6-4, 2823         | R.ELEDATETADAMNR.E                | 1566.63006 | 2 | 1.33E-07 | 0.92 | 3.80 | - | 1100.5 |
| AHQ-6-11, 2785        | R.ELEDATETADAMNR.E                | 1566.63006 | 2 | 2.22E-05 | 0.95 | 3.60 | - | 1896.0 |
| AHQ-6-2, 2832 - 2854  | R.ELEDATETADAMNR.E                | 1566.63006 | 2 | 5.76E-08 | 0.90 | 3.43 | - | 916.1  |
| AHQ-6-12, 2831 - 2835 | R.ELEDATETADAMNR.E                | 1566.63006 | 2 | 6.74E-06 | 0.85 | 2.97 | - | 821.0  |
| AHQ-6-5, 2787         | R.ELEDATETADAMNR.E                | 1566.63006 | 2 | 4.46E-07 | 0.85 | 3.21 | - | 792.9  |
| AHQ-6-6, 5390         | R.ELESQISELQEDLESER.A             | 2035.10956 | 2 | 2.56E-06 | 0.94 | 4.29 | - | 982.4  |
| AHQ-6-1, 5467 - 5535  | R.ELESQISELQEDLESER.A             | 2035.10956 | 2 | 1.42E-06 | 0.91 | 4.21 | - | 857.9  |
| AHQ-6-4, 5183         | R.ELESQISELQEDLESER.A             | 2035.10956 | 2 | 1.44E-04 | 0.80 | 3.51 | - | 621.6  |
| AHQ-6-2, 5172         | R.ELESQISELQEDLESER.A             | 2035.10956 | 2 | 4.67E-11 | 0.94 | 4.34 | - | 846.6  |
| AHQ-6-4, 5467 - 5527  | R.ELESQISELQEDLESER.A             | 2035.10956 | 2 | 8.03E-09 | 0.95 | 4.74 | - | 1235.2 |
| AHQ-6-5, 5447         | R.ELESQISELQEDLESER.A             | 2035.10956 | 2 | 1.74E-09 | 0.90 | 3.94 | - | 843.5  |
| AHQ-6-7, 5242         | R.ELESQISELQEDLESER.A             | 2035.10956 | 2 | 2.87E-05 | 0.88 | 3.90 | - | 723.3  |
| AHQ-6-3, 5476         | R.ELESQISELQEDLESER.A             | 2035.10956 | 2 | 6.47E-05 | 0.94 | 4.55 | - | 818.2  |
| AHQ-6-3, 5460         | R.ELESQISELQEDLESER.A             | 2035.10956 | 3 | 3.88E-09 | 0.98 | 6.02 | - | 2284.3 |
| AHQ-6-4, 5532         | R.ELESQISELQEDLESER.A             | 2035.10956 | 3 | 2.13E-08 | 0.98 | 6.32 | - | 2082.7 |
| AHQ-6-2, 5491         | R.ELESQISELQEDLESER.A             | 2035.10956 | 2 | 1.43E-06 | 0.96 | 5.32 | - | 1037.9 |
| AHQ-6-3, 5021         | R.ELESQISELQEDLESER.A             | 2035.10956 | 2 | 6.89E-07 | 0.90 | 3.97 | - | 871.4  |
| AHQ-6-4, 2251 - 2253  | R.EMEAELDERK.Q                    | 1379.47597 | 2 | 1.45E-06 | 0.92 | 3.25 | - | 1300.2 |
| AHQ-6-2, 4346         | K.EQADFAIALAK.A                   | 1306.44632 | 1 | 5.66E-04 | 0.35 | 2.82 | - | 272.9  |
| AHQ-6-2, 4336 - 4398  | K.EQADFAIALAK.A                   | 1306.44632 | 2 | 1.70E-04 | 0.75 | 2.67 | - | 546.7  |
| AHQ-6-3, 2564         | R.EQEVNLIK.K                      | 973.10554  | 1 | 1.25E-04 | 0.10 | 1.91 | - | 145.4  |
| AHQ-6-2, 2416 - 2483  | R.EQLEEEEEAKHNLEK.Q               | 1855.93770 | 2 | 9.44E-06 | 0.90 | 3.98 | - | 820.0  |
| AHQ-6-3, 2492         | R.EQLEEEEEAKHNLEK.Q               | 1855.93770 | 2 | 9.84E-06 | 0.89 | 4.05 | - | 722.3  |
| AHQ-6-5, 2428         | R.EQLEEEEEAKHNLEK.Q               | 1855.93770 | 2 | 8.06E-05 | 0.86 | 4.09 | - | 631.9  |
| AHQ-6-4, 2451         | R.EQLEEEEEAKHNLEK.Q               | 1855.93770 | 2 | 4.40E-07 | 0.84 | 3.72 | - | 669.2  |
| AHQ-6-2, 3408 - 3471  | R.FLSNGHVITIPGQDDK.D              | 1641.80946 | 2 | 2.02E-05 | 0.95 | 4.56 | - | 1071.6 |
| AHQ-6-2, 2994         | K.HEAMITDLEER.L                   | 1344.47646 | 2 | 2.88E-06 | 0.96 | 3.70 | - | 1379.2 |
| AHQ-6-4, 2483         | K.HEAMITDLEER.L                   | 1360.47586 | 2 | 8.46E-04 | 0.96 | 3.78 | - | 1580.3 |
| AHQ-6-2, 2526         | K.HEAMITDLEER.L                   | 1360.47586 | 2 | 1.14E-04 | 0.96 | 4.11 | - | 1574.4 |
| AHQ-6-6, 2907         | K.HEAMITDLEER.L                   | 1344.47646 | 2 | 1.69E-05 | 0.90 | 2.84 | - | 1122.5 |
| AHQ-6-3, 2993         | K.HEAMITDLEER.L                   | 1344.47646 | 2 | 4.00E-07 | 0.96 | 3.83 | - | 1347.8 |
| AHQ-6-3, 2521         | K.HEAMITDLEER.L                   | 1360.47586 | 2 | 7.42E-05 | 0.97 | 4.07 | - | 2081.7 |
| AHQ-6-2, 3655         | R.HEMPPHIYAITDTAYR.S              | 1916.14944 | 3 | 2.09E-08 | 0.98 | 4.85 | - | 2605.0 |
| AHQ-6-2, 3399         | R.HEMPPHIYAITDTAYR.S              | 1932.14884 | 2 | 3.07E-05 | 0.75 | 2.65 | - | 588.6  |
| AHQ-6-1, 3595         | R.HEMPPHIYAITDTAYR.S              | 1932.14884 | 3 | 4.71E-07 | 0.96 | 4.74 | - | 1659.6 |
| AHQ-6-5, 3289         | R.HEMPPHIYAITDTAYR.S              | 1932.14884 | 3 | 4.23E-04 | 0.96 | 4.10 | - | 1984.2 |
| AHQ-6-2, 3651         | R.HEMPPHIYAITDTAYR.S              | 1916.14944 | 2 | 8.49E-08 | 0.89 | 3.60 | - | 761.0  |
| AHQ-6-2, 3326 - 3404  | R.HEMPPHIYAITDTAYR.S              | 1932.14884 | 3 | 8.36E-04 | 0.75 | 3.07 | - | 865.9  |
| AHQ-6-2, 4467         | K.HSQAVEELAEQLEQTKR.R             | 1840.96940 | 3 | 2.97E-07 | 0.96 | 5.33 | - | 1784.2 |
| AHQ-6-1, 4595 - 4654  | K.HSQAVEELAEQLEQTKR.R             | 1840.96940 | 2 | 1.10E-04 | 0.97 | 4.43 | - | 1922.4 |
| AHQ-6-1, 4602         | K.HSQAVEELAEQLEQTKR.R             | 1840.96940 | 3 | 4.21E-06 | 0.97 | 5.25 | - | 2046.0 |
| AHQ-6-2, 4466         | K.HSQAVEELAEQLEQTKR.R             | 1840.96940 | 2 | 1.39E-11 | 0.98 | 6.42 | - | 2199.3 |
| AHQ-6-3, 4444 - 4446  | K.HSQAVEELAEQLEQTKR.R             | 1840.96940 | 3 | 2.56E-06 | 0.97 | 6.07 | - | 2033.3 |
| AHQ-6-4, 4453         | K.HSQAVEELAEQLEQTKR.R             | 1840.96940 | 3 | 4.20E-05 | 0.89 | 3.91 | - | 1291.2 |
| AHQ-6-3, 4440 - 4504  | K.HSQAVEELAEQLEQTKR.R             | 1840.96940 | 2 | 2.94E-08 | 0.98 | 5.80 | - | 1755.0 |
| AHQ-6-4, 4439         | K.HSQAVEELAEQLEQTKR.R             | 1840.96940 | 2 | 2.46E-08 | 0.98 | 5.65 | - | 1922.3 |
| AHQ-6-2, 4150         | K.HSQAVEELAEQLEQTKR.V             | 1997.15575 | 2 | 3.19E-11 | 0.98 | 5.61 | - | 2050.8 |
| AHQ-6-2, 4147         | K.HSQAVEELAEQLEQTKR.V             | 1997.15575 | 2 | 2.30E-09 | 0.98 | 6.10 | - | 1846.7 |
| AHQ-6-3, 4121         | K.HSQAVEELAEQLEQTKR.V             | 1997.15575 | 2 | 2.52E-08 | 0.99 | 6.61 | - | 3036.7 |
| AHQ-6-3, 4120         | K.HSQAVEELAEQLEQTKR.V             | 1997.15575 | 2 | 4.13E-11 | 0.98 | 6.55 | - | 1561.4 |
| AHQ-6-6, 4022         | K.HSQAVEELAEQLEQTKR.V             | 1997.15575 | 3 | 1.23E-05 | 0.97 | 6.17 | - | 1248.6 |
| AHQ-6-4, 4117         | K.HSQAVEELAEQLEQTKR.V             | 1997.15575 | 2 | 1.80E-12 | 0.98 | 6.06 | - | 2421.3 |
| AHQ-6-1, 4299         | K.HSQAVEELAEQLEQTKR.V             | 1997.15575 | 3 | 4.77E-08 | 0.97 | 6.15 | - | 1461.0 |



|                      |                             |            |   |          |      |      |   |        |
|----------------------|-----------------------------|------------|---|----------|------|------|---|--------|
| AHQ-6-4, 4111        | K.HSQAVEELAQLQEQTKR.V       | 1997.15575 | 3 | 2.02E-06 | 0.97 | 6.11 | - | 1253.8 |
| AHQ-6-5, 4047        | K.HSQAVEELAQLQEQTKR.V       | 1997.15575 | 3 | 4.50E-12 | 0.96 | 5.39 | - | 1423.5 |
| AHQ-6-3, 3681 - 3705 | R.IAEFTTNLTETEEEK.S         | 1654.75371 | 2 | 3.38E-07 | 0.88 | 3.47 | - | 1091.3 |
| AHQ-6-2, 3682 - 3746 | R.IAEFTTNLTETEEEK.S         | 1654.75371 | 2 | 1.07E-09 | 0.97 | 5.23 | - | 2077.0 |
| AHQ-6-13-, 3672      | R.IAEFTTNLTETEEEK.S         | 1654.75371 | 2 | 5.83E-08 | 0.93 | 3.55 | - | 1397.7 |
| AHQ-6-4, 3740 - 3748 | R.IAEFTTNLTETEEEK.S         | 1654.75371 | 2 | 3.97E-06 | 0.97 | 4.66 | - | 2487.4 |
| AHQ-6-1, 3847        | R.IAEFTTNLTETEEEK.S         | 1654.75371 | 2 | 1.67E-05 | 0.97 | 4.47 | - | 2132.2 |
| AHQ-6-4, 3653 - 3671 | R.IAEFTTNLTETEEEK.S         | 1654.75371 | 2 | 2.84E-05 | 0.96 | 4.27 | - | 1881.6 |
| AHQ-6-2, 3794 - 3850 | R.IAEFTTNLTETEEEK.S         | 1654.75371 | 2 | 8.79E-09 | 0.91 | 3.64 | - | 1294.4 |
| AHQ-6-6, 3582 - 3640 | R.IAEFTTNLTETEEEK.S         | 1654.75371 | 2 | 3.22E-06 | 0.94 | 4.05 | - | 1340.3 |
| AHQ-6-2, 3562 - 3622 | R.IAEFTTNLTETEEEK.S         | 1654.75371 | 2 | 1.22E-05 | 0.77 | 2.81 | - | 815.4  |
| AHQ-6-3, 3594 - 3652 | R.IAEFTTNLTETEEEK.S         | 1654.75371 | 2 | 2.07E-07 | 0.96 | 4.18 | - | 1663.5 |
| AHQ-6-2, 3910        | R.IAEFTTNLTETEEEK.S         | 1654.75371 | 2 | 4.82E-07 | 0.95 | 4.11 | - | 1593.4 |
| AHQ-6-5, 3619 - 3621 | R.IAEFTTNLTETEEEK.S         | 1654.75371 | 2 | 7.94E-09 | 0.96 | 4.84 | - | 1891.0 |
| AHQ-6-3, 3770        | R.IAEFTTNLTETEEEK.S         | 1654.75371 | 2 | 9.58E-06 | 0.82 | 3.31 | - | 864.2  |
| AHQ-6-3, 3882 - 3893 | R.IAEFTTNLTETEEEK.S         | 1654.75371 | 2 | 1.32E-09 | 0.97 | 4.67 | - | 2023.3 |
| AHQ-6-7, 3494        | R.IAEFTTNLTETEEEK.S         | 1654.75371 | 2 | 1.38E-04 | 0.80 | 2.87 | - | 1049.9 |
| AHQ-6-3, 4944        | R.IAQLEEEEEEQGNTELINDR.L    | 2473.58969 | 3 | 3.04E-04 | 0.54 | 3.17 | - | 569.0  |
| AHQ-6-2, 5242        | R.IAQLEEEEEEQGNTELINDR.L.K  | 2714.92085 | 2 | 1.48E-04 | 0.91 | 4.54 | - | 776.9  |
| AHQ-6-1, 3552        | K.IAQLEEQDNETK.E            | 1531.64695 | 2 | 4.93E-09 | 0.96 | 4.48 | - | 1517.3 |
| AHQ-6-4, 3335 - 3404 | K.IAQLEEQDNETK.E            | 1531.64695 | 2 | 1.51E-04 | 0.94 | 3.46 | - | 1585.9 |
| AHQ-6-2, 3748        | K.IAQLEEQDNETK.E            | 1531.64695 | 2 | 1.05E-07 | 0.92 | 3.99 | - | 966.5  |
| AHQ-6-2, 2963        | K.IAQLEEQDNETK.E            | 1531.64695 | 2 | 9.39E-04 | 0.96 | 4.50 | - | 1393.1 |
| AHQ-6-5, 3284        | K.IAQLEEQDNETK.E            | 1531.64695 | 2 | 1.32E-07 | 0.97 | 4.67 | - | 1638.2 |
| AHQ-6-3, 3718        | K.IAQLEEQDNETK.E            | 1531.64695 | 2 | 3.27E-05 | 0.83 | 3.29 | - | 834.2  |
| AHQ-6-6, 3051        | K.IAQLEEQDNETK.E            | 1531.64695 | 2 | 1.93E-06 | 0.95 | 3.90 | - | 1564.3 |
| AHQ-6-11, 3259       | K.IAQLEEQDNETK.E            | 1531.64695 | 2 | 1.72E-05 | 0.82 | 2.59 | - | 972.1  |
| AHQ-6-2, 3127        | K.IAQLEEQDNETK.E            | 1531.64695 | 2 | 2.53E-07 | 0.90 | 3.77 | - | 977.1  |
| AHQ-6-7, 3195        | K.IAQLEEQDNETK.E            | 1531.64695 | 2 | 1.88E-04 | 0.89 | 3.83 | - | 848.7  |
| AHQ-6-12, 3316       | K.IAQLEEQDNETK.E            | 1531.64695 | 2 | 1.47E-06 | 0.94 | 3.40 | - | 1374.3 |
| AHQ-6-2, 3480        | K.IAQLEEQDNETK.E            | 1531.64695 | 2 | 3.89E-10 | 0.93 | 3.83 | - | 1206.8 |
| AHQ-6-2, 3378 - 3382 | K.IAQLEEQDNETK.E            | 1531.64695 | 2 | 2.17E-07 | 0.97 | 4.41 | - | 1693.9 |
| AHQ-6-3, 3465        | K.IAQLEEQDNETK.E            | 1531.64695 | 2 | 1.84E-07 | 0.96 | 4.53 | - | 1412.5 |
| AHQ-6-3, 3360        | K.IAQLEEQDNETK.E            | 1531.64695 | 2 | 7.50E-08 | 0.96 | 4.14 | - | 1570.6 |
| AHQ-6-3, 3136        | K.IAQLEEQDNETK.E            | 1531.64695 | 2 | 1.94E-07 | 0.97 | 4.81 | - | 1689.5 |
| AHQ-6-6, 3268        | K.IAQLEEQDNETK.E            | 1531.64695 | 2 | 1.59E-08 | 0.95 | 3.97 | - | 1370.3 |
| AHQ-6-2, 3136        | K.IAQLEEQDNETKER.Q          | 1816.94784 | 2 | 2.79E-05 | 0.76 | 3.46 | - | 594.1  |
| AHQ-6-2, 3514 - 3584 | K.IAQLEEQDNETKER.Q          | 1816.94784 | 2 | 2.04E-06 | 0.86 | 3.67 | - | 963.3  |
| AHQ-6-3, 3493        | K.IAQLEEQDNETKER.Q          | 1816.94784 | 2 | 8.05E-07 | 0.84 | 3.76 | - | 655.5  |
| AHQ-6-14-, 5930      | R.IIGLDQVAGMSETALPGAFK.T    | 2019.35101 | 2 | 8.74E-04 | 0.85 | 3.33 | - | 697.7  |
| AHQ-6-3, 5753        | R.IIGLDQVAGMSETALPGAFK.T    | 2019.35101 | 2 | 1.61E-04 | 0.54 | 2.77 | - | 467.0  |
| AHQ-6-6, 5895 - 5958 | R.IIGLDQVAGMSETALPGAFK.T    | 2019.35101 | 2 | 4.77E-04 | 0.91 | 4.22 | - | 823.8  |
| AHQ-6-2, 5566        | R.IIGLDQVAGMSETALPGAFK.T    | 2019.35101 | 2 | 6.78E-05 | 0.96 | 5.13 | - | 1168.2 |
| AHQ-6-5, 5948 - 6027 | R.IIGLDQVAGMSETALPGAFK.T    | 2019.35101 | 2 | 8.51E-07 | 0.96 | 5.31 | - | 1063.0 |
| AHQ-6-4, 6115        | R.IIGLDQVAGMSETALPGAFK.T    | 2019.35101 | 2 | 2.90E-04 | 0.96 | 5.04 | - | 1117.2 |
| AHQ-6-2, 6004 - 6062 | R.IIGLDQVAGMSETALPGAFK.T    | 2019.35101 | 2 | 4.15E-05 | 0.83 | 3.82 | - | 541.3  |
| AHQ-6-2, 5028        | R.IIGLDQVAGM*SETALPGAFK.T   | 2035.35041 | 2 | 9.12E-06 | 0.95 | 4.78 | - | 1036.2 |
| AHQ-6-3, 5341 - 5397 | R.IIGLDQVAGM*SETALPGAFK.T   | 2035.35041 | 3 | 1.60E-04 | 0.84 | 3.92 | - | 886.2  |
| AHQ-6-6, 4423        | R.IM*GIPPEEQMGLLR.V         | 1632.92766 | 2 | 6.40E-05 | 0.86 | 3.38 | - | 590.9  |
| AHQ-6-2, 4480 - 4543 | R.IM*GIPPEEQM*GLLR.V        | 1632.92766 | 2 | 7.74E-04 | 0.72 | 3.46 | - | 539.6  |
| AHQ-6-5, 4408 - 4467 | R.IM*GIPPEEQM*GLLR.V        | 1632.92766 | 2 | 8.01E-04 | 0.54 | 2.76 | - | 383.2  |
| AHQ-6-2, 3899 - 3918 | R.IM*GIPPEEQM*GLLR.V        | 1648.92706 | 2 | 4.34E-04 | 0.89 | 3.73 | - | 662.4  |
| AHQ-6-5, 3832        | R.IM*GIPPEEQM*GLLR.V        | 1648.92706 | 2 | 6.20E-05 | 0.86 | 3.45 | - | 539.4  |
| AHQ-6-2, 5060 - 5066 | R.IMGIPPEEQMGLLR.V          | 1616.92826 | 2 | 3.31E-05 | 0.67 | 3.12 | - | 375.3  |
| AHQ-6-5, 4996        | R.IMGIPPEEQMGLLR.V          | 1616.92826 | 2 | 3.60E-07 | 0.58 | 2.80 | - | 336.3  |
| AHQ-6-6, 3799 - 3800 | R.IM*GIPPEEQM*GLLR.V        | 1648.92706 | 2 | 7.60E-04 | 0.94 | 4.13 | - | 885.8  |
| AHQ-6-2, 6538        | R.INFVDVYVIGANIETYLLEK.S    | 2386.68474 | 3 | 6.31E-04 | 0.94 | 4.07 | - | 1955.4 |
| AHQ-6-3, 5500        | K.IRELESQISELQEDLESER.A     | 2304.45416 | 3 | 3.75E-09 | 0.98 | 6.21 | - | 2043.2 |
| AHQ-6-2, 5542        | K.IRELESQISELQEDLESER.A     | 2304.45416 | 2 | 2.53E-06 | 0.97 | 6.00 | - | 1035.0 |
| AHQ-6-1, 5594 - 5600 | K.IRELESQISELQEDLESER.A     | 2304.45416 | 2 | 1.50E-05 | 0.98 | 6.74 | - | 1314.1 |
| AHQ-6-4, 5557 - 5567 | K.IRELESQISELQEDLESER.A     | 2304.45416 | 2 | 8.75E-07 | 0.98 | 7.11 | - | 1975.4 |
| AHQ-6-1, 5536 - 5591 | K.IRELESQISELQEDLESER.A     | 2304.45416 | 3 | 3.87E-07 | 0.95 | 4.61 | - | 1643.0 |
| AHQ-6-3, 5501        | K.IRELESQISELQEDLESER.A     | 2304.45416 | 2 | 3.97E-07 | 0.98 | 6.37 | - | 1319.0 |
| AHQ-6-4, 5563        | K.IRELESQISELQEDLESER.A     | 2304.45416 | 3 | 1.73E-04 | 0.97 | 5.58 | - | 1623.6 |
| AHQ-6-2, 4948        | K.ITDVIIGFQACCR.G           | 1555.80136 | 2 | 6.75E-04 | 0.79 | 2.77 | - | 772.9  |
| AHQ-6-2, 5266 - 5288 | K.ITDVIIGFQACCR.G           | 1555.80136 | 2 | 6.40E-04 | 0.73 | 3.12 | - | 802.3  |
| AHQ-6-2, 4458        | K.KANLQIQDINTDLNLER.S       | 1999.21478 | 3 | 7.64E-04 | 0.89 | 4.36 | - | 851.4  |
| AHQ-6-4, 4463        | K.KANLQIQDINTDLNLER.S       | 1999.21478 | 2 | 1.80E-05 | 0.88 | 3.81 | - | 747.2  |
| AHQ-6-6, 4319        | K.KANLQIQDINTDLNLER.S       | 1999.21478 | 2 | 5.98E-05 | 0.93 | 4.98 | - | 932.4  |
| AHQ-6-3, 4262        | K.KANLQIQDINTDLNLER.S       | 1999.21478 | 2 | 1.96E-09 | 0.97 | 4.84 | - | 1468.9 |
| AHQ-6-2, 4642 - 4691 | K.KANLQIQDINTDLNLER.S       | 1999.21478 | 3 | 2.14E-05 | 0.88 | 4.19 | - | 759.7  |
| AHQ-6-6, 2652        | R.KKVEAQLQELQVK.F           | 1541.81761 | 2 | 1.08E-07 | 0.97 | 4.63 | - | 2130.9 |
| AHQ-6-5, 2651 - 2656 | R.KKVEAQLQELQVK.F           | 1541.81761 | 2 | 6.83E-08 | 0.97 | 5.12 | - | 1689.5 |
| AHQ-6-3, 2716 - 2781 | R.KKVEAQLQELQVK.F           | 1541.81761 | 2 | 1.27E-06 | 0.98 | 5.50 | - | 2076.4 |
| AHQ-6-4, 2679        | R.KKVEAQLQELQVK.F           | 1541.81761 | 2 | 3.64E-06 | 0.96 | 4.72 | - | 1367.3 |
| AHQ-6-4, 3513        | K.KLEEEQIILEDQCNCK.L        | 1891.08992 | 2 | 1.63E-12 | 0.98 | 5.65 | - | 1589.1 |
| AHQ-6-3, 3542        | K.KLEEEQIILEDQCNCK.L        | 1891.08992 | 3 | 7.97E-06 | 0.90 | 4.42 | - | 1176.6 |
| AHQ-6-2, 3479 - 3560 | K.KLEEEQIILEDQCNCK.L        | 1891.08992 | 3 | 3.88E-08 | 0.93 | 4.86 | - | 1277.7 |
| AHQ-6-2, 3558        | K.KLEEEQIILEDQCNCK.L        | 1891.08992 | 2 | 1.07E-06 | 0.98 | 6.08 | - | 2397.2 |
| AHQ-6-2, 3440 - 3496 | K.KLEEEQIILEDQCNCK.L        | 1891.08992 | 2 | 2.79E-10 | 0.98 | 5.49 | - | 1884.0 |
| AHQ-6-3, 3457 - 3525 | K.KLEEEQIILEDQCNCK.L        | 1891.08992 | 2 | 3.33E-10 | 0.98 | 5.97 | - | 2157.1 |
| AHQ-6-2, 5771        | R.KLEGDSTLSDQIAELQAQIAELK.M | 2616.86032 | 3 | 2.05E-07 | 0.92 | 4.69 | - | 1398.6 |
| AHQ-6-3, 5736        | R.KLEGDSTLSDQIAELQAQIAELK.M | 2616.86032 | 3 | 2.60E-06 | 0.93 | 4.73 | - | 1387.0 |
| AHQ-6-1, 6446        | R.KLEGDSTLSDQIAELQAQIAELK.M | 2616.86032 | 3 | 9.10E-12 | 0.96 | 6.14 | - | 1106.8 |
| AHQ-6-1, 6447        | R.KLEGDSTLSDQIAELQAQIAELK.M | 2616.86032 | 2 | 1.12E-05 | 0.73 | 2.77 | - | 875.6  |
| AHQ-6-4, 6487        | R.KLEGDSTLSDQIAELQAQIAELK.M | 2616.86032 | 3 | 5.16E-08 | 0.88 | 4.54 | - | 878.2  |
| AHQ-6-2, 2926        | K.KLVVVPSPDK.S              | 1072.28194 | 2 | 1.50E-05 | 0.92 | 3.48 | - | 1055.1 |
| AHQ-6-2, 3235        | K.KM*EDSVGCLETAEEVKR.R      | 1843.02390 | 2 | 1.29E-05 | 0.92 | 3.82 | - | 972.7  |
| AHQ-6-2, 3343        | K.KMEDSVGCLETAEEVKR.K       | 1983.21085 | 3 | 1.70E-04 | 0.94 | 4.87 | - | 1458.0 |
| AHQ-6-2, 2990        | K.KM*EDSVGCLETAEEVKR.K      | 1999.21025 | 3 | 7.50E-08 | 0.96 | 4.84 | - | 1685.7 |
| AHQ-6-2, 2992        | K.KM*EDSVGCLETAEEVKR.K      | 1999.21025 | 2 | 7.22E-06 | 0.60 | 3.02 | - | 449.6  |
| AHQ-6-3, 2986        | K.KM*EDSVGCLETAEEVKR.K      | 1999.21025 | 2 | 3.05E-07 | 0.71 | 3.33 | - | 498.8  |
| AHQ-6-5, 3233        | K.KMEDSVGCLETAEEVKR.K       | 1983.21085 | 3 | 3.39E-08 | 0.92 | 4.66 | - | 992.6  |
| AHQ-6-2, 4726        | K.KM*QQNIQELEELEEEESAR.Q    | 2478.63294 | 2 | 1.75E-07 | 0.56 | 3.02 | - | 257.4  |
| AHQ-6-2, 4712        | K.KM*QQNIQELEELEEEESAR.Q    | 2478.63294 | 3 | 5.42E-04 | 0.75 | 3.50 | - | 767.9  |
| AHQ-6-4, 4715        | K.KM*QQNIQELEELEEEESAR.Q    | 2478.63294 | 3 | 2.62E-06 | 0.78 | 3.82 | - | 923.5  |
| AHQ-6-2, 4086        | K.KQLEEEIICHDLER.V          | 1771.93036 | 3 | 2.75E-06 | 0.97 | 5.47 | - | 2076.2 |
| AHQ-6-1, 4240        | K.KQLEEEIICHDLER.V          | 1771.93036 | 3 | 9.14E-06 | 0.95 | 4.91 | - | 1657.8 |
| AHQ-6-1, 4238 - 4314 | K.KQLEEEIICHDLER.V          | 1771.93036 | 2 | 8.50E-09 | 0.97 | 5.33 | - | 2032.4 |
| AHQ-6-5, 4009        | K.KQLEEEIICHDLER.V          | 1771.93036 | 3 | 6.74E-04 | 0.96 | 5.39 | - | 1358.2 |
| AHQ-6-2, 4082 - 4084 | K.KQLEEEIICHDLER.V          | 1771.93036 | 2 | 7.09E-04 | 0.97 | 4.97 | - | 1925.2 |
| AHQ-6-2, 3051        | K.KVEAQLQELQVK.F            | 1413.64470 | 3 | 3.11E-04 | 0.90 | 4.16 | - | 1284.6 |
| AHQ-6-4, 2995        | K.KVEAQLQELQVK.F            | 1413.64470 | 2 | 7.07E-07 | 0.94 | 4.55 | - | 1112.4 |
| AHQ-6-5, 2936 - 2955 | K.KVEAQLQELQVK.F            | 1413.64470 | 2 | 4.27E-06 | 0.94 | 4.05 | - | 1337.3 |
| AHQ-6-2, 3028        | K.KVEAQLQELQVK.F            | 1413.64470 | 2 | 6.95E-07 | 0.94 | 4.53 | - | 1052.2 |
| AHQ-6-1, 3891        | K.LEEEQIILEDQCNCK.L         | 1762.91700 | 2 | 2.04E-08 | 0.94 | 3.93 | - | 1206.0 |
| AHQ-6-4, 3732 - 3797 | K.LEEEQIILEDQCNCK.L         | 1762.91700 | 2 | 3.34E-05 | 0.95 | 4.57 | - | 1031.2 |

|                       |                           |            |   |          |      |      |   |        |
|-----------------------|---------------------------|------------|---|----------|------|------|---|--------|
| AHQ-6-2, 3814         | K.LEEEQIILEDQNK.L         | 1762.91700 | 2 | 1.34E-08 | 0.98 | 5.68 | - | 1597.9 |
| AHQ-6-5, 3725         | K.LEEEQIILEDQNK.L         | 1762.91700 | 2 | 1.77E-12 | 0.92 | 3.87 | - | 903.7  |
| AHQ-6-4, 2641 - 2645  | R.LEVINLQAM*K.A           | 1062.26570 | 2 | 3.25E-04 | 0.88 | 3.60 | - | 722.2  |
| AHQ-6-3, 3545         | R.LEVINLQAM*K.A           | 1046.26630 | 2 | 4.89E-04 | 0.86 | 3.29 | - | 735.9  |
| AHQ-6-2, 2674 - 2678  | R.LEVINLQAM*K.A           | 1062.26570 | 2 | 2.08E-04 | 0.93 | 3.72 | - | 895.7  |
| AHQ-6-3, 2685         | R.LEVINLQAM*K.A           | 1062.26570 | 2 | 4.72E-05 | 0.87 | 3.27 | - | 745.8  |
| AHQ-6-2, 3468 - 3527  | K.LKDVLLQVDDER.R          | 1443.62767 | 2 | 6.63E-07 | 0.93 | 3.80 | - | 1210.8 |
| AHQ-6-3, 3510         | K.LKDVLLQVDDER.R          | 1443.62767 | 2 | 2.14E-07 | 0.92 | 3.94 | - | 1069.8 |
| AHQ-6-4, 3136         | K.LKDVLLQVDDERR.N         | 1599.81402 | 2 | 1.78E-04 | 0.85 | 3.58 | - | 783.1  |
| AHQ-6-6, 3099         | K.LKDVLLQVDDERR.N         | 1599.81402 | 2 | 2.37E-06 | 0.68 | 2.79 | - | 810.0  |
| AHQ-6-3, 3140 - 3200  | K.LKDVLLQVDDERR.N         | 1599.81402 | 2 | 4.17E-05 | 0.72 | 3.27 | - | 599.7  |
| AHQ-6-11, 3107        | K.LKDVLLQVDDERR.N         | 1599.81402 | 3 | 4.07E-04 | 0.90 | 3.25 | - | 1064.1 |
| AHQ-6-11, 3100 - 3180 | K.LKDVLLQVDDERR.N         | 1599.81402 | 2 | 3.68E-04 | 0.76 | 3.02 | - | 840.0  |
| AHQ-6-3, 6580 - 6656  | K.LLQLEQLQAETELCAEAEELR.A | 2503.72536 | 3 | 1.70E-04 | 0.89 | 3.62 | - | 1533.7 |
| AHQ-6-2, 6556 - 6615  | K.LLQLEQLQAETELCAEAEELR.A | 2503.72536 | 2 | 2.80E-04 | 0.92 | 4.49 | - | 719.3  |
| AHQ-6-2, 6128 - 6198  | K.LLQLEQLQAETELCAEAEELR.A | 2503.72536 | 2 | 3.65E-06 | 0.57 | 2.53 | - | 409.6  |
| AHQ-6-2, 6670         | K.LLQLEQLQAETELCAEAEELR.A | 2503.72536 | 2 | 3.33E-06 | 0.96 | 4.68 | - | 1389.3 |
| AHQ-6-6, 5642 - 5646  | R.LQOELDDLVDLDHQR.Q       | 1951.12699 | 2 | 2.19E-08 | 0.97 | 5.04 | - | 1702.3 |
| AHQ-6-1, 5795 - 5827  | R.LQOELDDLVDLDHQR.Q       | 1951.12699 | 2 | 2.07E-09 | 0.97 | 5.21 | - | 1427.0 |
| AHQ-6-5, 5703         | R.LQOELDDLVDLDHQR.Q       | 1951.12699 | 2 | 8.36E-10 | 0.96 | 4.94 | - | 1384.4 |
| AHQ-6-2, 5703 - 5768  | R.LQOELDDLVDLDHQR.Q       | 1951.12699 | 2 | 1.72E-07 | 0.97 | 5.24 | - | 1469.2 |
| AHQ-6-7, 5498         | R.LQOELDDLVDLDHQR.Q       | 1951.12699 | 2 | 2.25E-10 | 0.92 | 4.01 | - | 1040.7 |
| AHQ-6-5, 5699         | R.LQOELDDLVDLDHQR.Q       | 1951.12699 | 3 | 4.67E-04 | 0.84 | 3.65 | - | 813.7  |
| AHQ-6-2, 5374         | R.LQOELDDLVDLDHQR.Q       | 1951.12699 | 2 | 2.94E-06 | 0.93 | 4.13 | - | 944.2  |
| AHQ-6-2, 5363         | R.LQOELDDLVDLDHQR.Q       | 1951.12699 | 3 | 1.51E-07 | 0.95 | 5.11 | - | 1328.3 |
| AHQ-6-3, 5713         | R.LQOELDDLVDLDHQR.Q       | 1951.12699 | 2 | 7.24E-10 | 0.97 | 5.29 | - | 1863.0 |
| AHQ-6-4, 5776 - 5779  | R.LQOELDDLVDLDHQR.Q       | 1951.12699 | 2 | 3.16E-10 | 0.97 | 5.60 | - | 1332.0 |
| AHQ-6-3, 4805         | R.LQOELDDLVDLDHQR.Q       | 1951.12699 | 2 | 2.31E-06 | 0.87 | 3.47 | - | 824.1  |
| AHQ-6-2, 5662 - 5719  | K.LQVELDNVTGLLSQSDSK.S    | 1947.13342 | 2 | 6.46E-11 | 0.97 | 5.34 | - | 1572.4 |
| AHQ-6-5, 5111         | K.LQVELDNVTGLLSQSDSK.S    | 1947.13342 | 2 | 2.54E-07 | 0.96 | 4.89 | - | 993.9  |
| AHQ-6-1, 5515         | K.LQVELDNVTGLLSQSDSK.S    | 1947.13342 | 3 | 4.27E-10 | 0.98 | 6.48 | - | 2387.1 |
| AHQ-6-1, 5472 - 5531  | K.LQVELDNVTGLLSQSDSK.S    | 1947.13342 | 2 | 4.19E-08 | 0.98 | 6.27 | - | 1773.8 |
| AHQ-6-5, 5383 - 5457  | K.LQVELDNVTGLLSQSDSK.S    | 1947.13342 | 2 | 2.29E-07 | 0.98 | 6.24 | - | 1606.4 |
| AHQ-6-4, 5464 - 5480  | K.LQVELDNVTGLLSQSDSK.S    | 1947.13342 | 2 | 4.79E-07 | 0.94 | 4.54 | - | 851.6  |
| AHQ-6-7, 5179         | K.LQVELDNVTGLLSQSDSK.S    | 1947.13342 | 2 | 1.38E-05 | 0.87 | 3.45 | - | 877.6  |
| AHQ-6-1, 5176 - 5238  | K.LQVELDNVTGLLSQSDSK.S    | 1947.13342 | 2 | 5.70E-07 | 0.92 | 4.54 | - | 673.8  |
| AHQ-6-2, 5140 - 5159  | K.LQVELDNVTGLLSQSDSK.S    | 1947.13342 | 2 | 1.02E-04 | 0.94 | 4.63 | - | 727.4  |
| AHQ-6-3, 5614 - 5674  | K.LQVELDNVTGLLSQSDSK.S    | 1947.13342 | 2 | 1.96E-07 | 0.96 | 5.03 | - | 1228.1 |
| AHQ-6-3, 5502 - 5562  | K.LQVELDNVTGLLSQSDSK.S    | 1947.13342 | 2 | 1.12E-07 | 0.96 | 5.39 | - | 1207.6 |
| AHQ-6-6, 5350         | K.LQVELDNVTGLLSQSDSK.S    | 1947.13342 | 2 | 4.21E-07 | 0.95 | 5.04 | - | 952.9  |
| AHQ-6-4, 5509         | K.LQVELDNVTGLLSQSDSK.S    | 1947.13342 | 3 | 5.94E-05 | 0.96 | 4.76 | - | 1794.1 |
| AHQ-6-2, 5380 - 5462  | K.LQVELDNVTGLLSQSDSK.S    | 1947.13342 | 2 | 2.23E-06 | 0.98 | 6.46 | - | 1759.3 |
| AHQ-6-2, 5459         | K.LQVELDNVTGLLSQSDSK.S    | 1947.13342 | 3 | 4.51E-10 | 0.98 | 6.06 | - | 1949.4 |
| AHQ-6-4, 5203 - 5269  | K.LQVELDNVTGLLSQSDSK.S    | 1947.13342 | 2 | 1.96E-05 | 0.88 | 4.17 | - | 755.8  |
| AHQ-6-1, 5702         | K.LQVELDNVTGLLSQSDSK.S    | 1947.13342 | 2 | 6.21E-07 | 0.88 | 3.82 | - | 724.4  |
| AHQ-6-4, 5583         | K.LQVELDNVTGLLSQSDSK.S    | 1947.13342 | 2 | 4.98E-07 | 0.88 | 4.40 | - | 674.6  |
| AHQ-6-3, 5389 - 5448  | K.LQVELDNVTGLLSQSDSK.S    | 1947.13342 | 2 | 6.11E-15 | 0.98 | 6.64 | - | 1593.5 |
| AHQ-6-3, 5141         | K.LQVELDNVTGLLSQSDSK.S    | 1947.13342 | 2 | 2.32E-07 | 0.97 | 5.21 | - | 1361.1 |
| AHQ-6-3, 5424         | K.LQVELDNVTGLLSQSDSK.S    | 1947.13342 | 3 | 7.43E-05 | 0.95 | 5.59 | - | 1191.8 |
| AHQ-6-14, 5924        | K.LQVELDNVTGLLSQSDSK.S    | 1947.13342 | 2 | 3.07E-04 | 0.86 | 3.26 | - | 888.9  |
| AHQ-6-2, 6102         | K.LQVELDNVTGLLSQSDSK.S    | 1947.13342 | 2 | 5.92E-05 | 0.81 | 3.17 | - | 695.2  |
| AHQ-6-2, 5518 - 5578  | K.LQVELDNVTGLLSQSDSK.S    | 1947.13342 | 2 | 1.64E-11 | 0.97 | 5.37 | - | 1484.3 |
| AHQ-6-2, 5108 - 5167  | K.LQVELDNVTGLLSQSDSKSSK.L | 2249.46164 | 3 | 1.94E-05 | 0.64 | 3.50 | - | 493.1  |
| AHQ-6-1, 4092         | R.LTEM*ETLQSQLMAEK.L      | 1769.03151 | 2 | 4.89E-04 | 0.96 | 4.00 | - | 1927.3 |
| AHQ-6-2, 4830 - 4903  | R.LTEM*ETLQSQLMAEK.L      | 1753.03211 | 2 | 1.70E-05 | 0.94 | 4.62 | - | 1058.3 |
| AHQ-6-2, 3506 - 3566  | R.LTEM*ETLQSQLMAEK.L      | 1785.03091 | 2 | 3.65E-05 | 0.94 | 3.95 | - | 1339.2 |
| AHQ-6-4, 3519         | R.LTEM*ETLQSQLMAEK.L      | 1785.03091 | 2 | 6.70E-05 | 0.88 | 3.60 | - | 1066.1 |
| AHQ-6-3, 3932 - 3996  | R.LTEM*ETLQSQLMAEK.L      | 1769.03151 | 2 | 4.01E-04 | 0.94 | 3.81 | - | 1836.1 |
| AHQ-6-3, 4386 - 4456  | R.LTEM*ETLQSQLMAEK.L      | 1769.03151 | 2 | 3.12E-04 | 0.93 | 4.26 | - | 1138.3 |
| AHQ-6-1, 3694         | R.LTEM*ETLQSQLMAEK.L      | 1785.03091 | 2 | 5.79E-05 | 0.95 | 4.53 | - | 1109.7 |
| AHQ-6-4, 3985         | R.LTEM*ETLQSQLMAEK.L      | 1769.03151 | 2 | 3.69E-06 | 0.83 | 3.16 | - | 773.8  |
| AHQ-6-2, 3960 - 4022  | R.LTEM*ETLQSQLMAEK.L      | 1769.03151 | 2 | 1.52E-07 | 0.97 | 4.51 | - | 1662.7 |
| AHQ-6-3, 3476 - 3549  | R.LTEM*ETLQSQLMAEK.L      | 1785.03091 | 2 | 3.77E-04 | 0.94 | 4.39 | - | 1131.4 |
| AHQ-6-4, 3827         | K.MEDSVGCLETAEEVKR.R      | 1698.85159 | 2 | 3.71E-05 | 0.92 | 4.51 | - | 636.1  |
| AHQ-6-2, 3556         | K.MEDSVGCLETAEEVKR.K      | 1855.03794 | 2 | 6.12E-08 | 0.65 | 2.88 | - | 379.3  |
| AHQ-6-3, 3256 - 3257  | K.M*EDSVGCLETAEEVKR.K     | 1871.03734 | 2 | 3.88E-07 | 0.91 | 3.59 | - | 806.3  |
| AHQ-6-3, 3261         | K.M*EDSVGCLETAEEVKR.K     | 1871.03734 | 3 | 8.32E-04 | 0.83 | 3.70 | - | 817.9  |
| AHQ-6-2, 3220 - 3267  | K.M*EDSVGCLETAEEVKR.K     | 1871.03734 | 2 | 2.85E-06 | 0.82 | 3.54 | - | 503.1  |
| AHQ-6-2, 4976 - 5038  | K.M*QQNIOLEEEQEEEEESAR.Q  | 2350.46003 | 3 | 2.51E-05 | 0.90 | 4.41 | - | 934.1  |
| AHQ-6-4, 5063 - 5123  | K.M*QQNIOLEEEQEEEEESAR.Q  | 2350.46003 | 3 | 3.73E-10 | 0.97 | 6.03 | - | 1494.5 |
| AHQ-6-2, 5515 - 5519  | K.NFINNPLAQADWAAK.K       | 1673.85315 | 2 | 4.86E-10 | 0.95 | 4.77 | - | 968.5  |
| AHQ-6-2, 5103         | K.NFINNPLAQADWAAK.K       | 1673.85315 | 2 | 1.84E-05 | 0.96 | 4.92 | - | 1315.2 |
| AHQ-6-6, 5411         | K.NFINNPLAQADWAAK.K       | 1673.85315 | 2 | 7.57E-13 | 0.88 | 4.02 | - | 789.6  |
| AHQ-6-1, 5195         | K.NFINNPLAQADWAAK.K       | 1673.85315 | 2 | 4.60E-06 | 0.95 | 4.59 | - | 1008.9 |
| AHQ-6-11, 4857        | K.NFINNPLAQADWAAK.K       | 1673.85315 | 2 | 5.41E-05 | 0.86 | 3.59 | - | 814.1  |
| AHQ-6-4, 5121         | K.NFINNPLAQADWAAK.K       | 1673.85315 | 2 | 2.01E-06 | 0.94 | 4.21 | - | 1193.8 |
| AHQ-6-5, 4981 - 5041  | K.NFINNPLAQADWAAK.K       | 1673.85315 | 2 | 4.98E-08 | 0.95 | 4.83 | - | 1066.1 |
| AHQ-6-1, 5564         | K.NFINNPLAQADWAAK.K       | 1673.85315 | 2 | 6.65E-06 | 0.73 | 2.62 | - | 653.9  |
| AHQ-6-2, 5262 - 5331  | K.NFINNPLAQADWAAK.K       | 1673.85315 | 2 | 3.73E-09 | 0.96 | 4.80 | - | 1469.2 |
| AHQ-6-10, 5179        | K.NFINNPLAQADWAAK.K       | 1673.85315 | 2 | 5.83E-04 | 0.82 | 3.45 | - | 517.5  |
| AHQ-6-6, 4999         | K.NFINNPLAQADWAAK.K       | 1673.85315 | 2 | 1.89E-09 | 0.94 | 4.57 | - | 976.0  |
| AHQ-6-5, 5467         | K.NFINNPLAQADWAAK.K       | 1673.85315 | 2 | 2.24E-08 | 0.95 | 4.60 | - | 1046.3 |
| AHQ-6-3, 5058 - 5077  | K.NFINNPLAQADWAAK.K       | 1673.85315 | 2 | 3.91E-05 | 0.96 | 4.63 | - | 1333.9 |
| AHQ-6-7, 4846         | K.NFINNPLAQADWAAK.K       | 1673.85315 | 2 | 9.93E-08 | 0.92 | 4.19 | - | 928.6  |
| AHQ-6-2, 2726 - 2728  | K.NKHEAMITDLEER.L         | 1586.75247 | 2 | 6.01E-05 | 0.93 | 3.63 | - | 1188.4 |
| AHQ-6-3, 2734         | K.NKHEAMITDLEER.L         | 1586.75247 | 2 | 2.26E-05 | 0.89 | 3.47 | - | 1062.0 |
| AHQ-6-4, 2689         | K.NKHEAMITDLEER.L         | 1586.75247 | 2 | 1.10E-05 | 0.90 | 3.43 | - | 1148.4 |
| AHQ-6-5, 5417 - 5427  | K.NLPIYSEEVEM*YK.G        | 1728.98720 | 2 | 1.11E-05 | 0.90 | 3.57 | - | 636.4  |
| AHQ-6-3, 4942 - 4948  | K.NLPIYSEEVEM*YK.G        | 1744.98660 | 2 | 2.14E-08 | 0.97 | 4.81 | - | 1342.8 |
| AHQ-6-2, 4970 - 4971  | K.NLPIYSEEVEM*YK.G        | 1744.98660 | 2 | 2.65E-07 | 0.95 | 5.05 | - | 838.2  |
| AHQ-6-1, 5546         | K.NLPIYSEEVEM*YK.G        | 1728.98720 | 2 | 1.11E-04 | 0.92 | 3.60 | - | 883.4  |
| AHQ-6-6, 4866         | K.NLPIYSEEVEM*YK.G        | 1744.98660 | 2 | 1.24E-04 | 0.88 | 3.71 | - | 590.0  |
| AHQ-6-4, 4981 - 4988  | K.NLPIYSEEVEM*YK.G        | 1744.98660 | 2 | 2.26E-06 | 0.95 | 4.44 | - | 1046.7 |
| AHQ-6-2, 5296 - 5300  | K.NMDPLNDNIATLLHQSSDK.F   | 2127.32169 | 2 | 4.55E-06 | 0.93 | 4.43 | - | 856.7  |
| AHQ-6-2, 5122         | K.NM*DPNDNIATLLHQSSDK.F   | 2143.32109 | 3 | 1.98E-05 | 0.73 | 3.14 | - | 709.3  |
| AHQ-6-2, 5294         | K.NM*DPNDNIATLLHQSSDK.F   | 2143.32109 | 3 | 7.46E-09 | 0.84 | 3.81 | - | 687.8  |
| AHQ-6-2, 4886         | K.NM*DPNDNIATLLHQSSDK.F   | 2143.32109 | 3 | 8.15E-06 | 0.80 | 3.71 | - | 620.4  |
| AHQ-6-2, 4848 - 4884  | K.NM*DPNDNIATLLHQSSDK.F   | 2143.32109 | 2 | 1.09E-08 | 0.93 | 3.76 | - | 1094.3 |
| AHQ-6-4, 4893         | K.NM*DPNDNIATLLHQSSDK.F   | 2143.32109 | 2 | 2.21E-04 | 0.56 | 2.68 | - | 469.0  |
| AHQ-6-3, 2485         | K.PLLQVSR.Q               | 812.98013  | 1 | 9.86E-04 | 0.20 | 1.96 | - | 237.0  |
| AHQ-6-2, 2386         | K.QIATLHAQVADM*K.K        | 1442.66637 | 2 | 3.59E-04 | 0.62 | 2.66 | - | 324.3  |
| AHQ-6-2, 2106         | R.QLEEAEEEAQR.A           | 1332.35590 | 2 | 7.18E-04 | 0.86 | 3.06 | - | 1015.0 |
| AHQ-6-4, 2079         | R.QLEEAEEEAQR.A           | 1332.35590 | 2 | 5.59E-07 | 0.72 | 3.06 | - | 496.3  |
| AHQ-6-6, 2060         | R.QLEEAEEEAQR.A           | 1332.35590 | 2 | 4.82E-05 | 0.53 | 2.99 | - | 351.6  |
| AHQ-6-3, 2973 - 3004  | K.QLTENERGELANEVK.V       | 1730.85818 | 2 | 1.65E-04 | 0.64 | 3.31 | - | 376.9  |
| AHQ-6-11, 3507        | R.RGDLPPVPR.R             | 1156.36217 | 2 | 7.14E-05 | 0.85 | 2.71 | - | 892.4  |
| AHQ-6-2, 3635         | R.RGDLPPVPR.R             | 1156.36217 | 2 | 5.79E-06 | 0.93 | 3.60 | - | 1109.9 |

|                                                                        |                                |            |   |          |       |        |       |          |
|------------------------------------------------------------------------|--------------------------------|------------|---|----------|-------|--------|-------|----------|
| AHQ-6-10, 3431 - 3432                                                  | R.RGDLPFVPR.R                  | 1156.36217 | 2 | 8.95E-06 | 0.86  | 3.27   | -     | 707.3    |
| AHQ-6-12, 3568                                                         | R.RGDLPFVPR.R                  | 1156.36217 | 2 | 2.13E-05 | 0.93  | 3.28   | -     | 1269.8   |
| AHQ-6-8, 3320                                                          | R.RGDLPFVPR.R                  | 1156.36217 | 2 | 1.61E-04 | 0.90  | 3.50   | -     | 795.6    |
| AHQ-6-4, 3597                                                          | R.RGDLPFVPR.R                  | 1156.36217 | 2 | 5.10E-06 | 0.93  | 3.67   | -     | 1235.7   |
| AHQ-6-5, 3535                                                          | R.RGDLPFVPR.R                  | 1156.36217 | 2 | 4.28E-06 | 0.94  | 4.02   | -     | 1066.5   |
| AHQ-6-1, 3830                                                          | R.RGDLPFVPR.R                  | 1156.36217 | 2 | 1.75E-06 | 0.93  | 3.46   | -     | 1315.5   |
| AHQ-6-3, 3628                                                          | R.RGDLPFVPR.R                  | 1156.36217 | 2 | 5.23E-05 | 0.95  | 3.62   | -     | 1489.3   |
| AHQ-6-6, 3506                                                          | R.RGDLPFVPR.R                  | 1156.36217 | 2 | 7.77E-06 | 0.94  | 4.03   | -     | 1122.8   |
| AHQ-6-3, 6254                                                          | R.RKLEGDSTDLSDQIAELQQAIAELK.M  | 2773.04667 | 3 | 2.85E-08 | 0.96  | 6.20   | -     | 1419.6   |
| AHQ-6-4, 6323                                                          | R.RKLEGDSTDLSDQIAELQQAIAELK.M  | 2773.04667 | 3 | 1.96E-05 | 0.92  | 4.63   | -     | 1178.5   |
| AHQ-6-2, 6286                                                          | R.RKLEGDSTDLSDQIAELQQAIAELK.M  | 2773.04667 | 3 | 1.73E-09 | 0.97  | 6.32   | -     | 1409.6   |
| AHQ-6-13-, 5604                                                        | K.SGFEPASLKKEEVGEEAIVLVENGKK.V | 2790.07246 | 3 | 4.77E-07 | 0.94  | 4.81   | -     | 1249.2   |
| AHQ-6-6, 5787                                                          | K.SGFEPASLKKEEVGEEAIVLVENGKK.V | 2790.07246 | 3 | 2.15E-08 | 0.92  | 4.66   | -     | 891.9    |
| AHQ-6-2, 5743 - 5803                                                   | K.SGFEPASLKKEEVGEEAIVLVENGKK.V | 2790.07246 | 3 | 7.63E-08 | 0.94  | 5.33   | -     | 1125.4   |
| AHQ-6-4, 5944                                                          | K.SGFEPASLKKEEVGEEAIVLVENGKK.V | 2790.07246 | 3 | 4.97E-04 | 0.76  | 3.18   | -     | 1016.5   |
| AHQ-6-5, 5853                                                          | K.SGFEPASLKKEEVGEEAIVLVENGKK.V | 2790.07246 | 3 | 1.07E-07 | 0.88  | 4.21   | -     | 933.4    |
| AHQ-6-2, 5868 - 5932                                                   | K.SGFEPASLKKEEVGEEAIVLVENGKK.V | 2790.07246 | 3 | 3.31E-08 | 0.96  | 5.74   | -     | 1471.5   |
| AHQ-6-2, 5240 - 5263                                                   | K.SMEAEM*IQLEELAAAER.A         | 2066.30004 | 2 | 6.82E-06 | 0.89  | 4.04   | -     | 1133.3   |
| AHQ-6-2, 4584                                                          | K.SM*EAE*IQLEELAAAER.A         | 2082.29944 | 2 | 3.81E-08 | 0.96  | 4.37   | -     | 1515.9   |
| AHQ-6-1, 5480 - 5534                                                   | K.SM*EAE*IQLEELAAAER.A         | 2066.30004 | 2 | 5.14E-04 | 0.50  | 3.04   | -     | 564.6    |
| AHQ-6-2, 5436 - 5510                                                   | K.SM*EAE*IQLEELAAAER.A         | 2066.30004 | 2 | 5.17E-07 | 0.95  | 5.14   | -     | 1663.3   |
| AHQ-6-3, 4554                                                          | K.SM*EAE*IQLEELAAAER.A         | 2082.29944 | 2 | 4.91E-08 | 0.97  | 5.01   | -     | 1770.9   |
| AHQ-6-4, 5517 - 5576                                                   | K.SM*EAE*IQLEELAAAER.A         | 2066.30004 | 2 | 5.96E-05 | 0.73  | 3.88   | -     | 442.8    |
| AHQ-6-5, 4492                                                          | K.SM*EAE*IQLEELAAAER.A         | 2082.29944 | 2 | 1.52E-08 | 0.97  | 5.57   | -     | 1533.2   |
| AHQ-6-1, 4676 - 4683                                                   | K.SM*EAE*IQLEELAAAER.A         | 2082.29944 | 2 | 2.90E-11 | 0.98  | 5.88   | -     | 1816.4   |
| AHQ-6-4, 4504 - 4579                                                   | K.SM*EAE*IQLEELAAAER.A         | 2082.29944 | 2 | 3.83E-08 | 0.97  | 5.25   | -     | 1668.3   |
| AHQ-6-6, 4447                                                          | K.SM*EAE*IQLEELAAAER.A         | 2082.29944 | 2 | 8.00E-09 | 0.96  | 4.66   | -     | 1790.1   |
| AHQ-6-2, 4723                                                          | K.SM*EAE*IQLEELAAAER.A         | 2082.29944 | 2 | 1.11E-08 | 0.97  | 5.51   | -     | 1640.3   |
| AHQ-6-4, 3683                                                          | K.TDLLLEPYNK.Y                 | 1206.36989 | 2 | 9.63E-06 | 0.90  | 3.61   | -     | 1131.1   |
| AHQ-6-2, 3648 - 3710                                                   | K.TDLLLEPYNK.Y                 | 1206.36989 | 2 | 1.09E-05 | 0.83  | 3.33   | -     | 877.1    |
| AHQ-6-3, 3638 - 3700                                                   | K.TDLLLEPYNK.Y                 | 1206.36989 | 2 | 5.06E-04 | 0.90  | 3.30   | -     | 1117.8   |
| AHQ-6-7, 3483                                                          | K.TDLLLEPYNK.Y                 | 1206.36989 | 2 | 7.15E-07 | 0.91  | 3.94   | -     | 1022.8   |
| AHQ-6-5, 3603                                                          | K.TDLLLEPYNK.Y                 | 1206.36989 | 2 | 4.58E-05 | 0.86  | 3.46   | -     | 964.9    |
| AHQ-6-1, 3868                                                          | K.TDLLLEPYNK.Y                 | 1206.36989 | 2 | 3.88E-07 | 0.90  | 3.63   | -     | 1062.9   |
| AHQ-6-6, 3588 - 3598                                                   | K.TDLLLEPYNK.Y                 | 1206.36989 | 2 | 3.29E-04 | 0.92  | 4.23   | -     | 904.2    |
| AHQ-6-2, 3862                                                          | K.TDLLLEPYNK.Y.F               | 1525.73037 | 2 | 1.57E-06 | 0.82  | 3.29   | -     | 815.3    |
| AHQ-6-1, 4236 - 4306                                                   | K.TELEOTLDSTAAQQELR.S          | 1921.00969 | 2 | 1.11E-11 | 0.98  | 5.37   | -     | 2390.2   |
| AHQ-6-3, 4184                                                          | K.TELEOTLDSTAAQQELR.S          | 1921.00969 | 3 | 1.94E-07 | 0.97  | 5.37   | -     | 2248.0   |
| AHQ-6-2, 4202 - 4267                                                   | K.TELEOTLDSTAAQQELR.S          | 1921.00969 | 2 | 8.89E-09 | 0.96  | 4.94   | -     | 1416.4   |
| AHQ-6-3, 4114 - 4182                                                   | K.TELEOTLDSTAAQQELR.S          | 1921.00969 | 2 | 4.43E-11 | 0.98  | 5.67   | -     | 2121.1   |
| AHQ-6-4, 4137 - 4191                                                   | K.TELEOTLDSTAAQQELR.S          | 1921.00969 | 2 | 1.24E-05 | 0.94  | 4.09   | -     | 1438.1   |
| AHQ-6-2, 3744                                                          | K.TELEOTLDSTAAQQELR.S          | 1921.00969 | 2 | 2.09E-05 | 0.59  | 3.05   | -     | 563.1    |
| AHQ-6-2, 3934                                                          | K.TELEOTLDSTAAQQELR.S          | 1921.00969 | 2 | 3.90E-04 | 0.75  | 2.74   | -     | 873.4    |
| AHQ-6-2, 3380                                                          | R.TEMEDLMSSKDDVVGK.S           | 1685.85626 | 2 | 2.96E-05 | 0.89  | 3.64   | -     | 961.2    |
| AHQ-6-2, 2048                                                          | R.TEM*EDLM*SSKDDVVGK.S         | 1717.85506 | 2 | 4.85E-04 | 0.65  | 2.91   | -     | 450.9    |
| AHQ-6-2, 2571                                                          | R.TEMEDLM*SSKDDVVGK.S          | 1701.85566 | 2 | 2.61E-05 | 0.90  | 3.79   | -     | 1028.7   |
| AHQ-6-2, 6135 - 6136                                                   | R.TFHIFYLLSGAGEHLK.T           | 1997.28378 | 2 | 8.74E-05 | 0.96  | 4.96   | -     | 1211.7   |
| AHQ-6-6, 6031 - 6087                                                   | R.TFHIFYLLSGAGEHLK.T           | 1997.28378 | 3 | 3.64E-05 | 0.91  | 4.70   | -     | 1027.1   |
| AHQ-6-2, 6118 - 6179                                                   | R.TFHIFYLLSGAGEHLK.T           | 1997.28378 | 3 | 1.66E-08 | 0.97  | 5.76   | -     | 1653.0   |
| AHQ-6-5, 6097 - 6167                                                   | R.TFHIFYLLSGAGEHLK.T           | 1997.28378 | 3 | 1.36E-04 | 0.96  | 4.95   | -     | 1711.0   |
| AHQ-6-2, 1952 - 1971                                                   | K.THEAQIQEMR.Q                 | 1243.37536 | 2 | 8.29E-05 | 0.71  | 2.55   | -     | 925.0    |
| AHQ-6-3, 2080                                                          | K.VAAYDKLEK.T                  | 1037.19123 | 2 | 3.52E-04 | 0.88  | 3.12   | -     | 929.9    |
| AHQ-6-2, 3352                                                          | K.VEAQIQELQVK.F                | 1285.47179 | 1 | 7.76E-05 | 0.07  | 2.47   | -     | 290.7    |
| AHQ-6-2, 5638                                                          | K.VEDMAELTCLNEASVLHNLK.E       | 2288.58457 | 3 | 3.02E-07 | 0.90  | 4.84   | -     | 677.0    |
| AHQ-6-5, 5589 - 5652                                                   | K.VEDMAELTCLNEASVLHNLK.E       | 2288.58457 | 2 | 2.41E-06 | 0.49  | 3.01   | -     | 283.6    |
| AHQ-6-13-, 5485                                                        | K.VEDMAELTCLNEASVLHNLK.E       | 2288.58457 | 3 | 1.53E-08 | 0.79  | 3.69   | -     | 449.8    |
| AHQ-6-3, 5089                                                          | K.VEDM*AELTCLNEASVLHNLK.E      | 2304.58397 | 2 | 7.44E-08 | 0.88  | 4.00   | -     | 728.5    |
| AHQ-6-10, 4756 - 4772                                                  | K.VEDM*AELTCLNEASVLHNLK.E      | 2304.58397 | 2 | 1.08E-07 | 0.88  | 4.00   | -     | 713.9    |
| AHQ-6-2, 5106 - 5132                                                   | K.VEDM*AELTCLNEASVLHNLK.E      | 2304.58397 | 3 | 2.33E-07 | 0.95  | 4.84   | -     | 1350.5   |
| AHQ-6-2, 5640                                                          | K.VEDMAELTCLNEASVLHNLK.E       | 2288.58457 | 2 | 9.61E-10 | 0.93  | 4.61   | -     | 707.4    |
| AHQ-6-5, 5505 - 5581                                                   | K.VEDMAELTCLNEASVLHNLK.E       | 2288.58457 | 3 | 3.76E-07 | 0.81  | 3.32   | -     | 868.5    |
| AHQ-6-2, 2116                                                          | R.VEEEEERQHLQAEK.K             | 1916.01642 | 3 | 4.88E-05 | 0.93  | 4.85   | -     | 859.3    |
| AHQ-6-5, 3881                                                          | K.VIQYLAYVASSHK.S              | 1479.70484 | 2 | 9.13E-04 | 0.94  | 4.02   | -     | 1183.1   |
| AHQ-6-2, 3947 - 3974                                                   | K.VIQYLAYVASSHK.S              | 1479.70484 | 2 | 7.43E-08 | 0.95  | 3.91   | -     | 1378.8   |
| AHQ-6-4, 3940                                                          | K.VIQYLAYVASSHK.S              | 1479.70484 | 2 | 1.58E-04 | 0.88  | 3.21   | -     | 942.9    |
| AHQ-6-10, 3739                                                         | K.VIQYLAYVASSHK.S              | 1479.70484 | 2 | 2.54E-04 | 0.90  | 3.52   | -     | 889.1    |
| AHQ-6-6, 3842                                                          | K.VIQYLAYVASSHK.S              | 1479.70484 | 2 | 2.00E-08 | 0.95  | 3.80   | -     | 1222.4   |
| AHQ-6-5, 3877                                                          | K.VIQYLAYVASSHK.S              | 1479.70484 | 3 | 2.65E-04 | 0.80  | 3.41   | -     | 591.4    |
| AHQ-6-4, 3945                                                          | K.VIQYLAYVASSHK.S              | 1479.70484 | 2 | 9.48E-10 | 0.96  | 4.37   | -     | 1401.3   |
| AHQ-6-2, 3982 - 3992                                                   | K.VIQYLAYVASSHK.S              | 1479.70484 | 3 | 1.71E-05 | 0.92  | 4.02   | -     | 942.9    |
| AHQ-6-3, 3960                                                          | K.VIQYLAYVASSHK.S              | 1479.70484 | 2 | 9.63E-07 | 0.93  | 3.95   | -     | 960.2    |
| AHQ-6-7, 3731 - 3791                                                   | K.VIQYLAYVASSHK.S              | 1479.70484 | 2 | 1.44E-04 | 0.79  | 2.81   | -     | 847.0    |
| AHQ-6-1, 4135                                                          | K.VIQYLAYVASSHK.S              | 1479.70484 | 2 | 3.40E-04 | 0.90  | 3.12   | -     | 1131.0   |
| AHQ-6-8, 5905                                                          | R.VISGVLQGNIVFK.K              | 1487.81155 | 2 | 1.60E-06 | 0.97  | 4.52   | -     | 1720.8   |
| AHQ-6-6, 5946                                                          | R.VISGVLQGNIVFK.K              | 1487.81155 | 2 | 1.62E-06 | 0.97  | 4.38   | -     | 1810.1   |
| AHQ-6-14-, 5928                                                        | R.VISGVLQGNIVFK.K              | 1487.81155 | 2 | 5.36E-06 | 0.96  | 3.87   | -     | 1581.6   |
| AHQ-6-7, 5786                                                          | R.VISGVLQGNIVFK.K              | 1487.81155 | 2 | 1.11E-06 | 0.98  | 5.37   | -     | 1753.2   |
| AHQ-6-13, 6005                                                         | R.VISGVLQGNIVFK.K              | 1487.81155 | 2 | 3.74E-05 | 0.96  | 3.79   | -     | 1526.3   |
| AHQ-6-2, 5967 - 6044                                                   | R.VISGVLQGNIVFK.K              | 1487.81155 | 2 | 2.68E-06 | 0.95  | 4.49   | -     | 1102.7   |
| AHQ-6-5, 6012 - 6015                                                   | R.VISGVLQGNIVFK.K              | 1487.81155 | 2 | 4.43E-07 | 0.94  | 3.51   | -     | 1310.2   |
| AHQ-6-1, 5646                                                          | R.VISGVLQGNIVFKK.E             | 1615.98446 | 2 | 3.56E-04 | 0.92  | 3.58   | -     | 1276.3   |
| AHQ-6-2, 5582                                                          | R.VISGVLQGNIVFKK.E             | 1615.98446 | 2 | 5.25E-06 | 0.91  | 3.99   | -     | 941.7    |
| AHQ-6-5, 5516                                                          | R.VISGVLQGNIVFKK.E             | 1615.98446 | 2 | 1.20E-09 | 0.96  | 4.82   | -     | 1146.7   |
| AHQ-6-3, 5490 - 5552                                                   | R.VISGVLQGNIVFKK.E             | 1615.98446 | 2 | 1.03E-07 | 0.90  | 3.53   | -     | 941.0    |
| AHQ-6-1, 4930                                                          | K.VSHLLGINVDFTR.G              | 1572.79026 | 3 | 2.02E-05 | 0.91  | 4.50   | -     | 752.8    |
| AHQ-6-2, 4867                                                          | K.VSHLLGINVDFTR.G              | 1572.79026 | 2 | 1.54E-06 | 0.87  | 3.32   | -     | 953.3    |
| AHQ-6-9, 4395                                                          | K.VSHLLGINVDFTR.G              | 1572.79026 | 2 | 1.81E-04 | 0.82  | 2.90   | -     | 803.1    |
| AHQ-6-3, 4734 - 4792                                                   | K.VSHLLGINVDFTR.G              | 1572.79026 | 2 | 3.12E-07 | 0.90  | 3.61   | -     | 1053.3   |
| AHQ-6-2, 4811                                                          | K.VSHLLGINVDFTR.G              | 1572.79026 | 3 | 1.27E-06 | 0.92  | 3.58   | -     | 1539.4   |
| AHQ-6-5, 4747                                                          | K.VSHLLGINVDFTR.G              | 1572.79026 | 2 | 4.99E-08 | 0.94  | 3.75   | -     | 1243.0   |
| AHQ-6-7, 4547                                                          | K.VSHLLGINVDFTR.G              | 1572.79026 | 2 | 7.94E-12 | 0.94  | 4.25   | -     | 1166.0   |
| AHQ-6-4, 4819 - 4891                                                   | K.VSHLLGINVDFTR.G              | 1572.79026 | 2 | 1.88E-08 | 0.96  | 4.45   | -     | 1661.4   |
| AHQ-6-2, 4746 - 4804                                                   | K.VSHLLGINVDFTR.G              | 1572.79026 | 2 | 1.72E-08 | 0.93  | 4.10   | -     | 1015.9   |
| AHQ-6-1, 3463                                                          | R.VVFEQFR.Q                    | 925.06580  | 2 | 4.29E-04 | 0.82  | 2.70   | -     | 587.8    |
| AHQ-6-2, 3950 - 3999                                                   | R.YEILTPNSIPK.G                | 1275.47536 | 2 | 5.12E-05 | 0.93  | 3.70   | -     | 1135.2   |
| AHQ-6-3, 4102                                                          | R.YEILTPNSIPK.G                | 1275.47536 | 2 | 2.54E-04 | 0.85  | 3.16   | -     | 819.0    |
| AHQ-6-4, 3921 - 3991                                                   | R.YEILTPNSIPK.G                | 1275.47536 | 2 | 9.67E-05 | 0.84  | 3.38   | -     | 732.3    |
| AHQ-6-4, 4113                                                          | R.YEILTPNSIPK.G                | 1275.47536 | 2 | 3.36E-06 | 0.91  | 2.96   | -     | 1034.7   |
| AHQ-6-10, 2218                                                         | K.YLYVDK.N                     | 800.92145  | 1 | 2.46E-04 | 0.30  | 2.17   | -     | 426.4    |
| gj[4504745]ref[NP_000410.1] integrin alpha 2b precursor [Homo sapiens] |                                |            |   | 1.83E-14 | 28.76 | 330.33 | 38.50 | 113374.2 |
| AHQ-6-14-, 4978 - 5048                                                 | R.AEGGQCPSSLFDL.R.D            | 1564.74505 | 2 | 1.17E-05 | 0.82  | 2.84   | -     | 940.4    |
| AHQ-6-13-, 5048 - 5073                                                 | R.AEGGQCPSSLFDL.R.D            | 1564.74505 | 2 | 6.09E-04 | 0.80  | 2.92   | -     | 684.1    |
| AHQ-6-4, 5112                                                          | R.AEGGQCPSSLFDL.R.D            | 1564.74505 | 2 | 7.00E-06 | 0.95  | 3.98   | -     | 1073.1   |
| AHQ-6-11, 4884 - 4889                                                  | R.AEGGQCPSSLFDL.R.D            | 1564.74505 | 2 | 2.07E-06 | 0.85  | 3.42   | -     | 783.9    |
| AHQ-6-5, 5072                                                          | R.AEGGQCPSSLFDL.R.D            | 1564.74505 | 2 | 1.34E-06 | 0.95  | 4.19   | -     | 1021.5   |
| AHQ-6-7, 4811 - 4874                                                   | R.AEGGQCPSSLFDL.R.D            | 1564.74505 | 2 | 4.57E-04 | 0.86  | 3.12   | -     | 700.2    |
| AHQ-6-10, 4782                                                         | R.AEGGQCPSSLFDL.R.D            | 1564.74505 | 2 | 5.33E-04 | 0.40  | 2.70   | -     | 419.0    |

|                       |                                    |            |   |          |      |      |   |        |
|-----------------------|------------------------------------|------------|---|----------|------|------|---|--------|
| AHQ-6-6, 4942 - 5020  | R.AEGGQCPSSLFDLR.D                 | 1564.74505 | 2 | 2.85E-05 | 0.86 | 3.45 | - | 812.0  |
| AHQ-6-3, 5102         | R.AEGGQCPSSLFDLR.D                 | 1564.74505 | 2 | 6.08E-07 | 0.87 | 3.18 | - | 791.1  |
| AHQ-6-7, 4862         | R.AEGGQCPSSLFDLR.D                 | 1564.74505 | 2 | 5.63E-07 | 0.92 | 4.07 | - | 774.7  |
| AHQ-6-4, 4692         | R.AEGGQCPSSLFDLRDETR.N             | 2066.23814 | 3 | 3.76E-07 | 0.66 | 3.67 | - | 489.9  |
| AHQ-6-6, 2846         | R.ALSNVEGFER.L                     | 1122.21308 | 2 | 7.72E-04 | 0.53 | 2.58 | - | 548.9  |
| AHQ-6-4, 2879         | R.ALSNVEGFER.L                     | 1122.21308 | 2 | 6.07E-07 | 0.84 | 3.12 | - | 794.1  |
| AHQ-6-7, 2782         | R.ALSNVEGFER.L                     | 1122.21308 | 2 | 1.80E-05 | 0.86 | 2.82 | - | 783.0  |
| AHQ-6-3, 2944         | R.ALSNVEGFER.L                     | 1122.21308 | 2 | 6.04E-04 | 0.81 | 2.91 | - | 667.3  |
| AHQ-6-5, 2856         | R.ALSNVEGFER.L                     | 1122.21308 | 2 | 3.93E-05 | 0.90 | 3.13 | - | 1042.3 |
| AHQ-6-4, 4927 - 4987  | K.ASQQVLLVQDSLNPVAVK.S             | 1682.94293 | 2 | 5.08E-04 | 0.94 | 5.04 | - | 899.9  |
| AHQ-6-4, 3073         | R.DETRVNVSQTLQTFK.A                | 1724.85363 | 2 | 1.94E-05 | 0.83 | 3.08 | - | 1044.6 |
| AHQ-6-4, 3975         | R.DGYNDAIVAAPYGGPSGR.G             | 1780.87574 | 2 | 9.19E-04 | 0.91 | 4.04 | - | 735.9  |
| AHQ-6-6, 3691 - 3723  | R.DGYNDAIVAAPYGGPSGR.G             | 1780.87574 | 2 | 4.64E-05 | 0.84 | 3.78 | - | 544.0  |
| AHQ-6-5, 3716 - 3741  | R.DGYNDAIVAAPYGGPSGR.G             | 1780.87574 | 2 | 1.05E-09 | 0.91 | 4.34 | - | 835.9  |
| AHQ-6-4, 3875         | R.DGYNDAIVAAPYGGPSGR.G             | 1780.87574 | 2 | 6.77E-05 | 0.87 | 3.76 | - | 598.5  |
| AHQ-6-4, 3775 - 3777  | R.DGYNDAIVAAPYGGPSGR.G             | 1780.87574 | 2 | 1.16E-10 | 0.95 | 4.81 | - | 874.5  |
| AHQ-6-3, 3777         | R.DGYNDAIVAAPYGGPSGR.G             | 1780.87574 | 2 | 7.41E-05 | 0.85 | 3.72 | - | 706.6  |
| AHQ-6-5, 5428 - 5487  | R.FGSAIAPLDLDRDGYNDIAVAAPYGGPSGR.G | 3094.34015 | 3 | 2.64E-09 | 0.86 | 4.28 | - | 656.5  |
| AHQ-6-5, 5523         | R.FGSAIAPLDLDRDGYNDIAVAAPYGGPSGR.G | 3094.34015 | 3 | 5.89E-04 | 0.88 | 4.10 | - | 972.8  |
| AHQ-6-5, 5604         | R.FGSAIAPLDLDRDGYNDIAVAAPYGGPSGR.G | 3094.34015 | 3 | 5.71E-07 | 0.70 | 3.35 | - | 620.0  |
| AHQ-6-3, 5542         | R.FGSAIAPLDLDRDGYNDIAVAAPYGGPSGR.G | 3094.34015 | 3 | 5.50E-04 | 0.83 | 3.72 | - | 790.0  |
| AHQ-6-4, 5607 - 5668  | R.FGSAIAPLDLDRDGYNDIAVAAPYGGPSGR.G | 3094.34015 | 3 | 8.10E-04 | 0.93 | 5.09 | - | 820.2  |
| AHQ-6-4, 5492 - 5551  | R.FGSAIAPLDLDRDGYNDIAVAAPYGGPSGR.G | 3094.34015 | 3 | 4.32E-04 | 0.94 | 5.34 | - | 840.7  |
| AHQ-6-4, 5935 - 5991  | R.GAVDIDDNGYPLDVGAYGANQVAVYR.A     | 2827.05458 | 3 | 3.50E-04 | 0.82 | 4.12 | - | 771.5  |
| AHQ-6-4, 6291 - 6353  | R.GAVDIDDNGYPLDVGAYGANQVAVYR.A     | 2827.05458 | 3 | 4.37E-04 | 0.85 | 4.01 | - | 769.5  |
| AHQ-6-4, 5891         | R.GAVDIDDNGYPLDVGAYGANQVAVYR.A     | 2827.05458 | 2 | 2.39E-04 | 0.85 | 3.88 | - | 398.7  |
| AHQ-6-3, 5686 - 5761  | R.GAVDIDDNGYPLDVGAYGANQVAVYR.A     | 2827.05458 | 3 | 7.29E-05 | 0.67 | 3.49 | - | 466.9  |
| AHQ-6-11, 4739        | R.GEAQVVTQLLR.A                    | 1301.47614 | 2 | 2.02E-04 | 0.76 | 3.26 | - | 546.4  |
| AHQ-6-10, 4634 - 4650 | R.GEAQVVTQLLR.A                    | 1301.47614 | 2 | 1.42E-06 | 0.83 | 3.30 | - | 833.3  |
| AHQ-6-1, 5115         | R.GEAQVVTQLLR.A                    | 1301.47614 | 2 | 1.12E-06 | 0.92 | 3.87 | - | 1043.7 |
| AHQ-6-4, 5605         | R.GNSFPASLVVAEEGER.E               | 1733.86053 | 2 | 7.04E-07 | 0.26 | 2.54 | - | 444.0  |
| AHQ-6-4, 5221 - 5279  | R.GNSFPASLVVAEEGER.E               | 1733.86053 | 2 | 6.09E-11 | 0.94 | 4.23 | - | 913.8  |
| AHQ-6-4, 5399 - 5465  | R.GNSFPASLVVAEEGER.E               | 1733.86053 | 2 | 2.14E-11 | 0.92 | 4.14 | - | 981.9  |
| AHQ-6-6, 5119         | R.GNSFPASLVVAEEGER.E               | 1733.86053 | 2 | 3.49E-04 | 0.38 | 2.68 | - | 413.4  |
| AHQ-6-4, 5271 - 5339  | R.GNSFPASLVVAEEGER.E               | 1733.86053 | 2 | 8.17E-09 | 0.90 | 4.31 | - | 629.2  |
| AHQ-6-4, 5109 - 5189  | R.GNSFPASLVVAEEGER.E               | 1733.86053 | 2 | 1.68E-05 | 0.89 | 3.74 | - | 781.4  |
| AHQ-6-4, 6048 - 6107  | R.GNSFPASLVVAEEGEREQNSLDSWGPK.V    | 2976.16043 | 3 | 3.82E-06 | 0.81 | 3.90 | - | 434.6  |
| AHQ-6-4, 5920 - 5992  | R.GNSFPASLVVAEEGEREQNSLDSWGPK.V    | 2976.16043 | 3 | 4.14E-05 | 0.67 | 3.36 | - | 389.1  |
| AHQ-6-4, 5075 - 5137  | R.GPHALGAPSLTGTQLYGR.F             | 2023.32431 | 3 | 7.46E-05 | 0.76 | 3.21 | - | 804.7  |
| AHQ-6-4, 5080 - 5081  | R.GPHALGAPSLTGTQLYGR.F             | 2023.32431 | 2 | 8.87E-09 | 0.98 | 6.21 | - | 1342.3 |
| AHQ-6-3, 5080         | R.GPHALGAPSLTGTQLYGR.F             | 2023.32431 | 2 | 1.43E-04 | 0.96 | 5.16 | - | 1188.2 |
| AHQ-6-7, 4818         | R.GPHALGAPSLTGTQLYGR.F             | 2023.32431 | 2 | 2.07E-06 | 0.94 | 4.67 | - | 732.8  |
| AHQ-6-6, 4990 - 5000  | R.GPHALGAPSLTGTQLYGR.F             | 2023.32431 | 2 | 5.27E-06 | 0.98 | 6.25 | - | 1214.6 |
| AHQ-6-5, 5020         | R.GPHALGAPSLTGTQLYGR.F             | 2023.32431 | 3 | 4.41E-04 | 0.85 | 3.33 | - | 981.0  |
| AHQ-6-5, 5029         | R.GPHALGAPSLTGTQLYGR.F             | 2023.32431 | 2 | 2.33E-10 | 0.97 | 5.64 | - | 1007.4 |
| AHQ-6-7, 4812         | R.GPHALGAPSLTGTQLYGR.F             | 2023.32431 | 3 | 7.35E-05 | 0.77 | 3.41 | - | 752.4  |
| AHQ-6-3, 4900         | R.GQVLVFLGQSEGLR.S                 | 1503.72793 | 2 | 9.77E-04 | 0.94 | 4.11 | - | 1182.6 |
| AHQ-6-6, 4806         | R.GQVLVFLGQSEGLR.S                 | 1503.72793 | 2 | 3.74E-07 | 0.96 | 4.39 | - | 1495.9 |
| AHQ-6-4, 4989 - 5032  | R.GQVLVFLGQSEGLR.S                 | 1503.72793 | 2 | 4.24E-06 | 0.88 | 3.15 | - | 1191.3 |
| AHQ-6-5, 4840         | R.GQVLVFLGQSEGLR.S                 | 1503.72793 | 2 | 1.41E-07 | 0.96 | 4.66 | - | 1327.9 |
| AHQ-6-4, 4907 - 4931  | R.GQVLVFLGQSEGLR.S                 | 1503.72793 | 2 | 5.21E-09 | 0.98 | 5.55 | - | 1651.7 |
| AHQ-6-5, 3792         | R.HDLLVGPALYM*ESR.A                | 1617.85128 | 2 | 9.42E-05 | 0.90 | 3.69 | - | 825.2  |
| AHQ-6-4, 3855         | R.HDLLVGPALYM*ESR.A                | 1617.85128 | 3 | 9.26E-05 | 0.82 | 3.45 | - | 995.6  |
| AHQ-6-11, 4213 - 4216 | K.IVLLDVPVR.A                      | 1024.28196 | 2 | 9.98E-05 | 0.89 | 3.98 | - | 715.3  |
| AHQ-6-4, 4377 - 4384  | K.IVLLDVPVR.A                      | 1024.28196 | 2 | 4.00E-04 | 0.91 | 3.40 | - | 982.6  |
| AHQ-6-4, 4287         | R.IYVENDFSWDK.R                    | 1416.51610 | 2 | 8.24E-09 | 0.90 | 3.55 | - | 836.9  |
| AHQ-6-4, 4124         | R.IYVENDFSWDK.R                    | 1572.70245 | 2 | 7.32E-10 | 0.88 | 3.34 | - | 1161.2 |
| AHQ-6-4, 3920         | R.IYVENDFSWDK.R                    | 1572.70245 | 3 | 1.20E-05 | 0.80 | 3.06 | - | 682.0  |
| AHQ-6-4, 3897 - 3959  | R.IYVENDFSWDK.R                    | 1572.70245 | 2 | 5.95E-06 | 0.90 | 3.46 | - | 990.7  |
| AHQ-6-4, 4027         | R.IYVENDFSWDK.R                    | 1572.70245 | 2 | 3.13E-07 | 0.94 | 3.96 | - | 1219.6 |
| AHQ-6-4, 4329         | K.LLSNAELQLDR.Q                    | 1272.43310 | 1 | 2.11E-04 | 0.40 | 1.99 | - | 580.9  |
| AHQ-6-4, 4289 - 4357  | K.LLSNAELQLDR.Q                    | 1272.43310 | 2 | 3.68E-05 | 0.87 | 3.41 | - | 970.8  |
| AHQ-6-4, 4483         | K.LLSNAELQLDR.Q                    | 1272.43310 | 2 | 1.83E-07 | 0.93 | 3.58 | - | 1158.2 |
| AHQ-6-11, 2896        | R.NVGSQTLQTFK.A                    | 1223.36055 | 2 | 2.51E-04 | 0.84 | 3.08 | - | 498.3  |
| AHQ-6-4, 6591 - 6653  | R.QGLGASVVSWSDVIVACAPWQHWNVLEK.T   | 3139.53208 | 3 | 1.26E-08 | 0.93 | 5.49 | - | 592.7  |
| AHQ-6-5, 6508         | R.QGLGASVVSWSDVIVACAPWQHWNVLEK.T   | 3139.53208 | 3 | 2.92E-05 | 0.93 | 5.27 | - | 656.1  |
| AHQ-6-4, 2104 - 2111  | K.SCVLPQTK.T                       | 934.09260  | 2 | 7.57E-04 | 0.56 | 2.64 | - | 521.8  |
| AHQ-6-3, 5718         | R.SRPSQVLDSPPFTGSAFGFSRLR.G        | 2354.60606 | 3 | 8.97E-05 | 0.97 | 6.40 | - | 1761.7 |
| AHQ-6-4, 5561 - 5633  | R.SRPSQVLDSPPFTGSAFGFSRLR.G        | 2354.60606 | 3 | 1.83E-14 | 0.97 | 6.36 | - | 1592.5 |
| AHQ-6-7, 5482         | R.SRPSQVLDSPPFTGSAFGFSRLR.G        | 2354.60606 | 3 | 1.05E-11 | 0.97 | 6.50 | - | 1708.0 |
| AHQ-6-4, 5771         | R.SRPSQVLDSPPFTGSAFGFSRLR.G        | 2354.60606 | 2 | 5.23E-04 | 0.82 | 3.65 | - | 381.5  |
| AHQ-6-4, 5759 - 5819  | R.SRPSQVLDSPPFTGSAFGFSRLR.G        | 2354.60606 | 3 | 8.49E-11 | 0.96 | 6.28 | - | 1227.3 |
| AHQ-6-5, 5691         | R.SRPSQVLDSPPFTGSAFGFSRLR.G        | 2354.60606 | 3 | 9.51E-09 | 0.93 | 5.28 | - | 938.0  |
| AHQ-6-1, 5800         | R.SRPSQVLDSPPFTGSAFGFSRLR.G        | 2354.60606 | 3 | 7.19E-04 | 0.83 | 3.49 | - | 1150.1 |
| AHQ-6-5, 5669 - 5704  | R.SRPSQVLDSPPFTGSAFGFSRLR.G        | 2354.60606 | 2 | 4.83E-05 | 0.52 | 2.86 | - | 311.5  |
| AHQ-6-4, 3625 - 3703  | K.TEEAEKTPVGSFCFLAQPESSGR.R        | 2295.46902 | 3 | 2.03E-04 | 0.69 | 3.71 | - | 478.4  |
| AHQ-6-6, 3619 - 3623  | K.TEEAEKTPVGSFCFLAQPESSGR.R        | 2295.46902 | 3 | 6.02E-04 | 0.70 | 3.56 | - | 651.1  |
| AHQ-6-3, 3730         | K.TEEAEKTPVGSFCFLAQPESSGR.R        | 2295.46902 | 2 | 8.21E-04 | 0.89 | 4.06 | - | 502.5  |
| AHQ-6-5, 3647         | K.TEEAEKTPVGSFCFLAQPESSGR.R        | 2295.46902 | 3 | 1.06E-04 | 0.84 | 3.45 | - | 1063.4 |
| AHQ-6-4, 3645 - 3707  | K.TEEAEKTPVGSFCFLAQPESSGR.R        | 2295.46902 | 2 | 1.40E-09 | 0.90 | 4.27 | - | 484.1  |
| AHQ-6-4, 3400 - 3401  | K.TEEAEKTPVGSFCFLAQPESSGR.R        | 2451.65537 | 3 | 1.05E-04 | 0.71 | 3.58 | - | 444.2  |
| AHQ-6-11, 5121 - 5123 | R.TLGPSQEETGGVFLCPWR.A             | 2036.25364 | 2 | 4.88E-06 | 0.89 | 3.85 | - | 905.4  |
| AHQ-6-4, 5368 - 5447  | R.TLGPSQEETGGVFLCPWR.A             | 2036.25364 | 2 | 7.69E-05 | 0.96 | 5.28 | - | 1128.5 |
| AHQ-6-12, 5164        | R.TLGPSQEETGGVFLCPWR.A             | 2036.25364 | 2 | 3.38E-06 | 0.91 | 3.75 | - | 937.3  |
| AHQ-6-13, 5266 - 5278 | R.TLGPSQEETGGVFLCPWR.A             | 2036.25364 | 2 | 2.94E-06 | 0.82 | 3.79 | - | 680.6  |
| AHQ-6-7, 5126         | R.TLGPSQEETGGVFLCPWR.A             | 2036.25364 | 2 | 1.92E-06 | 0.89 | 4.08 | - | 683.3  |
| AHQ-6-3, 5305 - 5361  | R.TLGPSQEETGGVFLCPWR.A             | 2036.25364 | 2 | 3.00E-06 | 0.90 | 3.98 | - | 863.5  |
| AHQ-6-11, 3584        | K.TPVGSCFLAQPESSGR.R               | 1607.76993 | 2 | 9.17E-04 | 0.62 | 2.68 | - | 468.1  |
| AHQ-6-7, 3518         | K.TPVGSCFLAQPESSGR.R               | 1607.76993 | 2 | 2.76E-06 | 0.84 | 3.74 | - | 496.8  |
| AHQ-6-4, 3695 - 3760  | K.TPVGSCFLAQPESSGR.R               | 1607.76993 | 2 | 8.13E-04 | 0.95 | 3.89 | - | 1303.1 |
| AHQ-6-12, 3639        | K.TPVGSCFLAQPESSGR.R               | 1607.76993 | 2 | 5.91E-04 | 0.79 | 3.11 | - | 749.8  |
| AHQ-6-10, 3526        | K.TPVGSCFLAQPESSGR.R               | 1607.76993 | 2 | 3.75E-04 | 0.76 | 3.25 | - | 454.3  |
| AHQ-6-5, 3644 - 3651  | K.TPVGSCFLAQPESSGR.R               | 1607.76993 | 2 | 2.18E-05 | 0.89 | 3.62 | - | 749.7  |
| AHQ-6-3, 4430 - 4460  | K.TPVSCFNIQM*CVGATGHNIPQK.L        | 2478.81062 | 3 | 2.77E-04 | 0.78 | 3.36 | - | 822.7  |
| AHQ-6-4, 4847 - 4917  | K.TPVSCFNIQM*CVGATGHNIPQK.L        | 2462.81122 | 3 | 3.03E-06 | 0.92 | 4.73 | - | 743.6  |
| AHQ-6-5, 4360         | K.TPVSCFNIQM*CVGATGHNIPQK.L        | 2478.81062 | 3 | 1.73E-05 | 0.95 | 4.53 | - | 1460.1 |
| AHQ-6-4, 4445         | K.TPVSCFNIQM*CVGATGHNIPQK.L        | 2478.81062 | 2 | 5.51E-04 | 0.77 | 3.06 | - | 719.2  |
| AHQ-6-4, 4433         | K.TPVSCFNIQM*CVGATGHNIPQK.L        | 2478.81062 | 3 | 3.03E-05 | 0.92 | 3.74 | - | 1503.3 |
| AHQ-6-4, 4524         | K.TPVSCFNIQM*CVGATGHNIPQK.L        | 2478.81062 | 3 | 9.18E-10 | 0.85 | 3.93 | - | 1012.7 |
| AHQ-6-4, 2661         | R.VAIVVGAPR.T                      | 882.08560  | 2 | 3.35E-06 | 0.94 | 3.25 | - | 1242.6 |
| AHQ-6-5, 2633         | R.VAIVVGAPR.T                      | 882.08560  | 2 | 1.49E-06 | 0.93 | 3.20 | - | 1330.6 |
| AHQ-6-7, 2559         | R.VAIVVGAPR.T                      | 882.08560  | 2 | 8.33E-06 | 0.91 | 2.93 | - | 1132.5 |
| AHQ-6-4, 5813 - 5839  | R.VLLGSSQAGTLLNLDLGGK.H            | 1999.29783 | 2 | 5.04E-09 | 0.97 | 5.57 | - | 1292.1 |
| AHQ-6-4, 5548 - 5611  | R.VLLGSSQAGTLLNLDLGGK.H            | 1999.29783 | 2 | 4.51E-06 | 0.90 | 4.79 | - | 795.2  |
| AHQ-6-4, 6668 - 6727  | R.VLLGSSQAGTLLNLDLGGK.H            | 1999.29783 | 2 | 7.22E-08 | 0.98 | 5.85 | - | 2052.5 |
| AHQ-6-4, 5681 - 5720  | R.VLLGSSQAGTLLNLDLGGK.H            | 1999.29783 | 2 | 5.34E-04 | 0.96 | 5.57 | - | 1177.0 |
| AHQ-6-5, 4000         | R.VLCELGNPMK.K                     | 1261.53692 | 2 | 2.52E-05 | 0.88 | 3.39 | - | 940.9  |

|                            |                                                                         |            |   |          |       |        |       |          |
|----------------------------|-------------------------------------------------------------------------|------------|---|----------|-------|--------|-------|----------|
| AHQ-6-4, 3327              | R.VVLCELGNPM*K.K                                                        | 1277.53632 | 2 | 3.01E-05 | 0.89  | 3.28   | -     | 1061.0   |
| AHQ-6-4, 4063 - 4064       | R.VVLCELGNPMK.K                                                         | 1261.53692 | 2 | 2.66E-06 | 0.96  | 4.24   | -     | 1484.7   |
| AHQ-6-4, 4212              | R.VYFLQPR.G                                                             | 1036.25129 | 2 | 9.00E-06 | 0.93  | 3.26   | -     | 1189.9   |
| gi 4506413 ref NP_002875.1 | RAP1A, member of RAS oncogene family; RAS-related protein RAP1A [Homo s |            |   | 2.11E-14 | 8.00  | 90.34  | 49.50 | 20987.1  |
| AHQ-6-11, 2512             | K.CDLEDERVVGK.E                                                         | 1321.43945 | 2 | 2.09E-05 | 0.90  | 3.27   | -     | 1167.1   |
| AHQ-6-11, 6329             | R.DLYM*KNGQGALVYSITAQSTFNDLQDLR.E                                       | 3326.68143 | 3 | 2.02E-08 | 0.89  | 4.48   | -     | 1135.6   |
| AHQ-6-11, 6188 - 6269      | R.DLYM*KNGQGALVYSITAQSTFNDLQDLR.E                                       | 3326.68143 | 3 | 2.11E-14 | 0.98  | 6.87   | -     | 1714.8   |
| AHQ-6-13, 6320             | K.INNVNFIYDLVR.Q                                                        | 1495.70427 | 2 | 4.38E-09 | 0.96  | 4.67   | -     | 1490.5   |
| AHQ-6-11, 6037             | K.INNVNFIYDLVR.Q                                                        | 1495.70427 | 2 | 1.75E-06 | 0.86  | 3.20   | -     | 964.9    |
| AHQ-6-11, 5140             | K.INNVNFIYDLVR.Q                                                        | 1495.70427 | 2 | 3.68E-04 | 0.88  | 3.24   | -     | 1180.1   |
| AHQ-6-11, 6148             | K.INNVNFIYDLVR.Q                                                        | 1495.70427 | 1 | 1.01E-04 | 0.40  | 2.60   | -     | 190.2    |
| AHQ-6-11, 6143             | K.INNVNFIYDLVR.Q                                                        | 1495.70427 | 1 | 8.31E-04 | 0.46  | 3.14   | -     | 264.4    |
| AHQ-6-11, 5441 - 5452      | K.INNVNFIYDLVR.Q                                                        | 1495.70427 | 2 | 1.18E-07 | 0.93  | 3.61   | -     | 1336.1   |
| AHQ-6-11, 6132 - 6195      | K.INNVNFIYDLVR.Q                                                        | 1495.70427 | 2 | 1.71E-08 | 0.96  | 5.06   | -     | 1276.6   |
| AHQ-6-14-, 5588            | K.INNVNFIYDLVR.Q                                                        | 1495.70427 | 2 | 4.89E-05 | 0.73  | 2.52   | -     | 752.1    |
| AHQ-6-12, 2863             | K.LVVLGSGGVGK.S                                                         | 986.19059  | 2 | 3.22E-04 | 0.56  | 2.74   | -     | 460.0    |
| AHQ-6-11, 2787 - 2844      | K.LVVLGSGGVGK.S                                                         | 986.19059  | 2 | 1.01E-05 | 0.92  | 3.83   | -     | 973.7    |
| AHQ-6-11, 6364 - 6373      | K.NGQGFALVYSITAQSTFNDLQDLR.E                                            | 2659.89181 | 2 | 1.59E-05 | 0.95  | 4.56   | -     | 1367.4   |
| AHQ-6-11, 6227 - 6291      | K.NGQGFALVYSITAQSTFNDLQDLR.E                                            | 2659.89181 | 2 | 4.25E-06 | 0.97  | 5.04   | -     | 1655.0   |
| AHQ-6-11, 5675 - 5743      | K.SALTQVFGQGFVEK.Y                                                      | 1666.94196 | 2 | 2.72E-06 | 0.95  | 4.33   | -     | 1291.5   |
| AHQ-6-11, 5631             | K.SALTQVFGQGFVEK.Y                                                      | 1666.94196 | 3 | 1.34E-04 | 0.94  | 3.60   | -     | 1844.2   |
| AHQ-6-11, 5431 - 5440      | K.SALTQVFGQGFVEK.Y                                                      | 1666.94196 | 2 | 3.05E-05 | 0.82  | 3.45   | -     | 713.9    |
| AHQ-6-14-, 5762            | K.SALTQVFGQGFVEK.Y                                                      | 1666.94196 | 2 | 2.31E-06 | 0.96  | 3.79   | -     | 1770.5   |
| AHQ-6-11, 5800 - 5871      | K.SALTQVFGQGFVEK.Y                                                      | 1666.94196 | 2 | 1.53E-05 | 0.96  | 4.11   | -     | 1940.8   |
| AHQ-6-13-, 5798 - 5870     | K.SALTQVFGQGFVEK.Y                                                      | 1666.94196 | 2 | 1.41E-04 | 0.96  | 4.87   | -     | 1577.7   |
| AHQ-6-11, 5927 - 5989      | K.SALTQVFGQGFVEK.Y                                                      | 1666.94196 | 2 | 2.45E-05 | 0.94  | 4.68   | -     | 1170.7   |
| AHQ-6-11, 6328             | K.SALTQVFGQGFVEK.Y                                                      | 1666.94196 | 2 | 4.68E-05 | 0.94  | 3.95   | -     | 1241.2   |
| AHQ-6-14-, 5863            | K.SKINVNEIFYDLVR.Q                                                      | 1710.95483 | 3 | 4.22E-05 | 0.90  | 3.57   | -     | 1365.6   |
| AHQ-6-11, 5696             | K.SKINVNEIFYDLVR.Q                                                      | 1710.95483 | 3 | 9.35E-05 | 0.78  | 3.43   | -     | 852.3    |
| AHQ-6-11, 5200             | K.SKINVNEIFYDLVR.Q                                                      | 1710.95483 | 2 | 5.48E-08 | 0.83  | 3.51   | -     | 612.8    |
| AHQ-6-11, 5011             | K.SKINVNEIFYDLVR.Q                                                      | 1710.95483 | 2 | 2.15E-07 | 0.92  | 3.64   | -     | 851.3    |
| AHQ-6-11, 5692 - 5773      | K.SKINVNEIFYDLVR.Q                                                      | 1710.95483 | 2 | 3.47E-06 | 0.67  | 3.01   | -     | 759.4    |
| AHQ-6-11, 5827 - 5884      | K.SKINVNEIFYDLVR.Q                                                      | 1710.95483 | 2 | 7.00E-06 | 0.62  | 2.86   | -     | 466.7    |
| AHQ-6-14-, 5163            | K.SKINVNEIFYDLVR.Q                                                      | 1710.95483 | 2 | 2.42E-04 | 0.63  | 3.06   | -     | 562.5    |
| AHQ-6-14-, 2842            | K.YDPTIEDSYR.K                                                          | 1259.30338 | 2 | 1.99E-05 | 0.80  | 2.59   | -     | 396.7    |
| AHQ-6-11, 2360 - 2361      | K.YDPTIEDSYR.Q                                                          | 1387.47629 | 2 | 1.60E-05 | 0.69  | 2.77   | -     | 451.3    |
| AHQ-6-11, 2451             | K.YDPTIEDSYR.Q                                                          | 1387.47629 | 2 | 1.95E-05 | 0.63  | 2.69   | -     | 304.3    |
| gi 4507485 ref NP_003237.1 | thrombospondin 1 [Homo sapiens]                                         |            |   | 2.66E-14 | 35.28 | 410.33 | 33.80 | 129351.8 |
| AHQ-6-2, 3994 - 4054       | K.AGTLDSLTVQGG.Q                                                        | 1303.48711 | 2 | 1.58E-04 | 0.95  | 3.82   | -     | 1404.1   |
| AHQ-6-2, 4127              | K.AGTLDSLTVQGG.Q                                                        | 1303.48711 | 2 | 4.09E-05 | 0.92  | 3.95   | -     | 999.3    |
| AHQ-6-4, 4021              | K.AGTLDSLTVQGG.Q                                                        | 1303.48711 | 2 | 1.71E-06 | 0.94  | 3.86   | -     | 1502.8   |
| AHQ-6-6, 3903 - 3980       | K.AGTLDSLTVQGG.Q                                                        | 1303.48711 | 2 | 1.46E-04 | 0.86  | 3.44   | -     | 896.0    |
| AHQ-6-3, 4092              | K.AGTLDSLTVQGG.Q                                                        | 1303.48711 | 2 | 5.41E-04 | 0.96  | 3.79   | -     | 1826.2   |
| AHQ-6-2, 2814              | R.AQLYIDCEK.M                                                           | 1141.27636 | 2 | 8.47E-04 | 0.81  | 3.02   | -     | 580.5    |
| AHQ-6-6, 2736              | R.AQLYIDCEK.M                                                           | 1141.27636 | 2 | 5.11E-04 | 0.77  | 2.62   | -     | 695.1    |
| AHQ-6-2, 5663 - 5742       | R.AQLYIDCEKM*ENAEADVPIQSVFTR.D                                          | 2988.33923 | 3 | 2.67E-08 | 0.96  | 6.05   | -     | 1098.0   |
| AHQ-6-5, 5620 - 5680       | R.AQLYIDCEKM*ENAEADVPIQSVFTR.D                                          | 2988.33923 | 3 | 2.05E-06 | 0.95  | 6.03   | -     | 947.0    |
| AHQ-6-6, 3702 - 3707       | R.CENTDPGYNCLPCPPR.F                                                    | 1954.10800 | 2 | 3.41E-06 | 0.91  | 4.37   | -     | 534.7    |
| AHQ-6-5, 3601              | R.CENTDPGYNCLPCPPR.F                                                    | 1954.10800 | 2 | 1.57E-06 | 0.88  | 4.17   | -     | 473.6    |
| AHQ-6-3, 3776 - 3837       | R.CENTDPGYNCLPCPPR.F                                                    | 1954.10800 | 2 | 1.69E-05 | 0.83  | 3.41   | -     | 520.9    |
| AHQ-6-2, 3683              | R.CENTDPGYNCLPCPPR.F                                                    | 1954.10800 | 2 | 1.67E-08 | 0.91  | 3.81   | -     | 659.3    |
| AHQ-6-5, 3729              | R.CENTDPGYNCLPCPPR.F                                                    | 1954.10800 | 2 | 7.78E-06 | 0.90  | 3.34   | -     | 829.4    |
| AHQ-6-4, 3787              | R.CENTDPGYNCLPCPPR.F                                                    | 1954.10800 | 2 | 9.79E-04 | 0.81  | 3.37   | -     | 496.4    |
| AHQ-6-3, 3356 - 3364       | K.CNYLGHYSDFPM*YR.C                                                     | 1693.84162 | 2 | 5.48E-04 | 0.89  | 3.67   | -     | 630.2    |
| AHQ-6-4, 3807              | K.CNYLGHYSDFPM*YR.C                                                     | 1677.84222 | 2 | 6.17E-04 | 0.94  | 3.99   | -     | 890.5    |
| AHQ-6-2, 3847 - 3855       | K.CNYLGHYSDFPM*YR.C                                                     | 1677.84222 | 2 | 1.98E-07 | 0.95  | 4.16   | -     | 958.1    |
| AHQ-6-3, 3805              | K.CNYLGHYSDFPM*YR.C                                                     | 1677.84222 | 2 | 5.79E-05 | 0.90  | 3.10   | -     | 1093.2   |
| AHQ-6-5, 3179              | K.DCVGDVTENQICNK.Q                                                      | 1654.75869 | 2 | 1.37E-04 | 0.93  | 3.98   | -     | 1071.4   |
| AHQ-6-3, 3240 - 3241       | K.DCVGDVTENQICNK.Q                                                      | 1654.75869 | 2 | 2.18E-06 | 0.96  | 4.47   | -     | 1218.5   |
| AHQ-6-6, 3178              | K.DCVGDVTENQICNK.Q                                                      | 1654.75869 | 2 | 2.51E-04 | 0.89  | 3.71   | -     | 803.1    |
| AHQ-6-2, 2826 - 2896       | K.DHSGQVFSVSNKG.A                                                       | 1461.56164 | 2 | 4.89E-06 | 0.95  | 3.96   | -     | 1429.6   |
| AHQ-6-5, 2911 - 2943       | K.DHSGQVFSVSNKG.A                                                       | 1461.56164 | 2 | 2.51E-08 | 0.84  | 3.12   | -     | 756.9    |
| AHQ-6-6, 2916              | K.DHSGQVFSVSNKG.A                                                       | 1461.56164 | 2 | 8.49E-06 | 0.95  | 3.93   | -     | 1155.6   |
| AHQ-6-2, 3002 - 3034       | K.DHSGQVFSVSNKG.A                                                       | 1461.56164 | 2 | 6.43E-05 | 0.80  | 3.26   | -     | 639.2    |
| AHQ-6-3, 3000              | K.DHSGQVFSVSNKG.A                                                       | 1461.56164 | 2 | 1.75E-06 | 0.92  | 3.40   | -     | 1009.8   |
| AHQ-6-6, 2807              | K.DHSGQVFSVSNKG.A                                                       | 1461.56164 | 2 | 4.51E-05 | 0.96  | 3.50   | -     | 1658.7   |
| AHQ-6-3, 2832 - 2896       | K.DHSGQVFSVSNKG.A                                                       | 1461.56164 | 2 | 1.36E-05 | 0.96  | 4.55   | -     | 1489.9   |
| AHQ-6-2, 6539              | K.DLQAIQIGISCDLSSMVLRLR.G                                               | 2412.74406 | 3 | 2.82E-10 | 0.97  | 5.10   | -     | 1770.7   |
| AHQ-6-3, 3172              | R.DNCQYVYVNDQR.D                                                        | 1575.64166 | 2 | 6.21E-07 | 0.86  | 3.36   | -     | 929.2    |
| AHQ-6-7, 2908              | R.DNCQYVYVNDQR.D                                                        | 1575.64166 | 2 | 4.86E-06 | 0.91  | 3.86   | -     | 1008.9   |
| AHQ-6-4, 3167              | R.DNCQYVYVNDQR.D                                                        | 1575.64166 | 2 | 2.50E-06 | 0.94  | 4.06   | -     | 1576.1   |
| AHQ-6-6, 2974              | R.DNCQYVYVNDQR.D                                                        | 1575.64166 | 2 | 9.17E-04 | 0.73  | 3.04   | -     | 667.6    |
| AHQ-6-2, 3155 - 3195       | R.DNCQYVYVNDQR.D                                                        | 1575.64166 | 2 | 9.12E-05 | 0.66  | 2.72   | -     | 731.1    |
| AHQ-6-2, 3059              | R.DNCQYVYVNDQR.D                                                        | 1575.64166 | 2 | 2.65E-05 | 0.69  | 2.84   | -     | 867.9    |
| AHQ-6-6, 3107 - 3131       | R.DNCQYVYVNDQR.D                                                        | 1575.64166 | 2 | 2.92E-05 | 0.93  | 3.66   | -     | 1354.7   |
| AHQ-6-3, 3048              | R.DNCQYVYVNDQR.D                                                        | 1575.64166 | 2 | 6.68E-06 | 0.93  | 4.01   | -     | 992.6    |
| AHQ-6-3, 3589 - 3649       | R.DTDM*DGVDGQDCNCPLEHNPDLQDSDSDR.I                                      | 3340.31822 | 3 | 8.94E-08 | 0.93  | 4.81   | -     | 950.0    |
| AHQ-6-3, 3680 - 3753       | R.DTDM*DGVDGQDCNCPLEHNPDLQDSDSDR.I                                      | 3340.31822 | 3 | 1.30E-13 | 0.92  | 4.94   | -     | 784.9    |
| AHQ-6-5, 3571 - 3631       | R.DTDM*DGVDGQDCNCPLEHNPDLQDSDSDR.I                                      | 3340.31822 | 3 | 1.41E-09 | 0.94  | 5.37   | -     | 770.6    |
| AHQ-6-6, 3570              | R.DTDM*DGVDGQDCNCPLEHNPDLQDSDSDR.I                                      | 3340.31822 | 3 | 2.66E-14 | 0.94  | 4.97   | -     | 1151.1   |
| AHQ-6-4, 3644              | R.DTDM*DGVDGQDCNCPLEHNPDLQDSDSDR.I                                      | 3340.31822 | 3 | 1.33E-10 | 0.92  | 4.84   | -     | 790.6    |
| AHQ-6-2, 4019              | R.DTDM*DGVDGQDCNCPLEHNPDLQDSDSDR.I                                      | 3324.31882 | 3 | 1.12E-05 | 0.95  | 5.46   | -     | 748.5    |
| AHQ-6-2, 3591 - 3654       | R.DTDM*DGVDGQDCNCPLEHNPDLQDSDSDR.I                                      | 3340.31822 | 3 | 6.14E-07 | 0.88  | 4.00   | -     | 813.3    |
| AHQ-6-2, 3714 - 3784       | R.DTDM*DGVDGQDCNCPLEHNPDLQDSDSDR.I                                      | 3340.31822 | 3 | 2.67E-09 | 0.94  | 5.40   | -     | 878.4    |
| AHQ-6-4, 3995              | R.DTDM*DGVDGQDCNCPLEHNPDLQDSDSDR.I                                      | 3324.31882 | 3 | 1.58E-05 | 0.94  | 5.22   | -     | 803.6    |
| AHQ-6-6, 3907              | R.DTDM*DGVDGQDCNCPLEHNPDLQDSDSDR.I                                      | 3324.31882 | 3 | 1.91E-07 | 0.93  | 5.13   | -     | 824.4    |
| AHQ-6-3, 3604              | K.FQDLVDAVR.A                                                           | 1063.18877 | 2 | 8.25E-06 | 0.88  | 3.06   | -     | 975.7    |
| AHQ-6-10, 3419 - 3424      | K.FQDLVDAVR.A                                                           | 1063.18877 | 2 | 1.95E-05 | 0.83  | 2.64   | -     | 920.8    |
| AHQ-6-2, 3626              | K.FQDLVDAVR.A                                                           | 1063.18877 | 2 | 2.46E-06 | 0.81  | 2.74   | -     | 863.1    |
| AHQ-6-3, 4192              | R.FQMIPDPK.G                                                            | 1089.33277 | 2 | 1.82E-04 | 0.79  | 2.70   | -     | 753.4    |
| AHQ-6-5, 2803 - 2879       | R.FTGSQPFQGGVEHATANK.Q                                                  | 1877.00666 | 2 | 4.93E-09 | 0.70  | 3.19   | -     | 304.0    |
| AHQ-6-4, 3007              | R.FTGSQPFQGGVEHATANK.Q                                                  | 1877.00666 | 2 | 6.37E-07 | 0.78  | 3.67   | -     | 327.3    |
| AHQ-6-5, 2872              | R.FTGSQPFQGGVEHATANK.Q                                                  | 1877.00666 | 2 | 2.42E-06 | 0.93  | 4.38   | -     | 668.9    |
| AHQ-6-8, 2668              | R.FTGSQPFQGGVEHATANK.Q                                                  | 1877.00666 | 2 | 1.67E-04 | 0.85  | 3.89   | -     | 594.7    |
| AHQ-6-1, 3188              | R.FTGSQPFQGGVEHATANK.Q                                                  | 1877.00666 | 2 | 3.47E-04 | 0.79  | 3.44   | -     | 536.8    |
| AHQ-6-3, 3049              | R.FTGSQPFQGGVEHATANK.Q                                                  | 1877.00666 | 2 | 5.99E-05 | 0.62  | 3.22   | -     | 280.2    |
| AHQ-6-6, 2874 - 2876       | R.FTGSQPFQGGVEHATANK.Q                                                  | 1877.00666 | 2 | 1.52E-05 | 0.88  | 3.94   | -     | 601.5    |
| AHQ-6-2, 2976 - 3050       | R.FTGSQPFQGGVEHATANK.Q                                                  | 1877.00666 | 2 | 2.97E-07 | 0.89  | 4.31   | -     | 506.9    |
| AHQ-6-3, 2885 - 2960       | R.FTGSQPFQGGVEHATANK.Q                                                  | 1877.00666 | 2 | 9.48E-04 | 0.91  | 4.44   | -     | 526.9    |
| AHQ-6-4, 2911              | R.FTGSQPFQGGVEHATANK.Q                                                  | 1877.00666 | 2 | 1.94E-05 | 0.91  | 4.38   | -     | 488.5    |
| AHQ-6-11, 5047 - 5048      | R.FVFGTTPEDILR.N                                                        | 1395.58470 | 2 | 4.32E-05 | 0.64  | 3.06   | -     | 427.0    |
| AHQ-6-1, 5382              | R.FVFGTTPEDILR.N                                                        | 1395.58470 | 2 | 5.36E-04 | 0.74  | 2.57   | -     | 681.4    |
| AHQ-6-4, 5340              | R.FVFGTTPEDILR.N                                                        | 1395.58470 | 1 | 3.80E-04 | 0.10  | 2.01   | -     | 175.2    |
| AHQ-6-3, 5268              | R.FVFGTTPEDILR.N                                                        | 1395.58470 | 2 | 5.27E-04 | 0.78  | 2.63   | -     | 804.8    |
| AHQ-6-11, 5160             | K.GFLLASLR.Q                                                            | 990.22407  | 2 | 3.87E-04 | 0.93  | 2.88   | -     | 1516.5   |
| AHQ-6-13, 5425             | K.GFLLASLR.Q                                                            | 990.22407  | 2 | 6.22E-04 | 0.85  | 2.58   | -     | 1004.8   |
| AHQ-6-4, 5433              | K.GFLLASLR.Q                                                            | 990.22407  | 2 | 4.26E-04 | 0.97  | 3.56   | -     | 2266.4   |

|                        |                               |            |   |          |      |      |   |        |
|------------------------|-------------------------------|------------|---|----------|------|------|---|--------|
| AHQ-6-1, 5520          | K.GFLLLASLR.Q                 | 990.22407  | 2 | 8.29E-05 | 0.96 | 3.71 | - | 1936.0 |
| AHQ-6-3, 5393          | K.GFLLLASLR.Q                 | 990.22407  | 2 | 2.00E-04 | 0.96 | 3.75 | - | 1951.3 |
| AHQ-6-5, 5351          | K.GFLLLASLR.Q                 | 990.22407  | 2 | 3.30E-04 | 0.95 | 2.88 | - | 1885.5 |
| AHQ-6-2, 5430 - 5444   | K.GFLLLASLR.Q                 | 990.22407  | 2 | 3.67E-05 | 0.97 | 4.03 | - | 2100.7 |
| AHQ-6-7, 4266 - 4324   | K.GGVNDFQGVQLQNR.F            | 1617.74799 | 2 | 3.17E-04 | 0.85 | 3.37 | - | 983.3  |
| AHQ-6-11, 4223         | K.GGVNDFQGVQLQNR.F            | 1617.74799 | 2 | 3.19E-04 | 0.65 | 2.91 | - | 483.0  |
| AHQ-6-5, 4035 - 4105   | K.GGVNDFQGVQLQNR.F            | 1617.74799 | 2 | 3.19E-07 | 0.92 | 4.22 | - | 909.0  |
| AHQ-6-6, 4402 - 4463   | K.GGVNDFQGVQLQNR.F            | 1617.74799 | 2 | 1.95E-05 | 0.90 | 4.32 | - | 746.6  |
| AHQ-6-6, 4306          | K.GGVNDFQGVQLQNR.F            | 1617.74799 | 2 | 4.41E-07 | 0.89 | 3.62 | - | 918.3  |
| AHQ-6-6, 4224          | K.GGVNDFQGVQLQNR.F            | 1617.74799 | 2 | 9.44E-07 | 0.85 | 4.05 | - | 582.6  |
| AHQ-6-3, 4344 - 4409   | K.GGVNDFQGVQLQNR.F            | 1617.74799 | 2 | 8.98E-04 | 0.91 | 4.40 | - | 879.4  |
| AHQ-6-10, 4091 - 4166  | K.GGVNDFQGVQLQNR.F            | 1617.74799 | 2 | 7.35E-04 | 0.90 | 4.06 | - | 923.8  |
| AHQ-6-3, 4516          | K.GGVNDFQGVQLQNR.F            | 1617.74799 | 2 | 2.81E-06 | 0.79 | 3.54 | - | 661.7  |
| AHQ-6-3, 4638          | K.GGVNDFQGVQLQNR.F            | 1617.74799 | 2 | 2.56E-06 | 0.75 | 3.37 | - | 622.2  |
| AHQ-6-6, 4084 - 4152   | K.GGVNDFQGVQLQNR.F            | 1617.74799 | 2 | 2.75E-04 | 0.90 | 4.07 | - | 920.1  |
| AHQ-6-4, 4523 - 4587   | K.GGVNDFQGVQLQNR.F            | 1617.74799 | 2 | 1.48E-04 | 0.75 | 3.20 | - | 603.2  |
| AHQ-6-4, 4435 - 4459   | K.GGVNDFQGVQLQNR.F            | 1617.74799 | 2 | 9.17E-05 | 0.76 | 3.19 | - | 491.3  |
| AHQ-6-4, 4337          | K.GGVNDFQGVQLQNR.F            | 1617.74799 | 2 | 4.63E-05 | 0.87 | 3.94 | - | 564.0  |
| AHQ-6-2, 4663          | K.GGVNDFQGVQLQNR.F            | 1617.74799 | 2 | 9.11E-07 | 0.75 | 2.80 | - | 677.1  |
| AHQ-6-5, 4272 - 4347   | K.GGVNDFQGVQLQNR.F            | 1617.74799 | 2 | 2.77E-05 | 0.90 | 3.55 | - | 918.2  |
| AHQ-6-5, 4440 - 4501   | K.GGVNDFQGVQLQNR.F            | 1617.74799 | 2 | 1.34E-05 | 0.87 | 4.00 | - | 692.2  |
| AHQ-6-2, 4380 - 4442   | K.GGVNDFQGVQLQNR.F            | 1617.74799 | 2 | 6.31E-08 | 0.91 | 4.52 | - | 805.1  |
| AHQ-6-1, 4491 - 4548   | K.GGVNDFQGVQLQNR.F            | 1617.74799 | 2 | 6.96E-07 | 0.91 | 4.33 | - | 787.5  |
| AHQ-6-7, 4102 - 4167   | K.GGVNDFQGVQLQNR.F            | 1617.74799 | 2 | 1.86E-05 | 0.77 | 3.66 | - | 560.7  |
| AHQ-6-2, 2246          | K.GPDPSSPAFR.I                | 1031.10364 | 2 | 5.57E-05 | 0.72 | 3.04 | - | 488.1  |
| AHQ-6-3, 2246 - 2270   | K.GPDPSSPAFR.I                | 1031.10364 | 2 | 4.82E-05 | 0.64 | 2.87 | - | 440.4  |
| AHQ-6-5, 3075          | R.GTLLALER.K                  | 873.03234  | 2 | 2.31E-04 | 0.91 | 3.14 | - | 1191.1 |
| AHQ-6-2, 3180          | R.GTLLALER.K                  | 873.03234  | 2 | 6.35E-04 | 0.91 | 3.27 | - | 1215.8 |
| AHQ-6-10, 3020         | R.GTLLALER.K                  | 873.03234  | 2 | 7.34E-04 | 0.85 | 2.90 | - | 859.3  |
| AHQ-6-4, 3147          | R.GTLLALER.K                  | 873.03234  | 2 | 3.16E-04 | 0.85 | 2.85 | - | 1038.4 |
| AHQ-6-12, 3148         | R.GTLLALER.K                  | 873.03234  | 2 | 4.67E-04 | 0.79 | 2.98 | - | 782.2  |
| AHQ-6-3, 2778          | K.GTSQNDPNWVVR.H              | 1373.45608 | 2 | 2.98E-04 | 0.50 | 2.75 | - | 646.8  |
| AHQ-6-4, 6128          | R.IEDANLIPPVDDKFDQLVDVAVR.A   | 2580.87450 | 2 | 4.43E-08 | 0.76 | 3.50 | - | 336.7  |
| AHQ-6-8, 5922          | R.IEDANLIPPVDDKFDQLVDVAVR.A   | 2580.87450 | 3 | 5.32E-08 | 0.62 | 3.18 | - | 363.3  |
| AHQ-6-3, 6036 - 6097   | R.IEDANLIPPVDDKFDQLVDVAVR.A   | 2580.87450 | 3 | 1.02E-13 | 0.82 | 3.86 | - | 390.9  |
| AHQ-6-6, 5956 - 6022   | R.IEDANLIPPVDDKFDQLVDVAVR.A   | 2580.87450 | 3 | 5.11E-08 | 0.79 | 3.75 | - | 391.9  |
| AHQ-6-13-, 5925        | R.IEDANLIPPVDDKFDQLVDVAVR.A   | 2580.87450 | 3 | 2.99E-04 | 0.67 | 3.18 | - | 349.1  |
| AHQ-6-6, 6078          | R.IEDANLIPPVDDKFDQLVDVAVR.A   | 2580.87450 | 3 | 2.41E-04 | 0.72 | 3.29 | - | 373.7  |
| AHQ-6-2, 6068 - 6126   | R.IEDANLIPPVDDKFDQLVDVAVR.A   | 2580.87450 | 3 | 1.51E-08 | 0.91 | 4.94 | - | 450.9  |
| AHQ-6-7, 5814 - 5870   | R.IEDANLIPPVDDKFDQLVDVAVR.A   | 2580.87450 | 3 | 8.29E-08 | 0.86 | 4.36 | - | 391.8  |
| AHQ-6-14-, 5922 - 5987 | R.IEDANLIPPVDDKFDQLVDVAVR.A   | 2580.87450 | 3 | 5.47E-06 | 0.81 | 3.71 | - | 380.1  |
| AHQ-6-3, 6049 - 6108   | R.IEDANLIPPVDDKFDQLVDVAVR.A   | 2580.87450 | 2 | 1.35E-04 | 0.41 | 2.53 | - | 237.0  |
| AHQ-6-3, 6152 - 6160   | R.IEDANLIPPVDDKFDQLVDVAVR.A   | 2580.87450 | 3 | 2.51E-04 | 0.77 | 3.48 | - | 491.7  |
| AHQ-6-2, 2384 - 2431   | K.IM*ADSGPIYDK.T              | 1226.38144 | 2 | 3.66E-05 | 0.75 | 3.23 | - | 485.2  |
| AHQ-6-11, 2657         | K.IMADSGPIYDK.T               | 1210.38204 | 2 | 6.13E-04 | 0.64 | 2.71 | - | 582.8  |
| AHQ-6-12, 2413 - 2420  | K.IM*ADSGPIYDK.T              | 1226.38144 | 2 | 4.60E-04 | 0.85 | 2.84 | - | 1032.0 |
| AHQ-6-2, 2698          | K.IMADSGPIYDK.T               | 1210.38204 | 2 | 5.13E-05 | 0.77 | 2.96 | - | 496.6  |
| AHQ-6-6, 2638 - 2646   | K.IMADSGPIYDK.T               | 1210.38204 | 2 | 1.32E-07 | 0.94 | 3.69 | - | 1025.3 |
| AHQ-6-8, 2552          | K.IMADSGPIYDK.T               | 1210.38204 | 2 | 7.08E-06 | 0.83 | 3.25 | - | 530.7  |
| AHQ-6-3, 2708          | K.IMADSGPIYDK.T               | 1210.38204 | 2 | 3.41E-05 | 0.94 | 3.49 | - | 1038.1 |
| AHQ-6-12, 2700         | K.IMADSGPIYDK.T               | 1210.38204 | 2 | 8.92E-05 | 0.81 | 3.27 | - | 545.6  |
| AHQ-6-2, 6378 - 6435   | R.IPESGGDNVDFIFELTGAAR.K      | 2196.35899 | 2 | 3.70E-09 | 0.97 | 5.73 | - | 1245.7 |
| AHQ-6-3, 6352 - 6353   | R.IPESGGDNVDFIFELTGAAR.K      | 2196.35899 | 2 | 2.86E-10 | 0.97 | 6.55 | - | 775.6  |
| AHQ-6-13-, 6228        | R.IPESGGDNVDFIFELTGAAR.K      | 2196.35899 | 2 | 5.30E-09 | 0.96 | 5.48 | - | 874.0  |
| AHQ-6-6, 6266 - 6327   | R.IPESGGDNVDFIFELTGAAR.K      | 2196.35899 | 2 | 2.58E-12 | 0.93 | 4.54 | - | 592.0  |
| AHQ-6-1, 6407          | R.IPESGGDNVDFIFELTGAAR.K      | 2196.35899 | 2 | 2.94E-05 | 0.88 | 4.20 | - | 767.2  |
| AHQ-6-10, 5986 - 6030  | R.IPESGGDNVDFIFELTGAAR.K      | 2196.35899 | 2 | 1.59E-04 | 0.64 | 3.34 | - | 315.1  |
| AHQ-6-11, 6093         | R.IPESGGDNVDFIFELTGAAR.K      | 2196.35899 | 2 | 8.93E-04 | 0.61 | 2.88 | - | 417.2  |
| AHQ-6-14-, 6242        | R.IPESGGDNVDFIFELTGAAR.K      | 2196.35899 | 2 | 7.62E-08 | 0.94 | 5.45 | - | 631.9  |
| AHQ-6-5, 6305 - 6363   | R.IPESGGDNVDFIFELTGAAR.K      | 2196.35899 | 2 | 6.96E-10 | 0.98 | 5.96 | - | 1524.9 |
| AHQ-6-5, 6348          | R.IPESGGDNVDFIFELTGAAR.K      | 2196.35899 | 2 | 4.70E-10 | 0.98 | 6.39 | - | 1326.4 |
| AHQ-6-4, 6435          | R.IPESGGDNVDFIFELTGAAR.K      | 2196.35899 | 2 | 8.30E-11 | 0.96 | 5.20 | - | 1087.8 |
| AHQ-6-7, 6130          | R.IPESGGDNVDFIFELTGAAR.K      | 2196.35899 | 2 | 1.31E-08 | 0.95 | 4.84 | - | 946.9  |
| AHQ-6-3, 2490 - 2548   | R.KDHSQGVFSVWSNGK.A           | 1589.73455 | 2 | 4.50E-05 | 0.78 | 3.14 | - | 503.0  |
| AHQ-6-3, 2470          | R.KDHSQGVFSVWSNGK.A           | 1589.73455 | 3 | 1.07E-04 | 0.92 | 4.21 | - | 1236.3 |
| AHQ-6-3, 2406 - 2469   | R.KDHSQGVFSVWSNGK.A           | 1589.73455 | 2 | 7.44E-07 | 0.84 | 3.24 | - | 788.8  |
| AHQ-6-4, 2416 - 2479   | R.KDHSQGVFSVWSNGK.A           | 1589.73455 | 2 | 4.03E-11 | 0.94 | 3.72 | - | 1316.7 |
| AHQ-6-2, 2472          | R.KDHSQGVFSVWSNGK.A           | 1589.73455 | 3 | 5.83E-06 | 0.87 | 3.61 | - | 1212.5 |
| AHQ-6-5, 2384 - 2456   | R.KDHSQGVFSVWSNGK.A           | 1589.73455 | 3 | 2.04E-05 | 0.88 | 3.62 | - | 1326.8 |
| AHQ-6-2, 2478 - 2480   | R.KDHSQGVFSVWSNGK.A           | 1589.73455 | 2 | 2.72E-07 | 0.87 | 3.84 | - | 691.7  |
| AHQ-6-5, 2381 - 2447   | R.KDHSQGVFSVWSNGK.A           | 1589.73455 | 2 | 2.35E-07 | 0.76 | 3.44 | - | 619.5  |
| AHQ-6-2, 2574          | R.KDHSQGVFSVWSNGK.A           | 1589.73455 | 2 | 7.00E-10 | 0.91 | 3.73 | - | 997.5  |
| AHQ-6-6, 2395 - 2468   | R.KDHSQGVFSVWSNGK.A           | 1589.73455 | 3 | 1.47E-05 | 0.90 | 3.48 | - | 1522.4 |
| AHQ-6-6, 2391 - 2459   | R.KDHSQGVFSVWSNGK.A           | 1589.73455 | 2 | 1.16E-06 | 0.44 | 2.74 | - | 336.8  |
| AHQ-6-12, 2509 - 2552  | K.KIMADSGPIYDK.T              | 1338.55496 | 2 | 5.08E-05 | 0.63 | 2.59 | - | 559.4  |
| AHQ-6-2, 2482          | R.KVTEENKELANL.R              | 1673.84976 | 2 | 9.39E-11 | 0.94 | 4.27 | - | 1373.9 |
| AHQ-6-3, 2218          | R.KVTEENKELANL.R              | 1673.84976 | 2 | 8.50E-09 | 0.94 | 4.20 | - | 1327.1 |
| AHQ-6-2, 2214          | R.KVTEENKELANL.R              | 1673.84976 | 2 | 2.02E-09 | 0.96 | 4.87 | - | 1588.5 |
| AHQ-6-4, 2431 - 2475   | R.KVTEENKELANL.R              | 1673.84976 | 2 | 1.67E-08 | 0.94 | 4.72 | - | 1340.0 |
| AHQ-6-5, 2403 - 2461   | R.KVTEENKELANL.R              | 1673.84976 | 2 | 2.52E-06 | 0.93 | 4.90 | - | 747.1  |
| AHQ-6-3, 2488          | R.KVTEENKELANL.R              | 1673.84976 | 3 | 1.30E-07 | 0.69 | 3.37 | - | 573.7  |
| AHQ-6-8, 2267          | R.KVTEENKELANL.R              | 1673.84976 | 2 | 9.09E-08 | 0.93 | 4.63 | - | 1067.4 |
| AHQ-6-3, 2484          | R.KVTEENKELANL.R              | 1673.84976 | 2 | 8.11E-11 | 0.90 | 4.62 | - | 889.0  |
| AHQ-6-6, 2160          | R.KVTEENKELANL.R              | 1673.84976 | 2 | 1.82E-06 | 0.53 | 2.85 | - | 480.3  |
| AHQ-6-4, 2552          | R.KVTEENKELANL.R              | 1673.84976 | 2 | 1.11E-09 | 0.96 | 5.10 | - | 1592.3 |
| AHQ-6-9, 2343          | R.KVTEENKELANL.R              | 1673.84976 | 2 | 2.17E-04 | 0.80 | 2.99 | - | 732.6  |
| AHQ-6-6, 2418          | R.KVTEENKELANL.R              | 1673.84976 | 3 | 3.82E-05 | 0.66 | 3.29 | - | 502.6  |
| AHQ-6-6, 2406          | R.KVTEENKELANL.R              | 1673.84976 | 2 | 6.15E-04 | 0.74 | 3.65 | - | 489.1  |
| AHQ-6-2, 2688          | R.LCNPAPQFGGK.D               | 1304.45694 | 2 | 2.69E-04 | 0.83 | 3.32 | - | 627.1  |
| AHQ-6-5, 2629 - 2632   | R.LCNPAPQFGGK.D               | 1304.45694 | 2 | 2.43E-04 | 0.88 | 3.97 | - | 595.2  |
| AHQ-6-4, 2669          | R.LCNPAPQFGGK.D               | 1304.45694 | 2 | 4.85E-06 | 0.85 | 3.88 | - | 531.6  |
| AHQ-6-3, 2692          | R.LCNPAPQFGGK.D               | 1304.45694 | 2 | 2.37E-04 | 0.91 | 3.63 | - | 813.1  |
| AHQ-6-2, 4194          | R.LCNPAPQFGGKDCVGDVTENQICNK.Q | 2940.19303 | 3 | 6.29E-08 | 0.89 | 4.57 | - | 570.9  |
| AHQ-6-3, 4161 - 4164   | R.LCNPAPQFGGKDCVGDVTENQICNK.Q | 2940.19303 | 3 | 7.11E-07 | 0.89 | 5.03 | - | 554.7  |
| AHQ-6-3, 2225          | R.LCNSPSPQM*NGKPCEGEAR.E      | 2151.34497 | 3 | 5.30E-04 | 0.87 | 3.93 | - | 813.1  |
| AHQ-6-2, 2568          | R.LCNSPSPQM*NGKPCEGEAR.E      | 2135.34557 | 2 | 2.67E-08 | 0.92 | 4.29 | - | 641.9  |
| AHQ-6-3, 2565 - 2568   | R.LCNSPSPQM*NGKPCEGEAR.E      | 2135.34557 | 2 | 1.09E-08 | 0.86 | 4.34 | - | 424.2  |
| AHQ-6-6, 2192          | R.LCNSPSPQM*NGKPCEGEAR.E      | 2151.34497 | 2 | 5.68E-04 | 0.80 | 3.54 | - | 331.7  |
| AHQ-6-3, 2222          | R.LCNSPSPQM*NGKPCEGEAR.E      | 2151.34497 | 2 | 3.68E-05 | 0.81 | 3.08 | - | 561.3  |
| AHQ-6-4, 2537          | R.LCNSPSPQM*NGKPCEGEAR.E      | 2135.34557 | 2 | 4.68E-06 | 0.82 | 3.90 | - | 514.5  |
| AHQ-6-6, 2519          | R.LCNSPSPQM*NGKPCEGEAR.E      | 2135.34557 | 2 | 4.52E-06 | 0.85 | 3.98 | - | 331.2  |
| AHQ-6-2, 2231          | R.LCNSPSPQM*NGKPCEGEAR.E      | 2151.34497 | 2 | 2.31E-04 | 0.82 | 3.37 | - | 553.6  |
| AHQ-6-4, 2188          | R.LCNSPSPQM*NGKPCEGEAR.E      | 2151.34497 | 2 | 1.85E-04 | 0.86 | 3.72 | - | 500.3  |
| AHQ-6-5, 2508          | R.LCNSPSPQM*NGKPCEGEAR.E      | 2135.34557 | 2 | 8.02E-08 | 0.90 | 3.85 | - | 576.8  |
| AHQ-6-4, 2192          | R.LCNSPSPQM*NGKPCEGEAR.E      | 2151.34497 | 3 | 2.32E-08 | 0.85 | 4.09 | - | 796.3  |
| AHQ-6-5, 2169 - 2171   | R.LCNSPSPQM*NGKPCEGEAR.E      | 2151.34497 | 2 | 1.40E-05 | 0.89 | 4.19 | - | 583.0  |
| AHQ-6-2, 6458 - 6536   | R.LGLFVFSQEM*VFFSDLK.Y        | 2024.36769 | 2 | 5.10E-05 | 0.75 | 3.77 | - | 624.4  |

|                             |                                                                          |            |   |          |       |        |       |         |
|-----------------------------|--------------------------------------------------------------------------|------------|---|----------|-------|--------|-------|---------|
| AHQ-6-6, 5078 - 5079        | K.M*ENALDVPQISVFTR.D                                                     | 1866.08547 | 2 | 3.18E-10 | 0.88  | 4.29   | -     | 572.3   |
| AHQ-6-5, 5117 - 5128        | K.M*ENALDVPQISVFTR.D                                                     | 1866.08547 | 2 | 1.21E-09 | 0.96  | 4.95   | -     | 841.3   |
| AHQ-6-3, 5149               | K.M*ENALDVPQISVFTR.D                                                     | 1866.08547 | 2 | 1.37E-04 | 0.81  | 3.55   | -     | 519.2   |
| AHQ-6-4, 5211 - 5240        | K.M*ENALDVPQISVFTR.D                                                     | 1866.08547 | 2 | 4.33E-11 | 0.96  | 5.22   | -     | 827.4   |
| AHQ-6-2, 5163 - 5219        | K.M*ENALDVPQISVFTR.D                                                     | 1866.08547 | 2 | 1.79E-07 | 0.93  | 4.27   | -     | 692.4   |
| AHQ-6-6, 3054               | K.QVTQSYWDTNPNTR.A                                                       | 1596.68241 | 2 | 2.04E-07 | 0.73  | 2.86   | -     | 505.6   |
| AHQ-6-5, 3055               | K.QVTQSYWDTNPNTR.A                                                       | 1596.68241 | 2 | 6.45E-07 | 0.83  | 3.08   | -     | 607.4   |
| AHQ-6-8, 2928               | K.QVTQSYWDTNPNTR.A                                                       | 1596.68241 | 2 | 3.47E-06 | 0.57  | 2.89   | -     | 374.0   |
| AHQ-6-7, 2971               | K.QVTQSYWDTNPNTR.A                                                       | 1596.68241 | 2 | 1.25E-07 | 0.80  | 3.35   | -     | 426.9   |
| AHQ-6-6, 2828               | R.RPPLCYHNGVQYR.N                                                        | 1661.86889 | 2 | 2.81E-04 | 0.90  | 3.43   | -     | 665.1   |
| AHQ-6-3, 2786               | R.RPPLCYHNGVQYR.N                                                        | 1661.86889 | 2 | 1.78E-04 | 0.50  | 2.61   | -     | 300.7   |
| AHQ-6-4, 2737               | R.RPPLCYHNGVQYR.N                                                        | 1661.86889 | 2 | 1.10E-04 | 0.76  | 3.03   | -     | 475.5   |
| AHQ-6-4, 2856               | R.RPPLCYHNGVQYR.N                                                        | 1661.86889 | 2 | 8.14E-06 | 0.87  | 3.63   | -     | 561.6   |
| AHQ-6-4, 2859               | R.RPPLCYHNGVQYR.N                                                        | 1661.86889 | 3 | 3.60E-06 | 0.95  | 4.38   | -     | 1435.4  |
| AHQ-6-5, 2847               | R.RPPLCYHNGVQYR.N                                                        | 1661.86889 | 2 | 7.15E-05 | 0.77  | 3.17   | -     | 525.2   |
| AHQ-6-2, 2939 - 2942        | R.RPPLCYHNGVQYR.N                                                        | 1661.86889 | 2 | 4.48E-05 | 0.88  | 3.61   | -     | 642.0   |
| AHQ-6-5, 3751 - 3755        | K.SITLQVQEDR.A                                                           | 1208.34588 | 2 | 2.09E-06 | 0.93  | 3.58   | -     | 1230.2  |
| AHQ-6-3, 3832               | K.SITLQVQEDR.A                                                           | 1208.34588 | 2 | 1.20E-06 | 0.91  | 3.25   | -     | 1069.3  |
| AHQ-6-11, 3691              | K.SITLQVQEDR.A                                                           | 1208.34588 | 2 | 7.04E-06 | 0.87  | 3.25   | -     | 845.6   |
| AHQ-6-2, 3858               | K.SITLQVQEDR.A                                                           | 1208.34588 | 2 | 1.64E-06 | 0.94  | 3.87   | -     | 1264.3  |
| AHQ-6-6, 3708 - 3722        | K.SITLQVQEDR.A                                                           | 1208.34588 | 2 | 1.58E-06 | 0.95  | 3.73   | -     | 1406.2  |
| AHQ-6-10, 3618              | K.SITLQVQEDR.A                                                           | 1208.34588 | 2 | 1.51E-05 | 0.92  | 3.11   | -     | 1573.4  |
| AHQ-6-13, 3981              | K.SITLQVQEDR.A                                                           | 1208.34588 | 2 | 2.04E-04 | 0.90  | 3.17   | -     | 1159.1  |
| AHQ-6-4, 3813 - 3873        | K.SITLQVQEDR.A                                                           | 1208.34588 | 2 | 4.30E-06 | 0.92  | 3.52   | -     | 1198.3  |
| AHQ-6-5, 4267               | R.TIVTTLQDSIR.K                                                          | 1247.42355 | 2 | 5.67E-07 | 0.95  | 3.46   | -     | 1383.4  |
| AHQ-6-5, 3277               | R.TIVTTLQDSIR.K                                                          | 1247.42355 | 2 | 5.45E-05 | 0.97  | 3.48   | -     | 2448.4  |
| AHQ-6-6, 4223               | R.TIVTTLQDSIR.K                                                          | 1247.42355 | 2 | 1.04E-06 | 0.97  | 4.09   | -     | 1806.4  |
| AHQ-6-1, 4515               | R.TIVTTLQDSIR.K                                                          | 1247.42355 | 2 | 7.70E-07 | 0.97  | 3.95   | -     | 1905.1  |
| AHQ-6-2, 4382 - 4402        | R.TIVTTLQDSIR.K                                                          | 1247.42355 | 2 | 2.74E-06 | 0.96  | 4.12   | -     | 1609.6  |
| AHQ-6-4, 3348               | R.TIVTTLQDSIR.K                                                          | 1247.42355 | 2 | 4.57E-05 | 0.94  | 3.11   | -     | 1750.6  |
| AHQ-6-3, 4345 - 4368        | R.TIVTTLQDSIR.K                                                          | 1247.42355 | 2 | 6.21E-08 | 0.97  | 4.62   | -     | 1540.5  |
| AHQ-6-4, 4339 - 4353        | R.TIVTTLQDSIR.K                                                          | 1247.42355 | 2 | 5.05E-08 | 0.96  | 4.25   | -     | 1584.6  |
| AHQ-6-7, 4110               | R.TIVTTLQDSIR.K                                                          | 1247.42355 | 2 | 1.57E-07 | 0.95  | 3.83   | -     | 1303.1  |
| AHQ-6-2, 5958               | K.TKDLOAICIGSCDELSSM*VLELR.G                                             | 2658.02070 | 3 | 4.87E-08 | 0.86  | 3.84   | -     | 1038.7  |
| AHQ-6-5, 5900               | K.TKDLOAICIGSCDELSSM*VLELR.G                                             | 2658.02070 | 3 | 1.60E-07 | 0.95  | 4.91   | -     | 1625.7  |
| AHQ-6-2, 6454               | K.TKDLOAICIGSCDELSSM*VLELR.G                                             | 2642.02130 | 3 | 3.07E-06 | 0.94  | 4.62   | -     | 1835.2  |
| AHQ-6-5, 6427 - 6428        | K.TKDLOAICIGSCDELSSM*VLELR.G                                             | 2642.02130 | 3 | 5.09E-07 | 0.98  | 5.77   | -     | 2296.9  |
| AHQ-6-4, 2615 - 2651        | K.VTEENKELANELR.R                                                        | 1545.67685 | 2 | 3.42E-07 | 0.90  | 3.86   | -     | 1076.1  |
| AHQ-6-6, 2623               | K.VTEENKELANELR.R                                                        | 1545.67685 | 2 | 3.53E-09 | 0.87  | 3.63   | -     | 842.1   |
| AHQ-6-7, 2550 - 2551        | K.VTEENKELANELR.R                                                        | 1545.67685 | 2 | 3.48E-07 | 0.75  | 3.26   | -     | 511.1   |
| AHQ-6-3, 2688               | K.VTEENKELANELR.R                                                        | 1545.67685 | 2 | 4.10E-09 | 0.86  | 3.36   | -     | 927.5   |
| AHQ-6-5, 2624               | K.VTEENKELANELR.R                                                        | 1545.67685 | 2 | 1.32E-09 | 0.92  | 4.26   | -     | 903.6   |
| AHQ-6-4, 2807               | K.VTEENKELANELR.R                                                        | 1545.67685 | 2 | 1.18E-04 | 0.56  | 2.72   | -     | 598.4   |
| gj 9257257 ref NP_059830.1  | WD repeat-containing protein 1 isoform 1 [Homo sapiens]                  |            |   | 3.05E-14 | 1.81  | 20.22  | 7.90  | 66193.1 |
| AHQ-6-6, 4196               | R.LHHVSSLAWLDEHTLVTTSHDASVKE                                             | 2785.06406 | 3 | 3.05E-14 | 0.92  | 4.41   | -     | 953.1   |
| AHQ-6-6, 4927               | K.VTVFVSADGYSENNVFGHHAJ.I                                                | 2541.75861 | 3 | 1.51E-07 | 0.89  | 4.38   | -     | 521.7   |
| gj 18104967 ref NP_000953.2 | prostaglandin-endoperoxide synthase 1 isoform 1 precursor; prostaglandin |            |   | 4.05E-14 | 4.64  | 50.36  | 16.20 | 68686.0 |
| AHQ-6-6, 3923               | K.AEHPVTWGEQLFQTR.L                                                      | 1917.02765 | 2 | 2.41E-06 | 0.95  | 4.08   | -     | 1013.6  |
| AHQ-6-6, 3843 - 3854        | K.ALGHGVDLGHIYGDNLER.Q                                                   | 1937.10524 | 3 | 1.95E-04 | 0.78  | 3.48   | -     | 793.4   |
| AHQ-6-6, 6487 - 6488        | K.EM*AAELEELYGDIDALEFYPLGALLEK.C                                         | 2989.33908 | 3 | 5.07E-06 | 0.97  | 5.93   | -     | 1564.5  |
| AHQ-6-6, 6484               | K.IVIEEYVQQLSGYFLQK.F                                                    | 2171.52045 | 3 | 4.05E-14 | 0.98  | 7.23   | -     | 1981.8  |
| AHQ-6-6, 3235 - 3294        | R.VPDASDDGPAVERPSTEL                                                     | 1984.06747 | 2 | 1.21E-08 | 0.97  | 5.42   | -     | 1074.5  |
| gj 13562114 ref NP_110400.1 | beta tubulin 1, class VI [Homo sapiens]                                  |            |   | 4.22E-14 | 15.48 | 180.37 | 53.90 | 50326.6 |
| AHQ-6-7, 6254               | K.AFVHWYWTGSEMDINEFGAEENIHDLVSEYQQFQDAK.A                                | 4364.62586 | 3 | 1.59E-04 | 0.89  | 4.22   | -     | 774.7   |
| AHQ-6-14-, 5867             | R.ALSVAELTQQMFDAR.N                                                      | 1680.90740 | 2 | 2.61E-04 | 0.95  | 4.47   | -     | 1298.7  |
| AHQ-6-13-, 4526             | R.ALSVAELTQQM*FDAR.N                                                     | 1696.90680 | 2 | 1.67E-04 | 0.90  | 3.52   | -     | 1218.6  |
| AHQ-6-14-, 4528             | R.ALSVAELTQQM*FDAR.N                                                     | 1696.90680 | 2 | 3.66E-05 | 0.91  | 3.73   | -     | 872.6   |
| AHQ-6-8, 4377 - 4378        | R.ALSVAELTQQM*FDAR.N                                                     | 1696.90680 | 2 | 1.46E-04 | 0.94  | 4.28   | -     | 1365.9  |
| AHQ-6-8, 5832               | R.ALSVAELTQQM*FDAR.N                                                     | 1680.90740 | 2 | 5.77E-05 | 0.96  | 4.67   | -     | 1596.4  |
| AHQ-6-13, 3668              | K.AVLEEDVEETVEAE*EPEDKGH                                                 | 2532.58787 | 3 | 3.47E-05 | 0.77  | 3.48   | -     | 604.9   |
| AHQ-6-14-, 4667 - 4726      | R.AVLVLEPPTGMDIRS.S                                                      | 1616.86162 | 2 | 6.66E-08 | 0.95  | 4.45   | -     | 914.5   |
| AHQ-6-14-, 4046 - 4047      | R.AVLVLEPPTGMDIRS.S                                                      | 1632.86102 | 2 | 6.87E-06 | 0.91  | 4.14   | -     | 676.1   |
| AHQ-6-13-, 4062 - 4121      | R.AVLVLEPPTGMDIRS.S                                                      | 1632.86102 | 2 | 5.88E-08 | 0.90  | 3.99   | -     | 695.3   |
| AHQ-6-8, 4494               | R.AVLVLEPPTGMDIRS.S                                                      | 1616.86162 | 2 | 1.85E-05 | 0.91  | 3.97   | -     | 739.0   |
| AHQ-6-12, 4657              | R.AVLVLEPPTGMDIRS.S                                                      | 1616.86162 | 2 | 5.79E-08 | 0.86  | 3.19   | -     | 665.5   |
| AHQ-6-14, 4552 - 4617       | R.EIVHIQIQCCGNQIGAK.F                                                    | 1867.11965 | 2 | 8.81E-04 | 0.81  | 3.30   | -     | 700.4   |
| AHQ-6-12, 3739              | R.EIVHIQIQCCGNQIGAK.F                                                    | 1867.11965 | 2 | 6.21E-05 | 0.80  | 3.37   | -     | 608.2   |
| AHQ-6-14-, 3899             | R.EIVHIQIQCCGNQIGAK.F                                                    | 1867.11965 | 2 | 2.48E-08 | 0.96  | 4.78   | -     | 1198.8  |
| AHQ-6-9, 3515 - 3516        | R.EIVHIQIQCCGNQIGAK.F                                                    | 1867.11965 | 2 | 8.91E-06 | 0.71  | 3.11   | -     | 564.0   |
| AHQ-6-14-, 3792             | R.EIVHIQIQCCGNQIGAK.F                                                    | 1867.11965 | 2 | 2.24E-05 | 0.88  | 3.76   | -     | 836.9   |
| AHQ-6-8, 3097 - 3106        | K.EVDQQLLSVQTR.N                                                         | 1416.56231 | 2 | 3.90E-04 | 0.67  | 2.90   | -     | 588.5   |
| AHQ-6-14-, 5014             | K.FWEMIGEHEGIDLAGSDR.G                                                   | 2063.23616 | 3 | 7.05E-07 | 0.87  | 3.12   | -     | 1385.0  |
| AHQ-6-14-, 5010             | K.FWEMIGEHEGIDLAGSDR.G                                                   | 2063.23616 | 2 | 1.15E-05 | 0.96  | 4.79   | -     | 1090.7  |
| AHQ-6-9, 6026               | K.GHYTEGAEIENVLEVVR.H                                                    | 2029.23935 | 2 | 7.80E-07 | 0.63  | 2.57   | -     | 866.1   |
| AHQ-6-13-, 6248             | K.GHYTEGAEIENVLEVVR.H                                                    | 2029.23935 | 3 | 5.30E-06 | 0.94  | 4.96   | -     | 1910.7  |
| AHQ-6-14-, 6266             | K.GHYTEGAEIENVLEVVR.H                                                    | 2029.23935 | 3 | 2.63E-04 | 0.84  | 4.03   | -     | 1209.0  |
| AHQ-6-13-, 6249 - 6250      | K.GHYTEGAEIENVLEVVR.H                                                    | 2029.23935 | 2 | 4.22E-14 | 0.99  | 7.25   | -     | 2530.8  |
| AHQ-6-7, 6163               | K.GHYTEGAEIENVLEVVR.H                                                    | 2029.23935 | 2 | 3.12E-11 | 0.98  | 6.50   | -     | 2556.1  |
| AHQ-6-13, 6288              | K.GHYTEGAEIENVLEVVR.H                                                    | 2029.23935 | 2 | 1.17E-12 | 0.99  | 7.35   | -     | 2687.7  |
| AHQ-6-11, 6115              | K.GHYTEGAEIENVLEVVR.H                                                    | 2029.23935 | 3 | 1.36E-04 | 0.80  | 3.49   | -     | 1143.7  |
| AHQ-6-14-, 6267 - 6268      | K.GHYTEGAEIENVLEVVR.H                                                    | 2029.23935 | 2 | 4.84E-08 | 0.98  | 6.40   | -     | 2561.7  |
| AHQ-6-8, 6261               | K.GHYTEGAEIENVLEVVR.H                                                    | 2029.23935 | 2 | 2.94E-07 | 0.98  | 6.59   | -     | 2685.1  |
| AHQ-6-7, 6167               | K.GHYTEGAEIENVLEVVR.H                                                    | 2029.23935 | 3 | 1.81E-04 | 0.93  | 4.52   | -     | 1782.7  |
| AHQ-6-13-, 6038 - 6069      | R.GLSM*AATFIGNNTAIQEIFNR.V                                               | 2285.56551 | 2 | 4.43E-07 | 0.93  | 4.61   | -     | 863.6   |
| AHQ-6-7, 5922               | R.GLSM*AATFIGNNTAIQEIFNR.V                                               | 2285.56551 | 2 | 2.66E-04 | 0.62  | 2.97   | -     | 427.9   |
| AHQ-6-13, 6139              | R.GLSM*AATFIGNNTAIQEIFNR.V                                               | 2285.56551 | 3 | 1.11E-04 | 0.69  | 3.03   | -     | 784.8   |
| AHQ-6-14-, 6192             | R.GLSM*AATFIGNNTAIQEIFNR.V                                               | 2285.56551 | 2 | 2.41E-05 | 0.62  | 2.86   | -     | 440.1   |
| AHQ-6-14-, 5974 - 6030      | R.GLSM*AATFIGNNTAIQEIFNR.V                                               | 2285.56551 | 2 | 3.17E-07 | 0.90  | 4.60   | -     | 754.9   |
| AHQ-6-14-, 6070             | R.GLSM*AATFIGNNTAIQEIFNR.V                                               | 2285.56551 | 2 | 7.63E-06 | 0.86  | 3.97   | -     | 715.1   |
| AHQ-6-13-, 5921             | R.GLSM*AATFIGNNTAIQEIFNR.V                                               | 2285.56551 | 2 | 4.54E-04 | 0.75  | 3.29   | -     | 551.8   |
| AHQ-6-11, 3169              | R.ISVYYYNEAYGR.K                                                         | 1335.44622 | 2 | 6.09E-06 | 0.93  | 3.38   | -     | 1078.9  |
| AHQ-6-14, 4001 - 4072       | R.ISVYYYNEAYGR.K                                                         | 1335.44622 | 2 | 2.03E-07 | 0.93  | 3.40   | -     | 1031.2  |
| AHQ-6-12, 3160 - 3203       | R.ISVYYYNEAYGR.K                                                         | 1335.44622 | 2 | 4.36E-07 | 0.96  | 3.62   | -     | 1684.3  |
| AHQ-6-8, 3070 - 3090        | R.ISVYYYNEAYGR.K                                                         | 1335.44622 | 2 | 4.37E-04 | 0.85  | 3.20   | -     | 746.7   |
| AHQ-6-13-, 3262 - 3321      | R.ISVYYYNEAYGR.K                                                         | 1335.44622 | 2 | 1.79E-07 | 0.92  | 3.27   | -     | 1390.2  |
| AHQ-6-13-, 3388             | R.ISVYYYNEAYGR.K                                                         | 1335.44622 | 2 | 8.07E-04 | 0.82  | 3.06   | -     | 688.2   |
| AHQ-6-14-, 3190             | R.ISVYYYNEAYGR.K                                                         | 1335.44622 | 2 | 2.38E-07 | 0.94  | 3.82   | -     | 1137.5  |
| AHQ-6-14-, 3279             | R.ISVYYYNEAYGR.K                                                         | 1335.44622 | 2 | 6.87E-06 | 0.79  | 2.65   | -     | 795.7   |
| AHQ-6-7, 3074 - 3078        | R.ISVYYYNEAYGR.K                                                         | 1335.44622 | 2 | 1.99E-08 | 0.95  | 3.64   | -     | 1222.8  |
| AHQ-6-13-, 4878 - 4941      | K.LGALFPQDSFVHGNSGAGNNWAK.G                                              | 2388.58260 | 3 | 2.71E-08 | 0.84  | 3.97   | -     | 874.9   |
| AHQ-6-7, 4867               | R.LHFFM*PGFAPLTAQGSQQYR.A                                                | 2313.62224 | 2 | 6.73E-07 | 0.90  | 3.75   | -     | 716.3   |
| AHQ-6-10, 4768              | R.LHFFM*PGFAPLTAQGSQQYR.A                                                | 2313.62224 | 2 | 1.49E-05 | 0.81  | 3.14   | -     | 635.4   |
| AHQ-6-11, 5432              | R.LHFFM*PGFAPLTAQGSQQYR.A                                                | 2297.62284 | 3 | 3.42E-05 | 0.85  | 3.50   | -     | 1088.2  |
| AHQ-6-8, 5461               | R.LHFFM*PGFAPLTAQGSQQYR.A                                                | 2297.62284 | 2 | 2.21E-04 | 0.95  | 4.62   | -     | 826.7   |
| AHQ-6-8, 5460               | R.LHFFM*PGFAPLTAQGSQQYR.A                                                | 2297.62284 | 3 | 2.44E-04 | 0.94  | 4.18   | -     | 1641.8  |
| AHQ-6-10, 5347 - 5354       | R.LHFFM*PGFAPLTAQGSQQYR.A                                                | 2297.62284 | 3 | 3.85E-04 | 0.80  | 3.44   | -     | 816.9   |
| AHQ-6-13-, 5024 - 5029      | R.LHFFM*PGFAPLTAQGSQQYR.A                                                | 2313.62224 | 3 | 1.49E-04 | 0.95  | 4.59   | -     | 1831.5  |

|                            |                                                                         |            |   |          |       |        |       |         |
|----------------------------|-------------------------------------------------------------------------|------------|---|----------|-------|--------|-------|---------|
| AHQ-6-7, 5442 - 5443       | R.LHFFMPGFAPLTAQGSQQYR.A                                                | 2297.62284 | 3 | 7.63E-04 | 0.96  | 5.30   | -     | 1677.0  |
| AHQ-6-9, 5281              | R.LHFFMPGFAPLTAQGSQQYR.A                                                | 2297.62284 | 2 | 1.28E-04 | 0.75  | 3.27   | -     | 428.8   |
| AHQ-6-8, 6181 - 6236       | K.LTTPTYGDLNHLVSLTM*SGITTSRLR.F                                         | 2709.06919 | 3 | 1.25E-04 | 0.91  | 4.18   | -     | 1087.4  |
| AHQ-6-14-, 6195            | K.LTTPTYGDLNHLVSLTM*SGITTSRLR.F                                         | 2709.06919 | 3 | 6.79E-04 | 0.83  | 3.44   | -     | 1108.2  |
| AHQ-6-7, 6039 - 6094       | K.LTTPTYGDLNHLVSLTM*SGITTSRLR.F                                         | 2709.06919 | 3 | 3.94E-06 | 0.73  | 3.20   | -     | 865.6   |
| AHQ-6-8, 4925 - 4997       | R.NSSCFVEWIPNNVK.V                                                      | 1695.87718 | 2 | 3.58E-04 | 0.50  | 2.78   | -     | 606.6   |
| AHQ-6-12, 5008             | R.NSSCFVEWIPNNVK.V                                                      | 1695.87718 | 2 | 2.95E-04 | 0.73  | 2.84   | -     | 587.5   |
| AHQ-6-10, 4880 - 4935      | R.NSSCFVEWIPNNVK.V                                                      | 1695.87718 | 2 | 1.64E-05 | 0.62  | 2.91   | -     | 501.1   |
| AHQ-6-14-, 3228            | R.VSEHFSAMFK.R                                                          | 1183.36152 | 2 | 6.80E-07 | 0.91  | 2.94   | -     | 1329.3  |
| gi 4826898 ref NP_005013.1 | profilin 1; profilin-1 [Homo sapiens]                                   |            |   | 5.33E-14 | 12.86 | 140.29 | 67.10 | 15054.2 |
| AHQ-6-13, 2240 - 2315      | K.CYEM*ASHLR.R                                                          | 1184.32794 | 2 | 1.25E-04 | 0.89  | 3.06   | -     | 1110.4  |
| AHQ-6-13-, 2533 - 2588     | K.CYEMASHLR.R                                                           | 1168.32854 | 2 | 3.46E-04 | 0.96  | 3.39   | -     | 2018.3  |
| AHQ-6-13-, 1886 - 1958     | K.CYEM*ASHLR.R                                                          | 1184.32794 | 2 | 7.50E-04 | 0.87  | 2.85   | -     | 1189.7  |
| AHQ-6-13-, 2000 - 2056     | K.CYEM*ASHLR.R                                                          | 1184.32794 | 2 | 5.40E-04 | 0.90  | 2.70   | -     | 1360.7  |
| AHQ-6-13, 2116 - 2196      | K.CYEM*ASHLR.R                                                          | 1184.32794 | 2 | 2.21E-04 | 0.88  | 3.30   | -     | 870.1   |
| AHQ-6-13-, 4162 - 4221     | K.DRSSFYVNGLTLGGQK.C                                                    | 1742.91379 | 2 | 8.18E-13 | 0.98  | 5.68   | -     | 1482.7  |
| AHQ-6-13, 4149             | K.DRSSFYVNGLTLGGQK.C                                                    | 1742.91379 | 3 | 1.36E-05 | 0.93  | 4.38   | -     | 1330.2  |
| AHQ-6-13, 4152             | K.DRSSFYVNGLTLGGQK.C                                                    | 1742.91379 | 2 | 5.33E-14 | 0.97  | 5.24   | -     | 1314.2  |
| AHQ-6-13, 4285             | K.DRSSFYVNGLTLGGQK.C                                                    | 1742.91379 | 2 | 3.20E-07 | 0.94  | 4.46   | -     | 845.7   |
| AHQ-6-12, 4853 - 4933      | R.DSLLQDGFESMDLR.T                                                      | 1626.77023 | 2 | 8.50E-07 | 0.93  | 3.56   | -     | 1257.3  |
| AHQ-6-12, 5005             | R.DSLLQDGFESMDLR.T                                                      | 1626.77023 | 2 | 6.81E-06 | 0.70  | 2.71   | -     | 613.2   |
| AHQ-6-13-, 4994 - 5052     | R.DSLLQDGFESMDLR.T                                                      | 1626.77023 | 2 | 6.45E-07 | 0.96  | 3.94   | -     | 1580.4  |
| AHQ-6-13-, 4892            | R.DSLLQDGFESMDLR.T                                                      | 1626.77023 | 2 | 6.07E-05 | 0.94  | 3.88   | -     | 1304.3  |
| AHQ-6-13-, 4813 - 4890     | R.DSLLQDGFESMDLR.T                                                      | 1642.76963 | 2 | 1.95E-05 | 0.88  | 3.65   | -     | 996.8   |
| AHQ-6-13-, 4653            | R.DSLLQDGFESMDLR.T                                                      | 1642.76963 | 2 | 9.33E-04 | 0.94  | 4.15   | -     | 1327.3  |
| AHQ-6-12, 4432 - 4448      | R.DSLLQDGFESMDLR.T                                                      | 1642.76963 | 2 | 2.06E-05 | 0.90  | 3.45   | -     | 1078.0  |
| AHQ-6-12, 4305             | R.DSLLQDGFESMDLR.T                                                      | 1642.76963 | 2 | 3.57E-06 | 0.85  | 2.79   | -     | 1225.6  |
| AHQ-6-13-, 4572            | R.DSLLQDGFESMDLR.T                                                      | 1642.76963 | 2 | 4.65E-10 | 0.97  | 4.54   | -     | 1693.6  |
| AHQ-6-13-, 4445 - 4500     | R.DSLLQDGFESMDLR.T                                                      | 1642.76963 | 2 | 4.90E-08 | 0.96  | 4.54   | -     | 1697.1  |
| AHQ-6-13-, 4324 - 4384     | R.DSLLQDGFESMDLR.T                                                      | 1642.76963 | 2 | 4.87E-07 | 0.96  | 4.38   | -     | 1577.3  |
| AHQ-6-13-, 5002 - 5081     | R.DSLLQDGFESMDLR.T                                                      | 1642.76963 | 2 | 3.86E-06 | 0.64  | 3.09   | -     | 571.2   |
| AHQ-6-13-, 5108 - 5164     | R.DSLLQDGFESMDLR.T                                                      | 1626.77023 | 2 | 7.87E-09 | 0.97  | 4.85   | -     | 1964.0  |
| AHQ-6-13-, 5168 - 5170     | R.DSLLQDGFESMDLR.T                                                      | 1642.76963 | 2 | 2.03E-04 | 0.92  | 3.27   | -     | 1648.8  |
| AHQ-6-13-, 5220 - 5276     | R.DSLLQDGFESMDLR.T                                                      | 1626.77023 | 2 | 2.72E-05 | 0.97  | 4.40   | -     | 1940.1  |
| AHQ-6-14, 5238             | R.DSLLQDGFESMDLR.T                                                      | 1642.76963 | 2 | 8.34E-05 | 0.95  | 3.82   | -     | 1817.3  |
| AHQ-6-13, 5705             | R.DSLLQDGFESMDLR.T                                                      | 1626.77023 | 2 | 3.22E-05 | 0.71  | 2.84   | -     | 769.2   |
| AHQ-6-14-, 4459 - 4518     | R.DSLLQDGFESMDLR.T                                                      | 1642.76963 | 2 | 2.16E-11 | 0.97  | 4.57   | -     | 1815.8  |
| AHQ-6-13, 5331 - 5392      | R.DSLLQDGFESMDLR.T                                                      | 1626.77023 | 2 | 5.09E-07 | 0.94  | 3.30   | -     | 1512.2  |
| AHQ-6-13-, 5334            | R.DSLLQDGFESMDLR.T                                                      | 1626.77023 | 2 | 9.32E-06 | 0.97  | 3.76   | -     | 2301.1  |
| AHQ-6-14-, 4374            | R.DSLLQDGFESMDLR.T                                                      | 1642.76963 | 2 | 1.44E-08 | 0.92  | 3.92   | -     | 855.7   |
| AHQ-6-13, 5449             | R.DSLLQDGFESMDLR.T                                                      | 1626.77023 | 2 | 3.98E-08 | 0.97  | 3.62   | -     | 2358.3  |
| AHQ-6-13, 5235 - 5291      | R.DSLLQDGFESMDLR.T                                                      | 1626.77023 | 2 | 1.05E-09 | 0.97  | 4.42   | -     | 1809.2  |
| AHQ-6-13, 5129             | R.DSLLQDGFESMDLR.T                                                      | 1642.76963 | 2 | 4.46E-06 | 0.92  | 4.19   | -     | 908.5   |
| AHQ-6-13, 5119 - 5181      | R.DSLLQDGFESMDLR.T                                                      | 1626.77023 | 2 | 1.57E-04 | 0.95  | 4.49   | -     | 1193.2  |
| AHQ-6-13, 4460 - 4519      | R.DSLLQDGFESMDLR.T                                                      | 1642.76963 | 2 | 3.53E-08 | 0.96  | 4.14   | -     | 1726.1  |
| AHQ-6-13, 5019             | R.DSLLQDGFESMDLR.T                                                      | 1626.77023 | 2 | 4.27E-05 | 0.89  | 3.54   | -     | 941.8   |
| AHQ-6-13, 4905             | R.DSLLQDGFESMDLR.T                                                      | 1642.76963 | 2 | 3.13E-04 | 0.60  | 2.62   | -     | 732.3   |
| AHQ-6-13, 4577 - 4647      | R.DSLLQDGFESMDLR.T                                                      | 1642.76963 | 2 | 8.76E-10 | 0.96  | 4.02   | -     | 1746.6  |
| AHQ-6-13, 4633             | R.DSLLQDGFESMDLR.T                                                      | 1642.76963 | 3 | 5.59E-04 | 0.94  | 4.01   | -     | 2008.6  |
| AHQ-6-13, 4703 - 4773      | R.DSLLQDGFESMDLR.T                                                      | 1642.76963 | 2 | 2.12E-07 | 0.96  | 4.16   | -     | 2120.8  |
| AHQ-6-13-, 3568 - 3628     | K.DSPSVWAAVPGK.T                                                        | 1214.35211 | 2 | 1.30E-07 | 0.86  | 3.57   | -     | 819.6   |
| AHQ-6-13, 3727 - 3783      | K.DSPSVWAAVPGK.T                                                        | 1214.35211 | 2 | 3.84E-05 | 0.86  | 2.96   | -     | 1055.9  |
| AHQ-6-12, 3551 - 3555      | K.DSPSVWAAVPGK.T                                                        | 1214.35211 | 2 | 1.43E-06 | 0.86  | 3.22   | -     | 803.1   |
| AHQ-6-13, 3861 - 3915      | K.DSPSVWAAVPGK.T                                                        | 1214.35211 | 2 | 5.44E-06 | 0.63  | 2.56   | -     | 726.9   |
| AHQ-6-13, 3531             | K.DSPSVWAAVPGK.T                                                        | 1214.35211 | 2 | 8.90E-04 | 0.81  | 2.88   | -     | 843.5   |
| AHQ-6-14-, 4375 - 4439     | R.SSFYVNGLTLGGQK.C                                                      | 1471.63957 | 2 | 1.39E-09 | 0.95  | 4.12   | -     | 1298.8  |
| AHQ-6-14-, 4250            | R.SSFYVNGLTLGGQK.C                                                      | 1471.63957 | 2 | 4.62E-07 | 0.95  | 3.89   | -     | 1032.1  |
| AHQ-6-13, 4355             | R.SSFYVNGLTLGGQK.C                                                      | 1471.63957 | 1 | 2.34E-07 | 0.39  | 2.38   | -     | 341.0   |
| AHQ-6-13, 4432 - 4513      | R.SSFYVNGLTLGGQK.C                                                      | 1471.63957 | 2 | 5.74E-09 | 0.96  | 4.49   | -     | 1206.1  |
| AHQ-6-12, 4185 - 4207      | R.SSFYVNGLTLGGQK.C                                                      | 1471.63957 | 2 | 2.22E-10 | 0.96  | 4.57   | -     | 949.7   |
| AHQ-6-12, 4201             | R.SSFYVNGLTLGGQK.C                                                      | 1471.63957 | 1 | 4.55E-08 | 0.44  | 2.19   | -     | 421.4   |
| AHQ-6-13, 4496 - 4559      | R.SSFYVNGLTLGGQK.C                                                      | 1471.63957 | 1 | 1.89E-08 | 0.62  | 2.99   | -     | 488.7   |
| AHQ-6-13-, 4378 - 4440     | R.SSFYVNGLTLGGQK.C                                                      | 1471.63957 | 2 | 5.98E-10 | 0.96  | 4.59   | -     | 1331.0  |
| AHQ-6-14, 4990             | R.SSFYVNGLTLGGQK.C                                                      | 1471.63957 | 2 | 9.90E-05 | 0.71  | 2.91   | -     | 420.1   |
| AHQ-6-14, 5106 - 5164      | R.SSFYVNGLTLGGQK.C                                                      | 1471.63957 | 2 | 1.23E-04 | 0.89  | 3.55   | -     | 890.6   |
| AHQ-6-13, 4347 - 4371      | R.SSFYVNGLTLGGQK.C                                                      | 1471.63957 | 2 | 1.03E-06 | 0.92  | 3.93   | -     | 714.1   |
| AHQ-6-13-, 4360 - 4420     | R.SSFYVNGLTLGGQK.C                                                      | 1471.63957 | 1 | 1.61E-08 | 0.80  | 3.30   | -     | 554.4   |
| AHQ-6-13-, 4241 - 4308     | R.SSFYVNGLTLGGQK.C                                                      | 1471.63957 | 2 | 2.00E-08 | 0.90  | 3.71   | -     | 804.3   |
| AHQ-6-13-, 4224            | R.SSFYVNGLTLGGQK.C                                                      | 1471.63957 | 1 | 9.19E-08 | 0.71  | 2.93   | -     | 635.7   |
| AHQ-6-13, 4571 - 4639      | R.SSFYVNGLTLGGQK.C                                                      | 1471.63957 | 2 | 1.58E-09 | 0.97  | 4.75   | -     | 1636.7  |
| AHQ-6-13, 3319 - 3391      | K.STGGAPTFNVTVK.T                                                       | 1380.52843 | 2 | 2.48E-11 | 0.78  | 3.02   | -     | 482.3   |
| AHQ-6-12, 3188             | K.STGGAPTFNVTVK.T                                                       | 1380.52843 | 1 | 8.51E-04 | 0.22  | 2.14   | -     | 365.5   |
| AHQ-6-13, 3447 - 3503      | K.STGGAPTFNVTVK.T                                                       | 1380.52843 | 2 | 5.40E-04 | 0.75  | 3.04   | -     | 299.0   |
| AHQ-6-13-, 3062 - 3120     | K.STGGAPTFNVTVK.T                                                       | 1380.52843 | 2 | 2.55E-04 | 0.87  | 3.49   | -     | 511.9   |
| AHQ-6-13-, 3118            | K.STGGAPTFNVTVK.T                                                       | 1380.52843 | 1 | 2.61E-04 | 0.53  | 2.39   | -     | 501.5   |
| AHQ-6-13-, 3210            | K.STGGAPTFNVTVK.T                                                       | 1380.52843 | 1 | 9.01E-05 | 0.46  | 2.81   | -     | 407.6   |
| AHQ-6-13-, 3260 - 3320     | K.STGGAPTFNVTVK.T                                                       | 1380.52843 | 2 | 3.10E-06 | 0.85  | 3.18   | -     | 456.0   |
| AHQ-6-13, 3184 - 3260      | K.STGGAPTFNVTVK.T                                                       | 1380.52843 | 2 | 3.82E-06 | 0.89  | 3.69   | -     | 543.9   |
| AHQ-6-13, 3269             | K.STGGAPTFNVTVK.T                                                       | 1380.52843 | 1 | 1.73E-07 | 0.59  | 2.58   | -     | 604.7   |
| AHQ-6-12, 3169 - 3207      | K.STGGAPTFNVTVK.T                                                       | 1380.52843 | 2 | 1.94E-08 | 0.88  | 3.81   | -     | 458.1   |
| AHQ-6-13-, 3040 - 3094     | K.TDKTLVLLM*GK.E                                                        | 1235.51929 | 2 | 4.92E-04 | 0.92  | 3.65   | -     | 1014.0  |
| AHQ-6-12, 3671             | K.TDKTLVLLM*GK.E                                                        | 1219.51989 | 2 | 2.17E-04 | 0.82  | 2.89   | -     | 1036.5  |
| AHQ-6-13, 3183 - 3199      | K.TDKTLVLLM*GK.E                                                        | 1235.51929 | 2 | 9.77E-07 | 0.92  | 3.57   | -     | 966.4   |
| AHQ-6-13-, 3729            | K.TDKTLVLLM*GK.E                                                        | 1219.51989 | 3 | 9.25E-05 | 0.93  | 3.72   | -     | 1839.9  |
| AHQ-6-14, 6249 - 6257      | K.TFVNITPAEVGVLGK.D                                                     | 1644.93630 | 2 | 2.48E-04 | 0.87  | 3.78   | -     | 894.0   |
| AHQ-6-13-, 5506 - 5518     | K.TFVNITPAEVGVLGK.D                                                     | 1644.93630 | 3 | 2.28E-04 | 0.92  | 4.22   | -     | 1230.3  |
| AHQ-6-13, 5365 - 5444      | K.TFVNITPAEVGVLGK.D                                                     | 1644.93630 | 2 | 5.90E-04 | 0.66  | 3.21   | -     | 397.2   |
| AHQ-6-13-, 5274 - 5358     | K.TFVNITPAEVGVLGK.D                                                     | 1644.93630 | 2 | 5.65E-05 | 0.83  | 4.05   | -     | 547.9   |
| AHQ-6-12, 5579             | K.TFVNITPAEVGVLGK.D                                                     | 1644.93630 | 2 | 2.16E-05 | 0.90  | 3.69   | -     | 873.1   |
| AHQ-6-12, 5465             | K.TFVNITPAEVGVLGK.D                                                     | 1644.93630 | 3 | 1.25E-07 | 0.93  | 3.86   | -     | 1399.9  |
| AHQ-6-12, 5445 - 5499      | K.TFVNITPAEVGVLGK.D                                                     | 1644.93630 | 2 | 3.59E-05 | 0.88  | 3.62   | -     | 644.4   |
| AHQ-6-13, 5511 - 5571      | K.TFVNITPAEVGVLGK.D                                                     | 1644.93630 | 2 | 6.57E-06 | 0.92  | 4.24   | -     | 813.1   |
| AHQ-6-13, 5627 - 5707      | K.TFVNITPAEVGVLGK.D                                                     | 1644.93630 | 2 | 6.92E-06 | 0.93  | 4.23   | -     | 984.8   |
| AHQ-6-13, 5589 - 5608      | K.TFVNITPAEVGVLGK.D                                                     | 1644.93630 | 3 | 1.00E-09 | 0.97  | 5.83   | -     | 1563.4  |
| AHQ-6-13-, 5440 - 5504     | K.TFVNITPAEVGVLGK.D                                                     | 1644.93630 | 2 | 9.22E-05 | 0.92  | 3.74   | -     | 974.8   |
| AHQ-6-12, 5187             | K.TFVNITPAEVGVLGKDR.S                                                   | 1916.21052 | 3 | 8.19E-06 | 0.55  | 3.12   | -     | 526.4   |
| AHQ-6-13, 5921             | K.TFVNITPAEVGVLGKDR.S                                                   | 1916.21052 | 2 | 2.18E-06 | 0.87  | 3.63   | -     | 675.9   |
| AHQ-6-13-, 5205 - 5273     | K.TFVNITPAEVGVLGKDR.S                                                   | 1916.21052 | 2 | 1.81E-07 | 0.90  | 4.12   | -     | 633.2   |
| AHQ-6-13, 3501             | R.TKSTGGAPTFNVTVK.T                                                     | 1609.80568 | 2 | 4.92E-04 | 0.43  | 2.61   | -     | 281.2   |
| AHQ-6-13-, 2948            | R.TKSTGGAPTFNVTVK.T                                                     | 1609.80568 | 3 | 1.64E-04 | 0.87  | 3.91   | -     | 1080.2  |
| AHQ-6-13-, 2858 - 2933     | R.TKSTGGAPTFNVTVK.T                                                     | 1609.80568 | 2 | 1.33E-07 | 0.96  | 4.79   | -     | 1006.7  |
| AHQ-6-13, 3073 - 3100      | R.TKSTGGAPTFNVTVK.T                                                     | 1609.80568 | 3 | 1.06E-04 | 0.78  | 3.54   | -     | 773.8   |
| AHQ-6-12, 2903             | R.TKSTGGAPTFNVTVK.T                                                     | 1609.80568 | 2 | 4.49E-06 | 0.90  | 3.77   | -     | 743.0   |
| AHQ-6-13, 3943 - 4003      | K.TLVLLM*GK.E                                                           | 875.15478  | 2 | 1.18E-05 | 0.84  | 2.70   | -     | 745.4   |
| AHQ-6-13-, 3801 - 3860     | K.TLVLLM*GK.E                                                           | 875.15478  | 2 | 1.42E-04 | 0.83  | 2.80   | -     | 678.8   |
| gi 4501881 ref NP_001091.1 | alpha 1 actin precursor; alpha skeletal muscle actin [Homo sapiens] [MA |            |   | 7.94E-14 | 9.57  | 130.27 | 28.40 | 42050.8 |
| AHQ-6-8, 1882 - 1948       | K.AGFAGDDAPR.A                                                          | 977.01283  | 2 | 7.22E-04 | 0.75  | 2.63   | -     | 1041.4  |



|                                                                       |                             |            |       |          |       |         |   |        |
|-----------------------------------------------------------------------|-----------------------------|------------|-------|----------|-------|---------|---|--------|
| AHQ-6-8, 1998 - 2064                                                  | K.AGFAGDDAPR.A              | 977.01283  | 2     | 1.26E-04 | 0.89  | 3.35    | - | 995.6  |
| AHQ-6-14, 4166                                                        | R.AVFPISVGRPR.H             | 1199.43018 | 2     | 9.90E-04 | 0.14  | 2.53    | - | 248.5  |
| AHQ-6-8, 3437                                                         | R.DLTDYLM*K.I               | 1015.16266 | 2     | 9.03E-04 | 0.69  | 2.76    | - | 391.7  |
| AHQ-6-9, 3402                                                         | R.DLTDYLM*K.I               | 1015.16266 | 1     | 4.53E-04 | 0.35  | 2.51    | - | 136.1  |
| AHQ-6-8, 3406 - 3464                                                  | R.DLTDYLM*K.I               | 1015.16266 | 1     | 5.86E-04 | 0.20  | 1.97    | - | 101.6  |
| AHQ-6-12, 3601                                                        | R.DLTDYLM*K.I               | 1015.16266 | 2     | 7.85E-04 | 0.66  | 2.57    | - | 426.5  |
| AHQ-6-8, 4413                                                         | R.DLTDYLMK.I                | 999.16326  | 1     | 4.26E-04 | 0.39  | 1.94    | - | 481.8  |
| AHQ-6-8, 4049 - 4085                                                  | R.DLTDYLMK.I                | 999.16326  | 2     | 4.06E-05 | 0.86  | 3.21    | - | 430.7  |
| AHQ-6-8, 1638 - 1694                                                  | K.DSYVGDQAQSK.R             | 1199.20634 | 2     | 3.83E-05 | 0.77  | 3.06    | - | 882.2  |
| AHQ-6-8, 1588 - 1726                                                  | K.DSYVGDQAQSK.R             | 1199.20634 | 1     | 1.64E-04 | 0.80  | 3.28    | - | 465.3  |
| AHQ-6-8, 1544 - 1582                                                  | K.DSYVGDQAQSK.R             | 1199.20634 | 2     | 8.46E-06 | 0.85  | 3.57    | - | 983.6  |
| AHQ-6-13, 3211                                                        | K.EITALAPSTMK.I             | 1162.38206 | 1     | 2.81E-04 | 0.14  | 2.04    | - | 224.5  |
| AHQ-6-10, 2890 - 2907                                                 | K.EITALAPSTMK.I             | 1162.38206 | 2     | 6.90E-05 | 0.73  | 2.84    | - | 568.9  |
| AHQ-6-14, 3212 - 3284                                                 | K.EITALAPSTM*K.I            | 1178.38146 | 2     | 6.69E-05 | 0.61  | 2.68    | - | 585.8  |
| AHQ-6-14-, 3022                                                       | K.EITALAPSTMK.I             | 1162.38206 | 1     | 3.71E-05 | 0.48  | 2.22    | - | 299.1  |
| AHQ-6-13, 2615 - 2675                                                 | K.EITALAPSTM*K.I            | 1178.38146 | 2     | 9.29E-04 | 0.56  | 2.67    | - | 435.3  |
| AHQ-6-13-, 2472 - 2532                                                | K.EITALAPSTM*K.I            | 1178.38146 | 2     | 2.93E-05 | 0.86  | 3.32    | - | 744.8  |
| AHQ-6-8, 2270 - 2330                                                  | K.EITALAPSTM*K.I            | 1178.38146 | 2     | 1.94E-05 | 0.85  | 3.46    | - | 610.2  |
| AHQ-6-8, 2878                                                         | K.EITALAPSTMK.I             | 1162.38206 | 1     | 4.47E-04 | 0.21  | 2.01    | - | 265.3  |
| AHQ-6-8, 2745 - 2804                                                  | K.IWHHTFYNELR.V             | 1516.68695 | 3     | 8.20E-05 | 0.95  | 5.22    | - | 1604.8 |
| AHQ-6-8, 2848 - 2920                                                  | K.IWHHTFYNELR.V             | 1516.68695 | 2     | 4.02E-07 | 0.92  | 3.54    | - | 880.4  |
| AHQ-6-8, 2728 - 2805                                                  | K.IWHHTFYNELR.V             | 1516.68695 | 2     | 7.60E-04 | 0.74  | 3.14    | - | 772.0  |
| AHQ-6-8, 3066 - 3124                                                  | K.IWHHTFYNELR.V             | 1516.68695 | 2     | 8.04E-08 | 0.91  | 3.46    | - | 1056.1 |
| AHQ-6-9, 3066 - 3142                                                  | K.IWHHTFYNELR.V             | 1516.68695 | 2     | 1.34E-07 | 0.77  | 2.71    | - | 710.1  |
| AHQ-6-12, 3201                                                        | K.IWHHTFYNELR.V             | 1516.68695 | 3     | 1.49E-05 | 0.86  | 4.11    | - | 1057.7 |
| AHQ-6-8, 4933 - 4984                                                  | R.LDLAQRDLTDYLMK.I          | 1624.88375 | 2     | 5.19E-07 | 0.86  | 3.59    | - | 742.0  |
| AHQ-6-6, 4858                                                         | K.SYELPDGGVITIGNER.F        | 1791.93998 | 2     | 6.62E-07 | 0.80  | 2.92    | - | 784.8  |
| AHQ-6-13-, 4844 - 4906                                                | K.SYELPDGGVITIGNER.F        | 1791.93998 | 2     | 4.60E-10 | 0.96  | 4.53    | - | 1190.4 |
| AHQ-6-6, 4736 - 4774                                                  | K.SYELPDGGVITIGNER.F        | 1791.93998 | 2     | 6.58E-04 | 0.88  | 3.55    | - | 791.5  |
| AHQ-6-8, 4076 - 4124                                                  | K.SYELPDGGVITIGNER.F        | 1791.93998 | 2     | 7.22E-07 | 0.93  | 3.59    | - | 1050.2 |
| AHQ-6-13-, 4701 - 4756                                                | K.SYELPDGGVITIGNER.F        | 1791.93998 | 2     | 4.50E-09 | 0.88  | 3.52    | - | 798.7  |
| AHQ-6-13-, 4369                                                       | K.SYELPDGGVITIGNER.F        | 1791.93998 | 2     | 2.81E-07 | 0.92  | 3.89    | - | 763.9  |
| AHQ-6-8, 4208 - 4268                                                  | K.SYELPDGGVITIGNER.F        | 1791.93998 | 2     | 4.13E-09 | 0.95  | 4.59    | - | 1008.3 |
| AHQ-6-8, 4233                                                         | K.SYELPDGGVITIGNER.F        | 1791.93998 | 3     | 1.81E-08 | 0.95  | 4.62    | - | 1501.6 |
| AHQ-6-8, 4324 - 4325                                                  | K.SYELPDGGVITIGNER.F        | 1791.93998 | 2     | 1.09E-11 | 0.96  | 4.72    | - | 1223.1 |
| AHQ-6-5, 4896 - 4899                                                  | K.SYELPDGGVITIGNER.F        | 1791.93998 | 2     | 6.80E-09 | 0.94  | 4.14    | - | 957.1  |
| AHQ-6-5, 4767                                                         | K.SYELPDGGVITIGNER.F        | 1791.93998 | 2     | 2.19E-08 | 0.96  | 4.63    | - | 1302.4 |
| AHQ-6-8, 4448 - 4514                                                  | K.SYELPDGGVITIGNER.F        | 1791.93998 | 2     | 9.95E-07 | 0.96  | 4.78    | - | 968.1  |
| AHQ-6-8, 4517                                                         | K.SYELPDGGVITIGNER.F        | 1791.93998 | 3     | 1.58E-07 | 0.94  | 4.37    | - | 1220.2 |
| AHQ-6-8, 4572 - 4650                                                  | K.SYELPDGGVITIGNER.F        | 1791.93998 | 2     | 1.15E-12 | 0.97  | 5.37    | - | 1167.4 |
| AHQ-6-4, 4487                                                         | K.SYELPDGGVITIGNER.F        | 1791.93998 | 2     | 6.93E-05 | 0.92  | 3.98    | - | 875.6  |
| AHQ-6-7, 4215                                                         | K.SYELPDGGVITIGNER.F        | 1791.93998 | 2     | 2.01E-06 | 0.87  | 3.29    | - | 734.0  |
| AHQ-6-8, 4768 - 4828                                                  | K.SYELPDGGVITIGNER.F        | 1791.93998 | 2     | 6.61E-11 | 0.96  | 4.63    | - | 1232.9 |
| AHQ-6-14-, 4734                                                       | K.SYELPDGGVITIGNER.F        | 1791.93998 | 2     | 1.07E-10 | 0.95  | 4.26    | - | 1343.3 |
| AHQ-6-7, 4586                                                         | K.SYELPDGGVITIGNER.F        | 1791.93998 | 2     | 5.22E-06 | 0.90  | 3.56    | - | 863.0  |
| AHQ-6-3, 4952                                                         | K.SYELPDGGVITIGNER.F        | 1791.93998 | 2     | 3.78E-08 | 0.85  | 3.62    | - | 584.5  |
| AHQ-6-2, 4990                                                         | K.SYELPDGGVITIGNER.F        | 1791.93998 | 2     | 1.41E-04 | 0.91  | 3.81    | - | 840.5  |
| AHQ-6-9, 4019 - 4096                                                  | K.SYELPDGGVITIGNER.F        | 1791.93998 | 2     | 4.63E-09 | 0.95  | 4.91    | - | 846.6  |
| AHQ-6-9, 4110 - 4190                                                  | K.SYELPDGGVITIGNER.F        | 1791.93998 | 2     | 2.50E-08 | 0.94  | 4.25    | - | 959.2  |
| AHQ-6-9, 4380 - 4450                                                  | K.SYELPDGGVITIGNER.F        | 1791.93998 | 2     | 7.27E-13 | 0.96  | 5.04    | - | 1083.5 |
| AHQ-6-9, 4528 - 4582                                                  | K.SYELPDGGVITIGNER.F        | 1791.93998 | 2     | 2.99E-10 | 0.92  | 4.08    | - | 790.1  |
| AHQ-6-9, 4638 - 4639                                                  | K.SYELPDGGVITIGNER.F        | 1791.93998 | 2     | 2.44E-04 | 0.92  | 4.38    | - | 931.5  |
| AHQ-6-2, 4832 - 4839                                                  | K.SYELPDGGVITIGNER.F        | 1791.93998 | 2     | 4.31E-07 | 0.85  | 3.23    | - | 834.2  |
| AHQ-6-10, 4099 - 4154                                                 | K.SYELPDGGVITIGNER.F        | 1791.93998 | 2     | 8.94E-05 | 0.71  | 3.15    | - | 409.0  |
| AHQ-6-10, 4242                                                        | K.SYELPDGGVITIGNER.F        | 1791.93998 | 2     | 1.13E-06 | 0.90  | 3.29    | - | 887.5  |
| AHQ-6-10, 4448 - 4526                                                 | K.SYELPDGGVITIGNER.F        | 1791.93998 | 2     | 7.94E-14 | 0.97  | 4.86    | - | 1357.6 |
| AHQ-6-10, 4508                                                        | K.SYELPDGGVITIGNER.F        | 1791.93998 | 3     | 9.50E-07 | 0.96  | 4.80    | - | 1811.0 |
| AHQ-6-10, 4610 - 4667                                                 | K.SYELPDGGVITIGNER.F        | 1791.93998 | 2     | 1.21E-11 | 0.96  | 4.57    | - | 1168.2 |
| AHQ-6-11, 4200 - 4259                                                 | K.SYELPDGGVITIGNER.F        | 1791.93998 | 2     | 5.61E-04 | 0.43  | 2.68    | - | 536.5  |
| AHQ-6-11, 4255                                                        | K.SYELPDGGVITIGNER.F        | 1791.93998 | 2     | 1.60E-08 | 0.92  | 3.91    | - | 767.8  |
| AHQ-6-11, 4547 - 4621                                                 | K.SYELPDGGVITIGNER.F        | 1791.93998 | 2     | 4.14E-09 | 0.90  | 3.43    | - | 832.6  |
| AHQ-6-11, 4589                                                        | K.SYELPDGGVITIGNER.F        | 1791.93998 | 3     | 4.64E-10 | 0.95  | 4.31    | - | 1427.5 |
| AHQ-6-11, 4700                                                        | K.SYELPDGGVITIGNER.F        | 1791.93998 | 2     | 2.13E-06 | 0.92  | 3.79    | - | 902.2  |
| AHQ-6-8, 4713 - 4772                                                  | K.SYELPDGGVITIGNER.F        | 1791.93998 | 2     | 6.69E-11 | 0.95  | 4.24    | - | 1149.9 |
| AHQ-6-1, 5043                                                         | K.SYELPDGGVITIGNER.F        | 1791.93998 | 2     | 2.41E-06 | 0.92  | 3.62    | - | 1006.6 |
| AHQ-6-12, 4229                                                        | K.SYELPDGGVITIGNER.F        | 1791.93998 | 2     | 4.34E-08 | 0.94  | 3.94    | - | 1066.9 |
| AHQ-6-12, 4321 - 4385                                                 | K.SYELPDGGVITIGNER.F        | 1791.93998 | 2     | 1.78E-09 | 0.93  | 4.31    | - | 779.6  |
| AHQ-6-12, 4635                                                        | K.SYELPDGGVITIGNER.F        | 1791.93998 | 2     | 1.56E-08 | 0.92  | 4.06    | - | 804.1  |
| AHQ-6-12, 4757 - 4836                                                 | K.SYELPDGGVITIGNER.F        | 1791.93998 | 2     | 1.49E-09 | 0.94  | 4.55    | - | 829.4  |
| AHQ-6-1, 4916                                                         | K.SYELPDGGVITIGNER.F        | 1791.93998 | 2     | 2.68E-07 | 0.93  | 4.10    | - | 923.7  |
| AHQ-6-1, 4587 - 4663                                                  | K.SYELPDGGVITIGNER.F        | 1791.93998 | 2     | 8.04E-04 | 0.77  | 2.99    | - | 540.1  |
| AHQ-6-13, 4484                                                        | K.SYELPDGGVITIGNER.F        | 1791.93998 | 2     | 3.12E-09 | 0.95  | 4.04    | - | 1117.2 |
| AHQ-6-13, 4836                                                        | K.SYELPDGGVITIGNER.F        | 1791.93998 | 2     | 3.32E-06 | 0.91  | 4.03    | - | 723.3  |
| AHQ-6-13, 4964 - 4988                                                 | K.SYELPDGGVITIGNER.F        | 1791.93998 | 2     | 1.16E-09 | 0.95  | 4.23    | - | 1191.0 |
| AHQ-6-14-, 4875                                                       | K.SYELPDGGVITIGNER.F        | 1791.93998 | 2     | 4.00E-05 | 0.94  | 3.78    | - | 1237.4 |
| AHQ-6-9, 3559 - 3616                                                  | R.VAPEEHPNLLTEAPLNPK.A      | 1957.21627 | 2     | 7.07E-04 | 0.68  | 3.18    | - | 480.7  |
| AHQ-6-8, 4106 - 4168                                                  | K.YPIEHGITNWDMEK.I          | 1962.17174 | 2     | 2.40E-05 | 0.88  | 3.85    | - | 788.9  |
| AHQ-6-8, 4678                                                         | K.YPIEHGITNWDMEK.I          | 1962.17174 | 2     | 9.50E-07 | 0.89  | 4.11    | - | 669.9  |
| AHQ-6-8, 3912 - 3992                                                  | K.YPIEHGITNWDMEK.I          | 1962.17174 | 2     | 5.76E-06 | 0.91  | 3.96    | - | 1123.8 |
| AHQ-6-8, 3822 - 3880                                                  | K.YPIEHGITNWDMEK.I          | 1978.17114 | 2     | 2.27E-04 | 0.82  | 3.41    | - | 704.0  |
| AHQ-6-8, 3793 - 3820                                                  | K.YPIEHGITNWDMEK.I          | 1978.17114 | 2     | 1.86E-04 | 0.85  | 3.70    | - | 668.1  |
| AHQ-6-8, 4100 - 4160                                                  | K.YPIEHGITNWDMEK.I          | 1962.17174 | 3     | 3.25E-05 | 0.87  | 3.98    | - | 1224.4 |
| AHQ-6-8, 4346 - 4408                                                  | K.YPIEHGITNWDMEK.I          | 1962.17174 | 2     | 1.77E-05 | 0.91  | 4.02    | - | 892.0  |
| gj28626504[ref][NP_113659.3] UNC-112 related protein 2 [Homo sapiens] |                             | 9.44E-14   | 21.28 | 240.33   | 55.10 | 75429.7 |   |        |
| AHQ-6-6, 3306                                                         | K.AGDALWLR.F                | 902.03223  | 2     | 1.00E-04 | 0.93  | 3.94    | - | 1280.9 |
| AHQ-6-5, 6287 - 6289                                                  | R.ASFSQLFQAVAAICR.L         | 1768.02967 | 2     | 1.24E-07 | 0.95  | 4.93    | - | 814.9  |
| AHQ-6-3, 6294                                                         | R.ASFSQLFQAVAAICR.L         | 1768.02967 | 2     | 7.10E-04 | 0.61  | 2.62    | - | 424.2  |
| AHQ-6-11, 6031                                                        | R.ASFSQLFQAVAAICR.L         | 1768.02967 | 2     | 3.66E-05 | 0.70  | 2.63    | - | 466.2  |
| AHQ-6-7, 6050                                                         | R.ASFSQLFQAVAAICR.L         | 1768.02967 | 2     | 2.32E-04 | 0.95  | 4.42    | - | 1011.3 |
| AHQ-6-6, 6130 - 6200                                                  | R.ASFSQLFQAVAAICR.L         | 1768.02967 | 2     | 1.73E-05 | 0.96  | 5.03    | - | 902.5  |
| AHQ-6-6, 3118                                                         | K.DEILGIANNR.L              | 1115.22208 | 2     | 6.80E-05 | 0.87  | 2.64    | - | 1391.4 |
| AHQ-6-7, 3468                                                         | K.EKEPEEELYLSK.V            | 1609.71294 | 2     | 9.19E-08 | 0.88  | 3.72    | - | 481.7  |
| AHQ-6-6, 3515 - 3586                                                  | K.EKEPEEELYLSK.V            | 1609.71294 | 2     | 1.23E-07 | 0.79  | 3.54    | - | 476.7  |
| AHQ-6-6, 6247 - 6311                                                  | R.FIQAWQSLPDFGISYVM*VR.F    | 2274.62593 | 2     | 1.70E-04 | 0.92  | 4.55    | - | 576.1  |
| AHQ-6-12, 6173                                                        | R.FIQAWQSLPDFGISYVM*VR.F    | 2274.62593 | 2     | 5.74E-05 | 0.81  | 3.50    | - | 271.1  |
| AHQ-6-6, 6314                                                         | R.FIQAWQSLPDFGISYVM*VR.F    | 2274.62593 | 3     | 9.74E-04 | 0.85  | 3.77    | - | 642.6  |
| AHQ-6-6, 3176                                                         | K.GCEVVPDNNVSGQK.F          | 1489.63335 | 1     | 4.64E-05 | 0.90  | 3.09    | - | 1147.7 |
| AHQ-6-6, 3135 - 3194                                                  | K.GCEVVPDNNVSGQK.F          | 1489.63335 | 2     | 1.53E-04 | 0.74  | 2.84    | - | 672.3  |
| AHQ-6-12, 6204                                                        | R.GEELDEDLFLQLTGGHEAF       | 2121.24574 | 2     | 2.08E-05 | 0.93  | 4.16    | - | 1229.0 |
| AHQ-6-6, 6346 - 6347                                                  | R.GEELDEDLFLQLTGGHEAF       | 2121.24574 | 2     | 2.61E-09 | 0.94  | 4.60    | - | 1170.9 |
| AHQ-6-14-, 6294                                                       | R.GEELDEDLFLQLTGGHEAF       | 2121.24574 | 2     | 3.20E-05 | 0.88  | 4.13    | - | 778.6  |
| AHQ-6-6, 3115                                                         | R.GM*PAHFSDSAQTEACYHM*LSR.P | 2430.63997 | 3     | 3.45E-07 | 0.92  | 4.17    | - | 1284.2 |
| AHQ-6-9, 3551                                                         | R.IDLAVGDVVK.T              | 1029.21223 | 1     | 9.32E-05 | 0.67  | 2.63    | - | 540.0  |
| AHQ-6-6, 3755                                                         | R.IDLAVGDVVK.T              | 1029.21223 | 1     | 4.29E-04 | 0.83  | 2.98    | - | 669.7  |
| AHQ-6-9, 4086                                                         | R.ILEAHQNVLAQLSLAEALR.F     | 2105.38372 | 2     | 3.48E-04 | 0.96  | 4.80    | - | 1516.7 |
| AHQ-6-6, 4331 - 4404                                                  | R.ILEAHQNVLAQLSLAEALR.F     | 2105.38372 | 3     | 7.00E-06 | 0.80  | 4.09    | - | 600.9  |
| AHQ-6-12, 4327 - 4336                                                 | R.ILEAHQNVLAQLSLAEALR.F     | 2105.38372 | 2     | 9.44E-14 | 0.98  | 6.68    | - | 1701.5 |

|                                                                                           |                                    |            |   |          |      |      |      |          |
|-------------------------------------------------------------------------------------------|------------------------------------|------------|---|----------|------|------|------|----------|
| AHQ-6-6, 4334 - 4395                                                                      | R.ILEAHQNVQLSLAEQRL.F              | 2105.38372 | 2 | 1.79E-13 | 0.98 | 6.36 | -    | 2329.7   |
| AHQ-6-6, 2730                                                                             | R.KDEILGIANNR.L                    | 1243.39499 | 2 | 9.37E-06 | 0.92 | 3.68 | -    | 1344.9   |
| AHQ-6-12, 2743                                                                            | R.KDEILGIANNR.L                    | 1243.39499 | 2 | 2.52E-04 | 0.90 | 3.35 | -    | 911.0    |
| AHQ-6-9, 2585 - 2589                                                                      | R.KDEILGIANNR.L                    | 1243.39499 | 2 | 3.88E-05 | 0.83 | 3.16 | -    | 786.8    |
| AHQ-6-6, 2591 - 2670                                                                      | R.KDEILGIANNR.L                    | 1243.39499 | 2 | 1.39E-05 | 0.91 | 3.34 | -    | 1128.4   |
| AHQ-6-6, 3966                                                                             | R.KQDWSDHAIWWEQK.R                 | 1858.00504 | 3 | 6.72E-07 | 0.96 | 5.03 | -    | 1495.0   |
| AHQ-6-8, 6094                                                                             | K.LEGSAPTDVLDLSTTIPELK.D           | 2100.35256 | 2 | 2.03E-05 | 0.78 | 3.49 | -    | 511.8    |
| AHQ-6-4, 6317                                                                             | K.LEGSAPTDVLDLSTTIPELK.D           | 2100.35256 | 2 | 6.19E-05 | 0.61 | 3.10 | -    | 346.2    |
| AHQ-6-7, 5983 - 5986                                                                      | K.LEGSAPTDVLDLSTTIPELK.D           | 2100.35256 | 2 | 2.13E-07 | 0.93 | 4.67 | -    | 693.9    |
| AHQ-6-6, 5310                                                                             | K.LEGSAPTDVLDLSTTIPELK.D           | 2100.35256 | 2 | 6.73E-04 | 0.93 | 4.48 | -    | 763.6    |
| AHQ-6-1, 6300                                                                             | K.LEGSAPTDVLDLSTTIPELK.D           | 2100.35256 | 2 | 2.79E-04 | 0.51 | 3.06 | -    | 380.8    |
| AHQ-6-5, 6239                                                                             | K.LEGSAPTDVLDLSTTIPELK.D           | 2100.35256 | 2 | 1.86E-07 | 0.91 | 3.98 | -    | 722.7    |
| AHQ-6-6, 5770 - 5835                                                                      | K.LEGSAPTDVLDLSTTIPELK.D           | 2100.35256 | 2 | 8.67E-07 | 0.90 | 3.97 | -    | 826.7    |
| AHQ-6-6, 6134 - 6190                                                                      | K.LEGSAPTDVLDLSTTIPELK.D           | 2100.35256 | 2 | 3.75E-04 | 0.88 | 3.89 | -    | 621.5    |
| AHQ-6-6, 6034 - 6047                                                                      | K.LEGSAPTDVLDLSTTIPELK.D           | 2100.35256 | 2 | 2.03E-06 | 0.85 | 3.83 | -    | 581.2    |
| AHQ-6-6, 5930                                                                             | K.LEGSAPTDVLDLSTTIPELKDH.LR.I      | 2621.92493 | 3 | 6.82E-07 | 0.73 | 3.29 | -    | 370.1    |
| AHQ-6-6, 5763                                                                             | K.LEGSAPTDVLDLSTTIPELKDH.LR.I      | 2621.92493 | 3 | 2.82E-06 | 0.62 | 3.09 | -    | 331.4    |
| AHQ-6-6, 5452 - 5510                                                                      | K.LLVPSPEGMSEIYLR.C                | 1705.01201 | 2 | 2.86E-08 | 0.86 | 2.89 | -    | 818.0    |
| AHQ-6-5, 6367                                                                             | K.LSQSGEVGEPAGTDPGLDDLDVALSNLEVK.L | 3027.24073 | 3 | 1.63E-06 | 0.93 | 4.67 | -    | 1000.3   |
| AHQ-6-7, 6146                                                                             | K.LSQSGEVGEPAGTDPGLDDLDVALSNLEVK.L | 3027.24073 | 3 | 8.42E-09 | 0.83 | 4.14 | -    | 907.5    |
| AHQ-6-8, 6256                                                                             | K.LSQSGEVGEPAGTDPGLDDLDVALSNLEVK.L | 3027.24073 | 3 | 4.88E-08 | 0.92 | 4.70 | -    | 976.1    |
| AHQ-6-1, 6418                                                                             | K.LSQSGEVGEPAGTDPGLDDLDVALSNLEVK.L | 3027.24073 | 3 | 2.11E-06 | 0.73 | 3.05 | -    | 1006.5   |
| AHQ-6-6, 6283                                                                             | K.LSQSGEVGEPAGTDPGLDDLDVALSNLEVK.L | 3027.24073 | 3 | 1.42E-06 | 0.94 | 5.34 | -    | 1173.0   |
| AHQ-6-7, 2355 - 2358                                                                      | R.LTQLYEQAR.W                      | 1122.25622 | 2 | 1.59E-07 | 0.91 | 3.80 | -    | 1102.5   |
| AHQ-6-6, 2404 - 2442                                                                      | R.LTQLYEQAR.W                      | 1122.25622 | 2 | 1.56E-04 | 0.86 | 2.81 | -    | 974.6    |
| AHQ-6-8, 3857 - 3860                                                                      | K.SQDEAPGDPPIQLNLK.G               | 1753.89174 | 2 | 4.16E-04 | 0.85 | 3.97 | -    | 412.9    |
| AHQ-6-5, 4005                                                                             | K.SQDEAPGDPPIQLNLK.G               | 1753.89174 | 2 | 1.57E-04 | 0.67 | 2.82 | -    | 413.2    |
| AHQ-6-13-, 3972 - 4030                                                                    | K.SQDEAPGDPPIQLNLK.G               | 1753.89174 | 2 | 7.69E-08 | 0.74 | 3.47 | -    | 551.7    |
| AHQ-6-6, 3904 - 3963                                                                      | K.SQDEAPGDPPIQLNLK.G               | 1753.89174 | 2 | 3.47E-06 | 0.92 | 4.40 | -    | 595.4    |
| AHQ-6-7, 4088                                                                             | K.TASGGYIDSSWELR.V                 | 1600.66783 | 2 | 6.54E-08 | 0.85 | 3.39 | -    | 773.7    |
| AHQ-6-13-, 4277                                                                           | K.TASGGYIDSSWELR.V                 | 1600.66783 | 2 | 1.83E-04 | 0.84 | 3.31 | -    | 919.4    |
| AHQ-6-6, 4094 - 4100                                                                      | K.TASGGYIDSSWELR.V                 | 1600.66783 | 2 | 5.10E-06 | 0.76 | 3.06 | -    | 458.2    |
| AHQ-6-6, 4190                                                                             | K.TASGGYIDSSWELR.V                 | 1600.66783 | 2 | 1.44E-10 | 0.91 | 3.60 | -    | 999.6    |
| AHQ-6-13, 4403                                                                            | K.TASGGYIDSSWELR.V                 | 1600.66783 | 2 | 2.14E-05 | 0.82 | 3.06 | -    | 972.9    |
| AHQ-6-7, 3723                                                                             | R.TGSGGPGNHHPGPDASAEGLNYPYGLVAPR.F | 2783.95312 | 2 | 2.62E-05 | 0.80 | 3.45 | -    | 540.6    |
| AHQ-6-9, 6179                                                                             | R.TM*ADSSYTSVQAILAFSLQR.T          | 2448.73471 | 3 | 4.93E-04 | 0.91 | 4.32 | -    | 1077.8   |
| AHQ-6-7, 6335                                                                             | R.TM*ADSSYTSVQAILAFSLQR.T          | 2448.73471 | 3 | 7.93E-07 | 0.95 | 4.88 | -    | 1526.0   |
| AHQ-6-6, 6474                                                                             | R.TM*ADSSYTSVQAILAFSLQR.T          | 2448.73471 | 3 | 4.54E-06 | 0.97 | 5.83 | -    | 1821.6   |
| AHQ-6-5, 3865 - 3923                                                                      | R.VFVGEEDEPEAESVTLR.V              | 1777.91007 | 2 | 1.75E-05 | 0.93 | 4.23 | -    | 1095.6   |
| AHQ-6-13-, 3862 - 3930                                                                    | R.VFVGEEDEPEAESVTLR.V              | 1777.91007 | 2 | 3.84E-06 | 0.86 | 4.17 | -    | 626.4    |
| AHQ-6-7, 3770                                                                             | R.VFVGEEDEPEAESVTLR.V              | 1777.91007 | 2 | 3.20E-05 | 0.88 | 3.73 | -    | 1043.8   |
| AHQ-6-6, 3882                                                                             | R.VFVGEEDEPEAESVTLR.V              | 1777.91007 | 3 | 5.14E-04 | 0.94 | 4.14 | -    | 1737.0   |
| AHQ-6-8, 3792                                                                             | R.VFVGEEDEPEAESVTLR.V              | 1777.91007 | 2 | 8.57E-04 | 0.81 | 3.60 | -    | 808.1    |
| AHQ-6-10, 3767 - 3770                                                                     | R.VFVGEEDEPEAESVTLR.V              | 1777.91007 | 2 | 5.87E-05 | 0.90 | 3.59 | -    | 1258.7   |
| AHQ-6-14, 4636 - 4697                                                                     | R.VFVGEEDEPEAESVTLR.V              | 1777.91007 | 2 | 7.16E-05 | 0.93 | 3.86 | -    | 1146.5   |
| AHQ-6-11, 3832                                                                            | R.VFVGEEDEPEAESVTLR.V              | 1777.91007 | 2 | 6.02E-08 | 0.94 | 3.97 | -    | 1180.2   |
| AHQ-6-9, 3671 - 3676                                                                      | R.VFVGEEDEPEAESVTLR.V              | 1777.91007 | 2 | 1.79E-04 | 0.61 | 3.06 | -    | 693.8    |
| AHQ-6-6, 3852 - 3911                                                                      | R.VFVGEEDEPEAESVTLR.V              | 1777.91007 | 2 | 9.07E-11 | 0.95 | 4.42 | -    | 1269.7   |
| AHQ-6-13, 4055 - 4113                                                                     | R.VFVGEEDEPEAESVTLR.V              | 1777.91007 | 2 | 5.89E-05 | 0.96 | 4.46 | -    | 1620.7   |
| AHQ-6-3, 3918 - 3984                                                                      | R.VFVGEEDEPEAESVTLR.V              | 1777.91007 | 2 | 1.64E-05 | 0.88 | 3.21 | -    | 1142.0   |
| AHQ-6-12, 3881                                                                            | R.VFVGEEDEPEAESVTLR.V              | 1777.91007 | 2 | 1.10E-05 | 0.78 | 2.96 | -    | 851.2    |
| AHQ-6-14-, 3910                                                                           | R.VFVGEEDEPEAESVTLR.V              | 1777.91007 | 2 | 2.30E-11 | 0.96 | 4.40 | -    | 1585.8   |
| AHQ-6-12, 2973                                                                            | R.VTGESHIGGVLLK.I                  | 1310.52448 | 2 | 1.02E-05 | 0.85 | 2.98 | -    | 1201.4   |
| AHQ-6-7, 2724 - 2794                                                                      | R.VTGESHIGGVLLK.I                  | 1310.52448 | 2 | 9.44E-05 | 0.87 | 3.24 | -    | 1154.4   |
| AHQ-6-6, 2866 - 2926                                                                      | R.VTGESHIGGVLLK.I                  | 1310.52448 | 2 | 8.27E-08 | 0.97 | 4.06 | -    | 1986.8   |
| AHQ-6-14-, 2980                                                                           | R.VTGESHIGGVLLK.I                  | 1310.52448 | 2 | 9.35E-06 | 0.96 | 3.87 | -    | 1752.3   |
| AHQ-6-6, 2872                                                                             | R.VTGESHIGGVLLK.I                  | 1310.52448 | 1 | 7.80E-04 | 0.49 | 2.03 | -    | 733.6    |
| AHQ-6-7, 2791                                                                             | R.VTGESHIGGVLLK.I                  | 1310.52448 | 2 | 5.53E-05 | 0.91 | 3.52 | -    | 1123.0   |
| AHQ-6-5, 2896                                                                             | R.VTGESHIGGVLLK.I                  | 1310.52448 | 2 | 1.22E-05 | 0.91 | 3.11 | -    | 1300.5   |
| AHQ-6-11, 4509 - 4577                                                                     | K.VVLAGGVAPALFR.G                  | 1270.54832 | 2 | 5.01E-04 | 0.91 | 3.35 | -    | 1081.3   |
| AHQ-6-10, 4479 - 4483                                                                     | K.VVLAGGVAPALFR.G                  | 1270.54832 | 2 | 1.25E-06 | 0.97 | 4.13 | -    | 1923.4   |
| AHQ-6-6, 4663 - 4687                                                                      | K.VVLAGGVAPALFR.G                  | 1270.54832 | 2 | 1.33E-11 | 0.97 | 5.04 | -    | 1878.8   |
| AHQ-6-7, 4538                                                                             | K.VVLAGGVAPALFR.G                  | 1270.54832 | 2 | 2.41E-10 | 0.97 | 4.51 | -    | 1863.4   |
| g 13124879 ref NP_002465.1 smooth muscle myosin heavy chain 11 isoform SM1 [Homo sapiens] |                                    |            |   |          |      |      | 4.20 | 227336.7 |
| AHQ-6-2, 4636                                                                             | R.DLGEELAEALK.T                    | 1117.23151 | 2 | 1.07E-05 | 0.90 | 3.53 | -    | 766.9    |
| AHQ-6-5, 2887                                                                             | K.FDQLLAEK.N                       | 1093.21165 | 2 | 5.29E-06 | 0.89 | 2.59 | -    | 1465.0   |
| AHQ-6-2, 2966                                                                             | K.FDQLLAEK.N                       | 1093.21165 | 2 | 1.33E-05 | 0.90 | 3.08 | -    | 1372.2   |
| AHQ-6-3, 2964                                                                             | K.FDQLLAEK.N                       | 1093.21165 | 1 | 4.71E-04 | 0.75 | 2.39 | -    | 1057.0   |
| AHQ-6-3, 2970                                                                             | K.FDQLLAEK.N                       | 1093.21165 | 2 | 1.73E-04 | 0.91 | 3.05 | -    | 1426.7   |
| AHQ-6-2, 2555 - 2579                                                                      | K.KEEELQAAALR.L                    | 1258.40643 | 1 | 6.62E-06 | 0.52 | 2.28 | -    | 557.7    |
| AHQ-6-4, 2531                                                                             | K.KEEELQAAALR.L                    | 1258.40643 | 2 | 3.46E-05 | 0.92 | 3.61 | -    | 1320.3   |
| AHQ-6-5, 2827 - 2851                                                                      | R.KFDQLLAEK.N                      | 1221.38456 | 2 | 1.96E-04 | 0.90 | 3.34 | -    | 1206.1   |
| AHQ-6-4, 2880                                                                             | R.KFDQLLAEK.N                      | 1221.38456 | 1 | 3.90E-04 | 0.71 | 2.74 | -    | 692.7    |
| AHQ-6-3, 2926                                                                             | R.KFDQLLAEK.N                      | 1221.38456 | 1 | 3.18E-05 | 0.26 | 2.33 | -    | 453.3    |
| AHQ-6-6, 2818 - 2834                                                                      | R.KFDQLLAEK.N                      | 1221.38456 | 2 | 5.25E-05 | 0.83 | 3.25 | -    | 1018.1   |
| AHQ-6-2, 2876 - 2916                                                                      | R.KFDQLLAEK.N                      | 1221.38456 | 2 | 2.60E-04 | 0.92 | 3.63 | -    | 1159.2   |
| AHQ-6-2, 2920 - 2922                                                                      | R.KFDQLLAEK.N                      | 1221.38456 | 1 | 6.01E-04 | 0.58 | 2.78 | -    | 783.1    |
| AHQ-6-3, 2920 - 2921                                                                      | R.KFDQLLAEK.N                      | 1221.38456 | 2 | 1.98E-04 | 0.88 | 3.44 | -    | 992.8    |
| AHQ-6-3, 5685                                                                             | K.LLQQLFNHTMFILEQEEYQR.E           | 2468.77258 | 3 | 1.24E-05 | 0.89 | 3.29 | -    | 1497.1   |
| AHQ-6-2, 5666 - 5723                                                                      | K.LLQQLFNHTMFILEQEEYQR.E           | 2468.77258 | 3 | 1.52E-10 | 0.99 | 6.64 | -    | 3760.4   |
| AHQ-6-3, 5064 - 5069                                                                      | K.LLQQLFNHTMFILEQEEYQR.E           | 2484.77198 | 3 | 1.10E-05 | 0.98 | 7.27 | -    | 2641.6   |
| AHQ-6-2, 5090 - 5162                                                                      | K.LLQQLFNHTMFILEQEEYQR.E           | 2484.77198 | 3 | 1.29E-13 | 0.98 | 6.68 | -    | 2359.8   |
| AHQ-6-4, 5728                                                                             | K.LLQQLFNHTMFILEQEEYQR.E           | 2468.77258 | 3 | 5.07E-04 | 0.89 | 3.16 | -    | 1550.6   |
| AHQ-6-2, 5116                                                                             | K.LLQQLFNHTMFILEQEEYQR.E           | 2484.77198 | 2 | 8.35E-06 | 0.73 | 2.80 | -    | 538.6    |
| AHQ-6-2, 5283                                                                             | K.LLQQLFNHTMFILEQEEYQR.E           | 2484.77198 | 3 | 1.96E-05 | 0.92 | 4.17 | -    | 1553.7   |
| AHQ-6-1, 5198                                                                             | K.LLQQLFNHTMFILEQEEYQR.E           | 2484.77198 | 3 | 1.55E-07 | 0.98 | 6.65 | -    | 2329.2   |
| AHQ-6-2, 5966                                                                             | K.LLQQLANPILEAFGNAK.T              | 1727.98540 | 2 | 1.25E-07 | 0.92 | 4.27 | -    | 553.3    |
| AHQ-6-2, 5870 - 5878                                                                      | K.LLQQLANPILEAFGNAK.T              | 1727.98540 | 2 | 3.62E-08 | 0.95 | 4.23 | -    | 1052.2   |
| AHQ-6-2, 5758 - 5814                                                                      | K.LLQQLANPILEAFGNAK.T              | 1727.98540 | 2 | 4.21E-09 | 0.95 | 4.36 | -    | 870.0    |
| AHQ-6-7, 5604 - 5606                                                                      | K.LLQQLANPILEAFGNAK.T              | 1727.98540 | 2 | 1.64E-05 | 0.89 | 4.36 | -    | 400.5    |
| AHQ-6-6, 5864 - 5936                                                                      | K.LLQQLANPILEAFGNAK.T              | 1727.98540 | 2 | 9.53E-07 | 0.82 | 3.20 | -    | 636.0    |
| AHQ-6-6, 5698 - 5759                                                                      | K.LLQQLANPILEAFGNAK.T              | 1727.98540 | 2 | 1.75E-09 | 0.96 | 4.95 | -    | 1132.7   |
| AHQ-6-3, 5770 - 5836                                                                      | K.LLQQLANPILEAFGNAK.T              | 1727.98540 | 2 | 2.15E-08 | 0.96 | 4.64 | -    | 1242.8   |
| AHQ-6-3, 5936                                                                             | K.LLQQLANPILEAFGNAK.T              | 1727.98540 | 2 | 1.15E-05 | 0.90 | 3.63 | -    | 624.8    |
| AHQ-6-5, 5820 - 5885                                                                      | K.LLQQLANPILEAFGNAK.T              | 1727.98540 | 2 | 2.59E-04 | 0.93 | 4.31 | -    | 899.3    |
| AHQ-6-5, 5707 - 5767                                                                      | K.LLQQLANPILEAFGNAK.T              | 1727.98540 | 2 | 9.10E-07 | 0.84 | 3.85 | -    | 509.6    |
| AHQ-6-1, 5830 - 5910                                                                      | K.LLQQLANPILEAFGNAK.T              | 1727.98540 | 2 | 8.66E-04 | 0.90 | 3.54 | -    | 792.0    |
| AHQ-6-1, 6026                                                                             | K.LLQQLANPILEAFGNAK.T              | 1727.98540 | 2 | 8.47E-06 | 0.87 | 3.68 | -    | 520.6    |
| AHQ-6-4, 5848 - 5903                                                                      | K.LLQQLANPILEAFGNAK.T              | 1727.98540 | 2 | 9.01E-11 | 0.93 | 4.41 | -    | 780.3    |
| AHQ-6-4, 6015                                                                             | K.LLQQLANPILEAFGNAK.T              | 1727.98540 | 2 | 8.38E-06 | 0.92 | 3.76 | -    | 859.8    |
| AHQ-6-10, 5468 - 5508                                                                     | K.LLQQLANPILEAFGNAK.T              | 1727.98540 | 2 | 3.62E-04 | 0.82 | 3.62 | -    | 525.9    |
| AHQ-6-1, 5471                                                                             | K.TLQLEEELEDELQATEDAK.L            | 1963.04334 | 3 | 1.44E-08 | 0.96 | 5.99 | -    | 1309.6   |
| AHQ-6-5, 5316 - 5359                                                                      | K.TLQLEEELEDELQATEDAK.L            | 1963.04334 | 2 | 3.44E-06 | 0.98 | 5.58 | -    | 2089.0   |
| AHQ-6-2, 3930 - 4008                                                                      | K.TLQLEEELEDELQATEDAK.L            | 1963.04334 | 2 | 9.28E-07 | 0.97 | 5.38 | -    | 1591.3   |
| AHQ-6-2, 5410 - 5484                                                                      | K.TLQLEEELEDELQATEDAK.L            | 1963.04334 | 2 | 8.91E-06 | 0.97 | 4.63 | -    | 1820.1   |
| AHQ-6-1, 5466                                                                             | K.TLQLEEELEDELQATEDAK.L            | 1963.04334 | 2 | 5.44E-05 | 0.95 | 4.49 | -    | 1279.1   |
| AHQ-6-6, 5298 - 5304                                                                      | K.TLQLEEELEDELQATEDAK.L            | 1963.04334 | 2 | 1.30E-07 | 0.98 | 6.04 | -    | 1765.3   |

|                             |                                                                        |            |   |          |       |        |       |         |
|-----------------------------|------------------------------------------------------------------------|------------|---|----------|-------|--------|-------|---------|
| AHQ-6-2, 5414               | K.TLQLELEDELQATEDAK.L                                                  | 1963.04334 | 3 | 3.34E-05 | 0.94  | 5.01   | -     | 974.3   |
| AHQ-6-3, 5377               | K.TLQLELEDELQATEDAK.L                                                  | 1963.04334 | 3 | 5.75E-06 | 0.95  | 5.01   | -     | 1163.1  |
| AHQ-6-7, 5128 - 5158        | K.TLQLELEDELQATEDAK.L                                                  | 1963.04334 | 2 | 1.99E-05 | 0.96  | 4.73   | -     | 1489.4  |
| AHQ-6-3, 5370               | K.TLQLELEDELQATEDAK.L                                                  | 1963.04334 | 2 | 4.64E-04 | 0.97  | 5.94   | -     | 1327.9  |
| AHQ-6-4, 5432 - 5436        | K.TLQLELEDELQATEDAK.L                                                  | 1963.04334 | 2 | 7.64E-09 | 0.98  | 5.96   | -     | 2641.4  |
| gi 13994151 ref NP_066272.1 | PDZ and LIM domain 1 (eflin); coxy terminal LIM domain protein 1 [H    |            |   | 1.50E-13 | 11.43 | 140.30 | 50.80 | 36071.5 |
| AHQ-6-14-, 5672 - 5732      | K.AALANLNCIGDVITADGENTSNM*THLEAQR.N.I                                  | 3331.63807 | 3 | 1.15E-05 | 0.94  | 5.52   | -     | 719.5   |
| AHQ-6-14-, 6160 - 6218      | K.AALANLNCIGDVITADGENTSNM*THLEAQR.N.I                                  | 3331.63807 | 3 | 1.50E-13 | 0.95  | 6.00   | -     | 690.1   |
| AHQ-6-13, 4535 - 4536       | K.CGTGIVGVFVK.L                                                        | 1138.36198 | 2 | 3.08E-04 | 0.93  | 3.23   | -     | 1334.7  |
| AHQ-6-11, 3505              | K.DFEQPLAIRS.V                                                         | 1176.30388 | 2 | 8.23E-06 | 0.93  | 3.78   | -     | 1051.0  |
| AHQ-6-13, 3745              | K.DFEQPLAIRS.V                                                         | 1176.30388 | 2 | 1.09E-06 | 0.88  | 3.17   | -     | 881.2   |
| AHQ-6-12, 3563              | K.DFEQPLAIRS.V                                                         | 1176.30388 | 2 | 1.88E-05 | 0.88  | 3.38   | -     | 879.3   |
| AHQ-6-14-, 3575             | K.DFEQPLAIRS.V                                                         | 1176.30388 | 2 | 1.06E-05 | 0.96  | 4.06   | -     | 1449.2  |
| AHQ-6-13-, 3586 - 3609      | K.DFEQPLAIRS.V                                                         | 1176.30388 | 2 | 3.24E-06 | 0.73  | 2.75   | -     | 631.2   |
| AHQ-6-13, 3543 - 3544       | K.GCTDNLLTVAR.S                                                        | 1322.47058 | 2 | 3.28E-04 | 0.76  | 2.94   | -     | 703.3   |
| AHQ-6-13, 4127              | K.GHFFVEDQIYCEK.H                                                      | 1673.82684 | 2 | 7.56E-04 | 0.90  | 3.44   | -     | 832.2   |
| AHQ-6-13-, 3990 - 4004      | K.GHFFVEDQIYCEK.H                                                      | 1673.82684 | 2 | 2.87E-04 | 0.96  | 4.59   | -     | 1367.7  |
| AHQ-6-12, 3920              | K.GHFFVEDQIYCEK.H                                                      | 1673.82684 | 2 | 9.98E-05 | 0.95  | 4.06   | -     | 1240.3  |
| AHQ-6-14-, 3963 - 3972      | K.GHFFVEDQIYCEK.H                                                      | 1673.82684 | 2 | 4.72E-06 | 0.96  | 4.08   | -     | 1681.4  |
| AHQ-6-13, 4093 - 4155       | K.GHFFVEDQIYCEK.H                                                      | 1673.82684 | 2 | 4.52E-04 | 0.87  | 3.25   | -     | 621.3   |
| AHQ-6-11, 3875              | K.GHFFVEDQIYCEK.H                                                      | 1673.82684 | 2 | 8.94E-04 | 0.89  | 3.43   | -     | 768.0   |
| AHQ-6-12, 3220              | R.IKGGTDNLLTVAR.S                                                      | 1563.80174 | 2 | 5.84E-08 | 0.90  | 3.77   | -     | 848.7   |
| AHQ-6-13, 3419              | R.IKGGTDNLLTVAR.S                                                      | 1563.80174 | 2 | 1.14E-11 | 0.87  | 3.40   | -     | 628.2   |
| AHQ-6-14, 4050 - 4106       | R.IKGGTDNLLTVAR.S                                                      | 1563.80174 | 2 | 5.25E-06 | 0.80  | 3.16   | -     | 688.1   |
| AHQ-6-13-, 3292             | R.IKGGTDNLLTVAR.S                                                      | 1563.80174 | 2 | 7.51E-11 | 0.96  | 4.35   | -     | 1250.3  |
| AHQ-6-14-, 3218             | R.IKGGTDNLLTVAR.S                                                      | 1563.80174 | 2 | 5.08E-08 | 0.94  | 3.88   | -     | 1106.7  |
| AHQ-6-12, 4575              | K.LPM*CDKCGTIVGVFVK.L                                                  | 1900.27298 | 3 | 1.43E-05 | 0.58  | 3.60   | -     | 559.1   |
| AHQ-6-13, 4753              | K.LPM*CDKCGTIVGVFVK.L                                                  | 1900.27298 | 3 | 5.92E-05 | 0.91  | 3.90   | -     | 1270.5  |
| AHQ-6-13, 3895              | R.LVGGKDFEQPLAIRS.V                                                    | 1630.86972 | 2 | 1.32E-08 | 0.92  | 4.77   | -     | 683.5   |
| AHQ-6-13-, 3772             | R.LVGGKDFEQPLAIRS.V                                                    | 1630.86972 | 2 | 7.69E-07 | 0.97  | 5.12   | -     | 1412.7  |
| AHQ-6-14-, 3747 - 3748      | R.LVGGKDFEQPLAIRS.V                                                    | 1630.86972 | 2 | 2.73E-08 | 0.98  | 5.72   | -     | 2159.3  |
| AHQ-6-13-, 3717             | K.M*NLASEPQEVLIHSAHNR.S                                                | 2120.33559 | 2 | 6.94E-06 | 0.92  | 4.32   | -     | 609.2   |
| AHQ-6-13-, 3709 - 3724      | K.M*NLASEPQEVLIHSAHNR.S                                                | 2120.33559 | 3 | 8.60E-04 | 0.73  | 3.18   | -     | 558.8   |
| AHQ-6-13-, 6197 - 6200      | K.QSTSFLVQLQEISEEK.G                                                   | 1981.18977 | 2 | 1.19E-07 | 0.97  | 5.28   | -     | 1470.8  |
| AHQ-6-13, 6239              | K.QSTSFLVQLQEISEEK.G                                                   | 1981.18977 | 2 | 9.79E-07 | 0.95  | 4.06   | -     | 1414.5  |
| AHQ-6-13-, 5840             | K.QSTSFLVQLQEISEEKGDPPKPSGFR.S                                         | 3037.32681 | 3 | 4.31E-06 | 0.70  | 3.04   | -     | 497.5   |
| AHQ-6-13, 2705              | R.SAM*PFTASPASSTTAR.V                                                  | 1599.74799 | 2 | 3.85E-05 | 0.75  | 2.84   | -     | 720.1   |
| AHQ-6-12, 2517 - 2523       | R.SAM*PFTASPASSTTAR.V                                                  | 1599.74799 | 2 | 2.55E-07 | 0.92  | 3.61   | -     | 1022.8  |
| AHQ-6-13-, 2530             | R.SAM*PFTASPASSTTAR.V                                                  | 1599.74799 | 2 | 3.48E-05 | 0.95  | 3.89   | -     | 1487.5  |
| AHQ-6-12, 3063              | R.SAMPFTASPASSTTAR.V                                                   | 1583.74859 | 2 | 2.08E-04 | 0.60  | 2.73   | -     | 541.8   |
| AHQ-6-11, 2479 - 2487       | R.SAM*PFTASPASSTTAR.V                                                  | 1599.74799 | 2 | 7.20E-07 | 0.84  | 3.14   | -     | 872.8   |
| AHQ-6-13, 4744 - 4747       | R.VTPEGEVTVFPK                                                         | 1662.90695 | 2 | 2.61E-07 | 0.47  | 2.59   | -     | 115.1   |
| gi 4502549 ref NP_001734.1  | calmodulin 2 (phosphorylase kinase, delta); phosphorylase kinase delta |            |   | 2.15E-13 | 1.90  | 20.23  | 22.10 | 16837.5 |
| AHQ-6-12, 3828 - 3833       | K.EAFSLFDKGDGDTITTK.E                                                  | 1845.98441 | 2 | 2.02E-06 | 0.75  | 3.35   | -     | 576.7   |
| AHQ-6-12, 4043 - 4100       | K.EAFSLFDKGDGDTITTK.E                                                  | 1845.98441 | 2 | 7.23E-07 | 0.94  | 4.24   | -     | 1051.1  |
| AHQ-6-13-, 3817             | R.VFDKGNNGYISAAELR.H                                                   | 1755.90933 | 2 | 1.44E-06 | 0.70  | 2.90   | -     | 346.4   |
| AHQ-6-12, 3736 - 3792       | R.VFDKGNNGYISAAELR.H                                                   | 1755.90933 | 2 | 2.15E-13 | 0.96  | 4.56   | -     | 1549.9  |
| gi 4501885 ref NP_001092.1  | beta actin; beta cytoskeletal actin [Homo sapiens]                     |            |   | 2.55E-13 | 13.55 | 150.35 | 36.00 | 41736.5 |
| AHQ-6-8, 5653 - 5728        | R.PCEALFQPSFLGM*ESCGIHETTFNSIMK.C                                      | 3267.67588 | 3 | 4.15E-05 | 0.91  | 4.92   | -     | 479.2   |
| AHQ-6-8, 6148 - 6221        | R.PCEALFQPSFLGM*ESCGIHETTFNSIMK.C                                      | 3251.67648 | 3 | 1.08E-05 | 0.79  | 4.77   | -     | 372.3   |
| AHQ-6-8, 5756 - 5813        | R.PCEALFQPSFLGM*ESCGIHETTFNSIMK.C                                      | 3267.67588 | 3 | 9.84E-04 | 0.88  | 4.50   | -     | 555.0   |
| AHQ-6-13-, 6118             | R.PCEALFQPSFLGM*ESCGIHETTFNSIMK.C                                      | 3251.67648 | 3 | 3.64E-04 | 0.75  | 3.83   | -     | 366.7   |
| AHQ-6-8, 6022 - 6096        | R.PCEALFQPSFLGM*ESCGIHETTFNSIMK.C                                      | 3251.67648 | 3 | 3.43E-06 | 0.73  | 3.75   | -     | 605.8   |
| AHQ-6-13-, 5680 - 5740      | R.PCEALFQPSFLGM*ESCGIHETTFNSIMK.C                                      | 3267.67588 | 3 | 8.70E-06 | 0.90  | 4.47   | -     | 563.7   |
| AHQ-6-8, 6544               | K.EKLCYVALDFEQEMATAAASSSSLEK.S                                         | 2810.10410 | 2 | 1.11E-07 | 0.90  | 4.45   | -     | 745.9   |
| AHQ-6-8, 6510               | K.EKLCYVALDFEQEM*ATAAASSSSLEK.S                                        | 2826.10350 | 2 | 2.00E-06 | 0.67  | 3.07   | -     | 622.5   |
| AHQ-6-2, 6446 - 6447        | K.EKLCYVALDFEQEMATAAASSSSLEK.S                                         | 2810.10410 | 3 | 4.64E-04 | 0.79  | 4.00   | -     | 701.3   |
| AHQ-6-8, 6449 - 6516        | K.EKLCYVALDFEQEMATAAASSSSLEK.S                                         | 2810.10410 | 3 | 1.28E-06 | 0.93  | 4.97   | -     | 1254.5  |
| AHQ-6-8, 6422               | K.EKLCYVALDFEQEM*ATAAASSSSLEK.S                                        | 2826.10350 | 3 | 2.17E-05 | 0.77  | 3.66   | -     | 640.5   |
| AHQ-6-8, 6408 - 6472        | K.EKLCYVALDFEQEMATAAASSSSLEK.S                                         | 2810.10410 | 2 | 4.67E-06 | 0.92  | 4.16   | -     | 834.5   |
| AHQ-6-9, 6049               | K.EKLCYVALDFEQEMATAAASSSSLEK.S                                         | 2810.10410 | 2 | 4.49E-05 | 0.84  | 3.27   | -     | 795.4   |
| AHQ-6-8, 6316 - 6382        | K.EKLCYVALDFEQEMATAAASSSSLEK.S                                         | 2810.10410 | 3 | 1.25E-10 | 0.95  | 5.30   | -     | 1384.6  |
| AHQ-6-10, 6056 - 6086       | K.EKLCYVALDFEQEMATAAASSSSLEK.S                                         | 2810.10410 | 3 | 1.35E-05 | 0.60  | 3.10   | -     | 573.1   |
| AHQ-6-8, 6576               | K.EKLCYVALDFEQEMATAAASSSSLEK.S                                         | 2810.10410 | 3 | 4.91E-05 | 0.87  | 3.79   | -     | 1116.3  |
| AHQ-6-8, 6280 - 6341        | K.EKLCYVALDFEQEMATAAASSSSLEK.S                                         | 2810.10410 | 2 | 8.14E-06 | 0.91  | 4.14   | -     | 837.6   |
| AHQ-6-8, 6284 - 6292        | R.FRCPALFQPSFLGMESCGIHETTFNSIMK.C                                      | 3539.03813 | 3 | 9.86E-07 | 0.97  | 6.73   | -     | 1073.3  |
| AHQ-6-8, 5661 - 5721        | R.FRCPALFQPSFLGM*ESCGIHETTFNSIMK.C                                     | 3571.03693 | 3 | 2.33E-09 | 0.97  | 6.85   | -     | 826.8   |
| AHQ-6-8, 5876 - 5950        | R.FRCPALFQPSFLGM*ESCGIHETTFNSIMK.C                                     | 3555.03753 | 3 | 4.62E-07 | 0.92  | 5.73   | -     | 906.8   |
| AHQ-6-8, 6168 - 6225        | R.FRCPALFQPSFLGMESCGIHETTFNSIMK.C                                      | 3539.03813 | 3 | 4.72E-08 | 0.97  | 6.49   | -     | 1393.4  |
| AHQ-6-8, 2355 - 2416        | R.GYSFTTAER.E                                                          | 1133.19273 | 2 | 3.40E-04 | 0.92  | 3.29   | -     | 1040.5  |
| AHQ-6-10, 2510 - 2572       | R.GYSFTTAER.E                                                          | 1133.19273 | 2 | 1.66E-04 | 0.93  | 3.19   | -     | 1216.7  |
| AHQ-6-4, 2593 - 2596        | R.GYSFTTAER.E                                                          | 1133.19273 | 2 | 2.04E-05 | 0.90  | 3.19   | -     | 861.2   |
| AHQ-6-8, 2562               | R.GYSFTTAER.E                                                          | 1133.19273 | 2 | 9.43E-05 | 0.86  | 2.75   | -     | 901.3   |
| AHQ-6-8, 2442 - 2504        | R.GYSFTTAER.E                                                          | 1133.19273 | 2 | 1.61E-04 | 0.92  | 3.32   | -     | 1197.7  |
| AHQ-6-11, 2576 - 2577       | R.GYSFTTAER.E                                                          | 1133.19273 | 2 | 2.21E-04 | 0.95  | 3.48   | -     | 1330.0  |
| AHQ-6-8, 4321 - 4368        | R.KDLYANTVLSGGTTMYPGIADR.M                                             | 2344.62976 | 2 | 1.11E-05 | 0.92  | 4.17   | -     | 896.3   |
| AHQ-6-8, 4340 - 4366        | R.KDLYANTVLSGGTTMYPGIADR.M                                             | 2344.62976 | 3 | 7.09E-04 | 0.87  | 4.29   | -     | 1063.5  |
| AHQ-6-8, 4430               | R.KDLYANTVLSGGTTMYPGIADR.M                                             | 2344.62976 | 3 | 1.92E-04 | 0.84  | 3.95   | -     | 808.2   |
| AHQ-6-8, 4557 - 4616        | R.KDLYANTVLSGGTTMYPGIADR.M                                             | 2344.62976 | 2 | 1.44E-08 | 0.97  | 5.13   | -     | 1319.6  |
| AHQ-6-10, 4018              | R.KDLYANTVLSGGTTMYPGIADR.M                                             | 2360.62916 | 3 | 1.87E-04 | 0.85  | 3.60   | -     | 887.2   |
| AHQ-6-8, 3981 - 4017        | R.KDLYANTVLSGGTTMYPGIADR.M                                             | 2360.62916 | 3 | 5.88E-06 | 0.82  | 4.15   | -     | 910.4   |
| AHQ-6-14-, 4386             | R.KDLYANTVLSGGTTMYPGIADR.M                                             | 2360.62916 | 3 | 3.56E-04 | 0.80  | 3.26   | -     | 830.8   |
| AHQ-6-14-, 4276             | R.KDLYANTVLSGGTTMYPGIADR.M                                             | 2360.62916 | 3 | 1.19E-05 | 0.55  | 3.01   | -     | 590.8   |
| AHQ-6-13-, 4149 - 4205      | R.KDLYANTVLSGGTTMYPGIADR.M                                             | 2360.62916 | 3 | 1.55E-05 | 0.97  | 5.38   | -     | 1708.5  |
| AHQ-6-14-, 4174             | R.KDLYANTVLSGGTTMYPGIADR.M                                             | 2360.62916 | 3 | 9.56E-04 | 0.93  | 4.30   | -     | 1071.6  |
| AHQ-6-8, 6396 - 6466        | K.LCYVALDFEQEMATAAASSSSLEK.S                                           | 2552.81665 | 3 | 8.87E-10 | 0.98  | 7.06   | -     | 2775.2  |
| AHQ-6-8, 5577 - 5645        | K.LCYVALDFEQEM*ATAAASSSSLEK.S                                          | 2568.81605 | 2 | 4.61E-06 | 0.94  | 4.04   | -     | 1463.1  |
| AHQ-6-8, 6366 - 6436        | K.LCYVALDFEQEM*ATAAASSSSLEK.S                                          | 2568.81605 | 3 | 4.36E-05 | 0.86  | 3.46   | -     | 1019.3  |
| AHQ-6-8, 6348 - 6416        | K.LCYVALDFEQEM*ATAAASSSSLEK.S                                          | 2568.81605 | 2 | 4.61E-04 | 0.96  | 4.68   | -     | 1316.8  |
| AHQ-6-8, 6552 - 6569        | K.LCYVALDFEQEMATAAASSSSLEK.S                                           | 2552.81665 | 2 | 2.10E-11 | 0.98  | 6.62   | -     | 1944.7  |
| AHQ-6-9, 6148 - 6217        | K.LCYVALDFEQEM*ATAAASSSSLEK.S                                          | 2568.81605 | 2 | 6.07E-05 | 0.66  | 2.81   | -     | 650.8   |
| AHQ-6-8, 6328 - 6424        | K.LCYVALDFEQEMATAAASSSSLEK.S                                           | 2552.81665 | 2 | 3.64E-10 | 0.98  | 6.69   | -     | 2039.0  |
| AHQ-6-8, 5385               | K.LCYVALDFEQEM*ATAAASSSSLEK.S                                          | 2568.81605 | 2 | 1.41E-04 | 0.78  | 3.03   | -     | 713.2   |
| AHQ-6-8, 6112 - 6173        | K.LCYVALDFEQEM*ATAAASSSSLEK.S                                          | 2568.81605 | 2 | 2.94E-05 | 0.98  | 5.65   | -     | 2042.2  |
| AHQ-6-7, 5095               | R.TTGIVM*DSGGVTHTVPIYEGYALPHAILR.L                                     | 3201.59868 | 3 | 2.61E-05 | 0.89  | 4.69   | -     | 840.7   |
| AHQ-6-6, 5423 - 5500        | R.TTGIVMDSGGVTHTVPIYEGYALPHAILR.L                                      | 3185.59928 | 3 | 5.79E-06 | 0.94  | 5.14   | -     | 1207.0  |
| AHQ-6-14-, 5447             | R.TTGIVMDSGGVTHTVPIYEGYALPHAILR.L                                      | 3185.59928 | 3 | 2.42E-07 | 0.93  | 4.90   | -     | 964.1   |
| AHQ-6-6, 5271               | R.TTGIVM*DSGGVTHTVPIYEGYALPHAILR.L                                     | 3201.59868 | 3 | 6.29E-05 | 0.97  | 6.05   | -     | 1770.3  |
| AHQ-6-5, 5552               | R.TTGIVMDSGGVTHTVPIYEGYALPHAILR.L                                      | 3185.59928 | 3 | 5.18E-07 | 0.96  | 5.89   | -     | 1240.9  |
| AHQ-6-13-, 5425 - 5488      | R.TTGIVMDSGGVTHTVPIYEGYALPHAILR.L                                      | 3185.59928 | 3 | 1.32E-10 | 0.96  | 5.38   | -     | 1435.6  |
| AHQ-6-13-, 5214             | R.TTGIVM*DSGGVTHTVPIYEGYALPHAILR.L                                     | 3201.59868 | 3 | 2.21E-06 | 0.91  | 4.25   | -     | 1125.0  |
| AHQ-6-14, 5808 - 5880       | R.TTGIVMDSGGVTHTVPIYEGYALPHAILR.L                                      | 3201.59868 | 3 | 2.13E-06 | 0.95  | 5.23   | -     | 1341.0  |
| AHQ-6-8, 5641               | R.TTGIVMDSGGVTHTVPIYEGYALPHAILR.L                                      | 3185.59928 | 3 | 2.77E-04 | 0.89  | 4.39   | -     | 874.5   |
| AHQ-6-8, 5500 - 5557        | R.TTGIVMDSGGVTHTVPIYEGYALPHAILR.L                                      | 3185.59928 | 3 | 7.69E-09 | 0.96  | 5.91   | -     | 1472.0  |
| AHQ-6-4, 5637               | R.TTGIVMDSGGVTHTVPIYEGYALPHAILR.L                                      | 3185.59928 | 3 | 4.75E-10 | 0.97  | 5.61   | -     | 1687.0  |
| AHQ-6-4, 5401               | R.TTGIVM*DSGGVTHTVPIYEGYALPHAILR.L                                     | 3201.59868 | 3 | 3.22E-09 | 0.97  | 6.22   | -     | 1301.6  |
| AHQ-6-8, 5369 - 5440        | R.TTGIVMDSGGVTHTVPIYEGYALPHAILR.L                                      | 3185.59928 | 3 | 2.55E-13 | 0.97  | 5.78   | -     | 1688.8  |

|                              |                                                                          |            |   |          |       |        |       |          |
|------------------------------|--------------------------------------------------------------------------|------------|---|----------|-------|--------|-------|----------|
| AHQ-6-3, 5574 - 5633         | R.TTGIVMDSGDGVTHTVPIYEGYALPHAILR.L                                       | 3185.59928 | 3 | 1.27E-04 | 0.94  | 5.16   | -     | 1125.6   |
| AHQ-6-3, 5344 - 5405         | R.TTGIVM*DSGDGVTHTVPIYEGYALPHAILR.L                                      | 3201.59868 | 3 | 8.41E-05 | 0.94  | 5.70   | -     | 979.2    |
| AHQ-6-8, 5289 - 5364         | R.TTGIVM*DSGDGVTHTVPIYEGYALPHAILR.L                                      | 3201.59868 | 3 | 4.16E-04 | 0.71  | 3.47   | -     | 829.9    |
| AHQ-6-8, 5244 - 5305         | R.TTGIVMDSGDGVTHTVPIYEGYALPHAILR.L                                       | 3185.59928 | 3 | 6.58E-07 | 0.97  | 6.61   | -     | 1562.9   |
| AHQ-6-13, 5508               | R.TTGIVMDSGDGVTHTVPIYEGYALPHAILR.L                                       | 3185.59928 | 3 | 4.41E-05 | 0.93  | 4.86   | -     | 1148.9   |
| AHQ-6-13, 5285               | R.TTGIVM*DSGDGVTHTVPIYEGYALPHAILR.L                                      | 3201.59868 | 3 | 1.48E-04 | 0.75  | 3.69   | -     | 503.3    |
| AHQ-6-9, 5146 - 5202         | R.TTGIVMDSGDGVTHTVPIYEGYALPHAILR.L                                       | 3185.59928 | 3 | 1.27E-05 | 0.93  | 4.82   | -     | 1034.0   |
| AHQ-6-8, 5188 - 5222         | R.TTGIVM*DSGDGVTHTVPIYEGYALPHAILR.L                                      | 3201.59868 | 3 | 5.04E-11 | 0.96  | 6.00   | -     | 1097.0   |
| AHQ-6-8, 5100 - 5160         | R.TTGIVM*DSGDGVTHTVPIYEGYALPHAILR.L                                      | 3201.59868 | 3 | 6.62E-07 | 0.97  | 5.81   | -     | 2138.1   |
| AHQ-6-1, 5452                | R.TTGIVM*DSGDGVTHTVPIYEGYALPHAILR.L                                      | 3201.59868 | 3 | 3.50E-04 | 0.92  | 4.52   | -     | 1277.2   |
| AHQ-6-12, 5141 - 5195        | R.TTGIVM*DSGDGVTHTVPIYEGYALPHAILR.L                                      | 3201.59868 | 3 | 9.99E-05 | 0.94  | 5.42   | -     | 936.4    |
| AHQ-6-8, 4961 - 5040         | R.TTGIVM*DSGDGVTHTVPIYEGYALPHAILR.L                                      | 3201.59868 | 3 | 6.99E-06 | 0.95  | 5.77   | -     | 971.4    |
| AHQ-6-10, 4996 - 5070        | R.TTGIVM*DSGDGVTHTVPIYEGYALPHAILR.L                                      | 3201.59868 | 3 | 1.71E-09 | 0.98  | 6.86   | -     | 1590.4   |
| AHQ-6-10, 5226 - 5282        | R.TTGIVMDSGDGVTHTVPIYEGYALPHAILR.L                                       | 3185.59928 | 3 | 9.35E-11 | 0.95  | 5.69   | -     | 1243.8   |
| AHQ-6-14-, 5227 - 5292       | R.TTGIVM*DSGDGVTHTVPIYEGYALPHAILR.L                                      | 3201.59868 | 3 | 1.46E-08 | 0.94  | 5.02   | -     | 1099.6   |
| AHQ-6-5, 5311                | R.TTGIVM*DSGDGVTHTVPIYEGYALPHAILR.L                                      | 3201.59868 | 3 | 2.25E-07 | 0.96  | 5.77   | -     | 1238.2   |
| AHQ-6-11, 5285 - 5324        | R.TTGIVMDSGDGVTHTVPIYEGYALPHAILR.L                                       | 3185.59928 | 3 | 8.29E-05 | 0.91  | 4.15   | -     | 1108.9   |
| AHQ-6-11, 5100 - 5156        | R.TTGIVM*DSGDGVTHTVPIYEGYALPHAILR.L                                      | 3201.59868 | 3 | 5.80E-08 | 0.94  | 5.65   | -     | 1082.6   |
| AHQ-6-11, 3803               | R.VAPEEHPVLLTEAPLNPK.A                                                   | 1955.24351 | 2 | 3.55E-07 | 0.93  | 4.31   | -     | 1027.0   |
| AHQ-6-12, 3843 - 3900        | R.VAPEEHPVLLTEAPLNPK.A                                                   | 1955.24351 | 2 | 1.06E-05 | 0.91  | 4.00   | -     | 785.7    |
| AHQ-6-10, 3715 - 3738        | R.VAPEEHPVLLTEAPLNPK.A                                                   | 1955.24351 | 2 | 5.26E-05 | 0.92  | 4.73   | -     | 751.7    |
| AHQ-6-13, 4039               | R.VAPEEHPVLLTEAPLNPK.A                                                   | 1955.24351 | 2 | 2.22E-06 | 0.90  | 4.25   | -     | 742.1    |
| AHQ-6-9, 3642 - 3654         | R.VAPEEHPVLLTEAPLNPK.A                                                   | 1955.24351 | 2 | 4.80E-05 | 0.89  | 4.14   | -     | 580.1    |
| AHQ-6-9, 3532 - 3599         | R.VAPEEHPVLLTEAPLNPK.A                                                   | 1955.24351 | 2 | 7.49E-06 | 0.94  | 4.99   | -     | 891.9    |
| AHQ-6-14, 4674               | R.VAPEEHPVLLTEAPLNPK.A                                                   | 1955.24351 | 2 | 3.67E-06 | 0.91  | 3.85   | -     | 999.3    |
| AHQ-6-8, 3686 - 3744         | R.VAPEEHPVLLTEAPLNPK.A                                                   | 1955.24351 | 2 | 4.37E-11 | 0.92  | 4.79   | -     | 775.2    |
| AHQ-6-13-, 3908              | R.VAPEEHPVLLTEAPLNPK.A                                                   | 1955.24351 | 2 | 9.95E-05 | 0.86  | 3.68   | -     | 596.3    |
| AHQ-6-8, 3580 - 3640         | R.VAPEEHPVLLTEAPLNPK.A                                                   | 1955.24351 | 2 | 6.28E-05 | 0.93  | 4.57   | -     | 903.1    |
| AHQ-6-8, 3493 - 3557         | R.VAPEEHPVLLTEAPLNPK.A                                                   | 1955.24351 | 3 | 4.05E-04 | 0.80  | 4.33   | -     | 836.1    |
| AHQ-6-8, 3488 - 3564         | R.VAPEEHPVLLTEAPLNPK.A                                                   | 1955.24351 | 2 | 8.11E-05 | 0.89  | 4.40   | -     | 661.2    |
| AHQ-6-6, 3831                | R.VAPEEHPVLLTEAPLNPK.A                                                   | 1955.24351 | 2 | 1.61E-04 | 0.84  | 3.96   | -     | 496.8    |
| AHQ-6-5, 3861 - 3871         | R.VAPEEHPVLLTEAPLNPK.A                                                   | 1955.24351 | 2 | 7.38E-05 | 0.78  | 3.11   | -     | 576.5    |
| AHQ-6-14-, 3904              | R.VAPEEHPVLLTEAPLNPK.A                                                   | 1955.24351 | 2 | 1.69E-11 | 0.92  | 4.24   | -     | 876.8    |
| AHQ-6-4, 3911 - 3973         | R.VAPEEHPVLLTEAPLNPK.A                                                   | 1955.24351 | 2 | 5.59E-05 | 0.90  | 4.03   | -     | 628.0    |
| AHQ-6-3, 3897 - 3962         | R.VAPEEHPVLLTEAPLNPK.A                                                   | 1955.24351 | 2 | 1.02E-04 | 0.87  | 4.23   | -     | 564.1    |
| AHQ-6-2, 3995                | R.VAPEEHPVLLTEAPLNPK.A                                                   | 1955.24351 | 2 | 1.38E-04 | 0.77  | 3.79   | -     | 466.1    |
| AHQ-6-1, 4127                | R.VAPEEHPVLLTEAPLNPK.A                                                   | 1955.24351 | 2 | 7.24E-05 | 0.87  | 4.09   | -     | 637.1    |
| AHQ-6-1, 4123                | R.VAPEEHPVLLTEAPLNPK.A                                                   | 1955.24351 | 3 | 5.24E-04 | 0.85  | 4.00   | -     | 1137.2   |
| gj[7656991]ref[INP_055140.1] | coronin, actin binding protein, 1C; coronin, actin-binding protein, 1C;  |            |   | 3.11E-13 | 6.31  | 70.32  | 23.60 | 53248.7  |
| AHQ-6-6, 5598 - 5654         | R.AIFLADGNVFTTGF.SR.M                                                    | 1716.91793 | 2 | 1.79E-06 | 0.97  | 5.66   | -     | 1673.8   |
| AHQ-6-6, 5506 - 5562         | R.AIFLADGNVFTTGF.SR.M                                                    | 1716.91793 | 2 | 3.11E-13 | 0.97  | 5.55   | -     | 1683.2   |
| AHQ-6-7, 5374 - 5430         | R.AIFLADGNVFTTGF.SR.M                                                    | 1716.91793 | 2 | 2.10E-04 | 0.96  | 4.56   | -     | 1368.4   |
| AHQ-6-6, 3368                | R.KCEPIIMTVPR.K                                                          | 1345.65706 | 2 | 6.43E-04 | 0.77  | 2.61   | -     | 774.8    |
| AHQ-6-6, 6354                | R.KSDFLQDDLYPDTAGPEAALEAEWFEQG.N                                         | 3273.46087 | 3 | 6.44E-09 | 0.98  | 6.30   | -     | 1935.4   |
| AHQ-6-6, 2336                | K.SIKDTICNQDER.I                                                         | 1480.58332 | 2 | 2.89E-07 | 0.88  | 2.93   | -     | 1121.9   |
| AHQ-6-6, 2422                | K.SIKDTICNQDER.I                                                         | 1480.58332 | 2 | 6.27E-06 | 0.91  | 3.55   | -     | 1149.1   |
| AHQ-6-7, 2963                | R.VGIVAWHPTAR.N                                                          | 1207.40918 | 2 | 7.78E-04 | 0.81  | 2.83   | -     | 901.3    |
| AHQ-6-6, 4194                | R.VTWDSFCAVNP.R.F                                                        | 1540.68205 | 2 | 2.91E-09 | 0.94  | 3.82   | -     | 1320.2   |
| AHQ-6-6, 5590 - 5667         | R.YFEITDESPLYHYLNTFSSK.E                                                 | 2441.63258 | 3 | 1.52E-07 | 0.77  | 3.31   | -     | 665.7    |
| AHQ-6-6, 5674                | R.YFEITDESPLYHYLNTFSSK.E                                                 | 2441.63258 | 2 | 4.81E-09 | 0.96  | 5.32   | -     | 833.6    |
| gj[4557435]ref[INP_001242.1] | CD68 antigen; Macrophage antigen CD68 (microsialin); macroscialin; scave |            |   | 3.31E-13 | 0.85  | 10.20  | 6.20  | 37408.0  |
| AHQ-6-5, 4500                | R.LQAAQLPHGTGVFGQSFSCPSDR.S                                              | 2405.63153 | 3 | 1.23E-07 | 0.87  | 4.04   | -     | 720.1    |
| AHQ-6-3, 4586                | R.LQAAQLPHGTGVFGQSFSCPSDR.S                                              | 2405.63153 | 3 | 3.31E-13 | 0.85  | 3.76   | -     | 907.0    |
| gj[5803011]ref[INP_001966.1] | enolase 2; enolase-2, gamma, neuronal; neurone-specific enolase; neuron  |            |   | 6.73E-13 | 0.97  | 10.24  | 3.70  | 47268.3  |
| AHQ-6-8, 6024                | R.YITGDQLGALYQDFVR.D                                                     | 1860.05915 | 2 | 6.73E-13 | 0.97  | 4.87   | -     | 1462.7   |
| gj[4501891]ref[INP_001093.1] | actinin, alpha 1 [Homo sapiens]                                          |            |   | 7.52E-13 | 34.48 | 390.30 | 49.30 | 103056.9 |
| AHQ-6-5, 6540 - 6545         | R.AAPFNWMM*EGAM*EDLQDFTVHITIEEIQGLTTAHEQFK.A                             | 4396.81902 | 3 | 1.91E-10 | 0.95  | 6.07   | -     | 903.6    |
| AHQ-6-6, 5080 - 5144         | K.AGTQIENIEEDFRDGLK.L                                                    | 1936.06918 | 2 | 8.93E-05 | 0.84  | 4.29   | -     | 805.5    |
| AHQ-6-4, 4708                | K.AGTQIENIEEDFRDGLK.L                                                    | 1936.06918 | 2 | 1.18E-05 | 0.62  | 3.53   | -     | 566.1    |
| AHQ-6-5, 6059 - 6075         | K.AIMTYVSSFYHAFSGAQK.A                                                   | 2009.27323 | 3 | 2.65E-05 | 0.67  | 3.06   | -     | 560.9    |
| AHQ-6-4, 6133 - 6140         | K.AIMTYVSSFYHAFSGAQK.A                                                   | 2009.27323 | 3 | 2.65E-06 | 0.82  | 3.81   | -     | 659.6    |
| AHQ-6-4, 5460 - 5520         | K.AIMTYVSSFYHAFSGAQK.A                                                   | 2025.27263 | 2 | 7.62E-07 | 0.95  | 4.65   | -     | 945.7    |
| AHQ-6-5, 6063                | K.AIMTYVSSFYHAFSGAQK.A                                                   | 2009.27323 | 2 | 4.08E-08 | 0.92  | 4.54   | -     | 604.4    |
| AHQ-6-4, 6131                | K.AIMTYVSSFYHAFSGAQK.A                                                   | 2009.27323 | 2 | 7.00E-08 | 0.93  | 4.55   | -     | 700.5    |
| AHQ-6-4, 2316                | K.ASIHEAWTDGK.E                                                          | 1215.29697 | 2 | 2.69E-04 | 0.81  | 3.01   | -     | 761.4    |
| AHQ-6-5, 5344                | K.DDPLTNLNTAFDVAEK.Y                                                     | 1763.88340 | 2 | 3.65E-07 | 0.93  | 3.87   | -     | 890.3    |
| AHQ-6-7, 5152                | K.DDPLTNLNTAFDVAEK.Y                                                     | 1763.88340 | 2 | 3.58E-05 | 0.86  | 3.89   | -     | 685.8    |
| AHQ-6-4, 5371 - 5431         | K.DDPLTNLNTAFDVAEK.Y                                                     | 1763.88340 | 2 | 1.79E-06 | 0.96  | 4.89   | -     | 1129.9   |
| AHQ-6-4, 4924                | K.DDPLTNLNTAFDVAEK.Y                                                     | 1763.88340 | 2 | 7.52E-13 | 0.95  | 4.20   | -     | 1088.9   |
| AHQ-6-4, 4796                | K.DGLGFCALIHR.H                                                          | 1260.44170 | 2 | 5.93E-07 | 0.91  | 2.64   | -     | 1570.8   |
| AHQ-6-5, 4728                | K.DGLGFCALIHR.H                                                          | 1260.44170 | 2 | 6.38E-08 | 0.90  | 2.97   | -     | 1218.9   |
| AHQ-6-4, 2597                | R.DHSGTLGPEEFK.A                                                         | 1317.38606 | 2 | 4.59E-05 | 0.95  | 3.61   | -     | 1200.8   |
| AHQ-6-6, 2582                | R.DHSGTLGPEEFK.A                                                         | 1317.38606 | 2 | 9.51E-06 | 0.80  | 2.91   | -     | 662.1    |
| AHQ-6-4, 3715                | K.DYETATLSEIK.A                                                          | 1270.36761 | 2 | 1.68E-05 | 0.92  | 3.66   | -     | 1147.1   |
| AHQ-6-4, 4101                | R.ETADTDADQVMASFK.I                                                      | 1730.83208 | 2 | 3.24E-05 | 0.87  | 3.58   | -     | 657.0    |
| AHQ-6-5, 4277                | R.ETADTDADQVMASFK.I                                                      | 1730.83208 | 2 | 5.44E-05 | 0.95  | 4.00   | -     | 1423.8   |
| AHQ-6-4, 4269 - 4331         | R.ETADTDADQVMASFK.I                                                      | 1730.83208 | 2 | 4.11E-08 | 0.96  | 4.53   | -     | 1294.3   |
| AHQ-6-5, 3140                | R.ETADTDADQVM*ASFK.I                                                     | 1746.83148 | 2 | 3.35E-08 | 0.96  | 5.09   | -     | 1112.0   |
| AHQ-6-11, 4143               | R.ETADTDADQVMASFK.I                                                      | 1730.83208 | 2 | 2.95E-04 | 0.59  | 2.83   | -     | 457.5    |
| AHQ-6-4, 2853                | R.ETADTDADQVM*ASFK.I                                                     | 1746.83148 | 2 | 7.29E-04 | 0.63  | 2.57   | -     | 810.4    |
| AHQ-6-4, 3187 - 3191         | R.ETADTDADQVM*ASFK.I                                                     | 1746.83148 | 2 | 2.73E-07 | 0.96  | 4.60   | -     | 1213.2   |
| AHQ-6-5, 2293                | K.GISQEQM*NEFR.A                                                         | 1355.45931 | 2 | 4.76E-04 | 0.70  | 2.92   | -     | 608.1    |
| AHQ-6-4, 3016                | K.GISQEQM*NEFR.A                                                         | 1339.45991 | 2 | 1.01E-05 | 0.88  | 3.24   | -     | 844.9    |
| AHQ-6-4, 2409                | K.GISQEQM*NEFR.A                                                         | 1355.45931 | 2 | 1.10E-07 | 0.86  | 2.99   | -     | 899.3    |
| AHQ-6-4, 2311                | K.GISQEQM*NEFR.A                                                         | 1355.45931 | 2 | 5.99E-06 | 0.79  | 3.39   | -     | 652.9    |
| AHQ-6-6, 2970 - 3004         | K.GISQEQM*NEFR.A                                                         | 1339.45991 | 2 | 1.70E-05 | 0.83  | 3.01   | -     | 778.2    |
| AHQ-6-4, 2720                | K.GISQEQM*NEFR.A                                                         | 1339.45991 | 2 | 4.12E-05 | 0.61  | 2.57   | -     | 555.9    |
| AHQ-6-5, 2971                | K.GISQEQM*NEFR.A                                                         | 1339.45991 | 2 | 3.41E-05 | 0.83  | 2.95   | -     | 823.3    |
| AHQ-6-4, 2235 - 2304         | R.HRPELIDYGG.L                                                           | 1228.38202 | 2 | 3.42E-04 | 0.92  | 3.44   | -     | 766.4    |
| AHQ-6-4, 2236                | R.HRPELIDYGG.L                                                           | 1228.38202 | 3 | 1.15E-05 | 0.89  | 3.39   | -     | 1209.7   |
| AHQ-6-5, 2224                | R.HRPELIDYGG.L                                                           | 1228.38202 | 2 | 5.87E-04 | 0.93  | 3.79   | -     | 702.0    |
| AHQ-6-3, 4704 - 4761         | K.ICDQWDLNGALGTQK.R                                                      | 1663.83349 | 2 | 5.15E-04 | 0.64  | 2.81   | -     | 601.2    |
| AHQ-6-5, 4723                | K.ICDQWDLNGALGTQK.R                                                      | 1663.83349 | 2 | 7.59E-05 | 0.96  | 3.94   | -     | 1937.4   |
| AHQ-6-4, 4781 - 4848         | K.ICDQWDLNGALGTQK.R                                                      | 1663.83349 | 2 | 3.50E-07 | 0.95  | 3.78   | -     | 1535.5   |
| AHQ-6-6, 4682 - 4747         | K.ICDQWDLNGALGTQK.R                                                      | 1663.83349 | 2 | 3.67E-04 | 0.93  | 3.86   | -     | 1456.2   |
| AHQ-6-4, 4665 - 4737         | K.ICDQWDLNGALGTQK.R                                                      | 1663.83349 | 2 | 3.37E-06 | 0.41  | 2.79   | -     | 585.9    |
| AHQ-6-4, 5644 - 5724         | K.IDQLEGDHQLQEALIFDNK.H                                                  | 2340.57447 | 3 | 6.25E-10 | 0.96  | 5.91   | -     | 1352.9   |
| AHQ-6-4, 5587 - 5645         | K.IDQLEGDHQLQEALIFDNK.H                                                  | 2340.57447 | 2 | 1.52E-06 | 0.94  | 4.40   | -     | 1257.9   |
| AHQ-6-10, 5274               | K.IDQLEGDHQLQEALIFDNK.H                                                  | 2340.57447 | 3 | 1.94E-04 | 0.90  | 3.44   | -     | 1332.4   |
| AHQ-6-4, 5525                | K.IDQLEGDHQLQEALIFDNK.H                                                  | 2340.57447 | 3 | 4.98E-08 | 0.95  | 5.09   | -     | 1175.3   |
| AHQ-6-6, 5522                | K.IDQLEGDHQLQEALIFDNK.H                                                  | 2340.57447 | 3 | 2.07E-04 | 0.73  | 3.20   | -     | 979.3    |
| AHQ-6-4, 5741                | K.IDQLEGDHQLQEALIFDNK.H                                                  | 2340.57447 | 3 | 4.85E-05 | 0.84  | 3.31   | -     | 1450.2   |
| AHQ-6-7, 5386 - 5387         | K.IDQLEGDHQLQEALIFDNK.H                                                  | 2340.57447 | 2 | 4.39E-06 | 0.88  | 3.52   | -     | 625.3    |
| AHQ-6-4, 4123 - 4193         | K.ILAGDKNYITMDEL.R                                                       | 1753.01353 | 2 | 3.59E-05 | 0.94  | 4.26   | -     | 990.9    |
| AHQ-6-6, 4134                | K.ILAGDKNYITMDEL.R                                                       | 1753.01353 | 2 | 1.68E-04 | 0.63  | 2.97   | -     | 427.7    |
| AHQ-6-4, 2365                | R.IM*SIVDPNR.L                                                           | 1061.23780 | 2 | 2.06E-06 | 0.73  | 2.68   | -     | 653.5    |
| AHQ-6-5, 4876                | R.ISIEMHGTELDQLSHLR.Q                                                    | 1980.23497 | 3 | 2.12E-09 | 0.92  | 4.55   | -     | 1213.1   |

|                           |                                  |            |   |          |      |        |       |         |
|---------------------------|----------------------------------|------------|---|----------|------|--------|-------|---------|
| AHQ-6-4, 4173             | K.IVQTYHVNMM*AGTNPYTTITPQEINGK.W | 2908.23575 | 2 | 3.66E-07 | 0.47 | 2.76   | -     | 433.8   |
| AHQ-6-4, 4545             | K.IVQTYHVNMMAGTNPYTTITPQEINGK.W  | 2892.23635 | 2 | 1.29E-05 | 0.88 | 4.06   | -     | 537.3   |
| AHQ-6-4, 4817             | R.KAGTQIENIEEDFRDGLK.L           | 2064.24210 | 3 | 9.07E-10 | 0.94 | 5.21   | -     | 966.3   |
| AHQ-6-5, 4760 - 4837      | R.KDDPLTLNLTAFDVAEK.Y            | 1892.05631 | 2 | 7.58E-08 | 0.97 | 4.92   | -     | 1511.9  |
| AHQ-6-4, 4811 - 4884      | R.KDDPLTLNLTAFDVAEK.Y            | 1892.05631 | 2 | 5.33E-05 | 0.97 | 5.24   | -     | 1475.6  |
| AHQ-6-7, 4563 - 4580      | R.KDDPLTLNLTAFDVAEK.Y            | 1892.05631 | 2 | 3.87E-04 | 0.92 | 4.16   | -     | 908.5   |
| AHQ-6-4, 4348             | R.KDDPLTLNLTAFDVAEK.Y            | 1892.05631 | 2 | 2.71E-05 | 0.94 | 4.28   | -     | 956.7   |
| AHQ-6-4, 4363             | R.KQFGAQAANVIGPWQTK.M            | 1887.17410 | 2 | 1.10E-05 | 0.96 | 4.77   | -     | 1495.9  |
| AHQ-6-5, 4304             | R.KQFGAQAANVIGPWQTK.M            | 1887.17410 | 2 | 3.52E-05 | 0.97 | 4.68   | -     | 1590.8  |
| AHQ-6-4, 3803 - 3837      | R.LAILGIHNEVSK.I                 | 1294.52505 | 2 | 1.31E-05 | 0.94 | 3.40   | -     | 1383.8  |
| AHQ-6-6, 3382             | R.LAILGIHNEVSK.I                 | 1294.52505 | 2 | 3.16E-08 | 0.90 | 3.57   | -     | 784.7   |
| AHQ-6-5, 3397             | R.LAILGIHNEVSK.I                 | 1294.52505 | 2 | 2.07E-08 | 0.93 | 3.42   | -     | 1059.9  |
| AHQ-6-4, 3447 - 3495      | R.LAILGIHNEVSK.I                 | 1294.52505 | 2 | 5.60E-07 | 0.90 | 3.43   | -     | 866.3   |
| AHQ-6-7, 3275             | R.LAILGIHNEVSK.I                 | 1294.52505 | 2 | 2.05E-04 | 0.79 | 2.93   | -     | 905.2   |
| AHQ-6-4, 5791             | K.LASDLLEWIR.R                   | 1216.41115 | 2 | 2.83E-07 | 0.97 | 4.38   | -     | 1748.4  |
| AHQ-6-6, 5659 - 5660      | K.LASDLLEWIR.R                   | 1216.41115 | 2 | 2.25E-08 | 0.96 | 4.04   | -     | 1849.5  |
| AHQ-6-4, 5799             | K.LASDLLEWIR.R                   | 1216.41115 | 1 | 5.66E-06 | 0.57 | 2.32   | -     | 517.1   |
| AHQ-6-5, 5715 - 5723      | K.LASDLLEWIR.R                   | 1216.41115 | 2 | 1.05E-07 | 0.97 | 4.66   | -     | 2137.2  |
| AHQ-6-4, 6159             | K.LLETIDQLYLEYAK.R               | 1712.96427 | 3 | 4.35E-07 | 0.97 | 5.32   | -     | 1856.8  |
| AHQ-6-4, 5217             | K.LLETIDQLYLEYAK.R               | 1712.96427 | 2 | 5.69E-06 | 0.91 | 3.70   | -     | 803.2   |
| AHQ-6-5, 6048 - 6103      | K.LLETIDQLYLEYAK.R               | 1712.96427 | 2 | 2.59E-07 | 0.97 | 5.26   | -     | 1242.1  |
| AHQ-6-4, 2743 - 2747      | R.LSNRPAFMPSSEGR.M               | 1462.65941 | 2 | 2.54E-04 | 0.85 | 3.44   | -     | 677.1   |
| AHQ-6-6, 2718             | R.LSNRPAFMPSSEGR.M               | 1462.65941 | 2 | 6.46E-04 | 0.83 | 3.51   | -     | 700.3   |
| AHQ-6-4, 2263             | R.LSNRPAFM*PSEGR.M               | 1478.65881 | 3 | 6.41E-06 | 0.82 | 3.41   | -     | 1068.9  |
| AHQ-6-5, 3539             | K.M*LDADIVGTARPDEK.A             | 1776.94709 | 3 | 8.66E-04 | 0.79 | 3.26   | -     | 710.1   |
| AHQ-6-6, 3499             | K.M*LDADIVGTARPDEK.A             | 1776.94709 | 2 | 2.53E-04 | 0.80 | 2.90   | -     | 741.8   |
| AHQ-6-5, 3891             | K.MLDAEDIVGTARPDEK.A             | 1760.94769 | 2 | 8.87E-06 | 0.85 | 4.04   | -     | 640.9   |
| AHQ-6-4, 3943 - 3947      | K.MLDAEDIVGTARPDEK.A             | 1760.94769 | 2 | 2.26E-08 | 0.94 | 4.33   | -     | 1112.7  |
| AHQ-6-5, 3517             | K.M*LDADIVGTARPDEK.A             | 1776.94709 | 2 | 2.23E-05 | 0.85 | 3.65   | -     | 658.0   |
| AHQ-6-4, 3948             | K.MLDAEDIVGTARPDEK.A             | 1760.94769 | 3 | 7.81E-06 | 0.84 | 3.78   | -     | 596.9   |
| AHQ-6-4, 3572             | K.M*LDADIVGTARPDEK.A             | 1776.94709 | 3 | 8.43E-07 | 0.87 | 3.76   | -     | 806.5   |
| AHQ-6-6, 5066 - 5070      | R.M*VSDINNAWGCLEQVEK.G           | 2011.22273 | 2 | 9.53E-08 | 0.97 | 5.24   | -     | 1241.3  |
| AHQ-6-4, 5039             | R.M*VSDINNAWGCLEQVEK.G           | 2011.22273 | 2 | 6.04E-08 | 0.96 | 4.59   | -     | 1324.2  |
| AHQ-6-4, 5197             | R.M*VSDINNAWGCLEQVEK.G           | 2011.22273 | 3 | 3.88E-09 | 0.97 | 5.81   | -     | 1713.4  |
| AHQ-6-5, 5105             | R.M*VSDINNAWGCLEQVEK.G           | 2011.22273 | 2 | 1.58E-07 | 0.96 | 4.55   | -     | 1262.0  |
| AHQ-6-5, 4885 - 4945      | R.M*VSDINNAWGCLEQVEK.G           | 2011.22273 | 2 | 4.24E-06 | 0.86 | 3.84   | -     | 540.4   |
| AHQ-6-4, 5356 - 5364      | R.M*VSDINNAWGCLEQVEK.G           | 2011.22273 | 2 | 1.49E-10 | 0.97 | 5.23   | -     | 1232.8  |
| AHQ-6-5, 4625             | K.NVNIQNFHISWK.D                 | 1500.68583 | 2 | 3.17E-04 | 0.76 | 2.95   | -     | 692.1   |
| AHQ-6-7, 4418             | K.NVNIQNFHISWK.D                 | 1500.68583 | 2 | 9.59E-05 | 0.65 | 3.38   | -     | 425.6   |
| AHQ-6-4, 4695             | K.NVNIQNFHISWK.D                 | 1500.68583 | 2 | 2.52E-06 | 0.87 | 3.16   | -     | 1016.9  |
| AHQ-6-4, 4980             | K.QFGAQAANVIGPWQTK.M             | 1759.00118 | 2 | 1.84E-05 | 0.82 | 3.42   | -     | 746.6   |
| AHQ-6-6, 3427             | R.TINEVENQILTR.D                 | 1430.58898 | 2 | 1.01E-05 | 0.58 | 2.54   | -     | 498.6   |
| AHQ-6-4, 4037             | R.TINEVENQILTR.D                 | 1430.58898 | 2 | 2.64E-04 | 0.93 | 4.21   | -     | 1139.3  |
| AHQ-6-4, 3115 - 3116      | R.TINEVENQILTR.D                 | 1430.58898 | 2 | 1.89E-05 | 0.88 | 3.62   | -     | 869.3   |
| AHQ-6-7, 3715 - 3719      | R.TINEVENQILTR.D                 | 1430.58898 | 2 | 4.94E-05 | 0.75 | 3.12   | -     | 881.0   |
| AHQ-6-4, 3507             | R.TINEVENQILTR.D                 | 1430.58898 | 2 | 1.14E-05 | 0.76 | 3.10   | -     | 434.8   |
| AHQ-6-6, 3815             | R.TINEVENQILTR.D                 | 1430.58898 | 2 | 2.02E-06 | 0.91 | 3.65   | -     | 1148.0  |
| AHQ-6-4, 4055             | R.TINEVENQILTR.D                 | 1430.58898 | 1 | 1.86E-04 | 0.06 | 1.99   | -     | 174.2   |
| AHQ-6-5, 3851             | R.TINEVENQILTR.D                 | 1430.58898 | 2 | 5.07E-07 | 0.88 | 3.79   | -     | 866.8   |
| AHQ-6-5, 3981             | R.TINEVENQILTR.D                 | 1430.58898 | 2 | 8.01E-04 | 0.87 | 3.23   | -     | 913.6   |
| AHQ-6-5, 3073             | R.TINEVENQILTR.D                 | 1430.58898 | 2 | 5.99E-04 | 0.46 | 2.57   | -     | 465.7   |
| AHQ-6-5, 6351             | R.VEQIAAIAQELNELDYDPSVSNAR.C     | 2810.02233 | 2 | 3.41E-07 | 0.66 | 2.87   | -     | 576.7   |
| AHQ-6-6, 6288             | R.VEQIAAIAQELNELDYDPSVSNAR.C     | 2810.02233 | 2 | 1.52E-04 | 0.81 | 3.16   | -     | 561.8   |
| AHQ-6-6, 6126             | R.VGWELTTIAR.T                   | 1387.60894 | 2 | 1.24E-05 | 0.84 | 3.19   | -     | 771.8   |
| AHQ-6-3, 6212             | R.VGWELTTIAR.T                   | 1387.60894 | 2 | 1.77E-05 | 0.91 | 3.39   | -     | 1121.4  |
| AHQ-6-2, 6274             | R.VGWELTTIAR.T                   | 1387.60894 | 2 | 4.10E-05 | 0.91 | 3.59   | -     | 1035.3  |
| AHQ-6-10, 5891 - 5894     | R.VGWELTTIAR.T                   | 1387.60894 | 2 | 8.43E-06 | 0.91 | 3.81   | -     | 1212.3  |
| AHQ-6-7, 5972 - 5978      | R.VGWELTTIAR.T                   | 1387.60894 | 2 | 2.12E-07 | 0.94 | 3.87   | -     | 1185.2  |
| AHQ-6-5, 6195 - 6196      | R.VGWELTTIAR.T                   | 1387.60894 | 2 | 4.28E-10 | 0.96 | 4.32   | -     | 1560.6  |
| AHQ-6-8, 6081             | R.VGWELTTIAR.T                   | 1387.60894 | 2 | 9.45E-07 | 0.94 | 3.86   | -     | 1330.2  |
| AHQ-6-4, 6259 - 6328      | R.VGWELTTIAR.T                   | 1387.60894 | 2 | 1.94E-06 | 0.96 | 3.93   | -     | 1575.8  |
| AHQ-6-11, 5952            | R.VGWELTTIAR.T                   | 1387.60894 | 2 | 2.18E-06 | 0.86 | 3.07   | -     | 899.0   |
| AHQ-6-6, 3483 - 3490      | K.VLAVNQENQLM*EDYEK.L            | 2069.23575 | 2 | 2.71E-06 | 0.95 | 4.61   | -     | 1323.3  |
| AHQ-6-5, 4085 - 4143      | K.VLAVNQENQLMEDYEK.L             | 2053.23635 | 2 | 1.15E-06 | 0.94 | 4.82   | -     | 907.0   |
| AHQ-6-5, 3509 - 3572      | K.VLAVNQENQLM*EDYEK.L            | 2069.23575 | 2 | 2.16E-06 | 0.86 | 4.12   | -     | 788.8   |
| AHQ-6-4, 4588             | K.VLAVNQENQLMEDYEK.L             | 2053.23635 | 2 | 1.20E-06 | 0.96 | 4.46   | -     | 1378.4  |
| AHQ-6-4, 4336 - 4407      | K.VLAVNQENQLMEDYEK.L             | 2053.23635 | 2 | 1.65E-05 | 0.96 | 4.75   | -     | 1091.8  |
| AHQ-6-4, 4207             | K.VLAVNQENQLMEDYEK.L             | 2053.23635 | 3 | 1.01E-12 | 0.95 | 4.92   | -     | 1115.9  |
| AHQ-6-4, 4159             | K.VLAVNQENQLMEDYEK.L             | 2053.23635 | 2 | 4.05E-08 | 0.95 | 4.87   | -     | 1066.6  |
| AHQ-6-4, 4119 - 4199      | K.VLAVNQENQLMEDYEK.L             | 2053.23635 | 2 | 8.23E-07 | 0.92 | 4.05   | -     | 1017.3  |
| AHQ-6-8, 3961             | K.VLAVNQENQLMEDYEK.L             | 2053.23635 | 2 | 2.37E-06 | 0.80 | 3.19   | -     | 644.9   |
| AHQ-6-4, 3880             | K.VLAVNQENQLM*EDYEK.L            | 2069.23575 | 2 | 8.82E-06 | 0.95 | 4.94   | -     | 1054.9  |
| AHQ-6-4, 3729             | K.VLAVNQENQLM*EDYEK.L            | 2069.23575 | 2 | 2.16E-09 | 0.97 | 5.46   | -     | 1773.2  |
| AHQ-6-4, 3563 - 3623      | K.VLAVNQENQLM*EDYEK.L            | 2069.23575 | 2 | 4.26E-10 | 0.97 | 5.00   | -     | 1362.5  |
| AHQ-6-4, 3441             | K.VLAVNQENQLM*EDYEK.L            | 2069.23575 | 2 | 1.31E-08 | 0.85 | 3.38   | -     | 709.6   |
| AHQ-6-6, 4042 - 4099      | K.VLAVNQENQLMEDYEK.L             | 2053.23635 | 2 | 2.61E-08 | 0.89 | 4.20   | -     | 822.2   |
| gi4505879 ref NP_002655.1 | pleckstrin; p47 [Homo sapiens]   |            |   | 7.73E-13 | 8.50 | 100.39 | 37.40 | 40082.5 |
| AHQ-6-13-, 5372           | R.EDPAYLHYDPAGAEDPLGAIHLR.G      | 2684.89982 | 3 | 2.62E-05 | 0.98 | 6.82   | -     | 1859.9  |
| AHQ-6-11, 5252 - 5303     | R.EDPAYLHYDPAGAEDPLGAIHLR.G      | 2684.89982 | 3 | 3.21E-05 | 0.92 | 4.30   | -     | 1246.3  |
| AHQ-6-9, 5110             | R.EDPAYLHYDPAGAEDPLGAIHLR.G      | 2684.89982 | 3 | 4.67E-06 | 0.81 | 3.43   | -     | 560.5   |
| AHQ-6-8, 5284             | R.EDPAYLHYDPAGAEDPLGAIHLR.G      | 2684.89982 | 2 | 2.72E-07 | 0.80 | 3.20   | -     | 644.0   |
| AHQ-6-13, 5452            | R.EDPAYLHYDPAGAEDPLGAIHLR.G      | 2684.89982 | 3 | 7.96E-11 | 0.91 | 4.57   | -     | 1004.8  |
| AHQ-6-12, 5303            | R.EDPAYLHYDPAGAEDPLGAIHLR.G      | 2684.89982 | 3 | 7.14E-10 | 0.96 | 5.44   | -     | 1526.8  |
| AHQ-6-10, 5174            | R.EDPAYLHYDPAGAEDPLGAIHLR.G      | 2684.89982 | 3 | 1.11E-06 | 0.75 | 3.43   | -     | 666.5   |
| AHQ-6-13, 2681 - 2755     | R.GCVVTSVESNSNGR.K               | 1467.54464 | 2 | 5.24E-04 | 0.79 | 3.10   | -     | 711.5   |
| AHQ-6-8, 2335 - 2411      | R.GCVVTSVESNSNGR.K               | 1467.54464 | 2 | 4.91E-06 | 0.91 | 3.46   | -     | 1247.7  |
| AHQ-6-8, 2348 - 2429      | R.GCVVTSVESNSNGR.K               | 1467.54464 | 1 | 1.55E-05 | 0.22 | 2.45   | -     | 132.8   |
| AHQ-6-13, 3172            | K.GSTLTPCQDFGKR.M                | 1555.69502 | 2 | 2.01E-04 | 0.61 | 2.80   | -     | 440.9   |
| AHQ-6-8, 6324             | K.IFNHCFTGNCVIDWLVSNQSVR.N       | 2669.97641 | 3 | 7.19E-06 | 0.96 | 4.54   | -     | 2137.1  |
| AHQ-6-9, 6127 - 6167      | R.KSEENLFEIITADEVHYFLQAATPK.E    | 3024.32650 | 3 | 8.12E-10 | 0.99 | 7.10   | -     | 3359.4  |
| AHQ-6-11, 6259 - 6333     | R.KSEENLFEIITADEVHYFLQAATPK.E    | 3024.32650 | 3 | 7.73E-13 | 0.99 | 7.85   | -     | 3107.1  |
| AHQ-6-3, 6520             | R.KSEENLFEIITADEVHYFLQAATPK.E    | 3024.32650 | 3 | 1.66E-08 | 0.97 | 6.88   | -     | 1671.1  |
| AHQ-6-8, 6438 - 6518      | R.KSEENLFEIITADEVHYFLQAATPK.E    | 3024.32650 | 3 | 6.69E-10 | 0.99 | 7.35   | -     | 3420.4  |
| AHQ-6-8, 6525             | R.KSEENLFEIITADEVHYFLQAATPK.E    | 3024.32650 | 3 | 1.16E-05 | 0.98 | 7.59   | -     | 2200.7  |
| AHQ-6-8, 5344             | R.LPETIDLGALYLSM*K.D             | 1680.98719 | 2 | 9.35E-05 | 0.96 | 4.50   | -     | 1326.8  |
| AHQ-6-13, 5467 - 5527     | R.LPETIDLGALYLSM*K.D             | 1680.98719 | 2 | 4.05E-05 | 0.89 | 3.59   | -     | 945.0   |
| AHQ-6-12, 5036 - 5037     | R.LPETIDLGALYLSM*KDTEK.G         | 2154.46684 | 3 | 2.75E-05 | 0.87 | 4.14   | -     | 750.5   |
| AHQ-6-12, 5035 - 5039     | R.LPETIDLGALYLSM*KDTEK.G         | 2154.46684 | 2 | 2.69E-04 | 0.92 | 4.32   | -     | 872.3   |
| AHQ-6-8, 5690             | R.NROEGLMIASSLLNEGYLQAPAGDMSK.S  | 2824.18382 | 2 | 1.80E-04 | 0.98 | 5.00   | -     | 2164.4  |
| AHQ-6-8, 5726 - 5806      | R.QEGLMIASSLLNEGYLQAPADM*SK.S    | 2569.89376 | 3 | 4.19E-05 | 0.50 | 3.35   | -     | 269.5   |
| AHQ-6-8, 6477 - 6517      | K.SEEENLFEIITADEVHYFLQAATPK.E    | 2896.15359 | 3 | 1.81E-10 | 0.96 | 5.69   | -     | 1356.9  |
| AHQ-6-12, 6363 - 6364     | K.SEEENLFEIITADEVHYFLQAATPK.E    | 2896.15359 | 3 | 2.40E-09 | 0.95 | 5.30   | -     | 1173.4  |
| AHQ-6-9, 6201             | K.SEEENLFEIITADEVHYFLQAATPK.E    | 2896.15359 | 3 | 9.33E-12 | 0.88 | 4.03   | -     | 989.6   |
| AHQ-6-8, 6492 - 6560      | K.SEEENLFEIITADEVHYFLQAATPK.E    | 2896.15359 | 2 | 5.51E-05 | 0.79 | 3.92   | -     | 441.8   |
| AHQ-6-11, 6299            | K.SEEENLFEIITADEVHYFLQAATPK.E    | 2896.15359 | 3 | 7.96E-11 | 0.92 | 4.59   | -     | 1081.4  |
| AHQ-6-10, 6234            | K.SEEENLFEIITADEVHYFLQAATPK.E    | 2896.15359 | 2 | 2.84E-06 | 0.55 | 3.37   | -     | 456.8   |
| AHQ-6-10, 6228            | K.SEEENLFEIITADEVHYFLQAATPK.E    | 2896.15359 | 3 | 3.18E-06 | 0.87 | 3.84   | -     | 837.1   |

|                             |                                                                         |            |   |          |       |        |       |          |
|-----------------------------|-------------------------------------------------------------------------|------------|---|----------|-------|--------|-------|----------|
| AHQ-6-9, 6203 - 6277        | K.SEENLFEIITADEVHYFLQAATPK.E                                            | 2896.15359 | 2 | 3.76E-06 | 0.74  | 3.88   | -     | 437.4    |
| gi 9910280 ref NP_064505.1  | UDP-glucose ceramide glucosyltransferase-like 1; UDP-glucose:glycoprote |            |   | 9.33E-13 | 0.94  | 10.23  | 1.60  | 177187.7 |
| AHQ-6-3, 6524               | R.IIGPLEDESEFNQDDFHLLLENILK.T                                           | 2927.29710 | 3 | 9.33E-13 | 0.94  | 4.67   | -     | 1120.4   |
| gi 17921989 ref NP_005991.1 | tubulin, alpha 1; testis-specific alpha tubulin; tubulin alpha-1 chain  |            |   | 1.52E-12 | 12.47 | 150.34 | 46.90 | 49924.1  |
| AHQ-6-13-, 4540 - 4610      | R.AFVHHVYVGEGM*EEGEFSEAR.E                                              | 2347.50435 | 3 | 3.52E-04 | 0.94  | 4.64   | -     | 1477.8   |
| AHQ-6-13, 4804              | R.AFVHHVYVGEGM*EEGEFSEAR.E                                              | 2347.50435 | 3 | 2.78E-05 | 0.83  | 3.26   | -     | 1156.2   |
| AHQ-6-14-, 4506 - 4582      | R.AFVHHVYVGEGM*EEGEFSEAR.E                                              | 2347.50435 | 3 | 6.25E-04 | 0.86  | 3.37   | -     | 908.8    |
| AHQ-6-12, 4509 - 4591       | R.AFVHHVYVGEGM*EEGEFSEAR.E                                              | 2347.50435 | 3 | 3.80E-05 | 0.70  | 3.13   | -     | 812.8    |
| AHQ-6-13-, 5188 - 5244      | R.AVCM*LSNTTAAIEAWAR.L                                                  | 1883.13932 | 2 | 1.10E-05 | 0.91  | 3.93   | -     | 946.9    |
| AHQ-6-13-, 4964 - 5020      | R.AVCM*LSNTTAAIEAWAR.L                                                  | 1883.13932 | 2 | 2.47E-05 | 0.94  | 4.54   | -     | 987.0    |
| AHQ-6-7, 4880               | R.AVCM*LSNTTAAIEAWAR.L                                                  | 1883.13932 | 2 | 8.18E-07 | 0.94  | 4.12   | -     | 1181.4   |
| AHQ-6-13-, 5696 - 5744      | R.AVCM*LSNTTAAIEAWAR.L                                                  | 1867.13992 | 2 | 7.66E-05 | 0.96  | 5.13   | -     | 1237.1   |
| AHQ-6-13, 5309 - 5317       | R.AVCM*LSNTTAAIEAWAR.L                                                  | 1883.13932 | 2 | 1.62E-04 | 0.92  | 4.10   | -     | 1071.8   |
| AHQ-6-7, 5551 - 5556        | R.AVCM*LSNTTAAIEAWAR.L                                                  | 1867.13992 | 2 | 3.80E-05 | 0.96  | 5.07   | -     | 1427.4   |
| AHQ-6-13, 5120 - 5140       | R.AVCM*LSNTTAAIEAWAR.L                                                  | 1883.13932 | 2 | 1.05E-05 | 0.97  | 4.79   | -     | 1761.6   |
| AHQ-6-14-, 5026             | R.AVCM*LSNTTAAIEAWAR.L                                                  | 1883.13932 | 2 | 2.35E-06 | 0.96  | 4.36   | -     | 1503.6   |
| AHQ-6-14-, 5208             | R.AVCM*LSNTTAAIEAWAR.L                                                  | 1883.13932 | 2 | 1.52E-12 | 0.79  | 3.08   | -     | 733.3    |
| AHQ-6-14-, 5687 - 5690      | R.AVCM*LSNTTAAIEAWAR.L                                                  | 1867.13992 | 2 | 1.09E-04 | 0.91  | 4.10   | -     | 1064.1   |
| AHQ-6-12, 5116              | R.AVCM*LSNTTAAIEAWAR.L                                                  | 1883.13932 | 2 | 4.89E-04 | 0.91  | 3.44   | -     | 1128.1   |
| AHQ-6-11, 5525 - 5567       | R.AVFVDELEPTVIDEIR.N                                                    | 1716.95615 | 2 | 1.69E-08 | 0.76  | 2.74   | -     | 904.0    |
| AHQ-6-14-, 5688 - 5702      | R.AVFVDELEPTVIDEIR.N                                                    | 1716.95615 | 2 | 3.50E-09 | 0.93  | 3.29   | -     | 1628.7   |
| AHQ-6-13, 5779              | R.AVFVDELEPTVIDEIR.N                                                    | 1716.95615 | 2 | 3.89E-08 | 0.82  | 3.20   | -     | 1033.6   |
| AHQ-6-13-, 5702             | R.AVFVDELEPTVIDEIR.N                                                    | 1716.95615 | 2 | 1.83E-06 | 0.91  | 3.66   | -     | 1254.9   |
| AHQ-6-12, 3379              | K.DVNAIAIAIK.T                                                          | 986.14745  | 2 | 2.80E-05 | 0.94  | 3.88   | -     | 1338.6   |
| AHQ-6-7, 2924               | K.DVNAIAIAIK.T                                                          | 986.14745  | 1 | 6.14E-05 | 0.62  | 1.96   | -     | 921.4    |
| AHQ-6-10, 4708 - 4764       | R.IHFPLATYAPVISAEEK.A                                                   | 1758.05310 | 2 | 3.78E-04 | 0.93  | 4.45   | -     | 567.9    |
| AHQ-6-7, 4767 - 4826        | R.IHFPLATYAPVISAEEK.A                                                   | 1758.05310 | 2 | 1.06E-04 | 0.94  | 4.19   | -     | 735.9    |
| AHQ-6-8, 4738 - 4797        | R.IHFPLATYAPVISAEEK.A                                                   | 1758.05310 | 2 | 6.70E-06 | 0.94  | 4.49   | -     | 748.7    |
| AHQ-6-13-, 5004             | R.IHFPLATYAPVISAEEK.A                                                   | 1758.05310 | 2 | 3.24E-04 | 0.79  | 3.48   | -     | 441.5    |
| AHQ-6-13-, 6242             | R.LISQVSSITASLR.F                                                       | 1488.75471 | 2 | 3.93E-10 | 0.96  | 4.21   | -     | 1341.4   |
| AHQ-6-7, 6126 - 6150        | R.LISQVSSITASLR.F                                                       | 1488.75471 | 2 | 9.04E-07 | 0.88  | 3.58   | -     | 702.0    |
| AHQ-6-14-, 6255 - 6258      | R.LISQVSSITASLR.F                                                       | 1488.75471 | 2 | 4.53E-08 | 0.96  | 4.81   | -     | 1395.4   |
| AHQ-6-7, 6246               | K.LSDQCTGLQGLVLFHSFGGGTSGGFTSLLM*ER.L                                   | 3425.79315 | 3 | 3.23E-07 | 0.97  | 6.76   | -     | 1320.4   |
| AHQ-6-8, 3246               | R.NLDIERPTYTLNLR.L                                                      | 1719.88022 | 2 | 3.92E-04 | 0.70  | 2.92   | -     | 596.3    |
| AHQ-6-12, 3403 - 3459       | R.NLDIERPTYTLNLR.L                                                      | 1719.88022 | 2 | 5.78E-04 | 0.73  | 3.46   | -     | 459.9    |
| AHQ-6-14-, 3478             | R.NLDIERPTYTLNLR.L                                                      | 1719.88022 | 2 | 1.84E-04 | 0.50  | 2.97   | -     | 277.8    |
| AHQ-6-14, 4248              | R.NLDIERPTYTLNLR.L                                                      | 1719.88022 | 2 | 7.96E-04 | 0.78  | 3.03   | -     | 596.8    |
| AHQ-6-13-, 3513             | R.NLDIERPTYTLNLR.L                                                      | 1719.88022 | 2 | 6.92E-09 | 0.50  | 2.98   | -     | 251.3    |
| AHQ-6-7, 3846               | R.QLFHPQLITGK.E                                                         | 1411.63050 | 2 | 3.17E-05 | 0.56  | 3.16   | -     | 169.2    |
| AHQ-6-7, 5294               | R.SIQFVDWCPGTFK.V                                                       | 1586.79232 | 2 | 2.57E-04 | 0.87  | 3.45   | -     | 843.5    |
| AHQ-6-11, 5283 - 5291       | R.SIQFVDWCPGTFK.V                                                       | 1586.79232 | 2 | 5.74E-07 | 0.85  | 3.39   | -     | 879.5    |
| AHQ-6-14-, 5434             | R.SIQFVDWCPGTFK.V                                                       | 1586.79232 | 2 | 1.42E-05 | 0.90  | 3.36   | -     | 883.7    |
| AHQ-6-13, 5528              | R.SIQFVDWCPGTFK.V                                                       | 1586.79232 | 2 | 1.08E-05 | 0.90  | 3.14   | -     | 1050.5   |
| AHQ-6-12, 5335 - 5343       | R.SIQFVDWCPGTFK.V                                                       | 1586.79232 | 2 | 4.20E-04 | 0.90  | 3.45   | -     | 870.9    |
| AHQ-6-7, 5178 - 5234        | K.TIGGGDDSFTHFFCETGAGK.H                                                | 2070.17889 | 2 | 3.56E-08 | 0.90  | 4.17   | -     | 644.7    |
| AHQ-6-9, 5024 - 5094        | K.TIGGGDDSFTHFFCETGAGK.H                                                | 2070.17889 | 2 | 1.49E-04 | 0.72  | 3.41   | -     | 395.1    |
| AHQ-6-14, 5950 - 6012       | K.TIGGGDDSFTHFFCETGAGK.H                                                | 2070.17889 | 2 | 1.60E-11 | 0.94  | 4.23   | -     | 993.6    |
| AHQ-6-13, 5471              | K.TIGGGDDSFTHFFCETGAGK.H                                                | 2070.17889 | 2 | 5.74E-08 | 0.86  | 3.84   | -     | 532.1    |
| AHQ-6-13-, 5362             | K.TIGGGDDSFTHFFCETGAGK.H                                                | 2070.17889 | 2 | 1.22E-06 | 0.91  | 4.27   | -     | 565.3    |
| AHQ-6-10, 5092 - 5148       | K.TIGGGDDSFTHFFCETGAGK.H                                                | 2070.17889 | 2 | 6.02E-05 | 0.57  | 3.19   | -     | 244.2    |
| AHQ-6-8, 5300               | K.TIGGGDDSFTHFFCETGAGK.H                                                | 2070.17889 | 2 | 7.79E-09 | 0.79  | 3.63   | -     | 464.9    |
| AHQ-6-14-, 5364             | K.TIGGGDDSFTHFFCETGAGK.H                                                | 2070.17889 | 2 | 1.73E-09 | 0.94  | 4.37   | -     | 848.7    |
| AHQ-6-12, 4312 - 4368       | K.VGINYQPTVVPGGDLAK.V                                                   | 1826.08584 | 2 | 6.03E-07 | 0.61  | 3.44   | -     | 186.4    |
| AHQ-6-7, 4100 - 4162        | K.VGINYQPTVVPGGDLAK.V                                                   | 1826.08584 | 2 | 4.82E-04 | 0.59  | 2.62   | -     | 353.9    |
| AHQ-6-13-, 4262 - 4320      | K.VGINYQPTVVPGGDLAK.V                                                   | 1826.08584 | 2 | 1.39E-04 | 0.54  | 2.89   | -     | 353.3    |
| AHQ-6-13, 4381 - 4440       | K.VGINYQPTVVPGGDLAK.V                                                   | 1826.08584 | 2 | 7.61E-04 | 0.68  | 3.19   | -     | 310.1    |
| AHQ-6-12, 4192 - 4251       | K.VGINYQPTVVPGGDLAK.V                                                   | 1826.08584 | 2 | 5.02E-05 | 0.32  | 2.51   | -     | 232.8    |
| AHQ-6-3, 4414               | K.VGINYQPTVVPGGDLAK.V                                                   | 1826.08584 | 2 | 2.46E-04 | 0.16  | 2.52   | -     | 198.1    |
| AHQ-6-8, 4152               | K.YMACCLLYR.G                                                           | 1252.50864 | 1 | 1.65E-05 | 0.17  | 2.28   | -     | 133.6    |
| AHQ-6-7, 4116 - 4186        | K.YMACCLLYR.G                                                           | 1252.50864 | 2 | 8.92E-05 | 0.91  | 2.83   | -     | 954.0    |
| AHQ-6-13, 4071 - 4081       | K.YM*ACCLLYR.G                                                          | 1268.50804 | 2 | 2.75E-04 | 0.74  | 2.69   | -     | 530.5    |
| AHQ-6-14-, 4363             | K.YMACCLLYR.G                                                           | 1252.50864 | 2 | 8.90E-07 | 0.95  | 3.60   | -     | 1222.0   |
| gi 4557419 ref NP_000063.1  | CD36 antigen (collagen type I receptor, thrombospondin receptor); CD36  |            |   | 2.14E-12 | 3.77  | 40.24  | 12.90 | 53052.1  |
| AHQ-6-1, 4628 - 4694        | K.AFASPVENPDNYCFCTEK.I                                                  | 2152.30319 | 2 | 1.98E-04 | 0.50  | 2.92   | -     | 318.1    |
| AHQ-6-6, 4454               | K.AFASPVENPDNYCFCTEK.I                                                  | 2152.30319 | 2 | 7.49E-05 | 0.76  | 3.14   | -     | 504.3    |
| AHQ-6-5, 4487 - 4488        | K.AFASPVENPDNYCFCTEK.I                                                  | 2152.30319 | 2 | 7.36E-10 | 0.93  | 4.12   | -     | 772.3    |
| AHQ-6-4, 4584               | K.AFASPVENPDNYCFCTEK.I                                                  | 2152.30319 | 2 | 2.63E-04 | 0.67  | 2.99   | -     | 469.3    |
| AHQ-6-5, 3092               | K.RLQVNLVLPSEK.I                                                        | 1524.83342 | 3 | 4.25E-06 | 0.95  | 3.65   | -     | 2244.2   |
| AHQ-6-5, 5312               | K.SQVLQFFSSDICR.S                                                       | 1588.76661 | 2 | 5.88E-05 | 0.93  | 3.82   | -     | 1245.8   |
| AHQ-6-1, 5442               | K.SQVLQFFSSDICR.S                                                       | 1588.76661 | 2 | 9.21E-08 | 0.94  | 3.76   | -     | 1404.6   |
| AHQ-6-6, 5275               | K.SQVLQFFSSDICR.S                                                       | 1588.76661 | 2 | 1.14E-06 | 0.92  | 3.69   | -     | 1333.8   |
| AHQ-6-5, 6415 - 6416        | R.TYLDIQIPITGFTLQFAK.R                                                  | 1957.25787 | 2 | 1.61E-11 | 0.96  | 4.88   | -     | 1278.8   |
| AHQ-6-1, 6462               | R.TYLDIQIPITGFTLQFAK.R                                                  | 1957.25787 | 2 | 2.14E-12 | 0.95  | 3.94   | -     | 1120.0   |
| gi 4507357 ref NP_001419.1  | enolase 1; phosphopyruvate hydratase; MYC promoter-binding protein 1; n |            |   | 2.27E-12 | 8.51  | 100.25 | 25.60 | 47168.7  |
| AHQ-6-14-, 5102             | R.AAVPSGASTGIYEALER.D                                                   | 1806.00979 | 2 | 2.22E-08 | 0.94  | 4.78   | -     | 595.2    |
| AHQ-6-13-, 5102             | R.AAVPSGASTGIYEALER.D                                                   | 1806.00979 | 2 | 1.40E-11 | 0.93  | 4.14   | -     | 616.0    |
| AHQ-6-14, 5760              | R.AAVPSGASTGIYEALER.D                                                   | 1806.00979 | 2 | 3.03E-12 | 0.94  | 4.92   | -     | 477.7    |
| AHQ-6-13, 5192              | R.AAVPSGASTGIYEALER.D                                                   | 1806.00979 | 2 | 7.35E-05 | 0.94  | 4.57   | -     | 583.0    |
| AHQ-6-11, 4960              | R.AAVPSGASTGIYEALER.D                                                   | 1806.00979 | 2 | 2.44E-05 | 0.89  | 3.65   | -     | 493.3    |
| AHQ-6-8, 4806               | R.AAVPSGASTGIYEALER.D                                                   | 1806.00979 | 2 | 1.84E-05 | 0.83  | 3.64   | -     | 442.9    |
| AHQ-6-8, 4909 - 4916        | R.AAVPSGASTGIYEALER.D                                                   | 1806.00979 | 2 | 9.26E-04 | 0.83  | 3.60   | -     | 380.7    |
| AHQ-6-10, 4114 - 4170       | K.DATNVGDEGGFAPNILENK.E                                                 | 1962.06350 | 2 | 4.63E-04 | 0.73  | 3.55   | -     | 506.3    |
| AHQ-6-8, 5593 - 5602        | K.DATNVGDEGGFAPNILENK.E                                                 | 1962.06350 | 2 | 2.27E-12 | 0.79  | 4.17   | -     | 642.9    |
| AHQ-6-8, 4000               | R.GNPTVEVDLFTSK.G                                                       | 1407.55065 | 1 | 4.82E-04 | 0.27  | 2.45   | -     | 511.5    |
| AHQ-6-8, 4006               | R.GNPTVEVDLFTSK.G                                                       | 1407.55065 | 1 | 7.50E-09 | 0.73  | 3.62   | -     | 703.4    |
| AHQ-6-8, 2259 - 2268        | R.IGAEYVHNLK.N                                                          | 1144.30502 | 2 | 2.09E-04 | 0.90  | 3.45   | -     | 1196.0   |
| AHQ-6-8, 6262               | K.LAMQEFMILPVGAANFR.E                                                   | 1909.30812 | 2 | 3.87E-05 | 0.95  | 4.78   | -     | 962.8    |
| AHQ-6-8, 5628               | K.LAM*QEFMILPVGAANFR.E                                                  | 1925.30752 | 2 | 1.67E-04 | 0.65  | 3.26   | -     | 595.9    |
| AHQ-6-8, 3629 - 3690        | K.VNQIGSVTESLQACK.L                                                     | 1635.82159 | 2 | 4.11E-05 | 0.95  | 4.06   | -     | 1376.1   |
| AHQ-6-10, 3567              | K.VNQIGSVTESLQACK.L                                                     | 1635.82159 | 2 | 4.48E-05 | 0.56  | 2.77   | -     | 518.0    |
| AHQ-6-8, 4730               | K.VVIGM*DVAASEFFR.S                                                     | 1557.79584 | 2 | 5.97E-05 | 0.95  | 3.72   | -     | 1549.9   |
| AHQ-6-8, 4485               | R.YISPDQLADLYK.S                                                        | 1426.59557 | 2 | 3.84E-08 | 0.91  | 4.10   | -     | 723.1    |
| AHQ-6-8, 4490               | R.YISPDQLADLYK.S                                                        | 1426.59557 | 1 | 2.75E-05 | 0.77  | 3.57   | -     | 564.3    |
| gi 4507357 ref NP_003555.1  | transglutinin 2; SM22-alpha homolog [Homo sapiens]                      |            |   | 2.38E-12 | 12.41 | 140.28 | 62.80 | 22391.3  |
| AHQ-6-13-, 5430 - 5484      | R.DDGLFSGDPNWFPPK.K                                                     | 1595.69288 | 2 | 3.79E-04 | 0.92  | 3.47   | -     | 1222.1   |
| AHQ-6-12, 5561 - 5623       | R.DDGLFSGDPNWFPPK.K                                                     | 1595.69288 | 2 | 4.46E-04 | 0.80  | 3.01   | -     | 763.9    |
| AHQ-6-11, 5379 - 5439       | R.DDGLFSGDPNWFPPK.K                                                     | 1595.69288 | 2 | 1.15E-04 | 0.96  | 4.27   | -     | 1373.0   |
| AHQ-6-12, 5415 - 5495       | R.DDGLFSGDPNWFPPK.K                                                     | 1595.69288 | 2 | 1.13E-07 | 0.98  | 5.07   | -     | 1798.0   |
| AHQ-6-11, 5469 - 5549       | R.DDGLFSGDPNWFPPK.K                                                     | 1595.69288 | 2 | 5.11E-04 | 0.88  | 3.51   | -     | 862.2    |
| AHQ-6-12, 4921              | R.DDGLFSGDPNWFPPK.S                                                     | 1723.86579 | 2 | 3.07E-06 | 0.89  | 3.40   | -     | 927.4    |
| AHQ-6-13-, 6393 - 6394      | K.DGTVLCELINALYPEGQAPVK.K                                               | 2289.59066 | 2 | 6.11E-05 | 0.69  | 3.21   | -     | 467.5    |
| AHQ-6-14-, 5847 - 5900      | K.DGTVLCELINALYPEGQAPVK.K                                               | 2289.59066 | 2 | 3.96E-04 | 0.17  | 2.53   | -     | 230.1    |
| AHQ-6-11, 6217 - 6225       | K.DGTVLCELINALYPEGQAPVKK.I                                              | 2417.76357 | 2 | 9.10E-04 | 0.57  | 2.93   | -     | 521.3    |
| AHQ-6-11, 5483              | K.DGTVLCELINALYPEGQAPVKK.I                                              | 2417.76357 |   |          |       |        |       |          |

|                             |                                                                         |            |   |          |       |        |       |         |
|-----------------------------|-------------------------------------------------------------------------|------------|---|----------|-------|--------|-------|---------|
| AHQ-6-11, 2756              | R.GASQAGMTGYGMPR.Q                                                      | 1384.56732 | 2 | 6.12E-05 | 0.73  | 2.72   | -     | 779.8   |
| AHQ-6-12, 2085 - 2115       | R.GPAYGLSR.E                                                            | 820.91599  | 2 | 6.66E-04 | 0.87  | 2.71   | -     | 953.2   |
| AHQ-6-12, 2491              | R.NFSDNQLQEGK.N                                                         | 1280.32582 | 2 | 8.33E-05 | 0.91  | 3.71   | -     | 1018.2  |
| AHQ-6-12, 2637 - 2701       | R.NFSDNQLQEGK.N                                                         | 1280.32582 | 2 | 2.27E-04 | 0.87  | 3.47   | -     | 833.8   |
| AHQ-6-12, 2243 - 2300       | R.NFSDNQLQEGK.N                                                         | 1280.32582 | 2 | 1.23E-06 | 0.79  | 3.11   | -     | 652.0   |
| AHQ-6-11, 2516 - 2583       | R.NFSDNQLQEGK.N                                                         | 1280.32582 | 2 | 3.63E-04 | 0.91  | 3.21   | -     | 1156.3  |
| AHQ-6-11, 2395              | R.NFSDNQLQEGK.N                                                         | 1280.32582 | 2 | 1.51E-05 | 0.85  | 3.66   | -     | 697.6   |
| AHQ-6-11, 3131              | K.NVIGLQMGNTNR.G                                                        | 1203.39751 | 2 | 7.49E-07 | 0.93  | 3.70   | -     | 1215.9  |
| AHQ-6-11, 2423 - 2503       | K.NVIGLQMGNTNR.G                                                        | 1219.39691 | 2 | 1.19E-04 | 0.95  | 3.86   | -     | 1207.5  |
| AHQ-6-12, 4547              | K.QM*EQISQFLQAAER.Y                                                     | 1695.87890 | 3 | 2.97E-07 | 0.93  | 3.51   | -     | 1958.2  |
| AHQ-6-12, 4455 - 4535       | K.QM*EQISQFLQAAER.Y                                                     | 1695.87890 | 2 | 8.28E-04 | 0.83  | 3.56   | -     | 654.8   |
| AHQ-6-12, 5131 - 5139       | K.QM*EQISQFLQAAER.Y                                                     | 1695.87890 | 2 | 1.69E-08 | 0.96  | 4.36   | -     | 1420.9  |
| AHQ-6-11, 4472              | K.QM*EQISQFLQAAER.Y                                                     | 1695.87890 | 3 | 3.39E-07 | 0.96  | 4.92   | -     | 1730.8  |
| AHQ-6-14-, 5254             | K.QM*EQISQFLQAAER.Y                                                     | 1695.87890 | 2 | 5.54E-06 | 0.80  | 3.11   | -     | 707.1   |
| AHQ-6-11, 3835 - 3844       | R.TLM*NLGGLAVAR.D                                                       | 1232.47872 | 2 | 7.81E-05 | 0.87  | 3.21   | -     | 1022.4  |
| AHQ-6-12, 3619 - 3647       | R.TLM*NLGGLAVAR.D                                                       | 1232.47872 | 2 | 2.29E-07 | 0.92  | 4.07   | -     | 957.4   |
| AHQ-6-12, 4375              | R.TLM*NLGGLAVAR.D                                                       | 1216.47932 | 2 | 1.11E-04 | 0.86  | 3.76   | -     | 844.3   |
| AHQ-6-12, 3825 - 3889       | R.TLM*NLGGLAVAR.D                                                       | 1232.47872 | 2 | 8.54E-06 | 0.84  | 2.86   | -     | 1042.3  |
| AHQ-6-11, 4307 - 4331       | R.TLM*NLGGLAVAR.D                                                       | 1216.47932 | 2 | 9.88E-07 | 0.93  | 4.26   | -     | 1197.4  |
| AHQ-6-13, 6319              | R.YGINTTDFQTVDLWEGK.N                                                   | 2101.30080 | 2 | 2.38E-12 | 0.94  | 4.41   | -     | 847.5   |
| AHQ-6-12, 6207              | R.YGINTTDFQTVDLWEGK.N                                                   | 2101.30080 | 2 | 8.64E-10 | 0.96  | 5.40   | -     | 980.2   |
| AHQ-6-11, 6075 - 6153       | R.YGINTTDFQTVDLWEGK.N                                                   | 2101.30080 | 2 | 3.72E-09 | 0.97  | 5.20   | -     | 1500.2  |
| AHQ-6-14-, 6298 - 6300      | R.YGINTTDFQTVDLWEGK.N                                                   | 2101.30080 | 2 | 5.89E-10 | 0.97  | 5.62   | -     | 1277.8  |
| AHQ-6-13-, 6284             | R.YGINTTDFQTVDLWEGK.N                                                   | 2101.30080 | 2 | 4.00E-08 | 0.96  | 4.77   | -     | 1173.7  |
| gi 30151108 ref XP_301187.1 | similar to actin beta, cytoskeletal - Kenyan clawed frog [Homo sapiens] |            |   | 2.70E-12 | 1.89  | 20.30  | 7.40  | 32164.8 |
| AHQ-6-2, 4808               | K.DLYANTVLSGGTTM*YPGIADR.M                                              | 2232.45624 | 2 | 2.16E-05 | 0.93  | 4.46   | -     | 848.6   |
| AHQ-6-3, 4786               | K.DLYANTVLSGGTTM*YPGIADR.M                                              | 2232.45624 | 2 | 7.41E-04 | 0.88  | 4.14   | -     | 573.5   |
| AHQ-6-4, 4832               | K.DLYANTVLSGGTTM*YPGIADR.M                                              | 2232.45624 | 2 | 3.18E-04 | 0.79  | 3.69   | -     | 501.7   |
| AHQ-6-4, 5297               | K.DLYANTVLSGGTTM*YPGIADR.M                                              | 2216.45684 | 2 | 4.89E-04 | 0.90  | 4.07   | -     | 665.4   |
| AHQ-6-5, 4620               | K.DLYANTVLSGGTTM*YPGIADR.M                                              | 2232.45624 | 2 | 2.01E-09 | 0.92  | 4.71   | -     | 675.6   |
| AHQ-6-5, 4751               | K.DLYANTVLSGGTTM*YPGIADR.M                                              | 2232.45624 | 2 | 1.35E-05 | 0.95  | 4.96   | -     | 758.3   |
| AHQ-6-6, 4722               | K.DLYANTVLSGGTTM*YPGIADR.M                                              | 2232.45624 | 2 | 3.26E-05 | 0.88  | 4.03   | -     | 665.1   |
| AHQ-6-8, 4392 - 4462        | K.DLYANTVLSGGTTM*YPGIADR.M                                              | 2232.45624 | 2 | 3.73E-04 | 0.73  | 3.25   | -     | 469.9   |
| AHQ-6-8, 4478 - 4540        | K.DLYANTVLSGGTTM*YPGIADR.M                                              | 2232.45624 | 2 | 3.26E-08 | 0.95  | 5.43   | -     | 857.9   |
| AHQ-6-8, 4578 - 4638        | K.DLYANTVLSGGTTM*YPGIADR.M                                              | 2232.45624 | 2 | 3.57E-04 | 0.96  | 5.36   | -     | 1076.4  |
| AHQ-6-8, 4697 - 4757        | K.DLYANTVLSGGTTM*YPGIADR.M                                              | 2232.45624 | 2 | 1.06E-09 | 0.97  | 5.93   | -     | 1035.8  |
| AHQ-6-8, 4798 - 4868        | K.DLYANTVLSGGTTM*YPGIADR.M                                              | 2216.45684 | 2 | 2.70E-12 | 0.97  | 5.81   | -     | 1227.1  |
| AHQ-6-8, 4816 - 4896        | K.DLYANTVLSGGTTM*YPGIADR.M                                              | 2232.45624 | 2 | 3.11E-04 | 0.90  | 4.35   | -     | 513.4   |
| AHQ-6-8, 4953 - 5012        | K.DLYANTVLSGGTTM*YPGIADR.M                                              | 2216.45684 | 2 | 2.68E-06 | 0.96  | 5.32   | -     | 941.9   |
| AHQ-6-8, 5072 - 5132        | K.DLYANTVLSGGTTM*YPGIADR.M                                              | 2216.45684 | 2 | 2.97E-07 | 0.97  | 5.69   | -     | 1226.8  |
| AHQ-6-8, 5994 - 6070        | K.DLYANTVLSGGTTM*YPGIADR.M                                              | 2216.45684 | 2 | 1.41E-06 | 0.83  | 3.91   | -     | 610.4   |
| AHQ-6-9, 4251 - 4307        | K.DLYANTVLSGGTTM*YPGIADR.M                                              | 2232.45624 | 2 | 1.99E-06 | 0.79  | 3.11   | -     | 698.0   |
| AHQ-6-9, 4398 - 4455        | K.DLYANTVLSGGTTM*YPGIADR.M                                              | 2232.45624 | 2 | 1.99E-05 | 0.95  | 5.73   | -     | 757.4   |
| AHQ-6-9, 4494               | K.DLYANTVLSGGTTM*YPGIADR.M                                              | 2232.45624 | 2 | 5.30E-04 | 0.37  | 2.58   | -     | 280.4   |
| AHQ-6-10, 4314 - 4374       | K.DLYANTVLSGGTTM*YPGIADR.M                                              | 2232.45624 | 2 | 3.61E-07 | 0.87  | 4.41   | -     | 418.2   |
| AHQ-6-10, 4443 - 4498       | K.DLYANTVLSGGTTM*YPGIADR.M                                              | 2232.45624 | 2 | 5.29E-04 | 0.94  | 5.02   | -     | 891.6   |
| AHQ-6-10, 4542              | K.DLYANTVLSGGTTM*YPGIADR.M                                              | 2232.45624 | 2 | 1.55E-05 | 0.78  | 3.73   | -     | 421.4   |
| AHQ-6-10, 4659              | K.DLYANTVLSGGTTM*YPGIADR.M                                              | 2232.45624 | 2 | 8.50E-05 | 0.89  | 4.18   | -     | 363.7   |
| AHQ-6-10, 4751 - 4806       | K.DLYANTVLSGGTTM*YPGIADR.M                                              | 2216.45684 | 2 | 9.46E-04 | 0.93  | 4.53   | -     | 1047.0  |
| AHQ-6-11, 4564              | K.DLYANTVLSGGTTM*YPGIADR.M                                              | 2232.45624 | 2 | 2.17E-05 | 0.96  | 5.25   | -     | 1100.4  |
| AHQ-6-12, 4465 - 4520       | K.DLYANTVLSGGTTM*YPGIADR.M                                              | 2232.45624 | 2 | 9.68E-06 | 0.89  | 4.11   | -     | 711.2   |
| AHQ-6-12, 4588 - 4644       | K.DLYANTVLSGGTTM*YPGIADR.M                                              | 2232.45624 | 2 | 1.58E-04 | 0.95  | 4.95   | -     | 908.4   |
| AHQ-6-12, 4896              | K.DLYANTVLSGGTTM*YPGIADR.M                                              | 2216.45684 | 2 | 1.02E-04 | 0.74  | 3.10   | -     | 553.8   |
| AHQ-6-13, 4651 - 4675       | K.DLYANTVLSGGTTM*YPGIADR.M                                              | 2232.45624 | 2 | 7.70E-10 | 0.96  | 5.23   | -     | 959.3   |
| AHQ-6-13, 4749 - 4807       | K.DLYANTVLSGGTTM*YPGIADR.M                                              | 2232.45624 | 2 | 3.77E-07 | 0.96  | 5.41   | -     | 1062.8  |
| AHQ-6-13, 4868 - 4869       | K.DLYANTVLSGGTTM*YPGIADR.M                                              | 2232.45624 | 2 | 7.76E-04 | 0.93  | 4.79   | -     | 798.5   |
| AHQ-6-13, 4972 - 5029       | K.DLYANTVLSGGTTM*YPGIADR.M                                              | 2232.45624 | 2 | 1.24E-04 | 0.90  | 4.00   | -     | 760.6   |
| AHQ-6-13, 5071 - 5128       | K.DLYANTVLSGGTTM*YPGIADR.M                                              | 2216.45684 | 2 | 6.47E-09 | 0.95  | 5.26   | -     | 928.8   |
| AHQ-6-13, 5207 - 5264       | K.DLYANTVLSGGTTM*YPGIADR.M                                              | 2216.45684 | 2 | 6.46E-04 | 0.93  | 4.58   | -     | 785.1   |
| AHQ-6-14, 5320 - 5380       | K.DLYANTVLSGGTTM*YPGIADR.M                                              | 2232.45624 | 2 | 9.70E-06 | 0.94  | 4.84   | -     | 931.4   |
| AHQ-6-14, 5437 - 5516       | K.DLYANTVLSGGTTM*YPGIADR.M                                              | 2232.45624 | 2 | 7.27E-05 | 0.92  | 4.63   | -     | 893.0   |
| AHQ-6-14, 5733 - 5789       | K.DLYANTVLSGGTTM*YPGIADR.M                                              | 2216.45684 | 2 | 1.04E-04 | 0.93  | 4.69   | -     | 838.7   |
| AHQ-6-13-, 4618 - 4676      | K.DLYANTVLSGGTTM*YPGIADR.M                                              | 2232.45624 | 2 | 7.27E-07 | 0.95  | 5.04   | -     | 928.6   |
| AHQ-6-13-, 4733 - 4741      | K.DLYANTVLSGGTTM*YPGIADR.M                                              | 2232.45624 | 2 | 2.66E-05 | 0.94  | 4.30   | -     | 970.5   |
| AHQ-6-13-, 4840             | K.DLYANTVLSGGTTM*YPGIADR.M                                              | 2232.45624 | 2 | 8.17E-07 | 0.91  | 4.37   | -     | 670.3   |
| AHQ-6-13-, 4940 - 5010      | K.DLYANTVLSGGTTM*YPGIADR.M                                              | 2216.45684 | 2 | 1.33E-04 | 0.95  | 5.32   | -     | 916.9   |
| AHQ-6-13-, 5092             | K.DLYANTVLSGGTTM*YPGIADR.M                                              | 2216.45684 | 2 | 9.20E-04 | 0.94  | 5.21   | -     | 658.8   |
| AHQ-6-13-, 5254             | K.DLYANTVLSGGTTM*YPGIADR.M                                              | 2216.45684 | 2 | 1.27E-04 | 0.89  | 4.20   | -     | 722.0   |
| AHQ-6-14-, 4511 - 4559      | K.DLYANTVLSGGTTM*YPGIADR.M                                              | 2232.45624 | 2 | 3.04E-12 | 0.92  | 4.49   | -     | 782.5   |
| AHQ-6-14-, 4636 - 4707      | K.DLYANTVLSGGTTM*YPGIADR.M                                              | 2232.45624 | 2 | 1.58E-04 | 0.97  | 5.68   | -     | 1148.9  |
| AHQ-6-14-, 4808 - 4862      | K.DLYANTVLSGGTTM*YPGIADR.M                                              | 2232.45624 | 2 | 1.56E-08 | 0.97  | 5.90   | -     | 1141.1  |
| AHQ-6-14-, 4939 - 5016      | K.DLYANTVLSGGTTM*YPGIADR.M                                              | 2216.45684 | 2 | 3.12E-04 | 0.93  | 4.70   | -     | 980.9   |
| AHQ-6-14-, 5075 - 5130      | K.DLYANTVLSGGTTM*YPGIADR.M                                              | 2216.45684 | 2 | 2.94E-05 | 0.97  | 6.01   | -     | 967.6   |
| gi 4503715 ref NP_000500.1  | fibrinogen, gamma chain isoform gamma-A precursor [Homo sapiens]        |            |   | 2.83E-12 | 12.19 | 150.25 | 46.00 | 49481.2 |
| AHQ-6-8, 4336               | K.AIQLTYNPDESSKPNMIDAATLK.S                                             | 2521.82886 | 2 | 4.52E-05 | 0.71  | 3.34   | -     | 379.0   |
| AHQ-6-7, 4315 - 4392        | K.AIQLTYNPDESSKPNMIDAATLK.S                                             | 2521.82886 | 2 | 5.14E-07 | 0.80  | 3.54   | -     | 468.3   |
| AHQ-6-7, 4300               | K.AIQLTYNPDESSKPNMIDAATLK.S                                             | 2521.82886 | 2 | 2.82E-04 | 0.38  | 3.04   | -     | 268.8   |
| AHQ-6-9, 4199               | K.AIQLTYNPDESSKPNMIDAATLK.S                                             | 2521.82886 | 2 | 6.45E-05 | 0.61  | 3.23   | -     | 279.7   |
| AHQ-6-14-, 5203 - 5214      | K.ASTPNGYDNGIIVATWK.T                                                   | 1895.06358 | 2 | 1.34E-11 | 0.86  | 3.56   | -     | 623.3   |
| AHQ-6-7, 5058 - 5114        | K.ASTPNGYDNGIIVATWK.T                                                   | 1895.06358 | 2 | 2.83E-12 | 0.87  | 3.64   | -     | 662.7   |
| AHQ-6-13-, 5336 - 5393      | K.ASTPNGYDNGIIVATWK.T                                                   | 1895.06358 | 2 | 4.85E-10 | 0.49  | 2.82   | -     | 357.1   |
| AHQ-6-7, 5163 - 5218        | K.ASTPNGYDNGIIVATWK.T                                                   | 1895.06358 | 2 | 4.64E-07 | 0.63  | 2.81   | -     | 492.8   |
| AHQ-6-13-, 5185 - 5240      | K.ASTPNGYDNGIIVATWK.T                                                   | 1895.06358 | 2 | 3.78E-06 | 0.78  | 3.03   | -     | 729.2   |
| AHQ-6-7, 2663 - 2738        | K.CHAGHLNGVYQQGTYSK.A                                                   | 2014.16662 | 3 | 7.91E-05 | 0.96  | 4.73   | -     | 1706.9  |
| AHQ-6-7, 2658 - 2720        | K.CHAGHLNGVYQQGTYSK.A                                                   | 2014.16662 | 2 | 2.17E-07 | 0.96  | 4.99   | -     | 1131.1  |
| AHQ-6-8, 2641               | K.CHAGHLNGVYQQGTYSK.A                                                   | 2014.16662 | 2 | 5.17E-08 | 0.94  | 4.29   | -     | 878.3   |
| AHQ-6-11, 3075 - 3081       | R.DNCCILDER.F                                                           | 1197.27847 | 2 | 4.37E-04 | 0.90  | 3.13   | -     | 1049.9  |
| AHQ-6-12, 3117              | R.DNCCILDER.F                                                           | 1197.27847 | 2 | 1.04E-04 | 0.84  | 3.06   | -     | 811.2   |
| AHQ-6-5, 5115               | K.EFGHLSPTGTFEFLWLNKE.I                                                 | 2208.37146 | 3 | 1.47E-04 | 0.72  | 3.29   | -     | 960.0   |
| AHQ-6-10, 4832              | K.EFGHLSPTGTFEFLWLNKE.I                                                 | 2208.37146 | 2 | 5.89E-04 | 0.70  | 2.82   | -     | 671.4   |
| AHQ-6-4, 5196               | K.EFGHLSPTGTFEFLWLNKE.I                                                 | 2208.37146 | 2 | 8.15E-05 | 0.69  | 3.42   | -     | 321.6   |
| AHQ-6-7, 4886 - 4947        | K.EFGHLSPTGTFEFLWLNKE.I                                                 | 2208.37146 | 2 | 2.89E-07 | 0.90  | 4.14   | -     | 660.4   |
| AHQ-6-7, 5990 - 6056        | R.FGSCPTTCGIADFLSTYQTK.V                                                | 2420.65656 | 2 | 2.66E-05 | 0.87  | 4.00   | -     | 581.2   |
| AHQ-6-7, 4262 - 4294        | K.IHLISTQSAIPYALR.V                                                     | 1683.97576 | 2 | 4.64E-07 | 0.93  | 3.78   | -     | 1119.3  |
| AHQ-6-9, 4182 - 4198        | K.IHLISTQSAIPYALR.V                                                     | 1683.97576 | 2 | 1.60E-10 | 0.97  | 4.72   | -     | 1485.5  |
| AHQ-6-7, 4370 - 4432        | K.IHLISTQSAIPYALR.V                                                     | 1683.97576 | 2 | 1.58E-04 | 0.68  | 3.13   | -     | 488.1   |
| AHQ-6-11, 4364              | K.IHLISTQSAIPYALR.V                                                     | 1683.97576 | 2 | 6.62E-08 | 0.95  | 4.21   | -     | 1053.8  |
| AHQ-6-7, 2051               | R.LDGSVDFKK.N                                                           | 1009.13788 | 2 | 4.48E-06 | 0.65  | 2.54   | -     | 617.5   |
| AHQ-6-13-, 2260             | R.LTIGEGQQHHLGGAK.Q                                                     | 1546.71290 | 2 | 3.81E-06 | 0.83  | 2.75   | -     | 992.5   |
| AHQ-6-14-, 2207 - 2214      | R.LTIGEGQQHHLGGAK.Q                                                     | 1546.71290 | 2 | 4.38E-09 | 0.92  | 3.87   | -     | 1112.2  |
| AHQ-6-12, 2241              | R.LTIGEGQQHHLGGAK.Q                                                     | 1546.71290 | 2 | 2.20E-04 | 0.41  | 2.55   | -     | 322.6   |
| AHQ-6-8, 2082 - 2083        | R.LTIGEGQQHHLGGAK.Q                                                     | 1546.71290 | 2 | 4.76E-08 | 0.92  | 3.80   | -     | 1125.3  |
| AHQ-6-7, 2078 - 2134        | R.LTIGEGQQHHLGGAK.Q                                                     | 1546.71290 | 2 | 1.21E-07 | 0.95  | 3.78   | -     | 1674.3  |
| AHQ-6-7, 3703 - 3706        | K.QSGLYFIKPLK.A                                                         | 1294.56665 | 2 | 4.80E-06 | 0.79  | 3.07   | -     | 475.2   |
| AHQ-6-7, 2950               | R.TSTADYAMFK.V                                                          | 1135.27203 | 1 | 4.07E-04 | 0.13  | 2.01   | -     | 95.0    |
| AHQ-6-7, 3702               | K.VAQLEAQCQEPCKDTVQIHDITGK.D                                            | 2772.06211 | 3 | 5.41E-06 | 0.90  | 4.36   | -     | 857.9   |
| AHQ-6-8, 3732               | K.VAQLEAQCQEPCKDTVQIHDITGK.D                                            | 2772.06211 | 3 | 3.04E-04 | 0.75  | 3.10   | -     | 584.6   |

|                             |                                                                         |            |   |          |       |        |       |         |
|-----------------------------|-------------------------------------------------------------------------|------------|---|----------|-------|--------|-------|---------|
| AHQ-6-7, 3858               | K.VAQLAEACQCEPKDVTQIHDTGKDCQDIANK.G                                     | 3718.05993 | 3 | 3.39E-05 | 0.94  | 5.04   | -     | 929.9   |
| AHQ-6-7, 3131               | R.VELEDWNGR.T                                                           | 1118.18129 | 2 | 7.45E-04 | 0.87  | 2.68   | -     | 1216.0  |
| AHQ-6-7, 3048               | R.VELEDWNGR.T                                                           | 1118.18129 | 2 | 1.46E-06 | 0.90  | 2.98   | -     | 1187.7  |
| AHQ-6-11, 3059              | K.YEASILTHDSSIR.Y                                                       | 1492.61564 | 2 | 4.26E-07 | 0.92  | 3.96   | -     | 848.3   |
| AHQ-6-10, 2939 - 2994       | K.YEASILTHDSSIR.Y                                                       | 1492.61564 | 2 | 4.82E-06 | 0.92  | 3.59   | -     | 1054.1  |
| AHQ-6-7, 2922 - 2923        | K.YEASILTHDSSIR.Y                                                       | 1492.61564 | 2 | 4.07E-07 | 0.92  | 3.73   | -     | 838.6   |
| AHQ-6-3, 3158               | K.YEASILTHDSSIR.Y                                                       | 1492.61564 | 2 | 3.77E-09 | 0.78  | 2.53   | -     | 788.0   |
| AHQ-6-12, 3089              | K.YEASILTHDSSIR.Y                                                       | 1492.61564 | 2 | 3.18E-06 | 0.72  | 2.87   | -     | 456.7   |
| gj 13775198 ref NP_112576.1 | SH3 domain binding glutamic acid-rich protein like 3; SH3BGR3-like pr   |            |   | 3.10E-12 | 4.01  | 50.26  | 34.40 | 10437.7 |
| AHQ-6-14, 5288              | R.IYQQLVDSQDNALR.D                                                      | 1776.97168 | 2 | 3.89E-05 | 0.92  | 3.80   | -     | 1371.1  |
| AHQ-6-13-, 4625 - 4686      | R.IYQQLVDSQDNALR.D                                                      | 1776.97168 | 2 | 6.19E-10 | 0.95  | 4.53   | -     | 1282.1  |
| AHQ-6-13-, 4552             | R.IYQQLVDSQDNALR.D                                                      | 1776.97168 | 3 | 9.71E-06 | 0.96  | 4.82   | -     | 2252.3  |
| AHQ-6-13-, 4544             | R.IYQQLVDSQDNALR.D                                                      | 1776.97168 | 2 | 3.10E-12 | 0.96  | 4.32   | -     | 1851.1  |
| AHQ-6-13, 4671 - 4732       | R.IYQQLVDSQDNALR.D                                                      | 1776.97168 | 2 | 1.63E-05 | 0.95  | 4.15   | -     | 1606.0  |
| AHQ-6-13, 4681              | R.IYQQLVDSQDNALR.D                                                      | 1776.97168 | 3 | 2.09E-06 | 0.96  | 5.05   | -     | 2105.7  |
| AHQ-6-13, 4803              | R.IYQQLVDSQDNALR.D                                                      | 1776.97168 | 2 | 1.27E-04 | 0.89  | 3.57   | -     | 992.1   |
| AHQ-6-14-, 4555 - 4616      | R.IYQQLVDSQDNALR.D                                                      | 1776.97168 | 2 | 5.49E-11 | 0.97  | 5.13   | -     | 1724.6  |
| AHQ-6-13, 4924              | R.IYQQLVDSQDNALRDEM.R.A                                                 | 2308.55751 | 2 | 2.45E-04 | 0.80  | 3.74   | -     | 425.4   |
| AHQ-6-13, 5024 - 5068       | R.IYQQLVDSQDNALRDEM.R.A                                                 | 2308.55751 | 3 | 2.06E-06 | 0.56  | 3.02   | -     | 460.5   |
| AHQ-6-14, 5053 - 5132       | R.IYQQLVDSQDNALRDEM.R.A                                                 | 2324.55691 | 3 | 2.50E-05 | 0.92  | 4.57   | -     | 740.1   |
| AHQ-6-13, 4907 - 4963       | R.IYQQLVDSQDNALRDEM.R.A                                                 | 2308.55751 | 3 | 3.91E-06 | 0.55  | 3.04   | -     | 384.6   |
| AHQ-6-14-, 4430             | R.IYQQLVDSQDNALRDEM.R.A                                                 | 2324.55691 | 3 | 4.05E-07 | 0.73  | 3.19   | -     | 379.2   |
| AHQ-6-14-, 4339             | R.IYQQLVDSQDNALRDEM.R.A                                                 | 2324.55691 | 3 | 6.08E-04 | 0.72  | 3.11   | -     | 635.0   |
| AHQ-6-13-, 4404 - 4473      | R.IYQQLVDSQDNALRDEM.R.A                                                 | 2324.55691 | 3 | 1.30E-06 | 0.72  | 3.70   | -     | 484.1   |
| AHQ-6-13, 4387 - 4447       | R.IYQQLVDSQDNALRDEM.R.A                                                 | 2324.55691 | 3 | 1.32E-05 | 0.73  | 3.25   | -     | 502.8   |
| AHQ-6-13, 4287              | R.IYQQLVDSQDNALRDEM.R.A                                                 | 2324.55691 | 3 | 4.65E-07 | 0.80  | 3.09   | -     | 723.1   |
| AHQ-6-13-, 4860             | R.IYQQLVDSQDNALRDEM.R.A                                                 | 2308.55751 | 3 | 2.02E-07 | 0.65  | 3.06   | -     | 394.1   |
| AHQ-6-13-, 4726 - 4800      | R.IYQQLVDSQDNALRDEM.R.A                                                 | 2308.55751 | 3 | 5.07E-04 | 0.88  | 3.75   | -     | 866.1   |
| AHQ-6-13-, 1946             | R.VYSTSVTGSR.E                                                          | 1057.13940 | 2 | 1.53E-04 | 0.83  | 2.72   | -     | 853.7   |
| AHQ-6-13-, 1828 - 1889      | R.VYSTSVTGSR.E                                                          | 1057.13940 | 2 | 3.85E-04 | 0.79  | 2.79   | -     | 593.9   |
| AHQ-6-13, 2151 - 2227       | R.VYSTSVTGSR.E                                                          | 1057.13940 | 2 | 1.32E-06 | 0.88  | 3.23   | -     | 865.2   |
| AHQ-6-13, 2547              | R.VYSTSVTGSREIK.S                                                       | 1427.58510 | 2 | 9.99E-04 | 0.78  | 2.79   | -     | 842.5   |
| gj 4759212 ref NP_004598.1  | beta-tubulin cofactor A [Homo sapiens]                                  |            |   | 3.21E-12 | 2.90  | 30.31  | 25.90 | 12854.8 |
| AHQ-6-13-, 3561             | R.ILENEKDLLEEAEYK.E                                                     | 1852.97372 | 2 | 9.32E-12 | 0.97  | 5.39   | -     | 1516.8  |
| AHQ-6-13-, 3402             | R.ILENEKDLLEEAEYK.E                                                     | 2209.35284 | 3 | 3.21E-12 | 0.97  | 5.59   | -     | 1602.4  |
| AHQ-6-13-, 3413             | R.ILENEKDLLEEAEYK.E                                                     | 2209.35284 | 2 | 1.50E-06 | 0.97  | 6.15   | -     | 1237.8  |
| AHQ-6-13, 3539              | R.ILENEKDLLEEAEYK.E                                                     | 2209.35284 | 3 | 3.45E-12 | 0.97  | 6.09   | -     | 1328.6  |
| AHQ-6-13, 3849 - 3859       | R.LEAAYLDLQK.I                                                          | 1192.34645 | 2 | 5.36E-06 | 0.96  | 3.86   | -     | 1558.5  |
| gj 4557677 ref NP_000203.1  | integrin beta chain, beta 3 precursor; platelet glycoprotein IIIa precu |            |   | 3.74E-12 | 20.08 | 240.30 | 35.50 | 87185.6 |
| AHQ-6-4, 3064               | R.AKWDTANNPLYK.E                                                        | 1421.58225 | 2 | 2.06E-07 | 0.56  | 3.06   | -     | 319.5   |
| AHQ-6-3, 3097 - 3160        | R.AKWDTANNPLYK.E                                                        | 1421.58225 | 2 | 2.48E-07 | 0.80  | 3.31   | -     | 801.9   |
| AHQ-6-12, 3041 - 3049       | R.AKWDTANNPLYK.E                                                        | 1421.58225 | 2 | 3.96E-04 | 0.72  | 2.85   | -     | 556.8   |
| AHQ-6-3, 5116               | R.CDLKENLLKDNCAPESEIEFPVSEAR.V                                          | 2938.23689 | 3 | 2.54E-05 | 0.85  | 3.85   | -     | 766.1   |
| AHQ-6-3, 5201               | R.CDLKENLLKDNCAPESEIEFPVSEAR.V                                          | 2938.23689 | 3 | 2.59E-05 | 0.93  | 4.72   | -     | 1061.3  |
| AHQ-6-3, 4180 - 4242        | R.CGPGWLGSCQCESEEDYRPSQQDECSPE.R                                        | 3380.49342 | 3 | 3.99E-05 | 0.83  | 4.15   | -     | 451.0   |
| AHQ-6-5, 4123               | R.CGPGWLGSCQCESEEDYRPSQQDECSPE.R                                        | 3380.49342 | 3 | 8.54E-08 | 0.71  | 3.77   | -     | 521.9   |
| AHQ-6-1, 5459 - 5532        | R.DAPEGGFDAIMQATVCDEK.I                                                 | 2056.21716 | 2 | 3.61E-05 | 0.93  | 3.90   | -     | 942.7   |
| AHQ-6-3, 5432 - 5488        | R.DAPEGGFDAIMQATVCDEK.I                                                 | 2056.21716 | 2 | 1.27E-08 | 0.92  | 3.86   | -     | 793.9   |
| AHQ-6-3, 5545               | R.DAPEGGFDAIMQATVCDEK.I                                                 | 2056.21716 | 2 | 1.00E-05 | 0.92  | 4.08   | -     | 751.5   |
| AHQ-6-1, 4388               | R.DAPEGGFDAIM*QATVCDEK.I                                                | 2072.21656 | 2 | 1.73E-07 | 0.95  | 4.50   | -     | 1009.5  |
| AHQ-6-6, 4183               | R.DAPEGGFDAIM*QATVCDEK.I                                                | 2072.21656 | 2 | 1.23E-05 | 0.89  | 3.23   | -     | 916.8   |
| AHQ-6-4, 4295               | R.DAPEGGFDAIM*QATVCDEK.I                                                | 2072.21656 | 2 | 4.01E-04 | 0.56  | 2.77   | -     | 393.9   |
| AHQ-6-3, 4346               | R.DAPEGGFDAIM*QATVCDEK.I                                                | 2072.21656 | 2 | 7.27E-04 | 0.66  | 3.12   | -     | 629.8   |
| AHQ-6-3, 4222 - 4280        | R.DAPEGGFDAIM*QATVCDEK.I                                                | 2072.21656 | 2 | 6.41E-08 | 0.93  | 4.05   | -     | 960.4   |
| AHQ-6-5, 5484               | R.DAPEGGFDAIMQATVCDEK.I                                                 | 2056.21716 | 2 | 3.69E-07 | 0.92  | 3.98   | -     | 868.7   |
| AHQ-6-4, 4760               | K.DDLWSIQNLGK.L                                                         | 1390.52332 | 2 | 5.35E-05 | 0.74  | 3.01   | -     | 610.4   |
| AHQ-6-6, 4154 - 4156        | K.DNCAPESEIEFPVSEAR.V                                                   | 1822.93099 | 2 | 3.12E-06 | 0.74  | 2.98   | -     | 582.1   |
| AHQ-6-2, 4282               | K.DNCAPESEIEFPVSEAR.V                                                   | 1822.93099 | 2 | 1.60E-04 | 0.78  | 3.11   | -     | 842.4   |
| AHQ-6-8, 4022               | K.DNCAPESEIEFPVSEAR.V                                                   | 1822.93099 | 2 | 5.24E-07 | 0.57  | 2.82   | -     | 479.1   |
| AHQ-6-3, 4237               | K.DNCAPESEIEFPVSEAR.V                                                   | 1822.93099 | 2 | 3.49E-06 | 0.89  | 3.44   | -     | 970.8   |
| AHQ-6-4, 3345               | K.EATSTFTNITYR.G                                                        | 1404.50685 | 2 | 9.02E-06 | 0.82  | 3.07   | -     | 670.1   |
| AHQ-6-3, 3372 - 3378        | K.EATSTFTNITYR.G                                                        | 1404.50685 | 2 | 2.48E-05 | 0.87  | 3.13   | -     | 905.3   |
| AHQ-6-5, 3300               | K.EATSTFTNITYR.G                                                        | 1404.50685 | 2 | 3.77E-08 | 0.87  | 2.91   | -     | 903.3   |
| AHQ-6-4, 2376 - 2377        | R.FQYYEDSSGK.S                                                          | 1224.25749 | 1 | 5.96E-04 | 0.41  | 2.28   | -     | 440.4   |
| AHQ-6-3, 2412               | R.FQYYEDSSGK.S                                                          | 1224.25749 | 1 | 2.18E-04 | 0.58  | 2.70   | -     | 463.3   |
| AHQ-6-6, 3450               | R.GECLCGQCVCHSSDFGK.I                                                   | 2006.16137 | 2 | 1.39E-05 | 0.92  | 3.93   | -     | 1277.5  |
| AHQ-6-1, 3711               | R.GECLCGQCVCHSSDFGK.I                                                   | 2006.16137 | 2 | 4.32E-04 | 0.70  | 2.91   | -     | 584.8   |
| AHQ-6-4, 3527               | R.GECLCGQCVCHSSDFGK.I                                                   | 2006.16137 | 2 | 9.89E-06 | 0.96  | 4.34   | -     | 1834.3  |
| AHQ-6-3, 3536 - 3614        | R.GECLCGQCVCHSSDFGK.I                                                   | 2006.16137 | 2 | 5.71E-07 | 0.92  | 3.78   | -     | 1353.3  |
| AHQ-6-5, 3471               | R.GECLCGQCVCHSSDFGK.I                                                   | 2006.16137 | 2 | 2.35E-05 | 0.96  | 4.44   | -     | 1581.7  |
| AHQ-6-3, 4437               | R.GKCEGSCVCIQPGSYGDTCEKCTCPDACTFK.K                                     | 3900.25293 | 3 | 3.37E-05 | 0.84  | 4.11   | -     | 556.4   |
| AHQ-6-3, 1970 - 2028        | K.GSGDSSQVTVSPQR.I                                                      | 1533.58302 | 2 | 9.63E-04 | 0.66  | 3.12   | -     | 665.1   |
| AHQ-6-8, 2616               | K.HVLTLTDQVTR.F                                                         | 1283.45912 | 2 | 7.18E-06 | 0.87  | 3.39   | -     | 555.6   |
| AHQ-6-4, 2781               | K.HVLTLTDQVTR.F                                                         | 1283.45912 | 2 | 5.59E-07 | 0.92  | 3.52   | -     | 754.1   |
| AHQ-6-3, 2758 - 2833        | K.HVLTLTDQVTR.F                                                         | 1283.45912 | 2 | 2.82E-09 | 0.94  | 3.78   | -     | 795.2   |
| AHQ-6-1, 3063               | K.HVLTLTDQVTR.F                                                         | 1283.45912 | 2 | 7.58E-07 | 0.93  | 3.48   | -     | 814.4   |
| AHQ-6-6, 2743               | K.HVLTLTDQVTR.F                                                         | 1283.45912 | 2 | 2.09E-04 | 0.71  | 2.99   | -     | 414.9   |
| AHQ-6-5, 2744               | K.HVLTLTDQVTR.F                                                         | 1283.45912 | 2 | 2.52E-05 | 0.92  | 3.23   | -     | 818.7   |
| AHQ-6-2, 2840               | K.HVLTLTDQVTR.F                                                         | 1283.45912 | 2 | 1.87E-08 | 0.91  | 3.40   | -     | 723.9   |
| AHQ-6-4, 4060               | K.IGDTVFSIEAK.V                                                         | 1267.41009 | 2 | 1.62E-05 | 0.70  | 2.54   | -     | 810.9   |
| AHQ-6-3, 4229               | K.IGDTVFSIEAK.V                                                         | 1267.41009 | 2 | 4.36E-05 | 0.89  | 3.11   | -     | 870.2   |
| AHQ-6-3, 4104               | K.IGDTVFSIEAK.V                                                         | 1267.41009 | 2 | 1.24E-04 | 0.86  | 2.98   | -     | 897.7   |
| AHQ-6-3, 3588               | K.IGDTVFSIEAK.V                                                         | 1267.41009 | 2 | 2.86E-08 | 0.88  | 3.29   | -     | 960.8   |
| AHQ-6-3, 3537 - 3600        | K.ITGKYCECDFSCVR.Y                                                      | 1914.08378 | 2 | 1.15E-04 | 0.83  | 3.48   | -     | 724.2   |
| AHQ-6-4, 3823 - 3887        | R.NDASHLVFTTDAK.T                                                       | 1532.67977 | 2 | 1.23E-09 | 0.98  | 5.94   | -     | 1698.9  |
| AHQ-6-9, 3552               | R.NDASHLVFTTDAK.T                                                       | 1532.67977 | 2 | 3.86E-06 | 0.77  | 2.99   | -     | 611.2   |
| AHQ-6-4, 4120               | R.NDASHLVFTTDAK.T                                                       | 1532.67977 | 2 | 3.91E-06 | 0.80  | 3.31   | -     | 752.5   |
| AHQ-6-4, 4275               | R.NDASHLVFTTDAK.T                                                       | 1532.67977 | 2 | 3.54E-11 | 0.96  | 4.64   | -     | 1260.9  |
| AHQ-6-3, 3821 - 3880        | R.NDASHLVFTTDAK.T                                                       | 1532.67977 | 2 | 4.11E-09 | 0.96  | 4.59   | -     | 1307.0  |
| AHQ-6-6, 3764               | R.NDASHLVFTTDAK.T                                                       | 1532.67977 | 2 | 1.10E-07 | 0.94  | 4.07   | -     | 1150.7  |
| AHQ-6-7, 3651               | R.NDASHLVFTTDAK.T                                                       | 1532.67977 | 2 | 5.42E-06 | 0.94  | 3.96   | -     | 1169.7  |
| AHQ-6-5, 3815               | R.NDASHLVFTTDAK.T                                                       | 1532.67977 | 3 | 1.03E-06 | 0.86  | 4.01   | -     | 924.8   |
| AHQ-6-3, 3894               | R.NDASHLVFTTDAK.T                                                       | 1532.67977 | 3 | 5.34E-05 | 0.95  | 4.38   | -     | 1396.9  |
| AHQ-6-4, 3465               | K.SFTIKPVGFK.D                                                          | 1124.35685 | 2 | 1.17E-05 | 0.88  | 2.84   | -     | 1113.4  |
| AHQ-6-6, 3398               | K.SFTIKPVGFK.D                                                          | 1124.35685 | 2 | 8.12E-05 | 0.77  | 2.68   | -     | 792.2   |
| AHQ-6-3, 2961               | R.TDTCM*SSNGLLCSGR.G                                                    | 1677.81726 | 2 | 2.79E-11 | 0.94  | 3.55   | -     | 1444.2  |
| AHQ-6-4, 2789               | R.TDTCM*SSNGLLCSGR.G                                                    | 1677.81726 | 2 | 2.97E-08 | 0.93  | 3.77   | -     | 1321.2  |
| AHQ-6-4, 3493               | R.TDTCMSSNGLLCSGR.G                                                     | 1661.81786 | 2 | 9.00E-05 | 0.81  | 3.21   | -     | 776.5   |
| AHQ-6-5, 3429 - 3504        | R.TDTCMSSNGLLCSGR.G                                                     | 1661.81786 | 2 | 4.54E-05 | 0.37  | 2.57   | -     | 561.1   |
| AHQ-6-4, 3399               | R.TDTCMSSNGLLCSGR.G                                                     | 1661.81786 | 2 | 3.06E-09 | 0.95  | 4.04   | -     | 1226.8  |
| AHQ-6-3, 2796 - 2868        | R.TDTCM*SSNGLLCSGR.G                                                    | 1677.81726 | 2 | 3.74E-12 | 0.95  | 3.91   | -     | 1656.1  |
| AHQ-6-5, 2015               | R.VLEDRPLSDK.G                                                          | 1172.31354 | 2 | 1.87E-06 | 0.94  | 3.60   | -     | 1081.6  |
| AHQ-6-3, 2062 - 2134        | R.VLEDRPLSDK.G                                                          | 1172.31354 | 2 | 1.68E-04 | 0.92  | 3.66   | -     | 997.0   |
| AHQ-6-4, 2035               | R.VLEDRPLSDK.G                                                          | 1172.31354 | 2 | 1.68E-05 | 0.91  | 3.19   | -     | 1122.1  |
| AHQ-6-6, 2034               | R.VLEDRPLSDK.G                                                          | 1172.31354 | 2 | 6.19E-05 | 0.85  | 3.12   | -     | 894.1   |
| AHQ-6-3, 2836               | R.VLEDRPLSDKSGDSSQVTVSPQR.I                                             | 2686.87396 | 3 | 1.75E-09 | 0.95  | 4.79   | -     | 1535.2  |
| AHQ-6-7, 2690               | R.VLEDRPLSDKSGDSSQVTVSPQR.I                                             | 2686.87396 | 3 | 8.03E-08 | 0.90  | 4.27   | -     | 967.6   |



|                            |                                                                         |            |   |          |       |        |       |          |
|----------------------------|-------------------------------------------------------------------------|------------|---|----------|-------|--------|-------|----------|
| AHQ-6-5, 2763              | R.VLEDRPLSDKGGSDSSQVTVSPQR.I                                            | 2686.87396 | 3 | 2.80E-07 | 0.90  | 3.86   | -     | 1004.1   |
| AHQ-6-4, 2811              | R.VLEDRPLSDKGGSDSSQVTVSPQR.I                                            | 2686.87396 | 3 | 1.97E-06 | 0.93  | 4.86   | -     | 1104.0   |
| AHQ-6-4, 3313              | K.VDWTANNPLYK.E                                                         | 1222.33111 | 2 | 8.63E-05 | 0.79  | 2.82   | -     | 788.0    |
| AHQ-6-3, 3504 - 3552       | K.YCECDDFSCVR.Y                                                         | 1514.59674 | 2 | 2.63E-06 | 0.96  | 3.88   | -     | 1437.6   |
| AHQ-6-6, 3468 - 3470       | K.YCECDDFSCVR.Y                                                         | 1514.59674 | 2 | 3.21E-04 | 0.95  | 3.61   | -     | 1408.5   |
| AHQ-6-3, 2373              | R.YCRDEIVK.E                                                            | 1300.42023 | 2 | 4.65E-06 | 0.92  | 3.60   | -     | 1175.0   |
| gi 4501893 ref NP_001094.1 | actinin, alpha 2 [Homo sapiens]                                         |            |   | 4.76E-12 | 10.66 | 120.26 | 13.30 | 103853.1 |
| AHQ-6-4, 4432              | K.AGTQIENIEEDFR.N                                                       | 1522.59861 | 2 | 6.43E-05 | 0.88  | 3.65   | -     | 878.4    |
| AHQ-6-4, 5181 - 5244       | K.AGTQIENIEEDFR.NGLK.L                                                  | 1935.08442 | 2 | 1.35E-07 | 0.58  | 3.76   | -     | 613.1    |
| AHQ-6-4, 4933              | K.AGTQIENIEEDFR.NGLK.L                                                  | 1935.08442 | 2 | 5.30E-04 | 0.41  | 3.20   | -     | 363.2    |
| AHQ-6-6, 4726              | K.CQLEINFNTLQTK.L                                                       | 1610.81373 | 2 | 1.08E-06 | 0.94  | 4.28   | -     | 1039.6   |
| AHQ-6-4, 4673              | K.CQLEINFNTLQTK.L                                                       | 1610.81373 | 2 | 7.56E-07 | 0.95  | 4.35   | -     | 1103.5   |
| AHQ-6-5, 4753              | K.CQLEINFNTLQTK.L                                                       | 1610.81373 | 2 | 5.26E-07 | 0.93  | 3.93   | -     | 954.3    |
| AHQ-6-4, 4827 - 4828       | K.CQLEINFNTLQTK.L                                                       | 1610.81373 | 2 | 6.89E-10 | 0.95  | 4.27   | -     | 1375.1   |
| AHQ-6-4, 4783              | K.EGILLWCQR.K                                                           | 1176.37031 | 2 | 9.56E-04 | 0.82  | 2.76   | -     | 709.6    |
| AHQ-6-6, 4058 - 4136       | R.FAIQDISVEETSACE                                                       | 1538.68108 | 2 | 3.82E-08 | 0.93  | 3.82   | -     | 1243.1   |
| AHQ-6-7, 3950              | R.FAIQDISVEETSACE                                                       | 1538.68108 | 2 | 6.38E-07 | 0.90  | 3.47   | -     | 1087.3   |
| AHQ-6-2, 4211              | R.FAIQDISVEETSACE                                                       | 1538.68108 | 2 | 2.68E-05 | 0.60  | 2.58   | -     | 583.3    |
| AHQ-6-3, 4166              | R.FAIQDISVEETSACE                                                       | 1538.68108 | 2 | 1.55E-10 | 0.94  | 3.98   | -     | 1164.6   |
| AHQ-6-4, 4152 - 4165       | R.FAIQDISVEETSACE                                                       | 1538.68108 | 2 | 6.30E-10 | 0.94  | 4.25   | -     | 1086.3   |
| AHQ-6-5, 4091              | R.FAIQDISVEETSACE                                                       | 1538.68108 | 2 | 2.28E-07 | 0.92  | 3.69   | -     | 1134.8   |
| AHQ-6-4, 4031              | R.FAIQDISVEETSACE                                                       | 1538.68108 | 2 | 1.80E-05 | 0.93  | 4.05   | -     | 1065.8   |
| AHQ-6-10, 3931             | R.FAIQDISVEETSACE                                                       | 1538.68108 | 2 | 3.39E-04 | 0.51  | 2.52   | -     | 589.4    |
| AHQ-6-6, 5606 - 5623       | K.GYEEWLLNEIR.R                                                         | 1422.56701 | 2 | 5.91E-07 | 0.94  | 3.87   | -     | 1399.1   |
| AHQ-6-4, 5291 - 5300       | K.GYEEWLLNEIR.R                                                         | 1422.56701 | 2 | 1.72E-06 | 0.94  | 3.68   | -     | 1315.9   |
| AHQ-6-4, 5736              | K.GYEEWLLNEIR.R                                                         | 1422.56701 | 2 | 2.10E-07 | 0.96  | 4.00   | -     | 1692.9   |
| AHQ-6-4, 5851              | K.GYEEWLLNEIR.R                                                         | 1422.56701 | 2 | 1.18E-04 | 0.87  | 3.16   | -     | 1070.2   |
| AHQ-6-5, 5667              | K.GYEEWLLNEIR.R                                                         | 1422.56701 | 2 | 1.56E-07 | 0.81  | 2.99   | -     | 952.0    |
| AHQ-6-4, 2364              | K.HEAFESDLAAHQDR.V                                                      | 1626.66861 | 2 | 6.12E-12 | 0.97  | 5.15   | -     | 1502.3   |
| AHQ-6-4, 3900 - 3961       | R.KAGTQIENIEEDFR.N                                                      | 1650.77152 | 2 | 1.86E-04 | 0.89  | 3.34   | -     | 812.8    |
| AHQ-6-6, 2151 - 2226       | R.KHEAFESDLAAHQDR.V                                                     | 1754.84152 | 2 | 2.13E-09 | 0.95  | 4.44   | -     | 1199.7   |
| AHQ-6-4, 2143              | R.KHEAFESDLAAHQDR.V                                                     | 1754.84152 | 2 | 4.76E-12 | 0.97  | 5.10   | -     | 1391.8   |
| AHQ-6-4, 3205              | R.KFTFAWCNSHLR.K                                                        | 1522.71309 | 2 | 8.35E-10 | 0.90  | 3.27   | -     | 1136.1   |
| AHQ-6-5, 5775              | K.LM'LLLEVISGER.L                                                       | 1389.68652 | 2 | 9.41E-07 | 0.98  | 4.96   | -     | 2131.7   |
| AHQ-6-4, 4300 - 4307       | K.LVSIAGEEIVDGNVK.M                                                     | 1543.74400 | 2 | 9.84E-07 | 0.96  | 4.54   | -     | 1364.1   |
| AHQ-6-4, 4039 - 4099       | K.LVSIAGEEIVDGNVK.M                                                     | 1543.74400 | 2 | 5.30E-09 | 0.97  | 4.84   | -     | 1559.5   |
| AHQ-6-5, 4247 - 4313       | K.LVSIAGEEIVDGNVK.M                                                     | 1543.74400 | 2 | 3.04E-06 | 0.54  | 2.50   | -     | 922.8    |
| AHQ-6-4, 4657              | K.LVSIAGEEIVDGNVK.M                                                     | 1543.74400 | 2 | 3.59E-05 | 0.93  | 4.39   | -     | 852.3    |
| gi 4505733 ref NP_002610.1 | platelet factor 4 (chemokine (C-X-C motif) ligand 4); platelet factor 4 |            |   | 4.90E-12 | 6.42  | 70.29  | 39.60 | 10844.9  |
| AHQ-6-14-, 4382            | K.AGPHCPAQLIATL.K.N                                                     | 1579.84600 | 2 | 3.62E-07 | 0.79  | 3.08   | -     | 573.0    |
| AHQ-6-13, 4275 - 4348      | K.AGPHCPAQLIATL.K.N                                                     | 1579.84600 | 2 | 5.44E-06 | 0.89  | 3.53   | -     | 702.1    |
| AHQ-6-14-, 4140            | K.AGPHCPAQLIATL.K.N                                                     | 1579.84600 | 2 | 2.77E-06 | 0.90  | 3.96   | -     | 729.1    |
| AHQ-6-14-, 4055 - 4056     | K.AGPHCPAQLIATL.K.N                                                     | 1579.84600 | 2 | 1.06E-05 | 0.95  | 4.05   | -     | 1055.3   |
| AHQ-6-14, 4824 - 4893      | K.AGPHCPAQLIATL.K.N                                                     | 1579.84600 | 2 | 7.24E-08 | 0.94  | 4.36   | -     | 889.9    |
| AHQ-6-13-, 4150 - 4226     | K.AGPHCPAQLIATL.K.N                                                     | 1579.84600 | 2 | 1.46E-04 | 0.93  | 3.59   | -     | 983.1    |
| AHQ-6-14, 4758 - 4762      | K.AGPHCPAQLIATL.K.NGR.K                                                 | 1907.18700 | 2 | 1.70E-10 | 0.97  | 5.19   | -     | 1513.7   |
| AHQ-6-14, 4760             | K.AGPHCPAQLIATL.K.NGR.K                                                 | 1907.18700 | 3 | 6.60E-09 | 0.97  | 5.06   | -     | 2068.9   |
| AHQ-6-14-, 3982 - 4034     | K.AGPHCPAQLIATL.K.NGR.K                                                 | 1907.18700 | 3 | 1.66E-10 | 0.98  | 5.42   | -     | 3240.0   |
| AHQ-6-14-, 3988            | K.AGPHCPAQLIATL.K.NGR.K                                                 | 1907.18700 | 2 | 4.90E-12 | 0.95  | 4.54   | -     | 1027.1   |
| AHQ-6-14-, 3872            | K.AGPHCPAQLIATL.K.NGR.K                                                 | 1907.18700 | 2 | 2.31E-07 | 0.96  | 4.77   | -     | 1105.0   |
| AHQ-6-14, 4649 - 4668      | K.AGPHCPAQLIATL.K.NGR.K                                                 | 1907.18700 | 3 | 2.79E-07 | 0.97  | 5.25   | -     | 1946.6   |
| AHQ-6-14, 4646 - 4677      | K.AGPHCPAQLIATL.K.NGR.K                                                 | 1907.18700 | 2 | 2.76E-06 | 0.92  | 4.11   | -     | 850.3    |
| AHQ-6-14-, 3819 - 3878     | K.AGPHCPAQLIATL.K.NGR.K                                                 | 1907.18700 | 3 | 3.19E-10 | 0.98  | 5.87   | -     | 3207.8   |
| AHQ-6-14-, 3627            | K.AGPHCPAQLIATL.K.NGR.K.I                                               | 2035.35992 | 2 | 3.38E-06 | 0.89  | 4.34   | -     | 569.5    |
| AHQ-6-14-, 3754            | K.AGPHCPAQLIATL.K.NGR.K.I                                               | 2035.35992 | 3 | 1.75E-09 | 0.96  | 5.20   | -     | 1619.6   |
| AHQ-6-14-, 2610 - 2682     | R.HITSLEVIK.A                                                           | 1040.23825 | 2 | 1.33E-06 | 0.91  | 3.87   | -     | 531.9    |
| AHQ-6-14, 3572 - 3636      | R.HITSLEVIK.A                                                           | 1040.23825 | 2 | 8.15E-07 | 0.87  | 3.22   | -     | 631.0    |
| AHQ-6-14, 3458 - 3520      | R.HITSLEVIK.A                                                           | 1040.23825 | 2 | 1.42E-05 | 0.76  | 3.30   | -     | 400.1    |
| AHQ-6-14-, 4764            | K.ICLDLQAPLYK.K                                                         | 1335.59400 | 1 | 2.83E-05 | 0.69  | 3.23   | -     | 525.8    |
| AHQ-6-14-, 4746 - 4748     | K.ICLDLQAPLYK.K                                                         | 1335.59400 | 2 | 1.64E-07 | 0.98  | 4.94   | -     | 2389.5   |
| AHQ-6-13-, 4760            | K.ICLDLQAPLYK.K                                                         | 1335.59400 | 2 | 7.00E-06 | 0.97  | 3.97   | -     | 2042.1   |
| AHQ-6-14-, 4944            | K.ICLDLQAPLYK.K                                                         | 1335.59400 | 2 | 3.80E-05 | 0.91  | 3.61   | -     | 1090.0   |
| AHQ-6-13, 4883             | K.ICLDLQAPLYK.K                                                         | 1335.59400 | 2 | 1.00E-05 | 0.96  | 3.63   | -     | 1927.3   |
| AHQ-6-14, 5488             | K.ICLDLQAPLYK.K                                                         | 1335.59400 | 2 | 6.86E-05 | 0.97  | 4.72   | -     | 1979.5   |
| AHQ-6-14-, 4614            | K.ICLDLQAPLYK.K                                                         | 1335.59400 | 2 | 4.55E-04 | 0.92  | 3.21   | -     | 1358.4   |
| AHQ-6-14-, 4407            | R.KICLDLQAPLYK.K                                                        | 1463.76691 | 1 | 5.59E-04 | 0.81  | 2.92   | -     | 882.4    |
| AHQ-6-14-, 4423            | R.KICLDLQAPLYK.K                                                        | 1463.76691 | 1 | 2.46E-07 | 0.88  | 3.67   | -     | 860.0    |
| AHQ-6-14-, 4402 - 4462     | R.KICLDLQAPLYK.K                                                        | 1463.76691 | 2 | 3.34E-06 | 0.97  | 5.12   | -     | 1484.2   |
| AHQ-6-14, 5189 - 5248      | R.KICLDLQAPLYK.K                                                        | 1463.76691 | 2 | 4.40E-06 | 0.95  | 4.14   | -     | 1246.0   |
| AHQ-6-12, 4377             | R.KICLDLQAPLYK.K                                                        | 1463.76691 | 2 | 4.59E-06 | 0.83  | 3.03   | -     | 982.5    |
| AHQ-6-14-, 4404 - 4470     | R.KICLDLQAPLYK.K                                                        | 1463.76691 | 3 | 1.89E-06 | 0.94  | 4.23   | -     | 1579.5   |
| AHQ-6-14, 4772             | R.KICLDLQAPLYK.K.I                                                      | 1591.93982 | 2 | 5.30E-05 | 0.84  | 3.53   | -     | 920.3    |
| gi 4758086 ref NP_004069.1 | cysteine and glycine-rich protein 1; cysteine-rich protein; LIM-domain  |            |   | 5.14E-12 | 6.20  | 70.23  | 50.30 | 20567.3  |
| AHQ-6-13, 4324             | K.GFGFGGAGALVHSE                                                        | 1434.53788 | 2 | 3.97E-04 | 0.60  | 2.77   | -     | 460.1    |
| AHQ-6-11, 4005 - 4063      | K.GFGFGGAGALVHSE                                                        | 1434.53788 | 2 | 1.14E-05 | 0.93  | 3.86   | -     | 877.1    |
| AHQ-6-11, 3232 - 3287      | K.GLESTTLADKDGIEYCK.G                                                   | 1902.06957 | 2 | 1.62E-06 | 0.95  | 4.49   | -     | 1262.9   |
| AHQ-6-11, 3229 - 3296      | K.GLESTTLADKDGIEYCK.G                                                   | 1902.06957 | 3 | 2.94E-08 | 0.91  | 4.44   | -     | 696.0    |
| AHQ-6-11, 2608             | K.GYGYGGAGTSLTDK.G                                                      | 1475.54194 | 2 | 4.69E-05 | 0.85  | 3.00   | -     | 789.2    |
| AHQ-6-11, 3493 - 3511      | K.GYGYGGAGTSLTDK.GESLGIK.H                                              | 2160.32665 | 3 | 4.04E-09 | 0.81  | 3.54   | -     | 662.4    |
| AHQ-6-13-, 3620            | K.GYGYGGAGTSLTDK.GESLGIK.H                                              | 2160.32665 | 3 | 7.12E-10 | 0.85  | 3.59   | -     | 636.9    |
| AHQ-6-13-, 3625            | K.GYGYGGAGTSLTDK.GESLGIK.H                                              | 2160.32665 | 2 | 2.69E-08 | 0.81  | 4.09   | -     | 554.9    |
| AHQ-6-11, 3496             | K.GYGYGGAGTSLTDK.GESLGIK.H                                              | 2160.32665 | 2 | 7.50E-11 | 0.93  | 4.65   | -     | 762.3    |
| AHQ-6-13-, 3566            | K.NLDSTTVAVHGEEIYCK.S                                                   | 1938.10514 | 2 | 2.56E-06 | 0.92  | 4.19   | -     | 723.9    |
| AHQ-6-11, 3449 - 3456      | K.NLDSTTVAVHGEEIYCK.S                                                   | 1938.10514 | 2 | 8.25E-08 | 0.91  | 4.43   | -     | 737.4    |
| AHQ-6-14-, 3534            | K.NLDSTTVAVHGEEIYCK.S                                                   | 1938.10514 | 2 | 5.14E-12 | 0.84  | 3.44   | -     | 695.2    |
| AHQ-6-11, 4585             | K.SCFCLMVCK.K                                                           | 1208.47423 | 2 | 4.91E-04 | 0.91  | 3.17   | -     | 840.8    |
| AHQ-6-11, 4053             | K.TVYFAEEVCEGNSFHK.S                                                    | 2047.19015 | 2 | 2.87E-05 | 0.83  | 3.96   | -     | 583.1    |
| gi 4504521 ref NP_002147.1 | heat shock 60kDa protein 1 (chaperonin); mitochondrial matrix protein P |            |   | 5.41E-12 | 2.32  | 30.27  | 11.70 | 61024.2  |
| AHQ-6-14-, 6303            | R.ALM'LQGVLLADAVAVTM'GPK.G                                              | 2146.55768 | 3 | 8.79E-10 | 0.97  | 5.12   | -     | 2469.1   |
| AHQ-6-7, 5076              | K.ISSIQISIVPALEIANHR.K                                                  | 1920.20240 | 2 | 2.17E-04 | 0.40  | 2.95   | -     | 290.0    |
| AHQ-6-7, 6374              | R.TALLDAAGVASLLTAEVVVTEIPKEEK.D                                         | 2870.28530 | 3 | 5.41E-12 | 0.95  | 5.34   | -     | 1263.7   |
| gi 5031635 ref NP_005498.1 | cofilin 1 (non-muscle) [Homo sapiens]                                   |            |   | 6.15E-12 | 9.33  | 100.34 | 62.70 | 18502.4  |
| AHQ-6-13-, 3610            | K.AVLFCLSEDKK.N                                                         | 1311.52930 | 2 | 2.76E-05 | 0.81  | 2.63   | -     | 774.3    |
| AHQ-6-12, 3515 - 3571      | K.AVLFCLSEDKK.N                                                         | 1311.52930 | 2 | 5.02E-05 | 0.75  | 2.95   | -     | 789.0    |
| AHQ-6-14-, 5382            | K.EILVGDVGGTVDVDDPYATFVK.M                                              | 2167.40069 | 2 | 7.90E-07 | 0.97  | 5.03   | -     | 1490.9   |
| AHQ-6-14, 5961 - 5965      | K.EILVGDVGGTVDVDDPYATFVK.M                                              | 2167.40069 | 2 | 1.67E-07 | 0.96  | 4.78   | -     | 1371.3   |
| AHQ-6-13-, 5364 - 5438     | K.EILVGDVGGTVDVDDPYATFVK.M                                              | 2167.40069 | 2 | 1.20E-09 | 0.98  | 5.88   | -     | 1801.5   |
| AHQ-6-12, 5296             | K.EILVGDVGGTVDVDDPYATFVK.M                                              | 2167.40069 | 2 | 2.82E-10 | 0.94  | 4.42   | -     | 944.2    |
| AHQ-6-13, 5448 - 5455      | K.EILVGDVGGTVDVDDPYATFVK.M                                              | 2167.40069 | 2 | 3.34E-09 | 0.98  | 5.74   | -     | 1705.5   |
| AHQ-6-12, 2507 - 2567      | K.HELQANCYEEVKDR.C                                                      | 1792.90812 | 3 | 6.15E-12 | 0.98  | 6.09   | -     | 2356.6   |
| AHQ-6-12, 2628 - 2687      | K.HELQANCYEEVKDR.C                                                      | 1792.90812 | 2 | 2.51E-08 | 0.96  | 4.38   | -     | 1162.6   |
| AHQ-6-13-, 2518 - 2589     | K.HELQANCYEEVKDR.C                                                      | 1792.90812 | 3 | 1.35E-05 | 0.91  | 4.00   | -     | 1089.0   |
| AHQ-6-12, 2483 - 2543      | K.HELQANCYEEVKDR.C                                                      | 1792.90812 | 2 | 2.12E-07 | 0.97  | 4.78   | -     | 1724.2   |
| AHQ-6-12, 3116             | K.KAVLFCLESDKK.N                                                        | 1439.70221 | 3 | 2.36E-06 | 0.88  | 3.93   | -     | 896.3    |
| AHQ-6-13-, 6112            | K.KEDLVFVIFWAPESAPLK.S                                                  | 1991.31745 | 2 | 1.29E-04 | 0.97  | 5.01   | -     | 1687.2   |
| AHQ-6-12, 3972 - 3975      | K.LGGSAVISLEGKPL                                                        | 1341.57848 | 2 | 2.36E-04 | 0.93  | 4.17   | -     | 1097.6   |
| AHQ-6-14-, 4338            | K.LGGSAVISLEGKPL                                                        | 1341.57848 | 2 | 2.11E-05 | 0.79  | 3.14   | -     | 639.0    |

|                            |                                                                         |            |   |          |       |        |       |         |
|----------------------------|-------------------------------------------------------------------------|------------|---|----------|-------|--------|-------|---------|
| AHQ-6-12, 4267 - 4332      | K.LGGSAVISLEGGKPL                                                       | 1341.57848 | 2 | 2.44E-05 | 0.97  | 4.93   | -     | 1311.1  |
| AHQ-6-12, 4387             | K.LGGSAVISLEGGKPL                                                       | 1341.57848 | 2 | 8.77E-05 | 0.93  | 4.28   | -     | 933.6   |
| AHQ-6-13-, 4345 - 4346     | K.LGGSAVISLEGGKPL                                                       | 1341.57848 | 2 | 6.74E-06 | 0.96  | 4.72   | -     | 1356.1  |
| AHQ-6-12, 3052 - 3121      | K.LTGKIKHELOANCYEEVKDR.C                                                | 2305.55341 | 3 | 7.56E-10 | 0.98  | 6.34   | -     | 1766.6  |
| AHQ-6-12, 6039 - 6120      | K.NILLEEGKEILVGDVGGQTVDDPYATFVK.M                                       | 3064.43208 | 3 | 6.79E-06 | 0.95  | 5.40   | -     | 1273.2  |
| AHQ-6-12, 6167 - 6175      | K.NILLEEGKEILVGDVGGQTVDDPYATFVK.M                                       | 3064.43208 | 3 | 3.72E-07 | 0.98  | 6.77   | -     | 2134.9  |
| AHQ-6-14-, 6184 - 6239     | K.NILLEEGKEILVGDVGGQTVDDPYATFVK.M                                       | 3064.43208 | 3 | 1.88E-05 | 0.92  | 5.04   | -     | 904.9   |
| AHQ-6-12, 3231 - 3261      | R.YALDATYETK.E                                                          | 1338.44364 | 2 | 3.98E-09 | 0.94  | 3.78   | -     | 1060.9  |
| AHQ-6-12, 3245             | R.YALDATYETK.E                                                          | 1338.44364 | 1 | 4.21E-08 | 0.68  | 3.09   | -     | 425.5   |
| AHQ-6-13, 3417 - 3485      | R.YALDATYETK.E                                                          | 1338.44364 | 2 | 5.89E-04 | 0.83  | 3.62   | -     | 848.3   |
| AHQ-6-12, 2964             | R.YALDATYETKESK.K                                                       | 1682.80875 | 2 | 8.24E-05 | 0.89  | 3.17   | -     | 1157.9  |
| gj 5032161 ref NP_005639.1 | elongin C; transcription elongation factor B (SIII), polypeptide 1 (15k |            |   | 6.87E-12 | 1.86  | 20.27  | 30.40 | 12473.1 |
| AHQ-6-13, 4487 - 4548      | K.AM*LSGPGQFAENETNEVNF.R                                                | 2228.38455 | 2 | 1.86E-07 | 0.92  | 4.20   | -     | 890.0   |
| AHQ-6-13-, 4390            | K.AM*LSGPGQFAENETNEVNF.R                                                | 2228.38455 | 2 | 6.87E-12 | 0.97  | 5.41   | -     | 1791.9  |
| AHQ-6-13, 4269             | K.AM*LSGPGQFAENETNEVNF.R                                                | 2228.38455 | 2 | 1.04E-10 | 0.74  | 2.72   | -     | 685.9   |
| AHQ-6-13-, 2797 - 2866     | K.TYGGCEGPDAM*YVK.L                                                     | 1565.70692 | 2 | 6.72E-07 | 0.89  | 3.56   | -     | 792.9   |
| gj 4505981 ref NP_002695.1 | pro-platelet basic protein (includes platelet basic protein, bet; Pro-p |            |   | 7.07E-12 | 8.23  | 90.30  | 46.90 | 13894.1 |
| AHQ-6-14, 5304 - 5360      | K.EESLSDSLYAE.LR.C                                                      | 1540.61070 | 2 | 1.09E-06 | 0.85  | 3.29   | -     | 800.2   |
| AHQ-6-14-, 4295 - 4358     | K.EESLSDSLYAE.LR.C                                                      | 1540.61070 | 2 | 1.16E-06 | 0.88  | 3.51   | -     | 593.6   |
| AHQ-6-14-, 4560 - 4640     | K.EESLSDSLYAE.LR.C                                                      | 1540.61070 | 2 | 2.31E-08 | 0.94  | 4.38   | -     | 906.4   |
| AHQ-6-13-, 4581            | K.EESLSDSLYAE.LR.C                                                      | 1540.61070 | 2 | 1.15E-05 | 0.90  | 3.55   | -     | 917.8   |
| AHQ-6-13, 4072             | K.GKEESLSDSLYAE.LR.C                                                    | 1725.83517 | 2 | 4.58E-05 | 0.85  | 3.10   | -     | 759.8   |
| AHQ-6-13, 4295             | K.GKEESLSDSLYAE.LR.C                                                    | 1725.83517 | 2 | 9.75E-10 | 0.98  | 5.24   | -     | 2037.7  |
| AHQ-6-13, 4296 - 4307      | K.GKEESLSDSLYAE.LR.C                                                    | 1725.83517 | 3 | 9.20E-04 | 0.85  | 4.10   | -     | 780.4   |
| AHQ-6-14-, 4355            | K.GKEESLSDSLYAE.LR.C                                                    | 1725.83517 | 2 | 1.10E-09 | 0.98  | 5.07   | -     | 2226.7  |
| AHQ-6-12, 4091             | K.GKEESLSDSLYAE.LR.C                                                    | 1725.83517 | 2 | 8.91E-08 | 0.98  | 5.19   | -     | 1899.8  |
| AHQ-6-14-, 4266            | K.GKEESLSDSLYAE.LR.C                                                    | 1725.83517 | 2 | 5.65E-09 | 0.98  | 5.22   | -     | 2458.9  |
| AHQ-6-14-, 4147 - 4207     | K.GKEESLSDSLYAE.LR.C                                                    | 1725.83517 | 2 | 1.49E-09 | 0.98  | 6.00   | -     | 2692.0  |
| AHQ-6-14-, 4110 - 4186     | K.GKEESLSDSLYAE.LR.C                                                    | 1725.83517 | 3 | 1.05E-04 | 0.91  | 4.42   | -     | 1118.3  |
| AHQ-6-14-, 4026 - 4086     | K.GKEESLSDSLYAE.LR.C                                                    | 1725.83517 | 2 | 1.16E-08 | 0.98  | 5.49   | -     | 2691.1  |
| AHQ-6-14-, 3986 - 4048     | K.GKEESLSDSLYAE.LR.C                                                    | 1725.83517 | 3 | 4.12E-06 | 0.89  | 3.98   | -     | 1191.8  |
| AHQ-6-14-, 3898 - 3966     | K.GKEESLSDSLYAE.LR.C                                                    | 1725.83517 | 2 | 2.16E-11 | 0.98  | 5.60   | -     | 2019.0  |
| AHQ-6-14-, 3755            | K.GKEESLSDSLYAE.LR.C                                                    | 1725.83517 | 2 | 9.72E-09 | 0.97  | 5.01   | -     | 1805.8  |
| AHQ-6-14-, 4527            | K.GKEESLSDSLYAE.LR.C                                                    | 1725.83517 | 2 | 1.05E-10 | 0.98  | 5.09   | -     | 2214.0  |
| AHQ-6-14, 5914             | K.GKEESLSDSLYAE.LR.C                                                    | 1725.83517 | 2 | 3.92E-06 | 0.93  | 3.30   | -     | 1720.7  |
| AHQ-6-14, 5570 - 5625      | K.GKEESLSDSLYAE.LR.C                                                    | 1725.83517 | 2 | 9.59E-08 | 0.97  | 4.56   | -     | 1949.2  |
| AHQ-6-14, 4632 - 4689      | K.GKEESLSDSLYAE.LR.C                                                    | 1725.83517 | 2 | 8.76E-04 | 0.96  | 4.69   | -     | 1260.6  |
| AHQ-6-14, 4657 - 4713      | K.GKEESLSDSLYAE.LR.C                                                    | 1725.83517 | 3 | 1.58E-05 | 0.88  | 4.35   | -     | 990.6   |
| AHQ-6-14, 5309 - 5364      | K.GKEESLSDSLYAE.LR.C                                                    | 1725.83517 | 2 | 1.20E-07 | 0.96  | 4.63   | -     | 1706.6  |
| AHQ-6-14, 4744 - 4800      | K.GKEESLSDSLYAE.LR.C                                                    | 1725.83517 | 2 | 6.63E-10 | 0.98  | 5.31   | -     | 2114.7  |
| AHQ-6-6, 4122              | K.GKEESLSDSLYAE.LR.C                                                    | 1725.83517 | 2 | 1.80E-06 | 0.98  | 4.82   | -     | 2365.9  |
| AHQ-6-14, 4825 - 4888      | K.GKEESLSDSLYAE.LR.C                                                    | 1725.83517 | 3 | 1.72E-05 | 0.83  | 4.23   | -     | 784.3   |
| AHQ-6-14, 5221 - 5276      | K.GKEESLSDSLYAE.LR.C                                                    | 1725.83517 | 2 | 6.75E-06 | 0.98  | 5.61   | -     | 2130.5  |
| AHQ-6-14, 4860 - 4937      | K.GKEESLSDSLYAE.LR.C                                                    | 1725.83517 | 2 | 2.05E-09 | 0.98  | 5.62   | -     | 2717.8  |
| AHQ-6-14, 5088 - 5144      | K.GKEESLSDSLYAE.LR.C                                                    | 1725.83517 | 2 | 5.86E-06 | 0.98  | 5.36   | -     | 1925.3  |
| AHQ-6-14, 4932 - 4988      | K.GKEESLSDSLYAE.LR.C                                                    | 1725.83517 | 3 | 5.49E-06 | 0.94  | 4.70   | -     | 1412.4  |
| AHQ-6-14, 4984 - 5000      | K.GKEESLSDSLYAE.LR.C                                                    | 1725.83517 | 2 | 1.44E-06 | 0.98  | 5.38   | -     | 2637.1  |
| AHQ-6-14-, 4779            | K.GKEESLSDSLYAE.LR.C                                                    | 1725.83517 | 2 | 7.47E-04 | 0.96  | 4.60   | -     | 1322.4  |
| AHQ-6-14, 4906 - 4980      | K.GTHCNQVEIATL.K.D                                                      | 1571.78073 | 2 | 1.40E-06 | 0.91  | 3.88   | -     | 916.3   |
| AHQ-6-14, 4165 - 4224      | K.GTHCNQVEIATL.K.D                                                      | 1571.78073 | 2 | 3.75E-04 | 0.93  | 3.68   | -     | 1345.0  |
| AHQ-6-14, 4764             | K.GTHCNQVEIATL.K.D                                                      | 1571.78073 | 2 | 1.75E-04 | 0.97  | 4.46   | -     | 2218.8  |
| AHQ-6-14, 4670 - 4694      | K.GTHCNQVEIATL.K.D                                                      | 1571.78073 | 2 | 1.17E-04 | 0.95  | 4.45   | -     | 1372.3  |
| AHQ-6-14, 4550 - 4628      | K.GTHCNQVEIATL.K.D                                                      | 1571.78073 | 2 | 1.06E-05 | 0.97  | 4.90   | -     | 1428.6  |
| AHQ-6-14, 4428 - 4484      | K.GTHCNQVEIATL.K.D                                                      | 1571.78073 | 2 | 6.38E-09 | 0.97  | 5.31   | -     | 1830.8  |
| AHQ-6-14-, 3854            | K.GTHCNQVEIATL.K.D                                                      | 1571.78073 | 2 | 6.05E-04 | 0.96  | 4.02   | -     | 1503.7  |
| AHQ-6-13-, 3493 - 3565     | K.GTHCNQVEIATL.K.D                                                      | 1571.78073 | 2 | 2.31E-09 | 0.94  | 4.18   | -     | 949.6   |
| AHQ-6-14, 4260 - 4336      | K.GTHCNQVEIATL.K.D                                                      | 1571.78073 | 2 | 1.63E-08 | 0.97  | 4.80   | -     | 2020.0  |
| AHQ-6-14-, 3706 - 3784     | K.GTHCNQVEIATL.K.D                                                      | 1571.78073 | 2 | 4.34E-09 | 0.97  | 5.28   | -     | 1708.0  |
| AHQ-6-14-, 3574 - 3648     | K.GTHCNQVEIATL.K.D                                                      | 1571.78073 | 2 | 2.17E-06 | 0.96  | 4.75   | -     | 1376.4  |
| AHQ-6-14-, 3524 - 3590     | K.GTHCNQVEIATL.K.D                                                      | 1571.78073 | 2 | 1.08E-08 | 0.96  | 4.68   | -     | 1415.3  |
| AHQ-6-14, 5034 - 5105      | K.GTHCNQVEIATL.K.D                                                      | 1571.78073 | 2 | 2.45E-05 | 0.95  | 3.59   | -     | 1609.3  |
| AHQ-6-14-, 3262 - 3332     | K.GTHCNQVEIATL.K.D                                                      | 1571.78073 | 2 | 2.38E-05 | 0.93  | 3.82   | -     | 1038.6  |
| AHQ-6-14-, 3115 - 3187     | K.GTHCNQVEIATLKDGR.K                                                    | 1900.10650 | 2 | 9.77E-08 | 0.98  | 5.39   | -     | 1863.5  |
| AHQ-6-14-, 3258            | K.GTHCNQVEIATLKDGR.K                                                    | 1900.10650 | 2 | 7.07E-12 | 0.98  | 5.83   | -     | 2069.0  |
| AHQ-6-14-, 3107 - 3134     | K.GTHCNQVEIATLKDGR.K                                                    | 1900.10650 | 3 | 2.08E-08 | 0.95  | 4.20   | -     | 1546.1  |
| AHQ-6-14, 3965 - 4034      | K.GTHCNQVEIATLKDGR.K                                                    | 1900.10650 | 2 | 3.76E-06 | 0.97  | 5.47   | -     | 1489.6  |
| AHQ-6-14, 3957 - 4026      | K.GTHCNQVEIATLKDGR.K                                                    | 1900.10650 | 3 | 4.10E-06 | 0.94  | 4.42   | -     | 1416.7  |
| AHQ-6-14, 4080 - 4141      | K.GTHCNQVEIATLKDGR.K                                                    | 1900.10650 | 3 | 7.46E-07 | 0.94  | 4.82   | -     | 1116.0  |
| AHQ-6-14-, 2810 - 2875     | K.GTHCNQVEIATLKDGR.K                                                    | 2028.27941 | 3 | 3.53E-04 | 0.84  | 3.49   | -     | 931.8   |
| AHQ-6-14-, 2839 - 2912     | K.ICLDPDAPR.I                                                           | 1058.19059 | 2 | 3.36E-05 | 0.90  | 3.26   | -     | 1176.0  |
| AHQ-6-13, 3133             | K.ICLDPDAPR.I                                                           | 1058.19059 | 2 | 5.52E-04 | 0.90  | 3.40   | -     | 1180.5  |
| AHQ-6-14-, 2590 - 2650     | R.KICLDPDAPR.I                                                          | 1186.36350 | 2 | 2.29E-04 | 0.89  | 3.43   | -     | 917.4   |
| AHQ-6-14, 3468 - 3524      | R.KICLDPDAPR.I                                                          | 1186.36350 | 2 | 4.71E-04 | 0.83  | 3.19   | -     | 726.7   |
| AHQ-6-13-, 2704 - 2716     | R.KICLDPDAPR.I                                                          | 1186.36350 | 2 | 4.61E-06 | 0.86  | 3.11   | -     | 920.6   |
| AHQ-6-14, 3356 - 3414      | R.KICLDPDAPR.I                                                          | 1186.36350 | 2 | 2.71E-06 | 0.92  | 3.41   | -     | 1093.4  |
| AHQ-6-14-, 2678 - 2742     | R.KICLDPDAPR.I                                                          | 1186.36350 | 2 | 8.96E-05 | 0.91  | 3.40   | -     | 1045.3  |
| AHQ-6-13, 2815 - 2895      | R.KICLDPDAPR.I                                                          | 1186.36350 | 2 | 8.30E-05 | 0.39  | 2.59   | -     | 403.0   |
| AHQ-6-14, 3232 - 3300      | R.KICLDPDAPR.I                                                          | 1186.36350 | 2 | 1.03E-05 | 0.74  | 2.79   | -     | 617.5   |
| AHQ-6-14-, 4071            | K.NIQSLEVIK.G                                                           | 1101.27845 | 2 | 2.72E-04 | 0.93  | 3.04   | -     | 1528.9  |
| AHQ-6-14, 4149 - 4229      | K.NIQSLEVIK.G                                                           | 1101.27845 | 2 | 9.18E-05 | 0.88  | 3.80   | -     | 661.2   |
| AHQ-6-14, 4854             | K.NIQSLEVIK.G                                                           | 1101.27845 | 2 | 2.94E-04 | 0.80  | 2.54   | -     | 1031.4  |
| AHQ-6-14, 4244 - 4300      | K.NIQSLEVIK.G                                                           | 1101.27845 | 2 | 7.83E-05 | 0.90  | 3.70   | -     | 790.0   |
| AHQ-6-14-, 3672 - 3696     | K.NIQSLEVIK.G                                                           | 1101.27845 | 2 | 9.20E-04 | 0.88  | 2.52   | -     | 1178.1  |
| AHQ-6-14-, 3290 - 3331     | K.NIQSLEVIK.G                                                           | 1101.27845 | 2 | 3.77E-04 | 0.88  | 2.81   | -     | 1091.5  |
| AHQ-6-14-, 3394 - 3472     | K.NIQSLEVIK.G                                                           | 1101.27845 | 2 | 1.84E-06 | 0.88  | 3.41   | -     | 793.2   |
| AHQ-6-14-, 3511 - 3579     | K.NIQSLEVIK.G                                                           | 1101.27845 | 2 | 4.88E-04 | 0.83  | 2.97   | -     | 832.9   |
| AHQ-6-14-, 3622            | K.TTSGIHPKNIQSLEVIK.G                                                   | 1923.20305 | 3 | 1.58E-07 | 0.86  | 3.52   | -     | 810.3   |
| gj 4503631 ref NP_000120.1 | coagulation factor XIII A1 subunit precursor; Coagulation factor XIII,  |            |   | 7.19E-12 | 18.63 | 220.31 | 41.80 | 83232.8 |
| AHQ-6-5, 4977 - 5044       | R.AVPPNNSNAEEDLPTVELQGVPVPR.G                                           | 2603.82656 | 2 | 8.97E-04 | 0.50  | 3.20   | -     | 124.8   |
| AHQ-6-5, 5103 - 5159       | R.AVPPNNSNAEEDLPTVELQGVPVPR.G                                           | 2603.82656 | 2 | 2.63E-05 | 0.68  | 3.42   | -     | 191.6   |
| AHQ-6-5, 2336              | R.CGPASVQAIA.K                                                          | 1032.19627 | 2 | 2.78E-04 | 0.71  | 2.56   | -     | 837.6   |
| AHQ-6-5, 2601              | K.DGTHVVENVDAATHIGK.L                                                   | 1692.81163 | 2 | 2.16E-06 | 0.92  | 3.58   | -     | 1150.9  |
| AHQ-6-5, 2599              | K.DGTHVVENVDAATHIGK.L                                                   | 1692.81163 | 3 | 3.67E-07 | 0.95  | 4.47   | -     | 1385.9  |
| AHQ-6-7, 2532              | K.DGTHVVENVDAATHIGK.L                                                   | 1692.81163 | 2 | 2.01E-04 | 0.95  | 4.47   | -     | 1353.1  |
| AHQ-6-5, 6568 - 6639       | K.EAVLIQAGEYM*GQLLEQASLHFFVTAR.I                                        | 3039.45415 | 3 | 2.03E-06 | 0.89  | 5.03   | -     | 517.6   |
| AHQ-6-5, 4833              | R.GTQVGSMD*TVTVQFTNPLK.E                                                | 2139.41549 | 2 | 4.00E-11 | 0.92  | 3.94   | -     | 800.0   |
| AHQ-6-5, 5393              | K.GTYIPVPIVSELQSGK.W                                                    | 1688.94594 | 2 | 2.74E-04 | 0.46  | 2.51   | -     | 353.7   |
| AHQ-6-7, 5186 - 5206       | K.GTYIPVPIVSELQSGK.W                                                    | 1688.94594 | 2 | 2.17E-05 | 0.69  | 3.12   | -     | 304.7   |
| AHQ-6-8, 5225 - 5233       | K.GTYIPVPIVSELQSGK.W                                                    | 1688.94594 | 2 | 7.91E-04 | 0.68  | 3.43   | -     | 316.1   |
| AHQ-6-5, 5480              | K.GTYIPVPIVSELQSGK.W                                                    | 1688.94594 | 2 | 9.30E-05 | 0.25  | 2.57   | -     | 141.7   |
| AHQ-6-9, 5983 - 6044       | R.GVNLQEFNLVTSVHLFK.E                                                   | 1946.23831 | 2 | 3.00E-04 | 0.83  | 2.67   | -     | 1011.6  |
| AHQ-6-5, 6404              | R.GVNLQEFNLVTSVHLFK.E                                                   | 1946.23831 | 2 | 2.50E-08 | 0.98  | 5.82   | -     | 1733.5  |
| AHQ-6-5, 6403              | R.GVNLQEFNLVTSVHLFK.E                                                   | 1946.23831 | 3 | 8.61E-07 | 0.83  | 4.14   | -     | 437.2   |
| AHQ-6-13, 6299             | R.GVNLQEFNLVTSVHLFK.E                                                   | 1946.23831 | 2 | 1.05E-05 | 0.73  | 3.06   | -     | 797.1   |
| AHQ-6-7, 6190 - 6258       | R.GVNLQEFNLVTSVHLFK.E                                                   | 1946.23831 | 2 | 2.81E-06 | 0.95  | 4.73   | -     | 915.2   |
| AHQ-6-13-, 6201 - 6268     | R.GVNLQEFNLVTSVHLFK.E                                                   | 1946.23831 | 2 | 1.46E-04 | 0.93  | 4.23   | -     | 1065.1  |
| AHQ-6-5, 3403 - 3465       | R.HVVGELDVIQIQR.R                                                       | 1457.61612 | 2 | 2.69E-05 | 0.92  | 3.70   | -     | 1073.1  |

|                           |                                                        |            |   |          |       |        |       |         |
|---------------------------|--------------------------------------------------------|------------|---|----------|-------|--------|-------|---------|
| AHQ-6-5, 6161 - 6228      | R.IVTNYFSAHDNDANLQMDIFLEEDGNVNSK.L                     | 3415.64559 | 3 | 4.77E-04 | 0.95  | 5.08   | -     | 1616.1  |
| AHQ-6-5, 6592 - 6667      | R.IVTNYFSAHDNDANLQMDIFLEEDGNVNSK.L                     | 3415.64559 | 3 | 1.86E-05 | 0.94  | 5.66   | -     | 832.8   |
| AHQ-6-5, 6283 - 6353      | R.IVTNYFSAHDNDANLQMDIFLEEDGNVNSK.L                     | 3415.64559 | 3 | 2.07E-10 | 0.95  | 5.47   | -     | 1107.1  |
| AHQ-6-5, 6051 - 6105      | R.IVTNYFSAHDNDANLQMDIFLEEDGNVNSK.L                     | 3415.64559 | 3 | 5.58E-06 | 0.96  | 6.14   | -     | 1005.5  |
| AHQ-6-5, 5852 - 5920      | R.IVTNYFSAHDNDANLQMDIFLEEDGNVNSK.L                     | 3415.64559 | 3 | 2.15E-05 | 0.94  | 5.64   | -     | 1336.6  |
| AHQ-6-5, 2284 - 2343      | K.KDGTHTVENVVDATHIGK.L                                 | 1820.98455 | 2 | 1.31E-04 | 0.96  | 4.71   | -     | 1452.4  |
| AHQ-6-5, 2459             | K.KDGTHTVENVVDATHIGK.L                                 | 1820.98455 | 3 | 2.85E-06 | 0.93  | 4.36   | -     | 1428.1  |
| AHQ-6-5, 2287             | K.KDGTHTVENVVDATHIGK.L                                 | 1820.98455 | 3 | 5.32E-09 | 0.98  | 6.15   | -     | 3406.3  |
| AHQ-6-5, 4923 - 4999      | K.KETFDVLTLEPLSFK.K                                    | 1654.88482 | 2 | 3.19E-10 | 0.94  | 3.71   | -     | 1362.0  |
| AHQ-6-10, 4714            | K.KETFDVLTLEPLSFK.K                                    | 1654.88482 | 2 | 2.03E-05 | 0.93  | 3.65   | -     | 1268.2  |
| AHQ-6-5, 2797             | R.KLIASMSDSLRL.H                                       | 1308.53039 | 2 | 3.26E-08 | 0.90  | 3.63   | -     | 1008.2  |
| AHQ-6-10, 2747            | R.KLIASMSDSLRL.H                                       | 1308.53039 | 2 | 1.47E-05 | 0.84  | 2.97   | -     | 952.0   |
| AHQ-6-5, 1971             | K.KPLNTEGVMK.S                                         | 1117.34452 | 2 | 1.11E-04 | 0.42  | 2.69   | -     | 325.4   |
| AHQ-6-6, 4124 - 4142      | R.LALETALM*YGA.K                                       | 1297.54595 | 2 | 8.81E-04 | 0.94  | 4.08   | -     | 1070.6  |
| AHQ-6-7, 5156             | R.M*YVAVWTPYGVLR.T                                     | 1571.86734 | 2 | 6.19E-04 | 0.69  | 3.08   | -     | 455.7   |
| AHQ-6-5, 6175 - 6192      | R.NPETDTYLFPWCEDDAVYLDNEKER.E                          | 3349.53903 | 3 | 4.35E-05 | 0.90  | 5.16   | -     | 781.5   |
| AHQ-6-5, 3639             | R.NVVVHLDGPGVTR.P                                      | 1450.62682 | 2 | 2.24E-07 | 0.92  | 3.52   | -     | 1266.9  |
| AHQ-6-10, 3531            | R.NVVVHLDGPGVTR.P                                      | 1450.62682 | 2 | 2.74E-05 | 0.64  | 2.58   | -     | 675.3   |
| AHQ-6-5, 2833             | K.QIGGDGM*M*DITDYK.F                                   | 1677.83576 | 2 | 2.99E-04 | 0.48  | 2.61   | -     | 411.4   |
| AHQ-6-5, 5205             | R.SNVDMDFEVENAVLKG.D                                   | 1767.93869 | 2 | 7.19E-12 | 0.95  | 4.75   | -     | 1133.5  |
| AHQ-6-5, 4423 - 4483      | R.SNVDM*DFEVENAVLKG.D                                  | 1783.93809 | 2 | 7.31E-08 | 0.96  | 4.27   | -     | 1585.9  |
| AHQ-6-5, 4232             | R.SNVDM*DFEVENAVLKG.D                                  | 1783.93809 | 2 | 1.47E-05 | 0.83  | 3.40   | -     | 729.9   |
| AHQ-6-6, 5050             | R.SNVDMDFEVENAVLKG.D                                   | 1767.93869 | 2 | 5.59E-06 | 0.91  | 3.55   | -     | 931.3   |
| AHQ-6-5, 4864             | R.SNVDMDFEVENAVLKG.D                                   | 1767.93869 | 2 | 1.45E-05 | 0.78  | 2.87   | -     | 714.1   |
| AHQ-6-5, 5077             | R.SNVDMDFEVENAVLKG.D                                   | 1767.93869 | 2 | 7.58E-08 | 0.94  | 3.54   | -     | 1848.0  |
| AHQ-6-6, 4436             | R.SNVDM*DFEVENAVLKG.D                                  | 1783.93809 | 2 | 2.66E-09 | 0.92  | 4.00   | -     | 1108.4  |
| AHQ-6-10, 4210 - 4270     | R.SNVDM*DFEVENAVLKG.D                                  | 1783.93809 | 2 | 2.14E-06 | 0.87  | 3.50   | -     | 1039.3  |
| AHQ-6-10, 5234 - 5240     | K.STVLTPIEIIK.V                                        | 1327.63485 | 2 | 4.55E-06 | 0.92  | 3.62   | -     | 1080.9  |
| AHQ-6-7, 5324             | K.STVLTPIEIIK.V                                        | 1327.63485 | 2 | 8.93E-04 | 0.82  | 2.99   | -     | 975.9   |
| AHQ-6-13-, 5468           | K.STVLTPIEIIK.V                                        | 1327.63485 | 2 | 6.59E-04 | 0.74  | 2.66   | -     | 1009.4  |
| AHQ-6-5, 5521 - 5548      | K.STVLTPIEIIK.V                                        | 1327.63485 | 2 | 9.07E-04 | 0.93  | 3.12   | -     | 1567.6  |
| AHQ-6-5, 6652 - 6625      | R.YGQCWVFAGVFNTFLR.C                                   | 1967.23783 | 2 | 9.40E-11 | 0.97  | 5.23   | -     | 1100.8  |
| gj4504349[ref]NP_000509.1 | beta globin [Homo sapiens]                             |            |   | 8.13E-12 | 8.76  | 100.31 | 70.70 | 15998.3 |
| AHQ-6-14-, 3167 - 3175    | K.EFTPPVQAAYQK.V                                       | 1379.54213 | 2 | 6.56E-06 | 0.74  | 2.99   | -     | 500.3   |
| AHQ-6-14-, 5352           | R.FFESFGDLSTPDVAMGNPK.V                                | 2060.27218 | 2 | 2.44E-06 | 0.95  | 4.05   | -     | 1131.8  |
| AHQ-6-13-, 5426           | R.FFESFGDLSTPDVAMGNPK.V                                | 2060.27218 | 2 | 7.20E-07 | 0.85  | 3.35   | -     | 666.0   |
| AHQ-6-13-, 5332           | R.FFESFGDLSTPDVAMGNPK.V                                | 2060.27218 | 2 | 1.50E-07 | 0.97  | 5.42   | -     | 968.7   |
| AHQ-6-13, 5515 - 5524     | R.FFESFGDLSTPDVAMGNPK.V                                | 2060.27218 | 2 | 7.06E-08 | 0.95  | 4.50   | -     | 1018.3  |
| AHQ-6-13-, 4942 - 4944    | R.FFESFGDLSTPDVAM*GNPK.V                               | 2076.27158 | 2 | 5.94E-08 | 0.93  | 4.32   | -     | 870.0   |
| AHQ-6-13, 4864 - 4912     | R.FFESFGDLSTPDVAM*GNPK.V                               | 2076.27158 | 2 | 5.23E-08 | 0.88  | 3.89   | -     | 583.4   |
| AHQ-6-13, 4892 - 4955     | R.FFESFGDLSTPDVAM*GNPK.V                               | 2076.27158 | 3 | 5.65E-05 | 0.90  | 4.16   | -     | 1206.2  |
| AHQ-6-13-, 4848           | R.FFESFGDLSTPDVAM*GNPK.V                               | 2076.27158 | 2 | 1.05E-06 | 0.94  | 4.38   | -     | 923.0   |
| AHQ-6-13-, 4834           | R.FFESFGDLSTPDVAM*GNPK.V                               | 2076.27158 | 3 | 3.97E-07 | 0.95  | 4.29   | -     | 1787.8  |
| AHQ-6-13, 4947 - 5027     | R.FFESFGDLSTPDVAM*GNPK.V                               | 2076.27158 | 2 | 1.63E-05 | 0.94  | 4.95   | -     | 695.2   |
| AHQ-6-13-, 4736 - 4792    | R.FFESFGDLSTPDVAM*GNPK.V                               | 2076.27158 | 2 | 3.00E-06 | 0.89  | 3.86   | -     | 598.9   |
| AHQ-6-13, 5423            | R.FFESFGDLSTPDVAMGNPK.V                                | 2060.27218 | 2 | 2.26E-07 | 0.93  | 4.77   | -     | 575.8   |
| AHQ-6-13, 3765 - 3779     | K.GTFATLSELHCDK.L                                      | 1480.62492 | 2 | 4.49E-05 | 0.80  | 3.27   | -     | 529.9   |
| AHQ-6-13-, 3630           | K.GTFATLSELHCDK.L                                      | 1480.62492 | 2 | 1.59E-07 | 0.88  | 3.69   | -     | 714.4   |
| AHQ-6-13-, 4873           | K.GTFATLSELHCDKLVDPENFR.L                              | 2588.83687 | 2 | 2.36E-09 | 0.87  | 4.15   | -     | 375.1   |
| AHQ-6-13, 5003            | K.GTFATLSELHCDKLVDPENFR.L                              | 2588.83687 | 3 | 3.17E-08 | 0.93  | 4.55   | -     | 1066.2  |
| AHQ-6-13-, 4856           | K.GTFATLSELHCDKLVDPENFR.L                              | 2588.83687 | 3 | 8.13E-12 | 0.95  | 5.20   | -     | 1275.6  |
| AHQ-6-13-, 4696           | K.KVLGAFSDGLAHLDNLK.G                                  | 1799.06362 | 3 | 6.65E-09 | 0.97  | 6.15   | -     | 1423.5  |
| AHQ-6-13-, 4490           | K.KVLGAFSDGLAHLDNLK.G                                  | 1799.06362 | 3 | 7.73E-10 | 0.98  | 5.99   | -     | 2268.1  |
| AHQ-6-13, 4837            | K.KVLGAFSDGLAHLDNLK.G                                  | 1799.06362 | 3 | 2.97E-07 | 0.95  | 5.45   | -     | 1343.7  |
| AHQ-6-13-, 4700 - 4740    | K.KVLGAFSDGLAHLDNLK.G                                  | 1799.06362 | 2 | 4.10E-06 | 0.97  | 5.69   | -     | 1305.1  |
| AHQ-6-13-, 3541 - 3545    | K.SAVTALWKG.V                                          | 933.08624  | 2 | 6.96E-07 | 0.88  | 3.04   | -     | 831.6   |
| AHQ-6-14-, 4996           | K.VLGFASDGLAHLDNLK.G                                   | 1670.89071 | 2 | 2.32E-09 | 0.97  | 5.34   | -     | 1897.8  |
| AHQ-6-13-, 5148 - 5150    | K.VLGFASDGLAHLDNLK.G                                   | 1670.89071 | 3 | 3.92E-10 | 0.82  | 3.85   | -     | 662.0   |
| AHQ-6-13, 5055 - 5111     | K.VLGFASDGLAHLDNLK.G                                   | 1670.89071 | 2 | 1.38E-11 | 0.96  | 4.61   | -     | 1637.3  |
| AHQ-6-13-, 4982 - 5040    | K.VLGFASDGLAHLDNLK.G                                   | 1670.89071 | 2 | 1.57E-05 | 0.97  | 5.24   | -     | 1813.9  |
| AHQ-6-14, 5685            | K.VLGFASDGLAHLDNLK.G                                   | 1670.89071 | 2 | 5.01E-07 | 0.87  | 3.68   | -     | 756.2   |
| AHQ-6-13-, 4808           | K.VLGFASDGLAHLDNLK.G                                   | 1670.89071 | 3 | 1.97E-07 | 0.89  | 4.04   | -     | 587.4   |
| AHQ-6-13-, 4809 - 4882    | K.VLGFASDGLAHLDNLK.G                                   | 1670.89071 | 2 | 4.59E-11 | 0.98  | 5.94   | -     | 1640.3  |
| AHQ-6-13, 4929 - 5007     | K.VLGFASDGLAHLDNLK.G                                   | 1670.89071 | 2 | 1.58E-05 | 0.97  | 5.05   | -     | 1983.5  |
| AHQ-6-13, 4923 - 4931     | K.VLGFASDGLAHLDNLK.G                                   | 1670.89071 | 3 | 1.84E-08 | 0.85  | 4.05   | -     | 467.8   |
| AHQ-6-13-, 4577           | K.VLGFASDGLAHLDNLK.G                                   | 1670.89071 | 2 | 2.02E-10 | 0.97  | 5.24   | -     | 1746.7  |
| AHQ-6-13, 5083 - 5087     | K.VLGFASDGLAHLDNLK.G                                   | 1670.89071 | 3 | 3.51E-08 | 0.84  | 3.67   | -     | 567.3   |
| AHQ-6-13-, 3284           | K.VNVDEVGGEALGR.L                                      | 1315.41484 | 2 | 5.85E-05 | 0.96  | 4.90   | -     | 1319.2  |
| AHQ-6-14-, 3230           | K.VNVDEVGGEALGR.L                                      | 1315.41484 | 2 | 1.22E-06 | 0.97  | 4.87   | -     | 1962.5  |
| AHQ-6-13, 3431 - 3432     | K.VNVDEVGGEALGR.L                                      | 1315.41484 | 1 | 5.07E-08 | 0.59  | 2.59   | -     | 356.7   |
| AHQ-6-13, 3423 - 3496     | K.VNVDEVGGEALGR.L                                      | 1315.41484 | 2 | 2.73E-05 | 0.98  | 4.71   | -     | 2260.6  |
| AHQ-6-13, 3352 - 3425     | K.VNVDEVGGEALGR.L                                      | 1315.41484 | 2 | 7.36E-07 | 0.94  | 4.25   | -     | 1192.3  |
| AHQ-6-13-, 3372           | K.VNVDEVGGEALGR.L                                      | 1315.41484 | 2 | 2.67E-04 | 0.96  | 4.12   | -     | 1624.8  |
| AHQ-6-14-, 2479 - 2542    | K.VVAGVANALAHK.Y                                       | 1150.35593 | 2 | 5.82E-04 | 0.84  | 2.64   | -     | 1152.9  |
| AHQ-6-13-, 2592 - 2604    | K.VVAGVANALAHK.Y                                       | 1150.35593 | 2 | 9.43E-07 | 0.97  | 3.78   | -     | 2114.7  |
| AHQ-6-13-, 2212 - 2282    | K.VVAGVANALAHK.Y                                       | 1150.35593 | 2 | 4.88E-04 | 0.95  | 3.67   | -     | 1723.2  |
| AHQ-6-13, 2768 - 2831     | K.VVAGVANALAHK.Y                                       | 1150.35593 | 2 | 5.65E-07 | 0.94  | 3.64   | -     | 1524.8  |
| gj9507215[ref]NP_061816.1 | tubulin, alpha-like 2; tubulin, alpha 8 [Homo sapiens] |            |   | 8.38E-12 | 3.45  | 40.26  | 13.10 | 50093.2 |
| AHQ-6-14, 5452 - 5453     | R.AVM*IDLEPTVVDEVR.A                                   | 1702.95125 | 2 | 6.74E-05 | 0.94  | 4.00   | -     | 1422.7  |
| AHQ-6-13-, 4737           | R.AVM*IDLEPTVVDEVR.A                                   | 1702.95125 | 2 | 1.55E-06 | 0.94  | 4.52   | -     | 1069.7  |
| AHQ-6-14-, 4664 - 4742    | R.AVM*IDLEPTVVDEVR.A                                   | 1702.95125 | 2 | 3.14E-07 | 0.97  | 5.12   | -     | 1404.1  |
| AHQ-6-13, 4791 - 4851     | R.AVM*IDLEPTVVDEVR.A                                   | 1702.95125 | 2 | 6.44E-04 | 0.54  | 2.52   | -     | 868.0   |
| AHQ-6-12, 3496            | K.DVNVAIAAK.T                                          | 1014.20080 | 2 | 1.55E-05 | 0.92  | 3.41   | -     | 1181.5  |
| AHQ-6-7, 5227             | R.IHFPLVTYAPIIAEK.A                                    | 1800.13312 | 2 | 7.50E-05 | 0.66  | 3.10   | -     | 357.1   |
| AHQ-6-14, 5697 - 5756     | K.INDDDSFTFFFSETGNGK.H                                 | 1996.03358 | 2 | 5.37E-09 | 0.64  | 3.26   | -     | 469.4   |
| AHQ-6-13-, 5201           | K.INDDDSFTFFFSETGNGK.H                                 | 1996.03358 | 2 | 1.06E-07 | 0.90  | 3.99   | -     | 735.4   |
| AHQ-6-7, 4928 - 4972      | K.INDDDSFTFFFSETGNGK.H                                 | 1996.03358 | 2 | 2.59E-04 | 0.53  | 3.18   | -     | 486.1   |
| AHQ-6-13, 5179            | K.INDDDSFTFFFSETGNGK.H                                 | 1996.03358 | 2 | 5.05E-09 | 0.79  | 3.34   | -     | 517.7   |
| AHQ-6-14-, 5066           | K.INDDDSFTFFFSETGNGK.H                                 | 1996.03358 | 2 | 8.38E-12 | 0.91  | 4.26   | -     | 721.5   |
| gj4502027[ref]NP_000468.1 | albumin precursor; PRO0883 protein [Homo sapiens]      |            |   | 1.32E-11 | 35.67 | 410.40 | 64.70 | 69366.4 |
| AHQ-6-5, 2529             | K.AAFTECCQAADK.A                                       | 1374.47927 | 1 | 4.32E-04 | 0.55  | 2.91   | -     | 425.0   |
| AHQ-6-5, 2071             | K.ADDKTCFAEEGK.K                                       | 1501.55462 | 2 | 4.09E-08 | 0.65  | 2.55   | -     | 767.6   |
| AHQ-6-5, 1855             | K.ADDKTCFAEEGK.L                                       | 1629.72754 | 2 | 9.56E-06 | 0.80  | 3.24   | -     | 768.1   |
| AHQ-6-5, 1951 - 2007      | K.AEFAEVS.K                                            | 880.96496  | 2 | 8.62E-04 | 0.60  | 2.53   | -     | 398.6   |
| AHQ-6-6, 5164             | K.AEFAEVS.KLVDTLTK.V                                   | 1651.88247 | 2 | 9.90E-05 | 0.76  | 3.65   | -     | 567.6   |
| AHQ-6-5, 6491             | K.ALVLIAFAQYLQCCPFEDHVK.L                              | 2492.87697 | 3 | 1.32E-11 | 0.97  | 5.79   | -     | 1240.3  |
| AHQ-6-5, 4391             | K.AVM*DDFAAFVEK.C                                      | 1359.52946 | 2 | 1.58E-04 | 0.95  | 3.94   | -     | 1277.9  |
| AHQ-6-5, 5239 - 5255      | K.AVMDDFAAFVEK.C                                       | 1343.53006 | 2 | 5.97E-08 | 0.96  | 4.29   | -     | 1568.4  |
| AHQ-6-14-, 5210           | K.AVMDDFAAFVEK.C                                       | 1343.53006 | 2 | 2.73E-08 | 0.96  | 4.30   | -     | 1689.8  |
| AHQ-6-6, 5208             | K.AVMDDFAAFVEK.C                                       | 1343.53006 | 2 | 1.13E-07 | 0.97  | 3.91   | -     | 2297.5  |
| AHQ-6-6, 2186             | K.CCAADPHECYAK.V                                       | 1556.67999 | 2 | 6.43E-07 | 0.83  | 3.23   | -     | 582.7   |
| AHQ-6-5, 2285             | K.CCKADDKTCFAEEGK.K                                    | 1952.08719 | 2 | 1.84E-04 | 0.89  | 3.64   | -     | 767.1   |
| AHQ-6-5, 2391             | K.CCTESLVNR.R                                          | 1141.25805 | 2 | 7.63E-06 | 0.89  | 3.19   | -     | 1008.3  |
| AHQ-6-4, 2429             | K.CCTESLVNR.R                                          | 1141.25805 | 2 | 4.62E-05 | 0.75  | 2.61   | -     | 746.9   |
| AHQ-6-5, 6296 - 6307      | K.DVFLGM*FLYEYAR.R                                     | 1640.88331 | 2 | 3.67E-06 | 0.96  | 4.36   | -     | 1492.4  |
| AHQ-6-6, 6226             | K.DVFLGM*FLYEYAR.R                                     | 1640.88331 | 2 | 1.16E-04 | 0.95  | 3.90   | -     | 1330.5  |
| AHQ-6-1, 6367             | K.DVFLGM*FLYEYAR.R                                     | 1640.88331 | 2 | 7.13E-05 | 0.90  | 3.24   | -     | 930.4   |

|                                                                                                        |                                  |            |   |          |      |       |       |         |
|--------------------------------------------------------------------------------------------------------|----------------------------------|------------|---|----------|------|-------|-------|---------|
| AHQ-6-5, 2711 - 2779                                                                                   | R.FKDLGEEENFK.A                  | 1227.34766 | 2 | 5.78E-06 | 0.90 | 3.81  | -     | 803.1   |
| AHQ-6-10, 2700                                                                                         | R.FKDLGEEENFK.A                  | 1227.34766 | 2 | 8.18E-04 | 0.82 | 2.72  | -     | 858.9   |
| AHQ-6-6, 2715                                                                                          | R.FKDLGEEENFK.A                  | 1227.34766 | 2 | 5.50E-07 | 0.83 | 3.55  | -     | 595.6   |
| AHQ-6-13, 2931 - 3007                                                                                  | R.FKDLGEEENFK.A                  | 1227.34766 | 2 | 1.01E-06 | 0.62 | 2.91  | -     | 401.7   |
| AHQ-6-6, 3042                                                                                          | K.FQNALLVRY                      | 961.14282  | 2 | 5.28E-04 | 0.82 | 2.82  | -     | 796.8   |
| AHQ-6-5, 6187                                                                                          | R.HPYFYAPELFFFAK.R               | 1744.02658 | 3 | 6.60E-07 | 0.93 | 4.62  | -     | 1144.2  |
| AHQ-6-6, 6118                                                                                          | R.HPYFYAPELFFFAK.R               | 1744.02658 | 3 | 4.42E-06 | 0.92 | 4.40  | -     | 972.4   |
| AHQ-6-7, 3346 - 3402                                                                                   | K.KVPQVSTPTLVEVSR.N              | 1640.90605 | 2 | 7.22E-05 | 0.91 | 3.35  | -     | 817.9   |
| AHQ-6-1, 3732 - 3812                                                                                   | K.KVPQVSTPTLVEVSR.N              | 1640.90605 | 2 | 2.63E-06 | 0.83 | 2.83  | -     | 723.5   |
| AHQ-6-3, 3625                                                                                          | K.KVPQVSTPTLVEVSR.N              | 1640.90605 | 2 | 1.78E-04 | 0.86 | 3.18  | -     | 707.9   |
| AHQ-6-6, 3478                                                                                          | K.KVPQVSTPTLVEVSR.N              | 1640.90605 | 3 | 1.88E-08 | 0.91 | 4.11  | -     | 1160.9  |
| AHQ-6-5, 3276                                                                                          | K.KVPQVSTPTLVEVSR.N              | 1640.90605 | 2 | 4.20E-08 | 0.84 | 3.36  | -     | 626.1   |
| AHQ-6-5, 3456 - 3523                                                                                   | K.KVPQVSTPTLVEVSR.N              | 1640.90605 | 2 | 2.33E-07 | 0.94 | 4.35  | -     | 878.8   |
| AHQ-6-6, 3426 - 3482                                                                                   | K.KVPQVSTPTLVEVSR.N              | 1640.90605 | 2 | 6.29E-10 | 0.80 | 3.14  | -     | 601.1   |
| AHQ-6-5, 3563 - 3637                                                                                   | K.KVPQVSTPTLVEVSR.N              | 1640.90605 | 2 | 2.19E-07 | 0.88 | 3.25  | -     | 775.1   |
| AHQ-6-5, 3507 - 3568                                                                                   | K.KVPQVSTPTLVEVSR.N              | 1640.90605 | 3 | 4.97E-09 | 0.95 | 5.24  | -     | 1290.8  |
| AHQ-6-5, 3927                                                                                          | K.KVPQVSTPTLVEVSR.NLGG.V         | 2053.39186 | 3 | 6.12E-08 | 0.68 | 3.27  | -     | 624.9   |
| AHQ-6-5, 2733                                                                                          | K.KYLYEIAR.R                     | 1056.23937 | 2 | 3.87E-05 | 0.74 | 2.64  | -     | 612.7   |
| AHQ-6-5, 1572 - 1624                                                                                   | K.LDELDRDEGK.A                   | 1075.15472 | 2 | 9.31E-04 | 0.54 | 2.53  | -     | 588.0   |
| AHQ-6-6, 1591 - 1662                                                                                   | K.LDELDRDEGK.A                   | 1075.15472 | 2 | 2.98E-04 | 0.58 | 2.56  | -     | 501.5   |
| AHQ-6-7, 2395                                                                                          | K.LKECCEKPLLEK.S                 | 1549.83503 | 2 | 2.28E-04 | 0.92 | 3.92  | -     | 1196.2  |
| AHQ-6-5, 2444                                                                                          | K.LKECCEKPLLEK.S                 | 1549.83503 | 2 | 8.88E-04 | 0.95 | 4.24  | -     | 1538.2  |
| AHQ-6-5, 2443                                                                                          | K.LKECCEKPLLEK.S                 | 1549.83503 | 3 | 4.04E-04 | 0.82 | 4.34  | -     | 677.9   |
| AHQ-6-5, 4031                                                                                          | K.LVAASQAALGL                    | 1014.20080 | 2 | 1.19E-06 | 0.93 | 3.53  | -     | 1086.3  |
| AHQ-6-6, 3999                                                                                          | K.LVAASQAALGL                    | 1014.20080 | 2 | 9.33E-07 | 0.90 | 3.23  | -     | 972.8   |
| AHQ-6-5, 3476 - 3488                                                                                   | K.LVNEVTEFAK.T                   | 1150.30633 | 2 | 5.17E-06 | 0.80 | 3.09  | -     | 447.8   |
| AHQ-6-6, 3266                                                                                          | K.LVNEVTEFAK.T                   | 1150.30633 | 2 | 9.27E-07 | 0.86 | 3.22  | -     | 712.7   |
| AHQ-6-5, 3149 - 3151                                                                                   | K.LVNEVTEFAK.T                   | 1150.30633 | 1 | 6.61E-07 | 0.64 | 2.65  | -     | 570.3   |
| AHQ-6-6, 3459 - 3522                                                                                   | K.LVNEVTEFAK.T                   | 1150.30633 | 2 | 5.58E-07 | 0.92 | 3.29  | -     | 955.3   |
| AHQ-6-10, 3198 - 3207                                                                                  | K.LVNEVTEFAK.T                   | 1150.30633 | 2 | 2.05E-04 | 0.90 | 3.19  | -     | 1002.1  |
| AHQ-6-5, 3249 - 3315                                                                                   | K.LVNEVTEFAK.T                   | 1150.30633 | 2 | 2.11E-06 | 0.90 | 3.66  | -     | 656.4   |
| AHQ-6-7, 3178                                                                                          | K.LVNEVTEFAK.T                   | 1150.30633 | 2 | 1.83E-04 | 0.83 | 2.75  | -     | 820.7   |
| AHQ-6-14-, 3286 - 3343                                                                                 | K.LVNEVTEFAK.T                   | 1150.30633 | 2 | 4.12E-06 | 0.64 | 2.85  | -     | 432.9   |
| AHQ-6-5, 3480                                                                                          | K.LVNEVTEFAK.T                   | 1150.30633 | 1 | 9.14E-07 | 0.68 | 2.43  | -     | 762.1   |
| AHQ-6-5, 4709                                                                                          | R.LVPRPEVDM*CTAFHDNEETFLK.K      | 2668.98368 | 3 | 7.42E-07 | 0.96 | 5.22  | -     | 1195.3  |
| AHQ-6-6, 4679                                                                                          | R.LVPRPEVDM*CTAFHDNEETFLK.K      | 2668.98368 | 3 | 5.27E-04 | 0.92 | 4.54  | -     | 1114.9  |
| AHQ-6-5, 5504                                                                                          | R.LVPRPEVDM*CTAFHDNEETFLK.K      | 2652.98428 | 3 | 5.75E-06 | 0.98 | 7.96  | -     | 2169.5  |
| AHQ-6-6, 5451                                                                                          | R.LVPRPEVDM*CTAFHDNEETFLK.K      | 2652.98428 | 3 | 1.00E-04 | 0.98 | 6.77  | -     | 1912.8  |
| AHQ-6-6, 5214                                                                                          | R.LVPRPEVDM*CTAFHDNEETFLK.K.Y    | 2781.15719 | 3 | 8.06E-06 | 0.97 | 6.62  | -     | 1531.3  |
| AHQ-6-6, 4330                                                                                          | R.LVPRPEVDM*CTAFHDNEETFLK.K.Y    | 2797.15659 | 3 | 1.28E-05 | 0.94 | 5.22  | -     | 822.1   |
| AHQ-6-7, 3939                                                                                          | R.RHPDYSVLLLR.L                  | 1468.72842 | 2 | 1.58E-04 | 0.90 | 3.32  | -     | 982.8   |
| AHQ-6-5, 4093 - 4163                                                                                   | R.RHPDYSVLLLR.L                  | 1468.72842 | 3 | 2.62E-05 | 0.95 | 4.52  | -     | 1795.5  |
| AHQ-6-6, 5727                                                                                          | R.RHPYFYAPPELLFFAK.R             | 1900.21293 | 2 | 8.82E-07 | 0.98 | 5.22  | -     | 2477.6  |
| AHQ-6-6, 5722                                                                                          | R.RHPYFYAPPELLFFAK.R             | 1900.21293 | 3 | 5.76E-09 | 0.97 | 5.43  | -     | 1751.6  |
| AHQ-6-5, 5728 - 5811                                                                                   | R.RHPYFYAPPELLFFAK.R             | 1900.21293 | 2 | 3.80E-05 | 0.98 | 4.87  | -     | 2016.2  |
| AHQ-6-5, 5781                                                                                          | R.RHPYFYAPPELLFFAK.R             | 1900.21293 | 2 | 1.71E-10 | 0.98 | 5.50  | -     | 2472.4  |
| AHQ-6-5, 5780 - 5845                                                                                   | R.RHPYFYAPPELLFFAK.R             | 1900.21293 | 3 | 1.55E-08 | 0.97 | 5.36  | -     | 1953.2  |
| AHQ-6-5, 6455                                                                                          | K.RM*PCAEYLSVLLNQLCVLHEK.T       | 2694.10110 | 3 | 2.49E-05 | 0.93 | 5.40  | -     | 1031.7  |
| AHQ-6-6, 6324 - 6382                                                                                   | K.RM*PCAEYLSVLLNQLCVLHEK.T       | 2694.10110 | 3 | 1.23E-04 | 0.92 | 5.26  | -     | 761.7   |
| AHQ-6-5, 4461                                                                                          | R.RPCFSALEVDETYVPK.E             | 1913.14041 | 3 | 1.58E-06 | 0.95 | 4.93  | -     | 1442.2  |
| AHQ-6-6, 4519 - 4578                                                                                   | R.RPCFSALEVDETYVPK.E             | 1913.14041 | 3 | 2.76E-04 | 0.84 | 4.03  | -     | 649.7   |
| AHQ-6-5, 4548 - 4608                                                                                   | R.RPCFSALEVDETYVPK.E             | 1913.14041 | 2 | 4.38E-05 | 0.97 | 5.31  | -     | 968.3   |
| AHQ-6-5, 4551 - 4611                                                                                   | R.RPCFSALEVDETYVPK.E             | 1913.14041 | 3 | 1.25E-05 | 0.95 | 5.46  | -     | 1179.7  |
| AHQ-6-5, 4449                                                                                          | R.RPCFSALEVDETYVPK.E             | 1913.14041 | 2 | 9.38E-07 | 0.86 | 3.77  | -     | 629.9   |
| AHQ-6-8, 4390 - 4461                                                                                   | R.RPCFSALEVDETYVPK.E             | 1913.14041 | 2 | 2.61E-04 | 0.63 | 2.96  | -     | 326.1   |
| AHQ-6-5, 5939                                                                                          | K.SHCIAEVENDEM*PADLPSLAADFVESK.D | 2993.22637 | 2 | 1.41E-04 | 0.94 | 4.99  | -     | 796.6   |
| AHQ-6-6, 5852 - 5922                                                                                   | K.SHCIAEVENDEM*PADLPSLAADFVESK.D | 2993.22637 | 3 | 1.47E-07 | 0.96 | 6.36  | -     | 974.3   |
| AHQ-6-5, 6272 - 6339                                                                                   | K.SHCIAEVENDEM*PADLPSLAADFVESK.D | 2977.22697 | 3 | 7.19E-06 | 0.92 | 4.80  | -     | 686.8   |
| AHQ-6-6, 6275                                                                                          | K.SHCIAEVENDEM*PADLPSLAADFVESK.D | 2977.22697 | 3 | 6.26E-04 | 0.83 | 4.00  | -     | 605.5   |
| AHQ-6-7, 5714 - 5726                                                                                   | K.SHCIAEVENDEM*PADLPSLAADFVESK.D | 2993.22637 | 3 | 5.29E-05 | 0.94 | 5.45  | -     | 692.9   |
| AHQ-6-5, 4965                                                                                          | K.SLHTLFGDKLCTVATLR.E            | 1934.24913 | 2 | 6.83E-06 | 0.95 | 4.32  | -     | 1218.5  |
| AHQ-6-5, 4955                                                                                          | K.SLHTLFGDKLCTVATLR.E            | 1934.24913 | 3 | 7.39E-04 | 0.84 | 3.79  | -     | 623.2   |
| AHQ-6-6, 1918                                                                                          | K.TCVADESAENCDK.S                | 1501.53308 | 2 | 4.17E-04 | 0.94 | 3.85  | -     | 1429.3  |
| AHQ-6-5, 1880 - 1937                                                                                   | K.TCVADESAENCDK.S                | 1501.53308 | 2 | 1.26E-09 | 0.97 | 4.52  | -     | 1991.2  |
| AHQ-6-5, 4363                                                                                          | K.TCVADESAENCDKSLHTLFGDK.L       | 2500.65848 | 3 | 9.33E-05 | 0.88 | 4.32  | -     | 719.6   |
| AHQ-6-5, 3745 - 3747                                                                                   | K.TYETTLEKCCAAADPHCEYAK.V        | 2522.72734 | 3 | 2.89E-09 | 0.95 | 4.93  | -     | 1072.7  |
| AHQ-6-5, 5392                                                                                          | K.VDFEFKPLVEEPQNLK.Q             | 2046.35142 | 2 | 3.94E-04 | 0.94 | 4.40  | -     | 730.2   |
| AHQ-6-5, 5384                                                                                          | K.VDFEFKPLVEEPQNLK.Q             | 2046.35142 | 3 | 6.07E-07 | 0.93 | 4.53  | -     | 1090.6  |
| AHQ-6-4, 5616                                                                                          | K.VDFEFKPLVEEPQNLK.Q             | 2046.35142 | 3 | 1.42E-08 | 0.96 | 5.42  | -     | 1162.1  |
| AHQ-6-1, 5628                                                                                          | K.VDFEFKPLVEEPQNLK.Q             | 2046.35142 | 2 | 2.35E-04 | 0.88 | 4.32  | -     | 362.2   |
| AHQ-6-6, 5254                                                                                          | K.VDFEFKPLVEEPQNLK.Q             | 2046.35142 | 3 | 8.94E-04 | 0.79 | 3.30  | -     | 1153.0  |
| AHQ-6-5, 5495                                                                                          | K.VDFEFKPLVEEPQNLK.Q             | 2046.35142 | 2 | 4.57E-04 | 0.47 | 3.03  | -     | 251.2   |
| AHQ-6-6, 5462 - 5535                                                                                   | K.VDFEFKPLVEEPQNLK.Q             | 2046.35142 | 2 | 2.78E-07 | 0.96 | 5.65  | -     | 608.5   |
| AHQ-6-5, 5499 - 5503                                                                                   | K.VDFEFKPLVEEPQNLK.Q             | 2046.35142 | 3 | 1.47E-06 | 0.97 | 5.36  | -     | 1581.9  |
| AHQ-6-6, 5478                                                                                          | K.VDFEFKPLVEEPQNLK.Q             | 2046.35142 | 2 | 6.94E-06 | 0.90 | 4.43  | -     | 389.2   |
| AHQ-6-10, 5223                                                                                         | K.VDFEFKPLVEEPQNLK.Q             | 2046.35142 | 3 | 3.77E-04 | 0.92 | 4.00  | -     | 1145.4  |
| AHQ-6-1, 5624                                                                                          | K.VDFEFKPLVEEPQNLK.Q             | 2046.35142 | 3 | 5.22E-04 | 0.94 | 3.96  | -     | 1404.1  |
| AHQ-6-7, 5296                                                                                          | K.VDFEFKPLVEEPQNLK.Q             | 2046.35142 | 2 | 5.72E-06 | 0.89 | 4.22  | -     | 441.8   |
| AHQ-6-3, 5548                                                                                          | K.VDFEFKPLVEEPQNLK.Q             | 2046.35142 | 2 | 1.50E-05 | 0.90 | 4.17  | -     | 504.3   |
| AHQ-6-3, 5546                                                                                          | K.VDFEFKPLVEEPQNLK.Q             | 2046.35142 | 3 | 2.27E-05 | 0.93 | 4.58  | -     | 1017.6  |
| AHQ-6-7, 5303                                                                                          | K.VDFEFKPLVEEPQNLK.Q             | 2046.35142 | 3 | 2.74E-07 | 0.95 | 4.83  | -     | 1169.2  |
| AHQ-6-5, 5591                                                                                          | K.VDFEFKPLVEEPQNLK.Q             | 2046.35142 | 3 | 4.31E-08 | 0.94 | 4.49  | -     | 1346.9  |
| AHQ-6-5, 5592                                                                                          | K.VDFEFKPLVEEPQNLK.Q             | 2046.35142 | 2 | 4.88E-07 | 0.92 | 4.61  | -     | 489.4   |
| AHQ-6-9, 5154                                                                                          | K.VDFEFKPLVEEPQNLK.Q             | 2046.35142 | 2 | 1.59E-05 | 0.49 | 2.56  | -     | 218.0   |
| AHQ-6-2, 5584 - 5587                                                                                   | K.VDFEFKPLVEEPQNLK.Q             | 2046.35142 | 2 | 1.82E-04 | 0.93 | 4.64  | -     | 504.0   |
| AHQ-6-6, 5470 - 5471                                                                                   | K.VDFEFKPLVEEPQNLK.Q             | 2046.35142 | 3 | 3.74E-05 | 0.97 | 5.26  | -     | 1837.4  |
| AHQ-6-6, 3082                                                                                          | K.VHTECCCHGDLLECADDR.A           | 2091.20307 | 2 | 1.37E-07 | 0.95 | 4.44  | -     | 1277.9  |
| AHQ-6-5, 3084 - 3093                                                                                   | K.VHTECCCHGDLLECADDR.A           | 2091.20307 | 2 | 4.10E-08 | 0.97 | 5.54  | -     | 1531.6  |
| AHQ-6-6, 3635                                                                                          | K.VHTECCCHGDLLECADDRADLAK.Y      | 2589.77855 | 3 | 2.51E-05 | 0.80 | 3.31  | -     | 757.9   |
| AHQ-6-6, 3652                                                                                          | K.VHTECCCHGDLLECADDRADLAK.Y      | 2589.77855 | 2 | 6.02E-04 | 0.85 | 3.38  | -     | 775.2   |
| AHQ-6-7, 3547                                                                                          | K.VHTECCCHGDLLECADDRADLAK.Y      | 2589.77855 | 3 | 7.58E-05 | 0.92 | 4.62  | -     | 946.7   |
| AHQ-6-10, 3686                                                                                         | K.VPQVSTPTLVEVSR.N               | 1512.73313 | 2 | 6.05E-05 | 0.72 | 3.07  | -     | 454.8   |
| AHQ-6-5, 3827                                                                                          | K.VPQVSTPTLVEVSR.N               | 1512.73313 | 2 | 1.68E-07 | 0.89 | 2.94  | -     | 829.7   |
| AHQ-6-6, 3790                                                                                          | K.VPQVSTPTLVEVSR.N               | 1512.73313 | 2 | 6.62E-06 | 0.76 | 2.65  | -     | 704.3   |
| AHQ-6-6, 2470                                                                                          | K.YICENQDSISSK.L                 | 1445.53420 | 2 | 2.14E-05 | 0.83 | 3.43  | -     | 550.0   |
| AHQ-6-6, 2283 - 2358                                                                                   | K.YICENQDSISSK.L                 | 1445.53420 | 2 | 1.33E-05 | 0.91 | 3.94  | -     | 694.5   |
| AHQ-6-5, 2361                                                                                          | K.YICENQDSISSK.L                 | 1445.53420 | 1 | 1.27E-05 | 0.64 | 3.12  | -     | 275.6   |
| AHQ-6-5, 2453                                                                                          | K.YICENQDSISSK.L                 | 1445.53420 | 2 | 3.62E-07 | 0.90 | 3.46  | -     | 854.5   |
| AHQ-6-5, 2268 - 2347                                                                                   | K.YICENQDSISSK.L                 | 1445.53420 | 2 | 2.08E-04 | 0.93 | 4.25  | -     | 764.9   |
| gi 21361755 ref NP_004090.3  stomatin; erythrocyte membrane protein band 7.2 (stomatin) [Homo sapiens] |                                  |            |   | 1.40E-11 | 4.49 | 50.27 | 24.70 | 31708.5 |
| AHQ-6-10, 3867 - 3884                                                                                  | K.EASM*VITESPAALQLR.Y            | 1732.98059 | 2 | 3.36E-04 | 0.61 | 2.99  | -     | 589.4   |
| AHQ-6-1, 4246                                                                                          | K.EASM*VITESPAALQLR.Y            | 1732.98059 | 2 | 1.32E-04 | 0.93 | 3.82  | -     | 1152.5  |
| AHQ-6-1, 4671 - 4743                                                                                   | K.EASM*VITESPAALQLR.Y            | 1716.98119 | 2 | 5.31E-06 | 0.84 | 3.45  | -     | 936.7   |
| AHQ-6-13-, 6348                                                                                        | K.GPGLFFILPCTDSFIK.V             | 1814.13672 | 2 | 6.10E-04 | 0.89 | 3.83  | -     | 636.8   |
| AHQ-6-1, 6530                                                                                          | K.GPGLFFILPCTDSFIK.V             | 1814.13672 | 2 | 7.31E-05 | 0.95 | 4.66  | -     | 818.5   |
| AHQ-6-1, 6507                                                                                          | K.NSTIVFPLPIDM*LQGIIGAK.H        | 2144.56315 | 2 | 1.47E-04 | 0.81 | 3.87  | -     | 341.9   |
| AHQ-6-2, 3886                                                                                          | R.VQNALTAVANITNADSATRL.L         | 1931.09731 | 2 | 3.06E-07 | 0.94 | 4.16  | -     | 930.2   |

|                             |                                                                        |            |   |          |      |      |   |        |
|-----------------------------|------------------------------------------------------------------------|------------|---|----------|------|------|---|--------|
| AHQ-6-10, 3638              | R.VQNATLAVANITNADSATR.L                                                | 1931.09731 | 2 | 1.95E-08 | 0.92 | 3.65 | - | 1226.8 |
| AHQ-6-1, 4007 - 4010        | R.VQNATLAVANITNADSATR.L                                                | 1931.09731 | 2 | 1.40E-11 | 0.97 | 5.45 | - | 1350.2 |
| AHQ-6-10, 4118              | R.VQNATLAVANITNADSATR.L                                                | 1931.09731 | 2 | 1.09E-04 | 0.87 | 3.60 | - | 626.1  |
| AHQ-6-1, 3896               | R.VQNATLAVANITNADSATR.L                                                | 1931.09731 | 2 | 1.68E-06 | 0.74 | 3.52 | - | 498.9  |
| AHQ-6-1, 4486               | R.VQNATLAVANITNADSATR.L                                                | 1931.09731 | 2 | 1.90E-11 | 0.94 | 4.14 | - | 977.2  |
| gi 29568101 ref NP_006467.3 | ATP synthase, H+ transporting, mitochondrial F0 complex, subunit g; AT |            |   |          |      |      |   |        |
| AHQ-6-14-, 3635             | K.TPALVNAAVTYSKPR.L                                                    | 1588.83283 | 3 | 1.70E-11 | 0.92 | 4.15 | - | 1033.4 |
| AHQ-6-14-, 3588 - 3631      | K.TPALVNAAVTYSKPR.L                                                    | 1588.83283 | 2 | 1.52E-04 | 0.95 | 3.88 | - | 1349.0 |
| gi 4504345 ref NP_000508.1  | alpha 2 globin [Homo sapiens]                                          |            |   |          |      |      |   |        |
| AHQ-6-13, 4349              | K.FLASVSTVLTSLK.Y                                                      | 1253.46970 | 2 | 9.43E-04 | 0.92 | 3.52 | - | 1144.1 |
| AHQ-6-13, 4144 - 4199       | K.TYFPFHDLSHGSAQVK.G                                                   | 1835.01138 | 3 | 2.72E-06 | 0.83 | 3.87 | - | 447.0  |
| AHQ-6-13, 4147 - 4217       | K.TYFPFHDLSHGSAQVK.G                                                   | 1835.01138 | 2 | 7.40E-06 | 0.90 | 3.62 | - | 823.7  |
| AHQ-6-13-, 4005 - 4064      | K.TYFPFHDLSHGSAQVK.G                                                   | 1835.01138 | 3 | 6.49E-10 | 0.88 | 4.06 | - | 617.6  |
| AHQ-6-13-, 4014 - 4077      | K.TYFPFHDLSHGSAQVK.G                                                   | 1835.01138 | 2 | 6.42E-10 | 0.96 | 4.10 | - | 1547.8 |
| AHQ-6-14-, 3996             | K.TYFPFHDLSHGSAQVK.G                                                   | 1835.01138 | 2 | 3.84E-07 | 0.89 | 3.51 | - | 645.5  |
| AHQ-6-14-, 5326 - 5384      | K.VADALTNVAHVDDM*PNALSALSDDLHAKH.L                                     | 3014.31995 | 3 | 6.34E-07 | 0.97 | 6.42 | - | 1398.6 |
| AHQ-6-13-, 5405             | K.VADALTNVAHVDDM*PNALSALSDDLHAKH.L                                     | 3014.31995 | 3 | 5.38E-06 | 0.97 | 5.49 | - | 2213.3 |
| AHQ-6-13, 2845 - 2904       | K.VGAHAGEYGAELER.M                                                     | 1530.62397 | 3 | 1.89E-05 | 0.96 | 5.50 | - | 1839.7 |
| AHQ-6-13-, 2664 - 2724      | K.VGAHAGEYGAELER.M                                                     | 1530.62397 | 3 | 1.04E-05 | 0.97 | 5.73 | - | 2205.7 |
| AHQ-6-13-, 2669 - 2728      | K.VGAHAGEYGAELER.M                                                     | 1530.62397 | 2 | 2.03E-11 | 0.97 | 4.89 | - | 1804.7 |
| AHQ-6-13, 2844 - 2903       | K.VGAHAGEYGAELER.M                                                     | 1530.62397 | 2 | 5.18E-09 | 0.97 | 4.37 | - | 1599.5 |
| gi 21956645 ref NP_665807.1 | myotrophin; granule cell differentiation protein [Homo sapiens]        |            |   |          |      |      |   |        |
| AHQ-6-13-, 3956 - 4017      | K.GPDGLTAFEATDNQAIK.A                                                  | 1748.87196 | 2 | 1.33E-08 | 0.97 | 5.18 | - | 1523.0 |
| AHQ-6-14-, 3958             | K.GPDGLTAFEATDNQAIK.A                                                  | 1748.87196 | 2 | 3.18E-07 | 0.95 | 4.82 | - | 927.4  |
| AHQ-6-13, 4143 - 4207       | K.GPDGLTAFEATDNQAIK.A                                                  | 1748.87196 | 2 | 3.68E-06 | 0.97 | 5.86 | - | 1356.0 |
| AHQ-6-14, 4606 - 4684       | K.GPDGLTAFEATDNQAIK.A                                                  | 1748.87196 | 2 | 7.97E-05 | 0.92 | 4.17 | - | 956.3  |
| AHQ-6-14, 4672 - 4741       | K.GPDGLTAFEATDNQAIK.A                                                  | 1748.87196 | 2 | 2.81E-06 | 0.98 | 6.06 | - | 1943.3 |
| AHQ-6-14-, 3930 - 3934      | K.GPDGLTAFEATDNQAIK.A                                                  | 1748.87196 | 2 | 2.60E-10 | 0.98 | 5.91 | - | 1699.5 |
| AHQ-6-14-, 3812 - 3876      | K.GPDGLTAFEATDNQAIK.A                                                  | 1748.87196 | 2 | 3.84E-05 | 0.96 | 4.72 | - | 1056.8 |
| AHQ-6-14-, 4043 - 4095      | K.GPDGLTAFEATDNQAIK.A                                                  | 1748.87196 | 2 | 1.42E-06 | 0.88 | 3.68 | - | 759.6  |
| AHQ-6-13-, 4080             | K.GPDGLTAFEATDNQAIK.A                                                  | 1748.87196 | 2 | 2.20E-11 | 0.96 | 4.86 | - | 1289.9 |
| AHQ-6-14-, 3628             | K.NGDLDEVKDYVAK.G                                                      | 1466.57496 | 2 | 9.12E-10 | 0.95 | 4.01 | - | 1507.5 |
| AHQ-6-13-, 3662             | K.NGDLDEVKDYVAK.G                                                      | 1466.57496 | 2 | 2.27E-08 | 0.90 | 3.33 | - | 1078.4 |
| AHQ-6-13-, 3570             | K.NGDLDEVKDYVAK.G                                                      | 1466.57496 | 2 | 2.31E-09 | 0.96 | 4.16 | - | 1725.4 |
| AHQ-6-13, 3807              | K.NGDLDEVKDYVAK.G                                                      | 1466.57496 | 2 | 1.13E-06 | 0.90 | 3.16 | - | 1167.6 |
| AHQ-6-13, 3715              | K.NGDLDEVKDYVAK.G                                                      | 1466.57496 | 2 | 2.79E-09 | 0.90 | 3.40 | - | 1241.2 |
| AHQ-6-14-, 3536             | K.NGDLDEVKDYVAK.G                                                      | 1466.57496 | 2 | 3.53E-07 | 0.92 | 3.69 | - | 1149.2 |
| gi 27498267 ref XP_209737.1 | similar to tyrosine 3/tryptophan 5-monooxygenase activation protein,   |            |   |          |      |      |   |        |
| AHQ-6-10, 6118 - 6130       | R.DICNDVLSLLEK.F                                                       | 1420.61093 | 2 | 5.31E-05 | 0.94 | 3.66 | - | 1598.2 |
| AHQ-6-10, 5406 - 5411       | R.DICNDVLSLLEK.F                                                       | 1420.61093 | 2 | 1.44E-07 | 0.89 | 3.02 | - | 1077.5 |
| AHQ-6-14, 5552 - 5562       | K.GIVDQSQQAQYQEAFAEISK.K                                               | 2042.19176 | 2 | 1.38E-05 | 0.94 | 4.90 | - | 826.1  |
| AHQ-6-10, 4288 - 4368       | K.GIVDQSQQAQYQEAFAEISK.K                                               | 2042.19176 | 2 | 4.75E-05 | 0.97 | 5.31 | - | 1396.5 |
| AHQ-6-13, 5023 - 5025       | K.GIVDQSQQAQYQEAFAEISK.K                                               | 2042.19176 | 2 | 6.77E-08 | 0.98 | 5.65 | - | 1586.8 |
| AHQ-6-13-, 4888             | K.GIVDQSQQAQYQEAFAEISK.K                                               | 2042.19176 | 2 | 1.31E-08 | 0.97 | 5.76 | - | 1347.1 |
| AHQ-6-10, 4678 - 4734       | K.GIVDQSQQAQYQEAFAEISK.K                                               | 2042.19176 | 2 | 2.28E-09 | 0.98 | 5.77 | - | 1835.7 |
| AHQ-6-10, 4682 - 4748       | K.GIVDQSQQAQYQEAFAEISK.K                                               | 2042.19176 | 3 | 2.26E-06 | 0.95 | 5.18 | - | 1507.4 |
| AHQ-6-10, 4790 - 4840       | K.GIVDQSQQAQYQEAFAEISK.K                                               | 2042.19176 | 2 | 4.51E-07 | 0.96 | 4.93 | - | 1332.2 |
| AHQ-6-10, 4876 - 4907       | K.GIVDQSQQAQYQEAFAEISK.K                                               | 2042.19176 | 2 | 1.84E-08 | 0.95 | 4.63 | - | 1018.8 |
| AHQ-6-10, 4460              | K.GIVDQSQQAQYQEAFAEISK.K                                               | 2042.19176 | 2 | 8.84E-11 | 0.96 | 4.55 | - | 1377.2 |
| AHQ-6-9, 4634 - 4642        | K.GIVDQSQQAQYQEAFAEISK.K                                               | 2042.19176 | 2 | 2.69E-09 | 0.96 | 4.88 | - | 1211.5 |
| AHQ-6-10, 6256              | K.GIVDQSQQAQYQEAFAEISK.K                                               | 2042.19176 | 2 | 4.03E-05 | 0.91 | 3.60 | - | 810.5  |
| AHQ-6-11, 4755 - 4756       | K.GIVDQSQQAQYQEAFAEISK.K                                               | 2042.19176 | 2 | 5.44E-08 | 0.97 | 5.65 | - | 1384.4 |
| AHQ-6-11, 4761 - 4824       | K.GIVDQSQQAQYQEAFAEISK.K                                               | 2042.19176 | 3 | 1.73E-05 | 0.92 | 4.01 | - | 1237.4 |
| AHQ-6-14-, 4908 - 4918      | K.GIVDQSQQAQYQEAFAEISK.K                                               | 2042.19176 | 2 | 2.33E-11 | 0.96 | 5.07 | - | 1402.8 |
| AHQ-6-10, 4362              | K.GIVDQSQQAQYQEAFAEISK.E                                               | 2170.36467 | 2 | 2.47E-04 | 0.71 | 3.20 | - | 660.8  |
| AHQ-6-10, 4266              | K.KGIVDQSQQAQYQEAFAEISK.K                                              | 2170.36467 | 2 | 8.05E-06 | 0.96 | 5.27 | - | 1340.0 |
| AHQ-6-10, 4271              | K.KGIVDQSQQAQYQEAFAEISK.K                                              | 2170.36467 | 3 | 9.64E-04 | 0.83 | 3.91 | - | 1048.7 |
| gi 11761631 ref NP_005132.1 | fibrinogen, beta chain preproprotein [Homo sapiens]                    |            |   |          |      |      |   |        |
| AHQ-6-11, 2452              | K.AHYGGFTVQNEANK.Y                                                     | 1536.63020 | 2 | 3.10E-07 | 0.92 | 3.53 | - | 985.0  |
| AHQ-6-10, 2412              | K.AHYGGFTVQNEANK.Y                                                     | 1536.63020 | 2 | 1.27E-06 | 0.91 | 3.08 | - | 1120.9 |
| AHQ-6-7, 2475 - 2535        | K.AHYGGFTVQNEANK.Y                                                     | 1536.63020 | 2 | 2.64E-11 | 0.94 | 3.92 | - | 1155.1 |
| AHQ-6-7, 3660               | K.AHYGGFTVQNEANKYQISVVK.Y                                              | 2369.57759 | 2 | 1.20E-04 | 0.91 | 3.82 | - | 823.2  |
| AHQ-6-6, 3130               | R.DNDGWLTSDDR.K                                                        | 1276.29403 | 2 | 1.68E-06 | 0.82 | 2.96 | - | 862.6  |
| AHQ-6-6, 3272               | K.DNENVVNEYSSSELEK.H                                                   | 1769.80167 | 2 | 7.70E-06 | 0.86 | 3.51 | - | 623.3  |
| AHQ-6-11, 3904              | K.DNENVVNEYSSSELEK.H                                                   | 1769.80167 | 2 | 5.20E-06 | 0.49 | 3.31 | - | 454.2  |
| AHQ-6-11, 4028              | K.DNENVVNEYSSSELEK.H                                                   | 1769.80167 | 2 | 1.60E-05 | 0.48 | 2.66 | - | 484.1  |
| AHQ-6-7, 4063               | K.DNENVVNEYSSSELEK.H                                                   | 1769.80167 | 2 | 3.73E-06 | 0.91 | 3.70 | - | 807.2  |
| AHQ-6-7, 3927 - 3998        | K.DNENVVNEYSSSELEK.H                                                   | 1769.80167 | 2 | 9.57E-05 | 0.91 | 4.21 | - | 584.0  |
| AHQ-6-7, 3798 - 3860        | K.DNENVVNEYSSSELEK.H                                                   | 1769.80167 | 2 | 7.71E-05 | 0.84 | 3.32 | - | 989.8  |
| AHQ-6-6, 4111 - 4179        | K.DNENVVNEYSSSELEK.H                                                   | 1769.80167 | 2 | 9.78E-06 | 0.95 | 5.05 | - | 806.9  |
| AHQ-6-5, 4025               | K.DNENVVNEYSSSELEK.H                                                   | 1769.80167 | 2 | 2.28E-04 | 0.76 | 3.60 | - | 646.6  |
| AHQ-6-7, 3442 - 3451        | K.DNENVVNEYSSSELEK.H                                                   | 1769.80167 | 2 | 8.02E-09 | 0.93 | 4.82 | - | 791.7  |
| AHQ-6-8, 3805 - 3876        | K.DNENVVNEYSSSELEK.H                                                   | 1769.80167 | 2 | 6.83E-04 | 0.85 | 3.49 | - | 707.6  |
| AHQ-6-8, 3210               | R.EEAPSLRPAPPPIGGGGYR.A                                                | 1952.15981 | 2 | 7.00E-04 | 0.44 | 2.66 | - | 299.6  |
| AHQ-6-7, 3866               | K.GGETSEMYLIQPDSSVKPYR.V                                               | 2258.49373 | 2 | 1.89E-05 | 0.79 | 3.90 | - | 449.6  |
| AHQ-6-9, 3780               | K.GGETSEMYLIQPDSSVKPYR.V                                               | 2258.49373 | 2 | 1.68E-04 | 0.51 | 3.10 | - | 349.2  |
| AHQ-6-6, 4002               | K.GGETSEMYLIQPDSSVKPYR.V                                               | 2258.49373 | 2 | 9.56E-06 | 0.92 | 4.38 | - | 713.8  |
| AHQ-6-8, 3877               | K.GGETSEMYLIQPDSSVKPYR.V                                               | 2258.49373 | 2 | 2.93E-04 | 0.74 | 3.44 | - | 486.6  |
| AHQ-6-6, 4003               | K.GGETSEMYLIQPDSSVKPYR.V                                               | 2258.49373 | 3 | 2.43E-08 | 0.89 | 3.72 | - | 1318.8 |
| AHQ-6-6, 3574               | K.GGETSEM*YLIQPDSSVKPYR.V                                              | 2274.49313 | 3 | 7.91E-05 | 0.79 | 3.49 | - | 779.1  |
| AHQ-6-7, 3428 - 3486        | K.GGETSEM*YLIQPDSSVKPYR.V                                              | 2274.49313 | 2 | 8.88E-06 | 0.82 | 3.37 | - | 696.9  |
| AHQ-6-7, 5683               | R.KAPDAGGCLHADPDLGVLCPTGCQLQEAALLQQRPIR.N                              | 4089.58482 | 3 | 5.77E-06 | 0.60 | 3.30 | - | 276.2  |
| AHQ-6-7, 3175               | R.KGGETSEM*YLIQPDSSVKPYR.V                                             | 2402.66604 | 2 | 2.71E-05 | 0.68 | 2.63 | - | 582.2  |
| AHQ-6-7, 3176 - 3186        | R.KGGETSEM*YLIQPDSSVKPYR.V                                             | 2402.66604 | 3 | 1.21E-07 | 0.83 | 4.03 | - | 556.0  |
| AHQ-6-7, 3551 - 3559        | R.KGGETSEM*YLIQPDSSVKPYR.V                                             | 2386.66664 | 3 | 1.07E-04 | 0.89 | 4.63 | - | 552.6  |
| AHQ-6-7, 3556               | R.KGGETSEM*YLIQPDSSVKPYR.V                                             | 2402.66604 | 3 | 8.30E-04 | 0.78 | 3.67 | - | 593.6  |
| AHQ-6-6, 3612 - 3670        | R.KGGETSEM*YLIQPDSSVKPYR.V                                             | 2386.66664 | 3 | 1.26E-05 | 0.82 | 3.95 | - | 691.3  |
| AHQ-6-8, 3465               | R.KGGETSEM*YLIQPDSSVKPYR.V                                             | 2386.66664 | 3 | 1.80E-05 | 0.83 | 4.52 | - | 525.7  |
| AHQ-6-6, 3288               | R.KGGETSEM*YLIQPDSSVKPYR.V                                             | 2402.66604 | 3 | 1.68E-08 | 0.66 | 3.75 | - | 427.0  |
| AHQ-6-8, 3148               | R.KGGETSEM*YLIQPDSSVKPYR.V                                             | 2402.66604 | 3 | 5.81E-05 | 0.78 | 3.83 | - | 730.1  |
| AHQ-6-6, 2575               | K.LESDVSAQM*EYCR.T                                                     | 1605.72945 | 2 | 2.26E-06 | 0.88 | 3.43 | - | 776.1  |
| AHQ-6-7, 2506 - 2528        | K.LESDVSAQM*EYCR.T                                                     | 1605.72945 | 2 | 1.70E-07 | 0.94 | 4.05 | - | 1021.4 |
| AHQ-6-7, 5787               | R.M*GPTLELLIEMEDWK.G                                                   | 1708.97776 | 2 | 4.11E-05 | 0.96 | 4.55 | - | 1449.4 |
| AHQ-6-6, 4624 - 4684        | R.M*GPTLELLIEMEDWK.G                                                   | 1724.97716 | 2 | 9.86E-05 | 0.81 | 2.67 | - | 1097.6 |
| AHQ-6-7, 5404               | K.NYCGLPGEYWLGNDKISQLTR.M                                              | 2486.74455 | 2 | 8.53E-06 | 0.57 | 2.51 | - | 292.3  |
| AHQ-6-7, 2964 - 3030        | K.REEAPSLRPAPPPIGGGGYR.A                                               | 2108.34617 | 3 | 1.17E-09 | 0.94 | 4.62 | - | 1272.8 |
| AHQ-6-6, 3687 - 3760        | R.TPCTVSCNIPVVGSK.E                                                    | 1621.85811 | 2 | 1.55E-05 | 0.43 | 2.78 | - | 325.5  |
| AHQ-6-8, 3565               | R.TPCTVSCNIPVVGSK.E                                                    | 1621.85811 | 2 | 5.92E-06 | 0.73 | 3.16 | - | 430.6  |
| AHQ-6-7, 3583 - 3586        | R.TPCTVSCNIPVVGSK.E                                                    | 1621.85811 | 2 | 1.25E-06 | 0.80 | 3.32 | - | 460.6  |
| AHQ-6-6, 4662 - 4738        | R.TPCTVSCNIPVVGSKCEEEIIR.K                                             | 2552.88440 | 3 | 2.81E-09 | 0.91 | 4.35 | - | 1016.4 |
| AHQ-6-7, 4468 - 4535        | R.TPCTVSCNIPVVGSKCEEEIIR.K                                             | 2552.88440 | 3 | 9.26E-06 | 0.94 | 4.64 | - | 1299.1 |
| AHQ-6-7, 4590               | R.TPCTVSCNIPVVGSKCEEEIIR.K                                             | 2552.88440 | 3 | 7.06E-10 | 0.94 | 4.80 | - | 1176.7 |
| AHQ-6-6, 4739 - 4740        | R.TPCTVSCNIPVVGSKCEEEIIR.K                                             | 2552.88440 | 2 | 1.57E-07 | 0.90 | 4.50 | - | 395.1  |
| AHQ-6-7, 3726 - 3783        | R.VYCDM*NTENGWTVIQNR.Q                                                 | 2175.34493 | 2 | 6.95E-08 | 0.93 | 4.46 | - | 789.4  |
| AHQ-6-8, 3762               | R.VYCDM*NTENGWTVIQNR.Q                                                 | 2175.34493 | 2 | 1.30E-04 | 0.92 | 4.31 | - | 784.7  |
| AHQ-6-6, 4303 - 4371        | R.VYCDMNTENGWTVIQNR.Q                                                  | 2159.34553 | 2 | 3.12E-06 | 0.88 | 3.85 | - | 727.4  |
| AHQ-6-7, 4174 - 4175        | R.VYCDMNTENGWTVIQNR.Q                                                  | 2159.34553 | 2 | 8.52E-08 | 0.95 | 4.34 | - | 1217.0 |

|                            |                                     |            |   |          |       |        |       |          |
|----------------------------|-------------------------------------|------------|---|----------|-------|--------|-------|----------|
| AHQ-6-6, 3839 - 3898       | R.VYCDM*NTENGWTVIQNR.Q              | 2175.34493 | 2 | 4.92E-08 | 0.92  | 4.24   | -     | 854.0    |
| AHQ-6-8, 4201 - 4202       | R.VYCDMNTENGWTVIQNR.Q               | 2159.34553 | 2 | 3.15E-10 | 0.95  | 4.67   | -     | 883.8    |
| AHQ-6-7, 2106              | K.YQISVNYK.Y                        | 851.96999  | 1 | 2.65E-04 | 0.23  | 2.42   | -     | 214.6    |
| AHQ-6-6, 4350              | R.YYWGQYTWDM*AK.H                   | 1685.83949 | 2 | 9.81E-04 | 0.92  | 3.43   | -     | 1005.2   |
| AHQ-6-7, 4171 - 4210       | R.YYWGQYTWDM*AK.H                   | 1685.83949 | 2 | 1.09E-05 | 0.92  | 3.41   | -     | 1011.1   |
| AHQ-6-6, 4891 - 4894       | R.YYWGQYTWDM*AK.H                   | 1669.84009 | 2 | 3.00E-11 | 0.94  | 3.65   | -     | 1196.0   |
| AHQ-6-12, 4320 - 4339      | R.YYWGQYTWDM*AK.H                   | 1685.83949 | 2 | 7.80E-04 | 0.74  | 2.75   | -     | 603.2    |
| AHQ-6-14-, 4395 - 4416     | R.YYWGQYTWDM*AK.H                   | 1685.83949 | 2 | 1.34E-04 | 0.96  | 4.26   | -     | 1203.3   |
| AHQ-6-7, 4732 - 4742       | R.YYWGQYTWDM*AK.H                   | 1669.84009 | 2 | 6.78E-07 | 0.93  | 3.46   | -     | 1125.7   |
| gj 4507877 ref NP_003364.1 | vinculin isoform VCL [Homo sapiens] |            |   | 2.73E-11 | 42.36 | 480.31 | 44.90 | 116721.6 |
| AHQ-6-14-, 6407            | K.AIPDLTAPVAAVQAAVSNLVR.V           | 2077.41342 | 2 | 4.13E-07 | 0.96  | 5.06   | -     | 961.7    |
| AHQ-6-1, 6579              | K.AIPDLTAPVAAVQAAVSNLVR.V           | 2077.41342 | 2 | 4.59E-05 | 0.75  | 2.85   | -     | 435.5    |
| AHQ-6-11, 6271             | K.AIPDLTAPVAAVQAAVSNLVR.V           | 2077.41342 | 2 | 1.12E-10 | 0.97  | 5.20   | -     | 1041.2   |
| AHQ-6-10, 6211             | K.AIPDLTAPVAAVQAAVSNLVR.V           | 2077.41342 | 2 | 5.07E-09 | 0.94  | 4.46   | -     | 866.0    |
| AHQ-6-7, 6334              | K.AIPDLTAPVAAVQAAVSNLVR.V           | 2077.41342 | 2 | 5.87E-07 | 0.96  | 4.66   | -     | 1036.3   |
| AHQ-6-4, 6569 - 6635       | K.AIPDLTAPVAAVQAAVSNLVR.V           | 2077.41342 | 2 | 3.53E-08 | 0.98  | 6.17   | -     | 1113.6   |
| AHQ-6-4, 6631              | K.AIPDLTAPVAAVQAAVSNLVR.V           | 2077.41342 | 3 | 7.44E-04 | 0.96  | 5.03   | -     | 1702.1   |
| AHQ-6-3, 6533              | K.AIPDLTAPVAAVQAAVSNLVR.V           | 2077.41342 | 2 | 6.43E-05 | 0.92  | 3.64   | -     | 881.3    |
| AHQ-6-5, 6547              | K.AIPDLTAPVAAVQAAVSNLVR.V           | 2077.41342 | 2 | 1.97E-07 | 0.97  | 5.24   | -     | 1252.3   |
| AHQ-6-1, 3600              | R.ALASQLQDSLK.D                     | 1174.32943 | 2 | 1.14E-04 | 0.89  | 3.15   | -     | 924.3    |
| AHQ-6-6, 3299              | R.ALASQLQDSLK.D                     | 1174.32943 | 2 | 1.61E-06 | 0.87  | 2.94   | -     | 1036.3   |
| AHQ-6-7, 3211 - 3214       | R.ALASQLQDSLK.D                     | 1174.32943 | 1 | 2.62E-04 | 0.32  | 2.77   | -     | 265.1    |
| AHQ-6-3, 3408              | R.ALASQLQDSLK.D                     | 1174.32943 | 2 | 2.35E-04 | 0.88  | 3.23   | -     | 995.1    |
| AHQ-6-5, 3317              | R.ALASQLQDSLK.D                     | 1174.32943 | 2 | 1.54E-04 | 0.84  | 3.23   | -     | 895.4    |
| AHQ-6-6, 3435 - 3494       | K.AQQVSGGLDVLTA.V                   | 1458.64233 | 2 | 2.23E-08 | 0.97  | 4.95   | -     | 1684.6   |
| AHQ-6-4, 3504 - 3585       | K.AQQVSGGLDVLTA.V                   | 1458.64233 | 2 | 1.00E-06 | 0.97  | 4.56   | -     | 1667.1   |
| AHQ-6-4, 3588              | K.AQQVSGGLDVLTA.V                   | 1458.64233 | 1 | 2.92E-06 | 0.68  | 3.66   | -     | 347.2    |
| AHQ-6-8, 3313              | K.AQQVSGGLDVLTA.V                   | 1458.64233 | 2 | 1.51E-04 | 0.95  | 4.30   | -     | 1280.4   |
| AHQ-6-5, 3527 - 3528       | K.AQQVSGGLDVLTA.V                   | 1458.64233 | 2 | 3.16E-09 | 0.97  | 5.16   | -     | 1540.2   |
| AHQ-6-5, 3524 - 3531       | K.AQQVSGGLDVLTA.V                   | 1458.64233 | 1 | 3.51E-05 | 0.61  | 3.07   | -     | 434.8    |
| AHQ-6-2, 3642              | K.AQQVSGGLDVLTA.V                   | 1458.64233 | 2 | 1.56E-07 | 0.97  | 4.16   | -     | 1731.8   |
| AHQ-6-4, 2511              | K.AVAGNISDPGLQK.S                   | 1270.41721 | 2 | 3.98E-04 | 0.76  | 3.04   | -     | 568.7    |
| AHQ-6-5, 2496              | K.AVAGNISDPGLQK.S                   | 1270.41721 | 2 | 1.16E-04 | 0.88  | 3.47   | -     | 734.6    |
| AHQ-6-8, 2356              | K.AVAGNISDPGLQK.S                   | 1270.41721 | 2 | 1.62E-04 | 0.64  | 2.94   | -     | 526.9    |
| AHQ-6-7, 2439              | K.AVAGNISDPGLQK.S                   | 1270.41721 | 2 | 2.41E-04 | 0.90  | 3.55   | -     | 805.1    |
| AHQ-6-5, 5563 - 5569       | K.CDRVDQLTAQLADLAAR.G               | 1918.12182 | 3 | 8.74E-06 | 0.94  | 4.89   | -     | 1385.7   |
| AHQ-6-4, 5641              | K.CDRVDQLTAQLADLAAR.G               | 1918.12182 | 3 | 2.79E-06 | 0.94  | 4.67   | -     | 1435.4   |
| AHQ-6-4, 5643              | K.CDRVDQLTAQLADLAAR.G               | 1918.12182 | 2 | 3.26E-04 | 0.93  | 4.13   | -     | 1126.4   |
| AHQ-6-5, 5567              | K.CDRVDQLTAQLADLAAR.G               | 1918.12182 | 2 | 3.55E-05 | 0.91  | 3.63   | -     | 927.9    |
| AHQ-6-7, 2271              | R.DPSASPGDAGEQAIR.Q                 | 1471.51169 | 2 | 1.43E-06 | 0.80  | 3.27   | -     | 533.9    |
| AHQ-6-5, 2311 - 2312       | R.DPSASPGDAGEQAIR.Q                 | 1471.51169 | 2 | 2.15E-06 | 0.92  | 3.91   | -     | 834.2    |
| AHQ-6-4, 2343              | R.DPSASPGDAGEQAIR.Q                 | 1471.51169 | 1 | 1.32E-04 | 0.17  | 2.05   | -     | 150.2    |
| AHQ-6-4, 2349              | R.DPSASPGDAGEQAIR.Q                 | 1471.51169 | 1 | 8.39E-04 | 0.19  | 2.03   | -     | 156.9    |
| AHQ-6-4, 2272 - 2335       | R.DPSASPGDAGEQAIR.Q                 | 1471.51169 | 2 | 2.96E-07 | 0.87  | 3.60   | -     | 605.6    |
| AHQ-6-3, 2381              | R.DPSASPGDAGEQAIR.Q                 | 1471.51169 | 2 | 1.42E-05 | 0.77  | 3.13   | -     | 536.0    |
| AHQ-6-5, 5315 - 5372       | R.EAFQPQEPDFPPPPDLEQLR.L            | 2448.67149 | 2 | 5.91E-05 | 0.80  | 3.22   | -     | 581.4    |
| AHQ-6-6, 3002 - 3012       | K.ETVQTTEDQILKR.D                   | 1561.71942 | 2 | 6.39E-04 | 0.79  | 2.72   | -     | 865.6    |
| AHQ-6-5, 3001              | K.ETVQTTEDQILKR.D                   | 1561.71942 | 2 | 6.37E-07 | 0.80  | 3.14   | -     | 736.1    |
| AHQ-6-10, 2954 - 2956      | K.ETVQTTEDQILKR.D                   | 1561.71942 | 2 | 6.10E-04 | 0.69  | 2.83   | -     | 576.0    |
| AHQ-6-4, 6637              | K.GILEYLTVAEVVETM*EDLVYTK.N         | 2633.99263 | 3 | 3.77E-05 | 0.96  | 5.09   | -     | 1757.1   |
| AHQ-6-6, 6334              | R.GILSGTSDLLLTDFDEAEVR.K            | 2037.25656 | 2 | 6.61E-09 | 0.97  | 5.00   | -     | 1235.3   |
| AHQ-6-7, 6191              | R.GILSGTSDLLLTDFDEAEVR.K            | 2037.25656 | 2 | 8.17E-05 | 0.92  | 4.43   | -     | 686.7    |
| AHQ-6-3, 6401              | R.GILSGTSDLLLTDFDEAEVR.K            | 2037.25656 | 2 | 3.12E-06 | 0.95  | 5.08   | -     | 735.1    |
| AHQ-6-14-, 6284            | R.GILSGTSDLLLTDFDEAEVR.K            | 2037.25656 | 2 | 3.71E-04 | 0.65  | 2.86   | -     | 658.6    |
| AHQ-6-2, 6438 - 6515       | R.GILSGTSDLLLTDFDEAEVR.K            | 2037.25656 | 2 | 6.63E-07 | 0.94  | 4.77   | -     | 951.4    |
| AHQ-6-4, 6489              | R.GILSGTSDLLLTDFDEAEVR.K            | 2037.25656 | 2 | 1.43E-04 | 0.97  | 5.72   | -     | 1073.5   |
| AHQ-6-4, 6357 - 6407       | R.GILSGTSDLLLTDFDEAEVR.K            | 2037.25656 | 2 | 1.04E-05 | 0.91  | 3.90   | -     | 858.9    |
| AHQ-6-11, 6060 - 6137      | R.GILSGTSDLLLTDFDEAEVR.K            | 2037.25656 | 2 | 1.33E-05 | 0.93  | 4.48   | -     | 804.2    |
| AHQ-6-5, 6399              | R.GILSGTSDLLLTDFDEAEVR.K            | 2037.25656 | 2 | 2.73E-11 | 0.96  | 5.14   | -     | 1162.2   |
| AHQ-6-4, 6193              | R.GILSGTSDLLLTDFDEAEVR.K            | 2165.42947 | 2 | 5.76E-08 | 0.90  | 4.25   | -     | 695.6    |
| AHQ-6-4, 3549              | K.GWLRDPSASPGDAGEQAIR.Q             | 1984.11876 | 2 | 1.07E-05 | 0.94  | 4.56   | -     | 821.5    |
| AHQ-6-4, 3492 - 3551       | K.GWLRDPSASPGDAGEQAIR.Q             | 1984.11876 | 3 | 7.42E-07 | 0.86  | 3.91   | -     | 737.2    |
| AHQ-6-5, 3497              | K.GWLRDPSASPGDAGEQAIR.Q             | 1984.11876 | 3 | 1.98E-04 | 0.89  | 3.54   | -     | 1251.6   |
| AHQ-6-4, 2269              | K.IAELCDDPKER.D                     | 1347.47690 | 2 | 1.20E-04 | 0.54  | 2.53   | -     | 522.8    |
| AHQ-6-4, 2189              | R.KIAELCDDPKER.D                    | 1475.64981 | 2 | 1.49E-06 | 0.83  | 3.19   | -     | 937.4    |
| AHQ-6-4, 3303              | R.KIAELCDDPKERDILLR.S               | 2088.32839 | 2 | 9.96E-05 | 0.89  | 3.73   | -     | 872.6    |
| AHQ-6-5, 4224              | K.KIDAAQNWLADPNNGGPEGEEQIR.G        | 2509.67332 | 2 | 2.71E-04 | 0.73  | 3.57   | -     | 285.3    |
| AHQ-6-4, 4153 - 4215       | K.KIDAAQNWLADPNNGGPEGEEQIR.G        | 2509.67332 | 3 | 2.41E-06 | 0.94  | 5.04   | -     | 1103.2   |
| AHQ-6-4, 4203 - 4281       | K.KIDAAQNWLADPNNGGPEGEEQIR.G        | 2509.67332 | 2 | 3.73E-07 | 0.66  | 3.22   | -     | 275.5    |
| AHQ-6-4, 4285              | K.KIDAAQNWLADPNNGGPEGEEQIR.G        | 2509.67332 | 3 | 1.67E-07 | 0.95  | 5.33   | -     | 1409.3   |
| AHQ-6-6, 4176              | K.KIDAAQNWLADPNNGGPEGEEQIR.G        | 2509.67332 | 2 | 1.02E-06 | 0.63  | 2.63   | -     | 360.7    |
| AHQ-6-5, 4208              | K.KIDAAQNWLADPNNGGPEGEEQIR.G        | 2509.67332 | 3 | 7.31E-06 | 0.85  | 3.80   | -     | 1110.6   |
| AHQ-6-5, 3380              | R.LANVMMPYR.Q                       | 1152.41560 | 2 | 7.21E-05 | 0.94  | 3.54   | -     | 1102.6   |
| AHQ-6-4, 3417              | R.LANVMMPYR.Q                       | 1152.41560 | 2 | 6.24E-04 | 0.92  | 3.36   | -     | 946.6    |
| AHQ-6-4, 4177 - 4243       | K.LLAVAATAPPDAPNREEVFDER.A          | 2382.61458 | 3 | 2.03E-05 | 0.63  | 3.04   | -     | 644.6    |
| AHQ-6-6, 3579 - 3590       | K.LVQAAQM*LQSDPYSVPA.R.D            | 1991.25773 | 2 | 4.22E-06 | 0.90  | 4.05   | -     | 740.2    |
| AHQ-6-11, 3547             | K.LVQAAQM*LQSDPYSVPA.R.D            | 1991.25773 | 2 | 3.63E-05 | 0.89  | 3.43   | -     | 794.0    |
| AHQ-6-5, 3611              | K.LVQAAQM*LQSDPYSVPA.R.D            | 1991.25773 | 2 | 5.07E-06 | 0.87  | 3.16   | -     | 817.3    |
| AHQ-6-4, 3692              | K.LVQAAQM*LQSDPYSVPA.R.D            | 1991.25773 | 3 | 4.19E-07 | 0.97  | 5.08   | -     | 2469.6   |
| AHQ-6-4, 3668              | K.LVQAAQM*LQSDPYSVPA.R.D            | 1991.25773 | 2 | 7.44E-05 | 0.87  | 3.87   | -     | 527.1    |
| AHQ-6-4, 4465              | K.LVQAAQM*LQSDPYSVPA.R.D            | 1975.25833 | 3 | 2.47E-05 | 0.90  | 4.38   | -     | 901.9    |
| AHQ-6-4, 3721 - 3727       | K.M*LGQMTDQVADLR.A                  | 1494.71995 | 2 | 4.08E-04 | 0.98  | 4.95   | -     | 2782.1   |
| AHQ-6-4, 4084              | K.MLGQMTDQVADLR.A                   | 1478.72055 | 2 | 6.62E-08 | 0.96  | 4.84   | -     | 1393.1   |
| AHQ-6-4, 3291              | K.MLGQM*TDQVADLR.A                  | 1494.71995 | 2 | 1.08E-07 | 0.92  | 4.28   | -     | 1265.8   |
| AHQ-6-6, 2906              | K.M*LGQM*TDQVADLR.A                 | 1510.71935 | 2 | 8.97E-07 | 0.96  | 3.83   | -     | 1996.9   |
| AHQ-6-5, 2888              | K.M*LGQM*TDQVADLR.A                 | 1510.71935 | 2 | 3.09E-05 | 0.92  | 3.43   | -     | 1392.8   |
| AHQ-6-5, 4013 - 4081       | K.MLGQMTDQVADLR.A                   | 1478.72055 | 2 | 3.93E-07 | 0.94  | 3.40   | -     | 1897.8   |
| AHQ-6-4, 2931              | K.M*LGQM*TDQVADLR.A                 | 1510.71935 | 2 | 2.93E-05 | 0.97  | 4.25   | -     | 2176.0   |
| AHQ-6-5, 3664              | K.M*LGQMTDQVADLR.A                  | 1494.71995 | 2 | 6.24E-05 | 0.96  | 3.98   | -     | 1868.4   |
| AHQ-6-6, 3630              | K.M*LGQMTDQVADLR.A                  | 1494.71995 | 2 | 2.42E-05 | 0.97  | 3.97   | -     | 2450.2   |
| AHQ-6-5, 3235              | K.MLGQM*TDQVADLR.A                  | 1494.71995 | 2 | 8.17E-06 | 0.96  | 4.56   | -     | 2011.9   |
| AHQ-6-6, 3170 - 3231       | K.MLGQM*TDQVADLR.A                  | 1494.71995 | 2 | 8.25E-05 | 0.63  | 2.67   | -     | 857.4    |
| AHQ-6-4, 5417 - 5456       | R.MQEAMTQEVSDFVSDTTPIK.L            | 2359.61664 | 2 | 1.77E-04 | 0.84  | 3.47   | -     | 1034.8   |
| AHQ-6-6, 3162              | K.M*SAEINEIR.V                      | 1192.36823 | 2 | 9.40E-06 | 0.86  | 3.21   | -     | 828.6    |
| AHQ-6-4, 3229              | K.M*SAEINEIR.V                      | 1192.36823 | 2 | 1.34E-06 | 0.93  | 3.57   | -     | 1269.1   |
| AHQ-6-5, 3168              | K.M*SAEINEIR.V                      | 1192.36823 | 2 | 4.83E-07 | 0.95  | 3.76   | -     | 1517.9   |
| AHQ-6-6, 3474              | K.MTGLVDEAIDTK.S                    | 1293.46936 | 2 | 2.21E-04 | 0.90  | 3.04   | -     | 1119.1   |
| AHQ-6-4, 3555              | K.MTGLVDEAIDTK.S                    | 1293.46936 | 2 | 5.72E-07 | 0.97  | 4.51   | -     | 1773.8   |
| AHQ-6-4, 3059 - 3128       | K.M*TLVDEAIDTK.S                    | 1309.46876 | 2 | 1.37E-06 | 0.93  | 2.98   | -     | 1375.2   |
| AHQ-6-5, 3072              | K.M*TLVDEAIDTK.S                    | 1309.46876 | 2 | 1.60E-06 | 0.92  | 3.18   | -     | 1318.9   |
| AHQ-6-4, 3127              | K.M*TLVDEAIDTK.S                    | 1309.46876 | 2 | 1.64E-09 | 0.93  | 3.61   | -     | 1180.4   |
| AHQ-6-5, 3496              | K.MTGLVDEAIDTK.S                    | 1293.46936 | 2 | 2.17E-07 | 0.96  | 3.88   | -     | 1650.4   |
| AHQ-6-6, 3028              | R.NPQGNQAAAEHFETM.K.N               | 1737.87437 | 2 | 9.29E-04 | 0.39  | 2.63   | -     | 429.2    |
| AHQ-6-4, 2561              | R.NPQGNQAAAEHFETM*K.N               | 1753.87377 | 2 | 1.22E-04 | 0.93  | 3.98   | -     | 948.1    |
| AHQ-6-4, 3060              | R.NPQGNQAAAEHFETM.K.N               | 1737.87437 | 2 | 1.03E-06 | 0.94  | 4.11   | -     | 1077.6   |
| AHQ-6-5, 2923 - 2925       | K.SFLDSGYR.I                        | 945.01074  | 2 | 5.22E-04 | 0.84  | 3.20   | -     | 543.4    |
| AHQ-6-4, 2960              | K.SFLDSGYR.I                        | 945.01074  | 2 | 3.19E-04 | 0.87  | 2.62   | -     | 827.7    |

|                             |                                                                                  |            |   |          |       |        |       |         |
|-----------------------------|----------------------------------------------------------------------------------|------------|---|----------|-------|--------|-------|---------|
| AHQ-6-6, 3406               | R.SLGEISALTSK.L                                                                  | 1106.25186 | 2 | 1.38E-05 | 0.93  | 3.47   | -     | 934.3   |
| AHQ-6-4, 3471               | R.SLGEISALTSK.L                                                                  | 1106.25186 | 2 | 6.00E-06 | 0.91  | 3.28   | -     | 973.8   |
| AHQ-6-4, 3483               | R.SLGEISALTSK.L                                                                  | 1106.25186 | 1 | 1.59E-05 | 0.37  | 2.83   | -     | 174.0   |
| AHQ-6-4, 3633               | R.SLGEISALTSK.L                                                                  | 1106.25186 | 2 | 6.24E-06 | 0.94  | 3.56   | -     | 1096.6  |
| AHQ-6-7, 3307               | R.SLGEISALTSK.L                                                                  | 1106.25186 | 2 | 9.05E-04 | 0.84  | 3.03   | -     | 702.4   |
| AHQ-6-5, 3335               | K.SLLDASEEAIKK.D                                                                 | 1304.47187 | 2 | 1.20E-05 | 0.81  | 2.93   | -     | 791.2   |
| AHQ-6-4, 3375               | K.SLLDASEEAIKK.D                                                                 | 1304.47187 | 2 | 1.29E-08 | 0.83  | 2.66   | -     | 892.2   |
| AHQ-6-3, 3437               | K.SLLDASEEAIKK.D                                                                 | 1304.47187 | 2 | 2.24E-08 | 0.80  | 2.80   | -     | 839.9   |
| AHQ-6-6, 3334 - 3355        | K.SLLDASEEAIKK.D                                                                 | 1304.47187 | 2 | 9.16E-04 | 0.83  | 2.97   | -     | 1009.2  |
| AHQ-6-5, 2375 - 2416        | K.STVEGIQASVK.T                                                                  | 1119.25064 | 2 | 1.45E-04 | 0.81  | 2.61   | -     | 848.7   |
| AHQ-6-7, 2363               | K.STVEGIQASVK.T                                                                  | 1119.25064 | 2 | 6.88E-06 | 0.89  | 3.18   | -     | 903.1   |
| AHQ-6-4, 2443               | K.STVEGIQASVK.T                                                                  | 1119.25064 | 2 | 2.94E-07 | 0.93  | 3.17   | -     | 1066.5  |
| AHQ-6-3, 2504               | K.STVEGIQASVK.T                                                                  | 1119.25064 | 2 | 4.52E-06 | 0.87  | 3.04   | -     | 866.0   |
| AHQ-6-4, 2568 - 2580        | R.TDAGFTLR.W                                                                     | 880.96819  | 2 | 3.30E-04 | 0.91  | 2.79   | -     | 1118.9  |
| AHQ-6-5, 2544               | R.TDAGFTLR.W                                                                     | 880.96819  | 2 | 5.13E-04 | 0.86  | 2.72   | -     | 903.6   |
| AHQ-6-11, 6216              | R.TIESILEPVAQIQLVIM*HEEGEVDPK.G                                                  | 3119.49274 | 3 | 4.24E-04 | 0.44  | 3.01   | -     | 213.9   |
| AHQ-6-4, 6351 - 6412        | R.TNISDEESEQATEM*LVHNAQNLMQSVK.E                                                 | 3064.30957 | 3 | 1.00E-06 | 0.79  | 4.39   | -     | 506.7   |
| AHQ-6-4, 5707 - 5787        | R.TNISDEESEQATEM*LVHNAQNLM*QSVK.E                                                | 3064.30957 | 3 | 7.89E-07 | 0.77  | 3.78   | -     | 758.1   |
| AHQ-6-12, 5105 - 5163       | R.TNISDEESEQATEM*LVHNAQNLM*QSVK.E                                                | 3080.30897 | 3 | 1.13E-04 | 0.79  | 3.84   | -     | 515.8   |
| AHQ-6-3, 6285 - 6286        | R.TNISDEESEQATEM*LVHNAQNLMQSVK.E                                                 | 3064.30957 | 3 | 8.14E-04 | 0.51  | 3.05   | -     | 453.0   |
| AHQ-6-14-, 5606             | R.TNISDEESEQATEM*LVHNAQNLMQSVK.E                                                 | 3064.30957 | 3 | 1.67E-05 | 0.75  | 4.47   | -     | 604.8   |
| AHQ-6-4, 6499               | R.TNISDEESEQATEM*LVHNAQNLMQSVK.E                                                 | 3048.31017 | 3 | 6.80E-04 | 0.84  | 3.85   | -     | 559.9   |
| AHQ-6-5, 3247               | R.TNLLQVCEI                                                                      | 1134.28859 | 2 | 5.67E-05 | 0.87  | 3.02   | -     | 1050.1  |
| AHQ-6-6, 3239               | R.TNLLQVCEI                                                                      | 1134.28859 | 2 | 4.76E-04 | 0.92  | 2.97   | -     | 1500.1  |
| AHQ-6-12, 3264              | R.TNLLQVCEI                                                                      | 1134.28859 | 2 | 4.74E-06 | 0.88  | 3.09   | -     | 978.4   |
| AHQ-6-6, 5102               | K.VAM*ANIQPQMLVAGATSIAR.R                                                        | 2059.44338 | 2 | 5.23E-07 | 0.89  | 3.88   | -     | 868.2   |
| AHQ-6-4, 4745 - 4805        | K.VAM*ANIQPQM*LVAGATSIAR.R                                                       | 2075.44278 | 2 | 7.16E-08 | 0.95  | 5.10   | -     | 782.2   |
| AHQ-6-4, 4815               | K.VAM*ANIQPQM*LVAGATSIAR.R                                                       | 2075.44278 | 3 | 2.60E-05 | 0.97  | 5.39   | -     | 1878.8  |
| AHQ-6-5, 5612               | K.VAMANIQPQMLVAGATSIAR.R                                                         | 2043.44398 | 2 | 1.89E-04 | 0.46  | 3.48   | -     | 242.8   |
| AHQ-6-5, 5140               | K.VAM*ANIQPQMLVAGATSIAR.R                                                        | 2059.44338 | 3 | 1.20E-06 | 0.91  | 3.95   | -     | 1813.9  |
| AHQ-6-5, 5133               | K.VAM*ANIQPQMLVAGATSIAR.R                                                        | 2059.44338 | 2 | 6.16E-06 | 0.97  | 5.84   | -     | 1247.5  |
| AHQ-6-4, 5723 - 5729        | K.VAMANIQPQM*LVAGATSIAR.R                                                        | 2043.44398 | 3 | 1.04E-06 | 0.95  | 5.03   | -     | 1571.4  |
| AHQ-6-4, 5365               | K.VAMANIQPQM*LVAGATSIAR.R                                                        | 2059.44338 | 3 | 1.20E-04 | 0.87  | 4.57   | -     | 1000.7  |
| AHQ-6-3, 5184               | K.VAM*ANIQPQMLVAGATSIAR.R                                                        | 2059.44338 | 2 | 8.73E-06 | 0.69  | 3.29   | -     | 541.1   |
| AHQ-6-5, 4740               | K.VAM*ANIQPQM*LVAGATSIAR.R                                                       | 2075.44278 | 3 | 2.66E-05 | 0.97  | 5.54   | -     | 2264.6  |
| AHQ-6-5, 4727               | K.VAM*ANIQPQM*LVAGATSIAR.R                                                       | 2075.44278 | 2 | 3.80E-04 | 0.53  | 2.94   | -     | 467.4   |
| AHQ-6-4, 5229               | K.VAM*ANIQPQMLVAGATSIAR.R                                                        | 2059.44338 | 3 | 8.34E-09 | 0.95  | 4.74   | -     | 2209.9  |
| AHQ-6-5, 4831               | R.VDQLTAQLADLAAR.G                                                               | 1485.66778 | 2 | 3.70E-07 | 0.98  | 4.73   | -     | 3306.4  |
| AHQ-6-6, 4796 - 4798        | R.VDQLTAQLADLAAR.G                                                               | 1485.66778 | 2 | 8.98E-08 | 0.98  | 4.53   | -     | 2866.1  |
| AHQ-6-4, 4904 - 4968        | R.VDQLTAQLADLAAR.G                                                               | 1485.66778 | 2 | 4.50E-09 | 0.98  | 5.23   | -     | 2704.2  |
| AHQ-6-3, 5209               | R.VLQLTSWDEDAAWASK.D                                                             | 1749.90156 | 2 | 6.78E-06 | 0.94  | 4.18   | -     | 982.8   |
| AHQ-6-5, 5097 - 5161        | R.VLQLTSWDEDAAWASK.D                                                             | 1749.90156 | 2 | 3.43E-06 | 0.96  | 4.79   | -     | 1229.1  |
| AHQ-6-6, 5122               | R.VLQLTSWDEDAAWASK.D                                                             | 1749.90156 | 2 | 2.51E-04 | 0.93  | 4.08   | -     | 876.5   |
| AHQ-6-2, 5244               | R.VLQLTSWDEDAAWASK.D                                                             | 1749.90156 | 2 | 4.68E-10 | 0.96  | 4.64   | -     | 1353.4  |
| AHQ-6-10, 4852 - 4906       | R.VLQLTSWDEDAAWASK.D                                                             | 1749.90156 | 2 | 3.83E-05 | 0.53  | 2.83   | -     | 467.4   |
| AHQ-6-4, 5236 - 5276        | R.VLQLTSWDEDAAWASK.D                                                             | 1749.90156 | 2 | 2.30E-09 | 0.97  | 5.16   | -     | 1629.3  |
| AHQ-6-4, 5133               | R.VLQLTSWDEDAAWASK.D                                                             | 1749.90156 | 2 | 9.03E-09 | 0.95  | 4.20   | -     | 1155.5  |
| AHQ-6-4, 3293               | R.VMLVNSMNTK.I                                                                   | 1236.53081 | 2 | 2.40E-05 | 0.94  | 3.58   | -     | 1325.2  |
| gi 21361657 ref NP_005304.3 | glucose regulated protein, 58kDa; glucose regulated protein, 58kD [Homo sapiens] |            |   | 2.75E-11 | 5.25  | 60.30  | 19.60 | 56782.0 |
| AHQ-6-13-, 5429             | R.ELSDFISYLQR.E                                                                  | 1371.52000 | 2 | 2.64E-04 | 0.95  | 4.14   | -     | 1378.9  |
| AHQ-6-13, 5531              | R.ELSDFISYLQR.E                                                                  | 1371.52000 | 2 | 1.33E-04 | 0.88  | 3.03   | -     | 982.8   |
| AHQ-6-7, 6211               | K.FISDKDASIVGFFDDSFSEAHSEFLK.A                                                   | 2940.16492 | 3 | 2.75E-11 | 0.98  | 5.97   | -     | 2589.7  |
| AHQ-6-7, 4331               | R.GFPTIYFSPANK.K                                                                 | 1342.52349 | 2 | 2.15E-05 | 0.74  | 2.84   | -     | 616.8   |
| AHQ-6-7, 5344               | R.KTFSHELSDFGLESTAGEIPVVAIR.T                                                    | 2705.01562 | 3 | 1.53E-07 | 0.91  | 3.68   | -     | 1383.5  |
| AHQ-6-7, 2991 - 3040        | K.M*DATANDVPSPEYVR.G                                                             | 1681.80586 | 2 | 1.57E-05 | 0.82  | 3.88   | -     | 353.0   |
| AHQ-6-7, 3047               | K.YGVSGYPTLK.I                                                                   | 1085.23435 | 2 | 4.32E-05 | 0.92  | 3.19   | -     | 974.7   |
| gi 4507953 ref NP_003397.1  | tyrosine 3/tryptophan 5-monoxygenase activation protein, zeta polypep            |            |   | 4.15E-11 | 5.38  | 60.29  | 29.80 | 27744.9 |
| AHQ-6-10, 5622              | K.IETELRDICNDVLSLLEK.F                                                           | 2162.44718 | 3 | 6.38E-07 | 0.85  | 3.87   | -     | 569.5   |
| AHQ-6-14-, 2376             | K.SVTEOGAELSNEER.N                                                               | 1549.57922 | 2 | 2.21E-08 | 0.92  | 3.54   | -     | 1262.6  |
| AHQ-6-10, 2154 - 2230       | K.SVTEOGAELSNEER.N                                                               | 1549.57922 | 2 | 3.00E-07 | 0.89  | 3.65   | -     | 1065.6  |
| AHQ-6-10, 2318 - 2379       | K.SVTEOGAELSNEER.N                                                               | 1549.57922 | 2 | 9.35E-08 | 0.96  | 5.09   | -     | 1381.1  |
| AHQ-6-13-, 2412 - 2442      | K.SVTEOGAELSNEER.N                                                               | 1549.57922 | 2 | 2.21E-07 | 0.88  | 3.73   | -     | 1156.7  |
| AHQ-6-12, 2403 - 2404       | K.SVTEOGAELSNEER.N                                                               | 1549.57922 | 2 | 4.79E-08 | 0.94  | 3.99   | -     | 1363.0  |
| AHQ-6-13, 2600              | K.SVTEOGAELSNEER.N                                                               | 1549.57922 | 2 | 2.40E-06 | 0.90  | 3.60   | -     | 1130.3  |
| AHQ-6-13-, 6296             | K.TAFDEAIELDTLSEESYK.D                                                           | 2133.25160 | 3 | 9.12E-06 | 0.91  | 4.50   | -     | 967.0   |
| AHQ-6-14-, 6254 - 6314      | K.TAFDEAIELDTLSEESYK.D                                                           | 2133.25160 | 2 | 1.15E-06 | 0.92  | 3.74   | -     | 1132.1  |
| AHQ-6-13-, 6233 - 6297      | K.TAFDEAIELDTLSEESYK.D                                                           | 2133.25160 | 2 | 1.31E-04 | 0.96  | 4.65   | -     | 1388.9  |
| AHQ-6-10, 6114 - 6116       | K.TAFDEAIELDTLSEESYK.D                                                           | 2133.25160 | 2 | 4.15E-11 | 0.97  | 5.75   | -     | 1478.4  |
| AHQ-6-13, 6343              | K.TAFDEAIELDTLSEESYK.D                                                           | 2133.25160 | 2 | 1.00E-05 | 0.96  | 4.92   | -     | 1166.1  |
| AHQ-6-10, 6202 - 6282       | K.TAFDEAIELDTLSEESYKDSLIM*QLLR.D                                                 | 3320.66704 | 3 | 1.04E-10 | 0.88  | 4.32   | -     | 801.6   |
| AHQ-6-10, 2327              | R.YLAEVAAGDDK.K                                                                  | 1152.23595 | 1 | 2.86E-05 | 0.80  | 2.42   | -     | 1452.5  |
| AHQ-6-12, 2156              | R.YLAEVAAGDDK.K                                                                  | 1280.40887 | 2 | 2.65E-04 | 0.90  | 3.15   | -     | 1294.9  |
| AHQ-6-10, 2082              | R.YLAEVAAGDDK.K                                                                  | 1280.40887 | 1 | 5.05E-05 | 0.87  | 3.49   | -     | 759.9   |
| AHQ-6-10, 2056 - 2110       | R.YLAEVAAGDDK.K                                                                  | 1280.40887 | 2 | 1.70E-05 | 0.95  | 3.61   | -     | 1635.8  |
| AHQ-6-13-, 2136 - 2193      | R.YLAEVAAGDDK.K                                                                  | 1280.40887 | 2 | 1.30E-04 | 0.89  | 3.12   | -     | 1438.5  |
| gi 5729877 ref NP_006588.1  | heat shock 70kDa protein 8 isoform 1; heat shock cognate protein, 71-kD          |            |   | 4.69E-11 | 13.42 | 150.24 | 22.90 | 70897.6 |
| AHQ-6-6, 4295               | R.ARFEELNADLFR.G                                                                 | 1481.63768 | 2 | 3.50E-06 | 0.97  | 4.70   | -     | 1245.4  |
| AHQ-6-6, 4510               | R.ARFEELNADLFR.G                                                                 | 1481.63768 | 2 | 2.66E-05 | 0.88  | 3.39   | -     | 811.6   |
| AHQ-6-6, 4523               | R.FEELNADLFR.G                                                                   | 1254.37310 | 2 | 1.36E-05 | 0.93  | 3.69   | -     | 1367.4  |
| AHQ-6-6, 5072               | K.GPAVGIDLGTYYSCVGVFQHGK.V                                                       | 2265.53088 | 3 | 4.69E-11 | 0.88  | 4.17   | -     | 814.4   |
| AHQ-6-6, 5366               | K.ILDKCNEIINWLDK.N                                                               | 1776.04688 | 2 | 4.28E-05 | 0.95  | 4.75   | -     | 1340.6  |
| AHQ-6-6, 5379               | K.ILDKCNEIINWLDK.N                                                               | 1776.04688 | 3 | 1.69E-04 | 0.86  | 4.59   | -     | 711.7   |
| AHQ-6-6, 2587               | K.M*KEIAEAYLGK.T                                                                 | 1269.49260 | 2 | 1.23E-04 | 0.84  | 3.02   | -     | 926.8   |
| AHQ-6-6, 2536 - 2595        | K.M*KEIAEAYLGK.T                                                                 | 1269.49260 | 3 | 4.35E-04 | 0.79  | 3.20   | -     | 993.1   |
| AHQ-6-6, 2742 - 2798        | K.NQVAM*NPTNTVFDAR.R                                                             | 1666.83756 | 2 | 1.93E-05 | 0.92  | 3.93   | -     | 829.9   |
| AHQ-6-6, 3310               | K.NQVAM*NPTNTVFDAR.R                                                             | 1666.83756 | 2 | 2.82E-04 | 0.93  | 4.39   | -     | 781.9   |
| AHQ-6-6, 3888               | K.NQVAMNPTNTVFDAR.R                                                              | 1650.83816 | 2 | 6.97E-05 | 0.92  | 3.76   | -     | 746.2   |
| AHQ-6-6, 3514               | K.NQVAMNPTNTVFDAR.R                                                              | 1650.83816 | 2 | 9.44E-06 | 0.93  | 3.85   | -     | 936.4   |
| AHQ-6-6, 4440               | K.NSLESYAFNMK.A                                                                  | 1304.45393 | 2 | 3.99E-05 | 0.86  | 3.19   | -     | 800.1   |
| AHQ-6-6, 3318               | K.NSLESYAFNMK.A                                                                  | 1320.45333 | 2 | 4.02E-05 | 0.87  | 3.35   | -     | 839.2   |
| AHQ-6-6, 2724               | R.RFDDAVVQSDMK.H                                                                 | 1411.56603 | 2 | 4.94E-08 | 0.94  | 4.13   | -     | 1155.2  |
| AHQ-6-13-, 2840             | R.RFDDAVVQSDMK.H                                                                 | 1411.56603 | 2 | 2.45E-05 | 0.87  | 2.85   | -     | 1338.0  |
| AHQ-6-6, 4299 - 4370        | K.SFYPEEYSSM*VLT.K.M                                                             | 1633.84425 | 2 | 3.58E-05 | 0.82  | 3.36   | -     | 688.6   |
| AHQ-6-6, 5010               | K.SFYPEEYSSM*VLT.K.M                                                             | 1617.84485 | 2 | 4.47E-06 | 0.86  | 3.17   | -     | 555.3   |
| AHQ-6-6, 6234 - 6246        | K.SINPDEAVYGAQAAILSGDK.S                                                         | 2261.47411 | 2 | 2.09E-05 | 0.94  | 4.46   | -     | 877.4   |
| AHQ-6-6, 6243               | K.SINPDEAVYGAQAAILSGDK.S                                                         | 2261.47411 | 3 | 5.78E-04 | 0.55  | 3.03   | -     | 529.8   |
| AHQ-6-6, 3111               | K.SQIHDIWLVGGSTR.I                                                               | 1482.66712 | 2 | 3.35E-08 | 0.97  | 3.98   | -     | 2104.8  |
| AHQ-6-6, 4432 - 4442        | K.VTNAVVTVPYFVNDSSQR.Q                                                           | 1983.17068 | 3 | 1.98E-04 | 0.74  | 3.75   | -     | 678.3   |
| gi 4503545 ref NP_001961.1  | eukaryotic translation initiation factor 5A; eIF5A; eIF5A [Homo sapiens]         |            |   | 4.81E-11 | 1.88  | 20.28  | 15.60 | 16832.2 |
| AHQ-6-12, 6227              | R.NDFQLIGIQDGYLSLLQDSGEVR.E                                                      | 2581.81935 | 2 | 4.81E-11 | 0.97  | 5.54   | -     | 985.0   |
| AHQ-6-12, 6161              | K.RNDFQLIGIQDGYLSLLQDSGEVR.E                                                     | 2738.00571 | 3 | 1.79E-09 | 0.92  | 4.75   | -     | 1113.9  |
| gi 5031857 ref NP_005557.1  | lactate dehydrogenase A [Homo sapiens]                                           |            |   | 5.17E-11 | 2.78  | 30.27  | 13.60 | 36688.5 |
| AHQ-6-14-, 6246             | K.DLADELALVDVIEDK.L                                                              | 1658.82864 | 2 | 8.53E-11 | 0.97  | 4.54   | -     | 1685.5  |
| AHQ-6-13, 6272              | K.DLADELALVDVIEDK.L                                                              | 1658.82864 | 2 | 1.95E-08 | 0.93  | 3.72   | -     | 1257.6  |
| AHQ-6-13-, 6229 - 6230      | K.DLADELALVDVIEDK.L                                                              | 1658.82864 | 2 | 5.17E-11 | 0.97  | 5.44   | -     | 1609.6  |
| AHQ-6-9, 6213               | K.GYTSWAIGLSVADLAESIMK.N                                                         | 2113.41967 | 2 | 1.88E-06 | 0.93  | 4.33   | -     | 1010.8  |
| AHQ-6-11, 2136 - 2201       | K.VLTSEEEAR.L                                                                    | 1135.20693 | 2 | 5.74E-04 | 0.88  | 2.94   | -     | 1139.3  |

| Accession                   | Protein Name                                                           | Length     | Score | E-value  | Score | E-value | Score | E-value | Score | E-value |
|-----------------------------|------------------------------------------------------------------------|------------|-------|----------|-------|---------|-------|---------|-------|---------|
| gi 17318569 ref NP_006112.2 | keratin 1; Keratin-1; cytokeratin 1; hair alpha protein [Homo sapiens] |            |       | 6.56E-11 | 17.11 | 210.25  | 38.80 | 66066.3 |       |         |
| AHQ-6-7, 2012               | K.AQYEDIAQK.S                                                          | 1066.14629 | 2     | 5.55E-05 | 0.46  | 2.52    | -     | 416.9   |       |         |
| AHQ-6-10, 2856              | R.DYQELMNTK.L                                                          | 1142.26457 | 1     | 5.86E-04 | 0.51  | 2.69    | -     | 271.1   |       |         |
| AHQ-6-10, 2846              | R.DYQELMNTK.L                                                          | 1142.26457 | 1     | 4.82E-04 | 0.65  | 2.67    | -     | 420.5   |       |         |
| AHQ-6-6, 2218               | R.GGGGGYSGSSSYSGGGSYSGGGGGGGR.G                                        | 2385.27982 | 2     | 1.69E-06 | 0.91  | 4.80    | -     | 612.8   |       |         |
| AHQ-6-3, 2264               | R.GGGGGYSGSSSYSGGGSYSGGGGGGGR.G                                        | 2385.27982 | 2     | 3.92E-05 | 0.74  | 3.74    | -     | 404.0   |       |         |
| AHQ-6-14-, 2243             | R.GGGGGYSGSSSYSGGGSYSGGGGGGGR.G                                        | 2385.27982 | 2     | 4.66E-05 | 0.62  | 2.87    | -     | 417.4   |       |         |
| AHQ-6-4, 2217               | R.GGGGGYSGSSSYSGGGSYSGGGGGGGR.G                                        | 2385.27982 | 2     | 2.56E-04 | 0.77  | 4.00    | -     | 287.1   |       |         |
| AHQ-6-2, 2270               | R.GGGGGYSGSSSYSGGGSYSGGGGGGGR.G                                        | 2385.27982 | 2     | 1.47E-04 | 0.36  | 2.81    | -     | 242.2   |       |         |
| AHQ-6-12, 2263              | R.GGGGGYSGSSSYSGGGSYSGGGGGGGR.G                                        | 2385.27982 | 2     | 4.86E-04 | 0.69  | 2.77    | -     | 440.8   |       |         |
| AHQ-6-10, 2507              | R.GSYSGSSSYSGGGSYSGGGGGGHSYSGSSGGYR.G                                  | 3314.18235 | 3     | 4.46E-05 | 0.75  | 3.48    | -     | 927.1   |       |         |
| AHQ-6-13-, 2616             | R.GSYSGSSSYSGGGSYSGGGGGGHSYSGSSGGYR.G                                  | 3314.18235 | 3     | 8.77E-06 | 0.83  | 4.43    | -     | 812.1   |       |         |
| AHQ-6-1, 5123               | K.LALDLEIATYR.T                                                        | 1278.47925 | 2     | 3.40E-06 | 0.96  | 4.32    | -     | 2328.0  |       |         |
| AHQ-6-2, 3940               | K.LNDLEDALQQAQ.E                                                       | 1358.47963 | 2     | 1.24E-06 | 0.96  | 4.00    | -     | 1819.4  |       |         |
| AHQ-6-13-, 3893             | K.LNDLEDALQQAQ.E                                                       | 1358.47963 | 2     | 8.39E-08 | 0.98  | 5.06    | -     | 2136.2  |       |         |
| AHQ-6-8, 3657 - 3660        | K.LNDLEDALQQAQ.E                                                       | 1358.47963 | 2     | 2.56E-06 | 0.97  | 4.63    | -     | 2240.5  |       |         |
| AHQ-6-10, 3644 - 3698       | K.LNDLEDALQQAQ.E                                                       | 1358.47963 | 2     | 5.69E-07 | 0.97  | 4.76    | -     | 1992.1  |       |         |
| AHQ-6-1, 4066               | K.LNDLEDALQQAQ.E                                                       | 1358.47963 | 2     | 1.31E-04 | 0.97  | 4.81    | -     | 1858.5  |       |         |
| AHQ-6-12, 3809              | K.LNDLEDALQQAQ.E                                                       | 1358.47963 | 2     | 3.29E-06 | 0.94  | 4.07    | -     | 1377.8  |       |         |
| AHQ-6-5, 3845               | K.LNDLEDALQQAQ.E                                                       | 1358.47963 | 2     | 1.26E-04 | 0.96  | 4.59    | -     | 1529.1  |       |         |
| AHQ-6-3, 3913               | K.LNDLEDALQQAQ.E                                                       | 1358.47963 | 2     | 7.32E-08 | 0.97  | 4.89    | -     | 1877.1  |       |         |
| AHQ-6-6, 3808               | K.LNDLEDALQQAQ.E                                                       | 1358.47963 | 2     | 1.56E-05 | 0.97  | 4.64    | -     | 2201.6  |       |         |
| AHQ-6-10, 3784              | K.LNDLEDALQQAQ.E                                                       | 1358.47963 | 2     | 4.21E-08 | 0.85  | 3.41    | -     | 1168.3  |       |         |
| AHQ-6-7, 3692               | K.LNDLEDALQQAQ.E                                                       | 1358.47963 | 2     | 6.94E-04 | 0.93  | 3.95    | -     | 1486.1  |       |         |
| AHQ-6-14-, 3864 - 3879      | K.LNDLEDALQQAQ.E                                                       | 1358.47963 | 2     | 2.86E-06 | 0.96  | 4.52    | -     | 1751.4  |       |         |
| AHQ-6-13, 4027              | K.LNDLEDALQQAQ.E                                                       | 1358.47963 | 2     | 5.51E-06 | 0.97  | 4.65    | -     | 2150.8  |       |         |
| AHQ-6-4, 3904               | K.LNDLEDALQQAQ.E                                                       | 1358.47963 | 2     | 2.68E-04 | 0.96  | 4.36    | -     | 1626.5  |       |         |
| AHQ-6-11, 4147              | K.NKLNLEDALQQAQ.E                                                      | 1600.75564 | 2     | 1.34E-04 | 0.87  | 3.29    | -     | 894.4   |       |         |
| AHQ-6-10, 3558              | K.NKLNLEDALQQAQ.E                                                      | 1600.75564 | 2     | 8.52E-05 | 0.93  | 3.82    | -     | 1168.7  |       |         |
| AHQ-6-10, 4092              | K.NKLNLEDALQQAQ.E                                                      | 1600.75564 | 3     | 8.60E-05 | 0.92  | 4.15    | -     | 1525.2  |       |         |
| AHQ-6-1, 4488 - 4562        | K.NKLNLEDALQQAQ.E                                                      | 1600.75564 | 2     | 1.52E-04 | 0.95  | 3.84    | -     | 1697.1  |       |         |
| AHQ-6-10, 2743 - 2798       | K.NMQDMVEDYR.N                                                         | 1317.43134 | 2     | 1.20E-04 | 0.81  | 3.05    | -     | 815.5   |       |         |
| AHQ-6-10, 3368 - 3374       | K.NMQDMVEDYR.N                                                         | 1301.43194 | 2     | 5.38E-05 | 0.75  | 3.10    | -     | 795.4   |       |         |
| AHQ-6-12, 3617              | K.QISNLQQSISDAEQR.G                                                    | 1717.81950 | 2     | 1.34E-04 | 0.77  | 3.05    | -     | 594.9   |       |         |
| AHQ-6-13-, 3689 - 3692      | K.QISNLQQSISDAEQR.G                                                    | 1717.81950 | 2     | 5.61E-08 | 0.89  | 4.11    | -     | 562.8   |       |         |
| AHQ-6-5, 3632               | K.QISNLQQSISDAEQR.G                                                    | 1717.81950 | 2     | 6.56E-11 | 0.90  | 4.20    | -     | 684.6   |       |         |
| AHQ-6-6, 3595               | K.QISNLQQSISDAEQR.G                                                    | 1717.81950 | 2     | 4.95E-07 | 0.84  | 3.29    | -     | 710.6   |       |         |
| AHQ-6-13, 3764 - 3825       | K.QISNLQQSISDAEQR.G                                                    | 1717.81950 | 2     | 7.55E-07 | 0.82  | 3.37    | -     | 668.9   |       |         |
| AHQ-6-7, 3499 - 3558        | K.QISNLQQSISDAEQR.G                                                    | 1717.81950 | 2     | 9.12E-06 | 0.82  | 3.35    | -     | 692.0   |       |         |
| AHQ-6-14-, 3666             | K.QISNLQQSISDAEQR.G                                                    | 1717.81950 | 2     | 4.99E-07 | 0.90  | 4.04    | -     | 594.6   |       |         |
| AHQ-6-11, 3501 - 3553       | K.QISNLQQSISDAEQR.G                                                    | 1717.81950 | 2     | 4.04E-04 | 0.60  | 3.02    | -     | 389.1   |       |         |
| AHQ-6-14-, 3587 - 3667      | K.QISNLQQSISDAEQR.G                                                    | 1717.81950 | 2     | 3.48E-04 | 0.76  | 3.05    | -     | 492.3   |       |         |
| AHQ-6-10, 3502              | K.QISNLQQSISDAEQR.G                                                    | 1717.81950 | 2     | 4.82E-05 | 0.94  | 4.20    | -     | 1108.1  |       |         |
| AHQ-6-1, 3860               | K.QISNLQQSISDAEQR.G                                                    | 1717.81950 | 2     | 1.70E-06 | 0.91  | 4.05    | -     | 820.6   |       |         |
| AHQ-6-4, 3679               | K.QISNLQQSISDAEQR.G                                                    | 1717.81950 | 2     | 1.17E-07 | 0.88  | 3.57    | -     | 818.9   |       |         |
| AHQ-6-10, 3302 - 3359       | R.SGGGFSSSGAGIINYQR.R                                                  | 1658.75374 | 2     | 5.71E-05 | 0.91  | 3.28    | -     | 1367.3  |       |         |
| AHQ-6-4, 3529               | R.SGGGFSSSGAGIINYQR.R                                                  | 1658.75374 | 2     | 5.99E-06 | 0.87  | 3.10    | -     | 1172.0  |       |         |
| AHQ-6-11, 3421 - 3477       | R.SGGGFSSSGAGIINYQR.R                                                  | 1658.75374 | 2     | 1.89E-04 | 0.65  | 2.64    | -     | 698.4   |       |         |
| AHQ-6-6, 3436               | R.SGGGFSSSGAGIINYQR.R                                                  | 1658.75374 | 2     | 2.30E-06 | 0.90  | 3.21    | -     | 1345.1  |       |         |
| AHQ-6-6, 1955               | K.SKAEAESLYQSK.Y                                                       | 1341.44907 | 2     | 6.48E-09 | 0.89  | 3.49    | -     | 773.6   |       |         |
| AHQ-6-4, 4029               | K.SKAEAESLYQSK.YEELQITAGR.H                                            | 2502.71900 | 2     | 1.38E-06 | 0.83  | 2.94    | -     | 979.6   |       |         |
| AHQ-6-5, 5803               | R.SLDLDSIIAEVK.A                                                       | 1303.48388 | 2     | 7.69E-07 | 0.96  | 3.94    | -     | 1580.9  |       |         |
| AHQ-6-11, 5547 - 5548       | R.SLDLDSIIAEVK.A                                                       | 1303.48388 | 2     | 1.30E-06 | 0.95  | 4.25    | -     | 1429.7  |       |         |
| AHQ-6-6, 5723               | R.SLDLDSIIAEVK.A                                                       | 1303.48388 | 2     | 6.36E-05 | 0.90  | 3.44    | -     | 1243.4  |       |         |
| AHQ-6-3, 5802               | R.SLDLDSIIAEVK.A                                                       | 1303.48388 | 2     | 1.08E-06 | 0.95  | 4.27    | -     | 1368.2  |       |         |
| AHQ-6-13, 5788 - 5799       | R.SLDLDSIIAEVK.A                                                       | 1303.48388 | 2     | 1.90E-06 | 0.96  | 4.70    | -     | 1358.8  |       |         |
| AHQ-6-2, 5838               | R.SLDLDSIIAEVK.A                                                       | 1303.48388 | 2     | 6.28E-05 | 0.94  | 3.63    | -     | 1284.3  |       |         |
| AHQ-6-1, 5802 - 5871        | R.SLDLDSIIAEVK.A                                                       | 1303.48388 | 2     | 2.77E-08 | 0.95  | 4.58    | -     | 1149.3  |       |         |
| AHQ-6-10, 5487              | R.SLDLDSIIAEVK.A                                                       | 1303.48388 | 1     | 3.63E-04 | 0.63  | 2.63    | -     | 606.8   |       |         |
| AHQ-6-10, 5474 - 5475       | R.SLDLDSIIAEVK.A                                                       | 1303.48388 | 2     | 8.44E-07 | 0.96  | 4.99    | -     | 1208.6  |       |         |
| AHQ-6-4, 5875               | R.SLDLDSIIAEVK.A                                                       | 1303.48388 | 2     | 6.56E-06 | 0.94  | 4.04    | -     | 1096.8  |       |         |
| AHQ-6-10, 4316              | K.SLNNQFASFIDK.V                                                       | 1384.51877 | 1     | 5.23E-05 | 0.63  | 3.16    | -     | 417.5   |       |         |
| AHQ-6-1, 4724               | K.SLNNQFASFIDK.V                                                       | 1384.51877 | 2     | 1.67E-07 | 0.83  | 3.44    | -     | 519.3   |       |         |
| AHQ-6-1, 4950               | K.SLNNQFASFIDK.V                                                       | 1384.51877 | 2     | 1.76E-05 | 0.88  | 3.54    | -     | 862.0   |       |         |
| AHQ-6-3, 4616               | K.SLNNQFASFIDK.V                                                       | 1384.51877 | 2     | 3.02E-08 | 0.94  | 3.95    | -     | 967.8   |       |         |
| AHQ-6-7, 4328               | K.SLNNQFASFIDK.V                                                       | 1384.51877 | 2     | 4.00E-07 | 0.94  | 4.33    | -     | 978.0   |       |         |
| AHQ-6-10, 4306              | K.SLNNQFASFIDK.V                                                       | 1384.51877 | 2     | 1.33E-06 | 0.90  | 3.48    | -     | 823.5   |       |         |
| AHQ-6-12, 2524 - 2529       | R.SLVNLGSSK.S                                                          | 875.00510  | 1     | 3.21E-04 | 0.07  | 1.81    | -     | 141.2   |       |         |
| AHQ-6-6, 6028 - 6096        | R.THNLEPYFESFINNLR.R                                                   | 1995.18315 | 2     | 1.47E-04 | 0.64  | 3.11    | -     | 258.4   |       |         |
| AHQ-6-10, 5854 - 5878       | R.THNLEPYFESFINNLR.R                                                   | 1995.18315 | 2     | 8.31E-05 | 0.91  | 4.04    | -     | 534.4   |       |         |
| AHQ-6-1, 6282               | R.THNLEPYFESFINNLR.R                                                   | 1995.18315 | 3     | 9.98E-06 | 0.92  | 4.17    | -     | 1203.8  |       |         |
| AHQ-6-7, 5192 - 5212        | R.THNLEPYFESFINNLR.R                                                   | 1995.18315 | 2     | 1.25E-04 | 0.90  | 3.75    | -     | 729.1   |       |         |
| AHQ-6-7, 5938               | R.THNLEPYFESFINNLR.R                                                   | 1995.18315 | 3     | 1.07E-05 | 0.96  | 4.79    | -     | 2141.0  |       |         |
| AHQ-6-5, 6164 - 6179        | R.THNLEPYFESFINNLR.R                                                   | 1995.18315 | 2     | 1.79E-05 | 0.61  | 2.94    | -     | 438.1   |       |         |
| AHQ-6-11, 5908 - 5916       | R.THNLEPYFESFINNLR.R                                                   | 1995.18315 | 3     | 3.88E-04 | 0.91  | 4.43    | -     | 1300.2  |       |         |
| AHQ-6-7, 5939               | R.THNLEPYFESFINNLR.R                                                   | 1995.18315 | 2     | 4.52E-05 | 0.89  | 3.29    | -     | 794.7   |       |         |
| AHQ-6-10, 5112 - 5166       | R.THNLEPYFESFINNLR.R                                                   | 1995.18315 | 2     | 9.16E-04 | 0.59  | 2.90    | -     | 444.3   |       |         |
| AHQ-6-13, 3357              | R.TNAENEFVTIK.K                                                        | 1266.38219 | 2     | 1.25E-05 | 0.84  | 3.17    | -     | 672.5   |       |         |
| AHQ-6-3, 3201               | R.TNAENEFVTIK.K                                                        | 1266.38219 | 2     | 5.90E-05 | 0.84  | 3.20    | -     | 650.3   |       |         |
| AHQ-6-1, 3407               | R.TNAENEFVTIK.K                                                        | 1266.38219 | 2     | 2.72E-04 | 0.93  | 3.66    | -     | 1146.2  |       |         |
| AHQ-6-2, 3208               | R.TNAENEFVTIK.K                                                        | 1266.38219 | 2     | 7.20E-06 | 0.89  | 3.70    | -     | 761.2   |       |         |
| AHQ-6-6, 3103               | R.TNAENEFVTIK.K                                                        | 1266.38219 | 2     | 1.41E-06 | 0.91  | 3.48    | -     | 903.8   |       |         |
| AHQ-6-7, 2999 - 3003        | R.TNAENEFVTIK.K                                                        | 1266.38219 | 2     | 7.86E-06 | 0.90  | 3.40    | -     | 861.8   |       |         |
| AHQ-6-12, 3101 - 3159       | R.TNAENEFVTIK.K                                                        | 1266.38219 | 2     | 1.42E-05 | 0.83  | 2.73    | -     | 950.8   |       |         |
| AHQ-6-5, 3099               | R.TNAENEFVTIK.K                                                        | 1266.38219 | 2     | 2.74E-04 | 0.78  | 2.92    | -     | 689.2   |       |         |
| AHQ-6-12, 2705 - 2769       | R.TNAENEFVIKK.D                                                        | 1394.55511 | 2     | 9.04E-05 | 0.80  | 2.90    | -     | 851.8   |       |         |
| AHQ-6-5, 2645               | R.TNAENEFVIKK.D                                                        | 1394.55511 | 2     | 1.79E-05 | 0.75  | 2.77    | -     | 774.6   |       |         |
| AHQ-6-10, 2602              | R.TNAENEFVIKK.D                                                        | 1394.55511 | 2     | 3.54E-05 | 0.86  | 3.04    | -     | 987.2   |       |         |
| AHQ-6-13-, 2756             | R.TNAENEFVIKK.D                                                        | 1394.55511 | 2     | 2.77E-04 | 0.92  | 3.55    | -     | 1269.5  |       |         |
| AHQ-6-11, 4251 - 4275       | K.WELLQVDTSTR.T                                                        | 1476.61621 | 2     | 1.37E-05 | 0.91  | 3.42    | -     | 1397.5  |       |         |
| AHQ-6-6, 4338 - 4375        | K.WELLQVDTSTR.T                                                        | 1476.61621 | 2     | 2.19E-07 | 0.83  | 3.11    | -     | 884.3   |       |         |
| AHQ-6-10, 4147 - 4202       | K.WELLQVDTSTR.T                                                        | 1476.61621 | 2     | 4.12E-07 | 0.94  | 4.02    | -     | 1451.4  |       |         |
| AHQ-6-10, 4175              | K.WELLQVDTSTR.T                                                        | 1476.61621 | 2     | 8.06E-09 | 0.96  | 4.21    | -     | 1546.1  |       |         |
| AHQ-6-12, 4308 - 4365       | K.WELLQVDTSTR.T                                                        | 1476.61621 | 2     | 1.83E-06 | 0.94  | 4.07    | -     | 1294.3  |       |         |
| AHQ-6-3, 4448 - 4508        | K.WELLQVDTSTR.T                                                        | 1476.61621 | 2     | 3.58E-04 | 0.72  | 2.71    | -     | 1119.1  |       |         |
| AHQ-6-5, 4384               | K.WELLQVDTSTR.T                                                        | 1476.61621 | 2     | 1.50E-06 | 0.93  | 3.72    | -     | 1243.9  |       |         |
| AHQ-6-2, 4486               | K.WELLQVDTSTR.T                                                        | 1476.61621 | 2     | 1.08E-07 | 0.95  | 3.79    | -     | 1670.4  |       |         |



|                             |                                                                         |            |   |          |      |        |       |         |
|-----------------------------|-------------------------------------------------------------------------|------------|---|----------|------|--------|-------|---------|
| AHQ-6-10, 2892 - 2895       | K.YEELQITAGR.H                                                          | 1180.29253 | 2 | 3.76E-05 | 0.96 | 4.39   | -     | 1622.6  |
| AHQ-6-1, 3256               | K.YEELQITAGR.H                                                          | 1180.29253 | 2 | 1.89E-05 | 0.94 | 3.90   | -     | 1558.1  |
| gi 4557697 ref NP_000412.1  | keratin 10; Keratin-10 [Homo sapiens]                                   |            |   | 7.14E-11 | 9.05 | 110.25 | 19.10 | 57247.1 |
| AHQ-6-1, 3019               | R.ALEESNYELEGK.I                                                        | 1382.45482 | 2 | 3.16E-05 | 0.95 | 3.88   | -     | 1362.7  |
| AHQ-6-14-, 2775             | R.ALEESNYELEGK.I                                                        | 1382.45482 | 2 | 4.12E-06 | 0.91 | 3.47   | -     | 1086.6  |
| AHQ-6-12, 2713 - 2779       | R.ALEESNYELEGK.I                                                        | 1382.45482 | 2 | 9.18E-07 | 0.87 | 3.47   | -     | 693.5   |
| AHQ-6-11, 2733              | R.ALEESNYELEGK.I                                                        | 1382.45482 | 2 | 3.80E-09 | 0.91 | 3.30   | -     | 1199.7  |
| AHQ-6-10, 2690              | R.ALEESNYELEGK.I                                                        | 1382.45482 | 2 | 1.77E-06 | 0.88 | 3.56   | -     | 920.1   |
| AHQ-6-2, 2803               | R.ALEESNYELEGK.I                                                        | 1382.45482 | 2 | 6.36E-06 | 0.86 | 3.74   | -     | 854.5   |
| AHQ-6-8, 2612               | R.ALEESNYELEGK.I                                                        | 1382.45482 | 2 | 3.86E-07 | 0.87 | 3.31   | -     | 926.1   |
| AHQ-6-7, 2650               | R.ALEESNYELEGK.I                                                        | 1382.45482 | 2 | 3.70E-06 | 0.90 | 3.46   | -     | 998.4   |
| AHQ-6-6, 2734               | R.ALEESNYELEGK.I                                                        | 1382.45482 | 2 | 5.53E-07 | 0.90 | 3.79   | -     | 846.5   |
| AHQ-6-5, 2732               | R.ALEESNYELEGK.I                                                        | 1382.45482 | 2 | 4.75E-07 | 0.84 | 3.19   | -     | 859.8   |
| AHQ-6-3, 2798               | R.ALEESNYELEGK.I                                                        | 1382.45482 | 2 | 8.52E-07 | 0.88 | 3.59   | -     | 856.3   |
| AHQ-6-4, 2763 - 2765        | R.ALEESNYELEGK.I                                                        | 1382.45482 | 2 | 3.16E-08 | 0.93 | 3.76   | -     | 1062.9  |
| AHQ-6-3, 3492               | K.DAEAWFNEK.S                                                           | 1110.15762 | 2 | 7.07E-04 | 0.69 | 2.91   | -     | 565.1   |
| AHQ-6-3, 4420               | K.ELTTEIDNNEIQISSYK.S                                                   | 1998.13406 | 2 | 6.56E-07 | 0.76 | 3.26   | -     | 566.4   |
| AHQ-6-11, 4953              | K.ELTTEIDNNEIQISSYK.S                                                   | 1998.13406 | 2 | 9.92E-06 | 0.76 | 3.33   | -     | 574.5   |
| AHQ-6-3, 5124 - 5181        | K.ELTTEIDNNEIQISSYK.S                                                   | 1998.13406 | 2 | 5.53E-04 | 0.68 | 2.75   | -     | 571.8   |
| AHQ-6-10, 4151 - 4160       | K.ELTTEIDNNEIQISSYK.S                                                   | 1998.13406 | 2 | 5.05E-07 | 0.90 | 4.09   | -     | 775.0   |
| AHQ-6-14-, 4340             | K.ELTTEIDNNEIQISSYK.S                                                   | 1998.13406 | 2 | 3.57E-04 | 0.56 | 2.85   | -     | 328.6   |
| AHQ-6-10, 4894              | K.ELTTEIDNNEIQISSYK.S                                                   | 1998.13406 | 2 | 3.44E-07 | 0.85 | 3.66   | -     | 659.5   |
| AHQ-6-13-, 5096             | K.ELTTEIDNNEIQISSYK.S                                                   | 1998.13406 | 2 | 1.39E-05 | 0.85 | 4.02   | -     | 539.1   |
| AHQ-6-13-, 4329             | K.ELTTEIDNNEIQISSYK.S                                                   | 1998.13406 | 2 | 8.11E-07 | 0.71 | 3.39   | -     | 521.5   |
| AHQ-6-1, 4542 - 4547        | K.ELTTEIDNNEIQISSYK.S                                                   | 1998.13406 | 2 | 5.80E-09 | 0.90 | 3.92   | -     | 657.6   |
| AHQ-6-1, 5282               | K.ELTTEIDNNEIQISSYK.S                                                   | 1998.13406 | 2 | 2.35E-05 | 0.86 | 3.78   | -     | 761.8   |
| AHQ-6-6, 5127 - 5130        | K.ELTTEIDNNEIQISSYK.S                                                   | 1998.13406 | 2 | 1.81E-06 | 0.79 | 3.30   | -     | 640.1   |
| AHQ-6-11, 4221 - 4229       | K.ELTTEIDNNEIQISSYK.S                                                   | 1998.13406 | 2 | 2.14E-08 | 0.86 | 3.64   | -     | 622.9   |
| AHQ-6-2, 5238 - 5299        | K.ELTTEIDNNEIQISSYK.S                                                   | 1998.13406 | 2 | 1.05E-04 | 0.82 | 3.65   | -     | 533.9   |
| AHQ-6-13, 4211              | K.GSLGGGFSGGGFSR.G                                                      | 1708.76962 | 2 | 4.53E-06 | 0.90 | 4.16   | -     | 704.0   |
| AHQ-6-2, 4167               | K.GSLGGGFSGGGFSR.G                                                      | 1708.76962 | 2 | 1.06E-09 | 0.85 | 3.64   | -     | 575.5   |
| AHQ-6-12, 4011              | K.GSLGGGFSGGGFSR.G                                                      | 1708.76962 | 2 | 5.96E-07 | 0.94 | 4.33   | -     | 1044.0  |
| AHQ-6-6, 4028               | K.GSLGGGFSGGGFSR.G                                                      | 1708.76962 | 2 | 3.00E-08 | 0.85 | 3.41   | -     | 715.1   |
| AHQ-6-13-, 4084             | K.GSLGGGFSGGGFSR.G                                                      | 1708.76962 | 2 | 3.45E-08 | 0.92 | 4.20   | -     | 860.5   |
| AHQ-6-10, 3899 - 3956       | K.GSLGGGFSGGGFSR.G                                                      | 1708.76962 | 2 | 3.08E-05 | 0.83 | 3.89   | -     | 510.2   |
| AHQ-6-1, 4263               | K.GSLGGGFSGGGFSR.G                                                      | 1708.76962 | 2 | 1.29E-09 | 0.93 | 4.02   | -     | 952.8   |
| AHQ-6-3, 4042 - 4117        | K.GSLGGGFSGGGFSR.G                                                      | 1708.76962 | 2 | 4.03E-08 | 0.83 | 3.66   | -     | 619.2   |
| AHQ-6-14-, 4032             | K.GSLGGGFSGGGFSR.G                                                      | 1708.76962 | 2 | 4.88E-05 | 0.80 | 3.40   | -     | 622.3   |
| AHQ-6-14, 4769 - 4770       | K.GSLGGGFSGGGFSR.G                                                      | 1708.76962 | 2 | 1.94E-08 | 0.89 | 3.88   | -     | 830.6   |
| AHQ-6-11, 3951              | K.GSLGGGFSGGGFSR.G                                                      | 1708.76962 | 2 | 8.96E-07 | 0.88 | 3.73   | -     | 859.8   |
| AHQ-6-13-, 3324             | K.IRLENIQTYR.S                                                          | 1435.61046 | 2 | 8.47E-07 | 0.95 | 3.93   | -     | 1596.7  |
| AHQ-6-10, 3071 - 3130       | K.IRLENIQTYR.S                                                          | 1435.61046 | 2 | 7.39E-04 | 0.81 | 3.25   | -     | 930.1   |
| AHQ-6-13, 3468              | K.IRLENIQTYR.S                                                          | 1435.61046 | 2 | 3.22E-07 | 0.95 | 3.89   | -     | 1704.9  |
| AHQ-6-3, 2550               | R.LENEIQTYR.S                                                           | 1166.26586 | 2 | 6.38E-05 | 0.88 | 3.42   | -     | 1149.6  |
| AHQ-6-7, 2423               | R.LENEIQTYR.S                                                           | 1166.26586 | 2 | 3.79E-04 | 0.88 | 3.55   | -     | 999.9   |
| AHQ-6-4, 2504               | R.LENEIQTYR.S                                                           | 1166.26586 | 2 | 2.08E-05 | 0.91 | 3.57   | -     | 1364.9  |
| AHQ-6-10, 2668 - 2678       | R.LKYEVALR.Q                                                            | 1235.41446 | 2 | 2.75E-06 | 0.57 | 2.85   | -     | 375.0   |
| AHQ-6-11, 2717              | R.LKYEVALR.Q                                                            | 1235.41446 | 2 | 3.72E-07 | 0.71 | 2.89   | -     | 397.2   |
| AHQ-6-14-, 5343             | R.NVSTGDVNVEM*NAAPGVDLTQLLNNM*R.N                                       | 2906.20003 | 3 | 7.40E-04 | 0.93 | 5.02   | -     | 919.8   |
| AHQ-6-4, 6312               | R.NVSTGDVNVEM*NAAPGVDLTQLLNNM*R.N                                       | 2906.20003 | 3 | 1.70E-04 | 0.89 | 4.11   | -     | 1096.2  |
| AHQ-6-13-, 5330             | R.NVSTGDVNVEM*NAAPGVDLTQLLNNM*R.N                                       | 2906.20003 | 3 | 2.51E-04 | 0.87 | 4.07   | -     | 861.8   |
| AHQ-6-14-, 6115             | R.NVSTGDVNVEM*NAAPGVDLTQLLNNM*R.N                                       | 2906.20003 | 3 | 6.24E-05 | 0.85 | 3.66   | -     | 953.6   |
| AHQ-6-7, 5224               | R.NVSTGDVNVEM*NAAPGVDLTQLLNNM*R.N                                       | 2906.20003 | 3 | 2.22E-04 | 0.86 | 3.94   | -     | 920.2   |
| AHQ-6-3, 4106               | K.SKELTTEIDNNEIQISSYK.S                                                 | 2213.38462 | 2 | 5.04E-05 | 0.88 | 4.12   | -     | 716.1   |
| AHQ-6-1, 4976 - 5052        | K.SKELTTEIDNNEIQISSYK.S                                                 | 2213.38462 | 2 | 7.14E-11 | 0.93 | 4.20   | -     | 1107.4  |
| AHQ-6-3, 4873 - 4932        | K.SKELTTEIDNNEIQISSYK.S                                                 | 2213.38462 | 2 | 3.34E-05 | 0.83 | 3.58   | -     | 819.3   |
| AHQ-6-3, 2165               | R.SLLEGESSGGGGR.G                                                       | 1263.29680 | 2 | 2.91E-04 | 0.49 | 2.64   | -     | 678.1   |
| gi 4507109 ref NP_000336.1  | alpha-synuclein isoform NACP140; non A4 component of amyloid precursor  |            |   | 7.81E-11 | 2.85 | 30.28  | 27.10 | 14460.1 |
| AHQ-6-12, 4440              | K.EQVTVNNGGAVVTGTAQAQK.T                                                | 1929.16446 | 2 | 1.41E-04 | 0.96 | 5.10   | -     | 1028.0  |
| AHQ-6-1, 4448               | K.TKEQVTVNNGGAVVTGTAQAQK.T                                              | 2158.44170 | 3 | 2.81E-04 | 0.90 | 3.82   | -     | 1661.2  |
| AHQ-6-12, 4157              | K.TKEQVTVNNGGAVVTGTAQAQK.T                                              | 2158.44170 | 2 | 6.11E-07 | 0.97 | 5.50   | -     | 1176.4  |
| AHQ-6-13, 4252 - 4319       | K.TKEQVTVNNGGAVVTGTAQAQK.T                                              | 2158.44170 | 3 | 4.19E-04 | 0.92 | 4.27   | -     | 1641.7  |
| AHQ-6-13, 4191 - 4247       | K.TVEGAGSIAAATGFVK.K                                                    | 1479.66001 | 2 | 2.16E-10 | 0.94 | 3.75   | -     | 1414.2  |
| AHQ-6-12, 4059 - 4069       | K.TVEGAGSIAAATGFVK.K                                                    | 1479.66001 | 2 | 7.42E-10 | 0.93 | 3.84   | -     | 1008.0  |
| AHQ-6-13-, 4124             | K.TVEGAGSIAAATGFVK.K                                                    | 1479.66001 | 2 | 7.81E-11 | 0.93 | 3.79   | -     | 1146.1  |
| AHQ-6-1, 4311               | K.TVEGAGSIAAATGFVK.K                                                    | 1479.66001 | 2 | 4.84E-08 | 0.95 | 3.81   | -     | 1649.1  |
| gi 4504183 ref NP_000843.1  | glutathione transferase; deafness, X-linked 7; fatty acid ethyl ester s |            |   | 1.05E-10 | 5.10 | 60.23  | 39.50 | 23355.7 |
| AHQ-6-11, 5056 - 5119       | K.ALPGQKPFETLLSQNGGK.T                                                  | 2127.42930 | 3 | 1.20E-07 | 0.80 | 3.82   | -     | 924.6   |
| AHQ-6-11, 5060              | K.ALPGQKPFETLLSQNGGK.T                                                  | 2127.42930 | 2 | 6.52E-04 | 0.79 | 3.45   | -     | 368.7   |
| AHQ-6-11, 3213              | K.ASLYGLPK.F                                                            | 1138.31884 | 2 | 2.53E-06 | 0.85 | 2.91   | -     | 803.4   |
| AHQ-6-11, 4879              | K.DQEEAALVDM*VNDGVEDLR.C                                                | 2134.26783 | 2 | 2.72E-07 | 0.93 | 4.50   | -     | 854.0   |
| AHQ-6-11, 5840 - 5921       | K.DQEEAALVDM*VNDGVEDLR.C                                                | 2118.26843 | 2 | 1.94E-04 | 0.73 | 3.65   | -     | 347.8   |
| AHQ-6-11, 4744              | K.FQDGDILTYQSNTILR.H                                                    | 1885.06701 | 2 | 5.03E-05 | 0.79 | 3.52   | -     | 660.3   |
| AHQ-6-11, 4647 - 4648       | K.FQDGDILTYQSNTILR.H                                                    | 1885.06701 | 2 | 1.09E-04 | 0.93 | 4.08   | -     | 754.2   |
| AHQ-6-11, 4535 - 4591       | K.FQDGDILTYQSNTILR.H                                                    | 1885.06701 | 2 | 1.05E-10 | 0.85 | 3.90   | -     | 579.8   |
| AHQ-6-10, 4548 - 4550       | K.FQDGDILTYQSNTILR.H                                                    | 1885.06701 | 2 | 5.03E-05 | 0.92 | 4.61   | -     | 659.9   |
| AHQ-6-14-, 4714 - 4786      | K.FQDGDILTYQSNTILR.H                                                    | 1885.06701 | 2 | 4.71E-06 | 0.87 | 4.00   | -     | 757.9   |
| AHQ-6-11, 4352              | K.YISILVNTYEAQKDDYVK.A                                                  | 2156.37637 | 2 | 8.87E-08 | 0.93 | 4.69   | -     | 742.2   |
| gi 4502491 ref NP_001203.1  | complement component 1, q subcomponent binding protein precursor; hyalu |            |   | 1.28E-10 | 0.93 | 10.28  | 10.60 | 31362.0 |
| AHQ-6-9, 6240               | R.GVDNFADELVELSTALEHQEYITFLEDLK.S                                       | 3441.73936 | 3 | 1.28E-10 | 0.93 | 5.54   | -     | 634.7   |
| gi 4502295 ref NP_001677.1  | ATP synthase, H+ transporting, mitochondrial F1 complex, beta polypepti |            |   | 1.52E-10 | 5.72 | 70.24  | 21.70 | 57955.2 |
| AHQ-6-7, 5150               | R.AIAELGIYPAVDPLDSTR.I                                                  | 1989.21513 | 2 | 2.94E-05 | 0.79 | 2.96   | -     | 496.7   |
| AHQ-6-7, 6302 - 6370        | R.DQEGDVLDFIDNIFR.F                                                     | 1923.11524 | 2 | 6.19E-05 | 0.66 | 3.08   | -     | 405.2   |
| AHQ-6-7, 4235 - 4238        | R.FTQAGSEVSALLGR.I                                                      | 1436.59522 | 2 | 1.52E-10 | 0.97 | 4.85   | -     | 1344.5  |
| AHQ-6-7, 3148               | R.IM*DPNIVGSEHYDVAR.G                                                   | 1833.01557 | 2 | 5.25E-04 | 0.64 | 2.71   | -     | 534.5   |
| AHQ-6-7, 4002               | R.LVLEVAQHLGESTVR.T                                                     | 1651.88893 | 2 | 9.06E-05 | 0.96 | 4.29   | -     | 1727.0  |
| AHQ-6-7, 6262               | K.SLQDIAILGM*DELSEEDKLTVSR.A                                            | 2693.02170 | 3 | 1.28E-08 | 0.88 | 4.30   | -     | 580.6   |
| AHQ-6-7, 5323               | R.VALTGLTYEYFR.D                                                        | 1440.66861 | 2 | 9.34E-07 | 0.81 | 3.22   | -     | 811.4   |
| gi 20535366 ref XP_053177.4 | similar to Tubulin alpha-3/alpha-7 chain (Alpha-tubulin 3/7) [Homo sap  |            |   | 1.53E-10 | 1.81 | 30.24  | 9.60  | 49858.2 |
| AHQ-6-7, 2787               | K.DVNAAIATIK.T                                                          | 1016.17355 | 1 | 3.98E-06 | 0.24 | 1.98   | -     | 391.8   |
| AHQ-6-7, 2990               | K.DVNAAIATIK.T                                                          | 1016.17355 | 2 | 4.03E-04 | 0.81 | 2.98   | -     | 865.7   |
| AHQ-6-12, 3265              | K.DVNAAIATIK.T                                                          | 1016.17355 | 1 | 5.27E-06 | 0.72 | 2.41   | -     | 563.1   |
| AHQ-6-12, 3123              | K.DVNAAIATIK.T                                                          | 1016.17355 | 2 | 4.14E-04 | 0.91 | 3.49   | -     | 1032.0  |
| AHQ-6-11, 3092              | K.DVNAAIATIK.T                                                          | 1016.17355 | 2 | 6.67E-05 | 0.85 | 3.06   | -     | 972.2   |
| AHQ-6-13-, 3173             | K.DVNAAIATIK.T                                                          | 1016.17355 | 2 | 3.89E-04 | 0.77 | 2.91   | -     | 712.1   |
| AHQ-6-7, 4834 - 4875        | K.TIGGGDDSFNTFFSETGAGK.H                                                | 2009.07549 | 2 | 5.10E-07 | 0.93 | 4.58   | -     | 664.7   |
| AHQ-6-11, 4812              | K.TIGGGDDSFNTFFSETGAGK.H                                                | 2009.07549 | 2 | 1.79E-04 | 0.59 | 2.96   | -     | 331.0   |
| AHQ-6-7, 4788 - 4816        | K.TIGGGDDSFNTFFSETGAGK.H                                                | 2009.07549 | 2 | 1.26E-05 | 0.86 | 3.68   | -     | 634.0   |
| AHQ-6-7, 4430               | K.TIGGGDDSFNTFFSETGAGK.H                                                | 2009.07549 | 2 | 4.31E-06 | 0.85 | 3.96   | -     | 439.6   |
| AHQ-6-13, 4733              | K.TIGGGDDSFNTFFSETGAGK.H                                                | 2009.07549 | 2 | 6.32E-07 | 0.83 | 3.74   | -     | 372.6   |
| AHQ-6-14-, 5148             | K.TIGGGDDSFNTFFSETGAGK.H                                                | 2009.07549 | 2 | 2.46E-09 | 0.93 | 4.33   | -     | 812.9   |
| AHQ-6-14, 5329              | K.TIGGGDDSFNTFFSETGAGK.H                                                | 2009.07549 | 2 | 2.18E-08 | 0.91 | 4.14   | -     | 539.2   |
| AHQ-6-14, 5580 - 5636       | K.TIGGGDDSFNTFFSETGAGK.H                                                | 2009.07549 | 2 | 2.86E-07 | 0.94 | 4.79   | -     | 740.1   |
| AHQ-6-14, 5692 - 5702       | K.TIGGGDDSFNTFFSETGAGK.H                                                | 2009.07549 | 2 | 1.28E-04 | 0.79 | 3.66   | -     | 406.7   |
| AHQ-6-7, 5014               | K.TIGGGDDSFNTFFSETGAGK.H                                                | 2009.07549 | 2 | 1.53E-10 | 0.87 | 3.76   | -     | 647.1   |
| AHQ-6-13-, 4972             | K.TIGGGDDSFNTFFSETGAGK.H                                                | 2009.07549 | 2 | 9.75E-07 | 0.68 | 3.38   | -     | 445.1   |
| AHQ-6-14-, 4942 - 4998      | K.TIGGGDDSFNTFFSETGAGK.H                                                | 2009.07549 | 2 | 2.20E-09 | 0.94 | 4.45   | -     | 957.6   |

|                             |                                                                          |            |   |          |       |        |       |         |
|-----------------------------|--------------------------------------------------------------------------|------------|---|----------|-------|--------|-------|---------|
| AHQ-6-14-, 4594             | K.TIGGGDDSFNTFFSETGAGK.H                                                 | 2009.07549 | 2 | 2.92E-10 | 0.92  | 4.39   | -     | 559.0   |
| AHQ-6-14-, 4847 - 4874      | K.TIGGGDDSFNTFFSETGAGK.H                                                 | 2009.07549 | 2 | 1.92E-08 | 0.83  | 3.58   | -     | 518.5   |
| AHQ-6-13, 5501 - 5565       | R.TIQFVDWCPGTFK.V                                                        | 1600.81899 | 2 | 7.27E-05 | 0.81  | 3.36   | -     | 558.4   |
| AHQ-6-13-, 5464 - 5477      | R.TIQFVDWCPGTFK.V                                                        | 1600.81899 | 2 | 2.67E-04 | 0.83  | 3.16   | -     | 709.5   |
| AHQ-6-14-, 5419 - 5466      | R.TIQFVDWCPGTFK.V                                                        | 1600.81899 | 2 | 1.43E-05 | 0.70  | 3.06   | -     | 705.4   |
| gi 29568111 ref NP_006088.2 | myosin, light polypeptide 9, regulatory; myosin regulatory light chain   |            |   | 1.60E-10 | 2.72  | 30.21  | 12.20 | 19827.1 |
| AHQ-6-12, 3451              | R.FTDEEVDEM*YR.E                                                         | 1434.51009 | 2 | 1.60E-10 | 0.94  | 4.13   | -     | 945.3   |
| AHQ-6-12, 2797              | R.FTDEEVDEM*YR.E                                                         | 1450.50949 | 2 | 8.02E-04 | 0.90  | 2.99   | -     | 956.4   |
| AHQ-6-13-, 2838             | R.FTDEEVDEM*YR.E                                                         | 1450.50949 | 2 | 9.43E-04 | 0.92  | 2.68   | -     | 1537.5  |
| AHQ-6-12, 3815              | K.GNFNYVEFTR.I                                                           | 1247.34066 | 2 | 1.16E-05 | 0.88  | 3.41   | -     | 730.0   |
| AHQ-6-11, 3915              | K.GNFNYVEFTR.I                                                           | 1247.34066 | 2 | 5.85E-04 | 0.78  | 2.87   | -     | 670.9   |
| AHQ-6-11, 3755 - 3757       | K.GNFNYVEFTR.I                                                           | 1247.34066 | 2 | 7.27E-05 | 0.87  | 3.41   | -     | 691.4   |
| gi 4506925 ref NP_003013.1  | SH3 domain binding glutamic acid-rich protein like; SH3-binding domain   |            |   | 2.08E-10 | 2.73  | 30.34  | 50.00 | 12774.2 |
| AHQ-6-13-, 5622 - 5676      | R.ENNAVYAFGLTAPPGSK.E                                                    | 1850.06426 | 2 | 1.28E-04 | 0.85  | 4.16   | -     | 459.5   |
| AHQ-6-13, 5755 - 5811       | R.ENNAVYAFGLTAPPGSK.E                                                    | 1850.06426 | 2 | 6.40E-04 | 0.96  | 4.78   | -     | 1053.4  |
| AHQ-6-13-, 5724 - 5780      | R.ENNAVYAFGLTAPPGSK.E                                                    | 1850.06426 | 2 | 6.50E-04 | 0.87  | 3.20   | -     | 818.0   |
| AHQ-6-13, 4999 - 5048       | R.ENVPENSRPATGYPLPPQIFNESQYR.G                                           | 3005.24660 | 3 | 2.08E-10 | 0.94  | 5.46   | -     | 826.1   |
| AHQ-6-13-, 4781 - 4841      | R.ENVPENSRPATGYPLPPQIFNESQYR.G                                           | 3005.24660 | 3 | 8.34E-09 | 0.97  | 6.31   | -     | 999.8   |
| AHQ-6-13-, 4900 - 4960      | R.ENVPENSRPATGYPLPPQIFNESQYR.G                                           | 3005.24660 | 3 | 2.17E-08 | 0.96  | 5.90   | -     | 1067.7  |
| AHQ-6-13, 4889 - 4944       | R.ENVPENSRPATGYPLPPQIFNESQYR.G                                           | 3005.24660 | 3 | 4.60E-10 | 0.97  | 6.72   | -     | 1238.4  |
| AHQ-6-13-, 2498 - 2561      | R.VYIASSSGSTAIK.K                                                        | 1284.44065 | 2 | 4.46E-05 | 0.96  | 4.37   | -     | 1784.2  |
| AHQ-6-13, 2673 - 2732       | R.VYIASSSGSTAIK.K                                                        | 1284.44065 | 2 | 2.72E-05 | 0.95  | 3.68   | -     | 1989.3  |
| gi 5031597 ref NP_005710.1  | actin related protein 2/3 complex subunit 3; ARP2/3 protein complex sub  |            |   | 2.16E-10 | 1.74  | 20.22  | 9.00  | 20546.5 |
| AHQ-6-12, 6047 - 6048       | K.DTDIVDEAIYFK.A                                                         | 1592.72721 | 2 | 2.38E-05 | 0.94  | 3.59   | -     | 1112.8  |
| AHQ-6-13-, 6152             | K.DTDIVDEAIYFK.A                                                         | 1592.72721 | 2 | 4.30E-09 | 0.96  | 3.98   | -     | 1523.5  |
| AHQ-6-14-, 6143             | K.DTDIVDEAIYFK.A                                                         | 1592.72721 | 2 | 2.16E-10 | 0.93  | 4.05   | -     | 1150.8  |
| AHQ-6-12, 5537 - 5609       | R.ETKDDTIVDEAIYFK.A                                                      | 1951.11899 | 2 | 6.32E-05 | 0.81  | 3.47   | -     | 693.8   |
| gi 29741246 ref XP_294070.1 | similar to Glyceraldehyde 3-phosphate dehydrogenase, liver (GAPDH) [Ho   |            |   | 2.28E-10 | 3.12  | 40.22  | 13.00 | 35032.0 |
| AHQ-6-12, 5221 - 5287       | K.LVINGNPITIFQER.D                                                       | 1614.87029 | 2 | 9.46E-09 | 0.88  | 3.05   | -     | 902.8   |
| AHQ-6-9, 5066 - 5122        | K.LVINGNPITIFQER.D                                                       | 1614.87029 | 2 | 3.62E-05 | 0.90  | 3.40   | -     | 916.7   |
| AHQ-6-13-, 5354 - 5414      | K.LVINGNPITIFQER.D                                                       | 1614.87029 | 2 | 2.28E-10 | 0.96  | 4.27   | -     | 1469.7  |
| AHQ-6-14, 6013              | K.LVINGNPITIFQER.D                                                       | 1614.87029 | 2 | 6.82E-07 | 0.86  | 3.07   | -     | 733.9   |
| AHQ-6-10, 5099 - 5154       | K.LVINGNPITIFQER.D                                                       | 1614.87029 | 2 | 9.29E-08 | 0.86  | 2.73   | -     | 767.6   |
| AHQ-6-11, 5232 - 5311       | K.LVINGNPITIFQER.D                                                       | 1614.87029 | 2 | 1.37E-04 | 0.91  | 3.20   | -     | 1041.3  |
| AHQ-6-14-, 5374             | K.LVINGNPITIFQER.D                                                       | 1614.87029 | 2 | 3.27E-10 | 0.92  | 3.55   | -     | 1109.5  |
| AHQ-6-13, 5447 - 5503       | K.LVINGNPITIFQER.D                                                       | 1614.87029 | 2 | 3.51E-10 | 0.94  | 3.83   | -     | 1021.5  |
| AHQ-6-13, 5559 - 5560       | K.LVINGNPITIFQER.D                                                       | 1614.87029 | 2 | 8.55E-08 | 0.95  | 3.82   | -     | 1282.4  |
| AHQ-6-9, 4731 - 4802        | K.LVINGNPITIFQERDPSK.I                                                   | 2042.32440 | 2 | 7.73E-07 | 0.52  | 3.03   | -     | 243.5   |
| AHQ-6-9, 5703 - 5747        | K.VLHDFNFVIVKGLM*TTVHAITATQK.T                                           | 2612.04471 | 3 | 4.16E-08 | 0.86  | 4.48   | -     | 940.3   |
| AHQ-6-9, 6091               | K.VLHDFNFVIVKGLM*TTVHAITATQK.T                                           | 2596.04531 | 3 | 5.09E-04 | 0.78  | 3.98   | -     | 1052.6  |
| gi 4757810 ref NP_004037.1  | ATP synthase, H+ transporting, mitochondrial F1 complex, alpha subunit,  |            |   | 2.50E-10 | 6.18  | 70.23  | 15.70 | 59750.3 |
| AHQ-6-7, 3738               | R.EAYPGDVFYLSR.L                                                         | 1554.68713 | 2 | 2.42E-08 | 0.89  | 2.78   | -     | 1043.2  |
| AHQ-6-7, 5543               | K.FENAFLSHVVSQHQALLGTIR.A                                                | 2368.67911 | 3 | 6.66E-06 | 0.97  | 4.65   | -     | 2353.6  |
| AHQ-6-7, 3420               | K.HALIIVDLSK.Q                                                           | 1288.47413 | 2 | 8.65E-08 | 0.95  | 3.85   | -     | 1201.7  |
| AHQ-6-7, 3543               | R.ILGADTSVLEETGR.V                                                       | 1576.68772 | 2 | 2.60E-08 | 0.93  | 4.04   | -     | 1061.6  |
| AHQ-6-14-, 3684             | R.ILGADTSVLEETGR.V                                                       | 1576.68772 | 2 | 2.50E-10 | 0.95  | 4.33   | -     | 1176.6  |
| AHQ-6-7, 5874 - 5946        | K.LKEIVTNFLAGFEA                                                         | 1552.79572 | 2 | 7.61E-05 | 0.86  | 3.13   | -     | 871.5   |
| AHQ-6-7, 3634               | K.TGTAEMSSILEER.I                                                        | 1424.55988 | 2 | 3.32E-07 | 0.82  | 2.95   | -     | 1137.5  |
| AHQ-6-7, 2588               | K.TGTAEM*SSILEER.I                                                       | 1440.55928 | 2 | 3.65E-06 | 0.74  | 2.97   | -     | 808.5   |
| gi 4503689 ref NP_000499.1  | fibronectin, alpha chain isoform alpha-E preproprotein [Homo sapiens] [M |            |   | 2.52E-10 | 12.12 | 160.26 | 20.10 | 94972.5 |
| AHQ-6-8, 5318               | K.DSDWPFCSDEDWVNYK.C                                                     | 1965.98609 | 2 | 3.19E-05 | 0.95  | 4.03   | -     | 843.0   |
| AHQ-6-7, 4626 - 4628        | K.DSHSLTNIIM*EILR.G                                                      | 1646.84779 | 2 | 2.51E-05 | 0.95  | 4.09   | -     | 1406.6  |
| AHQ-6-6, 4779               | K.DSHSLTNIIM*EILR.G                                                      | 1646.84779 | 2 | 9.02E-06 | 0.93  | 3.60   | -     | 1320.1  |
| AHQ-6-10, 4538 - 4555       | K.DSHSLTNIIM*EILR.G                                                      | 1646.84779 | 2 | 1.27E-04 | 0.93  | 3.54   | -     | 1310.9  |
| AHQ-6-8, 2537               | R.EVDLKDYEQQK.Q                                                          | 1510.58460 | 2 | 4.32E-08 | 0.87  | 3.07   | -     | 958.9   |
| AHQ-6-9, 2537 - 2563        | R.EVDLKDYEQQK.Q                                                          | 1510.58460 | 2 | 1.65E-06 | 0.83  | 3.44   | -     | 578.1   |
| AHQ-6-10, 2599 - 2600       | R.EVDLKDYEQQK.Q                                                          | 1510.58460 | 2 | 9.13E-09 | 0.92  | 3.82   | -     | 951.4   |
| AHQ-6-6, 2626               | R.EVDLKDYEQQK.Q                                                          | 1510.58460 | 2 | 1.47E-05 | 0.74  | 2.90   | -     | 630.1   |
| AHQ-6-13-, 2729             | R.EVDLKDYEQQK.Q                                                          | 1510.58460 | 2 | 1.35E-05 | 0.65  | 2.55   | -     | 559.3   |
| AHQ-6-7, 1799 - 1854        | R.GGSTSYGTGSETESPR.N                                                     | 1573.55765 | 2 | 1.07E-06 | 0.84  | 3.29   | -     | 723.2   |
| AHQ-6-6, 1842 - 1898        | R.GGSTSYGTGSETESPR.N                                                     | 1573.55765 | 2 | 1.20E-06 | 0.52  | 2.92   | -     | 397.7   |
| AHQ-6-12, 4427              | K.GLIDEVNDQFTNR.I                                                        | 1521.61384 | 2 | 5.86E-06 | 0.84  | 3.22   | -     | 769.7   |
| AHQ-6-9, 4224               | K.GLIDEVNDQFTNR.I                                                        | 1521.61384 | 2 | 8.97E-08 | 0.93  | 3.62   | -     | 1105.8  |
| AHQ-6-6, 4467 - 4526        | K.GLIDEVNDQFTNR.I                                                        | 1521.61384 | 2 | 3.86E-04 | 0.73  | 3.23   | -     | 732.1   |
| AHQ-6-13, 4648 - 4720       | K.GLIDEVNDQFTNR.I                                                        | 1521.61384 | 2 | 4.84E-05 | 0.93  | 3.81   | -     | 961.0   |
| AHQ-6-5, 4517 - 4553        | K.GLIDEVNDQFTNR.I                                                        | 1521.61384 | 2 | 8.35E-09 | 0.94  | 3.42   | -     | 1318.4  |
| AHQ-6-4, 4597               | K.GLIDEVNDQFTNR.I                                                        | 1521.61384 | 2 | 1.45E-05 | 0.91  | 3.71   | -     | 887.8   |
| AHQ-6-11, 4309 - 4365       | K.GLIDEVNDQFTNR.I                                                        | 1521.61384 | 2 | 1.14E-05 | 0.77  | 3.02   | -     | 680.1   |
| AHQ-6-10, 4310              | K.GLIDEVNDQFTNR.I                                                        | 1521.61384 | 2 | 1.71E-06 | 0.94  | 4.07   | -     | 1175.5  |
| AHQ-6-8, 4365 - 4376        | K.GLIDEVNDQFTNR.I                                                        | 1521.61384 | 2 | 6.98E-05 | 0.90  | 3.54   | -     | 826.5   |
| AHQ-6-8, 3832 - 3834        | K.GLIDEVNDQFTNR.I                                                        | 1521.61384 | 2 | 2.52E-10 | 0.91  | 4.01   | -     | 722.5   |
| AHQ-6-7, 3806               | K.GLIDEVNDQFTNR.I                                                        | 1521.61384 | 2 | 3.02E-04 | 0.86  | 3.55   | -     | 661.0   |
| AHQ-6-7, 4336               | K.GLIDEVNDQFTNR.I                                                        | 1521.61384 | 2 | 3.71E-04 | 0.81  | 3.43   | -     | 559.0   |
| AHQ-6-3, 4576               | K.GLIDEVNDQFTNR.I                                                        | 1521.61384 | 2 | 1.24E-05 | 0.81  | 2.92   | -     | 854.3   |
| AHQ-6-14-, 2352             | R.GSESGIFTNTK.E                                                          | 1141.21317 | 2 | 4.88E-04 | 0.79  | 2.95   | -     | 904.2   |
| AHQ-6-6, 2304               | R.GSESGIFTNTK.E                                                          | 1141.21317 | 1 | 5.10E-04 | 0.28  | 2.08   | -     | 314.4   |
| AHQ-6-6, 3147               | R.HPDEAAFFDTASTGK.T                                                      | 1594.66329 | 2 | 1.91E-04 | 0.81  | 3.27   | -     | 501.4   |
| AHQ-6-10, 3072              | R.HPDEAAFFDTASTGK.T                                                      | 1594.66329 | 2 | 6.52E-04 | 0.26  | 2.53   | -     | 278.5   |
| AHQ-6-12, 3175              | R.HPDEAAFFDTASTGK.T                                                      | 1594.66329 | 2 | 6.37E-06 | 0.66  | 3.19   | -     | 331.3   |
| AHQ-6-6, 2664               | R.HRHPDEAAFFDTASTGK.T                                                    | 1887.98954 | 3 | 1.40E-07 | 0.97  | 5.12   | -     | 2147.0  |
| AHQ-6-10, 2646              | R.HRHPDEAAFFDTASTGK.T                                                    | 1887.98954 | 2 | 1.59E-05 | 0.88  | 3.45   | -     | 782.9   |
| AHQ-6-6, 2659               | R.HRHPDEAAFFDTASTGK.T                                                    | 1887.98954 | 2 | 5.26E-07 | 0.95  | 4.60   | -     | 956.3   |
| AHQ-6-7, 2574               | R.HRHPDEAAFFDTASTGK.T                                                    | 1887.98954 | 2 | 9.91E-07 | 0.96  | 4.63   | -     | 1181.3  |
| AHQ-6-11, 2691              | R.HRHPDEAAFFDTASTGK.T                                                    | 1887.98954 | 2 | 4.09E-04 | 0.96  | 4.80   | -     | 1341.3  |
| AHQ-6-12, 2768 - 2844       | R.HRHPDEAAFFDTASTGK.T                                                    | 1887.98954 | 3 | 1.40E-07 | 0.98  | 5.08   | -     | 2440.8  |
| AHQ-6-9, 2815 - 2816        | K.LKNSLFYQK.N                                                            | 1270.45881 | 1 | 1.66E-04 | 0.15  | 1.80   | -     | 314.8   |
| AHQ-6-6, 2668               | R.MELERP*GNEITR.G                                                        | 1502.67870 | 2 | 5.73E-04 | 0.71  | 2.59   | -     | 695.2   |
| AHQ-6-6, 2216               | R.NPSSAGSWSNGSSGPGSTGNR.N                                                | 1964.94443 | 2 | 1.64E-05 | 0.91  | 4.03   | -     | 882.5   |
| AHQ-6-7, 2156 - 2216        | R.NPSSAGSWSNGSSGPGSTGNR.N                                                | 1964.94443 | 2 | 8.54E-05 | 0.91  | 3.97   | -     | 751.1   |
| AHQ-6-8, 2120               | R.NPSSAGSWSNGSSGPGSTGNR.N                                                | 1964.94443 | 2 | 9.27E-10 | 0.94  | 4.82   | -     | 895.8   |
| AHQ-6-6, 2319               | R.NPSSAGSWSNGSSGPGSTGNR.N                                                | 1964.94443 | 2 | 2.56E-07 | 0.90  | 4.40   | -     | 347.0   |
| AHQ-6-6, 2832 - 2843        | K.NSLFEYQK.N                                                             | 1029.12765 | 1 | 8.12E-04 | 0.12  | 2.07   | -     | 160.1   |
| AHQ-6-8, 2168               | R.PGSTGTWNP*GSSER.G                                                      | 1433.46515 | 2 | 2.95E-05 | 0.82  | 3.09   | -     | 596.0   |
| AHQ-6-11, 2285 - 2296       | R.PGSTGTWNP*GSSER.G                                                      | 1433.46515 | 2 | 1.62E-04 | 0.73  | 3.34   | -     | 451.2   |
| AHQ-6-6, 6278               | K.TFPGFSP*MLGEFVSETESR.G                                                 | 2282.51372 | 2 | 1.12E-04 | 0.76  | 3.36   | -     | 311.1   |
| AHQ-6-6, 6424 - 6426        | K.TFPGFSP*MLGEFVSETESR.G                                                 | 2266.51432 | 2 | 1.54E-04 | 0.90  | 4.03   | -     | 587.6   |
| AHQ-6-6, 2450 - 2462        | K.VQIHLQK.N                                                              | 1107.33106 | 2 | 3.66E-04 | 0.86  | 3.24   | -     | 739.0   |
| AHQ-6-10, 2414 - 2434       | K.VQIHLQK.N                                                              | 1107.33106 | 2 | 7.69E-05 | 0.75  | 2.69   | -     | 750.0   |
| gi 4758606 ref NP_004508.1  | integrin-linked kinase [Homo sapiens]                                    |            |   | 3.06E-10 | 5.61  | 70.21  | 17.50 | 51418.9 |
| AHQ-6-7, 4038 - 4040        | R.EVFPADLSNM*EIGM*K.V                                                    | 1713.95438 | 2 | 9.15E-05 | 0.72  | 3.30   | -     | 470.2   |
| AHQ-6-13, 5075              | R.EVFPADLSNM*EIGM*K.V                                                    | 1697.95498 | 2 | 8.34E-04 | 0.58  | 2.67   | -     | 364.8   |
| AHQ-6-7, 4236               | K.FDM*IVPILK.M                                                           | 1221.49108 | 2 | 5.41E-05 | 0.89  | 3.16   | -     | 1033.6  |
| AHQ-6-7, 2151               | R.GDDTPLHLAASHGHR.D                                                      | 1584.67809 | 3 | 3.06E-10 | 0.88  | 3.17   | -     | 1743.6  |
| AHQ-6-7, 4866 - 4915        | R.GM*AFHLTLEPLIPR.H                                                      | 1611.93301 | 2 | 3.05E-06 | 0.90  | 3.33   | -     | 973.2   |
| AHQ-6-7, 2343               | K.LN                                                                     |            |   |          |       |        |       |         |

|                             |                                                                                    |            |   |          |       |        |       |          |
|-----------------------------|------------------------------------------------------------------------------------|------------|---|----------|-------|--------|-------|----------|
| AHQ-6-5, 4471               | K.DVDLEFLAK.M                                                                      | 1050.18677 | 1 | 4.40E-05 | 0.60  | 2.22   | -     | 1006.0   |
| AHQ-6-5, 3715               | R.ELQELVQYVEHPDK.F                                                                 | 1825.01157 | 2 | 4.74E-04 | 0.89  | 3.37   | -     | 1025.8   |
| AHQ-6-5, 3499               | R.EVDIGIPDATGR.L                                                                   | 1243.34863 | 2 | 9.15E-04 | 0.76  | 2.74   | -     | 441.3    |
| AHQ-6-5, 3731               | K.GVLVFGYPPGCGK.T                                                                  | 1253.45154 | 2 | 9.68E-06 | 0.83  | 3.16   | -     | 840.3    |
| AHQ-6-5, 6257 - 6261        | R.VYQLLTMMDGLK.Q                                                                   | 1431.76657 | 2 | 2.35E-09 | 0.95  | 4.40   | -     | 1172.3   |
| AHQ-6-5, 3359               | R.KYEMFAQTLLQQR.G                                                                  | 1630.85008 | 2 | 8.69E-07 | 0.96  | 4.13   | -     | 1786.9   |
| AHQ-6-5, 5440               | R.LDQLIYPLPDEK.S                                                                   | 1557.81228 | 2 | 3.68E-06 | 0.92  | 3.63   | -     | 1064.6   |
| AHQ-6-5, 3237               | R.LELQIHTK.N                                                                       | 1095.31705 | 2 | 4.69E-04 | 0.83  | 2.51   | -     | 1106.3   |
| AHQ-6-5, 4801               | R.LVDEAINEDNSVLSQPK.M                                                              | 2171.39088 | 2 | 2.21E-05 | 0.98  | 5.35   | -     | 1957.9   |
| AHQ-6-5, 3817               | K.M*DELQLFR.G                                                                      | 1068.22879 | 2 | 3.14E-04 | 0.86  | 2.79   | -     | 1137.1   |
| AHQ-6-5, 6503               | K.NAPAIIFIDELDAIPK.R                                                               | 1812.09907 | 2 | 2.67E-04 | 0.94  | 4.25   | -     | 1095.0   |
| AHQ-6-5, 5491               | K.NVFIAGATNRPDIIIPAILR.PGR.L                                                       | 2519.93026 | 3 | 8.77E-05 | 0.72  | 3.86   | -     | 504.8    |
| AHQ-6-5, 4791               | K.VVETDPPSYCIVAPDTVIHCEGEPIK.R.E                                                   | 3085.45473 | 3 | 3.08E-10 | 0.83  | 3.85   | -     | 443.5    |
| AHQ-6-5, 3495 - 3500        | R.WALSQSNPSALR.E                                                                   | 1330.47434 | 2 | 1.93E-05 | 0.90  | 3.85   | -     | 942.9    |
| gi 29739414 ref XP_294015.1 | similar to Glycerlaldehyde 3-phosphate dehydrogenase, liver (GAPDH) [Homo sapiens] |            |   | 3.22E-10 | 1.69  | 20.23  | 12.80 | 26916.7  |
| AHQ-6-9, 3719 - 3776        | K.IISNASCTTINCLAPLAK.V                                                             | 1837.10868 | 2 | 3.17E-05 | 0.85  | 3.96   | -     | 1203.4   |
| AHQ-6-11, 3833              | K.IISNASCTTINCLAPLAK.V                                                             | 1837.10868 | 2 | 5.86E-04 | 0.85  | 2.57   | -     | 1652.3   |
| AHQ-6-11, 3749              | K.IISNASCTTINCLAPLAK.V                                                             | 1837.10868 | 2 | 2.01E-09 | 0.79  | 3.10   | -     | 1298.0   |
| AHQ-6-10, 3687 - 3766       | K.IISNASCTTINCLAPLAK.V                                                             | 1837.10868 | 2 | 1.02E-07 | 0.85  | 3.70   | -     | 1418.1   |
| AHQ-6-10, 3978              | K.IISNASCTTINCLAPLAK.V                                                             | 1837.10868 | 2 | 1.25E-08 | 0.62  | 3.17   | -     | 854.1    |
| AHQ-6-10, 4602              | K.LISWYDNEFGYSNR.V                                                                 | 1764.87478 | 2 | 7.10E-06 | 0.95  | 4.50   | -     | 935.9    |
| AHQ-6-9, 4615 - 4671        | K.LISWYDNEFGYSNR.V                                                                 | 1764.87478 | 2 | 1.25E-04 | 0.77  | 3.32   | -     | 677.5    |
| AHQ-6-9, 4490 - 4546        | K.LISWYDNEFGYSNR.V                                                                 | 1764.87478 | 2 | 1.58E-07 | 0.93  | 4.32   | -     | 1004.3   |
| AHQ-6-11, 4613 - 4671       | K.LISWYDNEFGYSNR.V                                                                 | 1764.87478 | 2 | 5.88E-06 | 0.91  | 4.21   | -     | 808.5    |
| AHQ-6-11, 4781              | K.LISWYDNEFGYSNR.V                                                                 | 1764.87478 | 2 | 1.28E-06 | 0.63  | 2.71   | -     | 534.3    |
| AHQ-6-13, 4968              | K.LISWYDNEFGYSNR.V                                                                 | 1764.87478 | 2 | 1.35E-09 | 0.94  | 3.90   | -     | 1156.7   |
| AHQ-6-13-, 4852             | K.LISWYDNEFGYSNR.V                                                                 | 1764.87478 | 2 | 3.22E-10 | 0.91  | 3.68   | -     | 848.4    |
| AHQ-6-14-, 4774 - 4838      | K.LISWYDNEFGYSNR.V                                                                 | 1764.87478 | 2 | 9.52E-06 | 0.90  | 4.17   | -     | 432.0    |
| AHQ-6-14-, 4904             | K.LISWYDNEFGYSNR.V                                                                 | 1764.87478 | 2 | 2.24E-05 | 0.87  | 3.65   | -     | 636.9    |
| gi 4827056 ref NP_005103.1  | WD repeat-containing protein 1 isoform 2 [Homo sapiens]                            |            |   | 3.24E-10 | 10.03 | 110.31 | 35.40 | 58001.9  |
| AHQ-6-6, 4836               | K.AHDGGIYAIWSWSPDSTHLLSASGDK.T                                                     | 2586.75455 | 2 | 6.20E-08 | 0.91  | 4.32   | -     | 637.2    |
| AHQ-6-6, 4835 - 4903        | K.AHDGGIYAIWSWSPDSTHLLSASGDK.T                                                     | 2586.75455 | 3 | 3.24E-10 | 0.97  | 5.72   | -     | 1688.4   |
| AHQ-6-6, 3864               | R.FATASADGQIYIDGK.T                                                                | 1720.86021 | 2 | 1.85E-05 | 0.83  | 3.38   | -     | 1121.1   |
| AHQ-6-6, 3740 - 3802        | R.FATASADGQIYIDGK.T                                                                | 1720.86021 | 2 | 1.58E-08 | 0.90  | 3.52   | -     | 871.4    |
| AHQ-6-6, 5407               | K.FGAVFLWDSGSSVGEITGHNK.V                                                          | 2209.40259 | 3 | 2.92E-06 | 0.87  | 4.26   | -     | 790.1    |
| AHQ-6-6, 5418               | K.FGAVFLWDSGSSVGEITGHNK.V                                                          | 2209.40259 | 2 | 2.20E-05 | 0.89  | 3.96   | -     | 674.6    |
| AHQ-6-6, 4455 - 4514        | K.GPVTVDAVYSHDGAFLAVCDASK.V                                                        | 2282.47194 | 2 | 2.80E-09 | 0.97  | 5.39   | -     | 1603.9   |
| AHQ-6-6, 5303 - 5358        | R.LATGSDDNCAAFFEGPPFK.F                                                            | 2046.20216 | 2 | 6.25E-10 | 0.91  | 4.22   | -     | 898.8    |
| AHQ-6-6, 5347 - 5420        | R.LATGSDDNCAAFFEGPPFK.F                                                            | 2046.20216 | 2 | 2.08E-08 | 0.83  | 3.95   | -     | 451.5    |
| AHQ-6-6, 5190 - 5246        | R.LATGSDDNCAAFFEGPPFK.F                                                            | 2046.20216 | 2 | 1.59E-06 | 0.94  | 4.64   | -     | 1022.6   |
| AHQ-6-7, 3815               | R.LYSILGTLTKDEGK.L                                                                 | 1538.76736 | 2 | 5.39E-04 | 0.86  | 3.23   | -     | 880.2    |
| AHQ-6-12, 3940              | R.LYSILGTLTKDEGK.L                                                                 | 1538.76736 | 2 | 8.02E-05 | 0.90  | 3.67   | -     | 901.2    |
| AHQ-6-6, 3926 - 3927        | R.LYSILGTLTKDEGK.L                                                                 | 1538.76736 | 2 | 6.55E-06 | 0.94  | 4.20   | -     | 1112.8   |
| AHQ-6-6, 4167               | R.M*TVDESGLISCSMDTIVR.Y                                                            | 2162.36305 | 2 | 1.65E-04 | 0.90  | 3.82   | -     | 844.1    |
| AHQ-6-6, 4203               | R.NIDNPALADIYEAHQVVAQ.Y                                                            | 2419.67805 | 2 | 3.62E-05 | 0.83  | 3.16   | -     | 762.9    |
| AHQ-6-6, 4070               | K.SYIYSGSHDGHINYWDSSETGENDSFAGK.G                                                  | 3138.17570 | 3 | 4.02E-06 | 0.98  | 6.27   | -     | 2699.8   |
| AHQ-6-6, 4168               | K.SYIYSGSHDGHINYWDSSETGENDSFAGK.G                                                  | 3138.17570 | 3 | 4.18E-08 | 0.97  | 5.71   | -     | 1776.3   |
| AHQ-6-12, 3831              | K.YAPSGFYIASGDVSGK.L                                                               | 1619.75589 | 2 | 3.22E-04 | 0.66  | 2.84   | -     | 558.9    |
| AHQ-6-6, 3768 - 3830        | K.YAPSGFYIASGDVSGK.L                                                               | 1619.75589 | 2 | 7.73E-10 | 0.92  | 3.81   | -     | 970.7    |
| AHQ-6-6, 2851 - 2867        | K.YEYQPFAGK.I                                                                      | 1103.20822 | 2 | 5.00E-06 | 0.84  | 2.87   | -     | 589.4    |
| gi 7669492 ref NP_002037.2  | glyceraldehyde-3-phosphate dehydrogenase [Homo sapiens]                            |            |   | 3.93E-10 | 1.87  | 20.28  | 11.30 | 36053.0  |
| AHQ-6-11, 5839 - 5912       | K.VIHDNFIVGELM*TTVHAITATQK.T                                                       | 2612.98634 | 3 | 8.10E-06 | 0.93  | 5.60   | -     | 1491.4   |
| AHQ-6-11, 3943              | R.VPTANVSVVDLTCR.L                                                                 | 1532.74450 | 2 | 1.88E-09 | 0.96  | 4.59   | -     | 1102.4   |
| AHQ-6-9, 3750 - 3786        | R.VPTANVSVVDLTCR.L                                                                 | 1532.74450 | 2 | 8.54E-09 | 0.94  | 3.82   | -     | 1049.3   |
| AHQ-6-5, 4039 - 4119        | R.VPTANVSVVDLTCR.L                                                                 | 1532.74450 | 2 | 2.69E-05 | 0.83  | 2.76   | -     | 881.0    |
| AHQ-6-12, 4007 - 4064       | R.VPTANVSVVDLTCR.L                                                                 | 1532.74450 | 2 | 1.75E-09 | 0.94  | 4.16   | -     | 919.5    |
| AHQ-6-13, 4175              | R.VPTANVSVVDLTCR.L                                                                 | 1532.74450 | 2 | 3.62E-08 | 0.95  | 4.06   | -     | 1120.1   |
| AHQ-6-14, 4768              | R.VPTANVSVVDLTCR.L                                                                 | 1532.74450 | 2 | 1.73E-06 | 0.89  | 3.57   | -     | 631.4    |
| AHQ-6-13-, 4052             | R.VPTANVSVVDLTCR.L                                                                 | 1532.74450 | 2 | 3.13E-09 | 0.89  | 3.89   | -     | 800.7    |
| AHQ-6-14-, 4031             | R.VPTANVSVVDLTCR.L                                                                 | 1532.74450 | 2 | 3.93E-10 | 0.94  | 4.48   | -     | 1013.8   |
| gi 30150448 ref XP_293066.2 | similar to Stress-70 protein, mitochondrial precursor (75 kDa glucose)             |            |   | 4.07E-10 | 0.95  | 10.23  | 2.90  | 58788.2  |
| AHQ-6-6, 4474 - 4483        | R.VINEPTAAALYGLDK.S                                                                | 1646.86592 | 2 | 4.07E-10 | 0.95  | 4.65   | -     | 874.2    |
| gi 4502051 ref NP_000688.1  | arachidonate 12-lipoxygenase; 12(S)-lipoxygenase [Homo sapiens]                    |            |   | 4.12E-10 | 8.91  | 110.22 | 22.60 | 75721.8  |
| AHQ-6-6, 4654               | R.AAAQLTYGSLCPPDDLADR.G                                                            | 2140.33708 | 2 | 5.63E-06 | 0.90  | 3.80   | -     | 528.3    |
| AHQ-6-6, 2456               | K.AVSTGGGGHVQLLR.R                                                                 | 1352.52468 | 2 | 1.06E-05 | 0.75  | 3.37   | -     | 493.0    |
| AHQ-6-6, 3106 - 3179        | R.EITEVGLCOAQDR.G                                                                  | 1520.64745 | 2 | 1.93E-05 | 0.85  | 3.32   | -     | 777.5    |
| AHQ-6-6, 6467               | K.ELQNGSLFEADFILLDGPANVIR.G                                                        | 2645.99132 | 2 | 1.14E-04 | 0.84  | 3.37   | -     | 708.6    |
| AHQ-6-6, 3419               | K.GDPELQAWCR.E                                                                     | 1233.33558 | 2 | 1.00E-06 | 0.73  | 2.67   | -     | 435.8    |
| AHQ-6-6, 5283               | R.GLLGLPGLYAHDALR.L                                                                | 1637.90708 | 2 | 4.12E-10 | 0.90  | 3.47   | -     | 680.4    |
| AHQ-6-6, 3660               | R.LPGDNALDM*FQK.H                                                                  | 1365.53724 | 2 | 1.70E-04 | 0.60  | 2.89   | -     | 585.2    |
| AHQ-6-6, 4410               | R.LPGDNALDM*FQK.H                                                                  | 1349.53784 | 2 | 4.51E-04 | 0.85  | 3.05   | -     | 881.0    |
| AHQ-6-6, 3964               | R.TQLISDGGIFDK.A                                                                   | 1294.43554 | 2 | 7.95E-04 | 0.84  | 2.95   | -     | 866.9    |
| AHQ-6-6, 4524 - 4559        | R.VATGAWLFGSGSYNR.V                                                                | 1529.68080 | 2 | 1.62E-04 | 0.76  | 3.22   | -     | 583.6    |
| AHQ-6-6, 4756 - 4822        | R.WVQGEDILSLPEGTAR.L                                                               | 1771.95190 | 2 | 1.70E-04 | 0.89  | 4.50   | -     | 652.1    |
| gi 5031677 ref NP_005681.1  | dynamitin 1-like protein isoform 3; dynamitin-like protein [Homo sapiens] [        |            |   | 5.59E-10 | 4.27  | 50.22  | 8.90  | 78060.6  |
| AHQ-6-13-, 4648 - 4649      | K.ALQGASQIAEIR.E                                                                   | 1370.57991 | 2 | 1.30E-08 | 0.95  | 3.92   | -     | 1661.7   |
| AHQ-6-13, 4780              | K.ALQGASQIAEIR.E                                                                   | 1370.57991 | 2 | 8.19E-06 | 0.93  | 3.78   | -     | 1531.1   |
| AHQ-6-13-, 4969             | K.DTLQSELVGLQYK.S                                                                  | 1494.67144 | 2 | 3.38E-04 | 0.85  | 3.16   | -     | 1044.8   |
| AHQ-6-6, 6308               | K.IFSPNVNLTLDVLPGMTK.V                                                             | 2059.45828 | 2 | 3.41E-09 | 0.62  | 2.89   | -     | 697.1    |
| AHQ-6-6, 5908               | K.IFSPNVNLTLDVLPGMTK.V                                                             | 2075.45768 | 2 | 8.12E-05 | 0.90  | 3.77   | -     | 904.9    |
| AHQ-6-5, 5979               | K.IFSPNVNLTLDVLPGMTK.V                                                             | 2075.45768 | 2 | 2.18E-07 | 0.90  | 3.98   | -     | 952.4    |
| AHQ-6-13-, 5866             | K.SSLDDLLTESEDM*AQR.R                                                              | 1940.07638 | 2 | 5.59E-10 | 0.95  | 4.35   | -     | 1279.5   |
| gi 27500274 ref XP_113950.3 | similar to Munc13-4 protein [Homo sapiens]                                         |            |   | 5.70E-10 | 8.46  | 100.24 | 12.50 | 123281.1 |
| AHQ-6-4, 6684               | K.AFGELCPNAPLPLQVTEALQTGTTEWFHLK.Q                                                 | 3472.91108 | 3 | 8.33E-09 | 0.81  | 3.97   | -     | 481.0    |
| AHQ-6-4, 6027 - 6063        | R.ALLYEDALTYVLR.L                                                                  | 1677.92484 | 2 | 5.70E-10 | 0.92  | 3.42   | -     | 1156.9   |
| AHQ-6-4, 4735               | R.AVQM*DELVPLGELTK.H                                                               | 1659.92638 | 2 | 3.45E-07 | 0.63  | 2.79   | -     | 511.1    |
| AHQ-6-4, 5577               | R.AVQMDELVPLGELTK.H                                                                | 1643.92698 | 2 | 7.14E-04 | 0.81  | 3.17   | -     | 626.0    |
| AHQ-6-4, 2496               | R.DLELQAASSR.E                                                                     | 1090.16939 | 2 | 9.72E-05 | 0.95  | 3.66   | -     | 1573.3   |
| AHQ-6-4, 3480               | R.IQQQAETTSEELGAVTVK.A                                                             | 1933.10674 | 2 | 3.19E-06 | 0.96  | 4.64   | -     | 1270.9   |
| AHQ-6-4, 5088               | R.LALVYCSLIK.A                                                                     | 1181.46990 | 2 | 2.86E-07 | 0.89  | 3.51   | -     | 830.9    |
| AHQ-6-4, 5311 - 5319        | K.LPAQLAWALEQR.V                                                                   | 1525.73360 | 2 | 3.21E-09 | 0.96  | 4.76   | -     | 1339.4   |
| AHQ-6-5, 5232               | K.LPAQLAWALEQR.V                                                                   | 1525.73360 | 2 | 2.37E-06 | 0.92  | 3.68   | -     | 1153.9   |
| AHQ-6-4, 4076               | R.SVFPVLSVSDSPAR.L                                                                 | 1362.51311 | 2 | 1.37E-05 | 0.83  | 3.07   | -     | 867.1    |
| AHQ-6-4, 5876               | R.WFQPAIPSWLQK.T                                                                   | 1501.75533 | 2 | 8.85E-05 | 0.70  | 2.99   | -     | 371.1    |
| gi 4504523 ref NP_002148.1  | heat shock 10kDa protein 1 (chaperonin 10); heat shock 10kDa protein 1 (           |            |   | 6.75E-10 | 1.75  | 20.24  | 25.50 | 10931.6  |
| AHQ-6-14-, 2815 - 2874      | K.VLQATVAVGSGSK.G                                                                  | 1316.52902 | 2 | 6.75E-10 | 0.97  | 4.81   | -     | 1462.3   |
| AHQ-6-14-, 4783 - 4863      | K.VLLDDKDYFLFR.D                                                                   | 1530.74861 | 2 | 4.37E-07 | 0.78  | 2.93   | -     | 856.6    |
| AHQ-6-14-, 4864             | K.VLLDDKDYFLFR.D                                                                   | 1530.74861 | 3 | 1.33E-05 | 0.87  | 3.30   | -     | 709.4    |
| AHQ-6-14, 5534 - 5600       | K.VLLDDKDYFLFR.D                                                                   | 1530.74861 | 2 | 6.37E-06 | 0.86  | 3.23   | -     | 741.1    |
| gi 29737978 ref XP_290747.1 | similar to Myosin heavy chain, nonmuscle type B (Cellular myosin heavy             |            |   | 7.24E-10 | 3.60  | 40.24  | 1.50  | 191380.7 |
| AHQ-6-3, 3864 - 3941        | K.ADFCIHYAGK.V                                                                     | 1296.47641 | 2 | 3.72E-05 | 0.86  | 2.90   | -     | 1232.8   |
| AHQ-6-5, 3867               | K.ADFCIHYAGK.V                                                                     | 1296.47641 | 2 | 7.24E-10 | 0.96  | 4.10   | -     | 1238.5   |
| AHQ-6-1, 4112               | K.ADFCIHYAGK.V                                                                     | 1296.47641 | 2 | 1.43E-07 | 0.91  | 3.47   | -     | 1010.4   |
| AHQ-6-4, 3924 - 3953        | K.ADFCIHYAGK.V                                                                     | 1296.47641 | 2 | 4.00E-07 | 0.92  | 3.18   | -     | 1328.1   |
| AHQ-6-6, 3838               | K.ADFCIHYAGK.V                                                                     | 1296.47641 | 2 | 7.59E-07 | 0.94  | 3.72   | -     | 1130.1   |
| AHQ-6-2, 3972               | K.ADFCIHYAGK.V                                                                     | 1296.47641 | 1 | 3.60E-05 | 0.67  | 2.56   | -     | 600.3    |
| AHQ-6-2, 3958 - 3966        | K.ADFCIHYAGK.V                                                                     | 1296.47641 | 2 | 1.12E-06 | 0.96  | 3.85   | -     | 1656.0   |

|                             |                                                                          |            |   |          |      |        |       |         |
|-----------------------------|--------------------------------------------------------------------------|------------|---|----------|------|--------|-------|---------|
| AHQ-6-1, 3320               | R.AGVLAHLEEEER.D                                                         | 1224.34854 | 2 | 2.04E-06 | 0.96 | 4.14   | -     | 1755.9  |
| AHQ-6-2, 3086               | R.AGVLAHLEEEER.D                                                         | 1224.34854 | 2 | 1.19E-07 | 0.96 | 4.14   | -     | 1665.6  |
| AHQ-6-3, 3082               | R.AGVLAHLEEEER.D                                                         | 1224.34854 | 2 | 1.27E-08 | 0.95 | 4.42   | -     | 1280.3  |
| AHQ-6-4, 3044               | R.AGVLAHLEEEER.D                                                         | 1224.34854 | 2 | 1.44E-06 | 0.96 | 4.28   | -     | 1449.1  |
| AHQ-6-6, 2919 - 2999        | R.AGVLAHLEEEER.D                                                         | 1224.34854 | 2 | 1.73E-06 | 0.95 | 3.81   | -     | 1758.6  |
| AHQ-6-5, 2992               | R.AGVLAHLEEEER.D                                                         | 1224.34854 | 2 | 9.20E-08 | 0.96 | 4.36   | -     | 1594.6  |
| AHQ-6-6, 3608               | K.DKADFCIIHYAGK.V                                                        | 1539.73719 | 2 | 3.69E-06 | 0.91 | 3.41   | -     | 1286.2  |
| AHQ-6-2, 3766               | K.DKADFCIIHYAGK.V                                                        | 1539.73719 | 3 | 4.95E-08 | 0.95 | 4.36   | -     | 1812.1  |
| AHQ-6-3, 3738               | K.DKADFCIIHYAGK.V                                                        | 1539.73719 | 2 | 1.20E-04 | 0.95 | 4.12   | -     | 1330.6  |
| AHQ-6-2, 3751               | K.DKADFCIIHYAGK.V                                                        | 1539.73719 | 2 | 4.10E-06 | 0.96 | 4.82   | -     | 1509.4  |
| AHQ-6-5, 3645               | K.DKADFCIIHYAGK.V                                                        | 1539.73719 | 2 | 1.33E-08 | 0.96 | 4.10   | -     | 1722.5  |
| AHQ-6-1, 3910               | K.DKADFCIIHYAGK.V                                                        | 1539.73719 | 2 | 3.47E-05 | 0.89 | 3.77   | -     | 777.9   |
| AHQ-6-3, 4597 - 4598        | K.LDPHLVLDQLR.C                                                          | 1319.53460 | 2 | 2.32E-06 | 0.73 | 2.86   | -     | 614.9   |
| AHQ-6-2, 4624               | K.LDPHLVLDQLR.C                                                          | 1319.53460 | 3 | 1.24E-04 | 0.90 | 3.31   | -     | 1101.3  |
| AHQ-6-4, 4603               | K.LDPHLVLDQLR.C                                                          | 1319.53460 | 2 | 2.39E-05 | 0.64 | 2.52   | -     | 418.8   |
| AHQ-6-5, 4521               | K.LDPHLVLDQLR.C                                                          | 1319.53460 | 3 | 2.76E-05 | 0.91 | 3.65   | -     | 952.1   |
| gi 5453898 ref NP_006212.1  | protein (peptidyl-prolyl cis/trans isomerase) NIMA-interacting 1; doc;   |            |   | 7.30E-10 | 0.97 | 10.24  | 9.20  | 18243.2 |
| AHQ-6-12, 4013              | R.TKEEALELINGYIQK.I                                                      | 1749.98614 | 2 | 7.30E-10 | 0.97 | 4.78   | -     | 1455.4  |
| gi 4758950 ref NP_000933.1  | peptidylprolyl isomerase B (cyclophilin B) [Homo sapiens]                |            |   | 7.65E-10 | 5.49 | 60.22  | 31.50 | 23742.4 |
| AHQ-6-12, 3065 - 3068       | R.DKPLKDVIIADCGK.I                                                       | 1573.83653 | 3 | 4.22E-06 | 0.91 | 4.42   | -     | 938.0   |
| AHQ-6-14-, 3079             | R.DKPLKDVIIADCGK.I                                                       | 1573.83653 | 2 | 7.15E-04 | 0.74 | 2.70   | -     | 717.6   |
| AHQ-6-12, 3061              | R.DKPLKDVIIADCGK.I                                                       | 1573.83653 | 2 | 7.65E-10 | 0.91 | 3.70   | -     | 1117.1  |
| AHQ-6-12, 4131 - 4187       | K.DTNGSOFFITTVK.T                                                        | 1458.59766 | 2 | 3.07E-07 | 0.93 | 3.84   | -     | 1126.4  |
| AHQ-6-12, 3228              | K.HYGPGWVSMANAGK.D                                                       | 1475.65664 | 2 | 6.12E-04 | 0.95 | 4.10   | -     | 1198.6  |
| AHQ-6-12, 4227 - 4288       | K.TVDNFVALATGEK.G                                                        | 1365.51377 | 2 | 8.07E-05 | 0.92 | 3.56   | -     | 981.8   |
| AHQ-6-12, 4473 - 4553       | K.TVDNFVALATGEK.G                                                        | 1365.51377 | 2 | 1.56E-06 | 0.91 | 3.65   | -     | 881.4   |
| AHQ-6-14-, 4366             | K.TVDNFVALATGEK.G                                                        | 1365.51377 | 2 | 1.65E-05 | 0.93 | 3.58   | -     | 1131.1  |
| AHQ-6-12, 3731 - 3800       | R.VIKDFM*IQGGDFTR.G                                                      | 1643.88873 | 2 | 2.60E-05 | 0.84 | 3.42   | -     | 891.9   |
| AHQ-6-12, 4105 - 4109       | R.VIKDFMIQGGDFTR.G                                                       | 1627.88933 | 2 | 7.79E-06 | 0.94 | 3.95   | -     | 1310.4  |
| gi 5902128 ref NP_008880.1  | synthaxin binding protein 2; Hunc18b [Homo sapiens]                      |            |   | 7.96E-10 | 9.91 | 110.28 | 33.40 | 66438.1 |
| AHQ-6-6, 6490               | R.AADPVSPLHHELTQAMAYDLLDIEQDITYR.Y                                       | 3437.82058 | 3 | 9.35E-08 | 0.94 | 5.40   | -     | 841.4   |
| AHQ-6-6, 5874               | K.AAHIFFTDTCPEPLFSELGR.S                                                 | 2310.57011 | 3 | 3.06E-06 | 0.92 | 4.68   | -     | 951.9   |
| AHQ-6-6, 6074 - 6079        | R.EPIPSLEAIYLLSPTEK.S                                                    | 1901.18939 | 2 | 4.87E-05 | 0.94 | 3.92   | -     | 1014.4  |
| AHQ-6-7, 5927               | R.EPIPSLEAIYLLSPTEK.S                                                    | 1901.18939 | 2 | 3.71E-04 | 0.49 | 2.75   | -     | 469.3   |
| AHQ-6-6, 3312               | R.KGPEDTAQLAHAVLAK.L                                                     | 1649.87303 | 3 | 1.52E-09 | 0.96 | 5.31   | -     | 1260.0  |
| AHQ-6-6, 3587               | K.LCSVEQDLAM*GSDAEGEK.I                                                  | 1957.08386 | 2 | 5.52E-05 | 0.82 | 3.28   | -     | 839.2   |
| AHQ-6-6, 5944               | K.LLVPVLLDAAPAYDK.I                                                      | 1698.03911 | 3 | 1.56E-06 | 0.98 | 5.64   | -     | 2477.0  |
| AHQ-6-6, 3218 - 3219        | R.NLEQLGGTVNPNPQGGSTSSR.L                                                | 1933.02693 | 2 | 1.87E-08 | 0.93 | 4.79   | -     | 607.3   |
| AHQ-6-6, 5227               | R.NLWPFVSDPAPTASSQAASAR.F                                                | 2273.48981 | 2 | 5.27E-05 | 0.88 | 4.01   | -     | 543.5   |
| AHQ-6-6, 6462               | R.QLEVLAAQIATLCATLQEQPAIR.Y                                              | 2632.02938 | 3 | 1.12E-04 | 0.84 | 3.56   | -     | 1093.8  |
| AHQ-6-6, 5671 - 5672        | R.REPIPSLEAIYLLSPTEK.S                                                   | 2057.37574 | 3 | 1.41E-06 | 0.78 | 3.37   | -     | 931.8   |
| AHQ-6-6, 5670               | R.REPIPSLEAIYLLSPTEK.S                                                   | 2057.37574 | 2 | 1.26E-04 | 0.97 | 5.26   | -     | 1273.4  |
| AHQ-6-6, 4706               | K.WEVLIGSSHILTPTR.F                                                      | 1709.97007 | 2 | 7.96E-10 | 0.93 | 3.65   | -     | 1110.1  |
| gi 20357552 ref NP_005222.2 | cortactin isoform A; oncogene EMS1 [Homo sapiens]                        |            |   | 8.52E-10 | 4.82 | 60.26  | 15.80 | 61585.7 |
| AHQ-6-14-, 4532 - 4547      | K.ASAGHAVSIQDDAGADDWETDPDFVNDVSEK.E                                      | 3334.37643 | 3 | 8.82E-04 | 0.76 | 3.70   | -     | 515.1   |
| AHQ-6-14-, 4659 - 4730      | K.ASAGHAVSIQDDAGADDWETDPDFVNDVSEK.E                                      | 3334.37643 | 3 | 3.93E-04 | 0.88 | 4.83   | -     | 463.9   |
| AHQ-6-14-, 4807             | K.ASAGHAVSIQDDAGADDWETDPDFVNDVSEK.E                                      | 3334.37643 | 3 | 5.06E-05 | 0.75 | 3.22   | -     | 759.1   |
| AHQ-6-12, 3895 - 3908       | R.LPSSPVYEDAAASF.K                                                       | 1511.65733 | 2 | 1.76E-04 | 0.76 | 3.01   | -     | 681.4   |
| AHQ-6-13, 4007              | K.NASTFEDVTQVSSAYQK.T                                                    | 1875.97061 | 2 | 3.13E-06 | 0.92 | 3.78   | -     | 1006.0  |
| AHQ-6-14, 4576              | K.NASTFEDVTQVSSAYQK.T                                                    | 1875.97061 | 2 | 2.49E-04 | 0.91 | 3.55   | -     | 962.1   |
| AHQ-6-12, 3803              | K.NASTFEDVTQVSSAYQK.T                                                    | 1875.97061 | 2 | 2.56E-07 | 0.87 | 3.09   | -     | 959.6   |
| AHQ-6-13-, 3870             | K.NASTFEDVTQVSSAYQK.T                                                    | 1875.97061 | 2 | 8.52E-10 | 0.97 | 5.27   | -     | 1282.1  |
| AHQ-6-14-, 3852 - 3916      | K.NASTFEDVTQVSSAYQK.T                                                    | 1875.97061 | 2 | 1.37E-09 | 0.93 | 3.89   | -     | 1055.4  |
| AHQ-6-13, 3139 - 3140       | K.VDKSAVGFQYQK.T                                                         | 1428.57155 | 2 | 1.16E-06 | 0.85 | 3.59   | -     | 511.0   |
| AHQ-6-13-, 2980             | R.VDQSAVGFQYQK.T                                                         | 1428.52841 | 2 | 1.51E-08 | 0.77 | 2.76   | -     | 798.0   |
| AHQ-6-12, 5071              | R.YGLFPANVVELR.Q                                                         | 1442.64306 | 2 | 1.17E-05 | 0.73 | 2.67   | -     | 458.6   |
| gi 6005749 ref NP_009193.1  | RNA-binding protein regulatory subunit; oncogene DJ1 [Homo sapiens] [MA] |            |   | 8.64E-10 | 2.64 | 30.23  | 22.20 | 19846.9 |
| AHQ-6-10, 6242              | R.PGPTSFEFALAIIVALNGK.E                                                  | 1922.17039 | 2 | 8.64E-10 | 0.90 | 3.86   | -     | 1044.4  |
| AHQ-6-10, 6183              | R.PGPTSFEFALAIIVALNGK.EAAQVK.A                                           | 2648.00721 | 3 | 1.64E-05 | 0.91 | 4.61   | -     | 873.2   |
| AHQ-6-11, 3193              | K.VTVAGLAGKDPVQCSR.D                                                     | 1659.88952 | 2 | 1.22E-09 | 0.83 | 3.28   | -     | 636.9   |
| gi 13129150 ref NP_005339.1 | heat shock 90kDa protein 1, alpha; heat shock 90kD protein 1, alpha [H]  |            |   | 8.79E-10 | 2.46 | 30.23  | 4.40  | 84659.1 |
| AHQ-6-5, 2512               | K.FYEQFSK.N                                                              | 949.04099  | 1 | 8.22E-05 | 0.69 | 2.14   | -     | 762.7   |
| AHQ-6-5, 3919               | R.NPDDITNEEYGEFYK.S                                                      | 1834.87381 | 2 | 2.77E-09 | 0.96 | 4.65   | -     | 1190.5  |
| AHQ-6-6, 3895               | R.NPDDITNEEYGEFYK.S                                                      | 1834.87381 | 2 | 1.90E-09 | 0.90 | 3.89   | -     | 857.9   |
| AHQ-6-5, 3833               | R.NPDDITNEEYGEFYK.S                                                      | 1834.87381 | 2 | 8.79E-10 | 0.96 | 4.62   | -     | 1250.4  |
| AHQ-6-5, 4083               | R.RAPDFLFEENR.K                                                          | 1265.40235 | 2 | 1.08E-06 | 0.81 | 3.32   | -     | 536.8   |
| gi 4557305 ref NP_000025.1  | aldolase A; fructose-bisphosphate aldolase; Aldolase A, fructose-bispho  |            |   | 9.77E-10 | 6.90 | 90.23  | 36.50 | 39419.7 |
| AHQ-6-8, 2123 - 2194        | R.ALANSLACQKQ.Y                                                          | 1134.28859 | 2 | 4.17E-05 | 0.80 | 3.29   | -     | 653.4   |
| AHQ-6-8, 4273 - 4338        | R.ALANSLACQKQYTPSGQAGAAASESLFVSNHAY                                      | 3344.61352 | 3 | 2.05E-05 | 0.53 | 3.03   | -     | 417.9   |
| AHQ-6-9, 4039 - 4044        | K.FSHEEIAMATVTLR.R                                                       | 1676.91875 | 2 | 1.01E-05 | 0.93 | 3.55   | -     | 1253.9  |
| AHQ-6-11, 2944              | K.GILAADESTGSIK.R                                                        | 1333.47008 | 2 | 1.32E-08 | 0.94 | 3.69   | -     | 1460.7  |
| AHQ-6-12, 2977 - 2980       | K.GILAADESTGSIK.R                                                        | 1333.47008 | 2 | 8.43E-08 | 0.95 | 3.94   | -     | 1377.4  |
| AHQ-6-8, 2696               | K.GILAADESTGSIK.R                                                        | 1333.47008 | 2 | 9.77E-10 | 0.96 | 4.28   | -     | 1154.6  |
| AHQ-6-13, 3161              | K.GILAADESTGSIK.R                                                        | 1333.47008 | 2 | 1.12E-07 | 0.93 | 3.67   | -     | 1105.7  |
| AHQ-6-9, 2787               | K.GILAADESTGSIK.R                                                        | 1333.47008 | 2 | 1.97E-04 | 0.84 | 2.75   | -     | 825.8   |
| AHQ-6-9, 4174               | K.GVVPVLAGTNGETTQGLDGLSER.C                                              | 2273.44329 | 2 | 5.65E-06 | 0.72 | 3.95   | -     | 601.6   |
| AHQ-6-8, 3976               | K.GVVPVLAGTNGETTQGLDGLSER.C                                              | 2273.44329 | 2 | 2.12E-04 | 0.79 | 4.53   | -     | 643.8   |
| AHQ-6-9, 4595 - 4620        | K.IGEHTPSALAIMENANVLR.Y                                                  | 2108.40788 | 2 | 1.16E-04 | 0.77 | 2.97   | -     | 571.7   |
| AHQ-6-9, 4962               | K.IGEHTPSALAIMENANVLR.Y                                                  | 2108.40788 | 2 | 2.51E-04 | 0.90 | 3.99   | -     | 616.7   |
| AHQ-6-9, 3816               | K.IGEHTPSALAIM*ENANVLR.Y                                                 | 2124.40728 | 2 | 2.95E-04 | 0.40 | 2.55   | -     | 394.5   |
| AHQ-6-8, 4706               | K.IGEHTPSALAIMENANVLR.Y                                                  | 2108.40788 | 2 | 8.51E-08 | 0.92 | 4.40   | -     | 656.0   |
| AHQ-6-8, 5236               | R.YASICQQNGIVPIVEPEILPDGDHDLKR.C                                         | 3179.54969 | 3 | 2.01E-05 | 0.88 | 4.56   | -     | 642.3   |
| AHQ-6-8, 4273 - 4338        | K.YTPSQGAGAAASESLFVSNHAY                                                 | 2229.34753 | 2 | 8.87E-07 | 0.78 | 3.63   | -     | 335.7   |
| gi 21361198 ref NP_000286.2 | serine (or cysteine) proteinase inhibitor, clade A (alpha-1) antiprotei  |            |   | 1.05E-09 | 0.86 | 10.24  | 4.30  | 46722.2 |
| AHQ-6-14-, 4380             | K.VFNSGADLSGVTEEAPLK.L                                                   | 1835.00476 | 2 | 1.05E-09 | 0.86 | 3.38   | -     | 772.4   |
| AHQ-6-7, 4156 - 4234        | K.VFNSGADLSGVTEEAPLK.L                                                   | 1835.00476 | 2 | 2.40E-06 | 0.94 | 4.83   | -     | 887.0   |
| gi 4507231 ref NP_003134.1  | single-stranded DNA binding protein; single-stranded DNA-binding protei  |            |   | 1.13E-09 | 2.51 | 30.22  | 32.40 | 17259.5 |
| AHQ-6-13-, 5689             | K.NPVTIFSLATNEM*WR.S                                                     | 1796.04007 | 2 | 1.29E-07 | 0.83 | 3.12   | -     | 974.2   |
| AHQ-6-13-, 5745             | R.QATTIADNIIFLSDQTK.E                                                    | 1993.24692 | 2 | 3.79E-06 | 0.77 | 3.41   | -     | 606.0   |
| AHQ-6-13-, 3261             | R.SGDSEVYQLGDVSKQ.T                                                      | 1612.67692 | 2 | 1.68E-09 | 0.94 | 4.48   | -     | 1022.0  |
| AHQ-6-13, 3408              | R.SGDSEVYQLGDVSKQ.T                                                      | 1612.67692 | 2 | 1.13E-09 | 0.91 | 3.55   | -     | 1255.5  |
| gi 10835187 ref NP_000627.1 | superoxide dismutase 2, mitochondrial [Homo sapiens]                     |            |   | 1.15E-09 | 3.52 | 40.25  | 28.40 | 24733.0 |
| AHQ-6-13-, 5848             | K.KAIWNVINWENVTER.Y                                                      | 1744.93137 | 2 | 1.85E-07 | 0.91 | 3.47   | -     | 1114.2  |
| AHQ-6-13, 5912              | K.KAIWNVINWENVTER.Y                                                      | 1744.93137 | 2 | 8.30E-06 | 0.54 | 2.62   | -     | 519.5   |
| AHQ-6-11, 5623 - 5679       | K.KAIWNVINWENVTER.Y                                                      | 1744.93137 | 2 | 2.32E-09 | 0.90 | 3.50   | -     | 977.2   |
| AHQ-6-14-, 5826             | K.KAIWNVINWENVTER.Y                                                      | 1744.93137 | 2 | 3.61E-04 | 0.83 | 3.19   | -     | 807.8   |
| AHQ-6-14-, 3859 - 3863      | K.GDVTQAIALQPALK.F                                                       | 1425.65548 | 2 | 2.43E-06 | 0.83 | 3.83   | -     | 730.0   |
| AHQ-6-11, 3777              | K.GDVTQAIALQPALK.F                                                       | 1425.65548 | 1 | 3.60E-05 | 0.49 | 2.83   | -     | 523.1   |
| AHQ-6-11, 3717 - 3771       | K.GDVTQAIALQPALK.F                                                       | 1425.65548 | 2 | 3.72E-07 | 0.90 | 4.19   | -     | 824.9   |
| AHQ-6-13-, 3857             | K.GDVTQAIALQPALK.F                                                       | 1425.65548 | 2 | 8.06E-05 | 0.75 | 3.03   | -     | 751.4   |
| AHQ-6-11, 2416 - 2488       | K.HHAAYVNNLNVTEEK.Y                                                      | 1739.86999 | 2 | 1.15E-09 | 0.96 | 5.08   | -     | 1186.2  |
| AHQ-6-11, 2595              | K.HHAAYVNNLNVTEEK.Y                                                      | 1739.86999 | 2 | 1.29E-08 | 0.91 | 3.45   | -     | 946.1   |
| AHQ-6-11, 5857 - 5936       | K.LTAASVGVQSGWGLWLFNK.E                                                  | 2036.27841 | 2 | 8.62E-06 | 0.76 | 2.88   | -     | 594.4   |
| gi 20149545 ref NP_002717.2 | prolyl endopeptidase [Homo sapiens]                                      |            |   | 1.26E-09 | 0.75 | 10.13  | 2.40  | 80733.0 |
| AHQ-6-6, 5578               | R.VFLDPNLSDDGTVALR.G                                                     | 1846.07392 | 2 | 1.26E-09 | 0.75 | 2.69   | -     | 805.9   |
| gi 4759300 ref NP_004772.1  | vesicle-associated membrane protein 3 (cellubrevin); vesicle-associated  |            |   | 1.28E-09 | 2.81 | 30.26  | 33.00 | 11309.0 |
| AHQ-6-13-, 3584             | R.ADALQAGASQFETSAK.L                                                     | 1666.77095 | 2 | 1.28E-09 | 0.90 | 3.93   | -     | 892.1   |

|                             |                                                                          |            |   |          |       |        |       |          |
|-----------------------------|--------------------------------------------------------------------------|------------|---|----------|-------|--------|-------|----------|
| AHQ-6-13, 4852              | R.LQQTQNVQDEVVDIMR.V                                                     | 1917.13404 | 2 | 2.34E-09 | 0.94  | 4.48   | -     | 1095.6   |
| AHQ-6-13-, 3688             | R.LQQTQNVQDEVVDIMR.V                                                     | 1933.13344 | 2 | 2.57E-08 | 0.97  | 5.16   | -     | 1564.0   |
| AHQ-6-13, 3827              | R.LQQTQNVQDEVVDIMR.V                                                     | 1933.13344 | 2 | 1.75E-06 | 0.95  | 4.47   | -     | 1137.1   |
| gi 4507725 ref NP_000362.1  | transferrin (prealbumin, amyloidosis type I); Transthyretin (prealbumin) |            |   | 1.35E-09 | 2.77  | 30.24  | 32.70 | 15886.9  |
| AHQ-6-13, 3951              | K.AADDTWEPFASGK.T                                                        | 1395.45529 | 2 | 4.55E-06 | 0.86  | 3.43   | -     | 570.7    |
| AHQ-6-13-, 4034             | R.GSPAINVAVHVFR.K                                                        | 1367.58095 | 2 | 6.37E-08 | 0.94  | 4.07   | -     | 1150.4   |
| AHQ-6-13, 4159 - 4193       | R.GSPAINVAVHVFR.K                                                        | 1367.58095 | 2 | 1.35E-09 | 0.94  | 3.97   | -     | 1121.3   |
| AHQ-6-13-, 5304             | K.TSESGELHGLTTEEFVVEGIYK.V                                               | 2456.60073 | 3 | 1.33E-04 | 0.94  | 4.65   | -     | 1658.6   |
| AHQ-6-13-, 5313 - 5316      | K.TSESGELHGLTTEEFVVEGIYK.V                                               | 2456.60073 | 2 | 6.63E-08 | 0.96  | 4.84   | -     | 1465.9   |
| AHQ-6-13, 5387              | K.TSESGELHGLTTEEFVVEGIYK.V                                               | 2456.60073 | 2 | 1.40E-04 | 0.72  | 2.58   | -     | 725.4    |
| gi 30148492 ref XP_293610.2 | similar to Heat shock cognate 71 kDa protein [Homo sapiens]              |            |   | 1.36E-09 | 3.23  | 40.19  | 4.30  | 72113.4  |
| AHQ-6-6, 2930               | R.FDDAVVQSDMK.H                                                          | 1255.37968 | 2 | 1.36E-09 | 0.92  | 3.54   | -     | 816.0    |
| AHQ-6-6, 2306 - 2334        | R.FDDAVVQSDMK.H                                                          | 1271.37908 | 2 | 2.80E-07 | 0.91  | 3.15   | -     | 1073.9   |
| AHQ-6-7, 4426               | R.IINEPTAAAIAYGLDK.K                                                     | 1660.89259 | 2 | 6.18E-06 | 0.69  | 3.55   | -     | 700.2    |
| AHQ-6-6, 4215 - 4222        | R.IINEPTAAAIAYGLDK.K                                                     | 1789.06550 | 3 | 5.65E-07 | 0.71  | 3.49   | -     | 280.4    |
| AHQ-6-6, 4135 - 4214        | R.IINEPTAAAIAYGLDK.K                                                     | 1789.06550 | 2 | 1.51E-06 | 0.89  | 3.86   | -     | 615.3    |
| gi 24119203 ref NP_705935.1 | tropomyosin 3 [Homo sapiens]                                             |            |   | 1.38E-09 | 4.67  | 50.28  | 14.50 | 29032.5  |
| AHQ-6-12, 3628              | R.IQLVEEELDR.A                                                           | 1244.37653 | 2 | 9.92E-08 | 0.87  | 2.78   | -     | 1026.8   |
| AHQ-6-10, 3504              | R.IQLVEEELDR.A                                                           | 1244.37653 | 2 | 6.73E-05 | 0.87  | 3.21   | -     | 946.7    |
| AHQ-6-10, 2767              | K.IQVLQQQADDAEER.A                                                       | 1643.73738 | 2 | 1.38E-09 | 0.95  | 3.84   | -     | 1493.9   |
| AHQ-6-10, 2562              | R.KIQLVQQQADDAEER.A                                                      | 1771.91030 | 2 | 1.49E-06 | 0.98  | 5.22   | -     | 2174.7   |
| AHQ-6-9, 2483 - 2509        | R.KIQLVQQQADDAEER.A                                                      | 1771.91030 | 2 | 3.79E-06 | 0.97  | 5.03   | -     | 1857.3   |
| AHQ-6-9, 3140               | R.RIQLVEEELDR.A                                                          | 1400.56288 | 2 | 1.81E-07 | 0.97  | 4.53   | -     | 1566.7   |
| AHQ-6-9, 2990 - 3008        | K.TIDDLDEKLC.C                                                           | 1190.32563 | 2 | 4.13E-05 | 0.91  | 3.58   | -     | 819.5    |
| gi 4557871 ref NP_001054.1  | transferrin [Homo sapiens]                                               |            |   | 1.39E-09 | 6.14  | 70.29  | 14.50 | 77049.5  |
| AHQ-6-5, 4868 - 4872        | K.EDPQTFFYYAVAVK.K                                                       | 1630.82181 | 2 | 5.87E-05 | 0.70  | 2.81   | -     | 556.7    |
| AHQ-6-5, 3561               | K.EGYGGYVAFGR.C                                                          | 1284.35776 | 2 | 2.67E-05 | 0.85  | 3.07   | -     | 776.2    |
| AHQ-6-5, 4007               | R.FDEFFSEGCAPGSK.K                                                       | 1579.66868 | 2 | 5.05E-05 | 0.95  | 3.88   | -     | 1408.7   |
| AHQ-6-5, 3329               | K.IECVSAETTEDCIAK.I                                                      | 1728.87748 | 2 | 1.97E-05 | 0.93  | 3.65   | -     | 1300.7   |
| AHQ-6-5, 3085               | R.KPVDEYKDCDLAQVPSHTVVAR.S                                               | 2551.86290 | 3 | 1.59E-05 | 0.95  | 5.71   | -     | 759.9    |
| AHQ-6-5, 3164               | R.LKQDEWVNSVGK.I                                                         | 1523.69293 | 2 | 1.39E-09 | 0.86  | 3.28   | -     | 789.9    |
| AHQ-6-5, 4489               | K.M*YLGVEYVTAIR.N                                                        | 1495.72451 | 2 | 2.58E-06 | 0.90  | 3.03   | -     | 1093.5   |
| gi 4885609 ref NP_005408.1  | v-src sarcoma (Schmidt-Ruppin A-2) viral oncogene homolog; Protooncogen  |            |   | 1.48E-09 | 3.65  | 40.26  | 15.70 | 59834.4  |
| AHQ-6-7, 6099               | R.AGPLAGGVVTFVALYDYESR.T                                                 | 2088.30526 | 2 | 1.74E-04 | 0.96  | 5.25   | -     | 1266.2   |
| AHQ-6-7, 6316               | R.KEPEERPTFEYLAQFLLEDYFTSTEPQYQPGENL                                     | 3998.26826 | 3 | 1.48E-09 | 0.86  | 4.39   | -     | 349.0    |
| AHQ-6-7, 6339               | K.SDVVWFGILLETLLTK.G                                                     | 1811.06794 | 2 | 1.47E-05 | 0.96  | 4.74   | -     | 1277.9   |
| AHQ-6-7, 5931               | R.TQFNLSLQQLVAYYSK.H                                                     | 1790.99681 | 2 | 1.63E-06 | 0.87  | 2.91   | -     | 1009.7   |
| AHQ-6-7, 5771 - 5850        | R.TQFNLSLQQLVAYYSK.H                                                     | 1790.99681 | 2 | 1.63E-05 | 0.81  | 3.26   | -     | 1060.0   |
| AHQ-6-7, 5598 - 5630        | R.TQFNLSLQQLVAYYSK.H                                                     | 1790.99681 | 2 | 5.91E-04 | 0.68  | 2.83   | -     | 677.0    |
| gi 4503747 ref NP_001448.1  | filamin B, beta (actin binding protein 278); beta filamin; filamin 1 (a  |            |   | 1.52E-09 | 3.04  | 40.25  | 1.40  | 278191.4 |
| AHQ-6-3, 3057               | K.DLAEDAPVKK.I                                                           | 1173.29999 | 2 | 6.57E-04 | 0.44  | 2.72   | -     | 547.4    |
| AHQ-6-2, 6046               | R.LIALLEVLISQK.R                                                         | 1227.51852 | 2 | 1.17E-06 | 0.96  | 4.08   | -     | 1419.3   |
| AHQ-6-13, 6008              | R.LIALLEVLISQK.R                                                         | 1227.51852 | 2 | 3.11E-05 | 0.94  | 3.88   | -     | 926.3    |
| AHQ-6-1, 6098               | R.LIALLEVLISQK.R                                                         | 1227.51852 | 2 | 1.52E-09 | 0.96  | 4.36   | -     | 1300.7   |
| AHQ-6-4, 6087               | R.LIALLEVLISQK.R                                                         | 1227.51852 | 2 | 5.34E-07 | 0.96  | 4.28   | -     | 1393.7   |
| AHQ-6-3, 6016               | R.LIALLEVLISQK.R                                                         | 1227.51852 | 2 | 1.59E-07 | 0.96  | 4.45   | -     | 1443.2   |
| AHQ-6-11, 5767 - 5771       | R.LIALLEVLISQK.R                                                         | 1227.51852 | 2 | 4.12E-07 | 0.97  | 4.59   | -     | 1484.6   |
| AHQ-6-13-, 5953             | R.LIALLEVLISQK.R                                                         | 1227.51852 | 2 | 1.68E-05 | 0.90  | 3.28   | -     | 819.5    |
| AHQ-6-5, 6007               | R.LIALLEVLISQK.R                                                         | 1227.51852 | 2 | 6.56E-07 | 0.97  | 5.06   | -     | 1365.0   |
| AHQ-6-6, 5943               | R.LIALLEVLISQK.R                                                         | 1227.51852 | 2 | 6.45E-09 | 0.94  | 3.64   | -     | 1117.9   |
| AHQ-6-7, 5790               | R.LIALLEVLISQK.R                                                         | 1227.51852 | 2 | 2.92E-07 | 0.97  | 4.61   | -     | 1434.1   |
| AHQ-6-10, 5706              | R.LIALLEVLISQK.R                                                         | 1227.51852 | 2 | 1.13E-05 | 0.95  | 3.75   | -     | 1280.2   |
| AHQ-6-2, 6330 - 6402        | R.QMQLENVSVALEFLDR.E                                                     | 1893.15408 | 2 | 1.00E-06 | 0.83  | 3.56   | -     | 529.7    |
| AHQ-6-1, 6067               | R.QM*QLENVSVALEFLDR.E                                                    | 1909.15348 | 2 | 2.87E-07 | 0.81  | 3.86   | -     | 564.7    |
| AHQ-6-3, 6448 - 6449        | R.QMQLENVSVALEFLDR.E                                                     | 1893.15408 | 2 | 2.83E-04 | 0.94  | 3.91   | -     | 1211.9   |
| gi 4505839 ref NP_002645.1  | pyruvate kinase, muscle; Pyruvate kinase-3; Thyroid hormone-binding pro  |            |   | 1.55E-09 | 12.90 | 150.25 | 37.50 | 57913.6  |
| AHQ-6-7, 5776               | R.AGKPVICAQMLESMIK.K                                                     | 1879.29869 | 3 | 7.27E-04 | 0.66  | 3.20   | -     | 682.5    |
| AHQ-6-7, 5098               | R.EAEAIIYHLQFLFEELRR.L                                                   | 2089.33962 | 2 | 3.15E-04 | 0.23  | 2.65   | -     | 171.1    |
| AHQ-6-7, 6282               | K.FGVEQDQVDMVFASFIR.K                                                    | 1877.10995 | 2 | 3.44E-07 | 0.96  | 4.60   | -     | 1487.4   |
| AHQ-6-7, 6322               | K.FGVEQDQVDMVFASFIR.K                                                    | 1861.11055 | 2 | 1.55E-09 | 0.96  | 4.57   | -     | 1622.0   |
| AHQ-6-7, 4194 - 4250        | K.GADFVLTEVINGGSLGSK.K                                                   | 1780.91396 | 2 | 8.83E-08 | 0.95  | 4.55   | -     | 1487.6   |
| AHQ-6-7, 4747 - 4790        | K.GADFVLTEVINGGSLGSK.K                                                   | 1780.91396 | 2 | 1.91E-04 | 0.96  | 4.49   | -     | 1490.6   |
| AHQ-6-7, 4554               | K.GADFVLTEVINGGSLGSK.K                                                   | 1780.91396 | 2 | 4.64E-05 | 0.97  | 4.59   | -     | 1996.6   |
| AHQ-6-8, 4292               | K.GADFVLTEVINGGSLGSK.K                                                   | 1780.91396 | 2 | 2.03E-04 | 0.80  | 3.09   | -     | 832.4    |
| AHQ-6-7, 6030 - 6036        | R.GIFPVLCKDPVQEAEDVDLR.V                                                 | 2559.87857 | 3 | 1.36E-05 | 0.97  | 4.96   | -     | 2051.9   |
| AHQ-6-7, 4302               | K.GVNLPGAADVLPVASEK.D                                                    | 1637.85902 | 2 | 9.92E-04 | 0.82  | 3.10   | -     | 637.9    |
| AHQ-6-8, 4342               | K.GVNLPGAADVLPVASEK.D                                                    | 1637.85902 | 2 | 5.52E-04 | 0.93  | 4.70   | -     | 619.3    |
| AHQ-6-7, 5288               | K.GVNLPGAADVLPVASEKIDQLDK.F                                              | 2350.65394 | 2 | 5.48E-05 | 0.92  | 3.81   | -     | 742.2    |
| AHQ-6-7, 5290               | K.GVNLPGAADVLPVASEKIDQLDK.F                                              | 2350.65394 | 3 | 7.12E-07 | 0.84  | 3.66   | -     | 488.7    |
| AHQ-6-7, 3930               | K.KGVNLPGAADVLPVASEK.D                                                   | 1766.03194 | 3 | 2.76E-06 | 0.88  | 4.26   | -     | 869.8    |
| AHQ-6-7, 5030 - 5107        | R.LAPITSDPTTEATAVGAVEASF.K.C                                             | 2176.40912 | 2 | 1.49E-08 | 0.97  | 5.08   | -     | 1225.9   |
| AHQ-6-2, 5580               | R.LAPITSDPTTEATAVGAVEASF.K.C                                             | 2176.40912 | 2 | 2.60E-04 | 0.56  | 2.95   | -     | 501.7    |
| AHQ-6-7, 5254 - 5310        | R.LAPITSDPTTEATAVGAVEASF.K.C                                             | 2176.40912 | 2 | 7.83E-07 | 0.97  | 4.85   | -     | 1383.6   |
| AHQ-6-7, 5304               | R.LAPITSDPTTEATAVGAVEASF.K.C                                             | 2176.40912 | 3 | 1.52E-04 | 0.89  | 4.45   | -     | 932.0    |
| AHQ-6-3, 5553               | R.LAPITSDPTTEATAVGAVEASF.K.C                                             | 2176.40912 | 2 | 3.48E-05 | 0.93  | 4.00   | -     | 1091.8   |
| AHQ-6-11, 5297              | R.LAPITSDPTTEATAVGAVEASF.K.C                                             | 2176.40912 | 2 | 2.90E-06 | 0.91  | 3.76   | -     | 837.9    |
| AHQ-6-7, 5367 - 5432        | R.LAPITSDPTTEATAVGAVEASF.K.C                                             | 2176.40912 | 2 | 2.14E-07 | 0.92  | 4.01   | -     | 884.8    |
| AHQ-6-7, 3263               | R.LDIDSPPIAR.N                                                           | 1198.35099 | 2 | 2.11E-06 | 0.96  | 3.76   | -     | 1565.8   |
| AHQ-6-7, 2402               | R.LNFSHGTHEYHAETIK.N                                                     | 1885.02879 | 3 | 7.47E-06 | 0.91  | 3.96   | -     | 1130.7   |
| AHQ-6-7, 2398               | R.LNFSHGTHEYHAETIK.N                                                     | 1885.02879 | 2 | 1.54E-05 | 0.89  | 3.69   | -     | 680.0    |
| AHQ-6-7, 2698               | R.LNFSHGTHEYHAETIK.N                                                     | 1885.02879 | 2 | 7.33E-04 | 0.63  | 2.87   | -     | 391.8    |
| AHQ-6-13-, 3484             | R.NTGIICTIGPASR.S                                                        | 1361.54994 | 2 | 6.86E-04 | 0.84  | 3.80   | -     | 797.7    |
| AHQ-6-7, 3272               | R.NTGIICTIGPASR.S                                                        | 1361.54994 | 2 | 1.35E-07 | 0.94  | 3.94   | -     | 977.1    |
| AHQ-6-7, 3674 - 3676        | R.NTGIICTIGPASR.S                                                        | 1361.54994 | 2 | 4.68E-05 | 0.89  | 3.50   | -     | 1011.4   |
| AHQ-6-13, 3627              | R.NTGIICTIGPASR.S                                                        | 1361.54994 | 2 | 7.88E-05 | 0.82  | 2.99   | -     | 907.4    |
| AHQ-6-6, 3392               | R.NTGIICTIGPASR.S                                                        | 1361.54994 | 2 | 1.75E-04 | 0.85  | 3.37   | -     | 777.7    |
| AHQ-6-7, 3902               | R.TATESFASDPILYR.P                                                       | 1571.71277 | 2 | 5.57E-07 | 0.87  | 3.47   | -     | 725.1    |
| AHQ-6-7, 5279 - 5338        | R.TATESFASDPILYRPAVALDTK.G                                               | 2466.77140 | 3 | 1.60E-05 | 0.87  | 3.87   | -     | 1095.2   |
| gi 4557731 ref NP_000618.1  | latent transforming growth factor beta binding protein 1 precursor [Hom  |            |   | 1.65E-09 | 6.03  | 70.23  | 8.00  | 152790.9 |
| AHQ-6-2, 3627               | R.ASGLGDHCEDINECLEOK.S                                                   | 2065.13910 | 2 | 8.59E-04 | 0.95  | 4.69   | -     | 1159.1   |
| AHQ-6-2, 2608               | R.CTCGQQYQLSAAK.D                                                        | 1446.58862 | 2 | 1.97E-04 | 0.74  | 2.66   | -     | 497.7    |
| AHQ-6-3, 3989               | K.CVDIDECTQVHLCSQGR.C                                                    | 2209.38110 | 2 | 1.65E-09 | 0.91  | 4.30   | -     | 771.2    |
| AHQ-6-1, 3396               | K.EAQPQGSQVSYQGLPVQK.T                                                   | 1945.12244 | 2 | 5.27E-04 | 0.75  | 3.08   | -     | 480.2    |
| AHQ-6-1, 5626 - 5688        | K.IGFQDPPTFSSCVDPVPPVISEEKGPCYR.L                                        | 3112.43550 | 3 | 2.27E-04 | 0.82  | 3.85   | -     | 369.4    |
| AHQ-6-2, 5586               | K.IGFQDPPTFSSCVDPVPPVISEEKGPCYR.L                                        | 3112.43550 | 3 | 8.49E-05 | 0.89  | 4.24   | -     | 769.9    |
| AHQ-6-4, 2881               | R.TSTDLDVDDQPK.E                                                         | 1433.50014 | 2 | 1.32E-07 | 0.93  | 4.06   | -     | 1172.8   |
| AHQ-6-5, 2837               | R.TSTDLDVDDQPK.E                                                         | 1433.50014 | 2 | 2.86E-05 | 0.75  | 2.84   | -     | 770.2    |
| AHQ-6-4, 2703               | R.TSTDLDVDDQPKKEE.K                                                      | 1819.90213 | 2 | 1.18E-07 | 0.88  | 3.62   | -     | 1146.3   |
| AHQ-6-2, 2740               | R.TSTDLDVDDQPKKEE.K                                                      | 1819.90213 | 2 | 1.47E-07 | 0.89  | 3.78   | -     | 999.3    |
| AHQ-6-3, 2741               | R.TSTDLDVDDQPKKEE.K                                                      | 1819.90213 | 2 | 1.19E-06 | 0.85  | 3.29   | -     | 1038.4   |
| AHQ-6-6, 2675               | R.TSTDLDVDDQPKKEE.K                                                      | 1819.90213 | 2 | 3.18E-05 | 0.82  | 3.35   | -     | 758.8    |
| gi 18543899 ref XP_086916.1 | similar to Phosphatidylethanolamine-binding protein (PEBP) (Prostatic    |            |   | 1.70E-09 | 1.76  | 20.26  | 15.50 | 21265.8  |
| AHQ-6-11, 4159 - 4208       | K.LYTLVLTDPDAPSR.K                                                       | 1561.76102 | 2 | 3.98E-04 | 0.80  | 3.36   | -     | 763.1    |
| AHQ-6-11, 3383 - 3392       | K.NRPTSISWDLGDSGK.L                                                      | 1633.74419 | 2 | 1.70E-09 | 0.97  | 5.16   | -     | 1332.3   |
| gi 7661818 ref NP_054900.1  | HSPC159 protein [Homo sapiens]                                           |            |   | 1.71E-09 | 4.12  | 50.21  | 41.90 |          |

|                             |                                                                         |            |   |          |       |        |       |          |
|-----------------------------|-------------------------------------------------------------------------|------------|---|----------|-------|--------|-------|----------|
| AHQ-6-11, 6127              | R.GEEQSAIPYFPFIPDQPPR.V                                                 | 2239.47029 | 2 | 3.08E-06 | 0.84  | 3.71   | -     | 333.2    |
| AHQ-6-14-, 6274             | R.GEEQSAIPYFPFIPDQPPR.V                                                 | 2239.47029 | 2 | 7.35E-08 | 0.82  | 3.40   | -     | 371.7    |
| AHQ-6-11, 2591 - 2647       | K.INGDLQITK.L                                                           | 1002.14688 | 2 | 3.70E-05 | 0.85  | 3.17   | -     | 725.1    |
| AHQ-6-11, 4588 - 4649       | K.LDDGHLNLSLSPVQADVYFPR.L                                               | 2445.62923 | 3 | 1.24E-04 | 0.87  | 3.80   | -     | 1102.6   |
| AHQ-6-13-, 6174             | R.NSCISGGERGEEQSAIPYFPFIPDQPPR.V                                        | 3144.41922 | 3 | 6.44E-06 | 0.63  | 3.25   | -     | 381.2    |
| AHQ-6-12, 4693              | R.VFVDGHLQDFDFYHR.I                                                     | 1780.96540 | 3 | 1.71E-09 | 0.86  | 3.53   | -     | 642.3    |
| AHQ-6-11, 4627 - 4631       | R.VFVDGHLQDFDFYHR.I                                                     | 1780.96540 | 2 | 2.60E-06 | 0.93  | 4.22   | -     | 882.9    |
| gi 6681259 ref NP_031377.1  | multimerin [Homo sapiens]                                               |            |   | 1.72E-09 | 18.04 | 210.30 | 23.70 | 138070.8 |
| AHQ-6-3, 2453               | R.AEQEQSLIHTNOAESHTAVGR.G                                               | 2306.43830 | 2 | 6.94E-07 | 0.94  | 4.63   | -     | 826.8    |
| AHQ-6-3, 2450 - 2520        | R.AEQEQSLIHTNOAESHTAVGR.G                                               | 2306.43830 | 3 | 3.31E-05 | 0.97  | 5.30   | -     | 1959.7   |
| AHQ-6-4, 2408               | R.AEQEQSLIHTNOAESHTAVGR.G                                               | 2306.43830 | 2 | 4.30E-07 | 0.93  | 4.64   | -     | 754.0    |
| AHQ-6-4, 2413               | R.AEQEQSLIHTNOAESHTAVGR.G                                               | 2306.43830 | 3 | 1.92E-04 | 0.83  | 4.01   | -     | 753.7    |
| AHQ-6-3, 5870 - 5904        | K.CTSDM*ETILTFIPQFHR.L                                                  | 2114.38778 | 3 | 1.36E-05 | 0.90  | 4.24   | -     | 784.9    |
| AHQ-6-3, 5901               | K.CTSDM*ETILTFIPQFHR.L                                                  | 2114.38778 | 2 | 1.12E-06 | 0.48  | 3.03   | -     | 371.3    |
| AHQ-6-2, 3980 - 4048        | R.DOALQLQVLNSR.F                                                        | 1385.55144 | 2 | 4.84E-05 | 0.88  | 3.22   | -     | 904.9    |
| AHQ-6-5, 3836               | R.DOALQLQVLNSR.F                                                        | 1385.55144 | 2 | 1.67E-06 | 0.93  | 3.44   | -     | 1152.6   |
| AHQ-6-2, 4136               | R.DOALQLQVLNSR.F                                                        | 1385.55144 | 2 | 2.24E-06 | 0.95  | 3.36   | -     | 1698.6   |
| AHQ-6-3, 3896 - 3953        | R.DOALQLQVLNSR.F                                                        | 1385.55144 | 2 | 2.28E-07 | 0.97  | 4.51   | -     | 2037.1   |
| AHQ-6-3, 3253               | K.ESLRGECEDMLSK.C                                                       | 1555.71360 | 2 | 1.77E-04 | 0.68  | 3.10   | -     | 558.5    |
| AHQ-6-3, 2888               | K.EVHEQLLSTEQVSDQK.N                                                    | 1870.99550 | 3 | 3.17E-04 | 0.93  | 3.95   | -     | 1746.2   |
| AHQ-6-2, 2900               | K.EVHEQLLSTEQVSDQK.N                                                    | 1870.99550 | 2 | 4.56E-05 | 0.96  | 4.64   | -     | 1253.2   |
| AHQ-6-3, 2884               | K.EVHEQLLSTEQVSDQK.N                                                    | 1870.99550 | 2 | 5.75E-04 | 0.95  | 4.39   | -     | 1300.1   |
| AHQ-6-10, 5632              | K.FPPVTTFSGYLLYR.T                                                      | 1661.92388 | 2 | 5.23E-06 | 0.83  | 2.87   | -     | 580.4    |
| AHQ-6-2, 5984 - 5987        | K.FPPVTTFSGYLLYR.T                                                      | 1661.92388 | 2 | 1.31E-06 | 0.90  | 4.30   | -     | 703.6    |
| AHQ-6-2, 5559 - 5567        | K.FVLVQENRPTLTDIVELR.N                                                  | 2143.47187 | 3 | 3.98E-08 | 0.92  | 4.38   | -     | 1033.6   |
| AHQ-6-3, 5524 - 5540        | K.FVLVQENRPTLTDIVELR.N                                                  | 2143.47187 | 3 | 8.15E-06 | 0.97  | 5.50   | -     | 1830.1   |
| AHQ-6-3, 5528               | K.FVLVQENRPTLTDIVELR.N                                                  | 2143.47187 | 2 | 3.74E-04 | 0.72  | 3.90   | -     | 352.0    |
| AHQ-6-1, 5796               | K.GLTEFVEPIQIK.T                                                        | 1487.76518 | 2 | 1.20E-07 | 0.83  | 3.54   | -     | 699.3    |
| AHQ-6-2, 5751               | K.GLTEFVEPIQIK.T                                                        | 1487.76518 | 2 | 2.71E-06 | 0.90  | 3.98   | -     | 830.0    |
| AHQ-6-3, 5709               | K.GLTEFVEPIQIK.T                                                        | 1487.76518 | 2 | 5.88E-05 | 0.90  | 3.71   | -     | 735.8    |
| AHQ-6-3, 2694               | K.GPCGWTGGSCPQR.S                                                       | 1422.52885 | 2 | 5.11E-04 | 0.77  | 2.85   | -     | 676.1    |
| AHQ-6-3, 2156 - 2157        | R.GVAEQQQQCGDPEVM*QK.M                                                  | 2135.27911 | 2 | 1.48E-04 | 0.95  | 4.40   | -     | 977.9    |
| AHQ-6-3, 3848               | K.HSLPDIQLQK.G                                                          | 1292.50915 | 2 | 1.72E-09 | 0.93  | 3.79   | -     | 1033.8   |
| AHQ-6-3, 5597               | K.IENLTSVAVNSLNFIIK.E                                                   | 1777.05472 | 2 | 3.34E-04 | 0.70  | 3.11   | -     | 491.1    |
| AHQ-6-2, 5070               | K.IFQNDM*QETVAQLFK.T                                                    | 1829.06683 | 2 | 2.45E-04 | 0.87  | 3.38   | -     | 912.9    |
| AHQ-6-2, 4950               | K.IFQNDM*QETVAQLFK.T                                                    | 1829.06683 | 2 | 1.70E-05 | 0.95  | 4.25   | -     | 1240.7   |
| AHQ-6-3, 4905 - 4916        | K.IFQNDM*QETVAQLFK.T                                                    | 1829.06683 | 2 | 1.15E-05 | 0.96  | 4.82   | -     | 1390.4   |
| AHQ-6-10, 5026              | R.IPYLGVYVFK.Y                                                          | 1199.46532 | 2 | 4.50E-04 | 0.89  | 2.97   | -     | 1127.8   |
| AHQ-6-3, 5781               | K.KIENLTSVAVNSLNFIIK.E                                                  | 1905.22764 | 3 | 6.41E-04 | 0.94  | 4.46   | -     | 1596.5   |
| AHQ-6-3, 2954               | K.LKEVHEQLLSTEQVSDQK.N                                                  | 2112.32666 | 2 | 2.86E-08 | 0.98  | 6.09   | -     | 1718.4   |
| AHQ-6-3, 2952               | K.LKEVHEQLLSTEQVSDQK.N                                                  | 2112.32666 | 3 | 2.03E-05 | 0.96  | 4.81   | -     | 2091.3   |
| AHQ-6-2, 3786               | K.LVEENALAPDFSK.G                                                       | 1433.58810 | 2 | 7.03E-04 | 0.81  | 2.90   | -     | 633.7    |
| AHQ-6-2, 3694               | K.LVEENALAPDFSK.G                                                       | 1433.58810 | 1 | 5.59E-04 | 0.16  | 1.82   | -     | 309.0    |
| AHQ-6-10, 3468 - 3536       | K.LVEENALAPDFSK.G                                                       | 1433.58810 | 2 | 4.82E-05 | 0.68  | 3.01   | -     | 657.5    |
| AHQ-6-3, 3764               | K.LVEENALAPDFSK.G                                                       | 1433.58810 | 2 | 1.84E-04 | 0.68  | 2.79   | -     | 676.9    |
| AHQ-6-11, 3613 - 3615       | K.LVEENALAPDFSK.G                                                       | 1433.58810 | 2 | 2.43E-06 | 0.59  | 3.06   | -     | 526.6    |
| AHQ-6-3, 6412 - 6414        | K.M*SEQLNDLTYDM*EILQPLLEGGASLR.Q                                        | 3041.40062 | 3 | 9.38E-08 | 0.94  | 5.30   | -     | 1502.1   |
| AHQ-6-1, 6470               | K.M*SEQLNDLTYDM*EILQPLLEGGASLR.Q                                        | 3041.40062 | 3 | 8.91E-07 | 0.84  | 3.69   | -     | 958.4    |
| AHQ-6-3, 5877               | K.TM*TIINNAIDFIQDNYALK.E                                                | 2215.51196 | 2 | 3.10E-07 | 0.95  | 4.56   | -     | 1189.4   |
| AHQ-6-4, 3432               | K.TVSSLSSEDLSTR.Q                                                       | 1424.49324 | 2 | 1.99E-07 | 0.81  | 2.94   | -     | 678.2    |
| AHQ-6-3, 4017               | R.YNFVLQVAK.T                                                           | 1082.27683 | 2 | 1.24E-06 | 0.94  | 3.85   | -     | 947.9    |
| gi 20149594 ref NP_031381.2 | heat shock 90kDa protein 1, beta; heat shock 90kDa protein 1, beta; Hea |            |   | 1.80E-09 | 4.62  | 50.24  | 9.40  | 83263.6  |
| AHQ-6-4, 3161               | R.ELISNASDALDK.I                                                        | 1276.37539 | 2 | 3.28E-07 | 0.85  | 3.29   | -     | 776.6    |
| AHQ-6-5, 5435               | K.HSQFIGYPTILYLEK.E                                                     | 1810.08487 | 2 | 1.68E-04 | 0.96  | 4.55   | -     | 1165.9   |
| AHQ-6-5, 3932 - 3988        | R.NPPDITQEEYGFYK.S                                                      | 1848.90048 | 2 | 1.80E-09 | 0.97  | 4.73   | -     | 1707.4   |
| AHQ-6-5, 3945               | K.SLTNDWEDHLAVK.H                                                       | 1528.64798 | 2 | 5.60E-06 | 0.92  | 3.97   | -     | 887.7    |
| AHQ-6-5, 3695               | R.TLTLVDTGIGM*TK.A                                                      | 1366.60658 | 2 | 7.40E-07 | 0.92  | 3.77   | -     | 966.6    |
| gi 16507237 ref NP_005338.1 | heat shock 70kDa protein 5 (glucose-regulated protein, 78kDa); BiP; he  |            |   | 1.83E-09 | 8.84  | 100.26 | 23.50 | 72332.5  |
| AHQ-6-6, 4867               | R.AKFEELNMDLFR.S                                                        | 1513.74309 | 2 | 6.18E-05 | 0.93  | 3.81   | -     | 1051.3   |
| AHQ-6-6, 5496 - 5554        | R.IEIESFYEGEDFSETLTRA                                                   | 2166.28328 | 2 | 1.83E-09 | 0.94  | 4.42   | -     | 1037.2   |
| AHQ-6-6, 5531               | R.IEIESFYEGEDFSETLTRA                                                   | 2166.28328 | 2 | 1.82E-06 | 0.97  | 4.85   | -     | 1768.1   |
| AHQ-6-6, 4332               | R.IINEPTAAAIAYGLDKR.E                                                   | 1817.07894 | 3 | 2.75E-08 | 0.70  | 3.21   | -     | 438.8    |
| AHQ-6-6, 3786               | R.ITPSYVAFTPEGER.L                                                      | 1567.72412 | 2 | 4.89E-05 | 0.59  | 2.57   | -     | 604.9    |
| AHQ-6-5, 3823               | R.ITPSYVAFTPEGER.L                                                      | 1567.72412 | 2 | 3.82E-07 | 0.91  | 3.62   | -     | 754.1    |
| AHQ-6-6, 3727               | K.KSDIDEIVLVGGSTR.I                                                     | 1589.77277 | 2 | 6.14E-08 | 0.95  | 4.00   | -     | 1736.3   |
| AHQ-6-6, 3538 - 3599        | K.NQLTSNPENTVFDKAR                                                      | 1678.78173 | 2 | 7.12E-04 | 0.81  | 3.35   | -     | 476.1    |
| AHQ-6-5, 3192               | K.NQLTSNPENTVFDKAR                                                      | 1678.78173 | 2 | 2.38E-09 | 0.75  | 3.08   | -     | 644.1    |
| AHQ-6-5, 3705 - 3707        | K.SQIFSTASDNQPTVTIK.V                                                   | 1838.00865 | 2 | 3.95E-04 | 0.96  | 4.84   | -     | 1204.9   |
| AHQ-6-6, 3664               | K.SQIFSTASDNQPTVTIK.V                                                   | 1838.00865 | 2 | 1.68E-08 | 0.94  | 4.66   | -     | 929.9    |
| AHQ-6-6, 4614 - 4686        | K.TFAPEEISAM*VLTK.M                                                     | 1553.80227 | 2 | 5.65E-07 | 0.91  | 4.25   | -     | 1386.5   |
| AHQ-6-6, 3058               | K.TKPYIQVIDIGGGQTK.T                                                    | 1605.81703 | 2 | 5.37E-06 | 0.86  | 3.18   | -     | 755.7    |
| AHQ-6-6, 3059               | K.TKPYIQVIDIGGGQTK.T                                                    | 1605.81703 | 3 | 4.05E-04 | 0.85  | 3.74   | -     | 1097.3   |
| AHQ-6-6, 3816 - 3875        | K.VTHAVTVPAVFNDAAQR.Q                                                   | 1889.10372 | 2 | 7.77E-05 | 0.95  | 4.97   | -     | 641.8    |
| gi 30159310 ref XP_301899.1 | similar to beta-actin [Homo sapiens]                                    |            |   | 1.89E-09 | 1.68  | 30.18  | 9.60  | 32376.4  |
| AHQ-6-8, 1511 - 1876        | K.DSYVGNQAQSK.R                                                         | 1198.22158 | 1 | 1.58E-08 | 0.43  | 3.14   | -     | 332.4    |
| AHQ-6-8, 2072               | K.DSYVGNQAQSK.R                                                         | 1198.22158 | 2 | 9.92E-04 | 0.77  | 2.81   | -     | 796.1    |
| AHQ-6-8, 1750 - 1828        | K.DSYVGNQAQSK.R                                                         | 1198.22158 | 2 | 1.77E-05 | 0.84  | 3.19   | -     | 859.2    |
| AHQ-6-8, 1955 - 2014        | K.DSYVGNQAQSK.R                                                         | 1198.22158 | 2 | 5.25E-05 | 0.67  | 2.78   | -     | 603.1    |
| AHQ-6-8, 1976 - 2046        | K.DSYVGNQAQSK.R                                                         | 1198.22158 | 1 | 7.68E-04 | 0.25  | 2.29   | -     | 378.4    |
| AHQ-6-13, 2044 - 2092       | K.DSYVGNQAQSK.R                                                         | 1198.22158 | 2 | 7.64E-04 | 0.74  | 2.83   | -     | 844.5    |
| AHQ-6-8, 1559 - 1622        | K.DSYVGNQAQSKR.G                                                        | 1354.40793 | 2 | 4.99E-07 | 0.41  | 2.56   | -     | 421.4    |
| AHQ-6-8, 4492 - 4561        | K.SYKLLDGGQVITIGNER.F                                                   | 1807.04092 | 2 | 8.97E-04 | 0.59  | 2.59   | -     | 374.8    |
| AHQ-6-8, 4693 - 4722        | K.SYKLLDGGQVITIGNER.F                                                   | 1807.04092 | 2 | 1.89E-09 | 0.84  | 3.58   | -     | 693.4    |
| AHQ-6-8, 4301 - 4308        | K.SYKLLDGGQVITIGNER.F                                                   | 1807.04092 | 2 | 1.08E-06 | 0.87  | 3.32   | -     | 821.0    |
| AHQ-6-8, 4110               | K.SYKLLDGGQVITIGNER.F                                                   | 1807.04092 | 2 | 1.50E-04 | 0.74  | 2.80   | -     | 528.3    |
| gi 5453740 ref NP_006462.1  | myosin regulatory light chain MRCL3; myosin, light polypeptide, regulat |            |   | 1.90E-09 | 5.53  | 60.24  | 27.50 | 19794.0  |
| AHQ-6-14-, 5814 - 5819      | R.ATSNVFAMFDQSQIQEFK.E                                                  | 2092.31741 | 2 | 9.86E-07 | 0.96  | 4.60   | -     | 1403.0   |
| AHQ-6-14-, 5188 - 5252      | R.ATSNVFAM*FDQSQIQEFK.E                                                 | 2108.31681 | 2 | 4.76E-06 | 0.96  | 4.88   | -     | 1449.9   |
| AHQ-6-13, 5308              | R.ATSNVFAM*FDQSQIQEFK.E                                                 | 2108.31681 | 2 | 1.36E-04 | 0.94  | 4.03   | -     | 1288.3   |
| AHQ-6-13-, 5224             | R.ATSNVFAM*FDQSQIQEFK.E                                                 | 2108.31681 | 2 | 2.60E-05 | 0.95  | 4.24   | -     | 1323.9   |
| AHQ-6-11, 4995 - 5059       | R.ATSNVFAM*FDQSQIQEFK.E                                                 | 2108.31681 | 2 | 1.90E-09 | 0.96  | 4.60   | -     | 1686.7   |
| AHQ-6-11, 5115              | R.ATSNVFAM*FDQSQIQEFK.E                                                 | 2108.31681 | 2 | 3.30E-08 | 0.91  | 4.30   | -     | 719.7    |
| AHQ-6-11, 5201 - 5255       | R.ATSNVFAM*FDQSQIQEFK.E                                                 | 2108.31681 | 2 | 1.67E-04 | 0.87  | 4.05   | -     | 526.2    |
| AHQ-6-12, 5051 - 5111       | R.ATSNVFAM*FDQSQIQEFK.E                                                 | 2108.31681 | 2 | 8.66E-05 | 0.95  | 4.66   | -     | 1305.0   |
| AHQ-6-13-, 5837             | R.ATSNVFAMFDQSQIQEFK.E                                                  | 2092.31741 | 2 | 2.61E-06 | 0.96  | 4.22   | -     | 1560.9   |
| AHQ-6-11, 5580 - 5647       | R.ATSNVFAMFDQSQIQEFK.E                                                  | 2092.31741 | 2 | 1.77E-04 | 0.95  | 4.73   | -     | 991.3    |
| AHQ-6-14, 5801 - 5840       | R.ATSNVFAM*FDQSQIQEFK.E                                                 | 2108.31681 | 2 | 6.11E-06 | 0.84  | 3.40   | -     | 774.7    |
| AHQ-6-12, 4396 - 4397       | R.DGFIDKEDLHDM*LASLGG.N                                                 | 2021.23746 | 3 | 7.01E-04 | 0.80  | 3.37   | -     | 717.3    |
| AHQ-6-11, 5447 - 5524       | R.DGFIDKEDLHDM*LASLGG.N                                                 | 2005.23806 | 2 | 1.16E-07 | 0.95  | 4.88   | -     | 1313.8   |
| AHQ-6-12, 5515              | R.DGFIDKEDLHDM*LASLGG.N                                                 | 2005.23806 | 2 | 5.80E-07 | 0.96  | 4.90   | -     | 1161.5   |
| AHQ-6-11, 4325              | R.DGFIDKEDLHDM*LASLGG.N                                                 | 2021.23746 | 2 | 1.87E-05 | 0.90  | 4.27   | -     | 610.4    |
| AHQ-6-11, 4323              | R.DGFIDKEDLHDM*LASLGG.N                                                 | 2021.23746 | 3 | 1.16E-04 | 0.93  | 3.86   | -     | 1781.9   |
| AHQ-6-12, 4391              | R.DGFIDKEDLHDM*LASLGG.N                                                 | 2021.23746 | 2 | 1.25E-05 | 0.89  | 3.88   | -     | 630.1    |
| AHQ-6-11, 5451 - 5528       | R.DGFIDKEDLHDM*LASLGG.N                                                 | 2005.23806 | 3 | 7.01E-06 | 0.91  | 3.77   | -     | 1162.3   |
| AHQ-6-12, 4088              | K.GNFNYIEFTR.I                                                          | 1261.36733 | 2 | 5.75E-04 | 0.74  | 3.11   | -     | 691.1    |
| AHQ-6-11, 4021 - 4051       | K.GNFNYIEFTR.I                                                          | 1261.36733 | 2 | 2.68E-05 | 0.84  | 3.73   | -     | 705.4    |
| AHQ-6-13, 4323              | K.GNFNYIEFTR.I                                                          | 1261.36733 | 2 | 5.38E-04 | 0.62  | 2.70   | -     | 608.4    |

|                             |                                                                         |            |   |          |      |        |       |          |
|-----------------------------|-------------------------------------------------------------------------|------------|---|----------|------|--------|-------|----------|
| AHQ-6-11, 3556              | K.KGNFYIEFTR.I                                                          | 1389.54025 | 2 | 1.60E-06 | 0.93 | 3.15   | -     | 1200.4   |
| gi 21314617 ref NP_000433.2 | platelet/endothelial cell adhesion molecule (CD31 antigen); platelet/e  |            |   | 2.10E-09 | 5.44 | 70.23  | 13.40 | 82449.6  |
| AHQ-6-4, 5591               | R.CESISGTLPISYQLLK.T                                                    | 1811.08954 | 2 | 6.06E-06 | 0.66 | 2.93   | -     | 301.1    |
| AHQ-6-1, 5844               | R.DQNFVILEFPVEEQDR.V                                                    | 1979.13566 | 2 | 3.92E-05 | 0.63 | 2.81   | -     | 729.9    |
| AHQ-6-4, 5844 - 5865        | R.DQNFVILEFPVEEQDR.V                                                    | 1979.13566 | 2 | 3.68E-04 | 0.78 | 3.67   | -     | 738.8    |
| AHQ-6-5, 5755               | R.DQNFVILEFPVEEQDR.V                                                    | 1979.13566 | 2 | 1.30E-04 | 0.92 | 4.60   | -     | 740.0    |
| AHQ-6-3, 3430 - 3432        | K.EDITVSGTQDFTK.I                                                       | 1512.60049 | 2 | 4.92E-05 | 0.81 | 3.22   | -     | 593.9    |
| AHQ-6-4, 3411               | K.EDITVSGTQDFTK.I                                                       | 1512.60049 | 2 | 7.87E-06 | 0.74 | 3.31   | -     | 455.4    |
| AHQ-6-5, 3361               | K.EDITVSGTQDFTK.I                                                       | 1512.60049 | 2 | 3.14E-04 | 0.80 | 3.29   | -     | 516.8    |
| AHQ-6-4, 4104               | R.ISYDAQFEVIK.G                                                         | 1313.48046 | 2 | 4.47E-09 | 0.87 | 3.43   | -     | 784.3    |
| AHQ-6-3, 4112               | R.ISYDAQFEVIK.G                                                         | 1313.48046 | 2 | 1.71E-05 | 0.85 | 3.00   | -     | 855.6    |
| AHQ-6-4, 4079               | K.STESYFIPEVR.I                                                         | 1328.45199 | 2 | 2.77E-06 | 0.89 | 3.27   | -     | 852.7    |
| AHQ-6-5, 4023               | K.STESYFIPEVR.I                                                         | 1328.45199 | 2 | 6.48E-04 | 0.80 | 2.75   | -     | 629.6    |
| AHQ-6-3, 4474               | K.TTAEYQVLVEGVPSPR.V                                                    | 1746.94234 | 2 | 7.77E-05 | 0.75 | 2.77   | -     | 660.3    |
| AHQ-6-3, 5269 - 5274        | K.VIAPVDEVIQISLSSK.V                                                    | 1698.98227 | 2 | 2.10E-09 | 0.90 | 3.97   | -     | 633.0    |
| AHQ-6-1, 5362 - 5427        | K.VIAPVDEVIQISLSSK.V                                                    | 1698.98227 | 2 | 1.64E-06 | 0.90 | 3.89   | -     | 609.2    |
| AHQ-6-4, 5320 - 5336        | K.VIAPVDEVIQISLSSK.V                                                    | 1698.98227 | 2 | 2.62E-04 | 0.85 | 2.98   | -     | 745.6    |
| gi 5031593 ref NP_005708.1  | actin related protein 2/3 complex subunit 5; Arp2/3 protein complex sub |            |   | 2.20E-09 | 3.73 | 40.29  | 41.10 | 16320.3  |
| AHQ-6-12, 3092 - 3093       | K.ALAAGGVGSIVR.V                                                        | 1071.25558 | 2 | 8.46E-05 | 0.98 | 4.73   | -     | 2180.6   |
| AHQ-6-12, 3659 - 3664       | K.AVQSLDKNGVDLLM*K.Y                                                    | 1647.91883 | 2 | 2.20E-09 | 0.92 | 4.45   | -     | 667.1    |
| AHQ-6-12, 3989 - 4060       | K.AVQSLDKNGVDLLM*K.Y                                                    | 1631.91943 | 2 | 6.48E-05 | 0.88 | 4.31   | -     | 481.3    |
| AHQ-6-12, 3527              | K.AVQSLDKNGVDLLM*K.Y                                                    | 1647.91883 | 2 | 2.19E-06 | 0.93 | 4.19   | -     | 738.8    |
| AHQ-6-12, 4152 - 4208       | R.KVDVDEYDENKVFDEEDGGDQAGPDEGEVDSCLR.Q                                  | 3890.92031 | 3 | 3.18E-05 | 0.96 | 5.74   | -     | 1268.5   |
| gi 4557703 ref NP_000414.1  | keratin 2a [Homo sapiens]                                               |            |   | 2.39E-09 | 8.45 | 100.26 | 19.20 | 65864.9  |
| AHQ-6-1, 3275               | R.FLEQQNQLVLTQK.W                                                       | 1476.65935 | 2 | 8.10E-08 | 0.97 | 5.03   | -     | 1992.8   |
| AHQ-6-8, 2842 - 2850        | R.FLEQQNQLVLTQK.W                                                       | 1476.65935 | 2 | 8.03E-05 | 0.96 | 4.26   | -     | 1771.3   |
| AHQ-6-10, 3075              | R.FLEQQNQLVLTQK.W                                                       | 1476.65935 | 2 | 6.05E-05 | 0.95 | 4.42   | -     | 1730.7   |
| AHQ-6-2, 3074 - 3082        | R.FLEQQNQLVLTQK.W                                                       | 1476.65935 | 2 | 3.20E-08 | 0.98 | 5.21   | -     | 2393.5   |
| AHQ-6-7, 2896               | R.FLEQQNQLVLTQK.W                                                       | 1476.65935 | 2 | 4.01E-08 | 0.97 | 4.90   | -     | 2005.7   |
| AHQ-6-6, 2983               | R.FLEQQNQLVLTQK.W                                                       | 1476.65935 | 2 | 3.02E-09 | 0.95 | 4.34   | -     | 1302.0   |
| AHQ-6-3, 3037 - 3076        | R.FLEQQNQLVLTQK.W                                                       | 1476.65935 | 2 | 6.23E-07 | 0.95 | 4.32   | -     | 1550.7   |
| AHQ-6-13-, 3077             | R.FLEQQNQLVLTQK.W                                                       | 1476.65935 | 2 | 4.55E-07 | 0.97 | 5.02   | -     | 2051.3   |
| AHQ-6-12, 3027              | R.FLEQQNQLVLTQK.W                                                       | 1476.65935 | 2 | 6.69E-06 | 0.95 | 4.25   | -     | 1488.1   |
| AHQ-6-4, 3039               | R.FLEQQNQLVLTQK.W                                                       | 1476.65935 | 2 | 4.01E-08 | 0.97 | 4.74   | -     | 1995.8   |
| AHQ-6-10, 2919 - 2944       | R.FLEQQNQLVLTQK.W                                                       | 1476.65935 | 2 | 6.18E-08 | 0.97 | 4.35   | -     | 2222.4   |
| AHQ-6-5, 2987 - 3063        | R.FLEQQNQLVLTQK.W                                                       | 1476.65935 | 2 | 7.52E-08 | 0.97 | 4.69   | -     | 1924.6   |
| AHQ-6-13-, 2301 - 2341      | R.FGSSGAVVSGGSR.R                                                       | 1255.31950 | 2 | 3.34E-05 | 0.91 | 3.59   | -     | 1228.6   |
| AHQ-6-10, 2799              | K.IEISELNR.V                                                            | 974.09353  | 2 | 8.28E-04 | 0.91 | 3.26   | -     | 1063.4   |
| AHQ-6-10, 2806              | K.IEISELNR.V                                                            | 974.09353  | 1 | 2.98E-04 | 0.24 | 2.29   | -     | 171.7    |
| AHQ-6-12, 2911              | K.IEISELNR.V                                                            | 974.09353  | 2 | 7.36E-04 | 0.80 | 2.70   | -     | 794.2    |
| AHQ-6-1, 4307               | K.LNDLEEAQQAAQ.E                                                        | 1372.50630 | 2 | 3.80E-05 | 0.95 | 4.26   | -     | 1514.5   |
| AHQ-6-2, 5839               | R.NLDDSIIEVK.A                                                          | 1330.50933 | 2 | 7.13E-07 | 0.95 | 4.28   | -     | 1072.1   |
| AHQ-6-3, 5801 - 5806        | R.NLDDSIIEVK.A                                                          | 1330.50933 | 2 | 4.63E-07 | 0.96 | 4.92   | -     | 1252.9   |
| AHQ-6-13, 5791 - 5792       | R.NLDDSIIEVK.A                                                          | 1330.50933 | 2 | 1.93E-06 | 0.97 | 5.10   | -     | 1260.7   |
| AHQ-6-6, 5730               | R.NLDDSIIEVK.A                                                          | 1330.50933 | 2 | 2.25E-06 | 0.96 | 4.57   | -     | 1283.6   |
| AHQ-6-13-, 5709             | R.NLDDSIIEVK.A                                                          | 1330.50933 | 2 | 2.76E-07 | 0.95 | 4.06   | -     | 1209.5   |
| AHQ-6-1, 5870               | R.NLDDSIIEVK.A                                                          | 1330.50933 | 2 | 3.65E-06 | 0.95 | 4.28   | -     | 1232.1   |
| AHQ-6-7, 5575               | R.NLDDSIIEVK.A                                                          | 1330.50933 | 2 | 4.94E-05 | 0.96 | 4.56   | -     | 1187.0   |
| AHQ-6-5, 5791               | R.NLDDSIIEVK.A                                                          | 1330.50933 | 2 | 1.20E-07 | 0.96 | 4.51   | -     | 1184.4   |
| AHQ-6-10, 5470 - 5480       | R.NLDDSIIEVK.A                                                          | 1330.50933 | 2 | 1.75E-06 | 0.97 | 4.79   | -     | 1467.2   |
| AHQ-6-4, 5880               | R.NLDDSIIEVK.A                                                          | 1330.50933 | 2 | 2.04E-06 | 0.96 | 4.78   | -     | 1114.6   |
| AHQ-6-12, 5620              | R.NLDDSIIEVK.A                                                          | 1330.50933 | 2 | 1.60E-06 | 0.93 | 4.01   | -     | 1030.3   |
| AHQ-6-14-, 5694 - 5716      | R.NLDDSIIEVK.A                                                          | 1330.50933 | 2 | 2.39E-09 | 0.96 | 4.95   | -     | 1150.0   |
| AHQ-6-4, 3188               | K.NVQDAIADAQR.G                                                         | 1330.38637 | 2 | 7.48E-06 | 0.90 | 3.25   | -     | 1125.3   |
| AHQ-6-5, 3129               | K.NVQDAIADAQR.G                                                         | 1330.38637 | 2 | 1.36E-08 | 0.88 | 3.06   | -     | 1028.6   |
| AHQ-6-6, 3119               | K.NVQDAIADAQR.G                                                         | 1330.38637 | 2 | 7.02E-07 | 0.84 | 3.46   | -     | 730.0    |
| AHQ-6-14-, 4503             | R.TSQNSELNNMQDLVEDYKK.K                                                 | 2257.42100 | 3 | 3.30E-05 | 0.84 | 3.70   | -     | 774.8    |
| AHQ-6-12, 5480              | K.VDLLNQEIEFLK.V                                                        | 1461.68459 | 2 | 1.89E-06 | 0.48 | 2.77   | -     | 431.2    |
| AHQ-6-6, 5607               | K.VDLLNQEIEFLK.V                                                        | 1461.68459 | 2 | 3.19E-07 | 0.90 | 4.03   | -     | 795.1    |
| AHQ-6-13, 5651              | K.VDLLNQEIEFLK.V                                                        | 1461.68459 | 2 | 4.72E-07 | 0.92 | 4.03   | -     | 879.3    |
| AHQ-6-4, 5743 - 5753        | K.VDLLNQEIEFLK.V                                                        | 1461.68459 | 2 | 4.96E-07 | 0.91 | 4.11   | -     | 906.4    |
| AHQ-6-10, 5359              | K.VDLLNQEIEFLK.V                                                        | 1461.68459 | 2 | 4.51E-05 | 0.78 | 3.40   | -     | 552.7    |
| AHQ-6-3, 5684 - 5716        | K.VDLLNQEIEFLK.V                                                        | 1461.68459 | 2 | 4.75E-07 | 0.95 | 4.23   | -     | 1252.6   |
| AHQ-6-7, 5391 - 5450        | K.VDLLNQEIEFLK.V                                                        | 1461.68459 | 2 | 4.36E-05 | 0.82 | 3.33   | -     | 777.5    |
| AHQ-6-14-, 5570 - 5579      | K.VDLLNQEIEFLK.V                                                        | 1461.68459 | 2 | 1.51E-08 | 0.94 | 4.44   | -     | 1026.5   |
| AHQ-6-2, 5722               | K.VDLLNQEIEFLK.V                                                        | 1461.68459 | 2 | 1.55E-05 | 0.92 | 4.13   | -     | 1033.1   |
| AHQ-6-5, 5663               | K.VDLLNQEIEFLK.V                                                        | 1461.68459 | 2 | 8.06E-07 | 0.90 | 3.71   | -     | 900.2    |
| AHQ-6-13-, 5384             | K.VLYDAEISQIHQSVDTNVILSM*DNSR.N                                         | 3066.34680 | 3 | 1.29E-06 | 0.83 | 3.41   | -     | 773.2    |
| AHQ-6-14-, 5386 - 5394      | K.VLYDAEISQIHQSVDTNVILSM*DNSR.N                                         | 3066.34680 | 3 | 2.84E-04 | 0.94 | 4.75   | -     | 1360.0   |
| AHQ-6-13-, 3178             | K.YEELQVTVGR.H                                                          | 1194.31920 | 2 | 1.26E-04 | 0.95 | 3.02   | -     | 2081.1   |
| gi 1389937 ref NP_113657.1  | SH3 domain binding glutamic acid-rich protein like 2 [Homo sapiens] [M  |            |   | 2.51E-09 | 4.53 | 50.28  | 72.90 | 12326.0  |
| AHQ-6-14, 5976 - 5984       | K.ESNTVFSFLGLKPR.L                                                      | 1595.82383 | 2 | 2.51E-09 | 0.81 | 3.65   | -     | 491.0    |
| AHQ-6-14-, 5310             | K.ESNTVFSFLGLKPR.L                                                      | 1595.82383 | 2 | 6.58E-09 | 0.76 | 3.54   | -     | 369.9    |
| AHQ-6-13, 5404              | K.ESNTVFSFLGLKPR.L                                                      | 1595.82383 | 2 | 2.80E-04 | 0.50 | 2.62   | -     | 390.8    |
| AHQ-6-14-, 4798 - 4856      | R.FLEANKIEFEVDITM*SEEQR.Q                                               | 2574.80223 | 3 | 5.95E-09 | 0.96 | 5.62   | -     | 1754.1   |
| AHQ-6-14-, 5484             | K.KPTQGNLPPQIFNGDRYCGDYDFESK.E                                          | 3380.64432 | 3 | 2.73E-04 | 0.81 | 4.10   | -     | 449.8    |
| AHQ-6-14-, 4319             | R.VFIASSSGFVAIK.K                                                       | 1326.56551 | 2 | 2.71E-08 | 0.98 | 5.06   | -     | 2958.1   |
| AHQ-6-14-, 3756             | R.VFIASSSGFVAIK.K                                                       | 1454.73842 | 2 | 5.78E-05 | 0.95 | 4.29   | -     | 1390.7   |
| gi 20070125 ref NP_000909.2 | prolyl 4-hydroxylase, beta subunit; v-erb-a avian erythroblastic leuke  |            |   | 2.66E-09 | 3.26 | 50.28  | 15.90 | 57115.9  |
| AHQ-6-7, 4827               | K.ILFIDSDHTDNQR.I                                                       | 1835.00968 | 2 | 9.43E-07 | 0.84 | 3.23   | -     | 1032.0   |
| AHQ-6-7, 2692               | K.LGETYKHENIVIAK.M                                                      | 1730.94291 | 2 | 8.53E-05 | 0.50 | 2.92   | -     | 350.9    |
| AHQ-6-12, 5451 - 5525       | K.QPVKVLVGK.N                                                           | 968.21840  | 1 | 3.92E-04 | 0.19 | 1.96   | -     | 344.9    |
| AHQ-6-14, 6272              | K.QPVKVLVGK.N                                                           | 968.21840  | 1 | 3.25E-04 | 0.36 | 2.18   | -     | 446.9    |
| AHQ-6-10, 6231              | R.TGPAATTLPDGAAAESLVESSEVAVIGFFK.D                                      | 2937.24716 | 3 | 2.66E-09 | 0.95 | 5.05   | -     | 1421.2   |
| AHQ-6-7, 6350               | R.TGPAATTLPDGAAAESLVESSEVAVIGFFK.D                                      | 2937.24716 | 3 | 2.23E-06 | 0.97 | 5.69   | -     | 1740.0   |
| AHQ-6-7, 2214 - 2219        | K.YKPESELTAER.I                                                         | 1452.54828 | 2 | 4.88E-06 | 0.62 | 2.95   | -     | 271.0    |
| gi 18860900 ref NP_002834.2 | protein tyrosine phosphatase, receptor type, J precursor; protein tyro  |            |   | 2.74E-09 | 6.97 | 80.28  | 10.20 | 145926.2 |
| AHQ-6-1, 3534               | R.AGSPTAPVHDESLVGPVDPSSGQQR.D                                           | 2576.71806 | 3 | 4.52E-04 | 0.91 | 4.27   | -     | 1238.9   |
| AHQ-6-1, 4352               | K.AYAVILTTGEAGHPSADVLK.Y                                                | 2014.26782 | 2 | 1.63E-06 | 0.97 | 4.94   | -     | 1988.5   |
| AHQ-6-1, 4356               | K.AYAVILTTGEAGHPSADVLK.Y                                                | 2014.26782 | 3 | 3.26E-07 | 0.97 | 5.51   | -     | 1774.9   |
| AHQ-6-1, 4846 - 4848        | R.DTEVLLVGLPEGTR.Y                                                      | 1499.69122 | 2 | 3.74E-07 | 0.93 | 3.45   | -     | 1519.8   |
| AHQ-6-1, 4999 - 5004        | K.GLIDGAESYVFSR.Y                                                       | 1501.62253 | 2 | 2.74E-09 | 0.94 | 4.11   | -     | 1212.5   |
| AHQ-6-1, 4763 - 4823        | K.SFCTDPASM*ASFDFCEVVPK.E                                               | 2167.37954 | 2 | 7.27E-04 | 0.73 | 3.15   | -     | 631.9    |
| AHQ-6-1, 5163               | K.SPDGASEYVYHLVIESK.H                                                   | 1895.05866 | 2 | 8.13E-04 | 0.91 | 4.02   | -     | 934.9    |
| AHQ-6-1, 5172               | K.SPDGASEYVYHLVIESK.H                                                   | 1895.05866 | 3 | 3.87E-07 | 0.78 | 3.36   | -     | 686.2    |
| AHQ-6-1, 3798               | K.TPSSGTGSPVFDIA.K                                                      | 1433.58810 | 2 | 4.21E-05 | 0.80 | 3.13   | -     | 724.3    |
| AHQ-6-1, 4271               | K.VITEPIVSDLR.V                                                         | 1339.56259 | 2 | 3.39E-07 | 0.91 | 3.40   | -     | 837.6    |
| gi 7661678 ref NP_056461.1  | RAP1B, member of RAS oncogene family; K-REV; RAS-related protein RAP1B  |            |   | 3.16E-09 | 5.12 | 60.26  | 33.70 | 20824.7  |
| AHQ-6-11, 6039 - 6097       | R.KQVEVDAQQCMLLEIDTAGTEQFTAM*R.D                                        | 3131.50548 | 3 | 1.21E-05 | 0.83 | 3.74   | -     | 851.0    |
| AHQ-6-11, 6349              | R.KQVEVDAQQCMLLEIDTAGTEQFTAM*R.D                                        | 3131.50548 | 3 | 6.53E-04 | 0.91 | 3.94   | -     | 1127.4   |
| AHQ-6-11, 4029 - 4099       | R.QWNNCAFLESSAK.S                                                       | 1556.68148 | 2 | 3.21E-06 | 0.53 | 2.74   | -     | 230.3    |
| AHQ-6-11, 3743              | R.VKDTRDVPMLVGNK.C                                                      | 1660.91437 | 2 | 3.07E-04 | 0.93 | 3.70   | -     | 1243.5   |
| AHQ-6-11, 3292 - 3347       | R.VKDTRDVPMLVGNK.C                                                      | 1660.91437 | 2 | 2.86E-04 | 0.97 | 5.02   | -     | 1836.6   |
| AHQ-6-11, 3725              | R.VKDTRDVPMLVGNK.C                                                      | 1644.91497 | 3 | 1.63E-04 | 0.95 | 4.62   | -     | 1670.2   |
| AHQ-6-11, 3709              | R.VKDTRDVPMLVGNK.C                                                      | 1644.91497 | 2 | 4.91E-04 | 0.89 | 2.85   | -     |          |

|                             |                                                                                                            |             |   |          |       |        |       |          |
|-----------------------------|------------------------------------------------------------------------------------------------------------|-------------|---|----------|-------|--------|-------|----------|
| AHQ-6-11, 3997 - 4059       | R.VKDTPDDVPM*ILVGNCKDLEDER.V                                                                               | 2579.844360 | 3 | 6.85E-06 | 0.96  | 5.26   | -     | 1569.7   |
| AHQ-6-11, 4211 - 4267       | R.VKDTPDDVPM*ILVGNCKDLEDER.V                                                                               | 2563.84420  | 3 | 3.16E-09 | 0.86  | 4.64   | -     | 816.5    |
| gi 29730023 ref XP_291482.1 | similar to 78 kDa glucose-regulated protein precursor (GRP 78) (Immunoglobulin superfamily class B domain) |             |   | 3.63E-09 | 4.87  | 60.24  | 13.60 | 63563.0  |
| AHQ-6-6, 4575               | R.IINKPTAAAIAYGLDK.R                                                                                       | 1659.95097  | 2 | 5.10E-07 | 0.82  | 4.02   | -     | 709.9    |
| AHQ-6-5, 4639               | R.IINKPTAAAIAYGLDK.R                                                                                       | 1659.95097  | 2 | 1.18E-07 | 0.87  | 4.07   | -     | 1050.4   |
| AHQ-6-6, 4335               | R.IINKPTAAAIAYGLDK.R                                                                                       | 1816.13732  | 2 | 3.63E-09 | 0.93  | 4.88   | -     | 1211.3   |
| AHQ-6-7, 4196 - 4200        | R.IINKPTAAAIAYGLDK.R                                                                                       | 1816.13732  | 2 | 6.07E-06 | 0.70  | 3.79   | -     | 509.5    |
| AHQ-6-6, 3434 - 3510        | K.LYGSAGPPTGEEDTAEKDEL                                                                                     | 2177.26447  | 2 | 4.79E-06 | 0.91  | 4.41   | -     | 585.1    |
| AHQ-6-5, 3999               | R.NELESYAYSLK.N                                                                                            | 1317.42597  | 2 | 3.50E-04 | 0.81  | 2.62   | -     | 1018.7   |
| AHQ-6-5, 3468 - 3536        | K.NQLTSPNKNVTFDAK.R                                                                                        | 1677.84011  | 2 | 1.45E-05 | 0.69  | 3.03   | -     | 515.0    |
| AHQ-6-6, 5382               | K.TFAPKEISAMVLT.K.M                                                                                        | 1536.86124  | 2 | 1.12E-06 | 0.67  | 2.95   | -     | 755.0    |
| AHQ-6-5, 5444               | K.TFAPKEISAMVLT.K.M                                                                                        | 1536.86124  | 2 | 2.84E-06 | 0.83  | 2.99   | -     | 878.1    |
| gi 27480104 ref XP_208215.1 | similar to triosephosphate isomerase 1 [Homo sapiens]                                                      |             |   | 3.93E-09 | 3.38  | 40.21  | 22.90 | 26942.6  |
| AHQ-6-10, 2883 - 2958       | R.HVFGSEDELIGQK.V                                                                                          | 1459.58565  | 2 | 9.68E-04 | 0.88  | 3.13   | -     | 637.5    |
| AHQ-6-10, 2710 - 2714       | R.IYIGSVTGATCK.E                                                                                           | 1328.51672  | 2 | 9.58E-05 | 0.69  | 2.84   | -     | 430.6    |
| AHQ-6-10, 4004 - 4038       | K.VTNGAFTGEISPGMIK.D                                                                                       | 1622.86786  | 2 | 3.93E-09 | 0.94  | 4.23   | -     | 1213.0   |
| AHQ-6-11, 5103              | K.VLVAYEPVWAIGTK.T                                                                                         | 1603.88587  | 2 | 6.10E-05 | 0.87  | 3.72   | -     | 764.6    |
| gi 5453832 ref NP_006380.1  | oxygen regulated protein precursor; oxygen regulated protein (150kD) [Homo sapiens]                        |             |   | 4.25E-09 | 2.35  | 30.22  | 4.40  | 111334.8 |
| AHQ-6-3, 2317 - 2321        | K.AEAGPEGVAPAEQEK.K                                                                                        | 1509.59983  | 2 | 3.22E-07 | 0.91  | 4.32   | -     | 671.1    |
| AHQ-6-3, 3266               | K.LYQPEYQEVSTEEQR.E                                                                                        | 1899.99217  | 2 | 1.96E-04 | 0.57  | 3.01   | -     | 402.4    |
| AHQ-6-3, 6076               | R.VEFEELCADLFR.V                                                                                           | 1658.81048  | 2 | 4.25E-09 | 0.87  | 3.16   | -     | 880.3    |
| gi 4758460 ref NP_004479.1  | glycoprotein V (platelet) [Homo sapiens]                                                                   |             |   | 4.42E-09 | 8.15  | 90.27  | 29.30 | 60958.9  |
| AHQ-6-5, 5288               | R.CAOPGAHAGLPLWALPGGDAECPGPR.G                                                                             | 2587.87539  | 3 | 3.96E-04 | 0.81  | 3.52   | -     | 696.6    |
| AHQ-6-6, 4434 - 4503        | R.GVLQSQSFGMTVLQR.L                                                                                        | 1738.99008  | 2 | 2.87E-06 | 0.84  | 3.02   | -     | 1221.7   |
| AHQ-6-5, 3819               | R.GVLQSQSFGMT*TVLQR.L                                                                                      | 1754.98948  | 2 | 4.61E-06 | 0.93  | 4.04   | -     | 1121.7   |
| AHQ-6-5, 4537 - 4539        | R.GVLQSQSFGMTVLQR.L                                                                                        | 1738.99008  | 2 | 4.42E-09 | 0.97  | 5.10   | -     | 1904.4   |
| AHQ-6-1, 3992 - 4040        | R.GVLQSQSFGMT*TVLQR.L                                                                                      | 1754.98948  | 2 | 9.65E-04 | 0.88  | 3.37   | -     | 1055.0   |
| AHQ-6-5, 5331               | R.LM*ISDSHISAVAPGTFSDLK.L                                                                                  | 2219.54375  | 3 | 3.11E-06 | 0.95  | 5.08   | -     | 1282.8   |
| AHQ-6-5, 5347               | R.LM*ISDSHISAVAPGTFSDLK.L                                                                                  | 2219.54375  | 2 | 4.36E-05 | 0.89  | 3.62   | -     | 917.5    |
| AHQ-6-6, 4476               | R.LPNLSLTL.SR.N                                                                                            | 1201.39802  | 2 | 5.96E-05 | 0.78  | 3.07   | -     | 970.6    |
| AHQ-6-5, 4504               | R.LPNLSLTL.SR.N                                                                                            | 1201.39802  | 2 | 1.34E-04 | 0.93  | 3.32   | -     | 1383.0   |
| AHQ-6-6, 6435               | R.LSALPQGAFOGLGELQVLALHNSGLTALPDGLLR.G                                                                     | 3471.99408  | 3 | 1.73E-07 | 0.93  | 5.18   | -     | 800.6    |
| AHQ-6-4, 6597               | R.LSALPQGAFOGLGELQVLALHNSGLTALPDGLLR.G                                                                     | 3471.99408  | 3 | 3.81E-07 | 0.74  | 3.33   | -     | 491.1    |
| AHQ-6-5, 3709               | R.LTEVLVGHNSWR.C                                                                                           | 1425.61726  | 2 | 7.36E-05 | 0.91  | 3.39   | -     | 1111.4   |
| AHQ-6-5, 6588               | K.LVNLQELALNQQLDFLPSLFTNLENK.L                                                                             | 3314.77659  | 3 | 5.25E-08 | 0.94  | 5.40   | -     | 974.4    |
| AHQ-6-6, 6506               | K.LVNLQELALNQQLDFLPSLFTNLENK.L                                                                             | 3314.77659  | 3 | 2.21E-06 | 0.92  | 5.17   | -     | 676.1    |
| AHQ-6-5, 5833               | K.M*VLEQLFDHNLAR.G                                                                                         | 1829.15633  | 2 | 6.31E-07 | 0.92  | 4.19   | -     | 862.2    |
| gi 4757766 ref NP_004299.1  | Rho GTPase activating protein 1; RhoGAP; p50rhoGAP; CDC42 GTPase-activator protein 1 [Homo sapiens]        |             |   | 4.44E-09 | 1.29  | 20.17  | 8.70  | 50435.4  |
| AHQ-6-8, 5649               | K.FLLDHQGLFPSPDPSGL                                                                                        | 1970.17037  | 2 | 1.35E-04 | 0.65  | 3.03   | -     | 376.6    |
| AHQ-6-7, 5554 - 5631        | K.FLLDHQGLFPSPDPSGL                                                                                        | 1970.17037  | 2 | 4.44E-09 | 0.76  | 3.36   | -     | 519.6    |
| AHQ-6-7, 5618               | R.VPATLQVLQTLPEENYQVLR.F                                                                                   | 2312.65053  | 2 | 1.06E-04 | 0.53  | 2.94   | -     | 369.9    |
| gi 28395033 ref NP_786886.1 | ras homolog gene family, member C; Aplysia RAS-related homolog 9 (onco protein) [Aplysia californica]      |             |   | 4.53E-09 | 3.73  | 40.21  | 22.80 | 22006.2  |
| AHQ-6-10, 4391              | K.HFCPNVPIILVGNK.K                                                                                         | 1609.91693  | 2 | 2.75E-07 | 0.96  | 4.17   | -     | 1408.7   |
| AHQ-6-10, 4003              | K.HFCPNVPIILVGNK.K                                                                                         | 1738.98985  | 3 | 5.09E-04 | 0.91  | 3.15   | -     | 1979.7   |
| AHQ-6-10, 4167 - 4168       | R.SAFGYLECSAK.T                                                                                            | 1347.51850  | 2 | 8.97E-08 | 0.90  | 3.11   | -     | 920.6    |
| AHQ-6-10, 4628 - 4639       | K.QVELALWDTAGQEDYDR.L                                                                                      | 2010.10662  | 2 | 4.53E-09 | 0.96  | 4.15   | -     | 1528.7   |
| gi 4508047 ref NP_003452.1  | zyxin [Homo sapiens]                                                                                       |             |   | 4.56E-09 | 0.94  | 10.25  | 4.40  | 61277.0  |
| AHQ-6-8, 3729 - 3733        | K.LGHPEALSAAGTSPQPSFTYAQQR.E                                                                               | 2598.81170  | 3 | 4.56E-09 | 0.94  | 5.00   | -     | 1072.4   |
| gi 4758012 ref NP_004850.1  | clathrin heavy chain; clathrin, heavy polypeptide-like 2 [Homo sapiens]                                    |             |   | 4.64E-09 | 9.19  | 110.24 | 9.70  | 191612.6 |
| AHQ-6-3, 4357               | R.ALEHFTLDYDIK.R                                                                                           | 1465.63179  | 2 | 6.23E-05 | 0.83  | 3.41   | -     | 733.7    |
| AHQ-6-3, 5734 - 5800        | R.GQCDELINVCNENSLFK.S                                                                                      | 2156.37965  | 2 | 8.37E-05 | 0.37  | 2.88   | -     | 243.8    |
| AHQ-6-3, 4642               | R.GQFSTDELVAEVEK.R                                                                                         | 1552.66462  | 2 | 1.53E-06 | 0.93  | 3.49   | -     | 1303.6   |
| AHQ-6-4, 4660               | R.GQFSTDELVAEVEK.R                                                                                         | 1552.66462  | 2 | 6.38E-05 | 0.72  | 3.20   | -     | 573.7    |
| AHQ-6-3, 5092               | R.ISGETIFVTAPHEATAGIIVGNR.K                                                                                | 2354.64751  | 3 | 4.64E-09 | 0.86  | 4.10   | -     | 847.7    |
| AHQ-6-3, 4266 - 4284        | K.LHIEVGPPTGNQPFPK.K                                                                                       | 1946.23831  | 2 | 4.86E-04 | 0.82  | 3.55   | -     | 517.1    |
| AHQ-6-3, 5704               | K.LLLPWLEAR.I                                                                                              | 1111.36131  | 2 | 2.43E-05 | 0.74  | 2.70   | -     | 596.7    |
| AHQ-6-3, 6165 - 6209        | R.LPVVIGGLLDVDCSEVIVK.N                                                                                    | 2043.36744  | 2 | 2.77E-05 | 0.94  | 4.44   | -     | 980.4    |
| AHQ-6-3, 5888 - 5894        | R.NLQNLLITAIK.A                                                                                            | 1354.66353  | 2 | 6.78E-06 | 0.97  | 4.76   | -     | 1704.4   |
| AHQ-6-3, 4244 - 4289        | R.NNLGAEELFAR.K                                                                                            | 1305.42165  | 2 | 8.84E-04 | 0.83  | 3.05   | -     | 835.3    |
| AHQ-6-3, 3145               | K.VIQCFEAETGGVQK.I                                                                                         | 1509.70940  | 2 | 5.60E-07 | 0.96  | 3.83   | -     | 1863.3   |
| AHQ-6-5, 3065               | K.VIQCFEAETGGVQK.I                                                                                         | 1509.70940  | 2 | 3.57E-06 | 0.96  | 4.12   | -     | 1878.8   |
| AHQ-6-3, 4985 - 5057        | K.VLLLTGISAQQR.V                                                                                           | 1500.72728  | 2 | 2.90E-05 | 0.96  | 4.00   | -     | 1756.4   |
| gi 4757900 ref NP_004334.1  | calreticulin precursor; Sica syndrome antigen A (autoantigen Ro; calreticulin) [Homo sapiens]              |             |   | 5.08E-09 | 5.90  | 70.27  | 32.90 | 48141.1  |
| AHQ-6-7, 3348               | R.AKIDPDTSDKPEDWKPHEIPDPDAK.K                                                                              | 2961.14253  | 3 | 1.25E-04 | 0.63  | 3.16   | -     | 383.6    |
| AHQ-6-7, 5431 - 5458        | R.CKDEFTHLVTLIVRPDNTYEVK.I                                                                                 | 2859.15977  | 3 | 5.08E-09 | 0.93  | 5.03   | -     | 820.7    |
| AHQ-6-7, 2170 - 2190        | K.HEQNIDCGGGYVK.L                                                                                          | 1478.56912  | 2 | 3.10E-05 | 0.90  | 4.18   | -     | 754.3    |
| AHQ-6-7, 3462               | K.IDDPDTSDKPEDWKPHEIPDPDAK.K                                                                               | 2761.89139  | 3 | 1.80E-07 | 0.86  | 4.33   | -     | 542.0    |
| AHQ-6-7, 4882 - 4958        | K.IDNSQVESGLEDWDFLPPKK.I                                                                                   | 2520.68965  | 3 | 1.01E-08 | 0.89  | 4.34   | -     | 883.9    |
| AHQ-6-7, 4570               | K.KPEDWDEEM*DGWEPPVIQNPYK.G                                                                                | 2978.14866  | 3 | 2.02E-04 | 0.94  | 5.33   | -     | 754.2    |
| AHQ-6-7, 6218 - 6284        | K.SGTIFDNFLTNDAYAEFFGNETWGVTK.A                                                                            | 3270.46022  | 3 | 2.60E-07 | 0.75  | 3.60   | -     | 786.1    |
| gi 4557323 ref NP_000031.1  | apolipoprotein C-III precursor [Homo sapiens]                                                              |             |   | 5.14E-09 | 0.94  | 10.18  | 16.20 | 10852.2  |
| AHQ-6-14-, 3164             | K.DALSSVQSQAQAR.G                                                                                          | 1717.81950  | 2 | 5.14E-09 | 0.94  | 3.58   | -     | 1556.9   |
| gi 30160191 ref XP_294035.2 | similar to Pyruvate kinase, M1 isozyme (Pyruvate kinase muscle isozyme) [Homo sapiens]                     |             |   | 5.17E-09 | 0.97  | 10.22  | 2.80  | 50222.2  |
| AHQ-6-11, 4793              | K.IYVDDGLISLQVK.Q                                                                                          | 1463.70048  | 2 | 1.28E-04 | 0.93  | 3.29   | -     | 1477.0   |
| AHQ-6-7, 4762               | K.IYVDDGLISLQVK.Q                                                                                          | 1463.70048  | 2 | 5.17E-09 | 0.97  | 4.37   | -     | 2167.6   |
| gi 22059949 ref XP_114617.2 | similar to tubulin, beta 5 [Homo sapiens]                                                                  |             |   | 5.22E-09 | 0.96  | 10.28  | 13.00 | 22810.8  |
| AHQ-6-7, 4966               | K.FWEIVSEHGIDPTGYTHGSDSLQLDR.I                                                                             | 3104.24553  | 3 | 5.22E-09 | 0.96  | 5.68   | -     | 1547.8   |
| gi 21624607 ref NP_066972.1 | coactosin-like 1 [Homo sapiens]                                                                            |             |   | 5.79E-09 | 2.80  | 30.28  | 24.60 | 15944.9  |
| AHQ-6-12, 2347              | R.AAYNLVR.D                                                                                                | 806.93245   | 2 | 2.38E-04 | 0.91  | 2.57   | -     | 1361.1   |
| AHQ-6-13-, 5028             | R.DDGSVAIIVWTFK.Y                                                                                          | 1338.49001  | 2 | 3.07E-05 | 0.92  | 3.35   | -     | 1127.4   |
| AHQ-6-13-, 6300             | K.FALITWIGENVSLQQR.A                                                                                       | 1805.06986  | 2 | 1.47E-06 | 0.98  | 5.33   | -     | 2215.9   |
| AHQ-6-13-, 6301             | K.FALITWIGENVSLQQR.A                                                                                       | 1805.06986  | 3 | 5.79E-09 | 0.97  | 5.33   | -     | 2112.6   |
| AHQ-6-13, 6351 - 6355       | K.FALITWIGENVSLQQR.A                                                                                       | 1805.06986  | 2 | 5.11E-04 | 0.97  | 5.58   | -     | 1614.4   |
| gi 4758018 ref NP_004359.1  | calponin 2; Calonin 2 [Homo sapiens]                                                                       |             |   | 5.79E-09 | 1.83  | 20.20  | 9.10  | 33696.9  |
| AHQ-6-12, 2949 - 3025       | K.GLQSGVDIVGK.Y                                                                                            | 1073.22510  | 2 | 3.86E-06 | 0.92  | 3.45   | -     | 1298.6   |
| AHQ-6-12, 5888 - 5899       | R.TWIEGLTGLSIGPDFQK.G                                                                                      | 1863.10294  | 2 | 5.79E-09 | 0.91  | 4.02   | -     | 928.2    |
| AHQ-6-13, 6012 - 6055       | R.TWIEGLTGLSIGPDFQK.G                                                                                      | 1863.10294  | 2 | 1.86E-06 | 0.84  | 3.10   | -     | 864.6    |
| AHQ-6-14-, 5979             | R.TWIEGLTGLSIGPDFQK.G                                                                                      | 1863.10294  | 2 | 4.29E-05 | 0.94  | 3.97   | -     | 1134.1   |
| AHQ-6-11, 5825              | R.TWIEGLTGLSIGPDFQK.G                                                                                      | 1863.10294  | 2 | 2.22E-05 | 0.92  | 3.63   | -     | 1136.8   |
| gi 6005846 ref NP_009215.1  | PTK9L protein tyrosine kinase 9-like (A6-related protein); protein tyrosine kinase 9-like [Homo sapiens]   |             |   | 5.83E-09 | 4.89  | 60.23  | 31.50 | 39547.7  |
| AHQ-6-14-, 6142             | R.AVLPLLLDAQQPCYLLYR.L                                                                                     | 2035.39506  | 2 | 3.18E-06 | 0.90  | 4.62   | -     | 539.7    |
| AHQ-6-13-, 6153             | R.AVLPLLLDAQQPCYLLYR.L                                                                                     | 2035.39506  | 2 | 8.45E-05 | 0.66  | 2.96   | -     | 451.8    |
| AHQ-6-9, 3847 - 3848        | R.ETIELVHTEPTDVAQLPSR.V                                                                                    | 2136.34822  | 2 | 6.78E-04 | 0.49  | 3.07   | -     | 463.8    |
| AHQ-6-12, 2741              | K.HLSSCAAPAPLTSAR.E                                                                                        | 1669.84126  | 3 | 4.47E-04 | 0.83  | 3.74   | -     | 689.5    |
| AHQ-6-11, 4263              | K.HQTLQGLAFLPQPEAQR.A                                                                                      | 1935.17562  | 2 | 5.83E-09 | 0.96  | 4.61   | -     | 1017.2   |
| AHQ-6-11, 5867 - 5925       | K.KIEIGDGAELTAFELYDEVHPK.Q                                                                                 | 2475.73515  | 3 | 1.71E-04 | 0.81  | 3.65   | -     | 1026.9   |
| AHQ-6-12, 4479              | K.VVIEDEQLVLGASQPEVGR.W                                                                                    | 2039.27568  | 2 | 3.50E-04 | 0.90  | 3.20   | -     | 1436.2   |
| gi 4507907 ref NP_000543.1  | von Willebrand factor precursor; Coagulation factor VIII VWF (von Wille factor) [Homo sapiens]             |             |   | 6.14E-09 | 13.79 | 160.39 | 7.60  | 309296.7 |
| AHQ-6-2, 3836               | R.CLPSACEVVTGSPR.G                                                                                         | 1535.72531  | 2 | 1.35E-04 | 0.67  | 3.36   | -     | 460.9    |
| AHQ-6-1, 3947               | R.CLPSACEVVTGSPR.G                                                                                         | 1535.72531  | 2 | 1.69E-04 | 0.82  | 3.56   | -     | 633.2    |
| AHQ-6-1, 4055 - 4063        | R.IALLM*ASQEPQR.M                                                                                          | 1486.76229  | 2 | 1.74E-04 | 0.94  | 3.83   | -     | 1363.2   |
| AHQ-6-1, 6515               | R.IGWPNAPILIQDFTLPR.E                                                                                      | 2081.40223  | 2 | 7.69E-09 | 0.90  | 3.75   | -     | 679.7    |
| AHQ-6-2, 2684               | R.LAGPAGDSNVVK.L                                                                                           | 1241.41901  | 2 | 8.44E-07 | 0.80  |        |       |          |



|                             |                                                                         |            |   |          |      |      |   |        |
|-----------------------------|-------------------------------------------------------------------------|------------|---|----------|------|------|---|--------|
| AHQ-6-2, 5463               | R.LPGDIQVPIGVGNANVQELER.I                                               | 2415.73085 | 2 | 9.51E-05 | 0.55 | 2.78 | - | 254.6  |
| AHQ-6-1, 4258               | R.LSEAEFEVLK.A                                                          | 1165.31777 | 2 | 7.79E-06 | 0.87 | 3.47 | - | 917.7  |
| AHQ-6-1, 4206               | K.LTGSCSYVLFQNK.E                                                       | 1518.71629 | 2 | 2.91E-06 | 0.90 | 4.02 | - | 850.9  |
| AHQ-6-1, 5278 - 5358        | K.RLPGDIQVPIGVGNANVQELER.I                                              | 2571.91720 | 3 | 6.14E-09 | 0.98 | 7.86 | - | 2212.3 |
| AHQ-6-2, 5218               | K.RLPGDIQVPIGVGNANVQELER.I                                              | 2571.91720 | 3 | 3.24E-07 | 0.98 | 6.99 | - | 2863.6 |
| AHQ-6-1, 4843               | K.SVGSQWASPENPCLINECVR.V                                                | 2306.51832 | 2 | 6.53E-09 | 0.89 | 3.81 | - | 519.6  |
| AHQ-6-1, 5302 - 5364        | K.TYGLCGICDENANDFM*LR.D                                                 | 2225.42231 | 2 | 6.92E-07 | 0.87 | 4.15 | - | 574.2  |
| AHQ-6-2, 2508               | R.VKEEVFIQQR.N                                                          | 1276.46658 | 2 | 4.09E-06 | 0.87 | 3.49 | - | 789.8  |
| AHQ-6-2, 4496               | R.VTVFPIGIDR.Y                                                          | 1174.37426 | 2 | 5.53E-06 | 0.93 | 3.27 | - | 1220.6 |
| AHQ-6-1, 4592               | R.VTVFPIGIDR.Y                                                          | 1174.37426 | 2 | 3.94E-07 | 0.91 | 3.46 | - | 979.3  |
| AHQ-6-1, 3163               | K.YAGSQVASTSEVLK.Y                                                      | 1440.58064 | 2 | 3.29E-07 | 0.90 | 3.40 | - | 940.2  |
| AHQ-6-2, 2948 - 2954        | K.YAGSQVASTSEVLK.Y                                                      | 1440.58064 | 2 | 7.93E-05 | 0.94 | 4.29 | - | 837.7  |
| AHQ-6-1, 5726               | K.YTLFQIFSK.I                                                           | 1147.34728 | 2 | 2.78E-06 | 0.95 | 3.41 | - | 1204.4 |
| gi 4502201 ref NP_001649.1  | ADP-ribosylation factor 1 [Homo sapiens]                                |            |   |          |      |      |   |        |
| AHQ-6-12, 4428              | R.DAVLLVFNK.Q                                                           | 1090.29726 | 1 | 8.95E-05 | 0.82 | 2.37 | - | 1090.8 |
| AHQ-6-12, 3699 - 3701       | R.ILMVGLDAAGK.T                                                         | 1088.34632 | 2 | 1.42E-05 | 0.94 | 4.00 | - | 1126.4 |
| AHQ-6-12, 3219              | R.ILM*VGLDAAGK.T                                                        | 1104.34572 | 2 | 1.07E-05 | 0.95 | 3.41 | - | 1671.2 |
| AHQ-6-12, 4812 - 4868       | K.NISFTVWDVGGQDK.I                                                      | 1566.69621 | 2 | 7.23E-05 | 0.77 | 3.05 | - | 734.5  |
| AHQ-6-13, 5043              | K.NISFTVWDVGGQDK.I                                                      | 1566.69621 | 2 | 1.17E-05 | 0.77 | 2.67 | - | 766.4  |
| AHQ-6-13-, 4928 - 4938      | K.NISFTVWDVGGQDK.I                                                      | 1566.69621 | 2 | 7.09E-09 | 0.92 | 4.09 | - | 764.6  |
| AHQ-6-12, 3124              | K.QDLPNAM*NAEITDK.L                                                     | 1647.78941 | 2 | 3.70E-04 | 0.85 | 3.32 | - | 571.7  |
| gi 4758304 ref NP_004902.1  | protein disulfide isomerase related protein (calcium-binding protein, i |            |   |          |      |      |   |        |
| AHQ-6-6, 4451               | K.DLGLSESGEDVNAALDESGKK.F                                               | 2248.38737 | 2 | 2.27E-07 | 0.96 | 4.89 | - | 1292.4 |
| AHQ-6-6, 3712               | K.FAM*EPEEFDSDTLR.E                                                     | 1703.80830 | 2 | 1.16E-04 | 0.85 | 3.27 | - | 688.4  |
| AHQ-6-6, 3607               | R.FDVSGYPTIK.I                                                          | 1127.27123 | 2 | 9.30E-05 | 0.91 | 2.80 | - | 1382.2 |
| AHQ-6-6, 3823               | K.GESDPAYQYQDAANLNR.E                                                   | 2041.08081 | 2 | 1.61E-07 | 0.87 | 4.19 | - | 692.0  |
| AHQ-6-6, 2898               | K.IDATSASVLSR.F                                                         | 1191.31686 | 2 | 7.13E-09 | 0.95 | 3.58 | - | 1700.9 |
| AHQ-6-6, 2495               | K.VSGQLVM*QPEK.F                                                        | 1459.69371 | 2 | 1.08E-05 | 0.86 | 3.27 | - | 1062.3 |
| gi 5031973 ref NP_005733.1  | protein disulfide isomerase-related protein [Homo sapiens]              |            |   |          |      |      |   |        |
| AHQ-6-7, 4527 - 4534        | K.GSFSEQGINFLR.E                                                        | 1484.59520 | 2 | 8.13E-06 | 0.75 | 3.14 | - | 577.4  |
| AHQ-6-8, 3852               | R.GSTAPVGGGAFPTIVER.E                                                   | 1616.79990 | 2 | 3.40E-07 | 0.93 | 3.77 | - | 1439.7 |
| AHQ-6-7, 3826               | R.GSTAPVGGGAFPTIVER.E                                                   | 1616.79990 | 2 | 4.38E-08 | 0.81 | 3.17 | - | 697.5  |
| AHQ-6-7, 4494               | K.LAADVTVNQVLSR.Y                                                       | 1528.73579 | 2 | 7.29E-09 | 0.96 | 4.51 | - | 1362.7 |
| gi 4540391 ref NP_000179.1  | hexokinase 1 isoform HK1; brain form hexokinase [Homo sapiens]          |            |   |          |      |      |   |        |
| AHQ-6-4, 4389 - 4396        | K.ATDCVGHVTVLLR.D                                                       | 1557.75406 | 2 | 8.23E-09 | 0.90 | 3.70 | - | 814.7  |
| AHQ-6-4, 5391               | K.GDFIALDLGSSFR.I                                                       | 1455.59700 | 2 | 5.68E-04 | 0.95 | 3.77 | - | 1544.2 |
| AHQ-6-4, 5669               | K.LPVGFTTFPCQSK.I                                                       | 1744.99134 | 2 | 5.18E-05 | 0.78 | 3.18 | - | 529.4  |
| AHQ-6-4, 6548               | R.SANLVAATLGAILNR.L                                                     | 1484.72615 | 2 | 4.91E-04 | 0.94 | 4.24 | - | 1365.6 |
| AHQ-6-4, 5740               | R.TPDGTENDFLALDLGGTNFR.V                                                | 2211.33051 | 2 | 1.19E-06 | 0.74 | 3.14 | - | 556.7  |
| gi 4557361 ref NP_001187.1  | BH3 interacting domain death agonist; BH3-interacting domain death agon |            |   |          |      |      |   |        |
| AHQ-6-11, 2783 - 2784       | R.IEADSEQEDDIR.N                                                        | 1505.56635 | 2 | 8.76E-09 | 0.95 | 3.81 | - | 1925.8 |
| gi 29731460 ref XP_293027.1 | similar to ADP/ATP carrier protein, fibroblast isoform (ADP/ATP transl  |            |   |          |      |      |   |        |
| AHQ-6-10, 4275              | K.DFLAGGVAIAISK.M                                                       | 1220.39980 | 2 | 8.78E-09 | 0.97 | 3.99 | - | 2721.5 |
| gi 13259510 ref NP_004073.2 | dynactin 1 isoform 1; dynactin 1 (p150, Glued (Drosophila) homolog); p  |            |   |          |      |      |   |        |
| AHQ-6-3, 4286               | R.AESLQVEEALK.E                                                         | 1345.48086 | 2 | 9.22E-05 | 0.85 | 3.14 | - | 1309.3 |
| AHQ-6-4, 6687               | R.GAAGEQLSFAAGLVYSLSLQATLHR.Y                                           | 2675.03589 | 3 | 9.01E-09 | 0.90 | 4.49 | - | 825.1  |
| gi 17986283 ref NP_006000.2 | tubulin, alpha 3; tubulin, alpha, brain-specific; hum-a-tub1; hum-a-tu  |            |   |          |      |      |   |        |
| AHQ-6-10, 5186              | R.AVFVDELEPTVIDEVR.T                                                    | 1702.92947 | 2 | 2.65E-04 | 0.57 | 2.81 | - | 506.2  |
| AHQ-6-12, 5327              | R.AVFVDELEPTVIDEVR.T                                                    | 1702.92947 | 2 | 1.54E-05 | 0.85 | 3.52 | - | 683.5  |
| AHQ-6-13-, 5388             | R.AVFVDELEPTVIDEVR.T                                                    | 1702.92947 | 2 | 5.44E-08 | 0.90 | 4.18 | - | 843.0  |
| AHQ-6-14-, 5136             | R.AVFVDELEPTVIDEVR.T                                                    | 1702.92947 | 2 | 4.29E-05 | 0.88 | 4.08 | - | 501.0  |
| AHQ-6-14-, 5390 - 5391      | R.AVFVDELEPTVIDEVR.T                                                    | 1702.92947 | 2 | 1.41E-06 | 0.96 | 5.52 | - | 899.2  |
| AHQ-6-7, 5200 - 5270        | R.AVFVDELEPTVIDEVR.T                                                    | 1702.92947 | 2 | 9.14E-09 | 0.91 | 4.39 | - | 655.0  |
| gi 21361370 ref NP_002853.2 | phosphorylase, glycogen; brain [Homo sapiens]                           |            |   |          |      |      |   |        |
| AHQ-6-5, 5584               | K.LLPLVSDVEFIR.D                                                        | 1401.67552 | 2 | 1.05E-08 | 0.88 | 2.83 | - | 811.1  |
| gi 30154095 ref XP_293967.2 | similar to gamma actin-like protein [Homo sapiens]                      |            |   |          |      |      |   |        |
| AHQ-6-8, 4424               | K.DLYTSTVLGGTTM*YPIADR.M                                                | 2235.45690 | 2 | 2.90E-05 | 0.78 | 3.42 | - | 545.9  |
| AHQ-6-8, 4524 - 4600        | K.DLYTSTVLGGTTM*YPIADR.M                                                | 2235.45690 | 2 | 4.83E-07 | 0.52 | 2.74 | - | 427.9  |
| AHQ-6-14-, 4571 - 4650      | K.DLYTSTVLGGTTM*YPIADR.M                                                | 2235.45690 | 2 | 4.64E-04 | 0.52 | 3.18 | - | 453.8  |
| AHQ-6-10, 4386              | K.DLYTSTVLGGTTM*YPIADR.M                                                | 2235.45690 | 2 | 1.24E-07 | 0.71 | 3.54 | - | 409.8  |
| AHQ-6-10, 4660              | K.DLYTSTVLGGTTM*YPIADR.M                                                | 2235.45690 | 2 | 9.78E-04 | 0.32 | 2.57 | - | 482.3  |
| AHQ-6-12, 4640              | K.DLYTSTVLGGTTM*YPIADR.M                                                | 2235.45690 | 2 | 6.59E-04 | 0.45 | 3.01 | - | 415.9  |
| AHQ-6-14, 5330 - 5392       | K.DLYTSTVLGGTTM*YPIADR.M                                                | 2235.45690 | 2 | 1.45E-06 | 0.62 | 3.27 | - | 381.9  |
| AHQ-6-13-, 4672             | K.DLYTSTVLGGTTM*YPIADR.M                                                | 2235.45690 | 2 | 2.59E-06 | 0.51 | 2.85 | - | 401.9  |
| AHQ-6-13-, 5104             | K.DLYTSTVLGGTTM*YPIADR.M                                                | 2219.45750 | 2 | 3.08E-05 | 0.10 | 2.63 | - | 191.8  |
| AHQ-6-14-, 4872             | K.DLYTSTVLGGTTM*YPIADR.M                                                | 2235.45690 | 2 | 4.16E-06 | 0.81 | 3.51 | - | 766.2  |
| AHQ-6-8, 6440               | R.NIKEKLCYLVDLDFEQEM*ATAASSSSLEK.S                                      | 3223.61779 | 3 | 1.06E-08 | 0.62 | 3.39 | - | 646.2  |
| gi 5453595 ref NP_006358.1  | adenyl cyclase-associated protein [Homo sapiens]                        |            |   |          |      |      |   |        |
| AHQ-6-7, 2859               | R.ALLVTSQCCQPAENK.L                                                     | 1759.96271 | 2 | 8.30E-05 | 0.37 | 2.54 | - | 246.2  |
| AHQ-6-7, 2730 - 2743        | R.ALLVTSQCCQPAENK.L                                                     | 1759.96271 | 2 | 5.89E-06 | 0.96 | 5.23 | - | 1058.0 |
| AHQ-6-8, 2656               | R.ALLVTSQCCQPAENK.L                                                     | 1759.96271 | 2 | 7.81E-06 | 0.94 | 4.40 | - | 909.6  |
| AHQ-6-7, 2731               | K.KEPAVLELEK.K                                                          | 1213.40557 | 2 | 9.43E-08 | 0.86 | 3.22 | - | 512.8  |
| AHQ-6-7, 6303 - 6383        | K.LGLVDFDDVGVGIVEIINSK.D                                                | 1931.26186 | 2 | 8.21E-08 | 0.98 | 6.28 | - | 1533.0 |
| AHQ-6-7, 6390 - 6455        | K.LGLVDFDDVGVGIVEIINSK.D                                                | 1931.26186 | 2 | 3.05E-06 | 0.97 | 5.45 | - | 1666.8 |
| AHQ-6-7, 4712               | K.LSDLLAPISEQIK.E                                                       | 1427.66814 | 1 | 1.20E-07 | 0.70 | 3.04 | - | 564.0  |
| AHQ-6-7, 4694 - 4768        | K.LSDLLAPISEQIK.E                                                       | 1427.66814 | 2 | 3.02E-04 | 0.71 | 2.97 | - | 686.1  |
| AHQ-6-7, 3287               | K.NSLDCEIVSAK.S                                                         | 1237.36245 | 2 | 1.59E-06 | 0.95 | 3.79 | - | 1532.5 |
| AHQ-6-7, 2974 - 3023        | K.NSLDCEIVSAK.S                                                         | 1237.36245 | 2 | 1.19E-05 | 0.93 | 3.46 | - | 1058.9 |
| AHQ-6-14-, 3056 - 3120      | K.NSLDCEIVSAK.S                                                         | 1237.36245 | 2 | 1.37E-04 | 0.84 | 2.82 | - | 884.8  |
| AHQ-6-7, 3290               | K.NSLDCEIVSAK.S                                                         | 1237.36245 | 1 | 2.29E-04 | 0.31 | 2.16 | - | 439.9  |
| AHQ-6-8, 4452               | R.SALFAQINQGESITHALK.H                                                  | 1929.16615 | 2 | 1.06E-08 | 0.94 | 4.58 | - | 971.3  |
| AHQ-6-7, 4643 - 4699        | R.SALFAQINQGESITHALK.H                                                  | 1929.16615 | 2 | 9.57E-04 | 0.52 | 2.85 | - | 407.2  |
| AHQ-6-7, 4498               | R.SALFAQINQGESITHALK.H                                                  | 1929.16615 | 2 | 3.70E-06 | 0.85 | 3.76 | - | 593.5  |
| AHQ-6-7, 4439 - 4514        | R.SALFAQINQGESITHALK.H                                                  | 1929.16615 | 3 | 1.17E-05 | 0.81 | 3.85 | - | 651.7  |
| AHQ-6-7, 2199               | R.SGPKPFSAPKQPTSPSPK.R                                                  | 1839.08461 | 2 | 2.75E-05 | 0.68 | 3.05 | - | 649.6  |
| AHQ-6-7, 4536 - 4614        | R.VENQENVSNLVIEDTELK.Q                                                  | 2074.23206 | 2 | 5.90E-08 | 0.94 | 4.40 | - | 952.8  |
| AHQ-6-7, 4423 - 4478        | R.VENQENVSNLVIEDTELK.Q                                                  | 2074.23206 | 2 | 6.89E-04 | 0.89 | 4.43 | - | 681.6  |
| AHQ-6-7, 4260               | R.VENQENVSNLVIEDTELK.Q                                                  | 2074.23206 | 2 | 6.98E-05 | 0.88 | 3.83 | - | 874.7  |
| AHQ-6-7, 3980 - 3987        | R.VENQENVSNLVIEDTELK.Q                                                  | 2074.23206 | 2 | 4.25E-07 | 0.75 | 3.47 | - | 204.6  |
| AHQ-6-8, 4445               | R.VENQENVSNLVIEDTELK.Q                                                  | 2074.23206 | 2 | 5.49E-07 | 0.90 | 4.03 | - | 659.9  |
| AHQ-6-7, 4670 - 4720        | R.VENQENVSNLVIEDTELK.Q                                                  | 2074.23206 | 2 | 7.40E-04 | 0.80 | 2.93 | - | 789.4  |
| AHQ-6-10, 4396              | R.VENQENVSNLVIEDTELK.Q                                                  | 2074.23206 | 2 | 3.20E-04 | 0.92 | 4.01 | - | 870.2  |
| AHQ-6-11, 4467              | R.VENQENVSNLVIEDTELK.Q                                                  | 2074.23206 | 2 | 1.55E-07 | 0.89 | 4.09 | - | 565.1  |
| AHQ-6-12, 4533              | R.VENQENVSNLVIEDTELK.Q                                                  | 2074.23206 | 2 | 1.88E-05 | 0.65 | 3.13 | - | 463.8  |
| AHQ-6-13-, 4614             | R.VENQENVSNLVIEDTELK.Q                                                  | 2074.23206 | 2 | 2.68E-04 | 0.81 | 3.07 | - | 669.1  |
| AHQ-6-7, 2564               | K.VPTISINK.T                                                            | 872.04435  | 1 | 3.87E-05 | 0.20 | 2.06 | - | 259.0  |
| gi 4758756 ref NP_004528.1  | nucleosome assembly protein 1-like 1; HSP22-like protein interacting pr |            |   |          |      |      |   |        |
| AHQ-6-7, 6242 - 6243        | K.GIPEFWLTVFK.N                                                         | 1337.58999 | 2 | 1.09E-08 | 0.84 | 3.42 | - | 274.1  |
| AHQ-6-7, 5142 - 5143        | R.LDGLVPTGYIESLPR.V                                                     | 1861.08535 | 2 | 6.78E-05 | 0.94 | 4.56 | - | 827.8  |
| gi 5729997 ref NP_004154.2  | RAB27B, member RAS oncogene family [Homo sapiens]                       |            |   |          |      |      |   |        |
| AHQ-6-11, 5381 - 5383       | K.AVETLLDLIM*K.R                                                        | 1262.54151 | 2 | 9.22E-05 | 0.87 | 3.50 | - | 717.5  |
| AHQ-6-10, 5294 - 5323       | K.AVETLLDLIM*K.R                                                        | 1262.54151 | 2 | 9.01E-06 | 0.87 | 3.46 | - | 727.6  |
| AHQ-6-11, 3635 - 3636       | K.VHLQLWDTAGQER.F                                                       | 1553.70390 | 2 | 1.15E-08 | 0.96 | 4.21 | - | 1375.2 |
| AHQ-6-10, 3562              | K.VHLQLWDTAGQER.F                                                       | 1553.70390 | 2 | 8.48E-08 | 0.93 | 3.41 | - | 1216.8 |
| AHQ-6-11, 4240 - 4299       | K.YGIPYFETSAAATGQNVK.E                                                  | 1976.13177 | 2 | 3.42E-06 | 0.57 | 3.04 | - | 649.0  |
| AHQ-6-12, 4372              | K.YGIPYFETSAAATGQNVK.E                                                  | 1976.13177 | 2 | 3.15E-05 | 0.73 | 2.90 | - | 551.8  |
| AHQ-6-13-, 4458             | K.YGIPYFETSAAATGQNVK.E                                                  | 1976.13177 | 2 | 1.73E-04 | 0.36 | 2.53 | - | 221.0  |

|                             |                                                                         |            |   |          |      |       |      |         |
|-----------------------------|-------------------------------------------------------------------------|------------|---|----------|------|-------|------|---------|
| AHQ-6-10, 4174 - 4230       | K.YGIPYFETSAAATGQNVK.A                                                  | 1976.13177 | 2 | 1.20E-07 | 0.96 | 4.77  | -    | 1149.3  |
| gi 4506877 ref NP_002996.1  | selectin P precursor; Selectin P (granulocyte membrane protein, 140kD;  |            |   |          |      |       |      |         |
| AHQ-6-3, 4646               | K.AVQCQHLFAPSEGTMMDCVHPLTAFAYGSSCK.F                                    | 3472.80519 | 3 | 6.75E-05 | 0.85 | 4.38  | -    | 486.5   |
| AHQ-6-3, 4361               | K.CPELFAPEEQGLDCSDTR.G                                                  | 2085.21515 | 2 | 6.99E-05 | 0.92 | 4.21  | -    | 659.3   |
| AHQ-6-3, 5497               | K.LECLASGIWTKPPQCLAAQCPLK.I                                             | 2857.31818 | 3 | 2.10E-06 | 0.89 | 3.64  | -    | 1488.7  |
| AHQ-6-3, 5601 - 5672        | K.LECLASGIWTKPPQCLAAQCPLKIPER.G                                         | 3352.89300 | 3 | 9.35E-06 | 0.48 | 3.21  | -    | 572.4   |
| AHQ-6-3, 3154               | R.PSQGWATVTPACR.A                                                       | 1432.58672 | 2 | 3.61E-05 | 0.93 | 3.64  | -    | 904.1   |
| AHQ-6-4, 4720               | K.STCQFICDEGYSLSGPER.L                                                  | 2109.23671 | 2 | 3.85E-06 | 0.90 | 3.44  | -    | 778.9   |
| AHQ-6-2, 4703               | K.STCQFICDEGYSLSGPER.L                                                  | 2109.23671 | 2 | 1.16E-08 | 0.94 | 4.36  | -    | 844.3   |
| AHQ-6-2, 2991               | R.YTDLVAIQNK.N                                                          | 1165.32100 | 2 | 1.53E-06 | 0.86 | 2.70  | -    | 883.3   |
| AHQ-6-3, 2984               | R.YTDLVAIQNK.N                                                          | 1165.32100 | 2 | 2.62E-04 | 0.93 | 3.55  | -    | 1125.9  |
| gi 4504517 ref NP_001531.1  | heat shock 27kDa protein 1; heat shock 27kD protein 1 [Homo sapiens] [M |            |   |          |      |       |      |         |
| AHQ-6-11, 4499 - 4580       | K.LATQSNIEITPVTFESR.A                                                   | 1907.11412 | 2 | 1.08E-05 | 0.87 | 3.79  | -    | 538.2   |
| AHQ-6-14-, 4635 - 4711      | K.LATQSNIEITPVTFESR.A                                                   | 1907.11412 | 2 | 7.23E-06 | 0.75 | 3.82  | -    | 243.4   |
| AHQ-6-10, 4326              | R.LFDQAFGLPR.L                                                          | 1164.33793 | 2 | 4.52E-07 | 0.96 | 4.19  | -    | 1494.8  |
| AHQ-6-11, 4395 - 4400       | R.LFDQAFGLPR.L                                                          | 1164.33793 | 2 | 1.52E-07 | 0.96 | 4.34  | -    | 1481.1  |
| AHQ-6-10, 4478              | R.VSLDVNHFAPDELTVK.T                                                    | 1784.99058 | 2 | 4.84E-05 | 0.93 | 3.99  | -    | 1290.5  |
| AHQ-6-10, 4330              | R.VSLDVNHFAPDELTVK.T                                                    | 1784.99058 | 2 | 6.26E-08 | 0.92 | 4.40  | -    | 860.5   |
| AHQ-6-11, 4501 - 4560       | R.VSLDVNHFAPDELTVK.T                                                    | 1784.99058 | 2 | 9.29E-07 | 0.86 | 3.76  | -    | 767.8   |
| AHQ-6-13-, 4537             | R.VSLDVNHFAPDELTVK.T                                                    | 1784.99058 | 2 | 2.88E-08 | 0.96 | 5.14  | -    | 1114.4  |
| AHQ-6-13-, 4538             | R.VSLDVNHFAPDELTVK.T                                                    | 1784.99058 | 3 | 1.43E-06 | 0.84 | 3.90  | -    | 530.4   |
| AHQ-6-11, 4405              | R.VSLDVNHFAPDELTVK.T                                                    | 1784.99058 | 3 | 1.19E-08 | 0.70 | 3.30  | -    | 321.6   |
| AHQ-6-11, 4369 - 4407       | R.VSLDVNHFAPDELTVK.T                                                    | 1784.99058 | 2 | 1.68E-08 | 0.96 | 4.94  | -    | 1325.4  |
| gi 4757768 ref NP_004300.1  | Rho GDP dissociation inhibitor (GDI) alpha [Homo sapiens]               |            |   |          |      |       |      |         |
| AHQ-6-10, 4298              | R.AEEYFELTPVEEAPK.G                                                     | 1752.89898 | 2 | 6.58E-05 | 0.86 | 3.03  | -    | 1087.5  |
| AHQ-6-10, 3031              | K.IDKTDYMGVSGYGR.A                                                      | 1602.79350 | 2 | 3.00E-05 | 0.90 | 3.00  | -    | 1305.2  |
| AHQ-6-10, 3674              | K.SIQEIQELDKDDESLR.K                                                    | 1919.03693 | 2 | 1.26E-08 | 0.87 | 3.75  | -    | 992.8   |
| AHQ-6-10, 3352              | K.SIQEIQELDKDDESLR.K                                                    | 2047.20984 | 2 | 5.40E-04 | 0.83 | 3.67  | -    | 605.6   |
| gi 4505303 ref NP_002466.1  | myosin alkali light chain 1 slow a; myosin light chain 1, slow-twitch m |            |   |          |      |       |      |         |
| AHQ-6-12, 2787 - 2853       | R.ALGNPNTNAEVLK.V                                                       | 1355.52211 | 2 | 1.37E-08 | 0.81 | 3.87  | -    | 364.6   |
| AHQ-6-12, 2801              | R.ALGNPNTNAEVLK.V                                                       | 1355.52211 | 1 | 1.84E-05 | 0.19 | 2.66  | -    | 332.7   |
| AHQ-6-13-, 2753             | K.ILYSQCQGDVMM.R.A                                                      | 1359.55429 | 2 | 2.10E-07 | 0.82 | 2.71  | -    | 949.8   |
| AHQ-6-14-, 2708             | K.ILYSQCQGDVMM.R.A                                                      | 1359.55429 | 2 | 1.21E-04 | 0.72 | 2.74  | -    | 528.6   |
| AHQ-6-12, 2707 - 2708       | K.ILYSQCQGDVMM.R.A                                                      | 1359.55429 | 2 | 1.46E-06 | 0.89 | 2.80  | -    | 1157.3  |
| gi 30159830 ref XP_302246.1 | similar to HSPC280 [Homo sapiens]                                       |            |   |          |      |       |      |         |
| AHQ-6-14-, 6358             | K.CANLFEALVGLK.A                                                        | 1437.68632 | 2 | 1.40E-08 | 0.96 | 4.69  | -    | 1238.2  |
| AHQ-6-14-, 6315             | R.DDKCANLFEALVGLK.A                                                     | 1796.03496 | 3 | 4.31E-07 | 0.96 | 4.53  | -    | 2399.8  |
| gi 4502695 ref NP_001779.1  | cell division cycle 10; cell division cycle 10 (homolog to CDC10 of S.c |            |   |          |      |       |      |         |
| AHQ-6-8, 6060 - 6109        | K.STLINSFLTDLTLYSPEYGPSPHR.I                                            | 2608.88640 | 2 | 1.41E-08 | 0.60 | 10.15 | 5.50 | 48786.6 |
| gi 10716563 ref NP_001737.1 | calnexin [Homo sapiens]                                                 |            |   |          |      |       |      |         |
| AHQ-6-5, 4775               | K.APVPTGEVYFADSFDR.G                                                    | 1771.90722 | 2 | 1.48E-08 | 0.95 | 4.20  | -    | 1212.4  |
| AHQ-6-7, 4618               | K.APVPTGEVYFADSFDR.G                                                    | 1771.90722 | 2 | 2.47E-06 | 0.58 | 2.67  | -    | 535.5   |
| AHQ-6-5, 4353               | R.GTLSGWLSK.A                                                           | 1062.24392 | 2 | 1.04E-05 | 0.87 | 2.85  | -    | 824.0   |
| AHQ-6-5, 3863               | K.IPDPEAVKPDWDEDAPAK.I                                                  | 2109.23496 | 3 | 1.24E-04 | 0.83 | 3.53  | -    | 796.6   |
| AHQ-6-5, 6277               | K.IPNPDFFDELEPFR.M                                                      | 1736.90447 | 2 | 1.57E-06 | 0.92 | 3.67  | -    | 853.1   |
| AHQ-6-5, 5884               | R.KIPNPDFFDELEPFR.M                                                     | 1865.07739 | 3 | 1.44E-05 | 0.97 | 5.62  | -    | 2561.0  |
| AHQ-6-5, 5876               | R.KIPNPDFFDELEPFR.M                                                     | 1865.07739 | 2 | 1.71E-07 | 0.90 | 3.70  | -    | 749.6   |
| gi 4503445 ref NP_001944.1  | endothelial cell growth factor 1 (platelet-derived); thymidine phosphor |            |   |          |      |       |      |         |
| AHQ-6-7, 6067               | R.ALPLALVHELHAGR.S                                                      | 1530.83966 | 2 | 1.69E-08 | 0.93 | 3.74  | -    | 1309.4  |
| gi 27477800 ref XP_208313.1 | similar to tropomyosin 4 [Homo sapiens]                                 |            |   |          |      |       |      |         |
| AHQ-6-9, 5082               | K.CGDLLEELKKNVTNNLK.S                                                   | 1878.05124 | 2 | 5.06E-04 | 0.95 | 4.54  | -    | 1210.9  |
| AHQ-6-9, 4211 - 4214        | K.CGDLLEELKKNVTNNLK.S                                                   | 1878.05124 | 3 | 1.88E-08 | 0.89 | 3.80  | -    | 1123.9  |
| gi 4507521 ref NP_001055.1  | transketolase [Homo sapiens]                                            |            |   |          |      |       |      |         |
| AHQ-6-6, 4456               | K.ILATPPQEDAPSVDIANIR.M                                                 | 2021.26036 | 2 | 2.10E-08 | 0.74 | 3.16  | -    | 348.3   |
| AHQ-6-6, 5570               | K.LDNLVALDINR.L                                                         | 1369.59192 | 2 | 2.83E-08 | 0.96 | 3.94  | -    | 1534.1  |
| AHQ-6-6, 6326               | K.SKDDQVTVIGAGVTLHEALAAELLK.K                                           | 2651.00941 | 3 | 8.34E-05 | 0.93 | 5.07  | -    | 796.8   |
| gi 4507487 ref NP_003238.1  | thrombospondin 2 [Homo sapiens]                                         |            |   |          |      |       |      |         |
| AHQ-6-1, 5008               | R.DDDYAGVFYQSSSR.F                                                      | 1814.84582 | 2 | 6.39E-08 | 0.94 | 3.63  | -    | 1278.8  |
| AHQ-6-2, 4966 - 5030        | R.DDDYAGVFYQSSSR.F                                                      | 1814.84582 | 2 | 2.13E-08 | 0.96 | 4.15  | -    | 1549.8  |
| AHQ-6-4, 4965               | R.DDDYAGVFYQSSSR.F                                                      | 1814.84582 | 2 | 5.80E-08 | 0.94 | 3.84  | -    | 1273.6  |
| AHQ-6-3, 4850 - 4930        | R.DDDYAGVFYQSSSR.F                                                      | 1814.84582 | 2 | 3.78E-04 | 0.46 | 2.71  | -    | 508.1   |
| AHQ-6-3, 3018               | R.NALWHTGNTPGQVR.T                                                      | 1551.69124 | 2 | 5.33E-04 | 0.87 | 3.38  | -    | 881.6   |
| AHQ-6-4, 2985               | R.NALWHTGNTPGQVR.T                                                      | 1551.69124 | 2 | 4.18E-04 | 0.91 | 3.29  | -    | 1133.9  |
| AHQ-6-3, 2822               | R.NALWHTGNTPGQVR.T                                                      | 1551.69124 | 2 | 7.68E-06 | 0.85 | 3.28  | -    | 896.8   |
| AHQ-6-6, 2711 - 2738        | R.NALWHTGNTPGQVR.T                                                      | 1551.69124 | 2 | 4.30E-04 | 0.89 | 3.57  | -    | 950.7   |
| AHQ-6-7, 2838               | R.NALWHTGNTPGQVR.T                                                      | 1551.69124 | 2 | 1.61E-05 | 0.92 | 3.58  | -    | 1196.0  |
| AHQ-6-11, 2755              | R.NALWHTGNTPGQVR.T                                                      | 1551.69124 | 2 | 5.06E-04 | 0.65 | 2.77  | -    | 662.5   |
| AHQ-6-11, 2951              | R.NALWHTGNTPGQVR.T                                                      | 1551.69124 | 2 | 1.87E-04 | 0.84 | 2.93  | -    | 845.2   |
| AHQ-6-11, 3085              | R.NALWHTGNTPGQVR.T                                                      | 1551.69124 | 2 | 2.92E-07 | 0.72 | 2.74  | -    | 762.4   |
| AHQ-6-14-, 2802             | R.NALWHTGNTPGQVR.T                                                      | 1551.69124 | 2 | 6.46E-06 | 0.77 | 2.91  | -    | 710.8   |
| gi 4507745 ref NP_003320.1  | thioredoxin [Homo sapiens]                                              |            |   |          |      |       |      |         |
| AHQ-6-13-, 3878             | K.EKLEATINELV                                                           | 1259.43110 | 2 | 1.84E-05 | 0.81 | 2.69  | -    | 831.3   |
| AHQ-6-13-, 3852 - 3853      | K.TAFQEALDAAGDK.L                                                       | 1337.41728 | 2 | 2.14E-08 | 0.92 | 3.51  | -    | 1319.4  |
| AHQ-6-14-, 3823 - 3830      | K.TAFQEALDAAGDK.L                                                       | 1337.41728 | 2 | 5.36E-07 | 0.91 | 2.81  | -    | 1682.0  |
| AHQ-6-13, 3991              | K.TAFQEALDAAGDK.L                                                       | 1337.41728 | 2 | 2.24E-07 | 0.91 | 3.28  | -    | 1280.0  |
| gi 11321601 ref NP_002618.1 | phosphofructokinase, platelet; Phosphofructokinase, platelet type [Hom  |            |   |          |      |       |      |         |
| AHQ-6-5, 4796               | K.ASYDVSDSGQLEHVQPWSV                                                   | 2105.20640 | 2 | 3.29E-04 | 0.56 | 2.90  | -    | 357.6   |
| AHQ-6-5, 5615 - 5616        | K.EIGWTDVGGWGTGGGSLGTR.K                                                | 2120.30735 | 2 | 9.66E-06 | 0.95 | 4.46  | -    | 1282.2  |
| AHQ-6-5, 5947               | R.GITNLVCGDGLSTGANLFR.K                                                 | 2137.40264 | 2 | 2.19E-08 | 0.93 | 4.47  | -    | 824.3   |
| gi 4507677 ref NP_003290.1  | tumor rejection antigen (gp96) 1; Tumor rejection antigen-1 (gp96); glu |            |   |          |      |       |      |         |
| AHQ-6-4, 2485 - 2491        | K.DISTNYYASQK.K                                                         | 1290.36061 | 2 | 5.39E-05 | 0.82 | 3.03  | -    | 625.7   |
| AHQ-6-5, 3185               | K.FAFQAEVNR.M                                                           | 1082.19378 | 2 | 3.32E-05 | 0.86 | 2.62  | -    | 1190.8  |
| AHQ-6-4, 3239               | K.FAFQAEVNR.M                                                           | 1082.19378 | 2 | 3.31E-05 | 0.90 | 2.84  | -    | 1164.5  |
| AHQ-6-6, 3866               | R.FQSSHHPTDITSLDQYVER.M                                                 | 2261.39276 | 3 | 1.10E-05 | 0.95 | 4.38  | -    | 1613.2  |
| AHQ-6-4, 3976               | R.FQSSHHPTDITSLDQYVER.M                                                 | 2261.39276 | 3 | 6.01E-05 | 0.97 | 5.14  | -    | 2452.5  |
| AHQ-6-5, 3895               | R.FQSSHHPTDITSLDQYVER.M                                                 | 2261.39276 | 3 | 2.23E-08 | 0.98 | 5.54  | -    | 2710.5  |
| AHQ-6-5, 3916               | R.FQSSHHPTDITSLDQYVER.M                                                 | 2261.39276 | 2 | 1.31E-04 | 0.84 | 3.73  | -    | 492.0   |
| AHQ-6-6, 3876               | K.GVVSDDLPLNLSR.E                                                       | 1486.60940 | 2 | 6.96E-07 | 0.91 | 4.32  | -    | 730.2   |
| AHQ-6-5, 6575               | R.IKEDDPTKVLDAVLFETATLR.S                                               | 2735.07994 | 3 | 3.02E-08 | 0.89 | 4.17  | -    | 986.4   |
| AHQ-6-6, 4000               | K.SILFVPTSAPR.G                                                         | 1188.40094 | 2 | 2.71E-04 | 0.86 | 2.61  | -    | 1137.4  |
| AHQ-6-4, 6427 - 6463        | K.YSQFINFPIYWSSK.T                                                      | 1880.13366 | 2 | 9.90E-06 | 0.82 | 3.74  | -    | 633.3   |
| AHQ-6-6, 6271               | K.YSQFINFPIYWSSK.T                                                      | 1880.13366 | 2 | 2.13E-05 | 0.62 | 2.85  | -    | 381.3   |
| AHQ-6-5, 6344               | K.YSQFINFPIYWSSK.T                                                      | 1880.13366 | 2 | 1.35E-05 | 0.94 | 4.26  | -    | 812.3   |
| gi 11993943 ref NP_055419.1 | Tax interaction protein 1 [Homo sapiens]                                |            |   |          |      |       |      |         |
| AHQ-6-13-, 4057 - 4074      | R.VSEGGPAEIALGLQIGDK.I                                                  | 1641.80454 | 2 | 5.20E-07 | 0.93 | 4.08  | -    | 1101.4  |
| AHQ-6-13, 4180              | R.VSEGGPAEIALGLQIGDK.I                                                  | 1641.80454 | 2 | 2.24E-08 | 0.87 | 3.64  | -    | 854.4   |
| gi 29742827 ref XP_294099.1 | similar to myosin:SUBUNIT=regulatory light chain [Homo sapiens]         |            |   |          |      |       |      |         |
| AHQ-6-12, 3755 - 3756       | R.FTDEEVDLYR.E                                                          | 1416.47127 | 2 | 3.75E-08 | 0.97 | 4.64  | -    | 1551.0  |
| AHQ-6-12, 3763 - 3765       | R.FTDEEVDLYR.E                                                          | 1416.47127 | 1 | 1.09E-04 | 0.32 | 1.99  | -    | 330.0   |
| AHQ-6-14, 4580              | R.FTDEEVDLYR.E                                                          | 1416.47127 | 2 | 6.72E-07 | 0.88 | 3.00  | -    | 1093.6  |
| AHQ-6-14-, 3822 - 3839      | R.FTDEEVDLYR.E                                                          | 1416.47127 | 2 | 2.29E-08 | 0.96 | 4.25  | -    | 1391.5  |
| AHQ-6-11, 3695              | R.FTDEEVDLYR.E                                                          | 1416.47127 | 2 | 5.07E-08 | 0.96 | 3.90  | -    | 1723.6  |
| gi 4504077 ref NP_000165.1  | glycoprotein IX (platelet) [Homo sapiens]                               |            |   |          |      |       |      |         |
| AHQ-6-14-, 2803             | R.CASPSLAAHGPLGR.L                                                      | 1395.56962 | 2 | 7.20E-06 | 0.73 | 2.66  | -    | 664.0   |
| AHQ-6-11, 2751              | R.CASPSLAAHGPLGR.L                                                      | 1395.56962 | 2 | 2.31E-08 | 0.86 | 3.02  | -    | 797.5   |
| AHQ-6-11, 3453              | R.GHGLTALPALPAR.T                                                       | 1274.49706 | 3 | 7.44E-05 | 0.88 | 3.33  | -    | 1101.7  |
| AHQ-6-12, 3500 - 3580       | R.GHGLTALPALPAR.T                                                       | 1274.49706 | 2 | 8.25E-05 | 0.83 | 2.92  | -    | 701.8   |

|                             |                                                                         |            |   |          |       |        |       |          |
|-----------------------------|-------------------------------------------------------------------------|------------|---|----------|-------|--------|-------|----------|
| AHQ-6-11, 3447 - 3465       | R.GHGLTALPALPAR.T                                                       | 1274.49706 | 2 | 5.09E-05 | 0.95  | 4.15   | -     | 1018.1   |
| AHQ-6-11, 3235 - 3241       | R.TPELLLQVR.C                                                           | 1027.19957 | 2 | 3.41E-05 | 0.94  | 3.56   | -     | 1347.2   |
| gi 5901944 ref NP_008977.1  | elastin microfibril interface located protein; TNF? elastin microfibril |            |   | 2.59E-08 | 4.70  | 50.28  | 9.60  | 106694.7 |
| AHQ-6-3, 2996               | R.GLEEGQAQAGQCPSELEGR.L                                                 | 1888.99421 | 2 | 2.73E-07 | 0.93  | 4.49   | -     | 810.6    |
| AHQ-6-3, 3617               | R.LDTVAGGLQGLR.E                                                        | 1200.37012 | 2 | 7.38E-06 | 0.95  | 3.92   | -     | 1549.1   |
| AHQ-6-3, 2942               | R.LVGGSLHTVEAAGEAR.Q                                                    | 1567.72888 | 2 | 4.06E-06 | 0.96  | 4.20   | -     | 1429.3   |
| AHQ-6-3, 3709               | R.PARPNLSGSSAGSPLSGLGEGPGESEK.V                                         | 2596.74928 | 3 | 2.59E-08 | 0.95  | 5.51   | -     | 1111.6   |
| AHQ-6-3, 2893               | R.RGTLELGGAAQGGGHPGYSLASR.L                                             | 2298.46100 | 3 | 8.77E-06 | 0.91  | 4.39   | -     | 958.5    |
| gi 17986258 ref NP_066299.2 | smooth muscle and non-muscle myosin alkali light chain isoform 1 [Homo  |            |   | 2.63E-08 | 4.47  | 50.24  | 26.50 | 16930.0  |
| AHQ-6-12, 4032 - 4087       | K.DQGTGYEDYVEGLR.V                                                      | 1545.58904 | 2 | 1.14E-06 | 0.92  | 3.98   | -     | 1038.4   |
| AHQ-6-13, 4293 - 4304       | K.DQGTGYEDYVEGLR.V                                                      | 1545.58904 | 2 | 4.67E-04 | 0.89  | 3.66   | -     | 1003.4   |
| AHQ-6-12, 2396 - 2473       | R.HVLVTLGEK.M                                                           | 996.18547  | 2 | 2.86E-07 | 0.86  | 3.20   | -     | 624.3    |
| AHQ-6-13-, 2432 - 2456      | R.HVLVTLGEK.M                                                           | 996.18547  | 2 | 2.24E-05 | 0.82  | 3.28   | -     | 493.2    |
| AHQ-6-12, 3916              | K.NKDQGTGYEDYVEGLR.V                                                    | 1787.86505 | 2 | 4.24E-06 | 0.84  | 3.69   | -     | 722.5    |
| AHQ-6-12, 3743 - 3813       | K.NKDQGTGYEDYVEGLR.V                                                    | 1787.86505 | 2 | 1.56E-05 | 0.89  | 3.75   | -     | 1066.9   |
| AHQ-6-14-, 3695 - 3723      | K.NKDQGTGYEDYVEGLR.V                                                    | 1787.86505 | 3 | 5.49E-04 | 0.87  | 3.73   | -     | 937.0    |
| AHQ-6-13-, 3768             | K.NKDQGTGYEDYVEGLR.V                                                    | 1787.86505 | 3 | 3.98E-04 | 0.89  | 3.86   | -     | 1062.3   |
| AHQ-6-13-, 3758 - 3766      | K.NKDQGTGYEDYVEGLR.V                                                    | 1787.86505 | 2 | 2.63E-08 | 0.91  | 3.86   | -     | 1018.4   |
| AHQ-6-12, 3651 - 3653       | K.NKDQGTGYEDYVEGLR.V                                                    | 1787.86505 | 3 | 2.57E-05 | 0.93  | 4.90   | -     | 1033.5   |
| AHQ-6-12, 3648              | K.NKDQGTGYEDYVEGLR.V                                                    | 1787.86505 | 2 | 8.41E-05 | 0.86  | 4.02   | -     | 634.3    |
| AHQ-6-14, 4494              | K.NKDQGTGYEDYVEGLR.V                                                    | 1787.86505 | 2 | 6.65E-07 | 0.83  | 3.71   | -     | 830.3    |
| AHQ-6-14-, 3964             | K.NKDQGTGYEDYVEGLR.V                                                    | 1787.86505 | 2 | 1.33E-05 | 0.58  | 3.13   | -     | 392.8    |
| AHQ-6-12, 5865 - 5907       | K.VLDFEHFLPM*LQTVAK.N                                                   | 1905.24957 | 3 | 5.32E-04 | 0.83  | 3.65   | -     | 793.0    |
| AHQ-6-13-, 5964             | K.VLDFEHFLPM*LQTVAK.N                                                   | 1905.24957 | 3 | 3.34E-06 | 0.85  | 3.47   | -     | 733.9    |
| AHQ-6-13-, 5965             | K.VLDFEHFLPM*LQTVAK.N                                                   | 1905.24957 | 2 | 1.53E-05 | 0.85  | 3.91   | -     | 419.2    |
| AHQ-6-12, 5863 - 5931       | K.VLDFEHFLPM*LQTVAK.N                                                   | 1905.24957 | 2 | 6.15E-06 | 0.86  | 4.06   | -     | 569.1    |
| AHQ-6-12, 6208              | K.VLDFEHFLPM*LQTVAK.N                                                   | 1889.25017 | 2 | 3.31E-04 | 0.92  | 4.34   | -     | 714.3    |
| AHQ-6-13, 6016              | K.VLDFEHFLPM*LQTVAK.N                                                   | 1905.24957 | 3 | 5.91E-05 | 0.81  | 3.30   | -     | 850.7    |
| AHQ-6-14-, 5946 - 5966      | K.VLDFEHFLPM*LQTVAK.N                                                   | 1905.24957 | 3 | 1.55E-05 | 0.89  | 4.11   | -     | 801.1    |
| AHQ-6-14-, 5950             | K.VLDFEHFLPM*LQTVAK.N                                                   | 1905.24957 | 2 | 1.09E-04 | 0.90  | 4.06   | -     | 838.6    |
| gi 4506365 ref NP_002856.1  | RAB2, member RAS oncogene family [Homo sapiens]                         |            |   | 2.78E-08 | 1.82  | 20.18  | 13.70 | 23545.4  |
| AHQ-6-11, 4076              | K.IQEGVFDINNEANGIK.I                                                    | 1761.91387 | 2 | 8.53E-05 | 0.87  | 3.53   | -     | 650.4    |
| AHQ-6-11, 4231              | K.LQIWDIAGQESFR.S                                                       | 1551.68478 | 2 | 2.78E-08 | 0.95  | 3.66   | -     | 1517.1   |
| gi 4505763 ref NP_000282.1  | phosphoglycerate kinase 1 [Homo sapiens]                                |            |   | 2.85E-08 | 5.04  | 60.27  | 23.00 | 44614.4  |
| AHQ-6-8, 5425               | K.ACANPAAGSVILLENLRF                                                    | 1771.03187 | 2 | 7.66E-06 | 0.92  | 3.89   | -     | 1134.3   |
| AHQ-6-8, 5149               | K.ALESPEPFLAILGGAK.V                                                    | 1770.06542 | 2 | 2.85E-08 | 0.96  | 5.38   | -     | 1320.0   |
| AHQ-6-10, 5080              | K.ALESPEPFLAILGGAK.V                                                    | 1770.06542 | 2 | 4.46E-04 | 0.73  | 3.29   | -     | 636.7    |
| AHQ-6-8, 4402               | K.DVLFKDCVGEVEK.A                                                       | 1750.00620 | 2 | 4.88E-07 | 0.92  | 4.35   | -     | 877.1    |
| AHQ-6-8, 5013               | K.ITLPVDFVTADKFDENAK.T                                                  | 2024.25948 | 2 | 3.45E-06 | 0.90  | 3.80   | -     | 753.4    |
| AHQ-6-8, 6381 - 6386        | K.QIIVWGPVGVFEWAFAFAR.G                                                 | 2106.37033 | 2 | 1.84E-04 | 0.45  | 2.55   | -     | 245.5    |
| AHQ-6-8, 4020               | K.YSLEPVAVELK.S                                                         | 1248.44991 | 2 | 2.21E-06 | 0.89  | 3.01   | -     | 952.1    |
| gi 5729887 ref NP_006624.1  | IQ motif containing GTPase activating protein 2 [Homo sapiens]          |            |   | 2.94E-08 | 3.59  | 40.26  | 3.90  | 180611.0 |
| AHQ-6-3, 5386               | K.GVLLDIDDLQTNQFK.N                                                     | 1719.91690 | 2 | 2.15E-07 | 0.97  | 5.21   | -     | 1802.1   |
| AHQ-6-3, 4645               | K.LPYDVTTEQALTYPEVK.N                                                   | 1968.19269 | 2 | 2.94E-08 | 0.98  | 5.04   | -     | 1959.1   |
| AHQ-6-4, 4687 - 4763        | K.LPYDVTTEQALTYPEVK.N                                                   | 1968.19269 | 2 | 3.78E-05 | 0.90  | 3.50   | -     | 947.5    |
| AHQ-6-3, 4064               | K.TLVGSENPPLTVIR.K                                                      | 1496.73370 | 2 | 8.68E-04 | 0.78  | 3.08   | -     | 692.9    |
| AHQ-6-5, 4027               | K.VDQVQDVTGNPTVIK.M                                                     | 1726.95257 | 2 | 1.90E-07 | 0.86  | 3.35   | -     | 945.5    |
| gi 7657431 ref NP_055205.1  | EBNA-2 co-activator (100kD) [Homo sapiens]                              |            |   | 3.01E-08 | 1.83  | 20.25  | 4.50  | 99689.7  |
| AHQ-6-4, 5933 - 5943        | K.DTNGENIAESLVAEGLATR.R                                                 | 1961.07704 | 2 | 3.01E-08 | 0.96  | 5.09   | -     | 1779.8   |
| AHQ-6-4, 6035 - 6047        | R.NLPGLVQEGEPFSEEAFLTK.E                                                | 2307.54125 | 2 | 7.80E-06 | 0.87  | 4.10   | -     | 349.1    |
| gi 30147105 ref XP_210550.2 | similar to Chain , Aldose Reductase (E.C.1.1.1.21) Mutant With Tyr 48   |            |   | 3.09E-08 | 0.92  | 10.19  | 2.20  | 61339.9  |
| AHQ-6-5, 4497               | K.ADLINNLGTTIAK.S                                                       | 1243.43490 | 2 | 4.81E-05 | 0.90  | 3.65   | -     | 679.9    |
| AHQ-6-5, 4120               | K.ADLINNLGTTIAK.S                                                       | 1243.43490 | 2 | 3.09E-08 | 0.92  | 3.77   | -     | 985.6    |
| gi 14249348 ref NP_116120.1 | hypothetical protein MGC14353 [Homo sapiens]                            |            |   | 3.25E-08 | 2.52  | 30.19  | 30.90 | 13940.7  |
| AHQ-6-13-, 4010             | K.SWCPDVCVQAEPPVR.E                                                     | 1705.89366 | 2 | 1.18E-05 | 0.87  | 3.17   | -     | 826.2    |
| AHQ-6-13-, 4668             | K.TIFAYFTGSK.D                                                          | 1135.29336 | 2 | 5.82E-05 | 0.75  | 3.06   | -     | 434.2    |
| AHQ-6-13-, 4142             | R.YEEVSVSGFEEFHR.A                                                      | 1715.80053 | 2 | 3.25E-08 | 0.90  | 3.72   | -     | 798.2    |
| gi 4758984 ref NP_004654.1  | RAB11A, member RAS oncogene family; RAB 11A, member oncogene family [Ho |            |   | 3.61E-08 | 3.49  | 40.26  | 17.10 | 24393.3  |
| AHQ-6-12, 2868              | K.AQIWDIAGQERY.Y                                                        | 1275.35241 | 2 | 9.28E-05 | 0.93  | 2.92   | -     | 1589.9   |
| AHQ-6-11, 4083              | R.DHADSNIVIM*LVGNK.S                                                    | 1642.85914 | 2 | 3.61E-08 | 0.98  | 5.11   | -     | 1974.5   |
| AHQ-6-11, 4823              | R.GAVGALLVYDIAK.H                                                       | 1290.53317 | 2 | 9.73E-04 | 0.93  | 3.74   | -     | 1299.0   |
| AHQ-6-11, 2875              | K.VVLIGDSVGGK.S                                                         | 1044.22690 | 2 | 5.61E-05 | 0.65  | 2.89   | -     | 921.6    |
| gi 10863977 ref NP_067000.1 | LSM2 homolog, U6 small nuclear RNA associated; U6 snRNA-associated Sm-  |            |   | 3.67E-08 | 0.96  | 10.24  | 20.00 | 10834.5  |
| AHQ-6-14-, 5192             | R.VYQLPADEVDTQLQDAAR.K                                                  | 2146.34311 | 2 | 3.67E-08 | 0.96  | 4.48   | -     | 1385.1   |
| AHQ-6-14, 5796              | R.VYQLPADEVDTQLQDAAR.K                                                  | 2146.34311 | 2 | 1.22E-05 | 0.93  | 4.09   | -     | 994.2    |
| gi 14210536 ref NP_115914.1 | similar to chicken tubulin beta 5 [Homo sapiens]                        |            |   | 3.78E-08 | 0.58  | 10.15  | 3.80  | 49858.8  |
| AHQ-6-14-, 5963             | K.M*ASTFIGNSTAIQELFK.R                                                  | 1875.13550 | 2 | 5.10E-06 | 0.46  | 3.03   | -     | 551.6    |
| AHQ-6-7, 5834               | K.M*ASTFIGNSTAIQELFK.R                                                  | 1875.13550 | 2 | 3.78E-08 | 0.58  | 2.96   | -     | 711.1    |
| gi 4507171 ref NP_003109.1  | secreted protein, acidic, cysteine-rich (osteonectin); Osteonectin (sec |            |   | 3.91E-08 | 1.51  | 20.19  | 9.60  | 34632.0  |
| AHQ-6-8, 3045 - 3104        | R.LEAGDHPVELLAR.D                                                       | 1420.59579 | 2 | 3.91E-08 | 0.93  | 3.88   | -     | 927.3    |
| AHQ-6-8, 5916 - 5920        | K.YIPPCDLSDELTEFPLR.M                                                   | 1952.21655 | 2 | 3.08E-07 | 0.58  | 2.96   | -     | 276.6    |
| gi 5729770 ref NP_000382.3  | ceroid-lipofuscinosis, neuronal 2, late infantile (Jansky-Bielschowsky  |            |   | 3.97E-08 | 0.92  | 10.17  | 2.50  | 61247.6  |
| AHQ-6-8, 3284               | R.LYQQHGAAGLFDVTR.G                                                     | 1605.77881 | 2 | 3.97E-08 | 0.92  | 3.42   | -     | 1307.8   |
| gi 17986260 ref NP_524147.1 | smooth muscle and non-muscle myosin alkali light chain isoform 2 [Homo  |            |   | 4.03E-08 | 0.95  | 10.28  | 23.30 | 12969.7  |
| AHQ-6-14-, 5314             | K.M*TEEEVEM*LVAGHEDSNGCINYEELVR.M                                       | 3188.42436 | 3 | 4.03E-08 | 0.95  | 5.30   | -     | 1284.0   |
| AHQ-6-13-, 5296             | K.M*TEEEVEM*LVAGHEDSNGCINYEELVR.M                                       | 3188.42436 | 3 | 6.26E-06 | 0.95  | 5.51   | -     | 1254.0   |
| gi 4885183 ref NP_005210.1  | diaphanous 1; deafness, autosomal dominant 1; hDia1 [Homo sapiens] [MAS |            |   | 4.15E-08 | 5.10  | 60.25  | 7.00  | 138977.7 |
| AHQ-6-3, 4525               | R.LGLHQVLQDLR.E                                                         | 1292.51238 | 2 | 3.03E-05 | 0.76  | 2.94   | -     | 675.5    |
| AHQ-6-3, 2449               | K.LQDLQGEKDALHSEK.Q                                                     | 1711.85486 | 2 | 2.22E-05 | 0.74  | 3.00   | -     | 711.5    |
| AHQ-6-3, 4949 - 4950        | K.LVAEDLSQDCFWTK.V                                                      | 1713.88927 | 2 | 4.15E-08 | 0.95  | 5.10   | -     | 807.8    |
| AHQ-6-3, 5438               | K.QDLEAEVSLTGEVAK.L                                                     | 1717.85617 | 2 | 4.21E-04 | 0.79  | 2.97   | -     | 908.9    |
| AHQ-6-3, 5617               | K.TAQNLSIFLGSFR.M                                                       | 1454.65537 | 2 | 6.44E-04 | 0.89  | 2.95   | -     | 1159.7   |
| AHQ-6-3, 4750               | R.VQLNVDFEQGEEDSYDLK.G                                                  | 2129.22304 | 2 | 3.32E-05 | 0.96  | 4.62   | -     | 1351.1   |
| gi 12408656 ref NP_005177.2 | calpain 1, large subunit; calpain, large polypeptide L1; calcium-activ  |            |   | 4.34E-08 | 10.05 | 110.27 | 20.60 | 81889.4  |
| AHQ-6-6, 4955               | K.APSDYLQILK.A                                                          | 1261.49183 | 2 | 7.84E-08 | 0.94  | 3.67   | -     | 1111.5   |
| AHQ-6-6, 2931               | K.IRLDEDDPDDYGD.R.E                                                     | 1795.79921 | 2 | 2.55E-06 | 0.82  | 3.48   | -     | 619.2    |
| AHQ-6-6, 6180               | K.LGLVFENILWNR.I                                                        | 1474.73142 | 2 | 7.37E-06 | 0.89  | 3.32   | -     | 1066.8   |
| AHQ-6-6, 4611               | R.LPPGEYVVVPSTFEPNK.E                                                   | 1874.12573 | 2 | 1.61E-06 | 0.92  | 4.11   | -     | 766.4    |
| AHQ-6-6, 5558               | R.LPPGEYVVVPSTFEPNK.GDFVLR.F                                            | 2691.03055 | 3 | 5.07E-06 | 0.79  | 3.34   | -     | 639.2    |
| AHQ-6-6, 5446               | R.LPPGEYVVVPSTFEPNK.GDFVLR.F                                            | 2691.03055 | 3 | 3.21E-07 | 0.90  | 4.25   | -     | 712.5    |
| AHQ-6-6, 5986               | K.LVVFVHSAEGNEFWSALLEK.A                                                | 2177.44364 | 3 | 3.57E-04 | 0.60  | 3.73   | -     | 428.2    |
| AHQ-6-6, 5994               | K.LVVFVHSAEGNEFWSALLEK.A                                                | 2177.44364 | 2 | 1.41E-06 | 0.91  | 4.73   | -     | 554.4    |
| AHQ-6-6, 3902 - 3906        | K.LYELIIR.Y                                                             | 1021.23493 | 2 | 5.25E-04 | 0.97  | 3.86   | -     | 2079.8   |
| AHQ-6-6, 5015 - 5016        | R.NYPATFWVNPQFK.I                                                       | 1612.81141 | 2 | 2.79E-07 | 0.95  | 3.89   | -     | 1348.8   |
| AHQ-6-6, 4422               | K.RPTELLSNPQFIVDGATR.T                                                  | 2015.25904 | 3 | 4.45E-04 | 0.93  | 5.05   | -     | 944.6    |
| AHQ-6-6, 4414               | K.RPTELLSNPQFIVDGATR.T                                                  | 2015.25904 | 2 | 3.64E-05 | 0.91  | 4.67   | -     | 393.4    |
| AHQ-6-6, 3196               | R.SEQFINLR.E                                                            | 1007.12521 | 1 | 3.88E-04 | 0.28  | 2.16   | -     | 252.1    |
| AHQ-6-6, 3191               | R.SEQFINLR.E                                                            | 1007.12521 | 2 | 1.04E-04 | 0.92  | 3.38   | -     | 1115.3   |
| AHQ-6-6, 6486               | R.YSEPLAVDFDNFVCLVLR.L                                                  | 2322.55612 | 2 | 4.34E-08 | 0.94  | 4.61   | -     | 686.5    |
| gi 4885079 ref NP_005165.1  | ATP synthase, H+ transporting, mitochondrial F1 complex, gamma polypept |            |   | 4.52E-08 | 0.94  | 10.24  | 10.40 | 32880.7  |
| AHQ-6-9, 6159               | R.KPPTGDAISVIALELLNSGYFDEGSIFNK.F                                       | 3373.75299 | 3 | 4.52E-08 | 0.94  | 4.86   | -     | 1331.4   |
| gi 4507789 ref NP_003338.1  | ubiquitin-conjugating enzyme E2L 3 [Homo sapiens]                       |            |   | 4.52E-08 | 1.69  | 20.22  | 26.00 | 17861.5  |
| AHQ-6-12, 5007              | R.IEINFPAEYFPKPKP.K                                                     | 1791.08155 | 3 | 4.52E-08 | 0.93  | 4.34   | -     | 1246.0   |
| AHQ-6-12, 4995 - 5004       | R.IEINFPAEYFPKPKP.K                                                     | 17         |   |          |       |        |       |          |

|                             |                                                                         |            |   |          |      |       |       |          |
|-----------------------------|-------------------------------------------------------------------------|------------|---|----------|------|-------|-------|----------|
| AHQ-6-10, 4722              | K.AFSAVDTDNGTINAQELGALK.A                                               | 2264.43486 | 2 | 4.58E-08 | 0.77 | 3.70  | -     | 422.1    |
| gi 4504981 ref NP_002296.1  | beta-galactosidase binding lectin precursor; Lectin, galactose-binding, |            |   | 4.75E-08 | 0.95 | 10.23 | 11.90 | 14715.6  |
| AHQ-6-13-, 4738             | R.LNLEAINYM*AADGDFK.I                                                   | 1801.99824 | 2 | 4.75E-08 | 0.95 | 4.64  | -     | 957.5    |
| AHQ-6-13, 4861              | R.LNLEAINYM*AADGDFK.I                                                   | 1801.99824 | 2 | 9.34E-06 | 0.84 | 3.38  | -     | 704.4    |
| gi 5031595 ref NP_005709.1  | actin related protein 2/3 complex subunit 4; Arp2/3 protein complex sub |            |   | 5.05E-08 | 1.87 | 20.20 | 11.30 | 19666.9  |
| AHQ-6-12, 4328              | R.AENFILR.R                                                             | 1010.17070 | 2 | 2.05E-04 | 0.96 | 3.93  | -     | 1672.9   |
| AHQ-6-12, 3211 - 3272       | K.VLEIGSINSVR.V                                                         | 1187.37134 | 2 | 5.05E-08 | 0.92 | 3.85  | -     | 1003.0   |
| gi 7705501 ref NP_057546.1  | hypothetical protein HSPC194 [Homo sapiens]                             |            |   | 5.57E-08 | 0.94 | 10.19 | 15.20 | 11564.5  |
| AHQ-6-14-, 5635 - 5638      | K.FM*PAGLIAGASLLM*VAK.V                                                 | 1723.13705 | 2 | 5.57E-08 | 0.94 | 3.78  | -     | 1338.9   |
| gi 4507669 ref NP_003286.1  | tumor protein, translationally-controlled 1; fortilin; histamine-releas |            |   | 5.61E-08 | 0.89 | 10.16 | 8.10  | 19595.2  |
| AHQ-6-11, 4607              | R.DLISHDEMFSDIYK.I                                                      | 1713.88949 | 2 | 5.61E-08 | 0.89 | 3.28  | -     | 881.7    |
| gi 30148644 ref XP_293716.2 | similar to Heat shock protein HSP 90-alpha (HSP 86) [Homo sapiens] [MA  |            |   | 5.74E-08 | 0.93 | 10.18 | 1.20  | 105150.3 |
| AHQ-6-5, 4159 - 4167        | R.TLTVDTGIGMTK.A                                                        | 1350.60718 | 2 | 5.74E-08 | 0.93 | 3.61  | -     | 1132.7   |
| gi 15431310 ref NP_000517.2 | keratin 14; cytokeratin 14 [Homo sapiens]                               |            |   | 5.81E-08 | 4.46 | 50.22 | 17.20 | 51621.2  |
| AHQ-6-10, 2731 - 2808       | R.ALEENADLEVK.I                                                         | 1302.41284 | 2 | 7.96E-07 | 0.94 | 4.04  | -     | 1300.9   |
| AHQ-6-10, 2550              | R.APSTYGGGLSVSSSR.F                                                     | 1426.51406 | 2 | 5.81E-08 | 0.80 | 2.86  | -     | 621.3    |
| AHQ-6-10, 2666 - 2692       | K.ASLENSLEETK.G                                                         | 1221.29659 | 2 | 1.41E-06 | 0.87 | 3.28  | -     | 1084.9   |
| AHQ-6-1, 3915               | R.GQVGGDVNVEM*DAAPGVDSL.R.I                                             | 2103.25697 | 2 | 1.06E-05 | 0.92 | 4.03  | -     | 714.5    |
| AHQ-6-10, 3135              | R.LLEGEDAHLSSQFSSGSQSSR.D                                               | 2310.37735 | 2 | 1.54E-07 | 0.92 | 4.31  | -     | 667.0    |
| AHQ-6-8, 3102               | R.LLEGEDAHLSSQFSSGSQSSR.D                                               | 2310.37735 | 2 | 3.63E-05 | 0.70 | 3.73  | -     | 379.5    |
| gi 22027538 ref NP_037506.2 | programmed cell death 6 interacting protein; ALG-2 interacting protein  |            |   | 5.87E-08 | 1.73 | 20.18 | 3.90  | 96022.6  |
| AHQ-6-5, 3199               | K.FIQQTYPSGGEEQAQYCR.A                                                  | 2164.29714 | 2 | 2.74E-04 | 0.85 | 3.63  | -     | 402.1    |
| AHQ-6-5, 5031               | R.SVIEGGGIQTVDLQI.K.E                                                   | 1728.96847 | 2 | 5.87E-08 | 0.87 | 3.63  | -     | 1072.7   |
| gi 12025678 ref NP_004915.2 | actinin, alpha 4 [Homo sapiens]                                         |            |   | 5.91E-08 | 7.74 | 90.25 | 12.70 | 104853.3 |
| AHQ-6-4, 3539 - 3541        | R.DYETATLSDIK.A                                                         | 1256.34094 | 2 | 8.95E-04 | 0.96 | 3.58  | -     | 1754.5   |
| AHQ-6-4, 4583 - 4595        | R.ETTDDTDADQVIAFSK.V                                                    | 1742.81936 | 2 | 3.70E-07 | 0.96 | 4.42  | -     | 1463.1   |
| AHQ-6-4, 2317               | K.GISQEQM*QEFR.A                                                        | 1369.48598 | 2 | 1.42E-06 | 0.68 | 3.08  | -     | 861.5    |
| AHQ-6-4, 4321               | R.KDDPVTNLNNAFEVAEK.Y                                                   | 1905.05509 | 2 | 5.91E-08 | 0.96 | 5.09  | -     | 980.8    |
| AHQ-6-4, 3779               | R.KDDPVTNLNNAFEVAEK.Y                                                   | 1905.05509 | 2 | 7.39E-07 | 0.95 | 4.41  | -     | 1267.8   |
| AHQ-6-4, 3816 - 3885        | R.M*APYQGPDAVP*GALDYK.S                                                 | 1810.02037 | 2 | 2.88E-06 | 0.93 | 3.80  | -     | 1332.7   |
| AHQ-6-4, 4121               | K.MLDAEDIVNTARPEK.A                                                     | 1817.99924 | 2 | 2.25E-06 | 0.73 | 3.33  | -     | 630.1    |
| AHQ-6-4, 3769               | K.M*LDAAEDIVNTARPEK.A                                                   | 1833.99864 | 2 | 8.16E-05 | 0.85 | 3.99  | -     | 491.3    |
| AHQ-6-4, 6488               | R.SIVDYKPNLDLLEQQHQIQEALIFDNK.H                                         | 3326.74423 | 3 | 1.60E-04 | 0.85 | 3.69  | -     | 952.5    |
| AHQ-6-4, 6152               | R.VEQIAAIEQNELDYYDHSNVNTR.C                                             | 2907.09810 | 3 | 2.91E-06 | 0.82 | 3.89  | -     | 604.0    |
| gi 20127408 ref NP_000173.2 | hydroxylacyl dehydrogenase, subunit A; trifunctional protein, alpha sub |            |   | 6.14E-08 | 3.47 | 40.22 | 7.90  | 82999.1  |
| AHQ-6-6, 2676 - 2678        | K.DTSASAVAVGLK.Q                                                        | 1119.25064 | 2 | 7.94E-05 | 0.92 | 3.08  | -     | 1307.0   |
| AHQ-6-6, 3464 - 3539        | K.GFYIYQEGVK.R                                                          | 1204.35659 | 2 | 1.66E-05 | 0.81 | 2.64  | -     | 736.0    |
| AHQ-6-6, 3086               | K.TGIEQGSDAGYLCESQK.F                                                   | 1844.93497 | 2 | 6.14E-08 | 0.93 | 4.34  | -     | 825.9    |
| AHQ-6-6, 5666               | K.TVLGTEPVELLGLALPGAGGTQR.L                                             | 2008.30795 | 2 | 4.93E-04 | 0.82 | 3.53  | -     | 521.3    |
| gi 21614499 ref NP_003370.2 | villin 2; Villin-2; cytovillin [Homo sapiens]                           |            |   | 6.18E-08 | 1.81 | 20.23 | 1.90  | 69412.3  |
| AHQ-6-6, 4280 - 4282        | K.APDFVYAPR.L                                                           | 1183.33971 | 2 | 6.18E-08 | 0.97 | 4.54  | -     | 1531.7   |
| AHQ-6-6, 3795               | K.KAPDFVYAPR.L                                                          | 1311.51262 | 2 | 9.49E-07 | 0.84 | 3.11  | -     | 713.1    |
| gi 5453603 ref NP_006422.1  | chaperonin containing TCP1, subunit 2 (beta); chaperonin containing t-c |            |   | 6.27E-08 | 4.45 | 50.24 | 15.30 | 57487.9  |
| AHQ-6-7, 3067               | R.EALLSSAVDHGSDEVK.F                                                    | 1657.76083 | 2 | 6.27E-08 | 0.93 | 4.17  | -     | 1070.7   |
| AHQ-6-7, 3034 - 3111        | R.GATQQLDEAER.S                                                         | 1331.41427 | 2 | 3.47E-04 | 0.77 | 2.78  | -     | 941.6    |
| AHQ-6-7, 5600 - 5611        | K.LGGSLADSYLDEGLLDK.K                                                   | 1914.10189 | 2 | 5.06E-04 | 0.93 | 4.17  | -     | 997.9    |
| AHQ-6-7, 5246               | R.SLHDALCVLAQTVK.D                                                      | 1556.80920 | 2 | 1.61E-04 | 0.87 | 3.42  | -     | 885.3    |
| AHQ-6-7, 6170               | R.VQDDEVGGDTSVTVLAAELLR.E                                               | 2289.48263 | 2 | 1.88E-06 | 0.95 | 4.76  | -     | 980.8    |
| gi 21464101 ref NP_036611.2 | tyrosine 3-monooxygenase/tryptophan 5-monooxygenase activation protein  |            |   | 6.68E-08 | 0.92 | 10.23 | 5.70  | 28302.4  |
| AHQ-6-14-, 3096             | K.NVTLENEPLSNEER.N                                                      | 1644.72215 | 2 | 1.18E-05 | 0.95 | 4.50  | -     | 973.6    |
| AHQ-6-10, 2982              | K.NVTLENEPLSNEER.N                                                      | 1644.72215 | 2 | 6.68E-08 | 0.92 | 3.86  | -     | 797.5    |
| gi 14251209 ref NP_001279.2 | chloride intracellular channel 1; p64CLCP; chloride channel ABP [Homo   |            |   | 7.00E-08 | 2.96 | 40.27 | 25.30 | 26922.5  |
| AHQ-6-14-, 5443 - 5448      | R.EEFASTCPDDEIEELAYEQVAK.A                                              | 2575.69730 | 2 | 2.38E-07 | 0.79 | 3.41  | -     | 382.8    |
| AHQ-6-13-, 3464 - 3465      | K.GVTFNVTVDTK.R                                                         | 1282.42476 | 2 | 1.88E-06 | 0.92 | 3.84  | -     | 964.7    |
| AHQ-6-13, 3611              | K.GVTFNVTVDTK.R                                                         | 1282.42476 | 2 | 1.44E-07 | 0.95 | 4.05  | -     | 1186.7   |
| AHQ-6-13, 5232              | K.LAALNPESNTAGLDIFAK.F                                                  | 1846.07392 | 2 | 4.18E-05 | 0.94 | 4.36  | -     | 894.8    |
| AHQ-6-10, 5032              | K.LAALNPESNTAGLDIFAK.F                                                  | 1846.07392 | 2 | 2.32E-07 | 0.84 | 3.78  | -     | 448.0    |
| AHQ-6-13-, 5137             | K.LAALNPESNTAGLDIFAK.F                                                  | 1846.07392 | 2 | 2.27E-06 | 0.89 | 4.06  | -     | 568.3    |
| AHQ-6-13-, 5230             | K.LAALNPESNTAGLDIFAK.F                                                  | 1846.07392 | 2 | 7.00E-08 | 0.94 | 4.10  | -     | 941.8    |
| AHQ-6-14-, 5160 - 5218      | K.LAALNPESNTAGLDIFAK.F                                                  | 1846.07392 | 2 | 7.35E-04 | 0.92 | 4.12  | -     | 748.9    |
| AHQ-6-11, 5023 - 5024       | K.LAALNPESNTAGLDIFAK.F                                                  | 1846.07392 | 2 | 7.45E-04 | 0.96 | 5.46  | -     | 778.9    |
| AHQ-6-9, 2736               | K.LHIVQVCK.K                                                            | 1097.35623 | 1 | 9.95E-05 | 0.28 | 2.09  | -     | 356.2    |
| gi 4502303 ref NP_001688.1  | mitochondrial ATP synthase, O subunit; ATP synthase, H+ transporting, m |            |   | 7.02E-08 | 4.51 | 50.22 | 35.70 | 23277.2  |
| AHQ-6-11, 6139              | R.FSPLTTNLLLAENGR.L                                                     | 1874.13050 | 2 | 4.02E-06 | 0.87 | 3.18  | -     | 1087.7   |
| AHQ-6-11, 5208 - 5211       | R.GEVPCTVTSASPLEEATLSELK.T                                              | 2320.56689 | 2 | 1.65E-04 | 0.91 | 4.24  | -     | 656.2    |
| AHQ-6-11, 3627              | K.LVRRPVQYVIEGR.Y                                                       | 1583.85942 | 3 | 3.52E-05 | 0.95 | 4.34  | -     | 1709.7   |
| AHQ-6-11, 3576 - 3577       | K.TDPSILGGM*IVR.I                                                       | 1275.50037 | 2 | 3.60E-05 | 0.86 | 2.97  | -     | 864.2    |
| AHQ-6-11, 3311 - 3312       | K.VAASVLPYVYK.R                                                         | 1161.37549 | 2 | 7.02E-08 | 0.92 | 3.81  | -     | 701.6    |
| gi 6857820 ref NP_005019.2  | phosphatidylinositol-4-phosphate 5-kinase type II alpha; 1-phosphatidy  |            |   | 7.08E-08 | 0.98 | 10.25 | 4.20  | 46224.3  |
| AHQ-6-7, 2759               | K.HGAGAESTVNPEQYSK.R                                                    | 1788.89618 | 2 | 7.08E-08 | 0.98 | 4.93  | -     | 2201.6   |
| gi 13518026 ref NP_004978.2 | LIM and senescent cell antigen-like domains 1 [Homo sapiens]            |            |   | 7.42E-08 | 1.77 | 20.18 | 7.70  | 37251.2  |
| AHQ-6-11, 4336              | K.CHAIDEQPLIFK.N                                                        | 1585.84900 | 2 | 4.96E-04 | 0.83 | 3.38  | -     | 825.2    |
| AHQ-6-9, 3282               | R.VIEGDVVSALNK.A                                                        | 1244.41966 | 2 | 2.93E-04 | 0.87 | 3.01  | -     | 1022.4   |
| AHQ-6-12, 3507              | R.VIEGDVVSALNK.A                                                        | 1244.41966 | 2 | 1.00E-06 | 0.93 | 3.28  | -     | 1041.9   |
| AHQ-6-8, 3304               | R.VIEGDVVSALNK.A                                                        | 1244.41966 | 2 | 7.42E-08 | 0.94 | 3.55  | -     | 1092.7   |
| gi 6912638 ref NP_036557.1  | ras suppressor protein 1 [Homo sapiens]                                 |            |   | 7.98E-08 | 4.15 | 50.25 | 30.70 | 31540.1  |
| AHQ-6-10, 6182 - 6190       | K.AENNPVWVPIADQFQLGVSHVFEYR.S                                           | 3032.35678 | 3 | 2.67E-04 | 0.53 | 3.19  | -     | 542.1    |
| AHQ-6-12, 6311 - 6312       | K.AENNPVWVPIADQFQLGVSHVFEYR.S                                           | 3032.35678 | 3 | 1.18E-04 | 0.57 | 3.20  | -     | 306.9    |
| AHQ-6-10, 5571 - 5639       | R.ALYLSDNDFEILPPDIGK.L                                                  | 2021.25559 | 2 | 8.38E-04 | 0.90 | 4.34  | -     | 397.4    |
| AHQ-6-10, 6134 - 6135       | R.GISNM*LDVNGLFTLSHTQLVLSHNK.L                                          | 2869.28903 | 3 | 7.98E-08 | 0.92 | 4.51  | -     | 960.8    |
| AHQ-6-10, 5299              | K.LQILSLRDNDLISLPK.E                                                    | 1839.16919 | 2 | 5.75E-04 | 0.80 | 3.66  | -     | 930.7    |
| AHQ-6-10, 5208 - 5264       | R.LTVLPPELGNLDTGQK.Q                                                    | 1809.09672 | 2 | 7.79E-04 | 0.50 | 2.78  | -     | 401.1    |
| AHQ-6-10, 5352 - 5370       | R.LTVLPPELGNLDTGQK.Q                                                    | 1809.09672 | 3 | 9.74E-05 | 0.96 | 4.98  | -     | 1354.5   |
| AHQ-6-10, 5318 - 5374       | R.LTVLPPELGNLDTGQK.Q                                                    | 1809.09672 | 2 | 6.61E-04 | 0.84 | 3.32  | -     | 586.1    |
| AHQ-6-13-, 5569 - 5637      | R.LTVLPPELGNLDTGQK.Q                                                    | 1809.09672 | 2 | 2.72E-04 | 0.76 | 2.96  | -     | 344.8    |
| gi 5453605 ref NP_006421.1  | chaperonin containing TCP1, subunit 4 (delta); chaperonin containing t- |            |   | 8.09E-08 | 1.66 | 20.25 | 5.90  | 57838.8  |
| AHQ-6-7, 5879               | R.DALSDLAHFLNKM.M                                                       | 1457.65603 | 2 | 8.09E-08 | 0.98 | 4.91  | -     | 2448.4   |
| AHQ-6-7, 5675               | K.LGGTIDDCELVEGLVLTQK.V                                                 | 2062.32762 | 2 | 7.83E-05 | 0.68 | 3.39  | -     | 499.8    |
| gi 4557321 ref NP_000030.1  | apolipoprotein A-I precursor [Homo sapiens]                             |            |   | 8.36E-08 | 2.70 | 30.18 | 15.70 | 30777.6  |
| AHQ-6-11, 5508 - 5511       | R.EQLGPVTQEFWDNLEK.E                                                    | 1934.09489 | 2 | 2.04E-06 | 0.86 | 3.69  | -     | 511.4    |
| AHQ-6-13-, 5033             | K.LLDNWDVSTTFSK.L                                                       | 1613.74965 | 2 | 3.42E-05 | 0.83 | 3.30  | -     | 621.4    |
| AHQ-6-14-, 5030 - 5036      | K.LLDNWDVSTTFSK.L                                                       | 1613.74965 | 2 | 5.55E-06 | 0.89 | 3.62  | -     | 857.4    |
| AHQ-6-11, 5711              | K.VSFLSALEEYTK.K                                                        | 1387.55934 | 2 | 8.36E-08 | 0.95 | 3.68  | -     | 1289.5   |
| AHQ-6-10, 5662              | K.VSFLSALEEYTK.K                                                        | 1387.55934 | 2 | 4.93E-06 | 0.93 | 3.59  | -     | 977.4    |
| gi 4505877 ref NP_000436.1  | plectin 1, intermediate filament binding protein 500kDa; plectin 1, int |            |   | 8.39E-08 | 3.51 | 40.23 | 1.30  | 518488.0 |
| AHQ-6-3, 4924 - 5001        | R.APVPASELLASGLVSR.A                                                    | 1567.81193 | 2 | 2.06E-04 | 0.91 | 3.78  | -     | 914.1    |
| AHQ-6-3, 3228               | K.AYSDPSTGEPATYGELQQR.C                                                 | 2071.14682 | 2 | 1.03E-06 | 0.93 | 4.67  | -     | 595.6    |
| AHQ-6-1, 4280               | R.SIQEELQQLR.Q                                                          | 1244.37976 | 2 | 5.21E-06 | 0.81 | 3.12  | -     | 1153.0   |
| AHQ-6-2, 4983               | K.VQSGSESIVQEVYDLR.T                                                    | 1809.95530 | 2 | 8.39E-08 | 0.87 | 3.31  | -     | 894.0    |
| gi 4503971 ref NP_001484.1  | GDP dissociation inhibitor 1; mental retardation, X-linked 41; mental r |            |   | 8.61E-08 | 2.75 | 30.25 | 14.50 | 50582.4  |
| AHQ-6-7, 4935               | R.NPYVGGESSITPLEELYK.R                                                  | 2148.31110 | 2 | 3.35E-07 | 0.96 | 4.95  | -     | 960.8    |
| AHQ-6-7, 3991               | R.TDDYLDQPCLETVNR.I                                                     | 1840.94632 | 2 | 5.20E-06 | 0.90 | 3.64  | -     | 685.6    |
| AHQ-6-6, 6296               | K.YIAIATTVTETDPEKEVEPALELLEPIDQK.F                                      | 3444.82460 | 3 | 8.61     |      |       |       |          |

|                             |                                                                         |            |   |          |      |       |      |         |
|-----------------------------|-------------------------------------------------------------------------|------------|---|----------|------|-------|------|---------|
| AHQ-6-4, 4549               | R.GQHVPSPFPQFTVGPLGEGGAHK.V                                             | 2305.53673 | 3 | 2.30E-05 | 0.78 | 4.17  | -    | 390.0   |
| AHQ-6-4, 4556 - 4565        | R.GQHVPSPFPQFTVGPLGEGGAHK.V                                             | 2305.53673 | 2 | 2.10E-05 | 0.94 | 5.32  | -    | 426.9   |
| AHQ-6-7, 4263               | R.GQHVPSPFPQFTVGPLGEGGAHK.V                                             | 2305.53673 | 3 | 2.83E-05 | 0.67 | 3.08  | -    | 449.6   |
| AHQ-6-5, 4463               | R.GQHVPSPFPQFTVGPLGEGGAHK.V                                             | 2305.53673 | 2 | 8.82E-08 | 0.92 | 4.53  | -    | 487.8   |
| AHQ-6-3, 2030               | K.IECDDKGGSDCDV.R.Y                                                     | 1628.67809 | 2 | 7.57E-06 | 0.84 | 3.44  | -    | 734.2   |
| AHQ-6-2, 1931 - 2006        | K.IECDDKGGSDCDV.R.Y                                                     | 1628.67809 | 2 | 7.88E-05 | 0.43 | 2.65  | -    | 350.9   |
| AHQ-6-3, 2121 - 2198        | K.NDNDTFTV.K.Y                                                          | 1054.09237 | 1 | 1.20E-04 | 0.38 | 2.11  | -    | 300.2   |
| gi 27498332 ref XP_212565.1 | similar to tubulin, beta 5 [Homo sapiens]                               |            |   |          |      |       |      |         |
| AHQ-6-7, 3258               | R.IM*NTFSVSPK.V                                                         | 1336.58217 | 2 | 2.76E-05 | 0.85 | 3.26  | -    | 742.1   |
| AHQ-6-7, 5826 - 5838        | K.M*AVTFIGNSTAIQELFK.R                                                  | 1887.18942 | 2 | 5.89E-06 | 0.90 | 4.10  | -    | 739.7   |
| AHQ-6-7, 6040 - 6074        | K.M*AVTFIGNSTAIQELFK.R                                                  | 1887.18942 | 2 | 2.53E-04 | 0.91 | 3.57  | -    | 728.6   |
| AHQ-6-7, 6131 - 6136        | K.MAVTFIGNSTAIQELFK.R                                                   | 1871.19002 | 2 | 2.06E-05 | 0.74 | 3.28  | -    | 718.4   |
| AHQ-6-14-, 5956 - 5968      | K.M*AVTFIGNSTAIQELFK.R                                                  | 1887.18942 | 2 | 2.40E-06 | 0.95 | 4.26  | -    | 1290.0  |
| AHQ-6-11, 5979 - 6044       | K.M*AVTFIGNSTAIQELFK.R                                                  | 1887.18942 | 2 | 5.75E-05 | 0.63 | 3.21  | -    | 385.8   |
| AHQ-6-13, 6047              | K.M*AVTFIGNSTAIQELFK.R                                                  | 1887.18942 | 2 | 9.03E-08 | 0.96 | 5.20  | -    | 1076.5  |
| AHQ-6-13, 6205 - 6220       | K.M*AVTFIGNSTAIQELFK.R                                                  | 1887.18942 | 2 | 5.70E-05 | 0.86 | 4.07  | -    | 549.8   |
| AHQ-6-13-, 5905 - 5982      | K.M*AVTFIGNSTAIQELFK.R                                                  | 1887.18942 | 2 | 5.00E-04 | 0.94 | 4.63  | -    | 937.5   |
| AHQ-6-13-, 6128 - 6189      | K.M*AVTFIGNSTAIQELFK.R                                                  | 1887.18942 | 2 | 3.60E-04 | 0.94 | 4.21  | -    | 924.2   |
| AHQ-6-13-, 6160             | K.M*AVTFIGNSTAIQELFK.R                                                  | 1887.18942 | 2 | 9.86E-05 | 0.95 | 3.99  | -    | 1312.0  |
| AHQ-6-14-, 6140 - 6198      | K.M*AVTFIGNSTAIQELFK.R                                                  | 1887.18942 | 2 | 7.15E-07 | 0.95 | 5.21  | -    | 738.5   |
| AHQ-6-11, 4287              | R.YLTVAAV.F.G                                                           | 1040.23994 | 2 | 2.83E-05 | 0.77 | 2.62  | -    | 627.2   |
| gi 4503725 ref NP_000792.1  | FK506-binding protein 1A; FK506-binding protein 1; FK506-binding protei |            |   |          |      |       |      |         |
| AHQ-6-13-, 3084             | R.GWEEGVAQM*SVGQR.A                                                     | 1550.67866 | 2 | 2.20E-05 | 0.92 | 3.66  | -    | 962.6   |
| AHQ-6-13-, 3868 - 3869      | R.GWEEGVAQM*SVGQR.A                                                     | 1534.67926 | 2 | 9.26E-08 | 0.89 | 3.57  | -    | 1249.1  |
| AHQ-6-14-, 3034             | R.GWEEGVAQM*SVGQR.A                                                     | 1550.67866 | 2 | 1.07E-06 | 0.94 | 3.96  | -    | 1078.6  |
| AHQ-6-14-, 3844 - 3846      | R.GWEEGVAQM*SVGQR.A                                                     | 1534.67926 | 2 | 5.12E-05 | 0.96 | 4.99  | -    | 1222.3  |
| AHQ-6-13, 3231 - 3243       | R.GWEEGVAQM*SVGQR.A                                                     | 1550.67866 | 2 | 1.68E-04 | 0.96 | 4.64  | -    | 1114.4  |
| gi 24430192 ref NP_005548.2 | keratin 16; keratin, type I cytoskeletal 16; cytokeratin 16 [Homo sapi  |            |   |          |      |       |      |         |
| AHQ-6-10, 4132              | R.DAETWFLSK.T                                                           | 1097.20199 | 1 | 2.39E-04 | 0.67 | 2.60  | -    | 490.0   |
| AHQ-6-10, 4128              | R.DAETWFLSK.T                                                           | 1097.20199 | 2 | 2.72E-05 | 0.82 | 2.95  | -    | 819.4   |
| AHQ-6-1, 3688               | R.GQTGGDVNVEM*DAAPGVDSL.R.I                                             | 2105.22972 | 2 | 1.96E-04 | 0.85 | 4.29  | -    | 565.9   |
| AHQ-6-10, 3347              | R.GQTGGDVNVEM*DAAPGVDSL.R.I                                             | 2105.22972 | 2 | 8.58E-04 | 0.67 | 3.15  | -    | 444.1   |
| AHQ-6-1, 5171               | K.IIAATIENAQPIQLQIDNAR.L                                                | 2065.35950 | 3 | 6.58E-04 | 0.98 | 5.41  | -    | 2143.6  |
| AHQ-6-1, 5167               | K.IIAATIENAQPIQLQIDNAR.L                                                | 2065.35950 | 2 | 1.39E-04 | 0.88 | 4.31  | -    | 522.8   |
| AHQ-6-10, 4732              | K.IIAATIENAQPIQLQIDNAR.L                                                | 2065.35950 | 2 | 2.71E-05 | 0.96 | 5.91  | -    | 916.5   |
| AHQ-6-10, 6018 - 6082       | R.TDLEM*QIEGLKEELAYLR.K                                                 | 2168.45360 | 3 | 3.96E-05 | 0.89 | 3.67  | -    | 1071.7  |
| AHQ-6-10, 2246              | R.TKYEHLA.L.R.Q                                                         | 1260.42402 | 2 | 1.07E-07 | 0.80 | 2.97  | -    | 649.7   |
| gi 4505989 ref NP_000299.1  | protective protein for beta-galactosidase; Protective protein for beta- |            |   |          |      |       |      |         |
| AHQ-6-12, 3517 - 3597       | K.YGDSGQIAGFV.K.E                                                       | 1371.47686 | 2 | 1.14E-07 | 0.97 | 10.22 | 2.70 | 54495.8 |
| gi 4759082 ref NP_004648.1  | serum deprivation response protein; serum deprivation response; phospho |            |   |          |      |       |      |         |
| AHQ-6-13-, 5932 - 5937      | R.DNSQVNAVTVLTLDDK.L                                                    | 1730.94122 | 2 | 1.62E-04 | 0.97 | 5.09  | -    | 1630.7  |
| AHQ-6-13, 5985              | R.DNSQVNAVTVLTLDDK.L                                                    | 1730.94122 | 2 | 2.55E-04 | 0.87 | 3.23  | -    | 738.2   |
| AHQ-6-11, 5693 - 5747       | R.DNSQVNAVTVLTLDDK.L                                                    | 1730.94122 | 2 | 5.14E-04 | 0.60 | 3.00  | -    | 389.5   |
| AHQ-6-14-, 5927             | R.DNSQVNAVTVLTLDDK.L                                                    | 1730.94122 | 2 | 1.05E-04 | 0.95 | 4.35  | -    | 1317.6  |
| AHQ-6-12, 3613              | K.LVNMLDAVQENQHK.M                                                      | 1639.85851 | 2 | 4.35E-04 | 0.89 | 3.42  | -    | 890.7   |
| AHQ-6-9, 5414 - 5472        | K.VLIFQEENEIPASVFK.Q                                                    | 1963.26241 | 2 | 3.87E-06 | 0.93 | 4.68  | -    | 736.0   |
| AHQ-6-8, 5722               | K.VLIFQEENEIPASVFK.Q                                                    | 1963.26241 | 2 | 2.02E-05 | 0.94 | 4.68  | -    | 630.1   |
| AHQ-6-6, 5774 - 5775        | K.VLIFQEENEIPASVFK.Q                                                    | 1963.26241 | 2 | 1.17E-07 | 0.95 | 4.52  | -    | 1066.1  |
| gi 5802966 ref NP_006861.1  | destrin (actin depolymerizing factor); destrin [Homo sapiens]           |            |   |          |      |       |      |         |
| AHQ-6-12, 3423              | K.AVIFCLSDADK.C                                                         | 1253.49298 | 2 | 3.97E-07 | 0.80 | 2.72  | -    | 787.5   |
| AHQ-6-12, 3719 - 3723       | R.YALYDASFETK.E                                                         | 1308.41754 | 2 | 1.19E-07 | 0.93 | 3.58  | -    | 959.6   |
| gi 10863927 ref NP_066953.1 | peptidylprolyl isomerase A (cyclophilin A) [Homo sapiens]               |            |   |          |      |       |      |         |
| AHQ-6-12, 3876 - 3935       | K.FEDENFILK.H                                                           | 1155.28144 | 2 | 2.88E-04 | 0.78 | 3.35  | -    | 527.1   |
| AHQ-6-13, 4115              | K.FEDENFILK.H                                                           | 1155.28144 | 2 | 2.47E-04 | 0.73 | 3.07  | -    | 524.3   |
| AHQ-6-12, 4417 - 4475       | K.SIYGKFEFENFILK.H                                                      | 1833.03047 | 2 | 1.64E-05 | 0.82 | 3.40  | -    | 793.4   |
| AHQ-6-13, 4704              | K.SIYGKFEFENFILK.H                                                      | 1833.03047 | 2 | 1.21E-07 | 0.79 | 3.45  | -    | 445.0   |
| AHQ-6-12, 4511              | K.SIYGKFEFENFILK.H                                                      | 1833.03047 | 2 | 1.21E-07 | 0.96 | 5.05  | -    | 1187.6  |
| AHQ-6-13-, 4584             | K.SIYGKFEFENFILK.H                                                      | 1833.03047 | 2 | 6.66E-06 | 0.95 | 4.72  | -    | 1122.3  |
| AHQ-6-14-, 4591             | K.SIYGKFEFENFILK.H                                                      | 1833.03047 | 2 | 4.23E-07 | 0.95 | 5.06  | -    | 979.5   |
| AHQ-6-12, 3681              | K.VKEGMNIVEAMER.F                                                       | 1506.77390 | 2 | 2.09E-04 | 0.93 | 4.13  | -    | 1086.7  |
| AHQ-6-12, 3073              | K.VKEGMNIVEAMER.F                                                       | 1522.77330 | 2 | 3.35E-04 | 0.80 | 2.91  | -    | 738.4   |
| AHQ-6-12, 2639              | K.VKEGMNIVEAM*ER.F                                                      | 1522.77330 | 2 | 7.78E-06 | 0.90 | 4.05  | -    | 1125.6  |
| AHQ-6-12, 3691              | K.VKEGMNIVEAMER.F                                                       | 1506.77390 | 3 | 2.74E-05 | 0.74 | 3.82  | -    | 870.0   |
| AHQ-6-13-, 4429             | R.VSFLFADK.V                                                            | 1056.19300 | 2 | 1.13E-04 | 0.87 | 3.21  | -    | 862.8   |
| AHQ-6-12, 4337              | R.VSFLFADK.V                                                            | 1056.19300 | 2 | 7.55E-05 | 0.78 | 2.98  | -    | 841.3   |
| AHQ-6-12, 4447              | R.VSFLFADKVPK.T                                                         | 1380.61317 | 2 | 3.66E-04 | 0.85 | 3.62  | -    | 770.2   |
| AHQ-6-12, 4456              | R.VSFLFADKVPK.T                                                         | 1380.61317 | 3 | 6.71E-07 | 0.57 | 3.38  | -    | 326.7   |
| gi 4507295 ref NP_003560.1  | synixin 7 [Homo sapiens]                                                |            |   |          |      |       |      |         |
| AHQ-6-13, 4893              | R.LVAEFTSLTNFQK.V                                                       | 1599.80925 | 2 | 1.24E-07 | 0.70 | 10.16 | 5.40 | 29845.3 |
| gi 4507767 ref NP_003326.1  | ubiquitin-activating enzyme E1-like; Ubiquitin-activating enzyme-2; ubi |            |   |          |      |       |      |         |
| AHQ-6-4, 4656               | R.VDGVAAALDSFQAR.R                                                      | 1420.55265 | 2 | 1.27E-07 | 0.97 | 4.30  | -    | 2084.3  |
| AHQ-6-4, 4303 - 4317        | K.VLEDGTFPFWSGPK.Q                                                      | 1433.58980 | 2 | 9.55E-05 | 0.61 | 2.88  | -    | 476.3   |
| AHQ-6-4, 4552               | R.VLVSLQLGLGAEVAK.N                                                     | 1441.69805 | 2 | 1.78E-06 | 0.85 | 2.77  | -    | 1235.6  |
| gi 14165439 ref NP_002131.2 | heterogeneous nuclear ribonucleoprotein K isoform a; dC-stretch bindin  |            |   |          |      |       |      |         |
| AHQ-6-7, 4760               | R.GSYGLDGLGPIITTVTPK.D                                                  | 1918.18004 | 2 | 1.29E-07 | 0.89 | 3.84  | -    | 818.8   |
| gi 4507509 ref NP_003245.1  | tissue inhibitor of metalloproteinase 1 precursor; Erythroid-potentiat  |            |   |          |      |       |      |         |
| AHQ-6-10, 3599              | K.GFQALGDAADIR.F                                                        | 1234.34342 | 2 | 1.37E-07 | 0.96 | 3.74  | -    | 2117.9  |
| gi 5729875 ref NP_006658.1  | progesterone receptor membrane component 1; progesterone binding protei |            |   |          |      |       |      |         |
| AHQ-6-11, 2905              | R.GDQPAASGSDSDDEPPPLP.R.L                                               | 2037.04410 | 2 | 1.46E-06 | 0.91 | 3.67  | -    | 872.7   |
| AHQ-6-11, 3984              | R.KFYGPPEPGYGFAGR.D                                                     | 1645.84140 | 2 | 1.58E-07 | 0.90 | 3.63  | -    | 957.7   |
| gi 5031573 ref NP_005712.1  | ARP3 actin-related protein 3 homolog; ARP3 (actin-related protein 3, ye |            |   |          |      |       |      |         |
| AHQ-6-8, 2889 - 2892        | R.DREVGIPEQSLQLETA.K.A                                                  | 1769.93431 | 2 | 5.34E-04 | 0.96 | 4.56  | -    | 918.4   |
| AHQ-6-8, 3300               | K.DYEEIIPGICR.H                                                         | 1340.44122 | 2 | 6.66E-05 | 0.84 | 2.97  | -    | 803.7   |
| AHQ-6-13, 3657              | K.DYEEIIPGICR.H                                                         | 1340.44122 | 2 | 2.04E-05 | 0.79 | 2.75  | -    | 503.8   |
| AHQ-6-13-, 3506             | K.DYEEIIPGICR.H                                                         | 1340.44122 | 2 | 2.75E-05 | 0.93 | 3.63  | -    | 1015.2  |
| AHQ-6-7, 6382               | R.FLGPPIFFHPEFANPDTQPISEWVDEIQNCPI.DV.R                                 | 4319.79733 | 3 | 7.54E-05 | 0.65 | 3.36  | -    | 596.1   |
| AHQ-6-8, 4150               | R.HGIVEDWDLMER.F                                                        | 1500.66127 | 2 | 2.24E-06 | 0.96 | 3.46  | -    | 1887.3  |
| AHQ-6-13, 3768              | R.LPACVVDGCTGYTK.L                                                      | 1543.74421 | 2 | 2.37E-04 | 0.41 | 2.59  | -    | 587.5   |
| AHQ-6-8, 3410               | R.LPACVVDGCTGYTK.L                                                      | 1543.74421 | 2 | 4.50E-04 | 0.47 | 2.81  | -    | 560.0   |
| AHQ-6-8, 3837               | K.NIVLSGGSTMFR.D                                                        | 1282.49663 | 2 | 1.67E-07 | 0.90 | 3.28  | -    | 1376.6  |
| AHQ-6-8, 5877 - 5956        | R.TLTGTVISDGGVTHVIPAEGYVIGSCIK.H                                        | 3061.45302 | 3 | 1.71E-04 | 0.88 | 4.40  | -    | 734.5   |
| AHQ-6-8, 3501 - 3505        | R.YSYVCPDLVK.E                                                          | 1245.42618 | 2 | 3.19E-05 | 0.73 | 2.94  | -    | 522.5   |
| gi 5454152 ref NP_006285.1  | ubiquinol-cytochrome c reductase binding protein [Homo sapiens]         |            |   |          |      |       |      |         |
| AHQ-6-13, 3671              | R.DDTIYEDVKEAIR.R                                                       | 1811.88169 | 2 | 3.14E-06 | 0.75 | 3.07  | -    | 630.1   |
| AHQ-6-13-, 5025             | K.YEEENFYLEPYLK.E                                                       | 1737.88601 | 2 | 8.04E-06 | 0.97 | 4.63  | -    | 1844.1  |
| AHQ-6-13, 5127              | K.YEEENFYLEPYLK.E                                                       | 1737.88601 | 2 | 1.78E-07 | 0.97 | 5.46  | -    | 1579.1  |
| gi 7705849 ref NP_057215.1  | ras-related GTP-binding protein RAB10; ras-related GTP-binding protein  |            |   |          |      |       |      |         |
| AHQ-6-14-, 6087             | K.AFLTLAEDILR.K                                                         | 1262.47982 | 2 | 4.43E-06 | 0.96 | 3.80  | -    | 1841.3  |
| AHQ-6-11, 5907              | K.AFLTLAEDILR.K                                                         | 1262.47982 | 2 | 1.50E-05 | 0.88 | 3.31  | -    | 1022.7  |
| AHQ-6-13, 6183              | K.AFLTLAEDILR.K                                                         | 1262.47982 | 2 | 1.83E-07 | 0.92 | 2.91  | -    | 1375.3  |
| AHQ-6-10, 5864              | K.AFLTLAEDILR.K                                                         | 1262.47982 | 2 | 8.72E-06 | 0.95 | 3.01  | -    | 2074.4  |
| AHQ-6-11, 1937 - 2008       | R.NIDEHANEDVER.M                                                        | 1441.44245 | 2 | 3.37E-04 | 0.76 | 2.89  | -    | 738.4   |
| gi 4507651 ref NP_003281.1  | tropomyosin 4 [Homo sapiens]                                            |            |   |          |      |       |      |         |
| AHQ-6-9, 3792               | R.AEVSELKCGDLEELK.N                                                     | 1851.02256 | 2 | 3.88E-05 | 0.84 | 3.11  | -    | 856.5   |
| AHQ-6-9, 2525 - 2600        | K.IQALQQQAEDAEDR.A                                                      | 1615.68404 | 2 | 1.29E-05 | 0.97 | 4.72  | -    | 1593.7  |
| AHQ-6-10, 2595              | K.IQALQQQAEDAEDR.A                                                      | 1615.68404 | 2 | 1.67E-04 | 0.79 | 2.78  | -    | 817.9   |
| AHQ-6-11, 2628              | K.IQALQQQAEDAEDR.A                                                      | 1615.68404 | 2 | 4.74E-07 | 0.90 | 3.43  | -    | 1124.5  |

|                            |                                                                          |            |   |          |      |       |       |         |
|----------------------------|--------------------------------------------------------------------------|------------|---|----------|------|-------|-------|---------|
| AHQ-6-11, 2477             | R.KIQALQQQADEAEDR.A                                                      | 1743.85695 | 2 | 1.70E-05 | 0.89 | 3.71  | -     | 1160.2  |
| AHQ-6-10, 2432             | R.KIQALQQQADEAEDR.A                                                      | 1743.85695 | 2 | 9.45E-06 | 0.94 | 4.35  | -     | 1281.9  |
| AHQ-6-12, 2515             | R.KIQALQQQADEAEDR.A                                                      | 1743.85695 | 2 | 1.86E-07 | 0.94 | 4.22  | -     | 1416.9  |
| AHQ-6-9, 2112 - 2180       | K.YSEKEDKYEEIK.L                                                         | 1690.78605 | 2 | 1.80E-04 | 0.92 | 3.72  | -     | 1159.8  |
| gi4504515 ref NP_002146.1  | heat shock 70kDa protein 6 (HSP70B); heat shock 70kDa protein 6 (HSP70B) |            |   |          |      |       |       |         |
| AHQ-6-6, 4855 - 4859       | R.ARFEELCSDLFR.S                                                         | 1544.71384 | 2 | 1.62E-05 | 0.93 | 3.86  | -     | 973.3   |
| AHQ-6-6, 4718              | R.INEPATAAAYGLDR.R                                                       | 1688.90603 | 2 | 3.36E-04 | 0.93 | 3.95  | -     | 903.4   |
| AHQ-6-11, 3388             | R.TTPSYVAFTDTER.L                                                        | 1488.58062 | 2 | 1.94E-07 | 0.77 | 2.51  | -     | 748.9   |
| AHQ-6-6, 3255              | R.TTPSYVAFTDTER.L                                                        | 1488.58062 | 2 | 1.91E-06 | 0.70 | 2.55  | -     | 658.3   |
| gi4507149 ref NP_000445.1  | superoxide dismutase 1, soluble (amyotrophic lateral sclerosis 1 (adult  |            |   |          |      |       |       |         |
| AHQ-6-12, 4257             | K.GDGPVQGIINFQK.E                                                        | 1502.65366 | 2 | 2.01E-07 | 0.81 | 3.31  | -     | 616.1   |
| AHQ-6-11, 4188             | K.GDGPVQGIINFQK.E                                                        | 1502.65366 | 2 | 2.80E-04 | 0.75 | 3.29  | -     | 500.0   |
| gi4557385 ref NP_000055.1  | complement component 3 precursor; acylation-stimulating protein cleavag  |            |   |          |      |       |       |         |
| AHQ-6-6, 5655 - 5735       | K.EYVLPSEFVIVPEK.F                                                       | 1880.12704 | 2 | 7.62E-05 | 0.89 | 3.96  | -     | 848.1   |
| AHQ-6-6, 3564              | R.IPIEDGSGEVLSR.K                                                        | 1471.63788 | 2 | 5.20E-07 | 0.92 | 3.44  | -     | 1039.5  |
| AHQ-6-4, 5647              | K.VFSLAVNLIADISQVLCGAVK.W                                                | 2219.62984 | 2 | 6.27E-04 | 0.71 | 3.21  | -     | 793.3   |
| AHQ-6-6, 4399              | R.VPVAVQGEDTVQSLTQGDGVAK.L                                               | 2199.40432 | 2 | 2.10E-07 | 0.96 | 5.29  | -     | 997.2   |
| gi7706675 ref NP_057861.1  | RAB6B, member RAS oncogene family; small GTPase RAB6B [Homo sapiens] [M  |            |   |          |      |       |       |         |
| AHQ-6-11, 4531             | R.GSDVIIMLVGNK.T                                                         | 1246.50220 | 2 | 2.14E-07 | 0.97 | 4.49  | -     | 2111.2  |
| AHQ-6-11, 3132             | R.VASALPGMENVQEK.S                                                       | 1473.67727 | 2 | 1.07E-04 | 0.58 | 2.52  | -     | 279.7   |
| gi19923457 ref NP_057447.2 | glycoprotein VI (platelet); platelet glycoprotein VI [Homo sapiens] [M   |            |   |          |      |       |       |         |
| AHQ-6-7, 4003 - 4020       | R.ASFPIITVTAHSGTYR.C                                                     | 1793.01594 | 2 | 2.24E-07 | 0.69 | 2.95  | -     | 629.0   |
| AHQ-6-7, 5219              | K.PSLQALPSSLVPLEKPVTLR.C                                                 | 2146.55880 | 3 | 7.30E-07 | 0.91 | 4.25  | -     | 1024.3  |
| AHQ-6-7, 4539              | R.YGDFQFALYK.E                                                           | 1252.39881 | 2 | 2.63E-07 | 0.90 | 3.12  | -     | 882.0   |
| gi30150022 ref XP_300862.1 | similar to beta-tubulin 4Q [Homo sapiens]                                |            |   |          |      |       |       |         |
| AHQ-6-8, 3209 - 3265       | R.FPQGLNADLR.K                                                           | 1131.26634 | 2 | 1.38E-04 | 0.87 | 3.04  | -     | 809.7   |
| AHQ-6-13-, 3458            | R.FPQGLNADLR.K                                                           | 1131.26634 | 2 | 2.25E-07 | 0.67 | 2.60  | -     | 709.1   |
| AHQ-6-7, 3238 - 3304       | R.FPQGLNADLR.K                                                           | 1131.26634 | 2 | 3.11E-05 | 0.82 | 2.70  | -     | 831.0   |
| AHQ-6-11, 3916             | R.KLAVNMVFPFR.L                                                          | 1272.58771 | 2 | 3.27E-04 | 0.59 | 2.63  | -     | 558.1   |
| AHQ-6-10, 4219             | K.LAVNMVFPFR.L                                                           | 1144.41480 | 2 | 9.27E-05 | 0.61 | 2.59  | -     | 412.5   |
| AHQ-6-10, 4663             | R.LHFFM*PGFAPLTSR.G                                                      | 1637.92902 | 2 | 1.77E-04 | 0.82 | 3.01  | -     | 658.5   |
| AHQ-6-9, 4580              | R.LHFFM*PGFAPLTSR.G                                                      | 1637.92902 | 2 | 3.49E-04 | 0.84 | 3.00  | -     | 722.8   |
| gi22547186 ref NP_004160.3 | serine hydroxymethyltransferase 1 (soluble) isoform 1; cytoplasmic ser   |            |   |          |      |       |       |         |
| AHQ-6-7, 4019              | K.VNPDITVYNDQLEENAR.L                                                    | 2112.19894 | 2 | 2.48E-07 | 0.71 | 3.06  | -     | 480.2   |
| gi14149680 ref NP_056107.1 | KIAA0747 protein [Homo sapiens]                                          |            |   |          |      |       |       |         |
| AHQ-6-4, 5835              | R.ALTGALTLPLAR.L                                                         | 1310.61075 | 2 | 1.10E-06 | 0.92 | 3.53  | -     | 1096.3  |
| AHQ-6-4, 4916              | R.FFLQDPQSQELDVQVK.D                                                     | 1922.12725 | 2 | 3.36E-06 | 0.68 | 2.96  | -     | 606.3   |
| AHQ-6-12, 3949             | R.LTHVDSPLAEPAGPLGGQVK.L                                                 | 1930.19405 | 2 | 2.59E-07 | 0.95 | 3.96  | -     | 1280.0  |
| AHQ-6-12, 4300             | K.VQLDLAETDLSQGVAR.W                                                     | 1715.88665 | 2 | 9.77E-05 | 0.89 | 4.12  | -     | 635.3   |
| gi21361478 ref NP_055944.2 | septin 6 isoform B; septin 2 [Homo sapiens]                              |            |   |          |      |       |       |         |
| AHQ-6-7, 3750              | K.FEGEPATHQPGVQLQSNYDLQESNVR.L                                           | 3147.31508 | 3 | 2.67E-07 | 0.95 | 5.85  | -     | 1108.8  |
| gi8922712 ref NP_060713.1  | hypothetical protein FLJ10849 [Homo sapiens]                             |            |   |          |      |       |       |         |
| AHQ-6-7, 3432 - 3440       | K.DTDPDSKPFSLQETYEAK.R                                                   | 2072.17149 | 2 | 2.76E-07 | 0.51 | 2.95  | -     | 246.8   |
| gi19923483 ref NP_057406.2 | GTPase Rab14 [Homo sapiens]                                              |            |   |          |      |       |       |         |
| AHQ-6-11, 3705 - 3708      | R.GAAGALM*VYDITR.R                                                       | 1354.55759 | 2 | 2.52E-05 | 0.95 | 4.13  | -     | 1113.2  |
| AHQ-6-11, 4791 - 4795      | R.NLTPNNTVILIGNK.A                                                       | 1624.90662 | 2 | 2.90E-07 | 0.91 | 4.16  | -     | 560.8   |
| AHQ-6-10, 3238             | K.SCLLHQFTEK.K                                                           | 1264.43272 | 2 | 6.94E-04 | 0.79 | 2.51  | -     | 1073.5  |
| AHQ-6-14-, 4427 - 4499     | K.TGENVEDAFLEAAK.K                                                       | 1494.58517 | 2 | 3.21E-04 | 0.55 | 3.25  | -     | 459.5   |
| AHQ-6-10, 4262             | K.TGENVEDAFLEAAK.K                                                       | 1494.58517 | 2 | 3.50E-05 | 0.66 | 2.84  | -     | 663.5   |
| gi4507951 ref NP_003396.1  | tyrosine 3/tryptophan 5-monoxygenase activation protein, eta polypept    |            |   |          |      |       |       |         |
| AHQ-6-10, 2902 - 2959      | K.AVTELNEPLSNEDR.N                                                       | 1587.67060 | 2 | 2.92E-07 | 0.92 | 4.64  | -     | 690.4   |
| AHQ-6-13, 3208 - 3209      | K.AVTELNEPLSNEDR.N                                                       | 1587.67060 | 2 | 1.31E-04 | 0.93 | 3.85  | -     | 934.3   |
| AHQ-6-10, 2376             | K.KNSVVEASEAAYK.E                                                        | 1396.52786 | 2 | 4.76E-04 | 0.89 | 3.13  | -     | 981.4   |
| AHQ-6-10, 2207             | R.YLAEVASGEK.K                                                           | 1067.17419 | 1 | 1.79E-05 | 0.19 | 2.01  | -     | 533.9   |
| gi10863873 ref NP_000651.1 | transforming growth factor, beta 1 (Camurati-Engelmann disease); trans   |            |   |          |      |       |       |         |
| AHQ-6-13-, 3362            | R.ALDTNYCFSSTEK.N                                                        | 1537.63010 | 2 | 2.95E-07 | 0.89 | 3.64  | -     | 708.1   |
| AHQ-6-13, 3519             | R.ALDTNYCFSSTEK.N                                                        | 1537.63010 | 2 | 1.02E-05 | 0.81 | 3.33  | -     | 501.8   |
| AHQ-6-13-, 2686 - 2748     | K.VEQLSNM*IVR.S                                                          | 1205.41014 | 2 | 9.31E-04 | 0.75 | 3.09  | -     | 641.0   |
| AHQ-6-13, 3713             | K.VEQLSNM*IVR.S                                                          | 1189.41074 | 2 | 6.44E-06 | 0.95 | 3.84  | -     | 1447.2  |
| gi16933567 ref NP_005361.2 | mel transforming oncogene; ras-associated protein RAB8 [Homo sapiens]    |            |   |          |      |       |       |         |
| AHQ-6-14-, 5632            | K.ANINVENAFFTLAR.D                                                       | 1580.76926 | 2 | 3.59E-07 | 0.77 | 3.07  | -     | 590.1   |
| AHQ-6-11, 5403 - 5471      | K.ANINVENAFFTLAR.D                                                       | 1580.76926 | 2 | 2.98E-07 | 0.96 | 4.41  | -     | 1523.2  |
| gi4757886 ref NP_004330.1  | pituitary tumor-transforming protein 1-interacting protein precursor; c  |            |   |          |      |       |       |         |
| AHQ-6-11, 5235             | K.ACLDYPYTVSLPPASLCK.L                                                   | 1994.31817 | 2 | 3.00E-07 | 0.68 | 3.33  | -     | 308.4   |
| gi30149221 ref XP_291446.2 | similar to Heat shock cognate 71 kDa protein [Homo sapiens]              |            |   |          |      |       |       |         |
| AHQ-6-7, 2406              | R.STAGDTHLGGEDFDNR.M                                                     | 1692.68222 | 2 | 1.06E-05 | 0.80 | 3.27  | -     | 648.2   |
| AHQ-6-6, 2498              | R.STAGDTHLGGEDFDNR.M                                                     | 1692.68222 | 2 | 3.03E-07 | 0.95 | 4.43  | -     | 1366.1  |
| gi4504351 ref NP_000510.1  | delta globin [Homo sapiens]                                              |            |   |          |      |       |       |         |
| AHQ-6-13, 4873             | R.FFESFGDLSPPDAVM*GNPK.V                                                 | 2062.24491 | 2 | 1.65E-04 | 0.82 | 3.43  | -     | 523.3   |
| AHQ-6-13-, 3194            | K.VNVDAVGGALGR.L                                                         | 1257.37853 | 2 | 3.11E-07 | 0.97 | 4.85  | -     | 1906.4  |
| gi5802974 ref NP_006784.1  | peroxiredoxin 3; antioxidant protein 1; thioredoxin-dependent peroxide   |            |   |          |      |       |       |         |
| AHQ-6-11, 4353 - 4417      | K.AFYVYVTEHGVCPANWTPDPTIKPSPAASK.E                                       | 3388.70790 | 3 | 3.18E-05 | 0.90 | 4.82  | -     | 517.0   |
| AHQ-6-11, 5045             | R.DYGVLLGSGGLALR.G                                                       | 1463.66058 | 2 | 2.04E-06 | 0.96 | 4.08  | -     | 1846.7  |
| AHQ-6-10, 4982             | R.DYGVLLGSGGLALR.G                                                       | 1463.66058 | 2 | 3.14E-07 | 0.95 | 3.68  | -     | 1511.0  |
| AHQ-6-11, 5268             | R.GLFIIDPNVVIK.H                                                         | 1286.54452 | 2 | 3.70E-04 | 0.80 | 3.45  | -     | 700.3   |
| gi4885063 ref NP_005156.1  | aldolase C, fructose-bisphosphate; Aldolase C, fructose-bisphosphatase   |            |   |          |      |       |       |         |
| AHQ-6-9, 4059 - 4119       | K.GVVPLAGTDGETTQGLDGLSER.C                                               | 2274.42806 | 2 | 9.39E-06 | 0.44 | 2.98  | -     | 327.0   |
| AHQ-6-8, 4264 - 4334       | K.GVVPLAGTDGETTQGLDGLSER.C                                               | 2274.42806 | 2 | 3.31E-07 | 0.80 | 4.63  | -     | 592.4   |
| gi4505621 ref NP_002558.1  | prostatic binding protein; phosphatidylethanolamine binding protein [Ho  |            |   |          |      |       |       |         |
| AHQ-6-11, 4696 - 4701      | R.APVAGTCYQAEWDDYVPK.L                                                   | 2072.23961 | 2 | 3.55E-07 | 0.96 | 5.00  | -     | 1375.3  |
| AHQ-6-11, 4180             | K.GNDISSGTVLSDYVYVGGPPK.G                                                | 1951.08062 | 2 | 1.29E-06 | 0.95 | 4.22  | -     | 1197.7  |
| gi5803225 ref NP_006752.1  | tyrosine 3/tryptophan 5-monoxygenase activation protein, epsilon poly    |            |   |          |      |       |       |         |
| AHQ-6-13-, 6144 - 6222     | K.AAFDDAIAELDTLSEESYK.D                                                  | 2089.19882 | 2 | 9.74E-05 | 0.94 | 4.72  | -     | 895.3   |
| AHQ-6-9, 6223              | K.AAFDDAIAELDTLSEESYKDTLIM*QLLR.D                                        | 3276.61426 | 3 | 3.79E-07 | 0.74 | 3.77  | -     | 556.4   |
| gi4507645 ref NP_000356.1  | triosephosphate isomerase 1 [Homo sapiens]                               |            |   |          |      |       |       |         |
| AHQ-6-10, 3680             | K.DCGATVWVLGHSE.R                                                        | 1588.72671 | 2 | 3.81E-07 | 3.50 | 40.27 | 31.30 | 26669.3 |
| AHQ-6-10, 6006 - 6063      | K.ELASQPDVDGFLVGGASLKPFEVDIINAK.Q                                        | 3031.40532 | 3 | 8.34E-06 | 0.74 | 3.57  | -     | 244.9   |
| AHQ-6-10, 4218             | R.KQSLGELIGTLNAAK.V                                                      | 1543.79037 | 2 | 4.39E-04 | 0.96 | 3.60  | -     | 2200.9  |
| AHQ-6-10, 5066 - 5139      | K.VPADTEVVCAPTAYIDFAR.Q                                                  | 2194.44943 | 2 | 2.74E-04 | 0.96 | 5.44  | -     | 663.8   |
| gi5031839 ref NP_005545.1  | keratin 6A; Keratin-6A; keratin, epidermal type II, K6A; cytokeratin 6A  |            |   |          |      |       |       |         |
| AHQ-6-10, 4854 - 4860      | K.ADTLTDIENFLR.A                                                         | 1408.53864 | 2 | 4.98E-07 | 0.86 | 3.42  | -     | 898.5   |
| AHQ-6-1, 5274 - 5275       | K.ADTLTDIENFLR.A                                                         | 1408.53864 | 2 | 4.13E-07 | 0.92 | 4.07  | -     | 1100.4  |
| AHQ-6-10, 3112 - 3116      | R.TAAENFVTLK.K                                                           | 1223.35732 | 2 | 1.92E-04 | 0.87 | 3.32  | -     | 1007.6  |
| gi4507869 ref NP_003361.1  | vasodilator-stimulated phosphoprotein [Homo sapiens]                     |            |   |          |      |       |       |         |
| AHQ-6-8, 5781              | K.VKEEIEAFVQLR.K                                                         | 1703.96061 | 2 | 4.14E-07 | 0.95 | 4.36  | -     | 1443.6  |
| AHQ-6-13-, 2978            | R.VQIYHNPANSFR.V                                                         | 1547.69936 | 2 | 4.43E-04 | 0.90 | 3.69  | -     | 788.8   |
| gi6598233 ref NP_001485.2  | GDP dissociation inhibitor 2; rab GDP-dissociation inhibitor, beta [Hom  |            |   |          |      |       |       |         |
| AHQ-6-8, 4941              | R.NPYYGESASITPLEDLYK.R                                                   | 2118.28499 | 2 | 4.24E-07 | 0.96 | 4.75  | -     | 50662.9 |
| AHQ-6-8, 6217              | K.SPYLYPLGLGELPQGFAR.L                                                   | 2142.44089 | 2 | 6.41E-04 | 0.86 | 3.78  | -     | 451.6   |
| AHQ-6-7, 6118              | K.SPYLYPLGLGELPQGFAR.L                                                   | 2142.44089 | 2 | 6.90E-05 | 0.95 | 4.61  | -     | 937.8   |
| AHQ-6-8, 3828              | R.TDDYLDQPCYETINR.I                                                      | 1904.98887 | 2 | 1.37E-06 | 0.83 | 3.94  | -     | 341.7   |
| gi20357529 ref NP_005264.2 | guanine nucleotide-binding protein, beta-2 subunit; G protein, beta-2    |            |   |          |      |       |       |         |
| AHQ-6-9, 4527              | R.KACGDSTLTQITAGLDPVGR.I                                                 | 2062.29094 | 2 | 4.25E-07 | 0.83 | 3.61  | -     | 669.7   |
| gi25188179 ref NP_005653.3 | voltage-dependent anion channel 3 [Homo sapiens]                         |            |   |          |      |       |       |         |
| AHQ-6-11, 4747 - 4752      | K.LTLDTIFVPNTGK.K                                                        | 1419.64771 | 2 | 3.30E-05 | 0.63 | 2.66  | -     | 521.7   |
| AHQ-6-10, 4294             | K.VNNASLIGLGYTQTLRPGVK.L                                                 | 2102.42298 | 2 | 3.29E-05 | 0.59 | 2.88  | -     | 468.5   |
| AHQ-6-10, 4198             | K.VNNASLIGLGYTQTLRPGVK.L                                                 | 2102.42298 | 2 | 4.65E-07 | 0.85 | 3.69  | -     | 575.4   |

|                             |                                                                         |            |   |          |      |       |       |          |
|-----------------------------|-------------------------------------------------------------------------|------------|---|----------|------|-------|-------|----------|
| AHQ-6-10, 3700              | K.YKVCNYGLTFTQK.W                                                       | 1623.85410 | 2 | 2.65E-05 | 0.94 | 3.92  | -     | 1056.3   |
| gi 29732955 ref XP_291603.1 | similar to glyceraldehyde 3-phosphate dehydrogenase [Homo sapiens] [MA  |            |   | 4.80E-07 | 0.38 | 10.20 | 16.80 | 11173.0  |
| AHQ-6-9, 3839 - 3906        | K.NISNASCTTNCIAPLAK.M                                                   | 1838.05353 | 2 | 2.40E-06 | 0.83 | 3.96  | -     | 1065.9   |
| AHQ-6-9, 3967 - 3972        | K.NISNASCTTNCIAPLAK.M                                                   | 1838.05353 | 2 | 2.32E-05 | 0.89 | 3.60  | -     | 1482.6   |
| AHQ-6-10, 3826              | K.NISNASCTTNCIAPLAK.M                                                   | 1838.05353 | 2 | 4.80E-07 | 0.38 | 2.75  | -     | 550.0    |
| AHQ-6-11, 4049              | K.NISNASCTTNCIAPLAK.M                                                   | 1838.05353 | 2 | 8.48E-04 | 0.73 | 3.30  | -     | 963.4    |
| AHQ-6-9, 3594 - 3662        | K.NISNASCTTNCIAPLAK.M                                                   | 1838.05353 | 2 | 6.66E-05 | 0.62 | 3.17  | -     | 836.8    |
| gi 4504071 ref NP_000164.1  | platelet glycoprotein Ib alpha polypeptide precursor [Homo sapiens] [MA |            |   | 4.84E-07 | 4.47 | 50.20 | 10.70 | 68955.0  |
| AHQ-6-3, 3920               | K.AMTSNVAVSQCDNSDKFPVYK.Y                                               | 2363.60999 | 2 | 3.19E-06 | 0.76 | 2.63  | -     | 711.0    |
| AHQ-6-4, 3793               | K.AMTSNVAVSQCDNSDKFPVYK.Y                                               | 2363.60999 | 2 | 3.65E-06 | 0.87 | 3.81  | -     | 595.2    |
| AHQ-6-4, 4865 - 4873        | R.GLGELQELYLK.G                                                         | 1263.46458 | 1 | 8.70E-04 | 0.23 | 2.34  | -     | 422.1    |
| AHQ-6-3, 4828               | R.GLGELQELYLK.G                                                         | 1263.46458 | 2 | 2.06E-05 | 0.93 | 3.90  | -     | 1235.1   |
| AHQ-6-1, 4967               | R.GLGELQELYLK.G                                                         | 1263.46458 | 2 | 2.55E-05 | 0.93 | 3.90  | -     | 1166.2   |
| AHQ-6-13, 4049 - 4050       | R.GQDLLSTVSIR.Y                                                         | 1189.34410 | 2 | 2.61E-06 | 0.96 | 3.77  | -     | 1807.5   |
| AHQ-6-3, 4068               | R.GQDLLSTVSIR.Y                                                         | 1189.34410 | 2 | 2.43E-04 | 0.89 | 3.15  | -     | 969.8    |
| AHQ-6-13, 4167 - 4187       | R.GQDLLSTVSIR.Y                                                         | 1189.34410 | 2 | 4.84E-07 | 0.94 | 3.28  | -     | 1621.1   |
| AHQ-6-1, 4244               | R.GQDLLSTVSIR.Y                                                         | 1189.34410 | 2 | 9.20E-06 | 0.95 | 3.62  | -     | 1356.0   |
| AHQ-6-12, 2240 - 2317       | R.GVLQGHLESSL.N                                                         | 1183.29965 | 2 | 5.68E-05 | 0.62 | 2.64  | -     | 502.0    |
| AHQ-6-3, 2229 - 2306        | R.GVLQGHLESSL.N                                                         | 1183.29965 | 2 | 8.23E-06 | 0.92 | 3.14  | -     | 1101.7   |
| AHQ-6-4, 2185               | R.GVLQGHLESSL.N                                                         | 1183.29965 | 2 | 4.80E-05 | 0.80 | 2.86  | -     | 754.9    |
| AHQ-6-3, 4880               | R.WLQDNAENVVYVWK.Q                                                      | 1665.82948 | 2 | 6.25E-06 | 0.92 | 3.68  | -     | 1192.2   |
| gi 8922673 ref NP_060692.1  | parvin, alpha; alpha-parvin; actopaxin [Homo sapiens]                   |            |   | 4.90E-07 | 0.96 | 10.23 | 3.50  | 42243.4  |
| AHQ-6-9, 4234 - 4292        | R.DAFDITFDHAPDK.L                                                       | 1492.57096 | 2 | 4.90E-07 | 0.96 | 4.64  | -     | 1462.1   |
| gi 4826657 ref NP_004333.1  | caldesmon 1 isoform 3; H-CAD; L-CAD [Homo sapiens]                      |            |   | 5.18E-07 | 1.74 | 20.21 | 5.80  | 62662.9  |
| AHQ-6-6, 2812 - 2890        | R.LEQYTSIAIEGTS.S                                                       | 1340.46107 | 2 | 6.58E-04 | 0.84 | 3.00  | -     | 1018.0   |
| AHQ-6-7, 3566               | K.TTTTNTQVEGDDEAAFLER.L                                                 | 2099.15534 | 2 | 3.49E-04 | 0.57 | 2.74  | -     | 300.6    |
| AHQ-6-6, 3663               | K.TTTTNTQVEGDDEAAFLER.L                                                 | 2099.15534 | 2 | 5.18E-07 | 0.90 | 4.11  | -     | 739.1    |
| gi 29727371 ref XP_298144.1 | hypothetical protein XP_298144 [Homo sapiens]                           |            |   | 5.20E-07 | 0.78 | 10.15 | 8.00  | 22108.6  |
| AHQ-6-4, 6069               | K.GEYNLTLDLTALTSNLK.T                                                   | 1753.93165 | 2 | 5.20E-07 | 0.78 | 2.94  | -     | 907.8    |
| AHQ-6-3, 5997               | K.GEYNLTLDLTALTSNLK.T                                                   | 1753.93165 | 2 | 2.07E-04 | 0.65 | 2.59  | -     | 774.9    |
| gi 4506045 ref NP_002718.1  | proteoglycan 1, secretory granule; Proteoglycan 1, secretory granule (p |            |   | 5.31E-07 | 1.77 | 20.17 | 10.10 | 17623.6  |
| AHQ-6-2, 4028               | K.GPM*FELLPGESNK.I                                                      | 1435.62747 | 2 | 9.05E-06 | 0.89 | 3.41  | -     | 903.3    |
| AHQ-6-1, 4163               | K.GPM*FELLPGESNK.I                                                      | 1435.62747 | 2 | 6.29E-05 | 0.79 | 2.94  | -     | 667.3    |
| AHQ-6-1, 4492               | K.GPM*FELLPGESNKIPR.L                                                   | 1802.08775 | 3 | 5.31E-07 | 0.88 | 3.43  | -     | 1018.1   |
| gi 4505667 ref NP_001074.1  | phosphodiesterase 5A isoform 1; cGMP-binding cGMP-specific 3',5'-cyclic |            |   | 5.35E-07 | 0.85 | 10.15 | 1.10  | 100012.4 |
| AHQ-6-5, 3749               | K.VIGVQQLVNM.K                                                          | 1131.37098 | 2 | 5.35E-07 | 0.85 | 3.09  | -     | 491.3    |
| gi 4505813 ref NP_003737.1  | cytoplasmic dynein light polypeptide; dynein, cytoplasmic, light chain  |            |   | 5.75E-07 | 1.46 | 20.15 | 37.10 | 10365.8  |
| AHQ-6-14, 4504              | K.NADM*SEEM*QQDSVECATQALEK.Y                                            | 2548.67874 | 2 | 2.32E-05 | 0.78 | 3.07  | -     | 576.8    |
| AHQ-6-14, 3603 - 3610       | K.YNPTWHICVGR.N                                                         | 1404.57820 | 2 | 5.75E-07 | 0.67 | 2.54  | -     | 633.6    |
| gi 24497612 ref NP_116262.2 | nm23-phosphorylated unknown substrate; SH3 domain-containing 70 kDa pr  |            |   | 5.77E-07 | 0.94 | 10.18 | 1.80  | 72695.6  |
| AHQ-6-6, 6110               | K.LGDDWVATIFSR.D                                                        | 1426.62208 | 2 | 5.77E-07 | 0.94 | 3.60  | -     | 1226.4   |
| gi 4758644 ref NP_004511.1  | kinesin heavy chain member 2; Kinesin, heavy chain, 2 [Homo sapiens] [M |            |   | 5.87E-07 | 0.91 | 10.22 | 2.40  | 76926.6  |
| AHQ-6-6, 4151               | R.FDYAFDSSAPNEM*VYR.F                                                   | 1957.06565 | 2 | 5.87E-07 | 0.91 | 4.32  | -     | 529.5    |
| gi 10346135 ref NP_055083.1 | microtubule-associated protein, RP/EB family, member 2; T-cell activat  |            |   | 5.96E-07 | 0.56 | 10.26 | 6.10  | 37031.1  |
| AHQ-6-12, 4715              | K.SDKDLETQVILNEQVHSLK.L                                                 | 2325.56134 | 3 | 5.96E-07 | 0.56 | 3.08  | -     | 544.3    |
| AHQ-6-9, 4510 - 4511        | K.SDKDLETQVILNEQVHSLK.L                                                 | 2325.56134 | 3 | 1.29E-06 | 0.94 | 5.14  | -     | 1038.6   |
| gi 5901922 ref NP_008996.1  | CDC37 homolog [Homo sapiens]                                            |            |   | 5.99E-07 | 0.93 | 10.24 | 5.60  | 44468.0  |
| AHQ-6-8, 6104               | R.LGPGGLDPVEVYESLPEELQK.C                                               | 2270.52091 | 2 | 5.99E-07 | 0.93 | 4.82  | -     | 536.5    |
| gi 4503291 ref NP_001346.1  | D-dopachrome tautomerase [Homo sapiens]                                 |            |   | 6.10E-07 | 1.79 | 20.19 | 22.90 | 12711.7  |
| AHQ-6-14, 5383 - 5410       | R.FFPLESHWQIGK.I                                                        | 1352.56151 | 2 | 6.10E-07 | 0.88 | 3.29  | -     | 680.2    |
| AHQ-6-14, 3556              | K.RLCAAASILGPKADR.V                                                     | 1671.94666 | 3 | 1.03E-05 | 0.91 | 3.89  | -     | 1475.4   |
| gi 4505591 ref NP_002565.1  | peroxiredoxin 1; natural killer-enhancing factor A; proliferation-assoc |            |   | 6.35E-07 | 4.36 | 50.21 | 30.70 | 22110.2  |
| AHQ-6-11, 3831              | R.GLFIDDK.G                                                             | 921.07223  | 2 | 5.94E-05 | 0.85 | 2.92  | -     | 987.4    |
| AHQ-6-11, 3167              | K.HGEVCPAGWKPGSDTIKPDVQK.S                                              | 2308.67532 | 3 | 4.11E-04 | 0.90 | 4.12  | -     | 1180.5   |
| AHQ-6-11, 3603 - 3607       | R.LVQAFQFTDK.H                                                          | 1197.36469 | 2 | 6.35E-07 | 0.92 | 3.48  | -     | 995.0    |
| AHQ-6-11, 3412 - 3467       | R.QITVNDLPVGR.S                                                         | 1212.38090 | 2 | 1.58E-04 | 0.87 | 3.82  | -     | 547.7    |
| AHQ-6-11, 3155 - 3212       | R.TIAQDYGVLK.A                                                          | 1108.26945 | 2 | 1.16E-04 | 0.82 | 2.97  | -     | 607.4    |
| gi 5803227 ref NP_006817.1  | tyrosine 3/tryptophan 5-monoxygenase activation protein, theta polype   |            |   | 6.47E-07 | 1.77 | 20.20 | 12.70 | 27764.1  |
| AHQ-6-10, 6004              | K.TAFDEAIELDTLNEDSYK.D                                                  | 2146.25037 | 2 | 6.47E-07 | 0.83 | 3.14  | -     | 817.3    |
| AHQ-6-10, 2667 - 2742       | K.YLIANATNPESK.V                                                        | 1321.46099 | 2 | 2.51E-04 | 0.94 | 3.95  | -     | 1515.8   |
| gi 4503743 ref NP_002009.1  | flightless 1 homolog [Homo sapiens]                                     |            |   | 6.60E-07 | 1.74 | 20.16 | 1.70  | 144750.1 |
| AHQ-6-3, 5337               | K.ADLTALFLPR.Q                                                          | 1117.32271 | 2 | 1.67E-05 | 0.90 | 2.97  | -     | 1413.2   |
| AHQ-6-3, 5041               | R.VPECLYTLPSLR.R                                                        | 1449.69710 | 2 | 6.60E-07 | 0.84 | 3.08  | -     | 754.3    |
| gi 4504073 ref NP_000398.1  | glycoprotein Ib beta polypeptide precursor [Homo sapiens]               |            |   | 6.84E-07 | 2.61 | 30.20 | 15.50 | 21717.6  |
| AHQ-6-1, 4780 - 4788        | R.LLPLYLAEDDEL.A                                                        | 1332.52691 | 2 | 2.88E-06 | 0.89 | 3.04  | -     | 594.7    |
| AHQ-6-3, 4658               | R.LLPLYLAEDDEL.A                                                        | 1332.52691 | 2 | 1.50E-06 | 0.83 | 2.76  | -     | 603.6    |
| AHQ-6-5, 4567               | R.LLPLYLAEDDEL.A                                                        | 1332.52691 | 2 | 2.70E-06 | 0.78 | 2.55  | -     | 465.9    |
| AHQ-6-6, 4522               | R.LLPLYLAEDDEL.A                                                        | 1332.52691 | 2 | 4.69E-06 | 0.86 | 2.94  | -     | 700.6    |
| AHQ-6-8, 4384               | R.LLPLYLAEDDEL.A                                                        | 1332.52691 | 2 | 4.89E-05 | 0.90 | 2.82  | -     | 660.0    |
| AHQ-6-10, 4327 - 4328       | R.LLPLYLAEDDEL.A                                                        | 1332.52691 | 2 | 1.21E-06 | 0.84 | 3.04  | -     | 518.5    |
| AHQ-6-10, 4338 - 4342       | R.LLPLYLAEDDEL.A                                                        | 1332.52691 | 1 | 3.86E-04 | 0.35 | 2.70  | -     | 205.6    |
| AHQ-6-13, 4556 - 4566       | R.LLPLYLAEDDEL.A                                                        | 1332.52691 | 2 | 1.26E-05 | 0.84 | 2.73  | -     | 568.4    |
| AHQ-6-13, 4676 - 4693       | R.LLPLYLAEDDEL.A                                                        | 1332.52691 | 2 | 3.91E-05 | 0.86 | 3.02  | -     | 676.1    |
| AHQ-6-12, 4492 - 4493       | R.LLPLYLAEDDEL.A                                                        | 1332.52691 | 2 | 2.58E-04 | 0.52 | 2.72  | -     | 319.5    |
| AHQ-6-11, 4399 - 4421       | R.LLPLYLAEDDEL.A                                                        | 1332.52691 | 2 | 4.04E-06 | 0.84 | 3.08  | -     | 563.7    |
| AHQ-6-11, 4104              | R.LSLTDPLVAER.A                                                         | 1214.39356 | 2 | 1.80E-04 | 0.95 | 3.65  | -     | 1597.4   |
| AHQ-6-11, 4123              | R.LSLTDPLVAER.A                                                         | 1214.39356 | 2 | 6.84E-07 | 0.96 | 3.97  | -     | 1621.0   |
| AHQ-6-11, 2463 - 2480       | R.TAHLGANPWR.C                                                          | 1123.24913 | 2 | 5.49E-05 | 0.81 | 2.82  | -     | 680.9    |
| gi 4759140 ref NP_004243.1  | solute carrier family 9 (sodium/hydrogen exchanger), isoform 3 regulato |            |   | 6.90E-07 | 0.87 | 10.18 | 3.90  | 38868.2  |
| AHQ-6-13, 3776              | R.LLVDPDETDEQLQK.L                                                      | 1627.81777 | 2 | 7.80E-07 | 0.91 | 3.32  | -     | 811.6    |
| AHQ-6-13, 3865 - 3908       | R.LLVDPDETDEQLQK.L                                                      | 1627.81777 | 2 | 6.90E-07 | 0.87 | 3.53  | -     | 663.9    |
| gi 22042381 ref XP_065237.3 | similar to FKSG30 [Homo sapiens]                                        |            |   | 7.43E-07 | 1.31 | 20.16 | 8.30  | 42016.0  |
| AHQ-6-14, 2447 - 2520       | K.QEYDESGPSIVHR.K                                                       | 1517.58206 | 2 | 2.01E-05 | 0.46 | 2.58  | -     | 270.4    |
| AHQ-6-13, 2497 - 2506       | K.QEYDESGPSIVHR.K                                                       | 1517.58206 | 2 | 3.05E-05 | 0.75 | 3.07  | -     | 433.9    |
| AHQ-6-8, 2283 - 2342        | K.QEYDESGPSIVHR.K                                                       | 1517.58206 | 2 | 7.43E-07 | 0.63 | 2.81  | -     | 357.3    |
| AHQ-6-9, 3563 - 3635        | R.VAPEEHPILLTEAPLNPK.A                                                  | 1969.27019 | 2 | 1.81E-04 | 0.29 | 2.53  | -     | 351.3    |
| AHQ-6-8, 3592 - 3656        | R.VAPEEHPILLTEAPLNPK.A                                                  | 1969.27019 | 2 | 8.49E-06 | 0.68 | 3.15  | -     | 367.4    |
| gi 4757996 ref NP_004060.1  | adaptor-related protein complex 2, sigma 1 subunit isoform AP17; clathr |            |   | 7.65E-07 | 0.94 | 10.21 | 10.60 | 17017.6  |
| AHQ-6-13, 5090              | K.VYTVVDEM*FLAGEIR.E                                                    | 1759.01650 | 2 | 7.65E-07 | 0.94 | 4.19  | -     | 1250.6   |
| gi 5453549 ref NP_006397.1  | thioredoxin peroxidase; thioredoxin peroxidase (antioxidant enzyme) [Ho |            |   | 8.26E-07 | 2.82 | 30.21 | 18.50 | 30539.7  |
| AHQ-6-10, 3580 - 3586       | K.DYGVYLEDGHTLR.G                                                       | 1625.72052 | 2 | 1.42E-06 | 0.96 | 3.89  | -     | 1522.4   |
| AHQ-6-10, 3958 - 3967       | K.HGEVCPAGWKPGSETIPDPAGK.L                                              | 2405.67144 | 3 | 1.37E-05 | 0.93 | 4.18  | -     | 1298.6   |
| AHQ-6-10, 4680 - 4699       | R.LPLSLDLTHQISK.D                                                       | 1465.71961 | 2 | 8.26E-07 | 0.94 | 3.60  | -     | 1287.7   |
| gi 30147623 ref XP_293669.2 | similar to actinin, alpha 4 [Homo sapiens]                              |            |   | 8.28E-07 | 0.93 | 10.23 | 3.50  | 57794.4  |
| AHQ-6-4, 3980 - 4035        | K.LSGSNPYTTVPIIINSK.W                                                   | 1921.14079 | 2 | 8.28E-07 | 0.93 | 4.63  | -     | 663.0    |
| gi 5031937 ref NP_005822.1  | nuclear domain 10 protein [Homo sapiens]                                |            |   | 8.60E-07 | 0.22 | 10.15 | 6.10  | 52253.6  |
| AHQ-6-11, 4389 - 4433       | R.EYTFMWWTLPIDLNKSAKQEVQFK.A                                            | 3322.77755 | 3 | 8.60E-07 | 0.22 | 3.05  | -     | 250.6    |
| gi 4505735 ref NP_002611.1  | platelet factor 4 variant 1; Platelet factor 4, variant 1 (PF4-like) [H |            |   | 8.62E-07 | 0.97 | 10.25 | 14.40 | 11552.6  |
| AHQ-6-14, 3670              | R.AEAEDGDQLQCLVK.T                                                      | 1739.86036 | 2 | 3.56E-04 | 0.93 | 3.78  | -     | 1229.2   |
| AHQ-6-14, 3751 - 3810       | R.AEAEDGDQLQCLVK.T                                                      | 1739.86036 | 2 | 8.62E-07 | 0.97 | 4.98  | -     | 1666.4   |
| AHQ-6-14, 4462              | R.AEAEDGDQLQCLVK.T                                                      | 1739.86036 | 2 | 1.76E-05 | 0.92 | 3.72  | -     | 803.6    |
| gi 4557032 ref NP_002291.1  | lactate dehydrogenase B [Homo sapiens]                                  |            |   | 8.79E-07 | 4.29 | 50.22 | 25.70 | 36638.3  |
| AHQ-6-9, 6101 - 6111        | K.GM*YGIENEVFLSLPCILNAR.G                                               | 2314.66682 | 2 | 3.39E-06 | 0.66 | 2.80  |       |          |

|                             |                                                                         |            |   |          |      |       |       |          |
|-----------------------------|-------------------------------------------------------------------------|------------|---|----------|------|-------|-------|----------|
| AHQ-6-13, 6255              | K.SLADELALVDVLEDK.L                                                     | 1630.81843 | 2 | 6.97E-04 | 0.95 | 4.17  | -     | 1321.7   |
| gi 5174393 ref NP_006001.1  | arginine-rich, mutated in early stage tumors; arginine-rich protein [Ho |            |   | 8.97E-07 | 0.97 | 10.26 | 7.30  | 26906.2  |
| AHQ-6-12, 5313 - 5316       | K.DRDVTFSPATIENELIK.F                                                   | 1949.15100 | 2 | 8.97E-07 | 0.97 | 5.24  | -     | 1885.1   |
| gi 4502171 ref NP_000476.1  | adenine phosphoribosyltransferase; AMP pyrophosphorylase; AMP diphospho |            |   | 9.00E-07 | 0.93 | 10.17 | 5.60  | 19607.6  |
| AHQ-6-11, 3527              | R.IDYIAGLDSR.G                                                          | 1123.24098 | 2 | 9.00E-07 | 0.93 | 3.32  | -     | 1348.7   |
| gi 5803181 ref NP_006810.1  | stress-induced-phosphoprotein 1 (Hsp70/Hsp90-organizing protein) [Homo  |            |   | 9.33E-07 | 1.58 | 20.19 | 5.90  | 62638.9  |
| AHQ-6-6, 5974               | K.ALSVGNIDDALQCYSEAII.L                                                 | 2069.27871 | 2 | 9.33E-07 | 0.82 | 3.72  | -     | 464.4    |
| AHQ-6-6, 4398               | R.LAYINPDLAEEK.N                                                        | 1489.69480 | 2 | 4.96E-06 | 0.76 | 3.21  | -     | 690.6    |
| gi 4758208 ref NP_004081.1  | dual specificity phosphatase 3; vaccinia virus phosphatase VH1-related; |            |   | 9.38E-07 | 1.73 | 20.21 | 15.70 | 20478.2  |
| AHQ-6-11, 5129              | K.ANDTQEFNLSAYFER.A                                                     | 1805.88207 | 2 | 1.55E-05 | 0.78 | 3.54  | -     | 729.1    |
| AHQ-6-11, 3935              | R.IYVGNASVAQDIPK.L                                                      | 1475.67136 | 2 | 3.31E-06 | 0.94 | 3.91  | -     | 1156.5   |
| AHQ-6-11, 3671              | R.IYVGNASVAQDIPK.L                                                      | 1475.67136 | 2 | 9.38E-07 | 0.96 | 4.15  | -     | 1411.6   |
| gi 22060072 ref XP_088293.2 | similar to cytochrome c [Homo sapiens]                                  |            |   | 9.77E-07 | 0.79 | 10.16 | 10.50 | 11887.8  |
| AHQ-6-13-, 3669             | K.TGPNLHGLFGR.K                                                         | 1169.31780 | 2 | 9.77E-07 | 0.79 | 3.07  | -     | 592.3    |
| gi 28178832 ref NP_002159.2 | isocitrate dehydrogenase 2 (NADP+), mitochondrial precursor; isocitrat  |            |   | 1.01E-06 | 2.80 | 30.25 | 8.20  | 50909.0  |
| AHQ-6-8, 3893               | K.DLAGCIHGLSNVK.L                                                       | 1385.57150 | 2 | 1.18E-06 | 0.94 | 3.94  | -     | 1456.1   |
| AHQ-6-8, 4936               | R.LIDDMVAQVLK.S                                                         | 1245.51421 | 2 | 1.01E-06 | 0.96 | 4.64  | -     | 1355.3   |
| AHQ-6-8, 2047 - 2090        | K.TIEAEAAGTIVTR.H                                                       | 1356.46696 | 2 | 7.03E-05 | 0.90 | 3.47  | -     | 870.2    |
| gi 30154839 ref XP_301583.1 | similar to actin CA15 - sea squirt (Styela clava) (fragments) [Homo sa  |            |   | 1.02E-06 | 0.61 | 10.14 | 6.50  | 19197.0  |
| AHQ-6-10, 3058              | K.IWHHTFYNKLK.V                                                         | 1515.74533 | 2 | 1.03E-04 | 0.56 | 2.57  | -     | 692.5    |
| AHQ-6-12, 3193              | K.IWHHTFYNKLK.V                                                         | 1515.74533 | 2 | 1.90E-05 | 0.63 | 2.89  | -     | 537.4    |
| AHQ-6-9, 2915 - 2971        | K.IWHHTFYNKLK.V                                                         | 1515.74533 | 2 | 1.02E-06 | 0.61 | 2.84  | -     | 654.8    |
| gi 30154839 ref XP_301540.1 | similar to keratin 8; cytokeratin 8; keratin, type II cytoskeletal 8 [  |            |   | 1.02E-06 | 0.89 | 10.19 | 3.40  | 39331.0  |
| AHQ-6-4, 4616               | K.SLNNKFASFDIK.V                                                        | 1384.56191 | 2 | 4.16E-05 | 0.83 | 3.49  | -     | 581.5    |
| AHQ-6-6, 4486               | K.SLNNKFASFDIK.V                                                        | 1384.56191 | 2 | 2.91E-04 | 0.64 | 2.80  | -     | 613.9    |
| AHQ-6-7, 4607               | K.SLNNKFASFDIK.V                                                        | 1384.56191 | 2 | 5.34E-05 | 0.87 | 3.08  | -     | 789.2    |
| AHQ-6-10, 4523 - 4536       | K.SLNNKFASFDIK.V                                                        | 1384.56191 | 2 | 1.02E-06 | 0.89 | 3.27  | -     | 967.3    |
| AHQ-6-11, 4388 - 4469       | K.SLNNKFASFDIK.V                                                        | 1384.56191 | 2 | 2.39E-06 | 0.92 | 3.84  | -     | 1117.3   |
| AHQ-6-2, 4643               | K.SLNNKFASFDIK.V                                                        | 1384.56191 | 2 | 4.78E-04 | 0.83 | 3.33  | -     | 774.8    |
| gi 4557801 ref NP_000261.1  | purine nucleoside phosphorylase [Homo sapiens]                          |            |   | 1.05E-06 | 3.32 | 40.22 | 16.30 | 32147.7  |
| AHQ-6-9, 3724               | K.HRPQVAICSGSLGGLTDK.L                                                  | 1981.26589 | 3 | 6.40E-05 | 0.97 | 3.89  | -     | 3455.2   |
| AHQ-6-9, 4475               | K.LGADAVGMSTVPEVIVAR.H                                                  | 1786.08666 | 2 | 7.65E-04 | 0.78 | 3.16  | -     | 651.0    |
| AHQ-6-13-, 4126             | K.LGADAVGM*STVPEVIVAR.H                                                 | 1802.08606 | 2 | 2.77E-04 | 0.93 | 4.31  | -     | 838.5    |
| AHQ-6-13, 4849              | K.LGADAVGMSTVPEVIVAR.H                                                  | 1786.08666 | 2 | 7.29E-05 | 0.84 | 3.06  | -     | 847.7    |
| AHQ-6-9, 3810 - 3879        | K.LGADAVGM*STVPEVIVAR.H                                                 | 1802.08606 | 2 | 2.11E-04 | 0.82 | 3.28  | -     | 678.5    |
| AHQ-6-13-, 4901 - 4902      | R.VFGFSLITNK.V                                                          | 1126.32960 | 2 | 1.27E-04 | 0.91 | 3.17  | -     | 801.0    |
| AHQ-6-9, 4552 - 4556        | R.VFGFSLITNK.V                                                          | 1126.32960 | 2 | 1.05E-06 | 0.69 | 2.91  | -     | 428.5    |
| gi 20149637 ref NP_057526.2 | type 1 tumor necrosis factor receptor shedding aminopeptidase regulato  |            |   | 1.09E-06 | 0.89 | 10.15 | 1.40  | 107761.4 |
| AHQ-6-4, 5956               | R.NPVGYPLAWQFLR.K                                                       | 1561.81077 | 2 | 1.09E-06 | 0.89 | 2.94  | -     | 786.8    |
| gi 18104989 ref NP_002822.2 | protein tyrosine phosphatase, non-receptor type 6 isoform 1; protein-t  |            |   | 1.09E-06 | 2.52 | 30.18 | 6.40  | 67560.7  |
| AHQ-6-6, 5614               | K.AGFWEFESLQK.Q                                                         | 1471.59489 | 2 | 5.66E-06 | 0.90 | 3.65  | -     | 1052.6   |
| AHQ-6-6, 4759               | R.DLSGLDAETLLK.G                                                        | 1275.43053 | 2 | 1.09E-06 | 0.89 | 3.24  | -     | 1140.9   |
| AHQ-6-6, 4342               | R.TLQVSPDLNGLDIR.E                                                      | 1541.73134 | 2 | 1.96E-05 | 0.73 | 2.90  | -     | 654.5    |
| gi 5729779 ref NP_006701.1  | COP9 homolog [Homo sapiens]                                             |            |   | 1.11E-06 | 0.86 | 10.16 | 6.70  | 23225.5  |
| AHQ-6-11, 3513              | K.GILEQGWQADSTTR.M                                                      | 1562.66596 | 2 | 1.11E-06 | 0.86 | 3.20  | -     | 979.8    |
| gi 9966825 ref NP_065089.1  | HEF like Protein [Homo sapiens]                                         |            |   | 1.15E-06 | 1.63 | 20.27 | 4.30  | 86696.2  |
| AHQ-6-13-, 4165             | K.AISAFHGLSSSQPAEIIQSK.L                                                | 2260.48935 | 2 | 2.64E-05 | 0.97 | 5.30  | -     | 1593.0   |
| AHQ-6-13-, 3477             | K.LVDTLCLMETQER.D                                                       | 1496.68930 | 2 | 1.15E-06 | 0.66 | 2.82  | -     | 518.1    |
| gi 13489087 ref NP_109591.1 | serine (or cysteine) proteinase inhibitor, clade B (ovalbumin), member  |            |   | 1.18E-06 | 0.82 | 10.17 | 5.00  | 42741.5  |
| AHQ-6-8, 3830 - 3848        | K.TYGAADLASVDFQHASEDAR.K                                                | 2054.11949 | 2 | 1.18E-06 | 0.82 | 3.42  | -     | 568.6    |
| gi 5123454 ref NP_005336.2  | heat shock 70kDa protein 1A; heat shock 70kD protein 1A; heat shock-ind |            |   | 1.20E-06 | 4.43 | 50.21 | 12.00 | 70037.7  |
| AHQ-6-6, 5084 - 5098        | K.AAAGIDGLGTTYSVGVFQHGK.V                                               | 2267.54677 | 2 | 2.04E-06 | 0.80 | 3.71  | -     | 609.8    |
| AHQ-6-6, 4730 - 4792        | K.AFYPEEISSM*VLTK.M                                                     | 1631.87149 | 2 | 1.20E-06 | 0.86 | 3.46  | -     | 733.8    |
| AHQ-6-6, 3276               | K.AQIHDLVLVGGSTR.I                                                      | 1466.66769 | 2 | 2.71E-06 | 0.92 | 3.75  | -     | 1201.8   |
| AHQ-6-6, 4610               | K.DAGVIAIAGLNLVLR.I                                                     | 1198.39736 | 2 | 8.29E-06 | 0.95 | 3.69  | -     | 1550.9   |
| AHQ-6-6, 4015 - 4018        | K.NQVALNPNQTVFDAQ.R                                                     | 1659.82478 | 2 | 1.80E-06 | 0.89 | 4.01  | -     | 540.6    |
| gi 28269681 ref NP_783313.1 | NADH-ubiquinone oxidoreductase subunit B14.7 [Homo sapiens]             |            |   | 1.26E-06 | 1.56 | 20.17 | 24.10 | 14852.0  |
| AHQ-6-13-, 4977             | K.AYSTISIASVAGLTAAYR.V                                                  | 1875.07212 | 2 | 6.80E-04 | 0.75 | 3.39  | -     | 522.0    |
| AHQ-6-13-, 4789 - 4812      | R.VTLNPPGFTLEGVAK.V                                                     | 1543.78883 | 2 | 1.26E-06 | 0.81 | 2.95  | -     | 564.3    |
| gi 6715607 ref NP_000175.1  | G-gamma globin [Homo sapiens]                                           |            |   | 1.28E-06 | 0.92 | 10.18 | 6.80  | 16126.3  |
| AHQ-6-13-, 4744 - 4745      | R.LLVVYPWTQR.F                                                          | 1275.52342 | 2 | 5.34E-06 | 0.93 | 3.41  | -     | 1056.8   |
| AHQ-6-14-, 4760             | R.LLVVYPWTQR.F                                                          | 1275.52342 | 2 | 6.49E-06 | 0.91 | 3.24  | -     | 1152.0   |
| AHQ-6-13, 4871 - 4899       | R.LLVVYPWTQR.F                                                          | 1275.52342 | 2 | 1.28E-06 | 0.92 | 3.57  | -     | 1014.9   |
| gi 1693542 ref NP_002017.1  | fibronectin 1 isoform 1 preproprotein; cold-insoluble globulin [Homo s  |            |   | 1.40E-06 | 4.80 | 60.25 | 3.90  | 259222.8 |
| AHQ-6-2, 4319               | R.IYGETGGNSPVQEFVPGSK.S                                                 | 2169.33354 | 2 | 5.42E-04 | 0.86 | 3.63  | -     | 585.0    |
| AHQ-6-2, 4844               | R.NLQPASEYTVSLVAIK.G                                                    | 1733.98671 | 2 | 6.41E-05 | 0.64 | 3.37  | -     | 337.7    |
| AHQ-6-1, 4910               | R.NLQPASEYTVSLVAIK.G                                                    | 1733.98671 | 2 | 8.41E-04 | 0.78 | 3.10  | -     | 446.1    |
| AHQ-6-3, 4812 - 4814        | R.NLQPASEYTVSLVAIK.G                                                    | 1733.98671 | 2 | 2.02E-04 | 0.75 | 3.13  | -     | 313.9    |
| AHQ-6-2, 5740               | R.NTFAEVTLSPGVYTFK.V                                                    | 1995.21983 | 2 | 1.40E-06 | 0.95 | 4.95  | -     | 827.3    |
| AHQ-6-3, 4556 - 4558        | R.SSPVVIDASTAIDAPSNLR.F                                                 | 1914.10666 | 2 | 9.26E-04 | 0.90 | 4.04  | -     | 963.5    |
| AHQ-6-2, 3742               | R.SYITGLQPGTDYK.I                                                       | 1544.68732 | 2 | 4.78E-04 | 0.85 | 3.03  | -     | 784.9    |
| AHQ-6-1, 4344               | R.TKTEITGFQVDVAVPANGQTIQR.T                                             | 2573.84359 | 3 | 9.85E-04 | 0.60 | 3.19  | -     | 531.4    |
| gi 4506467 ref NP_002897.1  | radixin [Homo sapiens]                                                  |            |   | 1.46E-06 | 0.94 | 10.22 | 2.60  | 68563.4  |
| AHQ-6-6, 5175 - 5182        | K.NQEQLAAELAEFTAK.I                                                     | 1663.81020 | 2 | 1.46E-06 | 0.94 | 4.38  | -     | 1057.6   |
| gi 30149327 ref XP_293672.2 | similar to ebiP7687 [Homo sapiens]                                      |            |   | 1.47E-06 | 1.74 | 20.22 | 4.80  | 59404.3  |
| AHQ-6-5, 3692               | K.HLEINPNHPIVETLR.Q                                                     | 1783.02428 | 2 | 3.16E-04 | 0.87 | 4.35  | -     | 1312.8   |
| AHQ-6-5, 2891               | K.SIYITGESK.E                                                           | 1161.28598 | 2 | 1.47E-06 | 0.87 | 2.74  | -     | 820.1    |
| gi 22043610 ref XP_171081.1 | similar to ras-related C3 botulinum toxin substrate 1 isoform Rac1; rh  |            |   | 1.49E-06 | 1.76 | 20.22 | 16.70 | 21543.1  |
| AHQ-6-11, 3893              | K.KLTPITYPQGLAMAK.E                                                     | 1632.99216 | 2 | 3.64E-04 | 0.82 | 3.22  | -     | 515.0    |
| AHQ-6-11, 4567              | K.PVNLGLWDTAGQEDYDR.L                                                   | 1950.05441 | 2 | 1.49E-06 | 0.94 | 3.55  | -     | 1242.3   |
| gi 4507949 ref NP_003395.1  | tyrosine 3-monooxygenase/tryptophan 5-monooxygenase activation protein, |            |   | 1.59E-06 | 3.63 | 40.27 | 23.60 | 28082.2  |
| AHQ-6-10, 6251              | R.EKIEALQDINDVLELLDK.Y                                                  | 2389.66216 | 3 | 1.59E-06 | 0.93 | 4.07  | -     | 1586.1   |
| AHQ-6-10, 6238              | K.IEALQDINDVLELLDK.Y                                                    | 2132.37471 | 2 | 8.46E-06 | 0.96 | 5.45  | -     | 969.2    |
| AHQ-6-10, 4020              | K.QTTVNSQQAYQEAFAEISK.K                                                 | 2160.28351 | 2 | 2.19E-06 | 0.82 | 3.26  | -     | 554.2    |
| AHQ-6-10, 3866              | K.QTTVNSQQAYQEAFAEISK.K                                                 | 2160.28351 | 2 | 5.55E-04 | 0.38 | 2.63  | -     | 265.7    |
| AHQ-6-14-, 6222             | K.TAFDEALIELDTLNEESYK.D                                                 | 2160.27705 | 2 | 3.71E-06 | 0.93 | 4.14  | -     | 1239.0   |
| gi 10835242 ref NP_006249.1 | protein kinase, cGMP-dependent, type I; Protein kinase, cGMP-dependent  |            |   | 1.63E-06 | 0.81 | 10.18 | 1.70  | 77803.3  |
| AHQ-6-6, 3432               | R.EDSPEDPVFLR.T                                                         | 1391.46494 | 2 | 1.63E-06 | 0.81 | 3.00  | -     | 646.9    |
| gi 4507793 ref NP_003339.1  | ubiquitin-conjugating enzyme E2N (UBC13 homolog, yeast); ubiquitin-conj |            |   | 1.67E-06 | 0.80 | 10.13 | 7.20  | 17137.7  |
| AHQ-6-13, 2532              | K.TNEAQAIETAR.A                                                         | 1204.27249 | 2 | 1.67E-06 | 0.80 | 2.69  | -     | 1196.4   |
| gi 24307955 ref NP_055191.1 | p53 inducible protein [Homo sapiens]                                    |            |   | 1.68E-06 | 1.77 | 20.16 | 2.00  | 145660.2 |
| AHQ-6-3, 5978               | K.DFVSEAYLLTGLK.F                                                       | 1456.66481 | 2 | 2.38E-04 | 0.94 | 3.13  | -     | 1299.6   |
| AHQ-6-3, 4758               | K.YAPLHLVPLIER.L                                                        | 1421.71166 | 2 | 1.68E-06 | 0.83 | 2.65  | -     | 991.8    |
| gi 7657056 ref NP_055415.1  | EH-domain containing 3; EH domain containing 3 [Homo sapiens]           |            |   | 1.71E-06 | 2.72 | 30.22 | 10.50 | 60886.7  |
| AHQ-6-7, 4272               | K.ELVNLNAEIYGR.I                                                        | 1391.55445 | 2 | 6.75E-04 | 0.84 | 3.48  | -     | 635.0    |
| AHQ-6-7, 5190               | K.GGAFFEGTLHGFPHGYGEGAGEDDAEWVVAR.D                                     | 3317.48513 | 3 | 3.94E-05 | 0.93 | 4.47  | -     | 1278.5   |
| AHQ-6-7, 4562               | K.LFEAEEDQLFR.D                                                         | 1397.51432 | 2 | 1.71E-06 | 0.95 | 3.10  | -     | 1965.5   |
| gi 20539300 ref XP_088391.4 | similar to tropomyosin 4 [Homo sapiens]                                 |            |   | 1.71E-06 | 2.56 | 30.19 | 9.40  | 18592.1  |
| AHQ-6-12, 3696              | R.KLVILEGELER.A                                                         | 1299.54160 | 2 | 2.17E-05 | 0.81 | 3.22  | -     | 806.4    |
| AHQ-6-11, 3633              | R.KLVILEGELER.A                                                         | 1299.54160 | 2 | 1.71E-06 | 0.92 | 3.28  | -     | 1128.3   |
| AHQ-6-9, 3730               | R.KLVILEGELERAEER.A                                                     | 1785.03525 | 2 | 1.34E-04 | 0.84 | 3.58  | -     | 630.9    |
| AHQ-6-9, 3682 - 3738        | R.KLVILEGELERAEER.A                                                     | 1785.03525 | 2 | 1.26E-04 | 0.79 | 3.76  | -     | 550.6    |
| AHQ-6-9, 3758               | R.KLVILEGELER.A                                                         | 1171.36868 | 2 | 1.58E-05 | 0.86 | 2.82  | -     | 1032.8   |
| gi 4503117 ref NP_000091.1  | cystatin B; stefin B; liver thiol proteinase inhibitor; CPI-B [Homo sap |            |   | 1.78E-06 | 1.69 | 20.20 | 33.70 | 11139.5  |
| AHQ-6-13-, 3678             | K.SQVVAGTNYFIK.V                                                        | 1327.51036 | 2 | 1.67E-05 | 0.94 | 3.96  | -     | 1120.9   |
| AHQ-6-13-, 3697             | R.VFGSLPHENKPLTSLSNYQTNK.A                                              | 2459.74218 | 3 | 1.83E-04 | 0.77 | 3.38  | -     | 587.0    |
| AHQ-6-13, 3819              | R.VFGSLPHENKPLTSLSNYQTNK.A                                              | 2459.74218 | 3 | 1.78E-06 | 0.76 | 3.49  | -     | 475.1    |





|                             |                                                                          |            |   |          |      |       |       |          |
|-----------------------------|--------------------------------------------------------------------------|------------|---|----------|------|-------|-------|----------|
| AHQ-6-11, 3612              | K.TLVNPNANVTFK.T                                                         | 1204.40037 | 2 | 4.54E-06 | 0.87 | 2.87  | -     | 786.0    |
| gi 14149734 ref NP_065174.1 | coronin, actin binding protein, 1B [Homo sapiens]                        |            |   | 4.61E-06 | 0.80 | 10.19 | 5.90  | 54234.4  |
| AHQ-6-6, 6218 - 6294        | R.KSDLFQDDLYPTAGPEAAEAEEVWVSGR.D                                         | 3211.39431 | 3 | 4.61E-06 | 0.80 | 3.84  | -     | 472.4    |
| gi 4757818 ref NP_004879.1  | ATPase, H+ transporting, lysosomal, V1 subunit G isoform 1; vacuolar H   |            |   | 4.62E-06 | 0.81 | 10.14 | 9.30  | 13757.4  |
| AHQ-6-13, 3024 - 3031       | K.EEAAEIEQYR.L                                                           | 1366.41548 | 2 | 4.62E-06 | 0.81 | 2.80  | -     | 1133.5   |
| gi 24234688 ref NP_004125.3 | heat shock 70kDa protein 9B precursor; heat shock 70kD protein 9; stre   |            |   | 4.77E-06 | 0.94 | 10.25 | 2.80  | 73680.1  |
| AHQ-6-6, 5538 - 5551        | K.STNGDFTLGGEDFDQALLR.H                                                  | 2057.16328 | 2 | 4.77E-06 | 0.94 | 4.92  | -     | 542.0    |
| gi 4757812 ref NP_004880.1  | ATP synthase, H+ transporting, mitochondrial F0 complex, subunit f, iso  |            |   | 4.82E-06 | 1.80 | 20.20 | 25.50 | 10917.8  |
| AHQ-6-13-, 5668 - 5673      | R.DFSPSGIFGAFQR.G                                                        | 1429.56124 | 2 | 4.82E-06 | 0.93 | 3.94  | -     | 993.0    |
| AHQ-6-14-, 5651 - 5670      | R.DFSPSGIFGAFQR.G                                                        | 1429.56124 | 2 | 4.16E-04 | 0.83 | 3.10  | -     | 803.3    |
| AHQ-6-13, 5757 - 5759       | R.DFSPSGIFGAFQR.G                                                        | 1429.56124 | 2 | 1.21E-04 | 0.93 | 3.56  | -     | 1147.3   |
| AHQ-6-14-, 5316             | K.LGELPSWILM*R.D                                                         | 1331.60876 | 2 | 2.03E-05 | 0.87 | 3.37  | -     | 562.8    |
| gi 5453710 ref NP_006139.1  | LIM and SH3 protein 1; Lasp-1 [Homo sapiens]                             |            |   | 4.89E-06 | 0.94 | 10.19 | 5.00  | 29717.0  |
| AHQ-6-13-, 3838 - 3913      | K.GFSVVADTPELQR.I                                                        | 1419.56466 | 2 | 1.19E-04 | 0.87 | 3.29  | -     | 982.3    |
| AHQ-6-14-, 3895             | K.GFSVVADTPELQR.I                                                        | 1419.56466 | 2 | 4.89E-06 | 0.94 | 3.73  | -     | 1339.7   |
| AHQ-6-12, 3840              | K.GFSVVADTPELQR.I                                                        | 1419.56466 | 2 | 6.77E-05 | 0.74 | 2.86  | -     | 744.5    |
| gi 4506405 ref NP_002872.1  | v-ral simian leukemia viral oncogene homolog B; RAS-like protein B; GTP  |            |   | 5.09E-06 | 1.64 | 20.20 | 7.80  | 23408.4  |
| AHQ-6-10, 3810              | K.AEEWGVQYVETSAK.T                                                       | 1597.70708 | 2 | 6.02E-04 | 0.72 | 2.63  | -     | 646.1    |
| AHQ-6-10, 3563              | R.SKAEWGVQYVETSAK.T                                                      | 1812.95765 | 2 | 5.09E-06 | 0.92 | 3.93  | -     | 1002.4   |
| gi 16950601 ref NP_005956.2 | myosin light chain kinase isoform 6; myosin light chain kinase [Homo s   |            |   | 5.27E-06 | 0.86 | 10.18 | 1.00  | 110074.8 |
| AHQ-6-6, 3472               | K.VSDFYDIER.L                                                            | 1273.33005 | 2 | 5.27E-06 | 0.86 | 2.70  | -     | 1026.7   |
| AHQ-6-5, 3484 - 3559        | K.VSDFYDIER.L                                                            | 1273.33005 | 2 | 8.12E-06 | 0.94 | 3.64  | -     | 1117.9   |
| gi 5174727 ref NP_005989.1  | chaperonin containing TCP1, subunit 3 (gamma); TCP1 (t-complex-1) ring   |            |   | 5.41E-06 | 2.45 | 30.18 | 6.60  | 60330.4  |
| AHQ-6-6, 3775               | R.AVAQAQLEVIPR.T                                                         | 1167.38326 | 2 | 5.41E-06 | 0.93 | 3.59  | -     | 1526.7   |
| AHQ-6-6, 4232 - 4298        | K.IPGGIEIDSCVLR.G                                                        | 1430.65218 | 2 | 7.41E-05 | 0.81 | 2.88  | -     | 1055.7   |
| AHQ-6-6, 2886 - 2903        | R.TLIQNCGASTIR.L                                                         | 1335.51249 | 2 | 3.52E-04 | 0.71 | 2.92  | -     | 557.3    |
| gi 6005786 ref NP_009214.1  | monoglyceride lipase; lysophospholipase-like [Homo sapiens]              |            |   | 5.51E-06 | 0.88 | 10.18 | 4.50  | 34292.3  |
| AHQ-6-14-, 5767 - 5774      | K.LTVPFLLGGASDR.L                                                        | 1530.79329 | 2 | 5.51E-06 | 0.88 | 3.63  | -     | 773.3    |
| AHQ-6-13-, 5785             | K.LTVPFLLGGASDR.L                                                        | 1530.79329 | 2 | 4.28E-05 | 0.86 | 3.04  | -     | 734.4    |
| gi 4758266 ref NP_004748.1  | small inducible cytokine subfamily E, member 1; endothelial monocyte-ac  |            |   | 5.58E-06 | 0.89 | 10.18 | 3.80  | 34326.4  |
| AHQ-6-13, 4876              | K.GAEDAQIIEYLK.Q                                                         | 1350.49910 | 2 | 5.58E-06 | 0.89 | 3.57  | -     | 1137.9   |
| gi 4502219 ref NP_001656.1  | ras homolog gene family, member G (rho G); RhoG [Homo sapiens]           |            |   | 5.63E-06 | 0.70 | 10.16 | 8.90  | 21338.4  |
| AHQ-6-11, 4653              | R.TVNLNLWDTAGQEEYDR.L                                                    | 2025.12129 | 2 | 5.63E-06 | 0.70 | 2.72  | -     | 608.6    |
| gi 4758988 ref NP_004152.1  | RAB1A, member RAS oncogene family; RAB1, member RAS oncogene family [Ho  |            |   | 5.82E-06 | 0.84 | 10.21 | 9.30  | 22677.6  |
| AHQ-6-11, 5539 - 5556       | R.FADDYTESYISTIGVDFK.I                                                   | 2173.31742 | 2 | 6.19E-05 | 0.86 | 3.59  | -     | 642.2    |
| AHQ-6-14-, 5599             | R.FADDYTESYISTIGVDFK.I                                                   | 2173.31742 | 2 | 2.10E-05 | 0.93 | 3.86  | -     | 961.5    |
| AHQ-6-11, 5425 - 5479       | R.FADDYTESYISTIGVDFK.I                                                   | 2173.31742 | 2 | 5.82E-06 | 0.84 | 3.32  | -     | 705.2    |
| gi 6005826 ref NP_009160.1  | protein kinase C and casein kinase substrate in neurons 2; pacsin 2 [Ho  |            |   | 5.86E-06 | 2.34 | 30.20 | 7.80  | 55904.6  |
| AHQ-6-6, 3230               | K.AIYHDLQESIR.A                                                          | 1345.48578 | 2 | 6.79E-06 | 0.87 | 2.77  | -     | 966.9    |
| AHQ-6-6, 3982               | R.ALYDYEGQEHDELFSK.A                                                     | 1945.03140 | 2 | 5.86E-06 | 0.90 | 4.05  | -     | 679.8    |
| AHQ-6-6, 3144               | K.HLNLNVAAGYK.A                                                          | 1216.37124 | 2 | 5.78E-04 | 0.57 | 2.73  | -     | 525.8    |
| gi 18570595 ref XP_095590.1 | similar to myosin regulatory light chain [Homo sapiens]                  |            |   | 5.90E-06 | 0.93 | 10.18 | 8.90  | 13951.5  |
| AHQ-6-11, 3123 - 3196       | K.LNGTDPEDVIR.H                                                          | 1229.32195 | 2 | 1.04E-04 | 0.94 | 3.23  | -     | 1328.3   |
| AHQ-6-12, 3059 - 3128       | K.LNGTDPEDVIR.H                                                          | 1229.32195 | 2 | 1.50E-04 | 0.88 | 3.09  | -     | 994.3    |
| AHQ-6-11, 3031 - 3087       | K.LNGTDPEDVIR.H                                                          | 1229.32195 | 2 | 5.90E-06 | 0.93 | 3.52  | -     | 1101.5   |
| gi 27480842 ref XP_208238.1 | similar to bA92K2.2 (similar to ubiquitin) [Homo sapiens]                |            |   | 6.04E-06 | 0.86 | 10.16 | 8.30  | 17966.9  |
| AHQ-6-14-, 2135 - 2172      | K.IQDKGIPPPDQQR.L                                                        | 1524.66087 | 2 | 1.64E-04 | 0.74 | 2.91  | -     | 507.2    |
| AHQ-6-14-, 1996 - 2059      | K.IQDKGIPPPDQQR.L                                                        | 1524.66087 | 2 | 6.04E-06 | 0.86 | 3.28  | -     | 644.6    |
| gi 4758032 ref NP_004757.1  | coatomer protein complex, subunit beta 2 (beta prime); coatomer binding  |            |   | 6.05E-06 | 0.88 | 10.20 | 2.10  | 102486.5 |
| AHQ-6-5, 5868               | K.AAESLADPTEYENLFPGLK.E                                                  | 2066.25322 | 2 | 6.05E-06 | 0.88 | 3.94  | -     | 596.2    |
| gi 30147536 ref XP_293762.2 | similar to bridging integrator 2; bridging integrator-2; breast cancer   |            |   | 6.15E-06 | 0.70 | 10.17 | 3.90  | 46870.6  |
| AHQ-6-5, 2843               | R.TSLEVSPNPEPEKPVPR.T                                                    | 1877.08801 | 3 | 6.15E-06 | 0.70 | 3.41  | -     | 471.2    |
| gi 29729345 ref XP_290995.1 | similar to speckle-type POZ protein [Homo sapiens]                       |            |   | 6.27E-06 | 0.79 | 10.22 | 10.90 | 18703.4  |
| AHQ-6-2, 5750               | K.NRVEINDLDPPEVFKEM*MR.F                                                 | 2252.55733 | 2 | 1.88E-04 | 0.95 | 4.41  | -     | 1450.7   |
| AHQ-6-3, 5693 - 5712        | K.NRVEINDLDPPEVFKEM*MR.F                                                 | 2252.55733 | 2 | 4.74E-05 | 0.32 | 2.97  | -     | 392.4    |
| AHQ-6-4, 5777 - 5780        | K.NRVEINDLDPPEVFKEM*MR.F                                                 | 2252.55733 | 2 | 6.27E-06 | 0.79 | 3.78  | -     | 886.8    |
| AHQ-6-5, 5700               | K.NRVEINDLDPPEVFKEM*MR.F                                                 | 2252.55733 | 2 | 3.43E-04 | 0.52 | 3.64  | -     | 433.1    |
| AHQ-6-1, 5808               | K.NRVEINDLDPPEVFKEM*MR.F                                                 | 2252.55733 | 2 | 6.52E-05 | 0.36 | 2.58  | -     | 586.6    |
| gi 10834976 ref NP_000572.1 | glutathione peroxidase 1 [Homo sapiens]                                  |            |   | 6.28E-06 | 2.25 | 30.21 | 24.40 | 21909.0  |
| AHQ-6-11, 5131              | K.CEVNGAGAHPLFAFLR.E                                                     | 1760.99723 | 2 | 6.28E-06 | 0.77 | 2.96  | -     | 647.4    |
| AHQ-6-11, 4801 - 4877       | R.GLVLVGFPPCQNFQGHQENAK.N                                                | 2117.37312 | 2 | 2.72E-04 | 0.67 | 3.78  | -     | 411.6    |
| AHQ-6-11, 3801              | R.PLAGGEPVSLGSLR.G                                                       | 1353.54935 | 2 | 6.60E-05 | 0.81 | 3.06  | -     | 787.9    |
| gi 21618359 ref NP_004095.3 | fatty acid synthase [Homo sapiens]                                       |            |   | 6.36E-06 | 1.77 | 20.27 | 1.70  | 273262.0 |
| AHQ-6-3, 5640               | R.LFDHPESPTNPTEPLFLAQAEVYK.E                                             | 2842.15075 | 3 | 6.53E-04 | 0.94 | 5.36  | -     | 883.6    |
| AHQ-6-2, 5676               | R.LFDHPESPTNPTEPLFLAQAEVYK.E                                             | 2842.15075 | 3 | 6.48E-05 | 0.73 | 3.88  | -     | 677.1    |
| AHQ-6-1, 5710 - 5718        | R.LFDHPESPTNPTEPLFLAQAEVYK.E                                             | 2842.15075 | 3 | 6.36E-06 | 0.93 | 4.66  | -     | 1162.8   |
| AHQ-6-1, 6371               | K.LPEDPLSLGLDPSALK.A                                                     | 1779.06739 | 2 | 5.79E-04 | 0.84 | 3.00  | -     | 851.0    |
| gi 30156116 ref XP_301571.1 | similar to Dual specificity protein phosphatase 3 (Dual specificity pr   |            |   | 6.62E-06 | 0.91 | 10.18 | 1.70  | 64164.4  |
| AHQ-6-11, 3631              | K.DSGITVLIK.A                                                            | 1067.21733 | 2 | 6.62E-06 | 0.91 | 3.52  | -     | 894.1    |
| gi 6912238 ref NP_036226.1  | peroxiredoxin 5; antioxidant enzyme B166 [Homo sapiens]                  |            |   | 6.73E-06 | 1.83 | 20.23 | 15.40 | 22026.2  |
| AHQ-6-12, 6224 - 6229       | K.ETDLLLDDSLVSIFGNR.R                                                    | 1908.09888 | 2 | 6.73E-06 | 0.96 | 4.56  | -     | 1382.4   |
| AHQ-6-12, 5029 - 5032       | K.GVLFGVPGFAFTPGCSK.T                                                    | 1595.84389 | 2 | 1.05E-04 | 0.87 | 3.49  | -     | 668.7    |
| gi 17986273 ref NP_524144.1 | fast skeletal myosin alkali light chain 1 isoform 1f; A1 catalytic; A2   |            |   | 7.28E-06 | 0.95 | 10.21 | 8.20  | 21145.0  |
| AHQ-6-12, 3281 - 3343       | R.VFDKENGVTVMGAELR.H                                                     | 1723.93228 | 2 | 7.28E-06 | 0.95 | 4.19  | -     | 1265.7   |
| gi 7706429 ref NP_057293.1  | unknown [Homo sapiens]                                                   |            |   | 7.42E-06 | 0.88 | 10.18 | 10.00 | 16146.6  |
| AHQ-6-13-, 5528             | R.ELYLGLLPTEDYK.V                                                        | 1717.93937 | 2 | 7.42E-06 | 0.88 | 3.66  | -     | 756.2    |
| gi 15306356 ref XP_035638.2 | similar to interleukin 25; lymphocyte antigen 6 complex, locus E ligand  |            |   | 7.44E-06 | 1.68 | 20.21 | 5.20  | 18795.1  |
| AHQ-6-13-, 3532             | R.ESDVPLKTEEFVTK.T                                                       | 1751.91253 | 2 | 1.02E-04 | 0.75 | 2.95  | -     | 471.2    |
| AHQ-6-12, 3484 - 3485       | R.ESDVPLKTEEFVTK.T                                                       | 1751.91253 | 2 | 3.28E-04 | 0.92 | 4.15  | -     | 602.0    |
| AHQ-6-13-, 4594             | K.SYLYFTQFK.A                                                            | 1197.36315 | 2 | 7.44E-06 | 0.93 | 3.50  | -     | 1111.6   |
| gi 18765729 ref NP_003816.2 | synaptosomal-associated protein 23 isoform SNAP23A; synaptosomal-assoc   |            |   | 7.75E-06 | 0.93 | 10.18 | 6.60  | 23353.9  |
| AHQ-6-14-, 4379             | R.LGLAIESQDAGIK.T                                                        | 1428.65614 | 2 | 7.75E-06 | 0.93 | 3.51  | -     | 1269.9   |
| gi 20551618 ref XP_167021.1 | similar to calponin 2; Calonin 2 [Homo sapiens]                          |            |   | 7.84E-06 | 0.82 | 10.17 | 3.70  | 47327.9  |
| AHQ-6-12, 5063 - 5068       | R.SM*QNWVHQLNLSNFIK.A                                                    | 2006.23095 | 2 | 7.84E-06 | 0.82 | 3.38  | -     | 559.9    |
| gi 14917115 ref NP_002268.2 | type I hair keratin 1; Ha-1; hard keratin, type I, 1; keratin, hair, a   |            |   | 8.90E-06 | 0.42 | 10.15 | 3.60  | 47236.9  |
| AHQ-6-5, 4051               | R.LNVEVDAAPTVDLNR.V                                                      | 1626.79310 | 2 | 8.90E-06 | 0.42 | 2.97  | -     | 250.8    |
| gi 10835189 ref NP_000628.1 | glutathione reductase [Homo sapiens]                                     |            |   | 9.25E-06 | 1.22 | 20.18 | 8.10  | 51700.3  |
| AHQ-6-7, 4490               | K.ADFDNTVAIHPTSSSEELVTLR                                                 | 2316.50977 | 2 | 9.25E-06 | 0.39 | 2.68  | -     | 251.8    |
| AHQ-6-7, 2608               | R.GHAAFSDPKPTIEVSGK.K                                                    | 1843.03012 | 2 | 8.01E-05 | 0.83 | 3.55  | -     | 439.8    |
| gi 22035600 ref NP_004570.2 | mitogen-activated protein kinase kinase kinase 2; Rab8 interact          |            |   | 9.54E-06 | 0.29 | 10.13 | 2.20  | 91555.4  |
| AHQ-6-14-, 5919 - 5976      | K.LDPGDDISSLQEQITILR.E                                                   | 2014.22299 | 2 | 9.54E-06 | 0.29 | 2.51  | -     | 231.8    |
| gi 4501993 ref NP_003650.1  | alkylglycerone phosphate synthase precursor [Homo sapiens]               |            |   | 9.97E-06 | 0.95 | 10.23 | 2.60  | 72911.4  |
| AHQ-6-6, 5622 - 5632        | R.GISDPLTFVFEQTEAAAR.E                                                   | 1805.96665 | 2 | 9.97E-06 | 0.95 | 4.68  | -     | 778.3    |
| gi 13569962 ref NP_112243.1 | RAB1B, member RAS oncogene family; small GTP-binding protein [Homo sap   |            |   | 1.05E-05 | 1.69 | 20.24 | 15.90 | 22171.0  |
| AHQ-6-11, 2204              | R.MGPGAASGGERPNLK.I                                                      | 1442.62650 | 2 | 1.05E-05 | 0.76 | 2.61  | -     | 1194.9   |
| AHQ-6-11, 5740              | K.NATNVEQAFM*TMAAEIK.K                                                   | 1886.14019 | 3 | 1.44E-05 | 0.93 | 4.79  | -     | 1707.5   |
| gi 5454028 ref NP_006261.1  | related RAS viral (v-ras) oncogene homolog; Oncogene RRAS [Homo sapiens] |            |   | 1.06E-05 | 0.92 | 10.16 | 5.50  | 23480.3  |
| AHQ-6-10, 5343              | R.LNVDEAFQLVR.A                                                          | 1433.59133 | 2 | 1.06E-05 | 0.92 | 3.20  | -     | 1411.9   |
| gi 4504111 ref NP_002077.1  | growth factor receptor-bound protein 2 [Homo sapiens]                    |            |   | 1.06E-05 | 1.53 | 20.18 | 18.90 | 25206.2  |
| AHQ-6-10, 6142 - 6144       | R.DIEQVPQPTYVQALFDFDPQEDGELGFR.R                                         | 3383.62169 | 3 | 1.06E-05 | 0.79 | 3.58  | -     | 365.9    |
| AHQ-6-10, 3340              | K.VLNEECDQNWYK.A                                                         | 1599.70313 | 2 | 4.30E-05 | 0.74 | 2.91  | -     | 637.9    |
| gi 4504107 ref NP_002076.1  | glutathione peroxidase 4;                                                |            |   |          |      |       |       |          |

|                             |                                                                         |            |   |          |      |       |       |          |
|-----------------------------|-------------------------------------------------------------------------|------------|---|----------|------|-------|-------|----------|
| AHQ-6-12, 4073              | K.DRPFAGLVK.Y                                                           | 1150.35439 | 2 | 2.54E-05 | 0.88 | 3.12  | -     | 1147.1   |
| AHQ-6-12, 3055 - 3057       | R.GLVGEIIR.F                                                            | 985.20582  | 2 | 1.76E-05 | 0.90 | 3.30  | -     | 1086.9   |
| AHQ-6-12, 2248 - 2249       | R.NIHGSDSVESA.E                                                         | 1486.56627 | 2 | 6.12E-04 | 0.89 | 4.20  | -     | 998.9    |
| AHQ-6-12, 3043 - 3103       | R.TFIAIKPDGVR.G                                                         | 1345.57205 | 2 | 1.12E-05 | 0.78 | 3.24  | -     | 627.6    |
| gi 9966867 ref NP_065123.1  | eIF-5A2 protein; eIF5AII [Homo sapiens]                                 |            |   | 1.13E-05 | 1.83 | 20.30 | 19.60 | 16793.1  |
| AHQ-6-12, 3640              | K.KYEDICPSTHNMV.PNIK.R                                                  | 2163.41723 | 3 | 1.83E-04 | 0.97 | 5.97  | -     | 1458.9   |
| AHQ-6-12, 4663              | K.VHLVDIGDITGK.K                                                        | 1299.54329 | 2 | 1.13E-05 | 0.86 | 2.99  | -     | 791.1    |
| gi 13129018 ref NP_076956.1 | hypothetical protein MGC3077 [Homo sapiens]                             |            |   | 1.13E-05 | 0.91 | 10.17 | 5.30  | 21007.6  |
| AHQ-6-11, 3792              | K.VSEEEIIDI.K                                                           | 1175.31097 | 2 | 1.13E-05 | 0.91 | 3.48  | -     | 1236.3   |
| gi 22538814 ref NP_002976.2 | small inducible cytokine A5 precursor; T-cell specific protein p288; T  |            |   | 1.16E-05 | 1.26 | 20.18 | 20.90 | 9989.6   |
| AHQ-6-14-, 3742 - 3758      | K.CSNPAVVFVTR.K                                                         | 1251.43718 | 2 | 1.16E-05 | 0.92 | 3.52  | -     | 879.3    |
| AHQ-6-14, 4586              | K.CSNPAVVFVTR.K                                                         | 1251.43718 | 2 | 8.24E-05 | 0.81 | 2.77  | -     | 835.1    |
| AHQ-6-14-, 2434             | K.EFYFTSGK.C                                                            | 995.06653  | 1 | 1.50E-05 | 0.34 | 2.32  | -     | 242.6    |
| gi 4503643 ref NP_000121.1  | coagulation factor V precursor; labile factor; factor V Leiden [Homo sa |            |   | 1.20E-05 | 3.21 | 40.19 | 2.50  | 251716.5 |
| AHQ-6-4, 3197               | R.AEVDVVIQVR.F                                                          | 1144.26019 | 2 | 1.20E-05 | 0.93 | 3.31  | -     | 1767.9   |
| AHQ-6-5, 3117               | K.EVIITGIQTQGA.H                                                        | 1358.56590 | 2 | 2.06E-05 | 0.90 | 3.44  | -     | 997.0    |
| AHQ-6-3, 3737 - 3801        | K.LSEGASYLDTFPAEK.M                                                     | 1765.90099 | 2 | 4.10E-04 | 0.70 | 3.21  | -     | 510.4    |
| AHQ-6-1, 4050               | R.M*PM*GLSTGIISDQIK.A                                                   | 1710.99516 | 2 | 4.15E-04 | 0.68 | 2.62  | -     | 609.9    |
| gi 20127528 ref NP_037459.2 | parvin, beta; CGI-56 protein; beta-parvin [Homo sapiens]                |            |   | 1.26E-05 | 3.47 | 40.21 | 15.90 | 41714.0  |
| AHQ-6-9, 3250 - 3275        | K.ARPEDVNLDLK.S                                                         | 1369.54878 | 2 | 1.26E-05 | 0.81 | 3.64  | -     | 538.0    |
| AHQ-6-9, 4943               | R.DAFDITFDHAPDKLSVVK.K                                                  | 2019.24293 | 2 | 6.22E-05 | 0.89 | 3.44  | -     | 946.3    |
| AHQ-6-9, 3404 - 3458        | K.LNVAEVTQSEIGQK.G                                                      | 1516.67865 | 2 | 2.29E-05 | 0.82 | 2.82  | -     | 966.4    |
| AHQ-6-9, 6083 - 6095        | K.VLLDWINDLVVEER.I                                                      | 1713.95549 | 2 | 3.20E-05 | 0.94 | 4.12  | -     | 1164.8   |
| gi 23510338 ref NP_003325.2 | ubiquitin-activating enzyme E1; A1S9T and BN75 temperature sensitivity  |            |   | 1.31E-05 | 1.70 | 20.26 | 3.40  | 117848.1 |
| AHQ-6-4, 5604               | R.NEEDAALVALAQAVNAR.A                                                   | 1885.02541 | 2 | 5.14E-05 | 0.94 | 4.02  | -     | 1548.9   |
| AHQ-6-4, 6132               | K.SLVAASLAEPDFVTFDAK.F                                                  | 1910.15638 | 2 | 1.31E-05 | 0.77 | 3.39  | -     | 524.7    |
| gi 19923233 ref NP_002970.2 | sterol carrier protein 2 [Homo sapiens]                                 |            |   | 1.31E-05 | 0.83 | 10.18 | 2.20  | 58993.3  |
| AHQ-6-13-, 2778             | K.LQNQLQPGNAK.L                                                         | 1324.51124 | 2 | 1.31E-05 | 0.83 | 3.37  | -     | 734.6    |
| gi 4506363 ref NP_002861.1  | RAB13, member RAS oncogene family; RAS-associated protein RAB13 [Homo s |            |   | 1.33E-05 | 1.83 | 20.17 | 10.80 | 22774.0  |
| AHQ-6-11, 3543              | K.LLLIGDSGVGK.T                                                         | 1072.28025 | 2 | 5.97E-04 | 0.64 | 2.67  | -     | 612.0    |
| AHQ-6-11, 3644              | K.LLLIGDSGVGK.T                                                         | 1072.28025 | 2 | 1.33E-05 | 0.93 | 3.32  | -     | 1200.2   |
| AHQ-6-13-, 3784             | K.LLLIGDSGVGK.T                                                         | 1072.28025 | 2 | 9.35E-04 | 0.72 | 2.72  | -     | 800.1    |
| AHQ-6-14-, 3775             | K.LLLIGDSGVGK.T                                                         | 1072.28025 | 2 | 1.88E-05 | 0.89 | 3.08  | -     | 955.0    |
| AHQ-6-11, 3047              | K.LQVWDTAQGER.F                                                         | 1303.40576 | 2 | 1.53E-05 | 0.90 | 3.36  | -     | 1120.8   |
| gi 4758618 ref NP_004684.1  | cytokeratin type II [Homo sapiens]                                      |            |   | 1.36E-05 | 1.69 | 20.22 | 3.60  | 59503.9  |
| AHQ-6-10, 2479              | R.AEAEVWYQTK.Y                                                          | 1213.27785 | 2 | 4.35E-04 | 0.72 | 2.55  | -     | 780.4    |
| AHQ-6-10, 2584 - 2586       | K.YEELQVTAGR.H                                                          | 1166.26586 | 2 | 1.36E-05 | 0.98 | 4.43  | -     | 2385.9   |
| gi 25306267 ref NP_001700.2 | brain-derived neurotrophic factor isoform A preproprotein [Homo sapien  |            |   | 1.41E-05 | 0.88 | 10.17 | 6.10  | 27817.8  |
| AHQ-6-13-, 3645             | K.TAVDMSGGTIVLEK.V                                                      | 1508.71993 | 2 | 1.41E-05 | 0.88 | 3.32  | -     | 992.3    |
| gi 5031569 ref NP_005727.1  | ARP1 actin-related protein 1 homolog A, centractin alpha; ARP1 (actin-r |            |   | 1.52E-05 | 1.71 | 20.26 | 9.00  | 42613.4  |
| AHQ-6-8, 3761 - 3778        | R.ACYLSINPKQKDETLETK.A                                                  | 2141.34169 | 2 | 1.52E-05 | 0.92 | 4.59  | -     | 609.6    |
| AHQ-6-8, 6218 - 6220        | R.TLFSNIVLGGSTLFG.G                                                     | 1684.95729 | 2 | 9.09E-04 | 0.79 | 3.31  | -     | 557.5    |
| gi 12545410 ref NP_031394.1 | RAS p21 protein activator 3; GTPase activating protein III; Ins(1,3,4,  |            |   | 1.54E-05 | 1.82 | 20.25 | 5.90  | 95912.5  |
| AHQ-6-5, 5989               | R.FFAPALISNPLQLPHHTDPQTSR.T                                             | 2837.18380 | 3 | 1.54E-05 | 0.86 | 3.56  | -     | 1184.6   |
| AHQ-6-5, 4921               | K.SVVDGPEQEEYSTFVIDDPQETYK.T                                            | 2840.94215 | 2 | 5.56E-04 | 0.96 | 4.95  | -     | 1133.4   |
| gi 19743813 ref NP_002202.2 | integrin beta 1 isoform 1A precursor; integrin VLA-4 beta subunit; fib  |            |   | 1.56E-05 | 2.40 | 30.24 | 6.00  | 88414.9  |
| AHQ-6-3, 4926 - 4997        | K.LKPEDITQIQQLVLR.L                                                     | 2020.36187 | 2 | 1.56E-05 | 0.93 | 4.14  | -     | 1315.2   |
| AHQ-6-3, 6424               | K.LSENNITIFAVTEEFQPVYK.E                                                | 2471.74650 | 3 | 2.58E-05 | 0.96 | 4.78  | -     | 1926.9   |
| AHQ-6-3, 3244               | K.VDVTGENPIYK.S                                                         | 1223.31587 | 2 | 5.75E-05 | 0.51 | 2.73  | -     | 487.9    |
| gi 21361827 ref NP_062826.2 | putative methyltransferase M6A; putative methyltransferase [Homo sapie  |            |   | 1.59E-05 | 0.74 | 10.18 | 3.10  | 64473.6  |
| AHQ-6-3, 3993               | K.YVHYEIDACMDSEAPGSK.D                                                  | 2074.23418 | 3 | 1.59E-05 | 0.74 | 3.53  | -     | 805.9    |
| gi 27764873 ref NP_057070.2 | cytokine receptor-like factor 3; cytokine receptor-like molecule 9; cy  |            |   | 1.61E-05 | 1.62 | 20.15 | 6.10  | 49737.6  |
| AHQ-6-7, 4422               | R.APTYFCGQTLTFR.V                                                       | 1563.75875 | 2 | 3.34E-05 | 0.81 | 2.85  | -     | 676.8    |
| AHQ-6-7, 3234               | K.LIEHGVTAEIDLVR.E                                                      | 1566.74089 | 2 | 1.61E-05 | 0.81 | 2.87  | -     | 961.7    |
| gi 4506063 ref NP_002725.1  | protein kinase, cAMP-dependent, regulatory, type I, alpha; tissue-speci |            |   | 1.63E-05 | 0.43 | 10.18 | 4.50  | 42981.4  |
| AHQ-6-12, 4860 - 4871       | R.LTVADALEPVQFEDGQK.I                                                   | 1861.04222 | 2 | 1.63E-05 | 0.43 | 2.93  | -     | 290.9    |
| gi 4502643 ref NP_001753.1  | chaperonin containing TCP1, subunit 6A (zeta 1); chaperonin containing  |            |   | 1.67E-05 | 0.77 | 10.15 | 3.00  | 58023.9  |
| AHQ-6-7, 4508               | K.VLAQNSGFDLQETLVK.I                                                    | 1762.98491 | 2 | 1.67E-05 | 0.77 | 3.10  | -     | 680.1    |
| gi 4557675 ref NP_000201.1  | integrin alpha chain, alpha 6 [Homo sapiens]                            |            |   | 1.67E-05 | 2.21 | 30.16 | 2.90  | 119509.5 |
| AHQ-6-4, 3393               | K.FGSCQGVAAATFTK.D                                                      | 1503.66172 | 2 | 1.61E-04 | 0.84 | 3.07  | -     | 853.9    |
| AHQ-6-4, 2967               | K.LETTSNQDNLAPITAK.A                                                    | 1716.87141 | 2 | 4.01E-04 | 0.72 | 3.23  | -     | 453.3    |
| AHQ-6-3, 5117               | K.LIATFPDITYSAYR.E                                                      | 1732.95729 | 2 | 1.67E-05 | 0.65 | 2.99  | -     | 402.6    |
| gi 5031985 ref NP_005787.1  | nuclear transport factor 2; placental protein 15 [Homo sapiens]         |            |   | 1.75E-05 | 0.70 | 10.19 | 11.00 | 14478.4  |
| AHQ-6-14-, 4344             | K.NINDAWVCTNDM*FR.L                                                     | 1773.92828 | 2 | 1.75E-05 | 0.70 | 3.23  | -     | 384.4    |
| gi 4504743 ref NP_002194.1  | integrin alpha 2 precursor; Integrin, alpha-2 (CD49B; alpha-2 subunit o |            |   | 1.76E-05 | 0.87 | 10.21 | 1.90  | 129294.4 |
| AHQ-6-4, 4915               | R.VDISLENPGTSPALEAYSETAK.V                                              | 2293.46974 | 2 | 1.76E-05 | 0.87 | 3.67  | -     | 732.9    |
| AHQ-6-3, 4860               | R.VDISLENPGTSPALEAYSETAK.V                                              | 2293.46974 | 2 | 3.05E-05 | 0.90 | 4.23  | -     | 565.3    |
| gi 14211923 ref NP_115982.1 | PKC1-related HIT protein [Homo sapiens]                                 |            |   | 1.78E-05 | 1.69 | 20.20 | 22.70 | 17161.6  |
| AHQ-6-13-, 5872             | R.ISQAEEDDQLLHLLVAK.Q                                                   | 2235.52293 | 3 | 1.78E-05 | 0.79 | 3.11  | -     | 912.8    |
| AHQ-6-13-, 5818 - 5824      | K.SLPADILYEDQQLVFR.D                                                    | 2069.32354 | 2 | 3.14E-05 | 0.90 | 4.03  | -     | 806.8    |
| AHQ-6-13, 5815 - 5892       | K.SLPADILYEDQQLVFR.D                                                    | 2069.32354 | 2 | 2.64E-04 | 0.32 | 2.58  | -     | 176.8    |
| gi 19913424 ref NP_001681.2 | ATPase, H+ transporting, lysosomal 70kD, V1 subunit A, isoform 1; V-AT  |            |   | 1.84E-05 | 2.64 | 30.27 | 8.10  | 68303.7  |
| AHQ-6-6, 4130               | R.LAEMPADSGYPAYLGAR.L                                                   | 1782.99819 | 2 | 4.42E-04 | 0.90 | 3.74  | -     | 845.3    |
| AHQ-6-6, 2347               | K.LPANHPLLTGQR.V                                                        | 1317.52194 | 2 | 5.02E-04 | 0.78 | 3.08  | -     | 658.5    |
| AHQ-6-6, 5152               | R.VGSHITGGDIYGVNSLNIK.H                                                 | 2160.41292 | 2 | 1.84E-05 | 0.97 | 5.41  | -     | 1250.5   |
| gi 14745898 ref XP_016144.2 | similar to tyrosine 3-monooxygenase/tryptophan 5-monooxygenase activat  |            |   | 1.94E-05 | 0.84 | 10.15 | 7.50  | 18201.0  |
| AHQ-6-11, 6088              | K.LLCCDILDVLDK.N                                                        | 1479.74157 | 2 | 1.94E-05 | 0.84 | 2.92  | -     | 473.7    |
| gi 4557241 ref NP_001095.1  | skeletal muscle specific actinin, alpha 3 [Homo sapiens]                |            |   | 1.96E-05 | 0.86 | 10.17 | 0.90  | 103293.7 |
| AHQ-6-4, 3023               | K.ALDFIASK.G                                                            | 865.00867  | 2 | 6.26E-05 | 0.90 | 3.41  | -     | 579.5    |
| AHQ-6-5, 2984               | K.ALDFIASK.G                                                            | 865.00867  | 2 | 1.96E-05 | 0.86 | 2.82  | -     | 572.8    |
| AHQ-6-4, 2972 - 3035        | K.ALDFIASK.G                                                            | 865.00867  | 1 | 1.15E-04 | 0.57 | 2.21  | -     | 802.9    |
| gi 29731857 ref XP_293042.1 | similar to ribosomal protein S12; 40S ribosomal protein S12 [Homo sapi  |            |   | 1.97E-05 | 0.87 | 10.17 | 8.90  | 19543.6  |
| AHQ-6-13-, 4478             | K.LVEALCAEQINLIK.V                                                      | 1753.05645 | 2 | 1.97E-05 | 0.87 | 3.50  | -     | 795.7    |
| gi 4503531 ref NP_001958.1  | eukaryotic translation initiation factor 4A, isoform 2 [Homo sapiens] [ |            |   | 2.17E-05 | 0.93 | 10.20 | 3.90  | 46393.9  |
| AHQ-6-8, 3454               | R.GIYAGFEKPSAIQQR.A                                                     | 1829.04828 | 2 | 2.17E-05 | 0.93 | 4.01  | -     | 974.8    |
| gi 4507383 ref NP_001052.1  | thromboxane A synthase 1 (platelet, cytochrome P450, family 5, subfamil |            |   | 2.18E-05 | 2.59 | 30.20 | 7.50  | 60675.3  |
| AHQ-6-7, 2448               | R.EAAQDCQVGLGQR.I                                                       | 1377.46310 | 2 | 5.26E-04 | 0.72 | 2.97  | -     | 741.1    |
| AHQ-6-7, 4075               | R.FQACPETQVPLQLESK.S                                                    | 1877.10807 | 2 | 2.18E-05 | 0.93 | 3.91  | -     | 912.9    |
| AHQ-6-7, 2984               | R.YAESGDADFQIR.C                                                        | 1372.42172 | 2 | 4.03E-05 | 0.94 | 3.55  | -     | 1385.9   |
| gi 5803201 ref NP_006818.1  | transmembrane trafficking protein [Homo sapiens]                        |            |   | 2.26E-05 | 0.93 | 10.18 | 5.00  | 24975.8  |
| AHQ-6-11, 4105              | R.IPDQLVLDM*K.H                                                         | 1301.57773 | 2 | 2.26E-05 | 0.93 | 3.50  | -     | 1300.5   |
| gi 9257232 ref NP_000598.1  | orosomucoid 1 precursor; Orosomucoid-1 (alpha-1-acid glycoprotein-1); a |            |   | 2.33E-05 | 0.82 | 10.16 | 7.00  | 23511.4  |
| AHQ-6-8, 5785               | K.EQLGFEFYALDCLR.I                                                      | 1744.90337 | 2 | 3.12E-04 | 0.87 | 3.22  | -     | 903.1    |
| AHQ-6-1, 5895 - 5964        | K.EQLGFEFYALDCLR.I                                                      | 1744.90337 | 2 | 2.33E-05 | 0.82 | 3.19  | -     | 635.9    |
| gi 21735621 ref NP_005909.2 | mitochondrial malate dehydrogenase precursor [Homo sapiens]             |            |   | 2.36E-05 | 0.95 | 10.26 | 6.50  | 35503.0  |
| AHQ-6-13-, 5428             | R.LTLYDIATPGVAADLSHIETK.A                                               | 2366.65506 | 3 | 2.36E-05 | 0.95 | 5.10  | -     | 1283.6   |
| gi 4502565 ref NP_001740.1  | calpain, small subunit 1; calpain, small polypeptide; calcium-dependent |            |   | 2.38E-05 | 0.69 | 10.20 | 5.60  | 28315.5  |
| AHQ-6-10, 2360              | R.THYSNIEANESSEVR.Q                                                     | 1778.81502 | 2 | 2.38E-05 | 0.69 | 2.59  | -     | 687.4    |
| gi 5453902 ref NP_006214.1  | protein (peptidyl-prolyl) cis/trans isomerase NIMA-interacting, 4 (parv |            |   | 2.41E-05 | 0.53 | 10.16 | 22.90 | 13809.9  |
| AHQ-6-13, 5727              | R.GSM*VGPQEAALPVSQM*DKPVFTDPPVK.T                                       | 3153.61740 | 3 | 2.41E-05 | 0.53 | 3.17  | -     | 319.8    |
| gi 4502011 ref NP_000467.1  | adenylate kinase 1 [Homo sapiens]                                       |            |   | 2.52E-05 | 1.75 | 20.19 | 17.00 | 21634.7  |
| AHQ-6-11, 5020              | R.IGOPTLLLYVDAGPETM*TRQ.L                                               | 2220.53174 | 2 | 2.52E-05 | 0.80 | 3.52  | -     | 635.2    |
| AHQ-6-11, 3737              | K.YGYTHLSTGDLLR.S                                                       | 1496.64912 | 2 | 5.08E-05 | 0.96 | 3.71  | -     | 1841.1   |
| gi 29732170 ref XP_291550.1 | similar to Heat shock protein HSP 90-alpha (HSP 86) [Homo sapiens] [MA  |            |   | 2.56E-05 | 1.82 | 20.20 | 13.60 | 13262.9  |
| AHQ-6-5, 4080               | K.HLEINPDHSIETLR.Q                                                      | 1787.99770 | 3 | 2.56E-05 | 0.95 | 4.04  | -     | 1886.8   |
| AHQ-6-5, 3656               | K.HLEINPDHSIETLR.Q                                                      | 1916.17061 | 2 | 7.08E-05 | 0.87 | 3.79  | -     | 674.6    |
| gi 19913373 ref NP_079536.2 | G6B protein isoform G6b-A precursor; G6B protein; immunoglobulin recep  |            |   | 2.61E-05 | 0.90 | 10.14 | 3.80  | 25002.6  |

|                             |                                                                                  |            |   |          |      |       |       |          |
|-----------------------------|----------------------------------------------------------------------------------|------------|---|----------|------|-------|-------|----------|
| AHQ-6-11, 2573 - 2648       | R.TVLHVLGDR.T                                                                    | 1010.17224 | 2 | 3.54E-04 | 0.89 | 2.74  | -     | 1176.6   |
| AHQ-6-10, 2512              | R.TVLHVLGDR.T                                                                    | 1010.17224 | 2 | 2.61E-05 | 0.90 | 2.62  | -     | 1262.0   |
| gi 30153076 ref XP_301485.1 | similar to ubiquitin-conjugating enzyme E2N; 1500026J17Rik [Homo sapiens]        |            |   | 2.67E-05 | 0.83 | 10.14 | 9.90  | 12235.8  |
| AHQ-6-12, 2267 - 2303       | K.TDEAQIAETAR.A                                                                  | 1205.25725 | 2 | 2.67E-05 | 0.83 | 2.82  | -     | 908.2    |
| gi 14043026 ref NP_003752.2 | vesicle-associated membrane protein 8; endobrevin [Homo sapiens]                 |            |   | 2.70E-05 | 0.95 | 10.21 | 14.00 | 11438.2  |
| AHQ-6-13-, 2610             | R.NKTEDELEATSEHF.K.T                                                             | 1649.74039 | 3 | 2.70E-05 | 0.95 | 4.14  | -     | 1611.5   |
| gi 30153852 ref XP_171113.3 | similar to Moesin (Membrane-organizing extension spike protein) [Homo sapiens]   |            |   | 2.73E-05 | 0.96 | 10.23 | 9.30  | 15601.7  |
| AHQ-6-6, 2084 - 2087        | R.RKPDITIEVQQMK.A                                                                | 1473.72364 | 2 | 2.73E-05 | 0.96 | 4.59  | -     | 1402.9   |
| gi 29736622 ref XP_293924.1 | similar to cytoplasmic beta-actin [Homo sapiens]                                 |            |   | 2.80E-05 | 0.87 | 10.20 | 8.00  | 42002.9  |
| AHQ-6-8, 5793               | R.TTGIVM'DSGDGVTHIVPIYEGYALPHAILR.L                                              | 3213.65260 | 3 | 2.80E-05 | 0.87 | 3.91  | -     | 1263.3   |
| gi 4505773 ref NP_002625.1  | prohibitin [Homo sapiens]                                                        |            |   | 2.88E-05 | 0.88 | 10.16 | 5.10  | 29803.9  |
| AHQ-6-10, 4042              | R.KLEAAEDIAQLSR.S                                                                | 1607.78978 | 2 | 2.88E-05 | 0.88 | 3.30  | -     | 863.8    |
| gi 18375655 ref NP_055184.2 | protein tyrosine phosphatase, non-receptor type 18; brain-derived phosphatase    |            |   | 3.07E-05 | 0.79 | 10.17 | 6.50  | 50482.1  |
| AHQ-6-13, 4933              | R.VPADQSPAGSGAYEDVAGGAQTGGGLFNLR.I                                               | 2864.03331 | 3 | 3.07E-05 | 0.79 | 3.45  | -     | 876.8    |
| gi 21361619 ref NP_061882.2 | TOLLIP protein; Toll-interacting protein [Homo sapiens]                          |            |   | 3.09E-05 | 0.90 | 10.20 | 5.10  | 30281.6  |
| AHQ-6-11, 5328 - 5387       | R.GPVYIGELPQDFLR.I                                                               | 1604.83072 | 2 | 3.09E-05 | 0.90 | 3.99  | -     | 771.5    |
| gi 18426915 ref NP_004386.2 | drebrin 1 isoform a; drebrin E; drebrin-1; drebrin E2 [Homo sapiens] [           |            |   | 3.23E-05 | 1.85 | 20.25 | 5.40  | 71438.9  |
| AHQ-6-13-, 4029             | K.LAASGEGQLQELSGHFENQK.V                                                         | 2073.20908 | 2 | 3.23E-05 | 0.94 | 4.99  | -     | 834.1    |
| AHQ-6-13-, 5326             | K.YVLINWVGEDVPDAR.K                                                              | 1746.94404 | 2 | 1.56E-04 | 0.91 | 4.10  | -     | 763.8    |
| gi 29788766 ref NP_064424.2 | tubulin, beta polypeptide 4, member Q [Homo sapiens]                             |            |   | 3.39E-05 | 1.30 | 20.26 | 10.90 | 48377.2  |
| AHQ-6-13, 4564              | R.AVLVLEPMTDMSVR.S                                                               | 1602.83495 | 2 | 4.88E-04 | 0.44 | 2.75  | -     | 352.4    |
| AHQ-6-7, 5636               | K.EAESDCLQGFQLTHSLGGTSGMGTLKLSK.I                                                | 3315.65550 | 3 | 3.39E-05 | 0.85 | 3.80  | -     | 789.4    |
| gi 22748619 ref NP_689476.1 | tropomyosin 3 [Homo sapiens]                                                     |            |   | 3.43E-05 | 1.66 | 20.17 | 9.90  | 28222.6  |
| AHQ-6-12, 3421              | R.KLVIIEDGLER.T                                                                  | 1285.51492 | 2 | 3.27E-04 | 0.79 | 2.85  | -     | 771.2    |
| AHQ-6-10, 2155 - 2232       | K.YSQKEDKYEEIEK.I                                                                | 1689.80129 | 2 | 3.43E-05 | 0.87 | 3.37  | -     | 1077.8   |
| gi 4557415 ref NP_000062.1  | cystathionine-beta-synthase; serine sulfhydryase; beta-thionase; methylycysteine |            |   | 3.52E-05 | 0.59 | 10.15 | 2.50  | 60586.2  |
| AHQ-6-3, 3936               | K.FLSDRWMLQKGLFK.E                                                               | 1770.13375 | 2 | 3.52E-05 | 0.59 | 2.99  | -     | 497.2    |
| gi 4826762 ref NP_005134.1  | haploglobin [Homo sapiens]                                                       |            |   | 3.55E-05 | 0.88 | 10.17 | 3.40  | 45205.0  |
| AHQ-6-8, 4018               | K.YVMVLPAVDQDCIR.H                                                               | 1709.96880 | 2 | 3.55E-05 | 0.88 | 3.41  | -     | 595.9    |
| gi 27500008 ref XP_208872.1 | similar to tropomyosin 3 [Homo sapiens]                                          |            |   | 3.56E-05 | 0.93 | 10.24 | 6.50  | 28954.4  |
| AHQ-6-9, 3674 - 3675        | R.ALKDEEKMELQELQLK.E                                                             | 1946.25520 | 2 | 3.56E-05 | 0.93 | 4.77  | -     | 951.9    |
| gi 4557251 ref NP_001101.1  | a disintegrin and metalloprotease domain 10 [Homo sapiens]                       |            |   | 3.57E-05 | 2.45 | 30.23 | 5.90  | 84141.7  |
| AHQ-6-5, 4531               | K.AIDTIYQTDFSGIR.N                                                               | 1701.85844 | 2 | 4.61E-04 | 0.96 | 4.59  | -     | 1177.5   |
| AHQ-6-5, 5327               | K.NTCQLYIQDHLFFK.Y                                                               | 1930.17267 | 2 | 3.57E-05 | 0.73 | 3.40  | -     | 355.7    |
| AHQ-6-5, 3949 - 3967        | R.TITLQPGSPCNDFR.G                                                               | 1607.76993 | 2 | 4.24E-04 | 0.76 | 3.06  | -     | 346.4    |
| gi 13435359 ref NP_001914.2 | damage-specific DNA binding protein 1; damage-specific DNA binding protein       |            |   | 3.66E-05 | 0.92 | 10.22 | 2.60  | 126987.0 |
| AHQ-6-4, 3763               | R.IEVDQTSGGTTALRPSASTQALSSSVSSSK.L                                               | 2954.15138 | 3 | 3.66E-05 | 0.92 | 4.40  | -     | 1300.1   |
| gi 7330335 ref NP_039234.1  | chloride intracellular channel 4; chloride intracellular channel 4 like          |            |   | 3.92E-05 | 0.51 | 10.13 | 8.70  | 28771.9  |
| AHQ-6-10, 4440              | R.DEFTNTCPSPDKEVEIAYS DVAK.R                                                     | 2520.66487 | 2 | 3.92E-05 | 0.51 | 2.68  | -     | 424.1    |
| gi 18201911 ref NP_000629.2 | vitronectin precursor; serum spreading factor; somatomedin B; compleme           |            |   | 3.93E-05 | 0.62 | 10.18 | 3.10  | 54335.4  |
| AHQ-6-14-, 5363 - 5423      | R.SIAQYWLGCPCPAGHL                                                               | 1671.90045 | 2 | 3.18E-04 | 0.81 | 3.52  | -     | 573.0    |
| AHQ-6-13-, 5352 - 5424      | R.SIAQYWLGCPCPAGHL                                                               | 1671.90045 | 2 | 3.93E-05 | 0.62 | 2.80  | -     | 416.6    |
| gi 21361399 ref NP_055040.2 | protein phosphatase 2 (formerly 2A), regulatory subunit A (PR 65), alp           |            |   | 3.95E-05 | 0.79 | 10.17 | 3.40  | 65308.3  |
| AHQ-6-6, 5223               | K.IGPILDNTLQSEVVKPILEK.L                                                         | 2195.54185 | 3 | 3.95E-05 | 0.79 | 3.47  | -     | 639.9    |
| gi 9845511 ref NP_008839.2  | ras-related C3 botulinum toxin substrate 1 isoform Rac1; rho family, sm          |            |   | 4.03E-05 | 0.82 | 10.15 | 5.20  | 21450.0  |
| AHQ-6-11, 2947 - 3009       | K.YLECSALTQR.G                                                                   | 1242.38392 | 2 | 4.03E-05 | 0.82 | 3.04  | -     | 802.9    |
| gi 4885417 ref NP_005330.1  | huntingtin interacting protein 2; ubiquitin-conjugating enzyme E2-25 KD          |            |   | 4.10E-05 | 0.87 | 10.18 | 7.50  | 22406.5  |
| AHQ-6-11, 2864 - 2876       | R.GEIAQPPDTPYEGGR.Y                                                              | 1516.59406 | 2 | 4.10E-05 | 0.87 | 3.51  | -     | 541.6    |
| gi 5174737 ref NP_006077.1  | tubulin, beta, 4 [Homo sapiens]                                                  |            |   | 4.15E-05 | 0.55 | 10.15 | 3.80  | 50517.5  |
| AHQ-6-13-, 5686 - 5764      | K.MSSTFIGNSTAIQELFK.R                                                            | 1875.13553 | 2 | 4.15E-05 | 0.55 | 3.06  | -     | 683.9    |
| gi 18105037 ref NP_004709.2 | cytochrome c oxidase subunit VIIa polypeptide 2 like; estrogen receptor          |            |   | 4.54E-05 | 0.82 | 10.21 | 28.90 | 12614.6  |
| AHQ-6-14-, 5779             | K.LAGAWASEAYSPQGLKPVVSTEAAPFIATPTK.L                                             | 3399.87995 | 3 | 4.54E-05 | 0.82 | 4.18  | -     | 530.1    |
| gi 7706497 ref NP_057392.1  | UMP-CMP kinase [Homo sapiens]                                                    |            |   | 4.64E-05 | 0.87 | 10.17 | 5.70  | 25854.7  |
| AHQ-6-11, 2729              | R.RKNPDSQYGLIEK.Y                                                                | 1521.65375 | 2 | 4.64E-05 | 0.87 | 3.35  | -     | 718.2    |
| gi 29734623 ref XP_299768.1 | hypothetical protein XP_299768 [Homo sapiens]                                    |            |   | 4.73E-05 | 0.43 | 10.12 | 7.50  | 14905.7  |
| AHQ-6-9, 3372 - 3426        | K.RMVPVKEIDR.L                                                                   | 1243.50477 | 1 | 4.73E-05 | 0.43 | 2.33  | -     | 498.6    |
| gi 29745994 ref XP_290546.1 | similar to KIAA0830 protein [Homo sapiens]                                       |            |   | 4.79E-05 | 0.69 | 10.15 | 2.60  | 55016.4  |
| AHQ-6-7, 3951 - 3958        | K.ILEVVNQIQDEER.M                                                                | 1585.74098 | 2 | 4.79E-05 | 0.69 | 3.10  | -     | 683.6    |
| gi 30147857 ref XP_293007.2 | similar to peptidylprolyl isomerase A (cyclophilin A) [Homo sapiens] [           |            |   | 4.90E-05 | 1.31 | 20.16 | 5.90  | 20789.8  |
| AHQ-6-12, 3707              | K.ITIADCGQLQ                                                                     | 1120.25869 | 2 | 9.84E-04 | 0.68 | 2.81  | -     | 921.5    |
| AHQ-6-13-, 3398             | K.KITIIDCGQLQ                                                                    | 1248.43160 | 2 | 5.52E-05 | 0.67 | 3.03  | -     | 718.0    |
| AHQ-6-12, 3257 - 3323       | K.KITIIDCGQLQ                                                                    | 1248.43160 | 2 | 4.90E-05 | 0.63 | 3.14  | -     | 719.5    |
| gi 13376282 ref NP_079131.1 | hypothetical protein FLJ12785 [Homo sapiens]                                     |            |   | 4.90E-05 | 0.79 | 10.13 | 2.00  | 68298.1  |
| AHQ-6-5, 3772 - 3783        | K.YPGHLAAITLSR.M                                                                 | 1299.50338 | 2 | 4.90E-05 | 0.79 | 2.62  | -     | 1091.3   |
| gi 27478749 ref XP_208411.1 | similar to L-lactate dehydrogenase A chain (LDH-A) (LDH muscle subunit           |            |   | 5.12E-05 | 0.94 | 10.26 | 7.40  | 25625.5  |
| AHQ-6-9, 6156               | K.LLIVSNPVDILTYVAWK.I                                                            | 1945.33337 | 2 | 5.12E-05 | 0.94 | 5.28  | -     | 779.1    |
| gi 20270259 ref NP_620061.1 | phosphoglycerate kinase 2; phosphoglycerate kinase 1, pseudogene 2 [Ho           |            |   | 5.19E-05 | 0.89 | 10.20 | 3.60  | 44895.0  |
| AHQ-6-8, 3473               | K.LGDVYVNDVDFGTAHR.A                                                             | 1635.76178 | 2 | 5.19E-05 | 0.89 | 4.01  | -     | 854.9    |
| gi 24307917 ref NP_006819.1 | RNA helicase family [Homo sapiens]                                               |            |   | 5.34E-05 | 0.41 | 10.13 | 0.60  | 251471.2 |
| AHQ-6-2, 4684 - 4744        | K.M*1LPEGIQRENNK.L                                                               | 1558.78537 | 2 | 5.34E-05 | 0.41 | 2.58  | -     | 458.0    |
| gi 4757952 ref NP_001782.1  | cell division cycle 42 isoform 1; cell division cycle 42 (GTP-binding p          |            |   | 5.84E-05 | 3.52 | 40.27 | 26.70 | 21258.5  |
| AHQ-6-11, 2367              | K.CVVVGDGAVGK.T                                                                  | 1062.22237 | 2 | 7.17E-04 | 0.86 | 2.72  | -     | 1368.2   |
| AHQ-6-11, 6129              | K.NVFDEAILAALPEPEPK.K                                                            | 1854.09282 | 3 | 5.84E-05 | 0.95 | 5.41  | -     | 1077.4   |
| AHQ-6-11, 5355 - 5368       | K.TPFLLVGKTQIDLR.D                                                               | 1473.74120 | 2 | 8.61E-04 | 0.95 | 4.12  | -     | 1543.2   |
| AHQ-6-11, 2620 - 2677       | K.YVECSALTQK.G                                                                   | 1200.34381 | 2 | 3.92E-04 | 0.76 | 3.05  | -     | 476.2    |
| gi 19913414 ref NP_055018.2 | adaptor-related protein complex 2, alpha 1 subunit isoform 1; adaptin,           |            |   | 6.07E-05 | 0.13 | 10.09 | 1.10  | 107545.3 |
| AHQ-6-12, 3703              | R.YGGAPALTLK.L                                                                   | 1119.29547 | 1 | 6.07E-05 | 0.13 | 1.89  | -     | 391.0    |
| gi 6912240 ref NP_036227.1  | adaptor-related protein complex 3, mu 1 subunit; mu-adaptin 3A; AP-3 ad          |            |   | 6.26E-05 | 0.81 | 10.16 | 4.10  | 46938.9  |
| AHQ-6-13, 5517              | K.SVVSQSVQDYFFEAQEK.A                                                            | 2025.18125 | 2 | 6.26E-05 | 0.81 | 3.16  | -     | 743.3    |
| gi 4505753 ref NP_002620.1  | phosphoglycerate mutase 1 (brain); Phosphoglycerate mutase A, nonmuscle          |            |   | 6.29E-05 | 0.81 | 10.16 | 7.10  | 28803.7  |
| AHQ-6-10, 3834              | R.FSGWYDADLSPAGHEEA.R                                                            | 1981.06697 | 3 | 6.29E-05 | 0.81 | 3.19  | -     | 1080.7   |
| gi 7706563 ref NP_057614.1  | RAB-8b protein [Homo sapiens]                                                    |            |   | 6.46E-05 | 0.84 | 10.18 | 6.80  | 23584.0  |
| AHQ-6-11, 5168 - 5237       | K.SSANVEEAFTLAR.D                                                                | 1542.67465 | 2 | 6.46E-05 | 0.84 | 3.51  | -     | 1127.2   |
| gi 24307939 ref NP_036205.1 | chaperonin containing TCP1, subunit 5 (epsilon) [Homo sapiens]                   |            |   | 6.51E-05 | 0.91 | 10.17 | 3.00  | 59670.7  |
| AHQ-6-7, 6011               | K.LGFAGLVQIEISFGTTK.D                                                            | 1668.91472 | 2 | 6.51E-05 | 0.91 | 3.46  | -     | 1164.1   |
| gi 4506765 ref NP_002952.1  | S100 calcium-binding protein A4; 18A2; 42A; S100 calcium-binding protei          |            |   | 6.57E-05 | 0.86 | 10.16 | 10.90 | 11728.5  |
| AHQ-6-14-, 3523 - 3600      | K.ALDMVMVSTFFHK.Y                                                                | 1248.47665 | 2 | 6.57E-05 | 0.86 | 2.91  | -     | 954.1    |
| gi 21361334 ref NP_001893.2 | cystathionase isoform 1; homoserine deaminase; homoserine dehydratase;           |            |   | 6.96E-05 | 0.82 | 10.18 | 3.50  | 44507.8  |
| AHQ-6-14-, 5406             | R.NCLEKAVAAALDGAK.Y                                                              | 1461.66628 | 2 | 6.96E-05 | 0.82 | 3.11  | -     | 1269.3   |
| gi 10835049 ref NP_001655.1 | ras homolog gene family, member A; Aplysia ras-related homolog 12; Rho           |            |   | 6.96E-05 | 1.74 | 20.21 | 18.70 | 21768.0  |
| AHQ-6-10, 6170              | K.DQFPEVYVPTFENYVADIEVDGK.Q                                                      | 2775.01481 | 3 | 6.96E-05 | 0.83 | 4.29  | -     | 708.6    |
| AHQ-6-10, 3631              | R.IGAFGYMECSAK.T                                                                 | 1335.53122 | 2 | 9.93E-05 | 0.91 | 3.37  | -     | 825.3    |
| gi 5031987 ref NP_005720.1  | peptidylprolyl isomerase F (cyclophilin F) [Homo sapiens]                        |            |   | 7.18E-05 | 2.54 | 30.19 | 19.30 | 22040.1  |
| AHQ-6-12, 3872              | R.FPDENFTLK.H                                                                    | 1111.22866 | 2 | 7.18E-05 | 0.87 | 3.05  | -     | 727.1    |
| AHQ-6-12, 4837 - 4908       | K.GSGDPSSSSSSGNPLVLDVANGKPLGR.V                                                  | 2834.99028 | 3 | 7.90E-05 | 0.77 | 3.52  | -     | 742.1    |
| AHQ-6-12, 3227 - 3305       | K.KIVITDCGQLS                                                                    | 1235.43283 | 2 | 3.05E-04 | 0.90 | 3.52  | -     | 926.6    |
| gi 4504489 ref NP_000403.1  | histidine-rich glycoprotein precursor; histidine-proline rich glycoprot          |            |   | 7.24E-05 | 0.95 | 10.22 | 2.70  | 59578.0  |
| AHQ-6-5, 6153 - 6160        | K.DSPVLDFEDTER.Y                                                                 | 1683.79674 | 2 | 7.24E-05 | 0.95 | 4.46  | -     | 1254.0   |
| gi 28827809 ref NP_789797.1 | nucleoside diphosphate kinase B-like [Homo sapiens]                              |            |   | 7.28E-05 | 0.92 | 10.19 | 6.60  | 15529.0  |
| AHQ-6-12, 3360 - 3364       | R.GDFCIQVGR.N                                                                    | 1053.17404 | 2 | 7.28E-05 | 0.92 | 3.76  | -     | 1103.8   |
| gi 29729616 ref XP_292963.1 | similar to peptidylprolyl isomerase A (cyclophilin A) [Homo sapiens] [           |            |   | 7.40E-05 | 0.85 | 10.29 | 16.40 | 18025.4  |
| AHQ-6-14-, 4732 - 4812      | K.HTGPGILSM*ANAGPNTNGSQFFICTAK.S                                                 | 2810.11545 | 3 | 9.82E-04 | 0.96 | 5.89  | -     | 1418.8   |
| AHQ-6-14-, 4822             | K.HTGPGILSM*ANAGPNTNGSQFFICTAK.S                                                 | 2810.11545 | 3 | 7.40E-05 | 0.85 | 4.15  | -     | 679.6    |
| AHQ-6-13, 4845 - 4915       | K.HTGPGILSM*ANAGPNTNGSQFFICTAK.S                                                 | 2810.11545 | 3 | 1.11E-04 | 0.95 | 5.49  | -     | 1340.6   |
| gi 29747201 ref XP_290702.1 | similar to Myo16 protein [Homo sapiens]                                          |            |   | 7.51E-05 | 0.80 | 10.15 | 10.50 | 16932.3  |
| AHQ-6-14, 4226              | R.DLAEHVEVEDTTLNR.C                                                              | 1870.95236 | 2 | 7.51E-05 | 0.80 | 2.97  | -     | 714.0    |
| gi 19882229 ref NP_065871.1 | P-Rex1 [Homo sapiens]                                                            |            |   | 7.65E-05 | 0.52 | 10.16 | 1.30  | 186232.7 |

|                            |                                                                         |            |   |          |      |       |       |          |
|----------------------------|-------------------------------------------------------------------------|------------|---|----------|------|-------|-------|----------|
| AHQ-6-14-, 5018            | R.FHADEEM*EGTSSKNQLRNDFK.L                                              | 2628.81644 | 3 | 7.65E-05 | 0.52 | 3.15  | -     | 308.8    |
| gi20553919 ref XP_033811.2 | similar to hypothetical protein FLJ14775 [Homo sapiens]                 |            |   | 7.66E-05 | 0.60 | 10.15 | 9.90  | 17460.4  |
| AHQ-6-11, 5492 - 5553      | R.NGSKEGNHHSTQPKR.N                                                     | 1677.76352 | 2 | 7.66E-05 | 0.60 | 2.94  | -     | 803.2    |
| gi5902134 ref NP_009005.1  | coronin, actin binding protein, 1A; coronin, actin-binding, 1A; coronin |            |   | 7.95E-05 | 1.90 | 20.22 | 6.90  | 51026.0  |
| AHQ-6-7, 6384 - 6443       | K.FVALICEASGGGAFVLPLGK.T                                                | 2121.52786 | 2 | 9.12E-04 | 0.96 | 4.42  | -     | 1442.8   |
| AHQ-6-7, 2298 - 2302       | R.KLQATVQELQK.R                                                         | 1286.50292 | 2 | 7.95E-05 | 0.95 | 3.94  | -     | 1537.2   |
| gi14249382 ref NP_116139.1 | hypothetical protein MGC15429 [Homo sapiens]                            |            |   | 7.99E-05 | 0.72 | 10.16 | 6.70  | 22345.5  |
| AHQ-6-11, 3921             | R.FSSETWQNLGTLHR.L                                                      | 1676.81390 | 3 | 7.99E-05 | 0.72 | 3.23  | -     | 413.5    |
| gi27482573 ref XP_208709.1 | similar to Ubiquitin-conjugating enzyme E2-18 kDa UbcH7 (Ubiquitin-pro  |            |   | 8.56E-05 | 1.77 | 20.24 | 26.00 | 18785.4  |
| AHQ-6-12, 4681             | K.GQVCLPVISAEENWKPAK.T                                                  | 2000.30757 | 2 | 1.39E-04 | 0.94 | 4.74  | -     | 678.3    |
| AHQ-6-12, 6179 - 6180      | K.TDQVQISLALVNDQPEHPLR.A                                                | 2484.79318 | 3 | 8.56E-05 | 0.83 | 4.00  | -     | 708.5    |
| gi4504505 ref NP_000405.1  | hydroxysteroid (17-beta) dehydrogenase 4 [Homo sapiens]                 |            |   | 8.64E-05 | 0.82 | 10.21 | 3.50  | 79685.9  |
| AHQ-6-5, 5824              | K.ICDFENASKPQSIQESTGSIIEVLK.I                                           | 2883.17795 | 3 | 8.64E-05 | 0.82 | 4.23  | -     | 693.0    |
| gi4506189 ref NP_002783.1  | proteasome alpha 7 subunit isoform 1; proteasome subunit RC6-1; proteas |            |   | 8.73E-05 | 0.84 | 10.17 | 6.00  | 27886.7  |
| AHQ-6-10, 3880 - 3894      | K.NYTDIAIETDDLTK.L                                                      | 1741.83137 | 2 | 8.73E-05 | 0.84 | 3.44  | -     | 703.5    |
| gi4557395 ref NP_000058.1  | carbonic anhydrase II; carbonic dehydratase II; carbonic dehydratase;   |            |   | 8.88E-05 | 0.72 | 10.18 | 7.30  | 29245.8  |
| AHQ-6-10, 4244 - 4248      | K.YDPSLKLPLSVSYDQATSLR.I                                                | 2141.36647 | 2 | 8.88E-05 | 0.72 | 2.99  | -     | 552.3    |
| gi10835121 ref NP_000289.1 | pyruvate kinase, liver and RBC; Pyruvate kinase, liver and RBC type [H  |            |   | 8.97E-05 | 0.92 | 10.18 | 1.90  | 61829.8  |
| AHQ-6-7, 3490 - 3506       | R.GDLGIEIPAEK.V                                                         | 1142.28420 | 2 | 8.97E-05 | 0.92 | 3.62  | -     | 1056.3   |
| AHQ-6-7, 3488              | R.GDLGIEIPAEK.V                                                         | 1142.28420 | 1 | 8.12E-04 | 0.63 | 2.32  | -     | 760.1    |
| gi30157216 ref XP_292133.2 | similar to gnetonin 1 [Homo sapiens]                                    |            |   | 8.98E-05 | 0.75 | 20.17 | 4.50  | 39693.8  |
| AHQ-6-14, 5029             | K.PSDTIENVK.A                                                           | 1003.08850 | 1 | 2.61E-04 | 0.32 | 2.17  | -     | 286.0    |
| AHQ-6-3, 4385 - 4461       | K.TITLEVKPSDITENVK.A                                                    | 1788.03268 | 2 | 1.71E-04 | 0.38 | 2.79  | -     | 292.7    |
| AHQ-6-1, 4519              | K.TITLEVKPSDITENVK.A                                                    | 1788.03268 | 2 | 8.98E-05 | 0.43 | 2.83  | -     | 411.3    |
| gi6996010 ref NP_002038.1  | glycyl-tRNA synthetase; GlyRS; glycine tRNA ligase [Homo sapiens]       |            |   | 9.10E-05 | 0.82 | 10.17 | 1.90  | 77530.3  |
| AHQ-6-6, 6163              | R.TFFSPFPAVAPFK.C                                                       | 1458.72722 | 2 | 9.10E-05 | 0.82 | 3.30  | -     | 603.8    |
| AHQ-6-5, 6235              | R.TFFSPFPAVAPFK.C                                                       | 1458.72722 | 2 | 3.13E-04 | 0.82 | 3.29  | -     | 470.5    |
| gi24497435 ref NP_002796.4 | proteasome 26S ATPase subunit 5; thyroid receptor interactor 1; protea  |            |   | 9.27E-05 | 0.36 | 10.14 | 4.20  | 45625.7  |
| AHQ-6-3, 4834 - 4893       | K.ILPNKNVDPLVSLMM*VEK.V                                                 | 1943.40420 | 2 | 9.27E-05 | 0.36 | 2.74  | -     | 364.3    |
| gi8923579 ref NP_060377.1  | hypothetical protein FLJ20625 [Homo sapiens]                            |            |   | 9.43E-05 | 0.69 | 10.16 | 19.30 | 17744.7  |
| AHQ-6-14-, 5723            | K.KLPLPLSLTSQPHQVLASEPIPFSDLQQVSR.I                                     | 3411.89550 | 3 | 9.43E-05 | 0.69 | 3.30  | -     | 513.4    |
| gi30148978 ref XP_291520.2 | similar to Keratin, type I cytoskeletal 18 (Cytokeratin 18) (K18) (CK   |            |   | 9.61E-05 | 0.52 | 10.14 | 2.20  | 68413.1  |
| AHQ-6-11, 4557 - 4561      | R.DWSHYFKTIKDLR.A                                                       | 1709.92863 | 2 | 9.61E-05 | 0.52 | 2.89  | -     | 479.2    |
| gi4557235 ref NP_000009.1  | acyl-Coenzyme A dehydrogenase, very long chain precursor [Homo sapiens] |            |   | 9.75E-05 | 0.44 | 10.15 | 2.90  | 70389.7  |
| AHQ-6-6, 5091 - 5155       | R.AGLGSGLSGLVHPPELSR.S                                                  | 1851.09693 | 2 | 9.75E-05 | 0.44 | 2.95  | -     | 512.2    |
| gi4502905 ref NP_001822.1  | clusterin; complement-associated protein SP-40 [Homo sapiens]           |            |   | 1.01E-04 | 1.53 | 20.21 | 8.70  | 52494.3  |
| AHQ-6-9, 2838 - 2844       | R.EILSVDCTNNPSQAK.L                                                     | 1764.89299 | 2 | 1.01E-04 | 0.63 | 2.86  | -     | 479.8    |
| AHQ-6-9, 3294              | R.VTTVASHTSDSDVPSGVTEVVVK.L                                             | 2135.52008 | 2 | 2.81E-04 | 0.90 | 4.15  | -     | 674.0    |
| gi4506193 ref NP_002784.1  | proteasome beta 1 subunit; proteasome subunit HC5; proteasome component |            |   | 1.01E-04 | 1.75 | 20.17 | 12.90 | 26489.2  |
| AHQ-6-11, 3911             | K.GAVYSFDPVGSYQR.D                                                      | 1546.66500 | 2 | 5.82E-04 | 0.86 | 2.99  | -     | 912.0    |
| AHQ-6-11, 4121             | K.TVIGCSGFHGDCLLTK.I                                                    | 1869.10923 | 2 | 1.01E-04 | 0.89 | 3.44  | -     | 895.7    |
| gi4503481 ref NP_001395.1  | eukaryotic translation elongation factor 1 gamma; elongation factor 1-g |            |   | 1.06E-04 | 1.42 | 20.17 | 6.20  | 50118.5  |
| AHQ-6-8, 2925              | K.ALIAAQSQAQVR.V                                                        | 1348.53280 | 2 | 1.06E-04 | 0.88 | 3.43  | -     | 746.2    |
| AHQ-6-8, 2509 - 2573       | R.KLDPSGSEETQTLVR.E                                                     | 1573.73020 | 2 | 1.65E-04 | 0.54 | 2.76  | -     | 254.0    |
| gi23110942 ref NP_002781.2 | proteasome alpha 5 subunit; proteasome component 5; macropain subunit   |            |   | 1.06E-04 | 0.84 | 10.13 | 5.00  | 26410.9  |
| AHQ-6-10, 5218             | R.LFQVEYIAEIK.L                                                         | 1424.66595 | 2 | 1.06E-04 | 0.84 | 2.53  | -     | 1436.2   |
| gi18201905 ref NP_000166.2 | glucose phosphate isomerase; neuroleukin; glucose-6-phosphate isomeras  |            |   | 1.08E-04 | 0.89 | 10.17 | 2.50  | 63146.7  |
| AHQ-6-7, 3732              | R.WVYVSNIDGTHIAK.T                                                      | 1603.80282 | 2 | 1.08E-04 | 0.89 | 3.36  | -     | 951.0    |
| gi4505395 ref NP_002499.1  | nidogen (enactin); Nidogen; nidogen (enactin) [Homo sapiens]            |            |   | 1.08E-04 | 0.95 | 10.23 | 1.30  | 136488.3 |
| AHQ-6-3, 5206              | K.ALEGLQYFPAVTSYK.N                                                     | 1744.96805 | 2 | 1.08E-04 | 0.95 | 4.63  | -     | 1036.6   |
| gi21361122 ref NP_001440.2 | four and a half LIM domains 1; Four-and-a-half LIM domains 1 [Homo sap  |            |   | 1.09E-04 | 2.33 | 30.23 | 14.30 | 31894.7  |
| AHQ-6-10, 2458             | K.AIVAGDQNVYK.G                                                         | 1307.43431 | 2 | 1.09E-04 | 0.83 | 3.14  | -     | 715.4    |
| AHQ-6-13-, 3788            | R.FVFHQEQVYCPDCAK.K                                                     | 1931.13758 | 3 | 1.74E-04 | 0.75 | 3.17  | -     | 1078.7   |
| AHQ-6-9, 3507              | R.FVFHQEQVYCPDCAK.K                                                     | 1931.13758 | 2 | 7.33E-04 | 0.71 | 2.78  | -     | 630.0    |
| AHQ-6-11, 3120             | K.GEDFYCVTCHETK.F                                                       | 1648.75260 | 2 | 3.26E-04 | 0.75 | 2.88  | -     | 555.3    |
| gi5730118 ref NP_006514.1  | X-prolyl aminopeptidase (aminopeptidase P) 1, soluble; X-prolyl aminope |            |   | 1.11E-04 | 0.74 | 10.17 | 2.60  | 69858.4  |
| AHQ-6-6, 5846              | R.GSLTFEPLTLVPIQTK.M                                                    | 1745.05263 | 2 | 1.11E-04 | 0.74 | 3.43  | -     | 493.8    |
| gi4757826 ref NP_004039.1  | beta-2-microglobulin [Homo sapiens]                                     |            |   | 1.15E-04 | 0.81 | 10.19 | 18.50 | 13714.5  |
| AHQ-6-14-, 6250 - 6251     | K.SNFLNCYVSGFHPDIEVDLLK.N                                               | 2556.83155 | 3 | 1.15E-04 | 0.81 | 3.73  | -     | 657.5    |
| gi4502297 ref NP_001678.1  | ATP synthase, H+ transporting, mitochondrial F1 complex, delta subunit  |            |   | 1.16E-04 | 0.90 | 10.18 | 8.30  | 17489.8  |
| AHQ-6-13-, 2606            | K.AQAELVGTAEATR.A                                                       | 1432.51860 | 2 | 1.16E-04 | 0.90 | 3.51  | -     | 1025.7   |
| gi4506773 ref NP_002956.1  | S100 calcium-binding protein A9; calgranulin B [Homo sapiens]           |            |   | 1.21E-04 | 0.89 | 10.21 | 13.20 | 13241.9  |
| AHQ-6-13-, 5466            | R.NIETINTFHQYSVK.L                                                      | 1808.02738 | 2 | 1.21E-04 | 0.89 | 4.26  | -     | 572.8    |
| gi18079216 ref NP_065815.1 | CASK-interacting protein 1 [Homo sapiens]                               |            |   | 1.29E-04 | 0.73 | 10.17 | 1.30  | 149812.6 |
| AHQ-6-2, 6486 - 6487       | R.PGSPQALGGPHGAPATAK.V                                                  | 1711.90292 | 2 | 1.29E-04 | 0.73 | 3.49  | -     | 709.7    |
| AHQ-6-1, 6495 - 6572       | R.PGSPQALGGPHGAPATAK.V                                                  | 1711.90292 | 2 | 6.49E-04 | 0.33 | 2.82  | -     | 327.4    |
| gi6005717 ref NP_009031.1  | ATP synthase, H+ transporting, mitochondrial F0 complex, subunit e; ATP |            |   | 1.37E-04 | 0.90 | 10.18 | 20.30 | 7933.1   |
| AHQ-6-14-, 5012            | R.YSALFLGVAYGATR.Y                                                      | 1489.69972 | 2 | 1.37E-04 | 0.90 | 3.58  | -     | 1058.7   |
| gi16904381 ref NP_006717.1 | LPS-responsive vesicle trafficking, beach and anchor containing; vesic  |            |   | 1.41E-04 | 0.78 | 10.18 | 0.60  | 319158.3 |
| AHQ-6-4, 4323              | R.SESYIGNCYILSGSR.D                                                     | 1764.89468 | 2 | 1.41E-04 | 0.78 | 3.59  | -     | 377.9    |
| gi4503785 ref NP_000135.1  | frataxin; Friedreich ataxia (frataxin) [Homo sapiens]                   |            |   | 1.45E-04 | 0.90 | 10.20 | 5.70  | 23218.1  |
| AHQ-6-13-, 3726 - 3797     | K.LGGDLGTYIVK.Y                                                         | 1250.42590 | 2 | 1.45E-04 | 0.90 | 3.21  | -     | 1105.8   |
| gi4504751 ref NP_002196.1  | integrin alpha 5 precursor; fibronectin receptor, alpha subunit; very I |            |   | 1.50E-04 | 0.91 | 10.20 | 1.70  | 114507.7 |
| AHQ-6-3, 3724              | R.LLESSSSSEGEPEVYK.S                                                    | 1984.10415 | 2 | 1.50E-04 | 0.91 | 4.09  | -     | 799.4    |
| gi4502923 ref NP_001830.1  | calponin 3; calponin, acidic [Homo sapiens]                             |            |   | 1.50E-04 | 0.84 | 10.14 | 3.30  | 36413.4  |
| AHQ-6-12, 2759 - 2760      | K.GPSYGLSAEVK.N                                                         | 1108.22631 | 2 | 1.50E-04 | 0.84 | 2.77  | -     | 976.1    |
| gi19923534 ref NP_060988.2 | MCM10 minichromosome maintenance deficient 10; homolog of yeast MCM10   |            |   | 1.52E-04 | 0.33 | 10.14 | 2.10  | 96134.1  |
| AHQ-6-8, 6148 - 6221       | R.EQLAYLESEEFQKILKAK.S                                                  | 2168.47496 | 2 | 1.52E-04 | 0.33 | 2.90  | -     | 118.5    |
| gi22035694 ref NP_001487.2 | GDNF family receptor alpha 3 preproprotein; glial cell line-derived ne  |            |   | 1.70E-04 | 0.57 | 10.13 | 2.50  | 44510.7  |
| AHQ-6-13, 3876             | K.M*NLSKLNMLK.P                                                         | 1208.52057 | 2 | 1.70E-04 | 0.57 | 2.57  | -     | 690.5    |
| gi21361456 ref NP_055425.2 | alpha glucosidase II alpha subunit; likely ortholog of mouse G2an alph  |            |   | 1.72E-04 | 0.83 | 10.16 | 0.90  | 109437.2 |
| AHQ-6-4, 2944              | R.GLLEFQHQR.A                                                           | 1129.25045 | 2 | 1.72E-04 | 0.83 | 3.15  | -     | 833.6    |
| gi30151752 ref XP_294531.2 | similar to seven transmembrane helix receptor [Homo sapiens]            |            |   | 1.78E-04 | 0.25 | 10.15 | 5.50  | 46776.6  |
| AHQ-6-2, 3070              | R.HSRTSLSSM*QQPELKGKVVQQR.E                                             | 2597.85025 | 3 | 1.78E-04 | 0.25 | 3.08  | -     | 231.0    |
| gi19923499 ref NP_061969.2 | GTP binding protein 2 [Homo sapiens]                                    |            |   | 1.83E-04 | 0.90 | 10.19 | 2.70  | 56683.9  |
| AHQ-6-6, 3996              | R.AGQAATLALGDFDR.A                                                      | 1406.52598 | 2 | 1.83E-04 | 0.90 | 3.75  | -     | 1024.8   |
| gi30158950 ref XP_301585.1 | similar to natural killer cell transcript 4 [Homo sapiens]              |            |   | 1.86E-04 | 0.48 | 10.17 | 15.40 | 18547.1  |
| AHQ-6-3, 4732 - 4760       | R.EPTVNDKIHORTCDLSKTIAPAER.Q                                            | 2911.19785 | 3 | 2.73E-04 | 0.55 | 3.30  | -     | 365.5    |
| AHQ-6-2, 4759 - 4836       | R.EPTVNDKIHORTCDLSKTIAPAER.Q                                            | 2911.19785 | 3 | 1.86E-04 | 0.48 | 3.04  | -     | 409.8    |
| gi4505599 ref NP_002568.1  | p21-activated kinase 2; novel serine kinase; hPAK65 [Homo sapiens] [MAS |            |   | 1.88E-04 | 0.78 | 10.16 | 3.40  | 58075.3  |
| AHQ-6-7, 4504              | R.ALYLIATNGTPELQNPKEK.L                                                 | 1973.21570 | 2 | 1.88E-04 | 0.78 | 3.27  | -     | 514.8    |
| gi5803115 ref NP_006830.1  | inner membrane protein, mitochondrial (mitofilin); motor protein [Homo  |            |   | 1.92E-04 | 0.49 | 10.15 | 2.20  | 83667.3  |
| AHQ-6-5, 6065              | K.LFEMVLGPAAYNVPLPK.K                                                   | 1860.25197 | 2 | 1.92E-04 | 0.49 | 3.07  | -     | 337.5    |
| gi8922511 ref NP_060605.1  | mitochondrial ribosomal protein S18A; mitochondrial ribosomal protein S |            |   | 1.92E-04 | 0.31 | 10.14 | 8.20  | 22183.8  |
| AHQ-6-4, 4053              | R.EVVEVTEQEGKTTIEGR.I                                                   | 1789.96553 | 2 | 1.92E-04 | 0.31 | 2.82  | -     | 327.9    |
| gi6912494 ref NP_036457.1  | microtubule-associated protein, RP/EB family, member 1; ADENOMATOUS POL |            |   | 1.95E-04 | 0.63 | 10.14 | 6.30  | 29998.9  |
| AHQ-6-12, 3897             | K.FFDANYDGKDYDPAAR.Q                                                    | 1965.06754 | 2 | 1.95E-04 | 0.63 | 2.64  | -     | 384.2    |
| gi9910156 ref NP_064590.1  | zinc finger protein Cezanne [Homo sapiens]                              |            |   | 1.95E-04 | 0.78 | 10.16 | 1.60  | 94400.5  |
| AHQ-6-13-, 5152            | K.EWNELIKASSEPR.M                                                       | 1672.86346 | 2 | 1.95E-04 | 0.78 | 3.22  | -     | 792.5    |
| gi4502013 ref NP_001616.1  | adenylate kinase 2 isoform a; adenylate kinase, mitochondrial; adenylat |            |   | 2.01E-04 | 0.81 | 10.18 | 6.70  | 26477.6  |
| AHQ-6-10, 3815             | R.LQAYHTQTTPLEIYYR.K                                                    | 1998.22695 | 2 | 2.01E-04 | 0.81 | 3.52  | -     | 671.8    |
| gi7705704 ref NP_057001.1  | glutathione S-transferase subunit 13 homolog                            |            |   |          |      |       |       |          |

|                             |                                                                         |            |   |          |      |         |       |          |
|-----------------------------|-------------------------------------------------------------------------|------------|---|----------|------|---------|-------|----------|
| AHQ-6-2, 3018               | K.EKLEQAAIVK.E                                                          | 1129.33180 | 2 | 2.17E-04 | 0.75 | 2.62    | -     | 915.1    |
| gi 4502693 ref NP_001760.1  | CD9 antigen; motility related protein; leukocyte antigen MIC3; antigen  |            |   | 2.18E-04 | 1.76 | 20.23   | 15.40 | 25415.9  |
| AHQ-6-11, 6223              | K.AIHVALNCCGLAGGVEQFISIDCPK.K                                           | 2798.16446 | 3 | 2.18E-04 | 0.91 | 4.60    | -     | 679.5    |
| AHQ-6-12, 3435              | K.KDVLLETTFKV.S                                                         | 1180.37558 | 2 | 8.13E-04 | 0.81 | 3.09    | -     | 780.0    |
| AHQ-6-11, 3387              | K.KDVLLETTFKV.S                                                         | 1180.37558 | 2 | 6.85E-04 | 0.85 | 3.26    | -     | 794.4    |
| gi 4505585 ref NP_002563.1  | platelet-activating factor acetylhydrolase, isoform Ib, beta subunit 30 |            |   | 2.31E-04 | 0.70 | 10.15   | 8.30  | 25569.1  |
| AHQ-6-10, 5472              | R.ELFSPALHNFIGGGDTR.H                                                   |            |   | 2.31E-04 | 0.70 | 3.07    | -     | 478.2    |
| gi 4504483 ref NP_000185.1  | hypoxanthine phosphoribosyltransferase 1 [Homo sapiens]                 | 2046.27160 | 2 | 2.37E-04 | 0.76 | 10.15   | 7.30  | 24579.2  |
| AHQ-6-10, 4496              | R.SVYGKPDFVGFEPDK.F                                                     |            |   | 2.37E-04 | 0.76 | 3.09    | -     | 442.8    |
| gi 17450333 ref XP_060887.1 | similar to peptidyl-Pro cis trans isomerase [Homo sapiens]              | 1799.01571 | 2 | 2.38E-04 | 0.74 | 10.22   | 11.00 | 17503.9  |
| AHQ-6-13-, 6021 - 6084      | -M*VNPTVFDIADVGGKPLGR.V                                                 | 1946.26009 | 2 | 4.91E-04 | 0.52 | 2.78    | -     | 517.1    |
| AHQ-6-13, 6197 - 6276       | -M*VNPTVFDIADVGGKPLGR.V                                                 | 1946.26009 | 2 | 2.38E-04 | 0.74 | 2.99    | -     | 874.8    |
| gi 6041669 ref NP_004538.2  | NADH dehydrogenase (ubiquinone) 1 beta subcomplex, 4, 15kDa; NADH dehyd |            |   | 2.44E-04 | 0.88 | 10.19   | 14.00 | 15208.5  |
| AHQ-6-13-, 4632             | R.TLPETLDPAEYNISPETR.R                                                  | 2047.20831 | 2 | 2.44E-04 | 0.88 | 3.75    | -     | 560.2    |
| AHQ-6-13, 4751              | R.TLPETLDPAEYNISPETR.R                                                  | 2047.20831 | 2 | 9.55E-04 | 0.62 | 2.52    | -     | 366.6    |
| gi 8923582 ref NP_060378.1  | hypothetical protein FLJ20626 [Homo sapiens]                            |            |   | 2.47E-04 | 0.04 | 10.13   | 2.70  | 48956.7  |
| AHQ-6-8, 2724 - 2784        | R.AFDWKSQVLVHR.K                                                        | 1500.72897 | 1 | 2.47E-04 | 0.04 | 1.91    | -     | 184.9    |
| AHQ-6-8, 2673 - 2736        | R.AFDWKSQVLVHR.K                                                        | 1500.72897 | 2 | 5.67E-04 | 0.50 | 2.57    | -     | 482.3    |
| gi 27597085 ref NP_000357.3 | tropomyosin 1 (alpha) [Homo sapiens]                                    |            |   | 2.49E-04 | 0.90 | 10.17   | 3.90  | 32865.7  |
| AHQ-6-9, 3172               | R.KLVIIESDLER.A                                                         | 1315.54103 | 2 | 2.49E-04 | 0.90 | 3.25    | -     | 1226.4   |
| gi 10864047 ref NP_067058.1 | epidermal growth factor receptor substrate EPS15R [Homo sapiens]        |            |   | 2.57E-04 | 0.91 | 10.19   | 1.90  | 94254.3  |
| AHQ-6-6, 3575               | R.LQOEETQLEQSIQAGR.V                                                    | 1858.98795 | 2 | 2.57E-04 | 0.91 | 3.77    | -     | 1008.8   |
| gi 4502167 ref NP_000475.1  | amyloid beta (A4) precursor protein (protease nexin-II, Alzheimer disea |            |   | 2.59E-04 | 0.78 | 10.15   | 2.10  | 86942.8  |
| AHQ-6-4, 2489               | K.YLETPGDENEHAHFQK.A                                                    | 1915.99652 | 2 | 2.59E-04 | 0.78 | 2.69    | -     | 762.3    |
| gi 29729857 ref XP_293567.1 | similar to 60 kDa heat shock protein, mitochondrial precursor (Hsp60)   |            |   | 2.64E-04 | 0.86 | 10.15   | 3.40  | 38427.8  |
| AHQ-6-7, 3371               | R.VIETPQGSWSPK.V                                                        | 1345.52569 | 2 | 2.64E-04 | 0.86 | 2.98    | -     | 977.9    |
| gi 14780596 ref XP_033004.1 | hypothetical protein BC005107 [Homo sapiens]                            |            |   | 2.66E-04 | 0.31 | 10.11   | 5.00  | 18127.9  |
| AHQ-6-3, 2084               | R.EQIIAKAK.A                                                            | 901.08569  | 1 | 2.66E-04 | 0.31 | 2.19    | -     | 369.5    |
| AHQ-6-2, 2043               | R.EQIIAKAK.A                                                            | 901.08569  | 1 | 6.41E-04 | 0.38 | 2.20    | -     | 336.5    |
| gi 4757732 ref NP_004199.1  | programmed cell death 8 isoform 1; apoptosis-inducing factor [Homo sapi |            |   | 2.71E-04 | 0.70 | 10.15   | 2.10  | 66900.2  |
| AHQ-6-6, 5184               | R.ALGTVEIQLFPEK.G                                                       | 1445.68516 | 2 | 2.71E-04 | 0.70 | 2.97    | -     | 561.6    |
| gi 30152949 ref XP_301425.1 | similar to Heat shock protein HSP 90-beta (HSP 84) (HSP 90) [Homo sapi  |            |   | 2.75E-04 | 0.47 | 10.12   | 2.50  | 42437.9  |
| AHQ-6-5, 2256               | K.YINQEELNK.I                                                           | 1151.25119 | 1 | 2.75E-04 | 0.47 | 2.42    | -     | 637.6    |
| gi 15718761 ref NP_004976.2 | c-K-ras2 protein isoform b; Kirsten rat sarcoma-2 viral (v-Ki-ras2) on  |            |   | 2.81E-04 | 0.91 | 10.21   | 8.00  | 21424.4  |
| AHQ-6-11, 3735              | R.VKDSEDPVM*VLVGNK.C                                                    | 1646.88770 | 2 | 2.81E-04 | 0.91 | 4.30    | -     | 1015.8   |
| gi 30158489 ref XP_301421.1 | similar to Chloride intracellular channel protein 1 (Nuclear chloride   |            |   | 2.81E-04 | 0.57 | 10.16   | 6.60  | 28267.5  |
| AHQ-6-10, 5458 - 5515       | K.FLNGNELTLADCNLLPK.L                                                   | 1934.20276 | 2 | 2.81E-04 | 0.57 | 3.06    | -     | 722.2    |
| gi 4506713 ref NP_002945.1  | ubiquitin and ribosomal protein S27a precursor; ubiquitin carboxyl exte |            |   | 2.89E-04 | 0.83 | 10.22   | 10.30 | 17964.8  |
| AHQ-6-14-, 4299 - 4318      | K.TITLEVPSDIENTVYK.A                                                    | 1788.97431 | 2 | 2.89E-04 | 0.83 | 4.45    | -     | 565.1    |
| gi 7669501 ref NP_005552.2  | lysosomal-associated membrane protein 1 [Homo sapiens]                  |            |   | 2.94E-04 | 0.93 | 10.24   | 3.80  | 44772.8  |
| AHQ-6-4, 6473               | R.FFLQGIQLNTLPDAR.D                                                     | 1847.14988 | 2 | 2.94E-04 | 0.93 | 4.83    | -     | 716.8    |
| gi 4507191 ref NP_003118.1  | spectrin, alpha, non-erythrocytic 1 (alpha-fodrin) [Homo sapiens]       |            |   | 2.95E-04 | 0.54 | 10.16   | 0.90  | 284279.3 |
| AHQ-6-3, 4238               | R.EKEPIVGSVDYKDEDSAEALLK.K                                              | 2495.67840 | 3 | 2.95E-04 | 0.54 | 3.19    | -     | 418.6    |
| gi 4502989 ref NP_001856.1  | cytochrome c oxidase subunit VIIa polypeptide 2 (liver) precursor; hepa |            |   | 3.11E-04 | 0.89 | 10.18   | 15.70 | 9395.9   |
| AHQ-6-14-, 5116 - 5182      | K.LFQEDDEIPLYL.K.G                                                      | 1623.82758 | 2 | 3.11E-04 | 0.89 | 3.64    | -     | 1013.9   |
| AHQ-6-14, 5762 - 5837       | K.LFQEDDEIPLYL.K.G                                                      | 1623.82758 | 2 | 6.61E-04 | 0.87 | 3.42    | -     | 995.5    |
| gi 20547107 ref XP_114482.1 | similar to HEAT SHOCK 70 KDA PROTEIN 4 (HEAT SHOCK 70-RELATED PROTEIN   |            |   | 3.19E-04 | 0.85 | 10.19   | 2.10  | 94330.3  |
| AHQ-6-4, 6156               | K.SNLAYDIVQLPTGTGIK.V                                                   | 1904.19651 | 2 | 3.19E-04 | 0.85 | 3.79    | -     | 653.5    |
| gi 4502097 ref NP_001142.1  | solute carrier family 25 (mitochondrial carrier; adenine nucleotide tra |            |   | 3.21E-04 | 0.74 | 10.16   | 4.00  | 33148.4  |
| AHQ-6-10, 5258 - 5267       | R.YFPTQALNFAFK.D                                                        | 1447.66130 | 2 | 3.21E-04 | 0.74 | 2.54    | -     | 535.3    |
| gi 4758484 ref NP_004823.1  | glutathione-S-transferase like; glutathione transferase omega [Homo sap |            |   | 3.21E-04 | 1.33 | 20.14   | 10.00 | 27565.7  |
| AHQ-6-10, 2866              | R.HEVININLK.N                                                           | 1080.26247 | 1 | 5.86E-04 | 0.51 | 2.30    | -     | 517.4    |
| AHQ-6-11, 2955 - 2968       | R.HEVININLK.N                                                           | 1080.26247 | 2 | 3.21E-04 | 0.82 | 2.89    | -     | 908.4    |
| AHQ-6-10, 2771 - 2787       | R.SQNKEDYAGLKEEFR.K                                                     | 1814.93364 | 2 | 6.65E-04 | 0.51 | 2.82    | -     | 614.5    |
| gi 4507143 ref NP_003786.1  | sorting nexin 3 isoform a; sorting nexin 3A [Homo sapiens]              |            |   | 3.35E-04 | 0.72 | 10.13   | 6.20  | 18762.2  |
| AHQ-6-12, 2901              | R.KQGLEQFINK.V                                                          | 1205.38836 | 2 | 3.35E-04 | 0.72 | 2.68    | -     | 787.3    |
| gi 4502285 ref NP_001672.1  | ATPase, Ca++ transporting, cardiac muscle, slow twitch 2 isoform 2; ATP |            |   | 3.41E-04 | 0.75 | 10.16   | 1.50  | 109690.3 |
| AHQ-6-1, 4647               | K.VGEATETALTCLVEK.M                                                     | 1622.81958 | 2 | 3.41E-04 | 0.75 | 3.25    | -     | 563.6    |
| gi 21618338 ref NP_003141.2 | signal transducer and activator of transcription 3 isoform 2; acute-ph  |            |   | 3.48E-04 | 0.81 | 10.18   | 2.30  | 87980.2  |
| AHQ-6-6, 6432               | R.SIVSELALGLSAM*EYVQK.T                                                 | 1955.26206 | 2 | 3.48E-04 | 0.81 | 3.62    | -     | 529.6    |
| gi 24111244 ref NP_705691.1 | MAM domain containing glycosylphosphatidylinositol anchor 1; glycosyl-  |            |   | 3.48E-04 | 0.11 | 10.09   | 1.00  | 105789.7 |
| AHQ-6-7, 3878 - 3935        | R.PPVVWSRVDK.E                                                          | 1197.41106 | 1 | 3.48E-04 | 0.11 | 1.81    | -     | 442.9    |
| gi 27478732 ref XP_210750.1 | similar to ATP synthase, H+ transporting, mitochondrial F0 complex, su  |            |   | 3.53E-04 | 0.76 | 10.13   | 7.10  | 16272.9  |
| AHQ-6-11, 3473              | K.SCAEWWVLSK.A                                                          | 1168.30181 | 2 | 3.53E-04 | 0.76 | 2.65    | -     | 692.9    |
| gi 6005902 ref NP_009043.1  | thrombospondin 3 [Homo sapiens]                                         |            |   | 3.67E-04 | 0.86 | 10.14   | 0.70  | 104200.6 |
| AHQ-6-7, 4296               | R.FYVVMWK.Q                                                             | 973.21547  | 1 | 3.87E-04 | 0.81 | 2.24    | -     | 1075.5   |
| AHQ-6-3, 4582               | R.FYVVMWK.Q                                                             | 973.21547  | 2 | 3.67E-04 | 0.86 | 2.77    | -     | 717.4    |
| gi 4506195 ref NP_002785.1  | proteasome beta 2 subunit; proteasome subunit, beta type, 2; macropain  |            |   | 3.72E-04 | 0.91 | 10.18   | 5.50  | 22836.1  |
| AHQ-6-11, 5703 - 5783       | R.FILNLTPTFSVR.I                                                        | 1307.56542 | 2 | 3.72E-04 | 0.91 | 3.56    | -     | 1005.4   |
| gi 12707570 ref NP_004083.2 | mitochondrial short-chain enoyl-coenzyme A hydratase 1 precursor [Homo  |            |   | 4.03E-04 | 0.82 | 10.18   | 7.20  | 31371.2  |
| AHQ-6-10, 4983              | K.AQFAQPEILGITIPAGGQTR.L                                                | 2126.40140 | 2 | 4.03E-04 | 0.82 | 3.58    | -     | 620.0    |
| gi 21536449 ref NP_002613.2 | prefoldin 1; prefoldin subunit 1 [Homo sapiens]                         |            |   | 4.04E-04 | 0.96 | 10.22   | 9.00  | 14210.4  |
| AHQ-6-13-, 3773             | K.LADIQIEQLNR.T                                                         | 1313.48523 | 2 | 4.04E-04 | 0.96 | 4.41    | -     | 1612.6   |
| gi 4504617 ref NP_000589.1  | insulin-like growth factor binding protein 3 [Homo sapiens]             |            |   | 4.09E-04 | 0.71 | 10.13   | 3.40  | 31660.0  |
| AHQ-6-6, 6590               | R.EM*EDTLNHLK.F                                                         | 1246.37275 | 2 | 4.09E-04 | 0.71 | 2.64    | -     | 1045.0   |
| gi 21361388 ref NP_008868.2 | SMT3 suppressor of mif two 3 homolog 2; SMT3 (suppressor of mif two 3,  |            |   | 4.15E-04 | 0.69 | 10.14   | 12.60 | 10870.2  |
| AHQ-6-12, 2720 - 2724       | K.VAGDQGSVVQFK.I                                                        | 1235.37133 | 2 | 4.15E-04 | 0.69 | 2.73    | -     | 572.6    |
| gi 29743324 ref XP_293276.1 | similar to Heat shock 27 kDa protein (HSP 27) (Stress-responsive prote  |            |   | 4.17E-04 | 1.82 | 20.30   | 16.00 | 21244.7  |
| AHQ-6-13-, 5280             | R.KYTLPPGVDPDKVSSLSPEGLTLVEAPMPK.L                                      | 3228.70228 | 3 | 4.17E-04 | 0.91 | 5.53    | -     | 1264.3   |
| AHQ-6-13-, 5057             | R.KYTLPPGVDPDKVSSLSPEGLTLVEAPMP*PK.L                                    | 3244.70168 | 3 | 4.86E-04 | 0.91 | 6.07    | -     | 974.6    |
| gi 4504205 ref NP_001512.1  | general transcription factor IIIC, polypeptide 2, beta 110kDa; general  |            |   | 4.32E-04 | 0.26 | 10.13   | 2.10  | 100678.9 |
| AHQ-6-14-, 5536 - 5539      | K.KIRQPAACPGEEVDGAPR.D                                                  | 2010.22095 | 2 | 4.32E-04 | 0.26 | 2.59    | -     | 163.3    |
| gi 22267436 ref NP_056284.1 | DKFZp564D177 protein [Homo sapiens]                                     |            |   | 4.33E-04 | 0.93 | 10.16   | 4.90  | 28466.4  |
| AHQ-6-11, 2188              | R.AVHAHVNLGYTK.L                                                        | 1310.48626 | 3 | 4.33E-04 | 0.93 | 3.29    | -     | 1422.3   |
| gi 5902726 ref NP_005800.1  | peroxiredoxin 2; thioredoxin-dependent peroxide reductase 1 (thiol-spec |            |   | 4.39E-04 | 0.60 | 10.14   | 8.60  | 21858.8  |
| AHQ-6-11, 6133              | K.EGGLGPLNIPLLADVTR.R                                                   | 1736.00583 | 2 | 4.39E-04 | 0.60 | 2.60    | -     | 356.2    |
| gi 4507795 ref NP_003340.1  | ubiquitin-conjugating enzyme E2 variant 1 isoform b; DNA-binding protei |            |   | 4.70E-04 | 0.83 | 10.15   | 4.10  | 25796.6  |
| AHQ-6-12, 3471 - 3481       | K.YPEAPPFVR.F                                                           | 1076.22914 | 2 | 4.70E-04 | 0.83 | 3.01    | -     | 587.3    |
| gi 11496277 ref NP_068805.1 | mitogen-activated protein kinase kinase 1 interacting protein 1; MEK p  |            |   | 4.82E-04 | 0.88 | 10.21   | 0.00  | 13622.6  |
| AHQ-6-14-, 5108 - 5179      | K.VANDNAPEHALRPGFLSTFALATDQGSK.L                                        | 2929.19327 | 3 | 4.82E-04 | 0.88 | 4.30    | -     | 621.1    |
| gi 19923981 ref NP_612460.1 | hypothetical protein BC013151 [Homo sapiens]                            |            |   | 4.95E-04 | 0.56 | 10.13   | 4.30  | 40094.2  |
| AHQ-6-14, 4802              | R.SAEAQNFIDSLIELR.G                                                     | 1706.87822 | 2 | 4.95E-04 | 0.56 | 2.60    | -     | 780.1    |
| gi 21389505 ref NP_653321.1 | hypothetical protein FLJ31564 [Homo sapiens]                            |            |   | 5.08E-04 | 0.66 | 10.16   | 0.00  | 73208.7  |
| AHQ-6-14, 5221 - 5276       | R.DSICCKLSNGADILFEPKLFK.F                                               | 2590.03282 | 3 | 5.08E-04 | 0.66 | 3.15    | -     | 589.3    |
| gi 21361322 ref NP_006078.2 | tubulin, beta, 5 [Homo sapiens]                                         |            |   | 5.17E-04 | 0.73 | 10.15   | 3.80  | 49585.5  |
| AHQ-6-7, 2871               | R.EIVHLQAGCQGNQIGAK.F                                                   | 1825.03962 | 2 | 5.17E-04 | 0.73 | 3.02    | -     | 737.6    |
| gi 11968023 ref NP_071918.1 | zinc finger protein 106 [Homo sapiens]                                  |            |   | 5.23E-04 | 0.81 | 10.16   | 0.70  | 208880.7 |
| AHQ-6-12, 6199 - 6200       | K.ERSQVDQLLNISLR.E                                                      | 1671.88024 | 2 | 5.23E-04 | 0.81 | 3.28    | -     | 1188.9   |
| gi 4557317 ref NP_001148.1  | annexin A11; annexin XI; autoantigen, 56-kD; calycin-associated annex   |            |   | 5.32E-04 | 0.91 | 10.19   | 3.20  | 54389.4  |
| AHQ-6-7, 5168               | K.GFGTDEQAIIDCLGSR.S                                                    | 1740.87312 | 2 | 5.32E-04 | 0.91 | 3.74    | -     | 1172.3   |
| gi 8922122 ref NP_061166.1  | elaC homolog 1 [Homo sapiens]                                           |            |   | 5.40E-04 | 0.11 | 10.09</ |       |          |

|                             |                                                                          |            |   |          |      |       |       |          |
|-----------------------------|--------------------------------------------------------------------------|------------|---|----------|------|-------|-------|----------|
| AHQ-6-12, 5727              | K.EISLWFKPEELVDYK.S                                                      | 1897.15929 | 2 | 5.67E-04 | 0.71 | 2.92  | -     | 515.8    |
| gi 21361427 ref NP_055182.2 | hypothetical protein, estradiol-induced [Homo sapiens]                   |            |   | 5.70E-04 | 0.55 | 10.13 | 8.90  | 21551.0  |
| AHQ-6-13-, 5417             | K.EDEIPETVSEMLDAAK.N                                                     | 1891.08690 | 2 | 5.70E-04 | 0.55 | 2.63  | -     | 324.6    |
| gi 20149570 ref NP_005816.2 | RAS guanyl releasing protein 2 isoform 1; calcium and diacylglycerol-r   |            |   | 6.00E-04 | 0.91 | 10.15 | 2.10  | 75547.0  |
| AHQ-6-12, 3943              | R.HSSLIDIDSVPPTYK.W                                                      | 1575.74455 | 2 | 6.00E-04 | 0.91 | 3.03  | -     | 1248.3   |
| gi 21265064 ref NP_620688.1 | a disintegrin-like and metalloprotease (repolysin type) with thrombos    |            |   | 6.30E-04 | 0.19 | 10.12 | 1.10  | 121099.3 |
| AHQ-6-12, 4285              | K.IGCDGIIGSAAK.E                                                         | 1163.32670 | 1 | 6.30E-04 | 0.19 | 1.95  | -     | 320.1    |
| gi 20127517 ref NP_009148.2 | programmed cell death 10; apoptosis-related protein 15 [Homo sapiens]    |            |   | 6.37E-04 | 0.81 | 10.19 | 11.30 | 24701.4  |
| AHQ-6-10, 4783              | R.M*AADDVVEEYMIERPEPEFQDLNEK.A                                           | 2916.14381 | 3 | 6.37E-04 | 0.81 | 3.80  | -     | 574.6    |
| gi 21361358 ref NP_006365.2 | serine/threonine kinase 25 (STE20 homolog, yeast); sterile 20 (oxidant   |            |   | 6.42E-04 | 0.88 | 10.18 | 3.80  | 48111.3  |
| AHQ-6-7, 4327               | K.LADFGVAGQLTDTQIK.R                                                     | 1677.88001 | 2 | 6.42E-04 | 0.88 | 3.70  | -     | 1026.7   |
| gi 24308149 ref NP_060035.1 | hypothetical protein DKFZp434F2322 [Homo sapiens]                        |            |   | 6.52E-04 | 0.62 | 10.14 | 2.00  | 61404.2  |
| AHQ-6-5, 5611               | K.PSGVHLKLVLR.F                                                          | 1219.50454 | 2 | 6.52E-04 | 0.62 | 2.87  | -     | 617.9    |
| gi 28461290 ref NP_443728.2 | TRALPUSH; no opposite paired repeat protein [Homo sapiens]               |            |   | 6.62E-04 | 0.66 | 10.14 | 0.40  | 240073.5 |
| AHQ-6-9, 3324               | K.KKPQVNAK.D                                                             | 913.09970  | 1 | 6.62E-04 | 0.66 | 2.64  | -     | 536.3    |
| gi 4557469 ref NP_001273.1  | adaptor-related protein complex 2, beta 1 subunit; adaptin, beta 2 (bet  |            |   | 6.96E-04 | 0.82 | 10.16 | 1.50  | 104551.9 |
| AHQ-6-6, 2802               | R.LSHANSAVLSAVK.V                                                        | 1396.61737 | 2 | 6.96E-04 | 0.82 | 2.92  | -     | 906.4    |
| gi 29727204 ref XP_290872.1 | similar to Pyruvate kinase, M2 isozyme [Homo sapiens]                    |            |   | 7.33E-04 | 0.91 | 10.17 | 5.40  | 16297.7  |
| AHQ-6-7, 2383 - 2458        | R.APIAVTR.N                                                              | 841.03348  | 2 | 7.33E-04 | 0.91 | 2.61  | -     | 1265.5   |
| gi 5803135 ref NP_006852.1  | RAB35, member RAS oncogene family; ras-related protein rab-1c (GTP-bind  |            |   | 7.50E-04 | 0.88 | 10.17 | 5.50  | 23025.1  |
| AHQ-6-13, 3919 - 3927       | K.LLIIIGDSGVGK.S                                                         | 1072.28025 | 2 | 7.50E-04 | 0.88 | 3.45  | -     | 941.9    |
| gi 5174553 ref NP_005917.1  | microfibrillar-associated protein 1 [Homo sapiens]                       |            |   | 7.66E-04 | 0.23 | 10.13 | 2.10  | 51854.9  |
| AHQ-6-10, 2194              | R.ANGKVIITNK.A                                                           | 945.09856  | 1 | 7.66E-04 | 0.23 | 2.70  | -     | 345.8    |
| gi 29741994 ref XP_292459.1 | similar to alpha tubulin [Homo sapiens]                                  |            |   | 7.73E-04 | 0.42 | 10.13 | 5.00  | 39987.6  |
| AHQ-6-12, 4261 - 4263       | K.VGINYQPPNVVPGGDLAK.V                                                   | 1839.08461 | 2 | 7.73E-04 | 0.42 | 2.68  | -     | 384.1    |
| gi 4557014 ref NP_001743.1  | catelase [Homo sapiens]                                                  |            |   | 7.83E-04 | 0.71 | 10.13 | 2.50  | 59755.8  |
| AHQ-6-7, 2451               | R.FNTANDNDNVTVQR.A                                                       | 1494.54849 | 2 | 7.83E-04 | 0.71 | 2.55  | -     | 703.2    |
| gi 5453597 ref NP_006126.1  | F-actin capping protein alpha-1 subunit; Cap Z [Homo sapiens]            |            |   | 7.93E-04 | 0.38 | 10.15 | 7.00  | 32922.5  |
| AHQ-6-9, 4991               | K.TIDGQQTIIACIESHQFQPK.N                                                 | 2316.57620 | 2 | 7.93E-04 | 0.38 | 2.58  | -     | 229.0    |
| gi 4557525 ref NP_000099.1  | dihydroliipoamide dehydrogenase precursor; E3 component of pyruvate dehy |            |   | 7.93E-04 | 0.91 | 10.18 | 2.60  | 54149.9  |
| AHQ-6-7, 2520 - 2522        | K.SEEQLKEEGIEYK.V                                                        | 1582.69072 | 2 | 7.93E-04 | 0.91 | 3.68  | -     | 968.4    |
| gi 4758440 ref NP_004868.1  | glia maturation factor, gamma [Homo sapiens]                             |            |   | 8.02E-04 | 0.77 | 10.15 | 9.20  | 16801.2  |
| AHQ-6-12, 4249              | R.TDDLEAWLQEK.L                                                          | 1550.64872 | 2 | 8.02E-04 | 0.77 | 3.06  | -     | 953.4    |
| gi 29734552 ref XP_291269.1 | similar to KIAA1875 protein [Homo sapiens]                               |            |   | 8.13E-04 | 0.45 | 10.14 | 1.70  | 93320.7  |
| AHQ-6-13-, 4492             | R.M*LAPKRSWGTPQLR.L                                                      | 1657.96500 | 2 | 8.13E-04 | 0.45 | 2.89  | -     | 496.2    |
| gi 29743501 ref XP_297109.1 | hypothetical protein XP_297109 [Homo sapiens]                            |            |   | 8.34E-04 | 0.21 | 10.14 | 3.40  | 58170.9  |
| AHQ-6-4, 5232               | K.TESGQVGLPYALVWVKER.K                                                   | 2063.29893 | 2 | 8.34E-04 | 0.21 | 2.73  | -     | 299.7    |
| gi 4506005 ref NP_002700.1  | protein phosphatase 1, catalytic subunit, beta isoform [Homo sapiens] [  |            |   | 8.37E-04 | 0.88 | 10.14 | 4.30  | 37186.6  |
| AHQ-6-9, 3711               | R.AHQVVEDGYEFFAK.R                                                       | 1640.77679 | 2 | 8.37E-04 | 0.88 | 2.85  | -     | 953.2    |
| gi 15618995 ref NP_258259.1 | keratin 6 irls [Homo sapiens]                                            |            |   | 8.71E-04 | 0.85 | 10.20 | 2.30  | 57291.2  |
| AHQ-6-6, 3146 - 3148        | R.FLEQQNQVLETK.W                                                         | 1477.64411 | 2 | 8.71E-04 | 0.85 | 3.91  | -     | 491.0    |
| gi 4506677 ref NP_002942.1  | ribophorin II [Homo sapiens]                                             |            |   | 9.13E-04 | 0.52 | 10.14 | 2.70  | 69301.6  |
| AHQ-6-1, 4888 - 4966        | R.LQVTNVLSQLTQATVK.L                                                     | 1841.14195 | 2 | 9.13E-04 | 0.52 | 2.66  | -     | 405.2    |
| gi 5174613 ref NP_005960.1  | nucleosome assembly protein 1-like 4; nucleosome assembly protein 2 [Ho  |            |   | 9.14E-04 | 0.90 | 10.16 | 2.70  | 42823.1  |
| AHQ-6-7, 2862               | K.FYEEVHDLER.K                                                           | 1337.41897 | 2 | 9.14E-04 | 0.90 | 3.11  | -     | 1231.5   |
| gi 22749143 ref NP_689761.1 | hypothetical protein FLJ25333 [Homo sapiens]                             |            |   | 9.40E-04 | 0.12 | 10.13 | 5.80  | 47726.0  |
| AHQ-6-7, 5520 - 5532        | K.SENKM*EEKLLQLSKVENFINTQK.Q                                             | 2855.21429 | 2 | 9.40E-04 | 0.12 | 2.55  | -     | 90.1     |
| gi 17482508 ref XP_058957.1 | similar to QIL1 [Homo sapiens]                                           |            |   | 9.56E-04 | 0.83 | 10.19 | 18.60 | 13087.2  |
| AHQ-6-14-, 5414 - 5420      | K.GSVAGGAVLVYDQELLGSPDK.S                                                | 2239.46691 | 2 | 9.56E-04 | 0.83 | 3.72  | -     | 684.9    |
| gi 4557773 ref NP_000248.1  | myosin, heavy polypeptide 7, cardiac muscle, beta [Homo sapiens]         |            |   | 9.56E-04 | 0.61 | 10.17 | 0.50  | 223110.8 |
| AHQ-6-5, 3124               | R.CNGVLEGR.I                                                             | 1019.15759 | 2 | 9.56E-04 | 0.61 | 2.72  | -     | 526.8    |
| gi 19923748 ref NP_001924.2 | dihydroliipoamide S-succinyltransferase (E2 component of 2-oxo-glutarat  |            |   | 9.61E-04 | 0.92 | 10.20 | 3.10  | 48755.0  |
| AHQ-6-7, 3252               | K.TPAFAESVTEGDVVR.W                                                      | 1479.57373 | 2 | 9.61E-04 | 0.92 | 2.94  | -     | 1803.8   |
| gi 24307907 ref NP_006207.1 | plasminogen activator inhibitor type 1, member 2; protease inhibitor 7   |            |   | 9.81E-04 | 0.80 | 10.15 | 3.50  | 44002.0  |
| AHQ-6-8, 3145               | K.FTAVAQTLKEPLK.V                                                        | 1561.80416 | 2 | 9.81E-04 | 0.80 | 2.95  | -     | 656.1    |

| Reference                  | Peptide                                                | MH+        | z | P (pro)  | Sf     | Score   | Coverage | MW       |
|----------------------------|--------------------------------------------------------|------------|---|----------|--------|---------|----------|----------|
| File, Scan(s)              |                                                        |            |   | P (pep)  | Sf     | XC      |          | Sp       |
| g 12667788 ref NP_002464.1 | myosin, heavy polypeptide 9, non-muscle [Homo sapiens] |            |   | 1.00E-30 | 102.50 | 1170.35 | 47.60    | 226529.8 |
| AHQ-7-5, 2059              | R.ALEEAAMEQK.A                                         | 1049.18068 | 2 | 4.00E-04 | 0.77   | 2.71    | -        | 751.2    |
| AHQ-7-6, 2043              | R.ALEEAAMEQK.A                                         | 1049.18068 | 2 | 2.11E-04 | 0.86   | 2.81    | -        | 966.9    |
| AHQ-7-3, 2121 - 2128       | R.ALEEAAMEQK.A                                         | 1049.18068 | 2 | 6.27E-05 | 0.83   | 3.15    | -        | 724.7    |
| AHQ-7-2, 3844 - 3907       | K.ALELDSNLYR.I                                         | 1194.31920 | 2 | 5.84E-07 | 0.95   | 3.99    | -        | 1157.3   |
| AHQ-7-3, 3779              | K.ALELDSNLYR.I                                         | 1194.31920 | 2 | 1.17E-06 | 0.94   | 3.65    | -        | 1334.6   |
| AHQ-7-5, 3752              | K.ALELDSNLYR.I                                         | 1194.31920 | 2 | 1.79E-06 | 0.93   | 3.43    | -        | 1096.5   |
| AHQ-7-14-, 3722            | K.ALELDSNLYR.I                                         | 1194.31920 | 2 | 1.47E-07 | 0.91   | 3.06    | -        | 1161.5   |
| AHQ-7-1, 3891              | K.ALELDSNLYR.I                                         | 1194.31920 | 2 | 2.89E-05 | 0.94   | 3.70    | -        | 1201.1   |
| AHQ-7-4, 3782              | K.ALELDSNLYR.I                                         | 1194.31920 | 2 | 9.58E-08 | 0.96   | 4.05    | -        | 1515.1   |
| AHQ-7-6, 3689 - 3697       | K.ALELDSNLYR.I                                         | 1194.31920 | 2 | 1.02E-04 | 0.92   | 3.52    | -        | 1142.9   |
| AHQ-7-2, 2985 - 2997       | R.ALEQQVEEMK.T                                         | 1205.36380 | 2 | 1.36E-05 | 0.92   | 3.90    | -        | 1146.9   |
| AHQ-7-3, 2195              | R.ALEQQVEEMK.T                                         | 1221.36320 | 2 | 3.37E-04 | 0.79   | 3.12    | -        | 845.5    |
| AHQ-7-5, 2878 - 2880       | R.ALEQQVEEMK.T                                         | 1205.36380 | 2 | 7.73E-05 | 0.83   | 3.22    | -        | 1020.4   |
| AHQ-7-2, 2227              | R.ALEQQVEEMK.T                                         | 1221.36320 | 2 | 1.17E-04 | 0.80   | 3.08    | -        | 899.8    |
| AHQ-7-1, 3125              | R.ALEQQVEEMK.T                                         | 1205.36380 | 2 | 7.94E-05 | 0.89   | 3.36    | -        | 1098.2   |
| AHQ-7-7, 2812              | R.ALEQQVEEMK.T                                         | 1205.36380 | 2 | 4.56E-04 | 0.91   | 3.31    | -        | 1217.7   |
| AHQ-7-6, 2869 - 2930       | R.ALEQQVEEMK.T                                         | 1205.36380 | 2 | 3.97E-04 | 0.92   | 3.42    | -        | 1056.1   |
| AHQ-7-4, 2888              | R.ALEQQVEEMK.T                                         | 1205.36380 | 2 | 1.89E-05 | 0.91   | 3.53    | -        | 1194.7   |
| AHQ-7-3, 2957 - 2975       | R.ALEQQVEEMK.T                                         | 1205.36380 | 2 | 1.42E-07 | 0.90   | 3.67    | -        | 1103.1   |
| AHQ-7-2, 6312              | R.ALEQQVEEMK.TQLEEELEDELOATEDAK.L                      | 3165.38394 | 3 | 3.66E-08 | 0.97   | 5.90    | -        | 1531.9   |
| AHQ-7-6, 6154              | R.ALEQQVEEMK.TQLEEELEDELOATEDAK.L                      | 3165.38394 | 3 | 1.35E-08 | 0.89   | 4.04    | -        | 1205.2   |
| AHQ-7-3, 6155 - 6156       | R.ALEQQVEEMK.TQLEEELEDELOATEDAK.L                      | 3165.38394 | 3 | 1.28E-04 | 0.96   | 5.54    | -        | 1763.6   |
| AHQ-7-5, 6244              | R.ALEQQVEEMK.TQLEEELEDELOATEDAK.L                      | 3165.38394 | 3 | 7.23E-08 | 0.96   | 5.36    | -        | 1718.3   |
| AHQ-7-2, 6848              | R.ALEQQVEEMK.TQLEEELEDELOATEDAK.L                      | 3149.38454 | 3 | 5.74E-08 | 0.96   | 5.95    | -        | 1395.6   |
| AHQ-7-1, 6079              | R.ALEQQVEEMK.TQLEEELEDELOATEDAK.L                      | 3165.38394 | 3 | 2.14E-05 | 0.96   | 5.61    | -        | 1762.5   |
| AHQ-7-1, 4973              | K.ANLQIDQINTDLNLER.S                                   | 1871.04187 | 2 | 4.74E-11 | 0.95   | 4.32    | -        | 1227.5   |
| AHQ-7-7, 4865 - 4942       | K.ANLQIDQINTDLNLER.S                                   | 1871.04187 | 2 | 1.81E-05 | 0.96   | 4.94    | -        | 1201.5   |
| AHQ-7-3, 5157              | K.ANLQIDQINTDLNLER.S                                   | 1871.04187 | 2 | 2.37E-04 | 0.93   | 4.52    | -        | 976.1    |
| AHQ-7-1, 5169 - 5188       | K.ANLQIDQINTDLNLER.S                                   | 1871.04187 | 2 | 2.65E-05 | 0.93   | 4.41    | -        | 728.9    |
| AHQ-7-3, 4708 - 4775       | K.ANLQIDQINTDLNLER.S                                   | 1871.04187 | 2 | 9.85E-04 | 0.93   | 4.02    | -        | 754.4    |
| AHQ-7-2, 5196              | K.ANLQIDQINTDLNLER.S                                   | 1871.04187 | 2 | 4.76E-05 | 0.97   | 6.10    | -        | 1207.7   |
| AHQ-7-5, 4779              | K.ANLQIDQINTDLNLER.S                                   | 1871.04187 | 2 | 6.20E-05 | 0.94   | 4.42    | -        | 843.1    |
| AHQ-7-2, 5064 - 5131       | K.ANLQIDQINTDLNLER.S                                   | 1871.04187 | 2 | 9.01E-07 | 0.98   | 6.20    | -        | 1318.6   |
| AHQ-7-2, 4867 - 4941       | K.ANLQIDQINTDLNLER.S                                   | 1871.04187 | 2 | 2.61E-09 | 0.97   | 5.56    | -        | 1279.8   |
| AHQ-7-11, 2387             | K.ASITALEAK.I                                          | 904.04321  | 2 | 2.49E-05 | 0.94   | 3.23    | -        | 1370.4   |
| AHQ-7-4, 2417              | K.ASITALEAK.I                                          | 904.04321  | 2 | 2.20E-07 | 0.93   | 3.09    | -        | 1415.3   |
| AHQ-7-6, 2367              | K.ASITALEAK.I                                          | 904.04321  | 2 | 8.56E-05 | 0.87   | 2.84    | -        | 847.1    |
| AHQ-7-5, 2380              | K.ASITALEAK.I                                          | 904.04321  | 2 | 3.41E-05 | 0.92   | 2.75    | -        | 1301.3   |
| AHQ-7-3, 2453              | K.ASITALEAK.I                                          | 904.04321  | 2 | 5.24E-07 | 0.93   | 3.05    | -        | 1130.5   |
| AHQ-7-2, 2172              | R.ASREELAAQAK.E                                        | 1216.36955 | 2 | 4.66E-04 | 0.94   | 3.39    | -        | 1802.0   |
| AHQ-7-3, 2167 - 2237       | R.ASREELAAQAK.E                                        | 1216.36955 | 2 | 6.77E-05 | 0.78   | 2.86    | -        | 991.5    |
| AHQ-7-2, 3255              | R.DELADEIANSSGK.G                                      | 1349.38323 | 2 | 9.57E-06 | 0.94   | 3.99    | -        | 1280.5   |
| AHQ-7-5, 3164              | R.DELADEIANSSGK.G                                      | 1349.38323 | 2 | 2.06E-05 | 0.94   | 3.70    | -        | 1428.1   |
| AHQ-7-4, 3205              | R.DELADEIANSSGK.G                                      | 1349.38323 | 2 | 1.32E-04 | 0.78   | 2.90    | -        | 838.7    |
| AHQ-7-2, 6375              | K.DFSALESQQLQDTQELLQEENR.Q                             | 2494.61059 | 2 | 4.21E-10 | 0.97   | 6.05    | -        | 1360.3   |
| AHQ-7-1, 6335 - 6340       | K.DFSALESQQLQDTQELLQEENR.Q                             | 2494.61059 | 3 | 2.86E-04 | 0.98   | 5.50    | -        | 2526.7   |
| AHQ-7-2, 6287              | K.DFSALESQQLQDTQELLQEENR.Q                             | 2494.61059 | 2 | 4.42E-05 | 0.85   | 3.97    | -        | 784.3    |
| AHQ-7-4, 6624 - 6628       | K.DFSALESQQLQDTQELLQEENR.Q                             | 2494.61059 | 3 | 2.96E-11 | 0.97   | 6.00    | -        | 1548.4   |
| AHQ-7-7, 6480 - 6513       | K.DFSALESQQLQDTQELLQEENR.Q                             | 2494.61059 | 3 | 1.01E-04 | 0.85   | 4.13    | -        | 831.0    |
| AHQ-7-1, 6041              | K.DFSALESQQLQDTQELLQEENRQK.L                           | 2750.91328 | 3 | 8.00E-13 | 0.85   | 4.19    | -        | 566.0    |
| AHQ-7-2, 6271 - 6333       | K.DFSALESQQLQDTQELLQEENRQK.L                           | 2750.91328 | 3 | 3.98E-09 | 0.86   | 4.15    | -        | 739.7    |
| AHQ-7-4, 2184 - 2186       | K.DLEAHIDSANK.N                                        | 1213.27938 | 2 | 2.18E-06 | 0.98   | 4.05    | -        | 2468.4   |
| AHQ-7-5, 2160 - 2164       | K.DLEAHIDSANK.N                                        | 1213.27938 | 2 | 2.96E-06 | 0.97   | 4.37    | -        | 1904.5   |
| AHQ-7-2, 2255              | K.DLEAHIDSANK.N                                        | 1213.27938 | 2 | 5.26E-07 | 0.98   | 4.40    | -        | 2533.6   |
| AHQ-7-6, 2173              | K.DLEAHIDSANK.N                                        | 1213.27938 | 2 | 4.87E-06 | 0.98   | 4.33    | -        | 2402.8   |
| AHQ-7-3, 2227 - 2229       | K.DLEAHIDSANK.N                                        | 1213.27938 | 2 | 4.24E-08 | 0.98   | 4.31    | -        | 2344.6   |
| AHQ-7-3, 2228              | K.DLEAHIDSANK.N                                        | 1213.27938 | 1 | 1.25E-05 | 0.59   | 1.83    | -        | 792.4    |
| AHQ-7-2, 2259              | K.DLEAHIDSANK.N                                        | 1213.27938 | 1 | 6.43E-05 | 0.54   | 1.98    | -        | 788.7    |
| AHQ-7-3, 2353              | K.DLEGLSQR.H                                           | 917.98683  | 1 | 3.21E-04 | 0.04   | 1.90    | -        | 144.8    |
| AHQ-7-6, 6761              | R.DLGEELAEALKTELEDTLDTAAQQQLR.S                        | 3019.21860 | 3 | 2.80E-10 | 0.97   | 6.86    | -        | 1603.3   |
| AHQ-7-6, 3285              | K.DVLLQVDDER.R                                         | 1202.29650 | 2 | 3.68E-06 | 0.91   | 3.19    | -        | 1320.8   |
| AHQ-7-4, 2920              | K.DVLLQVDDERR.N                                        | 1358.48286 | 2 | 2.17E-05 | 0.79   | 2.98    | -        | 990.7    |
| AHQ-7-3, 2980              | K.DVLLQVDDERR.N                                        | 1358.48286 | 2 | 3.07E-05 | 0.60   | 2.67    | -        | 683.6    |
| AHQ-7-5, 2907              | K.DVLLQVDDERR.N                                        | 1358.48286 | 2 | 7.34E-04 | 0.80   | 3.18    | -        | 766.4    |
| AHQ-7-2, 2288              | R.ELEDATETADAMN.R.E                                    | 1582.62946 | 2 | 3.15E-04 | 0.84   | 3.07    | -        | 988.0    |
| AHQ-7-2, 3091              | R.ELEDATETADAMN.R.E                                    | 1566.63006 | 2 | 2.45E-08 | 0.90   | 3.51    | -        | 1022.3   |
| AHQ-7-6, 2811              | R.ELEDATETADAMN.R.E                                    | 1566.63006 | 2 | 9.14E-06 | 0.90   | 3.69    | -        | 983.2    |
| AHQ-7-2, 2845 - 2911       | R.ELEDATETADAMN.R.E                                    | 1566.63006 | 2 | 5.78E-07 | 0.93   | 3.94    | -        | 1075.9   |
| AHQ-7-1, 3036              | R.ELEDATETADAMN.R.E                                    | 1566.63006 | 2 | 8.38E-07 | 0.93   | 3.51    | -        | 1389.4   |
| AHQ-7-5, 2830              | R.ELEDATETADAMN.R.E                                    | 1566.63006 | 2 | 1.26E-09 | 0.95   | 4.33    | -        | 1215.1   |
| AHQ-7-1, 5572 - 5573       | R.ELESQISELQEDLESER.A                                  | 2035.10956 | 3 | 4.70E-05 | 0.98   | 5.90    | -        | 2490.7   |
| AHQ-7-5, 5683              | R.ELESQISELQEDLESER.A                                  | 2035.10956 | 2 | 9.03E-08 | 0.96   | 4.80    | -        | 1186.7   |
| AHQ-7-2, 5961 - 5996       | R.ELESQISELQEDLESER.A                                  | 2035.10956 | 2 | 7.06E-08 | 0.96   | 4.73    | -        | 1247.9   |
| AHQ-7-7, 5513 - 5594       | R.ELESQISELQEDLESER.A                                  | 2035.10956 | 2 | 1.82E-07 | 0.91   | 4.30    | -        | 848.3    |
| AHQ-7-3, 5161              | R.ELESQISELQEDLESER.A                                  | 2035.10956 | 2 | 9.37E-07 | 0.87   | 3.78    | -        | 743.0    |
| AHQ-7-4, 5753              | R.ELESQISELQEDLESER.A                                  | 2035.10956 | 3 | 3.69E-05 | 0.98   | 6.11    | -        | 2396.8   |
| AHQ-7-3, 5571 - 5636       | R.ELESQISELQEDLESER.A                                  | 2035.10956 | 2 | 3.43E-06 | 0.91   | 4.59    | -        | 814.8    |
| AHQ-7-2, 5671 - 5737       | R.ELESQISELQEDLESER.A                                  | 2035.10956 | 2 | 2.64E-06 | 0.95   | 4.47    | -        | 1098.7   |
| AHQ-7-3, 5852              | R.ELESQISELQEDLESER.A                                  | 2035.10956 | 2 | 1.78E-06 | 0.68   | 2.86    | -        | 679.9    |
| AHQ-7-3, 5275              | R.ELESQISELQEDLESER.A                                  | 2035.10956 | 2 | 4.11E-07 | 0.92   | 4.07    | -        | 828.4    |
| AHQ-7-1, 5559 - 5560       | R.ELESQISELQEDLESER.A                                  | 2035.10956 | 2 | 1.18E-07 | 0.94   | 4.34    | -        | 913.2    |
| AHQ-7-2, 5384              | R.ELESQISELQEDLESER.A                                  | 2035.10956 | 2 | 1.03E-07 | 0.88   | 3.96    | -        | 606.3    |
| AHQ-7-4, 5752              | R.ELESQISELQEDLESER.A                                  | 2035.10956 | 2 | 9.42E-06 | 0.95   | 4.95    | -        | 1161.2   |
| AHQ-7-4, 2244              | R.EMEALEDERK.Q                                         | 1379.47597 | 2 | 9.42E-05 | 0.90   | 3.27    | -        | 1094.0   |
| AHQ-7-2, 2245 - 2315       | R.EMEALEDERK.Q                                         | 1379.47597 | 2 | 4.22E-04 | 0.94   | 3.39    | -        | 1557.4   |
| AHQ-7-5, 2219              | R.EMEALEDERK.Q                                         | 1379.47597 | 2 | 1.10E-04 | 0.87   | 3.05    | -        | 1033.4   |
| AHQ-7-2, 2311              | R.EMEALEDERK.Q                                         | 1379.47597 | 2 | 8.47E-06 | 0.93   | 3.35    | -        | 1431.1   |
| AHQ-7-5, 4322 - 4386       | K.EQADFALALAK.A                                        | 1306.44632 | 2 | 4.42E-04 | 0.81   | 2.63    | -        | 843.9    |
| AHQ-7-2, 4496              | K.EQADFALALAK.A                                        | 1306.44632 | 1 | 6.44E-04 | 0.59   | 3.25    | -        | 324.5    |
| AHQ-7-7, 4238              | K.EQADFALALAK.A                                        | 1306.44632 | 2 | 6.60E-04 | 0.53   | 2.65    | -        | 366.8    |
| AHQ-7-4, 2518              | R.EQEVNLIK.K                                           | 973.10554  | 1 | 5.83E-04 | 0.21   | 2.33    | -        | 196.4    |
| AHQ-7-2, 2507 - 2508       | R.EQLEEEEEAKHNLEK.Q                                    | 1855.93770 | 2 | 1.19E-05 | 0.91   | 4.52    | -        | 679.2    |
| AHQ-7-3, 2761              | R.EQLEEEEEAKHNLEK.Q                                    | 1855.93770 | 2 | 8.17E-04 | 0.77   | 3.53    | -        | 615.7    |
| AHQ-7-5, 2432              | R.EQLEEEEEAKHNLEK.Q                                    | 1855.93770 | 2 | 5.42E-04 | 0.90   | 4.02    | -        | 770.4    |
| AHQ-7-2, 2372              | R.EQLEEEEEAKHNLEK.Q                                    | 1855.93770 | 2 | 5.02E-06 | 0.86   | 3.55    | -        | 870.3    |
| AHQ-7-1, 2701              | R.EQLEEEEEAKHNLEK.Q                                    | 1855.93770 | 2 | 8.26E-06 | 0.94   | 4.59    | -        | 1166.4   |
| AHQ-7-2, 5124 - 5185       | R.FLSNGHVITIPGQDQDMFQETMEAM.R.I                        | 3028.39040 | 3 | 7.38E-04 | 0.79   | 4.67    | -        | 606.0    |
| AHQ-7-4, 3712              | K.FVSELWK.D                                            | 909.06314  | 1 | 1.44E-04 | 0.33   | 1.83    | -        | 810.3    |
| AHQ-7-4, 2486              | K.HEAMITDLEER.L                                        | 1360.47586 | 2 | 3.79E-04 | 0.97   | 4.04    | -        | 1612.7   |
| AHQ-7-5, 2914              | K.HEAMITDLEER.L                                        | 1344.47646 | 2 | 1.39E-06 | 0.95   | 3.82    | -        | 1267.9   |
| AHQ-7-2, 3015 - 3017       | K.HEAMITDLEER.L                                        | 1344.47646 | 2 | 1.26E-08 | 0.97   | 3.78    | -        | 1617.0   |
| AHQ-7-3, 2993 - 3007       | K.HEAMITDLEER.L                                        | 1344.47646 | 2 | 4.19E-07 | 0.96   | 3.97    | -        | 1384.6   |
| AHQ-7-10, 3380             | R.HEMPPHYAITDTAYR.S                                    | 1916.14944 | 3 | 6.80E-04 | 0.94   | 3.55    | -        | 1942.1   |
| AHQ-7-2, 3441              | R.HEMPPHYAITDTAYR.S                                    | 1932.14884 | 2 | 5.53E-06 | 0.88   | 3.34    | -        | 723.9    |



|                       |                           |            |   |          |      |      |   |        |
|-----------------------|---------------------------|------------|---|----------|------|------|---|--------|
| AHQ-7-1, 3816         | R.HEMPPHYAITDTAYR.S       | 1916.14944 | 3 | 1.40E-04 | 0.93 | 3.88 | - | 1532.2 |
| AHQ-7-4, 3373         | R.HEMPPHYAITDTAYR.S       | 1932.14884 | 3 | 1.64E-06 | 0.97 | 4.67 | - | 2206.4 |
| AHQ-7-11, 3240        | R.HEMPPHYAITDTAYR.S       | 1932.14884 | 3 | 1.10E-04 | 0.86 | 3.50 | - | 1099.5 |
| AHQ-7-4, 3374         | R.HEMPPHYAITDTAYR.S       | 1932.14884 | 2 | 1.07E-04 | 0.56 | 2.55 | - | 550.4  |
| AHQ-7-3, 3420         | R.HEMPPHYAITDTAYR.S       | 1932.14884 | 3 | 1.44E-06 | 0.98 | 5.18 | - | 2280.6 |
| AHQ-7-2, 3425         | R.HEMPPHYAITDTAYR.S       | 1932.14884 | 3 | 4.91E-05 | 0.92 | 4.24 | - | 1486.9 |
| AHQ-7-2, 3704 - 3767  | R.HEMPPHYAITDTAYR.S       | 1916.14944 | 3 | 4.96E-08 | 0.98 | 5.10 | - | 3380.9 |
| AHQ-7-2, 3732         | R.HEMPPHYAITDTAYR.S       | 1916.14944 | 2 | 6.43E-06 | 0.95 | 4.15 | - | 1126.1 |
| AHQ-7-1, 4600         | K.HSQAVEELAEQLEQTK.R      | 1840.96940 | 2 | 1.00E-30 | 0.98 | 6.27 | - | 2260.6 |
| AHQ-7-3, 4516         | K.HSQAVEELAEQLEQTK.R      | 1840.96940 | 2 | 1.76E-09 | 0.98 | 6.16 | - | 2730.5 |
| AHQ-7-3, 4520         | K.HSQAVEELAEQLEQTK.R      | 1840.96940 | 3 | 1.33E-07 | 0.96 | 4.74 | - | 1937.5 |
| AHQ-7-1, 4604         | K.HSQAVEELAEQLEQTK.R      | 1840.96940 | 3 | 3.55E-05 | 0.92 | 4.36 | - | 1439.7 |
| AHQ-7-4, 4545         | K.HSQAVEELAEQLEQTK.R      | 1840.96940 | 2 | 3.30E-06 | 0.98 | 6.41 | - | 2339.5 |
| AHQ-7-2, 4604         | K.HSQAVEELAEQLEQTK.R      | 1840.96940 | 2 | 4.25E-08 | 0.98 | 6.20 | - | 2638.9 |
| AHQ-7-2, 4605         | K.HSQAVEELAEQLEQTK.R      | 1840.96940 | 3 | 1.75E-07 | 0.96 | 4.77 | - | 2075.5 |
| AHQ-7-4, 4121 - 4192  | K.HSQAVEELAEQLEQTKR.V     | 1997.15575 | 2 | 2.39E-08 | 0.98 | 6.18 | - | 2084.0 |
| AHQ-7-4, 4190         | K.HSQAVEELAEQLEQTKR.V     | 1997.15575 | 2 | 1.33E-12 | 0.99 | 6.89 | - | 2609.2 |
| AHQ-7-5, 4154         | K.HSQAVEELAEQLEQTKR.V     | 1997.15575 | 3 | 3.35E-09 | 0.96 | 5.35 | - | 1116.9 |
| AHQ-7-6, 4089         | K.HSQAVEELAEQLEQTKR.V     | 1997.15575 | 3 | 7.02E-07 | 0.97 | 5.61 | - | 1662.7 |
| AHQ-7-1, 4240 - 4299  | K.HSQAVEELAEQLEQTKR.V     | 1997.15575 | 3 | 4.64E-06 | 0.97 | 5.49 | - | 1491.6 |
| AHQ-7-3, 4193         | K.HSQAVEELAEQLEQTKR.V     | 1997.15575 | 2 | 1.06E-07 | 0.98 | 6.47 | - | 2408.6 |
| AHQ-7-2, 4263         | K.HSQAVEELAEQLEQTKR.V     | 1997.15575 | 3 | 1.82E-10 | 0.97 | 6.77 | - | 1397.7 |
| AHQ-7-1, 4292         | K.HSQAVEELAEQLEQTKR.V     | 1997.15575 | 2 | 9.35E-10 | 0.98 | 6.28 | - | 2478.0 |
| AHQ-7-2, 4267         | K.HSQAVEELAEQLEQTKR.V     | 1997.15575 | 2 | 1.51E-07 | 0.98 | 6.61 | - | 2111.4 |
| AHQ-7-4, 4185         | K.HSQAVEELAEQLEQTKR.V     | 1997.15575 | 3 | 5.00E-05 | 0.97 | 5.51 | - | 1786.5 |
| AHQ-7-3, 4192         | K.HSQAVEELAEQLEQTKR.V     | 1997.15575 | 3 | 7.31E-07 | 0.97 | 6.16 | - | 1614.3 |
| AHQ-7-3, 3716 - 3743  | R.IAEFTTNLTTEEEK.S        | 1654.75371 | 2 | 1.71E-09 | 0.97 | 4.52 | - | 1898.6 |
| AHQ-7-2, 3963 - 4035  | R.IAEFTTNLTTEEEK.S        | 1654.75371 | 2 | 3.97E-10 | 0.97 | 4.59 | - | 1895.9 |
| AHQ-7-2, 3836 - 3899  | R.IAEFTTNLTTEEEK.S        | 1654.75371 | 2 | 2.44E-10 | 0.95 | 3.86 | - | 1718.6 |
| AHQ-7-2, 3727 - 3799  | R.IAEFTTNLTTEEEK.S        | 1654.75371 | 2 | 1.53E-04 | 0.95 | 4.34 | - | 1176.0 |
| AHQ-7-5, 3722         | R.IAEFTTNLTTEEEK.S        | 1654.75371 | 2 | 2.94E-08 | 0.97 | 4.77 | - | 1776.4 |
| AHQ-7-3, 3947 - 3988  | R.IAEFTTNLTTEEEK.S        | 1654.75371 | 2 | 1.59E-05 | 0.97 | 4.38 | - | 2332.2 |
| AHQ-7-4, 3740 - 3810  | R.IAEFTTNLTTEEEK.S        | 1654.75371 | 2 | 1.15E-07 | 0.97 | 4.81 | - | 2095.6 |
| AHQ-7-1, 3845         | R.IAEFTTNLTTEEEK.S        | 1654.75371 | 2 | 1.22E-09 | 0.97 | 4.41 | - | 1999.4 |
| AHQ-7-3, 3807 - 3868  | R.IAEFTTNLTTEEEK.S        | 1654.75371 | 2 | 5.03E-09 | 0.94 | 4.51 | - | 1306.6 |
| AHQ-7-3, 3627         | R.IAEFTTNLTTEEEK.S        | 1654.75371 | 2 | 1.16E-05 | 0.68 | 2.78 | - | 684.6  |
| AHQ-7-6, 3657         | R.IAEFTTNLTTEEEK.S        | 1654.75371 | 2 | 1.24E-07 | 0.95 | 3.79 | - | 1532.7 |
| AHQ-7-7, 3546 - 3592  | R.IAEFTTNLTTEEEK.S        | 1654.75371 | 2 | 2.21E-07 | 0.91 | 3.40 | - | 1272.8 |
| AHQ-7-2, 3613         | R.IAEFTTNLTTEEEK.S        | 1654.75371 | 2 | 1.54E-08 | 0.90 | 3.83 | - | 955.4  |
| AHQ-7-13, 3806 - 3834 | R.IAEFTTNLTTEEEK.S        | 1654.75371 | 2 | 5.10E-06 | 0.93 | 4.02 | - | 1222.1 |
| AHQ-7-8, 3555         | R.IAEFTTNLTTEEEK.S        | 1654.75371 | 2 | 1.07E-06 | 0.96 | 4.59 | - | 1675.2 |
| AHQ-7-3, 5075 - 5076  | R.IAQLEEELEEEQNTLINDR.L   | 2473.58969 | 3 | 1.24E-04 | 0.86 | 3.99 | - | 985.3  |
| AHQ-7-2, 5467         | R.IAQLEEELEEEQNTLINDR.L   | 2714.92085 | 2 | 4.71E-07 | 0.94 | 4.86 | - | 1052.5 |
| AHQ-7-3, 5356 - 5363  | R.IAQLEEELEEEQNTLINDR.L   | 2714.92085 | 2 | 9.32E-08 | 0.94 | 4.87 | - | 938.9  |
| AHQ-7-2, 5463         | R.IAQLEEELEEEQNTLINDR.L   | 2714.92085 | 3 | 2.28E-07 | 0.84 | 4.01 | - | 739.9  |
| AHQ-7-4, 5472         | R.IAQLEEELEEEQNTLINDR.L   | 2714.92085 | 2 | 2.38E-06 | 0.91 | 4.21 | - | 913.5  |
| AHQ-7-1, 5312 - 5380  | R.IAQLEEELEEEQNTLINDR.L   | 2714.92085 | 3 | 1.03E-04 | 0.66 | 3.71 | - | 542.7  |
| AHQ-7-7, 3233 - 3270  | K.IAQLEEQLDNETK.E         | 1531.64695 | 2 | 1.77E-05 | 0.91 | 4.03 | - | 790.4  |
| AHQ-7-6, 3321         | K.IAQLEEQLDNETK.E         | 1531.64695 | 2 | 7.06E-10 | 0.97 | 5.08 | - | 1727.1 |
| AHQ-7-1, 3527         | K.IAQLEEQLDNETK.E         | 1531.64695 | 2 | 1.63E-07 | 0.97 | 4.42 | - | 2258.3 |
| AHQ-7-11, 3031        | K.IAQLEEQLDNETK.E         | 1531.64695 | 2 | 6.54E-05 | 0.94 | 3.38 | - | 1534.1 |
| AHQ-7-3, 3348 - 3400  | K.IAQLEEQLDNETK.E         | 1531.64695 | 2 | 6.31E-08 | 0.96 | 3.84 | - | 2013.5 |
| AHQ-7-2, 3587         | K.IAQLEEQLDNETK.E         | 1531.64695 | 2 | 1.36E-06 | 0.87 | 3.32 | - | 817.0  |
| AHQ-7-11, 3231        | K.IAQLEEQLDNETK.E         | 1531.64695 | 2 | 4.45E-06 | 0.96 | 4.16 | - | 1581.9 |
| AHQ-7-2, 3447 - 3515  | K.IAQLEEQLDNETK.E         | 1531.64695 | 2 | 1.38E-07 | 0.97 | 4.28 | - | 1587.1 |
| AHQ-7-8, 3262         | K.IAQLEEQLDNETK.E         | 1531.64695 | 2 | 9.01E-09 | 0.96 | 4.75 | - | 1257.3 |
| AHQ-7-3, 3171         | K.IAQLEEQLDNETK.E         | 1531.64695 | 2 | 1.59E-08 | 0.97 | 4.75 | - | 1680.4 |
| AHQ-7-4, 3158         | K.IAQLEEQLDNETK.E         | 1531.64695 | 2 | 7.78E-06 | 0.93 | 3.82 | - | 1403.1 |
| AHQ-7-4, 3380 - 3453  | K.IAQLEEQLDNETK.E         | 1531.64695 | 2 | 2.37E-05 | 0.92 | 3.79 | - | 940.7  |
| AHQ-7-2, 3224 - 3296  | K.IAQLEEQLDNETK.E         | 1531.64695 | 2 | 1.83E-07 | 0.97 | 5.08 | - | 1788.2 |
| AHQ-7-5, 3359         | K.IAQLEEQLDNETK.E         | 1531.64695 | 2 | 1.12E-05 | 0.96 | 4.27 | - | 1668.9 |
| AHQ-7-2, 3013         | K.IAQLEEQLDNETK.E         | 1531.64695 | 2 | 1.35E-05 | 0.94 | 4.20 | - | 1045.6 |
| AHQ-7-9, 3082         | K.IAQLEEQLDNETK.E         | 1531.64695 | 2 | 5.10E-04 | 0.92 | 3.67 | - | 1094.6 |
| AHQ-7-2, 3181         | K.IAQLEEQLDNETKER.Q       | 1816.94784 | 2 | 8.14E-05 | 0.66 | 2.88 | - | 547.8  |
| AHQ-7-2, 3605         | K.IAQLEEQLDNETKER.Q       | 1816.94784 | 2 | 4.38E-09 | 0.91 | 4.25 | - | 799.7  |
| AHQ-7-1, 6072 - 6145  | R.IIGLDQVAGMSETALP.GAFK.T | 2019.35101 | 2 | 1.64E-13 | 0.97 | 5.59 | - | 1357.4 |
| AHQ-7-6, 6206         | R.IIGLDQVAGMSETALP.GAFK.T | 2019.35101 | 2 | 8.86E-05 | 0.95 | 5.08 | - | 967.3  |
| AHQ-7-8, 6267         | R.IIGLDQVAGMSETALP.GAFK.T | 2019.35101 | 2 | 6.70E-06 | 0.96 | 4.71 | - | 1290.0 |
| AHQ-7-6, 5517 - 5581  | R.IIGLDQVAGMSETALP.GAFK.T | 2035.35041 | 2 | 9.31E-04 | 0.77 | 3.90 | - | 627.3  |
| AHQ-7-7, 6254 - 6258  | R.IIGLDQVAGMSETALP.GAFK.T | 2019.35101 | 2 | 5.85E-05 | 0.96 | 5.27 | - | 949.4  |
| AHQ-7-14, 5318        | R.IIGLDQVAGMSETALP.GAFK.T | 2035.35041 | 2 | 1.16E-05 | 0.94 | 4.17 | - | 997.6  |
| AHQ-7-2, 6341 - 6399  | R.IIGLDQVAGMSETALP.GAFK.T | 2019.35101 | 2 | 8.83E-07 | 0.96 | 5.43 | - | 1106.5 |
| AHQ-7-3, 6208 - 6280  | R.IIGLDQVAGMSETALP.GAFK.T | 2019.35101 | 2 | 4.68E-06 | 0.84 | 3.73 | - | 584.8  |
| AHQ-7-5, 6298 - 6330  | R.IIGLDQVAGMSETALP.GAFK.T | 2019.35101 | 2 | 1.61E-04 | 0.91 | 4.24 | - | 819.7  |
| AHQ-7-2, 5831 - 5861  | R.IIGLDQVAGMSETALP.GAFK.T | 2019.35101 | 2 | 4.50E-06 | 0.95 | 5.06 | - | 1004.3 |
| AHQ-7-6, 5066 - 5125  | R.IMGPIEEEQMGLLR.V        | 1616.92826 | 2 | 7.36E-07 | 0.90 | 4.16 | - | 514.8  |
| AHQ-7-6, 4530         | R.IMGPIEEEQMGLLR.V        | 1632.92766 | 2 | 1.24E-04 | 0.83 | 2.94 | - | 652.0  |
| AHQ-7-5, 5191 - 5263  | R.IMGPIEEEQMGLLR.V        | 1616.92826 | 2 | 2.03E-08 | 0.82 | 3.39 | - | 321.4  |
| AHQ-7-2, 5272 - 5281  | R.IMGPIEEEQMGLLR.V        | 1648.92706 | 2 | 4.74E-05 | 0.85 | 3.67 | - | 482.6  |
| AHQ-7-2, 5256 - 5279  | R.IMGPIEEEQMGLLR.V        | 1616.92826 | 2 | 7.33E-06 | 0.87 | 3.53 | - | 537.8  |
| AHQ-7-2, 4652 - 4716  | R.IMGPIEEEQMGLLR.V        | 1632.92766 | 2 | 1.27E-08 | 0.96 | 4.64 | - | 964.4  |
| AHQ-7-4, 5256         | R.IMGPIEEEQMGLLR.V        | 1616.92826 | 2 | 8.13E-06 | 0.88 | 3.64 | - | 455.7  |
| AHQ-7-4, 5772 - 5786  | K.IRELESQISELQEDLESER.A   | 2304.45416 | 3 | 3.06E-05 | 0.93 | 4.47 | - | 1274.6 |
| AHQ-7-4, 5757 - 5776  | K.IRELESQISELQEDLESER.A   | 2304.45416 | 2 | 1.77E-06 | 0.98 | 6.31 | - | 1234.4 |
| AHQ-7-1, 5607         | K.IRELESQISELQEDLESER.A   | 2304.45416 | 2 | 8.38E-04 | 0.96 | 5.16 | - | 826.3  |
| AHQ-7-3, 5648         | K.IRELESQISELQEDLESER.A   | 2304.45416 | 2 | 3.38E-05 | 0.98 | 6.43 | - | 1295.0 |
| AHQ-7-2, 5783 - 5797  | K.IRELESQISELQEDLESER.A   | 2304.45416 | 3 | 2.15E-07 | 0.96 | 5.43 | - | 1877.9 |
| AHQ-7-3, 5647 - 5659  | K.IRELESQISELQEDLESER.A   | 2304.45416 | 3 | 9.26E-06 | 0.96 | 5.02 | - | 1701.7 |
| AHQ-7-1, 5549 - 5608  | K.IRELESQISELQEDLESER.A   | 2304.45416 | 2 | 4.81E-08 | 0.98 | 6.95 | - | 1625.1 |
| AHQ-7-2, 5741 - 5803  | K.IRELESQISELQEDLESER.A   | 2304.45416 | 2 | 3.07E-04 | 0.98 | 6.65 | - | 1832.2 |
| AHQ-7-2, 5481         | K.ITDVIIQOACCR.G          | 1555.80136 | 2 | 2.25E-05 | 0.90 | 3.25 | - | 1075.2 |
| AHQ-7-4, 4492 - 4565  | K.KANLQIDQINTDLNLER.S     | 1999.21478 | 2 | 9.25E-07 | 0.96 | 5.19 | - | 1369.3 |
| AHQ-7-2, 4765         | K.KANLQIDQINTDLNLER.S     | 1999.21478 | 2 | 3.44E-07 | 0.94 | 4.60 | - | 1034.3 |
| AHQ-7-2, 4457         | K.KANLQIDQINTDLNLER.S     | 1999.21478 | 2 | 8.89E-09 | 0.97 | 5.73 | - | 1222.7 |
| AHQ-7-2, 4601 - 4627  | K.KANLQIDQINTDLNLER.S     | 1999.21478 | 3 | 2.05E-05 | 0.90 | 4.42 | - | 1041.6 |
| AHQ-7-5, 4502         | K.KANLQIDQINTDLNLER.S     | 1999.21478 | 2 | 9.22E-09 | 0.96 | 5.10 | - | 1219.3 |
| AHQ-7-2, 4607         | K.KANLQIDQINTDLNLER.S     | 1999.21478 | 2 | 4.07E-04 | 0.97 | 5.95 | - | 1253.8 |
| AHQ-7-6, 4415         | K.KANLQIDQINTDLNLER.S     | 1999.21478 | 2 | 1.77E-11 | 0.97 | 5.23 | - | 1547.5 |
| AHQ-7-3, 2691         | R.KKVEAQLQELQVK.F         | 1541.81761 | 2 | 9.51E-08 | 0.97 | 4.97 | - | 1719.4 |
| AHQ-7-1, 2933         | R.KKVEAQLQELQVK.F         | 1541.81761 | 2 | 1.07E-05 | 0.94 | 4.45 | - | 1294.0 |
| AHQ-7-4, 2646         | R.KKVEAQLQELQVK.F         | 1541.81761 | 2 | 3.82E-09 | 0.97 | 4.90 | - | 1513.8 |
| AHQ-7-2, 2704 - 2707  | R.KKVEAQLQELQVK.F         | 1541.81761 | 2 | 1.43E-09 | 0.97 | 5.35 | - | 1375.4 |
| AHQ-7-5, 2656         | R.KKVEAQLQELQVK.F         | 1541.81761 | 2 | 3.34E-06 | 0.97 | 4.83 | - | 1548.7 |
| AHQ-7-1, 3635 - 3696  | K.KLEEEQIILEDQNCCK.L      | 1891.08992 | 2 | 2.54E-08 | 0.98 | 6.03 | - | 1707.7 |
| AHQ-7-3, 3493 - 3575  | K.KLEEEQIILEDQNCCK.L      | 1891.08992 | 2 | 1.56E-09 | 0.98 | 6.42 | - | 1989.6 |
| AHQ-7-3, 3596         | K.KLEEEQIILEDQNCCK.L      | 1891.08992 | 2 | 1.36E-12 | 0.98 | 5.56 | - | 1969.4 |
| AHQ-7-2, 3548 - 3627  | K.KLEEEQIILEDQNCCK.L      | 1891.08992 | 2 | 5.26E-04 | 0.96 | 5.27 | - | 1124.7 |

|                      |                             |            |   |          |      |      |   |        |
|----------------------|-----------------------------|------------|---|----------|------|------|---|--------|
| AHQ-7-4, 3492 - 3572 | K.KLEEEQIILEDQNC.L          | 1891.08992 | 2 | 1.90E-09 | 0.98 | 6.10 | - | 2356.0 |
| AHQ-7-5, 3467        | K.KLEEEQIILEDQNC.L          | 1891.08992 | 2 | 1.74E-05 | 0.98 | 5.88 | - | 1890.4 |
| AHQ-7-2, 3653        | K.KLEEEQIILEDQNC.L          | 1891.08992 | 3 | 4.70E-04 | 0.93 | 4.31 | - | 1423.9 |
| AHQ-7-6, 3413        | K.KLEEEQIILEDQNC.L          | 1891.08992 | 2 | 2.37E-04 | 0.95 | 4.84 | - | 891.0  |
| AHQ-7-2, 3983        | K.KLEEEQIILEDQNC.LAK.E      | 2203.49930 | 3 | 8.50E-04 | 0.96 | 4.95 | - | 1428.0 |
| AHQ-7-3, 6593 - 6659 | R.KLEGDSTDLSDQIAELQAIAELK.M | 2616.86032 | 2 | 4.62E-08 | 0.97 | 5.94 | - | 1474.6 |
| AHQ-7-4, 6796 - 6798 | R.KLEGDSTDLSDQIAELQAIAELK.M | 2616.86032 | 3 | 6.13E-08 | 0.91 | 5.03 | - | 714.2  |
| AHQ-7-6, 6601        | R.KLEGDSTDLSDQIAELQAIAELK.M | 2616.86032 | 3 | 7.97E-08 | 0.86 | 4.12 | - | 1064.4 |
| AHQ-7-3, 6516 - 6592 | R.KLEGDSTDLSDQIAELQAIAELK.M | 2616.86032 | 3 | 5.00E-06 | 0.93 | 5.67 | - | 930.3  |
| AHQ-7-2, 6692 - 6767 | R.KLEGDSTDLSDQIAELQAIAELK.M | 2616.86032 | 3 | 6.92E-08 | 0.94 | 5.46 | - | 918.3  |
| AHQ-7-2, 6057 - 6135 | R.KLEGDSTDLSDQIAELQAIAELK.M | 2616.86032 | 3 | 9.84E-05 | 0.92 | 4.34 | - | 1049.8 |
| AHQ-7-7, 6688        | R.KLEGDSTDLSDQIAELQAIAELK.M | 2616.86032 | 3 | 4.49E-08 | 0.91 | 4.99 | - | 742.9  |
| AHQ-7-1, 6480        | R.KLEGDSTDLSDQIAELQAIAELK.M | 2616.86032 | 2 | 1.15E-06 | 0.90 | 3.75 | - | 925.9  |
| AHQ-7-1, 6475 - 6477 | R.KLEGDSTDLSDQIAELQAIAELK.M | 2616.86032 | 3 | 4.91E-06 | 0.95 | 6.03 | - | 891.2  |
| AHQ-7-2, 6576        | R.KLEGDSTDLSDQIAELQAIAELK.M | 2616.86032 | 3 | 6.19E-06 | 0.96 | 5.14 | - | 1757.7 |
| AHQ-7-5, 6710        | R.KLEGDSTDLSDQIAELQAIAELK.M | 2616.86032 | 3 | 8.42E-09 | 0.93 | 5.15 | - | 925.8  |
| AHQ-7-3, 5911        | R.KLEGDSTDLSDQIAELQAIAELK.M | 2616.86032 | 3 | 1.53E-05 | 0.95 | 5.47 | - | 1538.1 |
| AHQ-7-4, 6797 - 6874 | R.KLEGDSTDLSDQIAELQAIAELK.M | 2616.86032 | 2 | 1.62E-06 | 0.96 | 6.11 | - | 996.9  |
| AHQ-7-6, 2813        | K.KLVWVPSDK.S               | 1072.28194 | 2 | 4.82E-04 | 0.77 | 3.41 | - | 738.4  |
| AHQ-7-4, 2868        | K.KLVWVPSDK.S               | 1072.28194 | 2 | 1.07E-04 | 0.89 | 3.37 | - | 982.5  |
| AHQ-7-2, 2947        | K.KLVWVPSDK.S               | 1072.28194 | 1 | 8.64E-04 | 0.56 | 2.44 | - | 501.2  |
| AHQ-7-3, 2936        | K.KLVWVPSDK.S               | 1072.28194 | 2 | 3.39E-04 | 0.89 | 3.60 | - | 797.0  |
| AHQ-7-2, 2944        | K.KLVWVPSDK.S               | 1072.28194 | 2 | 3.21E-05 | 0.91 | 3.20 | - | 1141.6 |
| AHQ-7-2, 3699        | K.KMEDSVGCLTAEEVK.R         | 1827.02450 | 2 | 1.27E-04 | 0.89 | 4.03 | - | 819.6  |
| AHQ-7-5, 3207        | K.KM*EDSVGCLTAEEVK.R        | 1843.02390 | 2 | 2.29E-04 | 0.91 | 3.47 | - | 1053.2 |
| AHQ-7-3, 3620        | K.KMEDSVGCLTAEEVK.R         | 1827.02450 | 2 | 5.27E-04 | 0.92 | 3.81 | - | 1375.9 |
| AHQ-7-2, 3381        | K.KMEDSVGCLTAEEVK.R.K       | 1983.21085 | 3 | 6.42E-08 | 0.95 | 5.25 | - | 1142.8 |
| AHQ-7-3, 3017        | K.KM*EDSVGCLTAEEVK.R.K      | 1999.21025 | 2 | 1.07E-06 | 0.91 | 3.92 | - | 779.3  |
| AHQ-7-3, 3336        | K.KMEDSVGCLTAEEVK.R.K       | 1983.21085 | 3 | 6.28E-05 | 0.95 | 5.29 | - | 1230.6 |
| AHQ-7-6, 3241        | K.KMEDSVGCLTAEEVK.R.K       | 1983.21085 | 3 | 1.75E-09 | 0.97 | 5.16 | - | 1876.6 |
| AHQ-7-4, 3325        | K.KMEDSVGCLTAEEVK.R.K       | 1983.21085 | 3 | 1.23E-04 | 0.76 | 3.74 | - | 453.5  |
| AHQ-7-2, 3289        | K.KMEDSVGCLTAEEVK.R.K       | 1983.21085 | 3 | 2.42E-05 | 0.78 | 3.53 | - | 851.2  |
| AHQ-7-2, 3043 - 3056 | K.KM*EDSVGCLTAEEVK.R.K      | 1999.21025 | 3 | 7.89E-04 | 0.93 | 4.66 | - | 1263.5 |
| AHQ-7-2, 3040        | K.KM*EDSVGCLTAEEVK.R.K      | 1999.21025 | 2 | 1.63E-05 | 0.86 | 3.64 | - | 545.4  |
| AHQ-7-4, 2953        | K.KM*EDSVGCLTAEEVK.R.K      | 1999.21025 | 3 | 2.88E-04 | 0.97 | 4.90 | - | 2108.0 |
| AHQ-7-5, 2940        | K.KM*EDSVGCLTAEEVK.R.K      | 1999.21025 | 3 | 5.70E-04 | 0.94 | 4.18 | - | 1508.3 |
| AHQ-7-3, 5227        | K.KMQQNIQELEEQLLEEEESAR.Q   | 2462.63354 | 2 | 1.98E-08 | 0.97 | 5.97 | - | 1183.4 |
| AHQ-7-2, 5331        | K.KMQQNIQELEEQLLEEEESAR.Q   | 2462.63354 | 2 | 1.34E-08 | 0.97 | 5.36 | - | 1467.2 |
| AHQ-7-3, 4788        | K.KM*QQNIQELEEQLLEEEESAR.Q  | 2478.63294 | 3 | 7.96E-09 | 0.90 | 4.80 | - | 1207.0 |
| AHQ-7-4, 5317        | K.KMQQNIQELEEQLLEEEESAR.Q   | 2462.63354 | 2 | 3.31E-05 | 0.87 | 3.72 | - | 908.6  |
| AHQ-7-3, 4119 - 4135 | K.KQEEIEICHDLAR.V           | 1771.93036 | 2 | 4.54E-06 | 0.98 | 5.88 | - | 2024.5 |
| AHQ-7-5, 4107        | K.KQEEIEICHDLAR.V           | 1771.93036 | 2 | 2.92E-06 | 0.96 | 4.72 | - | 1587.5 |
| AHQ-7-3, 4121 - 4131 | K.KQEEIEICHDLAR.V           | 1771.93036 | 3 | 2.98E-04 | 0.94 | 4.99 | - | 1091.9 |
| AHQ-7-1, 4223        | K.KQEEIEICHDLAR.V           | 1771.93036 | 3 | 5.35E-05 | 0.96 | 5.22 | - | 1639.5 |
| AHQ-7-2, 4189        | K.KQEEIEICHDLAR.V           | 1771.93036 | 2 | 5.79E-04 | 0.98 | 5.37 | - | 2136.7 |
| AHQ-7-4, 4124        | K.KQEEIEICHDLAR.V           | 1771.93036 | 2 | 4.15E-05 | 0.97 | 5.55 | - | 1572.5 |
| AHQ-7-4, 4132        | K.KQEEIEICHDLAR.V           | 1771.93036 | 3 | 5.33E-05 | 0.96 | 4.94 | - | 1570.4 |
| AHQ-7-6, 2949        | K.KVEAQLQELQVK.F            | 1413.64470 | 2 | 1.10E-06 | 0.96 | 4.67 | - | 1538.0 |
| AHQ-7-1, 3231        | K.KVEAQLQELQVK.F            | 1413.64470 | 2 | 1.36E-05 | 0.95 | 4.48 | - | 1325.2 |
| AHQ-7-2, 3068        | K.KVEAQLQELQVK.F            | 1413.64470 | 2 | 3.00E-06 | 0.96 | 4.86 | - | 1340.2 |
| AHQ-7-3, 3043        | K.KVEAQLQELQVK.F            | 1413.64470 | 2 | 1.82E-06 | 0.97 | 5.77 | - | 1417.9 |
| AHQ-7-4, 2985        | K.KVEAQLQELQVK.F            | 1413.64470 | 2 | 1.12E-05 | 0.97 | 4.92 | - | 1668.1 |
| AHQ-7-5, 2876 - 2954 | K.KVEAQLQELQVK.F            | 1413.64470 | 2 | 1.51E-06 | 0.96 | 4.50 | - | 1503.7 |
| AHQ-7-1, 3889 - 3949 | K.LEEEQIILEDQNC.L           | 1762.91700 | 2 | 3.06E-07 | 0.97 | 5.73 | - | 1168.0 |
| AHQ-7-2, 3883 - 3947 | K.LEEEQIILEDQNC.L           | 1762.91700 | 2 | 2.41E-10 | 0.97 | 5.38 | - | 1194.6 |
| AHQ-7-2, 3897        | K.LEEEQIILEDQNC.L           | 1762.91700 | 3 | 4.13E-06 | 0.86 | 4.23 | - | 1128.8 |
| AHQ-7-4, 3825 - 3848 | K.LEEEQIILEDQNC.L           | 1762.91700 | 2 | 1.43E-07 | 0.95 | 4.60 | - | 1172.2 |
| AHQ-7-3, 6647        | R.LEVNLQAM*K.A              | 1062.26570 | 2 | 1.30E-04 | 0.81 | 3.14 | - | 608.9  |
| AHQ-7-3, 2673        | R.LEVNLQAM*K.A              | 1062.26570 | 2 | 8.47E-04 | 0.85 | 2.76 | - | 802.0  |
| AHQ-7-4, 2638        | R.LEVNLQAM*K.A              | 1062.26570 | 2 | 8.08E-05 | 0.85 | 3.42 | - | 650.4  |
| AHQ-7-3, 3573        | R.LEVNLQAM*K.A              | 1062.26570 | 2 | 4.31E-05 | 0.89 | 3.58 | - | 725.7  |
| AHQ-7-2, 2693        | R.LEVNLQAM*K.A              | 1062.26570 | 2 | 1.33E-05 | 0.94 | 3.71 | - | 1306.6 |
| AHQ-7-3, 3536 - 3548 | K.LKDVLLQVDDER.R            | 1443.62767 | 2 | 3.79E-04 | 0.90 | 3.63 | - | 1344.8 |
| AHQ-7-3, 3207 - 3231 | K.LKDVLLQVDDER.R            | 1599.81402 | 3 | 1.64E-05 | 0.80 | 3.22 | - | 904.6  |
| AHQ-7-1, 3392        | K.LKDVLLQVDDER.R            | 1599.81402 | 2 | 1.57E-05 | 0.91 | 3.93 | - | 1036.9 |
| AHQ-7-2, 3227        | K.LKDVLLQVDDER.R            | 1599.81402 | 2 | 1.57E-05 | 0.91 | 3.93 | - | 1036.9 |
| AHQ-7-2, 6888 - 6953 | K.LQEQELQAEELCAEAEELR.A     | 2503.72536 | 2 | 2.65E-07 | 0.93 | 3.82 | - | 1195.6 |
| AHQ-7-2, 6944 - 7001 | K.LQEQELQAEELCAEAEELR.A     | 2503.72536 | 3 | 1.96E-04 | 0.92 | 4.13 | - | 1398.6 |
| AHQ-7-2, 7012        | K.LQEQELQAEELCAEAEELR.A     | 2503.72536 | 2 | 5.79E-06 | 0.91 | 3.71 | - | 872.9  |
| AHQ-7-3, 6737        | K.LQEQELQAEELCAEAEELR.A     | 2503.72536 | 2 | 7.59E-04 | 0.89 | 3.05 | - | 838.6  |
| AHQ-7-2, 5991 - 6003 | R.LQEQELDLVLDLQHR.Q         | 1951.12699 | 2 | 4.08E-09 | 0.97 | 4.96 | - | 2015.0 |
| AHQ-7-1, 5445        | R.LQEQELDLVLDLQHR.Q         | 1951.12699 | 3 | 1.61E-06 | 0.88 | 4.16 | - | 714.4  |
| AHQ-7-2, 5987 - 6051 | R.LQEQELDLVLDLQHR.Q         | 1951.12699 | 3 | 4.01E-06 | 0.91 | 4.06 | - | 845.9  |
| AHQ-7-4, 5988        | R.LQEQELDLVLDLQHR.Q         | 1951.12699 | 3 | 1.67E-05 | 0.93 | 4.74 | - | 890.3  |
| AHQ-7-4, 5994        | R.LQEQELDLVLDLQHR.Q         | 1951.12699 | 2 | 3.74E-10 | 0.98 | 5.49 | - | 2012.4 |
| AHQ-7-5, 5948        | R.LQEQELDLVLDLQHR.Q         | 1951.12699 | 2 | 3.32E-08 | 0.98 | 5.35 | - | 1827.7 |
| AHQ-7-6, 5849        | R.LQEQELDLVLDLQHR.Q         | 1951.12699 | 3 | 2.50E-07 | 0.85 | 4.03 | - | 711.1  |
| AHQ-7-6, 5851        | R.LQEQELDLVLDLQHR.Q         | 1951.12699 | 2 | 7.95E-10 | 0.96 | 4.65 | - | 1535.2 |
| AHQ-7-3, 5864 - 5871 | R.LQEQELDLVLDLQHR.Q         | 1951.12699 | 3 | 2.55E-04 | 0.90 | 4.40 | - | 659.1  |
| AHQ-7-3, 5863 - 5867 | R.LQEQELDLVLDLQHR.Q         | 1951.12699 | 2 | 9.51E-11 | 0.97 | 5.07 | - | 1971.4 |
| AHQ-7-2, 5593        | R.LQEQELDLVLDLQHR.Q         | 1951.12699 | 3 | 3.51E-10 | 0.94 | 4.82 | - | 1086.4 |
| AHQ-7-2, 5592        | R.LQEQELDLVLDLQHR.Q         | 1951.12699 | 2 | 9.36E-06 | 0.89 | 4.05 | - | 839.5  |
| AHQ-7-7, 5856        | R.LQEQELDLVLDLQHR.Q         | 1951.12699 | 2 | 1.80E-08 | 0.97 | 4.67 | - | 1602.2 |
| AHQ-7-1, 5816        | R.LQEQELDLVLDLQHR.Q         | 1951.12699 | 2 | 1.11E-06 | 0.97 | 5.05 | - | 1661.2 |
| AHQ-7-1, 5731        | K.LQVELDNVTGLLSQSDSK.S      | 1947.13342 | 2 | 9.08E-07 | 0.93 | 4.02 | - | 1045.6 |
| AHQ-7-2, 5396 - 5415 | K.LQVELDNVTGLLSQSDSK.S      | 1947.13342 | 2 | 2.30E-08 | 0.97 | 5.69 | - | 1108.0 |
| AHQ-7-3, 5769        | K.LQVELDNVTGLLSQSDSK.S      | 1947.13342 | 2 | 3.33E-06 | 0.93 | 4.42 | - | 1042.3 |
| AHQ-7-3, 5676 - 5704 | K.LQVELDNVTGLLSQSDSK.S      | 1947.13342 | 2 | 1.31E-07 | 0.95 | 4.83 | - | 1194.5 |
| AHQ-7-2, 5675 - 5735 | K.LQVELDNVTGLLSQSDSK.S      | 1947.13342 | 2 | 2.90E-06 | 0.98 | 5.77 | - | 1593.5 |
| AHQ-7-2, 5721        | K.LQVELDNVTGLLSQSDSK.S      | 1947.13342 | 3 | 2.88E-07 | 0.96 | 5.70 | - | 1337.0 |
| AHQ-7-3, 5584 - 5643 | K.LQVELDNVTGLLSQSDSK.S      | 1947.13342 | 2 | 1.53E-07 | 0.96 | 5.05 | - | 1131.6 |
| AHQ-7-3, 5583        | K.LQVELDNVTGLLSQSDSK.S      | 1947.13342 | 3 | 9.17E-09 | 0.97 | 5.17 | - | 1811.2 |
| AHQ-7-6, 5550        | K.LQVELDNVTGLLSQSDSK.S      | 1947.13342 | 2 | 2.08E-07 | 0.97 | 5.33 | - | 1218.1 |
| AHQ-7-5, 5600 - 5658 | K.LQVELDNVTGLLSQSDSK.S      | 1947.13342 | 2 | 2.77E-07 | 0.98 | 5.46 | - | 1897.0 |
| AHQ-7-1, 5619 - 5677 | K.LQVELDNVTGLLSQSDSK.S      | 1947.13342 | 2 | 4.02E-06 | 0.94 | 4.83 | - | 874.2  |
| AHQ-7-7, 5536        | K.LQVELDNVTGLLSQSDSK.S      | 1947.13342 | 2 | 2.17E-04 | 0.89 | 3.62 | - | 1088.2 |
| AHQ-7-2, 5799 - 5869 | K.LQVELDNVTGLLSQSDSK.S      | 1947.13342 | 2 | 1.29E-10 | 0.98 | 6.85 | - | 1688.6 |
| AHQ-7-2, 6961        | K.LQVELDNVTGLLSQSDSK.S      | 1947.13342 | 2 | 3.38E-05 | 0.93 | 4.67 | - | 676.9  |
| AHQ-7-2, 6297        | K.LQVELDNVTGLLSQSDSK.S      | 1947.13342 | 2 | 3.36E-04 | 0.88 | 4.02 | - | 565.6  |
| AHQ-7-1, 5529        | K.LQVELDNVTGLLSQSDSK.S      | 1947.13342 | 3 | 3.85E-07 | 0.95 | 4.58 | - | 1403.2 |
| AHQ-7-1, 5499 - 5555 | K.LQVELDNVTGLLSQSDSK.S      | 1947.13342 | 2 | 1.89E-10 | 0.97 | 5.15 | - | 1312.7 |
| AHQ-7-3, 5280        | K.LQVELDNVTGLLSQSDSK.S      | 1947.13342 | 2 | 1.20E-08 | 0.96 | 5.15 | - | 1138.5 |
| AHQ-7-1, 5264        | K.LQVELDNVTGLLSQSDSK.S      | 1947.13342 | 2 | 2.13E-07 | 0.94 | 4.84 | - | 764.6  |
| AHQ-7-14-, 5354      | K.LQVELDNVTGLLSQSDSK.S      | 1947.13342 | 2 | 2.24E-05 | 0.96 | 5.27 | - | 985.4  |
| AHQ-7-4, 5700        | K.LQVELDNVTGLLSQSDSK.S      | 1947.13342 | 2 | 7.00E-08 | 0.98 | 5.51 | - | 1744.2 |
| AHQ-7-2, 5943 - 6012 | K.LQVELDNVTGLLSQSDSK.S      | 1947.13342 | 2 | 2.22E-11 | 0.98 | 5.88 | - | 1743.8 |
| AHQ-7-3, 4009 - 4071 | R.LTEM*ETLQSQLMAEKL         | 1769.03151 | 2 | 3.59E-08 | 0.98 | 4.49 | - | 2644.5 |

|                       |                               |            |   |          |      |      |   |        |
|-----------------------|-------------------------------|------------|---|----------|------|------|---|--------|
| AHQ-7-1, 3645         | R.LTEM*ETLQSQL*AEK.L          | 1785.03091 | 2 | 7.17E-05 | 0.93 | 3.94 | - | 1102.3 |
| AHQ-7-3, 4969 - 4995  | R.LTEMETLQSQLMAEK.L           | 1753.03211 | 2 | 4.04E-05 | 0.92 | 3.97 | - | 1045.5 |
| AHQ-7-4, 4080         | R.LTEM*ETLQSQLMAEK.L          | 1769.03151 | 2 | 2.56E-08 | 0.98 | 4.42 | - | 2345.3 |
| AHQ-7-2, 3631 - 3709  | R.LTEM*ETLQSQL*AEK.L          | 1785.03091 | 2 | 9.12E-06 | 0.96 | 4.42 | - | 1385.3 |
| AHQ-7-2, 4095 - 4159  | R.LTEM*ETLQSQLMAEK.L          | 1769.03151 | 2 | 2.75E-05 | 0.96 | 4.56 | - | 1779.7 |
| AHQ-7-3, 4485 - 4511  | R.LTEMETLQSQL*AEK.L           | 1769.03151 | 2 | 1.02E-04 | 0.93 | 3.94 | - | 1242.7 |
| AHQ-7-1, 4091         | R.LTEM*ETLQSQLMAEK.L          | 1769.03151 | 2 | 1.03E-04 | 0.97 | 4.47 | - | 2260.0 |
| AHQ-7-2, 4505 - 4580  | R.LTEMETLQSQL*AEK.L           | 1769.03151 | 2 | 5.19E-05 | 0.94 | 4.44 | - | 1131.5 |
| AHQ-7-2, 6655         | K.LTKDFSALESQQLDQTELLQEENR.Q  | 2837.04608 | 3 | 2.62E-05 | 0.91 | 4.50 | - | 1215.2 |
| AHQ-7-3, 3897 - 3901  | K.MEDSVGCLETAEEVKR.R          | 1698.85159 | 2 | 2.78E-06 | 0.90 | 4.21 | - | 558.8  |
| AHQ-7-4, 3917         | K.MEDSVGCLETAEEVKR.R          | 1698.85159 | 2 | 3.51E-06 | 0.93 | 3.84 | - | 990.8  |
| AHQ-7-2, 3972         | K.MEDSVGCLETAEEVKR.R          | 1698.85159 | 2 | 7.75E-06 | 0.92 | 3.71 | - | 1018.4 |
| AHQ-7-2, 3643 - 3645  | K.MEDSVGCLETAEEVKR.K          | 1855.03794 | 3 | 9.52E-06 | 0.83 | 3.88 | - | 679.4  |
| AHQ-7-2, 3640         | K.MEDSVGCLETAEEVKR.K          | 1855.03794 | 2 | 5.27E-06 | 0.56 | 2.78 | - | 367.3  |
| AHQ-7-3, 3565         | K.MEDSVGCLETAEEVKR.K          | 1855.03794 | 2 | 4.66E-06 | 0.86 | 3.50 | - | 604.1  |
| AHQ-7-3, 3292         | K.M*EDSVGCLETAEEVKR.K         | 1871.03734 | 2 | 1.08E-07 | 0.79 | 3.53 | - | 435.2  |
| AHQ-7-2, 3344         | K.M*EDSVGCLETAEEVKR.K         | 1871.03734 | 3 | 7.13E-05 | 0.78 | 3.55 | - | 609.3  |
| AHQ-7-4, 3564         | K.MEDSVGCLETAEEVKR.K          | 1855.03794 | 2 | 1.34E-09 | 0.80 | 3.24 | - | 484.6  |
| AHQ-7-3, 5144 - 5151  | K.M*QONIQELEEQLLEEEESAR.Q     | 2350.46003 | 3 | 4.30E-09 | 0.96 | 5.90 | - | 1704.7 |
| AHQ-7-1, 5135         | K.M*QONIQELEEQLLEEEESAR.Q     | 2350.46003 | 3 | 3.15E-09 | 0.97 | 5.06 | - | 2029.8 |
| AHQ-7-2, 5251         | K.M*QONIQELEEQLLEEEESAR.Q     | 2350.46003 | 3 | 5.05E-07 | 0.97 | 6.02 | - | 1556.7 |
| AHQ-7-1, 5204         | K.NFINNPLAQADWAAK.K           | 1673.85315 | 2 | 1.45E-09 | 0.96 | 4.76 | - | 1132.0 |
| AHQ-7-1, 5591         | K.NFINNPLAQADWAAK.K           | 1673.85315 | 2 | 3.21E-05 | 0.87 | 3.40 | - | 736.8  |
| AHQ-7-10, 4745        | K.NFINNPLAQADWAAK.K           | 1673.85315 | 2 | 1.50E-08 | 0.93 | 4.45 | - | 893.8  |
| AHQ-7-2, 5288 - 5299  | K.NFINNPLAQADWAAK.K           | 1673.85315 | 2 | 3.24E-07 | 0.96 | 4.83 | - | 1290.4 |
| AHQ-7-4, 5290         | K.NFINNPLAQADWAAK.K           | 1673.85315 | 2 | 3.43E-04 | 0.96 | 4.99 | - | 1376.1 |
| AHQ-7-2, 5489         | K.NFINNPLAQADWAAK.K           | 1673.85315 | 2 | 2.69E-09 | 0.95 | 4.37 | - | 1409.4 |
| AHQ-7-13, 5507        | K.NFINNPLAQADWAAK.K           | 1673.85315 | 2 | 2.28E-05 | 0.70 | 2.87 | - | 640.3  |
| AHQ-7-13-, 5019       | K.NFINNPLAQADWAAK.K           | 1673.85315 | 2 | 1.89E-10 | 0.97 | 5.15 | - | 1283.2 |
| AHQ-7-6, 5150 - 5157  | K.NFINNPLAQADWAAK.K           | 1673.85315 | 2 | 1.36E-08 | 0.95 | 4.90 | - | 1034.0 |
| AHQ-7-5, 5190 - 5254  | K.NFINNPLAQADWAAK.K           | 1673.85315 | 2 | 1.97E-04 | 0.95 | 4.96 | - | 1042.2 |
| AHQ-7-3, 5203         | K.NFINNPLAQADWAAK.K           | 1673.85315 | 2 | 8.76E-06 | 0.93 | 4.36 | - | 985.9  |
| AHQ-7-2, 5776         | K.NFINNPLAQADWAAK.K           | 1673.85315 | 2 | 2.63E-10 | 0.93 | 3.92 | - | 1040.0 |
| AHQ-7-4, 2641         | K.NKHEAMITDLEER.L             | 1586.75247 | 2 | 4.14E-08 | 0.91 | 3.52 | - | 1174.5 |
| AHQ-7-3, 2703 - 2704  | K.NKHEAMITDLEER.L             | 1586.75247 | 2 | 3.82E-09 | 0.92 | 3.58 | - | 1081.5 |
| AHQ-7-2, 2715         | K.NKHEAMITDLEER.L             | 1586.75247 | 2 | 4.41E-09 | 0.93 | 3.65 | - | 1302.8 |
| AHQ-7-6, 5015 - 5042  | K.NLPIYSEEVIM*YK.G            | 1744.98660 | 2 | 8.71E-05 | 0.78 | 2.61 | - | 727.7  |
| AHQ-7-2, 5716 - 5720  | K.NLPIYSEEVIM*YK.G            | 1728.98720 | 2 | 1.56E-06 | 0.94 | 4.35 | - | 801.2  |
| AHQ-7-7, 4936         | K.NLPIYSEEVIM*YK.G            | 1744.98660 | 2 | 7.40E-04 | 0.89 | 3.27 | - | 790.6  |
| AHQ-7-4, 5142         | K.NLPIYSEEVIM*YK.G            | 1744.98660 | 2 | 5.45E-05 | 0.92 | 3.90 | - | 784.3  |
| AHQ-7-13, 4990        | K.NLPIYSEEVIM*YK.G            | 1744.98660 | 2 | 1.13E-05 | 0.84 | 3.46 | - | 555.0  |
| AHQ-7-11, 5228 - 5230 | K.NLPIYSEEVIM*YK.G            | 1728.98720 | 2 | 3.82E-06 | 0.78 | 3.06 | - | 685.1  |
| AHQ-7-10, 5123 - 5131 | K.NLPIYSEEVIM*YK.G            | 1728.98720 | 2 | 2.08E-05 | 0.92 | 4.14 | - | 553.9  |
| AHQ-7-3, 5587 - 5623  | K.NLPIYSEEVIM*YK.G            | 1728.98720 | 2 | 7.61E-05 | 0.90 | 3.75 | - | 754.3  |
| AHQ-7-2, 5167 - 5168  | K.NLPIYSEEVIM*YK.G            | 1744.98660 | 2 | 7.65E-09 | 0.96 | 5.13 | - | 1002.5 |
| AHQ-7-5, 5094         | K.NLPIYSEEVIM*YK.G            | 1744.98660 | 2 | 3.28E-05 | 0.94 | 4.09 | - | 998.1  |
| AHQ-7-6, 5555         | K.NLPIYSEEVIM*YK.G            | 1728.98720 | 2 | 4.34E-04 | 0.86 | 3.32 | - | 564.4  |
| AHQ-7-1, 5065 - 5105  | K.NLPIYSEEVIM*YK.G            | 1744.98660 | 2 | 3.33E-05 | 0.95 | 4.20 | - | 853.9  |
| AHQ-7-2, 5069         | K.NM*DPLNDNIATLLHQSSDK.F      | 2143.32109 | 2 | 2.54E-08 | 0.90 | 4.18 | - | 700.0  |
| AHQ-7-3, 5321 - 5395  | K.NM*DPLNDNIATLLHQSSDK.F      | 2127.32169 | 2 | 1.23E-04 | 0.81 | 3.81 | - | 628.0  |
| AHQ-7-4, 5505         | K.NM*DPLNDNIATLLHQSSDK.F      | 2127.32169 | 2 | 7.88E-05 | 0.94 | 4.36 | - | 981.0  |
| AHQ-7-2, 5523         | K.NM*DPLNDNIATLLHQSSDK.F      | 2143.32109 | 2 | 5.88E-05 | 0.60 | 2.60 | - | 487.5  |
| AHQ-7-3, 5399         | K.NM*DPLNDNIATLLHQSSDK.F      | 2127.32169 | 3 | 4.68E-06 | 0.69 | 3.04 | - | 440.1  |
| AHQ-7-2, 5511         | K.NM*DPLNDNIATLLHQSSDK.F      | 2127.32169 | 2 | 1.07E-04 | 0.89 | 4.43 | - | 640.1  |
| AHQ-7-3, 3268 - 3271  | R.QAQQERDELADEIANSSGK.G       | 2090.15168 | 3 | 3.90E-04 | 0.89 | 4.65 | - | 670.9  |
| AHQ-7-2, 2915         | R.QAQQERDELADEIANSSGK.G       | 2090.15168 | 2 | 1.05E-05 | 0.90 | 3.88 | - | 818.5  |
| AHQ-7-2, 3249 - 3315  | R.QAQQERDELADEIANSSGK.G       | 2090.15168 | 2 | 5.43E-04 | 0.92 | 4.21 | - | 636.8  |
| AHQ-7-2, 2121         | R.QLEEAEEEEAQR.A              | 1332.35590 | 2 | 5.43E-04 | 0.82 | 3.23 | - | 711.6  |
| AHQ-7-3, 2111         | R.QLEEAEEEEAQR.A              | 1332.35590 | 2 | 1.50E-06 | 0.65 | 3.08 | - | 431.6  |
| AHQ-7-4, 2068         | R.QLEEAEEEEAQR.A              | 1332.35590 | 2 | 1.84E-05 | 0.72 | 3.04 | - | 508.5  |
| AHQ-7-3, 3655         | R.RGDLPFVPR.R                 | 1156.36217 | 2 | 3.84E-05 | 0.94 | 3.67 | - | 1497.1 |
| AHQ-7-1, 3813         | R.RGDLPFVPR.R                 | 1156.36217 | 2 | 6.45E-05 | 0.93 | 3.72 | - | 1324.9 |
| AHQ-7-4, 3636         | R.RGDLPFVPR.R                 | 1156.36217 | 2 | 1.17E-04 | 0.93 | 3.87 | - | 1020.3 |
| AHQ-7-6, 3534         | R.RGDLPFVPR.R                 | 1156.36217 | 2 | 2.37E-06 | 0.94 | 3.93 | - | 1247.1 |
| AHQ-7-9, 3254         | R.RGDLPFVPR.R                 | 1156.36217 | 2 | 1.06E-04 | 0.85 | 3.21 | - | 922.5  |
| AHQ-7-7, 3468         | R.RGDLPFVPR.R                 | 1156.36217 | 2 | 2.25E-05 | 0.78 | 3.05 | - | 625.0  |
| AHQ-7-11, 3455        | R.RGDLPFVPR.R                 | 1156.36217 | 2 | 2.47E-04 | 0.94 | 3.37 | - | 1443.8 |
| AHQ-7-2, 3711 - 3757  | R.RGDLPFVPR.R                 | 1156.36217 | 2 | 5.88E-06 | 0.93 | 3.82 | - | 1131.4 |
| AHQ-7-5, 3598 - 3599  | R.RGDLPFVPR.R                 | 1156.36217 | 2 | 7.46E-06 | 0.94 | 3.95 | - | 1113.4 |
| AHQ-7-2, 3156         | K.RHEM*PPHYAITDTAYR.S         | 2088.33519 | 3 | 2.78E-06 | 0.95 | 4.62 | - | 1306.1 |
| AHQ-7-2, 6591         | R.RKLEGGSTDLSDQIAELQAQIAELK.M | 2773.04667 | 3 | 6.39E-13 | 0.96 | 5.99 | - | 1419.5 |
| AHQ-7-1, 6363 - 6372  | R.RKLEGGSTDLSDQIAELQAQIAELK.M | 2773.04667 | 3 | 5.32E-05 | 0.95 | 5.69 | - | 1133.8 |
| AHQ-7-3, 6519         | R.RKLEGGSTDLSDQIAELQAQIAELK.M | 2773.04667 | 3 | 4.67E-06 | 0.95 | 5.44 | - | 1211.7 |
| AHQ-7-3, 6428         | R.RKLEGGSTDLSDQIAELQAQIAELK.M | 2773.04667 | 3 | 2.17E-06 | 0.96 | 5.52 | - | 1574.1 |
| AHQ-7-4, 6600         | R.RKLEGGSTDLSDQIAELQAQIAELK.M | 2773.04667 | 3 | 4.53E-08 | 0.97 | 5.76 | - | 1928.5 |
| AHQ-7-3, 2087         | K.RQLEEAEEEEAQR.A             | 1488.54225 | 2 | 1.61E-09 | 0.97 | 4.81 | - | 2656.3 |
| AHQ-7-2, 2105         | K.RQLEEAEEEEAQR.A             | 1488.54225 | 2 | 5.01E-08 | 0.98 | 5.77 | - | 3280.7 |
| AHQ-7-5, 5975         | K.SGFEPASLKEEVGEEAIVLVEGKK.V  | 2790.07246 | 3 | 2.62E-07 | 0.86 | 3.83 | - | 867.6  |
| AHQ-7-2, 6112 - 6181  | K.SGFEPASLKEEVGEEAIVLVEGKK.V  | 2790.07246 | 3 | 9.56E-09 | 0.96 | 5.25 | - | 1266.2 |
| AHQ-7-2, 6929 - 6997  | K.SGFEPASLKEEVGEEAIVLVEGKK.V  | 2790.07246 | 3 | 1.07E-04 | 0.80 | 3.69 | - | 744.9  |
| AHQ-7-6, 6022         | K.SGFEPASLKEEVGEEAIVLVEGKK.V  | 2790.07246 | 3 | 4.05E-09 | 0.93 | 4.95 | - | 1096.6 |
| AHQ-7-1, 5968 - 5985  | K.SGFEPASLKEEVGEEAIVLVEGKK.V  | 2790.07246 | 3 | 2.21E-05 | 0.89 | 4.30 | - | 966.0  |
| AHQ-7-13-, 5789       | K.SGFEPASLKEEVGEEAIVLVEGKK.V  | 2790.07246 | 3 | 1.04E-09 | 0.96 | 5.81 | - | 1095.5 |
| AHQ-7-2, 6421 - 6489  | K.SGFEPASLKEEVGEEAIVLVEGKK.V  | 2790.07246 | 3 | 1.70E-04 | 0.83 | 3.89 | - | 810.0  |
| AHQ-7-1, 5512 - 5568  | K.SM*EAEM*IQLEELAAAER.A       | 2066.30004 | 2 | 1.88E-05 | 0.91 | 4.78 | - | 1082.2 |
| AHQ-7-3, 4669         | K.SM*EAEM*IQLEELAAAER.A       | 2082.29944 | 2 | 2.48E-09 | 0.98 | 5.76 | - | 1544.6 |
| AHQ-7-2, 5508         | K.SMEAEM*IQLEELAAAER.A        | 2066.30004 | 2 | 2.40E-04 | 0.85 | 4.05 | - | 875.6  |
| AHQ-7-3, 4652         | K.SM*EAEM*IQLEELAAAER.A       | 2082.29944 | 2 | 4.17E-07 | 0.93 | 3.99 | - | 1474.3 |
| AHQ-7-7, 6481         | K.SMEAEM*IQLEELAAAER.A        | 2050.30064 | 2 | 1.42E-05 | 0.94 | 4.24 | - | 1365.2 |
| AHQ-7-4, 6601 - 6629  | K.SMEAEM*IQLEELAAAER.A        | 2050.30064 | 2 | 1.75E-04 | 0.94 | 4.50 | - | 1335.7 |
| AHQ-7-1, 4683         | K.SM*EAEM*IQLEELAAAER.A       | 2082.29944 | 2 | 2.52E-09 | 0.96 | 5.02 | - | 1696.0 |
| AHQ-7-2, 7020         | K.SM*EAEM*IQLEELAAAER.A       | 2082.29944 | 2 | 4.92E-04 | 0.54 | 2.78 | - | 316.4  |
| AHQ-7-2, 6600         | K.SMEAEM*IQLEELAAAER.A        | 2050.30064 | 3 | 2.12E-04 | 0.91 | 4.43 | - | 965.0  |
| AHQ-7-2, 5687 - 5759  | K.SM*EAEM*IQLEELAAAER.A       | 2066.30004 | 2 | 4.51E-09 | 0.95 | 5.45 | - | 1690.8 |
| AHQ-7-2, 4755 - 4835  | K.SM*EAEM*IQLEELAAAER.A       | 2082.29944 | 2 | 2.14E-09 | 0.97 | 5.43 | - | 1472.7 |
| AHQ-7-1, 5284 - 5348  | K.SMEAEM*IQLEELAAAER.A        | 2066.30004 | 2 | 1.19E-07 | 0.91 | 4.26 | - | 1305.3 |
| AHQ-7-2, 4912         | K.SM*EAEM*IQLEELAAAER.A       | 2082.29944 | 2 | 3.95E-07 | 0.95 | 4.65 | - | 1493.5 |
| AHQ-7-2, 6543         | K.SMEAEM*IQLEELAAAER.A        | 2050.30064 | 2 | 2.90E-06 | 0.93 | 4.12 | - | 1276.9 |
| AHQ-7-5, 6550         | K.SMEAEM*IQLEELAAAER.A        | 2050.30064 | 2 | 6.79E-05 | 0.95 | 4.64 | - | 1373.5 |
| AHQ-7-10, 3256        | R.SMMQDREDQSSILCTGESGAGK.T    | 2302.50687 | 2 | 4.94E-04 | 0.69 | 2.75 | - | 697.4  |
| AHQ-7-2, 3097         | R.SMM*QDREDQSSILCTGESGAGK.T   | 2318.50627 | 2 | 6.37E-04 | 0.91 | 4.77 | - | 487.1  |
| AHQ-7-2, 3596         | R.SMMQDREDQSSILCTGESGAGK.T    | 2302.50687 | 2 | 3.45E-08 | 0.96 | 5.06 | - | 1493.1 |
| AHQ-7-3, 3519         | R.SMMQDREDQSSILCTGESGAGK.T    | 2302.50687 | 2 | 2.29E-05 | 0.98 | 6.18 | - | 1727.4 |
| AHQ-7-7, 3581 - 3657  | K.TDLLLEPYNK.Y                | 1206.36989 | 2 | 1.10E-04 | 0.61 | 2.64 | - | 736.0  |
| AHQ-7-1, 3857 - 3865  | K.TDLLLEPYNK.Y                | 1206.36989 | 2 | 1.75E-07 | 0.89 | 3.57 | - | 1099.1 |
| AHQ-7-2, 3808 - 3809  | K.TDLLLEPYNK.Y                | 1206.36989 | 2 | 2.81E-05 | 0.94 | 3.98 | - | 1154.1 |
| AHQ-7-6, 3585 - 3645  | K.TDLLLEPYNK.Y                | 1206.36989 | 2 | 4.19E-06 | 0.91 | 3.51 | - | 1050.6 |

|                         |                                                    |            |   |          |       |        |       |         |
|-------------------------|----------------------------------------------------|------------|---|----------|-------|--------|-------|---------|
| AHQ-7-5, 3687           | K.TDLLLEPYNK.Y                                     | 1206.36989 | 2 | 1.69E-05 | 0.85  | 3.73   | -     | 838.0   |
| AHQ-7-3, 3739           | K.TDLLLEPYNK.Y                                     | 1206.36989 | 2 | 1.52E-05 | 0.93  | 3.78   | -     | 1269.8  |
| AHQ-7-4, 3742           | K.TDLLLEPYNK.Y                                     | 1206.36989 | 2 | 9.48E-06 | 0.87  | 3.23   | -     | 953.5   |
| AHQ-7-2, 3987           | K.TDLLLEPYNK.Y.F                                   | 1525.73037 | 2 | 2.20E-06 | 0.78  | 2.98   | -     | 641.1   |
| AHQ-7-2, 4385           | K.TELEDTLDTAAQQLR.S                                | 1921.00969 | 3 | 5.70E-07 | 0.96  | 4.83   | -     | 2065.5  |
| AHQ-7-4, 4246 - 4312    | K.TELEDTLDTAAQQLR.S                                | 1921.00969 | 2 | 1.44E-04 | 0.94  | 3.92   | -     | 1497.9  |
| AHQ-7-2, 4367           | K.TELEDTLDTAAQQLR.S                                | 1921.00969 | 2 | 2.37E-07 | 0.78  | 3.41   | -     | 747.7   |
| AHQ-7-1, 4307           | K.TELEDTLDTAAQQLR.S                                | 1921.00969 | 2 | 8.71E-07 | 0.95  | 4.51   | -     | 1388.4  |
| AHQ-7-3, 4268           | K.TELEDTLDTAAQQLR.S                                | 1921.00969 | 2 | 1.21E-08 | 0.93  | 4.37   | -     | 1092.1  |
| AHQ-7-5, 4256           | K.TELEDTLDTAAQQLR.S                                | 1921.00969 | 2 | 1.25E-07 | 0.96  | 4.83   | -     | 1620.8  |
| AHQ-7-6, 3102           | R.TEMEDLMSSK.D                                     | 1171.32449 | 2 | 3.21E-05 | 0.81  | 2.53   | -     | 787.4   |
| AHQ-7-4, 3126           | R.TEMEDLMSSK.D                                     | 1171.32449 | 1 | 6.56E-05 | 0.38  | 1.97   | -     | 489.7   |
| AHQ-7-2, 3215           | R.TEMEDLMSSK.D                                     | 1171.32449 | 2 | 6.74E-04 | 0.74  | 2.51   | -     | 588.0   |
| AHQ-7-3, 3393           | R.TEMEDLMSSKDDVGK.S                                | 1685.85626 | 2 | 2.93E-06 | 0.89  | 3.87   | -     | 1018.9  |
| AHQ-7-2, 2603           | R.TEMEDLMSSKDDVGK.S                                | 1701.85566 | 2 | 8.33E-05 | 0.57  | 2.91   | -     | 399.4   |
| AHQ-7-6, 3297           | R.TEMEDLMSSKDDVGK.S                                | 1685.85626 | 2 | 2.88E-09 | 0.84  | 3.30   | -     | 910.5   |
| AHQ-7-4, 3376 - 3378    | R.TEMEDLMSSKDDVGK.S                                | 1685.85626 | 2 | 7.97E-06 | 0.81  | 3.17   | -     | 823.9   |
| AHQ-7-2, 3451           | R.TEMEDLMSSKDDVGK.S                                | 1685.85626 | 2 | 1.56E-05 | 0.90  | 3.31   | -     | 1314.7  |
| AHQ-7-5, 6338           | R.TFHIFYYLLSGAGEHLK.T                              | 1997.28378 | 2 | 9.67E-04 | 0.74  | 3.16   | -     | 413.3   |
| AHQ-7-2, 6381 - 6448    | R.TFHIFYYLLSGAGEHLK.T                              | 1997.28378 | 3 | 4.76E-10 | 0.96  | 5.66   | -     | 1204.6  |
| AHQ-7-6, 6250           | R.TFHIFYYLLSGAGEHLK.T                              | 1997.28378 | 3 | 2.94E-05 | 0.96  | 4.34   | -     | 1975.0  |
| AHQ-7-2, 6413           | R.TFHIFYYLLSGAGEHLK.T                              | 1997.28378 | 2 | 2.75E-06 | 0.97  | 4.93   | -     | 1368.3  |
| AHQ-7-4, 1897           | K.THEAQIQEMR.Q                                     | 1243.37536 | 1 | 4.38E-06 | 0.55  | 2.48   | -     | 430.9   |
| AHQ-7-4, 1986           | K.VAAYDKLEK.T                                      | 1037.19123 | 2 | 8.15E-07 | 0.79  | 3.01   | -     | 490.4   |
| AHQ-7-4, 3284 - 3352    | K.VEAQLQELQVK.F                                    | 1285.47179 | 2 | 4.31E-05 | 0.93  | 3.78   | -     | 1463.4  |
| AHQ-7-3, 3367           | K.VEAQLQELQVK.F                                    | 1285.47179 | 1 | 7.77E-04 | 0.73  | 2.93   | -     | 825.9   |
| AHQ-7-10, 4739 - 4772   | K.VEDM*AELTCLNEASVHLNLK.E                          | 2304.58397 | 3 | 7.92E-04 | 0.89  | 4.06   | -     | 1096.2  |
| AHQ-7-10, 5268          | K.VEDMAELTCLNEASVHLNLK.E                           | 2288.58457 | 2 | 9.78E-04 | 0.75  | 3.30   | -     | 563.1   |
| AHQ-7-5, 5715 - 5784    | K.VEDMAELTCLNEASVHLNLK.E                           | 2288.58457 | 2 | 6.56E-04 | 0.23  | 2.58   | -     | 323.5   |
| AHQ-7-13-, 4961 - 5001  | K.VEDM*AELTCLNEASVHLNLK.E                          | 2304.58397 | 3 | 2.11E-06 | 0.84  | 3.84   | -     | 837.9   |
| AHQ-7-6, 5721           | K.VEDMAELTCLNEASVHLNLK.E                           | 2288.58457 | 2 | 1.48E-06 | 0.92  | 4.14   | -     | 710.7   |
| AHQ-7-10, 5208 - 5273   | K.VEDMAELTCLNEASVHLNLK.E                           | 2288.58457 | 3 | 2.04E-07 | 0.77  | 3.66   | -     | 482.7   |
| AHQ-7-13, 5510 - 5571   | K.VEDMAELTCLNEASVHLNLK.E                           | 2288.58457 | 3 | 2.08E-06 | 0.75  | 3.35   | -     | 649.5   |
| AHQ-7-3, 5751           | K.VEDMAELTCLNEASVHLNLK.E                           | 2288.58457 | 3 | 5.10E-05 | 0.79  | 3.31   | -     | 648.4   |
| AHQ-7-2, 6041           | K.VEDMAELTCLNEASVHLNLK.E                           | 2288.58457 | 2 | 8.82E-10 | 0.80  | 3.29   | -     | 513.7   |
| AHQ-7-4, 6065           | K.VEDMAELTCLNEASVHLNLK.E                           | 2288.58457 | 3 | 2.75E-08 | 0.76  | 3.36   | -     | 462.5   |
| AHQ-7-1, 5199 - 5255    | K.VEDM*AELTCLNEASVHLNLK.E                          | 2304.58397 | 3 | 2.56E-04 | 0.88  | 4.07   | -     | 673.8   |
| AHQ-7-5, 5231           | K.VEDM*AELTCLNEASVHLNLK.E                          | 2304.58397 | 3 | 8.43E-04 | 0.90  | 3.99   | -     | 883.7   |
| AHQ-7-13, 5025 - 5098   | K.VEDM*AELTCLNEASVHLNLK.E                          | 2304.58397 | 3 | 4.55E-10 | 0.92  | 4.39   | -     | 1143.1  |
| AHQ-7-3, 5761           | K.VEDMAELTCLNEASVHLNLK.E                           | 2288.58457 | 2 | 4.89E-09 | 0.89  | 4.21   | -     | 458.6   |
| AHQ-7-3, 5689 - 5767    | K.VEDMAELTCLNEASVHLNLK.E                           | 2288.58457 | 2 | 7.81E-05 | 0.64  | 2.59   | -     | 701.5   |
| AHQ-7-2, 5264 - 5325    | K.VEDM*AELTCLNEASVHLNLK.E                          | 2304.58397 | 3 | 4.76E-08 | 0.87  | 3.92   | -     | 761.2   |
| AHQ-7-6, 5153 - 5155    | K.VEDM*AELTCLNEASVHLNLK.E                          | 2304.58397 | 3 | 4.58E-04 | 0.89  | 4.00   | -     | 1074.7  |
| AHQ-7-2, 5429 - 5497    | K.VEDM*AELTCLNEASVHLNLK.E                          | 2304.58397 | 2 | 2.70E-04 | 0.67  | 3.22   | -     | 482.6   |
| AHQ-7-5, 5815 - 5816    | K.VEDMAELTCLNEASVHLNLK.E                           | 2288.58457 | 3 | 2.66E-09 | 0.89  | 4.18   | -     | 877.8   |
| AHQ-7-2, 2173           | R.VEEEAQAQNMALK.K                                  | 1461.66649 | 2 | 2.32E-05 | 0.97  | 4.20   | -     | 2515.3  |
| AHQ-7-3, 2140           | R.VEEEAQAQNMALK.K                                  | 1461.66649 | 2 | 1.94E-04 | 0.97  | 4.84   | -     | 1836.8  |
| AHQ-7-2, 2131           | R.VEEEEERCQHLQAEK.K                                | 1916.01642 | 2 | 5.27E-07 | 0.88  | 3.94   | -     | 865.4   |
| AHQ-7-6, 3885           | K.VIQYLAYVASSHK.S                                  | 1479.70484 | 2 | 6.85E-06 | 0.96  | 3.79   | -     | 1589.2  |
| AHQ-7-5, 3970 - 3978    | K.VIQYLAYVASSHK.S                                  | 1479.70484 | 2 | 1.34E-08 | 0.95  | 4.04   | -     | 1204.9  |
| AHQ-7-6, 3890           | K.VIQYLAYVASSHK.S                                  | 1479.70484 | 3 | 2.58E-05 | 0.84  | 3.55   | -     | 530.3   |
| AHQ-7-5, 3976           | K.VIQYLAYVASSHK.S                                  | 1479.70484 | 3 | 1.26E-04 | 0.83  | 3.82   | -     | 730.9   |
| AHQ-7-3, 4016           | K.VIQYLAYVASSHK.S                                  | 1479.70484 | 2 | 4.24E-05 | 0.90  | 3.63   | -     | 873.7   |
| AHQ-7-2, 4180           | K.VIQYLAYVASSHK.S                                  | 1479.70484 | 2 | 3.18E-05 | 0.92  | 3.18   | -     | 1256.1  |
| AHQ-7-2, 4079           | K.VIQYLAYVASSHK.S                                  | 1479.70484 | 3 | 4.42E-04 | 0.83  | 3.46   | -     | 636.6   |
| AHQ-7-4, 3997           | K.VIQYLAYVASSHK.S                                  | 1479.70484 | 2 | 1.22E-04 | 0.92  | 3.67   | -     | 1160.6  |
| AHQ-7-10, 3679          | K.VIQYLAYVASSHK.S                                  | 1479.70484 | 2 | 3.10E-05 | 0.82  | 2.87   | -     | 951.1   |
| AHQ-7-2, 4075           | K.VIQYLAYVASSHK.S                                  | 1479.70484 | 2 | 2.17E-05 | 0.90  | 3.36   | -     | 989.0   |
| AHQ-7-1, 4127 - 4132    | K.VIQYLAYVASSHK.S                                  | 1479.70484 | 2 | 6.61E-05 | 0.94  | 3.86   | -     | 1215.2  |
| AHQ-7-8, 6226           | R.VISGVLQLGNVFK.K                                  | 1487.81155 | 2 | 1.48E-04 | 0.97  | 4.29   | -     | 2259.8  |
| AHQ-7-1, 6063 - 6131    | R.VISGVLQLGNVFK.K                                  | 1487.81155 | 2 | 3.62E-08 | 0.97  | 4.44   | -     | 1703.1  |
| AHQ-7-7, 6188           | R.VISGVLQLGNVFK.K                                  | 1487.81155 | 2 | 1.32E-08 | 0.97  | 4.46   | -     | 1959.3  |
| AHQ-7-5, 6274 - 6282    | R.VISGVLQLGNVFK.K                                  | 1487.81155 | 2 | 5.97E-06 | 0.94  | 3.79   | -     | 1324.1  |
| AHQ-7-9, 5634           | R.VISGVLQLGNVFK.K                                  | 1487.81155 | 2 | 8.37E-04 | 0.91  | 2.97   | -     | 1371.4  |
| AHQ-7-2, 6377           | R.VISGVLQLGNVFK.K                                  | 1487.81155 | 2 | 2.27E-06 | 0.94  | 3.47   | -     | 1406.5  |
| AHQ-7-2, 6251 - 6331    | R.VISGVLQLGNVFK.K                                  | 1487.81155 | 2 | 5.67E-05 | 0.96  | 4.55   | -     | 1182.4  |
| AHQ-7-4, 6352 - 6360    | R.VISGVLQLGNVFK.K                                  | 1487.81155 | 2 | 1.66E-05 | 0.78  | 2.70   | -     | 839.4   |
| AHQ-7-3, 5655 - 5701    | R.VISGVLQLGNVFKK.E                                 | 1615.98446 | 2 | 9.13E-05 | 0.90  | 4.20   | -     | 969.0   |
| AHQ-7-1, 5664 - 5680    | R.VISGVLQLGNVFKK.E                                 | 1615.98446 | 2 | 6.64E-05 | 0.90  | 3.66   | -     | 1011.7  |
| AHQ-7-2, 5819           | R.VISGVLQLGNVFKK.E                                 | 1615.98446 | 2 | 7.95E-10 | 0.91  | 3.88   | -     | 982.0   |
| AHQ-7-2, 2488           | K.VKPLLQVSR.Q                                      | 1040.28462 | 1 | 8.83E-04 | 0.01  | 2.05   | -     | 122.7   |
| AHQ-7-5, 4874           | K.VSHLLGINVDFTR.G                                  | 1572.79026 | 3 | 3.41E-04 | 0.83  | 3.74   | -     | 958.6   |
| AHQ-7-9, 4421           | K.VSHLLGINVDFTR.G                                  | 1572.79026 | 2 | 1.14E-04 | 0.80  | 3.12   | -     | 724.1   |
| AHQ-7-5, 4863           | K.VSHLLGINVDFTR.G                                  | 1572.79026 | 2 | 4.74E-08 | 0.95  | 4.14   | -     | 1371.7  |
| AHQ-7-2, 4927 - 4987    | K.VSHLLGINVDFTR.G                                  | 1572.79026 | 2 | 9.35E-10 | 0.96  | 4.22   | -     | 1524.4  |
| AHQ-7-1, 4904 - 4964    | K.VSHLLGINVDFTR.G                                  | 1572.79026 | 2 | 3.35E-10 | 0.97  | 4.97   | -     | 1484.0  |
| AHQ-7-4, 4938           | K.VSHLLGINVDFTR.G                                  | 1572.79026 | 3 | 1.12E-04 | 0.92  | 4.22   | -     | 1017.4  |
| AHQ-7-7, 4712           | K.VSHLLGINVDFTR.G                                  | 1572.79026 | 2 | 2.73E-10 | 0.94  | 4.17   | -     | 1214.9  |
| AHQ-7-4, 4845 - 4918    | K.VSHLLGINVDFTR.G                                  | 1572.79026 | 2 | 6.46E-10 | 0.94  | 3.96   | -     | 1143.5  |
| AHQ-7-4, 3240           | R.VVFQEFR.Q                                        | 925.06580  | 2 | 1.03E-04 | 0.77  | 2.59   | -     | 498.1   |
| AHQ-7-5, 3192 - 3194    | R.VVFQEFR.Q                                        | 925.06580  | 2 | 6.30E-05 | 0.79  | 2.87   | -     | 440.4   |
| AHQ-7-6, 3177           | R.VVFQEFR.Q                                        | 925.06580  | 2 | 1.23E-04 | 0.70  | 2.52   | -     | 357.9   |
| AHQ-7-2, 4265           | R.YEILTPNSIPK.G                                    | 1275.47536 | 2 | 9.58E-05 | 0.88  | 3.24   | -     | 966.3   |
| AHQ-7-13, 4062          | R.YEILTPNSIPK.G                                    | 1275.47536 | 2 | 6.32E-04 | 0.67  | 2.50   | -     | 769.4   |
| AHQ-7-3, 4191           | R.YEILTPNSIPK.G                                    | 1275.47536 | 2 | 8.71E-05 | 0.84  | 3.10   | -     | 673.3   |
| AHQ-7-2, 4061           | R.YEILTPNSIPK.G                                    | 1275.47536 | 1 | 3.43E-07 | 0.17  | 1.93   | -     | 264.5   |
| AHQ-7-2, 4048 - 4120    | R.YEILTPNSIPK.G                                    | 1275.47536 | 2 | 1.48E-05 | 0.90  | 3.20   | -     | 1100.1  |
| AHQ-7-5, 3954           | R.YEILTPNSIPK.G                                    | 1275.47536 | 2 | 1.91E-05 | 0.88  | 3.03   | -     | 1160.1  |
| AHQ-7-2, 6004           | K.YLYVDKNFINNPLAQADWAAK.K                          | 2455.75199 | 2 | 1.19E-10 | 0.97  | 5.12   | -     | 1142.9  |
| AHQ-7-2, 5999           | K.YLYVDKNFINNPLAQADWAAK.K                          | 2455.75199 | 3 | 1.88E-08 | 0.96  | 5.28   | -     | 1577.9  |
| gj4501885[ref]_001092.1 | beta actin; beta cytoskeletal actin [Homo sapiens] |            |   |          |       |        |       |         |
| AHQ-7-8, 6590 - 6650    | R.CPEALFQPSFLGMESCGIHETTFNSIMK.C                   | 3235.67708 | 3 | 2.83E-10 | 13.52 | 150.35 | 36.00 | 41736.5 |
| AHQ-7-13-, 6104 - 6175  | R.CPEALFQPSFLGMESCGIHETTFNSIMK.C                   | 3251.67648 | 3 | 4.27E-07 | 0.67  | 3.50   | -     | 596.1   |
| AHQ-7-13-, 5735 - 5791  | R.CPEALFQPSFLGMESCGIHETTFNSIM*K.C                  | 3267.67588 | 3 | 4.52E-04 | 0.88  | 4.32   | -     | 444.3   |
| AHQ-7-13, 5783 - 5841   | R.CPEALFQPSFLGMESCGIHETTFNSIM*K.C                  | 3267.67588 | 3 | 1.36E-06 | 0.79  | 3.45   | -     | 590.9   |
| AHQ-7-8, 6138 - 6140    | R.CPEALFQPSFLGMESCGIHETTFNSIM*K.C                  | 3267.67588 | 3 | 2.57E-04 | 0.68  | 3.61   | -     | 372.2   |
| AHQ-7-8, 6256 - 6314    | R.CPEALFQPSFLGMESCGIHETTFNSIMK.C                   | 3251.67648 | 3 | 1.15E-05 | 0.74  | 3.94   | -     | 563.1   |
| AHQ-7-8, 6342 - 6402    | R.CPEALFQPSFLGMESCGIHETTFNSIM*K.C                  | 3251.67648 | 3 | 2.44E-05 | 0.85  | 4.56   | -     | 691.9   |
| AHQ-7-8, 6976           | R.CPEALFQPSFLGMESCGIHETTFNSIMK.C                   | 3235.67708 | 3 | 3.62E-04 | 0.90  | 4.77   | -     | 575.7   |
| AHQ-7-8, 6462 - 6546    | R.CPEALFQPSFLGMESCGIHETTFNSIMK.C                   | 3251.67648 | 3 | 4.60E-05 | 0.87  | 4.75   | -     | 824.0   |
| AHQ-7-8, 6686 - 6760    | R.CPEALFQPSFLGMESCGIHETTFNSIMK.C                   | 3235.67708 | 3 | 6.32E-09 | 0.95  | 5.64   | -     | 808.2   |
| AHQ-7-8, 5978 - 6044    | R.CPEALFQPSFLGMESCGIHETTFNSIM*K.C                  | 3267.67588 | 3 | 1.42E-06 | 0.93  | 4.99   | -     | 663.8   |
| AHQ-7-8, 6826 - 6895    | R.CPEALFQPSFLGMESCGIHETTFNSIMK.C                   | 3235.67708 | 3 | 2.15E-06 | 0.95  | 5.62   | -     | 756.0   |
| AHQ-7-8, 6898 - 6963    | K.EKLCYVALDFEQEMATAASSSSLEK.S                      | 2810.10410 | 2 | 3.52E-08 | 0.86  | 3.54   | -     | 702.0   |
| AHQ-7-8, 6840           | K.EKLCYVALDFEQEM*ATAASSSSLEK.S                     | 2826.10350 | 3 | 6.78E-08 | 0.90  | 3.94   | -     | 1059.8  |
| AHQ-7-8, 6498           | K.EKLCYVALDFEQEM*ATAASSSSLEK.S                     | 2826.10350 | 3 | 4.92E-07 | 0.81  | 3.61   | -     | 535.1   |
| AHQ-7-8, 6810 - 6835    | K.EKLCYVALDFEQEMATAASSSSLEK.S                      | 2810.10410 | 2 | 3.44E-09 | 0.94  | 4.32   | -     | 937.3   |

|                           |                                          |            |       |          |       |          |   |        |
|---------------------------|------------------------------------------|------------|-------|----------|-------|----------|---|--------|
| AHQ-7-8, 6918 - 6978      | K.EKLCYVALDFEQEMATAASSSSLEK.S            | 2810.10410 | 3     | 3.90E-09 | 0.91  | 5.31     | - | 807.2  |
| AHQ-7-8, 6782 - 6855      | K.EKLCYVALDFEQEMATAASSSSLEK.S            | 2810.10410 | 3     | 1.15E-05 | 0.88  | 4.01     | - | 941.3  |
| AHQ-7-8, 6690 - 6763      | K.EKLCYVALDFEQEMATAASSSSLEK.S            | 2810.10410 | 3     | 1.94E-06 | 0.92  | 5.11     | - | 1076.2 |
| AHQ-7-8, 6923 - 6991      | K.EKLCYVALDFEQEM*ATAASSSSLEK.S           | 2826.10350 | 3     | 2.67E-05 | 0.82  | 3.75     | - | 1001.0 |
| AHQ-7-8, 6678 - 6743      | K.EKLCYVALDFEQEMATAASSSSLEK.S            | 2810.10410 | 2     | 6.36E-06 | 0.92  | 4.46     | - | 813.7  |
| AHQ-7-8, 6539 - 6607      | R.FRCPALFQPFLGMESCGIHETTFNSIMK.C         | 3539.03813 | 3     | 5.55E-16 | 0.97  | 6.82     | - | 1125.1 |
| AHQ-7-8, 6670 - 6712      | R.FRCPALFQPFLGMESCGIHETTFNSIMK.C         | 3539.03813 | 3     | 1.77E-07 | 0.98  | 7.08     | - | 1846.7 |
| AHQ-7-8, 2478 - 2542      | R.GYSFTTAAER.E                           | 1133.19273 | 2     | 3.42E-05 | 0.93  | 3.35     | - | 1075.9 |
| AHQ-7-1, 2824             | R.GYSFTTAAER.E                           | 1133.19273 | 2     | 1.55E-04 | 0.92  | 2.95     | - | 1107.2 |
| AHQ-7-8, 2387 - 2416      | R.GYSFTTAAER.E                           | 1133.19273 | 2     | 9.22E-06 | 0.93  | 3.12     | - | 1535.8 |
| AHQ-7-6, 2546             | R.GYSFTTAAER.E                           | 1133.19273 | 2     | 3.71E-04 | 0.92  | 2.92     | - | 1081.0 |
| AHQ-7-4, 2586             | R.GYSFTTAAER.E                           | 1133.19273 | 2     | 8.06E-04 | 0.88  | 3.05     | - | 877.2  |
| AHQ-7-3, 2631             | R.GYSFTTAAER.E                           | 1133.19273 | 2     | 4.29E-04 | 0.86  | 2.68     | - | 1048.1 |
| AHQ-7-10, 2479 - 2544     | R.GYSFTTAAER.E                           | 1133.19273 | 2     | 2.89E-05 | 0.92  | 3.54     | - | 1039.1 |
| AHQ-7-13, 2775 - 2837     | R.GYSFTTAAER.E                           | 1133.19273 | 2     | 6.76E-04 | 0.85  | 2.92     | - | 913.6  |
| AHQ-7-2, 2661             | R.GYSFTTAAER.E                           | 1133.19273 | 2     | 6.93E-06 | 0.94  | 3.03     | - | 1438.3 |
| AHQ-7-7, 2509             | R.GYSFTTAAER.E                           | 1133.19273 | 2     | 1.01E-06 | 0.86  | 3.00     | - | 809.0  |
| AHQ-7-8, 4818 - 4900      | R.KDLYANTVLSGGTTMYPGIADR.M               | 2344.62976 | 2     | 2.00E-04 | 0.81  | 3.51     | - | 621.0  |
| AHQ-7-8, 4884             | R.KDLYANTVLSGGTTMYPGIADR.M               | 2344.62976 | 3     | 1.62E-06 | 0.85  | 3.54     | - | 1066.0 |
| AHQ-7-10, 4336            | R.KDLYANTVLSGGTTMYPGIADR.M               | 2344.62976 | 2     | 1.56E-04 | 0.87  | 3.14     | - | 814.2  |
| AHQ-7-14, 5101            | R.KDLYANTVLSGGTTMYPGIADR.M               | 2360.62916 | 2     | 7.74E-04 | 0.86  | 3.26     | - | 849.3  |
| AHQ-7-13, 4273 - 4301     | R.KDLYANTVLSGGTTMYPGIADR.M               | 2360.62916 | 3     | 1.19E-05 | 0.92  | 4.93     | - | 1017.6 |
| AHQ-7-13-, 4161 - 4193    | R.KDLYANTVLSGGTTMYPGIADR.M               | 2360.62916 | 3     | 8.41E-04 | 0.71  | 3.17     | - | 606.9  |
| AHQ-7-8, 4167             | R.KDLYANTVLSGGTTMYPGIADR.M               | 2360.62916 | 3     | 5.64E-10 | 0.95  | 4.64     | - | 1556.8 |
| AHQ-7-8, 4600 - 4648      | R.KDLYANTVLSGGTTMYPGIADR.M               | 2344.62976 | 3     | 8.84E-04 | 0.77  | 3.43     | - | 658.3  |
| AHQ-7-8, 4610 - 4682      | R.KDLYANTVLSGGTTMYPGIADR.M               | 2344.62976 | 2     | 1.99E-06 | 0.93  | 5.16     | - | 1073.4 |
| AHQ-7-8, 4640             | R.KDLYANTVLSGGTTMYPGIADR.M               | 2360.62916 | 3     | 8.21E-05 | 0.78  | 3.59     | - | 802.0  |
| AHQ-7-8, 5910 - 5982      | K.LCYVALDFEQEM*ATAASSSSLEK.S             | 2568.81605 | 2     | 3.72E-04 | 0.95  | 4.93     | - | 1165.1 |
| AHQ-7-8, 6919 - 6980      | K.LCYVALDFEQEM*ATAASSSSLEK.S             | 2568.81605 | 3     | 6.97E-04 | 0.97  | 5.67     | - | 2169.0 |
| AHQ-7-8, 6166 - 6202      | K.LCYVALDFEQEM*ATAASSSSLEK.S             | 2568.81605 | 2     | 4.28E-05 | 0.91  | 3.73     | - | 1275.8 |
| AHQ-7-8, 6850 - 6927      | K.LCYVALDFEQEMATAASSSSLEK.S              | 2552.81665 | 3     | 1.77E-05 | 0.86  | 3.69     | - | 783.2  |
| AHQ-7-8, 6795 - 6874      | K.LCYVALDFEQEM*ATAASSSSLEK.S             | 2568.81605 | 2     | 1.48E-08 | 0.98  | 5.95     | - | 1952.0 |
| AHQ-7-8, 6750 - 6783      | K.LCYVALDFEQEMATAASSSSLEK.S              | 2552.81665 | 3     | 4.11E-06 | 0.95  | 5.37     | - | 1379.9 |
| AHQ-7-8, 5460             | K.LCYVALDFEQEM*ATAASSSSLEK.S             | 2568.81605 | 2     | 1.25E-04 | 0.88  | 3.08     | - | 1161.4 |
| AHQ-7-8, 6667             | K.LCYVALDFEQEMATAASSSSLEK.S              | 2552.81665 | 3     | 6.58E-07 | 0.93  | 4.73     | - | 1276.9 |
| AHQ-7-8, 6610 - 6675      | K.LCYVALDFEQEM*ATAASSSSLEK.S             | 2568.81605 | 2     | 6.60E-05 | 0.69  | 2.97     | - | 483.6  |
| AHQ-7-8, 6982 - 6987      | K.LCYVALDFEQEMATAASSSSLEK.S              | 2552.81665 | 3     | 4.28E-08 | 0.97  | 5.99     | - | 2016.0 |
| AHQ-7-13-, 5467           | R.TTGVMDSGGVTHTVPIYEGYALPHAILR.L         | 3185.59928 | 3     | 4.64E-13 | 0.98  | 6.29     | - | 2314.5 |
| AHQ-7-7, 5661 - 5730      | R.TTGVMDSGGVTHTVPIYEGYALPHAILR.L         | 3185.59928 | 4     | 4.39E-05 | 0.95  | 5.09     | - | 1448.5 |
| AHQ-7-8, 5462 - 5502      | R.TTGVMDSGGVTHTVPIYEGYALPHAILR.L         | 3201.59868 | 3     | 7.35E-08 | 0.96  | 5.39     | - | 1523.1 |
| AHQ-7-6, 5686 - 5762      | R.TTGVMDSGGVTHTVPIYEGYALPHAILR.L         | 3185.59928 | 3     | 2.22E-16 | 0.96  | 6.08     | - | 1282.4 |
| AHQ-7-1, 5465 - 5519      | R.TTGVMDSGGVTHTVPIYEGYALPHAILR.L         | 3201.59868 | 3     | 1.34E-07 | 0.94  | 5.16     | - | 1206.4 |
| AHQ-7-14-, 5250 - 5267    | R.TTGVMDSGGVTHTVPIYEGYALPHAILR.L         | 3201.59868 | 3     | 4.85E-06 | 0.95  | 5.20     | - | 1277.1 |
| AHQ-7-5, 5782 - 5851      | R.TTGVMDSGGVTHTVPIYEGYALPHAILR.L         | 3185.59928 | 3     | 3.65E-09 | 0.96  | 5.60     | - | 1596.0 |
| AHQ-7-8, 5592 - 5615      | R.TTGVMDSGGVTHTVPIYEGYALPHAILR.L         | 3201.59868 | 3     | 6.95E-04 | 0.71  | 3.76     | - | 669.7  |
| AHQ-7-14, 5958 - 6037     | R.TTGVMDSGGVTHTVPIYEGYALPHAILR.L         | 3201.59868 | 3     | 1.28E-05 | 0.71  | 3.82     | - | 733.7  |
| AHQ-7-4, 5853 - 5930      | R.TTGVMDSGGVTHTVPIYEGYALPHAILR.L         | 3185.59928 | 3     | 1.49E-08 | 0.98  | 6.42     | - | 1665.8 |
| AHQ-7-4, 5601 - 5609      | R.TTGVMDSGGVTHTVPIYEGYALPHAILR.L         | 3201.59868 | 3     | 4.47E-07 | 0.97  | 6.50     | - | 1494.6 |
| AHQ-7-8, 5646 - 5710      | R.TTGVMDSGGVTHTVPIYEGYALPHAILR.L         | 3185.59928 | 3     | 1.51E-11 | 0.97  | 6.19     | - | 1677.8 |
| AHQ-7-8, 5326 - 5403      | R.TTGVMDSGGVTHTVPIYEGYALPHAILR.L         | 3201.59868 | 3     | 5.96E-06 | 0.98  | 6.36     | - | 2453.3 |
| AHQ-7-3, 5728 - 5787      | R.TTGVMDSGGVTHTVPIYEGYALPHAILR.L         | 3185.59928 | 3     | 5.20E-08 | 0.96  | 5.50     | - | 1411.8 |
| AHQ-7-8, 5770 - 5830      | R.TTGVMDSGGVTHTVPIYEGYALPHAILR.L         | 3185.59928 | 3     | 1.44E-12 | 0.97  | 6.07     | - | 1726.6 |
| AHQ-7-3, 5493 - 5552      | R.TTGVMDSGGVTHTVPIYEGYALPHAILR.L         | 3201.59868 | 3     | 2.56E-06 | 0.97  | 5.93     | - | 1555.2 |
| AHQ-7-2, 5865             | R.TTGVMDSGGVTHTVPIYEGYALPHAILR.L         | 3185.59928 | 3     | 8.86E-10 | 0.97  | 5.71     | - | 1860.1 |
| AHQ-7-13-, 5247           | R.TTGVMDSGGVTHTVPIYEGYALPHAILR.L         | 3201.59868 | 3     | 6.47E-07 | 0.95  | 5.49     | - | 1246.5 |
| AHQ-7-1, 5696             | R.TTGVMDSGGVTHTVPIYEGYALPHAILR.L         | 3185.59928 | 3     | 1.27E-06 | 0.93  | 5.06     | - | 954.5  |
| AHQ-7-9, 4881 - 4936      | R.TTGVMDSGGVTHTVPIYEGYALPHAILR.L         | 3201.59868 | 3     | 2.99E-10 | 0.97  | 6.05     | - | 1902.9 |
| AHQ-7-9, 4924 - 4993      | R.TTGVMDSGGVTHTVPIYEGYALPHAILR.L         | 3201.59868 | 3     | 6.45E-07 | 0.96  | 5.94     | - | 1385.0 |
| AHQ-7-9, 5144 - 5212      | R.TTGVMDSGGVTHTVPIYEGYALPHAILR.L         | 3185.59928 | 3     | 3.65E-06 | 0.92  | 4.69     | - | 1146.5 |
| AHQ-7-2, 5624 - 5685      | R.TTGVMDSGGVTHTVPIYEGYALPHAILR.L         | 3201.59868 | 3     | 1.08E-05 | 0.91  | 4.79     | - | 956.7  |
| AHQ-7-13, 5310            | R.TTGVMDSGGVTHTVPIYEGYALPHAILR.L         | 3201.59868 | 3     | 3.94E-06 | 0.94  | 5.05     | - | 1193.5 |
| AHQ-7-8, 5200 - 5262      | R.TTGVMDSGGVTHTVPIYEGYALPHAILR.L         | 3201.59868 | 3     | 5.10E-09 | 0.97  | 6.15     | - | 1509.3 |
| AHQ-7-10, 5215 - 5272     | R.TTGVMDSGGVTHTVPIYEGYALPHAILR.L         | 3185.59928 | 3     | 1.02E-12 | 0.97  | 6.57     | - | 1599.9 |
| AHQ-7-10, 5327 - 5373     | R.TTGVMDSGGVTHTVPIYEGYALPHAILR.L         | 3185.59928 | 3     | 5.50E-06 | 0.95  | 5.61     | - | 1102.7 |
| AHQ-7-10, 5448            | R.TTGVMDSGGVTHTVPIYEGYALPHAILR.L         | 3185.59928 | 3     | 1.50E-05 | 0.70  | 3.18     | - | 432.2  |
| AHQ-7-6, 5447 - 5449      | R.TTGVMDSGGVTHTVPIYEGYALPHAILR.L         | 3201.59868 | 3     | 2.02E-06 | 0.93  | 4.62     | - | 1210.9 |
| AHQ-7-11, 5120 - 5176     | R.TTGVMDSGGVTHTVPIYEGYALPHAILR.L         | 3201.59868 | 3     | 6.20E-08 | 0.95  | 6.22     | - | 759.1  |
| AHQ-7-11, 5319 - 5374     | R.TTGVMDSGGVTHTVPIYEGYALPHAILR.L         | 3185.59928 | 3     | 7.06E-10 | 0.92  | 4.32     | - | 1360.0 |
| AHQ-7-11, 5447            | R.TTGVMDSGGVTHTVPIYEGYALPHAILR.L         | 3185.59928 | 3     | 4.43E-07 | 0.78  | 3.19     | - | 861.4  |
| AHQ-7-12, 5327 - 5395     | R.TTGVMDSGGVTHTVPIYEGYALPHAILR.L         | 3185.59928 | 3     | 3.66E-05 | 0.97  | 6.50     | - | 1255.1 |
| AHQ-7-12, 5094            | R.TTGVMDSGGVTHTVPIYEGYALPHAILR.L         | 3201.59868 | 3     | 2.67E-08 | 0.96  | 5.56     | - | 1414.0 |
| AHQ-7-14-, 5469           | R.TTGVMDSGGVTHTVPIYEGYALPHAILR.L         | 3185.59928 | 3     | 5.44E-06 | 0.96  | 5.78     | - | 1375.1 |
| AHQ-7-2, 4063 - 4127      | R.VAPEEHPVLLTEAPLNPK.A                   | 1955.24351 | 2     | 5.80E-05 | 0.81  | 3.54     | - | 572.7  |
| AHQ-7-13, 4021            | R.VAPEEHPVLLTEAPLNPK.A                   | 1955.24351 | 2     | 9.18E-04 | 0.93  | 4.47     | - | 766.7  |
| AHQ-7-11, 3768            | R.VAPEEHPVLLTEAPLNPK.A                   | 1955.24351 | 2     | 6.09E-06 | 0.92  | 4.56     | - | 770.6  |
| AHQ-7-10, 3663 - 3719     | R.VAPEEHPVLLTEAPLNPK.A                   | 1955.24351 | 2     | 3.91E-05 | 0.90  | 4.20     | - | 780.6  |
| AHQ-7-9, 3534 - 3592      | R.VAPEEHPVLLTEAPLNPK.A                   | 1955.24351 | 2     | 1.07E-05 | 0.94  | 5.08     | - | 828.2  |
| AHQ-7-4, 4021 - 4097      | R.VAPEEHPVLLTEAPLNPK.A                   | 1955.24351 | 2     | 6.98E-05 | 0.90  | 4.41     | - | 647.5  |
| AHQ-7-5, 3963 - 4028      | R.VAPEEHPVLLTEAPLNPK.A                   | 1955.24351 | 2     | 8.73E-05 | 0.90  | 4.08     | - | 787.1  |
| AHQ-7-13-, 3893           | R.VAPEEHPVLLTEAPLNPK.A                   | 1955.24351 | 2     | 7.41E-06 | 0.90  | 3.69     | - | 728.1  |
| AHQ-7-7, 3820 - 3838      | R.VAPEEHPVLLTEAPLNPK.A                   | 1955.24351 | 2     | 5.50E-04 | 0.89  | 4.41     | - | 630.9  |
| AHQ-7-8, 3599 - 3666      | R.VAPEEHPVLLTEAPLNPK.A                   | 1955.24351 | 2     | 4.51E-04 | 0.92  | 4.68     | - | 724.1  |
| AHQ-7-8, 3730 - 3766      | R.VAPEEHPVLLTEAPLNPK.A                   | 1955.24351 | 2     | 1.01E-07 | 0.93  | 4.48     | - | 846.9  |
| AHQ-7-8, 3830 - 3894      | R.VAPEEHPVLLTEAPLNPK.A                   | 1955.24351 | 2     | 2.70E-05 | 0.94  | 4.24     | - | 1068.0 |
| AHQ-7-1, 4123             | R.VAPEEHPVLLTEAPLNPK.A                   | 1955.24351 | 2     | 2.78E-06 | 0.89  | 4.28     | - | 652.7  |
| AHQ-7-8, 3954 - 4027      | R.VAPEEHPVLLTEAPLNPK.A                   | 1955.24351 | 2     | 3.96E-06 | 0.81  | 3.89     | - | 504.5  |
| AHQ-7-12, 3782 - 3842     | R.VAPEEHPVLLTEAPLNPK.A                   | 1955.24351 | 2     | 2.99E-04 | 0.94  | 4.94     | - | 946.8  |
| gj4501891 ref NP_001093.1 | actinin, alpha 1 [Homo sapiens]          | 5.55E-16   | 39.48 | 440.37   | 53.90 | 103056.9 |   |        |
| AHQ-7-5, 6855             | R.AAPFNW*EGAM*EQLDQTFIVHTIEIQGLTAEHQFK.A | 4396.81902 | 3     | 1.23E-04 | 0.70  | 3.62     | - | 568.0  |
| AHQ-7-6, 6751             | R.AAPFNW*EGAM*EQLDQTFIVHTIEIQGLTAEHQFK.A | 4396.81902 | 3     | 2.82E-04 | 0.86  | 4.14     | - | 648.2  |
| AHQ-7-4, 5909             | K.ACLISLGYDIGNDPQGEAEFA.R                | 2398.59093 | 3     | 6.09E-04 | 0.92  | 4.42     | - | 1043.3 |
| AHQ-7-6, 5306             | K.AGTQIENIEEDFRDGLK.L                    | 1936.06918 | 2     | 2.13E-05 | 0.62  | 3.53     | - | 594.8  |
| AHQ-7-5, 5379             | K.AGTQIENIEEDFRDGLK.L                    | 1936.06918 | 2     | 1.07E-06 | 0.74  | 3.60     | - | 879.4  |
| AHQ-7-4, 5416             | K.AGTQIENIEEDFRDGLK.L                    | 1936.06918 | 2     | 2.45E-05 | 0.79  | 4.26     | - | 740.6  |
| AHQ-7-4, 4826             | K.AGTQIENIEEDFRDGLK.L                    | 1936.06918 | 2     | 2.00E-06 | 0.67  | 3.61     | - | 729.9  |
| AHQ-7-5, 6332             | K.AIMTYVSSFYHAFSGAQK.A                   | 2009.27323 | 3     | 2.69E-04 | 0.86  | 3.64     | - | 954.5  |
| AHQ-7-4, 5636 - 5716      | K.AIMTYVSSFYHAFSGAQK.A                   | 2025.27263 | 3     | 3.58E-07 | 0.94  | 4.77     | - | 779.5  |
| AHQ-7-3, 6259             | K.AIMTYVSSFYHAFSGAQK.A                   | 2009.27323 | 2     | 8.50E-07 | 0.80  | 3.76     | - | 575.5  |
| AHQ-7-7, 6210 - 6273      | K.AIMTYVSSFYHAFSGAQK.A                   | 2009.27323 | 2     | 1.24E-05 | 0.88  | 3.98     | - | 577.7  |
| AHQ-7-5, 6334 - 6344      | K.AIMTYVSSFYHAFSGAQK.A                   | 2009.27323 | 2     | 1.53E-08 | 0.94  | 4.70     | - | 765.8  |
| AHQ-7-4, 6366 - 6381      | K.AIMTYVSSFYHAFSGAQK.A                   | 2009.27323 | 2     | 3.33E-08 | 0.82  | 3.60     | - | 468.3  |
| AHQ-7-4, 3457             | R.ASFNHFRDRHSGTLGPEEFK.A                 | 2292.40855 | 2     | 2.99E-05 | 0.95  | 4.42     | - | 1189.7 |
| AHQ-7-4, 3610             | R.ASFNHFRDRHSGTLGPEEFK.A                 | 2292.40855 | 3     | 3.33E-06 | 0.87  | 3.32     | - | 1371.1 |
| AHQ-7-4, 3605 - 3609      | R.ASFNHFRDRHSGTLGPEEFK.A                 | 2292.40855 | 2     | 2.06E-06 | 0.89  | 3.43     | - | 769.5  |
| AHQ-7-4, 2304 - 2306      | K.ASIHEAWTDGK.E                          | 1215.29697 | 2     | 9.30E-04 | 0.81  | 3.13     | - | 848.0  |
| AHQ-7-4, 1716 - 1773      | K.ATLPDADKER.L                           | 1116.20684 | 2     | 5.43E-07 | 0.76  | 2.67     | - | 492.4  |
| AHQ-7-1, 5475 - 5551      | K.DDPLTNLNTAFDVAEK.Y                     | 1763.88340 | 2     | 1.15E-04 | 0.51  | 2.69     | - | 433.7  |

|                      |                                 |            |   |          |      |      |   |        |
|----------------------|---------------------------------|------------|---|----------|------|------|---|--------|
| AHQ-7-4, 5097 - 5157 | K.DDPLTNLNTAFDVAEK.Y            | 1763.88340 | 2 | 6.88E-06 | 0.79 | 3.89 | - | 564.8  |
| AHQ-7-5, 5044        | K.DDPLTNLNTAFDVAEK.Y            | 1763.88340 | 2 | 3.08E-07 | 0.72 | 3.01 | - | 480.3  |
| AHQ-7-5, 5572 - 5574 | K.DDPLTNLNTAFDVAEK.Y            | 1763.88340 | 2 | 2.40E-07 | 0.96 | 5.44 | - | 1077.5 |
| AHQ-7-4, 6088 - 6134 | K.DDPLTNLNTAFDVAEK.Y            | 1763.88340 | 2 | 1.74E-05 | 0.93 | 4.45 | - | 1008.7 |
| AHQ-7-9, 5013        | K.DDPLTNLNTAFDVAEK.Y            | 1763.88340 | 2 | 5.39E-04 | 0.71 | 3.00 | - | 604.1  |
| AHQ-7-6, 5498        | K.DDPLTNLNTAFDVAEK.Y            | 1763.88340 | 2 | 3.84E-05 | 0.95 | 3.89 | - | 1451.4 |
| AHQ-7-4, 5584 - 5642 | K.DDPLTNLNTAFDVAEK.Y            | 1763.88340 | 2 | 7.56E-09 | 0.95 | 4.71 | - | 1142.5 |
| AHQ-7-4, 5116        | K.DGLGFCALHR.H                  | 1260.44730 | 2 | 1.31E-07 | 0.93 | 3.01 | - | 1534.5 |
| AHQ-7-5, 2568 - 2583 | R.DHSGTLGPEEFK.A                | 1317.38606 | 2 | 8.81E-07 | 0.89 | 3.12 | - | 921.4  |
| AHQ-7-4, 2581        | R.DHSGTLGPEEFK.A                | 1317.38606 | 2 | 1.19E-04 | 0.90 | 3.32 | - | 900.9  |
| AHQ-7-6, 2539 - 2551 | R.DHSGTLGPEEFK.A                | 1317.38606 | 2 | 7.54E-04 | 0.83 | 3.23 | - | 781.6  |
| AHQ-7-4, 3801        | K.DYETATLSEIK.A                 | 1270.36761 | 2 | 9.53E-05 | 0.94 | 3.61 | - | 1201.6 |
| AHQ-7-4, 3708        | R.ELPPDQAEYCIAR.M               | 1563.71392 | 2 | 1.29E-05 | 0.75 | 2.73 | - | 300.0  |
| AHQ-7-4, 4385 - 4453 | R.ETADTDADQVMASFK.I             | 1730.83208 | 2 | 9.83E-07 | 0.95 | 4.23 | - | 1097.3 |
| AHQ-7-6, 4343        | R.ETADTDADQVMASFK.I             | 1730.83208 | 2 | 2.07E-12 | 0.97 | 4.57 | - | 1485.7 |
| AHQ-7-4, 4452        | R.ETADTDADQVMASFK.I             | 1730.83208 | 2 | 6.25E-09 | 0.97 | 5.19 | - | 1435.1 |
| AHQ-7-4, 3149 - 3229 | R.ETADTDADQVM*ASFK.I            | 1746.83148 | 2 | 1.50E-06 | 0.79 | 3.69 | - | 255.4  |
| AHQ-7-5, 3215        | R.ETADTDADQVM*ASFK.I            | 1746.83148 | 2 | 3.24E-06 | 0.92 | 3.73 | - | 997.1  |
| AHQ-7-4, 3885        | R.ETADTDADQVMASFK.I             | 1730.83208 | 2 | 5.56E-09 | 0.95 | 4.43 | - | 1167.0 |
| AHQ-7-5, 4414 - 4430 | R.ETADTDADQVMASFK.I             | 1730.83208 | 2 | 1.17E-09 | 0.97 | 5.05 | - | 1496.9 |
| AHQ-7-6, 3187        | R.ETADTDADQVM*ASFK.I            | 1746.83148 | 2 | 9.58E-06 | 0.89 | 3.79 | - | 977.2  |
| AHQ-7-7, 4288 - 4337 | R.ETADTDADQVMASFK.I             | 1730.83208 | 2 | 6.18E-06 | 0.44 | 2.85 | - | 425.8  |
| AHQ-7-11, 4139       | R.ETADTDADQVMASFK.I             | 1730.83208 | 2 | 3.53E-04 | 0.77 | 3.47 | - | 581.1  |
| AHQ-7-6, 2989        | K.GISQEQMNEFR.A                 | 1339.45991 | 2 | 3.19E-05 | 0.89 | 3.22 | - | 1031.8 |
| AHQ-7-6, 2290        | K.GISQEQMNEFR.A                 | 1355.45931 | 2 | 1.31E-05 | 0.82 | 3.09 | - | 750.5  |
| AHQ-7-11, 2948       | K.GISQEQMNEFR.A                 | 1339.45991 | 2 | 4.83E-05 | 0.85 | 2.86 | - | 909.9  |
| AHQ-7-4, 3214        | K.GISQEQMNEFR.A                 | 1339.45991 | 2 | 2.52E-08 | 0.87 | 3.31 | - | 828.2  |
| AHQ-7-4, 2718        | K.GISQEQMNEFR.A                 | 1339.45991 | 2 | 1.95E-07 | 0.80 | 3.27 | - | 911.4  |
| AHQ-7-4, 2310 - 2337 | K.GISQEQMNEFR.A                 | 1355.45931 | 2 | 1.36E-05 | 0.76 | 2.86 | - | 771.7  |
| AHQ-7-4, 3024 - 3098 | K.GISQEQMNEFR.A                 | 1339.45991 | 2 | 1.55E-07 | 0.85 | 3.04 | - | 862.3  |
| AHQ-7-5, 3008        | K.GISQEQMNEFR.A                 | 1339.45991 | 2 | 3.97E-07 | 0.86 | 3.36 | - | 781.0  |
| AHQ-7-5, 2300        | K.GISQEQMNEFR.A                 | 1355.45931 | 2 | 6.04E-05 | 0.84 | 2.98 | - | 875.9  |
| AHQ-7-6, 2117 - 2194 | R.HRPELIDYK.L                   | 1228.38202 | 2 | 7.41E-04 | 0.76 | 2.95 | - | 596.8  |
| AHQ-7-4, 2162 - 2224 | R.HRPELIDYK.L                   | 1228.38202 | 2 | 6.67E-06 | 0.84 | 3.11 | - | 600.5  |
| AHQ-7-9, 2145        | R.HRPELIDYK.L                   | 1228.38202 | 2 | 3.86E-04 | 0.85 | 2.80 | - | 819.6  |
| AHQ-7-5, 2194        | R.HRPELIDYK.L                   | 1228.38202 | 2 | 5.64E-04 | 0.91 | 3.75 | - | 704.2  |
| AHQ-7-4, 4713        | K.ICDQWDLGALTKQ.R               | 1663.83349 | 2 | 2.71E-05 | 0.56 | 2.54 | - | 725.2  |
| AHQ-7-6, 4829        | K.ICDQWDLGALTKQ.R               | 1663.83349 | 2 | 1.30E-06 | 0.97 | 4.87 | - | 1788.6 |
| AHQ-7-6, 4683        | K.ICDQWDLGALTKQ.R               | 1663.83349 | 2 | 4.38E-04 | 0.75 | 3.17 | - | 739.1  |
| AHQ-7-4, 4548 - 4622 | K.ICDQWDLGALTKQ.R               | 1663.83349 | 2 | 1.02E-04 | 0.87 | 3.60 | - | 954.8  |
| AHQ-7-4, 4865 - 4928 | K.ICDQWDLGALTKQ.R               | 1663.83349 | 2 | 5.43E-07 | 0.97 | 4.67 | - | 2151.6 |
| AHQ-7-5, 4559 - 4592 | K.ICDQWDLGALTKQ.R               | 1663.83349 | 2 | 1.79E-07 | 0.89 | 3.17 | - | 1231.8 |
| AHQ-7-7, 4777        | K.ICDQWDLGALTKQ.R               | 1663.83349 | 2 | 4.71E-06 | 0.97 | 4.46 | - | 2000.7 |
| AHQ-7-5, 4856 - 4886 | K.ICDQWDLGALTKQ.R               | 1663.83349 | 2 | 4.32E-08 | 0.96 | 4.13 | - | 1923.3 |
| AHQ-7-4, 5734 - 5754 | K.IDQLEGDHLIQEALIFDNK.H         | 2340.57447 | 3 | 5.55E-16 | 0.95 | 5.28 | - | 1469.5 |
| AHQ-7-7, 5712        | K.IDQLEGDHLIQEALIFDNK.H         | 2340.57447 | 3 | 3.38E-04 | 0.91 | 3.98 | - | 1207.0 |
| AHQ-7-4, 5872 - 5952 | K.IDQLEGDHLIQEALIFDNK.H         | 2340.57447 | 2 | 8.35E-06 | 0.60 | 2.54 | - | 505.1  |
| AHQ-7-4, 3588        | K.ILAGDKNYITM*DEL.R             | 1769.01293 | 2 | 3.17E-04 | 0.93 | 3.98 | - | 788.7  |
| AHQ-7-4, 4225 - 4302 | K.ILAGDKNYITM*DEL.R             | 1753.01353 | 2 | 1.33E-09 | 0.97 | 4.50 | - | 1651.6 |
| AHQ-7-4, 5062        | R.ISIEM*HGTLEDQLSHLR.Q          | 1980.23497 | 2 | 1.77E-04 | 0.95 | 4.63 | - | 1332.2 |
| AHQ-7-5, 4432        | R.ISIEM*HGTLEDQLSHLR.Q          | 1996.23437 | 3 | 9.41E-05 | 0.96 | 5.07 | - | 1871.3 |
| AHQ-7-4, 4684        | K.IVQTYHVNMAAGTNPYTTITPQEINGK.W | 2892.23635 | 2 | 2.01E-05 | 0.90 | 4.31 | - | 735.1  |
| AHQ-7-4, 4825        | K.IVQTYHVNMAAGTNPYTTITPQEINGK.W | 2892.23635 | 2 | 3.83E-10 | 0.96 | 5.05 | - | 1292.9 |
| AHQ-7-4, 4104 - 4184 | K.IVQTYHVNMAAGTNPYTTITPQEINGK.W | 2908.23575 | 3 | 1.46E-05 | 0.87 | 4.56 | - | 515.9  |
| AHQ-7-4, 4489        | R.KDDPLTNLNTAFDVAEK.Y           | 1892.05631 | 2 | 3.73E-06 | 0.96 | 4.84 | - | 1386.7 |
| AHQ-7-5, 4914        | R.KDDPLTNLNTAFDVAEK.Y           | 1892.05631 | 2 | 8.12E-10 | 0.97 | 5.85 | - | 1388.3 |
| AHQ-7-5, 4403        | R.KDDPLTNLNTAFDVAEK.Y           | 1892.05631 | 2 | 1.19E-05 | 0.80 | 3.21 | - | 735.4  |
| AHQ-7-6, 4861        | R.KDDPLTNLNTAFDVAEK.Y           | 1892.05631 | 2 | 2.38E-05 | 0.90 | 4.34 | - | 574.4  |
| AHQ-7-4, 4932 - 4993 | R.KDDPLTNLNTAFDVAEK.Y           | 1892.05631 | 2 | 2.76E-07 | 0.96 | 5.35 | - | 964.6  |
| AHQ-7-5, 4420        | R.KQFGAQAANVIGPWQTK.M           | 1887.17410 | 2 | 3.28E-05 | 0.96 | 5.09 | - | 1242.2 |
| AHQ-7-4, 3833 - 3897 | R.LAILGIHNEVSK.I                | 1294.52505 | 2 | 5.61E-08 | 0.94 | 3.85 | - | 1119.1 |
| AHQ-7-7, 3302        | R.LAILGIHNEVSK.I                | 1294.52505 | 2 | 1.52E-05 | 0.91 | 3.58 | - | 1007.5 |
| AHQ-7-4, 3902        | R.LAILGIHNEVSK.I                | 1294.52505 | 2 | 1.72E-07 | 0.87 | 2.54 | - | 1211.8 |
| AHQ-7-4, 3752        | R.LAILGIHNEVSK.I                | 1294.52505 | 2 | 2.94E-08 | 0.95 | 3.73 | - | 1406.5 |
| AHQ-7-3, 5915        | K.LASDLLEWR.R                   | 1216.41115 | 2 | 5.82E-09 | 0.97 | 4.18 | - | 2090.1 |
| AHQ-7-8, 5864        | K.LASDLLEWR.R                   | 1216.41115 | 2 | 1.85E-07 | 0.95 | 3.93 | - | 1507.7 |
| AHQ-7-5, 5962        | K.LASDLLEWR.R                   | 1216.41115 | 2 | 1.49E-05 | 0.97 | 4.19 | - | 2112.7 |
| AHQ-7-7, 5858        | K.LASDLLEWR.R                   | 1216.41115 | 2 | 3.41E-07 | 0.97 | 4.07 | - | 2126.7 |
| AHQ-7-4, 6020        | K.LASDLLEWR.R                   | 1216.41115 | 1 | 5.71E-04 | 0.37 | 2.54 | - | 247.3  |
| AHQ-7-1, 5851        | K.LASDLLEWR.R                   | 1216.41115 | 2 | 5.52E-07 | 0.97 | 4.14 | - | 2238.9 |
| AHQ-7-6, 5865        | K.LASDLLEWR.R                   | 1216.41115 | 2 | 1.64E-08 | 0.96 | 3.96 | - | 1791.6 |
| AHQ-7-4, 6012        | K.LASDLLEWR.R                   | 1216.41115 | 2 | 1.42E-07 | 0.97 | 4.58 | - | 1952.9 |
| AHQ-7-4, 6429        | K.LLETIDQLYLEYAK.R              | 1712.96427 | 3 | 6.57E-07 | 0.98 | 5.12 | - | 2295.5 |
| AHQ-7-2, 6433        | K.LLETIDQLYLEYAK.R              | 1712.96427 | 2 | 2.99E-05 | 0.93 | 3.79 | - | 1039.5 |
| AHQ-7-4, 5406        | K.LLETIDQLYLEYAK.R              | 1712.96427 | 2 | 8.21E-05 | 0.83 | 2.99 | - | 695.8  |
| AHQ-7-7, 6308        | K.LLETIDQLYLEYAK.R              | 1712.96427 | 2 | 1.48E-07 | 0.96 | 4.53 | - | 1236.2 |
| AHQ-7-5, 6356 - 6368 | K.LLETIDQLYLEYAK.R              | 1712.96427 | 2 | 6.23E-04 | 0.97 | 4.80 | - | 1651.2 |
| AHQ-7-6, 6259        | K.LLETIDQLYLEYAK.R              | 1712.96427 | 2 | 3.77E-07 | 0.96 | 4.36 | - | 1291.4 |
| AHQ-7-6, 6275        | K.LLETIDQLYLEYAK.R              | 1712.96427 | 3 | 8.36E-04 | 0.94 | 3.42 | - | 1840.4 |
| AHQ-7-4, 2241        | R.LSNRPAFM*PSEGR.M              | 1478.65881 | 3 | 6.56E-04 | 0.72 | 3.09 | - | 959.3  |
| AHQ-7-5, 3948 - 4010 | K.MLDAEDIVGTARPDEK.A            | 1760.94769 | 2 | 5.83E-08 | 0.77 | 3.87 | - | 637.4  |
| AHQ-7-8, 3956        | K.MLDAEDIVGTARPDEK.A            | 1760.94769 | 2 | 3.99E-08 | 0.91 | 4.00 | - | 1043.4 |
| AHQ-7-4, 3738        | K.MLDAEDIVGTARPDEK.A            | 1760.94769 | 2 | 1.13E-04 | 0.42 | 2.61 | - | 423.9  |
| AHQ-7-5, 3623        | K.M*LD AEDIVGTARPDEK.A          | 1776.94709 | 2 | 2.87E-05 | 0.89 | 3.75 | - | 656.4  |
| AHQ-7-6, 3930 - 3939 | K.MLDAEDIVGTARPDEK.A            | 1760.94769 | 2 | 1.80E-06 | 0.83 | 3.94 | - | 670.5  |
| AHQ-7-6, 3547 - 3555 | K.M*LD AEDIVGTARPDEK.A          | 1776.94709 | 2 | 1.05E-04 | 0.85 | 3.55 | - | 652.8  |
| AHQ-7-4, 4026        | K.MLDAEDIVGTARPDEK.A            | 1760.94769 | 2 | 3.70E-04 | 0.91 | 4.25 | - | 801.1  |
| AHQ-7-7, 3876        | K.MLDAEDIVGTARPDEK.A            | 1760.94769 | 2 | 2.00E-04 | 0.84 | 3.29 | - | 894.4  |
| AHQ-7-4, 4033        | K.MLDAEDIVGTARPDEK.A            | 1760.94769 | 3 | 1.62E-08 | 0.88 | 4.39 | - | 596.1  |
| AHQ-7-4, 3632        | K.M*LD AEDIVGTARPDEK.A          | 1776.94709 | 2 | 2.07E-04 | 0.82 | 3.71 | - | 481.5  |
| AHQ-7-4, 5226        | R.M*VSDINNAWGCLEQVEK.G          | 2011.22273 | 2 | 6.37E-08 | 0.95 | 4.27 | - | 1254.0 |
| AHQ-7-4, 5688        | R.MVSDINNAWGCLEQVEK.G           | 1995.22333 | 2 | 1.32E-04 | 0.96 | 3.86 | - | 2085.2 |
| AHQ-7-4, 5076 - 5141 | R.M*VSDINNAWGCLEQVEK.G          | 2011.22273 | 2 | 2.47E-07 | 0.95 | 4.26 | - | 1025.2 |
| AHQ-7-6, 5009        | R.M*VSDINNAWGCLEQVEK.G          | 2011.22273 | 2 | 3.56E-08 | 0.95 | 4.76 | - | 1035.2 |
| AHQ-7-4, 5496 - 5561 | R.M*VSDINNAWGCLEQVEK.G          | 2011.22273 | 2 | 2.22E-08 | 0.96 | 4.46 | - | 1452.7 |
| AHQ-7-6, 5239        | R.M*VSDINNAWGCLEQVEK.G          | 2011.22273 | 2 | 5.16E-07 | 0.96 | 4.94 | - | 1021.0 |
| AHQ-7-5, 5290        | R.M*VSDINNAWGCLEQVEK.G          | 2011.22273 | 2 | 3.90E-05 | 0.87 | 3.69 | - | 519.9  |
| AHQ-7-6, 5431        | R.M*VSDINNAWGCLEQVEK.G          | 2011.22273 | 2 | 1.90E-04 | 0.62 | 2.77 | - | 512.2  |
| AHQ-7-4, 5320 - 5393 | R.MVSDINNAWGCLEQVEK.G           | 1995.22333 | 2 | 7.52E-04 | 0.96 | 4.36 | - | 2000.0 |
| AHQ-7-4, 4794        | K.NVNIQNFHISWK.D                | 1500.68583 | 2 | 4.23E-06 | 0.95 | 3.71 | - | 1518.0 |
| AHQ-7-5, 4738        | K.NVNIQNFHISWK.D                | 1500.68583 | 2 | 7.40E-04 | 0.95 | 4.03 | - | 1182.4 |
| AHQ-7-4, 3760        | K.NYITMDEL.R                    | 1155.30648 | 2 | 1.41E-05 | 0.84 | 2.99 | - | 650.8  |
| AHQ-7-4, 5136        | K.QFGAQAANVIGPWQTK.M            | 1759.00118 | 2 | 3.52E-04 | 0.90 | 3.90 | - | 855.6  |
| AHQ-7-4, 3974        | R.TINEVENQILTR.D                | 1430.58898 | 2 | 2.72E-04 | 0.89 | 3.77 | - | 847.6  |
| AHQ-7-6, 3486        | R.TINEVENQILTR.D                | 1430.58898 | 2 | 2.14E-05 | 0.81 | 2.99 | - | 676.5  |
| AHQ-7-5, 3119 - 3126 | R.TINEVENQILTR.D                | 1430.58898 | 2 | 1.27E-05 | 0.78 | 2.83 | - | 654.0  |
| AHQ-7-4, 3573 - 3576 | R.TINEVENQILTR.D                | 1430.58898 | 2 | 9.55E-06 | 0.74 | 3.14 | - | 478.5  |

|                             |                                            |            |   |          |        |         |       |          |
|-----------------------------|--------------------------------------------|------------|---|----------|--------|---------|-------|----------|
| AHQ-7-6, 3877 - 3889        | R.TINEVENQILTR.D                           | 1430.58898 | 2 | 2.87E-07 | 0.88   | 3.51    | -     | 949.2    |
| AHQ-7-4, 3993               | R.TINEVENQILTR.D                           | 1430.58898 | 1 | 8.43E-04 | 0.07   | 2.48    | -     | 128.9    |
| AHQ-7-4, 4141               | R.TINEVENQILTR.D                           | 1430.58898 | 1 | 5.36E-06 | 0.21   | 2.22    | -     | 248.0    |
| AHQ-7-4, 4133               | R.TINEVENQILTR.D                           | 1430.58898 | 2 | 4.34E-04 | 0.91   | 3.92    | -     | 898.5    |
| AHQ-7-4, 3152 - 3160        | R.TINEVENQILTR.D                           | 1430.58898 | 2 | 1.36E-04 | 0.83   | 3.38    | -     | 743.3    |
| AHQ-7-7, 6624               | R.VEQIAAIAQELNELDYDPSVSNAR.C               | 2810.02233 | 2 | 6.32E-06 | 0.90   | 3.86    | -     | 852.8    |
| AHQ-7-4, 6120               | R.VEQIAAIAQELNELDYDPSVSNAR.C               | 2810.02233 | 3 | 1.56E-10 | 0.87   | 4.07    | -     | 676.3    |
| AHQ-7-3, 6556               | R.VEQIAAIAQELNELDYDPSVSNAR.C               | 2810.02233 | 3 | 8.90E-09 | 0.96   | 5.53    | -     | 1210.6   |
| AHQ-7-4, 6738 - 6766        | R.VEQIAAIAQELNELDYDPSVSNAR.C               | 2810.02233 | 3 | 8.42E-06 | 0.97   | 5.60    | -     | 1822.3   |
| AHQ-7-5, 6662               | R.VEQIAAIAQELNELDYDPSVSNAR.C               | 2810.02233 | 3 | 7.56E-05 | 0.98   | 6.32    | -     | 2600.6   |
| AHQ-7-4, 6122 - 6125        | R.VEQIAAIAQELNELDYDPSVSNAR.C               | 2810.02233 | 2 | 3.54E-07 | 0.94   | 4.84    | -     | 763.0    |
| AHQ-7-2, 6731               | R.VEQIAAIAQELNELDYDPSVSNAR.C               | 2810.02233 | 3 | 7.72E-08 | 0.97   | 5.72    | -     | 1573.1   |
| AHQ-7-5, 6040               | R.VEQIAAIAQELNELDYDPSVSNAR.C               | 2810.02233 | 3 | 2.95E-04 | 0.85   | 3.71    | -     | 918.7    |
| AHQ-7-4, 6740 - 6744        | R.VEQIAAIAQELNELDYDPSVSNAR.C               | 2810.02233 | 2 | 2.99E-07 | 0.95   | 4.73    | -     | 1141.8   |
| AHQ-7-6, 6563               | R.VEQIAAIAQELNELDYDPSVSNAR.C               | 2810.02233 | 2 | 2.67E-09 | 0.93   | 4.91    | -     | 969.3    |
| AHQ-7-4, 6517               | R.VEQIAAIAQELNELDYDPSVSNAR.C               | 2810.02233 | 3 | 3.74E-09 | 0.97   | 5.61    | -     | 1795.2   |
| AHQ-7-6, 6558               | R.VEQIAAIAQELNELDYDPSVSNAR.C               | 2810.02233 | 3 | 9.40E-10 | 0.98   | 7.44    | -     | 2139.8   |
| AHQ-7-11, 5988 - 5999       | R.VGWEQLLTIAR.T                            | 1387.60894 | 2 | 2.55E-07 | 0.93   | 3.65    | -     | 1182.1   |
| AHQ-7-4, 6520 - 6576        | R.VGWEQLLTIAR.T                            | 1387.60894 | 2 | 6.71E-09 | 0.94   | 3.79    | -     | 1398.0   |
| AHQ-7-10, 5896 - 5899       | R.VGWEQLLTIAR.T                            | 1387.60894 | 2 | 4.24E-05 | 0.94   | 3.91    | -     | 1156.1   |
| AHQ-7-7, 6408               | R.VGWEQLLTIAR.T                            | 1387.60894 | 2 | 2.58E-08 | 0.96   | 4.48    | -     | 1344.2   |
| AHQ-7-3, 6392               | R.VGWEQLLTIAR.T                            | 1387.60894 | 2 | 1.02E-07 | 0.95   | 3.84    | -     | 1623.9   |
| AHQ-7-5, 6470 - 6495        | R.VGWEQLLTIAR.T                            | 1387.60894 | 2 | 2.80E-06 | 0.95   | 4.32    | -     | 1261.0   |
| AHQ-7-2, 6561               | R.VGWEQLLTIAR.T                            | 1387.60894 | 2 | 9.78E-08 | 0.93   | 3.92    | -     | 1207.2   |
| AHQ-7-8, 6422               | R.VGWEQLLTIAR.T                            | 1387.60894 | 2 | 5.06E-08 | 0.93   | 3.44    | -     | 1137.4   |
| AHQ-7-9, 5816 - 5821        | R.VGWEQLLTIAR.T                            | 1387.60894 | 2 | 2.88E-05 | 0.83   | 3.14    | -     | 1013.6   |
| AHQ-7-7, 4141               | K.VLAVNGEQLMEDYEK.L                        | 2053.23635 | 2 | 3.76E-07 | 0.88   | 4.08    | -     | 641.0    |
| AHQ-7-6, 4163 - 4217        | K.VLAVNGEQLMEDYEK.L                        | 2053.23635 | 2 | 2.28E-08 | 0.95   | 5.07    | -     | 923.8    |
| AHQ-7-6, 3550 - 3558        | K.VLAVNGEQLMEDYEK.L                        | 2069.23575 | 2 | 4.51E-05 | 0.94   | 4.47    | -     | 1092.1   |
| AHQ-7-5, 4492               | K.VLAVNGEQLMEDYEK.L                        | 2053.23635 | 2 | 5.30E-09 | 0.94   | 4.59    | -     | 705.5    |
| AHQ-7-5, 4238               | K.VLAVNGEQLMEDYEK.L                        | 2053.23635 | 2 | 1.39E-09 | 0.93   | 4.19    | -     | 925.9    |
| AHQ-7-8, 4143               | K.VLAVNGEQLMEDYEK.L                        | 2053.23635 | 2 | 5.69E-09 | 0.95   | 4.56    | -     | 1315.7   |
| AHQ-7-5, 3626               | K.VLAVNGEQLMEDYEK.L                        | 2069.23575 | 2 | 2.79E-07 | 0.96   | 5.01    | -     | 1206.1   |
| AHQ-7-4, 4472 - 4544        | K.VLAVNGEQLMEDYEK.L                        | 2053.23635 | 2 | 2.44E-07 | 0.96   | 4.74    | -     | 1168.1   |
| AHQ-7-4, 4270 - 4336        | K.VLAVNGEQLMEDYEK.L                        | 2053.23635 | 2 | 4.17E-07 | 0.97   | 5.84    | -     | 1496.3   |
| AHQ-7-4, 4018 - 4096        | K.VLAVNGEQLMEDYEK.L                        | 2069.23575 | 2 | 1.25E-06 | 0.88   | 4.21    | -     | 607.8    |
| AHQ-7-4, 3789 - 3860        | K.VLAVNGEQLMEDYEK.L                        | 2069.23575 | 2 | 3.85E-07 | 0.95   | 4.75    | -     | 973.2    |
| AHQ-7-4, 3637 - 3700        | K.VLAVNGEQLMEDYEK.L                        | 2069.23575 | 2 | 4.55E-07 | 0.97   | 5.21    | -     | 1516.3   |
| AHQ-7-3, 4304               | K.VLAVNGEQLMEDYEK.L                        | 2053.23635 | 2 | 1.69E-05 | 0.93   | 3.86    | -     | 1376.9   |
| AHQ-7-2, 4403               | K.VLAVNGEQLMEDYEK.L                        | 2053.23635 | 2 | 1.36E-07 | 0.95   | 4.84    | -     | 1036.5   |
| AHQ-7-1, 4347               | K.VLAVNGEQLMEDYEK.L                        | 2053.23635 | 2 | 8.03E-07 | 0.95   | 4.36    | -     | 1248.8   |
| gj 4557705 ref NP_000217.1  | keratin 9 [Homo sapiens]                   |            |   | 1.11E-15 | 6.35   | 70.29   | 24.10 | 61986.9  |
| AHQ-7-4, 6276               | K.DIENQYEQITQIEHEVSSSGQEVQSSAK.E           | 3266.38667 | 3 | 8.38E-09 | 0.95   | 5.08    | -     | 1444.3   |
| AHQ-7-1, 5969 - 6040        | K.DIENQYEQITQIEHEVSSSGQEVQSSAK.E           | 3266.38667 | 3 | 4.71E-09 | 0.93   | 4.52    | -     | 1272.9   |
| AHQ-7-13, 5903              | K.DIENQYEQITQIEHEVSSSGQEVQSSAK.E           | 3266.38667 | 3 | 1.87E-08 | 0.96   | 5.67    | -     | 1638.0   |
| AHQ-7-7, 6144               | K.DIENQYEQITQIEHEVSSSGQEVQSSAK.E           | 3266.38667 | 3 | 1.56E-05 | 0.94   | 4.76    | -     | 1260.8   |
| AHQ-7-6, 6118 - 6125        | K.DIENQYEQITQIEHEVSSSGQEVQSSAK.E           | 3266.38667 | 3 | 1.11E-15 | 0.97   | 5.68    | -     | 1725.0   |
| AHQ-7-14, 5869              | K.DIENQYEQITQIEHEVSSSGQEVQSSAK.E           | 3266.38667 | 3 | 1.15E-05 | 0.95   | 5.33    | -     | 1208.9   |
| AHQ-7-3, 6121               | K.DIENQYEQITQIEHEVSSSGQEVQSSAK.E           | 3266.38667 | 3 | 3.65E-06 | 0.96   | 5.77    | -     | 1117.2   |
| AHQ-7-2, 6277               | K.DIENQYEQITQIEHEVSSSGQEVQSSAK.E           | 3266.38667 | 3 | 2.20E-06 | 0.93   | 4.73    | -     | 1268.9   |
| AHQ-7-2, 4673               | K.EIETYHNLLEGGQEDFESSGAGK.I                | 2511.59648 | 2 | 4.68E-05 | 0.85   | 3.91    | -     | 749.0    |
| AHQ-7-6, 4474               | K.EIETYHNLLEGGQEDFESSGAGK.I                | 2511.59648 | 3 | 4.07E-08 | 0.95   | 4.48    | -     | 1655.7   |
| AHQ-7-14, 4422              | K.EIETYHNLLEGGQEDFESSGAGK.I                | 2511.59648 | 3 | 2.85E-07 | 0.97   | 5.39    | -     | 1856.7   |
| AHQ-7-3, 4571               | K.EIETYHNLLEGGQEDFESSGAGK.I                | 2511.59648 | 3 | 6.31E-06 | 0.93   | 5.16    | -     | 964.7    |
| AHQ-7-14, 4846              | R.GGGGSGFYSSYGGGSGGFSASSLGGGFGGGSR.G       | 2706.73770 | 2 | 1.45E-06 | 0.90   | 4.35    | -     | 650.5    |
| AHQ-7-5, 6739               | K.NYSPYNTIDDLKQDQVLDLTVGNK.T               | 2904.13412 | 3 | 8.26E-08 | 0.82   | 3.81    | -     | 494.8    |
| AHQ-7-1, 6459 - 6496        | K.NYSPYNTIDDLKQDQVLDLTVGNK.T               | 2904.13412 | 3 | 1.82E-13 | 0.80   | 3.83    | -     | 427.1    |
| AHQ-7-1, 6383 - 6399        | K.SDLEM*QYETLQEELM*ALK.K                   | 2204.46135 | 2 | 2.93E-06 | 0.90   | 3.49    | -     | 1395.7   |
| AHQ-7-2, 3293               | K.TLLDIDNTR.M                              | 1061.17119 | 2 | 4.15E-04 | 0.87   | 3.04    | -     | 878.9    |
| AHQ-7-2, 3131               | K.VQALEEANNDLENK.I                         | 1587.67060 | 2 | 2.86E-04 | 0.96   | 4.20    | -     | 1512.1   |
| AHQ-7-1, 3239 - 3317        | K.VQALEEANNDLENK.I                         | 1587.67060 | 2 | 4.20E-05 | 0.96   | 4.27    | -     | 1731.9   |
| AHQ-7-11, 2958              | K.VQALEEANNDLENK.I                         | 1587.67060 | 2 | 2.09E-04 | 0.83   | 3.20    | -     | 904.9    |
| gj 27500274 ref NP_113950.3 | similar to Munc13-4 protein [Homo sapiens] |            |   | 1.11E-15 | 5.67   | 60.28   | 10.10 | 123281.1 |
| AHQ-7-4, 6322               | R.ALLYEDALYTVLHR.L                         | 1677.92484 | 2 | 4.90E-11 | 0.95   | 4.14    | -     | 1490.9   |
| AHQ-7-4, 5798               | R.AVQMDELVPLGLTK.H                         | 1643.92698 | 2 | 1.44E-06 | 0.90   | 3.73    | -     | 771.7    |
| AHQ-7-6, 3455               | R.IQQQAETTSEELGAVTVK.A                     | 1933.10674 | 2 | 6.33E-05 | 0.76   | 3.03    | -     | 832.1    |
| AHQ-7-4, 3548               | R.IQQQAETTSEELGAVTVK.A                     | 1933.10674 | 2 | 2.96E-08 | 0.97   | 5.16    | -     | 1521.6   |
| AHQ-7-4, 5497               | K.LPQLAWALEQR.V                            | 1525.73360 | 2 | 3.66E-10 | 0.96   | 4.44    | -     | 1449.8   |
| AHQ-7-4, 6898               | R.LPLTYPAPNGDPIQLLEGR.K                    | 2178.51621 | 2 | 1.11E-15 | 0.93   | 4.57    | -     | 659.1    |
| AHQ-7-4, 6801               | R.VGAVLEQQQLQNTLHAQLQSALAGLGHIE.R          | 3153.54178 | 3 | 2.41E-06 | 0.96   | 5.66    | -     | 1259.1   |
| gj 16753233 ref NP_006280.2 | talin 1 [Homo sapiens]                     |            |   | 3.89E-15 | 112.28 | 1270.40 | 58.00 | 269665.3 |
| AHQ-7-7, 3102               | K.AAAFEQEENETVVVK.E                        | 1664.79496 | 2 | 3.73E-08 | 0.95   | 4.72    | -     | 1255.8   |
| AHQ-7-2, 3695 - 3760        | K.AAAFEQEENETVVVK.E                        | 1664.79496 | 2 | 1.27E-04 | 0.96   | 5.05    | -     | 1363.1   |
| AHQ-7-5, 3198               | K.AAAFEQEENETVVVK.E                        | 1664.79496 | 2 | 1.61E-04 | 0.90   | 3.86    | -     | 973.3    |
| AHQ-7-14, 3173              | K.AAAFEQEENETVVVK.E                        | 1664.79496 | 2 | 4.93E-05 | 0.90   | 3.91    | -     | 1130.1   |
| AHQ-7-4, 4074               | K.AAAFEQEENETVVVK.E                        | 1664.79496 | 2 | 4.76E-04 | 0.37   | 2.87    | -     | 508.0    |
| AHQ-7-1, 3291 - 3364        | K.AAAFEQEENETVVVK.E                        | 1664.79496 | 2 | 7.65E-06 | 0.84   | 3.58    | -     | 914.5    |
| AHQ-7-4, 3294 - 3368        | K.AAAFEQEENETVVVK.E                        | 1664.79496 | 2 | 7.83E-04 | 0.78   | 3.42    | -     | 591.6    |
| AHQ-7-6, 3158               | K.AAAFEQEENETVVVK.E                        | 1664.79496 | 2 | 1.81E-09 | 0.94   | 4.43    | -     | 1210.5   |
| AHQ-7-2, 3372               | R.AAMEPIVIAK.T                             | 1130.38320 | 1 | 3.65E-04 | 0.35   | 2.19    | -     | 570.0    |
| AHQ-7-3, 3339               | R.AAMEPIVIAK.T                             | 1130.38320 | 2 | 8.87E-04 | 0.56   | 2.63    | -     | 393.7    |
| AHQ-7-4, 2653               | R.AAM*EPIVIAK.T                            | 1146.38260 | 1 | 2.36E-04 | 0.16   | 2.07    | -     | 195.6    |
| AHQ-7-4, 2650               | R.AAM*EPIVIAK.T                            | 1146.38260 | 2 | 1.19E-05 | 0.88   | 2.91    | -     | 876.0    |
| AHQ-7-4, 3308               | R.AAM*EPIVIAK.T                            | 1130.38320 | 2 | 8.29E-05 | 0.52   | 2.50    | -     | 369.9    |
| AHQ-7-2, 2708 - 2711        | R.AAM*EPIVIAK.T                            | 1146.38260 | 2 | 4.79E-06 | 0.82   | 2.54    | -     | 839.8    |
| AHQ-7-3, 2692 - 2695        | R.AAM*EPIVIAK.T                            | 1146.38260 | 2 | 3.24E-06 | 0.90   | 2.69    | -     | 1165.4   |
| AHQ-7-7, 4832 - 4901        | K.ACEFAGFCQIQFGPHNEQK.H                    | 2399.60390 | 3 | 1.87E-05 | 0.71   | 3.65    | -     | 521.3    |
| AHQ-7-8, 4936 - 5016        | K.ACEFAGFCQIQFGPHNEQK.H                    | 2399.60390 | 2 | 1.58E-04 | 0.89   | 4.09    | -     | 689.5    |
| AHQ-7-6, 1973               | K.ADAEGESDLNSR.K                           | 1393.35296 | 2 | 1.23E-07 | 0.87   | 2.96    | -     | 966.5    |
| AHQ-7-4, 1992               | K.ADAEGESDLNSR.K                           | 1393.35296 | 2 | 4.51E-07 | 0.92   | 3.53    | -     | 1021.6   |
| AHQ-7-3, 2039               | K.ADAEGESDLNSR.K                           | 1393.35296 | 2 | 7.12E-04 | 0.72   | 2.56    | -     | 951.6    |
| AHQ-7-2, 2052               | K.ADAEGESDLNSR.K                           | 1393.35296 | 2 | 2.33E-06 | 0.91   | 3.61    | -     | 995.8    |
| AHQ-7-3, 2675 - 2728        | K.AGALQCCSPSDAYTK.K                        | 1470.58689 | 2 | 4.05E-05 | 0.86   | 3.18    | -     | 833.2    |
| AHQ-7-5, 2643               | K.AGALQCCSPSDAYTK.K                        | 1470.58689 | 2 | 6.23E-04 | 0.79   | 3.17    | -     | 592.8    |
| AHQ-7-2, 2527 - 2577        | K.AGALQCCSPSDAYTK.K                        | 1470.58689 | 2 | 4.21E-04 | 0.92   | 3.57    | -     | 1214.7   |
| AHQ-7-2, 4103 - 4168        | K.AIAVTVQEMVTK.S                           | 1290.55498 | 2 | 1.73E-06 | 0.94   | 4.40    | -     | 1196.4   |
| AHQ-7-3, 4024 - 4037        | K.AIAVTVQEMVTK.S                           | 1290.55498 | 2 | 4.38E-04 | 0.94   | 4.04    | -     | 1111.7   |
| AHQ-7-1, 4112               | K.AIAVTVQEMVTK.S                           | 1290.55498 | 2 | 4.13E-04 | 0.92   | 3.31    | -     | 1082.6   |
| AHQ-7-2, 3035 - 3104        | K.AIAVTVQEMVTK.S                           | 1306.55438 | 2 | 9.05E-04 | 0.91   | 3.54    | -     | 883.9    |
| AHQ-7-1, 4115               | K.AIAVTVQEMVTK.S                           | 1290.55498 | 2 | 2.51E-04 | 0.95   | 4.02    | -     | 1338.6   |
| AHQ-7-4, 4016 - 4085        | K.AIAVTVQEMVTK.S                           | 1290.55498 | 2 | 4.65E-06 | 0.94   | 4.06    | -     | 1085.8   |
| AHQ-7-2, 4252               | K.AIAVTVQEMVTK.S                           | 1290.55498 | 2 | 2.60E-04 | 0.67   | 2.60    | -     | 548.0    |
| AHQ-7-1, 2920               | K.ALDGAFTEENR.A                            | 1223.27427 | 2 | 1.11E-05 | 0.95   | 3.37    | -     | 1740.8   |
| AHQ-7-4, 2685               | K.ALDGAFTEENR.A                            | 1223.27427 | 2 | 9.35E-07 | 0.95   | 3.96    | -     | 1709.3   |
| AHQ-7-4, 2509               | K.ALDGAFTEENR.A                            | 1223.27427 | 2 | 7.46E-06 | 0.94   | 3.67    | -     | 1600.0   |
| AHQ-7-2, 2579 - 2581        | K.ALDGAFTEENR.A                            | 1223.27427 | 2 | 4.47E-05 | 0.93   | 3.32    | -     | 1322.2   |
| AHQ-7-7, 3252               | K.ALDYVM*LR.N                              | 1061.23626 | 2 | 4.21E-04 | 0.90   | 2.65    | -     | 1094.2   |

|                      |                                        |            |   |          |      |      |   |        |
|----------------------|----------------------------------------|------------|---|----------|------|------|---|--------|
| AHQ-7-13, 3529       | K.ALDYYM*LR.N                          | 1061.23626 | 2 | 4.08E-06 | 0.91 | 3.28 | - | 814.3  |
| AHQ-7-7, 3832        | K.ALDYYMLR.N                           | 1045.23686 | 2 | 2.17E-07 | 0.94 | 3.64 | - | 925.2  |
| AHQ-7-13-, 3935      | K.ALDYYMLR.N                           | 1045.23686 | 2 | 1.66E-06 | 0.93 | 3.33 | - | 922.7  |
| AHQ-7-7, 4301        | K.ALDYYMLRNGDITMEYR.K                  | 2012.25579 | 2 | 4.78E-05 | 0.71 | 3.22 | - | 519.8  |
| AHQ-7-3, 2096        | R.ALEATTEHIR.Q                         | 1141.25953 | 2 | 5.98E-04 | 0.75 | 3.01 | - | 822.9  |
| AHQ-7-5, 2011        | R.ALEATTEHIR.Q                         | 1141.25953 | 2 | 6.08E-06 | 0.90 | 2.93 | - | 1375.3 |
| AHQ-7-6, 2014        | R.ALEATTEHIR.Q                         | 1141.25953 | 2 | 2.69E-06 | 0.76 | 2.87 | - | 864.4  |
| AHQ-7-2, 2104 - 2177 | R.ALEATTEHIR.Q                         | 1141.25953 | 2 | 1.47E-05 | 0.89 | 3.25 | - | 1066.5 |
| AHQ-7-4, 2040        | R.ALEATTEHIR.Q                         | 1141.25953 | 2 | 1.54E-07 | 0.91 | 3.40 | - | 1200.7 |
| AHQ-7-7, 1992 - 2049 | R.ALEATTEHIR.Q                         | 1141.25953 | 2 | 2.08E-04 | 0.57 | 2.71 | - | 607.2  |
| AHQ-7-2, 3531        | K.ALGDILSATK.A                         | 989.14811  | 2 | 2.62E-06 | 0.90 | 3.58 | - | 756.6  |
| AHQ-7-3, 3484        | K.ALGDILSATK.A                         | 989.14811  | 2 | 3.18E-07 | 0.88 | 3.30 | - | 796.2  |
| AHQ-7-1, 3617        | K.ALGDILSATK.A                         | 989.14811  | 2 | 4.18E-06 | 0.92 | 3.51 | - | 896.4  |
| AHQ-7-6, 3390        | K.ALGDILSATK.A                         | 989.14811  | 2 | 3.42E-05 | 0.89 | 3.43 | - | 661.7  |
| AHQ-7-4, 3460        | K.ALGDILSATK.A                         | 989.14811  | 2 | 2.53E-07 | 0.95 | 4.04 | - | 961.9  |
| AHQ-7-2, 3565 - 3633 | K.ALGDILSATK.A                         | 989.14811  | 1 | 9.38E-04 | 0.47 | 2.29 | - | 526.0  |
| AHQ-7-5, 3431        | K.ALGDILSATK.A                         | 989.14811  | 2 | 1.65E-05 | 0.92 | 3.69 | - | 763.4  |
| AHQ-7-4, 2684        | K.ALSTDPAAPNLK.S                       | 1198.35099 | 2 | 4.35E-06 | 0.83 | 3.06 | - | 681.5  |
| AHQ-7-1, 2912        | K.ALSTDPAAPNLK.S                       | 1198.35099 | 2 | 1.21E-06 | 0.80 | 3.08 | - | 699.8  |
| AHQ-7-2, 2733 - 2735 | K.ALSTDPAAPNLK.S                       | 1198.35099 | 2 | 9.26E-07 | 0.86 | 3.44 | - | 803.4  |
| AHQ-7-3, 2712 - 2789 | K.ALSTDPAAPNLK.S                       | 1198.35099 | 2 | 5.83E-07 | 0.84 | 3.21 | - | 786.8  |
| AHQ-7-6, 2642        | K.ALSTDPAAPNLK.S                       | 1198.35099 | 2 | 1.11E-05 | 0.76 | 2.81 | - | 626.3  |
| AHQ-7-5, 2607 - 2671 | K.ALSTDPAAPNLK.S                       | 1198.35099 | 2 | 1.82E-06 | 0.61 | 2.76 | - | 403.9  |
| AHQ-7-2, 3697        | K.ALSTDPAAPNLKSQLAAAAA.R.A             | 1967.21592 | 2 | 3.01E-09 | 0.90 | 4.21 | - | 439.7  |
| AHQ-7-1, 5715 - 5760 | R.ANQAIQM*ACQSGLGEPGCTQAOQVLSAATIVAK.H | 3236.64462 | 3 | 1.19E-06 | 0.86 | 4.46 | - | 635.3  |
| AHQ-7-2, 6121        | K.APGQLECECTAIAALNSCLR.D               | 2077.32566 | 3 | 3.53E-07 | 0.90 | 4.72 | - | 852.1  |
| AHQ-7-2, 6111        | K.APGQLECECTAIAALNSCLR.D               | 2077.32566 | 2 | 1.26E-09 | 0.98 | 5.62 | - | 1720.9 |
| AHQ-7-3, 5964        | K.APGQLECECTAIAALNSCLR.D               | 2077.32566 | 2 | 6.32E-05 | 0.96 | 4.86 | - | 1262.7 |
| AHQ-7-4, 5429 - 5494 | K.APGQLECECTAIAALNSCLR.D               | 2077.32566 | 2 | 2.48E-08 | 0.97 | 4.88 | - | 1576.2 |
| AHQ-7-4, 6128        | K.APGQLECECTAIAALNSCLR.D               | 2077.32566 | 2 | 5.32E-09 | 0.97 | 5.41 | - | 1546.0 |
| AHQ-7-3, 6169        | K.APGQLECECTAIAALNSCLR.D               | 2077.32566 | 2 | 3.13E-04 | 0.88 | 3.61 | - | 811.5  |
| AHQ-7-3, 5313 - 5377 | K.APGQLECECTAIAALNSCLR.D               | 2077.32566 | 2 | 6.92E-09 | 0.98 | 5.53 | - | 1823.6 |
| AHQ-7-2, 5423 - 5496 | K.APGQLECECTAIAALNSCLR.D               | 2077.32566 | 2 | 2.89E-09 | 0.97 | 5.44 | - | 1295.8 |
| AHQ-7-3, 6460 - 6483 | K.AQEACGPLEMDSALSVVQNLEK.D             | 2391.66165 | 2 | 5.42E-09 | 0.81 | 2.96 | - | 986.9  |
| AHQ-7-3, 6459        | K.AQEACGPLEMDSALSVVQNLEK.D             | 2391.66165 | 3 | 9.98E-05 | 0.96 | 4.98 | - | 1875.3 |
| AHQ-7-4, 6641 - 6656 | K.AQEACGPLEMDSALSVVQNLEK.D             | 2391.66165 | 3 | 2.74E-06 | 0.95 | 4.84 | - | 1615.9 |
| AHQ-7-4, 6642 - 6644 | K.AQEACGPLEMDSALSVVQNLEK.D             | 2391.66165 | 2 | 3.38E-07 | 0.88 | 3.42 | - | 1172.1 |
| AHQ-7-5, 6595        | K.AQEACGPLEM*DSALSVVQNLEK.D            | 2407.66105 | 3 | 3.42E-04 | 0.76 | 3.59 | - | 642.9  |
| AHQ-7-5, 6570        | K.AQEACGPLEMDSALSVVQNLEK.D             | 2391.66165 | 3 | 3.82E-09 | 0.93 | 4.34 | - | 1739.2 |
| AHQ-7-3, 5739        | K.AQEACGPLEM*DSALSVVQNLEK.D            | 2407.66105 | 3 | 2.58E-05 | 0.93 | 4.37 | - | 1169.3 |
| AHQ-7-1, 5697        | K.AQEACGPLEM*DSALSVVQNLEK.D            | 2407.66105 | 3 | 1.99E-05 | 0.83 | 3.77 | - | 882.5  |
| AHQ-7-2, 6631        | K.AQEACGPLEMDSALSVVQNLEK.D             | 2391.66165 | 3 | 6.74E-07 | 0.95 | 4.93 | - | 1491.8 |
| AHQ-7-2, 6652        | K.AQEACGPLEM*DSALSVVQNLEK.D            | 2407.66105 | 3 | 2.20E-05 | 0.87 | 3.80 | - | 1189.3 |
| AHQ-7-6, 6469 - 6473 | K.AQEACGPLEMDSALSVVQNLEK.D             | 2391.66165 | 3 | 2.74E-07 | 0.95 | 4.89 | - | 1502.1 |
| AHQ-7-2, 6628 - 6685 | K.AQEACGPLEMDSALSVVQNLEK.D             | 2391.66165 | 2 | 3.35E-06 | 0.71 | 2.70 | - | 809.1  |
| AHQ-7-6, 2926        | K.ASAGPOPLLVQSCK.A                     | 1457.67763 | 2 | 2.64E-06 | 0.67 | 2.56 | - | 461.3  |
| AHQ-7-4, 2956 - 3021 | K.ASAGPOPLLVQSCK.A                     | 1457.67763 | 2 | 7.51E-08 | 0.88 | 3.73 | - | 499.9  |
| AHQ-7-3, 3023        | K.ASAGPOPLLVQSCK.A                     | 1457.67763 | 2 | 1.99E-05 | 0.76 | 2.74 | - | 546.2  |
| AHQ-7-3, 3045        | K.ASAGPOPLLVQSCK.A                     | 1457.67763 | 1 | 2.69E-04 | 0.18 | 2.20 | - | 320.2  |
| AHQ-7-5, 2932 - 2998 | K.ASAGPOPLLVQSCK.A                     | 1457.67763 | 2 | 4.51E-08 | 0.85 | 3.18 | - | 535.0  |
| AHQ-7-2, 3088        | K.ASAGPOPLLVQSCK.A                     | 1457.67763 | 1 | 1.31E-04 | 0.32 | 2.48 | - | 460.4  |
| AHQ-7-1, 3212        | K.ASAGPOPLLVQSCK.A                     | 1457.67763 | 2 | 3.43E-08 | 0.76 | 2.98 | - | 446.2  |
| AHQ-7-2, 3032 - 3111 | K.ASAGPOPLLVQSCK.A                     | 1457.67763 | 2 | 1.34E-09 | 0.72 | 3.04 | - | 414.3  |
| AHQ-7-4, 3012        | K.ASAGPOPLLVQSCK.A                     | 1457.67763 | 1 | 5.26E-06 | 0.19 | 2.36 | - | 326.3  |
| AHQ-7-2, 3781        | K.ASVPTIQDQASAM*QLSQCAK.N              | 2152.39272 | 2 | 8.58E-06 | 0.79 | 3.34 | - | 545.7  |
| AHQ-7-6, 4131        | K.ASVPTIQDQASAMQLSQCAK.N               | 2136.39332 | 2 | 2.45E-04 | 0.61 | 2.93 | - | 478.1  |
| AHQ-7-4, 4242 - 4296 | K.ASVPTIQDQASAMQLSQCAK.N               | 2136.39332 | 2 | 6.03E-07 | 0.93 | 4.55 | - | 596.4  |
| AHQ-7-1, 3801        | K.ASVPTIQDQASAM*QLSQCAK.N              | 2152.39272 | 2 | 8.56E-05 | 0.74 | 3.55 | - | 303.9  |
| AHQ-7-5, 3688        | K.ASVPTIQDQASAM*QLSQCAK.N              | 2152.39272 | 2 | 2.12E-05 | 0.90 | 4.10 | - | 808.8  |
| AHQ-7-1, 4283        | K.ASVPTIQDQASAMQLSQCAK.N               | 2136.39332 | 2 | 1.81E-09 | 0.89 | 3.98 | - | 516.7  |
| AHQ-7-3, 3715 - 3717 | K.ASVPTIQDQASAM*QLSQCAK.N              | 2152.39272 | 2 | 4.75E-08 | 0.90 | 3.93 | - | 730.3  |
| AHQ-7-6, 3629        | K.ASVPTIQDQASAM*QLSQCAK.N              | 2152.39272 | 2 | 4.83E-06 | 0.84 | 3.45 | - | 511.3  |
| AHQ-7-2, 4363        | K.ASVPTIQDQASAMQLSQCAK.N               | 2136.39332 | 2 | 9.56E-09 | 0.94 | 4.60 | - | 781.5  |
| AHQ-7-7, 4097        | K.ASVPTIQDQASAMQLSQCAK.N               | 2136.39332 | 2 | 1.36E-09 | 0.90 | 4.14 | - | 559.4  |
| AHQ-7-5, 4208        | K.ASVPTIQDQASAMQLSQCAK.N               | 2136.39332 | 2 | 1.47E-08 | 0.91 | 4.28 | - | 608.9  |
| AHQ-7-2, 4481        | K.ASVPTIQDQASAMQLSQCAK.N               | 2136.39332 | 2 | 1.05E-10 | 0.85 | 4.12 | - | 379.6  |
| AHQ-7-7, 4098        | K.ASVPTIQDQASAMQLSQCAK.N               | 2136.39332 | 2 | 2.72E-07 | 0.79 | 3.18 | - | 707.7  |
| AHQ-7-2, 4257 - 4323 | K.ASVPTIQDQASAMQLSQCAK.N               | 2136.39332 | 2 | 1.24E-05 | 0.81 | 3.84 | - | 368.7  |
| AHQ-7-4, 3725        | K.ASVPTIQDQASAM*QLSQCAK.N              | 2152.39272 | 2 | 9.72E-07 | 0.81 | 3.49 | - | 485.2  |
| AHQ-7-6, 4891        | K.AVAEQIPLLVQGV.R.G                    | 1493.77619 | 3 | 3.70E-05 | 0.95 | 4.69 | - | 1661.9 |
| AHQ-7-4, 5021        | K.AVAEQIPLLVQGV.R.G                    | 1493.77619 | 3 | 2.14E-06 | 0.94 | 4.49 | - | 1739.2 |
| AHQ-7-2, 5011 - 5071 | K.AVAEQIPLLVQGV.R.G                    | 1493.77619 | 2 | 1.19E-07 | 0.93 | 4.38 | - | 701.8  |
| AHQ-7-2, 5039        | K.AVAEQIPLLVQGV.R.G                    | 1493.77619 | 3 | 1.87E-06 | 0.93 | 4.26 | - | 1660.9 |
| AHQ-7-6, 4874        | K.AVAEQIPLLVQGV.R.G                    | 1493.77619 | 2 | 1.57E-06 | 0.89 | 4.25 | - | 527.7  |
| AHQ-7-5, 4952        | K.AVAEQIPLLVQGV.R.G                    | 1493.77619 | 3 | 1.87E-09 | 0.98 | 5.43 | - | 2315.0 |
| AHQ-7-3, 4927 - 4939 | K.AVAEQIPLLVQGV.R.G                    | 1493.77619 | 2 | 3.40E-05 | 0.81 | 3.72 | - | 395.6  |
| AHQ-7-1, 4959 - 4967 | K.AVAEQIPLLVQGV.R.G                    | 1493.77619 | 2 | 1.02E-05 | 0.94 | 3.94 | - | 893.6  |
| AHQ-7-7, 4798 - 4805 | K.AVAEQIPLLVQGV.R.G                    | 1493.77619 | 2 | 1.29E-07 | 0.90 | 4.38 | - | 539.0  |
| AHQ-7-5, 4939        | K.AVAEQIPLLVQGV.R.G                    | 1493.77619 | 2 | 1.91E-04 | 0.89 | 3.76 | - | 714.6  |
| AHQ-7-4, 3924        | K.AVASAAAAALVK.A                       | 1085.32216 | 2 | 1.28E-06 | 0.97 | 4.20 | - | 1903.8 |
| AHQ-7-5, 3878        | K.AVASAAAAALVK.A                       | 1085.32216 | 2 | 2.59E-06 | 0.96 | 3.64 | - | 1659.8 |
| AHQ-7-1, 4023        | K.AVASAAAAALVK.A                       | 1085.32216 | 2 | 9.21E-06 | 0.95 | 4.15 | - | 1482.0 |
| AHQ-7-2, 4093        | K.AVASAAAAALVK.A                       | 1085.32216 | 2 | 1.52E-04 | 0.96 | 3.96 | - | 1560.4 |
| AHQ-7-6, 3791 - 3855 | K.AVASAAAAALVK.A                       | 1085.32216 | 2 | 5.31E-06 | 0.93 | 3.10 | - | 1355.3 |
| AHQ-7-2, 4004 - 4011 | K.AVASAAAAALVK.A                       | 1085.32216 | 2 | 5.90E-06 | 0.96 | 4.25 | - | 1502.5 |
| AHQ-7-2, 3940        | K.AVEGCVSASQAATEDGQLLR.G               | 2064.22056 | 2 | 1.43E-06 | 0.93 | 4.33 | - | 1415.6 |
| AHQ-7-6, 3975        | K.AVEGCVSASQAATEDGQLLR.G               | 2064.22056 | 2 | 3.02E-04 | 0.92 | 4.03 | - | 1157.6 |
| AHQ-7-1, 4043 - 4095 | K.AVEGCVSASQAATEDGQLLR.G               | 2064.22056 | 2 | 2.54E-07 | 0.92 | 4.35 | - | 1200.2 |
| AHQ-7-2, 3847 - 3877 | K.AVEGCVSASQAATEDGQLLR.G               | 2064.22056 | 2 | 3.96E-07 | 0.97 | 4.90 | - | 2122.9 |
| AHQ-7-6, 4071        | K.AVEGCVSASQAATEDGQLLR.G               | 2064.22056 | 2 | 2.71E-08 | 0.94 | 4.95 | - | 917.3  |
| AHQ-7-5, 4026 - 4036 | K.AVEGCVSASQAATEDGQLLR.G               | 2064.22056 | 2 | 1.21E-07 | 0.94 | 4.95 | - | 1138.9 |
| AHQ-7-2, 4119 - 4187 | K.AVEGCVSASQAATEDGQLLR.G               | 2064.22056 | 2 | 9.40E-07 | 0.95 | 4.96 | - | 1148.2 |
| AHQ-7-2, 4121        | K.AVEGCVSASQAATEDGQLLR.G               | 2064.22056 | 2 | 9.34E-07 | 0.84 | 3.30 | - | 1093.5 |
| AHQ-7-3, 4044 - 4067 | K.AVEGCVSASQAATEDGQLLR.G               | 2064.22056 | 2 | 1.97E-06 | 0.92 | 3.65 | - | 1294.2 |
| AHQ-7-5, 4155        | K.AVEGCVSASQAATEDGQLLR.G               | 2064.22056 | 2 | 1.17E-08 | 0.91 | 3.84 | - | 1065.8 |
| AHQ-7-4, 4069 - 4140 | K.AVEGCVSASQAATEDGQLLR.G               | 2064.22056 | 2 | 4.85E-08 | 0.97 | 5.11 | - | 1757.9 |
| AHQ-7-3, 4152        | K.AVEGCVSASQAATEDGQLLR.G               | 2064.22056 | 2 | 2.01E-05 | 0.92 | 4.21 | - | 877.9  |
| AHQ-7-2, 4231 - 4303 | K.AVEGCVSASQAATEDGQLLR.G               | 2064.22056 | 2 | 3.73E-08 | 0.96 | 4.24 | - | 1761.8 |
| AHQ-7-2, 4369 - 4431 | K.AVEGCVSASQAATEDGQLLR.G               | 2064.22056 | 2 | 1.99E-07 | 0.96 | 5.10 | - | 1507.6 |
| AHQ-7-4, 3770 - 3846 | K.AVEGCVSASQAATEDGQLLR.G               | 2064.22056 | 2 | 9.29E-04 | 0.68 | 3.61 | - | 652.8  |
| AHQ-7-4, 7026        | K.AVEGCVSASQAATEDGQLLR.G               | 2064.22056 | 2 | 5.86E-05 | 0.64 | 2.75 | - | 924.4  |
| AHQ-7-2, 4264        | K.AVEGCVSASQAATEDGQLLR.G               | 2064.22056 | 2 | 3.04E-07 | 0.97 | 5.10 | - | 2120.2 |
| AHQ-7-4, 3849 - 3925 | K.AVEGCVSASQAATEDGQLLR.G               | 2064.22056 | 2 | 5.53E-05 | 0.56 | 3.14 | - | 329.6  |
| AHQ-7-8, 3988        | K.AVEGCVSASQAATEDGQLLR.G               | 2064.22056 | 2 | 7.75E-05 | 0.68 | 2.90 | - | 593.5  |
| AHQ-7-2, 4632        | K.AVEGCVSASQAATEDGQLLR.G               | 2064.22056 | 2 | 8.11E-07 | 0.96 | 4.90 | - | 1502.8 |
| AHQ-7-5, 6754        | K.AVSSAIAQLLGEVAQGNENYAGIAAR.D         | 2574.83158 | 3 | 1.95E-05 | 0.97 | 6.11 | - | 1435.1 |
| AHQ-7-3, 6576 - 6639 | K.AVSSAIAQLLGEVAQGNENYAGIAAR.D         | 2574.83158 | 3 | 3.36E-13 | 0.98 | 6.74 | - | 2141.5 |



|                       |                                       |            |   |          |      |      |   |        |
|-----------------------|---------------------------------------|------------|---|----------|------|------|---|--------|
| AHQ-7-5, 6616 - 6691  | K.AVSSAIAQLLGEVAQGNENYAGIAAR.D        | 2574.83158 | 3 | 4.12E-04 | 0.96 | 5.02 | - | 1884.1 |
| AHQ-7-2, 6749 - 6811  | K.AVSSAIAQLLGEVAQGNENYAGIAAR.D        | 2574.83158 | 3 | 1.47E-08 | 0.97 | 6.23 | - | 1953.6 |
| AHQ-7-4, 6777 - 6845  | K.AVSSAIAQLLGEVAQGNENYAGIAAR.D        | 2574.83158 | 3 | 2.24E-11 | 0.98 | 7.36 | - | 2381.1 |
| AHQ-7-6, 6649 - 6698  | K.AVSSAIAQLLGEVAQGNENYAGIAAR.D        | 2574.83158 | 3 | 1.58E-13 | 0.95 | 4.90 | - | 1476.4 |
| AHQ-7-6, 5765         | R.AVTDINQLITMCTQQAPGQK.E              | 2306.60312 | 2 | 6.05E-06 | 0.71 | 3.43 | - | 380.4  |
| AHQ-7-3, 5467 - 5487  | R.AVTDINQLITMCTQQAPGQK.E              | 2322.60252 | 2 | 2.57E-06 | 0.85 | 4.08 | - | 457.8  |
| AHQ-7-2, 5597 - 5677  | R.AVTDINQLITMCTQQAPGQK.E              | 2322.60252 | 2 | 2.93E-04 | 0.67 | 3.77 | - | 257.1  |
| AHQ-7-4, 5920         | R.AVTDINQLITMCTQQAPGQK.E              | 2306.60312 | 2 | 2.70E-04 | 0.47 | 3.01 | - | 256.3  |
| AHQ-7-2, 5915         | R.AVTDINQLITMCTQQAPGQK.E              | 2306.60312 | 2 | 4.20E-08 | 0.88 | 3.96 | - | 559.1  |
| AHQ-7-3, 5776         | R.AVTDINQLITMCTQQAPGQK.E              | 2306.60312 | 2 | 3.02E-06 | 0.89 | 4.28 | - | 498.2  |
| AHQ-7-2, 4736         | R.AVTDINQLITMCTQQAPGQK.E              | 2306.60312 | 2 | 6.25E-07 | 0.85 | 4.03 | - | 485.9  |
| AHQ-7-3, 4635 - 4649  | R.AVTDINQLITMCTQQAPGQK.E              | 2306.60312 | 2 | 3.77E-05 | 0.26 | 3.12 | - | 203.6  |
| AHQ-7-5, 5862         | R.AVTDINQLITMCTQQAPGQK.E              | 2306.60312 | 2 | 4.48E-08 | 0.90 | 4.09 | - | 602.9  |
| AHQ-7-5, 5930         | R.AVTDINQLITMCTQQAPGQKCEDNALR.E       | 3166.51128 | 3 | 1.05E-10 | 0.94 | 4.93 | - | 1106.2 |
| AHQ-7-3, 5848 - 5849  | R.AVTDINQLITMCTQQAPGQKCEDNALR.E       | 3166.51128 | 3 | 8.09E-12 | 0.92 | 4.45 | - | 1046.3 |
| AHQ-7-1, 5545 - 5548  | R.AVTDINQLITMCTQQAPGQKCEDNALR.E       | 3182.51068 | 3 | 2.64E-06 | 0.89 | 4.59 | - | 846.8  |
| AHQ-7-6, 5831         | R.AVTDINQLITMCTQQAPGQKCEDNALR.E       | 3166.51128 | 3 | 6.27E-07 | 0.88 | 4.00 | - | 1011.1 |
| AHQ-7-2, 5728 - 5804  | R.AVTDINQLITMCTQQAPGQKCEDNALR.E       | 3182.51068 | 3 | 1.42E-09 | 0.94 | 4.95 | - | 950.1  |
| AHQ-7-7, 5842         | R.AVTDINQLITMCTQQAPGQKCEDNALR.E       | 3166.51128 | 3 | 5.40E-08 | 0.77 | 3.59 | - | 712.2  |
| AHQ-7-4, 6016 - 6056  | R.AVTDINQLITMCTQQAPGQKCEDNALR.E       | 3166.51128 | 3 | 1.51E-10 | 0.94 | 5.17 | - | 986.0  |
| AHQ-7-2, 5989 - 6052  | R.AVTDINQLITMCTQQAPGQKCEDNALR.E       | 3166.51128 | 3 | 2.80E-10 | 0.92 | 4.64 | - | 1050.2 |
| AHQ-7-3, 5591         | R.AVTDINQLITMCTQQAPGQKCEDNALR.E       | 3182.51068 | 3 | 3.32E-04 | 0.66 | 3.24 | - | 757.0  |
| AHQ-7-4, 2441         | R.CVSLCPGQR.D                         | 1079.23309 | 1 | 7.01E-05 | 0.10 | 1.88 | - | 79.6   |
| AHQ-7-3, 2464         | R.CVSLCPGQR.D                         | 1079.23309 | 2 | 4.02E-06 | 0.81 | 2.81 | - | 793.2  |
| AHQ-7-2, 2509         | R.CVSLCPGQR.D                         | 1079.23309 | 1 | 6.93E-04 | 0.30 | 2.01 | - | 245.8  |
| AHQ-7-7, 3401 - 3436  | R.DDILNGSHPVSFDK.A                    | 1544.64741 | 2 | 1.83E-07 | 0.95 | 4.04 | - | 1250.4 |
| AHQ-7-10, 3287        | R.DDILNGSHPVSFDK.A                    | 1544.64741 | 2 | 2.02E-05 | 0.90 | 3.07 | - | 974.4  |
| AHQ-7-8, 3480 - 3559  | R.DDILNGSHPVSFDK.A                    | 1544.64741 | 2 | 1.38E-10 | 0.95 | 3.99 | - | 1476.8 |
| AHQ-7-7, 4169         | K.DHFLGEGDEESTM*LEDSVSPK.K            | 2339.43247 | 2 | 2.64E-04 | 0.76 | 3.02 | - | 458.2  |
| AHQ-7-7, 4686 - 4692  | K.DHFLGEGDEESTM*LEDSVSPK.K            | 2323.43307 | 2 | 5.21E-07 | 0.99 | 6.81 | - | 2490.7 |
| AHQ-7-4, 5937         | R.DKAPGQLECEATAIAALNSCLR.D            | 2320.58644 | 2 | 1.74E-10 | 0.93 | 4.17 | - | 935.6  |
| AHQ-7-3, 5803         | R.DKAPGQLECEATAIAALNSCLR.D            | 2320.58644 | 2 | 2.17E-11 | 0.97 | 5.40 | - | 1198.9 |
| AHQ-7-2, 6153         | R.DKAPGQLECEATAIAALNSCLR.D            | 2320.58644 | 2 | 2.22E-09 | 0.84 | 3.64 | - | 558.1  |
| AHQ-7-3, 5799         | R.DKAPGQLECEATAIAALNSCLR.D            | 2320.58644 | 3 | 7.57E-07 | 0.86 | 4.18 | - | 977.6  |
| AHQ-7-2, 5269         | R.DKAPGQLECEATAIAALNSCLR.D            | 2320.58644 | 2 | 4.00E-08 | 0.93 | 4.32 | - | 946.0  |
| AHQ-7-2, 5937         | R.DKAPGQLECEATAIAALNSCLR.D            | 2320.58644 | 2 | 2.22E-11 | 0.95 | 5.10 | - | 853.4  |
| AHQ-7-1, 5744 - 5812  | R.DKAPGQLECEATAIAALNSCLR.D            | 2320.58644 | 2 | 3.97E-08 | 0.94 | 4.31 | - | 893.3  |
| AHQ-7-6, 5795         | R.DKAPGQLECEATAIAALNSCLR.D            | 2320.58644 | 2 | 4.50E-07 | 0.95 | 5.18 | - | 757.6  |
| AHQ-7-3, 5127 - 5173  | R.DKAPGQLECEATAIAALNSCLR.D            | 2320.58644 | 2 | 1.13E-10 | 0.90 | 4.05 | - | 692.9  |
| AHQ-7-3, 6012         | R.DKAPGQLECEATAIAALNSCLR.D            | 2320.58644 | 2 | 9.59E-11 | 0.87 | 3.62 | - | 648.3  |
| AHQ-7-7, 5793 - 5794  | R.DKAPGQLECEATAIAALNSCLR.D            | 2320.58644 | 2 | 2.20E-08 | 0.92 | 4.28 | - | 680.4  |
| AHQ-7-4, 6160         | R.DKAPGQLECEATAIAALNSCLR.D            | 2320.58644 | 2 | 2.73E-09 | 0.93 | 4.15 | - | 1048.5 |
| AHQ-7-7, 5798         | R.DKAPGQLECEATAIAALNSCLR.D            | 2320.58644 | 3 | 6.16E-04 | 0.68 | 3.27 | - | 885.8  |
| AHQ-7-4, 5260         | R.DKAPGQLECEATAIAALNSCLR.D            | 2320.58644 | 2 | 1.50E-07 | 0.87 | 3.66 | - | 725.1  |
| AHQ-7-1, 5145         | R.DKAPGQLECEATAIAALNSCLR.D            | 2320.58644 | 2 | 1.60E-08 | 0.80 | 3.26 | - | 677.1  |
| AHQ-7-5, 5883         | R.DKAPGQLECEATAIAALNSCLR.D            | 2320.58644 | 3 | 6.44E-04 | 0.88 | 4.26 | - | 1033.3 |
| AHQ-7-2, 6080 - 6147  | R.DKAPGQLECEATAIAALNSCLR.D            | 2320.58644 | 3 | 2.58E-06 | 0.69 | 3.25 | - | 810.9  |
| AHQ-7-3, 5128         | R.DLDOASLAASVQQLAPR.E                 | 1783.96422 | 3 | 5.36E-04 | 0.90 | 4.54 | - | 1102.6 |
| AHQ-7-2, 5228         | R.DLDOASLAASVQQLAPR.E                 | 1783.96422 | 3 | 2.25E-06 | 0.91 | 4.23 | - | 1606.1 |
| AHQ-7-2, 5227 - 5240  | R.DLDOASLAASVQQLAPR.E                 | 1783.96422 | 2 | 2.13E-08 | 0.96 | 5.21 | - | 888.7  |
| AHQ-7-3, 5073 - 5140  | R.DLDOASLAASVQQLAPR.E                 | 1783.96422 | 2 | 4.28E-10 | 0.96 | 5.27 | - | 1063.2 |
| AHQ-7-4, 5234         | R.DLDOASLAASVQQLAPR.E                 | 1783.96422 | 3 | 6.32E-08 | 0.96 | 5.09 | - | 1620.6 |
| AHQ-7-2, 4644         | R.DLDOASLAASVQQLAPR.E                 | 1783.96422 | 2 | 1.54E-05 | 0.84 | 3.43 | - | 832.5  |
| AHQ-7-1, 5055 - 5096  | R.DLDOASLAASVQQLAPR.E                 | 1783.96422 | 2 | 2.57E-06 | 0.55 | 3.33 | - | 564.0  |
| AHQ-7-1, 5112         | R.DLDOASLAASVQQLAPR.E                 | 1783.96422 | 3 | 7.17E-07 | 0.89 | 4.40 | - | 1208.0 |
| AHQ-7-4, 5182 - 5244  | R.DLDOASLAASVQQLAPR.E                 | 1783.96422 | 2 | 3.83E-05 | 0.87 | 4.02 | - | 621.1  |
| AHQ-7-2, 3700 - 3715  | R.DPPSWSVLAGHSR.T                     | 1409.53156 | 2 | 5.74E-08 | 0.91 | 3.55 | - | 577.5  |
| AHQ-7-3, 3631         | R.DPPSWSVLAGHSR.T                     | 1409.53156 | 2 | 5.95E-08 | 0.77 | 2.98 | - | 431.8  |
| AHQ-7-3, 3639         | R.DPPSWSVLAGHSR.T                     | 1409.53156 | 3 | 1.13E-06 | 0.89 | 4.18 | - | 583.1  |
| AHQ-7-5, 3586         | R.DPPSWSVLAGHSR.T                     | 1409.53156 | 2 | 5.68E-07 | 0.88 | 3.22 | - | 510.1  |
| AHQ-7-2, 3708         | R.DPPSWSVLAGHSR.T                     | 1409.53156 | 3 | 3.61E-06 | 0.92 | 4.10 | - | 960.7  |
| AHQ-7-4, 3592 - 3618  | R.DPPSWSVLAGHSR.T                     | 1409.53156 | 2 | 1.42E-07 | 0.86 | 3.25 | - | 469.7  |
| AHQ-7-6, 3529         | R.DPPSWSVLAGHSR.T                     | 1409.53156 | 2 | 1.80E-08 | 0.78 | 3.12 | - | 481.3  |
| AHQ-7-9, 4621         | R.DPVLNLLYVQAR.D                      | 1529.76539 | 2 | 6.52E-10 | 0.94 | 4.03 | - | 1284.8 |
| AHQ-7-13, 4911        | R.DPVLNLLYVQAR.D                      | 1529.76539 | 2 | 2.20E-06 | 0.81 | 3.03 | - | 770.6  |
| AHQ-7-7, 4984         | R.DPVLNLLYVQAR.D                      | 1529.76539 | 2 | 4.05E-07 | 0.95 | 4.31 | - | 1271.1 |
| AHQ-7-8, 5023         | R.DPVLNLLYVQAR.D                      | 1529.76539 | 2 | 1.58E-08 | 0.98 | 5.43 | - | 1936.0 |
| AHQ-7-1, 5116         | R.DPVLNLLYVQAR.D                      | 1529.76539 | 2 | 7.27E-06 | 0.86 | 2.98 | - | 1032.3 |
| AHQ-7-3, 5129         | R.DPVLNLLYVQAR.D                      | 1529.76539 | 2 | 1.81E-04 | 0.88 | 3.19 | - | 1042.3 |
| AHQ-7-10, 4652 - 4656 | R.DPVLNLLYVQAR.D                      | 1529.76539 | 2 | 1.15E-07 | 0.97 | 4.86 | - | 1687.3 |
| AHQ-7-5, 2482         | K.EAAYHPEVAPDVR.L                     | 1454.56910 | 2 | 1.66E-04 | 0.58 | 2.58 | - | 528.2  |
| AHQ-7-6, 2471         | K.EAAYHPEVAPDVR.L                     | 1454.56910 | 2 | 4.07E-06 | 0.72 | 2.90 | - | 570.8  |
| AHQ-7-2, 2568         | K.EAAYHPEVAPDVR.L                     | 1454.56910 | 1 | 5.98E-04 | 0.50 | 2.17 | - | 443.9  |
| AHQ-7-4, 2496         | K.EAAYHPEVAPDVR.L                     | 1454.56910 | 2 | 2.76E-06 | 0.72 | 2.89 | - | 505.5  |
| AHQ-7-5, 2492         | K.EAAYHPEVAPDVR.L                     | 1454.56910 | 1 | 4.39E-04 | 0.27 | 1.92 | - | 300.6  |
| AHQ-7-3, 2535         | K.EAAYHPEVAPDVR.L                     | 1454.56910 | 2 | 1.60E-07 | 0.83 | 2.65 | - | 935.3  |
| AHQ-7-1, 2752         | K.EAAYHPEVAPDVR.L                     | 1454.56910 | 2 | 1.86E-04 | 0.83 | 2.63 | - | 987.4  |
| AHQ-7-7, 2428         | K.EAAYHPEVAPDVR.L                     | 1454.56910 | 2 | 1.75E-04 | 0.70 | 2.77 | - | 623.0  |
| AHQ-7-2, 5847 - 5907  | K.EADESLNFEEQILEAAK.S                 | 1937.05072 | 2 | 7.45E-08 | 0.97 | 4.95 | - | 1760.7 |
| AHQ-7-9, 5216         | K.EADESLNFEEQILEAAK.S                 | 1937.05072 | 2 | 5.60E-06 | 0.93 | 2.80 | - | 616.2  |
| AHQ-7-5, 5824 - 5891  | K.EADESLNFEEQILEAAK.S                 | 1937.05072 | 2 | 9.25E-07 | 0.94 | 4.38 | - | 1248.5 |
| AHQ-7-3, 5757 - 5839  | K.EADESLNFEEQILEAAK.S                 | 1937.05072 | 2 | 3.52E-07 | 0.97 | 5.49 | - | 1896.7 |
| AHQ-7-4, 5681         | K.EADESLNFEEQILEAAK.S                 | 1937.05072 | 2 | 1.47E-08 | 0.92 | 4.04 | - | 941.6  |
| AHQ-7-2, 5901 - 5967  | K.EADESLNFEEQILEAAK.S                 | 1937.05072 | 2 | 1.59E-09 | 0.96 | 5.03 | - | 1383.4 |
| AHQ-7-10, 5284 - 5285 | K.EADESLNFEEQILEAAK.S                 | 1937.05072 | 2 | 2.24E-06 | 0.96 | 4.85 | - | 1381.5 |
| AHQ-7-4, 5848 - 5913  | K.EADESLNFEEQILEAAK.S                 | 1937.05072 | 2 | 6.30E-08 | 0.97 | 5.63 | - | 1640.2 |
| AHQ-7-7, 5740 - 5804  | K.EADESLNFEEQILEAAK.S                 | 1937.05072 | 2 | 1.10E-05 | 0.95 | 4.93 | - | 1231.0 |
| AHQ-7-6, 5725 - 5786  | K.EADESLNFEEQILEAAK.S                 | 1937.05072 | 2 | 7.64E-09 | 0.95 | 4.37 | - | 1487.3 |
| AHQ-7-3, 5907         | K.EADESLNFEEQILEAAK.S                 | 1937.05072 | 2 | 1.09E-04 | 0.83 | 3.04 | - | 1045.0 |
| AHQ-7-1, 5693 - 5756  | K.EADESLNFEEQILEAAK.S                 | 1937.05072 | 2 | 1.73E-09 | 0.97 | 4.97 | - | 1849.0 |
| AHQ-7-2, 6032 - 6035  | K.EADESLNFEEQILEAAK.S                 | 1937.05072 | 2 | 1.77E-08 | 0.93 | 4.31 | - | 1155.4 |
| AHQ-7-4, 5976         | K.EADESLNFEEQILEAAK.S                 | 1937.05072 | 2 | 3.29E-06 | 0.96 | 4.84 | - | 1429.7 |
| AHQ-7-11, 5388        | K.EADESLNFEEQILEAAK.S                 | 1937.05072 | 2 | 2.20E-06 | 0.79 | 3.08 | - | 968.4  |
| AHQ-7-2, 5637 - 5701  | K.EADESLNFEEQILEAAK.S                 | 1937.05072 | 2 | 4.61E-07 | 0.89 | 4.29 | - | 675.4  |
| AHQ-7-2, 6909 - 6968  | K.EADESLNFEEQILEAAK.S                 | 1937.05072 | 2 | 1.22E-05 | 0.85 | 4.21 | - | 899.1  |
| AHQ-7-3, 5559 - 5629  | K.EADESLNFEEQILEAAK.S                 | 1937.05072 | 2 | 1.68E-05 | 0.46 | 2.75 | - | 343.4  |
| AHQ-7-4, 6922         | R.ECANGYLELHDHVLTLQKPSPELK.Q          | 2883.30906 | 3 | 6.63E-08 | 0.94 | 5.43 | - | 1077.5 |
| AHQ-7-3, 6707         | R.ECANGYLELHDHVLTLQKPSPELK.Q          | 2883.30906 | 3 | 1.03E-09 | 0.93 | 5.05 | - | 933.9  |
| AHQ-7-6, 6721 - 6726  | R.ECANGYLELHDHVLTLQKPSPELK.Q          | 2883.30906 | 3 | 4.56E-06 | 0.96 | 6.05 | - | 1232.0 |
| AHQ-7-2, 6883 - 6889  | R.ECANGYLELHDHVLTLQKPSPELK.Q          | 2883.30906 | 3 | 3.80E-10 | 0.97 | 6.10 | - | 1378.1 |
| AHQ-7-6, 6677         | R.EGISQEAHLHTQM*LTAVQEISHLIEPLANAAR.A | 3388.79744 | 3 | 1.47E-06 | 0.93 | 4.71 | - | 1136.4 |
| AHQ-7-2, 6879 - 6949  | R.EGISQEAHLHTQM*LTAVQEISHLIEPLANAAR.A | 3372.79804 | 3 | 3.81E-07 | 0.82 | 4.10 | - | 730.9  |
| AHQ-7-6, 6770         | R.EGISQEAHLHTQM*LTAVQEISHLIEPLANAAR.A | 3372.79804 | 3 | 1.38E-06 | 0.91 | 4.96 | - | 1055.4 |
| AHQ-7-3, 6685 - 6749  | R.EGISQEAHLHTQM*LTAVQEISHLIEPLANAAR.A | 3372.79804 | 3 | 3.49E-06 | 0.95 | 5.31 | - | 1167.5 |
| AHQ-7-5, 6778         | R.EGISQEAHLHTQM*LTAVQEISHLIEPLANAAR.A | 3388.79744 | 3 | 1.44E-06 | 0.92 | 4.85 | - | 928.6  |
| AHQ-7-7, 6868         | R.EGISQEAHLHTQM*LTAVQEISHLIEPLANAAR.A | 3372.79804 | 3 | 1.14E-11 | 0.98 | 6.95 | - | 1774.1 |
| AHQ-7-2, 6813         | R.EGISQEAHLHTQM*LTAVQEISHLIEPLANAAR.A | 3388.79744 | 3 | 5.52E-04 | 0.96 | 5.49 | - | 1736.0 |

|                        |                                      |            |   |          |      |      |   |        |
|------------------------|--------------------------------------|------------|---|----------|------|------|---|--------|
| AHQ-7-1, 6543          | R.EGISQEAHLTQM*LTAQVEISHLIEPLANAAR.A | 3388.79744 | 3 | 1.26E-07 | 0.94 | 5.38 | - | 890.6  |
| AHQ-7-5, 6874          | R.EGISQEAHLTQM*LTAVQEIHLIEPLANAAR.A  | 3372.79804 | 3 | 9.37E-09 | 0.97 | 5.83 | - | 1816.4 |
| AHQ-7-4, 6757          | R.ELLENVPQIPNDM*SYFGCLDSVMENSK.V     | 3148.48814 | 3 | 3.74E-04 | 0.63 | 3.60 | - | 618.2  |
| AHQ-7-2, 6727          | R.ELLENVPQIPNDM*SYFGCLDSVMENSK.V     | 3148.48814 | 3 | 2.16E-05 | 0.73 | 3.87 | - | 631.9  |
| AHQ-7-7, 3020          | R.EQGVVEEHETLLLR.R                   | 1553.69898 | 2 | 2.53E-06 | 0.78 | 3.06 | - | 410.7  |
| AHQ-7-8, 3070          | R.EQGVVEEHETLLLR.R                   | 1553.69898 | 2 | 8.13E-09 | 0.75 | 2.83 | - | 502.9  |
| AHQ-7-8, 5500          | R.ERIEAPAGPPSDFGLFLSDDDDPK.K         | 2571.77979 | 3 | 7.44E-10 | 0.97 | 5.91 | - | 1898.7 |
| AHQ-7-14-, 5323 - 5327 | R.ERIEAPAGPPSDFGLFLSDDDDPK.K         | 2571.77979 | 3 | 6.08E-09 | 0.98 | 7.30 | - | 2152.7 |
| AHQ-7-13-, 5319        | R.ERIEAPAGPPSDFGLFLSDDDDPK.K         | 2571.77979 | 3 | 1.84E-08 | 0.98 | 7.24 | - | 1484.8 |
| AHQ-7-7, 5460 - 5468   | R.ERIEAPAGPPSDFGLFLSDDDDPK.K         | 2571.77979 | 3 | 4.27E-11 | 0.97 | 6.75 | - | 1724.3 |
| AHQ-7-10, 4744         | R.ERIEAPAGPPSDFGLFLSDDDDPK.K         | 2699.95270 | 3 | 9.10E-04 | 0.89 | 4.17 | - | 994.0  |
| AHQ-7-14-, 5026 - 5082 | R.ERIEAPAGPPSDFGLFLSDDDDPK.K         | 2699.95270 | 3 | 9.48E-09 | 0.95 | 5.10 | - | 1339.3 |
| AHQ-7-13-, 4953 - 5009 | R.ERIEAPAGPPSDFGLFLSDDDDPK.K         | 2699.95270 | 3 | 1.71E-05 | 0.98 | 6.05 | - | 2032.2 |
| AHQ-7-7, 5001          | R.ERIEAPAGPPSDFGLFLSDDDDPK.K         | 2699.95270 | 3 | 3.67E-09 | 0.97 | 6.04 | - | 1943.3 |
| AHQ-7-3, 2296          | K.EVANSTANLYK.T                      | 1146.27608 | 1 | 3.36E-05 | 0.15 | 2.22 | - | 150.1  |
| AHQ-7-4, 2173 - 2201   | K.EVANSTANLYK.T                      | 1146.27608 | 2 | 8.53E-04 | 0.61 | 2.56 | - | 705.8  |
| AHQ-7-8, 4650 - 4716   | K.EVIQEWNLTK.R                       | 1487.68214 | 2 | 4.62E-05 | 0.91 | 3.57 | - | 1168.8 |
| AHQ-7-7, 4605          | K.EVIQEWNLTK.R                       | 1487.68214 | 1 | 5.71E-07 | 0.77 | 3.77 | - | 306.7  |
| AHQ-7-8, 2935 - 2951   | K.FFYSDQNVDSD.R                      | 1378.42795 | 2 | 1.95E-05 | 0.93 | 3.55 | - | 1159.2 |
| AHQ-7-7, 2956          | K.FFYSDQNVDSD.R                      | 1378.42795 | 2 | 6.50E-07 | 0.92 | 3.66 | - | 1054.9 |
| AHQ-7-7, 5808          | K.FFYSDQNVDSDR*VQLNLLVQAR.D          | 2889.17074 | 3 | 4.31E-10 | 0.98 | 6.67 | - | 2531.0 |
| AHQ-7-4, 6194          | R.FGQDFSTFLAAGVEM*AGQAPSQEDR.A       | 2734.89265 | 2 | 1.12E-05 | 0.70 | 2.74 | - | 603.6  |
| AHQ-7-2, 6171 - 6232   | R.FGQDFSTFLAAGVEM*AGQAPSQEDR.A       | 2734.89265 | 3 | 2.22E-04 | 0.91 | 4.49 | - | 791.0  |
| AHQ-7-3, 6016 - 6075   | R.FGQDFSTFLAAGVEM*AGQAPSQEDR.A       | 2734.89265 | 3 | 2.30E-06 | 0.82 | 4.35 | - | 529.7  |
| AHQ-7-4, 6182 - 6240   | R.FGQDFSTFLAAGVEM*AGQAPSQEDR.A       | 2734.89265 | 3 | 5.50E-06 | 0.84 | 4.07 | - | 624.7  |
| AHQ-7-4, 6793          | R.FGQDFSTFLAAGVEM*AGQAPSQEDR.A       | 2718.89325 | 3 | 4.52E-07 | 0.84 | 3.83 | - | 778.7  |
| AHQ-7-2, 6177 - 6179   | R.FGQDFSTFLAAGVEM*AGQAPSQEDR.A       | 2734.89265 | 2 | 1.49E-05 | 0.89 | 4.12 | - | 731.3  |
| AHQ-7-14-, 2874        | K.FLPSLRDEH                          | 1243.35032 | 2 | 4.68E-05 | 0.32 | 2.55 | - | 283.9  |
| AHQ-7-1, 3089          | K.FLPSLRDEH                          | 1243.35032 | 2 | 2.33E-05 | 0.68 | 2.64 | - | 371.1  |
| AHQ-7-4, 2833          | K.FLPSLRDEH                          | 1243.35032 | 2 | 9.73E-06 | 0.54 | 2.57 | - | 332.0  |
| AHQ-7-5, 2843          | K.FLPSLRDEH                          | 1243.35032 | 2 | 1.17E-04 | 0.39 | 2.71 | - | 211.3  |
| AHQ-7-4, 5152          | K.GLAGAVSELLR.S                      | 1086.26701 | 2 | 2.27E-05 | 0.97 | 4.49 | - | 2043.5 |
| AHQ-7-2, 4636          | K.GLAGAVSELLR.S                      | 1086.26701 | 2 | 1.32E-07 | 0.97 | 4.24 | - | 2042.8 |
| AHQ-7-2, 5183          | K.GLAGAVSELLR.S                      | 1086.26701 | 2 | 1.73E-05 | 0.97 | 4.34 | - | 1965.2 |
| AHQ-7-3, 5107          | K.GLAGAVSELLR.S                      | 1086.26701 | 2 | 2.55E-06 | 0.98 | 4.87 | - | 1999.5 |
| AHQ-7-1, 5127 - 5129   | K.GLAGAVSELLR.S                      | 1086.26701 | 2 | 7.78E-07 | 0.98 | 4.73 | - | 2265.7 |
| AHQ-7-5, 5118          | K.GLAGAVSELLR.S                      | 1086.26701 | 2 | 9.28E-07 | 0.97 | 4.98 | - | 1951.0 |
| AHQ-7-6, 5045 - 5047   | K.GLAGAVSELLR.S                      | 1086.26701 | 2 | 5.09E-06 | 0.98 | 5.03 | - | 2058.0 |
| AHQ-7-3, 6236 - 6303   | R.GSQAQPDSPSAQLALIAASQSFLOPGGK.M     | 2756.02103 | 3 | 2.37E-08 | 0.93 | 4.65 | - | 1169.8 |
| AHQ-7-7, 6342 - 6344   | R.GSQAQPDSPSAQLALIAASQSFLOPGGK.M     | 2756.02103 | 2 | 6.56E-05 | 0.88 | 4.39 | - | 540.8  |
| AHQ-7-2, 6239          | R.GSQAQPDSPSAQLALIAASQSFLOPGGK.M     | 2756.02103 | 2 | 2.67E-06 | 0.87 | 4.43 | - | 543.0  |
| AHQ-7-2, 6243 - 6319   | R.GSQAQPDSPSAQLALIAASQSFLOPGGK.M     | 2756.02103 | 3 | 2.32E-10 | 0.97 | 6.15 | - | 1628.4 |
| AHQ-7-6, 6302          | R.GSQAQPDSPSAQLALIAASQSFLOPGGK.M     | 2756.02103 | 3 | 3.72E-06 | 0.92 | 4.61 | - | 592.5  |
| AHQ-7-2, 6396 - 6459   | R.GSQAQPDSPSAQLALIAASQSFLOPGGK.M     | 2756.02103 | 3 | 5.31E-06 | 0.95 | 5.25 | - | 1358.4 |
| AHQ-7-2, 6479 - 6535   | R.GSQAQPDSPSAQLALIAASQSFLOPGGK.M     | 2756.02103 | 3 | 6.61E-05 | 0.87 | 4.37 | - | 749.9  |
| AHQ-7-4, 6252          | R.GSQAQPDSPSAQLALIAASQSFLOPGGK.M     | 2756.02103 | 3 | 1.87E-06 | 0.95 | 5.08 | - | 1407.1 |
| AHQ-7-3, 6359          | R.GSQAQPDSPSAQLALIAASQSFLOPGGK.M     | 2756.02103 | 3 | 5.32E-05 | 0.57 | 3.05 | - | 480.6  |
| AHQ-7-3, 6307 - 6319   | R.GSQAQPDSPSAQLALIAASQSFLOPGGK.M     | 2756.02103 | 2 | 3.22E-05 | 0.92 | 4.81 | - | 806.6  |
| AHQ-7-5, 6336 - 6398   | R.GSQAQPDSPSAQLALIAASQSFLOPGGK.M     | 2756.02103 | 3 | 7.20E-07 | 0.92 | 4.51 | - | 1043.6 |
| AHQ-7-5, 6399          | R.GSQAQPDSPSAQLALIAASQSFLOPGGK.M     | 2756.02103 | 2 | 2.60E-04 | 0.91 | 4.41 | - | 704.4  |
| AHQ-7-1, 6223 - 6279   | R.GSQAQPDSPSAQLALIAASQSFLOPGGK.M     | 2756.02103 | 3 | 4.45E-04 | 0.83 | 3.68 | - | 895.1  |
| AHQ-7-5, 6890          | K.GTEWVDPEDPTVIAENELGAAAIEAAAK.K     | 3053.32301 | 3 | 1.30E-07 | 0.97 | 6.22 | - | 1371.2 |
| AHQ-7-9, 6216          | K.GTEWVDPEDPTVIAENELGAAAIEAAAK.K     | 3053.32301 | 3 | 1.93E-08 | 0.92 | 5.24 | - | 970.4  |
| AHQ-7-3, 6763          | K.GTEWVDPEDPTVIAENELGAAAIEAAAK.K     | 3053.32301 | 3 | 5.58E-09 | 0.94 | 5.13 | - | 1471.0 |
| AHQ-7-7, 6888          | K.GTEWVDPEDPTVIAENELGAAAIEAAAK.K     | 3053.32301 | 3 | 5.89E-07 | 0.89 | 4.82 | - | 1092.7 |
| AHQ-7-6, 6785          | K.GTEWVDPEDPTVIAENELGAAAIEAAAK.K     | 3053.32301 | 3 | 1.26E-10 | 0.96 | 6.37 | - | 1203.8 |
| AHQ-7-1, 6631 - 6635   | K.GTEWVDPEDPTVIAENELGAAAIEAAAK.K     | 3053.32301 | 3 | 3.11E-07 | 0.89 | 4.29 | - | 1130.4 |
| AHQ-7-2, 6927 - 6947   | K.GTEWVDPEDPTVIAENELGAAAIEAAAK.K     | 3053.32301 | 3 | 1.02E-12 | 0.95 | 5.20 | - | 1547.1 |
| AHQ-7-2, 6713 - 6784   | R.GVAALTSDDPAVQAI*LD*ASDVL*DK.A      | 2470.75835 | 2 | 2.28E-04 | 0.74 | 2.52 | - | 721.7  |
| AHQ-7-5, 6782          | R.GVAALTSDDPAVQAI*LD*ASDVL*DK.A      | 2470.75835 | 3 | 1.85E-09 | 0.99 | 7.96 | - | 3069.5 |
| AHQ-7-5, 6783          | R.GVAALTSDDPAVQAI*LD*ASDVL*DK.A      | 2470.75835 | 2 | 6.28E-08 | 0.85 | 3.77 | - | 581.1  |
| AHQ-7-1, 6539          | R.GVAALTSDDPAVQAI*LD*ASDVL*DK.A      | 2470.75835 | 3 | 2.11E-07 | 0.97 | 4.85 | - | 2631.1 |
| AHQ-7-4, 6877 - 6878   | R.GVAALTSDDPAVQAI*LD*ASDVL*DK.A      | 2470.75835 | 3 | 4.96E-07 | 0.98 | 6.55 | - | 3243.1 |
| AHQ-7-1, 6540          | R.GVAALTSDDPAVQAI*LD*ASDVL*DK.A      | 2470.75835 | 2 | 2.58E-07 | 0.91 | 4.08 | - | 721.5  |
| AHQ-7-6, 6682 - 6683   | R.GVAALTSDDPAVQAI*LD*ASDVL*DK.A      | 2470.75835 | 3 | 3.28E-07 | 0.98 | 7.19 | - | 2015.7 |
| AHQ-7-2, 6841          | R.GVAALTSDDPAVQAI*LD*ASDVL*DK.A      | 2470.75835 | 3 | 1.03E-05 | 0.98 | 7.01 | - | 2670.6 |
| AHQ-7-2, 6895          | R.GVGAATAVTQALNELLQHV.K              | 2092.38495 | 3 | 4.60E-07 | 0.94 | 5.11 | - | 975.9  |
| AHQ-7-9, 6160          | R.GVGAATAVTQALNELLQHV.K              | 2092.38495 | 2 | 1.44E-06 | 0.95 | 5.31 | - | 821.8  |
| AHQ-7-3, 6719          | R.GVGAATAVTQALNELLQHV.K              | 2092.38495 | 3 | 6.71E-08 | 0.95 | 4.96 | - | 1319.6 |
| AHQ-7-1, 6599          | R.GVGAATAVTQALNELLQHV.K              | 2092.38495 | 2 | 5.33E-04 | 0.88 | 4.47 | - | 693.1  |
| AHQ-7-9, 6161          | R.GVGAATAVTQALNELLQHV.K              | 2092.38495 | 3 | 1.07E-07 | 0.94 | 4.86 | - | 947.9  |
| AHQ-7-1, 6595 - 6596   | R.GVGAATAVTQALNELLQHV.K              | 2092.38495 | 3 | 1.63E-08 | 0.92 | 4.62 | - | 964.5  |
| AHQ-7-2, 6896          | R.GVGAATAVTQALNELLQHV.K              | 2092.38495 | 2 | 1.16E-04 | 0.94 | 5.21 | - | 619.7  |
| AHQ-7-2, 5753          | R.GVGAATAVTQALNELLQHV.K              | 2092.38495 | 3 | 1.51E-05 | 0.90 | 3.90 | - | 1169.4 |
| AHQ-7-5, 6842          | R.GVGAATAVTQALNELLQHV.K              | 2092.38495 | 2 | 2.63E-04 | 0.96 | 5.14 | - | 1169.1 |
| AHQ-7-2, 5756          | R.GVGAATAVTQALNELLQHV.K              | 2092.38495 | 2 | 4.33E-05 | 0.88 | 4.74 | - | 466.7  |
| AHQ-7-6, 6738          | R.GVGAATAVTQALNELLQHV.K              | 2092.38495 | 3 | 7.31E-08 | 0.86 | 4.07 | - | 736.5  |
| AHQ-7-4, 6934          | R.GVGAATAVTQALNELLQHV.K              | 2092.38495 | 2 | 6.88E-09 | 0.95 | 5.37 | - | 991.4  |
| AHQ-7-6, 6739          | R.GVGAATAVTQALNELLQHV.K              | 2092.38495 | 2 | 3.24E-05 | 0.92 | 5.11 | - | 596.4  |
| AHQ-7-5, 6838 - 6844   | R.GVGAATAVTQALNELLQHV.K              | 2092.38495 | 3 | 2.51E-07 | 0.93 | 4.79 | - | 953.7  |
| AHQ-7-4, 6932 - 6933   | R.GVGAATAVTQALNELLQHV.K              | 2092.38495 | 3 | 1.13E-07 | 0.94 | 5.01 | - | 1083.4 |
| AHQ-7-3, 6721          | R.GVGAATAVTQALNELLQHV.K              | 2092.38495 | 2 | 1.87E-04 | 0.94 | 5.24 | - | 767.6  |
| AHQ-7-4, 5745          | R.GVGAATAVTQALNELLQHV.K              | 2092.38495 | 3 | 4.37E-05 | 0.86 | 3.98 | - | 772.6  |
| AHQ-7-8, 6854          | R.GVGAATAVTQALNELLQHV.K              | 2092.38495 | 2 | 5.48E-07 | 0.93 | 4.93 | - | 820.3  |
| AHQ-7-7, 6836 - 6838   | R.GVGAATAVTQALNELLQHV.K              | 2092.38495 | 3 | 1.10E-07 | 0.96 | 4.92 | - | 1447.1 |
| AHQ-7-7, 6837 - 6885   | R.GVGAATAVTQALNELLQHV.K              | 2092.38495 | 2 | 1.10E-04 | 0.91 | 4.72 | - | 646.1  |
| AHQ-7-4, 5746          | R.GVGAATAVTQALNELLQHV.K              | 2092.38495 | 2 | 1.90E-06 | 0.93 | 4.77 | - | 832.2  |
| AHQ-7-7, 2845          | K.IFQAHKNCQMSEIEAK.V                 | 1993.25380 | 2 | 1.13E-04 | 0.73 | 3.73 | - | 720.1  |
| AHQ-7-9, 3077          | R.IGITNHDEYSLVR.E                    | 1517.66833 | 2 | 9.72E-08 | 0.86 | 2.87 | - | 1036.1 |
| AHQ-7-13-, 3391        | R.IGITNHDEYSLVR.E                    | 1517.66833 | 3 | 1.47E-09 | 0.88 | 4.10 | - | 690.7  |
| AHQ-7-10, 3193 - 3273  | R.IGITNHDEYSLVR.E                    | 1517.66833 | 2 | 3.46E-06 | 0.79 | 3.40 | - | 540.6  |
| AHQ-7-13-, 3651        | R.IGITNHDEYSLVR.E                    | 1517.66833 | 2 | 7.89E-09 | 0.79 | 2.87 | - | 740.6  |
| AHQ-7-13-, 3655        | R.IGITNHDEYSLVR.E                    | 1517.66833 | 3 | 3.19E-07 | 0.72 | 3.24 | - | 641.1  |
| AHQ-7-13, 3537 - 3599  | R.IGITNHDEYSLVR.E                    | 1517.66833 | 2 | 2.74E-05 | 0.82 | 2.78 | - | 1071.3 |
| AHQ-7-11, 3258         | R.IGITNHDEYSLVR.E                    | 1517.66833 | 2 | 4.31E-10 | 0.91 | 3.34 | - | 1060.6 |
| AHQ-7-7, 3225          | R.IGITNHDEYSLVR.E                    | 1517.66833 | 2 | 1.39E-07 | 0.94 | 3.81 | - | 1190.1 |
| AHQ-7-7, 3469 - 3529   | R.IGITNHDEYSLVR.E                    | 1517.66833 | 2 | 2.91E-06 | 0.83 | 3.10 | - | 1014.1 |
| AHQ-7-7, 3576 - 3641   | R.IGITNHDEYSLVR.E                    | 1517.66833 | 2 | 4.02E-04 | 0.78 | 2.84 | - | 663.9  |
| AHQ-7-13-, 3387        | R.IGITNHDEYSLVR.E                    | 1517.66833 | 2 | 1.68E-09 | 0.97 | 4.51 | - | 1697.4 |
| AHQ-7-2, 4648          | R.ILAAQATSDLVNAIK.A                  | 1457.69748 | 2 | 8.16E-05 | 0.98 | 4.99 | - | 2058.3 |
| AHQ-7-5, 4996 - 5006   | R.ILAAQATSDLVNAIK.A                  | 1457.69748 | 2 | 5.10E-09 | 0.98 | 5.37 | - | 1869.5 |
| AHQ-7-4, 5040          | R.ILAAQATSDLVNAIK.A                  | 1457.69748 | 2 | 1.32E-04 | 0.95 | 3.96 | - | 1402.9 |
| AHQ-7-3, 4139 - 4144   | R.ILAAQATSDLVNAIK.A                  | 1457.69748 | 2 | 3.16E-09 | 0.98 | 4.88 | - | 2903.0 |
| AHQ-7-7, 4840          | R.ILAAQATSDLVNAIK.A                  | 1457.69748 | 2 | 9.68E-05 | 0.94 | 3.92 | - | 1267.3 |
| AHQ-7-3, 4975          | R.ILAAQATSDLVNAIK.A                  | 1457.69748 | 2 | 3.83E-05 | 0.97 | 4.17 | - | 1859.8 |
| AHQ-7-5, 4118          | R.ILAAQATSDLVNAIK.A                  | 1457.69748 | 2 | 3.39E-06 | 0.96 | 4.09 | - | 1492.1 |
| AHQ-7-1, 4989 - 4991   | R.ILAAQATSDLVNAIK.A                  | 1457.69748 | 2 | 2.81E-07 | 0.98 | 5.68 | - | 2063.6 |

|                        |                            |            |   |          |      |      |   |        |
|------------------------|----------------------------|------------|---|----------|------|------|---|--------|
| AHQ-7-2, 4212          | R.ILAQATSDLVNAIK.A         | 1457.69748 | 2 | 1.51E-05 | 0.97 | 4.65 | - | 2001.6 |
| AHQ-7-4, 4172          | R.ILAQATSDLVNAIK.A         | 1457.69748 | 2 | 1.85E-08 | 0.96 | 4.04 | - | 1390.9 |
| AHQ-7-2, 4448          | R.ILAQATSDLVNAIK.A         | 1457.69748 | 2 | 7.09E-09 | 0.97 | 4.13 | - | 1903.0 |
| AHQ-7-6, 4929          | R.ILAQATSDLVNAIK.A         | 1457.69748 | 2 | 8.08E-08 | 0.98 | 4.67 | - | 1875.3 |
| AHQ-7-6, 4057          | R.ILAQATSDLVNAIK.A         | 1457.69748 | 2 | 9.62E-07 | 0.96 | 4.04 | - | 1652.0 |
| AHQ-7-1, 4224          | R.ILAQATSDLVNAIK.A         | 1457.69748 | 2 | 7.00E-09 | 0.97 | 4.30 | - | 1697.4 |
| AHQ-7-8, 4055          | R.ILAQATSDLVNAIK.A         | 1457.69748 | 2 | 3.28E-05 | 0.85 | 3.15 | - | 787.2  |
| AHQ-7-13-, 5525 - 5603 | R.IPEAPAGPPSDFGLFLSDDDPK.K | 2286.47890 | 2 | 3.04E-06 | 0.95 | 5.09 | - | 885.8  |
| AHQ-7-8, 5790 - 5794   | R.IPEAPAGPPSDFGLFLSDDDPK.K | 2286.47890 | 2 | 9.45E-04 | 0.97 | 5.08 | - | 1452.3 |
| AHQ-7-13, 5635         | R.IPEAPAGPPSDFGLFLSDDDPK.K | 2286.47890 | 2 | 8.52E-06 | 0.94 | 4.50 | - | 842.5  |
| AHQ-7-13-, 5176 - 5249 | R.IPEAPAGPPSDFGLFLSDDDPK.K | 2414.65181 | 3 | 3.65E-12 | 0.97 | 5.20 | - | 1681.0 |
| AHQ-7-9, 4916 - 4922   | R.IPEAPAGPPSDFGLFLSDDDPK.K | 2414.65181 | 3 | 2.98E-05 | 0.89 | 3.57 | - | 1315.8 |
| AHQ-7-10, 4975 - 5011  | R.IPEAPAGPPSDFGLFLSDDDPK.K | 2414.65181 | 3 | 1.32E-08 | 0.91 | 4.24 | - | 1237.6 |
| AHQ-7-7, 5313 - 5337   | R.IPEAPAGPPSDFGLFLSDDDPK.K | 2414.65181 | 2 | 1.36E-04 | 0.79 | 3.34 | - | 642.3  |
| AHQ-7-13, 5278 - 5293  | R.IPEAPAGPPSDFGLFLSDDDPK.K | 2414.65181 | 3 | 2.03E-11 | 0.95 | 4.60 | - | 1619.5 |
| AHQ-7-8, 5264          | R.IPEAPAGPPSDFGLFLSDDDPK.K | 2414.65181 | 3 | 9.22E-04 | 0.92 | 4.10 | - | 1214.6 |
| AHQ-7-11, 5078 - 5136  | R.IPEAPAGPPSDFGLFLSDDDPK.K | 2414.65181 | 3 | 3.06E-07 | 0.73 | 3.32 | - | 603.8  |
| AHQ-7-7, 5296 - 5368   | R.IPEAPAGPPSDFGLFLSDDDPK.K | 2414.65181 | 3 | 5.62E-12 | 0.96 | 4.70 | - | 1667.6 |
| AHQ-7-8, 5272          | R.IPEAPAGPPSDFGLFLSDDDPK.K | 2414.65181 | 2 | 1.61E-06 | 0.89 | 3.66 | - | 837.1  |
| AHQ-7-1, 5437          | R.IPEAPAGPPSDFGLFLSDDDPK.K | 2414.65181 | 3 | 8.97E-07 | 0.93 | 4.58 | - | 1168.6 |
| AHQ-7-7, 1796 - 1860   | K.KEEITGLR.K               | 1047.18765 | 2 | 8.30E-04 | 0.53 | 2.57 | - | 466.1  |
| AHQ-7-7, 2624          | R.KFFYSQDNVDSR.D           | 1506.60087 | 2 | 4.66E-04 | 0.93 | 3.59 | - | 1153.7 |
| AHQ-7-7, 2492          | K.KGIWLEAGK.A              | 1002.19171 | 2 | 1.74E-04 | 0.88 | 3.12 | - | 847.7  |
| AHQ-7-13-, 2792        | K.LAQAAQSSVATITR.L         | 1417.59344 | 2 | 6.95E-06 | 0.91 | 3.23 | - | 1193.2 |
| AHQ-7-4, 2753 - 2820   | K.LAQAAQSSVATITR.L         | 1417.59344 | 2 | 1.42E-07 | 0.96 | 4.47 | - | 1506.8 |
| AHQ-7-4, 2770          | K.LAQAAQSSVATITR.L         | 1417.59344 | 1 | 9.97E-04 | 0.42 | 2.90 | - | 163.2  |
| AHQ-7-7, 2517 - 2562   | K.LAQAAQSSVATITR.L         | 1417.59344 | 2 | 7.79E-06 | 0.79 | 2.67 | - | 805.2  |
| AHQ-7-6, 2569 - 2578   | K.LAQAAQSSVATITR.L         | 1417.59344 | 2 | 6.40E-08 | 0.96 | 4.66 | - | 1297.9 |
| AHQ-7-10, 2652         | K.LAQAAQSSVATITR.L         | 1417.59344 | 2 | 7.50E-04 | 0.80 | 3.16 | - | 776.1  |
| AHQ-7-6, 2719 - 2725   | K.LAQAAQSSVATITR.L         | 1417.59344 | 2 | 1.40E-04 | 0.96 | 4.38 | - | 1415.6 |
| AHQ-7-4, 2601 - 2612   | K.LAQAAQSSVATITR.L         | 1417.59344 | 2 | 7.65E-10 | 0.97 | 4.96 | - | 1689.1 |
| AHQ-7-11, 2699         | K.LAQAAQSSVATITR.L         | 1417.59344 | 2 | 1.92E-08 | 0.95 | 4.04 | - | 1311.2 |
| AHQ-7-2, 2816          | K.LAQAAQSSVATITR.L         | 1417.59344 | 2 | 4.33E-05 | 0.95 | 3.77 | - | 1512.0 |
| AHQ-7-5, 2595          | K.LAQAAQSSVATITR.L         | 1417.59344 | 2 | 6.47E-08 | 0.97 | 4.06 | - | 1707.8 |
| AHQ-7-1, 2984          | K.LAQAAQSSVATITR.L         | 1417.59344 | 2 | 7.44E-05 | 0.91 | 2.94 | - | 1361.8 |
| AHQ-7-3, 2625          | K.LAQAAQSSVATITR.L         | 1417.59344 | 2 | 5.61E-06 | 0.97 | 3.56 | - | 2246.3 |
| AHQ-7-2, 2651          | K.LAQAAQSSVATITR.L         | 1417.59344 | 2 | 4.97E-08 | 0.93 | 3.70 | - | 1201.2 |
| AHQ-7-3, 2797          | K.LAQAAQSSVATITR.L         | 1417.59344 | 2 | 1.28E-09 | 0.96 | 4.23 | - | 1734.0 |
| AHQ-7-5, 2746          | K.LAQAAQSSVATITR.L         | 1417.59344 | 2 | 2.60E-10 | 0.97 | 4.44 | - | 1689.7 |
| AHQ-7-14-, 2793        | K.LAQAAQSSVATITR.L         | 1417.59344 | 2 | 3.24E-07 | 0.92 | 2.58 | - | 1774.4 |
| AHQ-7-3, 3320 - 3323   | R.LASEAKPAVAANEIEIGSHIK.H  | 2236.46779 | 3 | 9.70E-06 | 0.96 | 5.37 | - | 1962.4 |
| AHQ-7-5, 3011          | R.LASEAKPAVAANEIEIGSHIK.H  | 2236.46779 | 3 | 2.64E-09 | 0.95 | 5.16 | - | 1217.4 |
| AHQ-7-2, 3375          | R.LASEAKPAVAANEIEIGSHIK.H  | 2236.46779 | 2 | 1.67E-09 | 0.94 | 4.83 | - | 811.3  |
| AHQ-7-1, 3440 - 3499   | R.LASEAKPAVAANEIEIGSHIK.H  | 2236.46779 | 3 | 8.78E-06 | 0.95 | 5.35 | - | 1612.2 |
| AHQ-7-5, 3271          | R.LASEAKPAVAANEIEIGSHIK.H  | 2236.46779 | 2 | 1.16E-07 | 0.92 | 4.80 | - | 512.3  |
| AHQ-7-4, 3288          | R.LASEAKPAVAANEIEIGSHIK.H  | 2236.46779 | 3 | 1.73E-05 | 0.96 | 5.53 | - | 1674.8 |
| AHQ-7-4, 3290 - 3300   | R.LASEAKPAVAANEIEIGSHIK.H  | 2236.46779 | 2 | 4.70E-09 | 0.95 | 5.26 | - | 716.8  |
| AHQ-7-2, 3329 - 3396   | R.LASEAKPAVAANEIEIGSHIK.H  | 2236.46779 | 3 | 2.66E-08 | 0.97 | 5.95 | - | 1937.4 |
| AHQ-7-3, 3281 - 3344   | R.LASEAKPAVAANEIEIGSHIK.H  | 2236.46779 | 2 | 4.05E-07 | 0.96 | 5.48 | - | 752.1  |
| AHQ-7-2, 5503          | K.LGAASLGAEDPETQWVLINAVK.D | 2196.48671 | 2 | 3.32E-05 | 0.96 | 5.30 | - | 970.7  |
| AHQ-7-2, 5413 - 5479   | K.LGAASLGAEDPETQWVLINAVK.D | 2196.48671 | 2 | 1.29E-06 | 0.96 | 5.24 | - | 1187.5 |
| AHQ-7-2, 5296 - 5313   | K.LGAASLGAEDPETQWVLINAVK.D | 2196.48671 | 2 | 5.46E-06 | 0.93 | 4.54 | - | 809.0  |
| AHQ-7-2, 5201 - 5231   | K.LGAASLGAEDPETQWVLINAVK.D | 2196.48671 | 2 | 1.49E-07 | 0.93 | 4.42 | - | 881.3  |
| AHQ-7-9, 4812          | K.LGAASLGAEDPETQWVLINAVK.D | 2196.48671 | 2 | 1.80E-05 | 0.49 | 2.51 | - | 393.6  |
| AHQ-7-5, 5354 - 5355   | K.LGAASLGAEDPETQWVLINAVK.D | 2196.48671 | 2 | 1.94E-07 | 0.98 | 6.49 | - | 1194.1 |
| AHQ-7-3, 5093 - 5155   | K.LGAASLGAEDPETQWVLINAVK.D | 2196.48671 | 2 | 2.13E-08 | 0.96 | 4.81 | - | 1280.5 |
| AHQ-7-6, 5051 - 5109   | K.LGAASLGAEDPETQWVLINAVK.D | 2196.48671 | 2 | 4.66E-07 | 0.90 | 4.38 | - | 635.1  |
| AHQ-7-5, 5362 - 5364   | K.LGAASLGAEDPETQWVLINAVK.D | 2196.48671 | 3 | 3.75E-09 | 0.98 | 5.81 | - | 3133.0 |
| AHQ-7-11, 4804         | K.LGAASLGAEDPETQWVLINAVK.D | 2196.48671 | 2 | 9.97E-06 | 0.76 | 3.41 | - | 452.5  |
| AHQ-7-3, 5471 - 5472   | K.LGAASLGAEDPETQWVLINAVK.D | 2196.48671 | 2 | 1.40E-11 | 0.94 | 4.50 | - | 1168.6 |
| AHQ-7-5, 5158 - 5162   | K.LGAASLGAEDPETQWVLINAVK.D | 2196.48671 | 2 | 9.87E-07 | 0.92 | 4.20 | - | 862.4  |
| AHQ-7-3, 5331 - 5335   | K.LGAASLGAEDPETQWVLINAVK.D | 2196.48671 | 2 | 4.45E-05 | 0.98 | 6.06 | - | 1408.2 |
| AHQ-7-5, 5522          | K.LGAASLGAEDPETQWVLINAVK.D | 2196.48671 | 2 | 6.91E-10 | 0.93 | 4.43 | - | 925.5  |
| AHQ-7-4, 5597 - 5613   | K.LGAASLGAEDPETQWVLINAVK.D | 2196.48671 | 2 | 1.45E-09 | 0.96 | 5.63 | - | 752.1  |
| AHQ-7-1, 5124          | K.LGAASLGAEDPETQWVLINAVK.D | 2196.48671 | 2 | 7.33E-07 | 0.94 | 4.53 | - | 921.8  |
| AHQ-7-6, 5223 - 5302   | K.LGAASLGAEDPETQWVLINAVK.D | 2196.48671 | 2 | 5.61E-12 | 0.97 | 5.91 | - | 1142.7 |
| AHQ-7-7, 5370 - 5405   | K.LGAASLGAEDPETQWVLINAVK.D | 2196.48671 | 2 | 1.05E-04 | 0.54 | 2.52 | - | 511.6  |
| AHQ-7-11, 4991         | K.LGAASLGAEDPETQWVLINAVK.D | 2196.48671 | 2 | 5.57E-04 | 0.88 | 3.82 | - | 645.8  |
| AHQ-7-4, 5233 - 5298   | K.LGAASLGAEDPETQWVLINAVK.D | 2196.48671 | 2 | 9.70E-07 | 0.95 | 4.62 | - | 1238.1 |
| AHQ-7-1, 5433 - 5439   | K.LGAASLGAEDPETQWVLINAVK.D | 2196.48671 | 2 | 3.47E-11 | 0.96 | 5.22 | - | 1094.8 |
| AHQ-7-6, 5437 - 5439   | K.LGAASLGAEDPETQWVLINAVK.D | 2196.48671 | 2 | 1.31E-10 | 0.96 | 5.03 | - | 971.8  |
| AHQ-7-2, 5591 - 5607   | K.LGAASLGAEDPETQWVLINAVK.D | 2196.48671 | 2 | 9.11E-12 | 0.97 | 5.56 | - | 1392.3 |
| AHQ-7-4, 5448 - 5460   | K.LGAASLGAEDPETQWVLINAVK.D | 2196.48671 | 3 | 8.07E-07 | 0.98 | 6.40 | - | 2523.8 |
| AHQ-7-4, 5445          | K.LGAASLGAEDPETQWVLINAVK.D | 2196.48671 | 2 | 2.37E-04 | 0.95 | 4.81 | - | 1034.9 |
| AHQ-7-7, 5022          | K.LGAASLGAEDPETQWVLINAVK.D | 2196.48671 | 2 | 4.26E-06 | 0.95 | 4.90 | - | 1121.7 |
| AHQ-7-10, 4880         | K.LGAASLGAEDPETQWVLINAVK.D | 2196.48671 | 2 | 5.83E-06 | 0.82 | 3.40 | - | 690.6  |
| AHQ-7-7, 3704          | K.LHTDDELNLWDHGR.T         | 1721.81153 | 3 | 1.19E-06 | 0.94 | 4.86 | - | 951.1  |
| AHQ-7-9, 3417 - 3485   | K.LHTDDELNLWDHGR.T         | 1721.81153 | 2 | 6.12E-05 | 0.96 | 4.12 | - | 1725.6 |
| AHQ-7-10, 3601         | K.LHTDDELNLWDHGR.T         | 1721.81153 | 2 | 7.52E-05 | 0.81 | 3.22 | - | 619.2  |
| AHQ-7-8, 3603          | K.LHTDDELNLWDHGR.T         | 1721.81153 | 3 | 8.72E-06 | 0.94 | 4.52 | - | 1353.7 |
| AHQ-7-8, 3595          | K.LHTDDELNLWDHGR.T         | 1721.81153 | 2 | 5.90E-07 | 0.97 | 4.76 | - | 1680.0 |
| AHQ-7-2, 4456          | K.LLAALLEDEGGSGR.P         | 1401.54764 | 2 | 3.01E-11 | 0.97 | 4.31 | - | 1834.3 |
| AHQ-7-4, 4352 - 4373   | K.LLAALLEDEGGSGR.P         | 1401.54764 | 2 | 2.07E-06 | 0.92 | 3.01 | - | 1459.2 |
| AHQ-7-8, 5040          | K.LLAALLEDEGGSGRPLLQAAK.G  | 2123.43896 | 3 | 2.35E-07 | 0.93 | 5.23 | - | 960.0  |
| AHQ-7-8, 5034          | K.LLAALLEDEGGSGRPLLQAAK.G  | 2123.43896 | 2 | 5.66E-11 | 0.98 | 6.73 | - | 1463.2 |
| AHQ-7-3, 5215          | K.LLAALLEDEGGSGRPLLQAAK.G  | 2123.43896 | 2 | 1.19E-04 | 0.97 | 5.77 | - | 1223.2 |
| AHQ-7-6, 5158          | K.LLAALLEDEGGSGRPLLQAAK.G  | 2123.43896 | 3 | 3.38E-08 | 0.95 | 4.90 | - | 1446.9 |
| AHQ-7-6, 5162          | K.LLAALLEDEGGSGRPLLQAAK.G  | 2123.43896 | 2 | 4.80E-06 | 0.98 | 6.63 | - | 1747.4 |
| AHQ-7-3, 5216 - 5217   | K.LLAALLEDEGGSGRPLLQAAK.G  | 2123.43896 | 3 | 4.20E-09 | 0.97 | 5.86 | - | 1718.1 |
| AHQ-7-10, 4755         | K.LLAALLEDEGGSGRPLLQAAK.G  | 2123.43896 | 2 | 5.36E-08 | 0.93 | 4.61 | - | 812.1  |
| AHQ-7-2, 5297 - 5300   | K.LLAALLEDEGGSGRPLLQAAK.G  | 2123.43896 | 2 | 4.67E-08 | 0.98 | 6.86 | - | 1864.2 |
| AHQ-7-5, 5238 - 5243   | K.LLAALLEDEGGSGRPLLQAAK.G  | 2123.43896 | 2 | 1.38E-09 | 0.98 | 6.60 | - | 2031.0 |
| AHQ-7-1, 5247          | K.LLAALLEDEGGSGRPLLQAAK.G  | 2123.43896 | 2 | 2.29E-10 | 0.96 | 6.02 | - | 969.0  |
| AHQ-7-4, 5286 - 5348   | K.LLAALLEDEGGSGRPLLQAAK.G  | 2123.43896 | 3 | 1.36E-05 | 0.95 | 5.12 | - | 1349.0 |
| AHQ-7-1, 5243          | K.LLAALLEDEGGSGRPLLQAAK.G  | 2123.43896 | 3 | 8.91E-10 | 0.96 | 5.21 | - | 1662.1 |
| AHQ-7-11, 4879         | K.LLAALLEDEGGSGRPLLQAAK.G  | 2123.43896 | 2 | 2.51E-07 | 0.96 | 5.88 | - | 807.1  |
| AHQ-7-12, 4880         | K.LLAALLEDEGGSGRPLLQAAK.G  | 2123.43896 | 2 | 1.49E-04 | 0.95 | 4.94 | - | 1067.1 |
| AHQ-7-5, 5235 - 5236   | K.LLAALLEDEGGSGRPLLQAAK.G  | 2123.43896 | 3 | 5.18E-08 | 0.98 | 6.14 | - | 1849.1 |
| AHQ-7-4, 5292          | K.LLAALLEDEGGSGRPLLQAAK.G  | 2123.43896 | 2 | 2.49E-11 | 0.98 | 6.27 | - | 1758.9 |
| AHQ-7-2, 5295 - 5365   | K.LLAALLEDEGGSGRPLLQAAK.G  | 2123.43896 | 3 | 5.44E-08 | 0.96 | 5.35 | - | 1601.8 |
| AHQ-7-7, 5032          | K.LLAALLEDEGGSGRPLLQAAK.G  | 2123.43896 | 3 | 2.18E-05 | 0.95 | 4.64 | - | 1451.9 |
| AHQ-7-10, 4752         | K.LLAALLEDEGGSGRPLLQAAK.G  | 2123.43896 | 3 | 4.40E-07 | 0.74 | 3.27 | - | 583.7  |
| AHQ-7-7, 5028          | K.LLAALLEDEGGSGRPLLQAAK.G  | 2123.43896 | 2 | 1.40E-08 | 0.98 | 6.50 | - | 1660.7 |
| AHQ-7-9, 4689          | K.LLAALLEDEGGSGRPLLQAAK.G  | 2123.43896 | 2 | 1.80E-05 | 0.88 | 4.11 | - | 795.4  |
| AHQ-7-5, 4202          | R.LLSDSLPPSTGTQFEAQSR.L    | 2035.20076 | 2 | 3.74E-06 | 0.52 | 3.02 | - | 223.1  |
| AHQ-7-2, 4133 - 4207   | R.LLSDSLPPSTGTQFEAQSR.L    | 2035.20076 | 2 | 2.66E-06 | 0.82 | 3.55 | - | 429.9  |
| AHQ-7-4, 4196 - 4264   | R.LLSDSLPPSTGTQFEAQSR.L    | 2035.20076 | 2 | 1.74E-05 | 0.75 | 3.35 | - | 396.5  |

|                        |                                            |            |   |          |      |      |   |        |
|------------------------|--------------------------------------------|------------|---|----------|------|------|---|--------|
| AHQ-7-2, 4268 - 4337   | R.LLSDSLPPSTGTGFQEAQSR.L                   | 2035.20076 | 2 | 4.92E-04 | 0.85 | 3.98 | - | 304.4  |
| AHQ-7-1, 4195 - 4213   | R.LLSDSLPPSTGTGFQEAQSR.L                   | 2035.20076 | 2 | 7.58E-08 | 0.42 | 3.05 | - | 125.7  |
| AHQ-7-5, 4072 - 4135   | R.LLSDSLPPSTGTGFQEAQSR.L                   | 2035.20076 | 2 | 5.30E-08 | 0.59 | 3.33 | - | 289.8  |
| AHQ-7-3, 4143 - 4207   | R.LLSDSLPPSTGTGFQEAQSR.L                   | 2035.20076 | 2 | 6.71E-06 | 0.83 | 3.84 | - | 294.6  |
| AHQ-7-11, 5072         | R.LNEAAAGLNQAATELVQASR.G                   | 2028.21299 | 2 | 1.22E-09 | 0.94 | 4.23 | - | 1271.4 |
| AHQ-7-3, 4363          | R.LNEAAAGLNQAATELVQASR.G                   | 2028.21299 | 2 | 2.02E-11 | 0.95 | 4.78 | - | 982.9  |
| AHQ-7-3, 5428 - 5504   | R.LNEAAAGLNQAATELVQASR.G                   | 2028.21299 | 2 | 3.50E-10 | 0.98 | 5.68 | - | 1967.7 |
| AHQ-7-7, 5360          | R.LNEAAAGLNQAATELVQASR.G                   | 2028.21299 | 2 | 3.97E-12 | 0.98 | 5.42 | - | 2157.5 |
| AHQ-7-4, 5846          | R.LNEAAAGLNQAATELVQASR.G                   | 2028.21299 | 2 | 5.30E-09 | 0.84 | 3.42 | - | 697.8  |
| AHQ-7-10, 4977         | R.LNEAAAGLNQAATELVQASR.G                   | 2028.21299 | 2 | 5.14E-04 | 0.88 | 3.92 | - | 724.8  |
| AHQ-7-4, 5544          | R.LNEAAAGLNQAATELVQASR.G                   | 2028.21299 | 3 | 2.01E-06 | 0.96 | 5.33 | - | 1692.2 |
| AHQ-7-4, 5476 - 5540   | R.LNEAAAGLNQAATELVQASR.G                   | 2028.21299 | 2 | 6.25E-08 | 0.97 | 5.72 | - | 1359.0 |
| AHQ-7-4, 5449          | R.LNEAAAGLNQAATELVQASR.G                   | 2028.21299 | 2 | 1.12E-06 | 0.86 | 3.70 | - | 668.6  |
| AHQ-7-3, 5716 - 5792   | R.LNEAAAGLNQAATELVQASR.G                   | 2028.21299 | 2 | 7.90E-11 | 0.96 | 4.96 | - | 1327.6 |
| AHQ-7-4, 5121 - 5122   | R.LNEAAAGLNQAATELVQASR.G                   | 2028.21299 | 2 | 7.73E-07 | 0.95 | 4.10 | - | 1552.7 |
| AHQ-7-1, 5565          | R.LNEAAAGLNQAATELVQASR.G                   | 2028.21299 | 2 | 1.91E-06 | 0.84 | 2.82 | - | 765.5  |
| AHQ-7-9, 4920          | R.LNEAAAGLNQAATELVQASR.G                   | 2028.21299 | 2 | 8.00E-08 | 0.86 | 3.70 | - | 683.6  |
| AHQ-7-5, 4355          | R.LNEAAAGLNQAATELVQASR.G                   | 2028.21299 | 2 | 2.84E-05 | 0.95 | 4.66 | - | 915.0  |
| AHQ-7-4, 4410          | R.LNEAAAGLNQAATELVQASR.G                   | 2028.21299 | 2 | 5.86E-10 | 0.96 | 4.98 | - | 1277.2 |
| AHQ-7-1, 5401 - 5464   | R.LNEAAAGLNQAATELVQASR.G                   | 2028.21299 | 2 | 7.73E-10 | 0.97 | 5.20 | - | 1814.8 |
| AHQ-7-2, 5765          | R.LNEAAAGLNQAATELVQASR.G                   | 2028.21299 | 3 | 5.81E-06 | 0.90 | 4.10 | - | 1053.3 |
| AHQ-7-5, 5470 - 5542   | R.LNEAAAGLNQAATELVQASR.G                   | 2028.21299 | 2 | 9.08E-13 | 0.98 | 6.04 | - | 2313.4 |
| AHQ-7-2, 5672 - 5748   | R.LNEAAAGLNQAATELVQASR.G                   | 2028.21299 | 2 | 4.69E-07 | 0.97 | 5.21 | - | 1363.0 |
| AHQ-7-2, 5551          | R.LNEAAAGLNQAATELVQASR.G                   | 2028.21299 | 3 | 1.02E-07 | 0.98 | 6.40 | - | 2229.7 |
| AHQ-7-2, 5545 - 5609   | R.LNEAAAGLNQAATELVQASR.G                   | 2028.21299 | 2 | 7.15E-08 | 0.97 | 4.95 | - | 1787.8 |
| AHQ-7-2, 5449          | R.LNEAAAGLNQAATELVQASR.G                   | 2028.21299 | 2 | 4.36E-11 | 0.96 | 4.81 | - | 1063.1 |
| AHQ-7-5, 5479          | R.LNEAAAGLNQAATELVQASR.G                   | 2028.21299 | 3 | 6.85E-04 | 0.97 | 4.71 | - | 2076.1 |
| AHQ-7-2, 5348          | R.LNEAAAGLNQAATELVQASR.G                   | 2028.21299 | 2 | 1.59E-11 | 0.96 | 4.22 | - | 1468.1 |
| AHQ-7-2, 4460          | R.LNEAAAGLNQAATELVQASR.G                   | 2028.21299 | 2 | 9.35E-13 | 0.97 | 5.35 | - | 1209.3 |
| AHQ-7-5, 5690 - 5763   | R.LNEAAAGLNQAATELVQASR.G                   | 2028.21299 | 2 | 5.26E-06 | 0.96 | 5.24 | - | 1221.9 |
| AHQ-7-6, 5397          | R.LNEAAAGLNQAATELVQASR.G                   | 2028.21299 | 2 | 8.18E-12 | 0.97 | 5.59 | - | 1488.7 |
| AHQ-7-6, 5407          | R.LNEAAAGLNQAATELVQASR.G                   | 2028.21299 | 3 | 1.00E-06 | 0.98 | 6.50 | - | 1995.4 |
| AHQ-7-1, 4400          | R.LNEAAAGLNQAATELVQASR.G                   | 2028.21299 | 2 | 5.27E-08 | 0.93 | 4.16 | - | 753.5  |
| AHQ-7-2, 5156          | R.LNEAAAGLNQAATELVQASR.G                   | 2028.21299 | 2 | 1.90E-11 | 0.97 | 5.34 | - | 1473.5 |
| AHQ-7-2, 5372          | R.LNEAAAGLNQAATELVQASRGTQDLAR.A            | 2867.12501 | 3 | 1.08E-05 | 0.92 | 4.59 | - | 1164.5 |
| AHQ-7-4, 2046 - 2080   | R.MATNAAQNAIK.K                            | 1204.38227 | 2 | 4.87E-07 | 0.69 | 3.78 | - | 708.4  |
| AHQ-7-2, 2128          | R.MATNAAQNAIK.K                            | 1204.38227 | 2 | 5.05E-05 | 0.76 | 3.31 | - | 551.9  |
| AHQ-7-3, 2123          | R.MATNAAQNAIK.K                            | 1204.38227 | 2 | 6.79E-04 | 0.76 | 3.17 | - | 875.1  |
| AHQ-7-2, 4640          | R.MVAAATNNLCEAANAAVQGHASQEK.L              | 2558.79098 | 3 | 1.94E-05 | 0.98 | 5.77 | - | 2884.9 |
| AHQ-7-2, 4312          | R.M*VAAATNNLCEAANAAVQGHASQEK.L             | 2574.79038 | 3 | 4.49E-08 | 0.65 | 3.31 | - | 542.4  |
| AHQ-7-2, 4232          | R.MVAAATNNLCEAANAAVQGHASQEK.L              | 2558.79098 | 3 | 7.19E-06 | 0.98 | 6.41 | - | 3192.2 |
| AHQ-7-2, 4224          | R.M*VAAATNNLCEAANAAVQGHASQEK.L             | 2574.79038 | 2 | 8.11E-07 | 0.79 | 3.20 | - | 608.5  |
| AHQ-7-1, 4185          | R.M*VAAATNNLCEAANAAVQGHASQEK.L             | 2574.79038 | 3 | 1.31E-06 | 0.95 | 4.93 | - | 1187.9 |
| AHQ-7-2, 4404 - 4467   | R.MVAAATNNLCEAANAAVQGHASQEK.L              | 2558.79098 | 3 | 9.22E-06 | 0.97 | 5.25 | - | 2177.7 |
| AHQ-7-2, 4213          | R.M*VAAATNNLCEAANAAVQGHASQEK.L             | 2574.79038 | 3 | 9.79E-07 | 0.90 | 4.48 | - | 821.3  |
| AHQ-7-2, 4723          | R.MVAAATNNLCEAANAAVQGHASQEK.L              | 2558.79098 | 3 | 6.34E-09 | 0.98 | 6.27 | - | 2457.5 |
| AHQ-7-4, 4112          | R.M*VAAATNNLCEAANAAVQGHASQEK.L             | 2574.79038 | 3 | 2.02E-09 | 0.81 | 3.71 | - | 849.2  |
| AHQ-7-2, 4107          | R.M*VAAATNNLCEAANAAVQGHASQEK.L             | 2574.79038 | 3 | 1.24E-06 | 0.87 | 3.50 | - | 989.3  |
| AHQ-7-2, 3347          | R.MVAAATNNLCEAANAAVQGHASQEK.L              | 2558.79098 | 3 | 4.10E-07 | 0.93 | 4.07 | - | 1826.2 |
| AHQ-7-5, 4426          | R.MVAAATNNLCEAANAAVQGHASQEK.L              | 2558.79098 | 3 | 6.77E-05 | 0.87 | 3.89 | - | 1057.4 |
| AHQ-7-5, 4318          | R.MVAAATNNLCEAANAAVQGHASQEK.L              | 2558.79098 | 3 | 2.13E-04 | 0.81 | 3.43 | - | 1117.9 |
| AHQ-7-4, 4488          | R.MVAAATNNLCEAANAAVQGHASQEK.L              | 2558.79098 | 3 | 3.28E-04 | 0.97 | 5.15 | - | 1941.1 |
| AHQ-7-2, 5976 - 6047   | K.M*VGGIAQIIAAQEEM*LR.K                    | 1863.19287 | 2 | 1.94E-05 | 0.97 | 4.41 | - | 1705.5 |
| AHQ-7-2, 6503          | K.M*VGGIAQIIAAQEEM*LR.K                    | 1847.19347 | 3 | 1.01E-07 | 0.97 | 5.42 | - | 2139.2 |
| AHQ-7-14-, 5542 - 5610 | K.M*VGGIAQIIAAQEEM*LR.K                    | 1863.19287 | 2 | 6.84E-07 | 0.97 | 5.10 | - | 1500.8 |
| AHQ-7-1, 5717          | K.M*VGGIAQIIAAQEEM*LR.K                    | 1863.19287 | 3 | 3.41E-04 | 0.95 | 4.88 | - | 1698.7 |
| AHQ-7-4, 5970          | K.M*VGGIAQIIAAQEEM*LR.K                    | 1863.19287 | 2 | 9.86E-06 | 0.95 | 4.71 | - | 1207.9 |
| AHQ-7-14-, 5619        | K.M*VGGIAQIIAAQEEM*LR.K                    | 1863.19287 | 3 | 5.05E-06 | 0.86 | 3.47 | - | 1085.9 |
| AHQ-7-3, 6312 - 6328   | K.M*VGGIAQIIAAQEEM*LR.K                    | 1847.19347 | 2 | 2.45E-04 | 0.93 | 4.04 | - | 1359.4 |
| AHQ-7-14-, 6070        | K.M*VGGIAQIIAAQEEM*LR.K                    | 1847.19347 | 2 | 2.51E-07 | 0.97 | 4.48 | - | 1813.6 |
| AHQ-7-4, 6477 - 6486   | K.M*VGGIAQIIAAQEEM*LR.K                    | 1847.19347 | 2 | 4.44E-06 | 0.98 | 5.52 | - | 1911.6 |
| AHQ-7-7, 2312          | K.NCGQMSEIEAK.V                            | 1268.40005 | 2 | 9.29E-07 | 0.89 | 3.36 | - | 1143.5 |
| AHQ-7-8, 2303          | K.NCGQMSEIEAK.V                            | 1268.40005 | 2 | 1.25E-04 | 0.81 | 2.74 | - | 1036.3 |
| AHQ-7-3, 4244          | K.NGNLPEFGDAISTASK.A                       | 1621.73018 | 2 | 1.95E-06 | 0.80 | 3.27 | - | 438.4  |
| AHQ-7-2, 4508          | K.NGNLPEFGDAISTASK.A                       | 1621.73018 | 2 | 3.67E-04 | 0.82 | 3.61 | - | 427.9  |
| AHQ-7-4, 4381 - 4400   | K.NGNLPEFGDAISTASK.A                       | 1621.73018 | 2 | 1.95E-04 | 0.66 | 3.00 | - | 292.8  |
| AHQ-7-3, 4339 - 4405   | K.NGNLPEFGDAISTASK.A                       | 1621.73018 | 2 | 8.72E-08 | 0.94 | 4.70 | - | 609.4  |
| AHQ-7-6, 4198 - 4270   | K.NGNLPEFGDAISTASK.A                       | 1621.73018 | 2 | 1.92E-08 | 0.83 | 3.21 | - | 521.0  |
| AHQ-7-2, 4592          | K.NGNLPEFGDAISTASK.A                       | 1621.73018 | 2 | 2.59E-08 | 0.91 | 3.86 | - | 698.6  |
| AHQ-7-1, 4329 - 4384   | K.NGNLPEFGDAISTASK.A                       | 1621.73018 | 2 | 3.71E-07 | 0.68 | 2.90 | - | 358.6  |
| AHQ-7-1, 4311          | K.NLGTALAE*LR.T                            | 1058.21367 | 2 | 1.02E-04 | 0.84 | 3.21 | - | 897.5  |
| AHQ-7-5, 4174          | K.NLGTALAE*LR.T                            | 1058.21367 | 2 | 1.66E-05 | 0.87 | 3.45 | - | 859.1  |
| AHQ-7-3, 4217 - 4231   | K.NLGTALAE*LR.T                            | 1058.21367 | 2 | 3.56E-05 | 0.86 | 3.28 | - | 853.1  |
| AHQ-7-6, 4085          | K.NLGTALAE*LR.T                            | 1058.21367 | 2 | 6.33E-06 | 0.79 | 3.10 | - | 568.8  |
| AHQ-7-2, 4287 - 4296   | K.NLGTALAE*LR.T                            | 1058.21367 | 2 | 1.74E-04 | 0.84 | 3.03 | - | 847.5  |
| AHQ-7-3, 2855          | K.PAAVAENEIEIGSHIK.H                       | 1636.78798 | 3 | 3.68E-10 | 0.97 | 5.64 | - | 1837.8 |
| AHQ-7-3, 2856          | K.PAAVAENEIEIGSHIK.H                       | 1636.78798 | 2 | 7.03E-09 | 0.98 | 4.95 | - | 2357.5 |
| AHQ-7-2, 2789          | K.PAAVAENEIEIGSHIK.H                       | 1636.78798 | 2 | 1.07E-08 | 0.98 | 5.34 | - | 1840.5 |
| AHQ-7-2, 2791          | K.PAAVAENEIEIGSHIK.H                       | 1636.78798 | 3 | 2.46E-08 | 0.97 | 5.01 | - | 2286.0 |
| AHQ-7-2, 2881 - 2887   | K.PAAVAENEIEIGSHIK.H                       | 1636.78798 | 3 | 5.60E-11 | 0.96 | 5.07 | - | 1658.5 |
| AHQ-7-2, 2884          | K.PAAVAENEIEIGSHIK.H                       | 1636.78798 | 2 | 1.51E-05 | 0.98 | 5.26 | - | 1779.5 |
| AHQ-7-6, 2754          | K.PAAVAENEIEIGSHIK.H                       | 1636.78798 | 2 | 1.06E-07 | 0.97 | 4.99 | - | 1768.5 |
| AHQ-7-4, 2721 - 2792   | K.PAAVAENEIEIGSHIK.H                       | 1636.78798 | 2 | 5.66E-09 | 0.98 | 5.20 | - | 2299.7 |
| AHQ-7-5, 2788          | K.PAAVAENEIEIGSHIK.H                       | 1636.78798 | 2 | 1.03E-10 | 0.98 | 5.23 | - | 1777.3 |
| AHQ-7-5, 2786          | K.PAAVAENEIEIGSHIK.H                       | 1636.78798 | 3 | 2.89E-08 | 0.96 | 5.26 | - | 1406.0 |
| AHQ-7-4, 2789          | K.PAAVAENEIEIGSHIK.H                       | 1636.78798 | 3 | 3.68E-08 | 0.97 | 5.02 | - | 1695.6 |
| AHQ-7-2, 3251          | K.QAAASATQTIAAQHAASTPK.A                   | 1996.17099 | 2 | 1.98E-04 | 0.74 | 3.36 | - | 384.7  |
| AHQ-7-2, 3436          | K.QAAASATQTIAAQHAASTPK.A                   | 1996.17099 | 3 | 7.17E-05 | 0.84 | 3.58 | - | 907.0  |
| AHQ-7-3, 3380 - 3388   | K.QAAASATQTIAAQHAASTPK.A                   | 1996.17099 | 3 | 1.18E-05 | 0.86 | 3.33 | - | 1024.1 |
| AHQ-7-6, 3263 - 3335   | K.QAAASATQTIAAQHAASTPK.A                   | 1996.17099 | 2 | 9.25E-05 | 0.92 | 4.16 | - | 770.5  |
| AHQ-7-4, 3337 - 3364   | K.QAAASATQTIAAQHAASTPK.A                   | 1996.17099 | 3 | 1.13E-06 | 0.77 | 3.43 | - | 546.9  |
| AHQ-7-3, 3384 - 3392   | K.QAAASATQTIAAQHAASTPK.A                   | 1996.17099 | 2 | 8.30E-07 | 0.92 | 4.82 | - | 687.7  |
| AHQ-7-5, 3315          | K.QAAASATQTIAAQHAASTPK.A                   | 1996.17099 | 2 | 2.71E-05 | 0.95 | 5.11 | - | 1000.1 |
| AHQ-7-4, 3338          | K.QAAASATQTIAAQHAASTPK.A                   | 1996.17099 | 2 | 3.54E-07 | 0.91 | 4.76 | - | 498.9  |
| AHQ-7-2, 3433          | K.QAAASATQTIAAQHAASTPK.A                   | 1996.17099 | 2 | 4.29E-09 | 0.90 | 4.17 | - | 769.0  |
| AHQ-7-1, 3201          | R.QEDVIATANLSR.R                           | 1317.43074 | 2 | 1.79E-04 | 0.85 | 3.36 | - | 566.8  |
| AHQ-7-2, 4104          | R.QELAVFCSPEPPAK.T                         | 1574.77985 | 2 | 7.72E-05 | 0.93 | 3.59 | - | 1215.0 |
| AHQ-7-1, 4065 - 4111   | R.QELAVFCSPEPPAK.T                         | 1574.77985 | 2 | 1.34E-05 | 0.91 | 3.56 | - | 918.6  |
| AHQ-7-4, 4064 - 4068   | R.QELAVFCSPEPPAK.T                         | 1574.77985 | 2 | 3.93E-07 | 0.94 | 4.17 | - | 1151.0 |
| AHQ-7-2, 6845 - 6851   | R.QNLLQAAGNVGQASGELLQQIGESDTPHFDALM*QLAK.A | 4154.52584 | 3 | 1.11E-07 | 0.92 | 4.87 | - | 722.4  |
| AHQ-7-1, 3935          | K.QVAASTAQLLVACK.V                         | 1461.70942 | 2 | 1.78E-06 | 0.76 | 3.02 | - | 433.3  |
| AHQ-7-13, 3867 - 3874  | K.QVAASTAQLLVACK.V                         | 1461.70942 | 2 | 5.18E-06 | 0.80 | 3.22 | - | 394.2  |
| AHQ-7-13-, 3727        | K.QVAASTAQLLVACK.V                         | 1461.70942 | 2 | 2.80E-07 | 0.94 | 4.53 | - | 777.1  |
| AHQ-7-2, 3915          | K.QVAASTAQLLVACK.V                         | 1461.70942 | 2 | 8.72E-06 | 0.89 | 3.44 | - | 668.0  |
| AHQ-7-2, 5885          | K.RVAGSVTELIQAAEAMK.G                      | 1775.06387 | 2 | 3.65E-04 | 0.98 | 4.98 | - | 2298.5 |
| AHQ-7-3, 5748          | K.RVAGSVTELIQAAEAMK.G                      | 1775.06387 | 2 | 5.03E-07 | 0.97 | 4.81 | - | 1533.5 |
| AHQ-7-2, 4955 - 5015   | K.RVAGSVTELIQAAEAMK.G                      | 1791.06327 | 2 | 1.89E-04 | 0.87 | 3.75 | - | 515.8  |

|                        |                                    |            |   |          |      |      |   |        |
|------------------------|------------------------------------|------------|---|----------|------|------|---|--------|
| AHQ-7-4, 5877          | K.RVAGSVTELIQAAEAMK.G              | 1775.06387 | 2 | 2.04E-04 | 0.90 | 4.04 | - | 807.3  |
| AHQ-7-2, 3687 - 3688   | R.SGASGPFNFQVGSMP*PPAQQQITSGQMHR.G | 2945.19807 | 3 | 1.28E-08 | 0.83 | 4.43 | - | 418.0  |
| AHQ-7-5, 3588          | R.SGASGPFNFQVGSMP*PPAQQQITSGQMHR.G | 2945.19807 | 3 | 1.61E-04 | 0.69 | 3.54 | - | 439.2  |
| AHQ-7-7, 2941          | K.SIAAATSALVK.A                    | 1032.21612 | 2 | 5.72E-04 | 0.65 | 2.77 | - | 559.0  |
| AHQ-7-3, 3139          | K.SIAAATSALVK.A                    | 1032.21612 | 2 | 1.87E-05 | 0.85 | 2.94 | - | 886.6  |
| AHQ-7-2, 3164 - 3184   | K.SIAAATSALVK.A                    | 1032.21612 | 2 | 4.38E-04 | 0.90 | 3.70 | - | 838.6  |
| AHQ-7-6, 3038 - 3041   | K.SIAAATSALVK.A                    | 1032.21612 | 2 | 9.72E-05 | 0.86 | 2.93 | - | 920.3  |
| AHQ-7-13-, 3829        | K.SKDHFLEGEDEESTM*LEDSVSPK.K       | 2554.68304 | 3 | 2.05E-04 | 0.94 | 4.84 | - | 1426.5 |
| AHQ-7-7, 3784          | K.SKDHFLEGEDEESTM*LEDSVSPK.K       | 2554.68304 | 3 | 1.27E-07 | 0.95 | 5.12 | - | 1126.2 |
| AHQ-7-7, 4161 - 4225   | K.SKDHFLEGEDEESTM*LEDSVSPK.K       | 2538.68364 | 3 | 8.66E-06 | 0.87 | 3.58 | - | 1230.8 |
| AHQ-7-7, 4146 - 4196   | K.SKDHFLEGEDEESTM*LEDSVSPK.K       | 2538.68364 | 2 | 5.18E-06 | 0.86 | 3.98 | - | 573.2  |
| AHQ-7-4, 5252 - 5270   | K.SNTSPEELGPLANQLTSDYGR.L          | 2250.36505 | 2 | 5.84E-08 | 0.83 | 3.48 | - | 584.8  |
| AHQ-7-5, 5083 - 5148   | K.SNTSPEELGPLANQLTSDYGR.L          | 2250.36505 | 2 | 1.03E-10 | 0.93 | 4.78 | - | 478.3  |
| AHQ-7-7, 4997          | K.SNTSPEELGPLANQLTSDYGR.L          | 2250.36505 | 2 | 6.91E-05 | 0.69 | 3.10 | - | 438.3  |
| AHQ-7-2, 5009 - 5073   | K.SNTSPEELGPLANQLTSDYGR.L          | 2250.36505 | 2 | 7.17E-07 | 0.78 | 3.91 | - | 430.4  |
| AHQ-7-2, 4612 - 4615   | K.SNTSPEELGPLANQLTSDYGR.L          | 2250.36505 | 2 | 1.10E-07 | 0.90 | 4.17 | - | 645.5  |
| AHQ-7-4, 4582          | K.SNTSPEELGPLANQLTSDYGR.L          | 2250.36505 | 2 | 9.68E-10 | 0.84 | 3.99 | - | 467.5  |
| AHQ-7-1, 5080 - 5156   | K.SNTSPEELGPLANQLTSDYGR.L          | 2250.36505 | 2 | 1.10E-04 | 0.83 | 3.88 | - | 368.8  |
| AHQ-7-2, 4749          | K.SNTSPEELGPLANQLTSDYGR.L          | 2250.36505 | 2 | 2.65E-05 | 0.34 | 2.69 | - | 231.4  |
| AHQ-7-2, 4860          | K.SNTSPEELGPLANQLTSDYGR.L          | 2250.36505 | 2 | 2.86E-05 | 0.53 | 2.54 | - | 495.5  |
| AHQ-7-4, 5353 - 5418   | K.SNTSPEELGPLANQLTSDYGR.L          | 2250.36505 | 2 | 2.75E-09 | 0.92 | 4.25 | - | 725.1  |
| AHQ-7-2, 5504 - 5581   | K.SNTSPEELGPLANQLTSDYGR.L          | 2250.36505 | 2 | 1.49E-04 | 0.64 | 3.06 | - | 467.0  |
| AHQ-7-1, 4564          | K.SNTSPEELGPLANQLTSDYGR.L          | 2250.36505 | 2 | 8.58E-09 | 0.88 | 3.93 | - | 572.7  |
| AHQ-7-3, 4519          | K.SNTSPEELGPLANQLTSDYGR.L          | 2250.36505 | 2 | 2.64E-06 | 0.69 | 3.11 | - | 378.2  |
| AHQ-7-3, 4645          | K.SNTSPEELGPLANQLTSDYGR.L          | 2250.36505 | 2 | 1.92E-07 | 0.78 | 3.64 | - | 292.7  |
| AHQ-7-3, 5047 - 5119   | K.SNTSPEELGPLANQLTSDYGR.L          | 2250.36505 | 2 | 2.34E-05 | 0.86 | 4.14 | - | 351.2  |
| AHQ-7-6, 4458          | K.SNTSPEELGPLANQLTSDYGR.L          | 2250.36505 | 2 | 2.39E-07 | 0.77 | 3.73 | - | 398.3  |
| AHQ-7-3, 5163          | K.SNTSPEELGPLANQLTSDYGR.L          | 2250.36505 | 2 | 2.36E-07 | 0.83 | 3.52 | - | 447.9  |
| AHQ-7-2, 5284 - 5353   | K.SNTSPEELGPLANQLTSDYGR.L          | 2250.36505 | 2 | 1.53E-06 | 0.91 | 4.77 | - | 478.9  |
| AHQ-7-3, 5252 - 5284   | K.SNTSPEELGPLANQLTSDYGR.L          | 2250.36505 | 2 | 3.84E-04 | 0.77 | 3.73 | - | 301.3  |
| AHQ-7-5, 5312          | K.SNTSPEELGPLANQLTSDYGR.L          | 2250.36505 | 2 | 9.27E-10 | 0.90 | 4.30 | - | 443.6  |
| AHQ-7-5, 4522          | K.SNTSPEELGPLANQLTSDYGR.L          | 2250.36505 | 2 | 5.93E-07 | 0.86 | 3.81 | - | 497.3  |
| AHQ-7-2, 5139 - 5219   | K.SNTSPEELGPLANQLTSDYGR.L          | 2250.36505 | 2 | 3.99E-06 | 0.90 | 4.27 | - | 528.6  |
| AHQ-7-6, 5074          | K.SNTSPEELGPLANQLTSDYGR.L          | 2250.36505 | 2 | 1.04E-04 | 0.79 | 3.46 | - | 452.2  |
| AHQ-7-4, 5146 - 5208   | K.SNTSPEELGPLANQLTSDYGR.L          | 2250.36505 | 2 | 5.08E-11 | 0.89 | 4.19 | - | 366.5  |
| AHQ-7-5, 5207          | K.SNTSPEELGPLANQLTSDYGR.L          | 2250.36505 | 2 | 2.01E-04 | 0.69 | 2.89 | - | 420.2  |
| AHQ-7-2, 5408 - 5419   | K.SNTSPEELGPLANQLTSDYGR.L          | 2250.36505 | 2 | 1.62E-08 | 0.91 | 3.95 | - | 640.6  |
| AHQ-7-6, 5247          | K.SNTSPEELGPLANQLTSDYGR.L          | 2250.36505 | 2 | 3.76E-04 | 0.80 | 3.62 | - | 356.4  |
| AHQ-7-8, 6767 - 6772   | R.TEDSGLQTVIAAATQCALSTSQVLVACTK.V  | 3056.37009 | 3 | 2.09E-06 | 0.93 | 4.89 | - | 1138.4 |
| AHQ-7-2, 7016 - 7025   | R.TEDSGLQTVIAAATQCALSTSQVLVACTK.V  | 3056.37009 | 3 | 1.83E-04 | 0.90 | 5.05 | - | 1046.4 |
| AHQ-7-2, 6821          | R.TEDSGLQTVIAAATQCALSTSQVLVACTK.V  | 3056.37009 | 3 | 6.10E-08 | 0.96 | 5.56 | - | 1496.2 |
| AHQ-7-3, 6644 - 6645   | R.TEDSGLQTVIAAATQCALSTSQVLVACTK.V  | 3056.37009 | 3 | 4.44E-15 | 0.98 | 6.13 | - | 2154.9 |
| AHQ-7-7, 4221          | K.TKEVIQEWNLTKI.R                  | 1716.95938 | 3 | 8.85E-07 | 0.92 | 4.65 | - | 1062.2 |
| AHQ-7-8, 4204          | K.TKEVIQEWNLTKI.R                  | 1716.95938 | 2 | 1.79E-06 | 0.98 | 4.96 | - | 2070.5 |
| AHQ-7-7, 4182 - 4224   | K.TKEVIQEWNLTKI.R                  | 1716.95938 | 2 | 8.52E-06 | 0.96 | 4.33 | - | 1470.2 |
| AHQ-7-7, 6181          | K.TLAESALQLLYTAK.E                 | 1522.76793 | 2 | 1.47E-04 | 0.91 | 3.42 | - | 957.4  |
| AHQ-7-1, 6107 - 6109   | K.TLAESALQLLYTAK.E                 | 1522.76793 | 2 | 5.22E-08 | 0.96 | 5.12 | - | 1179.2 |
| AHQ-7-2, 6309 - 6367   | K.TLAESALQLLYTAK.E                 | 1522.76793 | 2 | 3.56E-07 | 0.95 | 4.30 | - | 1279.5 |
| AHQ-7-11, 5782         | K.TLAESALQLLYTAK.E                 | 1522.76793 | 2 | 6.58E-08 | 0.75 | 2.63 | - | 738.2  |
| AHQ-7-3, 6167 - 6243   | K.TLAESALQLLYTAK.E                 | 1522.76793 | 2 | 6.70E-08 | 0.97 | 4.97 | - | 1307.9 |
| AHQ-7-6, 6171          | K.TLAESALQLLYTAK.E                 | 1522.76793 | 2 | 7.56E-08 | 0.94 | 4.14 | - | 931.5  |
| AHQ-7-4, 6494 - 6521   | K.TLAESALQLLYTAK.E                 | 1522.76793 | 2 | 4.25E-04 | 0.89 | 3.23 | - | 939.1  |
| AHQ-7-2, 6320          | K.TLAESALQLLYTAK.E                 | 1522.76793 | 3 | 1.29E-06 | 0.97 | 4.89 | - | 2392.0 |
| AHQ-7-5, 6254 - 6262   | K.TLAESALQLLYTAK.E                 | 1522.76793 | 2 | 1.89E-06 | 0.96 | 4.67 | - | 1241.5 |
| AHQ-7-4, 2605          | K.TLSHPQQM*ALLDQTK.T               | 1727.96404 | 3 | 2.24E-06 | 0.94 | 4.07 | - | 1361.2 |
| AHQ-7-3, 3341          | K.TLSHPQQM*ALLDQTK.T               | 1711.96464 | 3 | 4.34E-05 | 0.95 | 4.75 | - | 1577.4 |
| AHQ-7-5, 2594          | K.TLSHPQQM*ALLDQTK.T               | 1727.96404 | 3 | 3.84E-08 | 0.93 | 4.09 | - | 1285.7 |
| AHQ-7-1, 3492          | K.TLSHPQQM*ALLDQTK.T               | 1711.96464 | 2 | 1.66E-04 | 0.95 | 4.67 | - | 817.6  |
| AHQ-7-5, 3276          | K.TLSHPQQM*ALLDQTK.T               | 1711.96464 | 3 | 4.65E-04 | 0.90 | 4.26 | - | 1139.2 |
| AHQ-7-3, 3327          | K.TLSHPQQM*ALLDQTK.T               | 1711.96464 | 2 | 6.97E-05 | 0.93 | 4.52 | - | 662.8  |
| AHQ-7-4, 3297          | K.TLSHPQQM*ALLDQTK.T               | 1711.96464 | 3 | 8.40E-04 | 0.94 | 4.91 | - | 1132.1 |
| AHQ-7-5, 3270          | K.TLSHPQQM*ALLDQTK.T               | 1711.96464 | 2 | 1.57E-04 | 0.95 | 4.76 | - | 803.9  |
| AHQ-7-6, 3238          | K.TLSHPQQM*ALLDQTK.T               | 1711.96464 | 2 | 2.97E-05 | 0.96 | 5.02 | - | 990.6  |
| AHQ-7-1, 3649 - 3652   | K.TM*LESAGGLIQTAR.A                | 1464.67035 | 2 | 4.88E-06 | 0.96 | 4.80 | - | 1564.2 |
| AHQ-7-4, 4316          | K.TM*LESAGGLIQTAR.A                | 1448.67095 | 2 | 1.33E-05 | 0.96 | 4.26 | - | 1837.5 |
| AHQ-7-11, 3342         | K.TM*LESAGGLIQTAR.A                | 1464.67035 | 2 | 1.22E-06 | 0.91 | 3.09 | - | 1414.3 |
| AHQ-7-7, 4150          | K.TM*LESAGGLIQTAR.A                | 1448.67095 | 2 | 6.50E-08 | 0.91 | 3.65 | - | 1285.0 |
| AHQ-7-6, 4203          | K.TM*LESAGGLIQTAR.A                | 1448.67095 | 2 | 2.38E-08 | 0.92 | 3.64 | - | 1751.7 |
| AHQ-7-6, 3422 - 3438   | K.TM*LESAGGLIQTAR.A                | 1464.67035 | 2 | 2.37E-04 | 0.70 | 3.30 | - | 791.0  |
| AHQ-7-13, 4281         | K.TM*LESAGGLIQTAR.A                | 1448.67095 | 2 | 3.93E-07 | 0.87 | 3.21 | - | 1239.2 |
| AHQ-7-2, 3577 - 3639   | K.TM*LESAGGLIQTAR.A                | 1464.67035 | 2 | 4.02E-08 | 0.95 | 4.42 | - | 1486.1 |
| AHQ-7-2, 4324 - 4388   | K.TM*LESAGGLIQTAR.A                | 1448.67095 | 2 | 6.25E-06 | 0.91 | 3.58 | - | 1392.9 |
| AHQ-7-2, 4412 - 4413   | K.TM*LESAGGLIQTAR.A                | 1464.67035 | 2 | 5.99E-06 | 0.74 | 2.86 | - | 970.9  |
| AHQ-7-5, 4278          | K.TM*LESAGGLIQTAR.A                | 1448.67095 | 2 | 7.63E-10 | 0.91 | 3.81 | - | 1394.1 |
| AHQ-7-1, 4303 - 4360   | K.TM*LESAGGLIQTAR.A                | 1448.67095 | 2 | 5.82E-10 | 0.96 | 4.32 | - | 2055.4 |
| AHQ-7-3, 4272 - 4297   | K.TM*LESAGGLIQTAR.A                | 1448.67095 | 2 | 4.78E-06 | 0.94 | 3.77 | - | 1240.8 |
| AHQ-7-13, 4333         | K.TM*QFPESTMVYDACR.I               | 1854.07511 | 2 | 5.35E-04 | 0.89 | 3.70 | - | 636.0  |
| AHQ-7-13-, 4784        | K.TVTDMLM*TICAR.I                  | 1429.70947 | 2 | 7.10E-06 | 0.56 | 2.83 | - | 570.2  |
| AHQ-7-13, 4895         | K.TVTDMLM*TICAR.I                  | 1429.70947 | 2 | 2.66E-05 | 0.85 | 2.77 | - | 1338.7 |
| AHQ-7-13-, 3616 - 3684 | K.TVTDMLM*TICAR.I                  | 1445.70887 | 2 | 1.36E-04 | 0.78 | 2.73 | - | 722.2  |
| AHQ-7-7, 5305 - 5309   | K.TVTDMLM*TICAR.I                  | 1413.71007 | 2 | 9.42E-04 | 0.86 | 2.66 | - | 1145.5 |
| AHQ-7-13, 3759 - 3822  | K.TVTDMLM*TICAR.I                  | 1445.70887 | 2 | 2.93E-04 | 0.85 | 3.01 | - | 723.0  |
| AHQ-7-7, 5088          | K.TYGVSFVFLK.E                     | 1161.37395 | 2 | 4.40E-07 | 0.90 | 3.43 | - | 717.8  |
| AHQ-7-8, 6118          | R.VAGSVTELIQAAEAMK.G               | 1618.87752 | 2 | 1.27E-06 | 0.94 | 4.35 | - | 1126.4 |
| AHQ-7-3, 5248          | R.VAGSVTELIQAAEAMK.G               | 1634.87692 | 2 | 2.17E-06 | 0.95 | 4.28 | - | 1337.3 |
| AHQ-7-4, 5332          | R.VAGSVTELIQAAEAMK.G               | 1634.87692 | 2 | 3.50E-05 | 0.95 | 4.72 | - | 1304.8 |
| AHQ-7-10, 5619         | R.VAGSVTELIQAAEAMK.G               | 1618.87752 | 2 | 7.97E-04 | 0.79 | 2.63 | - | 902.9  |
| AHQ-7-1, 6032 - 6036   | R.VAGSVTELIQAAEAMK.G               | 1618.87752 | 2 | 1.68E-05 | 0.95 | 3.91 | - | 1499.8 |
| AHQ-7-2, 6216 - 6276   | R.VAGSVTELIQAAEAMK.G               | 1618.87752 | 2 | 2.55E-07 | 0.97 | 5.42 | - | 1542.2 |
| AHQ-7-4, 6237 - 6262   | R.VAGSVTELIQAAEAMK.G               | 1618.87752 | 2 | 1.33E-08 | 0.96 | 4.31 | - | 1500.8 |
| AHQ-7-5, 5276          | R.VAGSVTELIQAAEAMK.G               | 1634.87692 | 2 | 2.68E-07 | 0.96 | 4.47 | - | 1543.6 |
| AHQ-7-9, 5493 - 5548   | R.VAGSVTELIQAAEAMK.G               | 1618.87752 | 2 | 8.04E-04 | 0.77 | 3.00 | - | 717.4  |
| AHQ-7-3, 6093          | R.VAGSVTELIQAAEAMK.G               | 1618.87752 | 2 | 5.07E-05 | 0.95 | 4.29 | - | 1457.1 |
| AHQ-7-6, 6083          | R.VAGSVTELIQAAEAMK.G               | 1618.87752 | 2 | 3.83E-06 | 0.95 | 4.40 | - | 1068.7 |
| AHQ-7-7, 6088          | R.VAGSVTELIQAAEAMK.G               | 1618.87752 | 2 | 6.75E-07 | 0.93 | 3.78 | - | 1247.7 |
| AHQ-7-1, 5235 - 5259   | R.VAGSVTELIQAAEAMK.G               | 1634.87692 | 2 | 3.93E-06 | 0.91 | 3.86 | - | 1051.3 |
| AHQ-7-5, 6171          | R.VAGSVTELIQAAEAMK.G               | 1618.87752 | 2 | 5.35E-06 | 0.95 | 4.16 | - | 1357.3 |
| AHQ-7-2, 5635 - 5695   | K.VGAIPANALDDGGOWSQGLISAAR.M       | 2311.53959 | 2 | 1.34E-07 | 0.96 | 4.97 | - | 1067.1 |
| AHQ-7-4, 5868 - 5926   | K.VGAIPANALDDGGOWSQGLISAAR.M       | 2311.53959 | 2 | 9.22E-10 | 0.96 | 5.30 | - | 1005.9 |
| AHQ-7-6, 5697          | K.VGAIPANALDDGGOWSQGLISAAR.M       | 2311.53959 | 2 | 6.88E-09 | 0.96 | 5.27 | - | 1136.9 |
| AHQ-7-2, 5703 - 5777   | K.VGAIPANALDDGGOWSQGLISAAR.M       | 2311.53959 | 3 | 7.96E-06 | 0.96 | 5.62 | - | 1387.3 |
| AHQ-7-1, 5669 - 5735   | K.VGAIPANALDDGGOWSQGLISAAR.M       | 2311.53959 | 2 | 5.71E-09 | 0.96 | 5.28 | - | 852.1  |
| AHQ-7-4, 5764 - 5806   | K.VGAIPANALDDGGOWSQGLISAAR.M       | 2311.53959 | 2 | 1.98E-11 | 0.96 | 5.09 | - | 934.4  |
| AHQ-7-2, 5768          | K.VGAIPANALDDGGOWSQGLISAAR.M       | 2311.53959 | 2 | 1.51E-08 | 0.88 | 4.20 | - | 409.5  |
| AHQ-7-2, 5851 - 5920   | K.VGAIPANALDDGGOWSQGLISAAR.M       | 2311.53959 | 2 | 1.74E-10 | 0.93 | 4.88 | - | 723.7  |
| AHQ-7-1, 5507 - 5575   | K.VGAIPANALDDGGOWSQGLISAAR.M       | 2311.53959 | 2 | 3.81E-08 | 0.92 | 4.41 | - | 560.0  |
| AHQ-7-4, 5626 - 5692   | K.VGAIPANALDDGGOWSQGLISAAR.M       | 2311.53959 | 2 | 4.24E-05 | 0.93 | 4.72 | - | 693.8  |

|                       |                                   |            |   |          |      |      |   |        |
|-----------------------|-----------------------------------|------------|---|----------|------|------|---|--------|
| AHQ-7-6, 5698         | K.VGAIPANALDDGQWSQGLISAAR.M       | 2311.53959 | 3 | 1.39E-05 | 0.94 | 4.62 | - | 1391.0 |
| AHQ-7-10, 5175 - 5244 | K.VGAIPANALDDGQWSQGLISAAR.M       | 2311.53959 | 2 | 7.37E-08 | 0.94 | 4.77 | - | 805.8  |
| AHQ-7-9, 5189 - 5256  | K.VGAIPANALDDGQWSQGLISAAR.M       | 2311.53959 | 2 | 1.08E-04 | 0.50 | 2.92 | - | 232.7  |
| AHQ-7-6, 5598         | K.VGAIPANALDDGQWSQGLISAAR.M       | 2311.53959 | 2 | 1.35E-06 | 0.89 | 4.41 | - | 336.8  |
| AHQ-7-3, 5508 - 5551  | K.VGAIPANALDDGQWSQGLISAAR.M       | 2311.53959 | 2 | 8.95E-07 | 0.92 | 4.92 | - | 629.0  |
| AHQ-7-6, 5477 - 5529  | K.VGAIPANALDDGQWSQGLISAAR.M       | 2311.53959 | 2 | 2.53E-08 | 0.95 | 4.96 | - | 944.3  |
| AHQ-7-5, 5559         | K.VGAIPANALDDGQWSQGLISAAR.M       | 2311.53959 | 2 | 1.43E-06 | 0.80 | 3.79 | - | 505.7  |
| AHQ-7-7, 5486         | K.VGAIPANALDDGQWSQGLISAAR.M       | 2311.53959 | 2 | 4.68E-06 | 0.83 | 3.54 | - | 640.3  |
| AHQ-7-7, 5604         | K.VGAIPANALDDGQWSQGLISAAR.M       | 2311.53959 | 2 | 5.50E-10 | 0.89 | 4.27 | - | 443.5  |
| AHQ-7-7, 5701 - 5702  | K.VGAIPANALDDGQWSQGLISAAR.M       | 2311.53959 | 2 | 7.38E-09 | 0.96 | 5.40 | - | 956.1  |
| AHQ-7-7, 5709         | K.VGAIPANALDDGQWSQGLISAAR.M       | 2311.53959 | 3 | 4.65E-07 | 0.54 | 3.07 | - | 527.3  |
| AHQ-7-3, 5621 - 5637  | K.VGAIPANALDDGQWSQGLISAAR.M       | 2311.53959 | 2 | 3.89E-15 | 0.94 | 4.94 | - | 679.4  |
| AHQ-7-5, 5684         | K.VGAIPANALDDGQWSQGLISAAR.M       | 2311.53959 | 2 | 9.34E-11 | 0.91 | 3.98 | - | 638.3  |
| AHQ-7-3, 5720 - 5781  | K.VGAIPANALDDGQWSQGLISAAR.M       | 2311.53959 | 2 | 1.20E-04 | 0.59 | 3.31 | - | 573.0  |
| AHQ-7-11, 5364        | K.VGAIPANALDDGQWSQGLISAAR.M       | 2311.53959 | 2 | 8.05E-10 | 0.90 | 3.99 | - | 608.0  |
| AHQ-7-5, 5790 - 5791  | K.VGAIPANALDDGQWSQGLISAAR.M       | 2311.53959 | 2 | 1.04E-08 | 0.97 | 6.13 | - | 1246.3 |
| AHQ-7-5, 5887         | K.VGAIPANALDDGQWSQGLISAAR.M       | 2311.53959 | 2 | 6.04E-09 | 0.92 | 4.51 | - | 793.1  |
| AHQ-7-1, 5611 - 5667  | K.VGAIPANALDDGQWSQGLISAAR.M       | 2311.53959 | 3 | 1.61E-04 | 0.94 | 4.67 | - | 1349.0 |
| AHQ-7-2, 3935         | K.VGDDPAVWQLK.N                   | 1228.37879 | 1 | 1.08E-06 | 0.34 | 2.46 | - | 303.3  |
| AHQ-7-6, 3739         | K.VGDDPAVWQLK.N                   | 1228.37879 | 2 | 1.73E-08 | 0.80 | 2.77 | - | 678.5  |
| AHQ-7-4, 3841 - 3861  | K.VGDDPAVWQLK.N                   | 1228.37879 | 1 | 4.68E-04 | 0.24 | 1.82 | - | 390.3  |
| AHQ-7-6, 3729         | K.VGDDPAVWQLK.N                   | 1228.37879 | 2 | 3.17E-08 | 0.93 | 3.81 | - | 891.9  |
| AHQ-7-5, 3807 - 3822  | K.VGDDPAVWQLK.N                   | 1228.37879 | 2 | 2.39E-08 | 0.92 | 3.78 | - | 822.2  |
| AHQ-7-3, 3843         | K.VGDDPAVWQLK.N                   | 1228.37879 | 2 | 5.60E-08 | 0.92 | 3.79 | - | 812.5  |
| AHQ-7-3, 3788 - 3851  | K.VGDDPAVWQLK.N                   | 1228.37879 | 2 | 6.43E-07 | 0.85 | 3.54 | - | 801.6  |
| AHQ-7-7, 3673         | K.VGDDPAVWQLK.N                   | 1228.37879 | 2 | 1.12E-08 | 0.95 | 4.11 | - | 1030.1 |
| AHQ-7-4, 3837 - 3840  | K.VGDDPAVWQLK.N                   | 1228.37879 | 2 | 1.33E-08 | 0.89 | 3.38 | - | 771.2  |
| AHQ-7-1, 3901 - 3960  | K.VGDDPAVWQLK.N                   | 1228.37879 | 2 | 2.29E-08 | 0.91 | 3.79 | - | 727.5  |
| AHQ-7-2, 3867 - 3927  | K.VGDDPAVWQLK.N                   | 1228.37879 | 2 | 2.52E-09 | 0.89 | 3.30 | - | 828.6  |
| AHQ-7-2, 3376         | K.VGDDPAVWQLKNSAK.V               | 1628.81068 | 2 | 1.55E-05 | 0.83 | 3.63 | - | 658.2  |
| AHQ-7-3, 3216 - 3220  | K.VLGEAMTGISQNAK.N                | 1419.62961 | 1 | 7.48E-04 | 0.56 | 2.72 | - | 506.6  |
| AHQ-7-4, 3196         | K.VLGEAMTGISQNAK.N                | 1419.62961 | 2 | 8.42E-05 | 0.92 | 3.88 | - | 1073.9 |
| AHQ-7-4, 2408         | K.VLGEAMTGISQNAK.N                | 1435.62901 | 2 | 1.00E-04 | 0.89 | 3.49 | - | 996.5  |
| AHQ-7-2, 3404         | K.VLGEAMTGISQNAK.N                | 1419.62961 | 2 | 2.55E-04 | 0.82 | 3.27 | - | 686.4  |
| AHQ-7-2, 2480 - 2545  | K.VLGEAMTGISQNAK.N                | 1435.62901 | 2 | 1.30E-07 | 0.96 | 4.45 | - | 1459.7 |
| AHQ-7-2, 3263 - 3267  | K.VLGEAMTGISQNAK.N                | 1419.62961 | 1 | 2.91E-06 | 0.84 | 2.93 | - | 746.6  |
| AHQ-7-11, 3055        | K.VLGEAMTGISQNAK.N                | 1419.62961 | 2 | 2.76E-05 | 0.89 | 3.58 | - | 1034.3 |
| AHQ-7-1, 4796         | K.VLGEAMTGISQNAKGNLPEFGDAISTASK.A | 3038.33659 | 3 | 3.77E-06 | 0.85 | 4.28 | - | 478.4  |
| AHQ-7-2, 4812 - 4875  | K.VLGEAMTGISQNAKGNLPEFGDAISTASK.A | 3038.33659 | 3 | 1.37E-11 | 0.92 | 5.25 | - | 592.6  |
| AHQ-7-3, 5208 - 5271  | K.VLGEAMTGISQNAKGNLPEFGDAISTASK.A | 3022.33719 | 3 | 1.41E-07 | 0.83 | 4.43 | - | 418.0  |
| AHQ-7-3, 4723 - 4784  | K.VLGEAMTGISQNAKGNLPEFGDAISTASK.A | 3038.33659 | 3 | 2.22E-06 | 0.85 | 4.67 | - | 447.9  |
| AHQ-7-4, 4860         | K.VLGEAMTGISQNAKGNLPEFGDAISTASK.A | 3038.33659 | 3 | 5.42E-06 | 0.87 | 4.59 | - | 477.3  |
| AHQ-7-5, 5284         | K.VLGEAMTGISQNAKGNLPEFGDAISTASK.A | 3022.33719 | 3 | 1.65E-04 | 0.92 | 4.96 | - | 904.2  |
| AHQ-7-5, 1712 - 1770  | K.VLVQNAAGSQEKL.L                 | 1244.37976 | 2 | 1.37E-06 | 0.93 | 3.65 | - | 1060.9 |
| AHQ-7-4, 1729 - 1796  | K.VLVQNAAGSQEKL.L                 | 1244.37976 | 2 | 4.17E-07 | 0.94 | 3.75 | - | 1150.8 |
| AHQ-7-4, 1917 - 1977  | K.VLVQNAAGSQEKL.L                 | 1244.37976 | 2 | 8.83E-05 | 0.74 | 2.85 | - | 544.5  |
| AHQ-7-2, 1797 - 1863  | K.VLVQNAAGSQEKL.L                 | 1244.37976 | 2 | 7.77E-09 | 0.93 | 3.62 | - | 1256.8 |
| AHQ-7-4, 2045         | K.VLVQNAAGSQEKL.L                 | 1244.37976 | 2 | 1.57E-04 | 0.52 | 2.60 | - | 520.7  |
| AHQ-7-3, 1820 - 1877  | K.VLVQNAAGSQEKL.L                 | 1244.37976 | 2 | 2.01E-06 | 0.93 | 3.62 | - | 1041.0 |
| AHQ-7-6, 1959         | K.VLVQNAAGSQEKL.L                 | 1244.37976 | 2 | 2.65E-06 | 0.83 | 3.08 | - | 751.6  |
| AHQ-7-2, 2040 - 2055  | K.VLVQNAAGSQEKL.L                 | 1244.37976 | 2 | 2.74E-06 | 0.92 | 3.51 | - | 925.3  |
| AHQ-7-5, 1826         | K.VLVQNAAGSQEKL.L                 | 1244.37976 | 2 | 8.61E-05 | 0.72 | 2.83 | - | 582.4  |
| AHQ-7-6, 1749 - 1815  | K.VLVQNAAGSQEKL.L                 | 1244.37976 | 2 | 7.40E-07 | 0.88 | 3.34 | - | 788.1  |
| AHQ-7-4, 1821 - 1860  | K.VLVQNAAGSQEKL.L                 | 1244.37976 | 2 | 6.43E-08 | 0.86 | 3.46 | - | 639.6  |
| AHQ-7-7, 4158         | K.VM*VTNVTLLK.T                   | 1221.49262 | 2 | 1.16E-04 | 0.77 | 2.98 | - | 629.4  |
| AHQ-7-2, 4767         | K.VMVTNVTLLK.T                    | 1205.49322 | 2 | 6.40E-06 | 0.92 | 3.79 | - | 887.9  |
| AHQ-7-7, 4473         | K.VMVTNVTLLK.T                    | 1205.49322 | 2 | 2.60E-04 | 0.78 | 3.43 | - | 620.0  |
| AHQ-7-2, 4443         | K.VM*VTNVTLLK.T                   | 1221.49262 | 2 | 3.54E-05 | 0.90 | 3.47 | - | 888.1  |
| AHQ-7-6, 4562         | K.VMVTNVTLLK.T                    | 1205.49322 | 2 | 8.18E-06 | 0.88 | 3.62 | - | 736.5  |
| AHQ-7-5, 4646         | K.VMVTNVTLLK.T                    | 1205.49322 | 2 | 5.68E-05 | 0.82 | 3.47 | - | 615.7  |
| AHQ-7-4, 4368         | K.VM*VTNVTLLK.T                   | 1221.49262 | 2 | 3.09E-05 | 0.68 | 2.88 | - | 538.6  |
| AHQ-7-3, 4680         | K.VMVTNVTLLK.T                    | 1205.49322 | 2 | 8.04E-05 | 0.91 | 3.80 | - | 865.1  |
| AHQ-7-3, 4361 - 4364  | K.VM*VTNVTLLK.T                   | 1221.49262 | 2 | 4.98E-05 | 0.82 | 3.38 | - | 656.5  |
| AHQ-7-4, 4725         | K.VMVTNVTLLK.T                    | 1205.49322 | 2 | 2.73E-04 | 0.91 | 3.69 | - | 877.0  |
| AHQ-7-6, 2809         | R.VQELGHGCAALVTK.A                | 1484.70307 | 2 | 3.26E-09 | 0.94 | 3.81 | - | 1275.7 |
| AHQ-7-1, 3095         | R.VQELGHGCAALVTK.A                | 1484.70307 | 2 | 1.29E-05 | 0.94 | 4.29 | - | 1165.9 |
| AHQ-7-4, 2836 - 2861  | R.VQELGHGCAALVTK.A                | 1484.70307 | 2 | 3.29E-04 | 0.98 | 5.07 | - | 2347.0 |
| AHQ-7-2, 2940 - 2945  | R.VQELGHGCAALVTK.A                | 1484.70307 | 3 | 2.80E-04 | 0.77 | 3.10 | - | 489.6  |
| AHQ-7-2, 2932         | R.VQELGHGCAALVTK.A                | 1484.70307 | 2 | 2.38E-06 | 0.95 | 4.20 | - | 1236.7 |
| AHQ-7-7, 2738         | R.VQELGHGCAALVTK.A                | 1484.70307 | 2 | 9.64E-10 | 0.98 | 4.88 | - | 2058.3 |
| AHQ-7-5, 2842         | R.VQELGHGCAALVTK.A                | 1484.70307 | 2 | 5.14E-05 | 0.97 | 4.69 | - | 1612.4 |
| AHQ-7-5, 2775 - 2806  | K.VSHVLAALQAGNR.G                 | 1336.52525 | 2 | 2.22E-09 | 0.96 | 4.07 | - | 1471.2 |
| AHQ-7-2, 2893         | K.VSHVLAALQAGNR.G                 | 1336.52525 | 1 | 5.86E-05 | 0.82 | 3.79 | - | 376.0  |
| AHQ-7-2, 2876         | K.VSHVLAALQAGNR.G                 | 1336.52525 | 1 | 4.30E-05 | 0.76 | 3.07 | - | 423.9  |
| AHQ-7-6, 2761         | K.VSHVLAALQAGNR.G                 | 1336.52525 | 2 | 5.34E-12 | 0.97 | 4.81 | - | 1780.1 |
| AHQ-7-2, 2869         | K.VSHVLAALQAGNR.G                 | 1336.52525 | 2 | 1.12E-07 | 0.97 | 4.35 | - | 1916.3 |
| AHQ-7-4, 2790         | K.VSHVLAALQAGNR.G                 | 1336.52525 | 1 | 2.66E-05 | 0.79 | 3.23 | - | 474.4  |
| AHQ-7-1, 3081         | K.VSHVLAALQAGNR.G                 | 1336.52525 | 2 | 1.18E-09 | 0.97 | 4.48 | - | 1725.8 |
| AHQ-7-3, 2864         | K.VSHVLAALQAGNR.G                 | 1336.52525 | 2 | 2.88E-10 | 0.97 | 4.64 | - | 1531.7 |
| AHQ-7-6, 2778         | K.VSHVLAALQAGNR.G                 | 1336.52525 | 1 | 4.80E-06 | 0.57 | 2.67 | - | 231.2  |
| AHQ-7-4, 2784 - 2793  | K.VSHVLAALQAGNR.G                 | 1336.52525 | 2 | 6.18E-10 | 0.98 | 5.00 | - | 2328.7 |
| AHQ-7-3, 2871 - 2876  | K.VSHVLAALQAGNR.G                 | 1336.52525 | 1 | 3.61E-04 | 0.84 | 3.27 | - | 451.7  |
| AHQ-7-7, 6428         | K.VSQMAQYFEPLTLAAVGAASK.T         | 2183.51313 | 2 | 1.30E-04 | 0.93 | 4.55 | - | 766.8  |
| AHQ-7-5, 6507         | K.VSQMAQYFEPLTLAAVGAASK.T         | 2183.51313 | 3 | 9.28E-07 | 0.95 | 4.74 | - | 1432.5 |
| AHQ-7-1, 6327         | K.VSQMAQYFEPLTLAAVGAASK.T         | 2183.51313 | 3 | 2.61E-06 | 0.94 | 4.29 | - | 1449.1 |
| AHQ-7-9, 5836         | K.VSQMAQYFEPLTLAAVGAASK.T         | 2183.51313 | 2 | 9.05E-04 | 0.74 | 2.98 | - | 437.6  |
| AHQ-7-1, 6319 - 6323  | K.VSQMAQYFEPLTLAAVGAASK.T         | 2183.51313 | 2 | 7.37E-05 | 0.93 | 4.32 | - | 843.4  |
| AHQ-7-4, 6674 - 6726  | K.VSQMAQYFEPLTLAAVGAASK.T         | 2183.51313 | 2 | 1.84E-07 | 0.89 | 4.44 | - | 538.2  |
| AHQ-7-11, 6011        | K.VSQMAQYFEPLTLAAVGAASK.T         | 2183.51313 | 2 | 2.35E-04 | 0.58 | 2.93 | - | 441.0  |
| AHQ-7-6, 5670 - 5673  | K.VSQM*AQYFEPLTLAAVGAASK.T        | 2199.51253 | 2 | 6.34E-06 | 0.96 | 4.85 | - | 1244.0 |
| AHQ-7-4, 6568 - 6590  | K.VSQMAQYFEPLTLAAVGAASK.T         | 2183.51313 | 3 | 1.29E-06 | 0.92 | 4.35 | - | 1150.4 |
| AHQ-7-1, 5672         | K.VSQM*AQYFEPLTLAAVGAASK.T        | 2199.51253 | 3 | 1.74E-11 | 0.97 | 5.29 | - | 2103.2 |
| AHQ-7-4, 6513 - 6572  | K.VSQMAQYFEPLTLAAVGAASK.T         | 2183.51313 | 2 | 8.17E-05 | 0.98 | 6.25 | - | 1156.6 |
| AHQ-7-5, 5760         | K.VSQM*AQYFEPLTLAAVGAASK.T        | 2199.51253 | 2 | 3.64E-05 | 0.86 | 3.69 | - | 723.4  |
| AHQ-7-6, 6385 - 6387  | K.VSQMAQYFEPLTLAAVGAASK.T         | 2183.51313 | 2 | 6.38E-05 | 0.96 | 5.70 | - | 714.2  |
| AHQ-7-4, 6504 - 6570  | K.VSQMAQYFEPLTLAAVGAASK.T         | 2183.51313 | 2 | 8.73E-07 | 0.97 | 5.44 | - | 1054.7 |
| AHQ-7-3, 6395 - 6403  | K.VSQMAQYFEPLTLAAVGAASK.T         | 2183.51313 | 3 | 4.39E-05 | 0.94 | 4.62 | - | 1323.4 |
| AHQ-7-3, 6320 - 6388  | K.VSQMAQYFEPLTLAAVGAASK.T         | 2183.51313 | 2 | 6.32E-06 | 0.91 | 4.22 | - | 679.3  |
| AHQ-7-3, 5715         | K.VSQM*AQYFEPLTLAAVGAASK.T        | 2199.51253 | 3 | 2.08E-08 | 0.96 | 4.65 | - | 1858.4 |
| AHQ-7-4, 5844         | K.VSQM*AQYFEPLTLAAVGAASK.T        | 2199.51253 | 2 | 2.23E-08 | 0.97 | 5.62 | - | 1136.1 |
| AHQ-7-3, 5712         | K.VSQM*AQYFEPLTLAAVGAASK.T        | 2199.51253 | 2 | 3.65E-08 | 0.94 | 4.41 | - | 1031.3 |
| AHQ-7-1, 5592 - 5668  | K.VSQM*AQYFEPLTLAAVGAASK.T        | 2199.51253 | 2 | 4.18E-07 | 0.93 | 4.55 | - | 997.4  |
| AHQ-7-2, 5855         | K.VSQM*AQYFEPLTLAAVGAASK.T        | 2199.51253 | 3 | 7.85E-07 | 0.90 | 3.50 | - | 1625.9 |
| AHQ-7-4, 5845         | K.VSQM*AQYFEPLTLAAVGAASK.T        | 2199.51253 | 2 | 1.86E-05 | 0.94 | 4.23 | - | 1093.4 |
| AHQ-7-2, 6469 - 6547  | K.VSQMAQYFEPLTLAAVGAASK.T         | 2183.51313 | 2 | 3.51E-09 | 0.97 | 6.09 | - | 1256.6 |
| AHQ-7-2, 6477         | K.VSQMAQYFEPLTLAAVGAASK.T         | 2183.51313 | 2 | 1.72E-06 | 0.94 | 4.85 | - | 749.1  |
| AHQ-7-2, 6563 - 6571  | K.VSQMAQYFEPLTLAAVGAASK.T         | 2183.51313 | 3 | 2.51E-10 | 0.98 | 5.69 | - | 2206.9 |

|                             |                                                                |            |   |          |       |        |       |          |
|-----------------------------|----------------------------------------------------------------|------------|---|----------|-------|--------|-------|----------|
| AHQ-7-2, 6608 - 6667        | K.VSQMAQYFEPLTLAAVGAASK.T                                      | 2183.51313 | 2 | 4.64E-05 | 0.95  | 5.53   | -     | 702.3    |
| AHQ-7-3, 5709               | K.VSQM*QYFEPLTLAAVGAASK.T                                      | 2199.51253 | 2 | 1.16E-07 | 0.95  | 4.96   | -     | 1039.8   |
| AHQ-7-1, 4595               | K.VVAPTSSPVQCEQLVEAGR.L                                        | 2142.41919 | 2 | 2.98E-07 | 0.95  | 4.60   | -     | 889.9    |
| AHQ-7-4, 4518               | K.VVAPTSSPVQCEQLVEAGR.L                                        | 2142.41919 | 2 | 7.12E-06 | 0.82  | 4.21   | -     | 253.0    |
| AHQ-7-3, 4467               | K.VVAPTSSPVQCEQLVEAGR.L                                        | 2142.41919 | 2 | 2.59E-09 | 0.92  | 4.03   | -     | 696.1    |
| AHQ-7-5, 4443               | K.VVAPTSSPVQCEQLVEAGR.L                                        | 2142.41919 | 2 | 1.49E-07 | 0.93  | 4.58   | -     | 590.0    |
| AHQ-7-6, 4373               | K.VVAPTSSPVQCEQLVEAGR.L                                        | 2142.41919 | 2 | 7.47E-07 | 0.83  | 3.77   | -     | 394.9    |
| AHQ-7-6, 4454 - 4481        | K.VVAPTSSPVQCEQLVEAGR.L                                        | 2142.41919 | 2 | 8.07E-09 | 0.96  | 4.93   | -     | 946.0    |
| AHQ-7-4, 4620               | K.VVAPTSSPVQCEQLVEAGR.L                                        | 2142.41919 | 2 | 6.01E-07 | 0.93  | 4.56   | -     | 596.2    |
| AHQ-7-5, 4546 - 4547        | K.VVAPTSSPVQCEQLVEAGR.L                                        | 2142.41919 | 2 | 7.91E-08 | 0.97  | 5.44   | -     | 968.3    |
| AHQ-7-14, 5246              | K.VVAPTSSPVQCEQLVEAGR.L                                        | 2142.41919 | 2 | 8.74E-06 | 0.91  | 4.14   | -     | 643.0    |
| AHQ-7-8, 4490 - 4496        | K.VVAPTSSPVQCEQLVEAGR.L                                        | 2142.41919 | 2 | 6.97E-09 | 0.97  | 5.84   | -     | 1068.8   |
| AHQ-7-14-, 4407             | K.VVAPTSSPVQCEQLVEAGR.L                                        | 2142.41919 | 2 | 5.61E-07 | 0.92  | 4.32   | -     | 637.8    |
| AHQ-7-8, 4506               | K.VVAPTSSPVQCEQLVEAGR.L                                        | 2142.41919 | 3 | 2.83E-11 | 0.90  | 4.12   | -     | 1061.9   |
| AHQ-7-13, 4483              | K.VVAPTSSPVQCEQLVEAGR.L                                        | 2142.41919 | 2 | 2.34E-08 | 0.95  | 5.09   | -     | 783.2    |
| AHQ-7-2, 4663 - 4743        | K.VVAPTSSPVQCEQLVEAGR.L                                        | 2142.41919 | 2 | 5.07E-06 | 0.96  | 5.47   | -     | 773.1    |
| AHQ-7-2, 4555               | K.VVAPTSSPVQCEQLVEAGR.L                                        | 2142.41919 | 2 | 2.84E-06 | 0.90  | 4.56   | -     | 398.7    |
| AHQ-7-11, 4284 - 4364       | K.VVAPTSSPVQCEQLVEAGR.L                                        | 2142.41919 | 2 | 1.82E-05 | 0.63  | 3.74   | -     | 315.4    |
| gi 4504165 ref NP_000168.1  | gelsolin (amyloidosis, Finnish type); Gelsolin [Homo sapiens]  |            |   | 3.89E-15 | 22.69 | 250.35 | 40.50 | 85696.9  |
| AHQ-7-6, 3647               | K.AGALNSNDAFVLK.T                                              | 1320.47622 | 2 | 2.90E-07 | 0.78  | 3.46   | -     | 471.9    |
| AHQ-7-6, 3751 - 3814        | K.AGALNSNDAFVLK.T                                              | 1320.47622 | 2 | 1.32E-04 | 0.85  | 3.54   | -     | 663.8    |
| AHQ-7-5, 3644 - 3710        | K.AGALNSNDAFVLK.T                                              | 1320.47622 | 2 | 1.55E-07 | 0.89  | 3.60   | -     | 887.8    |
| AHQ-7-5, 3906               | K.AGALNSNDAFVLK.T                                              | 1320.47622 | 2 | 4.41E-10 | 0.88  | 3.63   | -     | 713.4    |
| AHQ-7-5, 3876               | K.AGALNSNDAFVLK.T                                              | 1320.47622 | 1 | 1.45E-05 | 0.39  | 1.98   | -     | 482.7    |
| AHQ-7-5, 3227               | K.AGKEPLQIWR.V                                                 | 1255.45060 | 2 | 3.57E-04 | 0.77  | 2.89   | -     | 623.4    |
| AHQ-7-5, 3230               | K.AGKEPLQIWR.V                                                 | 1255.45060 | 3 | 4.04E-06 | 0.92  | 4.06   | -     | 1284.0   |
| AHQ-7-6, 5381 - 5441        | R.AQPQVAEAGESEPDGFWEALGGK.A                                    | 2273.44345 | 2 | 1.53E-04 | 0.94  | 4.67   | -     | 611.9    |
| AHQ-7-8, 5578               | R.AQPQVAEAGESEPDGFWEALGGK.A                                    | 2273.44345 | 2 | 2.46E-04 | 0.92  | 4.33   | -     | 665.3    |
| AHQ-7-11, 5270              | R.AQPQVAEAGESEPDGFWEALGGK.A                                    | 2273.44345 | 2 | 6.98E-08 | 0.90  | 4.14   | -     | 670.1    |
| AHQ-7-5, 5670 - 5730        | R.AQPQVAEAGESEPDGFWEALGGK.A                                    | 2273.44345 | 2 | 1.95E-07 | 0.97  | 6.01   | -     | 736.2    |
| AHQ-7-7, 5422 - 5429        | R.AQPQVAEAGESEPDGFWEALGGK.A                                    | 2273.44345 | 2 | 8.12E-05 | 0.95  | 4.90   | -     | 649.5    |
| AHQ-7-10, 5171              | R.AQPQVAEAGESEPDGFWEALGGK.A                                    | 2273.44345 | 2 | 8.28E-09 | 0.94  | 4.52   | -     | 806.8    |
| AHQ-7-7, 5589 - 5593        | R.AQPQVAEAGESEPDGFWEALGGK.A                                    | 2273.44345 | 2 | 3.20E-09 | 0.97  | 6.20   | -     | 1043.6   |
| AHQ-7-9, 5109               | R.AQPQVAEAGESEPDGFWEALGGK.A                                    | 2273.44345 | 2 | 1.05E-05 | 0.60  | 2.95   | -     | 358.1    |
| AHQ-7-7, 5514               | R.DPDQTDGLGLSYLSSHIANVER.V                                     | 2388.53285 | 3 | 2.54E-09 | 0.96  | 4.40   | -     | 2029.1   |
| AHQ-7-5, 5531 - 5594        | R.DPDQTDGLGLSYLSSHIANVER.V                                     | 2388.53285 | 3 | 5.85E-09 | 0.91  | 4.18   | -     | 1038.4   |
| AHQ-7-5, 5614               | R.DPDQTDGLGLSYLSSHIANVER.V                                     | 2388.53285 | 3 | 1.08E-10 | 0.95  | 4.84   | -     | 1391.7   |
| AHQ-7-6, 5525               | R.DPDQTDGLGLSYLSSHIANVER.V                                     | 2388.53285 | 3 | 1.31E-09 | 0.91  | 3.83   | -     | 1492.8   |
| AHQ-7-13, 2493              | K.DSQEEEKTEALTSK.R                                             | 1666.72289 | 2 | 1.27E-07 | 0.89  | 3.41   | -     | 1269.3   |
| AHQ-7-13-, 2308 - 2311      | K.DSQEEEKTEALTSK.R                                             | 1666.72289 | 3 | 9.61E-05 | 0.94  | 4.26   | -     | 1492.0   |
| AHQ-7-11, 2226              | K.DSQEEEKTEALTSK.R                                             | 1666.72289 | 2 | 2.49E-07 | 0.93  | 3.78   | -     | 1586.0   |
| AHQ-7-5, 2222 - 2299        | K.DSQEEEKTEALTSK.R                                             | 1666.72289 | 3 | 7.86E-07 | 0.98  | 5.33   | -     | 2490.7   |
| AHQ-7-7, 2196               | K.DSQEEEKTEALTSK.R                                             | 1666.72289 | 2 | 3.71E-07 | 0.89  | 3.59   | -     | 1057.9   |
| AHQ-7-10, 2203              | K.DSQEEEKTEALTSK.R                                             | 1666.72289 | 2 | 8.68E-06 | 0.85  | 3.07   | -     | 1080.4   |
| AHQ-7-13-, 2300             | K.DSQEEEKTEALTSK.R                                             | 1666.72289 | 2 | 1.53E-07 | 0.92  | 3.63   | -     | 1180.0   |
| AHQ-7-6, 2221               | K.DSQEEEKTEALTSK.R                                             | 1666.72289 | 2 | 2.14E-07 | 0.91  | 3.50   | -     | 1152.7   |
| AHQ-7-5, 2218 - 2294        | K.DSQEEEKTEALTSK.R                                             | 1666.72289 | 2 | 6.09E-06 | 0.94  | 3.99   | -     | 1498.7   |
| AHQ-7-4, 2262               | K.DSQEEEKTEALTSK.R                                             | 1666.72289 | 2 | 3.12E-05 | 0.91  | 3.58   | -     | 1175.4   |
| AHQ-7-2, 2341               | K.DSQEEEKTEALTSK.R                                             | 1666.72289 | 2 | 2.57E-05 | 0.75  | 3.13   | -     | 643.3    |
| AHQ-7-6, 2229               | K.DSQEEEKTEALTSK.R                                             | 1666.72289 | 3 | 6.64E-08 | 0.95  | 4.28   | -     | 1610.4   |
| AHQ-7-5, 4094 - 4164        | K.EPAHLSLFGGK.P                                                | 1287.51287 | 2 | 3.56E-04 | 0.60  | 2.94   | -     | 296.4    |
| AHQ-7-5, 6611               | R.EVQGFESATFLGYFK.S                                            | 1723.90570 | 2 | 1.26E-07 | 0.85  | 3.27   | -     | 886.0    |
| AHQ-7-5, 6519               | R.EVQGFESATFLGYFK.S                                            | 1723.90570 | 2 | 9.84E-06 | 0.92  | 3.84   | -     | 904.9    |
| AHQ-7-13-, 5769 - 5835      | R.EVQGFESATFLGYFK.S                                            | 1723.90570 | 2 | 1.81E-10 | 0.92  | 3.68   | -     | 996.5    |
| AHQ-7-5, 6199 - 6270        | R.EVQGFESATFLGYFK.S                                            | 1723.90570 | 2 | 3.48E-10 | 0.95  | 4.24   | -     | 1395.8   |
| AHQ-7-11, 5652              | R.EVQGFESATFLGYFK.S                                            | 1723.90570 | 2 | 1.93E-08 | 0.71  | 2.52   | -     | 845.1    |
| AHQ-7-1, 5976               | R.EVQGFESATFLGYFK.S                                            | 1723.90570 | 2 | 3.53E-08 | 0.82  | 3.34   | -     | 691.8    |
| AHQ-7-5, 6880               | R.EVQGFESATFLGYFK.S                                            | 1723.90570 | 2 | 1.02E-06 | 0.94  | 4.06   | -     | 1114.8   |
| AHQ-7-5, 6088 - 6154        | R.EVQGFESATFLGYFK.S                                            | 1723.90570 | 2 | 5.94E-08 | 0.97  | 4.80   | -     | 1873.5   |
| AHQ-7-14-, 5798 - 5801      | R.EVQGFESATFLGYFK.S                                            | 1723.90570 | 2 | 3.24E-05 | 0.97  | 4.98   | -     | 1599.6   |
| AHQ-7-5, 6850               | K.FDLVPVNTLGDFFTGDAYVILK.T                                     | 2706.08359 | 3 | 1.91E-06 | 0.89  | 4.00   | -     | 760.8    |
| AHQ-7-5, 2318 - 2330        | K.HVVPNEVVQR.L                                                 | 1276.46981 | 3 | 4.57E-04 | 0.70  | 3.66   | -     | 672.1    |
| AHQ-7-5, 2519 - 2527        | K.HVVPNEVVQR.L                                                 | 1276.46981 | 2 | 1.81E-05 | 0.91  | 3.34   | -     | 744.4    |
| AHQ-7-11, 2339              | K.HVVPNEVVQR.L                                                 | 1276.46981 | 2 | 9.25E-06 | 0.88  | 3.00   | -     | 671.0    |
| AHQ-7-5, 2314 - 2326        | K.HVVPNEVVQR.L                                                 | 1276.46981 | 2 | 8.49E-08 | 0.93  | 3.61   | -     | 707.9    |
| AHQ-7-5, 6035 - 6108        | R.IEGSNKVPVDPATYGFYGGDSYIILYNYR.H                              | 3401.72499 | 3 | 3.71E-09 | 0.94  | 4.82   | -     | 1216.3   |
| AHQ-7-5, 6166 - 6226        | R.IEGSNKVPVDPATYGFYGGDSYIILYNYR.H                              | 3401.72499 | 3 | 2.03E-05 | 0.95  | 5.16   | -     | 1409.7   |
| AHQ-7-6, 6019 - 6086        | R.IEGSNKVPVDPATYGFYGGDSYIILYNYR.H                              | 3401.72499 | 3 | 1.16E-04 | 0.69  | 3.23   | -     | 584.0    |
| AHQ-7-5, 5566 - 5579        | K.NWRDPDQTDGLGLSYLSSHIANVER.V                                  | 2845.03323 | 3 | 3.89E-15 | 0.98  | 7.04   | -     | 2316.2   |
| AHQ-7-5, 5303               | K.NWRDPDQTDGLGLSYLSSHIANVER.V                                  | 2845.03323 | 3 | 1.51E-09 | 0.98  | 6.77   | -     | 1760.2   |
| AHQ-7-6, 5509               | K.NWRDPDQTDGLGLSYLSSHIANVER.V                                  | 2845.03323 | 3 | 2.62E-11 | 0.98  | 6.06   | -     | 2067.0   |
| AHQ-7-5, 2507               | K.PALPAGTEDTAKEDAANR.K                                         | 1827.93072 | 2 | 3.30E-08 | 0.82  | 3.85   | -     | 388.9    |
| AHQ-7-5, 4747 - 4810        | K.QTQVSVLPEGGETPLFK.Q                                          | 1831.05925 | 2 | 4.37E-04 | 0.87  | 3.75   | -     | 421.9    |
| AHQ-7-5, 3079               | K.SEDCFILDHGK.D                                                | 1322.42590 | 1 | 8.99E-04 | 0.39  | 2.22   | -     | 301.1    |
| AHQ-7-5, 3080 - 3100        | K.SEDCFILDHGK.D                                                | 1322.42590 | 3 | 4.73E-04 | 0.80  | 3.45   | -     | 474.6    |
| AHQ-7-5, 3068 - 3103        | K.SEDCFILDHGK.D                                                | 1322.42590 | 2 | 3.03E-06 | 0.94  | 3.24   | -     | 1318.1   |
| AHQ-7-7, 2986               | K.SEDCFILDHGK.D                                                | 1322.42590 | 2 | 2.68E-05 | 0.94  | 3.56   | -     | 1281.8   |
| AHQ-7-10, 2231              | K.TGAQELLR.V                                                   | 888.00387  | 2 | 8.82E-05 | 0.90  | 2.97   | -     | 1222.1   |
| AHQ-7-5, 2238               | K.TGAQELLR.V                                                   | 888.00387  | 2 | 1.86E-04 | 0.92  | 3.43   | -     | 1201.0   |
| AHQ-7-5, 2328               | K.TGAQELLR.V                                                   | 888.00387  | 2 | 2.82E-04 | 0.87  | 3.08   | -     | 1001.6   |
| AHQ-7-5, 4446 - 4510        | K.TPSAAYLWVGTGASEAEK.T                                         | 1838.99510 | 2 | 2.47E-11 | 0.97  | 5.24   | -     | 1328.1   |
| AHQ-7-5, 4579               | K.TPSAAYLWVGTGASEAEK.T                                         | 1838.99510 | 2 | 4.37E-06 | 0.93  | 4.39   | -     | 883.1    |
| AHQ-7-6, 4378               | K.TPSAAYLWVGTGASEAEK.T                                         | 1838.99510 | 2 | 5.50E-05 | 0.95  | 3.68   | -     | 1482.4   |
| AHQ-7-11, 4183              | K.TPSAAYLWVGTGASEAEK.T                                         | 1838.99510 | 2 | 4.04E-05 | 0.86  | 3.05   | -     | 969.1    |
| AHQ-7-5, 3827 - 3890        | R.VHVSEEGTEPEAM*LQVLGPK.P                                      | 2167.42570 | 2 | 5.91E-04 | 0.97  | 5.74   | -     | 1154.5   |
| AHQ-7-5, 4935 - 5003        | R.VHVSEEGTEPEAM*LQVLGPK.P                                      | 2151.42630 | 2 | 2.07E-08 | 0.97  | 5.79   | -     | 1195.1   |
| AHQ-7-5, 3816 - 3887        | R.VHVSEEGTEPEAM*LQVLGPK.P                                      | 2167.42570 | 3 | 3.40E-04 | 0.92  | 4.31   | -     | 950.8    |
| AHQ-7-5, 5223               | R.VHVSEEGTEPEAM*LQVLGPKPALPAGTEDTAK.E                          | 3303.68611 | 3 | 5.52E-07 | 0.96  | 5.56   | -     | 1210.7   |
| AHQ-7-5, 4343               | R.VHVSEEGTEPEAM*LQVLGPKPALPAGTEDTAK.E                          | 3319.68551 | 3 | 1.12E-07 | 0.90  | 4.61   | -     | 606.7    |
| AHQ-7-5, 4016               | R.VPFDATLHTSTAMAAQHGMDDDGTGQK.Q                                | 2875.10141 | 3 | 3.85E-06 | 0.97  | 6.72   | -     | 1199.9   |
| AHQ-7-6, 3974               | R.VPFDATLHTSTAMAAQHGMDDDGTGQK.Q                                | 2875.10141 | 3 | 7.05E-07 | 0.97  | 6.27   | -     | 1230.1   |
| AHQ-7-5, 3883               | R.VPFDATLHTSTAMAAQHGMDDDGTGQK.Q                                | 2875.10141 | 3 | 7.85E-08 | 0.98  | 6.45   | -     | 1884.4   |
| AHQ-7-5, 3620 - 3686        | R.VPFDATLHTSTAMAAQHGMDDDGTGQK.Q                                | 2891.10081 | 3 | 2.59E-04 | 0.89  | 5.20   | -     | 1199.1   |
| AHQ-7-5, 4027               | R.VPFDATLHTSTAMAAQHGMDDDGTGQK.Q                                | 2875.10141 | 2 | 3.11E-10 | 0.90  | 4.26   | -     | 749.8    |
| AHQ-7-5, 3218               | R.VPFDATLHTSTAM*AAQHGMDDDGTGQK.Q                               | 2907.10021 | 3 | 2.89E-05 | 0.90  | 4.20   | -     | 836.9    |
| AHQ-7-5, 6376               | K.VPVPDPATYGFYGGDSYIILYNYR.H                                   | 2773.04698 | 2 | 2.15E-10 | 0.95  | 4.58   | -     | 1112.1   |
| AHQ-7-5, 6372 - 6451        | K.VPVPDPATYGFYGGDSYIILYNYR.H                                   | 2773.04698 | 3 | 1.74E-09 | 0.93  | 4.79   | -     | 1219.4   |
| AHQ-7-6, 6278 - 6285        | K.VPVPDPATYGFYGGDSYIILYNYR.H                                   | 2773.04698 | 3 | 4.23E-06 | 0.86  | 3.80   | -     | 895.7    |
| AHQ-7-5, 5350 - 5410        | K.VSNAGTMS*SVSLVADENPFAQGALK.S                                 | 2480.73680 | 2 | 4.28E-10 | 0.88  | 3.59   | -     | 787.3    |
| AHQ-7-6, 5317               | K.VSNAGTMS*SVSLVADENPFAQGALK.S                                 | 2480.73680 | 2 | 7.10E-10 | 0.94  | 4.08   | -     | 1066.9   |
| gi 13124879 ref NP_002465.1 | smooth muscle myosin heavy chain 11 isoform SM1 [Homo sapiens] |            |   | 4.44E-15 | 8.78  | 110.34 | 6.10  | 227336.7 |
| AHQ-7-3, 4712               | R.DLGEELALK.T                                                  | 1117.23151 | 2 | 1.35E-04 | 0.94  | 3.79   | -     | 1105.3   |
| AHQ-7-2, 4823               | R.DLGEELALK.T                                                  | 1117.23151 | 2 | 5.54E-06 | 0.90  | 3.60   | -     | 872.0    |
| AHQ-7-6, 2733               | R.EDQSILCTGESGAGK.T                                            | 1553.63107 | 2 | 5.33E-07 | 0.86  | 3.82   | -     | 486.0    |
| AHQ-7-5, 2750               | R.EDQSILCTGESGAGK.T                                            | 1553.63107 | 2 | 7.75E-04 | 0.47  | 2.83   | -     | 387.3    |
| AHQ-7-2, 3005               | K.FDQLLAEK.N                                                   | 1093.21165 | 1 | 4.14E-04 | 0.51  | 2.17   | -     | 938.4    |
| AHQ-7-2, 3007               | K.FDQLLAEK.N                                                   | 1093.21165 | 2 | 8.75E-06 | 0.92  | 3.04   | -     | 1639.3   |

|                            |                                                                         |            |   |          |      |        |       |         |
|----------------------------|-------------------------------------------------------------------------|------------|---|----------|------|--------|-------|---------|
| AHQ-7-3, 2979 - 2981       | K.FDQLLAEK.N                                                            | 1093.21165 | 2 | 1.63E-05 | 0.93 | 3.64   | -     | 1388.4  |
| AHQ-7-1, 3152              | K.FDQLLAEK.N                                                            | 1093.21165 | 2 | 1.79E-05 | 0.83 | 2.53   | -     | 1192.2  |
| AHQ-7-4, 2525              | K.KEEELQAAALR.L                                                         | 1258.40643 | 1 | 2.62E-06 | 0.17 | 1.88   | -     | 457.0   |
| AHQ-7-3, 2567 - 2597       | K.KEEELQAAALR.L                                                         | 1258.40643 | 2 | 4.03E-04 | 0.84 | 3.32   | -     | 885.8   |
| AHQ-7-4, 2517 - 2526       | K.KEEELQAAALR.L                                                         | 1258.40643 | 2 | 1.97E-04 | 0.88 | 3.37   | -     | 1024.2  |
| AHQ-7-2, 2609              | K.KEEELQAAALR.L                                                         | 1258.40643 | 3 | 9.22E-05 | 0.94 | 3.67   | -     | 1954.9  |
| AHQ-7-3, 2939              | R.KFDQLLAEK.N                                                           | 1221.38456 | 1 | 9.23E-05 | 0.42 | 2.67   | -     | 437.8   |
| AHQ-7-4, 2857              | R.KFDQLLAEK.N                                                           | 1221.38456 | 1 | 5.19E-05 | 0.44 | 2.16   | -     | 780.3   |
| AHQ-7-5, 2864              | R.KFDQLLAEK.N                                                           | 1221.38456 | 1 | 8.31E-06 | 0.58 | 2.62   | -     | 724.5   |
| AHQ-7-3, 2924              | R.KFDQLLAEK.N                                                           | 1221.38456 | 2 | 7.57E-04 | 0.90 | 3.29   | -     | 1173.9  |
| AHQ-7-5, 5902              | K.LQLFLNHTMFILEQEEYQR.E                                                 | 2468.77258 | 2 | 7.90E-06 | 0.79 | 3.01   | -     | 793.6   |
| AHQ-7-2, 5931 - 5993       | K.LQLFLNHTMFILEQEEYQR.E                                                 | 2468.77258 | 3 | 4.44E-15 | 0.98 | 6.43   | -     | 3269.2  |
| AHQ-7-7, 5765              | K.LQLFLNHTMFILEQEEYQR.E                                                 | 2468.77258 | 3 | 6.72E-13 | 0.98 | 5.30   | -     | 3460.3  |
| AHQ-7-3, 5800              | K.LQLFLNHTMFILEQEEYQR.E                                                 | 2468.77258 | 3 | 5.22E-14 | 0.97 | 5.73   | -     | 2174.4  |
| AHQ-7-5, 5884              | K.LQLFLNHTMFILEQEEYQR.E                                                 | 2468.77258 | 3 | 1.24E-04 | 0.96 | 5.34   | -     | 1482.2  |
| AHQ-7-3, 5184 - 5193       | K.LQLFLNHTMFILEQEEYQR.E                                                 | 2484.77198 | 3 | 8.81E-07 | 0.98 | 5.90   | -     | 2168.9  |
| AHQ-7-2, 6117 - 6193       | K.LQLFLNHTMFILEQEEYQR.E                                                 | 2468.77258 | 3 | 1.75E-09 | 0.94 | 4.67   | -     | 1421.1  |
| AHQ-7-2, 5941              | K.LQLFLNHTMFILEQEEYQR.E                                                 | 2468.77258 | 2 | 1.02E-07 | 0.94 | 3.57   | -     | 1600.4  |
| AHQ-7-2, 5283 - 5357       | K.LQLFLNHTMFILEQEEYQR.E                                                 | 2484.77198 | 3 | 2.24E-09 | 0.98 | 6.14   | -     | 2439.8  |
| AHQ-7-2, 2453 - 2461       | R.NCAAYL.K.L                                                            | 840.96726  | 1 | 1.00E-04 | 0.64 | 1.92   | -     | 973.6   |
| AHQ-7-4, 1876              | R.NTDQASMPDNTAAQK.V                                                     | 1592.67074 | 2 | 3.59E-04 | 0.69 | 3.00   | -     | 534.3   |
| AHQ-7-3, 1937              | R.NTDQASMPDNTAAQK.V                                                     | 1592.67074 | 2 | 1.61E-04 | 0.81 | 3.12   | -     | 528.0   |
| AHQ-7-1, 6048              | K.QLLQANPILAEFGNAK.T                                                    | 1727.98540 | 2 | 1.44E-09 | 0.94 | 4.03   | -     | 996.3   |
| AHQ-7-2, 6255              | K.QLLQANPILAEFGNAK.T                                                    | 1727.98540 | 2 | 4.80E-10 | 0.91 | 4.20   | -     | 624.8   |
| AHQ-7-3, 5945 - 6004       | K.QLLQANPILAEFGNAK.T                                                    | 1727.98540 | 2 | 3.73E-04 | 0.97 | 4.77   | -     | 1336.1  |
| AHQ-7-3, 6113              | K.QLLQANPILAEFGNAK.T                                                    | 1727.98540 | 2 | 1.20E-04 | 0.70 | 3.00   | -     | 398.5   |
| AHQ-7-13, 5835             | K.QLLQANPILAEFGNAK.T                                                    | 1727.98540 | 2 | 3.77E-05 | 0.88 | 3.40   | -     | 839.4   |
| AHQ-7-7, 5977 - 5988       | K.QLLQANPILAEFGNAK.T                                                    | 1727.98540 | 2 | 1.40E-04 | 0.83 | 3.34   | -     | 631.5   |
| AHQ-7-1, 5833 - 5888       | K.QLLQANPILAEFGNAK.T                                                    | 1727.98540 | 2 | 7.51E-13 | 0.97 | 4.61   | -     | 1351.5  |
| AHQ-7-9, 5440 - 5441       | K.QLLQANPILAEFGNAK.T                                                    | 1727.98540 | 2 | 8.54E-05 | 0.90 | 3.48   | -     | 933.0   |
| AHQ-7-2, 6163              | K.QLLQANPILAEFGNAK.T                                                    | 1727.98540 | 2 | 2.90E-05 | 0.94 | 4.17   | -     | 1039.0  |
| AHQ-7-5, 6015 - 6082       | K.QLLQANPILAEFGNAK.T                                                    | 1727.98540 | 2 | 3.05E-06 | 0.95 | 4.44   | -     | 956.6   |
| AHQ-7-2, 6017 - 6099       | K.QLLQANPILAEFGNAK.T                                                    | 1727.98540 | 2 | 2.32E-10 | 0.95 | 4.06   | -     | 1167.8  |
| AHQ-7-4, 6096 - 6161       | K.QLLQANPILAEFGNAK.T                                                    | 1727.98540 | 2 | 1.14E-06 | 0.96 | 5.09   | -     | 941.6   |
| AHQ-7-4, 6272              | K.QLLQANPILAEFGNAK.T                                                    | 1727.98540 | 2 | 3.27E-10 | 0.87 | 3.47   | -     | 644.8   |
| AHQ-7-10, 5461 - 5516      | K.QLLQANPILAEFGNAK.T                                                    | 1727.98540 | 2 | 1.12E-04 | 0.91 | 4.08   | -     | 833.1   |
| AHQ-7-6, 5923 - 5981       | K.QLLQANPILAEFGNAK.T                                                    | 1727.98540 | 2 | 1.46E-06 | 0.95 | 4.49   | -     | 973.9   |
| AHQ-7-1, 5943              | K.QLLQANPILAEFGNAK.T                                                    | 1727.98540 | 2 | 8.46E-08 | 0.95 | 4.11   | -     | 1158.7  |
| AHQ-7-5, 5568 - 5640       | K.TQLEELDEQLATEDAK.L                                                    | 1963.04334 | 2 | 1.46E-07 | 0.99 | 6.46   | -     | 2954.9  |
| AHQ-7-4, 5665              | K.TQLEELDEQLATEDAK.L                                                    | 1963.04334 | 3 | 6.93E-09 | 0.96 | 5.44   | -     | 1122.7  |
| AHQ-7-4, 5644 - 5648       | K.TQLEELDEQLATEDAK.L                                                    | 1963.04334 | 2 | 1.94E-09 | 0.98 | 6.06   | -     | 2595.4  |
| AHQ-7-3, 5527              | K.TQLEELDEQLATEDAK.L                                                    | 1963.04334 | 3 | 1.59E-05 | 0.97 | 5.72   | -     | 1723.2  |
| AHQ-7-6, 5497 - 5499       | K.TQLEELDEQLATEDAK.L                                                    | 1963.04334 | 3 | 3.29E-12 | 0.98 | 6.71   | -     | 2370.8  |
| AHQ-7-6, 5519              | K.TQLEELDEQLATEDAK.L                                                    | 1963.04334 | 3 | 3.47E-07 | 0.95 | 4.90   | -     | 1424.3  |
| AHQ-7-2, 5655              | K.TQLEELDEQLATEDAK.L                                                    | 1963.04334 | 3 | 1.28E-04 | 0.96 | 5.28   | -     | 1349.7  |
| AHQ-7-7, 5500              | K.TQLEELDEQLATEDAK.L                                                    | 1963.04334 | 2 | 3.11E-05 | 0.97 | 5.21   | -     | 1625.4  |
| AHQ-7-2, 5651 - 5713       | K.TQLEELDEQLATEDAK.L                                                    | 1963.04334 | 2 | 1.74E-09 | 0.97 | 4.69   | -     | 2033.4  |
| AHQ-7-2, 4064              | K.TQLEELDEQLATEDAK.L                                                    | 1963.04334 | 2 | 3.03E-09 | 0.97 | 5.30   | -     | 1279.5  |
| AHQ-7-8, 5528              | K.TQLEELDEQLATEDAK.L                                                    | 1963.04334 | 2 | 2.08E-05 | 0.92 | 3.86   | -     | 1187.0  |
| AHQ-7-1, 5487              | K.TQLEELDEQLATEDAK.L                                                    | 1963.04334 | 3 | 6.00E-08 | 0.95 | 4.60   | -     | 1559.6  |
| AHQ-7-1, 5480 - 5484       | K.TQLEELDEQLATEDAK.L                                                    | 1963.04334 | 2 | 1.19E-04 | 0.97 | 5.59   | -     | 1553.5  |
| AHQ-7-3, 5697              | K.TQLEELDEQLATEDAK.L                                                    | 1963.04334 | 2 | 9.19E-08 | 0.95 | 4.70   | -     | 1143.4  |
| gj4505879[ref]NP_002655.1  | pleckstrin; p47 [Homo sapiens]                                          |            |   | 5.00E-15 | 8.08 | 100.40 | 40.30 | 40082.5 |
| AHQ-7-14-, 5418            | R.EDPAYLHYDDPAGAEDPLGAIHLR.G                                            | 2684.89982 | 3 | 1.14E-08 | 0.97 | 5.94   | -     | 1588.8  |
| AHQ-7-10, 5176 - 5188      | R.EDPAYLHYDDPAGAEDPLGAIHLR.G                                            | 2684.89982 | 3 | 2.79E-05 | 0.97 | 5.72   | -     | 1843.3  |
| AHQ-7-13-, 5413            | R.EDPAYLHYDDPAGAEDPLGAIHLR.G                                            | 2684.89982 | 3 | 7.52E-09 | 0.97 | 6.26   | -     | 1669.6  |
| AHQ-7-13, 5465 - 5467      | R.EDPAYLHYDDPAGAEDPLGAIHLR.G                                            | 2684.89982 | 3 | 2.84E-06 | 0.97 | 6.18   | -     | 1607.5  |
| AHQ-7-8, 5550 - 5570       | R.EDPAYLHYDDPAGAEDPLGAIHLR.G                                            | 2684.89982 | 3 | 1.45E-10 | 0.98 | 6.85   | -     | 2075.5  |
| AHQ-7-8, 5556 - 5559       | R.EDPAYLHYDDPAGAEDPLGAIHLR.G                                            | 2684.89982 | 2 | 9.70E-07 | 0.86 | 3.84   | -     | 536.9   |
| AHQ-7-12, 5254             | R.EDPAYLHYDDPAGAEDPLGAIHLR.G                                            | 2684.89982 | 3 | 1.34E-05 | 0.97 | 5.47   | -     | 2026.1  |
| AHQ-7-11, 5278             | R.EDPAYLHYDDPAGAEDPLGAIHLR.G                                            | 2684.89982 | 3 | 3.27E-07 | 0.96 | 5.39   | -     | 1413.1  |
| AHQ-7-9, 5105 - 5112       | R.EDPAYLHYDDPAGAEDPLGAIHLR.G                                            | 2684.89982 | 3 | 1.60E-06 | 0.96 | 6.20   | -     | 1297.3  |
| AHQ-7-8, 2520 - 2584       | R.GCVVTSVESNSNGR.K                                                      | 1467.54464 | 2 | 1.67E-06 | 0.89 | 3.41   | -     | 1078.2  |
| AHQ-7-8, 2446 - 2503       | R.GCVVTSVESNSNGR.K                                                      | 1467.54464 | 1 | 5.86E-04 | 0.11 | 1.96   | -     | 153.6   |
| AHQ-7-8, 3200              | K.GSTLTPQCQDFGK.R                                                       | 1399.50867 | 1 | 2.36E-04 | 0.24 | 2.45   | -     | 261.5   |
| AHQ-7-8, 2698              | K.GSTLTPQCQDFGK.R                                                       | 1555.69502 | 2 | 2.21E-07 | 0.27 | 2.51   | -     | 300.0   |
| AHQ-7-8, 6664 - 6730       | K.IFNHCFNGCVIDWLVNSQSVR.N                                               | 2669.97641 | 2 | 1.65E-07 | 0.96 | 4.63   | -     | 1581.4  |
| AHQ-7-8, 6858 - 6926       | R.KSEENLFEIITAEVHYFLQAATPK.E                                            | 3024.32650 | 3 | 5.00E-15 | 0.98 | 6.85   | -     | 2759.7  |
| AHQ-7-8, 7007              | R.KSEENLFEIITAEVHYFLQAATPK.E                                            | 3024.32650 | 3 | 1.76E-05 | 0.97 | 5.84   | -     | 1750.4  |
| AHQ-7-9, 6169              | R.KSEENLFEIITAEVHYFLQAATPK.E                                            | 3024.32650 | 3 | 2.52E-06 | 0.98 | 7.90   | -     | 2490.4  |
| AHQ-7-9, 5160              | R.LPETIDL GALYLSM*K.D                                                   | 1680.98719 | 2 | 3.63E-04 | 0.92 | 3.96   | -     | 973.9   |
| AHQ-7-13, 5489 - 5559      | R.LPETIDL GALYLSM*K.D                                                   | 1680.98719 | 2 | 4.02E-05 | 0.91 | 4.57   | -     | 669.7   |
| AHQ-7-12, 5300 - 5364      | R.LPETIDL GALYLSM*K.D                                                   | 1680.98719 | 2 | 1.09E-04 | 0.97 | 5.42   | -     | 1152.1  |
| AHQ-7-8, 6304 - 6366       | R.LPETIDL GALYLSM*K.D                                                   | 1664.98779 | 2 | 9.72E-05 | 0.97 | 4.65   | -     | 1747.2  |
| AHQ-7-8, 5627              | R.LPETIDL GALYLSM*K.D                                                   | 1680.98719 | 2 | 2.32E-05 | 0.96 | 4.74   | -     | 1404.9  |
| AHQ-7-8, 6011 - 6084       | R.NRQEGLMIASSLNLEGYLPAGDMSK.S                                           | 2824.18382 | 2 | 6.49E-06 | 0.98 | 7.09   | -     | 1323.2  |
| AHQ-7-8, 6002              | R.NRQEGLMIASSLNLEGYLPAGDMSK.S                                           | 2824.18382 | 2 | 2.58E-04 | 0.96 | 4.92   | -     | 1242.1  |
| AHQ-7-8, 6914              | K.SEEENLFEIITAEVHYFLQAATPK.E                                            | 2896.15359 | 3 | 1.32E-12 | 0.84 | 4.04   | -     | 728.1   |
| AHQ-7-9, 6212              | K.SEEENLFEIITAEVHYFLQAATPK.E                                            | 2896.15359 | 3 | 1.45E-08 | 0.77 | 3.53   | -     | 723.5   |
| AHQ-7-8, 6911 - 6912       | K.SEEENLFEIITAEVHYFLQAATPK.E                                            | 2896.15359 | 2 | 3.09E-06 | 0.83 | 4.31   | -     | 380.1   |
| AHQ-7-12, 6322             | K.SEEENLFEIITAEVHYFLQAATPK.E                                            | 2896.15359 | 3 | 2.09E-06 | 0.71 | 3.26   | -     | 758.5   |
| AHQ-7-11, 6354 - 6355      | K.SEEENLFEIITAEVHYFLQAATPK.E                                            | 2896.15359 | 3 | 1.96E-09 | 0.78 | 3.79   | -     | 744.3   |
| gj4885609[ref]NP_005408.1  | v-src sarcoma (Schmidt-Ruppin A-2) viral oncogene homolog; Protooncogen |            |   | 6.11E-15 | 4.28 | 50.39  | 17.90 | 59834.4 |
| AHQ-7-7, 6766 - 6842       | R.KEPEERTFEYLQAFLEDYFTSTEPQYQGENL                                       | 3998.26826 | 3 | 6.16E-13 | 0.75 | 3.65   | -     | 345.0   |
| AHQ-7-7, 2925              | R.KLDSGGFYITSR.T                                                        | 1344.49778 | 2 | 4.53E-04 | 0.90 | 3.46   | -     | 943.2   |
| AHQ-7-7, 3734              | K.LFGGFSNDSITVTSPPQR.A                                                  | 1713.82931 | 2 | 6.43E-06 | 0.69 | 3.31   | -     | 702.6   |
| AHQ-7-7, 6825 - 6826       | R.LPQLVDMAAQIASGMAYVER.M                                                | 2164.53485 | 2 | 6.11E-15 | 0.99 | 7.80   | -     | 4471.5  |
| AHQ-7-7, 6377              | R.TQFNLSLQQLVAYYSK.H                                                    | 1790.99681 | 2 | 9.02E-06 | 0.90 | 3.48   | -     | 1111.9  |
| AHQ-7-7, 6193              | R.TQFNLSLQQLVAYYSK.H                                                    | 1790.99681 | 2 | 1.03E-07 | 0.96 | 4.22   | -     | 1544.2  |
| AHQ-7-7, 5994 - 5996       | R.TQFNLSLQQLVAYYSK.H                                                    | 1790.99681 | 2 | 2.14E-06 | 0.94 | 4.04   | -     | 1111.3  |
| gj21361657[ref]NP_005304.3 | glucose regulated protein, 58kDa; glucose regulated protein, 58kD [Homo |            |   | 7.77E-15 | 9.39 | 110.35 | 28.70 | 56782.0 |
| AHQ-7-13-, 5468            | R.ELSDFIYSYLQR.E                                                        | 1371.52000 | 2 | 2.75E-04 | 0.94 | 3.49   | -     | 1572.4  |
| AHQ-7-13, 5551             | R.ELSDFIYSYLQR.E                                                        | 1371.52000 | 2 | 1.53E-04 | 0.93 | 3.20   | -     | 1545.8  |
| AHQ-7-14-, 5459            | R.ELSDFIYSYLQR.E                                                        | 1371.52000 | 2 | 4.45E-04 | 0.95 | 3.75   | -     | 1491.3  |
| AHQ-7-7, 6204 - 6274       | R.FAHTNVESLVNVEYDDNGEGILFR.P                                            | 2753.96046 | 3 | 1.05E-07 | 0.95 | 4.85   | -     | 1232.9  |
| AHQ-7-7, 6209              | R.FAHTNVESLVNVEYDDNGEGILFR.P                                            | 2753.96046 | 2 | 8.12E-06 | 0.89 | 4.01   | -     | 842.8   |
| AHQ-7-7, 6716 - 6717       | K.FISDKDASIVGFDDSFSEAHSEFLK.A                                           | 2940.16492 | 3 | 7.77E-15 | 0.98 | 7.07   | -     | 3050.1  |
| AHQ-7-7, 4610              | R.FLQDYFDGNLK.R                                                         | 1360.49568 | 1 | 2.20E-04 | 0.24 | 1.88   | -     | 386.6   |
| AHQ-7-7, 4608              | R.FLQDYFDGNLK.R                                                         | 1360.49568 | 2 | 3.59E-05 | 0.86 | 3.46   | -     | 892.2   |
| AHQ-7-7, 4526              | R.GFPTIYFSPANK.K                                                        | 1342.52349 | 2 | 4.20E-04 | 0.89 | 3.54   | -     | 819.8   |
| AHQ-7-7, 5686              | R.KTFSHELSDFLGESTAGEIPVVAIR.T                                           | 2705.01562 | 3 | 5.33E-05 | 0.94 | 4.74   | -     | 1137.8  |
| AHQ-7-7, 2309              | R.LAPEYEAAATR.L                                                         | 1192.30331 | 2 | 3.96E-06 | 0.78 | 2.78   | -     | 348.1   |
| AHQ-7-7, 3362              | K.MDATANDVPSPEYVR.G                                                     | 1665.80646 | 2 | 1.45E-04 | 0.49 | 2.91   | -     | 339.3   |
| AHQ-7-7, 3509              | K.MDATANDVPSPEYVR.G                                                     | 1665.80646 | 2 | 1.34E-05 | 0.39 | 2.63   | -     | 345.1   |
| AHQ-7-7, 3060              | K.MDATANDVPSPEYVR.G                                                     | 1681.80586 | 2 | 5.88E-05 | 0.82 | 3.46   | -     | 521.6   |
| AHQ-7-7, 6076              | K.TFSHELSDFLGESTAGEIPVVAIR.T                                            | 2576.84271 | 2 | 6.68E-08 | 0.95 | 4.16   | -     | 1386.7  |
| AHQ-7-7, 3089              | K.YVSGYPTL.K.I                                                          | 1085.23435 | 2 | 6.01E-06 | 0.89 | 3.23   | -     | 649.9   |





|                                                                                                    |                                     |            |   |          |       |        |       |         |
|----------------------------------------------------------------------------------------------------|-------------------------------------|------------|---|----------|-------|--------|-------|---------|
| AHQ-7-2, 4152 - 4200                                                                               | R.VFVGEEDPEAESVTLR.V                | 1777.91007 | 2 | 1.35E-06 | 0.90  | 3.94   | -     | 941.6   |
| AHQ-7-13, 4003 - 4061                                                                              | R.VFVGEEDPEAESVTLR.V                | 1777.91007 | 2 | 5.68E-10 | 0.96  | 4.50   | -     | 1527.2  |
| AHQ-7-8, 3982 - 3983                                                                               | R.VFVGEEDPEAESVTLR.V                | 1777.91007 | 2 | 6.74E-05 | 0.93  | 4.02   | -     | 1003.4  |
| AHQ-7-7, 3908                                                                                      | R.VFVGEEDPEAESVTLR.V                | 1777.91007 | 2 | 2.15E-05 | 0.94  | 4.25   | -     | 1132.3  |
| AHQ-7-6, 3938 - 4007                                                                               | R.VFVGEEDPEAESVTLR.V                | 1777.91007 | 2 | 2.15E-08 | 0.93  | 4.19   | -     | 1043.2  |
| AHQ-7-10, 3745                                                                                     | R.VFVGEEDPEAESVTLR.V                | 1777.91007 | 2 | 4.38E-05 | 0.83  | 3.45   | -     | 873.2   |
| AHQ-7-13-, 3919                                                                                    | R.VFVGEEDPEAESVTLR.V                | 1777.91007 | 2 | 1.69E-07 | 0.94  | 4.44   | -     | 1154.5  |
| AHQ-7-3, 4029 - 4064                                                                               | R.VFVGEEDPEAESVTLR.V                | 1777.91007 | 2 | 2.01E-06 | 0.78  | 3.23   | -     | 881.9   |
| AHQ-7-6, 3962                                                                                      | R.VFVGEEDPEAESVTLR.V                | 1777.91007 | 3 | 3.17E-04 | 0.97  | 4.38   | -     | 2502.6  |
| AHQ-7-12, 3844                                                                                     | R.VFVGEEDPEAESVTLR.V                | 1777.91007 | 2 | 2.42E-07 | 0.76  | 2.61   | -     | 872.3   |
| AHQ-7-5, 4048 - 4051                                                                               | R.VFVGEEDPEAESVTLR.V                | 1777.91007 | 2 | 4.89E-11 | 0.95  | 4.91   | -     | 1167.5  |
| AHQ-7-11, 3822                                                                                     | R.VFVGEEDPEAESVTLR.V                | 1777.91007 | 2 | 1.46E-06 | 0.92  | 3.97   | -     | 997.8   |
| AHQ-7-11, 2870                                                                                     | R.VTGESHIGGVLLK.I                   | 1310.52448 | 2 | 8.56E-10 | 0.93  | 3.87   | -     | 1172.3  |
| AHQ-7-14-, 2985                                                                                    | R.VTGESHIGGVLLK.I                   | 1310.52448 | 2 | 2.06E-06 | 0.88  | 3.27   | -     | 1297.4  |
| AHQ-7-6, 2771 - 2850                                                                               | R.VTGESHIGGVLLK.I                   | 1310.52448 | 2 | 7.45E-11 | 0.95  | 4.59   | -     | 1176.9  |
| AHQ-7-9, 2729                                                                                      | R.VTGESHIGGVLLK.I                   | 1310.52448 | 1 | 5.04E-05 | 0.10  | 2.13   | -     | 257.6   |
| AHQ-7-9, 2704 - 2718                                                                               | R.VTGESHIGGVLLK.I                   | 1310.52448 | 2 | 5.06E-06 | 0.94  | 3.95   | -     | 1386.9  |
| AHQ-7-8, 2692                                                                                      | R.VTGESHIGGVLLK.I                   | 1310.52448 | 2 | 4.62E-07 | 0.92  | 3.84   | -     | 1206.5  |
| AHQ-7-7, 2776                                                                                      | R.VTGESHIGGVLLK.I                   | 1310.52448 | 2 | 3.43E-07 | 0.86  | 3.32   | -     | 1176.4  |
| AHQ-7-6, 2885                                                                                      | R.VTGESHIGGVLLK.I                   | 1310.52448 | 2 | 2.30E-07 | 0.95  | 4.07   | -     | 1475.4  |
| AHQ-7-4, 4949                                                                                      | K.VVLAGGVPALFR.G                    | 1270.54832 | 2 | 2.79E-06 | 0.97  | 4.64   | -     | 1837.8  |
| AHQ-7-6, 4762 - 4826                                                                               | K.VVLAGGVPALFR.G                    | 1270.54832 | 2 | 2.51E-09 | 0.98  | 5.21   | -     | 1961.4  |
| AHQ-7-9, 4388 - 4392                                                                               | K.VVLAGGVPALFR.G                    | 1270.54832 | 2 | 2.82E-06 | 0.97  | 4.86   | -     | 1760.1  |
| AHQ-7-10, 4435                                                                                     | K.VVLAGGVPALFR.G                    | 1270.54832 | 2 | 1.57E-07 | 0.95  | 4.22   | -     | 1334.7  |
| AHQ-7-7, 4713                                                                                      | K.VVLAGGVPALFR.G                    | 1270.54832 | 2 | 3.54E-07 | 0.95  | 4.46   | -     | 1239.4  |
| AHQ-7-7, 2558                                                                                      | K.YGILADAR.L                        | 878.99544  | 2 | 4.83E-04 | 0.92  | 3.14   | -     | 1046.3  |
| AHQ-7-6, 5309                                                                                      | K.YYSFFLDPK.T                       | 1295.42046 | 2 | 1.73E-04 | 0.81  | 3.29   | -     | 646.3   |
| AHQ-7-7, 5254                                                                                      | K.YYSFFLDPK.T                       | 1295.42046 | 2 | 6.50E-05 | 0.82  | 3.35   | -     | 691.9   |
| gi4557677[ref NP_000203.1] integrin beta chain, beta 3 precursor; platelet glycoprotein IIIa precu |                                     |            |   | 2.33E-14 | 20.04 | 230.30 | 32.40 | 87185.6 |
| AHQ-7-3, 3108                                                                                      | R.AKWDTANNPLYK.E                    | 1421.58225 | 2 | 1.01E-06 | 0.88  | 3.44   | -     | 638.2   |
| AHQ-7-7, 2910                                                                                      | R.AKWDTANNPLYK.E                    | 1421.58225 | 2 | 4.77E-06 | 0.86  | 3.04   | -     | 708.7   |
| AHQ-7-5, 3026 - 3098                                                                               | R.AKWDTANNPLYK.E                    | 1421.58225 | 2 | 4.52E-05 | 0.84  | 2.88   | -     | 826.2   |
| AHQ-7-4, 5352                                                                                      | R.CDLKENLLKDNCAPISEFPVSEAR.V        | 2938.23689 | 3 | 5.36E-05 | 0.91  | 5.20   | -     | 728.3   |
| AHQ-7-7, 5174                                                                                      | R.CDLKENLLKDNCAPISEFPVSEAR.V        | 2938.23689 | 3 | 5.40E-07 | 0.86  | 4.05   | -     | 811.7   |
| AHQ-7-5, 5310                                                                                      | R.CDLKENLLKDNCAPISEFPVSEAR.V        | 2938.23689 | 3 | 7.73E-09 | 0.96  | 5.47   | -     | 1404.5  |
| AHQ-7-3, 5181 - 5249                                                                               | R.CDLKENLLKDNCAPISEFPVSEAR.V        | 2938.23689 | 3 | 2.03E-05 | 0.93  | 4.99   | -     | 967.0   |
| AHQ-7-3, 4216 - 4280                                                                               | R.CGPGWLGSCQCESEEDYRPSQQDECSPR.E    | 3380.49342 | 3 | 2.43E-11 | 0.83  | 4.16   | -     | 522.9   |
| AHQ-7-5, 4271 - 4275                                                                               | R.CGPGWLGSCQCESEEDYRPSQQDECSPR.E    | 3380.49342 | 3 | 3.71E-05 | 0.79  | 3.49   | -     | 539.6   |
| AHQ-7-6, 4213                                                                                      | R.CGPGWLGSCQCESEEDYRPSQQDECSPR.E    | 3380.49342 | 3 | 1.48E-06 | 0.81  | 3.97   | -     | 427.1   |
| AHQ-7-1, 4323                                                                                      | R.CGPGWLGSCQCESEEDYRPSQQDECSPR.E    | 3380.49342 | 3 | 9.15E-07 | 0.65  | 3.07   | -     | 492.4   |
| AHQ-7-2, 4400                                                                                      | R.CGPGWLGSCQCESEEDYRPSQQDECSPR.E    | 3380.49342 | 3 | 9.71E-08 | 0.83  | 3.82   | -     | 456.2   |
| AHQ-7-7, 4172                                                                                      | R.CGPGWLGSCQCESEEDYRPSQQDECSPR.E    | 3380.49342 | 3 | 6.86E-06 | 0.81  | 3.89   | -     | 433.6   |
| AHQ-7-3, 4349                                                                                      | R.CGPGWLGSCQCESEEDYRPSQQDECSPR.E    | 3380.49342 | 3 | 4.61E-04 | 0.83  | 3.87   | -     | 436.0   |
| AHQ-7-4, 4253 - 4324                                                                               | R.CGPGWLGSCQCESEEDYRPSQQDECSPR.E    | 3380.49342 | 3 | 2.86E-04 | 0.78  | 3.71   | -     | 477.7   |
| AHQ-7-3, 6728 - 6761                                                                               | R.DAPEGGFDAIMQATVCDEK.I             | 2056.21716 | 2 | 3.59E-06 | 0.93  | 4.19   | -     | 1065.1  |
| AHQ-7-1, 5552                                                                                      | R.DAPEGGFDAIMQATVCDEK.I             | 2056.21716 | 2 | 9.19E-04 | 0.87  | 3.70   | -     | 726.4   |
| AHQ-7-1, 4396                                                                                      | R.DAPEGGFDAIM*QATVCDEK.I            | 2072.21656 | 2 | 1.66E-05 | 0.95  | 4.19   | -     | 1096.9  |
| AHQ-7-2, 4492                                                                                      | R.DAPEGGFDAIM*QATVCDEK.I            | 2072.21656 | 2 | 1.26E-04 | 0.89  | 3.67   | -     | 776.6   |
| AHQ-7-6, 5617 - 5695                                                                               | R.DAPEGGFDAIMQATVCDEK.I             | 2056.21716 | 2 | 1.15E-06 | 0.93  | 4.62   | -     | 591.5   |
| AHQ-7-3, 5795                                                                                      | R.DAPEGGFDAIMQATVCDEK.I             | 2056.21716 | 2 | 9.24E-08 | 0.90  | 3.80   | -     | 756.6   |
| AHQ-7-3, 4376 - 4377                                                                               | R.DAPEGGFDAIM*QATVCDEK.I            | 2072.21656 | 2 | 2.96E-07 | 0.96  | 4.95   | -     | 926.6   |
| AHQ-7-4, 4436 - 4486                                                                               | R.DAPEGGFDAIM*QATVCDEK.I            | 2072.21656 | 2 | 1.39E-04 | 0.93  | 4.31   | -     | 777.4   |
| AHQ-7-3, 5713                                                                                      | R.DAPEGGFDAIMQATVCDEK.I             | 2056.21716 | 2 | 2.06E-10 | 0.95  | 5.09   | -     | 603.9   |
| AHQ-7-4, 5910                                                                                      | R.DAPEGGFDAIMQATVCDEK.I             | 2056.21716 | 2 | 5.86E-10 | 0.90  | 4.10   | -     | 536.2   |
| AHQ-7-4, 5761 - 5821                                                                               | R.DAPEGGFDAIMQATVCDEK.I             | 2056.21716 | 2 | 2.04E-07 | 0.97  | 5.25   | -     | 1351.3  |
| AHQ-7-5, 4380 - 4388                                                                               | R.DAPEGGFDAIM*QATVCDEK.I            | 2072.21656 | 2 | 2.79E-09 | 0.93  | 3.77   | -     | 864.8   |
| AHQ-7-5, 5726                                                                                      | R.DAPEGGFDAIMQATVCDEK.I             | 2056.21716 | 2 | 2.86E-05 | 0.90  | 3.96   | -     | 638.6   |
| AHQ-7-3, 5601 - 5611                                                                               | R.DAPEGGFDAIMQATVCDEK.I             | 2056.21716 | 2 | 5.51E-05 | 0.87  | 3.81   | -     | 795.7   |
| AHQ-7-5, 4850                                                                                      | K.DDLWSIQNLGTL.L                    | 1390.52332 | 1 | 2.00E-04 | 0.19  | 2.14   | -     | 384.8   |
| AHQ-7-3, 4832 - 4839                                                                               | K.DDLWSIQNLGTL.L                    | 1390.52332 | 2 | 9.35E-09 | 0.93  | 3.87   | -     | 970.7   |
| AHQ-7-5, 4838                                                                                      | K.DDLWSIQNLGTL.L                    | 1390.52332 | 2 | 1.13E-04 | 0.83  | 2.84   | -     | 871.1   |
| AHQ-7-3, 4463                                                                                      | K.DNCAPISEFPVSEAR.V                 | 1822.93099 | 2 | 6.73E-10 | 0.95  | 3.97   | -     | 1469.6  |
| AHQ-7-7, 4220                                                                                      | K.DNCAPISEFPVSEAR.V                 | 1822.93099 | 2 | 4.49E-07 | 0.73  | 2.98   | -     | 582.6   |
| AHQ-7-5, 4328 - 4351                                                                               | K.DNCAPISEFPVSEAR.V                 | 1822.93099 | 2 | 8.62E-05 | 0.89  | 3.37   | -     | 1055.6  |
| AHQ-7-3, 4283 - 4343                                                                               | K.DNCAPISEFPVSEAR.V                 | 1822.93099 | 2 | 3.34E-04 | 0.72  | 2.92   | -     | 576.6   |
| AHQ-7-10, 3995                                                                                     | K.DNCAPISEFPVSEAR.V                 | 1822.93099 | 2 | 9.73E-04 | 0.63  | 2.84   | -     | 520.8   |
| AHQ-7-6, 4265 - 4273                                                                               | K.DNCAPISEFPVSEAR.V                 | 1822.93099 | 2 | 6.30E-05 | 0.46  | 2.75   | -     | 384.1   |
| AHQ-7-4, 3382                                                                                      | K.EATSTFTNITYR.G                    | 1404.50685 | 2 | 2.18E-07 | 0.77  | 2.95   | -     | 614.5   |
| AHQ-7-3, 3405                                                                                      | K.EATSTFTNITYR.G                    | 1404.50685 | 2 | 7.58E-05 | 0.69  | 2.76   | -     | 556.9   |
| AHQ-7-5, 3358                                                                                      | K.EATSTFTNITYR.G                    | 1404.50685 | 2 | 5.40E-06 | 0.77  | 2.99   | -     | 542.7   |
| AHQ-7-6, 3318                                                                                      | K.EATSTFTNITYR.G                    | 1404.50685 | 2 | 2.17E-04 | 0.79  | 2.95   | -     | 707.4   |
| AHQ-7-1, 3543                                                                                      | K.EATSTFTNITYR.G                    | 1404.50685 | 2 | 7.39E-07 | 0.82  | 2.96   | -     | 782.1   |
| AHQ-7-13, 3513                                                                                     | K.EATSTFTNITYR.G                    | 1404.50685 | 2 | 8.62E-07 | 0.73  | 2.55   | -     | 711.9   |
| AHQ-7-4, 2373                                                                                      | R.FQYYEDSSGK.S                      | 1224.25749 | 1 | 3.57E-05 | 0.69  | 3.17   | -     | 468.5   |
| AHQ-7-5, 3576 - 3578                                                                               | R.GECLCGQCCHSSDFGK.I                | 2006.16137 | 2 | 9.47E-08 | 0.96  | 4.36   | -     | 1661.6  |
| AHQ-7-3, 3591                                                                                      | R.GECLCGQCCHSSDFGK.I                | 2006.16137 | 2 | 2.76E-06 | 0.91  | 3.88   | -     | 900.7   |
| AHQ-7-6, 3514 - 3519                                                                               | R.GECLCGQCCHSSDFGK.I                | 2006.16137 | 2 | 1.28E-05 | 0.94  | 4.23   | -     | 1453.2  |
| AHQ-7-4, 3600                                                                                      | R.GECLCGQCCHSSDFGK.I                | 2006.16137 | 2 | 1.78E-04 | 0.91  | 4.08   | -     | 917.5   |
| AHQ-7-2, 3693                                                                                      | R.GECLCGQCCHSSDFGK.I                | 2006.16137 | 2 | 5.73E-05 | 0.93  | 4.16   | -     | 1035.2  |
| AHQ-7-1, 3700                                                                                      | R.GECLCGQCCHSSDFGK.I                | 2006.16137 | 2 | 1.09E-05 | 0.90  | 3.95   | -     | 965.5   |
| AHQ-7-1, 3709                                                                                      | R.GECLCGQCCHSSDFGK.I                | 2006.16137 | 3 | 5.09E-04 | 0.61  | 3.01   | -     | 472.4   |
| AHQ-7-3, 3595                                                                                      | R.GECLCGQCCHSSDFGK.I                | 2006.16137 | 3 | 1.04E-05 | 0.86  | 3.44   | -     | 776.8   |
| AHQ-7-3, 4228 - 4240                                                                               | R.GKCEGSCVCIQPGSYGDTCEKCPDPACTFKK.E | 4028.42584 | 3 | 1.28E-04 | 0.90  | 4.73   | -     | 710.1   |
| AHQ-7-5, 1931 - 1951                                                                               | K.GSGDSSQVTVSPQR.I                  | 1533.58302 | 2 | 1.01E-04 | 0.85  | 3.07   | -     | 1044.3  |
| AHQ-7-4, 2773                                                                                      | K.HVLTLDQVTR.F                      | 1283.45912 | 1 | 6.94E-10 | 0.81  | 3.46   | -     | 401.7   |
| AHQ-7-5, 2756                                                                                      | K.HVLTLDQVTR.F                      | 1283.45912 | 2 | 2.37E-05 | 0.90  | 3.43   | -     | 723.7   |
| AHQ-7-8, 2644                                                                                      | K.HVLTLDQVTR.F                      | 1283.45912 | 2 | 2.26E-06 | 0.86  | 3.25   | -     | 606.8   |
| AHQ-7-2, 2848                                                                                      | K.HVLTLDQVTR.F                      | 1283.45912 | 2 | 5.14E-06 | 0.90  | 3.23   | -     | 796.2   |
| AHQ-7-9, 2525 - 2604                                                                               | K.HVLTLDQVTR.F                      | 1283.45912 | 2 | 3.69E-05 | 0.89  | 3.44   | -     | 818.5   |
| AHQ-7-1, 3027                                                                                      | K.HVLTLDQVTR.F                      | 1283.45912 | 2 | 9.73E-08 | 0.94  | 3.71   | -     | 981.7   |
| AHQ-7-3, 2815 - 2881                                                                               | K.HVLTLDQVTR.F                      | 1283.45912 | 2 | 4.58E-06 | 0.88  | 3.38   | -     | 549.5   |
| AHQ-7-4, 2764 - 2765                                                                               | K.HVLTLDQVTR.F                      | 1283.45912 | 2 | 3.12E-07 | 0.92  | 3.96   | -     | 557.8   |
| AHQ-7-3, 4117                                                                                      | K.IGDVSFSIAK.V                      | 1267.41009 | 2 | 1.13E-04 | 0.87  | 3.17   | -     | 801.4   |
| AHQ-7-3, 3605                                                                                      | K.IGDVSFSIAK.V                      | 1267.41009 | 2 | 2.78E-05 | 0.75  | 2.93   | -     | 511.5   |
| AHQ-7-1, 4001                                                                                      | K.IGDVSFSIAK.V                      | 1267.41009 | 2 | 9.11E-05 | 0.85  | 2.97   | -     | 830.4   |
| AHQ-7-1, 4059 - 4060                                                                               | R.NDASHLLVFTTDAK.T                  | 1532.67977 | 2 | 2.49E-05 | 0.97  | 5.26   | -     | 1382.4  |
| AHQ-7-4, 3912 - 3940                                                                               | R.NDASHLLVFTTDAK.T                  | 1532.67977 | 2 | 4.69E-10 | 0.97  | 4.80   | -     | 1471.6  |
| AHQ-7-1, 4408                                                                                      | R.NDASHLLVFTTDAK.T                  | 1532.67977 | 2 | 3.68E-06 | 0.88  | 3.93   | -     | 760.7   |
| AHQ-7-7, 3744                                                                                      | R.NDASHLLVFTTDAK.T                  | 1532.67977 | 2 | 4.66E-08 | 0.88  | 3.34   | -     | 1063.0  |
| AHQ-7-6, 3815 - 3827                                                                               | R.NDASHLLVFTTDAK.T                  | 1532.67977 | 2 | 3.64E-09 | 0.97  | 4.82   | -     | 1519.4  |
| AHQ-7-7, 4197                                                                                      | R.NDASHLLVFTTDAK.T                  | 1532.67977 | 2 | 2.16E-07 | 0.92  | 3.64   | -     | 1078.4  |
| AHQ-7-4, 4380                                                                                      | R.NDASHLLVFTTDAK.T                  | 1532.67977 | 2 | 1.08E-05 | 0.90  | 3.53   | -     | 1047.8  |
| AHQ-7-3, 3889 - 3951                                                                               | R.NDASHLLVFTTDAK.T                  | 1532.67977 | 2 | 6.26E-09 | 0.97  | 4.84   | -     | 1721.5  |
| AHQ-7-5, 4348                                                                                      | R.NDASHLLVFTTDAK.T                  | 1532.67977 | 2 | 6.06E-09 | 0.93  | 3.86   | -     | 1004.0  |
| AHQ-7-3, 3953                                                                                      | R.NDASHLLVFTTDAK.T                  | 1532.67977 | 3 | 1.23E-07 | 0.94  | 4.36   | -     | 1318.1  |
| AHQ-7-3, 4356 - 4396                                                                               | R.NDASHLLVFTTDAK.T                  | 1532.67977 | 2 | 2.39E-10 | 0.95  | 4.24   | -     | 1229.3  |
| AHQ-7-4, 4229 - 4300                                                                               | R.NDASHLLVFTTDAK.T                  | 1532.67977 | 2 | 5.35E-10 | 0.82  | 3.62   | -     | 585.3   |

|                            |                                                                         |            |   |          |       |        |       |         |
|----------------------------|-------------------------------------------------------------------------|------------|---|----------|-------|--------|-------|---------|
| AHQ-7-5, 3915              | R.NDASHLLVFTTDAK.T                                                      | 1532.67977 | 3 | 1.51E-08 | 0.95  | 4.45   | -     | 1447.4  |
| AHQ-7-3, 4125 - 4199       | R.NDASHLLVFTTDAK.T                                                      | 1532.67977 | 2 | 4.91E-04 | 0.85  | 2.92   | -     | 1061.5  |
| AHQ-7-5, 3900 - 3979       | R.NDASHLLVFTTDAK.T                                                      | 1532.67977 | 2 | 2.61E-09 | 0.94  | 4.26   | -     | 1139.4  |
| AHQ-7-1, 3705              | K.SFTIKPVGFK.D                                                          | 1124.35685 | 2 | 7.50E-04 | 0.90  | 2.79   | -     | 1343.6  |
| AHQ-7-3, 3525              | K.SFTIKPVGFK.D                                                          | 1124.35685 | 2 | 8.99E-06 | 0.80  | 2.74   | -     | 945.6   |
| AHQ-7-5, 3454              | K.SFTIKPVGFK.D                                                          | 1124.35685 | 2 | 3.48E-06 | 0.85  | 2.69   | -     | 1074.5  |
| AHQ-7-5, 3535              | R.TDTCMSSNGLLCSGR.G                                                     | 1661.81786 | 2 | 7.96E-09 | 0.87  | 3.36   | -     | 755.0   |
| AHQ-7-3, 2825 - 2887       | R.TDTCMSSNGLLCSGR.G                                                     | 1677.81726 | 2 | 1.17E-08 | 0.92  | 3.79   | -     | 1054.4  |
| AHQ-7-5, 2784              | R.TDTCMSSNGLLCSGR.G                                                     | 1677.81726 | 2 | 2.57E-07 | 0.86  | 3.43   | -     | 899.3   |
| AHQ-7-3, 3555 - 3624       | R.TDTCMSSNGLLCSGR.G                                                     | 1661.81786 | 2 | 2.08E-08 | 0.90  | 3.72   | -     | 886.5   |
| AHQ-7-5, 2947              | R.TDTCMSSNGLLCSGR.G                                                     | 1677.81726 | 2 | 3.63E-06 | 0.93  | 3.50   | -     | 1344.1  |
| AHQ-7-4, 2978              | R.TDTCMSSNGLLCSGR.G                                                     | 1677.81726 | 2 | 9.60E-08 | 0.86  | 3.52   | -     | 899.1   |
| AHQ-7-3, 3453 - 3471       | R.TDTCMSSNGLLCSGR.G                                                     | 1661.81786 | 2 | 2.33E-14 | 0.95  | 4.28   | -     | 1265.9  |
| AHQ-7-4, 2801              | R.TDTCMSSNGLLCSGR.G                                                     | 1677.81726 | 2 | 1.01E-07 | 0.91  | 3.35   | -     | 1195.5  |
| AHQ-7-1, 3048              | R.TDTCMSSNGLLCSGR.G                                                     | 1677.81726 | 2 | 1.14E-08 | 0.93  | 3.75   | -     | 1124.1  |
| AHQ-7-4, 3482              | R.TDTCMSSNGLLCSGR.G                                                     | 1661.81786 | 2 | 1.75E-10 | 0.90  | 3.43   | -     | 958.3   |
| AHQ-7-7, 1906 - 1978       | R.VLEDRPLSDK.G                                                          | 1172.31354 | 2 | 8.49E-05 | 0.80  | 3.08   | -     | 792.2   |
| AHQ-7-3, 2048 - 2079       | R.VLEDRPLSDK.G                                                          | 1172.31354 | 2 | 4.12E-05 | 0.92  | 3.74   | -     | 1050.5  |
| AHQ-7-4, 2017              | R.VLEDRPLSDK.G                                                          | 1172.31354 | 2 | 6.49E-06 | 0.77  | 3.15   | -     | 667.3   |
| AHQ-7-5, 2803              | R.VLEDRPLSDKGGSDSSQVTVQSPQR.I                                           | 2686.87396 | 3 | 3.92E-09 | 0.86  | 3.71   | -     | 1033.6  |
| AHQ-7-1, 3021              | R.VLEDRPLSDKGGSDSSQVTVQSPQR.I                                           | 2686.87396 | 3 | 2.34E-06 | 0.96  | 5.50   | -     | 1759.7  |
| AHQ-7-3, 2851              | R.VLEDRPLSDKGGSDSSQVTVQSPQR.I                                           | 2686.87396 | 3 | 1.11E-05 | 0.91  | 4.74   | -     | 885.3   |
| AHQ-7-3, 2859              | R.VLEDRPLSDKGGSDSSQVTVQSPQR.I                                           | 2686.87396 | 2 | 3.40E-04 | 0.67  | 3.09   | -     | 305.1   |
| AHQ-7-4, 2804              | R.VLEDRPLSDKGGSDSSQVTVQSPQR.I                                           | 2686.87396 | 3 | 3.73E-09 | 0.96  | 6.00   | -     | 1487.0  |
| AHQ-7-3, 3375 - 3391       | K.WDTANNPLYK.E                                                          | 1222.33111 | 2 | 2.90E-06 | 0.61  | 2.82   | -     | 529.9   |
| AHQ-7-4, 3582 - 3648       | K.YCEDDDFSCVR.Y                                                         | 1514.59674 | 2 | 9.74E-07 | 0.96  | 3.79   | -     | 1389.4  |
| AHQ-7-5, 3607              | K.YCEDDDFSCVR.Y                                                         | 1514.59674 | 2 | 6.82E-05 | 0.83  | 2.68   | -     | 894.4   |
| AHQ-7-1, 3667 - 3719       | K.YCEDDDFSCVR.Y                                                         | 1514.59674 | 2 | 1.54E-05 | 0.93  | 3.39   | -     | 1045.4  |
| AHQ-7-2, 3712              | K.YCEDDDFSCVR.Y                                                         | 1514.59674 | 2 | 4.54E-07 | 0.94  | 3.57   | -     | 1213.9  |
| AHQ-7-6, 2299              | R.YCRDEIESVK.E                                                          | 1300.42023 | 2 | 3.49E-04 | 0.56  | 2.56   | -     | 655.0   |
| AHQ-7-4, 2338              | R.YCRDEIESVK.E                                                          | 1300.42023 | 2 | 1.53E-04 | 0.93  | 3.54   | -     | 1484.8  |
| gi 4501881 ref NP_001091.1 | alpha 1 actin precursor; alpha skeletal muscle actin [Homo sapiens] [MA |            |   | 3.50E-14 | 11.83 | 160.26 | 36.60 | 42050.8 |
| AHQ-7-8, 1712 - 1775       | K.AGFAGDDAPR.A                                                          | 977.01283  | 2 | 9.14E-04 | 0.91  | 3.51   | -     | 992.7   |
| AHQ-7-13, 2234 - 2289      | K.AGFAGDDAPR.A                                                          | 977.01283  | 2 | 1.09E-05 | 0.90  | 3.15   | -     | 1155.2  |
| AHQ-7-13-, 1893 - 1964     | K.AGFAGDDAPR.A                                                          | 977.01283  | 2 | 6.41E-04 | 0.87  | 2.68   | -     | 1133.6  |
| AHQ-7-12, 1995 - 2050      | K.AGFAGDDAPR.A                                                          | 977.01283  | 2 | 3.46E-05 | 0.91  | 2.90   | -     | 1255.8  |
| AHQ-7-8, 1834 - 1894       | K.AGFAGDDAPR.A                                                          | 977.01283  | 2 | 5.30E-07 | 0.91  | 3.32   | -     | 1156.5  |
| AHQ-7-8, 1954 - 2014       | K.AGFAGDDAPR.A                                                          | 977.01283  | 2 | 9.61E-04 | 0.78  | 2.57   | -     | 1166.1  |
| AHQ-7-12, 3566             | R.AVFFPSVIGR.P                                                          | 946.12815  | 2 | 9.76E-04 | 0.75  | 2.55   | -     | 763.2   |
| AHQ-7-8, 3498 - 3562       | R.AVFFPSVIGR.P                                                          | 946.12815  | 2 | 3.25E-04 | 0.67  | 2.60   | -     | 557.8   |
| AHQ-7-8, 3018 - 3090       | R.AVFFPSVIGRPR.H                                                        | 1199.43018 | 2 | 3.19E-04 | 0.60  | 3.10   | -     | 408.8   |
| AHQ-7-7, 4304              | R.DLTDYLMK.I                                                            | 999.16326  | 1 | 9.28E-04 | 0.21  | 1.98   | -     | 456.1   |
| AHQ-7-9, 3992 - 4010       | R.DLTDYLMK.I                                                            | 999.16326  | 2 | 4.31E-04 | 0.63  | 2.61   | -     | 385.8   |
| AHQ-7-8, 3312              | R.DLTDYLMK.I                                                            | 999.16326  | 1 | 2.46E-04 | 0.52  | 2.31   | -     | 455.4   |
| AHQ-7-11, 4128 - 4134      | R.DLTDYLMK.I                                                            | 999.16326  | 2 | 9.05E-04 | 0.72  | 3.25   | -     | 302.0   |
| AHQ-7-10, 3451 - 3467      | R.DLTDYLMK.I                                                            | 1015.16266 | 2 | 5.66E-04 | 0.65  | 2.62   | -     | 390.1   |
| AHQ-7-5, 4404              | R.DLTDYLMK.I                                                            | 999.16326  | 1 | 3.44E-04 | 0.54  | 2.15   | -     | 657.0   |
| AHQ-7-8, 4250 - 4319       | R.DLTDYLMK.I                                                            | 999.16326  | 2 | 9.04E-05 | 0.72  | 2.74   | -     | 384.1   |
| AHQ-7-8, 4246 - 4366       | R.DLTDYLMK.I                                                            | 999.16326  | 1 | 1.70E-05 | 0.51  | 2.61   | -     | 506.7   |
| AHQ-7-8, 3839 - 3904       | R.DLTDYLMK.I                                                            | 999.16326  | 1 | 4.26E-05 | 0.12  | 1.95   | -     | 177.3   |
| AHQ-7-8, 1528 - 1598       | K.DSYVGDEAQSQR                                                          | 1199.20634 | 2 | 1.37E-04 | 0.72  | 3.16   | -     | 584.8   |
| AHQ-7-8, 1572 - 1631       | K.DSYVGDEAQSQR                                                          | 1199.20634 | 1 | 5.12E-05 | 0.66  | 2.81   | -     | 450.4   |
| AHQ-7-8, 1562 - 1632       | K.DSYVGDEAQSQR.G                                                        | 1355.39270 | 2 | 6.29E-09 | 0.65  | 3.17   | -     | 539.9   |
| AHQ-7-8, 2314 - 2380       | K.EITALAPSTM.K.I                                                        | 1178.38146 | 2 | 5.15E-07 | 0.85  | 3.46   | -     | 643.8   |
| AHQ-7-13-, 3020 - 3021     | K.EITALAPSTM.K.I                                                        | 1162.38206 | 1 | 5.86E-04 | 0.59  | 2.68   | -     | 335.2   |
| AHQ-7-10, 2793 - 2852      | K.EITALAPSTM.K.I                                                        | 1162.38206 | 2 | 1.61E-04 | 0.77  | 2.74   | -     | 617.5   |
| AHQ-7-3, 3084              | K.EITALAPSTM.K.I                                                        | 1162.38206 | 1 | 9.52E-04 | 0.56  | 2.35   | -     | 363.0   |
| AHQ-7-5, 3010              | K.EITALAPSTM.K.I                                                        | 1162.38206 | 1 | 6.43E-06 | 0.48  | 2.46   | -     | 323.7   |
| AHQ-7-14-, 3023            | K.EITALAPSTM.K.I                                                        | 1162.38206 | 1 | 7.75E-04 | 0.37  | 2.48   | -     | 365.2   |
| AHQ-7-14-, 3013 - 3014     | K.EITALAPSTM.K.I                                                        | 1162.38206 | 2 | 1.90E-04 | 0.74  | 3.23   | -     | 455.8   |
| AHQ-7-6, 2993              | K.EITALAPSTM.K.I                                                        | 1162.38206 | 2 | 9.58E-04 | 0.89  | 2.80   | -     | 1064.6  |
| AHQ-7-14, 3154 - 3225      | K.EITALAPSTM.K.I                                                        | 1178.38146 | 2 | 9.57E-04 | 0.59  | 2.54   | -     | 564.4   |
| AHQ-7-13, 3181             | K.EITALAPSTM.K.I                                                        | 1162.38206 | 1 | 1.87E-04 | 0.33  | 2.16   | -     | 244.1   |
| AHQ-7-8, 6648 - 6711       | K.EKLCYVALDFENEM*ATAASSSSLEK.S                                          | 2812.07683 | 2 | 2.33E-04 | 0.58  | 2.76   | -     | 461.3   |
| AHQ-7-8, 2659              | R.HQGVVMVGMGQKDSYVGDEAQSQR                                              | 2352.59065 | 3 | 1.76E-08 | 0.89  | 3.77   | -     | 1176.7  |
| AHQ-7-8, 2647 - 2722       | K.IWHTFYNELR.V                                                          | 1516.68695 | 2 | 3.84E-08 | 0.80  | 3.33   | -     | 893.0   |
| AHQ-7-12, 3111 - 3119      | K.IWHTFYNELR.V                                                          | 1516.68695 | 3 | 2.04E-05 | 0.88  | 4.15   | -     | 1176.5  |
| AHQ-7-8, 2726 - 2794       | K.IWHTFYNELR.V                                                          | 1516.68695 | 3 | 1.37E-05 | 0.96  | 4.43   | -     | 1676.0  |
| AHQ-7-8, 2790 - 2862       | K.IWHTFYNELR.V                                                          | 1516.68695 | 2 | 1.54E-06 | 0.65  | 3.24   | -     | 626.0   |
| AHQ-7-8, 2834              | K.IWHTFYNELR.V                                                          | 1516.68695 | 3 | 2.69E-05 | 0.92  | 4.34   | -     | 1552.3  |
| AHQ-7-8, 2930 - 2991       | K.IWHTFYNELR.V                                                          | 1516.68695 | 2 | 9.06E-04 | 0.64  | 3.15   | -     | 569.0   |
| AHQ-7-8, 2978 - 3043       | K.IWHTFYNELR.V                                                          | 1516.68695 | 3 | 6.23E-04 | 0.95  | 4.13   | -     | 1745.6  |
| AHQ-7-12, 3094 - 3150      | K.IWHTFYNELR.V                                                          | 1516.68695 | 2 | 4.26E-06 | 0.85  | 3.27   | -     | 1034.7  |
| AHQ-7-12, 3250             | K.IWHTFYNELR.V                                                          | 1516.68695 | 2 | 1.44E-05 | 0.86  | 3.26   | -     | 842.7   |
| AHQ-7-8, 3107 - 3184       | K.IWHTFYNELR.V                                                          | 1516.68695 | 3 | 3.70E-05 | 0.92  | 3.88   | -     | 1450.6  |
| AHQ-7-8, 3226 - 3298       | K.IWHTFYNELR.V                                                          | 1516.68695 | 2 | 1.64E-09 | 0.93  | 3.69   | -     | 1102.7  |
| AHQ-7-11, 3072             | K.IWHTFYNELR.V                                                          | 1516.68695 | 2 | 5.78E-05 | 0.65  | 2.58   | -     | 744.0   |
| AHQ-7-10, 3004             | K.IWHTFYNELR.V                                                          | 1516.68695 | 3 | 5.52E-04 | 0.93  | 4.35   | -     | 1099.6  |
| AHQ-7-10, 2991 - 3049      | K.IWHTFYNELR.V                                                          | 1516.68695 | 2 | 5.85E-08 | 0.84  | 2.80   | -     | 678.7   |
| AHQ-7-4, 3169              | K.IWHTFYNELR.V                                                          | 1516.68695 | 2 | 4.20E-08 | 0.84  | 3.22   | -     | 994.3   |
| AHQ-7-9, 2993 - 3052       | K.IWHTFYNELR.V                                                          | 1516.68695 | 2 | 2.28E-07 | 0.87  | 3.55   | -     | 727.9   |
| AHQ-7-9, 2858              | K.IWHTFYNELR.V                                                          | 1516.68695 | 3 | 4.27E-04 | 0.96  | 4.50   | -     | 1600.1  |
| AHQ-7-8, 3042 - 3102       | K.IWHTFYNELR.V                                                          | 1516.68695 | 2 | 1.80E-08 | 0.93  | 4.27   | -     | 1100.1  |
| AHQ-7-8, 6836 - 6916       | K.LCYVALDFENEM*ATAASSSSLEK.S                                            | 2554.78938 | 3 | 1.62E-04 | 0.90  | 4.39   | -     | 1050.2  |
| AHQ-7-8, 4328 - 4390       | K.SYELPDGQVITIGNER.F                                                    | 1791.93998 | 2 | 1.39E-05 | 0.87  | 3.15   | -     | 726.4   |
| AHQ-7-4, 4530              | K.SYELPDGQVITIGNER.F                                                    | 1791.93998 | 2 | 1.08E-06 | 0.82  | 2.90   | -     | 790.7   |
| AHQ-7-8, 4454 - 4518       | K.SYELPDGQVITIGNER.F                                                    | 1791.93998 | 2 | 1.01E-12 | 0.94  | 3.85   | -     | 1249.5  |
| AHQ-7-8, 4550 - 4579       | K.SYELPDGQVITIGNER.F                                                    | 1791.93998 | 2 | 1.37E-12 | 0.97  | 4.62   | -     | 1443.0  |
| AHQ-7-8, 4584              | K.SYELPDGQVITIGNER.F                                                    | 1791.93998 | 3 | 4.21E-08 | 0.91  | 4.29   | -     | 1021.9  |
| AHQ-7-8, 4660 - 4738       | K.SYELPDGQVITIGNER.F                                                    | 1791.93998 | 2 | 6.50E-11 | 0.96  | 4.77   | -     | 1131.4  |
| AHQ-7-8, 4671 - 4743       | K.SYELPDGQVITIGNER.F                                                    | 1791.93998 | 2 | 8.18E-10 | 0.96  | 5.03   | -     | 983.9   |
| AHQ-7-8, 4758 - 4827       | K.SYELPDGQVITIGNER.F                                                    | 1791.93998 | 3 | 1.75E-07 | 0.96  | 4.89   | -     | 1624.6  |
| AHQ-7-8, 4802 - 4874       | K.SYELPDGQVITIGNER.F                                                    | 1791.93998 | 2 | 1.52E-09 | 0.93  | 4.31   | -     | 921.6   |
| AHQ-7-8, 4927 - 5008       | K.SYELPDGQVITIGNER.F                                                    | 1791.93998 | 2 | 1.35E-10 | 0.95  | 4.79   | -     | 939.7   |
| AHQ-7-14, 5706 - 5761      | K.SYELPDGQVITIGNER.F                                                    | 1791.93998 | 2 | 2.51E-04 | 0.83  | 3.52   | -     | 862.7   |
| AHQ-7-8, 5050 - 5070       | K.SYELPDGQVITIGNER.F                                                    | 1791.93998 | 2 | 7.70E-09 | 0.95  | 4.36   | -     | 1239.1  |
| AHQ-7-4, 4616              | K.SYELPDGQVITIGNER.F                                                    | 1791.93998 | 2 | 9.18E-09 | 0.84  | 3.46   | -     | 666.6   |
| AHQ-7-13-, 4844 - 4904     | K.SYELPDGQVITIGNER.F                                                    | 1791.93998 | 2 | 2.72E-12 | 0.94  | 4.12   | -     | 926.1   |
| AHQ-7-5, 4543 - 4623       | K.SYELPDGQVITIGNER.F                                                    | 1791.93998 | 2 | 1.93E-11 | 0.94  | 4.04   | -     | 943.1   |
| AHQ-7-13-, 4295 - 4372     | K.SYELPDGQVITIGNER.F                                                    | 1791.93998 | 2 | 2.17E-06 | 0.82  | 3.15   | -     | 700.2   |
| AHQ-7-5, 5088 - 5156       | K.SYELPDGQVITIGNER.F                                                    | 1791.93998 | 2 | 9.91E-11 | 0.95  | 4.67   | -     | 840.2   |
| AHQ-7-9, 4174 - 4186       | K.SYELPDGQVITIGNER.F                                                    | 1791.93998 | 2 | 1.00E-05 | 0.92  | 3.95   | -     | 962.0   |
| AHQ-7-9, 4393 - 4473       | K.SYELPDGQVITIGNER.F                                                    | 1791.93998 | 2 | 4.53E-09 | 0.95  | 4.50   | -     | 1045.9  |
| AHQ-7-9, 4557 - 4612       | K.SYELPDGQVITIGNER.F                                                    | 1791.93998 | 2 | 8.85E-12 | 0.95  | 4.54   | -     | 971.6   |
| AHQ-7-3, 5071              | K.SYELPDGQVITIGNER.F                                                    | 1791.93998 | 2 | 3.52E-08 | 0.92  | 4.00   | -     | 740.0   |
| AHQ-7-13-, 4727 - 4729     | K.SYELPDGQVITIGNER.F                                                    | 1791.93998 | 2 | 5.15E-10 | 0.95  | 4.60   | -     | 996.8   |
| AHQ-7-6, 4469 - 4477       | K.SYELPDGQVITIGNER.F                                                    | 1791.93998 | 2 | 4.89E-10 | 0.92  | 3.82   | -     | 837.4   |

|                             |                                     |            |   |          |       |        |       |          |
|-----------------------------|-------------------------------------|------------|---|----------|-------|--------|-------|----------|
| AHQ-7-3, 4925               | K.SYELPDGQVITIGNER.F                | 1791.93998 | 2 | 1.85E-06 | 0.75  | 3.00   | -     | 576.7    |
| AHQ-7-10, 4072 - 4135       | K.SYELPDGQVITIGNER.F                | 1791.93998 | 2 | 1.76E-08 | 0.92  | 4.05   | -     | 753.4    |
| AHQ-7-10, 4220              | K.SYELPDGQVITIGNER.F                | 1791.93998 | 2 | 3.50E-14 | 0.93  | 3.60   | -     | 1033.7   |
| AHQ-7-10, 4440 - 4495       | K.SYELPDGQVITIGNER.F                | 1791.93998 | 2 | 8.19E-10 | 0.96  | 4.56   | -     | 1119.7   |
| AHQ-7-10, 4477              | K.SYELPDGQVITIGNER.F                | 1791.93998 | 3 | 5.26E-08 | 0.95  | 4.58   | -     | 1696.2   |
| AHQ-7-10, 4559 - 4615       | K.SYELPDGQVITIGNER.F                | 1791.93998 | 2 | 2.64E-11 | 0.96  | 4.63   | -     | 1145.7   |
| AHQ-7-10, 4669 - 4728       | K.SYELPDGQVITIGNER.F                | 1791.93998 | 2 | 7.21E-05 | 0.76  | 3.03   | -     | 743.3    |
| AHQ-7-6, 4878               | K.SYELPDGQVITIGNER.F                | 1791.93998 | 2 | 9.73E-07 | 0.94  | 3.44   | -     | 1349.8   |
| AHQ-7-3, 4560 - 4632        | K.SYELPDGQVITIGNER.F                | 1791.93998 | 2 | 4.19E-12 | 0.93  | 4.04   | -     | 820.8    |
| AHQ-7-11, 4170 - 4246       | K.SYELPDGQVITIGNER.F                | 1791.93998 | 2 | 2.95E-09 | 0.90  | 3.28   | -     | 861.9    |
| AHQ-7-11, 4262 - 4331       | K.SYELPDGQVITIGNER.F                | 1791.93998 | 2 | 4.55E-07 | 0.94  | 4.28   | -     | 1080.8   |
| AHQ-7-11, 4558 - 4614       | K.SYELPDGQVITIGNER.F                | 1791.93998 | 2 | 3.11E-04 | 0.93  | 4.24   | -     | 840.2    |
| AHQ-7-11, 4694 - 4750       | K.SYELPDGQVITIGNER.F                | 1791.93998 | 2 | 6.48E-10 | 0.93  | 4.26   | -     | 850.5    |
| AHQ-7-2, 5179               | K.SYELPDGQVITIGNER.F                | 1791.93998 | 2 | 8.61E-07 | 0.95  | 3.92   | -     | 1144.4   |
| AHQ-7-6, 4983 - 5018        | K.SYELPDGQVITIGNER.F                | 1791.93998 | 2 | 1.28E-06 | 0.62  | 2.71   | -     | 501.2    |
| AHQ-7-6, 5086               | K.SYELPDGQVITIGNER.F                | 1791.93998 | 2 | 2.72E-04 | 0.48  | 2.57   | -     | 602.3    |
| AHQ-7-7, 4800               | K.SYELPDGQVITIGNER.F                | 1791.93998 | 2 | 5.62E-05 | 0.74  | 3.23   | -     | 509.0    |
| AHQ-7-2, 4668 - 4748        | K.SYELPDGQVITIGNER.F                | 1791.93998 | 2 | 1.37E-07 | 0.90  | 3.85   | -     | 658.7    |
| AHQ-7-12, 4186              | K.SYELPDGQVITIGNER.F                | 1791.93998 | 2 | 2.50E-04 | 0.75  | 2.85   | -     | 603.6    |
| AHQ-7-14, 5608              | K.SYELPDGQVITIGNER.F                | 1791.93998 | 2 | 2.89E-04 | 0.91  | 3.93   | -     | 838.0    |
| AHQ-7-12, 4282 - 4283       | K.SYELPDGQVITIGNER.F                | 1791.93998 | 2 | 8.26E-13 | 0.96  | 4.65   | -     | 1179.3   |
| AHQ-7-12, 4591              | K.SYELPDGQVITIGNER.F                | 1791.93998 | 2 | 2.99E-05 | 0.94  | 3.86   | -     | 1003.1   |
| AHQ-7-12, 4710 - 4768       | K.SYELPDGQVITIGNER.F                | 1791.93998 | 2 | 2.17E-08 | 0.95  | 4.67   | -     | 796.5    |
| AHQ-7-1, 5047 - 5120        | K.SYELPDGQVITIGNER.F                | 1791.93998 | 2 | 1.44E-09 | 0.94  | 4.38   | -     | 923.2    |
| AHQ-7-7, 4993 - 5005        | K.SYELPDGQVITIGNER.F                | 1791.93998 | 2 | 1.12E-08 | 0.93  | 3.83   | -     | 985.6    |
| AHQ-7-13, 4586              | K.SYELPDGQVITIGNER.F                | 1791.93998 | 2 | 2.15E-04 | 0.82  | 3.41   | -     | 603.6    |
| AHQ-7-13, 4845 - 4846       | K.SYELPDGQVITIGNER.F                | 1791.93998 | 2 | 1.37E-12 | 0.97  | 5.29   | -     | 951.9    |
| AHQ-7-13, 4966 - 5037       | K.SYELPDGQVITIGNER.F                | 1791.93998 | 2 | 1.15E-11 | 0.94  | 4.29   | -     | 965.5    |
| AHQ-7-1, 4507 - 4587        | K.SYELPDGQVITIGNER.F                | 1791.93998 | 2 | 1.73E-06 | 0.93  | 4.03   | -     | 971.9    |
| AHQ-7-14, 5566 - 5621       | K.SYELPDGQVITIGNER.F                | 1791.93998 | 2 | 9.82E-06 | 0.55  | 2.74   | -     | 525.3    |
| AHQ-7-14-, 4903             | K.SYELPDGQVITIGNER.F                | 1791.93998 | 2 | 7.73E-06 | 0.69  | 3.02   | -     | 608.8    |
| AHQ-7-8, 3640 - 3704        | R.VAPEEHPTLLEAPLNPK.A               | 1957.21627 | 2 | 5.16E-04 | 0.76  | 3.47   | -     | 437.9    |
| AHQ-7-8, 4318 - 4382        | K.YPIEHGIITNWDWMEK.I                | 1962.17174 | 2 | 1.14E-04 | 0.85  | 3.89   | -     | 681.0    |
| AHQ-7-8, 4227 - 4298        | K.YPIEHGIITNWDWMEK.I                | 1962.17174 | 2 | 6.76E-05 | 0.90  | 4.34   | -     | 700.4    |
| AHQ-7-8, 4940               | K.YPIEHGIITNWDWMEK.I                | 1962.17174 | 2 | 8.64E-07 | 0.87  | 3.90   | -     | 623.2    |
| AHQ-7-5, 4518               | K.YPIEHGIITNWDWMEK.I                | 1962.17174 | 2 | 3.69E-04 | 0.87  | 3.95   | -     | 717.1    |
| AHQ-7-4, 4594               | K.YPIEHGIITNWDWMEK.I                | 1962.17174 | 3 | 3.68E-04 | 0.83  | 3.36   | -     | 1141.4   |
| AHQ-7-4, 4577               | K.YPIEHGIITNWDWMEK.I                | 1962.17174 | 2 | 1.07E-04 | 0.73  | 3.17   | -     | 656.5    |
| AHQ-7-12, 4256              | K.YPIEHGIITNWDWMEK.I                | 1962.17174 | 2 | 2.21E-04 | 0.76  | 3.65   | -     | 483.7    |
| AHQ-7-8, 4426               | K.YPIEHGIITNWDWMEK.I                | 1962.17174 | 3 | 5.37E-04 | 0.76  | 3.41   | -     | 1131.9   |
| gj[4504345]ref[NP_000508.1] | alpha 2 globin [Homo sapiens]       |            |   | 3.55E-14 | 6.25  | 70.34  | 63.40 | 15257.4  |
| AHQ-7-13-, 4203 - 4204      | K.FLASVSTVLT.SK.Y                   | 1253.46970 | 2 | 9.28E-07 | 0.93  | 3.84   | -     | 1115.3   |
| AHQ-7-13, 4337              | K.FLASVSTVLT.SK.Y                   | 1253.46970 | 2 | 7.77E-04 | 0.93  | 3.56   | -     | 1253.8   |
| AHQ-7-13, 3197              | K.LRVDPNVFK.L                       | 1088.28460 | 2 | 2.25E-04 | 0.85  | 3.17   | -     | 696.0    |
| AHQ-7-13-, 3959 - 3960      | R.M*FLSPFPT.T                       | 1088.30161 | 2 | 7.00E-04 | 0.79  | 2.70   | -     | 671.5    |
| AHQ-7-13, 4125 - 4181       | K.TYFPHFDLSHGSQAQV.K.G              | 1835.01138 | 3 | 1.44E-08 | 0.91  | 4.10   | -     | 744.3    |
| AHQ-7-13, 4107 - 4166       | K.TYFPHFDLSHGSQAQV.K.G              | 1835.01138 | 2 | 1.01E-07 | 0.94  | 4.47   | -     | 860.2    |
| AHQ-7-13-, 3999             | K.TYFPHFDLSHGSQAQV.K.G              | 1835.01138 | 2 | 2.15E-07 | 0.96  | 4.19   | -     | 1451.4   |
| AHQ-7-13-, 3991 - 4029      | K.TYFPHFDLSHGSQAQV.K.G              | 1835.01138 | 3 | 1.30E-07 | 0.86  | 3.41   | -     | 655.9    |
| AHQ-7-14-, 3985             | K.TYFPHFDLSHGSQAQV.K.G              | 1835.01138 | 2 | 3.31E-13 | 0.94  | 3.73   | -     | 1162.3   |
| AHQ-7-13-, 5453             | K.VADALTNAAVAVDDM*PNALSALSDLHAHK.L  | 3014.31995 | 3 | 1.16E-10 | 0.83  | 4.22   | -     | 1140.3   |
| AHQ-7-13-, 5337             | K.VADALTNAAVAVDDM*PNALSALSDLHAHK.L  | 3014.31995 | 3 | 5.48E-08 | 0.97  | 6.55   | -     | 1699.5   |
| AHQ-7-13-, 4801             | K.VADALTNAAVAVDDM*PNALSALSDLHAHK.L  | 3014.31995 | 3 | 9.13E-08 | 0.97  | 6.72   | -     | 1384.2   |
| AHQ-7-13-, 5512             | K.VADALTNAAVAVDDM*PNALSALSDLHAHK.L  | 2998.32055 | 3 | 4.72E-10 | 0.93  | 5.31   | -     | 850.4    |
| AHQ-7-13, 2830 - 2885       | K.VGAHAGEYGAEALER.M                 | 1530.62397 | 2 | 3.55E-14 | 0.97  | 4.55   | -     | 1944.6   |
| AHQ-7-13-, 2632             | K.VGAHAGEYGAEALER.M                 | 1530.62397 | 2 | 2.57E-10 | 0.96  | 4.06   | -     | 1735.6   |
| AHQ-7-13, 2825 - 2881       | K.VGAHAGEYGAEALER.M                 | 1530.62397 | 3 | 2.23E-05 | 0.95  | 5.75   | -     | 1405.6   |
| AHQ-7-13-, 2633 - 2692      | K.VGAHAGEYGAEALER.M                 | 1530.62397 | 3 | 4.07E-06 | 0.98  | 6.22   | -     | 2646.5   |
| gj[4507877]ref[NP_003364.1] | vinculin isoform VCL [Homo sapiens] |            |   | 4.61E-14 | 48.89 | 580.31 | 52.30 | 116721.6 |
| AHQ-7-14-, 6447 - 6453      | K.AIPDLTAPVAAVQAASNLVR.V            | 2077.41342 | 2 | 6.92E-06 | 0.96  | 4.99   | -     | 1065.2   |
| AHQ-7-13-, 6483 - 6485      | K.AIPDLTAPVAAVQAASNLVR.V            | 2077.41342 | 2 | 2.71E-05 | 0.90  | 3.94   | -     | 696.0    |
| AHQ-7-12, 6295              | K.AIPDLTAPVAAVQAASNLVR.V            | 2077.41342 | 2 | 1.30E-07 | 0.80  | 3.60   | -     | 394.9    |
| AHQ-7-11, 6324              | K.AIPDLTAPVAAVQAASNLVR.V            | 2077.41342 | 2 | 4.61E-14 | 0.97  | 5.40   | -     | 1116.7   |
| AHQ-7-1, 6608               | K.AIPDLTAPVAAVQAASNLVR.V            | 2077.41342 | 2 | 1.09E-07 | 0.95  | 4.59   | -     | 938.8    |
| AHQ-7-5, 6796 - 6866        | K.AIPDLTAPVAAVQAASNLVR.V            | 2077.41342 | 2 | 4.84E-06 | 0.97  | 5.46   | -     | 1139.7   |
| AHQ-7-10, 6215 - 6216       | K.AIPDLTAPVAAVQAASNLVR.V            | 2077.41342 | 2 | 1.20E-09 | 0.98  | 5.99   | -     | 1115.4   |
| AHQ-7-6, 6754               | K.AIPDLTAPVAAVQAASNLVR.V            | 2077.41342 | 2 | 6.98E-10 | 0.96  | 4.70   | -     | 1054.1   |
| AHQ-7-8, 6878 - 6922        | K.AIPDLTAPVAAVQAASNLVR.V            | 2077.41342 | 2 | 1.45E-10 | 0.96  | 4.98   | -     | 946.9    |
| AHQ-7-3, 6689 - 6735        | K.AIPDLTAPVAAVQAASNLVR.V            | 2077.41342 | 2 | 4.96E-04 | 0.74  | 2.91   | -     | 615.7    |
| AHQ-7-4, 6952 - 7012        | K.AIPDLTAPVAAVQAASNLVR.V            | 2077.41342 | 2 | 1.66E-04 | 0.97  | 5.10   | -     | 1223.7   |
| AHQ-7-7, 6856               | K.AIPDLTAPVAAVQAASNLVR.V            | 2077.41342 | 2 | 2.32E-05 | 0.95  | 4.16   | -     | 1083.6   |
| AHQ-7-6, 3329               | R.ALASQLQDSLK.D                     | 1174.32943 | 2 | 1.99E-04 | 0.92  | 3.88   | -     | 1028.5   |
| AHQ-7-6, 3330 - 3333        | R.ALASQLQDSLK.D                     | 1174.32943 | 1 | 1.89E-04 | 0.11  | 1.94   | -     | 392.4    |
| AHQ-7-3, 3447               | R.ALASQLQDSLK.D                     | 1174.32943 | 2 | 5.88E-04 | 0.73  | 2.89   | -     | 571.9    |
| AHQ-7-5, 3375 - 3452        | R.ALASQLQDSLK.D                     | 1174.32943 | 2 | 1.14E-04 | 0.91  | 3.33   | -     | 1061.0   |
| AHQ-7-7, 3485               | K.AQQVSQLGLDVLTA.V                  | 1458.64233 | 2 | 1.05E-04 | 0.93  | 3.33   | -     | 1183.9   |
| AHQ-7-3, 3660 - 3663        | K.AQQVSQLGLDVLTA.V                  | 1458.64233 | 2 | 3.34E-11 | 0.96  | 4.31   | -     | 1179.5   |
| AHQ-7-11, 3459              | K.AQQVSQLGLDVLTA.V                  | 1458.64233 | 2 | 1.57E-04 | 0.94  | 3.60   | -     | 1435.6   |
| AHQ-7-5, 3595 - 3602        | K.AQQVSQLGLDVLTA.V                  | 1458.64233 | 2 | 1.04E-08 | 0.97  | 4.86   | -     | 1520.0   |
| AHQ-7-6, 3526 - 3527        | K.AQQVSQLGLDVLTA.V                  | 1458.64233 | 2 | 9.92E-10 | 0.96  | 4.97   | -     | 1216.2   |
| AHQ-7-10, 3368              | K.AQQVSQLGLDVLTA.V                  | 1458.64233 | 2 | 5.82E-04 | 0.82  | 2.73   | -     | 804.7    |
| AHQ-7-1, 3731 - 3773        | K.AQQVSQLGLDVLTA.V                  | 1458.64233 | 2 | 1.16E-07 | 0.93  | 3.36   | -     | 1412.2   |
| AHQ-7-7, 3496 - 3497        | K.AQQVSQLGLDVLTA.V                  | 1458.64233 | 1 | 2.09E-04 | 0.17  | 2.31   | -     | 249.7    |
| AHQ-7-4, 3652               | K.AQQVSQLGLDVLTA.V                  | 1458.64233 | 1 | 5.50E-08 | 0.69  | 3.37   | -     | 377.7    |
| AHQ-7-4, 3640               | K.AQQVSQLGLDVLTA.V                  | 1458.64233 | 1 | 3.14E-04 | 0.59  | 3.04   | -     | 463.5    |
| AHQ-7-4, 3578 - 3644        | K.AQQVSQLGLDVLTA.V                  | 1458.64233 | 2 | 4.53E-10 | 0.96  | 4.55   | -     | 1413.5   |
| AHQ-7-3, 2565               | K.AVAGNISDPGLQK.S                   | 1270.41721 | 2 | 3.45E-04 | 0.82  | 2.97   | -     | 719.6    |
| AHQ-7-5, 2502               | K.AVAGNISDPGLQK.S                   | 1270.41721 | 2 | 2.13E-06 | 0.89  | 3.56   | -     | 734.6    |
| AHQ-7-7, 2450               | K.AVAGNISDPGLQK.S                   | 1270.41721 | 2 | 4.57E-05 | 0.82  | 3.63   | -     | 610.2    |
| AHQ-7-4, 2516               | K.AVAGNISDPGLQK.S                   | 1270.41721 | 2 | 9.89E-05 | 0.88  | 3.85   | -     | 634.9    |
| AHQ-7-5, 5811 - 5812        | K.CDRVDQLTQLADLAAR.G                | 1918.12182 | 2 | 1.83E-06 | 0.96  | 4.44   | -     | 1632.5   |
| AHQ-7-5, 5810               | K.CDRVDQLTQLADLAAR.G                | 1918.12182 | 3 | 1.70E-05 | 0.91  | 4.26   | -     | 1144.5   |
| AHQ-7-3, 5752               | K.CDRVDQLTQLADLAAR.G                | 1918.12182 | 2 | 8.48E-06 | 0.60  | 2.92   | -     | 568.5    |
| AHQ-7-6, 5718               | K.CDRVDQLTQLADLAAR.G                | 1918.12182 | 3 | 3.72E-05 | 0.92  | 4.22   | -     | 1352.9   |
| AHQ-7-4, 5861 - 5876        | K.CDRVDQLTQLADLAAR.G                | 1918.12182 | 2 | 2.59E-04 | 0.95  | 4.05   | -     | 1464.6   |
| AHQ-7-4, 5862 - 5865        | K.CDRVDQLTQLADLAAR.G                | 1918.12182 | 3 | 3.04E-05 | 0.88  | 4.13   | -     | 1092.7   |
| AHQ-7-3, 2375               | R.DPSASPGDAGEQAIR.Q                 | 1471.51169 | 2 | 7.66E-04 | 0.77  | 3.07   | -     | 522.3    |
| AHQ-7-2, 2425               | R.DPSASPGDAGEQAIR.Q                 | 1471.51169 | 2 | 9.73E-05 | 0.76  | 2.75   | -     | 638.1    |
| AHQ-7-6, 2313               | R.DPSASPGDAGEQAIR.Q                 | 1471.51169 | 2 | 1.83E-07 | 0.87  | 3.59   | -     | 522.0    |
| AHQ-7-7, 2293               | R.DPSASPGDAGEQAIR.Q                 | 1471.51169 | 2 | 1.74E-04 | 0.74  | 3.09   | -     | 418.2    |
| AHQ-7-4, 2345 - 2349        | R.DPSASPGDAGEQAIR.Q                 | 1471.51169 | 1 | 4.91E-04 | 0.11  | 1.94   | -     | 115.4    |
| AHQ-7-4, 2284 - 2348        | R.DPSASPGDAGEQAIR.Q                 | 1471.51169 | 2 | 2.63E-06 | 0.91  | 3.74   | -     | 892.4    |
| AHQ-7-5, 2322               | R.DPSASPGDAGEQAIR.Q                 | 1471.51169 | 2 | 3.90E-04 | 0.84  | 3.14   | -     | 701.5    |
| AHQ-7-4, 2572 - 2636        | R.DYLDIGSR.G                        | 939.00451  | 1 | 7.62E-04 | 0.49  | 2.16   | -     | 285.4    |
| AHQ-7-5, 5842               | K.ELLPLVISAMK.I                     | 1214.54325 | 2 | 8.09E-05 | 0.81  | 3.15   | -     | 561.3    |
| AHQ-7-4, 5914 - 5924        | K.ELLPLVISAMK.I                     | 1214.54325 | 2 | 6.42E-07 | 0.84  | 3.17   | -     | 669.7    |
| AHQ-7-7, 2680               | R.ELTPQVVSAA.R.I                    | 1171.32878 | 2 | 5.99E-04 | 0.91  | 3.10   | -     | 1198.4   |

|                      |                                       |            |   |          |      |      |   |        |
|----------------------|---------------------------------------|------------|---|----------|------|------|---|--------|
| AHQ-7-4, 3052        | K.ETVQTTEDQILKR.D                     | 1561.71942 | 2 | 1.67E-08 | 0.88 | 3.63 | - | 809.6  |
| AHQ-7-5, 3044        | K.ETVQTTEDQILKR.D                     | 1561.71942 | 2 | 3.30E-04 | 0.67 | 2.78 | - | 613.4  |
| AHQ-7-7, 2922        | K.ETVQTTEDQILKR.D                     | 1561.71942 | 2 | 8.05E-05 | 0.56 | 2.78 | - | 518.8  |
| AHQ-7-6, 3015        | K.ETVQTTEDQILKR.D                     | 1561.71942 | 2 | 1.36E-06 | 0.78 | 3.34 | - | 657.0  |
| AHQ-7-4, 6804        | R.GILSGTSDLLTFDEAEVR.K                | 2037.25656 | 2 | 2.19E-07 | 0.95 | 4.92 | - | 1022.9 |
| AHQ-7-6, 6615 - 6686 | R.GILSGTSDLLTFDEAEVR.K                | 2037.25656 | 2 | 8.99E-07 | 0.95 | 5.08 | - | 806.8  |
| AHQ-7-1, 6489        | R.GILSGTSDLLTFDEAEVR.K                | 2037.25656 | 2 | 5.61E-05 | 0.89 | 4.41 | - | 604.8  |
| AHQ-7-5, 6719        | R.GILSGTSDLLTFDEAEVR.K                | 2037.25656 | 2 | 4.48E-07 | 0.94 | 4.43 | - | 1008.2 |
| AHQ-7-14-, 6321      | R.GILSGTSDLLTFDEAEVR.K                | 2037.25656 | 2 | 4.74E-04 | 0.88 | 3.67 | - | 839.1  |
| AHQ-7-7, 6694        | R.GILSGTSDLLTFDEAEVR.K                | 2037.25656 | 2 | 2.07E-07 | 0.95 | 5.34 | - | 738.3  |
| AHQ-7-5, 6584 - 6644 | R.GILSGTSDLLTFDEAEVR.K                | 2037.25656 | 2 | 6.34E-05 | 0.60 | 3.07 | - | 379.5  |
| AHQ-7-4, 6449        | R.GILSGTSDLLTFDEAEVRK.I               | 2165.42947 | 3 | 3.04E-08 | 0.87 | 3.67 | - | 889.5  |
| AHQ-7-4, 1670        | R.GQGSVPVAMQK.A                       | 1090.23603 | 2 | 5.08E-04 | 0.73 | 2.94 | - | 744.8  |
| AHQ-7-4, 3604 - 3676 | K.GWLRDPSASPGDAGEQAIR.Q               | 1984.11876 | 2 | 3.28E-05 | 0.83 | 3.84 | - | 479.0  |
| AHQ-7-4, 2260        | K.IAELCDDPKER.D                       | 1347.47690 | 2 | 4.75E-05 | 0.63 | 2.74 | - | 504.0  |
| AHQ-7-4, 3177        | R.IPTISTQLK.I                         | 1001.20202 | 2 | 2.71E-05 | 0.76 | 2.58 | - | 547.3  |
| AHQ-7-4, 3316        | R.KIAELCDDPKERDDILR.S                 | 2088.32839 | 2 | 7.17E-04 | 0.87 | 4.10 | - | 615.3  |
| AHQ-7-4, 3321        | R.KIAELCDDPKERDDILR.S                 | 2088.32839 | 3 | 8.49E-05 | 0.75 | 3.34 | - | 567.4  |
| AHQ-7-4, 4314 - 4325 | K.KIDAAQNWLADPNNGGPEGEEQIR.G          | 2509.67332 | 3 | 3.63E-08 | 0.97 | 6.17 | - | 1317.5 |
| AHQ-7-4, 4401        | K.KIDAAQNWLADPNNGGPEGEEQIR.G          | 2509.67332 | 3 | 2.16E-05 | 0.63 | 3.02 | - | 708.4  |
| AHQ-7-5, 4358        | K.KIDAAQNWLADPNNGGPEGEEQIR.G          | 2509.67332 | 2 | 5.53E-06 | 0.77 | 3.40 | - | 301.5  |
| AHQ-7-5, 4274        | K.KIDAAQNWLADPNNGGPEGEEQIR.G          | 2509.67332 | 2 | 1.67E-07 | 0.84 | 3.27 | - | 501.2  |
| AHQ-7-6, 4194        | K.KIDAAQNWLADPNNGGPEGEEQIR.G          | 2509.67332 | 3 | 4.40E-07 | 0.91 | 4.38 | - | 922.5  |
| AHQ-7-6, 4143 - 4206 | K.KIDAAQNWLADPNNGGPEGEEQIR.G          | 2509.67332 | 2 | 5.51E-05 | 0.81 | 3.29 | - | 371.2  |
| AHQ-7-4, 4428        | K.KIDAAQNWLADPNNGGPEGEEQIR.G          | 2509.67332 | 2 | 3.63E-09 | 0.86 | 3.94 | - | 447.0  |
| AHQ-7-5, 4270 - 4346 | K.KIDAAQNWLADPNNGGPEGEEQIR.G          | 2509.67332 | 3 | 1.31E-05 | 0.96 | 5.70 | - | 1214.8 |
| AHQ-7-4, 4290 - 4362 | K.KIDAAQNWLADPNNGGPEGEEQIR.G          | 2509.67332 | 2 | 6.92E-09 | 0.91 | 4.43 | - | 527.9  |
| AHQ-7-7, 4142        | K.KIDAAQNWLADPNNGGPEGEEQIR.G          | 2509.67332 | 2 | 1.46E-04 | 0.63 | 3.18 | - | 250.4  |
| AHQ-7-5, 2851 - 2928 | R.LANVMM*GPYR.Q                       | 1168.41500 | 2 | 2.50E-05 | 0.83 | 3.36 | - | 760.0  |
| AHQ-7-6, 2922        | R.LANVMM*GPYR.Q                       | 1168.41500 | 2 | 2.55E-05 | 0.88 | 3.74 | - | 909.3  |
| AHQ-7-5, 3424        | R.LANVMM*GPYR.Q                       | 1152.41560 | 2 | 9.13E-05 | 0.87 | 3.31 | - | 775.4  |
| AHQ-7-4, 4274 - 4340 | K.LLAVAATAPPDAPNREEVFDER.A            | 2382.61458 | 3 | 6.16E-09 | 0.78 | 3.32 | - | 801.2  |
| AHQ-7-4, 4444        | K.LLAVAATAPPDAPNREEVFDER.A            | 2382.61458 | 2 | 1.74E-05 | 0.78 | 3.29 | - | 559.8  |
| AHQ-7-1, 4365        | K.LLAVAATAPPDAPNREEVFDER.A            | 2382.61458 | 3 | 8.29E-05 | 0.63 | 3.01 | - | 515.8  |
| AHQ-7-5, 4508        | R.LTDELAPPKPLPEGEVPPRPPPEEKDEEFPEQK.A | 4028.46845 | 3 | 4.22E-05 | 0.70 | 3.44 | - | 383.6  |
| AHQ-7-4, 4538 - 4608 | R.LTDELAPPKPLPEGEVPPRPPPEEKDEEFPEQK.A | 4028.46845 | 3 | 4.05E-04 | 0.84 | 3.82 | - | 705.3  |
| AHQ-7-11, 3538       | K.LVQAAQM*LSQDPYSVPA.R                | 1991.25773 | 2 | 4.53E-06 | 0.76 | 3.06 | - | 520.0  |
| AHQ-7-6, 3653        | K.LVQAAQM*LSQDPYSVPA.R                | 1991.25773 | 2 | 1.16E-05 | 0.85 | 3.27 | - | 618.1  |
| AHQ-7-5, 3715        | K.LVQAAQM*LSQDPYSVPA.R                | 1991.25773 | 2 | 3.42E-07 | 0.95 | 4.99 | - | 828.6  |
| AHQ-7-4, 4596        | K.LVQAAQM*LSQDPYSVPA.R                | 1991.25773 | 3 | 1.63E-05 | 0.94 | 4.68 | - | 1435.8 |
| AHQ-7-4, 3768        | K.LVQAAQM*LSQDPYSVPA.R                | 1991.25773 | 2 | 5.31E-04 | 0.90 | 4.24 | - | 640.9  |
| AHQ-7-4, 4402        | R.MALLMAEMSR.L                        | 1153.46531 | 2 | 4.40E-07 | 0.96 | 4.06 | - | 1805.9 |
| AHQ-7-5, 2939        | K.M*LGQM*TDQVADLR.A                   | 1510.71935 | 2 | 9.98E-05 | 0.96 | 3.55 | - | 2047.7 |
| AHQ-7-6, 4077        | K.M*LGQM*TDQVADLR.A                   | 1478.72055 | 2 | 2.94E-07 | 0.92 | 3.20 | - | 1212.0 |
| AHQ-7-4, 4193        | K.M*LGQM*TDQVADLR.A                   | 1510.71935 | 2 | 8.83E-06 | 0.96 | 4.36 | - | 1595.5 |
| AHQ-7-5, 3255 - 3299 | K.M*LGQM*TDQVADLR.A                   | 1494.71995 | 2 | 4.66E-07 | 0.92 | 3.90 | - | 1402.9 |
| AHQ-7-4, 4178 - 4180 | K.M*LGQM*TDQVADLR.A                   | 1478.72055 | 2 | 9.26E-08 | 0.96 | 4.44 | - | 1641.2 |
| AHQ-7-5, 3772 - 3775 | K.M*LGQM*TDQVADLR.A                   | 1494.71995 | 2 | 2.77E-05 | 0.98 | 4.77 | - | 2422.8 |
| AHQ-7-5, 4142        | K.M*LGQM*TDQVADLR.A                   | 1478.72055 | 2 | 2.36E-10 | 0.97 | 4.91 | - | 1832.4 |
| AHQ-7-6, 3698        | K.M*LGQM*TDQVADLR.A                   | 1494.71995 | 2 | 3.05E-05 | 0.97 | 4.15 | - | 2449.4 |
| AHQ-7-6, 4495        | R.M*QEAM*QVEVSDVFSDDTTPIK.L           | 2391.61544 | 2 | 5.55E-05 | 0.89 | 3.60 | - | 651.1  |
| AHQ-7-6, 3754        | K.MSAEINEIR.V                         | 1176.36883 | 2 | 2.98E-05 | 0.90 | 3.43 | - | 1294.4 |
| AHQ-7-4, 3929        | K.MSAEINEIR.V                         | 1176.36883 | 2 | 1.59E-06 | 0.91 | 3.48 | - | 1277.8 |
| AHQ-7-4, 3257        | K.M*SAEINEIR.V                        | 1192.36823 | 2 | 6.88E-05 | 0.90 | 3.22 | - | 1000.5 |
| AHQ-7-5, 3223        | K.M*SAEINEIR.V                        | 1192.36823 | 2 | 1.23E-06 | 0.88 | 2.75 | - | 962.5  |
| AHQ-7-6, 3518        | K.MTGLVDEAIDTK.S                      | 1293.46936 | 2 | 1.13E-04 | 0.96 | 4.07 | - | 1418.9 |
| AHQ-7-4, 3612        | K.MTGLVDEAIDTK.S                      | 1293.46936 | 2 | 7.53E-08 | 0.96 | 4.20 | - | 1539.6 |
| AHQ-7-4, 3162        | K.M*MTGLVDEAIDTK.S                    | 1309.46876 | 2 | 9.28E-07 | 0.95 | 3.56 | - | 1381.7 |
| AHQ-7-5, 3574        | K.MTGLVDEAIDTK.S                      | 1293.46936 | 2 | 1.65E-08 | 0.97 | 4.38 | - | 1765.1 |
| AHQ-7-5, 3136 - 3151 | K.M*MTGLVDEAIDTK.S                    | 1309.46876 | 2 | 1.91E-07 | 0.94 | 3.50 | - | 1332.9 |
| AHQ-7-4, 2548 - 2616 | R.NP*GNQAAQYEHFETM*K.N                | 1753.87377 | 2 | 7.51E-05 | 0.91 | 3.44 | - | 799.9  |
| AHQ-7-5, 3048        | R.NP*GNQAAQYEHFETM*K.N                | 1737.87437 | 2 | 2.03E-05 | 0.83 | 3.15 | - | 704.1  |
| AHQ-7-4, 3054        | R.NP*GNQAAQYEHFETM*K.N                | 1737.87437 | 2 | 7.46E-06 | 0.94 | 4.27 | - | 1003.2 |
| AHQ-7-4, 3377        | R.NP*GNQAAQYEHFETM*K.N                | 1737.87437 | 2 | 3.63E-06 | 0.91 | 3.62 | - | 953.3  |
| AHQ-7-4, 2992        | K.NQWIDNVEK.M                         | 1146.23464 | 1 | 5.92E-05 | 0.40 | 2.59 | - | 218.0  |
| AHQ-7-4, 2942 - 3008 | K.QVATALNQNLQTK.T                     | 1315.50112 | 2 | 4.34E-08 | 0.89 | 3.90 | - | 560.7  |
| AHQ-7-4, 2976        | K.SFLDSGYR.I                          | 945.01074  | 1 | 4.84E-05 | 0.07 | 1.86 | - | 132.0  |
| AHQ-7-4, 2968 - 3037 | K.SFLDSGYR.I                          | 945.01074  | 2 | 6.67E-05 | 0.86 | 2.63 | - | 836.0  |
| AHQ-7-4, 3697        | R.SLGEISALTSK.L                       | 1106.25186 | 2 | 3.81E-04 | 0.92 | 3.45 | - | 896.4  |
| AHQ-7-7, 3372        | R.SLGEISALTSK.L                       | 1106.25186 | 2 | 5.30E-05 | 0.94 | 3.89 | - | 965.2  |
| AHQ-7-4, 3525 - 3526 | R.SLGEISALTSK.L                       | 1106.25186 | 2 | 2.05E-05 | 0.95 | 4.24 | - | 1029.5 |
| AHQ-7-5, 3508        | R.SLGEISALTSK.L                       | 1106.25186 | 1 | 4.37E-09 | 0.41 | 2.63 | - | 127.4  |
| AHQ-7-6, 3353        | K.SLLDASEEAIK.D                       | 1304.47187 | 2 | 1.79E-05 | 0.82 | 2.85 | - | 971.0  |
| AHQ-7-5, 3318 - 3382 | K.SLLDASEEAIK.D                       | 1304.47187 | 2 | 8.36E-05 | 0.59 | 2.53 | - | 495.4  |
| AHQ-7-8, 3272        | K.SLLDASEEAIK.D                       | 1304.47187 | 2 | 2.24E-05 | 0.67 | 2.65 | - | 654.3  |
| AHQ-7-4, 3400        | K.SLLDASEEAIK.D                       | 1304.47187 | 2 | 3.82E-06 | 0.86 | 2.97 | - | 881.6  |
| AHQ-7-4, 2445        | K.STVEGIQASVK.T                       | 1119.25064 | 2 | 5.03E-06 | 0.93 | 3.65 | - | 1004.8 |
| AHQ-7-4, 2564        | R.TDAGFTR.W                           | 880.96819  | 2 | 1.36E-05 | 0.90 | 2.70 | - | 1156.4 |
| AHQ-7-4, 6921        | R.TIESILEPVAQIISHLVIMHEEGEVDGK.A      | 3103.49334 | 3 | 1.05E-04 | 0.77 | 3.76 | - | 427.7  |
| AHQ-7-3, 6607        | R.TNISDEESEQATEMLVHNAQNLMSQVK.E       | 3048.31017 | 3 | 8.31E-04 | 0.73 | 3.29 | - | 546.5  |
| AHQ-7-4, 5666        | R.TNISDEESEQATEMLVHNAQNLMSQVK.E       | 3080.30897 | 3 | 3.68E-06 | 0.67 | 3.31 | - | 384.8  |
| AHQ-7-4, 6606 - 6676 | R.TNISDEESEQATEMLVHNAQNLMSQVK.E       | 3064.30957 | 3 | 5.92E-09 | 0.79 | 4.48 | - | 515.2  |
| AHQ-7-4, 6033 - 6112 | R.TNISDEESEQATEMLVHNAQNLMSQVK.E       | 3064.30957 | 3 | 1.25E-06 | 0.80 | 4.09 | - | 542.7  |
| AHQ-7-7, 6630 - 6700 | R.TNISDEESEQATEMLVHNAQNLMSQVK.E       | 3048.31017 | 3 | 1.44E-04 | 0.77 | 3.62 | - | 488.8  |
| AHQ-7-4, 6000        | R.TNISDEESEQATEMLVHNAQNLMSQVK.E       | 3048.31017 | 3 | 2.61E-10 | 0.92 | 4.80 | - | 734.1  |
| AHQ-7-5, 3310 - 3311 | R.TNLLQVCER.I                         | 1134.28859 | 2 | 7.20E-04 | 0.85 | 3.01 | - | 969.9  |
| AHQ-7-6, 3218 - 3269 | R.TNLLQVCER.I                         | 1134.28859 | 2 | 5.48E-04 | 0.89 | 2.81 | - | 1076.3 |
| AHQ-7-13-, 3295      | R.TNLLQVCER.I                         | 1134.28859 | 2 | 5.92E-04 | 0.87 | 3.02 | - | 910.3  |
| AHQ-7-4, 4977        | K.VAM*ANIQPM*LVAGATSIAR.R             | 2075.44278 | 3 | 5.91E-06 | 0.96 | 4.62 | - | 2051.3 |
| AHQ-7-5, 5880        | K.VAMANIQPM*LVAGATSIAR.R              | 2043.44398 | 3 | 1.71E-04 | 0.86 | 3.89 | - | 1087.1 |
| AHQ-7-4, 5405 - 5477 | K.VAM*ANIQPM*LVAGATSIAR.R             | 2059.44338 | 2 | 2.60E-07 | 0.90 | 4.48 | - | 760.4  |
| AHQ-7-7, 5170        | K.VAM*ANIQPM*LVAGATSIAR.R             | 2059.44338 | 2 | 5.51E-05 | 0.70 | 3.28 | - | 448.5  |
| AHQ-7-6, 5415        | K.VAMANIQPM*LVAGATSIAR.R              | 2059.44338 | 3 | 9.01E-04 | 0.80 | 3.99 | - | 1093.0 |
| AHQ-7-4, 5414        | K.VAM*ANIQPM*LVAGATSIAR.R             | 2059.44338 | 3 | 1.74E-05 | 0.89 | 4.56 | - | 1276.1 |
| AHQ-7-4, 5944        | K.VAMANIQPM*LVAGATSIAR.R              | 2043.44398 | 3 | 2.19E-08 | 0.96 | 4.72 | - | 2162.6 |
| AHQ-7-6, 4949 - 4950 | R.VDQLTALQADLAAR.G                    | 1485.66778 | 2 | 4.56E-08 | 0.98 | 4.85 | - | 2719.6 |
| AHQ-7-5, 5019        | R.VDQLTALQADLAAR.G                    | 1485.66778 | 2 | 1.01E-09 | 0.98 | 4.72 | - | 3005.4 |
| AHQ-7-4, 5064        | R.VDQLTALQADLAAR.G                    | 1485.66778 | 2 | 3.21E-05 | 0.97 | 3.89 | - | 2058.3 |
| AHQ-7-4, 3260        | R.VGKETVQTTEDQILK.R                   | 1689.88910 | 2 | 6.85E-05 | 0.91 | 4.43 | - | 944.1  |
| AHQ-7-6, 5285 - 5301 | R.VLQLTSWDEDAWASK.D                   | 1749.90156 | 2 | 2.58E-11 | 0.95 | 4.01 | - | 1147.6 |
| AHQ-7-3, 5347 - 5408 | R.VLQLTSWDEDAWASK.D                   | 1749.90156 | 2 | 1.98E-06 | 0.94 | 4.24 | - | 981.2  |
| AHQ-7-7, 5225        | R.VLQLTSWDEDAWASK.D                   | 1749.90156 | 2 | 9.99E-10 | 0.92 | 3.15 | - | 1142.6 |
| AHQ-7-5, 5363        | R.VLQLTSWDEDAWASK.D                   | 1749.90156 | 2 | 5.37E-08 | 0.96 | 4.70 | - | 1221.6 |
| AHQ-7-4, 5420 - 5440 | R.VLQLTSWDEDAWASK.D                   | 1749.90156 | 2 | 2.07E-06 | 0.97 | 4.59 | - | 1470.7 |
| AHQ-7-8, 5168 - 5196 | R.VLQLTSWDEDAWASK.D                   | 1749.90156 | 2 | 1.43E-05 | 0.92 | 3.73 | - | 1156.4 |
| AHQ-7-1, 5331 - 5389 | R.VLQLTSWDEDAWASK.D                   | 1749.90156 | 2 | 1.52E-04 | 0.85 | 3.82 | - | 659.2  |
| AHQ-7-2, 5460        | R.VLQLTSWDEDAWASK.D                   | 1749.90156 | 2 | 1.49E-07 | 0.86 | 3.23 | - | 649.9  |

|                            |                                              |            |   |          |       |        |       |          |
|----------------------------|----------------------------------------------|------------|---|----------|-------|--------|-------|----------|
| AHQ-7-4, 5322              | R.VLQLTSWDEDAWASK.D                          | 1749.90156 | 2 | 9.92E-06 | 0.88  | 2.97   | -     | 944.3    |
| AHQ-7-4, 3310              | R.VMLVNSMNTVK.E                              | 1236.53081 | 2 | 4.49E-04 | 0.94  | 3.88   | -     | 1128.0   |
| AHQ-7-5, 2892              | R.WIDNPTVDDR.G                               | 1231.29640 | 2 | 3.51E-06 | 0.86  | 2.75   | -     | 961.8    |
| gi 4507485 ref NP_003237.1 | thrombospondin 1 [Homo sapiens]              |            |   | 7.16E-14 | 37.30 | 430.33 | 41.50 | 129351.8 |
| AHQ-7-5, 4108              | K.AGTLDSLSTYQGG.Q                            | 1303.48711 | 2 | 8.10E-04 | 0.86  | 2.96   | -     | 1160.2   |
| AHQ-7-3, 4112              | K.AGTLDSLSTYQGG.Q                            | 1303.48711 | 2 | 1.50E-04 | 0.94  | 3.84   | -     | 1514.4   |
| AHQ-7-2, 2387 - 2388       | R.AQGYSLSVK.V                                | 1010.12587 | 2 | 8.07E-04 | 0.63  | 2.76   | -     | 333.6    |
| AHQ-7-2, 2852              | R.AQLYIDCEK.M                                | 1141.27636 | 2 | 3.82E-04 | 0.87  | 3.32   | -     | 823.6    |
| AHQ-7-4, 2774              | R.AQLYIDCEK.M                                | 1141.27636 | 2 | 6.05E-05 | 0.88  | 3.10   | -     | 738.7    |
| AHQ-7-4, 6101              | R.AQLYIDCEK*ENALDVPISVFTR.D                  | 2988.33923 | 3 | 8.39E-04 | 0.64  | 3.27   | -     | 502.6    |
| AHQ-7-2, 4645              | R.CDNPCYNHNPQADTDNNGEGDACAADIDGGILNER.D      | 4098.07237 | 3 | 2.25E-05 | 0.95  | 5.36   | -     | 1142.6   |
| AHQ-7-4, 3864 - 3916       | R.CENTDPGYNCLPCPPR.F                         | 1954.10800 | 2 | 1.80E-04 | 0.91  | 3.90   | -     | 591.6    |
| AHQ-7-5, 3859              | R.CENTDPGYNCLPCPPR.F                         | 1954.10800 | 2 | 1.40E-05 | 0.91  | 4.36   | -     | 567.4    |
| AHQ-7-4, 3777              | R.CENTDPGYNCLPCPPR.F                         | 1954.10800 | 2 | 1.30E-06 | 0.78  | 3.28   | -     | 386.8    |
| AHQ-7-5, 3746              | R.CENTDPGYNCLPCPPR.F                         | 1954.10800 | 2 | 2.70E-07 | 0.87  | 3.81   | -     | 478.3    |
| AHQ-7-3, 3731 - 3801       | R.CENTDPGYNCLPCPPR.F                         | 1954.10800 | 2 | 4.72E-10 | 0.82  | 3.19   | -     | 399.7    |
| AHQ-7-2, 3816              | R.CENTDPGYNCLPCPPR.F                         | 1954.10800 | 2 | 3.85E-05 | 0.89  | 3.71   | -     | 543.9    |
| AHQ-7-3, 3403              | K.CNYLGHYSYDPM*YR.C                          | 1693.84162 | 2 | 3.87E-06 | 0.94  | 3.47   | -     | 1005.3   |
| AHQ-7-2, 3476 - 3480       | K.CNYLGHYSYDPM*YR.C                          | 1693.84162 | 2 | 7.01E-06 | 0.92  | 3.79   | -     | 751.9    |
| AHQ-7-5, 3855 - 3862       | K.CNYLGHYSYDPM*YR.C                          | 1677.84222 | 2 | 1.31E-07 | 0.94  | 4.51   | -     | 840.8    |
| AHQ-7-2, 3493              | K.CNYLGHYSYDPM*YR.C                          | 1693.84162 | 3 | 8.69E-05 | 0.81  | 3.09   | -     | 1069.1   |
| AHQ-7-3, 3871              | K.CNYLGHYSYDPM*YR.C                          | 1677.84222 | 2 | 3.10E-08 | 0.81  | 2.98   | -     | 602.5    |
| AHQ-7-4, 3877              | K.CNYLGHYSYDPM*YR.C                          | 1677.84222 | 2 | 1.99E-05 | 0.82  | 3.31   | -     | 615.4    |
| AHQ-7-5, 3282              | K.DCVGDVTENQICNK.Q                           | 1654.75869 | 2 | 2.71E-04 | 0.90  | 3.20   | -     | 1118.0   |
| AHQ-7-6, 3245              | K.DCVGDVTENQICNK.Q                           | 1654.75869 | 2 | 5.58E-06 | 0.94  | 3.96   | -     | 990.2    |
| AHQ-7-3, 3299              | K.DCVGDVTENQICNK.Q                           | 1654.75869 | 2 | 8.36E-07 | 0.86  | 3.12   | -     | 945.7    |
| AHQ-7-2, 3369              | K.DCVGDVTENQICNK.Q                           | 1654.75869 | 2 | 3.02E-06 | 0.94  | 4.28   | -     | 1032.8   |
| AHQ-7-4, 6124              | K.DDFDHSVDPDIDDICPENVDISETDFR.R              | 3183.22991 | 3 | 7.55E-04 | 0.96  | 5.24   | -     | 1846.3   |
| AHQ-7-6, 2910 - 2965       | K.DHSQQVFSVVSNGK.A                           | 1461.56164 | 2 | 2.34E-04 | 0.49  | 2.56   | -     | 429.0    |
| AHQ-7-10, 2675 - 2724      | K.DHSQQVFSVVSNGK.A                           | 1461.56164 | 2 | 2.81E-05 | 0.86  | 3.63   | -     | 567.1    |
| AHQ-7-3, 2835 - 2911       | K.DHSQQVFSVVSNGK.A                           | 1461.56164 | 2 | 2.89E-10 | 0.92  | 3.38   | -     | 1097.8   |
| AHQ-7-2, 3049              | K.DHSQQVFSVVSNGK.A                           | 1461.56164 | 2 | 9.09E-05 | 0.91  | 3.19   | -     | 952.0    |
| AHQ-7-2, 2856 - 2873       | K.DHSQQVFSVVSNGK.A                           | 1461.56164 | 2 | 5.22E-11 | 0.95  | 4.24   | -     | 1262.8   |
| AHQ-7-4, 2958              | K.DHSQQVFSVVSNGK.A                           | 1461.56164 | 2 | 6.80E-06 | 0.87  | 3.38   | -     | 862.7    |
| AHQ-7-2, 3241 - 3308       | R.DNCQYVYVNDQR.D                             | 1575.64166 | 2 | 2.05E-04 | 0.86  | 3.17   | -     | 917.3    |
| AHQ-7-7, 2996              | R.DNCQYVYVNDQR.D                             | 1575.64166 | 2 | 7.67E-08 | 0.89  | 3.36   | -     | 909.1    |
| AHQ-7-3, 3181 - 3243       | R.DNCQYVYVNDQR.D                             | 1575.64166 | 2 | 7.32E-07 | 0.83  | 2.99   | -     | 889.8    |
| AHQ-7-6, 3179              | R.DNCQYVYVNDQR.D                             | 1575.64166 | 2 | 2.85E-06 | 0.92  | 3.70   | -     | 1282.3   |
| AHQ-7-6, 3023              | R.DNCQYVYVNDQR.D                             | 1575.64166 | 2 | 2.71E-05 | 0.83  | 2.89   | -     | 882.2    |
| AHQ-7-5, 3062              | R.DNCQYVYVNDQR.D                             | 1575.64166 | 2 | 2.25E-05 | 0.93  | 3.79   | -     | 1256.6   |
| AHQ-7-7, 5688              | K.DSDGDRGADACKDDDFDHSVDPDIDDICPENVDISETDFR.R | 4418.43100 | 3 | 6.46E-07 | 0.88  | 4.65   | -     | 569.4    |
| AHQ-7-4, 4070 - 4136       | R.DTDM*DGVDGQDCDNCPLHNPDLQSDSDR.I            | 3324.31882 | 3 | 7.66E-10 | 0.93  | 4.98   | -     | 861.5    |
| AHQ-7-2, 3807 - 3829       | R.DTDM*DGVDGQDCDNCPLHNPDLQSDSDR.I            | 3340.31822 | 3 | 1.50E-13 | 0.91  | 4.51   | -     | 962.8    |
| AHQ-7-2, 3667 - 3741       | R.DTDM*DGVDGQDCDNCPLHNPDLQSDSDR.I            | 3340.31822 | 3 | 5.24E-05 | 0.89  | 4.10   | -     | 831.2    |
| AHQ-7-3, 3683 - 3748       | R.DTDM*DGVDGQDCDNCPLHNPDLQSDSDR.I            | 3340.31822 | 3 | 3.54E-06 | 0.86  | 4.07   | -     | 728.4    |
| AHQ-7-2, 4175              | R.DTDM*DGVDGQDCDNCPLHNPDLQSDSDR.I            | 3324.31882 | 3 | 1.89E-08 | 0.92  | 4.76   | -     | 560.1    |
| AHQ-7-1, 3804              | R.DTDM*DGVDGQDCDNCPLHNPDLQSDSDR.I            | 3340.31822 | 3 | 1.35E-04 | 0.70  | 4.07   | -     | 256.1    |
| AHQ-7-4, 3745 - 3812       | R.DTDM*DGVDGQDCDNCPLHNPDLQSDSDR.I            | 3340.31822 | 3 | 1.68E-10 | 0.91  | 4.57   | -     | 818.6    |
| AHQ-7-7, 3869              | R.DTDM*DGVDGQDCDNCPLHNPDLQSDSDR.I            | 3324.31882 | 3 | 2.20E-08 | 0.91  | 4.25   | -     | 855.7    |
| AHQ-7-5, 3951              | R.DTDM*DGVDGQDCDNCPLHNPDLQSDSDR.I            | 3324.31882 | 3 | 8.30E-04 | 0.87  | 4.29   | -     | 601.8    |
| AHQ-7-6, 3913              | R.DTDM*DGVDGQDCDNCPLHNPDLQSDSDR.I            | 3324.31882 | 3 | 3.76E-07 | 0.92  | 4.78   | -     | 837.2    |
| AHQ-7-5, 3727              | R.DTDM*DGVDGQDCDNCPLHNPDLQSDSDR.I            | 3340.31822 | 3 | 6.63E-08 | 0.92  | 4.63   | -     | 1026.7   |
| AHQ-7-6, 3999              | R.DTDM*DGVDGQDCDNCPLHNPDLQSDSDR.I            | 3324.31882 | 3 | 5.82E-04 | 0.77  | 3.61   | -     | 574.8    |
| AHQ-7-7, 3965 - 3988       | R.DTDM*DGVDGQDCDNCPLHNPDLQSDSDR.I            | 3324.31882 | 3 | 1.24E-04 | 0.90  | 4.49   | -     | 792.3    |
| AHQ-7-3, 3649              | K.FQDLVDAVR.A                                | 1063.18877 | 2 | 7.00E-05 | 0.90  | 2.84   | -     | 1104.8   |
| AHQ-7-10, 3372 - 3373      | K.FQDLVDAVR.A                                | 1063.18877 | 2 | 7.71E-05 | 0.93  | 3.11   | -     | 1364.2   |
| AHQ-7-7, 3506              | K.FQDLVDAVR.A                                | 1063.18877 | 2 | 1.42E-05 | 0.91  | 3.12   | -     | 1052.9   |
| AHQ-7-2, 3725              | K.FQDLVDAVR.A                                | 1063.18877 | 2 | 8.03E-06 | 0.90  | 3.07   | -     | 1052.5   |
| AHQ-7-4, 3005 - 3006       | R.FTGSQPFQGGVEHATANK.Q                       | 1877.00666 | 2 | 3.10E-11 | 0.93  | 4.67   | -     | 718.4    |
| AHQ-7-7, 2793              | R.FTGSQPFQGGVEHATANK.Q                       | 1877.00666 | 2 | 8.97E-05 | 0.52  | 2.92   | -     | 313.8    |
| AHQ-7-6, 2886              | R.FTGSQPFQGGVEHATANK.Q                       | 1877.00666 | 2 | 1.50E-04 | 0.74  | 3.26   | -     | 376.7    |
| AHQ-7-2, 3036 - 3103       | R.FTGSQPFQGGVEHATANK.Q                       | 1877.00666 | 2 | 4.60E-11 | 0.93  | 4.80   | -     | 590.6    |
| AHQ-7-3, 3061              | R.FTGSQPFQGGVEHATANK.Q                       | 1877.00666 | 2 | 1.43E-09 | 0.79  | 3.52   | -     | 401.0    |
| AHQ-7-5, 2898              | R.FTGSQPFQGGVEHATANK.Q                       | 1877.00666 | 2 | 8.40E-06 | 0.87  | 3.83   | -     | 671.0    |
| AHQ-7-2, 2991              | R.FTGSQPFQGGVEHATANK.Q                       | 1877.00666 | 2 | 4.55E-04 | 0.70  | 3.04   | -     | 532.1    |
| AHQ-7-4, 2908              | R.FTGSQPFQGGVEHATANK.Q                       | 1877.00666 | 2 | 1.37E-07 | 0.89  | 4.14   | -     | 478.1    |
| AHQ-7-6, 2887 - 2894       | R.FTGSQPFQGGVEHATANK.Q                       | 1877.00666 | 3 | 8.61E-06 | 0.78  | 3.60   | -     | 515.8    |
| AHQ-7-13, 5209             | R.FVFGTTPEDILR.N                             | 1395.58470 | 2 | 7.64E-05 | 0.84  | 2.99   | -     | 713.8    |
| AHQ-7-9, 4884              | R.FVFGTTPEDILR.N                             | 1395.58470 | 2 | 6.20E-04 | 0.85  | 2.77   | -     | 900.7    |
| AHQ-7-11, 5055             | R.FVFGTTPEDILR.N                             | 1395.58470 | 2 | 1.23E-04 | 0.83  | 3.09   | -     | 697.8    |
| AHQ-7-6, 5362              | R.FVFGTTPEDILR.N                             | 1395.58470 | 2 | 2.85E-04 | 0.72  | 2.74   | -     | 654.9    |
| AHQ-7-2, 5908              | R.GDACKDFDHSVDPDIDDICPENVDISETDFR.R          | 3715.80029 | 3 | 2.84E-04 | 0.70  | 3.14   | -     | 434.4    |
| AHQ-7-13, 5344             | K.GFLLASLR.Q                                 | 990.22407  | 2 | 2.90E-05 | 0.96  | 3.66   | -     | 1949.0   |
| AHQ-7-1, 5527              | K.GFLLASLR.Q                                 | 990.22407  | 2 | 2.77E-04 | 0.96  | 3.32   | -     | 2135.7   |
| AHQ-7-2, 5643              | K.GFLLASLR.Q                                 | 990.22407  | 2 | 3.65E-06 | 0.97  | 4.21   | -     | 2318.3   |
| AHQ-7-6, 5475 - 5481       | K.GFLLASLR.Q                                 | 990.22407  | 2 | 7.28E-04 | 0.97  | 4.03   | -     | 2080.2   |
| AHQ-7-11, 5158             | K.GFLLASLR.Q                                 | 990.22407  | 2 | 4.90E-05 | 0.96  | 3.71   | -     | 2108.7   |
| AHQ-7-13, 5425             | K.GFLLASLR.Q                                 | 990.22407  | 2 | 3.62E-05 | 0.97  | 3.73   | -     | 2285.3   |
| AHQ-7-5, 5554              | K.GFLLASLR.Q                                 | 990.22407  | 2 | 2.71E-05 | 0.97  | 4.41   | -     | 2225.4   |
| AHQ-7-1, 4501 - 4559       | K.GGVNDFQGVGLQNVF.F                          | 1617.74799 | 2 | 4.32E-05 | 0.88  | 4.24   | -     | 757.2    |
| AHQ-7-5, 4498 - 4499       | K.GGVNDFQGVGLQNVF.F                          | 1617.74799 | 2 | 1.02E-07 | 0.92  | 4.29   | -     | 933.2    |
| AHQ-7-5, 4602 - 4603       | K.GGVNDFQGVGLQNVF.F                          | 1617.74799 | 2 | 2.88E-04 | 0.85  | 3.97   | -     | 622.2    |
| AHQ-7-3, 4293              | K.GGVNDFQGVGLQNVF.F                          | 1617.74799 | 2 | 3.69E-08 | 0.84  | 3.84   | -     | 622.3    |
| AHQ-7-7, 4365              | K.GGVNDFQGVGLQNVF.F                          | 1617.74799 | 2 | 2.43E-08 | 0.84  | 3.67   | -     | 619.3    |
| AHQ-7-3, 4445 - 4509       | K.GGVNDFQGVGLQNVF.F                          | 1617.74799 | 2 | 7.96E-06 | 0.84  | 3.55   | -     | 697.3    |
| AHQ-7-3, 4612              | K.GGVNDFQGVGLQNVF.F                          | 1617.74799 | 2 | 2.17E-05 | 0.82  | 3.67   | -     | 866.1    |
| AHQ-7-3, 4739              | K.GGVNDFQGVGLQNVF.F                          | 1617.74799 | 2 | 3.49E-06 | 0.87  | 3.46   | -     | 1008.7   |
| AHQ-7-7, 4272              | K.GGVNDFQGVGLQNVF.F                          | 1617.74799 | 2 | 6.36E-06 | 0.93  | 4.55   | -     | 890.2    |
| AHQ-7-1, 4663 - 4719       | K.GGVNDFQGVGLQNVF.F                          | 1617.74799 | 2 | 2.43E-04 | 0.84  | 3.85   | -     | 630.6    |
| AHQ-7-6, 4191              | K.GGVNDFQGVGLQNVF.F                          | 1617.74799 | 2 | 4.95E-07 | 0.65  | 2.89   | -     | 568.9    |
| AHQ-7-4, 4462 - 4505       | K.GGVNDFQGVGLQNVF.F                          | 1617.74799 | 2 | 1.30E-08 | 0.84  | 3.82   | -     | 615.4    |
| AHQ-7-9, 3989 - 4057       | K.GGVNDFQGVGLQNVF.F                          | 1617.74799 | 2 | 4.36E-07 | 0.85  | 4.06   | -     | 588.3    |
| AHQ-7-6, 4330              | K.GGVNDFQGVGLQNVF.F                          | 1617.74799 | 2 | 8.52E-04 | 0.88  | 4.02   | -     | 664.6    |
| AHQ-7-4, 4572 - 4589       | K.GGVNDFQGVGLQNVF.F                          | 1617.74799 | 2 | 2.03E-06 | 0.89  | 4.07   | -     | 690.2    |
| AHQ-7-4, 4661 - 4720       | K.GGVNDFQGVGLQNVF.F                          | 1617.74799 | 2 | 4.68E-06 | 0.82  | 3.58   | -     | 680.2    |
| AHQ-7-4, 4749              | K.GGVNDFQGVGLQNVF.F                          | 1617.74799 | 2 | 3.38E-06 | 0.56  | 2.86   | -     | 313.0    |
| AHQ-7-6, 4418              | K.GGVNDFQGVGLQNVF.F                          | 1617.74799 | 2 | 1.75E-08 | 0.90  | 4.29   | -     | 718.9    |
| AHQ-7-10, 4055 - 4127      | K.GGVNDFQGVGLQNVF.F                          | 1617.74799 | 2 | 4.41E-09 | 0.95  | 4.77   | -     | 1105.9   |
| AHQ-7-2, 4711              | K.GGVNDFQGVGLQNVF.F                          | 1617.74799 | 2 | 4.57E-06 | 0.78  | 3.50   | -     | 514.5    |
| AHQ-7-2, 4543 - 4611       | K.GGVNDFQGVGLQNVF.F                          | 1617.74799 | 2 | 1.04E-06 | 0.93  | 4.64   | -     | 888.6    |
| AHQ-7-6, 4519              | K.GGVNDFQGVGLQNVF.F                          | 1617.74799 | 2 | 1.14E-06 | 0.80  | 3.83   | -     | 544.7    |
| AHQ-7-5, 4411 - 4434       | K.GGVNDFQGVGLQNVF.F                          | 1617.74799 | 2 | 3.97E-05 | 0.90  | 4.28   | -     | 819.3    |
| AHQ-7-10, 4208 - 4212      | K.GGVNDFQGVGLQNVF.F                          | 1617.74799 | 2 | 6.22E-05 | 0.93  | 4.35   | -     | 978.9    |
| AHQ-7-11, 4143 - 4219      | K.GGVNDFQGVGLQNVF.F                          | 1617.74799 | 2 | 2.63E-04 | 0.90  | 4.15   | -     | 782.1    |
| AHQ-7-3, 2243              | K.GPDPSSPAFR.I                               | 1031.10364 | 2 | 6.53E-05 | 0.58  | 3.07   | -     | 314.3    |
| AHQ-7-4, 2194              | K.GPDPSSPAFR.I                               | 1031.10364 | 2 | 3.20E-05 | 0.74  | 3.06   | -     | 460.4    |
| AHQ-7-2, 2272              | K.GPDPSSPAFR.I                               | 1031.10364 | 2 | 3.97E-05 | 0.73  | 2.78   | -     | 532.8    |

|                        |                                |            |   |          |      |      |   |        |
|------------------------|--------------------------------|------------|---|----------|------|------|---|--------|
| AHQ-7-5, 3094          | R.GTLALER.K                    | 873.03234  | 2 | 9.29E-04 | 0.86 | 3.41 | - | 897.1  |
| AHQ-7-1, 3381          | R.GTLALER.K                    | 873.03234  | 2 | 5.01E-04 | 0.94 | 3.52 | - | 1218.2 |
| AHQ-7-6, 3074          | R.GTLALER.K                    | 873.03234  | 2 | 3.84E-04 | 0.83 | 2.91 | - | 820.4  |
| AHQ-7-2, 2807          | K.GTSONDPNWWWV.R.H             | 1373.45608 | 2 | 1.52E-04 | 0.55 | 2.69 | - | 639.7  |
| AHQ-7-13-, 5987 - 6064 | R.IEDANLIPPVPDDKFQDLVAVR.A     | 2580.87450 | 3 | 7.13E-08 | 0.77 | 3.45 | - | 361.4  |
| AHQ-7-1, 6140 - 6219   | R.IEDANLIPPVPDDKFQDLVAVR.A     | 2580.87450 | 3 | 5.28E-04 | 0.78 | 3.95 | - | 519.0  |
| AHQ-7-5, 6315 - 6384   | R.IEDANLIPPVPDDKFQDLVAVR.A     | 2580.87450 | 2 | 5.82E-07 | 0.67 | 3.33 | - | 258.2  |
| AHQ-7-8, 6239 - 6263   | R.IEDANLIPPVPDDKFQDLVAVR.A     | 2580.87450 | 2 | 2.93E-04 | 0.39 | 2.57 | - | 167.9  |
| AHQ-7-9, 5652 - 5653   | R.IEDANLIPPVPDDKFQDLVAVR.A     | 2580.87450 | 2 | 5.11E-06 | 0.66 | 3.14 | - | 253.9  |
| AHQ-7-3, 6215 - 6276   | R.IEDANLIPPVPDDKFQDLVAVR.A     | 2580.87450 | 3 | 2.35E-04 | 0.79 | 3.41 | - | 459.5  |
| AHQ-7-5, 6440          | R.IEDANLIPPVPDDKFQDLVAVR.A     | 2580.87450 | 3 | 2.70E-06 | 0.85 | 4.06 | - | 545.7  |
| AHQ-7-14-, 5953        | R.IEDANLIPPVPDDKFQDLVAVR.A     | 2580.87450 | 3 | 4.32E-06 | 0.69 | 3.28 | - | 415.5  |
| AHQ-7-13, 6013 - 6086  | R.IEDANLIPPVPDDKFQDLVAVR.A     | 2580.87450 | 3 | 3.44E-07 | 0.65 | 3.04 | - | 357.9  |
| AHQ-7-2, 6507 - 6523   | R.IEDANLIPPVPDDKFQDLVAVR.A     | 2580.87450 | 3 | 2.52E-05 | 0.73 | 3.32 | - | 378.8  |
| AHQ-7-2, 6376 - 6447   | R.IEDANLIPPVPDDKFQDLVAVR.A     | 2580.87450 | 3 | 1.60E-06 | 0.88 | 4.35 | - | 490.7  |
| AHQ-7-4, 6380 - 6457   | R.IEDANLIPPVPDDKFQDLVAVR.A     | 2580.87450 | 3 | 6.07E-12 | 0.93 | 4.63 | - | 729.4  |
| AHQ-7-4, 6393 - 6464   | R.IEDANLIPPVPDDKFQDLVAVR.A     | 2580.87450 | 2 | 2.00E-04 | 0.56 | 2.79 | - | 259.9  |
| AHQ-7-4, 6516          | R.IEDANLIPPVPDDKFQDLVAVR.A     | 2580.87450 | 3 | 3.83E-08 | 0.63 | 3.22 | - | 351.3  |
| AHQ-7-11, 5830 - 5898  | R.IEDANLIPPVPDDKFQDLVAVR.A     | 2580.87450 | 3 | 2.04E-10 | 0.79 | 3.46 | - | 478.2  |
| AHQ-7-10, 5732 - 5739  | R.IEDANLIPPVPDDKFQDLVAVR.A     | 2580.87450 | 2 | 1.38E-05 | 0.68 | 3.33 | - | 267.0  |
| AHQ-7-10, 5725         | R.IEDANLIPPVPDDKFQDLVAVR.A     | 2580.87450 | 3 | 3.21E-08 | 0.62 | 3.08 | - | 328.5  |
| AHQ-7-6, 6193 - 6253   | R.IEDANLIPPVPDDKFQDLVAVR.A     | 2580.87450 | 3 | 1.24E-06 | 0.85 | 4.71 | - | 362.2  |
| AHQ-7-12, 2664 - 2667  | K.IMADSGPIYDK.T                | 1210.38204 | 2 | 2.71E-06 | 0.89 | 3.35 | - | 724.3  |
| AHQ-7-11, 2608         | K.IMADSGPIYDK.T                | 1210.38204 | 2 | 6.50E-07 | 0.92 | 3.70 | - | 839.6  |
| AHQ-7-8, 2598 - 2606   | K.IMADSGPIYDK.T                | 1210.38204 | 1 | 1.49E-04 | 0.37 | 2.66 | - | 552.6  |
| AHQ-7-8, 2599          | K.IMADSGPIYDK.T                | 1210.38204 | 2 | 1.53E-04 | 0.94 | 3.91 | - | 910.1  |
| AHQ-7-6, 2629          | K.IMADSGPIYDK.T                | 1210.38204 | 2 | 1.03E-06 | 0.87 | 3.09 | - | 682.4  |
| AHQ-7-5, 2639 - 2664   | K.IMADSGPIYDK.T                | 1210.38204 | 2 | 1.38E-04 | 0.79 | 2.58 | - | 563.6  |
| AHQ-7-2, 2728 - 2732   | K.IMADSGPIYDK.T                | 1210.38204 | 2 | 1.41E-04 | 0.86 | 3.14 | - | 744.0  |
| AHQ-7-3, 2701          | K.IMADSGPIYDK.T                | 1210.38204 | 1 | 1.92E-04 | 0.63 | 2.55 | - | 657.5  |
| AHQ-7-11, 6140         | R.IPESGGDINSVFDFELTGAAR.K      | 2196.35899 | 2 | 1.93E-07 | 0.94 | 5.05 | - | 763.8  |
| AHQ-7-5, 6660          | R.IPESGGDINSVFDFELTGAAR.K      | 2196.35899 | 3 | 8.34E-06 | 0.94 | 4.70 | - | 1481.0 |
| AHQ-7-2, 6719          | R.IPESGGDINSVFDFELTGAAR.K      | 2196.35899 | 3 | 1.58E-04 | 0.89 | 3.83 | - | 1282.1 |
| AHQ-7-9, 5968 - 6028   | R.IPESGGDINSVFDFELTGAAR.K      | 2196.35899 | 2 | 1.25E-08 | 0.96 | 5.29 | - | 1280.6 |
| AHQ-7-4, 6745          | R.IPESGGDINSVFDFELTGAAR.K      | 2196.35899 | 3 | 3.92E-04 | 0.81 | 4.02 | - | 767.2  |
| AHQ-7-2, 6711          | R.IPESGGDINSVFDFELTGAAR.K      | 2196.35899 | 2 | 8.67E-06 | 0.96 | 5.12 | - | 1091.6 |
| AHQ-7-14-, 6274        | R.IPESGGDINSVFDFELTGAAR.K      | 2196.35899 | 2 | 4.70E-08 | 0.97 | 5.65 | - | 1127.4 |
| AHQ-7-13, 6293         | R.IPESGGDINSVFDFELTGAAR.K      | 2196.35899 | 2 | 3.41E-11 | 0.97 | 5.40 | - | 1552.1 |
| AHQ-7-7, 6664          | R.IPESGGDINSVFDFELTGAAR.K      | 2196.35899 | 2 | 1.43E-08 | 0.94 | 4.57 | - | 885.0  |
| AHQ-7-5, 6647 - 6706   | R.IPESGGDINSVFDFELTGAAR.K      | 2196.35899 | 2 | 3.74E-12 | 0.97 | 5.78 | - | 1404.9 |
| AHQ-7-1, 6439          | R.IPESGGDINSVFDFELTGAAR.K      | 2196.35899 | 2 | 4.83E-05 | 0.88 | 4.12 | - | 698.6  |
| AHQ-7-7, 6526 - 6585   | R.IPESGGDINSVFDFELTGAAR.K      | 2196.35899 | 2 | 1.17E-10 | 0.96 | 4.96 | - | 1180.5 |
| AHQ-7-13-, 6296 - 6300 | R.IPESGGDINSVFDFELTGAAR.K      | 2196.35899 | 2 | 3.38E-12 | 0.98 | 6.47 | - | 1315.8 |
| AHQ-7-3, 6540 - 6563   | R.IPESGGDINSVFDFELTGAAR.K      | 2196.35899 | 2 | 2.27E-09 | 0.96 | 5.82 | - | 910.1  |
| AHQ-7-6, 6546 - 6598   | R.IPESGGDINSVFDFELTGAAR.K      | 2196.35899 | 2 | 6.25E-09 | 0.97 | 5.54 | - | 1129.9 |
| AHQ-7-4, 6730 - 6789   | R.IPESGGDINSVFDFELTGAAR.K      | 2196.35899 | 2 | 7.16E-14 | 0.98 | 6.54 | - | 1291.1 |
| AHQ-7-4, 2409 - 2485   | R.KDHSGQVFSVSNKG.A             | 1589.73455 | 2 | 7.09E-10 | 0.91 | 3.63 | - | 1017.4 |
| AHQ-7-2, 2553          | R.KDHSGQVFSVSNKG.A             | 1589.73455 | 3 | 3.07E-05 | 0.92 | 3.80 | - | 1211.9 |
| AHQ-7-10, 2311         | R.KDHSGQVFSVSNKG.A             | 1589.73455 | 2 | 1.19E-06 | 0.65 | 2.92 | - | 623.8  |
| AHQ-7-3, 2463 - 2525   | R.KDHSGQVFSVSNKG.A             | 1589.73455 | 2 | 6.68E-08 | 0.87 | 3.40 | - | 946.3  |
| AHQ-7-5, 2359          | R.KDHSGQVFSVSNKG.A             | 1589.73455 | 2 | 9.10E-06 | 0.82 | 3.27 | - | 872.8  |
| AHQ-7-2, 2499 - 2564   | R.KDHSGQVFSVSNKG.A             | 1589.73455 | 2 | 1.69E-08 | 0.96 | 4.53 | - | 1534.9 |
| AHQ-7-9, 2284          | R.KDHSGQVFSVSNKG.A             | 1589.73455 | 2 | 5.11E-07 | 0.81 | 2.77 | - | 973.4  |
| AHQ-7-2, 2539          | K.KIMADSGPIYDK.T               | 1338.55496 | 2 | 1.13E-06 | 0.95 | 4.12 | - | 1057.7 |
| AHQ-7-4, 2150          | K.KIMADSGPIYDK.T               | 1354.55436 | 2 | 3.68E-04 | 0.84 | 3.11 | - | 832.8  |
| AHQ-7-2, 2503          | R.KVTEENKELANELR.R             | 1673.84976 | 2 | 1.37E-06 | 0.94 | 4.76 | - | 1242.7 |
| AHQ-7-3, 2467          | R.KVTEENKELANELR.R             | 1673.84976 | 2 | 2.23E-07 | 0.95 | 4.54 | - | 1589.1 |
| AHQ-7-4, 2422 - 2424   | R.KVTEENKELANELR.R             | 1673.84976 | 2 | 5.00E-08 | 0.95 | 4.53 | - | 1533.2 |
| AHQ-7-3, 2199          | R.KVTEENKELANELR.R             | 1673.84976 | 2 | 6.90E-10 | 0.89 | 3.99 | - | 1165.7 |
| AHQ-7-4, 2421 - 2489   | R.KVTEENKELANELR.R             | 1673.84976 | 3 | 8.88E-06 | 0.77 | 3.58 | - | 716.6  |
| AHQ-7-2, 2241          | R.KVTEENKELANELR.R             | 1673.84976 | 2 | 1.77E-10 | 0.91 | 3.99 | - | 1124.7 |
| AHQ-7-8, 2299          | R.KVTEENKELANELR.R             | 1673.84976 | 2 | 2.67E-08 | 0.91 | 3.98 | - | 1145.6 |
| AHQ-7-5, 2134          | R.KVTEENKELANELR.R             | 1673.84976 | 2 | 1.24E-09 | 0.86 | 3.60 | - | 1015.7 |
| AHQ-7-6, 2366 - 2423   | R.KVTEENKELANELR.R             | 1673.84976 | 3 | 1.10E-06 | 0.77 | 3.64 | - | 856.3  |
| AHQ-7-5, 2391          | R.KVTEENKELANELR.R             | 1673.84976 | 3 | 1.54E-06 | 0.85 | 3.92 | - | 853.9  |
| AHQ-7-5, 2390          | R.KVTEENKELANELR.R             | 1673.84976 | 2 | 8.52E-05 | 0.94 | 4.60 | - | 889.0  |
| AHQ-7-4, 2670          | R.LCNNPAPQFGGK.D               | 1304.45694 | 2 | 1.39E-04 | 0.91 | 4.04 | - | 725.3  |
| AHQ-7-5, 2654          | R.LCNNPAPQFGGK.D               | 1304.45694 | 2 | 9.60E-05 | 0.73 | 3.18 | - | 452.2  |
| AHQ-7-2, 2723          | R.LCNNPAPQFGGK.D               | 1304.45694 | 2 | 1.10E-05 | 0.92 | 3.88 | - | 764.2  |
| AHQ-7-3, 2697 - 2699   | R.LCNNPAPQFGGK.D               | 1304.45694 | 2 | 1.99E-04 | 0.87 | 3.97 | - | 473.0  |
| AHQ-7-2, 4368          | R.LCNNPAPQFGGK.CVGDVTENQICNK.Q | 2940.19303 | 3 | 4.70E-05 | 0.88 | 4.13 | - | 749.5  |
| AHQ-7-2, 2593          | R.LCNSPSPQMNGKPCGEAR.E         | 2135.34557 | 2 | 4.02E-12 | 0.92 | 4.27 | - | 693.0  |
| AHQ-7-6, 2509          | R.LCNSPSPQMNGKPCGEAR.E         | 2135.34557 | 2 | 2.39E-07 | 0.86 | 3.78 | - | 494.4  |
| AHQ-7-5, 2532          | R.LCNSPSPQMNGKPCGEAR.E         | 2135.34557 | 2 | 1.86E-08 | 0.81 | 3.61 | - | 481.0  |
| AHQ-7-3, 2561          | R.LCNSPSPQMNGKPCGEAR.E         | 2135.34557 | 2 | 4.07E-08 | 0.86 | 3.80 | - | 467.7  |
| AHQ-7-4, 2545          | R.LCNSPSPQMNGKPCGEAR.E         | 2135.34557 | 3 | 2.27E-08 | 0.87 | 4.22 | - | 692.9  |
| AHQ-7-4, 2536 - 2540   | R.LCNSPSPQMNGKPCGEAR.E         | 2135.34557 | 2 | 3.80E-09 | 0.92 | 4.41 | - | 692.7  |
| AHQ-7-3, 2569          | R.LCNSPSPQMNGKPCGEAR.E         | 2135.34557 | 3 | 3.25E-05 | 0.76 | 3.47 | - | 779.9  |
| AHQ-7-6, 2510          | R.LCNSPSPQMNGKPCGEAR.E         | 2135.34557 | 3 | 2.87E-05 | 0.93 | 4.36 | - | 1182.4 |
| AHQ-7-5, 2528          | R.LCNSPSPQMNGKPCGEAR.E         | 2135.34557 | 3 | 1.88E-06 | 0.87 | 3.54 | - | 1004.5 |
| AHQ-7-6, 5422 - 5445   | K.MENAEALDVPQISVFTR.D          | 1850.08607 | 2 | 8.67E-05 | 0.84 | 3.67 | - | 499.0  |
| AHQ-7-6, 5245 - 5249   | K.M*ENAEALDVPQISVFTR.D         | 1866.08547 | 2 | 2.69E-08 | 0.94 | 4.75 | - | 813.4  |
| AHQ-7-7, 5418          | K.MENAEALDVPQISVFTR.D          | 1850.08607 | 2 | 6.78E-04 | 0.70 | 3.26 | - | 510.4  |
| AHQ-7-2, 5397 - 5407   | K.M*ENAEALDVPQISVFTR.D         | 1866.08547 | 2 | 4.34E-07 | 0.85 | 3.60 | - | 587.5  |
| AHQ-7-2, 5584 - 5647   | K.MENAEALDVPQISVFTR.D          | 1850.08607 | 2 | 2.36E-05 | 0.76 | 3.52 | - | 478.3  |
| AHQ-7-4, 5617          | K.MENAEALDVPQISVFTR.D          | 1850.08607 | 2 | 7.16E-08 | 0.90 | 4.18 | - | 506.2  |
| AHQ-7-5, 5538          | K.MENAEALDVPQISVFTR.D          | 1850.08607 | 2 | 4.78E-06 | 0.88 | 3.90 | - | 563.4  |
| AHQ-7-5, 5324          | K.M*ENAEALDVPQISVFTR.D         | 1866.08547 | 2 | 1.44E-04 | 0.51 | 2.83 | - | 544.5  |
| AHQ-7-3, 5499          | K.MENAEALDVPQISVFTR.D          | 1850.08607 | 2 | 2.58E-06 | 0.84 | 3.64 | - | 415.6  |
| AHQ-7-4, 5400          | K.M*ENAEALDVPQISVFTR.D         | 1866.08547 | 2 | 9.39E-05 | 0.84 | 3.63 | - | 568.3  |
| AHQ-7-8, 2984 - 3048   | K.QVTSYWDNTPTR.A               | 1596.68241 | 2 | 1.67E-07 | 0.81 | 3.08 | - | 606.9  |
| AHQ-7-4, 3156          | K.QVTSYWDNTPTR.A               | 1596.68241 | 2 | 1.40E-06 | 0.71 | 2.69 | - | 590.5  |
| AHQ-7-5, 3120          | K.QVTSYWDNTPTR.A               | 1596.68241 | 2 | 1.49E-07 | 0.80 | 3.12 | - | 511.0  |
| AHQ-7-2, 3228 - 3292   | K.QVTSYWDNTPTR.A               | 1596.68241 | 2 | 5.38E-06 | 0.67 | 2.75 | - | 657.4  |
| AHQ-7-1, 3321          | K.QVTSYWDNTPTR.A               | 1596.68241 | 2 | 2.34E-06 | 0.85 | 3.18 | - | 753.9  |
| AHQ-7-7, 3002 - 3016   | K.QVTSYWDNTPTR.A               | 1596.68241 | 2 | 1.43E-05 | 0.79 | 2.93 | - | 532.6  |
| AHQ-7-3, 3177 - 3255   | K.QVTSYWDNTPTR.A               | 1596.68241 | 2 | 6.53E-07 | 0.80 | 2.61 | - | 824.7  |
| AHQ-7-6, 2847          | R.RPPLCYHNGVQYR.N              | 1661.86889 | 2 | 2.03E-07 | 0.94 | 4.17 | - | 878.2  |
| AHQ-7-5, 2856          | R.RPPLCYHNGVQYR.N              | 1661.86889 | 2 | 8.59E-04 | 0.80 | 3.06 | - | 547.9  |
| AHQ-7-2, 2804          | R.RPPLCYHNGVQYR.N              | 1661.86889 | 2 | 1.91E-05 | 0.84 | 3.17 | - | 667.1  |
| AHQ-7-2, 2964          | R.RPPLCYHNGVQYR.N              | 1661.86889 | 2 | 1.61E-04 | 0.70 | 2.54 | - | 546.8  |
| AHQ-7-2, 2960 - 2977   | R.RPPLCYHNGVQYR.N              | 1661.86889 | 3 | 8.33E-07 | 0.95 | 3.72 | - | 1893.0 |
| AHQ-7-4, 2734          | R.RPPLCYHNGVQYR.N              | 1661.86889 | 2 | 2.55E-04 | 0.61 | 2.71 | - | 390.8  |
| AHQ-7-3, 2313          | R.SCDLSLNNRCEGSSVQTR.T         | 1973.04966 | 2 | 1.14E-04 | 0.51 | 2.75 | - | 220.2  |
| AHQ-7-5, 3854          | K.SITLFOEDR.A                  | 1208.34588 | 2 | 1.95E-06 | 0.94 | 3.70 | - | 1192.6 |
| AHQ-7-1, 3999          | K.SITLFOEDR.A                  | 1208.34588 | 2 | 8.87E-07 | 0.93 | 3.59 | - | 1328.7 |
| AHQ-7-4, 3882          | K.SITLFOEDR.A                  | 1208.34588 | 2 | 7.92E-07 | 0.92 | 3.07 | - | 1345.3 |

|                            |                                                                         |            |   |          |       |         |       |          |
|----------------------------|-------------------------------------------------------------------------|------------|---|----------|-------|---------|-------|----------|
| AHQ-7-11, 3655             | K.SITLQVQEDR.A                                                          | 1208.34588 | 2 | 4.36E-06 | 0.90  | 3.25    | -     | 1088.0   |
| AHQ-7-13-, 3816            | K.SITLQVQEDR.A                                                          | 1208.34588 | 2 | 1.21E-06 | 0.90  | 2.72    | -     | 1407.7   |
| AHQ-7-7, 3714              | K.SITLQVQEDR.A                                                          | 1208.34588 | 2 | 1.22E-06 | 0.96  | 3.16    | -     | 1850.4   |
| AHQ-7-6, 3761 - 3763       | K.SITLQVQEDR.A                                                          | 1208.34588 | 2 | 1.47E-05 | 0.91  | 3.03    | -     | 1255.9   |
| AHQ-7-2, 3971 - 3996       | K.SITLQVQEDR.A                                                          | 1208.34588 | 2 | 1.14E-05 | 0.95  | 3.95    | -     | 1356.3   |
| AHQ-7-3, 3883              | K.SITLQVQEDR.A                                                          | 1208.34588 | 2 | 5.07E-05 | 0.89  | 3.05    | -     | 1068.0   |
| AHQ-7-9, 3489 - 3490       | K.SITLQVQEDR.A                                                          | 1208.34588 | 2 | 5.95E-05 | 0.88  | 2.99    | -     | 1040.9   |
| AHQ-7-14-, 3822            | K.SITLQVQEDR.A                                                          | 1208.34588 | 2 | 8.70E-06 | 0.90  | 3.01    | -     | 1204.9   |
| AHQ-7-13, 3966             | K.SITLQVQEDR.A                                                          | 1208.34588 | 2 | 2.50E-04 | 0.87  | 3.44    | -     | 821.9    |
| AHQ-7-1, 4515              | R.TIVTTLQDSIR.K                                                         | 1247.42355 | 2 | 2.24E-06 | 0.97  | 4.05    | -     | 1913.2   |
| AHQ-7-6, 3306              | R.TIVTTLQDSIR.K                                                         | 1247.42355 | 2 | 2.21E-07 | 0.93  | 3.28    | -     | 1232.4   |
| AHQ-7-2, 3648              | R.TIVTTLQDSIR.K                                                         | 1247.42355 | 2 | 3.42E-04 | 0.69  | 2.60    | -     | 670.3    |
| AHQ-7-4, 4441 - 4442       | R.TIVTTLQDSIR.K                                                         | 1247.42355 | 2 | 4.99E-08 | 0.96  | 4.26    | -     | 1299.4   |
| AHQ-7-5, 3360              | R.TIVTTLQDSIR.K                                                         | 1247.42355 | 2 | 9.27E-05 | 0.83  | 2.63    | -     | 990.9    |
| AHQ-7-11, 4147             | R.TIVTTLQDSIR.K                                                         | 1247.42355 | 2 | 1.20E-04 | 0.94  | 3.47    | -     | 1502.1   |
| AHQ-7-9, 3982              | R.TIVTTLQDSIR.K                                                         | 1247.42355 | 2 | 3.58E-06 | 0.95  | 3.69    | -     | 1400.1   |
| AHQ-7-6, 4313 - 4326       | R.TIVTTLQDSIR.K                                                         | 1247.42355 | 2 | 4.04E-08 | 0.96  | 4.44    | -     | 1359.8   |
| AHQ-7-4, 3385              | R.TIVTTLQDSIR.K                                                         | 1247.42355 | 2 | 5.14E-06 | 0.96  | 3.65    | -     | 1737.3   |
| AHQ-7-7, 4257              | R.TIVTTLQDSIR.K                                                         | 1247.42355 | 2 | 3.85E-07 | 0.96  | 3.83    | -     | 1926.8   |
| AHQ-7-3, 4440 - 4455       | R.TIVTTLQDSIR.K                                                         | 1247.42355 | 2 | 5.99E-08 | 0.97  | 3.99    | -     | 1994.0   |
| AHQ-7-2, 4532 - 4560       | R.TIVTTLQDSIR.K                                                         | 1247.42355 | 2 | 3.74E-07 | 0.96  | 4.05    | -     | 1502.7   |
| AHQ-7-5, 4406              | R.TIVTTLQDSIR.K                                                         | 1247.42355 | 2 | 1.26E-05 | 0.96  | 4.24    | -     | 1413.0   |
| AHQ-7-2, 6265 - 6340       | K.TKDLQAIICGISCDELSSM*VLELR.G                                           | 2658.02070 | 3 | 3.32E-07 | 0.84  | 3.63    | -     | 1015.7   |
| AHQ-7-5, 6187              | K.TKDLQAIICGISCDELSSM*VLELR.G                                           | 2658.02070 | 3 | 2.88E-06 | 0.83  | 3.63    | -     | 683.9    |
| AHQ-7-3, 6097              | K.TKDLQAIICGISCDELSSM*VLELR.G                                           | 2658.02070 | 3 | 8.21E-06 | 0.83  | 3.56    | -     | 877.7    |
| AHQ-7-3, 2680 - 2759       | K.VTEENKELANELR.R                                                       | 1545.67685 | 2 | 1.20E-06 | 0.90  | 4.04    | -     | 886.8    |
| AHQ-7-5, 2632              | K.VTEENKELANELR.R                                                       | 1545.67685 | 2 | 1.77E-07 | 0.92  | 3.75    | -     | 1177.8   |
| AHQ-7-6, 2605              | K.VTEENKELANELR.R                                                       | 1545.67685 | 3 | 4.89E-07 | 0.83  | 4.10    | -     | 955.8    |
| AHQ-7-6, 2561 - 2598       | K.VTEENKELANELR.R                                                       | 1545.67685 | 2 | 1.87E-07 | 0.87  | 3.08    | -     | 1145.2   |
| AHQ-7-4, 2633              | K.VTEENKELANELR.R                                                       | 1545.67685 | 2 | 3.44E-05 | 0.81  | 3.71    | -     | 687.6    |
| AHQ-7-7, 2541              | K.VTEENKELANELR.R                                                       | 1545.67685 | 2 | 4.00E-05 | 0.79  | 3.23    | -     | 882.9    |
| AHQ-7-2, 3060              | K.VTEENKELANELR.R                                                       | 1545.67685 | 2 | 2.95E-04 | 0.79  | 3.13    | -     | 773.6    |
| gi 4503745 ref NP_001447.1 | filamin 1 (actin-binding protein-280); filamin 1; filamin A, alpha (act |            |   | 9.16E-14 | 99.49 | 1150.35 | 53.80 | 280757.4 |
| AHQ-7-2, 2389 - 2415       | R.AEFTVETR.S                                                            | 953.03118  | 2 | 2.10E-05 | 0.90  | 2.93    | -     | 967.0    |
| AHQ-7-5, 2304 - 2306       | R.AEFTVETR.S                                                            | 953.03118  | 2 | 1.28E-05 | 0.92  | 3.07    | -     | 1266.2   |
| AHQ-7-4, 2557              | K.AEISFEDR.K                                                            | 967.01472  | 2 | 8.50E-04 | 0.78  | 2.59    | -     | 952.4    |
| AHQ-7-1, 2796              | K.AEISFEDR.K                                                            | 967.01472  | 2 | 7.74E-04 | 0.81  | 2.75    | -     | 833.8    |
| AHQ-7-5, 2119              | K.AEISFEDR.K                                                            | 1095.18763 | 2 | 3.46E-05 | 0.93  | 3.15    | -     | 1402.6   |
| AHQ-7-4, 2672              | K.AFGPGLQGGGAGSPAR.F                                                    | 1430.55077 | 2 | 5.19E-09 | 0.88  | 3.05    | -     | 958.4    |
| AHQ-7-7, 2588              | K.AFGPGLQGGGAGSPAR.F                                                    | 1430.55077 | 2 | 1.35E-04 | 0.83  | 2.73    | -     | 908.4    |
| AHQ-7-5, 2660 - 2663       | K.AFGPGLQGGGAGSPAR.F                                                    | 1430.55077 | 2 | 1.52E-09 | 0.96  | 4.19    | -     | 1778.3   |
| AHQ-7-3, 2707 - 2708       | K.AFGPGLQGGGAGSPAR.F                                                    | 1430.55077 | 2 | 7.28E-10 | 0.95  | 3.86    | -     | 1385.2   |
| AHQ-7-2, 2731 - 2775       | K.AFGPGLQGGGAGSPAR.F                                                    | 1430.55077 | 2 | 5.50E-08 | 0.88  | 2.84    | -     | 1204.5   |
| AHQ-7-8, 2603              | K.AFGPGLQGGGAGSPAR.F                                                    | 1430.55077 | 2 | 5.92E-05 | 0.81  | 2.65    | -     | 1097.4   |
| AHQ-7-2, 2841 - 2903       | K.AFGPGLQGGGAGSPAR.F                                                    | 1430.55077 | 2 | 1.17E-08 | 0.80  | 3.21    | -     | 855.4    |
| AHQ-7-6, 2641              | K.AFGPGLQGGGAGSPAR.F                                                    | 1430.55077 | 2 | 5.53E-05 | 0.95  | 3.45    | -     | 1410.4   |
| AHQ-7-4, 2821              | K.AFGPGLQGGGAGSPAR.F                                                    | 1430.55077 | 2 | 6.79E-06 | 0.89  | 3.36    | -     | 1176.4   |
| AHQ-7-14-, 2847 - 2850     | K.AGNM*LLVGVHGPR.T                                                      | 1451.67973 | 3 | 2.44E-05 | 0.94  | 4.40    | -     | 1535.1   |
| AHQ-7-14, 4232 - 4242      | K.AGNM*LLVGVHGPR.T                                                      | 1435.68033 | 2 | 2.36E-04 | 0.85  | 3.28    | -     | 821.9    |
| AHQ-7-14-, 3078            | K.AGNM*LLVGVHGPR.T                                                      | 1451.67973 | 2 | 1.60E-07 | 0.81  | 2.96    | -     | 747.8    |
| AHQ-7-14-, 3281            | K.AGNM*LLVGVHGPR.T                                                      | 1435.68033 | 3 | 2.40E-05 | 0.81  | 3.30    | -     | 900.7    |
| AHQ-7-14, 3841 - 3896      | K.AGNM*LLVGVHGPR.T                                                      | 1451.67973 | 2 | 3.69E-04 | 0.75  | 2.80    | -     | 785.7    |
| AHQ-7-14, 3730             | K.AGNM*LLVGVHGPR.T                                                      | 1451.67973 | 3 | 4.32E-07 | 0.92  | 3.86    | -     | 1396.3   |
| AHQ-7-14-, 3285            | K.AGNM*LLVGVHGPR.T                                                      | 1451.67973 | 2 | 5.81E-04 | 0.70  | 2.61    | -     | 747.9    |
| AHQ-7-14-, 3289            | K.AGNM*LLVGVHGPR.T                                                      | 1451.67973 | 3 | 7.22E-04 | 0.82  | 3.09    | -     | 1301.0   |
| AHQ-7-14-, 3463            | K.AGNM*LLVGVHGPR.T                                                      | 1435.68033 | 3 | 1.26E-07 | 0.92  | 3.63    | -     | 1465.5   |
| AHQ-7-14-, 3458 - 3523     | K.AGNM*LLVGVHGPR.T                                                      | 1435.68033 | 2 | 6.38E-07 | 0.85  | 3.39    | -     | 680.2    |
| AHQ-7-11, 3350             | K.AGNM*LLVGVHGPR.T                                                      | 1435.68033 | 2 | 5.14E-06 | 0.60  | 3.05    | -     | 603.5    |
| AHQ-7-3, 1860              | R.AGQSAAGAAPPGGVDTR.D                                                   | 1443.50471 | 2 | 6.05E-05 | 0.86  | 3.37    | -     | 938.6    |
| AHQ-7-2, 1832 - 1896       | R.AGQSAAGAAPPGGVDTR.D                                                   | 1443.50471 | 2 | 2.46E-04 | 0.88  | 3.83    | -     | 854.5    |
| AHQ-7-3, 2417              | K.AGVAPLQVK.V                                                           | 883.07036  | 2 | 5.38E-04 | 0.88  | 3.00    | -     | 750.7    |
| AHQ-7-2, 2432              | K.AGVAPLQVK.V                                                           | 883.07036  | 2 | 9.30E-06 | 0.82  | 2.89    | -     | 644.5    |
| AHQ-7-5, 2340              | K.AGVAPLQVK.V                                                           | 883.07036  | 2 | 8.30E-04 | 0.85  | 2.58    | -     | 746.2    |
| AHQ-7-4, 2376              | K.AGVAPLQVK.V                                                           | 883.07036  | 2 | 2.24E-05 | 0.85  | 3.14    | -     | 683.0    |
| AHQ-7-6, 2323              | K.AGVAPLQVK.V                                                           | 883.07036  | 2 | 2.06E-04 | 0.73  | 2.74    | -     | 563.1    |
| AHQ-7-2, 6672 - 6745       | K.AHEPTYFTVDCAEAGQGDVSIK.C                                              | 2567.76960 | 3 | 4.49E-04 | 0.84  | 4.04    | -     | 650.1    |
| AHQ-7-1, 6653 - 6731       | K.AHEPTYFTVDCAEAGQGDVSIK.C                                              | 2567.76960 | 3 | 8.78E-05 | 0.91  | 4.32    | -     | 1095.8   |
| AHQ-7-2, 6975 - 7031       | K.AHEPTYFTVDCAEAGQGDVSIK.C                                              | 2567.76960 | 3 | 4.04E-05 | 0.94  | 5.12    | -     | 1352.4   |
| AHQ-7-4, 2706              | K.AHVVPFCFASK.V                                                         | 1232.39073 | 2 | 1.28E-04 | 0.74  | 2.53    | -     | 607.8    |
| AHQ-7-1, 2952              | K.AHVVPFCFASK.V                                                         | 1232.39073 | 2 | 2.55E-06 | 0.81  | 2.86    | -     | 570.4    |
| AHQ-7-4, 6060 - 6084       | R.ALGALVDSAPGLCPDWSDWASKPVTNAR.E                                        | 3233.53437 | 3 | 9.31E-07 | 0.91  | 4.56    | -     | 764.7    |
| AHQ-7-2, 5975 - 6044       | R.ALGALVDSAPGLCPDWSDWASKPVTNAR.E                                        | 3233.53437 | 3 | 7.26E-09 | 0.96  | 5.93    | -     | 1115.9   |
| AHQ-7-4, 6146 - 6216       | R.ALGALVDSAPGLCPDWSDWASKPVTNAR.E                                        | 3233.53437 | 3 | 3.16E-11 | 0.90  | 5.05    | -     | 606.2    |
| AHQ-7-2, 6113 - 6188       | R.ALGALVDSAPGLCPDWSDWASKPVTNAR.E                                        | 3233.53437 | 3 | 7.57E-09 | 0.93  | 5.11    | -     | 789.7    |
| AHQ-7-2, 6215 - 6289       | R.ALGALVDSAPGLCPDWSDWASKPVTNAR.E                                        | 3233.53437 | 3 | 1.60E-08 | 0.93  | 5.21    | -     | 643.0    |
| AHQ-7-1, 5849 - 5915       | R.ALGALVDSAPGLCPDWSDWASKPVTNAR.E                                        | 3233.53437 | 3 | 1.32E-12 | 0.93  | 5.00    | -     | 746.6    |
| AHQ-7-5, 6130              | R.ALGALVDSAPGLCPDWSDWASKPVTNAR.E                                        | 3233.53437 | 3 | 6.51E-09 | 0.93  | 4.94    | -     | 884.6    |
| AHQ-7-5, 5979 - 6054       | R.ALGALVDSAPGLCPDWSDWASKPVTNAR.E                                        | 3233.53437 | 3 | 9.36E-06 | 0.94  | 5.55    | -     | 925.9    |
| AHQ-7-3, 5916 - 5971       | R.ALGALVDSAPGLCPDWSDWASKPVTNAR.E                                        | 3233.53437 | 3 | 3.89E-05 | 0.60  | 3.19    | -     | 535.4    |
| AHQ-7-3, 6029              | R.ALGALVDSAPGLCPDWSDWASKPVTNAR.E                                        | 3233.53437 | 3 | 7.31E-06 | 0.75  | 3.59    | -     | 420.3    |
| AHQ-7-7, 5989 - 6052       | R.ALGALVDSAPGLCPDWSDWASKPVTNAR.E                                        | 3233.53437 | 3 | 4.11E-13 | 0.95  | 5.67    | -     | 793.1    |
| AHQ-7-6, 5973 - 6033       | R.ALGALVDSAPGLCPDWSDWASKPVTNAR.E                                        | 3233.53437 | 3 | 5.27E-09 | 0.90  | 4.52    | -     | 777.7    |
| AHQ-7-2, 1653              | R.ALTQTGGPHVK.A                                                         | 1109.26067 | 2 | 2.82E-04 | 0.81  | 2.90    | -     | 754.4    |
| AHQ-7-8, 3234              | R.ANLPQSFQVDTSK.A                                                       | 1435.56409 | 2 | 4.39E-09 | 0.86  | 3.34    | -     | 594.3    |
| AHQ-7-2, 3572 - 3644       | R.ANLPQSFQVDTSK.A                                                       | 1435.56409 | 2 | 6.81E-08 | 0.79  | 3.29    | -     | 425.9    |
| AHQ-7-2, 3416              | R.ANLPQSFQVDTSK.A                                                       | 1435.56409 | 1 | 4.92E-06 | 0.70  | 2.97    | -     | 429.6    |
| AHQ-7-3, 3300 - 3371       | R.ANLPQSFQVDTSK.A                                                       | 1435.56409 | 2 | 1.49E-06 | 0.90  | 3.59    | -     | 626.0    |
| AHQ-7-2, 3401 - 3477       | R.ANLPQSFQVDTSK.A                                                       | 1435.56409 | 2 | 1.99E-05 | 0.61  | 2.81    | -     | 549.3    |
| AHQ-7-6, 3377              | R.APSVANVSHCDLSLK.I                                                     | 1656.84249 | 2 | 9.21E-07 | 0.95  | 4.69    | -     | 1031.2   |
| AHQ-7-5, 3430              | R.APSVANVSHCDLSLK.I                                                     | 1656.84249 | 2 | 1.96E-06 | 0.94  | 4.72    | -     | 781.5    |
| AHQ-7-4, 3466 - 3485       | R.APSVANVSHCDLSLK.I                                                     | 1656.84249 | 2 | 1.24E-04 | 0.91  | 4.26    | -     | 601.7    |
| AHQ-7-6, 1906              | K.ATCAPQHAGAPGGPADASK.V                                                 | 1791.92336 | 2 | 1.35E-04 | 0.92  | 3.72    | -     | 864.5    |
| AHQ-7-7, 1892              | K.ATCAPQHAGAPGGPADASK.V                                                 | 1791.92336 | 2 | 7.40E-04 | 0.90  | 3.98    | -     | 561.2    |
| AHQ-7-6, 3586              | R.AWGPGLGEGVVVK.S                                                       | 1227.39403 | 2 | 2.15E-06 | 0.89  | 3.53    | -     | 775.4    |
| AHQ-7-4, 3688 - 3709       | R.AWGPGLGEGVVVK.S                                                       | 1227.39403 | 2 | 1.55E-06 | 0.88  | 3.70    | -     | 646.4    |
| AHQ-7-7, 3534              | R.AWGPGLGEGVVVK.S                                                       | 1227.39403 | 2 | 1.00E-04 | 0.75  | 2.98    | -     | 760.9    |
| AHQ-7-5, 3638              | R.AWGPGLGEGVVVK.S                                                       | 1227.39403 | 2 | 5.36E-04 | 0.87  | 3.52    | -     | 572.7    |
| AHQ-7-3, 3691              | R.AWGPGLGEGVVVK.S                                                       | 1227.39403 | 2 | 2.29E-04 | 0.85  | 3.48    | -     | 681.7    |
| AHQ-7-1, 3811              | R.AWGPGLGEGVVVK.S                                                       | 1227.39403 | 2 | 1.41E-04 | 0.90  | 3.45    | -     | 955.3    |
| AHQ-7-2, 3759 - 3823       | R.AWGPGLGEGVVVK.S                                                       | 1227.39403 | 2 | 4.10E-05 | 0.84  | 3.24    | -     | 708.2    |
| AHQ-7-3, 3215 - 3288       | R.AYGPGLIEPTGNMVK.K                                                     | 1434.64274 | 2 | 7.82E-04 | 0.64  | 2.79    | -     | 455.0    |
| AHQ-7-6, 2753              | R.AYGPGLIEPTGNMVK.K                                                     | 1450.64214 | 2 | 4.27E-06 | 0.69  | 2.86    | -     | 436.2    |
| AHQ-7-1, 3423 - 3484       | R.AYGPGLIEPTGNMVK.K                                                     | 1434.64274 | 2 | 2.44E-04 | 0.64  | 2.86    | -     | 511.5    |
| AHQ-7-4, 3198 - 3264       | R.AYGPGLIEPTGNMVK.K                                                     | 1434.64274 | 2 | 3.00E-05 | 0.78  | 2.85    | -     | 559.2    |
| AHQ-7-5, 2768              | R.AYGPGLIEPTGNMVK.K                                                     | 1450.64214 | 2 | 8.65E-07 | 0.77  | 2.86    | -     | 557.7    |
| AHQ-7-3, 5705 - 5721       | K.CAPGVVGPAAEDIDFIIR.N                                                  | 2017.24863 | 2 | 5.89E-04 | 0.56  | 3.34    | -     | 546.5    |
| AHQ-7-3, 5856 - 5932       | K.CAPGVVGPAAEDIDFIIR.N                                                  | 2017.24863 | 2 | 6.86E-05 | 0.74  | 3.14    | -     | 590.1    |



|                        |                                        |            |   |          |      |      |   |        |
|------------------------|----------------------------------------|------------|---|----------|------|------|---|--------|
| AHQ-7-5, 5944          | K.CAPGVVGAPEADIDFDIIR.N                | 2017.24863 | 2 | 2.27E-04 | 0.68 | 3.24 | - | 374.7  |
| AHQ-7-6, 5866          | K.CAPGVVGAPEADIDFDIIR.N                | 2017.24863 | 2 | 8.33E-04 | 0.34 | 2.90 | - | 313.3  |
| AHQ-7-1, 5795          | K.CAPGVVGAPEADIDFDIIR.N                | 2017.24863 | 3 | 4.15E-11 | 0.96 | 5.33 | - | 1418.4 |
| AHQ-7-1, 5787 - 5860   | K.CAPGVVGAPEADIDFDIIR.N                | 2017.24863 | 2 | 4.97E-10 | 0.90 | 3.70 | - | 578.9  |
| AHQ-7-2, 6011          | K.CAPGVVGAPEADIDFDIIR.N                | 2017.24863 | 2 | 2.15E-05 | 0.80 | 3.27 | - | 565.0  |
| AHQ-7-2, 6027          | K.CAPGVVGAPEADIDFDIIR.N                | 2017.24863 | 3 | 4.18E-09 | 0.97 | 5.00 | - | 1867.9 |
| AHQ-7-4, 6041          | K.CAPGVVGAPEADIDFDIIR.N                | 2017.24863 | 2 | 4.10E-07 | 0.83 | 3.22 | - | 507.8  |
| AHQ-7-2, 3000 - 3067   | K.CSGPGLSPGMV.R.A                      | 1219.41699 | 2 | 5.94E-06 | 0.68 | 2.50 | - | 636.0  |
| AHQ-7-5, 2966 - 2970   | K.CSGPGLSPGMV.R.A                      | 1219.41699 | 2 | 2.54E-05 | 0.73 | 2.87 | - | 606.9  |
| AHQ-7-3, 5333          | R.CSYQPTMEGVHTVHVTFAGVPIPR.S           | 2686.06233 | 2 | 2.74E-10 | 0.90 | 3.60 | - | 770.1  |
| AHQ-7-3, 4896          | R.CSYQPTMEGVHTVHVTFAGVPIPR.S           | 2702.06173 | 2 | 2.78E-05 | 0.93 | 4.44 | - | 798.4  |
| AHQ-7-5, 4855 - 4918   | R.CSYQPTMEGVHTVHVTFAGVPIPR.S           | 2702.06173 | 3 | 7.57E-07 | 0.81 | 3.65 | - | 485.9  |
| AHQ-7-2, 5404 - 5472   | R.CSYQPTMEGVHTVHVTFAGVPIPR.S           | 2686.06233 | 3 | 4.32E-11 | 0.92 | 4.43 | - | 797.3  |
| AHQ-7-7, 5146          | R.CSYQPTMEGVHTVHVTFAGVPIPR.S           | 2686.06233 | 2 | 1.70E-04 | 0.73 | 2.97 | - | 651.2  |
| AHQ-7-3, 5323          | R.CSYQPTMEGVHTVHVTFAGVPIPR.S           | 2686.06233 | 3 | 4.28E-05 | 0.83 | 4.11 | - | 456.4  |
| AHQ-7-2, 4593          | R.DAEMPATEKDLAEDAPWK.K                 | 2018.19047 | 2 | 3.92E-07 | 0.96 | 4.44 | - | 1446.4 |
| AHQ-7-2, 4051          | R.DAEMPATEKDLAEDAPWK.K                 | 2034.18987 | 2 | 4.16E-04 | 0.85 | 3.64 | - | 731.6  |
| AHQ-7-1, 4552          | R.DAEMPATEKDLAEDAPWK.K                 | 2018.19047 | 2 | 1.48E-05 | 0.78 | 3.39 | - | 849.7  |
| AHQ-7-5, 3930 - 3999   | K.DAGEGGLSLAIEGPKS.A                   | 1501.62084 | 2 | 8.85E-08 | 0.96 | 5.16 | - | 1403.6 |
| AHQ-7-8, 3888          | K.DAGEGGLSLAIEGPKS.A                   | 1501.62084 | 2 | 3.83E-04 | 0.90 | 3.92 | - | 865.0  |
| AHQ-7-4, 3964 - 4030   | K.DAGEGGLSLAIEGPKS.A                   | 1501.62084 | 2 | 1.48E-08 | 0.95 | 4.82 | - | 1408.2 |
| AHQ-7-13, 3985         | K.DAGEGGLSLAIEGPKS.A                   | 1501.62084 | 2 | 5.60E-05 | 0.68 | 3.00 | - | 804.8  |
| AHQ-7-11, 3735         | K.DAGEGGLSLAIEGPKS.A                   | 1501.62084 | 2 | 9.23E-06 | 0.86 | 3.79 | - | 924.1  |
| AHQ-7-13-, 3780 - 3839 | K.DAGEGGLSLAIEGPKS.A                   | 1501.62084 | 2 | 1.99E-04 | 0.90 | 4.01 | - | 990.0  |
| AHQ-7-8, 3978          | K.DAGEGGLSLAIEGPKS.A                   | 1501.62084 | 2 | 1.54E-04 | 0.61 | 3.29 | - | 415.4  |
| AHQ-7-1, 4783          | K.DAGEGLLAVQITDPEGK.P                  | 1713.86752 | 2 | 3.54E-08 | 0.92 | 3.96 | - | 1087.1 |
| AHQ-7-4, 4872          | K.DAGEGLLAVQITDPEGK.P                  | 1713.86752 | 2 | 3.62E-07 | 0.91 | 3.88 | - | 1215.3 |
| AHQ-7-3, 4720 - 4768   | K.DAGEGLLAVQITDPEGK.P                  | 1713.86752 | 2 | 1.34E-07 | 0.78 | 3.09 | - | 1080.6 |
| AHQ-7-2, 4441 - 4504   | K.DAGEGLLAVQITDPEGKPP.K                | 1939.15612 | 2 | 1.10E-09 | 0.92 | 4.36 | - | 1046.3 |
| AHQ-7-7, 4198          | K.DAGEGLLAVQITDPEGKPP.K                | 1939.15612 | 3 | 9.73E-10 | 0.80 | 3.18 | - | 1055.6 |
| AHQ-7-8, 4183          | K.DAGEGLLAVQITDPEGKPP.K                | 1939.15612 | 2 | 6.33E-08 | 0.94 | 4.36 | - | 1172.8 |
| AHQ-7-7, 4188 - 4205   | K.DAGEGLLAVQITDPEGKPP.K                | 1939.15612 | 2 | 1.27E-04 | 0.84 | 3.88 | - | 786.9  |
| AHQ-7-6, 4253          | K.DAGEGLLAVQITDPEGKPP.K                | 1939.15612 | 2 | 3.04E-09 | 0.96 | 4.52 | - | 1749.2 |
| AHQ-7-4, 4384          | K.DAGEGLLAVQITDPEGKPP.K                | 1939.15612 | 2 | 3.79E-08 | 0.91 | 4.19 | - | 903.3  |
| AHQ-7-11, 4080 - 4084  | K.DAGEGLLAVQITDPEGKPP.K                | 1939.15612 | 2 | 5.82E-08 | 0.95 | 4.68 | - | 1173.9 |
| AHQ-7-3, 4367 - 4368   | K.DAGEGLLAVQITDPEGKPP.K                | 1939.15612 | 3 | 2.30E-09 | 0.95 | 4.33 | - | 1550.5 |
| AHQ-7-3, 4421          | K.DAGEGLLAVQITDPEGKPP.K                | 1939.15612 | 2 | 3.69E-04 | 0.87 | 3.76 | - | 1006.0 |
| AHQ-7-2, 4656 - 4665   | K.DAGEGLLAVQITDPEGKPP.K                | 1939.15612 | 2 | 1.94E-09 | 0.92 | 4.16 | - | 1075.5 |
| AHQ-7-9, 3916 - 3924   | K.DAGEGLLAVQITDPEGKPP.K                | 1939.15612 | 2 | 5.24E-07 | 0.92 | 4.00 | - | 1101.8 |
| AHQ-7-1, 4419 - 4431   | K.DAGEGLLAVQITDPEGKPP.K                | 1939.15612 | 2 | 2.27E-07 | 0.94 | 4.59 | - | 1164.8 |
| AHQ-7-10, 3989         | K.DAGEGLLAVQITDPEGKPP.K                | 1939.15612 | 2 | 1.41E-08 | 0.90 | 3.88 | - | 956.0  |
| AHQ-7-2, 4455 - 4525   | K.DAGEGLLAVQITDPEGKPP.K                | 1939.15612 | 3 | 5.23E-09 | 0.90 | 3.24 | - | 1217.7 |
| AHQ-7-5, 4334          | K.DAGEGLLAVQITDPEGKPP.K                | 1939.15612 | 2 | 2.81E-08 | 0.94 | 4.90 | - | 1212.8 |
| AHQ-7-3, 4567          | K.DAGEGLLAVQITDPEGKPP.K                | 1939.15612 | 2 | 3.40E-07 | 0.96 | 4.76 | - | 1242.8 |
| AHQ-7-4, 4388          | K.DAGEGLLAVQITDPEGKPP.K                | 1939.15612 | 3 | 3.75E-06 | 0.88 | 3.54 | - | 1162.0 |
| AHQ-7-2, 4569          | K.DAGEGLLAVQITDPEGKPP.K                | 1939.15612 | 2 | 6.29E-06 | 0.89 | 3.83 | - | 1000.8 |
| AHQ-7-3, 4296 - 4357   | K.DAGEGLLAVQITDPEGKPP.K                | 1939.15612 | 2 | 3.10E-09 | 0.91 | 3.99 | - | 962.5  |
| AHQ-7-6, 4379 - 4385   | R.DAGYGLLSLSIEGPKS.V                   | 1551.67986 | 2 | 5.55E-09 | 0.96 | 4.79 | - | 1582.1 |
| AHQ-7-3, 4464 - 4468   | R.DAGYGLLSLSIEGPKS.V                   | 1551.67986 | 2 | 7.83E-12 | 0.95 | 4.77 | - | 1245.8 |
| AHQ-7-5, 4210          | R.DAGYGLLSLSIEGPKS.V                   | 1551.67986 | 2 | 1.02E-04 | 0.89 | 3.48 | - | 1093.3 |
| AHQ-7-4, 4516          | R.DAGYGLLSLSIEGPKS.V                   | 1551.67986 | 2 | 1.49E-07 | 0.93 | 3.96 | - | 1219.3 |
| AHQ-7-2, 4568          | R.DAGYGLLSLSIEGPKS.V                   | 1551.67986 | 2 | 4.22E-09 | 0.94 | 3.97 | - | 1465.2 |
| AHQ-7-5, 4512          | R.DAGYGLLSLSIEGPKS.V                   | 1551.67986 | 2 | 4.08E-07 | 0.91 | 4.27 | - | 743.6  |
| AHQ-7-5, 4422 - 4442   | R.DAGYGLLSLSIEGPKS.V                   | 1551.67986 | 2 | 1.55E-07 | 0.94 | 4.16 | - | 1119.2 |
| AHQ-7-1, 4483 - 4509   | R.DAGYGLLSLSIEGPKS.V                   | 1551.67986 | 2 | 6.13E-11 | 0.91 | 3.79 | - | 1002.5 |
| AHQ-7-2, 2157          | R.DAPDFFHPR.V                          | 1198.22650 | 2 | 2.44E-04 | 0.45 | 2.51 | - | 497.7  |
| AHQ-7-5, 4830 - 4891   | K.DGSCGVAYVQEPGDYEVSVK.F               | 2260.41990 | 2 | 7.85E-04 | 0.63 | 3.38 | - | 369.3  |
| AHQ-7-7, 4569 - 4636   | K.DGSCGVAYVQEPGDYEVSVK.F               | 2260.41990 | 2 | 2.42E-06 | 0.88 | 4.58 | - | 435.4  |
| AHQ-7-1, 4691 - 4764   | K.DGSCGVAYVQEPGDYEVSVK.F               | 2260.41990 | 2 | 2.61E-06 | 0.76 | 3.71 | - | 407.9  |
| AHQ-7-3, 4707          | K.DGSCGVAYVQEPGDYEVSVK.F               | 2260.41990 | 2 | 6.68E-06 | 0.83 | 4.09 | - | 477.8  |
| AHQ-7-2, 4813          | K.DGSCGVAYVQEPGDYEVSVK.F               | 2260.41990 | 2 | 1.95E-04 | 0.91 | 4.51 | - | 736.9  |
| AHQ-7-5, 4590          | K.DGSCGVAYVQEPGDYEVSVK.F               | 2260.41990 | 2 | 9.83E-06 | 0.93 | 4.85 | - | 794.3  |
| AHQ-7-6, 4642 - 4665   | K.DGSCGVAYVQEPGDYEVSVK.F               | 2260.41990 | 2 | 1.94E-05 | 0.89 | 4.03 | - | 664.4  |
| AHQ-7-4, 4968          | K.DGSCGVAYVQEPGDYEVSVK.F               | 2260.41990 | 2 | 3.01E-05 | 0.82 | 3.76 | - | 573.5  |
| AHQ-7-3, 4869          | K.DGSCGVAYVQEPGDYEVSVK.F               | 2260.41990 | 2 | 3.26E-04 | 0.38 | 2.90 | - | 319.0  |
| AHQ-7-4, 4781          | K.DGSCGVAYVQEPGDYEVSVK.F               | 2260.41990 | 2 | 1.09E-07 | 0.94 | 4.80 | - | 775.5  |
| AHQ-7-5, 4707 - 4770   | K.DGSCGVAYVQEPGDYEVSVK.F               | 2260.41990 | 2 | 4.58E-05 | 0.84 | 3.99 | - | 518.0  |
| AHQ-7-11, 2491         | K.DKGEYTLVVK.W                         | 1152.32223 | 2 | 2.39E-05 | 0.57 | 2.57 | - | 409.0  |
| AHQ-7-14, 3368 - 3429  | K.DKGEYTLVVK.W                         | 1152.32223 | 2 | 3.38E-04 | 0.76 | 2.87 | - | 745.1  |
| AHQ-7-6, 2505          | K.DKGEYTLVVK.W                         | 1152.32223 | 2 | 3.23E-04 | 0.69 | 2.51 | - | 621.1  |
| AHQ-7-3, 2512 - 2588   | K.DKGEYTLVVK.W                         | 1152.32223 | 2 | 3.45E-05 | 0.45 | 2.58 | - | 468.0  |
| AHQ-7-4, 2532          | K.DKGEYTLVVK.W                         | 1152.32223 | 1 | 3.13E-05 | 0.19 | 1.99 | - | 480.1  |
| AHQ-7-3, 3235 - 3280   | K.DNNGTYSCSYVPR.K                      | 1591.64109 | 2 | 7.28E-06 | 0.82 | 2.80 | - | 888.5  |
| AHQ-7-1, 3332          | K.DNNGTYSCSYVPR.K                      | 1591.64109 | 2 | 7.71E-06 | 0.76 | 2.53 | - | 873.3  |
| AHQ-7-2, 3205 - 3243   | R.DVDIIDHDNTYTVK.Y                     | 1785.89230 | 2 | 6.32E-07 | 0.95 | 4.78 | - | 1026.3 |
| AHQ-7-3, 3204          | R.DVDIIDHDNTYTVK.Y                     | 1785.89230 | 2 | 2.56E-05 | 0.92 | 4.23 | - | 729.4  |
| AHQ-7-3, 3069 - 3133   | R.DVDIIDHDNTYTVK.Y                     | 1785.89230 | 2 | 2.57E-05 | 0.91 | 3.51 | - | 980.6  |
| AHQ-7-4, 3225          | R.DVDIIDHDNTYTVK.Y                     | 1785.89230 | 2 | 8.06E-06 | 0.90 | 3.47 | - | 1020.6 |
| AHQ-7-4, 3097          | R.DVDIIDHDNTYTVK.Y                     | 1785.89230 | 3 | 1.52E-04 | 0.54 | 3.02 | - | 400.5  |
| AHQ-7-1, 3283          | R.DVDIIDHDNTYTVK.Y                     | 1785.89230 | 2 | 3.69E-06 | 0.87 | 3.27 | - | 873.8  |
| AHQ-7-4, 3094          | R.DVDIIDHDNTYTVK.Y                     | 1785.89230 | 2 | 6.45E-07 | 0.90 | 3.76 | - | 791.1  |
| AHQ-7-5, 3458 - 3530   | R.EAGAGGLAIAVEGPKS.A                   | 1427.58510 | 2 | 4.88E-05 | 0.88 | 3.28 | - | 1140.3 |
| AHQ-7-2, 3487 - 3560   | R.EAGAGGLAIAVEGPKS.A                   | 1427.58510 | 2 | 1.04E-05 | 0.94 | 4.60 | - | 1019.9 |
| AHQ-7-5, 3391          | R.EAGAGGLAIAVEGPKS.A                   | 1427.58510 | 1 | 2.35E-07 | 0.68 | 3.51 | - | 288.6  |
| AHQ-7-5, 3374 - 3443   | R.EAGAGGLAIAVEGPKS.A                   | 1427.58510 | 2 | 1.56E-05 | 0.94 | 4.42 | - | 1153.6 |
| AHQ-7-3, 3439 - 3464   | R.EAGAGGLAIAVEGPKS.A                   | 1427.58510 | 2 | 5.54E-04 | 0.94 | 4.37 | - | 1261.2 |
| AHQ-7-7, 3277          | R.EAGAGGLAIAVEGPKS.A                   | 1427.58510 | 2 | 1.84E-05 | 0.94 | 3.82 | - | 1270.1 |
| AHQ-7-8, 3208 - 3287   | R.EAGAGGLAIAVEGPKS.A                   | 1427.58510 | 2 | 6.76E-04 | 0.87 | 2.82 | - | 1253.0 |
| AHQ-7-6, 3345 - 3410   | R.EAGAGGLAIAVEGPKS.A                   | 1427.58510 | 2 | 3.51E-04 | 0.85 | 3.19 | - | 1073.1 |
| AHQ-7-4, 3432          | R.EAGAGGLAIAVEGPKS.A                   | 1427.58510 | 1 | 8.34E-09 | 0.77 | 3.43 | - | 341.2  |
| AHQ-7-4, 3412 - 3481   | R.EAGAGGLAIAVEGPKS.A                   | 1427.58510 | 2 | 1.87E-05 | 0.92 | 3.82 | - | 1134.3 |
| AHQ-7-1, 3560 - 3620   | R.EAGAGGLAIAVEGPKS.A                   | 1427.58510 | 2 | 7.31E-06 | 0.96 | 4.13 | - | 1507.4 |
| AHQ-7-1, 2867          | R.EATTFVSVDAR.A                        | 1226.27493 | 2 | 2.32E-04 | 0.88 | 2.86 | - | 981.3  |
| AHQ-7-5, 6067 - 6147   | R.EEGPYEVEVTYDGVVPVPGSPFFLEAVAPTKPSK.V | 3487.85286 | 3 | 3.84E-05 | 0.91 | 5.20 | - | 725.7  |
| AHQ-7-8, 6115          | R.EEGPYEVEVTYDGVVPVPGSPFFLEAVAPTKPSK.V | 3487.85286 | 3 | 4.07E-05 | 0.87 | 4.76 | - | 546.6  |
| AHQ-7-2, 6259          | R.EEGPYEVEVTYDGVVPVPGSPFFLEAVAPTKPSK.V | 3487.85286 | 3 | 9.84E-10 | 0.96 | 5.92 | - | 953.7  |
| AHQ-7-2, 6116 - 6199   | R.EEGPYEVEVTYDGVVPVPGSPFFLEAVAPTKPSK.V | 3487.85286 | 3 | 4.18E-09 | 0.97 | 6.10 | - | 1233.1 |
| AHQ-7-3, 6084 - 6139   | R.EEGPYEVEVTYDGVVPVPGSPFFLEAVAPTKPSK.V | 3487.85286 | 3 | 3.02E-07 | 0.93 | 5.62 | - | 595.2  |
| AHQ-7-4, 6141 - 6201   | R.EEGPYEVEVTYDGVVPVPGSPFFLEAVAPTKPSK.V | 3487.85286 | 3 | 1.86E-07 | 0.93 | 5.20 | - | 735.9  |
| AHQ-7-3, 5968 - 6031   | R.EEGPYEVEVTYDGVVPVPGSPFFLEAVAPTKPSK.V | 3487.85286 | 3 | 1.75E-07 | 0.94 | 5.65 | - | 855.3  |
| AHQ-7-6, 6049          | R.EEGPYEVEVTYDGVVPVPGSPFFLEAVAPTKPSK.V | 3487.85286 | 3 | 1.65E-08 | 0.84 | 3.79 | - | 688.5  |
| AHQ-7-1, 5895 - 5951   | R.EEGPYEVEVTYDGVVPVPGSPFFLEAVAPTKPSK.V | 3487.85286 | 3 | 5.71E-09 | 0.91 | 5.24 | - | 667.3  |
| AHQ-7-7, 6057          | R.EEGPYEVEVTYDGVVPVPGSPFFLEAVAPTKPSK.V | 3487.85286 | 3 | 1.05E-05 | 0.85 | 4.47 | - | 578.2  |
| AHQ-7-4, 6260          | R.EEGPYEVEVTYDGVVPVPGSPFFLEAVAPTKPSK.V | 3487.85286 | 3 | 5.85E-08 | 0.90 | 4.67 | - | 698.6  |
| AHQ-7-1, 6007 - 6009   | R.EEGPYEVEVTYDGVVPVPGSPFFLEAVAPTKPSK.V | 3487.85286 | 3 | 1.83E-07 | 0.97 | 6.77 | - | 959.0  |
| AHQ-7-3, 4957 - 5019   | R.EGPYSISVLYGDEEIVPR.S                 | 1911.05809 | 2 | 1.06E-08 | 0.93 | 4.50 | - | 1011.0 |
| AHQ-7-3, 5004          | R.EGPYSISVLYGDEEIVPR.S                 | 1911.05809 | 3 | 4.75E-06 | 0.97 | 4.83 | - | 1912.1 |

|                       |                                |            |   |          |      |      |   |        |
|-----------------------|--------------------------------|------------|---|----------|------|------|---|--------|
| AHQ-7-1, 4916 - 4979  | R.EGPYSISVLYGDEEVP.R.S         | 1911.05809 | 2 | 5.02E-04 | 0.60 | 2.94 | - | 762.5  |
| AHQ-7-8, 4907 - 4908  | R.EGPYSISVLYGDEEVP.R.S         | 1911.05809 | 2 | 2.70E-06 | 0.94 | 4.62 | - | 872.9  |
| AHQ-7-6, 4945 - 5022  | R.EGPYSISVLYGDEEVP.R.S         | 1911.05809 | 2 | 4.28E-05 | 0.62 | 2.62 | - | 492.2  |
| AHQ-7-3, 4705         | R.EGPYSISVLYGDEEVP.R.S         | 1911.05809 | 2 | 1.01E-05 | 0.55 | 3.31 | - | 313.1  |
| AHQ-7-5, 5022         | R.EGPYSISVLYGDEEVP.R.S         | 1911.05809 | 2 | 4.64E-06 | 0.88 | 3.30 | - | 824.4  |
| AHQ-7-2, 5032 - 5099  | R.EGPYSISVLYGDEEVP.R.S         | 1911.05809 | 2 | 7.41E-10 | 0.92 | 4.56 | - | 949.4  |
| AHQ-7-9, 4509 - 4512  | R.EGPYSISVLYGDEEVP.R.S         | 1911.05809 | 2 | 9.67E-04 | 0.83 | 3.45 | - | 610.2  |
| AHQ-7-4, 5006 - 5036  | R.EGPYSISVLYGDEEVP.R.S         | 1911.05809 | 2 | 5.42E-07 | 0.82 | 2.97 | - | 883.3  |
| AHQ-7-2, 4757 - 4799  | R.EGPYSISVLYGDEEVP.R.S         | 1911.05809 | 2 | 1.06E-05 | 0.49 | 2.67 | - | 331.6  |
| AHQ-7-5, 3482 - 3483  | K.FADQHVPGSPFSVK.V             | 1516.68203 | 3 | 4.37E-05 | 0.91 | 3.91 | - | 1066.2 |
| AHQ-7-5, 3475 - 3539  | K.FADQHVPGSPFSVK.V             | 1516.68203 | 2 | 1.24E-05 | 0.62 | 2.96 | - | 458.1  |
| AHQ-7-4, 3528         | K.FADQHVPGSPFSVK.V             | 1516.68203 | 3 | 3.46E-05 | 0.88 | 3.40 | - | 1151.7 |
| AHQ-7-6, 3421         | K.FADQHVPGSPFSVK.V             | 1516.68203 | 2 | 1.17E-04 | 0.79 | 2.66 | - | 564.2  |
| AHQ-7-4, 3516 - 3518  | K.FADQHVPGSPFSVK.V             | 1516.68203 | 2 | 2.66E-04 | 0.53 | 2.95 | - | 452.2  |
| AHQ-7-6, 3427         | K.FADQHVPGSPFSVK.V             | 1516.68203 | 3 | 1.38E-06 | 0.84 | 3.40 | - | 846.7  |
| AHQ-7-1, 3672         | K.FADQHVPGSPFSVK.V             | 1516.68203 | 3 | 1.31E-07 | 0.95 | 4.06 | - | 1483.0 |
| AHQ-7-1, 5405         | R.FGGEHVNSPFQVTLAGDQPSVQPPLR.S | 2947.25342 | 2 | 9.40E-04 | 0.93 | 4.07 | - | 1033.3 |
| AHQ-7-6, 5338 - 5401  | R.FGGEHVNSPFQVTLAGDQPSVQPPLR.S | 2947.25342 | 3 | 5.76E-08 | 0.94 | 5.06 | - | 926.4  |
| AHQ-7-7, 5284 - 5357  | R.FGGEHVNSPFQVTLAGDQPSVQPPLR.S | 2947.25342 | 3 | 4.67E-04 | 0.92 | 4.73 | - | 957.6  |
| AHQ-7-7, 5341         | R.FGGEHVNSPFQVTLAGDQPSVQPPLR.S | 2947.25342 | 2 | 4.46E-07 | 0.94 | 4.84 | - | 817.7  |
| AHQ-7-4, 5549 - 5562  | R.FGGEHVNSPFQVTLAGDQPSVQPPLR.S | 2947.25342 | 2 | 1.21E-06 | 0.98 | 6.32 | - | 1329.2 |
| AHQ-7-4, 5481 - 5541  | R.FGGEHVNSPFQVTLAGDQPSVQPPLR.S | 2947.25342 | 3 | 5.71E-05 | 0.89 | 4.11 | - | 769.9  |
| AHQ-7-2, 5608 - 5639  | R.FGGEHVNSPFQVTLAGDQPSVQPPLR.S | 2947.25342 | 3 | 5.19E-05 | 0.88 | 4.66 | - | 594.4  |
| AHQ-7-8, 5256         | R.FGGEHVNSPFQVTLAGDQPSVQPPLR.S | 2947.25342 | 2 | 2.55E-08 | 0.95 | 4.63 | - | 1116.7 |
| AHQ-7-3, 5417         | R.FGGEHVNSPFQVTLAGDQPSVQPPLR.S | 2947.25342 | 2 | 8.62E-08 | 0.96 | 5.63 | - | 1044.0 |
| AHQ-7-2, 5483 - 5543  | R.FGGEHVNSPFQVTLAGDQPSVQPPLR.S | 2947.25342 | 3 | 1.20E-09 | 0.93 | 4.56 | - | 1181.1 |
| AHQ-7-3, 5372 - 5431  | R.FGGEHVNSPFQVTLAGDQPSVQPPLR.S | 2947.25342 | 3 | 2.04E-10 | 0.92 | 4.53 | - | 956.0  |
| AHQ-7-2, 5521 - 5535  | R.FGGEHVNSPFQVTLAGDQPSVQPPLR.S | 2947.25342 | 2 | 1.11E-06 | 0.96 | 5.30 | - | 1098.8 |
| AHQ-7-3, 5264         | R.FGGEHVNSPFQVTLAGDQPSVQPPLR.S | 2947.25342 | 3 | 7.14E-04 | 0.84 | 3.93 | - | 846.8  |
| AHQ-7-1, 5375 - 5412  | R.FGGEHVNSPFQVTLAGDQPSVQPPLR.S | 2947.25342 | 3 | 4.87E-13 | 0.95 | 5.32 | - | 1085.8 |
| AHQ-7-6, 5037 - 5043  | K.FNEEHIPDSPFVVPVSPSGDAR.R     | 2468.66280 | 2 | 7.07E-07 | 0.95 | 5.01 | - | 772.4  |
| AHQ-7-6, 5147 - 5151  | K.FNEEHIPDSPFVVPVSPSGDAR.R     | 2468.66280 | 2 | 5.49E-04 | 0.85 | 4.06 | - | 462.6  |
| AHQ-7-3, 5092 - 5104  | K.FNEEHIPDSPFVVPVSPSGDAR.R     | 2468.66280 | 2 | 8.40E-04 | 0.75 | 3.24 | - | 541.0  |
| AHQ-7-4, 5302         | K.FNEEHIPDSPFVVPVSPSGDAR.R     | 2468.66280 | 2 | 1.32E-04 | 0.76 | 3.16 | - | 511.8  |
| AHQ-7-1, 5203 - 5260  | K.FNEEHIPDSPFVVPVSPSGDAR.R     | 2468.66280 | 3 | 3.76E-04 | 0.93 | 4.49 | - | 1368.7 |
| AHQ-7-1, 5195         | K.FNEEHIPDSPFVVPVSPSGDAR.R     | 2468.66280 | 2 | 2.99E-05 | 0.66 | 2.84 | - | 406.8  |
| AHQ-7-2, 5213         | K.FNEEHIPDSPFVVPVSPSGDAR.R     | 2468.66280 | 2 | 6.46E-07 | 0.90 | 3.38 | - | 999.8  |
| AHQ-7-5, 3690 - 3700  | K.FNGTHIPGSPFK.I               | 1302.46259 | 2 | 7.11E-04 | 0.85 | 3.26 | - | 611.1  |
| AHQ-7-5, 3872 - 3935  | K.FNGTHIPGSPFK.I               | 1302.46259 | 2 | 1.28E-04 | 0.36 | 2.52 | - | 329.5  |
| AHQ-7-4, 3728         | K.FNGTHIPGSPFK.I               | 1302.46259 | 2 | 2.39E-05 | 0.70 | 2.71 | - | 501.4  |
| AHQ-7-7, 3805         | K.FNGTHIPGSPFK.I               | 1302.46259 | 2 | 2.25E-04 | 0.71 | 2.64 | - | 497.3  |
| AHQ-7-4, 3838 - 3856  | K.FNGTHIPGSPFK.I               | 1302.46259 | 2 | 2.43E-06 | 0.63 | 2.95 | - | 488.1  |
| AHQ-7-5, 3046 - 3047  | R.FVPAEM*GTHTVSVK.Y            | 1519.74761 | 2 | 8.97E-04 | 0.82 | 3.28 | - | 408.8  |
| AHQ-7-5, 3034         | R.FVPAEMGTHTVSVK.Y             | 1503.74821 | 2 | 6.54E-06 | 0.67 | 2.78 | - | 387.5  |
| AHQ-7-4, 3074         | R.FVPAEMGTHTVSVK.Y             | 1503.74821 | 2 | 1.35E-07 | 0.88 | 3.84 | - | 521.5  |
| AHQ-7-3, 2471         | R.FVPAEM*GTHTVSVK.Y            | 1519.74761 | 2 | 2.30E-06 | 0.59 | 2.55 | - | 268.3  |
| AHQ-7-1, 2676         | R.FVPAEM*GTHTVSVK.Y            | 1519.74761 | 2 | 2.09E-04 | 0.82 | 3.13 | - | 363.1  |
| AHQ-7-6, 2389         | R.FVPAEM*GTHTVSVK.Y            | 1519.74761 | 2 | 9.44E-04 | 0.83 | 3.08 | - | 529.2  |
| AHQ-7-7, 2344         | R.FVPAEM*GTHTVSVK.Y            | 1519.74761 | 2 | 2.25E-05 | 0.59 | 2.73 | - | 267.7  |
| AHQ-7-1, 3292         | R.FVPAEMGTHTVSVK.Y             | 1503.74821 | 2 | 1.06E-08 | 0.87 | 3.24 | - | 751.9  |
| AHQ-7-2, 6495 - 6551  | R.GAGSYTIM*VLFADQATPTSPIR.V    | 2297.61623 | 2 | 1.44E-05 | 0.95 | 5.34 | - | 1059.5 |
| AHQ-7-1, 5683         | R.GAGSYTIM*VLFADQATPTSPIR.V    | 2313.61563 | 2 | 1.85E-05 | 0.91 | 4.30 | - | 614.7  |
| AHQ-7-4, 3389         | R.GAGTGGLGLAVEGPEAK.M          | 1571.71430 | 2 | 8.73E-06 | 0.79 | 3.34 | - | 612.3  |
| AHQ-7-2, 3452 - 3519  | R.GAGTGGLGLAVEGPEAK.M          | 1571.71430 | 2 | 2.07E-06 | 0.87 | 3.69 | - | 674.3  |
| AHQ-7-5, 3355         | R.GAGTGGLGLAVEGPEAK.M          | 1571.71430 | 2 | 1.48E-05 | 0.83 | 3.12 | - | 801.0  |
| AHQ-7-7, 3248 - 3268  | R.GAGTGGLGLAVEGPEAK.M          | 1571.71430 | 2 | 1.80E-07 | 0.86 | 3.86 | - | 626.6  |
| AHQ-7-8, 3264         | R.GAGTGGLGLAVEGPEAK.M          | 1571.71430 | 2 | 3.02E-05 | 0.70 | 2.91 | - | 688.9  |
| AHQ-7-6, 3317         | R.GAGTGGLGLAVEGPEAK.M          | 1571.71430 | 2 | 8.52E-08 | 0.74 | 2.89 | - | 596.9  |
| AHQ-7-3, 3411 - 3419  | R.GAGTGGLGLAVEGPEAK.M          | 1571.71430 | 2 | 4.45E-05 | 0.90 | 4.10 | - | 720.4  |
| AHQ-7-4, 4976 - 4992  | K.GLVEPVDV*DNADGTQTVNYVPSR.E   | 2545.74387 | 2 | 3.82E-09 | 0.97 | 6.12 | - | 1562.8 |
| AHQ-7-3, 5051         | K.GLVEPVDV*DNADGTQTVNYVPSR.E   | 2545.74387 | 2 | 1.79E-06 | 0.94 | 4.26 | - | 1147.4 |
| AHQ-7-3, 4673 - 4747  | K.GLVEPVDV*DNADGTQTVNYVPSR.E   | 2545.74387 | 2 | 2.75E-07 | 0.90 | 4.48 | - | 732.9  |
| AHQ-7-1, 4975 - 5036  | K.GLVEPVDV*DNADGTQTVNYVPSR.E   | 2545.74387 | 2 | 8.53E-06 | 0.92 | 4.47 | - | 722.5  |
| AHQ-7-2, 4760 - 4841  | K.GLVEPVDV*DNADGTQTVNYVPSR.E   | 2545.74387 | 2 | 1.44E-07 | 0.97 | 6.53 | - | 1005.2 |
| AHQ-7-2, 4903 - 4984  | K.GLVEPVDV*DNADGTQTVNYVPSR.E   | 2545.74387 | 2 | 8.11E-07 | 0.97 | 6.07 | - | 1106.7 |
| AHQ-7-3, 4787 - 4859  | K.GLVEPVDV*DNADGTQTVNYVPSR.E   | 2545.74387 | 2 | 7.61E-10 | 0.92 | 4.45 | - | 745.8  |
| AHQ-7-4, 4866 - 4922  | K.GLVEPVDV*DNADGTQTVNYVPSR.E   | 2545.74387 | 2 | 1.67E-04 | 0.94 | 4.77 | - | 853.0  |
| AHQ-7-2, 5044 - 5111  | K.GLVEPVDV*DNADGTQTVNYVPSR.E   | 2545.74387 | 2 | 7.96E-08 | 0.96 | 5.05 | - | 1520.3 |
| AHQ-7-5, 4847 - 4910  | K.GLVEPVDV*DNADGTQTVNYVPSR.E   | 2545.74387 | 2 | 7.58E-12 | 0.97 | 5.71 | - | 1390.1 |
| AHQ-7-2, 5173         | K.GLVEPVDV*DNADGTQTVNYVPSR.E   | 2545.74387 | 2 | 1.36E-11 | 0.88 | 3.67 | - | 873.6  |
| AHQ-7-1, 2524         | K.GTVEPQLAR.G                  | 1100.20741 | 2 | 2.21E-05 | 0.79 | 2.76 | - | 580.2  |
| AHQ-7-2, 2339 - 2403  | K.GTVEPQLAR.G                  | 1100.20741 | 2 | 1.70E-05 | 0.88 | 3.17 | - | 755.0  |
| AHQ-7-4, 2261 - 2292  | K.GTVEPQLAR.G                  | 1100.20741 | 2 | 2.96E-04 | 0.83 | 3.07 | - | 538.2  |
| AHQ-7-3, 2312 - 2336  | K.GTVEPQLAR.G                  | 1100.20741 | 2 | 1.55E-06 | 0.67 | 2.91 | - | 520.0  |
| AHQ-7-3, 5420 - 5433  | K.HTAMVSWGGSIPNSPFR.V          | 1944.20601 | 2 | 2.38E-05 | 0.97 | 5.00 | - | 1195.3 |
| AHQ-7-2, 5544         | K.HTAMVSWGGSIPNSPFR.V          | 1944.20601 | 3 | 6.40E-04 | 0.87 | 4.54 | - | 796.5  |
| AHQ-7-2, 5539         | K.HTAMVSWGGSIPNSPFR.V          | 1944.20601 | 2 | 7.06E-06 | 0.97 | 5.03 | - | 1349.8 |
| AHQ-7-3, 5095 - 5099  | K.HTAM*VSWGGSIPNSPFR.V         | 1960.20541 | 2 | 6.05E-06 | 0.95 | 4.74 | - | 1148.5 |
| AHQ-7-2, 5204         | K.HTAM*VSWGGSIPNSPFR.V         | 1960.20541 | 3 | 1.45E-04 | 0.71 | 3.48 | - | 677.7  |
| AHQ-7-1, 5111 - 5113  | K.HTAM*VSWGGSIPNSPFR.V         | 1960.20541 | 2 | 6.10E-06 | 0.97 | 5.26 | - | 1250.3 |
| AHQ-7-1, 5107         | K.HTAM*VSWGGSIPNSPFR.V         | 1960.20541 | 3 | 6.60E-04 | 0.86 | 4.45 | - | 589.3  |
| AHQ-7-2, 5200 - 5209  | K.HTAM*VSWGGSIPNSPFR.V         | 1960.20541 | 2 | 4.41E-04 | 0.97 | 5.06 | - | 1606.6 |
| AHQ-7-6, 4146 - 4219  | R.IANLQTLDSGLR.L               | 1416.56231 | 2 | 1.56E-06 | 0.94 | 3.95 | - | 1182.2 |
| AHQ-7-1, 4291         | R.IANLQTLDSGLR.L               | 1416.56231 | 2 | 6.47E-07 | 0.94 | 4.00 | - | 940.9  |
| AHQ-7-5, 3823 - 3839  | R.IANLQTLDSGLR.L               | 1416.56231 | 2 | 1.43E-06 | 0.95 | 4.41 | - | 1067.9 |
| AHQ-7-8, 4111         | R.IANLQTLDSGLR.L               | 1416.56231 | 2 | 2.15E-05 | 0.72 | 2.99 | - | 691.3  |
| AHQ-7-2, 3931 - 3941  | R.IANLQTLDSGLR.L               | 1416.56231 | 2 | 1.59E-06 | 0.95 | 4.17 | - | 1326.1 |
| AHQ-7-2, 4319 - 4387  | R.IANLQTLDSGLR.L               | 1416.56231 | 2 | 1.28E-05 | 0.90 | 3.61 | - | 927.4  |
| AHQ-7-7, 3720         | R.IANLQTLDSGLR.L               | 1416.56231 | 2 | 5.26E-05 | 0.89 | 3.62 | - | 879.0  |
| AHQ-7-5, 4215 - 4235  | R.IANLQTLDSGLR.L               | 1416.56231 | 2 | 3.00E-07 | 0.89 | 3.31 | - | 994.6  |
| AHQ-7-2, 4117 - 4195  | R.IANLQTLDSGLR.L               | 1416.56231 | 2 | 3.70E-07 | 0.96 | 4.51 | - | 1362.0 |
| AHQ-7-11, 3958 - 3966 | R.IANLQTLDSGLR.L               | 1416.56231 | 2 | 2.22E-04 | 0.95 | 4.69 | - | 877.0  |
| AHQ-7-2, 4033         | R.IANLQTLDSGLR.L               | 1416.56231 | 2 | 4.76E-08 | 0.94 | 4.13 | - | 1044.9 |
| AHQ-7-12, 3986        | R.IANLQTLDSGLR.L               | 1416.56231 | 2 | 1.78E-04 | 0.87 | 3.03 | - | 833.6  |
| AHQ-7-7, 4060         | R.IANLQTLDSGLR.L               | 1416.56231 | 2 | 6.36E-06 | 0.94 | 4.40 | - | 846.6  |
| AHQ-7-10, 3892        | R.IANLQTLDSGLR.L               | 1416.56231 | 2 | 4.81E-05 | 0.89 | 3.15 | - | 1085.1 |
| AHQ-7-4, 4256         | R.IANLQTLDSGLR.L               | 1416.56231 | 2 | 6.77E-06 | 0.96 | 4.41 | - | 1313.1 |
| AHQ-7-3, 4239         | R.IANLQTLDSGLR.L               | 1416.56231 | 2 | 9.92E-07 | 0.93 | 3.62 | - | 1044.4 |
| AHQ-7-4, 3876         | R.IANLQTLDSGLR.L               | 1416.56231 | 2 | 1.23E-05 | 0.93 | 4.00 | - | 1172.1 |
| AHQ-7-3, 3844         | R.IANLQTLDSGLR.L               | 1416.56231 | 2 | 5.32E-07 | 0.95 | 4.29 | - | 1333.0 |
| AHQ-7-4, 3962         | R.IANLQTLDSGLR.L               | 1416.56231 | 2 | 1.10E-05 | 0.75 | 2.67 | - | 705.7  |
| AHQ-7-6, 3750         | R.IANLQTLDSGLR.L               | 1416.56231 | 2 | 8.03E-07 | 0.85 | 3.10 | - | 748.4  |
| AHQ-7-9, 3809 - 3826  | R.IANLQTLDSGLR.L               | 1416.56231 | 2 | 3.40E-04 | 0.80 | 2.57 | - | 776.0  |
| AHQ-7-13-, 4108       | R.IANLQTLDSGLR.L               | 1416.56231 | 2 | 4.00E-07 | 0.95 | 4.52 | - | 933.6  |
| AHQ-7-1, 3931         | R.IANLQTLDSGLR.L               | 1416.56231 | 2 | 2.08E-04 | 0.77 | 2.97 | - | 721.9  |
| AHQ-7-3, 4099         | K.IPEISIQDM*TAQVTSPSGK.T       | 2019.26301 | 2 | 8.41E-04 | 0.91 | 3.85 | - | 901.8  |
| AHQ-7-4, 4122 - 4153  | K.IPEISIQDM*TAQVTSPSGK.T       | 2019.26301 | 2 | 8.88E-06 | 0.96 | 4.45 | - | 1865.4 |

|                      |                                |            |   |          |      |      |   |        |
|----------------------|--------------------------------|------------|---|----------|------|------|---|--------|
| AHQ-7-5, 5403        | K.IPEISIQDMTAQVTSPSGK.T        | 2003.26361 | 3 | 1.29E-04 | 0.93 | 4.55 | - | 1078.3 |
| AHQ-7-4, 5492        | K.IPEISIQDMTAQVTSPSGK.T        | 2003.26361 | 3 | 1.85E-05 | 0.89 | 4.33 | - | 872.6  |
| AHQ-7-6, 5342        | K.IPEISIQDMTAQVTSPSGK.T        | 2003.26361 | 3 | 6.01E-07 | 0.89 | 4.36 | - | 773.6  |
| AHQ-7-3, 5369 - 5396 | K.IPEISIQDMTAQVTSPSGK.T        | 2003.26361 | 2 | 1.83E-04 | 0.89 | 4.08 | - | 894.4  |
| AHQ-7-6, 4015        | K.IPEISIQDM*TAQVTSPSGK.T       | 2019.26301 | 2 | 3.05E-08 | 0.97 | 4.89 | - | 1839.5 |
| AHQ-7-2, 5491        | K.IPEISIQDMTAQVTSPSGK.T        | 2003.26361 | 2 | 1.00E-05 | 0.97 | 5.19 | - | 1258.6 |
| AHQ-7-1, 5351        | K.IPEISIQDMTAQVTSPSGK.T        | 2003.26361 | 3 | 1.95E-05 | 0.90 | 4.60 | - | 822.4  |
| AHQ-7-4, 5480        | K.IPEISIQDMTAQVTSPSGK.T        | 2003.26361 | 2 | 1.65E-07 | 0.97 | 5.08 | - | 1579.0 |
| AHQ-7-6, 5319        | K.IPEISIQDMTAQVTSPSGK.T        | 2003.26361 | 2 | 1.02E-11 | 0.97 | 5.03 | - | 1540.3 |
| AHQ-7-1, 5336        | K.IPEISIQDMTAQVTSPSGK.T        | 2003.26361 | 2 | 3.37E-08 | 0.97 | 4.86 | - | 1616.4 |
| AHQ-7-5, 5390        | K.IPEISIQDMTAQVTSPSGK.T        | 2003.26361 | 2 | 1.84E-09 | 0.98 | 5.50 | - | 1831.3 |
| AHQ-7-8, 3932 - 4006 | K.IPEISIQDM*TAQVTSPSGK.T       | 2019.26301 | 2 | 9.49E-06 | 0.95 | 4.16 | - | 1346.6 |
| AHQ-7-7, 5278 - 5292 | K.IPEISIQDMTAQVTSPSGK.T        | 2003.26361 | 2 | 3.94E-10 | 0.97 | 5.27 | - | 1660.2 |
| AHQ-7-7, 3964        | K.IPEISIQDM*TAQVTSPSGK.T       | 2019.26301 | 2 | 1.40E-08 | 0.97 | 5.08 | - | 1539.6 |
| AHQ-7-7, 5301        | K.IPEISIQDMTAQVTSPSGK.T        | 2003.26361 | 3 | 6.69E-07 | 0.95 | 5.30 | - | 1050.8 |
| AHQ-7-2, 4237        | K.IPEISIQDM*TAQVTSPSGK.T       | 2019.26301 | 2 | 4.32E-04 | 0.96 | 5.00 | - | 1210.6 |
| AHQ-7-5, 4070 - 4134 | K.IPEISIQDM*TAQVTSPSGK.T       | 2019.26301 | 2 | 5.37E-07 | 0.98 | 5.03 | - | 1986.7 |
| AHQ-7-1, 4129 - 4188 | K.IPEISIQDM*TAQVTSPSGK.T       | 2019.26301 | 2 | 4.90E-09 | 0.97 | 5.01 | - | 1761.8 |
| AHQ-7-8, 5248        | K.IPEISIQDMTAQVTSPSGK.T        | 2003.26361 | 2 | 1.58E-10 | 0.97 | 5.09 | - | 1607.9 |
| AHQ-7-1, 4153 - 4233 | K.IPEISIQDM*TAQVTSPSGK.T       | 2019.26301 | 2 | 4.15E-07 | 0.97 | 5.15 | - | 1491.0 |
| AHQ-7-5, 2579        | K.IVGPSSAAVPCCK.V              | 1157.36530 | 2 | 1.51E-06 | 0.81 | 3.03 | - | 669.7  |
| AHQ-7-2, 2627 - 2631 | K.IVGPSSAAVPCCK.V              | 1157.36530 | 2 | 7.99E-09 | 0.92 | 3.71 | - | 848.3  |
| AHQ-7-4, 2546 - 2613 | K.IVGPSSAAVPCCK.V              | 1157.36530 | 2 | 8.59E-06 | 0.68 | 2.95 | - | 466.3  |
| AHQ-7-1, 2795        | K.IVGPSSAAVPCCK.V              | 1157.36530 | 2 | 7.39E-05 | 0.78 | 2.64 | - | 689.3  |
| AHQ-7-3, 2595        | K.IVGPSSAAVPCCK.V              | 1157.36530 | 2 | 6.93E-05 | 0.81 | 2.84 | - | 856.0  |
| AHQ-7-2, 4244 - 4251 | K.IVGPSSAAVPCCKVEPGLGADNSVVR.F | 2451.78478 | 2 | 3.27E-06 | 0.95 | 5.17 | - | 610.1  |
| AHQ-7-4, 4289        | K.IVGPSSAAVPCCKVEPGLGADNSVVR.F | 2451.78478 | 3 | 1.08E-06 | 0.89 | 4.06 | - | 974.3  |
| AHQ-7-2, 4364        | K.IVGPSSAAVPCCKVEPGLGADNSVVR.F | 2451.78478 | 3 | 8.23E-09 | 0.66 | 3.20 | - | 624.5  |
| AHQ-7-2, 4365        | K.IVGPSSAAVPCCKVEPGLGADNSVVR.F | 2451.78478 | 2 | 2.25E-04 | 0.90 | 4.11 | - | 454.8  |
| AHQ-7-1, 4207 - 4263 | K.IVGPSSAAVPCCKVEPGLGADNSVVR.F | 2451.78478 | 3 | 4.10E-05 | 0.95 | 4.60 | - | 1518.4 |
| AHQ-7-1, 4225 - 4227 | K.IVGPSSAAVPCCKVEPGLGADNSVVR.F | 2451.78478 | 2 | 8.12E-05 | 0.94 | 5.67 | - | 483.3  |
| AHQ-7-4, 4197        | K.IVGPSSAAVPCCKVEPGLGADNSVVR.F | 2451.78478 | 2 | 1.55E-06 | 0.80 | 3.44 | - | 405.0  |
| AHQ-7-4, 4188        | K.IVGPSSAAVPCCKVEPGLGADNSVVR.F | 2451.78478 | 3 | 7.13E-09 | 0.85 | 3.92 | - | 958.9  |
| AHQ-7-3, 4284        | K.IVGPSSAAVPCCKVEPGLGADNSVVR.F | 2451.78478 | 3 | 2.06E-06 | 0.83 | 3.64 | - | 936.4  |
| AHQ-7-3, 4273        | K.IVGPSSAAVPCCKVEPGLGADNSVVR.F | 2451.78478 | 2 | 6.57E-06 | 0.70 | 2.82 | - | 380.2  |
| AHQ-7-5, 4139        | K.IVGPSSAAVPCCKVEPGLGADNSVVR.F | 2451.78478 | 2 | 1.09E-04 | 0.92 | 4.80 | - | 435.1  |
| AHQ-7-3, 4156 - 4220 | K.IVGPSSAAVPCCKVEPGLGADNSVVR.F | 2451.78478 | 3 | 3.38E-11 | 0.96 | 5.91 | - | 1172.1 |
| AHQ-7-6, 4075        | K.IVGPSSAAVPCCKVEPGLGADNSVVR.F | 2451.78478 | 3 | 1.11E-06 | 0.91 | 4.58 | - | 1103.5 |
| AHQ-7-1, 4319        | K.IVGPSSAAVPCCKVEPGLGADNSVVR.F | 2451.78478 | 3 | 2.12E-06 | 0.86 | 3.98 | - | 724.5  |
| AHQ-7-2, 4233 - 4299 | K.IVGPSSAAVPCCKVEPGLGADNSVVR.F | 2451.78478 | 3 | 2.04E-05 | 0.92 | 4.50 | - | 1091.9 |
| AHQ-7-5, 4136        | K.IVGPSSAAVPCCKVEPGLGADNSVVR.F | 2451.78478 | 3 | 6.76E-06 | 0.96 | 5.20 | - | 1429.4 |
| AHQ-7-6, 4317        | R.KDGSFCGWAYVVQEPGDYEVSVK.F    | 2388.59282 | 2 | 6.35E-05 | 0.91 | 4.06 | - | 782.2  |
| AHQ-7-1, 4376 - 4449 | R.KDGSFCGWAYVVQEPGDYEVSVK.F    | 2388.59282 | 3 | 6.28E-05 | 0.91 | 4.65 | - | 1046.3 |
| AHQ-7-5, 4310 - 4384 | R.KDGSFCGWAYVVQEPGDYEVSVK.F    | 2388.59282 | 2 | 1.54E-06 | 0.96 | 5.66 | - | 1177.1 |
| AHQ-7-1, 4452        | K.KNGQHVASSPIPVVISQSEIGDASR.V  | 2577.83547 | 3 | 1.55E-10 | 0.97 | 5.61 | - | 2285.8 |
| AHQ-7-2, 4417 - 4485 | K.KNGQHVASSPIPVVISQSEIGDASR.V  | 2577.83547 | 3 | 2.74E-06 | 0.91 | 4.39 | - | 1271.6 |
| AHQ-7-6, 4255        | K.KNGQHVASSPIPVVISQSEIGDASR.V  | 2577.83547 | 2 | 2.48E-07 | 0.90 | 4.18 | - | 514.4  |
| AHQ-7-5, 4330        | K.KNGQHVASSPIPVVISQSEIGDASR.V  | 2577.83547 | 3 | 6.86E-10 | 0.97 | 5.37 | - | 1964.0 |
| AHQ-7-1, 4461        | K.KNGQHVASSPIPVVISQSEIGDASR.V  | 2577.83547 | 2 | 4.13E-08 | 0.77 | 2.96 | - | 692.5  |
| AHQ-7-3, 4383        | K.KNGQHVASSPIPVVISQSEIGDASR.V  | 2577.83547 | 3 | 1.11E-09 | 0.97 | 5.65 | - | 2244.9 |
| AHQ-7-8, 4168        | K.KNGQHVASSPIPVVISQSEIGDASR.V  | 2577.83547 | 2 | 3.12E-07 | 0.92 | 4.08 | - | 779.1  |
| AHQ-7-6, 4238        | K.KNGQHVASSPIPVVISQSEIGDASR.V  | 2577.83547 | 3 | 6.02E-12 | 0.96 | 5.18 | - | 1539.8 |
| AHQ-7-3, 4384        | K.KNGQHVASSPIPVVISQSEIGDASR.V  | 2577.83547 | 2 | 5.30E-04 | 0.77 | 3.34 | - | 444.8  |
| AHQ-7-5, 4326        | K.KNGQHVASSPIPVVISQSEIGDASR.V  | 2577.83547 | 2 | 7.64E-07 | 0.88 | 3.67 | - | 717.4  |
| AHQ-7-7, 4177        | K.KNGQHVASSPIPVVISQSEIGDASR.V  | 2577.83547 | 2 | 2.84E-04 | 0.89 | 3.69 | - | 749.3  |
| AHQ-7-4, 4377 - 4414 | K.KNGQHVASSPIPVVISQSEIGDASR.V  | 2577.83547 | 2 | 6.30E-06 | 0.91 | 4.31 | - | 706.2  |
| AHQ-7-4, 4372        | K.KNGQHVASSPIPVVISQSEIGDASR.V  | 2577.83547 | 3 | 9.91E-08 | 0.97 | 5.53 | - | 1671.8 |
| AHQ-7-4, 3584        | K.KTHIQDNHDGTYTVAYVPDVTGR.Y    | 2588.77367 | 3 | 4.68E-05 | 0.91 | 4.35 | - | 958.8  |
| AHQ-7-3, 3468        | K.KTHIQDNHDGTYTVAYVPDVTGR.Y    | 2588.77367 | 3 | 5.36E-04 | 0.95 | 5.04 | - | 1201.4 |
| AHQ-7-4, 3454        | K.KTHIQDNHDGTYTVAYVPDVTGR.Y    | 2588.77367 | 3 | 4.00E-06 | 0.87 | 4.05 | - | 951.4  |
| AHQ-7-1, 3627 - 3689 | K.KTHIQDNHDGTYTVAYVPDVTGR.Y    | 2588.77367 | 3 | 5.81E-08 | 0.93 | 4.16 | - | 1288.7 |
| AHQ-7-2, 3539        | K.KTHIQDNHDGTYTVAYVPDVTGR.Y    | 2588.77367 | 2 | 2.25E-09 | 0.96 | 4.98 | - | 1121.5 |
| AHQ-7-2, 3647 - 3692 | K.KTHIQDNHDGTYTVAYVPDVTGR.Y    | 2588.77367 | 3 | 4.44E-08 | 0.96 | 4.95 | - | 1622.1 |
| AHQ-7-3, 3477        | K.KTHIQDNHDGTYTVAYVPDVTGR.Y    | 2588.77367 | 2 | 4.87E-07 | 0.95 | 5.26 | - | 862.3  |
| AHQ-7-3, 3592        | K.KTHIQDNHDGTYTVAYVPDVTGR.Y    | 2588.77367 | 2 | 4.89E-05 | 0.91 | 3.94 | - | 739.4  |
| AHQ-7-3, 3952        | K.LDVQFSGLTK.G                 | 1108.26945 | 2 | 3.67E-04 | 0.93 | 3.90 | - | 1118.3 |
| AHQ-7-1, 4040        | K.LDVQFSGLTK.G                 | 1108.26945 | 2 | 4.37E-05 | 0.90 | 3.34 | - | 903.1  |
| AHQ-7-4, 3968        | K.LDVQFSGLTK.G                 | 1108.26945 | 2 | 4.02E-05 | 0.91 | 3.51 | - | 946.0  |
| AHQ-7-2, 4031 - 4045 | K.LDVQFSGLTK.G                 | 1108.26945 | 2 | 4.98E-05 | 0.92 | 4.06 | - | 799.8  |
| AHQ-7-2, 6639        | R.LLGGWIQNKLPQLPITNFSR.D       | 2239.64761 | 3 | 1.74E-06 | 0.95 | 4.87 | - | 1376.7 |
| AHQ-7-1, 6392        | R.LLGGWIQNKLPQLPITNFSR.D       | 2239.64761 | 3 | 7.89E-06 | 0.93 | 4.75 | - | 1027.3 |
| AHQ-7-4, 5090        | K.LPQLPITNFSR.D                | 1286.50461 | 2 | 3.72E-05 | 0.89 | 3.20 | - | 726.5  |
| AHQ-7-3, 5003        | K.LPQLPITNFSR.D                | 1286.50461 | 2 | 7.51E-08 | 0.90 | 3.02 | - | 841.4  |
| AHQ-7-10, 4381       | K.LPQLPITNFSR.D                | 1286.50461 | 2 | 6.77E-05 | 0.79 | 2.52 | - | 620.2  |
| AHQ-7-2, 4900 - 4901 | K.LPQLPITNFSR.D                | 1286.50461 | 2 | 2.02E-06 | 0.92 | 3.24 | - | 1058.4 |
| AHQ-7-2, 5100 - 5116 | K.LPQLPITNFSR.D                | 1286.50461 | 2 | 1.06E-05 | 0.81 | 2.98 | - | 603.0  |
| AHQ-7-4, 4873        | K.LPQLPITNFSR.D                | 1286.50461 | 2 | 6.06E-04 | 0.83 | 2.79 | - | 630.1  |
| AHQ-7-3, 5265 - 5276 | K.LQVEPAVDTSGVQCYGPGIEGQGVFR.E | 2766.03597 | 2 | 2.29E-06 | 0.94 | 4.60 | - | 1035.3 |
| AHQ-7-2, 5332 - 5395 | K.LQVEPAVDTSGVQCYGPGIEGQGVFR.E | 2766.03597 | 2 | 9.99E-07 | 0.91 | 4.13 | - | 752.8  |
| AHQ-7-2, 5341 - 5403 | K.LQVEPAVDTSGVQCYGPGIEGQGVFR.E | 2766.03597 | 3 | 3.45E-13 | 0.98 | 6.47 | - | 2139.8 |
| AHQ-7-7, 5224 - 5233 | K.LQVEPAVDTSGVQCYGPGIEGQGVFR.E | 2766.03597 | 2 | 4.20E-07 | 0.95 | 4.89 | - | 953.5  |
| AHQ-7-2, 5468 - 5531 | K.LQVEPAVDTSGVQCYGPGIEGQGVFR.E | 2766.03597 | 2 | 1.56E-09 | 0.90 | 4.65 | - | 466.2  |
| AHQ-7-4, 5413        | K.LQVEPAVDTSGVQCYGPGIEGQGVFR.E | 2766.03597 | 2 | 3.87E-10 | 0.98 | 6.41 | - | 1150.5 |
| AHQ-7-2, 5379        | K.LQVEPAVDTSGVQCYGPGIEGQGVFR.E | 2766.03597 | 2 | 9.50E-08 | 0.92 | 4.37 | - | 689.4  |
| AHQ-7-2, 5432 - 5500 | K.LQVEPAVDTSGVQCYGPGIEGQGVFR.E | 2766.03597 | 3 | 5.15E-04 | 0.92 | 4.54 | - | 1530.9 |
| AHQ-7-6, 5250        | K.LQVEPAVDTSGVQCYGPGIEGQGVFR.E | 2766.03597 | 2 | 1.49E-05 | 0.89 | 3.86 | - | 581.1  |
| AHQ-7-3, 5241 - 5301 | K.LQVEPAVDTSGVQCYGPGIEGQGVFR.E | 2766.03597 | 3 | 3.10E-12 | 0.98 | 7.09 | - | 2106.5 |
| AHQ-7-4, 3266        | R.LRNGHVGISFVPK.E              | 1424.67564 | 3 | 3.62E-05 | 0.90 | 3.29 | - | 1504.2 |
| AHQ-7-5, 2967        | R.LRNGHVGISFVPK.E              | 1424.67564 | 3 | 2.89E-04 | 0.92 | 3.45 | - | 1548.3 |
| AHQ-7-6, 3170        | R.LRNGHVGISFVPK.E              | 1424.67564 | 2 | 1.97E-05 | 0.71 | 2.53 | - | 718.3  |
| AHQ-7-4, 3124        | R.LRNGHVGISFVPK.E              | 1424.67564 | 2 | 1.72E-04 | 0.86 | 2.80 | - | 784.7  |
| AHQ-7-1, 3443        | R.LRNGHVGISFVPK.E              | 1424.67564 | 3 | 3.95E-05 | 0.88 | 3.21 | - | 1600.0 |
| AHQ-7-2, 4147 - 4164 | R.LSPFMADIR.D                  | 1050.25664 | 2 | 4.89E-04 | 0.74 | 2.57 | - | 516.4  |
| AHQ-7-5, 4038        | R.LSPFMADIR.D                  | 1050.25664 | 2 | 1.31E-05 | 0.84 | 2.61 | - | 660.0  |
| AHQ-7-3, 4075        | R.LSPFMADIR.D                  | 1050.25664 | 2 | 2.48E-04 | 0.73 | 2.57 | - | 586.4  |
| AHQ-7-5, 3546        | R.LTVSSLQESGLK.V               | 1262.43499 | 2 | 1.34E-04 | 0.66 | 2.56 | - | 850.3  |
| AHQ-7-4, 3484 - 3500 | R.LTVSSLQESGLK.V               | 1262.43499 | 2 | 4.77E-04 | 0.94 | 3.66 | - | 1137.8 |
| AHQ-7-1, 3553 - 3623 | R.LTVSSLQESGLK.V               | 1262.43499 | 2 | 2.75E-05 | 0.72 | 2.51 | - | 544.2  |
| AHQ-7-5, 3440 - 3470 | R.LTVSSLQESGLK.V               | 1262.43499 | 2 | 2.70E-07 | 0.90 | 3.18 | - | 938.4  |
| AHQ-7-6, 3407 - 3475 | R.LTVSSLQESGLK.V               | 1262.43499 | 2 | 2.58E-06 | 0.71 | 2.97 | - | 520.8  |
| AHQ-7-4, 4476        | R.LVSNHSLHETSSVFDLSLTK.A       | 2201.42190 | 3 | 6.19E-09 | 0.96 | 5.21 | - | 1461.9 |
| AHQ-7-6, 4354        | R.LVSNHSLHETSSVFDLSLTK.A       | 2201.42190 | 2 | 2.82E-10 | 0.95 | 4.65 | - | 1096.4 |
| AHQ-7-1, 4537        | R.LVSNHSLHETSSVFDLSLTK.A       | 2201.42190 | 3 | 9.16E-14 | 0.91 | 3.99 | - | 967.8  |
| AHQ-7-1, 4287        | R.LVSNHSLHETSSVFDLSLTK.A       | 2201.42190 | 2 | 1.05E-07 | 0.97 | 5.95 | - | 1016.3 |
| AHQ-7-13-, 4305      | R.LVSNHSLHETSSVFDLSLTK.A       | 2201.42190 | 2 | 2.30E-09 | 0.93 | 4.30 | - | 1025.5 |
| AHQ-7-9, 3757        | R.LVSNHSLHETSSVFDLSLTK.A       | 2201.42190 | 2 | 9.15E-08 | 0.47 | 2.58 | - | 451.9  |
| AHQ-7-5, 4402        | R.LVSNHSLHETSSVFDLSLTK.A       | 2201.42190 | 3 | 5.11E-10 | 0.97 | 5.26 | - | 1697.2 |

|                      |                                 |            |   |          |      |      |   |        |
|----------------------|---------------------------------|------------|---|----------|------|------|---|--------|
| AHQ-7-5, 4408        | R.LVSNHSLHETSSVFVDSLTK.A        | 2201.42190 | 2 | 3.84E-08 | 0.96 | 5.14 | - | 1038.4 |
| AHQ-7-7, 3990        | R.LVSNHSLHETSSVFVDSLTK.A        | 2201.42190 | 2 | 1.37E-07 | 0.96 | 4.78 | - | 1259.7 |
| AHQ-7-6, 4087 - 4151 | R.LVSNHSLHETSSVFVDSLTK.A        | 2201.42190 | 3 | 9.14E-04 | 0.92 | 4.25 | - | 977.9  |
| AHQ-7-4, 4186        | R.LVSNHSLHETSSVFVDSLTK.A        | 2201.42190 | 3 | 1.86E-05 | 0.96 | 5.12 | - | 1171.2 |
| AHQ-7-4, 4478        | R.LVSNHSLHETSSVFVDSLTK.A        | 2201.42190 | 2 | 1.64E-08 | 0.97 | 5.40 | - | 1702.5 |
| AHQ-7-4, 4181        | R.LVSNHSLHETSSVFVDSLTK.A        | 2201.42190 | 2 | 2.40E-07 | 0.96 | 5.37 | - | 1074.7 |
| AHQ-7-5, 4146        | R.LVSNHSLHETSSVFVDSLTK.A        | 2201.42190 | 2 | 8.42E-07 | 0.97 | 5.53 | - | 1162.9 |
| AHQ-7-10, 3852       | R.LVSNHSLHETSSVFVDSLTK.A        | 2201.42190 | 3 | 2.95E-06 | 0.96 | 4.29 | - | 2045.8 |
| AHQ-7-1, 4284        | R.LVSNHSLHETSSVFVDSLTK.A        | 2201.42190 | 3 | 2.60E-08 | 0.96 | 4.44 | - | 1854.5 |
| AHQ-7-5, 4143 - 4214 | R.LVSNHSLHETSSVFVDSLTK.A        | 2201.42190 | 3 | 6.77E-05 | 0.95 | 4.96 | - | 1257.6 |
| AHQ-7-11, 3923       | R.LVSNHSLHETSSVFVDSLTK.A        | 2201.42190 | 2 | 6.80E-07 | 0.94 | 4.49 | - | 1094.1 |
| AHQ-7-3, 4476        | R.LVSNHSLHETSSVFVDSLTK.A        | 2201.42190 | 2 | 5.81E-09 | 0.97 | 5.03 | - | 1588.1 |
| AHQ-7-4, 4617        | R.LYSVSYLLK.D                   | 1086.30538 | 2 | 1.08E-05 | 0.76 | 2.82 | - | 492.1  |
| AHQ-7-4, 2492 - 2493 | K.MDCQCEPEGYR.V                 | 1447.55375 | 2 | 7.52E-05 | 0.89 | 3.73 | - | 717.6  |
| AHQ-7-5, 2214        | K.M*DCQCEPEGYR.V                | 1463.55315 | 2 | 3.86E-08 | 0.95 | 3.97 | - | 1127.6 |
| AHQ-7-4, 2234        | K.M*DCQCEPEGYR.V                | 1463.55315 | 2 | 5.23E-07 | 0.95 | 3.89 | - | 1507.7 |
| AHQ-7-1, 4721        | K.NGQHVASSPPIVVISQSEIGDASR.V    | 2449.66256 | 3 | 3.15E-05 | 0.90 | 3.90 | - | 1275.5 |
| AHQ-7-4, 4742        | K.NGQHVASSPPIVVISQSEIGDASR.V    | 2449.66256 | 3 | 6.23E-04 | 0.91 | 3.92 | - | 1733.8 |
| AHQ-7-1, 4737        | K.NGQHVASSPPIVVISQSEIGDASR.V    | 2449.66256 | 2 | 2.29E-06 | 0.88 | 3.62 | - | 751.9  |
| AHQ-7-5, 4816        | K.NGQHVASSPPIVVISQSEIGDASR.V    | 2449.66256 | 2 | 1.17E-05 | 0.95 | 4.49 | - | 1019.6 |
| AHQ-7-4, 4886        | K.NGQHVASSPPIVVISQSEIGDASR.V    | 2449.66256 | 2 | 2.25E-05 | 0.95 | 4.56 | - | 945.2  |
| AHQ-7-5, 4660        | K.NGQHVASSPPIVVISQSEIGDASR.V    | 2449.66256 | 2 | 5.76E-05 | 0.97 | 5.27 | - | 1531.5 |
| AHQ-7-4, 4736        | K.NGQHVASSPPIVVISQSEIGDASR.V    | 2449.66256 | 2 | 1.05E-06 | 0.93 | 3.74 | - | 1325.8 |
| AHQ-7-6, 2085        | K.RAEFTVETR.S                   | 1109.21754 | 2 | 2.28E-05 | 0.90 | 3.13 | - | 1060.0 |
| AHQ-7-3, 2152 - 2153 | K.RAEFTVETR.S                   | 1109.21754 | 2 | 2.64E-06 | 0.92 | 3.28 | - | 894.8  |
| AHQ-7-5, 2056 - 2068 | K.RAEFTVETR.S                   | 1109.21754 | 2 | 2.58E-06 | 0.95 | 3.71 | - | 1009.7 |
| AHQ-7-4, 2098        | K.RAEFTVETR.S                   | 1109.21754 | 2 | 6.36E-05 | 0.87 | 2.78 | - | 814.7  |
| AHQ-7-7, 2040        | K.RAEFTVETR.S                   | 1109.21754 | 2 | 2.73E-06 | 0.91 | 3.33 | - | 946.8  |
| AHQ-7-2, 2155        | K.RAEFTVETR.S                   | 1109.21754 | 2 | 1.07E-05 | 0.95 | 3.65 | - | 1159.9 |
| AHQ-7-4, 3109 - 3110 | R.RAPSVANVGSCHDLSLK.I           | 1813.02884 | 3 | 8.11E-07 | 0.97 | 5.68 | - | 1999.8 |
| AHQ-7-6, 3065 - 3067 | R.RAPSVANVGSCHDLSLK.I           | 1813.02884 | 3 | 6.27E-04 | 0.97 | 5.49 | - | 1784.7 |
| AHQ-7-5, 3083        | R.RAPSVANVGSCHDLSLK.I           | 1813.02884 | 3 | 1.12E-04 | 0.97 | 5.38 | - | 1958.2 |
| AHQ-7-4, 3120        | R.RAPSVANVGSCHDLSLK.I           | 1813.02884 | 2 | 2.43E-05 | 0.96 | 4.51 | - | 1207.6 |
| AHQ-7-1, 3329        | R.RAPSVANVGSCHDLSLK.I           | 1813.02884 | 3 | 6.47E-06 | 0.98 | 5.50 | - | 2293.3 |
| AHQ-7-2, 3965        | K.RIANLQTDLSDGLR.L              | 1572.74866 | 2 | 1.80E-06 | 0.86 | 3.54 | - | 620.3  |
| AHQ-7-1, 3985        | K.RIANLQTDLSDGLR.L              | 1572.74866 | 2 | 1.70E-04 | 0.73 | 2.89 | - | 603.3  |
| AHQ-7-3, 3195        | R.RLTVSSLQESGLK.V               | 1418.62134 | 2 | 1.24E-04 | 0.97 | 4.94 | - | 1802.1 |
| AHQ-7-5, 3022 - 3096 | R.RLTVSSLQESGLK.V               | 1418.62134 | 2 | 1.00E-05 | 0.97 | 4.23 | - | 2145.3 |
| AHQ-7-4, 7030 - 7052 | K.SADPVVEAIGDDVGLTGFVSEGPSQAK.I | 2696.90399 | 3 | 1.94E-06 | 0.87 | 3.88 | - | 966.6  |
| AHQ-7-2, 6931 - 6988 | K.SADPVVEAIGDDVGLTGFVSEGPSQAK.I | 2696.90399 | 2 | 1.83E-07 | 0.95 | 4.15 | - | 1762.2 |
| AHQ-7-2, 6873 - 6937 | K.SADPVVEAIGDDVGLTGFVSEGPSQAK.I | 2696.90399 | 3 | 3.91E-04 | 0.96 | 5.73 | - | 1383.1 |
| AHQ-7-2, 7043        | K.SADPVVEAIGDDVGLTGFVSEGPSQAK.I | 2696.90399 | 2 | 2.47E-04 | 0.86 | 3.35 | - | 1092.4 |
| AHQ-7-2, 6932        | K.SADPVVEAIGDDVGLTGFVSEGPSQAK.I | 2696.90399 | 2 | 3.28E-06 | 0.92 | 3.89 | - | 1241.8 |
| AHQ-7-1, 4033 - 4113 | R.SAGGGEVLVYVEDPAGHQEEAK.V      | 2314.45074 | 3 | 2.41E-05 | 0.81 | 3.30 | - | 824.8  |
| AHQ-7-3, 3937        | R.SAGGGEVLVYVEDPAGHQEEAK.V      | 2314.45074 | 3 | 9.74E-08 | 0.86 | 3.87 | - | 739.7  |
| AHQ-7-8, 3808        | R.SAGGGEVLVYVEDPAGHQEEAK.V      | 2314.45074 | 2 | 1.36E-06 | 0.92 | 4.80 | - | 530.2  |
| AHQ-7-5, 3903        | R.SAGGGEVLVYVEDPAGHQEEAK.V      | 2314.45074 | 2 | 5.46E-07 | 0.92 | 4.59 | - | 638.9  |
| AHQ-7-1, 4035        | R.SAGGGEVLVYVEDPAGHQEEAK.V      | 2314.45074 | 2 | 1.44E-05 | 0.90 | 4.43 | - | 602.1  |
| AHQ-7-2, 4304        | R.SAGGGEVLVYVEDPAGHQEEAK.V      | 2314.45074 | 2 | 8.45E-08 | 0.89 | 4.12 | - | 649.4  |
| AHQ-7-7, 3772        | R.SAGGGEVLVYVEDPAGHQEEAK.V      | 2314.45074 | 3 | 2.46E-09 | 0.90 | 3.94 | - | 909.9  |
| AHQ-7-2, 4136        | R.SAGGGEVLVYVEDPAGHQEEAK.V      | 2314.45074 | 2 | 3.31E-07 | 0.95 | 5.42 | - | 762.3  |
| AHQ-7-7, 3769        | R.SAGGGEVLVYVEDPAGHQEEAK.V      | 2314.45074 | 2 | 1.18E-06 | 0.93 | 4.96 | - | 620.0  |
| AHQ-7-2, 4007 - 4072 | R.SAGGGEVLVYVEDPAGHQEEAK.V      | 2314.45074 | 3 | 6.15E-08 | 0.96 | 5.42 | - | 1155.1 |
| AHQ-7-2, 4005 - 4071 | R.SAGGGEVLVYVEDPAGHQEEAK.V      | 2314.45074 | 2 | 9.92E-06 | 0.93 | 4.78 | - | 669.5  |
| AHQ-7-4, 3934 - 3944 | R.SAGGGEVLVYVEDPAGHQEEAK.V      | 2314.45074 | 3 | 1.78E-09 | 0.93 | 4.36 | - | 1150.5 |
| AHQ-7-6, 3825        | R.SAGGGEVLVYVEDPAGHQEEAK.V      | 2314.45074 | 2 | 4.87E-07 | 0.92 | 4.54 | - | 666.6  |
| AHQ-7-4, 3933        | R.SAGGGEVLVYVEDPAGHQEEAK.V      | 2314.45074 | 2 | 4.74E-09 | 0.94 | 4.72 | - | 802.4  |
| AHQ-7-3, 3935 - 3995 | R.SAGGGEVLVYVEDPAGHQEEAK.V      | 2314.45074 | 2 | 1.14E-06 | 0.93 | 4.64 | - | 711.3  |
| AHQ-7-13, 3844       | R.SAGGGEVLVYVEDPAGHQEEAK.V      | 2314.45074 | 3 | 2.22E-10 | 0.79 | 3.75 | - | 911.8  |
| AHQ-7-6, 3829        | R.SAGGGEVLVYVEDPAGHQEEAK.V      | 2314.45074 | 3 | 2.72E-05 | 0.93 | 4.30 | - | 1566.5 |
| AHQ-7-5, 3904 - 3928 | R.SAGGGEVLVYVEDPAGHQEEAK.V      | 2314.45074 | 3 | 4.70E-08 | 0.86 | 3.59 | - | 988.1  |
| AHQ-7-6, 3919        | R.SAGGGEVLVYVEDPAGHQEEAK.V      | 2314.45074 | 2 | 3.21E-04 | 0.42 | 2.73 | - | 221.7  |
| AHQ-7-5, 3399        | K.SPFEEVYDK.S                   | 1084.20321 | 1 | 5.29E-04 | 0.67 | 2.18 | - | 905.7  |
| AHQ-7-3, 3461        | K.SPFEEVYDK.S                   | 1084.20321 | 1 | 4.15E-04 | 0.80 | 2.85 | - | 891.2  |
| AHQ-7-4, 3420        | K.SPFEEVYDK.S                   | 1084.20321 | 2 | 2.01E-05 | 0.92 | 3.40 | - | 975.9  |
| AHQ-7-2, 3491        | K.SPFEEVYDK.S                   | 1084.20321 | 1 | 2.35E-04 | 0.58 | 2.10 | - | 916.8  |
| AHQ-7-2, 3492 - 3511 | K.SPFEEVYDK.S                   | 1084.20321 | 2 | 1.23E-06 | 0.94 | 3.85 | - | 1130.7 |
| AHQ-7-3, 3459        | K.SPFEEVYDK.S                   | 1084.20321 | 2 | 3.85E-06 | 0.91 | 3.46 | - | 987.0  |
| AHQ-7-4, 3370 - 3440 | K.SPFEEVYDK.S                   | 1084.20321 | 1 | 9.09E-06 | 0.76 | 2.69 | - | 992.7  |
| AHQ-7-6, 3354        | K.SPFEEVYDK.S                   | 1084.20321 | 2 | 6.00E-05 | 0.76 | 2.75 | - | 860.9  |
| AHQ-7-5, 3398 - 3414 | K.SPFEEVYDK.S                   | 1084.20321 | 2 | 7.13E-06 | 0.93 | 3.24 | - | 1149.9 |
| AHQ-7-2, 3497        | K.SPFEEVYDK.S                   | 1084.20321 | 1 | 5.11E-04 | 0.79 | 2.80 | - | 784.3  |
| AHQ-7-3, 3455        | K.SPFEEVYDK.S                   | 1084.20321 | 1 | 3.40E-04 | 0.59 | 2.26 | - | 828.0  |
| AHQ-7-2, 3188        | K.SPFEEVYDKSQGDASK.V            | 1757.87886 | 2 | 1.32E-04 | 0.95 | 4.27 | - | 1133.4 |
| AHQ-7-2, 4923 - 4983 | K.SPFSVAVSPSLDLSK.I             | 1534.73557 | 2 | 2.02E-04 | 0.86 | 3.57 | - | 677.0  |
| AHQ-7-3, 4833 - 4903 | K.SPFSVAVSPSLDLSK.I             | 1534.73557 | 2 | 1.26E-06 | 0.93 | 3.79 | - | 969.3  |
| AHQ-7-1, 4828 - 4888 | K.SPFSVAVSPSLDLSK.I             | 1534.73557 | 2 | 1.31E-07 | 0.91 | 3.85 | - | 1059.3 |
| AHQ-7-5, 4894 - 4898 | K.SPFSVAVSPSLDLSK.I             | 1534.73557 | 2 | 2.96E-08 | 0.93 | 3.95 | - | 1028.0 |
| AHQ-7-2, 4817        | K.SPFSVAVSPSLDLSK.I             | 1534.73557 | 2 | 5.55E-07 | 0.85 | 3.67 | - | 622.2  |
| AHQ-7-3, 4727        | K.SPFSVAVSPSLDLSK.I             | 1534.73557 | 2 | 4.05E-04 | 0.83 | 3.65 | - | 565.1  |
| AHQ-7-1, 4711 - 4755 | K.SPFSVAVSPSLDLSK.I             | 1534.73557 | 2 | 6.95E-04 | 0.91 | 3.67 | - | 1012.1 |
| AHQ-7-4, 4772        | K.SPFSVAVSPSLDLSK.I             | 1534.73557 | 2 | 4.52E-04 | 0.53 | 2.82 | - | 472.4  |
| AHQ-7-2, 3483 - 3551 | R.SPYTVTVOGQACNPASR.A           | 1871.04208 | 2 | 2.38E-05 | 0.84 | 3.45 | - | 494.4  |
| AHQ-7-1, 3525 - 3583 | R.SPYTVTVOGQACNPASR.A           | 1871.04208 | 2 | 2.36E-05 | 0.93 | 4.54 | - | 616.2  |
| AHQ-7-5, 3415        | R.SPYTVTVOGQACNPASR.A           | 1871.04208 | 2 | 3.82E-04 | 0.94 | 4.69 | - | 675.7  |
| AHQ-7-1, 3711        | R.SPYTVTVOGQACNPASR.A           | 1871.04208 | 2 | 4.88E-08 | 0.78 | 3.20 | - | 467.0  |
| AHQ-7-6, 3361        | R.SPYTVTVOGQACNPASR.A           | 1871.04208 | 2 | 6.13E-05 | 0.81 | 3.12 | - | 481.2  |
| AHQ-7-4, 2214        | K.SSFTVDCKS.A                   | 1032.10676 | 1 | 2.02E-05 | 0.30 | 2.06 | - | 423.4  |
| AHQ-7-2, 5077 - 5080 | R.TFSVWVYPEVGTGTHK.V            | 1751.96228 | 3 | 9.67E-05 | 0.64 | 3.14 | - | 462.2  |
| AHQ-7-1, 5029 - 5039 | R.TFSVWVYPEVGTGTHK.V            | 1751.96228 | 2 | 2.70E-04 | 0.80 | 2.87 | - | 623.2  |
| AHQ-7-1, 3300        | K.TGVAVNKPAEFTVDAK.H            | 1647.85391 | 2 | 2.29E-05 | 0.91 | 4.06 | - | 678.4  |
| AHQ-7-2, 3183 - 3240 | K.TGVAVNKPAEFTVDAK.H            | 1647.85391 | 2 | 4.93E-06 | 0.93 | 4.78 | - | 655.4  |
| AHQ-7-2, 3245 - 3320 | K.TGVAVNKPAEFTVDAK.H            | 1647.85391 | 2 | 4.27E-04 | 0.73 | 3.45 | - | 486.0  |
| AHQ-7-2, 3173 - 3196 | K.TGVAVNKPAEFTVDAK.H            | 1647.85391 | 3 | 1.40E-07 | 0.94 | 4.27 | - | 988.0  |
| AHQ-7-3, 3156        | K.TGVAVNKPAEFTVDAK.H            | 1647.85391 | 3 | 7.79E-05 | 0.83 | 3.15 | - | 885.3  |
| AHQ-7-4, 3108        | K.TGVAVNKPAEFTVDAK.H            | 1647.85391 | 3 | 4.15E-06 | 0.89 | 3.39 | - | 1240.5 |
| AHQ-7-5, 3070        | K.TGVAVNKPAEFTVDAK.H            | 1647.85391 | 2 | 6.07E-04 | 0.78 | 3.35 | - | 581.0  |
| AHQ-7-5, 3071        | K.TGVAVNKPAEFTVDAK.H            | 1647.85391 | 3 | 1.86E-09 | 0.92 | 3.63 | - | 1129.6 |
| AHQ-7-6, 3055        | K.TGVAVNKPAEFTVDAK.H            | 1647.85391 | 2 | 1.68E-04 | 0.92 | 3.92 | - | 859.1  |
| AHQ-7-2, 3105 - 3171 | K.TGVAVNKPAEFTVDAK.H            | 1647.85391 | 2 | 2.28E-06 | 0.89 | 4.13 | - | 709.7  |
| AHQ-7-6, 3057        | K.TGVAVNKPAEFTVDAK.H            | 1647.85391 | 3 | 3.71E-08 | 0.75 | 3.12 | - | 597.6  |
| AHQ-7-1, 3304        | K.TGVAVNKPAEFTVDAK.H            | 1647.85391 | 3 | 7.84E-06 | 0.93 | 3.99 | - | 1213.9 |
| AHQ-7-1, 3184 - 3253 | R.TGVELGKPTFTVNAK.A             | 1699.93205 | 2 | 9.87E-04 | 0.92 | 4.27 | - | 701.1  |
| AHQ-7-3, 3011 - 3083 | R.TGVELGKPTFTVNAK.A             | 1699.93205 | 2 | 3.09E-05 | 0.89 | 3.63 | - | 693.9  |
| AHQ-7-4, 2925        | R.TGVELGKPTFTVNAK.A             | 1699.93205 | 2 | 7.30E-05 | 0.90 | 4.18 | - | 597.4  |
| AHQ-7-1, 3252        | R.TGVELGKPTFTVNAK.A             | 1699.93205 | 3 | 1.68E-04 | 0.78 | 3.38 | - | 732.9  |
| AHQ-7-4, 3034        | R.TGVELGKPTFTVNAK.A             | 1699.93205 | 2 | 9.54E-05 | 0.81 | 3.07 | - | 642.6  |

|                        |                                          |            |   |          |      |      |   |        |
|------------------------|------------------------------------------|------------|---|----------|------|------|---|--------|
| AHQ-7-6, 3181          | K.THEAEIVEGENHTYCI.R.F                   | 2060.19046 | 2 | 2.93E-07 | 0.95 | 4.40 | - | 978.7  |
| AHQ-7-5, 3074 - 3076   | K.THEAEIVEGENHTYCI.R.F                   | 2060.19046 | 3 | 2.02E-05 | 0.95 | 4.54 | - | 1321.9 |
| AHQ-7-6, 3062          | K.THEAEIVEGENHTYCI.R.F                   | 2060.19046 | 3 | 2.24E-05 | 0.91 | 4.26 | - | 825.5  |
| AHQ-7-4, 3105          | K.THEAEIVEGENHTYCI.R.F                   | 2060.19046 | 3 | 1.11E-07 | 0.95 | 4.98 | - | 1183.1 |
| AHQ-7-8, 3004          | K.THEAEIVEGENHTYCI.R.F                   | 2060.19046 | 2 | 1.35E-12 | 0.98 | 5.93 | - | 2069.1 |
| AHQ-7-5, 3222          | K.THEAEIVEGENHTYCI.R.F                   | 2060.19046 | 3 | 3.97E-08 | 0.88 | 3.99 | - | 805.8  |
| AHQ-7-2, 3252          | K.THEAEIVEGENHTYCI.R.F                   | 2060.19046 | 3 | 2.49E-09 | 0.92 | 3.92 | - | 1397.6 |
| AHQ-7-4, 3254          | K.THEAEIVEGENHTYCI.R.F                   | 2060.19046 | 2 | 3.70E-12 | 0.98 | 5.71 | - | 1864.9 |
| AHQ-7-4, 3246          | K.THEAEIVEGENHTYCI.R.F                   | 2060.19046 | 3 | 1.48E-07 | 0.89 | 3.64 | - | 1280.3 |
| AHQ-7-1, 3308          | K.THEAEIVEGENHTYCI.R.F                   | 2060.19046 | 2 | 2.78E-08 | 0.97 | 5.27 | - | 1558.8 |
| AHQ-7-1, 3307          | K.THEAEIVEGENHTYCI.R.F                   | 2060.19046 | 3 | 3.63E-04 | 0.95 | 4.60 | - | 1316.1 |
| AHQ-7-5, 3216          | K.THEAEIVEGENHTYCI.R.F                   | 2060.19046 | 2 | 3.92E-10 | 0.98 | 4.85 | - | 2272.3 |
| AHQ-7-2, 3831 - 3908   | K.THIQDNHDGTYTVAYVPDVTGR.Y               | 2460.60076 | 3 | 1.33E-05 | 0.93 | 4.79 | - | 843.6  |
| AHQ-7-3, 3756          | K.THIQDNHDGTYTVAYVPDVTGR.Y               | 2460.60076 | 2 | 4.40E-04 | 0.88 | 2.99 | - | 984.9  |
| AHQ-7-4, 3874          | K.THIQDNHDGTYTVAYVPDVTGR.Y               | 2460.60076 | 3 | 1.22E-04 | 0.79 | 3.55 | - | 680.1  |
| AHQ-7-3, 3212          | R.TPCEEILVK.H                            | 1090.27249 | 2 | 1.07E-05 | 0.84 | 2.92 | - | 800.0  |
| AHQ-7-14, 4013 - 4064  | R.TPCEEILVK.H                            | 1090.27249 | 2 | 1.51E-06 | 0.83 | 3.12 | - | 691.7  |
| AHQ-7-4, 3166          | R.TPCEEILVK.H                            | 1090.27249 | 2 | 1.81E-05 | 0.75 | 2.79 | - | 786.8  |
| AHQ-7-13-, 3147        | R.TPCEEILVK.H                            | 1090.27249 | 2 | 6.87E-05 | 0.83 | 3.52 | - | 594.9  |
| AHQ-7-1, 3349          | R.TPCEEILVK.H                            | 1090.27249 | 2 | 4.12E-06 | 0.82 | 2.54 | - | 737.6  |
| AHQ-7-5, 3150          | R.TPCEEILVK.H                            | 1090.27249 | 2 | 4.11E-06 | 0.79 | 2.99 | - | 540.5  |
| AHQ-7-6, 3119          | R.TPCEEILVK.H                            | 1090.27249 | 2 | 2.77E-05 | 0.86 | 3.12 | - | 697.8  |
| AHQ-7-7, 3040          | R.TPCEEILVK.H                            | 1090.27249 | 2 | 2.82E-05 | 0.71 | 2.62 | - | 540.1  |
| AHQ-7-14-, 3137 - 3201 | R.TPCEEILVK.H                            | 1090.27249 | 2 | 2.21E-04 | 0.88 | 3.15 | - | 861.2  |
| AHQ-7-14-, 3147        | R.TPCEEILVK.H                            | 1090.27249 | 1 | 1.36E-05 | 0.28 | 2.40 | - | 255.0  |
| AHQ-7-2, 3257 - 3268   | R.TPCEEILVK.H                            | 1090.27249 | 2 | 5.62E-06 | 0.87 | 3.04 | - | 698.4  |
| AHQ-7-11, 3056         | R.TPCEEILVK.H                            | 1090.27249 | 2 | 1.19E-04 | 0.79 | 3.00 | - | 706.0  |
| AHQ-7-13, 3317         | R.TPCEEILVK.H                            | 1090.27249 | 2 | 7.70E-07 | 0.85 | 3.35 | - | 640.3  |
| AHQ-7-1, 3444 - 3524   | R.VANPSGNLTETYVQDR.G                     | 1764.87462 | 2 | 3.22E-09 | 0.96 | 4.58 | - | 1066.0 |
| AHQ-7-1, 3477          | R.VANPSGNLTETYVQDR.G                     | 1764.87462 | 3 | 3.47E-04 | 0.88 | 3.66 | - | 978.2  |
| AHQ-7-2, 3637          | R.VANPSGNLTETYVQDR.G                     | 1764.87462 | 2 | 1.00E-05 | 0.75 | 2.61 | - | 894.6  |
| AHQ-7-5, 3400 - 3468   | R.VANPSGNLTETYVQDR.G                     | 1764.87462 | 2 | 7.51E-10 | 0.96 | 5.01 | - | 1177.0 |
| AHQ-7-2, 3499 - 3571   | R.VANPSGNLTETYVQDR.G                     | 1764.87462 | 2 | 1.65E-12 | 0.95 | 4.44 | - | 1110.4 |
| AHQ-7-4, 3429 - 3508   | R.VANPSGNLTETYVQDR.G                     | 1764.87462 | 2 | 7.12E-09 | 0.91 | 3.86 | - | 963.9  |
| AHQ-7-1, 3601          | R.VANPSGNLTETYVQDR.G                     | 1764.87462 | 2 | 1.43E-12 | 0.94 | 3.90 | - | 1027.8 |
| AHQ-7-3, 3308 - 3373   | R.VANPSGNLTETYVQDR.G                     | 1764.87462 | 2 | 4.05E-12 | 0.92 | 4.12 | - | 803.1  |
| AHQ-7-5, 3279          | R.VANPSGNLTETYVQDR.G                     | 1764.87462 | 2 | 1.24E-10 | 0.90 | 3.90 | - | 636.5  |
| AHQ-7-2, 3367 - 3435   | R.VANPSGNLTETYVQDR.G                     | 1764.87462 | 2 | 5.46E-10 | 0.94 | 4.38 | - | 884.3  |
| AHQ-7-8, 3220 - 3223   | R.VANPSGNLTETYVQDR.G                     | 1764.87462 | 2 | 2.11E-04 | 0.93 | 4.33 | - | 758.9  |
| AHQ-7-2, 3229 - 3300   | R.VANPSGNLTETYVQDR.G                     | 1764.87462 | 2 | 6.36E-08 | 0.92 | 3.92 | - | 881.1  |
| AHQ-7-3, 3435 - 3503   | R.VANPSGNLTETYVQDR.G                     | 1764.87462 | 2 | 9.98E-13 | 0.96 | 4.57 | - | 1058.5 |
| AHQ-7-6, 3242          | R.VANPSGNLTETYVQDR.G                     | 1764.87462 | 2 | 2.32E-12 | 0.89 | 3.94 | - | 544.7  |
| AHQ-7-6, 3343          | R.VANPSGNLTETYVQDR.G                     | 1764.87462 | 2 | 9.67E-10 | 0.92 | 3.96 | - | 808.3  |
| AHQ-7-7, 3188          | R.VANPSGNLTETYVQDR.G                     | 1764.87462 | 2 | 6.18E-08 | 0.89 | 3.59 | - | 800.3  |
| AHQ-7-3, 2920          | K.VAQPTITDNKDGTVTVR.Y                    | 1816.00621 | 2 | 2.15E-04 | 0.84 | 3.72 | - | 464.0  |
| AHQ-7-1, 2888          | K.VAQPTITDNKDGTVTVR.Y                    | 1816.00621 | 2 | 9.56E-06 | 0.84 | 3.23 | - | 633.4  |
| AHQ-7-1, 3057          | K.VAQPTITDNKDGTVTVR.Y                    | 1816.00621 | 2 | 2.20E-08 | 0.83 | 3.27 | - | 764.5  |
| AHQ-7-2, 2959          | K.VAQPTITDNKDGTVTVR.Y                    | 1816.00621 | 2 | 1.97E-04 | 0.82 | 3.48 | - | 502.2  |
| AHQ-7-4, 2604 - 2661   | K.VAQPTITDNKDGTVTVR.Y                    | 1816.00621 | 2 | 2.95E-04 | 0.88 | 3.67 | - | 699.3  |
| AHQ-7-5, 2822 - 2866   | K.VAQPTITDNKDGTVTVR.Y                    | 1816.00621 | 2 | 1.10E-07 | 0.93 | 4.71 | - | 775.5  |
| AHQ-7-6, 2833          | K.VAQPTITDNKDGTVTVR.Y                    | 1816.00621 | 2 | 5.81E-08 | 0.76 | 3.26 | - | 416.7  |
| AHQ-7-8, 2576          | K.VAQPTITDNKDGTVTVR.Y                    | 1816.00621 | 2 | 2.45E-06 | 0.82 | 3.32 | - | 531.7  |
| AHQ-7-4, 2828          | K.VAQPTITDNKDGTVTVR.Y                    | 1816.00621 | 2 | 4.13E-07 | 0.89 | 4.02 | - | 548.3  |
| AHQ-7-5, 2634          | K.VAQPTITDNKDGTVTVR.Y                    | 1816.00621 | 2 | 6.51E-07 | 0.89 | 3.77 | - | 706.0  |
| AHQ-7-11, 2820         | K.VAQPTITDNKDGTVTVR.Y                    | 1816.00621 | 2 | 2.71E-04 | 0.64 | 2.76 | - | 429.6  |
| AHQ-7-4, 3680 - 3694   | K.VDINTEDLEGGTCR.V                       | 1638.69283 | 2 | 8.71E-06 | 0.94 | 3.50 | - | 1246.9 |
| AHQ-7-4, 3320          | K.VDINTEDLEGGTCR.V                       | 1638.69283 | 2 | 3.85E-06 | 0.91 | 3.92 | - | 1057.8 |
| AHQ-7-5, 3280          | K.VDINTEDLEGGTCR.V                       | 1638.69283 | 2 | 1.15E-05 | 0.91 | 3.45 | - | 970.5  |
| AHQ-7-13, 3635         | K.VDINTEDLEGGTCR.V                       | 1638.69283 | 2 | 2.29E-07 | 0.70 | 2.69 | - | 722.1  |
| AHQ-7-7, 3473          | K.VDINTEDLEGGTCR.V                       | 1638.69283 | 2 | 1.99E-05 | 0.87 | 3.05 | - | 1086.9 |
| AHQ-7-3, 3317          | K.VDINTEDLEGGTCR.V                       | 1638.69283 | 2 | 1.29E-04 | 0.83 | 2.98 | - | 840.3  |
| AHQ-7-3, 3579 - 3580   | K.VDINTEDLEGGTCR.V                       | 1638.69283 | 2 | 3.66E-06 | 0.94 | 3.85 | - | 1302.7 |
| AHQ-7-13-, 3476        | K.VDINTEDLEGGTCR.V                       | 1638.69283 | 2 | 2.46E-04 | 0.89 | 3.42 | - | 1184.3 |
| AHQ-7-8, 3242          | K.VDINTEDLEGGTCR.V                       | 1638.69283 | 2 | 7.56E-06 | 0.84 | 3.19 | - | 869.8  |
| AHQ-7-5, 3372          | K.VDINTEDLEGGTCR.V                       | 1638.69283 | 2 | 4.04E-06 | 0.90 | 3.79 | - | 859.0  |
| AHQ-7-2, 3659          | K.VDINTEDLEGGTCR.V                       | 1638.69283 | 2 | 1.13E-06 | 0.93 | 3.23 | - | 1457.7 |
| AHQ-7-1, 3419 - 3421   | K.VDINTEDLEGGTCR.V                       | 1638.69283 | 2 | 9.23E-06 | 0.94 | 4.13 | - | 1220.0 |
| AHQ-7-6, 3246          | K.VDINTEDLEGGTCR.V                       | 1638.69283 | 2 | 1.20E-09 | 0.86 | 3.57 | - | 733.2  |
| AHQ-7-1, 3671 - 3745   | K.VDINTEDLEGGTCR.V                       | 1638.69283 | 2 | 1.22E-08 | 0.93 | 3.66 | - | 1228.9 |
| AHQ-7-8, 3372 - 3447   | K.VDINTEDLEGGTCR.V                       | 1638.69283 | 2 | 2.83E-06 | 0.89 | 3.58 | - | 1053.3 |
| AHQ-7-3, 2664          | K.VDVGKDOEFTVK.S                         | 1365.51377 | 1 | 8.48E-08 | 0.44 | 2.91 | - | 315.4  |
| AHQ-7-7, 2532          | K.VDVGKDOEFTVK.S                         | 1365.51377 | 2 | 5.98E-05 | 0.74 | 2.94 | - | 629.0  |
| AHQ-7-4, 2617          | K.VDVGKDOEFTVK.S                         | 1365.51377 | 2 | 5.99E-07 | 0.87 | 3.42 | - | 556.0  |
| AHQ-7-1, 2855          | K.VDVGKDOEFTVK.S                         | 1365.51377 | 2 | 1.91E-08 | 0.93 | 3.69 | - | 962.5  |
| AHQ-7-3, 2644          | K.VDVGKDOEFTVK.S                         | 1365.51377 | 2 | 5.99E-09 | 0.85 | 3.18 | - | 745.1  |
| AHQ-7-4, 2629          | K.VDVGKDOEFTVK.S                         | 1365.51377 | 1 | 6.98E-05 | 0.38 | 2.57 | - | 288.3  |
| AHQ-7-2, 2667 - 2681   | K.VDVGKDOEFTVK.S                         | 1365.51377 | 2 | 4.45E-10 | 0.90 | 3.89 | - | 670.7  |
| AHQ-7-3, 2796 - 2865   | K.VEPGLGADNSVVR.F                        | 1313.44209 | 2 | 1.34E-04 | 0.62 | 2.62 | - | 205.4  |
| AHQ-7-3, 2961 - 2965   | K.VEPGLGADNSVVR.F                        | 1313.44209 | 2 | 1.04E-06 | 0.65 | 2.55 | - | 169.6  |
| AHQ-7-1, 3117          | K.VEPGLGADNSVVR.F                        | 1313.44209 | 2 | 1.80E-04 | 0.78 | 2.58 | - | 431.0  |
| AHQ-7-2, 2811 - 2880   | K.VEPGLGADNSVVR.F                        | 1313.44209 | 2 | 7.48E-09 | 0.85 | 3.22 | - | 408.4  |
| AHQ-7-3, 2801 - 2803   | K.VEPGLGADNSVVR.F                        | 1313.44209 | 1 | 8.27E-05 | 0.22 | 2.34 | - | 177.1  |
| AHQ-7-4, 2758          | K.VEPGLGADNSVVR.F                        | 1313.44209 | 2 | 7.14E-07 | 0.76 | 2.81 | - | 311.6  |
| AHQ-7-1, 2983          | K.VEPGLGADNSVVR.F                        | 1313.44209 | 2 | 1.19E-07 | 0.92 | 3.60 | - | 553.2  |
| AHQ-7-6, 5929 - 5990   | K.VEYTPYEEGLHSVDVTDGSPVSPFPQVPTGEGDPSR.V | 4300.57494 | 3 | 6.66E-06 | 0.93 | 5.82 | - | 569.8  |
| AHQ-7-5, 6018 - 6090   | K.VEYTPYEEGLHSVDVTDGSPVSPFPQVPTGEGDPSR.V | 4300.57494 | 3 | 2.01E-07 | 0.93 | 5.98 | - | 678.6  |
| AHQ-7-3, 6679          | K.VGSAADIPINISSETDLSSLTATVPPSGR.E        | 2895.25495 | 2 | 1.25E-04 | 0.69 | 3.13 | - | 561.3  |
| AHQ-7-9, 6114          | K.VGSAADIPINISSETDLSSLTATVPPSGR.E        | 2895.25495 | 2 | 6.04E-04 | 0.58 | 2.77 | - | 525.1  |
| AHQ-7-5, 6791          | K.VGSAADIPINISSETDLSSLTATVPPSGR.E        | 2895.25495 | 2 | 3.04E-04 | 0.81 | 3.42 | - | 557.0  |
| AHQ-7-1, 6551          | K.VGSAADIPINISSETDLSSLTATVPPSGR.E        | 2895.25495 | 2 | 1.14E-07 | 0.95 | 5.35 | - | 935.1  |
| AHQ-7-4, 4409 - 4481   | K.VHSPSGALEECYVTEIDQDK.Y                 | 2279.42322 | 2 | 1.90E-09 | 0.97 | 5.71 | - | 1299.6 |
| AHQ-7-1, 4459          | K.VHSPSGALEECYVTEIDQDK.Y                 | 2279.42322 | 3 | 1.45E-06 | 0.72 | 3.07 | - | 974.0  |
| AHQ-7-4, 4404 - 4413   | K.VHSPSGALEECYVTEIDQDK.Y                 | 2279.42322 | 3 | 6.01E-10 | 0.97 | 5.15 | - | 2367.9 |
| AHQ-7-3, 4332 - 4393   | K.VHSPSGALEECYVTEIDQDK.Y                 | 2279.42322 | 2 | 2.08E-06 | 0.94 | 4.25 | - | 897.7  |
| AHQ-7-2, 4493          | K.VHSPSGALEECYVTEIDQDK.Y                 | 2279.42322 | 3 | 3.45E-07 | 0.88 | 3.82 | - | 1255.0 |
| AHQ-7-5, 4354          | K.VHSPSGALEECYVTEIDQDK.Y                 | 2279.42322 | 2 | 1.64E-07 | 0.97 | 5.43 | - | 1561.6 |
| AHQ-7-5, 4352 - 4390   | K.VHSPSGALEECYVTEIDQDK.Y                 | 2279.42322 | 3 | 2.59E-05 | 0.97 | 6.63 | - | 1786.4 |
| AHQ-7-1, 4463          | K.VHSPSGALEECYVTEIDQDK.Y                 | 2279.42322 | 2 | 1.75E-11 | 0.98 | 5.16 | - | 3071.8 |
| AHQ-7-6, 4277 - 4282   | K.VHSPSGALEECYVTEIDQDK.Y                 | 2279.42322 | 3 | 1.36E-05 | 0.95 | 4.94 | - | 1602.9 |
| AHQ-7-4, 4724 - 4732   | K.VHSPSGALEECYVTEIDQDKYAVR.F             | 2768.99349 | 3 | 1.07E-12 | 0.94 | 5.27 | - | 886.9  |
| AHQ-7-4, 4730 - 4737   | K.VHSPSGALEECYVTEIDQDKYAVR.F             | 2768.99349 | 2 | 5.81E-09 | 0.92 | 4.45 | - | 987.2  |
| AHQ-7-6, 4617 - 4618   | K.VHSPSGALEECYVTEIDQDKYAVR.F             | 2768.99349 | 3 | 2.43E-10 | 0.94 | 4.92 | - | 787.4  |
| AHQ-7-7, 4542          | K.VHSPSGALEECYVTEIDQDKYAVR.F             | 2768.99349 | 3 | 9.62E-09 | 0.90 | 4.56 | - | 594.6  |
| AHQ-7-3, 4728          | K.VHSPSGALEECYVTEIDQDKYAVR.F             | 2768.99349 | 3 | 2.38E-08 | 0.91 | 4.88 | - | 642.4  |
| AHQ-7-8, 4587          | K.VHSPSGALEECYVTEIDQDKYAVR.F             | 2768.99349 | 2 | 8.99E-07 | 0.88 | 3.87 | - | 921.4  |
| AHQ-7-2, 4805          | K.VHSPSGALEECYVTEIDQDKYAVR.F             | 2768.99349 | 3 | 1.77E-08 | 0.83 | 4.18 | - | 486.9  |
| AHQ-7-5, 4575 - 4651   | K.VHSPSGALEECYVTEIDQDKYAVR.F             | 2768.99349 | 3 | 3.02E-11 | 0.95 | 5.87 | - | 704.5  |

|                       |                                   |            |   |          |      |      |   |        |
|-----------------------|-----------------------------------|------------|---|----------|------|------|---|--------|
| AHQ-7-1, 4759         | K.VHSPSGALEECYVTEIDQDKYAVR.F      | 2768.99349 | 3 | 5.84E-11 | 0.92 | 4.68 | - | 778.2  |
| AHQ-7-5, 4683         | K.VHSPSGALEECYVTEIDQDKYAVR.F      | 2768.99349 | 2 | 1.54E-09 | 0.92 | 4.36 | - | 911.6  |
| AHQ-7-7, 3774         | K.VNQPASFAVSLNGAK.G               | 1503.68480 | 2 | 4.49E-07 | 0.84 | 3.40 | - | 469.1  |
| AHQ-7-2, 3833 - 3903  | K.VNQPASFAVSLNGAK.G               | 1503.68480 | 2 | 7.66E-09 | 0.91 | 4.20 | - | 644.0  |
| AHQ-7-1, 3975 - 4055  | K.VNQPASFAVSLNGAK.G               | 1503.68480 | 2 | 5.76E-05 | 0.47 | 2.86 | - | 291.0  |
| AHQ-7-3, 3751 - 3812  | K.VNQPASFAVSLNGAK.G               | 1503.68480 | 2 | 1.03E-04 | 0.92 | 4.31 | - | 647.6  |
| AHQ-7-5, 3842 - 3902  | K.VNQPASFAVSLNGAK.G               | 1503.68480 | 2 | 7.98E-08 | 0.92 | 3.80 | - | 747.5  |
| AHQ-7-6, 3649 - 3713  | K.VNQPASFAVSLNGAK.G               | 1503.68480 | 2 | 5.01E-09 | 0.83 | 3.34 | - | 573.0  |
| AHQ-7-3, 3933 - 3955  | K.VNQPASFAVSLNGAK.G               | 1503.68480 | 2 | 6.61E-07 | 0.71 | 3.15 | - | 498.2  |
| AHQ-7-5, 3714 - 3778  | K.VNQPASFAVSLNGAK.G               | 1503.68480 | 2 | 3.66E-08 | 0.94 | 4.50 | - | 755.8  |
| AHQ-7-1, 3805 - 3863  | K.VNQPASFAVSLNGAK.G               | 1503.68480 | 2 | 3.28E-10 | 0.87 | 3.56 | - | 614.2  |
| AHQ-7-8, 3547         | K.VNQPASFAVSLNGAK.G               | 1503.68480 | 2 | 5.59E-05 | 0.82 | 3.37 | - | 428.6  |
| AHQ-7-7, 3584 - 3649  | K.VNQPASFAVSLNGAK.G               | 1503.68480 | 2 | 5.05E-05 | 0.70 | 3.12 | - | 387.6  |
| AHQ-7-4, 3748 - 3821  | K.VNQPASFAVSLNGAK.G               | 1503.68480 | 2 | 4.21E-10 | 0.94 | 4.48 | - | 682.6  |
| AHQ-7-4, 3836 - 3900  | K.VNQPASFAVSLNGAK.G               | 1503.68480 | 2 | 3.28E-08 | 0.81 | 3.47 | - | 518.7  |
| AHQ-7-2, 1721 - 1784  | K.VPVHDTVTDASK.V                  | 1168.28175 | 2 | 7.92E-08 | 0.94 | 3.02 | - | 1502.9 |
| AHQ-7-3, 1753 - 1807  | K.VPVHDTVTDASK.V                  | 1168.28175 | 2 | 1.65E-04 | 0.91 | 3.23 | - | 1027.2 |
| AHQ-7-6, 1679         | K.VPVHDTVTDASK.V                  | 1168.28175 | 2 | 3.39E-07 | 0.94 | 3.52 | - | 1113.4 |
| AHQ-7-5, 1654         | K.VPVHDTVTDASK.V                  | 1168.28175 | 2 | 2.26E-06 | 0.91 | 3.13 | - | 943.0  |
| AHQ-7-4, 1693 - 1701  | K.VPVHDTVTDASK.V                  | 1168.28175 | 2 | 4.03E-05 | 0.83 | 2.83 | - | 725.4  |
| AHQ-7-2, 4185 - 4192  | R.VQVQDNNEGCPVEALVK.D             | 1786.98493 | 2 | 4.21E-06 | 0.96 | 5.05 | - | 1316.9 |
| AHQ-7-2, 4281 - 4311  | R.VQVQDNNEGCPVEALVK.D             | 1786.98493 | 2 | 3.33E-10 | 0.96 | 4.68 | - | 1473.2 |
| AHQ-7-3, 4195 - 4261  | R.VQVQDNNEGCPVEALVK.D             | 1786.98493 | 2 | 3.89E-04 | 0.91 | 4.10 | - | 922.5  |
| AHQ-7-3, 4111         | R.VQVQDNNEGCPVEALVK.D             | 1786.98493 | 2 | 2.84E-06 | 0.96 | 4.85 | - | 1322.0 |
| AHQ-7-6, 4033 - 4114  | R.VQVQDNNEGCPVEALVK.D             | 1786.98493 | 2 | 8.28E-04 | 0.91 | 3.70 | - | 1073.1 |
| AHQ-7-2, 4375         | R.VQVQDNNEGCPVEALVK.D             | 1786.98493 | 2 | 5.83E-05 | 0.89 | 3.90 | - | 958.3  |
| AHQ-7-1, 4183 - 4255  | R.VQVQDNNEGCPVEALVK.D             | 1786.98493 | 2 | 1.56E-08 | 0.96 | 5.05 | - | 1251.9 |
| AHQ-7-4, 4241         | R.VQVQDNNEGCPVEALVK.D             | 1786.98493 | 2 | 7.00E-08 | 0.88 | 3.80 | - | 854.6  |
| AHQ-7-4, 4137         | R.VQVQDNNEGCPVEALVK.D             | 1786.98493 | 2 | 7.42E-05 | 0.96 | 4.57 | - | 1284.6 |
| AHQ-7-1, 5136 - 5196  | R.VQVQDNNEGCPVEALVKDNGNGTYSYVPR.K | 3359.60342 | 3 | 3.56E-07 | 0.96 | 5.57 | - | 1645.7 |
| AHQ-7-3, 5149 - 5207  | R.VQVQDNNEGCPVEALVKDNGNGTYSYVPR.K | 3359.60342 | 3 | 1.66E-08 | 0.84 | 3.70 | - | 1341.6 |
| AHQ-7-5, 5230         | R.VQVQDNNEGCPVEALVKDNGNGTYSYVPR.K | 3359.60342 | 3 | 3.45E-07 | 0.66 | 3.14 | - | 775.2  |
| AHQ-7-2, 5301 - 5380  | R.VQVQDNNEGCPVEALVKDNGNGTYSYVPR.K | 3359.60342 | 3 | 6.22E-08 | 0.78 | 3.34 | - | 955.2  |
| AHQ-7-4, 5098 - 5160  | R.VQVQDNNEGCPVEALVKDNGNGTYSYVPR.K | 3359.60342 | 3 | 5.80E-06 | 0.89 | 3.65 | - | 1666.8 |
| AHQ-7-3, 5027 - 5087  | R.VQVQDNNEGCPVEALVKDNGNGTYSYVPR.K | 3359.60342 | 3 | 7.80E-09 | 0.93 | 4.65 | - | 1465.5 |
| AHQ-7-2, 5025 - 5104  | R.VQVQDNNEGCPVEALVKDNGNGTYSYVPR.K | 3359.60342 | 3 | 4.52E-08 | 0.95 | 5.00 | - | 1488.3 |
| AHQ-7-2, 4893         | R.VSGGQLEHGHTFPAEFIIIDTR.D        | 2441.64058 | 2 | 2.84E-04 | 0.85 | 3.73 | - | 732.3  |
| AHQ-7-7, 4570         | R.VSGGQLEHGHTFPAEFIIIDTR.D        | 2441.64058 | 3 | 4.55E-08 | 0.96 | 5.56 | - | 1135.5 |
| AHQ-7-6, 4653         | R.VSGGQLEHGHTFPAEFIIIDTR.D        | 2441.64058 | 3 | 1.28E-06 | 0.97 | 6.07 | - | 1460.3 |
| AHQ-7-2, 4887 - 4899  | R.VSGGQLEHGHTFPAEFIIIDTR.D        | 2441.64058 | 3 | 4.13E-08 | 0.93 | 4.63 | - | 1117.5 |
| AHQ-7-1, 4856 - 4860  | R.VSGGQLEHGHTFPAEFIIIDTR.D        | 2441.64058 | 2 | 3.69E-05 | 0.94 | 4.88 | - | 766.9  |
| AHQ-7-1, 4851         | R.VSGGQLEHGHTFPAEFIIIDTR.D        | 2441.64058 | 3 | 9.02E-08 | 0.96 | 5.39 | - | 1298.2 |
| AHQ-7-8, 4615 - 4628  | R.VSGGQLEHGHTFPAEFIIIDTR.D        | 2441.64058 | 3 | 1.18E-11 | 0.96 | 5.67 | - | 1134.5 |
| AHQ-7-3, 4800 - 4808  | R.VSGGQLEHGHTFPAEFIIIDTR.D        | 2441.64058 | 3 | 1.18E-08 | 0.96 | 5.36 | - | 1658.1 |
| AHQ-7-4, 4784 - 4813  | R.VSGGQLEHGHTFPAEFIIIDTR.D        | 2441.64058 | 3 | 3.16E-08 | 0.95 | 5.10 | - | 1243.4 |
| AHQ-7-6, 4655         | R.VSGGQLEHGHTFPAEFIIIDTR.D        | 2441.64058 | 2 | 4.12E-05 | 0.93 | 4.22 | - | 877.6  |
| AHQ-7-5, 4698 - 4731  | R.VSGGQLEHGHTFPAEFIIIDTR.D        | 2441.64058 | 3 | 1.37E-09 | 0.97 | 6.03 | - | 1702.5 |
| AHQ-7-5, 4703         | R.VSGGQLEHGHTFPAEFIIIDTR.D        | 2441.64058 | 2 | 1.90E-09 | 0.96 | 5.60 | - | 724.4  |
| AHQ-7-4, 4782 - 4821  | R.VSGGQLEHGHTFPAEFIIIDTR.D        | 2441.64058 | 2 | 4.95E-05 | 0.93 | 4.51 | - | 683.6  |
| AHQ-7-2, 2779 - 2847  | K.VTAQGPGLLEPSGNIANK.T            | 1653.81855 | 2 | 5.76E-08 | 0.77 | 3.54 | - | 414.0  |
| AHQ-7-3, 2743 - 2808  | K.VTAQGPGLLEPSGNIANK.T            | 1653.81855 | 2 | 5.11E-05 | 0.85 | 4.16 | - | 450.0  |
| AHQ-7-1, 2951 - 3013  | K.VTAQGPGLLEPSGNIANK.T            | 1653.81855 | 2 | 7.46E-06 | 0.65 | 3.05 | - | 383.7  |
| AHQ-7-5, 2782 - 2792  | K.VTAQGPGLLEPSGNIANK.T            | 1653.81855 | 2 | 1.63E-06 | 0.91 | 4.57 | - | 573.4  |
| AHQ-7-2, 2912         | K.VTAQGPGLLEPSGNIANK.T            | 1653.81855 | 2 | 7.23E-11 | 0.84 | 3.97 | - | 529.2  |
| AHQ-7-3, 2879 - 2880  | K.VTAQGPGLLEPSGNIANK.T            | 1653.81855 | 2 | 1.13E-07 | 0.87 | 3.91 | - | 577.9  |
| AHQ-7-6, 2701 - 2766  | K.VTAQGPGLLEPSGNIANK.T            | 1653.81855 | 2 | 2.90E-04 | 0.88 | 4.06 | - | 510.5  |
| AHQ-7-5, 2696 - 2727  | K.VTAQGPGLLEPSGNIANK.T            | 1653.81855 | 2 | 3.32E-05 | 0.86 | 3.87 | - | 626.1  |
| AHQ-7-7, 3110 - 3122  | K.VTVLFAAQHIAK.S                  | 1284.53185 | 2 | 5.19E-07 | 0.91 | 3.25 | - | 948.8  |
| AHQ-7-1, 3491         | K.VTVLFAAQHIAK.S                  | 1284.53185 | 2 | 3.04E-06 | 0.93 | 4.14 | - | 991.8  |
| AHQ-7-6, 3223         | K.VTVLFAAQHIAK.S                  | 1284.53185 | 2 | 2.02E-05 | 0.93 | 4.03 | - | 1001.5 |
| AHQ-7-3, 3331         | K.VTVLFAAQHIAK.S                  | 1284.53185 | 2 | 4.09E-06 | 0.94 | 3.92 | - | 954.6  |
| AHQ-7-4, 3296         | K.VTVLFAAQHIAK.S                  | 1284.53185 | 1 | 7.69E-05 | 0.36 | 1.90 | - | 630.5  |
| AHQ-7-5, 3258 - 3322  | K.VTVLFAAQHIAK.S                  | 1284.53185 | 2 | 1.67E-05 | 0.89 | 4.12 | - | 774.1  |
| AHQ-7-2, 3363         | K.VTVLFAAQHIAK.S                  | 1284.53185 | 2 | 2.39E-05 | 0.93 | 3.96 | - | 921.2  |
| AHQ-7-1, 4832 - 4885  | R.VTYCPTPEPGNYIINIK.F             | 1884.14221 | 2 | 5.78E-10 | 0.83 | 3.69 | - | 341.7  |
| AHQ-7-8, 4803 - 4880  | R.VTYCPTPEPGNYIINIK.F             | 1884.14221 | 2 | 3.87E-06 | 0.77 | 2.94 | - | 385.0  |
| AHQ-7-8, 4886 - 4943  | R.VTYCPTPEPGNYIINIK.F             | 1884.14221 | 2 | 1.08E-07 | 0.93 | 4.45 | - | 570.5  |
| AHQ-7-5, 4786 - 4846  | R.VTYCPTPEPGNYIINIK.F             | 1884.14221 | 2 | 2.97E-05 | 0.92 | 4.23 | - | 540.1  |
| AHQ-7-1, 5100         | R.VTYCPTPEPGNYIINIK.F             | 1884.14221 | 2 | 8.56E-09 | 0.72 | 3.09 | - | 351.8  |
| AHQ-7-6, 4925 - 4927  | R.VTYCPTPEPGNYIINIK.F             | 1884.14221 | 2 | 6.59E-04 | 0.80 | 3.51 | - | 359.6  |
| AHQ-7-6, 4781         | R.VTYCPTPEPGNYIINIK.F             | 1884.14221 | 2 | 1.76E-05 | 0.75 | 3.26 | - | 391.4  |
| AHQ-7-4, 4881 - 4892  | R.VTYCPTPEPGNYIINIK.F             | 1884.14221 | 2 | 2.06E-10 | 0.87 | 3.52 | - | 543.9  |
| AHQ-7-3, 4837         | R.VTYCPTPEPGNYIINIK.F             | 1884.14221 | 2 | 1.51E-05 | 0.77 | 3.20 | - | 394.4  |
| AHQ-7-5, 5080 - 5142  | R.VTYCPTPEPGNYIINIK.F             | 1884.14221 | 2 | 8.15E-09 | 0.86 | 3.80 | - | 523.2  |
| AHQ-7-4, 5197         | R.VTYCPTPEPGNYIINIK.F             | 1884.14221 | 2 | 1.63E-09 | 0.75 | 3.22 | - | 312.9  |
| AHQ-7-2, 5067         | R.VTYCPTPEPGNYIINIK.F             | 1884.14221 | 2 | 7.45E-04 | 0.81 | 3.55 | - | 405.0  |
| AHQ-7-2, 4924         | R.VTYCPTPEPGNYIINIK.F             | 1884.14221 | 2 | 9.67E-04 | 0.50 | 2.79 | - | 289.5  |
| AHQ-7-4, 5514 - 5528  | R.VTYTPMAPGSYLISIK.Y              | 1742.07225 | 2 | 1.83E-04 | 0.76 | 3.30 | - | 501.0  |
| AHQ-7-13, 5290        | R.VTYTPMAPGSYLISIK.Y              | 1742.07225 | 2 | 2.56E-05 | 0.80 | 3.02 | - | 595.5  |
| AHQ-7-2, 5547         | R.VTYTPMAPGSYLISIK.Y              | 1742.07225 | 2 | 2.22E-04 | 0.83 | 2.76 | - | 862.5  |
| AHQ-7-13, 5193        | R.VTYTPMAPGSYLISIK.Y              | 1742.07225 | 2 | 1.06E-05 | 0.75 | 3.17 | - | 387.3  |
| AHQ-7-7, 5293         | R.VTYTPMAPGSYLISIK.Y              | 1742.07225 | 2 | 3.36E-04 | 0.83 | 3.40 | - | 474.1  |
| AHQ-7-7, 5297         | R.VTYTPMAPGSYLISIK.Y              | 1742.07225 | 2 | 1.45E-05 | 0.54 | 2.76 | - | 386.7  |
| AHQ-7-5, 5368 - 5438  | R.VTYTPMAPGSYLISIK.Y              | 1742.07225 | 2 | 2.23E-04 | 0.91 | 3.52 | - | 1026.7 |
| AHQ-7-14, 5209 - 5215 | R.VTYTPMAPGSYLISIK.Y              | 1742.07225 | 2 | 3.76E-05 | 0.79 | 2.99 | - | 622.6  |
| AHQ-7-3, 1781         | K.VYGPVAK.T                       | 790.92979  | 1 | 7.77E-04 | 0.50 | 2.13 | - | 654.7  |
| AHQ-7-8, 3263         | R.YAPSEAGLHEM.DIR.Y               | 1589.75482 | 2 | 9.26E-05 | 0.82 | 3.33 | - | 691.6  |
| AHQ-7-5, 2608 - 2676  | R.YAPSEAGLHEM.DIR.Y               | 1605.75422 | 2 | 4.08E-05 | 0.91 | 3.49 | - | 1030.8 |
| AHQ-7-10, 3204 - 3207 | R.YAPSEAGLHEM.DIR.Y               | 1589.75482 | 2 | 5.40E-04 | 0.55 | 2.54 | - | 471.6  |
| AHQ-7-10, 2595        | R.YAPSEAGLHEM.DIR.Y               | 1605.75422 | 2 | 6.81E-04 | 0.59 | 2.52 | - | 605.8  |
| AHQ-7-4, 2692 - 2693  | R.YAPSEAGLHEM.DIR.Y               | 1605.75422 | 2 | 7.73E-04 | 0.84 | 3.14 | - | 799.5  |
| AHQ-7-3, 3460         | R.YAPSEAGLHEM.DIR.Y               | 1589.75482 | 2 | 2.73E-04 | 0.90 | 3.45 | - | 916.0  |
| AHQ-7-3, 4277         | K.YGGDEIPFSPYR.V                  | 1401.50466 | 1 | 9.78E-05 | 0.56 | 2.85 | - | 574.6  |
| AHQ-7-12, 4008        | K.YGGDEIPFSPYR.V                  | 1401.50466 | 2 | 4.72E-04 | 0.60 | 2.72 | - | 409.5  |
| AHQ-7-8, 4128 - 4135  | K.YGGDEIPFSPYR.V                  | 1401.50466 | 2 | 8.65E-06 | 0.71 | 2.98 | - | 475.2  |
| AHQ-7-4, 4293         | K.YGGDEIPFSPYR.V                  | 1401.50466 | 1 | 2.93E-07 | 0.23 | 2.31 | - | 382.1  |
| AHQ-7-13, 3429        | K.YGGPYHIGGSPFK.A                 | 1380.53182 | 2 | 3.46E-06 | 0.96 | 3.87 | - | 1893.4 |
| AHQ-7-8, 3256         | K.YGGPYHIGGSPFK.A                 | 1380.53182 | 2 | 1.62E-08 | 0.96 | 4.01 | - | 1662.7 |
| AHQ-7-5, 3395         | K.YGGPYHIGGSPFK.A                 | 1380.53182 | 2 | 1.95E-09 | 0.92 | 4.13 | - | 1043.0 |
| AHQ-7-7, 3204 - 3269  | K.YGGPYHIGGSPFK.A                 | 1380.53182 | 2 | 2.94E-07 | 0.96 | 3.93 | - | 1774.7 |
| AHQ-7-6, 3357 - 3362  | K.YGGPYHIGGSPFK.A                 | 1380.53182 | 2 | 2.78E-08 | 0.96 | 3.88 | - | 1609.7 |
| AHQ-7-1, 3611         | K.YGGPYHIGGSPFK.A                 | 1380.53182 | 2 | 2.77E-09 | 0.98 | 4.62 | - | 2225.3 |
| AHQ-7-3, 3473         | K.YGGPYHIGGSPFK.A                 | 1380.53182 | 2 | 6.10E-08 | 0.97 | 4.48 | - | 1981.2 |
| AHQ-7-4, 3406         | K.YGGPYHIGGSPFK.A                 | 1380.53182 | 2 | 1.92E-06 | 0.95 | 3.87 | - | 1453.8 |
| AHQ-7-5, 3420         | K.YGGPYHIGGSPFK.A                 | 1380.53182 | 1 | 1.18E-05 | 0.88 | 3.71 | - | 450.9  |
| AHQ-7-10, 3220        | K.YGGPYHIGGSPFK.A                 | 1380.53182 | 2 | 1.07E-04 | 0.90 | 3.37 | - | 1066.5 |
| AHQ-7-4, 3426 - 3444  | K.YGGPYHIGGSPFK.A                 | 1380.53182 | 1 | 2.06E-04 | 0.79 | 2.69 | - | 624.0  |

|                           |                                                                                        |            |   |          |       |        |       |          |
|---------------------------|----------------------------------------------------------------------------------------|------------|---|----------|-------|--------|-------|----------|
| AHQ-7-5, 3404             | K.YGGPYHIGGSPFK.A                                                                      | 1380.53182 | 3 | 7.57E-06 | 0.86  | 3.74   | -     | 555.8    |
| AHQ-7-4, 2994 - 3076      | K.YGGQPVNPFPSK.L                                                                       | 1291.43658 | 2 | 7.00E-05 | 0.86  | 3.64   | -     | 352.4    |
| AHQ-7-2, 3295             | K.YGGQPVNPFPSK.L                                                                       | 1291.43658 | 2 | 5.69E-06 | 0.84  | 3.35   | -     | 406.8    |
| AHQ-7-5, 3043             | K.YGGQPVNPFPSK.L                                                                       | 1291.43658 | 2 | 3.57E-04 | 0.83  | 3.22   | -     | 386.1    |
| AHQ-7-3, 3029 - 3107      | K.YGGQPVNPFPSK.L                                                                       | 1291.43658 | 2 | 1.92E-04 | 0.88  | 3.55   | -     | 412.9    |
| AHQ-7-2, 3145             | K.YGGQPVNPFPSK.L                                                                       | 1291.43658 | 1 | 3.95E-04 | 0.45  | 2.56   | -     | 362.6    |
| AHQ-7-3, 3249             | K.YGGQPVNPFPSK.L                                                                       | 1291.43658 | 2 | 9.58E-06 | 0.88  | 3.65   | -     | 496.0    |
| AHQ-7-2, 3139 - 3140      | K.YGGQPVNPFPSK.L                                                                       | 1291.43658 | 2 | 1.89E-05 | 0.93  | 3.65   | -     | 677.8    |
| AHQ-7-1, 3264             | K.YGGQPVNPFPSK.L                                                                       | 1291.43658 | 2 | 1.03E-04 | 0.94  | 3.65   | -     | 766.3    |
| AHQ-7-7, 4149             | K.YKGQHVPGSPFQFTVGPLGEGGAHK.V                                                          | 2596.88377 | 3 | 1.38E-04 | 0.95  | 5.82   | -     | 879.7    |
| AHQ-7-3, 4395             | K.YKGQHVPGSPFQFTVGPLGEGGAHK.V                                                          | 2596.88377 | 3 | 6.16E-06 | 0.87  | 3.60   | -     | 1051.1   |
| AHQ-7-4, 4348             | K.YKGQHVPGSPFQFTVGPLGEGGAHK.V                                                          | 2596.88377 | 3 | 3.29E-06 | 0.80  | 3.41   | -     | 847.3    |
| AHQ-7-2, 2909 - 2987      | K.YNEQHVPGSPFTAR.V                                                                     | 1603.71978 | 2 | 2.63E-05 | 0.91  | 3.70   | -     | 606.3    |
| AHQ-7-1, 3132             | K.YNEQHVPGSPFTAR.V                                                                     | 1603.71978 | 2 | 1.69E-06 | 0.72  | 2.74   | -     | 525.5    |
| AHQ-7-4, 3104             | K.YNEQHVPGSPFTAR.V                                                                     | 1603.71978 | 2 | 2.14E-05 | 0.59  | 2.81   | -     | 388.4    |
| AHQ-7-3, 2889 - 2955      | K.YNEQHVPGSPFTAR.V                                                                     | 1603.71978 | 2 | 6.65E-06 | 0.89  | 3.59   | -     | 530.0    |
| AHQ-7-4, 3113             | K.YNEQHVPGSPFTAR.V                                                                     | 1603.71978 | 3 | 4.30E-04 | 0.76  | 3.37   | -     | 732.3    |
| AHQ-7-5, 2867 - 2870      | K.YNEQHVPGSPFTAR.V                                                                     | 1603.71978 | 2 | 7.30E-06 | 0.89  | 3.35   | -     | 642.1    |
| AHQ-7-4, 2877 - 2892      | K.YNEQHVPGSPFTAR.V                                                                     | 1603.71978 | 2 | 2.72E-06 | 0.90  | 3.80   | -     | 535.6    |
| AHQ-7-8, 2686             | K.YNEQHVPGSPFTAR.V                                                                     | 1603.71978 | 3 | 4.51E-04 | 0.84  | 3.59   | -     | 900.8    |
| AHQ-7-4, 2885             | K.YNEQHVPGSPFTAR.V                                                                     | 1603.71978 | 3 | 3.86E-05 | 0.84  | 3.69   | -     | 788.8    |
| AHQ-7-4, 4504 - 4568      | K.YTPVQQGPVGVNVTYGGDPIPK.S                                                             | 2287.55640 | 2 | 2.18E-07 | 0.92  | 4.15   | -     | 718.1    |
| AHQ-7-13, 4422            | K.YTPVQQGPVGVNVTYGGDPIPK.S                                                             | 2287.55640 | 2 | 1.19E-06 | 0.70  | 3.34   | -     | 410.2    |
| AHQ-7-3, 4431 - 4495      | K.YTPVQQGPVGVNVTYGGDPIPK.S                                                             | 2287.55640 | 2 | 1.72E-07 | 0.90  | 4.06   | -     | 590.8    |
| AHQ-7-3, 4592 - 4672      | K.YTPVQQGPVGVNVTYGGDPIPK.S                                                             | 2287.55640 | 2 | 4.97E-06 | 0.87  | 3.97   | -     | 500.7    |
| AHQ-7-2, 4527 - 4591      | K.YTPVQQGPVGVNVTYGGDPIPK.S                                                             | 2287.55640 | 2 | 6.18E-05 | 0.90  | 4.12   | -     | 604.4    |
| AHQ-7-2, 4697             | K.YTPVQQGPVGVNVTYGGDPIPK.S                                                             | 2287.55640 | 2 | 4.24E-08 | 0.92  | 4.24   | -     | 747.7    |
| AHQ-7-3, 4329 - 4381      | K.YTPVQQGPVGVNVTYGGDPIPK.S                                                             | 2287.55640 | 2 | 1.21E-05 | 0.90  | 3.99   | -     | 762.0    |
| AHQ-7-8, 4407             | K.YTPVQQGPVGVNVTYGGDPIPK.S                                                             | 2287.55640 | 2 | 2.24E-04 | 0.95  | 4.48   | -     | 888.2    |
| AHQ-7-1, 4480 - 4535      | K.YTPVQQGPVGVNVTYGGDPIPK.S                                                             | 2287.55640 | 2 | 2.14E-05 | 0.95  | 4.79   | -     | 837.5    |
| AHQ-7-7, 4340             | K.YTPVQQGPVGVNVTYGGDPIPK.S                                                             | 2287.55640 | 2 | 1.23E-05 | 0.87  | 3.94   | -     | 505.4    |
| AHQ-7-4, 4673             | K.YTPVQQGPVGVNVTYGGDPIPK.S                                                             | 2287.55640 | 2 | 3.44E-05 | 0.89  | 4.02   | -     | 520.4    |
| AHQ-7-5, 4436 - 4486      | K.YTPVQQGPVGVNVTYGGDPIPK.S                                                             | 2287.55640 | 2 | 1.99E-05 | 0.92  | 4.22   | -     | 702.7    |
| AHQ-7-2, 6499 - 6555      | R.YWPQEAGEYAVHVLCSNSEDIR.L                                                             | 2538.73318 | 3 | 1.66E-09 | 0.79  | 3.32   | -     | 563.6    |
| AHQ-7-2, 6203 - 6244      | R.YWPQEAGEYAVHVLCSNSEDIR.L                                                             | 2538.73318 | 2 | 1.06E-11 | 0.90  | 3.83   | -     | 812.1    |
| AHQ-7-2, 6673             | R.YWPQEAGEYAVHVLCSNSEDIR.L                                                             | 2538.73318 | 2 | 2.02E-04 | 0.76  | 2.56   | -     | 742.7    |
| AHQ-7-2, 6513 - 6515      | R.YWPQEAGEYAVHVLCSNSEDIR.L                                                             | 2538.73318 | 2 | 2.05E-07 | 0.97  | 5.25   | -     | 1523.3   |
| AHQ-7-5, 6471             | R.YWPQEAGEYAVHVLCSNSEDIR.L                                                             | 2538.73318 | 2 | 5.97E-08 | 0.86  | 3.28   | -     | 614.4    |
| AHQ-7-4, 6529 - 6553      | R.YWPQEAGEYAVHVLCSNSEDIR.L                                                             | 2538.73318 | 2 | 1.72E-06 | 0.94  | 5.09   | -     | 666.5    |
| AHQ-7-3, 6080             | R.YWPQEAGEYAVHVLCSNSEDIR.L                                                             | 2538.73318 | 2 | 8.73E-08 | 0.91  | 3.97   | -     | 907.5    |
| AHQ-7-3, 6343 - 6357      | R.YWPQEAGEYAVHVLCSNSEDIR.L                                                             | 2538.73318 | 3 | 2.39E-07 | 0.54  | 3.03   | -     | 450.1    |
| gi4827056 ref NP_005103.1 | WD repeat-containing protein 1 isoform 2 [Homo sapiens]                                |            |   | 1.44E-13 | 11.50 | 130.36 | 45.10 | 58001.9  |
| AHQ-7-6, 5071             | K.AHDGGIYAIWSWSPDSTHLLSASGDK.T                                                         | 2586.75455 | 3 | 2.14E-11 | 0.98  | 7.00   | -     | 1708.6   |
| AHQ-7-10, 4568            | K.AHDGGIYAIWSWSPDSTHLLSASGDK.T                                                         | 2586.75455 | 3 | 1.87E-05 | 0.95  | 4.79   | -     | 1417.4   |
| AHQ-7-6, 4973             | K.AHDGGIYAIWSWSPDSTHLLSASGDK.T                                                         | 2586.75455 | 3 | 1.28E-09 | 0.97  | 5.83   | -     | 1633.5   |
| AHQ-7-7, 4861             | K.AHDGGIYAIWSWSPDSTHLLSASGDK.T                                                         | 2586.75455 | 3 | 3.70E-09 | 0.97  | 6.11   | -     | 1997.5   |
| AHQ-7-8, 4904             | K.AHDGGIYAIWSWSPDSTHLLSASGDK.T                                                         | 2586.75455 | 2 | 9.27E-08 | 0.91  | 4.49   | -     | 581.9    |
| AHQ-7-6, 4987             | K.AHDGGIYAIWSWSPDSTHLLSASGDK.T                                                         | 2586.75455 | 2 | 1.94E-07 | 0.96  | 5.66   | -     | 959.2    |
| AHQ-7-9, 5017             | K.CFSINDNPGYEPEVAVHPGGDVAIGGVDGNVR.L                                                   | 3400.67708 | 3 | 1.95E-05 | 0.81  | 3.38   | -     | 631.8    |
| AHQ-7-6, 5486 - 5554      | K.CFSINDNPGYEPEVAVHPGGDVAIGGVDGNVR.L                                                   | 3400.67708 | 3 | 1.06E-09 | 0.89  | 4.28   | -     | 745.0    |
| AHQ-7-8, 5515             | K.CFSINDNPGYEPEVAVHPGGDVAIGGVDGNVR.L                                                   | 3400.67708 | 3 | 4.76E-12 | 0.89  | 4.50   | -     | 541.8    |
| AHQ-7-6, 3902 - 3971      | R.FATASADGGIYIDGK.T                                                                    | 1720.86021 | 2 | 1.54E-06 | 0.85  | 3.22   | -     | 704.3    |
| AHQ-7-6, 4135             | R.FATASADGGIYIDGK.T                                                                    | 1720.86021 | 2 | 2.92E-07 | 0.92  | 3.54   | -     | 1197.9   |
| AHQ-7-6, 5586             | K.FGAVFLWDSGSSVGEITGHNK.V                                                              | 2209.40259 | 2 | 7.38E-08 | 0.91  | 4.27   | -     | 831.5    |
| AHQ-7-6, 5593             | K.FGAVFLWDSGSSVGEITGHNK.V                                                              | 2209.40259 | 3 | 1.76E-04 | 0.81  | 3.96   | -     | 735.5    |
| AHQ-7-6, 4727 - 4731      | K.GPVTDVAYSHDGAFLAVCDASK.V                                                             | 2282.47194 | 2 | 8.52E-07 | 0.89  | 3.93   | -     | 938.2    |
| AHQ-7-6, 4573 - 4637      | K.GPVTDVAYSHDGAFLAVCDASK.V                                                             | 2282.47194 | 2 | 5.78E-07 | 0.97  | 5.35   | -     | 1403.6   |
| AHQ-7-6, 1897             | R.IAVVGEGR.E                                                                           | 800.92621  | 2 | 1.33E-05 | 0.90  | 2.76   | -     | 1180.0   |
| AHQ-7-6, 2287 - 2369      | K.IKDIAWTEDSKR.I                                                                       | 1462.63267 | 2 | 1.45E-05 | 0.64  | 2.82   | -     | 565.6    |
| AHQ-7-6, 5485 - 5545      | R.LATGSDDDNCAAFEGPPPF.F                                                                | 2046.20216 | 2 | 1.44E-13 | 0.93  | 4.23   | -     | 1125.7   |
| AHQ-7-6, 5359 - 5425      | R.LATGSDDDNCAAFEGPPPF.F                                                                | 2046.20216 | 2 | 8.87E-08 | 0.91  | 4.17   | -     | 1056.4   |
| AHQ-7-10, 3783 - 3787     | R.LYSILGTTLLKDEGK.L                                                                    | 1538.76736 | 2 | 2.44E-05 | 0.92  | 4.04   | -     | 1022.4   |
| AHQ-7-6, 3981 - 4046      | R.LYSILGTTLLKDEGK.L                                                                    | 1538.76736 | 2 | 3.45E-05 | 0.88  | 3.71   | -     | 820.6    |
| AHQ-7-7, 3920             | R.LYSILGTTLLKDEGK.L                                                                    | 1538.76736 | 2 | 5.17E-04 | 0.86  | 3.38   | -     | 836.6    |
| AHQ-7-12, 3891            | R.LYSILGTTLLKDEGK.L                                                                    | 1538.76736 | 2 | 4.13E-06 | 0.70  | 2.86   | -     | 637.0    |
| AHQ-7-6, 4301             | R.M*TVDESQGLISCSMDDTVR.Y                                                               | 2162.36305 | 2 | 1.84E-07 | 0.88  | 4.12   | -     | 597.3    |
| AHQ-7-6, 4287             | R.NIDNPALADIYTEHAHQVVAKY                                                               | 2419.67805 | 2 | 1.72E-07 | 0.86  | 4.23   | -     | 471.4    |
| AHQ-7-6, 4285 - 4293      | R.NIDNPALADIYTEHAHQVVAKY                                                               | 2419.67805 | 3 | 9.53E-05 | 0.71  | 3.26   | -     | 437.0    |
| AHQ-7-6, 4121 - 4183      | K.SYIYSGSHDGHINYWDSSETGENDSFAGK.G                                                      | 3138.17570 | 3 | 5.75E-07 | 0.98  | 5.70   | -     | 2314.5   |
| AHQ-7-6, 4267             | K.SYIYSGSHDGHINYWDSSETGENDSFAGK.G                                                      | 3138.17570 | 3 | 9.59E-10 | 0.98  | 7.14   | -     | 2294.5   |
| AHQ-7-12, 3778            | K.YAPSGFYIASGDVSGK.L                                                                   | 1619.75589 | 2 | 5.63E-04 | 0.66  | 2.54   | -     | 571.5    |
| AHQ-7-11, 3760            | K.YAPSGFYIASGDVSGK.L                                                                   | 1619.75589 | 2 | 4.15E-05 | 0.59  | 2.78   | -     | 504.2    |
| AHQ-7-6, 3893 - 3953      | K.YAPSGFYIASGDVSGK.L                                                                   | 1619.75589 | 2 | 1.07E-11 | 0.94  | 4.22   | -     | 886.2    |
| gi4557731 ref NP_000618.1 | latent transforming growth factor beta binding protein 1 precursor [Homo sapiens]      |            |   | 1.73E-13 | 9.62  | 120.30 | 9.80  | 152790.9 |
| AHQ-7-2, 3737             | R.ASGLGDHCEIDNCELEDK.S                                                                 | 2065.13910 | 2 | 2.30E-08 | 0.98  | 5.99   | -     | 2041.2   |
| AHQ-7-1, 3761             | R.ASGLGDHCEIDNCELEDK.S                                                                 | 2065.13910 | 2 | 6.37E-06 | 0.96  | 5.29   | -     | 1311.1   |
| AHQ-7-3, 3657 - 3661      | R.ASGLGDHCEIDNCELEDK.S                                                                 | 2065.13910 | 2 | 9.45E-06 | 0.98  | 5.57   | -     | 2091.1   |
| AHQ-7-3, 3665             | R.ASGLGDHCEIDNCELEDK.S                                                                 | 2065.13910 | 3 | 9.69E-06 | 0.91  | 4.20   | -     | 995.9    |
| AHQ-7-2, 3977             | R.ASGLGDHCEIDNCELEDKSVQCR.G                                                            | 2696.84428 | 3 | 2.93E-05 | 0.88  | 3.82   | -     | 981.9    |
| AHQ-7-2, 2381             | R.CEYCDGSR.M                                                                           | 1212.24846 | 1 | 2.04E-04 | 0.24  | 2.04   | -     | 265.6    |
| AHQ-7-5, 2588             | R.CTCGGGQQLSAAK.D                                                                      | 1446.58862 | 2 | 1.22E-06 | 0.89  | 3.77   | -     | 704.3    |
| AHQ-7-2, 2655             | R.CTCGGGQQLSAAK.D                                                                      | 1446.58862 | 2 | 7.99E-04 | 0.68  | 2.57   | -     | 447.7    |
| AHQ-7-2, 4163             | K.CVDIDECTQVQHLCSQGR.C                                                                 | 2209.38110 | 2 | 1.40E-06 | 0.97  | 5.84   | -     | 1401.4   |
| AHQ-7-3, 4072             | K.CVDIDECTQVQHLCSQGR.C                                                                 | 2209.38110 | 2 | 2.87E-06 | 0.95  | 5.14   | -     | 929.9    |
| AHQ-7-3, 2165             | K.DQCEDIDECQHR.H                                                                       | 1607.61898 | 2 | 2.51E-06 | 0.63  | 2.55   | -     | 796.2    |
| AHQ-7-14, - 3170          | K.EAQPQSQSVYQGLPVQK.T                                                                  | 1945.12244 | 2 | 1.73E-13 | 0.91  | 4.36   | -     | 610.7    |
| AHQ-7-1, 5637 - 5657      | K.IGFDPDPTFSSCVPPVISEEKGPCYR.L                                                         | 3112.43550 | 3 | 9.76E-06 | 0.93  | 5.28   | -     | 873.3    |
| AHQ-7-4, 3717             | R.KCVDIDECTQVQHLCSQGR.C                                                                | 2337.55401 | 3 | 3.37E-07 | 0.63  | 3.20   | -     | 726.3    |
| AHQ-7-2, 2973 - 2981      | R.TSTDLDVDDVQPK.E                                                                      | 1433.50014 | 2 | 1.05E-06 | 0.86  | 3.49   | -     | 894.8    |
| AHQ-7-1, 3096             | R.TSTDLDVDDVQPK.E                                                                      | 1433.50014 | 2 | 6.03E-07 | 0.84  | 2.71   | -     | 1003.4   |
| AHQ-7-4, 2681 - 2708      | R.TSTDLDVDDVQPK.E                                                                      | 1819.90213 | 2 | 1.25E-04 | 0.66  | 3.02   | -     | 683.9    |
| AHQ-7-1, 2931             | R.TSTDLDVDDVQPK.E                                                                      | 1819.90213 | 2 | 2.01E-05 | 0.93  | 4.19   | -     | 1217.8   |
| AHQ-7-2, 2771             | R.TSTDLDVDDVQPK.E                                                                      | 1819.90213 | 2 | 8.91E-08 | 0.91  | 3.82   | -     | 1205.8   |
| AHQ-7-3, 2745             | R.TSTDLDVDDVQPK.E                                                                      | 1819.90213 | 2 | 5.11E-07 | 0.93  | 4.02   | -     | 1664.4   |
| AHQ-7-2, 3651             | R.YTICIEYGR.F                                                                          | 1387.51964 | 2 | 1.90E-05 | 0.80  | 2.94   | -     | 504.7    |
| gi7656991 ref NP_055140.1 | coronin, actin binding protein, 1C; coronin, actin-binding protein, 1C; [Homo sapiens] |            |   | 1.90E-13 | 8.68  | 100.35 | 31.00 | 53248.7  |
| AHQ-7-7, 5769 - 5844      | R.AIFLADGNVFTTGFSR.M                                                                   | 1716.91793 | 2 | 2.91E-05 | 0.96  | 4.80   | -     | 1520.6   |
| AHQ-7-6, 5890             | R.AIFLADGNVFTTGFSR.M                                                                   | 1716.91793 | 2 | 1.34E-05 | 0.97  | 5.03   | -     | 1540.3   |
| AHQ-7-6, 5706 - 5783      | R.AIFLADGNVFTTGFSR.M                                                                   | 1716.91793 | 2 | 1.52E-09 | 0.98  | 5.47   | -     | 2055.7   |
| AHQ-7-6, 5791 - 5821      | R.AIFLADGNVFTTGFSR.M                                                                   | 1716.91793 | 2 | 2.98E-04 | 0.97  | 4.76   | -     | 1796.7   |
| AHQ-7-6, 3798 - 3802      | K.CDLISIPK.K                                                                           | 947.13128  | 2 | 5.30E-04 | 0.87  | 3.24   | -     | 779.3    |
| AHQ-7-7, 2522             | R.GLDVKNKEIAR.F                                                                        | 1276.44504 | 2 | 7.47E-04 | 0.80  | 2.64   | -     | 1077.9   |
| AHQ-7-6, 3145             | R.HVFGAAVKNDQCYDDIR.V                                                                  | 2067.22783 | 3 | 1.23E-05 | 0.71  | 3.43   | -     | 633.4    |
| AHQ-7-6, 3385             | R.KCEPIIMTVPR.K                                                                        | 1345.65706 | 2 | 2.01E-06 | 0.91  | 3.46   | -     | 901.6    |
| AHQ-7-7, 6728             | R.KSDLFODDLYPDTAGPEAALEAEWFEKG.N                                                       | 3273.46087 | 3 | 1.21E-06 | 0.96  | 5.61   | -     | 1224.0   |
| AHQ-7-6, 6634 - 6635      | R.KSDLFODDLYPDTAGPEAALEAEWFEKG.N                                                       | 3273.46087 | 3 | 1.90E-13 | 0.98  | 6.93   | -     | 1420.0   |
| AHQ-7-6, 4023 - 4031      | K.NADPILISLKH                                                                          | 1084.29103 | 2 | 2.60E-05 | 0.75  | 2.82   | -     | 447.9    |

|                             |                                                                         |            |   |          |       |        |       |          |
|-----------------------------|-------------------------------------------------------------------------|------------|---|----------|-------|--------|-------|----------|
| AHQ-7-6, 2410               | K.SIKDTICNQDER.I                                                        | 1480.58332 | 2 | 3.61E-07 | 0.84  | 2.86   | -     | 1012.8   |
| AHQ-7-7, 4266 - 4276        | R.VTWDSFFCAVNP.R.F                                                      | 1540.68205 | 2 | 2.59E-07 | 0.90  | 3.58   | -     | 1129.5   |
| AHQ-7-7, 5880 - 5884        | R.YFEITDESPVYHYLNTFSSK.E                                                | 2441.63258 | 2 | 5.70E-07 | 0.94  | 4.88   | -     | 731.3    |
| AHQ-7-7, 5886               | R.YFEITDESPVYHYLNTFSSK.E                                                | 2441.63258 | 3 | 3.61E-05 | 0.90  | 3.85   | -     | 861.0    |
| AHQ-7-6, 5895               | R.YFEITDESPVYHYLNTFSSK.E                                                | 2441.63258 | 3 | 2.50E-06 | 0.85  | 3.46   | -     | 768.9    |
| AHQ-7-6, 5897 - 5970        | R.YFEITDESPVYHYLNTFSSK.E                                                | 2441.63258 | 2 | 3.70E-10 | 0.95  | 4.86   | -     | 929.7    |
| gi 6681259 ref NP_031377.1  | multimerin [Homo sapiens]                                               |            |   | 2.51E-13 | 24.41 | 290.31 | 30.30 | 138070.8 |
| AHQ-7-4, 2404               | R.AQEQQLSIHTNQAESHTAVGR.G                                               | 2306.43830 | 2 | 2.16E-05 | 0.93  | 4.98   | -     | 621.6    |
| AHQ-7-4, 2401 - 2469        | R.AQEQQLSIHTNQAESHTAVGR.G                                               | 2306.43830 | 3 | 9.47E-04 | 0.93  | 4.33   | -     | 1366.4   |
| AHQ-7-3, 2509               | R.AQEQQLSIHTNQAESHTAVGR.G                                               | 2306.43830 | 2 | 3.93E-09 | 0.90  | 4.15   | -     | 721.3    |
| AHQ-7-3, 2428               | R.AQEQQLSIHTNQAESHTAVGR.G                                               | 2306.43830 | 2 | 2.78E-08 | 0.93  | 5.02   | -     | 575.3    |
| AHQ-7-3, 6072 - 6087        | K.CTSDM*ETILTFIPQFHR.L                                                  | 2114.38778 | 3 | 4.21E-08 | 0.91  | 4.70   | -     | 1037.9   |
| AHQ-7-4, 4010 - 4077        | R.DQALQLQVLNSR.F                                                        | 1385.55144 | 2 | 7.41E-06 | 0.95  | 3.98   | -     | 1695.5   |
| AHQ-7-6, 3950 - 4014        | R.DQALQLQVLNSR.F                                                        | 1385.55144 | 2 | 3.80E-06 | 0.95  | 3.99   | -     | 1437.2   |
| AHQ-7-3, 3909 - 3979        | R.DQALQLQVLNSR.F                                                        | 1385.55144 | 2 | 4.22E-08 | 0.95  | 4.14   | -     | 1447.6   |
| AHQ-7-3, 4189               | R.DQALQLQVLNSR.F                                                        | 1385.55144 | 2 | 2.79E-10 | 0.95  | 4.18   | -     | 1368.3   |
| AHQ-7-3, 3975 - 4040        | R.DQALQLQVLNSR.F                                                        | 1385.55144 | 2 | 4.05E-07 | 0.97  | 5.55   | -     | 1636.3   |
| AHQ-7-1, 4048               | R.DQALQLQVLNSR.F                                                        | 1385.55144 | 2 | 2.39E-08 | 0.68  | 2.53   | -     | 1005.5   |
| AHQ-7-4, 3256               | K.ESLRGECEDMLSK.C                                                       | 1555.71360 | 2 | 7.79E-04 | 0.92  | 3.81   | -     | 906.7    |
| AHQ-7-3, 2148               | K.ETLSIKDNSEIHHK.C                                                      | 1752.90698 | 2 | 1.47E-07 | 0.87  | 3.40   | -     | 947.4    |
| AHQ-7-3, 2893               | K.EVHEQLLSTEQVSDQK.N                                                    | 1870.99550 | 2 | 1.14E-04 | 0.92  | 4.19   | -     | 817.5    |
| AHQ-7-2, 6281               | K.FPPVTTFSGYLLYR.T                                                      | 1661.92388 | 2 | 5.19E-05 | 0.82  | 3.10   | -     | 568.8    |
| AHQ-7-10, 5623 - 5629       | K.FPPVTTFSGYLLYR.T                                                      | 1661.92388 | 2 | 6.31E-07 | 0.94  | 4.12   | -     | 867.3    |
| AHQ-7-3, 5673 - 5692        | K.FVLVQENRPTLTDIVELR.N                                                  | 2143.47187 | 3 | 5.58E-07 | 0.95  | 5.07   | -     | 1090.2   |
| AHQ-7-1, 5649               | K.FVLVQENRPTLTDIVELR.N                                                  | 2143.47187 | 3 | 7.52E-05 | 0.87  | 3.61   | -     | 942.4    |
| AHQ-7-4, 5816               | K.FVLVQENRPTLTDIVELR.N                                                  | 2143.47187 | 3 | 1.01E-07 | 0.93  | 4.33   | -     | 1091.1   |
| AHQ-7-2, 5820               | K.FVLVQENRPTLTDIVELR.N                                                  | 2143.47187 | 3 | 1.02E-06 | 0.92  | 3.87   | -     | 1224.2   |
| AHQ-7-5, 5947               | K.GLTFEVEPIQIK.T                                                        | 1487.76518 | 2 | 4.75E-06 | 0.90  | 3.96   | -     | 682.6    |
| AHQ-7-1, 5821               | K.GLTFEVEPIQIK.T                                                        | 1487.76518 | 2 | 8.90E-05 | 0.74  | 2.91   | -     | 705.9    |
| AHQ-7-3, 5872               | K.GLTFEVEPIQIK.T                                                        | 1487.76518 | 2 | 3.54E-06 | 0.91  | 3.89   | -     | 890.2    |
| AHQ-7-2, 6001               | K.GLTFEVEPIQIK.T                                                        | 1487.76518 | 2 | 8.74E-06 | 0.86  | 3.26   | -     | 869.4    |
| AHQ-7-3, 2705               | K.GPCGWGTGSGCQR.S                                                       | 1422.52885 | 2 | 5.20E-04 | 0.84  | 2.74   | -     | 836.9    |
| AHQ-7-2, 2528               | R.GVAEQQQQCGDPEVMQK.M                                                   | 2119.27971 | 2 | 4.08E-07 | 0.95  | 4.41   | -     | 1123.5   |
| AHQ-7-5, 2447               | R.GVAEQQQQCGDPEVMQK.M                                                   | 2119.27971 | 2 | 2.91E-05 | 0.96  | 4.72   | -     | 1319.2   |
| AHQ-7-3, 3891               | K.HSLPDIQLLQK.G                                                         | 1292.50915 | 2 | 1.58E-07 | 0.90  | 3.40   | -     | 832.5    |
| AHQ-7-2, 4003               | K.HSLPDIQLLQK.G                                                         | 1292.50915 | 2 | 3.78E-08 | 0.85  | 3.04   | -     | 744.2    |
| AHQ-7-3, 6220 - 6289        | K.IFQNDMQETVAQLFK.T                                                     | 1813.06743 | 2 | 4.53E-05 | 0.95  | 4.25   | -     | 1260.7   |
| AHQ-7-1, 5048               | K.IFQNDM*QETVAQLFK.T                                                    | 1829.06683 | 2 | 8.34E-04 | 0.87  | 3.43   | -     | 934.2    |
| AHQ-7-5, 5067               | K.IFQNDM*QETVAQLFK.T                                                    | 1829.06683 | 2 | 1.41E-07 | 0.97  | 4.96   | -     | 1780.2   |
| AHQ-7-4, 6389 - 6460        | K.IFQNDMQETVAQLFK.T                                                     | 1813.06743 | 2 | 8.16E-04 | 0.70  | 3.13   | -     | 772.4    |
| AHQ-7-1, 6159               | K.IFQNDMQETVAQLFK.T                                                     | 1813.06743 | 2 | 3.96E-06 | 0.91  | 3.78   | -     | 1127.3   |
| AHQ-7-3, 5023 - 5025        | K.IFQNDM*QETVAQLFK.T                                                    | 1829.06683 | 2 | 1.72E-06 | 0.95  | 4.31   | -     | 1334.1   |
| AHQ-7-10, 5007              | R.IPYLVGVYVFK.Y                                                         | 1199.46532 | 2 | 2.85E-06 | 0.85  | 3.12   | -     | 785.3    |
| AHQ-7-3, 5951               | K.KIENLTSVNSLNFIIK.E                                                    | 1905.22764 | 2 | 9.35E-10 | 0.95  | 4.77   | -     | 967.4    |
| AHQ-7-10, 3543 - 3617       | K.LAFESINSEIHCDR.V                                                      | 1936.04933 | 2 | 1.45E-04 | 0.82  | 3.85   | -     | 401.7    |
| AHQ-7-6, 2895               | K.LKEVHEQLLSTEQVSDQK.N                                                  | 2112.32666 | 2 | 2.48E-06 | 0.93  | 4.59   | -     | 800.3    |
| AHQ-7-3, 2929 - 2995        | K.LKEVHEQLLSTEQVSDQK.N                                                  | 2112.32666 | 2 | 4.51E-07 | 0.98  | 6.11   | -     | 1615.6   |
| AHQ-7-4, 2937               | K.LKEVHEQLLSTEQVSDQK.N                                                  | 2112.32666 | 2 | 1.95E-05 | 0.96  | 4.90   | -     | 1038.8   |
| AHQ-7-2, 3916 - 3917        | K.LVEENALAPDFSK.G                                                       | 1433.58810 | 2 | 7.15E-05 | 0.88  | 3.59   | -     | 635.5    |
| AHQ-7-3, 3821               | K.LVEENALAPDFSK.G                                                       | 1433.58810 | 2 | 1.50E-05 | 0.75  | 2.78   | -     | 654.6    |
| AHQ-7-4, 6924               | K.M*SEQLNLDLYDMELIQLPQQGASLR.Q                                          | 3025.40122 | 3 | 1.34E-05 | 0.96  | 6.06   | -     | 1662.7   |
| AHQ-7-3, 6697               | K.M*SEQLNLDLYDMELIQLPQQGASLR.Q                                          | 3025.40122 | 3 | 3.73E-04 | 0.89  | 4.28   | -     | 1437.4   |
| AHQ-7-3, 6615 - 6624        | K.M*SEQLNLDLYDM*EILQLPQQGASLR.Q                                         | 3041.40062 | 3 | 2.51E-13 | 0.90  | 4.84   | -     | 850.7    |
| AHQ-7-3, 2395               | K.M*TDQVNYQAMK.L                                                        | 1345.52783 | 2 | 7.06E-07 | 0.91  | 3.44   | -     | 1109.5   |
| AHQ-7-3, 2011               | R.NTYSSLEGG.V                                                           | 999.05672  | 1 | 2.79E-05 | 0.11  | 1.81   | -     | 207.5    |
| AHQ-7-3, 2857 - 2875        | R.QEMTLTCKPIK.E                                                         | 1479.74501 | 2 | 8.91E-04 | 0.38  | 2.63   | -     | 469.8    |
| AHQ-7-3, 6207               | K.QSLMMLQM*FEDLHIQESK.I                                                 | 2225.59529 | 2 | 7.07E-04 | 0.62  | 3.11   | -     | 382.1    |
| AHQ-7-3, 6360               | K.TMTIINNAIDFIQDNYALK.E                                                 | 2199.51256 | 2 | 2.34E-08 | 0.94  | 4.98   | -     | 710.5    |
| AHQ-7-3, 6544               | K.TMTIINNAIDFIQDNYALK.E                                                 | 2199.51256 | 3 | 8.60E-04 | 0.83  | 3.38   | -     | 1104.6   |
| AHQ-7-3, 6692               | K.TMTIINNAIDFIQDNYALK.E                                                 | 2199.51256 | 2 | 5.11E-09 | 0.80  | 3.90   | -     | 468.3    |
| AHQ-7-3, 6052               | K.TM*TIINNAIDFIQDNYALK.E                                                | 2215.51196 | 2 | 2.30E-05 | 0.88  | 4.13   | -     | 569.4    |
| AHQ-7-3, 3073               | K.TVSSLSSELESTR.Q                                                       | 1424.49324 | 2 | 1.01E-06 | 0.74  | 2.95   | -     | 660.0    |
| AHQ-7-6, 3406               | K.TVSSLSSELESTR.Q                                                       | 1424.49324 | 2 | 1.36E-07 | 0.80  | 3.00   | -     | 799.8    |
| AHQ-7-5, 3462               | K.TVSSLSSELESTR.Q                                                       | 1424.49324 | 2 | 1.86E-06 | 0.82  | 2.74   | -     | 878.6    |
| AHQ-7-4, 3476               | K.TVSSLSSELESTR.Q                                                       | 1424.49324 | 2 | 3.58E-07 | 0.82  | 2.79   | -     | 844.6    |
| AHQ-7-4, 4109               | R.YNFVLQVAK.T                                                           | 1082.27683 | 2 | 3.08E-07 | 0.93  | 3.40   | -     | 919.6    |
| AHQ-7-1, 4189               | R.YNFVLQVAK.T                                                           | 1082.27683 | 2 | 3.36E-07 | 0.86  | 2.79   | -     | 843.5    |
| AHQ-7-3, 4089               | R.YNFVLQVAK.T                                                           | 1082.27683 | 2 | 2.42E-06 | 0.92  | 3.64   | -     | 762.7    |
| gi 27498332 ref XP_212565.1 | similar to tubulin, beta 5 [Homo sapiens]                               |            |   | 2.70E-13 | 5.15  | 60.24  | 11.90 | 49670.5  |
| AHQ-7-11, 5271              | R.ALTVPELTQQVFDK.N                                                      | 1660.89259 | 2 | 1.46E-05 | 0.76  | 3.04   | -     | 372.3    |
| AHQ-7-7, 3809 - 3877        | R.IMNTFSVVPSPK.V                                                        | 1320.58277 | 2 | 8.92E-04 | 0.95  | 3.86   | -     | 1446.2   |
| AHQ-7-7, 3322               | R.IM*NTFSVVPSPK.V                                                       | 1336.58217 | 2 | 2.27E-05 | 0.88  | 3.26   | -     | 898.2    |
| AHQ-7-8, 3347               | R.IM*NTFSVVPSPK.V                                                       | 1336.58217 | 2 | 5.09E-06 | 0.76  | 2.84   | -     | 758.0    |
| AHQ-7-7, 6532               | K.M*AVTFIGNSTAIQELFK.R                                                  | 1887.18942 | 2 | 2.70E-13 | 0.97  | 4.76   | -     | 1327.8   |
| AHQ-7-7, 6597               | K.MAVTFIGNSTAIQELFK.R                                                   | 1871.19002 | 2 | 5.69E-04 | 0.90  | 3.68   | -     | 1182.1   |
| AHQ-7-7, 6262 - 6268        | K.M*AVTFIGNSTAIQELFK.R                                                  | 1887.18942 | 2 | 3.91E-07 | 0.96  | 4.76   | -     | 1204.9   |
| AHQ-7-10, 5765              | K.M*AVTFIGNSTAIQELFK.R                                                  | 1887.18942 | 2 | 1.38E-04 | 0.62  | 2.57   | -     | 452.3    |
| AHQ-7-14-, 5935 - 5989      | K.M*AVTFIGNSTAIQELFK.R                                                  | 1887.18942 | 2 | 6.68E-08 | 0.94  | 4.37   | -     | 981.5    |
| AHQ-7-13-, 6251             | K.M*AVTFIGNSTAIQELFK.R                                                  | 1887.18942 | 2 | 7.03E-09 | 0.95  | 4.60   | -     | 987.3    |
| AHQ-7-11, 5850              | K.M*AVTFIGNSTAIQELFK.R                                                  | 1887.18942 | 2 | 7.43E-06 | 0.91  | 4.11   | -     | 796.9    |
| AHQ-7-12, 6020 - 6076       | K.M*AVTFIGNSTAIQELFK.R                                                  | 1887.18942 | 2 | 1.03E-05 | 0.88  | 4.02   | -     | 547.9    |
| AHQ-7-13, 5971 - 6049       | K.M*AVTFIGNSTAIQELFK.R                                                  | 1887.18942 | 2 | 1.08E-06 | 0.76  | 3.39   | -     | 374.7    |
| AHQ-7-13, 6229              | K.M*AVTFIGNSTAIQELFK.R                                                  | 1887.18942 | 2 | 2.63E-09 | 0.93  | 4.07   | -     | 888.0    |
| AHQ-7-13-, 6023 - 6045      | K.M*AVTFIGNSTAIQELFK.R                                                  | 1887.18942 | 2 | 1.25E-06 | 0.96  | 4.81   | -     | 1162.6   |
| AHQ-7-14-, 6225             | K.M*AVTFIGNSTAIQELFK.R                                                  | 1887.18942 | 2 | 2.83E-08 | 0.88  | 4.06   | -     | 448.3    |
| AHQ-7-11, 4254              | R.YLTVAAVFR.G                                                           | 1040.23994 | 2 | 2.68E-05 | 0.83  | 2.60   | -     | 750.1    |
| AHQ-7-7, 4364               | R.YLTVAAVFR.G                                                           | 1040.23994 | 2 | 3.40E-07 | 0.82  | 2.68   | -     | 790.9    |
| gi 4885063 ref NP_005156.1  | aldolase C, fructose-bisphosphate; Aldolase C, fructose-bisphosphatase  |            |   | 2.78E-13 | 1.28  | 20.27  | 7.10  | 39455.6  |
| AHQ-7-9, 4165               | K.GVVPFLAGTDGETTTQGLDGLSER.C                                            | 2274.42806 | 2 | 2.77E-11 | 0.92  | 4.38   | -     | 555.7    |
| AHQ-7-8, 4499 - 4562        | K.GVVPFLAGTDGETTTQGLDGLSER.C                                            | 2274.42806 | 2 | 2.78E-13 | 0.90  | 5.32   | -     | 867.1    |
| AHQ-7-8, 4155 - 4186        | K.GVVPFLAGTDGETTTQGLDGLSER.C                                            | 2274.42806 | 2 | 3.36E-06 | 0.86  | 4.59   | -     | 900.8    |
| AHQ-7-8, 4210               | K.VDKGVVPLAGTDGETTTQGLDGLSER.C                                          | 2616.82041 | 2 | 2.01E-04 | 0.38  | 3.24   | -     | 240.4    |
| gi 5729770 ref NP_000382.3  | ceroid-lipofuscinosis, neuronal 2, late infantile (Jansky-Bielschowsky) |            |   | 2.82E-13 | 0.97  | 10.32  | 4.80  | 61247.6  |
| AHQ-7-8, 6834               | R.VPIPVVSGTSASTPVGGLSLINEHR.I                                           | 2836.23725 | 3 | 2.82E-13 | 0.97  | 6.50   | -     | 1394.7   |
| gi 4759212 ref NP_004598.1  | beta-tubulin cofactor A [Homo sapiens]                                  |            |   | 2.85E-13 | 2.80  | 30.33  | 26.90 | 12854.8  |
| AHQ-7-13-, 3388             | R.ILENEKLEEAEEYKEAR.L                                                   | 2209.35284 | 3 | 3.43E-08 | 0.98  | 6.58   | -     | 1817.2   |
| AHQ-7-13, 3518 - 3519       | R.ILENEKLEEAEEYKEAR.L                                                   | 2209.35284 | 3 | 2.85E-13 | 0.95  | 5.45   | -     | 1177.4   |
| AHQ-7-13, 3841 - 3849       | R.LEAAYLDLQR.I                                                          | 1192.34645 | 2 | 1.25E-05 | 0.97  | 4.19   | -     | 1902.8   |
| AHQ-7-13, 3595              | R.LEAAYLDLQR.I                                                          | 1348.53280 | 2 | 1.29E-07 | 0.88  | 3.62   | -     | 731.3    |
| gi 4502549 ref NP_001734.1  | calmodulin 2 (phosphorylase kinase, delta); phosphorylase kinase delta  |            |   | 4.75E-13 | 2.40  | 30.24  | 19.50 | 16837.5  |
| AHQ-7-12, 3444 - 3498       | K.DTDSSEIEIRAFR.V                                                       | 1597.62234 | 2 | 3.23E-07 | 0.61  | 3.13   | -     | 391.3    |
| AHQ-7-11, 3978 - 4047       | K.EAFSLFDKDDGGDTITTK.E                                                  | 1845.98441 | 2 | 2.91E-04 | 0.82  | 3.19   | -     | 622.2    |
| AHQ-7-12, 3774              | K.EAFSLFDKDDGGDTITTK.E                                                  | 1845.98441 | 2 | 4.55E-04 | 0.59  | 3.01   | -     | 522.5    |
| AHQ-7-12, 3560              | R.VFDKDDGNGYISAAELR.H                                                   | 1755.90933 | 2 | 6.30E-06 | 0.83  | 3.25   | -     | 740.8    |
| AHQ-7-12, 3694 - 3750       | R.VFDKDDGNGYISAAELR.H                                                   | 1755.90933 | 2 | 4.75E-13 | 0.96  | 4.71   | -     | 1286.6   |
| AHQ-7-12, 3699 - 3754       | R.VFDKDDGNGYISAAELR.H                                                   | 1755.90933 | 3 | 1.73E-06 | 0.93  | 4.11   | -     | 1529.4   |
| AHQ-7-11, 3712              | R.VFDKDDGNGYISAAELR.H                                                   | 1755.90933 | 3 | 2.55E-06 | 0.94  | 4.24   | -     | 1757.2   |



|                            |                                                                         |            |   |          |       |        |       |         |
|----------------------------|-------------------------------------------------------------------------|------------|---|----------|-------|--------|-------|---------|
| AHQ-7-11, 3651 - 3706      | R.VFDKDGNGYISAAELR.H                                                    | 1755.90933 | 2 | 6.97E-04 | 0.95  | 3.85   | -     | 1618.9  |
| gi 4826898 ref NP_005013.1 | profilin-1 [Homo sapiens]                                               |            |   | 4.90E-13 | 13.60 | 160.30 | 67.10 | 15054.2 |
| AHQ-7-13, 2137 - 2194      | K.CYEM*ASHLR.R                                                          | 1184.32794 | 2 | 5.50E-06 | 0.85  | 2.97   | -     | 934.5   |
| AHQ-7-13-, 1931 - 1991     | K.CYEM*ASHLR.R                                                          | 1184.32794 | 2 | 3.82E-05 | 0.90  | 2.98   | -     | 1325.2  |
| AHQ-7-13-, 2015 - 2073     | K.CYEM*ASHLR.R                                                          | 1184.32794 | 2 | 1.23E-04 | 0.91  | 3.07   | -     | 1203.0  |
| AHQ-7-13-, 2397 - 2437     | K.CYEM*ASHLR.R                                                          | 1168.32854 | 2 | 9.83E-05 | 0.91  | 2.85   | -     | 1568.0  |
| AHQ-7-13-, 2496 - 2555     | K.CYEM*ASHLR.R                                                          | 1168.32854 | 2 | 5.37E-04 | 0.96  | 3.16   | -     | 2102.9  |
| AHQ-7-13, 2249 - 2310      | K.CYEM*ASHLR.R                                                          | 1184.32794 | 2 | 4.44E-05 | 0.87  | 2.97   | -     | 993.3   |
| AHQ-7-13, 4142             | K.DRSSFYVNGLTGGQK.C                                                     | 1742.91379 | 2 | 1.82E-09 | 0.97  | 4.97   | -     | 1232.9  |
| AHQ-7-13-, 4152            | K.DRSSFYVNGLTGGQK.C                                                     | 1742.91379 | 3 | 7.07E-05 | 0.93  | 4.62   | -     | 1149.2  |
| AHQ-7-13-, 4003            | K.DRSSFYVNGLTGGQK.C                                                     | 1742.91379 | 2 | 4.90E-13 | 0.97  | 5.44   | -     | 1372.2  |
| AHQ-7-13, 4291             | K.DRSSFYVNGLTGGQK.C                                                     | 1742.91379 | 2 | 1.76E-08 | 0.97  | 5.85   | -     | 1255.5  |
| AHQ-7-13-, 4667 - 4669     | R.DSLLQDGEFSM*DLR.T                                                     | 1642.76963 | 2 | 2.94E-06 | 0.97  | 4.53   | -     | 1900.2  |
| AHQ-7-12, 5048 - 5104      | R.DSLLQDGEFSM*DLR.T                                                     | 1626.77023 | 2 | 4.49E-04 | 0.74  | 2.71   | -     | 720.9   |
| AHQ-7-12, 4352 - 4407      | R.DSLLQDGEFSM*DLR.T                                                     | 1642.76963 | 2 | 7.75E-10 | 0.96  | 4.31   | -     | 1614.3  |
| AHQ-7-13-, 4563 - 4600     | R.DSLLQDGEFSM*DLR.T                                                     | 1642.76963 | 2 | 4.45E-04 | 0.96  | 3.92   | -     | 2073.8  |
| AHQ-7-13-, 4445 - 4504     | R.DSLLQDGEFSM*DLR.T                                                     | 1642.76963 | 2 | 2.50E-07 | 0.97  | 4.02   | -     | 2077.5  |
| AHQ-7-13-, 4309 - 4371     | R.DSLLQDGEFSM*DLR.T                                                     | 1642.76963 | 2 | 2.30E-09 | 0.91  | 4.09   | -     | 975.6   |
| AHQ-7-14-, 4538            | R.DSLLQDGEFSM*DLR.T                                                     | 1642.76963 | 2 | 3.90E-05 | 0.96  | 3.93   | -     | 1755.3  |
| AHQ-7-13-, 4832 - 4900     | R.DSLLQDGEFSM*DLR.T                                                     | 1642.76963 | 2 | 2.87E-04 | 0.90  | 3.70   | -     | 1057.0  |
| AHQ-7-13-, 4899            | R.DSLLQDGEFSMDLR.T                                                      | 1626.77023 | 2 | 7.78E-04 | 0.94  | 3.96   | -     | 1307.9  |
| AHQ-7-13-, 5013 - 5071     | R.DSLLQDGEFSMDLR.T                                                      | 1626.77023 | 2 | 4.94E-08 | 0.96  | 3.70   | -     | 1871.7  |
| AHQ-7-13-, 5027 - 5036     | R.DSLLQDGEFSM*DLR.T                                                     | 1642.76963 | 2 | 4.06E-04 | 0.72  | 3.01   | -     | 776.9   |
| AHQ-7-13-, 5196 - 5197     | R.DSLLQDGEFSM*DLR.T                                                     | 1642.76963 | 2 | 4.59E-09 | 0.95  | 3.98   | -     | 1563.1  |
| AHQ-7-13-, 5207 - 5276     | R.DSLLQDGEFSMDLR.T                                                      | 1626.77023 | 2 | 8.49E-09 | 0.97  | 4.61   | -     | 2386.2  |
| AHQ-7-14-, 5233            | R.DSLLQDGEFSMDLR.T                                                      | 1626.77023 | 2 | 1.66E-08 | 0.97  | 4.18   | -     | 1859.7  |
| AHQ-7-14, 5292 - 5361      | R.DSLLQDGEFSM*DLR.T                                                     | 1642.76963 | 2 | 7.37E-05 | 0.90  | 3.21   | -     | 1135.9  |
| AHQ-7-14, 5417             | R.DSLLQDGEFSM*DLR.T                                                     | 1642.76963 | 2 | 4.91E-06 | 0.94  | 3.60   | -     | 1514.5  |
| AHQ-7-13, 5491 - 5522      | R.DSLLQDGEFSMDLR.T                                                      | 1626.77023 | 2 | 2.32E-08 | 0.94  | 3.75   | -     | 1303.0  |
| AHQ-7-13, 5405 - 5434      | R.DSLLQDGEFSMDLR.T                                                      | 1626.77023 | 2 | 5.69E-04 | 0.92  | 3.00   | -     | 1621.8  |
| AHQ-7-13, 4485 - 4545      | R.DSLLQDGEFSM*DLR.T                                                     | 1642.76963 | 2 | 8.87E-07 | 0.94  | 3.91   | -     | 1348.7  |
| AHQ-7-14-, 4402            | R.DSLLQDGEFSM*DLR.T                                                     | 1642.76963 | 2 | 2.49E-04 | 0.91  | 3.44   | -     | 977.7   |
| AHQ-7-13, 5291 - 5349      | R.DSLLQDGEFSMDLR.T                                                      | 1626.77023 | 2 | 2.77E-08 | 0.98  | 4.93   | -     | 2247.1  |
| AHQ-7-13, 4601 - 4643      | R.DSLLQDGEFSM*DLR.T                                                     | 1642.76963 | 2 | 1.79E-08 | 0.97  | 4.90   | -     | 1691.3  |
| AHQ-7-13, 4702 - 4763      | R.DSLLQDGEFSM*DLR.T                                                     | 1642.76963 | 2 | 9.02E-06 | 0.96  | 4.43   | -     | 1705.7  |
| AHQ-7-13, 4942 - 5013      | R.DSLLQDGEFSM*DLR.T                                                     | 1642.76963 | 2 | 1.13E-04 | 0.93  | 3.60   | -     | 1511.6  |
| AHQ-7-13, 5070 - 5121      | R.DSLLQDGEFSM*DLR.T                                                     | 1642.76963 | 2 | 5.32E-04 | 0.94  | 4.16   | -     | 1561.9  |
| AHQ-7-13, 5141 - 5221      | R.DSLLQDGEFSMDLR.T                                                      | 1626.77023 | 2 | 4.38E-10 | 0.95  | 4.30   | -     | 1291.8  |
| AHQ-7-13-, 5336 - 5409     | R.DSLLQDGEFSMDLR.T                                                      | 1626.77023 | 2 | 2.22E-04 | 0.86  | 3.11   | -     | 1060.6  |
| AHQ-7-13, 3690 - 3753      | K.DSPSVWAAVPGK.T                                                        | 1214.35211 | 2 | 7.75E-06 | 0.92  | 3.56   | -     | 1054.2  |
| AHQ-7-13-, 3492 - 3551     | K.DSPSVWAAVPGK.T                                                        | 1214.35211 | 2 | 5.43E-04 | 0.88  | 3.44   | -     | 1002.1  |
| AHQ-7-13, 4347             | R.SSFYVNGLTGGQK.C                                                       | 1471.63957 | 1 | 2.25E-07 | 0.53  | 2.80   | -     | 391.4   |
| AHQ-7-12, 4124 - 4150      | R.SSFYVNGLTGGQK.C                                                       | 1471.63957 | 2 | 1.80E-07 | 0.95  | 4.18   | -     | 982.3   |
| AHQ-7-12, 4134             | R.SSFYVNGLTGGQK.C                                                       | 1471.63957 | 1 | 8.06E-07 | 0.85  | 2.66   | -     | 798.9   |
| AHQ-7-12, 4266 - 4331      | R.SSFYVNGLTGGQK.C                                                       | 1471.63957 | 2 | 4.34E-08 | 0.97  | 4.78   | -     | 1258.4  |
| AHQ-7-14, 5156             | R.SSFYVNGLTGGQK.C                                                       | 1471.63957 | 2 | 6.57E-05 | 0.85  | 2.89   | -     | 835.3   |
| AHQ-7-13, 4262 - 4342      | R.SSFYVNGLTGGQK.C                                                       | 1471.63957 | 2 | 4.62E-09 | 0.93  | 4.47   | -     | 738.7   |
| AHQ-7-13, 4401 - 4463      | R.SSFYVNGLTGGQK.C                                                       | 1471.63957 | 2 | 1.61E-06 | 0.93  | 4.26   | -     | 758.5   |
| AHQ-7-14-, 4463 - 4541     | R.SSFYVNGLTGGQK.C                                                       | 1471.63957 | 2 | 2.07E-07 | 0.96  | 4.07   | -     | 1459.9  |
| AHQ-7-13-, 4431 - 4487     | R.SSFYVNGLTGGQK.C                                                       | 1471.63957 | 2 | 7.38E-11 | 0.97  | 4.66   | -     | 1616.6  |
| AHQ-7-13, 4489 - 4551      | R.SSFYVNGLTGGQK.C                                                       | 1471.63957 | 1 | 2.96E-08 | 0.61  | 2.79   | -     | 388.5   |
| AHQ-7-13-, 4355 - 4475     | R.SSFYVNGLTGGQK.C                                                       | 1471.63957 | 1 | 2.53E-11 | 0.50  | 2.31   | -     | 394.0   |
| AHQ-7-14-, 4281            | R.SSFYVNGLTGGQK.C                                                       | 1471.63957 | 2 | 1.21E-04 | 0.90  | 3.40   | -     | 812.2   |
| AHQ-7-13-, 4207 - 4268     | R.SSFYVNGLTGGQK.C                                                       | 1471.63957 | 1 | 1.10E-07 | 0.77  | 3.09   | -     | 611.4   |
| AHQ-7-13-, 4199 - 4263     | R.SSFYVNGLTGGQK.C                                                       | 1471.63957 | 2 | 3.33E-07 | 0.94  | 4.42   | -     | 864.9   |
| AHQ-7-13, 4498 - 4574      | R.SSFYVNGLTGGQK.C                                                       | 1471.63957 | 2 | 1.45E-05 | 0.97  | 4.30   | -     | 1839.8  |
| AHQ-7-12, 4280 - 4339      | R.SSFYVNGLTGGQK.C                                                       | 1471.63957 | 1 | 3.56E-04 | 0.79  | 3.39   | -     | 478.0   |
| AHQ-7-13-, 3084 - 3219     | K.STGGAPTFNVTVK.T                                                       | 1380.52843 | 1 | 3.97E-06 | 0.48  | 2.71   | -     | 267.9   |
| AHQ-7-12, 3131             | K.STGGAPTFNVTVK.T                                                       | 1380.52843 | 2 | 8.05E-04 | 0.79  | 2.97   | -     | 467.0   |
| AHQ-7-13-, 3029 - 3092     | K.STGGAPTFNVTVK.T                                                       | 1380.52843 | 2 | 1.18E-07 | 0.93  | 4.01   | -     | 655.8   |
| AHQ-7-12, 3139             | K.STGGAPTFNVTVK.T                                                       | 1380.52843 | 1 | 1.17E-06 | 0.24  | 2.34   | -     | 290.8   |
| AHQ-7-13, 3297 - 3354      | K.STGGAPTFNVTVK.T                                                       | 1380.52843 | 2 | 3.89E-06 | 0.73  | 2.81   | -     | 391.4   |
| AHQ-7-13, 3413 - 3482      | K.STGGAPTFNVTVK.T                                                       | 1380.52843 | 2 | 1.21E-06 | 0.84  | 3.59   | -     | 362.1   |
| AHQ-7-13, 3183 - 3238      | K.STGGAPTFNVTVK.T                                                       | 1380.52843 | 2 | 4.45E-07 | 0.91  | 3.82   | -     | 600.3   |
| AHQ-7-13-, 2960            | K.STGGAPTFNVTVKTDK.T                                                    | 1724.89354 | 2 | 2.64E-07 | 0.86  | 3.60   | -     | 526.9   |
| AHQ-7-13, 3277             | K.STGGAPTFNVTVKTDK.T                                                    | 1724.89354 | 2 | 1.14E-04 | 0.90  | 3.42   | -     | 777.5   |
| AHQ-7-13, 3119             | K.STGGAPTFNVTVKTDK.T                                                    | 1724.89354 | 2 | 2.40E-04 | 0.86  | 3.52   | -     | 607.5   |
| AHQ-7-13, 3835             | K.TDKTLVLLMGK.E                                                         | 1219.51989 | 2 | 3.22E-07 | 0.93  | 3.56   | -     | 1417.5  |
| AHQ-7-13, 3161 - 3165      | K.TDKTLVLLMGK.E                                                         | 1235.51929 | 2 | 1.48E-04 | 0.87  | 3.41   | -     | 841.9   |
| AHQ-7-13-, 3665 - 3668     | K.TDKTLVLLMGK.E                                                         | 1219.51989 | 2 | 2.27E-06 | 0.91  | 3.65   | -     | 988.9   |
| AHQ-7-12, 5418 - 5483      | K.TFVNITPAEVGLVGK.D                                                     | 1644.93630 | 2 | 8.66E-04 | 0.91  | 3.64   | -     | 1020.7  |
| AHQ-7-11, 5439             | K.TFVNITPAEVGLVGK.D                                                     | 1644.93630 | 2 | 1.66E-04 | 0.67  | 3.07   | -     | 584.6   |
| AHQ-7-13, 5689 - 5749      | K.TFVNITPAEVGLVGK.D                                                     | 1644.93630 | 2 | 1.78E-07 | 0.92  | 4.39   | -     | 861.8   |
| AHQ-7-13, 5590 - 5649      | K.TFVNITPAEVGLVGK.D                                                     | 1644.93630 | 3 | 9.13E-09 | 0.96  | 5.60   | -     | 1175.2  |
| AHQ-7-13, 5581 - 5645      | K.TFVNITPAEVGLVGK.D                                                     | 1644.93630 | 2 | 4.51E-08 | 0.95  | 4.85   | -     | 842.9   |
| AHQ-7-13-, 5528 - 5596     | K.TFVNITPAEVGLVGK.D                                                     | 1644.93630 | 3 | 2.24E-06 | 0.97  | 5.92   | -     | 1404.3  |
| AHQ-7-13-, 5576 - 5631     | K.TFVNITPAEVGLVGK.D                                                     | 1644.93630 | 2 | 6.40E-08 | 0.95  | 5.34   | -     | 993.7   |
| AHQ-7-13-, 5475 - 5551     | K.TFVNITPAEVGLVGK.D                                                     | 1644.93630 | 2 | 9.66E-09 | 0.94  | 4.72   | -     | 865.1   |
| AHQ-7-13-, 5308 - 5328     | K.TFVNITPAEVGLVGK.D                                                     | 1644.93630 | 2 | 8.85E-04 | 0.79  | 3.48   | -     | 603.5   |
| AHQ-7-13-, 5687            | K.TFVNITPAEVGLVGK.D                                                     | 1644.93630 | 2 | 6.25E-08 | 0.94  | 4.27   | -     | 1011.3  |
| AHQ-7-14-, 5589            | K.TFVNITPAEVGLVGK.D                                                     | 1644.93630 | 2 | 2.30E-06 | 0.93  | 4.04   | -     | 843.8   |
| AHQ-7-13-, 5299            | K.TFVNITPAEVGLVGKDR.S                                                   | 1916.21052 | 3 | 1.64E-04 | 0.86  | 3.71   | -     | 1046.0  |
| AHQ-7-13, 5305             | K.TFVNITPAEVGLVGKDR.S                                                   | 1916.21052 | 2 | 6.30E-08 | 0.42  | 2.94   | -     | 371.0   |
| AHQ-7-13-, 5311            | K.TFVNITPAEVGLVGKDR.S                                                   | 1916.21052 | 2 | 4.16E-06 | 0.87  | 3.68   | -     | 854.3   |
| AHQ-7-14-, 2895            | R.TKSTGGAPTFNVTVK.T                                                     | 1609.80568 | 2 | 4.04E-11 | 0.96  | 4.72   | -     | 1220.0  |
| AHQ-7-13-, 2820            | R.TKSTGGAPTFNVTVK.T                                                     | 1609.80568 | 2 | 4.89E-06 | 0.94  | 4.13   | -     | 1029.3  |
| AHQ-7-13, 3045             | R.TKSTGGAPTFNVTVK.T                                                     | 1609.80568 | 2 | 2.00E-04 | 0.83  | 3.28   | -     | 618.2   |
| AHQ-7-13-, 2903            | R.TKSTGGAPTFNVTVK.T                                                     | 1609.80568 | 2 | 2.00E-04 | 0.92  | 4.17   | -     | 736.2   |
| AHQ-7-13, 3245             | K.TLVLLM*GK.E                                                           | 891.15418  | 2 | 5.93E-04 | 0.55  | 2.52   | -     | 417.5   |
| AHQ-7-13, 3902 - 3961      | K.TLVLLM*GK.E                                                           | 875.15478  | 2 | 5.36E-04 | 0.73  | 2.67   | -     | 466.5   |
| AHQ-7-13-, 3744 - 3815     | K.TLVLLM*GK.E                                                           | 875.15478  | 2 | 2.04E-05 | 0.82  | 3.03   | -     | 538.1   |
| AHQ-7-13-, 3075 - 3135     | K.TLVLLM*GK.E                                                           | 891.15418  | 2 | 4.68E-04 | 0.79  | 2.64   | -     | 676.6   |
| gi 4507521 ref NP_001055.1 | transketolase [Homo sapiens]                                            |            |   | 5.82E-13 | 0.95  | 10.26  | 3.00  | 67877.3 |
| AHQ-7-6, 4585 - 4593       | K.ILATPPQEDAPSVDIANIR.M                                                 | 2021.26036 | 2 | 5.82E-13 | 0.95  | 5.24   | -     | 504.9   |
| gi 6005942 ref NP_009057.1 | valosin-containing protein; yeast Cdc48p homolog; transitional endoplas |            |   | 8.13E-13 | 14.53 | 160.32 | 30.60 | 89321.3 |
| AHQ-7-5, 4628              | K.DVDLEFLAK.M                                                           | 1050.18677 | 2 | 7.92E-04 | 0.88  | 3.45   | -     | 923.0   |
| AHQ-7-5, 4182              | R.EDEEESLNEVGYDDIGCCR.K                                                 | 2188.18267 | 2 | 1.51E-05 | 0.83  | 3.08   | -     | 668.3   |
| AHQ-7-5, 3815 - 3840       | R.ELQELVQYVVEHPDK.F                                                     | 1825.01157 | 3 | 9.64E-04 | 0.76  | 3.03   | -     | 916.0   |
| AHQ-7-5, 3810              | R.ELQELVQYVVEHPDK.F                                                     | 1825.01157 | 2 | 3.15E-05 | 0.90  | 3.99   | -     | 902.0   |
| AHQ-7-5, 6044              | R.ETTVVPPQVTWEDIGGLEDVCR.E                                              | 2499.75825 | 2 | 2.89E-05 | 0.87  | 3.88   | -     | 371.7   |
| AHQ-7-5, 3696              | R.GILLYGPPPGTK.T                                                        | 1173.38627 | 2 | 4.36E-04 | 0.88  | 3.44   | -     | 920.0   |
| AHQ-7-5, 6387 - 6395       | K.GPELLTM*WFGSEANVR.E                                                   | 1953.16482 | 2 | 3.52E-07 | 0.94  | 4.75   | -     | 817.6   |
| AHQ-7-5, 3847 - 3850       | K.GVLFYGPPEGCK.T                                                        | 1253.45154 | 2 | 6.17E-06 | 0.90  | 3.41   | -     | 1007.6  |
| AHQ-7-5, 6538              | R.IVSQLLLTMDGLK.Q                                                       | 1431.76657 | 2 | 1.32E-05 | 0.91  | 3.88   | -     | 1056.0  |
| AHQ-7-5, 3428              | R.KYEMFAQTLQQSR.G                                                       | 1630.85008 | 2 | 3.51E-09 | 0.95  | 4.18   | -     | 1216.5  |
| AHQ-7-5, 6683              | K.LADDVBLEQVANETHGHVGADLAALCSEAAALQAIR.K                                | 3675.98140 | 3 | 8.13E-13 | 0.98  | 6.38   | -     | 2288.5  |
| AHQ-7-5, 5666 - 5668       | R.LDQLYIPLPDEK.S                                                        | 1557.81228 | 2 | 1.95E-06 | 0.95  | 4.33   | -     | 1123.0  |

|                             |                                                                         |            |   |          |      |        |       |         |
|-----------------------------|-------------------------------------------------------------------------|------------|---|----------|------|--------|-------|---------|
| AHQ-7-5, 4916 - 4995        | R.LIVDEAINEDNSVVSLSQPK.M                                                | 2171.39088 | 2 | 1.80E-06 | 0.98 | 6.23   | -     | 2349.0  |
| AHQ-7-6, 6713               | K.NAPAIIFIDELDAIAPK.R                                                   | 1812.09907 | 2 | 2.82E-07 | 0.96 | 4.36   | -     | 1143.7  |
| AHQ-7-4, 6912               | K.NAPAIIFIDELDAIAPK.R                                                   | 1812.09907 | 2 | 1.34E-05 | 0.94 | 4.30   | -     | 1083.7  |
| AHQ-7-5, 6820               | K.NAPAIIFIDELDAIAPK.R                                                   | 1812.09907 | 3 | 3.70E-06 | 0.95 | 4.92   | -     | 1531.4  |
| AHQ-7-7, 6812               | K.NAPAIIFIDELDAIAPK.R                                                   | 1812.09907 | 2 | 2.52E-04 | 0.90 | 3.97   | -     | 739.9   |
| AHQ-7-5, 6814               | K.NAPAIIFIDELDAIAPK.R                                                   | 1812.09907 | 2 | 5.60E-05 | 0.90 | 4.02   | -     | 604.8   |
| AHQ-7-4, 5800               | K.NVFIGATNRPDIIDPAIRPGR.L                                               | 2519.93026 | 3 | 8.61E-06 | 0.78 | 3.94   | -     | 649.5   |
| AHQ-7-5, 5718               | K.NVFIGATNRPDIIDPAIRPGR.L                                               | 2519.93026 | 3 | 4.85E-05 | 0.77 | 3.83   | -     | 525.6   |
| AHQ-7-5, 6834               | R.QAAPCVLFFDELDSIAK.A                                                   | 1926.17909 | 2 | 8.25E-09 | 0.88 | 4.03   | -     | 622.6   |
| AHQ-7-5, 3570               | R.WALQSNSPALR.E                                                         | 1330.47434 | 2 | 1.10E-06 | 0.95 | 4.07   | -     | 1429.4  |
| gi 27498267 ref XP_209737.1 | similar to tyrosine 3/tryptophan 5-monoxygenase activation protein,     |            |   | 8.86E-13 | 2.50 | 30.34  | 32.60 | 11063.6 |
| AHQ-7-10, 6125 - 6128       | R.DICNDVLSLLEK.F                                                        | 1420.61093 | 2 | 4.12E-05 | 0.85 | 3.05   | -     | 1005.8  |
| AHQ-7-13-, 6380 - 6392      | R.DICNDVLSLLEK.F                                                        | 1420.61093 | 2 | 4.29E-06 | 0.95 | 3.91   | -     | 1470.5  |
| AHQ-7-11, 5518              | R.DICNDVLSLLEK.F                                                        | 1420.61093 | 2 | 4.59E-05 | 0.95 | 3.19   | -     | 1694.2  |
| AHQ-7-10, 6137              | R.DICNDVLSLLEK.F                                                        | 1420.61093 | 1 | 4.41E-05 | 0.73 | 3.14   | -     | 600.5   |
| AHQ-7-14-, 6358 - 6370      | R.DICNDVLSLLEK.F                                                        | 1420.61093 | 2 | 3.54E-05 | 0.95 | 3.69   | -     | 1485.1  |
| AHQ-7-10, 5760              | R.DICNDVLSLLEK.F                                                        | 1420.61093 | 2 | 7.66E-05 | 0.95 | 3.13   | -     | 2247.6  |
| AHQ-7-10, 5416 - 5420       | R.DICNDVLSLLEK.F                                                        | 1420.61093 | 1 | 2.73E-08 | 0.57 | 2.62   | -     | 585.8   |
| AHQ-7-10, 5407 - 5408       | R.DICNDVLSLLEK.F                                                        | 1420.61093 | 2 | 4.89E-06 | 0.95 | 3.86   | -     | 1406.2  |
| AHQ-7-10, 4680 - 4757       | K.GIVDQSQQAYQEAFAEISK.K                                                 | 2042.19176 | 3 | 4.48E-09 | 0.98 | 6.82   | -     | 2249.6  |
| AHQ-7-10, 4732 - 4787       | K.GIVDQSQQAYQEAFAEISK.K                                                 | 2042.19176 | 2 | 2.33E-07 | 0.97 | 5.60   | -     | 1541.9  |
| AHQ-7-10, 4821 - 4876       | K.GIVDQSQQAYQEAFAEISK.K                                                 | 2042.19176 | 2 | 1.51E-09 | 0.97 | 5.67   | -     | 1571.3  |
| AHQ-7-10, 4932              | K.GIVDQSQQAYQEAFAEISK.K                                                 | 2042.19176 | 2 | 1.68E-07 | 0.96 | 4.95   | -     | 1282.5  |
| AHQ-7-10, 4617 - 4675       | K.GIVDQSQQAYQEAFAEISK.K                                                 | 2042.19176 | 2 | 1.17E-07 | 0.98 | 5.87   | -     | 1656.1  |
| AHQ-7-10, 4436              | K.GIVDQSQQAYQEAFAEISK.K                                                 | 2042.19176 | 2 | 4.60E-10 | 0.95 | 4.69   | -     | 1062.9  |
| AHQ-7-10, 4348              | K.GIVDQSQQAYQEAFAEISK.K                                                 | 2042.19176 | 2 | 9.26E-11 | 0.97 | 5.30   | -     | 1286.2  |
| AHQ-7-14-, 4938 - 4939      | K.GIVDQSQQAYQEAFAEISK.K                                                 | 2042.19176 | 2 | 5.73E-09 | 0.98 | 6.36   | -     | 1504.0  |
| AHQ-7-6, 5097               | K.GIVDQSQQAYQEAFAEISK.K                                                 | 2042.19176 | 2 | 2.68E-07 | 0.88 | 3.42   | -     | 874.0   |
| AHQ-7-10, 6169 - 6211       | K.GIVDQSQQAYQEAFAEISK.K                                                 | 2042.19176 | 2 | 4.75E-05 | 0.81 | 3.57   | -     | 765.6   |
| AHQ-7-10, 6272              | K.GIVDQSQQAYQEAFAEISK.K                                                 | 2042.19176 | 2 | 1.57E-05 | 0.93 | 4.21   | -     | 1070.4  |
| AHQ-7-11, 4774 - 4851       | K.GIVDQSQQAYQEAFAEISK.K                                                 | 2042.19176 | 2 | 8.86E-13 | 0.98 | 5.90   | -     | 1907.1  |
| AHQ-7-11, 4783 - 4839       | K.GIVDQSQQAYQEAFAEISK.K                                                 | 2042.19176 | 3 | 1.55E-07 | 0.89 | 3.96   | -     | 925.9   |
| AHQ-7-9, 4636               | K.GIVDQSQQAYQEAFAEISK.K                                                 | 2042.19176 | 2 | 8.66E-09 | 0.98 | 5.81   | -     | 1514.6  |
| AHQ-7-12, 4774              | K.GIVDQSQQAYQEAFAEISK.K                                                 | 2042.19176 | 2 | 1.05E-07 | 0.97 | 4.91   | -     | 1568.3  |
| AHQ-7-13, 5033              | K.GIVDQSQQAYQEAFAEISK.K                                                 | 2042.19176 | 2 | 1.89E-10 | 0.97 | 5.45   | -     | 1547.3  |
| AHQ-7-14, 5692              | K.GIVDQSQQAYQEAFAEISK.K                                                 | 2042.19176 | 2 | 6.46E-08 | 0.96 | 5.44   | -     | 1031.0  |
| AHQ-7-13-, 4681             | K.GIVDQSQQAYQEAFAEISK.K                                                 | 2042.19176 | 2 | 2.61E-07 | 0.66 | 3.12   | -     | 466.1   |
| AHQ-7-13-, 4872 - 4932      | K.GIVDQSQQAYQEAFAEISK.K                                                 | 2042.19176 | 2 | 2.17E-09 | 0.98 | 6.14   | -     | 1552.2  |
| AHQ-7-1, 5099               | K.GIVDQSQQAYQEAFAEISK.K                                                 | 2042.19176 | 2 | 9.19E-09 | 0.94 | 4.58   | -     | 990.3   |
| AHQ-7-10, 4243 - 4244       | K.KGIVDQSQQAYQEAFAEISK.K                                                | 2170.36467 | 3 | 2.39E-04 | 0.96 | 4.90   | -     | 2077.3  |
| AHQ-7-10, 4211 - 4231       | K.KGIVDQSQQAYQEAFAEISK.K                                                | 2170.36467 | 2 | 2.33E-05 | 0.96 | 5.08   | -     | 1167.9  |
| gi 4507953 ref NP_003397.1  | tyrosine 3/tryptophan 5-monoxygenase activation protein, zeta polypep   |            |   | 9.17E-13 | 8.15 | 100.28 | 40.00 | 27744.9 |
| AHQ-7-10, 3331 - 3412       | K.FLIPNASQAESK.V                                                        | 1305.46156 | 2 | 5.71E-04 | 0.67 | 3.04   | -     | 356.0   |
| AHQ-7-10, 3079 - 3140       | K.FLIPNASQAESK.V                                                        | 1305.46156 | 2 | 2.18E-05 | 0.76 | 2.98   | -     | 420.0   |
| AHQ-7-10, 3309 - 3391       | K.FLIPNASQAESK.V                                                        | 1305.46156 | 1 | 1.62E-04 | 0.27 | 2.34   | -     | 387.1   |
| AHQ-7-10, 4789              | K.FLIPNASQAESKVFYLLK.M                                                  | 1956.27311 | 2 | 6.17E-04 | 0.73 | 2.96   | -     | 646.7   |
| AHQ-7-10, 5615              | K.IETELRDICNDVLSLLEK.F                                                  | 2162.44718 | 3 | 6.99E-05 | 0.86 | 4.37   | -     | 597.4   |
| AHQ-7-14-, 2386             | K.SVTEQGAELSNEER.N                                                      | 1549.57922 | 2 | 6.08E-08 | 0.90 | 3.57   | -     | 1258.5  |
| AHQ-7-11, 2242 - 2322       | K.SVTEQGAELSNEER.N                                                      | 1549.57922 | 2 | 1.76E-08 | 0.92 | 4.12   | -     | 1003.2  |
| AHQ-7-13, 2601              | K.SVTEQGAELSNEER.N                                                      | 1549.57922 | 2 | 1.26E-05 | 0.90 | 3.42   | -     | 1103.4  |
| AHQ-7-13-, 2395             | K.SVTEQGAELSNEER.N                                                      | 1549.57922 | 2 | 4.70E-09 | 0.81 | 3.18   | -     | 917.2   |
| AHQ-7-10, 2291 - 2299       | K.SVTEQGAELSNEER.N                                                      | 1549.57922 | 2 | 8.64E-10 | 0.96 | 5.12   | -     | 1212.2  |
| AHQ-7-11, 2324              | K.SVTEQGAELSNEER.N                                                      | 1549.57922 | 2 | 1.13E-06 | 0.77 | 3.09   | -     | 827.8   |
| AHQ-7-10, 4577              | K.SVTEQGAELSNEERNLLSVAYK.N                                              | 2438.63331 | 2 | 2.02E-04 | 0.39 | 2.80   | -     | 406.4   |
| AHQ-7-10, 5559              | K.TAFDEAIAELDTLSEESYK.D                                                 | 2133.25160 | 2 | 1.14E-04 | 0.65 | 3.27   | -     | 302.5   |
| AHQ-7-13-, 6307 - 6375      | K.TAFDEAIAELDTLSEESYK.D                                                 | 2133.25160 | 2 | 1.96E-08 | 0.96 | 5.38   | -     | 1114.6  |
| AHQ-7-10, 6123 - 6124       | K.TAFDEAIAELDTLSEESYK.D                                                 | 2133.25160 | 2 | 1.87E-10 | 0.97 | 5.69   | -     | 1377.7  |
| AHQ-7-14-, 6291 - 6357      | K.TAFDEAIAELDTLSEESYK.D                                                 | 2133.25160 | 2 | 9.17E-13 | 0.95 | 4.61   | -     | 1293.2  |
| AHQ-7-13, 6373              | K.TAFDEAIAELDTLSEESYK.D                                                 | 2133.25160 | 2 | 3.10E-08 | 0.97 | 5.56   | -     | 1289.9  |
| AHQ-7-10, 6291              | K.TAFDEAIAELDTLSEESYK.DSTLIM*QLLR.D                                     | 3320.66704 | 3 | 3.19E-09 | 0.92 | 4.60   | -     | 870.2   |
| AHQ-7-10, 2485 - 2496       | R.YDDMAACMK.S                                                           | 1106.27579 | 2 | 2.96E-04 | 0.87 | 2.92   | -     | 886.8   |
| AHQ-7-10, 2289              | R.YLAEVAAGDDKK.K                                                        | 1152.23595 | 1 | 1.29E-05 | 0.83 | 2.85   | -     | 1320.3  |
| AHQ-7-10, 2019 - 2075       | R.YLAEVAAGDDKK.G                                                        | 1280.40887 | 2 | 7.91E-04 | 0.95 | 3.56   | -     | 1478.4  |
| AHQ-7-13-, 2027 - 2105      | R.YLAEVAAGDDKK.G                                                        | 1280.40887 | 2 | 1.56E-04 | 0.88 | 3.18   | -     | 1229.8  |
| gi 4507677 ref NP_003290.1  | tumor rejection antigen (gp96) 1; Tumor rejection antigen-1 (gp96); glu |            |   | 1.03E-12 | 8.00 | 90.28  | 14.40 | 92468.2 |
| AHQ-7-4, 2490               | K.DISTNYYASQK.K                                                         | 1290.36061 | 2 | 7.33E-05 | 0.83 | 3.20   | -     | 643.0   |
| AHQ-7-5, 2488               | K.DISTNYYASQK.K                                                         | 1290.36061 | 2 | 1.13E-05 | 0.84 | 3.44   | -     | 553.5   |
| AHQ-7-4, 3277               | K.FAFQAENVN.R                                                           | 1082.19378 | 2 | 7.84E-06 | 0.93 | 3.65   | -     | 1120.6  |
| AHQ-7-4, 4061               | R.FQSSHHPTDITSLDQYVER.M                                                 | 2261.39276 | 3 | 1.62E-06 | 0.95 | 4.50   | -     | 1752.1  |
| AHQ-7-5, 4007               | R.FQSSHHPTDITSLDQYVER.M                                                 | 2261.39276 | 2 | 8.33E-05 | 0.95 | 4.42   | -     | 1152.5  |
| AHQ-7-5, 4012               | R.FQSSHHPTDITSLDQYVER.M                                                 | 2261.39276 | 3 | 1.03E-12 | 0.97 | 5.39   | -     | 2327.7  |
| AHQ-7-4, 4088 - 4092        | K.GVVDSDDLPLNVS.R                                                       | 1486.60940 | 2 | 1.22E-07 | 0.96 | 4.79   | -     | 1218.1  |
| AHQ-7-6, 3965               | K.GVVDSDDLPLNVS.R                                                       | 1486.60940 | 2 | 2.96E-06 | 0.91 | 4.17   | -     | 937.2   |
| AHQ-7-4, 6670               | K.GYEVYILTEPVDVEYCIQALPEFDGKR.F                                         | 3107.43557 | 3 | 4.07E-07 | 0.91 | 4.64   | -     | 673.5   |
| AHQ-7-5, 6211 - 6283        | K.KYSQFINFPYVWSSK.T                                                     | 2008.30657 | 2 | 2.83E-05 | 0.70 | 2.91   | -     | 522.2   |
| AHQ-7-4, 1890 - 1893        | K.LGVIEDHSNR.T                                                          | 1140.23163 | 2 | 4.59E-04 | 0.82 | 2.98   | -     | 926.7   |
| AHQ-7-5, 4147 - 4148        | K.SILFVPTSAPR.G                                                         | 1188.40094 | 2 | 4.68E-05 | 0.93 | 3.80   | -     | 1210.3  |
| AHQ-7-4, 6716 - 6754        | K.YSQFINFPYVWSSK.T                                                      | 1880.13366 | 2 | 3.44E-05 | 0.97 | 5.51   | -     | 1116.3  |
| AHQ-7-6, 6535 - 6595        | K.YSQFINFPYVWSSK.T                                                      | 1880.13366 | 2 | 5.51E-05 | 0.83 | 3.75   | -     | 348.3   |
| AHQ-7-5, 6639               | K.YSQFINFPYVWSSK.T                                                      | 1880.13366 | 2 | 2.13E-06 | 0.93 | 4.14   | -     | 871.7   |
| gi 4504349 ref NP_000509.1  | beta globin [Homo sapiens]                                              |            |   | 1.38E-12 | 9.53 | 110.33 | 75.50 | 15998.3 |
| AHQ-7-14-, 3183             | K.EFTPPPQAAQK.V                                                         | 1379.54213 | 2 | 2.44E-05 | 0.54 | 2.58   | -     | 432.0   |
| AHQ-7-14-, 5377             | R.FFESFGDLSTPDVAVMGNPK.V                                                | 2060.27218 | 2 | 1.94E-06 | 0.93 | 4.38   | -     | 845.7   |
| AHQ-7-13-, 5445             | R.FFESFGDLSTPDVAVMGNPK.V                                                | 2060.27218 | 2 | 5.55E-08 | 0.94 | 4.45   | -     | 824.4   |
| AHQ-7-13-, 5288 - 5363      | R.FFESFGDLSTPDVAVMGNPK.V                                                | 2060.27218 | 2 | 5.56E-05 | 0.96 | 4.56   | -     | 992.6   |
| AHQ-7-13-, 5184             | R.FFESFGDLSTPDVAVMGNPK.V                                                | 2060.27218 | 2 | 1.22E-06 | 0.93 | 4.77   | -     | 618.9   |
| AHQ-7-13, 5531 - 5534       | R.FFESFGDLSTPDVAVMGNPK.V                                                | 2060.27218 | 2 | 1.11E-06 | 0.95 | 4.47   | -     | 970.7   |
| AHQ-7-13-, 4875 - 4943      | R.FFESFGDLSTPDVAVM*GNPK.V                                               | 2076.27158 | 2 | 4.46E-08 | 0.95 | 4.65   | -     | 882.3   |
| AHQ-7-13, 5451 - 5463       | R.FFESFGDLSTPDVAVMGNPK.V                                                | 2060.27218 | 3 | 5.15E-05 | 0.95 | 4.58   | -     | 1732.0  |
| AHQ-7-13, 5413 - 5470       | R.FFESFGDLSTPDVAVMGNPK.V                                                | 2060.27218 | 2 | 1.18E-06 | 0.95 | 4.38   | -     | 985.8   |
| AHQ-7-13, 5042 - 5107       | R.FFESFGDLSTPDVAVM*GNPK.V                                               | 2076.27158 | 2 | 4.82E-06 | 0.91 | 4.23   | -     | 714.7   |
| AHQ-7-13, 4954 - 4971       | R.FFESFGDLSTPDVAVM*GNPK.V                                               | 2076.27158 | 3 | 4.19E-07 | 0.93 | 3.96   | -     | 1438.6  |
| AHQ-7-13-, 4849             | R.FFESFGDLSTPDVAVM*GNPK.V                                               | 2076.27158 | 3 | 2.64E-08 | 0.95 | 4.80   | -     | 1486.9  |
| AHQ-7-14, 5701 - 5704       | R.FFESFGDLSTPDVAVM*GNPK.V                                               | 2076.27158 | 2 | 4.28E-08 | 0.87 | 3.56   | -     | 756.0   |
| AHQ-7-13, 4929 - 4985       | R.FFESFGDLSTPDVAVM*GNPK.V                                               | 2076.27158 | 2 | 2.91E-06 | 0.93 | 4.62   | -     | 701.9   |
| AHQ-7-13, 3741 - 3797       | K.GTGFATLSELHCDK.L                                                      | 1480.62492 | 2 | 1.59E-06 | 0.81 | 3.01   | -     | 742.8   |
| AHQ-7-13-, 3596 - 3671      | K.GTGFATLSELHCDK.L                                                      | 1480.62492 | 2 | 8.85E-09 | 0.82 | 3.28   | -     | 552.2   |
| AHQ-7-13-, 4867             | K.GTGFATLSELHCDKLVDPENFR.L                                              | 2588.83687 | 2 | 9.24E-09 | 0.92 | 4.68   | -     | 532.9   |
| AHQ-7-13-, 4921             | K.GTGFATLSELHCDKLVDPENFR.L                                              | 2588.83687 | 3 | 1.60E-04 | 0.85 | 3.22   | -     | 1213.5  |
| AHQ-7-13, 4950 - 4958       | K.GTGFATLSELHCDKLVDPENFR.L                                              | 2588.83687 | 3 | 6.34E-07 | 0.96 | 5.31   | -     | 1388.3  |
| AHQ-7-13-, 4781 - 4863      | K.GTGFATLSELHCDKLVDPENFR.L                                              | 2588.83687 | 3 | 6.03E-10 | 0.97 | 6.18   | -     | 1539.9  |
| AHQ-7-13, 4599              | K.KVLGAFSDGLAHLNLIK.G                                                   | 1799.06362 | 3 | 3.39E-07 | 0.97 | 5.65   | -     | 1718.9  |
| AHQ-7-13, 4805 - 4807       | K.KVLGAFSDGLAHLNLIK.G                                                   | 1799.06362 | 3 | 1.38E-12 | 0.98 | 6.60   | -     | 2207.6  |
| AHQ-7-13-, 4697             | K.KVLGAFSDGLAHLNLIK.G                                                   | 1799.06362 | 2 | 3.52E-10 | 0.98 | 5.65   | -     | 1672.0  |
| AHQ-7-13-, 4695             | K.KVLGAFSDGLAHLNLIK.G                                                   | 1799.06362 | 3 | 4.10E-11 | 0.97 | 6.48   | -     | 1643.8  |
| AHQ-7-13-, 2881             | K.LHVDPENFR.L                                                           | 1127.23455 | 2 | 8.47E-04 | 0.77 | 2.69   | -     | 1035.3  |
| AHQ-7-13-, 6244             | R.LLGNVLVCLAHHFGK.E                                                     | 1779.14197 | 2 | 5.62E-05 | 0.87 | 3.43   | -     | 952.8   |

|                             |                                                                          |            |   |          |       |        |       |         |
|-----------------------------|--------------------------------------------------------------------------|------------|---|----------|-------|--------|-------|---------|
| AHQ-7-14-, 5023             | K.VLGAFSDDLHLADLNK.G                                                     | 1670.89071 | 3 | 1.30E-07 | 0.81  | 3.34   | -     | 601.0   |
| AHQ-7-14, 5858              | K.VLGAFSDDLHLADLNK.G                                                     | 1670.89071 | 2 | 3.92E-04 | 0.94  | 3.91   | -     | 1435.1  |
| AHQ-7-14-, 5021             | K.VLGAFSDDLHLADLNK.G                                                     | 1670.89071 | 2 | 1.84E-10 | 0.96  | 5.39   | -     | 1361.8  |
| AHQ-7-13-, 5167 - 5168      | K.VLGAFSDDLHLADLNK.G                                                     | 1670.89071 | 2 | 8.98E-06 | 0.96  | 5.12   | -     | 1429.5  |
| AHQ-7-13-, 4984 - 4995      | K.VLGAFSDDLHLADLNK.G                                                     | 1670.89071 | 3 | 1.58E-07 | 0.73  | 3.01   | -     | 500.5   |
| AHQ-7-13, 5263              | K.VLGAFSDDLHLADLNK.G                                                     | 1670.89071 | 2 | 3.06E-09 | 0.96  | 5.42   | -     | 1338.7  |
| AHQ-7-13-, 4583             | K.VLGAFSDDLHLADLNK.G                                                     | 1670.89071 | 2 | 4.15E-04 | 0.96  | 4.41   | -     | 1783.7  |
| AHQ-7-13, 5082              | K.VLGAFSDDLHLADLNK.G                                                     | 1670.89071 | 3 | 7.92E-09 | 0.88  | 3.65   | -     | 815.8   |
| AHQ-7-13, 5081              | K.VLGAFSDDLHLADLNK.G                                                     | 1670.89071 | 2 | 7.42E-12 | 0.97  | 4.94   | -     | 1946.8  |
| AHQ-7-13, 4925              | K.VLGAFSDDLHLADLNK.G                                                     | 1670.89071 | 3 | 2.50E-08 | 0.91  | 3.96   | -     | 675.4   |
| AHQ-7-13-, 4813             | K.VLGAFSDDLHLADLNK.G                                                     | 1670.89071 | 2 | 7.62E-10 | 0.97  | 5.01   | -     | 1468.2  |
| AHQ-7-13-, 4820             | K.VLGAFSDDLHLADLNK.G                                                     | 1670.89071 | 3 | 1.08E-07 | 0.78  | 3.03   | -     | 598.9   |
| AHQ-7-13, 4921 - 4926       | K.VLGAFSDDLHLADLNK.G                                                     | 1670.89071 | 2 | 1.70E-08 | 0.96  | 5.12   | -     | 1249.3  |
| AHQ-7-13-, 4983 - 5045      | K.VLGAFSDDLHLADLNK.G                                                     | 1670.89071 | 2 | 7.93E-12 | 0.98  | 5.26   | -     | 1980.2  |
| AHQ-7-13-, 4897             | K.VLGAFSDDLHLADLNK.G                                                     | 1670.89071 | 2 | 1.97E-09 | 0.97  | 5.09   | -     | 1843.9  |
| AHQ-7-13, 3401 - 3479       | K.VNVDEVGGGALGR.L                                                        | 1315.41484 | 2 | 5.74E-05 | 0.97  | 5.09   | -     | 1456.1  |
| AHQ-7-13, 3415              | K.VNVDEVGGGALGR.L                                                        | 1315.41484 | 1 | 1.92E-06 | 0.36  | 2.75   | -     | 258.6   |
| AHQ-7-13-, 3264             | K.VNVDEVGGGALGR.L                                                        | 1315.41484 | 1 | 8.29E-07 | 0.75  | 3.55   | -     | 312.5   |
| AHQ-7-13-, 3259             | K.VNVDEVGGGALGR.L                                                        | 1315.41484 | 1 | 1.45E-06 | 0.38  | 2.46   | -     | 285.0   |
| AHQ-7-13-, 3255 - 3315      | K.VNVDEVGGGALGR.L                                                        | 1315.41484 | 2 | 9.04E-04 | 0.98  | 4.91   | -     | 2161.1  |
| AHQ-7-14-, 3251             | K.VNVDEVGGGALGR.L                                                        | 1315.41484 | 2 | 1.81E-04 | 0.97  | 4.44   | -     | 1831.8  |
| AHQ-7-13, 3405              | K.VNVDEVGGGALGR.L                                                        | 1315.41484 | 1 | 4.96E-05 | 0.24  | 2.01   | -     | 329.5   |
| AHQ-7-5, 3284               | K.VNVDEVGGGALGR.L                                                        | 1315.41484 | 2 | 2.92E-05 | 0.74  | 2.99   | -     | 679.6   |
| AHQ-7-13, 2399 - 2465       | K.VVAVANALAHK.Y                                                          | 1150.35593 | 2 | 8.22E-04 | 0.91  | 3.09   | -     | 1221.4  |
| AHQ-7-13, 2749 - 2757       | K.VVAVANALAHK.Y                                                          | 1150.35593 | 2 | 3.45E-04 | 0.92  | 3.16   | -     | 1425.2  |
| AHQ-7-13, 2973              | K.VVAVANALAHK.Y                                                          | 1150.35593 | 2 | 5.23E-06 | 0.89  | 2.82   | -     | 1222.9  |
| AHQ-7-13-, 2772             | K.VVAVANALAHK.Y                                                          | 1150.35593 | 2 | 1.94E-05 | 0.94  | 3.52   | -     | 1370.4  |
| AHQ-7-13-, 2540 - 2560      | K.VVAVANALAHK.Y                                                          | 1150.35593 | 2 | 5.36E-09 | 0.97  | 4.08   | -     | 1801.8  |
| AHQ-7-13, 2699 - 2769       | K.VVAVANALAHK.Y                                                          | 1150.35593 | 2 | 1.33E-06 | 0.96  | 3.63   | -     | 1541.0  |
| gi 4504351 ref NP_000510.1  | delta globin [Homo sapiens]                                              |            |   | 1.76E-12 | 3.76  | 40.24  | 29.90 | 16055.4 |
| AHQ-7-13-, 5375             | R.FFESFGDLSSPDVAVM*GNPK.V                                                | 2062.24491 | 2 | 5.47E-05 | 0.83  | 3.51   | -     | 616.2   |
| AHQ-7-13-, 4777             | R.FFESFGDLSSPDVAVM*GNPK.V                                                | 2062.24491 | 2 | 1.00E-07 | 0.90  | 4.26   | -     | 600.8   |
| AHQ-7-13-, 5320             | R.FFESFGDLSSPDVAVM*GNPK.V                                                | 2046.24551 | 2 | 1.76E-12 | 0.95  | 4.90   | -     | 1125.3  |
| AHQ-7-13, 4885 - 4887       | R.FFESFGDLSSPDVAVM*GNPK.V                                                | 2062.24491 | 2 | 1.69E-04 | 0.92  | 4.29   | -     | 845.1   |
| AHQ-7-13-, 5895             | R.LLGNLVLCV.LAR.N                                                        | 1328.64936 | 2 | 4.46E-05 | 0.95  | 4.41   | -     | 938.6   |
| AHQ-7-13-, 3065 - 3141      | K.VNVDAVGGGALGR.L                                                        | 1257.37853 | 2 | 2.02E-04 | 0.96  | 4.36   | -     | 1317.2  |
| gi 10835143 ref NP_000565.1 | decay accelerating factor for complement (CD55, Cromer blood group sys   |            |   | 1.87E-12 | 0.93  | 10.20  | 5.00  | 41399.9 |
| AHQ-7-5, 4804               | R.EIYCAPPQIDNGIIGQR.D                                                    | 2172.40385 | 2 | 1.87E-12 | 0.93  | 4.01   | -     | 683.7   |
| gi 29741246 ref XP_294070.1 | similar to Glycereraldehyde 3-phosphate dehydrogenase, liver (GAPDH) [Ho |            |   | 1.87E-12 | 3.57  | 40.28  | 14.60 | 35032.0 |
| AHQ-7-13-, 5155             | K.AENGLKLVINGNPITIFQER.D                                                 | 2114.39062 | 2 | 1.80E-09 | 0.84  | 3.60   | -     | 656.8   |
| AHQ-7-13, 5247              | K.AENGLKLVINGNPITIFQER.D                                                 | 2114.39062 | 3 | 2.89E-04 | 0.85  | 3.80   | -     | 808.4   |
| AHQ-7-9, 5133 - 5188        | K.LVINGNPITIFQER.D                                                       | 1614.87029 | 2 | 6.82E-10 | 0.93  | 3.51   | -     | 981.6   |
| AHQ-7-9, 5010 - 5069        | K.LVINGNPITIFQER.D                                                       | 1614.87029 | 2 | 4.20E-07 | 0.85  | 2.76   | -     | 944.6   |
| AHQ-7-13-, 5387 - 5463      | K.LVINGNPITIFQER.D                                                       | 1614.87029 | 2 | 4.16E-09 | 0.96  | 3.90   | -     | 1394.1  |
| AHQ-7-10, 5140 - 5199       | K.LVINGNPITIFQER.D                                                       | 1614.87029 | 2 | 6.51E-09 | 0.91  | 3.58   | -     | 1088.6  |
| AHQ-7-14-, 5501             | K.LVINGNPITIFQER.D                                                       | 1614.87029 | 2 | 1.91E-06 | 0.84  | 3.27   | -     | 678.1   |
| AHQ-7-14-, 5398 - 5446      | K.LVINGNPITIFQER.D                                                       | 1614.87029 | 2 | 1.80E-09 | 0.94  | 4.23   | -     | 1106.9  |
| AHQ-7-9, 5062 - 5124        | K.LVINGNPITIFQER.D                                                       | 1614.87029 | 2 | 1.87E-12 | 0.94  | 3.90   | -     | 1184.4  |
| AHQ-7-13, 5431 - 5509       | K.LVINGNPITIFQER.D                                                       | 1614.87029 | 2 | 7.76E-09 | 0.87  | 2.93   | -     | 814.4   |
| AHQ-7-13, 5565 - 5566       | K.LVINGNPITIFQER.D                                                       | 1614.87029 | 2 | 2.37E-06 | 0.90  | 2.98   | -     | 1009.9  |
| AHQ-7-12, 5175 - 5238       | K.LVINGNPITIFQER.D                                                       | 1614.87029 | 2 | 6.27E-06 | 0.86  | 2.80   | -     | 867.1   |
| AHQ-7-9, 4722 - 4785        | K.LVINGNPITIFQERDPSK.I                                                   | 2042.32440 | 2 | 4.92E-09 | 0.87  | 4.14   | -     | 481.7   |
| AHQ-7-9, 6080               | K.VLHDNFGIVKGLMTTVHAIATQK.T                                              | 2596.04531 | 3 | 2.23E-10 | 0.92  | 5.64   | -     | 1230.6  |
| AHQ-7-9, 6081               | K.VLHDNFGIVKGLMTTVHAIATQK.T                                              | 2596.04531 | 2 | 1.78E-06 | 0.90  | 3.95   | -     | 1516.0  |
| gi 5453595 ref NP_006358.1  | adenylyl cyclase-associated protein [Homo sapiens]                       |            |   | 1.96E-12 | 10.00 | 120.28 | 36.00 | 51672.7 |
| AHQ-7-13-, 2869             | R.ALLVTASQCQQAENK.L                                                      | 1759.96271 | 2 | 3.37E-06 | 0.93  | 4.06   | -     | 910.3   |
| AHQ-7-11, 2814              | R.ALLVTASQCQQAENK.L                                                      | 1759.96271 | 2 | 6.25E-05 | 0.92  | 3.54   | -     | 1109.1  |
| AHQ-7-7, 2754               | R.ALLVTASQCQQAENK.L                                                      | 1759.96271 | 2 | 3.02E-04 | 0.92  | 4.14   | -     | 731.0   |
| AHQ-7-7, 2765               | R.ALLVTASQCQQAENK.L                                                      | 1759.96271 | 3 | 1.82E-07 | 0.97  | 5.10   | -     | 1961.8  |
| AHQ-7-7, 2846               | R.ALLVTASQCQQAENK.L                                                      | 1759.96271 | 2 | 1.80E-04 | 0.73  | 3.19   | -     | 460.1   |
| AHQ-7-7, 6313 - 6372        | R.ALLVTASQCQQAENK.LSDLLAPISEQIK.E                                        | 3168.60826 | 3 | 2.73E-04 | 0.73  | 3.63   | -     | 900.0   |
| AHQ-7-7, 3038               | K.EFHITGLAWSK.T                                                          | 1277.40990 | 1 | 2.16E-04 | 0.73  | 3.36   | -     | 263.5   |
| AHQ-7-7, 3012               | K.EMNDAM*FYTNR.V                                                         | 1479.62070 | 2 | 1.46E-04 | 0.47  | 2.61   | -     | 335.5   |
| AHQ-7-7, 2713               | K.KEPAVLELEKG.K                                                          | 1213.40557 | 2 | 2.38E-06 | 0.83  | 3.14   | -     | 481.5   |
| AHQ-7-7, 6929               | K.LGLVFDVGVGIVEINSK.D                                                    | 1931.26186 | 2 | 2.10E-07 | 0.97  | 5.04   | -     | 1682.9  |
| AHQ-7-11, 4720              | K.LSDLLAPISEQIK.E                                                        | 1427.66814 | 2 | 2.29E-04 | 0.85  | 2.87   | -     | 1015.7  |
| AHQ-7-13-, 4880             | K.LSDLLAPISEQIK.E                                                        | 1427.66814 | 2 | 2.78E-07 | 0.86  | 3.32   | -     | 777.1   |
| AHQ-7-7, 4913               | K.LSDLLAPISEQIK.E                                                        | 1427.66814 | 1 | 1.78E-06 | 0.64  | 3.10   | -     | 464.4   |
| AHQ-7-13, 4982              | K.LSDLLAPISEQIK.E                                                        | 1427.66814 | 2 | 7.22E-05 | 0.82  | 2.93   | -     | 839.0   |
| AHQ-7-7, 4904               | K.LSDLLAPISEQIK.E                                                        | 1427.66814 | 2 | 2.92E-04 | 0.76  | 2.71   | -     | 909.8   |
| AHQ-7-7, 3418               | K.NSLDCEIVSAK.S                                                          | 1237.36245 | 1 | 2.60E-05 | 0.16  | 1.89   | -     | 312.5   |
| AHQ-7-7, 3428               | K.NSLDCEIVSAK.S                                                          | 1237.36245 | 2 | 9.30E-07 | 0.81  | 3.16   | -     | 738.2   |
| AHQ-7-7, 3265               | K.NSLDCEIVSAK.S                                                          | 1237.36245 | 1 | 6.28E-04 | 0.27  | 1.99   | -     | 436.9   |
| AHQ-7-7, 3033               | K.NSLDCEIVSAK.S                                                          | 1237.36245 | 2 | 2.14E-06 | 0.91  | 3.48   | -     | 860.4   |
| AHQ-7-14-, 3425             | K.NSLDCEIVSAK.S                                                          | 1237.36245 | 2 | 3.19E-09 | 0.94  | 3.64   | -     | 1143.7  |
| AHQ-7-7, 4664 - 4665        | R.SALFAIQNGGESITHALK.H                                                   | 1929.16615 | 2 | 3.33E-06 | 0.89  | 4.33   | -     | 598.6   |
| AHQ-7-7, 4525 - 4598        | R.SALFAIQNGGESITHALK.H                                                   | 1929.16615 | 2 | 9.17E-07 | 0.83  | 4.13   | -     | 386.3   |
| AHQ-7-7, 4386               | R.SALFAIQNGGESITHALK.H                                                   | 1929.16615 | 2 | 3.00E-05 | 0.71  | 3.49   | -     | 477.0   |
| AHQ-7-9, 4378 - 4390        | R.SALFAIQNGGESITHALK.H                                                   | 1929.16615 | 2 | 7.18E-04 | 0.80  | 3.49   | -     | 637.2   |
| AHQ-7-7, 4858               | R.SALFAIQNGGESITHALK.H                                                   | 1929.16615 | 2 | 8.75E-05 | 0.85  | 4.04   | -     | 523.1   |
| AHQ-7-8, 4687               | R.SALFAIQNGGESITHALK.H                                                   | 1929.16615 | 2 | 1.71E-08 | 0.93  | 4.94   | -     | 643.9   |
| AHQ-7-7, 2180               | R.SGPKFPAPKPTSPSPK.R                                                     | 1839.08461 | 2 | 5.49E-04 | 0.89  | 3.39   | -     | 961.7   |
| AHQ-7-7, 6357 - 6417        | K.SSEMNVLIPTTEGGDFNEFPVPEQFK.T                                           | 2813.08809 | 2 | 2.56E-05 | 0.75  | 3.24   | -     | 278.4   |
| AHQ-7-10, 4377 - 4379       | R.VENQENVSNLVIETELK.Q                                                    | 2074.23206 | 2 | 1.01E-04 | 0.96  | 5.68   | -     | 788.8   |
| AHQ-7-8, 4683               | R.VENQENVSNLVIETELK.Q                                                    | 2074.23206 | 2 | 1.96E-12 | 0.94  | 4.64   | -     | 901.4   |
| AHQ-7-11, 4475              | R.VENQENVSNLVIETELK.Q                                                    | 2074.23206 | 2 | 5.93E-06 | 0.93  | 4.32   | -     | 739.3   |
| AHQ-7-7, 4672               | R.VENQENVSNLVIETELK.Q                                                    | 2074.23206 | 3 | 1.68E-04 | 0.92  | 4.68   | -     | 1209.2  |
| AHQ-7-7, 4652 - 4724        | R.VENQENVSNLVIETELK.Q                                                    | 2074.23206 | 2 | 1.51E-04 | 0.93  | 4.01   | -     | 996.7   |
| AHQ-7-7, 4325               | R.VENQENVSNLVIETELK.Q                                                    | 2074.23206 | 2 | 1.46E-08 | 0.91  | 4.09   | -     | 739.4   |
| AHQ-7-7, 4140               | R.VENQENVSNLVIETELK.Q                                                    | 2074.23206 | 2 | 6.02E-08 | 0.93  | 4.34   | -     | 861.8   |
| AHQ-7-7, 4793 - 4873        | R.VENQENVSNLVIETELK.Q                                                    | 2074.23206 | 2 | 1.20E-07 | 0.96  | 5.43   | -     | 967.9   |
| AHQ-7-14-, 4643             | R.VENQENVSNLVIETELK.Q                                                    | 2074.23206 | 2 | 7.71E-05 | 0.94  | 4.38   | -     | 884.1   |
| gi 29568101 ref NP_006467.3 | ATP synthase, H+ transporting, mitochondrial F0 complex, subunit g, AT   |            |   | 2.45E-12 | 0.95  | 10.24  | 14.60 | 11400.3 |
| AHQ-7-14-, 3651 - 3662      | K.TPALVNAAVTYSKPR.L                                                      | 1588.83283 | 2 | 6.32E-07 | 0.94  | 4.19   | -     | 1083.3  |
| AHQ-7-14-, 3650             | K.TPALVNAAVTYSKPR.L                                                      | 1588.83283 | 3 | 2.45E-12 | 0.95  | 4.80   | -     | 1454.7  |
| gi 4506877 ref NP_002996.1  | selectin P precursor, Selectin P (granulocyte membrane protein, 140KD;   |            |   | 2.53E-12 | 9.14  | 100.31 | 17.20 | 90844.7 |
| AHQ-7-3, 5187 - 5189        | K.AVQCQHLAPSEGTMDCVHPLTAFAYGSSCK.F                                       | 3456.80579 | 3 | 2.43E-06 | 0.95  | 6.16   | -     | 556.1   |
| AHQ-7-2, 4824               | K.AVQCQHLAPSEGTMDCVHPLTAFAYGSSCK.F                                       | 3472.80519 | 3 | 1.90E-05 | 0.78  | 3.80   | -     | 593.1   |
| AHQ-7-3, 4745               | K.AVQCQHLAPSEGTMDCVHPLTAFAYGSSCK.F                                       | 3472.80519 | 3 | 8.69E-07 | 0.93  | 5.49   | -     | 667.8   |
| AHQ-7-3, 4471               | K.CPELFAPEEQGLDCSDTR.G                                                   | 2085.21515 | 2 | 2.13E-05 | 0.94  | 4.43   | -     | 713.3   |
| AHQ-7-2, 4576               | K.CPELFAPEEQGLDCSDTR.G                                                   | 2085.21515 | 2 | 4.02E-04 | 0.91  | 3.96   | -     | 696.9   |
| AHQ-7-3, 2357               | K.FECOPGYR.V                                                             | 1058.14914 | 2 | 8.27E-05 | 0.74  | 2.85   | -     | 707.2   |
| AHQ-7-3, 3021 - 3024        | K.HALCYTASCQDMSCSK.Q                                                     | 1923.11572 | 2 | 1.93E-08 | 0.98  | 4.81   | -     | 1883.5  |
| AHQ-7-2, 5800               | K.LECLASGIWNTKPPQCLAACQCPPLK.I                                           | 2857.31818 | 3 | 4.19E-11 | 0.96  | 5.08   | -     | 1362.0  |
| AHQ-7-3, 5652               | K.LECLASGIWNTKPPQCLAACQCPPLK.I                                           | 2857.31818 | 3 | 7.23E-07 | 0.86  | 4.08   | -     | 903.6   |
| AHQ-7-2, 5980               | K.LECLASGIWNTKPPQCLAACQCPPLKIPER.G                                       | 3352.89300 | 3 | 2.78E-05 | 0.81  | 4.09   | -     | 579.4   |
| AHQ-7-3, 5833               | K.LECLASGIWNTKPPQCLAACQCPPLKIPER.G                                       | 3352.89300 | 3 | 2.53E-12 | 0.89  | 4.36   | -     | 875.9   |

|                                                                        |                                      |            |   |          |       |        |       |          |
|------------------------------------------------------------------------|--------------------------------------|------------|---|----------|-------|--------|-------|----------|
| AHQ-7-3, 3179                                                          | R.PSGQWTVTPACR.A                     | 1432.58672 | 2 | 5.36E-06 | 0.95  | 3.85   | -     | 1364.5   |
| AHQ-7-3, 4781 - 4783                                                   | K.STCQFICDEGYLSGPER.L                | 2109.23671 | 2 | 4.50E-11 | 0.96  | 4.49   | -     | 1102.0   |
| AHQ-7-2, 4877                                                          | K.STCQFICDEGYLSGPER.L                | 2109.23671 | 2 | 9.99E-05 | 0.95  | 4.34   | -     | 1095.6   |
| AHQ-7-4, 4850                                                          | K.STCQFICDEGYLSGPER.L                | 2109.23671 | 2 | 4.37E-08 | 0.94  | 4.59   | -     | 896.6    |
| AHQ-7-6, 4750                                                          | K.STCQFICDEGYLSGPER.L                | 2109.23671 | 2 | 4.45E-08 | 0.90  | 3.68   | -     | 860.5    |
| AHQ-7-3, 2991                                                          | R.YTDLVAIQNK.N                       | 1165.32100 | 1 | 3.52E-05 | 0.13  | 2.07   | -     | 419.8    |
| AHQ-7-2, 3025                                                          | R.YTDLVAIQNK.N                       | 1165.32100 | 2 | 2.32E-06 | 0.85  | 3.32   | -     | 728.2    |
| AHQ-7-3, 2999                                                          | R.YTDLVAIQNK.N                       | 1165.32100 | 2 | 1.32E-05 | 0.96  | 3.40   | -     | 1822.1   |
| gj 18600882 ref XP_089309.1  similar to Cyclophilin-LC [Homo sapiens]  |                                      |            |   | 2.53E-12 | 0.81  | 10.14  | 8.50  | 18166.6  |
| AHQ-7-13, 4770 - 4781                                                  | R.IIPGFMCQGGDFTR.P                   | 1600.84403 | 2 | 2.53E-12 | 0.81  | 2.88   | -     | 299.8    |
| gj 4504745 ref NP_000410.1  integrin alpha 2b precursor [Homo sapiens] |                                      |            |   | 3.13E-12 | 31.24 | 350.31 | 37.20 | 113374.2 |
| AHQ-7-7, 5076                                                          | R.AEGGQCPSSLFDLR.D                   | 1564.74505 | 2 | 8.80E-08 | 0.93  | 3.92   | -     | 890.0    |
| AHQ-7-13, 5163                                                         | R.AEGGQCPSSLFDLR.D                   | 1564.74505 | 2 | 1.73E-07 | 0.96  | 3.81   | -     | 1524.4   |
| AHQ-7-5, 5248                                                          | R.AEGGQCPSSLFDLR.D                   | 1564.74505 | 2 | 6.93E-04 | 0.92  | 3.20   | -     | 1122.7   |
| AHQ-7-2, 5345                                                          | R.AEGGQCPSSLFDLR.D                   | 1564.74505 | 2 | 1.03E-05 | 0.94  | 4.01   | -     | 957.0    |
| AHQ-7-4, 5268 - 5333                                                   | R.AEGGQCPSSLFDLR.D                   | 1564.74505 | 2 | 1.74E-09 | 0.94  | 4.13   | -     | 1107.1   |
| AHQ-7-10, 4768 - 4769                                                  | R.AEGGQCPSSLFDLR.D                   | 1564.74505 | 2 | 1.21E-04 | 0.95  | 4.62   | -     | 1040.6   |
| AHQ-7-6, 5169                                                          | R.AEGGQCPSSLFDLR.D                   | 1564.74505 | 2 | 8.43E-04 | 0.89  | 3.30   | -     | 881.9    |
| AHQ-7-3, 5237 - 5243                                                   | R.AEGGQCPSSLFDLR.D                   | 1564.74505 | 2 | 9.04E-06 | 0.93  | 4.29   | -     | 779.2    |
| AHQ-7-4, 2873 - 2874                                                   | R.ALSNVEGFER.L                       | 1122.21308 | 2 | 3.56E-05 | 0.89  | 3.66   | -     | 875.9    |
| AHQ-7-4, 4553                                                          | K.ASVQLLVQDSLNPVAK.S                 | 1682.94293 | 2 | 2.05E-05 | 0.44  | 2.65   | -     | 512.5    |
| AHQ-7-4, 5078 - 5150                                                   | K.ASVQLLVQDSLNPVAK.S                 | 1682.94293 | 2 | 6.75E-04 | 0.87  | 4.06   | -     | 742.0    |
| AHQ-7-5, 5043                                                          | K.ASVQLLVQDSLNPVAK.S                 | 1682.94293 | 2 | 2.70E-05 | 0.93  | 4.57   | -     | 651.5    |
| AHQ-7-4, 6078                                                          | K.ASVQLLVQDSLNPVAKSCVLPQTK.T         | 2598.01293 | 3 | 7.12E-04 | 0.94  | 4.12   | -     | 1702.4   |
| AHQ-7-4, 3261                                                          | R.DETRNVGSTLQTFK.A                   | 1724.85363 | 2 | 8.10E-08 | 0.72  | 3.17   | -     | 532.8    |
| AHQ-7-5, 3851 - 3874                                                   | R.DGYNDIAVAAPYGGPSGR.G               | 1780.87574 | 2 | 8.95E-09 | 0.95  | 4.91   | -     | 1015.2   |
| AHQ-7-4, 3913                                                          | R.DGYNDIAVAAPYGGPSGR.G               | 1780.87574 | 3 | 3.87E-04 | 0.77  | 3.53   | -     | 1013.3   |
| AHQ-7-4, 3880 - 3945                                                   | R.DGYNDIAVAAPYGGPSGR.G               | 1780.87574 | 2 | 4.77E-07 | 0.85  | 3.74   | -     | 587.0    |
| AHQ-7-6, 3787                                                          | R.DGYNDIAVAAPYGGPSGR.G               | 1780.87574 | 2 | 2.43E-06 | 0.86  | 3.28   | -     | 675.7    |
| AHQ-7-4, 4008 - 4048                                                   | R.DGYNDIAVAAPYGGPSGR.G               | 1780.87574 | 2 | 3.45E-04 | 0.71  | 2.93   | -     | 722.1    |
| AHQ-7-3, 3875                                                          | R.DGYNDIAVAAPYGGPSGR.G               | 1780.87574 | 2 | 4.41E-05 | 0.44  | 2.60   | -     | 466.0    |
| AHQ-7-6, 5567 - 5574                                                   | R.FGSAIAPLGLDRLDRGYNDIAVAAPYGGPSGR.G | 3094.34015 | 3 | 7.02E-04 | 0.90  | 4.47   | -     | 929.9    |
| AHQ-7-6, 5669                                                          | R.FGSAIAPLGLDRLDRGYNDIAVAAPYGGPSGR.G | 3094.34015 | 3 | 5.45E-04 | 0.69  | 3.50   | -     | 599.1    |
| AHQ-7-4, 5670 - 5732                                                   | R.FGSAIAPLGLDRLDRGYNDIAVAAPYGGPSGR.G | 3094.34015 | 3 | 2.11E-07 | 0.94  | 5.21   | -     | 1014.4   |
| AHQ-7-5, 5647 - 5714                                                   | R.FGSAIAPLGLDRLDRGYNDIAVAAPYGGPSGR.G | 3094.34015 | 3 | 1.03E-05 | 0.92  | 4.59   | -     | 875.4    |
| AHQ-7-4, 5936                                                          | R.FGSAIAPLGLDRLDRGYNDIAVAAPYGGPSGR.G | 3094.34015 | 3 | 2.03E-07 | 0.70  | 4.11   | -     | 589.3    |
| AHQ-7-4, 5796 - 5874                                                   | R.FGSAIAPLGLDRLDRGYNDIAVAAPYGGPSGR.G | 3094.34015 | 3 | 5.09E-09 | 0.94  | 5.26   | -     | 1046.7   |
| AHQ-7-5, 5778                                                          | R.FGSAIAPLGLDRLDRGYNDIAVAAPYGGPSGR.G | 3094.34015 | 3 | 5.54E-05 | 0.84  | 4.09   | -     | 714.6    |
| AHQ-7-5, 6092                                                          | R.GAVDIDDNGYPLIVGAYGANQVAVYR.A       | 2827.05458 | 2 | 4.73E-04 | 0.75  | 3.12   | -     | 400.0    |
| AHQ-7-4, 6046 - 6118                                                   | R.GAVDIDDNGYPLIVGAYGANQVAVYR.A       | 2827.05458 | 2 | 1.18E-08 | 0.93  | 5.03   | -     | 599.5    |
| AHQ-7-10, 4595 - 4657                                                  | R.GEAQVWTQLLR.A                      | 1301.47614 | 2 | 3.22E-06 | 0.96  | 4.21   | -     | 1501.5   |
| AHQ-7-11, 4718                                                         | R.GEAQVWTQLLR.A                      | 1301.47614 | 2 | 1.56E-05 | 0.88  | 3.90   | -     | 772.0    |
| AHQ-7-1, 5123                                                          | R.GEAQVWTQLLR.A                      | 1301.47614 | 2 | 3.90E-07 | 0.91  | 3.78   | -     | 1077.1   |
| AHQ-7-4, 5278 - 5340                                                   | R.GNSFPASLVAAEEGER.E                 | 1733.86053 | 2 | 7.07E-05 | 0.55  | 2.63   | -     | 703.6    |
| AHQ-7-4, 5596 - 5662                                                   | R.GNSFPASLVAAEEGER.E                 | 1733.86053 | 2 | 2.92E-09 | 0.96  | 5.03   | -     | 1061.2   |
| AHQ-7-4, 5404 - 5469                                                   | R.GNSFPASLVAAEEGER.E                 | 1733.86053 | 2 | 1.65E-08 | 0.88  | 3.88   | -     | 578.7    |
| AHQ-7-4, 6537                                                          | R.GNSFPASLVAAEEGEREQNSLDSWGPK.V      | 2976.16043 | 3 | 1.30E-06 | 0.86  | 4.38   | -     | 498.2    |
| AHQ-7-4, 6341 - 6408                                                   | R.GNSFPASLVAAEEGEREQNSLDSWGPK.V      | 2976.16043 | 3 | 1.45E-06 | 0.93  | 5.12   | -     | 953.2    |
| AHQ-7-4, 6229 - 6282                                                   | R.GNSFPASLVAAEEGEREQNSLDSWGPK.V      | 2976.16043 | 3 | 9.58E-04 | 0.78  | 3.95   | -     | 403.7    |
| AHQ-7-7, 4972                                                          | R.GPHALGAPSLLLTGQLYGR.F              | 2023.32431 | 2 | 4.11E-04 | 0.92  | 4.47   | -     | 737.0    |
| AHQ-7-4, 5086                                                          | R.GPHALGAPSLLLTGQLYGR.F              | 2023.32431 | 2 | 2.65E-06 | 0.90  | 4.01   | -     | 633.0    |
| AHQ-7-4, 5224 - 5289                                                   | R.GPHALGAPSLLLTGQLYGR.F              | 2023.32431 | 2 | 2.28E-04 | 0.97  | 5.28   | -     | 1097.9   |
| AHQ-7-5, 5202                                                          | R.GPHALGAPSLLLTGQLYGR.F              | 2023.32431 | 3 | 1.35E-04 | 0.79  | 3.32   | -     | 851.8    |
| AHQ-7-3, 5209                                                          | R.GPHALGAPSLLLTGQLYGR.F              | 2023.32431 | 2 | 1.43E-05 | 0.94  | 4.45   | -     | 806.9    |
| AHQ-7-6, 5130 - 5131                                                   | R.GPHALGAPSLLLTGQLYGR.F              | 2023.32431 | 2 | 7.93E-09 | 0.97  | 5.52   | -     | 1229.7   |
| AHQ-7-5, 5206                                                          | R.GPHALGAPSLLLTGQLYGR.F              | 2023.32431 | 2 | 2.20E-05 | 0.96  | 5.19   | -     | 957.0    |
| AHQ-7-6, 4943                                                          | R.GQVLVFLGQSEGLR.S                   | 1503.72793 | 2 | 2.90E-06 | 0.97  | 4.27   | -     | 1790.2   |
| AHQ-7-7, 4860                                                          | R.GQVLVFLGQSEGLR.S                   | 1503.72793 | 2 | 6.54E-05 | 0.87  | 3.15   | -     | 1078.3   |
| AHQ-7-5, 5016 - 5082                                                   | R.GQVLVFLGQSEGLR.S                   | 1503.72793 | 2 | 4.78E-09 | 0.95  | 3.43   | -     | 1767.0   |
| AHQ-7-4, 5044 - 5108                                                   | R.GQVLVFLGQSEGLR.S                   | 1503.72793 | 2 | 6.64E-08 | 0.97  | 4.38   | -     | 1568.8   |
| AHQ-7-4, 4464 - 4465                                                   | R.HDLLVGAPLYMESR.A                   | 1601.85188 | 2 | 1.71E-09 | 0.97  | 4.50   | -     | 1588.4   |
| AHQ-7-4, 3928                                                          | R.HDLLVGAPLYMESR.A                   | 1617.85128 | 2 | 2.27E-05 | 0.96  | 3.95   | -     | 1462.4   |
| AHQ-7-5, 4438                                                          | K.IVLLDVPVR.A                        | 1024.28196 | 2 | 3.42E-05 | 0.92  | 3.78   | -     | 877.2    |
| AHQ-7-4, 4469                                                          | K.IVLLDVPVR.A                        | 1024.28196 | 2 | 1.53E-05 | 0.89  | 3.23   | -     | 800.1    |
| AHQ-7-4, 4417                                                          | R.IYVENDFSWDK.R                      | 1416.51610 | 1 | 2.46E-05 | 0.47  | 2.28   | -     | 410.8    |
| AHQ-7-4, 4406 - 4425                                                   | R.IYVENDFSWDK.R                      | 1416.51610 | 2 | 1.24E-09 | 0.89  | 3.58   | -     | 741.4    |
| AHQ-7-6, 3882 - 3946                                                   | R.IYVENDFSWDKR.Y                     | 1572.70245 | 2 | 4.19E-04 | 0.93  | 3.75   | -     | 1229.5   |
| AHQ-7-4, 3937 - 4001                                                   | R.IYVENDFSWDKR.Y                     | 1572.70245 | 2 | 7.54E-09 | 0.95  | 4.43   | -     | 1379.8   |
| AHQ-7-4, 4224                                                          | R.IYVENDFSWDKR.Y                     | 1572.70245 | 2 | 1.15E-08 | 0.91  | 3.37   | -     | 1122.9   |
| AHQ-7-4, 4421 - 4498                                                   | K.LSLNAELQLDR.Q                      | 1272.43310 | 2 | 7.70E-05 | 0.90  | 3.29   | -     | 1165.2   |
| AHQ-7-11, 2152 - 2166                                                  | R.NRPPEEDDEEGE                       | 1529.50164 | 2 | 2.70E-06 | 0.93  | 3.78   | -     | 1229.4   |
| AHQ-7-7, 2802                                                          | R.NVGSQTLQTFK.A                      | 1223.36055 | 2 | 3.16E-06 | 0.87  | 3.27   | -     | 635.2    |
| AHQ-7-4, 2766                                                          | R.NVGSQTLQTFK.A                      | 1223.36055 | 2 | 2.24E-06 | 0.75  | 3.15   | -     | 355.5    |
| AHQ-7-4, 6318 - 6378                                                   | R.PSQVLDSPPFTGSAFGFSR.G              | 2111.34205 | 2 | 1.39E-04 | 0.96  | 5.28   | -     | 1122.9   |
| AHQ-7-14-, 5637                                                        | R.SRPSQVLDSPPFTGSAFGFSR.G            | 2354.60606 | 3 | 1.31E-06 | 0.88  | 4.23   | -     | 978.9    |
| AHQ-7-5, 5923 - 5951                                                   | R.SRPSQVLDSPPFTGSAFGFSR.G            | 2354.60606 | 2 | 3.01E-09 | 0.94  | 4.58   | -     | 694.4    |
| AHQ-7-13, 5707                                                         | R.SRPSQVLDSPPFTGSAFGFSR.G            | 2354.60606 | 3 | 7.42E-04 | 0.83  | 3.30   | -     | 1184.8   |
| AHQ-7-6, 5843 - 5901                                                   | R.SRPSQVLDSPPFTGSAFGFSR.G            | 2354.60606 | 3 | 3.68E-05 | 0.96  | 4.96   | -     | 1873.2   |
| AHQ-7-6, 5857                                                          | R.SRPSQVLDSPPFTGSAFGFSR.G            | 2354.60606 | 2 | 3.13E-12 | 0.95  | 5.03   | -     | 675.7    |
| AHQ-7-4, 5977 - 6040                                                   | R.SRPSQVLDSPPFTGSAFGFSR.G            | 2354.60606 | 3 | 2.33E-09 | 0.97  | 6.27   | -     | 1873.8   |
| AHQ-7-7, 5833                                                          | R.SRPSQVLDSPPFTGSAFGFSR.G            | 2354.60606 | 3 | 2.02E-06 | 0.89  | 4.28   | -     | 985.9    |
| AHQ-7-1, 5828                                                          | R.SRPSQVLDSPPFTGSAFGFSR.G            | 2354.60606 | 3 | 1.53E-07 | 0.97  | 5.77   | -     | 1808.2   |
| AHQ-7-3, 5895                                                          | R.SRPSQVLDSPPFTGSAFGFSR.G            | 2354.60606 | 3 | 4.22E-07 | 0.96  | 6.08   | -     | 1589.1   |
| AHQ-7-4, 5768                                                          | R.SRPSQVLDSPPFTGSAFGFSR.G            | 2354.60606 | 3 | 2.29E-06 | 0.96  | 5.49   | -     | 1860.7   |
| AHQ-7-5, 5903 - 5963                                                   | R.SRPSQVLDSPPFTGSAFGFSR.G            | 2354.60606 | 3 | 1.52E-08 | 0.95  | 5.75   | -     | 1068.5   |
| AHQ-7-4, 3788                                                          | K.TEEAEKTPVGSFCFLAQPESEGR.R          | 2295.46902 | 2 | 8.68E-10 | 0.94  | 4.73   | -     | 836.7    |
| AHQ-7-7, 3616                                                          | K.TEEAEKTPVGSFCFLAQPESEGR.R          | 2295.46902 | 2 | 1.06E-05 | 0.87  | 4.16   | -     | 400.3    |
| AHQ-7-6, 3682                                                          | K.TEEAEKTPVGSFCFLAQPESEGR.R          | 2295.46902 | 2 | 5.78E-06 | 0.94  | 4.73   | -     | 710.7    |
| AHQ-7-4, 3716 - 3784                                                   | K.TEEAEKTPVGSFCFLAQPESEGR.R          | 2295.46902 | 2 | 1.71E-07 | 0.93  | 4.46   | -     | 606.8    |
| AHQ-7-4, 3437                                                          | K.TEEAEKTPVGSFCFLAQPESEGR.R          | 2451.65537 | 3 | 3.52E-04 | 0.81  | 3.90   | -     | 655.9    |
| AHQ-7-5, 5546 - 5622                                                   | R.TLGPSQEEETGVFLCPWR.A               | 2036.25364 | 2 | 9.33E-07 | 0.90  | 4.27   | -     | 722.6    |
| AHQ-7-8, 5435                                                          | R.TLGPSQEEETGVFLCPWR.A               | 2036.25364 | 2 | 2.93E-05 | 0.79  | 3.09   | -     | 837.5    |
| AHQ-7-4, 5628 - 5686                                                   | R.TLGPSQEEETGVFLCPWR.A               | 2036.25364 | 2 | 1.35E-06 | 0.97  | 5.51   | -     | 1233.5   |
| AHQ-7-7, 5390 - 5452                                                   | R.TLGPSQEEETGVFLCPWR.A               | 2036.25364 | 2 | 4.14E-07 | 0.95  | 4.84   | -     | 1008.4   |
| AHQ-7-10, 5027 - 5093                                                  | R.TLGPSQEEETGVFLCPWR.A               | 2036.25364 | 2 | 3.14E-04 | 0.48  | 2.52   | -     | 592.8    |
| AHQ-7-2, 5580 - 5644                                                   | R.TLGPSQEEETGVFLCPWR.A               | 2036.25364 | 2 | 1.22E-06 | 0.26  | 3.04   | -     | 332.3    |
| AHQ-7-12, 5122                                                         | R.TLGPSQEEETGVFLCPWR.A               | 2036.25364 | 2 | 1.16E-07 | 0.93  | 4.28   | -     | 932.4    |
| AHQ-7-4, 5622 - 5689                                                   | R.TLGPSQEEETGVFLCPWR.A               | 2036.25364 | 3 | 3.17E-06 | 0.87  | 4.15   | -     | 813.4    |
| AHQ-7-1, 5429 - 5485                                                   | R.TLGPSQEEETGVFLCPWR.A               | 2036.25364 | 2 | 1.05E-08 | 0.94  | 4.30   | -     | 1237.2   |
| AHQ-7-13, 5379                                                         | R.TLGPSQEEETGVFLCPWR.A               | 2036.25364 | 2 | 4.53E-08 | 0.80  | 3.69   | -     | 742.0    |
| AHQ-7-13-, 5296                                                        | R.TLGPSQEEETGVFLCPWR.A               | 2036.25364 | 2 | 3.44E-06 | 0.94  | 4.59   | -     | 910.4    |
| AHQ-7-3, 5459 - 5519                                                   | R.TLGPSQEEETGVFLCPWR.A               | 2036.25364 | 2 | 8.73E-07 | 0.94  | 4.93   | -     | 814.0    |
| AHQ-7-6, 5429 - 5469                                                   | R.TLGPSQEEETGVFLCPWR.A               | 2036.25364 | 2 | 1.04E-06 | 0.95  | 4.96   | -     | 932.7    |
| AHQ-7-4, 3769 - 3786                                                   | K.TPVGSCFLAQPESEGR.R                 | 1607.76993 | 2 | 2.09E-05 | 0.95  | 4.36   | -     | 865.0    |
| AHQ-7-5, 3751                                                          | K.TPVGSCFLAQPESEGR.R                 | 1607.76993 | 2 | 2.43E-06 | 0.93  | 3.77   | -     | 928.4    |
| AHQ-7-7, 3629                                                          | K.TPVGSCFLAQPESEGR.R                 | 1607.76993 | 2 | 1.89E-06 | 0.94  | 3.64   | -     | 1016.5   |
| AHQ-7-12, 3592                                                         | K.TPVGSCFLAQPESEGR.R                 | 1607.76993 | 2 | 1.25E-05 | 0.74  | 3.15   | -     | 491.1    |

|                              |                                                                         |            |   |          |      |      |   |        |
|------------------------------|-------------------------------------------------------------------------|------------|---|----------|------|------|---|--------|
| AHQ-7-11, 3558               | K.TPVGSCFLAQPESSGR.R                                                    | 1607.76993 | 2 | 9.54E-06 | 0.84 | 3.38 | - | 641.3  |
| AHQ-7-3, 3721 - 3785         | K.TPVGSCFLAQPESSGR.R                                                    | 1607.76993 | 2 | 3.11E-08 | 0.74 | 3.28 | - | 546.0  |
| AHQ-7-6, 3675 - 3693         | K.TPVGSCFLAQPESSGR.R                                                    | 1607.76993 | 2 | 2.15E-06 | 0.86 | 3.31 | - | 808.7  |
| AHQ-7-4, 4564                | K.TPVSCFNQM*CVGATGHNIPQK.L                                              | 2478.81062 | 3 | 1.86E-06 | 0.96 | 4.87 | - | 1538.9 |
| AHQ-7-4, 4890 - 4970         | K.TPVSCFNQM*CVGATGHNIPQK.L                                              | 2462.81122 | 3 | 1.75E-06 | 0.91 | 4.85 | - | 678.5  |
| AHQ-7-5, 4516                | K.TPVSCFNQM*CVGATGHNIPQK.L                                              | 2478.81062 | 3 | 8.31E-08 | 0.88 | 3.93 | - | 753.3  |
| AHQ-7-6, 2623                | R.VAIVVGAPR.T                                                           | 882.08560  | 2 | 1.23E-05 | 0.93 | 2.94 | - | 1376.4 |
| AHQ-7-4, 2652                | R.VAIVVGAPR.T                                                           | 882.08560  | 2 | 1.90E-06 | 0.95 | 3.48 | - | 1479.0 |
| AHQ-7-11, 2615               | R.VAIVVGAPR.T                                                           | 882.08560  | 2 | 2.85E-05 | 0.93 | 3.39 | - | 1265.4 |
| AHQ-7-5, 2644                | R.VAIVVGAPR.T                                                           | 882.08560  | 2 | 1.31E-04 | 0.94 | 3.35 | - | 1303.8 |
| AHQ-7-4, 5946 - 6014         | R.VLLLSQQAGTTLNLDLGGK.H                                                 | 1999.29783 | 2 | 9.12E-04 | 0.95 | 4.88 | - | 1016.2 |
| AHQ-7-4, 5668 - 5733         | R.VLLLSQQAGTTLNLDLGGK.H                                                 | 1999.29783 | 2 | 4.24E-07 | 0.98 | 5.90 | - | 1737.3 |
| AHQ-7-4, 5820                | R.VLLLSQQAGTTLNLDLGGK.H                                                 | 1999.29783 | 2 | 1.98E-06 | 0.94 | 4.59 | - | 883.1  |
| AHQ-7-4, 7005 - 7073         | R.VLLLSQQAGTTLNLDLGGK.H                                                 | 1999.29783 | 2 | 1.39E-06 | 0.98 | 6.19 | - | 1692.5 |
| AHQ-7-4, 3372                | R.VVLCGLNPM*K.K                                                         | 1277.53632 | 2 | 1.95E-05 | 0.96 | 3.99 | - | 1606.2 |
| AHQ-7-6, 4045                | R.VVLCGLNPMK.K                                                          | 1261.53692 | 2 | 1.25E-06 | 0.91 | 3.75 | - | 889.2  |
| AHQ-7-4, 4165                | R.VVLCGLNPMK.K                                                          | 1261.53692 | 1 | 5.43E-05 | 0.53 | 2.78 | - | 620.0  |
| AHQ-7-4, 4152                | R.VVLCGLNPMK.K                                                          | 1261.53692 | 2 | 2.19E-06 | 0.96 | 4.28 | - | 1377.8 |
| AHQ-7-5, 4122                | R.VVLCGLNPMK.K                                                          | 1261.53692 | 2 | 8.37E-05 | 0.88 | 3.36 | - | 850.4  |
| AHQ-7-4, 3681                | R.VVLCGLNPMKK.N                                                         | 1389.70984 | 2 | 4.94E-05 | 0.72 | 2.70 | - | 686.3  |
| AHQ-7-6, 4165                | R.VYLFLOPR.G                                                            | 1036.25129 | 2 | 4.82E-06 | 0.94 | 3.28 | - | 1136.7 |
| AHQ-7-4, 4309                | R.VYLFLOPR.G                                                            | 1036.25129 | 2 | 1.72E-05 | 0.95 | 3.61 | - | 1514.1 |
| AHQ-7-5, 4268                | R.VYLFLOPR.G                                                            | 1036.25129 | 2 | 2.35E-06 | 0.95 | 3.17 | - | 1464.3 |
| glj4504183[ref]NP_000843.1]  | glutathione transferase; deafness, X-linked 7; fatty acid ethyl ester s |            |   |          |      |      |   |        |
| AHQ-7-14-, 5134              | K.AFLASPEYVNLPLNGKQ                                                     | 2033.27283 | 2 | 2.10E-04 | 0.77 | 2.54 | - | 1068.7 |
| AHQ-7-11, 5064 - 5128        | K.ALPGQLKPFETLLSNQGGK.T                                                 | 2127.42930 | 2 | 1.45E-06 | 0.93 | 4.53 | - | 572.0  |
| AHQ-7-11, 5070               | K.ALPGQLKPFETLLSNQGGK.T                                                 | 2127.42930 | 2 | 2.76E-07 | 0.86 | 3.87 | - | 452.1  |
| AHQ-7-11, 3178               | K.ASCLYGLPK.F                                                           | 1138.31884 | 2 | 4.88E-07 | 0.90 | 3.49 | - | 880.3  |
| AHQ-7-11, 4187               | K.DQQAALVDM*VNDGVEDLR.C                                                 | 2134.26783 | 2 | 5.24E-06 | 0.94 | 4.79 | - | 808.1  |
| AHQ-7-11, 5880 - 5882        | K.DQQAALVDM*VNDGVEDLR.C                                                 | 2118.26843 | 2 | 3.21E-04 | 0.91 | 4.40 | - | 681.3  |
| AHQ-7-11, 4896               | K.DQQAALVDM*VNDGVEDLR.C                                                 | 2134.26783 | 2 | 1.04E-06 | 0.93 | 4.54 | - | 746.2  |
| AHQ-7-11, 4894               | K.DQQAALVDM*VNDGVEDLR.C                                                 | 2118.26843 | 2 | 7.70E-06 | 0.73 | 3.37 | - | 510.8  |
| AHQ-7-14-, 4798              | K.FQDGDLLYQSNTILR.H                                                     | 1885.06701 | 2 | 4.19E-05 | 0.93 | 4.80 | - | 687.6  |
| AHQ-7-11, 4743               | K.FQDGDLLYQSNTILR.H                                                     | 1885.06701 | 2 | 8.95E-07 | 0.30 | 2.87 | - | 253.8  |
| AHQ-7-14, 5570 - 5648        | K.FQDGDLLYQSNTILR.H                                                     | 1885.06701 | 2 | 1.35E-04 | 0.89 | 4.02 | - | 722.3  |
| AHQ-7-11, 4631               | K.FQDGDLLYQSNTILR.H                                                     | 1885.06701 | 3 | 4.58E-07 | 0.92 | 4.85 | - | 866.6  |
| AHQ-7-11, 4551 - 4606        | K.FQDGDLLYQSNTILR.H                                                     | 1885.06701 | 3 | 3.26E-12 | 0.91 | 3.81 | - | 864.2  |
| AHQ-7-11, 5642 - 5647        | R.M*LLADQQGGSWKKEEVTVTWQEGSLK.A                                         | 3009.33685 | 3 | 4.60E-05 | 0.92 | 4.92 | - | 1031.5 |
| AHQ-7-11, 4280 - 4339        | K.YISLYTYNVEAGKDDYVK.A                                                  | 2156.37637 | 2 | 1.75E-06 | 0.93 | 4.46 | - | 882.8  |
| AHQ-7-11, 4338 - 4352        | K.YISLYTYNVEAGKDDYVK.A                                                  | 2156.37637 | 3 | 2.46E-05 | 0.75 | 3.47 | - | 584.4  |
| glj11761631[ref]NP_005132.1] | fibrinogen, beta chain preproprotein [Homo sapiens]                     |            |   |          |      |      |   |        |
| AHQ-7-7, 2466 - 2536         | K.AHYGGFTVQNEANK.Y                                                      | 1536.63020 | 2 | 1.59E-10 | 0.94 | 4.10 | - | 1116.2 |
| AHQ-7-10, 2385               | K.AHYGGFTVQNEANK.Y                                                      | 1536.63020 | 2 | 6.91E-07 | 0.89 | 3.27 | - | 947.8  |
| AHQ-7-6, 2402                | K.AHYGGFTVQNEANK.Y                                                      | 1536.63020 | 2 | 3.67E-12 | 0.94 | 4.54 | - | 1000.3 |
| AHQ-7-6, 2518                | K.AHYGGFTVQNEANK.Y                                                      | 1536.63020 | 2 | 2.01E-08 | 0.95 | 4.03 | - | 1243.7 |
| AHQ-7-11, 2394               | K.AHYGGFTVQNEANK.Y                                                      | 1536.63020 | 2 | 4.25E-04 | 0.93 | 3.75 | - | 1110.3 |
| AHQ-7-9, 2326                | K.AHYGGFTVQNEANK.Y                                                      | 1536.63020 | 2 | 1.49E-05 | 0.90 | 3.13 | - | 908.5  |
| AHQ-7-7, 2348                | K.AHYGGFTVQNEANK.Y                                                      | 1536.63020 | 2 | 3.01E-05 | 0.95 | 3.80 | - | 1248.0 |
| AHQ-7-7, 6318                | K.APDAGGCLHAPDLGVLCPTGCQLQEQALLQQRPIR.N                                 | 3961.41191 | 3 | 6.04E-06 | 0.83 | 3.97 | - | 471.6  |
| AHQ-7-9, 3729 - 3782         | K.DNENVNVEYSSELEK.H                                                     | 1769.80167 | 2 | 1.97E-05 | 0.60 | 2.91 | - | 493.4  |
| AHQ-7-10, 3841               | K.DNENVNVEYSSELEK.H                                                     | 1769.80167 | 2 | 8.04E-12 | 0.92 | 4.14 | - | 836.1  |
| AHQ-7-4, 4208                | K.DNENVNVEYSSELEK.H                                                     | 1769.80167 | 2 | 4.54E-05 | 0.83 | 3.61 | - | 653.6  |
| AHQ-7-8, 4000 - 4066         | K.DNENVNVEYSSELEK.H                                                     | 1769.80167 | 2 | 2.57E-05 | 0.79 | 3.39 | - | 607.7  |
| AHQ-7-11, 3239               | K.DNENVNVEYSSELEK.H                                                     | 1769.80167 | 2 | 2.09E-04 | 0.57 | 2.98 | - | 385.8  |
| AHQ-7-11, 3903               | K.DNENVNVEYSSELEK.H                                                     | 1769.80167 | 2 | 6.95E-09 | 0.86 | 3.86 | - | 754.3  |
| AHQ-7-6, 4053 - 4117         | K.DNENVNVEYSSELEK.H                                                     | 1769.80167 | 2 | 1.69E-07 | 0.86 | 3.58 | - | 752.7  |
| AHQ-7-7, 4204 - 4273         | K.DNENVNVEYSSELEK.H                                                     | 1769.80167 | 2 | 9.74E-08 | 0.96 | 5.51 | - | 753.7  |
| AHQ-7-7, 4120 - 4201         | K.DNENVNVEYSSELEK.H                                                     | 1769.80167 | 2 | 6.99E-12 | 0.77 | 3.56 | - | 568.9  |
| AHQ-7-6, 4178 - 4237         | K.DNENVNVEYSSELEK.H                                                     | 1769.80167 | 2 | 2.63E-09 | 0.92 | 4.49 | - | 808.0  |
| AHQ-7-7, 3397                | K.DNENVNVEYSSELEK.H                                                     | 1769.80167 | 2 | 1.40E-05 | 0.56 | 2.82 | - | 578.8  |
| AHQ-7-7, 3518 - 3580         | K.DNENVNVEYSSELEK.H                                                     | 1769.80167 | 2 | 4.57E-05 | 0.82 | 3.58 | - | 701.1  |
| AHQ-7-13, 4110 - 4173        | K.DNENVNVEYSSELEK.H                                                     | 1769.80167 | 2 | 1.25E-04 | 0.87 | 4.09 | - | 684.9  |
| AHQ-7-7, 3993 - 4056         | K.DNENVNVEYSSELEK.H                                                     | 1769.80167 | 2 | 1.94E-07 | 0.94 | 4.08 | - | 1043.0 |
| AHQ-7-6, 3601                | K.EDGGGWYNYR.C                                                          | 1240.26508 | 2 | 2.02E-05 | 0.64 | 2.60 | - | 511.4  |
| AHQ-7-11, 3486               | K.EDGGGWYNYR.C                                                          | 1240.26508 | 2 | 3.43E-04 | 0.59 | 2.56 | - | 388.2  |
| AHQ-7-7, 3556 - 3620         | K.EDGGGWYNYR.C                                                          | 1240.26508 | 2 | 2.57E-04 | 0.70 | 2.67 | - | 519.3  |
| AHQ-7-6, 3339 - 3414         | R.EEAPSLRPAPPISGGGYR.A                                                  | 1952.15981 | 3 | 4.22E-04 | 0.77 | 3.35 | - | 584.1  |
| AHQ-7-6, 3397                | R.EEAPSLRPAPPISGGGYR.A                                                  | 1952.15981 | 2 | 1.53E-04 | 0.40 | 2.92 | - | 233.7  |
| AHQ-7-8, 4052                | K.GGETSEMYLIQPDSSVKPYR.V                                                | 2258.49373 | 2 | 1.58E-05 | 0.82 | 3.69 | - | 543.9  |
| AHQ-7-7, 4014                | K.GGETSEM*YLIQPDSSVKPYR.V                                               | 2274.49313 | 2 | 7.30E-04 | 0.20 | 2.99 | - | 195.6  |
| AHQ-7-7, 4001 - 4008         | K.GGETSEMYLIQPDSSVKPYR.V                                                | 2258.49373 | 3 | 2.46E-06 | 0.94 | 4.70 | - | 1464.7 |
| AHQ-7-6, 4090                | K.GGETSEMYLIQPDSSVKPYR.V                                                | 2258.49373 | 2 | 1.31E-05 | 0.89 | 4.21 | - | 642.3  |
| AHQ-7-6, 4081                | K.GGETSEMYLIQPDSSVKPYR.V                                                | 2258.49373 | 3 | 4.68E-08 | 0.92 | 4.31 | - | 1068.0 |
| AHQ-7-7, 3992                | K.GGETSEMYLIQPDSSVKPYR.V                                                | 2258.49373 | 2 | 2.22E-04 | 0.82 | 3.89 | - | 615.0  |
| AHQ-7-6, 4291                | K.HGTDDGVVMMNWK.G                                                       | 1545.70374 | 2 | 7.19E-09 | 0.96 | 4.42 | - | 1348.2 |
| AHQ-7-7, 4176 - 4248         | K.HGTDDGVVMMNWK.G                                                       | 1545.70374 | 2 | 2.79E-05 | 0.95 | 4.15 | - | 1159.6 |
| AHQ-7-6, 6113                | R.KAPDAGGCLHAPDLGVLCPTGCQLQEQALLQQR.P                                   | 3723.12454 | 3 | 2.99E-06 | 0.97 | 7.22 | - | 1302.7 |
| AHQ-7-8, 6146                | R.KAPDAGGCLHAPDLGVLCPTGCQLQEQALLQQR.P                                   | 3723.12454 | 3 | 1.14E-07 | 0.90 | 3.91 | - | 1013.0 |
| AHQ-7-7, 6030 - 6092         | R.KAPDAGGCLHAPDLGVLCPTGCQLQEQALLQQR.P                                   | 4089.58482 | 3 | 2.52E-04 | 0.71 | 3.90 | - | 254.1  |
| AHQ-7-6, 6079 - 6081         | R.KAPDAGGCLHAPDLGVLCPTGCQLQEQALLQQRPIR.N                                | 4089.58482 | 3 | 1.50E-05 | 0.89 | 4.96 | - | 392.4  |
| AHQ-7-7, 3696                | R.KGGETSEMYLIQPDSSVKPYR.V                                               | 2386.66664 | 3 | 5.33E-06 | 0.72 | 3.23 | - | 581.4  |
| AHQ-7-8, 3558                | R.KGGETSEMYLIQPDSSVKPYR.V                                               | 2386.66664 | 3 | 2.53E-04 | 0.79 | 3.57 | - | 544.5  |
| AHQ-7-8, 3560                | R.KGGETSEMYLIQPDSSVKPYR.V                                               | 2386.66664 | 2 | 3.13E-04 | 0.88 | 3.65 | - | 907.0  |
| AHQ-7-6, 3310                | R.KGGETSEM*YLIQPDSSVKPYR.V                                              | 2402.66604 | 3 | 1.64E-10 | 0.89 | 4.50 | - | 873.6  |
| AHQ-7-7, 3632 - 3640         | R.KGGETSEMYLIQPDSSVKPYR.V                                               | 2386.66664 | 2 | 2.51E-04 | 0.84 | 3.61 | - | 502.8  |
| AHQ-7-6, 3722 - 3723         | R.KGGETSEM*YLIQPDSSVKPYR.V                                              | 2402.66604 | 3 | 9.03E-04 | 0.79 | 3.43 | - | 938.4  |
| AHQ-7-7, 3553 - 3633         | R.KGGETSEMYLIQPDSSVKPYR.V                                               | 2386.66664 | 3 | 4.05E-04 | 0.81 | 4.37 | - | 444.0  |
| AHQ-7-8, 3230                | R.KGGETSEM*YLIQPDSSVKPYR.V                                              | 2402.66604 | 3 | 8.84E-04 | 0.82 | 3.89 | - | 652.0  |
| AHQ-7-7, 3216                | R.KGGETSEM*YLIQPDSSVKPYR.V                                              | 2402.66604 | 3 | 1.06E-04 | 0.84 | 3.83 | - | 905.9  |
| AHQ-7-6, 2909                | K.KREEAPSLRPAPPISGGGYR.A                                                | 2236.51908 | 3 | 1.55E-09 | 0.94 | 4.67 | - | 1205.1 |
| AHQ-7-7, 3249 - 3326         | K.LESDVSAQMEYCR.T                                                       | 1589.73005 | 2 | 2.02E-07 | 0.91 | 3.44 | - | 1233.8 |
| AHQ-7-7, 3414                | K.LESDVSAQMEYCR.T                                                       | 1589.73005 | 2 | 1.49E-04 | 0.77 | 2.57 | - | 732.2  |
| AHQ-7-7, 2529                | K.LESDVSAQMEYCR.T                                                       | 1605.72945 | 2 | 5.00E-05 | 0.90 | 3.47 | - | 817.0  |
| AHQ-7-7, 3785                | K.LESDVSAQMEYCR.T                                                       | 1589.73005 | 2 | 1.49E-07 | 0.89 | 3.27 | - | 773.4  |
| AHQ-7-8, 2567                | K.LESDVSAQMEYCR.T                                                       | 1605.72945 | 2 | 7.55E-09 | 0.91 | 3.69 | - | 946.1  |
| AHQ-7-6, 2575 - 2577         | K.LESDVSAQMEYCR.T                                                       | 1605.72945 | 2 | 8.19E-08 | 0.94 | 4.20 | - | 945.4  |
| AHQ-7-11, 5790 - 5855        | R.M*GPTLLIEMEDWK.G                                                      | 1708.97776 | 2 | 2.00E-04 | 0.69 | 2.72 | - | 809.8  |
| AHQ-7-8, 6232                | R.M*GPTLLIEMEDWK.G                                                      | 1708.97776 | 2 | 2.00E-07 | 0.96 | 4.58 | - | 1431.0 |
| AHQ-7-11, 4547               | R.M*GPTLLIEMEDWK.G                                                      | 1724.97716 | 2 | 4.85E-04 | 0.81 | 3.23 | - | 578.4  |
| AHQ-7-7, 6196                | R.M*GPTLLIEMEDWK.G                                                      | 1708.97776 | 2 | 4.26E-04 | 0.87 | 3.58 | - | 833.7  |
| AHQ-7-6, 6177                | R.M*GPTLLIEMEDWK.G                                                      | 1708.97776 | 2 | 1.71E-04 | 0.82 | 2.95 | - | 922.5  |
| AHQ-7-7, 5172                | R.MGPTLLIEMEDWK.G                                                       | 1708.97776 | 2 | 8.53E-04 | 0.58 | 2.66 | - | 454.4  |
| AHQ-7-7, 6364                | R.MGPTLLIEMEDWK.G                                                       | 1692.97836 | 2 | 3.79E-04 | 0.96 | 4.43 | - | 1579.9 |
| AHQ-7-7, 6429 - 6498         | R.NSDVDELNNVEAVSQTSSSFQYMYLLK.D                                         | 3169.42237 | 3 | 5.03E-06 | 0.93 | 5.17 | - | 936.8  |
| AHQ-7-7, 6556 - 6626         | R.NSDVDELNNVEAVSQTSSSFQYMYLLK.D                                         | 3169.42237 | 3 | 1.03E-04 | 0.90 | 4.61 | - | 914.9  |
| AHQ-7-7, 5117 - 5185         | K.NYCGLPGEYWLGNDK.I                                                     | 1787.92994 | 2 | 1.95E-04 | 0.85 | 3.59 | - | 400.6  |
| AHQ-7-6, 5774                | K.NYCGLPGEYWLGNDK.IQLTR.M                                               | 2486.74455 | 2 | 2.47E-08 | 0.75 | 2.86 | - | 479.3  |

|                              |                                                                         |            |   |          |       |        |       |          |
|------------------------------|-------------------------------------------------------------------------|------------|---|----------|-------|--------|-------|----------|
| AHQ-7-7, 5772 - 5797         | K.NYCGLPGEYWLGNKDISQLTR.M                                               | 2486.74455 | 2 | 5.28E-07 | 0.90  | 4.04   | -     | 711.6    |
| AHQ-7-6, 2213                | K.QGFGNVAINTDQK.N                                                       | 1309.36716 | 2 | 4.80E-05 | 0.71  | 2.93   | -     | 530.1    |
| AHQ-7-3, 3879                | R.TPCTVSCNIPVVSQK.E                                                     | 1621.85811 | 2 | 2.25E-04 | 0.80  | 3.20   | -     | 591.4    |
| AHQ-7-8, 3776                | R.TPCTVSCNIPVVSQK.E                                                     | 1621.85811 | 2 | 1.02E-05 | 0.87  | 4.18   | -     | 422.3    |
| AHQ-7-7, 3724                | R.TPCTVSCNIPVVSQK.E                                                     | 1621.85811 | 2 | 9.70E-04 | 0.89  | 3.55   | -     | 641.2    |
| AHQ-7-7, 4682 - 4689         | R.TPCTVSCNIPVVSQK.E                                                     | 2552.88440 | 3 | 1.10E-11 | 0.96  | 5.11   | -     | 1475.5   |
| AHQ-7-6, 4877                | R.TPCTVSCNIPVVSQK.E                                                     | 2552.88440 | 2 | 2.30E-08 | 0.70  | 3.14   | -     | 359.8    |
| AHQ-7-7, 4780 - 4784         | R.TPCTVSCNIPVVSQK.E                                                     | 2552.88440 | 2 | 1.98E-07 | 0.59  | 2.96   | -     | 368.0    |
| AHQ-7-8, 4828                | R.TPCTVSCNIPVVSQK.E                                                     | 2552.88440 | 3 | 8.42E-08 | 0.91  | 3.97   | -     | 1206.9   |
| AHQ-7-7, 4776 - 4804         | R.TPCTVSCNIPVVSQK.E                                                     | 2552.88440 | 3 | 1.03E-05 | 0.95  | 4.83   | -     | 1196.2   |
| AHQ-7-7, 4406                | R.TPCTVSCNIPVVSQK.E                                                     | 2681.05731 | 3 | 2.87E-06 | 0.70  | 3.73   | -     | 329.7    |
| AHQ-7-8, 3963                | R.VYCDM*NTENGWTVIQNR.Q                                                  | 2175.34493 | 2 | 1.17E-05 | 0.86  | 3.80   | -     | 615.4    |
| AHQ-7-6, 4039                | R.VYCDM*NTENGWTVIQNR.Q                                                  | 2175.34493 | 2 | 8.60E-06 | 0.88  | 3.71   | -     | 948.3    |
| AHQ-7-8, 4438 - 4514         | R.VYCDM*NTENGWTVIQNR.Q                                                  | 2159.34553 | 2 | 1.64E-09 | 0.97  | 4.82   | -     | 1461.0   |
| AHQ-7-7, 4513 - 4588         | R.VYCDM*NTENGWTVIQNR.Q                                                  | 2159.34553 | 2 | 1.59E-09 | 0.97  | 4.86   | -     | 1566.2   |
| AHQ-7-7, 4342                | R.VYCDM*NTENGWTVIQNR.Q                                                  | 2159.34553 | 2 | 1.39E-05 | 0.92  | 3.65   | -     | 998.1    |
| AHQ-7-7, 4033                | R.VYCDM*NTENGWTVIQNR.Q                                                  | 2175.34493 | 2 | 1.92E-08 | 0.92  | 4.19   | -     | 1104.3   |
| AHQ-7-7, 3878 - 3952         | R.VYCDM*NTENGWTVIQNR.Q                                                  | 2175.34493 | 2 | 9.99E-09 | 0.95  | 4.36   | -     | 1164.1   |
| AHQ-7-6, 4423 - 4486         | R.VYCDM*NTENGWTVIQNR.Q                                                  | 2159.34553 | 2 | 3.71E-10 | 0.95  | 4.72   | -     | 931.4    |
| AHQ-7-6, 4558 - 4630         | R.VYCDM*NTENGWTVIQNR.Q                                                  | 2159.34553 | 2 | 2.52E-06 | 0.84  | 3.40   | -     | 733.7    |
| AHQ-7-7, 4424 - 4454         | R.VYCDM*NTENGWTVIQNR.Q                                                  | 2159.34553 | 2 | 1.52E-09 | 0.94  | 4.76   | -     | 865.6    |
| AHQ-7-6, 3933 - 3941         | R.VYCDM*NTENGWTVIQNR.Q                                                  | 2175.34493 | 2 | 6.58E-08 | 0.95  | 4.52   | -     | 1036.1   |
| AHQ-7-7, 4370 - 4396         | R.YYWGQYTWDM*AK.H                                                       | 1685.83949 | 2 | 2.53E-04 | 0.94  | 3.89   | -     | 1123.7   |
| AHQ-7-11, 4719               | R.YYWGQYTWDM*AK.H                                                       | 1669.84009 | 2 | 1.70E-08 | 0.84  | 2.96   | -     | 950.7    |
| AHQ-7-6, 5034                | R.YYWGQYTWDM*AK.H                                                       | 1669.84009 | 2 | 1.44E-10 | 0.95  | 4.05   | -     | 1210.6   |
| AHQ-7-6, 4457                | R.YYWGQYTWDM*AK.H                                                       | 1685.83949 | 2 | 8.92E-06 | 0.93  | 3.58   | -     | 980.2    |
| AHQ-7-14-, 4918 - 4925       | R.YYWGQYTWDM*AK.H                                                       | 1669.84009 | 2 | 7.16E-06 | 0.97  | 3.87   | -     | 2036.1   |
| AHQ-7-7, 4928 - 4956         | R.YYWGQYTWDM*AK.H                                                       | 1669.84009 | 2 | 2.95E-04 | 0.94  | 3.62   | -     | 1218.1   |
| gj4505877[ref][NP_000436.1]  | plectin 1, intermediate filament binding protein 500kDa; plectin 1, int |            |   | 4.02E-12 | 9.78  | 110.24 | 3.40  | 518488.0 |
| AHQ-7-2, 5147                | R.APVPASELLASGVLRS.A                                                    | 1567.81193 | 2 | 2.90E-09 | 0.94  | 3.87   | -     | 1055.9   |
| AHQ-7-3, 5040                | R.APVPASELLASGVLRS.A                                                    | 1567.81193 | 2 | 3.41E-07 | 0.93  | 3.62   | -     | 1015.6   |
| AHQ-7-1, 5049                | R.APVPASELLASGVLRS.A                                                    | 1567.81193 | 2 | 2.61E-05 | 0.86  | 3.29   | -     | 686.8    |
| AHQ-7-1, 3644                | K.AQVEQLTLLR.L                                                          | 1288.43253 | 2 | 2.28E-07 | 0.84  | 3.12   | -     | 667.8    |
| AHQ-7-2, 3332                | K.AYSDPSTGEPATYQELQQR.C                                                 | 2071.14682 | 2 | 4.02E-12 | 0.95  | 4.67   | -     | 767.6    |
| AHQ-7-3, 5401                | R.DPYSGGTISLQAMQK.G                                                     | 1773.98806 | 2 | 2.55E-04 | 0.93  | 3.74   | -     | 1293.4   |
| AHQ-7-2, 5441 - 5484         | R.DPYTGQSVSLFQALK.K                                                     | 1654.84491 | 2 | 6.53E-05 | 0.92  | 3.99   | -     | 978.3    |
| AHQ-7-1, 5783 - 5791         | K.EQELQQLTQQEQSVLDQLR.G                                                 | 2314.49541 | 2 | 6.24E-06 | 0.95  | 4.73   | -     | 1204.4   |
| AHQ-7-7, 3945                | R.LLDPEDVLPPOPDEK.S                                                     | 1709.83251 | 2 | 4.43E-04 | 0.68  | 3.05   | -     | 734.2    |
| AHQ-7-1, 3841                | K.NLLDEELQR.L                                                           | 1130.23352 | 2 | 7.92E-04 | 0.79  | 3.12   | -     | 714.1    |
| AHQ-7-1, 4273                | R.SIQEELQLR.Q                                                           | 1244.37976 | 2 | 4.13E-05 | 0.91  | 3.40   | -     | 1510.7   |
| AHQ-7-1, 4351                | R.SQVEELFSVR.V                                                          | 1323.43374 | 2 | 2.22E-05 | 0.93  | 3.72   | -     | 1153.3   |
| AHQ-7-1, 5064                | K.VQSGSESVIQEYVDLR.T                                                    | 1809.95530 | 2 | 4.90E-06 | 0.94  | 4.23   | -     | 1079.6   |
| gj4758086[ref][NP_004069.1]  | cysteine and glycine-rich protein 1; cysteine-rich protein; LIM-domain  |            |   | 4.04E-12 | 6.61  | 70.25  | 50.30 | 20567.3  |
| AHQ-7-11, 4043               | K.GFGGQAGALVHSE                                                         | 1434.53788 | 2 | 3.97E-07 | 0.96  | 4.41   | -     | 1102.0   |
| AHQ-7-13, 4321               | K.GFGGQAGALVHSE                                                         | 1434.53788 | 2 | 8.61E-04 | 0.86  | 3.07   | -     | 925.4    |
| AHQ-7-12, 4080               | K.GFGGQAGALVHSE                                                         | 1434.53788 | 2 | 6.57E-07 | 0.90  | 3.08   | -     | 1083.5   |
| AHQ-7-13-, 4183 - 4188       | K.GFGGQAGALVHSE                                                         | 1434.53788 | 2 | 8.00E-05 | 0.95  | 4.37   | -     | 1194.3   |
| AHQ-7-11, 3210 - 3266        | K.GLESTTLADKGEIYCK.G                                                    | 1902.06957 | 2 | 5.97E-09 | 0.96  | 4.81   | -     | 1257.4   |
| AHQ-7-11, 2564               | K.GYGYGQAGTLSTDK.G                                                      | 1475.54194 | 2 | 4.04E-12 | 0.95  | 3.95   | -     | 1114.6   |
| AHQ-7-13-, 3600              | K.GYGYGQAGTLSTDKGSLGIK.H                                                | 2160.32665 | 3 | 5.98E-09 | 0.79  | 3.15   | -     | 604.9    |
| AHQ-7-11, 3463               | K.GYGYGQAGTLSTDKGSLGIK.H                                                | 2160.32665 | 3 | 1.39E-08 | 0.83  | 3.68   | -     | 788.6    |
| AHQ-7-12, 3506 - 3507        | K.GYGYGQAGTLSTDKGSLGIK.H                                                | 2160.32665 | 2 | 6.30E-11 | 0.94  | 4.41   | -     | 909.4    |
| AHQ-7-11, 3462 - 3464        | K.GYGYGQAGTLSTDKGSLGIK.H                                                | 2160.32665 | 2 | 3.70E-11 | 0.94  | 5.07   | -     | 623.2    |
| AHQ-7-13, 3727               | K.GYGYGQAGTLSTDKGSLGIK.H                                                | 2160.32665 | 2 | 1.17E-04 | 0.75  | 3.36   | -     | 488.8    |
| AHQ-7-13, 3721               | K.GYGYGQAGTLSTDKGSLGIK.H                                                | 2160.32665 | 3 | 1.20E-10 | 0.79  | 3.80   | -     | 498.0    |
| AHQ-7-11, 3416               | K.NLDSTTVAVHGEEIYCK.S                                                   | 1938.10514 | 2 | 1.14E-09 | 0.96  | 5.04   | -     | 968.8    |
| AHQ-7-11, 4604               | K.SCFCLMVCK.K                                                           | 1208.47423 | 2 | 1.81E-04 | 0.91  | 3.61   | -     | 682.9    |
| AHQ-7-11, 4031               | K.TVYFAEEVQCEGNSFHK.S                                                   | 2047.19015 | 2 | 2.55E-05 | 0.83  | 3.89   | -     | 516.3    |
| AHQ-7-11, 3839               | K.TVYFAEEVQCEGNSFHK.S                                                   | 2047.19015 | 2 | 3.95E-09 | 0.94  | 4.52   | -     | 929.3    |
| gj13562114[ref][NP_110400.1] | beta tubulin 1, class VI [Homo sapiens]                                 |            |   | 4.07E-12 | 18.66 | 210.37 | 60.50 | 50326.6  |
| AHQ-7-3, 6148                | R.ALSVAELTQQMFDAR.N                                                     | 1680.90740 | 2 | 8.75E-04 | 0.87  | 3.55   | -     | 1146.2   |
| AHQ-7-9, 5564 - 5572         | R.ALSVAELTQQMFDAR.N                                                     | 1680.90740 | 2 | 3.78E-05 | 0.91  | 3.39   | -     | 1319.2   |
| AHQ-7-8, 6152                | R.ALSVAELTQQMFDAR.N                                                     | 1680.90740 | 2 | 1.74E-04 | 0.91  | 3.75   | -     | 1347.0   |
| AHQ-7-8, 4620                | R.ALSVAELTQQM*FDAR.N                                                    | 1696.90680 | 2 | 5.93E-06 | 0.95  | 4.10   | -     | 1581.2   |
| AHQ-7-10, 5643 - 5721        | R.ALSVAELTQQMFDAR.N                                                     | 1680.90740 | 2 | 9.42E-05 | 0.70  | 3.14   | -     | 730.6    |
| AHQ-7-7, 6121 - 6129         | R.ALSVAELTQQMFDAR.N                                                     | 1680.90740 | 2 | 1.67E-06 | 0.96  | 5.14   | -     | 1370.3   |
| AHQ-7-7, 3766                | K.AVLEEDDEVTEEAEMEPEDKGH                                                | 2516.58847 | 3 | 1.47E-05 | 0.28  | 3.05   | -     | 231.9    |
| AHQ-7-13-, 3532 - 3533       | K.AVLEEDDEVTEEAEMEPEDKGH                                                | 2516.58847 | 3 | 1.10E-06 | 0.85  | 3.77   | -     | 723.6    |
| AHQ-7-8, 4127                | R.AVLVDLEPGTMD*SIK.S                                                    | 1632.86102 | 2 | 1.20E-04 | 0.72  | 3.39   | -     | 449.3    |
| AHQ-7-13, 4854               | R.AVLVDLEPGTMD*SIK.S                                                    | 1616.86162 | 2 | 6.22E-06 | 0.94  | 3.86   | -     | 1088.7   |
| AHQ-7-12, 4614 - 4616        | R.AVLVDLEPGTMD*SIK.S                                                    | 1616.86162 | 2 | 1.07E-05 | 0.69  | 3.00   | -     | 478.1    |
| AHQ-7-12, 3696 - 3758        | R.EIVHIQIQCGGNQIGAK.F                                                   | 1867.11965 | 2 | 3.55E-04 | 0.93  | 4.09   | -     | 898.7    |
| AHQ-7-7, 3880                | R.EIVHIQIQCGGNQIGAK.F                                                   | 1867.11965 | 3 | 4.78E-04 | 0.82  | 3.50   | -     | 834.2    |
| AHQ-7-14, 4665               | R.EIVHIQIQCGGNQIGAK.F                                                   | 1867.11965 | 2 | 3.81E-05 | 0.92  | 4.52   | -     | 704.3    |
| AHQ-7-14-, 3894              | R.EIVHIQIQCGGNQIGAK.F                                                   | 1867.11965 | 3 | 7.54E-05 | 0.80  | 3.19   | -     | 1063.8   |
| AHQ-7-7, 3889                | R.EIVHIQIQCGGNQIGAK.F                                                   | 1867.11965 | 2 | 7.04E-05 | 0.76  | 3.32   | -     | 522.9    |
| AHQ-7-13-, 5025              | K.FWEMIGEEHGIDL*AGSDR.G                                                 | 2063.23616 | 2 | 2.70E-07 | 0.98  | 5.82   | -     | 2211.7   |
| AHQ-7-14-, 4547              | K.FWEMIGEEHGIDL*AGSDR.G                                                 | 2079.23556 | 2 | 3.44E-05 | 0.93  | 3.83   | -     | 769.5    |
| AHQ-7-7, 5129                | K.FWEMIGEEHGIDL*AGSDR.G                                                 | 2063.23616 | 2 | 6.67E-06 | 0.96  | 4.77   | -     | 1256.8   |
| AHQ-7-13-, 4941 - 5017       | K.FWEMIGEEHGIDL*AGSDR.G                                                 | 2063.23616 | 3 | 3.07E-08 | 0.90  | 3.56   | -     | 1168.8   |
| AHQ-7-14-, 5029              | K.FWEMIGEEHGIDL*AGSDR.G                                                 | 2063.23616 | 2 | 2.62E-04 | 0.98  | 5.55   | -     | 1775.6   |
| AHQ-7-14-, 5033 - 5034       | K.FWEMIGEEHGIDL*AGSDR.G                                                 | 2063.23616 | 3 | 3.74E-09 | 0.95  | 4.64   | -     | 1369.9   |
| AHQ-7-13, 6313 - 6315        | K.GHYTEGAELIEN*VLEVR.H                                                  | 2029.23935 | 3 | 1.08E-04 | 0.87  | 3.80   | -     | 1420.0   |
| AHQ-7-13, 6314               | K.GHYTEGAELIEN*VLEVR.H                                                  | 2029.23935 | 2 | 8.80E-09 | 0.98  | 6.45   | -     | 2264.0   |
| AHQ-7-7, 6608                | K.GHYTEGAELIEN*VLEVR.H                                                  | 2029.23935 | 3 | 4.51E-05 | 0.93  | 4.68   | -     | 1899.7   |
| AHQ-7-8, 6622                | K.GHYTEGAELIEN*VLEVR.H                                                  | 2029.23935 | 2 | 1.20E-06 | 0.98  | 6.36   | -     | 2237.7   |
| AHQ-7-12, 6136               | K.GHYTEGAELIEN*VLEVR.H                                                  | 2029.23935 | 2 | 5.38E-08 | 0.98  | 6.31   | -     | 2635.3   |
| AHQ-7-13-, 6316              | K.GHYTEGAELIEN*VLEVR.H                                                  | 2029.23935 | 3 | 4.24E-04 | 0.89  | 4.26   | -     | 1627.4   |
| AHQ-7-13-, 6319 - 6320       | K.GHYTEGAELIEN*VLEVR.H                                                  | 2029.23935 | 2 | 4.07E-12 | 0.99  | 7.33   | -     | 2369.9   |
| AHQ-7-11, 6168               | K.GHYTEGAELIEN*VLEVR.H                                                  | 2029.23935 | 3 | 8.49E-04 | 0.69  | 3.10   | -     | 1045.8   |
| AHQ-7-14-, 6297              | K.GHYTEGAELIEN*VLEVR.H                                                  | 2029.23935 | 3 | 3.46E-05 | 0.90  | 4.33   | -     | 1554.2   |
| AHQ-7-11, 6107 - 6163        | K.GHYTEGAELIEN*VLEVR.H                                                  | 2029.23935 | 2 | 4.16E-06 | 0.97  | 4.89   | -     | 1803.5   |
| AHQ-7-10, 6067               | K.GHYTEGAELIEN*VLEVR.H                                                  | 2029.23935 | 2 | 2.30E-05 | 0.95  | 4.74   | -     | 1210.2   |
| AHQ-7-9, 6004                | K.GHYTEGAELIEN*VLEVR.H                                                  | 2029.23935 | 3 | 5.12E-06 | 0.83  | 3.37   | -     | 1176.9   |
| AHQ-7-7, 6604 - 6669         | K.GHYTEGAELIEN*VLEVR.H                                                  | 2029.23935 | 2 | 7.42E-11 | 0.98  | 5.97   | -     | 2211.2   |
| AHQ-7-14-, 6298              | K.GHYTEGAELIEN*VLEVR.H                                                  | 2029.23935 | 2 | 6.10E-05 | 0.98  | 6.28   | -     | 2514.9   |
| AHQ-7-9, 5780 - 5794         | R.GLSM*AATFIGNNTAIQEIFNR.V                                              | 2285.56551 | 2 | 6.78E-04 | 0.92  | 4.48   | -     | 697.9    |
| AHQ-7-13-, 6087 - 6121       | R.GLSM*AATFIGNNTAIQEIFNR.V                                              | 2285.56551 | 2 | 7.04E-04 | 0.71  | 3.63   | -     | 460.5    |
| AHQ-7-14-, 6057 - 6086       | R.GLSM*AATFIGNNTAIQEIFNR.V                                              | 2285.56551 | 2 | 7.76E-06 | 0.96  | 5.91   | -     | 942.4    |
| AHQ-7-7, 6345 - 6382         | R.GLSM*AATFIGNNTAIQEIFNR.V                                              | 2285.56551 | 2 | 3.19E-05 | 0.94  | 4.88   | -     | 745.3    |
| AHQ-7-7, 6125 - 6137         | R.HESESCDCLQGFQIVHSLGGGTGSGMGLLNMNK.I                                   | 3511.88634 | 3 | 8.53E-09 | 0.98  | 6.63   | -     | 1979.6   |
| AHQ-7-7, 3800 - 3868         | R.IMNSFVMPSPK.V                                                         | 1338.62160 | 2 | 5.53E-08 | 0.94  | 3.56   | -     | 1371.7   |
| AHQ-7-7, 3132                | R.ISVYNEAYGR.K                                                          | 1335.44622 | 2 | 6.41E-08 | 0.91  | 3.30   | -     | 1065.2   |
| AHQ-7-14-, 3230              | R.ISVYNEAYGR.K                                                          | 1335.44622 | 1 | 1.37E-04 | 0.12  | 1.90   | -     | 91.1     |
| AHQ-7-14-, 3235              | R.ISVYNEAYGR.K                                                          | 1335.44622 | 2 | 1.62E-07 | 0.92  | 3.29   | -     | 1137.5   |
| AHQ-7-11, 3134               | R.ISVYNEAYGR.K                                                          | 1335.44622 | 2 | 4.42E-06 | 0.91  | 3.08   | -     | 1118.9   |
| AHQ-7-14, 4089 - 4145        | R.ISVYNEAYGR.K                                                          | 1335.44622 | 2 | 5.27E-07 | 0.82  | 2.85   | -     | 713.3    |

|                            |                                                                         |            |   |          |       |        |       |         |
|----------------------------|-------------------------------------------------------------------------|------------|---|----------|-------|--------|-------|---------|
| AHQ-7-13-, 3367            | R.ISVYNEAYGR.K                                                          | 1335.44622 | 2 | 4.40E-06 | 0.89  | 2.71   | -     | 954.5   |
| AHQ-7-7, 4980              | K.LGALFOPDSFVHNSGAGNNWAK.G                                              | 2388.58260 | 2 | 3.93E-09 | 0.86  | 3.73   | -     | 765.5   |
| AHQ-7-7, 5094 - 5161       | K.LGALFOPDSFVHNSGAGNNWAK.G                                              | 2388.58260 | 2 | 3.86E-07 | 0.89  | 4.17   | -     | 959.1   |
| AHQ-7-13-, 4881 - 4939     | K.LGALFOPDSFVHNSGAGNNWAK.G                                              | 2388.58260 | 3 | 5.41E-06 | 0.84  | 4.15   | -     | 721.5   |
| AHQ-7-14-, 4970 - 5045     | R.LHFFMPGFAPLTAQGSQQYR.A                                                | 2313.62224 | 3 | 4.02E-07 | 0.98  | 6.16   | -     | 3076.0  |
| AHQ-7-8, 5727              | R.LHFFMPGFAPLTAQGSQQYR.A                                                | 2297.62284 | 2 | 2.64E-06 | 0.79  | 3.62   | -     | 328.3   |
| AHQ-7-11, 5455             | R.LHFFMPGFAPLTAQGSQQYR.A                                                | 2297.62284 | 2 | 2.22E-06 | 0.92  | 4.19   | -     | 603.0   |
| AHQ-7-9, 5262              | R.LHFFMPGFAPLTAQGSQQYR.A                                                | 2297.62284 | 2 | 1.04E-05 | 0.93  | 4.71   | -     | 529.1   |
| AHQ-7-13, 5129 - 5130      | R.LHFFMPGFAPLTAQGSQQYR.A                                                | 2313.62224 | 3 | 5.96E-09 | 0.96  | 5.60   | -     | 1323.2  |
| AHQ-7-7, 5754              | R.LHFFMPGFAPLTAQGSQQYR.A                                                | 2297.62284 | 3 | 8.38E-07 | 0.97  | 6.08   | -     | 2022.6  |
| AHQ-7-8, 5731              | R.LHFFMPGFAPLTAQGSQQYR.A                                                | 2297.62284 | 3 | 1.80E-06 | 0.95  | 4.95   | -     | 1325.3  |
| AHQ-7-7, 5025              | R.LHFFMPGFAPLTAQGSQQYR.A                                                | 2297.62284 | 2 | 6.13E-05 | 0.96  | 5.25   | -     | 745.0   |
| AHQ-7-14-, 6227            | K.LTTPPTYGDLNHLVSLTM*SGITTSR.F                                          | 2709.06919 | 3 | 2.09E-05 | 0.89  | 3.74   | -     | 1195.9  |
| AHQ-7-9, 6126              | K.LTTPPTYGDLNHLVSLTM*SGITTSR.F                                          | 2693.06979 | 2 | 1.39E-10 | 0.94  | 4.88   | -     | 813.0   |
| AHQ-7-9, 5918 - 5980       | K.LTTPPTYGDLNHLVSLTM*SGITTSR.F                                          | 2709.06919 | 3 | 7.55E-04 | 0.83  | 3.77   | -     | 1045.4  |
| AHQ-7-8, 6818              | K.LTTPPTYGDLNHLVSLTM*SGITTSR.F                                          | 2693.06979 | 2 | 1.91E-07 | 0.88  | 3.96   | -     | 702.3   |
| AHQ-7-8, 6814 - 6819       | K.LTTPPTYGDLNHLVSLTM*SGITTSR.F                                          | 2693.06979 | 3 | 2.29E-06 | 0.94  | 5.52   | -     | 934.8   |
| AHQ-7-7, 6796              | K.LTTPPTYGDLNHLVSLTM*SGITTSR.F                                          | 2693.06979 | 2 | 3.38E-09 | 0.95  | 5.43   | -     | 768.7   |
| AHQ-7-7, 6557              | K.LTTPPTYGDLNHLVSLTM*SGITTSR.F                                          | 2693.06979 | 3 | 7.02E-06 | 0.82  | 3.86   | -     | 643.0   |
| AHQ-7-9, 6128              | K.LTTPPTYGDLNHLVSLTM*SGITTSR.F                                          | 2693.06979 | 3 | 5.56E-06 | 0.96  | 5.12   | -     | 1477.4  |
| AHQ-7-9, 4788 - 4848       | R.NSSCFVEWIPNNVK.V                                                      | 1695.87718 | 2 | 3.67E-05 | 0.81  | 3.26   | -     | 730.0   |
| AHQ-7-7, 5202 - 5276       | R.NSSCFVEWIPNNVK.V                                                      | 1695.87718 | 2 | 3.08E-04 | 0.42  | 2.83   | -     | 357.9   |
| AHQ-7-13, 5239             | R.YLTVACIFR.G                                                           | 1144.36822 | 2 | 2.76E-04 | 0.80  | 2.74   | -     | 560.8   |
| AHQ-7-7, 5132 - 5153       | R.YLTVACIFR.G                                                           | 1144.36822 | 2 | 2.14E-06 | 0.95  | 3.65   | -     | 1021.9  |
| gi 4758606 ref NP_004508.1 | integrin-linked kinase [Homo sapiens]                                   |            |   | 4.87E-12 | 11.34 | 130.29 | 27.40 | 51418.9 |
| AHQ-7-7, 5465              | R.EVFPADLSNMEIGMK.V                                                     | 1681.95558 | 2 | 5.44E-04 | 0.82  | 3.08   | -     | 438.2   |
| AHQ-7-11, 4843             | R.EVFPADLSNMEIGMK.V                                                     | 1697.95498 | 2 | 4.66E-04 | 0.46  | 2.53   | -     | 249.9   |
| AHQ-7-7, 5046 - 5052       | R.EVFPADLSNMEIGMK.V                                                     | 1697.95498 | 2 | 2.78E-07 | 0.89  | 4.19   | -     | 637.3   |
| AHQ-7-7, 4433              | K.FDMIVPILEK.M                                                          | 1221.49108 | 2 | 5.07E-07 | 0.85  | 3.34   | -     | 744.1   |
| AHQ-7-7, 5528              | K.FDMIVPILEK.M                                                          | 1205.49168 | 2 | 3.60E-04 | 0.92  | 3.38   | -     | 1005.4  |
| AHQ-7-7, 2066 - 2136       | R.GDDTPLHLAASHGHR.D                                                     | 1584.67809 | 2 | 1.14E-07 | 0.91  | 3.75   | -     | 988.0   |
| AHQ-7-7, 2138              | R.GDDTPLHLAASHGHR.D                                                     | 1584.67809 | 3 | 1.86E-09 | 0.90  | 3.62   | -     | 1231.3  |
| AHQ-7-7, 5026              | R.GM*AFHLTLEPLIPR.H                                                     | 1611.93301 | 2 | 2.50E-04 | 0.90  | 3.51   | -     | 717.8   |
| AHQ-7-7, 5820              | R.GMAFLHTLEPLIPR.H                                                      | 1595.93361 | 2 | 2.13E-07 | 0.96  | 3.94   | -     | 1633.2  |
| AHQ-7-8, 5774 - 5843       | R.GMAFLHTLEPLIPR.H                                                      | 1595.93361 | 2 | 6.16E-05 | 0.88  | 3.60   | -     | 756.6   |
| AHQ-7-7, 2316              | K.LNENHSGELWK.G                                                         | 1327.42732 | 2 | 4.24E-05 | 0.94  | 3.42   | -     | 1570.7  |
| AHQ-7-7, 5872 - 5873       | R.LWLDNTENDLNQGGDDHGFSPHWACR.E                                          | 3113.28217 | 3 | 9.00E-08 | 0.96  | 5.79   | -     | 1218.3  |
| AHQ-7-7, 5957              | R.LWLDNTENDLNQGGDDHGFSPHWACR.E                                          | 3113.28217 | 3 | 4.87E-12 | 0.94  | 5.04   | -     | 1063.2  |
| AHQ-7-7, 4624              | R.MYAPAWVAPEALQK.K                                                      | 1575.85602 | 2 | 1.80E-07 | 0.94  | 3.57   | -     | 1180.8  |
| AHQ-7-13, 4278 - 4343      | R.M*YAPAWVAPEALQK.K                                                     | 1591.85542 | 2 | 1.59E-05 | 0.78  | 2.77   | -     | 640.2   |
| AHQ-7-11, 4116             | R.M*YAPAWVAPEALQK.K                                                     | 1591.85542 | 2 | 4.65E-04 | 0.72  | 3.28   | -     | 365.6   |
| AHQ-7-7, 1921              | K.SRDFNEECPRL                                                           | 1311.36321 | 2 | 8.26E-04 | 0.79  | 2.68   | -     | 497.8   |
| AHQ-7-7, 2886 - 2897       | R.WQNDIVVK.V                                                            | 1059.20012 | 1 | 1.15E-05 | 0.71  | 2.30   | -     | 753.3   |
| gi 1798600 ref NP_005505.2 | major histocompatibility complex, class I, B; HLA class I histocompati  |            |   | 5.32E-12 | 0.95  | 10.24  | 3.90  | 40459.8 |
| AHQ-7-8, 4718              | R.APWIEQGEPEYVDR.N                                                      | 1776.88556 | 2 | 5.32E-12 | 0.95  | 4.74   | -     | 906.1   |
| gi 7661678 ref NP_056461.1 | RAP1B, member of RAS oncogene family; K-REV; RAS-related protein RAP1B  |            |   | 5.41E-12 | 4.25  | 50.31  | 26.60 | 20824.7 |
| AHQ-7-14-, 5106            | R.KQVEVDAQQCM*LEILDATAGTEQFTAM*R.D                                      | 3147.50488 | 3 | 1.41E-10 | 0.96  | 5.36   | -     | 1558.8  |
| AHQ-7-11, 4959 - 5035      | R.KQVEVDAQQCM*LEILDATAGTEQFTAM*R.D                                      | 3147.50488 | 3 | 4.32E-06 | 0.94  | 4.72   | -     | 1363.5  |
| AHQ-7-11, 3988 - 4046      | R.QWNNCAFLESSAK.S                                                       | 1556.68148 | 2 | 1.13E-04 | 0.44  | 2.75   | -     | 210.5   |
| AHQ-7-11, 3680 - 3682      | R.VKDTRDVPMLVGNK.C                                                      | 1644.91497 | 3 | 1.01E-04 | 0.96  | 4.49   | -     | 2093.6  |
| AHQ-7-13-, 3860            | R.VKDTRDVPMLVGNK.C                                                      | 1644.91497 | 2 | 7.55E-07 | 0.96  | 4.43   | -     | 1633.8  |
| AHQ-7-13, 3999             | R.VKDTRDVPMLVGNK.C                                                      | 1644.91497 | 2 | 5.85E-06 | 0.85  | 3.36   | -     | 1115.2  |
| AHQ-7-6, 3819              | R.VKDTRDVPMLVGNK.C                                                      | 1644.91497 | 2 | 4.21E-04 | 0.85  | 3.23   | -     | 1020.3  |
| AHQ-7-13-, 3863            | R.VKDTRDVPMLVGNK.C                                                      | 1644.91497 | 3 | 1.89E-05 | 0.84  | 3.36   | -     | 1346.1  |
| AHQ-7-11, 3690             | R.VKDTRDVPMLVGNK.C                                                      | 1644.91497 | 2 | 5.76E-06 | 0.98  | 4.85   | -     | 2102.8  |
| AHQ-7-11, 4207 - 4266      | R.VKDTRDVPMLVGNKCDLEDER.V                                               | 2563.84420 | 3 | 5.41E-12 | 0.97  | 6.19   | -     | 1359.9  |
| AHQ-7-11, 4066 - 4131      | R.VKDTRDVPMLVGNKCDLEDER.V                                               | 2579.84360 | 3 | 2.44E-05 | 0.96  | 5.82   | -     | 1373.9  |
| AHQ-7-13-, 4160            | R.VKDTRDVPMLVGNKCDLEDER.V                                               | 2579.84360 | 3 | 2.59E-06 | 0.92  | 4.31   | -     | 1087.7  |
| AHQ-7-11, 4320 - 4383      | R.VKDTRDVPMLVGNKCDLEDER.V                                               | 2563.84420 | 3 | 1.06E-07 | 0.90  | 4.33   | -     | 916.0   |
| AHQ-7-11, 4240 - 4250      | R.VKDTRDVPMLVGNKCDLEDER.V                                               | 2563.84420 | 2 | 7.50E-05 | 0.87  | 3.34   | -     | 686.4   |
| gi 4557305 ref NP_000025.1 | aldolase A; fructose-bisphosphate aldolase; Aldolase A, fructose-bispho |            |   | 5.45E-12 | 7.66  | 90.29  | 45.10 | 39419.7 |
| AHQ-7-8, 5970 - 6004       | K.CPLLKPWALTFYGR.A                                                      | 1811.13929 | 2 | 1.02E-07 | 0.90  | 4.04   | -     | 595.4   |
| AHQ-7-9, 3948 - 4026       | K.FSHEEIAMATVTLR.R                                                      | 1676.91875 | 2 | 6.29E-08 | 0.90  | 3.56   | -     | 1047.7  |
| AHQ-7-13-, 4337            | K.FSHEEIAMATVTLR.R                                                      | 1676.91875 | 2 | 1.20E-05 | 0.42  | 2.53   | -     | 414.1   |
| AHQ-7-8, 4230 - 4234       | K.FSHEEIAMATVTLR.R                                                      | 1676.91875 | 2 | 5.45E-12 | 0.96  | 4.70   | -     | 1346.7  |
| AHQ-7-8, 4236              | K.FSHEEIAMATVTLR.R                                                      | 1676.91875 | 3 | 1.49E-06 | 0.48  | 3.05   | -     | 672.8   |
| AHQ-7-14-, 2978            | K.GILAADESTGSIAR.R                                                      | 1333.47008 | 2 | 5.36E-06 | 0.94  | 3.96   | -     | 1114.9  |
| AHQ-7-13-, 2973            | K.GILAADESTGSIAR.R                                                      | 1333.47008 | 2 | 2.20E-11 | 0.95  | 4.12   | -     | 1223.7  |
| AHQ-7-8, 2822              | K.GILAADESTGSIAR.R                                                      | 1333.47008 | 2 | 3.62E-10 | 0.96  | 4.17   | -     | 1608.3  |
| AHQ-7-9, 2764 - 2774       | K.GILAADESTGSIAR.R                                                      | 1333.47008 | 2 | 6.51E-08 | 0.92  | 3.97   | -     | 970.7   |
| AHQ-7-12, 2948             | K.GILAADESTGSIAR.R                                                      | 1333.47008 | 2 | 1.12E-06 | 0.89  | 3.02   | -     | 1097.6  |
| AHQ-7-8, 2826              | K.GILAADESTGSIAR.R                                                      | 1333.47008 | 1 | 3.16E-06 | 0.59  | 2.79   | -     | 412.6   |
| AHQ-7-13, 3141             | K.GILAADESTGSIAR.R                                                      | 1333.47008 | 2 | 5.22E-09 | 0.97  | 4.14   | -     | 1559.0  |
| AHQ-7-8, 4386 - 4415       | K.GVVPPLAGTNGETTTQGLDGLSER.C                                            | 2273.44329 | 2 | 7.30E-07 | 0.62  | 4.46   | -     | 323.9   |
| AHQ-7-11, 4311             | K.GVVPPLAGTNGETTTQGLDGLSER.C                                            | 2273.44329 | 2 | 7.11E-06 | 0.70  | 3.74   | -     | 567.5   |
| AHQ-7-9, 3889 - 3908       | K.GVVPPLAGTNGETTTQGLDGLSER.C                                            | 2273.44329 | 2 | 7.53E-04 | 0.56  | 3.45   | -     | 408.9   |
| AHQ-7-8, 4954              | K.IGEHTPSALAIMENANVLR.Y                                                 | 2108.40788 | 2 | 1.88E-11 | 0.97  | 5.35   | -     | 1039.2  |
| AHQ-7-9, 4961              | K.IGEHTPSALAIMENANVLR.Y                                                 | 2108.40788 | 2 | 3.48E-06 | 0.87  | 3.97   | -     | 561.6   |
| AHQ-7-8, 5282 - 5283       | K.IGEHTPSALAIMENANVLR.Y                                                 | 2108.40788 | 2 | 1.54E-07 | 0.97  | 5.76   | -     | 1021.6  |
| AHQ-7-8, 2679              | R.QLLLTADDR.V                                                           | 1045.17176 | 2 | 4.17E-06 | 0.73  | 2.66   | -     | 457.0   |
| AHQ-7-8, 5802 - 5867       | R.VNPCIQGVILFHETLYQK.A                                                  | 2090.43072 | 2 | 3.20E-04 | 0.94  | 4.45   | -     | 817.4   |
| AHQ-7-9, 5020              | R.YASICQNGIVPIVEPEILPDGDHDLKR.C                                         | 3179.54969 | 3 | 5.31E-04 | 0.71  | 3.38   | -     | 678.2   |
| AHQ-7-14-, 4399            | K.YTPSGQAAGAAASESLFVSNHAY                                               | 2229.34753 | 2 | 1.21E-05 | 0.73  | 2.97   | -     | 613.2   |
| AHQ-7-8, 4396 - 4475       | K.YTPSGQAAGAAASESLFVSNHAY                                               | 2229.34753 | 2 | 3.55E-09 | 0.88  | 3.73   | -     | 596.8   |
| gi 4505981 ref NP_002695.1 | pro-platelet basic protein (includes platelet basic protein, bet; Pro-p |            |   | 5.46E-12 | 8.33  | 100.30 | 50.80 | 13894.1 |
| AHQ-7-14, 5476 - 5536      | K.EESLSDLYAELR.C                                                        | 1540.61070 | 2 | 9.43E-08 | 0.80  | 2.68   | -     | 900.4   |
| AHQ-7-14-, 4455            | K.EESLSDLYAELR.C                                                        | 1540.61070 | 2 | 1.75E-04 | 0.89  | 3.40   | -     | 838.4   |
| AHQ-7-13, 4714 - 4722      | K.EESLSDLYAELR.C                                                        | 1540.61070 | 2 | 9.34E-05 | 0.83  | 3.67   | -     | 564.8   |
| AHQ-7-14-, 4319 - 4381     | K.EESLSDLYAELR.C                                                        | 1540.61070 | 2 | 1.50E-06 | 0.88  | 3.35   | -     | 696.3   |
| AHQ-7-14-, 4515 - 4591     | K.EESLSDLYAELR.C                                                        | 1540.61070 | 2 | 1.92E-06 | 0.96  | 4.32   | -     | 1426.0  |
| AHQ-7-14-, 4810 - 4811     | K.GKEESLSDLYAELR.C                                                      | 1725.83517 | 2 | 1.33E-08 | 0.95  | 4.01   | -     | 1501.3  |
| AHQ-7-12, 3976 - 4046      | K.GKEESLSDLYAELR.C                                                      | 1725.83517 | 2 | 7.68E-09 | 0.96  | 4.37   | -     | 1466.1  |
| AHQ-7-14-, 4397            | K.GKEESLSDLYAELR.C                                                      | 1725.83517 | 2 | 3.27E-11 | 0.97  | 4.83   | -     | 2119.0  |
| AHQ-7-13, 4293             | K.GKEESLSDLYAELR.C                                                      | 1725.83517 | 3 | 1.54E-05 | 0.87  | 4.31   | -     | 844.9   |
| AHQ-7-14-, 4554            | K.GKEESLSDLYAELR.C                                                      | 1725.83517 | 2 | 5.46E-12 | 0.99  | 6.07   | -     | 3061.7  |
| AHQ-7-14-, 4306            | K.GKEESLSDLYAELR.C                                                      | 1725.83517 | 2 | 7.18E-06 | 0.97  | 4.09   | -     | 2046.5  |
| AHQ-7-14-, 4217 - 4291     | K.GKEESLSDLYAELR.C                                                      | 1725.83517 | 3 | 1.55E-06 | 0.90  | 4.60   | -     | 935.8   |
| AHQ-7-14-, 4213 - 4286     | K.GKEESLSDLYAELR.C                                                      | 1725.83517 | 2 | 9.84E-12 | 0.98  | 5.18   | -     | 1984.5  |
| AHQ-7-14-, 4169 - 4225     | K.GKEESLSDLYAELR.C                                                      | 1725.83517 | 2 | 5.82E-09 | 0.98  | 6.05   | -     | 2546.3  |
| AHQ-7-14-, 4105 - 4161     | K.GKEESLSDLYAELR.C                                                      | 1725.83517 | 3 | 2.38E-07 | 0.92  | 4.43   | -     | 1179.7  |
| AHQ-7-14-, 4042 - 4098     | K.GKEESLSDLYAELR.C                                                      | 1725.83517 | 3 | 2.47E-04 | 0.74  | 3.11   | -     | 936.5   |
| AHQ-7-14-, 4021 - 4087     | K.GKEESLSDLYAELR.C                                                      | 1725.83517 | 2 | 3.21E-10 | 0.98  | 5.89   | -     | 2414.4  |
| AHQ-7-14, 4733 - 4788      | K.GKEESLSDLYAELR.C                                                      | 1725.83517 | 2 | 7.60E-10 | 0.97  | 5.22   | -     | 1533.3  |
| AHQ-7-14, 4844 - 4900      | K.GKEESLSDLYAELR.C                                                      | 1725.83517 | 2 | 1.71E-10 | 0.98  | 5.52   | -     | 2385.5  |
| AHQ-7-14, 4958 - 5016      | K.GKEESLSDLYAELR.C                                                      | 1725.83517 | 2 | 1.38E-09 | 0.98  | 5.61   | -     | 3085.2  |
| AHQ-7-14, 4993 - 5049      | K.GKEESLSDLYAELR.C                                                      | 1725.83517 | 3 | 8.84E-06 | 0.86  | 4.30   | -     | 743.7   |
| AHQ-7-14-, 3903 - 3982     | K.GKEESLSDLYAELR.C                                                      | 1725.83517 | 3 | 3.05E-07 | 0.92  | 4.65   | -     | 926.5   |

|                                                                                        |                                |            |   |          |      |       |       |         |
|----------------------------------------------------------------------------------------|--------------------------------|------------|---|----------|------|-------|-------|---------|
| AHQ-7-14, 5056 - 5112                                                                  | K.GKEESLSDLYAELR.C             | 1725.83517 | 2 | 4.07E-11 | 0.98 | 5.81  | -     | 2594.8  |
| AHQ-7-14, 5108 - 5164                                                                  | K.GKEESLSDLYAELR.C             | 1725.83517 | 3 | 4.88E-07 | 0.88 | 4.17  | -     | 860.3   |
| AHQ-7-14, 5168 - 5230                                                                  | K.GKEESLSDLYAELR.C             | 1725.83517 | 2 | 4.60E-11 | 0.98 | 5.43  | -     | 2621.8  |
| AHQ-7-14, 5260 - 5317                                                                  | K.GKEESLSDLYAELR.C             | 1725.83517 | 2 | 1.22E-08 | 0.98 | 4.99  | -     | 2306.8  |
| AHQ-7-14, 5373 - 5453                                                                  | K.GKEESLSDLYAELR.C             | 1725.83517 | 2 | 3.61E-09 | 0.97 | 5.06  | -     | 1970.0  |
| AHQ-7-1, 4363 - 4388                                                                   | K.GKEESLSDLYAELR.C             | 1725.83517 | 2 | 3.90E-05 | 0.94 | 3.90  | -     | 1320.9  |
| AHQ-7-14, 5478 - 5549                                                                  | K.GKEESLSDLYAELR.C             | 1725.83517 | 2 | 1.14E-07 | 0.97 | 4.88  | -     | 2034.1  |
| AHQ-7-14, 3901 - 3961                                                                  | K.GKEESLSDLYAELR.C             | 1725.83517 | 2 | 7.86E-12 | 0.98 | 6.03  | -     | 1942.8  |
| AHQ-7-14, 5610 - 5668                                                                  | K.GKEESLSDLYAELR.C             | 1725.83517 | 2 | 8.26E-06 | 0.96 | 4.72  | -     | 1369.1  |
| AHQ-7-14, 3766                                                                         | K.GKEESLSDLYAELR.C             | 1725.83517 | 2 | 1.28E-06 | 0.95 | 4.30  | -     | 1281.1  |
| AHQ-7-14, 4927                                                                         | K.GKEESLSDLYAELR.C             | 1725.83517 | 2 | 3.15E-05 | 0.83 | 3.44  | -     | 847.6   |
| AHQ-7-13, 4163                                                                         | K.GKEESLSDLYAELR.C             | 1725.83517 | 2 | 3.28E-10 | 0.98 | 5.10  | -     | 2274.1  |
| AHQ-7-13, 4164 - 4168                                                                  | K.GKEESLSDLYAELR.C             | 1725.83517 | 3 | 6.31E-04 | 0.90 | 3.91  | -     | 1145.6  |
| AHQ-7-14, 4707                                                                         | K.GKEESLSDLYAELRCM*CIK.T       | 2436.72245 | 3 | 7.65E-06 | 0.90 | 4.39  | -     | 814.9   |
| AHQ-7-13, 3335 - 3408                                                                  | K.GTHCNQVEIATLK.D              | 1571.78073 | 2 | 1.16E-05 | 0.95 | 4.34  | -     | 1071.4  |
| AHQ-7-14, 4536 - 4596                                                                  | K.GTHCNQVEIATLK.D              | 1571.78073 | 2 | 1.74E-04 | 0.98 | 5.70  | -     | 2263.2  |
| AHQ-7-14, 5481                                                                         | K.GTHCNQVEIATLK.D              | 1571.78073 | 2 | 5.32E-04 | 0.82 | 3.27  | -     | 874.6   |
| AHQ-7-13, 3565 - 3622                                                                  | K.GTHCNQVEIATLK.D              | 1571.78073 | 2 | 9.14E-04 | 0.93 | 3.86  | -     | 1118.0  |
| AHQ-7-14, 3926 - 3937                                                                  | K.GTHCNQVEIATLK.D              | 1571.78073 | 2 | 5.21E-04 | 0.95 | 4.60  | -     | 1072.4  |
| AHQ-7-14, 4298 - 4372                                                                  | K.GTHCNQVEIATLK.D              | 1571.78073 | 2 | 1.17E-06 | 0.97 | 4.93  | -     | 1895.3  |
| AHQ-7-14, 3665 - 3721                                                                  | K.GTHCNQVEIATLK.D              | 1571.78073 | 2 | 4.45E-08 | 0.98 | 4.82  | -     | 2026.7  |
| AHQ-7-14, 3570 - 3606                                                                  | K.GTHCNQVEIATLK.D              | 1571.78073 | 2 | 1.88E-05 | 0.97 | 4.42  | -     | 1697.2  |
| AHQ-7-14, 3351 - 3413                                                                  | K.GTHCNQVEIATLK.D              | 1571.78073 | 2 | 1.63E-09 | 0.97 | 4.67  | -     | 1558.2  |
| AHQ-7-14, 4652 - 4714                                                                  | K.GTHCNQVEIATLK.D              | 1571.78073 | 2 | 5.24E-06 | 0.97 | 4.66  | -     | 1792.6  |
| AHQ-7-14, 3446 - 3513                                                                  | K.GTHCNQVEIATLK.D              | 1571.78073 | 2 | 1.10E-07 | 0.97 | 4.55  | -     | 1550.5  |
| AHQ-7-14, 3783 - 3842                                                                  | K.GTHCNQVEIATLK.D              | 1571.78073 | 2 | 5.86E-05 | 0.98 | 4.89  | -     | 2157.9  |
| AHQ-7-14, 3202                                                                         | K.GTHCNQVEIATLKDGGR.K          | 1900.10650 | 2 | 3.76E-11 | 0.98 | 6.09  | -     | 1886.8  |
| AHQ-7-14, 4068 - 4129                                                                  | K.GTHCNQVEIATLKDGGR.K          | 1900.10650 | 3 | 4.01E-05 | 0.93 | 4.63  | -     | 839.3   |
| AHQ-7-14, 3122 - 3181                                                                  | K.GTHCNQVEIATLKDGGR.K          | 1900.10650 | 3 | 1.95E-06 | 0.96 | 4.59  | -     | 1581.8  |
| AHQ-7-14, 3110 - 3190                                                                  | K.GTHCNQVEIATLKDGGR.K          | 1900.10650 | 2 | 3.02E-08 | 0.98 | 5.41  | -     | 1598.1  |
| AHQ-7-14, 3241 - 3266                                                                  | K.GTHCNQVEIATLKDGGR.K          | 1900.10650 | 3 | 8.37E-12 | 0.96 | 4.91  | -     | 1658.8  |
| AHQ-7-14, 3347                                                                         | K.GTHCNQVEIATLKDGGR.K          | 1900.10650 | 3 | 1.13E-09 | 0.93 | 4.30  | -     | 1226.1  |
| AHQ-7-14, 2799 - 2859                                                                  | K.ICLDPDAPR.I                  | 1058.19059 | 2 | 1.05E-04 | 0.74 | 2.51  | -     | 839.8   |
| AHQ-7-14, 3688 - 3758                                                                  | K.ICLDPDAPR.I                  | 1058.19059 | 2 | 2.75E-04 | 0.40 | 2.66  | -     | 473.7   |
| AHQ-7-13, 3122                                                                         | K.ICLDPDAPR.I                  | 1058.19059 | 2 | 1.18E-04 | 0.81 | 3.01  | -     | 976.3   |
| AHQ-7-14, 3801 - 3856                                                                  | K.ICLDPDAPR.I                  | 1058.19059 | 2 | 1.47E-04 | 0.89 | 3.95  | -     | 855.0   |
| AHQ-7-14, 2918 - 2989                                                                  | K.ICLDPDAPR.I                  | 1058.19059 | 2 | 4.19E-04 | 0.83 | 2.99  | -     | 917.3   |
| AHQ-7-14, 3468 - 3536                                                                  | R.KICLDPDAPR.I                 | 1186.36350 | 2 | 3.39E-04 | 0.92 | 3.69  | -     | 1028.1  |
| AHQ-7-14, 2605 - 2665                                                                  | R.KICLDPDAPR.I                 | 1186.36350 | 2 | 2.78E-05 | 0.90 | 3.25  | -     | 1078.0  |
| AHQ-7-14, 2734 - 2798                                                                  | R.KICLDPDAPR.I                 | 1186.36350 | 2 | 7.46E-05 | 0.84 | 3.02  | -     | 805.4   |
| AHQ-7-14, 3356 - 3412                                                                  | R.KICLDPDAPR.I                 | 1186.36350 | 2 | 1.59E-05 | 0.81 | 2.95  | -     | 832.7   |
| AHQ-7-13, 2865                                                                         | R.KICLDPDAPR.I                 | 1186.36350 | 2 | 2.89E-04 | 0.41 | 2.58  | -     | 371.4   |
| AHQ-7-13, 2676                                                                         | R.KICLDPDAPR.I                 | 1186.36350 | 2 | 7.67E-05 | 0.90 | 3.55  | -     | 959.4   |
| AHQ-7-14, 4240 - 4296                                                                  | K.NIQSLEVIQK.G                 | 1101.27845 | 2 | 1.28E-06 | 0.91 | 3.84  | -     | 803.2   |
| AHQ-7-14, 4352 - 4433                                                                  | K.NIQSLEVIQK.G                 | 1101.27845 | 2 | 2.01E-05 | 0.81 | 2.97  | -     | 689.9   |
| AHQ-7-14, 4082                                                                         | K.NIQSLEVIQK.G                 | 1101.27845 | 2 | 9.73E-04 | 0.89 | 2.98  | -     | 1249.4  |
| AHQ-7-14, 4071                                                                         | K.NIQSLEVIQK.G                 | 1101.27845 | 1 | 7.10E-04 | 0.34 | 2.17  | -     | 498.1   |
| AHQ-7-14, 3703                                                                         | K.NIQSLEVIQK.G                 | 1101.27845 | 1 | 2.79E-04 | 0.81 | 2.70  | -     | 928.8   |
| AHQ-7-14, 4994                                                                         | K.NIQSLEVIQK.G                 | 1101.27845 | 1 | 1.24E-04 | 0.79 | 2.93  | -     | 685.6   |
| AHQ-7-14, 3647 - 3706                                                                  | K.NIQSLEVIQK.G                 | 1101.27845 | 2 | 2.59E-06 | 0.89 | 2.82  | -     | 1215.5  |
| AHQ-7-14, 3397 - 3457                                                                  | K.NIQSLEVIQK.G                 | 1101.27845 | 2 | 2.57E-05 | 0.91 | 3.62  | -     | 900.3   |
| AHQ-7-14, 4515 - 4591                                                                  | K.RNLAKGKEESLSDLYAELR.C        | 2308.53401 | 3 | 3.64E-04 | 0.65 | 3.06  | -     | 491.4   |
| AHQ-7-14, 3626                                                                         | K.TTSGIHPKNIQLEVIQK.G          | 1923.20305 | 3 | 1.66E-05 | 0.61 | 3.10  | -     | 488.4   |
| gi 5031973 ref NP_005733.1  protein disulfide isomerase-related protein [Homo sapiens] |                                |            |   | 5.71E-12 | 5.51 | 60.30 | 20.70 | 48121.0 |
| AHQ-7-7, 6828 - 6830                                                                   | R.ALDFSDNAPPPELLEINEDIAK.R     | 2638.95072 | 3 | 1.79E-09 | 0.97 | 6.01  | -     | 1683.8  |
| AHQ-7-7, 6697                                                                          | R.DGELPVEDDIDLSDVELDLGLKDEL    | 2759.86565 | 2 | 5.71E-12 | 0.96 | 5.08  | -     | 1152.2  |
| AHQ-7-7, 4729 - 4732                                                                   | K.GSFSEQGINEFLR.E              | 1484.59520 | 2 | 2.56E-04 | 0.82 | 2.67  | -     | 812.4   |
| AHQ-7-7, 3957                                                                          | R.GSTAPYGGGAFPTIVER.E          | 1616.79990 | 2 | 8.87E-04 | 0.88 | 3.32  | -     | 988.9   |
| AHQ-7-7, 4704                                                                          | K.LAAVDATVYNQVLAASR.Y          | 1528.73579 | 2 | 2.55E-05 | 0.94 | 4.04  | -     | 1127.4  |
| AHQ-7-13, 5886                                                                         | R.TGEAIVDAALSALR.Q             | 1387.56411 | 2 | 1.67E-05 | 0.95 | 3.99  | -     | 1778.2  |
| AHQ-7-7, 6029 - 6044                                                                   | R.TGEAIVDAALSALR.Q             | 1387.56411 | 2 | 8.76E-08 | 0.95 | 4.03  | -     | 1688.5  |
| gi 4507729 ref NP_001060.1  tubulin, beta polypeptide [Homo sapiens]                   |                                |            |   | 7.13E-12 | 7.88 | 90.38 | 28.10 | 49906.7 |
| AHQ-7-13, 4653 - 4715                                                                  | R.AILLDEPGTMDSVR.S             | 1616.86162 | 2 | 2.99E-05 | 0.81 | 3.75  | -     | 405.8   |
| AHQ-7-14, 5957                                                                         | K.GHYTEGAELVDSVLDVVR.K         | 1960.13388 | 2 | 1.94E-08 | 0.98 | 6.26  | -     | 2659.2  |
| AHQ-7-13, 6018 - 6031                                                                  | K.GHYTEGAELVDSVLDVVR.K         | 1960.13388 | 3 | 1.91E-04 | 0.91 | 4.79  | -     | 1097.6  |
| AHQ-7-12, 5808                                                                         | K.GHYTEGAELVDSVLDVVR.K         | 1960.13388 | 2 | 9.87E-05 | 0.91 | 4.29  | -     | 819.9   |
| AHQ-7-7, 6192                                                                          | K.GHYTEGAELVDSVLDVVR.K         | 1960.13388 | 2 | 1.13E-05 | 0.98 | 6.42  | -     | 2743.5  |
| AHQ-7-10, 5729 - 5744                                                                  | K.GHYTEGAELVDSVLDVVR.K         | 1960.13388 | 2 | 2.79E-06 | 0.98 | 6.57  | -     | 2435.5  |
| AHQ-7-9, 5640                                                                          | K.GHYTEGAELVDSVLDVVR.K         | 1960.13388 | 2 | 9.75E-06 | 0.97 | 5.32  | -     | 1743.7  |
| AHQ-7-13, 5999                                                                         | K.GHYTEGAELVDSVLDVVR.K         | 1960.13388 | 2 | 8.62E-08 | 0.99 | 6.63  | -     | 2927.1  |
| AHQ-7-8, 6230                                                                          | K.GHYTEGAELVDSVLDVVR.K         | 1960.13388 | 2 | 4.84E-05 | 0.98 | 5.78  | -     | 2199.6  |
| AHQ-7-13, 6029                                                                         | K.GHYTEGAELVDSVLDVVR.K         | 1960.13388 | 2 | 2.87E-07 | 0.99 | 6.28  | -     | 3082.3  |
| AHQ-7-13, 4415                                                                         | R.ISEQFTAMFR.R                 | 1230.41818 | 2 | 5.44E-07 | 0.96 | 3.97  | -     | 1859.0  |
| AHQ-7-13, 4563                                                                         | R.ISEQFTAMFR.R                 | 1230.41818 | 2 | 5.07E-04 | 0.75 | 2.89  | -     | 742.2   |
| AHQ-7-13, 3781 - 3853                                                                  | R.ISEQFTAMFR.R                 | 1246.41758 | 2 | 1.05E-05 | 0.85 | 2.84  | -     | 844.6   |
| AHQ-7-14, 3622                                                                         | R.ISEQFTAMFR.R                 | 1246.41758 | 2 | 2.13E-06 | 0.93 | 3.65  | -     | 1234.5  |
| AHQ-7-9, 6061                                                                          | K.LTTPPTYGDLNHLVSATMSGVTTCLR.F | 2711.06527 | 2 | 5.03E-06 | 0.78 | 3.07  | -     | 569.0   |
| AHQ-7-7, 6024                                                                          | K.LTTPPTYGDLNHLVSATMSGVTTCLR.F | 2727.06467 | 3 | 2.01E-05 | 0.79 | 3.20  | -     | 1064.0  |
| AHQ-7-9, 6060 - 6062                                                                   | K.LTTPPTYGDLNHLVSATMSGVTTCLR.F | 2711.06527 | 3 | 8.08E-04 | 0.68 | 3.12  | -     | 885.3   |
| AHQ-7-8, 6736                                                                          | K.LTTPPTYGDLNHLVSATMSGVTTCLR.F | 2711.06527 | 3 | 4.67E-07 | 0.88 | 4.26  | -     | 1131.3  |
| AHQ-7-7, 6724                                                                          | K.LTTPPTYGDLNHLVSATMSGVTTCLR.F | 2711.06527 | 2 | 1.62E-07 | 0.95 | 5.10  | -     | 953.6   |
| AHQ-7-8, 6063                                                                          | K.LTTPPTYGDLNHLVSATMSGVTTCLR.F | 2711.06527 | 2 | 4.59E-04 | 0.84 | 3.75  | -     | 572.4   |
| AHQ-7-13, 6054 - 6066                                                                  | K.M*SATFIGNSTAIQELFK.R         | 1875.13550 | 2 | 5.20E-04 | 0.27 | 2.89  | -     | 347.4   |
| AHQ-7-7, 6282 - 6349                                                                   | K.M*SATFIGNSTAIQELFK.R         | 1875.13550 | 2 | 2.40E-10 | 0.74 | 4.10  | -     | 626.4   |
| AHQ-7-14, 5754 - 5821                                                                  | K.M*SATFIGNSTAIQELFK.R         | 1875.13550 | 2 | 6.25E-08 | 0.77 | 4.09  | -     | 786.8   |
| AHQ-7-14, 5990                                                                         | K.M*SATFIGNSTAIQELFK.R         | 1875.13550 | 2 | 4.67E-05 | 0.82 | 3.99  | -     | 820.0   |
| AHQ-7-13, 5397                                                                         | K.NSSYFVEWIPNNVK.T             | 1697.87148 | 2 | 1.85E-04 | 0.63 | 2.65  | -     | 600.1   |
| AHQ-7-12, 5078 - 5139                                                                  | K.NSSYFVEWIPNNVK.T             | 1697.87148 | 2 | 1.65E-04 | 0.89 | 3.96  | -     | 701.2   |
| AHQ-7-13, 5257 - 5317                                                                  | K.NSSYFVEWIPNNVK.T             | 1697.87148 | 2 | 2.68E-04 | 0.92 | 4.20  | -     | 848.2   |
| AHQ-7-7, 5436 - 5512                                                                   | K.NSSYFVEWIPNNVK.T             | 1697.87148 | 2 | 4.22E-08 | 0.73 | 3.25  | -     | 564.4   |
| AHQ-7-13, 5907 - 5971                                                                  | R.SGPPGQIFRPDNFVFGQSGAGNNWAK.G | 2800.03898 | 3 | 7.13E-12 | 0.98 | 7.56  | -     | 1863.0  |
| AHQ-7-9, 5608 - 5681                                                                   | R.SGPPGQIFRPDNFVFGQSGAGNNWAK.G | 2800.03898 | 3 | 8.39E-07 | 0.84 | 4.43  | -     | 810.6   |
| AHQ-7-13, 6027 - 6093                                                                  | R.SGPPGQIFRPDNFVFGQSGAGNNWAK.G | 2800.03898 | 3 | 1.54E-09 | 0.97 | 6.21  | -     | 1422.4  |
| AHQ-7-8, 6190 - 6260                                                                   | R.SGPPGQIFRPDNFVFGQSGAGNNWAK.G | 2800.03898 | 2 | 8.93E-07 | 0.90 | 4.17  | -     | 792.0   |
| AHQ-7-7, 6180 - 6245                                                                   | R.SGPPGQIFRPDNFVFGQSGAGNNWAK.G | 2800.03898 | 2 | 5.93E-04 | 0.96 | 5.71  | -     | 1017.6  |
| AHQ-7-7, 6102 - 6170                                                                   | R.SGPPGQIFRPDNFVFGQSGAGNNWAK.G | 2800.03898 | 3 | 3.62E-06 | 0.97 | 6.47  | -     | 1719.3  |
| AHQ-7-13, 5962 - 5997                                                                  | R.SGPPGQIFRPDNFVFGQSGAGNNWAK.G | 2800.03898 | 3 | 4.03E-05 | 0.95 | 4.73  | -     | 1698.0  |
| gi 4557697 ref NP_000412.1  keratin 10; Keratin-10 [Homo sapiens]                      |                                |            |   | 8.19E-12 | 4.56 | 50.23 | 10.90 | 57247.1 |
| AHQ-7-1, 2987                                                                          | R.ALEESNYELEGK.I               | 1382.45482 | 2 | 2.21E-06 | 0.93 | 3.83  | -     | 1196.7  |
| AHQ-7-14, 2794                                                                         | R.ALEESNYELEGK.I               | 1382.45482 | 2 | 8.71E-06 | 0.91 | 3.67  | -     | 1024.3  |
| AHQ-7-5, 2759                                                                          | R.ALEESNYELEGK.I               | 1382.45482 | 2 | 1.22E-06 | 0.87 | 3.55  | -     | 836.4   |
| AHQ-7-13, 2795                                                                         | R.ALEESNYELEGK.I               | 1382.45482 | 2 | 4.83E-07 | 0.96 | 3.91  | -     | 1676.2  |
| AHQ-7-7, 2676                                                                          | R.ALEESNYELEGK.I               | 1382.45482 | 2 | 1.03E-06 | 0.87 | 3.18  | -     | 962.5   |
| AHQ-7-6, 2755                                                                          | R.ALEESNYELEGK.I               | 1382.45482 | 2 | 4.70E-04 | 0.83 | 2.96  | -     | 930.6   |
| AHQ-7-3, 2811                                                                          | R.ALEESNYELEGK.I               | 1382.45482 | 2 | 5.23E-06 | 0.90 | 3.55  | -     | 993.7   |
| AHQ-7-1, 5299                                                                          | K.ELTTEIDNIEQISSYK.S           | 1998.13406 | 2 | 3.24E-08 | 0.88 | 3.82  | -     | 764.0   |
| AHQ-7-1, 4551                                                                          | K.ELTTEIDNIEQISSYK.S           | 1998.13406 | 2 | 5.67E-11 | 0.89 | 3.92  | -     | 695.3   |



|                            |                                                                          |            |   |          |       |        |       |          |
|----------------------------|--------------------------------------------------------------------------|------------|---|----------|-------|--------|-------|----------|
| AHQ-7-7, 5265              | K.ELTTEIDNNIEQISSYK.S                                                    | 1998.13406 | 2 | 2.56E-06 | 0.88  | 3.90   | -     | 630.4    |
| AHQ-7-2, 5447              | K.ELTTEIDNNIEQISSYK.S                                                    | 1998.13406 | 2 | 1.85E-07 | 0.95  | 4.68   | -     | 1017.8   |
| AHQ-7-14-, 4363            | K.ELTTEIDNNIEQISSYK.S                                                    | 1998.13406 | 2 | 2.48E-04 | 0.80  | 3.19   | -     | 640.5    |
| AHQ-7-5, 4120 - 4198       | K.GSLGGGFSGGGFSGGFSR.G                                                   | 1708.76962 | 2 | 8.61E-06 | 0.61  | 2.72   | -     | 611.7    |
| AHQ-7-3, 4223 - 4249       | K.GSLGGGFSGGGFSGGFSR.G                                                   | 1708.76962 | 2 | 2.51E-07 | 0.89  | 3.87   | -     | 651.5    |
| AHQ-7-2, 4313              | K.GSLGGGFSGGGFSGGFSR.G                                                   | 1708.76962 | 2 | 4.39E-09 | 0.81  | 3.17   | -     | 702.0    |
| AHQ-7-12, 3962             | K.GSLGGGFSGGGFSGGFSR.G                                                   | 1708.76962 | 2 | 2.77E-04 | 0.82  | 3.92   | -     | 411.1    |
| AHQ-7-13, 4209 - 4211      | K.GSLGGGFSGGGFSGGFSR.G                                                   | 1708.76962 | 2 | 7.55E-05 | 0.85  | 3.50   | -     | 650.4    |
| AHQ-7-14-, 4031 - 4041     | K.GSLGGGFSGGGFSGGFSR.G                                                   | 1708.76962 | 2 | 8.19E-12 | 0.91  | 4.65   | -     | 659.8    |
| AHQ-7-13-, 4075            | K.GSLGGGFSGGGFSGGFSR.G                                                   | 1708.76962 | 2 | 1.15E-10 | 0.93  | 4.08   | -     | 1054.4   |
| AHQ-7-1, 4260              | K.GSLGGGFSGGGFSGGFSR.G                                                   | 1708.76962 | 2 | 1.16E-06 | 0.83  | 3.62   | -     | 643.7    |
| AHQ-7-14-, 3258            | K.IRLENEIQTYR.S                                                          | 1435.61046 | 2 | 2.98E-07 | 0.92  | 3.88   | -     | 1047.6   |
| AHQ-7-1, 4999 - 5060       | K.SKELTTEIDNNIEQISSYK.S                                                  | 2213.38462 | 2 | 3.71E-04 | 0.88  | 4.09   | -     | 959.0    |
| AHQ-7-5, 5079              | K.SKELTTEIDNNIEQISSYK.S                                                  | 2213.38462 | 2 | 8.55E-04 | 0.70  | 2.97   | -     | 518.0    |
| gi 4504517 ref NP_001531.1 | heat shock 27kDa protein 1; heat shock 27kDa protein 1 [Homo sapiens] [M |            |   | 8.22E-12 | 4.71  | 60.29  | 45.40 | 22782.3  |
| AHQ-7-13-, 5316            | R.KYTLPPGVDPQTQVSSLSPEGLTVEAPMPK.L                                       | 3228.65914 | 3 | 2.47E-04 | 0.93  | 5.70   | -     | 1364.5   |
| AHQ-7-13, 5378             | R.KYTLPPGVDPQTQVSSLSPEGLTVEAPMPK.L                                       | 3228.65914 | 3 | 1.23E-04 | 0.90  | 5.31   | -     | 1185.7   |
| AHQ-7-14, 5776             | R.KYTLPPGVDPQTQVSSLSPEGLTVEAPM*PK.L                                      | 3244.65854 | 3 | 8.84E-04 | 0.72  | 4.17   | -     | 747.6    |
| AHQ-7-11, 5227             | R.KYTLPPGVDPQTQVSSLSPEGLTVEAPMPK.L                                       | 3228.65914 | 3 | 1.68E-06 | 0.90  | 5.83   | -     | 943.3    |
| AHQ-7-14-, 4657 - 4734     | K.LATQSNIEITPVTFESR.A                                                    | 1907.11412 | 2 | 4.11E-04 | 0.68  | 3.28   | -     | 405.7    |
| AHQ-7-13-, 4719            | K.LATQSNIEITPVTFESR.A                                                    | 1907.11412 | 2 | 4.02E-05 | 0.78  | 3.73   | -     | 338.0    |
| AHQ-7-13, 4741             | K.LATQSNIEITPVTFESR.A                                                    | 1907.11412 | 2 | 1.49E-04 | 0.54  | 2.80   | -     | 353.0    |
| AHQ-7-11, 4511 - 4566      | K.LATQSNIEITPVTFESR.A                                                    | 1907.11412 | 2 | 4.17E-08 | 0.58  | 2.87   | -     | 277.0    |
| AHQ-7-10, 4287             | R.LFDQAFGLPR.L                                                           | 1164.33793 | 2 | 1.51E-05 | 0.96  | 4.43   | -     | 1537.6   |
| AHQ-7-14-, 4586            | R.LFDQAFGLPR.L                                                           | 1164.33793 | 2 | 4.11E-07 | 0.96  | 3.73   | -     | 1446.3   |
| AHQ-7-11, 4382             | R.LFDQAFGLPR.L                                                           | 1164.33793 | 2 | 1.21E-06 | 0.96  | 3.97   | -     | 1504.8   |
| AHQ-7-11, 3968             | R.PLPPAAIESPAVAAPAYSR.A                                                  | 1879.14874 | 2 | 2.41E-04 | 0.58  | 2.64   | -     | 218.8    |
| AHQ-7-11, 4419             | R.VSLDVNHFAPDELTVK.T                                                     | 1784.99058 | 3 | 3.22E-09 | 0.79  | 3.67   | -     | 443.7    |
| AHQ-7-13-, 4495 - 4555     | R.VSLDVNHFAPDELTVK.T                                                     | 1784.99058 | 3 | 8.22E-12 | 0.97  | 4.98   | -     | 2157.2   |
| AHQ-7-13-, 4544 - 4551     | R.VSLDVNHFAPDELTVK.T                                                     | 1784.99058 | 3 | 1.31E-06 | 0.89  | 4.38   | -     | 494.3    |
| AHQ-7-10, 4431 - 4456      | R.VSLDVNHFAPDELTVK.T                                                     | 1784.99058 | 2 | 3.55E-06 | 0.69  | 3.26   | -     | 609.1    |
| AHQ-7-10, 4295             | R.VSLDVNHFAPDELTVK.T                                                     | 1784.99058 | 2 | 6.56E-08 | 0.95  | 4.72   | -     | 1184.6   |
| AHQ-7-14, 5446             | R.VSLDVNHFAPDELTVK.T                                                     | 1784.99058 | 2 | 3.23E-05 | 0.63  | 2.93   | -     | 526.0    |
| AHQ-7-11, 4370 - 4435      | R.VSLDVNHFAPDELTVK.T                                                     | 1784.99058 | 2 | 7.75E-08 | 0.97  | 5.14   | -     | 1445.4   |
| AHQ-7-11, 4572 - 4632      | R.VSLDVNHFAPDELTVK.T                                                     | 1784.99058 | 2 | 4.31E-07 | 0.93  | 4.34   | -     | 1003.1   |
| gi 4501893 ref NP_001094.1 | actinin, alpha 2 [Homo sapiens]                                          |            |   | 9.30E-12 | 9.01  | 110.24 | 13.00 | 103853.1 |
| AHQ-7-4, 4542              | K.AGTQIENIEEDFR.N                                                        | 1522.59861 | 2 | 3.41E-05 | 0.75  | 2.93   | -     | 723.4    |
| AHQ-7-12, 4970             | K.AGTQIENIEEDFRNGLK.L                                                    | 1935.08442 | 2 | 6.89E-05 | 0.16  | 2.62   | -     | 339.3    |
| AHQ-7-5, 4934              | K.CQLEINFNTLQTK.L                                                        | 1610.81373 | 2 | 9.43E-07 | 0.90  | 3.95   | -     | 776.5    |
| AHQ-7-4, 4416              | K.CQLEINFNTLQTK.L                                                        | 1610.81373 | 2 | 4.41E-06 | 0.70  | 2.70   | -     | 655.7    |
| AHQ-7-7, 4820 - 4828       | K.CQLEINFNTLQTK.L                                                        | 1610.81373 | 2 | 7.11E-04 | 0.70  | 3.37   | -     | 531.3    |
| AHQ-7-4, 5153              | K.CQLEINFNTLQTK.L                                                        | 1610.81373 | 2 | 1.63E-07 | 0.91  | 4.09   | -     | 700.7    |
| AHQ-7-5, 4844              | K.EGILLWCQR.K                                                            | 1176.37031 | 2 | 8.13E-07 | 0.89  | 3.17   | -     | 743.2    |
| AHQ-7-6, 4157              | R.FAIQDISVEETSAK.E                                                       | 1538.68108 | 2 | 2.62E-07 | 0.90  | 3.47   | -     | 953.2    |
| AHQ-7-4, 4240 - 4304       | R.FAIQDISVEETSAK.E                                                       | 1538.68108 | 2 | 8.46E-05 | 0.90  | 3.60   | -     | 1032.9   |
| AHQ-7-4, 4257              | R.FAIQDISVEETSAK.E                                                       | 1538.68108 | 2 | 5.41E-11 | 0.93  | 4.27   | -     | 927.8    |
| AHQ-7-8, 4039 - 4116       | R.FAIQDISVEETSAK.E                                                       | 1538.68108 | 2 | 7.97E-05 | 0.30  | 2.66   | -     | 319.9    |
| AHQ-7-10, 3919             | R.FAIQDISVEETSAK.E                                                       | 1538.68108 | 2 | 4.31E-05 | 0.93  | 3.30   | -     | 1325.9   |
| AHQ-7-11, 3976 - 3982      | R.FAIQDISVEETSAK.E                                                       | 1538.68108 | 2 | 9.30E-12 | 0.95  | 4.49   | -     | 1145.6   |
| AHQ-7-4, 4130 - 4156       | R.FAIQDISVEETSAK.E                                                       | 1538.68108 | 2 | 1.40E-04 | 0.96  | 3.79   | -     | 1775.1   |
| AHQ-7-7, 4092              | R.FAIQDISVEETSAK.E                                                       | 1538.68108 | 2 | 2.65E-07 | 0.89  | 3.25   | -     | 1043.4   |
| AHQ-7-5, 4228              | R.FAIQDISVEETSAK.E                                                       | 1538.68108 | 2 | 2.00E-09 | 0.93  | 3.81   | -     | 1346.4   |
| AHQ-7-13, 4241 - 4246      | R.FAIQDISVEETSAK.E                                                       | 1538.68108 | 2 | 7.01E-04 | 0.78  | 2.61   | -     | 1062.4   |
| AHQ-7-1, 4296              | R.FAIQDISVEETSAK.E                                                       | 1538.68108 | 2 | 9.13E-05 | 0.82  | 3.04   | -     | 810.3    |
| AHQ-7-4, 5482              | K.GYEEWLLNEIR.R                                                          | 1422.56701 | 2 | 1.93E-07 | 0.93  | 3.30   | -     | 1216.7   |
| AHQ-7-4, 5960 - 5984       | K.GYEEWLLNEIR.R                                                          | 1422.56701 | 2 | 3.14E-07 | 0.97  | 4.66   | -     | 1778.3   |
| AHQ-7-2, 5988              | K.GYEEWLLNEIR.R                                                          | 1422.56701 | 2 | 4.99E-05 | 0.74  | 2.66   | -     | 877.0    |
| AHQ-7-7, 5832              | K.GYEEWLLNEIR.R                                                          | 1422.56701 | 2 | 1.30E-06 | 0.87  | 3.31   | -     | 1071.0   |
| AHQ-7-6, 5817              | K.GYEEWLLNEIR.R                                                          | 1422.56701 | 2 | 1.91E-07 | 0.96  | 4.41   | -     | 1599.7   |
| AHQ-7-4, 6100              | K.GYEEWLLNEIR.R                                                          | 1422.56701 | 2 | 8.04E-07 | 0.91  | 3.53   | -     | 1184.6   |
| AHQ-7-5, 5936              | K.GYEEWLLNEIR.R                                                          | 1422.56701 | 1 | 4.88E-04 | 0.55  | 2.52   | -     | 361.0    |
| AHQ-7-5, 5918 - 5922       | K.GYEEWLLNEIR.R                                                          | 1422.56701 | 2 | 1.70E-05 | 0.90  | 3.74   | -     | 995.8    |
| AHQ-7-4, 1994              | K.HTNYTMEHR.V                                                            | 1302.44449 | 3 | 4.72E-04 | 0.79  | 3.34   | -     | 946.8    |
| AHQ-7-4, 2096 - 2168       | R.KHEAFESDLAAHQDR.V                                                      | 1754.84152 | 2 | 4.12E-08 | 0.93  | 4.10   | -     | 929.2    |
| AHQ-7-6, 2110              | R.KHEAFESDLAAHQDR.V                                                      | 1754.84152 | 2 | 4.22E-08 | 0.97  | 4.75   | -     | 1384.1   |
| AHQ-7-7, 2056              | R.KHEAFESDLAAHQDR.V                                                      | 1754.84152 | 2 | 1.39E-10 | 0.96  | 4.58   | -     | 1380.0   |
| AHQ-7-6, 2113              | R.KHEAFESDLAAHQDR.V                                                      | 1754.84152 | 3 | 1.07E-06 | 0.95  | 4.36   | -     | 1333.8   |
| AHQ-7-4, 3213              | R.KTFTAWCNSHLR.K                                                         | 1522.71309 | 3 | 7.25E-07 | 0.85  | 3.61   | -     | 896.8    |
| AHQ-7-4, 3224              | R.KTFTAWCNSHLR.K                                                         | 1522.71309 | 3 | 5.52E-07 | 0.87  | 3.44   | -     | 836.9    |
| AHQ-7-4, 4761              | K.LVSI GAEEIVDGNVK.M                                                     | 1543.74400 | 2 | 1.45E-05 | 0.87  | 2.88   | -     | 1085.2   |
| AHQ-7-4, 4974              | K.LVSI GAEEIVDGNVK.M                                                     | 1543.74400 | 2 | 2.88E-06 | 0.89  | 3.04   | -     | 1102.0   |
| AHQ-7-5, 4098              | K.LVSI GAEEIVDGNVK.M                                                     | 1543.74400 | 2 | 7.71E-04 | 0.88  | 3.73   | -     | 807.6    |
| AHQ-7-4, 4653              | K.LVSI GAEEIVDGNVK.M                                                     | 1543.74400 | 2 | 5.39E-05 | 0.83  | 3.44   | -     | 547.1    |
| AHQ-7-4, 4138 - 4216       | K.LVSI GAEEIVDGNVK.M                                                     | 1543.74400 | 2 | 5.95E-06 | 0.96  | 4.21   | -     | 1391.0   |
| AHQ-7-4, 4445 - 4461       | K.LVSI GAEEIVDGNVK.M                                                     | 1543.74400 | 2 | 8.58E-08 | 0.95  | 4.28   | -     | 1140.0   |
| AHQ-7-4, 3545 - 3624       | K.TFTAWCNSHLR.K                                                          | 1394.54018 | 2 | 5.06E-04 | 0.86  | 2.93   | -     | 811.1    |
| AHQ-7-5, 3608              | K.TFTAWCNSHLR.K                                                          | 1394.54018 | 2 | 2.63E-05 | 0.82  | 2.72   | -     | 778.0    |
| gi 4503715 ref NP_000500.1 | fibrinogen, gamma chain isoform gamma-A precursor [Homo sapiens]         |            |   | 9.60E-12 | 15.77 | 180.34 | 60.20 | 49481.2  |
| AHQ-7-7, 4004 - 4068       | K.AIQLTYNPDESSKPNM*IDAATLK.S                                             | 2537.82826 | 3 | 1.99E-04 | 0.81  | 4.01   | -     | 463.6    |
| AHQ-7-7, 4322              | K.AIQLTYNPDESSKPNMIDAATLK.S                                              | 2521.82886 | 2 | 5.22E-04 | 0.23  | 2.64   | -     | 212.8    |
| AHQ-7-7, 4442 - 4508       | K.AIQLTYNPDESSKPNMIDAATLK.S                                              | 2521.82886 | 3 | 4.16E-08 | 0.86  | 3.76   | -     | 734.7    |
| AHQ-7-7, 6309 - 6384       | K.ANQDFLVYCEIDGSGNGWTVFQK.R                                              | 2663.90221 | 2 | 6.60E-10 | 0.94  | 4.48   | -     | 903.8    |
| AHQ-7-14-, 5223 - 5282     | K.ASTPNGYDNGIIWATWK.T                                                    | 1895.06358 | 2 | 6.17E-08 | 0.79  | 3.10   | -     | 748.8    |
| AHQ-7-13-, 5211 - 5271     | K.ASTPNGYDNGIIWATWK.T                                                    | 1895.06358 | 2 | 4.40E-08 | 0.78  | 3.20   | -     | 489.7    |
| AHQ-7-7, 5352 - 5412       | K.ASTPNGYDNGIIWATWK.T                                                    | 1895.06358 | 2 | 2.52E-07 | 0.79  | 3.14   | -     | 677.9    |
| AHQ-7-7, 5453 - 5516       | K.ASTPNGYDNGIIWATWK.T                                                    | 1895.06358 | 2 | 2.05E-10 | 0.68  | 2.96   | -     | 526.8    |
| AHQ-7-14-, 5339 - 5403     | K.ASTPNGYDNGIIWATWK.T                                                    | 1895.06358 | 2 | 1.04E-08 | 0.55  | 2.92   | -     | 389.7    |
| AHQ-7-7, 5580              | K.ASTPNGYDNGIIWATWK.T                                                    | 1895.06358 | 2 | 8.65E-06 | 0.80  | 3.23   | -     | 668.4    |
| AHQ-7-13, 5330 - 5387      | K.ASTPNGYDNGIIWATWK.T                                                    | 1895.06358 | 2 | 6.09E-08 | 0.71  | 3.32   | -     | 424.1    |
| AHQ-7-13-, 2804            | K.CHAGHLNGVYVYGGGTYSK.A                                                  | 2014.16662 | 2 | 3.97E-08 | 0.94  | 4.25   | -     | 1000.5   |
| AHQ-7-9, 2608              | K.CHAGHLNGVYVYGGGTYSK.A                                                  | 2014.16662 | 2 | 3.78E-04 | 0.73  | 3.14   | -     | 576.0    |
| AHQ-7-7, 2798              | K.CHAGHLNGVYVYGGGTYSK.A                                                  | 2014.16662 | 2 | 3.17E-07 | 0.91  | 4.32   | -     | 541.4    |
| AHQ-7-14-, 2814            | K.CHAGHLNGVYVYGGGTYSK.A                                                  | 2014.16662 | 3 | 1.58E-04 | 0.91  | 3.51   | -     | 1319.7   |
| AHQ-7-7, 2664 - 2728       | K.CHAGHLNGVYVYGGGTYSK.A                                                  | 2014.16662 | 2 | 8.61E-10 | 0.98  | 5.57   | -     | 1648.9   |
| AHQ-7-7, 3085 - 3108       | R.DNCCILDER.F                                                            | 1197.27847 | 2 | 2.79E-04 | 0.89  | 3.33   | -     | 969.5    |
| AHQ-7-11, 3060             | R.DNCCILDER.F                                                            | 1197.27847 | 2 | 3.89E-04 | 0.84  | 3.01   | -     | 836.1    |
| AHQ-7-7, 3254              | R.DNCCILDER.F                                                            | 1197.27847 | 2 | 1.35E-04 | 0.87  | 3.07   | -     | 979.9    |
| AHQ-7-7, 5073 - 5137       | K.EGFGHLSPTGTTFEFLWLNK.E                                                 | 2208.37146 | 3 | 1.18E-04 | 0.95  | 5.08   | -     | 1710.9   |
| AHQ-7-7, 5100 - 5128       | K.EGFGHLSPTGTTFEFLWLNK.E                                                 | 2208.37146 | 2 | 1.77E-08 | 0.95  | 4.96   | -     | 755.6    |
| AHQ-7-4, 5376              | K.EGFGHLSPTGTTFEFLWLNK.E                                                 | 2208.37146 | 3 | 7.11E-04 | 0.87  | 3.60   | -     | 1317.9   |
| AHQ-7-7, 5194 - 5258       | K.EGFGHLSPTGTTFEFLWLNK.E                                                 | 2208.37146 | 2 | 2.35E-06 | 0.96  | 5.04   | -     | 1090.0   |
| AHQ-7-1, 5288              | K.EGFGHLSPTGTTFEFLWLNK.E                                                 | 2208.37146 | 2 | 5.78E-05 | 0.83  | 3.16   | -     | 704.1    |
| AHQ-7-4, 5372              | K.EGFGHLSPTGTTFEFLWLNK.E                                                 | 2208.37146 | 2 | 1.28E-07 | 0.92  | 4.43   | -     | 628.7    |
| AHQ-7-4, 5454              | K.EGFGHLSPTGTTFEFLWLNK.E                                                 | 2208.37146 | 2 | 1.66E-04 | 0.58  | 3.23   | -     | 333.3    |
| AHQ-7-8, 5090 - 5091       | K.EGFGHLSPTGTTFEFLWLNK.E                                                 | 2208.37146 | 2 | 7.99E-06 | 0.93  | 4.42   | -     | 723.5    |
| AHQ-7-3, 5296              | K.EGFGHLSPTGTTFEFLWLNK.E                                                 | 2208.37146 | 2 | 6.73E-04 | 0.45  | 2.70   | -     | 336.1    |
| AHQ-7-4, 6593              | R.FGSYCPTTGCIAIDFLSTYQTK.V                                               | 2420.65656 | 3 | 1.03E-04 | 0.72  | 3.49   | -     | 684.5    |

|                                                                                                     |                                      |            |   |          |       |        |       |         |
|-----------------------------------------------------------------------------------------------------|--------------------------------------|------------|---|----------|-------|--------|-------|---------|
| AHQ-7-7, 6581 - 6648                                                                                | R.FGSYCPPTTCGADFLSTYQTK.V            | 2420.65656 | 2 | 1.20E-09 | 0.82  | 3.34   | -     | 548.8   |
| AHQ-7-7, 6452 - 6520                                                                                | R.FGSYCPPTTCGADFLSTYQTK.V            | 2420.65656 | 2 | 1.21E-09 | 0.95  | 4.95   | -     | 934.6   |
| AHQ-7-8, 6415 - 6475                                                                                | R.FGSYCPPTTCGADFLSTYQTK.V            | 2420.65656 | 2 | 1.70E-06 | 0.93  | 4.50   | -     | 988.7   |
| AHQ-7-6, 6419                                                                                       | R.FGSYCPPTTCGADFLSTYQTK.V            | 2420.65656 | 3 | 7.03E-05 | 0.93  | 4.66   | -     | 1325.2  |
| AHQ-7-8, 6470                                                                                       | R.FGSYCPPTTCGADFLSTYQTK.V            | 2420.65656 | 3 | 1.16E-05 | 0.81  | 3.57   | -     | 893.0   |
| AHQ-7-9, 5844 - 5846                                                                                | R.FGSYCPPTTCGADFLSTYQTK.V            | 2420.65656 | 2 | 2.65E-04 | 0.62  | 2.85   | -     | 396.9   |
| AHQ-7-6, 6398 - 6413                                                                                | R.FGSYCPPTTCGADFLSTYQTK.V            | 2420.65656 | 2 | 2.11E-05 | 0.84  | 3.24   | -     | 652.3   |
| AHQ-7-4, 4638 - 4716                                                                                | K.IHLISTQSAIPYALR.V                  | 1683.97576 | 2 | 9.25E-04 | 0.92  | 3.74   | -     | 820.3   |
| AHQ-7-9, 4160 - 4162                                                                                | K.IHLISTQSAIPYALR.V                  | 1683.97576 | 2 | 4.53E-09 | 0.96  | 4.80   | -     | 1365.9  |
| AHQ-7-7, 4464 - 4528                                                                                | K.IHLISTQSAIPYALR.V                  | 1683.97576 | 2 | 9.60E-12 | 0.96  | 5.39   | -     | 1143.0  |
| AHQ-7-3, 4683                                                                                       | K.IHLISTQSAIPYALR.V                  | 1683.97576 | 2 | 1.82E-04 | 0.93  | 4.07   | -     | 997.4   |
| AHQ-7-6, 4569                                                                                       | K.IHLISTQSAIPYALR.V                  | 1683.97576 | 2 | 6.76E-10 | 0.92  | 4.05   | -     | 876.7   |
| AHQ-7-8, 4435                                                                                       | K.IHLISTQSAIPYALR.V                  | 1683.97576 | 2 | 2.85E-11 | 0.95  | 4.99   | -     | 969.8   |
| AHQ-7-7, 2060 - 2120                                                                                | R.LTIGEGQQHHLGGAK.Q                  | 1546.71290 | 2 | 1.86E-10 | 0.96  | 4.41   | -     | 1520.2  |
| AHQ-7-8, 2098                                                                                       | R.LTIGEGQQHHLGGAK.Q                  | 1546.71290 | 2 | 3.82E-07 | 0.83  | 3.18   | -     | 845.1   |
| AHQ-7-13, 2220 - 2285                                                                               | R.LTIGEGQQHHLGGAK.Q                  | 1546.71290 | 2 | 1.07E-08 | 0.92  | 4.09   | -     | 995.2   |
| AHQ-7-4, 2146 - 2160                                                                                | R.LTIGEGQQHHLGGAK.Q                  | 1546.71290 | 2 | 3.36E-06 | 0.89  | 4.05   | -     | 917.9   |
| AHQ-7-7, 6228                                                                                       | R.LTYAYFAGGDAGDAFGDFGDDPSDK.F        | 2835.88415 | 2 | 2.80E-05 | 0.82  | 3.48   | -     | 481.3   |
| AHQ-7-7, 6396 - 6462                                                                                | R.LTYAYFAGGDAGDAFGDFGDDPSDK.F        | 2835.88415 | 2 | 7.18E-07 | 0.89  | 3.82   | -     | 691.1   |
| AHQ-7-7, 2225 - 2236                                                                                | K.RLDGSDVDFK.K                       | 1037.15132 | 2 | 5.41E-04 | 0.84  | 3.29   | -     | 427.7   |
| AHQ-7-7, 3752 - 3824                                                                                | K.VAQLAQCOEPCPKDVTQIHDITGK.D         | 2772.06211 | 2 | 2.11E-07 | 0.75  | 3.09   | -     | 434.0   |
| AHQ-7-7, 3825 - 3826                                                                                | K.VAQLAQCOEPCPKDVTQIHDITGK.D         | 2772.06211 | 3 | 3.55E-05 | 0.91  | 4.65   | -     | 845.7   |
| AHQ-7-5, 3971                                                                                       | K.VAQLAQCOEPCPKDVTQIHDITGK.D         | 2772.06211 | 3 | 1.42E-04 | 0.87  | 3.93   | -     | 931.3   |
| AHQ-7-9, 3589 - 3610                                                                                | K.VAQLAQCOEPCPKDVTQIHDITGK.D         | 2772.06211 | 3 | 1.26E-04 | 0.77  | 3.60   | -     | 674.1   |
| AHQ-7-7, 3986 - 4062                                                                                | K.VAQLAQCOEPCPKDVTQIHDITGKDCQDIANK.G | 3718.05993 | 3 | 1.66E-08 | 0.97  | 6.88   | -     | 1258.4  |
| AHQ-7-4, 4212                                                                                       | K.VAQLAQCOEPCPKDVTQIHDITGKDCQDIANK.G | 3718.05993 | 3 | 1.03E-11 | 0.97  | 6.56   | -     | 1761.5  |
| AHQ-7-8, 4046 - 4059                                                                                | K.VAQLAQCOEPCPKDVTQIHDITGKDCQDIANK.G | 3718.05993 | 3 | 9.01E-10 | 0.95  | 5.24   | -     | 1371.1  |
| AHQ-7-9, 3770                                                                                       | K.VAQLAQCOEPCPKDVTQIHDITGKDCQDIANK.G | 3718.05993 | 3 | 1.59E-04 | 0.86  | 4.10   | -     | 955.7   |
| AHQ-7-7, 3260                                                                                       | R.VELEDWNGR.T                        | 1118.18129 | 2 | 1.93E-05 | 0.85  | 2.88   | -     | 1018.8  |
| AHQ-7-7, 3120 - 3194                                                                                | R.VELEDWNGR.T                        | 1118.18129 | 2 | 2.22E-04 | 0.83  | 3.01   | -     | 900.6   |
| AHQ-7-7, 1586                                                                                       | K.VGPEADKYR.L                        | 1035.13542 | 2 | 2.36E-05 | 0.86  | 3.18   | -     | 632.8   |
| AHQ-7-7, 1514 - 1592                                                                                | K.VGPEADKYR.L                        | 1035.13542 | 1 | 3.09E-04 | 0.22  | 2.04   | -     | 279.0   |
| AHQ-7-11, 3014 - 3022                                                                               | K.YEASILTHDSSIR.Y                    | 1492.61564 | 2 | 6.68E-06 | 0.85  | 3.30   | -     | 720.3   |
| AHQ-7-9, 2828                                                                                       | K.YEASILTHDSSIR.Y                    | 1492.61564 | 2 | 1.63E-06 | 0.83  | 3.15   | -     | 635.7   |
| AHQ-7-13, 3120                                                                                      | K.YEASILTHDSSIR.Y                    | 1492.61564 | 2 | 2.00E-04 | 0.80  | 3.13   | -     | 653.5   |
| AHQ-7-7, 2921 - 2988                                                                                | K.YEASILTHDSSIR.Y                    | 1492.61564 | 2 | 2.46E-05 | 0.90  | 3.63   | -     | 746.3   |
| AHQ-7-5, 3102                                                                                       | K.YEASILTHDSSIR.Y                    | 1492.61564 | 2 | 5.77E-07 | 0.86  | 2.99   | -     | 819.5   |
| AHQ-7-1, 3320 - 3385                                                                                | K.YEASILTHDSSIR.Y                    | 1492.61564 | 2 | 5.54E-06 | 0.87  | 3.45   | -     | 658.5   |
| AHQ-7-4, 2832                                                                                       | R.YLQEIYNSNNQK.I                     | 1514.62131 | 2 | 2.55E-08 | 0.93  | 4.41   | -     | 1035.1  |
| AHQ-7-10, 2659 - 2716                                                                               | R.YLQEIYNSNNQK.I                     | 1514.62131 | 2 | 4.34E-04 | 0.96  | 4.78   | -     | 1188.0  |
| AHQ-7-11, 2696 - 2768                                                                               | R.YLQEIYNSNNQK.I                     | 1514.62131 | 2 | 5.89E-08 | 0.92  | 4.51   | -     | 827.4   |
| AHQ-7-7, 2722 - 2766                                                                                | R.YLQEIYNSNNQK.I                     | 1514.62131 | 2 | 3.35E-04 | 0.96  | 4.57   | -     | 1617.9  |
| gi 10835187 ref NP_000627.1  superoxide dismutase 2, mitochondrial [Homo sapiens]                   |                                      |            |   | 1.04E-11 | 2.69  | 30.25  | 19.40 | 24733.0 |
| AHQ-7-13, 5919                                                                                      | K.AIWNVINWVNTYR.Y                    | 1744.93137 | 2 | 7.42E-04 | 0.88  | 3.61   | -     | 845.3   |
| AHQ-7-13, 5889                                                                                      | K.AIWNVINWVNTYR.Y                    | 1744.93137 | 2 | 9.65E-04 | 0.88  | 3.41   | -     | 803.3   |
| AHQ-7-14, 5790 - 5854                                                                               | K.AIWNVINWVNTYR.Y                    | 1744.93137 | 2 | 1.21E-07 | 0.95  | 4.31   | -     | 1318.6  |
| AHQ-7-11, 5632 - 5687                                                                               | K.AIWNVINWVNTYR.Y                    | 1744.93137 | 2 | 1.04E-11 | 0.97  | 4.87   | -     | 1416.8  |
| AHQ-7-11, 5688                                                                                      | K.AIWNVINWVNTYR.Y                    | 1744.93137 | 3 | 7.11E-08 | 0.93  | 4.31   | -     | 1139.2  |
| AHQ-7-13, 3847                                                                                      | K.GDVTQAIALOPALK.F                   | 1425.65548 | 2 | 8.55E-07 | 0.87  | 3.63   | -     | 776.8   |
| AHQ-7-11, 3738 - 3811                                                                               | K.GDVTQAIALOPALK.F                   | 1425.65548 | 2 | 3.76E-09 | 0.75  | 3.21   | -     | 626.8   |
| AHQ-7-14, 3857                                                                                      | K.GDVTQAIALOPALK.F                   | 1425.65548 | 2 | 1.04E-05 | 0.87  | 3.87   | -     | 739.0   |
| AHQ-7-11, 3751                                                                                      | K.GDVTQAIALOPALK.F                   | 1425.65548 | 1 | 8.07E-06 | 0.80  | 3.07   | -     | 956.1   |
| AHQ-7-11, 2362 - 2439                                                                               | K.HHAAAYNNLNVTTEK.Y                  | 1739.86999 | 2 | 2.60E-10 | 0.97  | 5.09   | -     | 1468.9  |
| AHQ-7-14, 2519                                                                                      | K.HHAAAYNNLNVTTEK.Y                  | 1739.86999 | 2 | 2.87E-06 | 0.49  | 2.55   | -     | 390.7   |
| gi 5729877 ref NP_006588.1  heat shock 70kDa protein 8 isoform 1; heat shock cognate protein, 71-kD |                                      |            |   | 1.16E-11 | 12.68 | 140.33 | 28.20 | 70897.6 |
| AHQ-7-6, 4381                                                                                       | R.ARFEELNADLFR.G                     | 1481.63768 | 2 | 5.82E-09 | 0.96  | 4.37   | -     | 1035.2  |
| AHQ-7-6, 4645 - 4646                                                                                | R.FEELNADLFR.G                       | 1254.37310 | 2 | 1.49E-05 | 0.90  | 3.80   | -     | 973.0   |
| AHQ-7-14, 5077                                                                                      | K.GPAVIGIDLGTITYSCVGVFQHGK.V         | 2265.53088 | 3 | 1.16E-11 | 0.92  | 4.30   | -     | 1045.4  |
| AHQ-7-6, 5233 - 5237                                                                                | K.GPAVIGIDLGTITYSCVGVFQHGK.V         | 2265.53088 | 3 | 4.69E-10 | 0.95  | 6.62   | -     | 914.0   |
| AHQ-7-6, 5238                                                                                       | K.GPAVIGIDLGTITYSCVGVFQHGK.V         | 2265.53088 | 2 | 2.55E-07 | 0.94  | 4.76   | -     | 840.1   |
| AHQ-7-6, 5553                                                                                       | K.ILDKCNEINWLDK.N                    | 1776.04688 | 2 | 2.16E-07 | 0.96  | 4.80   | -     | 1462.6  |
| AHQ-7-6, 3599                                                                                       | K.LDKSQIHDLVGGSTR.I                  | 1839.08615 | 2 | 4.84E-07 | 0.94  | 3.96   | -     | 1335.2  |
| AHQ-7-6, 3442                                                                                       | K.NQVAMNPTNTVFDAR.R                  | 1650.83816 | 2 | 2.23E-07 | 0.90  | 3.71   | -     | 884.2   |
| AHQ-7-6, 3979                                                                                       | K.NQVAMNPTNTVFDAR.R                  | 1650.83816 | 2 | 2.90E-05 | 0.92  | 4.14   | -     | 728.4   |
| AHQ-7-6, 4571                                                                                       | K.NSLESYAFNMK.A                      | 1304.45393 | 2 | 8.60E-05 | 0.73  | 3.18   | -     | 520.7   |
| AHQ-7-6, 4083 - 4105                                                                                | K.NSLESYAFNMK.A                      | 1304.45393 | 2 | 2.42E-05 | 0.91  | 3.89   | -     | 865.6   |
| AHQ-7-6, 5435                                                                                       | K.QTQTFTTYSDNQPGLVLIQVYGER.A         | 2775.96443 | 2 | 1.07E-05 | 0.61  | 2.80   | -     | 276.2   |
| AHQ-7-6, 2718                                                                                       | R.RFDDAVVQSDMK.H                     | 1411.56603 | 2 | 6.83E-06 | 0.92  | 3.58   | -     | 1267.6  |
| AHQ-7-6, 2198                                                                                       | R.RFDDAVVQSDMK.H                     | 1427.56543 | 2 | 1.09E-04 | 0.92  | 3.68   | -     | 812.2   |
| AHQ-7-6, 5122 - 5187                                                                                | K.SFYPEEVSMLVTK.M                    | 1617.84485 | 2 | 5.55E-07 | 0.94  | 3.78   | -     | 823.9   |
| AHQ-7-6, 6509 - 6513                                                                                | K.SINPEAVAYGAQAAILSGDK.S             | 2261.47411 | 2 | 5.25E-04 | 0.93  | 4.26   | -     | 844.5   |
| AHQ-7-6, 6518                                                                                       | K.SINPEAVAYGAQAAILSGDK.S             | 2261.47411 | 2 | 8.68E-05 | 0.94  | 4.46   | -     | 896.1   |
| AHQ-7-7, 6565 - 6582                                                                                | K.SINPEAVAYGAQAAILSGDK.S             | 2261.47411 | 2 | 1.72E-08 | 0.95  | 4.91   | -     | 998.3   |
| AHQ-7-8, 2995                                                                                       | K.SQIHDLVGGSTR.I                     | 1482.66712 | 2 | 8.22E-09 | 0.93  | 4.04   | -     | 1166.4  |
| AHQ-7-6, 3129 - 3203                                                                                | K.SQIHDLVGGSTR.I                     | 1482.66712 | 2 | 8.60E-07 | 0.97  | 4.20   | -     | 2027.2  |
| AHQ-7-6, 4537 - 4601                                                                                | K.TVTNAVVTVPAYFNDSQR.Q               | 1983.17068 | 2 | 4.70E-06 | 0.91  | 4.37   | -     | 498.7   |
| gi 4506413 ref NP_002875.1  RAP1A, member of RAS oncogene family; RAS-related protein RAP1A [Homo s |                                      |            |   | 1.29E-11 | 7.49  | 90.25  | 54.90 | 20987.1 |
| AHQ-7-11, 2471 - 2486                                                                               | K.CDLEDERVVGK.E                      | 1321.43945 | 2 | 1.02E-05 | 0.91  | 3.42   | -     | 1040.0  |
| AHQ-7-13, 6355                                                                                      | K.INVNEIFYDLVR.Q                     | 1495.70427 | 2 | 4.72E-10 | 0.96  | 5.06   | -     | 1110.1  |
| AHQ-7-5, 6735                                                                                       | K.INVNEIFYDLVR.Q                     | 1495.70427 | 2 | 2.12E-06 | 0.92  | 4.07   | -     | 832.7   |
| AHQ-7-13, 6354                                                                                      | K.INVNEIFYDLVR.Q                     | 1495.70427 | 2 | 1.44E-07 | 0.95  | 4.65   | -     | 1067.8  |
| AHQ-7-11, 6199                                                                                      | K.INVNEIFYDLVR.Q                     | 1495.70427 | 1 | 4.24E-07 | 0.31  | 2.92   | -     | 207.1   |
| AHQ-7-11, 6194                                                                                      | K.INVNEIFYDLVR.Q                     | 1495.70427 | 1 | 6.93E-07 | 0.47  | 3.07   | -     | 242.1   |
| AHQ-7-11, 6184 - 6248                                                                               | K.INVNEIFYDLVR.Q                     | 1495.70427 | 2 | 5.11E-09 | 0.96  | 4.71   | -     | 1614.1  |
| AHQ-7-11, 6080                                                                                      | K.INVNEIFYDLVR.Q                     | 1495.70427 | 2 | 2.42E-04 | 0.91  | 3.32   | -     | 1105.1  |
| AHQ-7-14, 6329                                                                                      | K.INVNEIFYDLVR.Q                     | 1495.70427 | 2 | 2.78E-07 | 0.94  | 4.81   | -     | 973.4   |
| AHQ-7-11, 5635 - 5700                                                                               | K.INVNEIFYDLVR.Q                     | 1495.70427 | 2 | 9.86E-04 | 0.87  | 3.43   | -     | 898.5   |
| AHQ-7-11, 2730 - 2798                                                                               | K.LVVLGSGGVGK.S                      | 986.19059  | 2 | 3.04E-06 | 0.89  | 3.77   | -     | 975.5   |
| AHQ-7-13, 2865                                                                                      | K.LVVLGSGGVGK.S                      | 986.19059  | 2 | 1.37E-04 | 0.84  | 2.98   | -     | 851.6   |
| AHQ-7-11, 2750                                                                                      | K.LVVLGSGGVGK.S                      | 986.19059  | 1 | 1.05E-04 | 0.80  | 3.06   | -     | 714.4   |
| AHQ-7-11, 6284 - 6343                                                                               | K.NGQQGFALVYSITAQSTFNDLQDLR.E        | 2659.89181 | 3 | 9.16E-04 | 0.67  | 3.40   | -     | 561.4   |
| AHQ-7-11, 6307                                                                                      | K.NGQQGFALVYSITAQSTFNDLQDLR.E        | 2659.89181 | 2 | 4.45E-06 | 0.69  | 3.00   | -     | 386.2   |
| AHQ-7-11, 6346 - 6416                                                                               | K.SALTVOFQGVFVEK.Y                   | 1666.94196 | 2 | 3.02E-04 | 0.96  | 4.43   | -     | 1756.6  |
| AHQ-7-13, 5839 - 5899                                                                               | K.SALTVOFQGVFVEK.Y                   | 1666.94196 | 2 | 3.17E-04 | 0.95  | 4.80   | -     | 1477.2  |
| AHQ-7-11, 6104 - 6171                                                                               | K.SALTVOFQGVFVEK.Y                   | 1666.94196 | 2 | 3.23E-05 | 0.93  | 4.43   | -     | 1164.4  |
| AHQ-7-11, 5987 - 6047                                                                               | K.SALTVOFQGVFVEK.Y                   | 1666.94196 | 2 | 3.66E-04 | 0.66  | 2.57   | -     | 881.7   |
| AHQ-7-11, 5762 - 5818                                                                               | K.SALTVOFQGVFVEK.Y                   | 1666.94196 | 2 | 2.04E-06 | 0.96  | 4.72   | -     | 1653.2  |
| AHQ-7-11, 5651 - 5706                                                                               | K.SALTVOFQGVFVEK.Y                   | 1666.94196 | 2 | 4.21E-05 | 0.93  | 3.96   | -     | 1278.5  |
| AHQ-7-11, 5702                                                                                      | K.SKININVEIFYDLVR.Q                  | 1710.95483 | 3 | 5.56E-08 | 0.93  | 3.94   | -     | 1430.0  |
| AHQ-7-14, 5886                                                                                      | K.SKININVEIFYDLVR.Q                  | 1710.95483 | 2 | 2.65E-10 | 0.95  | 4.46   | -     | 1163.1  |
| AHQ-7-11, 5002                                                                                      | K.SKININVEIFYDLVR.Q                  | 1710.95483 | 2 | 3.52E-08 | 0.74  | 3.39   | -     | 401.0   |
| AHQ-7-11, 5210 - 5215                                                                               | K.SKININVEIFYDLVR.Q                  | 1710.95483 | 2 | 1.98E-09 | 0.96  | 4.58   | -     | 1096.9  |
| AHQ-7-11, 5698                                                                                      | K.SKININVEIFYDLVR.Q                  | 1710.95483 | 2 | 1.99E-08 | 0.97  | 4.72   | -     | 1414.4  |
| AHQ-7-11, 5936 - 5943                                                                               | K.SKININVEIFYDLVR.Q                  | 1710.95483 | 2 | 1.72E-06 | 0.87  | 4.08   | -     | 819.3   |
| AHQ-7-11, 6026                                                                                      | K.SKININVEIFYDLVR.Q                  | 1710.95483 | 2 | 1.29E-11 | 0.90  | 3.69   | -     | 964.7   |
| AHQ-7-11, 3716                                                                                      | R.VKDTEDEVPMILVGNK.C                 | 1658.94164 | 2 | 3.05E-06 | 0.84  | 3.60   | -     | 680.8   |
| AHQ-7-14, 2877                                                                                      | K.YDPTIEDSYR.K                       | 1259.30338 | 2 | 1.13E-04 | 0.77  | 2.70   | -     | 396.2   |

|                             |                                                                                |            |   |          |      |       |       |          |
|-----------------------------|--------------------------------------------------------------------------------|------------|---|----------|------|-------|-------|----------|
| AHQ-7-11, 2772 - 2830       | K.YDPTIEDSYR.K                                                                 | 1259.30338 | 2 | 2.38E-06 | 0.80 | 3.18  | -     | 347.3    |
| AHQ-7-12, 2836              | K.YDPTIEDSYR.K                                                                 | 1259.30338 | 2 | 8.09E-06 | 0.64 | 2.53  | -     | 410.9    |
| AHQ-7-11, 2310              | K.YDPTIEDSYR.K                                                                 | 1387.47629 | 2 | 1.24E-07 | 0.55 | 2.55  | -     | 213.4    |
| gi 7657431 ref NP_055205.1  | EBNA-2 co-activator (100kD) [Homo sapiens]                                     |            |   | 1.35E-11 | 0.84 | 10.27 | 2.40  | 99689.7  |
| AHQ-7-5, 6242               | R.NLPLVQVEGPFSEATLFTK.E                                                        | 2307.54125 | 2 | 1.10E-07 | 0.93 | 4.63  | -     | 638.5    |
| AHQ-7-6, 6150               | R.NLPLVQVEGPFSEATLFTK.E                                                        | 2307.54125 | 2 | 1.35E-11 | 0.84 | 3.74  | -     | 373.9    |
| AHQ-7-4, 6314               | R.NLPLVQVEGPFSEATLFTK.E                                                        | 2307.54125 | 2 | 2.03E-08 | 0.96 | 5.32  | -     | 737.0    |
| gi 4505733 ref NP_002610.1  | platelet factor 4 (chemokine (C-X-C motif) ligand 4); platelet factor 4        |            |   | 1.37E-11 | 7.47 | 80.27 | 39.60 | 10844.9  |
| AHQ-7-14, 5010              | K.AGPHCPTAQLIATLKN.K                                                           | 1579.84600 | 2 | 1.82E-06 | 0.86 | 3.60  | -     | 684.0    |
| AHQ-7-14-, 4049             | K.AGPHCPTAQLIATLKN.K                                                           | 1579.84600 | 3 | 3.05E-05 | 0.88 | 4.24  | -     | 1022.4   |
| AHQ-7-14-, 4045 - 4050      | K.AGPHCPTAQLIATLKN.K                                                           | 1579.84600 | 2 | 1.25E-05 | 0.95 | 3.87  | -     | 1175.7   |
| AHQ-7-14, 5190 - 5221       | K.AGPHCPTAQLIATLKN.K                                                           | 1579.84600 | 2 | 5.53E-07 | 0.94 | 3.89  | -     | 1108.3   |
| AHQ-7-13-, 4068 - 4148      | K.AGPHCPTAQLIATLKN.K                                                           | 1579.84600 | 2 | 9.76E-09 | 0.85 | 3.44  | -     | 568.2    |
| AHQ-7-14, 4957              | K.AGPHCPTAQLIATLKN.K                                                           | 1907.18700 | 3 | 1.37E-11 | 0.98 | 5.20  | -     | 2909.5   |
| AHQ-7-14, 4796              | K.AGPHCPTAQLIATLKN.K                                                           | 1907.18700 | 2 | 5.97E-05 | 0.75 | 2.69  | -     | 634.7    |
| AHQ-7-14-, 3870             | K.AGPHCPTAQLIATLKN.K                                                           | 1907.18700 | 2 | 3.69E-06 | 0.92 | 3.95  | -     | 911.5    |
| AHQ-7-14-, 3975 - 3981      | K.AGPHCPTAQLIATLKN.K                                                           | 1907.18700 | 2 | 5.31E-09 | 0.95 | 4.51  | -     | 1047.7   |
| AHQ-7-14, 4964              | K.AGPHCPTAQLIATLKN.K                                                           | 1907.18700 | 2 | 2.54E-05 | 0.96 | 4.17  | -     | 1338.7   |
| AHQ-7-14-, 3641 - 3645      | K.AGPHCPTAQLIATLKN.K                                                           | 2035.35992 | 3 | 6.46E-07 | 0.95 | 4.44  | -     | 1432.0   |
| AHQ-7-14, 4570              | K.AGPHCPTAQLIATLKN.K                                                           | 2035.35992 | 3 | 8.67E-05 | 0.92 | 4.02  | -     | 1179.4   |
| AHQ-7-13, 2922 - 2985       | R.HITSLEVIK.A                                                                  | 1040.23825 | 2 | 3.14E-04 | 0.79 | 2.91  | -     | 404.4    |
| AHQ-7-14-, 2614 - 2677      | R.HITSLEVIK.A                                                                  | 1040.23825 | 2 | 1.43E-07 | 0.92 | 3.96  | -     | 575.1    |
| AHQ-7-14-, 2729 - 2789      | R.HITSLEVIK.A                                                                  | 1040.23825 | 2 | 8.07E-07 | 0.92 | 3.39  | -     | 750.9    |
| AHQ-7-13-, 4779 - 4787      | K.ICLDLQAPLYK.K                                                                | 1335.59400 | 2 | 4.69E-05 | 0.95 | 3.92  | -     | 1468.1   |
| AHQ-7-14, 5666              | K.ICLDLQAPLYK.K                                                                | 1335.59400 | 2 | 2.61E-06 | 0.97 | 4.14  | -     | 2476.0   |
| AHQ-7-14-, 4773 - 4785      | K.ICLDLQAPLYK.K                                                                | 1335.59400 | 2 | 1.78E-05 | 0.97 | 4.72  | -     | 1800.0   |
| AHQ-7-13, 4891              | K.ICLDLQAPLYK.K                                                                | 1335.59400 | 2 | 2.00E-05 | 0.97 | 4.38  | -     | 1853.4   |
| AHQ-7-14-, 4781             | K.ICLDLQAPLYK.K                                                                | 1335.59400 | 1 | 4.15E-06 | 0.65 | 3.05  | -     | 586.8    |
| AHQ-7-14-, 4303             | K.ICLDLQAPLYK.K                                                                | 1463.76691 | 2 | 3.33E-04 | 0.95 | 3.57  | -     | 1877.8   |
| AHQ-7-14, 5397 - 5400       | R.ICLDLQAPLYK.K                                                                | 1463.76691 | 2 | 8.13E-06 | 0.98 | 5.31  | -     | 2190.6   |
| AHQ-7-14-, 4398 - 4461      | R.ICLDLQAPLYK.K                                                                | 1463.76691 | 2 | 5.19E-06 | 0.97 | 5.09  | -     | 1321.1   |
| AHQ-7-14-, 4430 - 4465      | R.ICLDLQAPLYK.K                                                                | 1463.76691 | 3 | 1.79E-06 | 0.91 | 3.87  | -     | 1768.6   |
| AHQ-7-14, 5301              | R.ICLDLQAPLYK.K                                                                | 1463.76691 | 2 | 4.47E-04 | 0.64 | 3.33  | -     | 651.1    |
| AHQ-7-14-, 3994 - 4059      | R.ICLDLQAPLYK.K                                                                | 1591.93982 | 3 | 5.19E-08 | 0.94 | 4.48  | -     | 1261.5   |
| AHQ-7-14-, 3995             | R.ICLDLQAPLYK.K                                                                | 1591.93982 | 2 | 3.17E-04 | 0.92 | 3.83  | -     | 1259.0   |
| gi 5031857 ref NP_005557.1  | lactate dehydrogenase A [Homo sapiens]                                         |            |   | 1.45E-11 | 1.75 | 20.31 | 7.20  | 36688.5  |
| AHQ-7-13, 6301              | K.DLADELALVDVIEDK.L                                                            | 1658.82864 | 2 | 1.81E-04 | 0.96 | 4.46  | -     | 1670.4   |
| AHQ-7-14-, 6281             | K.DLADELALVDVIEDK.L                                                            | 1658.82864 | 2 | 3.80E-08 | 0.96 | 4.29  | -     | 1503.6   |
| AHQ-7-13-, 6303 - 6304      | K.DLADELALVDVIEDK.L                                                            | 1658.82864 | 2 | 1.45E-11 | 0.98 | 6.13  | -     | 1930.8   |
| AHQ-7-9, 6000               | K.DLADELALVDVIEDK.L                                                            | 1658.82864 | 2 | 1.07E-04 | 0.91 | 3.32  | -     | 1380.7   |
| AHQ-7-13-, 2877             | K.LVITAGAR.Q                                                                   | 914.12760  | 2 | 4.01E-04 | 0.77 | 2.74  | -     | 800.0    |
| gi 14251209 ref NP_001279.2 | chloride intracellular channel 1; p64CLCP; chloride channel ABP [Homo sapiens] |            |   | 1.51E-11 | 4.92 | 60.28 | 28.20 | 26922.5  |
| AHQ-7-9, 5185 - 5204        | R.EEFASCPDDEEELAYEVAK.A                                                        | 2575.69730 | 3 | 1.52E-04 | 0.82 | 3.17  | -     | 1117.7   |
| AHQ-7-9, 5398 - 5432        | K.FLDGNELTLADCNLLPK.L                                                          | 1935.18752 | 2 | 6.25E-05 | 0.81 | 3.66  | -     | 562.0    |
| AHQ-7-10, 5507 - 5585       | K.FLDGNELTLADCNLLPK.L                                                          | 1935.18752 | 2 | 1.10E-04 | 0.88 | 4.05  | -     | 924.1    |
| AHQ-7-13, 3593              | K.GVTFNVTVDTK.R                                                                | 1282.42476 | 2 | 1.87E-07 | 0.93 | 4.07  | -     | 1045.3   |
| AHQ-7-9, 3150               | K.GVTFNVTVDTK.R                                                                | 1282.42476 | 2 | 4.38E-07 | 0.56 | 2.51  | -     | 522.2    |
| AHQ-7-13, 3559 - 3585       | K.GVTFNVTVDTK.R                                                                | 1282.42476 | 2 | 4.82E-06 | 0.89 | 3.46  | -     | 787.4    |
| AHQ-7-10, 3253              | K.GVTFNVTVDTK.R                                                                | 1282.42476 | 2 | 3.50E-06 | 0.84 | 3.25  | -     | 658.2    |
| AHQ-7-13-, 3421 - 3439      | K.GVTFNVTVDTK.R                                                                | 1282.42476 | 2 | 2.94E-07 | 0.93 | 3.59  | -     | 1058.6   |
| AHQ-7-13-, 5267             | K.LAALNPESNTAGLDIFAK.F                                                         | 1846.07392 | 2 | 1.51E-11 | 0.97 | 5.57  | -     | 960.4    |
| AHQ-7-9, 4958 - 4960        | K.LAALNPESNTAGLDIFAK.F                                                         | 1846.07392 | 2 | 2.29E-05 | 0.85 | 3.52  | -     | 539.2    |
| AHQ-7-13, 5202 - 5259       | K.LAALNPESNTAGLDIFAK.F                                                         | 1846.07392 | 2 | 1.43E-05 | 0.97 | 5.52  | -     | 1108.4   |
| AHQ-7-13, 5345              | K.LAALNPESNTAGLDIFAK.F                                                         | 1846.07392 | 2 | 2.23E-05 | 0.70 | 3.17  | -     | 300.9    |
| AHQ-7-14-, 5186             | K.LAALNPESNTAGLDIFAK.F                                                         | 1846.07392 | 2 | 1.08E-05 | 0.92 | 4.66  | -     | 641.4    |
| AHQ-7-13-, 5171             | K.LAALNPESNTAGLDIFAK.F                                                         | 1846.07392 | 2 | 1.15E-06 | 0.96 | 5.45  | -     | 730.2    |
| AHQ-7-9, 2674 - 2678        | K.LHIVQVCK.K                                                                   | 1097.35623 | 1 | 7.61E-04 | 0.55 | 2.16  | -     | 640.4    |
| AHQ-7-10, 2748 - 2755       | K.LHIVQVCK.K                                                                   | 1097.35623 | 2 | 2.50E-06 | 0.79 | 2.71  | -     | 546.2    |
| AHQ-7-10, 2267              | K.NSNPALNDNLEK.G                                                               | 1329.39838 | 2 | 4.07E-05 | 0.60 | 2.70  | -     | 612.0    |
| gi 4507487 ref NP_003238.1  | thrombospondin 2 [Homo sapiens]                                                |            |   | 1.57E-11 | 1.77 | 20.24 | 2.60  | 129954.5 |
| AHQ-7-1, 5019               | R.DDDYAGVFVGYQSSSR.F                                                           | 1814.84582 | 2 | 1.87E-05 | 0.92 | 3.37  | -     | 1103.9   |
| AHQ-7-11, 4754              | R.DDDYAGVFVGYQSSSR.F                                                           | 1814.84582 | 2 | 2.51E-05 | 0.91 | 3.18  | -     | 1295.8   |
| AHQ-7-6, 4995 - 5053        | R.DDDYAGVFVGYQSSSR.F                                                           | 1814.84582 | 2 | 6.66E-04 | 0.90 | 3.82  | -     | 980.3    |
| AHQ-7-2, 5119 - 5199        | R.DDDYAGVFVGYQSSSR.F                                                           | 1814.84582 | 2 | 1.57E-11 | 0.96 | 4.80  | -     | 1409.5   |
| AHQ-7-5, 5170               | R.DDDYAGVFVGYQSSSR.F                                                           | 1814.84582 | 2 | 7.34E-09 | 0.95 | 4.60  | -     | 1224.7   |
| AHQ-7-3, 5064               | R.DDDYAGVFVGYQSSSR.F                                                           | 1814.84582 | 2 | 2.96E-06 | 0.93 | 3.69  | -     | 1255.5   |
| AHQ-7-4, 5166               | R.DDDYAGVFVGYQSSSR.F                                                           | 1814.84582 | 2 | 1.07E-05 | 0.85 | 3.21  | -     | 911.2    |
| AHQ-7-4, 2990               | R.NALWHTGNTPGQVR.T                                                             | 1551.69124 | 2 | 9.31E-07 | 0.90 | 3.50  | -     | 934.2    |
| AHQ-7-5, 2742 - 2812        | R.NALWHTGNTPGQVR.T                                                             | 1551.69124 | 2 | 8.04E-05 | 0.74 | 2.78  | -     | 651.9    |
| AHQ-7-3, 3041               | R.NALWHTGNTPGQVR.T                                                             | 1551.69124 | 2 | 8.60E-05 | 0.83 | 3.21  | -     | 787.5    |
| AHQ-7-6, 2705               | R.NALWHTGNTPGQVR.T                                                             | 1551.69124 | 2 | 9.10E-04 | 0.83 | 3.45  | -     | 784.7    |
| AHQ-7-6, 2939               | R.NALWHTGNTPGQVR.T                                                             | 1551.69124 | 2 | 3.37E-05 | 0.69 | 3.01  | -     | 535.7    |
| AHQ-7-2, 3064               | R.NALWHTGNTPGQVR.T                                                             | 1551.69124 | 2 | 5.81E-04 | 0.93 | 3.45  | -     | 1273.4   |
| AHQ-7-7, 2576 - 2637        | R.NALWHTGNTPGQVR.T                                                             | 1551.69124 | 2 | 8.16E-06 | 0.78 | 3.08  | -     | 753.9    |
| AHQ-7-7, 2864               | R.NALWHTGNTPGQVR.T                                                             | 1551.69124 | 2 | 1.81E-07 | 0.81 | 3.17  | -     | 746.6    |
| AHQ-7-11, 2686 - 2694       | R.NALWHTGNTPGQVR.T                                                             | 1551.69124 | 2 | 4.97E-06 | 0.91 | 4.01  | -     | 963.7    |
| AHQ-7-2, 2823               | R.NALWHTGNTPGQVR.T                                                             | 1551.69124 | 3 | 1.73E-04 | 0.74 | 3.38  | -     | 649.9    |
| AHQ-7-14-, 2813             | R.NALWHTGNTPGQVR.T                                                             | 1551.69124 | 2 | 2.06E-04 | 0.91 | 3.14  | -     | 1156.2   |
| gi 20357552 ref NP_005222.2 | contactin isoform a; oncogene EMS1 [Homo sapiens]                              |            |   | 1.71E-11 | 5.25 | 60.29 | 19.60 | 61585.7  |
| AHQ-7-14-, 4747 - 4758      | K.ASAGHAVSIAQDDAGADDWETDPDFVNDVSEK.E                                           | 3334.37643 | 3 | 5.77E-07 | 0.94 | 5.75  | -     | 634.6    |
| AHQ-7-11, 3931              | R.GPVSGETPEPVYSMEAADYR.E                                                       | 2156.31513 | 2 | 8.53E-04 | 0.91 | 3.90  | -     | 716.6    |
| AHQ-7-13-, 3957             | R.LPSSPYVEDAASFKA                                                              | 1511.65733 | 2 | 6.37E-05 | 0.73 | 2.62  | -     | 630.4    |
| AHQ-7-13, 3997              | K.NASTFEDVTQVSSAYQK.T                                                          | 1875.97061 | 2 | 2.55E-08 | 0.93 | 4.39  | -     | 1092.6   |
| AHQ-7-12, 3764              | K.NASTFEDVTQVSSAYQK.T                                                          | 1875.97061 | 2 | 3.97E-04 | 0.93 | 3.94  | -     | 1075.7   |
| AHQ-7-14-, 3859             | K.NASTFEDVTQVSSAYQK.T                                                          | 1875.97061 | 2 | 1.71E-11 | 0.96 | 4.78  | -     | 1324.0   |
| AHQ-7-14, 4677              | K.NASTFEDVTQVSSAYQK.T                                                          | 1875.97061 | 2 | 2.94E-07 | 0.88 | 3.61  | -     | 877.7    |
| AHQ-7-13-, 2943 - 2956      | K.VDKSAVGFYQGGK.T                                                              | 1428.57155 | 2 | 1.13E-05 | 0.85 | 3.55  | -     | 607.0    |
| AHQ-7-13, 3121              | K.VDKSAVGFYQGGK.T                                                              | 1428.57155 | 2 | 1.59E-04 | 0.81 | 2.94  | -     | 774.8    |
| AHQ-7-12, 5010              | R.YGLFPANYVELR.Q                                                               | 1442.64306 | 2 | 6.13E-08 | 0.85 | 3.26  | -     | 632.8    |
| gi 4504071 ref NP_000164.1  | platelet glycoprotein Ib alpha polypeptide precursor [Homo sapiens] [MA]       |            |   | 1.80E-11 | 5.22 | 60.21 | 12.80 | 68955.0  |
| AHQ-7-4, 3873               | K.AMTSNVASQCDDNSDKFPVYK.Y                                                      | 2363.60999 | 2 | 1.80E-11 | 0.88 | 3.80  | -     | 853.0    |
| AHQ-7-1, 4969               | R.GLGELQELYLK.G                                                                | 1263.46458 | 2 | 1.66E-04 | 0.94 | 3.91  | -     | 1305.3   |
| AHQ-7-4, 4921 - 4997        | R.GLGELQELYLK.G                                                                | 1263.46458 | 2 | 1.00E-04 | 0.89 | 3.55  | -     | 995.1    |
| AHQ-7-3, 4935               | R.GLGELQELYLK.G                                                                | 1263.46458 | 2 | 2.41E-06 | 0.93 | 3.99  | -     | 1099.4   |
| AHQ-7-12, 3919 - 3926       | R.GQDLLSTVSIR.Y                                                                | 1189.34410 | 2 | 6.72E-07 | 0.95 | 3.98  | -     | 1261.8   |
| AHQ-7-3, 4147 - 4155        | R.GQDLLSTVSIR.Y                                                                | 1189.34410 | 2 | 2.28E-05 | 0.94 | 3.53  | -     | 1259.9   |
| AHQ-7-1, 4235               | R.GQDLLSTVSIR.Y                                                                | 1189.34410 | 2 | 2.36E-05 | 0.95 | 3.81  | -     | 1304.8   |
| AHQ-7-13-, 4027 - 4057      | R.GQDLLSTVSIR.Y                                                                | 1189.34410 | 2 | 7.26E-07 | 0.94 | 3.75  | -     | 1273.8   |
| AHQ-7-12, 2222 - 2292       | R.GVLQGHLESSR.N                                                                | 1183.29965 | 2 | 8.24E-05 | 0.78 | 2.55  | -     | 798.4    |
| AHQ-7-3, 2141 - 2211        | R.GVLQGHLESSR.N                                                                | 1183.29965 | 2 | 6.66E-07 | 0.79 | 2.76  | -     | 691.6    |
| AHQ-7-4, 2158 - 2169        | R.GVLQGHLESSR.N                                                                | 1183.29965 | 2 | 1.07E-06 | 0.86 | 2.81  | -     | 907.5    |
| AHQ-7-3, 3687               | R.LTQLNLDRCCLTK.L                                                              | 1605.83862 | 2 | 1.17E-04 | 0.81 | 3.58  | -     | 755.6    |
| AHQ-7-4, 3661 - 3692        | R.LTQLNLDRCCLTK.L                                                              | 1605.83862 | 2 | 8.35E-04 | 0.50 | 2.67  | -     | 664.2    |
| AHQ-7-1, 4871 - 4889        | R.WLQDNAENYVVK.Q                                                               | 1665.82948 | 2 | 8.05E-05 | 0.86 | 3.10  | -     | 1072.9   |
| AHQ-7-3, 4844 - 4885        | R.WLQDNAENYVVK.Q                                                               | 1665.82948 | 2 | 2.91E-05 | 0.87 | 3.43  | -     | 1248.1   |
| gi 14249382 ref NP_116139.1 | hypothetical protein MGC15429 [Homo sapiens]                                   |            |   | 1.84E-11 | 0.65 | 10.16 | 6.70  | 22345.5  |
| AHQ-7-11, 3890              | R.FSSETWQNLGLTHR.L                                                             | 1676.81390 | 2 | 1.84E-11 | 0.65 | 3.26  | -     | 500.6    |



|                                                                                                     |                                   |            |   |          |       |        |       |          |
|-----------------------------------------------------------------------------------------------------|-----------------------------------|------------|---|----------|-------|--------|-------|----------|
| AHQ-7-13-, 5008 - 5068                                                                              | R.AVCM*LSNTTAAIEAWAR.L            | 1883.13932 | 2 | 4.18E-05 | 0.94  | 4.41   | -     | 1292.9   |
| AHQ-7-7, 5125 - 5154                                                                                | R.AVCM*LSNTTAAIEAWAR.L            | 1883.13932 | 2 | 1.42E-05 | 0.93  | 4.36   | -     | 916.7    |
| AHQ-7-13-, 5217                                                                                     | R.AVCM*LSNTTAAIEAWAR.L            | 1883.13932 | 2 | 8.96E-05 | 0.93  | 3.97   | -     | 1131.6   |
| AHQ-7-14-, 5714                                                                                     | R.AVFVDLEPTVIDEIR.N               | 1716.95615 | 2 | 4.71E-08 | 0.89  | 3.32   | -     | 1355.3   |
| AHQ-7-13-, 5692 - 5755                                                                              | R.AVFVDLEPTVIDEIR.N               | 1716.95615 | 2 | 2.62E-07 | 0.93  | 3.89   | -     | 1501.7   |
| AHQ-7-11, 5590 - 5668                                                                               | R.AVFVDLEPTVIDEIR.N               | 1716.95615 | 2 | 1.62E-07 | 0.79  | 3.00   | -     | 972.1    |
| AHQ-7-7, 5002                                                                                       | K.AYHEQLSVAEITNACFEPANQMVK.C      | 2753.06070 | 2 | 1.09E-05 | 0.97  | 5.65   | -     | 1116.6   |
| AHQ-7-7, 5373 - 5446                                                                                | K.AYHEQLSVAEITNACFEPANQMVK.C      | 2753.06070 | 3 | 8.09E-05 | 0.87  | 4.10   | -     | 705.7    |
| AHQ-7-7, 3533                                                                                       | K.DVNAIAIAIK.T                    | 986.14745  | 1 | 1.77E-05 | 0.84  | 2.60   | -     | 1012.2   |
| AHQ-7-12, 3279 - 3339                                                                               | K.DVNAIAIAIK.T                    | 986.14745  | 1 | 6.74E-05 | 0.47  | 2.50   | -     | 411.4    |
| AHQ-7-7, 3348                                                                                       | K.DVNAIAIAIK.T                    | 986.14745  | 2 | 5.70E-04 | 0.91  | 2.82   | -     | 1500.2   |
| AHQ-7-12, 3026                                                                                      | K.DVNAIAIAIK.T                    | 986.14745  | 1 | 3.95E-08 | 0.87  | 2.48   | -     | 1304.7   |
| AHQ-7-7, 6628 - 6629                                                                                | R.FDGNLVDLTFEQTNLVPYPR.I          | 2410.66639 | 2 | 2.28E-04 | 0.92  | 4.42   | -     | 768.6    |
| AHQ-7-7, 3304 - 3344                                                                                | K.FDLMYAK.R                       | 888.06574  | 1 | 1.25E-04 | 0.31  | 2.10   | -     | 342.0    |
| AHQ-7-8, 4994 - 5068                                                                                | R.IHFLPYPVISAIAEK.A               | 1758.05310 | 2 | 4.09E-04 | 0.89  | 3.50   | -     | 639.2    |
| AHQ-7-7, 4924 - 4988                                                                                | R.IHFLPYPVISAIAEK.A               | 1758.05310 | 2 | 5.46E-06 | 0.95  | 4.62   | -     | 728.6    |
| AHQ-7-9, 4624 - 4680                                                                                | R.IHFLPYPVISAIAEK.A               | 1758.05310 | 2 | 4.70E-06 | 0.89  | 3.79   | -     | 454.0    |
| AHQ-7-13-, 5000                                                                                     | R.IHFLPYPVISAIAEK.A               | 1758.05310 | 2 | 1.57E-05 | 0.91  | 3.93   | -     | 572.3    |
| AHQ-7-13-, 6311                                                                                     | R.LISQIVSSITASLR.F                | 1488.75471 | 2 | 1.03E-10 | 0.94  | 4.32   | -     | 1024.8   |
| AHQ-7-7, 6600                                                                                       | R.LISQIVSSITASLR.F                | 1488.75471 | 2 | 5.48E-09 | 0.95  | 4.48   | -     | 959.9    |
| AHQ-7-8, 6628                                                                                       | R.LISQIVSSITASLR.F                | 1488.75471 | 2 | 2.98E-08 | 0.94  | 3.95   | -     | 984.5    |
| AHQ-7-14-, 6289 - 6290                                                                              | R.LISQIVSSITASLR.F                | 1488.75471 | 2 | 9.03E-10 | 0.96  | 4.42   | -     | 1465.0   |
| AHQ-7-7, 5809                                                                                       | R.LISQIVSSITASLR.F                | 1488.75471 | 2 | 3.02E-04 | 0.85  | 3.13   | -     | 823.4    |
| AHQ-7-9, 5993                                                                                       | R.LISQIVSSITASLR.F                | 1488.75471 | 2 | 2.06E-07 | 0.91  | 3.52   | -     | 1003.5   |
| AHQ-7-10, 6055                                                                                      | R.LISQIVSSITASLR.F                | 1488.75471 | 2 | 5.44E-04 | 0.90  | 3.82   | -     | 752.5    |
| AHQ-7-11, 6172                                                                                      | R.LISQIVSSITASLR.F                | 1488.75471 | 2 | 6.91E-05 | 0.76  | 2.57   | -     | 917.2    |
| AHQ-7-13-, 3463 - 3483                                                                              | R.NLDIERPTYTNLNR.L                | 1719.88022 | 2 | 5.18E-06 | 0.57  | 3.07   | -     | 301.7    |
| AHQ-7-7, 3385 - 3389                                                                                | R.NLDIERPTYTNLNR.L                | 1719.88022 | 2 | 9.60E-05 | 0.50  | 3.12   | -     | 379.2    |
| AHQ-7-8, 3350                                                                                       | R.NLDIERPTYTNLNR.L                | 1719.88022 | 2 | 1.75E-06 | 0.81  | 3.46   | -     | 632.3    |
| AHQ-7-5, 3527                                                                                       | R.NLDIERPTYTNLNR.L                | 1719.88022 | 2 | 1.00E-04 | 0.22  | 2.52   | -     | 295.3    |
| AHQ-7-14-, 3502                                                                                     | R.NLDIERPTYTNLNR.L                | 1719.88022 | 2 | 5.12E-05 | 0.75  | 3.27   | -     | 622.6    |
| AHQ-7-14, 4322 - 4330                                                                               | R.NLDIERPTYTNLNR.L                | 1719.88022 | 2 | 3.80E-04 | 0.53  | 2.91   | -     | 364.1    |
| AHQ-7-7, 5612 - 5625                                                                                | R.SIQFVDCWCPGFK.V                 | 1586.79232 | 2 | 4.69E-06 | 0.88  | 3.43   | -     | 910.0    |
| AHQ-7-14-, 5462                                                                                     | R.SIQFVDCWCPGFK.V                 | 1586.79232 | 2 | 1.03E-04 | 0.87  | 3.21   | -     | 739.2    |
| AHQ-7-13-, 5472                                                                                     | R.SIQFVDCWCPGFK.V                 | 1586.79232 | 2 | 4.02E-07 | 0.91  | 3.66   | -     | 881.6    |
| AHQ-7-12, 5283 - 5360                                                                               | R.SIQFVDCWCPGFK.V                 | 1586.79232 | 2 | 4.05E-05 | 0.76  | 2.67   | -     | 701.8    |
| AHQ-7-11, 5310 - 5322                                                                               | R.SIQFVDCWCPGFK.V                 | 1586.79232 | 2 | 6.31E-05 | 0.92  | 3.82   | -     | 924.0    |
| AHQ-7-14-, 5387 - 5393                                                                              | K.TIGGGDDSSFTTFFCETGAGK.H         | 2070.17889 | 2 | 2.07E-08 | 0.93  | 4.24   | -     | 748.0    |
| AHQ-7-10, 5157                                                                                      | K.TIGGGDDSSFTTFFCETGAGK.H         | 2070.17889 | 2 | 5.82E-08 | 0.78  | 3.57   | -     | 429.2    |
| AHQ-7-14, 6230 - 6233                                                                               | K.TIGGGDDSSFTTFFCETGAGK.H         | 2070.17889 | 2 | 1.89E-08 | 0.86  | 3.84   | -     | 625.4    |
| AHQ-7-1, 5567                                                                                       | K.TIGGGDDSSFTTFFCETGAGK.H         | 2070.17889 | 2 | 1.67E-06 | 0.63  | 3.06   | -     | 337.7    |
| AHQ-7-12, 5214 - 5218                                                                               | K.TIGGGDDSSFTTFFCETGAGK.H         | 2070.17889 | 2 | 1.29E-07 | 0.81  | 3.45   | -     | 588.3    |
| AHQ-7-7, 5520 - 5585                                                                                | K.TIGGGDDSSFTTFFCETGAGK.H         | 2070.17889 | 2 | 1.05E-08 | 0.93  | 4.48   | -     | 843.0    |
| AHQ-7-13-, 5396                                                                                     | K.TIGGGDDSSFTTFFCETGAGK.H         | 2070.17889 | 2 | 7.31E-11 | 0.88  | 4.14   | -     | 507.0    |
| AHQ-7-11, 5254                                                                                      | K.TIGGGDDSSFTTFFCETGAGK.H         | 2070.17889 | 2 | 2.31E-09 | 0.79  | 3.82   | -     | 372.0    |
| AHQ-7-9, 5030 - 5088                                                                                | K.TIGGGDDSSFTTFFCETGAGK.H         | 2070.17889 | 2 | 6.47E-07 | 0.87  | 3.60   | -     | 737.3    |
| AHQ-7-13, 5485                                                                                      | K.TIGGGDDSSFTTFFCETGAGK.H         | 2070.17889 | 2 | 2.25E-09 | 0.88  | 3.94   | -     | 672.9    |
| AHQ-7-13-, 4269                                                                                     | K.VGINYPPTVVPGGDLAK.V             | 1826.08584 | 2 | 1.07E-05 | 0.44  | 2.79   | -     | 251.6    |
| AHQ-7-13, 4393 - 4470                                                                               | K.VGINYPPTVVPGGDLAK.V             | 1826.08584 | 2 | 9.13E-07 | 0.73  | 3.66   | -     | 269.6    |
| AHQ-7-12, 4168 - 4250                                                                               | K.VGINYPPTVVPGGDLAK.V             | 1826.08584 | 2 | 7.78E-04 | 0.79  | 3.19   | -     | 433.8    |
| AHQ-7-14-, 4294 - 4354                                                                              | K.VGINYPPTVVPGGDLAK.V             | 1826.08584 | 2 | 5.14E-10 | 0.69  | 2.75   | -     | 440.4    |
| AHQ-7-7, 4376                                                                                       | K.VGINYPPTVVPGGDLAK.V             | 1826.08584 | 2 | 9.35E-05 | 0.50  | 2.64   | -     | 257.6    |
| AHQ-7-1, 4548                                                                                       | K.VGINYPPTVVPGGDLAK.V             | 1826.08584 | 2 | 3.14E-04 | 0.65  | 3.22   | -     | 333.0    |
| AHQ-7-7, 4361                                                                                       | K.YMACCLLYR.G                     | 1252.50864 | 1 | 1.62E-04 | 0.60  | 3.20   | -     | 278.7    |
| AHQ-7-7, 3882                                                                                       | K.YM*ACCLLYR.G                    | 1268.50804 | 2 | 6.91E-04 | 0.82  | 2.72   | -     | 647.7    |
| AHQ-7-7, 4353 - 4360                                                                                | K.YMACCLLYR.G                     | 1252.50864 | 2 | 4.36E-05 | 0.96  | 4.28   | -     | 897.6    |
| AHQ-7-11, 4224                                                                                      | K.YMACCLLYR.G                     | 1252.50864 | 2 | 4.41E-05 | 0.92  | 2.82   | -     | 1084.7   |
| gi 27482573 ref XP_208709.1  similar to Ubiquitin-conjugating enzyme E2-18 kDa UbcH7 [Ubiquitin-pro | K.GQVCLPVISAEAWKPAK.T             | 2000.30757 | 2 | 8.97E-05 | 0.75  | 3.52   | 26.00 | 17875.4  |
| AHQ-7-12, 4624                                                                                      | K.TDQVIGLSIALVNDPQPEHPLR.A        | 2484.79318 | 3 | 4.06E-11 | 0.93  | 4.90   | -     | 461.0    |
| AHQ-7-12, 6135                                                                                      | K.TDQVIGLSIALVNDPQPEHPLR.A        | 2484.79318 | 3 | 4.06E-11 | 0.93  | 4.90   | -     | 715.5    |
| gi 17986260 ref NP_524147.1  smooth muscle and non-muscle myosin alkali light chain isoform 2 [Homo | K.M*TEEEVEM*LVAGHEDSNGCINYEELVR.M | 3188.42436 | 3 | 9.48E-07 | 0.95  | 5.29   | 23.30 | 12969.7  |
| AHQ-7-14-, 5342                                                                                     | K.M*TEEEVEM*LVAGHEDSNGCINYEELVR.M | 3188.42436 | 3 | 4.16E-11 | 0.97  | 6.32   | -     | 1546.5   |
| AHQ-7-12, 5183 - 5186                                                                               | K.M*TEEEVEM*LVAGHEDSNGCINYEELVR.M | 3188.42436 | 3 | 4.16E-11 | 0.97  | 6.32   | -     | 1656.4   |
| gi 4504391 ref NP_000179.1  hexokinase 1 isoform HK1; brain form hexokinase [Homo sapiens]          | K.ATDCVGHVDTLLR.D                 | 1557.75406 | 2 | 4.21E-11 | 0.94  | 3.83   | 5.60  | 102502.4 |
| AHQ-7-4, 4496                                                                                       | K.KLPVGFTFSPCQSK.I                | 1873.16425 | 2 | 2.73E-06 | 0.93  | 3.88   | -     | 1041.0   |
| AHQ-7-4, 5484                                                                                       | K.LPVGFTFSPCQSK.I                 | 1744.99134 | 2 | 1.53E-05 | 0.78  | 3.33   | -     | 1097.2   |
| AHQ-7-4, 5901                                                                                       | R.PDGTENGDFLADLGGTNFR.V           | 2211.33051 | 2 | 4.16E-07 | 0.89  | 4.05   | -     | 482.7    |
| AHQ-7-4, 5981                                                                                       | R.PDGTENGDFLADLGGTNFR.V           | 2211.33051 | 2 | 4.16E-07 | 0.89  | 4.05   | -     | 736.8    |
| gi 4502027 ref NP_000468.1  albumin precursor; PRO0883 protein [Homo sapiens]                       | K.AEFAEVS.K                       | 880.96496  | 1 | 4.39E-11 | 37.85 | 460.37 | 71.40 | 69366.4  |
| AHQ-7-5, 2531 - 2562                                                                                | K.AEFAEVS.K                       | 880.96496  | 1 | 4.15E-04 | 0.62  | 2.41   | -     | 872.5    |
| AHQ-7-6, 2530                                                                                       | K.AEFAEVS.K                       | 880.96496  | 1 | 4.15E-04 | 0.62  | 2.41   | -     | 335.4    |
| AHQ-7-6, 2517                                                                                       | K.AEFAEVS.K                       | 880.96496  | 1 | 4.15E-04 | 0.62  | 2.41   | -     | 981.2    |
| AHQ-7-7, 2498                                                                                       | K.AEFAEVS.K                       | 880.96496  | 1 | 4.15E-04 | 0.62  | 2.41   | -     | 549.2    |
| AHQ-7-6, 1850                                                                                       | K.AEFAEVS.K                       | 880.96496  | 1 | 4.15E-04 | 0.62  | 2.41   | -     | 576.2    |
| AHQ-7-6, 1786 - 1851                                                                                | K.AEFAEVS.K                       | 880.96496  | 1 | 4.15E-04 | 0.62  | 2.41   | -     | 1061.9   |
| AHQ-7-5, 1819 - 1860                                                                                | K.AEFAEVS.K                       | 880.96496  | 1 | 4.15E-04 | 0.62  | 2.41   | -     | 1250.7   |
| AHQ-7-6, 1855                                                                                       | K.AEFAEVS.K                       | 880.96496  | 1 | 4.15E-04 | 0.62  | 2.41   | -     | 1481.0   |
| AHQ-7-6, 1935 - 1994                                                                                | K.AEFAEVS.K                       | 880.96496  | 1 | 4.15E-04 | 0.62  | 2.41   | -     | 456.2    |
| AHQ-7-5, 1974                                                                                       | K.AEFAEVS.K                       | 880.96496  | 1 | 4.15E-04 | 0.62  | 2.41   | -     | 576.5    |
| AHQ-7-5, 5400                                                                                       | K.AEFAEVS.K                       | 880.96496  | 1 | 4.15E-04 | 0.62  | 2.41   | -     | 739.7    |
| AHQ-7-6, 6703                                                                                       | K.AEFAEVS.K                       | 880.96496  | 1 | 4.15E-04 | 0.62  | 2.41   | -     | 734.8    |
| AHQ-7-5, 6806                                                                                       | K.AEFAEVS.K                       | 880.96496  | 1 | 4.15E-04 | 0.62  | 2.41   | -     | 1106.6   |
| AHQ-7-6, 4397 - 4461                                                                                | K.AEFAEVS.K                       | 880.96496  | 1 | 4.15E-04 | 0.62  | 2.41   | -     | 536.9    |
| AHQ-7-11, 5074                                                                                      | K.AEFAEVS.K                       | 880.96496  | 1 | 4.15E-04 | 0.62  | 2.41   | -     | 1259.9   |
| AHQ-7-3, 5443                                                                                       | K.AEFAEVS.K                       | 880.96496  | 1 | 4.15E-04 | 0.62  | 2.41   | -     | 1041.1   |
| AHQ-7-12, 5063                                                                                      | K.AEFAEVS.K                       | 880.96496  | 1 | 4.15E-04 | 0.62  | 2.41   | -     | 1005.3   |
| AHQ-7-10, 4972                                                                                      | K.AEFAEVS.K                       | 880.96496  | 1 | 4.15E-04 | 0.62  | 2.41   | -     | 1238.7   |
| AHQ-7-1, 5409                                                                                       | K.AEFAEVS.K                       | 880.96496  | 1 | 4.15E-04 | 0.62  | 2.41   | -     | 941.9    |
| AHQ-7-13, 5334                                                                                      | K.AEFAEVS.K                       | 880.96496  | 1 | 4.15E-04 | 0.62  | 2.41   | -     | 1044.9   |
| AHQ-7-13-, 4357                                                                                     | K.AEFAEVS.K                       | 880.96496  | 1 | 4.15E-04 | 0.62  | 2.41   | -     | 745.8    |
| AHQ-7-13-, 5228 - 5231                                                                              | K.AEFAEVS.K                       | 880.96496  | 1 | 4.15E-04 | 0.62  | 2.41   | -     | 1129.7   |
| AHQ-7-14-, 4417                                                                                     | K.AEFAEVS.K                       | 880.96496  | 1 | 4.15E-04 | 0.62  | 2.41   | -     | 813.9    |
| AHQ-7-7, 5372                                                                                       | K.AEFAEVS.K                       | 880.96496  | 1 | 4.15E-04 | 0.62  | 2.41   | -     | 1024.2   |
| AHQ-7-6, 5323 - 5389                                                                                | K.AEFAEVS.K                       | 880.96496  | 1 | 4.15E-04 | 0.62  | 2.41   | -     | 1278.4   |
| AHQ-7-5, 5480                                                                                       | K.AEFAEVS.K                       | 880.96496  | 1 | 4.15E-04 | 0.62  | 2.41   | -     | 756.1    |
| AHQ-7-5, 5454                                                                                       | K.AEFAEVS.K                       | 880.96496  | 1 | 4.15E-04 | 0.62  | 2.41   | -     | 1418.4   |
| AHQ-7-14-, 5234                                                                                     | K.AEFAEVS.K                       | 880.96496  | 1 | 4.15E-04 | 0.62  | 2.41   | -     | 1484.1   |
| AHQ-7-6, 2165 - 2169                                                                                | K.AEFAEVS.K                       | 880.96496  | 1 | 4.15E-04 | 0.62  | 2.41   | -     | 891.1    |
| AHQ-7-5, 2168                                                                                       | K.AEFAEVS.K                       | 880.96496  | 1 | 4.15E-04 | 0.62  | 2.41   | -     | 587.8    |
| AHQ-7-5, 2106                                                                                       | K.AEFAEVS.K                       | 880.96496  | 1 | 4.15E-04 | 0.62  | 2.41   | -     | 2062.8   |
| AHQ-7-6, 2417 - 2483                                                                                | K.AEFAEVS.K                       | 880.96496  | 1 | 4.15E-04 | 0.62  | 2.41   | -     | 89.4     |
| AHQ-7-7, 2400 - 2405                                                                                | K.AEFAEVS.K                       | 880.96496  | 1 | 4.15E-04 | 0.62  | 2.41   | -     | 822.3    |
| AHQ-7-5, 2412 - 2414                                                                                | K.AEFAEVS.K                       | 880.96496  | 1 | 4.15E-04 | 0.62  | 2.41   | -     | 97.1     |
| AHQ-7-5, 2410 - 2420                                                                                | K.AEFAEVS.K                       | 880.96496  | 1 | 4.15E-04 | 0.62  | 2.41   | -     | 1113.7   |
| AHQ-7-6, 2379 - 2445                                                                                | K.AEFAEVS.K                       | 880.96496  | 1 | 4.15E-04 | 0.62  | 2.41   | -     | 1458.1   |
| AHQ-7-5, 6598 - 6656                                                                                | K.AEFAEVS.K                       | 880.96496  | 1 | 4.15E-04 | 0.62  | 2.41   | -     | 1133.3   |
| AHQ-7-6, 6491                                                                                       | K.AEFAEVS.K                       | 880.96496  | 1 | 4.15E-04 | 0.62  | 2.41   | -     | 1002.8   |

|                        |                                  |            |   |          |      |      |   |        |
|------------------------|----------------------------------|------------|---|----------|------|------|---|--------|
| AHQ-7-7, 6560 - 6638   | K.DVFLGM*FLYEYAR.R               | 1640.88331 | 2 | 5.51E-04 | 0.82 | 3.36 | - | 530.0  |
| AHQ-7-13-, 2723        | R.ETYGEMADCCAK.Q                 | 1437.55563 | 2 | 2.59E-05 | 0.60 | 2.86 | - | 393.8  |
| AHQ-7-5, 2071 - 2079   | R.ETYGEM*ADCCAK.Q                | 1453.55503 | 2 | 9.52E-05 | 0.83 | 2.89 | - | 669.6  |
| AHQ-7-6, 2670          | R.ETYGEMADCCAK.Q                 | 1437.55563 | 1 | 1.33E-08 | 0.49 | 2.63 | - | 158.4  |
| AHQ-7-5, 3016          | R.ETYGEMADCCAKQEPER.N            | 2077.21652 | 2 | 9.66E-08 | 0.87 | 3.69 | - | 599.6  |
| AHQ-7-6, 3926          | R.ETYGEMADCCAKQEPER.N            | 3135.38952 | 3 | 2.28E-10 | 0.68 | 3.61 | - | 395.3  |
| AHQ-7-6, 2690          | R.FKDLGEEFNK.A                   | 1227.34766 | 2 | 4.40E-07 | 0.83 | 3.51 | - | 703.3  |
| AHQ-7-6, 2699          | R.FKDLGEEFNK.A                   | 1227.34766 | 1 | 7.39E-05 | 0.31 | 1.99 | - | 437.5  |
| AHQ-7-7, 2641          | R.FKDLGEEFNK.A                   | 1227.34766 | 1 | 8.45E-05 | 0.22 | 1.83 | - | 396.6  |
| AHQ-7-5, 2724 - 2730   | R.FKDLGEEFNK.A                   | 1227.34766 | 1 | 2.43E-05 | 0.59 | 2.57 | - | 429.5  |
| AHQ-7-13, 2986         | R.FKDLGEEFNK.A                   | 1227.34766 | 2 | 7.60E-06 | 0.86 | 3.14 | - | 820.4  |
| AHQ-7-13, 2991         | R.FKDLGEEFNK.A                   | 1227.34766 | 3 | 3.71E-04 | 0.85 | 3.52 | - | 1084.8 |
| AHQ-7-6, 2781          | R.FKDLGEEFNK.A                   | 1227.34766 | 2 | 5.07E-06 | 0.76 | 3.00 | - | 550.3  |
| AHQ-7-13-, 2815        | R.FKDLGEEFNK.A                   | 1227.34766 | 2 | 1.52E-05 | 0.77 | 3.22 | - | 631.8  |
| AHQ-7-10, 2933         | K.FQNALLVR.Y                     | 961.14282  | 2 | 7.45E-04 | 0.70 | 2.64 | - | 726.2  |
| AHQ-7-5, 6446 - 6462   | R.HPYFYAPELFFAK.R                | 1744.02658 | 2 | 2.87E-04 | 0.65 | 2.51 | - | 386.9  |
| AHQ-7-6, 6354          | R.HPYFYAPELFFAK.R                | 1744.02658 | 3 | 5.55E-06 | 0.91 | 4.06 | - | 1074.1 |
| AHQ-7-5, 6450          | R.HPYFYAPELFFAK.R                | 1744.02658 | 3 | 1.03E-06 | 0.94 | 3.79 | - | 1539.4 |
| AHQ-7-6, 6353          | R.HPYFYAPELFFAK.R                | 1744.02658 | 2 | 6.29E-04 | 0.83 | 3.10 | - | 390.0  |
| AHQ-7-6, 2742 - 2743   | K.KQATALVELV.H                   | 1129.37494 | 1 | 7.11E-05 | 0.25 | 2.20 | - | 306.0  |
| AHQ-7-5, 2778          | K.KQATALVELV.H                   | 1129.37494 | 1 | 9.11E-04 | 0.41 | 2.29 | - | 438.9  |
| AHQ-7-9, 3252 - 3262   | K.KVPOVSTPTLVEVSR.N              | 1640.90605 | 2 | 5.39E-06 | 0.70 | 2.50 | - | 561.6  |
| AHQ-7-1, 3796          | K.KVPOVSTPTLVEVSR.N              | 1640.90605 | 3 | 6.40E-07 | 0.95 | 4.59 | - | 1565.8 |
| AHQ-7-6, 3295          | K.KVPOVSTPTLVEVSR.N              | 1640.90605 | 2 | 2.18E-07 | 0.95 | 3.79 | - | 1175.0 |
| AHQ-7-5, 3571 - 3646   | K.KVPOVSTPTLVEVSR.N              | 1640.90605 | 3 | 3.23E-09 | 0.97 | 5.42 | - | 1612.8 |
| AHQ-7-7, 3472          | K.KVPOVSTPTLVEVSR.N              | 1640.90605 | 2 | 5.71E-04 | 0.72 | 3.15 | - | 704.5  |
| AHQ-7-6, 3497 - 3561   | K.KVPOVSTPTLVEVSR.N              | 1640.90605 | 2 | 1.16E-09 | 0.90 | 3.53 | - | 792.0  |
| AHQ-7-5, 3326          | K.KVPOVSTPTLVEVSR.N              | 1640.90605 | 2 | 1.51E-08 | 0.87 | 3.33 | - | 661.0  |
| AHQ-7-5, 3550 - 3618   | K.KVPOVSTPTLVEVSR.N              | 1640.90605 | 2 | 1.12E-08 | 0.92 | 3.71 | - | 925.9  |
| AHQ-7-10, 3359         | K.KVPOVSTPTLVEVSR.N              | 1640.90605 | 2 | 2.70E-04 | 0.74 | 2.97 | - | 356.5  |
| AHQ-7-2, 3747          | K.KVPOVSTPTLVEVSR.N              | 1640.90605 | 2 | 9.44E-06 | 0.93 | 3.75 | - | 1035.0 |
| AHQ-7-1, 3791 - 3872   | K.KVPOVSTPTLVEVSR.N              | 1640.90605 | 2 | 2.36E-08 | 0.83 | 3.35 | - | 552.1  |
| AHQ-7-6, 3513 - 3515   | K.KVPOVSTPTLVEVSR.N              | 1640.90605 | 3 | 5.75E-06 | 0.95 | 5.32 | - | 1326.1 |
| AHQ-7-7, 3493          | K.KVPOVSTPTLVEVSR.N              | 1640.90605 | 3 | 1.48E-08 | 0.94 | 4.72 | - | 1096.3 |
| AHQ-7-6, 2703          | K.KYLYEIAI.R                     | 1056.23937 | 2 | 1.05E-04 | 0.80 | 2.72 | - | 615.1  |
| AHQ-7-5, 1567 - 1639   | K.LDELDRDEGK.A                   | 1075.15472 | 2 | 1.38E-05 | 0.70 | 2.78 | - | 606.8  |
| AHQ-7-5, 2454 - 2466   | K.LKECCEKPLEK.S                  | 1549.83503 | 3 | 1.48E-05 | 0.89 | 4.65 | - | 723.9  |
| AHQ-7-13-, 4044        | K.LVAASQAALGL                    | 1014.20080 | 2 | 3.05E-06 | 0.94 | 3.53 | - | 1071.1 |
| AHQ-7-5, 4162          | K.LVAASQAALGL                    | 1014.20080 | 2 | 2.62E-05 | 0.96 | 3.82 | - | 1383.3 |
| AHQ-7-5, 3335 - 3370   | K.LVNEVTEFAK.T                   | 1150.30633 | 2 | 3.80E-05 | 0.88 | 2.89 | - | 767.6  |
| AHQ-7-3, 3425          | K.LVNEVTEFAK.T                   | 1150.30633 | 2 | 5.30E-06 | 0.60 | 2.62 | - | 437.6  |
| AHQ-7-5, 3338 - 3412   | K.LVNEVTEFAK.T                   | 1150.30633 | 1 | 9.28E-04 | 0.65 | 2.37 | - | 869.0  |
| AHQ-7-14-, 3306        | K.LVNEVTEFAK.T                   | 1150.30633 | 1 | 3.03E-04 | 0.19 | 2.24 | - | 392.5  |
| AHQ-7-6, 3287 - 3365   | K.LVNEVTEFAK.T                   | 1150.30633 | 2 | 3.76E-07 | 0.92 | 3.85 | - | 775.5  |
| AHQ-7-6, 3185          | K.LVNEVTEFAK.T                   | 1150.30633 | 2 | 3.10E-05 | 0.75 | 2.97 | - | 437.8  |
| AHQ-7-1, 3548          | K.LVNEVTEFAK.T                   | 1150.30633 | 2 | 1.66E-05 | 0.83 | 3.02 | - | 600.6  |
| AHQ-7-5, 3226          | K.LVNEVTEFAK.T                   | 1150.30633 | 1 | 4.36E-05 | 0.37 | 2.07 | - | 331.6  |
| AHQ-7-5, 3562          | K.LVNEVTEFAK.T                   | 1150.30633 | 2 | 7.77E-07 | 0.92 | 3.55 | - | 831.7  |
| AHQ-7-14-, 3301        | K.LVNEVTEFAK.T                   | 1150.30633 | 2 | 5.16E-06 | 0.76 | 2.81 | - | 668.0  |
| AHQ-7-10, 3160         | K.LVNEVTEFAK.T                   | 1150.30633 | 2 | 4.71E-05 | 0.82 | 2.94 | - | 555.2  |
| AHQ-7-5, 3175 - 3238   | K.LVNEVTEFAK.T                   | 1150.30633 | 2 | 5.42E-05 | 0.58 | 2.70 | - | 326.2  |
| AHQ-7-5, 3566          | K.LVNEVTEFAK.T                   | 1150.30633 | 1 | 1.53E-05 | 0.81 | 2.74 | - | 1034.4 |
| AHQ-7-13, 3490 - 3558  | K.LVNEVTEFAK.T                   | 1150.30633 | 2 | 8.17E-06 | 0.76 | 2.98 | - | 486.8  |
| AHQ-7-13-, 3355 - 3360 | K.LVNEVTEFAK.T                   | 1150.30633 | 1 | 4.56E-04 | 0.81 | 2.91 | - | 795.4  |
| AHQ-7-7, 3228          | K.LVNEVTEFAK.T                   | 1150.30633 | 2 | 1.18E-04 | 0.92 | 3.41 | - | 964.5  |
| AHQ-7-5, 4870 - 4920   | R.LVLRPEVDVM*CTAFHDNEETFLK.K     | 2668.98368 | 3 | 5.91E-04 | 0.95 | 5.53 | - | 1193.6 |
| AHQ-7-5, 5724          | R.LVLRPEVDVMCTAFHDNEETFLK.K      | 2652.98428 | 3 | 3.63E-05 | 0.98 | 6.74 | - | 2561.8 |
| AHQ-7-7, 5628          | R.LVLRPEVDVMCTAFHDNEETFLK.K      | 2652.98428 | 3 | 3.72E-06 | 0.98 | 6.65 | - | 2215.9 |
| AHQ-7-6, 5629          | R.LVLRPEVDVMCTAFHDNEETFLK.K      | 2652.98428 | 3 | 1.17E-06 | 0.98 | 7.37 | - | 2211.7 |
| AHQ-7-5, 5458          | R.LVLRPEVDVMCTAFHDNEETFLK.Y      | 2781.15719 | 3 | 5.19E-09 | 0.97 | 6.62 | - | 1473.6 |
| AHQ-7-6, 5365          | R.LVLRPEVDVMCTAFHDNEETFLK.Y      | 2781.15719 | 3 | 1.51E-08 | 0.97 | 6.06 | - | 2060.4 |
| AHQ-7-7, 5289          | R.LVLRPEVDVMCTAFHDNEETFLK.Y      | 2781.15719 | 3 | 7.31E-07 | 0.97 | 6.58 | - | 1608.1 |
| AHQ-7-5, 4423 - 4496   | R.LVLRPEVDVM*CTAFHDNEETFLK.Y     | 2797.15659 | 3 | 3.66E-05 | 0.81 | 4.23 | - | 506.0  |
| AHQ-7-5, 6798          | R.M*PCAEDYLSVVLNQLCVLHEK.T       | 2537.91475 | 3 | 4.48E-10 | 0.97 | 5.59 | - | 1692.1 |
| AHQ-7-6, 3043          | R.NECFLOHQDDNPNLPR.L             | 1999.15349 | 3 | 4.07E-05 | 0.49 | 3.21 | - | 391.1  |
| AHQ-7-6, 4985 - 4986   | K.QNCELFEQLGEYK.F                | 1659.79847 | 2 | 3.69E-07 | 0.83 | 3.44 | - | 659.8  |
| AHQ-7-5, 5062 - 5130   | K.QNCELFEQLGEYK.F                | 1659.79847 | 2 | 1.25E-06 | 0.62 | 2.72 | - | 392.0  |
| AHQ-7-6, 5079 - 5142   | K.QNCELFEQLGEYK.F                | 1659.79847 | 2 | 2.76E-04 | 0.70 | 3.07 | - | 475.5  |
| AHQ-7-5, 5228 - 5304   | K.QNCELFEQLGEYK.F                | 1659.79847 | 2 | 2.69E-06 | 0.92 | 3.87 | - | 799.6  |
| AHQ-7-5, 4180 - 4244   | R.RHPDYSVVLNQL.L                 | 1468.72842 | 3 | 8.58E-05 | 0.97 | 4.85 | - | 2489.0 |
| AHQ-7-6, 5909 - 5967   | R.RHPYFYAPELFFAK.R               | 1900.21293 | 3 | 9.00E-10 | 0.97 | 5.49 | - | 2062.3 |
| AHQ-7-5, 6002 - 6066   | R.RHPYFYAPELFFAK.R               | 1900.21293 | 3 | 6.70E-10 | 0.97 | 5.95 | - | 2092.0 |
| AHQ-7-5, 6007          | R.RHPYFYAPELFFAK.R               | 1900.21293 | 2 | 3.61E-06 | 0.97 | 5.01 | - | 1772.3 |
| AHQ-7-6, 5910 - 5975   | R.RHPYFYAPELFFAK.R               | 1900.21293 | 2 | 4.39E-11 | 0.98 | 5.16 | - | 2632.4 |
| AHQ-7-5, 6766          | K.RM*PCAEDYLSVVLNQLCVLHEK.T      | 2694.10110 | 3 | 8.78E-07 | 0.97 | 6.02 | - | 1648.4 |
| AHQ-7-6, 6661          | K.RM*PCAEDYLSVVLNQLCVLHEK.T      | 2694.10110 | 3 | 3.44E-05 | 0.90 | 4.48 | - | 1066.3 |
| AHQ-7-1, 4781          | R.RPCFSALEVDETYVPK.E             | 1913.14041 | 3 | 5.23E-05 | 0.89 | 4.45 | - | 786.1  |
| AHQ-7-6, 4531          | R.RPCFSALEVDETYVPK.E             | 1913.14041 | 2 | 8.22E-04 | 0.89 | 4.21 | - | 645.8  |
| AHQ-7-6, 4542          | R.RPCFSALEVDETYVPK.E             | 1913.14041 | 3 | 8.65E-07 | 0.95 | 5.26 | - | 1294.2 |
| AHQ-7-6, 4621 - 4685   | R.RPCFSALEVDETYVPK.E             | 1913.14041 | 2 | 4.94E-05 | 0.90 | 3.96 | - | 634.2  |
| AHQ-7-6, 4629          | R.RPCFSALEVDETYVPK.E             | 1913.14041 | 3 | 9.21E-08 | 0.85 | 4.25 | - | 710.6  |
| AHQ-7-11, 4440 - 4451  | R.RPCFSALEVDETYVPK.E             | 1913.14041 | 2 | 8.51E-05 | 0.87 | 4.03 | - | 516.0  |
| AHQ-7-13, 4674         | R.RPCFSALEVDETYVPK.E             | 1913.14041 | 2 | 7.99E-04 | 0.91 | 4.13 | - | 640.5  |
| AHQ-7-5, 4594 - 4611   | R.RPCFSALEVDETYVPK.E             | 1913.14041 | 2 | 1.81E-05 | 0.95 | 4.61 | - | 876.7  |
| AHQ-7-5, 4620 - 4694   | R.RPCFSALEVDETYVPK.E             | 1913.14041 | 3 | 2.67E-05 | 0.85 | 4.66 | - | 715.8  |
| AHQ-7-5, 4688 - 4754   | R.RPCFSALEVDETYVPK.E             | 1913.14041 | 2 | 8.33E-04 | 0.93 | 4.10 | - | 673.4  |
| AHQ-7-3, 4760          | R.RPCFSALEVDETYVPK.E             | 1913.14041 | 2 | 1.00E-04 | 0.92 | 4.42 | - | 541.1  |
| AHQ-7-5, 4759 - 4763   | R.RPCFSALEVDETYVPK.E             | 1913.14041 | 3 | 3.57E-06 | 0.93 | 4.66 | - | 924.0  |
| AHQ-7-1, 4776          | R.RPCFSALEVDETYVPK.E             | 1913.14041 | 2 | 3.09E-05 | 0.87 | 3.62 | - | 562.7  |
| AHQ-7-5, 6650          | K.SHICIAEVNDEM*PADLPSLAADFVESK.D | 2977.22697 | 2 | 7.77E-05 | 0.90 | 4.00 | - | 712.5  |
| AHQ-7-7, 6592 - 6594   | K.SHICIAEVNDEM*PADLPSLAADFVESK.D | 2977.22697 | 3 | 7.67E-05 | 0.97 | 7.14 | - | 936.2  |
| AHQ-7-6, 6059 - 6141   | K.SHICIAEVNDEM*PADLPSLAADFVESK.D | 2993.22637 | 3 | 9.10E-08 | 0.96 | 6.65 | - | 866.1  |
| AHQ-7-5, 6200          | K.SHICIAEVNDEM*PADLPSLAADFVESK.D | 2993.22637 | 2 | 1.41E-04 | 0.94 | 4.33 | - | 1203.6 |
| AHQ-7-3, 6116 - 6124   | K.SHICIAEVNDEM*PADLPSLAADFVESK.D | 2993.22637 | 3 | 1.74E-07 | 0.96 | 6.75 | - | 831.8  |
| AHQ-7-6, 6437          | K.SHICIAEVNDEM*PADLPSLAADFVESK.D | 2993.22637 | 3 | 4.25E-04 | 0.65 | 3.27 | - | 595.7  |
| AHQ-7-6, 6498 - 6557   | K.SHICIAEVNDEM*PADLPSLAADFVESK.D | 2977.22697 | 3 | 2.68E-06 | 0.93 | 5.31 | - | 770.5  |
| AHQ-7-5, 6191 - 6198   | K.SHICIAEVNDEM*PADLPSLAADFVESK.D | 2993.22637 | 2 | 3.41E-04 | 0.95 | 5.12 | - | 983.0  |
| AHQ-7-5, 5126          | K.SLHTLFGDKLCTVATLR.E            | 1934.24913 | 3 | 1.03E-06 | 0.94 | 4.29 | - | 1355.3 |
| AHQ-7-5, 5138          | K.SLHTLFGDKLCTVATLR.E            | 1934.24913 | 2 | 1.28E-06 | 0.97 | 4.58 | - | 1589.6 |
| AHQ-7-6, 5061 - 5127   | K.SLHTLFGDKLCTVATLR.E            | 1934.24913 | 2 | 7.40E-05 | 0.89 | 3.58 | - | 799.1  |
| AHQ-7-5, 1871 - 1934   | K.TCVADESAENCDK.S                | 1501.53308 | 2 | 5.69E-09 | 0.98 | 4.35 | - | 2703.6 |
| AHQ-7-6, 1853 - 1910   | K.TCVADESAENCDK.S                | 1501.53308 | 2 | 1.82E-08 | 0.97 | 4.30 | - | 2217.2 |
| AHQ-7-5, 5848          | K.VFDEFKPLVEEPQNLK.Q             | 2046.35142 | 3 | 1.65E-06 | 0.91 | 4.12 | - | 1003.5 |
| AHQ-7-6, 5526 - 5601   | K.VFDEFKPLVEEPQNLK.Q             | 2046.35142 | 3 | 2.42E-05 | 0.80 | 3.88 | - | 637.2  |
| AHQ-7-1, 5600 - 5655   | K.VFDEFKPLVEEPQNLK.Q             | 2046.35142 | 2 | 2.03E-09 | 0.90 | 4.13 | - | 535.0  |
| AHQ-7-4, 5836          | K.VFDEFKPLVEEPQNLK.Q             | 2046.35142 | 3 | 4.60E-07 | 0.97 | 5.21 | - | 1480.3 |
| AHQ-7-5, 5602          | K.VFDEFKPLVEEPQNLK.Q             | 2046.35142 | 3 | 4.16E-05 | 0.95 | 4.85 | - | 1197.8 |

|                             |                                                                         |            |   |          |       |        |       |         |
|-----------------------------|-------------------------------------------------------------------------|------------|---|----------|-------|--------|-------|---------|
| AHQ-7-5, 5580 - 5648        | K.VFDEFKPLVEEPQNLK.Q                                                    | 2046.35142 | 2 | 8.17E-05 | 0.60  | 2.97   | -     | 300.0   |
| AHQ-7-4, 5832               | K.VFDEFKPLVEEPQNLK.Q                                                    | 2046.35142 | 2 | 4.89E-07 | 0.89  | 4.24   | -     | 432.3   |
| AHQ-7-5, 5731 - 5738        | K.VFDEFKPLVEEPQNLK.Q                                                    | 2046.35142 | 2 | 2.56E-09 | 0.93  | 4.68   | -     | 511.5   |
| AHQ-7-3, 5703               | K.VFDEFKPLVEEPQNLK.Q                                                    | 2046.35142 | 3 | 2.68E-09 | 0.95  | 4.94   | -     | 1063.8  |
| AHQ-7-7, 5646               | K.VFDEFKPLVEEPQNLK.Q                                                    | 2046.35142 | 2 | 7.28E-07 | 0.90  | 4.08   | -     | 439.5   |
| AHQ-7-7, 5652               | K.VFDEFKPLVEEPQNLK.Q                                                    | 2046.35142 | 3 | 1.61E-04 | 0.92  | 4.25   | -     | 1128.7  |
| AHQ-7-5, 5732               | K.VFDEFKPLVEEPQNLK.Q                                                    | 2046.35142 | 3 | 7.01E-06 | 0.96  | 5.06   | -     | 1447.5  |
| AHQ-7-2, 5843               | K.VFDEFKPLVEEPQNLK.Q                                                    | 2046.35142 | 2 | 3.71E-07 | 0.90  | 4.15   | -     | 537.1   |
| AHQ-7-5, 5448               | K.VFDEFKPLVEEPQNLK.Q                                                    | 2046.35142 | 2 | 5.33E-06 | 0.83  | 4.13   | -     | 361.6   |
| AHQ-7-9, 5145               | K.VFDEFKPLVEEPQNLK.Q                                                    | 2046.35142 | 2 | 6.61E-04 | 0.72  | 3.47   | -     | 305.6   |
| AHQ-7-3, 5700               | K.VFDEFKPLVEEPQNLK.Q                                                    | 2046.35142 | 2 | 1.75E-04 | 0.90  | 4.14   | -     | 512.6   |
| AHQ-7-13-, 5469             | K.VFDEFKPLVEEPQNLK.Q                                                    | 2046.35142 | 2 | 6.08E-05 | 0.64  | 3.04   | -     | 326.0   |
| AHQ-7-6, 5571 - 5634        | K.VFDEFKPLVEEPQNLK.Q                                                    | 2046.35142 | 2 | 6.88E-07 | 0.91  | 4.42   | -     | 431.2   |
| AHQ-7-1, 5651               | K.VFDEFKPLVEEPQNLK.Q                                                    | 2046.35142 | 2 | 2.77E-04 | 0.86  | 3.95   | -     | 440.3   |
| AHQ-7-10, 5216              | K.VFDEFKPLVEEPQNLK.Q                                                    | 2046.35142 | 2 | 6.07E-04 | 0.87  | 3.91   | -     | 399.7   |
| AHQ-7-1, 5647               | K.VFDEFKPLVEEPQNLK.Q                                                    | 2046.35142 | 3 | 4.67E-06 | 0.93  | 5.17   | -     | 875.6   |
| AHQ-7-5, 3132               | K.VHTECCHGDLLCEADDR.A                                                   | 2091.20307 | 2 | 3.29E-06 | 0.96  | 4.51   | -     | 1426.2  |
| AHQ-7-6, 3098               | K.VHTECCHGDLLCEADDR.A                                                   | 2091.20307 | 2 | 2.47E-07 | 0.97  | 4.74   | -     | 1513.5  |
| AHQ-7-6, 3694               | K.VHTECCHGDLLCEADDRADLAK.Y                                              | 2589.77855 | 2 | 8.61E-05 | 0.90  | 3.88   | -     | 873.9   |
| AHQ-7-5, 3512 - 3532        | K.VHTECCHGDLLCEADDRADLAK.Y                                              | 2589.77855 | 3 | 9.12E-04 | 0.55  | 3.33   | -     | 559.6   |
| AHQ-7-7, 3669 - 3672        | K.VHTECCHGDLLCEADDRADLAK.Y                                              | 2589.77855 | 2 | 3.47E-06 | 0.93  | 4.35   | -     | 1225.7  |
| AHQ-7-7, 3668               | K.VHTECCHGDLLCEADDRADLAK.Y                                              | 2589.77855 | 3 | 3.12E-04 | 0.93  | 4.82   | -     | 685.8   |
| AHQ-7-5, 3770 - 3774        | K.VHTECCHGDLLCEADDRADLAK.Y                                              | 2589.77855 | 2 | 6.51E-05 | 0.96  | 5.13   | -     | 1231.8  |
| AHQ-7-7, 3821               | K.VPQVSTPLTVEVSR.N                                                      | 1512.73313 | 2 | 2.90E-04 | 0.85  | 2.65   | -     | 989.3   |
| AHQ-7-11, 3747              | K.VPQVSTPLTVEVSR.N                                                      | 1512.73313 | 2 | 7.56E-06 | 0.87  | 3.03   | -     | 783.1   |
| AHQ-7-6, 3857 - 3858        | K.VPQVSTPLTVEVSR.N                                                      | 1512.73313 | 2 | 2.12E-08 | 0.94  | 3.60   | -     | 1164.3  |
| AHQ-7-3, 2419               | K.YICENQDSISSK.L                                                        | 1445.53420 | 2 | 3.33E-04 | 0.88  | 3.26   | -     | 779.8   |
| AHQ-7-5, 2278 - 2354        | K.YICENQDSISSK.L                                                        | 1445.53420 | 2 | 2.64E-05 | 0.90  | 3.73   | -     | 718.5   |
| AHQ-7-2, 2469               | K.YICENQDSISSK.L                                                        | 1445.53420 | 2 | 7.42E-05 | 0.82  | 3.33   | -     | 505.3   |
| AHQ-7-5, 2467 - 2484        | K.YICENQDSISSK.L                                                        | 1445.53420 | 2 | 3.28E-06 | 0.86  | 3.61   | -     | 549.3   |
| AHQ-7-6, 2462               | K.YICENQDSISSK.L                                                        | 1445.53420 | 2 | 1.04E-06 | 0.86  | 3.29   | -     | 631.6   |
| AHQ-7-5, 2372               | K.YICENQDSISSK.L                                                        | 1445.53420 | 1 | 6.18E-05 | 0.72  | 3.17   | -     | 346.5   |
| AHQ-7-5, 2476               | K.YICENQDSISSK.L                                                        | 1445.53420 | 1 | 1.85E-06 | 0.59  | 2.20   | -     | 538.2   |
| AHQ-7-6, 2345               | K.YICENQDSISSK.L                                                        | 1445.53420 | 2 | 1.99E-06 | 0.85  | 3.63   | -     | 630.7   |
| AHQ-7-6, 2958               | K.YLYEIAR.R                                                             | 928.06646  | 1 | 9.15E-04 | 0.24  | 2.07   | -     | 279.6   |
| gi 21624607 ref NP_066972.1 | coactosin-like 1 [Homo sapiens]                                         |            |   | 5.08E-11 | 3.53  | 40.29  | 45.10 | 15944.9 |
| AHQ-7-13-, 5056 - 5069      | R.DDGSAAVIVVTFK.Y                                                       | 1338.49001 | 2 | 1.44E-07 | 0.97  | 4.85   | -     | 1157.6  |
| AHQ-7-13, 6381 - 6387       | K.FALITWIGENVSGLQR.A                                                    | 1805.06986 | 2 | 3.29E-05 | 0.98  | 5.82   | -     | 2555.3  |
| AHQ-7-13-, 6379             | K.FALITWIGENVSGLQR.A                                                    | 1805.06986 | 3 | 8.66E-08 | 0.97  | 5.20   | -     | 1889.0  |
| AHQ-7-13-, 6376 - 6437      | K.FALITWIGENVSGLQR.A                                                    | 1805.06986 | 2 | 2.54E-05 | 0.98  | 5.61   | -     | 2089.5  |
| AHQ-7-13-, 2947 - 2951      | R.KELEEDFIK.S                                                           | 1151.29110 | 2 | 6.52E-04 | 0.85  | 3.37   | -     | 727.0   |
| AHQ-7-12, 2891              | R.KELEEDFIK.S                                                           | 1151.29110 | 2 | 5.70E-05 | 0.77  | 2.91   | -     | 698.3   |
| AHQ-7-12, 4915 - 4971       | K.YDGSITVPGEQGAEYQHFIQQCTDDVDR.L                                        | 3116.27790 | 3 | 5.08E-11 | 0.83  | 4.11   | -     | 437.9   |
| gi 9507215 ref NP_061816.1  | tubulin, alpha-like 2; tubulin, alpha 8 [Homo sapiens]                  |            |   | 5.26E-11 | 3.57  | 40.25  | 10.90 | 50093.2 |
| AHQ-7-7, 5186               | R.AVMIDLEPTVVDEVR.A                                                     | 1686.95185 | 2 | 2.97E-05 | 0.84  | 2.89   | -     | 1160.1  |
| AHQ-7-14-, 4767             | R.AVMIDLEPTVVDEVR.A                                                     | 1702.95125 | 2 | 6.30E-10 | 0.97  | 5.07   | -     | 1354.7  |
| AHQ-7-13, 4858              | R.AVMIDLEPTVVDEVR.A                                                     | 1702.95125 | 2 | 6.22E-07 | 0.86  | 3.98   | -     | 568.7   |
| AHQ-7-14-, 4703 - 4769      | R.AVMIDLEPTVVDEVR.A                                                     | 1702.95125 | 2 | 4.19E-04 | 0.91  | 3.70   | -     | 1040.8  |
| AHQ-7-14-, 5117             | R.AVMIDLEPTVVDEVR.A                                                     | 1686.95185 | 2 | 4.46E-06 | 0.92  | 3.71   | -     | 1226.7  |
| AHQ-7-7, 5529               | R.IHFPVLVYAPIISAEK.A                                                    | 1800.13312 | 2 | 3.47E-06 | 0.81  | 3.56   | -     | 494.9   |
| AHQ-7-14-, 5091             | K.INDDDSFTTFFSETGNKGK.H                                                 | 1996.03358 | 2 | 5.26E-11 | 0.88  | 4.02   | -     | 483.4   |
| AHQ-7-13, 5371              | K.INDDDSFTTFFSETGNKGK.H                                                 | 1996.03358 | 2 | 1.73E-08 | 0.46  | 2.72   | -     | 381.5   |
| AHQ-7-13, 5135 - 5215       | K.INDDDSFTTFFSETGNKGK.H                                                 | 1996.03358 | 2 | 1.38E-07 | 0.79  | 3.86   | -     | 491.7   |
| gi 16507237 ref NP_005338.1 | heat shock 70kDa protein 5 (glucose-regulated protein, 78kDa); BIP; he  |            |   | 5.40E-11 | 9.10  | 100.30 | 24.50 | 72332.5 |
| AHQ-7-6, 5002               | R.AKFEELNMDLFR.S                                                        | 1513.74309 | 3 | 1.27E-07 | 0.87  | 3.69   | -     | 1038.4  |
| AHQ-7-6, 4923 - 5001        | R.AKFEELNMDLFR.S                                                        | 1513.74309 | 2 | 2.53E-07 | 0.94  | 3.81   | -     | 1183.8  |
| AHQ-7-6, 5482               | K.DNHLLEGFDLTIPIPPAPR.G                                                 | 1935.17239 | 2 | 2.00E-06 | 0.92  | 3.82   | -     | 933.0   |
| AHQ-7-6, 5879               | R.IEIESFYEGEDFSETLTRA.A                                                 | 2166.28328 | 2 | 2.52E-04 | 0.49  | 2.61   | -     | 565.8   |
| AHQ-7-6, 5750 - 5782        | R.IEIESFYEGEDFSETLTRA.A                                                 | 2166.28328 | 2 | 1.63E-05 | 0.93  | 4.06   | -     | 1190.8  |
| AHQ-7-6, 4681               | K.IEWLESHQDADIEDFK.A                                                    | 1976.08864 | 3 | 1.68E-08 | 0.89  | 4.29   | -     | 535.0   |
| AHQ-7-6, 4674               | K.IEWLESHQDADIEDFK.A                                                    | 1976.08864 | 2 | 5.40E-11 | 0.98  | 5.96   | -     | 1946.3  |
| AHQ-7-6, 4421               | R.IINEPTAAAIYGLDKR.E                                                    | 1817.07894 | 2 | 6.28E-11 | 0.87  | 4.34   | -     | 956.7   |
| AHQ-7-6, 3785               | K.KSIDIEIVLVGGSTR.I                                                     | 1589.77277 | 3 | 5.22E-06 | 0.74  | 3.39   | -     | 813.1   |
| AHQ-7-6, 3786               | K.KSIDIEIVLVGGSTR.I                                                     | 1589.77277 | 2 | 3.30E-08 | 0.94  | 3.93   | -     | 1564.0  |
| AHQ-7-6, 3666               | K.NQLTSPNPVTFDAK.R                                                      | 1678.78173 | 2 | 6.00E-04 | 0.80  | 3.95   | -     | 359.5   |
| AHQ-7-6, 3742               | K.SQIFSTASDNQPTVTIIV.V                                                  | 1838.00865 | 2 | 5.36E-06 | 0.88  | 3.83   | -     | 830.7   |
| AHQ-7-7, 3701               | K.SQIFSTASDNQPTVTIIV.V                                                  | 1838.00865 | 2 | 3.36E-07 | 0.96  | 4.88   | -     | 1170.7  |
| AHQ-7-6, 3070               | K.KTPYIQVDIGGGQTK.T                                                     | 1605.81703 | 2 | 5.52E-06 | 0.88  | 3.32   | -     | 935.1   |
| AHQ-7-6, 3879 - 3942        | K.VTHAVVTPAYFNAQRR.Q                                                    | 1889.10372 | 2 | 5.39E-09 | 0.94  | 4.50   | -     | 670.5   |
| gi 20149594 ref NP_031381.2 | heat shock 90kDa protein 1, beta; heat shock 90kD protein 1, beta; Hea  |            |   | 5.60E-11 | 5.27  | 60.28  | 10.60 | 83263.6 |
| AHQ-7-5, 3162               | R.ELISNASDALDK.I                                                        | 1276.37539 | 2 | 1.87E-06 | 0.86  | 2.99   | -     | 844.2   |
| AHQ-7-4, 3204               | R.ELISNASDALDK.I                                                        | 1276.37539 | 2 | 7.87E-05 | 0.71  | 3.01   | -     | 587.5   |
| AHQ-7-5, 5632               | K.HSQFIGYPTILYLEK.E                                                     | 1810.08487 | 2 | 1.00E-06 | 0.95  | 4.10   | -     | 1051.9  |
| AHQ-7-5, 4058 - 4132        | R.NPDDITQEEYGEFYK.S                                                     | 1848.90048 | 2 | 5.60E-11 | 0.98  | 5.56   | -     | 1625.7  |
| AHQ-7-5, 4063               | K.SLTNDWEDHLAVK.H                                                       | 1528.64798 | 2 | 1.56E-09 | 0.85  | 3.65   | -     | 688.6   |
| AHQ-7-5, 4294 - 4296        | R.TLTLVDTGIGMTK.A                                                       | 1350.60718 | 2 | 1.03E-07 | 0.95  | 4.07   | -     | 1055.9  |
| AHQ-7-6, 2262               | K.YIDQEELNK.T                                                           | 1152.23595 | 2 | 4.21E-04 | 0.68  | 2.59   | -     | 448.5   |
| gi 24797067 ref NP_002107.3 | major histocompatibility complex, class I, A precursor; HLA-A1 class I  |            |   | 5.72E-11 | 4.35  | 50.27  | 22.70 | 40840.5 |
| AHQ-7-8, 4926               | R.APWIEQEGPEYWDQETR.N                                                   | 2135.23420 | 2 | 5.72E-11 | 0.97  | 5.46   | -     | 988.5   |
| AHQ-7-8, 3288               | R.DGEDQTDTELVELTRPAGDGTGFK.W                                            | 2638.69666 | 2 | 9.59E-08 | 0.68  | 3.71   | -     | 446.0   |
| AHQ-7-8, 3390               | R.DGEDQTDTELVELTRPAGDGTGFK.W                                            | 2638.69666 | 3 | 5.43E-06 | 0.70  | 3.32   | -     | 458.0   |
| AHQ-7-8, 4935 - 5000        | R.FIAYGVYDDTQFVRF.F                                                     | 1630.82504 | 2 | 5.12E-08 | 0.98  | 4.74   | -     | 2186.5  |
| AHQ-7-1, 5008               | R.FIAYGVYDDTQFVRF.F                                                     | 1630.82504 | 2 | 4.98E-08 | 0.97  | 4.07   | -     | 1967.7  |
| AHQ-7-8, 2194               | R.YLENGKETLQR.T                                                         | 1351.49032 | 2 | 5.59E-07 | 0.78  | 2.85   | -     | 790.0   |
| AHQ-7-8, 3238               | R.YTCHVQHEGLPKPLTLR.W                                                   | 2051.35781 | 2 | 1.90E-04 | 0.96  | 4.94   | -     | 1762.0  |
| gi 29732955 ref XP_291603.1 | similar to glyceraldehyde 3-phosphate dehydrogenase [Homo sapiens] [MA  |            |   | 5.85E-11 | 0.85  | 10.21  | 16.80 | 11173.0 |
| AHQ-7-9, 3824 - 3901        | K.NISNASCSTTNCIAPLAK.M                                                  | 1838.05353 | 2 | 7.18E-10 | 0.91  | 3.79   | -     | 956.3   |
| AHQ-7-10, 3655 - 3725       | K.NISNASCSTTNCIAPLAK.M                                                  | 1838.05353 | 2 | 2.53E-04 | 0.56  | 3.03   | -     | 700.4   |
| AHQ-7-11, 3742 - 3802       | K.NISNASCSTTNCIAPLAK.M                                                  | 1838.05353 | 2 | 2.63E-05 | 0.81  | 3.59   | -     | 1193.8  |
| AHQ-7-11, 4048 - 4060       | K.NISNASCSTTNCIAPLAK.M                                                  | 1838.05353 | 2 | 7.96E-05 | 0.27  | 2.56   | -     | 546.0   |
| AHQ-7-9, 3588 - 3668        | K.NISNASCSTTNCIAPLAK.M                                                  | 1838.05353 | 2 | 5.85E-11 | 0.85  | 4.18   | -     | 1089.2  |
| gi 7661818 ref NP_054900.1  | HSPC159 protein [Homo sapiens]                                          |            |   | 6.44E-11 | 3.14  | 40.21  | 37.80 | 19011.6 |
| AHQ-7-14-, 6315             | R.GEEQSAIYFPFIPDQPFV.V                                                  | 2239.47029 | 2 | 8.07E-06 | 0.65  | 2.74   | -     | 327.1   |
| AHQ-7-13-, 6331             | R.GEEQSAIYFPFIPDQPFV.V                                                  | 2239.47029 | 2 | 5.47E-05 | 0.85  | 3.60   | -     | 434.0   |
| AHQ-7-11, 6178              | R.GEEQSAIYFPFIPDQPFV.V                                                  | 2239.47029 | 2 | 3.92E-04 | 0.82  | 3.66   | -     | 286.0   |
| AHQ-7-13, 6321              | R.GEEQSAIYFPFIPDQPFV.V                                                  | 2239.47029 | 2 | 3.49E-07 | 0.83  | 3.59   | -     | 334.7   |
| AHQ-7-11, 4627 - 4683       | K.LDDGHLNLSLSSPVQADVYFPR.L                                              | 2445.62923 | 3 | 1.04E-08 | 0.90  | 4.20   | -     | 1120.4  |
| AHQ-7-11, 3904              | R.LIVPFCGHK.G                                                           | 1185.46348 | 2 | 9.12E-05 | 0.51  | 2.56   | -     | 280.8   |
| AHQ-7-11, 4620              | R.VFVDGHLQDFDYHR.I                                                      | 1780.96540 | 3 | 6.44E-11 | 0.91  | 4.06   | -     | 831.6   |
| AHQ-7-11, 4563 - 4618       | R.VFVDGHLQDFDYHR.I                                                      | 1780.96540 | 2 | 4.75E-06 | 0.96  | 4.19   | -     | 1534.8  |
| gi 30159830 ref XP_302246.1 | similar to HSPC280 [Homo sapiens]                                       |            |   | 6.69E-11 | 1.92  | 20.25  | 3.90  | 45644.4 |
| AHQ-7-14-, 6397             | K.CANLFEALVGTLK.A                                                       | 1437.68632 | 2 | 4.99E-06 | 0.97  | 5.02   | -     | 1403.4  |
| AHQ-7-14-, 6354 - 6414      | R.DDKCANLFEALVGTLK.A                                                    | 1796.03496 | 3 | 6.89E-05 | 0.91  | 4.06   | -     | 1613.4  |
| AHQ-7-14-, 6353             | R.DDKCANLFEALVGTLK.A                                                    | 1796.03496 | 2 | 6.69E-11 | 0.95  | 3.80   | -     | 1567.5  |
| gi 4503689 ref NP_000499.1  | fibrinogen, alpha chain isoform alpha-E preproprotein [Homo sapiens] [M |            |   | 6.87E-11 | 17.63 | 230.29 | 36.00 | 94972.5 |
| AHQ-7-10, 5180 - 5183       | K.DSDWPFCSDEDWNYK.C                                                     | 1965.98609 | 2 | 8.64E-07 | 0.90  | 3.96   | -     | 609.9   |
| AHQ-7-9, 5113               | K.DSDWPFCSDEDWNYK.C                                                     | 1965.98609 | 2 | 4.80E-05 | 0.90  | 3.72   | -     | 454.4   |

|                           |                                                                        |            |   |          |       |        |       |         |
|---------------------------|------------------------------------------------------------------------|------------|---|----------|-------|--------|-------|---------|
| AHQ-7-7, 5621 - 5622      | K.DSDWPFCSDEDWNYK.C                                                    | 1965.98609 | 2 | 1.54E-04 | 0.90  | 3.61   | -     | 571.4   |
| AHQ-7-6, 5597 - 5599      | K.DSDWPFCSDEDWNYK.C                                                    | 1965.98609 | 2 | 2.07E-07 | 0.94  | 4.33   | -     | 644.9   |
| AHQ-7-6, 5647 - 5683      | K.DSHSLTTNMEILR.G                                                      | 1630.84839 | 2 | 3.96E-05 | 0.95  | 3.79   | -     | 1472.9  |
| AHQ-7-8, 5644             | K.DSHSLTTNMEILR.G                                                      | 1630.84839 | 2 | 9.14E-04 | 0.95  | 4.20   | -     | 1173.9  |
| AHQ-7-10, 4515 - 4520     | K.DSHSLTTNMEILR.G                                                      | 1646.84779 | 2 | 2.08E-05 | 0.91  | 3.44   | -     | 1158.3  |
| AHQ-7-9, 5168 - 5176      | K.DSHSLTTNMEILR.G                                                      | 1630.84839 | 2 | 2.95E-04 | 0.97  | 4.74   | -     | 1646.3  |
| AHQ-7-6, 4919             | K.DSHSLTTNMEILR.G                                                      | 1646.84779 | 2 | 8.43E-05 | 0.82  | 2.90   | -     | 938.1   |
| AHQ-7-7, 5641 - 5644      | K.DSHSLTTNMEILR.G                                                      | 1630.84839 | 2 | 5.73E-04 | 0.96  | 4.17   | -     | 1548.8  |
| AHQ-7-7, 2285             | K.ESSSHHPGIAEFPSR.G                                                    | 1638.72252 | 2 | 6.38E-04 | 0.74  | 2.58   | -     | 695.3   |
| AHQ-7-6, 2329 - 2343      | K.ESSSHHPGIAEFPSR.G                                                    | 1638.72252 | 2 | 2.94E-05 | 0.84  | 3.07   | -     | 563.3   |
| AHQ-7-11, 2354 - 2355     | K.ESSSHHPGIAEFPSR.G                                                    | 1638.72252 | 3 | 6.70E-04 | 0.67  | 3.08   | -     | 758.0   |
| AHQ-7-8, 2586 - 2587      | R.EVDLKDYEQQQ.Q                                                        | 1510.58460 | 2 | 2.90E-07 | 0.90  | 3.76   | -     | 801.0   |
| AHQ-7-13-, 2696           | R.EVDLKDYEQQQ.Q                                                        | 1510.58460 | 2 | 2.34E-08 | 0.60  | 2.79   | -     | 422.4   |
| AHQ-7-6, 2617             | R.EVDLKDYEQQQ.Q                                                        | 1510.58460 | 2 | 3.18E-06 | 0.72  | 2.82   | -     | 598.0   |
| AHQ-7-7, 2565             | R.EVDLKDYEQQQ.Q                                                        | 1510.58460 | 2 | 1.93E-04 | 0.67  | 3.00   | -     | 503.4   |
| AHQ-7-10, 2563 - 2640     | R.EVDLKDYEQQQ.Q                                                        | 1510.58460 | 2 | 6.93E-07 | 0.88  | 3.12   | -     | 1011.1  |
| AHQ-7-7, 6264             | K.EVVTSEDDGDCPEAMDGLTSGIGTLDFGR.H                                      | 3131.34937 | 3 | 3.44E-08 | 0.78  | 3.71   | -     | 725.0   |
| AHQ-7-6, 1827 - 1887      | R.GGTSYGTGSETESPR.N                                                    | 1573.55765 | 2 | 8.18E-06 | 0.63  | 2.64   | -     | 541.8   |
| AHQ-7-7, 1829             | R.GGTSYGTGSETESPR.N                                                    | 1573.55765 | 2 | 8.40E-05 | 0.56  | 2.91   | -     | 394.1   |
| AHQ-7-6, 4034             | K.GLIDEVNDQFTNR.I                                                      | 1521.61384 | 2 | 2.92E-05 | 0.93  | 4.27   | -     | 730.5   |
| AHQ-7-9, 4598             | K.GLIDEVNDQFTNR.I                                                      | 1521.61384 | 2 | 1.05E-06 | 0.87  | 3.18   | -     | 832.0   |
| AHQ-7-10, 4275 - 4284     | K.GLIDEVNDQFTNR.I                                                      | 1521.61384 | 2 | 3.73E-06 | 0.96  | 4.34   | -     | 1344.6  |
| AHQ-7-6, 4579 - 4605      | K.GLIDEVNDQFTNR.I                                                      | 1521.61384 | 2 | 1.41E-05 | 0.90  | 3.59   | -     | 806.8   |
| AHQ-7-12, 4390 - 4391     | K.GLIDEVNDQFTNR.I                                                      | 1521.61384 | 2 | 7.90E-05 | 0.93  | 4.20   | -     | 944.4   |
| AHQ-7-8, 4619 - 4630      | K.GLIDEVNDQFTNR.I                                                      | 1521.61384 | 2 | 2.98E-09 | 0.95  | 4.23   | -     | 1207.5  |
| AHQ-7-13, 4565 - 4645     | K.GLIDEVNDQFTNR.I                                                      | 1521.61384 | 2 | 4.88E-06 | 0.95  | 4.05   | -     | 1114.2  |
| AHQ-7-8, 4034 - 4035      | K.GLIDEVNDQFTNR.I                                                      | 1521.61384 | 2 | 7.92E-07 | 0.88  | 3.95   | -     | 627.8   |
| AHQ-7-9, 4229 - 4288      | K.GLIDEVNDQFTNR.I                                                      | 1521.61384 | 2 | 5.74E-05 | 0.96  | 4.36   | -     | 1335.2  |
| AHQ-7-7, 3984             | K.GLIDEVNDQFTNR.I                                                      | 1521.61384 | 2 | 8.07E-07 | 0.91  | 4.21   | -     | 693.2   |
| AHQ-7-7, 4576             | K.GLIDEVNDQFTNR.I                                                      | 1521.61384 | 2 | 8.19E-10 | 0.89  | 3.69   | -     | 773.1   |
| AHQ-7-2, 4792 - 4816      | K.GLIDEVNDQFTNR.I                                                      | 1521.61384 | 2 | 2.50E-07 | 0.94  | 4.32   | -     | 998.1   |
| AHQ-7-5, 4675             | K.GLIDEVNDQFTNR.I                                                      | 1521.61384 | 2 | 3.01E-08 | 0.96  | 4.59   | -     | 1228.6  |
| AHQ-7-3, 4677             | K.GLIDEVNDQFTNR.I                                                      | 1521.61384 | 2 | 2.79E-05 | 0.65  | 2.97   | -     | 643.6   |
| AHQ-7-6, 4757             | K.GLIDEVNDQFTNR.I                                                      | 1521.61384 | 2 | 5.37E-06 | 0.24  | 2.51   | -     | 383.4   |
| AHQ-7-6, 2206 - 2277      | R.GSESGIFTNKT.E                                                        | 1141.21317 | 2 | 4.13E-05 | 0.80  | 2.96   | -     | 796.0   |
| AHQ-7-11, 2278            | R.GSESGIFTNKT.E                                                        | 1141.21317 | 1 | 1.64E-04 | 0.30  | 2.26   | -     | 284.6   |
| AHQ-7-11, 2244 - 2286     | R.GSESGIFTNKT.E                                                        | 1141.21317 | 2 | 1.24E-05 | 0.76  | 2.72   | -     | 735.4   |
| AHQ-7-13, 3398            | R.HPDEAAFFDTASTGK.T                                                    | 1594.66329 | 2 | 7.59E-04 | 0.42  | 2.54   | -     | 318.1   |
| AHQ-7-7, 3022 - 3088      | R.HPDEAAFFDTASTGK.T                                                    | 1594.66329 | 2 | 1.01E-05 | 0.84  | 3.68   | -     | 423.8   |
| AHQ-7-12, 3118            | R.HPDEAAFFDTASTGK.T                                                    | 1594.66329 | 2 | 3.62E-04 | 0.69  | 2.81   | -     | 415.6   |
| AHQ-7-6, 2614 - 2619      | R.HRHPDEAAFFDTASTGK.T                                                  | 1887.98954 | 3 | 5.51E-09 | 0.97  | 5.54   | -     | 1983.7  |
| AHQ-7-6, 2618             | R.HRHPDEAAFFDTASTGK.T                                                  | 1887.98954 | 2 | 6.71E-06 | 0.97  | 5.66   | -     | 1373.5  |
| AHQ-7-10, 2588            | R.HRHPDEAAFFDTASTGK.T                                                  | 1887.98954 | 3 | 2.30E-06 | 0.96  | 4.40   | -     | 1761.1  |
| AHQ-7-7, 2557             | R.HRHPDEAAFFDTASTGK.T                                                  | 1887.98954 | 3 | 1.68E-06 | 0.96  | 4.62   | -     | 1793.2  |
| AHQ-7-13-, 2764 - 2803    | R.HRHPDEAAFFDTASTGK.T                                                  | 1887.98954 | 3 | 4.74E-07 | 0.95  | 4.46   | -     | 1597.8  |
| AHQ-7-13-, 2781           | R.HRHPDEAAFFDTASTGK.T                                                  | 1887.98954 | 2 | 3.92E-06 | 0.97  | 4.91   | -     | 1374.8  |
| AHQ-7-9, 2498 - 2570      | R.HRHPDEAAFFDTASTGK.T                                                  | 1887.98954 | 2 | 7.70E-04 | 0.94  | 4.51   | -     | 824.2   |
| AHQ-7-13, 3014 - 3094     | R.HRHPDEAAFFDTASTGK.T                                                  | 1887.98954 | 3 | 3.07E-05 | 0.97  | 5.11   | -     | 2142.0  |
| AHQ-7-11, 2618            | R.HRHPDEAAFFDTASTGK.T                                                  | 1887.98954 | 2 | 3.66E-09 | 0.97  | 5.29   | -     | 1240.4  |
| AHQ-7-6, 2942             | K.LKNSLFEYQK.N                                                         | 1270.45881 | 2 | 1.36E-05 | 0.54  | 2.63   | -     | 501.1   |
| AHQ-7-9, 2769 - 2770      | K.LKNSLFEYQK.N                                                         | 1270.45881 | 1 | 1.19E-04 | 0.19  | 2.11   | -     | 316.5   |
| AHQ-7-6, 2785             | R.MELERPGEINR.G                                                        | 1502.67870 | 2 | 6.59E-05 | 0.80  | 3.13   | -     | 875.7   |
| AHQ-7-7, 3912             | K.MKPPDLVPGNFK.S                                                       | 1442.75114 | 2 | 3.06E-05 | 0.48  | 2.81   | -     | 286.8   |
| AHQ-7-8, 3756             | K.MKPPDLVPGNFK.S                                                       | 1442.75114 | 2 | 5.06E-04 | 0.55  | 2.55   | -     | 391.8   |
| AHQ-7-7, 5317             | K.NNKDSHSLTTNMEILR.G                                                   | 1987.22751 | 2 | 1.76E-05 | 0.81  | 3.46   | -     | 684.6   |
| AHQ-7-6, 3278             | R.NPGSSGTGGTATWKPSSGPGSTGSWNSGSSGTSTGNQNPSPR.P                         | 4123.15285 | 3 | 6.97E-06 | 0.92  | 5.26   | -     | 604.3   |
| AHQ-7-8, 3231             | R.NPGSSGTGGTATWKPSSGPGSTGSWNSGSSGTSTGNQNPSPR.P                         | 4123.15285 | 3 | 1.95E-08 | 0.93  | 5.02   | -     | 1044.4  |
| AHQ-7-7, 2157 - 2216      | R.NPSSAGSWNSGSSGPGSTGNR.N                                              | 1964.94443 | 2 | 3.26E-10 | 0.97  | 5.73   | -     | 1113.8  |
| AHQ-7-6, 2185 - 2259      | R.NPSSAGSWNSGSSGPGSTGNR.N                                              | 1964.94443 | 2 | 7.51E-08 | 0.97  | 5.03   | -     | 1373.2  |
| AHQ-7-8, 2215             | R.NPSSAGSWNSGSSGPGSTGNR.N                                              | 1964.94443 | 2 | 6.87E-11 | 0.95  | 4.80   | -     | 827.7   |
| AHQ-7-8, 2690             | K.NSLFEYQK.N                                                           | 1029.12765 | 1 | 6.30E-05 | 0.13  | 2.00   | -     | 192.0   |
| AHQ-7-13, 2534            | R.PGSTGTWNPSSSER.G                                                     | 1433.46515 | 2 | 8.40E-05 | 0.62  | 2.62   | -     | 527.5   |
| AHQ-7-8, 2202             | R.PGSTGTWNPSSSER.G                                                     | 1433.46515 | 2 | 7.11E-08 | 0.91  | 3.85   | -     | 708.9   |
| AHQ-7-13-, 4532 - 4581    | R.PNNDPWGTGTFEEVSGNVSPGTR.R                                            | 2261.34962 | 2 | 2.67E-07 | 0.86  | 3.82   | -     | 699.5   |
| AHQ-7-11, 4444            | R.PNNDPWGTGTFEEVSGNVSPGTR.R                                            | 2261.34962 | 1 | 1.12E-10 | 0.88  | 4.21   | -     | 510.6   |
| AHQ-7-6, 6705             | K.TFPGFSPMLGEFVSETESR.G                                                | 2266.51432 | 2 | 2.05E-04 | 0.88  | 3.90   | -     | 438.2   |
| AHQ-7-13-, 6292           | K.TFPGFSPMLGEFVSETESR.G                                                | 2282.51372 | 2 | 1.97E-04 | 0.71  | 3.03   | -     | 245.4   |
| AHQ-7-6, 6547             | K.TFPGFSPMLGEFVSETESR.G                                                | 2282.51372 | 2 | 2.37E-04 | 0.60  | 3.08   | -     | 210.5   |
| AHQ-7-9, 6132             | K.TFPGFSPMLGEFVSETESR.G                                                | 2266.51432 | 2 | 2.47E-06 | 0.82  | 3.51   | -     | 367.9   |
| AHQ-7-13-, 6427           | K.TFPGFSPMLGEFVSETESR.G                                                | 2266.51432 | 2 | 2.41E-06 | 0.90  | 3.95   | -     | 539.2   |
| AHQ-7-13, 6209 - 6281     | K.TFPGFSPMLGEFVSETESR.G                                                | 2282.51372 | 2 | 7.51E-04 | 0.59  | 2.94   | -     | 214.7   |
| AHQ-7-7, 6804             | K.TFPGFSPMLGEFVSETESR.G                                                | 2266.51432 | 2 | 2.88E-07 | 0.84  | 3.57   | -     | 457.3   |
| AHQ-7-9, 2317             | K.VQHILLLQK.N                                                          | 1107.33106 | 1 | 4.51E-04 | 0.73  | 2.98   | -     | 559.4   |
| AHQ-7-7, 2342             | K.VQHILLLQK.N                                                          | 1107.33106 | 2 | 3.82E-04 | 0.79  | 2.76   | -     | 669.3   |
| AHQ-7-7, 2336             | K.VQHILLLQK.N                                                          | 1107.33106 | 1 | 1.72E-04 | 0.56  | 2.33   | -     | 715.5   |
| AHQ-7-8, 2312             | K.VQHILLLQK.N                                                          | 1107.33106 | 1 | 9.00E-04 | 0.58  | 2.83   | -     | 371.4   |
| AHQ-7-10, 2359 - 2373     | K.VQHILLLQK.N                                                          | 1107.33106 | 2 | 4.15E-04 | 0.86  | 2.77   | -     | 852.9   |
| gi4503631 ref NP_000120.1 | coagulation factor XIII A1 subunit precursor; Coagulation factor XIII, |            |   | 7.83E-11 | 23.23 | 280.30 | 39.90 | 83232.8 |
| AHQ-7-5, 5358 - 5423      | R.AVPPNNSNAEDDLPTVELQGVVPR.G                                           | 2603.82656 | 2 | 8.01E-08 | 0.44  | 3.15   | -     | 164.4   |
| AHQ-7-5, 5222 - 5295      | R.AVPPNNSNAEDDLPTVELQGVVPR.G                                           | 2603.82656 | 2 | 4.16E-07 | 0.62  | 3.25   | -     | 116.2   |
| AHQ-7-7, 2569             | R.CLGPAPR.I                                                            | 787.95073  | 1 | 5.05E-05 | 0.52  | 2.10   | -     | 370.0   |
| AHQ-7-8, 2572             | K.DGTHVVENVATHIGK.L                                                    | 1692.81163 | 2 | 8.40E-07 | 0.95  | 4.25   | -     | 1102.0  |
| AHQ-7-6, 2599             | K.DGTHVVENVATHIGK.L                                                    | 1692.81163 | 3 | 2.14E-05 | 0.84  | 3.84   | -     | 781.5   |
| AHQ-7-5, 2616             | K.DGTHVVENVATHIGK.L                                                    | 1692.81163 | 2 | 2.15E-09 | 0.95  | 4.30   | -     | 1116.4  |
| AHQ-7-5, 2614             | K.DGTHVVENVATHIGK.L                                                    | 1692.81163 | 3 | 1.36E-05 | 0.85  | 3.75   | -     | 960.2   |
| AHQ-7-5, 2760 - 2800      | K.DGTHVVENVATHIGK.L                                                    | 1692.81163 | 2 | 2.40E-04 | 0.81  | 3.52   | -     | 642.8   |
| AHQ-7-5, 6994             | K.EAVLIQAGEYMGQLLEQASLHFVTAR.I                                         | 3023.45475 | 3 | 1.18E-07 | 0.84  | 4.11   | -     | 674.1   |
| AHQ-7-5, 5688 - 5722      | K.ETFDVTLEPLSFK.K                                                      | 1526.71190 | 2 | 1.28E-04 | 0.83  | 3.26   | -     | 724.2   |
| AHQ-7-5, 5042             | K.ETFDVTLEPLSFK.K                                                      | 1654.88482 | 2 | 1.37E-05 | 0.74  | 3.21   | -     | 427.5   |
| AHQ-7-5, 5070             | R.GTQVYSGDM*TVTVQFTNPLK.E                                              | 2139.41549 | 2 | 1.21E-08 | 0.91  | 3.91   | -     | 851.3   |
| AHQ-7-6, 5542 - 5615      | K.GTYIPVPIVSELQSGK.W                                                   | 1688.94594 | 2 | 3.22E-04 | 0.61  | 3.03   | -     | 231.2   |
| AHQ-7-5, 5606 - 5615      | K.GTYIPVPIVSELQSGK.W                                                   | 1688.94594 | 2 | 1.73E-04 | 0.66  | 2.88   | -     | 302.9   |
| AHQ-7-5, 5707             | K.GTYIPVPIVSELQSGK.W                                                   | 1688.94594 | 2 | 4.53E-05 | 0.60  | 2.85   | -     | 264.9   |
| AHQ-7-11, 5220 - 5226     | K.GTYIPVPIVSELQSGK.W                                                   | 1688.94594 | 2 | 8.04E-04 | 0.78  | 3.39   | -     | 320.1   |
| AHQ-7-5, 6714 - 6715      | R.GVNLQEFNLVTSVHLFK.E                                                  | 1946.23831 | 3 | 8.53E-10 | 0.85  | 3.96   | -     | 688.2   |
| AHQ-7-7, 6680 - 6681      | R.GVNLQEFNLVTSVHLFK.E                                                  | 1946.23831 | 2 | 2.88E-07 | 0.97  | 5.55   | -     | 1384.3  |
| AHQ-7-9, 6037             | R.GVNLQEFNLVTSVHLFK.E                                                  | 1946.23831 | 2 | 2.55E-04 | 0.95  | 3.95   | -     | 1347.1  |
| AHQ-7-6, 6610             | R.GVNLQEFNLVTSVHLFK.E                                                  | 1946.23831 | 2 | 3.65E-10 | 0.95  | 4.91   | -     | 1065.8  |
| AHQ-7-5, 6711             | R.GVNLQEFNLVTSVHLFK.E                                                  | 1946.23831 | 2 | 6.25E-10 | 0.97  | 4.75   | -     | 1600.9  |
| AHQ-7-13, 6329            | R.GVNLQEFNLVTSVHLFK.E                                                  | 1946.23831 | 2 | 2.59E-05 | 0.91  | 3.75   | -     | 861.4   |
| AHQ-7-12, 6090 - 6151     | R.GVNLQEFNLVTSVHLFK.E                                                  | 1946.23831 | 2 | 6.30E-04 | 0.92  | 4.62   | -     | 806.0   |
| AHQ-7-13-, 6267 - 6339    | R.GVNLQEFNLVTSVHLFK.E                                                  | 1946.23831 | 2 | 1.90E-05 | 0.97  | 5.92   | -     | 1213.8  |
| AHQ-7-5, 3814             | R.HVYGELDVQIQR.R                                                       | 1457.61612 | 2 | 1.03E-06 | 0.91  | 3.25   | -     | 767.9   |
| AHQ-7-5, 3472 - 3536      | R.HVYGELDVQIQR.R                                                       | 1457.61612 | 2 | 3.28E-10 | 0.94  | 4.19   | -     | 825.4   |
| AHQ-7-5, 2266             | K.KDGTTHVVENVATHIGK.L                                                  | 1820.98455 | 3 | 2.47E-07 | 0.97  | 5.28   | -     | 2417.1  |
| AHQ-7-5, 2458             | K.KDGTTHVVENVATHIGK.L                                                  | 1820.98455 | 2 | 5.99E-09 | 0.84  | 3.66   | -     | 673.0   |
| AHQ-7-6, 2255 - 2331      | K.KDGTTHVVENVATHIGK.L                                                  | 1820.98455 | 3 | 1.34E-05 | 0.80  | 3.06   | -     | 1045.8  |



|                             |                                                                            |            |          |          |        |       |         |        |
|-----------------------------|----------------------------------------------------------------------------|------------|----------|----------|--------|-------|---------|--------|
| AHQ-7-5, 2463               | K.KDGTHTVVENVNDATHIGK.L                                                    | 1820.98455 | 3        | 1.39E-05 | 0.98   | 5.61  | -       | 2825.9 |
| AHQ-7-5, 2271               | K.KDGTHTVVENVNDATHIGK.L                                                    | 1820.98455 | 2        | 3.66E-05 | 0.90   | 3.34  | -       | 1139.6 |
| AHQ-7-10, 4700              | K.KETFDVTLLEPLSFK.K                                                        | 1654.88482 | 2        | 7.80E-05 | 0.91   | 3.71  | -       | 1325.3 |
| AHQ-7-11, 4819              | K.KETFDVTLLEPLSFK.K                                                        | 1654.88482 | 2        | 5.48E-08 | 0.93   | 3.70  | -       | 1288.2 |
| AHQ-7-6, 5115               | K.KETFDVTLLEPLSFK.K                                                        | 1654.88482 | 2        | 8.85E-05 | 0.95   | 3.91  | -       | 1605.7 |
| AHQ-7-5, 5124 - 5186        | K.KETFDVTLLEPLSFK.K                                                        | 1654.88482 | 2        | 6.55E-08 | 0.96   | 4.57  | -       | 1591.6 |
| AHQ-7-5, 2802 - 2804        | R.KLIASMSDSSLR.H                                                           | 1308.53039 | 2        | 1.01E-09 | 0.96   | 4.04  | -       | 1509.9 |
| AHQ-7-5, 2114               | R.KLIASM*SSDSSLR.H                                                         | 1324.52979 | 2        | 1.21E-05 | 0.86   | 3.07  | -       | 900.0  |
| AHQ-7-5, 4702 - 4743        | R.LALETALMYGAK.K                                                           | 1281.54655 | 2        | 1.54E-04 | 0.96   | 3.91  | -       | 1737.4 |
| AHQ-7-6, 4639 - 4669        | R.LALETALMYGAK.K                                                           | 1281.54655 | 2        | 9.72E-08 | 0.96   | 3.67  | -       | 1743.6 |
| AHQ-7-5, 4718               | R.LALETALMYGAK.K                                                           | 1297.54595 | 2        | 2.46E-07 | 0.93   | 3.66  | -       | 1210.1 |
| AHQ-7-5, 2262               | K.LIASM*SSDSSLR.H                                                          | 1196.35688 | 2        | 2.12E-04 | 0.87   | 3.26  | -       | 638.7  |
| AHQ-7-5, 6042 - 6051        | R.MYVAVWTPYGVLR.T                                                          | 1555.86794 | 2        | 9.00E-04 | 0.94   | 4.41  | -       | 906.4  |
| AHQ-7-5, 5571 - 5650        | R.M*YVAVWTPYGVLR.T                                                         | 1571.86734 | 2        | 2.93E-04 | 0.97   | 2.92  | -       | 551.9  |
| AHQ-7-5, 6635 - 6712        | R.NPETDTYILFNPWCEDDAVYLDNEK.E                                              | 3064.23814 | 3        | 1.66E-04 | 0.64   | 3.06  | -       | 723.8  |
| AHQ-7-5, 6464               | R.NPETDTYILFNPWCEDDAVYLDNEK.E                                              | 3349.53903 | 3        | 7.83E-11 | 0.93   | 4.75  | -       | 995.1  |
| AHQ-7-7, 6397               | R.NPETDTYILFNPWCEDDAVYLDNEK.E                                              | 3349.53903 | 3        | 9.05E-07 | 0.92   | 4.75  | -       | 938.1  |
| AHQ-7-11, 3544              | R.NVVVHLDGPGVTR.P                                                          | 1450.62682 | 2        | 7.10E-06 | 0.86   | 3.21  | -       | 959.3  |
| AHQ-7-8, 3542               | R.NVVVHLDGPGVTR.P                                                          | 1450.62682 | 2        | 3.30E-05 | 0.74   | 2.77  | -       | 597.1  |
| AHQ-7-5, 3724               | R.NVVVHLDGPGVTR.P                                                          | 1450.62682 | 2        | 3.24E-08 | 0.93   | 3.63  | -       | 1257.8 |
| AHQ-7-5, 4263 - 4266        | K.QIGGDGMMDDITDYK.F                                                        | 1645.83696 | 2        | 1.28E-08 | 0.91   | 4.01  | -       | 680.5  |
| AHQ-7-5, 3671 - 3738        | K.QIGGDGMM*DDITDYK.F                                                       | 1661.83636 | 2        | 8.26E-04 | 0.36   | 2.68  | -       | 388.9  |
| AHQ-7-5, 4576 - 4642        | R.SNVDMDFEVENAVLGK.D                                                       | 1783.93809 | 2        | 4.93E-07 | 0.97   | 4.94  | -       | 1891.7 |
| AHQ-7-6, 4565 - 4567        | R.SNVDMDFEVENAVLGK.D                                                       | 1783.93809 | 2        | 3.46E-10 | 0.97   | 4.36  | -       | 1939.1 |
| AHQ-7-6, 5213               | R.SNVDMDFEVENAVLGK.D                                                       | 1767.93869 | 2        | 1.20E-05 | 0.91   | 3.61  | -       | 1290.5 |
| AHQ-7-5, 5280 - 5306        | R.SNVDMDFEVENAVLGK.D                                                       | 1767.93869 | 2        | 3.94E-09 | 0.97   | 5.48  | -       | 2019.1 |
| AHQ-7-5, 4114               | R.SNVDMDFEVENAVLGK.D                                                       | 1783.93809 | 2        | 2.43E-07 | 0.73   | 2.69  | -       | 727.7  |
| AHQ-7-5, 5375               | R.SNVDMDFEVENAVLGK.D                                                       | 1767.93869 | 2        | 6.26E-06 | 0.84   | 3.60  | -       | 817.2  |
| AHQ-7-6, 5643 - 5705        | K.STVLTPIEIIK.V                                                            | 1327.63485 | 2        | 2.00E-04 | 0.80   | 2.73  | -       | 1101.9 |
| AHQ-7-7, 5638 - 5642        | K.STVLTPIEIIK.V                                                            | 1327.63485 | 2        | 2.66E-04 | 0.88   | 3.45  | -       | 1019.5 |
| AHQ-7-13, 5503              | K.STVLTPIEIIK.V                                                            | 1327.63485 | 2        | 9.60E-04 | 0.89   | 2.86  | -       | 1386.9 |
| AHQ-7-11, 5350 - 5419       | K.STVLTPIEIIK.V                                                            | 1327.63485 | 2        | 1.20E-04 | 0.92   | 4.01  | -       | 992.2  |
| AHQ-7-5, 6868               | R.YGQCWVAVGFNTFLR.C                                                        | 1967.23783 | 2        | 2.41E-08 | 0.95   | 4.56  | -       | 1030.4 |
| gi 4506467 ref NP_002897.1  | radixin [Homo sapiens]                                                     | 2          | 8.54E-11 | 0.96     | 10.23  | 2.60  | 68563.4 |        |
| AHQ-7-6, 5351               | K.NQEQLAAELAEFTAK.I                                                        | 1663.81020 | 2        | 8.54E-11 | 0.96   | 4.60  | -       | 1379.8 |
| gi 450725 ref NP_000362.1   | transthyretin (prealbumin, amyloidosis type I); Transthyretin (prealbumin) | 2          | 8.59E-11 | 6.27     | 70.29  | 69.40 | 15886.9 |        |
| AHQ-7-13, 3933 - 3937       | K.AADDTWEPFASGK.T                                                          | 1395.45529 | 2        | 1.41E-04 | 0.91   | 3.69  | -       | 943.4  |
| AHQ-7-13, 4451              | K.ALGISPFHEHAIEVFTANDSGPR.R                                                | 2452.66660 | 3        | 1.68E-06 | 0.89   | 3.27  | -       | 1567.3 |
| AHQ-7-13, 4138 - 4145       | R.GSPAINVAHVFR.K                                                           | 1367.58095 | 2        | 3.23E-07 | 0.94   | 4.23  | -       | 1081.3 |
| AHQ-7-13, 4015 - 4028       | R.GSPAINVAHVFR.K                                                           | 1367.58095 | 2        | 1.56E-09 | 0.96   | 4.53  | -       | 1157.1 |
| AHQ-7-13, 3459              | R.KAADDTWEPFASGK.T                                                         | 1523.62820 | 2        | 1.45E-05 | 0.94   | 3.40  | -       | 1500.8 |
| AHQ-7-13, 5709              | R.RYTIALLSPYSYSTTAVVTPNPK.E                                                | 2646.97608 | 3        | 3.26E-04 | 0.70   | 3.07  | -       | 785.6  |
| AHQ-7-13, 5335              | K.TSESGELHGLTTEEEFVEGIYK.V                                                 | 2456.60073 | 3        | 2.11E-08 | 0.96   | 5.34  | -       | 1305.8 |
| AHQ-7-13, 5341              | K.TSESGELHGLTTEEEFVEGIYK.V                                                 | 2456.60073 | 2        | 8.59E-11 | 0.98   | 5.87  | -       | 1668.3 |
| AHQ-7-13, 5401              | K.TSESGELHGLTTEEEFVEGIYK.V                                                 | 2456.60073 | 2        | 6.98E-06 | 0.88   | 3.47  | -       | 968.0  |
| AHQ-7-13, 6136              | K.TSESGELHGLTTEEEFVEGIYKVEIDTK.S                                           | 3142.37019 | 3        | 2.08E-04 | 0.91   | 5.13  | -       | 623.4  |
| gi 21361547 ref NP_002930.2 | ribonuclease/angiogenin inhibitor; Placental ribonuclease inhibitor [H]    | 2          | 8.65E-11 | 0.91     | 10.19  | 3.30  | 49973.3 |        |
| AHQ-7-7, 6414               | R.WAELLPLLQQQVVR.L                                                         | 1855.19360 | 2        | 8.65E-11 | 0.91   | 3.81  | -       | 726.4  |
| gi 13994151 ref NP_066272.1 | PDZ and LIM domain 1 (elfin); carboxy terminal LIM domain protein 1 [H]    | 2          | 9.28E-11 | 12.07    | 140.27 | 51.40 | 36071.5 |        |
| AHQ-7-14, 6182 - 6245       | K.AALANLCIGDVTDAIDGENTSNM*THLEAQRN.I                                       | 3331.63807 | 3        | 6.53E-06 | 0.95   | 5.45  | -       | 938.6  |
| AHQ-7-13, 6252              | K.AALANLCIGDVTDAIDGENTSNM*THLEAQRN.I                                       | 3331.63807 | 3        | 1.01E-05 | 0.94   | 5.37  | -       | 653.5  |
| AHQ-7-13, 6272 - 6347       | K.AALANLCIGDVTDAIDGENTSNM*THLEAQRN.I                                       | 3315.63867 | 3        | 1.28E-06 | 0.90   | 4.55  | -       | 599.0  |
| AHQ-7-13, 6278              | K.AALANLCIGDVTDAIDGENTSNM*THLEAQRN.I                                       | 3331.63807 | 3        | 1.74E-06 | 0.89   | 4.42  | -       | 597.5  |
| AHQ-7-13, 5732              | K.AALANLCIGDVTDAIDGENTSNM*THLEAQRN.I                                       | 3331.63807 | 3        | 3.07E-07 | 0.86   | 4.23  | -       | 530.8  |
| AHQ-7-14, 4421 - 4446       | K.CGTGIVGVFVK.L                                                            | 1138.36198 | 2        | 2.15E-04 | 0.91   | 2.89  | -       | 1299.5 |
| AHQ-7-13, 4389              | K.CGTGIVGVFVK.L                                                            | 1138.36198 | 2        | 1.83E-05 | 0.93   | 3.58  | -       | 1298.3 |
| AHQ-7-13, 4526 - 4539       | K.CGTGIVGVFVK.L                                                            | 1138.36198 | 2        | 5.60E-04 | 0.91   | 3.41  | -       | 988.5  |
| AHQ-7-11, 3483 - 3560       | K.DFEQPLAIR.V                                                              | 1176.30388 | 2        | 2.45E-06 | 0.91   | 3.39  | -       | 1056.4 |
| AHQ-7-12, 3524              | K.DFEQPLAIR.V                                                              | 1176.30388 | 2        | 1.56E-06 | 0.92   | 3.45  | -       | 1116.0 |
| AHQ-7-14, 3597 - 3614       | K.DFEQPLAIR.V                                                              | 1176.30388 | 2        | 4.89E-05 | 0.91   | 3.67  | -       | 905.0  |
| AHQ-7-13, 3523              | K.GCTDNLTLTVAR.S                                                           | 1322.47058 | 2        | 2.69E-07 | 0.71   | 3.20  | -       | 565.6  |
| AHQ-7-13, 3363              | K.GCTDNLTLTVAR.S                                                           | 1322.47058 | 2        | 5.75E-05 | 0.87   | 3.73  | -       | 735.2  |
| AHQ-7-13, 4111 - 4183       | K.GHFFVEDQIYCEK.H                                                          | 1673.82684 | 2        | 1.75E-05 | 0.94   | 3.89  | -       | 1020.8 |
| AHQ-7-14, 3959 - 3965       | K.GHFFVEDQIYCEK.H                                                          | 1673.82684 | 2        | 2.49E-05 | 0.97   | 4.98  | -       | 1217.6 |
| AHQ-7-11, 3856              | K.GHFFVEDQIYCEK.H                                                          | 1673.82684 | 2        | 3.39E-05 | 0.94   | 3.80  | -       | 1200.2 |
| AHQ-7-13, 3971              | K.GHFFVEDQIYCEK.H                                                          | 1673.82684 | 2        | 3.01E-05 | 0.97   | 4.43  | -       | 1707.9 |
| AHQ-7-13, 2787              | R.HRHPCEVCVCTDCGTNLK.Q                                                     | 2151.34648 | 3        | 3.80E-04 | 0.96   | 5.10  | -       | 1332.7 |
| AHQ-7-13, 3256              | R.IKGTDLTLTVAR.S                                                           | 1563.80174 | 2        | 4.26E-09 | 0.94   | 3.87  | -       | 1068.1 |
| AHQ-7-14, 3233 - 3234       | R.IKGTDLTLTVAR.S                                                           | 1563.80174 | 2        | 2.01E-10 | 0.96   | 4.77  | -       | 1108.6 |
| AHQ-7-13, 3381 - 3459       | R.IKGTDLTLTVAR.S                                                           | 1563.80174 | 2        | 2.48E-04 | 0.40   | 2.55  | -       | 497.5  |
| AHQ-7-12, 3166              | R.IKGTDLTLTVAR.S                                                           | 1563.80174 | 2        | 9.28E-11 | 0.92   | 3.88  | -       | 971.5  |
| AHQ-7-11, 3148              | R.IKGTDLTLTVAR.S                                                           | 1563.80174 | 2        | 2.88E-10 | 0.94   | 3.93  | -       | 1046.1 |
| AHQ-7-13, 3387 - 3397       | R.IKGTDLTLTVAR.S                                                           | 1563.80174 | 2        | 6.13E-09 | 0.94   | 3.84  | -       | 1147.5 |
| AHQ-7-13, 3539 - 3554       | R.IKGTDLTLTVAR.S                                                           | 1563.80174 | 2        | 2.29E-05 | 0.78   | 3.29  | -       | 740.6  |
| AHQ-7-14, 4126              | R.IKGTDLTLTVAR.S                                                           | 1563.80174 | 2        | 2.59E-06 | 0.85   | 3.14  | -       | 666.3  |
| AHQ-7-14, 4667              | K.LPM*CDKCGTIVGVFVK.L                                                      | 1900.27298 | 3        | 1.49E-06 | 0.82   | 3.40  | -       | 971.0  |
| AHQ-7-13, 3875              | R.LVGGKDFEQPLAIR.V                                                         | 1630.86972 | 2        | 1.72E-06 | 0.92   | 4.01  | -       | 960.2  |
| AHQ-7-13, 3703              | K.M*NLASEPQEVHLHIGSAHNR.S                                                  | 2120.33559 | 2        | 7.71E-05 | 0.86   | 3.85  | -       | 545.1  |
| AHQ-7-13, 3691 - 3696       | K.M*NLASEPQEVHLHIGSAHNR.S                                                  | 2120.33559 | 3        | 2.19E-09 | 0.76   | 3.72  | -       | 528.3  |
| AHQ-7-12, 3576              | K.M*NLASEPQEVHLHIGSAHNR.S                                                  | 2120.33559 | 2        | 8.43E-04 | 0.42   | 2.71  | -       | 232.2  |
| AHQ-7-13, 3810 - 3829       | K.M*NLASEPQEVHLHIGSAHNR.S                                                  | 2120.33559 | 3        | 9.37E-04 | 0.73   | 3.44  | -       | 654.6  |
| AHQ-7-13, 6255              | K.QSTSFLVLQEIIESEEK.G                                                      | 1981.18977 | 2        | 2.48E-06 | 0.94   | 4.06  | -       | 1328.7 |
| AHQ-7-13, 6266              | K.QSTSFLVLQEIIESEEK.G                                                      | 1981.18977 | 2        | 6.23E-08 | 0.97   | 4.30  | -       | 1731.3 |
| AHQ-7-13, 5884 - 5887       | K.QSTSFLVLQEIIESEEKGDPNKPSGFR.S                                            | 3037.32681 | 3        | 1.43E-05 | 0.79   | 3.76  | -       | 547.7  |
| AHQ-7-13, 3080              | R.SAMPFTASPASSTAR.V                                                        | 1583.74859 | 2        | 2.65E-04 | 0.44   | 2.60  | -       | 449.0  |
| AHQ-7-11, 2992              | R.SAMPFTASPASSTAR.V                                                        | 1583.74859 | 2        | 3.34E-06 | 0.68   | 2.74  | -       | 632.5  |
| gi 25188179 ref NP_005653.3 | voltage-dependent anion channel 3 [Homo sapiens]                           | 2          | 9.67E-11 | 2.61     | 30.22  | 16.30 | 30658.4 |        |
| AHQ-7-10, 4608              | K.LTLDITFVPTGK.K                                                           | 1419.64771 | 2        | 7.31E-05 | 0.85   | 3.38  | -       | 649.5  |
| AHQ-7-10, 4264              | K.VNNASLIGLGYTQLRPGVK.L                                                    | 2102.42298 | 2        | 9.67E-11 | 0.80   | 3.46  | -       | 592.0  |
| AHQ-7-10, 4153              | K.VNNASLIGLGYTQLRPGVK.L                                                    | 2102.42298 | 2        | 4.90E-08 | 0.85   | 3.74  | -       | 686.3  |
| AHQ-7-14, 5369              | K.VNNASLIGLGYTQLRPGVK.L                                                    | 2102.42298 | 2        | 9.37E-05 | 0.71   | 2.93  | -       | 463.2  |
| AHQ-7-10, 3656 - 3669       | K.YKVCNYGLTFTQ.W                                                           | 1623.85410 | 2        | 6.29E-05 | 0.96   | 4.43  | -       | 1405.7 |
| gi 30151108 ref XP_301187.1 | similar to actin beta, cytoskeletal - Kenyan clawed frog [Homo sapiens]    | 2          | 9.82E-11 | 2.69     | 30.30  | 13.10 | 32164.8 |        |
| AHQ-7-1, 4897 - 4899        | K.DLYANTVLSGGTTM*YPIADR.M                                                  | 2232.45624 | 2        | 5.48E-06 | 0.92   | 4.56  | -       | 721.1  |
| AHQ-7-1, 5325 - 5328        | K.DLYANTVLSGGTTM*YPIADR.M                                                  | 2216.45684 | 2        | 1.78E-04 | 0.95   | 5.13  | -       | 997.8  |
| AHQ-7-2, 5019 - 5091        | K.DLYANTVLSGGTTM*YPIADR.M                                                  | 2232.45624 | 2        | 1.15E-06 | 0.95   | 4.83  | -       | 1159.7 |
| AHQ-7-3, 4916               | K.DLYANTVLSGGTTM*YPIADR.M                                                  | 2232.45624 | 2        | 1.16E-04 | 0.93   | 4.52  | -       | 861.1  |
| AHQ-7-3, 5196               | K.DLYANTVLSGGTTM*YPIADR.M                                                  | 2216.45684 | 2        | 8.55E-05 | 0.91   | 3.78  | -       | 988.2  |
| AHQ-7-4, 4864               | K.DLYANTVLSGGTTM*YPIADR.M                                                  | 2232.45624 | 2        | 1.15E-06 | 0.92   | 4.35  | -       | 690.7  |
| AHQ-7-4, 5012               | K.DLYANTVLSGGTTM*YPIADR.M                                                  | 2232.45624 | 2        | 3.12E-04 | 0.89   | 3.99  | -       | 723.8  |
| AHQ-7-5, 4795               | K.DLYANTVLSGGTTM*YPIADR.M                                                  | 2232.45624 | 2        | 3.58E-08 | 0.94   | 4.57  | -       | 854.4  |
| AHQ-7-5, 4892 - 4954        | K.DLYANTVLSGGTTM*YPIADR.M                                                  | 2232.45624 | 2        | 4.46E-05 | 0.95   | 4.89  | -       | 1088.1 |
| AHQ-7-5, 5242               | K.DLYANTVLSGGTTM*YPIADR.M                                                  | 2216.45684 | 2        | 6.91E-05 | 0.81   | 3.54  | -       | 354.5  |
| AHQ-7-5, 5414               | K.DLYANTVLSGGTTM*YPIADR.M                                                  | 2216.45684 | 2        | 2.98E-04 | 0.88   | 3.88  | -       | 779.5  |
| AHQ-7-6, 4883               | K.DLYANTVLSGGTTM*YPIADR.M                                                  | 2232.45624 | 2        | 1.29E-05 | 0.97   | 5.29  | -       | 1559.1 |
| AHQ-7-6, 5057               | K.DLYANTVLSGGTTM*YPIADR.M                                                  | 2232.45624 | 2        | 2.67E-04 | 0.86   | 3.60  | -       | 719.2  |
| AHQ-7-6, 5166               | K.DLYANTVLSGGTTM*YPIADR.M                                                  | 2216.45684 | 2        | 2.81E-05 | 0.84   | 3.73  | -       | 332.4  |

|                            |                                                                         |            |   |          |      |       |       |          |
|----------------------------|-------------------------------------------------------------------------|------------|---|----------|------|-------|-------|----------|
| AHQ-7-6, 5337              | K.DLYANTVLSGGTTMYPGIADR.M                                               | 2216.45684 | 2 | 4.26E-04 | 0.81 | 3.70  | -     | 537.4    |
| AHQ-7-7, 5141              | K.DLYANTVLSGGTTMYPGIADR.M                                               | 2216.45684 | 2 | 2.68E-06 | 0.95 | 4.54  | -     | 1081.1   |
| AHQ-7-7, 5326 - 5328       | K.DLYANTVLSGGTTMYPGIADR.M                                               | 2216.45684 | 2 | 1.64E-05 | 0.95 | 5.05  | -     | 900.1    |
| AHQ-7-14-, 5054 - 5109     | K.DLYANTVLSGGTTMYPGIADR.M                                               | 2216.45684 | 2 | 4.70E-07 | 0.94 | 4.68  | -     | 842.9    |
| AHQ-7-8, 4652 - 4714       | K.DLYANTVLSGGTTMYPGIADR.M                                               | 2232.45624 | 2 | 2.07E-09 | 0.97 | 5.19  | -     | 1363.8   |
| AHQ-7-8, 4778 - 4838       | K.DLYANTVLSGGTTMYPGIADR.M                                               | 2232.45624 | 2 | 9.33E-07 | 0.94 | 4.76  | -     | 857.5    |
| AHQ-7-8, 4856 - 4863       | K.DLYANTVLSGGTTMYPGIADR.M                                               | 2232.45624 | 3 | 1.71E-04 | 0.81 | 3.78  | -     | 741.7    |
| AHQ-7-8, 4870 - 4930       | K.DLYANTVLSGGTTMYPGIADR.M                                               | 2232.45624 | 2 | 1.76E-07 | 0.95 | 5.17  | -     | 893.4    |
| AHQ-7-8, 4902              | K.DLYANTVLSGGTTMYPGIADR.M                                               | 2232.45624 | 2 | 2.06E-04 | 0.92 | 4.71  | -     | 818.7    |
| AHQ-7-8, 5075 - 5127       | K.DLYANTVLSGGTTMYPGIADR.M                                               | 2216.45684 | 2 | 7.25E-07 | 0.96 | 5.40  | -     | 1110.5   |
| AHQ-7-8, 5174 - 5242       | K.DLYANTVLSGGTTMYPGIADR.M                                               | 2216.45684 | 2 | 3.65E-08 | 0.96 | 5.32  | -     | 1062.3   |
| AHQ-7-8, 5538 - 5606       | K.DLYANTVLSGGTTMYPGIADR.M                                               | 2216.45684 | 2 | 3.68E-06 | 0.96 | 5.38  | -     | 951.2    |
| AHQ-7-8, 6174 - 6246       | K.DLYANTVLSGGTTMYPGIADR.M                                               | 2216.45684 | 2 | 1.28E-04 | 0.95 | 4.72  | -     | 1148.2   |
| AHQ-7-8, 6182              | K.DLYANTVLSGGTTMYPGIADR.M                                               | 2216.45684 | 2 | 2.77E-04 | 0.89 | 3.76  | -     | 865.3    |
| AHQ-7-8, 6803 - 6868       | K.DLYANTVLSGGTTMYPGIADR.M                                               | 2216.45684 | 2 | 2.10E-05 | 0.84 | 3.93  | -     | 507.6    |
| AHQ-7-8, 6938              | K.DLYANTVLSGGTTMYPGIADR.M                                               | 2216.45684 | 2 | 5.11E-04 | 0.90 | 4.44  | -     | 663.5    |
| AHQ-7-9, 4452              | K.DLYANTVLSGGTTMYPGIADR.M                                               | 2232.45624 | 2 | 8.59E-05 | 0.93 | 4.31  | -     | 1048.9   |
| AHQ-7-10, 4359 - 4428      | K.DLYANTVLSGGTTMYPGIADR.M                                               | 2232.45624 | 2 | 4.27E-06 | 0.96 | 5.21  | -     | 1002.0   |
| AHQ-7-10, 4483 - 4545      | K.DLYANTVLSGGTTMYPGIADR.M                                               | 2232.45624 | 2 | 1.74E-05 | 0.94 | 4.99  | -     | 856.3    |
| AHQ-7-10, 4643             | K.DLYANTVLSGGTTMYPGIADR.M                                               | 2232.45624 | 2 | 3.75E-06 | 0.91 | 3.95  | -     | 832.2    |
| AHQ-7-10, 4872 - 4935      | K.DLYANTVLSGGTTMYPGIADR.M                                               | 2216.45684 | 2 | 4.84E-06 | 0.95 | 5.09  | -     | 894.4    |
| AHQ-7-11, 4474             | K.DLYANTVLSGGTTMYPGIADR.M                                               | 2232.45624 | 2 | 9.82E-11 | 0.95 | 5.04  | -     | 871.6    |
| AHQ-7-11, 4586             | K.DLYANTVLSGGTTMYPGIADR.M                                               | 2232.45624 | 2 | 2.78E-05 | 0.90 | 4.16  | -     | 728.5    |
| AHQ-7-11, 4863 - 4864      | K.DLYANTVLSGGTTMYPGIADR.M                                               | 2216.45684 | 2 | 4.76E-05 | 0.93 | 4.93  | -     | 749.0    |
| AHQ-7-12, 4478 - 4487      | K.DLYANTVLSGGTTMYPGIADR.M                                               | 2232.45624 | 2 | 6.46E-09 | 0.95 | 5.27  | -     | 1057.0   |
| AHQ-7-13, 4689 - 4761      | K.DLYANTVLSGGTTMYPGIADR.M                                               | 2232.45624 | 2 | 1.05E-05 | 0.95 | 5.09  | -     | 959.0    |
| AHQ-7-13, 4817 - 4841      | K.DLYANTVLSGGTTMYPGIADR.M                                               | 2232.45624 | 2 | 4.00E-05 | 0.97 | 5.49  | -     | 1190.5   |
| AHQ-7-13, 4989 - 5005      | K.DLYANTVLSGGTTMYPGIADR.M                                               | 2232.45624 | 2 | 7.23E-06 | 0.97 | 5.31  | -     | 1289.2   |
| AHQ-7-13, 5079 - 5137      | K.DLYANTVLSGGTTMYPGIADR.M                                               | 2216.45684 | 2 | 2.43E-04 | 0.89 | 3.93  | -     | 903.9    |
| AHQ-7-13, 5203 - 5261      | K.DLYANTVLSGGTTMYPGIADR.M                                               | 2216.45684 | 2 | 2.44E-06 | 0.95 | 4.83  | -     | 967.1    |
| AHQ-7-14, 5353 - 5409      | K.DLYANTVLSGGTTMYPGIADR.M                                               | 2232.45624 | 2 | 2.59E-05 | 0.94 | 4.61  | -     | 887.6    |
| AHQ-7-14, 5468 - 5524      | K.DLYANTVLSGGTTMYPGIADR.M                                               | 2232.45624 | 2 | 2.17E-05 | 0.94 | 4.92  | -     | 728.5    |
| AHQ-7-14, 5580 - 5642      | K.DLYANTVLSGGTTMYPGIADR.M                                               | 2232.45624 | 2 | 3.79E-05 | 0.92 | 4.63  | -     | 655.9    |
| AHQ-7-14, 5702 - 5768      | K.DLYANTVLSGGTTMYPGIADR.M                                               | 2232.45624 | 2 | 6.04E-05 | 0.95 | 4.40  | -     | 1240.0   |
| AHQ-7-14, 5748             | K.DLYANTVLSGGTTMYPGIADR.M                                               | 2216.45684 | 2 | 2.12E-04 | 0.92 | 4.25  | -     | 687.3    |
| AHQ-7-13-, 4772            | K.DLYANTVLSGGTTMYPGIADR.M                                               | 2232.45624 | 2 | 5.94E-05 | 0.89 | 3.65  | -     | 934.4    |
| AHQ-7-13-, 4861            | K.DLYANTVLSGGTTMYPGIADR.M                                               | 2232.45624 | 2 | 1.44E-07 | 0.97 | 5.02  | -     | 1421.1   |
| AHQ-7-13-, 5095 - 5164     | K.DLYANTVLSGGTTMYPGIADR.M                                               | 2216.45684 | 2 | 1.58E-06 | 0.96 | 5.91  | -     | 928.4    |
| AHQ-7-14-, 4543 - 4602     | K.DLYANTVLSGGTTMYPGIADR.M                                               | 2232.45624 | 2 | 1.89E-08 | 0.97 | 5.78  | -     | 1077.6   |
| AHQ-7-14-, 4661 - 4722     | K.DLYANTVLSGGTTMYPGIADR.M                                               | 2232.45624 | 2 | 4.33E-05 | 0.96 | 5.26  | -     | 1129.9   |
| AHQ-7-14-, 4790 - 4851     | K.DLYANTVLSGGTTMYPGIADR.M                                               | 2232.45624 | 2 | 2.09E-05 | 0.94 | 4.69  | -     | 823.9    |
| AHQ-7-14-, 4879 - 4941     | K.DLYANTVLSGGTTMYPGIADR.M                                               | 2232.45624 | 2 | 6.79E-08 | 0.95 | 4.74  | -     | 937.0    |
| AHQ-7-14-, 4947 - 5005     | K.DLYANTVLSGGTTMYPGIADR.M                                               | 2216.45684 | 2 | 1.76E-04 | 0.95 | 4.99  | -     | 1072.7   |
| AHQ-7-14-, 5293 - 5294     | K.DLYANTVLSGGTTMYPGIADR.M                                               | 2216.45684 | 2 | 1.66E-06 | 0.96 | 5.86  | -     | 924.0    |
| AHQ-7-8, 4063 - 4075       | K.YPIEHSITNWDMEK.I                                                      | 1992.19784 | 2 | 3.15E-04 | 0.78 | 3.31  | -     | 891.6    |
| gj4502051 ref NP_000688.1  | arachidonate 12-lipoxygenase; 12(S)-lipoxygenase [Homo sapiens]         |            |   | 9.93E-11 | 6.97 | 80.22 | 17.60 | 75721.8  |
| AHQ-7-6, 4802              | R.AAAQLTYCSLCPDLDLDR.G                                                  | 2140.33708 | 2 | 2.83E-05 | 0.84 | 3.40  | -     | 555.2    |
| AHQ-7-6, 3470              | K.GDPELQAWCR.E                                                          | 1233.33558 | 2 | 1.04E-06 | 0.74 | 2.56  | -     | 505.5    |
| AHQ-7-6, 5458              | R.GLLGLPGALYAHDAALR.L                                                   | 1637.90708 | 2 | 9.93E-11 | 0.94 | 4.41  | -     | 803.3    |
| AHQ-7-6, 5033              | R.ITVQGPAGCAEVAFPCYR.W                                                  | 1999.25659 | 2 | 5.46E-04 | 0.79 | 3.35  | -     | 784.5    |
| AHQ-7-6, 4509              | R.LPGDNALDMFQKH                                                         | 1349.53784 | 2 | 2.74E-05 | 0.88 | 3.45  | -     | 858.6    |
| AHQ-7-6, 4047              | R.TQLISDGGIFDK.A                                                        | 1294.43554 | 2 | 1.22E-06 | 0.92 | 3.71  | -     | 1007.8   |
| AHQ-7-6, 4673              | R.VATGAWLFGSSYNR.V                                                      | 1529.68080 | 2 | 1.93E-04 | 0.91 | 3.35  | -     | 1099.4   |
| AHQ-7-6, 4966              | R.WVQGEDILSLPEGTAR.L                                                    | 1771.95190 | 2 | 1.34E-05 | 0.94 | 4.31  | -     | 1000.7   |
| gj29742410 ref XP_291183.1 | similar to TREM-like transcript 1 [Homo sapiens]                        |            |   | 9.93E-11 | 1.57 | 20.21 | 10.30 | 32678.3  |
| AHQ-7-11, 4123             | R.FLPEGGQPLVSSAVDR.R                                                    | 1776.99174 | 2 | 9.93E-11 | 0.84 | 3.60  | -     | 504.4    |
| AHQ-7-13-, 4103 - 4107     | R.FLPEGGQPLVSSAVDR.R                                                    | 1776.99174 | 2 | 1.96E-07 | 0.90 | 4.06  | -     | 520.6    |
| AHQ-7-13-, 4185 - 4259     | R.FLPEGGQPLVSSAVDR.R                                                    | 1776.99174 | 2 | 3.10E-07 | 0.89 | 3.55  | -     | 613.6    |
| AHQ-7-13-, 3868 - 3933     | R.VSLNILPPEEEEEETHK.I                                                   | 1865.03087 | 3 | 1.42E-04 | 0.73 | 3.22  | -     | 770.2    |
| AHQ-7-11, 3723             | R.VSLNILPPEEEEEETHK.I                                                   | 1865.03087 | 3 | 2.94E-04 | 0.56 | 3.14  | -     | 595.6    |
| gj5031635 ref NP_005498.1  | cofilin 1 (non-muscle) [Homo sapiens]                                   |            |   | 1.07E-10 | 7.32 | 80.33 | 57.80 | 18502.4  |
| AHQ-7-12, 3443 - 3500      | K.AVLFCLSEDKK.N                                                         | 1311.52930 | 2 | 2.84E-06 | 0.74 | 2.69  | -     | 686.1    |
| AHQ-7-11, 5286             | K.EILVGDVGQTVDDPYATFVK.M                                                | 2167.40069 | 2 | 1.07E-10 | 0.94 | 4.48  | -     | 1124.9   |
| AHQ-7-13, 5469 - 5471      | K.EILVGDVGQTVDDPYATFVK.M                                                | 2167.40069 | 2 | 3.40E-06 | 0.98 | 6.15  | -     | 1663.0   |
| AHQ-7-13-, 5404            | K.EILVGDVGQTVDDPYATFVK.M                                                | 2167.40069 | 2 | 1.98E-07 | 0.96 | 5.17  | -     | 1285.8   |
| AHQ-7-12, 5296             | K.EILVGDVGQTVDDPYATFVK.M                                                | 2167.40069 | 2 | 3.68E-07 | 0.50 | 2.88  | -     | 375.3    |
| AHQ-7-12, 5192 - 5239      | K.EILVGDVGQTVDDPYATFVK.M                                                | 2167.40069 | 2 | 1.50E-09 | 0.98 | 6.17  | -     | 1720.2   |
| AHQ-7-14-, 5411            | K.EILVGDVGQTVDDPYATFVK.M                                                | 2167.40069 | 2 | 6.28E-09 | 0.96 | 5.21  | -     | 1073.8   |
| AHQ-7-14, 6149             | K.EILVGDVGQTVDDPYATFVK.M                                                | 2167.40069 | 2 | 5.31E-04 | 0.94 | 4.69  | -     | 915.6    |
| AHQ-7-12, 2608 - 2683      | K.HELOANCYEEVKDR.C                                                      | 1792.90812 | 2 | 7.39E-05 | 0.83 | 3.24  | -     | 530.2    |
| AHQ-7-12, 2446 - 2511      | K.HELOANCYEEVKDR.C                                                      | 1792.90812 | 2 | 2.65E-09 | 0.97 | 5.42  | -     | 1405.0   |
| AHQ-7-12, 3063 - 3132      | K.KAVLFLCSEDKK.N                                                        | 1439.70221 | 2 | 1.08E-04 | 0.91 | 3.71  | -     | 888.3    |
| AHQ-7-12, 3087             | K.KAVLFLCSEDKK.N                                                        | 1439.70221 | 3 | 1.17E-08 | 0.90 | 3.88  | -     | 1061.7   |
| AHQ-7-11, 5984             | K.KEDLVFIFWAPESAPLK.S                                                   | 1991.31745 | 2 | 9.59E-04 | 0.65 | 2.77  | -     | 553.6    |
| AHQ-7-12, 5959 - 6034      | K.KEDLVFIFWAPESAPLK.S                                                   | 1991.31745 | 2 | 2.34E-06 | 0.93 | 4.36  | -     | 872.7    |
| AHQ-7-13-, 6113 - 6148     | K.KEDLVFIFWAPESAPLK.S                                                   | 1991.31745 | 2 | 6.26E-05 | 0.94 | 4.59  | -     | 967.0    |
| AHQ-7-13-, 6149            | K.KEDLVFIFWAPESAPLK.S                                                   | 1991.31745 | 3 | 8.62E-04 | 0.92 | 5.17  | -     | 620.7    |
| AHQ-7-12, 4222 - 4303      | K.LGSSAVISLEGKPL                                                        | 1341.57848 | 2 | 5.53E-08 | 0.96 | 5.03  | -     | 1310.1   |
| AHQ-7-14-, 4365            | K.LGSSAVISLEGKPL                                                        | 1341.57848 | 2 | 1.39E-06 | 0.95 | 4.43  | -     | 1209.3   |
| AHQ-7-12, 3928 - 3930      | K.LGSSAVISLEGKPL                                                        | 1341.57848 | 2 | 1.38E-06 | 0.95 | 4.23  | -     | 1439.3   |
| AHQ-7-12, 4227 - 4296      | K.LGSSAVISLEGKPL                                                        | 1341.57848 | 1 | 4.29E-04 | 0.33 | 2.46  | -     | 403.2    |
| AHQ-7-12, 4359             | K.LGSSAVISLEGKPL                                                        | 1341.57848 | 2 | 5.63E-04 | 0.90 | 3.53  | -     | 1100.5   |
| AHQ-7-13-, 4329            | K.LGSSAVISLEGKPL                                                        | 1341.57848 | 2 | 8.11E-05 | 0.90 | 3.66  | -     | 971.3    |
| AHQ-7-11, 6147             | K.NIILEEGKEILVGDVGQTVDDPYATFVK.M                                        | 3064.43208 | 3 | 4.59E-05 | 0.92 | 5.00  | -     | 859.0    |
| AHQ-7-12, 6119             | K.NIILEEGKEILVGDVGQTVDDPYATFVK.M                                        | 3064.43208 | 3 | 4.79E-10 | 0.96 | 6.55  | -     | 1365.3   |
| AHQ-7-12, 3115 - 3178      | R.YALYDATYETK.E                                                         | 1338.44364 | 2 | 1.48E-06 | 0.95 | 3.95  | -     | 1075.7   |
| AHQ-7-11, 3194 - 3264      | R.YALYDATYETK.E                                                         | 1338.44364 | 2 | 2.95E-09 | 0.91 | 3.37  | -     | 932.9    |
| AHQ-7-12, 3182             | R.YALYDATYETK.E                                                         | 1338.44364 | 1 | 1.97E-06 | 0.53 | 2.79  | -     | 301.4    |
| gj13518026 ref NP_004978.2 | LIM and senescent cell antigen-like domains 1 [Homo sapiens]            |            |   | 1.07E-10 | 2.60 | 30.23 | 12.00 | 37251.2  |
| AHQ-7-9, 4129 - 4140       | K.CHAIIDEQPLIFK.N                                                       | 1585.84900 | 2 | 2.44E-04 | 0.95 | 4.61  | -     | 1390.5   |
| AHQ-7-8, 4404 - 4418       | K.CHAIIDEQPLIFK.N                                                       | 1585.84900 | 2 | 1.07E-10 | 0.96 | 4.65  | -     | 1233.0   |
| AHQ-7-11, 4319 - 4327      | K.CHAIIDEQPLIFK.N                                                       | 1585.84900 | 2 | 3.10E-07 | 0.95 | 4.60  | -     | 1170.5   |
| AHQ-7-8, 3318              | R.ELKGELYCLPCHDK.M                                                      | 1765.00101 | 2 | 9.81E-06 | 0.70 | 2.86  | -     | 504.0    |
| AHQ-7-8, 3327              | R.VIEGDVVSALNK.A                                                        | 1244.41966 | 2 | 6.43E-06 | 0.90 | 3.37  | -     | 892.1    |
| AHQ-7-10, 3351             | R.VIEGDVVSALNK.A                                                        | 1244.41966 | 2 | 8.80E-04 | 0.71 | 2.80  | -     | 456.6    |
| AHQ-7-11, 3423 - 3434      | R.VIEGDVVSALNK.A                                                        | 1244.41966 | 2 | 5.09E-05 | 0.95 | 4.28  | -     | 952.3    |
| AHQ-7-9, 3265              | R.VIEGDVVSALNK.A                                                        | 1244.41966 | 1 | 1.63E-04 | 0.63 | 2.58  | -     | 675.6    |
| AHQ-7-8, 3414              | R.VIEGDVVSALNK.A                                                        | 1244.41966 | 2 | 1.82E-07 | 0.94 | 4.17  | -     | 1145.6   |
| gj5729887 ref NP_006624.1  | IQ motif containing GTPase activating protein 2 [Homo sapiens]          |            |   | 1.14E-10 | 5.40 | 60.27 | 6.00  | 180611.0 |
| AHQ-7-3, 3749              | K.AWVVNQLTQGEASK.L                                                      | 1662.78230 | 2 | 7.05E-04 | 0.70 | 3.00  | -     | 658.3    |
| AHQ-7-3, 5536              | K.GVLLDIDDLQTNQFK.N                                                     | 1719.91690 | 2 | 1.15E-07 | 0.95 | 4.63  | -     | 1246.2   |
| AHQ-7-3, 4753              | K.LPYDVTTEQALTYPEVK.N                                                   | 1968.19269 | 2 | 1.14E-10 | 0.97 | 4.74  | -     | 1896.1   |
| AHQ-7-3, 4475              | K.SLIINTNPVEVYK.A                                                       | 1490.72593 | 2 | 4.50E-04 | 0.85 | 2.93  | -     | 1238.8   |
| AHQ-7-3, 4116 - 4187       | K.VDQVQDIVTGNPTVIK.M                                                    | 1726.95257 | 2 | 1.19E-08 | 0.95 | 4.88  | -     | 1137.2   |
| AHQ-7-3, 5680              | R.VVAVGYNEAIDEGNPLR.T                                                   | 1930.15092 | 2 | 7.48E-10 | 0.98 | 5.37  | -     | 2180.2   |
| gj5453607 ref NP_006420.1  | chaperonin containing TCP1, subunit 7 (eta); chaperonin containing t-co |            |   | 1.25E-10 | 1.88 | 20.24 | 6.60  | 59366.3  |
| AHQ-7-7, 4941              | K.LPIGDVATQYFADR.D                                                      | 1566.73935 | 2 | 1.25E-10 | 0.93 | 3.57  | -     | 1136.4   |

|                             |                                                                          |            |   |          |       |        |       |          |
|-----------------------------|--------------------------------------------------------------------------|------------|---|----------|-------|--------|-------|----------|
| AHQ-7-7, 6676               | K.SQDAEVDGTTSVTLAAEFLK.Q                                                 | 2253.44875 | 2 | 6.48E-06 | 0.95  | 4.89   | -     | 1076.5   |
| gi 10835002 ref NP_001166.1 | Rho GDP dissociation inhibitor (GDI) beta; Ly-GDI [Homo sapiens]         |            |   | 1.53E-10 | 4.19  | 50.25  | 40.80 | 22987.8  |
| AHQ-7-10, 2419              | K.APEPHVEEDDDDELDSK.L                                                    | 1940.90995 | 2 | 3.25E-09 | 0.97  | 4.67   | -     | 1737.7   |
| AHQ-7-10, 2356 - 2437       | K.APEPHVEEDDDDELDSK.L                                                    | 1940.90995 | 3 | 1.53E-10 | 0.96  | 5.09   | -     | 1650.6   |
| AHQ-7-10, 5100 - 5155       | K.ATFMVGSYGPRPEEYFLTPVEEAPK.G                                            | 2962.27864 | 3 | 4.77E-10 | 0.88  | 4.25   | -     | 737.4    |
| AHQ-7-10, 5292 - 5299       | K.ATFMVGSYGPRPEEYFLTPVEEAPK.G                                            | 2946.27924 | 3 | 2.58E-05 | 0.85  | 4.09   | -     | 782.8    |
| AHQ-7-13-, 5372             | K.ATFMVGSYGPRPEEYFLTPVEEAPK.G                                            | 2962.27864 | 3 | 4.80E-04 | 0.82  | 3.54   | -     | 781.0    |
| AHQ-7-11, 5236 - 5238       | K.ATFMVGSYGPRPEEYFLTPVEEAPK.G                                            | 2962.27864 | 3 | 7.50E-06 | 0.87  | 4.02   | -     | 903.9    |
| AHQ-7-10, 3021 - 3075       | K.ELQEMDKDDDELK.Y                                                        | 1693.85489 | 2 | 8.42E-04 | 0.84  | 3.77   | -     | 820.8    |
| AHQ-7-10, 5751 - 5808       | R.LTLVCSAPPITM*DLTGDLEALKK.E                                             | 2691.11214 | 3 | 2.09E-07 | 0.66  | 3.13   | -     | 593.5    |
| gi 4758012 ref NP_004850.1  | clathrin heavy chain; clathrin, heavy polypeptide-like 2 [Homo sapiens]  |            |   | 1.55E-10 | 13.26 | 150.24 | 12.00 | 191612.6 |
| AHQ-7-3, 4456               | R.ALEHFTLDYDIK.R                                                         | 1465.63179 | 2 | 2.25E-05 | 0.90  | 3.30   | -     | 934.3    |
| AHQ-7-3, 4752               | R.GQFSTDELVAEVEK.R                                                       | 1552.66462 | 2 | 9.49E-08 | 0.94  | 4.54   | -     | 1128.9   |
| AHQ-7-3, 4703               | R.GQFSTDELVAEVEK.N                                                       | 1708.85097 | 2 | 1.12E-07 | 0.89  | 3.89   | -     | 942.8    |
| AHQ-7-3, 2156               | R.IHEGCEEPATHNALAK.I                                                     | 1778.92458 | 2 | 9.06E-04 | 0.87  | 3.36   | -     | 803.5    |
| AHQ-7-3, 5212               | R.ISGETIFVTAPHEATAGIIGVNR.K                                              | 2354.64751 | 3 | 1.55E-10 | 0.91  | 4.10   | -     | 1366.7   |
| AHQ-7-3, 4479               | R.LASTLVHLGEYQAAVDGAR.K                                                  | 1972.19103 | 2 | 9.25E-05 | 0.92  | 3.92   | -     | 1021.1   |
| AHQ-7-3, 5857               | K.LLLPVLLEAR.I                                                           | 1111.36131 | 2 | 1.37E-04 | 0.60  | 2.86   | -     | 395.5    |
| AHQ-7-3, 6421 - 6500        | R.LPVVIGLLDVCSDSEVIK.N                                                   | 2043.36744 | 2 | 6.70E-04 | 0.91  | 3.94   | -     | 844.6    |
| AHQ-7-4, 6209               | R.NLQNLILTAIK.A                                                          | 1354.66353 | 2 | 3.42E-05 | 0.97  | 4.64   | -     | 1703.5   |
| AHQ-7-3, 6059 - 6079        | R.NLQNLILTAIK.A                                                          | 1354.66353 | 2 | 2.05E-05 | 0.97  | 4.47   | -     | 2204.3   |
| AHQ-7-5, 4862 - 4923        | R.TSIDAYDNFNDISLAQR.L                                                    | 1944.04818 | 2 | 8.79E-07 | 0.78  | 3.22   | -     | 776.7    |
| AHQ-7-3, 3295               | K.VANVELYYR.A                                                            | 1127.27446 | 2 | 3.22E-07 | 0.92  | 3.54   | -     | 931.4    |
| AHQ-7-3, 6581               | K.VGYTPDWIFLLR.N                                                         | 1480.73443 | 2 | 2.14E-07 | 0.77  | 3.21   | -     | 382.9    |
| AHQ-7-3, 3192               | K.VIQCAETGQVQK.I                                                         | 1509.70940 | 2 | 1.08E-07 | 0.96  | 3.78   | -     | 2082.8   |
| AHQ-7-3, 3815               | R.VVGAMQLYSVDR.K                                                         | 1338.55819 | 2 | 8.37E-08 | 0.94  | 3.64   | -     | 1223.7   |
| AHQ-7-3, 5188               | K.WLLLTGISAQNR.V                                                         | 1500.72728 | 2 | 1.64E-06 | 0.98  | 4.84   | -     | 2438.9   |
| AHQ-7-5, 5208               | K.WLLLTGISAQNR.V                                                         | 1500.72728 | 2 | 1.19E-04 | 0.93  | 3.08   | -     | 1747.7   |
| gi 4759300 ref NP_004772.1  | vesicle-associated membrane protein 3 (cellubrevin); vesicle-associated  |            |   | 1.71E-10 | 2.90  | 30.30  | 33.00 | 11309.0  |
| AHQ-7-14-, 3582             | R.ADALQAGASQFETSAAK.L                                                    | 1666.77095 | 2 | 5.87E-09 | 0.94  | 4.18   | -     | 1183.5   |
| AHQ-7-13-, 3569             | R.ADALQAGASQFETSAAK.L                                                    | 1666.77095 | 2 | 6.26E-10 | 0.95  | 4.94   | -     | 1039.9   |
| AHQ-7-13-, 3515 - 3575      | R.ADALQAGASQFETSAAK.L                                                    | 1666.77095 | 2 | 6.30E-08 | 0.91  | 4.00   | -     | 973.2    |
| AHQ-7-13, 3689              | R.ADALQAGASQFETSAAK.L                                                    | 1666.77095 | 2 | 4.89E-05 | 0.90  | 3.66   | -     | 889.8    |
| AHQ-7-13-, 3680 - 3681      | R.LQQTQNGQVDEVVIMR.V                                                     | 1933.13344 | 2 | 2.36E-08 | 0.98  | 6.06   | -     | 1824.0   |
| AHQ-7-13-, 4745             | R.LQQTQNGQVDEVVIMR.V                                                     | 1917.13404 | 2 | 1.71E-10 | 0.97  | 4.78   | -     | 1778.3   |
| AHQ-7-13, 4850              | R.LQQTQNGQVDEVVIMR.V                                                     | 1917.13404 | 2 | 8.12E-08 | 0.97  | 4.91   | -     | 1532.1   |
| AHQ-7-13, 3811              | R.LQQTQNGQVDEVVIMR.V                                                     | 1933.13344 | 2 | 1.04E-05 | 0.97  | 4.99   | -     | 1562.1   |
| gi 5729875 ref NP_006658.1  | progesterone receptor membrane component 1; progesterone binding protein |            |   | 1.78E-10 | 1.77  | 20.20  | 17.40 | 21671.0  |
| AHQ-7-11, 4356 - 4362       | K.FYGPPEPGYVAGFR.D                                                       | 1517.66849 | 2 | 1.78E-10 | 0.94  | 3.99   | -     | 1095.7   |
| AHQ-7-11, 2864              | R.GDQPAASGDSDDEPPPLPR.L                                                  | 2037.04410 | 2 | 2.50E-04 | 0.83  | 3.72   | -     | 518.0    |
| gi 4502011 ref NP_000467.1  | adenylate kinase 1 [Homo sapiens]                                        |            |   | 1.87E-10 | 2.32  | 30.24  | 24.20 | 21634.7  |
| AHQ-7-11, 6311              | K.GQVPLETLDMLR.D                                                         | 1584.90590 | 2 | 1.87E-10 | 0.95  | 4.80   | -     | 543.4    |
| AHQ-7-11, 5014              | R.IGQPTLLLYVDAGPETM*QTR.L                                                | 2220.53174 | 2 | 2.21E-05 | 0.56  | 2.75   | -     | 561.1    |
| AHQ-7-11, 3676 - 3732       | K.YGYTHLSTGDLLR.S                                                        | 1496.64912 | 2 | 2.77E-05 | 0.81  | 3.24   | -     | 635.5    |
| gi 5453549 ref NP_006397.1  | thioredoxin peroxidase; thioredoxin peroxidase (antioxidant enzyme) [Ho  |            |   | 2.07E-10 | 2.79  | 30.20  | 18.50 | 30539.7  |
| AHQ-7-10, 3548              | K.DYGVYLEDGSHTR.G                                                        | 1625.72052 | 2 | 2.07E-10 | 0.96  | 4.05   | -     | 1465.1   |
| AHQ-7-10, 3935              | K.HGEVCPAGWKPGSETIIPDPAGK.L                                              | 2405.67144 | 3 | 4.01E-05 | 0.87  | 3.52   | -     | 1402.3   |
| AHQ-7-10, 4648              | R.IPLLSDLTHQISK.D                                                        | 1465.71961 | 2 | 7.02E-09 | 0.96  | 4.08   | -     | 1164.1   |
| gi 30160191 ref XP_294035.2 | similar to Pyruvate kinase, M1 isozyme (Pyruvate kinase muscle isozyme   |            |   | 2.25E-10 | 0.70  | 10.22  | 2.80  | 50222.2  |
| AHQ-7-7, 5009               | K.IYVDDGLISLQVK.Q                                                        | 1463.70048 | 1 | 2.25E-10 | 0.70  | 3.19   | -     | 584.7    |
| AHQ-7-7, 4990               | K.IYVDDGLISLQVK.Q                                                        | 1463.70048 | 2 | 9.67E-07 | 0.97  | 4.43   | -     | 2098.9   |
| gi 17986258 ref NP_066299.2 | smooth muscle and non-muscle myosin alkali light chain isoform 1 [Homo   |            |   | 2.32E-10 | 6.15  | 70.23  | 37.10 | 16930.0  |
| AHQ-7-13-, 4144             | K.DQGTYYEDYVEGLR.V                                                       | 1545.58904 | 2 | 8.23E-04 | 0.91  | 3.56   | -     | 1073.5   |
| AHQ-7-14-, 4195             | K.DQGTYYEDYVEGLR.V                                                       | 1545.58904 | 2 | 1.44E-06 | 0.93  | 3.68   | -     | 1245.2   |
| AHQ-7-12, 4038 - 4114       | K.DQGTYYEDYVEGLR.V                                                       | 1545.58904 | 2 | 5.69E-05 | 0.91  | 3.76   | -     | 1021.5   |
| AHQ-7-13, 2653 - 2679       | R.HVLVTLGEK.M                                                            | 996.18547  | 2 | 3.73E-06 | 0.86  | 2.86   | -     | 691.7    |
| AHQ-7-12, 2367              | R.HVLVTLGEK.M                                                            | 996.18547  | 1 | 5.81E-05 | 0.66  | 3.18   | -     | 431.6    |
| AHQ-7-12, 2362 - 2418       | R.HVLVTLGEK.M                                                            | 996.18547  | 2 | 6.48E-06 | 0.89  | 3.41   | -     | 644.9    |
| AHQ-7-13-, 2404             | R.HVLVTLGEK.M                                                            | 996.18547  | 2 | 5.21E-06 | 0.86  | 3.46   | -     | 568.7    |
| AHQ-7-12, 3698 - 3775       | K.NKDGTYEDYVEGLR.V                                                       | 1787.86505 | 2 | 2.23E-08 | 0.95  | 4.09   | -     | 1379.4   |
| AHQ-7-12, 3594 - 3615       | K.NKDGTYEDYVEGLR.V                                                       | 1787.86505 | 3 | 7.85E-06 | 0.93  | 4.49   | -     | 1210.8   |
| AHQ-7-12, 3587 - 3644       | K.NKDGTYEDYVEGLR.V                                                       | 1787.86505 | 2 | 3.12E-04 | 0.72  | 3.24   | -     | 476.5    |
| AHQ-7-14-, 3742             | K.NKDGTYEDYVEGLR.V                                                       | 1787.86505 | 2 | 5.82E-08 | 0.89  | 3.68   | -     | 1041.4   |
| AHQ-7-13-, 3757             | K.NKDGTYEDYVEGLR.V                                                       | 1787.86505 | 3 | 4.35E-04 | 0.91  | 4.20   | -     | 1037.8   |
| AHQ-7-13-, 3731 - 3735      | K.NKDGTYEDYVEGLR.V                                                       | 1787.86505 | 2 | 3.89E-10 | 0.90  | 4.04   | -     | 877.3    |
| AHQ-7-12, 2890 - 2959       | K.NKDGTYEDYVEGLR.V                                                       | 1787.86505 | 2 | 1.07E-05 | 0.72  | 3.84   | -     | 495.0    |
| AHQ-7-13, 3869              | K.NKDGTYEDYVEGLR.V                                                       | 1787.86505 | 2 | 1.52E-06 | 0.86  | 3.49   | -     | 883.4    |
| AHQ-7-12, 3872 - 3947       | K.NKDGTYEDYVEGLR.V                                                       | 1787.86505 | 2 | 2.32E-10 | 0.93  | 4.29   | -     | 1030.2   |
| AHQ-7-14, 4584              | K.NKDGTYEDYVEGLR.V                                                       | 1787.86505 | 2 | 1.64E-04 | 0.85  | 3.33   | -     | 865.0    |
| AHQ-7-12, 2679 - 2735       | R.VFDKEGNGTVM*GAEIR.H                                                    | 1739.93168 | 2 | 2.46E-05 | 0.83  | 3.01   | -     | 899.7    |
| AHQ-7-12, 3235 - 3243       | R.VFDKEGNGTVM*GAEIR.H                                                    | 1723.93228 | 3 | 4.50E-04 | 0.75  | 3.26   | -     | 1026.2   |
| AHQ-7-12, 5819 - 5874       | K.VLDFEHFLPM*LQTVAK.N                                                    | 1905.24957 | 3 | 1.31E-04 | 0.62  | 3.03   | -     | 514.6    |
| AHQ-7-12, 6162              | K.VLDFEHFLPM*LQTVAK.N                                                    | 1889.25017 | 2 | 4.63E-05 | 0.93  | 4.58   | -     | 710.5    |
| AHQ-7-13-, 6012 - 6015      | K.VLDFEHFLPM*LQTVAK.N                                                    | 1905.24957 | 3 | 5.53E-05 | 0.83  | 3.69   | -     | 719.0    |
| AHQ-7-13-, 6356             | K.VLDFEHFLPM*LQTVAK.N                                                    | 1889.25017 | 2 | 9.51E-06 | 0.93  | 4.56   | -     | 722.4    |
| AHQ-7-13-, 6359             | K.VLDFEHFLPM*LQTVAK.N                                                    | 1889.25017 | 3 | 1.94E-04 | 0.89  | 4.08   | -     | 1121.1   |
| AHQ-7-13-, 6011             | K.VLDFEHFLPM*LQTVAK.N                                                    | 1905.24957 | 2 | 3.69E-07 | 0.93  | 4.16   | -     | 672.8    |
| AHQ-7-12, 5866 - 5928       | K.VLDFEHFLPM*LQTVAK.N                                                    | 1905.24957 | 2 | 3.68E-05 | 0.84  | 3.70   | -     | 474.2    |
| AHQ-7-13, 6037              | K.VLDFEHFLPM*LQTVAK.N                                                    | 1905.24957 | 3 | 1.70E-04 | 0.73  | 3.32   | -     | 489.4    |
| AHQ-7-14-, 5971             | K.VLDFEHFLPM*LQTVAK.N                                                    | 1905.24957 | 2 | 2.78E-05 | 0.94  | 4.36   | -     | 928.5    |
| gi 10863977 ref NP_067000.1 | LSM2 homolog, U6 small nuclear RNA associated; U6 snRNA-associated Sm-   |            |   | 2.57E-10 | 0.97  | 10.30  | 20.00 | 10834.5  |
| AHQ-7-14-, 5213             | R.YVQLPADEVDTLQLQDAAR.K                                                  | 2146.34311 | 2 | 2.57E-10 | 0.97  | 6.07   | -     | 1462.0   |
| AHQ-7-14, 5934 - 5937       | R.YVQLPADEVDTLQLQDAAR.K                                                  | 2146.34311 | 2 | 8.83E-06 | 0.98  | 6.07   | -     | 1429.6   |
| gi 4505753 ref NP_002620.1  | phosphoglycerate mutase 1 (brain); Phosphoglycerate mutase A, nonmuscle  |            |   | 2.69E-10 | 0.85  | 10.19  | 8.30  | 28803.7  |
| AHQ-7-10, 4569              | R.YADLTEDQLPSCSEKLDTIAR.A                                                | 2427.62735 | 3 | 2.69E-10 | 0.85  | 3.49   | -     | 765.7    |
| gi 5902128 ref NP_008880.1  | syntaxin binding protein 2; Hunc18b [Homo sapiens]                       |            |   | 3.06E-10 | 8.05  | 90.32  | 26.30 | 66438.1  |
| AHQ-7-6, 6695 - 6710        | R.AADVPSPHLLHELTQAM*AYDLLDIEQDITYR.Y                                     | 3453.81998 | 3 | 2.07E-06 | 0.88  | 4.43   | -     | 756.5    |
| AHQ-7-6, 6106               | K.AAHIFFTDTCPPELFLSELGR.S                                                | 2310.57011 | 3 | 6.61E-05 | 0.90  | 4.01   | -     | 1153.6   |
| AHQ-7-6, 6115 - 6122        | K.AAHIFFTDTCPPELFLSELGR.S                                                | 2310.57011 | 2 | 7.90E-07 | 0.98  | 6.36   | -     | 1395.0   |
| AHQ-7-6, 6321               | R.EPIPSLEAIYLLSPTK.S                                                     | 1901.18939 | 2 | 3.64E-04 | 0.69  | 2.59   | -     | 569.0    |
| AHQ-7-6, 3323               | R.KGPEDTAQLAHAVLAK.L                                                     | 1649.87303 | 2 | 1.00E-08 | 0.95  | 4.26   | -     | 1386.7   |
| AHQ-7-6, 4129               | K.LCSVEQDLAMGSDAEAGEK.I                                                  | 1941.08446 | 2 | 5.69E-05 | 0.91  | 3.99   | -     | 887.5    |
| AHQ-7-7, 6173               | K.LIVPVLDAAPAYDK.I                                                       | 1698.03911 | 2 | 1.05E-05 | 0.92  | 3.49   | -     | 1165.6   |
| AHQ-7-6, 6173               | K.LIVPVLDAAPAYDK.I                                                       | 1698.03911 | 3 | 2.23E-05 | 0.93  | 4.98   | -     | 1051.6   |
| AHQ-7-6, 6631               | K.M*SDILAEGITIVEDINKR.R                                                  | 2034.32082 | 3 | 3.06E-10 | 0.83  | 3.89   | -     | 704.4    |
| AHQ-7-6, 3253               | R.NLEQLGGTVPNPGSGTSSRL.L                                                 | 1933.02693 | 2 | 1.99E-09 | 0.91  | 4.25   | -     | 615.4    |
| AHQ-7-6, 5873               | R.REPIPSLEAIYLLSPTK.S                                                    | 2057.37574 | 3 | 5.13E-06 | 0.85  | 3.73   | -     | 985.0    |
| AHQ-7-6, 5882 - 5899        | R.REPIPSLEAIYLLSPTK.S                                                    | 2057.37574 | 2 | 2.47E-07 | 0.98  | 6.18   | -     | 1853.0   |
| gi 19923457 ref NP_057447.2 | glycoprotein VI (platelet); platelet glycoprotein VI [Homo sapiens] [M   |            |   | 3.27E-10 | 3.49  | 40.23  | 10.80 | 67308.6  |
| AHQ-7-7, 5524               | K.PSLQALPSSLVLEKPVTLR.C                                                  | 2146.55880 | 3 | 3.27E-10 | 0.91  | 3.98   | -     | 1134.5   |
| AHQ-7-7, 5534               | K.PSLQALPSSLVLEKPVTLR.C                                                  | 2146.55880 | 2 | 8.64E-05 | 0.93  | 4.68   | -     | 631.3    |
| AHQ-7-7, 3684               | K.PSLQAQPGPAVSSGGDVTLCQQR.Y                                              | 2415.62303 | 2 | 3.82E-05 | 0.73  | 2.72   | -     | 783.7    |
| AHQ-7-7, 4752               | R.YGDFQFALYK.E                                                           | 1252.39881 | 2 | 1.45E-07 | 0.93  | 3.47   | -     | 900.5    |
| AHQ-7-7, 4949               | R.YQDQAVLFIAMK.R                                                         | 1524.8900  |   |          |       |        |       |          |



|                             |                                                                               |            |   |          |      |       |       |          |
|-----------------------------|-------------------------------------------------------------------------------|------------|---|----------|------|-------|-------|----------|
| AHQ-7-14-, 4030             | K.EASM*VITESPAALQLR.Y                                                         | 1732.98059 | 2 | 2.51E-05 | 0.94 | 4.34  | -     | 930.5    |
| AHQ-7-9, 6124 - 6125        | K.GPGLFFILPCTDSFIK.V                                                          | 1814.13672 | 2 | 7.56E-05 | 0.96 | 4.60  | -     | 1139.4   |
| AHQ-7-13-, 6423 - 6425      | K.GPGLFFILPCTDSFIK.V                                                          | 1814.13672 | 2 | 4.97E-05 | 0.94 | 4.76  | -     | 744.9    |
| AHQ-7-3, 6687               | K.GPGLFFILPCTDSFIK.V                                                          | 1814.13672 | 2 | 7.58E-04 | 0.93 | 4.36  | -     | 891.7    |
| AHQ-7-1, 6559 - 6560        | K.GPGLFFILPCTDSFIK.V                                                          | 1814.13672 | 2 | 5.51E-04 | 0.96 | 4.77  | -     | 1142.8   |
| AHQ-7-10, 2349              | R.LLAQTTLR.N                                                                  | 916.10035  | 2 | 6.58E-05 | 0.63 | 2.59  | -     | 565.6    |
| AHQ-7-9, 6224 - 6226        | K.NSTVFPPLPMDLGGIIGAK.H                                                       | 2128.56375 | 2 | 2.82E-04 | 0.85 | 3.94  | -     | 449.6    |
| AHQ-7-1, 5343 - 5424        | R.TISFDIPPOELTK.D                                                             | 1602.85305 | 2 | 7.61E-04 | 0.53 | 2.66  | -     | 228.4    |
| AHQ-7-10, 2232 - 2240       | K.VIAAEGEMNASR.A                                                              | 1248.39191 | 2 | 1.05E-08 | 0.97 | 4.31  | -     | 1550.8   |
| AHQ-7-1, 4149 - 4211        | R.VQNATLAVANITNADSATR.L                                                       | 1931.09731 | 2 | 7.77E-10 | 0.96 | 5.31  | -     | 1032.5   |
| AHQ-7-1, 4496               | R.VQNATLAVANITNADSATR.L                                                       | 1931.09731 | 2 | 1.05E-07 | 0.92 | 4.29  | -     | 719.4    |
| AHQ-7-1, 3899 - 3961        | R.VQNATLAVANITNADSATR.L                                                       | 1931.09731 | 2 | 4.75E-08 | 0.94 | 4.77  | -     | 756.8    |
| AHQ-7-10, 3744 - 3816       | R.VQNATLAVANITNADSATR.L                                                       | 1931.09731 | 2 | 6.04E-08 | 0.95 | 4.87  | -     | 1092.8   |
| AHQ-7-1, 4019 - 4084        | R.VQNATLAVANITNADSATR.L                                                       | 1931.09731 | 2 | 4.86E-10 | 0.96 | 4.86  | -     | 1264.9   |
| AHQ-7-10, 4087              | R.VQNATLAVANITNADSATR.L                                                       | 1931.09731 | 2 | 1.42E-09 | 0.94 | 3.94  | -     | 981.7    |
| AHQ-7-1, 4007               | R.VQNATLAVANITNADSATR.L                                                       | 1931.09731 | 3 | 4.96E-05 | 0.89 | 4.39  | -     | 870.9    |
| AHQ-7-1, 3880               | R.VQNATLAVANITNADSATR.L                                                       | 1931.09731 | 2 | 4.88E-08 | 0.95 | 4.65  | -     | 935.6    |
| AHQ-7-2, 4012               | R.YLQTLTIIAAEK.N                                                              | 1352.55813 | 2 | 3.92E-04 | 0.87 | 3.12  | -     | 981.5    |
| AHQ-7-1, 3937 - 4011        | R.YLQTLTIIAAEK.N                                                              | 1352.55813 | 2 | 1.55E-05 | 0.93 | 3.66  | -     | 1399.7   |
| gi 21956645 ref NP_065807.1 | myotrophin; granule cell differentiation protein [Homo sapiens]               |            |   | 5.25E-10 | 2.89 | 30.28 | 41.50 | 12894.7  |
| AHQ-7-13, 4074 - 4129       | K.GPDLGTAFEATDNQAIK.A                                                         | 1748.87196 | 2 | 3.00E-08 | 0.97 | 5.41  | -     | 1691.1   |
| AHQ-7-13, 4202 - 4206       | K.GPDLGTAFEATDNQAIK.A                                                         | 1748.87196 | 2 | 5.25E-10 | 0.97 | 5.56  | -     | 1286.1   |
| AHQ-7-14, 4732 - 4790       | K.GPDLGTAFEATDNQAIK.A                                                         | 1748.87196 | 2 | 2.12E-04 | 0.96 | 5.27  | -     | 1148.0   |
| AHQ-7-14, 4846 - 4928       | K.GPDLGTAFEATDNQAIK.A                                                         | 1748.87196 | 2 | 8.14E-04 | 0.97 | 5.57  | -     | 1354.6   |
| AHQ-7-13-, 4071             | K.GPDLGTAFEATDNQAIK.A                                                         | 1748.87196 | 2 | 7.79E-09 | 0.98 | 5.52  | -     | 1585.1   |
| AHQ-7-14-, 3927 - 4001      | K.GPDLGTAFEATDNQAIK.A                                                         | 1748.87196 | 2 | 1.72E-06 | 0.84 | 3.15  | -     | 763.3    |
| AHQ-7-13-, 3987             | K.HHITPLLSAVYEGHVSCVK.L                                                       | 2149.45825 | 3 | 1.97E-09 | 0.98 | 5.55  | -     | 2396.2   |
| AHQ-7-13-, 3647             | K.NGDLDEVKDYVAK.G                                                             | 1466.57496 | 2 | 3.59E-07 | 0.80 | 2.99  | -     | 774.2    |
| AHQ-7-14-, 3565             | K.NGDLDEVKDYVAK.G                                                             | 1466.57496 | 2 | 9.10E-08 | 0.88 | 3.73  | -     | 726.3    |
| AHQ-7-13, 3695              | K.NGDLDEVKDYVAK.G                                                             | 1466.57496 | 2 | 1.09E-09 | 0.94 | 4.05  | -     | 1159.5   |
| gi 4505763 ref NP_000282.1  | phosphoglycerate kinase 1 [Homo sapiens]                                      |            |   | 5.64E-10 | 5.75 | 70.27 | 25.40 | 44614.4  |
| AHQ-7-8, 5714               | K.ACANPAAGSVILLENLR.F                                                         | 1771.03187 | 2 | 6.75E-06 | 0.89 | 3.75  | -     | 1074.6   |
| AHQ-7-8, 5327               | K.ALESPPRPFLLAILGGAK.V                                                        | 1770.06542 | 2 | 3.74E-06 | 0.97 | 5.43  | -     | 1688.4   |
| AHQ-7-10, 5072              | K.ALESPPRPFLLAILGGAK.V                                                        | 1770.06542 | 2 | 3.35E-04 | 0.82 | 3.91  | -     | 941.4    |
| AHQ-7-8, 4642               | K.DVLFKDCVGPVEVK.A                                                            | 1750.00620 | 2 | 5.64E-10 | 0.92 | 3.92  | -     | 1057.9   |
| AHQ-7-8, 4159               | K.IQLINMLDK.V                                                                 | 1202.44942 | 2 | 5.14E-06 | 0.57 | 3.15  | -     | 342.6    |
| AHQ-7-8, 5234               | K.ITLPVDFVTADKFDENAK.T                                                        | 2024.25948 | 2 | 4.75E-06 | 0.94 | 4.79  | -     | 850.9    |
| AHQ-7-8, 5111               | K.VLNNMIEGTSLFDEEGAK.I                                                        | 1968.17459 | 2 | 1.82E-04 | 0.89 | 4.32  | -     | 539.1    |
| AHQ-7-8, 5306               | K.VLPGVDALSNI                                                                 | 1098.27456 | 1 | 1.32E-04 | 0.57 | 2.15  | -     | 335.0    |
| gi 5454152 ref NP_006285.1  | ubiquinol-cytochrome c reductase binding protein [Homo sapiens]               |            |   | 5.69E-10 | 1.57 | 20.20 | 25.20 | 13530.4  |
| AHQ-7-13-, 3520             | R.DDTIYEDDEVKEAIR.R                                                           | 1811.88169 | 2 | 8.92E-07 | 0.86 | 3.42  | -     | 735.8    |
| AHQ-7-13, 3655              | R.DDTIYEDDEVKEAIR.R                                                           | 1811.88169 | 2 | 5.69E-10 | 0.63 | 2.82  | -     | 560.4    |
| AHQ-7-13-, 4997 - 5055      | K.YEEENFYLEPYLK.E                                                             | 1737.88601 | 2 | 2.05E-05 | 0.94 | 4.07  | -     | 1241.9   |
| AHQ-7-13, 5131 - 5207       | K.YEEENFYLEPYLK.E                                                             | 1737.88601 | 2 | 3.42E-06 | 0.94 | 3.45  | -     | 1356.9   |
| gi 29737978 ref XP_290747.1 | similar to Myosin heavy chain, nonmuscle type B (Cellular myosin heavy chain) |            |   | 5.83E-10 | 4.51 | 50.25 | 2.60  | 191380.7 |
| AHQ-7-2, 3115               | K.ADEWLKM.N                                                                   | 893.04238  | 2 | 2.31E-04 | 0.86 | 2.77  | -     | 676.8    |
| AHQ-7-3, 4007 - 4008        | K.ADFCIHYAGK.V                                                                | 1296.47641 | 2 | 1.46E-06 | 0.96 | 3.83  | -     | 1533.2   |
| AHQ-7-1, 4104               | K.ADFCIHYAGK.V                                                                | 1296.47641 | 2 | 4.41E-06 | 0.94 | 3.88  | -     | 1186.0   |
| AHQ-7-2, 4100               | K.ADFCIHYAGK.V                                                                | 1296.47641 | 1 | 1.64E-04 | 0.78 | 2.93  | -     | 669.0    |
| AHQ-7-5, 3975               | K.ADFCIHYAGK.V                                                                | 1296.47641 | 2 | 1.38E-05 | 0.95 | 4.10  | -     | 1187.4   |
| AHQ-7-6, 3891               | K.ADFCIHYAGK.V                                                                | 1296.47641 | 2 | 8.01E-07 | 0.94 | 3.97  | -     | 1100.3   |
| AHQ-7-2, 4076 - 4115        | K.ADFCIHYAGK.V                                                                | 1296.47641 | 2 | 2.46E-06 | 0.93 | 3.56  | -     | 1268.1   |
| AHQ-7-4, 3998 - 4006        | K.ADFCIHYAGK.V                                                                | 1296.47641 | 2 | 2.05E-06 | 0.93 | 3.63  | -     | 1069.8   |
| AHQ-7-3, 3033 - 3095        | R.AGVLAHLEEEER.D                                                              | 1224.34854 | 2 | 1.98E-07 | 0.96 | 4.38  | -     | 1710.6   |
| AHQ-7-7, 2902               | R.AGVLAHLEEEER.D                                                              | 1224.34854 | 2 | 3.30E-07 | 0.89 | 3.63  | -     | 1028.9   |
| AHQ-7-2, 3112               | R.AGVLAHLEEEER.D                                                              | 1224.34854 | 2 | 5.35E-07 | 0.94 | 4.08  | -     | 1288.2   |
| AHQ-7-13-, 3096             | R.AGVLAHLEEEER.D                                                              | 1224.34854 | 2 | 1.27E-05 | 0.92 | 3.42  | -     | 1236.8   |
| AHQ-7-4, 3025               | R.AGVLAHLEEEER.D                                                              | 1224.34854 | 2 | 2.60E-08 | 0.95 | 4.31  | -     | 1511.9   |
| AHQ-7-1, 3279               | R.AGVLAHLEEEER.D                                                              | 1224.34854 | 2 | 7.80E-07 | 0.96 | 4.31  | -     | 1637.8   |
| AHQ-7-6, 3006               | R.AGVLAHLEEEER.D                                                              | 1224.34854 | 2 | 2.33E-06 | 0.97 | 4.59  | -     | 1705.9   |
| AHQ-7-5, 3007               | R.AGVLAHLEEEER.D                                                              | 1224.34854 | 2 | 1.45E-06 | 0.95 | 4.18  | -     | 1470.7   |
| AHQ-7-3, 3784               | K.DKADFCIIHYAGK.V                                                             | 1539.73719 | 2 | 5.83E-10 | 0.96 | 4.14  | -     | 1487.4   |
| AHQ-7-2, 3855               | K.DKADFCIIHYAGK.V                                                             | 1539.73719 | 3 | 5.22E-06 | 0.93 | 4.15  | -     | 1463.3   |
| AHQ-7-6, 3673               | K.DKADFCIIHYAGK.V                                                             | 1539.73719 | 2 | 2.06E-07 | 0.97 | 4.42  | -     | 1777.2   |
| AHQ-7-2, 3851 - 3853        | K.DKADFCIIHYAGK.V                                                             | 1539.73719 | 2 | 8.95E-10 | 0.98 | 4.92  | -     | 2060.0   |
| AHQ-7-2, 4784               | K.LDPHLVDQLR.C                                                                | 1319.53460 | 3 | 1.47E-05 | 0.85 | 3.38  | -     | 775.3    |
| AHQ-7-5, 4671               | K.LDPHLVDQLR.C                                                                | 1319.53460 | 3 | 9.75E-07 | 0.67 | 3.05  | -     | 622.3    |
| AHQ-7-5, 4662 - 4663        | K.LDPHLVDQLR.C                                                                | 1319.53460 | 2 | 7.18E-07 | 0.80 | 2.87  | -     | 561.6    |
| AHQ-7-4, 4744 - 4753        | K.LDPHLVDQLR.C                                                                | 1319.53460 | 2 | 9.98E-07 | 0.79 | 2.78  | -     | 657.0    |
| AHQ-7-3, 4681               | K.LDPHLVDQLR.C                                                                | 1319.53460 | 2 | 9.84E-06 | 0.74 | 2.65  | -     | 582.7    |
| gi 28178832 ref NP_002159.2 | isocitrate dehydrogenase 2 (NADP+), mitochondrial precursor; isocitrat        |            |   | 6.20E-10 | 3.38 | 40.22 | 12.20 | 50909.0  |
| AHQ-7-8, 4074 - 4079        | K.DLAGCIHGLSNVRL                                                              | 1385.57150 | 2 | 6.20E-10 | 0.96 | 4.50  | -     | 1592.3   |
| AHQ-7-14-, 5431 - 5442      | K.LNEHFLNITDFLDTIK.S                                                          | 1922.12725 | 2 | 7.97E-05 | 0.92 | 4.20  | -     | 988.6    |
| AHQ-7-8, 5656               | K.LNEHFLNITDFLDTIK.S                                                          | 1922.12725 | 2 | 1.06E-05 | 0.79 | 3.32  | -     | 813.3    |
| AHQ-7-8, 2078               | K.TIEAAAHGVTTR.H                                                              | 1356.46696 | 2 | 3.14E-04 | 0.76 | 2.84  | -     | 714.2    |
| AHQ-7-8, 3106               | K.VCVETVESGAMTK.D                                                             | 1412.61230 | 2 | 7.04E-04 | 0.87 | 3.20  | -     | 966.2    |
| gi 5031597 ref NP_005710.1  | actin related protein 2/3 complex subunit 3; ARP2/3 protein complex sub       |            |   | 6.35E-10 | 2.53 | 30.21 | 15.20 | 20546.5  |
| AHQ-7-11, 6012 - 6034       | K.DTDIVDEAIYFK.A                                                              | 1592.72721 | 2 | 4.10E-06 | 0.93 | 4.14  | -     | 1090.1   |
| AHQ-7-14-, 6173             | K.DTDIVDEAIYFK.A                                                              | 1592.72721 | 2 | 6.35E-10 | 0.92 | 3.25  | -     | 1407.2   |
| AHQ-7-11, 5571              | R.ETKDTDIVDEAIYFK.A                                                           | 1951.11899 | 2 | 2.64E-07 | 0.67 | 2.72  | -     | 608.3    |
| AHQ-7-11, 4858              | K.LIGNMALLPIR.S                                                               | 1211.54582 | 2 | 2.30E-05 | 0.94 | 3.43  | -     | 1680.6   |
| gi 4504523 ref NP_002148.1  | heat shock 10kDa protein 1 (chaperonin 10); heat shock 10kD protein 1 (       |            |   | 6.56E-10 | 1.82 | 20.20 | 25.50 | 10931.6  |
| AHQ-7-14-, 2834 - 2893      | K.VLQATVAVGSGSK.G                                                             | 1316.52902 | 2 | 3.27E-08 | 0.95 | 3.92  | -     | 1360.8   |
| AHQ-7-14-, 4882             | K.VVLDKDYFLFR.D                                                               | 1530.74861 | 2 | 4.08E-09 | 0.92 | 2.98  | -     | 1264.1   |
| AHQ-7-14, 5780 - 5857       | K.VVLDKDYFLFR.D                                                               | 1530.74861 | 2 | 6.56E-10 | 0.87 | 3.11  | -     | 862.6    |
| gi 5453832 ref NP_006380.1  | oxygen regulated protein precursor; oxygen regulated protein (150kD) [H       |            |   | 7.28E-10 | 1.89 | 20.22 | 2.80  | 111334.8 |
| AHQ-7-3, 3303               | K.LYQPEYQEVSTEEQR.E                                                           | 1899.99217 | 2 | 7.28E-10 | 0.94 | 4.39  | -     | 744.3    |
| AHQ-7-3, 6267               | R.VEFEELCADLFR.V                                                              | 1658.81048 | 2 | 1.10E-09 | 0.95 | 4.22  | -     | 1307.3   |
| gi 10346135 ref NP_055083.1 | microtubule-associated protein, RP/EB family, member 2; T-cell activat        |            |   | 7.46E-10 | 1.89 | 20.27 | 9.80  | 37031.1  |
| AHQ-7-9, 6032 - 6038        | R.FQDNDFIQWFK.K                                                               | 1601.78539 | 2 | 3.96E-07 | 0.97 | 5.30  | -     | 1362.9   |
| AHQ-7-9, 4504               | K.SDKDLETQVQLNEQVHSLK.L                                                       | 2325.56134 | 2 | 7.46E-10 | 0.92 | 4.63  | -     | 815.2    |
| gi 21314617 ref NP_000433.2 | platelet/endothelial cell adhesion molecule (CD31 antigen); platelet/e        |            |   | 7.86E-10 | 4.33 | 50.24 | 6.90  | 82449.6  |
| AHQ-7-1, 5864               | R.DQNFVILEFFVEEQDR.V                                                          | 1979.13566 | 2 | 4.99E-04 | 0.94 | 4.43  | -     | 1084.9   |
| AHQ-7-4, 6105 - 6106        | R.DQNFVILEFFVEEQDR.V                                                          | 1979.13566 | 2 | 7.86E-10 | 0.91 | 4.41  | -     | 909.0    |
| AHQ-7-3, 5949               | R.DQNFVILEFFVEEQDR.V                                                          | 1979.13566 | 2 | 6.67E-06 | 0.95 | 4.88  | -     | 1026.7   |
| AHQ-7-6, 5927               | R.DQNFVILEFFVEEQDR.V                                                          | 1979.13566 | 2 | 4.53E-04 | 0.79 | 3.81  | -     | 525.1    |
| AHQ-7-5, 3455               | K.EDTIVSQTQDFTK.I                                                             | 1512.60049 | 2 | 5.41E-05 | 0.84 | 3.35  | -     | 623.3    |
| AHQ-7-4, 4218               | R.ISYDAQFEVIK.G                                                               | 1313.48046 | 2 | 6.83E-05 | 0.93 | 3.68  | -     | 1010.4   |
| AHQ-7-4, 4168 - 4169        | K.STESYFPIEVR.I                                                               | 1328.45199 | 2 | 5.38E-05 | 0.79 | 2.85  | -     | 609.8    |
| AHQ-7-3, 5412               | K.VIAPVDEQVSISSSK.V                                                           | 1698.98227 | 2 | 3.21E-04 | 0.85 | 3.41  | -     | 552.8    |
| AHQ-7-4, 5522 - 5593        | K.VIAPVDEQVSISSSK.V                                                           | 1698.98227 | 2 | 4.29E-04 | 0.81 | 3.11  | -     | 423.1    |
| gi 5453740 ref NP_006462.1  | myosin regulatory light chain MRCL3; myosin, light polypeptide, regulat       |            |   | 7.87E-10 | 5.75 | 70.29 | 32.70 | 19794.0  |
| AHQ-7-11, 5622 - 5680       | R.ATSNVFMFDDQSQIQEFK.E                                                        | 2092.31741 | 2 | 5.32E-08 | 0.98 | 5.75  | -     | 2342.8   |
| AHQ-7-14-, 5206 - 5253      | R.ATSNVFMFDDQSQIQEFK.E                                                        | 2108.31681 | 2 | 2.95E-06 | 0.97 | 5.22  | -     | 1693.1   |
| AHQ-7-13-, 5888             | R.ATSNVFMFDDQSQIQEFK.E                                                        | 2092.31741 | 2 | 2.22E-07 | 0.98 | 5.14  | -     | 2042.5   |
| AHQ-7-13-, 5248             | R.ATSNVFMFDDQSQIQEFK.E                                                        | 2108.31681 | 2 | 6.10E-06 | 0.97 | 4.59  | -     | 1571.8   |
| AHQ-7-14, 5968              | R.ATSNVFMFDDQSQIQEFK.E                                                        | 2108.31681 | 2 | 1.18E-08 | 0.96 | 4.55  | -     | 1479.6   |

|                                                                                                                |                                   |            |   |          |       |        |       |         |
|----------------------------------------------------------------------------------------------------------------|-----------------------------------|------------|---|----------|-------|--------|-------|---------|
| AHQ-7-11, 4919                                                                                                 | R.ATSNVFAM*FDQSQIQEFK.E           | 2108.31681 | 2 | 3.47E-08 | 0.91  | 3.99   | -     | 804.2   |
| AHQ-7-11, 5020 - 5086                                                                                          | R.ATSNVFAM*FDQSQIQEFK.E           | 2108.31681 | 2 | 7.87E-10 | 0.98  | 5.62   | -     | 1517.2  |
| AHQ-7-11, 5142 - 5224                                                                                          | R.ATSNVFAM*FDQSQIQEFK.E           | 2108.31681 | 2 | 7.09E-08 | 0.97  | 5.35   | -     | 1716.2  |
| AHQ-7-11, 5279 - 5294                                                                                          | R.ATSNVFAM*FDQSQIQEFK.E           | 2108.31681 | 2 | 3.00E-06 | 0.96  | 5.26   | -     | 1066.6  |
| AHQ-7-12, 5686                                                                                                 | R.ATSNVFAM*FDQSQIQEFK.E           | 2092.31741 | 2 | 1.45E-05 | 0.89  | 3.58   | -     | 930.0   |
| AHQ-7-12, 5070                                                                                                 | R.ATSNVFAM*FDQSQIQEFK.E           | 2108.31681 | 2 | 1.78E-06 | 0.93  | 4.15   | -     | 1231.2  |
| AHQ-7-11, 5511 - 5567                                                                                          | R.ATSNVFAM*FDQSQIQEFK.E           | 2092.31741 | 2 | 8.97E-06 | 0.94  | 3.99   | -     | 1038.6  |
| AHQ-7-11, 5990                                                                                                 | R.ATSNVFAM*FDQSQIQEFK.E           | 2092.31741 | 2 | 1.27E-05 | 0.85  | 3.51   | -     | 743.2   |
| AHQ-7-11, 5858                                                                                                 | R.ATSNVFAM*FDQSQIQEFK.E           | 2092.31741 | 2 | 1.27E-05 | 0.91  | 3.79   | -     | 866.8   |
| AHQ-7-14-, 5846 - 5853                                                                                         | R.ATSNVFAM*FDQSQIQEFK.E           | 2092.31741 | 2 | 8.67E-07 | 0.98  | 5.67   | -     | 1820.9  |
| AHQ-7-11, 5759                                                                                                 | R.ATSNVFAM*FDQSQIQEFK.E           | 2092.31741 | 2 | 5.40E-05 | 0.90  | 3.82   | -     | 792.6   |
| AHQ-7-11, 5560                                                                                                 | R.DGFIDKEDLDHMLASLGK.N            | 2005.23806 | 3 | 2.18E-08 | 0.91  | 3.76   | -     | 1477.6  |
| AHQ-7-11, 5554 - 5563                                                                                          | R.DGFIDKEDLDHMLASLGK.N            | 2005.23806 | 2 | 7.92E-07 | 0.90  | 4.20   | -     | 928.3   |
| AHQ-7-11, 4236 - 4312                                                                                          | R.DGFIDKEDLDHMLASLGK.N            | 2021.23746 | 2 | 4.87E-06 | 0.94  | 4.06   | -     | 1106.4  |
| AHQ-7-11, 5470                                                                                                 | R.DGFIDKEDLDHMLASLGK.N            | 2005.23806 | 2 | 7.60E-09 | 0.96  | 4.45   | -     | 1450.5  |
| AHQ-7-12, 5474 - 5487                                                                                          | R.DGFIDKEDLDHMLASLGK.N            | 2005.23806 | 2 | 2.97E-04 | 0.94  | 4.44   | -     | 1198.0  |
| AHQ-7-12, 5478 - 5479                                                                                          | R.DGFIDKEDLDHMLASLGK.N            | 2005.23806 | 3 | 1.78E-07 | 0.95  | 4.37   | -     | 1648.0  |
| AHQ-7-11, 5468                                                                                                 | R.DGFIDKEDLDHMLASLGK.N            | 2005.23806 | 3 | 9.59E-08 | 0.88  | 3.95   | -     | 1012.3  |
| AHQ-7-11, 4314                                                                                                 | R.DGFIDKEDLDHMLASLGK.N            | 2021.23746 | 3 | 4.96E-05 | 0.90  | 3.80   | -     | 1344.9  |
| AHQ-7-11, 2679                                                                                                 | R.ELLTMTGDR.F                     | 1036.18513 | 1 | 1.52E-04 | 0.13  | 1.84   | -     | 145.7   |
| AHQ-7-11, 4002 - 4006                                                                                          | K.GNFNIEFTR.I                     | 1261.36733 | 2 | 3.92E-04 | 0.80  | 3.53   | -     | 657.2   |
| AHQ-7-12, 4050 - 4059                                                                                          | K.GNFNIEFTR.I                     | 1261.36733 | 2 | 9.12E-05 | 0.84  | 3.59   | -     | 733.3   |
| AHQ-7-13-, 4176 - 4180                                                                                         | K.GNFNIEFTR.I                     | 1261.36733 | 2 | 4.56E-05 | 0.87  | 3.37   | -     | 857.4   |
| AHQ-7-11, 3514                                                                                                 | K.GNFNIEFTR.I                     | 1389.54025 | 2 | 3.85E-06 | 0.89  | 3.14   | -     | 845.6   |
| gi 29730023 ref XP_291482.1  similar to 78 kDa glucose-regulated protein precursor (GRP 78) [Immunoglobulin]   |                                   |            |   | 8.04E-10 | 4.49  | 60.21  | 11.50 | 63563.0 |
| AHQ-7-10, 4365                                                                                                 | R.IINKPTAAAIAYGLDK.R              | 1659.95097 | 2 | 2.58E-06 | 0.34  | 3.09   | -     | 376.9   |
| AHQ-7-6, 3493 - 3557                                                                                           | K.LYGSAGPPPTGEEDTAEKDEL           | 2177.26447 | 2 | 2.63E-05 | 0.91  | 4.09   | -     | 1010.9  |
| AHQ-7-7, 3470                                                                                                  | K.NQLTSPNPKNTVDAK.R               | 1677.84011 | 2 | 2.96E-05 | 0.87  | 3.88   | -     | 1034.5  |
| AHQ-7-6, 3489                                                                                                  | K.NQLTSPNPKNTVDAK.R               | 1677.84011 | 2 | 2.29E-04 | 0.78  | 4.15   | -     | 639.0   |
| AHQ-7-7, 4654                                                                                                  | K.PTAAAIAYGLDK.R                  | 1191.35846 | 1 | 5.30E-04 | 0.70  | 2.62   | -     | 699.1   |
| AHQ-7-6, 5565                                                                                                  | K.TFAPKEISAM*VLTK.M               | 1536.86124 | 2 | 8.04E-10 | 0.80  | 3.20   | -     | 948.9   |
| AHQ-7-6, 4833                                                                                                  | K.TFAPKEISAM*VLTK.M               | 1552.86064 | 2 | 8.09E-09 | 0.87  | 3.62   | -     | 1052.7  |
| AHQ-7-6, 4675 - 4741                                                                                           | K.TFAPKEISAM*VLTK.M               | 1552.86064 | 2 | 4.69E-05 | 0.83  | 3.51   | -     | 989.1   |
| gi 4758984 ref NP_004654.1  RAB11A, member RAS oncogene family; RAB 11A, member oncogene family [Homo sapiens] |                                   |            |   | 8.06E-10 | 4.13  | 50.30  | 23.10 | 24393.3 |
| AHQ-7-13-, 2880                                                                                                | R.AQIWDTAGQER.Y                   | 1275.35241 | 2 | 2.47E-05 | 0.89  | 3.02   | -     | 1116.3  |
| AHQ-7-11, 2778 - 2791                                                                                          | K.AQIWDTAGQER.Y                   | 1275.35241 | 2 | 3.82E-07 | 0.96  | 3.81   | -     | 1933.8  |
| AHQ-7-11, 4062 - 4070                                                                                          | R.DHADSNVIM*LVGNK.S               | 1642.85914 | 2 | 5.69E-07 | 0.98  | 6.01   | -     | 2727.9  |
| AHQ-7-11, 4554 - 4624                                                                                          | R.DHADSNVIM*LVGNK.S               | 1626.85974 | 2 | 8.06E-10 | 0.97  | 4.47   | -     | 1751.0  |
| AHQ-7-11, 4806                                                                                                 | R.GAVGALLVYDIAK.H                 | 1290.53317 | 2 | 1.53E-06 | 0.96  | 4.14   | -     | 1695.0  |
| AHQ-7-11, 2856                                                                                                 | K.VVLLIGDSGVGK.S                  | 1044.22690 | 1 | 4.66E-05 | 0.25  | 2.56   | -     | 487.7   |
| AHQ-7-11, 2846                                                                                                 | K.VVLLIGDSGVGK.S                  | 1044.22690 | 1 | 1.83E-04 | 0.43  | 2.15   | -     | 801.9   |
| gi 5802974 ref NP_006784.1  peroxiredoxin 3; antioxidant protein 1; thioredoxin-dependent peroxidase           |                                   |            |   | 8.19E-10 | 3.69  | 40.28  | 26.60 | 27692.5 |
| AHQ-7-11, 4359                                                                                                 | K.AFQVYVETHGEVCPANWTPDPTKPSAASK.E | 3388.70790 | 3 | 8.19E-10 | 0.95  | 5.50   | -     | 1182.8  |
| AHQ-7-11, 5060                                                                                                 | R.DYGVLLLEGGSLALR.G               | 1463.66058 | 2 | 1.51E-08 | 0.96  | 3.89   | -     | 1937.8  |
| AHQ-7-10, 4973                                                                                                 | R.DYGVLLLEGGSLALR.G               | 1463.66058 | 2 | 2.17E-04 | 0.92  | 2.87   | -     | 1651.6  |
| AHQ-7-11, 5150                                                                                                 | R.GLFIIDPNGVIK.H                  | 1286.54452 | 2 | 2.90E-05 | 0.88  | 2.93   | -     | 1214.7  |
| AHQ-7-11, 5300                                                                                                 | R.GLFIIDPNGVIK.H                  | 1286.54452 | 2 | 1.37E-05 | 0.87  | 3.60   | -     | 870.2   |
| AHQ-7-11, 2971 - 3032                                                                                          | K.HLSVNDLVPVGR.S                  | 1207.36435 | 2 | 3.80E-07 | 0.90  | 3.57   | -     | 649.6   |
| gi 20127528 ref NP_037459.2  parvin, beta; CGI-56 protein; beta-parvin [Homo sapiens]                          |                                   |            |   | 8.41E-10 | 3.01  | 40.25  | 15.90 | 41714.0 |
| AHQ-7-9, 3196                                                                                                  | K.ARPEDVVNLDLK.S                  | 1369.54878 | 2 | 1.91E-06 | 0.81  | 3.54   | -     | 662.7   |
| AHQ-7-9, 3208                                                                                                  | K.ARPEDVVNLDLK.S                  | 1369.54878 | 1 | 1.73E-05 | 0.31  | 2.71   | -     | 199.4   |
| AHQ-7-13-, 3513                                                                                                | K.ARPEDVVNLDLK.S                  | 1369.54878 | 2 | 6.89E-05 | 0.81  | 3.49   | -     | 581.8   |
| AHQ-7-13, 3653                                                                                                 | K.ARPEDVVNLDLK.S                  | 1369.54878 | 2 | 1.43E-06 | 0.71  | 3.13   | -     | 626.2   |
| AHQ-7-14-, 3529                                                                                                | K.ARPEDVVNLDLK.S                  | 1369.54878 | 2 | 3.38E-05 | 0.92  | 4.20   | -     | 908.3   |
| AHQ-7-9, 4941                                                                                                  | R.DAFDTLFDHAPDKLSVVK.K            | 2019.24293 | 2 | 3.53E-07 | 0.63  | 3.35   | -     | 491.9   |
| AHQ-7-9, 3385 - 3448                                                                                           | K.LNVAEYDQSEIGQK.Q                | 1516.67865 | 2 | 8.41E-10 | 0.97  | 5.02   | -     | 1687.0  |
| AHQ-7-9, 3694                                                                                                  | K.QLEEDLYDQVLOK.L                 | 1678.82164 | 2 | 3.27E-05 | 0.92  | 3.50   | -     | 1171.2  |
| AHQ-7-9, 3486                                                                                                  | K.QLEEDLYDQVLOK.L                 | 1678.82164 | 2 | 6.85E-06 | 0.70  | 2.68   | -     | 694.7   |
| gi 4505839 ref NP_002645.1  pyruvate kinase, muscle; Pyruvate kinase-3; Thyroid hormone-binding protein        |                                   |            |   | 9.20E-10 | 15.03 | 170.27 | 45.80 | 57913.6 |
| AHQ-7-7, 5586 - 5657                                                                                           | R.AEGSDVANALDGDADICIM*LSGETAK.G   | 2512.71089 | 2 | 3.79E-04 | 0.89  | 3.84   | -     | 708.8   |
| AHQ-7-7, 6161                                                                                                  | R.AGKPVICATQMLSEMIK.K             | 1879.29869 | 3 | 2.17E-05 | 0.91  | 4.15   | -     | 1363.1  |
| AHQ-7-7, 5786 - 5852                                                                                           | R.EAEAIIHLQLFEELR.R               | 1933.15326 | 2 | 9.20E-10 | 0.94  | 4.28   | -     | 993.6   |
| AHQ-7-7, 6797                                                                                                  | K.FGVEQVDV*VFASFIR.K              | 1877.10995 | 2 | 1.01E-06 | 0.97  | 5.37   | -     | 1294.8  |
| AHQ-7-7, 4769                                                                                                  | K.GADFLVTEVENGSGSLGSK.K           | 1780.91396 | 2 | 4.79E-09 | 0.96  | 4.79   | -     | 1258.0  |
| AHQ-7-7, 5014 - 5024                                                                                           | K.GADFLVTEVENGSGSLGSK.K           | 1780.91396 | 2 | 2.41E-07 | 0.96  | 4.82   | -     | 1622.7  |
| AHQ-7-10, 4457                                                                                                 | K.GADFLVTEVENGSGSLGSK.K           | 1780.91396 | 2 | 3.00E-05 | 0.87  | 3.77   | -     | 791.0   |
| AHQ-7-7, 4434 - 4501                                                                                           | K.GADFLVTEVENGSGSLGSK.K           | 1780.91396 | 2 | 9.73E-05 | 0.52  | 3.27   | -     | 199.7   |
| AHQ-7-7, 2828 - 2860                                                                                           | K.GDYPLEAVR.M                     | 1020.12076 | 2 | 3.72E-06 | 0.52  | 2.54   | -     | 396.5   |
| AHQ-7-14-, 6185                                                                                                | R.GIFPVLCKDPVQEAWAEDVDLR.V        | 2559.87857 | 3 | 8.54E-04 | 0.94  | 4.64   | -     | 1322.0  |
| AHQ-7-7, 6469                                                                                                  | R.GIFPVLCKDPVQEAWAEDVDLR.V        | 2559.87857 | 3 | 9.76E-08 | 0.95  | 4.98   | -     | 1687.1  |
| AHQ-7-8, 4580                                                                                                  | K.GVNLPGAADVLPVASEK.D             | 1637.85902 | 2 | 6.64E-04 | 0.69  | 3.10   | -     | 508.1   |
| AHQ-7-7, 4500 - 4516                                                                                           | K.GVNLPGAADVLPVASEK.D             | 1637.85902 | 2 | 2.30E-06 | 0.94  | 4.58   | -     | 715.3   |
| AHQ-7-7, 3173                                                                                                  | K.ITLDNAYMEK.C                    | 1198.37126 | 2 | 2.37E-04 | 0.77  | 3.03   | -     | 598.4   |
| AHQ-7-7, 4061                                                                                                  | K.KGVNLPGAADVLPVASEK.D            | 1766.03194 | 3 | 2.67E-06 | 0.90  | 3.94   | -     | 1276.4  |
| AHQ-7-11, 5331                                                                                                 | R.LAPITSDPTEATAVGAEASF.K          | 2176.40912 | 2 | 3.30E-04 | 0.94  | 4.33   | -     | 1123.4  |
| AHQ-7-7, 5660 - 5728                                                                                           | R.LAPITSDPTEATAVGAEASF.K          | 2176.40912 | 2 | 1.18E-08 | 0.97  | 5.45   | -     | 1357.4  |
| AHQ-7-7, 5676                                                                                                  | R.LAPITSDPTEATAVGAEASF.K          | 2176.40912 | 3 | 1.74E-06 | 0.94  | 4.21   | -     | 1560.1  |
| AHQ-7-12, 5310                                                                                                 | R.LAPITSDPTEATAVGAEASF.K          | 2176.40912 | 2 | 4.90E-05 | 0.67  | 3.09   | -     | 436.7   |
| AHQ-7-13, 5539                                                                                                 | R.LAPITSDPTEATAVGAEASF.K          | 2176.40912 | 2 | 1.72E-04 | 0.83  | 3.39   | -     | 593.4   |
| AHQ-7-9, 5166                                                                                                  | R.LAPITSDPTEATAVGAEASF.K          | 2176.40912 | 2 | 7.45E-06 | 0.50  | 2.51   | -     | 376.3   |
| AHQ-7-7, 5325                                                                                                  | R.LAPITSDPTEATAVGAEASF.K          | 2176.40912 | 2 | 6.09E-05 | 0.92  | 4.30   | -     | 723.3   |
| AHQ-7-1, 5643                                                                                                  | R.LAPITSDPTEATAVGAEASF.K          | 2176.40912 | 2 | 2.51E-05 | 0.67  | 2.69   | -     | 561.3   |
| AHQ-7-13-, 3431                                                                                                | R.LDIDSPPIAR.N                    | 1198.35099 | 2 | 3.72E-04 | 0.87  | 3.00   | -     | 981.2   |
| AHQ-7-11, 3339                                                                                                 | R.LDIDSPPIAR.N                    | 1198.35099 | 2 | 8.58E-04 | 0.93  | 3.94   | -     | 1034.0  |
| AHQ-7-7, 2384                                                                                                  | R.LNFSHGTHEYHAETIK.N              | 1885.02879 | 2 | 3.22E-04 | 0.84  | 3.82   | -     | 602.3   |
| AHQ-7-7, 2397                                                                                                  | R.LNFSHGTHEYHAETIK.N              | 1885.02879 | 3 | 2.19E-07 | 0.95  | 4.88   | -     | 1490.5  |
| AHQ-7-7, 3852                                                                                                  | R.NTGIICTIGPASR.S                 | 1361.54994 | 2 | 8.31E-05 | 0.83  | 3.26   | -     | 1049.7  |
| AHQ-7-10, 3279 - 3281                                                                                          | R.NTGIICTIGPASR.S                 | 1361.54994 | 2 | 1.67E-05 | 0.93  | 3.75   | -     | 1148.1  |
| AHQ-7-13-, 3456 - 3469                                                                                         | R.NTGIICTIGPASR.S                 | 1361.54994 | 2 | 8.62E-06 | 0.94  | 3.75   | -     | 1265.1  |
| AHQ-7-7, 4693 - 4718                                                                                           | R.RFDILEASDGIMVAR.G               | 1823.06385 | 2 | 1.61E-05 | 0.96  | 5.01   | -     | 905.0   |
| AHQ-7-7, 4982                                                                                                  | R.RFDILEASDGIMVAR.G               | 1823.06385 | 2 | 5.71E-09 | 0.97  | 5.44   | -     | 1444.9  |
| AHQ-7-7, 4036                                                                                                  | R.TATESFASDPILYR.P                | 1571.71277 | 2 | 1.66E-08 | 0.81  | 3.33   | -     | 634.3   |
| AHQ-7-7, 5613 - 5617                                                                                           | R.TATESFASDPILYR.P                | 2466.77140 | 3 | 5.26E-04 | 0.78  | 3.33   | -     | 750.1   |
| AHQ-7-13, 5453 - 5526                                                                                          | R.TATESFASDPILYR.P                | 2466.77140 | 3 | 9.99E-04 | 0.49  | 3.43   | -     | 553.8   |
| gi 16933567 ref NP_005361.2  mel transforming oncogene; ras-associated protein RAB8 [Homo sapiens]             |                                   |            |   | 9.96E-10 | 0.97  | 10.27  | 6.80  | 23668.1 |
| AHQ-7-11, 5435 - 5498                                                                                          | K.ANINVENAFFTLAR.D                | 1580.76926 | 2 | 9.96E-10 | 0.97  | 5.41   | -     | 1533.7  |
| AHQ-7-11, 5575 - 5650                                                                                          | K.ANINVENAFFTLAR.D                | 1580.76926 | 2 | 1.74E-07 | 0.91  | 3.61   | -     | 734.9   |
| AHQ-7-11, 4890                                                                                                 | K.ANINVENAFFTLAR.D                | 1580.76926 | 2 | 2.78E-04 | 0.54  | 2.71   | -     | 511.6   |
| gi 4759082 ref NP_004648.1  serum deprivation response protein; serum deprivation response; phosphatase        |                                   |            |   | 1.09E-09 | 3.79  | 40.27  | 14.40 | 47172.9 |
| AHQ-7-11, 5839                                                                                                 | R.DNSQVNAVTLTLLDK.L               | 1730.94122 | 2 | 6.18E-06 | 0.91  | 3.72   | -     | 1115.0  |
| AHQ-7-13-, 5985 - 5993                                                                                         | R.DNSQVNAVTLTLLDK.L               | 1730.94122 | 2 | 3.39E-04 | 0.96  | 4.53   | -     | 1377.6  |
| AHQ-7-13, 6101                                                                                                 | R.DNSQVNAVTLTLLDK.L               | 1730.94122 | 2 | 6.40E-04 | 0.75  | 3.34   | -     | 747.5   |
| AHQ-7-9, 5613 - 5668                                                                                           | R.DNSQVNAVTLTLLDK.L               | 1730.94122 | 2 | 1.13E-06 | 0.89  | 4.22   | -     | 657.4   |
| AHQ-7-9, 5698 - 5757                                                                                           | R.DNSQVNAVTLTLLDK.L               | 1730.94122 | 2 | 5.17E-05 | 0.92  | 4.25   | -     | 964.1   |
| AHQ-7-13, 6011                                                                                                 | R.DNSQVNAVTLTLLDK.L               | 1730.94122 | 2 | 4.97E-05 | 0.79  | 3.17   | -     | 643.0   |
| AHQ-7-12, 5772 - 5814                                                                                          | R.DNSQVNAVTLTLLDK.L               | 1730.94122 | 2 | 2.94E-05 | 0.90  | 3.42   | -     | 1112.7  |
| AHQ-7-14-, 5958                                                                                                | R.DNSQVNAVTLTLLDK.L               | 1730.94122 | 2 | 1.08E-07 | 0.97  | 5.08   | -     | 1629.8  |

|                             |                                                                         |            |   |          |       |        |       |          |
|-----------------------------|-------------------------------------------------------------------------|------------|---|----------|-------|--------|-------|----------|
| AHQ-7-11, 3511 - 3522       | K.LVNMMLDAVGENQHK.M                                                     | 1639.85851 | 2 | 1.39E-05 | 0.94  | 4.44   | -     | 1122.8   |
| AHQ-7-14-, 5765 - 5766      | K.VLIFQEENEIPASVFK.Q                                                    | 1963.26241 | 2 | 5.73E-05 | 0.96  | 5.34   | -     | 877.3    |
| AHQ-7-11, 5602 - 5638       | K.VLIFQEENEIPASVFK.Q                                                    | 1963.26241 | 2 | 8.74E-06 | 0.97  | 5.23   | -     | 1100.1   |
| AHQ-7-11, 5755              | K.VLIFQEENEIPASVFK.Q                                                    | 1963.26241 | 2 | 1.36E-05 | 0.84  | 3.36   | -     | 536.5    |
| AHQ-7-7, 6008               | K.VLIFQEENEIPASVFK.Q                                                    | 1963.26241 | 2 | 3.60E-06 | 0.94  | 4.42   | -     | 921.0    |
| AHQ-7-10, 5527              | K.VLIFQEENEIPASVFK.Q                                                    | 1963.26241 | 2 | 5.03E-07 | 0.96  | 5.15   | -     | 1013.1   |
| AHQ-7-9, 5417 - 5448        | K.VLIFQEENEIPASVFK.Q                                                    | 1963.26241 | 2 | 2.73E-08 | 0.95  | 5.08   | -     | 752.8    |
| AHQ-7-13-, 5793             | K.VLIFQEENEIPASVFK.Q                                                    | 1963.26241 | 2 | 1.23E-05 | 0.83  | 3.30   | -     | 778.1    |
| AHQ-7-6, 6006 - 6013        | K.VLIFQEENEIPASVFK.Q                                                    | 1963.26241 | 2 | 1.09E-09 | 0.95  | 4.92   | -     | 850.8    |
| AHQ-7-12, 2882              | R.YEGSYALTSEEAEER.S                                                     | 1605.64124 | 2 | 2.99E-04 | 0.78  | 2.77   | -     | 684.8    |
| AHQ-7-13, 3095 - 3151       | R.YEGSYALTSEEAEER.S                                                     | 1605.64124 | 2 | 1.31E-06 | 0.92  | 3.60   | -     | 892.8    |
| gi 4507907 ref NP_000543.1  | von Willebrand factor precursor; Coagulation factor VIII VWF (von Wille |            |   | 1.12E-09 | 20.99 | 250.29 | 13.00 | 309296.7 |
| AHQ-7-1, 3911 - 3989        | R.CLPSACEVVTGSPR.G                                                      | 1535.72531 | 2 | 4.68E-05 | 0.89  | 3.92   | -     | 820.3    |
| AHQ-7-1, 4327               | R.CM*VQVGVISGFK.L                                                       | 1342.61000 | 2 | 8.93E-04 | 0.72  | 2.69   | -     | 767.2    |
| AHQ-7-3, 4911 - 4985        | R.EGGPSQIGDALGFAVR.Y                                                    | 1574.71988 | 2 | 1.13E-05 | 0.26  | 2.73   | -     | 407.4    |
| AHQ-7-1, 4684 - 4697        | R.EQAPNLVYM*VTGNPASDEIK.R                                               | 2193.42002 | 2 | 1.74E-05 | 0.94  | 4.14   | -     | 1080.9   |
| AHQ-7-2, 5631               | R.EQAPNLVYM*VTGNPASDEIK.R                                               | 2177.42062 | 2 | 6.31E-04 | 0.74  | 3.56   | -     | 388.0    |
| AHQ-7-2, 4149               | K.EQDLVILHNGACSPGAR.Q                                                   | 1968.13770 | 2 | 3.09E-07 | 0.80  | 3.29   | -     | 702.4    |
| AHQ-7-1, 4128               | K.EQDLVILHNGACSPGAR.Q                                                   | 1968.13770 | 2 | 2.40E-06 | 0.84  | 3.78   | -     | 637.2    |
| AHQ-7-1, 3357               | R.HIVTFDGGKFK.L                                                         | 1306.45124 | 2 | 6.50E-08 | 0.87  | 3.34   | -     | 597.1    |
| AHQ-7-1, 6547               | R.IGWPNAPILIQDFETLPR.E                                                  | 2081.40223 | 2 | 1.47E-06 | 0.91  | 4.57   | -     | 432.7    |
| AHQ-7-1, 2877               | R.ILAGPAGDSNVVK.L                                                       | 1241.41901 | 2 | 1.85E-07 | 0.87  | 3.06   | -     | 968.5    |
| AHQ-7-2, 3832               | R.ILTSVDFQDCKN.L                                                        | 1441.58869 | 2 | 4.69E-07 | 0.93  | 3.87   | -     | 945.9    |
| AHQ-7-1, 3839               | R.ILTSVDFQDCKN.L                                                        | 1441.58869 | 2 | 5.78E-07 | 0.90  | 3.51   | -     | 790.6    |
| AHQ-7-1, 3713               | K.IPGTCCDTCPEECNDITAR.L                                                 | 2403.54132 | 2 | 1.18E-05 | 0.54  | 2.63   | -     | 525.9    |
| AHQ-7-1, 6428               | R.LLDFVLLDSSRL.L                                                        | 1448.68905 | 2 | 1.66E-05 | 0.88  | 3.26   | -     | 934.1    |
| AHQ-7-1, 4253               | R.LSEAEFVLK.A                                                           | 1165.31777 | 2 | 1.74E-05 | 0.89  | 3.45   | -     | 957.9    |
| AHQ-7-4, 3286               | K.LSGEAYGFVAR.I                                                         | 1170.29934 | 2 | 1.77E-05 | 0.95  | 3.84   | -     | 1476.7   |
| AHQ-7-3, 4967               | R.NSQWICSNEECPGCELVGTQSHFK.S                                            | 2872.07402 | 3 | 3.36E-06 | 0.86  | 4.18   | -     | 601.6    |
| AHQ-7-1, 5391 - 5457        | K.RLPDGIQVVPVIGVGNANVQELER.I                                            | 2571.91720 | 3 | 5.91E-06 | 0.97  | 5.83   | -     | 2035.0   |
| AHQ-7-1, 4037 - 4109        | R.SGFTYVHLHEGECGR.C                                                     | 1774.91285 | 2 | 3.53E-09 | 0.96  | 4.32   | -     | 1426.6   |
| AHQ-7-2, 4935               | K.SVGSQWASPENPCLINECVR.V                                                | 2306.51832 | 2 | 1.12E-09 | 0.91  | 4.41   | -     | 567.2    |
| AHQ-7-3, 4851               | K.SVGSQWASPENPCLINECVR.V                                                | 2306.51832 | 2 | 7.04E-08 | 0.91  | 4.63   | -     | 495.6    |
| AHQ-7-1, 4843               | K.SVGSQWASPENPCLINECVR.V                                                | 2306.51832 | 2 | 3.40E-04 | 0.79  | 3.63   | -     | 386.8    |
| AHQ-7-4, 3217               | R.TCQSLHINEMCQER.C                                                      | 1808.99579 | 2 | 1.55E-04 | 0.89  | 3.49   | -     | 718.4    |
| AHQ-7-1, 5329 - 5379        | K.TYGLCGDDENGANDFM*LR.D                                                 | 2225.42231 | 2 | 1.51E-06 | 0.96  | 4.71   | -     | 1296.4   |
| AHQ-7-1, 4545               | K.VIVIPVGIQPHANLK.Q                                                     | 1527.87891 | 2 | 2.86E-05 | 0.49  | 2.60   | -     | 413.6    |
| AHQ-7-1, 4607               | R.VTVFPIGIDR.Y                                                          | 1174.37426 | 2 | 1.49E-07 | 0.94  | 3.39   | -     | 1551.2   |
| AHQ-7-2, 4657               | R.VTVFPIGIDR.Y                                                          | 1174.37426 | 2 | 1.97E-06 | 0.94  | 3.46   | -     | 1351.8   |
| AHQ-7-1, 3123               | K.YAGSQVASTSEVLK.Y                                                      | 1440.58064 | 2 | 2.69E-07 | 0.94  | 4.22   | -     | 953.8    |
| AHQ-7-2, 2999               | K.YAGSQVASTSEVLK.Y                                                      | 1440.58064 | 2 | 4.60E-04 | 0.92  | 4.03   | -     | 865.3    |
| AHQ-7-3, 2964 - 2972        | K.YAGSQVASTSEVLK.Y                                                      | 1440.58064 | 2 | 4.44E-08 | 0.96  | 4.93   | -     | 1167.8   |
| AHQ-7-1, 3597               | R.YLSDHSHFLVSGDR.E                                                      | 1624.73576 | 2 | 3.79E-06 | 0.94  | 3.99   | -     | 1122.2   |
| AHQ-7-1, 5747               | K.YTLFQIFSK.I                                                           | 1147.34728 | 2 | 2.91E-05 | 0.92  | 3.22   | -     | 906.8    |
| gi 4507869 ref NP_003361.1  | vasodilator-stimulated phosphoprotein [Homo sapiens]                    |            |   | 1.17E-09 | 0.95  | 10.21  | 3.70  | 39829.4  |
| AHQ-7-8, 6082               | K.VKEEIEAFVQLER.K                                                       | 1703.96061 | 2 | 1.17E-09 | 0.95  | 4.22   | -     | 1377.8   |
| gi 13129150 ref NP_005339.1 | heat shock 90kDa protein 1, alpha; heat shock 90kD protein 1, alpha [H  |            |   | 1.19E-09 | 1.86  | 20.27  | 3.40  | 84659.1  |
| AHQ-7-8, 4002               | R.NPDDITNEEYGEFYK.S                                                     | 1834.87381 | 2 | 7.99E-07 | 0.96  | 4.42   | -     | 1473.1   |
| AHQ-7-6, 3994               | R.NPDDITNEEYGEFYK.S                                                     | 1834.87381 | 2 | 2.33E-09 | 0.96  | 4.52   | -     | 1157.3   |
| AHQ-7-7, 3946               | R.NPDDITNEEYGEFYK.S                                                     | 1834.87381 | 2 | 2.29E-06 | 0.92  | 4.02   | -     | 1116.2   |
| AHQ-7-5, 4047 - 4050        | R.NPDDITNEEYGEFYK.S                                                     | 1834.87381 | 2 | 1.19E-09 | 0.97  | 5.47   | -     | 1247.9   |
| AHQ-7-5, 4095 - 4170        | R.RAPDFLFRN.K                                                           | 1265.40235 | 2 | 5.62E-06 | 0.89  | 3.36   | -     | 851.5    |
| gi 13489087 ref NP_109591.1 | serine (or cysteine) proteinase inhibitor, clade B (ovalbumin), member  |            |   | 1.27E-09 | 1.55  | 20.22  | 8.70  | 42741.5  |
| AHQ-7-9, 3721               | K.TYGDALASVDFQHASEDAR.K                                                 | 2054.11949 | 2 | 7.17E-05 | 0.60  | 2.83   | -     | 471.9    |
| AHQ-7-13-, 3988             | K.TYGDALASVDFQHASEDAR.K                                                 | 2054.11949 | 2 | 2.05E-05 | 0.88  | 3.72   | -     | 803.0    |
| AHQ-7-8, 4024               | K.TYGDALASVDFQHASEDAR.K                                                 | 2054.11949 | 3 | 1.27E-09 | 0.90  | 4.38   | -     | 692.3    |
| AHQ-7-14-, 5871             | K.TYNFLPEFLVSTQK.T                                                      | 1687.91650 | 2 | 7.59E-04 | 0.60  | 2.62   | -     | 407.3    |
| AHQ-7-13, 5882 - 5938       | K.TYNFLPEFLVSTQK.T                                                      | 1687.91650 | 2 | 3.48E-05 | 0.66  | 2.96   | -     | 330.6    |
| gi 17444699 ref XP_017966.4 | similar to Reticulon protein 3 (Neuroendocrine-specific protein-like 2  |            |   | 1.32E-09 | 0.82  | 10.16  | 4.70  | 25522.7  |
| AHQ-7-1, 3093               | K.TQIDHYVGIAR.H                                                         | 1273.42279 | 2 | 1.32E-09 | 0.82  | 3.27   | -     | 864.1    |
| gi 18104967 ref NP_000953.2 | prostaglandin-endoperoxide synthase 1 isoform 1 precursor; prostagland  |            |   | 1.38E-09 | 4.09  | 50.24  | 17.20 | 68686.0  |
| AHQ-7-6, 3993               | K.AEHPTWGDQLFQTTR.L                                                     | 1917.02765 | 3 | 2.84E-04 | 0.91  | 4.19   | -     | 1257.7   |
| AHQ-7-6, 5117               | R.FGMKPYTSFQELVGEK.E                                                    | 1862.13845 | 2 | 2.57E-07 | 0.80  | 3.62   | -     | 393.5    |
| AHQ-7-6, 6585               | K.GLLGNPICSPYWKPFSTFGGEVGNV.K                                           | 3069.47853 | 3 | 1.47E-05 | 0.77  | 3.86   | -     | 392.7    |
| AHQ-7-6, 3227 - 3303        | R.VPDASQDDGPAVERPSTEL                                                   | 1984.06747 | 2 | 1.38E-09 | 0.95  | 4.86   | -     | 929.0    |
| AHQ-7-6, 5310               | K.YQVLDEGMYPVSEAEAPVLM*HYPR.G                                           | 2838.20739 | 3 | 9.57E-08 | 0.65  | 3.18   | -     | 464.7    |
| gi 21361478 ref NP_055944.2 | septin 6 isoform B; septin 2 [Homo sapiens]                             |            |   | 1.42E-09 | 1.92  | 20.26  | 11.10 | 49716.3  |
| AHQ-7-7, 3881               | K.FEGEPATHTPQGVQLQSNYDQLQESNVR.L                                        | 3147.31508 | 3 | 1.42E-09 | 0.95  | 5.24   | -     | 1347.5   |
| AHQ-7-7, 4954 - 4960        | R.TVPLAGHVGFDSLPDQVYK.S                                                 | 2108.38284 | 2 | 7.17E-08 | 0.97  | 5.27   | -     | 1272.4   |
| gi 29742827 ref XP_294099.1 | similar to myosin:SUBUNIT=regulatory light chain [Homo sapiens]         |            |   | 1.42E-09 | 2.17  | 30.23  | 14.20 | 17094.0  |
| AHQ-7-11, 2843 - 2851       | K.EAFNMIDQNR.D                                                          | 1238.35558 | 2 | 8.01E-05 | 0.63  | 2.80   | -     | 442.2    |
| AHQ-7-11, 2962              | K.EAFNMIDQNR.D                                                          | 1238.35558 | 2 | 2.89E-04 | 0.81  | 3.29   | -     | 644.4    |
| AHQ-7-11, 2964              | K.EAFNMIDQNR.D                                                          | 1254.35498 | 2 | 4.72E-05 | 0.55  | 2.64   | -     | 543.4    |
| AHQ-7-14-, 3079 - 3133      | K.EAFNMIDQNR.D                                                          | 1238.35558 | 2 | 2.41E-05 | 0.66  | 2.73   | -     | 709.6    |
| AHQ-7-11, 3150              | K.EAFNMIDQNR.D                                                          | 1238.35558 | 2 | 9.47E-05 | 0.85  | 3.29   | -     | 779.2    |
| AHQ-7-11, 3624 - 3674       | R.FTDEEVDLYR.E                                                          | 1416.47127 | 2 | 1.15E-08 | 0.97  | 4.13   | -     | 2182.7   |
| AHQ-7-11, 3675              | R.FTDEEVDLYR.E                                                          | 1416.47127 | 1 | 8.01E-06 | 0.32  | 1.92   | -     | 403.7    |
| AHQ-7-11, 3136 - 3195       | R.FTDEEVDLYR.E                                                          | 1416.47127 | 2 | 3.44E-05 | 0.84  | 2.94   | -     | 780.5    |
| AHQ-7-12, 3714              | R.FTDEEVDLYR.E                                                          | 1416.47127 | 2 | 3.20E-08 | 0.97  | 3.99   | -     | 1814.8   |
| AHQ-7-12, 3724              | R.FTDEEVDLYR.E                                                          | 1416.47127 | 1 | 5.23E-09 | 0.64  | 2.75   | -     | 519.2    |
| AHQ-7-13, 3969 - 4041       | R.FTDEEVDLYR.E                                                          | 1416.47127 | 2 | 1.54E-05 | 0.96  | 3.98   | -     | 1955.3   |
| AHQ-7-14, 4676              | R.FTDEEVDLYR.E                                                          | 1416.47127 | 2 | 5.11E-08 | 0.95  | 3.48   | -     | 1768.7   |
| AHQ-7-13-, 3828 - 3897      | R.FTDEEVDLYR.E                                                          | 1416.47127 | 2 | 1.91E-06 | 0.96  | 3.94   | -     | 1522.8   |
| AHQ-7-11, 3695              | R.FTDEEVDLYR.E                                                          | 1416.47127 | 1 | 1.52E-09 | 0.58  | 2.59   | -     | 428.4    |
| AHQ-7-14-, 3831             | R.FTDEEVDLYR.E                                                          | 1416.47127 | 2 | 1.42E-09 | 0.96  | 4.52   | -     | 1499.3   |
| gi 29739414 ref XP_294015.1 | similar to Glyceraldehyde 3-phosphate dehydrogenase, liver (GAPDH) [Ho  |            |   | 1.67E-09 | 2.45  | 30.23  | 17.70 | 26916.7  |
| AHQ-7-9, 3713 - 3778        | K.IISNASCTTNCLAPLAK.V                                                   | 1837.10868 | 2 | 8.22E-06 | 0.86  | 4.17   | -     | 1195.3   |
| AHQ-7-10, 3960              | K.IISNASCTTNCLAPLAK.V                                                   | 1837.10868 | 2 | 2.06E-09 | 0.59  | 3.10   | -     | 751.3    |
| AHQ-7-10, 3743 - 3800       | K.IISNASCTTNCLAPLAK.V                                                   | 1837.10868 | 2 | 2.50E-08 | 0.83  | 3.53   | -     | 1233.7   |
| AHQ-7-11, 3824 - 3900       | K.IISNASCTTNCLAPLAK.V                                                   | 1837.10868 | 2 | 7.35E-08 | 0.91  | 4.53   | -     | 1366.6   |
| AHQ-7-9, 4670               | K.LISWYDNEFGYSNR.V                                                      | 1764.87478 | 2 | 9.34E-05 | 0.67  | 3.03   | -     | 513.2    |
| AHQ-7-9, 4498 - 4553        | K.LISWYDNEFGYSNR.V                                                      | 1764.87478 | 2 | 5.46E-07 | 0.96  | 4.30   | -     | 1208.5   |
| AHQ-7-9, 4369 - 4425        | K.LISWYDNEFGYSNR.V                                                      | 1764.87478 | 2 | 9.51E-04 | 0.56  | 2.82   | -     | 385.6    |
| AHQ-7-14-, 4858 - 4930      | K.LISWYDNEFGYSNR.V                                                      | 1764.87478 | 2 | 8.90E-08 | 0.94  | 4.58   | -     | 923.0    |
| AHQ-7-10, 4576 - 4583       | K.LISWYDNEFGYSNR.V                                                      | 1764.87478 | 2 | 8.33E-08 | 0.94  | 4.00   | -     | 1215.9   |
| AHQ-7-11, 4651 - 4706       | K.LISWYDNEFGYSNR.V                                                      | 1764.87478 | 2 | 6.06E-09 | 0.91  | 3.70   | -     | 741.2    |
| AHQ-7-13, 4965 - 4974       | K.LISWYDNEFGYSNR.V                                                      | 1764.87478 | 2 | 1.67E-09 | 0.96  | 4.56   | -     | 1339.1   |
| AHQ-7-14, 5741 - 5742       | K.LISWYDNEFGYSNR.V                                                      | 1764.87478 | 2 | 1.92E-05 | 0.94  | 4.39   | -     | 1020.7   |
| AHQ-7-13-, 4847             | K.LISWYDNEFGYSNR.V                                                      | 1764.87478 | 2 | 3.55E-08 | 0.93  | 3.77   | -     | 1071.6   |
| AHQ-7-9, 2957               | R.VVDLMAHMASKE                                                          | 1331.58746 | 2 | 1.20E-05 | 0.90  | 3.21   | -     | 1076.7   |
| gi 4557871 ref NP_001054.1  | transferrin [Homo sapiens]                                              |            |   | 1.70E-09 | 8.52  | 100.26 | 19.50 | 77049.5  |
| AHQ-7-5, 4638               | K.CSTSLLLEACTFR.R                                                       | 1534.69418 | 2 | 4.60E-04 | 0.89  | 3.10   | -     | 956.7    |
| AHQ-7-5, 5050               | K.EDPQTYYAVAVVK.K                                                       | 1630.82181 | 2 | 8.14E-04 | 0.37  | 2.63   | -     | 488.1    |
| AHQ-7-5, 3666               | K.EGYYGTGAFR.C                                                          | 1284.35776 | 2 | 4.42E-05 | 0.78  | 2.55   | -     | 835.6    |
| AHQ-7-5, 4138               | R.FDEFFSEGCAPGSK.K                                                      | 1579.66868 | 2 | 6.88E-06 | 0.96  | 3.92   | -     | 1618.5   |
| AHQ-7-6, 4073 - 4079        | R.FDEFFSEGCAPGSK.K                                                      | 1579.66868 | 2 | 1.64E-05 | 0.96  | 4.22   | -     | 1382.1   |
| AHQ-7-5, 2983               | K.HSTIFENLANKA                                                          | 1274.40755 | 2 | 3.22E-05 | 0.95  | 3.93   | -     | 1223.5   |

|                             |                                                                         |            |   |          |      |        |       |          |
|-----------------------------|-------------------------------------------------------------------------|------------|---|----------|------|--------|-------|----------|
| AHQ-7-6, 3378               | K.IECVSAETTEDCIAK.I                                                     | 1728.87748 | 2 | 1.39E-04 | 0.77 | 3.48   | -     | 539.9    |
| AHQ-7-5, 3422               | K.IECVSAETTEDCIAK.I                                                     | 1728.87748 | 2 | 1.57E-05 | 0.91 | 3.20   | -     | 1022.3   |
| AHQ-7-5, 3220 - 3231        | R.LKCDSEVSVNSVGVK.I                                                     | 1523.69293 | 2 | 1.70E-09 | 0.87 | 3.64   | -     | 739.2    |
| AHQ-7-5, 4652               | K.M*YLGVEYVTAIR.N                                                       | 1495.72451 | 2 | 1.31E-06 | 0.94 | 3.13   | -     | 1406.9   |
| AHQ-7-5, 6763               | R.SAGWNIPIGLLYCDLPEPR.K                                                 | 2173.47658 | 2 | 2.32E-06 | 0.96 | 5.13   | -     | 940.9    |
| AHQ-7-5, 5983 - 5990        | R.TAGWNIPIGMLLYNK.I                                                     | 1578.85991 | 2 | 5.90E-06 | 0.87 | 3.93   | -     | 504.0    |
| gi 4507651 ref NP_003281.1  | tropomyosin 4 [Homo sapiens]                                            |            |   | 1.80E-09 | 4.46 | 50.27  | 22.60 | 28521.6  |
| AHQ-7-9, 3792               | R.AEVSELKCGDLEELK.N                                                     | 1851.02256 | 2 | 7.00E-06 | 0.85 | 3.74   | -     | 710.5    |
| AHQ-7-9, 1940 - 1956        | R.EKAEGDVAALNR.R                                                        | 1273.37796 | 2 | 4.07E-05 | 0.74 | 2.87   | -     | 717.6    |
| AHQ-7-9, 2504 - 2561        | K.IQALQQQADEAEDR.A                                                      | 1615.68404 | 2 | 5.30E-05 | 0.84 | 3.29   | -     | 877.5    |
| AHQ-7-13, 2867              | K.IQALQQQADEAEDR.A                                                      | 1615.68404 | 2 | 6.41E-04 | 0.81 | 3.02   | -     | 591.9    |
| AHQ-7-10, 2572 - 2573       | K.IQALQQQADEAEDR.A                                                      | 1615.68404 | 2 | 1.80E-09 | 0.96 | 4.11   | -     | 1673.0   |
| AHQ-7-11, 2594 - 2655       | K.IQALQQQADEAEDR.A                                                      | 1615.68404 | 2 | 6.59E-08 | 0.95 | 4.28   | -     | 1323.0   |
| AHQ-7-11, 2426              | R.KIQALQQQADEAEDR.A                                                     | 1743.85695 | 2 | 9.19E-06 | 0.97 | 5.42   | -     | 2019.3   |
| AHQ-7-9, 2332 - 2388        | R.KIQALQQQADEAEDR.A                                                     | 1743.85695 | 2 | 6.28E-05 | 0.95 | 4.94   | -     | 1145.5   |
| AHQ-7-9, 2088 - 2150        | K.YSEKEDKYEIEIK.L                                                       | 1690.78605 | 3 | 1.23E-04 | 0.95 | 4.80   | -     | 1346.7   |
| gi 4758460 ref NP_004479.1  | glycoprotein V (platelet) [Homo sapiens]                                |            |   | 1.83E-09 | 7.08 | 80.24  | 24.80 | 60958.9  |
| AHQ-7-5, 5495               | R.CAGPGAHAGLPLWALPGGDAECPGPR.G                                          | 2587.87539 | 3 | 1.95E-06 | 0.86 | 4.12   | -     | 728.9    |
| AHQ-7-6, 5414               | R.CAGPGAHAGLPLWALPGGDAECPGPR.G                                          | 2587.87539 | 3 | 8.73E-09 | 0.84 | 4.20   | -     | 790.9    |
| AHQ-7-6, 4625               | R.GVLQSQSFGSMTVLQR.L                                                    | 1738.99008 | 2 | 1.19E-06 | 0.93 | 3.88   | -     | 1286.5   |
| AHQ-7-5, 4680 - 4686        | R.GVLQSQSFGSMTVLQR.L                                                    | 1738.99008 | 2 | 1.15E-08 | 0.96 | 4.80   | -     | 1403.5   |
| AHQ-7-5, 3944               | R.GVLQSQSFGSMT*TVLQR.L                                                  | 1754.98948 | 2 | 4.72E-07 | 0.96 | 4.56   | -     | 1755.0   |
| AHQ-7-5, 5547               | R.LM*ISDSHISAVAPGTFSDLIK.L                                              | 2219.54375 | 3 | 1.49E-06 | 0.93 | 4.77   | -     | 1058.7   |
| AHQ-7-5, 5550               | R.LM*ISDSHISAVAPGTFSDLIK.L                                              | 2219.54375 | 2 | 1.83E-09 | 0.96 | 4.78   | -     | 1086.9   |
| AHQ-7-6, 5474               | R.LM*ISDSHISAVAPGTFSDLIK.L                                              | 2219.54375 | 3 | 9.13E-09 | 0.90 | 4.26   | -     | 1076.6   |
| AHQ-7-6, 4589               | R.LPNLSLTL*SR.N                                                         | 1201.39802 | 2 | 5.72E-05 | 0.74 | 2.97   | -     | 871.9    |
| AHQ-7-5, 4687               | R.LPNLSLTL*SR.N                                                         | 1201.39802 | 2 | 7.07E-05 | 0.88 | 3.25   | -     | 1061.4   |
| AHQ-7-5, 6826               | R.LSALPQGAFQGLGELQVLALHNSGLTALPDGLLR.G                                  | 3471.99408 | 3 | 2.15E-05 | 0.80 | 4.11   | -     | 445.8    |
| AHQ-7-5, 6803               | R.LVSLD*SGLLNSL*GALTELOFHR.N                                            | 2384.71675 | 3 | 8.17E-07 | 0.72 | 3.23   | -     | 525.6    |
| AHQ-7-6, 6701               | R.LVSLD*SGLLNSL*GALTELOFHR.N                                            | 2384.71675 | 3 | 5.21E-08 | 0.77 | 3.31   | -     | 576.9    |
| AHQ-7-5, 6707               | R.LVSLD*SGLLNSL*GALTELOFHR.N                                            | 2384.71675 | 3 | 2.12E-09 | 0.90 | 4.25   | -     | 983.1    |
| AHQ-7-5, 3459               | R.YLGVTL*SPRL                                                           | 1006.18036 | 2 | 8.29E-04 | 0.91 | 3.28   | -     | 1196.8   |
| gi 4506353 ref NP_002854.1  | phosphorylase, glycogen; liver (Hers disease, glycogen storage disease) |            |   | 1.90E-09 | 1.80 | 20.26  | 3.70  | 97147.8  |
| AHQ-7-5, 4848               | K.EYANINWNVPSDLK.I                                                      | 1806.95311 | 2 | 7.66E-07 | 0.84 | 3.72   | -     | 531.6    |
| AHQ-7-5, 6251               | R.WLLLCNPLGAEIAEK.I                                                     | 1842.19160 | 2 | 1.90E-09 | 0.95 | 5.16   | -     | 1412.3   |
| gi 4758208 ref NP_004081.1  | dual specificity phosphatase 3; vaccinia virus phosphatase VH1-related; |            |   | 2.05E-09 | 3.67 | 40.24  | 32.40 | 20478.2  |
| AHQ-7-11, 5154              | K.ANDTQEFNLSAYFER.A                                                     | 1805.88207 | 2 | 2.05E-09 | 0.95 | 4.38   | -     | 1264.6   |
| AHQ-7-11, 5628              | R.EIGPNDGFLAQLCQLNDR.L                                                  | 2062.24949 | 2 | 1.69E-06 | 0.89 | 4.01   | -     | 703.2    |
| AHQ-7-11, 3935              | R.IYVGNASVAQDIPK.L                                                      | 1475.67136 | 2 | 2.35E-08 | 0.94 | 3.18   | -     | 1525.4   |
| AHQ-7-11, 3639 - 3650       | R.IYVGNASVAQDIPK.L                                                      | 1475.67136 | 2 | 3.01E-04 | 0.95 | 4.73   | -     | 1085.6   |
| AHQ-7-11, 3376              | K.LGITHVLNAAEGR.S                                                       | 1351.53669 | 2 | 1.80E-07 | 0.89 | 3.17   | -     | 1015.2   |
| AHQ-7-11, 3051              | K.LGITHVLNAAEGR.S                                                       | 1351.53669 | 2 | 1.69E-05 | 0.91 | 3.57   | -     | 992.9    |
| gi 4507109 ref NP_000336.1  | alpha-synuclein isoform NACP140; non A4 component of amyloid precursor  |            |   | 2.15E-09 | 3.53 | 40.30  | 36.40 | 14460.1  |
| AHQ-7-12, 2298 - 2332       | K.EGVVHG*VATVAEK.T                                                      | 1296.45466 | 2 | 1.52E-04 | 0.73 | 2.76   | -     | 668.6    |
| AHQ-7-13, 4517              | K.EQVTVNGGAVTVGTVAAQK.T                                                 | 1929.16446 | 2 | 3.34E-08 | 0.95 | 5.39   | -     | 832.6    |
| AHQ-7-12, 4399 - 4410       | K.EQVTVNGGAVTVGTVAAQK.T                                                 | 1929.16446 | 2 | 2.39E-05 | 0.96 | 5.50   | -     | 1005.1   |
| AHQ-7-13, 4617              | K.EQVTVNGGAVTVGTVAAQK.T                                                 | 1929.16446 | 2 | 1.36E-05 | 0.96 | 5.07   | -     | 1143.9   |
| AHQ-7-14, 4533              | K.EQVTVNGGAVTVGTVAAQK.T                                                 | 1929.16446 | 2 | 1.20E-07 | 0.97 | 5.91   | -     | 1387.7   |
| AHQ-7-13, 4305 - 4319       | K.TKEQVTVNGGAVTVGTVAAQK.T                                               | 2158.44170 | 3 | 8.81E-05 | 0.81 | 3.93   | -     | 1337.7   |
| AHQ-7-12, 4096              | K.TKEQVTVNGGAVTVGTVAAQK.T                                               | 2158.44170 | 2 | 2.15E-09 | 0.96 | 5.17   | -     | 1171.1   |
| AHQ-7-13, 4313              | K.TKEQVTVNGGAVTVGTVAAQK.T                                               | 2158.44170 | 2 | 1.86E-04 | 0.89 | 4.22   | -     | 641.3    |
| AHQ-7-13, 4198 - 4254       | K.TVEGAAGSIAAATGFVKK.K                                                  | 1479.66001 | 2 | 1.50E-06 | 0.89 | 3.37   | -     | 1019.6   |
| gi 5031571 ref NP_005713.1  | actin-related protein 2; ARP2 (actin-related protein 2, yeast) homolog  |            |   | 2.28E-09 | 1.83 | 20.23  | 6.30  | 44760.5  |
| AHQ-7-8, 3482               | R.GYAFNHSADEFVTR.M                                                      | 1614.69943 | 2 | 5.57E-06 | 0.95 | 3.90   | -     | 1058.9   |
| AHQ-7-8, 3299               | R.GYAFNHSADEFVTR.M                                                      | 1614.69943 | 2 | 2.28E-09 | 0.91 | 4.43   | -     | 741.8    |
| AHQ-7-8, 4134               | K.HLWDYTF*GPEK.L                                                        | 1393.52736 | 2 | 7.69E-07 | 0.92 | 3.26   | -     | 794.1    |
| gi 21361122 ref NP_001440.2 | four and a half LIM domains 1; Four-and-a-half LIM domains 1 [Homo sap  |            |   | 2.38E-09 | 2.20 | 30.20  | 14.30 | 31894.7  |
| AHQ-7-12, 2523              | K.AINAGDQNV*EYK.G                                                       | 1307.43431 | 2 | 9.34E-04 | 0.77 | 2.61   | -     | 632.9    |
| AHQ-7-11, 2470              | K.AINAGDQNV*EYK.G                                                       | 1307.43431 | 2 | 9.45E-05 | 0.93 | 3.85   | -     | 879.4    |
| AHQ-7-9, 2382               | K.AINAGDQNV*EYK.G                                                       | 1307.43431 | 2 | 1.96E-05 | 0.76 | 2.73   | -     | 650.8    |
| AHQ-7-10, 3588              | R.FV*FHQEQV*YCPDCAK.K                                                   | 1931.13758 | 2 | 1.13E-06 | 0.85 | 3.59   | -     | 749.5    |
| AHQ-7-9, 3488               | R.FV*FHQEQV*YCPDCAK.K                                                   | 1931.13758 | 2 | 7.53E-04 | 0.91 | 3.62   | -     | 972.4    |
| AHQ-7-13, 3775 - 3776       | R.FV*FHQEQV*YCPDCAK.K                                                   | 1931.13758 | 3 | 1.91E-04 | 0.89 | 3.94   | -     | 1171.8   |
| AHQ-7-11, 3075              | K.GEDFYCV*TCHEK.F                                                       | 1648.75260 | 2 | 2.38E-09 | 0.59 | 2.66   | -     | 387.8    |
| AHQ-7-9, 2936               | K.GEDFYCV*TCHEK.F                                                       | 1648.75260 | 2 | 1.35E-04 | 0.80 | 2.80   | -     | 787.1    |
| gi 4502295 ref NP_001677.1  | ATP synthase, H+ transporting, mitochondrial F1 complex, beta polypepti |            |   | 2.45E-09 | 8.22 | 100.28 | 28.90 | 57955.2  |
| AHQ-7-7, 5472               | R.AIAELGI*PVDPLD*STR.I                                                  | 1989.21513 | 2 | 7.89E-04 | 0.68 | 2.72   | -     | 422.5    |
| AHQ-7-7, 6060               | R.FLSQPFQVAE*VFTGHMGK.L                                                 | 2024.33104 | 3 | 3.64E-07 | 0.85 | 3.86   | -     | 530.4    |
| AHQ-7-7, 4408               | R.FTQAGSE*V*ALLGR.I                                                     | 1436.59522 | 2 | 3.44E-08 | 0.93 | 4.02   | -     | 1079.9   |
| AHQ-7-7, 4409               | R.FTQAGSE*V*ALLGR.I                                                     | 1436.59522 | 1 | 3.39E-04 | 0.08 | 2.22   | -     | 102.6    |
| AHQ-7-7, 6708               | K.GFQQILAGE*YDHLPEQAFY*V*GPIEE*AVAK.A                                   | 3368.75991 | 3 | 2.45E-09 | 0.95 | 5.55   | -     | 999.5    |
| AHQ-7-7, 2893               | K.IPVGP*ETLGR.I                                                         | 1039.21035 | 2 | 9.11E-05 | 0.85 | 2.70   | -     | 745.3    |
| AHQ-7-7, 4132               | R.LVLEVAQH*LGESTVR.T                                                    | 1651.88893 | 2 | 1.30E-06 | 0.96 | 4.62   | -     | 1188.5   |
| AHQ-7-7, 6705               | K.TV*LMEL*INNVAK.A                                                      | 1458.79202 | 2 | 7.43E-06 | 0.98 | 4.92   | -     | 2847.8   |
| AHQ-7-7, 5637               | R.VALTGLT*VAEYFR.D                                                      | 1440.66861 | 2 | 1.51E-04 | 0.95 | 3.98   | -     | 1953.8   |
| AHQ-7-7, 3453               | K.VALVY*GMN*P*PPGAR.A                                                   | 1601.85511 | 2 | 5.66E-09 | 0.85 | 3.42   | -     | 648.7    |
| AHQ-7-7, 2097               | K.VLDSG*APIK.I                                                          | 900.05456  | 1 | 9.87E-04 | 0.22 | 1.97   | -     | 396.4    |
| gi 19557677 ref NP_002108.3 | major histocompatibility complex, class I, C precursor; HLA class I hi  |            |   | 2.72E-09 | 0.96 | 10.21  | 3.30  | 40994.6  |
| AHQ-7-8, 5087               | R.AYLEG*TCVEWLR.R                                                       | 1498.68507 | 2 | 2.72E-09 | 0.96 | 4.18   | -     | 1233.5   |
| gi 6598323 ref NP_001485.2  | GDP dissociation inhibitor 2; rab GDP-dissociation inhibitor, beta [Hom |            |   | 2.84E-09 | 2.88 | 30.30  | 12.80 | 50662.9  |
| AHQ-7-7, 5252               | R.NP*Y*YGGESASIT*PLEDLYK.R                                              | 2118.28499 | 2 | 2.84E-09 | 0.94 | 4.46   | -     | 1047.8   |
| AHQ-7-7, 6568 - 6636        | K.SP*YLY*PLY*GL*GEL*PQGFAR.L                                            | 2142.44089 | 2 | 3.30E-05 | 0.91 | 4.32   | -     | 673.6    |
| AHQ-7-8, 6584 - 6586        | K.SP*YLY*PLY*GL*GEL*PQGFAR.L                                            | 2142.44089 | 2 | 3.09E-05 | 0.96 | 4.95   | -     | 944.7    |
| AHQ-7-6, 6483 - 6549        | K.SP*YLY*PLY*GL*GEL*PQGFAR.L                                            | 2142.44089 | 2 | 1.05E-06 | 0.97 | 5.75   | -     | 907.7    |
| AHQ-7-8, 6870               | K.VP*STEA*EAL*AS*LM*GL*FEK.R                                            | 1981.25641 | 2 | 1.81E-08 | 0.97 | 5.94   | -     | 1106.3   |
| gi 4503743 ref NP_002009.1  | flightless 1 homolog [Homo sapiens]                                     |            |   | 2.89E-09 | 2.01 | 30.21  | 3.40  | 144750.1 |
| AHQ-7-3, 6051               | R.TGLCYL*PEEL*ALQK.L                                                    | 1707.96931 | 2 | 8.55E-04 | 0.64 | 3.20   | -     | 364.3    |
| AHQ-7-4, 6445               | K.VGLGL*GYEL*LP*QINYK.L                                                 | 1778.08432 | 2 | 1.62E-05 | 0.47 | 2.87   | -     | 423.1    |
| AHQ-7-3, 5172               | R.VPECLY*TL*PSLR.R                                                      | 1449.69710 | 2 | 2.89E-09 | 0.90 | 3.14   | -     | 1050.6   |
| gi 9257257 ref NP_059830.1  | WD repeat-containing protein 1 isoform 1 [Homo sapiens]                 |            |   | 2.92E-09 | 1.62 | 20.20  | 7.90  | 66193.1  |
| AHQ-7-6, 4155 - 4222        | R.LHHV*SSLAWL*DEHT*LVTT*SHDASVK.E                                       | 2785.06406 | 3 | 2.61E-07 | 0.76 | 3.32   | -     | 812.0    |
| AHQ-7-13, 4949              | K.VVTV*FVAD*GYSENN*FYGH*IAK.I                                           | 2541.75861 | 3 | 2.92E-09 | 0.86 | 4.01   | -     | 724.2    |
| gi 11496885 ref NP_005442.2 | enigma protein; LIM domain protein [Homo sapiens]                       |            |   | 2.96E-09 | 0.83 | 10.19  | 2.60  | 49844.4  |
| AHQ-7-13, 4839              | K.VVLE*GPAP*W*GFR.L                                                     | 1328.54318 | 2 | 7.30E-07 | 0.94 | 3.63   | -     | 1151.9   |
| AHQ-7-13, 4725 - 4763       | K.VVLE*GPAP*W*GFR.L                                                     | 1328.54318 | 2 | 4.43E-05 | 0.93 | 3.73   | -     | 1013.6   |
| AHQ-7-11, 4567              | K.VVLE*GPAP*W*GFR.L                                                     | 1328.54318 | 2 | 2.96E-09 | 0.83 | 3.16   | -     | 751.8    |
| gi 4557419 ref NP_000063.1  | CD36 antigen (collagen type I receptor, thrombospondin receptor); CD36  |            |   | 3.07E-09 | 2.71 | 30.20  | 10.20 | 53052.1  |
| AHQ-7-1, 4692               | K.AFASP*VEN*PDNY*CF*CTEK.I                                              | 2152.30319 | 2 | 7.66E-05 | 0.84 | 3.30   | -     | 675.6    |
| AHQ-7-5, 4647               | K.AFASP*VEN*PDNY*CF*CTEK.I                                              | 2152.30319 | 2 | 9.43E-05 | 0.82 | 3.34   | -     | 564.9    |
| AHQ-7-3, 4668               | K.AFASP*VEN*PDNY*CF*CTEK.I                                              | 2152.30319 | 2 | 1.55E-07 | 0.85 | 3.73   | -     | 488.6    |
| AHQ-7-2, 4773               | K.AFASP*VEN*PDNY*CF*CTEK.I                                              | 2152.30319 | 2 | 1.40E-04 | 0.70 | 3.19   | -     | 498.0    |
| AHQ-7-1, 5463               | K.SQVL*QFF*SS*DICR.S                                                    | 1588.76661 | 2 | 6.80E-06 | 0.89 | 3.26   | -     | 996.6    |
| AHQ-7-5, 5524               | K.SQVL*QFF*SS*DICR.S                                                    | 1588.76661 | 2 | 2.69E-08 | 0.92 | 3.57   | -     | 1213.9   |
| AHQ-7-6, 5462               | K.SQVL*QFF*SS*DICR.S                                                    | 1588.76661 | 2 | 7.46E-08 | 0.93 | 3.76   | -     | 1277.0   |
| AHQ-7-5, 6730               | R.TYLDI*QIP*IT*G*FTL*QFAK.R                                             | 1957.25787 | 2 | 3.07E-09 | 0.94 | 4.06   | -     | 1000.6   |
| AHQ-7-1, 6487 - 6495        | R.TYLDI*QIP*IT*G*FTL*QFAK.R                                             | 1957.25787 | 2 | 1.16E-08 | 0.92 | 4.06   | -     | 1006.5   |
| gi 4504085 ref NP_000399.1  | glycerol-3-phosphate dehydrogenase 2 (mitochondrial) [Homo sapiens] [MA |            |   | 3.24E-09 | 2.70 | 30.23  | 6.50  | 80814.1  |



|                             |                                                                          |            |   |          |       |        |       |          |
|-----------------------------|--------------------------------------------------------------------------|------------|---|----------|-------|--------|-------|----------|
| AHQ-7-6, 5566               | R.LVQDYGLESEVAQHLAATYGDK.A                                               | 2408.60567 | 3 | 5.62E-04 | 0.85  | 3.31   | -     | 1072.5   |
| AHQ-7-6, 5559               | R.LVQDYGLESEVAQHLAATYGDK.A                                               | 2408.60567 | 2 | 2.54E-06 | 0.90  | 3.36   | -     | 988.0    |
| AHQ-7-6, 6026 - 6027        | R.VIFFLPWQK.M                                                            | 1178.44934 | 2 | 1.29E-05 | 0.84  | 2.74   | -     | 666.8    |
| AHQ-7-6, 6037 - 6051        | R.YGAATANYMEVSVLLK.K                                                     | 1731.00632 | 2 | 3.24E-09 | 0.95  | 4.55   | -     | 1102.6   |
| gi 5803201 ref NP_006818.1  | transmembrane trafficking protein [Homo sapiens]                         |            |   | 3.37E-09 | 1.91  | 20.20  | 10.50 | 24975.8  |
| AHQ-7-11, 4092 - 4095       | R.IPDQLVILDM.K.H                                                         | 1301.57773 | 2 | 6.88E-04 | 0.94  | 3.93   | -     | 1361.8   |
| AHQ-7-11, 2459              | K.ITDSAGHLYSK.E                                                          | 1305.46156 | 2 | 3.37E-09 | 0.97  | 4.06   | -     | 1751.7   |
| gi 4758970 ref NP_004150.1  | proteasome beta 8 subunit isoform E1 proprotein; proteasome subunit, be  |            |   | 3.60E-09 | 1.86  | 20.19  | 9.20  | 29769.4  |
| AHQ-7-11, 3274              | R.ASAGSYISALR.V                                                          | 1096.21876 | 2 | 1.02E-04 | 0.91  | 3.45   | -     | 1104.5   |
| AHQ-7-11, 4004              | K.VESTDVSDLLHQYR.E                                                       | 1662.78230 | 2 | 3.60E-09 | 0.96  | 3.86   | -     | 1629.0   |
| gi 23110925 ref NP_002789.1 | proteasome beta 6 subunit; proteasome subunit Y; proteasome subunit be   |            |   | 3.61E-09 | 0.95  | 10.19  | 4.60  | 25357.6  |
| AHQ-7-11, 2474              | R.LAAIAESGVER.Q                                                          | 1116.24998 | 2 | 3.61E-09 | 0.95  | 3.82   | -     | 1401.2   |
| gi 6005846 ref NP_009215.1  | PTK9L protein tyrosine kinase 9-like (A6-related protein); protein tyro  |            |   | 3.67E-09 | 4.41  | 50.25  | 24.90 | 39547.7  |
| AHQ-7-13-, 6192             | R.AVLPLLDAQQPCYLLYR.L                                                    | 2035.39506 | 2 | 1.21E-08 | 0.96  | 4.75   | -     | 996.2    |
| AHQ-7-9, 5861               | R.AVLPLLDAQQPCYLLYR.L                                                    | 2035.39506 | 2 | 2.55E-06 | 0.72  | 3.00   | -     | 488.3    |
| AHQ-7-13, 6142 - 6219       | R.AVLPLLDAQQPCYLLYR.L                                                    | 2035.39506 | 2 | 8.35E-04 | 0.89  | 3.92   | -     | 631.7    |
| AHQ-7-14-, 6151             | R.AVLPLLDAQQPCYLLYR.L                                                    | 2035.39506 | 2 | 4.95E-08 | 0.78  | 3.33   | -     | 477.9    |
| AHQ-7-11, 3990              | R.ETIELVHTEPTDVAQLPSR.V                                                  | 2136.34822 | 2 | 2.32E-05 | 0.81  | 4.02   | -     | 469.8    |
| AHQ-7-9, 3836               | R.ETIELVHTEPTDVAQLPSR.V                                                  | 2136.34822 | 2 | 4.85E-04 | 0.85  | 3.82   | -     | 628.3    |
| AHQ-7-11, 4235              | K.HQTLQGLAFPLQPEAQR.A                                                    | 1935.17562 | 3 | 7.15E-05 | 0.87  | 3.61   | -     | 1081.5   |
| AHQ-7-11, 4227              | K.HQTLQGLAFPLQPEAQR.A                                                    | 1935.17562 | 2 | 3.67E-09 | 0.97  | 4.95   | -     | 1234.1   |
| AHQ-7-9, 4053               | K.HQTLQGLAFPLQPEAQR.A                                                    | 1935.17562 | 2 | 2.35E-04 | 0.91  | 3.97   | -     | 748.4    |
| AHQ-7-11, 4968              | R.LLDSVEEQDFHLEIAK.K                                                     | 1757.96513 | 2 | 1.43E-06 | 0.72  | 3.10   | -     | 532.3    |
| AHQ-7-12, 4439 - 4442       | K.VVIEDEQLVLVGASQEPVGR.W                                                 | 2039.27568 | 2 | 1.64E-06 | 0.95  | 3.84   | -     | 1650.9   |
| gi 24119203 ref NP_705935.1 | tropomyosin 3 [Homo sapiens]                                             |            |   | 3.69E-09 | 4.71  | 50.22  | 14.50 | 29032.5  |
| AHQ-7-9, 3342 - 3396        | R.IQLVEEELDR.A                                                           | 1244.37653 | 2 | 1.72E-06 | 0.94  | 3.94   | -     | 1120.4   |
| AHQ-7-10, 3452              | R.IQLVEEELDR.A                                                           | 1244.37653 | 2 | 3.71E-05 | 0.77  | 3.07   | -     | 668.3    |
| AHQ-7-11, 3506 - 3542       | R.IQLVEEELDR.A                                                           | 1244.37653 | 2 | 8.01E-05 | 0.79  | 2.70   | -     | 844.5    |
| AHQ-7-9, 3256 - 3464        | R.IQLVEEELDR.A                                                           | 1244.37653 | 1 | 2.42E-04 | 0.64  | 2.90   | -     | 581.2    |
| AHQ-7-10, 2735              | K.IQVLQQQADDAEER.A                                                       | 1643.73738 | 2 | 2.13E-08 | 0.92  | 3.59   | -     | 1484.7   |
| AHQ-7-9, 2664 - 2672        | K.IQVLQQQADDAEER.A                                                       | 1643.73738 | 2 | 3.69E-09 | 0.97  | 4.31   | -     | 2223.6   |
| AHQ-7-9, 2456               | R.KIQVLQQQADDAEER.A                                                      | 1771.91030 | 2 | 1.97E-04 | 0.95  | 4.42   | -     | 1429.6   |
| AHQ-7-10, 3219 - 3228       | R.RIQLVEEELDR.A                                                          | 1400.56288 | 2 | 7.61E-06 | 0.97  | 4.24   | -     | 1742.7   |
| AHQ-7-9, 2945 - 2950        | K.TIDDELDKLR.C                                                           | 1190.32563 | 2 | 1.55E-06 | 0.88  | 3.53   | -     | 714.3    |
| gi 4504521 ref NP_002147.1  | heat shock 60kDa protein 1 (chaperonin); mitochondrial matrix protein P  |            |   | 3.81E-09 | 1.58  | 20.19  | 8.00  | 61024.2  |
| AHQ-7-7, 5306               | K.ISSIQSIVPALEIANHR.K                                                    | 1920.20240 | 2 | 3.81E-09 | 0.79  | 3.83   | -     | 323.2    |
| AHQ-7-7, 6904               | R.TALLDAAGVASLLTTAEVWVVEIPKEEK.D                                         | 2870.28530 | 3 | 1.45E-08 | 0.79  | 3.45   | -     | 858.3    |
| gi 10716563 ref NP_001737.1 | calnexin [Homo sapiens]                                                  |            |   | 3.99E-09 | 5.28  | 60.27  | 14.00 | 67567.8  |
| AHQ-7-1, 4956               | K.APVPTGEVYFADSFDR.G                                                     | 1771.90722 | 2 | 2.90E-05 | 0.91  | 3.60   | -     | 1135.0   |
| AHQ-7-2, 5055               | K.APVPTGEVYFADSFDR.G                                                     | 1771.90722 | 2 | 1.35E-05 | 0.85  | 3.10   | -     | 892.2    |
| AHQ-7-5, 4950               | K.APVPTGEVYFADSFDR.G                                                     | 1771.90722 | 2 | 3.99E-09 | 0.95  | 4.28   | -     | 1116.2   |
| AHQ-7-12, 4622              | K.APVPTGEVYFADSFDR.G                                                     | 1771.90722 | 2 | 2.68E-06 | 0.84  | 3.35   | -     | 638.4    |
| AHQ-7-5, 4247               | R.CESAPGCGVWQRVIDNPNYK.G                                                 | 2450.69236 | 2 | 5.66E-07 | 0.67  | 3.02   | -     | 313.6    |
| AHQ-7-5, 3980               | K.IPDPEAVKPDWDEDAPAK.I                                                   | 2109.23496 | 2 | 6.73E-04 | 0.90  | 4.05   | -     | 643.2    |
| AHQ-7-5, 3986               | K.IPDPEAVKPDWDEDAPAK.I                                                   | 2109.23496 | 3 | 3.22E-08 | 0.96  | 4.72   | -     | 1622.3   |
| AHQ-7-5, 6580               | K.IPNPDFFEEDLEPFR.M                                                      | 1736.90447 | 2 | 1.39E-06 | 0.86  | 3.26   | -     | 776.3    |
| AHQ-7-5, 6144               | R.KIPNPDFFEEDLEPFR.M                                                     | 1865.07739 | 3 | 9.35E-06 | 0.97  | 5.33   | -     | 2031.5   |
| AHQ-7-5, 6142               | R.KIPNPDFFEEDLEPFR.M                                                     | 1865.07739 | 2 | 3.34E-07 | 0.94  | 4.34   | -     | 824.2    |
| AHQ-7-5, 3619               | K.TPELNLDQFDHK.T                                                         | 1457.56976 | 2 | 5.83E-04 | 0.90  | 3.56   | -     | 1036.1   |
| gi 22042381 ref XP_065237.3 | similar to FKSG30 [Homo sapiens]                                         |            |   | 5.02E-09 | 1.56  | 20.19  | 8.30  | 42016.0  |
| AHQ-7-14-, 2947             | K.QEYDESGPSIVHR.K                                                        | 1517.58206 | 2 | 7.98E-04 | 0.69  | 3.09   | -     | 581.4    |
| AHQ-7-13-, 2476             | K.QEYDESGPSIVHR.K                                                        | 1517.58206 | 2 | 1.49E-08 | 0.60  | 2.95   | -     | 368.9    |
| AHQ-7-14-, 2454 - 2471      | K.QEYDESGPSIVHR.K                                                        | 1517.58206 | 2 | 5.02E-09 | 0.82  | 3.40   | -     | 484.2    |
| AHQ-7-3, 3016               | K.QEYDESGPSIVHR.K                                                        | 1517.58206 | 2 | 4.17E-06 | 0.55  | 2.53   | -     | 507.3    |
| AHQ-7-8, 3726 - 3791        | R.VAPEEHPILLTEAPLNPK.A                                                   | 1969.27019 | 2 | 2.04E-04 | 0.74  | 3.30   | -     | 496.8    |
| gi 30150448 ref XP_293066.2 | similar to Stress-70 protein, mitochondrial precursor (75 kDa glucose    |            |   | 5.21E-09 | 1.75  | 20.23  | 5.10  | 58788.2  |
| AHQ-7-6, 3954               | K.DAGQISGLNVL.R.V                                                        | 1243.39499 | 2 | 2.35E-04 | 0.81  | 2.89   | -     | 913.6    |
| AHQ-7-6, 4599 - 4602        | R.VINEPTAAALAYGLDK.S                                                     | 1646.86592 | 2 | 5.21E-09 | 0.94  | 4.65   | -     | 839.7    |
| gi 4557321 ref NP_000030.1  | apolipoprotein A-I precursor [Homo sapiens]                              |            |   | 5.26E-09 | 5.09  | 60.29  | 25.50 | 30777.6  |
| AHQ-7-13, 5782              | R.EQLGPVTQEFWDNLEK.E                                                     | 1934.09489 | 2 | 2.73E-05 | 0.68  | 2.74   | -     | 460.7    |
| AHQ-7-11, 5538              | R.EQLGPVTQEFWDNLEK.E                                                     | 1934.09489 | 2 | 2.44E-06 | 0.83  | 3.49   | -     | 488.2    |
| AHQ-7-13, 5149              | K.LLDNWDVSTVTFSSK.L                                                      | 1613.74965 | 2 | 1.37E-04 | 0.56  | 2.64   | -     | 425.5    |
| AHQ-7-10, 4783              | K.LLDNWDVSTVTFSSK.L                                                      | 1613.74965 | 2 | 1.67E-07 | 0.68  | 2.84   | -     | 462.5    |
| AHQ-7-14-, 5061             | K.LLDNWDVSTVTFSSK.L                                                      | 1613.74965 | 2 | 2.75E-07 | 0.91  | 3.90   | -     | 969.5    |
| AHQ-7-11, 5366              | K.LREQLGPVTQEFWDNLEK.E                                                   | 2203.43949 | 2 | 1.25E-05 | 0.97  | 5.72   | -     | 1564.5   |
| AHQ-7-11, 5343              | R.QGLLPVLESFK.V                                                          | 1231.46572 | 2 | 2.10E-05 | 0.75  | 2.57   | -     | 569.9    |
| AHQ-7-11, 4342 - 4348       | R.VKDLATVYVDVLDK.D                                                       | 1463.74362 | 2 | 2.75E-07 | 0.91  | 3.46   | -     | 1049.4   |
| AHQ-7-10, 5659 - 5673       | K.VSFLSALEEYTK.K                                                         | 1387.55934 | 2 | 5.26E-09 | 0.94  | 4.33   | -     | 781.7    |
| gi 12408656 ref NP_005177.2 | calpain 1, large subunit; calpain, large polypeptide L1; calcium-activ   |            |   | 5.27E-09 | 10.26 | 120.27 | 23.10 | 81889.4  |
| AHQ-7-6, 5114               | K.APSDLYQIILK.A                                                          | 1261.49183 | 2 | 2.86E-07 | 0.90  | 3.16   | -     | 1233.4   |
| AHQ-7-6, 6073 - 6147        | R.DM*ETIGFAVYEVPELWQVPAVHLK.R                                            | 2757.15391 | 3 | 6.13E-06 | 0.87  | 3.75   | -     | 812.8    |
| AHQ-7-6, 5863               | R.FRLPPEYVYVVPSTFEPNKEGDFVLR.F                                           | 2994.39160 | 3 | 7.05E-07 | 0.92  | 4.81   | -     | 1215.1   |
| AHQ-7-6, 2954               | K.IRLDETDDDDYDGR.E                                                       | 1795.79921 | 2 | 3.64E-07 | 0.85  | 3.37   | -     | 766.6    |
| AHQ-7-6, 4879               | R.LEICNLTPDALK.S                                                         | 1388.61207 | 2 | 8.24E-04 | 0.92  | 3.30   | -     | 1331.6   |
| AHQ-7-6, 5630 - 5631        | R.LPPGEYVYVVPSTFEPNKEGDFVLR.F                                            | 2691.03055 | 3 | 5.27E-09 | 0.90  | 4.58   | -     | 612.5    |
| AHQ-7-6, 6242               | K.LVVFHSAEGNEFWALLEK.A                                                   | 2177.44364 | 2 | 5.05E-06 | 0.96  | 5.34   | -     | 1285.8   |
| AHQ-7-6, 3977               | K.LYELIITR.Y                                                             | 1021.23493 | 2 | 6.00E-04 | 0.95  | 3.61   | -     | 1692.9   |
| AHQ-7-6, 5163               | R.NYPATFWVNPQFK.I                                                        | 1612.81141 | 2 | 3.35E-07 | 0.95  | 3.93   | -     | 1221.8   |
| AHQ-7-6, 4533               | R.RPTELLSNPQFIVDGATR.T                                                   | 2015.25904 | 3 | 6.00E-07 | 0.97  | 5.07   | -     | 1959.0   |
| AHQ-7-6, 3201               | R.SEQFINLR.E                                                             | 1007.12521 | 2 | 8.46E-04 | 0.84  | 2.78   | -     | 817.3    |
| AHQ-7-6, 3207               | R.SEQFINLR.E                                                             | 1007.12521 | 1 | 4.59E-05 | 0.17  | 1.89   | -     | 251.1    |
| AHQ-7-6, 3319 - 3325        | K.YLGDQYEQLR.V                                                           | 1285.38720 | 2 | 9.97E-08 | 0.90  | 3.73   | -     | 618.0    |
| gi 27477800 ref XP_208313.1 | similar to tropomyosin 4 [Homo sapiens]                                  |            |   | 5.36E-09 | 0.91  | 10.24  | 10.10 | 18426.7  |
| AHQ-7-9, 4652 - 4653        | K.CGDLEELKNVTNNLK.S                                                      | 1878.05124 | 2 | 3.80E-07 | 0.94  | 4.75   | -     | 970.7    |
| AHQ-7-9, 5072               | K.CGDLEELKNVTNNLK.S                                                      | 1878.05124 | 2 | 3.27E-04 | 0.84  | 3.67   | -     | 822.3    |
| AHQ-7-9, 5081               | K.CGDLEELKNVTNNLK.S                                                      | 1878.05124 | 3 | 1.60E-08 | 0.80  | 3.64   | -     | 784.1    |
| AHQ-7-9, 5184 - 5186        | K.CGDLEELKNVTNNLK.S                                                      | 1878.05124 | 2 | 3.66E-08 | 0.92  | 4.74   | -     | 792.2    |
| AHQ-7-9, 4205 - 4208        | K.CGDLEELKNVTNNLK.S                                                      | 1878.05124 | 3 | 5.36E-09 | 0.91  | 4.43   | -     | 1076.1   |
| gi 18201905 ref NP_000166.2 | glucose phosphate isomerase; neuroleukin; glucose-6-phosphate isomerases |            |   | 5.60E-09 | 3.67  | 40.22  | 10.90 | 63146.7  |
| AHQ-7-7, 6832               | K.ILLANFLAQTEALMR.G                                                      | 1705.05838 | 2 | 5.60E-09 | 0.96  | 3.53   | -     | 1738.9   |
| AHQ-7-7, 2994               | K.TFTTQETITNAETAK.E                                                      | 1656.77283 | 2 | 1.00E-07 | 0.86  | 3.47   | -     | 727.9    |
| AHQ-7-7, 5952 - 5953        | K.TLAQLNPESSFIASK.T                                                      | 1833.11828 | 2 | 2.97E-07 | 0.90  | 4.37   | -     | 417.6    |
| AHQ-7-7, 3841               | R.VWVYSNIDGTHIAK.T                                                       | 1603.80282 | 2 | 1.44E-08 | 0.96  | 4.26   | -     | 1281.6   |
| gi 5901944 ref NP_008977.1  | elastin microfibril interface located protein; TNF? elastin microfibril  |            |   | 5.74E-09 | 5.37  | 60.28  | 12.30 | 106694.7 |
| AHQ-7-3, 2988 - 3027        | R.GLEEGQAAGQCPSEGLR.L                                                    | 1888.99421 | 2 | 3.26E-05 | 0.77  | 2.94   | -     | 672.4    |
| AHQ-7-3, 3169               | R.GTLEGGAAAGGGHPGYTSLASR.L                                               | 2142.27464 | 2 | 1.66E-05 | 0.87  | 4.21   | -     | 301.3    |
| AHQ-7-3, 3671               | R.LDTVAGGLQGLR.E                                                         | 1200.37012 | 2 | 3.36E-04 | 0.96  | 3.51   | -     | 1995.9   |
| AHQ-7-3, 5285               | R.LGQLEGLLQAHGDEGCGACGGVQEELGR.L                                         | 2914.13552 | 3 | 5.59E-05 | 0.95  | 5.39   | -     | 1094.5   |
| AHQ-7-3, 2883 - 2960        | R.LVSGSLHTVEAAGEAR.Q                                                     | 1567.72888 | 2 | 5.74E-09 | 0.86  | 3.13   | -     | 923.0    |
| AHQ-7-3, 3768               | R.PARNLSSGSSAGSPLSLGSGEGGPGSEK.V                                         | 2596.74828 | 3 | 5.35E-07 | 0.96  | 5.66   | -     | 1212.4   |
| gi 7706497 ref NP_057392.1  | UMP-CMP kinase [Homo sapiens]                                            |            |   | 5.96E-09 | 1.91  | 20.21  | 11.40 | 25854.7  |
| AHQ-7-11, 2670 - 2678       | R.KNPDSSQYGELIEK.Y                                                       | 1521.65375 | 2 | 5.96E-09 | 0.94  | 4.28   | -     | 869.8    |
| AHQ-7-11, 3740              | K.YGYTHLSAGELLR.D                                                        | 1480.64969 | 2 | 8.86E-06 | 0.97  | 3.80   | -     | 2249.5   |
| gi 4505303 ref NP_002466.1  | myosin alkali light chain 1 slow a; myosin light chain 1, slow-twitch m  |            |   | 6.16E-09 | 2.24  | 30.21  | 11.50 | 22763.8  |
| AHQ-7-12, 2756              | R.ALGNPTNAEVLK.V                                                         | 1355.52211 | 1 | 1.50E-06 | 0.38  | 2.78   | -     | 368.5    |
| AHQ-7-12, 2931              | R.ALGNPTNAEVLK.V                                                         | 1355.52211 | 1 | 1.51E-05 | 0.20  | 2.57   | -     | 336.6    |
| AHQ-7-12, 2746 - 2806       | R.ALGNPTNAEVLK.V                                                         | 1355.52211 | 2 | 7.01E-06 | 0.85  | 4.15   | -     | 366.0    |

|                             |                                                                         |            |   |          |      |       |       |          |
|-----------------------------|-------------------------------------------------------------------------|------------|---|----------|------|-------|-------|----------|
| AHQ-7-12, 3226              | K.ILYSQCGDVMR.A                                                         | 1343.55489 | 1 | 4.54E-04 | 0.25 | 2.59  | -     | 213.9    |
| AHQ-7-13-, 2724             | K.ILYSQCGDVMR.A                                                         | 1359.55429 | 2 | 6.16E-09 | 0.91 | 3.21  | -     | 1076.4   |
| AHQ-7-14-, 2715             | K.ILYSQCGDVMR.A                                                         | 1359.55429 | 2 | 4.32E-05 | 0.75 | 2.98  | -     | 610.5    |
| AHQ-7-12, 3176 - 3234       | K.ILYSQCGDVMR.A                                                         | 1343.55489 | 2 | 4.44E-04 | 0.95 | 3.82  | -     | 1239.7   |
| gi 24307939 ref NP_036205.1 | chaperonin containing TCP1, subunit 5 (epsilon) [Homo sapiens]          |            |   | 6.38E-09 | 0.98 | 10.28 | 3.00  | 59670.7  |
| AHQ-7-7, 6454               | K.LGFAGLVQIEISFGTTK.D                                                   | 1668.91472 | 2 | 6.38E-09 | 0.98 | 5.56  | -     | 1764.6   |
| gi 15306356 ref XP_035638.2 | similar to interleukin 25; lymphocyte antigen 6 complex, locus E ligand |            |   | 6.79E-09 | 2.64 | 30.21 | 20.80 | 18795.1  |
| AHQ-7-13-, 3445 - 3505      | R.ESDVPLKTEEFVTK.T                                                      | 1751.91253 | 2 | 6.79E-09 | 0.89 | 4.17  | -     | 473.8    |
| AHQ-7-13, 3633 - 3637       | R.ESDVPLKTEEFVTK.T                                                      | 1751.91253 | 2 | 2.77E-06 | 0.88 | 3.90  | -     | 502.6    |
| AHQ-7-13-, 3464 - 3507      | R.GAEIEYAMAYSK.A                                                        | 1333.49204 | 2 | 6.17E-04 | 0.92 | 3.85  | -     | 1024.8   |
| AHQ-7-13, 3681              | R.GAEIEYAMAYSK.A                                                        | 1333.49204 | 2 | 5.78E-05 | 0.91 | 3.95  | -     | 1002.3   |
| AHQ-7-13, 4699              | K.SYLYFTQFK.A                                                           | 1197.36315 | 2 | 7.73E-06 | 0.83 | 2.76  | -     | 763.5    |
| gi 4502303 ref NP_001688.1  | mitochondrial ATP synthase, O subunit; ATP synthase, H+ transporting, m |            |   | 7.52E-09 | 2.76 | 30.25 | 22.10 | 23277.2  |
| AHQ-7-11, 5183 - 5242       | R.GEVPTVTSASPLEEATLSELK.T                                               | 2320.55669 | 2 | 7.52E-09 | 0.94 | 4.95  | -     | 876.7    |
| AHQ-7-14-, 5379             | R.GEVPTVTSASPLEEATLSELK.T                                               | 2320.55669 | 2 | 2.65E-05 | 0.91 | 4.38  | -     | 759.0    |
| AHQ-7-11, 3592              | K.LVRPPVQVYIEGR.Y                                                       | 1583.85942 | 3 | 1.14E-04 | 0.96 | 4.43  | -     | 1960.9   |
| AHQ-7-11, 3271              | K.VAASVLNPNYK.R                                                         | 1161.37549 | 2 | 9.55E-08 | 0.86 | 3.42  | -     | 693.2    |
| gi 4758304 ref NP_004902.1  | protein disulfide isomerase related protein (calcium-binding protein, i |            |   | 7.63E-09 | 6.88 | 80.21 | 16.10 | 72931.9  |
| AHQ-7-6, 4575               | K.DLGLSEGEDVNAALIDESGKK.F                                               | 2248.38737 | 2 | 7.63E-09 | 0.90 | 3.62  | -     | 1264.2   |
| AHQ-7-6, 3797               | K.FAM*EPEEFDSDLR.E                                                      | 1703.80830 | 2 | 1.20E-04 | 0.72 | 2.95  | -     | 400.0    |
| AHQ-7-6, 4583               | K.FAMPEEFDSDLR.E                                                        | 1687.80890 | 2 | 1.55E-04 | 0.72 | 3.22  | -     | 375.8    |
| AHQ-7-6, 3685               | R.FDVSGYPTIK.I                                                          | 1127.27123 | 2 | 8.67E-07 | 0.91 | 2.97  | -     | 1221.7   |
| AHQ-7-6, 3907               | K.GESDPAYQQDAANLNR.E                                                    | 2041.08081 | 2 | 1.75E-07 | 0.85 | 3.44  | -     | 1016.7   |
| AHQ-7-6, 2929               | K.IDATSASVLSR.F                                                         | 1191.31686 | 2 | 9.56E-08 | 0.94 | 3.84  | -     | 1330.0   |
| AHQ-7-6, 5134               | K.VEGFPTIYFAPSGDK.K                                                     | 1628.80592 | 2 | 3.54E-05 | 0.94 | 4.13  | -     | 993.6    |
| AHQ-7-6, 3005               | K.VSQGLVVMQPEK.F                                                        | 1443.69431 | 2 | 2.61E-05 | 0.90 | 3.35  | -     | 1241.1   |
| gi 5123454 ref NP_005336.2  | heat shock 70kDa protein 1A; heat shock 70kD protein 1A; heat shock-ind |            |   | 8.56E-09 | 3.74 | 40.25 | 12.50 | 70037.7  |
| AHQ-7-6, 4725 - 4730        | K.DAGVIAGLNVL.R.I                                                       | 1198.39736 | 2 | 6.88E-07 | 0.96 | 3.91  | -     | 1745.5   |
| AHQ-7-6, 5969 - 6042        | K.ELEQVCPNIIISGLYQAGGPGGFGGAQGGPK.G                                     | 3058.37100 | 3 | 6.03E-04 | 0.93 | 4.46  | -     | 1455.2   |
| AHQ-7-6, 3665               | K.HWPPVQVINDGDKPK.V                                                     | 1681.87528 | 3 | 5.97E-07 | 0.96 | 4.93  | -     | 1623.3   |
| AHQ-7-6, 6489               | K.SINPDEAVYGAAGAAAILM*GDK.S                                             | 2321.59293 | 2 | 8.56E-09 | 0.90 | 3.69  | -     | 828.4    |
| gi 4758950 ref NP_000933.1  | peptidylprolyl isomerase B (cyclophilin B) [Homo sapiens]               |            |   | 8.59E-09 | 4.56 | 50.19 | 30.10 | 23742.4  |
| AHQ-7-12, 3022              | R.DKPKLKVIIADCGK.I                                                      | 1573.83653 | 2 | 7.54E-07 | 0.91 | 3.76  | -     | 940.3    |
| AHQ-7-11, 2995 - 3002       | R.DKPKLKVIIADCGK.I                                                      | 1573.83653 | 2 | 1.72E-08 | 0.94 | 3.60  | -     | 1485.9   |
| AHQ-7-11, 4064 - 4130       | K.DTNGSQFFITTVK.T                                                       | 1458.59766 | 2 | 8.59E-09 | 0.93 | 3.80  | -     | 1264.1   |
| AHQ-7-12, 4086 - 4155       | K.DTNGSQFFITTVK.T                                                       | 1458.59766 | 2 | 8.99E-06 | 0.73 | 3.00  | -     | 612.6    |
| AHQ-7-12, 3186              | K.IEVEKPFAlA.K.E                                                        | 1245.49240 | 2 | 1.87E-06 | 0.94 | 3.74  | -     | 1308.2   |
| AHQ-7-11, 4192              | K.TVDNPFVALTGEK.G                                                       | 1365.51377 | 2 | 1.15E-04 | 0.83 | 3.18  | -     | 632.1    |
| AHQ-7-11, 4023              | R.VIKDFMIQGGDFTR.G                                                      | 1627.88933 | 2 | 2.13E-07 | 0.92 | 3.40  | -     | 1131.2   |
| gi 30148492 ref XP_293610.2 | similar to Heat shock cognate 71 kDa protein [Homo sapiens]             |            |   | 9.00E-09 | 1.58 | 20.22 | 2.60  | 72113.4  |
| AHQ-7-6, 4689 - 4713        | R.IINEPTAAAIAYGLDK.K                                                    | 1660.89259 | 2 | 4.84E-06 | 0.83 | 4.32  | -     | 735.1    |
| AHQ-7-6, 4290               | R.IINEPTAAAIAYGLDK.V                                                    | 1789.06550 | 3 | 9.00E-09 | 0.75 | 3.37  | -     | 406.4    |
| AHQ-7-6, 4286               | R.IINEPTAAAIAYGLDK.V                                                    | 1789.06550 | 2 | 7.67E-07 | 0.86 | 4.09  | -     | 700.6    |
| gi 29731460 ref XP_293027.1 | similar to ADP-ATP carrier protein, fibroblast isoform (ADP/ATP trans   |            |   | 1.04E-08 | 0.98 | 10.23 | 6.10  | 23572.2  |
| AHQ-7-10, 4265              | K.DFLAGVAAAIK.M                                                         | 1220.39980 | 2 | 1.04E-08 | 0.98 | 4.61  | -     | 2830.1   |
| gi 4501993 ref NP_003650.1  | alkylglycerone phosphate synthase precursor [Homo sapiens]              |            |   | 1.10E-08 | 0.87 | 10.19 | 2.60  | 72911.4  |
| AHQ-7-6, 5842               | R.GISDPLTVFEQTEAAAR.E                                                   | 1805.96665 | 2 | 1.10E-08 | 0.87 | 3.84  | -     | 546.1    |
| gi 30159310 ref XP_301899.1 | similar to beta-actin [Homo sapiens]                                    |            |   | 1.12E-08 | 0.82 | 20.17 | 9.20  | 32376.4  |
| AHQ-7-8, 1531 - 2083        | K.DSYVGNQASQK.R                                                         | 1198.22158 | 1 | 7.09E-08 | 0.54 | 2.85  | -     | 295.2    |
| AHQ-7-8, 1647 - 1724        | K.DSYVGNQASQK.R                                                         | 1198.22158 | 2 | 4.78E-05 | 0.85 | 3.46  | -     | 718.5    |
| AHQ-7-8, 1886 - 1956        | K.DSYVGNQASQK.R                                                         | 1198.22158 | 2 | 2.26E-05 | 0.76 | 3.10  | -     | 807.3    |
| AHQ-7-8, 2024               | K.DSYVGNQASQK.R                                                         | 1198.22158 | 2 | 3.24E-04 | 0.58 | 3.07  | -     | 376.5    |
| AHQ-7-8, 2195               | K.DSYVGNQASQK.R                                                         | 1198.22158 | 1 | 1.12E-08 | 0.30 | 2.15  | -     | 268.3    |
| AHQ-7-12, 1823 - 1846       | K.DSYVGNQASQK.R                                                         | 1198.22158 | 1 | 4.50E-05 | 0.33 | 2.14  | -     | 488.5    |
| AHQ-7-12, 1808 - 1878       | K.DSYVGNQASQK.R                                                         | 1198.22158 | 2 | 1.25E-04 | 0.83 | 2.94  | -     | 891.2    |
| AHQ-7-8, 4570               | K.SYKLLDGQVITIGNER.F                                                    | 1807.04092 | 2 | 4.64E-04 | 0.68 | 2.80  | -     | 662.4    |
| AHQ-7-8, 4448 - 4516        | K.SYKLLDGQVITIGNER.F                                                    | 1807.04092 | 2 | 2.37E-06 | 0.51 | 2.58  | -     | 421.5    |
| AHQ-7-8, 4982 - 5062        | K.SYKLLDGQVITIGNER.F                                                    | 1807.04092 | 2 | 7.22E-07 | 0.52 | 2.81  | -     | 463.8    |
| gi 4505621 ref NP_002558.1  | prostatic binding protein; phosphatidylethanolamine binding protein [Ho |            |   | 1.13E-08 | 1.88 | 20.26 | 20.30 | 21056.6  |
| AHQ-7-11, 4695              | R.APVAGTCYQAEWDDYVPK.L                                                  | 2072.23961 | 2 | 1.85E-05 | 0.92 | 3.84  | -     | 1152.8   |
| AHQ-7-11, 4306              | K.GNDISSGTVLSDYVSGPPK.G                                                 | 1951.08062 | 2 | 1.13E-08 | 0.96 | 5.13  | -     | 1025.6   |
| AHQ-7-11, 4167 - 4178       | K.GNDISSGTVLSDYVSGPPK.G                                                 | 1951.08062 | 2 | 1.90E-07 | 0.97 | 4.95  | -     | 1549.1   |
| gi 5031987 ref NP_005720.1  | peptidylprolyl isomerase F (cyclophilin F) [Homo sapiens]               |            |   | 1.14E-08 | 1.68 | 20.22 | 18.40 | 22040.1  |
| AHQ-7-12, 3739              | R.FPDENFTLK.H                                                           | 1111.22866 | 1 | 8.92E-04 | 0.10 | 1.80  | -     | 346.6    |
| AHQ-7-12, 3855              | R.FPDENFTLK.H                                                           | 1111.22866 | 2 | 9.59E-04 | 0.71 | 2.62  | -     | 625.1    |
| AHQ-7-12, 3703 - 3762       | R.FPDENFTLK.H                                                           | 1111.22866 | 2 | 2.39E-05 | 0.79 | 2.56  | -     | 639.4    |
| AHQ-7-12, 4778 - 4846       | K.GSGDPPSSSSSSGNPLVYLDVDANGKPLGR.V                                      | 2834.99028 | 3 | 1.14E-08 | 0.89 | 4.38  | -     | 929.1    |
| gi 4503643 ref NP_000121.1  | coagulation factor V precursor; labile factor; factor V Leiden [Homo sa |            |   | 1.23E-08 | 5.24 | 60.18 | 3.10  | 251716.5 |
| AHQ-7-3, 5717               | R.AADIEQAVFAVFDENK.S                                                    | 1896.04666 | 2 | 4.99E-04 | 0.88 | 3.52  | -     | 1153.8   |
| AHQ-7-5, 3183               | R.AEVDVIVQVR.F                                                          | 1144.26019 | 2 | 1.28E-05 | 0.96 | 3.33  | -     | 2387.4   |
| AHQ-7-1, 3896               | R.AWAYYSAVNPEK.D                                                        | 1399.53190 | 2 | 5.41E-05 | 0.90 | 2.57  | -     | 1495.3   |
| AHQ-7-2, 3568               | R.ETDIEDSDIPEDTTYK.K                                                    | 1986.97539 | 2 | 9.26E-07 | 0.79 | 3.59  | -     | 361.0    |
| AHQ-7-4, 3065               | R.ETDIEDSDIPEDTTYK.K                                                    | 2115.14831 | 2 | 1.23E-08 | 0.81 | 3.46  | -     | 396.9    |
| AHQ-7-5, 3095 - 3168        | K.EVIITGIQTQGAH.H                                                       | 1358.56590 | 2 | 2.12E-06 | 0.88 | 3.12  | -     | 1181.1   |
| AHQ-7-3, 3233               | K.EVIITGIQTQGAH.H                                                       | 1358.56590 | 2 | 4.67E-05 | 0.93 | 3.68  | -     | 1355.7   |
| AHQ-7-2, 3277               | K.EVIITGIQTQGAH.H                                                       | 1358.56590 | 2 | 1.72E-06 | 0.89 | 3.27  | -     | 954.5    |
| gi 4557703 ref NP_000414.1  | keratin 2a [Homo sapiens]                                               |            |   | 1.25E-08 | 6.40 | 70.26 | 19.70 | 65864.9  |
| AHQ-7-5, 6626               | R.FGGFGGPGVGLGGPGGFGPGGYPGGIHEVSVNQLLQPLNVK.V                           | 4094.54151 | 3 | 8.28E-05 | 0.92 | 5.20  | -     | 629.9    |
| AHQ-7-4, 6729               | R.FGGFGGPGVGLGGPGGFGPGGYPGGIHEVSVNQLLQPLNVK.V                           | 4094.54151 | 3 | 7.06E-05 | 0.70 | 3.23  | -     | 716.1    |
| AHQ-7-3, 6524               | R.FGGFGGPGVGLGGPGGFGPGGYPGGIHEVSVNQLLQPLNVK.V                           | 4094.54151 | 3 | 1.25E-04 | 0.94 | 5.16  | -     | 1125.2   |
| AHQ-7-2, 6699               | R.FGGFGGPGVGLGGPGGFGPGGYPGGIHEVSVNQLLQPLNVK.V                           | 4094.54151 | 3 | 2.39E-04 | 0.89 | 4.91  | -     | 479.2    |
| AHQ-7-1, 6419               | R.FGGFGGPGVGLGGPGGFGPGGYPGGIHEVSVNQLLQPLNVK.V                           | 4094.54151 | 3 | 6.61E-05 | 0.87 | 4.04  | -     | 878.9    |
| AHQ-7-6, 6525               | R.FGGFGGPGVGLGGPGGFGPGGYPGGIHEVSVNQLLQPLNVK.V                           | 4094.54151 | 3 | 5.37E-05 | 0.91 | 4.97  | -     | 740.7    |
| AHQ-7-2, 3137               | R.FLEQQNQLQTK.W                                                         | 1476.65935 | 2 | 1.41E-08 | 0.98 | 5.13  | -     | 2704.1   |
| AHQ-7-13, 3201              | R.FLEQQNQLQTK.W                                                         | 1476.65935 | 2 | 2.24E-06 | 0.90 | 3.18  | -     | 1627.7   |
| AHQ-7-12, 2998              | R.FLEQQNQLQTK.W                                                         | 1476.65935 | 2 | 1.93E-05 | 0.97 | 4.55  | -     | 2001.2   |
| AHQ-7-1, 3411               | R.FLEQQNQLQTK.W                                                         | 1476.65935 | 2 | 8.87E-04 | 0.93 | 3.30  | -     | 1765.9   |
| AHQ-7-3, 3101               | R.FLEQQNQLQTK.W                                                         | 1476.65935 | 2 | 7.60E-05 | 0.97 | 4.25  | -     | 2225.6   |
| AHQ-7-11, 2966              | R.FLEQQNQLQTK.W                                                         | 1476.65935 | 2 | 6.67E-04 | 0.97 | 4.52  | -     | 1905.3   |
| AHQ-7-10, 2899 - 2903       | R.FLEQQNQLQTK.W                                                         | 1476.65935 | 2 | 3.47E-07 | 0.96 | 4.48  | -     | 1951.2   |
| AHQ-7-7, 2960               | R.FLEQQNQLQTK.W                                                         | 1476.65935 | 2 | 9.85E-05 | 0.94 | 3.12  | -     | 1944.2   |
| AHQ-7-13-, 3043             | R.FLEQQNQLQTK.W                                                         | 1476.65935 | 2 | 3.85E-07 | 0.96 | 3.80  | -     | 2235.8   |
| AHQ-7-4, 3077 - 3078        | R.FLEQQNQLQTK.W                                                         | 1476.65935 | 2 | 3.59E-08 | 0.98 | 4.72  | -     | 2784.6   |
| AHQ-7-1, 3244               | R.FLEQQNQLQTK.W                                                         | 1476.65935 | 2 | 1.24E-05 | 0.96 | 3.80  | -     | 1918.4   |
| AHQ-7-14, 3892              | R.FLEQQNQLQTK.W                                                         | 1476.65935 | 2 | 1.91E-05 | 0.96 | 3.99  | -     | 1821.8   |
| AHQ-7-14-, 3055             | R.FLEQQNQLQTK.W                                                         | 1476.65935 | 2 | 4.69E-07 | 0.98 | 5.11  | -     | 2410.8   |
| AHQ-7-6, 3017               | R.FLEQQNQLQTK.W                                                         | 1476.65935 | 2 | 6.88E-08 | 0.97 | 5.02  | -     | 2073.3   |
| AHQ-7-5, 3032 - 3040        | R.FLEQQNQLQTK.W                                                         | 1476.65935 | 2 | 1.25E-08 | 0.97 | 5.27  | -     | 2149.6   |
| AHQ-7-6, 2845               | K.IEISELNR.V                                                            | 974.09353  | 2 | 9.17E-05 | 0.78 | 2.65  | -     | 817.2    |
| AHQ-7-5, 2888               | K.IEISELNR.V                                                            | 974.09353  | 2 | 2.27E-04 | 0.83 | 2.66  | -     | 835.5    |
| AHQ-7-1, 3119               | K.IEISELNR.V                                                            | 974.09353  | 2 | 5.83E-04 | 0.79 | 3.14  | -     | 606.0    |
| AHQ-7-6, 5961               | R.NLDDLIIAEVK.A                                                         | 1330.50933 | 2 | 9.12E-07 | 0.94 | 3.76  | -     | 1244.5   |
| AHQ-7-1, 5896               | R.NLDDLIIAEVK.A                                                         | 1330.50933 | 2 | 5.18E-06 | 0.96 | 4.45  | -     | 1128.5   |
| AHQ-7-13-, 5759             | R.NLDDLIIAEVK.A                                                         | 1330.50933 | 2 | 3.12E-05 | 0.96 | 4.55  | -     | 1259.5   |
| AHQ-7-3, 5983 - 5984        | R.NLDDLIIAEVK.A                                                         | 1330.50933 | 2 | 1.01E-06 | 0.97 | 5.17  | -     | 1227.6   |
| AHQ-7-12, 5578              | R.NLDDLIIAEVK.A                                                         | 1330.50933 | 2 | 2.47E-05 | 0.90 | 3.18  | -     | 1010.4   |
| AHQ-7-5, 6062               | R.NLDDLIIAEVK.A                                                         | 1330.50933 | 2 | 2.64E-07 | 0.96 | 4.81  | -     | 1239.5   |

|                             |                                                                         |            |   |          |      |       |       |          |
|-----------------------------|-------------------------------------------------------------------------|------------|---|----------|------|-------|-------|----------|
| AHQ-7-2, 6131               | R.NLDDLSIAIEVKA                                                         | 1330.50933 | 2 | 1.11E-05 | 0.95 | 4.64  | -     | 1148.0   |
| AHQ-7-1, 3361               | K.NVQDAIADAEOQR.G                                                       | 1330.38637 | 2 | 4.71E-08 | 0.91 | 3.90  | -     | 932.6    |
| AHQ-7-3, 3248               | K.NVQDAIADAEOQR.G                                                       | 1330.38637 | 2 | 2.69E-07 | 0.79 | 3.27  | -     | 648.7    |
| AHQ-7-6, 5815               | K.VDLLNQEIEFLK.V                                                        | 1461.68459 | 2 | 4.36E-05 | 0.79 | 3.21  | -     | 700.1    |
| AHQ-7-5, 5914               | K.VDLLNQEIEFLK.V                                                        | 1461.68459 | 2 | 1.11E-06 | 0.94 | 4.63  | -     | 933.6    |
| AHQ-7-2, 5983 - 6025        | K.VDLLNQEIEFLK.V                                                        | 1461.68459 | 2 | 8.93E-05 | 0.91 | 4.07  | -     | 911.8    |
| AHQ-7-3, 5847               | K.VDLLNQEIEFLK.V                                                        | 1461.68459 | 2 | 7.39E-06 | 0.95 | 4.47  | -     | 1065.3   |
| AHQ-7-14-, 5427             | K.VLYDAEISQIHQSVTDTNVILSM*DNSR.N                                        | 3066.34680 | 3 | 1.37E-07 | 0.92 | 3.91  | -     | 1490.1   |
| gi 4503747 ref NP_001448.1  | filamin B, beta (actin binding protein 278); beta filamin; filamin 1 (a |            |   | 1.28E-08 | 4.56 | 60.25 | 2.00  | 278191.4 |
| AHQ-7-3, 3068               | K.DLAEDAPWKK.I                                                          | 1173.29999 | 2 | 7.80E-04 | 0.72 | 2.88  | -     | 794.6    |
| AHQ-7-5, 2996 - 3000        | K.DLAEDAPWKK.I                                                          | 1173.29999 | 2 | 3.26E-04 | 0.70 | 2.62  | -     | 938.8    |
| AHQ-7-2, 6332               | R.LIALLEVLSQLR.R                                                        | 1227.51852 | 2 | 1.52E-06 | 0.97 | 4.12  | -     | 1719.9   |
| AHQ-7-10, 5696 - 5700       | R.LIALLEVLSQLR.R                                                        | 1227.51852 | 2 | 8.55E-06 | 0.95 | 3.85  | -     | 1151.8   |
| AHQ-7-9, 5637               | R.LIALLEVLSQLR.R                                                        | 1227.51852 | 2 | 5.04E-04 | 0.86 | 2.74  | -     | 974.1    |
| AHQ-7-7, 6184               | R.LIALLEVLSQLR.R                                                        | 1227.51852 | 2 | 6.90E-07 | 0.96 | 4.36  | -     | 1084.7   |
| AHQ-7-11, 5784 - 5786       | R.LIALLEVLSQLR.R                                                        | 1227.51852 | 2 | 1.28E-08 | 0.97 | 4.59  | -     | 1544.7   |
| AHQ-7-1, 6123               | R.LIALLEVLSQLR.R                                                        | 1227.51852 | 2 | 6.15E-05 | 0.97 | 4.30  | -     | 1607.9   |
| AHQ-7-3, 6188               | R.LIALLEVLSQLR.R                                                        | 1227.51852 | 2 | 2.42E-08 | 0.97 | 4.52  | -     | 1465.2   |
| AHQ-7-6, 6182               | R.LIALLEVLSQLR.R                                                        | 1227.51852 | 2 | 8.19E-08 | 0.96 | 4.15  | -     | 1283.1   |
| AHQ-7-13, 6026              | R.LIALLEVLSQLR.R                                                        | 1227.51852 | 2 | 6.16E-08 | 0.97 | 3.83  | -     | 1755.9   |
| AHQ-7-4, 6344               | R.LIALLEVLSQLR.R                                                        | 1227.51852 | 2 | 1.22E-06 | 0.97 | 4.95  | -     | 1309.4   |
| AHQ-7-5, 6271               | R.LIALLEVLSQLR.R                                                        | 1227.51852 | 2 | 2.53E-07 | 0.97 | 4.48  | -     | 1395.2   |
| AHQ-7-4, 3721               | R.LLGGWIQNK.I                                                           | 972.16560  | 2 | 3.91E-04 | 0.87 | 2.99  | -     | 701.3    |
| AHQ-7-5, 3628 - 3694        | R.LLGGWIQNK.I                                                           | 972.16560  | 2 | 5.30E-04 | 0.82 | 2.71  | -     | 718.7    |
| AHQ-7-3, 1989               | K.LVSDSK.A                                                              | 761.88676  | 1 | 1.91E-05 | 0.15 | 2.01  | -     | 293.8    |
| AHQ-7-2, 6743               | R.QMQLENVSALEFLDR.E                                                     | 1893.15408 | 2 | 1.84E-06 | 0.93 | 4.23  | -     | 866.9    |
| AHQ-7-2, 6315 - 6327        | R.QMQLENVSALEFLDR.E                                                     | 1893.15408 | 2 | 4.56E-04 | 0.95 | 4.62  | -     | 1160.8   |
| AHQ-7-1, 6091               | R.QMQLENVSALEFLDR.E                                                     | 1893.15408 | 2 | 4.11E-05 | 0.94 | 3.63  | -     | 1374.6   |
| AHQ-7-2, 6831 - 6832        | R.QMQLENVSALEFLDR.E                                                     | 1893.15408 | 2 | 2.91E-05 | 0.90 | 3.49  | -     | 913.7    |
| gi 4757900 ref NP_004334.1  | calreticulin precursor; Sica syndrome antigen A (autoantigen Ro; calre  |            |   | 1.35E-08 | 5.87 | 70.30 | 30.70 | 48141.1  |
| AHQ-7-7, 5777               | R.CKDDFETHLYTLVRPNTYEVK.I                                               | 2859.15977 | 2 | 4.78E-06 | 0.90 | 3.70  | -     | 898.5    |
| AHQ-7-7, 5764               | R.CKDDFETHLYTLVRPNTYEVK.I                                               | 2859.15977 | 3 | 1.35E-08 | 0.97 | 6.01  | -     | 1706.1   |
| AHQ-7-13-, 3891             | K.EQFLDGGDWTSR.W                                                        | 1411.45795 | 2 | 2.86E-05 | 0.72 | 2.88  | -     | 647.5    |
| AHQ-7-7, 3844               | K.EQFLDGGDWTSR.W                                                        | 1411.45795 | 2 | 1.11E-04 | 0.77 | 3.10  | -     | 637.3    |
| AHQ-7-14-, 3889             | K.EQFLDGGDWTSR.W                                                        | 1411.45795 | 2 | 2.07E-04 | 0.81 | 2.60  | -     | 829.0    |
| AHQ-7-14, 6036              | R.FYALSASFEPFSNK.G                                                      | 1608.77470 | 2 | 1.58E-07 | 0.92 | 2.94  | -     | 1280.1   |
| AHQ-7-14-, 5197 - 5258      | R.FYALSASFEPFSNK.G                                                      | 1608.77470 | 2 | 9.01E-08 | 0.94 | 3.60  | -     | 1290.6   |
| AHQ-7-7, 3564 - 3574        | K.IDDDPDSKPEDWKKPEHIPDDPAK.K                                            | 2761.89139 | 3 | 1.11E-05 | 0.86 | 4.66  | -     | 606.6    |
| AHQ-7-7, 5165 - 5242        | K.IDNSQVSEGSLEDDWDFLPPKK.I                                              | 2520.68965 | 3 | 2.62E-05 | 0.71 | 3.33  | -     | 626.5    |
| AHQ-7-7, 5346               | K.KPEDWDEEMDGEWEPPIQNPYK.G                                              | 2962.14926 | 3 | 9.47E-06 | 0.90 | 4.43  | -     | 840.0    |
| AHQ-7-7, 5369               | K.KPEDWDEEMDGEWEPPIQNPYK.G                                              | 2962.14926 | 2 | 1.27E-04 | 0.79 | 3.20  | -     | 472.7    |
| AHQ-7-7, 2396               | K.KVHVIFYNK.G                                                           | 1148.38164 | 1 | 1.87E-06 | 0.77 | 2.60  | -     | 637.0    |
| gi 4504743 ref NP_002194.1  | integrin alpha 2 precursor; Integrin, alpha-2 (CD49B; alpha-2 subunit o |            |   | 1.51E-08 | 6.81 | 80.24 | 11.10 | 129294.4 |
| AHQ-7-3, 3689               | K.AGDISCNADINPLK.I                                                      | 1489.63335 | 2 | 1.04E-05 | 0.90 | 4.00  | -     | 898.9    |
| AHQ-7-3, 3044               | K.AVIDQCNDHNLIR.F                                                       | 1569.72493 | 2 | 8.10E-07 | 0.81 | 3.11  | -     | 965.7    |
| AHQ-7-3, 3549               | K.FVQGLDIGPTK.T                                                         | 1715.35903 | 2 | 5.31E-07 | 0.95 | 3.17  | -     | 1956.6   |
| AHQ-7-3, 6263 - 6279        | K.GNWLVLGSPWGFPENR.M                                                    | 1917.11562 | 2 | 1.72E-04 | 0.59 | 3.14  | -     | 469.2    |
| AHQ-7-3, 5197 - 5259        | K.IPLLYDAEIHTR.S                                                        | 1554.81485 | 2 | 1.91E-07 | 0.89 | 3.68  | -     | 740.2    |
| AHQ-7-3, 6361               | R.STNINFYEISSDGNVPSIVHSFEDVGP.K                                         | 3054.26956 | 3 | 5.61E-04 | 0.82 | 3.74  | -     | 750.8    |
| AHQ-7-3, 6447 - 6521        | R.STNINFYEISSDGNVPSIVHSFEDVGP.K                                         | 3054.26956 | 3 | 9.66E-04 | 0.89 | 4.83  | -     | 759.6    |
| AHQ-7-3, 3443               | K.TQVGLIQYANPR.V                                                        | 1474.64668 | 2 | 2.49E-05 | 0.94 | 3.55  | -     | 1614.3   |
| AHQ-7-4, 5092               | R.VDISLENPGTSPALEAYSETAK.V                                              | 2293.46974 | 2 | 6.84E-05 | 0.85 | 3.76  | -     | 464.6    |
| AHQ-7-3, 4928 - 4992        | R.VDISLENPGTSPALEAYSETAK.V                                              | 2293.46974 | 2 | 1.51E-08 | 0.91 | 3.99  | -     | 812.8    |
| gi 16933542 ref NP_002017.1 | fibronectin 1 isoform 1 preproprotein; cold-insoluble globulin [Homo s  |            |   | 1.56E-08 | 5.10 | 60.23 | 3.50  | 25922.8  |
| AHQ-7-1, 4921               | R.NLQPASEYTVSLVAIK.G                                                    | 1733.98671 | 2 | 4.56E-06 | 0.90 | 3.41  | -     | 690.7    |
| AHQ-7-1, 6189               | R.NTFAEVTGLSPGVTYFFK.V                                                  | 1995.21983 | 2 | 7.17E-06 | 0.87 | 3.79  | -     | 499.9    |
| AHQ-7-1, 5749 - 5803        | R.NTFAEVTGLSPGVTYFFK.V                                                  | 1995.21983 | 2 | 5.50E-07 | 0.91 | 4.18  | -     | 825.2    |
| AHQ-7-1, 4679 - 4680        | R.SSPVVIDASTAIDAPSNLR.F                                                 | 1914.10666 | 2 | 2.01E-05 | 0.93 | 4.60  | -     | 996.2    |
| AHQ-7-3, 4655               | R.SSPVVIDASTAIDAPSNLR.F                                                 | 1914.10666 | 2 | 5.18E-04 | 0.86 | 3.76  | -     | 826.5    |
| AHQ-7-1, 3871 - 3913        | R.SYTTITGLQPOTDYK.I                                                     | 1544.68732 | 2 | 1.58E-04 | 0.71 | 2.97  | -     | 511.0    |
| AHQ-7-1, 4093               | R.VDVIPVNLPEHGGQR.L                                                     | 1630.82981 | 3 | 1.41E-04 | 0.74 | 3.23  | -     | 510.7    |
| AHQ-7-1, 3549 - 3629        | R.VPGTSTATLTGLTR.G                                                      | 1462.63098 | 2 | 1.56E-08 | 0.89 | 3.54  | -     | 868.9    |
| gi 12545410 ref NP_031394.1 | RAS p21 protein activator 3; GTPase activating protein III; Ins(1,3,4,  |            |   | 1.57E-08 | 1.88 | 30.19 | 8.20  | 95912.5  |
| AHQ-7-5, 5052               | R.APSDSAPGCGSPCTGGPLANIQLDIDGDRETER.I                                   | 3360.54658 | 3 | 2.64E-04 | 0.55 | 3.50  | -     | 302.2    |
| AHQ-7-5, 6182               | K.SKGDQPLYSIPIENILAVEK.L                                                | 2215.53162 | 3 | 3.86E-04 | 0.76 | 3.85  | -     | 673.1    |
| AHQ-7-5, 6184               | K.SKGDQPLYSIPIENILAVEK.L                                                | 2215.53162 | 2 | 4.69E-04 | 0.78 | 3.69  | -     | 449.1    |
| AHQ-7-5, 6104               | K.SLCPFYGEDFYCEIPR.S                                                    | 2056.26024 | 2 | 2.12E-08 | 0.89 | 3.42  | -     | 681.3    |
| AHQ-7-4, 6193               | K.SLCPFYGEDFYCEIPR.S                                                    | 2056.26024 | 2 | 1.57E-08 | 0.57 | 2.79  | -     | 376.8    |
| gi 6857820 ref NP_005019.2  | phosphatidylinositol-4-phosphate 5-kinase type II alpha; 1-phosphatidy  |            |   | 1.64E-08 | 2.64 | 30.29 | 11.30 | 46224.3  |
| AHQ-7-7, 4492 - 4493        | R.FGIDDQDFQNSLTR.S                                                      | 1656.73462 | 2 | 1.64E-08 | 0.89 | 4.13  | -     | 803.1    |
| AHQ-7-7, 4284               | R.FGIDDQDFQNSLTR.S                                                      | 1656.73462 | 2 | 1.23E-05 | 0.84 | 3.47  | -     | 880.8    |
| AHQ-7-7, 2758               | K.HGAGAESTVNPPEQYSK.R                                                   | 1788.89618 | 2 | 6.30E-07 | 0.98 | 5.79  | -     | 2124.9   |
| AHQ-7-7, 4226               | K.TITSEDVAEMHNLK.K                                                      | 1701.92338 | 2 | 2.30E-07 | 0.76 | 3.64  | -     | 470.7    |
| gi 30147623 ref XP_293669.2 | similar to actinin, alpha 4 [Homo sapiens]                              |            |   | 1.66E-08 | 0.90 | 10.22 | 3.50  | 57794.4  |
| AHQ-7-5, 4082 - 4083        | K.LSGSNPYTTVTPQIINSK.W                                                  | 1921.14079 | 2 | 4.56E-06 | 0.90 | 4.30  | -     | 765.2    |
| AHQ-7-4, 4106 - 4120        | K.LSGSNPYTTVTPQIINSK.W                                                  | 1921.14079 | 2 | 1.66E-08 | 0.90 | 3.88  | -     | 534.5    |
| gi 18426915 ref NP_004386.2 | drebrin 1 isoform a; drebrin E; drebrin-1; drebrin E2 [Homo sapiens] [  |            |   | 1.67E-08 | 4.43 | 50.25 | 12.80 | 71438.9  |
| AHQ-7-13-, 5452             | R.EESAADWALYTYEDGSDDLK.L                                                | 2279.31212 | 2 | 2.44E-05 | 0.78 | 3.67  | -     | 581.3    |
| AHQ-7-8, 3971 - 4030        | K.LAASGEGGLQELSGHFENQK.V                                                | 2073.20908 | 2 | 5.08E-05 | 0.93 | 4.15  | -     | 1177.3   |
| AHQ-7-13-, 4001             | K.LAASGEGGLQELSGHFENQK.V                                                | 2073.20908 | 3 | 3.06E-07 | 0.75 | 3.65  | -     | 516.8    |
| AHQ-7-13, 5842              | R.LELLAAEYEVIR.E                                                        | 1419.64771 | 2 | 7.30E-05 | 0.96 | 3.50  | -     | 1914.5   |
| AHQ-7-8, 2222               | R.LREDDENAEPVGTTYQK.T                                                   | 1850.96428 | 2 | 6.55E-05 | 0.97 | 5.10  | -     | 1647.0   |
| AHQ-7-13-, 5359 - 5360      | K.YVLLINWVGDVPDAR.K                                                     | 1746.94404 | 2 | 1.67E-08 | 0.97 | 5.06  | -     | 1725.1   |
| AHQ-7-13, 5429              | K.YVLLINWVGDVPDAR.K                                                     | 1746.94404 | 2 | 5.16E-06 | 0.93 | 4.00  | -     | 1225.2   |
| gi 10863927 ref NP_066953.1 | peptidylprolyl isomerase A (cyclophilin A) [Homo sapiens]               |            |   | 1.82E-08 | 6.25 | 70.24 | 24.20 | 18012.4  |
| AHQ-7-13-, 3968             | K.FEDENFILK.H                                                           | 1155.28144 | 2 | 4.23E-04 | 0.63 | 2.80  | -     | 507.4    |
| AHQ-7-13, 4105              | K.FEDENFILK.H                                                           | 1155.28144 | 2 | 1.04E-04 | 0.78 | 3.07  | -     | 568.9    |
| AHQ-7-13-, 4596             | K.SIYGKEKFEDENFILK.H                                                    | 1833.03047 | 2 | 4.40E-06 | 0.94 | 4.51  | -     | 1089.5   |
| AHQ-7-13, 4691              | K.SIYGKEKFEDENFILK.H                                                    | 1833.03047 | 2 | 1.08E-04 | 0.84 | 4.10  | -     | 539.8    |
| AHQ-7-14-, 4613             | K.SIYGKEKFEDENFILK.H                                                    | 1833.03047 | 2 | 1.82E-08 | 0.95 | 4.77  | -     | 987.9    |
| AHQ-7-12, 4431 - 4490       | K.SIYGKEKFEDENFILK.H                                                    | 1833.03047 | 2 | 2.37E-05 | 0.92 | 3.82  | -     | 1205.8   |
| AHQ-7-14-, 3125             | K.VKEGMNIVEAMER.F                                                       | 1522.77330 | 2 | 8.21E-04 | 0.88 | 3.00  | -     | 1057.9   |
| AHQ-7-12, 3627              | K.VKEGMNIVEAMER.F                                                       | 1506.77390 | 2 | 6.74E-08 | 0.89 | 4.09  | -     | 882.7    |
| AHQ-7-12, 2576 - 2600       | K.VKEGMNIVEAMER.F                                                       | 1522.77330 | 2 | 5.31E-04 | 0.96 | 4.65  | -     | 1621.8   |
| AHQ-7-12, 4254              | R.VSFELFADK.V                                                           | 1056.19300 | 2 | 3.73E-06 | 0.90 | 3.51  | -     | 1127.3   |
| AHQ-7-12, 4260              | R.VSFELFADK.V                                                           | 1056.19300 | 1 | 1.92E-04 | 0.63 | 2.61  | -     | 599.5    |
| AHQ-7-12, 4402              | R.VSFELFADKVPK.T                                                        | 1380.61317 | 2 | 1.45E-05 | 0.89 | 3.74  | -     | 879.6    |
| gi 4502201 ref NP_001649.1  | ADP-ribosylation factor 1 [Homo sapiens]                                |            |   | 1.90E-08 | 5.59 | 70.26 | 46.40 | 20696.6  |
| AHQ-7-12, 4374              | R.DAVLLVFANK.Q                                                          | 1090.29726 | 1 | 5.53E-05 | 0.59 | 2.33  | -     | 675.4    |
| AHQ-7-12, 4600              | R.HYFQNTQGLIFVDSNDR.E                                                   | 2154.32702 | 2 | 4.21E-05 | 0.68 | 3.30  | -     | 580.5    |
| AHQ-7-12, 4643 - 4698       | R.HYFQNTQGLIFVDSNDRER.V                                                 | 2439.62792 | 3 | 3.50E-07 | 0.88 | 3.66  | -     | 847.1    |
| AHQ-7-12, 3172              | R.ILM*VGLDAAGK.T                                                        | 1104.34572 | 2 | 1.96E-05 | 0.95 | 3.47  | -     | 1621.0   |
| AHQ-7-13-, 6041 - 6055      | K.LGEIVTPTIPIGNVETVEYK.N                                                | 2324.65485 | 2 | 7.58E-05 | 0.64 | 3.31  | -     | 188.8    |
| AHQ-7-14-, 5995             | K.LGEIVTPTIPIGNVETVEYK.N                                                | 2324.65485 | 2 | 2.14E-04 | 0.34 | 2.55  | -     | 164.5    |
| AHQ-7-12, 6194 - 6195       | R.M*LAEDLRLDALVLFVANK.Q                                                 | 2064.39175 | 3 | 1.50E-07 | 0.97 | 5.27  | -     | 1998.8   |
| AHQ-7-13-, 4937             | K.NISFTVWVDVGGQDK.I                                                     | 1566.69621 | 2 | 1.76E-04 | 0.90 | 3.51  | -     | 793.0    |
| AHQ-7-12, 4766 - 4819       | K.NISFTVWVDVGGQDK.I                                                     | 1566.69621 | 2 | 3.43E-05 | 0.81 | 3.06  | -     | 629.8    |

|                             |                                                                         |            |   |          |       |        |       |          |
|-----------------------------|-------------------------------------------------------------------------|------------|---|----------|-------|--------|-------|----------|
| AHQ-7-14-, 4953             | K.NISFTVVDVGGQDK.I                                                      | 1566.69621 | 2 | 1.90E-08 | 0.88  | 3.24   | -     | 779.9    |
| AHQ-7-11, 4696 - 4766       | K.NISFTVVDVGGQDK.I                                                      | 1566.69621 | 2 | 3.18E-06 | 0.68  | 2.67   | -     | 538.2    |
| AHQ-7-13, 5049 - 5071       | K.NISFTVVDVGGQDK.I                                                      | 1566.69621 | 2 | 2.43E-04 | 0.88  | 3.86   | -     | 626.8    |
| gi 4502985 ref NP_001854.1  | cytochrome c oxidase subunit Vlb; human cytochrome oxidase subunit Vlb  |            |   | 2.19E-08 | 0.97  | 10.25  | 20.90 | 10192.3  |
| AHQ-7-14-, 5895             | R.VYQSLCPTSWVDWDEQR.A                                                   | 2272.43560 | 2 | 2.19E-08 | 0.97  | 5.05   | -     | 1621.6   |
| gi 4557597 ref NP_001449.1  | gamma filamin; filamin 2; filamin C, gamma (actin-binding protein-280); |            |   | 2.19E-08 | 2.00  | 30.29  | 1.80  | 288897.4 |
| AHQ-7-4, 4666               | R.GQHVPGPSFQFTVGPLGEGGAHK.V                                             | 2305.53673 | 2 | 2.19E-08 | 0.96  | 5.71   | -     | 754.9    |
| AHQ-7-7, 4393               | R.GQHVPGPSFQFTVGPLGEGGAHK.V                                             | 2305.53673 | 2 | 1.13E-07 | 0.95  | 5.28   | -     | 631.4    |
| AHQ-7-2, 4735 - 4739        | R.GQHVPGPSFQFTVGPLGEGGAHK.V                                             | 2305.53673 | 3 | 1.36E-07 | 0.72  | 3.47   | -     | 386.4    |
| AHQ-7-6, 4498 - 4505        | R.GQHVPGPSFQFTVGPLGEGGAHK.V                                             | 2305.53673 | 3 | 3.74E-08 | 0.88  | 4.60   | -     | 442.0    |
| AHQ-7-5, 4583               | R.GQHVPGPSFQFTVGPLGEGGAHK.V                                             | 2305.53673 | 2 | 5.40E-05 | 0.94  | 4.85   | -     | 589.9    |
| AHQ-7-4, 4660               | R.GQHVPGPSFQFTVGPLGEGGAHK.V                                             | 2305.53673 | 3 | 5.54E-08 | 0.82  | 4.01   | -     | 476.3    |
| AHQ-7-7, 4394               | R.GQHVPGPSFQFTVGPLGEGGAHK.V                                             | 2305.53673 | 3 | 1.47E-05 | 0.74  | 3.47   | -     | 544.0    |
| AHQ-7-5, 4582               | R.GQHVPGPSFQFTVGPLGEGGAHK.V                                             | 2305.53673 | 3 | 2.18E-06 | 0.94  | 5.22   | -     | 788.6    |
| AHQ-7-3, 1921 - 1999        | K.IECCDKKGGSDCVR.Y                                                      | 1628.67809 | 2 | 6.86E-04 | 0.58  | 2.88   | -     | 464.9    |
| AHQ-7-2, 2015               | K.IECCDKKGGSDCVR.Y                                                      | 1628.67809 | 2 | 6.45E-04 | 0.92  | 3.42   | -     | 1083.2   |
| AHQ-7-4, 1958               | K.IECCDKKGGSDCVR.Y                                                      | 1628.67809 | 2 | 9.98E-06 | 0.73  | 2.92   | -     | 633.8    |
| AHQ-7-2, 4360               | K.YGGDEIPYSPFR.I                                                        | 1401.50466 | 1 | 9.03E-05 | 0.31  | 2.77   | -     | 315.5    |
| gi 4503445 ref NP_001944.1  | endothelial cell growth factor 1 (platelet-derived); thymidine phosphor |            |   | 2.24E-08 | 3.55  | 40.25  | 16.40 | 49955.2  |
| AHQ-7-7, 6497               | R.ALPLALVHLELGAGR.S                                                     | 1530.83966 | 2 | 2.24E-08 | 0.97  | 4.61   | -     | 1703.3   |
| AHQ-7-7, 4233               | R.AREQEELLAPADQVELVRA                                                   | 2097.31523 | 2 | 8.82E-07 | 0.92  | 4.75   | -     | 735.3    |
| AHQ-7-7, 6889               | R.DLVTLTGGALLWLSGHAGTQAQGAAR.V                                          | 2565.86952 | 3 | 5.12E-07 | 0.96  | 5.00   | -     | 1679.7   |
| AHQ-7-7, 6774               | R.DVATVDSLPLITASILSK.K                                                  | 1945.24371 | 2 | 3.58E-06 | 0.70  | 3.60   | -     | 270.7    |
| gi 4502097 ref NP_001142.1  | solute carrier family 25 (mitochondrial carrier; adenine nucleotide tra |            |   | 2.27E-08 | 0.88  | 10.17  | 4.00  | 33148.4  |
| AHQ-7-10, 5256 - 5257       | R.YFPTQALNFAFK.D                                                        | 1447.66130 | 2 | 2.27E-08 | 0.88  | 3.43   | -     | 609.4    |
| gi 5902134 ref NP_009005.1  | coronin, actin binding protein, 1A; coronin, actin-binding, 1A; coronin |            |   | 2.28E-08 | 1.86  | 20.22  | 5.90  | 51026.0  |
| AHQ-7-7, 2273               | R.KLQATVQELQK.R                                                         | 1286.50292 | 2 | 5.25E-04 | 0.92  | 4.11   | -     | 1192.4   |
| AHQ-7-13, 4238 - 4245       | R.VSQTTWDSGFCAVNP.K.F                                                   | 1798.95426 | 2 | 3.73E-04 | 0.79  | 3.64   | -     | 623.1    |
| AHQ-7-13-, 4109 - 4111      | R.VSQTTWDSGFCAVNP.K.F                                                   | 1798.95426 | 2 | 7.23E-06 | 0.68  | 3.32   | -     | 492.4    |
| AHQ-7-7, 4048 - 4108        | R.VSQTTWDSGFCAVNP.K.F                                                   | 1798.95426 | 2 | 2.28E-08 | 0.94  | 4.49   | -     | 872.8    |
| gi 20539300 ref XP_088391.4 | similar to tropomyosin 4 [Homo sapiens]                                 |            |   | 2.38E-08 | 1.42  | 20.19  | 6.90  | 18592.1  |
| AHQ-7-9, 3354               | R.KLVILEGELER.A                                                         | 1299.54160 | 1 | 2.38E-08 | 0.47  | 2.59   | -     | 282.8    |
| AHQ-7-11, 3516 - 3587       | R.KLVILEGELER.A                                                         | 1299.54160 | 2 | 1.46E-06 | 0.94  | 3.77   | -     | 1446.4   |
| AHQ-7-10, 3509              | R.KLVILEGELER.A                                                         | 1299.54160 | 2 | 4.05E-05 | 0.88  | 3.27   | -     | 942.1    |
| AHQ-7-9, 3340               | R.KLVILEGELER.A                                                         | 1299.54160 | 2 | 4.04E-06 | 0.93  | 3.62   | -     | 1112.6   |
| AHQ-7-9, 3736 - 3737        | R.KLVILEGELER.A                                                         | 1171.36868 | 2 | 8.26E-06 | 0.95  | 3.82   | -     | 1532.2   |
| gi 20127408 ref NP_000173.2 | hydroxacyl dehydrogenase, subunit A; trifunctional protein, alpha sub   |            |   | 2.53E-08 | 3.36  | 40.21  | 8.70  | 82999.1  |
| AHQ-7-6, 6166               | R.DSIFSNLTGQLDYQGFEK.A                                                  | 2063.20943 | 2 | 2.53E-08 | 0.92  | 4.17   | -     | 820.1    |
| AHQ-7-6, 2673               | K.DTSASAVALLGK.Q                                                        | 1119.25064 | 2 | 3.09E-04 | 0.85  | 2.94   | -     | 1082.8   |
| AHQ-7-6, 4610               | R.FGGGNPELLQMVSK.G                                                      | 1578.81508 | 2 | 1.61E-04 | 0.84  | 3.26   | -     | 592.0    |
| AHQ-7-6, 5885               | K.TVLGTPVLLGALPAGGTQR.L                                                 | 2008.30795 | 2 | 1.30E-04 | 0.76  | 3.59   | -     | 282.2    |
| gi 7705849 ref NP_057215.1  | ras-related GTP-binding protein RAB10; ras-related GTP-binding protein  |            |   | 2.61E-08 | 2.36  | 30.19  | 23.00 | 22540.8  |
| AHQ-7-14-, 6105             | K.AFLTLAEDILR.K                                                         | 1262.47982 | 2 | 2.26E-05 | 0.93  | 3.34   | -     | 1446.7   |
| AHQ-7-11, 5935              | K.AFLTLAEDILR.K                                                         | 1262.47982 | 2 | 6.65E-06 | 0.96  | 3.81   | -     | 1731.7   |
| AHQ-7-13, 6203              | K.AFLTLAEDILR.K                                                         | 1262.47982 | 2 | 2.61E-08 | 0.96  | 3.70   | -     | 1898.6   |
| AHQ-7-13-, 6145             | K.AFLTLAEDILR.K                                                         | 1262.47982 | 2 | 5.75E-04 | 0.94  | 3.68   | -     | 1498.0   |
| AHQ-7-11, 1906 - 1971       | R.NIDEHANEDVER.M                                                        | 1441.44245 | 2 | 2.39E-05 | 0.67  | 2.73   | -     | 578.2    |
| AHQ-7-11, 3518 - 3594       | K.TPVKPEPNSENVDISSGGVGTWK.S                                             | 2359.53465 | 3 | 5.51E-05 | 0.74  | 3.32   | -     | 835.2    |
| gi 4503725 ref NP_000792.1  | FK506-binding protein 1A; FK506-binding protein 1; FK506-binding protei |            |   | 2.90E-08 | 1.75  | 20.25  | 13.00 | 11950.6  |
| AHQ-7-13, 3939 - 4001       | R.GWEEGVAQMSVGGQR.A                                                     | 1534.67926 | 2 | 3.56E-04 | 0.84  | 3.59   | -     | 1129.8   |
| AHQ-7-13-, 3051             | R.GWEEGVAQMSVGGQR.A                                                     | 1550.67866 | 2 | 5.35E-07 | 0.95  | 4.90   | -     | 921.4    |
| AHQ-7-13-, 3851 - 3861      | R.GWEEGVAQMSVGGQR.A                                                     | 1534.67926 | 2 | 2.90E-08 | 0.95  | 3.99   | -     | 1474.9   |
| AHQ-7-14-, 3067             | R.GWEEGVAQMSVGGQR.A                                                     | 1550.67866 | 2 | 3.15E-05 | 0.94  | 3.93   | -     | 1172.6   |
| AHQ-7-13, 3199              | R.GWEEGVAQMSVGGQR.A                                                     | 1550.67866 | 2 | 4.44E-07 | 0.81  | 3.06   | -     | 752.2    |
| gi 7705827 ref NP_057187.1  | GTP-binding protein Sara [Homo sapiens]                                 |            |   | 2.93E-08 | 0.95  | 10.19  | 5.60  | 22409.7  |
| AHQ-7-11, 4287 - 4291       | K.LVFLGLDNAGK.T                                                         | 1147.34882 | 2 | 2.93E-08 | 0.95  | 3.80   | -     | 1327.2   |
| gi 17318569 ref NP_006112.2 | keratin 1; Keratin-1; cytokeratin 1; hair alpha protein [Homo sapiens]  |            |   | 3.02E-08 | 10.96 | 120.25 | 22.70 | 66066.3  |
| AHQ-7-1, 4005 - 4067        | K.LNDLEDALQQAQ.E                                                        | 1358.47963 | 2 | 1.12E-04 | 0.92  | 3.61   | -     | 1490.4   |
| AHQ-7-14-, 3882             | K.LNDLEDALQQAQ.E                                                        | 1358.47963 | 2 | 2.61E-04 | 0.97  | 4.60   | -     | 2120.5   |
| AHQ-7-13, 4025              | K.LNDLEDALQQAQ.E                                                        | 1358.47963 | 2 | 5.29E-05 | 0.94  | 3.72   | -     | 1596.0   |
| AHQ-7-1, 4499               | K.NKLNLEDALQQAQ.E                                                       | 1600.75564 | 2 | 3.33E-04 | 0.95  | 3.95   | -     | 1633.0   |
| AHQ-7-3, 2943               | K.NMQDMV'DEYR.N                                                         | 1317.43134 | 2 | 9.57E-04 | 0.86  | 2.89   | -     | 1009.9   |
| AHQ-7-1, 3859               | K.QISNLQQSISDAEQR.G                                                     | 1717.81950 | 2 | 4.42E-08 | 0.89  | 3.68   | -     | 774.7    |
| AHQ-7-13-, 3679             | K.QISNLQQSISDAEQR.G                                                     | 1717.81950 | 2 | 2.66E-04 | 0.84  | 3.03   | -     | 725.4    |
| AHQ-7-3, 3767               | K.QISNLQQSISDAEQR.G                                                     | 1717.81950 | 2 | 3.02E-08 | 0.84  | 3.64   | -     | 554.4    |
| AHQ-7-1, 3717               | R.SGGGFSGAGAIINYQR.R                                                    | 1658.75374 | 2 | 4.06E-04 | 0.86  | 2.63   | -     | 1272.3   |
| AHQ-7-6, 5957               | R.SLDDLSIAEVK.A                                                         | 1303.48388 | 2 | 3.39E-08 | 0.96  | 4.50   | -     | 1353.0   |
| AHQ-7-2, 6127               | R.SLDDLSIAEVK.A                                                         | 1303.48388 | 2 | 1.08E-06 | 0.93  | 3.88   | -     | 1208.0   |
| AHQ-7-5, 6058               | R.SLDDLSIAEVK.A                                                         | 1303.48388 | 2 | 7.45E-07 | 0.95  | 4.18   | -     | 1372.4   |
| AHQ-7-13, 5818              | R.SLDDLSIAEVK.A                                                         | 1303.48388 | 2 | 5.09E-06 | 0.93  | 3.80   | -     | 1162.1   |
| AHQ-7-4, 6136               | R.SLDDLSIAEVK.A                                                         | 1303.48388 | 2 | 1.14E-07 | 0.94  | 3.89   | -     | 1376.9   |
| AHQ-7-13-, 5763             | R.SLDDLSIAEVK.A                                                         | 1303.48388 | 2 | 5.11E-05 | 0.55  | 2.57   | -     | 585.8    |
| AHQ-7-11, 5586 - 5598       | R.SLDDLSIAEVK.A                                                         | 1303.48388 | 2 | 1.65E-07 | 0.96  | 4.41   | -     | 1440.2   |
| AHQ-7-3, 5980 - 5981        | R.SLDDLSIAEVK.A                                                         | 1303.48388 | 2 | 7.94E-07 | 0.96  | 4.13   | -     | 1412.6   |
| AHQ-7-13, 4659 - 4671       | K.SLNNQFASFDK.V                                                         | 1384.51877 | 2 | 9.21E-04 | 0.87  | 3.27   | -     | 891.0    |
| AHQ-7-1, 4760 - 4761        | K.SLNNQFASFDK.V                                                         | 1384.51877 | 2 | 3.18E-04 | 0.85  | 3.86   | -     | 669.8    |
| AHQ-7-3, 4299               | R.SLVNLGGKSISSISVAR.G                                                   | 1688.95071 | 2 | 1.68E-06 | 0.92  | 4.26   | -     | 820.4    |
| AHQ-7-13-, 6068 - 6147      | R.THNLPEPYFESFINLNR.L                                                   | 1995.18315 | 3 | 1.85E-05 | 0.95  | 4.90   | -     | 1488.6   |
| AHQ-7-2, 6533               | R.THNLPEPYFESFINLNR.L                                                   | 1995.18315 | 2 | 8.96E-04 | 0.66  | 3.40   | -     | 329.2    |
| AHQ-7-1, 6297               | R.THNLPEPYFESFINLNR.L                                                   | 1995.18315 | 3 | 3.07E-07 | 0.92  | 4.27   | -     | 1267.8   |
| AHQ-7-6, 6349               | R.THNLPEPYFESFINLNR.L                                                   | 1995.18315 | 3 | 3.72E-05 | 0.92  | 4.35   | -     | 1137.0   |
| AHQ-7-1, 3379               | R.TNAENFVTK.K                                                           | 1266.38219 | 2 | 1.43E-04 | 0.94  | 3.34   | -     | 1276.9   |
| AHQ-7-6, 3139               | R.TNAENFVTK.K                                                           | 1266.38219 | 2 | 1.78E-04 | 0.75  | 2.56   | -     | 703.6    |
| AHQ-7-5, 4527               | K.WELLQQVDTSTR.T                                                        | 1476.61621 | 2 | 3.76E-07 | 0.95  | 3.71   | -     | 1802.0   |
| AHQ-7-1, 4596 - 4660        | K.WELLQQVDTSTR.T                                                        | 1476.61621 | 2 | 3.80E-08 | 0.95  | 3.73   | -     | 1689.9   |
| AHQ-7-14-, 4409 - 4470      | K.WELLQQVDTSTR.T                                                        | 1476.61621 | 2 | 4.93E-08 | 0.83  | 3.18   | -     | 908.5    |
| AHQ-7-2, 4643               | K.WELLQQVDTSTR.T                                                        | 1476.61621 | 2 | 4.58E-08 | 0.94  | 3.42   | -     | 1766.6   |
| AHQ-7-6, 4438 - 4502        | K.WELLQQVDTSTR.T                                                        | 1476.61621 | 2 | 4.23E-06 | 0.94  | 3.65   | -     | 1746.0   |
| AHQ-7-3, 4544               | K.WELLQQVDTSTR.T                                                        | 1476.61621 | 2 | 8.08E-07 | 0.89  | 3.37   | -     | 1248.8   |
| AHQ-7-3, 3079               | K.YEELQITAGR.H                                                          | 1180.29253 | 2 | 7.18E-06 | 0.96  | 3.81   | -     | 1829.1   |
| AHQ-7-2, 3133               | K.YEELQITAGR.H                                                          | 1180.29253 | 2 | 6.40E-04 | 0.94  | 3.63   | -     | 1658.4   |
| AHQ-7-1, 3233               | K.YEELQITAGR.H                                                          | 1180.29253 | 2 | 8.42E-05 | 0.94  | 3.58   | -     | 1704.3   |
| AHQ-7-7, 2914               | K.YEELQITAGR.H                                                          | 1180.29253 | 2 | 6.16E-04 | 0.89  | 3.47   | -     | 1180.0   |
| gi 4758638 ref NP_004896.1  | peroxiredoxin 6; antioxidant protein 2; non-selenium glutathione peroxi |            |   | 3.07E-08 | 4.96  | 60.25  | 36.60 | 25034.8  |
| AHQ-7-10, 3643              | R.DFTPVCTTELGR.A                                                        | 1397.53591 | 2 | 3.07E-07 | 0.81  | 2.83   | -     | 578.2    |
| AHQ-7-10, 3968              | K.DGDSVM'VLPITPEEEAK.K                                                  | 1847.03409 | 2 | 6.01E-05 | 0.44  | 2.81   | -     | 333.2    |
| AHQ-7-10, 5631              | R.ELAILLQMLDPAEKDEK.G                                                   | 1886.19976 | 2 | 1.82E-05 | 0.96  | 4.72   | -     | 1097.2   |
| AHQ-7-10, 5429 - 5489       | K.LIALSIDSVEDHLAWSK.D                                                   | 1898.14883 | 2 | 1.32E-06 | 0.92  | 4.37   | -     | 680.9    |
| AHQ-7-10, 5435 - 5437       | K.LIALSIDSVEDHLAWSK.D                                                   | 1898.14883 | 3 | 2.52E-05 | 0.78  | 3.87   | -     | 489.1    |
| AHQ-7-14-, 5673             | K.LIALSIDSVEDHLAWSK.D                                                   | 1898.14883 | 2 | 3.07E-08 | 0.94  | 3.69   | -     | 1406.3   |
| AHQ-7-10, 4233 - 4239       | K.LPFPIDDR.N                                                            | 1086.26548 | 2 | 5.82E-05 | 0.93  | 3.58   | -     | 939.2    |
| AHQ-7-10, 3088 - 3089       | R.VVVFPGDPDK.L                                                          | 1136.36763 | 2 | 5.18E-04 | 0.87  | 3.05   | -     | 980.3    |
| gi 4504515 ref NP_002146.1  | heat shock 70kDa protein 6 (HSP70B); heat shock 70kD protein 6 (HSP70B  |            |   | 3.09E-08 | 4.60  | 50.21  | 8.40  | 70853.4  |
| AHQ-7-6, 4994               | R.ARFEELCSDLFR.S                                                        | 1544.71384 | 2 | 4.46E-05 | 0.95  | 4.18   | -     | 1221.7   |
| AHQ-7-6, 5003               | R.FEELCSDLFR.S                                                          | 1317.44926 | 2 | 2.38E-06 | 0.95  | 4.12   | -     | 1257.3   |
| AHQ-7-6, 4855               | R.IINEPTAAAIAYGLDR.R                                                    | 1688.90603 | 2 | 7.83E-08 | 0.93  | 4.15   | -     | 992.4    |
| AHQ-7-6, 4351               | K.LLQDFNFKELNK.S                                                        | 1566.78249 | 2 | 4.96E-04 | 0.87  | 3.64   | -     | 798.5    |

|                             |                                                                         |            |   |          |      |       |       |          |
|-----------------------------|-------------------------------------------------------------------------|------------|---|----------|------|-------|-------|----------|
| AHQ-7-13-, 3475 - 3480      | R.TTSPSYVAFTDTER.L                                                      | 1488.58062 | 2 | 6.21E-07 | 0.80 | 2.70  | -     | 773.1    |
| AHQ-7-6, 3441               | R.TTSPSYVAFTDTER.L                                                      | 1488.58062 | 2 | 3.09E-08 | 0.90 | 2.87  | -     | 1084.1   |
| gi 16950601 ref NP_005956.2 | myosin light chain kinase isoform 6; myosin light chain kinase [Homo s  |            |   | 3.28E-08 | 3.51 | 40.17 | 5.00  | 110074.8 |
| AHQ-7-5, 5595               | K.IEGYDPDEVVWFK.D                                                       | 1579.77650 | 2 | 8.09E-06 | 0.88 | 3.20  | -     | 621.2    |
| AHQ-7-5, 3650               | K.LVQCVDAAFEK.A                                                         | 1339.49637 | 2 | 2.65E-04 | 0.90 | 3.05  | -     | 1127.7   |
| AHQ-7-5, 5110               | R.STSFNQDLLPDPHEYK.F                                                    | 1894.03076 | 2 | 4.10E-05 | 0.80 | 3.50  | -     | 416.5    |
| AHQ-7-6, 3517               | K.VSDFYDIEER.L                                                          | 1273.33005 | 2 | 7.83E-07 | 0.93 | 3.01  | -     | 1440.8   |
| AHQ-7-5, 3564               | K.VSDFYDIEER.L                                                          | 1273.33005 | 2 | 3.28E-08 | 0.93 | 3.42  | -     | 1123.5   |
| gi 4507171 ref NP_003109.1  | secreted protein, acidic, cysteine-rich (osteonectin); Osteonectin (sec |            |   | 3.42E-08 | 3.57 | 40.19 | 19.80 | 34632.0  |
| AHQ-7-8, 3174               | R.LEAGDHPVELLAR.D                                                       | 1420.59579 | 2 | 1.67E-07 | 0.92 | 3.83  | -     | 844.5    |
| AHQ-7-8, 5058               | K.NVLVTLYEREDNNLLTEK.Q                                                  | 2279.48944 | 2 | 3.89E-04 | 0.89 | 3.75  | -     | 1005.5   |
| AHQ-7-8, 3408               | K.TFDSSCHFATK.C                                                         | 1449.56938 | 2 | 3.42E-08 | 0.90 | 3.66  | -     | 933.7    |
| AHQ-7-9, 5661 - 5662        | K.YIPPCLDSELTEFFPLR.M                                                   | 1952.21655 | 2 | 8.76E-07 | 0.85 | 3.78  | -     | 248.8    |
| gi 6005749 ref NP_009193.1  | RNA-binding protein regulatory subunit; oncogene DJ1 [Homo sapiens] [MA |            |   | 3.44E-08 | 2.33 | 30.18 | 24.30 | 19846.9  |
| AHQ-7-11, 3367              | R.DVVICPDASLEDAKK.E                                                     | 1661.85581 | 2 | 3.44E-08 | 0.81 | 2.94  | -     | 680.3    |
| AHQ-7-11, 4082              | K.GAEEM*ETVIPDVVMR.R                                                    | 1692.93673 | 2 | 2.75E-05 | 0.67 | 3.22  | -     | 428.7    |
| AHQ-7-11, 3158              | K.VTVAGLAGKDPVQCSR.D                                                    | 1659.88952 | 2 | 1.18E-07 | 0.84 | 3.28  | -     | 629.2    |
| gi 4507231 ref NP_003134.1  | single-stranded DNA binding protein; single-stranded DNA-binding protei |            |   | 3.48E-08 | 3.51 | 40.25 | 32.40 | 17259.5  |
| AHQ-7-13-, 5724             | K.NPVITFSLATNEM*WR.S                                                    | 1796.04007 | 2 | 3.48E-08 | 0.87 | 3.42  | -     | 607.7    |
| AHQ-7-13-, 6325             | K.NPVITFSLATNEMWR.S                                                     | 1780.04067 | 2 | 4.78E-04 | 0.86 | 2.94  | -     | 979.3    |
| AHQ-7-13-, 5777             | R.QATTIADNIIFLSDQTK.E                                                   | 1993.24692 | 2 | 1.36E-05 | 0.90 | 3.88  | -     | 740.1    |
| AHQ-7-13-, 3232 - 3233      | R.SGDSEVYQLGDVSOQ.T                                                     | 1612.67692 | 2 | 5.73E-07 | 0.96 | 4.98  | -     | 1264.3   |
| AHQ-7-13, 3385              | R.SGDSEVYQLGDVSOQ.T                                                     | 1612.67692 | 2 | 3.04E-07 | 0.88 | 3.33  | -     | 853.1    |
| gi 18375655 ref NP_055184.2 | protein tyrosine phosphatase, non-receptor type 18; brain-derived phos  |            |   | 3.53E-08 | 0.97 | 10.31 | 6.50  | 50482.1  |
| AHQ-7-13, 4939              | R.VPADQSPAGSGAYEDVAGGATGGGLFNLR.I                                       | 2864.03331 | 3 | 3.53E-08 | 0.97 | 6.15  | -     | 1462.9   |
| gi 11321601 ref NP_002618.1 | phosphofruktokinase, platelet; Phosphofruktokinase, platelet type [Hom  |            |   | 3.57E-08 | 6.26 | 70.28 | 16.10 | 85595.6  |
| AHQ-7-5, 3736               | K.AIGVLTSGGDAQGMNAAR.V                                                  | 1789.00750 | 2 | 2.76E-07 | 0.97 | 5.68  | -     | 1517.4   |
| AHQ-7-5, 4974               | K.ASYDVSQGLEHVQPVSV                                                     | 2105.20640 | 2 | 2.84E-06 | 0.69 | 3.38  | -     | 326.7    |
| AHQ-7-5, 5867 - 5876        | K.EIGWTDVGGWGTGGGSILGTR.K                                               | 2120.30735 | 2 | 3.57E-08 | 0.92 | 4.15  | -     | 911.0    |
| AHQ-7-5, 6192               | R.GITNLGVIGDGSLSLTGANLFR.K                                              | 2137.40264 | 2 | 1.46E-06 | 0.97 | 5.24  | -     | 1324.0   |
| AHQ-7-5, 3912 - 3952        | K.IKELVVTQLG DYTR.V                                                     | 1635.88627 | 2 | 2.98E-04 | 0.83 | 3.36  | -     | 795.1    |
| AHQ-7-5, 6352 - 6354        | R.NESCSENYTTDFIYQLYSEEGK.G                                              | 2679.76407 | 2 | 4.55E-07 | 0.94 | 4.82  | -     | 860.1    |
| AHQ-7-5, 3683               | K.YLEEIATQMR.T                                                          | 1254.43805 | 2 | 3.11E-06 | 0.94 | 3.92  | -     | 1480.3   |
| gi 7657056 ref NP_055415.1  | EH-domain containing 3; EH domain containing 3 [Homo sapiens]           |            |   | 3.74E-08 | 5.61 | 60.33 | 24.10 | 60886.7  |
| AHQ-7-7, 4965               | R.FHEFQSPALDADFDNKPML*VLLVGGYSTGK.T                                     | 3410.75689 | 3 | 3.74E-08 | 0.94 | 4.88  | -     | 1002.9   |
| AHQ-7-7, 6822               | R.FVCAQLPNPVLESISVIDTP*GILSSEK.K                                        | 2886.30971 | 2 | 3.57E-05 | 0.82 | 3.51  | -     | 643.3    |
| AHQ-7-7, 5498               | K.GGAFEGTLHGPFHGHYGEGAGEGIDDAEWWWAR.D                                   | 3317.48513 | 3 | 1.08E-04 | 0.98 | 6.69  | -     | 2415.5   |
| AHQ-7-7, 4782               | K.LFEAEQDFFR.D                                                          | 1397.51432 | 2 | 2.48E-07 | 0.97 | 3.96  | -     | 2196.7   |
| AHQ-7-7, 5958               | R.VYIGFSWHLIPDNR.K                                                      | 2015.30234 | 2 | 8.49E-04 | 0.93 | 4.43  | -     | 808.2    |
| AHQ-7-7, 4668 - 4681        | R.YLLEQDFFGMR.I                                                         | 1369.57075 | 2 | 4.46E-05 | 0.96 | 3.65  | -     | 2005.8   |
| gi 18570595 ref XP_095590.1 | similar to myosin regulatory light chain [Homo sapiens]                 |            |   | 3.80E-08 | 0.94 | 10.20 | 8.90  | 13951.5  |
| AHQ-7-11, 3070              | K.LNGTDPEDVIR.H                                                         | 1229.32195 | 2 | 3.80E-08 | 0.94 | 4.06  | -     | 1105.9   |
| AHQ-7-12, 3090              | K.LNGTDPEDVIR.H                                                         | 1229.32195 | 2 | 5.30E-04 | 0.83 | 2.80  | -     | 992.9    |
| AHQ-7-11, 2923 - 2994       | K.LNGTDPEDVIR.H                                                         | 1229.32195 | 2 | 8.37E-05 | 0.91 | 3.11  | -     | 1339.9   |
| gi 4506417 ref NP_002877.1  | RAP2B, member of RAS oncogene family [Homo sapiens]                     |            |   | 3.86E-08 | 2.35 | 30.21 | 20.80 | 20494.2  |
| AHQ-7-11, 4886 - 4948       | K.ALAEEVWSCPFMETSAN.K                                                   | 1859.06988 | 2 | 2.05E-04 | 0.56 | 3.00  | -     | 164.5    |
| AHQ-7-11, 5764              | K.ASVDELFAEIVR.Q                                                        | 1349.51434 | 2 | 1.69E-07 | 0.93 | 4.14  | -     | 1177.8   |
| AHQ-7-11, 4059 - 4072       | K.YDPTIEDFYR.K                                                          | 1319.40042 | 2 | 3.86E-08 | 0.86 | 2.80  | -     | 640.8    |
| gi 4502695 ref NP_001779.1  | cell division cycle 10; cell division cycle 10 (homolog to CDC10 of S.c |            |   | 3.90E-08 | 2.57 | 30.22 | 13.60 | 48786.6  |
| AHQ-7-8, 3970               | K.IYEFFPETDDEEENKLVK.K                                                  | 2099.23685 | 2 | 1.90E-04 | 0.76 | 3.94  | -     | 312.9    |
| AHQ-7-13-, 5244             | K.NLEGYVGFANLPNQVYR.K                                                   | 1955.16216 | 2 | 1.74E-04 | 0.95 | 4.37  | -     | 1087.5   |
| AHQ-7-8, 6443 - 6448        | K.STLINSLFLTDLYSPEYGPSPHR.I                                             | 2608.88640 | 3 | 1.76E-07 | 0.83 | 3.82  | -     | 554.4    |
| AHQ-7-8, 6400 - 6452        | K.STLINSLFLTDLYSPEYGPSPHR.I                                             | 2608.88640 | 2 | 3.90E-08 | 0.87 | 4.13  | -     | 457.7    |
| gi 14249348 ref NP_116120.1 | hypothetical protein MGC14353 [Homo sapiens]                            |            |   | 4.26E-08 | 0.93 | 10.19 | 11.40 | 13940.7  |
| AHQ-7-13-, 4012             | K.SWPCDPCVQAEPPVR.E                                                     | 1705.89366 | 2 | 4.26E-08 | 0.93 | 3.75  | -     | 1037.5   |
| AHQ-7-13, 4146              | K.SWPCDPCVQAEPPVR.E                                                     | 1705.89366 | 2 | 4.67E-04 | 0.83 | 2.85  | -     | 748.1    |
| gi 4757812 ref NP_004880.1  | ATP synthase, H+ transporting, mitochondrial F0 complex, subunit f, iso |            |   | 4.38E-08 | 1.79 | 20.19 | 25.50 | 10917.8  |
| AHQ-7-13, 5779              | R.DFSPSGIFGAFQR.G                                                       | 1429.56124 | 2 | 3.23E-05 | 0.81 | 2.92  | -     | 747.8    |
| AHQ-7-13-, 5715             | R.DFSPSGIFGAFQR.G                                                       | 1429.56124 | 2 | 4.38E-08 | 0.95 | 3.72  | -     | 1290.5   |
| AHQ-7-13-, 5353             | K.LGELPSWILM*RD.D                                                       | 1331.60876 | 2 | 2.20E-04 | 0.86 | 3.22  | -     | 489.4    |
| AHQ-7-14-, 5338             | K.LGELPSWILM*RD.D                                                       | 1331.60876 | 2 | 2.01E-06 | 0.84 | 3.37  | -     | 495.7    |
| AHQ-7-13, 5426              | K.LGELPSWILM*RD.D                                                       | 1331.60876 | 2 | 1.60E-05 | 0.93 | 3.73  | -     | 653.3    |
| gi 20532885 ref XP_086931.2 | similar to epsilon isoform of 14-3-3 protein [Homo sapiens]             |            |   | 4.41E-08 | 2.44 | 30.24 | 13.70 | 29380.0  |
| AHQ-7-9, 2481               | K.EAAKNSIVAYK.A                                                         | 1194.36234 | 2 | 5.53E-05 | 0.59 | 2.89  | -     | 500.8    |
| AHQ-7-10, 6035 - 6036       | K.LICCDILDLVK.H                                                         | 1479.74157 | 2 | 4.41E-08 | 0.96 | 4.89  | -     | 961.2    |
| AHQ-7-11, 6142              | K.LICCDILDLVK.H                                                         | 1479.74157 | 2 | 1.29E-04 | 0.90 | 3.45  | -     | 699.0    |
| AHQ-7-13-, 6297             | K.LICCDILDLVK.H                                                         | 1479.74157 | 2 | 1.82E-05 | 0.92 | 3.51  | -     | 820.2    |
| AHQ-7-9, 2620               | R.YLAEFATGNDRK.E                                                        | 1385.50677 | 2 | 5.89E-07 | 0.89 | 3.03  | -     | 987.6    |
| gi 6715607 ref NP_000175.1  | G-gamma globin [Homo sapiens]                                           |            |   | 4.48E-08 | 0.92 | 10.19 | 6.80  | 16126.3  |
| AHQ-7-13-, 4743 - 4744      | R.LLVVYPWTR.F                                                           | 1275.52342 | 2 | 4.48E-08 | 0.92 | 3.75  | -     | 931.7    |
| AHQ-7-13, 4853 - 4874       | R.LLVVYPWTR.F                                                           | 1275.52342 | 2 | 8.93E-05 | 0.90 | 3.52  | -     | 910.7    |
| gi 4507951 ref NP_003396.1  | tyrosine 3/tryptophan 5-monoxygenase activation protein, eta polypept   |            |   | 4.60E-08 | 4.93 | 60.22 | 26.80 | 28218.5  |
| AHQ-7-10, 2863 - 2925       | K.AVTELNPLSNEDR.N                                                       | 1587.67060 | 2 | 9.60E-07 | 0.92 | 4.43  | -     | 593.2    |
| AHQ-7-10, 5404 - 5484       | K.ELETVCNDVLSLLDK.F                                                     | 1749.96137 | 2 | 2.33E-04 | 0.57 | 2.65  | -     | 368.8    |
| AHQ-7-10, 6095 - 6168       | K.ELETVCNDVLSLLDK.F                                                     | 1749.96137 | 2 | 1.48E-07 | 0.76 | 3.57  | -     | 418.1    |
| AHQ-7-10, 3903              | K.FLIKNCDFQYESK.V                                                       | 1808.00430 | 2 | 4.60E-08 | 0.88 | 3.59  | -     | 587.6    |
| AHQ-7-10, 2343              | K.KNSVVEASEAAYK.E                                                       | 1396.52786 | 2 | 2.92E-04 | 0.83 | 3.09  | -     | 759.5    |
| AHQ-7-10, 2528 - 2591       | K.NSVVEASEAAYK.E                                                        | 1268.35495 | 2 | 9.56E-05 | 0.91 | 3.92  | -     | 801.1    |
| AHQ-7-10, 2179              | R.YLAEVASGEK.K                                                          | 1067.17419 | 1 | 2.62E-04 | 0.39 | 2.03  | -     | 643.6    |
| AHQ-7-10, 2139 - 2195       | R.YLAEVASGEK.K                                                          | 1067.17419 | 2 | 2.61E-05 | 0.83 | 3.04  | -     | 895.5    |
| AHQ-7-10, 2189              | R.YLAEVASGEK.K                                                          | 1067.17419 | 1 | 1.79E-05 | 0.63 | 2.81  | -     | 376.8    |
| gi 11128019 ref NP_061820.1 | cytochrome c [Homo sapiens]                                             |            |   | 4.80E-08 | 0.84 | 10.15 | 13.30 | 11748.7  |
| AHQ-7-13-, 2228             | K.TGQAPGYSYTAANK.N                                                      | 1429.51641 | 2 | 4.80E-08 | 0.84 | 2.91  | -     | 763.6    |
| gi 4826762 ref NP_005134.1  | haptoglobin [Homo sapiens]                                              |            |   | 5.02E-08 | 2.66 | 30.21 | 9.90  | 45205.0  |
| AHQ-7-8, 4231               | R.VMPICLPSKDYAEVGR.V                                                    | 1837.15372 | 2 | 5.02E-08 | 0.88 | 3.51  | -     | 555.9    |
| AHQ-7-8, 3512               | K.VTISIQDWVQK.T                                                         | 1204.35723 | 2 | 1.46E-04 | 0.92 | 3.24  | -     | 1136.8   |
| AHQ-7-8, 4200               | K.YVMLPVADQDQICR.H                                                      | 1709.96880 | 2 | 2.48E-04 | 0.87 | 3.18  | -     | 741.8    |
| gi 30149460 ref XP_210540.2 | similar to Heat shock protein HSP 90-alpha (HSP 86) [Homo sapiens] [MA  |            |   | 5.34E-08 | 0.91 | 10.17 | 4.00  | 29287.8  |
| AHQ-7-5, 2392               | K.HIYYITGETK.D                                                          | 1225.37490 | 2 | 5.34E-08 | 0.91 | 3.35  | -     | 676.5    |
| gi 10835189 ref NP_000628.1 | glutathione reductase [Homo sapiens]                                    |            |   | 5.56E-08 | 1.55 | 20.21 | 7.50  | 51700.3  |
| AHQ-7-7, 4685               | K.ADFDNTVAIHPTSSSEELVTLR                                                | 2316.50977 | 2 | 5.56E-08 | 0.84 | 4.15  | -     | 387.9    |
| AHQ-7-7, 3548               | K.TYSTSFTPMYHAYTK.R                                                     | 1734.95353 | 2 | 2.39E-04 | 0.71 | 3.01  | -     | 537.0    |
| gi 5802966 ref NP_006861.1  | destrin (actin depolymerizing factor); destrin [Homo sapiens]           |            |   | 6.16E-08 | 1.75 | 20.19 | 14.50 | 18505.6  |
| AHQ-7-12, 2071 - 2136       | K.HECCANGPEDLNR.A                                                       | 1541.58530 | 2 | 4.96E-04 | 0.83 | 2.82  | -     | 728.3    |
| AHQ-7-12, 3632 - 3687       | R.YALYDASFETK.E                                                         | 1308.41754 | 2 | 6.16E-08 | 0.92 | 3.89  | -     | 888.0    |
| gi 4507745 ref NP_003320.1  | thioredoxin [Homo sapiens]                                              |            |   | 6.35E-08 | 0.92 | 10.18 | 12.40 | 11693.3  |
| AHQ-7-14, 4718              | K.TAFQEALDAAGDK.L                                                       | 1337.41728 | 2 | 1.81E-07 | 0.93 | 3.27  | -     | 1706.6   |
| AHQ-7-13-, 3832             | K.TAFQEALDAAGDK.L                                                       | 1337.41728 | 2 | 1.88E-06 | 0.87 | 2.99  | -     | 1171.9   |
| AHQ-7-14-, 3837             | K.TAFQEALDAAGDK.L                                                       | 1337.41728 | 2 | 3.60E-06 | 0.89 | 3.29  | -     | 1221.8   |
| AHQ-7-13, 3978 - 3979       | K.TAFQEALDAAGDK.L                                                       | 1337.41728 | 2 | 6.35E-08 | 0.92 | 3.19  | -     | 1452.8   |
| gi 4506675 ref NP_002941.1  | ribophorin I [Homo sapiens]                                             |            |   | 6.62E-08 | 2.46 | 30.20 | 6.80  | 68569.0  |
| AHQ-7-1, 4639               | K.ALTSEIALLQSR.L                                                        | 1302.50235 | 2 | 6.62E-08 | 0.95 | 3.92  | -     | 1703.2   |
| AHQ-7-6, 5570               | R.FVDHVDFDEQVIDSLTVK.I                                                  | 1992.21748 | 2 | 6.03E-05 | 0.67 | 3.22  | -     | 511.2    |
| AHQ-7-1, 4075               | K.NIEIDSPYEISR.A                                                        | 1436.54885 | 2 | 2.52E-05 | 0.85 | 3.48  | -     | 745.1    |
| gi 4557361 ref NP_001187.1  | BH3 interacting domain death agonist; BH3-interacting domain death agon |            |   | 6.74E-08 | 0.92 | 10.15 | 6.70  | 21994.6  |
| AHQ-7-11, 2759 - 2823       | R.IEADSESDIIR.N                                                         | 1505.56635 | 2 | 6.74E-08 | 0.92 | 3.10  | -     | 1544.5   |
| gi 4505759 ref NP_002622.1  | phosphogluconate dehydrogenase; 6-phosphogluconate dehydrogenase [Homo  |            |   | 6.87E-08 | 1.87 | 20.27 | 7.00  | 53151.7  |

|                             |                                                                         |            |   |          |      |       |       |          |
|-----------------------------|-------------------------------------------------------------------------|------------|---|----------|------|-------|-------|----------|
| AHQ-7-14-, 4510             | R.DYFGAHTYELLAK.P                                                       | 1528.68958 | 2 | 6.21E-07 | 0.90 | 3.16  | -     | 1072.4   |
| AHQ-7-8, 6559               | K.IKDAFDRNPELQNLDDFFK.S                                                 | 2552.86598 | 3 | 6.87E-08 | 0.97 | 5.48  | -     | 1665.3   |
| gi 21361198 ref NP_000286.2 | serine (or cysteine) proteinase inhibitor, clade A (alpha-1 antiprotei  |            |   | 7.12E-08 | 4.46 | 50.23 | 19.90 | 46722.2  |
| AHQ-7-7, 3429 - 3449        | K.DTEEDDFHVDDQVTTVK.V                                                   | 1892.95480 | 2 | 1.13E-05 | 0.93 | 3.57  | -     | 1268.6   |
| AHQ-7-7, 3674 - 3690        | K.LQHLELNELTHDIITK.F                                                    | 1805.02503 | 2 | 3.82E-05 | 0.96 | 4.51  | -     | 1572.7   |
| AHQ-7-7, 3884               | K.SVLGQLGITK.V                                                          | 1016.21669 | 2 | 1.86E-06 | 0.90 | 2.99  | -     | 901.0    |
| AHQ-7-7, 5846               | R.TLNGPPDSQLQTLTGNGLFSEGLK.L                                            | 2575.85625 | 2 | 4.61E-06 | 0.78 | 3.62  | -     | 379.3    |
| AHQ-7-8, 4520               | K.VFSNGADLSGVTEEAAPLK.L                                                 | 1835.00476 | 2 | 7.12E-08 | 0.89 | 3.74  | -     | 904.0    |
| AHQ-7-7, 4457 - 4537        | K.VFSNGADLSGVTEEAAPLK.L                                                 | 1835.00476 | 2 | 5.26E-06 | 0.92 | 4.52  | -     | 940.2    |
| gi 4507645 ref NP_000356.1  | triosephosphate isomerase 1 [Homo sapiens]                              |            |   | 7.14E-08 | 3.35 | 40.28 | 26.50 | 26669.3  |
| AHQ-7-10, 3623 - 3700       | K.DCGATVVVLGHSE.R                                                       | 1588.72671 | 2 | 1.58E-04 | 0.62 | 2.93  | -     | 712.8    |
| AHQ-7-10, 4853 - 4861       | K.QSLGELIGTLNAAK.V                                                      | 1415.61746 | 2 | 2.52E-07 | 0.86 | 3.60  | -     | 614.3    |
| AHQ-7-10, 5056              | K.VAHALAEGLGVIACIEGK.L                                                  | 1810.10800 | 2 | 7.14E-08 | 0.98 | 5.53  | -     | 2196.2   |
| AHQ-7-10, 5048 - 5104       | K.VPADTEVVCAPPTAYIDFAR.Q                                                | 2194.44943 | 2 | 4.75E-05 | 0.89 | 3.87  | -     | 685.1    |
| gi 4758756 ref NP_004528.1  | nucleosome assembly protein 1-like 1; HSP22-like protein interacting pr |            |   | 7.44E-08 | 1.67 | 20.27 | 7.40  | 45373.8  |
| AHQ-7-7, 6748               | K.GIPEFWLTVFK.N                                                         | 1337.58999 | 2 | 1.65E-07 | 0.70 | 2.51  | -     | 261.2    |
| AHQ-7-7, 5432               | K.NVDLLSDMVQEHDEPILK.H                                                  | 2096.34751 | 2 | 7.44E-08 | 0.97 | 5.43  | -     | 1370.8   |
| gi 5453722 ref NP_006321.1  | lysophospholipase I; lysophospholipase 1; lysophospholipid-specific lys |            |   | 8.12E-08 | 1.72 | 20.17 | 11.30 | 24669.5  |
| AHQ-7-11, 3020              | K.ALIDQEVKNGIPSNR.I                                                     | 1654.84968 | 2 | 8.12E-08 | 0.82 | 2.72  | -     | 875.7    |
| AHQ-7-11, 3575 - 3579       | K.TLVNPNANVTFK.T                                                        | 1204.40037 | 2 | 3.38E-04 | 0.89 | 3.28  | -     | 923.3    |
| gi 4557395 ref NP_000058.1  | carbonic anhydrase II; carbonate dehydratase II; carbonic dehydratase;  |            |   | 8.90E-08 | 4.62 | 50.23 | 35.00 | 29245.8  |
| AHQ-7-10, 6119 - 6120       | K.AVQQPDGLAVLGLIFLK.V                                                   | 1669.98899 | 2 | 8.90E-08 | 0.94 | 4.63  | -     | 706.1    |
| AHQ-7-10, 3945              | R.ILNNGHFANVFEDDSQDK.A                                                  | 2064.15751 | 2 | 8.45E-04 | 0.47 | 2.53  | -     | 568.1    |
| AHQ-7-10, 3796              | R.ILNNGHFANVFEDDSQDK.A                                                  | 2064.15751 | 2 | 4.19E-07 | 0.93 | 4.19  | -     | 1296.3   |
| AHQ-7-10, 4549              | R.KLNFNGEGEPEELM*VDNWRPAQPLK.N                                          | 2929.25665 | 3 | 3.57E-04 | 0.87 | 3.77  | -     | 871.0    |
| AHQ-7-10, 3444              | K.YAAELHLVHWNTK.Y                                                       | 1582.78684 | 2 | 1.85E-07 | 0.92 | 3.18  | -     | 1619.5   |
| AHQ-7-10, 4176 - 4219       | K.YDPSLKPLSVYDQATSLR.I                                                  | 2141.36647 | 2 | 9.19E-06 | 0.87 | 3.50  | -     | 604.0    |
| AHQ-7-10, 4149 - 4217       | K.YDPSLKPLSVYDQATSLR.I                                                  | 2141.36647 | 3 | 2.35E-07 | 0.95 | 4.08  | -     | 1711.0   |
| gi 7705704 ref NP_057001.1  | glutathione S-transferase subunit 13 homolog [Homo sapiens]             |            |   | 8.94E-08 | 0.88 | 10.23 | 7.10  | 25497.6  |
| AHQ-7-11, 4358              | R.NEDITEPQSILAAEA.K                                                     | 1729.86695 | 2 | 8.94E-08 | 0.88 | 3.60  | -     | 584.5    |
| gi 13376181 ref NP_079079.1 | hypothetical protein FLJ21665 [Homo sapiens]                            |            |   | 9.60E-08 | 0.81 | 10.18 | 3.80  | 49905.5  |
| AHQ-7-7, 5300               | R.SFGGGTSGFTSLLMER.L                                                    | 1704.88582 | 2 | 9.60E-08 | 0.81 | 3.57  | -     | 679.5    |
| gi 4505989 ref NP_000299.1  | protective protein for beta-galactosidase; Protective protein for beta- |            |   | 9.79E-08 | 0.96 | 10.20 | 2.70  | 54495.8  |
| AHQ-7-12, 3466              | K.YGDSGEGIAQFVK.E                                                       | 1371.47686 | 2 | 9.79E-08 | 0.96 | 4.10  | -     | 1582.9   |
| gi 4557251 ref NP_001101.1  | a disintegrin and metalloprotease domain 10 [Homo sapiens]              |            |   | 9.81E-08 | 0.95 | 10.26 | 2.00  | 84141.7  |
| AHQ-7-5, 4674               | K.AIDTIYQTFDFSGIR.N                                                     | 1701.85844 | 2 | 9.81E-08 | 0.95 | 5.16  | -     | 826.6    |
| gi 7657647 ref NP_055363.1  | tropomodulin 2 (neuronal) [Homo sapiens]                                |            |   | 9.83E-08 | 0.84 | 10.14 | 3.10  | 39594.8  |
| AHQ-7-11, 3238              | K.FGYQFTKQGPR.T                                                         | 1329.48804 | 2 | 9.83E-08 | 0.84 | 2.78  | -     | 813.0    |
| gi 4502565 ref NP_001740.1  | calpain, small subunit 1; calpain, small polypeptide; calcium-dependent |            |   | 1.01E-07 | 0.97 | 10.25 | 5.60  | 28315.5  |
| AHQ-7-11, 2351 - 2352       | R.THYSNIEANESSEEV.R.Q                                                   | 1778.81502 | 2 | 7.78E-06 | 0.95 | 4.24  | -     | 1329.4   |
| AHQ-7-10, 2328 - 2333       | R.THYSNIEANESSEEV.R.Q                                                   | 1778.81502 | 2 | 1.01E-07 | 0.97 | 4.92  | -     | 1797.4   |
| gi 4885417 ref NP_005330.1  | huntingtin interacting protein 2; ubiquitin-conjugating enzyme E2-25 KD |            |   | 1.03E-07 | 0.86 | 10.15 | 6.00  | 22406.5  |
| AHQ-7-11, 4458              | K.VDLVDENFTEL.R.G                                                       | 1450.57553 | 2 | 1.03E-07 | 0.86 | 3.02  | -     | 981.6    |
| gi 4507767 ref NP_003326.1  | ubiquitin-activating enzyme E1-like; Ubiquitin-activating enzyme-2; ubi |            |   | 1.04E-07 | 0.96 | 10.20 | 1.40  | 111719.5 |
| AHQ-7-4, 4785               | R.VDGVAAALDSFQAR.R                                                      | 1420.55265 | 2 | 1.04E-07 | 0.96 | 4.05  | -     | 1958.3   |
| gi 5729997 ref NP_004154.2  | RAB27B, member RAS oncogene family [Homo sapiens]                       |            |   | 1.05E-07 | 3.52 | 40.21 | 19.30 | 24607.7  |
| AHQ-7-11, 6164 - 6166       | K.AVETLLDLIMK.R                                                         | 1246.54211 | 2 | 4.45E-04 | 0.89 | 3.93  | -     | 661.2    |
| AHQ-7-11, 5406              | K.AVETLLDLIMK.R                                                         | 1262.54151 | 2 | 1.08E-05 | 0.87 | 3.65  | -     | 710.7    |
| AHQ-7-11, 3583              | K.VHLQLWDTAGGER.F                                                       | 1553.70390 | 2 | 1.77E-05 | 0.90 | 3.11  | -     | 1025.5   |
| AHQ-7-13-, 3777             | K.VHLQLWDTAGGER.F                                                       | 1553.70390 | 2 | 4.29E-05 | 0.94 | 3.81  | -     | 1195.2   |
| AHQ-7-10, 3505              | K.VHLQLWDTAGGER.F                                                       | 1553.70390 | 2 | 2.40E-05 | 0.96 | 4.15  | -     | 1553.2   |
| AHQ-7-11, 4296              | K.YGIPYFETSAAATGQNVKA.A                                                 | 1976.13177 | 2 | 1.54E-06 | 0.91 | 4.13  | -     | 694.1    |
| AHQ-7-11, 4228 - 4310       | K.YGIPYFETSAAATGQNVKA.A                                                 | 1976.13177 | 2 | 1.05E-07 | 0.86 | 4.05  | -     | 524.7    |
| AHQ-7-10, 4133 - 4187       | K.YGIPYFETSAAATGQNVKA.A                                                 | 1976.13177 | 2 | 1.52E-06 | 0.90 | 3.62  | -     | 789.3    |
| gi 13899317 ref NP_113657.1 | SH3 domain binding glutamic acid-rich protein like 2 [Homo sapiens] [M  |            |   | 1.07E-07 | 3.85 | 50.30 | 72.00 | 12326.0  |
| AHQ-7-13, 5406 - 5417       | K.ESNTVFSFLGKPR.L                                                       | 1595.82383 | 2 | 2.28E-04 | 0.74 | 3.33  | -     | 390.2    |
| AHQ-7-13-, 5340             | K.ESNTVFSFLGKPR.L                                                       | 1595.82383 | 2 | 1.88E-07 | 0.70 | 3.60  | -     | 394.3    |
| AHQ-7-13-, 4797             | R.FLEANKIEFEEDVITM*SEEQR.Q                                              | 2574.80223 | 3 | 5.75E-06 | 0.97 | 5.93  | -     | 1660.2   |
| AHQ-7-14-, 4830             | R.FLEANKIEFEEDVITM*SEEQR.Q                                              | 2574.80223 | 2 | 7.31E-04 | 0.65 | 2.88  | -     | 514.8    |
| AHQ-7-14-, 4822 - 4887      | R.FLEANKIEFEEDVITM*SEEQR.Q                                              | 2574.80223 | 3 | 8.26E-07 | 0.97 | 5.60  | -     | 2227.4   |
| AHQ-7-13, 4907              | R.FLEANKIEFEEDVITM*SEEQR.Q                                              | 2574.80223 | 3 | 3.02E-04 | 0.90 | 4.57  | -     | 945.4    |
| AHQ-7-14-, 3743             | K.KPTQGNPLPPOIFNGDR.Y                                                   | 1880.09682 | 2 | 4.29E-05 | 0.56 | 2.79  | -     | 388.9    |
| AHQ-7-14-, 5513 - 5590      | K.KPTQGNPLPPOIFNGDR.Y                                                   | 3380.64432 | 3 | 2.88E-05 | 0.65 | 3.41  | -     | 556.8    |
| AHQ-7-13-, 4316             | R.VFIASSGVAIK.K                                                         | 1326.56551 | 2 | 1.75E-06 | 0.97 | 3.73  | -     | 2109.8   |
| AHQ-7-14-, 4339             | R.VFIASSGVAIK.K                                                         | 1326.56551 | 2 | 1.07E-07 | 0.98 | 4.53  | -     | 2438.2   |
| gi 5031569 ref NP_005727.1  | ARP1 actin-related protein 1 homolog A, contractin alpha; ARP1 (actin-r |            |   | 1.15E-07 | 1.89 | 20.31 | 10.60 | 42613.4  |
| AHQ-7-8, 3935               | R.ACYSLINSQKDETLETKE.A                                                  | 2141.34169 | 2 | 8.51E-04 | 0.92 | 4.60  | -     | 641.1    |
| AHQ-7-8, 5204               | K.DQLQTFSEHPVLLTEAPLNPR.K                                               | 2535.79382 | 2 | 1.15E-07 | 0.97 | 6.28  | -     | 929.0    |
| gi 4505145 ref NP_002387.1  | malic enzyme 2, NAD(+)-dependent, mitochondrial; Malic enzyme, mitochon |            |   | 1.16E-07 | 5.40 | 60.23 | 16.80 | 65443.3  |
| AHQ-7-7, 3517               | K.ALTSQTLDEELAQQGR.L                                                    | 1632.75450 | 2 | 4.84E-05 | 0.91 | 3.59  | -     | 1343.9   |
| AHQ-7-6, 4854               | R.CLFASGSPFGPVK.L                                                       | 1368.58254 | 2 | 1.16E-07 | 0.95 | 3.83  | -     | 1507.5   |
| AHQ-7-6, 3355               | R.HISDSVFLEAAK.A                                                        | 1317.47234 | 2 | 5.70E-04 | 0.81 | 3.03  | -     | 545.4    |
| AHQ-7-6, 3027               | K.IETQDIQALR.F                                                          | 1187.32821 | 2 | 1.34E-05 | 0.88 | 2.99  | -     | 1073.8   |
| AHQ-7-6, 6414               | R.I.LGLGDLGVYGMPVKG.L                                                   | 1760.13394 | 2 | 5.06E-05 | 0.94 | 4.54  | -     | 1109.7   |
| AHQ-7-7, 6668               | R.I.LGDIESLM*PIVYTPTVGLACSQYGHIFR.R                                     | 3455.94544 | 3 | 2.85E-04 | 0.91 | 4.36  | -     | 970.2    |
| gi 21361370 ref NP_002853.2 | phosphorylase, glycogen; brain [Homo sapiens]                           |            |   | 1.19E-07 | 1.72 | 20.16 | 3.20  | 96695.3  |
| AHQ-7-7, 3600               | R.HLDHVAALFPGDVDR.L                                                     | 1662.83036 | 2 | 2.92E-05 | 0.82 | 2.95  | -     | 880.0    |
| AHQ-7-5, 5819               | K.LLPLVSEDFVIR.D                                                        | 1401.67552 | 2 | 1.19E-07 | 0.90 | 3.10  | -     | 754.9    |
| gi 4506063 ref NP_002725.1  | protein kinase, cAMP-dependent, regulatory, type I, alpha; tissue-speci |            |   | 1.22E-07 | 2.65 | 30.23 | 10.80 | 42981.4  |
| AHQ-7-8, 5007 - 5080        | R.LTVADALEPVQFEDGQK.I                                                   | 1861.04222 | 2 | 7.00E-05 | 0.84 | 3.85  | -     | 488.2    |
| AHQ-7-8, 3232               | K.NVLFSHLDDNER.S                                                        | 1459.54574 | 2 | 1.22E-07 | 0.84 | 3.46  | -     | 725.9    |
| AHQ-7-7, 2414               | R.RSENEEFVEVGR.L                                                        | 1451.52361 | 2 | 3.27E-06 | 0.97 | 4.53  | -     | 2204.6   |
| gi 4504557 ref NP_000864.1  | intercellular adhesion molecule 2 precursor [Homo sapiens]              |            |   | 1.25E-07 | 0.88 | 10.21 | 5.80  | 30653.1  |
| AHQ-7-7, 6872               | R.VPTVEPLDSLTLFLFR.G                                                    | 1848.17455 | 2 | 1.25E-07 | 0.88 | 4.10  | -     | 484.3    |
| gi 4557801 ref NP_000261.1  | purine nucleoside phosphorylase [Homo sapiens]                          |            |   | 1.36E-07 | 2.84 | 30.29 | 18.70 | 32147.7  |
| AHQ-7-13-, 3997             | K.HRPQVAICGSGGLGGLTDK.L                                                 | 1981.26589 | 3 | 4.82E-07 | 0.98 | 5.66  | -     | 4087.7   |
| AHQ-7-9, 3690 - 3697        | K.HRPQVAICGSGGLGGLTDK.L                                                 | 1981.26589 | 3 | 1.36E-07 | 0.98 | 5.83  | -     | 3363.0   |
| AHQ-7-9, 6172               | K.LEQFVSILMASIPLDK.A                                                    | 1902.28716 | 2 | 8.33E-05 | 0.92 | 4.25  | -     | 699.9    |
| AHQ-7-9, 3873 - 3876        | K.LGADAVGM*STVPEVIVAR.H                                                 | 1802.08606 | 2 | 1.41E-06 | 0.94 | 4.07  | -     | 1085.8   |
| gi 4507789 ref NP_003338.1  | ubiquitin-conjugating enzyme E2L 3 [Homo sapiens]                       |            |   | 1.38E-07 | 0.92 | 10.19 | 9.70  | 17861.5  |
| AHQ-7-12, 4956              | R.IEINFPAEYFKPKP.K.I                                                    | 1791.08155 | 3 | 1.38E-07 | 0.92 | 3.88  | -     | 1226.8   |
| gi 4504077 ref NP_000165.1  | glycoprotein IX (platelet) [Homo sapiens]                               |            |   | 1.41E-07 | 3.57 | 40.20 | 27.10 | 19046.0  |
| AHQ-7-11, 4018              | R.ALETM*GLWVDCR.G                                                       | 1468.68075 | 2 | 2.69E-04 | 0.88 | 3.67  | -     | 785.6    |
| AHQ-7-11, 2698              | R.CASPSLAAGPLGR.L                                                       | 1395.56962 | 2 | 4.73E-07 | 0.88 | 2.98  | -     | 1012.9   |
| AHQ-7-11, 3398              | R.GHGLTALPALPAR.T                                                       | 1274.49706 | 3 | 3.17E-05 | 0.92 | 3.91  | -     | 1235.8   |
| AHQ-7-11, 3392              | R.GHGLTALPALPAR.T                                                       | 1274.49706 | 2 | 6.51E-05 | 0.91 | 3.68  | -     | 672.6    |
| AHQ-7-12, 3459 - 3462       | R.GHGLTALPALPAR.T                                                       | 1274.49706 | 2 | 3.84E-04 | 0.94 | 3.93  | -     | 857.1    |
| AHQ-7-14-, 3297 - 3299      | R.TPEALLQVR.C                                                           | 1027.19957 | 2 | 1.41E-07 | 0.89 | 3.03  | -     | 1059.0   |
| AHQ-7-11, 3182              | R.TPEALLQVR.C                                                           | 1027.19957 | 2 | 2.43E-05 | 0.90 | 3.21  | -     | 1074.9   |
| gi 29568111 ref NP_006088.2 | myosin, light polypeptide 9, regulatory; myosin regulatory light chain  |            |   | 1.68E-07 | 2.49 | 30.19 | 12.20 | 19827.1  |
| AHQ-7-11, 3355              | R.FTDEEVDYMYR.E                                                         | 1450.50949 | 2 | 8.31E-04 | 0.78 | 2.54  | -     | 941.3    |
| AHQ-7-11, 3347              | R.FTDEEVDYMYR.E                                                         | 1434.51009 | 2 | 1.68E-07 | 0.89 | 3.04  | -     | 919.1    |
| AHQ-7-11, 4035              | K.GNFNYYVFTR.I                                                          | 1247.34066 | 2 | 2.57E-05 | 0.82 | 3.04  | -     | 762.5    |
| AHQ-7-14-, 3897             | K.GNFNYYVFTR.I                                                          | 1247.34066 | 2 | 1.27E-04 | 0.62 | 2.52  | -     | 680.6    |
| AHQ-7-11, 3722 - 3726       | K.GNFNYYVFTR.I                                                          | 1247.34066 | 2 | 6.34E-04 | 0.94 | 3.87  | -     | 1055.0   |
| gi 27597085 ref NP_000357.3 | tropomyosin 1 (alpha) [Homo sapiens]                                    |            |   | 1.77E-07 | 1.82 | 20.20 | 3.90  | 32865.7  |
| AHQ-7-9, 3116 - 3126        | R.KLVIESDLR.EA                                                          | 1315.54103 | 2 | 8.05E-07 | 0.94 | 4.01  | -     | 1352.8   |

|                             |                                                                                |            |   |          |      |       |       |          |
|-----------------------------|--------------------------------------------------------------------------------|------------|---|----------|------|-------|-------|----------|
| AHQ-7-10, 3592              | K.LVIIESDLER.A                                                                 | 1187.36811 | 2 | 1.77E-07 | 0.88 | 2.92  | -     | 937.0    |
| gi 30153852 ref XP_171113.3 | similar to Moesin (Membrane-organizing extension spike protein) [Homo sapiens] |            |   | 1.79E-07 | 0.97 | 10.23 | 9.30  | 15601.7  |
| AHQ-7-6, 2049               | R.RKPDITIEVQMK.A                                                               | 1473.72364 | 2 | 1.79E-07 | 0.97 | 4.52  | -     | 1804.5   |
| gi 4885183 ref NP_005210.1  | diaphanous 1; deafness, autosomal dominant 1; hDia1 [Homo sapiens] [MAS]       |            |   | 1.85E-07 | 5.25 | 60.25 | 6.80  | 138977.7 |
| AHQ-7-3, 3316               | R.DVQNFPAAATDEKDKFVKE.M                                                        | 2082.25588 | 2 | 1.33E-04 | 0.85 | 3.69  | -     | 646.0    |
| AHQ-7-3, 3629               | R.EMVSQYLYTSK.A                                                                | 1349.53461 | 2 | 1.15E-05 | 0.81 | 2.91  | -     | 704.3    |
| AHQ-7-3, 4591               | R.LGLHQLVQLDR.E                                                                | 1292.51238 | 2 | 1.31E-04 | 0.84 | 3.35  | -     | 768.4    |
| AHQ-7-3, 5079               | K.LVAEDLSQDCFWTK.V                                                             | 1713.88927 | 2 | 1.85E-07 | 0.91 | 3.76  | -     | 828.9    |
| AHQ-7-3, 5777 - 5779        | K.TAQNLSIFLGSFR.M                                                              | 1454.65537 | 2 | 4.65E-06 | 0.88 | 3.75  | -     | 779.5    |
| AHQ-7-3, 4797 - 4867        | R.VQLNVFDEQGEEDSYDLK.G                                                         | 2129.22304 | 2 | 1.95E-05 | 0.97 | 4.91  | -     | 1487.7   |
| gi 5803225 ref NP_006752.1  | tyrosine 3/tryptophan 5-monoxygenase activation protein, epsilon poly          |            |   | 1.86E-07 | 0.97 | 10.24 | 7.50  | 29173.7  |
| AHQ-7-10, 6040              | K.AAFDDAIAELDLTSEESYK.D                                                        | 2089.19882 | 2 | 2.05E-07 | 0.94 | 4.14  | -     | 1169.6   |
| AHQ-7-13, 6231 - 6289       | K.AAFDDAIAELDLTSEESYK.D                                                        | 2089.19882 | 2 | 2.88E-06 | 0.84 | 3.88  | -     | 596.8    |
| AHQ-7-14-, 6277             | K.AAFDDAIAELDLTSEESYK.D                                                        | 2089.19882 | 2 | 1.86E-07 | 0.97 | 4.77  | -     | 1500.2   |
| AHQ-7-9, 5925 - 5985        | K.AAFDDAIAELDLTSEESYK.D                                                        | 2089.19882 | 2 | 1.75E-04 | 0.94 | 4.15  | -     | 1070.7   |
| gi 9945439 ref NP_002679.2  | peanut-like 1; septin HCDCREL-1 [Homo sapiens]                                 |            |   | 1.88E-07 | 0.89 | 10.17 | 3.30  | 42776.7  |
| AHQ-7-8, 2892 - 2970        | K.DVTDVHYENYR.A                                                                | 1572.63777 | 2 | 1.88E-07 | 0.89 | 3.39  | -     | 862.2    |
| gi 18765729 ref NP_003816.2 | synaptosomal-associated protein 23 isoform SNAP23A; synaptosomal-associ        |            |   | 1.95E-07 | 0.96 | 10.21 | 6.60  | 23353.9  |
| AHQ-7-14, 5365              | R.IILGLAIESQDAIGK.T                                                            | 1428.65614 | 2 | 4.96E-04 | 0.94 | 3.53  | -     | 1381.1   |
| AHQ-7-14-, 4405 - 4482      | R.IILGLAIESQDAIGK.T                                                            | 1428.65614 | 2 | 3.22E-04 | 0.97 | 4.13  | -     | 1972.6   |
| AHQ-7-11, 4248              | R.IILGLAIESQDAIGK.T                                                            | 1428.65614 | 2 | 1.95E-07 | 0.96 | 3.62  | -     | 1718.3   |
| gi 4506925 ref NP_003013.1  | SH3 domain binding glutamic acid-rich protein like; SH3-binding domain         |            |   | 2.04E-07 | 3.62 | 40.30 | 58.80 | 12774.2  |
| AHQ-7-13, 5974 - 6014       | R.ENNAVAYFLGLTAPPQSK.E                                                         | 1850.06426 | 2 | 3.81E-04 | 0.82 | 3.15  | -     | 629.2    |
| AHQ-7-13-, 5717 - 5775      | R.ENNAVAYFLGLTAPPQSK.E                                                         | 1850.06426 | 2 | 4.29E-07 | 0.94 | 4.76  | -     | 970.9    |
| AHQ-7-13-, 5865 - 5945      | R.ENNAVAYFLGLTAPPQSK.E                                                         | 1850.06426 | 2 | 1.20E-04 | 0.57 | 2.88  | -     | 419.7    |
| AHQ-7-13, 5109              | R.ENVPENSRPATGYPLPQIFNESQYR.G                                                  | 3005.24660 | 3 | 1.37E-05 | 0.81 | 3.86  | -     | 594.5    |
| AHQ-7-13, 4882 - 4938       | R.ENVPENSRPATGYPLPQIFNESQYR.G                                                  | 3005.24660 | 3 | 3.34E-07 | 0.96 | 5.85  | -     | 1286.9   |
| AHQ-7-13-, 4795 - 4864      | R.ENVPENSRPATGYPLPQIFNESQYR.G                                                  | 3005.24660 | 3 | 1.63E-05 | 0.96 | 5.80  | -     | 1095.6   |
| AHQ-7-13, 4993 - 5054       | R.ENVPENSRPATGYPLPQIFNESQYR.G                                                  | 3005.24660 | 3 | 2.04E-07 | 0.96 | 5.94  | -     | 1034.2   |
| AHQ-7-13, 4158 - 4213       | R.GDYDAFFEAR.E                                                                 | 1191.23073 | 2 | 3.33E-04 | 0.82 | 2.98  | -     | 826.8    |
| AHQ-7-13, 2666 - 2722       | R.VYIASSSGSTAIK.K                                                              | 1284.44065 | 2 | 1.96E-05 | 0.89 | 3.43  | -     | 1391.0   |
| AHQ-7-13-, 2459 - 2485      | R.VYIASSSGSTAIK.K                                                              | 1284.44065 | 2 | 2.11E-05 | 0.95 | 3.75  | -     | 1823.7   |
| gi 18104989 ref NP_002822.2 | protein tyrosine phosphatase, non-receptor type 6 isoform 1; protein-t         |            |   | 2.13E-07 | 4.88 | 60.23 | 15.50 | 67560.7  |
| AHQ-7-6, 5829 - 5830        | K.AGFWEFESLQK.Q                                                                | 1471.59489 | 2 | 8.16E-07 | 0.96 | 4.66  | -     | 1396.4   |
| AHQ-7-6, 4911               | R.DLSGLDAETLLK.G                                                               | 1275.43053 | 2 | 2.27E-07 | 0.93 | 3.55  | -     | 1203.0   |
| AHQ-7-6, 6458 - 6490        | R.ESLSQPGDFVLSVSDQPK.A                                                         | 2047.25144 | 2 | 7.33E-04 | 0.69 | 3.48  | -     | 320.5    |
| AHQ-7-6, 4058               | R.IQNSGDFDYLYGGEK.F                                                            | 1706.79040 | 2 | 8.34E-07 | 0.86 | 3.62  | -     | 652.6    |
| AHQ-7-6, 4450               | R.TLQVSPDNGDLIR.E                                                              | 1541.73134 | 2 | 2.70E-05 | 0.67 | 2.83  | -     | 611.6    |
| AHQ-7-6, 6694               | R.YTVGGLETFDSLTLVHEHFK.K                                                       | 2272.49536 | 3 | 2.13E-07 | 0.78 | 3.45  | -     | 523.5    |
| gi 24307955 ref NP_055191.1 | p53 inducible protein [Homo sapiens]                                           |            |   | 2.21E-07 | 1.61 | 20.14 | 2.00  | 145660.2 |
| AHQ-7-3, 3251               | R.AVGSSTQLYM*VR.T                                                              | 1425.63581 | 2 | 5.32E-06 | 0.68 | 2.72  | -     | 639.4    |
| AHQ-7-3, 4857               | K.YAPLHLVPLIR.L                                                                | 1421.71166 | 2 | 2.21E-07 | 0.93 | 2.77  | -     | 1493.2   |
| gi 4557032 ref NP_002291.1  | lactate dehydrogenase B [Homo sapiens]                                         |            |   | 2.23E-07 | 5.83 | 70.28 | 21.90 | 36638.3  |
| AHQ-7-9, 4432               | K.GEMMDLQHGSLFLOTPK.I                                                          | 1933.24171 | 2 | 1.79E-06 | 0.91 | 3.75  | -     | 994.5    |
| AHQ-7-9, 6190               | K.GYTNWAIGLSADLIESM*LK.N                                                       | 2198.52454 | 2 | 1.48E-04 | 0.70 | 2.69  | -     | 781.9    |
| AHQ-7-13-, 2601             | K.IVVVTAGVR.Q                                                                  | 914.12760  | 2 | 3.26E-05 | 0.85 | 3.09  | -     | 772.1    |
| AHQ-7-13-, 3407             | K.LIAPVAEEATVPNNK.I                                                            | 1695.89534 | 2 | 4.49E-04 | 0.85 | 3.32  | -     | 694.4    |
| AHQ-7-9, 2148 - 2149        | K.KLDDEVAQLK.K                                                                 | 1159.31477 | 2 | 5.58E-05 | 0.74 | 3.13  | -     | 524.9    |
| AHQ-7-11, 6130              | K.SLADELALVDLEDK.L                                                             | 1630.81843 | 2 | 1.95E-04 | 0.91 | 3.57  | -     | 1076.5   |
| AHQ-7-13-, 6283             | K.SLADELALVDLEDK.L                                                             | 1630.81843 | 2 | 2.23E-07 | 0.92 | 3.67  | -     | 1061.7   |
| AHQ-7-14-, 6265             | K.SLADELALVDLEDK.L                                                             | 1630.81843 | 2 | 1.13E-05 | 0.96 | 4.53  | -     | 1534.1   |
| AHQ-7-13, 6285 - 6286       | K.SLADELALVDLEDK.L                                                             | 1630.81843 | 2 | 4.09E-07 | 0.98 | 5.55  | -     | 1968.0   |
| AHQ-7-14-, 6350             | K.SLADELALVDLEDKL.K.G                                                          | 1872.14959 | 2 | 8.22E-06 | 0.86 | 3.37  | -     | 879.4    |
| gi 5803011 ref NP_001966.1  | enolase 2; enolase-2, gamma, neuronal; neurone-specific enolase; neuron        |            |   | 2.25E-07 | 0.87 | 10.19 | 3.70  | 47268.3  |
| AHQ-7-8, 6375               | R.YITGDQLGALYQDFVR.D                                                           | 1860.05915 | 2 | 2.25E-07 | 0.87 | 3.73  | -     | 872.5    |
| gi 17986283 ref NP_006000.2 | tubulin, alpha 3; tubulin, alpha, brain-specific; hum-a-tub 1; hum-a-tu        |            |   | 2.28E-07 | 0.93 | 10.22 | 3.30  | 50135.3  |
| AHQ-7-7, 5497               | R.AVFVLEPTVIDEVR.T                                                             | 1702.92947 | 2 | 3.33E-05 | 0.74 | 3.02  | -     | 528.5    |
| AHQ-7-7, 5588               | R.AVFVLEPTVIDEVR.T                                                             | 1702.92947 | 2 | 2.28E-07 | 0.93 | 4.37  | -     | 849.4    |
| AHQ-7-13, 5494 - 5502       | R.AVFVLEPTVIDEVR.T                                                             | 1702.92947 | 2 | 7.75E-07 | 0.89 | 4.28  | -     | 651.4    |
| AHQ-7-1, 5623               | R.AVFVLEPTVIDEVR.T                                                             | 1702.92947 | 2 | 3.98E-04 | 0.83 | 3.58  | -     | 621.2    |
| gi 29788766 ref NP_064424.2 | tubulin, beta polypeptide 4, member Q [Homo sapiens]                           |            |   | 2.33E-07 | 2.64 | 30.32 | 11.10 | 48377.2  |
| AHQ-7-14-, 4489             | R.AVLVDLEPPTMSVRS.S                                                            | 1602.83495 | 2 | 2.33E-07 | 0.85 | 3.65  | -     | 542.9    |
| AHQ-7-7, 3840 - 3842        | R.AVLVDLEPPTM*DSVRS.S                                                          | 1618.83435 | 2 | 3.48E-04 | 0.82 | 3.57  | -     | 467.9    |
| AHQ-7-7, 5744               | R.KEAESDCLQGFQLTHSLGGTSGMGTLKLS.K                                              | 3443.82841 | 3 | 5.58E-05 | 0.97 | 6.35  | -     | 1669.5   |
| gi 4505735 ref NP_002611.1  | platelet factor 4 variant 1; Platelet factor 4, variant 1 (PF4-like) [H        |            |   | 2.35E-07 | 1.93 | 20.24 | 25.00 | 11552.6  |
| AHQ-7-14-, 3809             | R.AEAEEDGDLQCLCVK.T                                                            | 1739.86036 | 2 | 2.35E-07 | 0.97 | 4.82  | -     | 1779.9   |
| AHQ-7-14-, 3702             | R.AEAEEDGDLQCLCVK.T                                                            | 1739.86036 | 2 | 3.83E-05 | 0.91 | 3.78  | -     | 793.3    |
| AHQ-7-14-, 5950             | K.ICLDLQALLYK.K                                                                | 1351.63656 | 2 | 8.64E-07 | 0.96 | 4.13  | -     | 1318.1   |
| gi 4507949 ref NP_003395.1  | tyrosine 3-monoxygenase/tryptophan 5-monoxygenase activation protein,          |            |   | 2.38E-07 | 3.51 | 40.23 | 27.60 | 28082.2  |
| AHQ-7-10, 6247              | K.IEAEALQDINDVLELDK.Y                                                          | 2132.37471 | 2 | 1.65E-06 | 0.86 | 4.52  | -     | 528.0    |
| AHQ-7-10, 3836              | K.QTTVSNQQAYQEAIFEISK.K                                                        | 2160.28351 | 2 | 3.20E-05 | 0.75 | 3.38  | -     | 533.1    |
| AHQ-7-10, 6148 - 6199       | K.TAFDEAIAELDLTNEESYK.D                                                        | 2160.27705 | 2 | 3.38E-05 | 0.71 | 3.36  | -     | 410.4    |
| AHQ-7-10, 6017 - 6019       | K.TAFDEAIAELDLTNEESYK.D                                                        | 2160.27705 | 2 | 5.67E-06 | 0.96 | 4.68  | -     | 1190.6   |
| AHQ-7-13-, 6279             | K.TAFDEAIAELDLTNEESYK.D                                                        | 2160.27705 | 2 | 1.48E-04 | 0.79 | 3.28  | -     | 781.3    |
| AHQ-7-14-, 6258             | K.TAFDEAIAELDLTNEESYK.D                                                        | 2160.27705 | 2 | 1.13E-05 | 0.95 | 4.07  | -     | 1474.2   |
| AHQ-7-10, 2819 - 2877       | K.YLIPNATQPEK.V                                                                | 1361.52512 | 2 | 2.38E-07 | 0.94 | 4.31  | -     | 845.6    |
| gi 4506005 ref NP_002700.1  | protein phosphatase 1, catalytic subunit, beta isoform [Homo sapiens] [        |            |   | 2.45E-07 | 2.78 | 30.25 | 15.00 | 37186.6  |
| AHQ-7-9, 3688               | R.AHQVVVEDGYEFFAK.R                                                            | 1640.77679 | 2 | 2.17E-05 | 0.92 | 3.74  | -     | 1016.2   |
| AHQ-7-9, 6110               | R.EIFLSQIPILLEAPLK.I                                                           | 1954.33857 | 2 | 2.45E-07 | 0.94 | 4.92  | -     | 632.9    |
| AHQ-7-14-, 6385             | R.EIFLSQIPILLEAPLK.I                                                           | 1954.33857 | 2 | 3.09E-04 | 0.80 | 3.07  | -     | 571.9    |
| AHQ-7-9, 6009 - 6065        | K.TFTDFCNFLPIAAIVDEK.I                                                         | 2117.38502 | 2 | 2.07E-06 | 0.92 | 4.13  | -     | 718.1    |
| gi 27480842 ref XP_208238.1 | similar to bA92K2.2 (similar to ubiquitin) [Homo sapiens]                      |            |   | 2.51E-07 | 0.91 | 10.17 | 8.30  | 17966.9  |
| AHQ-7-14-, 2153 - 2211      | K.IQDKEGIPDQQR.L                                                               | 1524.66087 | 2 | 4.41E-04 | 0.86 | 3.43  | -     | 737.1    |
| AHQ-7-14-, 1991 - 2062      | K.IQDKEGIPDQQR.L                                                               | 1524.66087 | 2 | 2.51E-07 | 0.91 | 3.48  | -     | 910.8    |
| gi 29731857 ref XP_293042.1 | similar to ribosomal protein S12; 40S ribosomal protein S12 [Homo sapi         |            |   | 2.77E-07 | 0.96 | 10.28 | 8.90  | 19543.6  |
| AHQ-7-13-, 4473             | K.LVEALCAEHQINLIK.V                                                            | 1753.05645 | 2 | 2.77E-07 | 0.96 | 5.56  | -     | 1368.0   |
| gi 4557471 ref NP_001274.1  | adaptor-related protein complex 1, sigma 1 subunit isoform 1; clathrin-        |            |   | 2.98E-07 | 0.92 | 10.19 | 10.10 | 18732.9  |
| AHQ-7-12, 3503              | K.AIEQADLLQEEDESPR.S                                                           | 1843.92692 | 2 | 2.98E-07 | 0.92 | 3.78  | -     | 1402.5   |
| gi 19923483 ref NP_057406.2 | GTPase Rab14 [Homo sapiens]                                                    |            |   | 2.99E-07 | 2.23 | 30.19 | 20.90 | 23896.8  |
| AHQ-7-10, 4593 - 4668       | R.NLNTNPNTVILIGNK.A                                                            | 1624.90662 | 2 | 1.50E-04 | 0.60 | 2.95  | -     | 527.4    |
| AHQ-7-14-, 5454             | K.QFAEENGLFLEASAK.T                                                            | 1767.96002 | 2 | 2.99E-07 | 0.88 | 3.89  | -     | 623.2    |
| AHQ-7-10, 4227              | K.TGENVEDFALEAAK.K                                                             | 1494.58517 | 2 | 7.86E-05 | 0.75 | 3.21  | -     | 466.8    |
| gi 4826657 ref NP_004333.1  | caldesmon 1 isoform 3; H-CAD; L-CAD [Homo sapiens]                             |            |   | 3.04E-07 | 1.78 | 20.22 | 5.80  | 62662.9  |
| AHQ-7-13-, 2793 - 2871      | R.LEQYSAIEGK.S                                                                 | 1340.46107 | 2 | 2.87E-04 | 0.86 | 2.98  | -     | 1198.0   |
| AHQ-7-10, 3541 - 3545       | K.TTTTNTQVEGDDEAAFLER.L                                                        | 2099.15534 | 2 | 3.04E-07 | 0.92 | 4.40  | -     | 886.3    |
| AHQ-7-6, 3735               | K.TTTTNTQVEGDDEAAFLER.L                                                        | 2099.15534 | 2 | 7.49E-07 | 0.93 | 4.05  | -     | 912.2    |
| gi 5031573 ref NP_005712.1  | ARP3 actin-related protein 3 homolog; ARP3 (actin-related protein 3, ye        |            |   | 3.32E-07 | 7.05 | 80.27 | 27.00 | 47370.9  |
| AHQ-7-7, 4888               | R.AEPEDHYFLTPEPLNTPENR.E                                                       | 2483.67423 | 2 | 1.25E-04 | 0.73 | 2.69  | -     | 563.9    |
| AHQ-7-7, 6854               | R.DITYFIQQLLR.D                                                                | 1410.64250 | 2 | 6.17E-04 | 0.95 | 4.09  | -     | 1262.4   |
| AHQ-7-7, 2998 - 3074        | R.DREVGIPPEQSLETAK.A                                                           | 1769.93431 | 2 | 1.13E-06 | 0.97 | 5.43  | -     | 919.7    |
| AHQ-7-7, 3477               | K.DYEEIGPSICR.H                                                                | 1340.44122 | 2 | 3.32E-07 | 0.87 | 2.94  | -     | 886.8    |
| AHQ-7-13-, 3488             | K.DYEEIGPSICR.H                                                                | 1340.44122 | 2 | 1.01E-04 | 0.84 | 2.74  | -     | 1050.1   |
| AHQ-7-7, 3949               | R.FMEQVIFK.Y                                                                   | 1042.27611 | 2 | 2.24E-04 | 0.81 | 2.74  | -     | 643.7    |
| AHQ-7-7, 4358 - 4362        | R.HGIVEDWDLMER.F                                                               | 1500.66127 | 2 | 2.25E-05 | 0.95 | 4.10  | -     | 1292.7   |
| AHQ-7-7, 6168               | K.LGYAGNTEPQFIIPSCIAIK.E                                                       | 2194.53570 | 2 | 6.77E-05 | 0.88 | 3.85  | -     | 697.4    |
| AHQ-7-7, 6037 - 6065        | K.LGYAGNTEPQFIIPSCIAIK.E                                                       | 2194.53570 | 2 | 4.06E-04 | 0.46 | 3.22  | -     | 326.4    |
| AHQ-7-13-, 5819             | K.LGYAGNTEPQFIIPSCIAIK.E                                                       | 2194.53570 | 2 | 7.45E-04 | 0.31 | 2.81  | -     | 324.2    |

|                            |                                                                         |            |   |          |      |       |       |          |
|----------------------------|-------------------------------------------------------------------------|------------|---|----------|------|-------|-------|----------|
| AHQ-7-7, 3588              | R.LPACVDCGTGYTK.L                                                       | 1543.74421 | 2 | 1.93E-04 | 0.90 | 3.57  | -     | 908.2    |
| gi18543899 ref XP_086916.1 | similar to Phosphatidyethanolamine-binding protein (PEBP) (Prostatic    |            |   | 3.33E-07 | 0.95 | 10.20 | 8.00  | 21265.8  |
| AHQ-7-11, 3338             | K.NRPTSISWDLGSDGK.L                                                     | 1633.74419 | 2 | 3.33E-07 | 0.95 | 3.99  | -     | 1095.3   |
| gi30147857 ref NP_293007.2 | similar to peptidylprolyl isomerase A (cyclophilin A) [Homo sapiens] [  |            |   | 3.33E-07 | 0.84 | 10.18 | 5.90  | 20789.8  |
| AHQ-7-14, 4222             | K.KITIADCGQLQ                                                           | 1248.43160 | 2 | 3.34E-04 | 0.50 | 2.59  | -     | 694.0    |
| AHQ-7-14-, 3353            | K.KITIADCGQLQ                                                           | 1248.43160 | 2 | 3.33E-07 | 0.84 | 3.59  | -     | 1050.4   |
| AHQ-7-12, 3274 - 3350      | K.KITIADCGQLQ                                                           | 1248.43160 | 2 | 5.30E-05 | 0.73 | 3.37  | -     | 789.9    |
| gi4505329 ref NP_003818.1  | N-ethylmaleimide-sensitive factor attachment protein, alpha; alpha-SNAP |            |   | 3.37E-07 | 0.94 | 10.23 | 6.10  | 33246.6  |
| AHQ-7-9, 3105              | K.LLEAHEEQNVDSYTESVK.E                                                  | 2092.20594 | 2 | 3.37E-07 | 0.94 | 4.52  | -     | 1254.8   |
| gi8922673 ref NP_060692.1  | parvin, alpha; alpha-parvin; actopaxin [Homo sapiens]                   |            |   | 3.45E-07 | 0.95 | 10.22 | 3.50  | 42243.4  |
| AHQ-7-9, 4216 - 4270       | R.DAFDTLFDHAPDK.L                                                       | 1492.57096 | 2 | 3.45E-07 | 0.95 | 4.34  | -     | 1124.3   |
| gi4503609 ref NP_001976.1  | electron-transfer-flavoprotein, beta polypeptide; electron-transferring |            |   | 3.92E-07 | 0.70 | 10.14 | 6.70  | 27843.4  |
| AHQ-7-10, 3555             | K.EVIASVCGPAQCQETIR.T                                                   | 1921.14254 | 2 | 3.92E-07 | 0.70 | 2.88  | -     | 528.7    |
| gi18702323 ref NP_570967.1 | dynein, cytoplasmic, light polypeptide 2B; dynein light chain 2B; bith  |            |   | 4.17E-07 | 0.76 | 10.13 | 12.50 | 10854.6  |
| AHQ-7-14-, 4841            | R.DIDPQNDLTLFLR.I                                                       | 1447.57487 | 2 | 4.17E-07 | 0.76 | 2.60  | -     | 555.2    |
| gi27500008 ref XP_208872.1 | similar to tropomyosin 3 [Homo sapiens]                                 |            |   | 4.19E-07 | 1.93 | 20.29 | 12.10 | 28954.4  |
| AHQ-7-9, 3664              | R.ALKDEEKMLQELQLK.E                                                     | 1946.25520 | 2 | 4.19E-07 | 0.95 | 4.74  | -     | 1381.7   |
| AHQ-7-9, 2346 - 2356       | R.ARKQAEAEVSLNLR.R                                                      | 1543.71055 | 2 | 2.74E-06 | 0.98 | 5.77  | -     | 2785.3   |
| gi4503971 ref NP_001484.1  | GDP dissociation inhibitor 1; mental retardation, X-linked 41; mental r |            |   | 4.26E-07 | 3.34 | 40.27 | 17.40 | 50582.4  |
| AHQ-7-7, 4292              | R.FOLLEGPPESMGR.G                                                       | 1461.66818 | 2 | 6.69E-07 | 0.91 | 3.82  | -     | 939.6    |
| AHQ-7-7, 5166              | R.NPYYGGESSITPLEELYK.R                                                  | 2148.31110 | 2 | 4.26E-07 | 0.91 | 3.78  | -     | 826.9    |
| AHQ-7-7, 5173              | R.NPYYGGESSITPLEELYK.R                                                  | 2148.31110 | 2 | 3.89E-06 | 0.95 | 5.31  | -     | 721.2    |
| AHQ-7-7, 4170              | R.TDDYLDQPCLETVNR.I                                                     | 1840.94632 | 2 | 3.71E-04 | 0.85 | 4.38  | -     | 387.9    |
| AHQ-7-6, 6574              | K.YAIASTVYTTTDPKEVEPELLELPEIDQK.F                                       | 3444.82460 | 3 | 4.27E-05 | 0.68 | 3.09  | -     | 718.7    |
| gi30148644 ref XP_293716.2 | similar to Heat shock protein HSP 90-alpha (HSP 86) [Homo sapiens] [MA  |            |   | 4.36E-07 | 0.92 | 10.18 | 1.20  | 105150.3 |
| AHQ-7-5, 3675              | R.TLTIIVDTGIGM*TK.A                                                     | 1366.60658 | 2 | 4.36E-07 | 0.92 | 3.29  | -     | 1048.9   |
| gi21361456 ref NP_055425.2 | alpha glucosidase II alpha subunit; likely ortholog of mouse G2an alph  |            |   | 4.47E-07 | 3.41 | 40.22 | 6.60  | 109437.2 |
| AHQ-7-4, 4100 - 4101       | R.DENSVELTMAEGPYK.I                                                     | 1683.81855 | 2 | 1.16E-05 | 0.81 | 3.12  | -     | 658.1    |
| AHQ-7-4, 4897              | R.FGAVWTGDNTAEWDHLK.I                                                   | 1948.08335 | 2 | 4.47E-07 | 0.93 | 4.44  | -     | 931.3    |
| AHQ-7-4, 4592              | R.LSFQHPDGETSVLVLK.K                                                    | 1741.96893 | 2 | 9.82E-06 | 0.71 | 3.13  | -     | 416.1    |
| AHQ-7-4, 3808              | K.MMDYLQSGSETPQTIDVLR.W                                                 | 1929.12196 | 2 | 3.38E-05 | 0.96 | 4.37  | -     | 1562.0   |
| gi21614520 ref NP_000393.2 | glucose-6-phosphate dehydrogenase [Homo sapiens]                        |            |   | 4.57E-07 | 3.36 | 40.26 | 11.10 | 59257.4  |
| AHQ-7-7, 3062              | K.GYLDTPVPR.G                                                           | 1133.23587 | 2 | 4.73E-05 | 0.89 | 2.74  | -     | 952.6    |
| AHQ-7-7, 6549 - 6596       | R.LFYALPPTYEAVTK.N                                                      | 1826.16735 | 2 | 3.89E-05 | 0.66 | 2.51  | -     | 345.2    |
| AHQ-7-7, 5945              | R.LILDVFCGSMHFVR.S                                                      | 1824.15987 | 2 | 5.25E-04 | 0.83 | 3.32  | -     | 871.3    |
| AHQ-7-7, 4333              | R.LQFHVDVAGDIFHQQCK.R                                                   | 1945.14742 | 2 | 4.57E-07 | 0.98 | 5.14  | -     | 1806.8   |
| gi455797 ref NP_000260.1   | non-metastatic cells 1 protein [Homo sapiens]                           |            |   | 4.60E-07 | 2.40 | 30.21 | 23.70 | 17148.6  |
| AHQ-7-12, 4015             | K.DRPPFFAGLVK.Y                                                         | 1150.35439 | 2 | 3.04E-04 | 0.88 | 3.44  | -     | 919.2    |
| AHQ-7-12, 2228 - 2235      | R.NIIHGSDDSVEAEK.E                                                      | 1486.56627 | 2 | 4.60E-07 | 0.71 | 4.28  | -     | 470.8    |
| AHQ-7-12, 3003 - 3058      | R.TFIAIKPDGVQVR.G                                                       | 1345.57205 | 2 | 7.98E-04 | 0.81 | 3.21  | -     | 736.0    |
| gi4502989 ref NP_001856.1  | cytochrome c oxidase subunit VIIa polypeptide 2 (liver) precursor; hepa |            |   | 4.74E-07 | 0.95 | 10.23 | 15.70 | 9395.9   |
| AHQ-7-14-, 5137 - 5191     | K.LFQEDEIPILYK.G                                                        | 1623.82758 | 2 | 6.63E-04 | 0.92 | 4.01  | -     | 1078.0   |
| AHQ-7-14, 5924 - 5936      | K.LFQEDEIPILYK.G                                                        | 1623.82758 | 2 | 4.74E-07 | 0.95 | 4.66  | -     | 1378.1   |
| gi5453898 ref NP_006212.1  | protein (peptidyl-prolyl cis/trans isomerase) NIMA-interacting 1; doo;  |            |   | 4.91E-07 | 0.92 | 10.17 | 11.70 | 18243.2  |
| AHQ-7-12, 4724             | R.TGEM*SGPVFTDSGIIHLR.T                                                 | 2047.32128 | 3 | 4.91E-07 | 0.92 | 3.47  | -     | 1778.8   |
| gi30150022 ref XP_300862.1 | similar to beta-tubulin 4Q [Homo sapiens]                               |            |   | 4.97E-07 | 5.31 | 60.20 | 22.20 | 33545.2  |
| AHQ-7-7, 5969 - 6036       | K.EAESCDLQGFQLTHSLGGGTGSGMGTLLISK.I                                     | 3315.65550 | 3 | 5.80E-05 | 0.90 | 4.06  | -     | 1113.6   |
| AHQ-7-7, 3441              | R.FPGQLNADLR.K                                                          | 1131.26634 | 2 | 3.40E-04 | 0.93 | 3.61  | -     | 1051.5   |
| AHQ-7-13, 3561 - 3609      | R.FPGQLNADLR.K                                                          | 1131.26634 | 2 | 6.22E-06 | 0.82 | 2.85  | -     | 681.2    |
| AHQ-7-9, 3132 - 3189       | R.FPGQLNADLR.K                                                          | 1131.26634 | 2 | 5.23E-06 | 0.77 | 2.95  | -     | 739.1    |
| AHQ-7-8, 3315 - 3375       | R.FPGQLNADLR.K                                                          | 1131.26634 | 2 | 2.98E-05 | 0.90 | 3.42  | -     | 833.2    |
| AHQ-7-7, 3292 - 3360       | R.FPGQLNADLR.K                                                          | 1131.26634 | 2 | 2.63E-05 | 0.84 | 3.01  | -     | 726.7    |
| AHQ-7-7, 3924              | R.KLAVNMVFPFR.L                                                         | 1272.58771 | 2 | 4.97E-07 | 0.94 | 3.83  | -     | 1239.3   |
| AHQ-7-7, 4380 - 4381       | K.LAVNMVFPFR.L                                                          | 1144.41480 | 2 | 3.61E-06 | 0.92 | 3.31  | -     | 827.9    |
| AHQ-7-11, 4275             | K.LAVNMVFPFR.L                                                          | 1144.41480 | 2 | 3.56E-05 | 0.87 | 3.23  | -     | 700.4    |
| AHQ-7-7, 3812              | K.LAVNM*VPFR.L                                                          | 1160.41420 | 2 | 2.19E-05 | 0.94 | 3.61  | -     | 1251.8   |
| AHQ-7-13-, 4417            | K.LAVNMVFPFR.L                                                          | 1144.41480 | 2 | 5.46E-07 | 0.81 | 2.70  | -     | 672.1    |
| AHQ-7-7, 5668 - 5690       | R.LHFFMPGFAPLTSR.G                                                      | 1621.92962 | 2 | 6.93E-04 | 0.95 | 3.95  | -     | 1010.6   |
| gi4506077 ref NP_002734.1  | protein kinase C substrate 80K-H; glucosidase II, beta subunit; AGE-bin |            |   | 5.36E-07 | 0.91 | 10.16 | 2.50  | 59296.0  |
| AHQ-7-5, 3287              | K.AQQEQELAADAFK.E                                                       | 1449.54763 | 2 | 5.36E-07 | 0.91 | 3.17  | -     | 1389.3   |
| gi4504489 ref NP_000403.1  | histidine-rich glycoprotein precursor; histidine-proline rich glycoprot |            |   | 5.42E-07 | 0.84 | 10.15 | 2.70  | 59578.0  |
| AHQ-7-5, 6359 - 6426       | K.DSPVLIDFFEDTER.Y                                                      | 1683.79674 | 2 | 5.42E-07 | 0.84 | 3.02  | -     | 937.3    |
| gi27436929 ref NP_005518.2 | heat shock 70kDa protein 1-like; heat shock 70kD protein-like 1 [Homo   |            |   | 5.47E-07 | 0.94 | 10.18 | 2.20  | 70404.7  |
| AHQ-7-6, 3286              | K.KAIIHDVILVGGSTR.I                                                     | 1466.71083 | 2 | 5.47E-07 | 0.94 | 3.66  | -     | 1518.9   |
| gi11993943 ref NP_055419.1 | Tax interaction protein 1 [Homo sapiens]                                |            |   | 5.70E-07 | 0.77 | 10.14 | 13.70 | 13734.6  |
| AHQ-7-13, 4191             | R.VSEGGPAEAGLQIGDK.I                                                    | 1641.80454 | 2 | 5.70E-07 | 0.77 | 2.78  | -     | 771.0    |
| gi13027638 ref NP_006750.2 | UDP-glucose pyrophosphorylase 2; UTP-glucose-1-phosphate uridylyltranse |            |   | 5.71E-07 | 1.11 | 20.17 | 7.50  | 56964.9  |
| AHQ-7-7, 6293              | R.NENTFLDLTVQIEHLNK.T                                                   | 2157.36913 | 2 | 2.33E-04 | 0.29 | 2.66  | -     | 209.5    |
| AHQ-7-7, 6678              | K.TLDGGLNVIQLETAAGAAIK.S                                                | 1984.28316 | 2 | 5.71E-07 | 0.82 | 3.42  | -     | 736.4    |
| gi4503327 ref NP_000389.1  | cytochrome b5 reductase membrane-bound isoform; diaphorase (NADH) [Homo |            |   | 5.91E-07 | 2.04 | 30.21 | 15.30 | 34234.6  |
| AHQ-7-9, 4333 - 4402       | K.DILLRPELEELR.N                                                        | 1496.73370 | 2 | 2.98E-05 | 0.33 | 2.64  | -     | 464.6    |
| AHQ-7-9, 5489              | R.FALPSPQHILGLPVGNQHIYLSAR.I                                            | 2515.94007 | 3 | 5.91E-07 | 0.74 | 3.11  | -     | 623.6    |
| AHQ-7-9, 2853              | R.GPSSGLLVYQGGK.G                                                       | 1119.29547 | 2 | 8.38E-04 | 0.97 | 4.30  | -     | 1797.2   |
| gi20536967 ref XP_115812.1 | similar to Latent transforming growth factor beta binding protein 1L p  |            |   | 5.98E-07 | 0.89 | 10.18 | 12.00 | 13416.2  |
| AHQ-7-1, 3535 - 3541       | K.GISGEQSTGESFFLR.Y                                                     | 1565.66662 | 2 | 5.98E-07 | 0.89 | 3.53  | -     | 961.7    |
| gi24234688 ref NP_004125.3 | heat shock 70kDa protein 9B precursor; heat shock 70kD protein 9; stre  |            |   | 6.04E-07 | 1.66 | 20.19 | 4.40  | 73680.1  |
| AHQ-7-6, 5759 - 5838       | K.STNGDTFLGGEDFDQALLR.H                                                 | 2057.16328 | 2 | 6.04E-07 | 0.75 | 3.88  | -     | 321.7    |
| AHQ-7-6, 3738              | K.VQQTSTVQVVGILK.I                                                      | 1291.43811 | 2 | 5.40E-04 | 0.91 | 3.54  | -     | 1218.8   |
| gi4543603 ref NP_006422.1  | chaperonin containing TCP1, subunit 2 (beta); chaperonin containing t-c |            |   | 6.11E-07 | 3.17 | 40.20 | 8.40  | 57487.9  |
| AHQ-7-7, 3105              | R.EALLSSAVDHGSDDEVK.F                                                   | 1657.76083 | 2 | 6.11E-07 | 0.67 | 2.69  | -     | 847.7    |
| AHQ-7-7, 5540              | R.LALVTGGIEASTFDHPELVK.L                                                | 2098.38473 | 2 | 6.05E-04 | 0.91 | 4.03  | -     | 974.1    |
| AHQ-7-7, 6009              | K.LGGSLADSYLDEGFLDK.K                                                   | 1914.10189 | 2 | 5.15E-04 | 0.77 | 3.14  | -     | 604.1    |
| AHQ-7-7, 3642              | K.LIEEVMIGEDK.L                                                         | 1276.48193 | 2 | 3.37E-05 | 0.82 | 3.02  | -     | 730.0    |
| gi4826659 ref NP_004921.1  | F-actin capping protein beta subunit; Cap Z [Homo sapiens]              |            |   | 6.13E-07 | 1.37 | 20.19 | 10.70 | 30628.5  |
| AHQ-7-9, 3774              | K.GCWDSIHVVVEQEK.S                                                      | 1687.85505 | 2 | 6.13E-07 | 0.88 | 3.57  | -     | 968.2    |
| AHQ-7-10, 3864             | K.GCWDSIHVVVEQEK.S                                                      | 1687.85505 | 2 | 4.29E-04 | 0.86 | 3.47  | -     | 921.1    |
| AHQ-7-9, 3325              | K.SKQEALKNDLVEALK.R                                                     | 1686.93158 | 2 | 3.61E-04 | 0.50 | 2.57  | -     | 770.2    |
| gi5453599 ref NP_006127.1  | capping protein (actin filament) muscle Z-line, alpha 2; F-actin cappin |            |   | 6.53E-07 | 0.61 | 10.18 | 5.20  | 32948.9  |
| AHQ-7-13, 5205             | K.FTTTPSTTQVVGILK.I                                                     | 1605.90007 | 2 | 6.53E-07 | 0.61 | 3.08  | -     | 252.4    |
| AHQ-7-9, 4790 - 4806       | K.FTTTPSTTQVVGILK.I                                                     | 1605.90007 | 2 | 2.52E-04 | 0.70 | 2.82  | -     | 399.4    |
| gi4557385 ref NP_000055.1  | complement component 3 precursor; acylation-stimulating protein cleavag |            |   | 6.59E-07 | 2.80 | 30.28 | 3.40  | 187162.3 |
| AHQ-7-6, 5190              | R.AYYENSPQVQVFTEFEVK.E                                                  | 2167.31611 | 2 | 8.01E-05 | 0.89 | 4.11  | -     | 706.0    |
| AHQ-7-6, 5867              | K.EYVLPSEFIVPETEK.F                                                     | 1880.12704 | 2 | 5.36E-06 | 0.95 | 4.63  | -     | 801.7    |
| AHQ-7-6, 4525              | R.VPVAVQGEDTVQSLTQGDGVAK.L                                              | 2199.40432 | 2 | 6.59E-07 | 0.96 | 5.51  | -     | 954.9    |
| gi29736622 ref XP_293924.1 | similar to cytoplasmic beta-actin [Homo sapiens]                        |            |   | 6.84E-07 | 3.04 | 40.22 | 27.10 | 42002.9  |
| AHQ-7-10, 4911             | K.DLYANTVLSSGSTM*YPGIADR.M                                              | 2218.42957 | 2 | 7.27E-04 | 0.84 | 4.36  | -     | 580.7    |
| AHQ-7-14-, 4987 - 5063     | K.DLYANTVLSSGSTM*YPGIADR.M                                              | 2218.42957 | 2 | 6.81E-05 | 0.84 | 4.23  | -     | 686.4    |
| AHQ-7-8, 6599 - 6608       | R.FRCPEAIFPQSLGISSGIHETTFNSIMK.C                                        | 3446.89713 | 3 | 4.10E-04 | 0.66 | 3.00  | -     | 444.0    |
| AHQ-7-8, 6116              | R.TTGVMV*DSGDGVTHVPIYEGYALPHAILR.L                                      | 3213.65260 | 3 | 6.84E-07 | 0.89 | 4.35  | -     | 949.2    |
| AHQ-7-8, 4090              | R.VAPDEHPILLTEAPLNPKINR.E                                               | 2338.69122 | 3 | 6.42E-04 | 0.66 | 3.28  | -     | 746.6    |
| gi4758988 ref NP_004152.1  | RAB1A, member RAS oncogene family; RAB1, member RAS oncogene family [Ho |            |   | 6.86E-07 | 2.63 | 30.20 | 25.40 | 22677.6  |
| AHQ-7-11, 5704 - 5758      | K.EFADSLGPILETSAK.N                                                     | 1725.91990 | 2 | 6.86E-07 | 0.87 | 4.00  | -     | 582.4    |
| AHQ-7-11, 5526             | R.FADDTYTESYISTIGVDFK.I                                                 | 2173.31742 | 2 | 2.82E-04 | 0.72 | 3.25  | -     | 393.0    |
| AHQ-7-14-, 5633            | R.FADDTYTESYISTIGVDFK.I                                                 | 2173.31742 | 2 | 3.92E-05 | 0.92 | 3.76  | -     | 1074.1   |
| AHQ-7-11, 5306             | R.FADDTYTESYISTIGVDFK.I                                                 | 2173.31742 | 2 | 2.78E-04 | 0.90 | 3.89  | -     | 865.3    |
| AHQ-7-11, 5422 - 5488      | K.LLLIGDSGVGKSCLLLR.F                                                   | 1816.19882 | 2 | 8.28E-05 | 0.83 | 3.80  | -     | 596.8    |
| gi18491024 ref NP_005691.2 | dipeptidylpeptidase III isoform 1; dipeptidylpeptidase III [Homo sapie  |            |   | 7.46E-07 | 0.93 | 10.20 | 2.70  | 82588.6  |



|                            |                                                                          |            |   |          |      |       |       |          |
|----------------------------|--------------------------------------------------------------------------|------------|---|----------|------|-------|-------|----------|
| AHQ-7-6, 6427              | R.LEGSDVQLLEYSAAAGLR.S                                                   | 2135.36023 | 2 | 7.46E-07 | 0.93 | 4.07  | -     | 1067.4   |
| gi4503531 ref NP_001958.1  | eukaryotic translation initiation factor 4A, isoform 2 [Homo sapiens] [  |            |   | 7.51E-07 | 0.93 | 10.20 | 3.90  | 46393.9  |
| AHQ-7-8, 3554              | R.GIYAYGFKEPSAIQQR.A                                                     | 1829.04828 | 2 | 7.51E-07 | 0.93 | 4.05  | -     | 810.5    |
| gi2146410 ref NP_036611.2  | tyrosine 3-monooxygenase/tryptophan 5-monooxygenase activation protein   |            |   | 7.73E-07 | 2.31 | 30.22 | 17.40 | 28302.4  |
| AHQ-7-10, 2941             | K.NVTELNEPLSNSEER.N                                                      | 1644.72215 | 2 | 7.73E-07 | 0.93 | 4.00  | -     | 826.1    |
| AHQ-7-11, 3024             | K.NVTELNEPLSNSEER.N                                                      | 1644.72215 | 2 | 6.88E-04 | 0.51 | 2.81  | -     | 391.3    |
| AHQ-7-14-, 3109            | K.NVTELNEPLSNSEER.N                                                      | 1644.72215 | 2 | 1.88E-05 | 0.91 | 4.37  | -     | 800.8    |
| AHQ-7-10, 5907 - 5928      | K.TAFDEAIAELDTLNEDSYK.D                                                  | 2132.22370 | 2 | 2.13E-06 | 0.48 | 2.93  | -     | 476.0    |
| AHQ-7-10, 2279             | R.YLAEVATGEK.R                                                           | 1081.20087 | 2 | 9.01E-07 | 0.90 | 3.49  | -     | 870.0    |
| gi23110942 ref NP_002781.2 | proteasome alpha 5 subunit; proteasome component 5; macropain subunit    |            |   | 8.60E-07 | 0.97 | 10.23 | 5.80  | 26410.9  |
| AHQ-7-10, 5633             | R.PFGVALLFGGVDEK.G                                                       | 1449.67550 | 2 | 8.60E-07 | 0.97 | 4.63  | -     | 1752.8   |
| gi29727204 ref XP_290872.1 | similar to Pyruvate kinase, M2 isozyme [Homo sapiens]                    |            |   | 8.83E-07 | 1.86 | 20.23 | 22.10 | 16297.7  |
| AHQ-7-7, 3801 - 3874       | K.CCSGAIIVLT.K.S                                                         | 1224.47324 | 2 | 1.39E-04 | 0.95 | 4.02  | -     | 1070.8   |
| AHQ-7-7, 5268              | K.KGDVVVILTGWRPGSGFTNTMR.V                                               | 2392.76561 | 3 | 8.83E-07 | 0.91 | 4.61  | -     | 987.3    |
| gi4757826 ref NP_004039.1  | beta-2-microglobulin [Homo sapiens]                                      |            |   | 8.97E-07 | 1.82 | 20.22 | 21.80 | 13714.5  |
| AHQ-7-14-, 6285            | K.SNFLNCYVSGFHPSDIEVDLLK.N                                               | 2556.83155 | 3 | 8.97E-07 | 0.90 | 4.25  | -     | 771.6    |
| AHQ-7-14-, 6066            | K.SNFLNCYVSGFHPSDIEVDLLKNGER.I                                           | 3013.28710 | 3 | 2.91E-06 | 0.91 | 4.49  | -     | 1025.2   |
| gi5803227 ref NP_006817.1  | tyrosine 3/tryptophan 5 - monooxygenase activation protein, theta polype |            |   | 9.19E-07 | 2.45 | 30.22 | 18.40 | 27764.1  |
| AHQ-7-10, 2243             | K.AVTEQQAELSNEER.N                                                       | 1533.57979 | 2 | 1.33E-05 | 0.78 | 2.86  | -     | 784.0    |
| AHQ-7-10, 6007             | K.TAFDEAIAELDTLNEDSYK.D                                                  | 2146.25037 | 2 | 1.17E-05 | 0.91 | 4.35  | -     | 754.7    |
| AHQ-7-14-, 6255            | K.TAFDEAIAELDTLNEDSYK.D                                                  | 2146.25037 | 2 | 9.19E-07 | 0.87 | 3.65  | -     | 673.6    |
| AHQ-7-10, 2777             | K.YLIANATNPESK.V                                                         | 1321.46099 | 2 | 2.03E-04 | 0.92 | 3.27  | -     | 1361.3   |
| AHQ-7-10, 2695             | K.YLIANATNPESK.V                                                         | 1321.46099 | 2 | 1.57E-04 | 0.80 | 2.95  | -     | 995.4    |
| gi30158852 ref XP_301583.1 | similar to actin CA15 - sea squirt (Styela clava) (fragments) [Homo sa   |            |   | 9.34E-07 | 0.77 | 10.16 | 6.50  | 19197.0  |
| AHQ-7-6, 3131              | K.IWHTFYKNLR.V                                                           | 1515.74533 | 2 | 1.51E-06 | 0.55 | 2.63  | -     | 668.6    |
| AHQ-7-9, 2848 - 2913       | K.IWHTFYKNLR.V                                                           | 1515.74533 | 2 | 9.34E-07 | 0.77 | 3.23  | -     | 719.4    |
| AHQ-7-3, 3256              | K.IWHTFYKNLR.V                                                           | 1515.74533 | 2 | 2.95E-05 | 0.56 | 3.00  | -     | 600.3    |
| gi5803135 ref NP_006852.1  | RAB35, member RAS oncogene family; ras-related protein rab-1c (GTP-bind  |            |   | 9.42E-07 | 0.69 | 10.18 | 5.50  | 23025.1  |
| AHQ-7-11, 3626             | K.LLIIIGDSGVGK.S                                                         | 1072.28025 | 1 | 9.42E-07 | 0.69 | 2.62  | -     | 559.9    |
| AHQ-7-11, 3614             | K.LLIIIGDSGVGK.S                                                         | 1072.28025 | 2 | 9.73E-07 | 0.94 | 3.61  | -     | 1172.7   |
| gi9966867 ref NP_065123.1  | eIF-5A2 protein; eIF5AII [Homo sapiens]                                  |            |   | 9.89E-07 | 1.84 | 20.25 | 19.60 | 16793.1  |
| AHQ-7-12, 3590             | K.KYEDICPSTHNMDVGNPKR                                                    | 2163.41723 | 3 | 9.41E-04 | 0.97 | 5.07  | -     | 2133.5   |
| AHQ-7-12, 3586             | K.KYEDICPSTHNMDVGNPKR                                                    | 2163.41723 | 2 | 2.40E-04 | 0.89 | 3.54  | -     | 945.7    |
| AHQ-7-12, 4611 - 4618      | K.VHLVIGDIFTGK.K                                                         | 1299.54329 | 2 | 8.98E-07 | 0.95 | 4.15  | -     | 1178.6   |
| gi22059949 ref XP_114617.2 | similar to tubulin, beta 5 [Homo sapiens]                                |            |   | 9.90E-07 | 1.74 | 20.29 | 18.80 | 22810.8  |
| AHQ-7-7, 5220              | K.FWEVISDEHGIDPTGYHGDSDLQLDR.I                                           | 3104.24553 | 3 | 1.94E-05 | 0.95 | 5.74  | -     | 1210.3   |
| AHQ-7-7, 5318              | K.FWEVISDEHGIDPTGYHGDSDLQLDR.I                                           | 3104.24553 | 3 | 4.71E-04 | 0.90 | 4.63  | -     | 884.8    |
| AHQ-7-7, 2706 - 2709       | R.ISVYYNEATGGK.Y                                                         | 1302.41453 | 2 | 1.03E-05 | 0.80 | 3.10  | -     | 788.3    |
| AHQ-7-13, 2950 - 3005      | R.ISVYYNEATGGK.Y                                                         | 1302.41453 | 2 | 9.90E-07 | 0.79 | 2.90  | -     | 676.3    |
| AHQ-7-13-, 2761 - 2836     | R.ISVYYNEATGGK.Y                                                         | 1302.41453 | 2 | 2.87E-05 | 0.90 | 3.52  | -     | 982.3    |
| AHQ-7-7, 2705              | R.ISVYYNEATGGK.Y                                                         | 1302.41453 | 1 | 6.69E-04 | 0.21 | 2.21  | -     | 319.7    |
| gi29826319 ref NP_001110.2 | adducin 1 (alpha) isoform a; erythrocyte adducin alpha subunit [Homo s   |            |   | 1.05E-06 | 0.92 | 10.22 | 2.40  | 80954.7  |
| AHQ-7-7, 4502              | R.TLASAGPDLNVLNPEK.Y                                                     | 1810.04158 | 2 | 1.05E-06 | 0.92 | 4.44  | -     | 918.0    |
| gi4758032 ref NP_004757.1  | coatomer protein complex, subunit beta 2 (beta prime); coatomer binding  |            |   | 1.07E-06 | 0.90 | 10.21 | 2.10  | 102486.5 |
| AHQ-7-5, 6136              | K.AAESLADPTYEYENLFPGLK.E                                                 | 2066.25322 | 2 | 1.07E-06 | 0.90 | 4.28  | -     | 629.1    |
| gi7019375 ref NP_037373.1  | formin homology 2 domain containing 1; FH1/FH2 domain-containing protei  |            |   | 1.07E-06 | 1.88 | 20.20 | 2.60  | 126496.5 |
| AHQ-7-14-, 5858            | K.SGLGDDLVLQALGSLK.G                                                     | 1473.65377 | 2 | 1.07E-06 | 0.97 | 3.53  | -     | 2227.0   |
| AHQ-7-6, 5979              | K.VDFEQLTENGLQLER.R                                                      | 1791.93998 | 2 | 1.18E-05 | 0.91 | 3.92  | -     | 1111.8   |
| gi5803181 ref NP_006810.1  | stress-induced-phosphoprotein 1 (Hsp70/Hsp90-organizing protein) [Homo   |            |   | 1.07E-06 | 1.80 | 20.21 | 5.90  | 62638.9  |
| AHQ-7-6, 6195 - 6229       | K.ALSVGNIDDALQCYSIAIK.L                                                  | 2069.27871 | 2 | 4.94E-06 | 0.93 | 4.16  | -     | 784.6    |
| AHQ-7-6, 4503              | R.LAYINPDLALEEK.N                                                        | 1489.69480 | 2 | 1.07E-06 | 0.87 | 3.46  | -     | 766.2    |
| gi4507195 ref NP_003119.1  | spectrin, beta, non-erythrocytic 1; Spectrin, beta, nonerythrocytic-1 (  |            |   | 1.08E-06 | 1.64 | 20.21 | 1.50  | 274628.5 |
| AHQ-7-1, 5681              | R.LVSDQNFQFGLPVAEATK.K                                                   | 2023.23158 | 2 | 1.31E-04 | 0.70 | 3.12  | -     | 386.2    |
| AHQ-7-1, 4108              | R.SQNIIVTDSLSLSEAEIR.Q                                                   | 1778.89960 | 2 | 1.08E-06 | 0.94 | 4.12  | -     | 1280.3   |
| gi30148978 ref XP_291520.2 | similar to Keratin, type I cytoskeletal 18 (Cytokeratin 18) (K18) (CK    |            |   | 1.09E-06 | 0.72 | 10.16 | 2.20  | 68413.1  |
| AHQ-7-11, 4714             | R.DWSHYFKTIKDLR.A                                                        | 1709.92863 | 2 | 1.09E-06 | 0.72 | 3.21  | -     | 696.2    |
| AHQ-7-11, 4568 - 4570      | R.DWSHYFKTIKDLR.A                                                        | 1709.92863 | 2 | 1.01E-04 | 0.66 | 3.15  | -     | 588.1    |
| gi4505093 ref NP_000889.1  | monoamine oxidase B [Homo sapiens]                                       |            |   | 1.20E-06 | 2.74 | 30.20 | 8.80  | 58762.0  |
| AHQ-7-7, 4193              | K.LLLHDSGLNVVLEAR.D                                                      | 1635.88950 | 2 | 1.20E-06 | 0.96 | 4.04  | -     | 1481.2   |
| AHQ-7-7, 4478              | K.VLGSLEALEPVIHYEEK.N                                                    | 1814.02869 | 2 | 8.18E-06 | 0.84 | 3.54  | -     | 720.9    |
| AHQ-7-7, 3282              | K.YVDLGGGSYVGPQNR.I                                                      | 1626.75165 | 2 | 7.23E-06 | 0.93 | 4.09  | -     | 965.7    |
| gi4502171 ref NP_000476.1  | adenine phosphoribosyltransferase; AMP pyrophosphorylase; AMP diphospho  |            |   | 1.20E-06 | 1.89 | 20.24 | 16.70 | 19607.6  |
| AHQ-7-11, 6330 - 6331      | R.GFLFQPSLAQELGLGCVLIR.K                                                 | 2149.54130 | 2 | 4.91E-06 | 0.96 | 4.80  | -     | 1416.7   |
| AHQ-7-11, 3504             | R.IDYIAGLDSR.G                                                           | 1123.24098 | 2 | 1.20E-06 | 0.93 | 3.35  | -     | 1377.6   |
| gi10835121 ref NP_000289.1 | pyruvate kinase, liver and RBC; Pyruvate kinase, liver and RBC type [H   |            |   | 1.20E-06 | 0.67 | 10.13 | 1.90  | 61829.8  |
| AHQ-7-7, 3604              | R.GDLGIEIPEAK.V                                                          | 1142.28420 | 1 | 1.20E-06 | 0.67 | 2.65  | -     | 586.2    |
| gi22060072 ref XP_088293.2 | similar to cytochrome c [Homo sapiens]                                   |            |   | 1.20E-06 | 1.76 | 20.16 | 18.10 | 11887.8  |
| AHQ-7-13, 4339             | R.ADLIAYLK.K                                                             | 907.08869  | 2 | 8.18E-06 | 0.87 | 2.73  | -     | 972.1    |
| AHQ-7-13-, 3612 - 3632     | K.TGPNLHGLFGR.K                                                          | 1169.31780 | 2 | 1.20E-06 | 0.88 | 3.14  | -     | 729.4    |
| gi24431935 ref NP_065393.1 | reticulin 4; neuroendocrine-specific protein C like (focren) [Homo sap   |            |   | 1.21E-06 | 0.86 | 10.16 | 1.10  | 129930.3 |
| AHQ-7-1, 3405              | R.GPLPAAPPVAPER.Q                                                        | 1272.47793 | 2 | 1.21E-06 | 0.86 | 3.17  | -     | 732.2    |
| gi20543399 ref XP_116396.1 | similar to peptidylprolyl isomerase A (cyclophilin A) [Homo sapiens] [   |            |   | 1.22E-06 | 0.79 | 10.13 | 5.00  | 19852.7  |
| AHQ-7-13, 4547             | R.VSFKLFADK.F                                                            | 1055.25138 | 2 | 1.22E-06 | 0.79 | 2.55  | -     | 989.7    |
| AHQ-7-12, 4251 - 4306      | R.VSFKLFADK.F                                                            | 1055.25138 | 1 | 2.12E-04 | 0.78 | 2.52  | -     | 1202.2   |
| gi18201911 ref NP_000629.2 | vitronectin precursor; serum spreading factor; somatomedin B; compleme   |            |   | 1.23E-06 | 0.93 | 10.22 | 3.10  | 54335.4  |
| AHQ-7-14-, 5399 - 5453     | R.SIAQYWLGGCPAPGHL                                                       | 1671.90045 | 2 | 1.23E-06 | 0.93 | 4.45  | -     | 739.6    |
| AHQ-7-13-, 5401 - 5460     | R.SIAQYWLGGCPAPGHL                                                       | 1671.90045 | 2 | 2.97E-04 | 0.67 | 2.79  | -     | 587.9    |
| gi30154839 ref XP_301540.1 | similar to keratin 8; cytokeratin 8; keratin, type II cytoskeletal 8 [   |            |   | 1.28E-06 | 0.78 | 10.17 | 3.40  | 39331.0  |
| AHQ-7-7, 4529              | K.SLNNKFASFIDK.V                                                         | 1384.56191 | 2 | 2.29E-06 | 0.89 | 3.48  | -     | 1075.9   |
| AHQ-7-14-, 4534 - 4581     | K.SLNNKFASFIDK.V                                                         | 1384.56191 | 2 | 1.28E-06 | 0.78 | 2.94  | -     | 687.8    |
| AHQ-7-2, 4800              | K.SLNNKFASFIDK.V                                                         | 1384.56191 | 2 | 4.10E-04 | 0.73 | 2.92  | -     | 691.9    |
| gi4759044 ref NP_004841.1  | Rho-associated, coiled-coil containing protein kinase 2 [Homo sapiens]   |            |   | 1.29E-06 | 1.76 | 20.23 | 2.10  | 160883.4 |
| AHQ-7-3, 5827              | K.ELQDQLAEQYFSTLYK.T                                                     | 2106.27421 | 2 | 1.29E-06 | 0.95 | 4.51  | -     | 1136.2   |
| AHQ-7-3, 3449              | R.ENLLLSDSPSCR.E                                                         | 1392.51767 | 2 | 2.65E-04 | 0.81 | 3.22  | -     | 735.4    |
| gi11056061 ref NP_066932.1 | thymosin, beta 4 [Homo sapiens]                                          |            |   | 1.29E-06 | 0.74 | 10.15 | 29.50 | 5052.6   |
| AHQ-7-14-, 2509            | K.NPLPSKETIEQEK.Q                                                        | 1513.67476 | 2 | 1.29E-06 | 0.74 | 3.05  | -     | 462.4    |
| gi4757952 ref NP_001782.1  | cell division cycle 42 isoform 1; cell division cycle 42 (GTP-binding p  |            |   | 1.30E-06 | 1.72 | 20.26 | 14.10 | 21258.5  |
| AHQ-7-11, 6174 - 6187      | K.NVFDEAIAALEPPEPK.K                                                     | 1854.09282 | 3 | 1.30E-06 | 0.95 | 5.17  | -     | 1047.7   |
| AHQ-7-11, 2578 - 2636      | K.YVECSALTQK.G                                                           | 1200.34381 | 2 | 1.76E-04 | 0.77 | 3.24  | -     | 492.6    |
| gi4504073 ref NP_000398.1  | glycoprotein Ib beta polypeptide precursor [Homo sapiens]                |            |   | 1.32E-06 | 2.45 | 30.19 | 15.50 | 21717.6  |
| AHQ-7-1, 4788              | R.LLPLYLAEDELR.A                                                         | 1332.52691 | 2 | 7.41E-06 | 0.88 | 3.36  | -     | 670.4    |
| AHQ-7-3, 4749              | R.LLPLYLAEDELR.A                                                         | 1332.52691 | 2 | 4.48E-06 | 0.79 | 2.70  | -     | 438.3    |
| AHQ-7-4, 4788              | R.LLPLYLAEDELR.A                                                         | 1332.52691 | 2 | 1.82E-05 | 0.85 | 3.15  | -     | 575.0    |
| AHQ-7-5, 4708              | R.LLPLYLAEDELR.A                                                         | 1332.52691 | 2 | 2.10E-04 | 0.83 | 2.53  | -     | 600.2    |
| AHQ-7-7, 4572              | R.LLPLYLAEDELR.A                                                         | 1332.52691 | 2 | 1.99E-06 | 0.84 | 2.59  | -     | 518.9    |
| AHQ-7-8, 4616              | R.LLPLYLAEDELR.A                                                         | 1332.52691 | 2 | 6.93E-06 | 0.67 | 2.72  | -     | 412.5    |
| AHQ-7-13-, 4560 - 4565     | R.LLPLYLAEDELR.A                                                         | 1332.52691 | 2 | 4.24E-06 | 0.90 | 3.23  | -     | 695.6    |
| AHQ-7-13-, 4577            | R.LLPLYLAEDELR.A                                                         | 1332.52691 | 1 | 6.05E-04 | 0.18 | 2.17  | -     | 219.8    |
| AHQ-7-10, 4288 - 4309      | R.LLPLYLAEDELR.A                                                         | 1332.52691 | 2 | 1.32E-06 | 0.65 | 2.82  | -     | 519.9    |
| AHQ-7-13, 4670 - 4678      | R.LLPLYLAEDELR.A                                                         | 1332.52691 | 2 | 4.02E-06 | 0.87 | 3.35  | -     | 429.7    |
| AHQ-7-11, 4386 - 4448      | R.LLPLYLAEDELR.A                                                         | 1332.52691 | 2 | 2.13E-05 | 0.84 | 3.11  | -     | 510.8    |
| AHQ-7-11, 4408             | R.LLPLYLAEDELR.A                                                         | 1332.52691 | 1 | 2.83E-04 | 0.60 | 3.06  | -     | 312.1    |
| AHQ-7-10, 4016             | R.LSLTDPLVAER.A                                                          | 1214.39356 | 2 | 8.42E-06 | 0.83 | 3.14  | -     | 694.2    |
| AHQ-7-1                    |                                                                          |            |   |          |      |       |       |          |

|                            |                                                                          |            |   |          |      |       |       |          |
|----------------------------|--------------------------------------------------------------------------|------------|---|----------|------|-------|-------|----------|
| AHQ-7-11, 3458             | K.KLTPITYPQGLAM*AK.E                                                     | 1648.99156 | 2 | 1.36E-04 | 0.79 | 2.86  | -     | 581.8    |
| AHQ-7-11, 3762             | K.LTPIYTPQGLAM*AK.E                                                      | 1520.81864 | 2 | 6.42E-04 | 0.67 | 2.76  | -     | 259.1    |
| AHQ-7-11, 4571             | K.PVNLGLWDTAGQEDYDR.L                                                    | 1950.05441 | 2 | 1.33E-06 | 0.97 | 4.58  | -     | 1780.2   |
| gi4506045 ref NP_002718.1  | proteoglycan 1, secretory granule; Proteoglycan 1, secretory granule (p  |            |   | 1.33E-06 | 1.65 | 20.17 | 8.20  | 17623.6  |
| AHQ-7-2, 4768              | K.GPMFELLPGESNK.I                                                        | 1419.62807 | 2 | 6.46E-05 | 0.92 | 3.35  | -     | 1148.4   |
| AHQ-7-3, 4664              | K.GPMFELLPGESNK.I                                                        | 1419.62807 | 2 | 1.33E-06 | 0.87 | 3.29  | -     | 752.0    |
| AHQ-7-1, 4165 - 4171       | K.GPMFELLPGESNK.I                                                        | 1435.62747 | 2 | 5.44E-05 | 0.77 | 3.14  | -     | 476.1    |
| gi14149680 ref NP_056107.1 | KIAA0747 protein [Homo sapiens]                                          |            |   | 1.34E-06 | 0.93 | 10.20 | 1.70  | 122855.6 |
| AHQ-7-12, 3906             | R.LTHVDSPLAEPAGPLGQVK.L                                                  | 1930.19405 | 2 | 1.34E-06 | 0.93 | 4.09  | -     | 1003.6   |
| gi29732725 ref XP_291587.1 | similar to Endoplasmic precursor (94 kDa glucose-regulated protein) (G   |            |   | 1.35E-06 | 0.10 | 10.10 | 2.70  | 37967.5  |
| AHQ-7-4, 3293              | R.GLFDYEGSK.K                                                            | 1016.08574 | 1 | 1.35E-06 | 0.10 | 1.89  | -     | 307.1    |
| gi4503481 ref NP_001395.1  | eukaryotic translation elongation factor 1 gamma; elongation factor 1-g  |            |   | 1.48E-06 | 0.95 | 10.18 | 3.00  | 50118.5  |
| AHQ-7-8, 2999              | K.ALIAAQYSGAQVR.V                                                        | 1348.53280 | 2 | 1.48E-06 | 0.95 | 3.61  | -     | 1726.5   |
| gi5031599 ref NP_005722.1  | actin related protein 2/3 complex subunit 2; ARP2/3 protein complex sub  |            |   | 1.55E-06 | 3.37 | 40.22 | 24.70 | 34332.8  |
| AHQ-7-9, 6138              | K.DTDAAVGDNIGYITVLFPR.H                                                  | 2185.42094 | 2 | 1.63E-05 | 0.91 | 3.42  | -     | 1337.5   |
| AHQ-7-9, 2624              | K.ELQAHGADLELL.K.R                                                       | 1324.46487 | 2 | 7.66E-05 | 0.67 | 2.80  | -     | 764.8    |
| AHQ-7-9, 6109              | R.VYGSFLVNPESGYVNSLLYDLENLPASK.D                                         | 3090.42808 | 3 | 3.65E-05 | 0.87 | 4.39  | -     | 425.5    |
| AHQ-7-9, 2652              | K.YFQFQEEGKGENR.A                                                        | 1761.82929 | 2 | 1.55E-06 | 0.92 | 3.96  | -     | 964.5    |
| gi29729345 ref XP_290995.1 | similar to speckle-type POZ protein [Homo sapiens]                       |            |   | 1.61E-06 | 1.43 | 20.20 | 10.90 | 18703.4  |
| AHQ-7-2, 5992              | K.NRVEINLDLPEVFKEMM*MR.F                                                 | 2252.55733 | 2 | 7.55E-05 | 0.80 | 3.61  | -     | 1024.0   |
| AHQ-7-3, 5868              | K.NRVEINLDLPEVFKEMM*MR.F                                                 | 2252.55733 | 2 | 5.38E-06 | 0.73 | 3.68  | -     | 819.9    |
| AHQ-7-4, 5997 - 6066       | K.NRVEINLDLPEVFKEMM*MR.F                                                 | 2252.55733 | 2 | 5.43E-06 | 0.81 | 3.91  | -     | 923.8    |
| AHQ-7-5, 5950              | K.NRVEINLDLPEVFKEMM*MR.F                                                 | 2252.55733 | 2 | 2.42E-04 | 0.73 | 3.69  | -     | 730.7    |
| AHQ-7-6, 5854              | K.NRVEINLDLPEVFKEM*MR.F                                                  | 2252.55733 | 2 | 1.76E-04 | 0.76 | 3.35  | -     | 682.2    |
| AHQ-7-1, 5824              | K.NRVEINLDLPEVFKEM*MR.F                                                  | 2252.55733 | 2 | 1.61E-06 | 0.70 | 3.19  | -     | 465.5    |
| gi22748619 ref NP_689476.1 | tropomyosin 3 [Homo sapiens]                                             |            |   | 1.66E-06 | 1.85 | 20.22 | 9.90  | 28222.6  |
| AHQ-7-9, 3108 - 3173       | R.KLVIEGDLER.T                                                           | 1285.51492 | 2 | 1.66E-06 | 0.94 | 3.71  | -     | 1449.3   |
| AHQ-7-10, 3244 - 3248      | R.KLVIEGDLER.T                                                           | 1285.51492 | 2 | 1.21E-05 | 0.82 | 2.97  | -     | 968.0    |
| AHQ-7-9, 2076 - 2144       | K.YSQEKDKYEEIEK.I                                                        | 1689.80129 | 2 | 3.45E-04 | 0.91 | 4.44  | -     | 1137.7   |
| gi29729950 ref XP_293759.1 | similar to Heat shock protein HSP 90-alpha (HSP 86) [Homo sapiens] [MA   |            |   | 1.67E-06 | 0.75 | 10.15 | 5.00  | 39776.4  |
| AHQ-7-5, 5103              | K.CLELFTLAEADKENYK.F                                                     | 2132.37640 | 3 | 1.67E-06 | 0.75 | 3.09  | -     | 673.7    |
| gi4557525 ref NP_000099.1  | dihydroliipoamide dehydrogenase precursor; E3 component of pyruvate dehy |            |   | 1.67E-06 | 0.78 | 10.15 | 2.60  | 54149.9  |
| AHQ-7-7, 2524              | K.SEEQLKEEGIEYK.V                                                        | 1582.69072 | 2 | 1.67E-06 | 0.78 | 3.10  | -     | 801.7    |
| gi23510338 ref NP_003325.2 | ubiquitin-activating enzyme E1; A1S9T and BN75 temperature sensitivity   |            |   | 1.75E-06 | 3.19 | 40.21 | 5.90  | 11784.1  |
| AHQ-7-4, 4669              | R.ALPAVQNNLDEDLIR.K                                                      | 1810.00167 | 2 | 1.30E-05 | 0.88 | 3.83  | -     | 434.5    |
| AHQ-7-4, 3620              | K.DNPGVVTCLDEAR.H                                                        | 1447.55333 | 2 | 1.75E-06 | 0.59 | 2.68  | -     | 500.9    |
| AHQ-7-4, 6398 - 6401       | K.SLVASLAEPDFVVTDFAK.F                                                   | 1910.15638 | 2 | 4.79E-05 | 0.88 | 4.16  | -     | 447.1    |
| AHQ-7-4, 4078              | R.YDGGQAVFGSDLQEK.L                                                      | 1656.77453 | 2 | 6.37E-06 | 0.83 | 3.16  | -     | 778.0    |
| gi1799541 ref NP_060676.2  | vacuolar protein sorting 35; maternal-embryonic 3 [Homo sapiens]         |            |   | 1.75E-06 | 0.88 | 10.14 | 1.30  | 91706.5  |
| AHQ-7-5, 3604              | K.LLDEAIAQAVK.V                                                          | 1100.29046 | 2 | 1.75E-06 | 0.88 | 2.84  | -     | 1263.3   |
| gi10835242 ref NP_006249.1 | protein kinase, cGMP-dependent, type I; Protein kinase, cGMP-dependent   |            |   | 1.83E-06 | 0.83 | 10.17 | 1.70  | 77803.3  |
| AHQ-7-6, 2786              | K.HLIGLDDVSNK.A                                                          | 1268.40132 | 2 | 1.83E-06 | 0.83 | 2.65  | -     | 769.5    |
| gi7705819 ref NP_057181.1  | HSPC039 protein [Homo sapiens]                                           |            |   | 1.83E-06 | 0.92 | 10.21 | 24.40 | 8968.7   |
| AHQ-7-14-, 4946            | K.NIGWTDQIGGFGGEEPIK.S                                                   | 2033.18655 | 2 | 1.83E-06 | 0.92 | 4.15  | -     | 888.2    |
| gi21735621 ref NP_005909.2 | mitochondrial malate dehydrogenase precursor [Homo sapiens]              |            |   | 1.85E-06 | 2.81 | 30.24 | 17.20 | 35503.0  |
| AHQ-7-9, 5149              | R.LTYDIAHTPGVAADLSHIETK.A                                                | 2366.65506 | 3 | 1.85E-06 | 0.95 | 4.85  | -     | 1655.6   |
| AHQ-7-9, 4981 - 5012       | K.SQETECTYFSTPLLLGK.K                                                    | 1976.19328 | 2 | 3.59E-06 | 0.94 | 4.45  | -     | 986.2    |
| AHQ-7-13, 6221             | K.VAVLGASGGIQPLSLLK.N                                                    | 1794.17156 | 2 | 5.14E-04 | 0.93 | 4.10  | -     | 1046.0   |
| AHQ-7-13-, 6195            | K.VAVLGASGGIQPLSLLK.N                                                    | 1794.17156 | 2 | 3.89E-05 | 0.92 | 3.87  | -     | 1235.1   |
| AHQ-7-9, 5805 - 5860       | K.VAVLGASGGIQPLSLLK.N                                                    | 1794.17156 | 2 | 1.40E-04 | 0.65 | 3.05  | -     | 526.3    |
| gi11559923 ref NP_071496.1 | eukaryotic translation initiation factor 4H isoform 1 [Homo sapiens] [   |            |   | 2.01E-06 | 0.48 | 10.14 | 8.50  | 27384.8  |
| AHQ-7-10, 4464             | R.TVATPLNQNVPNSAIFGARP                                                   | 2099.33604 | 2 | 2.01E-06 | 0.48 | 2.74  | -     | 334.7    |
| gi5031595 ref NP_005709.1  | actin related protein 2/3 complex subunit 4; Arp2/3 protein complex sub  |            |   | 2.02E-06 | 1.86 | 20.21 | 11.30 | 19669.9  |
| AHQ-7-11, 4234             | R.AENFFILR.R                                                             | 1010.17070 | 2 | 1.02E-04 | 0.95 | 3.89  | -     | 1627.9   |
| AHQ-7-12, 4264             | R.AENFFILR.R                                                             | 1010.17070 | 2 | 4.97E-05 | 0.95 | 3.47  | -     | 1648.6   |
| AHQ-7-11, 3142 - 3192      | K.VLIEGSINSVR.V                                                          | 1187.37134 | 2 | 2.02E-06 | 0.91 | 3.46  | -     | 959.8    |
| gi4506363 ref NP_002861.1  | RAB13, member RAS oncogene family; RAS-associated protein RAB13 [Homo s  |            |   | 2.07E-06 | 0.89 | 10.18 | 5.40  | 22774.0  |
| AHQ-7-13-, 3771            | K.LLLIGDSGVGK.T                                                          | 1072.28025 | 2 | 1.35E-04 | 0.91 | 3.55  | -     | 991.6    |
| AHQ-7-14-, 3781            | K.LLLIGDSGVGK.T                                                          | 1072.28025 | 2 | 1.21E-05 | 0.77 | 3.06  | -     | 739.7    |
| AHQ-7-13, 3919             | K.LLLIGDSGVGK.T                                                          | 1072.28025 | 2 | 2.07E-06 | 0.89 | 3.16  | -     | 929.1    |
| gi4505591 ref NP_002565.1  | peroxiredoxin 1; natural killer-enhancing factor A; proliferation-assoc  |            |   | 2.30E-06 | 3.52 | 40.30 | 24.10 | 22110.2  |
| AHQ-7-11, 2424             | K.ADEGISFR.G                                                             | 894.95173  | 2 | 2.30E-06 | 0.77 | 2.68  | -     | 568.6    |
| AHQ-7-11, 3807             | R.GLFIIDDK.G                                                             | 921.07223  | 2 | 2.03E-04 | 0.87 | 3.38  | -     | 888.5    |
| AHQ-7-11, 3123             | K.HGEVCPAGWKPGSDTIKPDVQK.S                                               | 2408.67532 | 3 | 3.72E-06 | 0.97 | 5.91  | -     | 1786.1   |
| AHQ-7-11, 3571             | R.LVQAQFQTDK.H                                                           | 1197.36469 | 2 | 1.67E-04 | 0.91 | 3.17  | -     | 978.8    |
| gi5453597 ref NP_006126.1  | F-actin capping protein alpha-1 subunit; Cap Z [Homo sapiens]            |            |   | 2.37E-06 | 3.35 | 50.23 | 28.00 | 32922.5  |
| AHQ-7-13-, 2860            | K.DVQDSLTVSNEAQTAQ.E                                                     | 1706.79025 | 2 | 2.37E-06 | 0.95 | 4.69  | -     | 1069.9   |
| AHQ-7-9, 2709              | K.DVQDSLTVSNEAQTAQ.E                                                     | 1706.79025 | 2 | 5.34E-04 | 0.63 | 2.80  | -     | 435.0    |
| AHQ-7-9, 4052              | R.EGAAHFAFQYNNMQDFTPVK.I                                                 | 2126.33709 | 2 | 2.01E-04 | 0.67 | 3.36  | -     | 439.8    |
| AHQ-7-13-, 5151            | K.FTITPTPAQVGVVK.I                                                       | 1571.88532 | 2 | 1.16E-04 | 0.68 | 2.64  | -     | 309.2    |
| AHQ-7-9, 3793              | R.LLLNNDLRL.E                                                            | 1198.39736 | 2 | 2.12E-04 | 0.57 | 2.60  | -     | 528.0    |
| AHQ-7-9, 4984 - 4988       | K.TIDGQTIACIESHQFQPK.N                                                   | 2316.57620 | 2 | 1.71E-05 | 0.49 | 2.81  | -     | 359.7    |
| gi6996010 ref NP_002038.1  | glycyl-tRNA synthetase; GlyRS; glycine tRNA ligase [Homo sapiens]        |            |   | 2.39E-06 | 1.49 | 20.16 | 4.80  | 77530.3  |
| AHQ-7-6, 6410              | R.TFFSFAVAPFK.C                                                          | 1458.72722 | 2 | 5.08E-04 | 0.84 | 3.23  | -     | 591.9    |
| AHQ-7-6, 6477              | K.TLYVEEVVNPVIEPSFGLGR.I                                                 | 2219.52197 | 2 | 2.39E-06 | 0.65 | 3.27  | -     | 414.3    |
| gi28827809 ref NP_789797.1 | nucleoside diphosphate kinase B-like [Homo sapiens]                      |            |   | 2.42E-06 | 1.61 | 20.19 | 19.00 | 15529.0  |
| AHQ-7-12, 3311             | R.GDFCIQVGR.N                                                            | 1053.17404 | 2 | 2.42E-06 | 0.91 | 3.66  | -     | 1015.9   |
| AHQ-7-12, 3314             | R.GDFCIQVGR.N                                                            | 1053.17404 | 1 | 5.00E-04 | 0.10 | 1.93  | -     | 185.7    |
| AHQ-7-12, 2894 - 2958      | R.VMLGETNPADSKPGTIR.G                                                    | 1787.03151 | 3 | 4.64E-06 | 0.71 | 3.72  | -     | 371.5    |
| gi19913424 ref NP_001681.2 | ATPase, H+ transporting, lysosomal 70kD, V1 subunit A, isoform 1; V-AT   |            |   | 2.53E-06 | 0.86 | 10.15 | 2.80  | 68303.7  |
| AHQ-7-6, 4227              | R.LAEMPADSGPAYLGAR.L                                                     | 1782.99819 | 2 | 2.53E-06 | 0.86 | 3.02  | -     | 777.2    |
| gi4502297 ref NP_001678.1  | ATP synthase, H+ transporting, mitochondrial F1 complex, delta subunit   |            |   | 2.56E-06 | 0.91 | 10.19 | 8.30  | 17489.8  |
| AHQ-7-13-, 2587            | K.AQAELVGTAEATR.A                                                        | 1432.51860 | 2 | 2.56E-06 | 0.91 | 3.81  | -     | 673.6    |
| AHQ-7-13, 2777             | K.AQAELVGTAEATR.A                                                        | 1432.51860 | 2 | 2.33E-05 | 0.75 | 3.04  | -     | 531.3    |
| gi6912638 ref NP_036557.1  | ras suppressor protein 1 [Homo sapiens]                                  |            |   | 2.60E-06 | 2.60 | 30.21 | 21.30 | 31540.1  |
| AHQ-7-10, 5571 - 5627      | R.ALYSDNDFEILPPDIGK.L                                                    | 2021.25559 | 2 | 2.60E-06 | 0.93 | 4.16  | -     | 558.9    |
| AHQ-7-10, 5580 - 5637      | R.ALYSDNDFEILPPDIGK.L                                                    | 2021.25559 | 3 | 1.01E-04 | 0.59 | 3.27  | -     | 561.9    |
| AHQ-7-10, 5340 - 5395      | R.LTVLPPELGNLDTGQK.Q                                                     | 1809.09672 | 3 | 9.66E-04 | 0.95 | 4.26  | -     | 1845.2   |
| AHQ-7-10, 5335 - 5399      | R.LTVLPPELGNLDTGQK.Q                                                     | 1809.09672 | 2 | 6.90E-06 | 0.92 | 4.14  | -     | 631.1    |
| AHQ-7-10, 6140             | K.NLEVLNFFNNQIEELPTQISSLQK.L                                             | 2820.14663 | 2 | 3.50E-05 | 0.75 | 2.95  | -     | 522.3    |
| gi30154095 ref XP_293967.2 | similar to gamma actin-like protein [Homo sapiens]                       |            |   | 2.65E-06 | 1.04 | 20.18 | 12.20 | 19259.0  |
| AHQ-7-8, 4784 - 4866       | K.DLYSTVLSGGTTM*YPIADR.M                                                 | 2235.45690 | 2 | 3.15E-04 | 0.59 | 3.44  | -     | 284.4    |
| AHQ-7-8, 5039              | K.DLYSTVLSGGTTM*YPIADR.M                                                 | 2235.45690 | 2 | 2.65E-06 | 0.82 | 3.60  | -     | 652.3    |
| AHQ-7-8, 5290 - 5310       | K.DLYSTVLSGGTTM*YPIADR.M                                                 | 2219.45750 | 2 | 1.37E-05 | 0.22 | 2.53  | -     | 297.4    |
| AHQ-7-13, 4697 - 4777      | K.DLYSTVLSGGTTM*YPIADR.M                                                 | 2235.45690 | 2 | 5.09E-05 | 0.78 | 3.66  | -     | 552.9    |
| AHQ-7-14, 5393             | K.DLYSTVLSGGTTM*YPIADR.M                                                 | 2235.45690 | 2 | 1.66E-04 | 0.58 | 2.94  | -     | 496.5    |
| AHQ-7-14, 5477 - 5532      | K.DLYSTVLSGGTTM*YPIADR.M                                                 | 2235.45690 | 2 | 7.98E-05 | 0.22 | 2.53  | -     | 415.4    |
| AHQ-7-13-, 4575 - 4644     | K.DLYSTVLSGGTTM*YPIADR.M                                                 | 2235.45690 | 2 | 2.51E-04 | 0.55 | 3.34  | -     | 425.7    |
| AHQ-7-13-, 4703            | K.DLYSTVLSGGTTM*YPIADR.M                                                 | 2235.45690 | 2 | 6.74E-06 | 0.32 | 2.66  | -     | 403.0    |
| AHQ-7-14-, 4683 - 4717     | K.DLYSTVLSGGTTM*YPIADR.M                                                 | 2235.45690 | 2 | 3.11E-04 | 0.73 | 3.32  | -     | 468.9    |
| AHQ-7-14-, 4893            | K.DLYSTVLSGGTTM*YPIADR.M                                                 | 2235.45690 | 2 | 9.14E-05 | 0.71 | 3.31  | -     | 649.1    |
| gi30156116 ref XP_301571.1 | similar to Dual specificity protein phosphatase 3 (Dual specificity pr   |            |   | 2.85E-06 | 0.88 | 10.15 | 1.70  | 64164.4  |
| AHQ-7-11, 3608 - 3611      | K.DSGITVGLIK.A                                                           | 1067.21733 | 2 | 2.85E-06 | 0.88 | 3.07  | -     | 1078.6   |
| gi13786129 ref NP_112586.1 | RAB38B, member RAS oncogene family; likely ortholog of mouse RAB33b [H   |            |   | 3.20E-06 | 0.90 | 10.19 | 4.80  | 25717.4  |
| AHQ-7-11, 3472 - 3482      | K.IQLWDTAGQER.F                                                          | 1317.43243 | 2 | 2.86E-04 | 0.88 | 3.16  | -     | 935.9    |
| AHQ-7-14-, 3498            | K.IQLWDTAGQER.F                                                          | 1317.43243 | 2 | 3.20E-06 | 0.90 | 3.34  | -     | 945.4    |
| AHQ-7-11, 3311 - 3366      | K.IQLWDTAGQER.F                                                          | 1317.43243 | 2 | 6.40E-05 | 0.90 | 3.87  | -     | 780.7    |





|                             |                                                                         |            |   |          |      |       |       |          |
|-----------------------------|-------------------------------------------------------------------------|------------|---|----------|------|-------|-------|----------|
| AHQ-7-11, 3694              | K.SCPDAIKEVFDNK.F                                                       | 1524.67770 | 2 | 4.79E-04 | 0.89 | 3.23  | -     | 955.4    |
| gi 5032161 ref NP_005639.1  | elongin C; transcription elongation factor B (SIII), polypeptide 1 (15k |            |   | 2.08E-05 | 0.82 | 10.15 | 12.50 | 12473.1  |
| AHQ-7-13-, 2776 - 2840      | K.YTGGCEGPDAM*YVK.L                                                     | 1565.70692 | 2 | 2.08E-05 | 0.82 | 2.96  | -     | 728.5    |
| gi 7705501 ref NP_057546.1  | hypothetical protein HSPC194 [Homo sapiens]                             |            |   | 2.08E-05 | 1.53 | 20.20 | 41.10 | 11564.5  |
| AHQ-7-14-, 6469             | K.AGVSPLAAGLLFGSLAGL.GAYQLSQDPR.N                                       | 2818.17710 | 3 | 2.08E-05 | 0.57 | 3.19  | -     | 449.5    |
| AHQ-7-14-, 5665             | K.FM*PAGLIAGASLLM*VAK.V                                                 | 1723.13705 | 2 | 9.80E-04 | 0.96 | 4.06  | -     | 1589.0   |
| gi 14779875 ref XP_032693.1 | similar to KIAA0420 [Homo sapiens]                                      |            |   | 2.11E-05 | 0.30 | 10.13 | 1.90  | 78941.3  |
| AHQ-7-3, 5628               | R.FLRAHDFHLDKAR.E                                                       | 1626.84608 | 2 | 2.11E-05 | 0.30 | 2.61  | -     | 308.9    |
| gi 20270343 ref NP_620150.1 | hypothetical protein BC015408 [Homo sapiens]                            |            |   | 2.15E-05 | 1.76 | 20.21 | 17.20 | 21415.8  |
| AHQ-7-11, 2838              | K.MNLSAIQDR.E                                                           | 1048.19914 | 2 | 2.15E-05 | 0.93 | 2.97  | -     | 1725.6   |
| AHQ-7-11, 5542 - 5606       | K.NELHNLDDKPLQGPVVLVGNK.R                                               | 2553.98492 | 3 | 9.28E-04 | 0.83 | 4.12  | -     | 354.8    |
| gi 4507149 ref NP_000445.1  | superoxide dismutase 1, soluble (amyotrophic lateral sclerosis 1 (adult |            |   | 2.19E-05 | 0.59 | 10.14 | 9.10  | 15935.7  |
| AHQ-7-12, 4194              | K.GDGPVQGINFEQK.E                                                       | 1502.65366 | 2 | 2.19E-05 | 0.59 | 2.57  | -     | 600.2    |
| gi 8923812 ref NP_060943.1  | uncharacterized hypothetical protein HT012 [Homo sapiens]               |            |   | 2.26E-05 | 0.90 | 10.16 | 8.60  | 14960.4  |
| AHQ-7-13-, 4047             | K.TLAFTSVLDTNK.A                                                        | 1310.47811 | 2 | 3.22E-04 | 0.83 | 3.22  | -     | 671.4    |
| AHQ-7-13, 4185 - 4193       | K.TLAFTSVLDTNK.A                                                        | 1310.47811 | 2 | 2.26E-05 | 0.90 | 3.23  | -     | 964.3    |
| gi 5031985 ref NP_005787.1  | nuclear transport factor 2; placental protein 15 [Homo sapiens]         |            |   | 2.27E-05 | 2.59 | 30.24 | 32.30 | 14478.4  |
| AHQ-7-14-, 5279             | K.IQHSITAQDHQPTDSCIISM*VVGQLK.A                                         | 3022.40358 | 3 | 2.27E-05 | 0.95 | 4.90  | -     | 1466.8   |
| AHQ-7-14-, 5183             | K.NINDAWVCTNDMFR.L                                                      | 1757.92888 | 2 | 2.39E-05 | 0.87 | 3.90  | -     | 599.9    |
| AHQ-7-14-, 4386             | K.NINDAWVCTNDM*FR.L                                                     | 1773.92828 | 2 | 7.66E-04 | 0.77 | 3.36  | -     | 452.0    |
| gi 23111030 ref NP_037478.2 | sorting nexin 12 [Homo sapiens]                                         |            |   | 2.37E-05 | 0.94 | 10.21 | 8.60  | 18884.4  |
| AHQ-7-12, 4716 - 4719       | R.GDEGIFEEESFIEER.R                                                     | 1657.71615 | 2 | 2.37E-05 | 0.94 | 4.20  | -     | 975.5    |
| gi 6005826 ref NP_009160.1  | protein kinase C and casein kinase substrate in neurons 2; paxcin 2 [Ho |            |   | 2.47E-05 | 1.49 | 20.13 | 4.50  | 55904.6  |
| AHQ-7-6, 3958               | K.AYAAQLTEWAR.R                                                         | 1337.46534 | 2 | 2.47E-05 | 0.79 | 2.55  | -     | 1064.9   |
| AHQ-7-6, 3167               | K.HLNLNSVAGYK.A                                                         | 1216.37124 | 2 | 8.00E-05 | 0.70 | 2.56  | -     | 647.2    |
| gi 4758618 ref NP_004684.1  | cyokeratin type II [Homo sapiens]                                       |            |   | 2.58E-05 | 0.97 | 10.22 | 2.20  | 59503.9  |
| AHQ-7-3, 3104               | R.FLEQQNKVLET.K.W                                                       | 1477.68725 | 2 | 2.58E-05 | 0.97 | 4.43  | -     | 1937.7   |
| gi 4557241 ref NP_001095.1  | skeletal muscle specific actinin, alpha 3 [Homo sapiens]                |            |   | 2.95E-05 | 0.90 | 10.16 | 0.90  | 103293.7 |
| AHQ-7-5, 3003               | K.ALDFIAFK.G                                                            | 865.00867  | 2 | 4.39E-05 | 0.89 | 3.15  | -     | 733.6    |
| AHQ-7-4, 3022               | K.ALDFIAFK.G                                                            | 865.00867  | 2 | 2.95E-05 | 0.90 | 3.22  | -     | 627.7    |
| gi 7656999 ref NP_004380.1  | catenin (cadherin-associated protein), alpha 2; Catenin, alpha-2 (cadhe |            |   | 2.98E-05 | 0.57 | 10.15 | 2.00  | 105281.3 |
| AHQ-7-14-, 4917             | K.KAHVLAASVEGATQNFLEK.G                                                 | 2085.34928 | 2 | 8.44E-04 | 0.16 | 2.64  | -     | 296.2    |
| AHQ-7-5, 5152               | K.KAHVLAASVEGATQNFLEK.G                                                 | 2085.34928 | 2 | 2.98E-05 | 0.57 | 3.02  | -     | 638.9    |
| gi 4502905 ref NP_001822.1  | clusterin; complement-associated protein SP-40 [Homo sapiens]           |            |   | 3.01E-05 | 2.38 | 30.27 | 11.40 | 52494.3  |
| AHQ-7-9, 5264               | R.ASSIDELFQDR.F                                                         | 1394.51197 | 2 | 1.79E-04 | 0.54 | 2.62  | -     | 688.4    |
| AHQ-7-9, 2810 - 2814        | R.EILSVDCSTNPNPSQAK.L                                                   | 1764.89299 | 2 | 5.18E-05 | 0.92 | 4.20  | -     | 839.3    |
| AHQ-7-11, 3451              | R.VTTVASHTSDSDVPSGVTVEVVK.L                                             | 2315.52008 | 2 | 3.24E-05 | 0.95 | 5.36  | -     | 656.1    |
| AHQ-7-9, 3261               | R.VTTVASHTSDSDVPSGVTVEVVK.L                                             | 2315.52008 | 2 | 3.01E-05 | 0.92 | 4.31  | -     | 833.2    |
| gi 4758484 ref NP_004823.1  | glutathione-S-transferase like; glutathione transferase omega [Homo sap |            |   | 3.07E-05 | 1.27 | 20.16 | 8.70  | 27565.7  |
| AHQ-7-10, 3904 - 3948       | K.EFTKLEEVTLNK.K                                                        | 1451.64657 | 2 | 2.02E-04 | 0.74 | 3.25  | -     | 544.4    |
| AHQ-7-10, 2808              | R.HEVININLK.N                                                           | 1080.26247 | 1 | 3.07E-05 | 0.53 | 2.50  | -     | 476.6    |
| AHQ-7-10, 2803              | R.HEVININLK.N                                                           | 1080.26247 | 2 | 5.86E-04 | 0.91 | 3.18  | -     | 992.8    |
| gi 6005902 ref NP_009043.1  | thrombospondin 3 [Homo sapiens]                                         |            |   | 3.08E-05 | 1.30 | 20.13 | 0.70  | 104200.6 |
| AHQ-7-3, 4659               | R.FYVVMWK.Q                                                             | 973.21547  | 1 | 1.62E-04 | 0.71 | 2.18  | -     | 828.1    |
| AHQ-7-6, 4534 - 4538        | R.FYVVMWK.Q                                                             | 973.21547  | 1 | 2.21E-04 | 0.76 | 2.22  | -     | 912.8    |
| AHQ-7-6, 4541               | R.FYVVMWK.Q                                                             | 973.21547  | 2 | 7.72E-04 | 0.86 | 2.52  | -     | 750.7    |
| AHQ-7-7, 4446               | R.FYVVMWK.Q                                                             | 973.21547  | 1 | 2.11E-04 | 0.60 | 2.12  | -     | 730.0    |
| AHQ-7-9, 4145               | R.FYVVMWK.Q                                                             | 973.21547  | 1 | 3.08E-05 | 0.71 | 2.02  | -     | 846.6    |
| AHQ-7-3, 4136               | R.FYVVM*WK.Q                                                            | 989.21487  | 1 | 8.87E-04 | 0.59 | 2.23  | -     | 162.5    |
| gi 4506193 ref NP_002784.1  | proteasome beta 1 subunit; proteasome subunit HC5; proteasome component |            |   | 3.13E-05 | 2.23 | 30.24 | 17.00 | 26489.2  |
| AHQ-7-11, 3858 - 3916       | K.GAVYSFDPVGSYQR.D                                                      | 1546.66500 | 2 | 3.13E-05 | 0.69 | 2.70  | -     | 616.7    |
| AHQ-7-11, 2614              | R.LSEGSIHTR.D                                                           | 1147.26577 | 2 | 4.03E-05 | 0.61 | 2.89  | -     | 506.2    |
| AHQ-7-11, 4106 - 4107       | K.TVIGCSGFHGDCLTLT.K.I                                                  | 1869.10923 | 2 | 6.70E-04 | 0.94 | 4.87  | -     | 957.2    |
| gi 4557894 ref NP_000230.1  | lysozyme precursor [Homo sapiens]                                       |            |   | 3.16E-05 | 0.83 | 10.17 | 8.10  | 16537.0  |
| AHQ-7-13, 4275              | R.STDVGIFQINSR.Y                                                        | 1401.50620 | 2 | 3.16E-05 | 0.83 | 3.34  | -     | 655.4    |
| gi 4504107 ref NP_002076.1  | glutathione peroxidase 4; phospholipid hydroperoxidase; sperm nucleus g |            |   | 3.17E-05 | 0.82 | 10.15 | 6.10  | 22137.7  |
| AHQ-7-11, 3878              | R.YGPMEEPVIEK.D                                                         | 1405.64130 | 2 | 3.17E-05 | 0.82 | 2.99  | -     | 646.6    |
| gi 30149555 ref XP_301154.1 | similar to heat shock protein 86 [Homo sapiens]                         |            |   | 3.18E-05 | 0.96 | 10.24 | 10.60 | 15781.6  |
| AHQ-7-5, 5838               | K.HSQFIGYPTLFVEK.E                                                      | 1780.05877 | 2 | 3.18E-05 | 0.96 | 4.82  | -     | 1030.6   |
| gi 13569962 ref NP_112243.1 | RAB1B, member RAS oncogene family; small GTP-binding protein [Homo sap  |            |   | 3.33E-05 | 2.87 | 40.29 | 26.40 | 22171.0  |
| AHQ-7-11, 4351              | R.GAHGIIIVYDVTDCQESYANVK.Q                                              | 2279.49113 | 2 | 3.33E-05 | 0.98 | 5.84  | -     | 2127.5   |
| AHQ-7-11, 2150 - 2228       | R.MGPGVAASGGERNPK.I                                                     | 1442.62650 | 2 | 1.78E-04 | 0.81 | 3.30  | -     | 772.1    |
| AHQ-7-11, 1834 - 1902       | R.M*GPGVAASGGERNPK.I                                                    | 1458.62590 | 2 | 7.78E-04 | 0.69 | 2.96  | -     | 632.4    |
| AHQ-7-11, 6022 - 6091       | K.NATNVEQAFMTM*AAEIK.K                                                  | 1886.14019 | 2 | 8.07E-04 | 0.39 | 2.74  | -     | 415.9    |
| gi 18087855 ref NP_542408.1 | dynein light chain 2 [Homo sapiens]                                     |            |   | 3.45E-05 | 0.65 | 10.10 | 7.90  | 10349.8  |
| AHQ-7-14-, 3154             | K.DIAAYIK.K                                                             | 793.93045  | 1 | 3.45E-05 | 0.65 | 1.94  | -     | 747.5    |
| gi 5032041 ref NP_005605.1  | Ras homolog enriched in brain 2 [Homo sapiens]                          |            |   | 3.48E-05 | 0.86 | 10.16 | 8.70  | 20497.4  |
| AHQ-7-12, 4694              | K.ALAESWNAALFESSAK.E                                                    | 1695.85389 | 2 | 3.48E-05 | 0.86 | 3.11  | -     | 861.4    |
| gi 7661728 ref NP_054736.1  | HSPC003 protein [Homo sapiens]                                          |            |   | 3.58E-05 | 0.59 | 10.15 | 14.40 | 13507.4  |
| AHQ-7-14-, 6207 - 6209      | K.AQALVYQLEELPTQVAAS                                                    | 1932.16358 | 2 | 3.58E-05 | 0.59 | 2.97  | -     | 368.9    |
| gi 4758038 ref NP_004246.1  | cytochrome c oxidase subunit Va precursor; cytochrome c oxidase polypep |            |   | 3.62E-05 | 1.88 | 20.24 | 10.00 | 16774.1  |
| AHQ-7-13-, 4140             | K.GINTLVLYDM*VPEPK.I                                                    | 1693.94282 | 2 | 9.79E-05 | 0.88 | 3.27  | -     | 1324.3   |
| AHQ-7-13-, 4717 - 4721      | K.GINTLVLYDM*VPEPK.I                                                    | 1677.94342 | 2 | 4.88E-05 | 0.92 | 4.02  | -     | 1251.2   |
| AHQ-7-13, 4267 - 4270       | K.GINTLVLYDM*VPEPK.I                                                    | 1693.94282 | 2 | 3.62E-05 | 0.96 | 4.74  | -     | 1481.2   |
| gi 10835049 ref NP_001655.1 | ras homolog gene family, member A; Aplysia ras-related homolog 12; Rho  |            |   | 3.62E-05 | 0.93 | 10.19 | 6.20  | 21768.0  |
| AHQ-7-10, 3587 - 3591       | R.IGAFGYMECSAK.T                                                        | 1335.53122 | 2 | 3.62E-05 | 0.93 | 3.77  | -     | 872.7    |
| gi 4557469 ref NP_001273.1  | adaptor-related protein complex 2, beta 1 subunit; adaptin, beta 2 (bet |            |   | 3.67E-05 | 0.91 | 10.19 | 1.30  | 104551.9 |
| AHQ-7-6, 5891               | R.CVSTLLDLIQT.K.V                                                       | 1392.64385 | 2 | 3.67E-05 | 0.91 | 3.73  | -     | 931.7    |
| gi 24497612 ref NP_116262.2 | nm23-phosphorylated unknown substrate; SH3 domain-containing 70 kDa pr  |            |   | 3.80E-05 | 0.85 | 10.21 | 3.90  | 72695.6  |
| AHQ-7-6, 5347 - 5355        | R.RPYEDQLGELTPTLTIICQPM*QPLR.V                                          | 2932.32204 | 3 | 3.80E-05 | 0.85 | 4.21  | -     | 712.7    |
| gi 4757786 ref NP_004306.1  | N-acylsphingosine amidohydrolase (acid ceramidase) 1; N-acylsphingosine |            |   | 3.96E-05 | 0.70 | 10.18 | 6.30  | 44649.3  |
| AHQ-7-14-, 5863             | K.VM*QVVDKLPGLLGNFPGPFEEEM*K.G                                          | 2837.26081 | 3 | 3.96E-05 | 0.70 | 3.45  | -     | 604.8    |
| gi 19923437 ref NP_057366.2 | adenylate kinase 3 alpha like [Homo sapiens]                            |            |   | 4.17E-05 | 1.51 | 20.16 | 12.80 | 25565.2  |
| AHQ-7-10, 5880 - 5943       | K.NLTQYVSWLLDGFPR.T                                                     | 1710.91339 | 2 | 4.17E-05 | 0.81 | 2.71  | -     | 813.1    |
| AHQ-7-10, 4337 - 4415       | K.TVGIIDLTGPELIQR.E                                                     | 1627.82100 | 2 | 4.22E-04 | 0.70 | 2.91  | -     | 676.9    |
| gi 5803009 ref NP_006786.1  | EH-domain containing 1; homolog of Drosophila past; EH domain containi  |            |   | 4.29E-05 | 0.78 | 10.22 | 2.80  | 60844.7  |
| AHQ-7-7, 5493               | K.LLTDVDDMLANDIAR.L                                                     | 1675.88593 | 2 | 4.29E-05 | 0.78 | 2.89  | -     | 627.5    |
| gi 4758384 ref NP_004108.1  | FK506 binding protein 5; FK506-binding protein 5; 51 kDa FK506-binding  |            |   | 4.33E-05 | 0.66 | 10.13 | 2.20  | 51211.8  |
| AHQ-7-2, 3063               | K.EKLEQAAIVK.E                                                          | 1129.33180 | 2 | 4.33E-05 | 0.66 | 2.63  | -     | 960.5    |
| gi 8922950 ref NP_060835.1  | hypothetical protein FLJ11222 [Homo sapiens]                            |            |   | 4.47E-05 | 0.84 | 10.14 | 2.60  | 60570.9  |
| AHQ-7-10, 2244              | K.ERAAQIAEKDAIK.Y                                                       | 1443.63090 | 2 | 4.47E-05 | 0.84 | 2.84  | -     | 718.5    |
| gi 14589893 ref NP_001785.2 | cadherin 4, type 1 preproprotein; cadherin 4, R-cadherin (retinal); R-  |            |   | 4.54E-05 | 0.28 | 10.15 | 2.00  | 100279.9 |
| AHQ-7-9, 4256               | K.VENPIDLYYVIDM*NDNR.P                                                  | 2213.45293 | 2 | 2.13E-04 | 0.32 | 2.98  | -     | 321.0    |
| AHQ-7-7, 4562               | K.VENPIDLYYVIDM*NDNR.P                                                  | 2213.45293 | 2 | 4.54E-05 | 0.28 | 2.65  | -     | 406.9    |
| gi 19743813 ref NP_002202.2 | integrin beta 1 isoform 1A precursor; integrin VLA-4 beta subunit; fib  |            |   | 4.56E-05 | 3.54 | 40.26 | 7.40  | 88414.9  |
| AHQ-7-3, 3239               | K.FCECDNFNCDR.S                                                         | 1540.59429 | 2 | 5.84E-04 | 0.94 | 3.68  | -     | 1304.0   |
| AHQ-7-3, 3693               | K.GEVFNELVQK.Q                                                          | 1092.22688 | 2 | 7.60E-04 | 0.72 | 2.77  | -     | 749.0    |
| AHQ-7-4, 5218               | K.LKPEDITIQPQLVLR.L                                                     | 2020.36187 | 2 | 3.35E-04 | 0.93 | 4.29  | -     | 806.0    |
| AHQ-7-3, 6628 - 6672        | K.LSENNIQTIFAVEEFQPVYK.E                                                | 2471.74650 | 3 | 4.56E-05 | 0.96 | 5.18  | -     | 1583.3   |
| gi 5729779 ref NP_006701.1  | COP9 homolog [Homo sapiens]                                             |            |   | 4.63E-05 | 0.69 | 10.15 | 6.70  | 23225.5  |
| AHQ-7-11, 3487              | K.GILEQQWQADSTTR.M                                                      | 1562.66596 | 2 | 4.63E-05 | 0.69 | 2.91  | -     | 606.8    |
| gi 24308149 ref NP_060035.1 | hypothetical protein DKFZp434F2322 [Homo sapiens]                       |            |   | 4.65E-05 | 0.72 | 10.15 | 2.00  | 61404.2  |
| AHQ-7-4, 5908               | K.PSGVHLKLVLR.F                                                         | 1219.50454 | 2 | 4.65E-05 | 0.72 | 3.08  | -     | 714.8    |
| gi 9506667 ref NP_061907.1  | ras homolog gene family, member F [Homo sapiens]                        |            |   | 4.72E-05 | 0.65 | 10.16 | 8.10  | 23593.2  |
| AHQ-7-11, 4068              | K.EVTNLNLYDTAGQEDYDR.L                                                  | 2003.06925 | 2 | 4.72E-05 | 0.65 | 3.10  | -     | 406.6    |
| gi 4507509 ref NP_003245.1  | tissue inhibitor of metalloproteinase 1 precursor; Erythroid-potentiati |            |   | 4.73E-05 | 0.92 | 10.17 | 5.80  | 23170.8  |
| AHQ-7-10, 3561 - 3568       | K.GFQALGDAADIR.F                                                        | 1234.34342 | 2 | 4.73E-05 | 0.92 | 3.44  | -     | 1127.0   |

|                             |                                                                         |            |   |          |      |       |       |          |
|-----------------------------|-------------------------------------------------------------------------|------------|---|----------|------|-------|-------|----------|
| gi 10863873 ref NP_000651.1 | transforming growth factor, beta 1 (Camurati-Engelmann disease); trans  |            |   | 4.73E-05 | 2.73 | 30.20 | 5.90  | 44422.0  |
| AHQ-7-13-, 3344             | R.ALDNTNYCFSSTEK.N                                                      | 1537.63010 | 2 | 1.58E-04 | 0.88 | 3.82  | -     | 616.9    |
| AHQ-7-13-, 2725             | K.VEQLSNM*IVR.S                                                         | 1205.41014 | 2 | 4.73E-05 | 0.90 | 3.78  | -     | 942.2    |
| AHQ-7-13, 3685              | K.VEQLSNMIVR.S                                                          | 1189.41074 | 2 | 2.30E-04 | 0.95 | 4.03  | -     | 1415.5   |
| gi 28269681 ref NP_783313.1 | NADH-ubiquinone oxidoreductase subunit B14.7 [Homo sapiens]             |            |   | 4.98E-05 | 0.94 | 10.22 | 16.30 | 14852.0  |
| AHQ-7-13-, 6223             | R.EKPDPLNYFLGGCAGGLTGAR.T                                               | 2423.68676 | 3 | 4.98E-05 | 0.94 | 4.36  | -     | 1591.1   |
| gi 7661922 ref NP_055814.1  | RAB21, member RAS oncogene family [Homo sapiens]                        |            |   | 5.36E-05 | 0.82 | 10.16 | 7.60  | 24347.4  |
| AHQ-7-10, 4048              | R.HVSIQEAESYAESVGAK.H                                                   | 1805.92351 | 2 | 5.36E-05 | 0.82 | 3.17  | -     | 613.1    |
| gi 4759086 ref NP_004883.1  | vesicle trafficking protein sec22b [Homo sapiens]                       |            |   | 5.36E-05 | 0.88 | 10.18 | 6.50  | 24740.4  |
| AHQ-7-12, 3827              | R.NLGSINTELQDVQR.I                                                      | 1587.71696 | 2 | 5.36E-05 | 0.88 | 3.57  | -     | 1126.3   |
| gi 4557225 ref NP_000005.1  | alpha 2 macroglobulin precursor [Homo sapiens]                          |            |   | 5.43E-05 | 1.70 | 20.21 | 2.00  | 163276.5 |
| AHQ-7-3, 5517               | R.VSVQLEASPAFLAVPVEK.E                                                  | 1885.19319 | 2 | 2.16E-04 | 0.85 | 3.73  | -     | 639.4    |
| AHQ-7-2, 5645               | R.VSVQLEASPAFLAVPVEK.E                                                  | 1885.19319 | 2 | 4.53E-04 | 0.81 | 3.27  | -     | 656.2    |
| AHQ-7-4, 3009               | R.VTAAPQSVCALR.A                                                        | 1274.47229 | 2 | 5.43E-05 | 0.85 | 2.96  | -     | 700.7    |
| gi 5453704 ref NP_006398.1  | cytoskeleton related vitamin A responsive protein; glutamate transport  |            |   | 5.46E-05 | 0.84 | 10.15 | 5.90  | 21614.6  |
| AHQ-7-1, 4948               | R.AWDDFFPQSDR.F                                                         | 1313.35597 | 2 | 5.46E-05 | 0.84 | 2.93  | -     | 697.8    |
| gi 4506765 ref NP_002952.1  | S100 calcium-binding protein A4; 18A2; 42A; S100 calcium-binding protei |            |   | 5.60E-05 | 1.60 | 20.15 | 10.90 | 11725.5  |
| AHQ-7-14-, 3519             | K.ALDMVMSTFHK.Y                                                         | 1248.47665 | 2 | 5.60E-05 | 0.68 | 2.69  | -     | 577.7    |
| AHQ-7-14-, 3077             | K.ALDMVM*VSTFHK.Y                                                       | 1264.47605 | 2 | 6.09E-04 | 0.92 | 2.91  | -     | 1314.3   |
| gi 29727565 ref XP_291384.1 | similar to Cytochrome c, somatic [Homo sapiens]                         |            |   | 5.73E-05 | 0.94 | 10.20 | 16.20 | 1621.4   |
| AHQ-7-13-, 6076             | K.GIIWGEDTLM*EYLENPK.K                                                  | 2025.26771 | 2 | 5.73E-05 | 0.94 | 4.06  | -     | 1146.7   |
| AHQ-7-13, 6118              | K.GIIWGEDTLM*EYLENPK.K                                                  | 2025.26771 | 2 | 2.27E-04 | 0.60 | 2.68  | -     | 561.3    |
| gi 4501867 ref NP_001089.1  | aconitase 2 [Homo sapiens]                                              |            |   | 5.91E-05 | 1.60 | 20.19 | 4.60  | 85424.8  |
| AHQ-7-5, 6574               | K.DINQEVYNFLATAGAK.Y                                                    | 1754.92134 | 2 | 5.91E-05 | 0.91 | 3.78  | -     | 898.8    |
| AHQ-7-5, 6176               | R.DLGGIVLANACGPGICGWDR.K                                                | 2175.43103 | 2 | 7.73E-04 | 0.70 | 3.22  | -     | 594.1    |
| gi 4503069 ref NP_001306.1  | mitogen-activated protein kinase 14 isoform 1; cytokine suppressive ant |            |   | 6.23E-05 | 0.92 | 10.18 | 4.20  | 41493.2  |
| AHQ-7-9, 5378               | K.HENVIGLLDVFTPAR.S                                                     | 1681.91672 | 2 | 6.23E-05 | 0.92 | 3.64  | -     | 1118.5   |
| gi 21359837 ref NP_003312.2 | Tu translation elongation factor, mitochondrial [Homo sapiens]          |            |   | 6.44E-05 | 0.69 | 10.17 | 3.10  | 49541.2  |
| AHQ-7-8, 5026               | K.LLDAVDYIYIPVAR.D                                                      | 1543.78883 | 2 | 6.44E-05 | 0.69 | 2.78  | -     | 606.1    |
| gi 20070272 ref NP_057110.2 | androgen-regulated short-chain dehydrogenase/reductase 1; prostate sho  |            |   | 6.56E-05 | 0.67 | 10.15 | 6.30  | 35414.1  |
| AHQ-7-9, 3369               | K.GSGVTTYVHPGTVQSELR.H                                                  | 2075.26811 | 2 | 6.56E-05 | 0.67 | 2.91  | -     | 454.9    |
| gi 22749499 ref NP_689979.1 | hypothetical protein MGC40107 [Homo sapiens]                            |            |   | 6.73E-05 | 0.91 | 10.21 | 24.80 | 11741.6  |
| AHQ-7-14-, 5434             | R.LGALSAAAALGFASYGHAGAQFPPDAYGK.E                                       | 2669.93152 | 3 | 6.73E-05 | 0.91 | 4.12  | -     | 1157.8   |
| gi 5803013 ref NP_006808.1  | endoplasmic reticulum protein 29 precursor; endoplasmic reticulum lumen |            |   | 6.76E-05 | 0.88 | 10.16 | 5.70  | 28993.2  |
| AHQ-7-10, 3724 - 3749       | K.ILDQGGDFPASEMTR.I                                                     | 1709.85924 | 2 | 6.76E-05 | 0.88 | 3.19  | -     | 913.7    |
| gi 29732170 ref XP_291550.1 | similar to Heat shock protein HSP 90-alpha (HSP 86) [Homo sapiens] [MA  |            |   | 6.79E-05 | 0.96 | 10.25 | 12.70 | 13262.9  |
| AHQ-7-5, 4179               | K.HLEINPDHSIIETLR.Q                                                     | 1787.99770 | 2 | 6.79E-05 | 0.96 | 5.06  | -     | 1488.3   |
| gi 17017988 ref NP_001853.2 | cytochrome c oxidase subunit Vb precursor; cytochrome c oxidase polype  |            |   | 6.84E-05 | 0.46 | 10.14 | 9.30  | 13695.6  |
| AHQ-7-13-, 3571             | K.KGLDPYVNLVAPK.G                                                       | 1315.54272 | 2 | 6.84E-05 | 0.46 | 2.71  | -     | 457.4    |
| gi 4757766 ref NP_004299.1  | Rho GTPase activating protein 1; RhoGAP; p50rhoGAP; CDC42 GTPase-activa |            |   | 6.85E-05 | 0.95 | 10.26 | 4.60  | 50435.4  |
| AHQ-7-7, 6018               | R.VPATLQVLQLTPPEENYQVLR.F                                               | 2312.65053 | 3 | 1.75E-04 | 0.59 | 3.28  | -     | 369.2    |
| AHQ-7-7, 6016               | R.VPATLQVLQLTPPEENYQVLR.F                                               | 2312.65053 | 2 | 6.85E-05 | 0.95 | 5.20  | -     | 757.6    |
| gi 19913441 ref NP_002140.2 | hippocampin-1; visinin-like protein 3; calcium-binding protein BD       |            |   | 6.87E-05 | 1.46 | 20.15 | 11.90 | 22313.1  |
| AHQ-7-11, 3272              | K.LRPEVLQDLR.E                                                          | 1239.44948 | 2 | 8.94E-04 | 0.55 | 2.78  | -     | 443.9    |
| AHQ-7-11, 3630 - 3643       | R.TFTDNGDGTDFR.E                                                        | 1459.49937 | 2 | 6.87E-05 | 0.92 | 2.97  | -     | 1154.0   |
| gi 7662338 ref NP_054735.1  | suppressor of actin 1 [Homo sapiens]                                    |            |   | 6.88E-05 | 0.81 | 10.17 | 2.70  | 66966.5  |
| AHQ-7-1, 5061               | R.LSNTSPFQEMSLER.A                                                      | 1882.08493 | 2 | 6.88E-05 | 0.81 | 3.35  | -     | 518.7    |
| gi 5453990 ref NP_006254.1  | proteasome (prosome, macropain) activator subunit 1 (PA28 alpha); Prote |            |   | 7.14E-05 | 0.66 | 10.14 | 4.80  | 28722.9  |
| AHQ-7-10, 6023              | R.NAYAVLYDIILK.N                                                        | 1396.65574 | 2 | 7.14E-05 | 0.66 | 2.60  | -     | 544.6    |
| gi 4507295 ref NP_003560.1  | syntaxin 7 [Homo sapiens]                                               |            |   | 7.15E-05 | 0.47 | 10.13 | 5.70  | 29845.3  |
| AHQ-7-13-, 3373             | R.TLNLQGTQDQSPELR.Q                                                     | 1669.81798 | 2 | 9.92E-05 | 0.64 | 2.60  | -     | 591.0    |
| AHQ-7-10, 3208              | R.TLNLQGTQDQSPELR.Q                                                     | 1669.81798 | 2 | 7.15E-05 | 0.47 | 2.68  | -     | 389.5    |
| gi 22538814 ref NP_002976.2 | small inducible cytokine A5 precursor; T-cell specific protein p288; T  |            |   | 7.18E-05 | 0.87 | 10.15 | 12.10 | 9989.6   |
| AHQ-7-14-, 3757 - 3769      | K.CSNPAVVFVTR.K                                                         | 1251.43718 | 2 | 3.31E-04 | 0.83 | 2.89  | -     | 652.3    |
| AHQ-7-14, 4696              | K.CSNPAVVFVTR.K                                                         | 1251.43718 | 2 | 7.18E-05 | 0.87 | 2.98  | -     | 810.4    |
| gi 19923262 ref NP_004153.2 | RAB5A, member RAS oncogene family; RAS-associated protein RAB5A [Homo   |            |   | 7.30E-05 | 1.36 | 20.14 | 9.80  | 23658.5  |
| AHQ-7-10, 3705 - 3751       | K.FEIWDTAGQER.Y                                                         | 1352.43364 | 2 | 7.30E-05 | 0.86 | 2.82  | -     | 1144.7   |
| AHQ-7-10, 2883              | R.YHSLAPMYR.R                                                           | 1301.49810 | 2 | 7.02E-04 | 0.50 | 2.52  | -     | 606.5    |
| gi 29731062 ref XP_293011.1 | hypothetical protein XP_293011 [Homo sapiens]                           |            |   | 7.41E-05 | 0.53 | 10.15 | 14.50 | 20147.8  |
| AHQ-7-9, 6009 - 6065        | K.QYYKHQEFDNHINSYDHAHKQRTSK.I                                           | 3176.36627 | 3 | 7.41E-05 | 0.53 | 3.04  | -     | 387.9    |
| gi 11321585 ref NP_002065.1 | guanine nucleotide-binding protein, beta-1 subunit; G protein, beta-1   |            |   | 7.90E-05 | 0.36 | 10.15 | 5.90  | 37378.6  |
| AHQ-7-9, 3746               | R.KACADATLSQLTNNIDPVGR.G                                                | 2146.36794 | 2 | 7.90E-05 | 0.36 | 2.65  | -     | 336.4    |
| gi 14211923 ref NP_115982.1 | PKC1-1-related HIT protein [Homo sapiens]                               |            |   | 8.18E-05 | 1.75 | 20.26 | 22.70 | 17161.6  |
| AHQ-7-13-, 5927             | R.ISQAEEDQQLLGHLLLVAK.Q                                                 | 2235.52293 | 2 | 8.18E-05 | 0.95 | 5.13  | -     | 1459.9   |
| AHQ-7-13, 5931 - 5961       | R.ISQAEEDQQLLGHLLLVAK.Q                                                 | 2235.52293 | 3 | 3.32E-04 | 0.75 | 3.37  | -     | 903.5    |
| AHQ-7-13-, 5875             | K.SLPADILYEDQQCLVFR.D                                                   | 2069.32354 | 2 | 3.15E-04 | 0.80 | 3.26  | -     | 540.1    |
| gi 27477132 ref NP_061934.2 | phosphatidylinositol-3-phosphate 3-phosphatase adaptor subunit; 3-phos  |            |   | 8.22E-05 | 0.31 | 10.14 | 2.40  | 86147.2  |
| AHQ-7-5, 5712               | R.LPAYFVPTPLPEENVQR.F                                                   | 2070.37621 | 2 | 8.22E-05 | 0.31 | 2.52  | -     | 323.0    |
| gi 4506713 ref NP_002945.1  | ubiquitin and ribosomal protein S27a precursor; ubiquitin carboxyl exte |            |   | 8.53E-05 | 0.77 | 10.19 | 10.30 | 17964.8  |
| AHQ-7-14, 5224 - 5281       | K.TITLEVEPDSITIENVK.A                                                   | 1788.97431 | 2 | 8.53E-05 | 0.77 | 3.72  | -     | 776.9    |
| gi 5174393 ref NP_006001.1  | arginine-rich, mutated in early stage tumors; arginine-rich protein [Ho |            |   | 8.65E-05 | 0.93 | 10.24 | 7.30  | 26906.2  |
| AHQ-7-12, 5208 - 5266       | K.DRDVTFSPATIENELIK.F                                                   | 1949.15100 | 2 | 8.65E-05 | 0.93 | 4.77  | -     | 909.7    |
| gi 11496277 ref NP_068805.1 | mitogen-activated protein kinase kinase 1 interacting protein 1; MEK P  |            |   | 8.76E-05 | 0.92 | 10.24 | 22.60 | 13622.6  |
| AHQ-7-14-, 5119             | K.VANDNAPEHALRPGFLSTFALATDQGS.K                                         | 2929.19327 | 3 | 8.76E-05 | 0.92 | 4.73  | -     | 1018.5   |
| gi 13376689 ref NP_079390.1 | hypothetical protein FLJ13615 [Homo sapiens]                            |            |   | 9.01E-05 | 0.25 | 10.13 | 2.30  | 67925.5  |
| AHQ-7-9, 3888               | R.LDLKKNSSNGSR.K                                                        | 1447.62278 | 1 | 9.01E-05 | 0.25 | 2.03  | -     | 513.1    |
| gi 9910542 ref NP_064535.1  | SAR1a gene homolog 1; SAR1 protein [Homo sapiens]                       |            |   | 9.02E-05 | 0.92 | 10.21 | 11.60 | 22366.6  |
| AHQ-7-11, 6162              | K.VELNALM*TDETISNPILILGNK.I                                             | 2514.92088 | 2 | 5.23E-04 | 0.62 | 2.78  | -     | 456.6    |
| AHQ-7-11, 6095 - 6158       | K.VELNALM*TDETISNPILILGNK.I                                             | 2514.92088 | 3 | 9.02E-05 | 0.92 | 4.22  | -     | 927.8    |
| gi 4502211 ref NP_001654.1  | ADP-ribosylation factor 6 [Homo sapiens]                                |            |   | 9.08E-05 | 0.89 | 10.16 | 6.30  | 20082.0  |
| AHQ-7-12, 3910 - 3911       | K.FNVVDDVGGQDK.I                                                        | 1265.35598 | 2 | 9.08E-05 | 0.89 | 3.20  | -     | 1165.1   |
| gi 30153966 ref XP_293932.2 | similar to hypothetical protein BC013073 [Homo sapiens]                 |            |   | 9.30E-05 | 0.26 | 10.20 | 9.00  | 21711.3  |
| AHQ-7-1, 3976               | R.MIFTLFTINVSKDIRRH                                                     | 2073.44997 | 2 | 1.48E-04 | 0.54 | 2.89  | -     | 425.0    |
| AHQ-7-1, 4147               | R.MIFTLFTINVSKDIRRH                                                     | 2073.44997 | 3 | 9.38E-04 | 0.77 | 3.70  | -     | 968.5    |
| AHQ-7-2, 3789               | R.MIFTLFTINVSKDIRRH                                                     | 2073.44997 | 3 | 8.11E-04 | 0.60 | 3.25  | -     | 666.7    |
| AHQ-7-2, 3985               | R.MIFTLFTINVSKDIRRH                                                     | 2073.44997 | 2 | 7.95E-04 | 0.74 | 3.22  | -     | 714.8    |
| AHQ-7-2, 4236 - 4307        | R.MIFTLFTINVSKDIRRH                                                     | 2073.44997 | 2 | 8.22E-04 | 0.38 | 2.88  | -     | 422.6    |
| AHQ-7-3, 3703               | R.MIFTLFTINVSKDIRRH                                                     | 2073.44997 | 2 | 7.54E-04 | 0.53 | 3.25  | -     | 357.5    |
| AHQ-7-3, 3907               | R.MIFTLFTINVSKDIRRH                                                     | 2073.44997 | 2 | 9.30E-05 | 0.26 | 2.63  | -     | 331.6    |
| AHQ-7-3, 4088               | R.MIFTLFTINVSKDIRRH                                                     | 2073.44997 | 3 | 9.35E-04 | 0.71 | 3.38  | -     | 954.4    |
| AHQ-7-7, 3968               | R.MIFTLFTINVSKDIRRH                                                     | 2073.44997 | 2 | 5.10E-04 | 0.37 | 2.90  | -     | 389.2    |
| gi 4502923 ref NP_001830.1  | calponin 3; calponin, acidic [Homo sapiens]                             |            |   | 9.50E-05 | 0.89 | 10.15 | 3.30  | 36413.4  |
| AHQ-7-12, 2716              | K.GPSYGLSAEVK.N                                                         | 1108.22631 | 2 | 9.50E-05 | 0.89 | 3.06  | -     | 986.8    |
| gi 5729999 ref NP_006561.1  | Ras-related GTP-binding protein RAGA [Homo sapiens]                     |            |   | 1.02E-04 | 0.61 | 10.11 | 1.90  | 36565.9  |
| AHQ-7-13, 3906 - 3965       | K.VLLMKG.S                                                              | 660.89221  | 1 | 1.02E-04 | 0.61 | 2.21  | -     | 709.2    |
| gi 4503477 ref NP_001950.1  | eukaryotic translation elongation factor 1 beta 2; eukaryotic translati |            |   | 1.05E-04 | 0.76 | 10.16 | 6.70  | 24763.6  |
| AHQ-7-9, 4932 - 4997        | K.SPAGLQVLDNLYLADK.S                                                    | 1604.78589 | 2 | 1.05E-04 | 0.76 | 3.15  | -     | 563.1    |
| gi 28461290 ref NP_443728.2 | TRALPUSH; no opposite paired repeat protein [Homo sapiens]              |            |   | 1.07E-04 | 0.53 | 10.15 | 0.40  | 240073.5 |
| AHQ-7-8, 3538               | K.KKPQVNAK.D                                                            | 913.09970  | 1 | 1.07E-04 | 0.53 | 2.24  | -     | 478.2    |
| AHQ-7-6, 3573               | K.KKPQVNAK.D                                                            | 913.09970  | 1 | 6.52E-04 | 0.58 | 2.57  | -     | 450.9    |
| gi 21361565 ref NP_001679.2 | ATP synthase, H+ transporting, mitochondrial F0 complex, subunit b, is  |            |   | 1.09E-04 | 0.90 | 10.20 | 5.90  | 28908.4  |
| AHQ-7-11, 6335 - 6336       | R.YGLPEEFFQLYLPK.T                                                      | 1892.18434 | 2 | 1.09E-04 | 0.90 | 3.98  | -     | 405.0    |
| gi 4506181 ref NP_002778.1  |                                                                         |            |   |          |      |       |       |          |

|                            |                                                                          |            |   |          |      |       |       |          |
|----------------------------|--------------------------------------------------------------------------|------------|---|----------|------|-------|-------|----------|
| AHQ-7-5, 2690              | R.ELISNSDALKI                                                            | 1292.37482 | 2 | 1.21E-04 | 0.80 | 3.33  | -     | 608.3    |
| gi4503117 ref NP_000091.1  | cystatin B; stefin B; liver thiol proteinase inhibitor; CPI-B [Homo sap  |            |   | 1.23E-04 | 0.89 | 10.21 | 21.40 | 11139.5  |
| AHQ-7-13-, 3621 - 3672     | R.VFQSLPHENKPLTLSNYQTNK.A                                                | 2459.74218 | 3 | 1.23E-04 | 0.89 | 4.28  | -     | 820.9    |
| AHQ-7-13, 3802             | R.VFQSLPHENKPLTLSNYQTNK.A                                                | 2459.74218 | 3 | 9.65E-04 | 0.84 | 4.13  | -     | 618.9    |
| gi4503573 ref NP_001967.1  | enolase 3; enolase-3, beta, muscle; muscle specific enolase; beta enola  |            |   | 1.29E-04 | 0.88 | 10.17 | 3.50  | 46958.5  |
| AHQ-7-8, 3843              | K.VNQIGSVTESIQACK.L                                                      | 1635.82159 | 2 | 1.29E-04 | 0.88 | 3.47  | -     | 925.2    |
| gi4557323 ref NP_000031.1  | apolipoprotein C-III precursor [Homo sapiens]                            |            |   | 1.37E-04 | 0.86 | 10.16 | 16.20 | 10852.2  |
| AHQ-7-14-, 3189            | K.DALSSVQESQVAQQAR.G                                                     | 1717.81950 | 2 | 1.37E-04 | 0.86 | 3.23  | -     | 1195.7   |
| gi8923904 ref NP_061158.1  | bridging integrator 3 [Homo sapiens]                                     |            |   | 1.38E-04 | 0.63 | 10.17 | 5.50  | 29664.7  |
| AHQ-7-7, 5180              | R.M*DAFNQKQKVNQIK.T                                                      | 1709.90558 | 2 | 1.38E-04 | 0.63 | 3.32  | -     | 401.3    |
| gi4505409 ref NP_002503.1  | non-metastatic cells 2, protein (NM23B) expressed in; Non-metastatic ce  |            |   | 1.41E-04 | 0.80 | 10.15 | 9.90  | 17297.9  |
| AHQ-7-14-, 5830 - 5834     | K.EISLWFKPEELVDYK.S                                                      | 1897.15929 | 2 | 1.41E-04 | 0.80 | 2.99  | -     | 646.1    |
| gi19923142 ref NP_002256.2 | karyopherin beta 1; nuclear factor p97; importin 90; importin beta-1 s   |            |   | 1.46E-04 | 0.69 | 10.17 | 1.70  | 97169.7  |
| AHQ-7-4, 5738              | R.ESCLEAYTGIVQGLK.G                                                      | 1669.87794 | 2 | 1.46E-04 | 0.69 | 2.91  | -     | 635.4    |
| gi21361399 ref NP_055040.2 | protein phosphatase 2 (formerly 2A), regulatory subunit A (PR 65), alp   |            |   | 1.56E-04 | 0.83 | 10.18 | 3.20  | 65308.3  |
| AHQ-7-6, 5613 - 5681       | K.SEIIPMFSNLASDEQDSVRL                                                   | 2139.32924 | 2 | 1.56E-04 | 0.83 | 3.69  | -     | 619.8    |
| gi4506189 ref NP_002783.1  | proteasome alpha 7 subunit isoform 1; proteasome subunit RC6-1; protea   |            |   | 1.57E-04 | 0.77 | 10.16 | 6.00  | 27886.7  |
| AHQ-7-10, 3855             | K.NYTDIAETDILTIK.L                                                       | 1741.83137 | 2 | 1.57E-04 | 0.77 | 2.84  | -     | 733.2    |
| gi21361397 ref NP_037409.2 | Rac GTPase activating protein 1; GTPase activating protein [Homo sapie   |            |   | 1.57E-04 | 0.33 | 10.13 | 1.70  | 71026.2  |
| AHQ-7-8, 3215              | R.IKFGFLSKLCR.D                                                          | 1351.68616 | 2 | 1.57E-04 | 0.33 | 2.57  | -     | 531.8    |
| gi4502013 ref NP_001616.1  | adenylate kinase 2 isoform a; adenylate kinase, mitochondrial; adenylat  |            |   | 1.57E-04 | 0.94 | 10.22 | 6.70  | 26477.6  |
| AHQ-7-10, 3776             | R.LQAYHTQTTPLEEYR.K                                                      | 1998.22695 | 2 | 1.57E-04 | 0.94 | 4.31  | -     | 1230.0   |
| gi6005786 ref NP_009214.1  | monoglyceride lipase; lysophospholipase-like [Homo sapiens]              |            |   | 1.58E-04 | 0.81 | 10.23 | 4.50  | 34292.3  |
| AHQ-7-13, 5866 - 5874      | K.LTVPFLLLQGSADR.L                                                       | 1530.79329 | 2 | 1.58E-04 | 0.81 | 3.27  | -     | 611.0    |
| gi21618359 ref NP_004095.3 | fatty acid synthase [Homo sapiens]                                       |            |   | 1.70E-04 | 2.84 | 30.28 | 2.30  | 273262.0 |
| AHQ-7-3, 5801              | R.LFDHPESTPTNPTEPLFLAQAEVYK.E                                            | 2842.15075 | 3 | 3.57E-04 | 0.95 | 5.55  | -     | 988.8    |
| AHQ-7-2, 6669              | K.LPEDPLLSGLDSDPAK.A                                                     | 1779.06739 | 2 | 6.00E-04 | 0.95 | 4.14  | -     | 1479.9   |
| AHQ-7-1, 5128              | K.VVVQVLAEEPVAVK.G                                                       | 1623.91540 | 2 | 1.70E-04 | 0.94 | 4.42  | -     | 1276.1   |
| gi4504751 ref NP_002196.1  | integrin alpha 5 precursor; fibronectin receptor, alpha subunit; very I  |            |   | 1.73E-04 | 0.90 | 10.20 | 1.70  | 114507.7 |
| AHQ-7-3, 3793              | R.LLESSLSSEGEPEYV.K                                                      | 1984.10415 | 2 | 1.73E-04 | 0.90 | 4.01  | -     | 580.9    |
| gi9257232 ref NP_000598.1  | orosomucoid 1 precursor; Orosomucoid-1 (alpha-1-acid glycoprotein-1); a  |            |   | 1.79E-04 | 0.87 | 10.15 | 7.00  | 23511.4  |
| AHQ-7-1, 5992              | K.EQLGGEFYEALDCLR.I                                                      | 1744.90337 | 2 | 1.79E-04 | 0.87 | 2.98  | -     | 1033.0   |
| gi14210536 ref NP_115914.1 | similar to chicken tubulin beta 5 [Homo sapiens]                         |            |   | 1.83E-04 | 0.67 | 10.18 | 3.80  | 49856.8  |
| AHQ-7-12, 5596 - 5655      | K.M*ASTFIGNSTAIQELFK.R                                                   | 1875.13550 | 2 | 1.83E-04 | 0.67 | 3.55  | -     | 682.5    |
| gi20540570 ref XP_116321.1 | similar to 60 kDa heat shock protein, mitochondrial precursor (Hsp60)    |            |   | 1.99E-04 | 0.88 | 10.20 | 6.10  | 24274.4  |
| AHQ-7-4, 6334              | K.LTNDELEIMEGMK.F                                                        | 1523.75487 | 3 | 1.99E-04 | 0.88 | 3.96  | -     | 1296.3   |
| gi4502419 ref NP_000704.1  | biliverdin reductase B (flavin reductase (NADPH)); flavin reductase (NA  |            |   | 2.02E-04 | 0.90 | 10.18 | 11.70 | 22119.2  |
| AHQ-7-11, 4472             | R.LPSEGPRPAHVVVGDVLAQADVDK.T                                             | 2470.76651 | 3 | 2.02E-04 | 0.90 | 3.70  | -     | 1372.0   |
| gi20149637 ref NP_057526.2 | type 1 tumor necrosis factor receptor shedding aminopeptidase regulato   |            |   | 2.04E-04 | 0.49 | 10.13 | 1.40  | 107761.4 |
| AHQ-7-4, 6222              | R.NPVGYPALWQFLR.K                                                        | 1561.81077 | 2 | 2.04E-04 | 0.49 | 2.56  | -     | 347.4    |
| gi4505237 ref NP_002427.1  | palmitoylated membrane protein 1; membrane protein, palmitoylated 1 (55  |            |   | 2.07E-04 | 0.78 | 10.17 | 6.90  | 52296.2  |
| AHQ-7-13-, 3915            | R.SRPEAVSHPLNVTEDMYTNGSPAPGSPAQVK.G                                      | 3339.63863 | 3 | 2.07E-04 | 0.78 | 3.49  | -     | 568.3    |
| gi8922712 ref NP_060713.1  | hypothetical protein FLJ10849 [Homo sapiens]                             |            |   | 2.12E-04 | 1.87 | 20.21 | 6.80  | 49397.9  |
| AHQ-7-7, 2554              | K.AAAQLLQSQAQSGAQQTK.K                                                   | 1958.12276 | 2 | 2.12E-04 | 0.93 | 4.25  | -     | 1092.0   |
| AHQ-7-7, 2889              | K.RNEFLGELQK.K                                                           | 1234.38656 | 2 | 7.01E-04 | 0.94 | 3.31  | -     | 1698.5   |
| gi28872861 ref NP_055987.1 | HBxAg transactivated protein 2 [Homo sapiens]                            |            |   | 2.22E-04 | 0.51 | 10.13 | 0.40  | 295826.6 |
| AHQ-7-10, 2324 - 2369      | R.EPNNLEPMVK.Q                                                           | 1186.36048 | 2 | 2.22E-04 | 0.51 | 2.56  | -     | 434.8    |
| gi21361427 ref NP_055182.2 | hypothetical protein, estradiol-induced [Homo sapiens]                   |            |   | 2.24E-04 | 0.88 | 10.20 | 8.90  | 21551.0  |
| AHQ-7-13-, 5456            | K.EDDEPETVSLMLDAAK.N                                                     | 1891.08690 | 2 | 2.24E-04 | 0.88 | 3.90  | -     | 390.4    |
| gi23065544 ref NP_000552.2 | glutathione S-transferase M1 isoform 1; HB subunit 4; glutathione S-al   |            |   | 2.25E-04 | 0.76 | 10.15 | 7.80  | 25711.6  |
| AHQ-7-10, 5855             | K.LGLDFPNLPYLIDGAKH.I                                                    | 1884.16698 | 3 | 2.25E-04 | 0.76 | 3.05  | -     | 823.9    |
| gi22748717 ref NP_689541.1 | hypothetical protein FLJ38602 [Homo sapiens]                             |            |   | 2.27E-04 | 0.37 | 10.14 | 2.60  | 50208.1  |
| AHQ-7-14, 4198             | K.RRRCGWLDMLLR.Y                                                         | 1590.94188 | 2 | 2.27E-04 | 0.37 | 2.77  | -     | 382.7    |
| gi4885583 ref NP_005397.1  | Rho-associated, coiled-coil containing protein kinase 1; p160ROCK; p160  |            |   | 2.29E-04 | 0.26 | 10.13 | 1.30  | 158173.3 |
| AHQ-7-3, 4631              | R.CDTAVGTPDYISPEVLK.S                                                    | 1867.06682 | 2 | 2.29E-04 | 0.26 | 2.64  | -     | 297.9    |
| gi19745148 ref NP_056078.1 | rabconnectin-3 [Homo sapiens]                                            |            |   | 2.38E-04 | 0.56 | 10.17 | 1.00  | 339754.9 |
| AHQ-7-14-, 5299            | R.GLHMKLDHDLDRESEAGTGSSEHEDGER.E                                         | 3309.44151 | 3 | 2.38E-04 | 0.56 | 3.30  | -     | 413.0    |
| gi22538465 ref NP_002786.2 | proteasome beta 3 subunit; proteasome theta chain; proteasome chain 13   |            |   | 2.41E-04 | 0.77 | 10.14 | 7.80  | 22948.8  |
| AHQ-7-11, 4932             | R.FGPPYTEPVIAGLDPK.T                                                     | 1768.00162 | 2 | 2.41E-04 | 0.77 | 2.80  | -     | 718.8    |
| gi7706563 ref NP_057614.1  | RAB-8b protein [Homo sapiens]                                            |            |   | 2.44E-04 | 0.93 | 10.20 | 6.80  | 23584.0  |
| AHQ-7-11, 5263 - 5264      | K.SSANVEEAAFTLAR.D                                                       | 1542.67465 | 2 | 2.44E-04 | 0.93 | 4.03  | -     | 1277.2   |
| gi4506405 ref NP_002872.1  | v-r simian leukemia viral oncogene homolog B; RAS-like protein B; GTP    |            |   | 2.46E-04 | 1.80 | 20.22 | 15.50 | 23408.4  |
| AHQ-7-10, 3511             | R.SKAEEVGVQYVETS.AK.T                                                    | 1812.95765 | 2 | 2.47E-04 | 0.97 | 4.48  | -     | 1871.7   |
| AHQ-7-10, 3456             | R.VKAEEDKIPLLVVGK.S                                                      | 1753.07630 | 2 | 2.46E-04 | 0.83 | 3.85  | -     | 620.5    |
| gi4506265 ref NP_000954.1  | prostaglandin-endoperoxide synthase 2 precursor; prostaglandin G/H synt  |            |   | 2.53E-04 | 0.57 | 10.13 | 1.50  | 68995.7  |
| AHQ-7-6, 4095              | R.LILIGTIK.I                                                             | 1000.25717 | 2 | 2.53E-04 | 0.57 | 2.63  | -     | 537.0    |
| gi20357529 ref NP_005264.2 | guanine nucleotide-binding protein, beta-2 subunit; G protein, beta-2    |            |   | 2.60E-04 | 0.81 | 10.18 | 5.90  | 37330.8  |
| AHQ-7-9, 4521              | R.KACGDSTLTQTAGLDVPGR.I                                                  | 2062.29094 | 2 | 2.60E-04 | 0.81 | 3.53  | -     | 547.5    |
| gi6005727 ref NP_006576.1  | chaperonin containing TCP1, subunit 8 (theta); T-complex protein 1, the  |            |   | 2.66E-04 | 0.88 | 10.18 | 2.90  | 59662.4  |
| AHQ-7-7, 5109              | K.IAVYSCFPDGMITETK.G                                                     | 1834.10347 | 2 | 2.66E-04 | 0.88 | 3.54  | -     | 583.7    |
| gi13376539 ref NP_079295.1 | hypothetical protein FLJ13940 [Homo sapiens]                             |            |   | 2.69E-04 | 0.79 | 10.16 | 5.00  | 27546.1  |
| AHQ-7-13-, 4036 - 4048     | R.QIFHFLEQLITG.E                                                         | 1411.63050 | 2 | 2.69E-04 | 0.79 | 3.23  | -     | 338.0    |
| gi29729329 ref XP_291459.1 | similar to Cofilin, non-muscle isoform (18 kDa phosphoprotein) (P18) [   |            |   | 2.70E-04 | 0.71 | 10.19 | 5.20  | 17172.9  |
| AHQ-7-12, 2442             | K.NIILEEG.E                                                              | 916.05399  | 1 | 2.70E-04 | 0.71 | 3.25  | -     | 480.3    |
| gi4507669 ref NP_003286.1  | tumor protein, translationally-controlled 1; fortillin; histamine-releas |            |   | 2.73E-04 | 0.81 | 10.15 | 8.10  | 19595.2  |
| AHQ-7-11, 4044             | R.DLISHDEM*FSDIYK.I                                                      | 1729.88889 | 2 | 2.73E-04 | 0.81 | 3.06  | -     | 875.3    |
| gi25121940 ref NP_004482.2 | glucocorticoid receptor DNA binding factor 1 isoform b [Homo sapiens]    |            |   | 2.76E-04 | 0.35 | 10.11 | 0.70  | 172174.1 |
| AHQ-7-7, 3297              | R.EDTSLPSLSK.D                                                           | 1077.16739 | 1 | 2.76E-04 | 0.35 | 1.87  | -     | 593.2    |
| gi20149570 ref NP_005816.2 | RAS guanyl releasing protein 2 isoform 1; calcium and diacylglycerol-r   |            |   | 2.80E-04 | 0.92 | 10.16 | 2.10  | 75547.0  |
| AHQ-7-12, 3894             | R.HSSLIDISVPTYK.W                                                        | 1575.74455 | 2 | 2.80E-04 | 0.92 | 3.19  | -     | 1398.7   |
| gi22065448 ref XP_084610.2 | similar to tubulin alpha-1 chain - Chinese hamster [Homo sapiens] [MAS   |            |   | 2.80E-04 | 0.79 | 10.14 | 2.40  | 41009.4  |
| AHQ-7-11, 4658             | K.EIIDLVLDL.R                                                            | 1086.26378 | 2 | 2.80E-04 | 0.79 | 2.89  | -     | 820.0    |
| gi4758986 ref NP_004209.1  | RAB11B, member RAS oncogene family; RAB11B, member of RAS oncogene fami  |            |   | 2.82E-04 | 0.80 | 10.16 | 9.60  | 24573.4  |
| AHQ-7-11, 5798             | K.NNLSFIETALSALDSTNVEEAFK.N                                              | 2330.49008 | 2 | 2.82E-04 | 0.80 | 3.28  | -     | 658.6    |
| gi21071030 ref NP_570602.2 | alpha 1B-glycoprotein [Homo sapiens]                                     |            |   | 2.83E-04 | 0.93 | 10.28 | 7.50  | 54253.2  |
| AHQ-7-6, 6537 - 6539       | R.LHDNQWGSWGSAPVELILSDETLPAPEFSPESGR.A                                   | 3993.21165 | 3 | 2.83E-04 | 0.93 | 5.52  | -     | 612.8    |
| gi30158950 ref XP_301585.1 | similar to natural killer cell transcript 4 [Homo sapiens]               |            |   | 2.84E-04 | 0.32 | 10.18 | 15.40 | 18547.1  |
| AHQ-7-1, 4853 - 4923       | R.EPTVNKDIHQRTCDLSKIEAIPAER.Q                                            | 2911.19785 | 3 | 2.84E-04 | 0.32 | 3.22  | -     | 267.1    |
| gi5031611 ref NP_005859.1  | BET1 homolog; Golgi vesicular membrane trafficking protein p18; Betp1 h  |            |   | 2.89E-04 | 1.83 | 20.22 | 15.30 | 13289.4  |
| AHQ-7-14-, 5275 - 5290     | K.LLAEMDSQFDSTTGFLGK.T                                                   | 1961.18205 | 2 | 8.75E-04 | 0.88 | 3.74  | -     | 849.9    |
| AHQ-7-14, 5462             | K.LLAEM*DSQFDSTTGFLGK.T                                                  | 1977.18145 | 2 | 2.89E-04 | 0.95 | 4.32  | -     | 1000.4   |
| gi19923264 ref NP_004571.2 | RAB27A, member RAS oncogene family [Homo sapiens]                        |            |   | 2.93E-04 | 0.85 | 10.16 | 4.50  | 24867.9  |
| AHQ-7-14-, 4577            | K.FITTVGIDFR.E                                                           | 1169.35448 | 2 | 7.97E-04 | 0.91 | 3.10  | -     | 869.6    |
| AHQ-7-10, 4316             | K.FITTVGIDFR.E                                                           | 1169.35448 | 2 | 2.93E-04 | 0.85 | 2.97  | -     | 827.5    |
| gi29731325 ref XP_293023.1 | similar to peptidyl-Pro cis trans isomerase [Homo sapiens]               |            |   | 3.07E-04 | 0.74 | 10.16 | 6.00  | 28867.8  |
| AHQ-7-12, 3899             | K.AGPNNTNGSQFFICTA.K                                                     | 1714.88050 | 2 | 3.07E-04 | 0.74 | 3.26  | -     | 348.7    |
| gi4503141 ref NP_001805.1  | cathepsin C isoform a preproprotein; dipeptidyl-peptidase I; dipeptidyl  |            |   | 3.07E-04 | 0.93 | 10.22 | 4.10  | 51841.5  |
| AHQ-7-14-, 5237            | R.GTDECAIESIAAATPIPK.L                                                   | 1945.18072 | 2 | 3.07E-04 | 0.93 | 4.45  | -     | 858.7    |
| AHQ-7-14, 5978 - 5985      | R.GTDECAIESIAAATPIPK.L                                                   | 1945.18072 | 2 | 5.15E-04 | 0.89 | 4.04  | -     | 696.4    |
| gi4504041 ref NP_002061.1  | guanine nucleotide binding protein (G protein), alpha inhibiting activi  |            |   | 3.12E-04 | 0.60 | 10.17 | 5.10  | 40450.7  |
| AHQ-7-9, 4412              | K.IHSPHTICFPEYTGANK.Y                                                    | 2051.30821 | 2 | 3.12E-04 | 0.60 | 3.10  | -     | 418.1    |





|                             |                                                                          |            |   |          |      |       |       |          |
|-----------------------------|--------------------------------------------------------------------------|------------|---|----------|------|-------|-------|----------|
| AHQ-7-7, 4590 - 4614        | R.CSREVNSREDNVLYRVVK.P                                                   | 2225.47152 | 2 | 7.76E-04 | 0.37 | 2.55  | -     | 621.2    |
| gi 4505301 ref NP_002463.1  | myosin, heavy polypeptide 8, skeletal muscle, perinatal [Homo sapiens]   |            |   | 7.86E-04 | 0.38 | 10.19 | 1.40  | 222660.8 |
| AHQ-7-4, 3637 - 3700        | K.AGLLGLLEEM* <sup>R</sup> DEKLAQIITRTQAVCR.G                            | 3103.60765 | 3 | 7.86E-04 | 0.38 | 3.02  | -     | 245.0    |
| gi 4502153 ref NP_000375.1  | apolipoprotein B precursor; apoB-100; apoB-48 [Homo sapiens]             |            |   | 7.91E-04 | 0.63 | 10.13 | 0.40  | 515560.6 |
| AHQ-7-1, 6312               | K.ATFQTPDFIVPLTDLR.I                                                     | 1835.09273 | 2 | 7.91E-04 | 0.63 | 2.67  | -     | 425.9    |
| gi 5453916 ref NP_006311.1  | progesterone membrane binding protein [Homo sapiens]                     |            |   | 8.55E-04 | 0.89 | 10.19 | 8.50  | 23818.3  |
| AHQ-7-10, 3025              | R.GLGAGAGAGEESPATSLPR.M                                                  | 1698.81618 | 2 | 8.55E-04 | 0.89 | 3.88  | -     | 859.8    |
| gi 21070997 ref NP_003147.2 | stromal interaction molecule 1 precursor [Homo sapiens]                  |            |   | 8.57E-04 | 0.83 | 10.17 | 2.00  | 77422.9  |
| AHQ-7-7, 5981               | K.ALDTVLFGPPLLTR.H                                                       | 1513.80587 | 2 | 8.57E-04 | 0.83 | 3.37  | -     | 619.2    |
| gi 9845255 ref NP_000574.1  | group-specific component (vitamin D binding protein); hDBP [Homo sapien] |            |   | 8.65E-04 | 0.45 | 10.15 | 4.60  | 53049.5  |
| AHQ-7-6, 6807               | K.VPTADLEVLPLAEDITNLSK.C                                                 | 2367.67804 | 3 | 8.65E-04 | 0.45 | 3.05  | -     | 369.2    |
| gi 30157526 ref XP_297980.2 | hypothetical protein XP_297980 [Homo sapiens]                            |            |   | 8.67E-04 | 0.31 | 10.16 | 6.90  | 48376.1  |
| AHQ-7-5, 5135 - 5204        | K.QTARNHHGQEDSFRHPSSVGVFTA AHMLSR.A                                      | 3362.64690 | 3 | 8.67E-04 | 0.31 | 3.10  | -     | 324.2    |
| gi 30158009 ref XP_210183.2 | similar to 60S ribosomal protein L7a (Surfeit locus protein 3) (PLA-X)   |            |   | 8.68E-04 | 0.65 | 10.18 | 8.20  | 33293.0  |
| AHQ-7-4, 4248               | K.GDIPNKRPVVLQAGVKTVTNLVFNK.K                                            | 2689.10724 | 3 | 8.68E-04 | 0.65 | 3.55  | -     | 555.0    |
| gi 11321640 ref NP_066301.1 | basic beta 1 syntrophin; 59-DAP; syntrophin, beta 1; syntrophin, beta    |            |   | 8.72E-04 | 0.72 | 10.16 | 3.30  | 58060.8  |
| AHQ-7-6, 4581               | R.TAFTDLPEQVPESISNQR.R                                                   | 2005.17142 | 2 | 8.72E-04 | 0.72 | 3.23  | -     | 419.3    |
| gi 4502219 ref NP_001656.1  | ras homolog gene family, member G (rho G); RhoG [Homo sapiens]           |            |   | 8.96E-04 | 1.30 | 20.16 | 13.10 | 21338.4  |
| AHQ-7-11, 2472              | K.EVFAEAVR.A                                                             | 921.03232  | 2 | 9.29E-04 | 0.52 | 2.57  | -     | 434.9    |
| AHQ-7-11, 4648              | R.TVNLNLWDTAGQEEYDR.L                                                    | 2025.12129 | 2 | 8.96E-04 | 0.79 | 3.22  | -     | 729.2    |
| gi 22027538 ref NP_037506.2 | programmed cell death 6 interacting protein; ALG-2 interacting protein   |            |   | 8.98E-04 | 0.96 | 10.23 | 1.80  | 96022.6  |
| AHQ-7-5, 5219 - 5224        | R.SVIEQGGIQTVDQLIK.E                                                     | 1728.96847 | 2 | 8.98E-04 | 0.96 | 4.68  | -     | 1686.7   |
| gi 30155531 ref XP_305444.1 | hypothetical protein XP_305444 [Homo sapiens]                            |            |   | 9.00E-04 | 0.33 | 10.13 | 14.00 | 13692.9  |
| AHQ-7-4, 6326               | K.TELVENCGKLDQWKK.K                                                      | 1978.21563 | 2 | 9.00E-04 | 0.33 | 2.61  | -     | 301.0    |
| gi 5453710 ref NP_006139.1  | LIM and SH3 protein 1; Lasp-1 [Homo sapiens]                             |            |   | 9.14E-04 | 0.69 | 10.14 | 5.00  | 29717.0  |
| AHQ-7-13, 4030              | K.GFSVADTPELQR.I                                                         | 1419.56466 | 2 | 9.14E-04 | 0.69 | 2.82  | -     | 755.5    |
| gi 475714 ref NP_004291.1   | acid phosphatase 1 isoform c; acid phosphatase of erythrocyte; red cell  |            |   | 9.15E-04 | 0.84 | 10.18 | 7.00  | 18042.4  |
| AHQ-7-11, 3672 - 3730       | K.IELLSYDPQK.Q                                                           | 1263.42144 | 2 | 9.15E-04 | 0.84 | 3.53  | -     | 904.6    |
| gi 17864092 ref NP_061720.1 | axonemal dynein heavy chain 7 [Homo sapiens]                             |            |   | 9.86E-04 | 0.37 | 10.17 | 0.30  | 461142.7 |
| AHQ-7-7, 3154               | R.LYDKYDFLITRK.A                                                         | 1575.83252 | 2 | 9.86E-04 | 0.37 | 2.65  | -     | 402.3    |

| Reference                   | File, Scan(s) | Peptide                                                | MH+        | z | P (pro)<br>P (pep) | Sf<br>Sf | Score<br>XC | Coverage | MW<br>Sp |
|-----------------------------|---------------|--------------------------------------------------------|------------|---|--------------------|----------|-------------|----------|----------|
| gi 12667788 ref NP_002464.1 |               | myosin, heavy polypeptide 9, non-muscle [Homo sapiens] |            |   | 1.00E-30           | 89.97    | 1020.36     | 44.20    | 226529.8 |
| AHQ-8-2, 2156               |               | R.ALEEEAMEQK.A                                         | 1049.18068 | 2 | 1.37E-04           | 0.76     | 3.08        | -        | 666.0    |
| AHQ-8-5, 3676               |               | K.ALELDSNLYR.I                                         | 1194.31920 | 2 | 5.84E-07           | 0.95     | 4.06        | -        | 1324.0   |
| AHQ-8-3, 3702               |               | K.ALELDSNLYR.I                                         | 1194.31920 | 2 | 2.68E-06           | 0.95     | 3.89        | -        | 1292.0   |
| AHQ-8-2, 3653               |               | K.ALELDSNLYR.I                                         | 1194.31920 | 2 | 9.12E-07           | 0.95     | 3.64        | -        | 1681.2   |
| AHQ-8-2, 3764 - 3768        |               | K.ALELDSNLYR.I                                         | 1194.31920 | 2 | 1.95E-06           | 0.96     | 3.89        | -        | 1410.4   |
| AHQ-8-2, 3781               |               | K.ALELDSNLYR.I                                         | 1194.31920 | 1 | 1.82E-04           | 0.26     | 2.15        | -        | 284.9    |
| AHQ-8-1, 3864               |               | K.ALELDSNLYR.I                                         | 1194.31920 | 2 | 3.73E-06           | 0.94     | 3.73        | -        | 1319.5   |
| AHQ-8-2, 3911               |               | K.ALELDSNLYR.I                                         | 1194.31920 | 2 | 4.74E-05           | 0.73     | 2.57        | -        | 587.2    |
| AHQ-8-14-, 3702 - 3711      |               | K.ALELDSNLYR.I                                         | 1194.31920 | 2 | 2.26E-06           | 0.82     | 3.12        | -        | 747.7    |
| AHQ-8-4, 3705 - 3706        |               | K.ALELDSNLYR.I                                         | 1194.31920 | 2 | 3.76E-06           | 0.95     | 3.84        | -        | 1310.8   |
| AHQ-8-6, 2823 - 2899        |               | R.ALEQQVEEMK.T                                         | 1205.36380 | 2 | 2.86E-05           | 0.85     | 3.15        | -        | 984.7    |
| AHQ-8-5, 2909               |               | R.ALEQQVEEMK.T                                         | 1205.36380 | 2 | 5.12E-05           | 0.89     | 3.38        | -        | 979.5    |
| AHQ-8-3, 2940 - 2941        |               | R.ALEQQVEEMK.T                                         | 1205.36380 | 2 | 2.42E-06           | 0.91     | 3.70        | -        | 1002.4   |
| AHQ-8-2, 2228               |               | R.ALEQQVEEMK.T                                         | 1221.36320 | 2 | 8.62E-04           | 0.83     | 2.97        | -        | 845.0    |
| AHQ-8-7, 2856               |               | R.ALEQQVEEMK.T                                         | 1205.36380 | 2 | 1.48E-04           | 0.77     | 2.99        | -        | 803.2    |
| AHQ-8-4, 2905               |               | R.ALEQQVEEMK.T                                         | 1205.36380 | 2 | 3.49E-05           | 0.86     | 3.18        | -        | 1068.7   |
| AHQ-8-2, 5996 - 6007        |               | R.ALEQQVEEMK.TQLEELLEDELQATEDAK.L                      | 3165.38394 | 3 | 2.28E-12           | 0.98     | 6.65        | -        | 2149.4   |
| AHQ-8-5, 5941 - 5972        |               | R.ALEQQVEEMK.TQLEELLEDELQATEDAK.L                      | 3165.38394 | 3 | 1.24E-07           | 0.98     | 6.12        | -        | 2462.4   |
| AHQ-8-1, 5992               |               | R.ALEQQVEEMK.TQLEELLEDELQATEDAK.L                      | 3165.38394 | 3 | 8.03E-05           | 0.86     | 4.05        | -        | 788.0    |
| AHQ-8-6, 5838               |               | R.ALEQQVEEMK.TQLEELLEDELQATEDAK.L                      | 3165.38394 | 3 | 1.06E-11           | 0.92     | 4.51        | -        | 1168.6   |
| AHQ-8-4, 5993 - 6029        |               | R.ALEQQVEEMK.TQLEELLEDELQATEDAK.L                      | 3165.38394 | 3 | 3.36E-07           | 0.97     | 6.01        | -        | 1909.8   |
| AHQ-8-8, 4774               |               | K.ANLQIDQINTDLNLER.S                                   | 1871.04187 | 2 | 2.24E-04           | 0.71     | 2.86        | -        | 550.4    |
| AHQ-8-5, 4910               |               | K.ANLQIDQINTDLNLER.S                                   | 1871.04187 | 2 | 3.19E-06           | 0.89     | 4.02        | -        | 742.2    |
| AHQ-8-2, 5069               |               | K.ANLQIDQINTDLNLER.S                                   | 1871.04187 | 2 | 1.70E-07           | 0.96     | 4.73        | -        | 1289.3   |
| AHQ-8-6, 4738               |               | K.ANLQIDQINTDLNLER.S                                   | 1871.04187 | 2 | 1.64E-05           | 0.96     | 4.68        | -        | 1182.7   |
| AHQ-8-1, 4920               |               | K.ANLQIDQINTDLNLER.S                                   | 1871.04187 | 2 | 1.72E-09           | 0.96     | 4.75        | -        | 1381.5   |
| AHQ-8-2, 4880               |               | K.ANLQIDQINTDLNLER.S                                   | 1871.04187 | 3 | 4.80E-04           | 0.98     | 5.35        | -        | 2854.7   |
| AHQ-8-2, 4959               |               | K.ANLQIDQINTDLNLER.S                                   | 1871.04187 | 2 | 8.01E-10           | 0.95     | 4.70        | -        | 991.6    |
| AHQ-8-2, 4687 - 4761        |               | K.ANLQIDQINTDLNLER.S                                   | 1871.04187 | 2 | 6.60E-11           | 0.97     | 5.47        | -        | 1180.6   |
| AHQ-8-2, 4871               |               | K.ANLQIDQINTDLNLER.S                                   | 1871.04187 | 2 | 7.66E-08           | 0.97     | 5.41        | -        | 1605.4   |
| AHQ-8-3, 4741 - 4797        |               | K.ANLQIDQINTDLNLER.S                                   | 1871.04187 | 2 | 8.31E-08           | 0.97     | 5.68        | -        | 1494.3   |
| AHQ-8-3, 4800               |               | K.ANLQIDQINTDLNLER.S                                   | 1871.04187 | 3 | 5.46E-04           | 0.97     | 4.80        | -        | 2499.0   |
| AHQ-8-4, 2439               |               | K.ASITALEAK.I                                          | 904.04321  | 2 | 1.99E-04           | 0.92     | 3.22        | -        | 940.3    |
| AHQ-8-3, 2481               |               | K.ASITALEAK.I                                          | 904.04321  | 2 | 6.27E-06           | 0.93     | 3.22        | -        | 1219.6   |
| AHQ-8-2, 2501               |               | K.ASITALEAK.I                                          | 904.04321  | 2 | 5.32E-06           | 0.94     | 3.46        | -        | 1198.4   |
| AHQ-8-5, 2430               |               | K.ASITALEAK.I                                          | 904.04321  | 2 | 2.43E-05           | 0.90     | 3.35        | -        | 840.0    |
| AHQ-8-5, 2145               |               | R.ASREIEILAQAK.E                                       | 1216.36955 | 2 | 8.46E-04           | 0.90     | 3.19        | -        | 1415.1   |
| AHQ-8-4, 2151               |               | R.ASREIEILAQAK.E                                       | 1216.36955 | 2 | 2.43E-04           | 0.92     | 3.56        | -        | 1385.5   |
| AHQ-8-2, 2204               |               | R.ASREIEILAQAK.E                                       | 1216.36955 | 2 | 3.25E-06           | 0.95     | 3.44        | -        | 1775.3   |
| AHQ-8-4, 2738               |               | R.DELADEIANSSGK.G                                      | 1349.38323 | 2 | 1.25E-04           | 0.87     | 2.54        | -        | 999.8    |
| AHQ-8-2, 3175               |               | R.DELADEIANSSGK.G                                      | 1349.38323 | 2 | 6.16E-08           | 0.92     | 3.65        | -        | 1258.1   |
| AHQ-8-5, 3125               |               | R.DELADEIANSSGK.G                                      | 1349.38323 | 2 | 9.27E-07           | 0.93     | 3.14        | -        | 1436.6   |
| AHQ-8-2, 2800 - 2812        |               | R.DELADEIANSSGK.G                                      | 1349.38323 | 2 | 1.42E-06           | 0.96     | 3.63        | -        | 1660.1   |
| AHQ-8-2, 6265 - 6308        |               | K.DFSALESQLODQTQELLQEEENR.Q                            | 2494.61059 | 3 | 8.40E-10           | 0.95     | 5.12        | -        | 1459.5   |
| AHQ-8-2, 6048               |               | K.DFSALESQLODQTQELLQEEENR.Q                            | 2494.61059 | 2 | 1.07E-05           | 0.91     | 3.37        | -        | 1124.5   |
| AHQ-8-3, 5948 - 5950        |               | K.DFSALESQLODQTQELLQEEENR.Q                            | 2494.61059 | 3 | 5.73E-05           | 0.86     | 3.82        | -        | 1069.6   |
| AHQ-8-3, 6164 - 6186        |               | K.DFSALESQLODQTQELLQEEENR.Q                            | 2494.61059 | 3 | 1.04E-11           | 0.97     | 5.59        | -        | 2302.9   |
| AHQ-8-3, 6165 - 6166        |               | K.DFSALESQLODQTQELLQEEENR.Q                            | 2494.61059 | 2 | 1.30E-04           | 0.77     | 3.24        | -        | 538.3    |
| AHQ-8-5, 6228               |               | K.DFSALESQLODQTQELLQEEENR.Q                            | 2494.61059 | 3 | 5.72E-05           | 0.95     | 4.06        | -        | 2043.7   |
| AHQ-8-2, 6371               |               | K.DFSALESQLODQTQELLQEEENR.Q                            | 2494.61059 | 3 | 1.37E-06           | 0.67     | 3.38        | -        | 785.4    |
| AHQ-8-1, 5960               |               | K.DFSALESQLODQTQELLQEEENRQK.L                          | 2750.91328 | 3 | 8.02E-08           | 0.82     | 3.59        | -        | 730.8    |
| AHQ-8-6, 2212 - 2259        |               | K.DLEAHIDSANK.N                                        | 1213.27938 | 2 | 2.03E-04           | 0.95     | 3.29        | -        | 1784.5   |
| AHQ-8-2, 2260               |               | K.DLEAHIDSANK.N                                        | 1213.27938 | 2 | 7.10E-06           | 0.98     | 3.91        | -        | 2618.3   |
| AHQ-8-4, 2155 - 2213        |               | K.DLEAHIDSANK.N                                        | 1213.27938 | 2 | 4.44E-06           | 0.98     | 4.14        | -        | 2678.0   |
| AHQ-8-5, 2209 - 2234        |               | K.DLEAHIDSANK.N                                        | 1213.27938 | 2 | 8.80E-05           | 0.98     | 4.29        | -        | 2631.4   |
| AHQ-8-3, 2200 - 2257        |               | K.DLEAHIDSANK.N                                        | 1213.27938 | 2 | 1.35E-07           | 0.97     | 3.86        | -        | 1874.1   |
| AHQ-8-3, 6460               |               | R.DLGEELAEALKTELEDTLDSAAQQLER.S                        | 3019.21860 | 3 | 3.91E-08           | 0.97     | 4.91        | -        | 2294.7   |
| AHQ-8-2, 6567               |               | R.DLGEELAEALKTELEDTLDSAAQQLER.S                        | 3019.21860 | 3 | 3.25E-11           | 0.96     | 5.14        | -        | 1930.8   |
| AHQ-8-4, 3307 - 3342        |               | K.DVLLQVDDER.R                                         | 1202.29650 | 2 | 1.26E-07           | 0.81     | 2.51        | -        | 1138.2   |
| AHQ-8-2, 3363               |               | K.DVLLQVDDER.R                                         | 1202.29650 | 2 | 7.57E-07           | 0.90     | 3.30        | -        | 960.2    |
| AHQ-8-2, 3007               |               | K.DVLLQVDDERR.N                                        | 1358.48286 | 2 | 8.14E-04           | 0.44     | 2.87        | -        | 554.4    |
| AHQ-8-3, 2264               |               | R.ELEDATETADAMN.R.E                                    | 1582.62946 | 2 | 1.34E-08           | 0.94     | 4.51        | -        | 883.9    |
| AHQ-8-4, 2821               |               | R.ELEDATETADAMN.R.E                                    | 1566.63006 | 2 | 5.14E-09           | 0.91     | 3.90        | -        | 967.5    |
| AHQ-8-2, 2865 - 2887        |               | R.ELEDATETADAMN.R.E                                    | 1566.63006 | 2 | 1.52E-07           | 0.91     | 3.43        | -        | 1153.7   |
| AHQ-8-4, 2226               |               | R.ELEDATETADAMN.R.E                                    | 1582.62946 | 2 | 1.51E-05           | 0.90     | 3.87        | -        | 723.8    |
| AHQ-8-11, 2792 - 2809       |               | R.ELEDATETADAMN.R.E                                    | 1566.63006 | 2 | 2.72E-08           | 0.89     | 3.30        | -        | 962.1    |
| AHQ-8-6, 2806               |               | R.ELEDATETADAMN.R.E                                    | 1566.63006 | 2 | 1.87E-07           | 0.90     | 2.73        | -        | 1476.3   |
| AHQ-8-3, 2770 - 2846        |               | R.ELEDATETADAMN.R.E                                    | 1566.63006 | 2 | 7.33E-05           | 0.40     | 2.54        | -        | 339.0    |
| AHQ-8-2, 5416 - 5485        |               | R.ELESQISELQEDLESER.A                                  | 2035.10956 | 3 | 2.27E-05           | 0.97     | 5.04        | -        | 2260.7   |
| AHQ-8-4, 5457               |               | R.ELESQISELQEDLESER.A                                  | 2035.10956 | 2 | 1.64E-09           | 0.96     | 4.32        | -        | 1389.3   |
| AHQ-8-2, 5464               |               | R.ELESQISELQEDLESER.A                                  | 2035.10956 | 2 | 3.23E-04           | 0.72     | 3.33        | -        | 599.2    |
| AHQ-8-6, 5327               |               | R.ELESQISELQEDLESER.A                                  | 2035.10956 | 2 | 1.27E-07           | 0.88     | 3.62        | -        | 823.3    |
| AHQ-8-3, 5389 - 5392        |               | R.ELESQISELQEDLESER.A                                  | 2035.10956 | 3 | 3.87E-08           | 0.98     | 5.79        | -        | 2632.4   |
| AHQ-8-2, 5155               |               | R.ELESQISELQEDLESER.A                                  | 2035.10956 | 2 | 3.68E-05           | 0.85     | 3.62        | -        | 587.2    |
| AHQ-8-2, 5707 - 5780        |               | R.ELESQISELQEDLESER.A                                  | 2035.10956 | 2 | 7.70E-04           | 0.80     | 3.35        | -        | 649.7    |
| AHQ-8-3, 4294               |               | R.ELESQISELQEDLESER.A                                  | 2035.10956 | 2 | 3.66E-06           | 0.79     | 3.38        | -        | 547.1    |
| AHQ-8-3, 5077               |               | R.ELESQISELQEDLESER.A                                  | 2035.10956 | 2 | 1.72E-06           | 0.59     | 2.61        | -        | 459.5    |
| AHQ-8-5, 5432               |               | R.ELESQISELQEDLESER.A                                  | 2035.10956 | 2 | 2.76E-06           | 0.93     | 4.19        | -        | 980.0    |
| AHQ-8-3, 5384 - 5418        |               | R.ELESQISELQEDLESER.A                                  | 2035.10956 | 2 | 4.90E-06           | 0.92     | 4.79        | -        | 659.3    |
| AHQ-8-7, 5266               |               | R.ELESQISELQEDLESER.A                                  | 2035.10956 | 2 | 1.05E-05           | 0.80     | 3.24        | -        | 571.9    |
| AHQ-8-1, 5485               |               | R.ELESQISELQEDLESER.A                                  | 2035.10956 | 2 | 2.21E-07           | 0.92     | 4.42        | -        | 935.1    |
| AHQ-8-4, 2554               |               | R.EMEALEDER.K                                          | 1251.30306 | 2 | 4.50E-04           | 0.43     | 2.52        | -        | 536.0    |
| AHQ-8-2, 2323               |               | R.EMEALEDER.K.Q                                        | 1379.47597 | 2 | 2.85E-08           | 0.87     | 3.06        | -        | 1106.0   |
| AHQ-8-4, 2270               |               | R.EMEALEDER.K.Q                                        | 1379.47597 | 2 | 2.67E-06           | 0.92     | 3.37        | -        | 1085.5   |
| AHQ-8-5, 2269 - 2282        |               | R.EMEALEDER.K.Q                                        | 1379.47597 | 2 | 1.72E-06           | 0.91     | 3.29        | -        | 1157.8   |
| AHQ-8-2, 4339 - 4383        |               | K.EQADFAIEALAK.A                                       | 1306.44632 | 2 | 1.16E-04           | 0.81     | 2.56        | -        | 668.0    |
| AHQ-8-4, 4287               |               | K.EQADFAIEALAK.A                                       | 1306.44632 | 2 | 4.00E-04           | 0.75     | 2.67        | -        | 614.4    |
| AHQ-8-2, 2531               |               | R.EQLEEEEEAKHNLEK.Q                                    | 1855.93770 | 2 | 1.68E-06           | 0.90     | 4.29        | -        | 704.5    |
| AHQ-8-5, 2465               |               | R.EQLEEEEEAKHNLEK.Q                                    | 1855.93770 | 2 | 3.34E-04           | 0.89     | 3.80        | -        | 716.9    |
| AHQ-8-2, 3436               |               | R.FLSNGHVITIPGQQDK.D                                   | 1641.80946 | 2 | 2.76E-05           | 0.88     | 3.60        | -        | 901.2    |
| AHQ-8-5, 2962               |               | K.HEAMITDLEER.L                                        | 1344.47646 | 2 | 5.78E-05           | 0.96     | 3.76        | -        | 1957.2   |
| AHQ-8-4, 2955 - 3022        |               | K.HEAMITDLEER.L                                        | 1344.47646 | 2 | 3.30E-06           | 0.89     | 3.14        | -        | 899.6    |
| AHQ-8-3, 2993               |               | K.HEAMITDLEER.L                                        | 1344.47646 | 2 | 2.48E-06           | 0.95     | 3.95        | -        | 1185.8   |
| AHQ-8-2, 3377 - 3435        |               | R.HEM*PPHIYAITDTAYR.S                                  | 1932.14884 | 3 | 1.50E-04           | 0.98     | 4.90        | -        | 2534.7   |
| AHQ-8-5, 3520 - 3594        |               | R.HEMPPHIYAITDTAYR.S                                   | 1916.14944 | 3 | 6.58E-04           | 0.87     | 3.88        | -        | 884.8    |
| AHQ-8-2, 3677 - 3695        |               | R.HEMPPHIYAITDTAYR.S                                   | 1916.14944 | 3 | 1.73E-10           | 0.97     | 4.95        | -        | 2313.8   |
| AHQ-8-2, 3433               |               | R.HEM*PPHIYAITDTAYR.S                                  | 1932.14884 | 2 | 1.82E-04           | 0.92     | 3.59        | -        | 853.7    |
| AHQ-8-4, 4415               |               | K.HSQAVEELAEQLEQTK.R                                   | 1840.96940 | 2 | 6.03E-08           | 0.98     | 5.28        | -        | 1892.4   |
| AHQ-8-4, 4418               |               | K.HSQAVEELAEQLEQTK.R                                   | 1840.96940 | 3 | 5.51E-06           | 0.95     | 4.18        | -        | 1913.6   |
| AHQ-8-5, 4388               |               | K.HSQAVEELAEQLEQTK.R                                   | 1840.96940 | 3 | 1.25E-05           | 0.94     | 4.52        | -        | 1501.0   |

|                       |                             |            |   |          |      |      |   |        |
|-----------------------|-----------------------------|------------|---|----------|------|------|---|--------|
| AHQ-8-2, 4167         | K.HSQAVEELAEQLEQTKR.V       | 1997.15575 | 2 | 1.00E-30 | 0.99 | 6.84 | - | 2900.8 |
| AHQ-8-6, 4036         | K.HSQAVEELAEQLEQTKR.V       | 1997.15575 | 3 | 5.15E-06 | 0.97 | 5.46 | - | 1663.0 |
| AHQ-8-4, 4105         | K.HSQAVEELAEQLEQTKR.V       | 1997.15575 | 2 | 5.23E-08 | 0.98 | 5.77 | - | 2884.1 |
| AHQ-8-1, 4273         | K.HSQAVEELAEQLEQTKR.V       | 1997.15575 | 3 | 1.02E-06 | 0.97 | 5.79 | - | 1415.0 |
| AHQ-8-2, 4179 - 4249  | K.HSQAVEELAEQLEQTKR.V       | 1997.15575 | 3 | 1.14E-10 | 0.97 | 5.81 | - | 1596.6 |
| AHQ-8-3, 4100         | K.HSQAVEELAEQLEQTKR.V       | 1997.15575 | 3 | 2.25E-08 | 0.97 | 5.96 | - | 1650.2 |
| AHQ-8-3, 4101         | K.HSQAVEELAEQLEQTKR.V       | 1997.15575 | 2 | 1.48E-09 | 0.98 | 6.13 | - | 2590.9 |
| AHQ-8-5, 4082 - 4158  | K.HSQAVEELAEQLEQTKR.V       | 1997.15575 | 3 | 2.93E-06 | 0.96 | 5.83 | - | 1203.1 |
| AHQ-8-1, 3815 - 3817  | R.IAEFTTNLTETEEEK.S         | 1654.75371 | 2 | 6.87E-07 | 0.95 | 3.83 | - | 2018.7 |
| AHQ-8-3, 3602 - 3660  | R.IAEFTTNLTETEEEK.S         | 1654.75371 | 2 | 1.95E-08 | 0.95 | 4.10 | - | 1749.3 |
| AHQ-8-13-, 3683       | R.IAEFTTNLTETEEEK.S         | 1654.75371 | 2 | 9.54E-06 | 0.74 | 2.59 | - | 807.8  |
| AHQ-8-2, 3859 - 3921  | R.IAEFTTNLTETEEEK.S         | 1654.75371 | 2 | 6.87E-08 | 0.97 | 4.89 | - | 1723.1 |
| AHQ-8-2, 3732 - 3800  | R.IAEFTTNLTETEEEK.S         | 1654.75371 | 2 | 2.24E-04 | 0.67 | 2.54 | - | 728.6  |
| AHQ-8-3, 3780 - 3850  | R.IAEFTTNLTETEEEK.S         | 1654.75371 | 2 | 3.16E-09 | 0.98 | 5.16 | - | 1955.1 |
| AHQ-8-5, 3644         | R.IAEFTTNLTETEEEK.S         | 1654.75371 | 2 | 4.13E-07 | 0.90 | 3.28 | - | 1337.9 |
| AHQ-8-7, 3548         | R.IAEFTTNLTETEEEK.S         | 1654.75371 | 2 | 1.56E-07 | 0.93 | 3.56 | - | 1474.4 |
| AHQ-8-4, 3634 - 3683  | R.IAEFTTNLTETEEEK.S         | 1654.75371 | 2 | 4.39E-08 | 0.96 | 4.14 | - | 1647.4 |
| AHQ-8-2, 3637 - 3700  | R.IAEFTTNLTETEEEK.S         | 1654.75371 | 2 | 1.07E-06 | 0.96 | 4.32 | - | 1538.6 |
| AHQ-8-4, 3859         | R.IAEFTTNLTETEEEK.S         | 1654.75371 | 2 | 6.20E-08 | 0.86 | 3.38 | - | 809.9  |
| AHQ-8-2, 3759         | R.IAEFTTNLTETEEEK.S         | 1654.75371 | 2 | 8.33E-10 | 0.98 | 5.12 | - | 2368.8 |
| AHQ-8-3, 3354 - 3412  | R.IAEFTTNLTETEEESK.S        | 1870.00428 | 2 | 1.08E-04 | 0.93 | 4.44 | - | 1012.0 |
| AHQ-8-3, 4852 - 4908  | R.IAQLEEEEEEQGNTELINDRL.R   | 2473.58969 | 3 | 4.57E-06 | 0.72 | 3.70 | - | 750.6  |
| AHQ-8-4, 5205         | R.IAQLEEEEEEQGNTELINDRL.K   | 2714.92085 | 3 | 4.43E-07 | 0.82 | 3.74 | - | 606.8  |
| AHQ-8-2, 5223         | R.IAQLEEEEEEQGNTELINDRL.K   | 2714.92085 | 3 | 1.41E-07 | 0.81 | 3.89 | - | 695.0  |
| AHQ-8-4, 3111         | K.IAQLEEQLDNETK.E           | 1531.64695 | 2 | 1.64E-07 | 0.97 | 4.64 | - | 1982.4 |
| AHQ-8-7, 3254         | K.IAQLEEQLDNETK.E           | 1531.64695 | 2 | 1.75E-05 | 0.93 | 3.52 | - | 1307.9 |
| AHQ-8-2, 3163         | K.IAQLEEQLDNETK.E           | 1531.64695 | 2 | 7.82E-10 | 0.97 | 4.87 | - | 1830.1 |
| AHQ-8-6, 3298         | K.IAQLEEQLDNETK.E           | 1531.64695 | 2 | 4.01E-04 | 0.93 | 4.00 | - | 1229.3 |
| AHQ-8-4, 3337         | K.IAQLEEQLDNETK.E           | 1531.64695 | 2 | 1.37E-08 | 0.97 | 4.53 | - | 1925.2 |
| AHQ-8-3, 3693         | K.IAQLEEQLDNETK.E           | 1531.64695 | 2 | 1.43E-04 | 0.87 | 3.12 | - | 964.8  |
| AHQ-8-11, 3052 - 3060 | K.IAQLEEQLDNETK.E           | 1531.64695 | 2 | 7.92E-05 | 0.82 | 3.30 | - | 838.3  |
| AHQ-8-11, 3201 - 3271 | K.IAQLEEQLDNETK.E           | 1531.64695 | 2 | 1.04E-05 | 0.92 | 3.70 | - | 1180.3 |
| AHQ-8-2, 3395         | K.IAQLEEQLDNETK.E           | 1531.64695 | 2 | 8.51E-06 | 0.96 | 4.16 | - | 1507.3 |
| AHQ-8-2, 2992         | K.IAQLEEQLDNETK.E           | 1531.64695 | 2 | 1.18E-04 | 0.93 | 3.70 | - | 1180.4 |
| AHQ-8-2, 3505         | K.IAQLEEQLDNETK.E           | 1531.64695 | 2 | 1.09E-06 | 0.89 | 3.36 | - | 841.1  |
| AHQ-8-3, 3116         | K.IAQLEEQLDNETK.E           | 1531.64695 | 2 | 8.59E-09 | 0.97 | 4.25 | - | 1893.3 |
| AHQ-8-8, 3286 - 3287  | K.IAQLEEQLDNETK.E           | 1531.64695 | 2 | 3.00E-05 | 0.96 | 4.82 | - | 1432.7 |
| AHQ-8-5, 3093         | K.IAQLEEQLDNETK.E           | 1531.64695 | 2 | 2.51E-06 | 0.97 | 4.57 | - | 1782.0 |
| AHQ-8-1, 3528         | K.IAQLEEQLDNETK.E           | 1531.64695 | 2 | 3.67E-09 | 0.96 | 4.27 | - | 1672.5 |
| AHQ-8-2, 3248         | K.IAQLEEQLDNETK.E           | 1531.64695 | 2 | 7.59E-04 | 0.85 | 3.13 | - | 995.5  |
| AHQ-8-5, 3332         | K.IAQLEEQLDNETK.E           | 1531.64695 | 2 | 2.08E-08 | 0.97 | 4.57 | - | 1818.9 |
| AHQ-8-3, 3352         | K.IAQLEEQLDNETK.E           | 1531.64695 | 2 | 1.12E-07 | 0.96 | 4.43 | - | 1497.3 |
| AHQ-8-10, 3226        | K.IAQLEEQLDNETK.E           | 1531.64695 | 2 | 5.49E-08 | 0.93 | 3.12 | - | 1548.3 |
| AHQ-8-3, 3085         | K.IAQLEEQLDNETKER.Q         | 1816.94784 | 2 | 1.44E-07 | 0.87 | 3.59 | - | 743.3  |
| AHQ-8-2, 3527         | K.IAQLEEQLDNETKER.Q         | 1816.94784 | 3 | 9.97E-04 | 0.71 | 3.03 | - | 639.8  |
| AHQ-8-3, 3473         | K.IAQLEEQLDNETKER.Q         | 1816.94784 | 2 | 4.28E-08 | 0.93 | 4.26 | - | 1049.1 |
| AHQ-8-2, 3539         | K.IAQLEEQLDNETKER.Q         | 1816.94784 | 2 | 7.83E-14 | 0.94 | 3.86 | - | 1252.5 |
| AHQ-8-3, 5956 - 5957  | R.IIGLDQVAGMSETALPGAFK.T    | 2019.35101 | 2 | 8.27E-07 | 0.96 | 5.20 | - | 1158.1 |
| AHQ-8-5, 5969 - 5985  | R.IIGLDQVAGMSETALPGAFK.T    | 2019.35101 | 2 | 3.49E-06 | 0.92 | 3.96 | - | 1044.3 |
| AHQ-8-4, 6045         | R.IIGLDQVAGMSETALPGAFK.T    | 2019.35101 | 2 | 4.78E-06 | 0.97 | 5.81 | - | 1231.6 |
| AHQ-8-2, 5028         | R.IIGLDQVAGMSETALPGAFK.T    | 2035.35041 | 2 | 9.24E-04 | 0.92 | 4.15 | - | 944.5  |
| AHQ-8-2, 5553 - 5565  | R.IIGLDQVAGMSETALPGAFK.T    | 2019.35101 | 2 | 8.69E-04 | 0.72 | 3.53 | - | 285.6  |
| AHQ-8-2, 6055 - 6059  | R.IIGLDQVAGMSETALPGAFK.T    | 2019.35101 | 2 | 6.46E-07 | 0.98 | 6.26 | - | 1541.1 |
| AHQ-8-1, 6048         | R.IIGLDQVAGMSETALPGAFK.T    | 2019.35101 | 2 | 7.71E-04 | 0.90 | 3.72 | - | 907.3  |
| AHQ-8-1, 4569         | R.IMGPIPEEQM*GLLR.V         | 1632.92766 | 2 | 2.17E-04 | 0.69 | 3.04 | - | 323.7  |
| AHQ-8-2, 5521 - 5532  | K.IRELESQISELQEDLESER.A     | 2304.45416 | 2 | 1.16E-04 | 0.97 | 6.12 | - | 1057.1 |
| AHQ-8-3, 5432         | K.IRELESQISELQEDLESER.A     | 2304.45416 | 2 | 2.52E-04 | 0.98 | 6.28 | - | 1926.6 |
| AHQ-8-3, 5428 - 5430  | K.IRELESQISELQEDLESER.A     | 2304.45416 | 3 | 4.74E-10 | 0.98 | 6.46 | - | 2309.0 |
| AHQ-8-2, 5443 - 5519  | K.IRELESQISELQEDLESER.A     | 2304.45416 | 3 | 2.17E-07 | 0.96 | 5.31 | - | 1619.7 |
| AHQ-8-1, 5545         | K.IRELESQISELQEDLESER.A     | 2304.45416 | 2 | 1.37E-05 | 0.98 | 5.85 | - | 1467.8 |
| AHQ-8-4, 5505         | K.IRELESQISELQEDLESER.A     | 2304.45416 | 2 | 1.29E-04 | 0.98 | 6.96 | - | 1398.7 |
| AHQ-8-2, 4952 - 5016  | K.ITDVIIFGQACCR.G           | 1555.80136 | 2 | 1.63E-04 | 0.87 | 3.46 | - | 751.2  |
| AHQ-8-5, 4372         | K.KANLQIQINDLNLER.S         | 1999.21478 | 2 | 5.02E-07 | 0.96 | 5.41 | - | 1225.8 |
| AHQ-8-2, 4303         | K.KANLQIQINDLNLER.S         | 1999.21478 | 2 | 2.60E-06 | 0.94 | 4.94 | - | 999.9  |
| AHQ-8-3, 4398 - 4405  | K.KANLQIQINDLNLER.S         | 1999.21478 | 3 | 1.81E-06 | 0.81 | 4.24 | - | 714.8  |
| AHQ-8-6, 4318         | K.KANLQIQINDLNLER.S         | 1999.21478 | 2 | 2.95E-08 | 0.95 | 5.13 | - | 821.7  |
| AHQ-8-2, 4459         | K.KANLQIQINDLNLER.S         | 1999.21478 | 3 | 1.86E-04 | 0.85 | 4.09 | - | 771.7  |
| AHQ-8-2, 2756         | R.KKVEAQLQELQVK.F           | 1541.81761 | 2 | 3.38E-08 | 0.98 | 5.41 | - | 1846.1 |
| AHQ-8-5, 2697         | R.KKVEAQLQELQVK.F           | 1541.81761 | 2 | 3.38E-09 | 0.96 | 4.42 | - | 1486.5 |
| AHQ-8-4, 2685         | R.KKVEAQLQELQVK.F           | 1541.81761 | 2 | 6.32E-08 | 0.98 | 5.01 | - | 2046.4 |
| AHQ-8-2, 3567         | K.KLEEEQIILEDQCNCK.L        | 1891.08992 | 2 | 5.54E-12 | 0.98 | 5.21 | - | 1942.0 |
| AHQ-8-2, 3447 - 3495  | K.KLEEEQIILEDQCNCK.L        | 1891.08992 | 2 | 8.72E-04 | 0.95 | 4.58 | - | 1244.0 |
| AHQ-8-2, 3499 - 3579  | K.KLEEEQIILEDQCNCK.L        | 1891.08992 | 3 | 2.13E-05 | 0.94 | 4.86 | - | 1476.5 |
| AHQ-8-4, 3519         | K.KLEEEQIILEDQCNCK.L        | 1891.08992 | 3 | 9.11E-04 | 0.91 | 4.16 | - | 1253.7 |
| AHQ-8-3, 3444 - 3505  | K.KLEEEQIILEDQCNCK.L        | 1891.08992 | 2 | 1.42E-09 | 0.98 | 6.54 | - | 1964.5 |
| AHQ-8-4, 3437 - 3511  | K.KLEEEQIILEDQCNCK.L        | 1891.08992 | 2 | 1.01E-10 | 0.98 | 6.37 | - | 2292.2 |
| AHQ-8-1, 3620         | K.KLEEEQIILEDQCNCK.L        | 1891.08992 | 2 | 4.66E-04 | 0.97 | 5.04 | - | 1861.6 |
| AHQ-8-5, 3489         | K.KLEEEQIILEDQCNCK.L        | 1891.08992 | 3 | 6.72E-04 | 0.82 | 3.38 | - | 952.2  |
| AHQ-8-3, 3820         | K.KLEEEQIILEDQCNCKLAK.E     | 2203.49930 | 2 | 6.42E-08 | 0.91 | 4.52 | - | 574.3  |
| AHQ-8-3, 3816         | K.KLEEEQIILEDQCNCKLAK.E     | 2203.49930 | 3 | 8.69E-05 | 0.96 | 5.66 | - | 1227.7 |
| AHQ-8-3, 6320 - 6400  | R.KLEGGDSDLSDQIAELQAIAELK.M | 2616.86032 | 2 | 7.88E-07 | 0.97 | 5.92 | - | 1368.4 |
| AHQ-8-4, 6409         | R.KLEGGDSDLSDQIAELQAIAELK.M | 2616.86032 | 3 | 9.87E-07 | 0.92 | 5.67 | - | 579.8  |
| AHQ-8-3, 6316         | R.KLEGGDSDLSDQIAELQAIAELK.M | 2616.86032 | 3 | 5.93E-08 | 0.92 | 5.20 | - | 920.0  |
| AHQ-8-7, 6200 - 6201  | R.KLEGGDSDLSDQIAELQAIAELK.M | 2616.86032 | 3 | 3.81E-08 | 0.94 | 4.85 | - | 1416.1 |
| AHQ-8-5, 6356         | R.KLEGGDSDLSDQIAELQAIAELK.M | 2616.86032 | 3 | 6.84E-05 | 0.79 | 3.65 | - | 807.4  |
| AHQ-8-2, 6416 - 6419  | R.KLEGGDSDLSDQIAELQAIAELK.M | 2616.86032 | 2 | 5.05E-08 | 0.98 | 6.67 | - | 1371.9 |
| AHQ-8-6, 6250         | R.KLEGGDSDLSDQIAELQAIAELK.M | 2616.86032 | 3 | 8.20E-06 | 0.88 | 4.47 | - | 801.8  |
| AHQ-8-2, 6349 - 6415  | R.KLEGGDSDLSDQIAELQAIAELK.M | 2616.86032 | 3 | 6.85E-06 | 0.90 | 5.13 | - | 707.1  |
| AHQ-8-1, 6399         | R.KLEGGDSDLSDQIAELQAIAELK.M | 2616.86032 | 3 | 3.72E-07 | 0.93 | 5.38 | - | 852.3  |
| AHQ-8-5, 2898         | K.KLVVWVPSDK.S              | 1072.28194 | 2 | 4.30E-05 | 0.88 | 3.15 | - | 948.3  |
| AHQ-8-2, 2971         | K.KLVVWVPSDK.S              | 1072.28194 | 2 | 4.03E-04 | 0.86 | 3.23 | - | 830.6  |
| AHQ-8-2, 3265         | K.KM*EDSVGCLETAEEVK.R       | 1843.02390 | 2 | 4.70E-04 | 0.89 | 3.53 | - | 850.6  |
| AHQ-8-2, 3625         | K.KMEDSVGCLETAEEVK.R        | 1827.02450 | 2 | 4.36E-04 | 0.88 | 4.09 | - | 790.8  |
| AHQ-8-2, 3016         | K.KM*EDSVGCLETAEEVKR.K      | 1999.21025 | 3 | 3.03E-08 | 0.97 | 5.72 | - | 1862.8 |
| AHQ-8-3, 2980         | K.KM*EDSVGCLETAEEVKR.K      | 1999.21025 | 3 | 1.99E-05 | 0.95 | 4.87 | - | 1510.3 |
| AHQ-8-4, 2958         | K.KM*EDSVGCLETAEEVKR.K      | 1999.21025 | 3 | 2.10E-07 | 0.96 | 5.80 | - | 1451.0 |
| AHQ-8-3, 2982         | K.KM*EDSVGCLETAEEVKR.K      | 1999.21025 | 2 | 5.40E-05 | 0.67 | 2.72 | - | 533.3  |
| AHQ-8-3, 3312         | K.KMEDSVGCLETAEEVKR.K       | 1983.21085 | 3 | 4.48E-06 | 0.94 | 5.19 | - | 1044.2 |
| AHQ-8-2, 3360         | K.KMEDSVGCLETAEEVKR.K       | 1983.21085 | 3 | 1.61E-08 | 0.96 | 4.99 | - | 1837.7 |
| AHQ-8-5, 3280         | K.KMEDSVGCLETAEEVKR.K       | 1983.21085 | 3 | 4.94E-10 | 0.94 | 4.98 | - | 1212.7 |
| AHQ-8-2, 3025         | K.KM*EDSVGCLETAEEVKR.K      | 1999.21025 | 2 | 5.99E-06 | 0.92 | 3.89 | - | 839.2  |
| AHQ-8-5, 2944         | K.KM*EDSVGCLETAEEVKR.K      | 1999.21025 | 3 | 6.87E-05 | 0.90 | 4.46 | - | 971.1  |
| AHQ-8-4, 4670         | K.KM*QNIQIELEEQLEEEESAR.Q   | 2478.63294 | 3 | 1.89E-05 | 0.87 | 4.04 | - | 1065.3 |
| AHQ-8-2, 4716 - 4724  | K.KM*QNIQIELEEQLEEEESAR.Q   | 2478.63294 | 2 | 6.61E-06 | 0.89 | 4.10 | - | 498.0  |
| AHQ-8-2, 4099         | K.KQEEIEIHDLEAR.V           | 1771.93036 | 2 | 5.28E-05 | 0.96 | 4.83 | - | 1683.8 |
| AHQ-8-6, 3983         | K.KQEEIEIHDLEAR.V           | 1771.93036 | 3 | 4.68E-04 | 0.97 | 5.69 | - | 2283.6 |
| AHQ-8-3, 4040         | K.KQEEIEIHDLEAR.V           | 1771.93036 | 2 | 7.66E-04 | 0.97 | 5.47 | - | 1863.3 |

|                      |                             |            |   |          |      |      |   |        |
|----------------------|-----------------------------|------------|---|----------|------|------|---|--------|
| AHQ-8-2, 4100        | K.KQELEEIICHDLER.V          | 1771.93036 | 3 | 2.12E-04 | 0.95 | 4.57 | - | 1714.8 |
| AHQ-8-1, 4177 - 4203 | K.KQELEEIICHDLER.V          | 1771.93036 | 2 | 2.38E-06 | 0.97 | 5.31 | - | 1883.0 |
| AHQ-8-5, 2992        | K.KVEAQLOELQVK.F            | 1413.64470 | 2 | 4.09E-04 | 0.95 | 4.25 | - | 1331.0 |
| AHQ-8-2, 3075        | K.KVEAQLOELQVK.F            | 1413.64470 | 2 | 1.77E-04 | 0.96 | 4.64 | - | 1623.0 |
| AHQ-8-6, 3735        | K.KVIQYLAYVASSHK.S          | 1607.87775 | 3 | 3.41E-09 | 0.96 | 4.90 | - | 1620.6 |
| AHQ-8-2, 3889        | K.KVIQYLAYVASSHK.S          | 1607.87775 | 2 | 3.95E-06 | 0.88 | 3.65 | - | 857.2  |
| AHQ-8-4, 3713 - 3773 | K.LEEEEQILLEQDNCK.L         | 1762.91700 | 2 | 1.53E-06 | 0.97 | 5.28 | - | 1247.7 |
| AHQ-8-2, 3772 - 3831 | K.LEEEEQILLEQDNCK.L         | 1762.91700 | 2 | 1.57E-09 | 0.97 | 5.44 | - | 1523.5 |
| AHQ-8-3, 3700 - 3772 | K.LEEEEQILLEQDNCK.L         | 1762.91700 | 2 | 2.11E-04 | 0.94 | 4.16 | - | 1066.1 |
| AHQ-8-5, 3690        | K.LEEEEQILLEQDNCK.L         | 1762.91700 | 2 | 3.70E-04 | 0.94 | 4.03 | - | 1000.8 |
| AHQ-8-3, 6369        | K.LEGDSITLSDQIAELQAQIAELK.M | 2488.68740 | 2 | 2.64E-08 | 0.74 | 3.25 | - | 614.5  |
| AHQ-8-3, 6368        | K.LEGDSITLSDQIAELQAQIAELK.M | 2488.68740 | 3 | 6.77E-04 | 0.90 | 4.72 | - | 941.8  |
| AHQ-8-2, 3571        | R.LEVNLQAMK.A               | 1046.26630 | 2 | 1.61E-04 | 0.84 | 3.22 | - | 571.4  |
| AHQ-8-2, 2711 - 2713 | R.LEVNLQAM*K.A              | 1062.26570 | 2 | 4.91E-05 | 0.81 | 3.33 | - | 556.2  |
| AHQ-8-6, 3460 - 3536 | R.LEVNLQAMK.A               | 1046.26630 | 2 | 5.17E-05 | 0.57 | 2.87 | - | 359.8  |
| AHQ-8-4, 3494 - 3501 | K.LKDVLVQVDDER.R            | 1443.62767 | 2 | 2.70E-06 | 0.96 | 4.05 | - | 1779.0 |
| AHQ-8-3, 3425 - 3501 | K.LKDVLVQVDDER.R            | 1443.62767 | 2 | 2.72E-09 | 0.95 | 3.64 | - | 1783.3 |
| AHQ-8-2, 3565 - 3572 | K.LKDVLVQVDDER.R            | 1443.62767 | 2 | 1.80E-08 | 0.95 | 4.37 | - | 1434.4 |
| AHQ-8-2, 3233        | K.LKDVLVQVDDERR.N           | 1599.81402 | 3 | 2.80E-04 | 0.90 | 3.70 | - | 1364.4 |
| AHQ-8-3, 3169 - 3200 | K.LKDVLVQVDDERR.N           | 1599.81402 | 2 | 1.32E-05 | 0.86 | 3.16 | - | 1111.4 |
| AHQ-8-2, 3232        | K.LKDVLVQVDDERR.N           | 1599.81402 | 2 | 6.55E-04 | 0.95 | 3.74 | - | 1625.6 |
| AHQ-8-4, 3167        | K.LKDVLVQVDDERR.N           | 1599.81402 | 2 | 1.68E-05 | 0.83 | 3.28 | - | 1130.4 |
| AHQ-8-2, 6592 - 6656 | K.LLQEQELQAEITLCAEAEELR.A   | 2503.72536 | 2 | 1.03E-07 | 0.84 | 3.34 | - | 579.3  |
| AHQ-8-1, 5707 - 5748 | R.LQQLDLDLVDLDHQR.Q         | 1951.12699 | 2 | 4.97E-07 | 0.96 | 5.03 | - | 1341.2 |
| AHQ-8-2, 5731        | R.LQQLDLDLVDLDHQR.Q         | 1951.12699 | 2 | 4.28E-10 | 0.97 | 5.32 | - | 1672.4 |
| AHQ-8-5, 5676        | R.LQQLDLDLVDLDHQR.Q         | 1951.12699 | 3 | 5.43E-06 | 0.76 | 3.42 | - | 653.1  |
| AHQ-8-3, 5553 - 5633 | R.LQQLDLDLVDLDHQR.Q         | 1951.12699 | 2 | 1.59E-08 | 0.94 | 4.26 | - | 1358.8 |
| AHQ-8-3, 5632        | R.LQQLDLDLVDLDHQR.Q         | 1951.12699 | 3 | 1.73E-05 | 0.91 | 4.17 | - | 863.4  |
| AHQ-8-3, 5637        | R.LQQLDLDLVDLDHQR.Q         | 1951.12699 | 2 | 4.21E-09 | 0.97 | 5.67 | - | 1534.2 |
| AHQ-8-6, 5583        | R.LQQLDLDLVDLDHQR.Q         | 1951.12699 | 2 | 2.89E-07 | 0.94 | 4.49 | - | 1270.6 |
| AHQ-8-2, 5347        | R.LQQLDLDLVDLDHQR.Q         | 1951.12699 | 3 | 3.75E-05 | 0.94 | 5.03 | - | 996.4  |
| AHQ-8-2, 5355        | R.LQQLDLDLVDLDHQR.Q         | 1951.12699 | 2 | 7.31E-08 | 0.98 | 5.54 | - | 2018.0 |
| AHQ-8-3, 5272        | R.LQQLDLDLVDLDHQR.Q         | 1951.12699 | 3 | 3.34E-04 | 0.91 | 3.84 | - | 1159.1 |
| AHQ-8-5, 5680 - 5682 | R.LQQLDLDLVDLDHQR.Q         | 1951.12699 | 2 | 6.25E-12 | 0.98 | 5.50 | - | 1786.2 |
| AHQ-8-4, 5714        | R.LQQLDLDLVDLDHQR.Q         | 1951.12699 | 2 | 2.73E-10 | 0.97 | 5.16 | - | 1546.1 |
| AHQ-8-4, 5713        | R.LQQLDLDLVDLDHQR.Q         | 1951.12699 | 3 | 5.72E-07 | 0.89 | 4.19 | - | 759.9  |
| AHQ-8-2, 5727        | R.LQQLDLDLVDLDHQR.Q         | 1951.12699 | 3 | 3.50E-06 | 0.94 | 4.96 | - | 1068.8 |
| AHQ-8-2, 5424 - 5483 | K.LQVELDNVTGLLSQSDSK.S      | 1947.13342 | 2 | 2.93E-11 | 0.98 | 6.25 | - | 1842.8 |
| AHQ-8-13, 5274       | K.LQVELDNVTGLLSQSDSK.S      | 1947.13342 | 2 | 3.68E-06 | 0.94 | 4.64 | - | 812.6  |
| AHQ-8-2, 6687        | K.LQVELDNVTGLLSQSDSK.S      | 1947.13342 | 2 | 2.97E-06 | 0.83 | 3.16 | - | 763.3  |
| AHQ-8-7, 5212        | K.LQVELDNVTGLLSQSDSK.S      | 1947.13342 | 2 | 1.04E-08 | 0.90 | 3.81 | - | 838.2  |
| AHQ-8-1, 5196        | K.LQVELDNVTGLLSQSDSK.S      | 1947.13342 | 2 | 3.15E-06 | 0.91 | 4.05 | - | 794.5  |
| AHQ-8-1, 5384 - 5441 | K.LQVELDNVTGLLSQSDSK.S      | 1947.13342 | 2 | 2.15E-08 | 0.96 | 5.46 | - | 1090.8 |
| AHQ-8-4, 5434        | K.LQVELDNVTGLLSQSDSK.S      | 1947.13342 | 3 | 2.17E-05 | 0.84 | 3.95 | - | 812.5  |
| AHQ-8-3, 5437 - 5454 | K.LQVELDNVTGLLSQSDSK.S      | 1947.13342 | 2 | 5.85E-07 | 0.95 | 5.29 | - | 767.7  |
| AHQ-8-2, 5168        | K.LQVELDNVTGLLSQSDSK.S      | 1947.13342 | 2 | 1.67E-13 | 0.96 | 5.40 | - | 1155.0 |
| AHQ-8-4, 5153        | K.LQVELDNVTGLLSQSDSK.S      | 1947.13342 | 2 | 1.83E-07 | 0.92 | 4.58 | - | 778.9  |
| AHQ-8-1, 5463        | K.LQVELDNVTGLLSQSDSK.S      | 1947.13342 | 3 | 2.26E-08 | 0.96 | 4.70 | - | 1753.8 |
| AHQ-8-6, 5284        | K.LQVELDNVTGLLSQSDSK.S      | 1947.13342 | 2 | 1.91E-07 | 0.96 | 5.24 | - | 1013.8 |
| AHQ-8-3, 5074        | K.LQVELDNVTGLLSQSDSK.S      | 1947.13342 | 2 | 9.34E-06 | 0.96 | 5.10 | - | 1257.8 |
| AHQ-8-5, 5094        | K.LQVELDNVTGLLSQSDSK.S      | 1947.13342 | 2 | 4.09E-07 | 0.94 | 4.22 | - | 1135.3 |
| AHQ-8-2, 5543        | K.LQVELDNVTGLLSQSDSK.S      | 1947.13342 | 2 | 1.53E-07 | 0.98 | 6.43 | - | 1623.0 |
| AHQ-8-2, 5645 - 5709 | K.LQVELDNVTGLLSQSDSK.S      | 1947.13342 | 2 | 8.55E-14 | 0.98 | 6.44 | - | 1777.3 |
| AHQ-8-5, 5362        | K.LQVELDNVTGLLSQSDSK.S      | 1947.13342 | 2 | 1.00E-04 | 0.87 | 3.98 | - | 608.7  |
| AHQ-8-3, 5325 - 5380 | K.LQVELDNVTGLLSQSDSK.S      | 1947.13342 | 2 | 6.47E-08 | 0.98 | 6.09 | - | 1422.3 |
| AHQ-8-3, 5354        | K.LQVELDNVTGLLSQSDSK.S      | 1947.13342 | 3 | 2.44E-07 | 0.95 | 4.80 | - | 1381.0 |
| AHQ-8-4, 5421 - 5498 | K.LQVELDNVTGLLSQSDSK.S      | 1947.13342 | 2 | 5.44E-06 | 0.96 | 5.00 | - | 1075.5 |
| AHQ-8-2, 4165        | K.LRLEVNLAQAMK.A            | 1315.61090 | 2 | 4.18E-05 | 0.92 | 3.48 | - | 1196.5 |
| AHQ-8-2, 3525 - 3588 | R.LTEM*TLQSOLM*AEK.L        | 1785.03091 | 2 | 2.59E-06 | 0.95 | 4.10 | - | 1305.0 |
| AHQ-8-2, 3979        | R.LTEM*TLQSOLMAEK.L         | 1769.03151 | 2 | 3.12E-04 | 0.98 | 5.20 | - | 2738.9 |
| AHQ-8-4, 3926 - 3963 | R.LTEM*TLQSOLMAEK.L         | 1769.03151 | 2 | 1.28E-04 | 0.96 | 4.40 | - | 1781.9 |
| AHQ-8-4, 4865 - 4867 | R.LTEM*TLQSOLMAEK.L         | 1753.03211 | 2 | 4.26E-05 | 0.94 | 4.15 | - | 1323.3 |
| AHQ-8-3, 3905        | R.LTEM*TLQSOLMAEK.L         | 1769.03151 | 2 | 6.75E-07 | 0.95 | 3.96 | - | 1632.1 |
| AHQ-8-2, 3803 - 3876 | K.MEDSVGCLETAEEVKR.R        | 1698.85159 | 2 | 3.88E-05 | 0.66 | 2.52 | - | 669.6  |
| AHQ-8-2, 3573        | K.MEDSVGCLETAEEVKR.K        | 1855.03794 | 2 | 2.04E-05 | 0.63 | 2.92 | - | 372.6  |
| AHQ-8-2, 3292 - 3296 | K.M*EDSVGCLETAEEVKR.K       | 1871.03734 | 2 | 1.63E-07 | 0.93 | 4.36 | - | 756.4  |
| AHQ-8-2, 3289        | K.M*EDSVGCLETAEEVKR.K       | 1871.03734 | 3 | 7.08E-04 | 0.73 | 3.06 | - | 696.2  |
| AHQ-8-3, 3258        | K.M*EDSVGCLETAEEVKR.K       | 1871.03734 | 2 | 1.16E-06 | 0.88 | 3.87 | - | 581.4  |
| AHQ-8-5, 3469        | K.MEDSVGCLETAEEVKR.K        | 1855.03794 | 2 | 2.51E-04 | 0.47 | 2.58 | - | 426.4  |
| AHQ-8-2, 5027        | K.M*QQNIQELLEEQLLEEEESAR.Q  | 2350.46003 | 2 | 5.19E-07 | 0.81 | 2.68 | - | 961.8  |
| AHQ-8-1, 5063        | K.M*QQNIQELLEEQLLEEEESAR.Q  | 2350.46003 | 3 | 3.61E-07 | 0.88 | 3.92 | - | 814.5  |
| AHQ-8-3, 4898 - 4956 | K.M*QQNIQELLEEQLLEEEESAR.Q  | 2350.46003 | 3 | 6.17E-05 | 0.96 | 5.79 | - | 1254.8 |
| AHQ-8-3, 5040 - 5041 | K.MQQNIQELLEEQLLEEEESAR.Q   | 2334.46063 | 2 | 3.07E-05 | 0.42 | 3.47 | - | 316.4  |
| AHQ-8-6, 5346 - 5408 | K.NFINNPLAQADWAAK.K         | 1673.85315 | 2 | 1.08E-09 | 0.87 | 3.50 | - | 743.1  |
| AHQ-8-2, 5099 - 5107 | K.NFINNPLAQADWAAK.K         | 1673.85315 | 2 | 5.27E-10 | 0.95 | 4.68 | - | 1074.1 |
| AHQ-8-5, 5445        | K.NFINNPLAQADWAAK.K         | 1673.85315 | 2 | 1.39E-06 | 0.88 | 3.54 | - | 804.1  |
| AHQ-8-3, 5416        | K.NFINNPLAQADWAAK.K         | 1673.85315 | 2 | 3.26E-11 | 0.92 | 4.04 | - | 897.9  |
| AHQ-8-4, 5077 - 5078 | K.NFINNPLAQADWAAK.K         | 1673.85315 | 2 | 8.86E-06 | 0.97 | 4.98 | - | 1326.3 |
| AHQ-8-5, 5040        | K.NFINNPLAQADWAAK.K         | 1673.85315 | 2 | 2.21E-07 | 0.93 | 4.02 | - | 1078.5 |
| AHQ-8-2, 5440 - 5505 | K.NFINNPLAQADWAAK.K         | 1673.85315 | 2 | 4.79E-07 | 0.91 | 3.74 | - | 1002.7 |
| AHQ-8-3, 5025        | K.NFINNPLAQADWAAK.K         | 1673.85315 | 2 | 1.33E-09 | 0.97 | 5.43 | - | 1152.4 |
| AHQ-8-6, 4960 - 4966 | K.NFINNPLAQADWAAK.K         | 1673.85315 | 2 | 5.33E-10 | 0.97 | 5.54 | - | 1152.7 |
| AHQ-8-2, 5252        | K.NFINNPLAQADWAAK.K         | 1673.85315 | 2 | 3.68E-07 | 0.93 | 4.36 | - | 943.1  |
| AHQ-8-1, 5144        | K.NFINNPLAQADWAAK.K         | 1673.85315 | 2 | 2.52E-06 | 0.96 | 4.90 | - | 1274.4 |
| AHQ-8-2, 5503        | K.NFINNPLAQADWAAK.K         | 1673.85315 | 2 | 1.40E-10 | 0.93 | 4.72 | - | 900.6  |
| AHQ-8-7, 4854        | K.NFINNPLAQADWAAK.K         | 1673.85315 | 2 | 1.65E-05 | 0.88 | 3.82 | - | 718.1  |
| AHQ-8-2, 2795        | K.NKHEAMITLDEER.L           | 1586.75247 | 2 | 1.18E-09 | 0.91 | 3.45 | - | 1142.7 |
| AHQ-8-3, 2745        | K.NKHEAMITLDEER.L           | 1586.75247 | 2 | 1.97E-04 | 0.63 | 2.65 | - | 513.1  |
| AHQ-8-3, 5381 - 5390 | K.NLPIYSEEIVEM*YK.G         | 1728.98720 | 2 | 2.35E-10 | 0.93 | 3.87 | - | 862.6  |
| AHQ-8-1, 5005 - 5017 | K.NLPIYSEEIVEM*YK.G         | 1744.98660 | 2 | 4.80E-04 | 0.94 | 4.25 | - | 937.7  |
| AHQ-8-4, 4931 - 4937 | K.NLPIYSEEIVEM*YK.G         | 1744.98660 | 2 | 4.04E-10 | 0.95 | 4.62 | - | 854.4  |
| AHQ-8-2, 5461 - 5467 | K.NLPIYSEEIVEM*YK.G         | 1728.98720 | 2 | 1.16E-11 | 0.96 | 4.66 | - | 1086.1 |
| AHQ-8-3, 4882        | K.NLPIYSEEIVEM*YK.G         | 1744.98660 | 2 | 1.63E-07 | 0.95 | 4.03 | - | 1032.5 |
| AHQ-8-6, 4819 - 4838 | K.NLPIYSEEIVEM*YK.G         | 1744.98660 | 2 | 2.60E-05 | 0.94 | 4.48 | - | 968.3  |
| AHQ-8-5, 4904 - 4968 | K.NLPIYSEEIVEM*YK.G         | 1744.98660 | 2 | 3.76E-05 | 0.95 | 4.30 | - | 1056.5 |
| AHQ-8-2, 4963        | K.NLPIYSEEIVEM*YK.G         | 1744.98660 | 2 | 4.62E-04 | 0.87 | 3.32 | - | 859.2  |
| AHQ-8-2, 5283        | K.NMDPLNDNIATLLHQSSDK.F     | 2127.32169 | 2 | 5.18E-07 | 0.94 | 4.37 | - | 927.2  |
| AHQ-8-2, 4895        | K.NM*DPLNDNIATLLHQSSDK.F    | 2143.32109 | 2 | 9.02E-08 | 0.86 | 3.22 | - | 1064.1 |
| AHQ-8-2, 5284 - 5285 | K.NMDPLNDNIATLLHQSSDK.F     | 2127.32169 | 3 | 2.16E-06 | 0.83 | 3.50 | - | 510.1  |
| AHQ-8-2, 4892 - 4896 | K.NM*DPLNDNIATLLHQSSDK.F    | 2143.32109 | 3 | 8.35E-07 | 0.92 | 4.89 | - | 883.9  |
| AHQ-8-2, 2917        | R.QAQQRDELADAEIANSSGK.G     | 2090.15168 | 2 | 5.01E-06 | 0.88 | 3.80 | - | 714.2  |
| AHQ-8-2, 3275        | R.QAQQRDELADAEIANSSGK.G     | 2090.15168 | 2 | 1.95E-04 | 0.94 | 4.42 | - | 762.6  |
| AHQ-8-3, 3238        | R.QAQQRDELADAEIANSSGK.G     | 2090.15168 | 2 | 6.57E-05 | 0.85 | 3.98 | - | 422.7  |
| AHQ-8-2, 3268 - 3269 | R.QAQQRDELADAEIANSSGK.G     | 2090.15168 | 3 | 5.14E-05 | 0.92 | 4.43 | - | 1310.8 |
| AHQ-8-3, 3236        | R.QAQQRDELADAEIANSSGK.G     | 2090.15168 | 3 | 7.74E-04 | 0.81 | 3.82 | - | 665.2  |
| AHQ-8-3, 2877        | R.QAQQRDELADAEIANSSGK.G     | 2090.15168 | 2 | 2.64E-06 | 0.79 | 3.69 | - | 465.1  |
| AHQ-8-2, 2988        | K.QIATLHAQVADMK.K           | 1426.66697 | 2 | 9.48E-05 | 0.72 | 3.13 | - | 376.6  |

|                             |                                                               |            |   |          |       |        |       |         |
|-----------------------------|---------------------------------------------------------------|------------|---|----------|-------|--------|-------|---------|
| AHQ-8-2, 2143 - 2144        | R.QLEEEEEEQR.A                                                | 1332.35590 | 2 | 1.07E-05 | 0.70  | 3.03   | -     | 550.3   |
| AHQ-8-3, 2133               | R.QLEEEEEEQR.A                                                | 1332.35590 | 2 | 1.29E-04 | 0.64  | 3.04   | -     | 384.7   |
| AHQ-8-2, 2297               | K.REQEVNLIK.K                                                 | 1129.29189 | 2 | 5.01E-04 | 0.87  | 2.65   | -     | 1178.8  |
| AHQ-8-5, 3580               | R.RGDLFFVVR.R                                                 | 1156.36217 | 2 | 1.59E-04 | 0.93  | 3.97   | -     | 1179.8  |
| AHQ-8-6, 3546 - 3547        | R.RGDLFFVVR.R                                                 | 1156.36217 | 2 | 5.38E-06 | 0.95  | 3.81   | -     | 1209.3  |
| AHQ-8-11, 3519              | R.RGDLFFVVR.R                                                 | 1156.36217 | 2 | 2.78E-05 | 0.90  | 3.38   | -     | 912.7   |
| AHQ-8-3, 3612               | R.RGDLFFVVR.R                                                 | 1156.36217 | 2 | 1.71E-04 | 0.93  | 3.56   | -     | 1202.3  |
| AHQ-8-1, 3801               | R.RGDLFFVVR.R                                                 | 1156.36217 | 2 | 5.65E-06 | 0.95  | 3.90   | -     | 1088.7  |
| AHQ-8-12, 3538              | R.RGDLFFVVR.R                                                 | 1156.36217 | 2 | 2.66E-05 | 0.91  | 3.29   | -     | 1196.2  |
| AHQ-8-8, 3474               | R.RGDLFFVVR.R                                                 | 1156.36217 | 2 | 2.43E-04 | 0.72  | 2.68   | -     | 702.6   |
| AHQ-8-13-, 3640             | R.RGDLFFVVR.R                                                 | 1156.36217 | 2 | 4.47E-04 | 0.76  | 2.68   | -     | 769.3   |
| AHQ-8-2, 3671               | R.RGDLFFVVR.R                                                 | 1156.36217 | 2 | 5.62E-06 | 0.92  | 3.46   | -     | 1160.4  |
| AHQ-8-2, 6263               | R.RKLEGDSTDLSDQIAELQAIAELK.M                                  | 2773.04667 | 3 | 8.53E-13 | 0.98  | 7.11   | -     | 1523.0  |
| AHQ-8-3, 6184               | R.RKLEGDSTDLSDQIAELQAIAELK.M                                  | 2773.04667 | 3 | 3.65E-08 | 0.96  | 6.15   | -     | 1102.0  |
| AHQ-8-2, 6609 - 6673        | K.SGFEPASLKKEEVGEEAIVLVENGKK.V                                | 2790.07246 | 3 | 2.72E-05 | 0.89  | 4.25   | -     | 945.3   |
| AHQ-8-2, 6341               | K.SGFEPASLKKEEVGEEAIVLVENGKK.V                                | 2790.07246 | 3 | 8.46E-07 | 0.70  | 3.23   | -     | 738.0   |
| AHQ-8-2, 5888 - 5956        | K.SGFEPASLKKEEVGEEAIVLVENGKK.V                                | 2790.07246 | 3 | 1.48E-09 | 0.97  | 6.02   | -     | 1548.9  |
| AHQ-8-5, 5745 - 5817        | K.SGFEPASLKKEEVGEEAIVLVENGKK.V                                | 2790.07246 | 3 | 1.64E-06 | 0.79  | 3.97   | -     | 779.3   |
| AHQ-8-3, 5800               | K.SGFEPASLKKEEVGEEAIVLVENGKK.V                                | 2790.07246 | 3 | 1.25E-05 | 0.75  | 3.22   | -     | 888.1   |
| AHQ-8-13-, 5546 - 5626      | K.SGFEPASLKKEEVGEEAIVLVENGKK.V                                | 2790.07246 | 3 | 8.86E-08 | 0.90  | 4.54   | -     | 891.3   |
| AHQ-8-3, 5386               | K.SM*EAMIQLEELAAAER.A                                         | 2066.30004 | 2 | 4.60E-06 | 0.96  | 5.60   | -     | 1706.2  |
| AHQ-8-1, 5477               | K.SM*EAMIQLEELAAAER.A                                         | 2066.30004 | 2 | 4.27E-06 | 0.92  | 4.34   | -     | 1456.5  |
| AHQ-8-1, 4629               | K.SM*EAM*IQLEELAAAER.A                                        | 2082.29944 | 2 | 4.05E-07 | 0.96  | 4.34   | -     | 1850.9  |
| AHQ-8-3, 4510               | K.SM*EAM*IQLEELAAAER.A                                        | 2082.29944 | 2 | 2.60E-08 | 0.94  | 4.20   | -     | 1152.9  |
| AHQ-8-2, 4580               | K.SM*EAM*IQLEELAAAER.A                                        | 2082.29944 | 2 | 7.73E-11 | 0.98  | 5.55   | -     | 2159.9  |
| AHQ-8-2, 4663 - 4741        | K.SM*EAM*IQLEELAAAER.A                                        | 2082.29944 | 2 | 6.33E-05 | 0.92  | 4.04   | -     | 992.3   |
| AHQ-8-4, 4463 - 4535        | K.SM*EAM*IQLEELAAAER.A                                        | 2082.29944 | 2 | 2.41E-08 | 0.97  | 5.13   | -     | 1509.1  |
| AHQ-8-5, 4422 - 4496        | K.SM*EAM*IQLEELAAAER.A                                        | 2082.29944 | 2 | 2.56E-10 | 0.96  | 4.66   | -     | 1376.3  |
| AHQ-8-2, 5188 - 5247        | K.SMAEAM*IQLEELAAAER.A                                        | 2066.30004 | 2 | 3.62E-07 | 0.95  | 5.35   | -     | 1465.8  |
| AHQ-8-6, 3583 - 3598        | K.TDLLLEPYNK.Y                                                | 1206.36989 | 2 | 2.83E-06 | 0.86  | 3.29   | -     | 609.0   |
| AHQ-8-2, 3675 - 3745        | K.TDLLLEPYNK.Y                                                | 1206.36989 | 2 | 1.38E-04 | 0.91  | 4.12   | -     | 999.4   |
| AHQ-8-3, 3669 - 3676        | K.TDLLLEPYNK.Y                                                | 1206.36989 | 2 | 2.51E-06 | 0.94  | 4.31   | -     | 1258.7  |
| AHQ-8-5, 3637               | K.TDLLLEPYNK.Y                                                | 1206.36989 | 2 | 2.27E-05 | 0.89  | 3.90   | -     | 885.9   |
| AHQ-8-4, 3669               | K.TDLLLEPYNK.Y                                                | 1206.36989 | 2 | 2.15E-06 | 0.93  | 4.15   | -     | 1111.2  |
| AHQ-8-1, 3844               | K.TDLLLEPYNK.Y                                                | 1206.36989 | 2 | 2.55E-05 | 0.93  | 3.91   | -     | 1121.1  |
| AHQ-8-7, 3550               | K.TDLLLEPYNK.Y                                                | 1206.36989 | 2 | 6.13E-06 | 0.89  | 3.43   | -     | 895.2   |
| AHQ-8-2, 3880               | K.TDLLLEPYNK.Y.F                                              | 1525.73037 | 2 | 2.98E-06 | 0.59  | 2.77   | -     | 631.4   |
| AHQ-8-4, 4153               | K.TELEDTLDDSTAAQQELR.S                                        | 1921.00969 | 2 | 3.22E-07 | 0.96  | 4.56   | -     | 1407.8  |
| AHQ-8-3, 4134               | K.TELEDTLDDSTAAQQELR.S                                        | 1921.00969 | 2 | 3.15E-05 | 0.96  | 5.19   | -     | 1229.6  |
| AHQ-8-2, 4205               | K.TELEDTLDDSTAAQQELR.S                                        | 1921.00969 | 2 | 9.10E-11 | 0.97  | 5.37   | -     | 1719.9  |
| AHQ-8-2, 6091 - 6157        | R.TFHIFYLLSGAGEHLK.T                                          | 1997.28378 | 3 | 1.39E-07 | 0.93  | 4.62   | -     | 1148.7  |
| AHQ-8-5, 6104 - 6120        | R.TFHIFYLLSGAGEHLK.T                                          | 1997.28378 | 3 | 5.09E-04 | 0.93  | 4.74   | -     | 1148.1  |
| AHQ-8-5, 2040               | K.VAAYDKLEK.T                                                 | 1037.19123 | 2 | 5.78E-06 | 0.60  | 2.53   | -     | 533.0   |
| AHQ-8-2, 2117               | K.VAAYDKLEK.T                                                 | 1037.19123 | 2 | 3.56E-05 | 0.76  | 2.63   | -     | 552.1   |
| AHQ-8-7, 4852 - 4861        | K.VEDM*AELTCLNEASVLHNLK.E                                     | 2304.58397 | 3 | 1.03E-06 | 0.91  | 4.11   | -     | 1052.8  |
| AHQ-8-2, 5049 - 5103        | K.VEDM*AELTCLNEASVLHNLK.E                                     | 2304.58397 | 3 | 1.70E-09 | 0.95  | 5.31   | -     | 1065.8  |
| AHQ-8-2, 5547 - 5617        | K.VEDM*AELTCLNEASVLHNLK.E                                     | 2288.58457 | 3 | 5.05E-06 | 0.68  | 3.41   | -     | 656.4   |
| AHQ-8-2, 5625               | K.VEDM*AELTCLNEASVLHNLK.E                                     | 2288.58457 | 2 | 2.25E-09 | 0.91  | 4.12   | -     | 668.8   |
| AHQ-8-3, 5024 - 5105        | K.VEDM*AELTCLNEASVLHNLK.E                                     | 2304.58397 | 3 | 4.85E-04 | 0.80  | 3.78   | -     | 766.4   |
| AHQ-8-2, 5104 - 5173        | K.VEDM*AELTCLNEASVLHNLK.E                                     | 2304.58397 | 2 | 3.64E-10 | 0.94  | 4.45   | -     | 924.8   |
| AHQ-8-5, 4986 - 5044        | K.VEDM*AELTCLNEASVLHNLK.E                                     | 2304.58397 | 3 | 8.91E-04 | 0.87  | 4.21   | -     | 789.8   |
| AHQ-8-2, 2145 - 2221        | R.VEEEEERQHLQAEK.K                                            | 1916.01642 | 2 | 1.13E-04 | 0.70  | 3.29   | -     | 548.0   |
| AHQ-8-5, 3909               | K.VIQIYAYVASSHK.S                                             | 1479.70484 | 2 | 8.93E-05 | 0.86  | 3.12   | -     | 927.6   |
| AHQ-8-2, 3999               | K.VIQIYAYVASSHK.S                                             | 1479.70484 | 2 | 3.23E-04 | 0.94  | 3.68   | -     | 1230.5  |
| AHQ-8-3, 3944               | K.VIQIYAYVASSHK.S                                             | 1479.70484 | 2 | 2.64E-05 | 0.92  | 3.35   | -     | 1188.2  |
| AHQ-8-4, 3930               | K.VIQIYAYVASSHK.S                                             | 1479.70484 | 2 | 3.11E-04 | 0.90  | 3.44   | -     | 1046.4  |
| AHQ-8-6, 3854               | K.VIQIYAYVASSHK.S                                             | 1479.70484 | 2 | 7.38E-06 | 0.94  | 3.84   | -     | 1293.9  |
| AHQ-8-1, 4047 - 4111        | K.VIQIYAYVASSHK.S                                             | 1479.70484 | 2 | 5.90E-05 | 0.90  | 3.62   | -     | 983.1   |
| AHQ-8-2, 4004               | K.VIQIYAYVASSHK.S                                             | 1479.70484 | 3 | 4.09E-05 | 0.63  | 3.09   | -     | 504.8   |
| AHQ-8-5, 3914               | K.VIQIYAYVASSHK.S                                             | 1479.70484 | 3 | 1.31E-04 | 0.63  | 3.24   | -     | 455.6   |
| AHQ-8-7, 3792               | K.VIQIYAYVASSHK.S                                             | 1479.70484 | 2 | 2.33E-04 | 0.88  | 3.79   | -     | 787.1   |
| AHQ-8-2, 5955 - 6035        | R.VISGVQLQGNIVFK.K                                            | 1487.81155 | 2 | 3.84E-07 | 0.95  | 4.80   | -     | 1138.3  |
| AHQ-8-6, 5875 - 5882        | R.VISGVQLQGNIVFK.K                                            | 1487.81155 | 2 | 2.85E-08 | 0.98  | 5.24   | -     | 2027.1  |
| AHQ-8-5, 5976 - 5978        | R.VISGVQLQGNIVFK.K                                            | 1487.81155 | 2 | 6.37E-07 | 0.96  | 4.00   | -     | 1537.1  |
| AHQ-8-8, 6029               | R.VISGVQLQGNIVFK.K                                            | 1487.81155 | 2 | 2.89E-05 | 0.96  | 4.42   | -     | 1418.4  |
| AHQ-8-7, 5805               | R.VISGVQLQGNIVFK.K                                            | 1487.81155 | 2 | 8.91E-06 | 0.94  | 3.58   | -     | 1554.2  |
| AHQ-8-1, 6043 - 6045        | R.VISGVQLQGNIVFK.K                                            | 1487.81155 | 2 | 2.96E-07 | 0.98  | 4.85   | -     | 2350.2  |
| AHQ-8-4, 5557               | R.VISGVQLQGNIVFK.K.E                                          | 1615.98446 | 2 | 1.81E-04 | 0.95  | 4.54   | -     | 1179.6  |
| AHQ-8-3, 5420 - 5490        | R.VISGVQLQGNIVFK.K.E                                          | 1615.98446 | 2 | 2.46E-05 | 0.89  | 3.29   | -     | 1080.1  |
| AHQ-8-2, 5573 - 5575        | R.VISGVQLQGNIVFK.K.E                                          | 1615.98446 | 2 | 1.55E-09 | 0.93  | 4.23   | -     | 986.2   |
| AHQ-8-5, 5510               | R.VISGVQLQGNIVFK.K.E                                          | 1615.98446 | 2 | 7.73E-04 | 0.94  | 4.01   | -     | 1102.2  |
| AHQ-8-7, 4574               | K.VSHLLGINVDFTR.G                                             | 1572.79026 | 2 | 1.22E-11 | 0.96  | 4.55   | -     | 1433.4  |
| AHQ-8-3, 4750               | K.VSHLLGINVDFTR.G                                             | 1572.79026 | 3 | 3.14E-06 | 0.90  | 3.92   | -     | 933.9   |
| AHQ-8-5, 4738               | K.VSHLLGINVDFTR.G                                             | 1572.79026 | 2 | 4.95E-04 | 0.88  | 3.32   | -     | 1187.1  |
| AHQ-8-4, 4774 - 4846        | K.VSHLLGINVDFTR.G                                             | 1572.79026 | 2 | 7.49E-04 | 0.89  | 3.59   | -     | 935.8   |
| AHQ-8-6, 4670               | K.VSHLLGINVDFTR.G                                             | 1572.79026 | 3 | 3.19E-05 | 0.91  | 3.83   | -     | 1396.2  |
| AHQ-8-4, 3223               | R.VVFQEFR.Q                                                   | 925.06580  | 2 | 4.18E-05 | 0.76  | 2.58   | -     | 700.1   |
| AHQ-8-1, 3432               | R.VVFQEFR.Q                                                   | 925.06580  | 2 | 1.36E-04 | 0.76  | 2.54   | -     | 624.0   |
| AHQ-8-3, 3884 - 3953        | R.YEILTPNSIPK.G                                               | 1275.47536 | 2 | 3.28E-05 | 0.97  | 4.23   | -     | 1840.2  |
| AHQ-8-2, 3948 - 4027        | R.YEILTPNSIPK.G                                               | 1275.47536 | 2 | 1.27E-04 | 0.92  | 3.63   | -     | 1179.0  |
| AHQ-8-4, 3887               | R.YEILTPNSIPK.G                                               | 1275.47536 | 2 | 1.06E-07 | 0.94  | 3.77   | -     | 1274.1  |
| AHQ-8-2, 4140 - 4141        | R.YEILTPNSIPK.G                                               | 1275.47536 | 2 | 7.52E-05 | 0.78  | 3.10   | -     | 787.4   |
| AHQ-8-2, 5712               | K.YLYVDKFNINPLAQADWAAK.K                                      | 2455.75199 | 3 | 1.76E-07 | 0.92  | 4.30   | -     | 1184.0  |
| gj[4504165]ref[NP_000168.1] | gelsolin (amyloidosis, Finnish type); Gelsolin [Homo sapiens] |            |   | 1.00E-30 | 21.42 | 250.34 | 41.20 | 85696.9 |
| AHQ-8-6, 3616               | K.AGALNSNDAFVLK.T                                             | 1320.47622 | 2 | 7.19E-07 | 0.86  | 3.75   | -     | 610.7   |
| AHQ-8-5, 3808 - 3857        | K.AGALNSNDAFVLK.T                                             | 1320.47622 | 2 | 3.05E-06 | 0.75  | 3.06   | -     | 515.9   |
| AHQ-8-5, 3593 - 3664        | K.AGALNSNDAFVLK.T                                             | 1320.47622 | 2 | 5.12E-05 | 0.92  | 3.95   | -     | 818.4   |
| AHQ-8-5, 3268               | K.AGKEPGLQIWR.V                                               | 1255.45060 | 3 | 2.75E-04 | 0.86  | 3.70   | -     | 1066.1  |
| AHQ-8-5, 3261               | K.AGKEPGLQIWR.V                                               | 1255.45060 | 2 | 5.86E-06 | 0.97  | 2.66   | -     | 469.3   |
| AHQ-8-6, 5336 - 5339        | R.AQPVQVAEGSEPDGFWEALGGK.A                                    | 2273.44345 | 2 | 1.60E-04 | 0.96  | 5.14   | -     | 824.6   |
| AHQ-8-5, 5268               | R.AQPVQVAEGSEPDGFWEALGGK.A                                    | 2273.44345 | 2 | 3.47E-06 | 0.94  | 4.91   | -     | 660.5   |
| AHQ-8-5, 5625               | R.AQPVQVAEGSEPDGFWEALGGK.A                                    | 2273.44345 | 2 | 6.86E-04 | 0.65  | 2.92   | -     | 412.0   |
| AHQ-8-8, 5441               | R.AQPVQVAEGSEPDGFWEALGGK.A                                    | 2273.44345 | 2 | 3.87E-07 | 0.96  | 5.67   | -     | 909.3   |
| AHQ-8-10, 5170              | R.AQPVQVAEGSEPDGFWEALGGK.A                                    | 2273.44345 | 2 | 3.95E-05 | 0.81  | 3.13   | -     | 640.1   |
| AHQ-8-5, 5429 - 5496        | R.AQPVQVAEGSEPDGFWEALGGK.A                                    | 2273.44345 | 2 | 6.37E-07 | 0.95  | 5.15   | -     | 662.4   |
| AHQ-8-7, 5281 - 5285        | R.AQPVQVAEGSEPDGFWEALGGK.A                                    | 2273.44345 | 2 | 2.41E-08 | 0.96  | 5.31   | -     | 893.7   |
| AHQ-8-11, 5243              | R.AQPVQVAEGSEPDGFWEALGGK.A                                    | 2273.44345 | 2 | 1.54E-06 | 0.83  | 3.49   | -     | 574.1   |
| AHQ-8-5, 5458               | R.DPDQTDGLGLSYLSSHIANVER.V                                    | 2388.53285 | 3 | 1.13E-05 | 0.88  | 3.91   | -     | 989.8   |
| AHQ-8-6, 5279               | R.DPDQTDGLGLSYLSSHIANVER.V                                    | 2388.53285 | 3 | 2.74E-09 | 0.92  | 4.22   | -     | 1162.7  |
| AHQ-8-5, 5324 - 5380        | R.DPDQTDGLGLSYLSSHIANVER.V                                    | 2388.53285 | 3 | 1.65E-07 | 0.94  | 4.29   | -     | 1447.2  |
| AHQ-8-11, 2277              | K.DSQEEKTEALTSK.R                                             | 1666.72289 | 2 | 1.98E-07 | 0.88  | 3.74   | -     | 996.3   |
| AHQ-8-6, 2271               | K.DSQEEKTEALTSK.R                                             | 1666.72289 | 3 | 2.96E-05 | 0.96  | 4.42   | -     | 1881.2  |
| AHQ-8-6, 2266               | K.DSQEEKTEALTSK.R                                             | 1666.72289 | 2 | 9.08E-06 | 0.91  | 3.74   | -     | 1240.9  |
| AHQ-8-7, 2257               | K.DSQEEKTEALTSK.R                                             | 1666.72289 | 2 | 5.13E-07 | 0.94  | 4.07   | -     | 1291.6  |
| AHQ-8-5, 2265 - 2333        | K.DSQEEKTEALTSK.R                                             | 1666.72289 | 3 | 1.20E-04 | 0.97  | 4.78   | -     | 2130.7  |
| AHQ-8-5, 2264 - 2329        | K.DSQEEKTEALTSK.R                                             | 1666.72289 | 2 | 9.29E-07 | 0.93  | 3.79   | -     | 1270.1  |
| AHQ-8-13-, 2342             | K.DSQEEKTEALTSK.R                                             | 1666.72289 | 2 | 7.43E-05 | 0.77  | 2.90   | -     | 835.2   |

|                            |                                                                         |            |   |          |        |         |       |          |
|----------------------------|-------------------------------------------------------------------------|------------|---|----------|--------|---------|-------|----------|
| AHQ-8-8, 2243              | K.DSQEEEKTEALTSK.R                                                      | 1666.72289 | 2 | 1.91E-07 | 0.93   | 3.46    | -     | 1450.6   |
| AHQ-8-7, 5676 - 5749       | R.EVGGFESATFLGYFK.S                                                     | 1723.90570 | 2 | 3.39E-08 | 0.94   | 4.17    | -     | 1038.5   |
| AHQ-8-5, 5880 - 5936       | R.EVGGFESATFLGYFK.S                                                     | 1723.90570 | 2 | 9.99E-06 | 0.96   | 4.15    | -     | 1408.3   |
| AHQ-8-5, 5789 - 5844       | R.EVGGFESATFLGYFK.S                                                     | 1723.90570 | 2 | 3.61E-11 | 0.97   | 5.06    | -     | 1538.3   |
| AHQ-8-13-, 5706            | R.EVGGFESATFLGYFK.S                                                     | 1723.90570 | 2 | 2.61E-08 | 0.95   | 4.31    | -     | 1163.4   |
| AHQ-8-6, 5740 - 5742       | R.EVGGFESATFLGYFK.S                                                     | 1723.90570 | 2 | 1.25E-06 | 0.94   | 4.21    | -     | 1205.8   |
| AHQ-8-8, 5829 - 5909       | R.EVGGFESATFLGYFK.S                                                     | 1723.90570 | 2 | 2.17E-05 | 0.76   | 2.93    | -     | 883.3    |
| AHQ-8-14-, 5721            | R.EVGGFESATFLGYFK.S                                                     | 1723.90570 | 2 | 1.13E-04 | 0.88   | 3.04    | -     | 1046.6   |
| AHQ-8-5, 6484 - 6490       | K.FDLVPVPTNLYGDFFTGDAYVILK.T                                            | 2706.08359 | 2 | 4.01E-07 | 0.95   | 5.02    | -     | 629.3    |
| AHQ-8-5, 2386              | K.HVVPNEVVQR.L                                                          | 1276.46981 | 1 | 2.68E-05 | 0.21   | 1.89    | -     | 295.4    |
| AHQ-8-5, 2360 - 2380       | K.HVVPNEVVQR.L                                                          | 1276.46981 | 2 | 6.32E-06 | 0.93   | 3.71    | -     | 653.0    |
| AHQ-8-5, 2558              | K.HVVPNEVVQR.L                                                          | 1276.46981 | 2 | 2.51E-04 | 0.87   | 3.00    | -     | 582.6    |
| AHQ-8-5, 5780 - 5836       | R.IEGSNKVPDPATYGFYGGDSYIILYNR.H                                         | 3401.72499 | 3 | 1.57E-07 | 0.96   | 4.90    | -     | 1687.6   |
| AHQ-8-5, 5360 - 5361       | K.NWRDPDQTDGLGLSYLSSHIANVER.V                                           | 2845.03323 | 3 | 1.00E-30 | 0.98   | 6.80    | -     | 1868.0   |
| AHQ-8-6, 5282              | K.NWRDPDQTDGLGLSYLSSHIANVER.V                                           | 2845.03323 | 3 | 5.83E-10 | 0.95   | 5.26    | -     | 1354.2   |
| AHQ-8-5, 2165              | K.PALPAGTEDTAK.E                                                        | 1171.28241 | 2 | 1.23E-06 | 0.83   | 2.94    | -     | 411.7    |
| AHQ-8-5, 2081 - 2149       | K.PALPAGTEDTAK.E                                                        | 1171.28241 | 2 | 1.92E-04 | 0.60   | 2.61    | -     | 274.3    |
| AHQ-8-5, 2529              | K.PALPAGTEDTAKEDAANR.K                                                  | 1827.93072 | 2 | 1.70E-06 | 0.94   | 4.44    | -     | 641.9    |
| AHQ-8-5, 4642 - 4688       | K.QTQVSVLPEGGETPLFK.Q                                                   | 1831.05925 | 2 | 3.13E-04 | 0.51   | 3.00    | -     | 235.7    |
| AHQ-8-6, 3108              | K.SEDCFILDHGK.D                                                         | 1322.42590 | 3 | 7.59E-06 | 0.82   | 3.18    | -     | 756.0    |
| AHQ-8-6, 3099              | K.SEDCFILDHGK.D                                                         | 1322.42590 | 2 | 1.03E-06 | 0.91   | 3.39    | -     | 965.7    |
| AHQ-8-5, 3100              | K.SEDCFILDHGK.D                                                         | 1322.42590 | 2 | 3.12E-04 | 0.97   | 4.26    | -     | 1865.7   |
| AHQ-8-5, 2830              | K.SEDCFILDHGKDGK.I                                                      | 1622.73823 | 2 | 1.05E-04 | 0.61   | 2.78    | -     | 715.9    |
| AHQ-8-5, 2141 - 2206       | K.TASDFITK.M                                                            | 882.98086  | 2 | 1.78E-04 | 0.68   | 2.81    | -     | 394.9    |
| AHQ-8-5, 2293 - 2353       | K.TGAQELLR.V                                                            | 888.00387  | 2 | 4.40E-05 | 0.91   | 3.07    | -     | 1278.6   |
| AHQ-8-7, 2282              | K.TGAQELLR.V                                                            | 888.00387  | 2 | 5.30E-05 | 0.84   | 2.80    | -     | 858.4    |
| AHQ-8-5, 4321 - 4380       | K.TPSAAYLWVGTGASEAEK.T                                                  | 1838.99510 | 2 | 1.13E-05 | 0.97   | 5.11    | -     | 1513.9   |
| AHQ-8-6, 4271              | K.TPSAAYLWVGTGASEAEK.T                                                  | 1838.99510 | 2 | 6.78E-10 | 0.96   | 4.89    | -     | 1139.4   |
| AHQ-8-8, 4262              | K.TPSAAYLWVGTGASEAEK.T                                                  | 1838.99510 | 2 | 1.82E-05 | 0.90   | 3.75    | -     | 942.1    |
| AHQ-8-11, 4213             | K.TPSAAYLWVGTGASEAEK.T                                                  | 1838.99510 | 2 | 4.72E-04 | 0.71   | 2.87    | -     | 642.7    |
| AHQ-8-5, 3733 - 3794       | R.VHVSEEGTEPEAM*LQVLGPK.P                                               | 2167.42570 | 3 | 3.72E-04 | 0.78   | 3.37    | -     | 673.3    |
| AHQ-8-5, 4782 - 4838       | R.VHVSEEGTEPEAMLQVLGPK.P                                                | 2151.42630 | 3 | 6.33E-04 | 0.83   | 3.55    | -     | 686.0    |
| AHQ-8-5, 4781 - 4804       | R.VHVSEEGTEPEAMLQVLGPK.P                                                | 2151.42630 | 2 | 1.71E-04 | 0.97   | 5.81    | -     | 1066.6   |
| AHQ-8-5, 5050              | R.VHVSEEGTEPEAMLQVLGPKPALPAGTEDTAK.E                                    | 3303.68611 | 3 | 1.70E-08 | 0.96   | 5.88    | -     | 1079.7   |
| AHQ-8-5, 3564 - 3620       | R.VPFDAAHLTHTSTAMAAQHGM*DDDDGTGQK.Q                                     | 2891.10081 | 3 | 2.99E-06 | 0.91   | 5.34    | -     | 1137.7   |
| AHQ-8-5, 3940              | R.VPFDAAHLTHTSTAMAAQHGM*DDDDGTGQK.Q                                     | 2875.10141 | 3 | 2.51E-11 | 0.97   | 6.38    | -     | 1457.2   |
| AHQ-8-6, 3516 - 3526       | R.VPFDAAHLTHTSTAMAAQHGM*DDDDGTGQK.Q                                     | 2891.10081 | 3 | 1.03E-04 | 0.87   | 4.71    | -     | 884.6    |
| AHQ-8-5, 6053              | K.VPVDPATYGFYGGDSYIILYNR.H                                              | 2773.04698 | 2 | 1.03E-06 | 0.70   | 3.22    | -     | 445.4    |
| AHQ-8-5, 5138              | K.VSNGAGTM*SVSLVADENPFAQGALK.S                                          | 2480.73680 | 2 | 1.07E-07 | 0.77   | 3.43    | -     | 491.5    |
| AHQ-8-6, 5066              | K.VSNGAGTM*SVSLVADENPFAQGALK.S                                          | 2480.73680 | 2 | 3.30E-04 | 0.70   | 2.77    | -     | 488.6    |
| gj4505879 ref NP_002655.1  | pleckstrin; p47 [Homo sapiens]                                          |            |   | 5.55E-16 | 6.50   | 80.39   | 23.70 | 40082.5  |
| AHQ-8-8, 5418 - 5429       | R.EDPAYLHYDDPAGAEDPLGAIHLR.G                                            | 2684.89982 | 3 | 1.93E-13 | 0.98   | 6.94    | -     | 1956.6   |
| AHQ-8-12, 5179 - 5251      | R.EDPAYLHYDDPAGAEDPLGAIHLR.G                                            | 2684.89982 | 3 | 5.14E-05 | 0.80   | 4.42    | -     | 455.0    |
| AHQ-8-8, 2434 - 2447       | R.GCVVTSVESNSNGR.K                                                      | 1467.54464 | 1 | 1.02E-05 | 0.14   | 2.01    | -     | 115.9    |
| AHQ-8-8, 2179 - 2226       | R.GCVVTSVESNSNGR.K                                                      | 1595.71755 | 2 | 1.47E-07 | 0.74   | 3.02    | -     | 579.2    |
| AHQ-8-11, 6251             | R.KSEENLFEIITADEVHYFLQAATPK.E                                           | 3024.32650 | 3 | 4.18E-06 | 0.99   | 7.77    | -     | 3320.2   |
| AHQ-8-12, 6274             | R.KSEENLFEIITADEVHYFLQAATPK.E                                           | 3024.32650 | 3 | 1.32E-08 | 0.98   | 6.58    | -     | 2475.3   |
| AHQ-8-10, 6202             | R.KSEENLFEIITADEVHYFLQAATPK.E                                           | 3024.32650 | 3 | 1.16E-10 | 0.98   | 7.35    | -     | 1869.4   |
| AHQ-8-8, 6546 - 6551       | R.KSEENLFEIITADEVHYFLQAATPK.E                                           | 3024.32650 | 3 | 5.55E-16 | 0.98   | 6.81    | -     | 2406.1   |
| AHQ-8-13-, 5334 - 5392     | R.LPETIDLGALYLSM*K.D                                                    | 1680.98719 | 2 | 2.69E-04 | 0.93   | 4.11    | -     | 1098.8   |
| AHQ-8-8, 5485 - 5486       | R.LPETIDLGALYLSM*K.D                                                    | 1680.98719 | 2 | 4.24E-07 | 0.95   | 5.09    | -     | 857.8    |
| AHQ-8-8, 6093 - 6154       | R.LPETIDLGALYLSM.K.D                                                    | 1664.98779 | 2 | 6.05E-07 | 0.97   | 4.56    | -     | 1815.1   |
| AHQ-8-12, 4991             | R.LPETIDLGALYLSM*KDTEK.G                                                | 2154.46684 | 2 | 1.38E-04 | 0.86   | 3.61    | -     | 567.5    |
| AHQ-8-12, 6314             | K.SEEENLFEIITADEVHYFLQAATPK.E                                           | 2896.15359 | 3 | 5.34E-08 | 0.66   | 3.10    | -     | 558.6    |
| AHQ-8-8, 6589              | K.SEEENLFEIITADEVHYFLQAATPK.E                                           | 2896.15359 | 2 | 3.69E-04 | 0.56   | 3.47    | -     | 313.2    |
| AHQ-8-8, 6585 - 6654       | K.SEEENLFEIITADEVHYFLQAATPK.E                                           | 2896.15359 | 3 | 5.61E-14 | 0.89   | 3.94    | -     | 814.0    |
| gj4557305 ref NP_000025.1  | aldolase A; fructose-bisphosphate aldolase; Aldolase A, fructose-bispho |            |   | 1.67E-15 | 8.78   | 100.25  | 47.80 | 39419.7  |
| AHQ-8-8, 4202 - 4214       | K.ALSDDHIIYLETGLLKPNNMTPGHACTQK.F                                       | 3134.57879 | 3 | 6.20E-04 | 0.89   | 4.50    | -     | 790.9    |
| AHQ-8-8, 2825              | K.GILAADESTGSIAR.K                                                      | 1333.47008 | 2 | 2.04E-10 | 0.97   | 4.58    | -     | 1658.5   |
| AHQ-8-8, 2831              | K.GILAADESTGSIAR.R                                                      | 1333.47008 | 1 | 2.15E-04 | 0.55   | 3.00    | -     | 339.4    |
| AHQ-8-14-, 2990            | K.GILAADESTGSIAR.R                                                      | 1333.47008 | 2 | 2.83E-09 | 0.95   | 3.75    | -     | 1437.9   |
| AHQ-8-12, 4326             | K.GVVPLAGTNGETTTQGLDGLSER.C                                             | 2273.44329 | 2 | 1.41E-09 | 0.68   | 4.01    | -     | 438.5    |
| AHQ-8-8, 4379 - 4445       | K.GVVPLAGTNGETTTQGLDGLSER.C                                             | 2273.44329 | 2 | 1.67E-15 | 0.88   | 4.96    | -     | 680.4    |
| AHQ-8-8, 4093              | K.GVVPLAGTNGETTTQGLDGLSER.C                                             | 2273.44329 | 2 | 2.67E-05 | 0.67   | 3.93    | -     | 631.3    |
| AHQ-8-8, 4875 - 4942       | K.IGEHTPSALAIMENANVLR.Y                                                 | 2108.40788 | 2 | 1.91E-06 | 0.92   | 4.28    | -     | 773.6    |
| AHQ-8-8, 5285              | K.IGEHTPSALAIMENANVLR.Y                                                 | 2108.40788 | 2 | 7.72E-05 | 0.93   | 4.21    | -     | 863.1    |
| AHQ-8-8, 4047 - 4082       | K.IGEHTPSALAIMENANVLR.Y                                                 | 2124.40728 | 2 | 1.58E-05 | 0.95   | 4.93    | -     | 821.5    |
| AHQ-8-8, 2785              | R.QLLTADDR.V                                                            | 1045.17176 | 2 | 3.33E-04 | 0.74   | 2.56    | -     | 608.1    |
| AHQ-8-8, 6577              | R.TVPPAVGTITFLSGGQSEEEASINLNAINK.C                                      | 3059.37393 | 3 | 2.91E-04 | 0.88   | 4.48    | -     | 1168.3   |
| AHQ-8-8, 5677              | R.YASICQQNGVPIVEPEILPDGDHDLK.R                                          | 3023.36334 | 3 | 2.40E-04 | 0.84   | 4.80    | -     | 458.4    |
| AHQ-8-8, 5361              | R.YASICQQNGVPIVEPEILPDGDHDLK.R                                          | 3179.54969 | 3 | 1.39E-06 | 0.93   | 4.66    | -     | 1022.0   |
| AHQ-8-8, 4391 - 4454       | K.YTPSQGAAASSELVFNHAY                                                   | 2229.34753 | 2 | 3.64E-06 | 0.79   | 3.37    | -     | 446.3    |
| gj4502549 ref NP_001734.1  | calmodulin 2 (phosphorylase kinase, delta); phosphorylase kinase delta  |            |   | 3.33E-15 | 1.78   | 20.23   | 22.10 | 16837.5  |
| AHQ-8-12, 4014 - 4082      | K.EAFSLFDKDGDTITTK.E                                                    | 1845.98441 | 3 | 9.57E-05 | 0.78   | 3.04    | -     | 839.4    |
| AHQ-8-12, 4010 - 4038      | K.EAFSLFDKDGDTITTK.E                                                    | 1845.98441 | 2 | 2.38E-04 | 0.92   | 3.88    | -     | 1104.0   |
| AHQ-8-12, 4094             | K.EAFSLFDKDGDTITTK.E                                                    | 1845.98441 | 2 | 8.62E-08 | 0.83   | 3.12    | -     | 638.2    |
| AHQ-8-12, 3842             | R.VFDKDGNGYISAAELR.H                                                    | 1755.90933 | 2 | 3.09E-05 | 0.85   | 3.34    | -     | 972.3    |
| AHQ-8-12, 3706 - 3766      | R.VFDKDGNGYISAAELR.H                                                    | 1755.90933 | 2 | 3.33E-15 | 0.95   | 4.66    | -     | 1075.5   |
| AHQ-8-11, 3705             | R.VFDKDGNGYISAAELR.H                                                    | 1755.90933 | 3 | 2.69E-05 | 0.92   | 3.75    | -     | 1576.5   |
| gj16753233 ref NP_006280.2 | talin 1 [Homo sapiens]                                                  |            |   | 5.00E-15 | 104.42 | 1180.38 | 56.20 | 269665.3 |
| AHQ-8-13-, 3174 - 3175     | K.AAAFEEOENETVVVK.E                                                     | 1664.79496 | 2 | 6.37E-07 | 0.92   | 4.38    | -     | 1172.9   |
| AHQ-8-4, 3231 - 3295       | K.AAAFEEOENETVVVK.E                                                     | 1664.79496 | 2 | 4.18E-04 | 0.93   | 4.34    | -     | 1301.2   |
| AHQ-8-14-, 3155            | K.AAAFEEOENETVVVK.E                                                     | 1664.79496 | 2 | 1.66E-06 | 0.92   | 4.71    | -     | 958.7    |
| AHQ-8-1, 3349              | K.AAAFEEOENETVVVK.E                                                     | 1664.79496 | 2 | 1.05E-05 | 0.95   | 4.92    | -     | 1236.1   |
| AHQ-8-2, 3225 - 3300       | K.AAAFEEOENETVVVK.E                                                     | 1664.79496 | 2 | 2.42E-05 | 0.92   | 4.24    | -     | 1031.5   |
| AHQ-8-5, 3168              | K.AAAFEEOENETVVVK.E                                                     | 1664.79496 | 2 | 3.46E-07 | 0.94   | 4.43    | -     | 1226.0   |
| AHQ-8-3, 2700              | R.AAM*EPIVISAK.T                                                        | 1146.38260 | 2 | 3.09E-07 | 0.90   | 2.67    | -     | 1112.9   |
| AHQ-8-2, 2744              | R.AAM*EPIVISAK.T                                                        | 1146.38260 | 1 | 1.46E-04 | 0.22   | 2.17    | -     | 205.4    |
| AHQ-8-2, 2731              | R.AAM*EPIVISAK.T                                                        | 1146.38260 | 2 | 5.83E-06 | 0.72   | 2.63    | -     | 633.4    |
| AHQ-8-5, 3266              | R.AAM*EPIVISAK.T                                                        | 1130.38320 | 2 | 4.88E-04 | 0.60   | 2.51    | -     | 410.0    |
| AHQ-8-4, 2667              | R.AAM*EPIVISAK.T                                                        | 1146.38260 | 1 | 1.51E-05 | 0.10   | 2.06    | -     | 151.2    |
| AHQ-8-7, 4630 - 4696       | K.ACCEFAFGCQIQGFPHNEQK.H                                                | 2399.60390 | 3 | 1.21E-04 | 0.73   | 3.46    | -     | 460.9    |
| AHQ-8-3, 2074              | K.ADAEAGESDLENSR.K                                                      | 1393.35296 | 2 | 3.71E-05 | 0.85   | 2.71    | -     | 1153.4   |
| AHQ-8-4, 2026              | K.ADAEAGESDLENSR.K                                                      | 1393.35296 | 2 | 1.05E-07 | 0.93   | 3.74    | -     | 1183.3   |
| AHQ-8-5, 2030              | K.ADAEAGESDLENSR.K                                                      | 1393.35296 | 2 | 2.15E-06 | 0.88   | 3.67    | -     | 794.0    |
| AHQ-8-2, 2072              | K.ADAEAGESDLENSR.K                                                      | 1393.35296 | 2 | 1.26E-07 | 0.94   | 3.91    | -     | 1185.7   |
| AHQ-8-6, 2039              | K.ADAEAGESDLENSR.K                                                      | 1393.35296 | 2 | 2.58E-05 | 0.87   | 3.21    | -     | 874.0    |
| AHQ-8-4, 2641              | K.AGALQCSPSDAYTK.K                                                      | 1470.58689 | 2 | 5.88E-06 | 0.90   | 3.42    | -     | 819.7    |
| AHQ-8-6, 2635              | K.AGALQCSPSDAYTK.K                                                      | 1470.58689 | 2 | 3.99E-04 | 0.62   | 2.79    | -     | 545.2    |
| AHQ-8-7, 5737              | K.AGFLDLKDFLPK.E                                                        | 1364.61374 | 2 | 9.65E-04 | 0.87   | 3.30    | -     | 1183.5   |
| AHQ-8-5, 3905              | K.AIAVTQEMVTK.S                                                         | 1290.55498 | 2 | 8.48E-08 | 0.94   | 3.58    | -     | 1251.5   |
| AHQ-8-4, 3925 - 4002       | K.AIAVTQEMVTK.S                                                         | 1290.55498 | 2 | 1.92E-07 | 0.90   | 3.36    | -     | 971.4    |
| AHQ-8-2, 3019 - 3032       | K.AIAVTQEMVTK.S                                                         | 1306.55438 | 2 | 4.96E-05 | 0.92   | 3.98    | -     | 806.8    |
| AHQ-8-4, 2942 - 2949       | K.AIAVTQEMVTK.S                                                         | 1306.55438 | 2 | 1.77E-07 | 0.95   | 3.74    | -     | 1260.2   |
| AHQ-8-5, 2937 - 2954       | K.AIAVTQEMVTK.S                                                         | 1306.55438 | 2 | 2.75E-04 | 0.88   | 3.21    | -     | 845.2    |
| AHQ-8-3, 2968              | K.AIAVTQEMVTK.S                                                         | 1306.55438 | 2 | 3.71E-06 | 0.92   | 3.66    | -     | 837.0    |
| AHQ-8-3, 3933 - 3934       | K.AIAVTQEMVTK.S                                                         | 1290.55498 | 2 | 4.05E-07 | 0.97   | 4.97    | -     | 1465.6   |

|                       |                                   |            |   |          |      |      |   |        |
|-----------------------|-----------------------------------|------------|---|----------|------|------|---|--------|
| AHQ-8-4, 2689         | K.ALDGAFTEENR.A                   | 1223.27427 | 2 | 1.19E-04 | 0.95 | 4.03 | - | 1526.3 |
| AHQ-8-2, 2759         | K.ALDGAFTEENR.A                   | 1223.27427 | 2 | 5.48E-06 | 0.95 | 3.89 | - | 1452.8 |
| AHQ-8-4, 2506         | K.ALDGAFTEENR.A                   | 1223.27427 | 2 | 3.80E-06 | 0.88 | 3.25 | - | 1192.4 |
| AHQ-8-3, 2552         | K.ALDGAFTEENR.A                   | 1223.27427 | 2 | 3.90E-06 | 0.92 | 3.49 | - | 1247.1 |
| AHQ-8-3, 2684 - 2728  | K.ALDGAFTEENR.A                   | 1223.27427 | 2 | 1.48E-05 | 0.95 | 3.72 | - | 1551.6 |
| AHQ-8-6, 2694         | K.ALDGAFTEENR.A                   | 1223.27427 | 2 | 3.26E-06 | 0.95 | 3.71 | - | 1676.2 |
| AHQ-8-7, 3806         | K.ALDYYMLR.N                      | 1045.23686 | 2 | 1.78E-06 | 0.90 | 3.25 | - | 645.2  |
| AHQ-8-5, 2073 - 2084  | R.ALEATTEHIR.Q                    | 1141.25953 | 2 | 1.37E-05 | 0.86 | 2.85 | - | 1204.7 |
| AHQ-8-6, 2083 - 2084  | R.ALEATTEHIR.Q                    | 1141.25953 | 2 | 5.70E-05 | 0.79 | 2.63 | - | 969.9  |
| AHQ-8-4, 2082 - 2086  | R.ALEATTEHIR.Q                    | 1141.25953 | 2 | 4.43E-06 | 0.88 | 3.42 | - | 1096.8 |
| AHQ-8-2, 2140 - 2167  | R.ALEATTEHIR.Q                    | 1141.25953 | 2 | 2.71E-07 | 0.90 | 3.34 | - | 1280.3 |
| AHQ-8-3, 2138         | R.ALEATTEHIR.Q                    | 1141.25953 | 2 | 8.83E-06 | 0.88 | 2.98 | - | 1323.0 |
| AHQ-8-3, 3433 - 3446  | K.ALGDILSATK.A                    | 989.14811  | 2 | 2.33E-06 | 0.95 | 4.13 | - | 904.8  |
| AHQ-8-5, 3409         | K.ALGDILSATK.A                    | 989.14811  | 2 | 3.92E-06 | 0.91 | 3.48 | - | 846.1  |
| AHQ-8-2, 3477         | K.ALGDILSATK.A                    | 989.14811  | 2 | 3.92E-04 | 0.87 | 3.34 | - | 616.3  |
| AHQ-8-4, 3419         | K.ALGDILSATK.A                    | 989.14811  | 2 | 1.56E-06 | 0.92 | 3.46 | - | 900.0  |
| AHQ-8-2, 2573         | K.ALSTDPAAPNLK.S                  | 1198.35099 | 2 | 8.54E-05 | 0.58 | 2.88 | - | 415.9  |
| AHQ-8-2, 2761 - 2764  | K.ALSTDPAAPNLK.S                  | 1198.35099 | 1 | 8.07E-04 | 0.19 | 1.98 | - | 312.2  |
| AHQ-8-3, 2710 - 2720  | K.ALSTDPAAPNLK.S                  | 1198.35099 | 2 | 1.59E-06 | 0.82 | 3.08 | - | 674.1  |
| AHQ-8-5, 2686         | K.ALSTDPAAPNLK.S                  | 1198.35099 | 2 | 1.38E-05 | 0.53 | 2.60 | - | 598.8  |
| AHQ-8-4, 2686         | K.ALSTDPAAPNLK.S                  | 1198.35099 | 2 | 1.10E-08 | 0.64 | 2.77 | - | 607.8  |
| AHQ-8-6, 2678         | K.ALSTDPAAPNLK.S                  | 1198.35099 | 2 | 4.46E-06 | 0.71 | 2.89 | - | 722.1  |
| AHQ-8-2, 2741 - 2755  | K.ALSTDPAAPNLK.S                  | 1198.35099 | 2 | 1.35E-07 | 0.85 | 3.59 | - | 635.8  |
| AHQ-8-2, 5808         | K.APGLQECETAIAALNSCLR.D           | 2077.32566 | 2 | 3.61E-07 | 0.96 | 4.66 | - | 1214.7 |
| AHQ-8-4, 5797         | K.APGLQECETAIAALNSCLR.D           | 2077.32566 | 2 | 2.11E-06 | 0.97 | 4.82 | - | 1458.4 |
| AHQ-8-2, 5195 - 5255  | K.APGLQECETAIAALNSCLR.D           | 2077.32566 | 2 | 2.48E-10 | 0.95 | 4.67 | - | 1193.3 |
| AHQ-8-2, 5812         | K.APGLQECETAIAALNSCLR.D           | 2077.32566 | 3 | 1.15E-04 | 0.78 | 3.58 | - | 717.1  |
| AHQ-8-3, 5425 - 5496  | K.AQEAACGPLEM*DSALSVVQNLK.D       | 2407.66105 | 3 | 1.31E-05 | 0.91 | 4.55 | - | 1046.2 |
| AHQ-8-3, 6193         | K.AQEAACGPLEM*DSALSVVQNLK.D       | 2391.66165 | 2 | 1.02E-07 | 0.62 | 2.51 | - | 536.3  |
| AHQ-8-2, 5599         | K.AQEAACGPLEM*DSALSVVQNLK.D       | 2407.66105 | 3 | 2.25E-04 | 0.88 | 3.53 | - | 1197.5 |
| AHQ-8-2, 6292         | K.AQEAACGPLEM*DSALSVVQNLK.D       | 2391.66165 | 3 | 7.74E-06 | 0.95 | 5.10 | - | 1023.8 |
| AHQ-8-2, 5591         | K.AQEAACGPLEM*DSALSVVQNLK.D       | 2407.66105 | 2 | 2.75E-06 | 0.90 | 3.52 | - | 1053.3 |
| AHQ-8-3, 5501 - 5506  | K.AQEAACGPLEM*DSALSVVQNLK.D       | 2407.66105 | 2 | 7.88E-04 | 0.64 | 3.24 | - | 662.8  |
| AHQ-8-2, 3048         | K.ASAGPQPLLVQSCK.A                | 1457.67763 | 2 | 4.01E-05 | 0.59 | 2.64 | - | 398.7  |
| AHQ-8-5, 2960         | K.ASAGPQPLLVQSCK.A                | 1457.67763 | 2 | 5.99E-07 | 0.63 | 2.90 | - | 394.0  |
| AHQ-8-4, 2967         | K.ASAGPQPLLVQSCK.A                | 1457.67763 | 2 | 3.51E-06 | 0.56 | 2.89 | - | 332.1  |
| AHQ-8-3, 2994         | K.ASAGPQPLLVQSCK.A                | 1457.67763 | 2 | 1.23E-04 | 0.59 | 2.74 | - | 348.8  |
| AHQ-8-7, 2920         | K.ASAGPQPLLVQSCK.A                | 1457.67763 | 2 | 4.06E-11 | 0.83 | 3.90 | - | 415.3  |
| AHQ-8-1, 3219         | K.ASAGPQPLLVQSCK.A                | 1457.67763 | 2 | 4.94E-06 | 0.90 | 3.81 | - | 562.2  |
| AHQ-8-6, 2939 - 2994  | K.ASAGPQPLLVQSCK.A                | 1457.67763 | 2 | 6.69E-08 | 0.88 | 3.83 | - | 503.9  |
| AHQ-8-3, 4104         | K.ASVPTIQDQASAMQLSQCAK.N          | 2136.39332 | 2 | 1.66E-04 | 0.87 | 3.41 | - | 826.2  |
| AHQ-8-4, 4122 - 4123  | K.ASVPTIQDQASAMQLSQCAK.N          | 2136.39332 | 2 | 2.73E-06 | 0.87 | 4.34 | - | 409.6  |
| AHQ-8-1, 3777         | K.ASVPTIQDQASAM*QLSQCAK.N         | 2152.39272 | 2 | 1.05E-05 | 0.78 | 3.74 | - | 384.9  |
| AHQ-8-4, 4129         | K.ASVPTIQDQASAMQLSQCAK.N          | 2136.39332 | 3 | 1.90E-05 | 0.56 | 3.02 | - | 364.3  |
| AHQ-8-5, 3608         | K.ASVPTIQDQASAM*QLSQCAK.N         | 2152.39272 | 2 | 3.64E-06 | 0.89 | 3.90 | - | 582.8  |
| AHQ-8-2, 4145 - 4149  | K.ASVPTIQDQASAMQLSQCAK.N          | 2136.39332 | 2 | 8.01E-06 | 0.82 | 3.96 | - | 418.3  |
| AHQ-8-6, 4039         | K.ASVPTIQDQASAMQLSQCAK.N          | 2136.39332 | 2 | 5.27E-07 | 0.92 | 4.30 | - | 686.3  |
| AHQ-8-4, 3630         | K.ASVPTIQDQASAM*QLSQCAK.N         | 2152.39272 | 2 | 9.46E-08 | 0.87 | 3.97 | - | 449.9  |
| AHQ-8-3, 4120         | K.ASVPTIQDQASAMQLSQCAK.N          | 2136.39332 | 3 | 1.21E-07 | 0.91 | 3.95 | - | 1394.0 |
| AHQ-8-5, 4096         | K.ASVPTIQDQASAMQLSQCAK.N          | 2136.39332 | 2 | 3.68E-07 | 0.94 | 4.39 | - | 742.7  |
| AHQ-8-2, 3608 - 3687  | K.ASVPTIQDQASAM*QLSQCAK.N         | 2152.39272 | 2 | 8.30E-04 | 0.91 | 4.73 | - | 395.0  |
| AHQ-8-2, 4864         | K.AVAEQIPLLVQGV.R.G               | 1493.77619 | 3 | 2.98E-09 | 0.97 | 5.09 | - | 2285.5 |
| AHQ-8-2, 4845 - 4847  | K.AVAEQIPLLVQGV.R.G               | 1493.77619 | 2 | 7.87E-05 | 0.90 | 3.90 | - | 645.1  |
| AHQ-8-1, 4912 - 4924  | K.AVAEQIPLLVQGV.R.G               | 1493.77619 | 2 | 6.77E-05 | 0.90 | 3.84 | - | 697.9  |
| AHQ-8-3, 4790         | K.AVAEQIPLLVQGV.R.G               | 1493.77619 | 3 | 3.80E-04 | 0.97 | 4.82 | - | 2523.5 |
| AHQ-8-6, 4720         | K.AVAEQIPLLVQGV.R.G               | 1493.77619 | 3 | 1.08E-05 | 0.95 | 4.40 | - | 2060.7 |
| AHQ-8-4, 4830         | K.AVAEQIPLLVQGV.R.G               | 1493.77619 | 3 | 6.48E-07 | 0.97 | 5.15 | - | 1955.2 |
| AHQ-8-5, 4808         | K.AVAEQIPLLVQGV.R.G               | 1493.77619 | 3 | 2.70E-05 | 0.96 | 5.08 | - | 1774.9 |
| AHQ-8-4, 4811 - 4825  | K.AVAEQIPLLVQGV.R.G               | 1493.77619 | 2 | 2.60E-08 | 0.93 | 4.35 | - | 767.1  |
| AHQ-8-4, 3833 - 3903  | K.AVASAAAALVLK.A                  | 1085.32216 | 2 | 3.52E-06 | 0.96 | 4.12 | - | 1551.4 |
| AHQ-8-6, 3751         | K.AVASAAAALVLK.A                  | 1085.32216 | 2 | 3.36E-05 | 0.91 | 3.57 | - | 1049.6 |
| AHQ-8-1, 3999         | K.AVASAAAALVLK.A                  | 1085.32216 | 2 | 1.36E-05 | 0.96 | 3.83 | - | 1482.8 |
| AHQ-8-5, 3770 - 3828  | K.AVASAAAALVLK.A                  | 1085.32216 | 2 | 4.92E-04 | 0.94 | 3.94 | - | 1315.8 |
| AHQ-8-2, 3909 - 3969  | K.AVASAAAALVLK.A                  | 1085.32216 | 2 | 1.02E-06 | 0.95 | 4.09 | - | 1333.0 |
| AHQ-8-2, 4127         | K.AVEGCVSASQAATEDGQLLR.G          | 2064.22056 | 2 | 1.21E-05 | 0.69 | 2.72 | - | 887.9  |
| AHQ-8-3, 3958         | K.AVEGCVSASQAATEDGQLLR.G          | 2064.22056 | 2 | 3.18E-07 | 0.96 | 4.75 | - | 1282.7 |
| AHQ-8-2, 4008 - 4068  | K.AVEGCVSASQAATEDGQLLR.G          | 2064.22056 | 2 | 1.22E-07 | 0.95 | 4.79 | - | 1293.3 |
| AHQ-8-5, 3933         | K.AVEGCVSASQAATEDGQLLR.G          | 2064.22056 | 2 | 1.14E-06 | 0.92 | 3.95 | - | 1190.9 |
| AHQ-8-1, 4061         | K.AVEGCVSASQAATEDGQLLR.G          | 2064.22056 | 2 | 1.66E-05 | 0.91 | 4.07 | - | 1102.9 |
| AHQ-8-2, 3896         | K.AVEGCVSASQAATEDGQLLR.G          | 2064.22056 | 2 | 1.87E-06 | 0.93 | 4.18 | - | 1045.7 |
| AHQ-8-4, 3947 - 4027  | K.AVEGCVSASQAATEDGQLLR.G          | 2064.22056 | 2 | 2.94E-08 | 0.94 | 4.61 | - | 1068.2 |
| AHQ-8-2, 4280         | K.AVEGCVSASQAATEDGQLLR.G          | 2064.22056 | 2 | 1.77E-06 | 0.82 | 3.26 | - | 818.0  |
| AHQ-8-2, 3795 - 3797  | K.AVEGCVSASQAATEDGQLLR.G          | 2064.22056 | 2 | 3.07E-07 | 0.96 | 4.92 | - | 1309.8 |
| AHQ-8-6, 3892         | K.AVEGCVSASQAATEDGQLLR.G          | 2064.22056 | 2 | 1.71E-07 | 0.94 | 4.13 | - | 1281.6 |
| AHQ-8-2, 4529         | K.AVEGCVSASQAATEDGQLLR.G          | 2064.22056 | 2 | 2.09E-06 | 0.83 | 3.47 | - | 701.0  |
| AHQ-8-2, 6463         | K.AVSSAIAQLLGEVAQGNENYAGIAAR.D    | 2574.83158 | 3 | 6.14E-08 | 0.95 | 4.71 | - | 1598.4 |
| AHQ-8-3, 6344 - 6354  | K.AVSSAIAQLLGEVAQGNENYAGIAAR.D    | 2574.83158 | 3 | 1.64E-07 | 0.98 | 6.10 | - | 2257.8 |
| AHQ-8-4, 6394 - 6453  | K.AVSSAIAQLLGEVAQGNENYAGIAAR.D    | 2574.83158 | 3 | 5.00E-15 | 0.97 | 6.48 | - | 1757.0 |
| AHQ-8-1, 6364 - 6423  | K.AVSSAIAQLLGEVAQGNENYAGIAAR.D    | 2574.83158 | 3 | 1.52E-10 | 0.97 | 5.21 | - | 2575.4 |
| AHQ-8-6, 6290         | K.AVSSAIAQLLGEVAQGNENYAGIAAR.D    | 2574.83158 | 3 | 1.63E-10 | 0.97 | 5.36 | - | 1825.0 |
| AHQ-8-4, 5317 - 5326  | R.AVTDINQLITM*CTQQAPGQK.E         | 2322.60252 | 2 | 1.03E-05 | 0.87 | 4.14 | - | 540.3  |
| AHQ-8-2, 5631         | R.AVTDINQLITMCTQQAPGQK.E          | 2306.60312 | 2 | 8.16E-07 | 0.81 | 3.36 | - | 611.9  |
| AHQ-8-2, 5700         | R.AVTDINQLITMCTQQAPGQK.ECDNALR.E  | 3166.51128 | 3 | 1.16E-08 | 0.76 | 3.55 | - | 654.9  |
| AHQ-8-6, 5312         | R.AVTDINQLITM*CTQQAPGQK.ECDNALR.E | 3182.51068 | 3 | 3.34E-04 | 0.88 | 4.12 | - | 906.4  |
| AHQ-8-2, 5456 - 5517  | R.AVTDINQLITM*CTQQAPGQK.ECDNALR.E | 3182.51068 | 3 | 2.45E-09 | 0.96 | 5.64 | - | 1299.4 |
| AHQ-8-3, 5368 - 5434  | R.AVTDINQLITM*CTQQAPGQK.ECDNALR.E | 3182.51068 | 3 | 1.16E-09 | 0.75 | 3.69 | - | 812.9  |
| AHQ-8-3, 2468         | R.CVSCPLPQR.D                     | 1079.23309 | 2 | 7.00E-05 | 0.72 | 2.78 | - | 514.2  |
| AHQ-8-7, 3492 - 3554  | R.DDILNGSHPVSFDK.A                | 1544.64741 | 2 | 8.36E-10 | 0.96 | 4.31 | - | 1316.9 |
| AHQ-8-8, 3334 - 3385  | R.DDILNGSHPVSFDK.A                | 1544.64741 | 2 | 3.99E-06 | 0.86 | 3.28 | - | 827.5  |
| AHQ-8-3, 3670         | R.DDILNGSHPVSFDK.A                | 1544.64741 | 2 | 6.33E-06 | 0.77 | 3.28 | - | 513.3  |
| AHQ-8-7, 3368 - 3441  | R.DDILNGSHPVSFDK.A                | 1544.64741 | 2 | 1.69E-09 | 0.92 | 3.67 | - | 1057.7 |
| AHQ-8-8, 4573         | K.DHFGLEDDEESTMLEDSVSPK.K         | 2323.43307 | 2 | 3.79E-06 | 0.97 | 5.34 | - | 1768.0 |
| AHQ-8-7, 4496         | K.DHFGLEDDEESTMLEDSVSPK.K         | 2323.43307 | 2 | 8.01E-06 | 0.96 | 5.07 | - | 1130.1 |
| AHQ-8-4, 5638         | R.DKAPGQLECEETAIAALNSCLR.D        | 2320.58644 | 2 | 2.30E-07 | 0.91 | 4.24 | - | 776.4  |
| AHQ-8-2, 5592 - 5653  | R.DKAPGQLECEETAIAALNSCLR.D        | 2320.58644 | 3 | 1.89E-04 | 0.44 | 3.00 | - | 623.5  |
| AHQ-8-2, 5656         | R.DKAPGQLECEETAIAALNSCLR.D        | 2320.58644 | 2 | 1.05E-10 | 0.75 | 3.05 | - | 594.3  |
| AHQ-8-3, 5561         | R.DKAPGQLECEETAIAALNSCLR.D        | 2320.58644 | 2 | 4.98E-09 | 0.92 | 4.30 | - | 776.8  |
| AHQ-8-3, 4964 - 4970  | R.DKAPGQLECEETAIAALNSCLR.D        | 2320.58644 | 2 | 2.29E-11 | 0.94 | 4.23 | - | 1109.9 |
| AHQ-8-2, 4997 - 5055  | R.DKAPGQLECEETAIAALNSCLR.D        | 2320.58644 | 2 | 7.81E-06 | 0.84 | 3.22 | - | 858.9  |
| AHQ-8-11, 4776 - 4783 | R.DLDQASLAAV*SQLAPR.E             | 1783.96422 | 2 | 3.39E-04 | 0.88 | 3.41 | - | 820.2  |
| AHQ-8-1, 5048         | R.DLDQASLAAV*SQLAPR.E             | 1783.96422 | 3 | 4.42E-05 | 0.92 | 4.27 | - | 1398.1 |
| AHQ-8-4, 4979 - 4997  | R.DLDQASLAAV*SQLAPR.E             | 1783.96422 | 2 | 8.97E-05 | 0.94 | 4.37 | - | 1005.1 |
| AHQ-8-3, 4926 - 4933  | R.DLDQASLAAV*SQLAPR.E             | 1783.96422 | 3 | 3.08E-07 | 0.96 | 5.04 | - | 2024.1 |
| AHQ-8-2, 5009 - 5015  | R.DLDQASLAAV*SQLAPR.E             | 1783.96422 | 3 | 2.12E-07 | 0.96 | 5.34 | - | 1829.8 |
| AHQ-8-4, 4990         | R.DLDQASLAAV*SQLAPR.E             | 1783.96422 | 3 | 3.22E-06 | 0.93 | 4.52 | - | 1406.5 |
| AHQ-8-3, 4916         | R.DLDQASLAAV*SQLAPR.E             | 1783.96422 | 2 | 4.52E-06 | 0.69 | 2.69 | - | 840.4  |
| AHQ-8-5, 4961         | R.DLDQASLAAV*SQLAPR.E             | 1783.96422 | 3 | 1.73E-05 | 0.96 | 4.44 | - | 2191.0 |

|                       |                                       |            |   |          |      |      |   |        |
|-----------------------|---------------------------------------|------------|---|----------|------|------|---|--------|
| AHQ-8-2, 4953 - 5000  | R.DLDQASLAAVSQQ LAPR.E                | 1783.96422 | 2 | 1.51E-05 | 0.94 | 4.15 | - | 1209.6 |
| AHQ-8-5, 4948         | R.DLDQASLAAVSQQ LAPR.E                | 1783.96422 | 2 | 2.90E-04 | 0.54 | 2.51 | - | 587.6  |
| AHQ-8-6, 4879         | R.DLDQASLAAVSQQ LAPR.E                | 1783.96422 | 3 | 2.93E-08 | 0.92 | 4.50 | - | 1218.7 |
| AHQ-8-1, 5033 - 5041  | R.DLDQASLAAVSQQ LAPR.E                | 1783.96422 | 2 | 1.49E-05 | 0.88 | 3.49 | - | 780.5  |
| AHQ-8-4, 3570         | R.DPPSWVSLAGHSR.T                     | 1409.53156 | 2 | 9.02E-07 | 0.89 | 2.71 | - | 883.4  |
| AHQ-8-3, 3588         | R.DPPSWVSLAGHSR.T                     | 1409.53156 | 3 | 1.34E-08 | 0.93 | 5.07 | - | 667.2  |
| AHQ-8-2, 3639         | R.DPPSWVSLAGHSR.T                     | 1409.53156 | 2 | 2.42E-07 | 0.95 | 4.30 | - | 932.1  |
| AHQ-8-4, 3575         | R.DPPSWVSLAGHSR.T                     | 1409.53156 | 3 | 1.94E-07 | 0.92 | 4.13 | - | 880.1  |
| AHQ-8-2, 3649         | R.DPPSWVSLAGHSR.T                     | 1409.53156 | 3 | 5.11E-07 | 0.92 | 4.68 | - | 687.2  |
| AHQ-8-3, 3580         | R.DPPSWVSLAGHSR.T                     | 1409.53156 | 2 | 5.07E-05 | 0.83 | 3.02 | - | 480.8  |
| AHQ-8-10, 4680        | R.DPVQLNLLVYQAR.D                     | 1529.76539 | 2 | 8.08E-04 | 0.88 | 2.71 | - | 1230.7 |
| AHQ-8-7, 4721 - 4752  | R.DPVQLNLLVYQAR.D                     | 1529.76539 | 2 | 3.42E-04 | 0.97 | 5.06 | - | 1550.5 |
| AHQ-8-8, 4899 - 4902  | R.DPVQLNLLVYQAR.D                     | 1529.76539 | 2 | 5.29E-08 | 0.98 | 5.72 | - | 1669.4 |
| AHQ-8-3, 4934         | R.DPVQLNLLVYQAR.D                     | 1529.76539 | 2 | 9.34E-07 | 0.94 | 3.60 | - | 1643.5 |
| AHQ-8-4, 2509         | K.EAAYHPEVAPDVR.L                     | 1454.56910 | 2 | 3.30E-08 | 0.78 | 2.85 | - | 779.4  |
| AHQ-8-3, 2560         | K.EAAYHPEVAPDVR.L                     | 1454.56910 | 2 | 8.28E-06 | 0.83 | 2.91 | - | 925.2  |
| AHQ-8-6, 2510         | K.EAAYHPEVAPDVR.L                     | 1454.56910 | 2 | 1.16E-04 | 0.82 | 2.65 | - | 843.1  |
| AHQ-8-2, 5671         | K.EADESLNFFEEQILEAAK.S                | 1937.05072 | 2 | 1.27E-07 | 0.93 | 4.24 | - | 1212.9 |
| AHQ-8-3, 5474 - 5536  | K.EADESLNFFEEQILEAAK.S                | 1937.05072 | 2 | 8.14E-08 | 0.97 | 5.37 | - | 1499.1 |
| AHQ-8-5, 5554 - 5624  | K.EADESLNFFEEQILEAAK.S                | 1937.05072 | 2 | 1.09E-07 | 0.96 | 4.90 | - | 1745.1 |
| AHQ-8-2, 5793         | K.EADESLNFFEEQILEAAK.S                | 1937.05072 | 2 | 3.60E-05 | 0.71 | 3.14 | - | 851.8  |
| AHQ-8-3, 5592         | K.EADESLNFFEEQILEAAK.S                | 1937.05072 | 2 | 1.08E-07 | 0.93 | 4.32 | - | 1053.4 |
| AHQ-8-1, 5621 - 5684  | K.EADESLNFFEEQILEAAK.S                | 1937.05072 | 2 | 4.69E-07 | 0.96 | 4.91 | - | 1553.7 |
| AHQ-8-8, 5549 - 5625  | K.EADESLNFFEEQILEAAK.S                | 1937.05072 | 2 | 1.07E-05 | 0.96 | 4.43 | - | 1492.3 |
| AHQ-8-3, 5274 - 5332  | K.EADESLNFFEEQILEAAK.S                | 1937.05072 | 2 | 2.36E-06 | 0.93 | 4.74 | - | 637.1  |
| AHQ-8-4, 5799         | K.EADESLNFFEEQILEAAK.S                | 1937.05072 | 2 | 8.14E-07 | 0.58 | 3.25 | - | 450.6  |
| AHQ-8-2, 5559 - 5615  | K.EADESLNFFEEQILEAAK.S                | 1937.05072 | 2 | 1.26E-07 | 0.96 | 4.46 | - | 1616.8 |
| AHQ-8-4, 5654         | K.EADESLNFFEEQILEAAK.S                | 1937.05072 | 2 | 5.19E-10 | 0.96 | 4.83 | - | 1333.6 |
| AHQ-8-6, 5450 - 5519  | K.EADESLNFFEEQILEAAK.S                | 1937.05072 | 2 | 3.93E-07 | 0.95 | 4.76 | - | 1205.5 |
| AHQ-8-4, 5539 - 5597  | K.EADESLNFFEEQILEAAK.S                | 1937.05072 | 2 | 2.48E-08 | 0.97 | 4.99 | - | 1845.9 |
| AHQ-8-4, 5399 - 5473  | K.EADESLNFFEEQILEAAK.S                | 1937.05072 | 2 | 3.40E-07 | 0.75 | 3.24 | - | 615.1  |
| AHQ-8-7, 5394 - 5461  | K.EADESLNFFEEQILEAAK.S                | 1937.05072 | 2 | 2.86E-07 | 0.94 | 4.56 | - | 1273.7 |
| AHQ-8-6, 5267 - 5322  | K.EADESLNFFEEQILEAAK.S                | 1937.05072 | 2 | 9.02E-06 | 0.64 | 3.44 | - | 419.2  |
| AHQ-8-2, 5375 - 5415  | K.EADESLNFFEEQILEAAK.S                | 1937.05072 | 2 | 1.54E-05 | 0.87 | 3.56 | - | 726.0  |
| AHQ-8-5, 6464         | R.ECANGYLELLDHLVLLTQKPSPELK.Q         | 2883.30906 | 3 | 2.86E-04 | 0.67 | 3.49 | - | 733.6  |
| AHQ-8-7, 6348         | R.EGISQEAALHTQMLTAVQEIISHLIEPLANAAR.A | 3372.79804 | 3 | 5.73E-08 | 0.96 | 5.49 | - | 1661.9 |
| AHQ-8-6, 6315         | R.EGISQEAALHTQMLTAVQEIISHLIEPLANAAR.A | 3388.79744 | 3 | 8.74E-06 | 0.95 | 5.45 | - | 1283.8 |
| AHQ-8-2, 6459         | R.EGISQEAALHTQMLTAVQEIISHLIEPLANAAR.A | 3388.79744 | 3 | 9.04E-11 | 0.91 | 4.96 | - | 884.1  |
| AHQ-8-7, 6264         | R.EGISQEAALHTQMLTAVQEIISHLIEPLANAAR.A | 3388.79744 | 3 | 4.07E-05 | 0.93 | 4.28 | - | 1425.4 |
| AHQ-8-4, 5811 - 5869  | R.ELLENPQQPINDM*SYFGCLDSVM*ENSK.V     | 3164.48754 | 3 | 9.12E-07 | 0.86 | 4.18 | - | 543.4  |
| AHQ-8-2, 6376         | R.ELLENPQQPINDM*SYFGCLDSVM*ENSK.V     | 3148.48814 | 3 | 4.84E-04 | 0.72 | 3.62 | - | 413.8  |
| AHQ-8-8, 3035 - 3093  | R.EQVVEEHTLLLR.R                      | 1553.69898 | 2 | 4.88E-04 | 0.83 | 2.98 | - | 579.5  |
| AHQ-8-8, 5357         | R.ERIEPAPAGPPSDFGLFLSDDDPK.K          | 2571.77979 | 3 | 9.54E-13 | 0.98 | 6.85 | - | 1971.3 |
| AHQ-8-14, 5202 - 5262 | R.ERIEPAPAGPPSDFGLFLSDDDPK.K          | 2571.77979 | 3 | 3.02E-06 | 0.93 | 4.77 | - | 1265.3 |
| AHQ-8-13, 4978        | R.ERIEPAPAGPPSDFGLFLSDDDPK.K          | 2699.95270 | 3 | 8.92E-04 | 0.89 | 3.79 | - | 1143.7 |
| AHQ-8-8, 5022         | R.ERIEPAPAGPPSDFGLFLSDDDPK.K          | 2699.95270 | 3 | 2.98E-07 | 0.96 | 5.29 | - | 1409.1 |
| AHQ-8-8, 4569         | K.EVIOEWLNTNIK.R                      | 1487.68214 | 1 | 8.52E-06 | 0.46 | 3.14 | - | 203.3  |
| AHQ-8-8, 4557         | K.EVIOEWLNTNIK.R                      | 1487.68214 | 2 | 3.67E-06 | 0.91 | 3.96 | - | 841.3  |
| AHQ-8-7, 4457         | K.EVIOEWLNTNIK.R                      | 1487.68214 | 2 | 2.29E-05 | 0.87 | 3.61 | - | 770.1  |
| AHQ-8-8, 2958         | K.FFYSDQNVDSR.D                       | 1378.42795 | 2 | 7.84E-08 | 0.93 | 3.41 | - | 1094.0 |
| AHQ-8-7, 2966         | K.FFYSDQNVDSR.D                       | 1378.42795 | 2 | 2.97E-07 | 0.94 | 3.59 | - | 1215.0 |
| AHQ-8-7, 5408 - 5465  | K.FFYSDQNVDSRDPVQLNLLVYQAR.D          | 2889.17074 | 3 | 8.92E-04 | 0.89 | 4.15 | - | 879.5  |
| AHQ-8-3, 5602         | K.FFYSDQNVDSRDPVQLNLLVYQAR.D          | 2889.17074 | 3 | 7.26E-06 | 0.96 | 5.75 | - | 1085.2 |
| AHQ-8-1, 5704         | K.FFYSDQNVDSRDPVQLNLLVYQAR.D          | 2889.17074 | 3 | 1.45E-04 | 0.91 | 4.40 | - | 1280.3 |
| AHQ-8-8, 5681         | K.FFYSDQNVDSRDPVQLNLLVYQAR.D          | 2889.17074 | 3 | 4.30E-11 | 0.97 | 5.20 | - | 2109.0 |
| AHQ-8-2, 5868         | R.FGQDFSTFLAEGVEM*AGQAPSQEDR.A        | 2734.89265 | 3 | 3.06E-05 | 0.60 | 2.70 | - | 699.6  |
| AHQ-8-2, 5919         | R.FGQDFSTFLAEGVEM*AGQAPSQEDR.A        | 2734.89265 | 3 | 1.47E-06 | 0.86 | 3.67 | - | 844.1  |
| AHQ-8-2, 5783 - 5863  | R.FGQDFSTFLAEGVEM*AGQAPSQEDR.A        | 2734.89265 | 3 | 9.54E-05 | 0.67 | 3.58 | - | 538.8  |
| AHQ-8-1, 5776 - 5857  | R.FGQDFSTFLAEGVEM*AGQAPSQEDR.A        | 2734.89265 | 3 | 6.49E-05 | 0.80 | 4.08 | - | 459.7  |
| AHQ-8-3, 5801         | R.FGQDFSTFLAEGVEM*AGQAPSQEDR.A        | 2734.89265 | 2 | 1.85E-04 | 0.78 | 2.95 | - | 708.1  |
| AHQ-8-3, 2898         | K.FLPSELRDEH                          | 1243.35032 | 2 | 1.01E-05 | 0.73 | 2.65 | - | 425.7  |
| AHQ-8-2, 2931 - 2935  | K.FLPSELRDEH                          | 1243.35032 | 2 | 8.91E-07 | 0.49 | 2.51 | - | 342.0  |
| AHQ-8-1, 5075         | K.GLAGAVSELLR.S                       | 1086.26701 | 2 | 2.35E-06 | 0.98 | 4.79 | - | 2400.6 |
| AHQ-8-4, 4970 - 4978  | K.GLAGAVSELLR.S                       | 1086.26701 | 2 | 1.05E-06 | 0.98 | 5.11 | - | 2134.8 |
| AHQ-8-5, 4952         | K.GLAGAVSELLR.S                       | 1086.26701 | 2 | 1.53E-04 | 0.97 | 4.09 | - | 2034.1 |
| AHQ-8-3, 4941         | K.GLAGAVSELLR.S                       | 1086.26701 | 2 | 2.06E-06 | 0.97 | 4.33 | - | 2073.1 |
| AHQ-8-7, 4777         | K.GLAGAVSELLR.S                       | 1086.26701 | 2 | 2.34E-06 | 0.97 | 4.84 | - | 1943.9 |
| AHQ-8-2, 5019         | K.GLAGAVSELLR.S                       | 1086.26701 | 2 | 1.23E-07 | 0.98 | 4.65 | - | 2041.4 |
| AHQ-8-4, 6169 - 6235  | R.GSQAQDPSPSAQLALIAASQSFLQPGGK.M      | 2756.02103 | 3 | 2.54E-04 | 0.78 | 3.47 | - | 700.9  |
| AHQ-8-4, 6134         | R.GSQAQDPSPSAQLALIAASQSFLQPGGK.M      | 2756.02103 | 2 | 1.55E-04 | 0.87 | 4.50 | - | 538.7  |
| AHQ-8-5, 6082         | R.GSQAQDPSPSAQLALIAASQSFLQPGGK.M      | 2756.02103 | 2 | 1.75E-04 | 0.84 | 3.77 | - | 687.7  |
| AHQ-8-3, 6052 - 6053  | R.GSQAQDPSPSAQLALIAASQSFLQPGGK.M      | 2756.02103 | 2 | 6.83E-08 | 0.95 | 5.57 | - | 680.9  |
| AHQ-8-2, 6337 - 6405  | R.GSQAQDPSPSAQLALIAASQSFLQPGGK.M      | 2756.02103 | 3 | 1.49E-04 | 0.89 | 4.51 | - | 768.4  |
| AHQ-8-2, 6083 - 6153  | R.GSQAQDPSPSAQLALIAASQSFLQPGGK.M      | 2756.02103 | 3 | 3.70E-06 | 0.91 | 4.93 | - | 871.7  |
| AHQ-8-3, 5970 - 6044  | R.GSQAQDPSPSAQLALIAASQSFLQPGGK.M      | 2756.02103 | 3 | 1.33E-08 | 0.96 | 5.86 | - | 1294.8 |
| AHQ-8-5, 6524 - 6526  | K.GTEWVDPEDPTVIAENELLGAAAIAEAAK.K     | 3053.32301 | 3 | 1.37E-09 | 0.97 | 6.09 | - | 1871.1 |
| AHQ-8-3, 6480 - 6484  | K.GTEWVDPEDPTVIAENELLGAAAIAEAAK.K     | 3053.32301 | 3 | 1.51E-12 | 0.96 | 5.76 | - | 1420.6 |
| AHQ-8-2, 6587         | K.GTEWVDPEDPTVIAENELLGAAAIAEAAK.K     | 3053.32301 | 3 | 2.59E-13 | 0.97 | 5.84 | - | 1918.1 |
| AHQ-8-4, 6581         | K.GTEWVDPEDPTVIAENELLGAAAIAEAAK.K     | 3053.32301 | 3 | 6.32E-10 | 0.88 | 4.55 | - | 1056.4 |
| AHQ-8-4, 6482         | R.GVAALTSDPVQAIIVLDTASDVLDK.A         | 2470.75835 | 3 | 1.10E-07 | 0.98 | 6.61 | - | 2778.4 |
| AHQ-8-6, 6318 - 6319  | R.GVAALTSDPVQAIIVLDTASDVLDK.A         | 2470.75835 | 3 | 3.94E-11 | 0.97 | 6.17 | - | 1781.7 |
| AHQ-8-2, 6489         | R.GVAALTSDPVQAIIVLDTASDVLDK.A         | 2470.75835 | 3 | 1.56E-08 | 0.98 | 6.81 | - | 2824.4 |
| AHQ-8-5, 6425         | R.GVAALTSDPVQAIIVLDTASDVLDK.A         | 2470.75835 | 3 | 7.34E-08 | 0.94 | 5.51 | - | 1248.1 |
| AHQ-8-2, 6487 - 6488  | R.GVAALTSDPVQAIIVLDTASDVLDK.A         | 2470.75835 | 2 | 2.86E-11 | 0.98 | 7.53 | - | 1242.0 |
| AHQ-8-5, 6476         | R.GVGAAATAVTQALNELLQHVK.A             | 2092.38495 | 3 | 1.55E-06 | 0.95 | 5.17 | - | 1180.3 |
| AHQ-8-1, 6511         | R.GVGAAATAVTQALNELLQHVK.A             | 2092.38495 | 3 | 2.86E-07 | 0.92 | 4.23 | - | 1163.1 |
| AHQ-8-3, 6436         | R.GVGAAATAVTQALNELLQHVK.A             | 2092.38495 | 3 | 5.30E-08 | 0.92 | 4.20 | - | 1052.2 |
| AHQ-8-5, 6477         | R.GVGAAATAVTQALNELLQHVK.A             | 2092.38495 | 2 | 1.89E-04 | 0.94 | 5.16 | - | 807.9  |
| AHQ-8-6, 6370         | R.GVGAAATAVTQALNELLQHVK.A             | 2092.38495 | 3 | 1.70E-09 | 0.95 | 4.99 | - | 1360.6 |
| AHQ-8-2, 5512         | R.GVGAAATAVTQALNELLQHVK.A             | 2092.38495 | 2 | 1.13E-04 | 0.83 | 3.86 | - | 534.5  |
| AHQ-8-7, 6320         | R.GVGAAATAVTQALNELLQHVK.A             | 2092.38495 | 3 | 1.76E-08 | 0.94 | 5.06 | - | 1049.0 |
| AHQ-8-2, 5504         | R.GVGAAATAVTQALNELLQHVK.A             | 2092.38495 | 3 | 7.60E-07 | 0.95 | 4.52 | - | 1255.7 |
| AHQ-8-2, 6540         | R.GVGAAATAVTQALNELLQHVK.A             | 2092.38495 | 2 | 3.66E-06 | 0.94 | 5.52 | - | 569.5  |
| AHQ-8-7, 6322         | R.GVGAAATAVTQALNELLQHVK.A             | 2092.38495 | 2 | 6.32E-05 | 0.85 | 4.21 | - | 484.1  |
| AHQ-8-4, 6515 - 6533  | R.GVGAAATAVTQALNELLQHVK.A             | 2092.38495 | 3 | 2.52E-07 | 0.87 | 4.09 | - | 936.5  |
| AHQ-8-4, 6534         | R.GVGAAATAVTQALNELLQHVK.A             | 2092.38495 | 2 | 2.03E-06 | 0.94 | 5.17 | - | 793.4  |
| AHQ-8-3, 6437 - 6438  | R.GVGAAATAVTQALNELLQHVK.A             | 2092.38495 | 2 | 6.91E-07 | 0.96 | 5.39 | - | 1169.5 |
| AHQ-8-2, 6539         | R.GVGAAATAVTQALNELLQHVK.A             | 2092.38495 | 3 | 6.55E-07 | 0.86 | 4.20 | - | 654.4  |
| AHQ-8-7, 3272         | R.IGITNHDEYSLVR.E                     | 1517.66833 | 2 | 3.29E-04 | 0.94 | 3.55 | - | 1459.5 |
| AHQ-8-11, 3313        | R.IGITNHDEYSLVR.E                     | 1517.66833 | 2 | 5.44E-04 | 0.85 | 2.73 | - | 1096.6 |
| AHQ-8-7, 3485 - 3544  | R.IGITNHDEYSLVR.E                     | 1517.66833 | 2 | 1.29E-05 | 0.93 | 3.11 | - | 1641.7 |
| AHQ-8-13, 3424        | R.IGITNHDEYSLVR.E                     | 1517.66833 | 2 | 7.05E-10 | 0.94 | 3.86 | - | 1183.7 |
| AHQ-8-8, 3546 - 3610  | R.IGITNHDEYSLVR.E                     | 1517.66833 | 2 | 3.14E-06 | 0.88 | 3.21 | - | 939.7  |
| AHQ-8-1, 4939         | R.ILAAQTSDLVNAIK.A                    | 1457.69748 | 2 | 6.03E-08 | 0.98 | 4.95 | - | 2206.1 |
| AHQ-8-6, 4740 - 4742  | R.ILAAQTSDLVNAIK.A                    | 1457.69748 | 2 | 9.67E-08 | 0.98 | 5.74 | - | 1793.1 |
| AHQ-8-7, 4645         | R.ILAAQTSDLVNAIK.A                    | 1457.69748 | 2 | 6.02E-06 | 0.96 | 4.20 | - | 1361.2 |
| AHQ-8-4, 4842 - 4866  | R.ILAAQTSDLVNAIK.A                    | 1457.69748 | 2 | 1.07E-06 | 0.96 | 3.97 | - | 1678.0 |



|                      |                                    |            |   |          |      |      |   |        |
|----------------------|------------------------------------|------------|---|----------|------|------|---|--------|
| AHQ-8-2, 4107 - 4128 | R.ILAQATSDLVNAIK.A                 | 1457.69748 | 2 | 9.91E-07 | 0.98 | 4.67 | - | 2317.9 |
| AHQ-8-4, 4051        | R.ILAQATSDLVNAIK.A                 | 1457.69748 | 2 | 4.51E-08 | 0.97 | 4.24 | - | 1945.2 |
| AHQ-8-5, 4021        | R.ILAQATSDLVNAIK.A                 | 1457.69748 | 2 | 1.00E-07 | 0.96 | 3.74 | - | 1862.8 |
| AHQ-8-5, 4817 - 4841 | R.ILAQATSDLVNAIK.A                 | 1457.69748 | 2 | 4.52E-08 | 0.95 | 3.87 | - | 1361.8 |
| AHQ-8-3, 4809 - 4810 | R.ILAQATSDLVNAIK.A                 | 1457.69748 | 2 | 1.34E-10 | 0.98 | 5.93 | - | 1495.2 |
| AHQ-8-6, 3960        | R.ILAQATSDLVNAIK.A                 | 1457.69748 | 2 | 2.32E-08 | 0.97 | 4.61 | - | 2073.7 |
| AHQ-8-1, 4189        | R.ILAQATSDLVNAIK.A                 | 1457.69748 | 2 | 2.39E-06 | 0.97 | 4.44 | - | 1626.2 |
| AHQ-8-2, 4883        | R.ILAQATSDLVNAIK.A                 | 1457.69748 | 2 | 1.06E-08 | 0.97 | 4.66 | - | 1741.1 |
| AHQ-8-3, 4041        | R.ILAQATSDLVNAIK.A                 | 1457.69748 | 2 | 2.29E-07 | 0.98 | 4.94 | - | 2606.9 |
| AHQ-8-3, 5246 - 5262 | R.IPEAPAGPPSDFGLFLSDDDDPKK.G       | 2414.65181 | 3 | 2.36E-11 | 0.91 | 4.50 | - | 1022.5 |
| AHQ-8-1, 5355        | R.IPEAPAGPPSDFGLFLSDDDDPKK.G       | 2414.65181 | 3 | 4.06E-07 | 0.85 | 4.04 | - | 709.2  |
| AHQ-8-8, 5225 - 5302 | R.IPEAPAGPPSDFGLFLSDDDDPKK.G       | 2414.65181 | 3 | 2.49E-10 | 0.92 | 4.37 | - | 1255.6 |
| AHQ-8-13, 5284       | R.IPEAPAGPPSDFGLFLSDDDDPKK.G       | 2414.65181 | 3 | 2.07E-05 | 0.90 | 3.66 | - | 1401.1 |
| AHQ-8-7, 2596        | K.KGIWLEAGK.A                      | 1002.19171 | 2 | 2.77E-04 | 0.72 | 2.74 | - | 779.3  |
| AHQ-8-3, 2640        | K.LAQAAQSSVATITR.L                 | 1417.59344 | 2 | 4.87E-08 | 0.95 | 3.54 | - | 1510.3 |
| AHQ-8-4, 2606        | K.LAQAAQSSVATITR.L                 | 1417.59344 | 2 | 2.18E-09 | 0.97 | 4.70 | - | 1737.2 |
| AHQ-8-6, 2746        | K.LAQAAQSSVATITR.L                 | 1417.59344 | 2 | 2.50E-07 | 0.96 | 4.43 | - | 1380.0 |
| AHQ-8-7, 2709        | K.LAQAAQSSVATITR.L                 | 1417.59344 | 2 | 1.20E-07 | 0.95 | 4.09 | - | 1459.7 |
| AHQ-8-5, 2760        | K.LAQAAQSSVATITR.L                 | 1417.59344 | 2 | 4.90E-10 | 0.96 | 4.30 | - | 1497.3 |
| AHQ-8-3, 2796 - 2818 | K.LAQAAQSSVATITR.L                 | 1417.59344 | 2 | 1.36E-08 | 0.97 | 4.26 | - | 1779.5 |
| AHQ-8-2, 2669 - 2704 | K.LAQAAQSSVATITR.L                 | 1417.59344 | 2 | 1.04E-04 | 0.93 | 3.44 | - | 1253.4 |
| AHQ-8-14-, 2801      | K.LAQAAQSSVATITR.L                 | 1417.59344 | 2 | 7.87E-04 | 0.87 | 3.13 | - | 1152.2 |
| AHQ-8-1, 2991        | K.LAQAAQSSVATITR.L                 | 1417.59344 | 2 | 9.10E-06 | 0.94 | 3.23 | - | 1583.2 |
| AHQ-8-11, 2755       | K.LAQAAQSSVATITR.L                 | 1417.59344 | 2 | 1.65E-04 | 0.92 | 3.37 | - | 1119.3 |
| AHQ-8-4, 2758        | K.LAQAAQSSVATITR.L                 | 1417.59344 | 2 | 2.40E-10 | 0.96 | 3.79 | - | 1776.2 |
| AHQ-8-2, 3339        | R.LASEAKPAVAEAENEIEGSHIK.H         | 2236.46779 | 3 | 7.32E-10 | 0.97 | 5.61 | - | 2462.4 |
| AHQ-8-4, 3262        | R.LASEAKPAVAEAENEIEGSHIK.H         | 2236.46779 | 3 | 3.37E-07 | 0.93 | 4.72 | - | 1117.9 |
| AHQ-8-3, 3296        | R.LASEAKPAVAEAENEIEGSHIK.H         | 2236.46779 | 2 | 7.42E-10 | 0.95 | 5.27 | - | 712.1  |
| AHQ-8-4, 3277        | R.LASEAKPAVAEAENEIEGSHIK.H         | 2236.46779 | 2 | 8.71E-10 | 0.96 | 5.36 | - | 878.1  |
| AHQ-8-3, 3214 - 3288 | R.LASEAKPAVAEAENEIEGSHIK.H         | 2236.46779 | 3 | 2.12E-07 | 0.95 | 4.94 | - | 1700.6 |
| AHQ-8-6, 5058 - 5062 | K.LGAASLGAEDPETQVVLINAVK.D         | 2196.48671 | 3 | 5.21E-04 | 0.95 | 4.74 | - | 1701.5 |
| AHQ-8-4, 5334        | K.LGAASLGAEDPETQVVLINAVK.D         | 2196.48671 | 3 | 1.58E-05 | 0.83 | 3.14 | - | 1368.4 |
| AHQ-8-4, 5322        | K.LGAASLGAEDPETQVVLINAVK.D         | 2196.48671 | 2 | 3.85E-08 | 0.87 | 4.07 | - | 609.8  |
| AHQ-8-4, 5201 - 5203 | K.LGAASLGAEDPETQVVLINAVK.D         | 2196.48671 | 3 | 1.08E-07 | 0.97 | 5.54 | - | 2072.5 |
| AHQ-8-4, 5193 - 5197 | K.LGAASLGAEDPETQVVLINAVK.D         | 2196.48671 | 2 | 1.51E-05 | 0.96 | 4.92 | - | 1236.1 |
| AHQ-8-5, 5145        | K.LGAASLGAEDPETQVVLINAVK.D         | 2196.48671 | 2 | 1.84E-06 | 0.97 | 5.90 | - | 1159.1 |
| AHQ-8-5, 5148 - 5156 | K.LGAASLGAEDPETQVVLINAVK.D         | 2196.48671 | 3 | 9.04E-06 | 0.97 | 5.41 | - | 2340.7 |
| AHQ-8-2, 4996 - 5031 | K.LGAASLGAEDPETQVVLINAVK.D         | 2196.48671 | 2 | 1.99E-10 | 0.96 | 5.07 | - | 1138.5 |
| AHQ-8-6, 5182 - 5231 | K.LGAASLGAEDPETQVVLINAVK.D         | 2196.48671 | 2 | 5.33E-04 | 0.90 | 4.34 | - | 671.4  |
| AHQ-8-2, 5184 - 5243 | K.LGAASLGAEDPETQVVLINAVK.D         | 2196.48671 | 2 | 3.76E-05 | 0.97 | 5.15 | - | 1467.4 |
| AHQ-8-2, 5321 - 5336 | K.LGAASLGAEDPETQVVLINAVK.D         | 2196.48671 | 2 | 1.28E-05 | 0.84 | 4.04 | - | 498.6  |
| AHQ-8-6, 4875 - 4903 | K.LGAASLGAEDPETQVVLINAVK.D         | 2196.48671 | 2 | 2.43E-09 | 0.97 | 5.11 | - | 1611.1 |
| AHQ-8-1, 5247 - 5315 | K.LGAASLGAEDPETQVVLINAVK.D         | 2196.48671 | 2 | 6.58E-07 | 0.95 | 4.51 | - | 1068.8 |
| AHQ-8-5, 4933 - 4998 | K.LGAASLGAEDPETQVVLINAVK.D         | 2196.48671 | 2 | 6.92E-05 | 0.59 | 2.88 | - | 432.2  |
| AHQ-8-5, 5278        | K.LGAASLGAEDPETQVVLINAVK.D         | 2196.48671 | 2 | 3.08E-08 | 0.90 | 4.68 | - | 469.1  |
| AHQ-8-4, 5005        | K.LGAASLGAEDPETQVVLINAVK.D         | 2196.48671 | 2 | 2.06E-07 | 0.94 | 4.61 | - | 875.1  |
| AHQ-8-7, 4785        | K.LGAASLGAEDPETQVVLINAVK.D         | 2196.48671 | 2 | 4.22E-07 | 0.93 | 4.49 | - | 797.0  |
| AHQ-8-3, 5136 - 5198 | K.LGAASLGAEDPETQVVLINAVK.D         | 2196.48671 | 2 | 2.85E-04 | 0.97 | 5.07 | - | 1498.5 |
| AHQ-8-1, 5079        | K.LGAASLGAEDPETQVVLINAVK.D         | 2196.48671 | 2 | 5.06E-05 | 0.94 | 4.60 | - | 931.1  |
| AHQ-8-3, 4940 - 4958 | K.LGAASLGAEDPETQVVLINAVK.D         | 2196.48671 | 2 | 2.65E-06 | 0.95 | 4.99 | - | 843.4  |
| AHQ-8-3, 5256 - 5296 | K.LGAASLGAEDPETQVVLINAVK.D         | 2196.48671 | 2 | 5.51E-04 | 0.91 | 4.04 | - | 787.6  |
| AHQ-8-8, 3657        | K.LHTDDELNLWLDHGR.T                | 1721.81153 | 2 | 3.26E-06 | 0.97 | 5.01 | - | 1819.3 |
| AHQ-8-8, 3662        | K.LHTDDELNLWLDHGR.T                | 1721.81153 | 3 | 2.14E-07 | 0.91 | 4.63 | - | 823.6  |
| AHQ-8-7, 3697        | K.LHTDDELNLWLDHGR.T                | 1721.81153 | 2 | 3.45E-06 | 0.96 | 4.67 | - | 1742.1 |
| AHQ-8-2, 4292 - 4355 | K.LLAALLEDEGGSGR.P                 | 1401.54764 | 2 | 1.52E-05 | 0.72 | 2.72 | - | 287.4  |
| AHQ-8-1, 5183        | K.LLAALLEDEGGSGRPLLOAAK.G          | 2123.43896 | 3 | 2.24E-06 | 0.95 | 4.69 | - | 1382.3 |
| AHQ-8-7, 4864        | K.LLAALLEDEGGSGRPLLOAAK.G          | 2123.43896 | 3 | 8.04E-11 | 0.96 | 4.80 | - | 1794.3 |
| AHQ-8-7, 4865        | K.LLAALLEDEGGSGRPLLOAAK.G          | 2123.43896 | 2 | 2.36E-08 | 0.97 | 6.17 | - | 1211.1 |
| AHQ-8-4, 5093        | K.LLAALLEDEGGSGRPLLOAAK.G          | 2123.43896 | 3 | 3.32E-09 | 0.95 | 4.93 | - | 1224.1 |
| AHQ-8-2, 5120        | K.LLAALLEDEGGSGRPLLOAAK.G          | 2123.43896 | 3 | 1.42E-07 | 0.97 | 5.34 | - | 1734.5 |
| AHQ-8-2, 5123 - 5124 | K.LLAALLEDEGGSGRPLLOAAK.G          | 2123.43896 | 2 | 1.29E-12 | 0.97 | 6.44 | - | 1170.8 |
| AHQ-8-6, 4974        | K.LLAALLEDEGGSGRPLLOAAK.G          | 2123.43896 | 2 | 8.73E-08 | 0.97 | 6.20 | - | 1145.2 |
| AHQ-8-6, 4971        | K.LLAALLEDEGGSGRPLLOAAK.G          | 2123.43896 | 3 | 1.21E-07 | 0.94 | 5.28 | - | 1186.5 |
| AHQ-8-5, 5060        | K.LLAALLEDEGGSGRPLLOAAK.G          | 2123.43896 | 2 | 6.53E-10 | 0.97 | 6.48 | - | 1268.9 |
| AHQ-8-2, 6568 - 6569 | K.LLAALLEDEGGSGRPLLOAAK.G          | 2123.43896 | 2 | 1.62E-04 | 0.82 | 3.78 | - | 744.2  |
| AHQ-8-5, 5058        | K.LLAALLEDEGGSGRPLLOAAK.G          | 2123.43896 | 3 | 4.65E-09 | 0.97 | 5.73 | - | 1723.8 |
| AHQ-8-3, 5046        | K.LLAALLEDEGGSGRPLLOAAK.G          | 2123.43896 | 2 | 4.43E-06 | 0.98 | 6.72 | - | 1729.5 |
| AHQ-8-4, 5094        | K.LLAALLEDEGGSGRPLLOAAK.G          | 2123.43896 | 2 | 3.44E-11 | 0.98 | 6.36 | - | 1751.1 |
| AHQ-8-3, 5044        | K.LLAALLEDEGGSGRPLLOAAK.G          | 2123.43896 | 3 | 1.66E-08 | 0.95 | 4.91 | - | 1481.0 |
| AHQ-8-1, 5135 - 5191 | K.LLAALLEDEGGSGRPLLOAAK.G          | 2123.43896 | 2 | 1.35E-08 | 0.96 | 5.67 | - | 960.7  |
| AHQ-8-8, 5018        | K.LLAALLEDEGGSGRPLLOAAK.G          | 2123.43896 | 2 | 1.97E-09 | 0.96 | 5.77 | - | 974.0  |
| AHQ-8-3, 4076 - 4136 | R.LLSDSLPPSTGTGFQEAQSR.L           | 2035.20076 | 2 | 6.88E-06 | 0.87 | 3.95 | - | 337.9  |
| AHQ-8-3, 3962 - 4020 | R.LLSDSLPPSTGTGFQEAQSR.L           | 2035.20076 | 2 | 1.26E-09 | 0.88 | 3.71 | - | 429.8  |
| AHQ-8-2, 4092 - 4151 | R.LLSDSLPPSTGTGFQEAQSR.L           | 2035.20076 | 2 | 1.79E-08 | 0.80 | 3.38 | - | 351.3  |
| AHQ-8-4, 4098 - 4171 | R.LLSDSLPPSTGTGFQEAQSR.L           | 2035.20076 | 2 | 1.15E-04 | 0.91 | 4.20 | - | 412.5  |
| AHQ-8-4, 3973 - 4037 | R.LLSDSLPPSTGTGFQEAQSR.L           | 2035.20076 | 2 | 4.31E-04 | 0.88 | 3.55 | - | 432.8  |
| AHQ-8-5, 4209        | R.LNEAAAAGLNQAATELVQASR.G          | 2028.21299 | 2 | 3.65E-06 | 0.94 | 4.81 | - | 920.7  |
| AHQ-8-1, 5337        | R.LNEAAAAGLNQAATELVQASR.G          | 2028.21299 | 2 | 4.10E-12 | 0.98 | 6.02 | - | 2362.5 |
| AHQ-8-2, 5576        | R.LNEAAAAGLNQAATELVQASR.G          | 2028.21299 | 2 | 6.17E-13 | 0.97 | 5.33 | - | 1760.2 |
| AHQ-8-2, 4281        | R.LNEAAAAGLNQAATELVQASR.G          | 2028.21299 | 2 | 2.20E-08 | 0.92 | 4.01 | - | 857.6  |
| AHQ-8-2, 5476 - 5479 | R.LNEAAAAGLNQAATELVQASR.G          | 2028.21299 | 2 | 1.71E-07 | 0.95 | 4.36 | - | 1072.7 |
| AHQ-8-3, 5232        | R.LNEAAAAGLNQAATELVQASR.G          | 2028.21299 | 3 | 2.02E-07 | 0.98 | 5.96 | - | 2066.1 |
| AHQ-8-6, 5328        | R.LNEAAAAGLNQAATELVQASR.G          | 2028.21299 | 2 | 2.98E-07 | 0.83 | 3.44 | - | 813.5  |
| AHQ-8-4, 4243        | R.LNEAAAAGLNQAATELVQASR.G          | 2028.21299 | 2 | 4.14E-09 | 0.96 | 4.91 | - | 1021.7 |
| AHQ-8-6, 4148        | R.LNEAAAAGLNQAATELVQASR.G          | 2028.21299 | 2 | 2.00E-08 | 0.95 | 4.59 | - | 937.7  |
| AHQ-8-3, 5489        | R.LNEAAAAGLNQAATELVQASR.G          | 2028.21299 | 2 | 8.65E-10 | 0.97 | 5.11 | - | 1626.6 |
| AHQ-8-4, 5559 - 5618 | R.LNEAAAAGLNQAATELVQASR.G          | 2028.21299 | 2 | 4.38E-08 | 0.96 | 4.98 | - | 1439.7 |
| AHQ-8-1, 4356        | R.LNEAAAAGLNQAATELVQASR.G          | 2028.21299 | 2 | 9.61E-07 | 0.93 | 4.56 | - | 668.5  |
| AHQ-8-6, 5172        | R.LNEAAAAGLNQAATELVQASR.G          | 2028.21299 | 3 | 4.11E-04 | 0.97 | 6.09 | - | 1947.8 |
| AHQ-8-6, 5171        | R.LNEAAAAGLNQAATELVQASR.G          | 2028.21299 | 2 | 1.49E-08 | 0.93 | 4.51 | - | 955.8  |
| AHQ-8-7, 5090        | R.LNEAAAAGLNQAATELVQASR.G          | 2028.21299 | 2 | 1.06E-08 | 0.97 | 5.33 | - | 1484.5 |
| AHQ-8-4, 5462        | R.LNEAAAAGLNQAATELVQASR.G          | 2028.21299 | 2 | 2.66E-05 | 0.96 | 4.78 | - | 1201.1 |
| AHQ-8-5, 5210 - 5269 | R.LNEAAAAGLNQAATELVQASR.G          | 2028.21299 | 2 | 1.27E-09 | 0.97 | 5.52 | - | 1437.1 |
| AHQ-8-2, 4944        | R.LNEAAAAGLNQAATELVQASR.G          | 2028.21299 | 2 | 1.27E-08 | 0.94 | 4.25 | - | 1137.2 |
| AHQ-8-5, 5308        | R.LNEAAAAGLNQAATELVQASR.G          | 2028.21299 | 2 | 9.56E-06 | 0.92 | 4.07 | - | 813.5  |
| AHQ-8-4, 5289        | R.LNEAAAAGLNQAATELVQASR.G          | 2028.21299 | 2 | 4.65E-06 | 0.98 | 5.64 | - | 1915.9 |
| AHQ-8-2, 5305 - 5373 | R.LNEAAAAGLNQAATELVQASR.G          | 2028.21299 | 2 | 3.19E-12 | 0.98 | 5.94 | - | 1409.8 |
| AHQ-8-6, 5167        | R.LNEAAAAGLNQAATELVQASR.G          | 2028.21299 | 2 | 3.02E-09 | 0.98 | 5.92 | - | 1720.3 |
| AHQ-8-3, 5224 - 5245 | R.LNEAAAAGLNQAATELVQASR.G          | 2028.21299 | 2 | 1.27E-06 | 0.96 | 4.87 | - | 1683.7 |
| AHQ-8-3, 4220        | R.LNEAAAAGLNQAATELVQASR.G          | 2028.21299 | 2 | 5.93E-09 | 0.96 | 4.84 | - | 1221.2 |
| AHQ-8-2, 5152        | R.LNEAAAAGLNQAATELVQASRGTTPQDLAR.A | 2867.12501 | 3 | 1.53E-05 | 0.56 | 3.11 | - | 607.1  |
| AHQ-8-2, 2149        | R.MATNAAAGNAIK.K                   | 1204.38227 | 2 | 1.67E-07 | 0.81 | 3.36 | - | 715.4  |
| AHQ-8-4, 4009        | R.M'VAATNNLCEAANAAVQGHASQEK.L      | 2574.79038 | 3 | 2.09E-09 | 0.84 | 3.57 | - | 715.8  |
| AHQ-8-2, 3976        | R.M'VAATNNLCEAANAAVQGHASQEK.L      | 2574.79038 | 3 | 2.92E-07 | 0.71 | 3.49 | - | 657.8  |
| AHQ-8-5, 3998        | R.M'VAATNNLCEAANAAVQGHASQEK.L      | 2574.79038 | 3 | 4.74E-08 | 0.83 | 3.59 | - | 826.4  |
| AHQ-8-2, 4065 - 4079 | R.M'VAATNNLCEAANAAVQGHASQEK.L      | 2574.79038 | 3 | 2.93E-09 | 0.95 | 5.95 | - | 966.9  |
| AHQ-8-4, 3915        | R.M'VAATNNLCEAANAAVQGHASQEK.L      | 2574.79038 | 3 | 1.52E-12 | 0.92 | 4.36 | - | 969.7  |

|                        |                                             |            |   |          |      |      |   |        |
|------------------------|---------------------------------------------|------------|---|----------|------|------|---|--------|
| AHQ-8-3, 4009          | R.M*VAATNNLCEAANAAVQGHASQEK.L               | 2574.79038 | 3 | 3.36E-11 | 0.89 | 4.53 | - | 869.2  |
| AHQ-8-2, 3055          | R.M*VAATNNLCEAANAAVQGHASQEK.L               | 2574.79038 | 3 | 6.98E-05 | 0.76 | 3.49 | - | 600.5  |
| AHQ-8-5, 4176          | R.M*VAATNNLCEAANAAVQGHASQEK.L               | 2574.79038 | 3 | 9.46E-04 | 0.96 | 5.83 | - | 1451.7 |
| AHQ-8-3, 3917          | R.M*VAATNNLCEAANAAVQGHASQEK.L               | 2574.79038 | 3 | 1.43E-09 | 0.78 | 3.57 | - | 655.7  |
| AHQ-8-2, 4256          | R.M*VAATNNLCEAANAAVQGHASQEK.L               | 2574.79038 | 3 | 4.90E-04 | 0.97 | 5.80 | - | 2004.3 |
| AHQ-8-4, 6157          | K.M*VGGIAQIIAAQEEM*LR.K                     | 1847.19347 | 3 | 3.08E-05 | 0.94 | 4.58 | - | 1376.8 |
| AHQ-8-2, 5639 - 5717   | K.M*VGGIAQIIAAQEEM*LR.K                     | 1863.19287 | 3 | 3.13E-09 | 0.97 | 6.14 | - | 1722.0 |
| AHQ-8-13-, 5446 - 5522 | K.M*VGGIAQIIAAQEEM*LR.K                     | 1863.19287 | 2 | 2.36E-05 | 0.90 | 3.72 | - | 966.9  |
| AHQ-8-2, 6177          | K.M*VGGIAQIIAAQEEM*LR.K                     | 1847.19347 | 3 | 3.50E-10 | 0.96 | 5.42 | - | 1489.2 |
| AHQ-8-2, 5629 - 5703   | K.M*VGGIAQIIAAQEEM*LR.K                     | 1863.19287 | 2 | 1.11E-06 | 0.97 | 5.46 | - | 1584.6 |
| AHQ-8-2, 5769          | K.M*VGGIAQIIAAQEEM*LR.K                     | 1847.19347 | 3 | 4.89E-04 | 0.89 | 3.49 | - | 2123.5 |
| AHQ-8-2, 6121 - 6176   | K.M*VGGIAQIIAAQEEM*LR.K                     | 1847.19347 | 2 | 5.60E-09 | 0.98 | 5.52 | - | 1840.1 |
| AHQ-8-14-, 5473 - 5538 | K.M*VGGIAQIIAAQEEM*LR.K                     | 1863.19287 | 2 | 1.08E-07 | 0.97 | 5.46 | - | 1496.2 |
| AHQ-8-4, 6146          | K.M*VGGIAQIIAAQEEM*LR.K                     | 1847.19347 | 2 | 4.09E-04 | 0.91 | 4.11 | - | 1056.0 |
| AHQ-8-4, 5678          | K.M*VGGIAQIIAAQEEM*LR.K                     | 1863.19287 | 3 | 1.02E-08 | 0.97 | 5.88 | - | 2069.7 |
| AHQ-8-4, 5685          | K.M*VGGIAQIIAAQEEM*LR.K                     | 1863.19287 | 2 | 6.98E-07 | 0.93 | 4.56 | - | 858.1  |
| AHQ-8-7, 2297 - 2373   | K.NCGMSEIEAK.V                              | 1268.40005 | 2 | 5.92E-04 | 0.88 | 2.88 | - | 1300.9 |
| AHQ-8-7, 4216          | K.NGNLPEFGDAISTASK.A                        | 1621.73018 | 2 | 1.71E-06 | 0.73 | 3.09 | - | 416.0  |
| AHQ-8-5, 4349 - 4374   | K.NGNLPEFGDAISTASK.A                        | 1621.73018 | 2 | 5.85E-06 | 0.90 | 4.20 | - | 559.1  |
| AHQ-8-3, 4178 - 4198   | K.NGNLPEFGDAISTASK.A                        | 1621.73018 | 2 | 7.74E-04 | 0.81 | 3.25 | - | 412.6  |
| AHQ-8-2, 4287          | K.NGNLPEFGDAISTASK.A                        | 1621.73018 | 2 | 5.76E-07 | 0.92 | 3.90 | - | 701.6  |
| AHQ-8-1, 4475          | K.NGNLPEFGDAISTASK.A                        | 1621.73018 | 2 | 1.88E-08 | 0.86 | 3.60 | - | 479.6  |
| AHQ-8-1, 4337 - 4349   | K.NGNLPEFGDAISTASK.A                        | 1621.73018 | 2 | 8.48E-04 | 0.71 | 3.42 | - | 304.6  |
| AHQ-8-3, 4036 - 4096   | K.NGNLPEFGDAISTASK.A                        | 1621.73018 | 2 | 8.41E-06 | 0.84 | 3.63 | - | 400.6  |
| AHQ-8-1, 4285          | K.NLGTALAE*LR.T                             | 1058.21367 | 2 | 5.70E-04 | 0.83 | 3.36 | - | 711.6  |
| AHQ-8-2, 4192          | K.NLGTALAE*LR.T                             | 1058.21367 | 2 | 1.22E-04 | 0.91 | 3.40 | - | 940.4  |
| AHQ-8-3, 4124          | K.NLGTALAE*LR.T                             | 1058.21367 | 2 | 9.98E-06 | 0.92 | 3.61 | - | 1106.0 |
| AHQ-8-3, 2848          | K.PAAVAEENEEIGSHIK.H                        | 1636.78798 | 3 | 1.13E-08 | 0.95 | 5.05 | - | 1189.9 |
| AHQ-8-4, 2811 - 2873   | K.PAAVAEENEEIGSHIK.H                        | 1636.78798 | 2 | 2.01E-09 | 0.97 | 4.87 | - | 1508.5 |
| AHQ-8-3, 2849          | K.PAAVAEENEEIGSHIK.H                        | 1636.78798 | 2 | 1.12E-09 | 0.97 | 5.02 | - | 1734.0 |
| AHQ-8-6, 2794          | K.PAAVAEENEEIGSHIK.H                        | 1636.78798 | 3 | 6.96E-07 | 0.96 | 4.50 | - | 1885.4 |
| AHQ-8-2, 2888          | K.PAAVAEENEEIGSHIK.H                        | 1636.78798 | 3 | 2.47E-07 | 0.96 | 5.10 | - | 1586.2 |
| AHQ-8-2, 2885          | K.PAAVAEENEEIGSHIK.H                        | 1636.78798 | 2 | 4.09E-11 | 0.98 | 5.51 | - | 1849.6 |
| AHQ-8-5, 2816          | K.PAAVAEENEEIGSHIK.H                        | 1636.78798 | 2 | 9.76E-09 | 0.97 | 5.14 | - | 1458.7 |
| AHQ-8-4, 2807 - 2839   | K.PAAVAEENEEIGSHIK.H                        | 1636.78798 | 3 | 2.60E-05 | 0.96 | 4.82 | - | 1713.1 |
| AHQ-8-5, 2808          | K.PAAVAEENEEIGSHIK.H                        | 1636.78798 | 3 | 6.52E-08 | 0.97 | 5.96 | - | 1954.9 |
| AHQ-8-4, 2715          | K.PAAVAEENEEIGSHIK.H                        | 1636.78798 | 2 | 2.96E-13 | 0.97 | 4.85 | - | 1543.8 |
| AHQ-8-5, 3300          | K.QAAASATQIIAAQHAASTPK.A                    | 1996.17099 | 3 | 7.21E-04 | 0.89 | 3.83 | - | 831.2  |
| AHQ-8-6, 3236 - 3274   | K.QAAASATQIIAAQHAASTPK.A                    | 1996.17099 | 3 | 1.17E-06 | 0.73 | 3.10 | - | 599.4  |
| AHQ-8-4, 3305          | K.QAAASATQIIAAQHAASTPK.A                    | 1996.17099 | 3 | 2.68E-05 | 0.71 | 3.11 | - | 562.0  |
| AHQ-8-2, 3387 - 3389   | K.QAAASATQIIAAQHAASTPK.A                    | 1996.17099 | 2 | 4.61E-08 | 0.94 | 4.78 | - | 852.6  |
| AHQ-8-2, 3383 - 3459   | K.QAAASATQIIAAQHAASTPK.A                    | 1996.17099 | 3 | 2.76E-04 | 0.77 | 3.57 | - | 775.7  |
| AHQ-8-6, 3278          | K.QAAASATQIIAAQHAASTPK.A                    | 1996.17099 | 2 | 2.03E-04 | 0.89 | 4.24 | - | 656.6  |
| AHQ-8-3, 3336          | K.QAAASATQIIAAQHAASTPK.A                    | 1996.17099 | 2 | 3.97E-07 | 0.90 | 4.21 | - | 627.4  |
| AHQ-8-1, 3511          | K.QAAASATQIIAAQHAASTPK.A                    | 1996.17099 | 3 | 4.32E-07 | 0.70 | 3.11 | - | 826.7  |
| AHQ-8-3, 3332 - 3410   | K.QAAASATQIIAAQHAASTPK.A                    | 1996.17099 | 3 | 6.71E-12 | 0.73 | 3.09 | - | 645.1  |
| AHQ-8-1, 3520          | K.QAAASATQIIAAQHAASTPK.A                    | 1996.17099 | 2 | 8.97E-08 | 0.74 | 3.24 | - | 668.4  |
| AHQ-8-4, 3313          | K.QAAASATQIIAAQHAASTPK.A                    | 1996.17099 | 2 | 4.53E-04 | 0.85 | 3.94 | - | 520.0  |
| AHQ-8-5, 3306          | K.QAAASATQIIAAQHAASTPK.A                    | 1996.17099 | 2 | 1.46E-06 | 0.93 | 4.32 | - | 900.3  |
| AHQ-8-2, 3987          | R.QELAVFCSPEPPAK.T                          | 1574.77985 | 2 | 1.57E-07 | 0.94 | 3.53 | - | 1312.0 |
| AHQ-8-6, 3852          | R.QELAVFCSPEPPAK.T                          | 1574.77985 | 2 | 1.79E-07 | 0.88 | 3.12 | - | 889.3  |
| AHQ-8-5, 3900 - 3908   | R.QELAVFCSPEPPAK.T                          | 1574.77985 | 2 | 1.91E-05 | 0.87 | 3.51 | - | 873.8  |
| AHQ-8-3, 3920 - 3930   | R.QELAVFCSPEPPAK.T                          | 1574.77985 | 2 | 3.56E-04 | 0.82 | 3.01 | - | 793.2  |
| AHQ-8-2, 6493 - 6545   | R.QNLLQAAGNVGQASGELLQQIGESDTPHFQDALM*QLAK.A | 4154.52584 | 3 | 8.68E-04 | 0.77 | 3.88 | - | 416.9  |
| AHQ-8-2, 3819          | K.QVAASATQIIAAQHAASTPK.A                    | 1461.70942 | 2 | 1.80E-07 | 0.86 | 3.50 | - | 526.3  |
| AHQ-8-13-, 3748        | K.QVAASATQIIAAQHAASTPK.A                    | 1461.70942 | 2 | 5.15E-06 | 0.81 | 2.72 | - | 696.5  |
| AHQ-8-4, 3745          | K.QVAASATQIIAAQHAASTPK.A                    | 1461.70942 | 2 | 1.22E-09 | 0.92 | 4.00 | - | 684.3  |
| AHQ-8-4, 5607          | K.RVAGSVTELIQAAEAMK.G                       | 1775.06387 | 2 | 2.69E-04 | 0.95 | 4.68 | - | 1202.8 |
| AHQ-8-6, 3216          | R.SGASGPENFQVGSMP*PPAQQQITSGQM*HR.G         | 2961.19747 | 3 | 5.86E-05 | 0.79 | 3.59 | - | 661.0  |
| AHQ-8-4, 3538          | R.SGASGPENFQVGSMP*PPAQQQITSGQM*HR.G         | 2945.19807 | 3 | 5.79E-07 | 0.78 | 4.22 | - | 489.2  |
| AHQ-8-4, 3737          | R.SGASGPENFQVGSMP*PPAQQQITSGQM*HR.G         | 2945.19807 | 3 | 3.05E-04 | 0.66 | 3.36 | - | 369.2  |
| AHQ-8-6, 3476          | R.SGASGPENFQVGSMP*PPAQQQITSGQM*HR.G         | 2945.19807 | 3 | 2.69E-04 | 0.79 | 3.72 | - | 458.1  |
| AHQ-8-3, 3461 - 3540   | R.SGASGPENFQVGSMP*PPAQQQITSGQM*HR.G         | 2945.19807 | 3 | 2.85E-05 | 0.71 | 3.70 | - | 355.0  |
| AHQ-8-4, 3257          | R.SGASGPENFQVGSMP*PPAQQQITSGQM*HR.G         | 2961.19747 | 3 | 5.80E-06 | 0.84 | 4.30 | - | 728.6  |
| AHQ-8-2, 3316          | R.SGASGPENFQVGSMP*PPAQQQITSGQM*HR.G         | 2961.19747 | 3 | 2.28E-04 | 0.89 | 4.54 | - | 741.1  |
| AHQ-8-2, 3813 - 3821   | R.SGASGPENFQVGSMP*PPAQQQITSGQM*HR.G         | 2945.19807 | 3 | 1.05E-05 | 0.82 | 4.06 | - | 448.9  |
| AHQ-8-3, 3269          | R.SGASGPENFQVGSMP*PPAQQQITSGQM*HR.G         | 2961.19747 | 3 | 3.75E-07 | 0.92 | 4.74 | - | 991.2  |
| AHQ-8-2, 3600          | R.SGASGPENFQVGSMP*PPAQQQITSGQM*HR.G         | 2945.19807 | 3 | 2.58E-04 | 0.83 | 4.05 | - | 744.6  |
| AHQ-8-6, 3074          | K.SIAAATSALVK.A                             | 1032.21612 | 2 | 9.09E-04 | 0.81 | 2.55 | - | 756.5  |
| AHQ-8-2, 3160          | K.SIAAATSALVK.A                             | 1032.21612 | 2 | 6.24E-04 | 0.90 | 3.23 | - | 1032.5 |
| AHQ-8-8, 4171          | K.SKDFGLGEDDEESTMLEDSVSPK.K                 | 2538.68364 | 2 | 2.51E-04 | 0.89 | 3.22 | - | 1028.5 |
| AHQ-8-7, 3708          | K.SKDFGLGEDDEESTMLEDSVSPK.K                 | 2554.68304 | 3 | 6.39E-06 | 0.96 | 5.06 | - | 1838.8 |
| AHQ-8-8, 4169          | K.SKDFGLGEDDEESTMLEDSVSPK.K                 | 2538.68364 | 3 | 2.13E-06 | 0.95 | 4.72 | - | 1468.9 |
| AHQ-8-7, 4110          | K.SKDFGLGEDDEESTMLEDSVSPK.K                 | 2538.68364 | 3 | 1.96E-10 | 0.98 | 5.68 | - | 2276.0 |
| AHQ-8-8, 3791          | K.SKDFGLGEDDEESTMLEDSVSPK.K                 | 2554.68304 | 2 | 3.80E-04 | 0.65 | 2.93 | - | 360.2  |
| AHQ-8-5, 5078          | K.SNTSPEELGPLANQLTSDYGR.L                   | 2250.36505 | 2 | 9.33E-09 | 0.84 | 3.61 | - | 465.3  |
| AHQ-8-5, 4370          | K.SNTSPEELGPLANQLTSDYGR.L                   | 2250.36505 | 2 | 1.08E-07 | 0.88 | 3.86 | - | 568.9  |
| AHQ-8-2, 4440 - 4448   | K.SNTSPEELGPLANQLTSDYGR.L                   | 2250.36505 | 2 | 5.25E-08 | 0.88 | 4.18 | - | 468.1  |
| AHQ-8-4, 5115          | K.SNTSPEELGPLANQLTSDYGR.L                   | 2250.36505 | 2 | 1.24E-06 | 0.85 | 3.64 | - | 478.7  |
| AHQ-8-7, 4780          | K.SNTSPEELGPLANQLTSDYGR.L                   | 2250.36505 | 2 | 3.86E-06 | 0.40 | 2.78 | - | 189.5  |
| AHQ-8-3, 5058          | K.SNTSPEELGPLANQLTSDYGR.L                   | 2250.36505 | 2 | 9.78E-07 | 0.81 | 3.63 | - | 354.5  |
| AHQ-8-3, 4377 - 4392   | K.SNTSPEELGPLANQLTSDYGR.L                   | 2250.36505 | 2 | 3.56E-08 | 0.89 | 3.99 | - | 616.6  |
| AHQ-8-4, 4407          | K.SNTSPEELGPLANQLTSDYGR.L                   | 2250.36505 | 2 | 5.50E-10 | 0.91 | 4.26 | - | 657.8  |
| AHQ-8-1, 5185          | K.SNTSPEELGPLANQLTSDYGR.L                   | 2250.36505 | 2 | 4.82E-04 | 0.88 | 4.25 | - | 406.6  |
| AHQ-8-3, 4901 - 4968   | K.SNTSPEELGPLANQLTSDYGR.L                   | 2250.36505 | 2 | 2.72E-07 | 0.92 | 4.43 | - | 578.5  |
| AHQ-8-6, 4862          | K.SNTSPEELGPLANQLTSDYGR.L                   | 2250.36505 | 2 | 6.50E-07 | 0.71 | 3.38 | - | 305.0  |
| AHQ-8-2, 5140 - 5159   | K.SNTSPEELGPLANQLTSDYGR.L                   | 2250.36505 | 2 | 1.87E-07 | 0.92 | 4.46 | - | 614.6  |
| AHQ-8-2, 4916 - 4984   | K.SNTSPEELGPLANQLTSDYGR.L                   | 2250.36505 | 2 | 3.98E-06 | 0.87 | 4.05 | - | 441.9  |
| AHQ-8-6, 4292 - 4312   | K.SNTSPEELGPLANQLTSDYGR.L                   | 2250.36505 | 2 | 5.16E-05 | 0.89 | 4.08 | - | 586.7  |
| AHQ-8-1, 4516          | K.SNTSPEELGPLANQLTSDYGR.L                   | 2250.36505 | 2 | 4.10E-05 | 0.76 | 3.35 | - | 434.9  |
| AHQ-8-4, 5239 - 5242   | K.SNTSPEELGPLANQLTSDYGR.L                   | 2250.36505 | 2 | 9.77E-05 | 0.42 | 2.69 | - | 289.2  |
| AHQ-8-4, 4950 - 5009   | K.SNTSPEELGPLANQLTSDYGR.L                   | 2250.36505 | 2 | 2.40E-07 | 0.86 | 4.03 | - | 439.9  |
| AHQ-8-2, 5043          | K.SNTSPEELGPLANQLTSDYGR.L                   | 2250.36505 | 2 | 5.11E-06 | 0.85 | 4.09 | - | 446.7  |
| AHQ-8-5, 4929 - 4984   | K.SNTSPEELGPLANQLTSDYGR.L                   | 2250.36505 | 2 | 1.78E-05 | 0.88 | 4.03 | - | 503.6  |
| AHQ-8-14-, 6277        | R.TEDSGLQTQVIAAATQCALSSTQVACTK.V            | 3056.37009 | 3 | 1.82E-05 | 0.90 | 3.57 | - | 1328.4 |
| AHQ-8-1, 6439          | R.TEDSGLQTQVIAAATQCALSSTQVACTK.V            | 3056.37009 | 3 | 2.87E-12 | 0.97 | 5.84 | - | 2060.0 |
| AHQ-8-2, 6467 - 6500   | R.TEDSGLQTQVIAAATQCALSSTQVACTK.V            | 3056.37009 | 3 | 2.78E-09 | 0.97 | 6.01 | - | 1541.2 |
| AHQ-8-8, 6465 - 6535   | R.TEDSGLQTQVIAAATQCALSSTQVACTK.V            | 3056.37009 | 3 | 4.63E-07 | 0.97 | 5.89 | - | 1961.9 |
| AHQ-8-3, 6364          | R.TEDSGLQTQVIAAATQCALSSTQVACTK.V            | 3056.37009 | 3 | 3.15E-11 | 0.97 | 6.35 | - | 1687.3 |
| AHQ-8-8, 4185          | K.TKEVIEEWLNTNIK.R                          | 1716.95938 | 3 | 6.53E-07 | 0.95 | 4.66 | - | 1442.9 |
| AHQ-8-7, 4073 - 4136   | K.TKEVIEEWLNTNIK.R                          | 1716.95938 | 2 | 1.69E-08 | 0.97 | 4.13 | - | 2201.0 |
| AHQ-8-8, 4181          | K.TKEVIEEWLNTNIK.R                          | 1716.95938 | 2 | 3.71E-07 | 0.96 | 4.57 | - | 1601.8 |
| AHQ-8-14-, 5861 - 5867 | K.TLAESALQLLYTAK.E                          | 1522.76793 | 2 | 2.16E-05 | 0.83 | 3.08 | - | 642.5  |
| AHQ-8-2, 6016          | K.TLAESALQLLYTAK.E                          | 1522.76793 | 2 | 6.31E-06 | 0.94 | 3.83 | - | 1147.0 |
| AHQ-8-4, 6003 - 6083   | K.TLAESALQLLYTAK.E                          | 1522.76793 | 2 | 1.54E-10 | 0.95 | 4.55 | - | 1028.3 |
| AHQ-8-5, 5956          | K.TLAESALQLLYTAK.E                          | 1522.76793 | 2 | 5.93E-06 | 0.78 | 3.01 | - | 658.2  |
| AHQ-8-4, 6015          | K.TLAESALQLLYTAK.E                          | 1522.76793 | 3 | 1.39E-05 | 0.96 | 4.65 | - | 1898.9 |

|                      |                                    |            |   |          |      |      |   |        |
|----------------------|------------------------------------|------------|---|----------|------|------|---|--------|
| AHQ-8-7, 5800 - 5870 | K.TLAESALQLLYTAK.E                 | 1522.76793 | 2 | 9.31E-07 | 0.92 | 3.54 | - | 973.0  |
| AHQ-8-8, 6014        | K.TLAESALQLLYTAK.E                 | 1522.76793 | 2 | 4.56E-04 | 0.91 | 3.32 | - | 1011.6 |
| AHQ-8-3, 5929        | K.TLAESALQLLYTAK.E                 | 1522.76793 | 3 | 1.64E-04 | 0.96 | 4.84 | - | 1849.4 |
| AHQ-8-1, 6023        | K.TLAESALQLLYTAK.E                 | 1522.76793 | 2 | 8.62E-07 | 0.92 | 3.72 | - | 879.2  |
| AHQ-8-3, 5917        | K.TLAESALQLLYTAK.E                 | 1522.76793 | 2 | 1.61E-07 | 0.96 | 4.35 | - | 1166.4 |
| AHQ-8-5, 3274        | K.TLSHPQQMALLDQTK.T                | 1711.96464 | 3 | 4.27E-07 | 0.96 | 4.95 | - | 1539.7 |
| AHQ-8-5, 3276        | K.TLSHPQQMALLDQTK.T                | 1711.96464 | 2 | 1.56E-05 | 0.93 | 4.04 | - | 859.3  |
| AHQ-8-2, 3357        | K.TLSHPQQMALLDQTK.T                | 1711.96464 | 3 | 4.83E-05 | 0.93 | 4.44 | - | 1103.6 |
| AHQ-8-3, 3314        | K.TLSHPQQMALLDQTK.T                | 1711.96464 | 3 | 2.92E-05 | 0.94 | 4.53 | - | 1300.4 |
| AHQ-8-4, 3287        | K.TLSHPQQMALLDQTK.T                | 1711.96464 | 3 | 6.79E-05 | 0.93 | 4.50 | - | 1223.4 |
| AHQ-8-2, 3347 - 3359 | K.TLSHPQQMALLDQTK.T                | 1711.96464 | 2 | 2.04E-04 | 0.96 | 4.93 | - | 1018.8 |
| AHQ-8-6, 4106        | K.TMLESAGGLIQTAR.A                 | 1448.67095 | 2 | 4.95E-07 | 0.92 | 4.06 | - | 1269.8 |
| AHQ-8-2, 4197 - 4255 | K.TMLESAGGLIQTAR.A                 | 1448.67095 | 2 | 8.55E-10 | 0.96 | 4.40 | - | 1658.6 |
| AHQ-8-1, 3639        | K.TMLESAGGLIQTAR.A                 | 1464.67035 | 2 | 5.25E-07 | 0.92 | 3.22 | - | 1318.1 |
| AHQ-8-4, 4187        | K.TMLESAGGLIQTAR.A                 | 1448.67095 | 2 | 1.28E-07 | 0.96 | 3.78 | - | 2104.6 |
| AHQ-8-1, 4248 - 4323 | K.TMLESAGGLIQTAR.A                 | 1448.67095 | 2 | 1.19E-06 | 0.94 | 4.27 | - | 1604.8 |
| AHQ-8-3, 3430 - 3497 | K.TMLESAGGLIQTAR.A                 | 1464.67035 | 2 | 3.05E-04 | 0.96 | 4.60 | - | 1439.9 |
| AHQ-8-3, 4140 - 4172 | K.TMLESAGGLIQTAR.A                 | 1448.67095 | 2 | 1.41E-07 | 0.91 | 3.75 | - | 1511.5 |
| AHQ-8-7, 4042 - 4044 | K.TMLESAGGLIQTAR.A                 | 1448.67095 | 2 | 2.64E-05 | 0.96 | 4.31 | - | 1741.6 |
| AHQ-8-8, 4114        | K.TMLESAGGLIQTAR.A                 | 1448.67095 | 2 | 9.37E-05 | 0.91 | 3.72 | - | 1156.8 |
| AHQ-8-2, 3504 - 3563 | K.TMLESAGGLIQTAR.A                 | 1464.67035 | 2 | 1.85E-08 | 0.95 | 3.72 | - | 1838.7 |
| AHQ-8-2, 4197 - 4255 | K.TMLESAGGLIQTARALAVNPR.D          | 2170.52235 | 3 | 5.63E-05 | 0.58 | 3.13 | - | 529.8  |
| AHQ-8-8, 4166        | K.TMLESAGGLIQTAR.A                 | 1854.07511 | 2 | 1.40E-04 | 0.91 | 3.93 | - | 687.4  |
| AHQ-8-13, 3660       | K.TMLESAGGLIQTAR.A                 | 1870.07451 | 2 | 3.34E-04 | 0.78 | 3.01 | - | 503.9  |
| AHQ-8-7, 4080        | K.TMLESAGGLIQTAR.A                 | 1854.07511 | 2 | 5.47E-04 | 0.87 | 3.77 | - | 659.9  |
| AHQ-8-8, 4138        | K.TVTDMLMTICAR.I                   | 1429.70947 | 2 | 2.74E-05 | 0.64 | 2.90 | - | 860.5  |
| AHQ-8-7, 4920        | K.TYGVSFLLVK.E                     | 1161.37395 | 2 | 3.14E-07 | 0.90 | 3.41 | - | 760.4  |
| AHQ-8-8, 5058        | K.TYGVSFLLVK.E                     | 1161.37395 | 2 | 1.40E-06 | 0.89 | 3.50 | - | 664.9  |
| AHQ-8-1, 5252        | K.TYGVSFLLVK.E                     | 1161.37395 | 2 | 6.10E-06 | 0.88 | 3.23 | - | 657.0  |
| AHQ-8-3, 5846        | R.VAGSVTELIQAAEAMK.G               | 1618.87752 | 2 | 3.93E-05 | 0.95 | 4.06 | - | 1330.1 |
| AHQ-8-2, 5947        | R.VAGSVTELIQAAEAMK.G               | 1618.87752 | 2 | 5.80E-10 | 0.94 | 4.11 | - | 1082.0 |
| AHQ-8-7, 4909        | R.VAGSVTELIQAAEAMK.G               | 1634.87692 | 2 | 5.85E-06 | 0.87 | 3.35 | - | 839.3  |
| AHQ-8-4, 5917 - 5955 | R.VAGSVTELIQAAEAMK.G               | 1618.87752 | 2 | 6.86E-07 | 0.91 | 3.85 | - | 811.7  |
| AHQ-8-5, 5080 - 5088 | R.VAGSVTELIQAAEAMK.G               | 1634.87692 | 2 | 4.71E-05 | 0.97 | 5.19 | - | 1389.9 |
| AHQ-8-4, 5102        | R.VAGSVTELIQAAEAMK.G               | 1634.87692 | 2 | 4.48E-06 | 0.87 | 3.82 | - | 913.8  |
| AHQ-8-1, 5917 - 5955 | R.VAGSVTELIQAAEAMK.G               | 1618.87752 | 2 | 1.69E-05 | 0.89 | 3.55 | - | 921.1  |
| AHQ-8-6, 5780 - 5795 | R.VAGSVTELIQAAEAMK.G               | 1618.87752 | 2 | 2.38E-04 | 0.87 | 3.04 | - | 946.5  |
| AHQ-8-7, 5722        | R.VAGSVTELIQAAEAMK.G               | 1618.87752 | 2 | 1.61E-05 | 0.85 | 2.84 | - | 1086.7 |
| AHQ-8-2, 5163        | R.VAGSVTELIQAAEAMK.G               | 1634.87692 | 3 | 1.30E-08 | 0.92 | 4.42 | - | 1337.7 |
| AHQ-8-2, 5131        | R.VAGSVTELIQAAEAMK.G               | 1634.87692 | 2 | 1.16E-05 | 0.81 | 2.84 | - | 953.8  |
| AHQ-8-3, 5049 - 5056 | R.VAGSVTELIQAAEAMK.G               | 1634.87692 | 2 | 4.17E-06 | 0.96 | 4.00 | - | 1901.0 |
| AHQ-8-2, 3765        | K.VEHGSVALPIMR.S                   | 1380.64144 | 2 | 4.12E-10 | 0.85 | 3.15 | - | 948.9  |
| AHQ-8-7, 5368 - 5369 | K.VGAIPANALDDGQWSQGLISAAR.M        | 2311.53959 | 3 | 1.49E-04 | 0.96 | 5.01 | - | 1839.0 |
| AHQ-8-7, 5365        | K.VGAIPANALDDGQWSQGLISAAR.M        | 2311.53959 | 2 | 2.87E-11 | 0.95 | 4.60 | - | 1426.6 |
| AHQ-8-6, 5423 - 5494 | K.VGAIPANALDDGQWSQGLISAAR.M        | 2311.53959 | 2 | 2.90E-11 | 0.97 | 5.64 | - | 1081.3 |
| AHQ-8-4, 5566 - 5629 | K.VGAIPANALDDGQWSQGLISAAR.M        | 2311.53959 | 2 | 1.36E-09 | 0.97 | 5.83 | - | 919.7  |
| AHQ-8-6, 5270 - 5340 | K.VGAIPANALDDGQWSQGLISAAR.M        | 2311.53959 | 2 | 4.09E-07 | 0.85 | 3.71 | - | 407.8  |
| AHQ-8-2, 5495 - 5569 | K.VGAIPANALDDGQWSQGLISAAR.M        | 2311.53959 | 2 | 1.83E-08 | 0.83 | 4.05 | - | 446.5  |
| AHQ-8-1, 5591 - 5652 | K.VGAIPANALDDGQWSQGLISAAR.M        | 2311.53959 | 2 | 9.22E-05 | 0.94 | 4.83 | - | 871.1  |
| AHQ-8-3, 5492 - 5548 | K.VGAIPANALDDGQWSQGLISAAR.M        | 2311.53959 | 2 | 3.01E-10 | 0.91 | 4.24 | - | 814.3  |
| AHQ-8-4, 5485        | K.VGAIPANALDDGQWSQGLISAAR.M        | 2311.53959 | 2 | 6.44E-12 | 0.91 | 4.54 | - | 478.5  |
| AHQ-8-3, 5406        | K.VGAIPANALDDGQWSQGLISAAR.M        | 2311.53959 | 2 | 1.53E-10 | 0.87 | 3.88 | - | 520.7  |
| AHQ-8-5, 5358        | K.VGAIPANALDDGQWSQGLISAAR.M        | 2311.53959 | 2 | 4.83E-05 | 0.61 | 2.99 | - | 320.6  |
| AHQ-8-3, 5346 - 5405 | K.VGAIPANALDDGQWSQGLISAAR.M        | 2311.53959 | 3 | 1.19E-08 | 0.93 | 4.84 | - | 1354.3 |
| AHQ-8-2, 5372 - 5432 | K.VGAIPANALDDGQWSQGLISAAR.M        | 2311.53959 | 2 | 6.29E-08 | 0.91 | 4.52 | - | 627.1  |
| AHQ-8-5, 5446 - 5466 | K.VGAIPANALDDGQWSQGLISAAR.M        | 2311.53959 | 2 | 2.20E-04 | 0.90 | 4.47 | - | 415.1  |
| AHQ-8-5, 5528        | K.VGAIPANALDDGQWSQGLISAAR.M        | 2311.53959 | 3 | 3.46E-05 | 0.77 | 3.07 | - | 802.7  |
| AHQ-8-5, 5529        | K.VGAIPANALDDGQWSQGLISAAR.M        | 2311.53959 | 2 | 2.29E-11 | 0.92 | 4.57 | - | 578.5  |
| AHQ-8-4, 5359        | K.VGAIPANALDDGQWSQGLISAAR.M        | 2311.53959 | 2 | 1.80E-07 | 0.86 | 3.92 | - | 521.7  |
| AHQ-8-4, 3758        | K.VGDDPAVVQLK.N                    | 1228.37879 | 2 | 8.79E-08 | 0.93 | 3.73 | - | 858.4  |
| AHQ-8-2, 3832        | K.VGDDPAVVQLK.N                    | 1228.37879 | 2 | 6.62E-08 | 0.95 | 4.42 | - | 901.6  |
| AHQ-8-7, 3636 - 3664 | K.VGDDPAVVQLK.N                    | 1228.37879 | 2 | 8.52E-09 | 0.84 | 3.33 | - | 637.8  |
| AHQ-8-2, 3780 - 3847 | K.VGDDPAVVQLK.N                    | 1228.37879 | 2 | 2.37E-08 | 0.88 | 3.53 | - | 708.1  |
| AHQ-8-6, 3686 - 3744 | K.VGDDPAVVQLK.N                    | 1228.37879 | 2 | 3.80E-07 | 0.78 | 2.69 | - | 675.0  |
| AHQ-8-5, 3734        | K.VGDDPAVVQLK.N                    | 1228.37879 | 2 | 4.61E-09 | 0.90 | 3.23 | - | 893.1  |
| AHQ-8-3, 3760        | K.VGDDPAVVQLK.N                    | 1228.37879 | 2 | 5.68E-08 | 0.93 | 3.79 | - | 883.1  |
| AHQ-8-1, 3929        | K.VGDDPAVVQLK.N                    | 1228.37879 | 2 | 7.27E-09 | 0.95 | 4.16 | - | 960.8  |
| AHQ-8-5, 3117        | K.VLGEAMTGISQNAK.N                 | 1419.62961 | 2 | 5.47E-07 | 0.97 | 4.01 | - | 2047.6 |
| AHQ-8-4, 2409        | K.VLGEAMTGISQNAK.N                 | 1435.62901 | 2 | 9.06E-05 | 0.83 | 3.44 | - | 731.6  |
| AHQ-8-3, 2549        | K.VLGEAMTGISQNAK.N                 | 1435.62901 | 2 | 2.55E-06 | 0.94 | 3.83 | - | 1278.5 |
| AHQ-8-3, 2454        | K.VLGEAMTGISQNAK.N                 | 1435.62901 | 2 | 1.10E-04 | 0.96 | 4.02 | - | 1655.8 |
| AHQ-8-4, 2426 - 2498 | K.VLGEAMTGISQNAK.N                 | 1435.62901 | 2 | 1.89E-04 | 0.89 | 3.49 | - | 1215.2 |
| AHQ-8-2, 2569        | K.VLGEAMTGISQNAK.N                 | 1435.62901 | 2 | 1.18E-04 | 0.87 | 3.09 | - | 951.1  |
| AHQ-8-2, 3188 - 3211 | K.VLGEAMTGISQNAK.N                 | 1419.62961 | 2 | 1.20E-04 | 0.97 | 4.38 | - | 2280.6 |
| AHQ-8-3, 4554 - 4621 | K.VLGEAMTGISQNAKNGNLPEFGDAISTASK.A | 3038.33659 | 3 | 5.68E-08 | 0.91 | 5.23 | - | 526.3  |
| AHQ-8-2, 5145 - 5217 | K.VLGEAMTGISQNAKNGNLPEFGDAISTASK.A | 3022.33719 | 3 | 1.04E-04 | 0.74 | 4.15 | - | 425.2  |
| AHQ-8-3, 4990 - 5053 | K.VLGEAMTGISQNAKNGNLPEFGDAISTASK.A | 3022.33719 | 3 | 1.82E-06 | 0.88 | 5.27 | - | 596.0  |
| AHQ-8-2, 4633 - 4691 | K.VLGEAMTGISQNAKNGNLPEFGDAISTASK.A | 3038.33659 | 3 | 1.24E-12 | 0.92 | 4.98 | - | 849.9  |
| AHQ-8-4, 4610 - 4669 | K.VLGEAMTGISQNAKNGNLPEFGDAISTASK.A | 3038.33659 | 3 | 1.78E-06 | 0.86 | 4.32 | - | 686.0  |
| AHQ-8-4, 1893 - 1958 | K.VLVQNAAGSQEK.L                   | 1244.37976 | 2 | 2.35E-05 | 0.88 | 3.66 | - | 690.8  |
| AHQ-8-4, 1782 - 1838 | K.VLVQNAAGSQEK.L                   | 1244.37976 | 2 | 4.88E-06 | 0.93 | 3.60 | - | 1027.5 |
| AHQ-8-2, 2069        | K.VLVQNAAGSQEK.L                   | 1244.37976 | 2 | 9.99E-06 | 0.89 | 3.51 | - | 844.9  |
| AHQ-8-6, 1920 - 1944 | K.VLVQNAAGSQEK.L                   | 1244.37976 | 2 | 3.27E-05 | 0.55 | 2.64 | - | 399.1  |
| AHQ-8-2, 1857 - 1912 | K.VLVQNAAGSQEK.L                   | 1244.37976 | 2 | 8.13E-08 | 0.94 | 3.98 | - | 1087.2 |
| AHQ-8-5, 1794 - 1849 | K.VLVQNAAGSQEK.L                   | 1244.37976 | 2 | 1.50E-08 | 0.90 | 3.43 | - | 908.0  |
| AHQ-8-2, 1971 - 2000 | K.VLVQNAAGSQEK.L                   | 1244.37976 | 2 | 7.16E-05 | 0.76 | 3.12 | - | 605.9  |
| AHQ-8-3, 1905        | K.VLVQNAAGSQEK.L                   | 1244.37976 | 2 | 4.89E-06 | 0.94 | 3.86 | - | 996.1  |
| AHQ-8-6, 4446        | K.VMVTNVTSLK.T                     | 1205.49322 | 2 | 3.27E-04 | 0.90 | 3.48 | - | 910.0  |
| AHQ-8-4, 4563        | K.VMVTNVTSLK.T                     | 1205.49322 | 2 | 6.92E-06 | 0.89 | 3.80 | - | 748.3  |
| AHQ-8-4, 4249        | K.VMVTNVTSLK.T                     | 1221.49262 | 2 | 9.99E-06 | 0.86 | 3.49 | - | 804.1  |
| AHQ-8-2, 4300        | K.VMVTNVTSLK.T                     | 1221.49262 | 2 | 2.72E-06 | 0.70 | 2.92 | - | 640.4  |
| AHQ-8-6, 4146 - 4151 | K.VMVTNVTSLK.T                     | 1221.49262 | 2 | 9.05E-04 | 0.73 | 3.16 | - | 603.1  |
| AHQ-8-3, 4552 - 4564 | K.VMVTNVTSLK.T                     | 1205.49322 | 2 | 3.23E-05 | 0.93 | 4.28 | - | 870.3  |
| AHQ-8-2, 4625        | K.VMVTNVTSLK.T                     | 1205.49322 | 2 | 9.30E-05 | 0.89 | 3.59 | - | 836.1  |
| AHQ-8-5, 4213        | K.VMVTNVTSLK.T                     | 1221.49262 | 2 | 4.98E-04 | 0.39 | 2.51 | - | 487.8  |
| AHQ-8-3, 4233 - 4241 | K.VMVTNVTSLK.T                     | 1221.49262 | 2 | 2.42E-05 | 0.89 | 3.53 | - | 854.1  |
| AHQ-8-4, 2861        | R.VQELGHGCAALVTK.A                 | 1484.70307 | 2 | 3.51E-04 | 0.97 | 4.71 | - | 1776.6 |
| AHQ-8-7, 2816        | R.VQELGHGCAALVTK.A                 | 1484.70307 | 2 | 6.92E-05 | 0.96 | 4.45 | - | 1296.0 |
| AHQ-8-5, 2872        | R.VQELGHGCAALVTK.A                 | 1484.70307 | 2 | 9.38E-05 | 0.95 | 4.12 | - | 1270.1 |
| AHQ-8-2, 2943        | R.VQELGHGCAALVTK.A                 | 1484.70307 | 2 | 3.53E-06 | 0.97 | 4.74 | - | 1980.7 |
| AHQ-8-1, 3097        | R.VQELGHGCAALVTK.A                 | 1484.70307 | 2 | 3.18E-05 | 0.95 | 4.28 | - | 1148.8 |
| AHQ-8-6, 2854        | R.VQELGHGCAALVTK.A                 | 1484.70307 | 2 | 5.21E-07 | 0.95 | 4.40 | - | 1286.7 |
| AHQ-8-4, 2837 - 2855 | K.VSHVLAALQAGNR.G                  | 1336.52525 | 2 | 3.36E-10 | 0.97 | 4.37 | - | 1985.1 |
| AHQ-8-6, 2834        | K.VSHVLAALQAGNR.G                  | 1336.52525 | 2 | 1.25E-09 | 0.97 | 4.77 | - | 1689.6 |
| AHQ-8-3, 2885        | K.VSHVLAALQAGNR.G                  | 1336.52525 | 2 | 4.71E-10 | 0.96 | 4.21 | - | 1812.1 |
| AHQ-8-2, 2915        | K.VSHVLAALQAGNR.G                  | 1336.52525 | 2 | 2.61E-08 | 0.96 | 4.28 | - | 1429.8 |
| AHQ-8-6, 6072        | K.VSQMAYFEPLTAAVGAASK.T            | 2183.51313 | 2 | 6.23E-05 | 0.92 | 4.44 | - | 749.4  |

|                             |                                                                         |            |   |          |       |         |       |          |
|-----------------------------|-------------------------------------------------------------------------|------------|---|----------|-------|---------|-------|----------|
| AHQ-8-4, 6209               | K.VSQMAQYFEPLTLAAVGAASK.T                                               | 2183.51313 | 2 | 1.49E-06 | 0.77  | 3.39    | -     | 537.9    |
| AHQ-8-4, 5562               | K.VSQM"AQYFEPLTLAAVGAASK.T                                              | 2199.51253 | 3 | 2.15E-08 | 0.94  | 4.36    | -     | 1279.2   |
| AHQ-8-1, 5532 - 5596        | K.VSQM"AQYFEPLTLAAVGAASK.T                                              | 2199.51253 | 3 | 1.50E-04 | 0.91  | 3.40    | -     | 1606.0   |
| AHQ-8-2, 5579               | K.VSQM"AQYFEPLTLAAVGAASK.T                                              | 2199.51253 | 2 | 5.32E-07 | 0.96  | 4.94    | -     | 1015.6   |
| AHQ-8-2, 5584               | K.VSQM"AQYFEPLTLAAVGAASK.T                                              | 2199.51253 | 3 | 4.25E-06 | 0.94  | 4.43    | -     | 1401.4   |
| AHQ-8-7, 6014               | K.VSQMAQYFEPLTLAAVGAASK.T                                               | 2183.51313 | 2 | 7.51E-09 | 0.94  | 4.76    | -     | 872.4    |
| AHQ-8-2, 6165 - 6227        | K.VSQMAQYFEPLTLAAVGAASK.T                                               | 2183.51313 | 2 | 2.66E-05 | 0.94  | 4.66    | -     | 920.6    |
| AHQ-8-2, 6237 - 6244        | K.VSQMAQYFEPLTLAAVGAASK.T                                               | 2183.51313 | 3 | 1.29E-08 | 0.94  | 5.00    | -     | 1474.6   |
| AHQ-8-7, 5352               | K.VSQM"AQYFEPLTLAAVGAASK.T                                              | 2199.51253 | 2 | 1.15E-05 | 0.87  | 3.53    | -     | 701.3    |
| AHQ-8-4, 5561 - 5563        | K.VSQM"AQYFEPLTLAAVGAASK.T                                              | 2199.51253 | 2 | 2.08E-06 | 0.95  | 5.09    | -     | 1074.9   |
| AHQ-8-6, 5422               | K.VSQM"AQYFEPLTLAAVGAASK.T                                              | 2199.51253 | 2 | 3.06E-08 | 0.87  | 3.95    | -     | 807.3    |
| AHQ-8-3, 5484 - 5493        | K.VSQM"AQYFEPLTLAAVGAASK.T                                              | 2199.51253 | 3 | 3.66E-12 | 0.94  | 4.71    | -     | 1284.4   |
| AHQ-8-3, 6133               | K.VSQMAQYFEPLTLAAVGAASK.T                                               | 2183.51313 | 2 | 5.40E-06 | 0.93  | 4.44    | -     | 794.6    |
| AHQ-8-5, 5450 - 5516        | K.VSQM"AQYFEPLTLAAVGAASK.T                                              | 2199.51253 | 2 | 3.35E-07 | 0.96  | 5.27    | -     | 1082.9   |
| AHQ-8-7, 4260               | K.VVAPTISSPVQCEQLVEAGR.L                                                | 2142.41919 | 2 | 7.42E-07 | 0.86  | 3.74    | -     | 685.4    |
| AHQ-8-4, 4454 - 4455        | K.VVAPTISSPVQCEQLVEAGR.L                                                | 2142.41919 | 3 | 3.87E-11 | 0.94  | 4.87    | -     | 1281.4   |
| AHQ-8-4, 4518               | K.VVAPTISSPVQCEQLVEAGR.L                                                | 2142.41919 | 2 | 6.51E-05 | 0.36  | 3.10    | -     | 157.9    |
| AHQ-8-3, 4412               | K.VVAPTISSPVQCEQLVEAGR.L                                                | 2142.41919 | 2 | 3.22E-08 | 0.75  | 3.49    | -     | 422.7    |
| AHQ-8-2, 4568               | K.VVAPTISSPVQCEQLVEAGR.L                                                | 2142.41919 | 2 | 4.93E-06 | 0.47  | 2.82    | -     | 214.6    |
| AHQ-8-2, 4479 - 4480        | K.VVAPTISSPVQCEQLVEAGR.L                                                | 2142.41919 | 2 | 4.73E-06 | 0.96  | 5.27    | -     | 847.1    |
| AHQ-8-6, 4330               | K.VVAPTISSPVQCEQLVEAGR.L                                                | 2142.41919 | 2 | 4.29E-08 | 0.95  | 4.75    | -     | 827.3    |
| AHQ-8-2, 4379 - 4388        | K.VVAPTISSPVQCEQLVEAGR.L                                                | 2142.41919 | 2 | 2.51E-08 | 0.95  | 5.41    | -     | 506.5    |
| AHQ-8-14-, 4362             | K.VVAPTISSPVQCEQLVEAGR.L                                                | 2142.41919 | 2 | 4.40E-04 | 0.79  | 3.24    | -     | 494.9    |
| AHQ-8-5, 4310               | K.VVAPTISSPVQCEQLVEAGR.L                                                | 2142.41919 | 2 | 1.16E-06 | 0.82  | 4.01    | -     | 260.3    |
| AHQ-8-5, 4398               | K.VVAPTISSPVQCEQLVEAGR.L                                                | 2142.41919 | 2 | 2.31E-09 | 0.93  | 4.53    | -     | 599.8    |
| AHQ-8-8, 4378               | K.VVAPTISSPVQCEQLVEAGR.L                                                | 2142.41919 | 2 | 6.96E-06 | 0.97  | 5.36    | -     | 1197.9   |
| AHQ-8-3, 4325               | K.VVAPTISSPVQCEQLVEAGR.L                                                | 2142.41919 | 2 | 7.25E-05 | 0.77  | 3.70    | -     | 231.7    |
| gI4503745]reflNP_0014447.1] | filamin 1 (actin-binding protein-280); filamin 1; filamin A, alpha (act |            |   | 5.55E-15 | 91.13 | 1060.32 | 52.20 | 280757.4 |
| AHQ-8-4, 2189               | K.AEISFEDR.D                                                            | 1095.18763 | 2 | 4.51E-04 | 0.71  | 2.88    | -     | 590.2    |
| AHQ-8-3, 2712               | K.AFGPGLQGGGAGSPAR.F                                                    | 1430.55077 | 2 | 2.06E-07 | 0.95  | 3.37    | -     | 1491.1   |
| AHQ-8-2, 2747               | K.AFGPGLQGGGAGSPAR.F                                                    | 1430.55077 | 2 | 9.03E-08 | 0.94  | 3.52    | -     | 1280.1   |
| AHQ-8-1, 2909               | K.AFGPGLQGGGAGSPAR.F                                                    | 1430.55077 | 2 | 1.54E-09 | 0.94  | 3.76    | -     | 1343.6   |
| AHQ-8-7, 2648               | K.AFGPGLQGGGAGSPAR.F                                                    | 1430.55077 | 2 | 1.25E-05 | 0.92  | 3.34    | -     | 1238.1   |
| AHQ-8-6, 2595 - 2674        | K.AFGPGLQGGGAGSPAR.F                                                    | 1430.55077 | 2 | 4.49E-04 | 0.90  | 3.09    | -     | 1268.1   |
| AHQ-8-5, 2684 - 2693        | K.AFGPGLQGGGAGSPAR.F                                                    | 1430.55077 | 2 | 1.27E-07 | 0.92  | 3.61    | -     | 1260.6   |
| AHQ-8-4, 2678 - 2681        | K.AFGPGLQGGGAGSPAR.F                                                    | 1430.55077 | 2 | 1.67E-08 | 0.95  | 3.98    | -     | 1536.5   |
| AHQ-8-14-, 2862 - 2883      | K.AGNM"LLVGVHGRP.T                                                      | 1451.67973 | 3 | 8.45E-07 | 0.81  | 3.29    | -     | 1275.5   |
| AHQ-8-14-, 2982             | K.AGNM"LLVGVHGRP.T                                                      | 1451.67973 | 2 | 1.43E-04 | 0.67  | 2.69    | -     | 652.3    |
| AHQ-8-14-, 3321             | K.AGNM"LLVGVHGRP.T                                                      | 1435.68033 | 3 | 2.67E-06 | 0.78  | 3.22    | -     | 961.5    |
| AHQ-8-14, 3846 - 3915       | K.AGNM"LLVGVHGRP.T                                                      | 1451.67973 | 3 | 1.31E-05 | 0.83  | 3.23    | -     | 1093.3   |
| AHQ-8-14-, 3502             | K.AGNM"LLVGVHGRP.T                                                      | 1451.67973 | 2 | 1.34E-06 | 0.83  | 3.02    | -     | 717.1    |
| AHQ-8-14-, 2813 - 2870      | K.AGNM"LLVGVHGRP.T                                                      | 1451.67973 | 2 | 2.00E-06 | 0.93  | 3.79    | -     | 1034.7   |
| AHQ-8-14, 3827 - 3886       | K.AGNM"LLVGVHGRP.T                                                      | 1451.67973 | 2 | 3.27E-06 | 0.73  | 2.84    | -     | 665.1    |
| AHQ-8-4, 2974               | K.AGNM"LLVGVHGRP.T                                                      | 1451.67973 | 2 | 1.66E-05 | 0.72  | 2.87    | -     | 663.7    |
| AHQ-8-14-, 3485 - 3505      | K.AGNM"LLVGVHGRP.T                                                      | 1435.68033 | 2 | 4.84E-06 | 0.89  | 3.36    | -     | 997.7    |
| AHQ-8-14-, 3317             | K.AGNM"LLVGVHGRP.T                                                      | 1435.68033 | 2 | 1.01E-04 | 0.65  | 2.92    | -     | 539.4    |
| AHQ-8-3, 2441               | K.AGVAPLQVK.V                                                           | 883.07036  | 2 | 1.45E-06 | 0.77  | 2.76    | -     | 597.5    |
| AHQ-8-2, 2455               | K.AGVAPLQVK.V                                                           | 883.07036  | 2 | 7.75E-05 | 0.90  | 3.41    | -     | 676.6    |
| AHQ-8-4, 2391               | K.AGVAPLQVK.V                                                           | 883.07036  | 2 | 3.52E-04 | 0.79  | 2.77    | -     | 664.2    |
| AHQ-8-2, 6589 - 6651        | K.AHEPTTYFTVDCAEAGQDGVSIGI.C                                            | 2567.76960 | 3 | 4.39E-04 | 0.87  | 3.94    | -     | 1076.8   |
| AHQ-8-2, 2787               | K.AHVPCFDASK.V                                                          | 1232.39073 | 2 | 6.09E-04 | 0.79  | 2.69    | -     | 693.3    |
| AHQ-8-3, 2753               | K.AHVPCFDASK.V                                                          | 1232.39073 | 2 | 3.92E-04 | 0.68  | 2.53    | -     | 462.1    |
| AHQ-8-2, 5768 - 5840        | R.ALGALVDSAPGLCPDWSDWASKPVTNAR.E                                        | 3233.53437 | 3 | 5.55E-15 | 0.94  | 5.70    | -     | 658.8    |
| AHQ-8-4, 5831 - 5886        | R.ALGALVDSAPGLCPDWSDWASKPVTNAR.E                                        | 3233.53437 | 3 | 1.28E-07 | 0.88  | 4.82    | -     | 446.6    |
| AHQ-8-3, 5649 - 5710        | R.ALGALVDSAPGLCPDWSDWASKPVTNAR.E                                        | 3233.53437 | 3 | 8.98E-04 | 0.59  | 3.42    | -     | 412.8    |
| AHQ-8-2, 5895               | R.ALGALVDSAPGLCPDWSDWASKPVTNAR.E                                        | 3233.53437 | 3 | 2.61E-08 | 0.93  | 5.14    | -     | 765.3    |
| AHQ-8-7, 5618 - 5677        | R.ALGALVDSAPGLCPDWSDWASKPVTNAR.E                                        | 3233.53437 | 3 | 3.50E-07 | 0.90  | 4.50    | -     | 598.5    |
| AHQ-8-8, 5894               | R.ALGALVDSAPGLCPDWSDWASKPVTNAR.E                                        | 3233.53437 | 3 | 8.01E-04 | 0.77  | 3.40    | -     | 608.7    |
| AHQ-8-6, 5672 - 5736        | R.ALGALVDSAPGLCPDWSDWASKPVTNAR.E                                        | 3233.53437 | 3 | 3.02E-04 | 0.90  | 4.98    | -     | 509.3    |
| AHQ-8-5, 5834 - 5897        | R.ALGALVDSAPGLCPDWSDWASKPVTNAR.E                                        | 3233.53437 | 3 | 2.83E-07 | 0.80  | 4.08    | -     | 396.4    |
| AHQ-8-3, 5792               | R.ALGALVDSAPGLCPDWSDWASKPVTNAR.E                                        | 3233.53437 | 3 | 1.86E-05 | 0.78  | 3.98    | -     | 356.7    |
| AHQ-8-5, 5718 - 5777        | R.ALGALVDSAPGLCPDWSDWASKPVTNAR.E                                        | 3233.53437 | 3 | 1.16E-06 | 0.91  | 4.58    | -     | 763.9    |
| AHQ-8-1, 5839 - 5895        | R.ALGALVDSAPGLCPDWSDWASKPVTNAR.E                                        | 3233.53437 | 3 | 2.21E-06 | 0.89  | 4.85    | -     | 629.0    |
| AHQ-8-4, 3310               | R.ANLPQSFQVDTSK.A                                                       | 1435.56409 | 2 | 3.03E-09 | 0.88  | 3.44    | -     | 616.9    |
| AHQ-8-2, 3427 - 3500        | R.ANLPQSFQVDTSK.A                                                       | 1435.56409 | 2 | 1.72E-04 | 0.84  | 3.30    | -     | 663.3    |
| AHQ-8-1, 3601               | R.APSVANVGHSHCDLSL.K.I                                                  | 1656.84249 | 2 | 1.74E-07 | 0.92  | 4.08    | -     | 772.2    |
| AHQ-8-5, 1958               | K.ATCAPQHAGPAGPADASK.V                                                  | 1791.92336 | 3 | 1.43E-06 | 0.75  | 3.10    | -     | 880.3    |
| AHQ-8-4, 1947               | K.ATCAPQHAGPAGPADASK.V                                                  | 1791.92336 | 3 | 1.01E-04 | 0.86  | 3.38    | -     | 991.0    |
| AHQ-8-2, 3684 - 3713        | R.AWGPGLGEGVVGK.S                                                       | 1227.39403 | 2 | 2.68E-06 | 0.94  | 3.89    | -     | 958.7    |
| AHQ-8-4, 3621               | R.AWGPGLGEGVVGK.S                                                       | 1227.39403 | 2 | 6.24E-05 | 0.88  | 3.43    | -     | 755.0    |
| AHQ-8-6, 3555               | R.AWGPGLGEGVVGK.S                                                       | 1227.39403 | 2 | 2.26E-04 | 0.80  | 2.80    | -     | 697.2    |
| AHQ-8-3, 3622               | R.AWGPGLGEGVVGK.S                                                       | 1227.39403 | 2 | 5.87E-07 | 0.84  | 3.00    | -     | 731.6    |
| AHQ-8-5, 3588               | R.AWGPGLGEGVVGK.S                                                       | 1227.39403 | 2 | 3.17E-07 | 0.87  | 3.26    | -     | 808.7    |
| AHQ-8-7, 3512               | R.AWGPGLGEGVVGK.S                                                       | 1227.39403 | 2 | 9.65E-05 | 0.88  | 3.03    | -     | 867.2    |
| AHQ-8-1, 3787               | R.AWGPGLGEGVVGK.S                                                       | 1227.39403 | 2 | 3.67E-05 | 0.92  | 3.73    | -     | 1084.8   |
| AHQ-8-3, 3172 - 3245        | R.AYGPGEPTGNMVK.K                                                       | 1434.64274 | 2 | 2.12E-04 | 0.55  | 2.99    | -     | 344.4    |
| AHQ-8-5, 2672               | R.AYGPGEPTGNMVK.K                                                       | 1450.64214 | 2 | 6.13E-05 | 0.70  | 3.20    | -     | 397.6    |
| AHQ-8-5, 3354               | R.AYGPGEPTGNMVK.K                                                       | 1434.64274 | 2 | 4.72E-05 | 0.81  | 2.87    | -     | 723.5    |
| AHQ-8-2, 2833 - 2847        | R.AYGPGEPTGNMVK.K                                                       | 1450.64214 | 2 | 5.93E-04 | 0.38  | 2.52    | -     | 327.4    |
| AHQ-8-3, 3254 - 3324        | R.AYGPGEPTGNMVK.K                                                       | 1434.64274 | 2 | 2.65E-04 | 0.81  | 3.32    | -     | 529.1    |
| AHQ-8-2, 2725               | R.AYGPGEPTGNMVK.K                                                       | 1450.64214 | 2 | 3.91E-05 | 0.64  | 2.72    | -     | 381.2    |
| AHQ-8-1, 5656 - 5731        | K.CAPGVVGAEADIDFIIIR.N                                                  | 2017.24863 | 2 | 3.35E-04 | 0.82  | 3.67    | -     | 459.6    |
| AHQ-8-1, 5724               | K.CAPGVVGAEADIDFIIIR.N                                                  | 2017.24863 | 3 | 2.15E-10 | 0.96  | 5.18    | -     | 1898.2   |
| AHQ-8-2, 5719               | K.CAPGVVGAEADIDFIIIR.N                                                  | 2017.24863 | 3 | 3.44E-09 | 0.95  | 4.83    | -     | 1432.9   |
| AHQ-8-3, 5609 - 5676        | K.CAPGVVGAEADIDFIIIR.N                                                  | 2017.24863 | 2 | 4.60E-05 | 0.92  | 4.59    | -     | 556.7    |
| AHQ-8-4, 5705               | K.CAPGVVGAEADIDFIIIR.N                                                  | 2017.24863 | 2 | 6.41E-05 | 0.39  | 2.67    | -     | 378.5    |
| AHQ-8-3, 5617               | K.CAPGVVGAEADIDFIIIR.N                                                  | 2017.24863 | 3 | 1.37E-09 | 0.92  | 4.59    | -     | 994.0    |
| AHQ-8-2, 5715 - 5775        | K.CAPGVVGAEADIDFIIIR.N                                                  | 2017.24863 | 2 | 6.77E-09 | 0.95  | 4.26    | -     | 983.9    |
| AHQ-8-2, 4804 - 4815        | R.CSYQPTM"EGVTVHVTFAGVPIPR.S                                            | 2702.06173 | 3 | 2.56E-08 | 0.86  | 4.62    | -     | 438.4    |
| AHQ-8-2, 4441 - 4457        | R.DAEMPAEKDLAEDAPWK.K                                                   | 2018.19047 | 2 | 4.47E-07 | 0.65  | 2.96    | -     | 599.2    |
| AHQ-8-2, 3919               | K.DAGEGGLSLAIEGPKS.A                                                    | 1501.62084 | 2 | 9.64E-09 | 0.90  | 3.37    | -     | 1124.7   |
| AHQ-8-5, 3825 - 3884        | K.DAGEGGLSLAIEGPKS.A                                                    | 1501.62084 | 2 | 1.31E-06 | 0.95  | 4.83    | -     | 1423.5   |
| AHQ-8-8, 3790               | K.DAGEGGLSLAIEGPKS.A                                                    | 1501.62084 | 2 | 5.21E-04 | 0.92  | 4.04    | -     | 1013.9   |
| AHQ-8-4, 4038               | K.DAGEGGLSLAIEGPKS.A                                                    | 1501.62084 | 2 | 4.21E-06 | 0.62  | 2.99    | -     | 727.3    |
| AHQ-8-4, 3854 - 3917        | K.DAGEGGLSLAIEGPKS.A                                                    | 1501.62084 | 2 | 8.47E-04 | 0.92  | 4.14    | -     | 1136.6   |
| AHQ-8-1, 3979               | K.DAGEGGLSLAIEGPKS.A                                                    | 1501.62084 | 2 | 4.59E-04 | 0.90  | 4.12    | -     | 944.6    |
| AHQ-8-3, 4602               | K.DAGEGLLAVQITDPEGK.P                                                   | 1713.86752 | 2 | 2.28E-08 | 0.94  | 3.82    | -     | 1498.8   |
| AHQ-8-2, 4671 - 4703        | K.DAGEGLLAVQITDPEGK.P                                                   | 1713.86752 | 2 | 1.35E-04 | 0.82  | 2.97    | -     | 1091.3   |
| AHQ-8-1, 4725               | K.DAGEGLLAVQITDPEGK.P                                                   | 1713.86752 | 2 | 2.87E-06 | 0.85  | 3.31    | -     | 1148.3   |
| AHQ-8-8, 4158 - 4165        | K.DAGEGLLAVQITDPEGKPK.K                                                 | 1939.15612 | 2 | 4.86E-05 | 0.94  | 4.37    | -     | 1229.7   |
| AHQ-8-4, 4261 - 4262        | K.DAGEGLLAVQITDPEGKPK.K                                                 | 1939.15612 | 2 | 5.62E-06 | 0.89  | 3.88    | -     | 1102.3   |
| AHQ-8-5, 4216               | K.DAGEGLLAVQITDPEGKPK.K                                                 | 1939.15612 | 2 | 3.75E-05 | 0.88  | 3.91    | -     | 1009.2   |
| AHQ-8-1, 4384               | K.DAGEGLLAVQITDPEGKPK.K                                                 | 1939.15612 | 2 | 8.95E-08 | 0.91  | 4.25    | -     | 860.1    |
| AHQ-8-3, 4232               | K.DAGEGLLAVQITDPEGKPK.K                                                 | 1939.15612 | 2 | 1.51E-05 | 0.94  | 4.38    | -     | 1241.7   |
| AHQ-8-6, 4150               | K.DAGEGLLAVQITDPEGKPK.K                                                 | 1939.15612 | 2 | 2.49E-07 | 0.95  | 4.24    | -     | 1604.5   |
| AHQ-8-11, 4096 - 4103       | K.DAGEGLLAVQITDPEGKPK.K                                                 | 1939.15612 | 2 | 6.94E-04 | 0.89  | 3.33    | -     | 1070.1   |
| AHQ-8-2, 4301               | K.DAGEGLLAVQITDPEGKPK.K                                                 | 1939.15612 | 3 | 2.55E-06 | 0.79  | 3.04    | -     | 828.8    |

|                       |                                     |            |   |          |      |      |   |        |
|-----------------------|-------------------------------------|------------|---|----------|------|------|---|--------|
| AHQ-8-7, 4081         | K.DAGEGLLAVQITDPEGKPK.K             | 1939.15612 | 2 | 9.25E-06 | 0.90 | 4.16 | - | 802.0  |
| AHQ-8-3, 4237         | K.DAGEGLLAVQITDPEGKPK.K             | 1939.15612 | 3 | 5.04E-07 | 0.88 | 3.25 | - | 1170.1 |
| AHQ-8-3, 4424         | K.DAGEGLLAVQITDPEGKPK.K             | 1939.15612 | 2 | 5.39E-05 | 0.93 | 3.84 | - | 1203.8 |
| AHQ-8-2, 4299 - 4363  | K.DAGEGLLAVQITDPEGKPK.K             | 1939.15612 | 2 | 2.29E-09 | 0.95 | 4.46 | - | 1433.5 |
| AHQ-8-3, 4313         | R.DAGYGGLSLSIEGSPK.V                | 1551.67986 | 2 | 3.04E-04 | 0.69 | 3.13 | - | 803.0  |
| AHQ-8-4, 4107         | R.DAGYGGLSLSIEGSPK.V                | 1551.67986 | 2 | 9.14E-05 | 0.82 | 3.12 | - | 991.1  |
| AHQ-8-6, 4232         | R.DAGYGGLSLSIEGSPK.V                | 1551.67986 | 2 | 1.42E-10 | 0.92 | 3.69 | - | 1268.1 |
| AHQ-8-2, 4380 - 4400  | R.DAGYGGLSLSIEGSPK.V                | 1551.67986 | 2 | 5.71E-06 | 0.94 | 3.96 | - | 1371.8 |
| AHQ-8-5, 4081         | R.DAGYGGLSLSIEGSPK.V                | 1551.67986 | 2 | 4.99E-07 | 0.90 | 3.61 | - | 1063.8 |
| AHQ-8-5, 4294         | R.DAGYGGLSLSIEGSPK.V                | 1551.67986 | 2 | 3.79E-11 | 0.96 | 4.27 | - | 1703.2 |
| AHQ-8-1, 4431 - 4433  | R.DAGYGGLSLSIEGSPK.V                | 1551.67986 | 2 | 6.23E-11 | 0.94 | 4.31 | - | 1294.7 |
| AHQ-8-4, 4274 - 4337  | R.DAGYGGLSLSIEGSPK.V                | 1551.67986 | 2 | 7.45E-09 | 0.96 | 4.43 | - | 1408.4 |
| AHQ-8-3, 2065         | R.DAPQDFHPDR.V                      | 1198.22650 | 2 | 4.96E-06 | 0.73 | 2.71 | - | 715.9  |
| AHQ-8-4, 2035         | R.DAPQDFHPDR.V                      | 1198.22650 | 2 | 1.81E-05 | 0.85 | 2.80 | - | 842.9  |
| AHQ-8-2, 2065         | R.DAPQDFHPDR.V                      | 1198.22650 | 2 | 8.58E-06 | 0.61 | 2.64 | - | 465.1  |
| AHQ-8-5, 4690         | K.DGSCGVAYVQEPGDYEVSVK.F            | 2260.41990 | 2 | 5.12E-04 | 0.55 | 3.26 | - | 302.3  |
| AHQ-8-5, 4540         | K.DGSCGVAYVQEPGDYEVSVK.F            | 2260.41990 | 2 | 8.88E-07 | 0.90 | 4.31 | - | 793.1  |
| AHQ-8-7, 4400 - 4410  | K.DGSCGVAYVQEPGDYEVSVK.F            | 2260.41990 | 2 | 2.55E-04 | 0.66 | 3.39 | - | 356.6  |
| AHQ-8-4, 4575 - 4579  | K.DGSCGVAYVQEPGDYEVSVK.F            | 2260.41990 | 2 | 1.57E-05 | 0.81 | 4.05 | - | 412.5  |
| AHQ-8-6, 4472         | K.DGSCGVAYVQEPGDYEVSVK.F            | 2260.41990 | 2 | 2.02E-07 | 0.84 | 3.76 | - | 585.3  |
| AHQ-8-8, 4494 - 4522  | K.DGSCGVAYVQEPGDYEVSVK.F            | 2260.41990 | 2 | 6.49E-04 | 0.82 | 4.04 | - | 517.1  |
| AHQ-8-6, 2552         | K.DKGEYTLVVK.W                      | 1152.32223 | 2 | 5.45E-05 | 0.74 | 2.66 | - | 568.7  |
| AHQ-8-14-, 2585       | K.DKGEYTLVVK.W                      | 1152.32223 | 1 | 5.35E-04 | 0.41 | 2.38 | - | 515.8  |
| AHQ-8-5, 3172         | K.DNNGTYSCSYVPR.K                   | 1591.64109 | 2 | 5.71E-06 | 0.71 | 2.69 | - | 654.4  |
| AHQ-8-1, 3293         | R.DVDIHDHNTYTVK.Y                   | 1785.89230 | 2 | 9.85E-06 | 0.95 | 4.20 | - | 1282.6 |
| AHQ-8-5, 3077         | R.DVDIHDHNTYTVK.Y                   | 1785.89230 | 2 | 1.89E-05 | 0.90 | 3.90 | - | 819.1  |
| AHQ-8-3, 3108         | R.DVDIHDHNTYTVK.Y                   | 1785.89230 | 2 | 6.18E-06 | 0.94 | 4.07 | - | 1125.2 |
| AHQ-8-6, 3059         | R.DVDIHDHNTYTVK.Y                   | 1785.89230 | 2 | 8.94E-05 | 0.59 | 2.54 | - | 519.0  |
| AHQ-8-2, 3149         | R.DVDIHDHNTYTVK.Y                   | 1785.89230 | 2 | 5.83E-05 | 0.86 | 3.37 | - | 826.0  |
| AHQ-8-3, 3104         | R.DVDIHDHNTYTVK.Y                   | 1785.89230 | 3 | 1.56E-05 | 0.76 | 3.37 | - | 451.5  |
| AHQ-8-2, 3151         | R.DVDIHDHNTYTVK.Y                   | 1785.89230 | 3 | 6.39E-05 | 0.66 | 3.09 | - | 422.4  |
| AHQ-8-2, 3441 - 3445  | R.EAGAGGLAIAVEGSPK.A                | 1427.58510 | 2 | 3.72E-04 | 0.95 | 4.12 | - | 1352.6 |
| AHQ-8-5, 3352 - 3418  | R.EAGAGGLAIAVEGSPK.A                | 1427.58510 | 2 | 2.31E-05 | 0.92 | 3.48 | - | 1253.4 |
| AHQ-8-4, 3371 - 3415  | R.EAGAGGLAIAVEGSPK.A                | 1427.58510 | 2 | 6.35E-07 | 0.72 | 2.52 | - | 1001.6 |
| AHQ-8-6, 3326 - 3388  | R.EAGAGGLAIAVEGSPK.A                | 1427.58510 | 2 | 3.32E-08 | 0.85 | 3.15 | - | 940.3  |
| AHQ-8-8, 3309         | R.EAGAGGLAIAVEGSPK.A                | 1427.58510 | 2 | 4.21E-06 | 0.90 | 3.60 | - | 1211.3 |
| AHQ-8-3, 3384 - 3450  | R.EAGAGGLAIAVEGSPK.A                | 1427.58510 | 2 | 1.32E-06 | 0.89 | 3.36 | - | 1168.6 |
| AHQ-8-7, 3274         | R.EAGAGGLAIAVEGSPK.A                | 1427.58510 | 2 | 1.39E-09 | 0.94 | 3.88 | - | 1220.2 |
| AHQ-8-5, 2660         | R.EATTEFSVDAR.A                     | 1226.27493 | 2 | 1.58E-04 | 0.85 | 3.00 | - | 735.6  |
| AHQ-8-1, 2871         | R.EATTEFSVDAR.A                     | 1226.27493 | 2 | 2.04E-04 | 0.79 | 2.77 | - | 834.9  |
| AHQ-8-2, 2712 - 2785  | R.EATTEFSVDAR.A                     | 1226.27493 | 2 | 5.44E-05 | 0.84 | 2.73 | - | 805.5  |
| AHQ-8-4, 2645 - 2657  | R.EATTEFSVDAR.A                     | 1226.27493 | 2 | 2.91E-04 | 0.92 | 3.05 | - | 1028.7 |
| AHQ-8-2, 5827 - 5883  | R.EEGPYEVEVTDGVPVPGSPFFLEAVPTKPSK.V | 3487.85286 | 3 | 2.79E-08 | 0.95 | 5.49 | - | 942.1  |
| AHQ-8-5, 5813 - 5868  | R.EEGPYEVEVTDGVPVPGSPFFLEAVPTKPSK.V | 3487.85286 | 3 | 4.01E-09 | 0.95 | 6.42 | - | 609.2  |
| AHQ-8-1, 5823 - 5888  | R.EEGPYEVEVTDGVPVPGSPFFLEAVPTKPSK.V | 3487.85286 | 3 | 6.69E-07 | 0.90 | 4.82 | - | 587.2  |
| AHQ-8-3, 5828 - 5885  | R.EEGPYEVEVTDGVPVPGSPFFLEAVPTKPSK.V | 3487.85286 | 3 | 1.04E-09 | 0.95 | 5.59 | - | 830.1  |
| AHQ-8-4, 5825 - 5870  | R.EEGPYEVEVTDGVPVPGSPFFLEAVPTKPSK.V | 3487.85286 | 3 | 8.36E-05 | 0.85 | 4.26 | - | 572.0  |
| AHQ-8-3, 5714 - 5772  | R.EEGPYEVEVTDGVPVPGSPFFLEAVPTKPSK.V | 3487.85286 | 3 | 1.21E-05 | 0.93 | 4.94 | - | 754.1  |
| AHQ-8-4, 5925         | R.EEGPYEVEVTDGVPVPGSPFFLEAVPTKPSK.V | 3487.85286 | 3 | 1.31E-09 | 0.92 | 4.82 | - | 831.8  |
| AHQ-8-7, 5705         | R.EEGPYEVEVTDGVPVPGSPFFLEAVPTKPSK.V | 3487.85286 | 3 | 2.25E-05 | 0.83 | 3.69 | - | 639.6  |
| AHQ-8-1, 5943         | R.EEGPYEVEVTDGVPVPGSPFFLEAVPTKPSK.V | 3487.85286 | 3 | 5.09E-09 | 0.91 | 5.11 | - | 625.3  |
| AHQ-8-11, 4653        | R.EGPPYSISVLYGDEEVP.R.S             | 1911.05809 | 2 | 2.70E-05 | 0.77 | 2.93 | - | 721.4  |
| AHQ-8-5, 4832         | R.EGPPYSISVLYGDEEVP.R.S             | 1911.05809 | 2 | 1.65E-04 | 0.70 | 3.14 | - | 571.1  |
| AHQ-8-7, 4656 - 4660  | R.EGPPYSISVLYGDEEVP.R.S             | 1911.05809 | 2 | 1.09E-05 | 0.93 | 4.40 | - | 963.0  |
| AHQ-8-6, 4684 - 4750  | R.EGPPYSISVLYGDEEVP.R.S             | 1911.05809 | 2 | 3.64E-07 | 0.95 | 4.15 | - | 1279.4 |
| AHQ-8-3, 4818         | R.EGPPYSISVLYGDEEVP.R.S             | 1911.05809 | 3 | 1.02E-07 | 0.97 | 6.11 | - | 1558.8 |
| AHQ-8-2, 4813 - 4879  | R.EGPPYSISVLYGDEEVP.R.S             | 1911.05809 | 2 | 2.55E-07 | 0.86 | 3.69 | - | 738.2  |
| AHQ-8-8, 4770 - 4783  | R.EGPPYSISVLYGDEEVP.R.S             | 1911.05809 | 2 | 4.48E-07 | 0.91 | 3.97 | - | 800.4  |
| AHQ-8-10, 4574 - 4578 | R.EGPPYSISVLYGDEEVP.R.S             | 1911.05809 | 2 | 5.10E-04 | 0.46 | 2.68 | - | 374.8  |
| AHQ-8-1, 4944         | R.EGPPYSISVLYGDEEVP.R.S             | 1911.05809 | 3 | 2.04E-05 | 0.86 | 3.84 | - | 782.8  |
| AHQ-8-1, 4881 - 4935  | R.EGPPYSISVLYGDEEVP.R.S             | 1911.05809 | 2 | 9.66E-10 | 0.94 | 4.24 | - | 1289.1 |
| AHQ-8-3, 4744 - 4808  | R.EGPPYSISVLYGDEEVP.R.S             | 1911.05809 | 2 | 4.11E-09 | 0.90 | 4.44 | - | 865.5  |
| AHQ-8-2, 4629         | R.EGPPYSISVLYGDEEVP.R.S             | 1911.05809 | 2 | 8.79E-07 | 0.92 | 4.36 | - | 840.5  |
| AHQ-8-2, 4908         | R.EGPPYSISVLYGDEEVP.R.S             | 1911.05809 | 3 | 1.19E-06 | 0.96 | 4.97 | - | 1746.0 |
| AHQ-8-4, 3858         | R.ENGVYLDIVK.F                      | 1150.30633 | 2 | 8.04E-04 | 0.75 | 2.59 | - | 589.6  |
| AHQ-8-5, 3830         | R.ENGVYLDIVK.F                      | 1150.30633 | 2 | 5.41E-06 | 0.87 | 3.11 | - | 669.5  |
| AHQ-8-1, 3659         | K.FADQHVPGSPFSVK.V                  | 1516.68203 | 2 | 8.84E-08 | 0.81 | 2.95 | - | 645.6  |
| AHQ-8-3, 3484 - 3545  | K.FADQHVPGSPFSVK.V                  | 1516.68203 | 2 | 1.30E-04 | 0.78 | 3.46 | - | 432.2  |
| AHQ-8-6, 3416         | K.FADQHVPGSPFSVK.V                  | 1516.68203 | 3 | 7.83E-10 | 0.93 | 4.41 | - | 1144.9 |
| AHQ-8-4, 3467         | K.FADQHVPGSPFSVK.V                  | 1516.68203 | 3 | 4.46E-05 | 0.92 | 3.84 | - | 1188.3 |
| AHQ-8-4, 3463 - 3531  | K.FADQHVPGSPFSVK.V                  | 1516.68203 | 2 | 1.97E-06 | 0.74 | 2.98 | - | 610.3  |
| AHQ-8-5, 3448         | K.FADQHVPGSPFSVK.V                  | 1516.68203 | 3 | 2.63E-07 | 0.94 | 4.14 | - | 1297.7 |
| AHQ-8-1, 5276 - 5331  | R.FGGEHVPNPFFQVTLALAGDQPSVQPPLR.S   | 2947.25342 | 3 | 3.55E-10 | 0.93 | 5.03 | - | 828.8  |
| AHQ-8-5, 5188 - 5249  | R.FGGEHVPNPFFQVTLALAGDQPSVQPPLR.S   | 2947.25342 | 3 | 1.27E-09 | 0.96 | 5.52 | - | 1270.5 |
| AHQ-8-3, 5164 - 5228  | R.FGGEHVPNPFFQVTLALAGDQPSVQPPLR.S   | 2947.25342 | 3 | 1.05E-06 | 0.94 | 4.55 | - | 1214.4 |
| AHQ-8-13-, 5114       | R.FGGEHVPNPFFQVTLALAGDQPSVQPPLR.S   | 2947.25342 | 3 | 5.71E-04 | 0.89 | 4.36 | - | 710.3  |
| AHQ-8-2, 5249 - 5315  | R.FGGEHVPNPFFQVTLALAGDQPSVQPPLR.S   | 2947.25342 | 3 | 5.58E-05 | 0.85 | 4.33 | - | 634.2  |
| AHQ-8-1, 5189         | R.FGGEHVPNPFFQVTLALAGDQPSVQPPLR.S   | 2947.25342 | 3 | 1.74E-04 | 0.81 | 3.48 | - | 946.9  |
| AHQ-8-12, 5042        | R.FGGEHVPNPFFQVTLALAGDQPSVQPPLR.S   | 2947.25342 | 3 | 2.65E-06 | 0.75 | 3.35 | - | 597.8  |
| AHQ-8-2, 5371         | R.FGGEHVPNPFFQVTLALAGDQPSVQPPLR.S   | 2947.25342 | 3 | 7.03E-07 | 0.84 | 3.86 | - | 826.4  |
| AHQ-8-4, 5186 - 5254  | R.FGGEHVPNPFFQVTLALAGDQPSVQPPLR.S   | 2947.25342 | 3 | 3.19E-09 | 0.90 | 4.01 | - | 901.8  |
| AHQ-8-5, 4900 - 4964  | K.FNEEHIPDSPFFVVPVSPSGDAR.R         | 2468.66280 | 3 | 2.48E-04 | 0.91 | 4.15 | - | 953.0  |
| AHQ-8-1, 5044 - 5045  | K.FNEEHIPDSPFFVVPVSPSGDAR.R         | 2468.66280 | 2 | 8.49E-05 | 0.84 | 3.45 | - | 618.8  |
| AHQ-8-6, 4926 - 5006  | K.FNEEHIPDSPFFVVPVSPSGDAR.R         | 2468.66280 | 3 | 4.33E-05 | 0.86 | 3.81 | - | 857.1  |
| AHQ-8-4, 4957 - 4967  | K.FNEEHIPDSPFFVVPVSPSGDAR.R         | 2468.66280 | 2 | 5.94E-04 | 0.67 | 2.81 | - | 484.3  |
| AHQ-8-7, 4720         | K.FNEEHIPDSPFFVVPVSPSGDAR.R         | 2468.66280 | 3 | 5.94E-04 | 0.87 | 3.35 | - | 1259.6 |
| AHQ-8-4, 3649 - 3659  | K.FNGTHIPGSPFK.I                    | 1302.46259 | 2 | 8.53E-07 | 0.79 | 2.99 | - | 588.3  |
| AHQ-8-5, 3722         | K.FNGTHIPGSPFK.I                    | 1302.46259 | 3 | 1.13E-05 | 0.69 | 3.26 | - | 633.1  |
| AHQ-8-4, 3089         | R.FVPAEMGTHTVSVK.Y                  | 1503.74821 | 2 | 1.14E-07 | 0.87 | 3.02 | - | 756.4  |
| AHQ-8-6, 2428 - 2430  | R.FVPAEMGTHTVSVK.Y                  | 1519.74761 | 2 | 3.40E-05 | 0.75 | 3.16 | - | 334.7  |
| AHQ-8-5, 3065 - 3066  | R.FVPAEMGTHTVSVK.Y                  | 1503.74821 | 2 | 1.44E-05 | 0.92 | 3.85 | - | 751.9  |
| AHQ-8-4, 2438 - 2449  | R.FVPAEMGTHTVSVK.Y                  | 1519.74761 | 2 | 1.32E-06 | 0.83 | 3.16 | - | 370.1  |
| AHQ-8-1, 6191         | R.GAGSYTIMVLFADQATPTSPIR.V          | 2297.61623 | 2 | 4.04E-05 | 0.48 | 2.92 | - | 315.6  |
| AHQ-8-1, 5609         | R.GAGSYTIMVLFADQATPTSPIR.V          | 2313.61563 | 2 | 3.80E-05 | 0.89 | 4.25 | - | 593.9  |
| AHQ-8-2, 5612 - 5684  | R.GAGSYTIMVLFADQATPTSPIR.V          | 2313.61563 | 2 | 1.33E-07 | 0.94 | 4.81 | - | 786.4  |
| AHQ-8-6, 3308         | R.GAGTGGGLGLAVEGSPSEAK.M            | 1571.71430 | 2 | 1.24E-04 | 0.87 | 3.60 | - | 781.9  |
| AHQ-8-4, 3306 - 3365  | R.GAGTGGGLGLAVEGSPSEAK.M            | 1571.71430 | 2 | 1.11E-05 | 0.89 | 3.90 | - | 724.5  |
| AHQ-8-5, 3341         | R.GAGTGGGLGLAVEGSPSEAK.M            | 1571.71430 | 2 | 7.24E-07 | 0.90 | 3.95 | - | 761.8  |
| AHQ-8-8, 3291         | R.GAGTGGGLGLAVEGSPSEAK.M            | 1571.71430 | 2 | 4.41E-08 | 0.90 | 3.85 | - | 796.4  |
| AHQ-8-1, 3543         | R.GAGTGGGLGLAVEGSPSEAK.M            | 1571.71430 | 2 | 3.63E-07 | 0.79 | 3.32 | - | 697.8  |
| AHQ-8-7, 3258         | R.GAGTGGGLGLAVEGSPSEAK.M            | 1571.71430 | 2 | 1.12E-04 | 0.63 | 2.67 | - | 492.9  |
| AHQ-8-2, 3568         | K.GKLDVQFSGLTK.G                    | 1293.49392 | 3 | 4.15E-05 | 0.88 | 4.00 | - | 987.7  |
| AHQ-8-1, 3687         | K.GKLDVQFSGLTK.G                    | 1293.49392 | 2 | 3.03E-06 | 0.89 | 3.78 | - | 770.8  |
| AHQ-8-3, 3502         | K.GKLDVQFSGLTK.G                    | 1293.49392 | 2 | 1.42E-06 | 0.94 | 4.07 | - | 1156.4 |
| AHQ-8-3, 4520 - 4600  | K.GLVEPVDVNDADGTQTVNYPVSR.E         | 2545.74387 | 2 | 1.41E-07 | 0.89 | 3.82 | - | 759.3  |
| AHQ-8-2, 4935         | K.GLVEPVDVNDADGTQTVNYPVSR.E         | 2545.74387 | 2 | 1.53E-07 | 0.76 | 2.71 | - | 731.4  |
| AHQ-8-3, 4641 - 4696  | K.GLVEPVDVNDADGTQTVNYPVSR.E         | 2545.74387 | 3 | 4.61E-04 | 0.77 | 3.43 | - | 615.3  |

|                        |                               |            |   |          |      |      |   |        |
|------------------------|-------------------------------|------------|---|----------|------|------|---|--------|
| AHQ-8-1, 4800          | K.GLVEPVDVVDNADGTQTVNYPVSR.E  | 2545.74387 | 2 | 2.02E-10 | 0.94 | 4.04 | - | 1103.3 |
| AHQ-8-3, 4632 - 4688   | K.GLVEPVDVVDNADGTQTVNYPVSR.E  | 2545.74387 | 2 | 3.46E-04 | 0.54 | 2.56 | - | 522.9  |
| AHQ-8-2, 4719 - 4775   | K.GLVEPVDVVDNADGTQTVNYPVSR.E  | 2545.74387 | 2 | 9.60E-10 | 0.97 | 5.72 | - | 1188.8 |
| AHQ-8-6, 4556 - 4619   | K.GLVEPVDVVDNADGTQTVNYPVSR.E  | 2545.74387 | 2 | 1.55E-04 | 0.88 | 3.68 | - | 808.2  |
| AHQ-8-2, 4807 - 4872   | K.GLVEPVDVVDNADGTQTVNYPVSR.E  | 2545.74387 | 2 | 5.12E-05 | 0.65 | 2.90 | - | 749.5  |
| AHQ-8-5, 4700          | K.GLVEPVDVVDNADGTQTVNYPVSR.E  | 2545.74387 | 2 | 4.52E-07 | 0.80 | 2.92 | - | 744.0  |
| AHQ-8-3, 4862          | K.GLVEPVDVVDNADGTQTVNYPVSR.E  | 2545.74387 | 2 | 8.91E-09 | 0.91 | 3.26 | - | 1156.5 |
| AHQ-8-2, 2345 - 2412   | K.GTVEPQLEAR.G                | 1100.20741 | 2 | 1.84E-06 | 0.78 | 3.03 | - | 538.9  |
| AHQ-8-3, 2337          | K.GTVEPQLEAR.G                | 1100.20741 | 2 | 2.00E-04 | 0.71 | 2.85 | - | 563.3  |
| AHQ-8-1, 2535          | K.GTVEPQLEAR.G                | 1100.20741 | 2 | 5.59E-04 | 0.73 | 2.89 | - | 512.5  |
| AHQ-8-4, 4966          | K.HTAM*VSWGVSIPNSPFR.V        | 1960.20541 | 2 | 2.57E-05 | 0.97 | 4.93 | - | 1592.4 |
| AHQ-8-2, 5007          | K.HTAM*VSWGVSIPNSPFR.V        | 1960.20541 | 2 | 6.16E-07 | 0.94 | 4.22 | - | 1038.1 |
| AHQ-8-2, 5003 - 5008   | K.HTAM*VSWGVSIPNSPFR.V        | 1960.20541 | 3 | 7.15E-04 | 0.87 | 4.00 | - | 753.4  |
| AHQ-8-3, 4918 - 4928   | K.HTAM*VSWGVSIPNSPFR.V        | 1960.20541 | 2 | 5.63E-05 | 0.95 | 5.12 | - | 881.8  |
| AHQ-8-3, 4924          | K.HTAM*VSWGVSIPNSPFR.V        | 1960.20541 | 3 | 3.05E-05 | 0.85 | 3.69 | - | 983.6  |
| AHQ-8-1, 5053          | K.HTAM*VSWGVSIPNSPFR.V        | 1960.20541 | 2 | 7.23E-04 | 0.94 | 4.05 | - | 1254.2 |
| AHQ-8-7, 3972 - 3980   | R.IANLQTDLSDDL.R              | 1416.56231 | 2 | 2.90E-08 | 0.90 | 4.06 | - | 635.2  |
| AHQ-8-2, 3929 - 3997   | R.IANLQTDLSDDL.R              | 1416.56231 | 2 | 4.05E-07 | 0.96 | 4.59 | - | 1229.5 |
| AHQ-8-2, 3823 - 3824   | R.IANLQTDLSDDL.R              | 1416.56231 | 2 | 3.24E-07 | 0.93 | 4.08 | - | 1054.8 |
| AHQ-8-2, 4076          | R.IANLQTDLSDDL.R              | 1416.56231 | 2 | 1.40E-06 | 0.95 | 4.39 | - | 1078.3 |
| AHQ-8-1, 4260          | R.IANLQTDLSDDL.R              | 1416.56231 | 2 | 1.61E-06 | 0.93 | 3.91 | - | 957.0  |
| AHQ-8-4, 3761          | R.IANLQTDLSDDL.R              | 1416.56231 | 2 | 1.07E-05 | 0.94 | 3.77 | - | 1090.0 |
| AHQ-8-13-, 4063 - 4120 | R.IANLQTDLSDDL.R              | 1416.56231 | 2 | 1.63E-04 | 0.57 | 2.52 | - | 423.6  |
| AHQ-8-5, 4102 - 4108   | R.IANLQTDLSDDL.R              | 1416.56231 | 2 | 1.75E-05 | 0.89 | 3.75 | - | 770.5  |
| AHQ-8-4, 4127 - 4151   | R.IANLQTDLSDDL.R              | 1416.56231 | 2 | 4.32E-06 | 0.90 | 3.52 | - | 889.4  |
| AHQ-8-12, 4006         | R.IANLQTDLSDDL.R              | 1416.56231 | 2 | 1.26E-07 | 0.92 | 3.59 | - | 1215.5 |
| AHQ-8-13, 4263         | R.IANLQTDLSDDL.R              | 1416.56231 | 2 | 1.58E-05 | 0.81 | 3.16 | - | 574.9  |
| AHQ-8-3, 4113 - 4117   | R.IANLQTDLSDDL.R              | 1416.56231 | 2 | 4.40E-06 | 0.96 | 4.63 | - | 1309.6 |
| AHQ-8-6, 4046 - 4124   | R.IANLQTDLSDDL.R              | 1416.56231 | 2 | 5.50E-06 | 0.94 | 4.21 | - | 1070.6 |
| AHQ-8-2, 4173 - 4252   | R.IANLQTDLSDDL.R              | 1416.56231 | 2 | 6.85E-06 | 0.93 | 3.90 | - | 1002.6 |
| AHQ-8-3, 3756          | R.IANLQTDLSDDL.R              | 1416.56231 | 2 | 4.50E-07 | 0.92 | 3.76 | - | 1057.3 |
| AHQ-8-5, 3728 - 3732   | R.IANLQTDLSDDL.R              | 1416.56231 | 2 | 4.64E-06 | 0.96 | 4.53 | - | 1145.7 |
| AHQ-8-11, 3989 - 3997  | R.IANLQTDLSDDL.R              | 1416.56231 | 2 | 3.40E-05 | 0.93 | 4.16 | - | 931.4  |
| AHQ-8-1, 3901          | R.IANLQTDLSDDL.R              | 1416.56231 | 2 | 4.54E-07 | 0.95 | 4.59 | - | 1048.7 |
| AHQ-8-4, 5225          | K.IPEISIQDM*TAQVTSPPSGK.T     | 2003.26361 | 2 | 3.50E-08 | 0.97 | 4.83 | - | 1518.7 |
| AHQ-8-2, 4049          | K.IPEISIQDM*TAQVTSPPSGK.T     | 2019.26301 | 2 | 2.94E-07 | 0.97 | 5.36 | - | 1578.4 |
| AHQ-8-1, 5272          | K.IPEISIQDM*TAQVTSPPSGK.T     | 2003.26361 | 2 | 5.05E-12 | 0.97 | 5.32 | - | 1556.7 |
| AHQ-8-4, 3990          | K.IPEISIQDM*TAQVTSPPSGK.T     | 2019.26301 | 2 | 1.14E-04 | 0.97 | 5.17 | - | 1837.4 |
| AHQ-8-1, 5279 - 5357   | K.IPEISIQDM*TAQVTSPPSGK.T     | 2003.26361 | 3 | 7.33E-05 | 0.95 | 5.03 | - | 1378.7 |
| AHQ-8-6, 5104          | K.IPEISIQDM*TAQVTSPPSGK.T     | 2003.26361 | 3 | 5.31E-07 | 0.83 | 3.56 | - | 934.0  |
| AHQ-8-5, 5174 - 5193   | K.IPEISIQDM*TAQVTSPPSGK.T     | 2003.26361 | 2 | 2.29E-11 | 0.98 | 5.90 | - | 2161.1 |
| AHQ-8-6, 5090          | K.IPEISIQDM*TAQVTSPPSGK.T     | 2003.26361 | 2 | 7.90E-07 | 0.96 | 5.40 | - | 1120.4 |
| AHQ-8-3, 5168 - 5169   | K.IPEISIQDM*TAQVTSPPSGK.T     | 2003.26361 | 2 | 2.51E-09 | 0.97 | 5.45 | - | 1400.2 |
| AHQ-8-5, 3956 - 4016   | K.IPEISIQDM*TAQVTSPPSGK.T     | 2019.26301 | 2 | 1.99E-08 | 0.97 | 5.36 | - | 1717.4 |
| AHQ-8-2, 5263          | K.IPEISIQDM*TAQVTSPPSGK.T     | 2003.26361 | 2 | 1.93E-11 | 0.98 | 6.38 | - | 1910.1 |
| AHQ-8-3, 3980 - 4050   | K.IPEISIQDM*TAQVTSPPSGK.T     | 2019.26301 | 2 | 6.81E-06 | 0.96 | 4.39 | - | 1764.0 |
| AHQ-8-4, 5237          | K.IPEISIQDM*TAQVTSPPSGK.T     | 2003.26361 | 3 | 5.81E-06 | 0.75 | 3.72 | - | 690.6  |
| AHQ-8-6, 3904 - 3948   | K.IPEISIQDM*TAQVTSPPSGK.T     | 2019.26301 | 2 | 4.86E-06 | 0.98 | 5.98 | - | 1844.1 |
| AHQ-8-5, 4732          | K.IPEISIQDM*TAQVTSPPSGK.T     | 2003.26361 | 2 | 4.08E-04 | 0.91 | 4.62 | - | 538.8  |
| AHQ-8-7, 4969 - 5016   | K.IPEISIQDM*TAQVTSPPSGK.T     | 2003.26361 | 2 | 4.97E-09 | 0.97 | 5.10 | - | 1823.1 |
| AHQ-8-8, 5159          | K.IPEISIQDM*TAQVTSPPSGK.T     | 2003.26361 | 2 | 1.12E-07 | 0.97 | 4.99 | - | 1353.8 |
| AHQ-8-7, 3846          | K.IPEISIQDM*TAQVTSPPSGK.T     | 2019.26301 | 2 | 1.43E-07 | 0.98 | 5.00 | - | 2455.2 |
| AHQ-8-4, 2581          | K.IVGPSSGAAVPCV.V             | 1157.36530 | 2 | 4.64E-08 | 0.86 | 3.18 | - | 782.3  |
| AHQ-8-2, 2639 - 2640   | K.IVGPSSGAAVPCV.V             | 1157.36530 | 2 | 4.25E-09 | 0.85 | 3.13 | - | 783.2  |
| AHQ-8-3, 2614          | K.IVGPSSGAAVPCV.V             | 1157.36530 | 2 | 4.61E-10 | 0.92 | 3.46 | - | 1002.8 |
| AHQ-8-5, 2590          | K.IVGPSSGAAVPCV.V             | 1157.36530 | 2 | 1.81E-06 | 0.84 | 2.96 | - | 776.0  |
| AHQ-8-1, 4184          | K.IVGPSSGAAVPCVPEPLGADNSVVR.F | 2451.78478 | 3 | 2.78E-08 | 0.93 | 4.87 | - | 1234.6 |
| AHQ-8-1, 4197          | K.IVGPSSGAAVPCVPEPLGADNSVVR.F | 2451.78478 | 2 | 1.64E-06 | 0.81 | 3.57 | - | 470.1  |
| AHQ-8-3, 4022 - 4080   | K.IVGPSSGAAVPCVPEPLGADNSVVR.F | 2451.78478 | 3 | 2.63E-10 | 0.86 | 4.01 | - | 905.0  |
| AHQ-8-3, 4042 - 4044   | K.IVGPSSGAAVPCVPEPLGADNSVVR.F | 2451.78478 | 2 | 9.77E-04 | 0.89 | 4.60 | - | 398.9  |
| AHQ-8-4, 4065          | K.IVGPSSGAAVPCVPEPLGADNSVVR.F | 2451.78478 | 2 | 1.71E-04 | 0.72 | 3.34 | - | 285.2  |
| AHQ-8-4, 4057          | K.IVGPSSGAAVPCVPEPLGADNSVVR.F | 2451.78478 | 3 | 2.42E-06 | 0.96 | 5.55 | - | 1286.5 |
| AHQ-8-5, 4029          | K.IVGPSSGAAVPCVPEPLGADNSVVR.F | 2451.78478 | 3 | 1.69E-05 | 0.96 | 5.04 | - | 1599.7 |
| AHQ-8-1, 4275          | K.IVGPSSGAAVPCVPEPLGADNSVVR.F | 2451.78478 | 3 | 2.33E-07 | 0.86 | 4.30 | - | 659.5  |
| AHQ-8-2, 4113          | K.IVGPSSGAAVPCVPEPLGADNSVVR.F | 2451.78478 | 2 | 4.04E-04 | 0.81 | 3.27 | - | 447.4  |
| AHQ-8-2, 4108          | K.IVGPSSGAAVPCVPEPLGADNSVVR.F | 2451.78478 | 3 | 1.19E-04 | 0.91 | 4.44 | - | 1020.8 |
| AHQ-8-3, 4133          | K.IVGPSSGAAVPCVPEPLGADNSVVR.F | 2451.78478 | 3 | 7.12E-09 | 0.74 | 3.47 | - | 1110.3 |
| AHQ-8-1, 4335          | R.KDGSCGVAYVQEPGDYEVSVK.F     | 2388.59282 | 3 | 9.09E-04 | 0.70 | 3.32 | - | 764.1  |
| AHQ-8-4, 4294          | R.KDGSCGVAYVQEPGDYEVSVK.F     | 2388.59282 | 2 | 4.46E-04 | 0.60 | 3.28 | - | 486.8  |
| AHQ-8-5, 4244          | R.KDGSCGVAYVQEPGDYEVSVK.F     | 2388.59282 | 3 | 5.26E-06 | 0.88 | 4.23 | - | 863.5  |
| AHQ-8-5, 4189 - 4258   | R.KDGSCGVAYVQEPGDYEVSVK.F     | 2388.59282 | 2 | 4.07E-04 | 0.78 | 3.61 | - | 705.9  |
| AHQ-8-5, 4212          | K.KNGQHVASSPIPVVISQSEIGDASR.V | 2577.83547 | 3 | 1.44E-10 | 0.97 | 5.21 | - | 2316.3 |
| AHQ-8-2, 4257 - 4336   | K.KNGQHVASSPIPVVISQSEIGDASR.V | 2577.83547 | 3 | 7.03E-05 | 0.89 | 4.47 | - | 970.6  |
| AHQ-8-5, 4220          | K.KNGQHVASSPIPVVISQSEIGDASR.V | 2577.83547 | 2 | 4.73E-08 | 0.91 | 3.85 | - | 894.8  |
| AHQ-8-8, 4161          | K.KNGQHVASSPIPVVISQSEIGDASR.V | 2577.83547 | 2 | 1.07E-06 | 0.85 | 3.55 | - | 607.2  |
| AHQ-8-8, 4153          | K.KNGQHVASSPIPVVISQSEIGDASR.V | 2577.83547 | 3 | 2.07E-07 | 0.95 | 5.06 | - | 1397.9 |
| AHQ-8-7, 4101          | K.KNGQHVASSPIPVVISQSEIGDASR.V | 2577.83547 | 3 | 7.84E-05 | 0.95 | 4.92 | - | 1804.4 |
| AHQ-8-1, 4403 - 4481   | K.KNGQHVASSPIPVVISQSEIGDASR.V | 2577.83547 | 3 | 3.00E-12 | 0.97 | 5.90 | - | 1775.2 |
| AHQ-8-4, 4271          | K.KNGQHVASSPIPVVISQSEIGDASR.V | 2577.83547 | 2 | 1.54E-07 | 0.87 | 3.41 | - | 769.7  |
| AHQ-8-3, 4270 - 4342   | K.KNGQHVASSPIPVVISQSEIGDASR.V | 2577.83547 | 3 | 2.66E-07 | 0.96 | 4.95 | - | 2298.5 |
| AHQ-8-4, 4257 - 4263   | K.KNGQHVASSPIPVVISQSEIGDASR.V | 2577.83547 | 3 | 8.87E-13 | 0.98 | 6.23 | - | 2576.7 |
| AHQ-8-5, 4084 - 4148   | K.KNGQHVASSPIPVVISQSEIGDASR.V | 2577.83547 | 3 | 9.26E-06 | 0.94 | 4.72 | - | 1674.3 |
| AHQ-8-2, 3492          | K.KTHIQDNHGDGTYTVAYVPDVTGR.Y  | 2588.77367 | 3 | 1.52E-09 | 0.96 | 5.17 | - | 1263.2 |
| AHQ-8-2, 3496          | K.KTHIQDNHGDGTYTVAYVPDVTGR.Y  | 2588.77367 | 2 | 7.94E-05 | 0.83 | 3.61 | - | 484.5  |
| AHQ-8-2, 3581          | K.KTHIQDNHGDGTYTVAYVPDVTGR.Y  | 2588.77367 | 2 | 4.47E-05 | 0.69 | 2.80 | - | 551.4  |
| AHQ-8-4, 3411          | K.KTHIQDNHGDGTYTVAYVPDVTGR.Y  | 2588.77367 | 3 | 1.74E-06 | 0.93 | 4.55 | - | 1051.4 |
| AHQ-8-1, 3619          | K.KTHIQDNHGDGTYTVAYVPDVTGR.Y  | 2588.77367 | 3 | 3.32E-04 | 0.91 | 4.08 | - | 1071.7 |
| AHQ-8-3, 3537 - 3594   | K.KTHIQDNHGDGTYTVAYVPDVTGR.Y  | 2588.77367 | 3 | 3.29E-04 | 0.93 | 5.44 | - | 840.4  |
| AHQ-8-3, 3445          | K.KTHIQDNHGDGTYTVAYVPDVTGR.Y  | 2588.77367 | 3 | 8.64E-07 | 0.91 | 4.45 | - | 860.3  |
| AHQ-8-3, 3456          | K.KTHIQDNHGDGTYTVAYVPDVTGR.Y  | 2588.77367 | 2 | 1.70E-05 | 0.88 | 3.42 | - | 738.4  |
| AHQ-8-4, 3862          | K.LDVQFSLTK.G                 | 1108.26945 | 2 | 5.79E-05 | 0.92 | 3.42 | - | 1112.3 |
| AHQ-8-2, 3931 - 3935   | K.LDVQFSLTK.G                 | 1108.26945 | 2 | 2.85E-05 | 0.93 | 3.45 | - | 972.4  |
| AHQ-8-3, 3856          | K.LDVQFSLTK.G                 | 1108.26945 | 2 | 3.11E-05 | 0.93 | 3.98 | - | 888.5  |
| AHQ-8-1, 4009          | K.LDVQFSLTK.G                 | 1108.26945 | 2 | 2.43E-04 | 0.90 | 3.41 | - | 826.5  |
| AHQ-8-5, 6248          | R.LLQWIKNKLPLPITNFSR.D        | 2239.64761 | 3 | 1.06E-04 | 0.82 | 3.53 | - | 697.0  |
| AHQ-8-3, 6204          | R.LLQWIKNKLPLPITNFSR.D        | 2239.64761 | 3 | 4.66E-04 | 0.79 | 3.48 | - | 857.6  |
| AHQ-8-2, 6300          | R.LLQWIKNKLPLPITNFSR.D        | 2239.64761 | 3 | 2.92E-04 | 0.93 | 4.53 | - | 1324.5 |
| AHQ-8-3, 4598 - 4673   | K.LPQLPITNFSR.D               | 1286.50461 | 2 | 2.80E-04 | 0.73 | 2.80 | - | 491.5  |
| AHQ-8-5, 4842          | K.LPQLPITNFSR.D               | 1286.50461 | 2 | 1.12E-05 | 0.90 | 3.31 | - | 943.0  |
| AHQ-8-1, 4805          | K.LPQLPITNFSR.D               | 1286.50461 | 2 | 3.53E-04 | 0.85 | 3.01 | - | 605.4  |
| AHQ-8-2, 4737          | K.LPQLPITNFSR.D               | 1286.50461 | 2 | 1.55E-04 | 0.86 | 3.05 | - | 595.3  |
| AHQ-8-1, 4947          | K.LPQLPITNFSR.D               | 1286.50461 | 2 | 1.27E-04 | 0.88 | 2.99 | - | 837.3  |
| AHQ-8-2, 4901 - 4911   | K.LPQLPITNFSR.D               | 1286.50461 | 2 | 2.62E-06 | 0.89 | 3.33 | - | 712.6  |
| AHQ-8-6, 4587          | K.LPQLPITNFSR.D               | 1286.50461 | 2 | 6.72E-05 | 0.69 | 2.83 | - | 458.9  |
| AHQ-8-2, 5271          | K.LQVEPAVDTSGVQCYGPIEGQGVFR.E | 2766.03597 | 2 | 9.76E-07 | 0.81 | 3.31 | - | 653.3  |
| AHQ-8-2, 5191          | K.LQVEPAVDTSGVQCYGPIEGQGVFR.E | 2766.03597 | 3 | 1.24E-04 | 0.97 | 5.79 | - | 1595.6 |
| AHQ-8-2, 5167          | K.LQVEPAVDTSGVQCYGPIEGQGVFR.E | 2766.03597 | 2 | 4.77E-08 | 0.96 | 5.10 | - | 1003.7 |

|                      |                                  |            |   |          |      |      |   |        |
|----------------------|----------------------------------|------------|---|----------|------|------|---|--------|
| AHQ-8-3, 5085        | K.LQVEPAVDTSGVQCYGPIEGQGVFR.E    | 2766.03597 | 2 | 3.33E-09 | 0.97 | 5.67 | - | 1047.7 |
| AHQ-8-1, 5195        | K.LQVEPAVDTSGVQCYGPIEGQGVFR.E    | 2766.03597 | 2 | 7.90E-06 | 0.89 | 4.05 | - | 496.9  |
| AHQ-8-3, 3988        | R.LSPFMADIR.D                    | 1050.25664 | 2 | 6.14E-05 | 0.65 | 2.53 | - | 330.2  |
| AHQ-8-4, 3357 - 3427 | R.LTVSSLOEQSLK.V                 | 1262.43499 | 2 | 5.21E-05 | 0.83 | 2.99 | - | 776.3  |
| AHQ-8-1, 3615        | R.LTVSSLOEQSLK.V                 | 1262.43499 | 2 | 1.69E-05 | 0.84 | 2.89 | - | 734.3  |
| AHQ-8-4, 4091        | R.LVSNHSLHETSSVFVDSLTK.A         | 2201.42190 | 2 | 1.60E-08 | 0.97 | 5.76 | - | 1200.3 |
| AHQ-8-8, 4049        | R.LVSNHSLHETSSVFVDSLTK.A         | 2201.42190 | 2 | 2.26E-04 | 0.89 | 3.77 | - | 674.1  |
| AHQ-8-4, 4345        | R.LVSNHSLHETSSVFVDSLTK.A         | 2201.42190 | 3 | 2.98E-06 | 0.92 | 3.65 | - | 1118.1 |
| AHQ-8-4, 4346        | R.LVSNHSLHETSSVFVDSLTK.A         | 2201.42190 | 2 | 4.03E-09 | 0.94 | 4.77 | - | 773.3  |
| AHQ-8-5, 4074        | R.LVSNHSLHETSSVFVDSLTK.A         | 2201.42190 | 2 | 8.58E-05 | 0.95 | 4.85 | - | 991.1  |
| AHQ-8-4, 4089        | R.LVSNHSLHETSSVFVDSLTK.A         | 2201.42190 | 3 | 7.10E-11 | 0.97 | 5.71 | - | 1330.0 |
| AHQ-8-5, 4316        | R.LVSNHSLHETSSVFVDSLTK.A         | 2201.42190 | 2 | 3.72E-08 | 0.94 | 4.37 | - | 1011.6 |
| AHQ-8-1, 4264 - 4343 | R.LVSNHSLHETSSVFVDSLTK.A         | 2201.42190 | 3 | 9.22E-07 | 0.95 | 5.01 | - | 1184.6 |
| AHQ-8-3, 2522        | K.MDCQCEPEGYR.V                  | 1447.55375 | 2 | 3.14E-04 | 0.72 | 2.94 | - | 617.6  |
| AHQ-8-5, 2254        | K.MDCQCEPEGYR.V                  | 1463.55315 | 2 | 1.05E-06 | 0.89 | 3.38 | - | 922.2  |
| AHQ-8-4, 2238        | K.MDCQCEPEGYR.V                  | 1463.55315 | 2 | 1.09E-05 | 0.80 | 2.72 | - | 817.2  |
| AHQ-8-5, 4521        | K.NGQHVASSPIPVVISQSEIGDASR.V     | 2449.66256 | 2 | 5.06E-04 | 0.84 | 3.15 | - | 756.0  |
| AHQ-8-3, 4542        | K.NGQHVASSPIPVVISQSEIGDASR.V     | 2449.66256 | 3 | 1.54E-06 | 0.92 | 4.19 | - | 1683.6 |
| AHQ-8-5, 4656        | K.NGQHVASSPIPVVISQSEIGDASR.V     | 2449.66256 | 3 | 6.39E-12 | 0.93 | 4.58 | - | 1654.3 |
| AHQ-8-8, 4491        | K.NGQHVASSPIPVVISQSEIGDASR.V     | 2449.66256 | 2 | 5.32E-04 | 0.96 | 4.17 | - | 1494.0 |
| AHQ-8-1, 4663        | K.NGQHVASSPIPVVISQSEIGDASR.V     | 2449.66256 | 3 | 1.57E-04 | 0.85 | 3.76 | - | 921.3  |
| AHQ-8-5, 2132        | K.RAEFTVETR.S                    | 1109.21754 | 2 | 2.61E-06 | 0.90 | 2.82 | - | 976.7  |
| AHQ-8-4, 2147 - 2215 | K.RAEFTVETR.S                    | 1109.21754 | 2 | 8.93E-06 | 0.88 | 3.25 | - | 803.0  |
| AHQ-8-3, 2186        | K.RAEFTVETR.S                    | 1109.21754 | 2 | 3.96E-06 | 0.88 | 2.98 | - | 759.1  |
| AHQ-8-1, 3345        | R.RAPSVANVGSCHCDLSLK.I           | 1813.02884 | 3 | 1.15E-05 | 0.94 | 4.69 | - | 1066.4 |
| AHQ-8-3, 3158        | R.RAPSVANVGSCHCDLSLK.I           | 1813.02884 | 3 | 3.38E-05 | 0.96 | 5.24 | - | 1568.1 |
| AHQ-8-5, 3109        | R.RAPSVANVGSCHCDLSLK.I           | 1813.02884 | 3 | 1.41E-04 | 0.98 | 5.67 | - | 2371.7 |
| AHQ-8-5, 3114        | R.RAPSVANVGSCHCDLSLK.I           | 1813.02884 | 2 | 2.79E-04 | 0.93 | 4.60 | - | 753.6  |
| AHQ-8-2, 3855 - 3873 | K.RIANLQTLDSGLR.L                | 1572.74866 | 2 | 5.59E-07 | 0.91 | 3.47 | - | 1064.8 |
| AHQ-8-1, 3368        | R.RLTVSSLOEQSLK.V                | 1418.62134 | 2 | 2.40E-06 | 0.98 | 4.93 | - | 2449.6 |
| AHQ-8-5, 3145        | R.RLTVSSLOEQSLK.V                | 1418.62134 | 2 | 1.42E-04 | 0.96 | 3.79 | - | 1731.5 |
| AHQ-8-2, 6561 - 6619 | K.SADFVVEAIGDDVGLGFSVEGSPQAK.I   | 2696.90399 | 2 | 4.66E-06 | 0.95 | 4.87 | - | 1283.1 |
| AHQ-8-2, 6444 - 6503 | K.SADFVVEAIGDDVGLGFSVEGSPQAK.I   | 2696.90399 | 2 | 1.90E-05 | 0.92 | 4.44 | - | 1022.6 |
| AHQ-8-5, 3832        | R.SAGQGEVLVYVEDPAGHQEEAK.V       | 2314.45074 | 3 | 2.07E-07 | 0.91 | 3.93 | - | 1147.7 |
| AHQ-8-4, 3857        | R.SAGQGEVLVYVEDPAGHQEEAK.V       | 2314.45074 | 2 | 5.19E-07 | 0.95 | 4.80 | - | 904.0  |
| AHQ-8-4, 3853        | R.SAGQGEVLVYVEDPAGHQEEAK.V       | 2314.45074 | 3 | 2.78E-06 | 0.84 | 3.42 | - | 957.8  |
| AHQ-8-1, 4003        | R.SAGQGEVLVYVEDPAGHQEEAK.V       | 2314.45074 | 3 | 7.99E-14 | 0.95 | 5.10 | - | 1215.9 |
| AHQ-8-5, 3833 - 3834 | R.SAGQGEVLVYVEDPAGHQEEAK.V       | 2314.45074 | 2 | 2.12E-05 | 0.93 | 4.65 | - | 741.5  |
| AHQ-8-1, 4005        | R.SAGQGEVLVYVEDPAGHQEEAK.V       | 2314.45074 | 2 | 3.52E-05 | 0.90 | 4.13 | - | 628.0  |
| AHQ-8-6, 3782        | R.SAGQGEVLVYVEDPAGHQEEAK.V       | 2314.45074 | 2 | 1.09E-07 | 0.81 | 4.03 | - | 540.4  |
| AHQ-8-2, 3920        | R.SAGQGEVLVYVEDPAGHQEEAK.V       | 2314.45074 | 3 | 1.48E-06 | 0.94 | 4.54 | - | 1306.4 |
| AHQ-8-7, 3724        | R.SAGQGEVLVYVEDPAGHQEEAK.V       | 2314.45074 | 3 | 2.12E-06 | 0.90 | 3.67 | - | 1337.4 |
| AHQ-8-2, 3923 - 3924 | R.SAGQGEVLVYVEDPAGHQEEAK.V       | 2314.45074 | 2 | 1.13E-08 | 0.94 | 4.67 | - | 827.4  |
| AHQ-8-6, 3776        | R.SAGQGEVLVYVEDPAGHQEEAK.V       | 2314.45074 | 3 | 8.54E-05 | 0.74 | 3.60 | - | 585.4  |
| AHQ-8-3, 3836 - 3894 | R.SAGQGEVLVYVEDPAGHQEEAK.V       | 2314.45074 | 3 | 2.40E-10 | 0.89 | 3.77 | - | 951.4  |
| AHQ-8-2, 4017        | R.SAGQGEVLVYVEDPAGHQEEAK.V       | 2314.45074 | 2 | 2.22E-06 | 0.80 | 3.33 | - | 514.7  |
| AHQ-8-3, 3852 - 3914 | R.SAGQGEVLVYVEDPAGHQEEAK.V       | 2314.45074 | 2 | 5.52E-06 | 0.93 | 4.53 | - | 693.5  |
| AHQ-8-7, 3722        | R.SAGQGEVLVYVEDPAGHQEEAK.V       | 2314.45074 | 2 | 1.65E-06 | 0.80 | 3.75 | - | 544.3  |
| AHQ-8-1, 3591        | K.SPFVYVYDK.S                    | 1084.20321 | 2 | 2.46E-06 | 0.89 | 2.89 | - | 950.1  |
| AHQ-8-4, 3401        | K.SPFVYVYDK.S                    | 1084.20321 | 1 | 1.84E-04 | 0.55 | 2.13 | - | 847.5  |
| AHQ-8-5, 3392        | K.SPFVYVYDK.S                    | 1084.20321 | 1 | 9.04E-05 | 0.81 | 2.68 | - | 1100.0 |
| AHQ-8-5, 3384        | K.SPFVYVYDK.S                    | 1084.20321 | 2 | 5.14E-07 | 0.93 | 3.06 | - | 1202.5 |
| AHQ-8-3, 3420        | K.SPFVYVYDK.S                    | 1084.20321 | 1 | 1.05E-05 | 0.83 | 3.01 | - | 810.2  |
| AHQ-8-2, 3455        | K.SPFVYVYDK.S                    | 1084.20321 | 2 | 6.40E-06 | 0.85 | 3.03 | - | 857.7  |
| AHQ-8-4, 3397        | K.SPFVYVYDK.S                    | 1084.20321 | 2 | 2.85E-05 | 0.89 | 3.04 | - | 1020.7 |
| AHQ-8-3, 3414        | K.SPFVYVYDK.S                    | 1084.20321 | 2 | 2.49E-06 | 0.94 | 3.39 | - | 1160.5 |
| AHQ-8-1, 4832 - 4895 | K.SPFSVAVSPSLDLSK.I              | 1534.73557 | 2 | 3.15E-04 | 0.87 | 3.52 | - | 992.0  |
| AHQ-8-2, 4648        | K.SPFSVAVSPSLDLSK.I              | 1534.73557 | 2 | 2.07E-05 | 0.72 | 3.20 | - | 509.1  |
| AHQ-8-3, 4570        | K.SPFSVAVSPSLDLSK.I              | 1534.73557 | 2 | 2.45E-05 | 0.91 | 3.31 | - | 1037.6 |
| AHQ-8-5, 4728 - 4798 | K.SPFSVAVSPSLDLSK.I              | 1534.73557 | 2 | 1.27E-06 | 0.80 | 3.17 | - | 688.2  |
| AHQ-8-6, 4650 - 4706 | K.SPFSVAVSPSLDLSK.I              | 1534.73557 | 2 | 6.75E-05 | 0.74 | 3.03 | - | 688.5  |
| AHQ-8-7, 4568        | K.SPFSVAVSPSLDLSK.I              | 1534.73557 | 2 | 9.34E-06 | 0.64 | 2.88 | - | 628.9  |
| AHQ-8-7, 3292        | R.SPYTVTVGQACNPSACR.A            | 1871.04208 | 2 | 8.59E-05 | 0.84 | 3.62 | - | 467.7  |
| AHQ-8-4, 3321 - 3381 | R.SPYTVTVGQACNPSACR.A            | 1871.04208 | 2 | 1.03E-04 | 0.86 | 4.06 | - | 445.6  |
| AHQ-8-6, 3334        | R.SPYTVTVGQACNPSACR.A            | 1871.04208 | 2 | 2.13E-06 | 0.95 | 5.13 | - | 505.8  |
| AHQ-8-2, 3404 - 3464 | R.SPYTVTVGQACNPSACR.A            | 1871.04208 | 2 | 4.50E-05 | 0.83 | 3.81 | - | 421.5  |
| AHQ-8-1, 3527 - 3547 | R.SPYTVTVGQACNPSACR.A            | 1871.04208 | 2 | 4.33E-05 | 0.86 | 3.45 | - | 515.4  |
| AHQ-8-6, 3279 - 3338 | R.SPYTVTVGQACNPSACR.A            | 1871.04208 | 2 | 1.27E-04 | 0.87 | 3.98 | - | 419.4  |
| AHQ-8-5, 3360        | R.SPYTVTVGQACNPSACR.A            | 1871.04208 | 2 | 9.51E-04 | 0.84 | 3.47 | - | 487.5  |
| AHQ-8-3, 4850        | R.TFSVWYVPEVTGTHK.V              | 1751.96228 | 3 | 1.04E-05 | 0.64 | 3.29 | - | 400.6  |
| AHQ-8-6, 4776        | R.TFSVWYVPEVTGTHK.V              | 1751.96228 | 3 | 5.51E-07 | 0.81 | 3.51 | - | 622.2  |
| AHQ-8-1, 4989 - 4995 | R.TFSVWYVPEVTGTHK.V              | 1751.96228 | 3 | 7.49E-05 | 0.67 | 3.07 | - | 541.4  |
| AHQ-8-1, 4980 - 4984 | R.TFSVWYVPEVTGTHK.V              | 1751.96228 | 2 | 3.46E-07 | 0.82 | 3.06 | - | 535.0  |
| AHQ-8-4, 4889        | R.TFSVWYVPEVTGTHK.V              | 1751.96228 | 3 | 8.26E-07 | 0.76 | 3.63 | - | 459.9  |
| AHQ-8-5, 4853        | R.TFSVWYVPEVTGTHK.V              | 1751.96228 | 3 | 7.12E-05 | 0.72 | 3.19 | - | 478.9  |
| AHQ-8-3, 3124        | K.TGVAVNKPFAEFTVDAK.H            | 1647.85391 | 3 | 3.59E-05 | 0.83 | 3.24 | - | 687.4  |
| AHQ-8-1, 3311        | K.TGVAVNKPFAEFTVDAK.H            | 1647.85391 | 3 | 1.10E-04 | 0.83 | 3.45 | - | 719.9  |
| AHQ-8-6, 3075        | K.TGVAVNKPFAEFTVDAK.H            | 1647.85391 | 2 | 9.42E-04 | 0.88 | 4.23 | - | 388.1  |
| AHQ-8-5, 3054 - 3090 | K.TGVAVNKPFAEFTVDAK.H            | 1647.85391 | 3 | 1.79E-05 | 0.79 | 3.34 | - | 706.9  |
| AHQ-8-4, 3110        | K.TGVAVNKPFAEFTVDAK.H            | 1647.85391 | 3 | 3.06E-07 | 0.86 | 3.33 | - | 843.4  |
| AHQ-8-2, 3171        | K.TGVAVNKPFAEFTVDAK.H            | 1647.85391 | 3 | 2.24E-07 | 0.80 | 3.12 | - | 744.8  |
| AHQ-8-3, 3061        | R.TGVELGKPTHFTVNAK.A             | 1699.93205 | 2 | 1.87E-04 | 0.68 | 2.79 | - | 616.1  |
| AHQ-8-2, 3033 - 3104 | R.TGVELGKPTHFTVNAK.A             | 1699.93205 | 2 | 1.64E-05 | 0.86 | 3.76 | - | 510.2  |
| AHQ-8-3, 2910 - 2985 | R.TGVELGKPTHFTVNAK.A             | 1699.93205 | 2 | 9.43E-04 | 0.91 | 4.06 | - | 713.9  |
| AHQ-8-4, 3215        | K.THEAIEIVENHTYCI.R              | 2060.19046 | 3 | 1.48E-06 | 0.91 | 4.26 | - | 859.4  |
| AHQ-8-4, 3098        | K.THEAIEIVENHTYCI.R              | 2060.19046 | 3 | 5.62E-13 | 0.90 | 4.08 | - | 946.4  |
| AHQ-8-6, 3078        | K.THEAIEIVENHTYCI.R              | 2060.19046 | 3 | 2.55E-10 | 0.94 | 4.71 | - | 1181.3 |
| AHQ-8-5, 3085 - 3096 | K.THEAIEIVENHTYCI.R              | 2060.19046 | 2 | 1.27E-04 | 0.98 | 5.44 | - | 1859.1 |
| AHQ-8-5, 3089 - 3101 | K.THEAIEIVENHTYCI.R              | 2060.19046 | 3 | 2.36E-07 | 0.94 | 4.58 | - | 1130.9 |
| AHQ-8-6, 3082 - 3086 | K.THEAIEIVENHTYCI.R              | 2060.19046 | 2 | 7.44E-05 | 0.97 | 4.78 | - | 1522.3 |
| AHQ-8-3, 3140        | K.THEAIEIVENHTYCI.R              | 2060.19046 | 3 | 1.56E-05 | 0.86 | 3.31 | - | 1071.7 |
| AHQ-8-7, 3040        | K.THEAIEIVENHTYCI.R              | 2060.19046 | 3 | 2.40E-04 | 0.90 | 3.56 | - | 1207.2 |
| AHQ-8-8, 3050        | K.THEAIEIVENHTYCI.R              | 2060.19046 | 3 | 3.58E-06 | 0.86 | 3.46 | - | 1128.3 |
| AHQ-8-2, 3179        | K.THEAIEIVENHTYCI.R              | 2060.19046 | 3 | 3.98E-05 | 0.66 | 3.04 | - | 632.5  |
| AHQ-8-5, 3218        | K.THEAIEIVENHTYCI.R              | 2060.19046 | 2 | 2.89E-14 | 0.98 | 5.05 | - | 1902.5 |
| AHQ-8-5, 3206 - 3282 | K.THEAIEIVENHTYCI.R              | 2060.19046 | 3 | 1.54E-04 | 0.83 | 3.45 | - | 828.3  |
| AHQ-8-3, 3173        | R.TPCEILVK.H                     | 1090.27249 | 2 | 3.40E-04 | 0.91 | 3.23 | - | 881.3  |
| AHQ-8-1, 3351        | R.TPCEILVK.H                     | 1090.27249 | 2 | 9.55E-06 | 0.85 | 2.99 | - | 772.8  |
| AHQ-8-6, 3128        | R.TPCEILVK.H                     | 1090.27249 | 2 | 4.87E-06 | 0.70 | 2.72 | - | 603.7  |
| AHQ-8-4, 3141        | R.TPCEILVK.H                     | 1090.27249 | 2 | 4.94E-06 | 0.64 | 2.86 | - | 513.0  |
| AHQ-8-14-, 3167      | R.TPCEILVK.H                     | 1090.27249 | 1 | 1.72E-05 | 0.53 | 2.75 | - | 353.0  |
| AHQ-8-5, 3141        | R.TPCEILVK.H                     | 1090.27249 | 2 | 1.80E-05 | 0.75 | 2.94 | - | 556.3  |
| AHQ-8-3, 6560 - 6564 | K.TTYFEIFTAGAGTGEVEVVIQDPM"GQK.G | 2906.21339 | 3 | 3.92E-04 | 0.86 | 3.44 | - | 1357.6 |
| AHQ-8-5, 3333 - 3406 | R.VANPSGNLTETYVQDR.G             | 1764.87462 | 2 | 2.00E-13 | 0.94 | 4.53 | - | 939.0  |
| AHQ-8-7, 3194        | R.VANPSGNLTETYVQDR.G             | 1764.87462 | 2 | 6.23E-05 | 0.91 | 3.72 | - | 946.9  |
| AHQ-8-5, 3252        | R.VANPSGNLTETYVQDR.G             | 1764.87462 | 2 | 3.01E-07 | 0.82 | 3.40 | - | 555.9  |
| AHQ-8-4, 3187 - 3261 | R.VANPSGNLTETYVQDR.G             | 1764.87462 | 2 | 1.48E-05 | 0.78 | 3.02 | - | 470.1  |

|                      |                                            |            |   |          |      |      |   |        |
|----------------------|--------------------------------------------|------------|---|----------|------|------|---|--------|
| AHQ-8-5, 3192 - 3264 | R.VANPSGNLTETYVQDR.G                       | 1764.87462 | 2 | 2.82E-11 | 0.93 | 3.95 | - | 983.5  |
| AHQ-8-1, 3467 - 3523 | R.VANPSGNLTETYVQDR.G                       | 1764.87462 | 2 | 3.24E-13 | 0.92 | 3.95 | - | 878.2  |
| AHQ-8-3, 3137 - 3205 | R.VANPSGNLTETYVQDR.G                       | 1764.87462 | 2 | 1.30E-05 | 0.82 | 3.56 | - | 577.7  |
| AHQ-8-8, 3225 - 3306 | R.VANPSGNLTETYVQDR.G                       | 1764.87462 | 2 | 1.60E-06 | 0.93 | 4.88 | - | 471.4  |
| AHQ-8-2, 3397 - 3437 | R.VANPSGNLTETYVQDR.G                       | 1764.87462 | 2 | 3.26E-09 | 0.95 | 4.57 | - | 1136.9 |
| AHQ-8-3, 3272 - 3334 | R.VANPSGNLTETYVQDR.G                       | 1764.87462 | 2 | 1.06E-07 | 0.78 | 3.30 | - | 374.6  |
| AHQ-8-2, 3305        | R.VANPSGNLTETYVQDR.G                       | 1764.87462 | 2 | 1.90E-05 | 0.46 | 2.75 | - | 241.5  |
| AHQ-8-2, 3183 - 3243 | R.VANPSGNLTETYVQDR.G                       | 1764.87462 | 2 | 1.07E-11 | 0.94 | 4.15 | - | 1132.3 |
| AHQ-8-6, 3230 - 3303 | R.VANPSGNLTETYVQDR.G                       | 1764.87462 | 2 | 1.10E-10 | 0.92 | 3.93 | - | 971.3  |
| AHQ-8-3, 3424        | R.VANPSGNLTETYVQDR.G                       | 1764.87462 | 2 | 7.13E-10 | 0.93 | 4.20 | - | 797.1  |
| AHQ-8-1, 3079        | K.VAQPITTDNKDGTVTVR.Y                      | 1816.00621 | 2 | 2.07E-06 | 0.85 | 3.55 | - | 591.3  |
| AHQ-8-4, 2845        | K.VAQPITTDNKDGTVTVR.Y                      | 1816.00621 | 2 | 3.11E-06 | 0.88 | 3.69 | - | 665.5  |
| AHQ-8-6, 2856        | K.VAQPITTDNKDGTVTVR.Y                      | 1816.00621 | 2 | 3.25E-04 | 0.57 | 2.80 | - | 310.0  |
| AHQ-8-2, 2939 - 2987 | K.VAQPITTDNKDGTVTVR.Y                      | 1816.00621 | 2 | 2.02E-05 | 0.93 | 3.95 | - | 895.3  |
| AHQ-8-3, 2893        | K.VAQPITTDNKDGTVTVR.Y                      | 1816.00621 | 2 | 4.49E-08 | 0.86 | 3.86 | - | 424.1  |
| AHQ-8-4, 2651        | K.VAQPITTDNKDGTVTVR.Y                      | 1816.00621 | 2 | 3.73E-06 | 0.71 | 3.05 | - | 485.1  |
| AHQ-8-5, 2665        | K.VAQPITTDNKDGTVTVR.Y                      | 1816.00621 | 2 | 2.65E-05 | 0.92 | 4.05 | - | 800.6  |
| AHQ-8-14-, 2895      | K.VAQPITTDNKDGTVTVR.Y                      | 1816.00621 | 2 | 1.10E-05 | 0.77 | 3.18 | - | 346.7  |
| AHQ-8-5, 2840 - 2868 | K.VAQPITTDNKDGTVTVR.Y                      | 1816.00621 | 2 | 1.55E-06 | 0.85 | 3.55 | - | 614.6  |
| AHQ-8-3, 3257 - 3338 | K.VDINTEDLEDGTGR.V                         | 1638.69283 | 2 | 2.06E-07 | 0.92 | 3.69 | - | 1056.0 |
| AHQ-8-13-, 3498      | K.VDINTEDLEDGTGR.V                         | 1638.69283 | 2 | 1.13E-06 | 0.81 | 2.94 | - | 880.8  |
| AHQ-8-6, 3204 - 3282 | K.VDINTEDLEDGTGR.V                         | 1638.69283 | 2 | 1.23E-07 | 0.85 | 3.15 | - | 854.3  |
| AHQ-8-4, 3490 - 3509 | K.VDINTEDLEDGTGR.V                         | 1638.69283 | 2 | 1.18E-06 | 0.93 | 4.06 | - | 903.8  |
| AHQ-8-8, 3215        | K.VDINTEDLEDGTGR.V                         | 1638.69283 | 2 | 2.06E-07 | 0.56 | 2.60 | - | 645.1  |
| AHQ-8-5, 3470 - 3540 | K.VDINTEDLEDGTGR.V                         | 1638.69283 | 2 | 2.99E-05 | 0.95 | 4.21 | - | 1210.4 |
| AHQ-8-2, 3561        | K.VDINTEDLEDGTGR.V                         | 1638.69283 | 2 | 1.08E-05 | 0.91 | 3.86 | - | 1112.8 |
| AHQ-8-1, 3647 - 3649 | K.VDINTEDLEDGTGR.V                         | 1638.69283 | 2 | 5.60E-07 | 0.93 | 4.18 | - | 1013.2 |
| AHQ-8-4, 3327        | K.VDINTEDLEDGTGR.V                         | 1638.69283 | 2 | 7.59E-05 | 0.92 | 3.54 | - | 1195.2 |
| AHQ-8-5, 3309 - 3381 | K.VDINTEDLEDGTGR.V                         | 1638.69283 | 2 | 2.24E-07 | 0.91 | 3.21 | - | 1211.5 |
| AHQ-8-3, 3492 - 3550 | K.VDINTEDLEDGTGR.V                         | 1638.69283 | 2 | 5.08E-06 | 0.80 | 3.26 | - | 745.8  |
| AHQ-8-4, 3242        | K.VDINTEDLEDGTGR.V                         | 1638.69283 | 2 | 1.93E-07 | 0.88 | 3.75 | - | 769.3  |
| AHQ-8-5, 3228        | K.VDINTEDLEDGTGR.V                         | 1638.69283 | 2 | 7.00E-06 | 0.86 | 3.27 | - | 908.2  |
| AHQ-8-8, 3425        | K.VDINTEDLEDGTGR.V                         | 1638.69283 | 2 | 2.37E-06 | 0.96 | 4.78 | - | 1212.0 |
| AHQ-8-6, 2624        | K.VDVGKDQEFVTK.S                           | 1365.51377 | 2 | 8.40E-10 | 0.89 | 3.40 | - | 771.9  |
| AHQ-8-2, 2693        | K.VDVGKDQEFVTK.S                           | 1365.51377 | 2 | 7.43E-08 | 0.86 | 3.36 | - | 637.9  |
| AHQ-8-4, 2626        | K.VDVGKDQEFVTK.S                           | 1365.51377 | 2 | 1.11E-07 | 0.82 | 3.08 | - | 599.7  |
| AHQ-8-1, 2861        | K.VDVGKDQEFVTK.S                           | 1365.51377 | 2 | 7.46E-10 | 0.90 | 3.59 | - | 738.0  |
| AHQ-8-3, 2660        | K.VDVGKDQEFVTK.S                           | 1365.51377 | 2 | 1.22E-08 | 0.70 | 3.10 | - | 460.5  |
| AHQ-8-3, 2801        | K.VEPGLGADNSVVR.F                          | 1313.44209 | 1 | 1.59E-06 | 0.05 | 1.91 | - | 136.7  |
| AHQ-8-1, 2983        | K.VEPGLGADNSVVR.F                          | 1313.44209 | 2 | 1.10E-04 | 0.69 | 2.73 | - | 335.0  |
| AHQ-8-2, 5739 - 5795 | K.VEYTPYEEGLHSVDVTDGSPVPSSPFQVPVTEGCDPSR.V | 4300.57494 | 3 | 2.54E-05 | 0.93 | 5.51 | - | 799.4  |
| AHQ-8-1, 5791 - 5847 | K.VEYTPYEEGLHSVDVTDGSPVPSSPFQVPVTEGCDPSR.V | 4300.57494 | 3 | 3.88E-06 | 0.96 | 6.08 | - | 931.0  |
| AHQ-8-6, 5667        | K.VEYTPYEEGLHSVDVTDGSPVPSSPFQVPVTEGCDPSR.V | 4300.57494 | 3 | 8.75E-04 | 0.75 | 3.63 | - | 428.3  |
| AHQ-8-2, 6443 - 6499 | K.VGSAADIPINISSETDLSLLTATVPPSGR.E          | 2895.25495 | 3 | 2.24E-04 | 0.81 | 4.28 | - | 358.1  |
| AHQ-8-5, 6429        | K.VGSAADIPINISSETDLSLLTATVPPSGR.E          | 2895.25495 | 2 | 1.39E-04 | 0.44 | 2.70 | - | 227.9  |
| AHQ-8-4, 6491 - 6493 | K.VGSAADIPINISSETDLSLLTATVPPSGR.E          | 2895.25495 | 2 | 5.02E-06 | 0.85 | 4.00 | - | 382.7  |
| AHQ-8-1, 6472 - 6473 | K.VGSAADIPINISSETDLSLLTATVPPSGR.E          | 2895.25495 | 2 | 1.37E-06 | 0.86 | 3.69 | - | 686.0  |
| AHQ-8-3, 6396        | K.VGSAADIPINISSETDLSLLTATVPPSGR.E          | 2895.25495 | 2 | 2.00E-05 | 0.93 | 4.23 | - | 772.7  |
| AHQ-8-8, 6501 - 6567 | K.VGSAADIPINISSETDLSLLTATVPPSGR.E          | 2895.25495 | 2 | 3.05E-04 | 0.81 | 3.32 | - | 514.1  |
| AHQ-8-2, 6501        | K.VGSAADIPINISSETDLSLLTATVPPSGR.E          | 2895.25495 | 2 | 8.38E-04 | 0.55 | 2.83 | - | 358.5  |
| AHQ-8-2, 1600 - 1639 | R.VHGPQIGSGTNNKPN.F                        | 1635.80645 | 2 | 4.67E-07 | 0.87 | 3.60 | - | 771.8  |
| AHQ-8-1, 4411        | K.VHSPSGALEECYVTEIDQDK.Y                   | 2279.42322 | 2 | 2.36E-04 | 0.90 | 3.58 | - | 919.3  |
| AHQ-8-4, 4266        | K.VHSPSGALEECYVTEIDQDK.Y                   | 2279.42322 | 2 | 1.43E-06 | 0.97 | 5.59 | - | 1354.9 |
| AHQ-8-5, 4233 - 4248 | K.VHSPSGALEECYVTEIDQDK.Y                   | 2279.42322 | 3 | 5.95E-05 | 0.95 | 4.73 | - | 1666.2 |
| AHQ-8-6, 4184        | K.VHSPSGALEECYVTEIDQDK.Y                   | 2279.42322 | 3 | 2.73E-04 | 0.90 | 4.25 | - | 1321.9 |
| AHQ-8-5, 4237        | K.VHSPSGALEECYVTEIDQDK.Y                   | 2279.42322 | 2 | 7.35E-09 | 0.97 | 5.42 | - | 1391.3 |
| AHQ-8-8, 4177        | K.VHSPSGALEECYVTEIDQDK.Y                   | 2279.42322 | 2 | 5.21E-06 | 0.97 | 4.97 | - | 1772.2 |
| AHQ-8-1, 4408        | K.VHSPSGALEECYVTEIDQDK.Y                   | 2279.42322 | 3 | 3.40E-05 | 0.93 | 3.37 | - | 1987.0 |
| AHQ-8-7, 4108        | K.VHSPSGALEECYVTEIDQDK.Y                   | 2279.42322 | 2 | 3.09E-06 | 0.94 | 4.80 | - | 928.6  |
| AHQ-8-4, 4621        | K.VHSPSGALEECYVTEIDQDKYAVR.F               | 2768.99349 | 3 | 8.58E-10 | 0.93 | 4.85 | - | 783.4  |
| AHQ-8-3, 4582        | K.VHSPSGALEECYVTEIDQDKYAVR.F               | 2768.99349 | 3 | 3.28E-08 | 0.93 | 4.92 | - | 701.3  |
| AHQ-8-5, 4550 - 4562 | K.VHSPSGALEECYVTEIDQDKYAVR.F               | 2768.99349 | 3 | 7.77E-15 | 0.89 | 4.40 | - | 498.1  |
| AHQ-8-6, 4507        | K.VHSPSGALEECYVTEIDQDKYAVR.F               | 2768.99349 | 3 | 8.59E-05 | 0.86 | 4.05 | - | 553.0  |
| AHQ-8-1, 4713        | K.VHSPSGALEECYVTEIDQDKYAVR.F               | 2768.99349 | 3 | 5.55E-15 | 0.94 | 5.12 | - | 847.2  |
| AHQ-8-5, 4572        | K.VHSPSGALEECYVTEIDQDKYAVR.F               | 2768.99349 | 2 | 5.66E-07 | 0.80 | 3.81 | - | 555.8  |
| AHQ-8-2, 4660        | K.VHSPSGALEECYVTEIDQDKYAVR.F               | 2768.99349 | 3 | 9.78E-12 | 0.86 | 4.29 | - | 617.6  |
| AHQ-8-1, 3949        | K.VNQPASFAVSLNGAK.G                        | 1503.68480 | 2 | 9.60E-12 | 0.91 | 3.97 | - | 657.6  |
| AHQ-8-7, 3546 - 3606 | K.VNQPASFAVSLNGAK.G                        | 1503.68480 | 2 | 1.25E-04 | 0.79 | 3.20 | - | 446.7  |
| AHQ-8-3, 3666 - 3724 | K.VNQPASFAVSLNGAK.G                        | 1503.68480 | 2 | 4.98E-09 | 0.84 | 3.73 | - | 442.2  |
| AHQ-8-5, 3636 - 3696 | K.VNQPASFAVSLNGAK.G                        | 1503.68480 | 2 | 8.39E-04 | 0.89 | 3.69 | - | 625.2  |
| AHQ-8-5, 3760 - 3824 | K.VNQPASFAVSLNGAK.G                        | 1503.68480 | 2 | 3.91E-10 | 0.87 | 3.60 | - | 608.8  |
| AHQ-8-3, 3788 - 3849 | K.VNQPASFAVSLNGAK.G                        | 1503.68480 | 2 | 2.77E-06 | 0.58 | 2.94 | - | 346.4  |
| AHQ-8-1, 3821        | K.VNQPASFAVSLNGAK.G                        | 1503.68480 | 2 | 7.10E-08 | 0.94 | 4.41 | - | 775.5  |
| AHQ-8-4, 3793 - 3850 | K.VNQPASFAVSLNGAK.G                        | 1503.68480 | 2 | 5.70E-09 | 0.83 | 3.54 | - | 450.2  |
| AHQ-8-4, 3662 - 3725 | K.VNQPASFAVSLNGAK.G                        | 1503.68480 | 2 | 9.17E-08 | 0.84 | 3.67 | - | 438.7  |
| AHQ-8-2, 3744 - 3805 | K.VNQPASFAVSLNGAK.G                        | 1503.68480 | 2 | 1.90E-07 | 0.87 | 3.67 | - | 575.0  |
| AHQ-8-8, 3553 - 3617 | K.VNQPASFAVSLNGAK.G                        | 1503.68480 | 2 | 2.83E-09 | 0.91 | 3.83 | - | 697.7  |
| AHQ-8-6, 3594 - 3650 | K.VNQPASFAVSLNGAK.G                        | 1503.68480 | 2 | 2.42E-08 | 0.83 | 3.40 | - | 506.0  |
| AHQ-8-2, 3925        | K.VNQPASFAVSLNGAK.G                        | 1503.68480 | 2 | 7.40E-05 | 0.77 | 2.97 | - | 428.1  |
| AHQ-8-3, 1790        | K.VPVHVDTDASK.V                            | 1168.28175 | 2 | 6.37E-06 | 0.95 | 3.38 | - | 1484.8 |
| AHQ-8-2, 1729 - 1796 | K.VPVHVDTDASK.V                            | 1168.28175 | 2 | 4.36E-05 | 0.92 | 3.19 | - | 1151.0 |
| AHQ-8-1, 4119 - 4179 | R.VQVQDNQGPCVEALVK.D                       | 1786.98493 | 2 | 1.76E-07 | 0.96 | 4.19 | - | 1816.6 |
| AHQ-8-5, 3989 - 4056 | R.VQVQDNQGPCVEALVK.D                       | 1786.98493 | 2 | 1.27E-07 | 0.96 | 5.02 | - | 1310.4 |
| AHQ-8-4, 4023 - 4099 | R.VQVQDNQGPCVEALVK.D                       | 1786.98493 | 2 | 6.82E-08 | 0.96 | 4.59 | - | 1529.3 |
| AHQ-8-2, 4069 - 4144 | R.VQVQDNQGPCVEALVK.D                       | 1786.98493 | 2 | 5.01E-10 | 0.97 | 5.48 | - | 1300.1 |
| AHQ-8-1, 4120 - 4175 | R.VQVQDNQGPCVEALVK.D                       | 1786.98493 | 2 | 1.34E-06 | 0.98 | 5.14 | - | 1881.0 |
| AHQ-8-3, 4028 - 4072 | R.VQVQDNQGPCVEALVK.D                       | 1786.98493 | 2 | 1.37E-04 | 0.96 | 5.73 | - | 1039.4 |
| AHQ-8-1, 4952 - 5007 | R.VQVQDNQGPCVEALVKDNGNGTYSCSYVPR.K         | 3359.60342 | 3 | 6.71E-07 | 0.95 | 5.12 | - | 1448.5 |
| AHQ-8-3, 4840 - 4896 | R.VQVQDNQGPCVEALVKDNGNGTYSCSYVPR.K         | 3359.60342 | 3 | 2.99E-04 | 0.95 | 5.03 | - | 1624.5 |
| AHQ-8-2, 5048 - 5113 | R.VQVQDNQGPCVEALVKDNGNGTYSCSYVPR.K         | 3359.60342 | 3 | 7.67E-06 | 0.91 | 4.30 | - | 1170.8 |
| AHQ-8-2, 4749        | R.VSQGQLHEGHTFPEAEFIIDTR.D                 | 2441.64058 | 3 | 1.02E-07 | 0.96 | 5.41 | - | 1378.9 |
| AHQ-8-4, 4682        | R.VSQGQLHEGHTFPEAEFIIDTR.D                 | 2441.64058 | 2 | 1.34E-06 | 0.94 | 4.98 | - | 713.3  |
| AHQ-8-1, 4803 - 4863 | R.VSQGQLHEGHTFPEAEFIIDTR.D                 | 2441.64058 | 3 | 3.53E-07 | 0.95 | 5.13 | - | 1371.5 |
| AHQ-8-3, 4666 - 4669 | R.VSQGQLHEGHTFPEAEFIIDTR.D                 | 2441.64058 | 3 | 8.96E-08 | 0.95 | 5.27 | - | 1075.0 |
| AHQ-8-8, 4559 - 4563 | R.VSQGQLHEGHTFPEAEFIIDTR.D                 | 2441.64058 | 3 | 2.12E-09 | 0.94 | 4.43 | - | 1462.2 |
| AHQ-8-5, 4625 - 4684 | R.VSQGQLHEGHTFPEAEFIIDTR.D                 | 2441.64058 | 3 | 7.82E-10 | 0.97 | 5.87 | - | 1638.9 |
| AHQ-8-6, 4564 - 4576 | R.VSQGQLHEGHTFPEAEFIIDTR.D                 | 2441.64058 | 3 | 3.52E-06 | 0.92 | 4.27 | - | 1049.9 |
| AHQ-8-7, 4476        | R.VSQGQLHEGHTFPEAEFIIDTR.D                 | 2441.64058 | 3 | 1.59E-09 | 0.93 | 4.61 | - | 1123.2 |
| AHQ-8-6, 2718 - 2738 | K.VTAQGPGLPESGNIANK.T                      | 1653.81855 | 2 | 1.75E-05 | 0.79 | 3.19 | - | 601.4  |
| AHQ-8-2, 2772 - 2835 | K.VTAQGPGLPESGNIANK.T                      | 1653.81855 | 2 | 2.14E-05 | 0.82 | 3.54 | - | 533.9  |
| AHQ-8-1, 2955        | K.VTAQGPGLPESGNIANK.T                      | 1653.81855 | 2 | 4.96E-06 | 0.89 | 3.87 | - | 665.7  |
| AHQ-8-2, 2903        | K.VTAQGPGLPESGNIANK.T                      | 1653.81855 | 2 | 6.81E-06 | 0.92 | 4.23 | - | 713.0  |
| AHQ-8-6, 2832        | K.VTAQGPGLPESGNIANK.T                      | 1653.81855 | 2 | 4.17E-06 | 0.44 | 2.55 | - | 367.4  |
| AHQ-8-5, 2745 - 2800 | K.VTAQGPGLPESGNIANK.T                      | 1653.81855 | 2 | 2.23E-09 | 0.89 | 4.44 | - | 443.4  |
| AHQ-8-3, 2748 - 2812 | K.VTAQGPGLPESGNIANK.T                      | 1653.81855 | 2 | 8.16E-07 | 0.90 | 4.38 | - | 551.4  |
| AHQ-8-3, 2873        | K.VTAQGPGLPESGNIANK.T                      | 1653.81855 | 2 | 8.88E-06 | 0.81 | 3.24 | - | 479.3  |
| AHQ-8-4, 2734 - 2797 | K.VTAQGPGLPESGNIANK.T                      | 1653.81855 | 2 | 1.94E-04 | 0.74 | 2.94 | - | 604.3  |



|                            |                                                                         |            |   |          |       |        |       |         |
|----------------------------|-------------------------------------------------------------------------|------------|---|----------|-------|--------|-------|---------|
| AHQ-8-7, 3180              | K.VTVLFAQGHIAK.S                                                        | 1284.53185 | 2 | 3.00E-07 | 0.89  | 3.59   | -     | 751.9   |
| AHQ-8-4, 3291              | K.VTVLFAQGHIAK.S                                                        | 1284.53185 | 2 | 5.57E-07 | 0.95  | 4.24   | -     | 1052.5  |
| AHQ-8-3, 3317              | K.VTVLFAQGHIAK.S                                                        | 1284.53185 | 3 | 5.34E-06 | 0.75  | 3.31   | -     | 672.1   |
| AHQ-8-3, 3308              | K.VTVLFAQGHIAK.S                                                        | 1284.53185 | 2 | 2.59E-04 | 0.94  | 3.86   | -     | 1162.3  |
| AHQ-8-2, 3351 - 3356       | K.VTVLFAQGHIAK.S                                                        | 1284.53185 | 2 | 6.97E-07 | 0.93  | 3.71   | -     | 1041.2  |
| AHQ-8-2, 3353              | K.VTVLFAQGHIAK.S                                                        | 1284.53185 | 3 | 1.40E-04 | 0.81  | 3.63   | -     | 561.3   |
| AHQ-8-8, 3127              | K.VTVLFAQGHIAK.S                                                        | 1284.53185 | 2 | 2.07E-06 | 0.91  | 3.84   | -     | 850.4   |
| AHQ-8-1, 4919              | R.VTYCPTEPGNYIINIK.F                                                    | 1884.14221 | 2 | 2.34E-04 | 0.77  | 2.96   | -     | 434.2   |
| AHQ-8-5, 4754 - 4813       | R.VTYCPTEPGNYIINIK.F                                                    | 1884.14221 | 2 | 6.87E-07 | 0.92  | 4.45   | -     | 494.5   |
| AHQ-8-6, 4595              | R.VTYCPTEPGNYIINIK.F                                                    | 1884.14221 | 2 | 1.86E-04 | 0.77  | 3.20   | -     | 423.9   |
| AHQ-8-5, 4673              | R.VTYCPTEPGNYIINIK.F                                                    | 1884.14221 | 2 | 3.99E-04 | 0.90  | 3.65   | -     | 602.8   |
| AHQ-8-8, 4765 - 4837       | R.VTYCPTEPGNYIINIK.F                                                    | 1884.14221 | 2 | 4.21E-07 | 0.88  | 3.97   | -     | 444.5   |
| AHQ-8-3, 4658              | R.VTYCPTEPGNYIINIK.F                                                    | 1884.14221 | 2 | 4.75E-06 | 0.78  | 3.01   | -     | 463.7   |
| AHQ-8-1, 4775              | R.VTYCPTEPGNYIINIK.F                                                    | 1884.14221 | 2 | 5.95E-07 | 0.85  | 3.14   | -     | 599.8   |
| AHQ-8-5, 4886 - 4940       | R.VTYCPTEPGNYIINIK.F                                                    | 1884.14221 | 2 | 2.41E-10 | 0.79  | 3.70   | -     | 340.1   |
| AHQ-8-4, 4703              | R.VTYCPTEPGNYIINIK.F                                                    | 1884.14221 | 2 | 1.01E-10 | 0.93  | 4.36   | -     | 707.6   |
| AHQ-8-7, 4641              | R.VTYCPTEPGNYIINIK.F                                                    | 1884.14221 | 2 | 4.70E-05 | 0.84  | 3.25   | -     | 417.4   |
| AHQ-8-4, 4801 - 4861       | R.VTYCPTEPGNYIINIK.F                                                    | 1884.14221 | 2 | 2.90E-04 | 0.92  | 4.26   | -     | 561.9   |
| AHQ-8-4, 5275 - 5278       | R.VTYTPMAPGYSYLISIK.Y                                                   | 1742.07225 | 2 | 3.17E-06 | 0.87  | 3.64   | -     | 698.9   |
| AHQ-8-1, 5328              | R.VTYTPMAPGYSYLISIK.Y                                                   | 1742.07225 | 2 | 2.40E-04 | 0.69  | 2.78   | -     | 522.3   |
| AHQ-8-13-, 4735            | R.VTYTPMAPGYSYLISIK.Y                                                   | 1758.07165 | 2 | 7.43E-05 | 0.66  | 2.71   | -     | 415.6   |
| AHQ-8-14, 5574 - 5587      | R.VTYTPMAPGYSYLISIK.Y                                                   | 1758.07165 | 2 | 2.13E-04 | 0.75  | 3.12   | -     | 491.6   |
| AHQ-8-14-, 5143 - 5218     | R.VTYTPMAPGYSYLISIK.Y                                                   | 1742.07225 | 2 | 2.09E-05 | 0.82  | 3.00   | -     | 567.1   |
| AHQ-8-5, 4801              | R.VTYTPMAPGYSYLISIK.Y                                                   | 1758.07165 | 3 | 9.18E-04 | 0.93  | 3.87   | -     | 1251.0  |
| AHQ-8-3, 2740              | R.YAPSEAGLHEM'DIR.Y                                                     | 1605.75422 | 2 | 1.89E-05 | 0.84  | 2.80   | -     | 905.9   |
| AHQ-8-2, 3399 - 3472       | R.YAPSEAGLHEM'DIR.Y                                                     | 1589.75482 | 2 | 7.07E-05 | 0.60  | 2.59   | -     | 579.2   |
| AHQ-8-4, 3386 - 3462       | R.YAPSEAGLHEM'DIR.Y                                                     | 1589.75482 | 2 | 1.64E-05 | 0.77  | 3.15   | -     | 707.0   |
| AHQ-8-1, 3584              | R.YAPSEAGLHEM'DIR.Y                                                     | 1589.75482 | 2 | 1.44E-05 | 0.54  | 2.66   | -     | 599.5   |
| AHQ-8-4, 2646 - 2709       | R.YAPSEAGLHEM'DIR.Y                                                     | 1605.75422 | 2 | 5.00E-04 | 0.64  | 2.66   | -     | 567.7   |
| AHQ-8-5, 2700              | R.YAPSEAGLHEM'DIR.Y                                                     | 1605.75422 | 2 | 2.25E-04 | 0.79  | 2.58   | -     | 792.9   |
| AHQ-8-2, 2777              | R.YAPSEAGLHEM'DIR.Y                                                     | 1605.75422 | 2 | 7.36E-04 | 0.66  | 2.73   | -     | 677.2   |
| AHQ-8-4, 4143 - 4213       | K.YGGDEIFPSPYR.V                                                        | 1401.50466 | 2 | 7.59E-07 | 0.70  | 3.14   | -     | 451.4   |
| AHQ-8-7, 3304              | K.YGGPYHIGGSPFK.A                                                       | 1380.53182 | 2 | 2.04E-06 | 0.90  | 3.58   | -     | 1138.8  |
| AHQ-8-1, 3621              | K.YGGPYHIGGSPFK.A                                                       | 1380.53182 | 2 | 5.37E-04 | 0.95  | 4.39   | -     | 1114.8  |
| AHQ-8-8, 3329              | K.YGGPYHIGGSPFK.A                                                       | 1380.53182 | 2 | 7.62E-09 | 0.97  | 4.64   | -     | 1669.4  |
| AHQ-8-5, 3393              | K.YGGPYHIGGSPFK.A                                                       | 1380.53182 | 2 | 1.16E-06 | 0.90  | 3.61   | -     | 946.5   |
| AHQ-8-6, 3376              | K.YGGPYHIGGSPFK.A                                                       | 1380.53182 | 2 | 2.98E-07 | 0.96  | 4.27   | -     | 1244.2  |
| AHQ-8-4, 3398              | K.YGGPYHIGGSPFK.A                                                       | 1380.53182 | 2 | 6.08E-08 | 0.97  | 4.76   | -     | 1745.1  |
| AHQ-8-2, 3497              | K.YGGPYHIGGSPFK.A                                                       | 1380.53182 | 2 | 5.22E-04 | 0.97  | 4.30   | -     | 1904.0  |
| AHQ-8-4, 3410              | K.YGGPYHIGGSPFK.A                                                       | 1380.53182 | 3 | 1.91E-05 | 0.93  | 4.59   | -     | 669.3   |
| AHQ-8-11, 3331 - 3343      | K.YGGPYHIGGSPFK.A                                                       | 1380.53182 | 2 | 2.69E-06 | 0.97  | 4.37   | -     | 1760.1  |
| AHQ-8-5, 3405              | K.YGGPYHIGGSPFK.A                                                       | 1380.53182 | 3 | 3.54E-07 | 0.91  | 4.00   | -     | 753.1   |
| AHQ-8-3, 3434              | K.YGGPYHIGGSPFK.A                                                       | 1380.53182 | 2 | 7.93E-08 | 0.98  | 4.58   | -     | 2129.4  |
| AHQ-8-1, 3267              | K.YGGQVPVNFPSK.L                                                        | 1291.43658 | 2 | 2.05E-05 | 0.93  | 3.38   | -     | 763.7   |
| AHQ-8-2, 3065 - 3127       | K.YGGQVPVNFPSK.L                                                        | 1291.43658 | 2 | 5.03E-04 | 0.86  | 3.18   | -     | 429.7   |
| AHQ-8-3, 3080              | K.YGGQVPVNFPSK.L                                                        | 1291.43658 | 2 | 1.65E-05 | 0.90  | 3.39   | -     | 539.1   |
| AHQ-8-1, 4468 - 4547       | K.YKGQHVPGSPFQFTVGPLGEGGAHK.V                                           | 2596.88377 | 3 | 8.70E-07 | 0.90  | 3.97   | -     | 954.7   |
| AHQ-8-5, 4240 - 4282       | K.YKGQHVPGSPFQFTVGPLGEGGAHK.V                                           | 2596.88377 | 3 | 1.56E-05 | 0.90  | 4.48   | -     | 836.0   |
| AHQ-8-6, 4175              | K.YKGQHVPGSPFQFTVGPLGEGGAHK.V                                           | 2596.88377 | 3 | 9.74E-06 | 0.89  | 4.77   | -     | 625.4   |
| AHQ-8-3, 4296              | K.YKGQHVPGSPFQFTVGPLGEGGAHK.V                                           | 2596.88377 | 3 | 1.38E-05 | 0.67  | 3.37   | -     | 569.0   |
| AHQ-8-7, 4094              | K.YKGQHVPGSPFQFTVGPLGEGGAHK.V                                           | 2596.88377 | 3 | 8.10E-05 | 0.79  | 3.45   | -     | 619.9   |
| AHQ-8-4, 2906              | K.YNEQHVPGSPFTAR.V                                                      | 1603.71978 | 2 | 1.20E-05 | 0.84  | 3.03   | -     | 526.6   |
| AHQ-8-10, 2762 - 2834      | K.YNEQHVPGSPFTAR.V                                                      | 1603.71978 | 2 | 7.14E-07 | 0.82  | 3.38   | -     | 444.3   |
| AHQ-8-4, 3095              | K.YNEQHVPGSPFTAR.V                                                      | 1603.71978 | 2 | 7.60E-07 | 0.86  | 3.02   | -     | 499.6   |
| AHQ-8-4, 2915              | K.YNEQHVPGSPFTAR.V                                                      | 1603.71978 | 3 | 4.16E-04 | 0.97  | 5.38   | -     | 1629.4  |
| AHQ-8-3, 2948              | K.YNEQHVPGSPFTAR.V                                                      | 1603.71978 | 2 | 9.58E-06 | 0.83  | 3.10   | -     | 539.5   |
| AHQ-8-8, 2790              | K.YNEQHVPGSPFTAR.V                                                      | 1603.71978 | 2 | 7.01E-05 | 0.88  | 3.40   | -     | 536.2   |
| AHQ-8-4, 3101              | K.YNEQHVPGSPFTAR.V                                                      | 1603.71978 | 3 | 5.46E-05 | 0.84  | 3.32   | -     | 916.4   |
| AHQ-8-5, 4336              | K.YTPVQQGPVGVNVTYGGDPIPK.S                                              | 2287.55640 | 2 | 8.17E-07 | 0.90  | 4.08   | -     | 699.3   |
| AHQ-8-3, 4192              | K.YTPVQQGPVGVNVTYGGDPIPK.S                                              | 2287.55640 | 2 | 2.65E-06 | 0.90  | 3.74   | -     | 733.2   |
| AHQ-8-3, 4452 - 4496       | K.YTPVQQGPVGVNVTYGGDPIPK.S                                              | 2287.55640 | 2 | 3.71E-04 | 0.92  | 4.57   | -     | 588.5   |
| AHQ-8-3, 4297 - 4345       | K.YTPVQQGPVGVNVTYGGDPIPK.S                                              | 2287.55640 | 2 | 2.46E-06 | 0.92  | 4.34   | -     | 687.2   |
| AHQ-8-7, 4202              | K.YTPVQQGPVGVNVTYGGDPIPK.S                                              | 2287.55640 | 2 | 2.35E-06 | 0.86  | 3.74   | -     | 602.3   |
| AHQ-8-2, 4260              | K.YTPVQQGPVGVNVTYGGDPIPK.S                                              | 2287.55640 | 2 | 6.73E-07 | 0.90  | 4.12   | -     | 526.7   |
| AHQ-8-6, 4267              | K.YTPVQQGPVGVNVTYGGDPIPK.S                                              | 2287.55640 | 2 | 5.18E-05 | 0.84  | 3.49   | -     | 565.2   |
| AHQ-8-2, 4356 - 4415       | K.YTPVQQGPVGVNVTYGGDPIPK.S                                              | 2287.55640 | 2 | 1.26E-05 | 0.95  | 5.02   | -     | 823.5   |
| AHQ-8-1, 4564              | K.YTPVQQGPVGVNVTYGGDPIPK.S                                              | 2287.55640 | 2 | 6.54E-06 | 0.82  | 3.57   | -     | 568.3   |
| AHQ-8-2, 4515 - 4573       | K.YTPVQQGPVGVNVTYGGDPIPK.S                                              | 2287.55640 | 2 | 7.70E-07 | 0.89  | 3.81   | -     | 606.8   |
| AHQ-8-1, 4449 - 4503       | K.YTPVQQGPVGVNVTYGGDPIPK.S                                              | 2287.55640 | 2 | 2.43E-06 | 0.88  | 4.15   | -     | 510.0   |
| AHQ-8-4, 4385              | K.YTPVQQGPVGVNVTYGGDPIPK.S                                              | 2287.55640 | 2 | 1.31E-06 | 0.87  | 4.10   | -     | 490.3   |
| AHQ-8-2, 6164 - 6239       | R.YWPQEAAGEYAVHVLCSNEDIR.L                                              | 2538.73318 | 3 | 3.08E-06 | 0.74  | 3.55   | -     | 455.9   |
| AHQ-8-2, 5852 - 5920       | R.YWPQEAAGEYAVHVLCSNEDIR.L                                              | 2538.73318 | 2 | 4.51E-05 | 0.90  | 3.93   | -     | 911.9   |
| AHQ-8-3, 6076 - 6132       | R.YWPQEAAGEYAVHVLCSNEDIR.L                                              | 2538.73318 | 3 | 4.23E-07 | 0.75  | 3.69   | -     | 455.1   |
| gj4503571[ref NP_001419.1] | enolase 1; phosphopyruvate hydratase; MYC promoter-binding protein 1; n |            |   | 5.55E-15 | 9.17  | 110.27 | 31.80 | 47168.7 |
| AHQ-8-7, 4924 - 4982       | R.AAVPSGASTGIYEALER.D                                                   | 1806.00979 | 2 | 5.25E-04 | 0.59  | 2.84   | -     | 245.8   |
| AHQ-8-13-, 5015 - 5070     | R.AAVPSGASTGIYEALER.D                                                   | 1806.00979 | 2 | 3.03E-12 | 0.97  | 5.40   | -     | 1124.7  |
| AHQ-8-13, 5199             | R.AAVPSGASTGIYEALER.D                                                   | 1806.00979 | 2 | 5.06E-08 | 0.85  | 3.60   | -     | 363.4   |
| AHQ-8-11, 4957             | R.AAVPSGASTGIYEALER.D                                                   | 1806.00979 | 2 | 4.45E-05 | 0.58  | 2.55   | -     | 284.1   |
| AHQ-8-8, 5107              | R.AAVPSGASTGIYEALER.D                                                   | 1806.00979 | 2 | 1.02E-04 | 0.77  | 3.16   | -     | 305.6   |
| AHQ-8-8, 4993              | R.AAVPSGASTGIYEALER.D                                                   | 1806.00979 | 2 | 1.11E-05 | 0.85  | 3.93   | -     | 320.1   |
| AHQ-8-14-, 5022 - 5102     | R.AAVPSGASTGIYEALER.D                                                   | 1806.00979 | 2 | 5.55E-15 | 0.96  | 5.29   | -     | 694.5   |
| AHQ-8-10, 4170             | K.DATNVGDEGGFAPNILENK.E                                                 | 1962.06350 | 2 | 7.08E-07 | 0.71  | 3.00   | -     | 524.6   |
| AHQ-8-8, 5090              | K.FTASAGIQVGGDLTNTPNK.R                                                 | 2034.25590 | 2 | 7.84E-05 | 0.90  | 4.09   | -     | 725.9   |
| AHQ-8-8, 4154              | R.GNPTVEVDLFTSK.G                                                       | 1407.55065 | 1 | 4.22E-07 | 0.53  | 3.25   | -     | 476.9   |
| AHQ-8-8, 4145              | R.GNPTVEVDLFTSK.G                                                       | 1407.55065 | 1 | 6.31E-04 | 0.15  | 1.90   | -     | 413.1   |
| AHQ-8-8, 2366              | R.IGAEVYHNLK.N                                                          | 1144.30502 | 2 | 4.38E-05 | 0.95  | 3.92   | -     | 1535.6  |
| AHQ-8-8, 5941 - 5963       | K.LAMQEFM*ILPVGAAANFR.E                                                 | 1925.30752 | 2 | 3.98E-04 | 0.93  | 5.26   | -     | 766.8   |
| AHQ-8-8, 5769 - 5770       | K.LAM*QEFMILPVGAAANFR.E                                                 | 1925.30752 | 2 | 2.10E-04 | 0.93  | 5.25   | -     | 828.4   |
| AHQ-8-8, 5365              | K.LAM*QEFM*ILPVGAAANFR.E                                                | 1941.30692 | 2 | 6.09E-05 | 0.94  | 4.49   | -     | 832.3   |
| AHQ-8-8, 3469              | K.LQAANGWGVMSHR.S                                                       | 1526.74832 | 2 | 1.08E-09 | 0.85  | 3.00   | -     | 1075.8  |
| AHQ-8-14, 4621             | K.VNIGSVTESLQACK.L                                                      | 1635.82159 | 2 | 5.87E-04 | 0.60  | 2.52   | -     | 469.3   |
| AHQ-8-8, 4649              | R.YISPDQLADLYK.S                                                        | 1426.59557 | 1 | 2.04E-05 | 0.81  | 3.52   | -     | 715.5   |
| AHQ-8-8, 4642              | R.YISPDQLADLYK.S                                                        | 1426.59557 | 1 | 2.75E-04 | 0.22  | 2.10   | -     | 525.9   |
| AHQ-8-8, 4641              | R.YISPDQLADLYK.S                                                        | 1426.59557 | 2 | 1.07E-05 | 0.87  | 3.25   | -     | 687.8   |
| gj4505257[ref NP_002435.1] | moesin [Homo sapiens]                                                   |            |   | 7.22E-15 | 10.90 | 120.34 | 25.30 | 67819.5 |
| AHQ-8-6, 2302 - 2303       | R.ALELEQER.K                                                            | 988.07707  | 2 | 2.10E-04 | 0.90  | 2.99   | -     | 1489.5  |
| AHQ-8-6, 2630              | K.ALTSELANAR.D                                                          | 1046.15975 | 2 | 6.90E-05 | 0.94  | 3.55   | -     | 1371.5  |
| AHQ-8-6, 6311              | K.EGILNDDIYCPPELAVLLASAYVQSK.Y                                          | 2869.19288 | 3 | 8.07E-09 | 0.87  | 4.30   | -     | 792.9   |
| AHQ-8-6, 5636              | R.EVWFFGLQYQDTK.G                                                       | 1661.83760 | 2 | 1.24E-06 | 0.91  | 3.36   | -     | 1050.3  |
| AHQ-8-6, 6276              | K.FYPEDVSEELIQDITQR.L                                                   | 2083.24065 | 2 | 1.79E-08 | 0.92  | 4.35   | -     | 889.4   |
| AHQ-8-6, 6279              | K.FYPEDVSEELIQDITQR.L                                                   | 2083.24065 | 3 | 8.73E-07 | 0.95  | 4.75   | -     | 1340.2  |
| AHQ-8-6, 5124 - 5195       | K.IAQDLEM*YGVNYSIK.N                                                    | 1908.16395 | 2 | 1.26E-06 | 0.95  | 4.35   | -     | 1269.0  |
| AHQ-8-6, 5504              | K.IAQDLEM*YGVNYSIK.N                                                    | 1892.16455 | 2 | 2.72E-06 | 0.71  | 3.12   | -     | 779.6   |
| AHQ-8-6, 2110              | R.IQVWHEHR.G                                                            | 1234.34835 | 2 | 2.30E-05 | 0.81  | 2.85   | -     | 904.8   |
| AHQ-8-6, 4560              | K.KTQEQLALEMAELTAR.I                                                    | 1833.10018 | 2 | 6.34E-07 | 0.98  | 4.99   | -     | 2084.3  |
| AHQ-8-6, 4566 - 4567       | K.KTQEQLALEMAELTAR.I                                                    | 1833.10018 | 3 | 3.78E-05 | 0.96  | 4.83   | -     | 1965.7  |
| AHQ-8-6, 3350 - 3406       | K.TAMSTPHVAEPAENQDEQDENGAEASADLR.A                                      | 3314.36856 | 3 | 3.82E-12 | 0.96  | 5.59   | -     | 1433.8  |

|                             |                                                                                  |            |   |          |       |        |       |         |
|-----------------------------|----------------------------------------------------------------------------------|------------|---|----------|-------|--------|-------|---------|
| AHQ-8-6, 3178 - 3234        | K.TAM*STPHVAEPAENEQDEQDENGAEASADLR.A                                             | 3330.36796 | 3 | 3.16E-10 | 0.97  | 6.24   | -     | 2127.3  |
| AHQ-8-6, 3054 - 3115        | K.TAM*STPHVAEPAENEQDEQDENGAEASADLR.A                                             | 3330.36796 | 3 | 7.22E-15 | 0.97  | 6.74   | -     | 1605.6  |
| AHQ-8-6, 3463 - 3464        | K.TAMSTPHVAEPAENEQDEQDENGAEASADLR.A                                              | 3314.36856 | 3 | 1.17E-09 | 0.96  | 5.44   | -     | 1807.2  |
| AHQ-8-6, 5050               | K.TQEQLALEMAELTAR.I                                                              | 1704.92727 | 2 | 3.80E-08 | 0.97  | 3.69   | -     | 2463.2  |
| gi 4557697 ref NP_000412.1  | keratin 10; Keratin-10 [Homo sapiens]                                            |            |   | 7.77E-15 | 14.16 | 160.30 | 26.20 | 57247.1 |
| AHQ-8-1, 2979               | R.ALEESNYELEGK.I                                                                 | 1382.45482 | 2 | 4.01E-06 | 0.95  | 4.11   | -     | 1393.9  |
| AHQ-8-10, 2703              | R.ALEESNYELEGK.I                                                                 | 1382.45482 | 2 | 1.55E-06 | 0.83  | 3.04   | -     | 877.3   |
| AHQ-8-4, 2754               | R.ALEESNYELEGK.I                                                                 | 1382.45482 | 2 | 1.26E-07 | 0.92  | 3.52   | -     | 1247.5  |
| AHQ-8-11, 2749 - 2751       | R.ALEESNYELEGK.I                                                                 | 1382.45482 | 2 | 1.52E-07 | 0.92  | 3.77   | -     | 1064.4  |
| AHQ-8-12, 2703 - 2768       | R.ALEESNYELEGK.I                                                                 | 1382.45482 | 2 | 8.53E-04 | 0.69  | 2.80   | -     | 369.5   |
| AHQ-8-3, 2797               | R.ALEESNYELEGK.I                                                                 | 1382.45482 | 2 | 5.49E-07 | 0.93  | 3.87   | -     | 1109.9  |
| AHQ-8-13, 2971              | R.ALEESNYELEGK.I                                                                 | 1382.45482 | 2 | 1.73E-04 | 0.76  | 3.12   | -     | 660.6   |
| AHQ-8-14-, 2799 - 2806      | R.ALEESNYELEGK.I                                                                 | 1382.45482 | 2 | 6.55E-10 | 0.94  | 3.81   | -     | 1300.4  |
| AHQ-8-2, 2828               | R.ALEESNYELEGK.I                                                                 | 1382.45482 | 2 | 9.85E-08 | 0.94  | 3.96   | -     | 1237.2  |
| AHQ-8-8, 2726               | R.ALEESNYELEGK.I                                                                 | 1382.45482 | 2 | 1.41E-06 | 0.82  | 3.19   | -     | 768.5   |
| AHQ-8-14, 3611              | R.ALEESNYELEGK.I                                                                 | 1382.45482 | 2 | 1.40E-04 | 0.48  | 2.53   | -     | 497.8   |
| AHQ-8-13-, 2831             | R.ALEESNYELEGK.I                                                                 | 1382.45482 | 2 | 5.72E-07 | 0.94  | 4.16   | -     | 1142.6  |
| AHQ-8-4, 3465               | K.DAEAWFNEK.S                                                                    | 1110.15762 | 2 | 2.05E-05 | 0.73  | 2.78   | -     | 881.0   |
| AHQ-8-14-, 3490             | K.DAEAWFNEK.S                                                                    | 1110.15762 | 2 | 1.06E-04 | 0.73  | 2.84   | -     | 732.8   |
| AHQ-8-2, 3531               | K.DAEAWFNEK.S                                                                    | 1110.15762 | 2 | 1.99E-04 | 0.84  | 2.94   | -     | 1038.4  |
| AHQ-8-2, 4427 - 4503        | K.ELTTEIDNNEIQISSYK.S                                                            | 1998.13406 | 2 | 2.89E-14 | 0.96  | 5.13   | -     | 926.8   |
| AHQ-8-8, 5141               | K.ELTTEIDNNEIQISSYK.S                                                            | 1998.13406 | 2 | 1.87E-04 | 0.83  | 3.67   | -     | 665.1   |
| AHQ-8-13-, 5058             | K.ELTTEIDNNEIQISSYK.S                                                            | 1998.13406 | 2 | 3.61E-04 | 0.89  | 4.10   | -     | 755.1   |
| AHQ-8-13-, 5168             | K.ELTTEIDNNEIQISSYK.S                                                            | 1998.13406 | 2 | 1.88E-07 | 0.92  | 4.25   | -     | 816.7   |
| AHQ-8-13, 4475              | K.ELTTEIDNNEIQISSYK.S                                                            | 1998.13406 | 2 | 2.50E-09 | 0.86  | 3.36   | -     | 867.4   |
| AHQ-8-2, 5203               | K.ELTTEIDNNEIQISSYK.S                                                            | 1998.13406 | 2 | 2.24E-06 | 0.95  | 4.59   | -     | 1101.6  |
| AHQ-8-4, 4398 - 4475        | K.ELTTEIDNNEIQISSYK.S                                                            | 1998.13406 | 2 | 1.02E-07 | 0.90  | 3.99   | -     | 768.7   |
| AHQ-8-13-, 4319             | K.ELTTEIDNNEIQISSYK.S                                                            | 1998.13406 | 2 | 8.16E-11 | 0.92  | 3.69   | -     | 871.6   |
| AHQ-8-3, 4372               | K.ELTTEIDNNEIQISSYK.S                                                            | 1998.13406 | 2 | 4.64E-08 | 0.92  | 4.09   | -     | 866.9   |
| AHQ-8-1, 4501               | K.ELTTEIDNNEIQISSYK.S                                                            | 1998.13406 | 2 | 1.44E-08 | 0.91  | 4.44   | -     | 673.6   |
| AHQ-8-1, 5229               | K.ELTTEIDNNEIQISSYK.S                                                            | 1998.13406 | 2 | 4.73E-08 | 0.96  | 5.02   | -     | 1050.1  |
| AHQ-8-3, 5124 - 5176        | K.ELTTEIDNNEIQISSYK.S                                                            | 1998.13406 | 2 | 3.90E-05 | 0.75  | 3.56   | -     | 544.0   |
| AHQ-8-3, 5238               | K.ELTTEIDNNEIQISSYK.S                                                            | 1998.13406 | 2 | 8.77E-04 | 0.78  | 3.52   | -     | 608.4   |
| AHQ-8-14-, 5078             | K.ELTTEIDNNEIQISSYK.S                                                            | 1998.13406 | 2 | 1.38E-07 | 0.96  | 5.07   | -     | 1104.4  |
| AHQ-8-10, 4156              | K.ELTTEIDNNEIQISSYK.S                                                            | 1998.13406 | 2 | 1.38E-06 | 0.54  | 2.70   | -     | 327.6   |
| AHQ-8-13, 5187 - 5188       | K.ELTTEIDNNEIQISSYK.S                                                            | 1998.13406 | 2 | 3.14E-07 | 0.95  | 4.59   | -     | 995.7   |
| AHQ-8-13-, 4010 - 4071      | K.GSLGGGFSGGFSGGSFSR.G                                                           | 1708.76962 | 2 | 5.89E-05 | 0.90  | 3.77   | -     | 888.8   |
| AHQ-8-6, 3956 - 4026        | K.GSLGGGFSGGFSGGSFSR.G                                                           | 1708.76962 | 2 | 9.43E-04 | 0.47  | 2.70   | -     | 436.0   |
| AHQ-8-1, 4229               | K.GSLGGGFSGGFSGGSFSR.G                                                           | 1708.76962 | 2 | 7.77E-11 | 0.95  | 4.28   | -     | 1244.5  |
| AHQ-8-7, 3956               | K.GSLGGGFSGGFSGGSFSR.G                                                           | 1708.76962 | 2 | 1.19E-06 | 0.94  | 4.58   | -     | 898.9   |
| AHQ-8-2, 4156 - 4229        | K.GSLGGGFSGGFSGGSFSR.G                                                           | 1708.76962 | 2 | 5.22E-13 | 0.93  | 3.97   | -     | 956.6   |
| AHQ-8-14-, 4034             | K.GSLGGGFSGGFSGGSFSR.G                                                           | 1708.76962 | 2 | 6.77E-07 | 0.79  | 3.49   | -     | 721.8   |
| AHQ-8-12, 3975 - 3982       | K.GSLGGGFSGGFSGGSFSR.G                                                           | 1708.76962 | 2 | 5.17E-08 | 0.95  | 4.51   | -     | 1134.8  |
| AHQ-8-8, 4051 - 4079        | K.GSLGGGFSGGFSGGSFSR.G                                                           | 1708.76962 | 2 | 1.11E-04 | 0.86  | 3.57   | -     | 692.5   |
| AHQ-8-2, 3345               | K.IRLNEIQTYR.S                                                                   | 1435.61046 | 3 | 9.69E-06 | 0.74  | 3.66   | -     | 648.3   |
| AHQ-8-13-, 3331             | K.IRLNEIQTYR.S                                                                   | 1435.61046 | 2 | 5.16E-08 | 0.97  | 4.20   | -     | 1770.2  |
| AHQ-8-10, 3087 - 3146       | K.IRLNEIQTYR.S                                                                   | 1435.61046 | 2 | 2.97E-08 | 0.98  | 4.70   | -     | 2360.5  |
| AHQ-8-4, 2511               | R.LENEIQTYR.S                                                                    | 1166.26586 | 2 | 3.96E-06 | 0.92  | 4.19   | -     | 1189.7  |
| AHQ-8-14-, 2794             | R.LKYNEVALR.Q                                                                    | 1235.41446 | 2 | 4.68E-07 | 0.72  | 3.20   | -     | 459.1   |
| AHQ-8-13-, 2788 - 2830      | R.LKYNEVALR.Q                                                                    | 1235.41446 | 2 | 1.60E-04 | 0.64  | 2.88   | -     | 388.0   |
| AHQ-8-2, 6129               | K.NQLNLTDTNANILLQIDNAR.L                                                         | 2368.63258 | 3 | 5.05E-05 | 0.97  | 4.95   | -     | 2246.3  |
| AHQ-8-1, 5483 - 5561        | R.NVSTGDVNVEM*NAAPGVDLTQLLNNM*R.N                                                | 2906.20003 | 3 | 3.25E-04 | 0.96  | 5.72   | -     | 1057.9  |
| AHQ-8-14-, 6073             | R.NVSTGDVNVEM*NAAPGVDLTQLLNNM*R.N                                                | 2890.20063 | 3 | 7.80E-05 | 0.72  | 3.50   | -     | 590.9   |
| AHQ-8-2, 5480               | R.NVSTGDVNVEM*NAAPGVDLTQLLNNM*R.N                                                | 2906.20003 | 2 | 1.58E-06 | 0.85  | 4.45   | -     | 285.2   |
| AHQ-8-2, 5475               | R.NVSTGDVNVEM*NAAPGVDLTQLLNNM*R.N                                                | 2906.20003 | 3 | 1.17E-04 | 0.94  | 5.31   | -     | 733.5   |
| AHQ-8-2, 6243               | R.NVSTGDVNVEM*NAAPGVDLTQLLNNM*R.N                                                | 2890.20063 | 3 | 2.12E-05 | 0.93  | 4.84   | -     | 948.8   |
| AHQ-8-8, 6222               | R.NVSTGDVNVEM*NAAPGVDLTQLLNNM*R.N                                                | 2890.20063 | 3 | 5.13E-04 | 0.72  | 3.45   | -     | 776.6   |
| AHQ-8-13-, 5287             | R.NVSTGDVNVEM*NAAPGVDLTQLLNNM*R.N                                                | 2906.20003 | 3 | 6.22E-07 | 0.92  | 4.96   | -     | 783.3   |
| AHQ-8-13-, 5656             | R.NVSTGDVNVEM*NAAPGVDLTQLLNNM*R.N                                                | 2890.20063 | 3 | 1.23E-04 | 0.79  | 3.58   | -     | 648.5   |
| AHQ-8-7, 5257               | R.NVSTGDVNVEM*NAAPGVDLTQLLNNM*R.N                                                | 2906.20003 | 3 | 1.12E-04 | 0.93  | 5.28   | -     | 833.3   |
| AHQ-8-14-, 6078 - 6083      | R.NVSTGDVNVEM*NAAPGVDLTQLLNNM*R.N                                                | 2890.20063 | 2 | 9.54E-04 | 0.85  | 3.81   | -     | 388.2   |
| AHQ-8-2, 3429               | K.QSLEASLAETEGR.Y                                                                | 1391.46648 | 2 | 6.11E-05 | 0.79  | 3.45   | -     | 430.2   |
| AHQ-8-13-, 4826             | K.SKELTEIDNNEIQISSYK.S                                                           | 2213.38462 | 3 | 4.19E-07 | 0.72  | 3.04   | -     | 623.8   |
| AHQ-8-2, 4907 - 4965        | K.SKELTEIDNNEIQISSYK.S                                                           | 2213.38462 | 2 | 5.36E-09 | 0.97  | 5.52   | -     | 1544.7  |
| AHQ-8-2, 5132               | K.SKELTEIDNNEIQISSYK.S                                                           | 2213.38462 | 2 | 1.43E-10 | 0.95  | 4.90   | -     | 854.6   |
| AHQ-8-3, 4813 - 4884        | K.SKELTEIDNNEIQISSYK.S                                                           | 2213.38462 | 2 | 1.18E-04 | 0.83  | 3.74   | -     | 619.1   |
| AHQ-8-7, 3929               | K.SKELTEIDNNEIQISSYK.S                                                           | 2213.38462 | 2 | 4.70E-04 | 0.60  | 2.84   | -     | 367.9   |
| AHQ-8-3, 5050               | K.SKELTEIDNNEIQISSYK.S                                                           | 2213.38462 | 2 | 1.94E-05 | 0.70  | 3.13   | -     | 213.7   |
| AHQ-8-2, 4137               | K.SKELTEIDNNEIQISSYK.S                                                           | 2213.38462 | 2 | 7.77E-15 | 0.97  | 5.90   | -     | 1415.9  |
| AHQ-8-1, 5091 - 5172        | K.SKELTEIDNNEIQISSYK.S                                                           | 2213.38462 | 2 | 1.18E-06 | 0.40  | 2.62   | -     | 251.3   |
| AHQ-8-14-, 4997             | K.SKELTEIDNNEIQISSYK.S                                                           | 2213.38462 | 3 | 1.83E-06 | 0.69  | 3.04   | -     | 710.4   |
| AHQ-8-14-, 4758 - 4831      | K.SKELTEIDNNEIQISSYK.S                                                           | 2213.38462 | 3 | 8.74E-04 | 0.73  | 3.38   | -     | 624.1   |
| AHQ-8-2, 2189               | R.SLLEGEQSSGGGGR.G                                                               | 1263.29680 | 2 | 2.22E-06 | 0.88  | 3.01   | -     | 1146.4  |
| AHQ-8-4, 2133               | R.SLLEGEQSSGGGGR.G                                                               | 1263.29680 | 2 | 3.16E-05 | 0.88  | 3.36   | -     | 800.0   |
| AHQ-8-13-, 6280             | K.TIDDLNQLNLTDTNANILLQIDNAR.L                                                    | 3054.40205 | 3 | 1.48E-09 | 0.92  | 4.97   | -     | 1199.4  |
| AHQ-8-2, 2309               | K.VTMQNLNDR.L                                                                    | 1091.22402 | 2 | 1.25E-05 | 0.83  | 2.87   | -     | 851.2   |
| gi 21361657 ref NP_005304.3 | glucose regulated protein, 58kDa; glucose regulated protein, 58kD [Homo sapiens] |            |   | 1.22E-14 | 4.56  | 60.30  | 16.80 | 56782.0 |
| AHQ-8-7, 6225               | K.FISDKDASIVGFFDDSFSEAHSEFLK.A                                                   | 2940.16492 | 3 | 1.22E-14 | 0.98  | 6.07   | -     | 3236.2  |
| AHQ-8-7, 4440               | R.FLDQYFDGNL.K.R                                                                 | 1360.49568 | 2 | 1.19E-04 | 0.90  | 3.72   | -     | 889.2   |
| AHQ-8-7, 4405               | R.GFPTIYFSPANK.K                                                                 | 1342.52349 | 2 | 2.68E-04 | 0.87  | 3.20   | -     | 803.8   |
| AHQ-8-7, 5370               | R.KTFSHELSDFGLESTAGEIPVVAIR.T                                                    | 2705.01562 | 3 | 7.11E-05 | 0.65  | 3.35   | -     | 489.6   |
| AHQ-8-7, 2416               | K.LSKDPNVIAM.M                                                                   | 1198.43727 | 2 | 1.59E-06 | 0.60  | 2.56   | -     | 519.4   |
| AHQ-8-7, 2397 - 2400        | K.SEPIPENSDGPV.K.V                                                               | 1369.45928 | 2 | 6.12E-04 | 0.56  | 2.65   | -     | 310.2   |
| gi 4758460 ref NP_004479.1  | glycoprotein V (platelet) [Homo sapiens]                                         |            |   | 1.83E-14 | 7.77  | 90.26  | 24.80 | 60958.9 |
| AHQ-8-5, 5272 - 5276        | R.CAGPGAAGLPLWALPGGDAECPGPR.G                                                    | 2587.87539 | 3 | 2.04E-06 | 0.90  | 4.47   | -     | 814.7   |
| AHQ-8-5, 3838               | R.GVLQSQFSGM*TVLQ.R.L                                                            | 1754.98948 | 2 | 2.53E-06 | 0.96  | 4.61   | -     | 1421.9  |
| AHQ-8-5, 4544               | R.GVLQSQFSGM*TVLQ.R.L                                                            | 1738.99008 | 2 | 1.87E-08 | 0.98  | 5.11   | -     | 2236.5  |
| AHQ-8-5, 5312               | R.LM*ISDSHISAVPGTFSDLIK.L                                                        | 2219.54375 | 3 | 1.74E-05 | 0.91  | 3.96   | -     | 1284.2  |
| AHQ-8-5, 4510 - 4525        | R.LPNLSLTL.SR.N                                                                  | 1201.39802 | 2 | 3.56E-06 | 0.88  | 3.38   | -     | 1090.2  |
| AHQ-8-6, 6354               | R.LSALPQGAQGLGELQVLALHNSGLTALPDGLLR.G                                            | 3471.99408 | 3 | 4.41E-08 | 0.75  | 3.42   | -     | 453.4   |
| AHQ-8-5, 6460               | R.LSALPQGAQGLGELQVLALHNSGLTALPDGLLR.G                                            | 3471.99408 | 3 | 1.83E-14 | 0.85  | 4.28   | -     | 463.6   |
| AHQ-8-5, 6445               | R.LVSLDGLLNSLALTELQFHR.N                                                         | 2384.71675 | 3 | 4.84E-12 | 0.77  | 3.50   | -     | 517.8   |
| AHQ-8-5, 5806               | K.M*VLLEQLFDHNLAR.G                                                              | 1829.15633 | 2 | 5.42E-05 | 0.61  | 2.68   | -     | 501.2   |
| AHQ-8-5, 3429 - 3432        | R.YLGVTLSPR.L                                                                    | 1006.18036 | 2 | 2.21E-05 | 0.92  | 3.34   | -     | 1274.1  |
| AHQ-8-6, 3399               | R.YLGVTLSPR.L                                                                    | 1006.18036 | 2 | 5.93E-04 | 0.93  | 3.19   | -     | 1405.7  |
| gi 18104967 ref NP_000953.2 | prostaglandin-endoperoxide synthase 1 isoform 1 precursor; prostaglandin         |            |   | 2.00E-14 | 3.64  | 40.28  | 11.90 | 68686.0 |
| AHQ-8-6, 3928 - 4002        | K.AEHPWTGDEQLFQTRR.L                                                             | 1917.02765 | 2 | 1.22E-05 | 0.93  | 4.04   | -     | 793.4   |
| AHQ-8-6, 3847 - 3859        | K.ALGHGVDLGHYGDNLER.Q                                                            | 1937.10524 | 3 | 1.02E-07 | 0.81  | 3.14   | -     | 896.1   |
| AHQ-8-6, 6398               | K.IVIEEYVQQLSGYFLQLK.F                                                           | 2171.52045 | 3 | 2.00E-14 | 0.97  | 5.65   | -     | 1722.2  |
| AHQ-8-6, 6402               | K.IVIEEYVQQLSGYFLQLK.F                                                           | 2171.52045 | 3 | 1.19E-05 | 0.97  | 4.84   | -     | 1658.4  |
| AHQ-8-6, 3319               | R.VPDASQDDGPAVERPSTEL                                                            | 1984.06747 | 2 | 6.62E-07 | 0.93  | 4.22   | -     | 854.4   |
| AHQ-8-6, 3208 - 3259        | R.VPDASQDDGPAVERPSTEL                                                            | 1984.06747 | 2 | 3.38E-06 | 0.93  | 4.54   | -     | 858.5   |
| gi 7656991 ref NP_055140.1  | coronin, actin binding protein, 1C; coronin, actin-binding protein, 1C;          |            |   | 2.66E-14 | 6.92  | 80.30  | 25.50 | 53248.7 |
| AHQ-8-6, 5554               | R.AIFLADGNVFTTGF.SR.M                                                            | 1716.91793 | 2 | 7.95E-06 | 0.90  | 3.75   | -     | 967.6   |
| AHQ-8-6, 5442 - 5498        | R.AIFLADGNVFTTGF.SR.M                                                            | 1716.91793 | 2 | 1.88E-07 | 0.97  | 4.84   | -     | 1681.2  |
| AHQ-8-6, 3402 - 3407        | R.KCEPIIMTVPR.K                                                                  | 1345.65706 | 2 | 1.31E-05 | 0.89  | 3.13   | -     | 839.9   |
| AHQ-8-6, 6278               | R.KSDFQDDLYPDATAGPEAALEAEWFEQG.N                                                 | 3273.46087 | 3 | 2.66E-14 | 0.97  | 6.02   | -     | 1390.0  |

|                           |                                   |            |       |          |       |          |   |        |
|---------------------------|-----------------------------------|------------|-------|----------|-------|----------|---|--------|
| AHQ-8-6, 2342 - 2356      | K.NDQCYYDIR.V                     | 1200.21762 | 2     | 9.51E-04 | 0.82  | 2.91     | - | 1025.7 |
| AHQ-8-6, 2431             | K.SIKDTICNQR.I                    | 1480.58332 | 2     | 6.66E-05 | 0.88  | 2.84     | - | 1136.4 |
| AHQ-8-6, 3119             | R.VGVAWHPTAR.N                    | 1207.40918 | 3     | 1.71E-04 | 0.79  | 3.41     | - | 719.0  |
| AHQ-8-7, 4125             | R.VTWDSFCAVNPR.F                  | 1540.68205 | 2     | 1.32E-04 | 0.89  | 3.73     | - | 882.9  |
| AHQ-8-6, 4127 - 4191      | R.VTWDSFCAVNPR.F                  | 1540.68205 | 2     | 9.20E-09 | 0.85  | 3.42     | - | 1083.4 |
| AHQ-8-7, 5546             | R.YFEITDESPPYHYLNTFSSK.E          | 2441.63258 | 3     | 1.78E-07 | 0.76  | 3.29     | - | 592.9  |
| AHQ-8-6, 5604             | R.YFEITDESPPYHYLNTFSSK.E          | 2441.63258 | 3     | 2.01E-07 | 0.92  | 4.75     | - | 859.7  |
| g 4507485 ref NP_003237.1 | thrombospondin 1 [Homo sapiens]   | 6.49E-14   | 29.98 | 350.32   | 31.20 | 129351.8 |   |        |
| AHQ-8-5, 3961             | K.AGTLDSLTVQGK.Q                  | 1303.48711 | 2     | 2.83E-05 | 0.95  | 3.91     | - | 1462.4 |
| AHQ-8-3, 4006             | K.AGTLDSLTVQGK.Q                  | 1303.48711 | 2     | 2.32E-06 | 0.94  | 3.49     | - | 1605.3 |
| AHQ-8-5, 2781             | R.AQLYIDCEK.M                     | 1141.27636 | 2     | 1.33E-04 | 0.81  | 2.85     | - | 817.0  |
| AHQ-8-4, 5647 - 5703      | R.AQLYIDCEK*ENALDVP IQSVFTR.D     | 2988.33923 | 3     | 4.16E-04 | 0.88  | 4.29     | - | 817.4  |
| AHQ-8-2, 5655 - 5721      | R.AQLYIDCEK*ENALDVP IQSVFTR.D     | 2988.33923 | 3     | 1.97E-07 | 0.93  | 5.45     | - | 900.7  |
| AHQ-8-6, 5486 - 5542      | R.AQLYIDCEK*ENALDVP IQSVFTR.D     | 2988.33923 | 3     | 1.94E-05 | 0.88  | 4.69     | - | 409.8  |
| AHQ-8-4, 3597 - 3647      | R.CENTDPGYNCLPCPPR.F              | 1954.10800 | 2     | 1.67E-06 | 0.84  | 3.52     | - | 407.9  |
| AHQ-8-5, 3626             | R.CENTDPGYNCLPCPPR.F              | 1954.10800 | 2     | 2.27E-09 | 0.75  | 2.88     | - | 453.7  |
| AHQ-8-2, 3820             | R.CENTDPGYNCLPCPPR.F              | 1954.10800 | 2     | 1.48E-06 | 0.85  | 3.39     | - | 409.7  |
| AHQ-8-5, 3746             | R.CENTDPGYNCLPCPPR.F              | 1954.10800 | 2     | 2.39E-05 | 0.74  | 3.04     | - | 541.8  |
| AHQ-8-3, 3749             | R.CENTDPGYNCLPCPPR.F              | 1954.10800 | 2     | 2.55E-04 | 0.81  | 3.09     | - | 522.0  |
| AHQ-8-2, 3707             | R.CENTDPGYNCLPCPPR.F              | 1954.10800 | 2     | 1.18E-10 | 0.85  | 3.39     | - | 505.4  |
| AHQ-8-3, 3624 - 3689      | R.CENTDPGYNCLPCPPR.F              | 1954.10800 | 2     | 2.57E-05 | 0.67  | 2.90     | - | 418.6  |
| AHQ-8-3, 3792             | K.CNLYGHYSDPMYR.C                 | 1677.84222 | 2     | 6.78E-06 | 0.90  | 3.82     | - | 643.8  |
| AHQ-8-2, 3396             | K.CNLYGHYSDPMYR.C                 | 1693.84162 | 2     | 8.35E-05 | 0.87  | 2.90     | - | 748.0  |
| AHQ-8-3, 3345             | K.CNLYGHYSDPMYR.C                 | 1693.84162 | 2     | 7.39E-04 | 0.93  | 3.48     | - | 1244.4 |
| AHQ-8-2, 3276 - 3280      | K.DCVGVDVTENQICNK.Q               | 1654.75869 | 2     | 7.33E-08 | 0.96  | 4.77     | - | 1367.6 |
| AHQ-8-2, 2857 - 2861      | K.DHSGQVFSVVSNGK.A                | 1461.56164 | 2     | 3.93E-06 | 0.94  | 3.89     | - | 1213.7 |
| AHQ-8-5, 2953             | K.DHSGQVFSVVSNGK.A                | 1461.56164 | 2     | 2.72E-10 | 0.84  | 2.95     | - | 815.3  |
| AHQ-8-3, 3161             | R.DNCQYYVNVQDR.D                  | 1575.64166 | 2     | 2.23E-06 | 0.88  | 3.62     | - | 932.1  |
| AHQ-8-5, 3021             | R.DNCQYYVNVQDR.D                  | 1575.64166 | 2     | 1.45E-04 | 0.83  | 2.62     | - | 1128.9 |
| AHQ-8-2, 3079             | R.DNCQYYVNVQDR.D                  | 1575.64166 | 2     | 1.22E-04 | 0.80  | 2.59     | - | 980.9  |
| AHQ-8-7, 2964             | R.DNCQYYVNVQDR.D                  | 1575.64166 | 2     | 2.54E-05 | 0.89  | 3.54     | - | 915.7  |
| AHQ-8-7, 3092             | R.DNCQYYVNVQDR.D                  | 1575.64166 | 2     | 2.16E-06 | 0.84  | 3.42     | - | 880.6  |
| AHQ-8-6, 3120             | R.DNCQYYVNVQDR.D                  | 1575.64166 | 2     | 3.63E-05 | 0.54  | 2.73     | - | 537.1  |
| AHQ-8-6, 3008             | R.DNCQYYVNVQDR.D                  | 1575.64166 | 2     | 1.79E-04 | 0.94  | 3.60     | - | 1563.1 |
| AHQ-8-3, 3038 - 3040      | R.DNCQYYVNVQDR.D                  | 1575.64166 | 2     | 5.56E-07 | 0.92  | 3.92     | - | 989.5  |
| AHQ-8-5, 3153             | R.DNCQYYVNVQDR.D                  | 1575.64166 | 2     | 1.18E-06 | 0.92  | 3.59     | - | 1217.7 |
| AHQ-8-5, 3609             | R.DTDM*DGVGDDQDNCPLHNPDLQDSDSDR.I | 3340.31822 | 3     | 6.49E-14 | 0.86  | 3.74     | - | 799.6  |
| AHQ-8-4, 3629             | R.DTDM*DGVGDDQDNCPLHNPDLQDSDSDR.I | 3340.31822 | 3     | 1.40E-09 | 0.90  | 4.52     | - | 810.7  |
| AHQ-8-2, 4021             | R.DTDM*DGVGDDQDNCPLHNPDLQDSDSDR.I | 3324.31882 | 3     | 6.94E-06 | 0.91  | 4.67     | - | 541.9  |
| AHQ-8-2, 3752             | R.DTDM*DGVGDDQDNCPLHNPDLQDSDSDR.I | 3340.31822 | 3     | 1.25E-07 | 0.90  | 4.64     | - | 678.4  |
| AHQ-8-3, 3582 - 3661      | R.DTDM*DGVGDDQDNCPLHNPDLQDSDSDR.I | 3340.31822 | 3     | 8.10E-11 | 0.88  | 4.31     | - | 621.0  |
| AHQ-8-6, 3486 - 3556      | R.DTDM*DGVGDDQDNCPLHNPDLQDSDSDR.I | 3340.31822 | 3     | 8.43E-09 | 0.83  | 3.40     | - | 909.0  |
| AHQ-8-7, 3540             | R.DTDM*DGVGDDQDNCPLHNPDLQDSDSDR.I | 3340.31822 | 3     | 3.34E-04 | 0.74  | 3.09     | - | 985.4  |
| AHQ-8-4, 3977             | R.DTDM*DGVGDDQDNCPLHNPDLQDSDSDR.I | 3324.31882 | 3     | 1.89E-10 | 0.88  | 4.49     | - | 585.0  |
| AHQ-8-2, 3617 - 3679      | R.DTDM*DGVGDDQDNCPLHNPDLQDSDSDR.I | 3340.31822 | 3     | 3.00E-11 | 0.81  | 3.99     | - | 497.2  |
| AHQ-8-3, 3956             | R.DTDM*DGVGDDQDNCPLHNPDLQDSDSDR.I | 3324.31882 | 3     | 4.07E-08 | 0.83  | 3.80     | - | 511.9  |
| AHQ-8-4, 3587             | K.FQDLVDVAVR.A                    | 1063.18877 | 2     | 5.14E-07 | 0.90  | 3.11     | - | 940.2  |
| AHQ-8-2, 3655             | K.FQDLVDVAVR.A                    | 1063.18877 | 2     | 1.22E-06 | 0.90  | 3.52     | - | 942.8  |
| AHQ-8-6, 3531             | K.FQDLVDVAVR.A                    | 1063.18877 | 2     | 8.60E-04 | 0.82  | 2.68     | - | 958.2  |
| AHQ-8-3, 4164 - 4165      | R.FQMIFLDPK.G                     | 1089.33277 | 2     | 2.01E-04 | 0.81  | 2.74     | - | 586.1  |
| AHQ-8-3, 2892 - 2952      | R.FTGSOPFGQGVHEHATANK.Q           | 1877.00666 | 2     | 2.82E-04 | 0.86  | 3.98     | - | 411.3  |
| AHQ-8-3, 3049             | R.FTGSOPFGQGVHEHATANK.Q           | 1877.00666 | 2     | 2.22E-06 | 0.67  | 3.07     | - | 331.3  |
| AHQ-8-6, 2915 - 2920      | R.FTGSOPFGQGVHEHATANK.Q           | 1877.00666 | 3     | 9.10E-08 | 0.49  | 3.26     | - | 383.5  |
| AHQ-8-2, 2996             | R.FTGSOPFGQGVHEHATANK.Q           | 1877.00666 | 2     | 2.15E-06 | 0.80  | 3.67     | - | 354.1  |
| AHQ-8-7, 2860             | R.FTGSOPFGQGVHEHATANK.Q           | 1877.00666 | 2     | 1.60E-05 | 0.73  | 3.43     | - | 419.0  |
| AHQ-8-4, 2917             | R.FTGSOPFGQGVHEHATANK.Q           | 1877.00666 | 2     | 1.58E-06 | 0.94  | 4.96     | - | 613.8  |
| AHQ-8-8, 2793             | R.FTGSOPFGQGVHEHATANK.Q           | 1877.00666 | 2     | 9.99E-04 | 0.91  | 3.86     | - | 785.3  |
| AHQ-8-4, 2919 - 2922      | R.FTGSOPFGQGVHEHATANK.Q           | 1877.00666 | 3     | 2.91E-04 | 0.69  | 3.46     | - | 405.6  |
| AHQ-8-3, 2953 - 2954      | R.FTGSOPFGQGVHEHATANK.Q           | 1877.00666 | 3     | 5.73E-06 | 0.81  | 3.76     | - | 627.2  |
| AHQ-8-6, 2911             | R.FTGSOPFGQGVHEHATANK.Q           | 1877.00666 | 2     | 5.00E-04 | 0.85  | 3.96     | - | 376.5  |
| AHQ-8-11, 5155            | K.GFLLASLR.Q                      | 990.22407  | 2     | 6.18E-05 | 0.96  | 3.50     | - | 2046.9 |
| AHQ-8-5, 5344 - 5348      | K.GFLLASLR.Q                      | 990.22407  | 2     | 2.38E-04 | 0.97  | 4.11     | - | 2246.0 |
| AHQ-8-4, 5393             | K.GFLLASLR.Q                      | 990.22407  | 2     | 5.72E-04 | 0.97  | 3.88     | - | 2067.0 |
| AHQ-8-1, 5468             | K.GFLLASLR.Q                      | 990.22407  | 2     | 4.24E-05 | 0.96  | 3.61     | - | 1932.8 |
| AHQ-8-2, 5420             | K.GFLLASLR.Q                      | 990.22407  | 2     | 8.94E-05 | 0.97  | 3.80     | - | 1982.1 |
| AHQ-8-3, 5341             | K.GFLLASLR.Q                      | 990.22407  | 2     | 1.10E-04 | 0.97  | 4.20     | - | 2086.4 |
| AHQ-8-6, 4223 - 4299      | K.GGVNDFQGVQLQVNR.F               | 1617.74799 | 2     | 4.67E-04 | 0.77  | 3.51     | - | 545.8  |
| AHQ-8-3, 4472 - 4476      | K.GGVNDFQGVQLQVNR.F               | 1617.74799 | 2     | 1.10E-04 | 0.86  | 4.05     | - | 661.4  |
| AHQ-8-2, 4636 - 4657      | K.GGVNDFQGVQLQVNR.F               | 1617.74799 | 2     | 5.49E-06 | 0.86  | 3.63     | - | 852.3  |
| AHQ-8-2, 4447             | K.GGVNDFQGVQLQVNR.F               | 1617.74799 | 2     | 1.14E-08 | 0.94  | 4.41     | - | 1039.7 |
| AHQ-8-6, 4090             | K.GGVNDFQGVQLQVNR.F               | 1617.74799 | 2     | 3.14E-05 | 0.49  | 2.93     | - | 413.2  |
| AHQ-8-2, 4327 - 4387      | K.GGVNDFQGVQLQVNR.F               | 1617.74799 | 2     | 1.77E-06 | 0.88  | 4.20     | - | 701.8  |
| AHQ-8-6, 4490             | K.GGVNDFQGVQLQVNR.F               | 1617.74799 | 2     | 3.41E-06 | 0.43  | 2.68     | - | 513.9  |
| AHQ-8-3, 4312 - 4368      | K.GGVNDFQGVQLQVNR.F               | 1617.74799 | 2     | 4.17E-05 | 0.90  | 4.43     | - | 765.9  |
| AHQ-8-4, 4494             | K.GGVNDFQGVQLQVNR.F               | 1617.74799 | 2     | 2.35E-04 | 0.65  | 3.11     | - | 542.3  |
| AHQ-8-4, 4322 - 4399      | K.GGVNDFQGVQLQVNR.F               | 1617.74799 | 2     | 1.31E-05 | 0.91  | 4.65     | - | 764.9  |
| AHQ-8-7, 4152 - 4221      | K.GGVNDFQGVQLQVNR.F               | 1617.74799 | 2     | 8.65E-05 | 0.90  | 3.99     | - | 871.1  |
| AHQ-8-10, 4056 - 4111     | K.GGVNDFQGVQLQVNR.F               | 1617.74799 | 2     | 7.84E-06 | 0.86  | 3.15     | - | 868.7  |
| AHQ-8-4, 4179             | K.GGVNDFQGVQLQVNR.F               | 1617.74799 | 2     | 1.46E-06 | 0.84  | 3.58     | - | 718.7  |
| AHQ-8-11, 4176 - 4231     | K.GGVNDFQGVQLQVNR.F               | 1617.74799 | 2     | 9.16E-05 | 0.67  | 3.47     | - | 514.0  |
| AHQ-8-6, 4386             | K.GGVNDFQGVQLQVNR.F               | 1617.74799 | 2     | 8.99E-06 | 0.69  | 3.34     | - | 525.7  |
| AHQ-8-5, 4288 - 4356      | K.GGVNDFQGVQLQVNR.F               | 1617.74799 | 2     | 5.25E-06 | 0.91  | 4.08     | - | 825.6  |
| AHQ-8-1, 4460 - 4520      | K.GGVNDFQGVQLQVNR.F               | 1617.74799 | 2     | 6.25E-04 | 0.87  | 3.68     | - | 879.9  |
| AHQ-8-2, 2283             | K.GPDPSSPAFR.I                    | 1031.10364 | 2     | 5.43E-04 | 0.78  | 2.98     | - | 545.9  |
| AHQ-8-3, 2277             | K.GPDPSSPAFR.I                    | 1031.10364 | 2     | 3.22E-06 | 0.91  | 3.42     | - | 864.9  |
| AHQ-8-4, 3153 - 3157      | R.GTLALER.K                       | 873.03234  | 2     | 8.58E-04 | 0.89  | 3.38     | - | 908.5  |
| AHQ-8-6, 3122             | R.GTLALER.K                       | 873.03234  | 2     | 9.41E-04 | 0.76  | 3.05     | - | 849.5  |
| AHQ-8-11, 5787 - 5851     | R.IEDANLIPPVPDDKFDQLVDVAVR.A      | 2580.87450 | 3     | 4.83E-07 | 0.57  | 3.17     | - | 304.0  |
| AHQ-8-2, 5984 - 6056      | R.IEDANLIPPVPDDKFDQLVDVAVR.A      | 2580.87450 | 3     | 2.68E-07 | 0.80  | 3.66     | - | 376.0  |
| AHQ-8-3, 5960 - 6018      | R.IEDANLIPPVPDDKFDQLVDVAVR.A      | 2580.87450 | 3     | 6.94E-08 | 0.85  | 4.04     | - | 530.6  |
| AHQ-8-5, 5988 - 6056      | R.IEDANLIPPVPDDKFDQLVDVAVR.A      | 2580.87450 | 3     | 1.01E-07 | 0.70  | 3.54     | - | 304.9  |
| AHQ-8-13-, 5858           | R.IEDANLIPPVPDDKFDQLVDVAVR.A      | 2580.87450 | 3     | 6.44E-06 | 0.57  | 3.17     | - | 342.8  |
| AHQ-8-4, 6042 - 6103      | R.IEDANLIPPVPDDKFDQLVDVAVR.A      | 2580.87450 | 3     | 5.94E-05 | 0.65  | 3.37     | - | 319.5  |
| AHQ-8-4, 6062             | R.IEDANLIPPVPDDKFDQLVDVAVR.A      | 2580.87450 | 2     | 3.11E-04 | 0.50  | 2.69     | - | 284.1  |
| AHQ-8-4, 6166             | R.IEDANLIPPVPDDKFDQLVDVAVR.A      | 2580.87450 | 3     | 7.87E-09 | 0.75  | 3.62     | - | 383.7  |
| AHQ-8-3, 5968 - 6025      | R.IEDANLIPPVPDDKFDQLVDVAVR.A      | 2580.87450 | 2     | 2.75E-05 | 0.55  | 2.69     | - | 172.9  |
| AHQ-8-7, 5836 - 5894      | R.IEDANLIPPVPDDKFDQLVDVAVR.A      | 2580.87450 | 3     | 2.90E-10 | 0.66  | 3.84     | - | 462.4  |
| AHQ-8-6, 5883 - 5960      | R.IEDANLIPPVPDDKFDQLVDVAVR.A      | 2580.87450 | 3     | 1.36E-07 | 0.78  | 3.76     | - | 391.5  |
| AHQ-8-3, 2708             | K.IMADSGPIYDK.T                   | 1210.38204 | 2     | 8.49E-05 | 0.84  | 3.43     | - | 521.6  |
| AHQ-8-6, 2666             | K.IMADSGPIYDK.T                   | 1210.38204 | 2     | 8.12E-05 | 0.86  | 3.16     | - | 669.3  |
| AHQ-8-2, 2740             | K.IMADSGPIYDK.T                   | 1210.38204 | 2     | 1.95E-06 | 0.83  | 3.16     | - | 574.3  |
| AHQ-8-6, 2380 - 2446      | K.IM*ADSGPIYDK.T                  | 1226.38144 | 2     | 2.94E-04 | 0.75  | 2.68     | - | 692.3  |
| AHQ-8-11, 2668            | K.IMADSGPIYDK.T                   | 1210.38204 | 2     | 2.11E-06 | 0.89  | 3.13     | - | 790.5  |
| AHQ-8-2, 2459             | K.IM*ADSGPIYDK.T                  | 1226.38144 | 2     | 4.62E-05 | 0.84  | 3.12     | - | 719.5  |
| AHQ-8-3, 6274 - 6305      | R.IPESGGDNSVDFIFELTGAAR.K         | 2196.35899 | 2     | 3.60E-08 | 0.97  | 6.48     | - | 1144.6 |
| AHQ-8-4, 6339 - 6399      | R.IPESGGDNSVDFIFELTGAAR.K         | 2196.35899 | 2     | 5.43E-09 | 0.98  | 5.93     | - | 1546.6 |
| AHQ-8-5, 6305 - 6312      | R.IPESGGDNSVDFIFELTGAAR.K         | 2196.35899 | 2     | 7.58E-09 | 0.98  | 6.11     | - | 1801.5 |

|                           |                                                                         |            |   |          |       |        |       |         |
|---------------------------|-------------------------------------------------------------------------|------------|---|----------|-------|--------|-------|---------|
| AHQ-8-2, 6379             | R.IPESGGDNSVDFIFELTGAAR.K                                               | 2196.35899 | 3 | 5.09E-04 | 0.76  | 3.86   | -     | 766.7   |
| AHQ-8-11, 6084            | R.IPESGGDNSVDFIFELTGAAR.K                                               | 2196.35899 | 2 | 2.16E-04 | 0.76  | 2.76   | -     | 738.0   |
| AHQ-8-13-, 6184           | R.IPESGGDNSVDFIFELTGAAR.K                                               | 2196.35899 | 2 | 1.20E-05 | 0.92  | 4.04   | -     | 822.4   |
| AHQ-8-2, 6368 - 6375      | R.IPESGGDNSVDFIFELTGAAR.K                                               | 2196.35899 | 2 | 1.37E-08 | 0.96  | 5.62   | -     | 920.9   |
| AHQ-8-6, 6207             | R.IPESGGDNSVDFIFELTGAAR.K                                               | 2196.35899 | 3 | 4.76E-04 | 0.84  | 3.55   | -     | 945.9   |
| AHQ-8-6, 6202 - 6252      | R.IPESGGDNSVDFIFELTGAAR.K                                               | 2196.35899 | 2 | 8.44E-11 | 0.95  | 4.78   | -     | 1132.3  |
| AHQ-8-14-, 6198           | R.IPESGGDNSVDFIFELTGAAR.K                                               | 2196.35899 | 2 | 5.21E-09 | 0.95  | 4.57   | -     | 1050.2  |
| AHQ-8-4, 2487             | R.KDHSQGQVFSVVSNGK.A                                                    | 1589.73455 | 3 | 1.19E-06 | 0.91  | 3.77   | -     | 1237.9  |
| AHQ-8-2, 2576             | R.KDHSQGQVFSVVSNGK.A                                                    | 1589.73455 | 2 | 1.83E-10 | 0.92  | 3.34   | -     | 1270.9  |
| AHQ-8-3, 2492             | R.KDHSQGQVFSVVSNGK.A                                                    | 1589.73455 | 2 | 4.08E-06 | 0.56  | 2.70   | -     | 573.9   |
| AHQ-8-2, 2513             | R.KDHSQGQVFSVVSNGK.A                                                    | 1589.73455 | 3 | 2.53E-05 | 0.95  | 4.16   | -     | 1933.2  |
| AHQ-8-6, 2423 - 2500      | R.KDHSQGQVFSVVSNGK.A                                                    | 1589.73455 | 2 | 5.11E-08 | 0.86  | 3.54   | -     | 777.2   |
| AHQ-8-2, 2559             | K.KIMADSGPIYDK.T                                                        | 1338.55496 | 2 | 4.27E-05 | 0.87  | 3.51   | -     | 802.7   |
| AHQ-8-8, 2373             | R.KVTEENKELANELR.R                                                      | 1673.84976 | 2 | 4.15E-05 | 0.90  | 4.02   | -     | 1011.4  |
| AHQ-8-2, 2464 - 2528      | R.KVTEENKELANELR.R                                                      | 1673.84976 | 2 | 3.34E-09 | 0.95  | 4.32   | -     | 1524.9  |
| AHQ-8-5, 2453             | R.KVTEENKELANELR.R                                                      | 1673.84976 | 3 | 5.76E-07 | 0.74  | 3.73   | -     | 780.6   |
| AHQ-8-3, 2497             | R.KVTEENKELANELR.R                                                      | 1673.84976 | 2 | 5.45E-08 | 0.95  | 4.89   | -     | 1272.4  |
| AHQ-8-6, 2442 - 2507      | R.KVTEENKELANELR.R                                                      | 1673.84976 | 2 | 2.28E-04 | 0.92  | 4.28   | -     | 1135.4  |
| AHQ-8-4, 2446             | R.KVTEENKELANELR.R                                                      | 1673.84976 | 3 | 2.49E-08 | 0.62  | 3.11   | -     | 495.6   |
| AHQ-8-5, 2452             | R.KVTEENKELANELR.R                                                      | 1673.84976 | 2 | 8.09E-09 | 0.96  | 4.97   | -     | 1570.7  |
| AHQ-8-7, 2422             | R.KVTEENKELANELR.R                                                      | 1673.84976 | 2 | 4.99E-06 | 0.95  | 4.55   | -     | 1436.4  |
| AHQ-8-2, 2536             | R.KVTEENKELANELR.R                                                      | 1673.84976 | 3 | 9.46E-06 | 0.87  | 4.07   | -     | 883.0   |
| AHQ-8-5, 2541             | R.LCNPSQPQMGKPCGEAR.E                                                   | 2135.34557 | 3 | 6.36E-06 | 0.87  | 3.80   | -     | 915.3   |
| AHQ-8-4, 2527             | R.LCNPSQPQMGKPCGEAR.E                                                   | 2135.34557 | 2 | 2.37E-04 | 0.82  | 3.71   | -     | 397.4   |
| AHQ-8-4, 2535             | R.LCNPSQPQMGKPCGEAR.E                                                   | 2135.34557 | 3 | 2.40E-05 | 0.83  | 3.29   | -     | 955.4   |
| AHQ-8-4, 2194             | R.LCNPSQPQMGKPCGEAR.E                                                   | 2151.34497 | 3 | 5.65E-07 | 0.79  | 3.49   | -     | 608.4   |
| AHQ-8-6, 5068             | K.MENALDVPQISVFTR.D                                                     | 1850.08607 | 2 | 3.57E-04 | 0.73  | 3.32   | -     | 603.7   |
| AHQ-8-5, 5109             | K.M*ENALDVPQISVFTR.D                                                    | 1866.08547 | 2 | 8.36E-06 | 0.90  | 3.93   | -     | 668.2   |
| AHQ-8-4, 5162             | K.M*ENALDVPQISVFTR.D                                                    | 1866.08547 | 2 | 7.64E-07 | 0.86  | 3.59   | -     | 527.1   |
| AHQ-8-6, 5016             | K.M*ENALDVPQISVFTR.D                                                    | 1866.08547 | 2 | 5.47E-04 | 0.82  | 3.34   | -     | 597.0   |
| AHQ-8-3, 5092             | K.M*ENALDVPQISVFTR.D                                                    | 1866.08547 | 2 | 1.18E-04 | 0.37  | 2.65   | -     | 289.3   |
| AHQ-8-6, 3087             | K.QVTSYWBTDNPTTR.A                                                      | 1596.68241 | 2 | 1.93E-06 | 0.85  | 3.00   | -     | 743.1   |
| AHQ-8-11, 3071            | K.QVTSYWBTDNPTTR.A                                                      | 1596.68241 | 2 | 6.78E-08 | 0.57  | 2.68   | -     | 436.1   |
| AHQ-8-4, 3113             | K.QVTSYWBTDNPTTR.A                                                      | 1596.68241 | 2 | 2.80E-06 | 0.84  | 3.56   | -     | 567.9   |
| AHQ-8-3, 2850 - 2928      | R.RPPLCYHNGVQYR.N                                                       | 1661.86889 | 2 | 1.00E-04 | 0.79  | 3.28   | -     | 502.3   |
| AHQ-8-3, 2784             | R.RPPLCYHNGVQYR.N                                                       | 1661.86889 | 3 | 8.94E-06 | 0.87  | 3.13   | -     | 1145.1  |
| AHQ-8-5, 2752             | R.RPPLCYHNGVQYR.N                                                       | 1661.86889 | 3 | 3.53E-10 | 0.97  | 4.61   | -     | 1784.6  |
| AHQ-8-5, 2905             | R.RPPLCYHNGVQYR.N                                                       | 1661.86889 | 2 | 1.87E-04 | 0.53  | 2.57   | -     | 446.4   |
| AHQ-8-11, 3697            | K.SITLQVQEDR.A                                                          | 1208.34588 | 2 | 4.74E-06 | 0.76  | 2.60   | -     | 784.5   |
| AHQ-8-4, 3801             | K.SITLQVQEDR.A                                                          | 1208.34588 | 2 | 6.48E-06 | 0.95  | 3.55   | -     | 1539.7  |
| AHQ-8-5, 3778             | K.SITLQVQEDR.A                                                          | 1208.34588 | 2 | 4.61E-07 | 0.93  | 3.60   | -     | 1249.5  |
| AHQ-8-6, 3726             | K.SITLQVQEDR.A                                                          | 1208.34588 | 2 | 3.91E-06 | 0.92  | 2.98   | -     | 1314.0  |
| AHQ-8-3, 3804             | K.SITLQVQEDR.A                                                          | 1208.34588 | 2 | 1.56E-05 | 0.89  | 3.09   | -     | 1205.9  |
| AHQ-8-7, 4153             | R.TIVTLQDSIR.K                                                          | 1247.42355 | 2 | 3.28E-04 | 0.95  | 3.78   | -     | 1447.5  |
| AHQ-8-5, 3326             | R.TIVTLQDSIR.K                                                          | 1247.42355 | 2 | 8.09E-04 | 0.94  | 3.17   | -     | 1545.4  |
| AHQ-8-3, 4318             | R.TIVTLQDSIR.K                                                          | 1247.42355 | 2 | 2.04E-04 | 0.97  | 4.18   | -     | 2031.8  |
| AHQ-8-4, 4329 - 4333      | R.TIVTLQDSIR.K                                                          | 1247.42355 | 2 | 1.79E-04 | 0.97  | 4.16   | -     | 1847.2  |
| AHQ-8-1, 4483             | R.TIVTLQDSIR.K                                                          | 1247.42355 | 2 | 1.96E-08 | 0.96  | 3.79   | -     | 1513.4  |
| AHQ-8-5, 4300             | R.TIVTLQDSIR.K                                                          | 1247.42355 | 2 | 1.37E-08 | 0.96  | 3.67   | -     | 1730.2  |
| AHQ-8-2, 3409             | R.TIVTLQDSIR.K                                                          | 1247.42355 | 2 | 4.18E-05 | 0.95  | 3.54   | -     | 1564.6  |
| AHQ-8-2, 4389 - 4396      | R.TIVTLQDSIR.K                                                          | 1247.42355 | 2 | 1.16E-06 | 0.97  | 4.20   | -     | 1738.5  |
| AHQ-8-6, 4234 - 4275      | R.TIVTLQDSIR.K                                                          | 1247.42355 | 2 | 2.49E-07 | 0.97  | 4.08   | -     | 1872.2  |
| AHQ-8-6, 3295             | R.TIVTLQDSIR.K                                                          | 1247.42355 | 2 | 3.79E-05 | 0.95  | 3.63   | -     | 1526.3  |
| AHQ-8-2, 5953             | K.TKDLQAICIGSCDELSSM*VLELR.G                                            | 2658.02070 | 3 | 2.37E-05 | 0.75  | 3.79   | -     | 536.3   |
| AHQ-8-4, 2654             | K.VTEENKELANELR.R                                                       | 1545.67685 | 2 | 1.47E-09 | 0.88  | 3.89   | -     | 830.2   |
| AHQ-8-6, 2590 - 2667      | K.VTEENKELANELR.R                                                       | 1545.67685 | 2 | 5.18E-06 | 0.79  | 3.44   | -     | 681.4   |
| AHQ-8-5, 2674             | K.VTEENKELANELR.R                                                       | 1545.67685 | 2 | 5.25E-06 | 0.84  | 3.47   | -     | 815.0   |
| AHQ-8-2, 2736             | K.VTEENKELANELR.R                                                       | 1545.67685 | 2 | 1.21E-05 | 0.88  | 3.79   | -     | 805.2   |
| gj4507729 ref NP_001060.1 | tubulin, beta polypeptide [Homo sapiens]                                |            |   | 1.13E-13 | 7.70  | 90.36  | 30.80 | 49906.7 |
| AHQ-8-13, 4833            | R.AILVDLEPGTMDSVR.S                                                     | 1616.86162 | 2 | 6.09E-04 | 0.45  | 2.57   | -     | 368.4   |
| AHQ-8-13-, 4666 - 4723    | R.AILVDLEPGTMDSVR.S                                                     | 1616.86162 | 2 | 1.75E-04 | 0.78  | 3.43   | -     | 434.0   |
| AHQ-8-7, 2892             | K.EVDEQMLNVDQK.N                                                        | 1447.59668 | 2 | 3.98E-05 | 0.67  | 3.19   | -     | 723.5   |
| AHQ-8-7, 4385             | K.GHYTEGAEALDVSVDVVR.K                                                  | 1960.13388 | 2 | 8.14E-07 | 0.95  | 4.50   | -     | 1260.7  |
| AHQ-8-13-, 5872 - 5874    | K.GHYTEGAEALDVSVDVVR.K                                                  | 1960.13388 | 2 | 1.13E-13 | 0.99  | 7.20   | -     | 3323.2  |
| AHQ-8-8, 6042             | K.GHYTEGAEALDVSVDVVR.K                                                  | 1960.13388 | 3 | 4.12E-04 | 0.79  | 3.91   | -     | 1105.3  |
| AHQ-8-8, 6038             | K.GHYTEGAEALDVSVDVVR.K                                                  | 1960.13388 | 2 | 1.00E-10 | 0.98  | 5.63   | -     | 2634.8  |
| AHQ-8-8, 5987 - 6054      | K.GHYTEGAEALDVSVDVVR.K                                                  | 1960.13388 | 2 | 8.60E-05 | 0.96  | 4.85   | -     | 1978.7  |
| AHQ-8-7, 5824             | K.GHYTEGAEALDVSVDVVR.K                                                  | 1960.13388 | 2 | 3.46E-10 | 0.98  | 6.55   | -     | 2367.6  |
| AHQ-8-7, 5820 - 5822      | K.GHYTEGAEALDVSVDVVR.K                                                  | 1960.13388 | 3 | 2.31E-04 | 0.88  | 4.23   | -     | 1154.6  |
| AHQ-8-14-, 5882           | K.GHYTEGAEALDVSVDVVR.K                                                  | 1960.13388 | 2 | 1.33E-05 | 0.96  | 4.32   | -     | 1573.6  |
| AHQ-8-7, 4293             | R.ISEQFTAMFR.R                                                          | 1230.41818 | 2 | 9.50E-09 | 0.92  | 3.55   | -     | 1003.4  |
| AHQ-8-13-, 4426 - 4427    | R.ISEQFTAMFR.R                                                          | 1230.41818 | 2 | 1.95E-08 | 0.95  | 4.13   | -     | 1338.0  |
| AHQ-8-13, 3827 - 3889     | R.ISEQFTAM*FR.R                                                         | 1246.41758 | 2 | 1.05E-06 | 0.86  | 3.10   | -     | 792.6   |
| AHQ-8-7, 3516 - 3578      | R.ISEQFTAM*FR.R                                                         | 1246.41758 | 2 | 6.12E-04 | 0.73  | 2.69   | -     | 673.3   |
| AHQ-8-7, 6224             | K.LTTPTYGDLNLHLVSATMSGVTTCLR.F                                          | 2711.06527 | 3 | 1.68E-07 | 0.89  | 4.39   | -     | 779.7   |
| AHQ-8-7, 5614             | K.M*SATFIGNSTAIQELFK.R                                                  | 1875.13550 | 2 | 1.98E-06 | 0.83  | 4.15   | -     | 914.9   |
| AHQ-8-7, 5858             | K.M*SATFIGNSTAIQELFK.R                                                  | 1875.13550 | 2 | 8.73E-05 | 0.37  | 2.71   | -     | 469.5   |
| AHQ-8-14-, 5678           | K.M*SATFIGNSTAIQELFK.R                                                  | 1875.13550 | 2 | 6.33E-06 | 0.82  | 3.81   | -     | 952.2   |
| AHQ-8-7, 5572 - 5634      | K.NSSYFVFWIPNNVK.T                                                      | 1697.87148 | 2 | 3.15E-04 | 0.86  | 3.21   | -     | 996.6   |
| AHQ-8-13-, 5198 - 5263    | K.NSSYFVFWIPNNVK.T                                                      | 1697.87148 | 2 | 2.46E-06 | 0.79  | 3.67   | -     | 501.1   |
| AHQ-8-13-, 5323 - 5364    | K.NSSYFVFWIPNNVK.T                                                      | 1697.87148 | 2 | 1.96E-06 | 0.78  | 3.30   | -     | 698.0   |
| AHQ-8-7, 5106 - 5164      | K.NSSYFVFWIPNNVK.T                                                      | 1697.87148 | 2 | 8.70E-06 | 0.94  | 4.58   | -     | 1008.8  |
| AHQ-8-7, 5229 - 5309      | K.NSSYFVFWIPNNVK.T                                                      | 1697.87148 | 2 | 8.12E-05 | 0.37  | 2.70   | -     | 354.5   |
| AHQ-8-8, 6013             | R.SGPFQGIQFRPDNFVFGQSGAGNNWAK.G                                         | 2800.03898 | 3 | 9.94E-08 | 0.95  | 5.59   | -     | 1149.6  |
| AHQ-8-7, 5742 - 5789      | R.SGPFQGIQFRPDNFVFGQSGAGNNWAK.G                                         | 2800.03898 | 3 | 3.12E-06 | 0.95  | 5.08   | -     | 1183.9  |
| AHQ-8-13-, 5824 - 5884    | R.SGPFQGIQFRPDNFVFGQSGAGNNWAK.G                                         | 2800.03898 | 3 | 9.95E-12 | 0.98  | 6.97   | -     | 1987.0  |
| gj4501881 ref NP_001091.1 | alpha 1 actin precursor; alpha skeletal muscle actin [Homo sapiens] [MA |            |   | 1.15E-13 | 12.63 | 150.25 | 43.50 | 42050.8 |
| AHQ-8-8, 1989 - 2045      | K.AGFAGDDAPR.A                                                          | 977.01283  | 2 | 1.60E-05 | 0.89  | 3.19   | -     | 1043.9  |
| AHQ-8-5, 3656             | R.AVFPISIVGR.P                                                          | 946.12815  | 2 | 3.99E-04 | 0.81  | 2.51   | -     | 721.7   |
| AHQ-8-8, 4871             | K.DLYANNVMSGGTTMYPGIADR.M                                               | 2247.49444 | 2 | 5.96E-04 | 0.35  | 2.61   | -     | 274.0   |
| AHQ-8-8, 1561 - 1619      | K.DSYVGDEAQSK.R                                                         | 1199.20634 | 2 | 1.23E-04 | 0.74  | 3.08   | -     | 717.4   |
| AHQ-8-8, 1677 - 1733      | K.DSYVGDEAQSK.R                                                         | 1199.20634 | 2 | 3.93E-06 | 0.86  | 3.60   | -     | 871.2   |
| AHQ-8-14-, 2977 - 3037    | K.EITALAPSTMK.I                                                         | 1162.38206 | 2 | 6.16E-04 | 0.70  | 2.60   | -     | 520.1   |
| AHQ-8-8, 2814 - 2881      | K.EITALAPSTMK.I                                                         | 1162.38206 | 1 | 5.22E-05 | 0.46  | 2.56   | -     | 281.3   |
| AHQ-8-8, 2377 - 2437      | K.EITALAPSTM*K.I                                                        | 1178.38146 | 2 | 6.46E-04 | 0.88  | 3.29   | -     | 794.0   |
| AHQ-8-14-, 2505 - 2506    | K.EITALAPSTM*K.I                                                        | 1178.38146 | 2 | 5.60E-04 | 0.85  | 2.91   | -     | 763.0   |
| AHQ-8-13-, 3090 - 3091    | K.EITALAPSTMK.I                                                         | 1162.38206 | 1 | 4.72E-05 | 0.73  | 3.41   | -     | 270.7   |
| AHQ-8-8, 2817 - 2886      | K.EITALAPSTMK.I                                                         | 1162.38206 | 2 | 1.67E-04 | 0.84  | 2.71   | -     | 827.8   |
| AHQ-8-11, 2927 - 2992     | K.EITALAPSTMK.I                                                         | 1162.38206 | 2 | 8.27E-04 | 0.73  | 2.79   | -     | 488.2   |
| AHQ-8-14-, 3041           | K.EITALAPSTMK.I                                                         | 1162.38206 | 1 | 7.72E-04 | 0.20  | 1.97   | -     | 263.3   |
| AHQ-8-8, 1882 - 1943      | R.HQGVMMVMGQK.D                                                         | 1172.40691 | 2 | 6.33E-06 | 0.91  | 3.49   | -     | 716.7   |
| AHQ-8-8, 2003 - 2043      | R.HQGVMMVMGQK.D                                                         | 1172.40691 | 2 | 4.05E-04 | 0.88  | 3.58   | -     | 619.9   |
| AHQ-8-8, 3370 - 3431      | K.IWHHTFYNELR.V                                                         | 1516.68695 | 3 | 1.31E-04 | 0.94  | 4.03   | -     | 1617.5  |
| AHQ-8-8, 3009 - 3066      | K.IWHHTFYNELR.V                                                         | 1516.68695 | 3 | 5.00E-06 | 0.93  | 4.30   | -     | 1860.8  |
| AHQ-8-8, 3422 - 3486      | K.IWHHTFYNELR.V                                                         | 1516.68695 | 2 | 3.02E-06 | 0.87  | 3.11   | -     | 845.5   |
| AHQ-8-5, 3200             | K.IWHHTFYNELR.V                                                         | 1516.68695 | 3 | 1.72E-04 | 0.85  | 4.20   | -     | 1045.1  |
| AHQ-8-8, 3293 - 3369      | K.IWHHTFYNELR.V                                                         | 1516.68695 | 2 | 2.87E-04 | 0.88  | 3.47   | -     | 925.0   |

|                              |                                                    |            |   |          |       |        |       |         |
|------------------------------|----------------------------------------------------|------------|---|----------|-------|--------|-------|---------|
| AHQ-8-8, 3173 - 3233         | K.IWHTFYNELR.V                                     | 1516.68695 | 2 | 4.55E-07 | 0.94  | 3.84   | -     | 1086.2  |
| AHQ-8-8, 2898 - 2957         | K.IWHTFYNELR.V                                     | 1516.68695 | 3 | 4.38E-06 | 0.96  | 4.68   | -     | 1529.0  |
| AHQ-8-8, 2953 - 2981         | K.IWHTFYNELR.V                                     | 1516.68695 | 2 | 4.55E-09 | 0.84  | 3.69   | -     | 839.3   |
| AHQ-8-8, 3131 - 3194         | K.IWHTFYNELR.V                                     | 1516.68695 | 3 | 2.62E-04 | 0.91  | 4.13   | -     | 1443.5  |
| AHQ-8-8, 6637                | K.LCYVALDFENEM*ATAASSSSLEK.S                       | 2554.78938 | 2 | 1.88E-06 | 0.95  | 4.84   | -     | 1366.7  |
| AHQ-8-8, 5115                | R.LDLAGRDLTDYLMK.I                                 | 1624.88375 | 2 | 2.43E-04 | 0.94  | 4.35   | -     | 1197.6  |
| AHQ-8-4, 4785                | K.SYELPDGQVITIGNER.F                               | 1791.93998 | 2 | 2.05E-05 | 0.92  | 3.87   | -     | 864.1   |
| AHQ-8-5, 4761 - 4765         | K.SYELPDGQVITIGNER.F                               | 1791.93998 | 2 | 3.06E-06 | 0.92  | 3.79   | -     | 916.0   |
| AHQ-8-3, 4876                | K.SYELPDGQVITIGNER.F                               | 1791.93998 | 2 | 3.09E-05 | 0.78  | 3.15   | -     | 502.4   |
| AHQ-8-2, 4835                | K.SYELPDGQVITIGNER.F                               | 1791.93998 | 2 | 1.68E-09 | 0.92  | 3.55   | -     | 851.5   |
| AHQ-8-2, 4780 - 4843         | K.SYELPDGQVITIGNER.F                               | 1791.93998 | 2 | 8.53E-05 | 0.90  | 3.88   | -     | 775.8   |
| AHQ-8-5, 4894 - 4949         | K.SYELPDGQVITIGNER.F                               | 1791.93998 | 2 | 7.00E-06 | 0.94  | 3.73   | -     | 1351.2  |
| AHQ-8-8, 4227 - 4306         | K.SYELPDGQVITIGNER.F                               | 1791.93998 | 2 | 2.62E-11 | 0.93  | 4.31   | -     | 981.7   |
| AHQ-8-13-, 4818 - 4876       | K.SYELPDGQVITIGNER.F                               | 1791.93998 | 2 | 8.69E-10 | 0.95  | 4.11   | -     | 1250.6  |
| AHQ-8-8, 4363 - 4371         | K.SYELPDGQVITIGNER.F                               | 1791.93998 | 3 | 6.74E-06 | 0.96  | 5.01   | -     | 1448.2  |
| AHQ-8-8, 4365 - 4425         | K.SYELPDGQVITIGNER.F                               | 1791.93998 | 2 | 1.46E-12 | 0.97  | 5.02   | -     | 1332.1  |
| AHQ-8-8, 4482                | K.SYELPDGQVITIGNER.F                               | 1791.93998 | 2 | 6.10E-09 | 0.95  | 4.42   | -     | 1021.5  |
| AHQ-8-13-, 4695 - 4718       | K.SYELPDGQVITIGNER.F                               | 1791.93998 | 2 | 6.81E-11 | 0.95  | 4.53   | -     | 884.7   |
| AHQ-8-8, 4594 - 4665         | K.SYELPDGQVITIGNER.F                               | 1791.93998 | 2 | 2.35E-11 | 0.96  | 4.81   | -     | 1211.7  |
| AHQ-8-8, 4662                | K.SYELPDGQVITIGNER.F                               | 1791.93998 | 3 | 4.29E-05 | 0.94  | 4.23   | -     | 1306.9  |
| AHQ-8-8, 4721 - 4790         | K.SYELPDGQVITIGNER.F                               | 1791.93998 | 2 | 5.71E-11 | 0.95  | 4.42   | -     | 1105.4  |
| AHQ-8-8, 4725                | K.SYELPDGQVITIGNER.F                               | 1791.93998 | 2 | 3.25E-08 | 0.96  | 4.41   | -     | 1130.5  |
| AHQ-8-1, 5001                | K.SYELPDGQVITIGNER.F                               | 1791.93998 | 2 | 6.85E-07 | 0.80  | 2.79   | -     | 856.4   |
| AHQ-8-8, 4845 - 4905         | K.SYELPDGQVITIGNER.F                               | 1791.93998 | 2 | 1.15E-13 | 0.96  | 4.48   | -     | 1202.0  |
| AHQ-8-14, 5541 - 5613        | K.SYELPDGQVITIGNER.F                               | 1791.93998 | 2 | 9.07E-05 | 0.88  | 3.80   | -     | 630.9   |
| AHQ-8-1, 4868                | K.SYELPDGQVITIGNER.F                               | 1791.93998 | 2 | 7.30E-06 | 0.90  | 3.48   | -     | 773.8   |
| AHQ-8-8, 4930 - 4970         | K.SYELPDGQVITIGNER.F                               | 1791.93998 | 2 | 7.22E-10 | 0.94  | 4.19   | -     | 1022.7  |
| AHQ-8-8, 4966 - 4989         | K.SYELPDGQVITIGNER.F                               | 1791.93998 | 2 | 7.98E-12 | 0.93  | 4.13   | -     | 821.9   |
| AHQ-8-4, 4442                | K.SYELPDGQVITIGNER.F                               | 1791.93998 | 2 | 1.49E-10 | 0.92  | 3.49   | -     | 1069.0  |
| AHQ-8-8, 4219                | K.SYELPDGQVITIGNER.F                               | 1791.93998 | 2 | 2.34E-09 | 0.88  | 3.46   | -     | 1065.7  |
| AHQ-8-10, 4194               | K.SYELPDGQVITIGNER.F                               | 1791.93998 | 3 | 7.17E-05 | 0.81  | 3.22   | -     | 935.4   |
| AHQ-8-10, 4248               | K.SYELPDGQVITIGNER.F                               | 1791.93998 | 2 | 1.03E-04 | 0.87  | 3.01   | -     | 697.8   |
| AHQ-8-10, 4456 - 4530        | K.SYELPDGQVITIGNER.F                               | 1791.93998 | 2 | 6.04E-11 | 0.97  | 5.00   | -     | 1219.3  |
| AHQ-8-10, 4514 - 4528        | K.SYELPDGQVITIGNER.F                               | 1791.93998 | 3 | 1.44E-08 | 0.96  | 4.89   | -     | 1554.5  |
| AHQ-8-10, 4611 - 4666        | K.SYELPDGQVITIGNER.F                               | 1791.93998 | 2 | 5.16E-11 | 0.93  | 3.95   | -     | 1001.8  |
| AHQ-8-7, 4601                | K.SYELPDGQVITIGNER.F                               | 1791.93998 | 2 | 6.52E-05 | 0.47  | 2.54   | -     | 511.5   |
| AHQ-8-11, 4571               | K.SYELPDGQVITIGNER.F                               | 1791.93998 | 2 | 1.28E-09 | 0.90  | 3.94   | -     | 566.9   |
| AHQ-8-11, 4683 - 4740        | K.SYELPDGQVITIGNER.F                               | 1791.93998 | 2 | 3.65E-10 | 0.94  | 4.23   | -     | 1042.3  |
| AHQ-8-13, 4983               | K.SYELPDGQVITIGNER.F                               | 1791.93998 | 2 | 6.76E-06 | 0.94  | 4.18   | -     | 951.5   |
| AHQ-8-12, 4280               | K.SYELPDGQVITIGNER.F                               | 1791.93998 | 2 | 3.77E-06 | 0.93  | 3.92   | -     | 1003.5  |
| AHQ-8-12, 4598 - 4602        | K.SYELPDGQVITIGNER.F                               | 1791.93998 | 2 | 1.36E-07 | 0.95  | 4.16   | -     | 1066.8  |
| AHQ-8-12, 4716 - 4780        | K.SYELPDGQVITIGNER.F                               | 1791.93998 | 2 | 5.17E-04 | 0.82  | 3.27   | -     | 525.1   |
| AHQ-8-13, 4511 - 4576        | K.SYELPDGQVITIGNER.F                               | 1791.93998 | 2 | 4.19E-09 | 0.92  | 3.46   | -     | 935.8   |
| AHQ-8-13, 4851 - 4853        | K.SYELPDGQVITIGNER.F                               | 1791.93998 | 2 | 1.20E-07 | 0.90  | 3.96   | -     | 631.7   |
| AHQ-8-1, 4497 - 4545         | K.SYELPDGQVITIGNER.F                               | 1791.93998 | 2 | 5.70E-06 | 0.62  | 2.52   | -     | 450.1   |
| AHQ-8-8, 4833 - 4914         | K.SYELPDGQVITIGNERFR.C                             | 2095.30102 | 2 | 4.14E-05 | 0.90  | 3.83   | -     | 878.8   |
| AHQ-8-8, 3857                | R.VAPEEHTLLTEAPLNPK.A                              | 1957.21627 | 2 | 5.39E-06 | 0.94  | 4.44   | -     | 763.2   |
| AHQ-8-8, 4337 - 4409         | K.YPIEHGITNWDMEK.I                                 | 1962.17174 | 2 | 4.98E-04 | 0.86  | 3.64   | -     | 805.4   |
| AHQ-8-8, 3897 - 3953         | K.YPIEHGITNWDMEK.I                                 | 1978.17114 | 2 | 1.76E-04 | 0.84  | 3.98   | -     | 441.3   |
| AHQ-8-8, 4555                | K.YPIEHGITNWDMEK.I                                 | 1962.17174 | 2 | 3.68E-05 | 0.87  | 3.85   | -     | 564.1   |
| AHQ-8-8, 4865 - 4931         | K.YPIEHGITNWDMEK.I                                 | 1962.17174 | 2 | 1.04E-05 | 0.85  | 3.76   | -     | 595.0   |
| AHQ-8-12, 4274               | K.YPIEHGITNWDMEK.I                                 | 1962.17174 | 2 | 1.50E-04 | 0.89  | 3.83   | -     | 830.7   |
| gj 13562114[ref NP_110400.1] | beta tubulin 1, class VI [Homo sapiens]            |            |   | 4.45E-13 | 11.01 | 130.32 | 44.30 | 50326.6 |
| AHQ-8-8, 5962                | R.ALSVAELTQQMFDAR.N                                | 1680.90740 | 2 | 2.85E-07 | 0.96  | 4.66   | -     | 1477.2  |
| AHQ-8-7, 5669 - 5748         | R.ALSVAELTQQMFDAR.N                                | 1680.90740 | 2 | 1.83E-04 | 0.93  | 3.64   | -     | 1593.2  |
| AHQ-8-14-, 4643 - 4702       | R.AVLVDLEPQTMSIR.S                                 | 1616.86162 | 2 | 2.34E-07 | 0.92  | 4.64   | -     | 540.2   |
| AHQ-8-7, 3630 - 3688         | R.EIVHIQGCQGNQIGAK.F                               | 1867.11965 | 3 | 5.07E-04 | 0.68  | 3.00   | -     | 622.3   |
| AHQ-8-11, 3223               | K.EVDQQLLSVQTR.N                                   | 1416.56231 | 2 | 8.51E-04 | 0.80  | 3.05   | -     | 714.0   |
| AHQ-8-8, 3211 - 3238         | K.EVDQQLLSVQTR.N                                   | 1416.56231 | 2 | 7.77E-04 | 0.57  | 2.62   | -     | 537.1   |
| AHQ-8-13, 6249               | K.GHYTEGALIENLVVVR.H                               | 2029.23935 | 3 | 7.21E-04 | 0.79  | 3.29   | -     | 1315.6  |
| AHQ-8-13, 6248               | K.GHYTEGALIENLVVVR.H                               | 2029.23935 | 2 | 7.84E-06 | 0.98  | 5.86   | -     | 2326.9  |
| AHQ-8-13-, 6206              | K.GHYTEGALIENLVVVR.H                               | 2029.23935 | 2 | 1.36E-07 | 0.98  | 5.75   | -     | 2193.0  |
| AHQ-8-13-, 6202 - 6204       | K.GHYTEGALIENLVVVR.H                               | 2029.23935 | 3 | 1.14E-04 | 0.86  | 4.60   | -     | 922.3   |
| AHQ-8-7, 6180                | K.GHYTEGALIENLVVVR.H                               | 2029.23935 | 3 | 1.98E-06 | 0.94  | 4.29   | -     | 2230.7  |
| AHQ-8-11, 6113               | K.GHYTEGALIENLVVVR.H                               | 2029.23935 | 3 | 5.26E-04 | 0.66  | 3.18   | -     | 963.1   |
| AHQ-8-8, 6395                | K.GHYTEGALIENLVVVR.H                               | 2029.23935 | 2 | 2.95E-05 | 0.98  | 5.84   | -     | 2227.9  |
| AHQ-8-8, 6151                | R.GLSM*AATFIGNNTAIQEIFNR.V                         | 2285.56551 | 2 | 1.50E-05 | 0.91  | 3.68   | -     | 1080.0  |
| AHQ-8-7, 5928 - 5968         | R.GLSM*AATFIGNNTAIQEIFNR.V                         | 2285.56551 | 3 | 5.64E-04 | 0.67  | 3.12   | -     | 945.2   |
| AHQ-8-14-, 5989 - 6034       | R.GLSM*AATFIGNNTAIQEIFNR.V                         | 2285.56551 | 2 | 1.11E-04 | 0.87  | 3.91   | -     | 743.8   |
| AHQ-8-14, 4090 - 4157        | R.ISVYNEAYGR.K                                     | 1335.44622 | 2 | 2.16E-06 | 0.63  | 2.75   | -     | 477.9   |
| AHQ-8-13-, 3276 - 3286       | R.ISVYNEAYGR.K                                     | 1335.44622 | 2 | 1.17E-07 | 0.94  | 3.70   | -     | 1081.3  |
| AHQ-8-8, 3169                | R.ISVYNEAYGR.K                                     | 1335.44622 | 2 | 3.04E-04 | 0.87  | 3.30   | -     | 672.8   |
| AHQ-8-7, 3148 - 3184         | R.ISVYNEAYGR.K                                     | 1335.44622 | 2 | 1.11E-05 | 0.90  | 3.05   | -     | 855.8   |
| AHQ-8-7, 4881                | K.LGALFPQDSFVHGNSGAGNNWAK.G                        | 2388.58260 | 3 | 4.80E-07 | 0.78  | 3.31   | -     | 669.8   |
| AHQ-8-13-, 4932 - 4998       | K.LGALFPQDSFVHGNSGAGNNWAK.G                        | 2388.58260 | 3 | 3.96E-07 | 0.78  | 3.26   | -     | 732.6   |
| AHQ-8-7, 4784                | K.LGALFPQDSFVHGNSGAGNNWAK.G                        | 2388.58260 | 3 | 8.37E-06 | 0.78  | 3.81   | -     | 661.7   |
| AHQ-8-8, 5619                | R.LHFFMPGFAPLTAQGSQQYR.A                           | 2297.62284 | 3 | 9.87E-06 | 0.96  | 5.13   | -     | 1484.3  |
| AHQ-8-7, 5452 - 5482         | R.LHFFMPGFAPLTAQGSQQYR.A                           | 2297.62284 | 3 | 5.79E-09 | 0.98  | 6.08   | -     | 2271.8  |
| AHQ-8-7, 5466                | R.LHFFMPGFAPLTAQGSQQYR.A                           | 2297.62284 | 2 | 6.33E-05 | 0.95  | 4.70   | -     | 801.8   |
| AHQ-8-7, 4866 - 4890         | R.LHFFMPGFAPLTAQGSQQYR.A                           | 2313.62224 | 3 | 4.45E-13 | 0.98  | 6.36   | -     | 2720.2  |
| AHQ-8-7, 6062 - 6117         | K.LTTPTYGDLNHLVSLTM*SGITSLR.F                      | 2709.06919 | 3 | 2.80E-08 | 0.79  | 3.40   | -     | 559.5   |
| AHQ-8-8, 6317                | K.LTTPTYGDLNHLVSLTM*SGITSLR.F                      | 2709.06919 | 3 | 4.54E-07 | 0.85  | 3.70   | -     | 1006.3  |
| AHQ-8-7, 4956 - 5028         | R.NSSCFVEWIPNVK.V                                  | 1695.87718 | 2 | 1.59E-04 | 0.74  | 3.69   | -     | 361.5   |
| AHQ-8-7, 4940                | R.YLTVACIFR.G                                      | 1144.36822 | 2 | 2.90E-04 | 0.79  | 2.73   | -     | 654.6   |
| gj 4501885[ref NP_001092.1]  | beta actin; beta cytoskeletal actin [Homo sapiens] |            |   | 4.57E-13 | 13.36 | 150.33 | 36.00 | 41736.5 |
| AHQ-8-8, 6301 - 6358         | R.CPEALFQPSFLGM*ESCGIHETTFNSIMK.C                  | 3251.67648 | 3 | 1.37E-06 | 0.72  | 4.34   | -     | 471.6   |
| AHQ-8-13-, 5983 - 6052       | R.CPEALFQPSFLGM*ESCGIHETTFNSIMK.C                  | 3251.67648 | 3 | 1.96E-05 | 0.84  | 4.64   | -     | 647.6   |
| AHQ-8-8, 5841 - 5913         | R.CPEALFQPSFLGM*ESCGIHETTFNSIMK.C                  | 3267.67588 | 3 | 2.74E-04 | 0.91  | 4.45   | -     | 681.7   |
| AHQ-8-8, 6165 - 6246         | R.CPEALFQPSFLGMESCGIHETTFNSIMK.C                   | 3251.67648 | 3 | 9.27E-05 | 0.75  | 4.32   | -     | 383.4   |
| AHQ-8-8, 6413                | R.CPEALFQPSFLGMESCGIHETTFNSIMK.C                   | 3235.67708 | 3 | 5.43E-07 | 0.88  | 4.17   | -     | 539.0   |
| AHQ-8-13, 5752 - 5809        | R.CPEALFQPSFLGM*ESCGIHETTFNSIMK.C                  | 3267.67588 | 3 | 3.14E-07 | 0.88  | 4.38   | -     | 544.5   |
| AHQ-8-8, 6409 - 6469         | K.EKLCYVALDFEQEMATAASSSSLEK.S                      | 2810.10410 | 2 | 2.64E-05 | 0.90  | 4.11   | -     | 686.7   |
| AHQ-8-8, 6481 - 6542         | K.EKLCYVALDFEQEMATAASSSSLEK.S                      | 2810.10410 | 3 | 5.83E-07 | 0.94  | 5.12   | -     | 1423.7  |
| AHQ-8-8, 6506 - 6573         | K.EKLCYVALDFEQEMATAASSSSLEK.S                      | 2826.10350 | 3 | 3.52E-06 | 0.90  | 4.14   | -     | 1041.0  |
| AHQ-8-8, 6363 - 6421         | K.EKLCYVALDFEQEMATAASSSSLEK.S                      | 2810.10410 | 3 | 3.38E-06 | 0.93  | 5.19   | -     | 1154.6  |
| AHQ-8-8, 5238 - 5305         | K.EKLCYVALDFEQEMATAASSSSLEK.S                      | 2826.10350 | 3 | 2.42E-06 | 0.91  | 4.18   | -     | 1203.0  |
| AHQ-8-8, 6602 - 6663         | K.EKLCYVALDFEQEMATAASSSSLEK.S                      | 2810.10410 | 3 | 1.40E-08 | 0.93  | 5.04   | -     | 946.6   |
| AHQ-8-8, 6633                | K.EKLCYVALDFEQEMATAASSSSLEK.S                      | 2826.10350 | 3 | 1.79E-05 | 0.91  | 4.10   | -     | 1308.4  |
| AHQ-8-8, 6261 - 6329         | K.EKLCYVALDFEQEMATAASSSSLEK.S                      | 2826.10350 | 3 | 2.61E-05 | 0.74  | 3.48   | -     | 718.1   |
| AHQ-8-8, 5763 - 5877         | R.FRCPREALFQPSFLGM*ESCGIHETTFNSIMK.C               | 3571.03693 | 3 | 9.15E-04 | 0.79  | 3.44   | -     | 659.8   |
| AHQ-8-8, 2462 - 2523         | R.GYSFTTTAER.E                                     | 1133.19273 | 2 | 4.19E-04 | 0.84  | 2.95   | -     | 1020.0  |
| AHQ-8-4, 2593                | R.GYSFTTTAER.E                                     | 1133.19273 | 2 | 2.03E-04 | 0.87  | 2.74   | -     | 955.7   |
| AHQ-8-9, 6555                | R.GYSFTTTAER.E                                     | 1133.19273 | 2 | 2.90E-04 | 0.91  | 2.74   | -     | 1290.8  |
| AHQ-8-10, 2486 - 2543        | R.GYSFTTTAER.E                                     | 1133.19273 | 2 | 6.59E-06 | 0.92  | 3.33   | -     | 1116.9  |
| AHQ-8-3, 2641                | R.GYSFTTTAER.E                                     | 1133.19273 | 2 | 8.74E-04 | 0.90  | 3.08   | -     | 995.1   |
| AHQ-8-13-, 2676 - 2738       | R.GYSFTTTAER.E                                     | 1133.19273 | 2 | 1.77E-05 | 0.90  | 3.33   | -     | 909.1   |
| AHQ-8-8, 2585 - 2654         | R.GYSFTTTAER.E                                     | 1133.19273 | 2 | 1.47E-04 | 0.91  | 3.30   | -     | 1070.2  |

|                           |                                          |            |       |          |       |          |   |        |
|---------------------------|------------------------------------------|------------|-------|----------|-------|----------|---|--------|
| AHQ-8-11, 2579            | R.GYSFTTAE.R.E                           | 1133.19273 | 2     | 6.29E-05 | 0.88  | 2.78     | - | 1118.7 |
| AHQ-8-8, 4753 - 4755      | R.KDLYANTVLSGGTTMYPGIADR.M               | 2344.62976 | 3     | 1.65E-07 | 0.95  | 5.27     | - | 1515.3 |
| AHQ-8-8, 4691 - 4758      | R.KDLYANTVLSGGTTMYPGIADR.M               | 2344.62976 | 2     | 8.88E-10 | 0.96  | 4.72     | - | 1437.1 |
| AHQ-8-8, 4325 - 4386      | R.KDLYANTVLSGGTTMYPGIADR.M               | 2360.62916 | 2     | 8.50E-05 | 0.95  | 4.31     | - | 1210.9 |
| AHQ-8-8, 4471 - 4534      | R.KDLYANTVLSGGTTMYPGIADR.M               | 2344.62976 | 3     | 2.12E-05 | 0.95  | 5.22     | - | 1368.2 |
| AHQ-8-8, 4602             | R.KDLYANTVLSGGTTMYPGIADR.M               | 2344.62976 | 2     | 3.17E-08 | 0.94  | 4.43     | - | 1001.4 |
| AHQ-8-8, 4473 - 4533      | R.KDLYANTVLSGGTTMYPGIADR.M               | 2344.62976 | 2     | 7.12E-05 | 0.95  | 4.22     | - | 1202.2 |
| AHQ-8-13-, 4147 - 4202    | R.KDLYANTVLSGGTTMYPGIADR.M               | 2360.62916 | 3     | 1.11E-06 | 0.95  | 4.69     | - | 1430.5 |
| AHQ-8-8, 6393 - 6457      | K.LCYVALDFEQEMATAAASSSSLEK.S             | 2552.81665 | 2     | 4.50E-07 | 0.87  | 3.99     | - | 1022.6 |
| AHQ-8-8, 5698 - 5777      | K.LCYVALDFEQEMATAAASSSSLEK.S             | 2568.81605 | 2     | 3.64E-06 | 0.95  | 4.72     | - | 941.3  |
| AHQ-8-8, 6557 - 6614      | K.LCYVALDFEQEMATAAASSSSLEK.S             | 2552.81665 | 3     | 6.23E-07 | 0.96  | 6.61     | - | 1515.6 |
| AHQ-8-8, 6513 - 6541      | K.LCYVALDFEQEMATAAASSSSLEK.S             | 2568.81605 | 2     | 9.96E-09 | 0.97  | 5.11     | - | 1690.3 |
| AHQ-8-8, 5378 - 5446      | K.LCYVALDFEQEMATAAASSSSLEK.S             | 2568.81605 | 2     | 8.86E-04 | 0.80  | 3.10     | - | 1079.9 |
| AHQ-8-8, 5786 - 5850      | K.LCYVALDFEQEMATAAASSSSLEK.S             | 2568.81605 | 2     | 1.91E-05 | 0.89  | 3.73     | - | 1065.4 |
| AHQ-8-8, 6617 - 6673      | K.LCYVALDFEQEMATAAASSSSLEK.S             | 2568.81605 | 3     | 4.57E-13 | 0.98  | 6.28     | - | 2082.2 |
| AHQ-8-8, 6077 - 6133      | K.LCYVALDFEQEMATAAASSSSLEK.S             | 2568.81605 | 2     | 6.20E-05 | 0.88  | 3.68     | - | 1034.2 |
| AHQ-8-8, 6081 - 6145      | K.LCYVALDFEQEMATAAASSSSLEK.S             | 2568.81605 | 3     | 1.43E-04 | 0.86  | 3.32     | - | 1706.3 |
| AHQ-8-8, 6626 - 6658      | K.LCYVALDFEQEMATAAASSSSLEK.S             | 2568.81605 | 2     | 3.45E-09 | 0.98  | 5.51     | - | 2389.1 |
| AHQ-8-8, 6315 - 6369      | K.LCYVALDFEQEMATAAASSSSLEK.S             | 2568.81605 | 2     | 7.16E-06 | 0.88  | 3.49     | - | 991.5  |
| AHQ-8-8, 6202 - 6257      | K.LCYVALDFEQEMATAAASSSSLEK.S             | 2568.81605 | 3     | 2.27E-04 | 0.95  | 4.56     | - | 1810.1 |
| AHQ-8-8, 6670             | K.LCYVALDFEQEMATAAASSSSLEK.S             | 2552.81665 | 3     | 1.78E-04 | 0.84  | 3.37     | - | 1276.4 |
| AHQ-8-8, 6525 - 6558      | K.LCYVALDFEQEMATAAASSSSLEK.S             | 2568.81605 | 3     | 1.65E-04 | 0.95  | 4.28     | - | 1980.2 |
| AHQ-8-8, 6194 - 6258      | K.LCYVALDFEQEMATAAASSSSLEK.S             | 2568.81605 | 2     | 9.53E-08 | 0.92  | 4.27     | - | 1062.0 |
| AHQ-8-8, 5771             | R.TTGIVMDSGGDVHTVPIYEGYALPHAILR.L        | 3185.59928 | 3     | 2.34E-06 | 0.96  | 5.45     | - | 1345.7 |
| AHQ-8-8, 5670 - 5726      | R.TTGIVMDSGGDVHTVPIYEGYALPHAILR.L        | 3185.59928 | 3     | 2.68E-08 | 0.96  | 5.86     | - | 1075.5 |
| AHQ-8-8, 5547 - 5613      | R.TTGIVMDSGGDVHTVPIYEGYALPHAILR.L        | 3185.59928 | 3     | 1.42E-05 | 0.95  | 5.60     | - | 966.9  |
| AHQ-8-8, 5470 - 5529      | R.TTGIVMDSGGDVHTVPIYEGYALPHAILR.L        | 3201.59868 | 3     | 2.34E-04 | 0.77  | 4.06     | - | 634.5  |
| AHQ-8-8, 5450 - 5513      | R.TTGIVMDSGGDVHTVPIYEGYALPHAILR.L        | 3185.59928 | 3     | 1.77E-08 | 0.97  | 5.92     | - | 1639.6 |
| AHQ-8-8, 5410 - 5439      | R.TTGIVMDSGGDVHTVPIYEGYALPHAILR.L        | 3201.59868 | 3     | 5.01E-04 | 0.91  | 4.71     | - | 776.6  |
| AHQ-8-8, 5291 - 5349      | R.TTGIVMDSGGDVHTVPIYEGYALPHAILR.L        | 3201.59868 | 3     | 2.83E-07 | 0.97  | 5.73     | - | 2281.1 |
| AHQ-8-8, 5122 - 5194      | R.TTGIVMDSGGDVHTVPIYEGYALPHAILR.L        | 3201.59868 | 3     | 1.08E-04 | 0.80  | 4.20     | - | 349.5  |
| AHQ-8-12, 5330 - 5387     | R.TTGIVMDSGGDVHTVPIYEGYALPHAILR.L        | 3185.59928 | 3     | 2.10E-04 | 0.89  | 4.36     | - | 1142.3 |
| AHQ-8-7, 5357 - 5413      | R.TTGIVMDSGGDVHTVPIYEGYALPHAILR.L        | 3185.59928 | 3     | 5.90E-06 | 0.95  | 4.97     | - | 1376.9 |
| AHQ-8-5, 5256 - 5318      | R.TTGIVMDSGGDVHTVPIYEGYALPHAILR.L        | 3201.59868 | 3     | 4.74E-05 | 0.64  | 3.12     | - | 643.2  |
| AHQ-8-4, 5590             | R.TTGIVMDSGGDVHTVPIYEGYALPHAILR.L        | 3185.59928 | 3     | 9.29E-07 | 0.91  | 4.56     | - | 1073.0 |
| AHQ-8-4, 5349 - 5410      | R.TTGIVMDSGGDVHTVPIYEGYALPHAILR.L        | 3201.59868 | 3     | 2.87E-07 | 0.96  | 5.80     | - | 1304.2 |
| AHQ-8-13-, 5183 - 5248    | R.TTGIVMDSGGDVHTVPIYEGYALPHAILR.L        | 3201.59868 | 3     | 4.80E-06 | 0.94  | 5.35     | - | 977.2  |
| AHQ-8-3, 5280             | R.TTGIVMDSGGDVHTVPIYEGYALPHAILR.L        | 3201.59868 | 3     | 2.45E-07 | 0.94  | 4.73     | - | 1246.3 |
| AHQ-8-12, 5103 - 5158     | R.TTGIVMDSGGDVHTVPIYEGYALPHAILR.L        | 3201.59868 | 3     | 8.49E-07 | 0.94  | 5.31     | - | 1125.5 |
| AHQ-8-13-, 5398           | R.TTGIVMDSGGDVHTVPIYEGYALPHAILR.L        | 3185.59928 | 3     | 9.67E-06 | 0.91  | 4.31     | - | 1140.5 |
| AHQ-8-11, 5096 - 5152     | R.TTGIVMDSGGDVHTVPIYEGYALPHAILR.L        | 3201.59868 | 3     | 3.79E-05 | 0.94  | 5.29     | - | 1036.4 |
| AHQ-8-10, 5010 - 5066     | R.TTGIVMDSGGDVHTVPIYEGYALPHAILR.L        | 3201.59868 | 3     | 3.37E-04 | 0.96  | 5.61     | - | 1554.3 |
| AHQ-8-14-, 5183           | R.TTGIVMDSGGDVHTVPIYEGYALPHAILR.L        | 3201.59868 | 3     | 3.31E-04 | 0.96  | 4.94     | - | 1651.4 |
| AHQ-8-11, 3811            | R.VAPEEHPVLLTEAPLNP.K.A                  | 1955.24351 | 2     | 2.74E-04 | 0.87  | 3.67     | - | 671.2  |
| AHQ-8-10, 3734            | R.VAPEEHPVLLTEAPLNP.K.A                  | 1955.24351 | 2     | 3.47E-04 | 0.83  | 3.42     | - | 475.4  |
| AHQ-8-12, 3756 - 3822     | R.VAPEEHPVLLTEAPLNP.K.A                  | 1955.24351 | 3     | 3.66E-06 | 0.82  | 4.22     | - | 746.4  |
| AHQ-8-12, 3810 - 3880     | R.VAPEEHPVLLTEAPLNP.K.A                  | 1955.24351 | 2     | 9.55E-05 | 0.91  | 4.31     | - | 817.3  |
| AHQ-8-9, 6671 - 6672      | R.VAPEEHPVLLTEAPLNP.K.A                  | 1955.24351 | 2     | 8.45E-05 | 0.95  | 4.83     | - | 1071.7 |
| AHQ-8-8, 3797 - 3877      | R.VAPEEHPVLLTEAPLNP.K.A                  | 1955.24351 | 2     | 5.18E-04 | 0.89  | 5.05     | - | 517.7  |
| AHQ-8-8, 3658 - 3754      | R.VAPEEHPVLLTEAPLNP.K.A                  | 1955.24351 | 2     | 4.20E-06 | 0.88  | 3.80     | - | 671.2  |
| AHQ-8-7, 3786             | R.VAPEEHPVLLTEAPLNP.K.A                  | 1955.24351 | 2     | 9.81E-05 | 0.85  | 4.13     | - | 556.2  |
| AHQ-8-13-, 3915           | R.VAPEEHPVLLTEAPLNP.K.A                  | 1955.24351 | 2     | 2.08E-07 | 0.87  | 4.13     | - | 582.9  |
| AHQ-8-6, 3839 - 3850      | R.VAPEEHPVLLTEAPLNP.K.A                  | 1955.24351 | 2     | 2.86E-04 | 0.90  | 4.36     | - | 718.6  |
| AHQ-8-4, 3882 - 3941      | R.VAPEEHPVLLTEAPLNP.K.A                  | 1955.24351 | 2     | 5.82E-06 | 0.92  | 4.81     | - | 672.6  |
| AHQ-8-3, 3937 - 3954      | R.VAPEEHPVLLTEAPLNP.K.A                  | 1955.24351 | 2     | 5.52E-04 | 0.92  | 4.50     | - | 846.7  |
| AHQ-8-2, 4013 - 4028      | R.VAPEEHPVLLTEAPLNP.K.A                  | 1955.24351 | 2     | 3.75E-04 | 0.86  | 4.24     | - | 439.2  |
| AHQ-8-14-, 3885           | R.VAPEEHPVLLTEAPLNP.K.A                  | 1955.24351 | 2     | 3.91E-08 | 0.91  | 4.19     | - | 1032.3 |
| AHQ-8-1, 4100             | R.VAPEEHPVLLTEAPLNP.K.A                  | 1955.24351 | 2     | 3.53E-04 | 0.84  | 3.95     | - | 663.7  |
| gl4501891 ref NP_001093.1 | actinin, alpha 1 [Homo sapiens]          | 4.86E-13   | 34.32 | 390.37   | 48.10 | 103056.9 |   |        |
| AHQ-8-5, 6492 - 6493      | R.AAFPNNWMEGAM*EDLQDTFVHTIEEQGLTAEHQFK.A | 4396.81902 | 3     | 6.30E-08 | 0.97  | 6.11     | - | 1580.1 |
| AHQ-8-5, 5176             | K.AGTQIENIEDFRDGLK.L                     | 1936.06918 | 2     | 6.55E-07 | 0.82  | 4.41     | - | 745.7  |
| AHQ-8-4, 5214             | K.AGTQIENIEDFRDGLK.L                     | 1936.06918 | 2     | 4.10E-06 | 0.85  | 4.41     | - | 887.8  |
| AHQ-8-4, 6070             | K.AIMTYVSSFYHAFSGAQK.A                   | 2009.27323 | 2     | 1.56E-08 | 0.95  | 4.59     | - | 1119.7 |
| AHQ-8-5, 6026             | K.AIMTYVSSFYHAFSGAQK.A                   | 2009.27323 | 3     | 1.28E-06 | 0.65  | 3.14     | - | 606.9  |
| AHQ-8-4, 6067             | K.AIMTYVSSFYHAFSGAQK.A                   | 2009.27323 | 3     | 6.61E-05 | 0.76  | 3.46     | - | 830.0  |
| AHQ-8-4, 5407 - 5467      | K.AIMTYVSSFYHAFSGAQK.A                   | 2025.27263 | 3     | 2.78E-06 | 0.83  | 3.44     | - | 788.1  |
| AHQ-8-6, 5940 - 6010      | K.AIMTYVSSFYHAFSGAQK.A                   | 2009.27323 | 2     | 6.74E-05 | 0.66  | 3.34     | - | 384.6  |
| AHQ-8-6, 5943 - 5944      | K.AIMTYVSSFYHAFSGAQK.A                   | 2009.27323 | 3     | 3.52E-06 | 0.70  | 3.31     | - | 630.7  |
| AHQ-8-4, 3438             | R.ASFNFHFRDHSGLGPEEFK.A                  | 2292.40855 | 3     | 7.51E-04 | 0.96  | 4.20     | - | 2642.2 |
| AHQ-8-4, 2329             | K.ASIEHAWTDGK.E                          | 1215.29697 | 2     | 1.66E-04 | 0.80  | 2.89     | - | 787.8  |
| AHQ-8-4, 2339 - 2346      | K.ASIEHAWTDGK.E                          | 1215.29697 | 1     | 1.64E-06 | 0.70  | 2.67     | - | 763.5  |
| AHQ-8-3, 5313             | K.DDPLTNLNTAFDVAEK.Y                     | 1763.88340 | 2     | 1.04E-04 | 0.74  | 2.91     | - | 528.9  |
| AHQ-8-4, 5758             | K.DDPLTNLNTAFDVAEK.Y                     | 1763.88340 | 2     | 5.03E-04 | 0.60  | 2.92     | - | 389.7  |
| AHQ-8-5, 5322             | K.DDPLTNLNTAFDVAEK.Y                     | 1763.88340 | 2     | 3.78E-07 | 0.95  | 4.51     | - | 1153.0 |
| AHQ-8-4, 5323 - 5382      | K.DDPLTNLNTAFDVAEK.Y                     | 1763.88340 | 2     | 5.59E-08 | 0.95  | 4.71     | - | 1055.3 |
| AHQ-8-6, 5234             | K.DDPLTNLNTAFDVAEK.Y                     | 1763.88340 | 2     | 5.22E-06 | 0.89  | 3.49     | - | 967.9  |
| AHQ-8-7, 5169             | K.DDPLTNLNTAFDVAEK.Y                     | 1763.88340 | 2     | 1.10E-04 | 0.62  | 3.22     | - | 422.4  |
| AHQ-8-5, 2612             | R.DHSGLTGPPEEFK.A                        | 1317.38606 | 2     | 2.26E-09 | 0.78  | 3.01     | - | 633.4  |
| AHQ-8-4, 2590 - 2602      | R.DHSGLTGPPEEFK.A                        | 1317.38606 | 2     | 5.48E-06 | 0.89  | 3.43     | - | 885.8  |
| AHQ-8-7, 3597             | K.DYETATLSEIK.A                          | 1270.36761 | 2     | 5.15E-05 | 0.88  | 2.82     | - | 1304.1 |
| AHQ-8-4, 3702             | K.DYETATLSEIK.A                          | 1270.36761 | 2     | 6.00E-07 | 0.92  | 3.60     | - | 1102.8 |
| AHQ-8-4, 3481 - 3541      | R.ELPPDOAEYCIAR.M                        | 1563.71392 | 2     | 3.11E-09 | 0.87  | 2.98     | - | 428.8  |
| AHQ-8-4, 3355 - 3418      | R.ELPPDOAEYCIAR.M                        | 1563.71392 | 2     | 1.56E-05 | 0.59  | 2.91     | - | 137.3  |
| AHQ-8-6, 3160             | R.ETADTDADQVM*ASF.K.I                    | 1746.83148 | 2     | 2.59E-06 | 0.93  | 4.42     | - | 782.0  |
| AHQ-8-13, 3376            | R.ETADTDADQVM*ASF.K.I                    | 1746.83148 | 2     | 6.59E-04 | 0.81  | 3.19     | - | 745.2  |
| AHQ-8-13-, 4282           | R.ETADTDADQVM*ASF.K.I                    | 1730.83208 | 2     | 3.57E-04 | 0.74  | 3.09     | - | 557.9  |
| AHQ-8-4, 4265 - 4313      | R.ETADTDADQVM*ASF.K.I                    | 1730.83208 | 2     | 6.23E-05 | 0.95  | 4.13     | - | 1323.8 |
| AHQ-8-4, 3181             | R.ETADTDADQVM*ASF.K.I                    | 1746.83148 | 2     | 7.13E-06 | 0.92  | 4.31     | - | 811.6  |
| AHQ-8-5, 3181             | R.ETADTDADQVM*ASF.K.I                    | 1746.83148 | 2     | 2.94E-07 | 0.95  | 4.66     | - | 1045.6 |
| AHQ-8-6, 2330             | K.GISQEQM*NEFR.A                         | 1355.45931 | 2     | 6.87E-05 | 0.76  | 3.31     | - | 526.4  |
| AHQ-8-4, 2713             | K.GISQEQM*NEFR.A                         | 1339.45991 | 2     | 1.73E-08 | 0.92  | 3.53     | - | 1058.0 |
| AHQ-8-6, 3012             | K.GISQEQM*NEFR.A                         | 1339.45991 | 2     | 4.65E-07 | 0.89  | 3.14     | - | 951.4  |
| AHQ-8-4, 2319             | K.GISQEQM*NEFR.A                         | 1355.45931 | 2     | 5.48E-06 | 0.83  | 2.89     | - | 791.9  |
| AHQ-8-5, 3016 - 3017      | K.GISQEQM*NEFR.A                         | 1339.45991 | 2     | 6.02E-05 | 0.84  | 3.12     | - | 850.2  |
| AHQ-8-7, 2902 - 2962      | K.GISQEQM*NEFR.A                         | 1339.45991 | 2     | 3.27E-08 | 0.91  | 3.29     | - | 1208.0 |
| AHQ-8-5, 2332             | K.GISQEQM*NEFR.A                         | 1355.45931 | 2     | 7.65E-06 | 0.78  | 3.02     | - | 561.2  |
| AHQ-8-4, 2403             | K.GISQEQM*NEFR.A                         | 1355.45931 | 2     | 6.78E-04 | 0.86  | 2.86     | - | 1002.4 |
| AHQ-8-11, 2340            | K.GISQEQM*NEFR.A                         | 1355.45931 | 2     | 9.79E-07 | 0.77  | 2.52     | - | 810.8  |
| AHQ-8-4, 3171             | K.GISQEQM*NEFR.A                         | 1339.45991 | 2     | 3.30E-06 | 0.82  | 3.04     | - | 837.1  |
| AHQ-8-4, 3017             | K.GISQEQM*NEFR.A                         | 1339.45991 | 2     | 2.65E-07 | 0.91  | 3.70     | - | 1033.0 |
| AHQ-8-4, 2257             | R.HRPELIDYDK.L                           | 1228.38202 | 3     | 5.45E-05 | 0.94  | 3.80     | - | 1341.5 |
| AHQ-8-5, 2290             | R.HRPELIDYDK.L                           | 1228.38202 | 2     | 7.77E-04 | 0.82  | 2.61     | - | 702.4  |
| AHQ-8-7, 2245             | R.HRPELIDYDK.L                           | 1228.38202 | 2     | 3.01E-05 | 0.92  | 3.17     | - | 866.3  |
| AHQ-8-4, 2253             | R.HRPELIDYDK.L                           | 1228.38202 | 2     | 4.94E-04 | 0.93  | 3.68     | - | 747.7  |
| AHQ-8-4, 4435 - 4515      | K.ICDQWDLNGLALTQK.R                      | 1663.83349 | 2     | 1.15E-04 | 0.95  | 4.43     | - | 1336.7 |
| AHQ-8-4, 4609             | K.ICDQWDLNGLALTQK.R                      | 1663.83349 | 2     | 2.14E-05 | 0.88  | 3.41     | - | 1123.0 |
| AHQ-8-6, 4632             | K.ICDQWDLNGLALTQK.R                      | 1663.83349 | 2     | 4.30E-09 | 0.95  | 3.86     | - | 1540.3 |

|                           |                                                                 |            |   |          |       |        |       |         |
|---------------------------|-----------------------------------------------------------------|------------|---|----------|-------|--------|-------|---------|
| AHQ-8-4, 4713 - 4753      | K.ICDQWDNLGALTQK.R                                              | 1663.83349 | 2 | 6.36E-07 | 0.98  | 4.75   | -     | 2471.1  |
| AHQ-8-5, 4701 - 4717      | K.ICDQWDNLGALTQK.R                                              | 1663.83349 | 2 | 1.31E-05 | 0.90  | 3.42   | -     | 1172.2  |
| AHQ-8-7, 4565             | K.ICDQWDNLGALTQK.R                                              | 1663.83349 | 2 | 1.79E-05 | 0.95  | 4.08   | -     | 1590.5  |
| AHQ-8-4, 5545 - 5605      | K.IDQLEGDGHQIQEALIFDNK.H                                        | 2340.57447 | 2 | 3.06E-08 | 0.96  | 4.84   | -     | 1395.2  |
| AHQ-8-4, 5458             | K.IDQLEGDGHQIQEALIFDNK.H                                        | 2340.57447 | 3 | 8.73E-10 | 0.96  | 5.70   | -     | 1609.6  |
| AHQ-8-7, 5373 - 5389      | K.IDQLEGDGHQIQEALIFDNK.H                                        | 2340.57447 | 3 | 6.47E-05 | 0.91  | 4.28   | -     | 1076.6  |
| AHQ-8-5, 5556 - 5560      | K.IDQLEGDGHQIQEALIFDNK.H                                        | 2340.57447 | 3 | 8.93E-06 | 0.95  | 5.44   | -     | 1394.7  |
| AHQ-8-6, 5458             | K.IDQLEGDGHQIQEALIFDNK.H                                        | 2340.57447 | 2 | 4.11E-06 | 0.75  | 2.66   | -     | 809.1   |
| AHQ-8-4, 4101             | K.ILAGDKNYITMDEL.R                                              | 1753.01353 | 2 | 1.04E-08 | 0.96  | 4.20   | -     | 1253.3  |
| AHQ-8-4, 4227             | K.ILAGDKNYITMDEL.R                                              | 1753.01353 | 2 | 2.30E-06 | 0.91  | 4.34   | -     | 636.4   |
| AHQ-8-4, 3527             | K.ILAGDKNYITM*DEL.R                                             | 1769.01293 | 2 | 5.22E-04 | 0.95  | 4.82   | -     | 787.3   |
| AHQ-8-4, 3554             | K.ILAGDKNYITM*DEL.R                                             | 1769.01293 | 3 | 1.37E-06 | 0.75  | 3.48   | -     | 575.6   |
| AHQ-8-4, 4495             | K.IVQYTHVNMAGTNPYTTITPQEINGK.W                                  | 2892.23635 | 3 | 1.08E-05 | 0.90  | 4.38   | -     | 850.0   |
| AHQ-8-6, 4714             | R.KAGTQIENIEEDFRDGLK.L                                          | 2064.24210 | 3 | 1.34E-05 | 0.91  | 4.46   | -     | 1018.9  |
| AHQ-8-4, 4770             | R.KDDPLTNLNTAFDVAEK.Y                                           | 1892.05631 | 2 | 1.34E-05 | 0.97  | 5.20   | -     | 1486.4  |
| AHQ-8-5, 4764             | R.KDDPLTNLNTAFDVAEK.Y                                           | 1892.05631 | 2 | 4.32E-04 | 0.94  | 4.68   | -     | 901.0   |
| AHQ-8-6, 4686             | R.KDDPLTNLNTAFDVAEK.Y                                           | 1892.05631 | 2 | 8.48E-06 | 0.94  | 4.68   | -     | 1051.1  |
| AHQ-8-4, 4357             | R.KQFGAQAQNVIGPWIQTK.M                                          | 1887.17410 | 3 | 2.33E-04 | 0.95  | 4.60   | -     | 1670.4  |
| AHQ-8-5, 4324 - 4340      | R.KQFGAQAQNVIGPWIQTK.M                                          | 1887.17410 | 2 | 3.82E-04 | 0.94  | 4.29   | -     | 1059.8  |
| AHQ-8-4, 3790 - 3847      | R.LAILGHNHNEVSK.I                                               | 1294.52505 | 2 | 7.26E-06 | 0.94  | 3.25   | -     | 1469.7  |
| AHQ-8-5, 3461             | R.LAILGHNHNEVSK.I                                               | 1294.52505 | 2 | 2.31E-08 | 0.95  | 3.47   | -     | 1290.7  |
| AHQ-8-4, 3690             | R.LAILGHNHNEVSK.I                                               | 1294.52505 | 2 | 3.28E-10 | 0.93  | 3.45   | -     | 1076.0  |
| AHQ-8-4, 5741             | K.LASDLEWIR.R                                                   | 1216.41115 | 1 | 8.76E-06 | 0.45  | 2.66   | -     | 302.9   |
| AHQ-8-6, 5595             | K.LASDLEWIR.R                                                   | 1216.41115 | 2 | 9.64E-08 | 0.96  | 3.91   | -     | 1629.9  |
| AHQ-8-7, 5536             | K.LASDLEWIR.R                                                   | 1216.41115 | 2 | 7.46E-07 | 0.95  | 3.77   | -     | 1545.6  |
| AHQ-8-4, 5729 - 5730      | K.LASDLEWIR.R                                                   | 1216.41115 | 2 | 7.56E-07 | 0.97  | 4.11   | -     | 1914.6  |
| AHQ-8-5, 5696             | K.LASDLEWIR.R                                                   | 1216.41115 | 2 | 4.54E-07 | 0.96  | 3.97   | -     | 1695.3  |
| AHQ-8-4, 6085 - 6158      | K.LLETIDQLYLEYAK.R                                              | 1712.96427 | 2 | 8.97E-06 | 0.96  | 4.77   | -     | 1103.2  |
| AHQ-8-7, 5821 - 5888      | K.LLETIDQLYLEYAK.R                                              | 1712.96427 | 2 | 3.55E-08 | 0.89  | 3.36   | -     | 984.0   |
| AHQ-8-4, 6094             | K.LLETIDQLYLEYAK.R                                              | 1712.96427 | 3 | 8.30E-07 | 0.97  | 5.45   | -     | 1434.7  |
| AHQ-8-4, 5159             | K.LLETIDQLYLEYAK.R                                              | 1712.96427 | 2 | 4.55E-06 | 0.89  | 3.76   | -     | 564.3   |
| AHQ-8-6, 5884 - 5939      | K.LLETIDQLYLEYAK.R                                              | 1712.96427 | 2 | 2.49E-05 | 0.95  | 4.10   | -     | 1099.1  |
| AHQ-8-5, 6041             | K.LLETIDQLYLEYAK.R                                              | 1712.96427 | 2 | 5.15E-10 | 0.97  | 4.79   | -     | 1354.3  |
| AHQ-8-3, 6016             | K.LLETIDQLYLEYAK.R                                              | 1712.96427 | 2 | 5.64E-06 | 0.92  | 3.58   | -     | 1096.7  |
| AHQ-8-4, 2753             | R.LSNRPAFMPSEGR.M                                               | 1462.65941 | 2 | 1.69E-04 | 0.80  | 3.64   | -     | 520.5   |
| AHQ-8-4, 2697 - 2770      | R.LSNRPAFMPSEGR.M                                               | 1462.65941 | 2 | 5.20E-05 | 0.79  | 3.17   | -     | 711.6   |
| AHQ-8-4, 2206 - 2278      | R.LSNRPAFMPSEGR.M                                               | 1478.65881 | 3 | 4.94E-04 | 0.69  | 3.35   | -     | 669.3   |
| AHQ-8-5, 3545             | K.M*LD AEDIVGTARPDEK.A                                          | 1776.94709 | 2 | 6.86E-05 | 0.80  | 3.40   | -     | 477.4   |
| AHQ-8-4, 3923             | K.M*LD AEDIVGTARPDEK.A                                          | 1760.94769 | 2 | 2.14E-05 | 0.66  | 3.12   | -     | 692.5   |
| AHQ-8-4, 3929             | K.M*LD AEDIVGTARPDEK.A                                          | 1760.94769 | 3 | 2.98E-06 | 0.70  | 3.66   | -     | 499.2   |
| AHQ-8-6, 3514 - 3590      | K.M*LD AEDIVGTARPDEK.A                                          | 1776.94709 | 2 | 4.03E-05 | 0.69  | 3.36   | -     | 400.3   |
| AHQ-8-4, 3566             | K.M*LD AEDIVGTARPDEK.A                                          | 1776.94709 | 2 | 7.72E-05 | 0.91  | 3.93   | -     | 814.6   |
| AHQ-8-5, 3922             | K.M*LD AEDIVGTARPDEK.A                                          | 1760.94769 | 2 | 8.66E-08 | 0.91  | 4.15   | -     | 976.5   |
| AHQ-8-4, 5147             | R.M*VSDINNAWGCLEQVEK.G                                          | 2011.22273 | 3 | 1.01E-04 | 0.93  | 4.82   | -     | 1140.0  |
| AHQ-8-4, 5305             | R.M*VSDINNAWGCLEQVEK.G                                          | 2011.22273 | 2 | 1.40E-05 | 0.86  | 3.29   | -     | 821.3   |
| AHQ-8-5, 5098             | R.M*VSDINNAWGCLEQVEK.G                                          | 2011.22273 | 2 | 1.16E-06 | 0.94  | 4.51   | -     | 917.6   |
| AHQ-8-6, 4796             | R.M*VSDINNAWGCLEQVEK.G                                          | 2011.22273 | 2 | 2.18E-05 | 0.61  | 3.15   | -     | 573.4   |
| AHQ-8-4, 5135 - 5138      | R.M*VSDINNAWGCLEQVEK.G                                          | 2011.22273 | 2 | 2.58E-10 | 0.97  | 5.21   | -     | 1371.6  |
| AHQ-8-6, 5018             | R.M*VSDINNAWGCLEQVEK.G                                          | 2011.22273 | 2 | 1.41E-04 | 0.95  | 4.44   | -     | 1071.1  |
| AHQ-8-4, 4666 - 4675      | K.NVNIQNFHISWK.D                                                | 1500.68583 | 2 | 2.51E-07 | 0.96  | 4.50   | -     | 1253.7  |
| AHQ-8-6, 4575             | K.NVNIQNFHISWK.D                                                | 1500.68583 | 2 | 4.89E-06 | 0.97  | 4.55   | -     | 1361.2  |
| AHQ-8-6, 4828             | K.QFGAQAQNVIGPWIQTK.M                                           | 1759.00118 | 2 | 1.41E-04 | 0.74  | 3.07   | -     | 697.8   |
| AHQ-8-4, 4925             | K.QFGAQAQNVIGPWIQTK.M                                           | 1759.00118 | 2 | 6.47E-05 | 0.88  | 3.78   | -     | 793.1   |
| AHQ-8-5, 3081             | R.QKDYETATLSEIK.A                                               | 1526.67030 | 2 | 7.73E-05 | 0.24  | 2.70   | -     | 171.2   |
| AHQ-8-6, 3088             | R.TINEVENQLTR.D                                                 | 1430.58898 | 2 | 5.07E-04 | 0.88  | 3.61   | -     | 745.3   |
| AHQ-8-4, 3486             | R.TINEVENQLTR.D                                                 | 1430.58898 | 2 | 7.08E-04 | 0.70  | 2.68   | -     | 511.1   |
| AHQ-8-5, 4001             | R.TINEVENQLTR.D                                                 | 1430.58898 | 2 | 1.68E-06 | 0.91  | 3.88   | -     | 1018.4  |
| AHQ-8-6, 3826 - 3827      | R.TINEVENQLTR.D                                                 | 1430.58898 | 2 | 5.19E-07 | 0.90  | 3.85   | -     | 905.1   |
| AHQ-8-4, 3902             | R.TINEVENQLTR.D                                                 | 1430.58898 | 1 | 5.31E-06 | 0.31  | 2.57   | -     | 219.6   |
| AHQ-8-7, 3889             | R.TINEVENQLTR.D                                                 | 1430.58898 | 2 | 7.93E-05 | 0.66  | 2.99   | -     | 493.3   |
| AHQ-8-4, 4018 - 4019      | R.TINEVENQLTR.D                                                 | 1430.58898 | 2 | 3.17E-05 | 0.91  | 3.91   | -     | 1012.7  |
| AHQ-8-5, 3105             | R.TINEVENQLTR.D                                                 | 1430.58898 | 2 | 5.32E-04 | 0.84  | 3.23   | -     | 764.2   |
| AHQ-8-4, 3885             | R.TINEVENQLTR.D                                                 | 1430.58898 | 2 | 3.76E-07 | 0.92  | 4.17   | -     | 968.1   |
| AHQ-8-5, 3874             | R.TINEVENQLTR.D                                                 | 1430.58898 | 2 | 1.99E-06 | 0.90  | 3.55   | -     | 956.1   |
| AHQ-8-3, 6281             | R.VEQIAAIAQELNELDYDPSVSNAR.C                                    | 2810.02233 | 3 | 1.78E-06 | 0.89  | 4.09   | -     | 828.4   |
| AHQ-8-5, 6313             | R.VEQIAAIAQELNELDYDPSVSNAR.C                                    | 2810.02233 | 3 | 4.70E-06 | 0.95  | 5.82   | -     | 1013.2  |
| AHQ-8-5, 6314 - 6316      | R.VEQIAAIAQELNELDYDPSVSNAR.C                                    | 2810.02233 | 2 | 5.89E-05 | 0.95  | 5.14   | -     | 1017.6  |
| AHQ-8-4, 6366 - 6367      | R.VEQIAAIAQELNELDYDPSVSNAR.C                                    | 2810.02233 | 2 | 5.23E-09 | 0.97  | 6.14   | -     | 1570.6  |
| AHQ-8-6, 6211             | R.VEQIAAIAQELNELDYDPSVSNAR.C                                    | 2810.02233 | 3 | 4.82E-11 | 0.98  | 7.46   | -     | 2765.3  |
| AHQ-8-7, 5996             | R.VGWEQLLTIAR.T                                                 | 1387.60894 | 2 | 8.06E-09 | 0.94  | 3.29   | -     | 1805.4  |
| AHQ-8-8, 6206             | R.VGWEQLLTIAR.T                                                 | 1387.60894 | 2 | 2.75E-07 | 0.96  | 4.25   | -     | 1504.9  |
| AHQ-8-6, 6063             | R.VGWEQLLTIAR.T                                                 | 1387.60894 | 2 | 5.67E-07 | 0.93  | 3.63   | -     | 1191.1  |
| AHQ-8-4, 6195 - 6266      | R.VGWEQLLTIAR.T                                                 | 1387.60894 | 2 | 7.20E-06 | 0.95  | 4.18   | -     | 1384.6  |
| AHQ-8-11, 5947            | R.VGWEQLLTIAR.T                                                 | 1387.60894 | 2 | 3.67E-04 | 0.70  | 2.79   | -     | 723.8   |
| AHQ-8-5, 6160 - 6168      | R.VGWEQLLTIAR.T                                                 | 1387.60894 | 2 | 2.67E-06 | 0.97  | 4.35   | -     | 1763.4  |
| AHQ-8-4, 3443 - 3505      | K.VLAVNQENEGQLM*EDYEK.L                                         | 2069.23575 | 2 | 8.14E-06 | 0.91  | 3.88   | -     | 781.1   |
| AHQ-8-4, 3565 - 3641      | K.VLAVNQENEGQLM*EDYEK.L                                         | 2069.23575 | 2 | 2.26E-09 | 0.97  | 5.31   | -     | 1355.7  |
| AHQ-8-4, 4541             | K.VLAVNQENEGQLM*EDYEK.L                                         | 2053.23635 | 2 | 2.09E-05 | 0.91  | 4.08   | -     | 668.4   |
| AHQ-8-7, 4028             | K.VLAVNQENEGQLM*EDYEK.L                                         | 2053.23635 | 2 | 2.09E-08 | 0.95  | 4.11   | -     | 1408.4  |
| AHQ-8-4, 3558             | K.VLAVNQENEGQLM*EDYEK.L                                         | 2069.23575 | 3 | 4.86E-13 | 0.97  | 6.21   | -     | 1726.2  |
| AHQ-8-5, 4330             | K.VLAVNQENEGQLM*EDYEK.L                                         | 2053.23635 | 2 | 1.53E-10 | 0.95  | 4.41   | -     | 1106.6  |
| AHQ-8-5, 4152             | K.VLAVNQENEGQLM*EDYEK.L                                         | 2053.23635 | 2 | 1.53E-06 | 0.96  | 5.40   | -     | 1146.1  |
| AHQ-8-5, 3589             | K.VLAVNQENEGQLM*EDYEK.L                                         | 2069.23575 | 3 | 1.24E-09 | 0.94  | 4.17   | -     | 1469.4  |
| AHQ-8-5, 3542 - 3553      | K.VLAVNQENEGQLM*EDYEK.L                                         | 2069.23575 | 2 | 2.13E-07 | 0.96  | 5.30   | -     | 1238.5  |
| AHQ-8-4, 4303 - 4365      | K.VLAVNQENEGQLM*EDYEK.L                                         | 2053.23635 | 2 | 3.00E-07 | 0.96  | 5.05   | -     | 1254.4  |
| AHQ-8-8, 4083 - 4111      | K.VLAVNQENEGQLM*EDYEK.L                                         | 2053.23635 | 2 | 7.66E-08 | 0.95  | 4.43   | -     | 1153.9  |
| AHQ-8-6, 3498             | K.VLAVNQENEGQLM*EDYEK.L                                         | 2069.23575 | 2 | 7.29E-06 | 0.97  | 5.18   | -     | 1542.5  |
| AHQ-8-4, 3723             | K.VLAVNQENEGQLM*EDYEK.L                                         | 2069.23575 | 2 | 6.33E-07 | 0.81  | 3.47   | -     | 816.3   |
| AHQ-8-4, 4126 - 4185      | K.VLAVNQENEGQLM*EDYEK.L                                         | 2053.23635 | 2 | 6.93E-07 | 0.97  | 5.56   | -     | 1387.6  |
| AHQ-8-6, 4043 - 4099      | K.VLAVNQENEGQLM*EDYEK.L                                         | 2053.23635 | 2 | 7.36E-06 | 0.96  | 5.46   | -     | 1128.9  |
| AHQ-8-2, 4240             | K.VLAVNQENEGQLM*EDYEK.L                                         | 2053.23635 | 2 | 1.13E-05 | 0.88  | 3.80   | -     | 811.2   |
| gj4502051 ref NP_000688.1 | arachidonate 12-lipoxygenase; 12(S)-lipoxygenase [Homo sapiens] |            |   | 5.70E-13 | 8.45  | 100.24 | 21.60 | 75721.8 |
| AHQ-8-6, 4607             | R.AAAQLTYCSLCPDLDLADR.G                                         | 2140.33708 | 2 | 5.42E-04 | 0.77  | 3.51   | -     | 271.6   |
| AHQ-8-6, 2470 - 2472      | K.AVSTGGGGHVKLLR.R                                              | 1352.52468 | 2 | 1.66E-10 | 0.88  | 3.16   | -     | 1075.0  |
| AHQ-8-6, 3703 - 3706      | K.EGLPLTIAADR.K                                                 | 1156.31411 | 2 | 3.60E-05 | 0.81  | 2.97   | -     | 651.2   |
| AHQ-8-6, 3126 - 3206      | R.EITVEGLCOAQDR.G                                               | 1520.64745 | 2 | 4.26E-04 | 0.86  | 3.07   | -     | 796.5   |
| AHQ-8-6, 3439             | K.GDPQLQAWCR.E                                                  | 1233.33558 | 2 | 1.46E-07 | 0.54  | 2.62   | -     | 339.7   |
| AHQ-8-6, 5232 - 5240      | R.GLLGLPGALYAHDLR.L                                             | 1637.90708 | 2 | 5.70E-13 | 0.95  | 4.72   | -     | 751.6   |
| AHQ-8-6, 4820             | R.ITVQGGACAEVAFPCYR.W                                           | 1999.25659 | 2 | 4.07E-05 | 0.91  | 3.49   | -     | 1247.9  |
| AHQ-8-6, 3671 - 3675      | R.LPGDNLDM*FKH.H                                                | 1365.53724 | 2 | 3.58E-05 | 0.94  | 4.31   | -     | 1026.5  |
| AHQ-8-6, 4551             | R.VATGAWLFGSGYNR.V                                              | 1529.68080 | 2 | 1.04E-04 | 0.90  | 3.92   | -     | 790.7   |
| AHQ-8-6, 4771             | R.WVQGEDLSLPEGTAR.L                                             | 1771.95190 | 2 | 7.19E-06 | 0.91  | 4.12   | -     | 749.4   |
| gj4827056 ref NP_005103.1 | WD repeat-containing protein 1 isoform 2 [Homo sapiens]         |            |   | 9.13E-13 | 12.24 | 140.31 | 50.20 | 58001.9 |
| AHQ-8-6, 4788 - 4806      | K.AHDGGIYASISWSPDSTHLLSASGDK.T                                  | 2586.75455 | 3 | 9.13E-13 | 0.97  | 6.21   | -     | 1282.6  |
| AHQ-8-8, 5347             | K.CFSIDNPGYEPVAVHPGGDTVAIGVGDGNVR.L                             | 3400.67708 | 3 | 1.54E-06 | 0.90  | 3.72   | -     | 1105.6  |
| AHQ-8-6, 4014             | R.FATASADGQIYVDGK.T                                             | 1720.86021 | 2 | 5.91E-04 | 0.81  | 3.08   | -     | 666.0   |
| AHQ-8-6, 3800 - 3864      | R.FATASADGQIYVDGK.T                                             | 1720.86021 | 2 | 1.79E-06 | 0.69  | 2.94   | -     | 767.8   |

|                             |                                                                        |            |       |          |       |          |   |        |
|-----------------------------|------------------------------------------------------------------------|------------|-------|----------|-------|----------|---|--------|
| AHQ-8-6, 5351               | K.FGAVFLWDSGSSVGEITGHNK.V                                              | 2209.40259 | 3     | 1.20E-09 | 0.87  | 4.13     | - | 679.5  |
| AHQ-8-6, 4420 - 4480        | K.GPVTDVAYSHDGAFLAVCDASK.V                                             | 2282.47194 | 3     | 4.29E-06 | 0.94  | 5.00     | - | 1117.7 |
| AHQ-8-6, 4434 - 4498        | K.GPVTDVAYSHDGAFLAVCDASK.V                                             | 2282.47194 | 2     | 3.12E-08 | 0.97  | 5.75     | - | 1575.3 |
| AHQ-8-6, 1951               | R.IAVVGEGR.E                                                           | 800.92621  | 2     | 9.06E-05 | 0.78  | 2.85     | - | 644.4  |
| AHQ-8-6, 2454               | K.IKIDIAWTEDESKR.I                                                     | 1462.63267 | 2     | 2.66E-06 | 0.91  | 3.68     | - | 922.8  |
| AHQ-8-6, 5318 - 5386        | R.LATGSDDDNCAAFFEGPPFK.F                                               | 2046.20216 | 2     | 1.83E-11 | 0.70  | 3.67     | - | 454.0  |
| AHQ-8-6, 5186 - 5262        | R.LATGSDDDNCAAFFEGPPFK.F                                               | 2046.20216 | 2     | 3.30E-10 | 0.94  | 4.98     | - | 963.4  |
| AHQ-8-6, 5092 - 5147        | R.LATGSDDDNCAAFFEGPPFK.F                                               | 2046.20216 | 2     | 1.55E-05 | 0.76  | 3.16     | - | 693.4  |
| AHQ-8-7, 5209               | R.LATGSDDDNCAAFFEGPPFK.F                                               | 2046.20216 | 2     | 3.77E-04 | 0.44  | 2.67     | - | 512.1  |
| AHQ-8-7, 5114 - 5129        | R.LATGSDDDNCAAFFEGPPFK.F                                               | 2046.20216 | 2     | 1.04E-06 | 0.89  | 3.77     | - | 957.4  |
| AHQ-8-6, 3930 - 3934        | R.LYSILGTTLLKDEGK.L                                                    | 1538.76736 | 2     | 4.14E-08 | 0.79  | 3.19     | - | 681.7  |
| AHQ-8-7, 3881 - 3946        | R.LYSILGTTLLKDEGK.L                                                    | 1538.76736 | 2     | 1.36E-04 | 0.75  | 3.10     | - | 583.3  |
| AHQ-8-6, 4160               | R.M*TVDESGQLLSCSMDDTV.R.Y                                              | 2162.36305 | 2     | 2.83E-04 | 0.95  | 4.43     | - | 934.4  |
| AHQ-8-6, 4212 - 4288        | R.NIDNPALADIYTEHAHQVVAK.Y                                              | 2419.67805 | 3     | 8.95E-05 | 0.86  | 3.88     | - | 595.6  |
| AHQ-8-6, 4218               | R.NIDNPALADIYTEHAHQVVAK.Y                                              | 2419.67805 | 2     | 2.11E-05 | 0.91  | 4.20     | - | 601.3  |
| AHQ-8-6, 2142               | K.SIQCCLTVHKNGGK.S                                                     | 1443.65418 | 2     | 1.07E-05 | 0.87  | 3.64     | - | 967.2  |
| AHQ-8-6, 4071 - 4079        | K.SYIYSGSHDGHINYWDSSETGENDSFAGK.G                                      | 3138.17570 | 3     | 2.06E-11 | 0.98  | 6.12     | - | 3013.7 |
| AHQ-8-6, 4163               | K.SYIYSGSHDGHINYWDSSETGENDSFAGK.G                                      | 3138.17570 | 3     | 7.32E-07 | 0.94  | 4.56     | - | 1187.3 |
| AHQ-8-5, 3896               | K.YAPSGFYIASGDVSGK.L                                                   | 1619.75589 | 2     | 2.64E-04 | 0.51  | 2.60     | - | 390.5  |
| AHQ-8-6, 3758 - 3830        | K.YAPSGFYIASGDVSGK.L                                                   | 1619.75589 | 2     | 5.98E-08 | 0.95  | 4.13     | - | 919.6  |
| AHQ-8-11, 3785 - 3791       | K.YAPSGFYIASGDVSGK.L                                                   | 1619.75589 | 2     | 1.26E-05 | 0.92  | 3.27     | - | 1111.7 |
| gj 16507237 ref NP_005338.1 | heat shock 70kDa protein 5 (glucose-regulated protein, 78kDa); BiP; he | 9.18E-13   | 9.52  | 110.26   | 23.90 | 7232.5   |   |        |
| AHQ-8-5, 4926               | R.AKFEELNMDLFR.S                                                       | 1513.74309 | 2     | 8.55E-04 | 0.79  | 2.58     | - | 793.0  |
| AHQ-8-5, 4174               | R.AKFEELNM*DLFR.S                                                      | 1529.74249 | 2     | 8.59E-05 | 0.74  | 3.17     | - | 550.7  |
| AHQ-8-5, 5592               | R.IEIESFYEGEDFSETLTRA                                                  | 2166.28328 | 2     | 5.42E-06 | 0.94  | 4.26     | - | 889.6  |
| AHQ-8-5, 4637               | K.IEWLESHQDADIEDFK.A                                                   | 1976.08864 | 3     | 3.21E-10 | 0.90  | 4.35     | - | 704.5  |
| AHQ-8-5, 4617               | K.IEWLESHQDADIEDFK.A                                                   | 1976.08864 | 2     | 1.26E-07 | 0.97  | 5.20     | - | 1715.6 |
| AHQ-8-5, 4397 - 4400        | R.IINEPTAAAIYGLDKR.E                                                   | 1817.07894 | 2     | 9.18E-13 | 0.89  | 4.27     | - | 1122.9 |
| AHQ-8-5, 3840 - 3849        | R.ITPSYVAFTPEGER.L                                                     | 1567.72412 | 2     | 7.27E-04 | 0.62  | 2.64     | - | 532.1  |
| AHQ-8-6, 3802               | R.ITPSYVAFTPEGER.L                                                     | 1567.72412 | 2     | 6.99E-04 | 0.68  | 2.72     | - | 629.8  |
| AHQ-8-14-, 3843             | R.ITPSYVAFTPEGER.L                                                     | 1567.72412 | 2     | 1.70E-05 | 0.81  | 3.63     | - | 372.9  |
| AHQ-8-5, 3790               | K.KSDIDEIVLVGGSTR.I                                                    | 1589.77277 | 2     | 7.30E-10 | 0.98  | 4.92     | - | 3121.2 |
| AHQ-8-5, 3809               | K.NQLTSPNPTVFDAR.R                                                     | 1678.78173 | 2     | 6.29E-04 | 0.60  | 3.62     | - | 428.9  |
| AHQ-8-5, 3229               | K.NQLTSPNPTVFDAR.R                                                     | 1678.78173 | 2     | 8.79E-09 | 0.89  | 3.73     | - | 786.2  |
| AHQ-8-6, 3678 - 3679        | K.SQIFSTASDNOPVTIK.V                                                   | 1838.00865 | 2     | 9.19E-10 | 0.96  | 5.14     | - | 1135.1 |
| AHQ-8-5, 3724 - 3725        | K.SQIFSTASDNOPVTIK.V                                                   | 1838.00865 | 2     | 1.31E-08 | 0.95  | 4.75     | - | 960.5  |
| AHQ-8-7, 3626               | K.SQIFSTASDNOPVTIK.V                                                   | 1838.00865 | 2     | 8.32E-07 | 0.94  | 4.55     | - | 920.0  |
| AHQ-8-6, 3104               | K.TKPYIQVDIGGGQTK.T                                                    | 1605.81703 | 2     | 4.81E-07 | 0.68  | 2.84     | - | 674.1  |
| AHQ-8-5, 3930               | K.VTHAVTVPAYFNDAR.Q                                                    | 1889.10372 | 2     | 4.82E-04 | 0.93  | 4.63     | - | 635.5  |
| gj 11761631 ref NP_005132.1 | fibrinogen, beta chain preproprotein [Homo sapiens]                    | 1.06E-12   | 17.23 | 210.27   | 39.50 | 55901.8  |   |        |
| AHQ-8-7, 2540               | K.AHYGGFTVQNEANK.Y                                                     | 1536.63020 | 2     | 6.14E-09 | 0.88  | 3.67     | - | 778.0  |
| AHQ-8-11, 2465              | K.AHYGGFTVQNEANK.Y                                                     | 1536.63020 | 2     | 1.27E-07 | 0.92  | 3.37     | - | 1154.5 |
| AHQ-8-6, 2462               | K.AHYGGFTVQNEANK.Y                                                     | 1536.63020 | 2     | 3.71E-06 | 0.91  | 3.77     | - | 843.7  |
| AHQ-8-7, 2432 - 2433        | K.AHYGGFTVQNEANK.Y                                                     | 1536.63020 | 2     | 6.60E-07 | 0.96  | 4.56     | - | 1455.7 |
| AHQ-8-7, 3538 - 3558        | K.AHYGGFTVQNEANKYQISVNK.Y                                              | 2369.57759 | 3     | 7.17E-04 | 0.89  | 3.81     | - | 674.9  |
| AHQ-8-8, 4014               | K.DNENVVNEYSSLEK.H                                                     | 1769.80167 | 2     | 6.08E-04 | 0.80  | 3.40     | - | 631.7  |
| AHQ-8-8, 4013               | K.DNENVVNEYSSLEK.H                                                     | 1769.80167 | 2     | 2.66E-04 | 0.85  | 3.99     | - | 512.7  |
| AHQ-8-7, 4036 - 4112        | K.DNENVVNEYSSLEK.H                                                     | 1769.80167 | 2     | 3.47E-08 | 0.95  | 4.88     | - | 917.5  |
| AHQ-8-11, 3911 - 3968       | K.DNENVVNEYSSLEK.H                                                     | 1769.80167 | 2     | 3.41E-07 | 0.91  | 4.43     | - | 890.9  |
| AHQ-8-6, 3906 - 3971        | K.DNENVVNEYSSLEK.H                                                     | 1769.80167 | 2     | 1.18E-08 | 0.94  | 4.61     | - | 929.7  |
| AHQ-8-7, 3334               | K.DNENVVNEYSSLEK.H                                                     | 1769.80167 | 2     | 1.61E-04 | 0.78  | 3.30     | - | 639.6  |
| AHQ-8-7, 3245 - 3310        | K.DNENVVNEYSSLEK.H                                                     | 1769.80167 | 2     | 4.59E-04 | 0.88  | 3.82     | - | 670.7  |
| AHQ-8-6, 4094 - 4174        | K.DNENVVNEYSSLEK.H                                                     | 1769.80167 | 2     | 1.35E-05 | 0.87  | 4.03     | - | 563.2  |
| AHQ-8-9, 6547               | K.DNENVVNEYSSLEK.H                                                     | 1769.80167 | 2     | 2.89E-06 | 0.80  | 3.35     | - | 587.5  |
| AHQ-8-8, 3295               | K.DNENVVNEYSSLEK.H                                                     | 1769.80167 | 2     | 5.09E-04 | 0.67  | 3.24     | - | 421.1  |
| AHQ-8-6, 3283               | K.DNENVVNEYSSLEK.H                                                     | 1769.80167 | 2     | 2.28E-06 | 0.80  | 3.50     | - | 634.2  |
| AHQ-8-8, 4133               | K.DNENVVNEYSSLEK.H                                                     | 1769.80167 | 2     | 6.56E-04 | 0.50  | 2.64     | - | 698.3  |
| AHQ-8-6, 3574 - 3575        | K.EDGGGWVWYNR.C                                                        | 1240.26508 | 2     | 6.04E-05 | 0.73  | 3.03     | - | 461.2  |
| AHQ-8-6, 3386               | R.EEAPSLRPPPIPGGGYR.A                                                  | 2252.15981 | 2     | 7.26E-05 | 0.21  | 3.00     | - | 156.4  |
| AHQ-8-7, 3893               | K.GGETSEM*YLIQPDSSVKPYR.V                                              | 2258.49373 | 3     | 6.00E-09 | 0.91  | 3.92     | - | 1189.4 |
| AHQ-8-7, 3924               | K.GGETSEM*YLIQPDSSVKPYR.V                                              | 2258.49373 | 2     | 8.74E-07 | 0.84  | 3.90     | - | 463.7  |
| AHQ-8-6, 4006               | K.GGETSEM*YLIQPDSSVKPYR.V                                              | 2258.49373 | 2     | 3.72E-06 | 0.89  | 4.13     | - | 543.1  |
| AHQ-8-8, 4018               | K.GGETSEM*YLIQPDSSVKPYR.V                                              | 2258.49373 | 2     | 2.91E-07 | 0.90  | 4.50     | - | 457.9  |
| AHQ-8-8, 4025               | K.GGETSEM*YLIQPDSSVKPYR.V                                              | 2258.49373 | 3     | 1.71E-05 | 0.90  | 4.17     | - | 1007.0 |
| AHQ-8-6, 4000               | K.GGETSEM*YLIQPDSSVKPYR.V                                              | 2258.49373 | 3     | 1.58E-05 | 0.85  | 3.50     | - | 989.4  |
| AHQ-8-7, 3536               | K.GGETSEM*YLIQPDSSVKPYR.V                                              | 2274.49313 | 2     | 9.72E-06 | 0.57  | 3.32     | - | 237.3  |
| AHQ-8-7, 4041 - 4117        | K.HGTDDGVVWMMWK.G                                                      | 1545.70374 | 2     | 1.28E-04 | 0.91  | 3.48     | - | 717.3  |
| AHQ-8-7, 3545 - 3614        | K.HGTDDGVVWMM*WVK.G                                                    | 1561.70314 | 2     | 4.65E-06 | 0.94  | 4.17     | - | 800.4  |
| AHQ-8-6, 3694               | R.KGGETSEM*YLIQPDSSVKPYR.V                                             | 2386.66664 | 3     | 3.60E-07 | 0.88  | 4.11     | - | 593.0  |
| AHQ-8-8, 3619               | R.KGGETSEM*YLIQPDSSVKPYR.V                                             | 2386.66664 | 3     | 3.87E-04 | 0.83  | 4.34     | - | 467.2  |
| AHQ-8-6, 3322               | R.KGGETSEM*YLIQPDSSVKPYR.V                                             | 2402.66604 | 3     | 4.27E-04 | 0.86  | 4.04     | - | 842.9  |
| AHQ-8-7, 3260               | R.KGGETSEM*YLIQPDSSVKPYR.V                                             | 2402.66604 | 3     | 2.15E-04 | 0.88  | 4.41     | - | 782.3  |
| AHQ-8-7, 3589 - 3645        | R.KGGETSEM*YLIQPDSSVKPYR.V                                             | 2386.66664 | 3     | 6.21E-07 | 0.84  | 3.84     | - | 738.5  |
| AHQ-8-8, 3623 - 3627        | R.KGGETSEM*YLIQPDSSVKPYR.V                                             | 2386.66664 | 2     | 7.16E-06 | 0.94  | 5.35     | - | 794.1  |
| AHQ-8-7, 3434 - 3509        | K.LESDVSAQMEYCR.T                                                      | 1589.73005 | 2     | 5.83E-06 | 0.71  | 2.72     | - | 712.8  |
| AHQ-8-7, 3212 - 3268        | K.LESDVSAQMEYCR.T                                                      | 1589.73005 | 2     | 3.68E-07 | 0.88  | 3.57     | - | 900.9  |
| AHQ-8-6, 5874               | R.M*GPTLLIEMEDWK.G                                                     | 1708.97776 | 2     | 1.78E-05 | 0.94  | 4.22     | - | 1161.1 |
| AHQ-8-11, 4543              | R.M*GPTLLIEM*EDWK.G                                                    | 1724.97716 | 2     | 1.32E-05 | 0.55  | 2.59     | - | 425.3  |
| AHQ-8-8, 6027               | R.M*GPTLLIEMEDWK.G                                                     | 1708.97776 | 2     | 3.09E-05 | 0.83  | 2.94     | - | 906.4  |
| AHQ-8-6, 4583 - 4646        | R.M*GPTLLIEM*EDWK.G                                                    | 1724.97716 | 2     | 1.03E-05 | 0.79  | 3.15     | - | 629.6  |
| AHQ-8-7, 5796               | R.M*GPTLLIEMEDWK.G                                                     | 1708.97776 | 2     | 8.78E-06 | 0.97  | 4.82     | - | 1984.1 |
| AHQ-8-7, 4901 - 4912        | K.NYCGLPGEYWLGNDK.I                                                    | 1787.92994 | 2     | 1.48E-05 | 0.70  | 3.05     | - | 314.0  |
| AHQ-8-7, 3633               | R.TPCTVSCNIPV*VSGK.E                                                   | 1621.85811 | 2     | 2.14E-05 | 0.53  | 3.22     | - | 234.2  |
| AHQ-8-7, 3588 - 3644        | R.TPCTVSCNIPV*VSGK.E                                                   | 1621.85811 | 2     | 3.62E-04 | 0.79  | 3.32     | - | 518.7  |
| AHQ-8-8, 3666               | R.TPCTVSCNIPV*VSGK.E                                                   | 1621.85811 | 2     | 2.78E-05 | 0.92  | 3.84     | - | 747.0  |
| AHQ-8-7, 4612 - 4648        | R.TPCTVSCNIPV*VSGKECEEIIR.K                                            | 2552.88440 | 3     | 7.90E-07 | 0.87  | 4.15     | - | 774.4  |
| AHQ-8-7, 4493 - 4556        | R.TPCTVSCNIPV*VSGKECEEIIR.K                                            | 2552.88440 | 3     | 6.03E-07 | 0.92  | 3.98     | - | 1231.2 |
| AHQ-8-6, 4615 - 4678        | R.TPCTVSCNIPV*VSGKECEEIIR.K                                            | 2552.88440 | 3     | 9.09E-05 | 0.91  | 4.40     | - | 864.8  |
| AHQ-8-1, 4876               | R.TPCTVSCNIPV*VSGKECEEIIR.K                                            | 2552.88440 | 3     | 1.39E-05 | 0.74  | 3.36     | - | 675.4  |
| AHQ-8-3, 4756               | R.TPCTVSCNIPV*VSGKECEEIIR.K                                            | 2552.88440 | 3     | 1.80E-05 | 0.88  | 4.18     | - | 734.9  |
| AHQ-8-7, 3772 - 3828        | R.VYCDM*NTENG*GWT*VIQNR.Q                                              | 2175.34493 | 2     | 2.86E-07 | 0.94  | 4.86     | - | 740.1  |
| AHQ-8-6, 3831 - 3887        | R.VYCDM*NTENG*GWT*VIQNR.Q                                              | 2175.34493 | 2     | 8.39E-08 | 0.95  | 4.53     | - | 1141.7 |
| AHQ-8-7, 4222               | R.VYCDM*NTENG*GWT*VIQNR.Q                                              | 2175.34493 | 2     | 1.82E-05 | 0.39  | 2.59     | - | 470.4  |
| AHQ-8-6, 4283 - 4284        | R.VYCDM*NTENG*GWT*VIQNR.Q                                              | 2159.34553 | 2     | 4.65E-06 | 0.91  | 4.17     | - | 783.6  |
| AHQ-8-7, 4209 - 4210        | R.VYCDM*NTENG*GWT*VIQNR.Q                                              | 2159.34553 | 2     | 9.57E-11 | 0.97  | 4.79     | - | 1465.1 |
| AHQ-8-7, 3892               | R.VYCDM*NTENG*GWT*VIQNR.Q                                              | 2175.34493 | 2     | 1.91E-05 | 0.89  | 3.80     | - | 1028.6 |
| AHQ-8-7, 4300               | R.VYCDM*NTENG*GWT*VIQNR.Q                                              | 2159.34553 | 2     | 1.06E-12 | 0.94  | 4.19     | - | 1353.5 |
| AHQ-8-7, 4217 - 4261        | R.YYWGGQYTWDM*AK.H                                                     | 1685.83949 | 2     | 6.49E-05 | 0.89  | 3.45     | - | 741.3  |
| AHQ-8-7, 4732               | R.YYWGGQYTWDM*AK.H                                                     | 1669.84009 | 2     | 6.06E-04 | 0.89  | 3.05     | - | 968.1  |
| AHQ-8-6, 4843 - 4907        | R.YYWGGQYTWDM*AK.H                                                     | 1669.84009 | 2     | 1.14E-04 | 0.94  | 3.63     | - | 1192.7 |
| AHQ-8-6, 4343               | R.YYWGGQYTWDM*AK.H                                                     | 1685.83949 | 2     | 4.21E-04 | 0.92  | 3.27     | - | 952.3  |
| gj 4501893 ref NP_001094.1  | actinin, alpha 2 [Homo sapiens]                                        | 1.69E-12   | 9.10  | 100.25   | 12.50 | 103853.1 |   |        |
| AHQ-8-5, 4377 - 4390        | K.AGTQIENIEDFR.N                                                       | 1522.59861 | 2     | 2.93E-04 | 0.90  | 3.65     | - | 1050.4 |
| AHQ-8-4, 4913               | K.CQLEINFNTLQTK.L                                                      | 1610.81373 | 2     | 1.26E-05 | 0.87  | 3.20     | - | 826.6  |
| AHQ-8-4, 4614               | K.CQLEINFNTLQTK.L                                                      | 1610.81373 | 2     | 7.57E-09 | 0.95  | 3.93     | - | 1463.1 |
| AHQ-8-5, 4757 - 4760        | K.CQLEINFNTLQTK.L                                                      | 1610.81373 | 2     | 2.58E-10 | 0.95  | 4.75     | - | 1158.6 |
| AHQ-8-4, 4254               | K.CQLEINFNTLQTK.L                                                      | 1610.81373 | 2     | 5.15E-06 | 0.93  | 4.13     | - | 1206.5 |



|                            |                                            |            |   |          |      |        |       |          |
|----------------------------|--------------------------------------------|------------|---|----------|------|--------|-------|----------|
| AHQ-8-6, 4659 - 4674       | K.CQLEINFNTLQTK.L                          | 1610.81373 | 2 | 3.23E-06 | 0.93 | 4.12   | -     | 901.2    |
| AHQ-8-4, 4707              | R.DLLDPAWEK.Q                              | 1200.36535 | 2 | 4.20E-04 | 0.72 | 2.97   | -     | 757.9    |
| AHQ-8-4, 4741              | K.EGLLLWCQR.K                              | 1176.37031 | 2 | 1.01E-05 | 0.81 | 2.70   | -     | 800.8    |
| AHQ-8-6, 4023 - 4078       | R.FAIDQISVEETSAAK.E                        | 1538.68108 | 2 | 1.63E-06 | 0.77 | 3.16   | -     | 801.5    |
| AHQ-8-10, 3942             | R.FAIDQISVEETSAAK.E                        | 1538.68108 | 2 | 5.50E-05 | 0.91 | 3.11   | -     | 1154.9   |
| AHQ-8-11, 3995             | R.FAIDQISVEETSAAK.E                        | 1538.68108 | 2 | 2.27E-05 | 0.84 | 3.20   | -     | 698.6    |
| AHQ-8-8, 4073              | R.FAIDQISVEETSAAK.E                        | 1538.68108 | 2 | 1.02E-05 | 0.92 | 3.32   | -     | 1154.8   |
| AHQ-8-7, 3981              | R.FAIDQISVEETSAAK.E                        | 1538.68108 | 2 | 9.51E-07 | 0.94 | 4.42   | -     | 982.3    |
| AHQ-8-4, 4102 - 4161       | R.FAIDQISVEETSAAK.E                        | 1538.68108 | 2 | 6.24E-09 | 0.95 | 3.73   | -     | 1210.8   |
| AHQ-8-13-, 4112            | R.FAIDQISVEETSAAK.E                        | 1538.68108 | 2 | 1.51E-06 | 0.83 | 3.25   | -     | 837.0    |
| AHQ-8-3, 4137              | R.FAIDQISVEETSAAK.E                        | 1538.68108 | 2 | 8.96E-06 | 0.89 | 3.30   | -     | 1032.6   |
| AHQ-8-5, 4109              | R.FAIDQISVEETSAAK.E                        | 1538.68108 | 2 | 1.13E-05 | 0.93 | 3.62   | -     | 1272.4   |
| AHQ-8-14-, 4067            | R.FAIDQISVEETSAAK.E                        | 1538.68108 | 2 | 1.88E-04 | 0.78 | 2.89   | -     | 584.3    |
| AHQ-8-6, 5128 - 5130       | K.GYEEWLLNEIR.R                            | 1422.56701 | 2 | 1.11E-07 | 0.85 | 3.02   | -     | 905.8    |
| AHQ-8-4, 5775 - 5782       | K.GYEEWLLNEIR.R                            | 1422.56701 | 2 | 6.33E-04 | 0.73 | 3.09   | -     | 857.3    |
| AHQ-8-6, 5544              | K.GYEEWLLNEIR.R                            | 1422.56701 | 2 | 1.08E-07 | 0.94 | 3.73   | -     | 1396.9   |
| AHQ-8-5, 5200              | K.GYEEWLLNEIR.R                            | 1422.56701 | 2 | 1.37E-04 | 0.84 | 2.82   | -     | 1072.2   |
| AHQ-8-4, 5669              | K.GYEEWLLNEIR.R                            | 1422.56701 | 2 | 9.64E-05 | 0.94 | 3.38   | -     | 1939.2   |
| AHQ-8-4, 5245              | K.GYEEWLLNEIR.R                            | 1422.56701 | 2 | 2.60E-04 | 0.90 | 3.20   | -     | 1166.5   |
| AHQ-8-5, 5644              | K.GYEEWLLNEIR.R                            | 1422.56701 | 2 | 8.99E-05 | 0.92 | 3.48   | -     | 1254.7   |
| AHQ-8-4, 2375              | K.HEAFESDLAAHQDR.V                         | 1626.66861 | 2 | 2.10E-07 | 0.97 | 4.83   | -     | 1582.7   |
| AHQ-8-4, 2369 - 2442       | K.HEAFESDLAAHQDR.V                         | 1626.66861 | 3 | 1.26E-05 | 0.93 | 4.21   | -     | 1144.1   |
| AHQ-8-4, 2165              | R.KHEAFESDLAAHQDR.V                        | 1754.84152 | 3 | 4.25E-08 | 0.90 | 4.30   | -     | 833.0    |
| AHQ-8-5, 2192              | R.KHEAFESDLAAHQDR.V                        | 1754.84152 | 2 | 1.20E-07 | 0.90 | 3.16   | -     | 1107.8   |
| AHQ-8-6, 2183              | R.KHEAFESDLAAHQDR.V                        | 1754.84152 | 2 | 1.40E-07 | 0.91 | 3.83   | -     | 865.6    |
| AHQ-8-4, 2163              | R.KHEAFESDLAAHQDR.V                        | 1754.84152 | 2 | 1.69E-12 | 0.97 | 5.04   | -     | 1316.1   |
| AHQ-8-4, 3974 - 4033       | K.LVSIAGEEIVDGNVK.M                        | 1543.74400 | 2 | 2.69E-05 | 0.95 | 4.45   | -     | 1329.5   |
| AHQ-8-4, 6634              | K.LVSIAGEEIVDGNVK.M                        | 1543.74400 | 2 | 2.37E-04 | 0.84 | 2.73   | -     | 902.3    |
| AHQ-8-4, 4519              | K.LVSIAGEEIVDGNVK.M                        | 1543.74400 | 2 | 8.24E-07 | 0.83 | 2.96   | -     | 996.7    |
| AHQ-8-5, 3994              | K.LVSIAGEEIVDGNVK.M                        | 1543.74400 | 2 | 1.49E-05 | 0.88 | 3.66   | -     | 814.6    |
| AHQ-8-4, 4373 - 4451       | K.LVSIAGEEIVDGNVK.M                        | 1543.74400 | 2 | 3.97E-04 | 0.73 | 3.48   | -     | 582.4    |
| AHQ-8-4, 4239 - 4310       | K.LVSIAGEEIVDGNVK.M                        | 1543.74400 | 2 | 3.25E-08 | 0.96 | 4.48   | -     | 1300.8   |
| AHQ-8-4, 6403              | K.M*TLGM*IWITILR.F                         | 1480.86426 | 2 | 1.95E-07 | 0.93 | 3.63   | -     | 1190.8   |
| gj 4504745 ref NP_000410.1 | integrin alpha 2b precursor [Homo sapiens] |            |   |          |      | 320.34 | 35.60 | 113374.2 |
| AHQ-8-7, 4870 - 4884       | R.AEGGQCPSSLFLDLR.D                        | 1564.74505 | 2 | 8.85E-08 | 0.92 | 3.83   | -     | 983.3    |
| AHQ-8-5, 5064              | R.AEGGQCPSSLFLDLR.D                        | 1564.74505 | 2 | 1.04E-04 | 0.86 | 3.17   | -     | 779.7    |
| AHQ-8-3, 5048 - 5060       | R.AEGGQCPSSLFLDLR.D                        | 1564.74505 | 2 | 5.45E-07 | 0.94 | 4.05   | -     | 961.6    |
| AHQ-8-12, 4906             | R.AEGGQCPSSLFLDLR.D                        | 1564.74505 | 2 | 2.22E-04 | 0.86 | 3.66   | -     | 610.6    |
| AHQ-8-4, 5001 - 5070       | R.AEGGQCPSSLFLDLR.D                        | 1564.74505 | 2 | 4.68E-07 | 0.94 | 4.43   | -     | 899.6    |
| AHQ-8-6, 4970 - 4979       | R.AEGGQCPSSLFLDLR.D                        | 1564.74505 | 2 | 8.25E-06 | 0.90 | 3.40   | -     | 871.3    |
| AHQ-8-4, 5109              | R.AEGGQCPSSLFLDLR.D                        | 1564.74505 | 2 | 6.08E-05 | 0.93 | 3.46   | -     | 1125.7   |
| AHQ-8-6, 2887 - 2946       | R.ALSNVEGFER.L                             | 1122.21308 | 2 | 2.18E-06 | 0.81 | 3.12   | -     | 596.0    |
| AHQ-8-7, 2845 - 2849       | R.ALSNVEGFER.L                             | 1122.21308 | 2 | 3.92E-06 | 0.82 | 2.99   | -     | 748.8    |
| AHQ-8-5, 2908              | R.ALSNVEGFER.L                             | 1122.21308 | 2 | 3.94E-06 | 0.84 | 3.34   | -     | 758.2    |
| AHQ-8-5, 4856 - 4858       | K.ASVQLLVQDSLNPVK.S                        | 1682.94293 | 2 | 2.53E-04 | 0.88 | 4.08   | -     | 761.0    |
| AHQ-8-4, 4638 - 4702       | K.ASVQLLVQDSLNPVK.S                        | 1682.94293 | 2 | 7.83E-05 | 0.82 | 3.46   | -     | 763.2    |
| AHQ-8-7, 4681              | K.ASVQLLVQDSLNPVK.S                        | 1682.94293 | 2 | 2.44E-05 | 0.78 | 3.48   | -     | 601.8    |
| AHQ-8-5, 4646 - 4693       | K.ASVQLLVQDSLNPVK.S                        | 1682.94293 | 2 | 6.53E-04 | 0.46 | 2.82   | -     | 424.8    |
| AHQ-8-6, 4774              | K.ASVQLLVQDSLNPVK.S                        | 1682.94293 | 2 | 5.91E-04 | 0.74 | 3.41   | -     | 458.9    |
| AHQ-8-4, 4894              | K.ASVQLLVQDSLNPVK.S                        | 1682.94293 | 3 | 1.23E-05 | 0.82 | 3.66   | -     | 805.8    |
| AHQ-8-4, 3217              | R.DETRNVSQTLQTFK.A                         | 1724.85363 | 3 | 1.52E-04 | 0.72 | 3.15   | -     | 692.7    |
| AHQ-8-4, 3082              | R.DETRNVSQTLQTFK.A                         | 1724.85363 | 2 | 4.34E-04 | 0.93 | 4.05   | -     | 1069.0   |
| AHQ-8-4, 3846 - 3898       | R.DGYNDAVAAAPYGGPSGR.G                     | 1780.87574 | 2 | 2.65E-11 | 0.91 | 4.34   | -     | 634.0    |
| AHQ-8-4, 3749 - 3757       | R.DGYNDAVAAAPYGGPSGR.G                     | 1780.87574 | 2 | 2.98E-08 | 0.96 | 4.40   | -     | 1216.7   |
| AHQ-8-5, 3730 - 3761       | R.DGYNDAVAAAPYGGPSGR.G                     | 1780.87574 | 2 | 5.81E-11 | 0.82 | 3.43   | -     | 648.6    |
| AHQ-8-4, 3957              | R.DGYNDAVAAAPYGGPSGR.G                     | 1780.87574 | 2 | 5.56E-04 | 0.85 | 3.44   | -     | 719.7    |
| AHQ-8-4, 3135              | R.EQNSLDSWGPK.V                            | 1121.32250 | 2 | 9.82E-04 | 0.63 | 2.64   | -     | 600.5    |
| AHQ-8-6, 5404              | R.FGSAIAPLGDLLDRDGYNDIAVAAAPYGGPSGR.G      | 3094.34015 | 3 | 4.29E-05 | 0.80 | 3.77   | -     | 700.5    |
| AHQ-8-4, 5586 - 5645       | R.FGSAIAPLGDLLDRDGYNDIAVAAAPYGGPSGR.G      | 3094.34015 | 3 | 9.32E-05 | 0.91 | 4.64   | -     | 1006.2   |
| AHQ-8-4, 5327 - 5409       | R.FGSAIAPLGDLLDRDGYNDIAVAAAPYGGPSGR.G      | 3094.34015 | 3 | 5.45E-07 | 0.89 | 4.40   | -     | 846.9    |
| AHQ-8-5, 5412              | R.FGSAIAPLGDLLDRDGYNDIAVAAAPYGGPSGR.G      | 3094.34015 | 3 | 1.00E-03 | 0.67 | 3.85   | -     | 436.7    |
| AHQ-8-6, 5315 - 5335       | R.FGSAIAPLGDLLDRDGYNDIAVAAAPYGGPSGR.G      | 3094.34015 | 3 | 2.94E-08 | 0.77 | 3.75   | -     | 719.6    |
| AHQ-8-4, 5465 - 5527       | R.FGSAIAPLGDLLDRDGYNDIAVAAAPYGGPSGR.G      | 3094.34015 | 3 | 3.59E-11 | 0.95 | 6.39   | -     | 722.4    |
| AHQ-8-3, 5410 - 5470       | R.FGSAIAPLGDLLDRDGYNDIAVAAAPYGGPSGR.G      | 3094.34015 | 3 | 2.09E-05 | 0.86 | 4.24   | -     | 812.2    |
| AHQ-8-10, 4652             | R.GEAQVWVWTLR.A                            | 1301.47614 | 2 | 5.36E-05 | 0.71 | 2.83   | -     | 629.3    |
| AHQ-8-11, 4731 - 4755      | R.GEAQVWVWTLR.A                            | 1301.47614 | 2 | 2.17E-05 | 0.93 | 4.21   | -     | 940.6    |
| AHQ-8-1, 5072 - 5077       | R.GEAQVWVWTLR.A                            | 1301.47614 | 2 | 7.63E-08 | 0.88 | 4.05   | -     | 688.4    |
| AHQ-8-4, 5295 - 5357       | R.GNSFPASLVVAEEGER.E                       | 1733.86053 | 2 | 1.25E-08 | 0.92 | 4.36   | -     | 951.0    |
| AHQ-8-5, 5293 - 5350       | R.GNSFPASLVVAEEGER.E                       | 1733.86053 | 2 | 7.29E-04 | 0.54 | 2.96   | -     | 446.9    |
| AHQ-8-6, 5151              | R.GNSFPASLVVAEEGER.E                       | 1733.86053 | 2 | 4.18E-04 | 0.57 | 2.67   | -     | 732.5    |
| AHQ-8-4, 5170 - 5234       | R.GNSFPASLVVAEEGER.E                       | 1733.86053 | 2 | 8.42E-08 | 0.91 | 4.18   | -     | 710.4    |
| AHQ-8-4, 6163              | R.GNSFPASLVVAEEGEREQNSLDSWGPK.V            | 2976.16043 | 3 | 3.08E-04 | 0.75 | 3.36   | -     | 639.7    |
| AHQ-8-4, 5015 - 5075       | R.GPHALGAPSLLLTGTQLYGR.F                   | 2023.32431 | 3 | 2.99E-06 | 0.89 | 4.34   | -     | 789.9    |
| AHQ-8-3, 5028 - 5030       | R.GPHALGAPSLLLTGTQLYGR.F                   | 2023.32431 | 3 | 2.63E-04 | 0.81 | 3.42   | -     | 1149.3   |
| AHQ-8-5, 5037              | R.GPHALGAPSLLLTGTQLYGR.F                   | 2023.32431 | 2 | 1.39E-05 | 0.96 | 5.43   | -     | 950.4    |
| AHQ-8-7, 4820              | R.GPHALGAPSLLLTGTQLYGR.F                   | 2023.32431 | 2 | 2.67E-04 | 0.93 | 4.56   | -     | 733.1    |
| AHQ-8-4, 5045              | R.GPHALGAPSLLLTGTQLYGR.F                   | 2023.32431 | 2 | 1.11E-04 | 0.98 | 5.74   | -     | 1462.0   |
| AHQ-8-7, 4816              | R.GPHALGAPSLLLTGTQLYGR.F                   | 2023.32431 | 3 | 4.35E-04 | 0.77 | 3.27   | -     | 784.1    |
| AHQ-8-6, 4943              | R.GPHALGAPSLLLTGTQLYGR.F                   | 2023.32431 | 3 | 6.65E-06 | 0.79 | 3.24   | -     | 1014.0   |
| AHQ-8-5, 4840 - 4844       | R.GQVLFVFGQSEGLR.S                         | 1503.72793 | 2 | 1.47E-08 | 0.97 | 5.21   | -     | 1227.1   |
| AHQ-8-6, 4766              | R.GQVLFVFGQSEGLR.S                         | 1503.72793 | 2 | 1.27E-05 | 0.94 | 4.03   | -     | 1335.7   |
| AHQ-8-4, 4841 - 4921       | R.GQVLFVFGQSEGLR.S                         | 1503.72793 | 2 | 8.04E-10 | 0.97 | 5.06   | -     | 1622.1   |
| AHQ-8-4, 4981 - 5062       | R.GQVLFVFGQSEGLR.S                         | 1503.72793 | 2 | 3.88E-05 | 0.90 | 3.05   | -     | 1203.5   |
| AHQ-8-4, 4286 - 4351       | R.HDLLVFGAPLYMESR.A                        | 1601.85188 | 2 | 1.54E-07 | 0.95 | 3.61   | -     | 1419.4   |
| AHQ-8-4, 3785              | K.HSPICHTTMAFLR.D                          | 1572.83705 | 3 | 1.50E-04 | 0.77 | 3.21   | -     | 811.3    |
| AHQ-8-4, 3219              | K.HSPICHTTMAFLR.D                          | 1588.83645 | 2 | 1.06E-05 | 0.72 | 3.21   | -     | 405.6    |
| AHQ-8-4, 4361              | K.IVLLDVPVR.A                              | 1024.28196 | 2 | 1.78E-05 | 0.93 | 3.52   | -     | 1173.6   |
| AHQ-8-4, 3899              | R.IYVNEKFSWDKR.Y                           | 1572.70245 | 3 | 1.17E-06 | 0.64 | 3.14   | -     | 400.2    |
| AHQ-8-4, 3913 - 3978       | R.IYVNEKFSWDKR.Y                           | 1572.70245 | 2 | 1.68E-07 | 0.93 | 3.85   | -     | 1197.7   |
| AHQ-8-6, 4188              | K.LSLNAELQLDR.Q                            | 1272.43310 | 2 | 1.34E-06 | 0.86 | 2.93   | -     | 787.2    |
| AHQ-8-4, 4235 - 4302       | K.LSLNAELQLDR.Q                            | 1272.43310 | 2 | 2.22E-06 | 0.94 | 3.98   | -     | 1256.6   |
| AHQ-8-10, 2164 - 2178      | R.NRPLEEDEEEGE                             | 1529.50164 | 2 | 2.55E-06 | 0.79 | 2.97   | -     | 787.9    |
| AHQ-8-4, 2783              | R.NVGSQTLQTFK.A                            | 1223.36055 | 2 | 9.16E-09 | 0.83 | 3.04   | -     | 508.4    |
| AHQ-8-4, 2111 - 2131       | K.SCVLPQTK.T                               | 934.09260  | 2 | 3.69E-04 | 0.80 | 2.96   | -     | 795.6    |
| AHQ-8-4, 5501 - 5578       | R.SRPSQVLDSPPFTGSAFGFSR.G                  | 2354.60606 | 3 | 9.44E-11 | 0.97 | 5.57   | -     | 1849.3   |
| AHQ-8-7, 5453 - 5508       | R.SRPSQVLDSPPFTGSAFGFSR.G                  | 2354.60606 | 3 | 3.00E-12 | 0.98 | 6.87   | -     | 2077.3   |
| AHQ-8-5, 5669              | R.SRPSQVLDSPPFTGSAFGFSR.G                  | 2354.60606 | 3 | 1.89E-08 | 0.97 | 6.06   | -     | 1491.3   |
| AHQ-8-4, 5697 - 5755       | R.SRPSQVLDSPPFTGSAFGFSR.G                  | 2354.60606 | 3 | 1.09E-08 | 0.95 | 5.68   | -     | 1049.3   |
| AHQ-8-3, 5640 - 5648       | R.SRPSQVLDSPPFTGSAFGFSR.G                  | 2354.60606 | 3 | 9.97E-05 | 0.97 | 5.38   | -     | 1849.0   |
| AHQ-8-5, 3677              | K.TEEAEKTPVGSCLAQPESEGR.R                  | 2295.46902 | 2 | 4.31E-07 | 0.67 | 3.25   | -     | 402.6    |
| AHQ-8-4, 3693              | K.TEEAEKTPVGSCLAQPESEGR.R                  | 2295.46902 | 2 | 7.15E-07 | 0.93 | 4.31   | -     | 663.6    |
| AHQ-8-7, 3574              | K.TEEAEKTPVGSCLAQPESEGR.R                  | 2295.46902 | 2 | 2.35E-05 | 0.82 | 3.50   | -     | 454.2    |
| AHQ-8-7, 5157              | R.TLGPSQEETGGVFLCPWR.A                     | 2036.25364 | 3 | 1.45E-04 | 0.81 | 4.30   | -     | 538.0    |
| AHQ-8-3, 5250 - 5324       | R.TLGPSQEETGGVFLCPWR.A                     | 2036.25364 | 2 | 4.04E-05 | 0.26 | 2.89   | -     | 328.2    |
| AHQ-8-12, 5123             | R.TLGPSQEETGGVFLCPWR.A                     | 2036.25364 | 2 | 2.10E-04 | 0.82 | 3.17   | -     | 633.2    |
| AHQ-8-7, 5142 - 5202       | R.TLGPSQEETGGVFLCPWR.A                     | 2036.25364 | 2 | 1.61E-07 | 0.92 | 4.20   | -     | 797.0    |
| AHQ-8-13-, 5234 - 5240     | R.TLGPSQEETGGVFLCPWR.A                     | 2036.25364 | 2 | 1.15E-07 | 0.88 | 4.00   | -     | 785.5    |

|                            |                                                   |            |   |          |       |        |       |         |
|----------------------------|---------------------------------------------------|------------|---|----------|-------|--------|-------|---------|
| AHQ-8-5, 5313 - 5376       | R.TLGPSQEETGGVFLCPWR.A                            | 2036.25364 | 2 | 2.40E-06 | 0.95  | 4.40   | -     | 1316.4  |
| AHQ-8-4, 5353 - 5419       | R.TLGPSQEETGGVFLCPWR.A                            | 2036.25364 | 3 | 4.48E-04 | 0.70  | 3.41   | -     | 620.4   |
| AHQ-8-4, 5369 - 5401       | R.TLGPSQEETGGVFLCPWR.A                            | 2036.25364 | 2 | 8.86E-08 | 0.95  | 4.85   | -     | 1096.7  |
| AHQ-8-10, 3526             | K.TPVGSCFLAQPESGR.R                               | 1607.76993 | 2 | 6.85E-06 | 0.85  | 3.16   | -     | 822.2   |
| AHQ-8-7, 3518 - 3576       | K.TPVGSCFLAQPESGR.R                               | 1607.76993 | 2 | 2.06E-06 | 0.89  | 3.48   | -     | 912.6   |
| AHQ-8-5, 3669              | K.TPVGSCFLAQPESGR.R                               | 1607.76993 | 2 | 2.89E-07 | 0.95  | 3.87   | -     | 1275.6  |
| AHQ-8-11, 3589             | K.TPVGSCFLAQPESGR.R                               | 1607.76993 | 2 | 2.94E-04 | 0.81  | 3.21   | -     | 623.1   |
| AHQ-8-4, 3677 - 3681       | K.TPVGSCFLAQPESGR.R                               | 1607.76993 | 2 | 2.07E-07 | 0.95  | 4.61   | -     | 897.1   |
| AHQ-8-4, 4406              | K.TPVSCFNIGM*CVGATGHNIPQK.L                       | 2478.81062 | 3 | 8.77E-07 | 0.94  | 4.54   | -     | 1436.8  |
| AHQ-8-4, 4839              | K.TPVSCFNIGM*CVGATGHNIPQK.L                       | 2462.81122 | 3 | 2.04E-05 | 0.94  | 4.95   | -     | 1129.4  |
| AHQ-8-11, 2680             | R.VAIVVGAAPR.T                                    | 882.08560  | 2 | 9.94E-06 | 0.93  | 3.26   | -     | 1215.9  |
| AHQ-8-4, 2661              | R.VAIVVGAAPR.T                                    | 882.08560  | 2 | 7.40E-07 | 0.94  | 3.35   | -     | 1400.5  |
| AHQ-8-4, 5398 - 5474       | R.VLLLSGQQAGTTLNLDLGGK.H                          | 1999.29783 | 2 | 2.04E-12 | 0.95  | 4.99   | -     | 1177.6  |
| AHQ-8-4, 5537              | R.VLLLSGQQAGTTLNLDLGGK.H                          | 1999.29783 | 2 | 2.27E-04 | 0.92  | 4.15   | -     | 938.2   |
| AHQ-8-4, 5643 - 5701       | R.VLLLSGQQAGTTLNLDLGGK.H                          | 1999.29783 | 2 | 3.28E-05 | 0.94  | 4.65   | -     | 975.1   |
| AHQ-8-4, 6670 - 6678       | R.VLLLSGQQAGTTLNLDLGGK.H                          | 1999.29783 | 2 | 1.67E-04 | 0.97  | 5.35   | -     | 1340.8  |
| AHQ-8-4, 3333 - 3350       | R.VVLCCELGNPM*K.K                                 | 1277.53632 | 2 | 3.32E-05 | 0.95  | 3.95   | -     | 1543.1  |
| AHQ-8-4, 4039              | R.VVLCCELGNPM*K.K                                 | 1261.53692 | 2 | 1.35E-06 | 0.96  | 4.50   | -     | 1633.8  |
| AHQ-8-6, 3299              | R.VVLCCELGNPM*K.K                                 | 1277.53632 | 2 | 1.08E-05 | 0.77  | 2.55   | -     | 901.1   |
| AHQ-8-5, 4022              | R.VVLCCELGNPM*K.K                                 | 1261.53692 | 2 | 2.34E-05 | 0.87  | 3.24   | -     | 897.5   |
| AHQ-8-7, 4038              | R.VYFLQPPR.G                                      | 1036.25129 | 2 | 7.71E-05 | 0.89  | 2.92   | -     | 852.6   |
| AHQ-8-5, 4156              | R.VYFLQPPR.G                                      | 1036.25129 | 2 | 3.54E-06 | 0.94  | 3.51   | -     | 1275.3  |
| AHQ-8-4, 4167              | R.VYFLQPPR.G                                      | 1036.25129 | 2 | 3.82E-06 | 0.92  | 3.27   | -     | 1058.5  |
| AHQ-8-6, 4107              | R.VYFLQPPR.G                                      | 1036.25129 | 2 | 1.00E-06 | 0.95  | 3.69   | -     | 1191.4  |
| gl4502027[ref NP_000468.1] | albumin precursor; PRO0883 protein [Homo sapiens] |            |   | 2.23E-12 | 35.16 | 400.34 | 69.10 | 69366.4 |
| AHQ-8-7, 2504 - 2538       | K.AAFTECCQAADK.A                                  | 1374.47927 | 2 | 6.98E-04 | 0.44  | 2.59   | -     | 415.7   |
| AHQ-8-5, 2654              | K.AAFTECCQAADK.A                                  | 1374.47927 | 2 | 3.42E-04 | 0.83  | 2.76   | -     | 848.2   |
| AHQ-8-6, 2546 - 2547       | K.AAFTECCQAADK.A                                  | 1374.47927 | 2 | 7.42E-05 | 0.90  | 3.44   | -     | 1004.6  |
| AHQ-8-5, 2556              | K.AAFTECCQAADK.A                                  | 1374.47927 | 1 | 2.90E-04 | 0.63  | 2.84   | -     | 510.0   |
| AHQ-8-5, 1998 - 2068       | K.AEFAEVS.K.L                                     | 880.96496  | 2 | 2.27E-04 | 0.42  | 2.95   | -     | 282.8   |
| AHQ-8-5, 5196              | K.AEFAEVS.K.L                                     | 880.96496  | 2 | 2.43E-07 | 0.87  | 3.44   | -     | 931.2   |
| AHQ-8-5, 6444              | K.ALVLIAFAQYLQPCPFEDHV.K.L                        | 2492.87697 | 3 | 2.18E-09 | 0.96  | 5.37   | -     | 1351.9  |
| AHQ-8-14-, 5167            | K.AVMDDFAAFVEK.C                                  | 1343.53006 | 2 | 1.82E-06 | 0.95  | 3.73   | -     | 1492.0  |
| AHQ-8-7, 5086              | K.AVMDDFAAFVEK.C                                  | 1343.53006 | 2 | 4.47E-08 | 0.94  | 3.80   | -     | 1294.6  |
| AHQ-8-5, 4346 - 4408       | K.AVM*DDFAAFVEK.C                                 | 1359.52946 | 2 | 7.60E-05 | 0.92  | 3.70   | -     | 958.5   |
| AHQ-8-13-, 4390            | K.AVM*DDFAAFVEK.C                                 | 1359.52946 | 2 | 6.31E-04 | 0.77  | 2.59   | -     | 459.2   |
| AHQ-8-13-, 5164            | K.AVMDDFAAFVEK.C                                  | 1343.53006 | 2 | 2.41E-09 | 0.92  | 3.31   | -     | 1064.1  |
| AHQ-8-5, 5228              | K.AVMDDFAAFVEK.C                                  | 1343.53006 | 2 | 1.05E-08 | 0.95  | 3.93   | -     | 1309.5  |
| AHQ-8-6, 5111 - 5154       | K.AVMDDFAAFVEK.C                                  | 1343.53006 | 2 | 5.25E-08 | 0.94  | 3.80   | -     | 1322.7  |
| AHQ-8-7, 2197              | K.CCAAADPHCEYAK.V                                 | 1556.67999 | 2 | 5.23E-04 | 0.64  | 2.91   | -     | 497.8   |
| AHQ-8-5, 2208              | K.CCAAADPHCEYAK.V                                 | 1556.67999 | 2 | 3.35E-06 | 0.79  | 3.55   | -     | 567.3   |
| AHQ-8-5, 2402 - 2425       | K.CCTESLVNR.R                                     | 1141.25805 | 2 | 7.86E-04 | 0.90  | 2.92   | -     | 1148.5  |
| AHQ-8-5, 6252 - 6256       | K.DVFLGM*FLYEYAR.R                                | 1640.88331 | 2 | 1.15E-05 | 0.94  | 3.79   | -     | 922.1   |
| AHQ-8-6, 6106 - 6162       | K.DVFLGM*FLYEYAR.R                                | 1640.88331 | 2 | 5.04E-04 | 0.89  | 3.67   | -     | 832.7   |
| AHQ-8-1, 6307              | K.DVFLGM*FLYEYAR.R                                | 1640.88331 | 2 | 1.66E-05 | 0.78  | 2.51   | -     | 827.3   |
| AHQ-8-5, 2761 - 2826       | R.FKDLGEENFK.A                                    | 1227.34766 | 2 | 8.31E-06 | 0.90  | 3.84   | -     | 786.5   |
| AHQ-8-5, 2929              | R.FKDLGEENFK.A                                    | 1227.34766 | 2 | 1.41E-04 | 0.86  | 3.18   | -     | 815.9   |
| AHQ-8-6, 2760              | R.FKDLGEENFK.A                                    | 1227.34766 | 2 | 1.52E-05 | 0.85  | 3.32   | -     | 663.0   |
| AHQ-8-10, 3014             | K.FQNALLVY.R                                      | 961.14282  | 2 | 9.88E-05 | 0.82  | 2.54   | -     | 947.0   |
| AHQ-8-6, 6054 - 6060       | R.HPYFYAPPELLFFAK.R                               | 1744.02658 | 3 | 2.21E-07 | 0.95  | 4.64   | -     | 1393.1  |
| AHQ-8-5, 6144 - 6204       | R.HPYFYAPPELLFFAK.R                               | 1744.02658 | 3 | 6.63E-07 | 0.94  | 4.71   | -     | 1198.8  |
| AHQ-8-1, 6239              | R.HPYFYAPPELLFFAK.R                               | 1744.02658 | 3 | 4.95E-05 | 0.83  | 3.37   | -     | 731.7   |
| AHQ-8-7, 5993              | R.HPYFYAPPELLFFAK.R                               | 1744.02658 | 3 | 4.88E-06 | 0.91  | 4.33   | -     | 1033.2  |
| AHQ-8-5, 3686              | K.KLVAASQAALGL                                    | 1142.37371 | 2 | 2.57E-04 | 0.89  | 3.18   | -     | 911.7   |
| AHQ-8-5, 2836              | K.KQTLVLELVK.H                                    | 1129.37494 | 2 | 1.14E-05 | 0.75  | 2.85   | -     | 714.0   |
| AHQ-8-3, 3605 - 3685       | K.KVPQVSTPTLVEVSR.N                               | 1640.90605 | 2 | 1.09E-06 | 0.73  | 2.84   | -     | 573.4   |
| AHQ-8-6, 3506 - 3586       | K.KVPQVSTPTLVEVSR.N                               | 1640.90605 | 2 | 3.97E-08 | 0.85  | 3.64   | -     | 541.0   |
| AHQ-8-7, 3476              | K.KVPQVSTPTLVEVSR.N                               | 1640.90605 | 3 | 3.62E-08 | 0.96  | 4.61   | -     | 1775.9  |
| AHQ-8-5, 3536              | K.KVPQVSTPTLVEVSR.N                               | 1640.90605 | 3 | 9.27E-05 | 0.96  | 4.78   | -     | 1557.8  |
| AHQ-8-5, 3556 - 3600       | K.KVPQVSTPTLVEVSR.N                               | 1640.90605 | 2 | 2.51E-04 | 0.86  | 3.65   | -     | 470.6   |
| AHQ-8-7, 3402 - 3472       | K.KVPQVSTPTLVEVSR.N                               | 1640.90605 | 2 | 1.99E-04 | 0.59  | 2.96   | -     | 460.5   |
| AHQ-8-5, 3321              | K.KVPQVSTPTLVEVSR.N                               | 1640.90605 | 2 | 7.84E-08 | 0.94  | 3.59   | -     | 1343.6  |
| AHQ-8-10, 3428 - 3434      | K.KVPQVSTPTLVEVSR.N                               | 1640.90605 | 3 | 1.97E-05 | 0.71  | 3.23   | -     | 839.1   |
| AHQ-8-6, 3510 - 3587       | K.KVPQVSTPTLVEVSR.N                               | 1640.90605 | 3 | 6.42E-06 | 0.85  | 3.79   | -     | 938.3   |
| AHQ-8-4, 3605 - 3614       | K.KVPQVSTPTLVEVSR.N                               | 1640.90605 | 2 | 3.31E-08 | 0.92  | 4.06   | -     | 769.6   |
| AHQ-8-5, 3952 - 3980       | K.KVPQVSTPTLVEVSRNLGK.V                           | 2053.39186 | 3 | 5.06E-08 | 0.92  | 4.65   | -     | 1010.1  |
| AHQ-8-5, 2790 - 2794       | K.KYLYEIAI.R                                      | 1056.23937 | 2 | 6.81E-04 | 0.74  | 2.84   | -     | 557.2   |
| AHQ-8-5, 1638 - 1710       | K.LDELDRDEGK.A                                    | 1075.15472 | 2 | 3.42E-04 | 0.66  | 2.93   | -     | 640.0   |
| AHQ-8-5, 2480              | K.LKECCEKPLLEK.S                                  | 1549.83503 | 3 | 2.19E-04 | 0.89  | 4.56   | -     | 1073.0  |
| AHQ-8-14-, 4021            | K.LVAASQAALGL                                     | 1014.20080 | 2 | 5.24E-05 | 0.93  | 3.32   | -     | 1124.9  |
| AHQ-8-5, 4044 - 4065       | K.LVAASQAALGL                                     | 1014.20080 | 2 | 1.31E-04 | 0.93  | 3.18   | -     | 1182.1  |
| AHQ-8-2, 3425              | K.LVNEVTEFAK.T                                    | 1150.30633 | 2 | 2.85E-05 | 0.82  | 3.49   | -     | 549.0   |
| AHQ-8-13, 3533 - 3539      | K.LVNEVTEFAK.T                                    | 1150.30633 | 2 | 1.61E-05 | 0.91  | 3.30   | -     | 916.8   |
| AHQ-8-5, 3194              | K.LVNEVTEFAK.T                                    | 1150.30633 | 1 | 1.53E-05 | 0.47  | 2.29   | -     | 409.5   |
| AHQ-8-5, 3518              | K.LVNEVTEFAK.T                                    | 1150.30633 | 1 | 8.17E-04 | 0.44  | 2.32   | -     | 517.2   |
| AHQ-8-5, 3512              | K.LVNEVTEFAK.T                                    | 1150.30633 | 2 | 8.12E-06 | 0.92  | 3.50   | -     | 807.1   |
| AHQ-8-6, 3302              | K.LVNEVTEFAK.T                                    | 1150.30633 | 2 | 1.21E-05 | 0.66  | 2.71   | -     | 465.6   |
| AHQ-8-5, 3324 - 3353       | K.LVNEVTEFAK.T                                    | 1150.30633 | 2 | 1.41E-06 | 0.87  | 3.57   | -     | 650.0   |
| AHQ-8-5, 5493              | R.LVRPEVDVMTAFHDNEETFLK.K                         | 2652.98428 | 3 | 1.86E-05 | 0.98  | 6.81   | -     | 1821.3  |
| AHQ-8-5, 4713 - 4718       | R.LVRPEVDVMTAFHDNEETFLK.K                         | 2668.98368 | 3 | 1.58E-08 | 0.98  | 6.45   | -     | 1652.3  |
| AHQ-8-5, 5198 - 5238       | R.LVRPEVDVMTAFHDNEETFLK.K                         | 2781.15719 | 3 | 3.15E-09 | 0.98  | 6.75   | -     | 1808.8  |
| AHQ-8-5, 3158              | R.NECLFQHKDDNP.LR.L                               | 1999.15349 | 3 | 4.79E-04 | 0.76  | 3.58   | -     | 740.6   |
| AHQ-8-5, 3026              | K.QEPEERNECLFQHKDDNP.LR.L                         | 2638.81438 | 3 | 1.22E-04 | 0.75  | 3.79   | -     | 496.2   |
| AHQ-8-6, 4794              | K.QNCELFEQLGEYK.F                                 | 1659.79847 | 2 | 1.32E-07 | 0.87  | 3.25   | -     | 610.5   |
| AHQ-8-5, 4876 - 4936       | K.QNCELFEQLGEYK.F                                 | 1659.79847 | 2 | 1.50E-04 | 0.76  | 3.16   | -     | 499.0   |
| AHQ-8-7, 4006              | R.RHPDYSVWLLLR.L                                  | 1468.72842 | 2 | 2.23E-04 | 0.90  | 3.16   | -     | 937.2   |
| AHQ-8-5, 4128 - 4188       | R.RHPDYSVWLLLR.L                                  | 1468.72842 | 3 | 3.42E-05 | 0.95  | 4.83   | -     | 1757.9  |
| AHQ-8-5, 4192              | R.RHPDYSVWLLLR.L                                  | 1468.72842 | 2 | 6.87E-06 | 0.96  | 3.33   | -     | 1621.2  |
| AHQ-8-6, 5678 - 5735       | R.RHPYFYAPPELLFFAK.R                              | 1900.21293 | 3 | 3.09E-07 | 0.97  | 5.55   | -     | 2027.7  |
| AHQ-8-7, 5613              | R.RHPYFYAPPELLFFAK.R                              | 1900.21293 | 3 | 2.25E-08 | 0.97  | 5.58   | -     | 2175.0  |
| AHQ-8-5, 5756 - 5812       | R.RHPYFYAPPELLFFAK.R                              | 1900.21293 | 3 | 5.72E-10 | 0.97  | 5.49   | -     | 1709.2  |
| AHQ-8-5, 5818 - 5884       | R.RHPYFYAPPELLFFAK.R                              | 1900.21293 | 2 | 4.37E-04 | 0.94  | 4.00   | -     | 1494.4  |
| AHQ-8-5, 5881              | R.RHPYFYAPPELLFFAK.R                              | 1900.21293 | 3 | 9.02E-06 | 0.94  | 4.48   | -     | 1419.2  |
| AHQ-8-5, 5690 - 5758       | R.RHPYFYAPPELLFFAK.R                              | 1900.21293 | 2 | 1.82E-11 | 0.98  | 5.64   | -     | 2328.0  |
| AHQ-8-5, 6408              | K.RM*PCAEDYLSVVLNQLCVLHEK.T                       | 2694.10110 | 3 | 9.02E-06 | 0.95  | 5.78   | -     | 1255.0  |
| AHQ-8-6, 6302              | K.RM*PCAEDYLSVVLNQLCVLHEK.T                       | 2694.10110 | 3 | 3.05E-05 | 0.96  | 5.83   | -     | 1408.0  |
| AHQ-8-5, 4461              | R.RPCFSALEVDETYVPK.E                              | 1913.14041 | 2 | 1.78E-05 | 0.95  | 5.20   | -     | 701.6   |
| AHQ-8-6, 4502              | R.RPCFSALEVDETYVPK.E                              | 1913.14041 | 3 | 1.46E-06 | 0.85  | 4.30   | -     | 746.1   |
| AHQ-8-5, 4545 - 4604       | R.RPCFSALEVDETYVPK.E                              | 1913.14041 | 2 | 2.95E-05 | 0.93  | 4.34   | -     | 632.5   |
| AHQ-8-6, 4406              | R.RPCFSALEVDETYVPK.E                              | 1913.14041 | 3 | 6.34E-04 | 0.74  | 3.34   | -     | 676.9   |
| AHQ-8-6, 4486 - 4487       | R.RPCFSALEVDETYVPK.E                              | 1913.14041 | 2 | 8.04E-06 | 0.93  | 4.29   | -     | 715.3   |
| AHQ-8-5, 4553 - 4630       | R.RPCFSALEVDETYVPK.E                              | 1913.14041 | 3 | 3.37E-05 | 0.91  | 4.84   | -     | 648.7   |
| AHQ-8-6, 4403              | R.RPCFSALEVDETYVPK.E                              | 1913.14041 | 2 | 2.65E-05 | 0.73  | 3.30   | -     | 368.2   |
| AHQ-8-7, 5734              | K.SHCIAEVENDEM*PADLPSLAADFVESK.D                  | 2993.22637 | 3 | 4.76E-06 | 0.90  | 4.44   | -     | 772.5   |
| AHQ-8-5, 5908              | K.SHCIAEVENDEM*PADLPSLAADFVESK.D                  | 2993.22637 | 3 | 7.43E-05 | 0.96  | 5.94   | -     | 991.7   |
| AHQ-8-5, 5896              | K.SHCIAEVENDEM*PADLPSLAADFVESK.D                  | 2993.22637 | 2 | 3.58E-06 | 0.82  | 3.58   | -     | 605.6   |
| AHQ-8-4, 5958 - 6017       | K.SHCIAEVENDEM*PADLPSLAADFVESK.D                  | 2993.22637 | 3 | 4.08E-04 | 0.81  | 3.86   | -     | 412.4   |

|                            |                                       |            |   |          |       |        |       |         |
|----------------------------|---------------------------------------|------------|---|----------|-------|--------|-------|---------|
| AHQ-8-3, 5817 - 5874       | K.SHCIAEVENDEM*PADLPSLAADFVESK.D      | 2993.22637 | 3 | 6.04E-05 | 0.84  | 4.33   | -     | 601.6   |
| AHQ-8-6, 4898              | K.SLHTLFGDKLCTVATLR.E                 | 1934.24913 | 3 | 4.91E-05 | 0.81  | 3.50   | -     | 686.7   |
| AHQ-8-6, 4890              | K.SLHTLFGDKLCTVATLR.E                 | 1934.24913 | 2 | 3.91E-05 | 0.87  | 3.85   | -     | 669.7   |
| AHQ-8-5, 4962              | K.SLHTLFGDKLCTVATLR.E                 | 1934.24913 | 2 | 1.56E-06 | 0.96  | 4.70   | -     | 1133.8  |
| AHQ-8-5, 4957              | K.SLHTLFGDKLCTVATLR.E                 | 1934.24913 | 3 | 1.41E-06 | 0.94  | 4.36   | -     | 1225.3  |
| AHQ-8-5, 1922 - 1981       | K.TCVADESAENCDK.S                     | 1501.53308 | 2 | 1.93E-09 | 0.95  | 3.76   | -     | 1445.1  |
| AHQ-8-6, 1983 - 2050       | K.TCVADESAENCDK.S                     | 1501.53308 | 2 | 2.66E-04 | 0.97  | 4.02   | -     | 2360.3  |
| AHQ-8-5, 4384              | K.TCVADESAENCDKSLHTLFGDKL             | 2500.65848 | 3 | 2.23E-12 | 0.90  | 3.85   | -     | 921.3   |
| AHQ-8-5, 3776 - 3777       | K.TYETTLEKCCAAADPHECYAK.V             | 2522.72734 | 3 | 2.21E-09 | 0.93  | 5.07   | -     | 918.1   |
| AHQ-8-6, 5406              | K.VFDEFKPLVEEPQNLIK.Q                 | 2046.35142 | 3 | 6.67E-05 | 0.96  | 4.78   | -     | 1451.0  |
| AHQ-8-5, 5570              | K.VFDEFKPLVEEPQNLIK.Q                 | 2046.35142 | 2 | 4.45E-05 | 0.88  | 3.92   | -     | 496.0   |
| AHQ-8-5, 5485              | K.VFDEFKPLVEEPQNLIK.Q                 | 2046.35142 | 2 | 2.60E-05 | 0.89  | 4.03   | -     | 459.0   |
| AHQ-8-7, 5324 - 5336       | K.VFDEFKPLVEEPQNLIK.Q                 | 2046.35142 | 3 | 2.05E-05 | 0.96  | 4.74   | -     | 1421.7  |
| AHQ-8-5, 5673              | K.VFDEFKPLVEEPQNLIK.Q                 | 2046.35142 | 2 | 1.92E-04 | 0.44  | 2.77   | -     | 224.4   |
| AHQ-8-1, 5583              | K.VFDEFKPLVEEPQNLIK.Q                 | 2046.35142 | 3 | 1.05E-06 | 0.96  | 4.80   | -     | 1811.6  |
| AHQ-8-5, 5373              | K.VFDEFKPLVEEPQNLIK.Q                 | 2046.35142 | 2 | 2.20E-09 | 0.94  | 4.50   | -     | 662.3   |
| AHQ-8-1, 5521 - 5580       | K.VFDEFKPLVEEPQNLIK.Q                 | 2046.35142 | 2 | 5.86E-04 | 0.78  | 3.72   | -     | 313.3   |
| AHQ-8-5, 5370              | K.VFDEFKPLVEEPQNLIK.Q                 | 2046.35142 | 3 | 7.89E-06 | 0.93  | 4.42   | -     | 1150.3  |
| AHQ-8-5, 5225              | K.VFDEFKPLVEEPQNLIK.Q                 | 2046.35142 | 2 | 4.33E-05 | 0.80  | 3.52   | -     | 430.2   |
| AHQ-8-5, 3130 - 3210       | K.VHTECCHGDILLECADDR.A                | 2091.20307 | 2 | 1.90E-06 | 0.96  | 5.09   | -     | 1420.0  |
| AHQ-8-5, 3126 - 3205       | K.VHTECCHGDILLECADDR.A                | 2091.20307 | 3 | 2.44E-04 | 0.93  | 4.43   | -     | 917.3   |
| AHQ-8-6, 3660 - 3674       | K.VHTECCHGDILLECADDRADLAK.Y           | 2589.77855 | 3 | 6.63E-05 | 0.94  | 5.78   | -     | 628.0   |
| AHQ-8-5, 3692              | K.VHTECCHGDILLECADDRADLAK.Y           | 2589.77855 | 3 | 9.74E-05 | 0.93  | 5.11   | -     | 684.3   |
| AHQ-8-5, 3810              | K.VHTECCHGDILLECADDRADLAK.Y           | 2589.77855 | 3 | 1.10E-07 | 0.86  | 4.36   | -     | 697.3   |
| AHQ-8-5, 3704              | K.VHTECCHGDILLECADDRADLAK.Y           | 2589.77855 | 2 | 1.49E-04 | 0.86  | 3.57   | -     | 703.2   |
| AHQ-8-7, 2368 - 2381       | K.YICENQDSISSK.L                      | 1445.53420 | 2 | 6.36E-06 | 0.80  | 3.28   | -     | 527.6   |
| AHQ-8-6, 2374 - 2390       | K.YICENQDSISSK.L                      | 1445.53420 | 2 | 2.72E-08 | 0.93  | 4.12   | -     | 973.5   |
| AHQ-8-6, 2502              | K.YICENQDSISSK.L                      | 1445.53420 | 2 | 4.28E-06 | 0.86  | 3.45   | -     | 586.8   |
| AHQ-8-8, 2361              | K.YICENQDSISSK.L                      | 1445.53420 | 2 | 1.47E-04 | 0.90  | 3.44   | -     | 787.7   |
| AHQ-8-4, 2390              | K.YICENQDSISSK.L                      | 1445.53420 | 2 | 2.94E-04 | 0.74  | 3.40   | -     | 474.9   |
| AHQ-8-5, 2476              | K.YICENQDSISSK.L                      | 1445.53420 | 2 | 2.60E-06 | 0.89  | 3.26   | -     | 697.8   |
| AHQ-8-5, 2390              | K.YICENQDSISSK.L                      | 1445.53420 | 1 | 3.05E-04 | 0.70  | 3.21   | -     | 301.0   |
| AHQ-8-5, 2302 - 2381       | K.YICENQDSISSK.L                      | 1445.53420 | 2 | 5.92E-08 | 0.90  | 3.71   | -     | 801.3   |
| gj 4826898 ref NP_005013.1 | profilin 1, profilin-1 [Homo sapiens] |            |   | 2.64E-12 | 13.94 | 160.29 | 58.60 | 15054.2 |
| AHQ-8-12, 2540 - 2562      | K.CYEMASHLR.R                         | 1168.32854 | 2 | 7.49E-05 | 0.90  | 2.83   | -     | 1419.7  |
| AHQ-8-13, 2080             | K.CYEM*ASHLR.R                        | 1184.32794 | 2 | 1.46E-04 | 0.78  | 2.64   | -     | 865.5   |
| AHQ-8-13, 1967 - 2023      | K.CYEM*ASHLR.R                        | 1184.32794 | 2 | 1.24E-04 | 0.92  | 3.13   | -     | 1448.6  |
| AHQ-8-13, 1854 - 1910      | K.CYEM*ASHLR.R                        | 1184.32794 | 2 | 3.27E-05 | 0.92  | 3.17   | -     | 1416.1  |
| AHQ-8-13, 2179 - 2237      | K.CYEM*ASHLR.R                        | 1184.32794 | 2 | 4.33E-04 | 0.91  | 3.11   | -     | 1289.8  |
| AHQ-8-13, 4317 - 4373      | K.DRSSFYVNGLTGGQK.C                   | 1742.91379 | 2 | 1.27E-06 | 0.92  | 4.42   | -     | 675.0   |
| AHQ-8-13, 4160 - 4220      | K.DRSSFYVNGLTGGQK.C                   | 1742.91379 | 2 | 4.76E-12 | 0.98  | 5.53   | -     | 1660.3  |
| AHQ-8-13, 4176 - 4179      | K.DRSSFYVNGLTGGQK.C                   | 1742.91379 | 2 | 4.54E-12 | 0.98  | 5.84   | -     | 1319.4  |
| AHQ-8-13, 4022 - 4026      | K.DRSSFYVNGLTGGQK.C                   | 1742.91379 | 3 | 5.44E-05 | 0.88  | 3.79   | -     | 1057.9  |
| AHQ-8-13, 4028             | K.DRSSFYVNGLTGGQK.C                   | 1742.91379 | 2 | 2.64E-12 | 0.97  | 5.50   | -     | 1253.7  |
| AHQ-8-12, 5054 - 5120      | R.DSLLDQGEFSDMLR.T                    | 1626.77023 | 2 | 6.02E-04 | 0.93  | 3.48   | -     | 1446.4  |
| AHQ-8-12, 4275 - 4351      | R.DSLLDQGEFSDMLR.T                    | 1642.76963 | 2 | 5.94E-05 | 0.87  | 3.46   | -     | 974.6   |
| AHQ-8-13, 5174 - 5230      | R.DSLLDQGEFSDMLR.T                    | 1626.77023 | 2 | 2.77E-11 | 0.97  | 4.43   | -     | 2145.0  |
| AHQ-8-13, 4318 - 4374      | R.DSLLDQGEFSDMLR.T                    | 1642.76963 | 2 | 1.50E-07 | 0.93  | 4.04   | -     | 1156.2  |
| AHQ-8-13, 5080 - 5124      | R.DSLLDQGEFSDMLR.T                    | 1626.77023 | 2 | 2.51E-04 | 0.93  | 3.67   | -     | 1423.4  |
| AHQ-8-14, 4361 - 4363      | R.DSLLDQGEFSDMLR.T                    | 1642.76963 | 2 | 5.83E-05 | 0.93  | 4.20   | -     | 1053.7  |
| AHQ-8-14, 4483             | R.DSLLDQGEFSDMLR.T                    | 1642.76963 | 2 | 1.16E-04 | 0.88  | 3.12   | -     | 1381.4  |
| AHQ-8-14, 5149             | R.DSLLDQGEFSDMLR.T                    | 1626.77023 | 2 | 4.79E-11 | 0.97  | 4.89   | -     | 1961.9  |
| AHQ-8-13, 4343 - 4399      | R.DSLLDQGEFSDMLR.T                    | 1642.76963 | 2 | 2.08E-04 | 0.87  | 3.15   | -     | 1082.7  |
| AHQ-8-13, 4434 - 4490      | R.DSLLDQGEFSDMLR.T                    | 1642.76963 | 2 | 6.39E-07 | 0.95  | 4.30   | -     | 1616.6  |
| AHQ-8-14, 5911             | R.DSLLDQGEFSDMLR.T                    | 1626.77023 | 2 | 1.10E-06 | 0.96  | 3.97   | -     | 1677.4  |
| AHQ-8-13, 4483 - 4539      | R.DSLLDQGEFSDMLR.T                    | 1642.76963 | 2 | 1.67E-08 | 0.95  | 4.31   | -     | 1109.0  |
| AHQ-8-14, 5390             | R.DSLLDQGEFSDMLR.T                    | 1642.76963 | 2 | 2.90E-04 | 0.89  | 3.14   | -     | 1269.5  |
| AHQ-8-14, 5287             | R.DSLLDQGEFSDMLR.T                    | 1642.76963 | 2 | 1.35E-04 | 0.94  | 3.74   | -     | 1464.2  |
| AHQ-8-13, 4599 - 4671      | R.DSLLDQGEFSDMLR.T                    | 1642.76963 | 2 | 1.11E-08 | 0.96  | 4.04   | -     | 1746.4  |
| AHQ-8-13, 4727 - 4785      | R.DSLLDQGEFSDMLR.T                    | 1642.76963 | 2 | 3.55E-04 | 0.94  | 3.72   | -     | 1792.5  |
| AHQ-8-13, 4801 - 4861      | R.DSLLDQGEFSDMLR.T                    | 1642.76963 | 2 | 9.88E-04 | 0.95  | 4.32   | -     | 1513.3  |
| AHQ-8-13, 5195 - 5251      | R.DSLLDQGEFSDMLR.T                    | 1626.77023 | 2 | 5.34E-05 | 0.96  | 3.92   | -     | 1812.2  |
| AHQ-8-13, 4976 - 5030      | R.DSLLDQGEFSDMLR.T                    | 1642.76963 | 2 | 3.27E-05 | 0.94  | 3.84   | -     | 1464.2  |
| AHQ-8-13, 5296 - 5356      | R.DSLLDQGEFSDMLR.T                    | 1642.76963 | 2 | 2.38E-04 | 0.95  | 3.66   | -     | 1802.7  |
| AHQ-8-13, 5307 - 5363      | R.DSLLDQGEFSDMLR.T                    | 1626.77023 | 2 | 5.17E-08 | 0.98  | 5.19   | -     | 2377.6  |
| AHQ-8-13, 5419             | R.DSLLDQGEFSDMLR.T                    | 1626.77023 | 2 | 9.26E-06 | 0.95  | 3.85   | -     | 1697.5  |
| AHQ-8-13, 4952 - 5022      | R.DSLLDQGEFSDMLR.T                    | 1626.77023 | 2 | 5.72E-09 | 0.94  | 3.43   | -     | 1684.1  |
| AHQ-8-13, 4548 - 4624      | R.DSLLDQGEFSDMLR.T                    | 1642.76963 | 2 | 1.34E-07 | 0.96  | 3.74   | -     | 2021.6  |
| AHQ-8-13, 3700 - 3755      | K.DSPSWAAVPGK.T                       | 1214.35211 | 2 | 4.69E-04 | 0.86  | 3.41   | -     | 990.8   |
| AHQ-8-13, 3578 - 3643      | K.DSPSWAAVPGK.T                       | 1214.35211 | 2 | 3.04E-04 | 0.89  | 3.03   | -     | 1115.4  |
| AHQ-8-13, 4387             | R.SSFYVNGLTGGQK.C                     | 1471.63957 | 1 | 1.23E-06 | 0.62  | 2.42   | -     | 546.9   |
| AHQ-8-13, 4376 - 4432      | R.SSFYVNGLTGGQK.C                     | 1471.63957 | 2 | 1.88E-08 | 0.91  | 3.98   | -     | 673.0   |
| AHQ-8-13, 4360 - 4418      | R.SSFYVNGLTGGQK.C                     | 1471.63957 | 1 | 3.81E-08 | 0.51  | 2.49   | -     | 448.2   |
| AHQ-8-12, 4272 - 4339      | R.SSFYVNGLTGGQK.C                     | 1471.63957 | 2 | 6.41E-09 | 0.96  | 4.60   | -     | 1293.8  |
| AHQ-8-13, 4342 - 4422      | R.SSFYVNGLTGGQK.C                     | 1471.63957 | 2 | 1.74E-07 | 0.93  | 3.93   | -     | 971.2   |
| AHQ-8-13, 4499             | R.SSFYVNGLTGGQK.C                     | 1471.63957 | 2 | 1.53E-04 | 0.81  | 2.85   | -     | 658.0   |
| AHQ-8-13, 4234 - 4235      | R.SSFYVNGLTGGQK.C                     | 1471.63957 | 1 | 1.31E-06 | 0.35  | 2.59   | -     | 335.5   |
| AHQ-8-13, 4226 - 4286      | R.SSFYVNGLTGGQK.C                     | 1471.63957 | 2 | 1.31E-05 | 0.95  | 4.85   | -     | 910.3   |
| AHQ-8-14, 4241 - 4251      | R.SSFYVNGLTGGQK.C                     | 1471.63957 | 2 | 1.35E-07 | 0.93  | 3.94   | -     | 848.8   |
| AHQ-8-14, 4437 - 4501      | R.SSFYVNGLTGGQK.C                     | 1471.63957 | 2 | 1.17E-06 | 0.95  | 3.44   | -     | 1492.9  |
| AHQ-8-12, 4138 - 4142      | R.SSFYVNGLTGGQK.C                     | 1471.63957 | 2 | 1.23E-05 | 0.94  | 4.20   | -     | 990.0   |
| AHQ-8-13, 4523 - 4588      | R.SSFYVNGLTGGQK.C                     | 1471.63957 | 1 | 9.20E-06 | 0.68  | 2.67   | -     | 527.2   |
| AHQ-8-12, 3162 - 3239      | K.STGGAPTFNVTVTK.T                    | 1380.52843 | 2 | 2.25E-05 | 0.75  | 2.81   | -     | 464.5   |
| AHQ-8-13, 3278 - 3334      | K.STGGAPTFNVTVTK.T                    | 1380.52843 | 2 | 7.09E-06 | 0.77  | 3.21   | -     | 371.6   |
| AHQ-8-13, 3230             | K.STGGAPTFNVTVTK.T                    | 1380.52843 | 1 | 1.02E-04 | 0.54  | 2.72   | -     | 425.8   |
| AHQ-8-13, 3435 - 3503      | K.STGGAPTFNVTVTK.T                    | 1380.52843 | 2 | 2.13E-07 | 0.85  | 3.59   | -     | 397.4   |
| AHQ-8-13, 3217 - 3287      | K.STGGAPTFNVTVTK.T                    | 1380.52843 | 2 | 4.96E-05 | 0.84  | 3.35   | -     | 549.9   |
| AHQ-8-13, 3079 - 3134      | K.STGGAPTFNVTVTK.T                    | 1380.52843 | 2 | 2.54E-07 | 0.89  | 3.65   | -     | 553.3   |
| AHQ-8-13, 3387             | K.STGGAPTFNVTVTK.T                    | 1380.52843 | 1 | 1.09E-04 | 0.11  | 2.19   | -     | 212.4   |
| AHQ-8-12, 3171             | K.STGGAPTFNVTVTK.T                    | 1380.52843 | 1 | 1.84E-04 | 0.39  | 2.44   | -     | 332.1   |
| AHQ-8-13, 3022             | K.STGGAPTFNVTVTKTDK.T                 | 1724.89354 | 2 | 1.75E-04 | 0.65  | 2.81   | -     | 411.9   |
| AHQ-8-13, 3184             | K.STGGAPTFNVTVTKTDK.T                 | 1724.89354 | 2 | 2.05E-05 | 0.72  | 2.94   | -     | 529.3   |
| AHQ-8-13, 3059             | K.TDKTLVLLM*GK.E                      | 1235.51929 | 2 | 1.69E-04 | 0.90  | 3.12   | -     | 986.4   |
| AHQ-8-13, 3195 - 3215      | K.TDKTLVLLM*GK.E                      | 1235.51929 | 2 | 1.14E-04 | 0.91  | 3.24   | -     | 1074.2  |
| AHQ-8-12, 3631 - 3635      | K.TDKTLVLLM*GK.E                      | 1219.51989 | 2 | 6.16E-04 | 0.69  | 2.69   | -     | 687.2   |
| AHQ-8-13, 5454 - 5510      | K.TFVNITPAEVGVLVGK.D                  | 1644.93630 | 2 | 2.97E-06 | 0.95  | 4.67   | -     | 884.2   |
| AHQ-8-13, 5554 - 5610      | K.TFVNITPAEVGVLVGK.D                  | 1644.93630 | 2 | 2.24E-08 | 0.93  | 4.35   | -     | 909.7   |
| AHQ-8-13, 5631 - 5707      | K.TFVNITPAEVGVLVGK.D                  | 1644.93630 | 2 | 8.70E-05 | 0.94  | 4.55   | -     | 968.8   |
| AHQ-8-13, 5587 - 5623      | K.TFVNITPAEVGVLVGK.D                  | 1644.93630 | 3 | 7.13E-06 | 0.96  | 5.37   | -     | 1409.1  |
| AHQ-8-13, 5438 - 5498      | K.TFVNITPAEVGVLVGK.D                  | 1644.93630 | 2 | 8.00E-06 | 0.92  | 4.74   | -     | 652.4   |
| AHQ-8-13, 5450 - 5463      | K.TFVNITPAEVGVLVGK.D                  | 1644.93630 | 3 | 3.86E-06 | 0.94  | 3.31   | -     | 1912.6  |
| AHQ-8-13, 5288 - 5359      | K.TFVNITPAEVGVLVGKDR.S                | 1916.21052 | 3 | 5.34E-04 | 0.78  | 3.64   | -     | 920.9   |
| AHQ-8-13, 5184             | K.TFVNITPAEVGVLVGKDR.S                | 1916.21052 | 2 | 1.74E-06 | 0.85  | 3.90   | -     | 487.0   |
| AHQ-8-13, 5166 - 5238      | K.TFVNITPAEVGVLVGKDR.S                | 1916.21052 | 3 | 7.24E-06 | 0.70  | 3.32   | -     | 708.9   |
| AHQ-8-13, 3083             | R.KTSTGGAPTFNVTVTK.T                  | 1609.80568 | 2 | 1.79E-06 | 0.79  | 3.01   | -     | 728.1   |
| AHQ-8-13, 3146 - 3207      | K.TLVLLM*GK.E                         | 891.15418  | 2 | 2.84E-04 | 0.77  | 2.85   | -     | 603.6   |
| AHQ-8-13, 3991             | K.TLVLLM*GK.E                         | 875.15478  | 2 | 1.73E-05 | 0.87  | 2.91   | -     | 759.5   |

|                             |                                                                       |            |   |          |      |       |       |         |
|-----------------------------|-----------------------------------------------------------------------|------------|---|----------|------|-------|-------|---------|
| AHQ-8-13-, 3819             | K.TLVLLMGK.E                                                          | 875.15478  | 1 | 4.62E-04 | 0.24 | 2.71  | -     | 189.5   |
| gj 13775198 ref NP_112576.1 | SH3 domain binding glutamic acid-rich protein like 3; SH3BGR3-like pr |            |   |          |      |       |       |         |
| AHQ-8-13-, 4530 - 4604      | R.IQYQLVDISQDNALR.D                                                   | 1776.97168 | 2 | 2.69E-12 | 3.06 | 40.29 | 31.20 | 10437.7 |
| AHQ-8-13-, 4699 - 4759      | R.IQYQLVDISQDNALR.D                                                   | 1776.97168 | 2 | 8.15E-11 | 0.97 | 5.60  | -     | 1867.8  |
| AHQ-8-13-, 4542             | R.IQYQLVDISQDNALR.D                                                   | 1776.97168 | 3 | 1.28E-04 | 0.96 | 5.43  | -     | 1935.9  |
| AHQ-8-14-, 4538 - 4539      | R.IQYQLVDISQDNALR.D                                                   | 1776.97168 | 2 | 5.51E-12 | 0.98 | 5.81  | -     | 1871.2  |
| AHQ-8-14-, 4331 - 4393      | R.IQYQLVDISQDNALRDEM.R.A                                              | 2324.55691 | 3 | 4.50E-06 | 0.58 | 3.14  | -     | 481.5   |
| AHQ-8-13-, 4886 - 4934      | R.IQYQLVDISQDNALRDEM.R.A                                              | 2308.55751 | 3 | 5.46E-05 | 0.84 | 3.94  | -     | 604.4   |
| AHQ-8-13-, 4980             | R.IQYQLVDISQDNALRDEM.R.A                                              | 2308.55751 | 3 | 1.50E-08 | 0.69 | 3.22  | -     | 601.5   |
| AHQ-8-13-, 4702 - 4774      | R.IQYQLVDISQDNALRDEM.R.A                                              | 2308.55751 | 3 | 1.16E-05 | 0.57 | 3.28  | -     | 486.3   |
| AHQ-8-13-, 4411 - 4477      | R.IQYQLVDISQDNALRDEM.R.A                                              | 2324.55691 | 3 | 2.99E-05 | 0.78 | 3.86  | -     | 430.4   |
| AHQ-8-13-, 1775 - 1834      | R.VYSTSVTGSR.E                                                        | 1057.13940 | 2 | 6.85E-04 | 0.89 | 3.20  | -     | 878.6   |
| AHQ-8-13-, 2070             | R.VYSTSVTGSR.E                                                        | 1057.13940 | 2 | 8.06E-06 | 0.82 | 2.60  | -     | 972.3   |
| AHQ-8-13-, 1890 - 1954      | R.VYSTSVTGSR.E                                                        | 1057.13940 | 2 | 3.67E-04 | 0.86 | 2.95  | -     | 876.1   |
| gj 4507877 ref NP_003364.1  | vinculin isoform VCL [Homo sapiens]                                   |            |   |          |      |       |       |         |
| AHQ-8-14-, 6371 - 6374      | K.AIPDLTAPVAAVQAAVSNLVR.V                                             | 2077.41342 | 2 | 5.08E-06 | 0.94 | 4.25  | -     | 818.5   |
| AHQ-8-12-, 6282             | K.AIPDLTAPVAAVQAAVSNLVR.V                                             | 2077.41342 | 2 | 1.31E-04 | 0.85 | 3.28  | -     | 651.0   |
| AHQ-8-11-, 6259 - 6317      | K.AIPDLTAPVAAVQAAVSNLVR.V                                             | 2077.41342 | 2 | 2.96E-08 | 0.96 | 4.41  | -     | 1178.2  |
| AHQ-8-10-, 6210 - 6214      | K.AIPDLTAPVAAVQAAVSNLVR.V                                             | 2077.41342 | 2 | 7.41E-09 | 0.97 | 4.78  | -     | 1353.4  |
| AHQ-8-7-, 6277 - 6336       | K.AIPDLTAPVAAVQAAVSNLVR.V                                             | 2077.41342 | 2 | 2.53E-07 | 0.93 | 4.36  | -     | 763.0   |
| AHQ-8-3-, 6397 - 6457       | K.AIPDLTAPVAAVQAAVSNLVR.V                                             | 2077.41342 | 2 | 7.12E-07 | 0.86 | 3.96  | -     | 637.4   |
| AHQ-8-3-, 6456              | K.AIPDLTAPVAAVQAAVSNLVR.V                                             | 2077.41342 | 3 | 2.13E-04 | 0.88 | 3.74  | -     | 1277.5  |
| AHQ-8-4-, 6485 - 6566       | K.AIPDLTAPVAAVQAAVSNLVR.V                                             | 2077.41342 | 2 | 4.66E-06 | 0.90 | 4.13  | -     | 697.7   |
| AHQ-8-6-, 6387 - 6388       | K.AIPDLTAPVAAVQAAVSNLVR.V                                             | 2077.41342 | 2 | 4.41E-11 | 0.96 | 5.11  | -     | 859.8   |
| AHQ-8-4-, 6549              | K.AIPDLTAPVAAVQAAVSNLVR.V                                             | 2077.41342 | 3 | 7.69E-04 | 0.91 | 4.23  | -     | 1086.6  |
| AHQ-8-5-, 6496              | K.AIPDLTAPVAAVQAAVSNLVR.V                                             | 2077.41342 | 2 | 2.93E-12 | 0.97 | 5.76  | -     | 1152.9  |
| AHQ-8-3-, 3401              | R.ALASQLDLSK.D                                                        | 1174.32943 | 2 | 2.17E-04 | 0.64 | 2.89  | -     | 634.8   |
| AHQ-8-6-, 3331 - 3332       | R.ALASQLDLSK.D                                                        | 1174.32943 | 2 | 5.25E-06 | 0.91 | 3.74  | -     | 890.3   |
| AHQ-8-7-, 3209 - 3284       | R.ALASQLDLSK.D                                                        | 1174.32943 | 2 | 2.24E-04 | 0.87 | 2.79  | -     | 1013.5  |
| AHQ-8-5-, 3364              | R.ALASQLDLSK.D                                                        | 1174.32943 | 2 | 2.33E-05 | 0.90 | 3.12  | -     | 1053.7  |
| AHQ-8-5-, 3513 - 3581       | K.AQVVSQGLDVLTAQ.V                                                    | 1458.64233 | 2 | 1.40E-08 | 0.90 | 3.30  | -     | 1346.2  |
| AHQ-8-4-, 3573              | K.AQVVSQGLDVLTAQ.V                                                    | 1458.64233 | 2 | 1.83E-10 | 0.96 | 4.50  | -     | 1384.0  |
| AHQ-8-8-, 3450              | K.AQVVSQGLDVLTAQ.V                                                    | 1458.64233 | 2 | 5.75E-08 | 0.96 | 3.85  | -     | 1474.1  |
| AHQ-8-3-, 3589              | K.AQVVSQGLDVLTAQ.V                                                    | 1458.64233 | 2 | 3.09E-07 | 0.97 | 4.11  | -     | 1743.4  |
| AHQ-8-5-, 2528              | K.AVAGNISDPGLQK.S                                                     | 1270.41721 | 2 | 9.04E-05 | 0.78 | 2.92  | -     | 590.7   |
| AHQ-8-6-, 2516 - 2522       | K.AVAGNISDPGLQK.S                                                     | 1270.41721 | 2 | 7.42E-06 | 0.68 | 2.91  | -     | 565.8   |
| AHQ-8-7-, 2497              | K.AVAGNISDPGLQK.S                                                     | 1270.41721 | 2 | 2.26E-05 | 0.81 | 2.98  | -     | 651.1   |
| AHQ-8-4-, 2517              | K.AVAGNISDPGLQK.S                                                     | 1270.41721 | 2 | 8.68E-05 | 0.84 | 3.33  | -     | 731.5   |
| AHQ-8-5-, 5549              | K.CDRVDQLTAQLADLAAR.G                                                 | 1918.12182 | 3 | 6.64E-07 | 0.89 | 4.57  | -     | 1204.2  |
| AHQ-8-4-, 5581              | K.CDRVDQLTAQLADLAAR.G                                                 | 1918.12182 | 3 | 1.07E-04 | 0.94 | 4.47  | -     | 1666.8  |
| AHQ-8-6-, 5456              | K.CDRVDQLTAQLADLAAR.G                                                 | 1918.12182 | 2 | 6.58E-04 | 0.83 | 3.28  | -     | 883.7   |
| AHQ-8-5-, 5552              | K.CDRVDQLTAQLADLAAR.G                                                 | 1918.12182 | 2 | 9.08E-08 | 0.91 | 3.76  | -     | 989.1   |
| AHQ-8-6-, 5446              | K.CDRVDQLTAQLADLAAR.G                                                 | 1918.12182 | 3 | 5.14E-06 | 0.93 | 4.61  | -     | 1336.6  |
| AHQ-8-5-, 2342 - 2348       | R.DPSASPGDAGEQAIR.Q                                                   | 1471.51169 | 2 | 4.00E-09 | 0.95 | 4.11  | -     | 1008.1  |
| AHQ-8-7-, 2329 - 2330       | R.DPSASPGDAGEQAIR.Q                                                   | 1471.51169 | 2 | 2.75E-07 | 0.92 | 4.10  | -     | 830.4   |
| AHQ-8-4-, 2335              | R.DPSASPGDAGEQAIR.Q                                                   | 1471.51169 | 2 | 9.21E-05 | 0.78 | 3.33  | -     | 455.0   |
| AHQ-8-6-, 2338              | R.DPSASPGDAGEQAIR.Q                                                   | 1471.51169 | 2 | 6.77E-05 | 0.80 | 3.17  | -     | 569.6   |
| AHQ-8-8-, 2339              | R.DPSASPGDAGEQAIR.Q                                                   | 1471.51169 | 2 | 9.09E-04 | 0.80 | 3.44  | -     | 577.5   |
| AHQ-8-4-, 4630 - 4637       | K.ELLVPLISAM.K.I                                                      | 1230.54265 | 2 | 2.70E-04 | 0.84 | 3.66  | -     | 671.8   |
| AHQ-8-5-, 2778              | R.ELTPQVVAAR.I                                                        | 1171.32878 | 2 | 5.72E-04 | 0.92 | 3.01  | -     | 1349.0  |
| AHQ-8-6-, 3050              | K.ETVQTTEDQILKR.D                                                     | 1561.71942 | 2 | 6.81E-05 | 0.85 | 3.10  | -     | 931.2   |
| AHQ-8-4-, 3054 - 3058       | K.ETVQTTEDQILKR.D                                                     | 1561.71942 | 2 | 2.60E-05 | 0.84 | 3.35  | -     | 670.8   |
| AHQ-8-5-, 3061              | K.ETVQTTEDQILKR.D                                                     | 1561.71942 | 2 | 1.83E-06 | 0.70 | 2.83  | -     | 579.2   |
| AHQ-8-14-, 3101             | K.ETVQTTEDQILKR.D                                                     | 1561.71942 | 2 | 1.47E-04 | 0.57 | 2.94  | -     | 416.6   |
| AHQ-8-4-, 6557 - 6615       | K.GILEYLTVAEVVETM*EDLVYTK.N                                           | 2633.99263 | 3 | 6.34E-10 | 0.96 | 5.27  | -     | 1608.3  |
| AHQ-8-5-, 6506 - 6580       | K.GILEYLTVAEVVETM*EDLVYTK.N                                           | 2633.99263 | 3 | 7.78E-09 | 0.96 | 5.00  | -     | 1980.0  |
| AHQ-8-5-, 6364              | R.GILSGTSDLLLTDFDAEVR.K                                               | 2037.25656 | 2 | 2.70E-06 | 0.93 | 4.07  | -     | 1103.1  |
| AHQ-8-6-, 6200 - 6262       | R.GILSGTSDLLLTDFDAEVR.K                                               | 2037.25656 | 2 | 1.12E-06 | 0.93 | 4.53  | -     | 861.8   |
| AHQ-8-4-, 6417              | R.GILSGTSDLLLTDFDAEVR.K                                               | 2037.25656 | 2 | 4.08E-05 | 0.97 | 5.97  | -     | 1119.3  |
| AHQ-8-4-, 6135 - 6203       | R.GILSGTSDLLLTDFDAEVRK.I                                              | 2165.42947 | 2 | 1.54E-10 | 0.93 | 4.55  | -     | 906.6   |
| AHQ-8-4-, 3542              | K.GWLRDPSASPGDAGEQAIR.Q                                               | 1984.11876 | 3 | 1.04E-10 | 0.90 | 4.79  | -     | 771.6   |
| AHQ-8-4-, 3547              | K.GWLRDPSASPGDAGEQAIR.Q                                               | 1984.11876 | 2 | 2.62E-04 | 0.86 | 3.99  | -     | 609.3   |
| AHQ-8-4-, 2277              | K.IAELCDDPKER.D                                                       | 1347.47690 | 2 | 1.50E-05 | 0.56 | 2.66  | -     | 426.8   |
| AHQ-8-4-, 4279              | K.KIDAAQNWLADPNNGGPEGEEQIR.G                                          | 2509.67332 | 3 | 1.81E-06 | 0.97 | 6.37  | -     | 1797.7  |
| AHQ-8-7-, 4037 - 4097       | K.KIDAAQNWLADPNNGGPEGEEQIR.G                                          | 2509.67332 | 3 | 7.05E-07 | 0.87 | 4.44  | -     | 830.9   |
| AHQ-8-5-, 4161 - 4225       | K.KIDAAQNWLADPNNGGPEGEEQIR.G                                          | 2509.67332 | 3 | 5.06E-08 | 0.93 | 5.05  | -     | 874.6   |
| AHQ-8-6-, 4031 - 4102       | K.KIDAAQNWLADPNNGGPEGEEQIR.G                                          | 2509.67332 | 3 | 5.72E-04 | 0.80 | 4.10  | -     | 519.5   |
| AHQ-8-4-, 4282              | K.KIDAAQNWLADPNNGGPEGEEQIR.G                                          | 2509.67332 | 2 | 4.75E-06 | 0.83 | 3.67  | -     | 505.6   |
| AHQ-8-4-, 3429              | R.LANVMMGPYR.Q                                                        | 1152.41560 | 2 | 1.80E-04 | 0.87 | 3.28  | -     | 732.7   |
| AHQ-8-4-, 2306              | R.LANVMM*GPYR.Q                                                       | 1184.41440 | 2 | 3.78E-04 | 0.93 | 3.97  | -     | 899.3   |
| AHQ-8-4-, 2954              | R.LANVMM*GPYR.Q                                                       | 1168.41500 | 2 | 2.65E-05 | 0.69 | 3.30  | -     | 535.6   |
| AHQ-8-4-, 4141 - 4201       | K.LLVAATAPPDAPNREEVFDER.A                                             | 2382.61458 | 3 | 1.17E-04 | 0.82 | 3.65  | -     | 731.4   |
| AHQ-8-3-, 4176 - 4194       | K.LLVAATAPPDAPNREEVFDER.A                                             | 2382.61458 | 3 | 1.30E-05 | 0.75 | 3.26  | -     | 725.6   |
| AHQ-8-4-, 4210              | R.LTDELAPPKPLPEGEVPPRPPPEEK.D                                         | 3025.44391 | 3 | 3.60E-05 | 0.69 | 3.38  | -     | 761.4   |
| AHQ-8-4-, 4311              | R.LTDELAPPKPLPEGEVPPRPPPEEK.D                                         | 4028.46845 | 3 | 7.62E-05 | 0.66 | 3.04  | -     | 478.5   |
| AHQ-8-4-, 4425              | K.LVQAAQMLQSDPYSVPAR.D                                                | 1975.25833 | 3 | 5.68E-06 | 0.90 | 3.93  | -     | 1200.6  |
| AHQ-8-5-, 3638 - 3640       | K.LVQAAQMLQSDPYSVPAR.D                                                | 1991.25773 | 2 | 1.05E-06 | 0.94 | 4.69  | -     | 812.4   |
| AHQ-8-11-, 3555             | K.LVQAAQMLQSDPYSVPAR.D                                                | 1991.25773 | 2 | 1.40E-04 | 0.89 | 3.32  | -     | 831.1   |
| AHQ-8-4-, 3661              | K.LVQAAQMLQSDPYSVPAR.D                                                | 1991.25773 | 2 | 9.26E-07 | 0.93 | 4.17  | -     | 722.1   |
| AHQ-8-4-, 2315              | R.M*ALLM*AEEM*SR.L                                                    | 1201.46351 | 2 | 6.18E-05 | 0.91 | 3.06  | -     | 1207.0  |
| AHQ-8-4-, 2929              | K.M*LGQM*TDQVADLR.A                                                   | 1510.71935 | 2 | 3.40E-04 | 0.96 | 3.82  | -     | 1844.9  |
| AHQ-8-6-, 3642              | K.M*LGQMTDQVADLR.A                                                    | 1494.71995 | 2 | 1.23E-04 | 0.97 | 3.92  | -     | 2063.5  |
| AHQ-8-5-, 2930              | K.M*LGQM*TDQVADLR.A                                                   | 1510.71935 | 2 | 2.28E-05 | 0.88 | 3.24  | -     | 1092.6  |
| AHQ-8-4-, 4058              | K.MLGM*TDQVADLR.A                                                     | 1478.72055 | 2 | 4.69E-06 | 0.97 | 4.40  | -     | 1719.1  |
| AHQ-8-5-, 3680 - 3689       | K.M*LGQMTDQVADLR.A                                                    | 1494.71995 | 2 | 1.21E-04 | 0.95 | 3.66  | -     | 1654.2  |
| AHQ-8-5-, 4412 - 4413       | R.M*QEAM*QTEVSDVFSDTTPIK.L                                            | 2391.61544 | 2 | 1.78E-06 | 0.68 | 3.05  | -     | 424.6   |
| AHQ-8-4-, 3237 - 3250       | K.M*SAEINEIIR.V                                                       | 1192.36823 | 2 | 4.71E-08 | 0.96 | 3.89  | -     | 1678.0  |
| AHQ-8-5-, 3224              | K.M*SAEINEIIR.V                                                       | 1192.36823 | 2 | 2.25E-08 | 0.94 | 3.49  | -     | 1297.4  |
| AHQ-8-4-, 2869              | K.M*SAEINEIIR.V                                                       | 1192.36823 | 2 | 2.28E-08 | 0.82 | 2.62  | -     | 836.1   |
| AHQ-8-6-, 3722              | K.MSAEINEIIR.V                                                        | 1176.36883 | 2 | 4.01E-05 | 0.86 | 2.76  | -     | 1291.2  |
| AHQ-8-5-, 3533 - 3598       | K.MTGLVDEAIDTK.S                                                      | 1293.46936 | 2 | 8.64E-04 | 0.95 | 3.46  | -     | 1495.3  |
| AHQ-8-4-, 3557              | K.MTGLVDEAIDTK.S                                                      | 1293.46936 | 2 | 2.56E-08 | 0.97 | 4.09  | -     | 2001.9  |
| AHQ-8-6-, 3111              | K.M*TGLVDEAIDTK.S                                                     | 1309.46876 | 2 | 1.12E-05 | 0.83 | 3.05  | -     | 1010.7  |
| AHQ-8-5-, 3133              | K.M*TGLVDEAIDTK.S                                                     | 1309.46876 | 2 | 2.41E-04 | 0.93 | 3.90  | -     | 1077.4  |
| AHQ-8-4-, 3133              | K.M*TGLVDEAIDTK.S                                                     | 1309.46876 | 2 | 4.89E-05 | 0.94 | 3.94  | -     | 1211.9  |
| AHQ-8-4-, 3079              | R.NPQNAQAAEHFETMK.N                                                   | 1737.87437 | 2 | 3.53E-05 | 0.92 | 3.56  | -     | 1050.6  |
| AHQ-8-4-, 3471 - 3546       | R.SLGEISALTSK.L                                                       | 1106.25186 | 2 | 3.69E-05 | 0.90 | 3.60  | -     | 705.5   |
| AHQ-8-7-, 3373              | R.SLGEISALTSK.L                                                       | 1106.25186 | 2 | 2.09E-05 | 0.93 | 3.38  | -     | 1008.7  |
| AHQ-8-3-, 3421              | K.SLLDASEEAIKK.D                                                      | 1304.47187 | 2 | 7.70E-04 | 0.76 | 2.55  | -     | 838.0   |
| AHQ-8-5-, 3322 - 3388       | K.SLLDASEEAIKK.D                                                      | 1304.47187 | 2 | 1.16E-07 | 0.82 | 2.96  | -     | 689.1   |
| AHQ-8-4-, 2453              | K.STVEGIGQSVK.T                                                       | 1119.25064 | 2 | 3.55E-05 | 0.89 | 3.22  | -     | 802.4   |
| AHQ-8-11-, 6209             | R.TIESILEPVAQIQSHLVIM*HEEGEVGDK.A                                     | 3119.49274 | 3 | 1.97E-04 | 0.64 | 3.24  | -     | 326.3   |
| AHQ-8-4-, 6309 - 6355       | R.TNISDEESEQATEM*LVHNAQNLMQSVK.E                                      | 3064.30957 | 3 | 4.13E-04 | 0.47 | 3.06  | -     | 396.2   |
| AHQ-8-4-, 5394 - 5463       | R.TNISDEESEQATEM*LVHNAQNLM*QSVK.E                                     | 3080.30897 | 3 | 5.23E-04 | 0.59 | 3.40  | -     | 349.3   |
| AHQ-8-4-, 5178              | K.VAM*ANIQPMLVAGATSIAR.R                                              | 2059.44338 | 3 | 1.06E-05 | 0.85 | 3.71  | -     |         |

|                            |                                                                         |            |   |          |       |        |       |         |
|----------------------------|-------------------------------------------------------------------------|------------|---|----------|-------|--------|-------|---------|
| AHQ-8-5, 5117              | K.VAM*ANIQQPMLVAGATSIAR.R                                               | 2059.44338 | 2 | 7.13E-05 | 0.85  | 3.46   | -     | 871.8   |
| AHQ-8-6, 5036              | K.VAM*ANIQQPMLVAGATSIAR.R                                               | 2059.44338 | 2 | 8.44E-07 | 0.77  | 3.68   | -     | 675.7   |
| AHQ-8-4, 4915              | R.VDQLTAQLADLAAR.G                                                      | 1485.66778 | 2 | 8.08E-06 | 0.90  | 2.92   | -     | 1524.6  |
| AHQ-8-6, 4752 - 4754       | R.VDQLTAQLADLAAR.G                                                      | 1485.66778 | 2 | 6.00E-09 | 0.98  | 5.11   | -     | 3337.6  |
| AHQ-8-4, 4786 - 4855       | R.VDQLTAQLADLAAR.G                                                      | 1485.66778 | 2 | 5.92E-06 | 0.98  | 4.70   | -     | 2679.0  |
| AHQ-8-5, 4833 - 4834       | R.VDQLTAQLADLAAR.G                                                      | 1485.66778 | 2 | 4.79E-08 | 0.98  | 5.68   | -     | 3197.8  |
| AHQ-8-5, 5074 - 5153       | R.VLQLTSDWDEDAWASK.D                                                    | 1749.90156 | 2 | 1.62E-07 | 0.95  | 4.37   | -     | 1041.9  |
| AHQ-8-6, 5071 - 5082       | R.VLQLTSDWDEDAWASK.D                                                    | 1749.90156 | 2 | 1.78E-05 | 0.94  | 4.67   | -     | 807.7   |
| AHQ-8-3, 5149              | R.VLQLTSDWDEDAWASK.D                                                    | 1749.90156 | 2 | 7.26E-06 | 0.95  | 4.47   | -     | 1045.6  |
| AHQ-8-4, 5191 - 5270       | R.VLQLTSDWDEDAWASK.D                                                    | 1749.90156 | 2 | 1.71E-06 | 0.95  | 4.01   | -     | 1529.9  |
| AHQ-8-4, 5083              | R.VLQLTSDWDEDAWASK.D                                                    | 1749.90156 | 2 | 7.56E-09 | 0.94  | 3.74   | -     | 1268.9  |
| AHQ-8-4, 2894 - 2963       | R.WIDNPTVDDR.G                                                          | 1231.29640 | 2 | 9.67E-05 | 0.94  | 3.34   | -     | 1252.5  |
| AHQ-8-5, 2900              | R.WIDNPTVDDR.G                                                          | 1231.29640 | 2 | 1.87E-06 | 0.92  | 3.54   | -     | 1066.1  |
| AHQ-8-6, 2886 - 2951       | R.WIDNPTVDDR.G                                                          | 1231.29640 | 2 | 2.13E-04 | 0.95  | 3.84   | -     | 1328.5  |
| gi 5031635 ref NP_005498.1 | cofilin 1 (non-muscle) [Homo sapiens]                                   |            |   | 3.26E-12 | 7.34  | 80.34  | 60.80 | 18502.4 |
| AHQ-8-12, 5246             | K.EILVGDVGGTVDVDPYATFVK.M                                               | 2167.40069 | 2 | 8.29E-06 | 0.97  | 5.42   | -     | 1296.5  |
| AHQ-8-13-, 5326            | K.EILVGDVGGTVDVDPYATFVK.M                                               | 2167.40069 | 2 | 3.26E-12 | 0.97  | 5.29   | -     | 1280.6  |
| AHQ-8-14, 6022             | K.EILVGDVGGTVDVDPYATFVK.M                                               | 2167.40069 | 2 | 3.29E-09 | 0.64  | 2.85   | -     | 501.2   |
| AHQ-8-13, 5448 - 5452      | K.EILVGDVGGTVDVDPYATFVK.M                                               | 2167.40069 | 2 | 1.86E-04 | 0.97  | 5.24   | -     | 1568.3  |
| AHQ-8-14-, 5342            | K.EILVGDVGGTVDVDPYATFVK.M                                               | 2167.40069 | 2 | 9.48E-06 | 0.96  | 4.69   | -     | 1327.0  |
| AHQ-8-12, 2636             | K.HELQANCYEEVKDR.C                                                      | 1792.90812 | 2 | 3.08E-06 | 0.70  | 2.96   | -     | 476.4   |
| AHQ-8-12, 2498 - 2550      | K.HELQANCYEEVKDR.C                                                      | 1792.90812 | 3 | 5.31E-06 | 0.98  | 5.88   | -     | 2810.8  |
| AHQ-8-12, 3115             | K.KAVLFCLSDK.N                                                          | 1439.70221 | 3 | 1.22E-04 | 0.94  | 4.64   | -     | 1324.7  |
| AHQ-8-12, 5936 - 5942      | K.KEDLVFVFWAPESAPLK.S                                                   | 1991.31745 | 2 | 3.33E-04 | 0.66  | 3.15   | -     | 492.9   |
| AHQ-8-13-, 6022            | K.KEDLVFVFWAPESAPLK.S                                                   | 1991.31745 | 2 | 4.36E-05 | 0.88  | 3.68   | -     | 667.2   |
| AHQ-8-12, 4234 - 4294      | K.LGGSAVISLEGGKPL                                                       | 1341.57848 | 2 | 1.22E-07 | 0.96  | 4.83   | -     | 1204.9  |
| AHQ-8-12, 3947 - 3951      | K.LGGSAVISLEGGKPL                                                       | 1341.57848 | 2 | 1.03E-05 | 0.97  | 4.24   | -     | 1681.3  |
| AHQ-8-14-, 4329            | K.LGGSAVISLEGGKPL                                                       | 1341.57848 | 2 | 4.93E-07 | 0.92  | 4.14   | -     | 851.4   |
| AHQ-8-12, 4243             | K.LGGSAVISLEGGKPL                                                       | 1341.57848 | 1 | 3.49E-06 | 0.42  | 2.58   | -     | 398.2   |
| AHQ-8-12, 3046 - 3114      | K.LTGKHELQANCYEEVKDR.C                                                  | 2305.55341 | 3 | 2.74E-06 | 0.95  | 4.79   | -     | 1400.4  |
| AHQ-8-11, 6091             | K.NIILEEGKELVGDVGGTVDVDPYATFVK.M                                        | 3064.43208 | 3 | 4.03E-05 | 0.92  | 3.96   | -     | 1366.5  |
| AHQ-8-13-, 6170            | K.NIILEEGKELVGDVGGTVDVDPYATFVK.M                                        | 3064.43208 | 3 | 8.12E-10 | 0.98  | 6.75   | -     | 2049.9  |
| AHQ-8-13, 3432 - 3492      | R.YALYDATYETK.E                                                         | 1338.44364 | 2 | 4.22E-07 | 0.94  | 3.65   | -     | 1306.3  |
| AHQ-8-12, 3214             | R.YALYDATYETK.E                                                         | 1338.44364 | 1 | 6.58E-07 | 0.77  | 3.13   | -     | 432.2   |
| AHQ-8-12, 3206 - 3238      | R.YALYDATYETK.E                                                         | 1338.44364 | 2 | 3.45E-07 | 0.96  | 3.84   | -     | 1273.1  |
| AHQ-8-13-, 3282 - 3339     | R.YALYDATYETK.E                                                         | 1338.44364 | 2 | 1.52E-06 | 0.95  | 4.03   | -     | 1201.7  |
| gi 4557677 ref NP_000203.1 | integrin beta chain, beta 3 precursor; platelet glycoprotein IIIa precu |            |   | 6.07E-12 | 17.80 | 210.28 | 30.30 | 87185.6 |
| AHQ-8-3, 5042              | R.CDLKENLLKDNCAPESEIEFPVSEAR.V                                          | 2938.23689 | 3 | 1.31E-04 | 0.94  | 5.50   | -     | 1801.7  |
| AHQ-8-3, 5138 - 5160       | R.CDLKENLLKDNCAPESEIEFPVSEAR.V                                          | 2938.23689 | 3 | 1.79E-04 | 0.80  | 3.69   | -     | 640.3   |
| AHQ-8-3, 4085 - 4144       | R.CGPGWLGSCQCESEEDYRPSQQDECSPR.E                                        | 3380.49342 | 3 | 6.02E-05 | 0.46  | 3.28   | -     | 409.2   |
| AHQ-8-4, 4158              | R.CGPGWLGSCQCESEEDYRPSQQDECSPR.E                                        | 3380.49342 | 3 | 7.20E-10 | 0.73  | 3.55   | -     | 390.3   |
| AHQ-8-1, 4280              | R.CGPGWLGSCQCESEEDYRPSQQDECSPR.E                                        | 3380.49342 | 3 | 1.77E-05 | 0.63  | 3.02   | -     | 381.3   |
| AHQ-8-5, 4136              | R.CGPGWLGSCQCESEEDYRPSQQDECSPR.E                                        | 3380.49342 | 3 | 1.39E-04 | 0.56  | 3.33   | -     | 444.5   |
| AHQ-8-1, 4353              | R.DAPEGGFDALIM*QATVCDEK.I                                               | 2072.21656 | 2 | 5.76E-04 | 0.94  | 4.12   | -     | 1022.7  |
| AHQ-8-3, 5397 - 5469       | R.DAPEGGFDALIM*QATVCDEK.I                                               | 2072.21656 | 2 | 8.31E-07 | 0.96  | 5.24   | -     | 865.3   |
| AHQ-8-3, 4218              | R.DAPEGGFDALIM*QATVCDEK.I                                               | 2072.21656 | 2 | 1.22E-05 | 0.86  | 3.52   | -     | 685.7   |
| AHQ-8-5, 4169 - 4236       | R.DAPEGGFDALIM*QATVCDEK.I                                               | 2072.21656 | 2 | 4.49E-05 | 0.50  | 2.90   | -     | 235.6   |
| AHQ-8-5, 5476              | R.DAPEGGFDALIM*QATVCDEK.I                                               | 2072.21656 | 2 | 1.47E-04 | 0.88  | 3.19   | -     | 910.1   |
| AHQ-8-3, 5385              | R.DAPEGGFDALIM*QATVCDEK.I                                               | 2072.21656 | 2 | 5.67E-06 | 0.91  | 3.45   | -     | 951.9   |
| AHQ-8-6, 4166              | R.DAPEGGFDALIM*QATVCDEK.I                                               | 2072.21656 | 2 | 9.13E-10 | 0.79  | 3.30   | -     | 529.2   |
| AHQ-8-4, 4709 - 4721       | K.DDLWSIQNLGK.L                                                         | 1390.52332 | 2 | 4.42E-04 | 0.91  | 3.93   | -     | 903.9   |
| AHQ-8-5, 4201              | K.DNCAPESEIEFPVSEAR.V                                                   | 1822.93099 | 2 | 1.44E-05 | 0.88  | 3.71   | -     | 885.7   |
| AHQ-8-4, 4229              | K.DNCAPESEIEFPVSEAR.V                                                   | 1822.93099 | 2 | 1.41E-04 | 0.60  | 2.72   | -     | 529.1   |
| AHQ-8-1, 4267 - 4339       | K.DNCAPESEIEFPVSEAR.V                                                   | 1822.93099 | 2 | 4.37E-06 | 0.87  | 3.04   | -     | 973.6   |
| AHQ-8-6, 4135              | K.DNCAPESEIEFPVSEAR.V                                                   | 1822.93099 | 2 | 1.71E-05 | 0.83  | 2.78   | -     | 1086.9  |
| AHQ-8-3, 4304              | K.DNCAPESEIEFPVSEAR.V                                                   | 1822.93099 | 2 | 5.95E-07 | 0.79  | 2.90   | -     | 878.3   |
| AHQ-8-5, 3344              | K.EATSTFTNITYR.G                                                        | 1404.50685 | 2 | 1.48E-04 | 0.83  | 3.23   | -     | 606.8   |
| AHQ-8-4, 3266 - 3346       | K.EATSTFTNITYR.G                                                        | 1404.50685 | 2 | 1.23E-07 | 0.64  | 2.67   | -     | 608.0   |
| AHQ-8-3, 3361              | K.EATSTFTNITYR.G                                                        | 1404.50685 | 2 | 2.88E-08 | 0.68  | 2.73   | -     | 532.2   |
| AHQ-8-1, 3540              | K.EATSTFTNITYR.G                                                        | 1404.50685 | 2 | 1.60E-07 | 0.57  | 2.66   | -     | 389.7   |
| AHQ-8-4, 2385 - 2386       | R.FQYEDSSGK.S                                                           | 1224.25749 | 1 | 8.68E-04 | 0.82  | 2.99   | -     | 644.9   |
| AHQ-8-3, 3513 - 3586       | R.GECLCGQCVCVCHSSDFGK.I                                                 | 2006.16137 | 2 | 8.25E-05 | 0.92  | 3.99   | -     | 996.9   |
| AHQ-8-6, 3466              | R.GECLCGQCVCVCHSSDFGK.I                                                 | 2006.16137 | 2 | 6.81E-06 | 0.93  | 4.20   | -     | 1172.4  |
| AHQ-8-3, 3516 - 3577       | R.GECLCGQCVCVCHSSDFGK.I                                                 | 2006.16137 | 3 | 5.92E-06 | 0.79  | 3.39   | -     | 793.1   |
| AHQ-8-5, 3494              | R.GECLCGQCVCVCHSSDFGK.I                                                 | 2006.16137 | 2 | 8.39E-05 | 0.92  | 4.11   | -     | 976.4   |
| AHQ-8-4, 3513              | R.GECLCGQCVCVCHSSDFGK.I                                                 | 2006.16137 | 2 | 1.80E-07 | 0.92  | 3.79   | -     | 1157.9  |
| AHQ-8-6, 2008              | K.GSGDSSQVTQVSPQR.I                                                     | 1533.58302 | 2 | 1.35E-04 | 0.71  | 2.77   | -     | 929.7   |
| AHQ-8-4, 1955 - 2013       | K.GSGDSSQVTQVSPQR.I                                                     | 1533.58302 | 2 | 9.82E-04 | 0.78  | 2.95   | -     | 845.7   |
| AHQ-8-4, 2786              | K.HVLTLDQVTR.F                                                          | 1283.45912 | 2 | 2.36E-09 | 0.93  | 3.85   | -     | 816.4   |
| AHQ-8-4, 2793              | K.HVLTLDQVTR.F                                                          | 1283.45912 | 1 | 2.13E-04 | 0.40  | 2.22   | -     | 326.8   |
| AHQ-8-6, 2776              | K.HVLTLDQVTR.F                                                          | 1283.45912 | 2 | 1.89E-06 | 0.92  | 3.53   | -     | 741.9   |
| AHQ-8-8, 2739              | K.HVLTLDQVTR.F                                                          | 1283.45912 | 2 | 8.53E-06 | 0.87  | 3.10   | -     | 723.2   |
| AHQ-8-3, 2828 - 2830       | K.HVLTLDQVTR.F                                                          | 1283.45912 | 2 | 1.76E-08 | 0.92  | 3.33   | -     | 732.2   |
| AHQ-8-7, 2733              | K.HVLTLDQVTR.F                                                          | 1283.45912 | 2 | 3.11E-06 | 0.87  | 3.09   | -     | 600.8   |
| AHQ-8-5, 2793 - 2802       | K.HVLTLDQVTR.F                                                          | 1283.45912 | 2 | 2.01E-09 | 0.90  | 3.48   | -     | 661.5   |
| AHQ-8-3, 3993 - 4012       | K.IGDTVSFSIAEK.V                                                        | 1267.41009 | 2 | 2.47E-06 | 0.89  | 3.26   | -     | 803.8   |
| AHQ-8-4, 3522              | K.IGDTVSFSIAEK.V                                                        | 1267.41009 | 2 | 1.36E-06 | 0.76  | 2.63   | -     | 726.5   |
| AHQ-8-3, 4206              | K.IGDTVSFSIAEK.V                                                        | 1267.41009 | 2 | 2.99E-04 | 0.84  | 3.09   | -     | 701.0   |
| AHQ-8-3, 3572              | K.IGDTVSFSIAEK.V                                                        | 1267.41009 | 2 | 7.52E-06 | 0.94  | 3.75   | -     | 1282.0  |
| AHQ-8-4, 4070              | K.IGDTVSFSIAEK.V                                                        | 1267.41009 | 2 | 2.21E-06 | 0.89  | 3.50   | -     | 840.8   |
| AHQ-8-3, 4094              | K.IGDTVSFSIAEK.V                                                        | 1267.41009 | 2 | 3.76E-06 | 0.89  | 3.26   | -     | 797.4   |
| AHQ-8-4, 4245 - 4247       | R.NDASHLLVFTTDAK.T                                                      | 1532.67977 | 2 | 4.56E-09 | 0.94  | 4.28   | -     | 1144.8  |
| AHQ-8-5, 4226 - 4297       | R.NDASHLLVFTTDAK.T                                                      | 1532.67977 | 2 | 7.15E-10 | 0.92  | 3.87   | -     | 1011.7  |
| AHQ-8-4, 3866              | R.NDASHLLVFTTDAK.T                                                      | 1532.67977 | 3 | 2.77E-06 | 0.96  | 4.61   | -     | 1540.1  |
| AHQ-8-4, 3861              | R.NDASHLLVFTTDAK.T                                                      | 1532.67977 | 2 | 5.16E-10 | 0.96  | 4.78   | -     | 1154.0  |
| AHQ-8-6, 3786              | R.NDASHLLVFTTDAK.T                                                      | 1532.67977 | 2 | 1.85E-09 | 0.96  | 4.66   | -     | 1167.3  |
| AHQ-8-6, 3791              | R.NDASHLLVFTTDAK.T                                                      | 1532.67977 | 3 | 6.78E-10 | 0.93  | 4.36   | -     | 1042.8  |
| AHQ-8-7, 3718 - 3725       | R.NDASHLLVFTTDAK.T                                                      | 1532.67977 | 2 | 4.47E-05 | 0.96  | 4.76   | -     | 1086.4  |
| AHQ-8-5, 3836              | R.NDASHLLVFTTDAK.T                                                      | 1532.67977 | 2 | 9.81E-06 | 0.87  | 3.24   | -     | 848.1   |
| AHQ-8-3, 3878              | R.NDASHLLVFTTDAK.T                                                      | 1532.67977 | 3 | 1.14E-07 | 0.95  | 4.81   | -     | 1464.6  |
| AHQ-8-5, 3472 - 3476       | K.SFTIKPVGFK.D                                                          | 1124.35685 | 2 | 8.89E-05 | 0.91  | 2.96   | -     | 1296.1  |
| AHQ-8-3, 2078              | R.SKVELEVR.D                                                            | 960.10999  | 2 | 2.24E-04 | 0.69  | 2.53   | -     | 594.8   |
| AHQ-8-4, 2765              | R.TDTCM*SSNGLLCSGR.G                                                    | 1677.81726 | 2 | 1.43E-08 | 0.89  | 3.18   | -     | 1094.3  |
| AHQ-8-3, 3468 - 3533       | R.TDTCM*SSNGLLCSGR.G                                                    | 1661.81786 | 2 | 1.46E-07 | 0.71  | 3.03   | -     | 568.9   |
| AHQ-8-3, 3385              | R.TDTCM*SSNGLLCSGR.G                                                    | 1661.81786 | 2 | 6.23E-09 | 0.93  | 3.74   | -     | 1111.9  |
| AHQ-8-3, 2789 - 2870       | R.TDTCM*SSNGLLCSGR.G                                                    | 1677.81726 | 2 | 3.70E-11 | 0.93  | 4.10   | -     | 1098.7  |
| AHQ-8-4, 3379              | R.TDTCM*SSNGLLCSGR.G                                                    | 1661.81786 | 2 | 2.00E-10 | 0.91  | 3.69   | -     | 825.3   |
| AHQ-8-4, 2851              | R.TDTCM*SSNGLLCSGR.G                                                    | 1677.81726 | 2 | 3.33E-07 | 0.84  | 3.25   | -     | 940.2   |
| AHQ-8-4, 2042 - 2115       | R.VLEDRLSDK.G                                                           | 1172.31354 | 2 | 7.02E-05 | 0.80  | 2.93   | -     | 777.3   |
| AHQ-8-3, 2088              | R.VLEDRLSDK.G                                                           | 1172.31354 | 2 | 2.37E-05 | 0.95  | 3.73   | -     | 1512.0  |
| AHQ-8-4, 2803              | R.VLEDRLSDKSGSDSSQVTQVSPQR.I                                            | 2686.87396 | 3 | 9.25E-07 | 0.93  | 4.38   | -     | 1370.3  |
| AHQ-8-3, 2829              | R.VLEDRLSDKSGSDSSQVTQVSPQR.I                                            | 2686.87396 | 3 | 6.07E-12 | 0.95  | 4.38   | -     | 1665.9  |
| AHQ-8-4, 3317 - 3394       | K.WDANNPLYK.E                                                           | 1222.33111 | 2 | 1.27E-04 | 0.66  | 2.54   | -     | 652.2   |
| AHQ-8-7, 3452              | K.YCECDDFSCVR.Y                                                         | 1514.59674 | 2 | 8.72E-06 | 0.85  | 2.62   | -     | 954.6   |
| AHQ-8-3, 3525              | K.YCECDDFSCVR.Y                                                         | 1514.59674 | 2 | 7.74E-07 | 0.90  | 3.04   | -     | 959.7   |
| gi 4758086 ref NP_004069.1 | cysteine and glycine-rich protein 1; cysteine-rich protein; LIM-domain  |            |   | 6.65E-12 | 4.57  | 50.24  | 36.80 | 20567.3 |
| AHQ-8-11, 4067 - 4128      | K.GFGFGGAGALVHSE                                                        | 1434.53788 | 2 | 1.35E-06 | 0.92  | 4.06   | -     | 822.4   |

|                            |                                                                         |            |   |          |      |       |       |         |
|----------------------------|-------------------------------------------------------------------------|------------|---|----------|------|-------|-------|---------|
| AHQ-8-11, 3239 - 3295      | K.GLESTTLADKDGGEIYCK.G                                                  | 1902.06957 | 2 | 1.10E-06 | 0.90 | 3.97  | -     | 815.1   |
| AHQ-8-11, 3236 - 3297      | K.GLESTTLADKDGGEIYCK.G                                                  | 1902.06957 | 3 | 6.65E-12 | 0.92 | 4.60  | -     | 847.4   |
| AHQ-8-11, 2611             | K.GYGYGGAGTLSTDK.G                                                      | 1475.54194 | 2 | 5.90E-06 | 0.94 | 3.44  | -     | 1361.3  |
| AHQ-8-11, 3503             | K.GYGYGGAGTLSTDKGESLGIK.H                                               | 2160.32665 | 2 | 7.96E-06 | 0.90 | 4.44  | -     | 644.5   |
| AHQ-8-13-, 3627            | K.GYGYGGAGTLSTDKGESLGIK.H                                               | 2160.32665 | 2 | 3.31E-07 | 0.82 | 4.17  | -     | 354.4   |
| AHQ-8-12, 3527             | K.GYGYGGAGTLSTDKGESLGIK.H                                               | 2160.32665 | 2 | 4.51E-04 | 0.42 | 2.69  | -     | 305.3   |
| AHQ-8-14-, 3539            | K.NLDSTTVAVHGEEIYCK.S                                                   | 1938.10514 | 2 | 8.31E-06 | 0.78 | 3.28  | -     | 530.8   |
| AHQ-8-11, 3455             | K.NLDSTTVAVHGEEIYCK.S                                                   | 1938.10514 | 2 | 9.32E-08 | 0.97 | 4.84  | -     | 1420.8  |
| gj17661678 ref NP_056461.1 | RAP1B, member of RAS oncogene family; K-REV; RAS-related protein RAP1B  |            |   | 7.08E-12 | 4.15 | 50.25 | 35.90 | 20824.7 |
| AHQ-8-14-, 5049            | R.KQVEVDAQQCM*LEILD*TAGTEQFTAM*R.D                                      | 3147.50488 | 3 | 1.50E-05 | 0.91 | 4.43  | -     | 1086.9  |
| AHQ-8-11, 3891 - 3947      | R.QWNNCAFLESSAK.S                                                       | 1556.68148 | 2 | 4.34E-07 | 0.56 | 2.52  | -     | 316.8   |
| AHQ-8-11, 4059 - 4116      | R.QWNNCAFLESSAK.S                                                       | 1556.68148 | 2 | 3.02E-04 | 0.43 | 2.69  | -     | 208.0   |
| AHQ-8-11, 3743             | R.VKD*DDV*P*MLV*GNK.C                                                   | 1644.91497 | 2 | 2.32E-06 | 0.91 | 3.62  | -     | 1185.5  |
| AHQ-8-11, 3747             | R.VKD*DDV*P*MLV*GNK.C                                                   | 1644.91497 | 3 | 1.05E-05 | 0.95 | 4.34  | -     | 1877.9  |
| AHQ-8-11, 4089 - 4107      | R.VKD*DDV*P*ILV*GNK*CDLEDER.V                                           | 2579.84360 | 3 | 2.09E-04 | 0.88 | 4.07  | -     | 1211.6  |
| AHQ-8-12, 3996 - 3999      | R.VKD*DDV*P*ILV*GNK*CDLEDER.V                                           | 2579.84360 | 3 | 3.49E-06 | 0.95 | 5.00  | -     | 1359.1  |
| AHQ-8-13-, 4095            | R.VKD*DDV*P*ILV*GNK*CDLEDER.V                                           | 2579.84360 | 3 | 1.49E-04 | 0.81 | 3.65  | -     | 841.6   |
| AHQ-8-11, 3975 - 4033      | R.VKD*DDV*P*ILV*GNK*CDLEDER.V                                           | 2579.84360 | 3 | 7.08E-12 | 0.88 | 4.60  | -     | 1148.4  |
| AHQ-8-11, 4139             | R.VKD*DDV*P*ILV*GNK*CDLEDER*V*GK.E                                      | 2963.33122 | 3 | 9.32E-05 | 0.89 | 4.28  | -     | 1049.8  |
| gj10863977 ref NP_067000.1 | LSM2 homolog, U6 small nuclear RNA associated; U6 snRNA-associated Sm-  |            |   | 7.96E-12 | 0.96 | 10.25 | 20.00 | 10834.5 |
| AHQ-8-14-, 5153            | R.YVQLPADEVDTQLLQDAAR.K                                                 | 2146.34311 | 2 | 7.96E-12 | 0.96 | 4.96  | -     | 1263.4  |
| AHQ-8-14, 5865             | R.YVQLPADEVDTQLLQDAAR.K                                                 | 2146.34311 | 2 | 2.37E-10 | 0.96 | 4.33  | -     | 1575.8  |
| gj14505733 ref NP_002610.1 | platelet factor 4 (chemokine (C-X-C motif) ligand 4); platelet factor 4 |            |   | 8.63E-12 | 7.48 | 80.27 | 39.60 | 10844.9 |
| AHQ-8-14, 5189 - 5246      | K.AGPHCP*TAQL*ATLK.N                                                    | 1579.84600 | 2 | 2.33E-04 | 0.93 | 4.59  | -     | 664.9   |
| AHQ-8-14-, 4065 - 4086     | K.AGPHCP*TAQL*ATLK.N                                                    | 1579.84600 | 3 | 5.67E-04 | 0.90 | 4.52  | -     | 985.3   |
| AHQ-8-14, 5025             | K.AGPHCP*TAQL*ATLK*NGR.K                                                | 1907.18700 | 3 | 8.63E-12 | 0.97 | 4.27  | -     | 2608.4  |
| AHQ-8-14-, 3862            | K.AGPHCP*TAQL*ATLK*NGR.K                                                | 1907.18700 | 2 | 2.67E-09 | 0.97 | 5.26  | -     | 1231.9  |
| AHQ-8-14-, 3977 - 4014     | K.AGPHCP*TAQL*ATLK*NGR.K                                                | 1907.18700 | 3 | 8.97E-10 | 0.97 | 5.36  | -     | 2233.7  |
| AHQ-8-14-, 3854 - 3861     | K.AGPHCP*TAQL*ATLK*NGR.K                                                | 1907.18700 | 3 | 4.80E-09 | 0.97 | 5.13  | -     | 2298.5  |
| AHQ-8-14-, 3987 - 3994     | K.AGPHCP*TAQL*ATLK*NGR.K                                                | 1907.18700 | 2 | 4.64E-09 | 0.97 | 5.31  | -     | 1167.1  |
| AHQ-8-14-, 3634            | K.AGPHCP*TAQL*ATLK*NGR.K                                                | 2035.35992 | 3 | 3.79E-06 | 0.93 | 4.54  | -     | 1235.2  |
| AHQ-8-14-, 2661 - 2729     | R.HITSLEVIK.A                                                           | 1040.23825 | 2 | 8.17E-07 | 0.90 | 3.74  | -     | 512.7   |
| AHQ-8-14, 3742 - 3797      | R.HITSLEVIK.A                                                           | 1040.23825 | 2 | 3.63E-05 | 0.80 | 3.08  | -     | 414.5   |
| AHQ-8-14, 3617 - 3685      | R.HITSLEVIK.A                                                           | 1040.23825 | 2 | 4.31E-06 | 0.90 | 3.52  | -     | 629.6   |
| AHQ-8-13, 4905             | K.ICLDLQAPLYK.K                                                         | 1335.59400 | 2 | 4.88E-05 | 0.95 | 3.59  | -     | 1755.6  |
| AHQ-8-13-, 4742            | K.ICLDLQAPLYK.K                                                         | 1335.59400 | 2 | 2.50E-05 | 0.95 | 4.17  | -     | 1461.4  |
| AHQ-8-14, 5585             | K.ICLDLQAPLYK.K                                                         | 1335.59400 | 2 | 1.64E-07 | 0.97 | 4.79  | -     | 2065.7  |
| AHQ-8-14-, 4717            | K.ICLDLQAPLYK.K                                                         | 1335.59400 | 2 | 4.18E-06 | 0.98 | 4.70  | -     | 2272.9  |
| AHQ-8-14-, 4273            | K.ICLDLQAPLYK.K                                                         | 1463.76691 | 2 | 3.41E-04 | 0.89 | 3.07  | -     | 1519.5  |
| AHQ-8-14-, 4401            | R.KICLDLQAPLYK.K                                                        | 1463.76691 | 2 | 5.03E-06 | 0.97 | 4.61  | -     | 1597.4  |
| AHQ-8-14-, 4405 - 4410     | R.KICLDLQAPLYK.K                                                        | 1463.76691 | 3 | 4.88E-04 | 0.89 | 3.70  | -     | 1393.1  |
| AHQ-8-14, 5301 - 5381      | R.KICLDLQAPLYK.K                                                        | 1463.76691 | 2 | 1.34E-06 | 0.94 | 4.36  | -     | 1126.4  |
| AHQ-8-14-, 3989            | R.KICLDLQAPLYK.K                                                        | 1591.93982 | 3 | 2.38E-07 | 0.94 | 4.89  | -     | 1252.1  |
| gj14507953 ref NP_003397.1 | tyrosine 3/tryptophan 5-monoxygenase activation protein, zeta polypep   |            |   | 9.44E-12 | 5.13 | 60.28 | 27.30 | 27744.9 |
| AHQ-8-10, 3152 - 3206      | K.FLIPNASQAESEK.V                                                       | 1305.46156 | 2 | 4.55E-06 | 0.76 | 3.00  | -     | 438.4   |
| AHQ-8-10, 3222             | K.FLIPNASQAESEK.V                                                       | 1305.46156 | 2 | 2.75E-04 | 0.73 | 2.72  | -     | 426.2   |
| AHQ-8-9, 5830 - 5968       | K.SVTEGGAELSNEER.N                                                      | 1549.57922 | 2 | 2.59E-04 | 0.68 | 2.69  | -     | 562.2   |
| AHQ-8-10, 2326 - 2384      | K.SVTEGGAELSNEER.N                                                      | 1549.57922 | 2 | 9.44E-12 | 0.95 | 4.32  | -     | 1383.7  |
| AHQ-8-11, 2297 - 2375      | K.SVTEGGAELSNEER.N                                                      | 1549.57922 | 2 | 3.84E-08 | 0.96 | 4.32  | -     | 1675.5  |
| AHQ-8-13-, 2422            | K.SVTEGGAELSNEER.N                                                      | 1549.57922 | 2 | 2.72E-05 | 0.79 | 3.13  | -     | 899.0   |
| AHQ-8-14-, 2407            | K.SVTEGGAELSNEER.N                                                      | 1549.57922 | 2 | 2.92E-08 | 0.84 | 3.21  | -     | 840.1   |
| AHQ-8-10, 6121 - 6130      | K.TAFDEIAIELDTLSEESYK.D                                                 | 2133.25160 | 2 | 2.92E-06 | 0.88 | 3.85  | -     | 738.4   |
| AHQ-8-13, 6295             | K.TAFDEIAIELDTLSEESYK.D                                                 | 2133.25160 | 2 | 3.34E-06 | 0.96 | 5.06  | -     | 1262.3  |
| AHQ-8-9, 6682              | K.TAFDEIAIELDTLSEESYK.D                                                 | 2133.25160 | 2 | 5.16E-07 | 0.96 | 4.90  | -     | 1272.4  |
| AHQ-8-13-, 6186 - 6254     | K.TAFDEIAIELDTLSEESYK.D                                                 | 2133.25160 | 2 | 6.39E-11 | 0.97 | 5.64  | -     | 990.9   |
| AHQ-8-10, 6218             | K.TAFDEIAIELDTLSEESYK*STLIM*QLLR.D                                      | 3320.66704 | 3 | 2.00E-05 | 0.83 | 3.48  | -     | 915.6   |
| AHQ-8-10, 2342             | R.YLAEVAAGDDK.K                                                         | 1152.23595 | 1 | 7.17E-07 | 0.69 | 2.26  | -     | 1162.3  |
| AHQ-8-10, 2063 - 2118      | R.YLAEVAAGDDK.K                                                         | 1280.40887 | 2 | 2.23E-07 | 0.93 | 3.65  | -     | 1313.9  |
| AHQ-8-10, 2082             | R.YLAEVAAGDDK.K                                                         | 1280.40887 | 3 | 8.03E-07 | 0.93 | 3.65  | -     | 1405.5  |
| gj14505981 ref NP_002695.1 | pro-platelet basic protein (includes platelet basic protein, bet; Pro-p |            |   | 9.97E-12 | 7.11 | 80.32 | 46.90 | 13894.1 |
| AHQ-8-13-, 4572            | K.EESLSDLYAELR.C                                                        | 1540.61070 | 2 | 4.55E-07 | 0.88 | 3.58  | -     | 769.0   |
| AHQ-8-14, 5314             | K.EESLSDLYAELR.C                                                        | 1540.61070 | 2 | 9.43E-05 | 0.86 | 3.21  | -     | 714.1   |
| AHQ-8-14, 5441 - 5502      | K.EESLSDLYAELR.C                                                        | 1540.61070 | 2 | 5.33E-06 | 0.92 | 3.93  | -     | 886.8   |
| AHQ-8-14-, 4294 - 4346     | K.EESLSDLYAELR.C                                                        | 1540.61070 | 2 | 2.21E-07 | 0.84 | 3.38  | -     | 527.0   |
| AHQ-8-14-, 4549 - 4607     | K.EESLSDLYAELR.C                                                        | 1540.61070 | 2 | 1.91E-06 | 0.90 | 3.91  | -     | 751.1   |
| AHQ-8-14-, 4514            | K.GKEESLSDLYAELR.C                                                      | 1725.83517 | 2 | 3.48E-11 | 0.98 | 5.27  | -     | 2288.6  |
| AHQ-8-14-, 4343            | K.GKEESLSDLYAELR.C                                                      | 1725.83517 | 2 | 3.05E-07 | 0.97 | 4.79  | -     | 2344.9  |
| AHQ-8-13, 4327             | K.GKEESLSDLYAELR.C                                                      | 1725.83517 | 3 | 2.56E-04 | 0.88 | 4.10  | -     | 1071.1  |
| AHQ-8-14-, 4234 - 4235     | K.GKEESLSDLYAELR.C                                                      | 1725.83517 | 2 | 2.20E-10 | 0.98 | 5.94  | -     | 2882.3  |
| AHQ-8-14, 4698             | K.GKEESLSDLYAELR.C                                                      | 1725.83517 | 2 | 2.18E-04 | 0.93 | 3.44  | -     | 1373.1  |
| AHQ-8-13, 4324             | K.GKEESLSDLYAELR.C                                                      | 1725.83517 | 2 | 1.67E-07 | 0.98 | 4.62  | -     | 2506.1  |
| AHQ-8-14, 4969             | K.GKEESLSDLYAELR.C                                                      | 1725.83517 | 2 | 1.28E-05 | 0.94 | 4.18  | -     | 1501.6  |
| AHQ-8-14, 5102 - 5158      | K.GKEESLSDLYAELR.C                                                      | 1725.83517 | 2 | 2.05E-10 | 0.98 | 6.36  | -     | 2699.5  |
| AHQ-8-14, 5117             | K.GKEESLSDLYAELR.C                                                      | 1725.83517 | 3 | 1.06E-05 | 0.87 | 4.06  | -     | 884.7   |
| AHQ-8-14, 5203             | K.GKEESLSDLYAELR.C                                                      | 1725.83517 | 3 | 1.23E-04 | 0.76 | 3.70  | -     | 742.6   |
| AHQ-8-14, 5217 - 5274      | K.GKEESLSDLYAELR.C                                                      | 1725.83517 | 2 | 1.67E-11 | 0.98 | 6.03  | -     | 2871.2  |
| AHQ-8-14-, 4861 - 4881     | K.GKEESLSDLYAELR.C                                                      | 1725.83517 | 2 | 5.40E-04 | 0.79 | 3.22  | -     | 926.2   |
| AHQ-8-14, 5346             | K.GKEESLSDLYAELR.C                                                      | 1725.83517 | 2 | 3.31E-06 | 0.97 | 4.76  | -     | 1970.4  |
| AHQ-8-14, 5434             | K.GKEESLSDLYAELR.C                                                      | 1725.83517 | 2 | 2.23E-08 | 0.97 | 5.01  | -     | 1922.2  |
| AHQ-8-14, 4829 - 4909      | K.GKEESLSDLYAELR.C                                                      | 1725.83517 | 2 | 6.23E-10 | 0.98 | 5.07  | -     | 2308.6  |
| AHQ-8-14, 5515 - 5590      | K.GKEESLSDLYAELR.C                                                      | 1725.83517 | 2 | 1.89E-05 | 0.98 | 5.63  | -     | 3195.9  |
| AHQ-8-14, 5647 - 5707      | K.GKEESLSDLYAELR.C                                                      | 1725.83517 | 2 | 5.26E-06 | 0.96 | 4.31  | -     | 1637.2  |
| AHQ-8-14, 5801 - 5870      | K.GKEESLSDLYAELR.C                                                      | 1725.83517 | 2 | 4.26E-04 | 0.72 | 3.29  | -     | 614.4   |
| AHQ-8-14-, 4185            | K.GKEESLSDLYAELR.C                                                      | 1725.83517 | 3 | 2.06E-04 | 0.87 | 4.50  | -     | 732.8   |
| AHQ-8-13-, 4190            | K.GKEESLSDLYAELR.C                                                      | 1725.83517 | 2 | 5.44E-11 | 0.98 | 5.78  | -     | 2617.8  |
| AHQ-8-12, 4059             | K.GKEESLSDLYAELR.C                                                      | 1725.83517 | 2 | 8.03E-08 | 0.97 | 4.78  | -     | 1572.1  |
| AHQ-8-14-, 4109 - 4173     | K.GKEESLSDLYAELR.C                                                      | 1725.83517 | 2 | 1.16E-11 | 0.98 | 5.95  | -     | 2312.7  |
| AHQ-8-14-, 5119            | K.GKEESLSDLYAELR.C                                                      | 1725.83517 | 2 | 2.03E-04 | 0.84 | 3.03  | -     | 839.4   |
| AHQ-8-14-, 4013            | K.GKEESLSDLYAELR.C                                                      | 1725.83517 | 3 | 6.94E-07 | 0.89 | 3.65  | -     | 1078.0  |
| AHQ-8-14-, 3993 - 4051     | K.GKEESLSDLYAELR.C                                                      | 1725.83517 | 2 | 1.18E-10 | 0.98 | 5.43  | -     | 2528.1  |
| AHQ-8-14-, 3894 - 3957     | K.GKEESLSDLYAELR.C                                                      | 1725.83517 | 3 | 5.60E-08 | 0.82 | 3.36  | -     | 934.3   |
| AHQ-8-14-, 3893 - 3949     | K.GKEESLSDLYAELR.C                                                      | 1725.83517 | 2 | 9.89E-10 | 0.98 | 5.57  | -     | 2523.2  |
| AHQ-8-14-, 3754            | K.GKEESLSDLYAELR.C                                                      | 1725.83517 | 2 | 9.97E-12 | 0.95 | 4.40  | -     | 1390.6  |
| AHQ-8-14-, 3653            | K.GTHCNQVEVIATLK.D                                                      | 1571.78073 | 2 | 1.15E-06 | 0.95 | 4.08  | -     | 1302.9  |
| AHQ-8-14-, 3417 - 3481     | K.GTHCNQVEVIATLK.D                                                      | 1571.78073 | 2 | 2.33E-06 | 0.94 | 3.72  | -     | 1401.9  |
| AHQ-8-14-, 3454 - 3511     | K.GTHCNQVEVIATLK.D                                                      | 1571.78073 | 3 | 4.18E-04 | 0.84 | 3.36  | -     | 1202.8  |
| AHQ-8-14-, 3541 - 3597     | K.GTHCNQVEVIATLK.D                                                      | 1571.78073 | 2 | 2.25E-11 | 0.97 | 5.19  | -     | 1625.8  |
| AHQ-8-14, 4342 - 4397      | K.GTHCNQVEVIATLK.D                                                      | 1571.78073 | 2 | 1.53E-06 | 0.97 | 4.75  | -     | 1718.3  |
| AHQ-8-14, 4453 - 4509      | K.GTHCNQVEVIATLK.D                                                      | 1571.78073 | 2 | 9.98E-06 | 0.98 | 5.38  | -     | 1817.2  |
| AHQ-8-13-, 3580            | K.GTHCNQVEVIATLK.D                                                      | 1571.78073 | 2 | 3.04E-04 | 0.79 | 3.04  | -     | 663.9   |
| AHQ-8-14-, 3290 - 3373     | K.GTHCNQVEVIATLK.D                                                      | 1571.78073 | 2 | 1.02E-10 | 0.97 | 5.06  | -     | 1546.6  |
| AHQ-8-14-, 3774 - 3830     | K.GTHCNQVEVIATLK.D                                                      | 1571.78073 | 2 | 6.17E-05 | 0.96 | 5.09  | -     | 1406.0  |
| AHQ-8-14, 4565 - 4629      | K.GTHCNQVEVIATLK.D                                                      | 1571.78073 | 2 | 9.95E-11 | 0.98 | 4.72  | -     | 2206.6  |
| AHQ-8-14-, 3231            | K.GTHCNQVEVIATLK*DG*GR.K                                                | 1900.10650 | 2 | 9.85E-05 | 0.98 | 5.75  | -     | 2215.9  |
| AHQ-8-14-, 3150            | K.GTHCNQVEVIATLK*DG*GR.K                                                | 1900.10650 | 2 | 2.09E-11 | 0.97 | 5.55  | -     | 1212.5  |
| AHQ-8-14-, 2897 - 2957     | K.ICLDPDAPR.I                                                           | 1058.19059 | 2 | 1.49E-04 | 0.91 | 3.73  | -     | 1031.2  |
| AHQ-8-14, 3749 - 3806      | K.ICLDPDAPR.I                                                           | 1058.19059 | 2 | 1.88E-04 | 0.87 | 3.53  | -     | 803.3   |

|                             |                                                                         |            |   |          |      |        |       |          |
|-----------------------------|-------------------------------------------------------------------------|------------|---|----------|------|--------|-------|----------|
| AHQ-8-14-, 2683 - 2741      | R.KICLDPDAPR.I                                                          | 1186.36350 | 2 | 8.83E-04 | 0.85 | 3.37   | -     | 726.5    |
| AHQ-8-14, 3593 - 3649       | R.KICLDPDAPR.I                                                          | 1186.36350 | 2 | 7.67E-04 | 0.71 | 2.69   | -     | 678.5    |
| AHQ-8-13, 2869 - 2928       | R.KICLDPDAPR.I                                                          | 1186.36350 | 2 | 1.44E-04 | 0.53 | 2.61   | -     | 591.4    |
| AHQ-8-14-, 2709             | R.KICLDPDAPR.I                                                          | 1186.36350 | 2 | 2.19E-05 | 0.87 | 3.64   | -     | 772.2    |
| AHQ-8-14-, 2587 - 2645      | R.KICLDPDAPR.I                                                          | 1186.36350 | 2 | 1.93E-04 | 0.84 | 3.06   | -     | 901.2    |
| AHQ-8-14-, 3547 - 3603      | K.NIQSLEVIK.G                                                           | 1101.27845 | 2 | 4.42E-05 | 0.78 | 3.08   | -     | 659.1    |
| AHQ-8-14-, 3338 - 3397      | K.NIQSLEVIK.G                                                           | 1101.27845 | 2 | 6.40E-05 | 0.91 | 3.53   | -     | 935.1    |
| AHQ-8-14-, 3617             | K.TTSGIHPKNIQSLEVIK.G                                                   | 1923.20305 | 3 | 4.12E-05 | 0.82 | 3.39   | -     | 897.5    |
| gj 5803011 ref NP_001966.1  | enolase 2; enolase-2, gamma, neuronal; neurone-specific enolase; neuron |            |   | 1.12E-11 | 0.97 | 10.26  | 3.70  | 47268.3  |
| AHQ-8-8, 6161               | R.YITGDQLGALYQDFVR.D                                                    | 1860.05915 | 2 | 1.12E-11 | 0.97 | 5.10   | -     | 1191.3   |
| gj 17986260 ref NP_524147.1 | smooth muscle and non-muscle myosin alkali light chain isoform 2 [Homo  |            |   | 1.42E-11 | 0.95 | 10.27  | 23.30 | 12969.7  |
| AHQ-8-14-, 5269             | K.M*TEEEVEM*LVAGHEDSNGCINYEELVR.M                                       | 3188.42436 | 3 | 1.42E-11 | 0.95 | 5.49   | -     | 1304.6   |
| AHQ-8-13-, 5264             | K.M*TEEEVEM*LVAGHEDSNGCINYEELVR.M                                       | 3188.42436 | 3 | 2.57E-05 | 0.93 | 5.05   | -     | 885.8    |
| gj 13124879 ref NP_002465.1 | smooth muscle myosin heavy chain 11 isoform SM1 [Homo sapiens]          |            |   | 1.46E-11 | 5.71 | 70.32  | 4.00  | 227336.7 |
| AHQ-8-3, 2965               | K.FDQLLAEK.N                                                            | 1093.21165 | 2 | 5.83E-06 | 0.90 | 2.92   | -     | 1325.1   |
| AHQ-8-2, 3003               | K.FDQLLAEK.N                                                            | 1093.21165 | 1 | 2.39E-04 | 0.47 | 2.09   | -     | 760.5    |
| AHQ-8-2, 3000               | K.FDQLLAEK.N                                                            | 1093.21165 | 2 | 1.33E-05 | 0.92 | 3.36   | -     | 1438.6   |
| AHQ-8-5, 2925 - 2926        | K.FDQLLAEK.N                                                            | 1093.21165 | 2 | 1.47E-05 | 0.92 | 3.18   | -     | 1354.7   |
| AHQ-8-2, 2619 - 2621        | K.KEELQAALAR.L                                                          | 1258.40643 | 2 | 1.91E-05 | 0.90 | 3.39   | -     | 1150.2   |
| AHQ-8-6, 2543               | K.KEELQAALAR.L                                                          | 1258.40643 | 2 | 7.62E-04 | 0.81 | 3.28   | -     | 890.0    |
| AHQ-8-5, 2554               | K.KEELQAALAR.L                                                          | 1258.40643 | 2 | 4.27E-05 | 0.89 | 3.29   | -     | 1094.9   |
| AHQ-8-5, 2888 - 2956        | R.KFDQLLAEK.N                                                           | 1221.38456 | 2 | 1.07E-05 | 0.67 | 2.67   | -     | 737.4    |
| AHQ-8-1, 3123               | R.KFDQLLAEK.N                                                           | 1221.38456 | 2 | 1.91E-04 | 0.90 | 3.46   | -     | 1091.6   |
| AHQ-8-2, 5080 - 5156        | K.LQQLFNHTM*FILEQEEYQR.E                                                | 2484.77198 | 3 | 1.02E-10 | 0.98 | 6.47   | -     | 2011.5   |
| AHQ-8-3, 5069               | K.LQQLFNHTM*FILEQEEYQR.E                                                | 2484.77198 | 3 | 2.16E-06 | 0.97 | 5.70   | -     | 1693.1   |
| AHQ-8-2, 5268               | K.LQQLFNHTM*FILEQEEYQR.E                                                | 2484.77198 | 3 | 4.84E-08 | 0.97 | 5.72   | -     | 2535.5   |
| AHQ-8-6, 4948 - 5008        | K.LQQLFNHTM*FILEQEEYQR.E                                                | 2484.77198 | 3 | 9.16E-05 | 0.95 | 5.00   | -     | 1333.9   |
| AHQ-8-4, 5134               | K.LQQLFNHTM*FILEQEEYQR.E                                                | 2484.77198 | 3 | 3.46E-05 | 0.86 | 4.31   | -     | 948.2    |
| AHQ-8-2, 4557 - 4563        | R.NWQVWVR.L                                                             | 976.07459  | 1 | 7.60E-04 | 0.36 | 2.15   | -     | 146.9    |
| AHQ-8-2, 5959 - 5963        | K.QLLQANPILEAFGNAK.T                                                    | 1727.98540 | 2 | 1.00E-08 | 0.96 | 4.24   | -     | 1290.2   |
| AHQ-8-2, 5744 - 5799        | K.QLLQANPILEAFGNAK.T                                                    | 1727.98540 | 2 | 1.55E-10 | 0.96 | 4.42   | -     | 1117.9   |
| AHQ-8-6, 5634 - 5683        | K.QLLQANPILEAFGNAK.T                                                    | 1727.98540 | 2 | 1.46E-11 | 0.95 | 4.59   | -     | 821.1    |
| AHQ-8-14-, 5694             | K.QLLQANPILEAFGNAK.T                                                    | 1727.98540 | 2 | 9.01E-04 | 0.71 | 2.80   | -     | 440.9    |
| AHQ-8-1, 5968               | K.QLLQANPILEAFGNAK.T                                                    | 1727.98540 | 2 | 8.13E-06 | 0.87 | 3.35   | -     | 682.5    |
| AHQ-8-3, 5692 - 5754        | K.QLLQANPILEAFGNAK.T                                                    | 1727.98540 | 2 | 2.90E-05 | 0.96 | 4.83   | -     | 966.9    |
| AHQ-8-3, 5858               | K.QLLQANPILEAFGNAK.T                                                    | 1727.98540 | 2 | 2.04E-05 | 0.91 | 3.82   | -     | 749.3    |
| AHQ-8-6, 5798               | K.QLLQANPILEAFGNAK.T                                                    | 1727.98540 | 2 | 5.57E-07 | 0.82 | 3.28   | -     | 525.9    |
| AHQ-8-5, 5732 - 5786        | K.QLLQANPILEAFGNAK.T                                                    | 1727.98540 | 2 | 4.59E-07 | 0.94 | 4.77   | -     | 690.1    |
| AHQ-8-4, 5791 - 5845        | K.QLLQANPILEAFGNAK.T                                                    | 1727.98540 | 2 | 4.03E-04 | 0.95 | 4.19   | -     | 1034.6   |
| AHQ-8-1, 5799               | K.QLLQANPILEAFGNAK.T                                                    | 1727.98540 | 2 | 6.88E-08 | 0.91 | 3.53   | -     | 903.7    |
| AHQ-8-7, 5576 - 5632        | K.QLLQANPILEAFGNAK.T                                                    | 1727.98540 | 2 | 3.04E-06 | 0.93 | 4.07   | -     | 815.7    |
| AHQ-8-2, 5855               | K.QLLQANPILEAFGNAK.T                                                    | 1727.98540 | 2 | 2.15E-08 | 0.94 | 4.02   | -     | 983.4    |
| AHQ-8-5, 5340               | K.TLQLELEDELQATEDAKL                                                    | 1963.04334 | 2 | 6.12E-09 | 0.98 | 6.25   | -     | 1941.6   |
| AHQ-8-4, 5387               | K.TLQLELEDELQATEDAKL                                                    | 1963.04334 | 3 | 1.26E-06 | 0.95 | 5.18   | -     | 1155.7   |
| AHQ-8-3, 5316 - 5317        | K.TLQLELEDELQATEDAKL                                                    | 1963.04334 | 3 | 3.36E-11 | 0.96 | 5.51   | -     | 1097.8   |
| AHQ-8-2, 5395               | K.TLQLELEDELQATEDAKL                                                    | 1963.04334 | 3 | 2.23E-09 | 0.94 | 5.34   | -     | 953.5    |
| AHQ-8-6, 5254 - 5332        | K.TLQLELEDELQATEDAKL                                                    | 1963.04334 | 2 | 1.19E-04 | 0.97 | 5.21   | -     | 1745.6   |
| AHQ-8-2, 5143               | K.TLQLELEDELQATEDAKL                                                    | 1963.04334 | 2 | 1.73E-06 | 0.97 | 5.15   | -     | 1473.2   |
| AHQ-8-2, 3943               | K.TLQLELEDELQATEDAKL                                                    | 1963.04334 | 2 | 1.60E-09 | 0.98 | 5.99   | -     | 1470.9   |
| AHQ-8-1, 5408 - 5467        | K.TLQLELEDELQATEDAKL                                                    | 1963.04334 | 2 | 7.09E-11 | 0.98 | 5.91   | -     | 1712.7   |
| AHQ-8-3, 5257 - 5312        | K.TLQLELEDELQATEDAKL                                                    | 1963.04334 | 2 | 4.85E-07 | 0.96 | 5.02   | -     | 1161.9   |
| gj 4503689 ref NP_000499.1  | fibrinogen, alpha chain isoform alpha-E preproprotein [Homo sapiens] [M |            |   | 1.55E-11 | 9.11 | 120.26 | 17.00 | 94972.5  |
| AHQ-8-6, 4744               | K.DSHSLTNNIM*EILR.G                                                     | 1646.84779 | 2 | 2.45E-05 | 0.95 | 3.63   | -     | 1479.6   |
| AHQ-8-10, 4559 - 4564       | K.DSHSLTNNIM*EILR.G                                                     | 1646.84779 | 2 | 1.73E-04 | 0.93 | 3.78   | -     | 1152.0   |
| AHQ-8-7, 2625 - 2705        | R.EVDLKYEDYEDQK.Q                                                       | 1510.58460 | 2 | 1.41E-07 | 0.91 | 3.43   | -     | 937.8    |
| AHQ-8-8, 2645               | R.EVDLKYEDYEDQK.Q                                                       | 1510.58460 | 2 | 1.49E-05 | 0.77 | 2.95   | -     | 573.8    |
| AHQ-8-6, 2650 - 2656        | R.EVDLKYEDYEDQK.Q                                                       | 1510.58460 | 2 | 3.38E-05 | 0.85 | 3.29   | -     | 700.6    |
| AHQ-8-10, 2610 - 2675       | R.EVDLKYEDYEDQK.Q                                                       | 1510.58460 | 2 | 7.29E-07 | 0.84 | 3.06   | -     | 765.1    |
| AHQ-8-8, 1849 - 1854        | R.GGSTSYYTGSSETESPR.N                                                   | 1573.55765 | 2 | 1.12E-06 | 0.78 | 3.33   | -     | 466.3    |
| AHQ-8-6, 1880 - 1940        | R.GGSTSYYTGSSETESPR.N                                                   | 1573.55765 | 2 | 1.12E-07 | 0.81 | 3.23   | -     | 600.4    |
| AHQ-8-7, 1842 - 1900        | R.GGSTSYYTGSSETESPR.N                                                   | 1573.55765 | 2 | 1.68E-06 | 0.63 | 2.93   | -     | 430.6    |
| AHQ-8-9, 5187 - 5243        | R.GGSTSYYTGSSETESPR.N                                                   | 1573.55765 | 2 | 2.87E-05 | 0.77 | 2.81   | -     | 820.3    |
| AHQ-8-11, 4371              | K.GLIDEVNDQFTNR.I                                                       | 1521.61384 | 2 | 1.21E-07 | 0.89 | 3.23   | -     | 851.0    |
| AHQ-8-10, 4303              | K.GLIDEVNDQFTNR.I                                                       | 1521.61384 | 2 | 1.09E-04 | 0.66 | 3.15   | -     | 522.3    |
| AHQ-8-12, 4390 - 4398       | K.GLIDEVNDQFTNR.I                                                       | 1521.61384 | 2 | 6.90E-05 | 0.88 | 3.31   | -     | 779.6    |
| AHQ-8-7, 4328 - 4384        | K.GLIDEVNDQFTNR.I                                                       | 1521.61384 | 2 | 2.42E-05 | 0.85 | 3.17   | -     | 810.5    |
| AHQ-8-7, 3850 - 3870        | K.GLIDEVNDQFTNR.I                                                       | 1521.61384 | 2 | 6.60E-04 | 0.84 | 3.63   | -     | 570.9    |
| AHQ-8-8, 4418 - 4498        | K.GLIDEVNDQFTNR.I                                                       | 1521.61384 | 2 | 1.54E-07 | 0.92 | 3.55   | -     | 1026.9   |
| AHQ-8-5, 4518               | K.GLIDEVNDQFTNR.I                                                       | 1521.61384 | 2 | 9.11E-09 | 0.91 | 3.67   | -     | 938.4    |
| AHQ-8-8, 3961               | K.GLIDEVNDQFTNR.I                                                       | 1521.61384 | 2 | 1.87E-05 | 0.88 | 3.73   | -     | 675.6    |
| AHQ-8-4, 4557 - 4565        | K.GLIDEVNDQFTNR.I                                                       | 1521.61384 | 2 | 1.61E-07 | 0.96 | 3.86   | -     | 1568.7   |
| AHQ-8-14-, 2381 - 2383      | R.GSESGIFTNTK.E                                                         | 1141.21317 | 2 | 3.97E-05 | 0.71 | 2.53   | -     | 819.6    |
| AHQ-8-6, 2326               | R.GSESGIFTNTK.E                                                         | 1141.21317 | 2 | 9.58E-04 | 0.68 | 2.53   | -     | 791.2    |
| AHQ-8-13, 2481 - 2543       | R.GSESGIFTNTK.E                                                         | 1141.21317 | 2 | 1.54E-05 | 0.81 | 2.69   | -     | 963.8    |
| AHQ-8-7, 2310               | R.GSESGIFTNTK.E                                                         | 1141.21317 | 2 | 1.61E-04 | 0.72 | 2.51   | -     | 773.4    |
| AHQ-8-13-, 2380 - 2408      | R.GSESGIFTNTK.E                                                         | 1141.21317 | 2 | 1.30E-05 | 0.74 | 2.68   | -     | 658.4    |
| AHQ-8-13-, 3272             | R.HPDEAAFFDFASTGK.T                                                     | 1594.66329 | 2 | 1.11E-04 | 0.42 | 2.99   | -     | 189.6    |
| AHQ-8-6, 3138 - 3195        | R.HPDEAAFFDFASTGK.T                                                     | 1594.66329 | 2 | 1.44E-04 | 0.55 | 2.59   | -     | 377.2    |
| AHQ-8-6, 2704 - 2782        | R.HRHPDEAAFFDFASTGK.T                                                   | 1887.98954 | 3 | 1.65E-05 | 0.94 | 4.55   | -     | 1323.4   |
| AHQ-8-6, 2711               | R.HRHPDEAAFFDFASTGK.T                                                   | 1887.98954 | 2 | 1.33E-06 | 0.97 | 5.12   | -     | 1266.1   |
| AHQ-8-7, 2669               | R.HRHPDEAAFFDFASTGK.T                                                   | 1887.98954 | 3 | 2.84E-05 | 0.97 | 5.29   | -     | 2022.5   |
| AHQ-8-7, 2216               | R.NPSSAGSWSNGSGSPGSTGNR.N                                               | 1964.94443 | 2 | 3.66E-07 | 0.80 | 3.77   | -     | 466.5    |
| AHQ-8-6, 2226               | R.NPSSAGSWSNGSGSPGSTGNR.N                                               | 1964.94443 | 2 | 6.72E-11 | 0.94 | 4.42   | -     | 914.6    |
| AHQ-8-8, 2218               | R.NPSSAGSWSNGSGSPGSTGNR.N                                               | 1964.94443 | 2 | 1.55E-11 | 0.95 | 4.74   | -     | 1216.8   |
| AHQ-8-7, 2300               | R.NPSSAGSWSNGSGSPGSTGNR.N                                               | 1964.94443 | 2 | 2.00E-04 | 0.76 | 3.03   | -     | 737.1    |
| AHQ-8-8, 2257               | R.PGSTGTWNPSSSER.G                                                      | 1433.46515 | 2 | 2.29E-08 | 0.84 | 3.48   | -     | 527.5    |
| AHQ-8-7, 2186 - 2264        | R.PGSTGTWNPSSSER.G                                                      | 1433.46515 | 2 | 1.95E-05 | 0.58 | 2.82   | -     | 494.9    |
| AHQ-8-6, 6332 - 6343        | K.TFPGFFSPMLGEFVSETESR.G                                                | 2266.51432 | 2 | 4.82E-04 | 0.72 | 3.29   | -     | 315.2    |
| AHQ-8-13-, 6174             | K.TFPGFFSPMLGEFVSETESR.G                                                | 2266.51432 | 2 | 2.49E-04 | 0.55 | 2.73   | -     | 155.7    |
| AHQ-8-6, 2491               | K.VQHIQLLQK.N                                                           | 1107.33106 | 1 | 2.27E-04 | 0.35 | 1.95   | -     | 579.7    |
| AHQ-8-7, 2461               | K.VQHIQLLQK.N                                                           | 1107.33106 | 1 | 8.36E-04 | 0.60 | 2.35   | -     | 655.8    |
| AHQ-8-7, 2456 - 2457        | K.VQHIQLLQK.N                                                           | 1107.33106 | 2 | 8.36E-04 | 0.77 | 2.82   | -     | 599.5    |
| gj 8393159 ref NP_059118.1  | calmodulin-like skin protein [Homo sapiens]                             |            |   | 1.73E-11 | 0.95 | 10.25  | 15.80 | 15920.4  |
| AHQ-8-14-, 4902             | K.AFSAVDTDNGNTINAQELGAALK.A                                             | 2264.43486 | 2 | 1.73E-11 | 0.95 | 5.03   | -     | 936.9    |
| gj 21361755 ref NP_004090.3 | stomatin; erythrocyte membrane protein band 7.2 (stomatin) [Homo sapie  |            |   | 1.77E-11 | 4.44 | 50.27  | 26.00 | 31708.5  |
| AHQ-8-13, 4197              | K.EASM*VITESPAALQLR.Y                                                   | 1732.98059 | 2 | 4.10E-05 | 0.69 | 2.94   | -     | 574.7    |
| AHQ-8-10, 6162              | K.GPGLFFILPCTDSFIK.V                                                    | 1814.13672 | 2 | 3.48E-05 | 0.95 | 4.37   | -     | 943.8    |
| AHQ-8-13-, 6298             | K.GPGLFFILPCTDSFIK.V                                                    | 1814.13672 | 2 | 2.34E-04 | 0.90 | 4.16   | -     | 567.5    |
| AHQ-8-10, 2279              | K.VIAAEGEMNASR.A                                                        | 1248.39191 | 2 | 9.90E-07 | 0.92 | 3.52   | -     | 832.7    |
| AHQ-8-10, 3644 - 3648       | R.VQNTLAVANITNADSATR.L                                                  | 1931.09731 | 2 | 4.30E-04 | 0.87 | 3.57   | -     | 925.2    |
| AHQ-8-1, 4448 - 4511        | R.VQNTLAVANITNADSATR.L                                                  | 1931.09731 | 2 | 4.71E-07 | 0.89 | 4.18   | -     | 613.8    |
| AHQ-8-1, 4068               | R.VQNTLAVANITNADSATR.L                                                  | 1931.09731 | 2 | 4.87E-06 | 0.84 | 3.34   | -     | 671.8    |
| AHQ-8-1, 3977               | R.VQNTLAVANITNADSATR.L                                                  | 1931.09731 | 2 | 1.63E-08 | 0.96 | 4.78   | -     | 971.0    |
| AHQ-8-1, 3852 - 3925        | R.VQNTLAVANITNADSATR.L                                                  | 1931.09731 | 2 | 1.77E-11 | 0.96 | 5.33   | -     | 1233.5   |
| AHQ-8-13, 3983              | R.YLQTLTTIAEK.N                                                         | 1352.55813 | 2 | 9.35E-04 | 0.92 | 3.55   | -     | 1250.7   |
| gj 4557419 ref NP_000063.1  | CD36 antigen (collagen type I receptor, thrombospondin receptor); CD36  |            |   | 2.07E-11 | 4.32 | 50.22  | 12.90 | 53052.1  |
| AHQ-8-5, 4488               | K.AFASPVENPDNYCFCTEK.I                                                  | 2152.30319 | 2 | 6.43E-06 | 0.91 | 4.21   | -     | 715.2    |





|                              |                                                                        |            |   |          |       |        |       |         |
|------------------------------|------------------------------------------------------------------------|------------|---|----------|-------|--------|-------|---------|
| AHQ-8-6, 6270 - 6274         | R.GEELDEDLFLQLTGGHEAF                                                  | 2121.24574 | 2 | 1.37E-07 | 0.95  | 4.54   | -     | 1334.9  |
| AHQ-8-6, 3146 - 3174         | R.GM*PAHFSDSAQTEACYHM*LSR.P                                            | 2430.63997 | 3 | 2.04E-07 | 0.96  | 4.63   | -     | 1939.9  |
| AHQ-8-6, 3750                | R.IDLAVGDVVK.T                                                         | 1029.21223 | 1 | 4.11E-04 | 0.41  | 2.19   | -     | 460.3   |
| AHQ-8-6, 3760                | R.IDLAVGDVVK.T                                                         | 1029.21223 | 1 | 1.94E-04 | 0.37  | 2.49   | -     | 320.6   |
| AHQ-8-12, 3746               | R.IDLAVGDVVK.T                                                         | 1029.21223 | 1 | 4.24E-04 | 0.33  | 2.10   | -     | 498.6   |
| AHQ-8-6, 4324                | R.ILEAHQNVQQLSLAEQRL.F                                                 | 2105.38372 | 2 | 5.65E-11 | 0.98  | 6.38   | -     | 1846.7  |
| AHQ-8-12, 4296               | R.ILEAHQNVQQLSLAEQRL.F                                                 | 2105.38372 | 2 | 2.90E-07 | 0.97  | 5.70   | -     | 1668.5  |
| AHQ-8-6, 4598                | R.ILEAHQNVQQLSLAEQRL.F                                                 | 2105.38372 | 3 | 2.15E-04 | 0.67  | 3.17   | -     | 907.0   |
| AHQ-8-6, 1819 - 1875         | K.IVEQINR.K                                                            | 872.00444  | 2 | 5.26E-04 | 0.75  | 2.77   | -     | 573.9   |
| AHQ-8-6, 2766 - 2846         | R.KDEILGIANNR.L                                                        | 1243.39499 | 2 | 1.58E-04 | 0.89  | 2.89   | -     | 1328.1  |
| AHQ-8-6, 2707 - 2767         | R.KDEILGIANNR.L                                                        | 1243.39499 | 3 | 5.45E-05 | 0.90  | 3.52   | -     | 1311.5  |
| AHQ-8-6, 2680 - 2751         | R.KDEILGIANNR.L                                                        | 1243.39499 | 2 | 5.76E-07 | 0.95  | 4.11   | -     | 1521.5  |
| AHQ-8-12, 2728 - 2742        | R.KDEILGIANNR.L                                                        | 1243.39499 | 2 | 5.56E-04 | 0.94  | 3.27   | -     | 1596.1  |
| AHQ-8-6, 2906                | R.KDEILGIANNR.L                                                        | 1243.39499 | 2 | 7.36E-06 | 0.88  | 2.85   | -     | 1373.4  |
| AHQ-8-6, 3936 - 3994         | R.KQDWSDHAIWWEQK.R                                                     | 1858.00504 | 2 | 4.01E-04 | 0.87  | 3.96   | -     | 816.1   |
| AHQ-8-6, 3988 - 3995         | R.KQDWSDHAIWWEQK.R                                                     | 1858.00504 | 3 | 5.49E-08 | 0.95  | 4.74   | -     | 1407.4  |
| AHQ-8-6, 5956                | K.LEGSAPTDVLDLSTTIPELK.D                                               | 2100.35256 | 2 | 6.60E-05 | 0.66  | 3.05   | -     | 500.4   |
| AHQ-8-7, 5172                | K.LEGSAPTDVLDLSTTIPELK.D                                               | 2100.35256 | 2 | 2.76E-04 | 0.74  | 3.45   | -     | 371.2   |
| AHQ-8-7, 6009 - 6012         | K.LEGSAPTDVLDLSTTIPELK.D                                               | 2100.35256 | 2 | 9.54E-06 | 0.91  | 4.11   | -     | 804.1   |
| AHQ-8-6, 5238                | K.LEGSAPTDVLDLSTTIPELK.D                                               | 2100.35256 | 2 | 3.20E-07 | 0.89  | 3.60   | -     | 801.8   |
| AHQ-8-6, 6058 - 6115         | K.LEGSAPTDVLDLSTTIPELK.D                                               | 2100.35256 | 2 | 2.33E-07 | 0.89  | 4.02   | -     | 701.3   |
| AHQ-8-5, 6180                | K.LEGSAPTDVLDLSTTIPELK.D                                               | 2100.35256 | 2 | 4.10E-04 | 0.76  | 3.33   | -     | 615.8   |
| AHQ-8-6, 5455                | K.LLVPSPPEGMSEIYL.R.C                                                  | 1705.01201 | 3 | 3.05E-04 | 0.97  | 4.68   | -     | 2063.0  |
| AHQ-8-7, 4529 - 4593         | K.LLVPSPPEGM*SEIYL.R.C                                                 | 1721.01141 | 2 | 2.56E-05 | 0.48  | 2.86   | -     | 189.2   |
| AHQ-8-6, 5426 - 5482         | K.LLVPSPPEGMSEIYL.R.C                                                  | 1705.01201 | 2 | 4.19E-04 | 0.87  | 3.31   | -     | 621.3   |
| AHQ-8-8, 6377                | K.LSQSGEVGEPAGTDPGLDDLDVALSNLEVK.L                                     | 3027.24073 | 3 | 5.90E-07 | 0.92  | 4.35   | -     | 1175.8  |
| AHQ-8-6, 6210                | K.LSQSGEVGEPAGTDPGLDDLDVALSNLEVK.L                                     | 3027.24073 | 3 | 4.48E-11 | 0.96  | 5.43   | -     | 1303.6  |
| AHQ-8-4, 6374                | K.LSQSGEVGEPAGTDPGLDDLDVALSNLEVK.L                                     | 3027.24073 | 3 | 3.18E-04 | 0.82  | 3.59   | -     | 1003.8  |
| AHQ-8-3, 6282                | K.LSQSGEVGEPAGTDPGLDDLDVALSNLEVK.L                                     | 3027.24073 | 3 | 9.94E-05 | 0.86  | 3.74   | -     | 1136.8  |
| AHQ-8-7, 6161 - 6168         | K.LSQSGEVGEPAGTDPGLDDLDVALSNLEVK.L                                     | 3027.24073 | 3 | 2.84E-07 | 0.91  | 4.40   | -     | 1010.1  |
| AHQ-8-6, 2407 - 2467         | R.LTQLYEQAR.W                                                          | 1122.25622 | 2 | 2.38E-06 | 0.89  | 2.97   | -     | 1127.9  |
| AHQ-8-7, 2420 - 2428         | R.LTQLYEQAR.W                                                          | 1122.25622 | 2 | 2.69E-04 | 0.85  | 3.05   | -     | 949.2   |
| AHQ-8-6, 3796                | R.PQPPDPLLQR.L                                                         | 1371.60951 | 3 | 1.48E-06 | 0.84  | 3.59   | -     | 1000.3  |
| AHQ-8-5, 4017 - 4018         | K.SQDEAPGDPIQQLNK.G                                                    | 1753.89174 | 2 | 9.62E-08 | 0.88  | 3.70   | -     | 543.2   |
| AHQ-8-6, 3951                | K.SQDEAPGDPIQQLNK.G                                                    | 1753.89174 | 3 | 2.61E-05 | 0.88  | 3.55   | -     | 1099.8  |
| AHQ-8-6, 3895 - 3970         | K.SQDEAPGDPIQQLNK.G                                                    | 1753.89174 | 2 | 1.44E-10 | 0.86  | 3.51   | -     | 452.9   |
| AHQ-8-6, 5019                | K.SQDEAPGDPIQQLNKGEVVPDENVSGQK.F                                       | 3224.50249 | 3 | 1.38E-06 | 0.67  | 3.30   | -     | 468.7   |
| AHQ-8-6, 4186 - 4251         | K.TASGDYIDSSWELR.V                                                     | 1600.66783 | 2 | 1.52E-08 | 0.95  | 4.20   | -     | 1084.6  |
| AHQ-8-13, 4280               | K.TASGDYIDSSWELR.V                                                     | 1600.66783 | 2 | 3.97E-04 | 0.94  | 3.87   | -     | 1140.1  |
| AHQ-8-7, 4130                | K.TASGDYIDSSWELR.V                                                     | 1600.66783 | 2 | 9.04E-07 | 0.90  | 3.66   | -     | 838.1   |
| AHQ-8-14, 4262               | K.TASGDYIDSSWELR.V                                                     | 1600.66783 | 2 | 2.55E-07 | 0.92  | 3.80   | -     | 944.8   |
| AHQ-8-6, 3823                | R.TGSGGPGNHHPGPDASAEGLNPNYGLVAPR.F                                     | 2783.95312 | 2 | 5.57E-05 | 0.89  | 4.15   | -     | 576.2   |
| AHQ-8-6, 6390                | R.TM*ADSSYTSSEVQAILAFLSLQR.T                                           | 2448.73471 | 3 | 8.71E-09 | 0.95  | 5.31   | -     | 1499.2  |
| AHQ-8-7, 3813 - 3817         | R.VFVGEEDPEAESVTLR.V                                                   | 1777.91007 | 2 | 1.53E-07 | 0.94  | 4.22   | -     | 1038.8  |
| AHQ-8-6, 3872                | R.VFVGEEDPEAESVTLR.V                                                   | 1777.91007 | 3 | 8.24E-05 | 0.97  | 5.10   | -     | 2322.3  |
| AHQ-8-6, 3851 - 3890         | R.VFVGEEDPEAESVTLR.V                                                   | 1777.91007 | 2 | 5.27E-08 | 0.96  | 4.65   | -     | 1458.2  |
| AHQ-8-13, 3930               | R.VFVGEEDPEAESVTLR.V                                                   | 1777.91007 | 2 | 9.71E-07 | 0.85  | 3.34   | -     | 1139.3  |
| AHQ-8-3, 3949                | R.VFVGEEDPEAESVTLR.V                                                   | 1777.91007 | 2 | 2.05E-04 | 0.86  | 3.16   | -     | 945.2   |
| AHQ-8-14, 3891 - 3918        | R.VFVGEEDPEAESVTLR.V                                                   | 1777.91007 | 2 | 6.25E-06 | 0.88  | 3.54   | -     | 903.8   |
| AHQ-8-14, 4797               | R.VFVGEEDPEAESVTLR.V                                                   | 1777.91007 | 2 | 2.01E-04 | 0.87  | 3.18   | -     | 1357.0  |
| AHQ-8-12, 3850               | R.VFVGEEDPEAESVTLR.V                                                   | 1777.91007 | 2 | 1.74E-06 | 0.78  | 3.01   | -     | 630.8   |
| AHQ-8-4, 3969                | R.VFVGEEDPEAESVTLR.V                                                   | 1777.91007 | 2 | 9.38E-08 | 0.91  | 3.85   | -     | 951.1   |
| AHQ-8-8, 3925                | R.VFVGEEDPEAESVTLR.V                                                   | 1777.91007 | 2 | 8.44E-08 | 0.92  | 3.95   | -     | 981.0   |
| AHQ-8-5, 3938                | R.VFVGEEDPEAESVTLR.V                                                   | 1777.91007 | 2 | 1.10E-09 | 0.95  | 4.64   | -     | 1191.1  |
| AHQ-8-11, 3831               | R.VFVGEEDPEAESVTLR.V                                                   | 1777.91007 | 2 | 7.11E-06 | 0.67  | 2.62   | -     | 632.7   |
| AHQ-8-2, 4024 - 4101         | R.VFVGEEDPEAESVTLR.V                                                   | 1777.91007 | 2 | 1.64E-04 | 0.82  | 3.37   | -     | 1018.4  |
| AHQ-8-5, 2948                | R.VTGESHIGGVLLK.I                                                      | 1310.52448 | 2 | 1.20E-04 | 0.91  | 3.74   | -     | 1131.5  |
| AHQ-8-7, 2873                | R.VTGESHIGGVLLK.I                                                      | 1310.52448 | 2 | 6.03E-06 | 0.96  | 4.45   | -     | 1523.3  |
| AHQ-8-6, 2910 - 2966         | R.VTGESHIGGVLLK.I                                                      | 1310.52448 | 2 | 1.60E-08 | 0.96  | 4.28   | -     | 1596.0  |
| AHQ-8-11, 4511 - 4580        | K.VVLAGGVAPALFR.G                                                      | 1270.54832 | 2 | 8.89E-04 | 0.96  | 3.46   | -     | 1972.9  |
| AHQ-8-7, 4566                | K.VVLAGGVAPALFR.G                                                      | 1270.54832 | 2 | 1.56E-07 | 0.97  | 4.97   | -     | 1887.1  |
| AHQ-8-5, 4736                | K.VVLAGGVAPALFR.G                                                      | 1270.54832 | 2 | 9.70E-07 | 0.97  | 4.88   | -     | 1706.2  |
| AHQ-8-6, 4630                | K.VVLAGGVAPALFR.G                                                      | 1270.54832 | 2 | 2.04E-06 | 0.97  | 4.75   | -     | 1590.5  |
| AHQ-8-3, 4753                | K.VVLAGGVAPALFR.G                                                      | 1270.54832 | 2 | 2.19E-08 | 0.93  | 3.87   | -     | 1131.6  |
| AHQ-8-6, 2566 - 2662         | K.YGLADAR.L                                                            | 878.99544  | 2 | 3.83E-05 | 0.91  | 3.30   | -     | 957.2   |
| gj14504349[ref][NP_000509.1] | beta globin [Homo sapiens]                                             |            |   | 2.71E-11 | 8.06  | 90.29  | 64.60 | 15998.3 |
| AHQ-8-14, 3189 - 3247        | K.EFTTPVQAAYQK.V                                                       | 1379.54213 | 2 | 5.03E-04 | 0.61  | 2.86   | -     | 515.0   |
| AHQ-8-13, 4896 - 4971        | R.FFESFGDLSTPDVAVM*GNPK.V                                              | 2076.27158 | 3 | 3.44E-04 | 0.85  | 3.52   | -     | 831.9   |
| AHQ-8-13, 4802 - 4851        | R.FFESFGDLSTPDVAVM*GNPK.V                                              | 2076.27158 | 2 | 1.65E-06 | 0.93  | 4.75   | -     | 487.5   |
| AHQ-8-13, 4995 - 5060        | R.FFESFGDLSTPDVAVM*GNPK.V                                              | 2076.27158 | 2 | 2.00E-07 | 0.88  | 3.99   | -     | 518.3   |
| AHQ-8-13, 4722 - 4795        | R.FFESFGDLSTPDVAVM*GNPK.V                                              | 2076.27158 | 2 | 9.87E-06 | 0.93  | 4.20   | -     | 788.2   |
| AHQ-8-13, 5288 - 5292        | R.FFESFGDLSTPDVAVMGNPK.V                                               | 2060.27218 | 2 | 2.48E-10 | 0.97  | 5.31   | -     | 1012.9  |
| AHQ-8-13, 4812               | R.FFESFGDLSTPDVAVM*GNPK.V                                              | 2076.27158 | 3 | 1.06E-06 | 0.93  | 3.95   | -     | 1459.1  |
| AHQ-8-14, 5314               | R.FFESFGDLSTPDVAVMGNPK.V                                               | 2060.27218 | 2 | 2.57E-09 | 0.94  | 4.73   | -     | 718.0   |
| AHQ-8-13, 3630 - 3631        | K.GTFATLSELHCDK.L                                                      | 1480.62492 | 2 | 1.22E-09 | 0.78  | 3.34   | -     | 524.0   |
| AHQ-8-13, 4831               | K.GTFATLSELHCDKLVDPENFR.L                                              | 2588.83687 | 3 | 2.46E-10 | 0.95  | 4.67   | -     | 1493.4  |
| AHQ-8-13, 4678 - 4686        | K.KVLGAFSDGLAHLNLIK.G                                                  | 1799.06362 | 3 | 2.40E-09 | 0.95  | 5.43   | -     | 1150.6  |
| AHQ-8-13, 4873               | K.KVLGAFSDGLAHLNLIK.G                                                  | 1799.06362 | 3 | 9.37E-07 | 0.92  | 4.56   | -     | 879.7   |
| AHQ-8-13, 4684               | K.KVLGAFSDGLAHLNLIK.G                                                  | 1799.06362 | 2 | 6.99E-10 | 0.96  | 4.80   | -     | 1304.9  |
| AHQ-8-13, 4794 - 4863        | K.VLGFASDGLAHLNLIK.G                                                   | 1670.89071 | 3 | 2.22E-07 | 0.88  | 3.93   | -     | 645.2   |
| AHQ-8-13, 4947               | K.VLGFASDGLAHLNLIK.G                                                   | 1670.89071 | 2 | 2.18E-04 | 0.74  | 3.20   | -     | 613.6   |
| AHQ-8-14, 4961               | K.VLGFASDGLAHLNLIK.G                                                   | 1670.89071 | 3 | 3.81E-07 | 0.82  | 3.24   | -     | 641.8   |
| AHQ-8-13, 4782               | K.VLGFASDGLAHLNLIK.G                                                   | 1670.89071 | 2 | 4.84E-10 | 0.95  | 4.90   | -     | 1022.1  |
| AHQ-8-13, 5077 - 5111        | K.VLGFASDGLAHLNLIK.G                                                   | 1670.89071 | 2 | 9.04E-09 | 0.97  | 5.17   | -     | 1632.1  |
| AHQ-8-13, 4864               | K.VLGFASDGLAHLNLIK.G                                                   | 1670.89071 | 2 | 1.66E-10 | 0.97  | 4.61   | -     | 1915.6  |
| AHQ-8-13, 4954 - 5014        | K.VLGFASDGLAHLNLIK.G                                                   | 1670.89071 | 2 | 2.71E-11 | 0.98  | 5.85   | -     | 1991.9  |
| AHQ-8-13, 4955               | K.VLGFASDGLAHLNLIK.G                                                   | 1670.89071 | 3 | 2.15E-08 | 0.79  | 3.42   | -     | 492.6   |
| AHQ-8-13, 5115               | K.VLGFASDGLAHLNLIK.G                                                   | 1670.89071 | 3 | 6.86E-08 | 0.59  | 3.08   | -     | 402.9   |
| AHQ-8-14, 4953               | K.VLGFASDGLAHLNLIK.G                                                   | 1670.89071 | 2 | 1.09E-08 | 0.96  | 4.30   | -     | 1614.9  |
| AHQ-8-14, 3261               | K.VNVDEVGGEALGR.L                                                      | 1315.41484 | 2 | 1.81E-06 | 0.97  | 5.24   | -     | 1769.6  |
| AHQ-8-13, 3377 - 3440        | K.VNVDEVGGEALGR.L                                                      | 1315.41484 | 2 | 3.15E-06 | 0.98  | 4.97   | -     | 2075.6  |
| AHQ-8-13, 3228 - 3291        | K.VNVDEVGGEALGR.L                                                      | 1315.41484 | 2 | 5.19E-06 | 0.96  | 4.66   | -     | 1366.1  |
| AHQ-8-13, 2543 - 2606        | K.VVAGVANALAHK.Y                                                       | 1150.35593 | 2 | 2.22E-06 | 0.95  | 3.88   | -     | 1568.3  |
| AHQ-8-13, 2779 - 2838        | K.VVAGVANALAHK.Y                                                       | 1150.35593 | 2 | 4.83E-04 | 0.81  | 2.69   | -     | 903.4   |
| gj17921989[ref][NP_005991.1] | tubulin, alpha 1; testis-specific alpha tubulin; tubulin alpha-1 chain |            |   | 2.97E-11 | 11.07 | 130.27 | 40.20 | 49924.1 |
| AHQ-8-13, 4488 - 4560        | R.AFVHYVYVGGEM*EEGEFSEAR.E                                             | 2347.50435 | 3 | 2.24E-05 | 0.97  | 5.31   | -     | 1884.1  |
| AHQ-8-7, 4434                | R.AFVHYVYVGGEM*EEGEFSEAR.E                                             | 2347.50435 | 3 | 4.01E-05 | 0.94  | 4.12   | -     | 1346.5  |
| AHQ-8-12, 5024 - 5078        | R.AVCM*LSNTTAAIEAWAR.L                                                 | 1883.13932 | 2 | 1.12E-07 | 0.84  | 3.37   | -     | 827.7   |
| AHQ-8-7, 5584 - 5653         | R.AVCM*LSNTTAAIEAWAR.L                                                 | 1867.13992 | 2 | 6.18E-06 | 0.95  | 4.48   | -     | 1467.7  |
| AHQ-8-13, 4990               | R.AVCM*LSNTTAAIEAWAR.L                                                 | 1883.13932 | 2 | 1.07E-04 | 0.94  | 3.96   | -     | 1330.1  |
| AHQ-8-13, 5630               | R.AVCM*LSNTTAAIEAWAR.L                                                 | 1867.13992 | 2 | 9.85E-09 | 0.96  | 4.98   | -     | 1553.8  |
| AHQ-8-7, 4880                | R.AVCM*LSNTTAAIEAWAR.L                                                 | 1883.13932 | 2 | 8.08E-05 | 0.82  | 3.20   | -     | 885.7   |
| AHQ-8-13, 5636               | R.AVCM*LSNTTAAIEAWAR.L                                                 | 1867.13992 | 3 | 2.11E-04 | 0.82  | 3.96   | -     | 951.2   |
| AHQ-8-13, 5132               | R.AVCM*LSNTTAAIEAWAR.L                                                 | 1883.13932 | 2 | 2.04E-04 | 0.91  | 3.50   | -     | 1245.0  |
| AHQ-8-13, 5638               | R.AVFDLEPTVIDEIR.N                                                     | 1716.95615 | 2 | 3.75E-07 | 0.91  | 3.56   | -     | 1459.3  |
| AHQ-8-7, 5521 - 5593         | R.AVFDLEPTVIDEIR.N                                                     | 1716.95615 | 2 | 6.06E-05 | 0.56  | 2.94   | -     | 700.6   |
| AHQ-8-7, 4629                | K.AYHEQLSVAEITNACFEPANQM*VK.C                                          | 2769.06010 | 3 | 2.75E-05 | 0.87  | 3.59   | -     | 1022.8  |

|                            |                                                                                                             |            |   |          |       |        |       |         |
|----------------------------|-------------------------------------------------------------------------------------------------------------|------------|---|----------|-------|--------|-------|---------|
| AHQ-8-7, 4828 - 4889       | R.IHFPLATYAPVISAEEK.A                                                                                       | 1758.05310 | 2 | 1.84E-04 | 0.94  | 4.04   | -     | 808.7   |
| AHQ-8-7, 4726 - 4808       | R.IHFPLATYAPVISAEEK.A                                                                                       | 1758.05310 | 2 | 8.46E-04 | 0.95  | 4.52   | -     | 754.2   |
| AHQ-8-13-, 6194 - 6195     | R.LISQIVSITASLR.F                                                                                           | 1488.75471 | 2 | 2.40E-07 | 0.95  | 4.74   | -     | 1004.7  |
| AHQ-8-8, 6389              | R.LISQIVSITASLR.F                                                                                           | 1488.75471 | 2 | 2.76E-07 | 0.85  | 3.20   | -     | 713.9   |
| AHQ-8-7, 6172              | R.LISQIVSITASLR.F                                                                                           | 1488.75471 | 2 | 5.11E-04 | 0.91  | 3.94   | -     | 907.2   |
| AHQ-8-14-, 6217            | R.LISQIVSITASLR.F                                                                                           | 1488.75471 | 2 | 4.87E-08 | 0.94  | 4.18   | -     | 1007.0  |
| AHQ-8-13-, 3506 - 3519     | R.NLDIERPTYNLNR.L                                                                                           | 1719.88022 | 2 | 7.91E-07 | 0.56  | 3.15   | -     | 261.0   |
| AHQ-8-14-, 3495            | R.NLDIERPTYNLNR.L                                                                                           | 1719.88022 | 2 | 5.46E-05 | 0.65  | 2.81   | -     | 474.9   |
| AHQ-8-12, 5286 - 5287      | R.SIQFVDWCPTGFK.V                                                                                           | 1586.79232 | 2 | 1.76E-04 | 0.63  | 2.95   | -     | 490.5   |
| AHQ-8-7, 5313 - 5332       | R.SIQFVDWCPTGFK.V                                                                                           | 1586.79232 | 2 | 2.35E-04 | 0.94  | 3.94   | -     | 1130.6  |
| AHQ-8-13-, 5390            | R.SIQFVDWCPTGFK.V                                                                                           | 1586.79232 | 2 | 5.48E-05 | 0.78  | 2.98   | -     | 649.3   |
| AHQ-8-11, 5279 - 5292      | R.SIQFVDWCPTGFK.V                                                                                           | 1586.79232 | 2 | 4.05E-04 | 0.90  | 3.20   | -     | 1025.7  |
| AHQ-8-14-, 5298 - 5326     | K.TIGGGDSFTTFFCETGAGK.H                                                                                     | 2070.17889 | 2 | 4.66E-08 | 0.91  | 4.45   | -     | 575.4   |
| AHQ-8-13, 5457             | K.TIGGGDSFTTFFCETGAGK.H                                                                                     | 2070.17889 | 2 | 2.97E-11 | 0.80  | 3.50   | -     | 535.1   |
| AHQ-8-7, 5186 - 5244       | K.TIGGGDSFTTFFCETGAGK.H                                                                                     | 2070.17889 | 2 | 4.92E-09 | 0.86  | 3.68   | -     | 554.6   |
| AHQ-8-12, 5218             | K.TIGGGDSFTTFFCETGAGK.H                                                                                     | 2070.17889 | 2 | 1.56E-07 | 0.58  | 3.09   | -     | 305.7   |
| AHQ-8-7, 5206              | K.TIGGGDSFTTFFCETGAGK.H                                                                                     | 2070.17889 | 2 | 8.95E-09 | 0.90  | 4.07   | -     | 656.8   |
| AHQ-8-13-, 5320            | K.TIGGGDSFTTFFCETGAGK.H                                                                                     | 2070.17889 | 2 | 6.52E-09 | 0.88  | 3.95   | -     | 525.2   |
| AHQ-8-11, 5173 - 5204      | K.TIGGGDSFTTFFCETGAGK.H                                                                                     | 2070.17889 | 2 | 1.87E-04 | 0.81  | 3.61   | -     | 481.3   |
| AHQ-8-7, 5300              | K.TIGGGDSFTTFFCETGAGK.H                                                                                     | 2070.17889 | 2 | 4.81E-06 | 0.82  | 3.61   | -     | 516.1   |
| AHQ-8-13, 4379 - 4435      | K.VGINYQPPTVVPGGDLAK.V                                                                                      | 1826.08584 | 2 | 2.02E-04 | 0.80  | 3.22   | -     | 447.9   |
| AHQ-8-14-, 4275 - 4354     | K.VGINYQPPTVVPGGDLAK.V                                                                                      | 1826.08584 | 2 | 8.66E-05 | 0.75  | 3.10   | -     | 453.4   |
| AHQ-8-13, 4428 - 4497      | K.VGINYQPPTVVPGGDLAK.V                                                                                      | 1826.08584 | 2 | 1.02E-06 | 0.73  | 3.25   | -     | 318.1   |
| AHQ-8-12, 4179 - 4242      | K.VGINYQPPTVVPGGDLAK.V                                                                                      | 1826.08584 | 2 | 2.45E-08 | 0.84  | 3.70   | -     | 437.8   |
| AHQ-8-12, 3807             | K.YM*ACCLLYR.G                                                                                              | 1268.50804 | 2 | 1.19E-04 | 0.73  | 2.61   | -     | 432.8   |
| AHQ-8-7, 3797              | K.YM*ACCLLYR.G                                                                                              | 1268.50804 | 2 | 6.50E-04 | 0.72  | 2.65   | -     | 477.9   |
| AHQ-8-7, 4224 - 4236       | K.YM*ACCLLYR.G                                                                                              | 1268.50804 | 2 | 1.21E-05 | 0.95  | 3.47   | -     | 1000.9  |
| gj4503715 ref NP_000500.1  | fibrinogen, gamma chain isoform gamma-A precursor [Homo sapiens]                                            |            |   | 3.25E-11 | 12.31 | 150.27 | 46.70 | 49481.2 |
| AHQ-8-8, 4530              | K.AIQLTYNPDESSKPNMIDAATLK.S                                                                                 | 2521.82886 | 2 | 4.50E-04 | 0.60  | 3.09   | -     | 338.1   |
| AHQ-8-7, 4349              | K.AIQLTYNPDESSKPNMIDAATLK.S                                                                                 | 2521.82886 | 2 | 1.88E-04 | 0.80  | 3.83   | -     | 410.7   |
| AHQ-8-7, 3969              | K.AIQLTYNPDESSKPNM*IDAATLK.S                                                                                | 2537.82826 | 2 | 2.93E-04 | 0.61  | 2.96   | -     | 309.9   |
| AHQ-8-8, 4011              | K.AIQLTYNPDESSKPNM*IDAATLK.S                                                                                | 2537.82826 | 3 | 8.20E-06 | 0.80  | 3.54   | -     | 717.0   |
| AHQ-8-7, 4436              | K.AIQLTYNPDESSKPNMIDAATLK.S                                                                                 | 2521.82886 | 2 | 8.59E-07 | 0.83  | 3.86   | -     | 554.0   |
| AHQ-8-13-, 5154 - 5211     | K.ASTPNNGYDNGIWWATWK.T                                                                                      | 1895.06358 | 2 | 9.06E-07 | 0.84  | 3.71   | -     | 507.0   |
| AHQ-8-13-, 5282 - 5346     | K.ASTPNNGYDNGIWWATWK.T                                                                                      | 1895.06358 | 2 | 5.79E-07 | 0.72  | 2.62   | -     | 739.3   |
| AHQ-8-7, 5068 - 5125       | K.ASTPNNGYDNGIWWATWK.T                                                                                      | 1895.06358 | 2 | 1.37E-07 | 0.69  | 2.74   | -     | 709.3   |
| AHQ-8-7, 5170 - 5224       | K.ASTPNNGYDNGIWWATWK.T                                                                                      | 1895.06358 | 2 | 2.46E-07 | 0.79  | 3.33   | -     | 476.7   |
| AHQ-8-14-, 5282 - 5337     | K.ASTPNNGYDNGIWWATWK.T                                                                                      | 1895.06358 | 2 | 6.59E-04 | 0.71  | 3.19   | -     | 444.7   |
| AHQ-8-7, 2801 - 2822       | K.CHAGHLNGVYVYQGGTYSK.A                                                                                     | 2014.16662 | 3 | 1.63E-06 | 0.98  | 5.19   | -     | 2495.1  |
| AHQ-8-7, 2689 - 2744       | K.CHAGHLNGVYVYQGGTYSK.A                                                                                     | 2014.16662 | 3 | 2.39E-04 | 0.97  | 5.47   | -     | 1870.6  |
| AHQ-8-8, 2722              | K.CHAGHLNGVYVYQGGTYSK.A                                                                                     | 2014.16662 | 2 | 3.10E-04 | 0.91  | 4.12   | -     | 849.3   |
| AHQ-8-7, 2728 - 2804       | K.CHAGHLNGVYVYQGGTYSK.A                                                                                     | 2014.16662 | 2 | 1.22E-07 | 0.97  | 5.15   | -     | 1113.0  |
| AHQ-8-7, 3054              | R.DNCCILDER.F                                                                                               | 1197.27847 | 2 | 8.20E-05 | 0.84  | 3.09   | -     | 737.7   |
| AHQ-8-7, 4988 - 5008       | K.EFGFHLSPTGTFEFLWLNK.I                                                                                     | 2208.37146 | 2 | 2.22E-08 | 0.93  | 4.52   | -     | 805.4   |
| AHQ-8-8, 5059              | K.EFGFHLSPTGTFEFLWLNK.I                                                                                     | 2208.37146 | 2 | 2.11E-06 | 0.85  | 3.84   | -     | 400.0   |
| AHQ-8-7, 4896 - 4952       | K.EFGFHLSPTGTFEFLWLNK.I                                                                                     | 2208.37146 | 2 | 1.01E-04 | 0.94  | 4.66   | -     | 744.1   |
| AHQ-8-7, 4897 - 4968       | K.EFGFHLSPTGTFEFLWLNK.I                                                                                     | 2208.37146 | 3 | 1.43E-05 | 0.93  | 4.54   | -     | 1588.9  |
| AHQ-8-8, 4426 - 4474       | K.IHLISTQSAIPYALR.V                                                                                         | 1683.97576 | 2 | 3.25E-11 | 0.95  | 4.47   | -     | 1017.2  |
| AHQ-8-10, 4295             | K.IHLISTQSAIPYALR.V                                                                                         | 1683.97576 | 2 | 1.07E-04 | 0.89  | 3.60   | -     | 894.8   |
| AHQ-8-7, 4312 - 4348       | K.IHLISTQSAIPYALR.V                                                                                         | 1683.97576 | 2 | 3.17E-08 | 0.95  | 4.27   | -     | 1281.7  |
| AHQ-8-8, 2169              | R.LTIGEGQQHHLGGAK.Q                                                                                         | 1546.71290 | 2 | 5.19E-07 | 0.94  | 4.05   | -     | 1415.2  |
| AHQ-8-7, 2148 - 2204       | R.LTIGEGQQHHLGGAK.Q                                                                                         | 1546.71290 | 2 | 3.87E-08 | 0.94  | 4.10   | -     | 1196.0  |
| AHQ-8-13-, 2263 - 2324     | R.LTIGEGQQHHLGGAK.Q                                                                                         | 1546.71290 | 2 | 3.42E-05 | 0.83  | 3.60   | -     | 674.7   |
| AHQ-8-14-, 2230            | R.LTIGEGQQHHLGGAK.Q                                                                                         | 1546.71290 | 2 | 8.17E-05 | 0.90  | 3.56   | -     | 964.9   |
| AHQ-8-7, 3726 - 3784       | K.QSGLYFIKPLK.A                                                                                             | 1294.56665 | 2 | 9.25E-04 | 0.70  | 2.87   | -     | 411.8   |
| AHQ-8-7, 3016              | R.TSTDYAMFK.V                                                                                               | 1135.27203 | 1 | 2.54E-05 | 0.10  | 2.18   | -     | 130.2   |
| AHQ-8-7, 3752              | K.VAQLAEOQCQEPCKDVTQIHDITGK.D                                                                               | 2772.06211 | 3 | 8.05E-06 | 0.91  | 4.25   | -     | 1006.7  |
| AHQ-8-7, 3845 - 3849       | K.VAQLAEOQCQEPCKDVTQIHDITGK.D                                                                               | 2772.06211 | 3 | 1.12E-05 | 0.54  | 3.20   | -     | 496.3   |
| AHQ-8-7, 3905 - 3982       | K.VAQLAEOQCQEPCKDVTQIHDITGKDCQDIANK.G                                                                       | 3718.05993 | 3 | 1.73E-10 | 0.94  | 5.30   | -     | 1057.2  |
| AHQ-8-8, 4006              | K.VAQLAEOQCQEPCKDVTQIHDITGKDCQDIANK.G                                                                       | 3718.05993 | 3 | 1.22E-05 | 0.83  | 3.82   | -     | 689.2   |
| AHQ-8-7, 3198 - 3257       | R.VELEDWNGR.T                                                                                               | 1118.18129 | 2 | 3.80E-05 | 0.88  | 2.87   | -     | 1094.1  |
| AHQ-8-12, 3079             | K.YEASILTHDSSIR.Y                                                                                           | 1492.61564 | 2 | 2.28E-05 | 0.65  | 2.59   | -     | 494.4   |
| AHQ-8-7, 3004 - 3065       | K.YEASILTHDSSIR.Y                                                                                           | 1492.61564 | 2 | 6.24E-08 | 0.94  | 4.32   | -     | 900.1   |
| AHQ-8-11, 3069             | K.YEASILTHDSSIR.Y                                                                                           | 1492.61564 | 2 | 9.07E-07 | 0.76  | 2.58   | -     | 711.8   |
| AHQ-8-8, 2702 - 2761       | R.YLQEIYNSNNQK.I                                                                                            | 1514.62131 | 2 | 1.63E-06 | 0.90  | 3.76   | -     | 952.0   |
| AHQ-8-7, 2724 - 2780       | R.YLQEIYNSNNQK.I                                                                                            | 1514.62131 | 2 | 1.66E-04 | 0.97  | 5.26   | -     | 1564.5  |
| AHQ-8-11, 2748 - 2804      | R.YLQEIYNSNNQK.I                                                                                            | 1514.62131 | 2 | 1.10E-04 | 0.96  | 4.78   | -     | 1352.6  |
| gj29730023 ref XP_291482.1 | similar to 78 kDa glucose-regulated protein precursor (GRP 78) (Immunoglobulin heavy chain isoform gamma-1) |            |   | 3.51E-11 | 4.84  | 60.26  | 13.80 | 63563.0 |
| AHQ-8-5, 4344 - 4352       | K.ELEEIVQPIISK.L                                                                                            | 1398.62680 | 2 | 3.30E-05 | 0.96  | 4.04   | -     | 1488.9  |
| AHQ-8-5, 4624              | R.IINKPTAAAIYGLDKR                                                                                          | 1659.95097 | 2 | 3.51E-11 | 0.92  | 5.12   | -     | 955.7   |
| AHQ-8-6, 4327              | R.IINKPTAAAIYGLDKR.E                                                                                        | 1816.13732 | 2 | 4.02E-06 | 0.52  | 3.17   | -     | 563.2   |
| AHQ-8-6, 3454              | K.LYGSAGPPTGEEDTAEKDEL                                                                                      | 2177.26447 | 2 | 5.35E-06 | 0.86  | 3.99   | -     | 478.2   |
| AHQ-8-5, 3486              | K.LYGSAGPPTGEEDTAEKDEL                                                                                      | 2177.26447 | 2 | 6.41E-04 | 0.85  | 3.54   | -     | 750.6   |
| AHQ-8-7, 3418              | K.NQLTSNPKNTVFDAR.R                                                                                         | 1677.84011 | 2 | 7.27E-04 | 0.27  | 2.67   | -     | 336.2   |
| AHQ-8-5, 3500 - 3516       | K.NQLTSNPKNTVFDAR.R                                                                                         | 1677.84011 | 2 | 3.77E-04 | 0.73  | 3.84   | -     | 632.7   |
| AHQ-8-6, 3470              | K.NQLTSNPKNTVFDAR.R                                                                                         | 1677.84011 | 2 | 6.41E-05 | 0.65  | 3.97   | -     | 412.5   |
| AHQ-8-6, 4582 - 4658       | K.TFAPKEISAM*VLTK.M                                                                                         | 1552.86064 | 2 | 2.04E-04 | 0.55  | 2.74   | -     | 691.6   |
| AHQ-8-5, 4729              | K.TFAPKEISAM*VLTK.M                                                                                         | 1552.86064 | 2 | 5.68E-08 | 0.93  | 3.74   | -     | 1490.3  |
| AHQ-8-5, 4593 - 4654       | K.TFAPKEISAM*VLTK.M                                                                                         | 1552.86064 | 2 | 1.16E-04 | 0.82  | 2.89   | -     | 1087.0  |
| gj5802974 ref NP_006784.1  | peroxiredoxin 3; antioxidant protein 1; thioredoxin-dependent peroxidoreductase 3                           |            |   | 3.95E-11 | 1.85  | 20.29  | 9.80  | 27692.5 |
| AHQ-8-11, 5044 - 5121      | R.DYGVLLGSLALR.G                                                                                            | 1463.66058 | 2 | 3.95E-11 | 0.98  | 5.79   | -     | 1922.5  |
| AHQ-8-11, 3012 - 3083      | K.HLSVNDLPVGR.S                                                                                             | 1207.36435 | 2 | 1.60E-05 | 0.87  | 3.46   | -     | 682.0   |
| gj4757112 ref NP_004026.1  | acyl-Coenzyme A oxidase isoform a; acyl-coenzyme A oxidase 1 [Homo sapiens]                                 |            |   | 4.14E-11 | 0.91  | 10.21  | 3.60  | 74745.4 |
| AHQ-8-6, 5850              | R.INEGIGQGDLSLPELHALTAGLK.A                                                                                 | 2476.76782 | 3 | 4.14E-11 | 0.91  | 4.11   | -     | 930.1   |
| gj4505735 ref NP_002611.1  | platelet factor 4 variant 1; Platelet factor 4, variant 1 (PF4-like) [Homo sapiens]                         |            |   | 4.60E-11 | 1.89  | 20.30  | 25.00 | 11552.6 |
| AHQ-8-14-, 3679            | R.AEAEDGDQLQCLCVK.T                                                                                         | 1739.86036 | 2 | 3.07E-05 | 0.84  | 3.43   | -     | 544.4   |
| AHQ-8-14-, 3789 - 3790     | R.AEAEDGDQLQCLCVK.T                                                                                         | 1739.86036 | 2 | 4.60E-11 | 0.98  | 6.00   | -     | 1565.8  |
| AHQ-8-14, 4706             | R.AEAEDGDQLQCLCVK.T                                                                                         | 1739.86036 | 2 | 1.88E-06 | 0.95  | 4.17   | -     | 1355.3  |
| AHQ-8-14-, 4721            | K.ICLDLQALLYK.K                                                                                             | 1351.63656 | 2 | 3.64E-04 | 0.91  | 3.52   | -     | 1286.6  |
| gj29741246 ref XP_294070.1 | similar to Glyceraldehyde 3-phosphate dehydrogenase, liver (GAPDH) [Homo sapiens]                           |            |   | 5.58E-11 | 0.90  | 10.18  | 4.30  | 35032.0 |
| AHQ-8-13-, 5316 - 5374     | K.LVINGNPITIFQER.D                                                                                          | 1614.87029 | 2 | 5.58E-11 | 0.90  | 3.24   | -     | 1109.6  |
| AHQ-8-13-, 5430            | K.LVINGNPITIFQER.D                                                                                          | 1614.87029 | 2 | 2.42E-05 | 0.91  | 3.60   | -     | 933.9   |
| AHQ-8-14-, 5327            | K.LVINGNPITIFQER.D                                                                                          | 1614.87029 | 2 | 2.56E-09 | 0.92  | 3.30   | -     | 1002.4  |
| AHQ-8-13, 5375 - 5445      | K.LVINGNPITIFQER.D                                                                                          | 1614.87029 | 2 | 2.98E-06 | 0.84  | 2.55   | -     | 967.4   |
| gj5902134 ref NP_009005.1  | coronin, actin binding protein, 1A; coronin, actin-binding, 1A; coronin 1                                   |            |   | 7.15E-11 | 1.79  | 20.28  | 10.60 | 51026.0 |
| AHQ-8-7, 6176              | R.KSDLFQEDLYPPTAGPDPALTAEEWLGGR.D                                                                           | 3175.44994 | 3 | 7.15E-11 | 0.94  | 5.50   | -     | 621.7   |
| AHQ-8-7, 6244              | R.YFEITSEAPFLHYLSM*FSSK.E                                                                                   | 2414.71688 | 3 | 9.05E-06 | 0.85  | 4.11   | -     | 700.8   |
| gj21956645 ref NP_665807.1 | myotrophin; granule cell differentiation protein [Homo sapiens]                                             |            |   | 7.37E-11 | 1.93  | 20.28  | 25.40 | 12894.7 |
| AHQ-8-14-, 3997 - 4053     | K.GPDGLTAFEATDNOAIK.A                                                                                       | 1748.87196 | 2 | 4.50E-05 | 0.96  | 4.56   | -     | 1336.1  |
| AHQ-8-13, 4107 - 4187      | K.GPDGLTAFEATDNOAIK.A                                                                                       | 1748.87196 | 2 | 7.37E-11 | 0.97  | 5.63   | -     | 1092.4  |
| AHQ-8-14, 4730 - 4789      | K.GPDGLTAFEATDNOAIK.A                                                                                       | 1748.87196 | 2 | 4.91E-05 | 0.81  | 3.27   | -     | 749.0   |
| AHQ-8-14, 4785 - 4845      | K.GPDGLTAFEATDNOAIK.A                                                                                       | 1748.87196 | 2 | 1.59E-07 | 0.97  | 5.31   | -     | 1161.3  |
| AHQ-8-14, 4849 - 4911      | K.GPDGLTAFEATDNOAIK.A                                                                                       | 1748.87196 | 2 | 3.92E-04 | 0.87  | 3.58   | -     | 805.5   |
| AHQ-8-14, 4901 - 4966      | K.GPDGLTAFEATDNOAIK.A                                                                                       | 1748.87196 | 2 | 1.49E-09 | 0.96  | 5.00   | -     | 1286.9  |
| AHQ-8-14-, 3950            | K.GPDGLTAFEATDNOAIK.A                                                                                       | 1748.87196 | 3 | 8.16E-04 | 0.90  | 3.62   | -     | 1204.0  |
| AHQ-8-14-, 3858 - 3934     | K.GPDGLTAFEATDNOAIK.A                                                                                       | 1748.87196 | 2 | 2.09E-07 | 0.97  | 4.81   | -     | 1432.9  |
| AHQ-8-13-, 3938 - 3994     | K.GPDGLTAFEATDNOAIK.A                                                                                       | 1748.87196 | 2 | 1.06E-08 | 0.96  | 4.42   | -     | 1205.8  |

|                             |                                                                         |            |   |          |      |      |   |        |
|-----------------------------|-------------------------------------------------------------------------|------------|---|----------|------|------|---|--------|
| AHQ-8-13-, 4075 - 4091      | K.GPDGLTAFEATDNOAIK.A                                                   | 1748.87196 | 2 | 7.35E-10 | 0.96 | 4.97 | - | 1234.2 |
| AHQ-8-13-, 3663 - 3728      | K.NGLDDEVKDYVAK.G                                                       | 1466.57496 | 2 | 1.96E-08 | 0.84 | 3.32 | - | 848.0  |
| AHQ-8-13-, 3574             | K.NGLDDEVKDYVAK.G                                                       | 1466.57496 | 2 | 4.74E-07 | 0.94 | 3.89 | - | 1188.3 |
| AHQ-8-14-, 3557             | K.NGLDDEVKDYVAK.G                                                       | 1466.57496 | 2 | 1.62E-08 | 0.96 | 4.22 | - | 1413.3 |
| AHQ-8-13, 3741 - 3817       | K.NGLDDEVKDYVAK.G                                                       | 1466.57496 | 2 | 1.21E-05 | 0.81 | 3.09 | - | 768.1  |
| gi 24797067 ref NP_002107.3 | major histocompatibility complex, class I, A precursor; HLA-A1 class I  |            |   |          |      |      |   |        |
| AHQ-8-8, 4813               | R.APWIEQEGPEYWDQETR.N                                                   | 2135.23420 | 2 | 1.36E-06 | 0.93 | 4.20 | - | 916.5  |
| AHQ-8-8, 3375               | R.DGEDQTQDELVELTRPAGDGTQK.W                                             | 2638.69666 | 3 | 1.81E-05 | 0.77 | 3.30 | - | 643.6  |
| AHQ-8-8, 3282               | R.DGEDQTQDELVELTRPAGDGTQK.W                                             | 2638.69666 | 2 | 2.08E-06 | 0.72 | 3.43 | - | 349.7  |
| AHQ-8-8, 4785 - 4843        | R.FIARGVDDTQFVR.F                                                       | 1630.82504 | 2 | 8.42E-11 | 0.98 | 5.70 | - | 2246.4 |
| AHQ-8-11, 3337              | K.WAAVVVPSGEEQR.Y                                                       | 1428.57478 | 2 | 2.86E-05 | 0.62 | 2.52 | - | 728.3  |
| AHQ-8-8, 3311               | R.YTCHVQHEGLPKPLTLR.W                                                   | 2051.35781 | 3 | 1.30E-06 | 0.94 | 4.89 | - | 1699.6 |
| gi 4759300 ref NP_004772.1  | vesicle-associated membrane protein 3 (cellubrevin); vesicle-associated |            |   |          |      |      |   |        |
| AHQ-8-13-, 3579             | R.ADALQAGASQFETSAK.L                                                    | 1666.77095 | 2 | 4.48E-04 | 0.94 | 4.54 | - | 829.7  |
| AHQ-8-14-, 3493 - 3561      | R.ADALQAGASQFETSAK.L                                                    | 1666.77095 | 2 | 7.86E-07 | 0.93 | 4.06 | - | 1066.8 |
| AHQ-8-13-, 4563             | R.LQQTQNVQDEVDIMR.V                                                     | 1917.13404 | 2 | 2.20E-05 | 0.97 | 4.75 | - | 1456.3 |
| AHQ-8-13-, 4720             | R.LQQTQNVQDEVDIMR.V                                                     | 1917.13404 | 2 | 1.86E-05 | 0.97 | 5.13 | - | 1606.5 |
| AHQ-8-13-, 3692             | R.LQQTQNVQDEVDIMR.V                                                     | 1933.13344 | 2 | 8.62E-11 | 0.96 | 4.53 | - | 1756.3 |
| AHQ-8-13, 3837              | R.LQQTQNVQDEVDIMR.V                                                     | 1933.13344 | 2 | 5.71E-04 | 0.93 | 3.64 | - | 1290.7 |
| gi 4504345 ref NP_000508.1  | alpha 2 globin [Homo sapiens]                                           |            |   |          |      |      |   |        |
| AHQ-8-13-, 4218             | K.FLASVSTVLT8K.Y                                                        | 1253.46970 | 2 | 4.00E-04 | 0.90 | 3.61 | - | 1137.2 |
| AHQ-8-13, 4375              | K.FLASVSTVLT8K.Y                                                        | 1253.46970 | 2 | 1.40E-06 | 0.92 | 3.81 | - | 1229.7 |
| AHQ-8-14, 5299              | K.FLASVSTVLT8K.Y                                                        | 1253.46970 | 2 | 6.00E-04 | 0.88 | 3.24 | - | 1002.9 |
| AHQ-8-13, 4181 - 4193       | K.TYFPHFDLSHGSQAQVK.G                                                   | 1835.01138 | 2 | 8.06E-06 | 0.85 | 3.29 | - | 698.2  |
| AHQ-8-13, 4175 - 4231       | K.TYFPHFDLSHGSQAQVK.G                                                   | 1835.01138 | 3 | 2.26E-08 | 0.89 | 3.77 | - | 726.6  |
| AHQ-8-13-, 3979 - 4034      | K.TYFPHFDLSHGSQAQVK.G                                                   | 1835.01138 | 3 | 1.15E-08 | 0.91 | 4.52 | - | 650.1  |
| AHQ-8-13-, 4007 - 4066      | K.TYFPHFDLSHGSQAQVK.G                                                   | 1835.01138 | 2 | 3.30E-09 | 0.93 | 4.47 | - | 764.5  |
| AHQ-8-13-, 5912             | K.VADALTNVAHVHDDMPNALSALSDLHAHK.L                                       | 2998.32055 | 3 | 1.69E-04 | 0.93 | 4.26 | - | 1545.6 |
| AHQ-8-13-, 5279             | K.VADALTNVAHVHDDMPNALSALSDLHAHK.L                                       | 3014.31995 | 3 | 1.28E-04 | 0.97 | 6.19 | - | 1484.6 |
| AHQ-8-13, 2969              | K.VGAHAGEYGAELER.M                                                      | 1530.62397 | 2 | 2.83E-06 | 0.86 | 2.77 | - | 959.6  |
| AHQ-8-13, 2856 - 2911       | K.VGAHAGEYGAELER.M                                                      | 1530.62397 | 2 | 7.25E-05 | 0.97 | 4.45 | - | 1743.6 |
| AHQ-8-13-, 2683 - 2747      | K.VGAHAGEYGAELER.M                                                      | 1530.62397 | 3 | 8.65E-05 | 0.96 | 4.88 | - | 2048.0 |
| AHQ-8-13-, 2684 - 2748      | K.VGAHAGEYGAELER.M                                                      | 1530.62397 | 2 | 8.77E-11 | 0.96 | 4.22 | - | 1512.4 |
| AHQ-8-13, 2852 - 2927       | K.VGAHAGEYGAELER.M                                                      | 1530.62397 | 3 | 8.36E-04 | 0.96 | 5.69 | - | 1688.9 |
| AHQ-8-14-, 2637             | K.VGAHAGEYGAELER.M                                                      | 1530.62397 | 2 | 2.68E-09 | 0.96 | 4.23 | - | 1485.5 |
| AHQ-8-14-, 2638             | K.VGAHAGEYGAELER.M                                                      | 1530.62397 | 3 | 9.74E-04 | 0.95 | 5.18 | - | 1607.3 |
| gi 30148492 ref XP_293610.2 | similar to Heat shock cognate 71 kDa protein [Homo sapiens]             |            |   |          |      |      |   |        |
| AHQ-8-6, 2327 - 2350        | R.FDDAVVSDM*K.H                                                         | 1271.37908 | 2 | 7.26E-05 | 0.93 | 3.68 | - | 906.3  |
| AHQ-8-6, 4479 - 4558        | R.IINEPTAAAIYGLDK.K                                                     | 1660.89259 | 2 | 9.71E-11 | 0.89 | 4.82 | - | 909.9  |
| AHQ-8-7, 4477               | R.IINEPTAAAIYGLDK.K                                                     | 1660.89259 | 2 | 8.15E-10 | 0.82 | 4.06 | - | 755.5  |
| AHQ-8-6, 4222               | R.IINEPTAAAIYGLDK.V                                                     | 1789.06550 | 2 | 2.15E-09 | 0.89 | 3.97 | - | 618.0  |
| gi 4758012 ref NP_004850.1  | clathrin heavy chain; clathrin, heavy polypeptide-like 2 [Homo sapiens] |            |   |          |      |      |   |        |
| AHQ-8-3, 6353 - 6418        | K.AFM*TADLPNELIELLEK.I                                                  | 1964.26896 | 2 | 6.54E-04 | 0.31 | 2.80 | - | 239.3  |
| AHQ-8-3, 6448               | R.FQSVPAQPGQTSPLLQYFQVILLDQGLQNK.Y                                      | 3189.60926 | 3 | 1.20E-09 | 0.96 | 5.56 | - | 1564.1 |
| AHQ-8-4, 4622               | R.GQFSTDELVAEVEK.R                                                      | 1552.66462 | 2 | 7.35E-08 | 0.94 | 4.34 | - | 1106.4 |
| AHQ-8-3, 2116 - 2184        | R.IHEGCEEPATHNALAK.I                                                    | 1778.92458 | 2 | 4.53E-04 | 0.69 | 2.82 | - | 471.0  |
| AHQ-8-3, 4952 - 5029        | R.ISGETIFVTPAPHEATAGIIGVNR.K                                            | 2354.64751 | 3 | 4.45E-10 | 0.93 | 4.21 | - | 1127.1 |
| AHQ-8-3, 5036               | R.ISGETIFVTPAPHEATAGIIGVNR.K                                            | 2354.64751 | 3 | 5.70E-07 | 0.92 | 4.04 | - | 1250.2 |
| AHQ-8-3, 6321               | R.KFDVNTSAVQVLIHIGNLD.R.A                                               | 2369.66218 | 3 | 4.44E-06 | 0.98 | 6.26 | - | 2375.9 |
| AHQ-8-3, 6148               | R.LPVIQVGLLDVDCSEDIK.N                                                  | 2043.36744 | 2 | 6.00E-04 | 0.94 | 4.11 | - | 1104.3 |
| AHQ-8-3, 5812               | R.NLQNLILLTAIK.A                                                        | 1354.66353 | 2 | 4.51E-04 | 0.97 | 4.95 | - | 1728.2 |
| AHQ-8-3, 6256 - 6258        | R.RPLIDQVQVQTALSETQDPEEVSVTK.A                                          | 2883.20103 | 3 | 4.01E-04 | 0.90 | 4.11 | - | 983.7  |
| AHQ-8-3, 6310               | K.VGYTPDWIFLLR.N                                                        | 1480.73443 | 2 | 9.94E-11 | 0.81 | 3.38 | - | 515.5  |
| AHQ-8-3, 3138               | K.VIQCFQFAETGGVQK.I                                                     | 1509.70940 | 2 | 6.41E-04 | 0.84 | 2.63 | - | 1514.7 |
| AHQ-8-3, 5001 - 5078        | K.WLLLTGISAQQR.N.V                                                      | 1500.72728 | 2 | 2.34E-05 | 0.72 | 3.13 | - | 586.8  |
| gi 9257257 ref NP_059830.1  | WD repeat-containing protein 1 isoform 1 [Homo sapiens]                 |            |   |          |      |      |   |        |
| AHQ-8-6, 4864 - 4891        | K.VVTVFVADGYSENNIFYGHAK.I                                               | 2541.75861 | 3 | 1.02E-10 | 0.74 | 3.29 | - | 623.2  |
| gi 4557703 ref NP_000414.1  | Keratin 2a [Homo sapiens]                                               |            |   |          |      |      |   |        |
| AHQ-8-2, 2199 - 2265        | K.AQYEEIAQR.S                                                           | 1108.18640 | 2 | 7.59E-04 | 0.84 | 3.30 | - | 971.2  |
| AHQ-8-2, 2919               | K.DVDNAYMIK.V                                                           | 1069.21359 | 2 | 1.43E-04 | 0.88 | 3.57 | - | 565.5  |
| AHQ-8-2, 3524 - 3532        | R.DYQELMNVK.L                                                           | 1140.29181 | 2 | 3.82E-04 | 0.89 | 3.39 | - | 1015.4 |
| AHQ-8-1, 6335               | R.FGGFGGGGGVGLGGPGGFGGGYGGIHEVSNQSLQLPLNVK.V                            | 4094.54151 | 3 | 9.15E-05 | 0.95 | 5.69 | - | 942.2  |
| AHQ-8-4, 6338               | R.FGGFGGGGGVGLGGPGGFGGGYGGIHEVSNQSLQLPLNVK.V                            | 4094.54151 | 3 | 3.92E-06 | 0.94 | 5.61 | - | 913.1  |
| AHQ-8-7, 6129               | R.FGGFGGGGGVGLGGPGGFGGGYGGIHEVSNQSLQLPLNVK.V                            | 4094.54151 | 3 | 4.21E-04 | 0.68 | 3.21 | - | 649.7  |
| AHQ-8-11, 3008 - 3075       | R.FLEQQNQVLOT.K.W                                                       | 1476.65935 | 2 | 1.40E-07 | 0.96 | 4.37 | - | 1814.7 |
| AHQ-8-10, 3082 - 3084       | R.FLEQQNQVLOT.K.W                                                       | 1476.65935 | 2 | 1.33E-05 | 0.93 | 4.18 | - | 1370.0 |
| AHQ-8-12, 3022              | R.FLEQQNQVLOT.K.W                                                       | 1476.65935 | 2 | 1.70E-06 | 0.97 | 4.09 | - | 2000.8 |
| AHQ-8-13, 3221 - 3243       | R.FLEQQNQVLOT.K.W                                                       | 1476.65935 | 2 | 3.51E-05 | 0.96 | 4.42 | - | 1637.1 |
| AHQ-8-13-, 3088             | R.FLEQQNQVLOT.K.W                                                       | 1476.65935 | 2 | 1.15E-07 | 0.97 | 4.95 | - | 2172.4 |
| AHQ-8-6, 3019               | R.FLEQQNQVLOT.K.W                                                       | 1476.65935 | 2 | 1.81E-07 | 0.97 | 4.52 | - | 2282.7 |
| AHQ-8-5, 3036 - 3073        | R.FLEQQNQVLOT.K.W                                                       | 1476.65935 | 2 | 1.48E-08 | 0.96 | 4.04 | - | 2281.8 |
| AHQ-8-1, 3248 - 3249        | R.FLEQQNQVLOT.K.W                                                       | 1476.65935 | 2 | 6.03E-06 | 0.97 | 4.51 | - | 2031.1 |
| AHQ-8-2, 3279               | R.FLEQQNQVLOT.K.W                                                       | 1476.65935 | 2 | 1.89E-06 | 0.96 | 4.83 | - | 2082.8 |
| AHQ-8-10, 2934              | R.FLEQQNQVLOT.K.W                                                       | 1476.65935 | 2 | 1.10E-05 | 0.90 | 3.84 | - | 987.3  |
| AHQ-8-4, 3041               | R.FLEQQNQVLOT.K.W                                                       | 1476.65935 | 2 | 1.84E-04 | 0.97 | 5.19 | - | 2271.5 |
| AHQ-8-3, 3230               | R.FLEQQNQVLOT.K.W                                                       | 1476.65935 | 2 | 5.93E-04 | 0.88 | 3.88 | - | 1123.7 |
| AHQ-8-3, 3064 - 3065        | R.FLEQQNQVLOT.K.W                                                       | 1476.65935 | 2 | 5.94E-07 | 0.97 | 4.68 | - | 2142.1 |
| AHQ-8-2, 2353               | R.GFSSGSVAVSGGSR.R                                                      | 1255.31950 | 2 | 6.91E-04 | 0.95 | 3.95 | - | 1399.6 |
| AHQ-8-4, 2289 - 2362        | R.GFSSGSVAVSGGSR.R                                                      | 1255.31950 | 2 | 8.52E-06 | 0.86 | 2.96 | - | 949.3  |
| AHQ-8-13-, 2344 - 2363      | R.GFSSGSVAVSGGSR.R                                                      | 1255.31950 | 2 | 7.92E-06 | 0.95 | 3.70 | - | 1563.9 |
| AHQ-8-4, 2187               | R.HGGGGGGGGGGGFSR.S                                                     | 1321.34296 | 2 | 1.27E-04 | 0.90 | 3.25 | - | 1152.1 |
| AHQ-8-2, 2252               | R.HGGGGGGGGGGGFSR.S                                                     | 1321.34296 | 2 | 5.62E-05 | 0.85 | 3.26 | - | 725.8  |
| AHQ-8-6, 2882               | K.IEISELNR.V                                                            | 974.09353  | 2 | 2.75E-04 | 0.72 | 2.84 | - | 547.5  |
| AHQ-8-11, 2876              | K.IEISELNR.V                                                            | 974.09353  | 2 | 4.16E-04 | 0.76 | 2.95 | - | 572.9  |
| AHQ-8-10, 2818              | K.IEISELNR.V                                                            | 974.09353  | 2 | 7.43E-04 | 0.73 | 2.89 | - | 587.2  |
| AHQ-8-7, 2840               | K.IEISELNR.V                                                            | 974.09353  | 2 | 2.19E-04 | 0.84 | 2.85 | - | 853.9  |
| AHQ-8-7, 2841               | K.IEISELNR.V                                                            | 974.09353  | 1 | 5.78E-04 | 0.16 | 1.85 | - | 207.0  |
| AHQ-8-4, 4069 - 4134        | K.LNDLEEAALQQAQ.E                                                       | 1372.50630 | 2 | 3.56E-06 | 0.97 | 4.74 | - | 1846.8 |
| AHQ-8-13-, 4122 - 4199      | K.LNDLEEAALQQAQ.E                                                       | 1372.50630 | 2 | 2.52E-06 | 0.97 | 4.47 | - | 2056.8 |
| AHQ-8-3, 4126               | K.LNDLEEAALQQAQ.E                                                       | 1372.50630 | 2 | 2.79E-05 | 0.95 | 4.45 | - | 1397.2 |
| AHQ-8-13, 4211 - 4279       | K.LNDLEEAALQQAQ.E                                                       | 1372.50630 | 2 | 4.13E-05 | 0.95 | 4.54 | - | 1366.6 |
| AHQ-8-2, 4115 - 4183        | K.LNDLEEAALQQAQ.E                                                       | 1372.50630 | 2 | 3.53E-06 | 0.97 | 4.62 | - | 1709.5 |
| AHQ-8-10, 3939              | K.LNDLEEAALQQAQ.E                                                       | 1372.50630 | 2 | 3.44E-04 | 0.80 | 3.08 | - | 1034.2 |
| AHQ-8-7, 3989               | K.LNDLEEAALQQAQ.E                                                       | 1372.50630 | 2 | 2.03E-05 | 0.95 | 4.27 | - | 1429.3 |
| AHQ-8-1, 4617               | R.NKLNDEEAALQQAQ.E                                                      | 1614.78232 | 2 | 2.39E-04 | 0.95 | 3.86 | - | 1613.1 |
| AHQ-8-2, 5884               | R.NKLNDEEAALQQAQEDLAR.L                                                 | 2199.40755 | 3 | 3.50E-04 | 0.95 | 5.38 | - | 1051.3 |
| AHQ-8-4, 5807               | R.NLDLDSIAEVK.A                                                         | 1330.50933 | 2 | 6.73E-07 | 0.96 | 4.42 | - | 1463.4 |
| AHQ-8-7, 5597               | R.NLDLDSIAEVK.A                                                         | 1330.50933 | 2 | 1.23E-05 | 0.96 | 4.75 | - | 1275.6 |
| AHQ-8-12, 5562              | R.NLDLDSIAEVK.A                                                         | 1330.50933 | 2 | 4.97E-04 | 0.90 | 3.60 | - | 954.5  |
| AHQ-8-14-, 5653             | R.NLDLDSIAEVK.A                                                         | 1330.50933 | 2 | 3.49E-06 | 0.95 | 4.41 | - | 1191.7 |
| AHQ-8-13, 5780              | R.NLDLDSIAEVK.A                                                         | 1330.50933 | 2 | 1.09E-06 | 0.96 | 4.48 | - | 1252.1 |
| AHQ-8-1, 5819               | R.NLDLDSIAEVK.A                                                         | 1330.50933 | 2 | 2.53E-06 | 0.96 | 5.03 | - | 1083.4 |
| AHQ-8-6, 5659 - 5662        | R.NLDLDSIAEVK.A                                                         | 1330.50933 | 2 | 1.76E-06 | 0.97 | 5.09 | - | 1288.0 |
| AHQ-8-2, 5815               | R.NLDLDSIAEVK.A                                                         | 1330.50933 | 2 | 2.50E-06 | 0.96 | 4.38 | - | 1333.2 |
| AHQ-8-13-, 5642             | R.NLDLDSIAEVK.A                                                         | 1330.50933 | 2 | 6.43E-07 | 0.96 | 4.80 | - | 1260.2 |
| AHQ-8-3, 5720 - 5725        | R.NLDLDSIAEVK.A                                                         | 1330.50933 | 2 | 8.98E-07 | 0.97 | 5.09 | - | 1208.4 |
| AHQ-8-2, 3224               | K.NVQDAIADAEQR.G                                                        | 1330.38637 | 2 | 6.91E-08 | 0.95 | 4.38 | - | 1161.7 |

|                              |                                                                           |            |   |          |       |        |       |          |
|------------------------------|---------------------------------------------------------------------------|------------|---|----------|-------|--------|-------|----------|
| AHQ-8-4, 3166                | K.NVQDAIADAQR.G                                                           | 1330.38637 | 2 | 3.11E-06 | 0.97  | 4.35   | -     | 1865.6   |
| AHQ-8-3, 3202                | K.NVQDAIADAQR.G                                                           | 1330.38637 | 2 | 7.80E-10 | 0.90  | 3.28   | -     | 1101.6   |
| AHQ-8-13-, 3199              | K.NVQDAIADAQR.G                                                           | 1330.38637 | 2 | 1.17E-06 | 0.95  | 4.01   | -     | 1577.7   |
| AHQ-8-14-, 3186              | K.NVQDAIADAQR.G                                                           | 1330.38637 | 2 | 2.68E-10 | 0.94  | 4.14   | -     | 1285.3   |
| AHQ-8-13, 3365 - 3369        | K.NVQDAIADAQR.G                                                           | 1330.38637 | 2 | 9.92E-09 | 0.94  | 3.81   | -     | 1156.9   |
| AHQ-8-2, 4977                | K.SISISVAGGGGGAAGGFGR.G                                                   | 1839.98956 | 2 | 1.45E-04 | 0.68  | 2.75   | -     | 744.5    |
| AHQ-8-2, 3272                | R.TAAENDFVTLK.K                                                           | 1209.33064 | 2 | 2.37E-04 | 0.69  | 2.51   | -     | 695.1    |
| AHQ-8-2, 2757                | R.TAAENDFVTLK.D                                                           | 1337.50356 | 2 | 1.69E-05 | 0.75  | 2.98   | -     | 719.9    |
| AHQ-8-2, 5047                | R.TSQNSELNMQDLVEDYK.K                                                     | 2129.24808 | 2 | 3.35E-09 | 0.97  | 4.64   | -     | 1481.9   |
| AHQ-8-2, 4504 - 4577         | R.TSQNSELNMQDLVEDYK.K                                                     | 2129.24808 | 2 | 2.62E-06 | 0.84  | 3.53   | -     | 590.4    |
| AHQ-8-4, 4558                | R.TSQNSELNMQDLVEDYK.K                                                     | 2257.42100 | 3 | 3.60E-07 | 0.80  | 3.27   | -     | 782.4    |
| AHQ-8-2, 4608                | R.TSQNSELNMQDLVEDYK.K                                                     | 2257.42100 | 2 | 1.10E-10 | 0.89  | 3.58   | -     | 960.9    |
| AHQ-8-4, 5677                | K.VDLLNQEIEFLK.V                                                          | 1461.68459 | 2 | 3.96E-07 | 0.93  | 4.15   | -     | 960.1    |
| AHQ-8-5, 5645                | K.VDLLNQEIEFLK.V                                                          | 1461.68459 | 2 | 6.58E-08 | 0.94  | 4.49   | -     | 983.5    |
| AHQ-8-13, 5637 - 5661        | K.VDLLNQEIEFLK.V                                                          | 1461.68459 | 2 | 2.88E-07 | 0.92  | 4.06   | -     | 993.2    |
| AHQ-8-3, 5604 - 5605         | K.VDLLNQEIEFLK.V                                                          | 1461.68459 | 2 | 3.76E-06 | 0.95  | 4.87   | -     | 964.7    |
| AHQ-8-14-, 5533 - 5553       | K.VDLLNQEIEFLK.V                                                          | 1461.68459 | 2 | 3.60E-06 | 0.84  | 3.59   | -     | 689.5    |
| AHQ-8-7, 5416 - 5472         | K.VDLLNQEIEFLK.V                                                          | 1461.68459 | 2 | 3.73E-07 | 0.87  | 3.73   | -     | 722.7    |
| AHQ-8-2, 5695                | K.VDLLNQEIEFLK.V                                                          | 1461.68459 | 2 | 1.51E-05 | 0.95  | 4.91   | -     | 934.5    |
| AHQ-8-13-, 5512 - 5588       | K.VDLLNQEIEFLK.V                                                          | 1461.68459 | 2 | 1.82E-04 | 0.89  | 3.87   | -     | 1003.7   |
| AHQ-8-13-, 5332 - 5340       | K.VLYDAEISQIHQSVTDTNVILSM*DNSR.N                                          | 3066.34680 | 3 | 2.25E-10 | 0.94  | 5.04   | -     | 1036.4   |
| AHQ-8-14-, 5343              | K.VLYDAEISQIHQSVTDTNVILSM*DNSR.N                                          | 3066.34680 | 3 | 2.31E-05 | 0.95  | 4.69   | -     | 1427.9   |
| AHQ-8-2, 5520 - 5577         | K.VLYDAEISQIHQSVTDTNVILSM*DNSR.N                                          | 3066.34680 | 3 | 1.68E-07 | 0.94  | 5.01   | -     | 1033.1   |
| AHQ-8-13-, 5654              | K.VLYDAEISQIHQSVTDTNVILSMDSNR.N                                           | 3050.34740 | 3 | 3.72E-07 | 0.73  | 3.26   | -     | 624.9    |
| AHQ-8-2, 3204                | K.YEELQVTVGR.H                                                            | 1194.31920 | 2 | 9.57E-07 | 0.95  | 3.55   | -     | 1745.8   |
| AHQ-8-2, 3191                | K.YEELQVTVGR.H                                                            | 1194.31920 | 2 | 1.64E-07 | 0.96  | 4.19   | -     | 1801.3   |
| AHQ-8-13, 3353 - 3359        | K.YEELQVTVGR.H                                                            | 1194.31920 | 2 | 4.19E-04 | 0.82  | 2.76   | -     | 1089.0   |
| AHQ-8-1, 3336                | K.YEELQVTVGR.H                                                            | 1194.31920 | 2 | 1.49E-07 | 0.95  | 3.43   | -     | 1793.6   |
| AHQ-8-2, 3035                | R.YLDGLTAER.T                                                             | 1038.13608 | 2 | 2.24E-04 | 0.88  | 3.44   | -     | 613.6    |
| gi 4759212 ref NP_004598.1   | beta-tubulin cofactor A [Homo sapiens]                                    |            |   | 1.22E-10 | 1.91  | 20.29  | 26.90 | 12854.8  |
| AHQ-8-13-, 3407              | R.ILENEKDLEEAEEYKEAR.L                                                    | 2209.35284 | 3 | 1.22E-10 | 0.97  | 5.84   | -     | 1880.7   |
| AHQ-8-13-, 3411              | R.ILENEKDLEEAEEYKEAR.L                                                    | 2209.35284 | 2 | 4.86E-09 | 0.95  | 4.88   | -     | 956.0    |
| AHQ-8-13, 3508 - 3576        | R.ILENEKDLEEAEEYKEAR.L                                                    | 2209.35284 | 3 | 1.14E-05 | 0.92  | 4.16   | -     | 1084.8   |
| AHQ-8-13-, 3495              | R.RLEAAAYLDLQR.I                                                          | 1348.53280 | 2 | 1.84E-06 | 0.94  | 3.76   | -     | 896.7    |
| gi 20357552 ref NP_005222.2  | contactin isoform a; oncogene EMS1 [Homo sapiens]                         |            |   | 1.23E-10 | 2.66  | 30.21  | 7.80  | 61585.7  |
| AHQ-8-12, 3770               | K.NASTFEDVTQVSSAYQK.T                                                     | 1875.97061 | 2 | 4.00E-08 | 0.77  | 3.06   | -     | 570.3    |
| AHQ-8-14-, 3839              | K.NASTFEDVTQVSSAYQK.T                                                     | 1875.97061 | 2 | 1.23E-10 | 0.96  | 4.11   | -     | 1353.2   |
| AHQ-8-13-, 2994 - 2995       | K.VDKSAVGFVEYQGGK.T                                                       | 1428.57155 | 2 | 1.56E-07 | 0.87  | 3.81   | -     | 757.3    |
| AHQ-8-14-, 2963              | R.VDOSAVGFVEYQGGK.T                                                       | 1428.52841 | 2 | 6.11E-07 | 0.84  | 3.43   | -     | 678.0    |
| AHQ-8-11, 2916               | R.VDOSAVGFVEYQGGK.T                                                       | 1428.52841 | 2 | 3.55E-04 | 0.76  | 2.84   | -     | 635.3    |
| gi 27500274 ref XP_113950.3  | similar to Munc13-4 protein [Homo sapiens]                                |            |   | 1.27E-10 | 4.39  | 50.31  | 8.30  | 123281.1 |
| AHQ-8-4, 4693 - 4699         | R.AVMQ*DELVPLGELTK.H                                                      | 1659.92638 | 2 | 4.61E-05 | 0.72  | 2.98   | -     | 444.8    |
| AHQ-8-4, 5181 - 5261         | K.LPAQLAWALEQR.V                                                          | 1525.73360 | 2 | 1.64E-10 | 0.94  | 3.75   | -     | 1437.7   |
| AHQ-8-4, 6498                | R.LPLTPAPNGDPILQLLEGR.K                                                   | 2178.51621 | 2 | 1.27E-10 | 0.88  | 3.71   | -     | 728.0    |
| AHQ-8-4, 4061 - 4067         | R.SVFPLSVSDSPAR.L                                                         | 1362.51311 | 2 | 4.36E-06 | 0.88  | 2.78   | -     | 1152.1   |
| AHQ-8-4, 6415                | R.VGAVLEQGLQNTLHAQLQSALAGLGHIE.R                                          | 3153.54178 | 3 | 3.34E-05 | 0.97  | 6.20   | -     | 1721.9   |
| gi 27498332 ref XP_1212565.1 | similar to tubulin, beta 5 [Homo sapiens]                                 |            |   | 1.31E-10 | 2.75  | 30.25  | 8.60  | 49670.5  |
| AHQ-8-13, 3624               | R.IM*NTFSVVPSPK.V                                                         | 1336.58217 | 2 | 1.10E-04 | 0.80  | 2.78   | -     | 765.7    |
| AHQ-8-7, 3324 - 3341         | R.IM*NTFSVVPSPK.V                                                         | 1336.58217 | 2 | 8.64E-06 | 0.90  | 3.27   | -     | 1103.1   |
| AHQ-8-7, 6033 - 6110         | K.M*AVTFIGNSTAIQELFK.R                                                    | 1887.18942 | 2 | 1.23E-07 | 0.95  | 4.80   | -     | 1007.4   |
| AHQ-8-11, 5800 - 5807        | K.M*AVTFIGNSTAIQELFK.R                                                    | 1887.18942 | 2 | 3.63E-06 | 0.85  | 3.82   | -     | 516.3    |
| AHQ-8-12, 5820               | K.M*AVTFIGNSTAIQELFK.R                                                    | 1887.18942 | 2 | 8.92E-04 | 0.91  | 3.69   | -     | 875.0    |
| AHQ-8-12, 6006 - 6064        | K.M*AVTFIGNSTAIQELFK.R                                                    | 1887.18942 | 2 | 5.18E-07 | 0.88  | 4.04   | -     | 513.5    |
| AHQ-8-7, 5848 - 5853         | K.M*AVTFIGNSTAIQELFK.R                                                    | 1887.18942 | 2 | 2.49E-05 | 0.97  | 5.04   | -     | 1234.0   |
| AHQ-8-14-, 5909              | K.M*AVTFIGNSTAIQELFK.R                                                    | 1887.18942 | 2 | 2.90E-07 | 0.89  | 3.72   | -     | 746.7    |
| AHQ-8-13, 6019               | K.M*AVTFIGNSTAIQELFK.R                                                    | 1887.18942 | 2 | 2.73E-08 | 0.95  | 4.49   | -     | 1193.3   |
| AHQ-8-13-, 5860 - 5890       | K.M*AVTFIGNSTAIQELFK.R                                                    | 1887.18942 | 2 | 1.04E-05 | 0.80  | 3.42   | -     | 523.0    |
| AHQ-8-14-, 6102 - 6161       | K.M*AVTFIGNSTAIQELFK.R                                                    | 1887.18942 | 2 | 1.31E-10 | 0.97  | 5.08   | -     | 1276.1   |
| AHQ-8-7, 4266 - 4274         | R.YLTVAAVFR.G                                                             | 1040.23994 | 2 | 1.88E-05 | 0.87  | 2.87   | -     | 859.3    |
| gi 4502295 ref NP_001677.1   | ATP synthase, H+ transporting, mitochondrial F1 complex, beta polypeptide |            |   | 1.39E-10 | 10.13 | 120.30 | 33.00 | 57955.2  |
| AHQ-8-7, 5168                | R.AIAELGIYPVAVDPLDSTR.I                                                   | 1989.21513 | 2 | 6.21E-04 | 0.81  | 3.18   | -     | 601.9    |
| AHQ-8-7, 6304 - 6373         | R.DQEGQDVLFFIDNIFR.F                                                      | 1923.11524 | 2 | 1.44E-08 | 0.95  | 4.80   | -     | 1024.9   |
| AHQ-8-7, 4286 - 4288         | R.FTQAQSEVSALLGR.I                                                        | 1436.59522 | 2 | 1.39E-10 | 0.96  | 4.70   | -     | 1424.5   |
| AHQ-8-7, 6212 - 6216         | K.GFQQLAGEYDHLPEQAFYM*VGPPIEAAVAK.A                                       | 3368.75991 | 3 | 6.94E-06 | 0.96  | 6.07   | -     | 1462.4   |
| AHQ-8-7, 3224                | R.IM*DPNIVGSEHYDVAR.G                                                     | 1833.01557 | 3 | 5.19E-05 | 0.63  | 3.36   | -     | 650.0    |
| AHQ-8-7, 3549                | R.IMDPNIVGSEHYDVAR.G                                                      | 1817.01617 | 2 | 3.95E-05 | 0.93  | 3.83   | -     | 986.8    |
| AHQ-8-7, 4016 - 4017         | R.IPSAVGYQPTLATDMGTM*QER.I                                                | 2283.56820 | 2 | 2.37E-04 | 0.89  | 4.93   | -     | 689.0    |
| AHQ-8-7, 4052                | R.LVLEVAQHIGESTVR.T                                                       | 1651.88893 | 2 | 6.72E-08 | 0.97  | 4.92   | -     | 1761.7   |
| AHQ-8-7, 5348                | R.VALTGLTVAEYFR.D                                                         | 1440.66861 | 2 | 3.94E-07 | 0.88  | 3.31   | -     | 1009.6   |
| AHQ-8-7, 2912                | K.VALVY*GQM*NQPPGAR.A                                                     | 1617.85451 | 2 | 3.84E-04 | 0.57  | 2.51   | -     | 381.2    |
| AHQ-8-7, 3437                | K.VALVY*GQM*NQPPGAR.A                                                     | 1601.85511 | 2 | 2.99E-05 | 0.68  | 2.81   | -     | 463.7    |
| AHQ-8-7, 4458 - 4518         | K.VLDSGAPIKIPVGPETLGR.I                                                   | 1920.24231 | 3 | 3.13E-06 | 0.90  | 3.35   | -     | 1319.9   |
| AHQ-8-7, 4452                | K.VLDSGAPIKIPVGPETLGR.I                                                   | 1920.24231 | 2 | 5.17E-05 | 0.55  | 2.86   | -     | 283.8    |
| gi 10716563 ref NP_001737.1  | calnexin [Homo sapiens]                                                   |            |   | 1.70E-10 | 3.54  | 40.25  | 8.40  | 67567.8  |
| AHQ-8-7, 4614                | K.APVPTGEVYFADSFDR.G                                                      | 1771.90722 | 2 | 3.62E-04 | 0.84  | 3.18   | -     | 795.1    |
| AHQ-8-5, 4777                | K.APVPTGEVYFADSFDR.G                                                      | 1771.90722 | 2 | 1.70E-10 | 0.95  | 4.33   | -     | 1044.8   |
| AHQ-8-6, 4638 - 4711         | K.APVPTGEVYFADSFDR.G                                                      | 1771.90722 | 2 | 3.25E-04 | 0.74  | 3.11   | -     | 639.7    |
| AHQ-8-5, 3888                | K.IPDPEAVK*PDDWDEDAPAK.I                                                  | 2109.23496 | 2 | 6.46E-04 | 0.90  | 4.02   | -     | 640.8    |
| AHQ-8-5, 3876                | K.IPDPEAVK*PDDWDEDAPAK.I                                                  | 2109.23496 | 3 | 8.84E-07 | 0.91  | 3.89   | -     | 1325.7   |
| AHQ-8-5, 6224                | K.IPNPDFFEDLEPFR.M                                                        | 1736.90447 | 2 | 1.51E-04 | 0.75  | 2.93   | -     | 652.7    |
| AHQ-8-5, 5852 - 5854         | R.KIPNPDFFEDLEPFR.M                                                       | 1865.07739 | 3 | 8.31E-06 | 0.94  | 5.09   | -     | 1496.9   |
| AHQ-8-5, 5846                | R.KIPNPDFFEDLEPFR.M                                                       | 1865.07739 | 2 | 1.43E-05 | 0.88  | 3.29   | -     | 939.7    |
| gi 4507357 ref NP_003555.1   | transgelin 2; SM22-alpha homolog [Homo sapiens]                           |            |   | 1.88E-10 | 12.77 | 150.28 | 64.80 | 22391.3  |
| AHQ-8-11, 5249 - 5304        | R.DDGLFSGDPNWFPPK.K                                                       | 1595.69288 | 2 | 5.76E-04 | 0.94  | 3.74   | -     | 1361.5   |
| AHQ-8-11, 5460               | R.DDGLFSGDPNWFPPK.K                                                       | 1595.69288 | 2 | 2.25E-05 | 0.90  | 3.20   | -     | 1112.7   |
| AHQ-8-13, 5584               | R.DDGLFSGDPNWFPPK.K                                                       | 1595.69288 | 2 | 2.94E-06 | 0.87  | 3.41   | -     | 886.0    |
| AHQ-8-11, 5543 - 5553        | R.DDGLFSGDPNWFPPK.K                                                       | 1595.69288 | 2 | 5.77E-04 | 0.66  | 2.69   | -     | 651.8    |
| AHQ-8-12, 5427 - 5482        | R.DDGLFSGDPNWFPPK.K                                                       | 1595.69288 | 2 | 5.34E-05 | 0.84  | 3.10   | -     | 733.4    |
| AHQ-8-11, 4657 - 4719        | R.DDGLFSGDPNWFPPK.S                                                       | 1723.86579 | 2 | 2.01E-09 | 0.69  | 3.16   | -     | 515.7    |
| AHQ-8-12, 4746               | R.DDGLFSGDPNWFPPK.S                                                       | 1723.86579 | 2 | 2.03E-04 | 0.70  | 3.11   | -     | 451.6    |
| AHQ-8-11, 6193 - 6252        | K.DGTVLCELINALYPEGQAPVK.K                                                 | 2289.59066 | 2 | 5.66E-05 | 0.37  | 2.72   | -     | 282.7    |
| AHQ-8-13-, 5782              | K.DGTVLCELINALYPEGQAPVK.K                                                 | 2289.59066 | 2 | 1.04E-07 | 0.79  | 3.28   | -     | 533.4    |
| AHQ-8-11, 5696               | K.DGTVLCELINALYPEGQAPVK.K                                                 | 2289.59066 | 2 | 1.42E-07 | 0.82  | 3.53   | -     | 602.9    |
| AHQ-8-12, 6207 - 6275        | K.DGTVLCELINALYPEGQAPVK.K                                                 | 2289.59066 | 2 | 2.97E-04 | 0.74  | 3.79   | -     | 375.1    |
| AHQ-8-11, 6211 - 6213        | K.DGTVLCELINALYPEGQAPVK.K                                                 | 2417.76357 | 2 | 5.69E-05 | 0.74  | 3.68   | -     | 452.1    |
| AHQ-8-11, 6203               | K.DGTVLCELINALYPEGQAPVK.K                                                 | 2417.76357 | 3 | 2.79E-07 | 0.86  | 4.02   | -     | 762.7    |
| AHQ-8-11, 2195 - 2225        | R.GASQAQMTGYGM*PR.Q                                                       | 1400.56672 | 2 | 1.41E-06 | 0.89  | 3.52   | -     | 1055.0   |
| AHQ-8-11, 2280               | R.GPAYSLSREYQQK.I                                                         | 1433.59456 | 2 | 2.11E-04 | 0.76  | 3.36   | -     | 712.6    |
| AHQ-8-11, 2383 - 2440        | R.NFSDNQLQEGEK.N                                                          | 1280.32582 | 2 | 1.90E-04 | 0.82  | 3.49   | -     | 619.6    |
| AHQ-8-11, 3727               | R.NFSDNQLQEGEKNVIGLQM*GTRN.R                                              | 2480.70013 | 3 | 1.71E-04 | 0.71  | 3.29   | -     | 679.9    |
| AHQ-8-11, 2379 - 2443        | K.NVIGLQM*GTRN.G                                                          | 1219.39691 | 2 | 2.31E-05 | 0.94  | 4.18   | -     | 888.6    |
| AHQ-8-11, 3131 - 3187        | K.NVIGLQM*GTRN.G                                                          | 1203.39751 | 2 | 6.16E-04 | 0.80  | 3.10   | -     | 878.9    |
| AHQ-8-11, 2512               | K.NVIGLQM*GTRN.G                                                          | 1219.39691 | 2 | 3.07E-04 | 0.77  | 2.80   | -     | 568.2    |
| AHQ-8-13-, 5206              | K.QMEQISQFLQAAER.Y                                                        | 1679.87950 | 2 | 4.67E-05 | 0.95  | 4.31   | -     | 1198.8   |
| AHQ-8-13-, 5598 - 5655       | K.QMEQISQFLQAAER.Y                                                        | 1679.87950 | 2 | 9.50E-04 | 0.85  | 2.98   | -     | 1223.3   |
| AHQ-8-11, 4479               | K.QM*EQISQFLQAAER.Y                                                       | 1695.87890 | 3 | 2.50E-05 | 0.94  | 4.14   | -     | 1907.1   |
| AHQ-8-12, 5091 - 5092        | K.QMEQISQFLQAAER.Y                                                        | 1679.87950 | 2 | 2.80E-06 | 0.88  | 3.50   | -     | 866.4    |

|                             |                                                                         |            |   |          |      |      |        |          |
|-----------------------------|-------------------------------------------------------------------------|------------|---|----------|------|------|--------|----------|
| AHQ-8-11, 5084              | K.QMEIQSFLQAAER.Y                                                       | 1679.87950 | 3 | 5.84E-06 | 0.98 | 5.27 | -      | 2986.7   |
| AHQ-8-11, 4472              | K.QM <sup>EQ</sup> ISQFLQAAER.Y                                         | 1695.87890 | 2 | 1.13E-04 | 0.73 | 3.17 | -      | 431.6    |
| AHQ-8-11, 5025 - 5079       | K.QMEIQSFLQAAER.Y                                                       | 1679.87950 | 2 | 2.31E-07 | 0.95 | 4.53 | -      | 1037.6   |
| AHQ-8-13, 3832 - 3847       | R.TLM <sup>NL</sup> GLGLAVAR.D                                          | 1232.47872 | 2 | 5.34E-06 | 0.87 | 3.21 | -      | 923.1    |
| AHQ-8-13, 4605              | R.TLMN <sup>LG</sup> LGLAVAR.D                                          | 1216.47932 | 2 | 3.16E-06 | 0.85 | 3.35 | -      | 830.5    |
| AHQ-8-12, 4340 - 4347       | R.TLMN <sup>LG</sup> LGLAVAR.D                                          | 1216.47932 | 2 | 1.20E-07 | 0.93 | 4.02 | -      | 1308.2   |
| AHQ-8-11, 4319 - 4320       | R.TLMN <sup>LG</sup> LGLAVAR.D                                          | 1216.47932 | 2 | 3.63E-06 | 0.94 | 4.15 | -      | 1189.8   |
| AHQ-8-11, 3787 - 3843       | R.TLM <sup>NL</sup> GLGLAVAR.D                                          | 1232.47872 | 2 | 2.27E-04 | 0.91 | 3.61 | -      | 1312.0   |
| AHQ-8-11, 3563 - 3601       | R.TLM <sup>NL</sup> GLGLAVAR.D                                          | 1232.47872 | 2 | 2.29E-04 | 0.94 | 4.00 | -      | 1034.8   |
| AHQ-8-12, 6046 - 6087       | R.YGINTTDIFQTVDLWEGK.N                                                  | 2101.30080 | 2 | 2.43E-04 | 0.83 | 3.84 | -      | 690.9    |
| AHQ-8-13, 6199 - 6279       | R.YGINTTDIFQTVDLWEGK.N                                                  | 2101.30080 | 2 | 3.73E-07 | 0.97 | 5.61 | -      | 952.6    |
| AHQ-8-13-, 6187 - 6244      | R.YGINTTDIFQTVDLWEGK.N                                                  | 2101.30080 | 2 | 1.88E-10 | 0.96 | 4.84 | -      | 1237.7   |
| AHQ-8-14-, 6261             | R.YGINTTDIFQTVDLWEGK.N                                                  | 2101.30080 | 2 | 1.64E-09 | 0.96 | 5.11 | -      | 1123.6   |
| gi 28178832 ref NP_002159.2 | isocitrate dehydrogenase 2 (NADP+), mitochondrial precursor; isocitrat  |            |   |          |      |      | 15.00  | 50909.0  |
| AHQ-8-8, 5119               | R.LIDDMVAQVLK.S                                                         | 1245.51421 | 2 | 1.23E-04 | 0.93 | 4.32 | -      | 1046.5   |
| AHQ-8-8, 5451               | K.LNEHFLNTDFLDTIK.S                                                     | 1922.12725 | 2 | 1.90E-10 | 0.97 | 5.04 | -      | 1259.4   |
| AHQ-8-8, 2138               | K.TIEEAAHGTVTR.H                                                        | 1356.46696 | 2 | 3.69E-06 | 0.81 | 3.01 | -      | 707.7    |
| AHQ-8-8, 2801               | K.VAKPVEMDGDDEMTR.I                                                     | 1677.92533 | 2 | 9.65E-05 | 0.62 | 3.15 | -      | 325.1    |
| AHQ-8-8, 2637 - 2639        | K.VCVETVESGAM <sup>TK</sup> .D                                          | 1428.61170 | 2 | 2.57E-04 | 0.93 | 4.12 | -      | 981.0    |
| gi 455731 ref NP_000618.1   | latent transforming growth factor beta binding protein 1 precursor [Hom |            |   |          |      |      | 90.30  | 152790.9 |
| AHQ-8-3, 3510 - 3584        | R.ASLGDHCEIDINECLEDK.S                                                  | 2065.13910 | 3 | 4.09E-04 | 0.85 | 4.19 | -      | 509.8    |
| AHQ-8-3, 3581               | R.ASLGDHCEIDINECLEDK.S                                                  | 2065.13910 | 2 | 7.52E-05 | 0.98 | 6.04 | -      | 2027.5   |
| AHQ-8-2, 3643 - 3720        | R.ASLGDHCEIDINECLEDK.S                                                  | 2065.13910 | 2 | 1.75E-04 | 0.95 | 4.99 | -      | 1178.0   |
| AHQ-8-2, 2637 - 2717        | R.CTCGQGYQLSAAK.D                                                       | 1446.58862 | 2 | 1.75E-06 | 0.92 | 3.87 | -      | 701.6    |
| AHQ-8-3, 2606               | R.CTCGQGYQLSAAK.D                                                       | 1446.58862 | 2 | 6.45E-06 | 0.90 | 3.77 | -      | 650.3    |
| AHQ-8-3, 3966               | K.CVDIDECTQVQHLCSSQGR.C                                                 | 2209.38110 | 2 | 7.67E-07 | 0.81 | 3.45 | -      | 585.2    |
| AHQ-8-14-, 3173             | K.EAOPGGSQVSYQGLPVQK.T                                                  | 1945.12244 | 2 | 2.58E-05 | 0.76 | 2.81 | -      | 567.4    |
| AHQ-8-1, 3371 - 3436        | K.EAOPGGSQVSYQGLPVQK.T                                                  | 1945.12244 | 2 | 5.01E-04 | 0.73 | 3.08 | -      | 443.9    |
| AHQ-8-1, 3984               | K.EEPEALTSFR.E                                                          | 1278.39297 | 2 | 8.10E-04 | 0.85 | 3.12 | -      | 748.1    |
| AHQ-8-1, 5572               | K.IGFQDPPTFSSCVDPDPVISEEKGPCYR.L                                        | 3112.43550 | 3 | 6.55E-06 | 0.88 | 4.45 | -      | 509.8    |
| AHQ-8-3, 5472               | K.IGFQDPPTFSSCVDPDPVISEEKGPCYR.L                                        | 3112.43550 | 3 | 4.28E-05 | 0.75 | 3.52 | -      | 497.5    |
| AHQ-8-5, 2878 - 2880        | R.TSTDLVDVDDQPK.E                                                       | 1433.50014 | 2 | 5.64E-09 | 0.91 | 3.43 | -      | 1263.1   |
| AHQ-8-4, 2882               | R.TSTDLVDVDDQPK.E                                                       | 1433.50014 | 2 | 2.27E-06 | 0.89 | 3.31 | -      | 1094.9   |
| AHQ-8-2, 2953               | R.TSTDLVDVDDQPK.E                                                       | 1433.50014 | 2 | 1.09E-08 | 0.88 | 3.28 | -      | 935.5    |
| AHQ-8-3, 2741               | R.TSTDLVDVDDQPK.E                                                       | 1819.90213 | 2 | 7.68E-07 | 0.87 | 3.48 | -      | 1144.9   |
| AHQ-8-5, 2712               | R.TSTDLVDVDDQPK.E                                                       | 1819.90213 | 2 | 2.76E-05 | 0.58 | 2.71 | -      | 862.0    |
| AHQ-8-2, 2779               | R.TSTDLVDVDDQPK.E                                                       | 1819.90213 | 2 | 2.06E-10 | 0.89 | 3.98 | -      | 1028.9   |
| AHQ-8-4, 2701               | R.TSTDLVDVDDQPK.E                                                       | 1819.90213 | 2 | 2.85E-06 | 0.92 | 3.64 | -      | 1366.9   |
| AHQ-8-1, 3651 - 3663        | R.YTTCICEGYR.F                                                          | 1387.51964 | 2 | 6.07E-06 | 0.85 | 2.77 | -      | 675.1    |
| gi 4507907 ref NP_000543.1  | von Willebrand factor precursor; Coagulation factor VIII VWF (von Wille |            |   |          |      |      | 200.35 | 309296.7 |
| AHQ-8-2, 3857               | R.CLPSACEVVTGSPR.G                                                      | 1535.72531 | 2 | 9.82E-05 | 0.75 | 3.00 | -      | 830.5    |
| AHQ-8-1, 3923               | R.CLPSACEVVTGSPR.G                                                      | 1535.72531 | 2 | 2.74E-07 | 0.93 | 4.64 | -      | 668.1    |
| AHQ-8-3, 4014               | R.CLPTACTIQLR.G                                                         | 1335.57568 | 2 | 5.41E-04 | 0.61 | 2.65 | -      | 432.2    |
| AHQ-8-1, 4149               | R.CLPTACTIQLR.G                                                         | 1335.57568 | 2 | 1.08E-04 | 0.74 | 3.03 | -      | 436.8    |
| AHQ-8-2, 4887               | R.EGGPSQIGDALGFVAVR.Y                                                   | 1574.71988 | 2 | 2.22E-04 | 0.78 | 3.47 | -      | 461.2    |
| AHQ-8-1, 4940               | R.EGGPSQIGDALGFVAVR.Y                                                   | 1574.71988 | 2 | 2.43E-04 | 0.74 | 2.58 | -      | 792.9    |
| AHQ-8-1, 5389               | R.EQAPNLVYMTGNPASDEIK.R                                                 | 2177.42062 | 2 | 1.90E-05 | 0.49 | 2.65 | -      | 316.8    |
| AHQ-8-1, 4088               | K.EQDLVEVILHNGACSPGAR.Q                                                 | 1968.13770 | 2 | 7.87E-07 | 0.88 | 3.62 | -      | 928.3    |
| AHQ-8-1, 4037               | R.IALLM <sup>AS</sup> EQEPPOR.M                                         | 1486.76229 | 2 | 1.89E-05 | 0.86 | 3.06 | -      | 829.7    |
| AHQ-8-1, 6465 - 6528        | R.IGWPNAPILQDFETLPR.E                                                   | 2081.40223 | 2 | 4.66E-04 | 0.96 | 4.91 | -      | 1006.5   |
| AHQ-8-1, 2889               | R.ILAOPAGDSNVVK.L                                                       | 1241.41901 | 2 | 1.02E-07 | 0.92 | 3.84 | -      | 1013.2   |
| AHQ-8-2, 2721               | R.ILAOPAGDSNVVK.L                                                       | 1241.41901 | 2 | 5.91E-09 | 0.91 | 3.47 | -      | 941.5    |
| AHQ-8-1, 6337 - 6416        | R.LLDLVFLLDGSSR.L                                                       | 1448.68905 | 2 | 9.55E-06 | 0.96 | 4.78 | -      | 1723.5   |
| AHQ-8-3, 4081               | R.LSEAEFFVLK.A                                                          | 1165.31777 | 2 | 3.72E-06 | 0.88 | 3.36 | -      | 944.5    |
| AHQ-8-1, 4223               | R.LSEAEFFVLK.A                                                          | 1165.31777 | 2 | 1.10E-06 | 0.93 | 3.80 | -      | 1257.4   |
| AHQ-8-4, 3253               | K.LSGEAYGFVAR.I                                                         | 1170.29934 | 2 | 9.39E-06 | 0.95 | 3.91 | -      | 1265.3   |
| AHQ-8-3, 3265               | K.LSGEAYGFVAR.I                                                         | 1170.29934 | 2 | 3.13E-07 | 0.95 | 3.44 | -      | 1549.5   |
| AHQ-8-2, 4104               | K.LTGSCSYVLFQNK.E                                                       | 1518.71629 | 2 | 3.18E-05 | 0.83 | 3.45 | -      | 810.5    |
| AHQ-8-1, 4168 - 4231        | R.KLTGSCSYVLFQNK.E                                                      | 1518.71629 | 2 | 6.44E-08 | 0.93 | 3.81 | -      | 1078.7   |
| AHQ-8-1, 5553               | R.NSM <sup>VL</sup> DVAVFLVLEGS DK.I                                    | 1740.95635 | 2 | 4.31E-05 | 0.92 | 2.97 | -      | 1748.3   |
| AHQ-8-1, 5153 - 5228        | K.RLPGDIQVPIGVPGNANVQELER.I                                             | 2571.91720 | 3 | 1.80E-04 | 0.96 | 5.30 | -      | 1420.5   |
| AHQ-8-2, 5207 - 5209        | K.RLPGDIQVPIGVPGNANVQELER.I                                             | 2571.91720 | 3 | 2.81E-10 | 0.98 | 6.98 | -      | 2564.5   |
| AHQ-8-1, 5311 - 5324        | K.RLPGDIQVPIGVPGNANVQELER.I                                             | 2571.91720 | 3 | 1.68E-04 | 0.98 | 6.11 | -      | 2117.0   |
| AHQ-8-2, 4759               | K.SVGSQWASPENPCLINECVR.V                                                | 2306.51832 | 2 | 2.83E-06 | 0.87 | 3.91 | -      | 515.3    |
| AHQ-8-1, 5253 - 5317        | K.TYGLCGICDENGANDFM <sup>LR</sup> .D                                    | 2225.42231 | 2 | 2.79E-05 | 0.89 | 4.14 | -      | 619.7    |
| AHQ-8-1, 4561               | R.VTVFPIGIDR.Y                                                          | 1174.37426 | 2 | 1.69E-07 | 0.94 | 3.61 | -      | 1237.0   |
| AHQ-8-2, 4500               | R.VTVFPIGIDR.Y                                                          | 1174.37426 | 2 | 2.41E-05 | 0.94 | 3.54 | -      | 1248.5   |
| AHQ-8-1, 3131               | K.YAGSQVASTSEVLK.Y                                                      | 1440.58064 | 2 | 8.89E-07 | 0.93 | 3.93 | -      | 1012.4   |
| AHQ-8-2, 2997               | K.YAGSQVASTSEVLK.Y                                                      | 1440.58064 | 2 | 1.33E-04 | 0.90 | 3.21 | -      | 896.5    |
| AHQ-8-1, 3585 - 3635        | R.YLSDHSLVSGGDR.E                                                       | 1624.73576 | 2 | 1.66E-09 | 0.95 | 3.95 | -      | 1488.5   |
| AHQ-8-1, 5677 - 5680        | K.YTLFQIFSK.I                                                           | 1147.34728 | 2 | 4.84E-06 | 0.95 | 3.38 | -      | 1320.2   |
| gi 5031987 ref NP_005720.1  | peptidylprolyl isomerase F (cyclophilin F) [Homo sapiens]               |            |   |          |      |      | 10.19  | 22040.1  |
| AHQ-8-12, 4779 - 4818       | K.GSGDPSSSSSSGNPLVLDVDANGKPLGR.V                                        | 2834.99028 | 3 | 3.03E-10 | 0.90 | 3.84 | -      | 1230.9   |
| gi 4504523 ref NP_002148.1  | heat shock 10kDa protein 1 (chaperonin 10); heat shock 10kD protein 1 ( |            |   |          |      |      | 11.80  | 10931.6  |
| AHQ-8-14-, 4830             | K.VVLDDKDYFLFR.D                                                        | 1530.74861 | 2 | 3.13E-10 | 0.88 | 3.13 | -      | 740.8    |
| AHQ-8-14, 5689              | K.VVLDDKDYFLFR.D                                                        | 1530.74861 | 2 | 1.01E-06 | 0.79 | 2.75 | -      | 603.4    |
| gi 10835002 ref NP_001166.1 | Rho GDP dissociation inhibitor (GDI) beta; Ly-GDI [Homo sapiens]        |            |   |          |      |      | 30.26  | 22987.8  |
| AHQ-8-10, 2466              | K.APEPHVEEDDDDELDSK.L                                                   | 1940.90995 | 2 | 3.16E-10 | 0.96 | 5.11 | -      | 1295.1   |
| AHQ-8-11, 5211 - 5219       | K.ATFM <sup>VGSY</sup> GRPEEYFLTPVEEAPK.G                               | 2962.27864 | 3 | 6.05E-09 | 0.93 | 4.57 | -      | 1130.2   |
| AHQ-8-13, 5401 - 5403       | K.ATFM <sup>VGSY</sup> GRPEEYFLTPVEEAPK.G                               | 2962.27864 | 3 | 1.96E-05 | 0.68 | 3.23 | -      | 487.4    |
| AHQ-8-10, 3271 - 3334       | K.TLLDGGPVTDPKA                                                         | 1312.49400 | 2 | 6.61E-05 | 0.90 | 3.66 | -      | 976.5    |
| gi 6005942 ref NP_009057.1  | valosin-containing protein; yeast Cdc48p homolog; transitional endoplas |            |   |          |      |      | 110.29 | 89321.3  |
| AHQ-8-5, 4013 - 4072        | K.AIANEQANFISIK.G                                                       | 1580.78762 | 2 | 1.20E-05 | 0.90 | 3.70 | -      | 696.2    |
| AHQ-8-4, 4095               | K.AIANEQANFISIK.G                                                       | 1580.78762 | 2 | 1.23E-04 | 0.81 | 3.26 | -      | 781.1    |
| AHQ-8-5, 3738               | R.ELQELVQYPVHPDK.F                                                      | 1825.01157 | 2 | 1.34E-05 | 0.76 | 2.98 | -      | 604.7    |
| AHQ-8-5, 3706 - 3765        | K.GVLFYPPGCGK.T                                                         | 1253.45154 | 2 | 4.85E-06 | 0.55 | 2.53 | -      | 547.6    |
| AHQ-8-5, 6229               | R.IVSQLLTLMDLGK.Q                                                       | 1431.76657 | 2 | 8.73E-08 | 0.94 | 4.10 | -      | 1045.0   |
| AHQ-8-5, 6333               | K.LADDVLEQVANETHGHVGDALALCSEAAQLAIR.K                                   | 3675.98140 | 3 | 2.33E-05 | 0.95 | 4.93 | -      | 1509.5   |
| AHQ-8-5, 5420               | R.LDQLIYPLPDEK.S                                                        | 1557.81228 | 2 | 4.40E-06 | 0.79 | 2.97 | -      | 800.5    |
| AHQ-8-5, 4793               | R.LIVDEAINEDNSVLSQPK.M                                                  | 2171.39088 | 2 | 2.88E-08 | 0.98 | 5.76 | -      | 1757.2   |
| AHQ-8-7, 6297               | K.NAPAIIFIDELDAIAPK.R                                                   | 1812.09907 | 2 | 2.72E-05 | 0.79 | 2.85 | -      | 863.8    |
| AHQ-8-4, 6509 - 6513        | K.NAPAIIFIDELDAIAPK.R                                                   | 1812.09907 | 2 | 1.12E-05 | 0.74 | 2.93 | -      | 650.2    |
| AHQ-8-5, 6456               | K.NAPAIIFIDELDAIAPK.R                                                   | 1812.09907 | 2 | 3.66E-10 | 0.98 | 5.66 | -      | 1646.7   |
| AHQ-8-5, 5481               | K.NVFIIGATNRPDIIDPAILRPR.L                                              | 2519.93026 | 3 | 1.35E-04 | 0.64 | 3.47 | -      | 428.4    |
| AHQ-8-5, 6468               | R.QAAPCVLFFDELDSIAK.A                                                   | 1926.17909 | 2 | 2.62E-06 | 0.89 | 3.96 | -      | 700.3    |
| AHQ-8-5, 3537 - 3538        | R.WALSQSNPSALR.E                                                        | 1330.47434 | 2 | 1.62E-06 | 0.93 | 3.75 | -      | 1128.8   |
| gi 13129150 ref NP_005339.1 | heat shock 90kDa protein 1, alpha; heat shock 90kD protein 1, alpha [H  |            |   |          |      |      | 3.40   | 84659.1  |
| AHQ-8-8, 3939               | R.NPDDITNEEYGEFYK.S                                                     | 1834.87381 | 2 | 2.32E-05 | 0.92 | 4.43 | -      | 913.4    |
| AHQ-8-6, 3894               | R.NPDDITNEEYGEFYK.S                                                     | 1834.87381 | 2 | 4.25E-10 | 0.96 | 4.55 | -      | 1526.0   |
| AHQ-8-5, 3869 - 3936        | R.NPDDITNEEYGEFYK.S                                                     | 1834.87381 | 2 | 3.91E-09 | 0.96 | 4.64 | -      | 1066.2   |
| AHQ-8-5, 4070 - 4116        | R.RAPFDL FENR.K                                                         | 1265.40235 | 2 | 9.57E-04 | 0.78 | 2.90 | -      | 634.9    |
| gi 24119203 ref NP_705935.1 | tropomyosin 3 [Homo sapiens]                                            |            |   |          |      |      | 9.70   | 29032.5  |
| AHQ-8-9, 6626               | R.IQLVEELDR.A                                                           | 1244.37653 | 2 | 1.86E-07 | 0.89 | 3.33 | -      | 956.5    |
| AHQ-8-9, 6627               | R.IQLVEELDR.A                                                           | 1244.37653 | 1 | 3.03E-04 | 0.10 | 1.80 | -      | 363.9    |
| AHQ-8-11, 3567 - 3572       | R.IQLVEELDR.A                                                           | 1244.37653 | 2 | 2.33E-06 | 0.86 | 3.07 | -      | 883.8    |
| AHQ-8-9, 6503               | K.IQLVQQQADDAEER.A                                                      | 1643.73738 | 2 | 4.37E-10 | 0.98 | 5.35 | -      | 2657.6   |
| gi 4505839 ref NP_002645.1  | pyruvate kinase, muscle; Pyruvate kinase-3; Thyroid hormone-binding pro |            |   |          |      |      | 13.69  | 57913.6  |

|                             |                                                                         |            |   |          |       |        |       |         |
|-----------------------------|-------------------------------------------------------------------------|------------|---|----------|-------|--------|-------|---------|
| AHQ-8-7, 5477               | R.EAEAAIYHLQLFEELR.R                                                    | 1933.15326 | 2 | 2.02E-07 | 0.93  | 4.44   | -     | 904.8   |
| AHQ-8-7, 6288               | K.FGVEQDQVDM*VFASFIR.K                                                  | 1877.10995 | 2 | 9.95E-09 | 0.97  | 5.11   | -     | 1511.5  |
| AHQ-8-7, 4276 - 4340        | K.GADFLVTEVENGSSLSGSK.K                                                 | 1780.91396 | 2 | 8.49E-06 | 0.94  | 4.39   | -     | 1122.0  |
| AHQ-8-7, 4758 - 4812        | K.GADFLVTEVENGSSLSGSK.K                                                 | 1780.91396 | 2 | 3.74E-08 | 0.96  | 5.12   | -     | 1315.9  |
| AHQ-8-7, 4478               | K.GADFLVTEVENGSSLSGSK.K                                                 | 1780.91396 | 2 | 2.43E-04 | 0.91  | 4.01   | -     | 925.1   |
| AHQ-8-7, 6005 - 6060        | R.GIFPVLCKDPVQEAWAEDVLR.V                                               | 2559.87857 | 3 | 4.45E-10 | 0.95  | 4.80   | -     | 1474.7  |
| AHQ-8-7, 4360               | K.GVNLPGAADVLPVASEK.D                                                   | 1637.85902 | 2 | 1.45E-06 | 0.91  | 3.58   | -     | 1096.5  |
| AHQ-8-7, 3985               | K.KGVNLPAAVADLPVASEK.D                                                  | 1766.03194 | 3 | 8.66E-05 | 0.83  | 3.53   | -     | 1090.8  |
| AHQ-8-7, 5004               | K.KGVNLPAAVADLPVASEKDIQDLK.F                                            | 2478.82685 | 3 | 2.40E-05 | 0.93  | 4.74   | -     | 1294.3  |
| AHQ-8-7, 5328               | R.LAPITSDPTTEATAVGAVEASF.K.C                                            | 2176.40912 | 3 | 9.14E-05 | 0.96  | 5.07   | -     | 1639.7  |
| AHQ-8-7, 5049 - 5121        | R.LAPITSDPTTEATAVGAVEASF.K.C                                            | 2176.40912 | 2 | 5.07E-07 | 0.92  | 4.35   | -     | 698.5   |
| AHQ-8-7, 5322 - 5386        | R.LAPITSDPTTEATAVGAVEASF.K.C                                            | 2176.40912 | 2 | 2.15E-09 | 0.95  | 4.36   | -     | 1053.0  |
| AHQ-8-7, 3326 - 3342        | R.LDIDSPPIAT.N                                                          | 1198.35099 | 2 | 7.69E-06 | 0.94  | 4.06   | -     | 1241.5  |
| AHQ-8-7, 2488               | R.LNFSGHTEHYHAETIK.N                                                    | 1885.02879 | 2 | 2.91E-06 | 0.95  | 4.20   | -     | 1382.7  |
| AHQ-8-7, 3340               | R.NTGIICIGPASR.S                                                        | 1361.54994 | 2 | 1.08E-04 | 0.95  | 4.24   | -     | 1309.1  |
| AHQ-8-7, 3712               | R.NTGIICIGPASR.S                                                        | 1361.54994 | 2 | 3.53E-04 | 0.88  | 2.92   | -     | 1149.4  |
| AHQ-8-6, 3408               | R.NTGIICIGPASR.S                                                        | 1361.54994 | 2 | 3.07E-05 | 0.81  | 3.63   | -     | 774.3   |
| AHQ-8-13-, 3484 - 3490      | R.NTGIICIGPASR.S                                                        | 1361.54994 | 2 | 1.03E-05 | 0.91  | 3.90   | -     | 980.7   |
| AHQ-8-7, 2314               | R.PVAVALDTK.G                                                           | 914.08123  | 2 | 2.85E-05 | 0.88  | 2.83   | -     | 756.2   |
| AHQ-8-7, 3961               | R.TATESFASDPILYR.P                                                      | 1571.71277 | 2 | 1.64E-05 | 0.92  | 3.97   | -     | 780.6   |
| AHQ-8-7, 5341 - 5344        | R.TATESFASDPILYR.PVAVALDTK.G                                            | 2466.77140 | 2 | 2.47E-05 | 0.86  | 4.15   | -     | 307.9   |
| AHQ-8-7, 5306 - 5364        | R.TATESFASDPILYR.PVAVALDTK.G                                            | 2466.77140 | 3 | 8.42E-04 | 0.76  | 3.19   | -     | 913.1   |
| AHQ-8-7, 2946               | R.VNFMNVGK.A                                                            | 980.16641  | 2 | 8.00E-04 | 0.80  | 2.69   | -     | 569.7   |
| gi 4758304 ref NP_004902.1  | protein disulfide isomerase related protein (calcium-binding protein, i |            |   | 5.35E-10 | 4.11  | 50.19  | 5.70  | 72931.9 |
| AHQ-8-6, 4436               | K.FAMEPEEFSDTLR.E                                                       | 1687.80890 | 2 | 3.14E-08 | 0.74  | 3.15   | -     | 520.7   |
| AHQ-8-6, 3666 - 3727        | K.FAM*EPEEFSDTLR.E                                                      | 1703.80830 | 2 | 1.61E-05 | 0.73  | 3.10   | -     | 506.1   |
| AHQ-8-6, 3559 - 3630        | R.FDVSGYPTLK.I                                                          | 1127.27123 | 2 | 9.68E-06 | 0.83  | 2.63   | -     | 1122.0  |
| AHQ-8-6, 2919 - 2927        | K.IDATASVLSAR.F                                                         | 1191.31686 | 2 | 5.35E-10 | 0.94  | 3.84   | -     | 1510.5  |
| AHQ-8-6, 3400 - 3403        | K.RFDVSGYPTLK.I                                                         | 1283.45758 | 2 | 5.55E-06 | 0.87  | 3.27   | -     | 938.5   |
| gi 4503445 ref NP_001944.1  | endothelial cell growth factor 1 (platelet-derived); thymidine phosphor |            |   | 7.69E-10 | 2.81  | 30.21  | 9.80  | 49955.2 |
| AHQ-8-7, 6097 - 6105        | R.ALPLALVHELGAQR.S                                                      | 1530.83966 | 2 | 7.69E-10 | 0.95  | 4.18   | -     | 1318.7  |
| AHQ-8-7, 6098               | R.ALPLALVHELGAQR.S                                                      | 1530.83966 | 3 | 6.94E-07 | 0.86  | 3.46   | -     | 581.4   |
| AHQ-8-7, 4138               | R.AREQEELLAPADGTVELVR.A                                                 | 2097.31523 | 2 | 9.66E-06 | 0.91  | 4.17   | -     | 748.3   |
| AHQ-8-7, 2722               | R.VAALDDGSALGR.F                                                        | 1216.32641 | 2 | 7.32E-06 | 0.95  | 4.15   | -     | 1287.8  |
| gi 2053366 ref XP_053177.4  | similar to Tubulin alpha-3/alpha-7 chain (Alpha-tubulin 3/7) [Homo sap  |            |   | 7.90E-10 | 2.35  | 30.24  | 6.70  | 49858.2 |
| AHQ-8-13-, 3188             | K.DVNAAIATK.T                                                           | 1016.17355 | 2 | 5.33E-04 | 0.66  | 2.65   | -     | 658.6   |
| AHQ-8-7, 4805 - 4860        | K.TIGGGDDSNFTFFSETGAGK.H                                                | 2009.07549 | 2 | 5.42E-09 | 0.93  | 4.05   | -     | 979.2   |
| AHQ-8-7, 5026               | K.TIGGGDDSNFTFFSETGAGK.H                                                | 2009.07549 | 2 | 2.20E-06 | 0.76  | 3.25   | -     | 501.0   |
| AHQ-8-14-, 4905 - 4955      | K.TIGGGDDSNFTFFSETGAGK.H                                                | 2009.07549 | 2 | 7.14E-09 | 0.92  | 4.51   | -     | 749.2   |
| AHQ-8-13, 5093              | K.TIGGGDDSNFTFFSETGAGK.H                                                | 2009.07549 | 2 | 2.63E-05 | 0.82  | 3.49   | -     | 701.3   |
| AHQ-8-14, 5670 - 5737       | K.TIGGGDDSNFTFFSETGAGK.H                                                | 2009.07549 | 2 | 7.90E-10 | 0.94  | 4.81   | -     | 983.5   |
| AHQ-8-7, 4704               | K.TIGGGDDSNFTFFSETGAGK.H                                                | 2009.07549 | 2 | 5.21E-04 | 0.84  | 3.45   | -     | 914.8   |
| AHQ-8-7, 4484               | K.TIGGGDDSNFTFFSETGAGK.H                                                | 2009.07549 | 2 | 6.26E-07 | 0.86  | 3.90   | -     | 382.3   |
| AHQ-8-13-, 4947             | K.TIGGGDDSNFTFFSETGAGK.H                                                | 2009.07549 | 2 | 2.94E-07 | 0.94  | 4.36   | -     | 1060.0  |
| AHQ-8-14-, 4574             | K.TIGGGDDSNFTFFSETGAGK.H                                                | 2009.07549 | 2 | 1.29E-07 | 0.90  | 4.06   | -     | 554.3   |
| AHQ-8-14-, 5385 - 5429      | R.TIQFVDMWCPTGFK.V                                                      | 1600.81899 | 2 | 8.25E-04 | 0.74  | 3.02   | -     | 579.0   |
| AHQ-8-7, 5278 - 5353        | R.TIQFVDMWCPTGFK.V                                                      | 1600.81899 | 2 | 6.55E-04 | 0.75  | 2.93   | -     | 572.4   |
| gi 4503631 ref NP_000120.1  | coagulation factor XIII A1 subunit precursor; Coagulation factor XIII,  |            |   | 8.06E-10 | 18.63 | 210.29 | 32.50 | 83232.8 |
| AHQ-8-5, 2641 - 2646        | K.DGTHVVENVATHIGK.L                                                     | 1692.81163 | 2 | 1.06E-08 | 0.93  | 4.15   | -     | 973.9   |
| AHQ-8-7, 2605               | K.DGTHVVENVATHIGK.L                                                     | 1692.81163 | 2 | 4.59E-04 | 0.95  | 4.53   | -     | 1201.3  |
| AHQ-8-5, 2644               | K.DGTHVVENVATHIGK.L                                                     | 1692.81163 | 3 | 2.21E-06 | 0.91  | 4.35   | -     | 996.6   |
| AHQ-8-8, 2629 - 2706        | K.DGTHVVENVATHIGK.L                                                     | 1692.81163 | 2 | 1.95E-04 | 0.59  | 2.95   | -     | 390.5   |
| AHQ-8-5, 6604 - 6605        | K.EAVLIQAGEYM*GQLLEQASLHFFVTAR.I                                        | 3039.45415 | 3 | 3.39E-05 | 0.91  | 4.35   | -     | 904.7   |
| AHQ-8-11, 5263              | K.ETFVDVLEPLSFK.K                                                       | 1526.71190 | 2 | 4.60E-05 | 0.73  | 2.97   | -     | 604.3   |
| AHQ-8-5, 4814               | R.GTQVVGSDM*TVTVQFTNPLK.E                                               | 2139.41549 | 2 | 5.73E-06 | 0.93  | 4.13   | -     | 1022.6  |
| AHQ-8-7, 5204 - 5216        | K.GTYIPVPIVSELQSGK.W                                                    | 1688.94594 | 2 | 2.91E-04 | 0.41  | 2.65   | -     | 215.5   |
| AHQ-8-5, 5374               | K.GTYIPVPIVSELQSGK.W                                                    | 1688.94594 | 2 | 2.69E-04 | 0.52  | 2.64   | -     | 337.8   |
| AHQ-8-8, 5366               | K.GTYIPVPIVSELQSGK.W                                                    | 1688.94594 | 2 | 3.77E-04 | 0.55  | 2.78   | -     | 284.1   |
| AHQ-8-5, 6360               | R.GVNLQEFNLVTSVHLFK.E                                                   | 1946.23831 | 3 | 2.06E-09 | 0.77  | 3.09   | -     | 646.2   |
| AHQ-8-13-, 6147 - 6219      | R.GVNLQEFNLVTSVHLFK.E                                                   | 1946.23831 | 2 | 3.56E-06 | 0.94  | 4.69   | -     | 1163.1  |
| AHQ-8-11, 6128              | R.GVNLQEFNLVTSVHLFK.E                                                   | 1946.23831 | 2 | 9.81E-04 | 0.78  | 3.16   | -     | 839.6   |
| AHQ-8-7, 6205               | R.GVNLQEFNLVTSVHLFK.E                                                   | 1946.23831 | 3 | 3.13E-09 | 0.89  | 4.09   | -     | 721.6   |
| AHQ-8-7, 6204 - 6266        | R.GVNLQEFNLVTSVHLFK.E                                                   | 1946.23831 | 2 | 6.15E-07 | 0.94  | 4.63   | -     | 941.1   |
| AHQ-8-5, 6285 - 6361        | R.GVNLQEFNLVTSVHLFK.E                                                   | 1946.23831 | 2 | 8.06E-10 | 0.97  | 5.35   | -     | 1445.2  |
| AHQ-8-5, 3366 - 3449        | R.HVYGLDVIQQR.R                                                         | 1457.61612 | 2 | 4.20E-04 | 0.89  | 3.32   | -     | 779.2   |
| AHQ-8-5, 2324               | K.KDGTHTVVENVATHIGK.L                                                   | 1820.98455 | 3 | 3.83E-08 | 0.98  | 5.86   | -     | 3019.1  |
| AHQ-8-5, 2321               | K.KDGTHTVVENVATHIGK.L                                                   | 1820.98455 | 2 | 1.93E-06 | 0.93  | 3.99   | -     | 1170.7  |
| AHQ-8-5, 2500               | K.KDGTHTVVENVATHIGK.L                                                   | 1820.98455 | 3 | 6.27E-05 | 0.95  | 4.83   | -     | 1723.9  |
| AHQ-8-5, 2417               | K.KDGTHTVVENVATHIGK.L                                                   | 1820.98455 | 3 | 1.85E-04 | 0.78  | 3.19   | -     | 831.7   |
| AHQ-8-5, 5004 - 5077        | K.KETFDVTLLEPLSFK.K                                                     | 1654.88482 | 2 | 2.23E-04 | 0.95  | 4.18   | -     | 1544.2  |
| AHQ-8-5, 2834               | R.KLIASMSDSL.R.H                                                        | 1308.53039 | 2 | 2.80E-06 | 0.92  | 3.90   | -     | 997.0   |
| AHQ-8-5, 2177               | R.KLIASM*SSDSL.R.H                                                      | 1324.52979 | 2 | 1.56E-04 | 0.90  | 3.21   | -     | 1218.0  |
| AHQ-8-5, 4565               | R.LALETALMYGAK.K                                                        | 1281.54655 | 2 | 3.62E-07 | 0.96  | 3.88   | -     | 1866.8  |
| AHQ-8-5, 2304               | K.LIASM*SSDSL.R.H                                                       | 1196.35688 | 2 | 1.80E-05 | 0.91  | 3.19   | -     | 903.3   |
| AHQ-8-6, 5216 - 5283        | R.M*YVAVWTPYGVLR.T                                                      | 1571.86734 | 2 | 3.07E-04 | 0.85  | 3.20   | -     | 676.7   |
| AHQ-8-7, 5184               | R.M*YVAVWTPYGVLR.T                                                      | 1571.86734 | 2 | 2.71E-04 | 0.93  | 4.02   | -     | 790.7   |
| AHQ-8-5, 5345 - 5364        | R.M*YVAVWTPYGVLR.T                                                      | 1571.86734 | 2 | 2.58E-04 | 0.84  | 2.94   | -     | 977.9   |
| AHQ-8-5, 6140 - 6145        | R.NPETDTYILFNPWCEDDAVYLDNEKER.E                                         | 3349.53903 | 3 | 3.59E-06 | 0.93  | 4.88   | -     | 926.6   |
| AHQ-8-5, 3673               | R.NVVVHLDGPGVTR.P                                                       | 1450.62682 | 2 | 1.37E-05 | 0.91  | 3.32   | -     | 1328.8  |
| AHQ-8-5, 3433               | R.NVVVHLDGPGVTRPM*K.K                                                   | 1823.11188 | 3 | 4.45E-07 | 0.83  | 3.74   | -     | 628.5   |
| AHQ-8-5, 4464               | R.SNVDM*DFEVENAVLGK.D                                                   | 1783.93809 | 2 | 6.43E-07 | 0.97  | 4.71   | -     | 2026.3  |
| AHQ-8-5, 4428 - 4490        | R.SNVDM*DFEVENAVLGK.D                                                   | 1783.93809 | 2 | 2.22E-04 | 0.87  | 2.99   | -     | 1162.0  |
| AHQ-8-6, 4996               | R.SNVDMDFEVENAVLGK.D                                                    | 1767.93869 | 2 | 9.21E-04 | 0.70  | 2.74   | -     | 919.9   |
| AHQ-8-10, 4215 - 4271       | R.SNVDM*DFEVENAVLGK.D                                                   | 1783.93809 | 2 | 2.11E-04 | 0.59  | 2.65   | -     | 619.1   |
| AHQ-8-5, 5068 - 5124        | R.SNVDMDFEVENAVLGK.D                                                    | 1767.93869 | 2 | 3.72E-08 | 0.96  | 4.67   | -     | 1787.4  |
| AHQ-8-5, 4618               | R.SNVDM*DFEVENAVLGK.D                                                   | 1783.93809 | 2 | 2.92E-04 | 0.62  | 3.17   | -     | 689.7   |
| AHQ-8-13-, 5426             | K.STVLTIPEIIIK.V                                                        | 1327.63485 | 2 | 1.40E-04 | 0.87  | 2.78   | -     | 1144.9  |
| AHQ-8-7, 5349               | K.STVLTIPEIIIK.V                                                        | 1327.63485 | 2 | 7.42E-04 | 0.91  | 2.78   | -     | 1538.5  |
| AHQ-8-14-, 5431 - 5434      | K.STVLTIPEIIIK.V                                                        | 1327.63485 | 2 | 4.72E-04 | 0.86  | 2.98   | -     | 1084.6  |
| AHQ-8-5, 2426               | R.VEVVIGR.Y                                                             | 835.97056  | 2 | 7.58E-04 | 0.81  | 2.53   | -     | 673.0   |
| gi 2956811 ref NP_006088.2  | myosin, light polypeptide 9, regulatory; myosin regulatory light chain  |            |   | 8.09E-10 | 2.43  | 30.17  | 12.20 | 19827.1 |
| AHQ-8-12, 2795              | R.FTDEEVDEM*YR.E                                                        | 1450.50949 | 2 | 7.97E-06 | 0.81  | 3.11   | -     | 784.9   |
| AHQ-8-11, 3387 - 3428       | R.FTDEEVDEM*YR.E                                                        | 1434.51009 | 2 | 8.09E-10 | 0.88  | 3.20   | -     | 1087.5  |
| AHQ-8-14-, 3878 - 3882      | K.GNFNYVFETRI.I                                                         | 1247.34066 | 2 | 5.09E-06 | 0.74  | 2.53   | -     | 587.6   |
| AHQ-8-11, 3921 - 3923       | K.GNFNYVFETRI.I                                                         | 1247.34066 | 2 | 2.85E-05 | 0.87  | 3.29   | -     | 772.4   |
| gi 13994151 ref NP_066272.1 | PDZ and LIM domain 1 (elfin); carboxy terminal LIM domain protein 1 [H  |            |   | 8.37E-10 | 6.19  | 70.24  | 27.40 | 36071.5 |
| AHQ-8-14-, 6149 - 6205      | K.AALANLNCIGDVIATDGENSNM*THLEAQR.N.I                                    | 3331.63807 | 3 | 6.76E-06 | 0.91  | 4.90   | -     | 602.5   |
| AHQ-8-13, 6204              | K.AALANLNCIGDVIATDGENSNM*THLEAQR.N.I                                    | 3331.63807 | 3 | 8.33E-04 | 0.83  | 4.25   | -     | 412.8   |
| AHQ-8-13-, 6132 - 6191      | K.AALANLNCIGDVIATDGENSNM*THLEAQR.N.I                                    | 3331.63807 | 3 | 7.89E-04 | 0.88  | 4.59   | -     | 649.0   |
| AHQ-8-14-, 3587             | K.DFEQPLAISR.V                                                          | 1176.30388 | 2 | 1.73E-05 | 0.92  | 3.75   | -     | 1030.8  |
| AHQ-8-11, 3508 - 3509       | K.DFEQPLAISR.V                                                          | 1176.30388 | 2 | 2.34E-06 | 0.85  | 3.37   | -     | 776.5   |
| AHQ-8-13-, 3592 - 3616      | K.DFEQPLAISR.V                                                          | 1176.30388 | 2 | 1.25E-04 | 0.93  | 3.25   | -     | 1287.2  |
| AHQ-8-13, 3761              | K.DFEQPLAISR.V                                                          | 1176.30388 | 2 | 3.27E-05 | 0.87  | 3.33   | -     | 820.2   |
| AHQ-8-12, 3531 - 3539       | K.DFEQPLAISR.V                                                          | 1176.30388 | 2 | 2.41E-04 | 0.85  | 2.83   | -     | 936.1   |
| AHQ-8-14-, 3343             | K.GCTDNLTLTVAR.S                                                        | 1322.47058 | 2 | 2.12E-04 | 0.72  | 2.80   | -     | 828.2   |
| AHQ-8-13, 3555 - 3557       | K.GCTDNLTLTVAR.S                                                        | 1322.47058 | 2 | 2.71E-06 | 0.64  | 3.15   | -     | 586.8   |
| AHQ-8-13, 4148 - 4167       | K.GHFVVEDQIYCKE.H                                                       | 1673.82684 | 2 | 3.78E-04 | 0.87  | 3.52   | -     | 725.3   |

|                             |                                                                         |            |   |          |       |        |       |          |
|-----------------------------|-------------------------------------------------------------------------|------------|---|----------|-------|--------|-------|----------|
| AHQ-8-12, 3891 - 3892       | K.GHFFVEDQIYCEK.H                                                       | 1673.82684 | 2 | 8.25E-06 | 0.97  | 4.60   | -     | 1345.4   |
| AHQ-8-13-, 3980 - 3995      | K.GHFFVEDQIYCEK.H                                                       | 1673.82684 | 2 | 8.80E-04 | 0.92  | 3.74   | -     | 913.3    |
| AHQ-8-14-, 3958             | K.GHFFVEDQIYCEK.H                                                       | 1673.82684 | 2 | 1.65E-04 | 0.91  | 3.51   | -     | 1073.6   |
| AHQ-8-13-, 3427 - 3483      | R.IKGCTDNLTLTVAR.S                                                      | 1563.80174 | 2 | 4.34E-06 | 0.57  | 2.73   | -     | 477.5    |
| AHQ-8-13-, 3299             | R.IKGCTDNLTLTVAR.S                                                      | 1563.80174 | 2 | 8.37E-10 | 0.95  | 4.16   | -     | 1130.5   |
| AHQ-8-12, 3194              | R.IKGCTDNLTLTVAR.S                                                      | 1563.80174 | 2 | 3.57E-04 | 0.72  | 3.37   | -     | 503.8    |
| AHQ-8-14-, 3257             | R.IKGCTDNLTLTVAR.S                                                      | 1563.80174 | 2 | 2.33E-08 | 0.94  | 4.05   | -     | 999.2    |
| AHQ-8-14, 4154              | R.IKGCTDNLTLTVAR.S                                                      | 1563.80174 | 2 | 6.94E-05 | 0.75  | 2.64   | -     | 713.4    |
| AHQ-8-13, 3443              | R.IKGCTDNLTLTVAR.S                                                      | 1563.80174 | 2 | 5.87E-09 | 0.92  | 3.53   | -     | 1003.7   |
| AHQ-8-11, 3203              | R.IKGCTDNLTLTVAR.S                                                      | 1563.80174 | 2 | 3.78E-06 | 0.81  | 3.00   | -     | 717.3    |
| AHQ-8-13-, 3780             | R.LVGGKDFEQPLAISR.V                                                     | 1630.86972 | 2 | 2.03E-06 | 0.93  | 4.39   | -     | 1046.0   |
| AHQ-8-14-, 3725 - 3749      | R.LVGGKDFEQPLAISR.V                                                     | 1630.86972 | 2 | 3.34E-04 | 0.38  | 2.76   | -     | 565.6    |
| AHQ-8-13-, 6142             | K.QSTSFLVLEQIESEEK.G                                                    | 1981.18977 | 2 | 4.26E-06 | 0.95  | 4.24   | -     | 1363.9   |
| gi 7669492 ref NP_002037.2  | glyceraldehyde-3-phosphate dehydrogenase [Homo sapiens]                 |            |   | 9.26E-10 | 3.25  | 40.23  | 14.90 | 36053.0  |
| AHQ-8-9, 6612               | R.GALQNIIPASTGAAK.A                                                     | 1412.61680 | 2 | 1.74E-05 | 0.72  | 3.18   | -     | 485.2    |
| AHQ-8-9, 6602               | R.VPTANVSVVDLTCR.L                                                      | 1532.74450 | 2 | 4.79E-09 | 0.95  | 4.43   | -     | 1091.3   |
| AHQ-8-11, 3917 - 3971       | R.VPTANVSVVDLTCR.L                                                      | 1532.74450 | 2 | 2.20E-08 | 0.94  | 4.04   | -     | 979.3    |
| AHQ-8-12, 3978 - 4035       | R.VPTANVSVVDLTCR.L                                                      | 1532.74450 | 2 | 6.72E-05 | 0.96  | 4.11   | -     | 1313.6   |
| AHQ-8-13, 4201 - 4261       | R.VPTANVSVVDLTCR.L                                                      | 1532.74450 | 2 | 8.77E-07 | 0.82  | 2.93   | -     | 709.3    |
| AHQ-8-13-, 4050             | R.VPTANVSVVDLTCR.L                                                      | 1532.74450 | 2 | 3.31E-09 | 0.95  | 4.44   | -     | 1067.9   |
| AHQ-8-14-, 4017             | R.VPTANVSVVDLTCR.L                                                      | 1532.74450 | 2 | 9.26E-10 | 0.93  | 4.29   | -     | 774.4    |
| AHQ-8-13-, 5651 - 5708      | K.WGDAGAEYVVESTGVFTTMEK.A                                               | 2278.48027 | 2 | 5.54E-04 | 0.66  | 3.25   | -     | 441.9    |
| AHQ-8-13-, 5251             | K.WGDAGAEYVVESTGVFTTMEK.A                                               | 2294.47967 | 2 | 6.10E-05 | 0.94  | 4.59   | -     | 743.4    |
| gi 4557377 ref NP_000052.1  | Bru1on agammaglobulinemia tyrosine kinase [Homo sapiens]                |            |   | 1.06E-09 | 0.88  | 10.19  | 2.30  | 76280.8  |
| AHQ-8-6, 3396               | R.FTNSETAEHIAQGLR.L                                                     | 1674.79631 | 2 | 1.06E-09 | 0.88  | 3.87   | -     | 828.0    |
| gi 5453595 ref NP_006358.1  | adenyllyl cyclase-associated protein [Homo sapiens]                     |            |   | 1.10E-09 | 6.89  | 80.35  | 26.90 | 51672.7  |
| AHQ-8-5, 2860               | R.ALLVTSQQCQPAENK.L                                                     | 1759.96271 | 2 | 3.18E-04 | 0.79  | 3.33   | -     | 474.5    |
| AHQ-8-7, 2802 - 2808        | R.ALLVTSQQCQPAENK.L                                                     | 1759.96271 | 3 | 4.68E-06 | 0.92  | 4.34   | -     | 1141.9   |
| AHQ-8-11, 2851              | R.ALLVTSQQCQPAENK.L                                                     | 1759.96271 | 2 | 2.25E-05 | 0.78  | 2.93   | -     | 556.4    |
| AHQ-8-8, 2777 - 2779        | R.ALLVTSQQCQPAENK.L                                                     | 1759.96271 | 2 | 1.18E-04 | 0.96  | 4.33   | -     | 1420.6   |
| AHQ-8-13-, 2911             | R.ALLVTSQQCQPAENK.L                                                     | 1759.96271 | 2 | 3.06E-06 | 0.87  | 3.49   | -     | 670.6    |
| AHQ-8-7, 2812 - 2889        | K.KEPAVLELEGG.K                                                         | 1213.40557 | 2 | 1.46E-07 | 0.82  | 2.63   | -     | 595.1    |
| AHQ-8-7, 6177               | K.LFNHLSAVSESIQALGVWAM*APK.P                                            | 2486.87415 | 3 | 8.35E-06 | 0.69  | 3.07   | -     | 739.1    |
| AHQ-8-7, 6412               | K.LGLVFDVVGVEIINSK.D                                                    | 1931.26186 | 2 | 1.10E-09 | 0.98  | 6.96   | -     | 1879.3   |
| AHQ-8-8, 4799               | K.LSDLLAPISEQIK.E                                                       | 1427.66814 | 2 | 3.06E-05 | 0.81  | 3.07   | -     | 673.1    |
| AHQ-8-13, 5001              | K.LSDLLAPISEQIK.E                                                       | 1427.66814 | 2 | 9.39E-04 | 0.57  | 2.85   | -     | 443.8    |
| AHQ-8-7, 3038 - 3089        | K.NSLDCEIVSAK.S                                                         | 1237.36245 | 2 | 2.36E-05 | 0.91  | 3.68   | -     | 832.4    |
| AHQ-8-7, 3332               | K.NSLDCEIVSAK.S                                                         | 1237.36245 | 2 | 3.74E-09 | 0.91  | 3.41   | -     | 1117.3   |
| AHQ-8-7, 4336 - 4397        | R.SALFAQINGESITHALK.H                                                   | 1929.16615 | 2 | 1.46E-05 | 0.87  | 4.39   | -     | 447.3    |
| AHQ-8-7, 4689               | R.SALFAQINGESITHALK.H                                                   | 1929.16615 | 2 | 9.81E-05 | 0.28  | 2.74   | -     | 353.1    |
| AHQ-8-7, 4465 - 4524        | R.SALFAQINGESITHALK.H                                                   | 1929.16615 | 2 | 1.20E-04 | 0.89  | 4.32   | -     | 640.7    |
| AHQ-8-7, 4473 - 4554        | R.VENQENSNLVIETELK.Q                                                    | 2074.23206 | 2 | 5.79E-07 | 0.93  | 4.81   | -     | 699.9    |
| AHQ-8-7, 4325               | R.VENQENSNLVIETELK.Q                                                    | 2074.23206 | 2 | 7.43E-05 | 0.79  | 3.12   | -     | 703.9    |
| AHQ-8-8, 4582               | R.VENQENSNLVIETELK.Q                                                    | 2074.23206 | 2 | 9.97E-07 | 0.93  | 4.37   | -     | 821.6    |
| gi 4505667 ref NP_001074.1  | phosphodiesterase 5A isoform 1; cGMP-binding cGMP-specific 3',5'-cyclic |            |   | 1.24E-09 | 2.29  | 30.21  | 5.00  | 100012.4 |
| AHQ-8-5, 3726               | R.FNAEVDQITGYK.T                                                        | 1385.50354 | 2 | 6.54E-07 | 0.75  | 3.17   | -     | 706.5    |
| AHQ-8-4, 4162               | R.FPWTTENTGNVQQCIR.S                                                    | 2067.22783 | 2 | 8.10E-06 | 0.59  | 3.16   | -     | 658.9    |
| AHQ-8-5, 5292               | R.IAELVATEFFDQGDR.E                                                     | 1711.85332 | 2 | 5.61E-08 | 0.96  | 4.21   | -     | 1240.8   |
| AHQ-8-4, 5343               | R.IAELVATEFFDQGDR.E                                                     | 1711.85332 | 2 | 1.24E-09 | 0.95  | 4.04   | -     | 1287.1   |
| gi 17318569 ref NP_006112.2 | keratin 1; Keratin-1; cytokeratin 1; hair alpha protein [Homo sapiens]  |            |   | 1.33E-09 | 17.80 | 200.29 | 37.60 | 66066.3  |
| AHQ-8-4, 2947               | R.DYQELMNTK.L                                                           | 1142.26457 | 2 | 1.41E-04 | 0.91  | 3.13   | -     | 1062.0   |
| AHQ-8-2, 3012               | R.DYQELMNTK.L                                                           | 1142.26457 | 2 | 7.00E-05 | 0.87  | 2.89   | -     | 977.4    |
| AHQ-8-13-, 2274 - 2275      | R.GGGGGYSGSSSYSGSSYSGGGGGGGGR.G                                         | 2385.27982 | 2 | 2.60E-07 | 0.78  | 3.53   | -     | 570.0    |
| AHQ-8-4, 2221 - 2222        | R.GGGGGYSGSSSYSGSSYSGGGGGGGGR.G                                         | 2385.27982 | 2 | 3.92E-07 | 0.90  | 4.65   | -     | 569.4    |
| AHQ-8-13-, 2618             | R.GSYGSGSSYSGSSYSGGGGGHGSYSGSSSSGGYR.G                                  | 3314.18235 | 3 | 1.92E-08 | 0.93  | 4.49   | -     | 1592.4   |
| AHQ-8-10, 3098              | K.KQISNLQSSISDAEQR.G                                                    | 1845.99241 | 2 | 2.99E-04 | 0.87  | 3.70   | -     | 755.1    |
| AHQ-8-10, 4715              | K.LALDLEIATYR.T                                                         | 1278.47925 | 2 | 1.23E-04 | 0.91  | 2.65   | -     | 1605.8   |
| AHQ-8-13-, 4884             | K.LALDLEIATYR.T                                                         | 1278.47925 | 2 | 1.14E-07 | 0.91  | 3.75   | -     | 1452.9   |
| AHQ-8-13-, 3883 - 3942      | K.LNDLEDALQQAQ.E                                                        | 1358.47963 | 2 | 1.23E-07 | 0.98  | 5.36   | -     | 2117.5   |
| AHQ-8-2, 3955               | K.LNDLEDALQQAQ.E                                                        | 1358.47963 | 2 | 3.56E-06 | 0.97  | 4.36   | -     | 2012.5   |
| AHQ-8-13, 4039 - 4111       | K.LNDLEDALQQAQ.E                                                        | 1358.47963 | 2 | 1.55E-07 | 0.97  | 4.93   | -     | 1834.5   |
| AHQ-8-4, 3889               | K.LNDLEDALQQAQ.E                                                        | 1358.47963 | 2 | 6.05E-06 | 0.97  | 4.76   | -     | 1752.9   |
| AHQ-8-12, 3776              | K.LNDLEDALQQAQ.E                                                        | 1358.47963 | 2 | 5.49E-05 | 0.94  | 3.81   | -     | 1452.9   |
| AHQ-8-3, 3885 - 3888        | K.LNDLEDALQQAQ.E                                                        | 1358.47963 | 2 | 3.84E-09 | 0.96  | 4.57   | -     | 1868.2   |
| AHQ-8-10, 3704              | K.LNDLEDALQQAQ.E                                                        | 1358.47963 | 2 | 2.20E-04 | 0.96  | 4.24   | -     | 1732.0   |
| AHQ-8-1, 4031               | K.LNDLEDALQQAQ.E                                                        | 1358.47963 | 2 | 8.34E-08 | 0.97  | 4.65   | -     | 1878.3   |
| AHQ-8-5, 3873               | K.LNDLEDALQQAQ.E                                                        | 1358.47963 | 2 | 7.16E-07 | 0.96  | 3.94   | -     | 2111.6   |
| AHQ-8-1, 4445               | K.NKLNLEDALQQAQ.E                                                       | 1600.75564 | 2 | 2.26E-04 | 0.96  | 4.51   | -     | 1663.3   |
| AHQ-8-2, 4373               | K.NKLNLEDALQQAQ.E                                                       | 1600.75564 | 2 | 4.40E-07 | 0.97  | 4.19   | -     | 2092.3   |
| AHQ-8-10, 4058 - 4100       | K.NKLNLEDALQQAQ.E                                                       | 1600.75564 | 2 | 7.83E-05 | 0.92  | 3.56   | -     | 1224.9   |
| AHQ-8-1, 3089               | K.NMQDM*VEDYR.N                                                         | 1317.43134 | 2 | 9.78E-05 | 0.83  | 3.08   | -     | 818.5    |
| AHQ-8-10, 2758 - 2814       | K.NMQDM*VEDYR.N                                                         | 1317.43134 | 2 | 3.04E-04 | 0.96  | 4.07   | -     | 1527.8   |
| AHQ-8-1, 3828               | K.QISNLQSSISDAEQR.G                                                     | 1717.81950 | 2 | 5.66E-08 | 0.94  | 4.10   | -     | 977.6    |
| AHQ-8-6, 3618               | K.QISNLQSSISDAEQR.G                                                     | 1717.81950 | 2 | 1.37E-04 | 0.79  | 2.92   | -     | 695.0    |
| AHQ-8-2, 3751               | K.QISNLQSSISDAEQR.G                                                     | 1717.81950 | 2 | 2.03E-05 | 0.84  | 3.56   | -     | 579.4    |
| AHQ-8-3, 3678               | K.QISNLQSSISDAEQR.G                                                     | 1717.81950 | 2 | 2.74E-07 | 0.86  | 3.34   | -     | 711.8    |
| AHQ-8-12, 3574              | K.QISNLQSSISDAEQR.G                                                     | 1717.81950 | 2 | 1.15E-05 | 0.77  | 2.91   | -     | 599.0    |
| AHQ-8-13, 3831              | K.QISNLQSSISDAEQR.G                                                     | 1717.81950 | 2 | 2.63E-06 | 0.82  | 3.32   | -     | 629.8    |
| AHQ-8-4, 3666               | K.QISNLQSSISDAEQR.G                                                     | 1717.81950 | 2 | 3.92E-06 | 0.95  | 4.59   | -     | 1131.7   |
| AHQ-8-14-, 3661             | K.QISNLQSSISDAEQR.G                                                     | 1717.81950 | 2 | 2.56E-06 | 0.94  | 4.10   | -     | 956.3    |
| AHQ-8-13-, 3694             | K.QISNLQSSISDAEQR.G                                                     | 1717.81950 | 2 | 1.18E-05 | 0.89  | 3.32   | -     | 895.6    |
| AHQ-8-14-, 3522 - 3586      | R.SGGGFSGSGAGIINYQR.R                                                   | 1658.75374 | 2 | 1.56E-05 | 0.89  | 2.94   | -     | 1315.7   |
| AHQ-8-6, 3468               | R.SGGGFSGSGAGIINYQR.R                                                   | 1658.75374 | 2 | 2.37E-05 | 0.89  | 3.39   | -     | 990.8    |
| AHQ-8-13-, 3460 - 3531      | R.SGGGFSGSGAGIINYQR.R                                                   | 1658.75374 | 2 | 4.50E-04 | 0.90  | 3.14   | -     | 1327.8   |
| AHQ-8-10, 3294 - 3363       | R.SGGGFSGSGAGIINYQR.R                                                   | 1658.75374 | 2 | 5.82E-06 | 0.94  | 3.49   | -     | 1974.6   |
| AHQ-8-2, 2061               | K.SKAEAESLYQSK.Y                                                        | 1341.44907 | 2 | 2.01E-08 | 0.92  | 3.77   | -     | 1034.6   |
| AHQ-8-4, 2002               | K.SKAEAESLYQSK.Y                                                        | 1341.44907 | 2 | 2.03E-08 | 0.87  | 3.51   | -     | 692.8    |
| AHQ-8-7, 1988               | K.SKAEAESLYQSK.Y                                                        | 1341.44907 | 2 | 5.36E-04 | 0.42  | 2.69   | -     | 551.7    |
| AHQ-8-1, 5837               | R.SLDLDSIIAEVK.A                                                        | 1303.48388 | 2 | 9.40E-07 | 0.95  | 4.20   | -     | 1340.6   |
| AHQ-8-8, 5807               | R.SLDLDSIIAEVK.A                                                        | 1303.48388 | 2 | 3.10E-05 | 0.91  | 3.58   | -     | 1145.9   |
| AHQ-8-7, 5609               | R.SLDLDSIIAEVK.A                                                        | 1303.48388 | 2 | 2.78E-06 | 0.94  | 4.03   | -     | 1291.2   |
| AHQ-8-13, 5779 - 5781       | R.SLDLDSIIAEVK.A                                                        | 1303.48388 | 2 | 6.05E-07 | 0.95  | 4.37   | -     | 1238.2   |
| AHQ-8-6, 5587 - 5655        | R.SLDLDSIIAEVK.A                                                        | 1303.48388 | 2 | 6.81E-05 | 0.90  | 3.43   | -     | 1102.6   |
| AHQ-8-12, 5559              | R.SLDLDSIIAEVK.A                                                        | 1303.48388 | 2 | 3.92E-04 | 0.88  | 2.69   | -     | 1278.8   |
| AHQ-8-1, 5743 - 5820        | R.SLDLDSIIAEVK.A                                                        | 1303.48388 | 2 | 1.46E-06 | 0.95  | 3.80   | -     | 1201.7   |
| AHQ-8-5, 5689 - 5762        | R.SLDLDSIIAEVK.A                                                        | 1303.48388 | 2 | 2.79E-05 | 0.93  | 3.92   | -     | 1261.0   |
| AHQ-8-10, 5478              | R.SLDLDSIIAEVK.A                                                        | 1303.48388 | 2 | 4.42E-05 | 0.90  | 3.58   | -     | 1162.9   |
| AHQ-8-2, 5819               | R.SLDLDSIIAEVK.A                                                        | 1303.48388 | 2 | 2.80E-06 | 0.96  | 4.30   | -     | 1616.2   |
| AHQ-8-3, 5645 - 5718        | R.SLDLDSIIAEVK.A                                                        | 1303.48388 | 2 | 1.80E-06 | 0.94  | 4.03   | -     | 1199.0   |
| AHQ-8-4, 5809 - 5810        | R.SLDLDSIIAEVK.A                                                        | 1303.48388 | 2 | 3.46E-07 | 0.96  | 4.71   | -     | 1287.5   |
| AHQ-8-7, 5525 - 5600        | R.SLDLDSIIAEVK.A                                                        | 1303.48388 | 2 | 2.24E-07 | 0.96  | 4.08   | -     | 1511.0   |
| AHQ-8-4, 4594               | K.SLNNQFASFIDK.V                                                        | 1384.51877 | 2 | 1.20E-04 | 0.77  | 3.14   | -     | 640.5    |
| AHQ-8-14, 5465              | K.SLNNQFASFIDK.V                                                        | 1384.51877 | 2 | 1.07E-06 | 0.80  | 3.06   | -     | 741.6    |
| AHQ-8-3, 4572               | K.SLNNQFASFIDK.V                                                        | 1384.51877 | 2 | 3.09E-06 | 0.92  | 4.01   | -     | 930.5    |
| AHQ-8-13, 4679 - 4739       | K.SLNNQFASFIDK.V                                                        | 1384.51877 | 2 | 4.54E-08 | 0.90  | 3.42   | -     | 1034.2   |
| AHQ-8-14-, 4506 - 4535      | K.SLNNQFASFIDK.V                                                        | 1384.51877 | 2 | 3.23E-05 | 0.87  | 3.03   | -     | 920.5    |
| AHQ-8-7, 4409 - 4481        | K.SLNNQFASFIDK.V                                                        | 1384.51877 | 2 | 6.96E-04 | 0.67  | 2.94   | -     | 461.3    |

|                             |                                                                          |            |   |          |      |        |       |          |
|-----------------------------|--------------------------------------------------------------------------|------------|---|----------|------|--------|-------|----------|
| AHQ-8-2, 2556               | R.SLVNLLGGSK.S                                                           | 875.00510  | 2 | 7.05E-04 | 0.72 | 2.81   | -     | 440.4    |
| AHQ-8-1, 4331               | R.SLVNLLGGSKSISIVAR.G                                                    | 1688.95071 | 2 | 7.95E-07 | 0.73 | 3.17   | -     | 505.9    |
| AHQ-8-6, 6031               | R.THNLEPYFESFINNLR.R                                                     | 1995.18315 | 3 | 1.36E-05 | 0.94 | 4.37   | -     | 1650.4   |
| AHQ-8-2, 6183 - 6208        | R.THNLEPYFESFINNLR.R                                                     | 1995.18315 | 2 | 1.33E-09 | 0.94 | 4.57   | -     | 580.4    |
| AHQ-8-13-, 6003 - 6014      | R.THNLEPYFESFINNLR.R                                                     | 1995.18315 | 3 | 5.92E-07 | 0.97 | 5.72   | -     | 1740.0   |
| AHQ-8-4, 6174 - 6254        | R.THNLEPYFESFINNLR.R                                                     | 1995.18315 | 2 | 5.05E-04 | 0.77 | 3.51   | -     | 334.4    |
| AHQ-8-1, 6200               | R.THNLEPYFESFINNLR.R                                                     | 1995.18315 | 2 | 2.68E-05 | 0.84 | 3.32   | -     | 534.5    |
| AHQ-8-3, 6096               | R.THNLEPYFESFINNLR.R                                                     | 1995.18315 | 3 | 2.89E-05 | 0.93 | 4.91   | -     | 1266.3   |
| AHQ-8-13, 6135              | R.THNLEPYFESFINNLR.R                                                     | 1995.18315 | 3 | 1.56E-07 | 0.95 | 5.01   | -     | 1765.7   |
| AHQ-8-13-, 6012             | R.THNLEPYFESFINNLR.R                                                     | 1995.18315 | 2 | 7.78E-04 | 0.91 | 4.16   | -     | 473.2    |
| AHQ-8-13-, 6111             | R.THNLEPYFESFINNLR.R                                                     | 1995.18315 | 3 | 4.27E-05 | 0.83 | 3.72   | -     | 948.3    |
| AHQ-8-10, 5126 - 5143       | R.THNLEPYFESFINNLR.R                                                     | 1995.18315 | 2 | 6.42E-04 | 0.80 | 3.32   | -     | 454.2    |
| AHQ-8-1, 6195 - 6232        | R.THNLEPYFESFINNLR.R                                                     | 1995.18315 | 3 | 3.86E-05 | 0.98 | 5.29   | -     | 2405.4   |
| AHQ-8-6, 3142               | R.TNAENEFVTIK.K                                                          | 1266.38219 | 2 | 1.27E-05 | 0.80 | 2.89   | -     | 576.2    |
| AHQ-8-10, 3047 - 3123       | R.TNAENEFVTIK.K                                                          | 1266.38219 | 2 | 2.83E-04 | 0.89 | 3.42   | -     | 857.9    |
| AHQ-8-4, 3161               | R.TNAENEFVTIK.K                                                          | 1266.38219 | 2 | 1.02E-05 | 0.74 | 2.89   | -     | 605.2    |
| AHQ-8-13-, 3232             | R.TNAENEFVTIK.K                                                          | 1266.38219 | 2 | 1.35E-05 | 0.93 | 3.83   | -     | 891.3    |
| AHQ-8-7, 3080 - 3085        | R.TNAENEFVTIK.K                                                          | 1266.38219 | 2 | 8.95E-07 | 0.91 | 3.30   | -     | 1014.1   |
| AHQ-8-3, 3197               | R.TNAENEFVTIK.K                                                          | 1266.38219 | 2 | 5.87E-05 | 0.88 | 3.01   | -     | 974.1    |
| AHQ-8-1, 3379               | R.TNAENEFVTIK.K                                                          | 1266.38219 | 2 | 7.29E-07 | 0.87 | 3.28   | -     | 768.8    |
| AHQ-8-13, 3375 - 3381       | R.TNAENEFVTIK.K                                                          | 1266.38219 | 2 | 4.14E-04 | 0.88 | 3.56   | -     | 701.3    |
| AHQ-8-5, 3162               | R.TNAENEFVTIK.K                                                          | 1266.38219 | 2 | 8.57E-06 | 0.91 | 3.16   | -     | 1031.4   |
| AHQ-8-2, 3236               | R.TNAENEFVTIK.K                                                          | 1266.38219 | 2 | 3.90E-05 | 0.91 | 3.38   | -     | 984.9    |
| AHQ-8-10, 2622 - 2624       | R.TNAENEFVTIKK.D                                                         | 1394.55511 | 2 | 4.70E-05 | 0.75 | 2.90   | -     | 564.5    |
| AHQ-8-13-, 2774 - 2776      | R.TNAENEFVTIKK.D                                                         | 1394.55511 | 2 | 5.62E-09 | 0.88 | 3.61   | -     | 981.3    |
| AHQ-8-6, 4334 - 4352        | K.WELLQOVDSTR.T                                                          | 1476.61621 | 2 | 3.39E-06 | 0.89 | 3.29   | -     | 1161.2   |
| AHQ-8-4, 4433 - 4461        | K.WELLQOVDSTR.T                                                          | 1476.61621 | 2 | 1.31E-05 | 0.92 | 3.59   | -     | 1356.8   |
| AHQ-8-3, 4406 - 4473        | K.WELLQOVDSTR.T                                                          | 1476.61621 | 2 | 1.83E-06 | 0.87 | 3.35   | -     | 1102.1   |
| AHQ-8-11, 4256 - 4291       | K.WELLQOVDSTR.T                                                          | 1476.61621 | 2 | 2.46E-04 | 0.84 | 2.76   | -     | 1035.3   |
| AHQ-8-12, 4270 - 4330       | K.WELLQOVDSTR.T                                                          | 1476.61621 | 2 | 1.56E-04 | 0.83 | 3.18   | -     | 891.1    |
| AHQ-8-7, 4250               | K.WELLQOVDSTR.T                                                          | 1476.61621 | 2 | 1.10E-04 | 0.94 | 3.62   | -     | 1571.5   |
| AHQ-8-5, 4405               | K.WELLQOVDSTR.T                                                          | 1476.61621 | 2 | 3.32E-05 | 0.65 | 2.62   | -     | 667.3    |
| AHQ-8-1, 4541 - 4600        | K.WELLQOVDSTR.T                                                          | 1476.61621 | 2 | 3.13E-08 | 0.92 | 3.76   | -     | 1225.3   |
| AHQ-8-2, 4472 - 4495        | K.WELLQOVDSTR.T                                                          | 1476.61621 | 2 | 7.45E-07 | 0.96 | 4.45   | -     | 1470.6   |
| AHQ-8-14, 3934              | K.YEELQITAGR.H                                                           | 1180.29253 | 2 | 5.17E-04 | 0.84 | 3.13   | -     | 1137.1   |
| AHQ-8-13, 3156 - 3223       | K.YEELQITAGR.H                                                           | 1180.29253 | 2 | 9.95E-04 | 0.92 | 3.17   | -     | 1610.0   |
| AHQ-8-12, 2947 - 3002       | K.YEELQITAGR.H                                                           | 1180.29253 | 2 | 3.50E-04 | 0.92 | 3.39   | -     | 1307.2   |
| AHQ-8-6, 2999               | K.YEELQITAGR.H                                                           | 1180.29253 | 2 | 2.47E-04 | 0.93 | 3.43   | -     | 1569.2   |
| AHQ-8-2, 3085               | K.YEELQITAGR.H                                                           | 1180.29253 | 2 | 6.14E-06 | 0.97 | 4.22   | -     | 2134.3   |
| AHQ-8-3, 3036               | K.YEELQITAGR.H                                                           | 1180.29253 | 2 | 4.64E-05 | 0.96 | 3.91   | -     | 1988.1   |
| AHQ-8-1, 3223               | K.YEELQITAGR.H                                                           | 1180.29253 | 2 | 3.02E-04 | 0.96 | 4.04   | -     | 1753.9   |
| AHQ-8-4, 3021               | K.YEELQITAGR.H                                                           | 1180.29253 | 2 | 3.13E-05 | 0.96 | 4.01   | -     | 1679.6   |
| gj 11056061 ref NP_066932.1 | thymosin, beta 4 [Homo sapiens]                                          |            |   | 1.38E-09 | 1.68 | 20.22  | 43.20 | 5052.6   |
| AHQ-8-14-, 2533             | K.NPLPSKETIEQEK.Q                                                        | 1513.67476 | 2 | 1.38E-09 | 0.80 | 3.57   | -     | 440.5    |
| AHQ-8-14-, 2625             | K.TETQEKNP.LPSKETIEQEK.Q                                                 | 2230.41519 | 2 | 1.59E-05 | 0.88 | 4.49   | -     | 518.6    |
| gj 4502167 ref NP_000475.1  | amyloid beta (A4) precursor protein (protease nexin-II, Alzheimer disea  |            |   | 1.39E-09 | 0.78 | 10.17  | 2.30  | 86942.8  |
| AHQ-8-4, 5661               | R.LALENYITALQAVPPRR.H                                                    | 2023.36745 | 3 | 1.39E-09 | 0.78 | 3.30   | -     | 811.3    |
| gj 4504515 ref NP_002146.1  | heat shock 70kDa protein 6 (HSP70B); heat shock 70kD protein 6 (HSP70B   |            |   | 1.45E-09 | 3.57 | 40.23  | 8.60  | 70853.4  |
| AHQ-8-6, 2506               | K.ATAGDTHLGGEDFDR.L                                                      | 1676.68279 | 2 | 1.45E-09 | 0.89 | 3.31   | -     | 1019.9   |
| AHQ-8-6, 4799               | R.FEELCSDLFR.S                                                           | 1317.44926 | 2 | 2.55E-05 | 0.80 | 2.97   | -     | 813.7    |
| AHQ-8-6, 4683               | R.IINEPTAAAIYGLDR.R                                                      | 1688.90603 | 3 | 1.59E-04 | 0.93 | 4.10   | -     | 1539.5   |
| AHQ-8-6, 4672               | R.IINEPTAAAIYGLDR.R                                                      | 1688.90603 | 2 | 3.07E-04 | 0.89 | 3.50   | -     | 806.9    |
| AHQ-8-6, 4263               | K.LLQDFNFKELNK.S                                                         | 1566.78249 | 2 | 6.72E-04 | 0.96 | 4.58   | -     | 1413.0   |
| gj 4505763 ref NP_000282.1  | phosphoglycerate kinase 1 [Homo sapiens]                                 |            |   | 1.45E-09 | 5.29 | 60.29  | 23.00 | 44614.4  |
| AHQ-8-8, 5570 - 5590        | K.ACANPAAGSVILLENL.R                                                     | 1771.03187 | 2 | 5.34E-07 | 0.93 | 4.23   | -     | 1056.4   |
| AHQ-8-8, 5326               | K.ALESPEPFLAILGGA.V                                                      | 1770.06542 | 2 | 1.45E-09 | 0.98 | 5.83   | -     | 1807.8   |
| AHQ-8-8, 4543               | K.DVLFLKDCVGPVEK.A                                                       | 1750.00620 | 2 | 7.30E-09 | 0.94 | 4.44   | -     | 967.0    |
| AHQ-8-8, 5223               | K.ITLVPDFVTADKFDENAK.T                                                   | 2024.25948 | 2 | 3.33E-07 | 0.86 | 3.59   | -     | 722.3    |
| AHQ-8-8, 5123               | K.VLNNMEIGTSLFDEEGAK.I                                                   | 1968.17459 | 2 | 1.08E-05 | 0.67 | 3.18   | -     | 304.3    |
| AHQ-8-8, 4162               | K.YSLEPVAVELK.S                                                          | 1248.44991 | 2 | 1.10E-06 | 0.91 | 3.27   | -     | 1045.6   |
| gj 4759082 ref NP_004648.1  | serum deprivation response protein; serum deprivation response; phosphat |            |   | 1.54E-09 | 1.87 | 20.26  | 7.80  | 47172.9  |
| AHQ-8-6, 5880 - 5892        | R.DNSQVNAVTVLTLDDK.L                                                     | 1730.94122 | 2 | 1.37E-04 | 0.71 | 2.68   | -     | 809.9    |
| AHQ-8-13, 6016              | R.DNSQVNAVTVLTLDDK.L                                                     | 1730.94122 | 2 | 1.54E-09 | 0.96 | 4.63   | -     | 1347.8   |
| AHQ-8-7, 5810 - 5876        | R.DNSQVNAVTVLTLDDK.L                                                     | 1730.94122 | 2 | 2.74E-04 | 0.69 | 3.52   | -     | 555.5    |
| AHQ-8-13-, 5871             | R.DNSQVNAVTVLTLDDK.L                                                     | 1730.94122 | 2 | 1.68E-05 | 0.96 | 4.48   | -     | 1395.4   |
| AHQ-8-11, 5713              | K.VLIFQEENEIPASVFK.Q                                                     | 1963.26241 | 2 | 6.34E-04 | 0.55 | 2.54   | -     | 448.0    |
| AHQ-8-12, 5608              | K.VLIFQEENEIPASVFK.Q                                                     | 1963.26241 | 2 | 2.29E-05 | 0.84 | 3.50   | -     | 599.4    |
| AHQ-8-8, 5851 - 5857        | K.VLIFQEENEIPASVFK.Q                                                     | 1963.26241 | 2 | 2.09E-04 | 0.96 | 5.13   | -     | 1050.1   |
| AHQ-8-7, 5637               | K.VLIFQEENEIPASVFK.Q                                                     | 1963.26241 | 2 | 1.08E-05 | 0.91 | 4.20   | -     | 718.8    |
| AHQ-8-13-, 5691             | K.VLIFQEENEIPASVFK.Q                                                     | 1963.26241 | 2 | 1.90E-04 | 0.83 | 3.81   | -     | 511.2    |
| AHQ-8-6, 5651 - 5706        | K.VLIFQEENEIPASVFK.Q                                                     | 1963.26241 | 2 | 3.87E-05 | 0.96 | 5.14   | -     | 1034.3   |
| AHQ-8-14-, 5693             | K.VLIFQEENEIPASVFK.Q                                                     | 1963.26241 | 2 | 6.65E-04 | 0.90 | 3.82   | -     | 673.6    |
| gj 4557361 ref NP_001187.1  | BH3 interacting domain death agonist; BH3-interacting domain death agon  |            |   | 1.69E-09 | 1.76 | 20.18  | 14.40 | 21994.6  |
| AHQ-8-11, 6260              | R.DLATALEQLLQAYPR.D                                                      | 1702.93270 | 2 | 1.67E-04 | 0.82 | 3.28   | -     | 715.8    |
| AHQ-8-11, 2791              | R.IEADSESQEDIR.N                                                         | 1505.56635 | 2 | 1.69E-09 | 0.94 | 3.12   | -     | 1870.2   |
| gj 4507725 ref NP_000362.1  | transthyretin (prealbumin, amyloidosis type I); Transthyretin (prealbum  |            |   | 1.81E-09 | 4.51 | 50.24  | 49.00 | 15886.9  |
| AHQ-8-13, 3893 - 3959       | K.AADDTWEPFASGK.T                                                        | 1395.45529 | 2 | 9.27E-04 | 0.69 | 2.58   | -     | 741.5    |
| AHQ-8-13-, 4308             | K.ALGISPFHEHAEVFTANDSGPR.R                                               | 2452.66660 | 3 | 1.28E-06 | 0.96 | 4.03   | -     | 2598.8   |
| AHQ-8-13, 4199              | R.GSPAINVAHVFR.K                                                         | 1367.58095 | 2 | 1.12E-07 | 0.93 | 3.90   | -     | 1075.3   |
| AHQ-8-13-, 4038             | R.GSPAINVAHVFR.K                                                         | 1367.58095 | 2 | 1.81E-09 | 0.95 | 4.05   | -     | 1207.0   |
| AHQ-8-13-, 3382             | R.KAADDTWEPFASGK.T                                                       | 1523.62820 | 2 | 6.17E-05 | 0.95 | 4.08   | -     | 1457.2   |
| AHQ-8-13, 3519              | R.KAADDTWEPFASGK.T                                                       | 1523.62820 | 2 | 9.24E-04 | 0.85 | 2.94   | -     | 887.7    |
| AHQ-8-13-, 5267             | K.TSESGELHGLTTEEEFVEGIYK.V                                               | 2456.60073 | 2 | 6.20E-08 | 0.96 | 4.75   | -     | 1360.6   |
| AHQ-8-13, 5379              | K.TSESGELHGLTTEEEFVEGIYK.V                                               | 2456.60073 | 3 | 2.29E-04 | 0.95 | 4.25   | -     | 1693.6   |
| gj 30159310 ref XP_301899.1 | similar to beta-actin [Homo sapiens]                                     |            |   | 1.83E-09 | 1.40 | 20.18  | 9.20  | 32376.4  |
| AHQ-8-8, 1789 - 1845        | K.DSYVGNEAQS.K.R                                                         | 1198.22158 | 2 | 8.36E-06 | 0.73 | 3.23   | -     | 653.8    |
| AHQ-8-8, 1922               | K.DSYVGNEAQS.K.R                                                         | 1198.22158 | 2 | 6.96E-05 | 0.65 | 2.55   | -     | 795.3    |
| AHQ-8-8, 2046 - 2119        | K.DSYVGNEAQS.K.R                                                         | 1198.22158 | 2 | 1.22E-06 | 0.71 | 2.97   | -     | 686.0    |
| AHQ-8-9, 5313 - 5369        | K.DSYVGNEAQS.K.R                                                         | 1198.22158 | 1 | 2.27E-04 | 0.54 | 2.03   | -     | 460.0    |
| AHQ-8-9, 5297 - 5353        | K.DSYVGNEAQS.K.R                                                         | 1198.22158 | 2 | 3.52E-06 | 0.83 | 3.27   | -     | 865.8    |
| AHQ-8-8, 1565 - 2047        | K.DSYVGNEAQS.K.R                                                         | 1198.22158 | 1 | 1.83E-09 | 0.61 | 2.67   | -     | 415.9    |
| AHQ-8-8, 4862 - 4938        | K.SYKLLDGGVITIGNER.F                                                     | 1807.04092 | 2 | 1.95E-06 | 0.79 | 3.62   | -     | 499.1    |
| AHQ-8-8, 4439               | K.SYKLLDGGVITIGNER.F                                                     | 1807.04092 | 2 | 2.73E-05 | 0.70 | 3.14   | -     | 556.7    |
| gj 19557677 ref NP_002108.3 | major histocompatibility complex, class I, C precursor; HLA class I hi   |            |   | 2.02E-09 | 0.97 | 10.24  | 3.80  | 40994.6  |
| AHQ-8-8, 3603               | R.SWTAADTAQAQITQR.K                                                      | 1520.62908 | 2 | 2.02E-09 | 0.97 | 4.69   | -     | 2114.6   |
| gj 12025678 ref NP_004915.2 | actinin, alpha 4 [Homo sapiens]                                          |            |   | 2.18E-09 | 8.94 | 100.27 | 13.30 | 104853.3 |
| AHQ-8-4, 3526               | R.DYETATLSDIK.A                                                          | 1256.34094 | 2 | 1.43E-04 | 0.94 | 3.27   | -     | 1444.7   |
| AHQ-8-4, 4542               | R.ETTDTDADQVIASFV.V                                                      | 1742.81936 | 2 | 1.48E-07 | 0.93 | 3.88   | -     | 1179.6   |
| AHQ-8-4, 2679               | K.HRDYETATLSDIK.A                                                        | 1549.66719 | 2 | 5.38E-05 | 0.90 | 3.24   | -     | 992.9    |
| AHQ-8-4, 3873               | R.M*APYQGPDAVPGALDYK.S                                                   | 1810.02037 | 2 | 2.18E-09 | 0.95 | 4.02   | -     | 1324.5   |
| AHQ-8-4, 3759               | K.M*LDADIVNTARPDEK.A                                                     | 1833.99864 | 2 | 6.91E-04 | 0.84 | 3.94   | -     | 544.8    |
| AHQ-8-4, 4537               | R.QFASQANVGPWIQT.K.M                                                     | 1775.00061 | 2 | 2.92E-08 | 0.75 | 3.23   | -     | 538.4    |
| AHQ-8-4, 6410               | R.SIVDYKPNLLLEQQHQLIQEALIFDNK.H                                          | 3326.74423 | 3 | 2.60E-09 | 0.94 | 5.46   | -     | 903.0    |
| AHQ-8-6, 5954               | R.VEGIAIAQELNELDYDHSNHNTR.C                                              | 2907.09810 | 3 | 2.25E-04 | 0.89 | 4.47   | -     | 821.0    |
| AHQ-8-4, 3927               | K.VLAGDKNFITAEELR.R                                                      | 1676.89525 | 2 | 6.79E-06 | 0.86 | 3.57   | -     | 813.1    |
| AHQ-8-4, 3729 - 3741        | K.VLAVNQNEHLMEDYEK.L                                                     | 2062.24648 | 2 | 3.39E-05 | 0.95 | 4.68   | -     | 1150.6   |
| gj 4506877 ref NP_002996.1  | selectin P precursor; Selectin P (granulocyte membrane protein, 140kD;   |            |   | 2.20E-09 | 3.74 | 40.24  | 8.00  | 90844.7  |



|                             |                                                                             |            |   |          |      |       |       |          |
|-----------------------------|-----------------------------------------------------------------------------|------------|---|----------|------|-------|-------|----------|
| AHQ-8-3, 5429               | K.LECLASGIWTKPPQCLAAQCPLK.I                                                 | 2857.31818 | 3 | 2.05E-05 | 0.94 | 4.64  | -     | 1222.4   |
| AHQ-8-3, 3141               | R.PSGQWTAIVTACR.A                                                           | 1432.58672 | 2 | 1.35E-05 | 0.91 | 3.58  | -     | 977.1    |
| AHQ-8-3, 4608               | K.STCQFCIDEGYSLGPER.L                                                       | 2109.23671 | 2 | 2.20E-09 | 0.95 | 4.78  | -     | 982.1    |
| AHQ-8-4, 4659               | K.STCQFCIDEGYSLGPER.L                                                       | 2109.23671 | 2 | 5.59E-07 | 0.94 | 4.00  | -     | 1151.9   |
| AHQ-8-3, 2972               | R.YTDLVIAQNK.N                                                              | 1165.32100 | 2 | 1.19E-06 | 0.94 | 3.70  | -     | 1267.3   |
| gi 29568101 ref NP_006467.3 | ATP synthase, H+ transporting, mitochondrial F0 complex, subunit g; AT      |            |   | 2.24E-09 | 0.95 | 10.21 | 14.60 | 11400.3  |
| AHQ-8-14-, 3642             | K.TPALVNAAVTYSKPR.L                                                         | 1588.83283 | 2 | 9.80E-08 | 0.91 | 3.62  | -     | 1085.4   |
| AHQ-8-14-, 3633             | K.TPALVNAAVTYSKPR.L                                                         | 1588.83283 | 3 | 2.24E-09 | 0.95 | 4.21  | -     | 1588.5   |
| gi 20149594 ref NP_031381.2 | heat shock 90kDa protein 1, beta; heat shock 90kDa protein 1, beta; Hea     |            |   | 2.25E-09 | 4.15 | 50.24 | 9.50  | 83263.6  |
| AHQ-8-5, 2522               | K.EDQTEYLEER.R                                                              | 1312.32145 | 2 | 3.25E-05 | 0.68 | 2.74  | -     | 462.5    |
| AHQ-8-4, 3142               | R.ELISNASDALDK.I                                                            | 1276.37539 | 2 | 1.00E-06 | 0.86 | 3.05  | -     | 774.0    |
| AHQ-8-14, 4869              | R.NPDDITQEEYGEFYK.S                                                         | 1848.90048 | 2 | 4.32E-06 | 0.86 | 3.85  | -     | 579.9    |
| AHQ-8-5, 4004               | R.NPDDITQEEYGEFYK.S                                                         | 1848.90048 | 2 | 3.16E-06 | 0.93 | 4.32  | -     | 911.9    |
| AHQ-8-6, 3963               | R.NPDDITQEEYGEFYK.S                                                         | 1848.90048 | 2 | 2.25E-09 | 0.96 | 4.76  | -     | 1141.5   |
| AHQ-8-14-, 3975             | R.NPDDITQEEYGEFYK.S                                                         | 1848.90048 | 2 | 4.88E-05 | 0.87 | 3.33  | -     | 998.3    |
| AHQ-8-5, 3969               | K.SLTNDWEDHLAVK.H                                                           | 1528.64798 | 2 | 1.79E-04 | 0.86 | 3.71  | -     | 629.1    |
| AHQ-8-5, 3958               | R.YHTSQSGDEMTSLSEYVSR.M                                                     | 2178.27920 | 2 | 1.48E-04 | 0.78 | 3.17  | -     | 633.6    |
| gi 27498267 ref XP_209737.1 | similar to tyrosine 3/tryptophan 5 -monooxygenase activation protein,       |            |   | 2.34E-09 | 2.77 | 30.32 | 32.60 | 11063.6  |
| AHQ-8-10, 6122 - 6133       | R.DICNDVLSLLEK.F                                                            | 1420.61093 | 2 | 9.92E-04 | 0.88 | 3.23  | -     | 1282.5   |
| AHQ-8-14-, 6294             | R.DICNDVLSLLEK.F                                                            | 1420.61093 | 2 | 1.28E-06 | 0.87 | 3.02  | -     | 1504.1   |
| AHQ-8-10, 4459              | K.GIVDQSQAYQEAIFEISK.K                                                      | 2042.19176 | 2 | 3.07E-04 | 0.88 | 3.40  | -     | 890.7    |
| AHQ-8-10, 4626 - 4682       | K.GIVDQSQAYQEAIFEISK.K                                                      | 2042.19176 | 2 | 2.34E-09 | 0.98 | 5.53  | -     | 1792.0   |
| AHQ-8-10, 4683 - 4690       | K.GIVDQSQAYQEAIFEISK.K                                                      | 2042.19176 | 3 | 1.04E-08 | 0.98 | 6.47  | -     | 2601.6   |
| AHQ-8-10, 4370              | K.GIVDQSQAYQEAIFEISK.K                                                      | 2042.19176 | 2 | 1.58E-05 | 0.77 | 3.58  | -     | 423.7    |
| AHQ-8-14-, 4878 - 4879      | K.GIVDQSQAYQEAIFEISK.K                                                      | 2042.19176 | 2 | 7.25E-08 | 0.97 | 5.22  | -     | 1373.9   |
| AHQ-8-11, 4743              | K.GIVDQSQAYQEAIFEISK.K                                                      | 2042.19176 | 2 | 7.36E-06 | 0.93 | 4.20  | -     | 1040.5   |
| AHQ-8-11, 4749 - 4817       | K.GIVDQSQAYQEAIFEISK.K                                                      | 2042.19176 | 3 | 2.48E-04 | 0.95 | 4.26  | -     | 1937.5   |
| AHQ-8-12, 4774              | K.GIVDQSQAYQEAIFEISK.K                                                      | 2042.19176 | 2 | 2.72E-04 | 0.94 | 4.06  | -     | 1124.4   |
| AHQ-8-13, 5023 - 5025       | K.GIVDQSQAYQEAIFEISK.K                                                      | 2042.19176 | 2 | 8.11E-09 | 0.97 | 5.67  | -     | 1385.1   |
| AHQ-8-14, 5621              | K.GIVDQSQAYQEAIFEISK.K                                                      | 2042.19176 | 2 | 1.14E-06 | 0.93 | 4.40  | -     | 805.9    |
| AHQ-8-13-, 4862             | K.GIVDQSQAYQEAIFEISK.K                                                      | 2042.19176 | 2 | 2.83E-08 | 0.97 | 5.79  | -     | 1143.8   |
| AHQ-8-10, 4270              | K.KGIVDQSQAYQEAIFEISK.K                                                     | 2170.36467 | 2 | 2.07E-04 | 0.81 | 3.38  | -     | 765.3    |
| AHQ-8-10, 4272 - 4274       | K.KGIVDQSQAYQEAIFEISK.K                                                     | 2170.36467 | 3 | 1.13E-05 | 0.92 | 3.90  | -     | 1462.8   |
| gi 17986258 ref NP_066299.2 | smooth muscle and non-muscle myosin alkali light chain isoform 1 [Homo      |            |   | 2.37E-09 | 5.63 | 70.23 | 42.40 | 16930.0  |
| AHQ-8-12, 4044 - 4119       | K.DQGTYYEDYVEGLR.V                                                          | 1545.58904 | 2 | 7.00E-07 | 0.93 | 3.83  | -     | 1062.4   |
| AHQ-8-13, 4311 - 4312       | K.DQGTYYEDYVEGLR.V                                                          | 1545.58904 | 2 | 1.71E-06 | 0.94 | 4.01  | -     | 1147.0   |
| AHQ-8-12, 3867              | K.EAFQLFDR.T                                                                | 1026.12699 | 1 | 5.88E-06 | 0.24 | 2.21  | -     | 103.1    |
| AHQ-8-12, 2510 - 2572       | R.HVLVTLGK.M                                                                | 996.18547  | 2 | 1.45E-05 | 0.86 | 2.96  | -     | 680.3    |
| AHQ-8-12, 2459              | R.HVLVTLGK.M                                                                | 996.18547  | 1 | 4.13E-04 | 0.85 | 2.96  | -     | 747.3    |
| AHQ-8-12, 2406 - 2467       | R.HVLVTLGK.M                                                                | 996.18547  | 2 | 8.50E-07 | 0.85 | 3.15  | -     | 558.6    |
| AHQ-8-12, 3718 - 3774       | K.NKDQGTYYEDYVEGLR.V                                                        | 1787.86505 | 2 | 2.14E-04 | 0.95 | 4.42  | -     | 1354.6   |
| AHQ-8-12, 3608              | K.NKDQGTYYEDYVEGLR.V                                                        | 1787.86505 | 3 | 6.23E-04 | 0.92 | 4.57  | -     | 1058.2   |
| AHQ-8-12, 3606 - 3664       | K.NKDQGTYYEDYVEGLR.V                                                        | 1787.86505 | 2 | 7.52E-08 | 0.94 | 4.38  | -     | 1081.2   |
| AHQ-8-14-, 3722             | K.NKDQGTYYEDYVEGLR.V                                                        | 1787.86505 | 3 | 5.70E-05 | 0.94 | 4.66  | -     | 1331.6   |
| AHQ-8-14-, 3966             | K.NKDQGTYYEDYVEGLR.V                                                        | 1787.86505 | 2 | 3.03E-04 | 0.73 | 3.31  | -     | 513.8    |
| AHQ-8-14-, 3719             | K.NKDQGTYYEDYVEGLR.V                                                        | 1787.86505 | 2 | 4.95E-07 | 0.93 | 4.09  | -     | 1086.9   |
| AHQ-8-13-, 3763             | K.NKDQGTYYEDYVEGLR.V                                                        | 1787.86505 | 2 | 3.50E-09 | 0.96 | 4.43  | -     | 1596.8   |
| AHQ-8-13, 3900              | K.NKDQGTYYEDYVEGLR.V                                                        | 1787.86505 | 2 | 2.88E-04 | 0.71 | 3.28  | -     | 461.4    |
| AHQ-8-12, 3831 - 3886       | K.NKDQGTYYEDYVEGLR.V                                                        | 1787.86505 | 2 | 2.25E-05 | 0.85 | 3.39  | -     | 816.0    |
| AHQ-8-14, 4649              | K.NKDQGTYYEDYVEGLR.V                                                        | 1787.86505 | 2 | 3.89E-05 | 0.88 | 3.37  | -     | 886.0    |
| AHQ-8-13-, 3762             | K.NKDQGTYYEDYVEGLR.V                                                        | 1787.86505 | 2 | 2.91E-06 | 0.87 | 3.61  | -     | 984.1    |
| AHQ-8-12, 3255 - 3310       | R.VFDKEGNGTVMGAEIR.H                                                        | 1723.93228 | 2 | 2.37E-09 | 0.94 | 4.55  | -     | 1035.7   |
| AHQ-8-12, 5802 - 5864       | K.VLDFEHLFPM*LQTVAK.N                                                       | 1905.24957 | 3 | 4.65E-05 | 0.85 | 3.44  | -     | 1017.9   |
| AHQ-8-12, 5760 - 5818       | K.VLDFEHLFPM*LQTVAK.N                                                       | 1905.24957 | 2 | 1.29E-04 | 0.93 | 4.48  | -     | 645.8    |
| AHQ-8-12, 6150              | K.VLDFEHLFPM*LQTVAK.N                                                       | 1889.25017 | 2 | 2.23E-04 | 0.87 | 4.02  | -     | 551.3    |
| AHQ-8-14-, 5901 - 5923      | K.VLDFEHLFPM*LQTVAK.N                                                       | 1905.24957 | 3 | 4.95E-06 | 0.84 | 3.56  | -     | 844.4    |
| gi 30160191 ref XP_294035.2 | similar to Pyruvate kinase, M1 isozyme (Pyruvate kinase muscle isozyme      |            |   | 2.42E-09 | 0.97 | 10.23 | 2.80  | 50222.2  |
| AHQ-8-7, 4761 - 4776        | K.IYVDDGLISLQVK.Q                                                           | 1463.70048 | 2 | 2.42E-09 | 0.97 | 4.58  | -     | 2069.0   |
| AHQ-8-7, 4596 - 4662        | K.IYVDDGLISLQVK.Q                                                           | 1463.70048 | 2 | 5.19E-06 | 0.89 | 3.59  | -     | 1017.0   |
| gi 5729887 ref NP_006624.1  | IQ motif containing GTPase activating protein 2 [Homo sapiens]              |            |   | 2.43E-09 | 3.53 | 40.28 | 4.10  | 180611.0 |
| AHQ-8-4, 4641               | K.LPYDVTTEQALTYPEVK.N                                                       | 1968.19269 | 2 | 7.76E-08 | 0.94 | 3.77  | -     | 1365.2   |
| AHQ-8-3, 4596               | K.LPYDVTTEQALTYPEVK.N                                                       | 1968.19269 | 2 | 2.43E-09 | 0.95 | 4.30  | -     | 1293.1   |
| AHQ-8-3, 4045               | K.TLVGSENPLTVIR.K                                                           | 1496.73370 | 2 | 3.27E-04 | 0.72 | 2.86  | -     | 512.9    |
| AHQ-8-3, 4065               | K.VDQVQDITVGNPTVIK.M                                                        | 1726.95257 | 2 | 8.70E-05 | 0.97 | 5.63  | -     | 1367.0   |
| AHQ-8-3, 5442               | R.VAVGYINEAIDEGNPLR.T                                                       | 1930.15092 | 2 | 8.26E-04 | 0.89 | 3.84  | -     | 1038.6   |
| gi 6598323 ref NP_001485.2  | GDP dissociation inhibitor 2; rab GDP-dissociation inhibitor, beta [Homo    |            |   | 2.79E-09 | 2.70 | 30.28 | 11.90 | 50662.9  |
| AHQ-8-8, 5137               | R.NPYYGESASITPLEDLKY.R                                                      | 2118.28499 | 2 | 2.79E-09 | 0.97 | 5.54  | -     | 1636.0   |
| AHQ-8-8, 6355               | K.SPYLYPLYGLGELPQGFAR.L                                                     | 2142.44089 | 3 | 5.00E-07 | 0.85 | 3.40  | -     | 943.5    |
| AHQ-8-8, 6349               | K.SPYLYPLYGLGELPQGFAR.L                                                     | 2142.44089 | 2 | 1.30E-07 | 0.94 | 4.61  | -     | 789.0    |
| AHQ-8-7, 6140 - 6190        | K.SPYLYPLYGLGELPQGFAR.L                                                     | 2142.44089 | 2 | 2.21E-05 | 0.90 | 4.11  | -     | 475.9    |
| AHQ-8-8, 3957               | R.TDDYLDQPCYETINR.I                                                         | 1904.98887 | 2 | 4.89E-06 | 0.79 | 3.56  | -     | 356.2    |
| gi 14251209 ref NP_001279.2 | chloride intracellular channel 1; p64CLCP; chloride channel ABP [Homo       |            |   | 3.80E-09 | 2.72 | 30.24 | 21.60 | 26922.5  |
| AHQ-8-9, 6610               | R.EEFSTCPDDEIEIAYEQVAK.A                                                    | 2575.69730 | 2 | 1.95E-06 | 0.87 | 3.84  | -     | 639.1    |
| AHQ-8-14-, 3439             | K.GVTFNVTTVDTK.R                                                            | 1282.42476 | 2 | 6.94E-06 | 0.94 | 3.98  | -     | 1105.4   |
| AHQ-8-10, 3299              | K.GVTFNVTTVDTK.R                                                            | 1282.42476 | 2 | 3.76E-04 | 0.86 | 3.04  | -     | 888.7    |
| AHQ-8-13, 3627              | K.GVTFNVTTVDTK.R                                                            | 1282.42476 | 2 | 1.22E-06 | 0.92 | 3.88  | -     | 908.2    |
| AHQ-8-13-, 3439 - 3474      | K.GVTFNVTTVDTK.R                                                            | 1282.42476 | 2 | 8.25E-06 | 0.92 | 3.75  | -     | 1132.4   |
| AHQ-8-13-, 5196             | K.LAALNPESNTAGLDIFAK.F                                                      | 1846.07392 | 2 | 3.80E-09 | 0.93 | 4.27  | -     | 741.1    |
| AHQ-8-9, 6652               | K.LAALNPESNTAGLDIFAK.F                                                      | 1846.07392 | 2 | 5.99E-07 | 0.89 | 3.84  | -     | 484.8    |
| AHQ-8-14-, 5117             | K.LAALNPESNTAGLDIFAK.F                                                      | 1846.07392 | 2 | 9.16E-04 | 0.96 | 4.84  | -     | 963.5    |
| AHQ-8-13-, 5106 - 5110      | K.LAALNPESNTAGLDIFAK.F                                                      | 1846.07392 | 2 | 1.64E-04 | 0.96 | 4.78  | -     | 956.9    |
| gi 5453740 ref NP_006462.1  | myosin regulatory light chain MRCL3; myosin, light polypeptide, regulat     |            |   | 3.95E-09 | 5.21 | 60.27 | 32.20 | 19794.0  |
| AHQ-8-14-, 5777             | R.ATSNVFAM*FDQSQIQEFK.E                                                     | 2092.31741 | 2 | 3.44E-06 | 0.96 | 4.18  | -     | 1576.8   |
| AHQ-8-14-, 5177             | R.ATSNVFAM*FDQSQIQEFK.E                                                     | 2108.31681 | 2 | 1.61E-06 | 0.96 | 4.62  | -     | 1589.8   |
| AHQ-8-13-, 5768             | R.ATSNVFAM*FDQSQIQEFK.E                                                     | 2092.31741 | 2 | 7.71E-05 | 0.96 | 4.19  | -     | 1502.7   |
| AHQ-8-12, 5594 - 5663       | R.ATSNVFAM*FDQSQIQEFK.E                                                     | 2092.31741 | 2 | 1.22E-04 | 0.78 | 3.73  | -     | 457.1    |
| AHQ-8-13-, 5187 - 5252      | R.ATSNVFAM*FDQSQIQEFK.E                                                     | 2108.31681 | 2 | 2.28E-06 | 0.81 | 3.51  | -     | 574.7    |
| AHQ-8-11, 4916 - 4991       | R.ATSNVFAM*FDQSQIQEFK.E                                                     | 2108.31681 | 2 | 1.36E-05 | 0.79 | 3.37  | -     | 625.5    |
| AHQ-8-11, 5056 - 5117       | R.ATSNVFAM*FDQSQIQEFK.E                                                     | 2108.31681 | 2 | 2.99E-08 | 0.98 | 5.30  | -     | 1650.1   |
| AHQ-8-11, 5172 - 5199       | R.ATSNVFAM*FDQSQIQEFK.E                                                     | 2108.31681 | 2 | 3.15E-06 | 0.93 | 3.93  | -     | 1033.8   |
| AHQ-8-12, 5039 - 5094       | R.ATSNVFAM*FDQSQIQEFK.E                                                     | 2108.31681 | 2 | 3.95E-09 | 0.97 | 4.93  | -     | 1479.4   |
| AHQ-8-11, 5583 - 5641       | R.ATSNVFAM*FDQSQIQEFK.E                                                     | 2092.31741 | 2 | 2.00E-04 | 0.94 | 4.03  | -     | 1235.0   |
| AHQ-8-13, 5303              | R.ATSNVFAM*FDQSQIQEFK.E                                                     | 2108.31681 | 2 | 4.22E-07 | 0.90 | 3.44  | -     | 871.3    |
| AHQ-8-11, 5448              | R.DGFIDKEDLHDM*LASLKG.N                                                     | 2005.23806 | 3 | 4.70E-09 | 0.90 | 3.47  | -     | 1361.0   |
| AHQ-8-11, 4333              | R.DGFIDKEDLHDM*LASLKG.N                                                     | 2021.23746 | 2 | 1.56E-04 | 0.88 | 3.76  | -     | 625.2    |
| AHQ-8-12, 4359 - 4363       | R.DGFIDKEDLHDM*LASLKG.N                                                     | 2021.23746 | 3 | 8.79E-06 | 0.93 | 3.90  | -     | 1642.5   |
| AHQ-8-11, 2655 - 2735       | R.ELLTTMGDR.F                                                               | 1036.18513 | 2 | 3.58E-05 | 0.71 | 2.64  | -     | 507.6    |
| AHQ-8-11, 4200              | K.GNFNYIEFTR.I                                                              | 1261.36733 | 2 | 6.00E-04 | 0.76 | 2.91  | -     | 791.8    |
| AHQ-8-14-, 4126             | K.GNFNYIEFTR.I                                                              | 1261.36733 | 2 | 1.67E-05 | 0.76 | 2.76  | -     | 648.7    |
| AHQ-8-11, 3965 - 4039       | K.GNFNYIEFTR.I                                                              | 1261.36733 | 2 | 8.17E-05 | 0.64 | 3.13  | -     | 549.2    |
| AHQ-8-12, 4058 - 4060       | K.GNFNYIEFTR.I                                                              | 1261.36733 | 2 | 4.20E-04 | 0.85 | 3.50  | -     | 791.4    |
| AHQ-8-11, 4343              | K.GNFNYIEFTR.I                                                              | 1261.36733 | 2 | 4.03E-04 | 0.73 | 3.41  | -     | 692.1    |
| gi 5031677 ref NP_005681.1  | dynamitin-1-like protein isoform 3; dynamitin-like protein [Homo sapiens] [ |            |   | 4.03E-09 | 4.26 | 50.20 | 10.00 | 78060.6  |
| AHQ-8-13-, 4640             | K.ALQGGASQIAEIR.E                                                           | 1370.57991 |   |          |      |       |       |          |

|                             |                                                                         |            |   |          |      |        |       |          |
|-----------------------------|-------------------------------------------------------------------------|------------|---|----------|------|--------|-------|----------|
| AHQ-8-5, 5933 - 5949        | K.IFSPNVNLTLDVDPGM*TK.V                                                 | 2075.45768 | 2 | 5.19E-06 | 0.83 | 3.68   | -     | 684.6    |
| AHQ-8-13, 5935              | K.SSLDLLLLESEDM*AQR.R                                                   | 1940.07638 | 2 | 2.86E-04 | 0.63 | 2.81   | -     | 637.7    |
| AHQ-8-13-, 5807             | K.SSLDLLLLESEDM*AQR.R                                                   | 1940.07638 | 2 | 4.03E-09 | 0.72 | 2.78   | -     | 847.7    |
| AHQ-8-5, 6440               | R.TLESVDPLGGLNTDILTAIR.N                                                | 2212.52928 | 2 | 3.65E-05 | 0.89 | 3.92   | -     | 669.9    |
| gi 12408656 ref NP_005177.2 | calpain 1, large subunit; calpain, large polypeptide L1; calcium-activ  |            |   | 4.27E-09 | 7.38 | 90.25  | 16.10 | 81889.4  |
| AHQ-8-6, 4914               | K.APSDLYQIILK.A                                                         | 1261.49183 | 2 | 2.90E-05 | 0.94 | 3.97   | -     | 1145.0   |
| AHQ-8-5, 5829 - 5886        | R.DM*ETIGFAVYEVPELVLGQPAVHLK.R                                          | 2757.15391 | 3 | 9.64E-07 | 0.93 | 5.03   | -     | 899.4    |
| AHQ-8-6, 4358               | R.KAPSDLYQIILK.A                                                        | 1389.66474 | 2 | 4.34E-05 | 0.86 | 3.18   | -     | 934.2    |
| AHQ-8-6, 4688               | R.LEICNLTDPALK.S                                                        | 1388.61207 | 2 | 9.33E-05 | 0.78 | 2.77   | -     | 850.4    |
| AHQ-8-5, 4772 - 4774        | R.LEICNLTDPALK.S                                                        | 1388.61207 | 2 | 8.92E-04 | 0.94 | 4.66   | -     | 865.3    |
| AHQ-8-6, 4559               | R.LPPGEYVVVPSTFEPNK.E                                                   | 1874.12573 | 2 | 3.90E-05 | 0.74 | 2.96   | -     | 467.0    |
| AHQ-8-6, 5382 - 5383        | R.LPPGEYVVVPSTFEPNKEGDFVLR.F                                            | 2691.03055 | 3 | 4.27E-09 | 0.84 | 3.92   | -     | 664.6    |
| AHQ-8-5, 4476               | K.RPTELLSNPQFIVDQVTR.T                                                  | 2015.25904 | 2 | 2.70E-05 | 0.93 | 4.44   | -     | 543.4    |
| AHQ-8-5, 3246               | R.SEQFINLR.E                                                            | 1007.12521 | 2 | 4.47E-04 | 0.73 | 2.66   | -     | 684.3    |
| AHQ-8-6, 3222               | R.SEQFINLR.E                                                            | 1007.12521 | 2 | 6.00E-04 | 0.82 | 2.66   | -     | 854.2    |
| AHQ-8-6, 6255               | K.TLTDLDGVVTFDLFK.W                                                     | 1799.99879 | 2 | 3.23E-04 | 0.63 | 2.90   | -     | 530.2    |
| gi 5901944 ref NP_008977.1  | elastin microfibril interface located protein; TNF? elastin microfibril |            |   | 4.81E-09 | 2.32 | 30.18  | 4.60  | 106694.7 |
| AHQ-8-3, 2964 - 2984        | R.GLEEGQAQAGQCPSEGR.L                                                   | 1888.99421 | 2 | 4.83E-05 | 0.84 | 3.57   | -     | 688.4    |
| AHQ-8-3, 2950               | R.LVGSGLHTVEAAGEAR.Q                                                    | 1567.72888 | 2 | 4.81E-09 | 0.89 | 3.31   | -     | 951.7    |
| AHQ-8-3, 3800 - 3857        | K.VQOLEEQVQLTK.E                                                        | 1530.70532 | 2 | 1.56E-05 | 0.59 | 3.15   | -     | 709.6    |
| gi 16933542 ref NP_002017.1 | fibronectin 1 isoform 1 preproprotein; cold-insoluble globulin [Homo s  |            |   | 4.96E-09 | 1.79 | 20.23  | 1.60  | 259222.8 |
| AHQ-8-2, 5724               | R.NTFAEVTGLSPGVTYFYK.V                                                  | 1995.21983 | 2 | 4.96E-09 | 0.92 | 4.54   | -     | 700.1    |
| AHQ-8-2, 4575               | R.SSPVVIDASTAIDAPSNLR.F                                                 | 1914.10666 | 2 | 1.93E-05 | 0.87 | 3.75   | -     | 773.4    |
| AHQ-8-3, 4506               | R.SSPVVIDASTAIDAPSNLR.F                                                 | 1914.10666 | 2 | 4.91E-04 | 0.81 | 3.75   | -     | 581.9    |
| AHQ-8-1, 4625               | R.SSPVVIDASTAIDAPSNLR.F                                                 | 1914.10666 | 2 | 7.44E-04 | 0.67 | 2.74   | -     | 731.8    |
| gi 450473 ref NP_000398.1   | glycoprotein Ib beta polypeptide precursor [Homo sapiens]               |            |   | 5.51E-09 | 2.47 | 30.19  | 15.50 | 21717.6  |
| AHQ-8-1, 4732 - 4745        | R.LLPYLAEDELR.A                                                         | 1332.52691 | 2 | 3.16E-04 | 0.71 | 2.68   | -     | 505.2    |
| AHQ-8-4, 4633               | R.LLPYLAEDELR.A                                                         | 1332.52691 | 2 | 2.99E-06 | 0.77 | 2.72   | -     | 478.2    |
| AHQ-8-5, 4592               | R.LLPYLAEDELR.A                                                         | 1332.52691 | 2 | 3.48E-06 | 0.79 | 2.60   | -     | 614.4    |
| AHQ-8-6, 4499               | R.LLPYLAEDELR.A                                                         | 1332.52691 | 2 | 7.60E-07 | 0.64 | 2.76   | -     | 386.1    |
| AHQ-8-8, 4513               | R.LLPYLAEDELR.A                                                         | 1332.52691 | 2 | 1.14E-04 | 0.50 | 2.53   | -     | 358.1    |
| AHQ-8-13-, 4551             | R.LLPYLAEDELR.A                                                         | 1332.52691 | 2 | 2.20E-05 | 0.87 | 3.07   | -     | 716.2    |
| AHQ-8-13, 4719 - 4720       | R.LLPYLAEDELR.A                                                         | 1332.52691 | 2 | 9.69E-07 | 0.93 | 3.27   | -     | 823.2    |
| AHQ-8-11, 4411              | R.LLPYLAEDELR.A                                                         | 1332.52691 | 2 | 4.47E-06 | 0.83 | 3.05   | -     | 479.0    |
| AHQ-8-11, 4112              | R.LSLDPLVAER.A                                                          | 1214.39356 | 2 | 5.51E-09 | 0.95 | 3.74   | -     | 1487.4   |
| AHQ-8-11, 2475              | R.TAHLGANPWR.C                                                          | 1123.24913 | 2 | 4.20E-05 | 0.88 | 3.19   | -     | 697.3    |
| gi 29739414 ref XP_294015.1 | similar to Glyceraldehyde 3-phosphate dehydrogenase, liver (GAPDH) [Ho  |            |   | 5.52E-09 | 1.85 | 20.22  | 12.80 | 26916.7  |
| AHQ-8-10, 3770 - 3827       | K.IISNASCSTTNCAPLAK.V                                                   | 1837.10868 | 2 | 2.53E-06 | 0.56 | 2.71   | -     | 654.8    |
| AHQ-8-9, 6590 - 6660        | K.IISNASCSTTNCAPLAK.V                                                   | 1837.10868 | 2 | 2.05E-08 | 0.90 | 4.40   | -     | 1246.3   |
| AHQ-8-13, 4981              | K.LISWYDNEFGYSNR.V                                                      | 1764.87478 | 2 | 3.02E-07 | 0.94 | 4.31   | -     | 871.8    |
| AHQ-8-13-, 4819             | K.LISWYDNEFGYSNR.V                                                      | 1764.87478 | 2 | 1.56E-06 | 0.90 | 3.69   | -     | 899.2    |
| AHQ-8-14-, 4803             | K.LISWYDNEFGYSNR.V                                                      | 1764.87478 | 2 | 5.52E-09 | 0.94 | 4.12   | -     | 987.1    |
| AHQ-8-11, 4655 - 4725       | K.LISWYDNEFGYSNR.V                                                      | 1764.87478 | 2 | 8.01E-08 | 0.95 | 4.19   | -     | 1176.9   |
| gi 4503747 ref NP_001448.1  | filamin B, beta (actin binding protein 278); beta filamin; filamin 1 (a |            |   | 6.05E-09 | 2.66 | 30.25  | 1.00  | 278191.4 |
| AHQ-8-3, 5940               | R.LIALLEVLISQK.R                                                        | 1227.51852 | 2 | 8.21E-06 | 0.96 | 4.20   | -     | 1332.5   |
| AHQ-8-1, 6047               | R.LIALLEVLISQK.R                                                        | 1227.51852 | 2 | 1.04E-05 | 0.96 | 4.12   | -     | 1362.3   |
| AHQ-8-10, 5702              | R.LIALLEVLISQK.R                                                        | 1227.51852 | 2 | 3.37E-04 | 0.72 | 2.69   | -     | 459.8    |
| AHQ-8-2, 5823               | R.LIALLEVLISQK.R                                                        | 1227.51852 | 2 | 1.48E-05 | 0.97 | 4.27   | -     | 1743.8   |
| AHQ-8-2, 6039               | R.LIALLEVLISQK.R                                                        | 1227.51852 | 2 | 2.52E-06 | 0.97 | 4.44   | -     | 1688.7   |
| AHQ-8-7, 5806               | R.LIALLEVLISQK.R                                                        | 1227.51852 | 2 | 4.81E-07 | 0.94 | 3.64   | -     | 1160.1   |
| AHQ-8-11, 5759              | R.LIALLEVLISQK.R                                                        | 1227.51852 | 2 | 4.37E-06 | 0.90 | 3.56   | -     | 786.5    |
| AHQ-8-4, 6026               | R.LIALLEVLISQK.R                                                        | 1227.51852 | 2 | 6.05E-09 | 0.96 | 4.20   | -     | 1157.1   |
| AHQ-8-5, 5970 - 5977        | R.LIALLEVLISQK.R                                                        | 1227.51852 | 2 | 1.12E-07 | 0.97 | 4.94   | -     | 1683.7   |
| AHQ-8-2, 6475               | R.QMQLENVSALEFLDR.E                                                     | 1893.15408 | 2 | 4.46E-07 | 0.92 | 3.90   | -     | 900.5    |
| AHQ-8-1, 6447               | R.QMQLENVSALEFLDR.E                                                     | 1893.15408 | 2 | 9.77E-06 | 0.92 | 3.89   | -     | 986.3    |
| AHQ-8-1, 6005               | R.QMQLENVSALEFLDR.E                                                     | 1909.15348 | 2 | 1.64E-05 | 0.86 | 3.60   | -     | 560.9    |
| AHQ-8-5, 5952               | R.QMQLENVSALEFLDR.E                                                     | 1909.15348 | 2 | 7.35E-06 | 0.78 | 2.86   | -     | 811.4    |
| gi 4507869 ref NP_003361.1  | vasodilator-stimulated phosphoprotein [Homo sapiens]                    |            |   | 6.18E-09 | 1.70 | 20.24  | 7.10  | 39829.4  |
| AHQ-8-8, 5925               | K.VKEEIEAFVQELR.K                                                       | 1703.96061 | 2 | 6.18E-09 | 0.96 | 4.88   | -     | 1336.7   |
| AHQ-8-14-, 2941 - 2949      | R.VQIYHNPTANSFR.V                                                       | 1547.69936 | 2 | 2.91E-05 | 0.74 | 3.07   | -     | 595.8    |
| gi 5902128 ref NP_008880.1  | syntaxin binding protein 2; Hunc18b [Homo sapiens]                      |            |   | 6.31E-09 | 7.24 | 80.28  | 25.10 | 66438.1  |
| AHQ-8-6, 6339               | R.AADPYSPLLHETLQAM*AYDLLDIEQDQTYR.Y                                     | 3453.81998 | 3 | 1.39E-04 | 0.92 | 4.66   | -     | 1186.2   |
| AHQ-8-6, 5812               | K.AAHIFDTDTCPELFSSELGR.S                                                | 2310.57011 | 2 | 2.21E-05 | 0.96 | 5.56   | -     | 909.1    |
| AHQ-8-6, 2862               | K.DVMEADVAEDR.L                                                         | 1179.24007 | 2 | 4.35E-04 | 0.86 | 2.76   | -     | 1102.1   |
| AHQ-8-6, 3670               | K.GPEDIAQLAHAVLAK.L                                                     | 1521.70012 | 2 | 1.79E-08 | 0.88 | 3.73   | -     | 879.3    |
| AHQ-8-6, 3591               | K.LCSVQQLAM*GSDAEGEK.I                                                  | 1957.08386 | 2 | 6.31E-09 | 0.93 | 3.83   | -     | 1120.4   |
| AHQ-8-6, 6275               | K.M*SDIAEGITIVEDINKR.R                                                  | 2034.32082 | 3 | 1.05E-06 | 0.79 | 3.65   | -     | 697.8    |
| AHQ-8-6, 3242               | R.NLEQLGGTVTNPGGSGTSSR.L                                                | 1933.02693 | 2 | 1.10E-04 | 0.92 | 4.25   | -     | 994.9    |
| AHQ-8-6, 5607               | R.REPISLEAIYLLSPTEK.S                                                   | 2057.37574 | 2 | 5.52E-07 | 0.97 | 5.56   | -     | 1404.1   |
| gi 13899317 ref NP_113657.1 | SH3 domain binding glutamic acid-rich protein like 2 [Homo sapiens] [M  |            |   | 8.03E-09 | 4.15 | 50.29  | 56.10 | 12326.0  |
| AHQ-8-13, 5404              | K.ESNTVFSFLGKPR.L                                                       | 1595.82383 | 2 | 1.77E-05 | 0.54 | 2.69   | -     | 288.0    |
| AHQ-8-13-, 5283             | K.ESNTVFSFLGKPR.L                                                       | 1595.82383 | 2 | 4.55E-08 | 0.68 | 3.10   | -     | 413.9    |
| AHQ-8-14, 6095              | K.ESNTVFSFLGKPR.L                                                       | 1595.82383 | 2 | 9.75E-07 | 0.67 | 2.74   | -     | 476.9    |
| AHQ-8-14-, 5265 - 5271      | K.ESNTVFSFLGKPR.L                                                       | 1595.82383 | 2 | 8.03E-09 | 0.82 | 3.80   | -     | 457.0    |
| AHQ-8-13-, 4760             | R.FLEANKIEFEVDITM*SEEQR.Q                                               | 2574.80223 | 3 | 1.01E-07 | 0.86 | 4.03   | -     | 929.4    |
| AHQ-8-14-, 4761 - 4762      | R.FLEANKIEFEVDITM*SEEQR.Q                                               | 2574.80223 | 3 | 5.09E-05 | 0.97 | 5.82   | -     | 1786.2   |
| AHQ-8-14-, 4133             | K.IEFEVDITM*SEEQR.Q                                                     | 1872.00051 | 2 | 1.49E-04 | 0.53 | 2.59   | -     | 652.8    |
| AHQ-8-14, 5045              | K.IEFEVDITM*SEEQR.Q                                                     | 1872.00051 | 2 | 5.24E-04 | 0.65 | 2.53   | -     | 610.2    |
| AHQ-8-14-, 4305             | R.VFIASSSGFVAIK.K                                                       | 1326.56551 | 2 | 1.53E-06 | 0.98 | 4.75   | -     | 2492.2   |
| AHQ-8-13-, 4320             | R.VFIASSSGFVAIK.K                                                       | 1326.56551 | 2 | 8.75E-04 | 0.97 | 4.09   | -     | 2131.4   |
| AHQ-8-14-, 4306 - 4381      | R.YCGDYDSFFESK.E                                                        | 1519.57010 | 2 | 8.36E-05 | 0.96 | 3.53   | -     | 1453.7   |
| gi 29742410 ref XP_291183.1 | similar to TREM-like transcript 1 [Homo sapiens]                        |            |   | 8.78E-09 | 1.62 | 20.17  | 10.30 | 32678.3  |
| AHQ-8-11, 4144              | R.FLPEGCQPLVSSAVDR.R                                                    | 1776.99174 | 2 | 8.78E-09 | 0.89 | 3.46   | -     | 781.7    |
| AHQ-8-13-, 4228             | R.FLPEGCQPLVSSAVDR.R                                                    | 1776.99174 | 2 | 1.15E-05 | 0.86 | 3.06   | -     | 558.4    |
| AHQ-8-11, 3763              | R.VSLNILPPEEEEEETHK.I                                                   | 1865.03087 | 3 | 3.43E-05 | 0.73 | 3.07   | -     | 705.2    |
| gi 4757810 ref NP_004037.1  | ATP synthase, H+ transporting, mitochondrial F1 complex, alpha subunit, |            |   | 9.60E-09 | 5.67 | 70.22  | 15.90 | 59750.3  |
| AHQ-8-7, 3730 - 3800        | R.EAYPGDVFLHSR.L                                                        | 1554.68713 | 2 | 7.09E-05 | 0.41 | 2.62   | -     | 389.9    |
| AHQ-8-7, 5097               | K.GM*SLNLEPDNVGVVVFVGNDK.L                                              | 2121.35703 | 2 | 9.60E-09 | 0.91 | 4.48   | -     | 596.4    |
| AHQ-8-7, 3496               | K.HALIYDDLK.SQ                                                          | 1288.47413 | 2 | 3.14E-06 | 0.96 | 3.63   | -     | 1391.3   |
| AHQ-8-7, 3593 - 3662        | R.ILGADTSVDLEETGR.V                                                     | 1576.68772 | 2 | 2.08E-07 | 0.89 | 3.31   | -     | 1074.5   |
| AHQ-8-14-, 3678             | R.ILGADTSVDLEETGR.V                                                     | 1576.68772 | 2 | 1.03E-05 | 0.73 | 2.82   | -     | 1039.9   |
| AHQ-8-7, 4941 - 4945        | R.TGAIVDVVPVGEELLGR.V                                                   | 1625.84824 | 2 | 6.87E-05 | 0.88 | 3.60   | -     | 696.8    |
| AHQ-8-7, 3685               | K.TGTAEMSSILEER.I                                                       | 1424.55988 | 2 | 6.92E-04 | 0.82 | 3.12   | -     | 869.9    |
| AHQ-8-7, 2656               | K.TGTAEM*SSILEER.I                                                      | 1440.55928 | 2 | 1.48E-04 | 0.80 | 2.73   | -     | 1082.0   |
| gi 29729616 ref XP_292963.1 | similar to peptidylprolyl isomerase A (cyclophilin A) [Homo sapiens] [  |            |   | 1.01E-08 | 0.94 | 10.30  | 16.40 | 18025.4  |
| AHQ-8-13, 4855 - 4936       | K.HTGPGLISM*ANAGPNTNGSQFFICTAK.S                                        | 2810.11545 | 3 | 8.01E-04 | 0.96 | 6.05   | -     | 1217.0   |
| AHQ-8-13-, 4694             | K.HTGPGLISM*ANAGPNTNGSQFFICTAK.S                                        | 2810.11545 | 3 | 5.56E-05 | 0.91 | 4.58   | -     | 1219.6   |
| AHQ-8-14-, 4694 - 4773      | K.HTGPGLISM*ANAGPNTNGSQFFICTAK.S                                        | 2810.11545 | 3 | 1.01E-08 | 0.94 | 5.18   | -     | 1249.2   |
| AHQ-8-12, 4622              | K.HTGPGLISM*ANAGPNTNGSQFFICTAK.S                                        | 2810.11545 | 2 | 7.48E-04 | 0.74 | 3.32   | -     | 419.9    |
| gi 5729877 ref NP_006588.1  | heat shock 70kDa protein 8 isoform 1; heat shock cognate protein, 71-kD |            |   | 1.03E-08 | 9.39 | 110.24 | 19.50 | 70897.6  |
| AHQ-8-6, 4303 - 4310        | R.ARFEELNADLFR.G                                                        | 1481.63768 | 2 | 7.87E-08 | 0.97 | 4.81   | -     | 1295.2   |
| AHQ-8-7, 4225               | R.ARFEELNADLFR.G                                                        | 1481.63768 | 2 | 1.72E-06 | 0.96 | 4.62   | -     | 1164.9   |
| AHQ-8-6, 4311               | R.ARFEELNADLFR.G                                                        | 1481.63768 | 3 | 1.38E-04 | 0.91 | 3.98   | -     | 1219.1   |
| AHQ-8-6, 4512 - 4514        | R.FEELNADLFR.G                                                          | 1254.37310 | 2 | 2.92E-07 | 0.91 | 3.93   | -     | 1007.5   |
| AHQ-8-6, 5310               | K.ILDKCNEIINWLDK.N                                                      | 1776.04688 | 2 |          |      |        |       |          |

|                            |                                                                          |            |   |          |       |        |       |          |
|----------------------------|--------------------------------------------------------------------------|------------|---|----------|-------|--------|-------|----------|
| AHQ-8-7, 3501              | K.NQVAMNPTNTVFDK.R                                                       | 1650.83816 | 2 | 4.96E-04 | 0.77  | 3.24   | -     | 463.3    |
| AHQ-8-6, 3716              | K.NQVAMNPTNTVFDK.R                                                       | 1650.83816 | 2 | 9.26E-06 | 0.90  | 3.50   | -     | 699.7    |
| AHQ-8-6, 2814              | K.NQVAMNPTNTVFDK.R                                                       | 1666.83756 | 2 | 5.80E-06 | 0.91  | 3.86   | -     | 674.8    |
| AHQ-8-6, 3534              | K.NQVAMNPTNTVFDK.R                                                       | 1650.83816 | 2 | 8.60E-04 | 0.93  | 4.14   | -     | 816.2    |
| AHQ-8-6, 3268 - 3347       | K.NSLEYAFNM*K.A                                                          | 1320.45333 | 2 | 5.25E-05 | 0.90  | 3.17   | -     | 1096.5   |
| AHQ-8-6, 2254              | R.RFDDAVVQSDM*K.H                                                        | 1427.56543 | 2 | 5.60E-06 | 0.93  | 3.65   | -     | 835.1    |
| AHQ-8-6, 4240 - 4286       | K.SFYPEEVVSM*VLTK.M                                                      | 1633.84425 | 2 | 3.44E-04 | 0.63  | 2.62   | -     | 441.8    |
| AHQ-8-6, 4348              | K.SFYPEEVVSM*VLTK.M                                                      | 1633.84425 | 2 | 3.90E-04 | 0.84  | 3.52   | -     | 528.9    |
| AHQ-8-7, 6132              | K.SINPDEAVAYGAAVQAAILSGDK.S                                              | 2261.47411 | 2 | 1.30E-05 | 0.70  | 3.12   | -     | 461.8    |
| AHQ-8-6, 6171 - 6174       | K.SINPDEAVAYGAAVQAAILSGDK.S                                              | 2261.47411 | 3 | 4.67E-05 | 0.80  | 3.71   | -     | 955.2    |
| AHQ-8-6, 3154 - 3155       | K.SQIHDIIVLGGSTR.I                                                       | 1482.66712 | 2 | 1.03E-08 | 0.97  | 4.36   | -     | 1800.3   |
| AHQ-8-6, 3168              | K.SQIHDIIVLGGSTR.I                                                       | 1482.66712 | 1 | 1.25E-05 | 0.47  | 2.54   | -     | 634.0    |
| AHQ-8-7, 3097 - 3130       | K.SQIHDIIVLGGSTR.I                                                       | 1482.66712 | 2 | 1.35E-06 | 0.95  | 3.97   | -     | 1462.2   |
| gj5031571 ref NP_005713.1  | actin-related protein 2; ARP2 (actin-related protein 2, yeast) homolog   |            |   | 1.11E-08 | 4.55  | 50.20  | 12.70 | 44760.5  |
| AHQ-8-8, 3629              | K.DLMVGDSEASLR.S                                                         | 1335.46633 | 2 | 2.69E-06 | 0.91  | 3.33   | -     | 1051.9   |
| AHQ-8-8, 3301              | K.DLMVGDSEASLR.S                                                         | 1351.46573 | 2 | 1.48E-06 | 0.90  | 3.17   | -     | 1059.1   |
| AHQ-8-8, 3511              | R.GYAFNHSADFVTR.M                                                        | 1614.69943 | 2 | 9.63E-07 | 0.94  | 3.95   | -     | 949.8    |
| AHQ-8-8, 3341 - 3401       | R.GYAFNHSADFVTR.M                                                        | 1614.69943 | 2 | 2.45E-05 | 0.84  | 3.45   | -     | 832.8    |
| AHQ-8-8, 4113              | K.HLWDTYFGPEK.L                                                          | 1393.52736 | 2 | 3.15E-07 | 0.86  | 3.31   | -     | 541.3    |
| AHQ-8-8, 3663              | K.LCYVGYNIEQEQK.L                                                        | 1645.81494 | 2 | 1.11E-08 | 0.94  | 3.91   | -     | 1115.5   |
| gj4507171 ref NP_003109.1  | secreted protein, acidic, cysteine-rich (osteonectin); Osteonectin (sec  |            |   | 1.11E-08 | 2.64  | 30.22  | 11.60 | 34632.0  |
| AHQ-8-8, 3181              | R.LEAGDHPVELLAR.D                                                        | 1420.59579 | 2 | 1.11E-08 | 0.97  | 4.33   | -     | 1632.1   |
| AHQ-8-8, 3303 - 3361       | K.LHLDYIGPKC.Y                                                           | 1217.41920 | 2 | 1.87E-05 | 0.78  | 3.20   | -     | 548.7    |
| AHQ-8-8, 3465              | K.TFSSCHFFATK.C                                                          | 1449.56938 | 2 | 5.24E-05 | 0.89  | 3.93   | -     | 814.2    |
| gj5454152 ref NP_006285.1  | ubiquinol-cytochrome c reductase binding protein [Homo sapiens]          |            |   | 1.14E-08 | 1.82  | 20.21  | 25.20 | 13530.4  |
| AHQ-8-13-, 3534            | R.DDTIYEDVDKEAIR.R                                                       | 1811.88169 | 2 | 1.14E-08 | 0.86  | 3.42   | -     | 920.5    |
| AHQ-8-13-, 4994            | K.YEEENFYLEPYLK.E                                                        | 1737.88601 | 2 | 1.17E-04 | 0.96  | 4.15   | -     | 1609.2   |
| gj4885183 ref NP_005210.1  | diaphanous 1; deafness, autosomal dominant 1; hDia1 [Homo sapiens] [MAS  |            |   | 1.15E-08 | 5.11  | 60.21  | 7.80  | 138977.7 |
| AHQ-8-3, 4486 - 4492       | R.LGLHQLQLDLR.E                                                          | 1292.51238 | 2 | 2.45E-05 | 0.73  | 3.04   | -     | 608.9    |
| AHQ-8-3, 5926              | K.LQFSQVENIKPEIVSVTAAACEELR.K                                            | 2892.23121 | 3 | 3.93E-05 | 0.84  | 3.84   | -     | 822.9    |
| AHQ-8-3, 4885 - 4892       | K.LVAEDLSQDCFWTK.V                                                       | 1713.88927 | 2 | 1.15E-08 | 0.92  | 4.19   | -     | 759.7    |
| AHQ-8-3, 5378              | K.QDLEAEVSQLTGEVAK.L                                                     | 1717.85617 | 2 | 7.82E-05 | 0.89  | 3.82   | -     | 763.0    |
| AHQ-8-3, 5545 - 5554       | K.TAQNLSIFLGSFR.M                                                        | 1454.65537 | 2 | 1.57E-05 | 0.81  | 3.34   | -     | 569.9    |
| AHQ-8-3, 4692              | R.VQLNVFDEQGEEDSYDLK.G                                                   | 2129.22304 | 2 | 7.05E-06 | 0.92  | 4.20   | -     | 827.4    |
| gj4506413 ref NP_002875.1  | RAP1A, member of RAS oncogene family; RAS-related protein RAP1A [Homo s  |            |   | 1.20E-08 | 5.45  | 60.26  | 25.00 | 20987.1  |
| AHQ-8-11, 2519 - 2523      | K.CLEDERVVGK.E                                                           | 1321.43945 | 2 | 4.36E-05 | 0.86  | 3.13   | -     | 933.3    |
| AHQ-8-14-, 5557 - 5558     | K.INVNEIFYDLVR.Q                                                         | 1495.70427 | 2 | 6.15E-05 | 0.91  | 3.65   | -     | 934.6    |
| AHQ-8-13-, 6235            | K.INVNEIFYDLVR.Q                                                         | 1495.70427 | 2 | 8.47E-08 | 0.96  | 4.99   | -     | 1349.9   |
| AHQ-8-13, 6280             | K.INVNEIFYDLVR.Q                                                         | 1495.70427 | 2 | 1.92E-05 | 0.91  | 3.98   | -     | 790.0    |
| AHQ-8-11, 6121 - 6188      | K.INVNEIFYDLVR.Q                                                         | 1495.70427 | 2 | 1.20E-08 | 0.96  | 4.97   | -     | 1412.6   |
| AHQ-8-14-, 6253            | K.INVNEIFYDLVR.Q                                                         | 1495.70427 | 2 | 4.88E-08 | 0.93  | 4.08   | -     | 1045.5   |
| AHQ-8-11, 2800 - 2860      | K.LVLVLSGGVVGK.S                                                         | 986.19059  | 2 | 2.99E-06 | 0.92  | 3.69   | -     | 1057.7   |
| AHQ-8-11, 5839 - 5895      | K.SALTVQFVQGFVEK.Y                                                       | 1666.94196 | 2 | 5.04E-04 | 0.96  | 4.35   | -     | 1640.3   |
| AHQ-8-11, 5727 - 5783      | K.SALTVQFVQGFVEK.Y                                                       | 1666.94196 | 2 | 3.02E-04 | 0.96  | 3.98   | -     | 1788.1   |
| AHQ-8-11, 4999 - 5016      | K.SKINNVNEIFYDLVR.Q                                                      | 1710.95483 | 2 | 5.90E-08 | 0.88  | 4.15   | -     | 653.4    |
| AHQ-8-11, 5901 - 5980      | K.SKINNVNEIFYDLVR.Q                                                      | 1710.95483 | 2 | 2.37E-08 | 0.95  | 4.43   | -     | 1108.1   |
| AHQ-8-11, 5687             | K.SKINNVNEIFYDLVR.Q                                                      | 1710.95483 | 2 | 3.95E-04 | 0.86  | 3.67   | -     | 686.9    |
| AHQ-8-11, 5691 - 5705      | K.SKINNVNEIFYDLVR.Q                                                      | 1710.95483 | 3 | 3.04E-08 | 0.94  | 4.67   | -     | 1392.7   |
| AHQ-8-11, 2737 - 2812      | K.YDPTIEDSYR.K                                                           | 1259.30338 | 2 | 5.90E-06 | 0.79  | 2.58   | -     | 423.8    |
| AHQ-8-11, 2823 - 2885      | K.YDPTIEDSYR.K                                                           | 1259.30338 | 2 | 4.20E-08 | 0.81  | 2.62   | -     | 445.8    |
| gj14211923 ref NP_115982.1 | PKC1-1-related HIT protein [Homo sapiens]                                |            |   | 1.25E-08 | 1.68  | 20.23  | 22.70 | 17161.6  |
| AHQ-8-13-, 5795            | R.ISQAEEDQLLGHLLVAK.Q                                                    | 2235.52293 | 3 | 1.25E-08 | 0.84  | 3.91   | -     | 656.4    |
| AHQ-8-13-, 5751            | K.SLPADILYEDQQCLVFR.D                                                    | 2069.32354 | 2 | 1.91E-04 | 0.84  | 3.13   | -     | 729.6    |
| gj4557597 ref NP_001449.1  | gamma filament; filamin 2; filamin C, gamma (actin-binding protein-280); |            |   | 1.28E-08 | 1.51  | 20.25  | 1.40  | 288897.4 |
| AHQ-8-2, 4600 - 4604       | R.GQHVPSPFQFTVGPLGEGGAHK.V                                               | 2305.53673 | 3 | 4.45E-06 | 0.91  | 4.81   | -     | 483.9    |
| AHQ-8-7, 4324              | R.GQHVPSPFQFTVGPLGEGGAHK.V                                               | 2305.53673 | 3 | 2.59E-05 | 0.90  | 4.71   | -     | 678.0    |
| AHQ-8-5, 4468 - 4472       | R.GQHVPSPFQFTVGPLGEGGAHK.V                                               | 2305.53673 | 3 | 6.62E-05 | 0.80  | 3.66   | -     | 615.5    |
| AHQ-8-5, 4484              | R.GQHVPSPFQFTVGPLGEGGAHK.V                                               | 2305.53673 | 2 | 1.65E-05 | 0.91  | 4.71   | -     | 397.5    |
| AHQ-8-6, 4411              | R.GQHVPSPFQFTVGPLGEGGAHK.V                                               | 2305.53673 | 3 | 3.94E-05 | 0.91  | 5.01   | -     | 572.8    |
| AHQ-8-1, 4672 - 4721       | R.GQHVPSPFQFTVGPLGEGGAHK.V                                               | 2305.53673 | 3 | 1.28E-08 | 0.89  | 4.24   | -     | 588.3    |
| AHQ-8-3, 2032              | K.IECDDKGGSCDVR.Y                                                        | 1628.67809 | 2 | 5.00E-05 | 0.63  | 2.85   | -     | 599.6    |
| gj4503291 ref NP_001346.1  | D-dopachrome tautomerase [Homo sapiens]                                  |            |   | 1.33E-08 | 0.91  | 10.17  | 9.30  | 12711.7  |
| AHQ-8-14-, 5351 - 5353     | R.FFPLESWQIGK.I                                                          | 1352.56151 | 2 | 1.33E-08 | 0.91  | 3.34   | -     | 1000.4   |
| gj7662651 ref NP_054778.1  | RGC32 protein [Homo sapiens]                                             |            |   | 1.41E-08 | 0.94  | 10.22  | 18.80 | 12924.1  |
| AHQ-8-14-, 3567            | R.SSASVSDSSGFSDESADSLYR.N                                                | 2242.21028 | 2 | 1.41E-08 | 0.94  | 4.45   | -     | 808.7    |
| gj6681259 ref NP_031377.1  | multimerin [Homo sapiens]                                                |            |   | 1.41E-08 | 16.97 | 190.32 | 21.70 | 138070.8 |
| AHQ-8-2, 2489              | R.AQEQQSLIHTNQAESHAVGR.G                                                 | 2306.43830 | 3 | 6.28E-06 | 0.88  | 3.91   | -     | 1025.3   |
| AHQ-8-3, 2460              | R.AQEQQSLIHTNQAESHAVGR.G                                                 | 2306.43830 | 2 | 7.54E-07 | 0.90  | 4.29   | -     | 558.8    |
| AHQ-8-4, 2413              | R.AQEQQSLIHTNQAESHAVGR.G                                                 | 2306.43830 | 3 | 6.31E-04 | 0.88  | 4.18   | -     | 839.9    |
| AHQ-8-3, 5820              | K.CTSDM*ETILTFIPQFHL.L                                                   | 2114.38778 | 3 | 1.35E-07 | 0.85  | 3.69   | -     | 828.0    |
| AHQ-8-3, 3864 - 3921       | R.DQALQLQVLSNR.F                                                         | 1385.55144 | 2 | 2.56E-07 | 0.97  | 5.14   | -     | 1923.9   |
| AHQ-8-3, 4066              | R.DQALQLQVLSNR.F                                                         | 1385.55144 | 2 | 8.48E-04 | 0.76  | 2.96   | -     | 874.0    |
| AHQ-8-2, 3993              | R.DQALQLQVLSNR.F                                                         | 1385.55144 | 2 | 1.08E-06 | 0.96  | 4.69   | -     | 1435.6   |
| AHQ-8-5, 2852              | K.EVHEQLLSTEQVSDQK.N                                                     | 1870.99550 | 2 | 2.20E-05 | 0.92  | 3.83   | -     | 1080.0   |
| AHQ-8-2, 5968 - 5980       | K.FPPVTTFSGYLLYR.T                                                       | 1661.92388 | 2 | 3.63E-05 | 0.70  | 3.31   | -     | 452.3    |
| AHQ-8-14-, 5801            | K.FPPVTTFSGYLLYR.T                                                       | 1661.92388 | 2 | 6.47E-04 | 0.95  | 4.00   | -     | 954.7    |
| AHQ-8-3, 5452              | K.FVLVQENRPTLTDIVELR.N                                                   | 2143.47187 | 3 | 1.79E-08 | 0.92  | 4.09   | -     | 1331.7   |
| AHQ-8-4, 5534              | K.FVLVQENRPTLTDIVELR.N                                                   | 2143.47187 | 3 | 6.71E-08 | 0.91  | 4.46   | -     | 807.0    |
| AHQ-8-2, 5555              | K.FVLVQENRPTLTDIVELR.N                                                   | 2143.47187 | 3 | 3.29E-07 | 0.94  | 4.00   | -     | 1312.3   |
| AHQ-8-6, 5566 - 5570       | K.GLTFEVEPIQIK.T                                                         | 1487.76518 | 2 | 1.01E-04 | 0.68  | 2.67   | -     | 694.4    |
| AHQ-8-2, 5743              | K.GLTFEVEPIQIK.T                                                         | 1487.76518 | 2 | 2.99E-04 | 0.83  | 3.39   | -     | 705.1    |
| AHQ-8-3, 5630 - 5646       | K.GLTFEVEPIQIK.T                                                         | 1487.76518 | 2 | 1.32E-07 | 0.94  | 4.01   | -     | 1229.9   |
| AHQ-8-3, 2693              | K.GPCGWTGGSCPQR.S                                                        | 1422.52885 | 2 | 3.72E-05 | 0.88  | 2.90   | -     | 1003.8   |
| AHQ-8-3, 4086              | K.GSVVTNERDQALQLQVLSNR.F                                                 | 2228.45212 | 3 | 1.64E-05 | 0.90  | 4.07   | -     | 1199.8   |
| AHQ-8-3, 2485              | R.GVAEQQQQCGDPEVMQK.M                                                    | 2119.27971 | 2 | 2.57E-04 | 0.90  | 4.35   | -     | 655.2    |
| AHQ-8-2, 3845 - 3917       | K.HSLPDIQLQK.G                                                           | 1292.50915 | 2 | 2.34E-08 | 0.92  | 3.71   | -     | 839.9    |
| AHQ-8-3, 3828 - 3830       | K.HSLPDIQLQK.G                                                           | 1292.50915 | 2 | 9.98E-08 | 0.88  | 3.76   | -     | 642.9    |
| AHQ-8-3, 4937 - 4992       | K.IFQNDM*QETVAQLFK.T                                                     | 1829.06683 | 2 | 1.05E-05 | 0.77  | 3.13   | -     | 705.3    |
| AHQ-8-3, 4773 - 4854       | K.IFQNDM*QETVAQLFK.T                                                     | 1829.06683 | 2 | 2.92E-08 | 0.97  | 5.01   | -     | 1619.1   |
| AHQ-8-2, 5388              | R.IPYLVGVVFK.Y                                                           | 1199.46532 | 2 | 5.55E-04 | 0.80  | 3.00   | -     | 707.9    |
| AHQ-8-3, 5196              | K.KIENLTSVAVNSLNFIIK.E                                                   | 1905.22764 | 2 | 1.45E-08 | 0.89  | 4.03   | -     | 582.3    |
| AHQ-8-3, 2949              | K.LKEVHEQLLSTEQVSDQK.N                                                   | 2112.32666 | 2 | 5.47E-06 | 0.98  | 6.49   | -     | 1822.4   |
| AHQ-8-4, 2931              | K.LKEVHEQLLSTEQVSDQK.N                                                   | 2112.32666 | 2 | 1.08E-04 | 0.95  | 5.31   | -     | 772.4    |
| AHQ-8-3, 3740              | K.LVEENALPDFSK.G                                                         | 1433.58810 | 2 | 2.24E-05 | 0.83  | 3.09   | -     | 875.2    |
| AHQ-8-2, 3785 - 3809       | K.LVEENALPDFSK.G                                                         | 1433.58810 | 2 | 8.52E-05 | 0.67  | 2.63   | -     | 553.5    |
| AHQ-8-4, 6439              | K.M*SEQLNDLTYDM*EILQPLLEGGASLR.Q                                         | 3041.40062 | 3 | 1.02E-04 | 0.58  | 3.20   | -     | 461.5    |
| AHQ-8-3, 6336 - 6349       | K.M*SEQLNDLTYDM*EILQPLLEGGASLR.Q                                         | 3041.40062 | 3 | 1.41E-08 | 0.95  | 5.05   | -     | 1526.8   |
| AHQ-8-2, 6449              | K.M*SEQLNDLTYDM*EILQPLLEGGASLR.Q                                         | 3041.40062 | 3 | 7.04E-05 | 0.62  | 3.15   | -     | 676.7    |
| AHQ-8-3, 3428              | K.TVSSLSSELESTR.Q                                                        | 1424.49324 | 2 | 9.35E-07 | 0.82  | 3.05   | -     | 936.9    |
| AHQ-8-3, 3992              | R.YNFVLQVAK.T                                                            | 1082.27683 | 2 | 6.26E-05 | 0.92  | 3.11   | -     | 1002.2   |
| gj30150448 ref XP_293066.2 | similar to Stress-70 protein, mitochondrial precursor (75 kDa glucose    |            |   | 1.61E-08 | 9.92  | 10.20  | 2.90  | 58788.2  |
| AHQ-8-6, 4456              | R.VINEPTAAALAYGLDK.S                                                     | 1646.86592 | 2 | 1.61E-08 | 0.92  | 4.02   | -     | 790.6    |
| gj21314617 ref NP_000433.2 | platelet/endothelial cell adhesion molecule (CD31 antigen); platelet/e   |            |   | 1.62E-08 | 5.28  | 70.20  | 13.00 | 82449.6  |
| AHQ-8-5, 5480 - 5482       | R.CESISGLTPIYSQLLK.T                                                     | 1811.08954 | 2 | 3.40E-04 | 0.45  | 2.77   | -     | 223.1    |
| AHQ-8-4, 5913              | R.DQNFVLEFPVEEQDR.V                                                      | 1979.13566 | 2 | 2.98E-04 | 0.67  | 3.44   | -     | 466.8    |
| AHQ-8-4, 5769 - 5774       | R.DQNFVLEFPVEEQDR.V                                                      | 1979.13566 | 2 | 1.26E-04 | 0.89  | 3.78   | -     | 792.0    |
| AHQ-8-5, 5721              | R.DQNFVLEFPVEEQDR.V                                                      | 1979.13566 | 2 | 5.48E-04 | 0.79  | 3.56   | -     | 668.3    |

|                             |                                                                         |            |   |          |      |       |      |         |
|-----------------------------|-------------------------------------------------------------------------|------------|---|----------|------|-------|------|---------|
| AHQ-8-4, 3402               | K.EDTIVSQDFTK.I                                                         | 1512.60049 | 2 | 1.30E-04 | 0.83 | 3.21  | -    | 644.0   |
| AHQ-8-4, 3529               | K.EQEGEYCYTAFNR.A                                                       | 1668.72232 | 2 | 3.42E-07 | 0.69 | 2.74  | -    | 468.1   |
| AHQ-8-4, 4081               | R.ISYDAQFEVFK.G                                                         | 1313.48046 | 2 | 2.32E-08 | 0.83 | 3.41  | -    | 590.6   |
| AHQ-8-4, 4063               | K.STESYFPEVR.I                                                          | 1328.45199 | 2 | 6.92E-05 | 0.82 | 2.96  | -    | 740.9   |
| AHQ-8-3, 4061               | K.STESYFPEVR.I                                                          | 1328.45199 | 2 | 6.69E-08 | 0.73 | 2.81  | -    | 533.4   |
| AHQ-8-3, 5209 - 5234        | K.VIAPVDEVQISLSSK.V                                                     | 1698.98227 | 2 | 1.23E-04 | 0.64 | 2.80  | -    | 333.3   |
| AHQ-8-1, 5316               | K.VIAPVDEVQISLSSK.V                                                     | 1698.98227 | 2 | 1.01E-05 | 0.91 | 3.64  | -    | 729.0   |
| AHQ-8-4, 5269               | K.VIAPVDEVQISLSSK.V                                                     | 1698.98227 | 2 | 1.62E-08 | 0.86 | 3.14  | -    | 752.8   |
| gi 29737978 ref XP_290747.1 | similar to Myosin heavy chain, nonmuscle type B (Cellular myosin heavy  |            |   |          |      |       |      |         |
| AHQ-8-1, 4076               | K.ADFCIHYAGK.V                                                          | 1296.47641 | 2 | 1.09E-07 | 0.96 | 3.73  | -    | 1591.4  |
| AHQ-8-6, 3846               | K.ADFCIHYAGK.V                                                          | 1296.47641 | 2 | 1.47E-06 | 0.95 | 3.83  | -    | 1382.8  |
| AHQ-8-4, 3914 - 3918        | K.ADFCIHYAGK.V                                                          | 1296.47641 | 2 | 2.98E-06 | 0.95 | 3.73  | -    | 1350.7  |
| AHQ-8-5, 3892 - 3893        | K.ADFCIHYAGK.V                                                          | 1296.47641 | 2 | 2.14E-07 | 0.95 | 3.82  | -    | 1135.2  |
| AHQ-8-2, 3983 - 3984        | K.ADFCIHYAGK.V                                                          | 1296.47641 | 2 | 1.71E-08 | 0.97 | 4.12  | -    | 2076.6  |
| AHQ-8-3, 3906 - 3928        | K.ADFCIHYAGK.V                                                          | 1296.47641 | 2 | 1.26E-06 | 0.96 | 3.82  | -    | 1725.3  |
| AHQ-8-3, 3084               | R.AGVLAHLEEER.D                                                         | 1224.34854 | 2 | 2.70E-06 | 0.94 | 3.76  | -    | 1478.0  |
| AHQ-8-2, 3124               | R.AGVLAHLEEER.D                                                         | 1224.34854 | 2 | 7.09E-07 | 0.95 | 4.05  | -    | 1478.3  |
| AHQ-8-5, 3049               | R.AGVLAHLEEER.D                                                         | 1224.34854 | 2 | 6.01E-07 | 0.91 | 3.61  | -    | 1056.2  |
| AHQ-8-6, 3056               | R.AGVLAHLEEER.D                                                         | 1224.34854 | 2 | 5.26E-06 | 0.96 | 4.20  | -    | 1680.2  |
| AHQ-8-4, 3051 - 3070        | R.AGVLAHLEEER.D                                                         | 1224.34854 | 2 | 4.59E-06 | 0.97 | 4.78  | -    | 1758.7  |
| AHQ-8-7, 2990               | R.AGVLAHLEEER.D                                                         | 1224.34854 | 2 | 5.57E-07 | 0.90 | 3.73  | -    | 1023.2  |
| AHQ-8-3, 3713               | K.DKADFCIIHYAGK.V                                                       | 1539.73719 | 2 | 3.52E-05 | 0.93 | 3.83  | -    | 1240.3  |
| AHQ-8-6, 3632               | K.DKADFCIIHYAGK.V                                                       | 1539.73719 | 2 | 8.54E-06 | 0.85 | 2.91  | -    | 908.1   |
| AHQ-8-2, 3776 - 3853        | K.DKADFCIIHYAGK.V                                                       | 1539.73719 | 2 | 2.78E-04 | 0.93 | 3.78  | -    | 1373.7  |
| AHQ-8-4, 3619 - 3691        | K.DKADFCIIHYAGK.V                                                       | 1539.73719 | 2 | 3.55E-05 | 0.80 | 3.23  | -    | 880.6   |
| AHQ-8-4, 4582               | K.LDPHLVLDQLR.C                                                         | 1319.53460 | 2 | 2.65E-06 | 0.57 | 2.53  | -    | 384.1   |
| AHQ-8-1, 4692               | K.LDPHLVLDQLR.C                                                         | 1319.53460 | 2 | 8.10E-06 | 0.72 | 2.83  | -    | 508.1   |
| AHQ-8-2, 4615               | K.LDPHLVLDQLR.C                                                         | 1319.53460 | 2 | 5.40E-04 | 0.86 | 2.97  | -    | 664.1   |
| AHQ-8-2, 4628               | K.LDPHLVLDQLR.C                                                         | 1319.53460 | 3 | 8.75E-06 | 0.93 | 4.07  | -    | 945.5   |
| gi 7657056 ref NP_055415.1  | EH-domain containing 3; EH domain containing 3 [Homo sapiens]           |            |   |          |      |       |      |         |
| AHQ-8-7, 4329               | K.ELVNNLAEIYGR.I                                                        | 1391.55445 | 2 | 1.04E-05 | 0.79 | 3.14  | -    | 733.1   |
| AHQ-8-7, 5166 - 5225        | K.GGAFEGTLHGPFHGEGEGEDDAEWVVAR.D                                        | 3317.48513 | 3 | 1.60E-05 | 0.91 | 4.53  | -    | 1122.3  |
| AHQ-8-7, 4133               | R.KLFEAEQDLFR.D                                                         | 1525.68723 | 2 | 2.58E-04 | 0.86 | 3.56  | -    | 735.7   |
| AHQ-8-7, 4576               | K.LFEAEQDLFR.D                                                          | 1397.51432 | 2 | 1.74E-08 | 0.96 | 3.61  | -    | 170.5   |
| gi 4885063 ref NP_005156.1  | aldolase C, fructose-bisphosphate; Aldolase C, fructose-bisphosphatase  |            |   |          |      |       |      |         |
| AHQ-8-9, 6295               | K.GVVPLAGTDGETTTQGLDGLSER.C                                             | 2274.42806 | 2 | 1.88E-08 | 0.94 | 10.21 | 6.30 | 39455.6 |
| gi 28395033 ref NP_786886.1 | ras homolog gene family, member C; Aplysia RAS-related homolog 9 (onco  |            |   |          |      |       |      |         |
| AHQ-8-10, 4408              | K.HFCPNVPIILVGNK.K                                                      | 1609.91693 | 2 | 8.21E-05 | 0.93 | 3.34  | -    | 1330.3  |
| AHQ-8-10, 4640              | K.QVELALVDTAGQEDYDR.L                                                   | 2010.10662 | 2 | 1.90E-08 | 0.94 | 3.80  | -    | 1257.3  |
| gi 4504517 ref NP_001531.1  | heat shock 27kDa protein 1; heat shock 27kD protein 1 [Homo sapiens] [M |            |   |          |      |       |      |         |
| AHQ-8-11, 4505 - 4579       | K.LATQSNIEITPVTFESR.A                                                   | 1907.11412 | 2 | 1.10E-04 | 0.75 | 3.77  | -    | 298.0   |
| AHQ-8-13, 4784 - 4849       | K.LATQSNIEITPVTFESR.A                                                   | 1907.11412 | 2 | 1.63E-04 | 0.71 | 3.43  | -    | 343.4   |
| AHQ-8-11, 4404              | R.LFDQAFGLPR.L                                                          | 1164.33793 | 2 | 1.99E-05 | 0.96 | 4.14  | -    | 1568.8  |
| AHQ-8-10, 4328 - 4331       | R.LFDQAFGLPR.L                                                          | 1164.33793 | 2 | 1.25E-04 | 0.95 | 4.36  | -    | 1399.3  |
| AHQ-8-14-, 4542             | R.LFDQAFGLPR.L                                                          | 1164.33793 | 2 | 1.03E-06 | 0.92 | 3.28  | -    | 1268.7  |
| AHQ-8-14, 5411              | R.VSLDYNHFAPDELTVK.T                                                    | 1784.99058 | 2 | 4.86E-04 | 0.55 | 2.74  | -    | 503.7   |
| AHQ-8-13-, 4526             | R.VSLDYNHFAPDELTVK.T                                                    | 1784.99058 | 3 | 1.90E-08 | 0.81 | 3.81  | -    | 438.9   |
| AHQ-8-13-, 4536             | R.VSLDYNHFAPDELTVK.T                                                    | 1784.99058 | 2 | 5.31E-05 | 0.87 | 3.86  | -    | 702.6   |
| AHQ-8-10, 4330              | R.VSLDYNHFAPDELTVK.T                                                    | 1784.99058 | 2 | 9.33E-06 | 0.90 | 3.60  | -    | 1169.9  |
| AHQ-8-11, 4413 - 4417       | R.VSLDYNHFAPDELTVK.T                                                    | 1784.99058 | 3 | 1.54E-05 | 0.82 | 4.01  | -    | 420.1   |
| gi 17149842 ref NP_004461.2 | FK506-binding protein 2 precursor; FK506-binding protein 2 (13kD); pep  |            |   |          |      |       |      |         |
| AHQ-8-13, 4007              | R.KLVIPSELGYGER.G                                                       | 1461.68782 | 3 | 5.72E-05 | 0.95 | 3.93  | -    | 1868.1  |
| AHQ-8-13-, 4138             | K.LVIPSELGYGER.G                                                        | 1333.51491 | 2 | 1.91E-08 | 0.68 | 2.63  | -    | 329.5   |
| AHQ-8-13, 4291              | K.LVIPSELGYGER.G                                                        | 1333.51491 | 2 | 6.66E-05 | 0.82 | 2.97  | -    | 471.9   |
| gi 29742827 ref XP_294099.1 | similar to myosin:SUBUNIT=regulatory light chain [Homo sapiens]         |            |   |          |      |       |      |         |
| AHQ-8-11, 3000 - 3080       | K.EAFNMIDQNR.D                                                          | 1238.35558 | 2 | 8.12E-04 | 0.84 | 3.18  | -    | 795.8   |
| AHQ-8-11, 3703 - 3723       | R.FTDEEVDELYR.E                                                         | 1416.47127 | 2 | 2.06E-08 | 0.93 | 3.52  | -    | 1038.4  |
| AHQ-8-12, 3643 - 3723       | R.FTDEEVDELYR.E                                                         | 1416.47127 | 2 | 7.81E-08 | 0.97 | 4.55  | -    | 1790.7  |
| AHQ-8-13, 3995 - 4061       | R.FTDEEVDELYR.E                                                         | 1416.47127 | 2 | 2.09E-07 | 0.95 | 3.17  | -    | 1632.6  |
| AHQ-8-14, 4729              | R.FTDEEVDELYR.E                                                         | 1416.47127 | 2 | 1.34E-05 | 0.96 | 3.46  | -    | 1732.8  |
| AHQ-8-13-, 3842 - 3912      | R.FTDEEVDELYR.E                                                         | 1416.47127 | 2 | 4.50E-08 | 0.96 | 3.50  | -    | 1804.7  |
| AHQ-8-14-, 3806             | R.FTDEEVDELYR.E                                                         | 1416.47127 | 2 | 1.00E-05 | 0.85 | 2.85  | -    | 1156.1  |
| AHQ-8-11, 3091 - 3169       | R.FTDEEVDELYR.E                                                         | 1416.47127 | 2 | 8.27E-04 | 0.82 | 2.94  | -    | 714.9   |
| gi 4826657 ref NP_004333.1  | caldesmon 1 isoform 3; H-CAD; L-CAD [Homo sapiens]                      |            |   |          |      |       |      |         |
| AHQ-8-5, 4756               | K.EFDPTITDASLSLPSR.R                                                    | 1749.89986 | 2 | 3.40E-07 | 0.81 | 3.52  | -    | 722.2   |
| AHQ-8-6, 4604 - 4676        | K.EFDPTITDASLSLPSR.R                                                    | 1749.89986 | 2 | 2.69E-07 | 0.90 | 3.85  | -    | 747.6   |
| AHQ-8-6, 2631               | K.GNVFSSTTAAGTPNK.E                                                     | 1448.56286 | 2 | 5.64E-05 | 0.92 | 3.40  | -    | 1255.7  |
| AHQ-8-5, 2642               | K.GNVFSSTTAAGTPNK.E                                                     | 1448.56286 | 2 | 2.68E-04 | 0.92 | 3.80  | -    | 941.8   |
| AHQ-8-5, 2856 - 2857        | R.LEQYTSIAIEGK.S                                                        | 1340.46107 | 2 | 1.94E-04 | 0.89 | 3.42  | -    | 1053.3  |
| AHQ-8-6, 3676               | K.TTTTNTQVEGDDEAAFLER.L                                                 | 2099.15534 | 2 | 3.04E-05 | 0.94 | 4.07  | -    | 1220.2  |
| AHQ-8-5, 3729               | K.TTTTNTQVEGDDEAAFLER.L                                                 | 2099.15534 | 2 | 2.36E-08 | 0.96 | 5.20  | -    | 1090.4  |
| AHQ-8-6, 2744 - 2750        | R.YEIEETVYTK.S                                                          | 1342.43060 | 2 | 8.82E-05 | 0.90 | 3.39  | -    | 897.7   |
| AHQ-8-5, 2762               | R.YEIEETVYTK.S                                                          | 1342.43060 | 2 | 1.12E-04 | 0.67 | 2.76  | -    | 609.5   |
| gi 5032161 ref NP_005639.1  | elongin C; transcription elongation factor B (SIII), polypeptide 1 (15k |            |   |          |      |       |      |         |
| AHQ-8-13, 4521              | K.AM*LSGPGQFAENETNEVNF.R                                                | 2228.38455 | 2 | 2.52E-08 | 0.96 | 4.79  | -    | 1389.4  |
| AHQ-8-13-, 2820             | K.TYGGCEGPDAM*YVK.L                                                     | 1565.70692 | 2 | 3.37E-04 | 0.87 | 2.84  | -    | 906.6   |
| gi 30147623 ref XP_293669.2 | similar to actinin, alpha 4 [Homo sapiens]                              |            |   |          |      |       |      |         |
| AHQ-8-5, 3986               | K.LSGSNPYTIVTPQIINSK.W                                                  | 1921.14079 | 2 | 2.18E-05 | 0.87 | 3.90  | -    | 848.5   |
| AHQ-8-4, 3998               | K.LSGSNPYTIVTPQIINSK.W                                                  | 1921.14079 | 2 | 2.62E-08 | 0.61 | 2.85  | -    | 531.2   |
| gi 18570595 ref XP_095590.1 | similar to myosin regulatory light chain [Homo sapiens]                 |            |   |          |      |       |      |         |
| AHQ-8-12, 3054 - 3110       | K.LNGTDPEVDVIR.H                                                        | 1229.32195 | 2 | 2.63E-08 | 0.96 | 4.52  | -    | 1459.2  |
| AHQ-8-13, 3339              | K.LNGTDPEVDVIR.H                                                        | 1229.32195 | 2 | 4.28E-04 | 0.76 | 2.67  | -    | 714.5   |
| AHQ-8-14, 3990 - 4027       | K.LNGTDPEVDVIR.H                                                        | 1229.32195 | 2 | 3.79E-04 | 0.79 | 2.72  | -    | 932.4   |
| AHQ-8-13-, 3190             | K.LNGTDPEVDVIR.H                                                        | 1229.32195 | 2 | 5.17E-05 | 0.93 | 3.60  | -    | 1144.7  |
| AHQ-8-11, 3035 - 3115       | K.LNGTDPEVDVIR.H                                                        | 1229.32195 | 2 | 2.71E-04 | 0.92 | 3.41  | -    | 1067.2  |
| gi 21361370 ref NP_002853.2 | phosphorylase, glycogen; brain [Homo sapiens]                           |            |   |          |      |       |      |         |
| AHQ-8-5, 3768               | R.GLAGLGDVAEVR.K                                                        | 1157.30210 | 2 | 3.84E-05 | 0.95 | 4.01  | -    | 1380.3  |
| AHQ-8-5, 5564 - 5565        | K.LLPLVSDVEVIR.D                                                        | 1401.67552 | 2 | 2.69E-08 | 0.90 | 3.40  | -    | 806.2   |
| AHQ-8-5, 6061 - 6078        | R.WLLLCNPGGLADTIVEK.I                                                   | 1844.16436 | 2 | 1.25E-05 | 0.84 | 3.85  | -    | 699.4   |
| gi 7705849 ref NP_057215.1  | ras-related GTP-binding protein RAB10; ras-related GTP-binding protein  |            |   |          |      |       |      |         |
| AHQ-8-14-, 6031             | K.AFLTLAEDILR.K                                                         | 1262.47982 | 2 | 2.86E-06 | 0.93 | 3.28  | -    | 1707.7  |
| AHQ-8-11, 5903 - 5904       | K.AFLTLAEDILR.K                                                         | 1262.47982 | 2 | 2.70E-08 | 0.94 | 3.71  | -    | 1318.0  |
| gi 17986283 ref NP_006000.2 | tubulin, alpha 3; tubulin, alpha, brain-specific; hum-a-tub1; hum-a-tu  |            |   |          |      |       |      |         |
| AHQ-8-11, 5265              | R.AVFDLEPTVIDEVR.T                                                      | 1702.92947 | 2 | 4.22E-04 | 0.89 | 3.64  | -    | 887.1   |
| AHQ-8-12, 5275 - 5278       | R.AVFDLEPTVIDEVR.T                                                      | 1702.92947 | 2 | 1.39E-05 | 0.76 | 3.55  | -    | 449.9   |
| AHQ-8-13, 5481              | R.AVFDLEPTVIDEVR.T                                                      | 1702.92947 | 2 | 4.34E-05 | 0.87 | 3.97  | -    | 573.2   |
| AHQ-8-13-, 5350             | R.AVFDLEPTVIDEVR.T                                                      | 1702.92947 | 2 | 9.77E-08 | 0.96 | 4.87  | -    | 1194.5  |
| AHQ-8-14-, 5350 - 5366      | R.AVFDLEPTVIDEVR.T                                                      | 1702.92947 | 2 | 1.09E-06 | 0.93 | 4.74  | -    | 795.0   |
| AHQ-8-7, 5284               | R.AVFDLEPTVIDEVR.T                                                      | 1702.92947 | 2 | 3.09E-08 | 0.80 | 3.74  | -    | 546.9   |
| gi 4504071 ref NP_000164.1  | platelet glycoprotein Ib alpha polypeptide precursor [Homo sapiens] [MA |            |   |          |      |       |      |         |
| AHQ-8-4, 3477               | K.AM*TSNVAHSVQCDNSDKFPVYK.Y                                             | 2379.60939 | 3 | 2.43E-04 | 0.72 | 3.10  | -    | 498.9   |
| AHQ-8-3, 4777               | R.GLQELQELYLK.G                                                         | 1263.46458 | 2 | 1.09E-04 | 0.92 | 3.75  | -    | 1172.7  |
| AHQ-8-4, 4810               | R.GLQELQELYLK.G                                                         | 1263.46458 | 2 | 9.78E-05 | 0.91 | 3.54  | -    | 1152.8  |
| AHQ-8-3, 4048               | R.GQDLLSTVSR.Y                                                          | 1189.34410 | 2 | 2.21E-07 | 0.92 | 3.12  | -    | 1230.9  |
| AHQ-8-13, 4200              | R.GQDLLSTVSR.Y                                                          | 1189.34410 | 2 | 1.75E-05 | 0.96 | 3.65  | -    | 1699.8  |
| AHQ-8-1, 4205               | R.GQDLLSTVSR.Y                                                          | 1189.34410 | 2 | 1.22E-07 | 0.95 | 3.60  | -    | 1337.8  |
| AHQ-8-13-, 4051 - 4064      | R.GQDLLSTVSR.Y                                                          | 1189.34410 | 2 | 2.04E-06 | 0.94 | 3.54  | -    | 1600.1  |

|                             |                                                                         |            |   |          |      |       |       |          |
|-----------------------------|-------------------------------------------------------------------------|------------|---|----------|------|-------|-------|----------|
| AHQ-8-2, 4132               | R.GQDLLSTVSIR.Y                                                         | 1189.34410 | 2 | 2.24E-04 | 0.81 | 2.77  | -     | 810.1    |
| AHQ-8-12, 3934 - 3935       | R.GQDLLSTVSIR.Y                                                         | 1189.34410 | 2 | 5.39E-07 | 0.94 | 3.62  | -     | 1234.8   |
| AHQ-8-14-, 4009 - 4071      | R.GQDLLSTVSIR.Y                                                         | 1189.34410 | 2 | 5.35E-04 | 0.92 | 3.00  | -     | 1265.3   |
| AHQ-8-3, 2260               | R.GVLQGHLESSR.N                                                         | 1183.29965 | 2 | 3.73E-04 | 0.88 | 3.48  | -     | 785.5    |
| AHQ-8-3, 4870               | R.WLQDNAENVVYVWK.Q                                                      | 1665.82948 | 2 | 9.00E-07 | 0.96 | 4.24  | -     | 1583.7   |
| AHQ-8-4, 4902 - 4922        | R.WLQDNAENVVYVWK.Q                                                      | 1665.82948 | 2 | 3.18E-08 | 0.93 | 3.43  | -     | 1415.4   |
| gi 4506077 ref NP_002734.1  | protein kinase C substrate 80K-H; glucosidase II, beta subunit; AGE-bin |            |   | 3.40E-08 | 0.95 | 10.20 | 2.50  | 59296.0  |
| AHQ-8-5, 3272               | K.AQQEQELAAADAFK.E                                                      | 1449.54763 | 2 | 3.40E-08 | 0.95 | 3.99  | -     | 1438.6   |
| gi 4507677 ref NP_003290.1  | tumor rejection antigen (gp96) 1; Tumor rejection antigen-1 (gp96); glu |            |   | 3.59E-08 | 5.07 | 60.28 | 11.20 | 92468.2  |
| AHQ-8-4, 3238 - 3239        | K.FAFQAEVNR.M                                                           | 1082.19378 | 2 | 1.98E-05 | 0.81 | 3.27  | -     | 777.7    |
| AHQ-8-5, 3233               | K.FAFQAEVNR.M                                                           | 1082.19378 | 2 | 5.47E-04 | 0.79 | 2.62  | -     | 934.7    |
| AHQ-8-4, 3951               | R.FQSSHHPTDITSLDQYVER.M                                                 | 2261.39276 | 3 | 4.93E-07 | 0.97 | 4.92  | -     | 2451.3   |
| AHQ-8-4, 3955               | R.FQSSHHPTDITSLDQYVER.M                                                 | 2261.39276 | 2 | 5.74E-08 | 0.96 | 5.05  | -     | 994.7    |
| AHQ-8-5, 3924               | R.FQSSHHPTDITSLDQYVER.M                                                 | 2261.39276 | 3 | 2.65E-06 | 0.95 | 4.63  | -     | 1571.4   |
| AHQ-8-4, 3953               | K.GVVSDDLLPLNVSR.E                                                      | 1486.60940 | 2 | 1.16E-04 | 0.93 | 3.98  | -     | 1277.7   |
| AHQ-8-5, 3920               | K.GVVSDDLLPLNVSR.E                                                      | 1486.60940 | 2 | 6.33E-06 | 0.89 | 3.64  | -     | 975.3    |
| AHQ-8-5, 6521               | R.IKEDDDKTVLDLAVLFFETATLR.S                                             | 2735.07994 | 3 | 1.29E-05 | 0.89 | 4.40  | -     | 750.0    |
| AHQ-8-4, 2830               | R.SGYLLPDTK.A                                                           | 994.12321  | 1 | 1.09E-04 | 0.55 | 2.16  | -     | 776.6    |
| AHQ-8-4, 6350 - 6351        | K.YSQFINFPYVWSSK.T                                                      | 1880.13366 | 2 | 1.00E-05 | 0.95 | 4.68  | -     | 975.0    |
| AHQ-8-5, 6300 - 6302        | K.YSQFINFPYVWSSK.T                                                      | 1880.13366 | 2 | 3.59E-08 | 0.97 | 5.54  | -     | 1229.6   |
| gi 9506667 ref NP_061907.1  | ras homolog gene family, member F [Homo sapiens]                        |            |   | 3.84E-08 | 0.83 | 10.17 | 8.10  | 23593.2  |
| AHQ-8-11, 4081              | K.EVTLNLYDTAGQEDYDR.L                                                   | 2003.06925 | 2 | 3.84E-08 | 0.83 | 3.30  | -     | 722.7    |
| gi 10834976 ref NP_000572.1 | glutathione peroxidase 1 [Homo sapiens]                                 |            |   | 4.48E-08 | 2.38 | 30.22 | 22.90 | 21909.0  |
| AHQ-8-11, 5364              | R.LAAAAQSVYFASARPLAGGEPVSLGSLR.G                                        | 2832.20700 | 3 | 1.02E-04 | 0.90 | 4.04  | -     | 1185.9   |
| AHQ-8-11, 3815 - 3816       | R.PLAGEPVSLSGLR.G                                                       | 1353.54935 | 2 | 4.48E-08 | 0.96 | 4.33  | -     | 1175.0   |
| AHQ-8-11, 4808              | K.YVRPGGGFEPNFM*LFKE.C                                                  | 2005.28455 | 2 | 2.31E-04 | 0.53 | 2.89  | -     | 211.2    |
| gi 29747201 ref XP_290702.1 | similar to Myo16 protein [Homo sapiens]                                 |            |   | 4.77E-08 | 0.87 | 10.17 | 10.50 | 16932.3  |
| AHQ-8-14-, 3498             | R.DLEAEHVEVDITLNR.C                                                     | 1870.95236 | 2 | 4.77E-08 | 0.87 | 3.44  | -     | 890.5    |
| gi 30147105 ref XP_210550.2 | similar to Chain , Aldose Reductase (E.C.1.1.1.21) Mutant With Tyr 48   |            |   | 4.96E-08 | 0.94 | 10.22 | 2.20  | 61339.9  |
| AHQ-8-5, 4138 - 4144        | K.ADLINNLGTIAK.S                                                        | 1243.43490 | 2 | 4.96E-08 | 0.94 | 4.45  | -     | 819.2    |
| AHQ-8-5, 4489               | K.ADLINNLGTIAK.S                                                        | 1243.43490 | 2 | 9.22E-05 | 0.92 | 4.02  | -     | 938.7    |
| AHQ-8-5, 3902               | K.ADLINNLGTIAK.S                                                        | 1243.43490 | 2 | 1.38E-04 | 0.82 | 3.31  | -     | 505.9    |
| gi 20070125 ref NP_000909.2 | prolyl 4-hydroxylase, beta subunit; v-erb-a avian erythroblastic leuke  |            |   | 5.13E-08 | 1.68 | 20.22 | 8.30  | 5715.9   |
| AHQ-8-7, 6296 - 6353        | R.TGPAATLTPDGAASLESVESSEVAVIGFFK.D                                      | 2937.24716 | 3 | 2.62E-06 | 0.89 | 4.37  | -     | 909.0    |
| AHQ-8-7, 2284 - 2285        | K.YKPESEELTAER.I                                                        | 1452.54828 | 2 | 5.13E-08 | 0.79 | 3.11  | -     | 441.8    |
| gi 21361565 ref NP_001679.2 | ATP synthase, H+ transporting, mitochondrial F0 complex, subunit b, iso |            |   | 5.13E-08 | 0.92 | 10.25 | 7.80  | 28908.4  |
| AHQ-8-11, 6243              | K.TGVTGPVYVLTGLLYALS.K.E                                                | 2024.38889 | 2 | 5.13E-08 | 0.92 | 5.03  | -     | 591.6    |
| gi 23110925 ref NP_002789.1 | proteasome beta 6 subunit; proteasome subunit Y; proteasome subunit be  |            |   | 5.70E-08 | 0.97 | 10.21 | 4.60  | 25357.6  |
| AHQ-8-11, 2527              | R.LAAIESGVER.Q                                                          | 1116.24998 | 2 | 5.70E-08 | 0.97 | 4.21  | -     | 2023.3   |
| gi 5031973 ref NP_005733.1  | protein disulfide isomerase-related protein [Homo sapiens]              |            |   | 5.89E-08 | 1.76 | 20.21 | 6.40  | 48121.0  |
| AHQ-8-7, 4557 - 4636        | K.GFSFSEQNINFLR.E                                                       | 1484.59520 | 2 | 2.64E-06 | 0.82 | 2.81  | -     | 782.5    |
| AHQ-8-7, 4521               | K.LAAVDATVNVQLASR.Y                                                     | 1528.73579 | 2 | 5.89E-08 | 0.94 | 4.21  | -     | 1122.2   |
| gi 7706563 ref NP_057614.1  | RAB-8b protein [Homo sapiens]                                           |            |   | 5.90E-08 | 0.93 | 10.19 | 6.80  | 23584.0  |
| AHQ-8-11, 5177 - 5235       | K.SSANVEEAFFTLAR.D                                                      | 1542.67465 | 2 | 5.90E-08 | 0.93 | 3.79  | -     | 1193.5   |
| gi 10863927 ref NP_066953.1 | peptidylprolyl isomerase A (cyclophilin A) [Homo sapiens]               |            |   | 6.04E-08 | 5.23 | 60.26 | 30.90 | 18012.4  |
| AHQ-8-12, 3846 - 3902       | K.FEDENFLK.H                                                            | 1155.28144 | 2 | 3.95E-04 | 0.88 | 3.55  | -     | 645.8    |
| AHQ-8-14-, 3342             | K.KITADCCGLE                                                            | 1249.41637 | 2 | 6.04E-08 | 0.84 | 3.75  | -     | 986.4    |
| AHQ-8-12, 3272 - 3326       | K.KITADCCGLE                                                            | 1249.41637 | 2 | 4.99E-05 | 0.85 | 3.54  | -     | 1224.3   |
| AHQ-8-12, 4443 - 4478       | K.SIYGEKFEDEFILK.H                                                      | 1833.03047 | 2 | 4.54E-05 | 0.94 | 4.56  | -     | 925.3    |
| AHQ-8-13-, 4580             | K.SIYGEKFEDEFILK.H                                                      | 1833.03047 | 2 | 1.02E-06 | 0.96 | 5.20  | -     | 1214.0   |
| AHQ-8-12, 3650              | K.VKEGMNVIEAMER.F                                                       | 1506.77390 | 2 | 2.83E-04 | 0.86 | 3.59  | -     | 758.3    |
| AHQ-8-13-, 4428             | R.VSFLFADK.V                                                            | 1056.19300 | 2 | 5.33E-06 | 0.82 | 3.02  | -     | 838.2    |
| AHQ-8-12, 4284              | R.VSFLFADK.V                                                            | 1056.19300 | 2 | 1.65E-04 | 0.87 | 3.23  | -     | 1114.1   |
| AHQ-8-12, 4395 - 4414       | R.VSFLFADKVPK.T                                                         | 1380.61317 | 2 | 1.32E-07 | 0.86 | 3.77  | -     | 814.0    |
| gi 18860900 ref NP_002834.2 | protein tyrosine phosphatase, receptor type, J precursor; protein tyro  |            |   | 6.92E-08 | 4.00 | 50.26 | 5.50  | 145926.2 |
| AHQ-8-1, 4328               | K.AYAVILTTGEAGHPSADV.K.Y                                                | 2014.26782 | 2 | 9.02E-08 | 0.97 | 5.19  | -     | 1837.5   |
| AHQ-8-1, 4808               | R.DTEVLVLGLEPGTR.Y                                                      | 1499.69122 | 2 | 1.81E-04 | 0.56 | 2.56  | -     | 695.8    |
| AHQ-8-1, 4955               | K.GLIDGAEYVFSR.Y                                                        | 1501.62253 | 2 | 6.92E-08 | 0.85 | 3.05  | -     | 1123.3   |
| AHQ-8-1, 3772               | K.TPSSTGSPSPVDFIK.A                                                     | 1433.58810 | 2 | 7.79E-04 | 0.81 | 3.37  | -     | 702.2    |
| AHQ-8-1, 4243               | K.VITEPIVPSDLR.V                                                        | 1339.56259 | 2 | 3.05E-05 | 0.80 | 2.88  | -     | 495.9    |
| gi 4757952 ref NP_001782.1  | cell division cycle 42 isoform 1; cell division cycle 42 (GTP-binding p |            |   | 7.42E-08 | 1.77 | 20.24 | 14.70 | 21258.5  |
| AHQ-8-11, 2377              | K.CVVVGDGAVGK.T                                                         | 1062.22237 | 2 | 2.19E-05 | 0.82 | 3.10  | -     | 980.1    |
| AHQ-8-11, 6116              | K.NVDFEALAALEPPEPK.K                                                    | 1854.09282 | 3 | 7.42E-08 | 0.95 | 4.79  | -     | 1033.3   |
| AHQ-8-11, 6111              | K.NVDFEALAALEPPEPK.K                                                    | 1854.09282 | 2 | 8.47E-06 | 0.57 | 2.69  | -     | 431.5    |
| gi 4507651 ref NP_003281.1  | tropomyosin 4 [Homo sapiens]                                            |            |   | 7.62E-08 | 2.84 | 30.22 | 10.10 | 28521.6  |
| AHQ-8-9, 6214 - 6272        | K.AEGDVAALNR.R                                                          | 1016.09051 | 2 | 3.59E-06 | 0.93 | 3.49  | -     | 1347.9   |
| AHQ-8-11, 2636              | K.IQALQQQADEAEDR.A                                                      | 1615.68404 | 2 | 4.67E-06 | 0.91 | 3.39  | -     | 1063.6   |
| AHQ-8-10, 2614              | K.IQALQQQADEAEDR.A                                                      | 1615.68404 | 2 | 2.62E-05 | 0.81 | 3.18  | -     | 794.9    |
| AHQ-8-9, 6296 - 6353        | K.IQALQQQADEAEDR.A                                                      | 1615.68404 | 2 | 7.62E-08 | 0.96 | 4.46  | -     | 1680.4   |
| AHQ-8-11, 2489              | R.KIQALQQQADEAEDR.A                                                     | 1743.85695 | 2 | 4.54E-07 | 0.95 | 3.82  | -     | 1644.9   |
| AHQ-8-10, 2450              | R.KIQALQQQADEAEDR.A                                                     | 1743.85695 | 2 | 9.38E-05 | 0.82 | 3.21  | -     | 784.6    |
| gi 4757812 ref NP_004880.1  | ATP synthase, H+ transporting, mitochondrial F0 complex, subunit f, iso |            |   | 7.89E-08 | 1.87 | 20.21 | 25.50 | 10917.8  |
| AHQ-8-14-, 5614 - 5621      | R.DFSPSGIFGAFQR.G                                                       | 1429.56124 | 2 | 9.70E-08 | 0.95 | 4.18  | -     | 1066.1   |
| AHQ-8-13, 5751              | R.DFSPSGIFGAFQR.G                                                       | 1429.56124 | 2 | 2.56E-06 | 0.89 | 3.39  | -     | 1045.1   |
| AHQ-8-14-, 5278             | K.LGELPSWILM*R.D                                                        | 1331.60876 | 2 | 7.89E-08 | 0.92 | 3.77  | -     | 604.3    |
| gi 10835187 ref NP_000627.1 | superoxide dismutase 2, mitochondrial [Homo sapiens]                    |            |   | 8.66E-08 | 3.37 | 40.20 | 22.50 | 24733.0  |
| AHQ-8-11, 5665              | K.AIWNVINWENTR.Y                                                        | 1744.93137 | 3 | 9.06E-05 | 0.82 | 3.06  | -     | 1138.5   |
| AHQ-8-11, 3713 - 3767       | K.GDVTQAIALQPALK.F                                                      | 1425.65548 | 2 | 8.66E-08 | 0.76 | 3.06  | -     | 692.8    |
| AHQ-8-11, 2448 - 2508       | K.HHAAVYNNLNVTEEK.Y                                                     | 1739.86999 | 2 | 3.30E-06 | 0.95 | 4.03  | -     | 1098.1   |
| AHQ-8-11, 3643              | K.HHAAVYNNLNVTEEK.Y                                                     | 1739.86999 | 3 | 1.32E-06 | 0.84 | 3.92  | -     | 588.0    |
| gi 5031593 ref NP_005708.1  | actin related protein 2/3 complex subunit 5; Arp2/3 protein complex sub |            |   | 8.66E-08 | 1.82 | 20.19 | 17.90 | 16320.3  |
| AHQ-8-12, 3082              | K.ALAAGGVGSIVR.V                                                        | 1071.25558 | 2 | 9.03E-04 | 0.95 | 3.27  | -     | 1607.7   |
| AHQ-8-12, 3494 - 3550       | K.AVQSLDKNGVLLM*K.Y                                                     | 1647.91883 | 2 | 8.66E-08 | 0.87 | 3.81  | -     | 515.5    |
| gi 10863873 ref NP_000651.1 | transforming growth factor, beta 1 (Camurati-Engelmann disease); trans  |            |   | 8.82E-08 | 1.71 | 20.18 | 5.90  | 44422.0  |
| AHQ-8-13-, 3372             | R.ALDTNYCFSSTEK.N                                                       | 1537.63010 | 2 | 5.10E-05 | 0.73 | 3.04  | -     | 558.6    |
| AHQ-8-13, 3528 - 3532       | R.ALDTNYCFSSTEK.N                                                       | 1537.63010 | 2 | 8.82E-08 | 0.83 | 3.59  | -     | 650.5    |
| AHQ-8-13-, 2766             | K.VEQLSNM*IVR.S                                                         | 1205.41014 | 2 | 1.82E-04 | 0.89 | 3.36  | -     | 867.0    |
| gi 29732955 ref XP_291603.1 | similar to glyceraldehyde 3-phosphate dehydrogenase [Homo sapiens] [MA  |            |   | 1.01E-07 | 0.78 | 10.22 | 16.80 | 11173.0  |
| AHQ-8-11, 3760 - 3839       | K.NISNASCTTNCIAPLAK.M                                                   | 1838.05353 | 2 | 1.01E-07 | 0.78 | 4.36  | -     | 826.6    |
| gi 11321601 ref NP_002618.1 | phosphofructokinase, platelet; Phosphofructokinase, platelet type [Hom  |            |   | 1.08E-07 | 5.28 | 60.28 | 13.30 | 85595.6  |
| AHQ-8-5, 3661               | K.AIGVLTSGGDAQGMNAAVR.A                                                 | 1789.00750 | 2 | 8.07E-04 | 0.96 | 4.43  | -     | 1536.3   |
| AHQ-8-5, 3492 - 3560        | R.DLQSNVHLTEK.M                                                         | 1413.51529 | 2 | 5.17E-04 | 0.70 | 2.82  | -     | 642.4    |
| AHQ-8-6, 5490               | K.EIGWTDVGGWVGQGGILGTR.R                                                | 2120.30735 | 2 | 3.89E-05 | 0.76 | 3.30  | -     | 485.2    |
| AHQ-8-5, 5590               | K.EIGWTDVGGWVGQGGILGTR.R                                                | 2120.30735 | 2 | 2.00E-05 | 0.93 | 4.10  | -     | 1032.1   |
| AHQ-8-5, 4564               | K.FTTDDSCIVLGISK.R                                                      | 1557.74760 | 2 | 3.57E-04 | 0.79 | 3.36  | -     | 521.9    |
| AHQ-8-5, 5914 - 5922        | R.GITNLCVIGDGLSTGANLFR.K                                                | 2137.40264 | 2 | 1.42E-05 | 0.96 | 5.64  | -     | 906.7    |
| AHQ-8-5, 5305               | R.IIEVVDAMITTAQSHQR.T                                                   | 1913.18853 | 2 | 1.08E-07 | 0.94 | 4.48  | -     | 1293.6   |
| gi 4505591 ref NP_002565.1  | peroxiredoxin 1; natural killer-enhancing factor A; proliferation-assoc |            |   | 1.13E-07 | 2.71 | 30.21 | 20.10 | 22110.2  |
| AHQ-8-11, 3840              | R.GLFIIDDK.G                                                            | 921.07223  | 2 | 4.81E-05 | 0.87 | 2.95  | -     | 936.8    |
| AHQ-8-11, 3179              | K.HGEVCPAGWKPGSDTIKPDVQK.S                                              | 2408.67532 | 3 | 1.13E-07 | 0.90 | 4.24  | -     | 969.2    |
| AHQ-8-11, 3604 - 3619       | R.LVQAFQFTDK.H                                                          | 1197.36469 | 2 | 3.32E-06 | 0.94 | 3.50  | -     | 1002.0   |
| gi 7019375 ref NP_037373.1  | formin homology 2 domain containing 1; FH1/FH2 domain-containing protei |            |   | 1.14E-07 | 0.93 | 10.14 | 1.30  | 126496.5 |
| AHQ-8-14-, 5789             | K.SGLGDDLVQALGLSK.G                                                     | 1473.65377 | 2 | 1.14E-07 | 0.93 | 2.84  | -     | 1773.4   |
| gi 18765729 ref NP_003816.2 | synaptosomal-associated protein 23 isoform SNAP23A; synaptosomal-assoc  |            |   | 1.28E-07 | 0.94 | 10.22 | 6.60  | 23353.9  |
| AHQ-8-14-, 4370             | R.ILGLAIESQDAGIK.T                                                      | 1428.65614 | 2 | 1.28E-07 | 0.94 | 4.43  | -     | 1176.7   |
| gi 16751921 ref NP_444513.1 | dermidin precursor; AIDD protein [Homo sapiens]                         |            |   | 1.28E-07 | 0.93 | 10.20 | 12.70 | 11283.8  |
| AHQ-8-14-, 3723             | K.LGKDAVEDLESVGK.G                                                      | 1460.61186 | 2 | 1.28E-07 | 0.93 | 4.07  | -     | 1342.2   |



|                             |                                                                         |            |   |          |      |       |       |          |
|-----------------------------|-------------------------------------------------------------------------|------------|---|----------|------|-------|-------|----------|
| AHQ-8-7, 3710               | K.LAVNM*VPFPR.L                                                         | 1160.41420 | 2 | 7.71E-06 | 0.93 | 3.50  | -     | 1046.6   |
| AHQ-8-11, 4747              | R.LHFFM*PGFAPLTSR.G                                                     | 1637.92902 | 2 | 1.24E-04 | 0.92 | 3.47  | -     | 923.1    |
| AHQ-8-7, 5409               | R.LHFFM*PGFAPLTSR.G                                                     | 1621.92962 | 2 | 3.52E-07 | 0.89 | 3.58  | -     | 730.8    |
| AHQ-8-7, 4736               | R.LHFFM*PGFAPLTSR.G                                                     | 1637.92902 | 2 | 1.26E-04 | 0.95 | 4.21  | -     | 1066.7   |
| gi 30148644 ref XP_293716.2 | similar to Heat shock protein HSP 90-alpha (HSP 86) [Homo sapiens] [MA  |            |   |          |      |       |       |          |
| AHQ-8-5, 3612               | R.TLTVDTGIGM*TK.A                                                       | 1366.60658 | 2 | 3.72E-07 | 0.94 | 10.17 | 1.20  | 105150.3 |
| gi 21361621 ref NP_002624.2 | phosphoglucomutase 1 [Homo sapiens]                                     |            |   |          |      |       |       |          |
| AHQ-8-7, 3552               | K.FNINSGGPAPEAITDK.I                                                    | 1631.76820 | 2 | 3.78E-07 | 0.95 | 3.70  | -     | 1618.6   |
| AHQ-8-7, 5746 - 5816        | R.LVIGQNGILSTPAVSCIIR.K                                                 | 2013.39093 | 2 | 2.53E-04 | 0.57 | 2.98  | -     | 509.6    |
| gi 4505877 ref NP_000436.1  | plectin 1, intermediate filament binding protein 500kDa; plectin 1, int |            |   |          |      |       |       |          |
| AHQ-8-3, 3821               | K.AGVVGPPELHQLLSAEK.A                                                   | 1777.99958 | 2 | 3.94E-07 | 0.92 | 3.98  | -     | 1031.6   |
| AHQ-8-2, 3521               | K.AQVEQELTLTLR.L                                                        | 1288.43253 | 2 | 1.77E-04 | 0.85 | 2.94  | -     | 726.8    |
| AHQ-8-3, 3218               | K.AYSDPSTGEPATYQELQQR.C                                                 | 2071.14682 | 2 | 4.81E-05 | 0.91 | 4.04  | -     | 549.8    |
| AHQ-8-2, 4097               | R.LQEAGILSAEELQRL.L                                                     | 1557.73077 | 2 | 4.73E-04 | 0.88 | 3.44  | -     | 1068.2   |
| AHQ-8-1, 4459               | K.VLALPEPSPAAPTLR.S                                                     | 1532.80918 | 2 | 8.62E-06 | 0.60 | 2.65  | -     | 355.1    |
| gi 5453607 ref NP_006420.1  | chaperonin containing TCP1, subunit 7 (eta); chaperonin containing t-co |            |   |          |      |       |       |          |
| AHQ-8-7, 6196               | K.SQDAEVDGGTTSVTLAAEFLK.Q                                               | 2253.44875 | 2 | 3.99E-07 | 0.95 | 5.51  | -     | 753.9    |
| gi 21614499 ref NP_003370.2 | villin 2; Villin-2; cytovillin [Homo sapiens]                           |            |   |          |      |       |       |          |
| AHQ-8-6, 4254               | K.APDPFVYAPR.L                                                          | 1183.33971 | 2 | 1.40E-06 | 0.95 | 3.71  | -     | 1175.3   |
| AHQ-8-6, 4967               | K.IGFWPSEIR.N                                                           | 1105.27049 | 2 | 8.07E-06 | 0.84 | 2.53  | -     | 924.6    |
| AHQ-8-6, 3818 - 3819        | K.KAPDFVYAPR.L                                                          | 1311.51262 | 2 | 4.02E-07 | 0.88 | 3.27  | -     | 763.6    |
| gi 29729345 ref XP_290995.1 | similar to speckle-type POZ protein [Homo sapiens]                      |            |   |          |      |       |       |          |
| AHQ-8-4, 5717               | K.NRVEINDLDPVEFKEM*MR.F                                                 | 2252.55733 | 2 | 2.03E-04 | 0.83 | 4.01  | -     | 1027.0   |
| AHQ-8-5, 5681               | K.NRVEINDLDPVEFKEM*MR.F                                                 | 2252.55733 | 2 | 4.52E-07 | 0.84 | 4.16  | -     | 986.9    |
| AHQ-8-3, 5636               | K.NRVEINDLDPVEFKEM*MR.F                                                 | 2252.55733 | 2 | 1.59E-06 | 0.89 | 3.92  | -     | 956.2    |
| gi 7657431 ref NP_055205.1  | EBNA-2 co-activator (100kD) [Homo sapiens]                              |            |   |          |      |       |       |          |
| AHQ-8-4, 5873               | K.DTNGENIASLVAEGLATR.R                                                  | 1961.07704 | 2 | 4.58E-07 | 0.92 | 3.87  | -     | 1346.5   |
| AHQ-8-4, 5986               | R.NLPLGVQEGEPFSEEAFLTK.E                                                | 2307.54125 | 2 | 2.05E-06 | 0.82 | 3.90  | -     | 338.4    |
| AHQ-8-4, 4723               | K.VNVTVDYIRPASPATETVPAFSE.R                                             | 2620.89872 | 3 | 3.74E-06 | 0.94 | 3.92  | -     | 1668.9   |
| gi 4507521 ref NP_001055.1  | transketolase [Homo sapiens]                                            |            |   |          |      |       |       |          |
| AHQ-8-6, 4431               | K.ILATPPQEDAPSVDIANIR.M                                                 | 2021.26036 | 2 | 4.70E-07 | 0.88 | 3.96  | -     | 455.0    |
| AHQ-8-6, 5499 - 5507        | K.LDNLVAIDLINR.L                                                        | 1369.59192 | 2 | 8.29E-07 | 0.94 | 4.03  | -     | 1222.5   |
| gi 5730118 ref NP_006514.1  | X-prolyl aminopeptidase (aminopeptidase P) 1, soluble; X-prolyl aminope |            |   |          |      |       |       |          |
| AHQ-8-6, 5302               | R.TLSLDEVYLLIDSGAQYK.D                                                  | 1916.11778 | 2 | 4.79E-07 | 0.78 | 10.18 | 2.70  | 69858.4  |
| gi 5031573 ref NP_005712.1  | ARP3 actin-related protein 3 homolog; ARP3 (actin-related protein 3, ye |            |   |          |      |       |       |          |
| AHQ-8-8, 4847               | R.AEPEHDHYFLLEPLNTPENR.E                                                | 2483.67423 | 2 | 7.66E-04 | 0.84 | 3.39  | -     | 554.2    |
| AHQ-8-7, 4718               | R.AEPEHDHYFLLEPLNTPENR.E                                                | 2483.67423 | 3 | 4.01E-04 | 0.67 | 3.07  | -     | 504.3    |
| AHQ-8-8, 6561               | R.DITYFIQQLR.D                                                          | 1410.64250 | 2 | 4.84E-07 | 0.97 | 4.58  | -     | 1428.7   |
| AHQ-8-8, 3029 - 3106        | R.DREVGIPEQSLQLETA.K                                                    | 1769.93431 | 2 | 2.16E-05 | 0.96 | 5.21  | -     | 1177.0   |
| AHQ-8-13, 3681              | K.DYEEIGPSICR.H                                                         | 1340.44122 | 2 | 2.07E-06 | 0.86 | 2.75  | -     | 956.7    |
| AHQ-8-13, 3512              | K.DYEEIGPSICR.H                                                         | 1340.44122 | 2 | 3.26E-05 | 0.75 | 2.67  | -     | 596.7    |
| AHQ-8-8, 5541               | K.GVDDLDFFIGDEAIEKPTYATK.W                                              | 2445.66268 | 2 | 4.41E-06 | 0.90 | 3.97  | -     | 855.1    |
| AHQ-8-8, 5543               | K.GVDDLDFFIGDEAIEKPTYATK.W                                              | 2445.66268 | 3 | 6.13E-04 | 0.65 | 3.26  | -     | 473.4    |
| AHQ-8-8, 4303               | R.HGVEDWDLMER.F                                                         | 1500.66127 | 2 | 1.15E-04 | 0.94 | 3.36  | -     | 1520.5   |
| AHQ-8-8, 6089 - 6147        | R.TLTGTVIDSGDGVTHVIPVAEYVIGSCIK.H                                       | 3061.45302 | 3 | 1.72E-04 | 0.85 | 4.26  | -     | 938.6    |
| AHQ-8-8, 3661               | R.YSYVCPDLVK.E                                                          | 1245.42618 | 2 | 9.91E-05 | 0.85 | 3.44  | -     | 511.6    |
| gi 4758018 ref NP_004359.1  | calponin 2; Calonin 2 [Homo sapiens]                                    |            |   |          |      |       |       |          |
| AHQ-8-12, 2943 - 2944       | K.GLQSGVDIGVK.Y                                                         | 1073.22510 | 2 | 1.10E-06 | 0.92 | 3.19  | -     | 1335.3   |
| AHQ-8-12, 5838              | R.TWIEGLTGLSIGPDFQK.G                                                   | 1863.10294 | 2 | 1.07E-04 | 0.95 | 3.76  | -     | 1723.7   |
| AHQ-8-14, 5929              | R.TWIEGLTGLSIGPDFQK.G                                                   | 1863.10294 | 2 | 5.11E-07 | 0.84 | 2.79  | -     | 1023.9   |
| AHQ-8-11, 5811              | R.TWIEGLTGLSIGPDFQK.G                                                   | 1863.10294 | 2 | 4.12E-06 | 0.89 | 2.72  | -     | 1155.3   |
| gi 21361670 ref NP_054782.2 | src homology 3 domain-containing protein HIP-55; HIP-55 protein [Homo   |            |   |          |      |       |       |          |
| AHQ-8-10, 3290 - 3339       | R.FQDVGQAPVGSVYQK.T                                                     | 1720.90658 | 2 | 5.34E-07 | 0.76 | 10.17 | 3.70  | 48294.0  |
| AHQ-8-8, 3358               | R.FQDVGQAPVGSVYQK.T                                                     | 1720.90658 | 2 | 5.21E-04 | 0.81 | 3.21  | -     | 815.4    |
| gi 18600882 ref XP_089309.1 | similar to Cyclophilin-LC [Homo sapiens]                                |            |   |          |      |       |       |          |
| AHQ-8-13, 4626              | R.IIPFMCQGGDFTR.P                                                       | 1600.84403 | 2 | 5.53E-07 | 0.81 | 10.14 | 8.50  | 18166.6  |
| gi 6005846 ref NP_009215.1  | PTK9L protein tyrosine kinase 9-like (A6-related protein); protein tyro |            |   |          |      |       |       |          |
| AHQ-8-14, 6093              | R.AVLPLDDAQPCYLLYR.L                                                    | 2035.39506 | 2 | 5.57E-06 | 0.83 | 3.29  | -     | 569.5    |
| AHQ-8-12, 2743              | K.HLSSCAAPPLTSAER.E                                                     | 1669.84126 | 2 | 5.55E-07 | 0.83 | 3.15  | -     | 586.8    |
| AHQ-8-12, 4450              | K.VVIEDEQLVLGASQEPVGR.W                                                 | 2039.27568 | 2 | 2.18E-06 | 0.96 | 3.12  | -     | 2365.8   |
| gi 4505621 ref NP_002558.1  | prostatic binding protein; phosphatidylethanolamine binding protein [Ho |            |   |          |      |       |       |          |
| AHQ-8-11, 4684              | R.APVAGTCYQAEWDDYVVK.L                                                  | 2072.23961 | 2 | 5.64E-07 | 1.92 | 20.23 | 20.30 | 21056.6  |
| AHQ-8-11, 4187              | K.GNDISSGTVLSVYVGSPPK.G                                                 | 1951.08062 | 2 | 2.41E-06 | 0.94 | 4.41  | -     | 1013.0   |
| gi 7705296 ref NP_057271.1  | bridging integrator 2; bridging integrator-2; breast cancer associated  |            |   |          |      |       |       |          |
| AHQ-8-5, 5709               | K.AIVWNDDLWEDYEEK.L                                                     | 2038.20157 | 2 | 2.77E-06 | 0.79 | 3.19  | -     | 791.8    |
| AHQ-8-7, 5553 - 5554        | K.AIVWNDDLWEDYEEK.L                                                     | 2038.20157 | 2 | 2.73E-05 | 0.54 | 2.73  | -     | 585.8    |
| AHQ-8-7, 2834               | R.FEQSASNFYQQQAEGHK.L                                                   | 2000.07352 | 2 | 5.60E-04 | 0.88 | 3.86  | -     | 776.0    |
| AHQ-8-10, 2815              | R.FEQSASNFYQQQAEGHK.L                                                   | 2000.07352 | 2 | 5.78E-07 | 0.87 | 3.68  | -     | 683.9    |
| AHQ-8-6, 6122               | R.IGCVYTFQNSNLR.D                                                       | 1800.07167 | 2 | 1.71E-05 | 0.88 | 3.28  | -     | 1046.8   |
| AHQ-8-7, 6068               | R.IGCVYTFQNSNLR.D                                                       | 1800.07167 | 2 | 1.09E-05 | 0.82 | 3.71  | -     | 579.2    |
| AHQ-8-5, 6225               | R.IGCVYTFQNSNLR.D                                                       | 1800.07167 | 2 | 7.98E-05 | 0.88 | 3.69  | -     | 877.3    |
| AHQ-8-5, 4181               | R.TATVSSPLTSPSTLSLKS                                                    | 1976.21467 | 2 | 1.77E-05 | 0.61 | 2.62  | -     | 487.8    |
| gi 5729875 ref NP_006658.1  | progesterone receptor membrane component 1; progesterone binding protei |            |   |          |      |       |       |          |
| AHQ-8-11, 4000              | R.KFYGPEGYGFAGR.D                                                       | 1645.84140 | 2 | 6.06E-07 | 0.87 | 10.17 | 7.70  | 21671.0  |
| gi 21361478 ref NP_055944.2 | septin 6 isoform B; septin 2 [Homo sapiens]                             |            |   |          |      |       |       |          |
| AHQ-8-7, 3796               | K.FEGEPATHQPGVQLQSNYDQLQESNVR.L                                         | 3147.31508 | 3 | 6.48E-07 | 0.98 | 6.50  | -     | 1882.4   |
| AHQ-8-7, 4765               | R.TVPLAGHVGFDSLPLQVLNKS                                                 | 2108.38284 | 2 | 9.49E-07 | 0.95 | 4.58  | -     | 991.0    |
| gi 19743813 ref NP_002202.2 | integrin beta 1 isoform 1A precursor; integrin VLA-4 beta subunit; fib  |            |   |          |      |       |       |          |
| AHQ-8-3, 4944               | K.LKPEDITIQIQQQLVLR.L                                                   | 2020.36187 | 2 | 6.94E-07 | 0.92 | 4.41  | -     | 745.5    |
| AHQ-8-3, 4938               | K.LKPEDITIQIQQQLVLR.L                                                   | 2020.36187 | 3 | 9.06E-07 | 0.95 | 4.73  | -     | 1353.0   |
| AHQ-8-3, 6269 - 6348        | K.LSENNIQTIFAVTEEFQPVVYK.E                                              | 2471.74650 | 3 | 8.10E-07 | 0.96 | 5.62  | -     | 1318.2   |
| gi 4506925 ref NP_003013.1  | SH3 domain binding glutamic acid-rich protein like; SH3-binding domain  |            |   |          |      |       |       |          |
| AHQ-8-13, 5749 - 5803       | R.ENNAVYAFGLTAPPQSK.E                                                   | 1850.06426 | 2 | 1.49E-05 | 0.93 | 4.25  | -     | 1009.1   |
| AHQ-8-13, 5614 - 5676       | R.ENNAVYAFGLTAPPQSK.E                                                   | 1850.06426 | 2 | 2.22E-04 | 0.92 | 3.52  | -     | 1121.9   |
| AHQ-8-13, 4916 - 4972       | R.ENVPENSRPATGYPLPPQIFNESQYR.G                                          | 3005.24660 | 3 | 3.46E-04 | 0.96 | 5.35  | -     | 1123.4   |
| AHQ-8-13, 4943              | R.ENVPENSRPATGYPLPPQIFNESQYR.G                                          | 3005.24660 | 3 | 7.14E-07 | 0.80 | 3.87  | -     | 766.4    |
| AHQ-8-13, 4758 - 4827       | R.ENVPENSRPATGYPLPPQIFNESQYR.G                                          | 3005.24660 | 3 | 4.96E-05 | 0.90 | 4.82  | -     | 617.3    |
| AHQ-8-13, 4224 - 4247       | R.GDYDAFFEAR.E                                                          | 1191.23073 | 2 | 1.43E-05 | 0.94 | 4.21  | -     | 985.9    |
| AHQ-8-13, 2507 - 2514       | R.VYIASSSGSTAIAK.K                                                      | 1284.44065 | 2 | 4.74E-04 | 0.95 | 4.27  | -     | 1705.9   |
| AHQ-8-13, 2581 - 2647       | R.VYIASSSGSTAIAK.K                                                      | 1284.44065 | 2 | 2.23E-04 | 0.87 | 3.31  | -     | 1333.7   |
| gi 4758158 ref NP_004395.1  | neural precursor cell expressed, developmentally down-regulated 5 [Homo |            |   |          |      |       |       |          |
| AHQ-8-8, 4985               | K.ASIPFVGVSNQLIEAK.G                                                    | 1761.01216 | 2 | 7.77E-07 | 0.85 | 10.17 | 4.70  | 41487.2  |
| gi 4503481 ref NP_001395.1  | eukaryotic translation elongation factor 1 gamma; elongation factor 1-g |            |   |          |      |       |       |          |
| AHQ-8-8, 3053               | K.ALIAAQQSGAQVR.V                                                       | 1348.53280 | 2 | 7.94E-07 | 1.88 | 20.23 | 6.20  | 50118.5  |
| AHQ-8-8, 2687 - 2690        | R.KLDPGSEETQLVLR.E                                                      | 1573.73020 | 2 | 1.99E-05 | 0.93 | 4.52  | -     | 556.7    |
| gi 9845511 ref NP_008839.2  | ras-related C3 botulinum toxin substrate 1 isoform Rac1; rho family, sm |            |   |          |      |       |       |          |
| AHQ-8-11, 3101 - 3159       | K.YLECSALTQR.G                                                          | 1242.38392 | 2 | 8.04E-07 | 0.82 | 2.87  | -     | 835.1    |
| gi 5453559 ref NP_006347.1  | ATP synthase, H+ transporting, mitochondrial F0 complex, subunit d; ATP |            |   |          |      |       |       |          |
| AHQ-8-11, 5179 - 5187       | R.LAALPENPAIDWAYYK.A                                                    | 1933.19486 | 2 | 8.26E-07 | 0.89 | 10.19 | 10.60 | 18491.1  |
| gi 4503725 ref NP_000792.1  | FK506-binding protein 1A; FK506-binding protein 1; FK506-binding protei |            |   |          |      |       |       |          |
| AHQ-8-13, 3104              | R.GWEEGVAQM*SVGQR.A                                                     | 1550.67866 | 2 | 9.27E-07 | 1.90 | 20.22 | 13.00 | 11950.6  |
| AHQ-8-13, 3874              | R.GWEEGVAQM*SVGQR.A                                                     | 1550.67866 | 2 | 6.94E-06 | 0.95 | 4.28  | -     | 1194.2   |
| AHQ-8-14, 3071              | R.GWEEGVAQM*SVGQR.A                                                     | 1550.67866 | 2 | 9.44E-05 | 0.94 | 3.78  | -     | 1332.6   |
| AHQ-8-14, 3837              | R.GWEEGVAQM*SVGQR.A                                                     | 1550.67866 | 2 | 1.12E-04 | 0.91 | 3.77  | -     | 1019.4   |
| AHQ-8-13, 3244              | R.GWEEGVAQM*SVGQR.A                                                     | 1550.67866 | 2 | 1.62E-05 | 0.94 | 3.70  | -     | 1243.0   |
| gi 5174727 ref NP_005989.1  | chaperonin containing TCP1, subunit 3 (gamma); TCP1 (t-complex-1) ring  |            |   |          |      |       |       |          |
| AHQ-8-6, 3790               | R.AVAQALEVIPR.T                                                         | 1167.38326 | 2 | 9.29E-07 | 3.77 | 40.22 | 8.50  | 60330.4  |
|                             |                                                                         |            |   | 7.97E-05 | 0.96 | 4.37  | -     | 1625.2   |

|                             |                                                                          |            |   |          |      |       |       |          |
|-----------------------------|--------------------------------------------------------------------------|------------|---|----------|------|-------|-------|----------|
| AHQ-8-6, 4295 - 4340        | K.IPGGIIEDSCVLR.G                                                        | 1430.65218 | 2 | 1.25E-06 | 0.92 | 3.97  | -     | 927.4    |
| AHQ-8-6, 4304               | R.IVLLDSSLEYK.K                                                          | 1280.49191 | 2 | 1.79E-06 | 0.94 | 3.45  | -     | 1257.1   |
| AHQ-8-6, 4675               | K.TAVETAVLLLR.I                                                          | 1186.42649 | 2 | 9.29E-07 | 0.94 | 3.57  | -     | 1869.7   |
| gi 22748619 ref NP_689476.1 | tropomyosin 3 [Homo sapiens]                                             |            |   | 9.32E-07 | 0.76 | 10.18 | 5.30  | 28222.6  |
| AHQ-8-9, 6686               | K.YSQKEDKYEEEEI.K                                                        | 1689.80129 | 2 | 9.32E-07 | 0.76 | 3.60  | -     | 773.7    |
| gi 6005826 ref NP_009160.1  | protein kinase C and casein kinase substrate in neurons 2; pacsin 2 [Ho  |            |   | 9.46E-07 | 0.89 | 10.17 | 2.30  | 55904.6  |
| AHQ-8-6, 3903               | K.AYAQQLETEWAR.R                                                         | 1337.46534 | 2 | 9.46E-07 | 0.89 | 3.32  | -     | 1060.4   |
| gi 18201905 ref NP_000166.2 | glucose phosphate isomerase; neuroleukin; glucose-6-phosphate isomerases |            |   | 1.04E-06 | 1.65 | 20.20 | 2.70  | 63146.7  |
| AHQ-8-7, 6316               | K.ILLANFLAQTEALMR.G                                                      | 1705.05838 | 2 | 1.53E-04 | 0.94 | 4.01  | -     | 1243.8   |
| AHQ-8-7, 5954 - 6008        | K.ILLANFLAQTEALMR.G                                                      | 1721.05778 | 2 | 1.04E-06 | 0.71 | 3.25  | -     | 414.5    |
| gi 30150299 ref XP_293010.2 | similar to keratin 8, type II cytoskeletal - human [Homo sapiens] [MAS   |            |   | 1.05E-06 | 0.94 | 10.21 | 2.70  | 44500.6  |
| AHQ-8-1, 5064               | K.LALDIEIATYR.Q                                                          | 1278.47925 | 2 | 1.05E-06 | 0.94 | 4.27  | -     | 1841.7   |
| gi 20547107 ref XP_114482.1 | similar to HEAT SHOCK 70 KDA PROTEIN 4 (HEAT SHOCK 70-RELATED PROTEIN    |            |   | 1.12E-06 | 0.89 | 10.19 | 2.10  | 94330.3  |
| AHQ-8-4, 6086               | K.SNLAYDIVQLPTGLTGK.V                                                    | 1904.19651 | 2 | 1.12E-06 | 0.89 | 3.88  | -     | 715.9    |
| gi 21361198 ref NP_000286.2 | serine (or cysteine) proteinase inhibitor, clade A (alpha-1 antiprotei   |            |   | 1.14E-06 | 1.77 | 20.19 | 6.70  | 46722.2  |
| AHQ-8-7, 3818               | K.SVLGQLGITK.V                                                           | 1016.21669 | 2 | 2.69E-04 | 0.86 | 3.28  | -     | 775.2    |
| AHQ-8-7, 4197               | K.VFSNGADLSGVTEEAPL.K.L                                                  | 1835.00476 | 2 | 1.14E-06 | 0.91 | 3.83  | -     | 1047.9   |
| gi 21361322 ref NP_006078.2 | tubulin, beta, 5 [Homo sapiens]                                          |            |   | 1.14E-06 | 0.93 | 10.25 | 6.10  | 49585.5  |
| AHQ-8-7, 4981               | K.FWEVISEDHGIDPTGTGTHGSDQLQLER.I                                         | 3118.27220 | 3 | 1.14E-06 | 0.93 | 5.08  | -     | 945.2    |
| gi 4502201 ref NP_001649.1  | ADP-ribosylation factor 1 [Homo sapiens]                                 |            |   | 1.19E-06 | 1.92 | 20.25 | 16.00 | 20696.6  |
| AHQ-8-13, 3437              | R.ILM*VGLDAAGK.T                                                         | 1104.34572 | 2 | 5.76E-04 | 0.87 | 2.66  | -     | 1187.3   |
| AHQ-8-12, 3207              | R.ILM*VGLDAAGK.T                                                         | 1104.34572 | 2 | 2.08E-04 | 0.95 | 3.26  | -     | 1856.0   |
| AHQ-8-13-, 6258             | R.M*LAEDELDRDAVLLVFANK.Q                                                 | 2064.39175 | 3 | 5.67E-04 | 0.94 | 3.75  | -     | 1934.7   |
| AHQ-8-12, 6182              | R.M*LAEDELDRDAVLLVFANK.Q                                                 | 2064.39175 | 3 | 1.19E-06 | 0.97 | 4.97  | -     | 2107.7   |
| gi 4507767 ref NP_003326.1  | ubiquitin-activating enzyme E1-like; Ubiquitin-activating enzyme-2; ubi  |            |   | 1.20E-06 | 2.80 | 30.25 | 4.90  | 111719.5 |
| AHQ-8-4, 3493               | R.APASAAASEDAPYPVCTVR.Y                                                  | 1935.10448 | 2 | 1.20E-06 | 0.94 | 5.04  | -     | 770.7    |
| AHQ-8-4, 4886               | R.TEEEPLEELDEALVR.T                                                      | 1870.00428 | 2 | 3.42E-05 | 0.89 | 3.42  | -     | 932.8    |
| AHQ-8-4, 4513               | R.VLVSGLQGLGAEVAK.N                                                      | 1441.69805 | 2 | 2.41E-04 | 0.97 | 4.55  | -     | 1612.4   |
| gi 4758950 ref NP_000933.1  | peptidylprolyl isomerase B (cyclophilin B) [Homo sapiens]                |            |   | 1.22E-06 | 2.44 | 30.21 | 18.50 | 23742.4  |
| AHQ-8-12, 3062              | R.DKPLKDVIIADCGK.I                                                       | 1573.83653 | 2 | 1.22E-06 | 0.90 | 3.33  | -     | 1191.9   |
| AHQ-8-11, 3055              | R.DKPLKDVIIADCGK.I                                                       | 1573.83653 | 3 | 9.89E-04 | 0.76 | 3.51  | -     | 666.0    |
| AHQ-8-12, 4096 - 4160       | K.DTNGSQFFITVK.T                                                         | 1458.59766 | 2 | 6.81E-05 | 0.95 | 4.19  | -     | 1409.5   |
| AHQ-8-11, 4153 - 4229       | K.TVDNFVALATGEK.G                                                        | 1365.51377 | 2 | 3.17E-05 | 0.59 | 2.76  | -     | 444.7    |
| gi 15431310 ref NP_000517.2 | keratin 14; cytokeratin 14 [Homo sapiens]                                |            |   | 1.24E-06 | 2.64 | 30.19 | 7.00  | 51621.2  |
| AHQ-8-10, 2831              | R.ALEEANADLEVK.I                                                         | 1302.41284 | 2 | 1.24E-06 | 0.91 | 3.16  | -     | 1352.9   |
| AHQ-8-10, 2571              | R.APSTYGGGLSVSSSR.F                                                      | 1426.51406 | 2 | 2.67E-04 | 0.88 | 3.20  | -     | 812.6    |
| AHQ-8-13, 3864 - 3943       | R.GQVGGDNNVEM*DAAPGVDSL.R.I                                              | 2103.25697 | 2 | 6.32E-04 | 0.63 | 2.84  | -     | 344.7    |
| AHQ-8-13-, 3718             | R.GQVGGDNNVEM*DAAPGVDSL.R.I                                              | 2103.25697 | 2 | 2.49E-04 | 0.84 | 3.65  | -     | 528.2    |
| AHQ-8-2, 3812               | R.GQVGGDNNVEM*DAAPGVDSL.R.I                                              | 2103.25697 | 2 | 7.75E-05 | 0.85 | 3.90  | -     | 443.2    |
| gi 20452464 ref NP_620411.1 | similar to endothelial cell-selective adhesion molecule; likely orthol   |            |   | 1.26E-06 | 0.69 | 10.14 | 3.60  | 41208.1  |
| AHQ-8-8, 2685               | K.DSGPYSQSVNVQDK.Q                                                       | 1557.62141 | 2 | 1.26E-06 | 0.69 | 2.85  | -     | 781.0    |
| gi 17986001 ref NP_005505.2 | major histocompatibility complex, class I, B; HLA class I histocompati   |            |   | 1.28E-06 | 0.67 | 10.15 | 5.50  | 40459.8  |
| AHQ-8-8, 2671 - 2746        | R.DGEDQDTDELVETRPAGDR.T                                                  | 2233.24975 | 3 | 1.28E-06 | 0.67 | 3.06  | -     | 690.0    |
| gi 24234688 ref NP_004125.3 | heat shock 70kDa protein 9B precursor; heat shock 70kD protein 9; stre   |            |   | 1.30E-06 | 0.77 | 10.19 | 2.80  | 73680.1  |
| AHQ-8-6, 5470 - 5484        | K.STNGDITFLGGEDFDQALLR.H                                                 | 2057.16328 | 2 | 1.30E-06 | 0.77 | 3.89  | -     | 311.0    |
| gi 4557321 ref NP_000030.1  | apolipoprotein A-I precursor [Homo sapiens]                              |            |   | 1.30E-06 | 1.75 | 20.18 | 9.70  | 30776.6  |
| AHQ-8-14-, 5003             | K.LLDNWDVSVTSTFSK.L                                                      | 1613.74965 | 2 | 2.27E-04 | 0.85 | 3.50  | -     | 652.3    |
| AHQ-8-11, 5708              | K.VSFLSALAEYTK.K                                                         | 1387.55934 | 2 | 1.30E-06 | 0.89 | 3.47  | -     | 805.9    |
| gi 21359837 ref NP_003312.2 | Tu translation elongation factor, mitochondrial [Homo sapiens]           |            |   | 1.33E-06 | 0.77 | 10.17 | 3.50  | 49541.2  |
| AHQ-8-8, 3275               | R.GITINAAHVEVYTAAR.H                                                     | 1674.83945 | 2 | 1.33E-06 | 0.77 | 3.43  | -     | 725.7    |
| gi 16950601 ref NP_005956.2 | myosin light chain kinase isoform 6; myosin light chain kinase [Homo s   |            |   | 1.42E-06 | 3.08 | 40.21 | 5.20  | 110074.8 |
| AHQ-8-5, 4094               | K.AAM*PPQIQFPEDQK.V                                                      | 1729.97839 | 2 | 8.89E-05 | 0.67 | 2.65  | -     | 528.5    |
| AHQ-8-5, 3885               | R.IIDEDFELTER.E                                                          | 1380.48206 | 2 | 2.17E-05 | 0.87 | 3.21  | -     | 695.2    |
| AHQ-8-5, 4938               | R.STSFNVQDILLPDHEYK.F                                                    | 1894.03076 | 2 | 2.67E-04 | 0.69 | 3.13  | -     | 305.8    |
| AHQ-8-6, 3492               | K.VSDFYDIER.L                                                            | 1273.33005 | 2 | 1.42E-06 | 0.86 | 3.14  | -     | 788.6    |
| AHQ-8-5, 3521               | K.VSDFYDIER.L                                                            | 1273.33005 | 2 | 2.93E-06 | 0.94 | 3.45  | -     | 1139.5   |
| gi 4502693 ref NP_001760.1  | CD9 antigen; motility related protein; leukocyte antigen MIC3; antigen   |            |   | 1.43E-06 | 1.75 | 20.18 | 9.60  | 25415.9  |
| AHQ-8-11, 2699              | K.EVQEFYKDYNYK.L                                                         | 1564.67709 | 2 | 8.09E-04 | 0.88 | 2.83  | -     | 1219.7   |
| AHQ-8-11, 3401              | K.KDVLETFTVK.S                                                           | 1180.37558 | 2 | 1.39E-05 | 0.90 | 3.64  | -     | 875.9    |
| AHQ-8-1, 3708               | K.KDVLETFTVK.S                                                           | 1180.37558 | 2 | 1.43E-06 | 0.86 | 3.26  | -     | 922.5    |
| gi 5453605 ref NP_006421.1  | chaperonin containing TCP1, subunit 4 (delta); chaperonin containing t-  |            |   | 1.44E-06 | 1.91 | 20.21 | 4.80  | 57838.8  |
| AHQ-8-7, 5901               | R.DALSDLAHLFLNK.M                                                        | 1457.65603 | 2 | 1.44E-06 | 0.97 | 4.27  | -     | 2312.0   |
| AHQ-8-7, 3486               | K.VIDPATATSDVLR.D                                                        | 1358.52277 | 2 | 1.43E-04 | 0.94 | 3.42  | -     | 1295.6   |
| gi 4506045 ref NP_002718.1  | proteoglycan 1, secretory granule; Proteoglycan 1, secretory granule (p  |            |   | 1.44E-06 | 0.81 | 10.15 | 8.20  | 17623.6  |
| AHQ-8-1, 4128               | K.GPM*FELLPGESNK.I                                                       | 1435.62747 | 2 | 1.44E-06 | 0.81 | 3.02  | -     | 893.2    |
| gi 5803225 ref NP_006752.1  | tyrosine 3/tryptophan 5-monoxygenase activation protein, epsilon poly    |            |   | 1.45E-06 | 0.96 | 10.25 | 7.50  | 29173.7  |
| AHQ-8-13-, 6178             | K.AAFDDAIAELDTLSEESYK.D                                                  | 2089.19882 | 2 | 1.45E-06 | 0.96 | 4.90  | -     | 1185.5   |
| gi 4557385 ref NP_000055.1  | complement component 3 precursor; acylation-stimulating protein cleavag  |            |   | 1.49E-06 | 2.81 | 30.26 | 3.10  | 187162.3 |
| AHQ-8-6, 5516 - 5584        | K.EYVLPSEFVIVPEK.F                                                       | 1880.12704 | 2 | 2.00E-05 | 0.94 | 4.45  | -     | 952.8    |
| AHQ-8-6, 3570               | R.IPIEDGSGEVVLSR.K                                                       | 1471.63788 | 2 | 9.95E-06 | 0.91 | 3.53  | -     | 791.2    |
| AHQ-8-6, 4376               | R.VPVAVQGEDTVQSLTQGGDVAK.L                                               | 2199.40432 | 2 | 1.49E-06 | 0.97 | 5.19  | -     | 1313.0   |
| gi 9845297 ref NP_063940.1  | second mitochondria-derived activator of caspase isoform Smac-alpha, pr  |            |   | 1.51E-06 | 0.94 | 10.15 | 4.20  | 27130.6  |
| AHQ-8-11, 3251              | K.LAEAIQIELR.Q                                                           | 1172.31354 | 2 | 1.51E-06 | 0.94 | 2.72  | -     | 2030.9   |
| gi 19913424 ref NP_001681.2 | ATPase, H+ transporting, lysosomal 70kD, V1 subunit A, isoform 1; V-AT   |            |   | 1.51E-06 | 0.92 | 10.21 | 2.80  | 68303.7  |
| AHQ-8-6, 4118 - 4128        | R.LAEMPADSGYPAYLGAR.L                                                    | 1782.99819 | 2 | 1.51E-06 | 0.92 | 4.24  | -     | 942.6    |
| gi 7705827 ref NP_057187.1  | GTP-binding protein Sara [Homo sapiens]                                  |            |   | 1.56E-06 | 0.95 | 10.19 | 5.60  | 22409.7  |
| AHQ-8-11, 4183              | K.LVFLGLDNAGK.T                                                          | 1147.34882 | 2 | 1.56E-06 | 0.95 | 3.87  | -     | 1332.7   |
| AHQ-8-11, 4108 - 4184       | K.LVFLGLDNAGK.T                                                          | 1147.34882 | 2 | 6.13E-05 | 0.84 | 2.66  | -     | 911.4    |
| gi 18104989 ref NP_002822.2 | protein tyrosine phosphatase, non-receptor type 6 isoform 1; protein-t   |            |   | 1.56E-06 | 3.66 | 50.20 | 11.60 | 67560.7  |
| AHQ-8-6, 5550               | K.AGFWEFESLQK.Q                                                          | 1471.59489 | 2 | 1.56E-06 | 0.93 | 3.19  | -     | 1609.2   |
| AHQ-8-6, 4634 - 4698        | R.DLSGLDAETLLK.G                                                         | 1275.43053 | 2 | 5.08E-04 | 0.90 | 3.20  | -     | 1291.0   |
| AHQ-8-6, 6118               | R.ESLSQPGDFVLSVLSQDPK.A                                                  | 2047.25144 | 3 | 4.65E-06 | 0.84 | 3.94  | -     | 1154.1   |
| AHQ-8-6, 4264 - 4322        | R.TLQVSPLDNGDLIR.E                                                       | 1541.73134 | 2 | 3.85E-04 | 0.61 | 3.01  | -     | 310.5    |
| AHQ-8-7, 4253               | R.TLQVSPLDNGDLIR.E                                                       | 1541.73134 | 2 | 5.76E-04 | 0.35 | 2.63  | -     | 403.2    |
| AHQ-8-6, 2695               | K.YPLNCSDPSTSR.W                                                         | 1440.51765 | 2 | 3.41E-04 | 0.38 | 2.63  | -     | 357.1    |
| gi 16933567 ref NP_005361.2 | mel transforming oncogene; ras-associated protein RAB8 [Homo sapiens]    |            |   | 1.58E-06 | 0.93 | 10.18 | 6.80  | 23668.1  |
| AHQ-8-11, 5399 - 5475       | K.ANINVENAFFTLAR.D                                                       | 1580.76926 | 2 | 1.58E-06 | 0.93 | 3.67  | -     | 1335.2   |
| gi 4557675 ref NP_000201.1  | integrin alpha chain, alpha 6 [Homo sapiens]                             |            |   | 1.59E-06 | 4.74 | 60.20 | 8.20  | 119509.5 |
| AHQ-8-4, 3391               | K.FGSCQQGVAATFTK.D                                                       | 1503.66172 | 2 | 1.59E-06 | 0.81 | 2.59  | -     | 1301.4   |
| AHQ-8-3, 3901               | K.GIVSKDEITFVSGAPR.A                                                     | 1676.89525 | 2 | 1.63E-06 | 0.76 | 3.29  | -     | 696.8    |
| AHQ-8-4, 4195               | K.LRPIPTASVEIQEPSSR.R                                                    | 1994.28128 | 2 | 1.23E-04 | 0.85 | 3.74  | -     | 653.9    |
| AHQ-8-4, 5437               | K.SEDEVGLSIEYFR.V                                                        | 1673.75872 | 2 | 1.75E-05 | 0.95 | 4.00  | -     | 1351.2   |
| AHQ-8-5, 3616               | K.TACGAPSGICLQVK.S                                                       | 1464.69022 | 2 | 7.55E-04 | 0.44 | 2.69  | -     | 306.7    |
| AHQ-8-4, 3201               | R.TGGLYSCDITAR.G                                                         | 1315.43490 | 2 | 9.29E-06 | 0.93 | 3.71  | -     | 991.3    |
| gi 4502285 ref NP_001672.1  | ATPase, Ca++ transporting, cardiac muscle, slow twitch 2 isoform 2; ATP  |            |   | 1.64E-06 | 0.92 | 10.20 | 1.50  | 109690.3 |
| AHQ-8-1, 4612               | K.VGAEETALTCLVEK.M                                                       | 1622.81958 | 2 | 1.64E-06 | 0.92 | 4.00  | -     | 892.6    |
| gi 6005786 ref NP_009214.1  | monoglyceride lipase; lysophospholipase-like [Homo sapiens]              |            |   | 1.66E-06 | 0.92 | 10.20 | 4.50  | 34292.3  |
| AHQ-8-14-, 5726 - 5727      | K.LTVPFLLLQGSADR.L                                                       | 1530.79329 | 2 | 1.66E-06 | 0.92 | 3.94  | -     | 917.3    |
| gi 20149637 ref NP_057526.2 | type 1 tumor necrosis factor receptor shedding aminopeptidase regulato   |            |   | 1.66E-06 | 0.79 | 10.13 | 1.40  | 107761.4 |
| AHQ-8-4, 5899               | R.NPVGVPLAWQFLR.K                                                        | 1561.81077 | 2 | 1.66E-06 | 0.79 | 2.58  | -     | 759.8    |
| gi 5803181 ref NP_006810.1  | stress-induced-phosphoprotein 1 (Hsp70/Hsp90-organizing protein) [Homo   |            |   | 1.68E-06 | 1.69 | 20.20 | 5.90  | 62638.9  |
| AHQ-8-6, 5899               | K.ALSVGNIDDLAQCYSEAIK.L                                                  | 2069.27871 | 2 | 1.68E-06 | 0.80 | 3.19  | -     | 720.7    |
| AHQ-8-6, 4375 - 4378        | R.LAYINPDLALEEK.N                                                        | 1489.69480 | 2 | 1.26E-04 | 0.89 | 3.99  | -     | 655.5    |
| gi 7705704 ref NP_057001.1  | glutathione S-transferase subunit 13 homolog [Homo sapiens]              |            |   | 1.70E-06 | 0.82 | 10.16 | 6.60  | 25496.7  |
| AHQ-8-11, 4012              | R.FLTAVNLHEPPEM*LEK.A                                                    | 1788.05785 | 2 | 1.70E-06 | 0.82 | 3.01  | -     | 800.8    |
| gi 20127408 ref NP_000173.2 | hydroxyacyl dehydrogenase, subunit A; trifunctional protein, alpha sub   |            |   | 1.71E-06 | 1.76 | 20.18 | 4.60  | 82999.1  |
| AHQ-8-6, 5847               | R.DSIFSNLTQLDLYQGFEK.A                                                   | 2063.20943 | 2 | 1.71E-06 | 0.84 | 3.60  | -     | 545.5    |



|                             |                                                                          |            |   |          |      |       |       |          |
|-----------------------------|--------------------------------------------------------------------------|------------|---|----------|------|-------|-------|----------|
| AHQ-8-6, 3106               | K.TGIEQGSADAGYLCSQK.F                                                    | 1844.93497 | 2 | 1.84E-04 | 0.92 | 3.63  | -     | 1100.5   |
| gi 6715607 ref NP_000175.1  | G-gamma globin [Homo sapiens]                                            |            |   | 1.72E-06 | 0.93 | 10.18 | 6.80  | 16126.3  |
| AHQ-8-14-, 4729 - 4741      | R.LLVVYPWTQR.F                                                           | 1275.52342 | 2 | 4.59E-06 | 0.89 | 3.01  | -     | 1077.1   |
| AHQ-8-13-, 4730 - 4731      | R.LLVVYPWTQR.F                                                           | 1275.52342 | 2 | 1.72E-06 | 0.93 | 3.53  | -     | 1143.7   |
| gi 4507745 ref NP_003320.1  | thioredoxin [Homo sapiens]                                               |            |   | 1.72E-06 | 1.90 | 30.18 | 22.90 | 11693.3  |
| AHQ-8-13-, 3872 - 3878      | K.EKLEATINELV                                                            | 1259.43110 | 2 | 5.70E-04 | 0.85 | 3.12  | -     | 948.9    |
| AHQ-8-14-, 4443             | K.LEATINELV                                                              | 1002.14365 | 1 | 6.03E-04 | 0.11 | 1.82  | -     | 188.0    |
| AHQ-8-14-, 3817             | K.TAFQALDAAGDK.L                                                         | 1337.41728 | 2 | 1.72E-06 | 0.94 | 3.50  | -     | 1606.1   |
| AHQ-8-13-, 3788 - 3846      | K.TAFQALDAAGDK.L                                                         | 1337.41728 | 2 | 4.53E-05 | 0.90 | 3.30  | -     | 1346.9   |
| AHQ-8-14, 4777              | K.TAFQALDAAGDK.L                                                         | 1337.41728 | 2 | 4.13E-04 | 0.66 | 2.78  | -     | 662.7    |
| gi 20539300 ref XP_008391.4 | similar to tropomyosin 4 [Homo sapiens]                                  |            |   | 1.83E-06 | 0.93 | 10.17 | 6.90  | 18592.1  |
| AHQ-8-11, 3648              | R.KLVILEGELER.A                                                          | 1299.54160 | 2 | 1.83E-06 | 0.93 | 3.44  | -     | 1559.0   |
| gi 13569962 ref NP_112243.1 | RAB1B, member RAS oncogene family; small GTP-binding protein [Homo sap   |            |   | 1.87E-06 | 0.87 | 10.23 | 8.50  | 22171.0  |
| AHQ-8-11, 5676 - 5736       | K.NATNVEQAFM*TMAAEIK.K                                                   | 1886.14019 | 2 | 1.87E-06 | 0.87 | 4.64  | -     | 838.2    |
| gi 4502171 ref NP_000476.1  | adenine phosphoribosyltransferase; AMP pyrophosphorylase; AMP diphospho  |            |   | 1.92E-06 | 0.97 | 10.21 | 5.60  | 19607.6  |
| AHQ-8-11, 3535 - 3537       | R.IDYIAGLDSR.G                                                           | 1123.24098 | 2 | 1.92E-06 | 0.97 | 4.11  | -     | 1915.8   |
| gi 4503531 ref NP_001958.1  | eukaryotic translation initiation factor 4A, isoform 2 [Homo sapiens] [  |            |   | 2.03E-06 | 0.92 | 10.21 | 3.90  | 46393.9  |
| AHQ-8-8, 3609               | R.GIYAGFEKPSAIQQR.A                                                      | 1829.04828 | 2 | 2.03E-06 | 0.92 | 4.24  | -     | 793.7    |
| gi 4504557 ref NP_000864.1  | intercellular adhesion molecule 2 precursor [Homo sapiens]               |            |   | 2.12E-06 | 0.90 | 10.19 | 5.80  | 30653.1  |
| AHQ-8-7, 6354 - 6426        | R.VPTPEPLDSLTLFLFR.G                                                     | 1848.17455 | 2 | 2.12E-06 | 0.90 | 3.83  | -     | 507.4    |
| gi 4507231 ref NP_003134.1  | single-stranded DNA binding protein; single-stranded DNA-binding protei  |            |   | 2.16E-06 | 1.82 | 20.22 | 22.30 | 11759.5  |
| AHQ-8-13-, 5668             | R.QATTIADNIIIFSDQTK.E                                                    | 1993.24692 | 2 | 5.63E-05 | 0.88 | 3.92  | -     | 811.2    |
| AHQ-8-13-, 3271             | R.SGDSEVYQLGDVSKQ.T                                                      | 1612.67692 | 2 | 2.16E-06 | 0.94 | 4.34  | -     | 1034.8   |
| gi 14149680 ref NP_056107.1 | KIAA0747 protein [Homo sapiens]                                          |            |   | 2.17E-06 | 0.68 | 10.19 | 1.40  | 122855.6 |
| AHQ-8-6, 5159               | K.AVYSTNCPVVEAFR.F                                                       | 1830.99795 | 2 | 2.17E-06 | 0.68 | 2.84  | -     | 538.9    |
| gi 5802966 ref NP_006861.1  | destrin (actin depolymerizing factor); destrin [Homo sapiens]            |            |   | 2.19E-06 | 0.94 | 10.18 | 6.70  | 18056.6  |
| AHQ-8-12, 3640 - 3695       | R.YALYDASFETK.E                                                          | 1308.41754 | 2 | 2.19E-06 | 0.94 | 3.63  | -     | 1168.5   |
| gi 21464101 ref NP_036611.2 | tyrosine 3-monooxygenase/tryptophan 5-monooxygenase activation protein   |            |   | 2.26E-06 | 0.93 | 10.22 | 5.70  | 28302.4  |
| AHQ-8-14-, 3122 - 3187      | K.NVTLENEPLSNEER.N                                                       | 1644.72215 | 2 | 3.76E-05 | 0.81 | 3.31  | -     | 675.7    |
| AHQ-8-10, 2994 - 2999       | K.NVTLENEPLSNEER.N                                                       | 1644.72215 | 2 | 2.26E-06 | 0.93 | 4.44  | -     | 774.9    |
| gi 5453832 ref NP_006380.1  | oxygen regulated protein precursor; oxygen regulated protein (150kD) [H  |            |   | 2.34E-06 | 0.95 | 10.20 | 1.30  | 111334.8 |
| AHQ-8-3, 6005               | R.VEFEELCADLFEV.V                                                        | 1658.81048 | 2 | 2.34E-06 | 0.95 | 4.01  | -     | 1133.9   |
| gi 4506417 ref NP_002877.1  | RAP2B, member of RAS oncogene family [Homo sapiens]                      |            |   | 2.47E-06 | 2.45 | 30.22 | 26.20 | 20494.2  |
| AHQ-8-11, 5729              | K.ASVDLFAEIVR.Q                                                          | 1349.51434 | 2 | 6.84E-05 | 0.78 | 2.91  | -     | 942.8    |
| AHQ-8-11, 6101 - 6103       | K.EIEVDSSPSVLEILDATAGTEQFASMR.D                                          | 2842.08287 | 3 | 6.17E-06 | 0.93 | 4.43  | -     | 1114.1   |
| AHQ-8-11, 4071              | K.YDPTIEDFYR.K                                                           | 1319.40042 | 2 | 2.47E-06 | 0.73 | 2.77  | -     | 283.8    |
| gi 6005749 ref NP_009193.1  | RNA-binding protein regulatory subunit; oncogene DJ1 [Homo sapiens] [MA  |            |   | 2.48E-06 | 0.86 | 10.17 | 8.50  | 19846.9  |
| AHQ-8-11, 3204              | K.VTVAGLAGKDPVQCSR.D                                                     | 1659.88952 | 2 | 2.48E-06 | 0.86 | 3.45  | -     | 643.0    |
| gi 30148978 ref XP_291520.2 | similar to Keratin, type I cytoskeletal 18 (Cytokeratin 18) (K18) (CK    |            |   | 2.61E-06 | 0.49 | 10.14 | 2.20  | 68413.1  |
| AHQ-8-11, 4567 - 4568       | R.DWSHYFKTKIDLR.A                                                        | 1709.92863 | 2 | 2.61E-06 | 0.49 | 2.87  | -     | 513.2    |
| gi 4757900 ref NP_004334.1  | calreticulin precursor; Sicca syndrome antigen A (autoantigen Ro; calre  |            |   | 2.71E-06 | 4.12 | 50.28 | 24.50 | 48141.1  |
| AHQ-8-7, 3408               | R.AKIDDPDTSKPEDWDPKPEHIPDPDAK.K                                          | 2961.14253 | 3 | 4.26E-04 | 0.61 | 3.17  | -     | 670.4    |
| AHQ-8-7, 5458               | R.CKDDEFTHLTLVLRPNDTVEVK.I                                               | 2859.15977 | 3 | 8.22E-06 | 0.96 | 5.58  | -     | 1430.5   |
| AHQ-8-14-, 5194             | R.FYALSASFEPFSNK.G                                                       | 1608.77470 | 2 | 2.71E-06 | 0.95 | 3.66  | -     | 1324.5   |
| AHQ-8-13-, 5159 - 5194      | R.FYALSASFEPFSNK.G                                                       | 1608.77470 | 2 | 6.63E-05 | 0.94 | 3.43  | -     | 1488.5   |
| AHQ-8-7, 2537               | K.IKDPDASKPEDWDER.A                                                      | 1801.89173 | 2 | 6.62E-05 | 0.91 | 3.57  | -     | 937.0    |
| AHQ-8-7, 4553               | K.KPEDWDEEM*DGWEPPVIQNPYK.G                                              | 2978.14866 | 3 | 4.27E-04 | 0.69 | 3.14  | -     | 522.4    |
| gi 4502011 ref NP_000467.1  | adenylate kinase 1 [Homo sapiens]                                        |            |   | 2.94E-06 | 2.56 | 30.19 | 23.20 | 21634.7  |
| AHQ-8-11, 5008              | R.IGQPTLLLYVDAQPETM*TOR.L                                                | 2220.53174 | 3 | 7.12E-05 | 0.77 | 3.12  | -     | 777.1    |
| AHQ-8-11, 5007              | R.IGQPTLLLYVDAQPETM*TOR.L                                                | 2220.53174 | 2 | 7.32E-04 | 0.82 | 2.95  | -     | 845.3    |
| AHQ-8-11, 3443 - 3507       | K.IIFVVGPPGSGSK.G                                                        | 1131.34939 | 2 | 3.29E-05 | 0.96 | 3.87  | -     | 2330.2   |
| AHQ-8-11, 3752              | K.YGYVHTLSTGDLR.S                                                        | 1496.64912 | 3 | 2.94E-06 | 0.82 | 3.05  | -     | 803.9    |
| gi 4757826 ref NP_004039.1  | beta-2-microglobulin [Homo sapiens]                                      |            |   | 2.97E-06 | 0.86 | 10.15 | 8.40  | 13714.5  |
| AHQ-8-14-, 2070 - 2090      | R.VNHVTLSPQK.I                                                           | 1123.28735 | 2 | 2.97E-06 | 0.86 | 2.89  | -     | 884.8    |
| AHQ-8-14-, 1933 - 2005      | R.VNHVTLSPQK.I                                                           | 1123.28735 | 2 | 2.82E-05 | 0.87 | 2.99  | -     | 771.8    |
| gi 29743324 ref XP_293276.1 | similar to Heat shock 27 kDa protein (HSP 27) (Stress-responsive prote   |            |   | 3.00E-06 | 0.85 | 10.34 | 16.00 | 21244.7  |
| AHQ-8-14-, 5033 - 5098      | R.KYTLPPGVDPTKVSSSLSPGEGTLTVEAPM*PK.L                                    | 3244.70168 | 3 | 3.00E-06 | 0.85 | 5.25  | -     | 840.7    |
| AHQ-8-13-, 5023 - 5051      | R.KYTLPPGVDPTKVSSSLSPGEGTLTVEAPM*PK.L                                    | 3244.70168 | 3 | 7.97E-04 | 0.94 | 6.79  | -     | 1106.6   |
| gi 4506365 ref NP_002856.1  | RAB2, member RAS oncogene family [Homo sapiens]                          |            |   | 3.04E-06 | 0.94 | 10.20 | 6.10  | 23545.4  |
| AHQ-8-11, 4235 - 4301       | K.LQIWDTAGQESFR.S                                                        | 1551.68478 | 2 | 3.04E-06 | 0.94 | 4.06  | -     | 1425.8   |
| gi 4502303 ref NP_001688.1  | mitochondrial ATP synthase, O subunit; ATP synthase, H+ transporting, m  |            |   | 3.35E-06 | 2.29 | 30.24 | 22.10 | 23277.2  |
| AHQ-8-11, 5207              | R.GEVPCTVTSASPLEEATLSELK.T                                               | 2320.55669 | 2 | 2.65E-04 | 0.52 | 2.82  | -     | 320.8    |
| AHQ-8-11, 3641              | K.LVRPPVQVYGIETR.Y                                                       | 1583.85942 | 3 | 1.19E-05 | 0.95 | 4.74  | -     | 1781.8   |
| AHQ-8-11, 3316              | K.VAASVLPVYV.R                                                           | 1161.37549 | 2 | 3.35E-06 | 0.82 | 3.08  | -     | 562.6    |
| gi 5453603 ref NP_006422.1  | chaperonin containing TCP11, subunit 2 (beta); chaperonin containing 1-c |            |   | 3.52E-06 | 0.86 | 10.17 | 3.00  | 57487.9  |
| AHQ-8-7, 3142               | R.EALLSSAVDHGSDEVK.F                                                     | 1657.76083 | 2 | 3.52E-06 | 0.86 | 3.18  | -     | 1190.9   |
| gi 5803227 ref NP_006817.1  | tyrosine 3/tryptophan 5-monooxygenase activation protein, theta polype   |            |   | 3.65E-06 | 1.67 | 20.16 | 10.60 | 27764.1  |
| AHQ-8-10, 2266 - 2335       | K.AVTEQGAELSNRER.N                                                       | 1533.57979 | 2 | 3.65E-06 | 0.81 | 3.14  | -     | 862.3    |
| AHQ-8-10, 2676 - 2750       | K.YLIANATNPESK.V                                                         | 1321.46099 | 2 | 6.83E-04 | 0.86 | 3.15  | -     | 1117.7   |
| gi 29731460 ref XP_293027.1 | similar to ADP/ATP carrier protein, fibroblast isoform (ADP/ATP transl   |            |   | 3.86E-06 | 0.97 | 10.16 | 6.10  | 23572.2  |
| AHQ-8-10, 4287              | K.DFLAGVAAAIK.M                                                          | 1220.39980 | 2 | 3.86E-06 | 0.97 | 3.26  | -     | 2730.2   |
| gi 4507109 ref NP_000336.1  | alpha-synuclein isoform NACP140; non A4 component of amyloid precursor   |            |   | 3.92E-06 | 2.50 | 30.28 | 15.70 | 14460.1  |
| AHQ-8-13-, 4496 - 4504      | K.EQVTNVGGAVVTGVTAVAQK.T                                                 | 1929.16446 | 2 | 3.92E-06 | 0.82 | 3.59  | -     | 576.8    |
| AHQ-8-12, 4116 - 4127       | K.TKEQVTNVGGAVVTGVTAVAQK.T                                               | 2158.44170 | 2 | 1.52E-05 | 0.97 | 5.68  | -     | 1034.5   |
| AHQ-8-2, 4219               | K.TVEGAGSIAAATGFVK.K                                                     | 1479.66001 | 2 | 5.64E-04 | 0.71 | 2.58  | -     | 917.4    |
| gi 11993943 ref NP_055419.1 | Tax interaction protein 1 [Homo sapiens]                                 |            |   | 4.17E-06 | 0.93 | 10.18 | 13.70 | 13734.6  |
| AHQ-8-13, 4212              | R.VSEGGPAEIALGQIDK.I                                                     | 1641.80454 | 2 | 4.17E-06 | 0.93 | 3.69  | -     | 1221.8   |
| gi 4507487 ref NP_003238.1  | thrombospondin 2 [Homo sapiens]                                          |            |   | 4.29E-06 | 1.65 | 20.19 | 2.60  | 129954.5 |
| AHQ-8-3, 4872 - 4946        | R.DDDYAGVFVFGYQSSSR.F                                                    | 1814.84582 | 2 | 5.31E-06 | 0.89 | 3.43  | -     | 953.2    |
| AHQ-8-5, 4914               | R.DDDYAGVFVFGYQSSSR.F                                                    | 1814.84582 | 2 | 8.82E-05 | 0.93 | 3.73  | -     | 1229.1   |
| AHQ-8-6, 4839               | R.DDDYAGVFVFGYQSSSR.F                                                    | 1814.84582 | 2 | 4.42E-05 | 0.92 | 3.60  | -     | 1082.2   |
| AHQ-8-2, 4948 - 5021        | R.DDDYAGVFVFGYQSSSR.F                                                    | 1814.84582 | 2 | 4.29E-06 | 0.92 | 3.54  | -     | 1016.6   |
| AHQ-8-11, 2767 - 2847       | R.NALWHTGNTPGQVR.T                                                       | 1551.69124 | 2 | 1.13E-04 | 0.73 | 2.62  | -     | 808.0    |
| AHQ-8-7, 2922               | R.NALWHTGNTPGQVR.T                                                       | 1551.69124 | 2 | 1.83E-04 | 0.69 | 2.62  | -     | 699.9    |
| gi 4504505 ref NP_000405.1  | hydroxysteroid (17-beta) dehydrogenase 4 [Homo sapiens]                  |            |   | 4.82E-06 | 0.79 | 10.19 | 2.20  | 79685.9  |
| AHQ-8-5, 2917               | R.ATSTATSGFAGAIGQK.L                                                     | 1468.59408 | 2 | 4.82E-06 | 0.79 | 3.40  | -     | 680.1    |
| gi 4506353 ref NP_002854.1  | phosphorylase, glycogen; liver (Hers disease, glycogen storage disease   |            |   | 4.95E-06 | 0.92 | 10.17 | 1.70  | 97147.8  |
| AHQ-8-5, 5208 - 5216        | K.LVIDQIDNGFFSPK.Q                                                       | 1593.80471 | 2 | 4.95E-06 | 0.92 | 3.43  | -     | 1190.6   |
| gi 4505759 ref NP_002622.1  | phosphogluconate dehydrogenase; 6-phosphogluconate dehydrogenase [Homo   |            |   | 5.17E-06 | 0.96 | 10.25 | 4.10  | 53151.7  |
| AHQ-8-8, 5875               | K.LVPLDGTGDIIDGGNSEYR.D                                                  | 2161.39768 | 2 | 5.17E-06 | 0.96 | 4.93  | -     | 1419.4   |
| gi 13378141 ref NP_054752.1 | DKFZP586A0522 protein [Homo sapiens]                                     |            |   | 5.17E-06 | 0.61 | 10.14 | 6.10  | 28318.9  |
| AHQ-8-1, 4965               | R.ELFSNLQEFAGPSGK.L                                                      | 1624.77567 | 2 | 5.17E-06 | 0.61 | 2.85  | -     | 423.9    |
| gi 29736622 ref XP_293924.1 | similar to cytoplasmic beta-actin [Homo sapiens]                         |            |   | 5.22E-06 | 1.47 | 20.20 | 8.00  | 42002.9  |
| AHQ-8-8, 5839 - 5921        | R.TTGIVM*DSGGDVTHIVPIYEGYALPHAILR.L                                      | 3213.65260 | 3 | 6.38E-04 | 0.84 | 3.66  | -     | 880.1    |
| AHQ-8-8, 6055               | R.TTGIVM*DSGGDVTHIVPIYEGYALPHAILR.L                                      | 3213.65260 | 3 | 5.22E-06 | 0.83 | 4.09  | -     | 686.1    |
| AHQ-8-8, 5559 - 5633        | R.TTGIVM*DSGGDVTHIVPIYEGYALPHAILR.L                                      | 3197.65320 | 3 | 5.21E-04 | 0.64 | 3.28  | -     | 624.7    |
| gi 21070997 ref NP_003147.2 | stromal interaction molecule 1 precursor [Homo sapiens]                  |            |   | 5.41E-06 | 0.82 | 10.16 | 1.50  | 77422.9  |
| AHQ-8-7, 2852               | K.YAEELEEQRV.E                                                           | 1266.33905 | 2 | 5.41E-06 | 0.82 | 3.17  | -     | 1155.6   |
| gi 4758984 ref NP_004654.1  | RAB11A, member RAS oncogene family; RAB 11A, member oncogene family [Ho  |            |   | 5.84E-06 | 2.53 | 30.20 | 16.20 | 24393.3  |
| AHQ-8-11, 4143              | R.DDEYDYLK.V                                                             | 1208.25483 | 2 | 1.78E-04 | 0.82 | 3.04  | -     | 885.7    |
| AHQ-8-11, 4088              | R.DHADSNIIVM*LVGNK.S                                                     | 1642.85914 | 2 | 5.84E-06 | 0.93 | 3.95  | -     | 980.2    |
| AHQ-8-11, 2841 - 2895       | K.VVLIGDSGVGK.S                                                          | 1044.22690 | 2 | 2.41E-04 |      |       |       |          |

|                             |                                                                         |            |   |          |      |        |       |          |
|-----------------------------|-------------------------------------------------------------------------|------------|---|----------|------|--------|-------|----------|
| AHQ-8-13-, 2764             | K.LGHPDTLNQGEFK.E                                                       | 1456.58499 | 3 | 4.30E-04 | 0.81 | 3.21   | -     | 1268.0   |
| AHQ-8-13-, 5411             | R.NIETIINTFHQYSVK.L                                                     | 1808.02738 | 2 | 4.00E-04 | 0.80 | 3.19   | -     | 773.9    |
| AHQ-8-13, 5549              | R.NIETIINTFHQYSVK.L                                                     | 1808.02738 | 2 | 7.66E-06 | 0.86 | 3.45   | -     | 634.7    |
| gi 18543899 ref XP_086916.1 | similar to Phosphatidylethanolamine-binding protein (PEBP) (Prostatic   |            |   | 7.91E-06 | 0.94 | 10.21  | 8.00  | 21265.8  |
| AHQ-8-11, 3395              | K.NRPTSISWGLDSDGK.L                                                     | 1633.74419 | 2 | 7.91E-06 | 0.94 | 4.18   | -     | 1037.6   |
| gi 4503545 ref NP_001961.1  | eukaryotic translation initiation factor 5A; eIF5A; eIF5A [Homo sapien  |            |   | 8.09E-06 | 0.78 | 10.18  | 11.00 | 16832.2  |
| AHQ-8-12, 3819 - 3879       | R.EDLRLPEGLDGLKEIEQK.Y                                                  | 1970.17021 | 3 | 8.09E-06 | 0.78 | 3.55   | -     | 780.0    |
| gi 13489087 ref NP_109591.1 | serine (or cysteine) proteinase inhibitor, clade B (ovalbumin), member  |            |   | 8.21E-06 | 1.75 | 20.19  | 8.70  | 42741.5  |
| AHQ-8-8, 3973               | K.TY.GADLASVDFQHASSEDAR.K                                               | 2054.11949 | 3 | 8.21E-06 | 0.88 | 3.78   | -     | 713.2    |
| AHQ-8-8, 5919               | K.TYNFLPEFLVSTQK.T                                                      | 1687.91650 | 2 | 1.35E-05 | 0.87 | 3.59   | -     | 516.0    |
| gi 4501867 ref NP_001089.1  | aconitase 2 [Homo sapiens]                                              |            |   | 8.45E-06 | 0.90 | 10.18  | 2.10  | 85424.8  |
| AHQ-8-5, 6234               | K.DINQEVYNFLATAGAK.Y                                                    | 1754.92134 | 2 | 8.45E-06 | 0.90 | 3.59   | -     | 765.2    |
| gi 30149460 ref XP_210540.2 | similar to Heat shock protein HSP 90-alpha (HSP 86) [Homo sapiens] [MA  |            |   | 8.65E-06 | 0.79 | 10.13  | 4.00  | 29287.8  |
| AHQ-8-5, 2374 - 2454        | K.HIYYITGETK.D                                                          | 1225.37490 | 2 | 8.65E-06 | 0.79 | 2.58   | -     | 703.8    |
| gi 4501993 ref NP_003650.1  | alkylglycerone phosphate synthase precursor [Homo sapiens]              |            |   | 8.95E-06 | 0.54 | 10.16  | 2.60  | 72911.4  |
| AHQ-8-6, 5555               | R.GISDPLTVFEQTEAAAR.E                                                   | 1805.96665 | 2 | 8.95E-06 | 0.54 | 2.76   | -     | 353.1    |
| gi 29788766 ref NP_064424.2 | tubulin, beta polypeptide 4, member Q [Homo sapiens]                    |            |   | 1.09E-05 | 1.24 | 20.16  | 3.50  | 48377.2  |
| AHQ-8-13-, 3882             | R.AVLVDLEPGTM*DSVR.S                                                    | 1618.83435 | 2 | 1.09E-05 | 0.63 | 2.84   | -     | 489.8    |
| AHQ-8-7, 4320               | R.AVLVDLEPGTMDSVR.S                                                     | 1602.83495 | 2 | 1.12E-04 | 0.61 | 2.94   | -     | 360.4    |
| gi 5729808 ref NP_006557.1  | adhesion glycoprotein; platelet and T cell activation antigen 1; DNAX a |            |   | 1.13E-05 | 0.95 | 10.20  | 6.00  | 38583.7  |
| AHQ-8-6, 4824               | K.IGTQQDSIAIFSPTHGMVIR.K                                                | 2172.49357 | 3 | 1.13E-05 | 0.95 | 4.03   | -     | 1954.3   |
| gi 4504351 ref NP_000510.1  | delta globin [Homo sapiens]                                             |            |   | 1.16E-05 | 1.44 | 20.24  | 21.80 | 16055.4  |
| AHQ-8-13-, 4734             | R.FFESFGDLSSPDVAVM*GNPK.V                                               | 2062.24491 | 2 | 1.16E-05 | 0.48 | 2.83   | -     | 436.5    |
| AHQ-8-13, 4885 - 4895       | R.FFESFGDLSSPDVAVM*GNPK.V                                               | 2062.24491 | 2 | 1.64E-04 | 0.87 | 3.77   | -     | 637.0    |
| AHQ-8-13-, 3204             | K.VNVDAVGGGALGR.L                                                       | 1257.37853 | 2 | 8.59E-04 | 0.96 | 4.88   | -     | 1120.8   |
| gi 4502695 ref NP_001779.1  | cell division cycle 10; cell division cycle 10 (homolog to CDC10 of S.c |            |   | 1.20E-05 | 1.58 | 20.19  | 8.10  | 48786.6  |
| AHQ-8-8, 3921               | K.IYEPFETDDEENKLVK.K                                                    | 2099.23685 | 2 | 1.20E-05 | 0.72 | 3.21   | -     | 293.5    |
| AHQ-8-14-, 5174             | K.NLEGVYGFANLPNQVYR.K                                                   | 1955.16216 | 2 | 4.50E-04 | 0.86 | 3.83   | -     | 693.8    |
| gi 4505303 ref NP_002466.1  | myosin alkali light chain 1 slow a; myosin light chain 1, slow-twitch m |            |   | 1.20E-05 | 1.21 | 20.20  | 11.50 | 22763.8  |
| AHQ-8-12, 2791              | R.ALQGNPTNAEVLK.V                                                       | 1355.52211 | 1 | 1.20E-05 | 0.41 | 3.08   | -     | 344.8    |
| AHQ-8-12, 2904 - 2958       | R.ALQGNPTNAEVLK.V                                                       | 1355.52211 | 2 | 8.23E-05 | 0.84 | 3.31   | -     | 732.6    |
| AHQ-8-13-, 2850             | R.ALQGNPTNAEVLK.V                                                       | 1355.52211 | 2 | 9.41E-05 | 0.85 | 3.96   | -     | 719.2    |
| AHQ-8-14-, 2726             | K.ILYSQCGDVM*R.A                                                        | 1359.55429 | 2 | 1.71E-04 | 0.91 | 3.00   | -     | 1325.7   |
| AHQ-8-12, 2694 - 2730       | K.ILYSQCGDVM*R.A                                                        | 1359.55429 | 2 | 1.18E-04 | 0.80 | 2.94   | -     | 667.0    |
| gi 28269681 ref NP_783313.1 | NADH-ubiquinone oxidoreductase subunit B14.7 [Homo sapiens]             |            |   | 1.21E-05 | 1.56 | 20.19  | 29.80 | 14852.0  |
| AHQ-8-13-, 4942 - 5019      | K.AYSTTISIASVAGLTAAYR.V                                                 | 1875.07212 | 2 | 2.34E-05 | 0.75 | 2.85   | -     | 685.1    |
| AHQ-8-13-, 6100 - 6180      | R.EKPDDPLNYFLGGCAGGLTLGAR.T                                             | 2423.68676 | 3 | 1.21E-05 | 0.81 | 3.80   | -     | 819.9    |
| gi 4758970 ref NP_004150.1  | proteasome beta 8 subunit isoform E1 proprotein; proteasome subunit, be |            |   | 1.25E-05 | 1.82 | 20.19  | 9.20  | 29769.4  |
| AHQ-8-11, 3325              | R.ASAGSYSIALR.V                                                         | 1096.21876 | 2 | 1.09E-04 | 0.92 | 2.97   | -     | 1273.7   |
| AHQ-8-11, 2545              | K.KGPGLYYVDEHGTR.L                                                      | 1592.73690 | 3 | 1.25E-05 | 0.91 | 3.83   | -     | 1203.8   |
| gi 15306356 ref XP_035638.2 | similar to interleukin 25; lymphocyte antigen 6 complex, locus E ligand |            |   | 1.30E-05 | 0.45 | 10.14  | 8.70  | 18795.1  |
| AHQ-8-12, 3451 - 3455       | R.ESDVLPLKTEFEVTK.T                                                     | 1751.91253 | 2 | 1.30E-05 | 0.45 | 2.75   | -     | 321.2    |
| gi 4507649 ref NP_003280.1  | tropomyosin 2 (beta) [Homo sapiens]                                     |            |   | 1.30E-05 | 0.81 | 10.13  | 4.60  | 32989.6  |
| AHQ-8-9, 6361               | K.ATDAEADVASLNR.R                                                       | 1333.38703 | 2 | 1.30E-05 | 0.81 | 2.50   | -     | 1183.0   |
| gi 4758606 ref NP_004508.1  | integrin-linked kinase [Homo sapiens]                                   |            |   | 1.32E-05 | 7.54 | 100.21 | 23.90 | 51418.9  |
| AHQ-8-7, 5250               | K.FDMIVPILEK.M                                                          | 1205.49168 | 2 | 3.01E-04 | 0.79 | 2.73   | -     | 665.0    |
| AHQ-8-7, 4292               | K.FDM*IVPILEK.M                                                         | 1221.49108 | 2 | 2.68E-05 | 0.68 | 2.67   | -     | 563.7    |
| AHQ-8-7, 3182               | K.FSFGPCGR.M                                                            | 1000.11283 | 1 | 2.71E-04 | 0.13 | 2.08   | -     | 107.0    |
| AHQ-8-7, 2229               | R.GDDTPLHLAASHGHR.D                                                     | 1584.67809 | 3 | 1.68E-05 | 0.86 | 3.24   | -     | 1162.4   |
| AHQ-8-7, 5528               | R.GMAFLHLELPIPR.H                                                       | 1595.93361 | 2 | 7.08E-05 | 0.93 | 3.85   | -     | 1035.5   |
| AHQ-8-7, 4888               | R.GM*AFHLLELPIPR.H                                                      | 1611.93301 | 2 | 2.16E-04 | 0.82 | 3.24   | -     | 657.5    |
| AHQ-8-7, 2418               | K.LNENHSSELWK.G                                                         | 1327.42732 | 2 | 3.06E-05 | 0.82 | 3.03   | -     | 1018.2   |
| AHQ-8-7, 5538               | R.LWLDNTENDLNQGDHGFSPHWACR.E                                            | 3113.28217 | 3 | 2.53E-04 | 0.90 | 4.21   | -     | 834.6    |
| AHQ-8-7, 4482               | R.MYAPAWVAPEALQK.K                                                      | 1575.85602 | 2 | 9.51E-05 | 0.87 | 3.03   | -     | 872.4    |
| AHQ-8-7, 3888               | R.SAVVEM*LIMR.G                                                         | 1165.45256 | 2 | 1.32E-05 | 0.74 | 2.98   | -     | 700.1    |
| gi 11968045 ref NP_071934.1 | hypothetical protein FLJ22056 [Homo sapiens]                            |            |   | 1.38E-05 | 0.93 | 10.22  | 8.00  | 36010.3  |
| AHQ-8-11, 6199 - 6201       | K.DPTSLTLLVQLQAEADSTSEGLEDAVHSR.G                                       | 2798.95471 | 3 | 1.38E-05 | 0.93 | 4.48   | -     | 1055.4   |
| gi 20270259 ref NP_620061.1 | phosphoglycerate kinase 2; phosphoglycerate kinase 1, pseudogene 2 [Ho  |            |   | 1.38E-05 | 0.53 | 10.17  | 3.60  | 44895.0  |
| AHQ-8-8, 3618               | K.LGDVVYNDAFGTAHR.A                                                     | 1635.76178 | 2 | 1.38E-05 | 0.53 | 3.31   | -     | 528.5    |
| gi 4507949 ref NP_003395.1  | tyrosine 3-monooxygenase/tryptophan 5-monooxygenase activation protein, |            |   | 1.44E-05 | 2.34 | 30.17  | 18.30 | 28082.2  |
| AHQ-8-10, 1955 - 1958       | K.AVTEQGHLENSNEER.N                                                     | 1599.64147 | 2 | 1.86E-04 | 0.87 | 3.47   | -     | 821.6    |
| AHQ-8-10, 3884              | K.QTTVSNQQAYQEAFAEISK.K                                                 | 2160.28351 | 2 | 1.44E-05 | 0.65 | 2.83   | -     | 551.0    |
| AHQ-8-10, 2878              | K.YLIPNATQPESK.V                                                        | 1361.52512 | 2 | 1.60E-04 | 0.83 | 2.85   | -     | 931.1    |
| gi 28466991 ref NP_775771.2 | tau-tubulin kinase [Homo sapiens]                                       |            |   | 1.44E-05 | 0.81 | 10.21  | 0.70  | 182465.3 |
| AHQ-8-14-, 4895             | K.LALDIKIATYR.K                                                         | 1277.53762 | 2 | 1.44E-05 | 0.81 | 3.23   | -     | 1231.7   |
| AHQ-8-13, 5084 - 5092       | K.LALDIKIATYR.K                                                         | 1277.53762 | 2 | 2.97E-04 | 0.94 | 4.18   | -     | 1695.9   |
| gi 4506195 ref NP_002785.1  | proteasome beta 2 subunit; proteasome subunit, beta type, 2; macropain  |            |   | 1.47E-05 | 0.70 | 10.18  | 8.50  | 22836.1  |
| AHQ-8-11, 3636              | K.MRNGYELSPATAANFTR.R                                                   | 1900.10841 | 3 | 1.47E-05 | 0.70 | 3.06   | -     | 1254.1   |
| gi 29727317 ref XP_298144.1 | hypothetical protein XP_298144 [Homo sapiens]                           |            |   | 1.52E-05 | 0.42 | 10.13  | 8.00  | 22108.6  |
| AHQ-8-5, 5957               | K.GEYNLTLDLTAITSNLK.T                                                   | 1753.93165 | 2 | 1.52E-05 | 0.42 | 2.62   | -     | 688.9    |
| gi 28373103 ref NP_005164.2 | sarco/endoplasmic reticulum Ca2+ -ATPase isoform a; ATPase, Ca(2+)-tra  |            |   | 1.53E-05 | 0.81 | 10.14  | 1.50  | 109255.5 |
| AHQ-8-1, 3747               | R.VDQSLTGESVSVTK.H                                                      | 1563.73208 | 2 | 1.53E-05 | 0.81 | 2.80   | -     | 677.7    |
| gi 30157216 ref XP_292133.2 | similar to genethonin 1 [Homo sapiens]                                  |            |   | 1.58E-05 | 0.83 | 10.18  | 4.50  | 39693.8  |
| AHQ-8-4, 4381               | K.TITLEVKPSDITIENVK.A                                                   | 1788.03268 | 2 | 3.74E-04 | 0.44 | 2.61   | -     | 485.0    |
| AHQ-8-13, 4444              | K.TITLEVKPSDITIENVK.A                                                   | 1788.03268 | 2 | 1.58E-05 | 0.83 | 3.64   | -     | 768.8    |
| AHQ-8-1, 4484               | K.TITLEVKPSDITIENVK.A                                                   | 1788.03268 | 2 | 8.64E-04 | 0.42 | 3.14   | -     | 271.0    |
| gi 4506363 ref NP_002861.1  | RAB13, member RAS oncogene family; RAS-associated protein RAB13 [Homo s |            |   | 1.63E-05 | 0.88 | 10.15  | 5.40  | 22774.0  |
| AHQ-8-14-, 3767             | K.LLLIGDSGVGK.T                                                         | 1072.28025 | 2 | 1.63E-05 | 0.88 | 3.09   | -     | 977.6    |
| AHQ-8-13-, 3786             | K.LLLIGDSGVGK.T                                                         | 1072.28025 | 2 | 5.02E-04 | 0.65 | 2.89   | -     | 669.3    |
| gi 4557032 ref NP_002291.1  | lactate dehydrogenase B [Homo sapiens]                                  |            |   | 1.64E-05 | 0.83 | 10.23  | 4.50  | 36638.3  |
| AHQ-8-13-, 6166             | K.SLADELALVDLEDK.L                                                      | 1630.81843 | 2 | 2.33E-04 | 0.96 | 4.69   | -     | 1326.2   |
| AHQ-8-13, 6215              | K.SLADELALVDLEDK.L                                                      | 1630.81843 | 2 | 1.64E-05 | 0.83 | 3.30   | -     | 897.7    |
| gi 22749949 ref NP_689979.1 | hypothetical protein MGC40107 [Homo sapiens]                            |            |   | 1.66E-05 | 0.91 | 10.19  | 24.80 | 11741.6  |
| AHQ-8-14-, 5371             | R.LGALSAAALGFASYGAHGAQFPDAYGK.E                                         | 2669.93152 | 3 | 1.66E-05 | 0.91 | 3.72   | -     | 1410.3   |
| gi 4758988 ref NP_004152.1  | RAB1A, member RAS oncogene family; RAB1, member RAS oncogene family [Ho |            |   | 1.81E-05 | 1.61 | 20.21  | 17.10 | 22677.6  |
| AHQ-8-14-, 5815 - 5837      | K.EFADSLGIPFLETSAK.N                                                    | 1725.91990 | 2 | 6.77E-05 | 0.67 | 3.42   | -     | 379.7    |
| AHQ-8-14-, 5561             | R.FADDTYTESYISTIGVDFK.I                                                 | 2173.31742 | 2 | 1.81E-05 | 0.94 | 4.19   | -     | 1126.3   |
| AHQ-8-13-, 5556             | R.FADDTYTESYISTIGVDFK.I                                                 | 2173.31742 | 2 | 3.70E-04 | 0.80 | 3.49   | -     | 453.6    |
| AHQ-8-11, 5264              | R.FADDTYTESYISTIGVDFK.I                                                 | 2173.31742 | 2 | 2.17E-04 | 0.89 | 3.65   | -     | 824.6    |
| gi 6679056 ref NP_031387.1  | nidogen 2 (osteonidogen); nidogen 2 [Homo sapiens]                      |            |   | 1.83E-05 | 0.49 | 10.14  | 1.20  | 151153.0 |
| AHQ-8-2, 5064 - 5072        | R.ITQTAEGLDPENYLSIK.T                                                   | 1893.08421 | 2 | 1.83E-05 | 0.49 | 2.75   | -     | 494.1    |
| gi 4507951 ref NP_003396.1  | tyrosine 3/tryptophan 5-monooxygenase activation protein, eta polypept  |            |   | 1.84E-05 | 0.88 | 10.18  | 5.70  | 28218.5  |
| AHQ-8-10, 2920 - 2975       | K.AVTELENEPLSNEDR.N                                                     | 1587.67060 | 2 | 1.84E-05 | 0.88 | 3.64   | -     | 623.5    |
| gi 15723376 ref NP_277050.1 | MacGAP protein [Homo sapiens]                                           |            |   | 1.85E-05 | 1.67 | 20.15  | 4.00  | 70163.1  |
| AHQ-8-5, 3312 - 3320        | R.FLSQESGVQAQTLK.K                                                      | 1408.58178 | 2 | 1.85E-05 | 0.89 | 3.06   | -     | 1312.9   |
| AHQ-8-5, 4641               | K.FYEGTFNWESVK.Q                                                        | 1507.62723 | 2 | 4.46E-05 | 0.78 | 2.90   | -     | 636.1    |
| gi 5032009 ref NP_005600.1  | glycogen phosphorylase; phosphorylase, glycogen, muscle; myophosphoryla |            |   | 1.89E-05 | 0.81 | 10.13  | 1.00  | 97091.4  |
| AHQ-8-5, 3894               | R.VIFLENRY.V                                                            | 1054.22348 | 2 | 1.89E-05 | 0.81 | 2.69   | -     | 613.5    |
| gi 27499681 ref XP_045792.6 | similar to RIKEN cDNA G431004K08 [Homo sapiens]                         |            |   | 1.91E-05 | 0.45 | 10.15  | 1.10  | 29283.2  |
| AHQ-8-8, 6433 - 6438        | R.EEFAIM*QTPAGELYDKSIIQSAQQDSIKK.A                                      | 3286.65552 | 3 | 1.91E-05 | 0.45 | 3.07   | -     | 315.3    |
| gi 5031597 ref NP_005710.1  | actin related protein 2/3 complex subunit 3; ARP2/3 protein complex sub |            |   | 1.91E-05 | 0.90 | 10.17  | 7.30  | 20546.5  |
| AHQ-8-14-, 6099             | K.DTDIVDEAIYFK.A                                                        | 1592.72721 | 2 | 2.49E-04 | 0.81 | 2.60   | -     | 1006.2   |
| AHQ-8-12, 5987              | K.DTDIVDEAIYFK.A                                                        | 1592.72721 | 2 | 1.91E-05 | 0.90 | 3.24   | -     | 856.3    |
| gi 30154095 ref XP_293967.2 | similar to gamma actin-like protein [Homo sapiens]                      |            |   | 1.97E-05 | 0.87 | 20.16  | 12.80 | 19259.0  |
| AHQ-8-8, 4561               | K.DLYSTVLSGGTTM*YPGIADR.M                                               | 2235.45690 | 2 | 6.69E-05 | 0.40 | 2.72   | -     | 393.8    |
| AHQ-8-8, 4693 - 4759        | K.DLYSTVLSGGTTM*YPGIADR.M                                               | 2235.45690 | 2 | 1.27E-04 | 0.67 | 3.21   | -     | 450.9    |
| AHQ-8-10, 4503              | K.DLYSTVLSGGTTM*YPGIADR.M                                               | 2235.45690 | 2 | 8.35E-04 | 0.62 | 3.00   | -     | 534.3    |

|                            |                                                                         |            |   |          |      |       |       |          |
|----------------------------|-------------------------------------------------------------------------|------------|---|----------|------|-------|-------|----------|
| AHQ-8-13, 4831             | K.DLYTSTVLSSGGTTM*YPGIADR.M                                             | 2235.45690 | 2 | 3.34E-04 | 0.16 | 2.57  | -     | 286.0    |
| AHQ-8-14-, 4626            | K.DLYTSTVLSSGGTTM*YPGIADR.M                                             | 2235.45690 | 2 | 1.97E-05 | 0.30 | 2.76  | -     | 246.2    |
| AHQ-8-8, 4501              | R.KDLYTSTVLSSGGTTM*YPGIADR.M                                            | 2347.63041 | 2 | 9.24E-05 | 0.57 | 2.98  | -     | 623.0    |
| gi25188179 ref NP_005653.3 | voltage-dependent anion channel 3 [Homo sapiens]                        |            |   | 2.04E-05 | 0.44 | 10.18 | 7.10  | 30658.4  |
| AHQ-8-10, 4210             | K.VNNASLIGLGYTQLRPGVK.L                                                 | 2102.42298 | 2 | 2.04E-05 | 0.44 | 2.64  | -     | 350.9    |
| AHQ-8-10, 4199 - 4211      | K.VNNASLIGLGYTQLRPGVK.L                                                 | 2102.42298 | 3 | 3.29E-04 | 0.68 | 3.53  | -     | 545.8    |
| gi4504391 ref NP_000179.1  | hexokinase 1 isoform HK1; brain form hexokinase [Homo sapiens]          |            |   | 2.05E-05 | 3.29 | 40.17 | 6.30  | 102502.4 |
| AHQ-8-4, 4353              | K.ADVCVGHVTVLLR.D                                                       | 1557.75406 | 2 | 2.05E-05 | 0.89 | 2.71  | -     | 1136.4   |
| AHQ-8-4, 2841              | K.FLSQIESDR.L                                                           | 1095.18763 | 2 | 1.55E-04 | 0.79 | 3.37  | -     | 469.5    |
| AHQ-8-4, 5339              | K.GDFIALDLGGSSFR.I                                                      | 1455.59700 | 2 | 3.00E-05 | 0.91 | 2.92  | -     | 1524.8   |
| AHQ-8-4, 5657              | R.TPDGTENGDFLALDLGGTNFR.V                                               | 2211.33051 | 2 | 2.27E-05 | 0.70 | 3.03  | -     | 500.4    |
| gi4758208 ref NP_004081.1  | dual specificity phosphatase 3; vaccinia virus phosphatase VH1-related; |            |   | 2.16E-05 | 0.96 | 10.22 | 7.60  | 20478.2  |
| AHQ-8-11, 3940 - 3944      | R.IYVGNASVAQDIPK.L                                                      | 1475.67136 | 2 | 2.16E-05 | 0.96 | 4.32  | -     | 1423.7   |
| AHQ-8-11, 3687 - 3688      | R.IYVGNASVAQDIPK.L                                                      | 1475.67136 | 2 | 9.57E-04 | 0.95 | 4.12  | -     | 1227.5   |
| gi29737976 ref XP_290742.1 | similar to Phosphoribosylformylglycinamide synthase (FGAM synthase)     |            |   | 2.17E-05 | 0.54 | 10.16 | 2.10  | 144733.3 |
| AHQ-8-3, 6300              | R.LGGTALQCFSQLGHEPPDLLPENLVR.A                                          | 3050.39201 | 3 | 2.17E-05 | 0.54 | 3.21  | -     | 453.1    |
| gi17986273 ref NP_524144.1 | fast skeletal myosin alkali light chain 1 isoform 1f; A1 catalytic; A2  |            |   | 2.17E-05 | 0.90 | 10.18 | 8.20  | 21145.0  |
| AHQ-8-13-, 3378 - 3440     | R.VFDKNGTVMGAELR.H                                                      | 1723.93228 | 2 | 2.17E-05 | 0.90 | 3.54  | -     | 1093.9   |
| AHQ-8-12, 3260 - 3319      | R.VFDKNGTVMGAELR.H                                                      | 1723.93228 | 3 | 2.80E-05 | 0.80 | 3.43  | -     | 1404.9   |
| gi4757996 ref NP_004060.1  | adaptor-related protein complex 2, sigma 1 subunit isoform AP17; clathr |            |   | 2.21E-05 | 0.92 | 10.19 | 10.60 | 17017.6  |
| AHQ-8-13-, 5050            | K.VYTVVDEMF*FLAGEIR.E                                                   | 1759.01650 | 2 | 2.21E-05 | 0.92 | 3.82  | -     | 1348.8   |
| gi24497612 ref NP_116262.2 | nm23-phosphorylated unknown substrate; SH3 domain-containing 70 kDa pr  |            |   | 2.31E-05 | 1.68 | 20.20 | 5.70  | 72695.6  |
| AHQ-8-6, 6040              | K.LGCDVWATIFSR.D                                                        | 1426.62208 | 2 | 2.31E-05 | 0.83 | 2.66  | -     | 680.9    |
| AHQ-8-6, 5087 - 5126       | R.RPYEDQGLGETTPLTIICQPM*QPLR.V                                          | 2932.32204 | 3 | 2.45E-05 | 0.84 | 4.00  | -     | 703.4    |
| gi4504743 ref NP_002194.1  | integrin alpha 2 precursor; Integrin, alpha-2 (CD49B; alpha-2 subunit o |            |   | 2.34E-05 | 2.21 | 30.18 | 5.40  | 129294.4 |
| AHQ-8-3, 3608              | K.AGDISCNADINPLK.I                                                      | 1489.63335 | 2 | 1.10E-04 | 0.87 | 3.53  | -     | 835.7    |
| AHQ-8-3, 6189 - 6265       | R.STNINFYEISSDGNVPSIVHSFEDVGP.K.F                                       | 3004.26956 | 3 | 2.34E-05 | 0.50 | 3.02  | -     | 650.0    |
| AHQ-8-3, 4801              | R.VDISLENPGTSPALEYSETAK.V                                               | 2293.46974 | 2 | 2.10E-04 | 0.84 | 3.50  | -     | 638.3    |
| gi29731857 ref XP_293042.1 | similar to ribosomal protein S12; 40S ribosomal protein S12 [Homo sapi  |            |   | 2.53E-05 | 0.93 | 10.22 | 8.90  | 19543.6  |
| AHQ-8-13-, 4462            | K.LVEALCAEHQINLIK.V                                                     | 1753.05645 | 2 | 2.53E-05 | 0.93 | 4.34  | -     | 1129.8   |
| gi4557241 ref NP_001095.1  | skeletal muscle specific actinin, alpha 3 [Homo sapiens]                |            |   | 2.56E-05 | 0.91 | 10.17 | 0.90  | 103293.7 |
| AHQ-8-4, 3042              | K.ALDFIASK.G                                                            | 865.00867  | 1 | 1.33E-04 | 0.59 | 2.29  | -     | 781.4    |
| AHQ-8-4, 3034 - 3038       | K.ALDFIASK.G                                                            | 865.00867  | 2 | 2.56E-05 | 0.91 | 3.43  | -     | 655.0    |
| gi4501841 ref NP_001596.1  | alanyl-tRNA synthetase [Homo sapiens]                                   |            |   | 2.58E-05 | 0.61 | 10.13 | 1.30  | 106800.7 |
| AHQ-8-4, 3146 - 3210       | K.AVYTDQDCPLAAAK.A                                                      | 1409.58983 | 2 | 2.58E-05 | 0.61 | 2.63  | -     | 679.0    |
| gi4505813 ref NP_003737.1  | cytoplasmic dynein light polypeptide; dynein, cytoplasmic, light chain  |            |   | 2.64E-05 | 0.82 | 10.15 | 12.40 | 10365.8  |
| AHQ-8-14-, 2510            | R.NFGSYVTHETK.H                                                         | 1283.37131 | 2 | 2.64E-05 | 0.82 | 3.08  | -     | 761.1    |
| gi4503377 ref NP_001377.1  | dihydropyrimidinase-like 2; collapsin response mediator protein hCRMP-2 |            |   | 2.75E-05 | 1.04 | 20.16 | 7.30  | 62293.3  |
| AHQ-8-6, 3979              | R.GLYDGPVCEVSVTPK.T                                                     | 1622.82128 | 2 | 3.69E-04 | 0.33 | 2.65  | -     | 310.6    |
| AHQ-8-7, 4849              | R.ILDJGITGPEGHVLSRPEEVEAEAVNR.A                                         | 2902.20927 | 3 | 2.75E-05 | 0.71 | 3.26  | -     | 417.6    |
| gi30149221 ref XP_291446.2 | similar to Heat shock cognate 71 kDa protein [Homo sapiens]             |            |   | 3.12E-05 | 0.97 | 10.21 | 3.90  | 45688.5  |
| AHQ-8-7, 2476              | R.STAGDTHLGGEDFDNR.M                                                    | 1692.68222 | 2 | 4.46E-04 | 0.80 | 3.28  | -     | 627.6    |
| AHQ-8-6, 2487              | R.STAGDTHLGGEDFDNR.M                                                    | 1692.68222 | 2 | 3.12E-05 | 0.97 | 4.15  | -     | 2086.6   |
| gi6912638 ref NP_036557.1  | ras suppressor protein 1 [Homo sapiens]                                 |            |   | 3.13E-05 | 0.90 | 10.18 | 6.10  | 31540.1  |
| AHQ-8-10, 5360             | R.LTVLPPELGNLDLTKGQK.Q                                                  | 1809.09672 | 3 | 3.13E-05 | 0.90 | 3.60  | -     | 1127.1   |
| gi4557014 ref NP_001743.1  | catalase [Homo sapiens]                                                 |            |   | 3.18E-05 | 0.93 | 10.17 | 2.30  | 59755.8  |
| AHQ-8-7, 4045              | R.AFYVNVLNEEQR.K                                                        | 1482.62245 | 2 | 3.18E-05 | 0.93 | 3.50  | -     | 1190.9   |
| gi4759044 ref NP_004841.1  | Rho-associated, coiled-coil containing protein kinase 2 [Homo sapiens]  |            |   | 3.21E-05 | 1.85 | 20.21 | 2.10  | 160883.4 |
| AHQ-8-3, 3098 - 3102       | K.DATIASLEETNR.T                                                        | 1320.38826 | 2 | 3.21E-05 | 0.92 | 3.25  | -     | 1239.3   |
| AHQ-8-3, 5580              | K.ELQDQLEAEQYFSTLYK.T                                                   | 2106.27421 | 2 | 1.19E-04 | 0.94 | 4.11  | -     | 904.5    |
| gi5031985 ref NP_005787.1  | nuclear transport factor 2; placental protein 15 [Homo sapiens]         |            |   | 3.24E-05 | 0.79 | 10.21 | 21.30 | 14478.4  |
| AHQ-8-14-, 5213 - 5217     | K.IQHSITAQDQHPTPDSIISM*VVGQLK.A                                         | 3022.40358 | 3 | 3.24E-05 | 0.79 | 4.17  | -     | 556.2    |
| gi4504077 ref NP_000165.1  | glycoprotein IX (platelet) [Homo sapiens]                               |            |   | 3.26E-05 | 3.25 | 40.19 | 30.50 | 19046.0  |
| AHQ-8-12, 4054             | R.ALETM*GLWVDCR.G                                                       | 1468.68075 | 2 | 1.89E-04 | 0.86 | 3.00  | -     | 839.0    |
| AHQ-8-11, 3981 - 4037      | R.ALETM*GLWVDCR.G                                                       | 1468.68075 | 2 | 1.09E-04 | 0.91 | 3.37  | -     | 1180.6   |
| AHQ-8-14-, 2814 - 2831     | R.CASPSLAAHGPLGR.L                                                      | 1395.56962 | 2 | 4.28E-05 | 0.91 | 3.47  | -     | 1112.2   |
| AHQ-8-12, 3478             | R.GHGLTALPALPAR.T                                                       | 1274.49706 | 2 | 4.59E-05 | 0.94 | 3.69  | -     | 1058.4   |
| AHQ-8-11, 3459 - 3471      | R.GHGLTALPALPAR.T                                                       | 1274.49706 | 3 | 3.26E-05 | 0.88 | 3.65  | -     | 876.9    |
| AHQ-8-11, 3457             | R.GHGLTALPALPAR.T                                                       | 1274.49706 | 2 | 7.99E-05 | 0.93 | 3.71  | -     | 815.4    |
| AHQ-8-12, 5106             | R.LWLEDRTPREALLQVR.C                                                    | 1840.11574 | 2 | 3.10E-04 | 0.55 | 2.80  | -     | 581.6    |
| gi4757768 ref NP_004300.1  | Rho GDP dissociation inhibitor (GDI) alpha [Homo sapiens]               |            |   | 3.35E-05 | 1.39 | 20.18 | 8.30  | 23206.9  |
| AHQ-8-10, 3682             | K.SIQEIQELDKDDESLR.K                                                    | 1919.03693 | 2 | 3.35E-05 | 0.54 | 2.69  | -     | 579.9    |
| AHQ-8-10, 3362 - 3364      | K.SIQEIQELDKDDESLR.K.Y                                                  | 2047.20984 | 3 | 3.54E-05 | 0.85 | 3.67  | -     | 1108.2   |
| AHQ-8-10, 3356 - 3367      | K.SIQEIQELDKDDESLR.K.Y                                                  | 2047.20984 | 2 | 3.77E-04 | 0.79 | 3.04  | -     | 753.1    |
| gi4504973 ref NP_002292.1  | lactate dehydrogenase C [Homo sapiens]                                  |            |   | 3.40E-05 | 0.73 | 10.14 | 3.60  | 36311.0  |
| AHQ-8-10, 2463             | R.VIGSGCNLDSAR.F                                                        | 1250.36445 | 2 | 3.40E-05 | 0.73 | 2.70  | -     | 534.5    |
| gi23503239 ref NP_699160.1 | hypothetical protein MGC10204 [Homo sapiens]                            |            |   | 3.72E-05 | 0.86 | 10.18 | 2.00  | 85113.0  |
| AHQ-8-5, 4068              | R.AWDQEAEGAPPELGLR.V                                                    | 1699.80263 | 2 | 3.72E-05 | 0.86 | 3.45  | -     | 1056.9   |
| gi4507149 ref NP_000445.1  | superoxide dismutase 1, soluble (amyotrophic lateral sclerosis 1 (adult |            |   | 3.76E-05 | 1.11 | 20.22 | 15.60 | 15935.7  |
| AHQ-8-12, 4228             | K.GDGPVQGINFEQK.E                                                       | 1502.65366 | 2 | 3.76E-05 | 0.65 | 2.95  | -     | 381.6    |
| AHQ-8-12, 3936             | R.LACGVIGIAQ                                                            | 1003.19807 | 1 | 7.90E-04 | 0.46 | 2.61  | -     | 575.6    |
| gi17995541 ref NP_060676.2 | vacuolar protein sorting 35; maternal-embryonic 3 [Homo sapiens]        |            |   | 3.80E-05 | 1.68 | 20.18 | 3.60  | 91706.5  |
| AHQ-8-5, 5574              | K.IPVDTYNILTVLK.L                                                       | 1603.88418 | 2 | 3.80E-05 | 0.91 | 3.56  | -     | 931.1    |
| AHQ-8-5, 4012              | R.SEDPDQYLLNTAR.K                                                       | 1763.88663 | 2 | 5.66E-04 | 0.77 | 2.95  | -     | 941.9    |
| gi21624607 ref NP_066972.1 | coactosin-like 1 [Homo sapiens]                                         |            |   | 3.82E-05 | 1.83 | 20.22 | 19.70 | 15944.9  |
| AHQ-8-13-, 5002            | R.DDGSAVIWWTFK.Y                                                        | 1338.49001 | 2 | 6.18E-05 | 0.88 | 3.63  | -     | 749.3    |
| AHQ-8-13-, 6255            | K.FALITWIGENVSLQRA                                                      | 1805.06986 | 2 | 3.82E-05 | 0.96 | 4.39  | -     | 1548.3   |
| gi6857820 ref NP_005019.2  | phosphatidylinositol-4-phosphate 5-kinase type II alpha; 1-phosphatidyl |            |   | 4.07E-05 | 1.82 | 20.23 | 7.60  | 46224.3  |
| AHQ-8-7, 4061 - 4122       | R.FGIDDQDFQNSLTR.S                                                      | 1656.73462 | 2 | 1.20E-04 | 0.23 | 2.78  | -     | 212.2    |
| AHQ-8-7, 4321              | R.FGIDDQDFQNSLTR.S                                                      | 1656.73462 | 2 | 4.07E-05 | 0.86 | 3.69  | -     | 840.6    |
| AHQ-8-7, 2806 - 2828       | K.HGAGAEISTVNPQYSK.R                                                    | 1788.89618 | 2 | 1.07E-04 | 0.96 | 4.69  | -     | 1144.3   |
| gi4504045 ref NP_002063.1  | guanine nucleotide binding protein (G protein), q polypeptide [Homo sap |            |   | 4.08E-05 | 0.80 | 10.16 | 4.20  | 42142.8  |
| AHQ-8-8, 4061              | R.VADPAYLPTQQDVLVR.V                                                    | 1686.89014 | 2 | 4.08E-05 | 0.80 | 3.20  | -     | 493.0    |
| gi22060072 ref XP_088293.2 | similar to cytochrome c [Homo sapiens]                                  |            |   | 4.20E-05 | 0.93 | 10.15 | 10.50 | 11887.8  |
| AHQ-8-13-, 3690            | K.TGPNLHGLFGR.K                                                         | 1169.31780 | 2 | 4.20E-05 | 0.93 | 3.04  | -     | 1235.3   |
| gi6041669 ref NP_004538.2  | NADH dehydrogenase (ubiquinone) 1 beta subcomplex, 4, 15kDa; NADH dehyd |            |   | 4.21E-05 | 0.87 | 10.18 | 14.00 | 15208.5  |
| AHQ-8-13-, 4618            | R.TLPETLDPAEYNISPETR.R                                                  | 2047.20831 | 2 | 4.21E-05 | 0.87 | 3.60  | -     | 506.6    |
| AHQ-8-13, 4780             | R.TLPETLDPAEYNISPETR.R                                                  | 2047.20831 | 2 | 1.89E-04 | 0.46 | 2.65  | -     | 323.0    |
| gi4506713 ref NP_002945.1  | ubiquitin and ribosomal protein S27a precursor; ubiquitin carboxyl exte |            |   | 4.21E-05 | 0.68 | 10.18 | 0.00  | 17964.8  |
| AHQ-8-14-, 4229 - 4286     | K.TITLEVEPSTIENVK.A                                                     | 1788.97431 | 2 | 4.21E-05 | 0.68 | 3.56  | -     | 511.6    |
| gi4507789 ref NP_003338.1  | ubiquitin-conjugating enzyme E2L 3 [Homo sapiens]                       |            |   | 4.56E-05 | 0.67 | 10.15 | 0.00  | 17861.5  |
| AHQ-8-12, 4958 - 4959      | R.IEINFPAEYPPKPK.I                                                      | 1791.08155 | 2 | 4.56E-05 | 0.67 | 3.06  | -     | 576.9    |
| gi30149555 ref XP_301154.1 | similar to heat shock protein 86 [Homo sapiens]                         |            |   | 4.66E-05 | 0.92 | 10.21 | 10.60 | 15781.6  |
| AHQ-8-5, 5605              | K.HSQFIGYPIITLVKE.E                                                     | 1780.05877 | 3 | 4.66E-05 | 0.92 | 4.25  | -     | 1127.4   |
| gi14765644 ref XP_037574.1 | similar to PTP1-associated RhoGAP 1 [Homo sapiens]                      |            |   | 4.73E-05 | 0.80 | 10.19 | 2.90  | 124613.7 |
| AHQ-8-6, 6394              | R.SPLTAASGPELPTGAGPDVVEDISHLLADVAR.F                                    | 3286.59214 | 3 | 4.73E-05 | 0.80 | 3.88  | -     | 297.2    |
| gi10835121 ref NP_000289.1 | pyruvate kinase, liver and RBC; Pyruvate kinase, liver and RBC type [H  |            |   | 4.80E-05 | 0.88 | 10.16 | 1.90  | 61829.8  |
| AHQ-8-7, 3553              | R.GDLGIEPAEK.V                                                          | 1142.28420 | 2 | 4.80E-05 | 0.88 | 3.16  | -     | 874.8    |
| gi4757766 ref NP_004299.1  | Rho GTPase activating protein 1; RhoGAP; p50rhoGAP; CDC42 GTPase-activa |            |   | 4.81E-05 | 0.87 | 10.22 | 4.60  | 50435.3  |
| AHQ-8-7, 5644              | R.VPALTQLQVLPPEENYQVLR.F                                                | 2312.65053 | 2 | 4.81E-05 | 0.87 | 4.36  | -     | 533.3    |
| gi7657649 ref NP_055362.1  | tropomodulin 3 (ubiquitous) [Homo sapiens]                              |            |   | 4.92E-05 | 0.65 | 10.13 | 3.10  | 39594.5  |
| AHQ-8-11, 3288             | K.FGYQFTQQGPR.T                                                         | 1329.44490 | 2 | 4.92E-05 | 0.65 | 2.63  | -     | 546.1    |
| gi5803121 ref NP_006801.1  | for protein disulfide isomerase-related [Homo sapiens]                  |            |   | 4.94E-05 | 0.65 | 10.14 | 2.30  | 59594.0  |
| AHQ-8-7, 2826              | K.DVVHLDSEKDFR.R                                                        | 1460.57364 | 2 | 4.94E-05 | 0.65 | 2.64  | -     | 818.3    |
| gi19923483 ref NP_057406.2 | GTPase Rab14 [Homo sapiens]                                             |            |   | 4.95E-05 | 2.14 | 30.21 | 19.50 | 23896.8  |
| AHQ-8-11, 3712             | R.GAAGALM*VYDITR.R                                                      | 1354.55759 | 2 | 4.95E-05 | 0.94 | 3.79  | -     | 1238.0   |
| AHQ-8-11, 4775 - 4777      | R.NLTNPNTVILILGNK.A                                                     | 1624.90662 | 2 | 6.38E-05 | 0.32 | 2.62  | -     | 240.7    |

|                             |                                                                                      |            |   |          |      |       |       |          |
|-----------------------------|--------------------------------------------------------------------------------------|------------|---|----------|------|-------|-------|----------|
| AHQ-8-14-, 4474 - 4551      | K.TGENVEDAFLEAAK.K                                                                   | 1494.58517 | 2 | 4.10E-04 | 0.59 | 2.53  | -     | 608.5    |
| AHQ-8-11, 4344 - 4405       | K.TGENVEDAFLEAAK.K                                                                   | 1494.58517 | 2 | 9.42E-05 | 0.88 | 4.12  | -     | 565.7    |
| gi 4502923 ref NP_001830.1  | calponin 3; calponin, acidic [Homo sapiens]                                          |            |   | 5.32E-05 | 0.82 | 10.13 | 3.30  | 36413.4  |
| AHQ-8-12, 2751              | K.GPSYGLSAEVK.N                                                                      | 1108.22631 | 2 | 5.32E-05 | 0.82 | 2.59  | -     | 763.0    |
| gi 8923812 ref NP_060943.1  | uncharacterized hypothalamus protein HT012 [Homo sapiens]                            |            |   | 5.61E-05 | 0.94 | 10.19 | 8.60  | 14960.4  |
| AHQ-8-13, 4219 - 4220       | K.TLAFTSVDLTK.A                                                                      | 1310.47811 | 2 | 5.61E-05 | 0.94 | 3.84  | -     | 1024.9   |
| gi 4502297 ref NP_001678.1  | ATP synthase, H+ transporting, mitochondrial F1 complex, delta subunit               |            |   | 5.87E-05 | 0.75 | 10.14 | 8.30  | 17489.8  |
| AHQ-8-13-, 2616             | K.AQAEVLGTDAEATR.A                                                                   | 1432.51860 | 2 | 5.87E-05 | 0.75 | 2.78  | -     | 605.8    |
| gi 4507157 ref NP_003096.1  | sortilin-related receptor containing LDLR class A repeats preproprotein              |            |   | 5.91E-05 | 0.40 | 10.16 | 0.80  | 248439.0 |
| AHQ-8-13-, 6124             | K.NNTCKEENTCLRNR.Q                                                                   | 2202.37174 | 2 | 5.91E-05 | 0.40 | 3.11  | -     | 443.2    |
| gi 4504489 ref NP_000403.1  | histidine-rich glycoprotein precursor; histidine-proline rich glycoprotein           |            |   | 5.95E-05 | 0.65 | 10.13 | 2.70  | 59578.0  |
| AHQ-8-5, 6101               | K.DSPVLIDFFEDTER.Y                                                                   | 1683.79674 | 2 | 5.95E-05 | 0.65 | 2.57  | -     | 550.8    |
| gi 16753212 ref NP_003921.2 | src family associated phosphoprotein 2; src kinase-associated phosphoprotein         |            |   | 5.97E-05 | 0.80 | 10.16 | 2.80  | 41216.5  |
| AHQ-8-7, 4057               | K.DAEVWVQQLK.F                                                                       | 1246.35097 | 2 | 5.97E-05 | 0.80 | 3.16  | -     | 814.5    |
| gi 5174393 ref NP_006001.1  | arginine-rich, mutated in early stage tumors; arginine-rich protein [Homo sapiens]   |            |   | 6.20E-05 | 0.84 | 10.19 | 7.30  | 26906.2  |
| AHQ-8-12, 5260 - 5266       | K.DRDVTFSPATIELIK.F                                                                  | 1949.15100 | 2 | 6.20E-05 | 0.84 | 3.81  | -     | 697.5    |
| gi 21361456 ref NP_055425.2 | alpha glucosidase II alpha subunit; likely ortholog of mouse G2an alpha              |            |   | 6.22E-05 | 1.52 | 20.16 | 3.30  | 109437.2 |
| AHQ-8-4, 2969               | R.GLLEFEHQ.R                                                                         | 1129.25045 | 2 | 6.90E-05 | 0.75 | 2.79  | -     | 899.3    |
| AHQ-8-4, 5689               | R.QYASLTGTQALPPLFLSLGHYQSR.W                                                         | 2536.82664 | 3 | 6.22E-05 | 0.77 | 3.07  | -     | 769.6    |
| gi 4507383 ref NP_001052.1  | thromboxane A synthase 1 (platelet, cytochrome P450, family 5, subfamily 1)          |            |   | 6.22E-05 | 1.85 | 20.18 | 4.70  | 60675.3  |
| AHQ-8-7, 5493               | R.DFLQM*VLDAR.H                                                                      | 1224.41192 | 2 | 6.22E-05 | 0.94 | 3.66  | -     | 1566.5   |
| AHQ-8-7, 3938               | R.HSASPMGVQDFDIVR.D                                                                  | 1659.84828 | 2 | 4.66E-04 | 0.91 | 3.07  | -     | 1200.8   |
| gi 4557890 ref NP_000415.1  | Keratin 5; Keratin-5; 58 kDa cyokeratin; keratin, type II cytoskeletal               |            |   | 6.28E-05 | 0.89 | 10.16 | 1.70  | 62461.1  |
| AHQ-8-2, 3517               | K.LAELEELQK.A                                                                        | 1144.30010 | 2 | 6.28E-05 | 0.89 | 3.21  | -     | 1204.9   |
| gi 4507947 ref NP_003671.1  | tyrosyl-tRNA synthetase; tyrosyl-tRNA synthetase; tyrosyl tRNA ligase [Homo sapiens] |            |   | 6.34E-05 | 0.84 | 10.17 | 2.30  | 59143.1  |
| AHQ-8-7, 4818               | R.TVSVGLVQVFK.E                                                                      | 1274.53374 | 2 | 6.34E-05 | 0.84 | 3.44  | -     | 678.0    |
| gi 4506405 ref NP_002872.1  | viral simian leukemia viral oncogene homolog B; RAS-like protein B; GTPase           |            |   | 6.52E-05 | 0.82 | 10.14 | 7.80  | 23408.4  |
| AHQ-8-10, 3574              | R.SKAEEVGVQVYVTSK.T                                                                  | 1812.95765 | 2 | 6.52E-05 | 0.82 | 2.75  | -     | 999.3    |
| gi 4557801 ref NP_000261.1  | purine nucleoside phosphorylase [Homo sapiens]                                       |            |   | 6.57E-05 | 0.86 | 10.18 | 6.20  | 32147.7  |
| AHQ-8-13, 4273              | K.LGADAVGM*STVPEVIVAR.H                                                              | 1802.08606 | 2 | 6.57E-05 | 0.86 | 3.54  | -     | 625.5    |
| gi 4506189 ref NP_002783.1  | proteasome alpha 7 subunit isoform 1; proteasome subunit RC6-1; proteasome subunit   |            |   | 6.58E-05 | 1.53 | 20.15 | 10.50 | 27886.7  |
| AHQ-8-10, 3040              | K.ALLEVVQSGGK.N                                                                      | 1101.27845 | 2 | 6.58E-05 | 0.69 | 2.57  | -     | 636.9    |
| AHQ-8-10, 3887              | K.NYTDIAEITDLDLTK.L                                                                  | 1741.83137 | 2 | 5.37E-04 | 0.84 | 3.02  | -     | 771.9    |
| gi 4505395 ref NP_002499.1  | nidogen (enactin); Nidogen; nidogen (enactin) [Homo sapiens]                         |            |   | 6.64E-05 | 0.72 | 10.15 | 1.80  | 136488.3 |
| AHQ-8-2, 4576               | R.SDIAVYVTTNGIATSEPPK.E                                                              | 2263.48678 | 2 | 6.64E-05 | 0.72 | 3.01  | -     | 592.5    |
| gi 22748811 ref NP_689590.1 | hypothetical protein MGC34837 [Homo sapiens]                                         |            |   | 6.88E-05 | 0.52 | 10.16 | 4.90  | 62034.3  |
| AHQ-8-3, 4925               | R.GSPEMNVYKLLWFLNSAASDYPQGNK.A                                                       | 3131.46380 | 3 | 6.88E-05 | 0.52 | 3.19  | -     | 567.2    |
| gi 8923579 ref NP_060377.1  | hypothetical protein FLJ20625 [Homo sapiens]                                         |            |   | 7.09E-05 | 0.78 | 10.16 | 18.60 | 17744.7  |
| AHQ-8-14-, 5913             | K.LPPLPSLTSPQHVLAASEPIPFSDLQVSR.I                                                    | 3283.72259 | 3 | 7.09E-05 | 0.78 | 3.12  | -     | 699.7    |
| gi 16904381 ref NP_006717.1 | LPS-responsive vesicle trafficking, beach and anchor containing; vesicle trafficking |            |   | 7.77E-05 | 0.51 | 10.17 | 0.50  | 319158.3 |
| AHQ-8-4, 5982               | R.IEPTTYFLNLQGGK.F                                                                   | 1728.96862 | 2 | 7.77E-05 | 0.51 | 3.01  | -     | 273.0    |
| gi 6912324 ref NP_036266.1  | leiomyodin 1 (smooth muscle); thyroid and eye muscle autoantigen D1 (64kDa)          |            |   | 7.83E-05 | 0.30 | 10.14 | 3.00  | 63737.1  |
| AHQ-8-14-, 4979             | K.GEKKDLLEVPKAGAVAK.G                                                                | 1754.06430 | 2 | 7.83E-05 | 0.30 | 2.74  | -     | 423.2    |
| gi 5803013 ref NP_006808.1  | endoplasmic reticulum protein 29 precursor; endoplasmic reticulum lumen protein      |            |   | 8.47E-05 | 0.77 | 10.15 | 5.70  | 28993.2  |
| AHQ-8-10, 3095              | K.ILDGEGDFPASEM*TR.I                                                                 | 1725.85864 | 2 | 8.47E-05 | 0.77 | 2.92  | -     | 473.7    |
| gi 27480842 ref XP_208238.1 | similar to bA92K2.2 (similar to ubiquitin) [Homo sapiens]                            |            |   | 8.71E-05 | 0.77 | 10.15 | 8.30  | 17966.9  |
| AHQ-8-14-, 2018 - 2086      | K.IQDKKEGIPPDQQR.L                                                                   | 1524.66087 | 2 | 8.71E-05 | 0.77 | 2.82  | -     | 528.1    |
| gi 5453710 ref NP_006139.1  | LIM and SH3 protein 1; Lasp-1 [Homo sapiens]                                         |            |   | 9.48E-05 | 0.47 | 10.16 | 5.00  | 29717.0  |
| AHQ-8-13-, 3911             | K.GFSVADTPELQR.I                                                                     | 1419.56466 | 2 | 9.48E-05 | 0.47 | 2.94  | -     | 409.1    |
| AHQ-8-13, 4064              | K.GFSVADTPELQR.I                                                                     | 1419.56466 | 2 | 4.32E-04 | 0.77 | 3.20  | -     | 685.9    |
| gi 30152949 ref XP_301425.1 | similar to Heat shock protein HSP 90-beta (HSP 84) (HSP 90) [Homo sapiens]           |            |   | 9.62E-05 | 0.62 | 10.13 | 2.50  | 42437.9  |
| AHQ-8-5, 2297 - 2378        | K.YINQEELNK.I                                                                        | 1151.25119 | 2 | 9.62E-05 | 0.62 | 2.62  | -     | 467.0    |
| gi 6005745 ref NP_009165.1  | dynactin 3 isoform 1; dynactin light chain [Homo sapiens]                            |            |   | 9.78E-05 | 0.86 | 10.14 | 5.90  | 21119.3  |
| AHQ-8-11, 2932              | K.VQVALGNISSK.R                                                                      | 1116.29312 | 2 | 9.78E-05 | 0.86 | 2.85  | -     | 910.8    |
| gi 17475428 ref XP_062849.1 | similar to Proteasome subunit alpha type 6 (Proteasome iota chain) (Ma)              |            |   | 9.96E-05 | 0.91 | 10.18 | 4.80  | 30918.3  |
| AHQ-8-10, 2910 - 2915       | K.AINQGGTSTAVR.K                                                                     | 1286.46301 | 2 | 9.96E-05 | 0.91 | 3.68  | -     | 1155.6   |
| gi 18201911 ref NP_000629.2 | vitronectin precursor; serum spreading factor; somatomedin B; complemen              |            |   | 1.01E-04 | 1.40 | 20.16 | 6.30  | 54335.4  |
| AHQ-8-6, 5791 - 5852        | R.DVWGIIEGPIIDAAFTR.I                                                                | 1647.81246 | 2 | 1.29E-04 | 0.61 | 2.53  | -     | 474.5    |
| AHQ-8-14-, 5321 - 5382      | R.SIAQYWLGCPCAPGHL                                                                   | 1671.90045 | 2 | 1.01E-04 | 0.79 | 3.19  | -     | 550.6    |
| gi 30155257 ref XP_299313.2 | hypothetical protein XP_299313 [Homo sapiens]                                        |            |   | 1.03E-04 | 0.18 | 10.14 | 9.00  | 20734.9  |
| AHQ-8-8, 6506 - 6573        | R.GGKCRQFTAASESDELK.L                                                                | 1886.03346 | 2 | 1.03E-04 | 0.18 | 2.52  | -     | 364.8    |
| gi 13435359 ref NP_001914.2 | damage-specific DNA binding protein 1; damage-specific DNA binding protein           |            |   | 1.09E-04 | 0.92 | 10.21 | 2.60  | 126987.0 |
| AHQ-8-4, 3746               | R.IEVQDTSGGTTALRPSASTQALSSVSSSK.L                                                    | 2954.15138 | 3 | 1.09E-04 | 0.92 | 4.28  | -     | 1411.4   |
| gi 4501865 ref NP_001087.1  | ATP citrate lyase [Homo sapiens]                                                     |            |   | 1.16E-04 | 0.45 | 10.14 | 1.40  | 121419.0 |
| AHQ-8-4, 3202               | R.TTDGVYEGVAIGDDR.Y                                                                  | 1510.58783 | 2 | 1.16E-04 | 0.45 | 2.77  | -     | 406.5    |
| gi 4502687 ref NP_003865.1  | CD84 antigen (leukocyte antigen); leukocyte antigen CD84 [Homo sapiens]              |            |   | 1.16E-04 | 0.65 | 10.15 | 4.30  | 36870.6  |
| AHQ-8-7, 2485               | K.ADINTQADPYTTTK.R                                                                   | 1539.62594 | 2 | 1.16E-04 | 0.65 | 2.90  | -     | 458.7    |
| gi 9966867 ref NP_065123.1  | eIF-5A2 protein; eIF5AII [Homo sapiens]                                              |            |   | 1.16E-04 | 0.90 | 10.16 | 7.80  | 16793.1  |
| AHQ-8-12, 4631 - 4638       | K.VHLVGIIDIFGK.K                                                                     | 1299.54329 | 2 | 1.16E-04 | 0.90 | 3.26  | -     | 1091.2   |
| gi 24307939 ref NP_036205.1 | chaperonin containing TCP1, subunit 5 (epsilon) [Homo sapiens]                       |            |   | 1.20E-04 | 0.86 | 10.18 | 3.00  | 59670.7  |
| AHQ-8-7, 6032               | K.LGFAGLVQIEISFGTTK.D                                                                | 1668.91472 | 2 | 1.20E-04 | 0.86 | 3.60  | -     | 803.6    |
| gi 30152584 ref XP_305800.1 | hypothetical protein XP_305800 [Homo sapiens]                                        |            |   | 1.23E-04 | 0.56 | 10.17 | 8.70  | 24751.1  |
| AHQ-8-2, 5391               | K.MGKSSSLSTPLSMVM*AWNLR.A                                                            | 2239.71147 | 2 | 1.23E-04 | 0.56 | 3.33  | -     | 594.6    |
| AHQ-8-1, 5404               | K.MGKSSSLSTPLSMVM*AWNLR.A                                                            | 2239.71147 | 2 | 4.06E-04 | 0.63 | 3.47  | -     | 699.2    |
| gi 455797 ref NP_000260.1   | non-metastatic cells 1 protein [Homo sapiens]                                        |            |   | 1.29E-04 | 0.82 | 10.15 | 7.90  | 17148.6  |
| AHQ-8-12, 3063              | R.TFIAIKPDGVQR.G                                                                     | 1345.57205 | 2 | 1.29E-04 | 0.82 | 2.97  | -     | 744.8    |
| gi 29740132 ref XP_299177.1 | hypothetical protein XP_299177 [Homo sapiens]                                        |            |   | 1.32E-04 | 0.46 | 10.16 | 2.70  | 114488.9 |
| AHQ-8-3, 4944               | R.RCHEEKLPLSAGTASHKQASQPITPR.Q                                                       | 3030.36879 | 3 | 1.32E-04 | 0.46 | 3.17  | -     | 243.9    |
| gi 5453629 ref NP_006391.1  | dynactin 2; dynactin complex 50 kD subunit; dynamitin; 50 kD dynein-ass              |            |   | 1.33E-04 | 0.91 | 10.20 | 4.70  | 44819.3  |
| AHQ-8-8, 5017               | K.LLGPDAANLTPDGDALAK.R                                                               | 1866.10514 | 2 | 1.33E-04 | 0.91 | 3.97  | -     | 807.9    |
| gi 4759342 ref NP_004808.1  | tight junction protein 2 (zona occludens 2); Friedreich ataxia region g              |            |   | 1.34E-04 | 0.88 | 10.14 | 1.10  | 124661.6 |
| AHQ-8-4, 6053               | R.EDAVVLLLEIPK.G                                                                     | 1403.64505 | 2 | 1.34E-04 | 0.88 | 2.65  | -     | 1470.1   |
| gi 4557251 ref NP_001101.1  | a disintegrin and metalloprotease domain 10 [Homo sapiens]                           |            |   | 1.35E-04 | 0.94 | 10.20 | 2.00  | 84141.7  |
| AHQ-8-5, 4530               | K.AIDTIYQTTDFSGIR.N                                                                  | 1701.85844 | 2 | 1.35E-04 | 0.94 | 4.04  | -     | 976.2    |
| gi 24307907 ref NP_006207.1 | plasminogen activator inhibitor type 1, member 2; protease inhibitor 7               |            |   | 1.46E-04 | 0.39 | 10.13 | 3.50  | 44002.0  |
| AHQ-8-8, 3285               | K.FTAAVQTDLKEPLK.V                                                                   | 1561.80416 | 2 | 1.46E-04 | 0.39 | 2.57  | -     | 436.5    |
| gi 7706497 ref NP_057392.1  | UMP-CMP kinase [Homo sapiens]                                                        |            |   | 1.50E-04 | 0.93 | 10.18 | 5.70  | 25854.7  |
| AHQ-8-11, 3729 - 3795       | K.YGYTHLSAGELLR.D                                                                    | 1480.64969 | 2 | 1.50E-04 | 0.93 | 3.51  | -     | 1154.2   |
| gi 20070158 ref NP_003567.2 | serine/threonine kinase 24 (STE20 homolog, yeast); STE20-like kinase 3               |            |   | 1.58E-04 | 0.89 | 10.17 | 3.40  | 49307.6  |
| AHQ-8-7, 3716               | K.SQACCGNLGSIEELR.G                                                                  | 1592.71366 | 2 | 1.58E-04 | 0.89 | 3.33  | -     | 1112.8   |
| gi 27499572 ref XP_058577.2 | similar to chromosome 11 open reading frame 25 [Homo sapiens]                        |            |   | 1.61E-04 | 0.48 | 10.16 | 2.30  | 107611.6 |
| AHQ-8-14-, 5898 - 5974      | K.ETFFNNATRSRIVHILQRIK.Y                                                             | 2581.96338 | 3 | 1.61E-04 | 0.48 | 3.20  | -     | 310.6    |
| gi 4503971 ref NP_001484.1  | GDP dissociation inhibitor 1; mental retardation, X-linked 41; mental r              |            |   | 1.61E-04 | 0.59 | 10.19 | 3.40  | 50582.4  |
| AHQ-8-7, 4032 - 4069        | R.TDDYLDQPCLETVNR.I                                                                  | 1840.94632 | 2 | 1.61E-04 | 0.59 | 3.05  | -     | 299.6    |
| gi 30158852 ref XP_301583.1 | similar to actin CA15 - sea squirt (Styela clava) (fragments) [Homo sa               |            |   | 1.62E-04 | 0.57 | 10.14 | 0.00  | 19197.0  |
| AHQ-8-4, 3211               | K.IWHTTFYKLR.V                                                                       | 1515.74533 | 2 | 1.62E-04 | 0.57 | 2.73  | -     | 644.2    |
| gi 5031595 ref NP_005709.1  | actin related protein 2/3 complex subunit 4; Arp2/3 protein complex sub              |            |   | 1.68E-04 | 0.79 | 10.16 | 6.50  | 19666.9  |
| AHQ-8-12, 3191 - 3240       | K.VLIEGSINVR.V                                                                       | 1187.37134 | 2 | 1.68E-04 | 0.79 | 3.15  | -     | 714.4    |
| gi 4503359 ref NP_003965.1  | docking protein 2, 56kD [Homo sapiens]                                               |            |   | 1.69E-04 | 0.62 | 10.15 | 3.60  | 45547.8  |
| AHQ-8-7, 3957               | R.GQEGEYAVPDAVAR.S                                                                   | 1609.72109 | 2 | 1.69E-04 | 0.62 | 3.02  | -     | 403.7    |
| gi 8922712 ref NP_060713.1  | hypothetical protein FLJ10849 [Homo sapiens]                                         |            |   | 1.72E-04 | 2.67 | 30.19 | 11.00 | 49397.9  |
|                             |                                                                                      |            |   |          |      |       |       |          |

|                             |                                                                          |            |   |          |      |       |       |          |
|-----------------------------|--------------------------------------------------------------------------|------------|---|----------|------|-------|-------|----------|
| AHQ-8-13-, 6262             | K.TFQLQLSSPSSIVPAFNTGITQVIK.V                                            | 2892.33903 | 3 | 1.73E-04 | 0.81 | 4.03  | -     | 901.7    |
| gi 4506675 ref NP_002941.1  | ribohorin I [Homo sapiens]                                               |            |   | 1.76E-04 | 0.79 | 10.17 | 3.60  | 68569.0  |
| AHQ-8-6, 5119               | R.APDELHYTYLDFGRPVIVAYK.K                                                | 2569.89500 | 3 | 1.76E-04 | 0.79 | 3.37  | -     | 711.7    |
| gi 4503743 ref NP_002009.1  | flightless I homolog [Homo sapiens]                                      |            |   | 1.77E-04 | 0.86 | 10.19 | 1.30  | 144750.1 |
| AHQ-8-4, 6121 - 6185        | K.VGLGLGLYLELPQINYL.L                                                    | 1778.08432 | 2 | 1.77E-04 | 0.86 | 3.72  | -     | 682.5    |
| gi 22059949 ref XP_114617.2 | similar to tubulin, beta 5 [Homo sapiens]                                |            |   | 1.78E-04 | 1.85 | 20.25 | 13.00 | 22810.8  |
| AHQ-8-7, 4977               | K.FWEVISEDHGIDPTGTYHGSDLQLDR.I                                           | 3104.24553 | 3 | 2.49E-04 | 0.94 | 4.95  | -     | 1355.1   |
| AHQ-8-7, 2696 - 2764        | R.ISVYYNEATGGK.Y                                                         | 1302.41453 | 2 | 1.78E-04 | 0.91 | 3.74  | -     | 779.7    |
| gi 30158844 ref XP_292513.2 | similar to KIAA1879 protein [Homo sapiens]                               |            |   | 1.81E-04 | 0.94 | 10.19 | 0.70  | 203894.8 |
| AHQ-8-7, 3990               | K.TSIAIDTIINQK.H                                                         | 1317.51378 | 2 | 1.81E-04 | 0.94 | 3.86  | -     | 1423.3   |
| gi 28461290 ref NP_443728.2 | TRALPUSH; no opposite paired repeat protein [Homo sapiens]               |            |   | 1.82E-04 | 0.26 | 10.14 | 0.40  | 240073.5 |
| AHQ-8-7, 3465               | K.KKPQVNAK.D                                                             | 913.09970  | 1 | 1.82E-04 | 0.26 | 2.37  | -     | 328.9    |
| AHQ-8-6, 3515               | K.KKPQVNAK.D                                                             | 913.09970  | 1 | 2.74E-04 | 0.67 | 2.72  | -     | 562.9    |
| gi 14249348 ref NP_116120.1 | hypothetical protein MGC14353 [Homo sapiens]                             |            |   | 1.87E-04 | 0.91 | 10.18 | 11.40 | 13940.7  |
| AHQ-8-13, 4163 - 4168       | K.SWPCDCVQAEPPV.R.E                                                      | 1705.89366 | 2 | 1.87E-04 | 0.91 | 3.59  | -     | 850.8    |
| gi 4758618 ref NP_004684.1  | cytokeratin type II [Homo sapiens]                                       |            |   | 2.01E-04 | 0.98 | 10.26 | 2.20  | 59503.9  |
| AHQ-8-2, 3107               | R.FLEQQNKVLETK.W                                                         | 1477.68725 | 2 | 2.01E-04 | 0.98 | 5.10  | -     | 2251.7   |
| gi 4508047 ref NP_003452.1  | zyxin [Homo sapiens]                                                     |            |   | 2.03E-04 | 0.78 | 10.19 | 4.40  | 61277.0  |
| AHQ-8-8, 3839               | K.LGHPEALSAGTGSQPSPFTYAQQR.E                                             | 2598.81170 | 3 | 6.09E-04 | 0.70 | 3.51  | -     | 505.8    |
| AHQ-8-5, 3889               | K.LGHPEALSAGTGSQPSPFTYAQQR.E                                             | 2598.81170 | 3 | 2.03E-04 | 0.78 | 3.85  | -     | 604.9    |
| gi 21361553 ref NP_003168.2 | spleen tyrosine kinase [Homo sapiens]                                    |            |   | 2.15E-04 | 1.33 | 20.17 | 5.70  | 72065.7  |
| AHQ-8-6, 5370               | K.QTWNLQGGQALEQAIISQKPQLEK.L                                             | 2652.98708 | 3 | 4.84E-04 | 0.76 | 3.31  | -     | 854.0    |
| AHQ-8-6, 4440 - 4484        | K.TGPFEDLKNLIR.E                                                         | 1532.72291 | 2 | 2.15E-04 | 0.57 | 2.93  | -     | 573.1    |
| gi 13775186 ref NP_112567.1 | ring finger protein 17 isoform long [Homo sapiens]                       |            |   | 2.20E-04 | 0.81 | 10.16 | 1.70  | 73736.0  |
| AHQ-8-10, 4964 - 5038       | K.TADQLTGLER.S                                                           | 1205.30039 | 2 | 2.20E-04 | 0.81 | 3.27  | -     | 1052.9   |
| gi 30150883 ref XP_305873.1 | hypothetical protein XP_305873 [Homo sapiens]                            |            |   | 2.21E-04 | 0.43 | 10.16 | 5.40  | 41521.9  |
| AHQ-8-13-, 3368             | K.AGFACSVTHIKFSQMRVTRK.N                                                 | 2413.80980 | 3 | 2.21E-04 | 0.43 | 3.26  | -     | 229.6    |
| gi 21536449 ref NP_002613.2 | prefoldin 1; prefoldin subunit 1 [Homo sapiens]                          |            |   | 2.24E-04 | 0.94 | 10.20 | 9.00  | 14210.4  |
| AHQ-8-13-, 3770 - 3782      | K.LADIQIEQLNR.T                                                          | 1313.48523 | 2 | 2.24E-04 | 0.94 | 4.02  | -     | 1583.3   |
| AHQ-8-13, 3915              | K.LADIQIEQLNR.T                                                          | 1313.48523 | 2 | 8.14E-04 | 0.92 | 3.10  | -     | 1436.8   |
| gi 20127528 ref NP_037459.2 | parvin, beta; CGI-56 protein; beta-parvin [Homo sapiens]                 |            |   | 2.27E-04 | 0.88 | 10.19 | 3.30  | 41714.0  |
| AHQ-8-14-, 3533             | K.ARPEDVNVLDL.K                                                          | 1369.54878 | 2 | 2.27E-04 | 0.88 | 3.83  | -     | 695.4    |
| gi 25306267 ref NP_001700.2 | brain-derived neurotrophic factor isoform a preproprotein [Homo sapien]  |            |   | 2.36E-04 | 1.70 | 20.24 | 14.20 | 27817.8  |
| AHQ-8-13-, 5519             | R.RGELSVCDISSEWVTAADKK.T                                                 | 2253.47527 | 3 | 2.36E-04 | 0.96 | 4.86  | -     | 1574.4   |
| AHQ-8-13-, 3642 - 3644      | K.TAVDMSSGQTVTVLEK.V                                                     | 1508.71993 | 2 | 5.35E-04 | 0.74 | 3.17  | -     | 750.3    |
| gi 17448269 ref XP_069750.1 | similar to GDP dissociation inhibitor isoform 2; GDI-2 [Homo sapiens]    |            |   | 2.48E-04 | 0.90 | 10.17 | 4.20  | 32024.9  |
| AHQ-8-8, 4106               | K.DLGTESQIFISR.A                                                         | 1366.50176 | 2 | 2.48E-04 | 0.90 | 3.41  | -     | 1353.1   |
| gi 4557773 ref NP_000248.1  | myosin, heavy polypeptide 7, cardiac muscle, beta [Homo sapiens]         |            |   | 2.49E-04 | 1.46 | 20.17 | 1.20  | 223110.8 |
| AHQ-8-4, 3177               | R.CNVLGEGIR.I                                                            | 1019.15759 | 2 | 7.12E-04 | 0.91 | 3.24  | -     | 874.0    |
| AHQ-8-2, 4061               | R.IEELEEESERTAR.A                                                        | 1833.93203 | 2 | 2.49E-04 | 0.54 | 3.26  | -     | 642.0    |
| gi 5453549 ref NP_006397.1  | thioredoxin peroxidase; thioredoxin peroxidase (antioxidant enzyme) [Ho  |            |   | 2.52E-04 | 0.79 | 10.20 | 5.20  | 30539.7  |
| AHQ-8-10, 3588 - 3595       | K.DYGVVLEDSGHTLR.G                                                       | 1625.72052 | 2 | 2.52E-04 | 0.79 | 2.76  | -     | 766.3    |
| gi 12545410 ref NP_031394.1 | RAS p21 protein activator 3; GTPase activating protein; Ins; Iln(1,3,4,  |            |   | 2.65E-04 | 1.53 | 20.17 | 5.00  | 95912.5  |
| AHQ-8-5, 4860               | R.APSDSAPGCSPTGGPLANIQLDIDGRETER.I                                       | 3360.54658 | 3 | 2.82E-04 | 0.60 | 3.26  | -     | 270.8    |
| AHQ-8-5, 4650               | K.FGDFELGELR.I                                                           | 1183.29488 | 2 | 2.65E-04 | 0.93 | 3.44  | -     | 1155.7   |
| gi 4758638 ref NP_004896.1  | peroxiredoxin 6; antioxidant protein 2; non-selenium glutathione pero    |            |   | 2.67E-04 | 0.83 | 20.14 | 10.30 | 25034.8  |
| AHQ-8-10, 2547 - 2587       | K.DINAYNCEEPTEK.L                                                        | 1584.64363 | 2 | 4.66E-04 | 0.70 | 2.72  | -     | 609.4    |
| AHQ-8-10, 3182              | R.VVVFVGPDKL.L                                                           | 1136.36763 | 1 | 2.67E-04 | 0.13 | 2.04  | -     | 383.3    |
| gi 7669501 ref NP_005552.1  | lysosomal-associated membrane protein 1 [Homo sapiens]                   |            |   | 2.85E-04 | 0.87 | 10.21 | 3.80  | 44772.8  |
| AHQ-8-4, 6393               | R.FFLQIGLNTILPDR.D                                                       | 1847.14988 | 2 | 2.85E-04 | 0.87 | 4.13  | -     | 532.7    |
| gi 24308149 ref NP_060035.1 | hypothetical protein DKFz434F2322 [Homo sapiens]                         |            |   | 2.85E-04 | 0.73 | 10.14 | 2.00  | 61404.2  |
| AHQ-8-4, 5619 - 5653        | K.PSGVHLKLVLR.F                                                          | 1219.50454 | 2 | 2.85E-04 | 0.73 | 2.83  | -     | 703.9    |
| gi 29733950 ref XP_293814.1 | similar to Keratin, type I cytoskeletal 18 (Cytokeratin 18) (K18) (CK    |            |   | 2.90E-04 | 0.54 | 10.13 | 2.00  | 49024.0  |
| AHQ-8-13, 2187 - 2252       | R.AQYDELAQK.N                                                            | 1066.14629 | 2 | 2.90E-04 | 0.54 | 2.63  | -     | 457.2    |
| gi 14589893 ref NP_001785.2 | cadherin 4, type 1 preproprotein; cadherin 4, R-cadherin (retinal); R-   |            |   | 2.93E-04 | 0.28 | 10.15 | 2.00  | 100279.9 |
| AHQ-8-8, 4493               | K.VENPIDLIYVIMDNR.P                                                      | 2213.45293 | 2 | 2.93E-04 | 0.28 | 2.92  | -     | 373.3    |
| gi 22267436 ref NP_056284.1 | DKFz564D177 protein [Homo sapiens]                                       |            |   | 3.08E-04 | 0.86 | 10.16 | 5.70  | 28464.6  |
| AHQ-8-11, 3737 - 3740       | K.LVGFVHTYEGALNR.V                                                       | 1576.78061 | 2 | 3.08E-04 | 0.86 | 3.28  | -     | 700.1    |
| gi 22095371 ref NP_079434.2 | RUN and FYVE domain-containing 1 [Homo sapiens]                          |            |   | 3.09E-04 | 0.64 | 10.14 | 2.00  | 69077.6  |
| AHQ-8-6, 3159               | R.ICSLQEEQQLR.E                                                          | 1533.68936 | 2 | 3.09E-04 | 0.64 | 2.87  | -     | 734.9    |
| gi 4502261 ref NP_000479.1  | serine (or cysteine) proteinase inhibitor, clade C (antithrombin), memb  |            |   | 3.18E-04 | 0.73 | 10.14 | 3.40  | 52602.1  |
| AHQ-8-7, 5782               | K.EQLQDMGLVLDLFSPEK.S                                                    | 1850.08284 | 2 | 3.18E-04 | 0.73 | 2.71  | -     | 612.0    |
| gi 4502989 ref NP_001856.1  | cytochrome c oxidase subunit VIIa polypeptide 2 (liver) precursor; hepa  |            |   | 3.31E-04 | 0.80 | 10.15 | 15.70 | 9395.9   |
| AHQ-8-14, 5846              | K.LFQEDDEIPLYLK.G                                                        | 1623.82758 | 2 | 3.31E-04 | 0.80 | 3.09  | -     | 895.7    |
| gi 28827809 ref NP_789797.1 | nucleoside diphosphate kinase B-like [Homo sapiens]                      |            |   | 3.40E-04 | 0.62 | 10.15 | 7.30  | 15529.0  |
| AHQ-8-12, 3844              | K.DRPFPPGLVK.Y                                                           | 1176.39185 | 2 | 3.40E-04 | 0.62 | 2.52  | -     | 676.1    |
| gi 18087855 ref NP_542408.1 | dynein light chain 2 [Homo sapiens]                                      |            |   | 3.61E-04 | 1.38 | 20.13 | 13.50 | 10349.8  |
| AHQ-8-14-, 3165             | K.DIAAIYK.K                                                              | 793.93045  | 1 | 3.61E-04 | 0.61 | 2.17  | -     | 627.3    |
| AHQ-8-14, 5657              | K.YNIEKIDIAIYK.K                                                         | 1441.65337 | 2 | 6.75E-04 | 0.78 | 2.52  | -     | 892.3    |
| gi 13128974 ref NP_076933.1 | hypothetical protein MGC3265 [Homo sapiens]                              |            |   | 3.63E-04 | 0.60 | 10.17 | 4.50  | 46867.3  |
| AHQ-8-7, 3221               | K.ANVIHATVTSVTLHSTGK.A                                                   | 1966.18479 | 3 | 3.63E-04 | 0.60 | 3.36  | -     | 558.1    |
| gi 9845255 ref NP_000574.1  | group-specific component (vitamin D binding protein); hDBP [Homo sapien] |            |   | 3.67E-04 | 0.90 | 10.19 | 4.60  | 53049.5  |
| AHQ-8-6, 6435               | K.VPTADLEDVLPALAEIDTILNSL.C                                              | 2367.67804 | 3 | 3.67E-04 | 0.90 | 3.83  | -     | 1086.1   |
| gi 4757714 ref NP_004291.1  | acid phosphatase 1 isoform c; acid phosphatase of erythrocyte; red cell  |            |   | 3.69E-04 | 0.89 | 10.16 | 7.00  | 18042.4  |
| AHQ-8-11, 3704              | K.IELLSYDPQK.Q                                                           | 1263.42144 | 2 | 3.69E-04 | 0.89 | 3.28  | -     | 960.8    |
| gi 30148456 ref XP_293602.2 | similar to glutathione-S-transferase like; glutathione transferase ome   |            |   | 3.80E-04 | 0.87 | 10.13 | 3.90  | 29139.6  |
| AHQ-8-10, 4359              | K.VPSLVGSFLR.T                                                           | 1075.28583 | 2 | 3.80E-04 | 0.87 | 2.69  | -     | 985.5    |
| gi 23510338 ref NP_003325.2 | ubiquitin-activating enzyme E1; A1S9T and BN75 temperature sensitivity   |            |   | 3.93E-04 | 1.47 | 20.19 | 2.90  | 117848.1 |
| AHQ-8-4, 5967 - 5971        | R.AAVATFLQSVQVPEFTP.K.S                                                  | 1934.22430 | 3 | 9.51E-04 | 0.76 | 3.80  | -     | 615.4    |
| AHQ-8-4, 3537               | K.DNPGVVTCLDEAR.H                                                        | 1447.55333 | 2 | 3.93E-04 | 0.71 | 2.82  | -     | 523.4    |
| gi 19913373 ref NP_079536.2 | G6B protein isoform G6b-A precursor; G6B protein; immunoglobulin recep   |            |   | 4.02E-04 | 0.92 | 10.13 | 3.80  | 25002.6  |
| AHQ-8-11, 2599 - 2647       | R.TVLHVLGDR.T                                                            | 1010.17224 | 2 | 4.02E-04 | 0.92 | 2.53  | -     | 1596.8   |
| gi 18375611 ref NP_542937.1 | dachshund homolog isoform a [Homo sapiens]                               |            |   | 4.07E-04 | 0.07 | 10.14 | 2.10  | 73029.7  |
| AHQ-8-7, 4156               | K.EGDLAGHDMGHESKR.M                                                      | 1639.73233 | 2 | 4.07E-04 | 0.07 | 2.82  | -     | 193.0    |
| gi 4557323 ref NP_000031.1  | apolipoprotein C-III precursor [Homo sapiens]                            |            |   | 4.21E-04 | 0.71 | 10.15 | 16.20 | 10852.2  |
| AHQ-8-14-, 3183             | K.DALSSVQESVQAQAR.G                                                      | 1717.81950 | 2 | 4.21E-04 | 0.71 | 2.92  | -     | 901.6    |
| gi 9910280 ref NP_064505.1  | UDP-glucose ceramide glucosyltransferase-like 1; UDP-glucose:glycoprote  |            |   | 4.41E-04 | 0.62 | 10.16 | 1.10  | 177187.7 |
| AHQ-8-3, 5177 - 5178        | R.YVLEPEIFSTSDNSFAK.G                                                    | 1948.11833 | 2 | 4.41E-04 | 0.62 | 3.20  | -     | 339.0    |
| gi 22042381 ref XP_065237.3 | similar to FKSG30 [Homo sapiens]                                         |            |   | 4.45E-04 | 0.70 | 10.19 | 4.80  | 42016.0  |
| AHQ-8-8, 3759 - 3809        | R.VAPEEHPILLTEAPLNPK.A                                                   | 1969.27019 | 2 | 4.45E-04 | 0.70 | 3.33  | -     | 492.9    |
| AHQ-8-8, 3667 - 3747        | R.VAPEEHPILLTEAPLNPK.A                                                   | 1969.27019 | 2 | 5.62E-04 | 0.86 | 3.74  | -     | 580.5    |
| gi 27480104 ref XP_208215.1 | similar to triosephosphate isomerase 1 [Homo sapiens]                    |            |   | 4.48E-04 | 0.79 | 10.15 | 4.80  | 26942.6  |
| AHQ-8-10, 2107 - 2163       | K.SNVSDAVAQSTR.I                                                         | 1235.28659 | 2 | 4.48E-04 | 0.79 | 2.73  | -     | 979.9    |
| gi 14150056 ref NP_115676.1 | hypothetical protein MGC10854 [Homo sapiens]                             |            |   | 4.50E-04 | 0.75 | 10.15 | 2.00  | 61071.3  |
| AHQ-8-8, 2371               | K.LKEVEATKLLK.K                                                          | 1159.40104 | 2 | 4.50E-04 | 0.75 | 2.94  | -     | 738.6    |
| gi 30153966 ref XP_293932.2 | similar to hypothetical protein BC013073 [Homo sapiens]                  |            |   | 4.70E-04 | 0.74 | 10.17 | 9.00  | 21711.3  |
| AHQ-8-2, 3672               | R.MIFLFTINVSVDIRRH                                                       | 2073.44997 | 2 | 4.73E-04 | 0.45 | 3.02  | -     | 329.5    |
| AHQ-8-2, 4031 - 4091        | R.MIFLFTINVSVDIRRH                                                       | 2073.44997 | 2 | 9.00E-04 | 0.35 | 3.26  | -     | 344.8    |
| AHQ-8-2, 4035               | R.MIFLFTINVSVDIRRH                                                       | 2073.44997 | 3 | 6.36E-04 | 0.64 | 3.27  | -     | 714.9    |
| AHQ-8-3, 3972 - 3976        | R.MIFLFTINVSVDIRRH                                                       | 2073.44997 | 3 | 6.92E-04 | 0.77 | 3.48  | -     | 948.7    |
| AHQ-8-7, 3864               | R.MIFLFTINVSVDIRRH                                                       | 2073.44997 | 2 | 7.41E-04 | 0.29 | 2.64  | -     | 328.6    |
| AHQ-8-1, 4085 - 4115        | R.MIFLFTINVSVDIRRH                                                       | 2073.44997 | 2 | 4.70E-04 | 0.74 | 3.42  | -     | 578.9    |

|                             |                                                                                      |            |   |          |      |       |       |         |
|-----------------------------|--------------------------------------------------------------------------------------|------------|---|----------|------|-------|-------|---------|
| AHQ-8-8, 3510 - 3571        | K.M*HAADLTVSALRGDM*DEK.E                                                             | 1993.20912 | 2 | 5.49E-04 | 0.19 | 2.69  | -     | 190.9   |
| gi 4757818 ref NP_004879.1  | ATPase, H <sup>+</sup> transporting, lysosomal, V1 subunit G isoform 1; vacuolar H ( |            |   | 5.56E-04 | 0.54 | 10.14 | 0.00  | 13757.4 |
| AHQ-8-13-, 2884             | K.EEAQAEIEQYR.L                                                                      | 1366.41548 | 2 | 5.56E-04 | 0.54 | 2.72  | -     | 640.5   |
| gi 20127450 ref NP_002729.2 | protein kinase C, beta 1; Protein kinase C, beta 1 polypeptide [Homo s               |            |   | 5.66E-04 | 0.93 | 10.18 | 1.80  | 77011.7 |
| AHQ-8-5, 6022               | K.LTDFNFLM*VLGK.G                                                                    | 1414.69453 | 2 | 5.66E-04 | 0.93 | 3.69  | -     | 1156.4  |
| gi 29740531 ref XP_296644.1 | hypothetical protein XP_296644 [Homo sapiens]                                        |            |   | 5.73E-04 | 0.29 | 10.13 | 6.60  | 24615.3 |
| AHQ-8-2, 5729 - 5801        | K.KVAPTLTVSGSSLAK.K                                                                  | 1459.71337 | 2 | 5.73E-04 | 0.29 | 2.60  | -     | 472.2   |
| gi 4506407 ref NP_002873.1  | RAN binding protein 1 [Homo sapiens]                                                 |            |   | 6.28E-04 | 0.82 | 10.13 | 5.50  | 23310.0 |
| AHQ-8-10, 4195              | K.TLEEDDEEELFK.M                                                                     | 1382.45159 | 2 | 6.28E-04 | 0.82 | 2.64  | -     | 760.4   |
| gi 5901922 ref NP_008996.1  | CDC37 homolog [Homo sapiens]                                                         |            |   | 6.35E-04 | 0.87 | 10.21 | 5.60  | 44468.0 |
| AHQ-8-8, 6235               | R.LGPGGLDPVEVYESLPEELQK.C                                                            | 2270.52091 | 2 | 6.35E-04 | 0.87 | 4.11  | -     | 381.1   |
| gi 22054400 ref XP_096852.2 | hypothetical protein XP_096852 [Homo sapiens]                                        |            |   | 6.66E-04 | 0.48 | 10.13 | 3.30  | 39743.5 |
| AHQ-8-2, 3861               | K.ESLLGGPPAPR.P                                                                      | 1207.40425 | 2 | 6.66E-04 | 0.48 | 2.62  | -     | 643.0   |
| gi 4506265 ref NP_000954.1  | prostaglandin-endoperoxide synthase 2 precursor; prostaglandin G/H synt              |            |   | 6.87E-04 | 0.74 | 10.16 | 1.50  | 68995.7 |
| AHQ-8-6, 4038               | R.LLIGETIK.I                                                                         | 1000.25717 | 2 | 6.87E-04 | 0.74 | 3.13  | -     | 584.9   |
| gi 4501889 ref NP_001606.1  | actin, gamma 2 propeptide; actin, alpha-3 [Homo sapiens]                             |            |   | 7.04E-04 | 0.50 | 10.14 | 5.60  | 41876.7 |
| AHQ-8-8, 4694 - 4751        | K.DLYANNVLSGGTTM*YPGIADR.M                                                           | 2245.45502 | 2 | 7.04E-04 | 0.50 | 2.78  | -     | 432.3   |
| gi 21361374 ref NP_009168.2 | SP140 nuclear body protein; nuclear body protein Sp140 [Homo sapiens]                |            |   | 7.24E-04 | 0.11 | 10.13 | 2.30  | 99869.6 |
| AHQ-8-2, 5580               | -M*AQQGQQGQM*ASGDSNLFNR.M                                                            | 2201.34420 | 2 | 7.24E-04 | 0.11 | 2.57  | -     | 176.7   |
| gi 7706495 ref NP_057390.1  | DnaJ (Hsp40) homolog, subfamily B, member 11; ER-associated DNAJ; ER-as              |            |   | 7.34E-04 | 0.96 | 10.17 | 4.50  | 40513.6 |
| AHQ-8-8, 4977               | K.FQDLGAAEYVLSSEK.R                                                                  | 1772.89029 | 2 | 7.34E-04 | 0.96 | 3.33  | -     | 1936.1  |
| gi 30159830 ref XP_302246.1 | similar to HSPC280 [Homo sapiens]                                                    |            |   | 7.60E-04 | 0.95 | 10.24 | 3.90  | 45644.4 |
| AHQ-8-14-, 6242 - 6278      | R.DDKCANLFALVGLTK.A                                                                  | 1796.03496 | 3 | 7.60E-04 | 0.95 | 4.78  | -     | 1743.8  |
| gi 20546215 ref XP_115639.1 | similar to leukocyte immunoglobulin-like receptor, subfamily B (with T               |            |   | 7.73E-04 | 0.48 | 10.15 | 4.70  | 42748.2 |
| AHQ-8-13, 4704              | R.CSREVNSREDNLYRVRVVK.P                                                              | 2225.47152 | 2 | 7.73E-04 | 0.48 | 2.89  | -     | 629.0   |
| gi 14149817 ref NP_115523.1 | hypothetical protein DKFZp434D0127 [Homo sapiens]                                    |            |   | 7.79E-04 | 0.65 | 10.10 | 1.00  | 81154.7 |
| AHQ-8-12, 3722              | R.RRILMGK.I                                                                          | 874.13334  | 1 | 7.79E-04 | 0.65 | 2.02  | -     | 904.0   |
| gi 17445600 ref XP_059465.1 | similar to ribosomal protein S15 [Homo sapiens]                                      |            |   | 7.82E-04 | 0.66 | 10.19 | 17.80 | 15238.9 |
| AHQ-8-3, 3000               | K.THLRDM*ILPEMVGSM*VGVYNGK.T                                                         | 2594.07144 | 3 | 7.82E-04 | 0.66 | 3.84  | -     | 444.9   |
| gi 4758484 ref NP_004823.1  | glutathione-S-transferase like; glutathione transferase omega [Homo sap              |            |   | 7.92E-04 | 0.59 | 10.14 | 6.20  | 27565.7 |
| AHQ-8-10, 2768 - 2811       | R.SQNKEDYAGLKEEFR.K                                                                  | 1814.93364 | 2 | 7.92E-04 | 0.59 | 2.53  | -     | 458.5   |
| gi 7662096 ref NP_055517.1  | KIAA0408 gene product [Homo sapiens]                                                 |            |   | 8.38E-04 | 0.46 | 10.16 | 4.50  | 64957.3 |
| AHQ-8-6, 4686               | K.TNAHMPVPMENVPDNPTKKSTTGLVR.Q                                                       | 2836.24097 | 3 | 8.38E-04 | 0.46 | 3.26  | -     | 257.9   |
| gi 4758078 ref NP_004374.1  | c-src tyrosine kinase [Homo sapiens]                                                 |            |   | 8.51E-04 | 0.67 | 10.13 | 2.90  | 50704.1 |
| AHQ-8-7, 5518 - 5529        | R.LLYPPETGLFLVR.E                                                                    | 1518.82411 | 2 | 8.51E-04 | 0.67 | 2.58  | -     | 494.7   |
| gi 11321640 ref NP_066301.1 | basic beta 1 syntrophin; 59-DAP; syntrophin, beta 1; syntrophin, beta                |            |   | 8.68E-04 | 0.76 | 10.17 | 3.30  | 58060.8 |
| AHQ-8-6, 4423               | R.TAFTDLPEQVPESISNQK.R                                                               | 2005.17142 | 2 | 8.68E-04 | 0.76 | 3.30  | -     | 549.4   |
| gi 27481160 ref XP_208217.1 | similar to elongation factor 1 alpha [Homo sapiens]                                  |            |   | 8.78E-04 | 0.85 | 10.13 | 2.60  | 50171.6 |
| AHQ-8-7, 3804               | R.EHALLAYTLGVK.Q                                                                     | 1315.54272 | 2 | 8.78E-04 | 0.85 | 2.60  | -     | 813.4   |
| gi 4757762 ref NP_004281.1  | ring finger protein 14; androgen receptor associated protein 54 [Homo s              |            |   | 9.47E-04 | 0.39 | 10.13 | 3.40  | 53837.2 |
| AHQ-8-7, 3150               | R.YGKRVIQKALEEMESK.E                                                                 | 1910.22778 | 2 | 9.47E-04 | 0.39 | 2.62  | -     | 421.3   |
| gi 30148842 ref XP_292982.2 | similar to FKSG30 [Homo sapiens]                                                     |            |   | 9.51E-04 | 0.75 | 10.20 | 3.90  | 66046.0 |
| AHQ-8-8, 6527 - 6533        | K.LCYVALDFEQEMATVASSSLEK.S                                                           | 2580.87000 | 3 | 9.51E-04 | 0.75 | 3.95  | -     | 952.8   |
| gi 11072091 ref NP_057736.2 | Cm, crooked neck-like 1; CGI-201 protein; crooked neck protein (cm);                 |            |   | 9.53E-04 | 0.38 | 10.11 | 1.10  | 99200.7 |
| AHQ-8-2, 3141               | R.FVLVHPDVK.N                                                                        | 1054.26662 | 1 | 9.53E-04 | 0.38 | 1.80  | -     | 556.8   |
| gi 7661732 ref NP_054738.1  | HSPC009 protein [Homo sapiens]                                                       |            |   | 9.69E-04 | 0.70 | 10.14 | 9.40  | 11731.2 |
| AHQ-8-13-, 3732             | R.FLDELEDEAK.A                                                                       | 1209.28427 | 2 | 9.69E-04 | 0.70 | 2.72  | -     | 716.0   |

| Reference                  | File, Scan(s) | Peptide                                    | MH+        | z | P (pro)<br>P (pep) | Sf    | Score  | Coverage | MW      |
|----------------------------|---------------|--------------------------------------------|------------|---|--------------------|-------|--------|----------|---------|
|                            |               |                                            |            |   |                    |       | XC     |          | Sp      |
| gi 4557705 ref NP_000217.1 |               | Keratin 9 [Homo sapiens]                   |            |   | 1.00E-30           | 11.23 | 130.33 | 36.20    | 61986.9 |
| AHQ-9-14, 5786             |               | K.DIENQYETQITQIEHEVSSSGQEVQSSAK.E          | 3266.38667 | 3 | 3.49E-04           | 0.80  | 3.53   | -        | 693.8   |
| AHQ-9-13, 5746 - 5786      |               | K.DIENQYETQITQIEHEVSSSGQEVQSSAK.E          | 3266.38667 | 3 | 2.72E-14           | 0.96  | 5.28   | -        | 1547.7  |
| AHQ-9-13, 5884 - 5898      |               | K.DIENQYETQITQIEHEVSSSGQEVQSSAK.E          | 3266.38667 | 3 | 1.11E-16           | 0.96  | 5.41   | -        | 1523.1  |
| AHQ-9-4, 5765 - 5820       |               | K.DIENQYETQITQIEHEVSSSGQEVQSSAK.E          | 3266.38667 | 3 | 9.75E-07           | 0.98  | 6.09   | -        | 2188.0  |
| AHQ-9-3, 5757              |               | K.DIENQYETQITQIEHEVSSSGQEVQSSAK.E          | 3266.38667 | 3 | 3.28E-07           | 0.94  | 4.92   | -        | 1247.4  |
| AHQ-9-2, 5925              |               | K.DIENQYETQITQIEHEVSSSGQEVQSSAK.E          | 3266.38667 | 3 | 3.33E-15           | 0.97  | 6.22   | -        | 1424.4  |
| AHQ-9-11, 5677             |               | K.DIENQYETQITQIEHEVSSSGQEVQSSAK.E          | 3266.38667 | 3 | 4.84E-06           | 0.85  | 3.60   | -        | 689.2   |
| AHQ-9-10, 5668 - 5675      |               | K.DIENQYETQITQIEHEVSSSGQEVQSSAK.E          | 3266.38667 | 3 | 2.50E-04           | 0.83  | 4.02   | -        | 490.1   |
| AHQ-9-7, 5694 - 5748       |               | K.DIENQYETQITQIEHEVSSSGQEVQSSAK.E          | 3266.38667 | 3 | 4.44E-15           | 0.97  | 5.87   | -        | 1634.5  |
| AHQ-9-2, 5590              |               | K.DIENQYETQITQIEHEVSSSGQEVQSSAK.E          | 3266.38667 | 3 | 1.27E-04           | 0.75  | 3.58   | -        | 514.1   |
| AHQ-9-1, 5599              |               | K.DIENQYETQITQIEHEVSSSGQEVQSSAK.E          | 3266.38667 | 3 | 5.52E-07           | 0.88  | 4.03   | -        | 970.1   |
| AHQ-9-6, 5753              |               | K.DIENQYETQITQIEHEVSSSGQEVQSSAK.E          | 3266.38667 | 3 | 1.12E-09           | 0.95  | 5.67   | -        | 1163.2  |
| AHQ-9-1, 5883 - 5938       |               | K.DIENQYETQITQIEHEVSSSGQEVQSSAK.E          | 3266.38667 | 3 | 1.47E-12           | 0.97  | 6.19   | -        | 1724.5  |
| AHQ-9-5, 5503              |               | K.DIENQYETQITQIEHEVSSSGQEVQSSAK.E          | 3266.38667 | 3 | 1.00E-30           | 0.96  | 5.28   | -        | 1671.0  |
| AHQ-9-5, 5916 - 5972       |               | K.DIENQYETQITQIEHEVSSSGQEVQSSAK.E          | 3266.38667 | 3 | 4.88E-05           | 0.91  | 4.47   | -        | 1136.1  |
| AHQ-9-5, 5835              |               | K.DIENQYETQITQIEHEVSSSGQEVQSSAK.E          | 3266.38667 | 3 | 5.12E-06           | 0.97  | 5.78   | -        | 1745.0  |
| AHQ-9-6, 4330              |               | K.EIETYHNLLEGGQEDFESSGAGK.I                | 2511.59648 | 2 | 2.11E-07           | 0.74  | 3.22   | -        | 569.7   |
| AHQ-9-1, 4534              |               | K.EIETYHNLLEGGQEDFESSGAGK.I                | 2511.59648 | 3 | 2.46E-07           | 0.96  | 5.61   | -        | 1280.2  |
| AHQ-9-1, 4539              |               | K.EIETYHNLLEGGQEDFESSGAGK.I                | 2511.59648 | 2 | 3.00E-04           | 0.82  | 3.36   | -        | 686.2   |
| AHQ-9-7, 4296              |               | K.EIETYHNLLEGGQEDFESSGAGK.I                | 2511.59648 | 3 | 1.20E-08           | 0.94  | 4.83   | -        | 1379.0  |
| AHQ-9-3, 4365 - 4373       |               | K.EIETYHNLLEGGQEDFESSGAGK.I                | 2511.59648 | 3 | 1.84E-05           | 0.94  | 5.05   | -        | 1501.5  |
| AHQ-9-5, 4379              |               | K.EIETYHNLLEGGQEDFESSGAGK.I                | 2511.59648 | 2 | 2.67E-04           | 0.83  | 3.41   | -        | 667.6   |
| AHQ-9-5, 4373              |               | K.EIETYHNLLEGGQEDFESSGAGK.I                | 2511.59648 | 3 | 1.27E-07           | 0.95  | 6.02   | -        | 1191.3  |
| AHQ-9-4, 4314 - 4381       |               | K.EIETYHNLLEGGQEDFESSGAGK.I                | 2511.59648 | 3 | 5.90E-05           | 0.94  | 4.70   | -        | 1491.4  |
| AHQ-9-5, 4824              |               | R.GGGGSFGYSYGGGGGGGFSASSLLGGGFGGGS.R       | 2706.73770 | 2 | 1.34E-07           | 0.77  | 3.18   | -        | 628.8   |
| AHQ-9-2, 4914              |               | R.GGGGSFGYSYGGGGGGGFSASSLLGGGFGGGS.R       | 2706.73770 | 2 | 2.23E-07           | 0.85  | 3.79   | -        | 527.8   |
| AHQ-9-1, 4938              |               | R.GGGGSFGYSYGGGGGGGFSASSLLGGGFGGGS.R       | 2706.73770 | 2 | 1.11E-07           | 0.93  | 4.56   | -        | 817.2   |
| AHQ-9-5, 2629              |               | R.GSGSGSHGGGSGFGGSESGSYGGEEASGGGGYGGGSGK.S | 3225.08711 | 3 | 1.54E-06           | 0.91  | 4.27   | -        | 1039.3  |
| AHQ-9-1, 2714 - 2764       |               | R.GSGSGSHGGGSGFGGSESGSYGGEEASGGGGYGGGSGK.S | 3225.08711 | 3 | 2.12E-06           | 0.96  | 5.71   | -        | 1287.4  |
| AHQ-9-7, 4865              |               | R.HGVQLELEIELQSLK.K                        | 1839.03978 | 2 | 2.69E-04           | 0.94  | 4.03   | -        | 1400.7  |
| AHQ-9-5, 4952              |               | R.HGVQLELEIELQSLK.K                        | 1839.03978 | 3 | 7.76E-05           | 0.84  | 3.60   | -        | 1357.1  |
| AHQ-9-4, 4945              |               | R.HGVQLELEIELQSLK.K                        | 1839.03978 | 3 | 4.20E-05           | 0.94  | 5.44   | -        | 1299.1  |
| AHQ-9-1, 5098              |               | R.HGVQLELEIELQSLK.K                        | 1839.03978 | 2 | 8.21E-11           | 0.95  | 4.67   | -        | 1203.2  |
| AHQ-9-7, 4868              |               | R.HGVQLELEIELQSLK.K                        | 1839.03978 | 3 | 1.26E-04           | 0.80  | 3.53   | -        | 1042.0  |
| AHQ-9-1, 5102              |               | R.HGVQLELEIELQSLK.K                        | 1839.03978 | 3 | 1.10E-06           | 0.96  | 5.24   | -        | 2022.9  |
| AHQ-9-2, 5047              |               | R.HGVQLELEIELQSLK.K                        | 1839.03978 | 2 | 5.86E-08           | 0.96  | 4.58   | -        | 1274.7  |
| AHQ-9-1, 5524              |               | R.KDIENQYETQITQIEHEVSSSGQEVQSSAK.E         | 3394.55959 | 3 | 8.15E-11           | 0.97  | 6.52   | -        | 1592.6  |
| AHQ-9-5, 5421              |               | R.KDIENQYETQITQIEHEVSSSGQEVQSSAK.E         | 3394.55959 | 3 | 2.64E-06           | 0.95  | 5.26   | -        | 1689.7  |
| AHQ-9-4, 5372 - 5429       |               | R.KDIENQYETQITQIEHEVSSSGQEVQSSAK.E         | 3394.55959 | 3 | 7.22E-07           | 0.81  | 3.68   | -        | 812.8   |
| AHQ-9-1, 5002              |               | R.LASYLKQVQALAEANNDLENK.I                  | 2378.57787 | 3 | 9.39E-05           | 0.80  | 3.51   | -        | 977.7   |
| AHQ-9-7, 6217              |               | K.NYSPPYNTIDDLKQIVDLTVGNK.T                | 2904.13412 | 3 | 1.01E-06           | 0.92  | 4.88   | -        | 617.5   |
| AHQ-9-13, 6216             |               | K.NYSPPYNTIDDLKQIVDLTVGNK.T                | 2904.13412 | 3 | 5.96E-06           | 0.83  | 3.81   | -        | 550.7   |
| AHQ-9-2, 6401              |               | K.NYSPPYNTIDDLKQIVDLTVGNK.T                | 2904.13412 | 3 | 3.88E-11           | 0.88  | 4.07   | -        | 475.2   |
| AHQ-9-5, 6312 - 6371       |               | K.NYSPPYNTIDDLKQIVDLTVGNK.T                | 2904.13412 | 3 | 6.21E-06           | 0.87  | 4.34   | -        | 504.6   |
| AHQ-9-4, 6254 - 6293       |               | K.NYSPPYNTIDDLKQIVDLTVGNK.T                | 2904.13412 | 3 | 9.62E-09           | 0.79  | 3.40   | -        | 451.4   |
| AHQ-9-3, 6237              |               | K.NYSPPYNTIDDLKQIVDLTVGNK.T                | 2904.13412 | 3 | 2.01E-08           | 0.92  | 4.92   | -        | 738.0   |
| AHQ-9-6, 6234              |               | K.NYSPPYNTIDDLKQIVDLTVGNK.T                | 2904.13412 | 3 | 1.66E-08           | 0.87  | 4.08   | -        | 637.9   |
| AHQ-9-1, 6435 - 6456       |               | K.NYSPPYNTIDDLKQIVDLTVGNK.T                | 2904.13412 | 3 | 2.66E-04           | 0.55  | 3.16   | -        | 434.2   |
| AHQ-9-1, 6344 - 6350       |               | K.NYSPPYNTIDDLKQIVDLTVGNK.T                | 2904.13412 | 3 | 7.01E-08           | 0.94  | 4.87   | -        | 946.4   |
| AHQ-9-1, 3044              |               | R.QVLDNLTM*EK.S                            | 1207.37967 | 2 | 1.07E-04           | 0.49  | 2.59   | -        | 290.3   |
| AHQ-9-2, 6266 - 6273       |               | K.SDLEM*QYETLQEELM*ALK.K                   | 2204.46135 | 2 | 2.73E-04           | 0.89  | 4.00   | -        | 1216.0  |
| AHQ-9-1, 6243 - 6298       |               | K.SDLEM*QYETLQEELM*ALK.K                   | 2204.46135 | 2 | 5.33E-05           | 0.88  | 3.98   | -        | 873.6   |
| AHQ-9-13, 6137             |               | K.SDLEM*QYETLQEELM*ALK.K                   | 2204.46135 | 2 | 1.40E-06           | 0.83  | 3.37   | -        | 915.3   |
| AHQ-9-5, 6176 - 6235       |               | K.SDLEM*QYETLQEELM*ALK.K                   | 2204.46135 | 2 | 2.06E-06           | 0.93  | 4.11   | -        | 1519.3  |
| AHQ-9-5, 5731 - 5740       |               | K.SDLEM*QYETLQEELM*ALKK.N                  | 2332.63427 | 3 | 7.83E-06           | 0.64  | 3.06   | -        | 609.4   |
| AHQ-9-1, 5836 - 5894       |               | K.SDLEM*QYETLQEELM*ALKK.N                  | 2332.63427 | 3 | 3.02E-06           | 0.82  | 3.69   | -        | 815.7   |
| AHQ-9-5, 3163 - 3241       |               | K.TLLDIDNTR.M                              | 1061.17119 | 2 | 4.15E-04           | 0.71  | 2.61   | -        | 605.3   |
| AHQ-9-11, 3150 - 3154      |               | K.TLLDIDNTR.M                              | 1061.17119 | 2 | 2.10E-05           | 0.58  | 2.54   | -        | 569.6   |
| AHQ-9-4, 3176 - 3177       |               | K.TLLDIDNTR.M                              | 1061.17119 | 2 | 1.05E-05           | 0.79  | 2.95   | -        | 568.0   |
| AHQ-9-7, 3004 - 3008       |               | K.VQALEEANNDLENK.I                         | 1587.67060 | 2 | 1.79E-08           | 0.98  | 5.21   | -        | 1821.6  |
| AHQ-9-7, 2637              |               | K.VQALEEANNDLENK.I                         | 1587.67060 | 2 | 1.53E-09           | 0.95  | 4.46   | -        | 1452.7  |
| AHQ-9-6, 3019 - 3022       |               | K.VQALEEANNDLENK.I                         | 1587.67060 | 2 | 4.87E-08           | 0.97  | 4.87   | -        | 1563.0  |
| AHQ-9-8, 2983              |               | K.VQALEEANNDLENK.I                         | 1587.67060 | 2 | 3.80E-05           | 0.96  | 4.68   | -        | 1656.2  |
| AHQ-9-2, 3117              |               | K.VQALEEANNDLENK.I                         | 1587.67060 | 2 | 3.05E-09           | 0.97  | 5.15   | -        | 1784.9  |
| AHQ-9-5, 3244 - 3252       |               | K.VQALEEANNDLENK.I                         | 1587.67060 | 2 | 4.14E-06           | 0.96  | 4.94   | -        | 1561.8  |
| AHQ-9-5, 3023              |               | K.VQALEEANNDLENK.I                         | 1587.67060 | 2 | 1.57E-08           | 0.97  | 4.99   | -        | 1716.9  |
| AHQ-9-1, 3215              |               | K.VQALEEANNDLENK.I                         | 1587.67060 | 2 | 4.55E-06           | 0.98  | 5.14   | -        | 2154.9  |
| AHQ-9-13, 3076             |               | K.VQALEEANNDLENK.I                         | 1587.67060 | 2 | 3.08E-07           | 0.88  | 3.68   | -        | 988.3   |
| AHQ-9-3, 3044              |               | K.VQALEEANNDLENK.I                         | 1587.67060 | 2 | 9.07E-06           | 0.96  | 4.08   | -        | 1871.6  |
| AHQ-9-4, 2637 - 2698       |               | K.VQALEEANNDLENK.I                         | 1587.67060 | 2 | 3.60E-05           | 0.95  | 4.14   | -        | 1357.5  |
| AHQ-9-4, 3014              |               | K.VQALEEANNDLENK.I                         | 1587.67060 | 2 | 1.64E-05           | 0.97  | 4.43   | -        | 1878.4  |
| AHQ-9-5, 2641 - 2645       |               | K.VQALEEANNDLENK.I                         | 1587.67060 | 2 | 1.06E-05           | 0.96  | 4.90   | -        | 1668.6  |
| gi 4507729 ref NP_001060.1 |               | tubulin, beta polypeptide [Homo sapiens]   |            |   | 1.11E-16           | 5.65  | 70.38  | 21.30    | 49906.7 |
| AHQ-9-7, 4592 - 4666       |               | R.AILVDLEPGTMDSVR.S                        | 1616.86162 | 2 | 2.33E-04           | 0.34  | 2.77   | -        | 335.1   |
| AHQ-9-7, 2936              |               | K.EVDEQMLNVQNK.N                           | 1447.59668 | 2 | 1.81E-04           | 0.94  | 3.49   | -        | 1451.8  |
| AHQ-9-8, 5923              |               | K.GHYTEGAEVLVSDVVR.K                       | 1960.13388 | 2 | 5.43E-05           | 0.92  | 4.04   | -        | 1177.0  |
| AHQ-9-11, 5791             |               | K.GHYTEGAEVLVSDVVR.K                       | 1960.13388 | 2 | 8.22E-04           | 0.91  | 3.03   | -        | 1486.2  |
| AHQ-9-8, 5919 - 5924       |               | K.GHYTEGAEVLVSDVVR.K                       | 1960.13388 | 3 | 2.55E-04           | 0.71  | 3.45   | -        | 828.4   |
| AHQ-9-7, 5834 - 5870       |               | K.GHYTEGAEVLVSDVVR.K                       | 1960.13388 | 2 | 7.96E-07           | 0.98  | 5.54   | -        | 2052.0  |
| AHQ-9-7, 5833 - 5844       |               | K.GHYTEGAEVLVSDVVR.K                       | 1960.13388 | 3 | 3.50E-05           | 0.90  | 4.41   | -        | 1055.1  |
| AHQ-9-13, 5888             |               | K.GHYTEGAEVLVSDVVR.K                       | 1960.13388 | 2 | 2.94E-10           | 0.98  | 5.80   | -        | 2146.4  |
| AHQ-9-7, 3554 - 3626       |               | R.ISEQFTAM*FR.R                            | 1246.41758 | 2 | 1.19E-04           | 0.72  | 2.66   | -        | 624.1   |
| AHQ-9-7, 4325              |               | R.ISEQFTAM*FR.R                            | 1230.41818 | 2 | 6.59E-07           | 0.71  | 2.95   | -        | 782.1   |
| AHQ-9-13, 4425             |               | R.ISEQFTAM*FR.R                            | 1230.41818 | 2 | 1.93E-07           | 0.88  | 3.08   | -        | 985.4   |
| AHQ-9-7, 5136 - 5193       |               | K.NSSYFVFWIPNVK.T                          | 1697.87148 | 2 | 4.81E-05           | 0.81  | 3.50   | -        | 660.8   |
| AHQ-9-13, 5884 - 5948      |               | R.SGPFQGIIFRPNDFVFGQSGAGNNWAK.G            | 2800.03898 | 3 | 1.42E-07           | 0.95  | 5.60   | -        | 1366.6  |
| AHQ-9-8, 5876 - 5939       |               | R.SGPFQGIIFRPNDFVFGQSGAGNNWAK.G            | 2800.03898 | 3 | 7.30E-08           | 0.98  | 6.62   | -        | 2177.2  |
| AHQ-9-7, 5776 - 5856       |               | R.SGPFQGIIFRPNDFVFGQSGAGNNWAK.G            | 2800.03898 | 3 | 1.11E-16           | 0.98  | 7.58   | -        | 2801.3  |
| gi 4505879 ref NP_002655.1 |               | pleckstrin, p47 [Homo sapiens]             |            |   | 3.89E-15           | 5.39  | 60.38  | 26.60    | 40082.5 |
| AHQ-9-12, 5286 - 5289      |               | R.EDPAYLHYDPAGAEDPLGAIHLR.G                | 2684.89982 | 3 | 2.09E-04           | 0.86  | 4.14   | -        | 914.9   |
| AHQ-9-8, 5364 - 5366       |               | R.EDPAYLHYDPAGAEDPLGAIHLR.G                | 2684.89982 | 3 | 8.49E-09           | 0.98  | 6.88   | -        | 2484.2  |
| AHQ-9-8, 5374              |               | R.EDPAYLHYDPAGAEDPLGAIHLR.G                | 2684.89982 | 2 | 7.10E-05           | 0.80  | 3.22   | -        | 492.8   |
| AHQ-9-11, 5253             |               | R.EDPAYLHYDPAGAEDPLGAIHLR.G                | 2684.89982 | 3 | 1.31E-06           | 0.91  | 3.77   | -        | 1179.6  |
| AHQ-9-13, 5325 - 5326      |               | R.EDPAYLHYDPAGAEDPLGAIHLR.G                | 2684.89982 | 3 | 4.40E-07           | 0.97  | 7.00   | -        | 1848.3  |
| AHQ-9-8, 2272              |               | R.GCVVTSVESNSNGR.K.S                       | 1595.71755 | 2 | 1.46E-07           | 0.63  | 3.12   | -        | 463.6   |
| AHQ-9-10, 6287             |               | R.KSEENLFEIITAEVHYFLQAATPK.E               | 3024.32650 |   |                    |       |        |          |         |

|                            |                                   |            |   |          |       |        |       |          |
|----------------------------|-----------------------------------|------------|---|----------|-------|--------|-------|----------|
| AHQ-9-8, 6443              | K.SEEENLEFIITADEVHYFLQAATPK.E     | 2896.15359 | 3 | 2.65E-08 | 0.91  | 4.45   | -     | 964.6    |
| gi 4507485 ref NP_003237.1 | [thrombospondin 1 [Homo sapiens]  |            |   | 5.00E-15 | 27.53 | 340.33 | 32.60 | 129351.8 |
| AHQ-9-5, 3953 - 3967       | K.AGTLDL.SLTVGK.Q                 | 1303.48711 | 2 | 5.31E-05 | 0.90  | 3.50   | -     | 1137.9   |
| AHQ-9-6, 2715 - 2779       | R.AQLYDCEK.M                      | 1141.27636 | 2 | 2.71E-05 | 0.82  | 2.92   | -     | 610.3    |
| AHQ-9-3, 5469 - 5525       | R.AQLYDCEKM'ENAELDVPIQSVFTR.D     | 2988.33923 | 3 | 1.72E-05 | 0.96  | 6.58   | -     | 975.1    |
| AHQ-9-5, 5520 - 5575       | R.AQLYDCEKM'ENAELDVPIQSVFTR.D     | 2988.33923 | 3 | 1.87E-04 | 0.96  | 5.76   | -     | 974.2    |
| AHQ-9-4, 5522 - 5581       | R.AQLYDCEKM'ENAELDVPIQSVFTR.D     | 2988.33923 | 3 | 6.38E-05 | 0.89  | 4.43   | -     | 714.3    |
| AHQ-9-6, 5441 - 5489       | R.AQLYDCEKM'ENAELDVPIQSVFTR.D     | 2988.33923 | 3 | 2.19E-05 | 0.95  | 5.92   | -     | 846.9    |
| AHQ-9-2, 5623 - 5677       | R.AQLYDCEKM'ENAELDVPIQSVFTR.D     | 2988.33923 | 3 | 1.04E-06 | 0.94  | 5.65   | -     | 646.9    |
| AHQ-9-4, 3598 - 3617       | R.CENTDPGYNCLPCPPR.F              | 1954.10800 | 2 | 9.07E-11 | 0.90  | 4.13   | -     | 530.6    |
| AHQ-9-2, 3821              | R.CENTDPGYNCLPCPPR.F              | 1954.10800 | 2 | 6.24E-05 | 0.91  | 4.30   | -     | 565.9    |
| AHQ-9-3, 3589 - 3602       | R.CENTDPGYNCLPCPPR.F              | 1954.10800 | 2 | 4.44E-08 | 0.91  | 3.90   | -     | 612.6    |
| AHQ-9-2, 3686              | R.CENTDPGYNCLPCPPR.F              | 1954.10800 | 2 | 8.88E-08 | 0.85  | 3.58   | -     | 447.1    |
| AHQ-9-2, 3859              | K.CNYLGHYSDPMYR.C                 | 1677.84222 | 2 | 1.11E-05 | 0.83  | 3.26   | -     | 533.4    |
| AHQ-9-3, 3761              | K.CNYLGHYSDPMYR.C                 | 1677.84222 | 2 | 8.71E-05 | 0.85  | 2.93   | -     | 796.1    |
| AHQ-9-4, 3749              | K.CNYLGHYSDPMYR.C                 | 1677.84222 | 2 | 4.61E-04 | 0.69  | 2.55   | -     | 540.3    |
| AHQ-9-4, 3186              | K.DCVGQVTEGICNK.Q                 | 1654.75869 | 2 | 1.00E-05 | 0.83  | 3.46   | -     | 612.8    |
| AHQ-9-3, 3197              | K.DCVGQVTEGICNK.Q                 | 1654.75869 | 2 | 2.55E-04 | 0.82  | 3.31   | -     | 613.2    |
| AHQ-9-2, 3278              | K.DCVGQVTEGICNK.Q                 | 1654.75869 | 2 | 2.04E-05 | 0.85  | 2.96   | -     | 841.5    |
| AHQ-9-5, 3201              | K.DCVGQVTEGICNK.Q                 | 1654.75869 | 2 | 4.58E-04 | 0.93  | 4.02   | -     | 1136.7   |
| AHQ-9-5, 2796              | K.DHSGQVFSVSNKG.A                 | 1461.56164 | 2 | 3.49E-06 | 0.93  | 3.85   | -     | 1052.4   |
| AHQ-9-6, 2850              | K.DHSGQVFSVSNKG.A                 | 1461.56164 | 2 | 7.79E-05 | 0.80  | 2.67   | -     | 1040.4   |
| AHQ-9-7, 3005              | R.DNCQVYVNVQDR.D                  | 1575.64166 | 2 | 5.18E-04 | 0.87  | 3.44   | -     | 864.7    |
| AHQ-9-2, 3094              | R.DNCQVYVNVQDR.D                  | 1575.64166 | 2 | 1.97E-04 | 0.87  | 3.67   | -     | 838.1    |
| AHQ-9-6, 3113              | R.DNCQVYVNVQDR.D                  | 1575.64166 | 2 | 2.81E-06 | 0.81  | 3.08   | -     | 834.5    |
| AHQ-9-4, 3001              | R.DNCQVYVNVQDR.D                  | 1575.64166 | 2 | 6.74E-05 | 0.66  | 2.57   | -     | 769.6    |
| AHQ-9-2, 3209              | R.DNCQVYVNVQDR.D                  | 1575.64166 | 2 | 1.30E-05 | 0.91  | 3.39   | -     | 1247.5   |
| AHQ-9-6, 3001              | R.DNCQVYVNVQDR.D                  | 1575.64166 | 2 | 2.96E-06 | 0.87  | 3.24   | -     | 953.1    |
| AHQ-9-5, 3012              | R.DNCQVYVNVQDR.D                  | 1575.64166 | 2 | 6.11E-04 | 0.90  | 3.68   | -     | 997.0    |
| AHQ-9-3, 3024 - 3097       | R.DNCQVYVNVQDR.D                  | 1575.64166 | 2 | 2.11E-04 | 0.74  | 3.17   | -     | 576.4    |
| AHQ-9-2, 3643 - 3709       | R.DTDM'DGVGDQDCNCPLEHNPQLDSDSDR.I | 3340.31822 | 3 | 8.85E-09 | 0.94  | 5.72   | -     | 811.7    |
| AHQ-9-5, 3609 - 3685       | R.DTDM'DGVGDQDCNCPLEHNPQLDSDSDR.I | 3340.31822 | 3 | 1.84E-09 | 0.93  | 5.09   | -     | 840.4    |
| AHQ-9-6, 3555              | R.DTDM'DGVGDQDCNCPLEHNPQLDSDSDR.I | 3340.31822 | 3 | 5.65E-12 | 0.83  | 4.12   | -     | 738.6    |
| AHQ-9-4, 3577 - 3634       | R.DTDM'DGVGDQDCNCPLEHNPQLDSDSDR.I | 3340.31822 | 3 | 2.37E-10 | 0.89  | 4.14   | -     | 809.1    |
| AHQ-9-7, 3877              | R.DTDM'DGVGDQDCNCPLEHNPQLDSDSDR.I | 3324.31882 | 3 | 7.69E-05 | 0.86  | 4.20   | -     | 601.4    |
| AHQ-9-3, 3546 - 3613       | R.DTDM'DGVGDQDCNCPLEHNPQLDSDSDR.I | 3340.31822 | 3 | 5.00E-15 | 0.95  | 5.81   | -     | 722.6    |
| AHQ-9-2, 3974              | R.DTDM'DGVGDQDCNCPLEHNPQLDSDSDR.I | 3324.31882 | 3 | 7.43E-04 | 0.88  | 4.32   | -     | 729.6    |
| AHQ-9-5, 3929              | R.DTDM'DGVGDQDCNCPLEHNPQLDSDSDR.I | 3324.31882 | 3 | 3.01E-08 | 0.61  | 3.31   | -     | 491.8    |
| AHQ-9-2, 3657              | K.FQDLVDAVR.A                     | 1063.18877 | 2 | 4.84E-05 | 0.90  | 3.07   | -     | 1063.9   |
| AHQ-9-6, 3523              | K.FQDLVDAVR.A                     | 1063.18877 | 2 | 2.45E-05 | 0.87  | 2.97   | -     | 1017.5   |
| AHQ-9-3, 3558              | K.FQDLVDAVR.A                     | 1063.18877 | 2 | 1.18E-04 | 0.80  | 2.78   | -     | 844.9    |
| AHQ-9-2, 4219 - 4229       | R.FQMIPLDPK.G                     | 1089.33277 | 2 | 5.82E-04 | 0.80  | 3.06   | -     | 708.1    |
| AHQ-9-6, 2929              | R.FTGSOPFGQVVEHATANK.Q            | 1877.00666 | 2 | 1.50E-04 | 0.67  | 2.94   | -     | 403.3    |
| AHQ-9-3, 2901 - 2960       | R.FTGSOPFGQVVEHATANK.Q            | 1877.00666 | 2 | 6.21E-09 | 0.73  | 3.36   | -     | 437.0    |
| AHQ-9-3, 2953              | R.FTGSOPFGQVVEHATANK.Q            | 1877.00666 | 3 | 1.29E-05 | 0.80  | 3.90   | -     | 454.6    |
| AHQ-9-2, 3018              | R.FTGSOPFGQVVEHATANK.Q            | 1877.00666 | 2 | 8.19E-05 | 0.86  | 4.22   | -     | 422.8    |
| AHQ-9-3, 2954              | R.FTGSOPFGQVVEHATANK.Q            | 1877.00666 | 2 | 1.81E-07 | 0.91  | 4.35   | -     | 450.6    |
| AHQ-9-4, 2928              | R.FTGSOPFGQVVEHATANK.Q            | 1877.00666 | 3 | 5.61E-07 | 0.83  | 3.61   | -     | 618.9    |
| AHQ-9-8, 5146              | R.FVFGTTPEDILR.N                  | 1395.58470 | 2 | 7.46E-04 | 0.78  | 3.36   | -     | 482.4    |
| AHQ-9-10, 5146             | K.GFLLASLR.Q                      | 990.22407  | 2 | 5.57E-05 | 0.95  | 2.98   | -     | 1928.8   |
| AHQ-9-2, 5397 - 5398       | K.GFLLASLR.Q                      | 990.22407  | 2 | 1.06E-04 | 0.97  | 4.18   | -     | 2157.6   |
| AHQ-9-4, 5297              | K.GFLLASLR.Q                      | 990.22407  | 2 | 2.87E-04 | 0.97  | 3.86   | -     | 1983.3   |
| AHQ-9-6, 5223              | K.GFLLASLR.Q                      | 990.22407  | 2 | 1.79E-04 | 0.94  | 3.07   | -     | 1498.0   |
| AHQ-9-11, 5171             | K.GFLLASLR.Q                      | 990.22407  | 2 | 6.71E-06 | 0.95  | 3.46   | -     | 1583.2   |
| AHQ-9-5, 5301              | K.GFLLASLR.Q                      | 990.22407  | 2 | 4.12E-05 | 0.96  | 3.53   | -     | 2020.7   |
| AHQ-9-3, 5252              | K.GFLLASLR.Q                      | 990.22407  | 2 | 2.33E-04 | 0.97  | 4.07   | -     | 2289.9   |
| AHQ-9-3, 4409              | K.GGVNDNFQGVQLQNV.R.F             | 1617.74799 | 2 | 1.02E-06 | 0.93  | 4.28   | -     | 1040.4   |
| AHQ-9-5, 4420              | K.GGVNDNFQGVQLQNV.R.F             | 1617.74799 | 2 | 3.28E-04 | 0.85  | 4.15   | -     | 668.4    |
| AHQ-9-2, 4213 - 4273       | K.GGVNDNFQGVQLQNV.R.F             | 1617.74799 | 2 | 3.97E-05 | 0.79  | 3.09   | -     | 614.6    |
| AHQ-9-2, 4365 - 4425       | K.GGVNDNFQGVQLQNV.R.F             | 1617.74799 | 2 | 1.48E-06 | 0.96  | 4.95   | -     | 1239.2   |
| AHQ-9-6, 4014 - 4063       | K.GGVNDNFQGVQLQNV.R.F             | 1617.74799 | 2 | 8.07E-05 | 0.62  | 2.91   | -     | 601.6    |
| AHQ-9-2, 4526              | K.GGVNDNFQGVQLQNV.R.F             | 1617.74799 | 2 | 3.59E-04 | 0.91  | 4.17   | -     | 823.1    |
| AHQ-9-10, 4153 - 4206      | K.GGVNDNFQGVQLQNV.R.F             | 1617.74799 | 2 | 2.93E-05 | 0.84  | 3.44   | -     | 800.2    |
| AHQ-9-3, 4250 - 4309       | K.GGVNDNFQGVQLQNV.R.F             | 1617.74799 | 2 | 6.69E-05 | 0.94  | 4.51   | -     | 1046.6   |
| AHQ-9-7, 4197 - 4253       | K.GGVNDNFQGVQLQNV.R.F             | 1617.74799 | 2 | 1.93E-06 | 0.88  | 3.87   | -     | 776.5    |
| AHQ-9-6, 4205              | K.GGVNDNFQGVQLQNV.R.F             | 1617.74799 | 2 | 5.25E-05 | 0.56  | 2.89   | -     | 608.4    |
| AHQ-9-6, 4218              | K.GGVNDNFQGVQLQNV.R.F             | 1617.74799 | 3 | 1.52E-04 | 0.78  | 3.62   | -     | 771.4    |
| AHQ-9-6, 4362 - 4437       | K.GGVNDNFQGVQLQNV.R.F             | 1617.74799 | 2 | 7.76E-05 | 0.90  | 4.14   | -     | 781.5    |
| AHQ-9-9, 4109              | K.GGVNDNFQGVQLQNV.R.F             | 1617.74799 | 2 | 1.71E-04 | 0.74  | 3.07   | -     | 747.1    |
| AHQ-9-4, 4256 - 4326       | K.GGVNDNFQGVQLQNV.R.F             | 1617.74799 | 2 | 1.46E-05 | 0.88  | 4.08   | -     | 616.4    |
| AHQ-9-4, 4109              | K.GGVNDNFQGVQLQNV.R.F             | 1617.74799 | 2 | 2.76E-06 | 0.50  | 3.09   | -     | 347.4    |
| AHQ-9-2, 2307              | K.GPDPSSPFR.I                     | 1031.10364 | 2 | 2.54E-04 | 0.83  | 3.01   | -     | 543.6    |
| AHQ-9-3, 2253              | K.GPDPSSPFR.I                     | 1031.10364 | 2 | 1.32E-04 | 0.68  | 2.97   | -     | 409.3    |
| AHQ-9-5, 3143              | R.GTLALER.K                       | 873.03234  | 2 | 5.81E-04 | 0.88  | 3.33   | -     | 927.5    |
| AHQ-9-3, 3173              | R.GTLALER.K                       | 873.03234  | 2 | 4.82E-04 | 0.91  | 3.46   | -     | 1000.4   |
| AHQ-9-3, 5853 - 5910       | R.IEDANLIPPVDDKFQDLVDAVR.A        | 2580.87450 | 3 | 1.53E-05 | 0.73  | 3.40   | -     | 515.8    |
| AHQ-9-5, 6048              | R.IEDANLIPPVDDKFQDLVDAVR.A        | 2580.87450 | 3 | 4.51E-05 | 0.66  | 3.03   | -     | 391.9    |
| AHQ-9-4, 5921 - 5990       | R.IEDANLIPPVDDKFQDLVDAVR.A        | 2580.87450 | 3 | 2.75E-05 | 0.90  | 4.52   | -     | 609.5    |
| AHQ-9-13, 5978 - 5982      | R.IEDANLIPPVDDKFQDLVDAVR.A        | 2580.87450 | 3 | 2.63E-05 | 0.76  | 3.42   | -     | 487.3    |
| AHQ-9-5, 5941 - 5943       | R.IEDANLIPPVDDKFQDLVDAVR.A        | 2580.87450 | 2 | 3.29E-07 | 0.70  | 3.09   | -     | 248.1    |
| AHQ-9-5, 5923 - 5992       | R.IEDANLIPPVDDKFQDLVDAVR.A        | 2580.87450 | 3 | 1.45E-05 | 0.76  | 3.18   | -     | 480.1    |
| AHQ-9-6, 5833 - 5894       | R.IEDANLIPPVDDKFQDLVDAVR.A        | 2580.87450 | 3 | 8.51E-07 | 0.59  | 3.04   | -     | 364.0    |
| AHQ-9-14-, 5897 - 5901     | R.IEDANLIPPVDDKFQDLVDAVR.A        | 2580.87450 | 3 | 7.69E-05 | 0.62  | 3.34   | -     | 377.2    |
| AHQ-9-2, 6081 - 6155       | R.IEDANLIPPVDDKFQDLVDAVR.A        | 2580.87450 | 3 | 2.33E-08 | 0.78  | 3.94   | -     | 435.0    |
| AHQ-9-11, 2409 - 2410      | K.IM'ADSGPIYDK.T                  | 1226.38144 | 2 | 8.95E-04 | 0.56  | 2.75   | -     | 401.6    |
| AHQ-9-6, 2674              | K.IMADSGPIYDK.T                   | 1210.38204 | 2 | 1.37E-06 | 0.89  | 3.32   | -     | 829.4    |
| AHQ-9-2, 2767              | K.IMADSGPIYDK.T                   | 1210.38204 | 2 | 2.79E-05 | 0.84  | 3.29   | -     | 553.9    |
| AHQ-9-7, 2668              | K.IMADSGPIYDK.T                   | 1210.38204 | 2 | 4.53E-05 | 0.81  | 2.98   | -     | 526.2    |
| AHQ-9-4, 6230              | R.IPESGGDNSVDFIFELTGAAR.K         | 2196.35899 | 2 | 2.41E-06 | 0.93  | 4.66   | -     | 624.2    |
| AHQ-9-13, 6255             | R.IPESGGDNSVDFIFELTGAAR.K         | 2196.35899 | 2 | 2.19E-06 | 0.93  | 4.25   | -     | 650.4    |
| AHQ-9-3, 6162 - 6165       | R.IPESGGDNSVDFIFELTGAAR.K         | 2196.35899 | 2 | 2.82E-11 | 0.98  | 6.46   | -     | 1445.8   |
| AHQ-9-2, 6334 - 6345       | R.IPESGGDNSVDFIFELTGAAR.K         | 2196.35899 | 2 | 1.96E-13 | 0.98  | 6.59   | -     | 1412.7   |
| AHQ-9-2, 6338              | R.IPESGGDNSVDFIFELTGAAR.K         | 2196.35899 | 3 | 2.71E-07 | 0.62  | 3.22   | -     | 739.7    |
| AHQ-9-5, 6244              | R.IPESGGDNSVDFIFELTGAAR.K         | 2196.35899 | 2 | 1.45E-09 | 0.97  | 5.55   | -     | 1154.7   |
| AHQ-9-7, 6140              | R.IPESGGDNSVDFIFELTGAAR.K         | 2196.35899 | 2 | 7.76E-07 | 0.95  | 4.36   | -     | 1070.2   |
| AHQ-9-1, 6332              | R.IPESGGDNSVDFIFELTGAAR.K         | 2196.35899 | 2 | 7.61E-04 | 0.83  | 3.37   | -     | 589.0    |
| AHQ-9-6, 6157 - 6207       | R.IPESGGDNSVDFIFELTGAAR.K         | 2196.35899 | 2 | 2.24E-08 | 0.93  | 4.67   | -     | 644.0    |
| AHQ-9-6, 2443 - 2501       | R.KDHSQVFSVSNKG.A                 | 1589.73455 | 2 | 1.96E-08 | 0.78  | 2.98   | -     | 871.6    |
| AHQ-9-4, 2454              | R.KDHSQVFSVSNKG.A                 | 1589.73455 | 2 | 5.82E-05 | 0.67  | 3.16   | -     | 396.4    |
| AHQ-9-2, 2650              | R.KDHSQVFSVSNKG.A                 | 1589.73455 | 2 | 5.80E-10 | 0.88  | 3.46   | -     | 911.6    |
| AHQ-9-3, 2489              | R.KDHSQVFSVSNKG.A                 | 1589.73455 | 2 | 5.04E-08 | 0.82  | 3.17   | -     | 852.2    |
| AHQ-9-4, 2469              | R.KVTEENKELANELR.R                | 1673.84976 | 2 | 1.71E-08 | 0.88  | 3.88   | -     | 967.5    |
| AHQ-9-7, 2456              | R.KVTEENKELANELR.R                | 1673.84976 | 2 | 2.95E-06 | 0.94  | 4.85   | -     | 1200.5   |
| AHQ-9-6, 2442 - 2463       | R.KVTEENKELANELR.R                | 1673.84976 | 2 | 3.37E-08 | 0.91  | 4.12   | -     | 1189.2   |
| AHQ-9-5, 2452 - 2463       | R.KVTEENKELANELR.R                | 1673.84976 | 2 | 5.66E-09 | 0.93  | 4.7    |       |          |



|                             |                              |            |   |          |       |         |       |          |
|-----------------------------|------------------------------|------------|---|----------|-------|---------|-------|----------|
| AHQ-9-3, 2500 - 2580        | R.KVTEENKELANELR.R           | 1673.84976 | 2 | 1.37E-08 | 0.96  | 4.75    | -     | 1624.0   |
| AHQ-9-2, 2473 - 2554        | R.KVTEENKELANELR.R           | 1673.84976 | 2 | 5.01E-08 | 0.94  | 4.43    | -     | 1494.5   |
| AHQ-9-5, 2577               | R.LCNSPSPQMMNGKPCGEAR.E      | 2135.34557 | 2 | 9.48E-04 | 0.36  | 2.59    | -     | 227.5    |
| AHQ-9-4, 4997 - 5054        | K.M*ENALDVP IQSVFTR.D        | 1866.08547 | 2 | 6.22E-06 | 0.76  | 3.23    | -     | 475.2    |
| AHQ-9-5, 5105               | K.MENALDVP IQSVFTR.D         | 1850.08607 | 2 | 2.84E-04 | 0.41  | 2.94    | -     | 408.0    |
| AHQ-9-3, 5012               | K.M*ENALDVP IQSVFTR.D        | 1866.08547 | 2 | 4.69E-05 | 0.87  | 3.06    | -     | 817.6    |
| AHQ-9-5, 5060               | K.M*ENALDVP IQSVFTR.D        | 1866.08547 | 2 | 5.70E-10 | 0.91  | 4.81    | -     | 434.3    |
| AHQ-9-6, 4982               | K.M*ENALDVP IQSVFTR.D        | 1866.08547 | 2 | 2.79E-05 | 0.56  | 3.20    | -     | 355.9    |
| AHQ-9-3, 3122 - 3194        | K.QVTSQYWDTPNTR.A            | 1596.68241 | 2 | 3.71E-04 | 0.67  | 3.13    | -     | 589.2    |
| AHQ-9-6, 3094 - 3095        | K.QVTSQYWDTPNTR.A            | 1596.68241 | 2 | 8.29E-07 | 0.89  | 3.62    | -     | 747.1    |
| AHQ-9-4, 3101               | K.QVTSQYWDTPNTR.A            | 1596.68241 | 2 | 1.65E-07 | 0.87  | 3.28    | -     | 686.7    |
| AHQ-9-5, 3105               | K.QVTSQYWDTPNTR.A            | 1596.68241 | 2 | 2.13E-07 | 0.69  | 2.90    | -     | 470.5    |
| AHQ-9-11, 3079 - 3139       | K.QVTSQYWDTPNTR.A            | 1596.68241 | 2 | 8.56E-06 | 0.75  | 3.12    | -     | 466.3    |
| AHQ-9-2, 2998               | R.RPPLCYHNGVQYR.N            | 1661.86889 | 2 | 1.49E-06 | 0.90  | 3.63    | -     | 856.3    |
| AHQ-9-6, 2899 - 2903        | R.RPPLCYHNGVQYR.N            | 1661.86889 | 2 | 3.09E-04 | 0.87  | 3.69    | -     | 475.6    |
| AHQ-9-4, 2806               | R.RPPLCYHNGVQYR.N            | 1661.86889 | 3 | 5.73E-04 | 0.90  | 3.22    | -     | 1236.6   |
| AHQ-9-3, 2242 - 2317        | R.SCDLNNRCGSSVQTR.T          | 1973.04966 | 2 | 2.56E-07 | 0.38  | 2.59    | -     | 251.1    |
| AHQ-9-4, 3769               | K.SITLQVQEDR.A               | 1208.34588 | 2 | 8.51E-07 | 0.91  | 3.21    | -     | 1229.9   |
| AHQ-9-13, 4000              | K.SITLQVQEDR.A               | 1208.34588 | 2 | 3.60E-04 | 0.66  | 2.74    | -     | 663.0    |
| AHQ-9-3, 3769 - 3773        | K.SITLQVQEDR.A               | 1208.34588 | 2 | 4.02E-06 | 0.94  | 3.63    | -     | 1383.5   |
| AHQ-9-11, 3647 - 3723       | K.SITLQVQEDR.A               | 1208.34588 | 2 | 7.20E-04 | 0.84  | 3.09    | -     | 859.7    |
| AHQ-9-2, 3873               | K.SITLQVQEDR.A               | 1208.34588 | 2 | 8.75E-07 | 0.94  | 3.51    | -     | 1369.6   |
| AHQ-9-5, 3735 - 3795        | K.SITLQVQEDR.A               | 1208.34588 | 2 | 7.56E-04 | 0.89  | 3.11    | -     | 1120.3   |
| AHQ-9-5, 3775               | K.SITLQVQEDR.A               | 1208.34588 | 2 | 7.65E-06 | 0.91  | 3.44    | -     | 1195.6   |
| AHQ-9-4, 3330               | R.TIVTLQDSIR.K               | 1247.42355 | 2 | 6.08E-05 | 0.94  | 3.02    | -     | 1895.8   |
| AHQ-9-7, 4200 - 4212        | R.TIVTLQDSIR.K               | 1247.42355 | 2 | 1.35E-05 | 0.97  | 4.18    | -     | 2156.7   |
| AHQ-9-5, 4276               | R.TIVTLQDSIR.K               | 1247.42355 | 2 | 1.12E-05 | 0.95  | 4.04    | -     | 1348.2   |
| AHQ-9-8, 4254               | R.TIVTLQDSIR.K               | 1247.42355 | 2 | 6.57E-04 | 0.97  | 3.58    | -     | 1971.5   |
| AHQ-9-6, 3303               | R.TIVTLQDSIR.K               | 1247.42355 | 2 | 4.72E-06 | 0.93  | 3.18    | -     | 1487.1   |
| AHQ-9-9, 4064               | R.TIVTLQDSIR.K               | 1247.42355 | 2 | 1.64E-06 | 0.97  | 3.89    | -     | 2189.8   |
| AHQ-9-3, 4260 - 4274        | R.TIVTLQDSIR.K               | 1247.42355 | 2 | 1.03E-07 | 0.97  | 4.33    | -     | 1826.2   |
| AHQ-9-6, 4217               | R.TIVTLQDSIR.K               | 1247.42355 | 2 | 8.62E-07 | 0.96  | 4.07    | -     | 1683.3   |
| AHQ-9-4, 4268 - 4269        | R.TIVTLQDSIR.K               | 1247.42355 | 2 | 3.33E-07 | 0.97  | 4.18    | -     | 1806.2   |
| AHQ-9-2, 4374 - 4385        | R.TIVTLQDSIR.K               | 1247.42355 | 2 | 4.52E-07 | 0.97  | 4.33    | -     | 1621.5   |
| AHQ-9-1, 4468               | R.TIVTLQDSIR.K               | 1247.42355 | 2 | 4.36E-08 | 0.96  | 3.68    | -     | 1512.2   |
| AHQ-9-6, 5715               | K.TKDQAICGISCDELSSM*VLELR.G  | 2658.02070 | 3 | 7.57E-06 | 0.81  | 3.34    | -     | 947.0    |
| AHQ-9-2, 5917               | K.TKDQAICGISCDELSSM*VLELR.G  | 2658.02070 | 3 | 1.67E-05 | 0.91  | 4.10    | -     | 1299.5   |
| AHQ-9-6, 2673               | K.VTEENKELANELR.R            | 1545.67685 | 2 | 1.93E-09 | 0.83  | 3.65    | -     | 681.0    |
| AHQ-9-2, 2755 - 2761        | K.VTEENKELANELR.R            | 1545.67685 | 2 | 2.44E-07 | 0.89  | 3.86    | -     | 797.9    |
| AHQ-9-5, 2677               | K.VTEENKELANELR.R            | 1545.67685 | 2 | 7.75E-07 | 0.93  | 3.84    | -     | 1317.5   |
| AHQ-9-3, 2708               | K.VTEENKELANELR.R            | 1545.67685 | 2 | 2.32E-05 | 0.71  | 3.11    | -     | 570.6    |
| AHQ-9-4, 2669               | K.VTEENKELANELR.R            | 1545.67685 | 2 | 3.72E-06 | 0.74  | 3.27    | -     | 639.3    |
| gj 16753233 ref NP_006280.2 | talin 1 [Homo sapiens]       |            |   | 6.66E-15 | 91.68 | 1020.35 | 50.50 | 269665.3 |
| AHQ-9-2, 3245 - 3309        | K.AAAFEQEENETVVK.E           | 1664.79496 | 2 | 1.27E-08 | 0.96  | 5.23    | -     | 1127.7   |
| AHQ-9-1, 3344               | K.AAAFEQEENETVVK.E           | 1664.79496 | 2 | 3.40E-06 | 0.96  | 4.29    | -     | 1573.7   |
| AHQ-9-14, - 3198            | K.AAAFEQEENETVVK.E           | 1664.79496 | 2 | 6.86E-05 | 0.84  | 3.53    | -     | 897.7    |
| AHQ-9-4, 3160 - 3238        | K.AAAFEQEENETVVK.E           | 1664.79496 | 2 | 5.29E-05 | 0.97  | 5.20    | -     | 1669.7   |
| AHQ-9-3, 3312               | K.AAAFEQEENETVVK.E           | 1664.79496 | 2 | 1.88E-04 | 0.84  | 3.09    | -     | 1067.2   |
| AHQ-9-2, 3990               | K.AAAFEQEENETVVK.E           | 1664.79496 | 2 | 4.28E-04 | 0.67  | 2.67    | -     | 633.8    |
| AHQ-9-13, - 3170 - 3173     | K.AAAFEQEENETVVK.E           | 1664.79496 | 2 | 3.97E-06 | 0.92  | 4.22    | -     | 1024.2   |
| AHQ-9-5, 3160 - 3227        | K.AAAFEQEENETVVK.E           | 1664.79496 | 2 | 3.45E-07 | 0.96  | 4.86    | -     | 1376.6   |
| AHQ-9-2, 2750               | R.AAM*EPIVISA.K.T            | 1146.38260 | 2 | 1.03E-04 | 0.82  | 2.93    | -     | 652.8    |
| AHQ-9-3, 2696 - 2710        | R.AAM*EPIVISA.K.T            | 1146.38260 | 2 | 1.64E-05 | 0.93  | 3.22    | -     | 1163.5   |
| AHQ-9-4, 2674               | R.AAM*EPIVISA.K.T            | 1146.38260 | 2 | 7.14E-05 | 0.88  | 2.97    | -     | 1004.2   |
| AHQ-9-2, 2102               | K.ADAEGESDLENSR.K            | 1393.35296 | 2 | 1.79E-09 | 0.92  | 3.37    | -     | 1221.6   |
| AHQ-9-4, 2033               | K.ADAEGESDLENSR.K            | 1393.35296 | 2 | 1.35E-05 | 0.91  | 3.29    | -     | 1043.1   |
| AHQ-9-3, 2068               | K.ADAEGESDLENSR.K            | 1393.35296 | 2 | 3.61E-07 | 0.84  | 3.19    | -     | 706.1    |
| AHQ-9-6, 2650               | K.AGALQCSPSDAYTK.K           | 1470.58689 | 2 | 2.70E-05 | 0.88  | 3.37    | -     | 846.5    |
| AHQ-9-3, 2678 - 2698        | K.AGALQCSPSDAYTK.K           | 1470.58689 | 2 | 1.32E-04 | 0.86  | 3.70    | -     | 683.5    |
| AHQ-9-2, 2725               | K.AGALQCSPSDAYTK.K           | 1470.58689 | 2 | 2.02E-05 | 0.91  | 3.68    | -     | 961.7    |
| AHQ-9-7, 5732               | K.AGFLDLKDFLPK.E             | 1364.61374 | 2 | 7.12E-05 | 0.91  | 3.26    | -     | 1392.0   |
| AHQ-9-8, 5810               | K.AGFLDLKDFLPK.E             | 1364.61374 | 2 | 3.15E-04 | 0.94  | 3.89    | -     | 1555.9   |
| AHQ-9-2, 3031               | K.AIAVTQEM*VTK.S             | 1306.55438 | 2 | 6.05E-07 | 0.93  | 3.33    | -     | 1199.8   |
| AHQ-9-4, 2941               | K.AIAVTQEM*VTK.S             | 1306.55438 | 2 | 3.27E-04 | 0.96  | 4.42    | -     | 1368.0   |
| AHQ-9-4, 3892               | K.AIAVTQEM*VTK.S             | 1290.55498 | 2 | 1.66E-07 | 0.95  | 4.16    | -     | 1082.4   |
| AHQ-9-5, 3892               | K.AIAVTQEM*VTK.S             | 1290.55498 | 2 | 2.51E-05 | 0.88  | 3.35    | -     | 913.8    |
| AHQ-9-5, 2943               | K.AIAVTQEM*VTK.S             | 1306.55438 | 2 | 2.52E-06 | 0.96  | 3.94    | -     | 1258.1   |
| AHQ-9-3, 2926 - 2988        | K.AIAVTQEM*VTK.S             | 1306.55438 | 2 | 2.41E-04 | 0.93  | 3.30    | -     | 1118.5   |
| AHQ-9-3, 3892 - 3893        | K.AIAVTQEM*VTK.S             | 1290.55498 | 2 | 6.26E-06 | 0.95  | 4.29    | -     | 1285.4   |
| AHQ-9-4, 2693               | K.ALDGAFTEENR.A              | 1223.27427 | 2 | 4.96E-04 | 0.93  | 3.47    | -     | 1460.7   |
| AHQ-9-2, 2777               | K.ALDGAFTEENR.A              | 1223.27427 | 2 | 4.83E-06 | 0.94  | 3.43    | -     | 1774.0   |
| AHQ-9-3, 2725               | K.ALDGAFTEENR.A              | 1223.27427 | 2 | 9.32E-06 | 0.96  | 3.90    | -     | 1617.3   |
| AHQ-9-4, 2520 - 2525        | K.ALDGAFTEENR.A              | 1223.27427 | 2 | 2.83E-05 | 0.95  | 3.54    | -     | 1703.8   |
| AHQ-9-3, 2544               | K.ALDGAFTEENR.A              | 1223.27427 | 2 | 3.42E-06 | 0.88  | 3.33    | -     | 1093.0   |
| AHQ-9-2, 2602               | K.ALDGAFTEENR.A              | 1223.27427 | 2 | 5.29E-08 | 0.92  | 2.77    | -     | 1515.1   |
| AHQ-9-7, 3322               | K.ALDYMM*LR.N                | 1061.23626 | 2 | 9.96E-04 | 0.89  | 2.85    | -     | 962.9    |
| AHQ-9-3, 2133               | R.ALEATTEHIR.Q               | 1141.25953 | 2 | 1.63E-04 | 0.89  | 3.03    | -     | 1215.5   |
| AHQ-9-5, 2084               | R.ALEATTEHIR.Q               | 1141.25953 | 2 | 6.04E-04 | 0.88  | 2.84    | -     | 1258.0   |
| AHQ-9-4, 2093 - 2158        | R.ALEATTEHIR.Q               | 1141.25953 | 2 | 6.44E-07 | 0.84  | 2.83    | -     | 1076.5   |
| AHQ-9-2, 2169               | R.ALEATTEHIR.Q               | 1141.25953 | 2 | 8.68E-06 | 0.77  | 2.88    | -     | 881.6    |
| AHQ-9-4, 3404               | K.ALGDLSATK.A                | 989.14811  | 2 | 2.77E-04 | 0.89  | 3.17    | -     | 801.0    |
| AHQ-9-3, 3406               | K.ALGDLSATK.A                | 989.14811  | 2 | 1.30E-05 | 0.94  | 4.10    | -     | 914.1    |
| AHQ-9-6, 3374               | K.ALGDLSATK.A                | 989.14811  | 2 | 8.81E-04 | 0.89  | 3.40    | -     | 704.8    |
| AHQ-9-5, 3401               | K.ALGDLSATK.A                | 989.14811  | 2 | 1.57E-06 | 0.94  | 4.02    | -     | 980.8    |
| AHQ-9-7, 3365               | K.ALGDLSATK.A                | 989.14811  | 2 | 2.74E-04 | 0.90  | 3.20    | -     | 838.2    |
| AHQ-9-2, 3486               | K.ALGDLSATK.A                | 989.14811  | 2 | 1.44E-04 | 0.87  | 3.58    | -     | 688.2    |
| AHQ-9-5, 2697               | K.ALSTDPAAPNLK.S             | 1198.35099 | 2 | 3.31E-05 | 0.63  | 2.84    | -     | 553.7    |
| AHQ-9-2, 2766               | K.ALSTDPAAPNLK.S             | 1198.35099 | 2 | 2.99E-05 | 0.84  | 2.98    | -     | 690.4    |
| AHQ-9-6, 2689               | K.ALSTDPAAPNLK.S             | 1198.35099 | 2 | 5.27E-06 | 0.73  | 2.55    | -     | 834.8    |
| AHQ-9-3, 2716               | K.ALSTDPAAPNLK.S             | 1198.35099 | 2 | 1.71E-05 | 0.71  | 2.79    | -     | 703.6    |
| AHQ-9-2, 3625               | K.ALSTDPAAPNLKSQLAAAAAR.A    | 1967.21592 | 2 | 3.94E-05 | 0.67  | 2.88    | -     | 487.6    |
| AHQ-9-4, 5670               | K.APGQLECE TAI AALNSCLR.D    | 2077.32566 | 2 | 2.65E-07 | 0.92  | 3.95    | -     | 768.6    |
| AHQ-9-2, 5167 - 5230        | K.APGQLECE TAI AALNSCLR.D    | 2077.32566 | 2 | 5.68E-06 | 0.76  | 3.10    | -     | 782.2    |
| AHQ-9-2, 5782               | K.APGQLECE TAI AALNSCLR.D    | 2077.32566 | 3 | 3.05E-04 | 0.84  | 3.69    | -     | 419.4    |
| AHQ-9-2, 5774               | K.APGQLECE TAI AALNSCLR.D    | 2077.32566 | 2 | 7.64E-07 | 0.95  | 4.76    | -     | 933.8    |
| AHQ-9-3, 5602 - 5625        | K.APGQLECE TAI AALNSCLR.D    | 2077.32566 | 2 | 5.77E-04 | 0.86  | 3.58    | -     | 741.1    |
| AHQ-9-2, 5555 - 5561        | K.AQEAACGPLEM*DSALSVVQNLEK.D | 2407.66105 | 2 | 3.62E-04 | 0.85  | 3.71    | -     | 788.0    |
| AHQ-9-2, 5559               | K.AQEAACGPLEM*DSALSVVQNLEK.D | 2407.66105 | 3 | 8.12E-05 | 0.82  | 3.86    | -     | 765.8    |
| AHQ-9-4, 5452               | K.AQEAACGPLEM*DSALSVVQNLEK.D | 2407.66105 | 3 | 2.47E-05 | 0.87  | 3.87    | -     | 1127.7   |
| AHQ-9-7, 2960               | K.ASAGPQLLVQSCCK.A           | 1457.67763 | 2 | 2.58E-06 | 0.58  | 3.16    | -     | 315.0    |
| AHQ-9-6, 2959 - 2970        | K.ASAGPQLLVQSCCK.A           | 1457.67763 | 2 | 3.23E-07 | 0.77  | 3.00    | -     | 433.8    |
| AHQ-9-3, 3013               | K.ASAGPQLLVQSCCK.A           | 1457.67763 | 2 | 1.54E-08 | 0.79  | 3.23    | -     | 397.9    |
| AHQ-9-4, 2962 - 2978        | K.ASAGPQLLVQSCCK.A           | 1457.67763 | 2 | 6.49E-08 | 0.72  | 3.01    | -     | 477.8    |
| AHQ-9-2, 3046 - 3110        | K.ASAGPQLLVQSCCK.A           | 1457.67763 | 2 | 1.94E-04 | 0.78  | 3.10    | -     | 469.8    |
| AHQ-9-4, 4061 - 4120        | K.ASVPTIQDQASAMQLSQCAK.N     | 2136.39332 | 2 | 7.19E-04 | 0.95  | 5.18    | -     | 749.6    |
| AHQ-9-3, 4048               | K.ASVPTIQDQASAMQLSQCAK.N     | 2136.39332 | 2 | 5.44E-04 | 0.87  | 3.91    | -     | 639.6    |
| AHQ-9-5, 3591               | K.ASVPTIQDQASAM*QLSQCAK.N    | 2152.39272 | 2 | 7.59E-05 | 0.89  | 3.73    | -     | 645.7    |

|                      |                                       |            |   |          |      |      |   |        |
|----------------------|---------------------------------------|------------|---|----------|------|------|---|--------|
| AHQ-9-6, 4022        | K.ASVPTIQDQASAMQLSQCAK.N              | 2136.39332 | 2 | 2.15E-08 | 0.83 | 3.57 | - | 511.3  |
| AHQ-9-2, 3677        | K.ASVPTIQDQASAM*QLSQCAK.N             | 2152.39272 | 2 | 4.68E-06 | 0.71 | 3.02 | - | 475.2  |
| AHQ-9-5, 4063        | K.ASVPTIQDQASAMQLSQCAK.N              | 2136.39332 | 2 | 4.90E-09 | 0.88 | 4.06 | - | 578.9  |
| AHQ-9-6, 3553 - 3563 | K.ASVPTIQDQASAM*QLSQCAK.N             | 2152.39272 | 2 | 2.05E-06 | 0.92 | 4.28 | - | 834.5  |
| AHQ-9-3, 3584 - 3585 | K.ASVPTIQDQASAM*QLSQCAK.N             | 2152.39272 | 2 | 3.74E-04 | 0.82 | 3.56 | - | 492.1  |
| AHQ-9-2, 4153        | K.ASVPTIQDQASAMQLSQCAK.N              | 2136.39332 | 2 | 1.09E-07 | 0.86 | 3.51 | - | 673.2  |
| AHQ-9-1, 3768        | K.ASVPTIQDQASAM*QLSQCAK.N             | 2152.39272 | 2 | 6.41E-05 | 0.93 | 4.02 | - | 840.5  |
| AHQ-9-4, 3593        | K.ASVPTIQDQASAM*QLSQCAK.N             | 2152.39272 | 2 | 4.40E-05 | 0.89 | 4.00 | - | 534.0  |
| AHQ-9-4, 4750        | K.AVAEQIPLLQVQVR.G                    | 1493.77619 | 3 | 1.20E-07 | 0.96 | 5.30 | - | 1770.8 |
| AHQ-9-2, 4845        | K.AVAEQIPLLQVQVR.G                    | 1493.77619 | 3 | 2.40E-05 | 0.96 | 4.45 | - | 2041.7 |
| AHQ-9-2, 4826 - 4829 | K.AVAEQIPLLQVQVR.G                    | 1493.77619 | 2 | 1.83E-05 | 0.93 | 4.28 | - | 835.0  |
| AHQ-9-1, 4900 - 4908 | K.AVAEQIPLLQVQVR.G                    | 1493.77619 | 2 | 9.73E-06 | 0.94 | 4.29 | - | 841.1  |
| AHQ-9-6, 4687        | K.AVAEQIPLLQVQVR.G                    | 1493.77619 | 3 | 1.85E-04 | 0.97 | 4.76 | - | 2707.0 |
| AHQ-9-5, 3801 - 3811 | K.AVASAAAALVLK.A                      | 1085.32216 | 2 | 1.42E-04 | 0.91 | 3.47 | - | 1070.8 |
| AHQ-9-3, 3733 - 3804 | K.AVASAAAALVLK.A                      | 1085.32216 | 2 | 5.97E-04 | 0.94 | 3.39 | - | 1482.4 |
| AHQ-9-2, 3863 - 3921 | K.AVASAAAALVLK.A                      | 1085.32216 | 2 | 7.04E-07 | 0.95 | 4.08 | - | 1424.6 |
| AHQ-9-6, 3895        | K.AVEGCVSQAQATDGGQLLR.G               | 2064.22056 | 2 | 5.16E-04 | 0.96 | 4.54 | - | 1356.5 |
| AHQ-9-2, 3997 - 4059 | K.AVEGCVSQAQATDGGQLLR.G               | 2064.22056 | 2 | 2.51E-07 | 0.68 | 3.02 | - | 747.2  |
| AHQ-9-2, 4215        | K.AVEGCVSQAQATDGGQLLR.G               | 2064.22056 | 2 | 5.22E-05 | 0.58 | 2.83 | - | 571.6  |
| AHQ-9-5, 3904 - 3964 | K.AVEGCVSQAQATDGGQLLR.G               | 2064.22056 | 2 | 5.31E-05 | 0.57 | 3.12 | - | 668.6  |
| AHQ-9-4, 3901        | K.AVEGCVSQAQATDGGQLLR.G               | 2064.22056 | 2 | 8.36E-07 | 0.88 | 3.50 | - | 1013.3 |
| AHQ-9-4, 3696 - 3753 | K.AVEGCVSQAQATDGGQLLR.G               | 2064.22056 | 2 | 5.42E-04 | 0.63 | 2.89 | - | 748.2  |
| AHQ-9-1, 3983 - 4048 | K.AVEGCVSQAQATDGGQLLR.G               | 2064.22056 | 2 | 6.64E-06 | 0.87 | 3.49 | - | 911.3  |
| AHQ-9-2, 4122        | K.AVEGCVSQAQATDGGQLLR.G               | 2064.22056 | 2 | 3.62E-04 | 0.81 | 3.33 | - | 976.2  |
| AHQ-9-3, 3894 - 3942 | K.AVEGCVSQAQATDGGQLLR.G               | 2064.22056 | 2 | 5.38E-07 | 0.95 | 4.79 | - | 1387.8 |
| AHQ-9-2, 3794        | K.AVEGCVSQAQATDGGQLLR.G               | 2064.22056 | 2 | 3.56E-07 | 0.94 | 4.29 | - | 1209.2 |
| AHQ-9-5, 6331        | K.AVSSAIAQLLGEVAQGNENYAGIAAR.D        | 2574.83158 | 3 | 6.49E-07 | 0.97 | 5.47 | - | 2110.8 |
| AHQ-9-2, 6417 - 6439 | K.AVSSAIAQLLGEVAQGNENYAGIAAR.D        | 2574.83158 | 3 | 4.51E-10 | 0.98 | 6.64 | - | 1878.4 |
| AHQ-9-6, 6250        | K.AVSSAIAQLLGEVAQGNENYAGIAAR.D        | 2574.83158 | 3 | 9.66E-09 | 0.98 | 6.03 | - | 2378.5 |
| AHQ-9-4, 5206        | R.AVTDSINQLITM*CTQQAPGQK.E            | 2322.60252 | 2 | 7.47E-04 | 0.61 | 2.92 | - | 462.2  |
| AHQ-9-2, 5298 - 5302 | R.AVTDSINQLITM*CTQQAPGQK.E            | 2322.60252 | 2 | 8.06E-05 | 0.59 | 3.34 | - | 316.0  |
| AHQ-9-1, 5450        | R.AVTDSINQLITM*CTQQAPGQKCEDNLR.E      | 3182.51068 | 3 | 1.39E-07 | 0.88 | 4.54 | - | 580.3  |
| AHQ-9-2, 5421        | R.AVTDSINQLITM*CTQQAPGQKCEDNLR.E      | 3182.51068 | 3 | 1.14E-06 | 0.86 | 4.22 | - | 687.1  |
| AHQ-9-2, 5665        | R.AVTDSINQLITM*CTQQAPGQKCEDNLR.E      | 3166.51128 | 3 | 6.94E-08 | 0.88 | 3.85 | - | 904.0  |
| AHQ-9-3, 5269 - 5334 | R.AVTDSINQLITM*CTQQAPGQKCEDNLR.E      | 3182.51068 | 3 | 2.91E-07 | 0.87 | 4.19 | - | 923.1  |
| AHQ-9-4, 2440        | R.CVSLPGQR.D                          | 1079.23309 | 2 | 2.22E-05 | 0.87 | 3.09 | - | 913.1  |
| AHQ-9-8, 3488 - 3534 | R.DDLNLSHPVPSFDK.A                    | 1544.64741 | 2 | 1.82E-07 | 0.96 | 4.43 | - | 1483.2 |
| AHQ-9-7, 3408 - 3481 | R.DDLNLSHPVPSFDK.A                    | 1544.64741 | 2 | 5.69E-06 | 0.91 | 3.78 | - | 766.1  |
| AHQ-9-2, 5621        | R.DKAPGLQECETAIAALNSCLR.D             | 2320.58644 | 3 | 9.85E-04 | 0.76 | 3.07 | - | 1054.9 |
| AHQ-9-2, 5823        | R.DKAPGLQECETAIAALNSCLR.D             | 2320.58644 | 3 | 1.42E-04 | 0.78 | 3.30 | - | 766.3  |
| AHQ-9-3, 4882        | R.DKAPGLQECETAIAALNSCLR.D             | 2320.58644 | 2 | 1.24E-05 | 0.91 | 3.96 | - | 902.2  |
| AHQ-9-2, 5750 - 5819 | R.DKAPGLQECETAIAALNSCLR.D             | 2320.58644 | 2 | 1.19E-08 | 0.88 | 3.56 | - | 794.3  |
| AHQ-9-4, 4925        | R.DKAPGLQECETAIAALNSCLR.D             | 2320.58644 | 2 | 2.07E-06 | 0.77 | 3.11 | - | 646.1  |
| AHQ-9-2, 5023 - 5043 | R.DKAPGLQECETAIAALNSCLR.D             | 2320.58644 | 2 | 5.70E-07 | 0.93 | 4.47 | - | 988.8  |
| AHQ-9-4, 5521        | R.DKAPGLQECETAIAALNSCLR.D             | 2320.58644 | 2 | 7.52E-10 | 0.92 | 4.54 | - | 727.0  |
| AHQ-9-3, 5473        | R.DKAPGLQECETAIAALNSCLR.D             | 2320.58644 | 2 | 6.18E-10 | 0.90 | 3.89 | - | 666.0  |
| AHQ-9-2, 5626 - 5627 | R.DKAPGLQECETAIAALNSCLR.D             | 2320.58644 | 2 | 5.27E-08 | 0.96 | 5.14 | - | 1162.2 |
| AHQ-9-1, 5036        | R.DLDQASLAAVSQQLAPR.E                 | 1783.96422 | 3 | 6.85E-08 | 0.93 | 4.60 | - | 1251.8 |
| AHQ-9-1, 5026        | R.DLDQASLAAVSQQLAPR.E                 | 1783.96422 | 2 | 1.71E-04 | 0.88 | 3.63 | - | 671.4  |
| AHQ-9-6, 4838        | R.DLDQASLAAVSQQLAPR.E                 | 1783.96422 | 3 | 3.48E-06 | 0.90 | 3.92 | - | 1227.3 |
| AHQ-9-2, 4931 - 4989 | R.DLDQASLAAVSQQLAPR.E                 | 1783.96422 | 3 | 8.66E-08 | 0.96 | 5.24 | - | 956.1  |
| AHQ-9-3, 4844 - 4850 | R.DLDQASLAAVSQQLAPR.E                 | 1783.96422 | 3 | 3.85E-06 | 0.94 | 5.02 | - | 1431.0 |
| AHQ-9-4, 4874 - 4908 | R.DLDQASLAAVSQQLAPR.E                 | 1783.96422 | 3 | 1.28E-09 | 0.90 | 3.88 | - | 957.9  |
| AHQ-9-5, 4907        | R.DLDQASLAAVSQQLAPR.E                 | 1783.96422 | 3 | 5.43E-06 | 0.90 | 3.67 | - | 1544.7 |
| AHQ-9-3, 3552 - 3554 | R.DPPSWSVLGHRSR.T                     | 1409.53156 | 2 | 4.99E-08 | 0.88 | 3.11 | - | 598.5  |
| AHQ-9-4, 3549        | R.DPPSWSVLGHRSR.T                     | 1409.53156 | 2 | 2.36E-09 | 0.89 | 3.55 | - | 455.5  |
| AHQ-9-3, 3572        | R.DPPSWSVLGHRSR.T                     | 1409.53156 | 3 | 3.47E-06 | 0.92 | 4.54 | - | 784.0  |
| AHQ-9-2, 3641        | R.DPPSWSVLGHRSR.T                     | 1409.53156 | 2 | 1.51E-07 | 0.70 | 2.86 | - | 281.7  |
| AHQ-9-2, 3651        | R.DPPSWSVLGHRSR.T                     | 1409.53156 | 3 | 4.75E-06 | 0.88 | 3.86 | - | 884.4  |
| AHQ-9-8, 4850 - 4851 | R.DPVQLNLLYVQAR.D                     | 1529.76539 | 2 | 5.19E-09 | 0.97 | 5.12 | - | 1506.9 |
| AHQ-9-7, 4734 - 4788 | R.DPVQLNLLYVQAR.D                     | 1529.76539 | 2 | 3.13E-04 | 0.95 | 4.05 | - | 1320.2 |
| AHQ-9-7, 4813        | R.DPVQLNLLYVQAR.D                     | 1529.76539 | 2 | 2.63E-04 | 0.87 | 2.84 | - | 1182.1 |
| AHQ-9-6, 2525        | K.EAAYHPEVAPDVR.L                     | 1454.56910 | 2 | 2.30E-04 | 0.82 | 2.73 | - | 869.3  |
| AHQ-9-6, 5414 - 5477 | K.EADESLNFEEQILEAAK.S                 | 1937.05072 | 2 | 1.29E-06 | 0.95 | 4.76 | - | 1385.6 |
| AHQ-9-8, 5442 - 5499 | K.EADESLNFEEQILEAAK.S                 | 1937.05072 | 2 | 3.38E-04 | 0.77 | 3.16 | - | 687.6  |
| AHQ-9-4, 5544        | K.EADESLNFEEQILEAAK.S                 | 1937.05072 | 2 | 5.57E-06 | 0.88 | 3.88 | - | 953.6  |
| AHQ-9-2, 5574 - 5653 | K.EADESLNFEEQILEAAK.S                 | 1937.05072 | 2 | 1.14E-07 | 0.97 | 5.45 | - | 2043.6 |
| AHQ-9-3, 5436 - 5489 | K.EADESLNFEEQILEAAK.S                 | 1937.05072 | 2 | 1.14E-06 | 0.94 | 4.70 | - | 1200.5 |
| AHQ-9-9, 5263        | K.EADESLNFEEQILEAAK.S                 | 1937.05072 | 2 | 1.99E-06 | 0.83 | 3.02 | - | 964.4  |
| AHQ-9-3, 5202 - 5237 | K.EADESLNFEEQILEAAK.S                 | 1937.05072 | 2 | 5.91E-05 | 0.56 | 2.79 | - | 388.2  |
| AHQ-9-7, 5404 - 5473 | K.EADESLNFEEQILEAAK.S                 | 1937.05072 | 2 | 1.61E-07 | 0.94 | 4.43 | - | 1219.4 |
| AHQ-9-4, 5430 - 5488 | K.EADESLNFEEQILEAAK.S                 | 1937.05072 | 2 | 1.24E-07 | 0.97 | 5.18 | - | 1786.8 |
| AHQ-9-1, 5598 - 5660 | K.EADESLNFEEQILEAAK.S                 | 1937.05072 | 2 | 7.82E-08 | 0.94 | 4.74 | - | 1123.3 |
| AHQ-9-3, 5380 - 5432 | K.EADESLNFEEQILEAAK.S                 | 1937.05072 | 2 | 1.30E-07 | 0.97 | 4.79 | - | 2060.2 |
| AHQ-9-5, 5491 - 5571 | K.EADESLNFEEQILEAAK.S                 | 1937.05072 | 2 | 6.47E-07 | 0.96 | 5.07 | - | 1525.9 |
| AHQ-9-5, 6399        | R.ECANGYLELDDHVLTLQKPSPELK.Q          | 2883.30906 | 3 | 4.71E-07 | 0.91 | 4.30 | - | 1078.8 |
| AHQ-9-2, 6485        | R.ECANGYLELDDHVLTLQKPSPELK.Q          | 2883.30906 | 3 | 3.37E-08 | 0.95 | 5.59 | - | 1101.6 |
| AHQ-9-2, 6347 - 6419 | R.EGISQEAALHTQM*LTAVQEISHLIEPLANAAR.A | 3388.79744 | 3 | 3.51E-06 | 0.93 | 5.35 | - | 926.7  |
| AHQ-9-2, 6450        | R.EGISQEAALHTQM*LTAVQEISHLIEPLANAAR.A | 3388.79744 | 3 | 5.23E-08 | 0.93 | 5.57 | - | 913.5  |
| AHQ-9-4, 6265 - 6334 | R.EGISQEAALHTQM*LTAVQEISHLIEPLANAAR.A | 3388.79744 | 3 | 9.69E-07 | 0.96 | 5.69 | - | 1409.8 |
| AHQ-9-6, 6273        | R.EGISQEAALHTQM*LTAVQEISHLIEPLANAAR.A | 3388.79744 | 3 | 1.16E-07 | 0.95 | 5.53 | - | 1235.7 |
| AHQ-9-4, 5637 - 5692 | R.ELLENVPQINDM*SYFGCLDSVM*ENSK.V      | 3164.48754 | 3 | 8.16E-07 | 0.79 | 3.47 | - | 636.3  |
| AHQ-9-3, 6169        | R.ELLENVPQINDM*SYFGCLDSVM*ENSK.V      | 3148.48814 | 3 | 1.10E-04 | 0.61 | 3.20 | - | 413.4  |
| AHQ-9-3, 5608 - 5676 | R.ELLENVPQINDM*SYFGCLDSVM*ENSK.V      | 3164.48754 | 3 | 1.64E-05 | 0.87 | 4.05 | - | 644.4  |
| AHQ-9-13-, 5244      | R.ERIPAPAGPPSDFGLFLSDDDPK.K           | 2571.77979 | 3 | 2.39E-08 | 0.96 | 5.69 | - | 1377.2 |
| AHQ-9-8, 5275 - 5338 | R.ERIPAPAGPPSDFGLFLSDDDPK.K           | 2571.77979 | 3 | 6.71E-08 | 0.96 | 4.71 | - | 1627.0 |
| AHQ-9-2, 2310        | K.EVANSTANLVK.T                       | 1146.27608 | 2 | 2.98E-05 | 0.77 | 2.87 | - | 713.1  |
| AHQ-9-8, 2970        | K.FFYSDQNVDSDR.D                      | 1378.42795 | 2 | 7.47E-06 | 0.93 | 3.88 | - | 980.2  |
| AHQ-9-8, 5554        | K.FFYSDQNVDSDRDPVQLNLLYVQAR.D         | 2889.17074 | 3 | 8.58E-10 | 0.98 | 6.18 | - | 2457.7 |
| AHQ-9-7, 5469 - 5541 | K.FFYSDQNVDSDRDPVQLNLLYVQAR.D         | 2889.17074 | 3 | 2.41E-05 | 0.98 | 6.91 | - | 1683.3 |
| AHQ-9-2, 5835 - 5839 | R.FGQDFSTFLAAGVEM*AGQAPSQEDR.A        | 2734.89265 | 2 | 1.47E-07 | 0.81 | 3.27 | - | 835.6  |
| AHQ-9-2, 5826 - 5882 | R.FGQDFSTFLAAGVEM*AGQAPSQEDR.A        | 2734.89265 | 3 | 3.67E-07 | 0.84 | 4.09 | - | 747.3  |
| AHQ-9-6, 5666        | R.FGQDFSTFLAAGVEM*AGQAPSQEDR.A        | 2734.89265 | 3 | 1.41E-07 | 0.68 | 3.16 | - | 660.8  |
| AHQ-9-2, 2953 - 2954 | K.FLPSRLRDEH                          | 1243.35032 | 2 | 1.73E-06 | 0.61 | 2.56 | - | 429.3  |
| AHQ-9-4, 2860        | K.FLPSRLRDEH                          | 1243.35032 | 2 | 4.42E-06 | 0.60 | 2.61 | - | 306.4  |
| AHQ-9-3, 2894 - 2910 | K.FLPSRLRDEH                          | 1243.35032 | 2 | 2.28E-05 | 0.50 | 2.64 | - | 310.6  |
| AHQ-9-4, 4890        | K.GLAGAVSELLR.S                       | 1086.26701 | 2 | 4.09E-07 | 0.97 | 4.09 | - | 2066.8 |
| AHQ-9-5, 4915        | K.GLAGAVSELLR.S                       | 1086.26701 | 2 | 5.75E-07 | 0.95 | 3.50 | - | 1618.4 |
| AHQ-9-3, 4878 - 4892 | K.GLAGAVSELLR.S                       | 1086.26701 | 2 | 3.75E-07 | 0.98 | 5.02 | - | 2132.0 |
| AHQ-9-2, 5001        | K.GLAGAVSELLR.S                       | 1086.26701 | 2 | 1.05E-06 | 0.97 | 4.57 | - | 2110.6 |
| AHQ-9-7, 4829        | K.GLAGAVSELLR.S                       | 1086.26701 | 2 | 3.45E-06 | 0.95 | 3.59 | - | 1719.7 |
| AHQ-9-6, 4843 - 4849 | K.GLAGAVSELLR.S                       | 1086.26701 | 2 | 5.93E-05 | 0.95 | 3.61 | - | 1486.1 |
| AHQ-9-9, 4680        | K.GLAGAVSELLR.S                       | 1086.26701 | 2 | 5.79E-04 | 0.98 | 3.77 | - | 2768.9 |
| AHQ-9-1, 5072        | K.GLAGAVSELLR.S                       | 1086.26701 | 2 | 1.45E-06 | 0.97 | 4.70 | - | 2031.7 |
| AHQ-9-4, 5936 - 6008 | R.GSQAPDPSAQLALIAASQSFLOPQGGK.M       | 2756.02103 | 3 | 7.10E-04 | 0.89 | 4.12 | - | 1136.6 |
| AHQ-9-4, 5806 - 5862 | R.GSQAPDPSAQLALIAASQSFLOPQGGK.M       | 2756.02103 | 3 | 3.92E-04 | 0.80 | 3.96 | - | 803.7  |
| AHQ-9-3, 5876 - 5933 | R.GSQAPDPSAQLALIAASQSFLOPQGGK.M       | 2756.02103 | 3 | 6.48E-04 | 0.85 | 4.18 | - | 1043.1 |

|                       |                                   |            |   |          |      |      |   |        |
|-----------------------|-----------------------------------|------------|---|----------|------|------|---|--------|
| AHQ-9-7, 5874 - 5928  | R.GSQAQPDSPSAQLALIAASQSFLOPQGG.K  | 2756.02103 | 3 | 5.01E-04 | 0.66 | 3.66 | - | 546.9  |
| AHQ-9-6, 5917 - 5981  | R.GSQAQPDSPSAQLALIAASQSFLOPQGG.K  | 2756.02103 | 3 | 2.85E-06 | 0.93 | 5.33 | - | 823.8  |
| AHQ-9-5, 6459         | K.GTEWVDPEDPTVIAENELLGAAAIEAAAK.K | 3053.32301 | 3 | 1.31E-05 | 0.93 | 4.96 | - | 1342.9 |
| AHQ-9-3, 6376 - 6446  | K.GTEWVDPEDPTVIAENELLGAAAIEAAAK.K | 3053.32301 | 3 | 1.44E-14 | 0.98 | 6.27 | - | 2324.8 |
| AHQ-9-6, 6375         | K.GTEWVDPEDPTVIAENELLGAAAIEAAAK.K | 3053.32301 | 3 | 1.09E-05 | 0.92 | 4.50 | - | 1488.8 |
| AHQ-9-2, 6541 - 6543  | K.GTEWVDPEDPTVIAENELLGAAAIEAAAK.K | 3053.32301 | 3 | 1.69E-10 | 0.96 | 5.46 | - | 1723.0 |
| AHQ-9-2, 6446         | R.GVAALTSDPVAQIIVLDTASDVLDK.A     | 2470.75835 | 3 | 1.77E-04 | 0.82 | 3.99 | - | 785.6  |
| AHQ-9-3, 6280         | R.GVAALTSDPVAQIIVLDTASDVLDK.A     | 2470.75835 | 3 | 5.11E-07 | 0.98 | 5.60 | - | 2374.5 |
| AHQ-9-5, 6360         | R.GVAALTSDPVAQIIVLDTASDVLDK.A     | 2470.75835 | 2 | 1.07E-07 | 0.97 | 6.31 | - | 1073.3 |
| AHQ-9-1, 6431         | R.GVAALTSDPVAQIIVLDTASDVLDK.A     | 2470.75835 | 2 | 7.06E-04 | 0.62 | 2.78 | - | 465.3  |
| AHQ-9-4, 6340         | R.GVAALTSDPVAQIIVLDTASDVLDK.A     | 2470.75835 | 3 | 3.00E-08 | 0.97 | 6.50 | - | 1764.3 |
| AHQ-9-7, 6262         | R.GVAALTSDPVAQIIVLDTASDVLDK.A     | 2470.75835 | 3 | 3.09E-05 | 0.95 | 5.98 | - | 1360.0 |
| AHQ-9-6, 6330         | R.GVGAAATAVTQALNELLQHVK.A         | 2092.38495 | 2 | 4.03E-04 | 0.79 | 4.16 | - | 497.8  |
| AHQ-9-2, 5473         | R.GVGAAATAVTQALNELLQHVK.A         | 2092.38495 | 2 | 5.20E-06 | 0.89 | 4.06 | - | 775.0  |
| AHQ-9-3, 6332         | R.GVGAAATAVTQALNELLQHVK.A         | 2092.38495 | 3 | 6.32E-08 | 0.92 | 4.48 | - | 1093.1 |
| AHQ-9-2, 6498         | R.GVGAAATAVTQALNELLQHVK.A         | 2092.38495 | 2 | 4.50E-09 | 0.96 | 5.23 | - | 1065.6 |
| AHQ-9-2, 6497         | R.GVGAAATAVTQALNELLQHVK.A         | 2092.38495 | 3 | 6.13E-09 | 0.94 | 5.24 | - | 822.6  |
| AHQ-9-3, 6334         | R.GVGAAATAVTQALNELLQHVK.A         | 2092.38495 | 2 | 9.20E-07 | 0.91 | 4.61 | - | 559.4  |
| AHQ-9-1, 6482         | R.GVGAAATAVTQALNELLQHVK.A         | 2092.38495 | 3 | 1.24E-07 | 0.92 | 4.25 | - | 1166.6 |
| AHQ-9-8, 6402 - 6404  | R.GVGAAATAVTQALNELLQHVK.A         | 2092.38495 | 3 | 6.29E-06 | 0.94 | 4.56 | - | 1129.4 |
| AHQ-9-4, 6390         | R.GVGAAATAVTQALNELLQHVK.A         | 2092.38495 | 2 | 1.03E-08 | 0.95 | 5.61 | - | 841.5  |
| AHQ-9-4, 6388         | R.GVGAAATAVTQALNELLQHVK.A         | 2092.38495 | 3 | 8.51E-05 | 0.95 | 5.10 | - | 1232.6 |
| AHQ-9-5, 6411         | R.GVGAAATAVTQALNELLQHVK.A         | 2092.38495 | 3 | 6.40E-07 | 0.91 | 4.17 | - | 1084.5 |
| AHQ-9-5, 6412         | R.GVGAAATAVTQALNELLQHVK.A         | 2092.38495 | 2 | 9.51E-09 | 0.95 | 5.42 | - | 756.1  |
| AHQ-9-7, 6312         | R.GVGAAATAVTQALNELLQHVK.A         | 2092.38495 | 3 | 3.05E-07 | 0.93 | 4.38 | - | 1166.2 |
| AHQ-9-6, 6329         | R.GVGAAATAVTQALNELLQHVK.A         | 2092.38495 | 3 | 1.65E-07 | 0.87 | 3.31 | - | 1220.8 |
| AHQ-9-7, 3324         | R.IGITNHDEYSVLR.E                 | 1517.66833 | 3 | 1.41E-07 | 0.95 | 4.45 | - | 1337.0 |
| AHQ-9-7, 3317         | R.IGITNHDEYSVLR.E                 | 1517.66833 | 2 | 2.09E-09 | 0.92 | 3.87 | - | 973.2  |
| AHQ-9-13, 3425        | R.IGITNHDEYSVLR.E                 | 1517.66833 | 2 | 6.44E-06 | 0.91 | 3.79 | - | 855.0  |
| AHQ-9-8, 3502 - 3559  | R.IGITNHDEYSVLR.E                 | 1517.66833 | 2 | 3.58E-08 | 0.95 | 3.80 | - | 1589.0 |
| AHQ-9-7, 4692         | R.ILAQATSDLVNIAK.A                | 1457.69748 | 2 | 1.53E-05 | 0.95 | 3.36 | - | 1693.0 |
| AHQ-9-1, 4922 - 4924  | R.ILAQATSDLVNIAK.A                | 1457.69748 | 2 | 1.43E-07 | 0.98 | 5.36 | - | 2878.5 |
| AHQ-9-7, 3933         | R.ILAQATSDLVNIAK.A                | 1457.69748 | 2 | 1.52E-06 | 0.91 | 3.37 | - | 1320.2 |
| AHQ-9-3, 4738         | R.ILAQATSDLVNIAK.A                | 1457.69748 | 2 | 7.90E-08 | 0.97 | 4.89 | - | 1746.7 |
| AHQ-9-4, 3953 - 4008  | R.ILAQATSDLVNIAK.A                | 1457.69748 | 2 | 6.60E-09 | 0.97 | 4.55 | - | 1718.9 |
| AHQ-9-3, 3989         | R.ILAQATSDLVNIAK.A                | 1457.69748 | 2 | 1.09E-09 | 0.98 | 4.50 | - | 2880.0 |
| AHQ-9-5, 4776         | R.ILAQATSDLVNIAK.A                | 1457.69748 | 2 | 3.67E-09 | 0.98 | 5.22 | - | 1892.4 |
| AHQ-9-5, 3992         | R.ILAQATSDLVNIAK.A                | 1457.69748 | 2 | 1.94E-05 | 0.96 | 3.77 | - | 1767.1 |
| AHQ-9-2, 4097         | R.ILAQATSDLVNIAK.A                | 1457.69748 | 2 | 5.11E-07 | 0.96 | 3.96 | - | 1618.7 |
| AHQ-9-8, 3992         | R.ILAQATSDLVNIAK.A                | 1457.69748 | 2 | 1.78E-06 | 0.89 | 2.98 | - | 1093.7 |
| AHQ-9-4, 4760         | R.ILAQATSDLVNIAK.A                | 1457.69748 | 2 | 2.06E-08 | 0.98 | 4.53 | - | 2376.0 |
| AHQ-9-2, 4865         | R.ILAQATSDLVNIAK.A                | 1457.69748 | 2 | 1.25E-07 | 0.97 | 4.64 | - | 1683.5 |
| AHQ-9-6, 3945         | R.ILAQATSDLVNIAK.A                | 1457.69748 | 2 | 9.59E-08 | 0.96 | 3.62 | - | 1754.0 |
| AHQ-9-6, 4709 - 4717  | R.ILAQATSDLVNIAK.A                | 1457.69748 | 2 | 1.78E-08 | 0.98 | 5.02 | - | 2147.9 |
| AHQ-9-8, 5514         | R.IPEAPAGPPSDFGLFLSDDDPKK.K       | 2286.47890 | 2 | 1.79E-04 | 0.80 | 3.21 | - | 641.8  |
| AHQ-9-14, 5161 - 5175 | R.IPEAPAGPPSDFGLFLSDDDPKK.G       | 2414.65181 | 3 | 1.05E-05 | 0.92 | 4.56 | - | 971.6  |
| AHQ-9-13, 5160 - 5186 | R.IPEAPAGPPSDFGLFLSDDDPKK.G       | 2414.65181 | 3 | 1.15E-07 | 0.95 | 4.54 | - | 1751.3 |
| AHQ-9-13, 5260 - 5284 | R.IPEAPAGPPSDFGLFLSDDDPKK.G       | 2414.65181 | 3 | 8.64E-04 | 0.73 | 3.08 | - | 1028.3 |
| AHQ-9-8, 2755         | R.KFFYSDQNVDSR.D                  | 1506.60087 | 2 | 8.40E-05 | 0.96 | 4.03 | - | 1401.6 |
| AHQ-9-11, 2774 - 2778 | K.LAQAAQSSVATITR.L                | 1417.59344 | 2 | 3.75E-04 | 0.84 | 3.31 | - | 767.0  |
| AHQ-9-4, 2761 - 2773  | K.LAQAAQSSVATITR.L                | 1417.59344 | 2 | 7.54E-08 | 0.94 | 3.61 | - | 1402.3 |
| AHQ-9-6, 2610         | K.LAQAAQSSVATITR.L                | 1417.59344 | 2 | 1.35E-06 | 0.95 | 3.57 | - | 1576.8 |
| AHQ-9-1, 2978         | K.LAQAAQSSVATITR.L                | 1417.59344 | 2 | 6.12E-05 | 0.95 | 3.24 | - | 1772.9 |
| AHQ-9-13, 2829        | K.LAQAAQSSVATITR.L                | 1417.59344 | 2 | 4.68E-04 | 0.90 | 3.28 | - | 1103.4 |
| AHQ-9-3, 2632         | K.LAQAAQSSVATITR.L                | 1417.59344 | 2 | 3.36E-07 | 0.94 | 4.04 | - | 1165.8 |
| AHQ-9-8, 2759 - 2762  | K.LAQAAQSSVATITR.L                | 1417.59344 | 2 | 2.48E-07 | 0.94 | 4.13 | - | 1161.9 |
| AHQ-9-6, 2757 - 2758  | K.LAQAAQSSVATITR.L                | 1417.59344 | 2 | 1.63E-08 | 0.97 | 5.03 | - | 1784.2 |
| AHQ-9-2, 2689 - 2727  | K.LAQAAQSSVATITR.L                | 1417.59344 | 2 | 8.81E-07 | 0.87 | 3.31 | - | 842.7  |
| AHQ-9-2, 2807 - 2845  | K.LAQAAQSSVATITR.L                | 1417.59344 | 2 | 6.13E-11 | 0.96 | 4.37 | - | 1467.8 |
| AHQ-9-3, 2794         | K.LAQAAQSSVATITR.L                | 1417.59344 | 2 | 2.08E-09 | 0.96 | 4.23 | - | 1713.1 |
| AHQ-9-5, 2767 - 2789  | K.LAQAAQSSVATITR.L                | 1417.59344 | 2 | 7.96E-05 | 0.97 | 4.56 | - | 1722.2 |
| AHQ-9-5, 2615         | K.LAQAAQSSVATITR.L                | 1417.59344 | 2 | 6.94E-06 | 0.91 | 3.00 | - | 1410.6 |
| AHQ-9-4, 2614         | K.LAQAAQSSVATITR.L                | 1417.59344 | 2 | 1.01E-06 | 0.86 | 2.79 | - | 1293.1 |
| AHQ-9-4, 3033 - 3106  | R.LASEAKPAVAANEIEIGSHIK.H         | 2236.46779 | 3 | 1.87E-06 | 0.89 | 3.94 | - | 1269.1 |
| AHQ-9-1, 3476         | R.LASEAKPAVAANEIEIGSHIK.H         | 2236.46779 | 3 | 9.64E-09 | 0.98 | 5.84 | - | 2629.7 |
| AHQ-9-4, 3268         | R.LASEAKPAVAANEIEIGSHIK.H         | 2236.46779 | 2 | 1.06E-07 | 0.91 | 4.25 | - | 617.7  |
| AHQ-9-3, 3288         | R.LASEAKPAVAANEIEIGSHIK.H         | 2236.46779 | 2 | 3.12E-09 | 0.93 | 4.39 | - | 702.6  |
| AHQ-9-2, 3595         | R.LASEAKPAVAANEIEIGSHIK.H         | 2236.46779 | 3 | 3.01E-07 | 0.96 | 4.57 | - | 2150.5 |
| AHQ-9-3, 3272         | R.LASEAKPAVAANEIEIGSHIK.H         | 2236.46779 | 3 | 1.68E-06 | 0.96 | 5.09 | - | 1650.9 |
| AHQ-9-3, 3054         | R.LASEAKPAVAANEIEIGSHIK.H         | 2236.46779 | 3 | 1.76E-06 | 0.87 | 4.00 | - | 929.1  |
| AHQ-9-2, 5193         | K.LGAASLGAEDPETQVVLINAVK.D        | 2196.48671 | 3 | 6.17E-10 | 0.98 | 6.66 | - | 3189.8 |
| AHQ-9-2, 5185 - 5250  | K.LGAASLGAEDPETQVVLINAVK.D        | 2196.48671 | 2 | 1.67E-06 | 0.96 | 5.49 | - | 976.0  |
| AHQ-9-1, 5235         | K.LGAASLGAEDPETQVVLINAVK.D        | 2196.48671 | 2 | 4.19E-08 | 0.97 | 4.98 | - | 1569.9 |
| AHQ-9-1, 5239         | K.LGAASLGAEDPETQVVLINAVK.D        | 2196.48671 | 3 | 1.07E-05 | 0.96 | 4.78 | - | 1943.2 |
| AHQ-9-4, 5216 - 5221  | K.LGAASLGAEDPETQVVLINAVK.D        | 2196.48671 | 2 | 7.04E-10 | 0.95 | 5.12 | - | 742.8  |
| AHQ-9-2, 5309         | K.LGAASLGAEDPETQVVLINAVK.D        | 2196.48671 | 2 | 2.12E-10 | 0.93 | 4.65 | - | 696.3  |
| AHQ-9-3, 5168 - 5172  | K.LGAASLGAEDPETQVVLINAVK.D        | 2196.48671 | 2 | 1.02E-07 | 0.95 | 5.03 | - | 922.1  |
| AHQ-9-5, 5219         | K.LGAASLGAEDPETQVVLINAVK.D        | 2196.48671 | 2 | 5.37E-09 | 0.93 | 4.27 | - | 859.2  |
| AHQ-9-4, 5093 - 5094  | K.LGAASLGAEDPETQVVLINAVK.D        | 2196.48671 | 2 | 3.18E-08 | 0.95 | 4.98 | - | 1003.1 |
| AHQ-9-2, 5005         | K.LGAASLGAEDPETQVVLINAVK.D        | 2196.48671 | 3 | 7.89E-09 | 0.89 | 3.47 | - | 1389.6 |
| AHQ-9-5, 5099         | K.LGAASLGAEDPETQVVLINAVK.D        | 2196.48671 | 2 | 3.22E-06 | 0.97 | 5.74 | - | 1066.2 |
| AHQ-9-3, 5049 - 5066  | K.LGAASLGAEDPETQVVLINAVK.D        | 2196.48671 | 3 | 4.03E-05 | 0.89 | 3.38 | - | 1462.6 |
| AHQ-9-4, 4901 - 4926  | K.LGAASLGAEDPETQVVLINAVK.D        | 2196.48671 | 2 | 8.20E-06 | 0.96 | 4.70 | - | 1433.5 |
| AHQ-9-3, 5048         | K.LGAASLGAEDPETQVVLINAVK.D        | 2196.48671 | 2 | 1.29E-04 | 0.93 | 4.39 | - | 893.4  |
| AHQ-9-2, 4970 - 5033  | K.LGAASLGAEDPETQVVLINAVK.D        | 2196.48671 | 2 | 1.16E-11 | 0.94 | 4.54 | - | 790.9  |
| AHQ-9-6, 4837         | K.LGAASLGAEDPETQVVLINAVK.D        | 2196.48671 | 2 | 8.18E-07 | 0.93 | 4.59 | - | 766.4  |
| AHQ-9-6, 5021         | K.LGAASLGAEDPETQVVLINAVK.D        | 2196.48671 | 2 | 2.48E-05 | 0.95 | 4.33 | - | 1293.5 |
| AHQ-9-6, 5023 - 5086  | K.LGAASLGAEDPETQVVLINAVK.D        | 2196.48671 | 3 | 6.55E-04 | 0.91 | 4.25 | - | 1544.1 |
| AHQ-9-6, 5151         | K.LGAASLGAEDPETQVVLINAVK.D        | 2196.48671 | 2 | 8.74E-07 | 0.92 | 4.44 | - | 712.0  |
| AHQ-9-5, 4913         | K.LGAASLGAEDPETQVVLINAVK.D        | 2196.48671 | 2 | 3.74E-08 | 0.90 | 4.11 | - | 682.5  |
| AHQ-9-4, 5100         | K.LGAASLGAEDPETQVVLINAVK.D        | 2196.48671 | 3 | 2.43E-07 | 0.97 | 5.58 | - | 2092.9 |
| AHQ-9-3, 4865         | K.LGAASLGAEDPETQVVLINAVK.D        | 2196.48671 | 2 | 4.70E-07 | 0.92 | 4.53 | - | 848.1  |
| AHQ-9-7, 4821         | K.LGAASLGAEDPETQVVLINAVK.D        | 2196.48671 | 2 | 1.05E-08 | 0.92 | 4.21 | - | 940.2  |
| AHQ-9-5, 5103         | K.LGAASLGAEDPETQVVLINAVK.D        | 2196.48671 | 3 | 2.18E-09 | 0.97 | 5.82 | - | 2226.2 |
| AHQ-9-8, 3676         | K.LHTDELNLWLDHGR.T                | 1721.81153 | 2 | 1.79E-05 | 0.97 | 4.49 | - | 1813.4 |
| AHQ-9-8, 3686         | K.LHTDELNLWLDHGR.T                | 1721.81153 | 3 | 3.24E-05 | 0.89 | 4.07 | - | 1007.1 |
| AHQ-9-7, 3740         | K.LHTDELNLWLDHGR.T                | 1721.81153 | 2 | 2.76E-05 | 0.93 | 3.47 | - | 1398.2 |
| AHQ-9-2, 4287         | K.LLLALLEDEGGSGR.P                | 1401.54764 | 2 | 1.18E-06 | 0.95 | 3.77 | - | 1118.5 |
| AHQ-9-3, 4972 - 4990  | K.LLLALLEDEGGSGR.LLOAAK.G         | 2123.43896 | 3 | 4.05E-09 | 0.95 | 5.06 | - | 1354.2 |
| AHQ-9-5, 5023         | K.LLLALLEDEGGSGR.LLOAAK.G         | 2123.43896 | 2 | 5.80E-05 | 0.97 | 6.70 | - | 1292.2 |
| AHQ-9-1, 5154 - 5176  | K.LLLALLEDEGGSGR.LLOAAK.G         | 2123.43896 | 3 | 8.03E-10 | 0.96 | 4.61 | - | 1591.6 |
| AHQ-9-1, 5183         | K.LLLALLEDEGGSGR.LLOAAK.G         | 2123.43896 | 2 | 3.76E-08 | 0.93 | 4.97 | - | 906.9  |
| AHQ-9-7, 4925         | K.LLLALLEDEGGSGR.LLOAAK.G         | 2123.43896 | 2 | 4.21E-06 | 0.98 | 6.91 | - | 1208.8 |
| AHQ-9-2, 5101         | K.LLLALLEDEGGSGR.LLOAAK.G         | 2123.43896 | 3 | 4.40E-10 | 0.95 | 5.06 | - | 1402.5 |
| AHQ-9-8, 4987         | K.LLLALLEDEGGSGR.LLOAAK.G         | 2123.43896 | 3 | 3.11E-08 | 0.94 | 4.73 | - | 1117.4 |
| AHQ-9-4, 5008 - 5009  | K.LLLALLEDEGGSGR.LLOAAK.G         | 2123.43896 | 2 | 1.15E-07 | 0.98 | 6.67 | - | 1599.2 |
| AHQ-9-5, 5020         | K.LLLALLEDEGGSGR.LLOAAK.G         | 2123.43896 | 3 | 6.09E-06 | 0.97 | 5.57 | - | 1616.4 |

|                      |                                     |            |   |          |      |      |   |        |
|----------------------|-------------------------------------|------------|---|----------|------|------|---|--------|
| AHQ-9-4, 5001 - 5002 | K.LLAALEDEGGSGRPLLOAAK.G            | 2123.43896 | 3 | 6.65E-09 | 0.98 | 6.14 | - | 2674.6 |
| AHQ-9-8, 4984        | K.LLAALEDEGGSGRPLLOAAK.G            | 2123.43896 | 2 | 2.30E-10 | 0.98 | 6.26 | - | 1452.9 |
| AHQ-9-2, 5102        | K.LLAALEDEGGSGRPLLOAAK.G            | 2123.43896 | 2 | 2.29E-11 | 0.98 | 6.36 | - | 1480.3 |
| AHQ-9-7, 4922 - 4929 | K.LLAALEDEGGSGRPLLOAAK.G            | 2123.43896 | 3 | 8.20E-08 | 0.96 | 5.77 | - | 1601.1 |
| AHQ-9-3, 4976        | K.LLAALEDEGGSGRPLLOAAK.G            | 2123.43896 | 2 | 4.62E-09 | 0.97 | 6.31 | - | 1461.0 |
| AHQ-9-6, 4941        | K.LLAALEDEGGSGRPLLOAAK.G            | 2123.43896 | 3 | 3.05E-07 | 0.94 | 5.04 | - | 988.2  |
| AHQ-9-6, 4945        | K.LLAALEDEGGSGRPLLOAAK.G            | 2123.43896 | 2 | 5.40E-09 | 0.98 | 6.11 | - | 1581.8 |
| AHQ-9-1, 5324        | R.LNEAAAGLNQAATELVQASR.G            | 2028.21299 | 2 | 5.21E-12 | 0.98 | 5.52 | - | 1797.4 |
| AHQ-9-4, 4169        | R.LNEAAAGLNQAATELVQASR.G            | 2028.21299 | 2 | 5.12E-09 | 0.92 | 4.33 | - | 693.9  |
| AHQ-9-5, 5201        | R.LNEAAAGLNQAATELVQASR.G            | 2028.21299 | 2 | 9.48E-09 | 0.98 | 5.64 | - | 1831.3 |
| AHQ-9-2, 5690        | R.LNEAAAGLNQAATELVQASR.G            | 2028.21299 | 2 | 1.71E-06 | 0.95 | 3.97 | - | 1388.5 |
| AHQ-9-6, 5138        | R.LNEAAAGLNQAATELVQASR.G            | 2028.21299 | 3 | 1.72E-04 | 0.98 | 5.53 | - | 2827.4 |
| AHQ-9-6, 5074 - 5130 | R.LNEAAAGLNQAATELVQASR.G            | 2028.21299 | 2 | 1.13E-08 | 0.93 | 4.53 | - | 947.8  |
| AHQ-9-2, 5442        | R.LNEAAAGLNQAATELVQASR.G            | 2028.21299 | 2 | 2.05E-08 | 0.96 | 5.08 | - | 1151.6 |
| AHQ-9-2, 5286        | R.LNEAAAGLNQAATELVQASR.G            | 2028.21299 | 3 | 1.73E-07 | 0.98 | 5.65 | - | 2345.1 |
| AHQ-9-2, 5282 - 5341 | R.LNEAAAGLNQAATELVQASR.G            | 2028.21299 | 2 | 4.88E-08 | 0.98 | 5.80 | - | 1922.5 |
| AHQ-9-11, 5063       | R.LNEAAAGLNQAATELVQASR.G            | 2028.21299 | 2 | 9.16E-05 | 0.70 | 2.59 | - | 754.1  |
| AHQ-9-3, 5388 - 5445 | R.LNEAAAGLNQAATELVQASR.G            | 2028.21299 | 2 | 1.50E-06 | 0.94 | 4.63 | - | 1316.7 |
| AHQ-9-4, 5440 - 5501 | R.LNEAAAGLNQAATELVQASR.G            | 2028.21299 | 2 | 6.48E-11 | 0.94 | 4.53 | - | 1213.3 |
| AHQ-9-6, 4130        | R.LNEAAAGLNQAATELVQASR.G            | 2028.21299 | 2 | 5.77E-04 | 0.83 | 3.44 | - | 726.4  |
| AHQ-9-2, 5122        | R.LNEAAAGLNQAATELVQASR.G            | 2028.21299 | 2 | 3.67E-06 | 0.95 | 4.47 | - | 1061.8 |
| AHQ-9-4, 5344        | R.LNEAAAGLNQAATELVQASR.G            | 2028.21299 | 2 | 8.25E-04 | 0.94 | 4.26 | - | 1243.0 |
| AHQ-9-5, 4180        | R.LNEAAAGLNQAATELVQASR.G            | 2028.21299 | 2 | 3.15E-07 | 0.97 | 5.29 | - | 1168.1 |
| AHQ-9-3, 5134 - 5144 | R.LNEAAAGLNQAATELVQASR.G            | 2028.21299 | 2 | 3.08E-10 | 0.97 | 5.47 | - | 1534.7 |
| AHQ-9-1, 5334        | R.LNEAAAGLNQAATELVQASR.G            | 2028.21299 | 3 | 3.52E-04 | 0.96 | 4.93 | - | 1675.0 |
| AHQ-9-2, 5537        | R.LNEAAAGLNQAATELVQASR.G            | 2028.21299 | 2 | 4.52E-08 | 0.97 | 4.74 | - | 1773.9 |
| AHQ-9-2, 4270        | R.LNEAAAGLNQAATELVQASR.G            | 2028.21299 | 2 | 9.51E-11 | 0.95 | 4.86 | - | 1002.6 |
| AHQ-9-7, 5121        | R.LNEAAAGLNQAATELVQASR.G            | 2028.21299 | 2 | 2.15E-05 | 0.97 | 4.79 | - | 1618.8 |
| AHQ-9-3, 5138        | R.LNEAAAGLNQAATELVQASR.G            | 2028.21299 | 3 | 2.85E-05 | 0.97 | 5.65 | - | 1960.4 |
| AHQ-9-3, 4157        | R.LNEAAAGLNQAATELVQASR.G            | 2028.21299 | 2 | 6.66E-15 | 0.97 | 5.45 | - | 1304.9 |
| AHQ-9-4, 5149 - 5196 | R.LNEAAAGLNQAATELVQASR.G            | 2028.21299 | 2 | 3.25E-06 | 0.96 | 4.15 | - | 1592.8 |
| AHQ-9-5, 5207        | R.LNEAAAGLNQAATELVQASR.G            | 2028.21299 | 3 | 3.91E-08 | 0.97 | 5.54 | - | 1930.4 |
| AHQ-9-5, 3884        | R.M*VAATNMLCEAANAAVQGHASQEK.L       | 2574.79038 | 3 | 4.28E-06 | 0.67 | 3.34 | - | 656.1  |
| AHQ-9-4, 3960        | R.M*VAATNMLCEAANAAVQGHASQEK.L       | 2574.79038 | 3 | 7.77E-05 | 0.92 | 4.81 | - | 934.6  |
| AHQ-9-4, 4044 - 4054 | R.M*VAATNMLCEAANAAVQGHASQEK.L       | 2574.79038 | 3 | 2.88E-09 | 0.93 | 4.85 | - | 1319.2 |
| AHQ-9-2, 4150        | R.M*VAATNMLCEAANAAVQGHASQEK.L       | 2574.79038 | 3 | 1.05E-08 | 0.86 | 3.91 | - | 768.5  |
| AHQ-9-5, 3975        | R.M*VAATNMLCEAANAAVQGHASQEK.L       | 2574.79038 | 3 | 2.93E-10 | 0.96 | 5.54 | - | 1247.5 |
| AHQ-9-3, 3953 - 3956 | R.M*VAATNMLCEAANAAVQGHASQEK.L       | 2574.79038 | 3 | 1.78E-09 | 0.96 | 5.73 | - | 1754.5 |
| AHQ-9-2, 4338 - 4395 | R.MVAATNMLCEAANAAVQGHASQEK.L        | 2558.79098 | 3 | 1.12E-05 | 0.95 | 5.50 | - | 1222.2 |
| AHQ-9-2, 3969        | R.M*VAATNMLCEAANAAVQGHASQEK.L       | 2574.79038 | 3 | 3.79E-09 | 0.90 | 4.15 | - | 1033.0 |
| AHQ-9-2, 4062 - 4066 | R.M*VAATNMLCEAANAAVQGHASQEK.L       | 2574.79038 | 3 | 1.51E-09 | 0.96 | 5.98 | - | 1224.4 |
| AHQ-9-3, 4044 - 4094 | R.M*VAATNMLCEAANAAVQGHASQEK.L       | 2574.79038 | 3 | 1.70E-06 | 0.77 | 3.56 | - | 622.4  |
| AHQ-9-4, 5566        | K.M*VGGIAQIIAAQEEEM*LR.K            | 1863.19287 | 3 | 8.22E-09 | 0.95 | 4.98 | - | 1569.8 |
| AHQ-9-4, 5568        | K.M*VGGIAQIIAAQEEEM*LR.K            | 1863.19287 | 2 | 2.60E-10 | 0.97 | 4.94 | - | 1822.4 |
| AHQ-9-2, 5669        | K.M*VGGIAQIIAAQEEEM*LR.K            | 1863.19287 | 3 | 2.92E-08 | 0.97 | 5.60 | - | 1856.7 |
| AHQ-9-2, 6142        | K.M*VGGIAQIIAAQEEEM*LR.K            | 1847.19347 | 3 | 9.63E-06 | 0.96 | 4.97 | - | 1644.9 |
| AHQ-9-2, 5597 - 5670 | K.M*VGGIAQIIAAQEEEM*LR.K            | 1863.19287 | 2 | 5.81E-08 | 0.98 | 5.35 | - | 1688.5 |
| AHQ-9-2, 5737        | K.MVGGIAQIIAAQEEEM*LR.K             | 1847.19347 | 3 | 6.81E-04 | 0.95 | 3.24 | - | 2892.8 |
| AHQ-9-5, 5589        | K.M*VGGIAQIIAAQEEEM*LR.K            | 1863.19287 | 2 | 5.59E-05 | 0.93 | 3.77 | - | 1122.7 |
| AHQ-9-6, 5434 - 5507 | K.M*VGGIAQIIAAQEEEM*LR.K            | 1863.19287 | 2 | 1.34E-06 | 0.97 | 4.77 | - | 1963.5 |
| AHQ-9-13, 5667       | K.M*VGGIAQIIAAQEEEM*LR.K            | 1863.19287 | 2 | 8.74E-06 | 0.48 | 2.55 | - | 496.6  |
| AHQ-9-6, 5435        | K.M*VGGIAQIIAAQEEEM*LR.K            | 1863.19287 | 3 | 4.21E-06 | 0.95 | 3.91 | - | 2204.7 |
| AHQ-9-3, 5520 - 5530 | K.M*VGGIAQIIAAQEEEM*LR.K            | 1863.19287 | 2 | 1.95E-06 | 0.96 | 4.75 | - | 1386.6 |
| AHQ-9-2, 5317        | K.M*VGGIAQIIAAQEEEM*LRK.E           | 1991.36578 | 3 | 4.46E-04 | 0.91 | 3.88 | - | 986.5  |
| AHQ-9-2, 4143        | K.NGNLPEFGDAISTASK.A                | 1621.73018 | 2 | 1.89E-04 | 0.85 | 3.53 | - | 482.1  |
| AHQ-9-5, 4157 - 4163 | K.NGNLPEFGDAISTASK.A                | 1621.73018 | 2 | 1.43E-04 | 0.36 | 2.62 | - | 264.9  |
| AHQ-9-1, 4463        | K.NGNLPEFGDAISTASK.A                | 1621.73018 | 2 | 5.38E-10 | 0.90 | 3.40 | - | 714.2  |
| AHQ-9-5, 4313        | K.NGNLPEFGDAISTASK.A                | 1621.73018 | 2 | 2.46E-05 | 0.87 | 3.84 | - | 498.3  |
| AHQ-9-4, 4153        | K.NGNLPEFGDAISTASK.A                | 1621.73018 | 2 | 1.24E-10 | 0.90 | 4.00 | - | 596.1  |
| AHQ-9-4, 4070 - 4072 | K.NLGTALALERT                       | 1058.21367 | 2 | 6.24E-05 | 0.87 | 3.36 | - | 818.2  |
| AHQ-9-6, 4037 - 4050 | K.NLGTALALERT                       | 1058.21367 | 2 | 2.33E-04 | 0.94 | 3.82 | - | 1186.6 |
| AHQ-9-3, 4080        | K.NLGTALALERT                       | 1058.21367 | 2 | 2.75E-04 | 0.82 | 3.13 | - | 683.4  |
| AHQ-9-2, 4185        | K.NLGTALALERT                       | 1058.21367 | 2 | 5.47E-04 | 0.93 | 3.56 | - | 1049.4 |
| AHQ-9-5, 4091        | K.NLGTALALERT                       | 1058.21367 | 2 | 1.33E-04 | 0.75 | 2.76 | - | 742.1  |
| AHQ-9-5, 2815        | K.PAAVAENEIEESHK.H                  | 1636.78798 | 3 | 3.73E-07 | 0.97 | 5.65 | - | 1667.1 |
| AHQ-9-3, 2849        | K.PAAVAENEIEESHK.H                  | 1636.78798 | 3 | 3.32E-09 | 0.97 | 5.21 | - | 2182.6 |
| AHQ-9-3, 2814 - 2846 | K.PAAVAENEIEESHK.H                  | 1636.78798 | 2 | 7.89E-08 | 0.98 | 5.47 | - | 2515.3 |
| AHQ-9-2, 2901        | K.PAAVAENEIEESHK.H                  | 1636.78798 | 3 | 6.96E-08 | 0.96 | 4.60 | - | 1609.0 |
| AHQ-9-4, 2813        | K.PAAVAENEIEESHK.H                  | 1636.78798 | 2 | 3.41E-06 | 0.96 | 4.10 | - | 1624.8 |
| AHQ-9-2, 2902        | K.PAAVAENEIEESHK.H                  | 1636.78798 | 2 | 1.90E-08 | 0.97 | 5.24 | - | 1648.4 |
| AHQ-9-4, 2721        | K.PAAVAENEIEESHK.H                  | 1636.78798 | 3 | 2.21E-07 | 0.96 | 4.77 | - | 1691.8 |
| AHQ-9-6, 2811 - 2818 | K.PAAVAENEIEESHK.H                  | 1636.78798 | 3 | 7.58E-05 | 0.93 | 4.54 | - | 1199.1 |
| AHQ-9-6, 3281        | K.QAAASATQTIAAAQHAASTPK.A           | 1996.17099 | 2 | 3.65E-08 | 0.87 | 3.90 | - | 590.6  |
| AHQ-9-2, 3393        | K.QAAASATQTIAAAQHAASTPK.A           | 1996.17099 | 2 | 4.79E-05 | 0.74 | 3.08 | - | 621.2  |
| AHQ-9-5, 3307        | K.QAAASATQTIAAAQHAASTPK.A           | 1996.17099 | 2 | 2.00E-06 | 0.80 | 3.77 | - | 536.9  |
| AHQ-9-5, 3300 - 3303 | K.QAAASATQTIAAAQHAASTPK.A           | 1996.17099 | 3 | 2.73E-05 | 0.64 | 3.09 | - | 459.7  |
| AHQ-9-4, 3289        | K.QAAASATQTIAAAQHAASTPK.A           | 1996.17099 | 3 | 8.36E-07 | 0.80 | 3.60 | - | 511.6  |
| AHQ-9-3, 3313        | K.QAAASATQTIAAAQHAASTPK.A           | 1996.17099 | 2 | 6.32E-05 | 0.91 | 4.56 | - | 572.3  |
| AHQ-9-4, 3300        | K.QAAASATQTIAAAQHAASTPK.A           | 1996.17099 | 2 | 1.26E-06 | 0.91 | 4.32 | - | 652.7  |
| AHQ-9-1, 3892 - 3946 | K.QVAASTAQLLVACK.V                  | 1461.70942 | 2 | 1.20E-05 | 0.86 | 3.41 | - | 591.8  |
| AHQ-9-2, 3809        | K.QVAASTAQLLVACK.V                  | 1461.70942 | 2 | 3.23E-08 | 0.89 | 3.58 | - | 724.8  |
| AHQ-9-2, 3326 - 3327 | R.SGASGPENFQVGSMS*PPAQQQITSGQM*HR.G | 2961.19747 | 3 | 6.39E-05 | 0.95 | 5.39 | - | 1104.7 |
| AHQ-9-4, 3240        | R.SGASGPENFQVGSMS*PPAQQQITSGQM*HR.G | 2961.19747 | 3 | 2.94E-06 | 0.92 | 4.90 | - | 812.5  |
| AHQ-9-5, 3240        | R.SGASGPENFQVGSMS*PPAQQQITSGQM*HR.G | 2961.19747 | 3 | 8.39E-05 | 0.82 | 3.96 | - | 583.1  |
| AHQ-9-2, 3599        | R.SGASGPENFQVGSMS*PPAQQQITSGQM*HR.G | 2945.19807 | 3 | 9.05E-05 | 0.85 | 4.17 | - | 638.4  |
| AHQ-9-3, 3244        | R.SGASGPENFQVGSMS*PPAQQQITSGQM*HR.G | 2961.19747 | 3 | 1.94E-05 | 0.85 | 3.85 | - | 855.0  |
| AHQ-9-3, 3118        | K.SIAAATSALV.K.A                    | 1032.21612 | 2 | 3.65E-05 | 0.91 | 3.37 | - | 1067.4 |
| AHQ-9-7, 3749 - 3758 | K.SKDFHGLEGDDEESTM*LEDSVSPK.K       | 2554.68304 | 3 | 2.14E-08 | 0.95 | 5.50 | - | 1267.6 |
| AHQ-9-8, 4191        | K.SKDFHGLEGDDEESTM*LEDSVSPK.K       | 2538.68364 | 3 | 3.38E-05 | 0.90 | 3.70 | - | 1351.5 |
| AHQ-9-1, 5027        | K.SNTSPEELGPLANQLTSDYGR.L           | 2250.36505 | 2 | 1.13E-06 | 0.72 | 3.39 | - | 310.0  |
| AHQ-9-5, 4869 - 4895 | K.SNTSPEELGPLANQLTSDYGR.L           | 2250.36505 | 2 | 9.65E-07 | 0.90 | 4.11 | - | 604.4  |
| AHQ-9-5, 4339        | K.SNTSPEELGPLANQLTSDYGR.L           | 2250.36505 | 2 | 7.08E-12 | 0.78 | 3.55 | - | 376.3  |
| AHQ-9-6, 4833        | K.SNTSPEELGPLANQLTSDYGR.L           | 2250.36505 | 2 | 3.24E-05 | 0.72 | 3.33 | - | 374.9  |
| AHQ-9-2, 4426        | K.SNTSPEELGPLANQLTSDYGR.L           | 2250.36505 | 2 | 9.39E-07 | 0.86 | 3.91 | - | 500.4  |
| AHQ-9-2, 5113 - 5117 | K.SNTSPEELGPLANQLTSDYGR.L           | 2250.36505 | 2 | 2.84E-06 | 0.87 | 4.37 | - | 391.9  |
| AHQ-9-3, 4978        | K.SNTSPEELGPLANQLTSDYGR.L           | 2250.36505 | 2 | 2.56E-07 | 0.75 | 3.11 | - | 352.3  |
| AHQ-9-2, 5026        | K.SNTSPEELGPLANQLTSDYGR.L           | 2250.36505 | 2 | 4.14E-05 | 0.84 | 3.84 | - | 393.8  |
| AHQ-9-2, 4899 - 4969 | K.SNTSPEELGPLANQLTSDYGR.L           | 2250.36505 | 2 | 8.14E-08 | 0.83 | 3.66 | - | 375.6  |
| AHQ-9-4, 4868        | K.SNTSPEELGPLANQLTSDYGR.L           | 2250.36505 | 2 | 5.48E-06 | 0.92 | 4.49 | - | 503.8  |
| AHQ-9-4, 5020        | K.SNTSPEELGPLANQLTSDYGR.L           | 2250.36505 | 2 | 1.62E-06 | 0.82 | 3.54 | - | 472.1  |
| AHQ-9-4, 4341        | K.SNTSPEELGPLANQLTSDYGR.L           | 2250.36505 | 2 | 3.56E-05 | 0.83 | 3.54 | - | 598.0  |
| AHQ-9-4, 4860 - 4916 | K.SNTSPEELGPLANQLTSDYGR.L           | 2250.36505 | 2 | 9.35E-08 | 0.86 | 3.63 | - | 479.2  |
| AHQ-9-3, 4826 - 4888 | K.SNTSPEELGPLANQLTSDYGR.L           | 2250.36505 | 2 | 2.94E-05 | 0.81 | 3.83 | - | 362.1  |
| AHQ-9-2, 6265 - 6330 | R.TEDSLGTQVIAAATQCALSTSQLVACTK.V    | 3056.37009 | 3 | 6.46E-04 | 0.91 | 4.28 | - | 1318.6 |
| AHQ-9-2, 6425        | R.TEDSLGTQVIAAATQCALSTSQLVACTK.V    | 3056.37009 | 3 | 1.34E-11 | 0.97 | 6.34 | - | 1471.3 |
| AHQ-9-8, 6326        | R.TEDSLGTQVIAAATQCALSTSQLVACTK.V    | 3056.37009 | 3 | 3.81E-11 | 0.96 | 5.79 | - | 1328.6 |
| AHQ-9-7, 6241 - 6242 | R.TEDSLGTQVIAAATQCALSTSQLVACTK.V    | 3056.37009 | 3 | 1.04E-09 | 0.97 | 5.86 | - | 2032.3 |

|                      |                                    |            |   |          |      |      |   |        |
|----------------------|------------------------------------|------------|---|----------|------|------|---|--------|
| AHQ-9-1, 6410 - 6440 | R.TEDSLQLTQVIAAATQCALSTSQLVACTK.V  | 3056.37009 | 3 | 1.40E-10 | 0.96 | 5.22 | - | 1841.0 |
| AHQ-9-8, 4234        | K.TKEVIEQWNLNTRK.R                 | 1716.95938 | 2 | 1.60E-07 | 0.96 | 4.69 | - | 1642.0 |
| AHQ-9-5, 5904 - 5907 | K.TLAESALQLLYTAK.E                 | 1522.76793 | 2 | 1.57E-10 | 0.96 | 4.73 | - | 1218.6 |
| AHQ-9-4, 5884 - 5900 | K.TLAESALQLLYTAK.E                 | 1522.76793 | 2 | 1.23E-04 | 0.97 | 4.71 | - | 1274.2 |
| AHQ-9-7, 5813        | K.TLAESALQLLYTAK.E                 | 1522.76793 | 2 | 5.68E-04 | 0.90 | 3.81 | - | 706.5  |
| AHQ-9-8, 5894        | K.TLAESALQLLYTAK.E                 | 1522.76793 | 2 | 6.91E-07 | 0.89 | 3.34 | - | 728.2  |
| AHQ-9-3, 5824 - 5834 | K.TLAESALQLLYTAK.E                 | 1522.76793 | 2 | 7.78E-06 | 0.94 | 4.09 | - | 1010.3 |
| AHQ-9-4, 6045 - 6094 | K.TLAESALQLLYTAK.E                 | 1522.76793 | 2 | 4.34E-04 | 0.57 | 2.69 | - | 538.1  |
| AHQ-9-2, 6003        | K.TLAESALQLLYTAK.E                 | 1522.76793 | 3 | 1.91E-06 | 0.96 | 5.01 | - | 1996.4 |
| AHQ-9-3, 5836        | K.TLAESALQLLYTAK.E                 | 1522.76793 | 3 | 1.17E-06 | 0.97 | 5.30 | - | 2174.1 |
| AHQ-9-2, 5986 - 6066 | K.TLAESALQLLYTAK.E                 | 1522.76793 | 2 | 7.89E-08 | 0.94 | 4.50 | - | 856.6  |
| AHQ-9-6, 5817        | K.TLAESALQLLYTAK.E                 | 1522.76793 | 2 | 8.85E-05 | 0.81 | 2.82 | - | 626.3  |
| AHQ-9-1, 6003 - 6030 | K.TLAESALQLLYTAK.E                 | 1522.76793 | 2 | 1.79E-07 | 0.93 | 3.87 | - | 1011.2 |
| AHQ-9-4, 2632 - 2633 | K.TLSHPQQM*ALLDQTK.T               | 1727.96404 | 3 | 3.41E-06 | 0.91 | 4.25 | - | 978.2  |
| AHQ-9-4, 3209 - 3280 | K.TLSHPQQMALLDQTK.T                | 1711.96464 | 2 | 1.77E-06 | 0.90 | 3.97 | - | 530.2  |
| AHQ-9-3, 3294        | K.TLSHPQQMALLDQTK.T                | 1711.96464 | 3 | 7.64E-06 | 0.94 | 4.55 | - | 1440.6 |
| AHQ-9-5, 3296        | K.TLSHPQQMALLDQTK.T                | 1711.96464 | 2 | 1.29E-05 | 0.91 | 4.47 | - | 492.6  |
| AHQ-9-2, 3365        | K.TLSHPQQMALLDQTK.T                | 1711.96464 | 2 | 2.17E-04 | 0.94 | 4.54 | - | 816.0  |
| AHQ-9-2, 3518        | K.TM*LESAGGLIQTAR.A                | 1464.67035 | 2 | 8.60E-10 | 0.97 | 5.02 | - | 1651.6 |
| AHQ-9-2, 3499 - 3557 | K.TM*LESAGGLIQTAR.A                | 1464.67035 | 2 | 8.87E-08 | 0.95 | 4.18 | - | 1429.2 |
| AHQ-9-7, 4077        | K.TMESAGGLIQTAR.A                  | 1448.67095 | 2 | 5.31E-04 | 0.80 | 3.14 | - | 1081.6 |
| AHQ-9-3, 4092 - 4106 | K.TMESAGGLIQTAR.A                  | 1448.67095 | 2 | 1.10E-04 | 0.80 | 2.81 | - | 1187.3 |
| AHQ-9-2, 4238        | K.TMESAGGLIQTAR.A                  | 1448.67095 | 3 | 2.08E-05 | 0.90 | 3.90 | - | 1413.9 |
| AHQ-9-6, 4086        | K.TMESAGGLIQTAR.A                  | 1448.67095 | 2 | 5.45E-07 | 0.93 | 3.73 | - | 1570.1 |
| AHQ-9-2, 4183 - 4241 | K.TMESAGGLIQTAR.A                  | 1448.67095 | 2 | 2.40E-08 | 0.95 | 4.34 | - | 1647.4 |
| AHQ-9-3, 3402 - 3461 | K.TM*LESAGGLIQTAR.A                | 1464.67035 | 2 | 6.62E-04 | 0.93 | 4.38 | - | 1198.9 |
| AHQ-9-4, 4125        | K.TMESAGGLIQTAR.A                  | 1448.67095 | 2 | 1.19E-07 | 0.91 | 3.52 | - | 1383.7 |
| AHQ-9-7, 4070 - 4125 | K.TM*QFEPSTMYVDACR.I               | 1854.07511 | 2 | 5.21E-04 | 0.92 | 4.27 | - | 702.1  |
| AHQ-9-8, 5031        | K.TYGVSFVLK.E                      | 1161.37395 | 2 | 3.83E-06 | 0.86 | 3.28 | - | 585.9  |
| AHQ-9-7, 4980        | K.TYGVSFVLK.E                      | 1161.37395 | 2 | 2.46E-06 | 0.86 | 3.01 | - | 773.4  |
| AHQ-9-1, 5948        | R.VAGSVTELIQAAEAMK.G               | 1618.87752 | 2 | 6.88E-09 | 0.67 | 2.98 | - | 647.5  |
| AHQ-9-1, 5167        | R.VAGSVTELIQAAEAM*K.G              | 1634.87692 | 2 | 5.22E-05 | 0.94 | 3.64 | - | 1338.4 |
| AHQ-9-7, 5736        | R.VAGSVTELIQAAEAMK.G               | 1618.87752 | 2 | 8.27E-08 | 0.91 | 3.39 | - | 1200.5 |
| AHQ-9-4, 5800        | R.VAGSVTELIQAAEAMK.G               | 1618.87752 | 2 | 6.62E-05 | 0.93 | 3.58 | - | 1311.2 |
| AHQ-9-3, 4973        | R.VAGSVTELIQAAEAM*K.G              | 1634.87692 | 2 | 2.79E-05 | 0.82 | 2.62 | - | 1121.8 |
| AHQ-9-4, 5000        | R.VAGSVTELIQAAEAM*K.G              | 1634.87692 | 2 | 3.07E-05 | 0.91 | 3.65 | - | 1048.6 |
| AHQ-9-6, 5741        | R.VAGSVTELIQAAEAMK.G               | 1618.87752 | 2 | 2.98E-08 | 0.96 | 4.53 | - | 1263.9 |
| AHQ-9-2, 5045 - 5105 | R.VAGSVTELIQAAEAM*K.G              | 1634.87692 | 2 | 5.69E-04 | 0.94 | 3.99 | - | 1353.1 |
| AHQ-9-2, 5913        | R.VAGSVTELIQAAEAMK.G               | 1618.87752 | 2 | 1.47E-05 | 0.84 | 3.26 | - | 901.4  |
| AHQ-9-5, 5828        | R.VAGSVTELIQAAEAMK.G               | 1618.87752 | 2 | 2.14E-08 | 0.96 | 4.24 | - | 1805.5 |
| AHQ-9-2, 3769        | K.VEHGSVALPAIMR.S                  | 1380.64144 | 2 | 1.64E-07 | 0.89 | 3.05 | - | 1057.2 |
| AHQ-9-2, 5474 - 5549 | K.VGAIPANALDDGQWSQGLISAAR.M        | 2311.53959 | 3 | 3.81E-07 | 0.92 | 4.84 | - | 1116.6 |
| AHQ-9-3, 5398 - 5452 | K.VGAIPANALDDGQWSQGLISAAR.M        | 2311.53959 | 2 | 2.01E-05 | 0.96 | 5.19 | - | 923.6  |
| AHQ-9-3, 5309 - 5345 | K.VGAIPANALDDGQWSQGLISAAR.M        | 2311.53959 | 3 | 7.71E-06 | 0.77 | 3.51 | - | 1153.7 |
| AHQ-9-3, 5240 - 5320 | K.VGAIPANALDDGQWSQGLISAAR.M        | 2311.53959 | 2 | 1.11E-06 | 0.93 | 4.75 | - | 570.5  |
| AHQ-9-1, 5571 - 5627 | K.VGAIPANALDDGQWSQGLISAAR.M        | 2311.53959 | 3 | 5.36E-04 | 0.78 | 3.39 | - | 1054.7 |
| AHQ-9-2, 5463 - 5543 | K.VGAIPANALDDGQWSQGLISAAR.M        | 2311.53959 | 2 | 4.45E-13 | 0.95 | 5.62 | - | 523.0  |
| AHQ-9-1, 5576        | K.VGAIPANALDDGQWSQGLISAAR.M        | 2311.53959 | 2 | 1.28E-08 | 0.94 | 4.65 | - | 937.6  |
| AHQ-9-2, 5346 - 5407 | K.VGAIPANALDDGQWSQGLISAAR.M        | 2311.53959 | 2 | 1.34E-11 | 0.94 | 4.74 | - | 824.9  |
| AHQ-9-5, 5401 - 5472 | K.VGAIPANALDDGQWSQGLISAAR.M        | 2311.53959 | 2 | 1.76E-11 | 0.94 | 4.74 | - | 718.6  |
| AHQ-9-2, 5345 - 5401 | K.VGAIPANALDDGQWSQGLISAAR.M        | 2311.53959 | 3 | 2.94E-04 | 0.95 | 5.06 | - | 1159.5 |
| AHQ-9-7, 5373        | K.VGAIPANALDDGQWSQGLISAAR.M        | 2311.53959 | 2 | 6.07E-06 | 0.76 | 3.53 | - | 491.5  |
| AHQ-9-4, 5368 - 5445 | K.VGAIPANALDDGQWSQGLISAAR.M        | 2311.53959 | 3 | 3.49E-08 | 0.93 | 4.72 | - | 1257.3 |
| AHQ-9-4, 5293 - 5365 | K.VGAIPANALDDGQWSQGLISAAR.M        | 2311.53959 | 2 | 9.87E-09 | 0.93 | 4.89 | - | 583.2  |
| AHQ-9-6, 5385        | K.VGAIPANALDDGQWSQGLISAAR.M        | 2311.53959 | 2 | 6.27E-08 | 0.95 | 4.70 | - | 895.1  |
| AHQ-9-5, 3725        | K.VGDDPAWVQLK.N                    | 1228.37879 | 2 | 3.27E-07 | 0.85 | 3.09 | - | 723.2  |
| AHQ-9-4, 3722        | K.VGDDPAWVQLK.N                    | 1228.37879 | 2 | 6.11E-09 | 0.94 | 3.99 | - | 939.0  |
| AHQ-9-3, 3726        | K.VGDDPAWVQLK.N                    | 1228.37879 | 2 | 3.60E-07 | 0.94 | 4.11 | - | 924.5  |
| AHQ-9-6, 3689        | K.VGDDPAWVQLK.N                    | 1228.37879 | 2 | 6.76E-08 | 0.92 | 3.67 | - | 835.5  |
| AHQ-9-2, 3779 - 3837 | K.VGDDPAWVQLK.N                    | 1228.37879 | 2 | 6.42E-09 | 0.92 | 3.68 | - | 866.2  |
| AHQ-9-4, 2518        | K.VLGEAM*TGISQNAK.N                | 1435.62901 | 2 | 2.01E-06 | 0.93 | 3.27 | - | 1335.6 |
| AHQ-9-2, 3206        | K.VLGEAM*TGISQNAK.N                | 1419.62961 | 2 | 3.79E-06 | 0.93 | 3.94 | - | 1226.8 |
| AHQ-9-3, 2545        | K.VLGEAM*TGISQNAK.N                | 1435.62901 | 2 | 2.04E-04 | 0.87 | 2.98 | - | 950.1  |
| AHQ-9-2, 2501        | K.VLGEAM*TGISQNAK.N                | 1435.62901 | 2 | 6.39E-04 | 0.95 | 4.07 | - | 1346.9 |
| AHQ-9-4, 2421 - 2433 | K.VLGEAM*TGISQNAK.N                | 1435.62901 | 2 | 5.70E-04 | 0.97 | 4.50 | - | 1946.9 |
| AHQ-9-4, 3061 - 3128 | K.VLGEAM*TGISQNAK.N                | 1419.62961 | 2 | 4.79E-05 | 0.95 | 3.82 | - | 1764.0 |
| AHQ-9-2, 4681        | K.VLGEAM*TGISQNAKNGNLPFGDAISTASK.A | 3038.33659 | 3 | 4.11E-11 | 0.88 | 4.55 | - | 652.7  |
| AHQ-9-3, 4482 - 4548 | K.VLGEAM*TGISQNAKNGNLPFGDAISTASK.A | 3038.33659 | 3 | 6.36E-10 | 0.95 | 5.63 | - | 834.5  |
| AHQ-9-4, 4576        | K.VLGEAM*TGISQNAKNGNLPFGDAISTASK.A | 3038.33659 | 3 | 8.28E-07 | 0.89 | 4.50 | - | 605.9  |
| AHQ-9-4, 1913 - 1978 | K.VLVQNAAGSQEK.L                   | 1244.37976 | 2 | 2.96E-04 | 0.82 | 3.07 | - | 609.0  |
| AHQ-9-6, 1839 - 1899 | K.VLVQNAAGSQEK.L                   | 1244.37976 | 2 | 2.54E-06 | 0.80 | 3.10 | - | 743.3  |
| AHQ-9-2, 1927        | K.VLVQNAAGSQEK.L                   | 1244.37976 | 2 | 9.05E-07 | 0.92 | 3.53 | - | 949.3  |
| AHQ-9-3, 1881        | K.VLVQNAAGSQEK.L                   | 1244.37976 | 2 | 2.16E-06 | 0.84 | 3.18 | - | 833.5  |
| AHQ-9-4, 1801 - 1857 | K.VLVQNAAGSQEK.L                   | 1244.37976 | 2 | 1.81E-05 | 0.93 | 3.74 | - | 1081.0 |
| AHQ-9-5, 1841 - 1900 | K.VLVQNAAGSQEK.L                   | 1244.37976 | 2 | 6.12E-04 | 0.83 | 3.18 | - | 664.6  |
| AHQ-9-4, 4512        | K.VMVTNVTSLK.T                     | 1205.49322 | 2 | 2.19E-07 | 0.92 | 4.21 | - | 785.8  |
| AHQ-9-2, 4610 - 4611 | K.VMVTNVTSLK.T                     | 1205.49322 | 2 | 1.94E-06 | 0.91 | 4.22 | - | 792.1  |
| AHQ-9-6, 4425        | K.VMVTNVTSLK.T                     | 1205.49322 | 2 | 2.66E-04 | 0.81 | 3.05 | - | 631.9  |
| AHQ-9-1, 4384        | K.VM*VTNVTSLK.T                    | 1221.49262 | 2 | 3.06E-04 | 0.68 | 2.69 | - | 528.5  |
| AHQ-9-3, 4170        | K.VM*VTNVTSLK.T                    | 1221.49262 | 2 | 9.07E-04 | 0.78 | 3.07 | - | 760.8  |
| AHQ-9-5, 4497        | K.VMVTNVTSLK.T                     | 1205.49322 | 2 | 5.18E-04 | 0.81 | 3.18 | - | 591.6  |
| AHQ-9-2, 4289 - 4290 | K.VM*VTNVTSLK.T                    | 1221.49262 | 2 | 7.56E-04 | 0.91 | 3.76 | - | 884.6  |
| AHQ-9-3, 4500        | K.VMVTNVTSLK.T                     | 1205.49322 | 2 | 5.58E-05 | 0.90 | 3.97 | - | 812.3  |
| AHQ-9-4, 4194        | K.VM*VTNVTSLK.T                    | 1221.49262 | 2 | 7.10E-05 | 0.86 | 3.39 | - | 798.5  |
| AHQ-9-7, 4112        | K.VM*VTNVTSLK.T                    | 1221.49262 | 2 | 5.04E-04 | 0.74 | 2.98 | - | 596.2  |
| AHQ-9-4, 2876        | R.VQELGHGCAALVTK.A                 | 1484.70307 | 2 | 9.02E-09 | 0.97 | 4.68 | - | 1749.3 |
| AHQ-9-3, 2900        | R.VQELGHGCAALVTK.A                 | 1484.70307 | 2 | 1.23E-04 | 0.98 | 4.91 | - | 1964.6 |
| AHQ-9-5, 2877 - 2884 | R.VQELGHGCAALVTK.A                 | 1484.70307 | 2 | 1.58E-08 | 0.97 | 4.79 | - | 1331.9 |
| AHQ-9-6, 2861        | R.VQELGHGCAALVTK.A                 | 1484.70307 | 2 | 1.15E-06 | 0.96 | 4.71 | - | 1386.6 |
| AHQ-9-3, 2842 - 2905 | R.VQELGHGCAALVTK.A                 | 1484.70307 | 2 | 2.21E-04 | 0.94 | 3.97 | - | 1110.2 |
| AHQ-9-2, 2958        | R.VQELGHGCAALVTK.A                 | 1484.70307 | 2 | 1.43E-08 | 0.96 | 4.51 | - | 1220.8 |
| AHQ-9-7, 2852        | R.VQELGHGCAALVTK.A                 | 1484.70307 | 2 | 4.70E-04 | 0.62 | 2.80 | - | 353.1  |
| AHQ-9-5, 2864        | K.VSHVLAALQAGNR.G                  | 1336.52525 | 2 | 8.01E-11 | 0.97 | 4.10 | - | 1716.6 |
| AHQ-9-2, 2939        | K.VSHVLAALQAGNR.G                  | 1336.52525 | 2 | 7.24E-07 | 0.97 | 4.80 | - | 1644.8 |
| AHQ-9-3, 2888        | K.VSHVLAALQAGNR.G                  | 1336.52525 | 2 | 2.35E-10 | 0.97 | 4.77 | - | 1928.9 |
| AHQ-9-6, 2839 - 2846 | K.VSHVLAALQAGNR.G                  | 1336.52525 | 2 | 7.76E-11 | 0.97 | 4.69 | - | 1887.8 |
| AHQ-9-4, 2850        | K.VSHVLAALQAGNR.G                  | 1336.52525 | 2 | 7.39E-09 | 0.97 | 4.62 | - | 1668.2 |
| AHQ-9-6, 6030        | K.VSQMAQYFEPFLTLAAVGAASK.T         | 2183.51313 | 2 | 1.50E-06 | 0.90 | 3.66 | - | 820.0  |
| AHQ-9-2, 6319        | K.VSQMAQYFEPFLTLAAVGAASK.T         | 2183.51313 | 2 | 6.61E-05 | 0.79 | 3.71 | - | 421.1  |
| AHQ-9-2, 6205        | K.VSQMAQYFEPFLTLAAVGAASK.T         | 2183.51313 | 3 | 3.07E-06 | 0.84 | 3.54 | - | 958.6  |
| AHQ-9-7, 5372        | K.VSQM*AQYFEPFLTLAAVGAASK.T        | 2199.51253 | 2 | 3.74E-06 | 0.89 | 3.61 | - | 1068.0 |
| AHQ-9-1, 6222        | K.VSQMAQYFEPFLTLAAVGAASK.T         | 2183.51313 | 2 | 9.30E-06 | 0.79 | 3.19 | - | 551.4  |
| AHQ-9-3, 6026        | K.VSQMAQYFEPFLTLAAVGAASK.T         | 2183.51313 | 2 | 7.43E-05 | 0.88 | 3.74 | - | 698.2  |
| AHQ-9-7, 6010        | K.VSQMAQYFEPFLTLAAVGAASK.T         | 2183.51313 | 2 | 5.75E-06 | 0.95 | 4.90 | - | 948.9  |
| AHQ-9-4, 6100        | K.VSQMAQYFEPFLTLAAVGAASK.T         | 2183.51313 | 2 | 4.28E-04 | 0.87 | 4.01 | - | 511.1  |
| AHQ-9-1, 5575 - 5582 | K.VSQM*AQYFEPFLTLAAVGAASK.T        | 2199.51253 | 3 | 1.67E-06 | 0.97 | 5.64 | - | 1539.6 |
| AHQ-9-3, 6030        | K.VSQMAQYFEPFLTLAAVGAASK.T         | 2183.51313 | 3 | 5.61E-07 | 0.84 | 3.64 | - | 904.6  |

|                            |                                                                         |            |   |          |       |         |       |          |
|----------------------------|-------------------------------------------------------------------------|------------|---|----------|-------|---------|-------|----------|
| AHQ-9-1, 5567              | K.VSQM*QYFEPLTLAAVGAASK.T                                               | 2199.51253 | 2 | 3.27E-06 | 0.90  | 4.12    | -     | 803.9    |
| AHQ-9-4, 5444 - 5465       | K.VSQM*QYFEPLTLAAVGAASK.T                                               | 2199.51253 | 2 | 8.88E-09 | 0.96  | 5.20    | -     | 1326.4   |
| AHQ-9-6, 5386              | K.VSQM*QYFEPLTLAAVGAASK.T                                               | 2199.51253 | 2 | 4.59E-05 | 0.94  | 4.72    | -     | 776.9    |
| AHQ-9-5, 5453              | K.VSQM*QYFEPLTLAAVGAASK.T                                               | 2199.51253 | 2 | 1.56E-07 | 0.95  | 4.56    | -     | 1106.1   |
| AHQ-9-3, 5392 - 5400       | K.VSQM*QYFEPLTLAAVGAASK.T                                               | 2199.51253 | 3 | 1.21E-06 | 0.91  | 3.85    | -     | 1294.7   |
| AHQ-9-2, 6197              | K.VSQM*QYFEPLTLAAVGAASK.T                                               | 2183.51313 | 2 | 1.01E-04 | 0.90  | 4.05    | -     | 676.9    |
| AHQ-9-3, 5390              | K.VSQM*QYFEPLTLAAVGAASK.T                                               | 2199.51253 | 2 | 5.36E-04 | 0.92  | 3.98    | -     | 1037.5   |
| AHQ-9-5, 6119              | K.VSQM*QYFEPLTLAAVGAASK.T                                               | 2183.51313 | 2 | 1.98E-06 | 0.94  | 4.64    | -     | 914.1    |
| AHQ-9-9, 4159              | K.VVAPTISSPVCQEQLVEAGR.L                                                | 2142.41919 | 2 | 6.15E-04 | 0.69  | 3.07    | -     | 346.5    |
| AHQ-9-2, 4366              | K.VVAPTISSPVCQEQLVEAGR.L                                                | 2142.41919 | 2 | 1.99E-05 | 0.90  | 4.32    | -     | 376.5    |
| AHQ-9-5, 4363              | K.VVAPTISSPVCQEQLVEAGR.L                                                | 2142.41919 | 2 | 5.48E-06 | 0.94  | 4.79    | -     | 680.3    |
| AHQ-9-12, 4332             | K.VVAPTISSPVCQEQLVEAGR.L                                                | 2142.41919 | 2 | 1.56E-05 | 0.86  | 3.64    | -     | 558.0    |
| AHQ-9-4, 4288              | K.VVAPTISSPVCQEQLVEAGR.L                                                | 2142.41919 | 2 | 3.39E-05 | 0.85  | 3.70    | -     | 458.1    |
| AHQ-9-4, 4380              | K.VVAPTISSPVCQEQLVEAGR.L                                                | 2142.41919 | 2 | 8.90E-07 | 0.88  | 4.11    | -     | 518.6    |
| AHQ-9-4, 4385 - 4388       | K.VVAPTISSPVCQEQLVEAGR.L                                                | 2142.41919 | 3 | 8.48E-07 | 0.92  | 4.71    | -     | 1212.3   |
| AHQ-9-1, 4535 - 4536       | K.VVAPTISSPVCQEQLVEAGR.L                                                | 2142.41919 | 2 | 1.32E-07 | 0.93  | 4.78    | -     | 613.3    |
| AHQ-9-6, 4306              | K.VVAPTISSPVCQEQLVEAGR.L                                                | 2142.41919 | 2 | 3.66E-07 | 0.96  | 5.28    | -     | 888.3    |
| AHQ-9-8, 4331 - 4346       | K.VVAPTISSPVCQEQLVEAGR.L                                                | 2142.41919 | 2 | 3.89E-08 | 0.95  | 5.10    | -     | 805.2    |
| AHQ-9-3, 4350              | K.VVAPTISSPVCQEQLVEAGR.L                                                | 2142.41919 | 2 | 1.25E-06 | 0.95  | 4.90    | -     | 952.1    |
| AHQ-9-2, 4466              | K.VVAPTISSPVCQEQLVEAGR.L                                                | 2142.41919 | 2 | 1.23E-07 | 0.93  | 4.79    | -     | 609.8    |
| AHQ-9-7, 4288              | K.VVAPTISSPVCQEQLVEAGR.L                                                | 2142.41919 | 2 | 2.38E-08 | 0.93  | 4.73    | -     | 668.7    |
| gj 4503745 ref NP_001447.1 | filamin 1 (actin-binding protein-280); filamin 1; filamin A, alpha (act |            |   | 1.11E-14 | 90.24 | 1040.35 | 54.70 | 280757.4 |
| AHQ-9-8, 4979              | R.AEAGVPAEFSIWTR.E                                                      | 1534.69735 | 2 | 8.79E-05 | 0.77  | 3.06    | -     | 465.1    |
| AHQ-9-1, 2898              | K.AFGPGLGGGAGSPAR.F                                                     | 1430.55077 | 2 | 1.29E-05 | 0.94  | 3.24    | -     | 1566.6   |
| AHQ-9-2, 2765              | K.AFGPGLGGGAGSPAR.F                                                     | 1430.55077 | 2 | 7.65E-10 | 0.93  | 3.27    | -     | 1322.2   |
| AHQ-9-3, 2714              | K.AFGPGLGGGAGSPAR.F                                                     | 1430.55077 | 2 | 5.80E-06 | 0.88  | 3.06    | -     | 1080.3   |
| AHQ-9-6, 2690 - 2763       | K.AFGPGLGGGAGSPAR.F                                                     | 1430.55077 | 2 | 4.16E-06 | 0.75  | 2.87    | -     | 829.2    |
| AHQ-9-4, 2692              | K.AFGPGLGGGAGSPAR.F                                                     | 1430.55077 | 2 | 9.53E-09 | 0.95  | 3.59    | -     | 1643.4   |
| AHQ-9-5, 2692 - 2695       | K.AFGPGLGGGAGSPAR.F                                                     | 1430.55077 | 2 | 4.20E-05 | 0.95  | 3.80    | -     | 1616.1   |
| AHQ-9-7, 2680              | K.AFGPGLGGGAGSPAR.F                                                     | 1430.55077 | 2 | 2.35E-07 | 0.93  | 3.23    | -     | 1368.5   |
| AHQ-9-4, 2980              | K.AGNNM*LLVGVHGRP.T                                                     | 1451.67973 | 2 | 7.92E-05 | 0.74  | 2.53    | -     | 603.3    |
| AHQ-9-14-, 2846 - 2901     | K.AGNNM*LLVGVHGRP.T                                                     | 1451.67973 | 2 | 1.63E-05 | 0.84  | 3.21    | -     | 655.7    |
| AHQ-9-14-, 2898 - 2914     | K.AGNNM*LLVGVHGRP.T                                                     | 1451.67973 | 3 | 3.53E-05 | 0.89  | 3.61    | -     | 1349.6   |
| AHQ-9-2, 1911              | R.AGQSAAGAAPPGGVDTR.D                                                   | 1443.50471 | 2 | 9.30E-06 | 0.48  | 2.59    | -     | 416.4    |
| AHQ-9-4, 1790 - 1858       | R.AGQSAAGAAPPGGVDTR.D                                                   | 1443.50471 | 2 | 1.17E-04 | 0.82  | 3.08    | -     | 788.7    |
| AHQ-9-3, 2438              | K.AGVAPLQVK.V                                                           | 883.07036  | 2 | 2.06E-05 | 0.73  | 2.71    | -     | 562.8    |
| AHQ-9-4, 2413              | K.AGVAPLQVK.V                                                           | 883.07036  | 2 | 3.40E-05 | 0.68  | 2.78    | -     | 397.8    |
| AHQ-9-2, 6511 - 6579       | K.AHEPTYFTYVDCAEAGQGDVIGIK.C                                            | 2567.76960 | 3 | 5.40E-04 | 0.91  | 4.70    | -     | 968.4    |
| AHQ-9-2, 6293 - 6295       | K.AHEPTYFTYVDCAEAGQGDVIGIK.C                                            | 2567.76960 | 3 | 4.38E-04 | 0.81  | 3.78    | -     | 630.3    |
| AHQ-9-4, 2745              | K.AHVVPFCDASK.V                                                         | 1232.39073 | 2 | 7.69E-05 | 0.68  | 2.53    | -     | 572.6    |
| AHQ-9-2, 2805              | K.AHVVPFCDASK.V                                                         | 1232.39073 | 2 | 4.48E-06 | 0.81  | 2.82    | -     | 680.2    |
| AHQ-9-1, 5784 - 5823       | R.ALGALVDSAPGLCPDWSDWASKPVTNAR.E                                        | 3233.53437 | 3 | 3.58E-06 | 0.79  | 3.56    | -     | 584.3    |
| AHQ-9-6, 5551 - 5630       | R.ALGALVDSAPGLCPDWSDWASKPVTNAR.E                                        | 3233.53437 | 3 | 1.10E-04 | 0.88  | 4.73    | -     | 449.4    |
| AHQ-9-4, 5764              | R.ALGALVDSAPGLCPDWSDWASKPVTNAR.E                                        | 3233.53437 | 3 | 6.32E-07 | 0.93  | 4.53    | -     | 912.7    |
| AHQ-9-7, 5626              | R.ALGALVDSAPGLCPDWSDWASKPVTNAR.E                                        | 3233.53437 | 3 | 2.30E-07 | 0.82  | 3.58    | -     | 560.1    |
| AHQ-9-5, 5712 - 5776       | R.ALGALVDSAPGLCPDWSDWASKPVTNAR.E                                        | 3233.53437 | 3 | 4.14E-09 | 0.88  | 4.43    | -     | 677.2    |
| AHQ-9-6, 5637              | R.ALGALVDSAPGLCPDWSDWASKPVTNAR.E                                        | 3233.53437 | 3 | 4.16E-04 | 0.76  | 3.44    | -     | 380.7    |
| AHQ-9-4, 3250 - 3308       | R.ANLPQSFQVDTSK.A                                                       | 1435.56409 | 2 | 5.12E-09 | 0.76  | 3.17    | -     | 412.9    |
| AHQ-9-6, 3259 - 3273       | R.ANLPQSFQVDTSK.A                                                       | 1435.56409 | 2 | 3.75E-11 | 0.88  | 3.25    | -     | 752.8    |
| AHQ-9-1, 3416 - 3475       | R.ANLPQSFQVDTSK.A                                                       | 1435.56409 | 2 | 1.30E-04 | 0.44  | 2.57    | -     | 488.1    |
| AHQ-9-4, 3332 - 3397       | R.APSVANVGHCDLSL.K                                                      | 1656.84249 | 2 | 3.47E-05 | 0.88  | 3.84    | -     | 706.1    |
| AHQ-9-4, 1969              | K.ATCAPQHAGAPGPGPADASK.V                                                | 1791.92336 | 3 | 1.05E-08 | 0.89  | 3.53    | -     | 1338.0   |
| AHQ-9-4, 1908 - 1964       | K.ATCAPQHAGAPGPGPADASK.V                                                | 1791.92336 | 2 | 2.36E-05 | 0.82  | 3.73    | -     | 468.0    |
| AHQ-9-6, 3558 - 3559       | R.AWGPGLGGVVGK.S                                                        | 1227.39403 | 2 | 1.60E-06 | 0.93  | 3.90    | -     | 952.7    |
| AHQ-9-3, 3592              | R.AWGPGLGGVVGK.S                                                        | 1227.39403 | 2 | 1.82E-05 | 0.92  | 3.50    | -     | 996.3    |
| AHQ-9-4, 3597              | R.AWGPGLGGVVGK.S                                                        | 1227.39403 | 2 | 1.21E-05 | 0.79  | 3.31    | -     | 557.6    |
| AHQ-9-7, 3556              | R.AWGPGLGGVVGK.S                                                        | 1227.39403 | 2 | 5.98E-06 | 0.79  | 3.12    | -     | 645.0    |
| AHQ-9-1, 3778              | R.AWGPGLGGVVGK.S                                                        | 1227.39403 | 2 | 1.18E-05 | 0.94  | 3.79    | -     | 1061.5   |
| AHQ-9-2, 3685 - 3687       | R.AWGPGLGGVVGK.S                                                        | 1227.39403 | 2 | 7.04E-06 | 0.93  | 3.80    | -     | 956.0    |
| AHQ-9-5, 3587              | R.AWGPGLGGVVGK.S                                                        | 1227.39403 | 2 | 6.87E-04 | 0.93  | 3.60    | -     | 1152.3   |
| AHQ-9-2, 2843              | R.AYGPGEPTGNM*VK.K                                                      | 1450.64214 | 2 | 5.33E-07 | 0.77  | 3.30    | -     | 390.5    |
| AHQ-9-2, 3422              | R.AYGPGEPTGNM*VK.K                                                      | 1434.64274 | 2 | 4.90E-05 | 0.49  | 2.62    | -     | 411.9    |
| AHQ-9-5, 2760              | R.AYGPGEPTGNM*VK.K                                                      | 1450.64214 | 2 | 1.21E-04 | 0.55  | 2.53    | -     | 391.2    |
| AHQ-9-5, 3212              | R.AYGPGEPTGNM*VK.K                                                      | 1434.64274 | 2 | 2.18E-07 | 0.90  | 3.48    | -     | 838.1    |
| AHQ-9-2, 5681              | K.CAPGVVGAEAIDDFDIIR.N                                                  | 2017.24863 | 3 | 1.93E-08 | 0.90  | 3.90    | -     | 1128.2   |
| AHQ-9-3, 5521 - 5590       | K.CAPGVVGAEAIDDFDIIR.N                                                  | 2017.24863 | 2 | 8.44E-05 | 0.92  | 4.32    | -     | 620.3    |
| AHQ-9-1, 5707              | K.CAPGVVGAEAIDDFDIIR.N                                                  | 2017.24863 | 3 | 1.89E-04 | 0.81  | 3.42    | -     | 716.6    |
| AHQ-9-1, 5691              | K.CAPGVVGAEAIDDFDIIR.N                                                  | 2017.24863 | 2 | 1.80E-06 | 0.84  | 3.45    | -     | 538.1    |
| AHQ-9-2, 5673              | K.CAPGVVGAEAIDDFDIIR.N                                                  | 2017.24863 | 2 | 4.35E-08 | 0.91  | 3.78    | -     | 863.5    |
| AHQ-9-3, 4664              | R.CSYQPTM*EGVHTVHVTFAGVPIPR.S                                           | 2702.06173 | 3 | 6.84E-11 | 0.94  | 5.13    | -     | 609.6    |
| AHQ-9-1, 4843              | R.CSYQPTM*EGVHTVHVTFAGVPIPR.S                                           | 2702.06173 | 3 | 4.11E-04 | 0.84  | 3.61    | -     | 529.0    |
| AHQ-9-5, 4700              | R.CSYQPTM*EGVHTVHVTFAGVPIPR.S                                           | 2702.06173 | 3 | 7.41E-07 | 0.85  | 4.10    | -     | 513.8    |
| AHQ-9-2, 4789              | R.CSYQPTM*EGVHTVHVTFAGVPIPR.S                                           | 2702.06173 | 3 | 2.24E-08 | 0.84  | 4.03    | -     | 386.7    |
| AHQ-9-1, 3894 - 3966       | K.DAGEGGLSLAIEGSPK.A                                                    | 1501.62084 | 2 | 8.69E-06 | 0.87  | 3.74    | -     | 894.4    |
| AHQ-9-2, 3907              | K.DAGEGGLSLAIEGSPK.A                                                    | 1501.62084 | 2 | 2.11E-04 | 0.89  | 3.17    | -     | 1232.9   |
| AHQ-9-4, 3804 - 3876       | K.DAGEGGLSLAIEGSPK.A                                                    | 1501.62084 | 2 | 3.51E-04 | 0.90  | 4.13    | -     | 773.7    |
| AHQ-9-5, 3808 - 3867       | K.DAGEGGLSLAIEGSPK.A                                                    | 1501.62084 | 2 | 1.17E-04 | 0.75  | 3.32    | -     | 832.1    |
| AHQ-9-3, 3768 - 3797       | K.DAGEGGLSLAIEGSPK.A                                                    | 1501.62084 | 2 | 8.35E-04 | 0.88  | 2.94    | -     | 1065.6   |
| AHQ-9-2, 4654 - 4662       | K.DAGEGLLAQITDPEGK.P                                                    | 1713.86752 | 2 | 1.18E-07 | 0.96  | 4.36    | -     | 1479.6   |
| AHQ-9-3, 4537              | K.DAGEGLLAQITDPEGK.P                                                    | 1713.86752 | 2 | 9.08E-08 | 0.94  | 3.99    | -     | 1416.6   |
| AHQ-9-7, 4117              | K.DAGEGLLAQITDPEGK.P.K                                                  | 1939.15612 | 2 | 2.65E-06 | 0.82  | 3.76    | -     | 648.6    |
| AHQ-9-6, 4137              | K.DAGEGLLAQITDPEGK.P.K                                                  | 1939.15612 | 2 | 2.84E-11 | 0.94  | 4.54    | -     | 1293.1   |
| AHQ-9-3, 4174 - 4180       | K.DAGEGLLAQITDPEGK.P.K                                                  | 1939.15612 | 2 | 2.75E-08 | 0.95  | 4.63    | -     | 1300.4   |
| AHQ-9-3, 4182              | K.DAGEGLLAQITDPEGK.P.K                                                  | 1939.15612 | 3 | 1.98E-06 | 0.91  | 3.46    | -     | 1282.2   |
| AHQ-9-12, 4172             | K.DAGEGLLAQITDPEGK.P.K                                                  | 1939.15612 | 2 | 1.49E-04 | 0.72  | 2.84    | -     | 856.4    |
| AHQ-9-2, 4235 - 4294       | K.DAGEGLLAQITDPEGK.P.K                                                  | 1939.15612 | 2 | 2.78E-08 | 0.94  | 4.59    | -     | 1135.3   |
| AHQ-9-1, 4371              | K.DAGEGLLAQITDPEGK.P.K                                                  | 1939.15612 | 2 | 4.83E-07 | 0.95  | 4.47    | -     | 1347.2   |
| AHQ-9-1, 4383              | K.DAGEGLLAQITDPEGK.P.K                                                  | 1939.15612 | 3 | 5.78E-09 | 0.86  | 3.57    | -     | 917.9    |
| AHQ-9-5, 4156 - 4189       | K.DAGEGLLAQITDPEGK.P.K                                                  | 1939.15612 | 2 | 5.07E-08 | 0.94  | 4.11    | -     | 1186.8   |
| AHQ-9-8, 4162              | K.DAGEGLLAQITDPEGK.P.K                                                  | 1939.15612 | 2 | 8.82E-07 | 0.76  | 3.37    | -     | 648.8    |
| AHQ-9-4, 4192              | K.DAGEGLLAQITDPEGK.P.K                                                  | 1939.15612 | 2 | 1.50E-07 | 0.92  | 4.25    | -     | 1120.6   |
| AHQ-9-1, 4422              | R.DAGYGGLSLAIEGSPK.V                                                    | 1551.67986 | 2 | 4.44E-09 | 0.95  | 3.88    | -     | 1700.0   |
| AHQ-9-2, 4363              | R.DAGYGGLSLAIEGSPK.V                                                    | 1551.67986 | 2 | 8.89E-08 | 0.95  | 4.03    | -     | 1488.0   |
| AHQ-9-5, 4047              | R.DAGYGGLSLAIEGSPK.V                                                    | 1551.67986 | 2 | 2.82E-05 | 0.81  | 3.07    | -     | 1069.6   |
| AHQ-9-4, 4042 - 4097       | R.DAGYGGLSLAIEGSPK.V                                                    | 1551.67986 | 2 | 1.31E-04 | 0.91  | 4.21    | -     | 935.2    |
| AHQ-9-5, 4259              | R.DAGYGGLSLAIEGSPK.V                                                    | 1551.67986 | 2 | 6.61E-08 | 0.94  | 4.02    | -     | 1385.1   |
| AHQ-9-3, 4248              | R.DAGYGGLSLAIEGSPK.V                                                    | 1551.67986 | 2 | 8.67E-05 | 0.83  | 3.28    | -     | 1076.9   |
| AHQ-9-4, 4260 - 4324       | R.DAGYGGLSLAIEGSPK.V                                                    | 1551.67986 | 2 | 7.14E-08 | 0.94  | 4.34    | -     | 1124.6   |
| AHQ-9-8, 4252              | R.DAGYGGLSLAIEGSPK.V                                                    | 1551.67986 | 2 | 1.52E-06 | 0.91  | 4.18    | -     | 849.9    |
| AHQ-9-6, 4214              | R.DAGYGGLSLAIEGSPK.V                                                    | 1551.67986 | 2 | 6.39E-08 | 0.89  | 3.89    | -     | 897.2    |
| AHQ-9-2, 2094              | R.DAPQDFHPDR.V                                                          | 1198.22650 | 2 | 7.75E-06 | 0.83  | 2.83    | -     | 750.6    |
| AHQ-9-4, 4488              | K.DGSCGVAYVQEPGDIYVSVK.F                                                | 2260.41990 | 2 | 3.35E-07 | 0.84  | 3.66    | -     | 448.0    |
| AHQ-9-2, 4595              | K.DGSCGVAYVQEPGDIYVSVK.F                                                | 2260.41990 | 2 | 7.60E-05 | 0.68  | 3.41    | -     | 468.1    |
| AHQ-9-5, 4651              | K.DGSCGVAYVQEPGDIYVSVK.F                                                | 2260.41990 | 2 | 9.67E-04 | 0.90  | 4.32    | -     | 789.8    |
| AHQ-9-4, 4640              | K.DGSCGVAYVQEPGDIYVSVK.F                                                | 2260.41990 | 2 | 4.50E-04 | 0.58  | 3.61    | -     | 248.0    |
| AHQ-9-5, 4495              | K.DGSCGVAYVQEPGDIYVSVK.F                                                | 2260.41990 | 2 | 6.43E-06 | 0.91  | 4.47    | -     | 762.7    |
| AHQ-9-3, 4464 - 4521       | K.DGSCGVAYVQEPGDIYVSVK.F                                                | 2260.41990 | 2 | 2.47E-05 | 0.64  | 3.49    | -     | 405.2    |

|                       |                                         |            |   |          |      |      |   |        |
|-----------------------|-----------------------------------------|------------|---|----------|------|------|---|--------|
| AHQ-9-6, 2562         | K.DKGEYTLVVK.W                          | 1152.32223 | 2 | 1.01E-06 | 0.81 | 2.70 | - | 678.4  |
| AHQ-9-5, 3155         | K.DNNGTYSCSYVPR.K                       | 1591.64109 | 2 | 2.00E-04 | 0.87 | 3.27 | - | 896.1  |
| AHQ-9-5, 3083         | R.DVDIHDHNTYTVK.Y                       | 1785.89230 | 2 | 5.51E-07 | 0.84 | 3.28 | - | 664.1  |
| AHQ-9-2, 3166 - 3226  | R.DVDIHDHNTYTVK.Y                       | 1785.89230 | 2 | 2.94E-04 | 0.88 | 3.43 | - | 909.0  |
| AHQ-9-3, 3057 - 3116  | R.DVDIHDHNTYTVK.Y                       | 1785.89230 | 2 | 2.44E-06 | 0.96 | 4.89 | - | 1304.3 |
| AHQ-9-6, 3323 - 3325  | R.EAGAGGLAIAVEGPSK.A                    | 1427.58510 | 2 | 7.34E-06 | 0.94 | 4.06 | - | 1119.3 |
| AHQ-9-5, 3351 - 3419  | R.EAGAGGLAIAVEGPSK.A                    | 1427.58510 | 2 | 7.71E-05 | 0.86 | 3.19 | - | 987.0  |
| AHQ-9-7, 3316 - 3389  | R.EAGAGGLAIAVEGPSK.A                    | 1427.58510 | 2 | 8.26E-05 | 0.90 | 3.38 | - | 1199.2 |
| AHQ-9-4, 3352 - 3396  | R.EAGAGGLAIAVEGPSK.A                    | 1427.58510 | 2 | 5.44E-06 | 0.83 | 3.10 | - | 956.2  |
| AHQ-9-8, 3311         | R.EAGAGGLAIAVEGPSK.A                    | 1427.58510 | 2 | 4.51E-05 | 0.87 | 3.44 | - | 864.4  |
| AHQ-9-1, 3544         | R.EAGAGGLAIAVEGPSK.A                    | 1427.58510 | 2 | 1.40E-05 | 0.96 | 4.21 | - | 1532.9 |
| AHQ-9-2, 3441         | R.EAGAGGLAIAVEGPSK.A                    | 1427.58510 | 2 | 1.43E-05 | 0.88 | 3.48 | - | 919.0  |
| AHQ-9-1, 2860         | R.EATTEFSVDAR.A                         | 1226.27493 | 2 | 1.23E-05 | 0.89 | 3.28 | - | 955.5  |
| AHQ-9-3, 2684         | R.EATTEFSVDAR.A                         | 1226.27493 | 2 | 1.45E-04 | 0.75 | 2.72 | - | 577.8  |
| AHQ-9-2, 2730 - 2801  | R.EATTEFSVDAR.A                         | 1226.27493 | 2 | 8.62E-04 | 0.68 | 2.79 | - | 687.7  |
| AHQ-9-3, 5644 - 5700  | R.EEGPYEVEVTYDGVVPVPGSPFFLEAVAPT KPSK.V | 3487.85286 | 3 | 1.73E-07 | 0.89 | 4.60 | - | 613.0  |
| AHQ-9-2, 5779 - 5837  | R.EEGPYEVEVTYDGVVPVPGSPFFLEAVAPT KPSK.V | 3487.85286 | 3 | 1.25E-08 | 0.92 | 4.89 | - | 732.4  |
| AHQ-9-4, 5721 - 5749  | R.EEGPYEVEVTYDGVVPVPGSPFFLEAVAPT KPSK.V | 3487.85286 | 3 | 1.70E-05 | 0.88 | 4.37 | - | 653.4  |
| AHQ-9-3, 5756 - 5814  | R.EEGPYEVEVTYDGVVPVPGSPFFLEAVAPT KPSK.V | 3487.85286 | 3 | 3.30E-08 | 0.95 | 5.67 | - | 1010.5 |
| AHQ-9-7, 5700 - 5766  | R.EEGPYEVEVTYDGVVPVPGSPFFLEAVAPT KPSK.V | 3487.85286 | 3 | 8.08E-07 | 0.84 | 4.16 | - | 641.3  |
| AHQ-9-2, 5873 - 5929  | R.EEGPYEVEVTYDGVVPVPGSPFFLEAVAPT KPSK.V | 3487.85286 | 3 | 2.38E-06 | 0.91 | 4.84 | - | 668.7  |
| AHQ-9-6, 5709         | R.EEGPYEVEVTYDGVVPVPGSPFFLEAVAPT KPSK.V | 3487.85286 | 3 | 2.83E-06 | 0.87 | 4.44 | - | 568.4  |
| AHQ-9-5, 5743 - 5801  | R.EEGPYEVEVTYDGVVPVPGSPFFLEAVAPT KPSK.V | 3487.85286 | 3 | 2.59E-08 | 0.96 | 6.38 | - | 994.0  |
| AHQ-9-4, 5804 - 5860  | R.EEGPYEVEVTYDGVVPVPGSPFFLEAVAPT KPSK.V | 3487.85286 | 3 | 3.42E-07 | 0.89 | 4.17 | - | 785.0  |
| AHQ-9-12, 4713 - 4724 | R.EGPYSISVLVGDDEEVP.R.S                 | 1911.05809 | 2 | 3.53E-04 | 0.51 | 2.81 | - | 638.0  |
| AHQ-9-3, 4749         | R.EGPYSISVLVGDDEEVP.R.S                 | 1911.05809 | 3 | 1.02E-06 | 0.97 | 5.41 | - | 1924.2 |
| AHQ-9-3, 4682 - 4737  | R.EGPYSISVLVGDDEEVP.R.S                 | 1911.05809 | 2 | 3.08E-10 | 0.92 | 4.20 | - | 1047.5 |
| AHQ-9-5, 4704 - 4781  | R.EGPYSISVLVGDDEEVP.R.S                 | 1911.05809 | 2 | 5.59E-05 | 0.34 | 2.74 | - | 382.0  |
| AHQ-9-11, 4663        | R.EGPYSISVLVGDDEEVP.R.S                 | 1911.05809 | 2 | 1.25E-06 | 0.71 | 2.86 | - | 620.5  |
| AHQ-9-2, 4795 - 4861  | R.EGPYSISVLVGDDEEVP.R.S                 | 1911.05809 | 2 | 3.07E-05 | 0.82 | 4.10 | - | 699.5  |
| AHQ-9-8, 4734 - 4762  | R.EGPYSISVLVGDDEEVP.R.S                 | 1911.05809 | 2 | 9.74E-07 | 0.91 | 3.68 | - | 811.8  |
| AHQ-9-1, 4838 - 4912  | R.EGPYSISVLVGDDEEVP.R.S                 | 1911.05809 | 2 | 5.03E-06 | 0.87 | 3.99 | - | 693.8  |
| AHQ-9-7, 4634 - 4694  | R.EGPYSISVLVGDDEEVP.R.S                 | 1911.05809 | 2 | 2.20E-06 | 0.46 | 3.02 | - | 255.3  |
| AHQ-9-4, 4690 - 4766  | R.EGPYSISVLVGDDEEVP.R.S                 | 1911.05809 | 2 | 1.16E-04 | 0.67 | 3.40 | - | 579.5  |
| AHQ-9-6, 4715         | R.EGPYSISVLVGDDEEVP.R.S                 | 1911.05809 | 2 | 4.54E-06 | 0.83 | 3.48 | - | 766.1  |
| AHQ-9-1, 3646 - 3710  | K.FADQHVPGSPFSVK.V                      | 1516.68203 | 2 | 2.81E-06 | 0.83 | 3.21 | - | 586.7  |
| AHQ-9-6, 3410         | K.FADQHVPGSPFSVK.V                      | 1516.68203 | 3 | 4.10E-06 | 0.94 | 3.76 | - | 1607.0 |
| AHQ-9-4, 3453         | K.FADQHVPGSPFSVK.V                      | 1516.68203 | 3 | 1.19E-06 | 0.93 | 4.28 | - | 1047.2 |
| AHQ-9-2, 3549         | K.FADQHVPGSPFSVK.V                      | 1516.68203 | 2 | 3.03E-09 | 0.87 | 3.24 | - | 591.1  |
| AHQ-9-4, 3448         | K.FADQHVPGSPFSVK.V                      | 1516.68203 | 2 | 5.81E-06 | 0.83 | 3.61 | - | 522.6  |
| AHQ-9-3, 3462         | K.FADQHVPGSPFSVK.V                      | 1516.68203 | 3 | 3.63E-11 | 0.89 | 3.98 | - | 861.9  |
| AHQ-9-5, 3448         | K.FADQHVPGSPFSVK.V                      | 1516.68203 | 3 | 3.92E-08 | 0.89 | 3.49 | - | 1204.8 |
| AHQ-9-1, 5240 - 5318  | R.FGGEHVNSPFQV TALAGDQPSVQPPLR.S        | 2947.25342 | 3 | 8.20E-10 | 0.92 | 5.06 | - | 735.5  |
| AHQ-9-12, 5082 - 5089 | R.FGGEHVNSPFQV TALAGDQPSVQPPLR.S        | 2947.25342 | 3 | 1.51E-04 | 0.84 | 4.09 | - | 430.1  |
| AHQ-9-3, 5081 - 5146  | R.FGGEHVNSPFQV TALAGDQPSVQPPLR.S        | 2947.25342 | 3 | 2.47E-06 | 0.93 | 4.78 | - | 860.3  |
| AHQ-9-1, 5326 - 5387  | R.FGGEHVNSPFQV TALAGDQPSVQPPLR.S        | 2947.25342 | 3 | 1.55E-06 | 0.89 | 4.20 | - | 890.5  |
| AHQ-9-2, 5223 - 5297  | R.FGGEHVNSPFQV TALAGDQPSVQPPLR.S        | 2947.25342 | 3 | 3.83E-08 | 0.91 | 5.13 | - | 735.8  |
| AHQ-9-2, 5353 - 5419  | R.FGGEHVNSPFQV TALAGDQPSVQPPLR.S        | 2947.25342 | 3 | 3.02E-04 | 0.78 | 3.75 | - | 503.4  |
| AHQ-9-5, 5141 - 5184  | R.FGGEHVNSPFQV TALAGDQPSVQPPLR.S        | 2947.25342 | 3 | 1.69E-06 | 0.96 | 5.51 | - | 1338.1 |
| AHQ-9-2, 5271         | R.FGGEHVNSPFQV TALAGDQPSVQPPLR.S        | 2947.25342 | 2 | 6.10E-07 | 0.95 | 4.29 | - | 1171.9 |
| AHQ-9-2, 5086 - 5145  | R.FGGEHVNSPFQV TALAGDQPSVQPPLR.S        | 2947.25342 | 3 | 5.24E-05 | 0.89 | 4.55 | - | 838.6  |
| AHQ-9-6, 5059 - 5113  | R.FGGEHVNSPFQV TALAGDQPSVQPPLR.S        | 2947.25342 | 3 | 3.67E-07 | 0.92 | 5.24 | - | 733.6  |
| AHQ-9-13, 5106        | R.FGGEHVNSPFQV TALAGDQPSVQPPLR.S        | 2947.25342 | 3 | 6.67E-05 | 0.87 | 4.44 | - | 677.6  |
| AHQ-9-1, 5032         | K.FNEEHPDPSFVVPV VASPSGDAR.R            | 2468.66280 | 2 | 8.97E-04 | 0.81 | 3.22 | - | 532.1  |
| AHQ-9-7, 4793         | K.FNEEHPDPSFVVPV VASPSGDAR.R            | 2468.66280 | 2 | 7.55E-05 | 0.84 | 3.14 | - | 648.1  |
| AHQ-9-4, 3538         | K.FNGTHIPGSPFK.I                        | 1302.46259 | 2 | 4.08E-06 | 0.75 | 3.21 | - | 516.0  |
| AHQ-9-4, 3084         | R.FVPAEMGTHTVSVK.Y                      | 1503.74821 | 2 | 7.39E-07 | 0.81 | 2.81 | - | 583.2  |
| AHQ-9-5, 3085         | R.FVPAEMGTHTVSVK.Y                      | 1519.74761 | 2 | 1.28E-04 | 0.47 | 2.73 | - | 347.0  |
| AHQ-9-4, 2456 - 2478  | R.FVPAEMGTHTVSVK.Y                      | 1519.74761 | 2 | 1.42E-05 | 0.77 | 3.47 | - | 273.8  |
| AHQ-9-5, 3080         | R.FVPAEMGTHTVSVK.Y                      | 1503.74821 | 2 | 5.10E-07 | 0.86 | 2.64 | - | 801.0  |
| AHQ-9-2, 5551 - 5602  | R.GAGSYTIM*VLFADQATPTSPIR.V             | 2313.61563 | 2 | 2.79E-05 | 0.94 | 4.79 | - | 783.8  |
| AHQ-9-4, 5505         | R.GAGSYTIM*VLFADQATPTSPIR.V             | 2313.61563 | 2 | 2.45E-04 | 0.67 | 3.23 | - | 434.4  |
| AHQ-9-1, 5606 - 5672  | R.GAGSYTIM*VLFADQATPTSPIR.V             | 2313.61563 | 2 | 7.44E-05 | 0.82 | 3.73 | - | 482.4  |
| AHQ-9-8, 3303 - 3315  | R.GAGTGGLGLAVEGSPSEAK.M                 | 1571.71430 | 2 | 1.13E-04 | 0.82 | 3.73 | - | 598.4  |
| AHQ-9-2, 3399 - 3457  | R.GAGTGGLGLAVEGSPSEAK.M                 | 1571.71430 | 2 | 2.55E-06 | 0.84 | 3.86 | - | 599.0  |
| AHQ-9-6, 3314         | R.GAGTGGLGLAVEGSPSEAK.M                 | 1571.71430 | 2 | 1.70E-06 | 0.91 | 4.35 | - | 693.7  |
| AHQ-9-5, 3339         | R.GAGTGGLGLAVEGSPSEAK.M                 | 1571.71430 | 2 | 9.57E-04 | 0.80 | 3.12 | - | 690.2  |
| AHQ-9-1, 3530 - 3532  | R.GAGTGGLGLAVEGSPSEAK.M                 | 1571.71430 | 2 | 4.40E-06 | 0.93 | 4.03 | - | 891.4  |
| AHQ-9-1, 3675 - 3679  | K.GKLDVQFSLGK.T                         | 1293.49392 | 2 | 1.48E-04 | 0.90 | 3.66 | - | 911.8  |
| AHQ-9-6, 4590 - 4619  | K.GLVEPVDVVDNADGTQT VNYVPSR.E           | 2545.74387 | 2 | 1.85E-05 | 0.45 | 2.95 | - | 199.2  |
| AHQ-9-2, 4569 - 4629  | K.GLVEPVDVVDNADGTQT VNYVPSR.E           | 2545.74387 | 2 | 2.80E-07 | 0.90 | 3.94 | - | 934.0  |
| AHQ-9-2, 4847 - 4906  | K.GLVEPVDVVDNADGTQT VNYVPSR.E           | 2545.74387 | 2 | 1.00E-06 | 0.93 | 4.48 | - | 907.3  |
| AHQ-9-3, 4581 - 4637  | K.GLVEPVDVVDNADGTQT VNYVPSR.E           | 2545.74387 | 3 | 4.20E-05 | 0.89 | 4.22 | - | 690.9  |
| AHQ-9-2, 4702         | K.GLVEPVDVVDNADGTQT VNYVPSR.E           | 2545.74387 | 2 | 5.60E-05 | 0.84 | 4.02 | - | 512.1  |
| AHQ-9-3, 2326         | K.GTVEPQLEAR.G                          | 1100.20741 | 2 | 8.35E-04 | 0.62 | 2.78 | - | 387.9  |
| AHQ-9-5, 2263 - 2297  | K.GTVEPQLEAR.G                          | 1100.20741 | 2 | 1.87E-05 | 0.72 | 2.86 | - | 488.3  |
| AHQ-9-2, 2371 - 2399  | K.GTVEPQLEAR.G                          | 1100.20741 | 2 | 6.58E-04 | 0.69 | 2.83 | - | 490.8  |
| AHQ-9-3, 4856         | K.HTAM*VSWGGSIPNSPFR.V                  | 1960.20541 | 2 | 1.09E-04 | 0.87 | 3.54 | - | 835.3  |
| AHQ-9-2, 4981         | K.HTAM*VSWGGSIPNSPFR.V                  | 1960.20541 | 2 | 1.03E-08 | 0.96 | 4.60 | - | 1506.2 |
| AHQ-9-2, 4983         | K.HTAM*VSWGGSIPNSPFR.V                  | 1960.20541 | 3 | 5.49E-04 | 0.75 | 3.60 | - | 759.8  |
| AHQ-9-3, 4857         | K.HTAM*VSWGGSIPNSPFR.V                  | 1960.20541 | 3 | 1.54E-06 | 0.90 | 3.33 | - | 1818.9 |
| AHQ-9-4, 3725         | R.IANLQTDLSGGLR.L                       | 1416.56231 | 2 | 1.60E-07 | 0.94 | 3.79 | - | 1208.4 |
| AHQ-9-5, 4079         | R.IANLQTDLSGGLR.L                       | 1416.56231 | 2 | 6.97E-05 | 0.92 | 3.99 | - | 797.6  |
| AHQ-9-5, 3721         | R.IANLQTDLSGGLR.L                       | 1416.56231 | 2 | 3.98E-06 | 0.87 | 3.32 | - | 862.4  |
| AHQ-9-1, 3886         | R.IANLQTDLSGGLR.L                       | 1416.56231 | 2 | 5.59E-05 | 0.90 | 3.15 | - | 889.0  |
| AHQ-9-13, 4049 - 4104 | R.IANLQTDLSGGLR.L                       | 1416.56231 | 2 | 3.01E-08 | 0.85 | 3.16 | - | 766.5  |
| AHQ-9-4, 4068         | R.IANLQTDLSGGLR.L                       | 1416.56231 | 2 | 1.08E-06 | 0.93 | 3.65 | - | 985.7  |
| AHQ-9-1, 4246         | R.IANLQTDLSGGLR.L                       | 1416.56231 | 2 | 6.80E-05 | 0.94 | 4.04 | - | 932.8  |
| AHQ-9-6, 4003 - 4031  | R.IANLQTDLSGGLR.L                       | 1416.56231 | 2 | 1.36E-04 | 0.93 | 3.46 | - | 1337.1 |
| AHQ-9-13, 4251 - 4263 | R.IANLQTDLSGGLR.L                       | 1416.56231 | 2 | 1.10E-05 | 0.94 | 4.42 | - | 995.0  |
| AHQ-9-11, 4001        | R.IANLQTDLSGGLR.L                       | 1416.56231 | 2 | 1.39E-06 | 0.94 | 3.59 | - | 1277.9 |
| AHQ-9-3, 4064 - 4126  | R.IANLQTDLSGGLR.L                       | 1416.56231 | 2 | 9.21E-06 | 0.95 | 4.05 | - | 1306.8 |
| AHQ-9-3, 3709         | R.IANLQTDLSGGLR.L                       | 1416.56231 | 2 | 7.35E-08 | 0.95 | 3.54 | - | 1432.5 |
| AHQ-9-7, 4012         | R.IANLQTDLSGGLR.L                       | 1416.56231 | 2 | 2.14E-07 | 0.94 | 3.70 | - | 1222.4 |
| AHQ-9-2, 3815         | R.IANLQTDLSGGLR.L                       | 1416.56231 | 2 | 1.98E-08 | 0.92 | 3.96 | - | 809.6  |
| AHQ-9-2, 4069         | R.IANLQTDLSGGLR.L                       | 1416.56231 | 2 | 6.13E-04 | 0.92 | 3.61 | - | 1175.4 |
| AHQ-9-6, 3677         | R.IANLQTDLSGGLR.L                       | 1416.56231 | 2 | 3.57E-06 | 0.79 | 3.29 | - | 715.7  |
| AHQ-9-2, 4151 - 4189  | R.IANLQTDLSGGLR.L                       | 1416.56231 | 2 | 2.04E-05 | 0.93 | 4.33 | - | 854.3  |
| AHQ-9-1, 5258         | K.IPEISIQDM*TAQVTSPSGK.T                | 2003.26361 | 2 | 4.43E-12 | 0.98 | 5.59 | - | 1652.4 |
| AHQ-9-6, 5057         | K.IPEISIQDM*TAQVTSPSGK.T                | 2003.26361 | 2 | 4.54E-10 | 0.97 | 5.60 | - | 1393.6 |
| AHQ-9-2, 4039         | K.IPEISIQDM*TAQVTSPSGK.T                | 2019.26301 | 2 | 2.13E-04 | 0.96 | 4.58 | - | 1203.5 |
| AHQ-9-3, 5080         | K.IPEISIQDM*TAQVTSPSGK.T                | 2003.26361 | 2 | 3.22E-09 | 0.96 | 4.77 | - | 1205.3 |
| AHQ-9-5, 3931 - 3988  | K.IPEISIQDM*TAQVTSPSGK.T                | 2019.26301 | 2 | 5.63E-07 | 0.97 | 5.30 | - | 1695.3 |
| AHQ-9-7, 5052         | K.IPEISIQDM*TAQVTSPSGK.T                | 2003.26361 | 2 | 7.91E-09 | 0.97 | 5.78 | - | 1375.1 |
| AHQ-9-4, 3940 - 3978  | K.IPEISIQDM*TAQVTSPSGK.T                | 2019.26301 | 3 | 4.29E-04 | 0.83 | 3.88 | - | 724.4  |
| AHQ-9-4, 5117         | K.IPEISIQDM*TAQVTSPSGK.T                | 2003.26361 | 2 | 1.11E-07 | 0.97 | 5.03 | - | 1408.5 |
| AHQ-9-3, 3901 - 3957  | K.IPEISIQDM*TAQVTSPSGK.T                | 2019.26301 | 2 | 2.81E-05 | 0.95 | 4.30 | - | 1182.4 |

|                      |                                 |            |   |          |      |      |   |        |
|----------------------|---------------------------------|------------|---|----------|------|------|---|--------|
| AHQ-9-5, 5139        | K.IPEISIQDM*TAQVTPSPSGK.T       | 2019.26301 | 2 | 4.90E-05 | 0.82 | 3.30 | - | 692.4  |
| AHQ-9-5, 5131        | K.IPEISIQDM*TAQVTPSPSGK.T       | 2003.26361 | 3 | 8.50E-07 | 0.65 | 3.61 | - | 511.4  |
| AHQ-9-7, 3880        | K.IPEISIQDM*TAQVTPSPSGK.T       | 2019.26301 | 2 | 1.86E-04 | 0.96 | 4.97 | - | 1296.3 |
| AHQ-9-5, 5123        | K.IPEISIQDM*TAQVTPSPSGK.T       | 2003.26361 | 2 | 1.19E-07 | 0.97 | 5.01 | - | 1661.0 |
| AHQ-9-4, 3936        | K.IPEISIQDM*TAQVTPSPSGK.T       | 2019.26301 | 2 | 4.42E-06 | 0.97 | 5.54 | - | 1448.6 |
| AHQ-9-6, 3890        | K.IPEISIQDM*TAQVTPSPSGK.T       | 2019.26301 | 2 | 4.10E-05 | 0.96 | 5.28 | - | 1262.4 |
| AHQ-9-2, 5225        | K.IPEISIQDM*TAQVTPSPSGK.T       | 2003.26361 | 2 | 1.69E-10 | 0.95 | 5.14 | - | 925.3  |
| AHQ-9-4, 2598 - 2618 | K.IVGPSSGAAVPCV.V               | 1157.36530 | 2 | 2.75E-07 | 0.83 | 2.93 | - | 678.8  |
| AHQ-9-2, 2657        | K.IVGPSSGAAVPCV.V               | 1157.36530 | 2 | 4.10E-05 | 0.79 | 3.06 | - | 730.3  |
| AHQ-9-3, 2616        | K.IVGPSSGAAVPCV.V               | 1157.36530 | 2 | 9.04E-07 | 0.88 | 3.12 | - | 838.6  |
| AHQ-9-5, 2599        | K.IVGPSSGAAVPCV.V               | 1157.36530 | 2 | 8.47E-06 | 0.73 | 3.07 | - | 645.1  |
| AHQ-9-2, 4093 - 4109 | K.IVGPSSGAAVPCVPEPLGADNSVVR.F   | 2451.78478 | 3 | 5.54E-11 | 0.94 | 4.48 | - | 1597.6 |
| AHQ-9-2, 4190        | K.IVGPSSGAAVPCVPEPLGADNSVVR.F   | 2451.78478 | 3 | 8.69E-10 | 0.87 | 3.70 | - | 993.0  |
| AHQ-9-5, 3999        | K.IVGPSSGAAVPCVPEPLGADNSVVR.F   | 2451.78478 | 3 | 3.39E-05 | 0.92 | 4.50 | - | 1029.5 |
| AHQ-9-3, 3969 - 4024 | K.IVGPSSGAAVPCVPEPLGADNSVVR.F   | 2451.78478 | 3 | 1.59E-06 | 0.90 | 4.13 | - | 1031.0 |
| AHQ-9-4, 4098        | K.IVGPSSGAAVPCVPEPLGADNSVVR.F   | 2451.78478 | 3 | 1.00E-10 | 0.94 | 4.34 | - | 1394.0 |
| AHQ-9-3, 3996        | K.IVGPSSGAAVPCVPEPLGADNSVVR.F   | 2451.78478 | 2 | 7.22E-06 | 0.77 | 3.44 | - | 342.3  |
| AHQ-9-1, 4166        | K.IVGPSSGAAVPCVPEPLGADNSVVR.F   | 2451.78478 | 3 | 2.85E-11 | 0.95 | 5.18 | - | 1445.8 |
| AHQ-9-3, 4081        | K.IVGPSSGAAVPCVPEPLGADNSVVR.F   | 2451.78478 | 3 | 3.21E-06 | 0.89 | 4.03 | - | 969.4  |
| AHQ-9-4, 4214        | R.KDGSAGVAVYVQEPGDYEVSVK.F      | 2388.59282 | 3 | 8.87E-05 | 0.84 | 4.24 | - | 627.3  |
| AHQ-9-8, 4176        | K.KNGQHVASSPIPVVISQSEIGDASR.V   | 2577.83547 | 3 | 9.37E-11 | 0.96 | 5.42 | - | 1555.6 |
| AHQ-9-1, 4404        | K.KNGQHVASSPIPVVISQSEIGDASR.V   | 2577.83547 | 3 | 3.33E-10 | 0.98 | 6.19 | - | 2149.5 |
| AHQ-9-4, 4146 - 4204 | K.KNGQHVASSPIPVVISQSEIGDASR.V   | 2577.83547 | 3 | 5.62E-11 | 0.96 | 5.59 | - | 1404.5 |
| AHQ-9-2, 4275 - 4339 | K.KNGQHVASSPIPVVISQSEIGDASR.V   | 2577.83547 | 3 | 1.15E-05 | 0.96 | 5.57 | - | 1493.4 |
| AHQ-9-5, 4205        | K.KNGQHVASSPIPVVISQSEIGDASR.V   | 2577.83547 | 2 | 2.47E-05 | 0.81 | 3.44 | - | 566.2  |
| AHQ-9-6, 4095 - 4149 | K.KNGQHVASSPIPVVISQSEIGDASR.V   | 2577.83547 | 3 | 3.15E-08 | 0.95 | 4.60 | - | 1588.6 |
| AHQ-9-5, 4064 - 4140 | K.KNGQHVASSPIPVVISQSEIGDASR.V   | 2577.83547 | 3 | 1.13E-10 | 0.97 | 6.27 | - | 1987.2 |
| AHQ-9-5, 4195        | K.KNGQHVASSPIPVVISQSEIGDASR.V   | 2577.83547 | 3 | 3.65E-11 | 0.96 | 5.57 | - | 1607.0 |
| AHQ-9-3, 4208        | K.KNGQHVASSPIPVVISQSEIGDASR.V   | 2577.83547 | 3 | 3.15E-05 | 0.96 | 5.07 | - | 1818.2 |
| AHQ-9-4, 4216        | K.KNGQHVASSPIPVVISQSEIGDASR.V   | 2577.83547 | 2 | 5.94E-06 | 0.82 | 3.47 | - | 525.2  |
| AHQ-9-3, 3513        | K.KTHIQDNHDGTYTVAYVPDVTGR.Y     | 2588.77367 | 3 | 9.02E-04 | 0.95 | 4.40 | - | 1560.6 |
| AHQ-9-2, 3502        | K.KTHIQDNHDGTYTVAYVPDVTGR.Y     | 2588.77367 | 3 | 3.87E-06 | 0.94 | 4.56 | - | 1130.1 |
| AHQ-9-2, 3590 - 3645 | K.KTHIQDNHDGTYTVAYVPDVTGR.Y     | 2588.77367 | 3 | 1.10E-06 | 0.93 | 4.30 | - | 1228.9 |
| AHQ-9-3, 3416        | K.KTHIQDNHDGTYTVAYVPDVTGR.Y     | 2588.77367 | 3 | 5.65E-06 | 0.96 | 5.14 | - | 1565.0 |
| AHQ-9-2, 3923        | K.LDVQFSLGTLK.G                 | 1108.26945 | 2 | 1.70E-06 | 0.92 | 3.59 | - | 924.4  |
| AHQ-9-3, 3814        | K.LDVQFSLGTLK.G                 | 1108.26945 | 2 | 1.47E-05 | 0.91 | 3.26 | - | 1036.7 |
| AHQ-9-6, 3775        | K.LDVQFSLGTLK.G                 | 1108.26945 | 2 | 4.84E-06 | 0.78 | 2.74 | - | 727.1  |
| AHQ-9-1, 6302        | R.LLGIWQNKLPQLPITNFSR.D         | 2239.64761 | 3 | 1.60E-05 | 0.75 | 3.25 | - | 695.4  |
| AHQ-9-2, 6267        | R.LLGIWQNKLPQLPITNFSR.D         | 2239.64761 | 3 | 1.40E-06 | 0.87 | 4.08 | - | 821.8  |
| AHQ-9-4, 4638        | K.LPQLPITNFSR.D                 | 1286.50461 | 2 | 1.18E-05 | 0.87 | 3.02 | - | 866.8  |
| AHQ-9-2, 4879        | K.LPQLPITNFSR.D                 | 1286.50461 | 2 | 1.94E-04 | 0.85 | 2.66 | - | 927.1  |
| AHQ-9-3, 4757        | K.LPQLPITNFSR.D                 | 1286.50461 | 2 | 1.35E-06 | 0.85 | 3.21 | - | 618.3  |
| AHQ-9-5, 4795        | K.LPQLPITNFSR.D                 | 1286.50461 | 2 | 4.60E-05 | 0.76 | 3.07 | - | 557.6  |
| AHQ-9-1, 4792        | K.LPQLPITNFSR.D                 | 1286.50461 | 2 | 2.29E-04 | 0.91 | 3.25 | - | 860.4  |
| AHQ-9-2, 4726        | K.LPQLPITNFSR.D                 | 1286.50461 | 2 | 2.02E-05 | 0.91 | 3.21 | - | 858.0  |
| AHQ-9-6, 4567 - 4574 | K.LPQLPITNFSR.D                 | 1286.50461 | 2 | 1.69E-05 | 0.89 | 3.52 | - | 612.2  |
| AHQ-9-5, 5063        | K.LQVEPAVDTSGVQCYGPGIEGGVFR.E   | 2766.03597 | 2 | 1.48E-04 | 0.93 | 3.97 | - | 893.2  |
| AHQ-9-2, 5111 - 5169 | K.LQVEPAVDTSGVQCYGPGIEGGVFR.E   | 2766.03597 | 3 | 1.57E-08 | 0.95 | 4.71 | - | 1272.3 |
| AHQ-9-3, 5013        | K.LQVEPAVDTSGVQCYGPGIEGGVFR.E   | 2766.03597 | 2 | 2.91E-06 | 0.94 | 4.82 | - | 787.3  |
| AHQ-9-4, 5056        | K.LQVEPAVDTSGVQCYGPGIEGGVFR.E   | 2766.03597 | 2 | 3.90E-08 | 0.94 | 4.83 | - | 820.1  |
| AHQ-9-4, 5052        | K.LQVEPAVDTSGVQCYGPGIEGGVFR.E   | 2766.03597 | 2 | 1.26E-04 | 0.78 | 2.93 | - | 656.2  |
| AHQ-9-6, 4910 - 4981 | K.LQVEPAVDTSGVQCYGPGIEGGVFR.E   | 2766.03597 | 3 | 7.34E-04 | 0.83 | 3.78 | - | 476.4  |
| AHQ-9-3, 5024 - 5092 | K.LQVEPAVDTSGVQCYGPGIEGGVFR.E   | 2766.03597 | 3 | 3.57E-06 | 0.96 | 5.31 | - | 1471.9 |
| AHQ-9-1, 5190        | K.LQVEPAVDTSGVQCYGPGIEGGVFR.E   | 2766.03597 | 2 | 4.19E-07 | 0.94 | 3.97 | - | 1175.8 |
| AHQ-9-6, 4990        | K.LQVEPAVDTSGVQCYGPGIEGGVFR.E   | 2766.03597 | 2 | 3.11E-07 | 0.88 | 3.70 | - | 672.1  |
| AHQ-9-1, 5151 - 5206 | K.LQVEPAVDTSGVQCYGPGIEGGVFR.E   | 2766.03597 | 3 | 2.07E-07 | 0.97 | 5.94 | - | 1797.0 |
| AHQ-9-3, 3946        | R.LSPFMADIR.D                   | 1050.25664 | 2 | 1.20E-05 | 0.74 | 3.02 | - | 356.2  |
| AHQ-9-8, 3355 - 3358 | R.LTVSSLQESGLK.V                | 1262.43499 | 2 | 4.91E-06 | 0.84 | 2.91 | - | 803.3  |
| AHQ-9-4, 3336 - 3416 | R.LTVSSLQESGLK.V                | 1262.43499 | 2 | 9.45E-05 | 0.88 | 3.02 | - | 963.5  |
| AHQ-9-4, 4056        | R.LVSNHSLHETSSVFDVSLTK.A        | 2201.42190 | 2 | 1.98E-06 | 0.95 | 4.98 | - | 1002.9 |
| AHQ-9-4, 4052 - 4110 | R.LVSNHSLHETSSVFDVSLTK.A        | 2201.42190 | 3 | 1.39E-05 | 0.95 | 4.95 | - | 1311.5 |
| AHQ-9-3, 4065 - 4122 | R.LVSNHSLHETSSVFDVSLTK.A        | 2201.42190 | 3 | 9.15E-04 | 0.87 | 3.59 | - | 1084.9 |
| AHQ-9-4, 4296        | R.LVSNHSLHETSSVFDVSLTK.A        | 2201.42190 | 2 | 3.89E-10 | 0.90 | 3.97 | - | 834.4  |
| AHQ-9-5, 4288        | R.LVSNHSLHETSSVFDVSLTK.A        | 2201.42190 | 3 | 3.04E-09 | 0.89 | 4.08 | - | 725.6  |
| AHQ-9-5, 4068        | R.LVSNHSLHETSSVFDVSLTK.A        | 2201.42190 | 2 | 2.10E-08 | 0.94 | 4.58 | - | 979.7  |
| AHQ-9-4, 4284        | R.LVSNHSLHETSSVFDVSLTK.A        | 2201.42190 | 3 | 1.76E-07 | 0.87 | 3.83 | - | 613.8  |
| AHQ-9-2, 4553        | R.LYSVSYLLK.D                   | 1086.30538 | 2 | 3.42E-05 | 0.81 | 2.67 | - | 611.9  |
| AHQ-9-4, 2178 - 2245 | K.M*DCQCEPEGYR.V                | 1463.55315 | 2 | 8.97E-06 | 0.89 | 2.93 | - | 977.8  |
| AHQ-9-4, 2494        | K.MDCQCEPEGYR.V                 | 1447.55375 | 2 | 1.96E-06 | 0.80 | 2.77 | - | 661.0  |
| AHQ-9-4, 4612        | K.NGOHVASSPIPVVISQSEIGDASR.V    | 2449.66256 | 3 | 9.25E-05 | 0.77 | 3.17 | - | 1056.7 |
| AHQ-9-1, 4659 - 4730 | K.NGOHVASSPIPVVISQSEIGDASR.V    | 2449.66256 | 3 | 3.45E-06 | 0.96 | 4.38 | - | 2610.9 |
| AHQ-9-5, 3107 - 3179 | R.RAPSVANVNGSHCDLSLK.I          | 1813.02884 | 3 | 1.29E-08 | 0.97 | 5.59 | - | 1505.8 |
| AHQ-9-4, 3121 - 3180 | R.RAPSVANVNGSHCDLSLK.I          | 1813.02884 | 3 | 4.52E-04 | 0.95 | 4.72 | - | 1347.9 |
| AHQ-9-3, 3150        | R.RAPSVANVNGSHCDLSLK.I          | 1813.02884 | 3 | 3.47E-05 | 0.94 | 3.94 | - | 1701.9 |
| AHQ-9-2, 3870        | K.RIANLQDLSLGLR.L               | 1572.74866 | 2 | 1.82E-06 | 0.95 | 4.41 | - | 957.7  |
| AHQ-9-5, 3148        | R.RLTVSSLQESGLK.V               | 1418.62134 | 3 | 4.16E-04 | 0.92 | 4.22 | - | 1087.1 |
| AHQ-9-6, 3106 - 3134 | R.RLTVSSLQESGLK.V               | 1418.62134 | 2 | 3.66E-04 | 0.94 | 4.13 | - | 1323.8 |
| AHQ-9-4, 3156        | R.RLTVSSLQESGLK.V               | 1418.62134 | 2 | 2.54E-04 | 0.97 | 4.36 | - | 2387.4 |
| AHQ-9-2, 6469 - 6519 | K.SADFVVEAIGDDVGTGFGSVEGSPQAK.I | 2696.90399 | 3 | 8.38E-04 | 0.90 | 4.53 | - | 1048.9 |
| AHQ-9-2, 6577 - 6589 | K.SADFVVEAIGDDVGTGFGSVEGSPQAK.I | 2696.90399 | 3 | 2.27E-08 | 0.87 | 3.91 | - | 1004.8 |
| AHQ-9-2, 6637        | K.SADFVVEAIGDDVGTGFGSVEGSPQAK.I | 2696.90399 | 2 | 2.07E-05 | 0.94 | 3.95 | - | 1269.3 |
| AHQ-9-2, 6402 - 6461 | K.SADFVVEAIGDDVGTGFGSVEGSPQAK.I | 2696.90399 | 2 | 6.05E-06 | 0.96 | 4.06 | - | 1731.1 |
| AHQ-9-3, 6305 - 6361 | K.SADFVVEAIGDDVGTGFGSVEGSPQAK.I | 2696.90399 | 3 | 8.20E-04 | 0.87 | 3.90 | - | 936.6  |
| AHQ-9-7, 3768        | R.SAGQGEVLVYVEDPAGHQEEAK.V      | 2314.45074 | 2 | 1.41E-06 | 0.90 | 4.38 | - | 575.3  |
| AHQ-9-1, 3990        | R.SAGQGEVLVYVEDPAGHQEEAK.V      | 2314.45074 | 3 | 3.90E-09 | 0.92 | 4.25 | - | 1286.6 |
| AHQ-9-1, 3994        | R.SAGQGEVLVYVEDPAGHQEEAK.V      | 2314.45074 | 2 | 1.24E-09 | 0.88 | 4.14 | - | 519.1  |
| AHQ-9-6, 3774        | R.SAGQGEVLVYVEDPAGHQEEAK.V      | 2314.45074 | 3 | 1.93E-05 | 0.77 | 3.43 | - | 717.0  |
| AHQ-9-7, 3766        | R.SAGQGEVLVYVEDPAGHQEEAK.V      | 2314.45074 | 3 | 3.81E-07 | 0.96 | 4.64 | - | 1720.6 |
| AHQ-9-4, 3821        | R.SAGQGEVLVYVEDPAGHQEEAK.V      | 2314.45074 | 3 | 1.36E-07 | 0.96 | 4.48 | - | 1960.2 |
| AHQ-9-4, 3822        | R.SAGQGEVLVYVEDPAGHQEEAK.V      | 2314.45074 | 2 | 7.67E-06 | 0.85 | 4.01 | - | 392.1  |
| AHQ-9-5, 3819        | R.SAGQGEVLVYVEDPAGHQEEAK.V      | 2314.45074 | 3 | 7.46E-09 | 0.92 | 4.56 | - | 798.5  |
| AHQ-9-3, 3816        | R.SAGQGEVLVYVEDPAGHQEEAK.V      | 2314.45074 | 3 | 7.89E-07 | 0.95 | 4.67 | - | 1554.0 |
| AHQ-9-2, 3913        | R.SAGQGEVLVYVEDPAGHQEEAK.V      | 2314.45074 | 3 | 2.05E-09 | 0.95 | 4.17 | - | 1726.7 |
| AHQ-9-5, 3824        | R.SAGQGEVLVYVEDPAGHQEEAK.V      | 2314.45074 | 2 | 1.81E-08 | 0.93 | 4.73 | - | 682.9  |
| AHQ-9-2, 3917        | R.SAGQGEVLVYVEDPAGHQEEAK.V      | 2314.45074 | 2 | 1.23E-06 | 0.91 | 4.16 | - | 747.7  |
| AHQ-9-3, 3813 - 3818 | R.SAGQGEVLVYVEDPAGHQEEAK.V      | 2314.45074 | 2 | 6.00E-05 | 0.92 | 4.62 | - | 617.4  |
| AHQ-9-6, 3777        | R.SAGQGEVLVYVEDPAGHQEEAK.V      | 2314.45074 | 2 | 7.66E-08 | 0.86 | 3.91 | - | 535.8  |
| AHQ-9-5, 3387        | K.SPFEVYVDK.S                   | 1084.20321 | 2 | 7.52E-06 | 0.93 | 3.05 | - | 1168.3 |
| AHQ-9-2, 3469        | K.SPFEVYVDK.S                   | 1084.20321 | 2 | 3.27E-05 | 0.94 | 3.50 | - | 1170.0 |
| AHQ-9-3, 3388        | K.SPFEVYVDK.S                   | 1084.20321 | 2 | 6.01E-06 | 0.91 | 3.14 | - | 1046.9 |
| AHQ-9-4, 3382        | K.SPFEVYVDK.S                   | 1084.20321 | 2 | 2.28E-06 | 0.93 | 3.04 | - | 1440.7 |
| AHQ-9-2, 3470        | K.SPFEVYVDK.S                   | 1084.20321 | 1 | 6.40E-04 | 0.79 | 2.48 | - | 1195.1 |
| AHQ-9-1, 3578        | K.SPFEVYVDK.S                   | 1084.20321 | 2 | 1.09E-06 | 0.91 | 3.11 | - | 991.5  |
| AHQ-9-4, 3386 - 3389 | K.SPFEVYVDK.S                   | 1084.20321 | 1 | 4.43E-06 | 0.58 | 2.39 | - | 743.7  |
| AHQ-9-2, 3511 - 3513 | K.SPFEVYVDKSDQDASK.V            | 1757.87886 | 2 | 3.97E-07 | 0.56 | 3.35 | - | 440.1  |
| AHQ-9-9, 4455        | K.SPFSAVSPSLDLSK.I              | 1534.73557 | 2 | 4.63E-05 | 0.68 | 2.69 | - | 707.1  |
| AHQ-9-2, 4765 - 4822 | K.SPFSAVSPSLDLSK.I              | 1534.73557 | 2 | 2.53E-06 | 0.85 | 3.50 | - | 785.9  |



|                      |                                           |            |   |          |      |      |   |        |
|----------------------|-------------------------------------------|------------|---|----------|------|------|---|--------|
| AHQ-9-1, 4818 - 4888 | K.SPFSVAVSPSLDLSK.I                       | 1534.73557 | 2 | 1.57E-04 | 0.89 | 3.29 | - | 1094.7 |
| AHQ-9-2, 4631 - 4710 | K.SPFSVAVSPSLDLSK.I                       | 1534.73557 | 2 | 7.79E-05 | 0.86 | 3.56 | - | 681.8  |
| AHQ-9-3, 4648 - 4704 | K.SPFSVAVSPSLDLSK.I                       | 1534.73557 | 2 | 1.10E-04 | 0.89 | 3.61 | - | 924.1  |
| AHQ-9-3, 4524 - 4593 | K.SPFSVAVSPSLDLSK.I                       | 1534.73557 | 2 | 6.62E-04 | 0.66 | 3.02 | - | 732.7  |
| AHQ-9-4, 4602 - 4676 | K.SPFSVAVSPSLDLSK.I                       | 1534.73557 | 2 | 4.82E-07 | 0.92 | 4.32 | - | 889.9  |
| AHQ-9-6, 4621 - 4678 | K.SPFSVAVSPSLDLSK.I                       | 1534.73557 | 2 | 6.19E-04 | 0.51 | 2.69 | - | 501.4  |
| AHQ-9-6, 4535 - 4614 | K.SPFSVAVSPSLDLSK.I                       | 1534.73557 | 2 | 6.41E-04 | 0.68 | 3.11 | - | 609.4  |
| AHQ-9-5, 4683 - 4743 | K.SPFSVAVSPSLDLSK.I                       | 1534.73557 | 2 | 1.94E-04 | 0.91 | 4.39 | - | 799.8  |
| AHQ-9-5, 3359        | R.SPYTVTGGQACNPSACR.A                     | 1871.04208 | 2 | 5.24E-06 | 0.89 | 4.15 | - | 422.9  |
| AHQ-9-4, 3301 - 3364 | R.SPYTVTGGQACNPSACR.A                     | 1871.04208 | 2 | 3.38E-05 | 0.91 | 3.79 | - | 633.2  |
| AHQ-9-2, 3402 - 3462 | R.SPYTVTGGQACNPSACR.A                     | 1871.04208 | 2 | 1.25E-04 | 0.91 | 4.24 | - | 625.8  |
| AHQ-9-4, 3353        | R.SPYTVTGGQACNPSACR.A                     | 1871.04208 | 2 | 3.60E-07 | 0.90 | 4.02 | - | 554.8  |
| AHQ-9-6, 3330        | R.SPYTVTGGQACNPSACR.A                     | 1871.04208 | 2 | 3.52E-04 | 0.92 | 4.25 | - | 554.2  |
| AHQ-9-5, 4811        | R.TFSVWVYVEVTGTHK.V                       | 1751.96228 | 3 | 3.28E-07 | 0.70 | 3.19 | - | 465.1  |
| AHQ-9-3, 4784        | R.TFSVWVYVEVTGTHK.V                       | 1751.96228 | 3 | 1.38E-06 | 0.66 | 3.25 | - | 512.0  |
| AHQ-9-1, 3300        | K.TGVAVNKPAEFTVDAK.H                      | 1647.85391 | 3 | 2.23E-05 | 0.85 | 3.40 | - | 907.2  |
| AHQ-9-5, 3088        | K.TGVAVNKPAEFTVDAK.H                      | 1647.85391 | 3 | 6.37E-05 | 0.90 | 4.06 | - | 890.6  |
| AHQ-9-3, 3112        | K.TGVAVNKPAEFTVDAK.H                      | 1647.85391 | 2 | 1.84E-04 | 0.91 | 4.09 | - | 760.1  |
| AHQ-9-4, 3110        | K.TGVAVNKPAEFTVDAK.H                      | 1647.85391 | 3 | 1.98E-07 | 0.90 | 3.72 | - | 1036.7 |
| AHQ-9-2, 3178 - 3233 | K.TGVAVNKPAEFTVDAK.H                      | 1647.85391 | 2 | 5.53E-04 | 0.92 | 3.96 | - | 846.8  |
| AHQ-9-2, 3182 - 3185 | K.TGVAVNKPAEFTVDAK.H                      | 1647.85391 | 3 | 4.30E-08 | 0.83 | 3.62 | - | 692.7  |
| AHQ-9-3, 3117        | K.TGVAVNKPAEFTVDAK.H                      | 1647.85391 | 3 | 3.20E-04 | 0.86 | 3.43 | - | 748.2  |
| AHQ-9-1, 3294        | K.TGVAVNKPAEFTVDAK.H                      | 1647.85391 | 2 | 4.88E-04 | 0.94 | 4.21 | - | 900.7  |
| AHQ-9-2, 3054 - 3125 | R.TGVELGKPTHFTVNAK.A                      | 1699.93205 | 2 | 5.97E-04 | 0.93 | 4.42 | - | 666.3  |
| AHQ-9-2, 3053 - 3123 | R.TGVELGKPTHFTVNAK.A                      | 1699.93205 | 3 | 2.43E-07 | 0.80 | 3.77 | - | 836.3  |
| AHQ-9-4, 3085        | K.THEAEIVGEGNHTYCIR.F                     | 2060.19046 | 3 | 1.99E-08 | 0.96 | 5.36 | - | 1396.7 |
| AHQ-9-5, 3092        | K.THEAEIVGEGNHTYCIR.F                     | 2060.19046 | 3 | 4.68E-11 | 0.90 | 3.77 | - | 1054.3 |
| AHQ-9-4, 3096 - 3097 | K.THEAEIVGEGNHTYCIR.F                     | 2060.19046 | 2 | 3.31E-05 | 0.98 | 5.65 | - | 1891.8 |
| AHQ-9-6, 3085 - 3086 | K.THEAEIVGEGNHTYCIR.F                     | 2060.19046 | 3 | 4.75E-07 | 0.94 | 4.58 | - | 1299.7 |
| AHQ-9-1, 3296        | K.THEAEIVGEGNHTYCIR.F                     | 2060.19046 | 3 | 1.50E-07 | 0.82 | 3.56 | - | 801.1  |
| AHQ-9-4, 3132        | R.TPCEELVK.H                              | 1090.27249 | 2 | 4.73E-06 | 0.80 | 2.67 | - | 709.2  |
| AHQ-9-14, - 3227     | R.TPCEELVK.H                              | 1090.27249 | 1 | 1.61E-05 | 0.63 | 2.69 | - | 460.0  |
| AHQ-9-4, 3150        | R.TPCEELVK.H                              | 1090.27249 | 1 | 7.92E-04 | 0.66 | 2.81 | - | 613.0  |
| AHQ-9-7, 3104        | R.TPCEELVK.H                              | 1090.27249 | 2 | 3.48E-06 | 0.83 | 2.99 | - | 684.3  |
| AHQ-9-3, 3156        | R.TPCEELVK.H                              | 1090.27249 | 2 | 4.49E-04 | 0.87 | 3.09 | - | 870.2  |
| AHQ-9-1, 3334        | R.TPCEELVK.H                              | 1090.27249 | 2 | 2.15E-05 | 0.78 | 3.07 | - | 584.1  |
| AHQ-9-5, 3137        | R.TPCEELVK.H                              | 1090.27249 | 2 | 8.47E-07 | 0.80 | 2.72 | - | 641.6  |
| AHQ-9-3, 6346 - 6404 | K.TTYFEIFTAAGTGEVEVVIQDPM*GQK.G           | 2906.21339 | 3 | 8.14E-06 | 0.92 | 4.42 | - | 1394.4 |
| AHQ-9-3, 6460        | K.TTYFEIFTAAGTGEVEVVIQDPM*GQK.G           | 2906.21339 | 3 | 4.52E-07 | 0.68 | 3.14 | - | 815.8  |
| AHQ-9-3, 3174 - 3245 | R.VANPSGNLTETYVQDR.G                      | 1764.87462 | 2 | 1.84E-04 | 0.82 | 3.09 | - | 508.8  |
| AHQ-9-2, 3325 - 3401 | R.VANPSGNLTETYVQDR.G                      | 1764.87462 | 2 | 7.63E-13 | 0.94 | 4.48 | - | 859.4  |
| AHQ-9-4, 3241 - 3321 | R.VANPSGNLTETYVQDR.G                      | 1764.87462 | 2 | 1.57E-10 | 0.95 | 4.85 | - | 985.8  |
| AHQ-9-3, 3316 - 3380 | R.VANPSGNLTETYVQDR.G                      | 1764.87462 | 2 | 3.70E-11 | 0.87 | 3.52 | - | 671.0  |
| AHQ-9-1, 3439 - 3506 | R.VANPSGNLTETYVQDR.G                      | 1764.87462 | 2 | 1.21E-10 | 0.96 | 4.58 | - | 1217.4 |
| AHQ-9-6, 3233 - 3301 | R.VANPSGNLTETYVQDR.G                      | 1764.87462 | 2 | 5.11E-13 | 0.96 | 4.81 | - | 1012.3 |
| AHQ-9-2, 3467        | R.VANPSGNLTETYVQDR.G                      | 1764.87462 | 2 | 1.82E-05 | 0.65 | 2.84 | - | 468.8  |
| AHQ-9-5, 3253 - 3259 | R.VANPSGNLTETYVQDR.G                      | 1764.87462 | 2 | 6.66E-14 | 0.94 | 4.17 | - | 878.0  |
| AHQ-9-7, 3234        | R.VANPSGNLTETYVQDR.G                      | 1764.87462 | 2 | 3.13E-11 | 0.90 | 3.66 | - | 749.1  |
| AHQ-9-6, 2870        | K.VAQPITIDNKGDTVTVR.Y                     | 1816.00621 | 2 | 5.03E-07 | 0.42 | 2.71 | - | 331.5  |
| AHQ-9-2, 2955        | K.VAQPITIDNKGDTVTVR.Y                     | 1816.00621 | 2 | 3.82E-04 | 0.80 | 3.30 | - | 441.1  |
| AHQ-9-4, 2833        | K.VAQPITIDNKGDTVTVR.Y                     | 1816.00621 | 2 | 4.00E-07 | 0.89 | 3.60 | - | 547.6  |
| AHQ-9-5, 2841        | K.VAQPITIDNKGDTVTVR.Y                     | 1816.00621 | 2 | 2.36E-04 | 0.74 | 3.08 | - | 503.5  |
| AHQ-9-1, 3066        | K.VAQPITIDNKGDTVTVR.Y                     | 1816.00621 | 2 | 2.65E-08 | 0.88 | 3.63 | - | 618.1  |
| AHQ-9-8, 2807 - 2842 | K.VAQPITIDNKGDTVTVR.Y                     | 1816.00621 | 2 | 7.11E-06 | 0.87 | 3.52 | - | 801.1  |
| AHQ-9-4, 2670        | K.VAQPITIDNKGDTVTVR.Y                     | 1816.00621 | 2 | 5.03E-05 | 0.80 | 3.53 | - | 450.4  |
| AHQ-9-3, 2889        | K.VAQPITIDNKGDTVTVR.Y                     | 1816.00621 | 2 | 5.17E-04 | 0.89 | 3.64 | - | 639.2  |
| AHQ-9-1, 3071        | K.VAQPITIDNKGDTVTVR.Y                     | 1816.00621 | 3 | 3.24E-04 | 0.70 | 3.10 | - | 468.3  |
| AHQ-9-5, 3463 - 3524 | K.VDINTEDLEDGTCR.V                        | 1638.69283 | 2 | 8.75E-08 | 0.97 | 4.78 | - | 1638.4 |
| AHQ-9-2, 3554 - 3566 | K.VDINTEDLEDGTCR.V                        | 1638.69283 | 2 | 4.58E-05 | 0.83 | 3.85 | - | 688.0  |
| AHQ-9-1, 3630        | K.VDINTEDLEDGTCR.V                        | 1638.69283 | 2 | 4.19E-05 | 0.92 | 3.71 | - | 1075.8 |
| AHQ-9-4, 3454 - 3472 | K.VDINTEDLEDGTCR.V                        | 1638.69283 | 2 | 1.49E-06 | 0.96 | 4.51 | - | 1206.3 |
| AHQ-9-6, 3429        | K.VDINTEDLEDGTCR.V                        | 1638.69283 | 2 | 5.03E-07 | 0.93 | 4.05 | - | 1061.0 |
| AHQ-9-6, 3199        | K.VDINTEDLEDGTCR.V                        | 1638.69283 | 2 | 2.15E-06 | 0.54 | 2.57 | - | 451.6  |
| AHQ-9-3, 3450        | K.VDINTEDLEDGTCR.V                        | 1638.69283 | 2 | 1.44E-04 | 0.78 | 2.77 | - | 986.6  |
| AHQ-9-5, 3219 - 3297 | K.VDINTEDLEDGTCR.V                        | 1638.69283 | 2 | 3.17E-07 | 0.90 | 3.68 | - | 999.1  |
| AHQ-9-3, 3224        | K.VDINTEDLEDGTCR.V                        | 1638.69283 | 2 | 5.62E-06 | 0.92 | 3.89 | - | 953.4  |
| AHQ-9-4, 3212 - 3288 | K.VDINTEDLEDGTCR.V                        | 1638.69283 | 2 | 1.55E-07 | 0.85 | 3.14 | - | 869.0  |
| AHQ-9-4, 2642        | K.VDVGKDOEFTVK.S                          | 1365.51377 | 2 | 5.11E-08 | 0.85 | 3.65 | - | 891.7  |
| AHQ-9-3, 2668        | K.VDVGKDOEFTVK.S                          | 1365.51377 | 2 | 2.04E-06 | 0.94 | 3.90 | - | 912.7  |
| AHQ-9-2, 2714 - 2717 | K.VDVGKDOEFTVK.S                          | 1365.51377 | 2 | 5.69E-07 | 0.93 | 4.04 | - | 910.6  |
| AHQ-9-5, 2644        | K.VDVGKDOEFTVK.S                          | 1365.51377 | 2 | 5.01E-08 | 0.72 | 2.96 | - | 598.2  |
| AHQ-9-6, 2637        | K.VDVGKDOEFTVK.S                          | 1365.51377 | 2 | 1.12E-07 | 0.89 | 3.34 | - | 811.2  |
| AHQ-9-1, 2851        | K.VDVGKDOEFTVK.S                          | 1365.51377 | 2 | 5.94E-07 | 0.87 | 3.35 | - | 671.0  |
| AHQ-9-2, 2830 - 2870 | K.VEPGLGADNSVVR.F                         | 1313.44209 | 2 | 7.67E-07 | 0.79 | 2.92 | - | 298.1  |
| AHQ-9-2, 5745 - 5801 | K.VEYTPYEEGLHSVDVTDGSPVSSPFQVPVTEGCDPSR.V | 4300.57494 | 3 | 3.91E-11 | 0.97 | 7.05 | - | 799.9  |
| AHQ-9-4, 5660 - 5716 | K.VEYTPYEEGLHSVDVTDGSPVSSPFQVPVTEGCDPSR.V | 4300.57494 | 3 | 1.17E-07 | 0.90 | 4.60 | - | 703.7  |
| AHQ-9-1, 5758 - 5814 | K.VEYTPYEEGLHSVDVTDGSPVSSPFQVPVTEGCDPSR.V | 4300.57494 | 3 | 3.65E-07 | 0.66 | 3.42 | - | 308.0  |
| AHQ-9-7, 6268 - 6270 | K.VGSAADIPINISSETDL.SLLTATVVPSSGR.E       | 2895.25495 | 3 | 1.45E-04 | 0.74 | 3.76 | - | 529.0  |
| AHQ-9-2, 6458        | K.VGSAADIPINISSETDL.SLLTATVVPSSGR.E       | 2895.25495 | 2 | 1.47E-06 | 0.90 | 4.09 | - | 604.3  |
| AHQ-9-1, 6438 - 6439 | K.VGSAADIPINISSETDL.SLLTATVVPSSGR.E       | 2895.25495 | 2 | 7.86E-05 | 0.93 | 4.52 | - | 729.5  |
| AHQ-9-4, 6304 - 6364 | K.VGSAADIPINISSETDL.SLLTATVVPSSGR.E       | 2895.25495 | 3 | 5.77E-04 | 0.73 | 3.79 | - | 436.0  |
| AHQ-9-2, 1618        | R.VHGPQISGTTNKNPK.F                       | 1635.80645 | 3 | 2.15E-07 | 0.91 | 3.54 | - | 1182.2 |
| AHQ-9-7, 4145        | K.VHSPSGALEECYVTEIDQDK.Y                  | 2279.42322 | 2 | 1.71E-06 | 0.95 | 4.17 | - | 1495.4 |
| AHQ-9-7, 4144        | K.VHSPSGALEECYVTEIDQDK.Y                  | 2279.42322 | 3 | 4.02E-04 | 0.82 | 3.50 | - | 1180.5 |
| AHQ-9-4, 4193        | K.VHSPSGALEECYVTEIDQDK.Y                  | 2279.42322 | 3 | 9.71E-04 | 0.81 | 3.28 | - | 1231.9 |
| AHQ-9-5, 4228        | K.VHSPSGALEECYVTEIDQDK.Y                  | 2279.42322 | 2 | 1.53E-08 | 0.98 | 5.75 | - | 2263.0 |
| AHQ-9-5, 4211        | K.VHSPSGALEECYVTEIDQDK.Y                  | 2279.42322 | 3 | 1.52E-07 | 0.95 | 4.95 | - | 1720.6 |
| AHQ-9-6, 4163        | K.VHSPSGALEECYVTEIDQDK.Y                  | 2279.42322 | 3 | 7.69E-05 | 0.94 | 4.31 | - | 1663.9 |
| AHQ-9-4, 4208        | K.VHSPSGALEECYVTEIDQDK.Y                  | 2279.42322 | 2 | 1.05E-04 | 0.97 | 5.26 | - | 1451.2 |
| AHQ-9-8, 4195        | K.VHSPSGALEECYVTEIDQDK.Y                  | 2279.42322 | 2 | 7.57E-04 | 0.91 | 4.14 | - | 840.8  |
| AHQ-9-1, 4703        | K.VHSPSGALEECYVTEIDQDKYAVR.F              | 2768.99349 | 3 | 7.34E-09 | 0.92 | 4.90 | - | 626.6  |
| AHQ-9-2, 4647        | K.VHSPSGALEECYVTEIDQDKYAVR.F              | 2768.99349 | 3 | 1.88E-11 | 0.92 | 4.47 | - | 655.7  |
| AHQ-9-6, 4485        | K.VHSPSGALEECYVTEIDQDKYAVR.F              | 2768.99349 | 3 | 9.65E-10 | 0.94 | 4.90 | - | 997.4  |
| AHQ-9-4, 4540        | K.VHSPSGALEECYVTEIDQDKYAVR.F              | 2768.99349 | 3 | 1.11E-14 | 0.95 | 5.37 | - | 974.7  |
| AHQ-9-5, 4535 - 4547 | K.VHSPSGALEECYVTEIDQDKYAVR.F              | 2768.99349 | 3 | 2.18E-12 | 0.96 | 6.03 | - | 851.6  |
| AHQ-9-2, 3914        | K.VNQPSFAVSLNGAK.G                        | 1503.68480 | 2 | 5.02E-06 | 0.66 | 2.81 | - | 682.3  |
| AHQ-9-5, 3748 - 3803 | K.VNQPSFAVSLNGAK.G                        | 1503.68480 | 2 | 6.39E-07 | 0.84 | 3.70 | - | 517.1  |
| AHQ-9-4, 3757 - 3812 | K.VNQPSFAVSLNGAK.G                        | 1503.68480 | 2 | 4.52E-08 | 0.81 | 3.76 | - | 441.5  |
| AHQ-9-7, 3580 - 3636 | K.VNQPSFAVSLNGAK.G                        | 1503.68480 | 2 | 1.64E-05 | 0.71 | 3.15 | - | 387.6  |
| AHQ-9-5, 3625 - 3683 | K.VNQPSFAVSLNGAK.G                        | 1503.68480 | 2 | 1.03E-07 | 0.83 | 3.53 | - | 441.1  |
| AHQ-9-3, 3624 - 3680 | K.VNQPSFAVSLNGAK.G                        | 1503.68480 | 2 | 4.83E-05 | 0.90 | 3.69 | - | 759.4  |
| AHQ-9-2, 3725 - 3786 | K.VNQPSFAVSLNGAK.G                        | 1503.68480 | 2 | 1.81E-07 | 0.91 | 3.79 | - | 823.5  |
| AHQ-9-4, 3629 - 3688 | K.VNQPSFAVSLNGAK.G                        | 1503.68480 | 2 | 1.44E-07 | 0.94 | 4.18 | - | 727.9  |
| AHQ-9-6, 3585 - 3642 | K.VNQPSFAVSLNGAK.G                        | 1503.68480 | 2 | 1.78E-10 | 0.93 | 3.98 | - | 817.7  |
| AHQ-9-1, 3808        | K.VNQPSFAVSLNGAK.G                        | 1503.68480 | 2 | 9.29E-08 | 0.90 | 3.69 | - | 690.6  |
| AHQ-9-5, 1755        | K.VPVHDVTDASK.V                           | 1168.28175 | 2 | 9.66E-04 | 0.85 | 2.76 | - | 1068.0 |
| AHQ-9-2, 1846        | K.VPVHDVTDASK.V                           | 1168.28175 | 2 | 1.12E-07 | 0.90 | 3.31 | - | 915.7  |

|                           |                                                                         |            |   |          |      |        |       |         |
|---------------------------|-------------------------------------------------------------------------|------------|---|----------|------|--------|-------|---------|
| AHQ-9-4, 3973 - 4038      | R.VQVQDNEGCPVEALVK.D                                                    | 1786.98493 | 2 | 4.59E-07 | 0.96 | 5.10   | -     | 1289.9  |
| AHQ-9-1, 4107 - 4168      | R.VQVQDNEGCPVEALVK.D                                                    | 1786.98493 | 2 | 9.04E-04 | 0.88 | 3.47   | -     | 883.5   |
| AHQ-9-2, 4061 - 4127      | R.VQVQDNEGCPVEALVK.D                                                    | 1786.98493 | 2 | 1.35E-05 | 0.96 | 5.13   | -     | 1095.0  |
| AHQ-9-3, 3906 - 3960      | R.VQVQDNEGCPVEALVK.D                                                    | 1786.98493 | 2 | 5.38E-05 | 0.97 | 4.17   | -     | 1926.5  |
| AHQ-9-5, 3960             | R.VQVQDNEGCPVEALVK.D                                                    | 1786.98493 | 2 | 3.80E-06 | 0.95 | 4.41   | -     | 1270.9  |
| AHQ-9-3, 3948 - 4020      | R.VQVQDNEGCPVEALVK.D                                                    | 1786.98493 | 2 | 9.87E-05 | 0.94 | 4.67   | -     | 945.6   |
| AHQ-9-6, 3929             | R.VQVQDNEGCPVEALVK.D                                                    | 1786.98493 | 2 | 4.88E-05 | 0.78 | 3.12   | -     | 712.9   |
| AHQ-9-7, 3917 - 3921      | R.VQVQDNEGCPVEALVK.D                                                    | 1786.98493 | 2 | 8.30E-07 | 0.87 | 3.55   | -     | 878.5   |
| AHQ-9-2, 5015 - 5085      | R.VQVQDNEGCPVEALVKDNGNGTYSCSYVPR.K                                      | 3359.60342 | 3 | 1.06E-07 | 0.83 | 3.54   | -     | 1230.8  |
| AHQ-9-1, 4943 - 4948      | R.VQVQDNEGCPVEALVKDNGNGTYSCSYVPR.K                                      | 3359.60342 | 3 | 4.93E-08 | 0.96 | 5.25   | -     | 1598.5  |
| AHQ-9-4, 4562 - 4616      | R.VSGQGLHEGHTFPAEFIIDTR.D                                               | 2441.64058 | 3 | 7.82E-08 | 0.96 | 5.93   | -     | 1020.1  |
| AHQ-9-8, 4540             | R.VSGQGLHEGHTFPAEFIIDTR.D                                               | 2441.64058 | 2 | 1.37E-06 | 0.92 | 4.38   | -     | 650.5   |
| AHQ-9-3, 4612             | R.VSGQGLHEGHTFPAEFIIDTR.D                                               | 2441.64058 | 3 | 5.73E-06 | 0.95 | 5.12   | -     | 1322.1  |
| AHQ-9-5, 4601 - 4659      | R.VSGQGLHEGHTFPAEFIIDTR.D                                               | 2441.64058 | 3 | 1.69E-10 | 0.92 | 4.86   | -     | 860.8   |
| AHQ-9-4, 4648             | R.VSGQGLHEGHTFPAEFIIDTR.D                                               | 2441.64058 | 3 | 2.29E-07 | 0.93 | 4.75   | -     | 1161.5  |
| AHQ-9-9, 4368 - 4371      | R.VSGQGLHEGHTFPAEFIIDTR.D                                               | 2441.64058 | 3 | 7.92E-05 | 0.91 | 3.98   | -     | 1086.7  |
| AHQ-9-6, 4558             | R.VSGQGLHEGHTFPAEFIIDTR.D                                               | 2441.64058 | 3 | 9.80E-05 | 0.93 | 4.53   | -     | 1143.3  |
| AHQ-9-1, 4794 - 4854      | R.VSGQGLHEGHTFPAEFIIDTR.D                                               | 2441.64058 | 3 | 4.35E-09 | 0.97 | 6.51   | -     | 1614.1  |
| AHQ-9-2, 4734             | R.VSGQGLHEGHTFPAEFIIDTR.D                                               | 2441.64058 | 3 | 4.04E-06 | 0.95 | 5.01   | -     | 1134.8  |
| AHQ-9-5, 4617             | R.VSGQGLHEGHTFPAEFIIDTR.D                                               | 2441.64058 | 2 | 2.76E-05 | 0.88 | 3.60   | -     | 836.2   |
| AHQ-9-8, 2730             | K.VTAQGPGLPESGNIANK.T                                                   | 1653.81855 | 2 | 7.10E-04 | 0.60 | 2.87   | -     | 387.0   |
| AHQ-9-3, 2761             | K.VTAQGPGLPESGNIANK.T                                                   | 1653.81855 | 2 | 2.89E-07 | 0.73 | 3.69   | -     | 444.0   |
| AHQ-9-6, 2729             | K.VTAQGPGLPESGNIANK.T                                                   | 1653.81855 | 2 | 2.19E-06 | 0.87 | 3.62   | -     | 579.8   |
| AHQ-9-2, 2929             | K.VTAQGPGLPESGNIANK.T                                                   | 1653.81855 | 2 | 2.53E-07 | 0.84 | 3.35   | -     | 565.8   |
| AHQ-9-2, 2794 - 2873      | K.VTAQGPGLPESGNIANK.T                                                   | 1653.81855 | 2 | 5.80E-06 | 0.90 | 4.36   | -     | 504.1   |
| AHQ-9-3, 2866             | K.VTAQGPGLPESGNIANK.T                                                   | 1653.81855 | 2 | 1.10E-07 | 0.54 | 2.76   | -     | 442.6   |
| AHQ-9-5, 3279             | K.VTVLFAGQHIK.S                                                         | 1284.53185 | 2 | 3.05E-07 | 0.95 | 3.99   | -     | 1107.3  |
| AHQ-9-4, 3286             | K.VTVLFAGQHIK.S                                                         | 1284.53185 | 2 | 1.93E-05 | 0.94 | 4.42   | -     | 878.5   |
| AHQ-9-2, 3366 - 3369      | K.VTVLFAGQHIK.S                                                         | 1284.53185 | 2 | 2.97E-05 | 0.93 | 3.82   | -     | 1171.3  |
| AHQ-9-3, 3296 - 3297      | K.VTVLFAGQHIK.S                                                         | 1284.53185 | 2 | 8.74E-06 | 0.85 | 3.55   | -     | 886.6   |
| AHQ-9-2, 3374             | K.VTVLFAGQHIK.S                                                         | 1284.53185 | 3 | 2.92E-05 | 0.76 | 3.55   | -     | 613.8   |
| AHQ-9-1, 3494             | K.VTVLFAGQHIK.S                                                         | 1284.53185 | 2 | 3.83E-06 | 0.62 | 3.20   | -     | 503.0   |
| AHQ-9-7, 3230             | K.VTVLFAGQHIK.S                                                         | 1284.53185 | 2 | 3.65E-05 | 0.82 | 3.15   | -     | 677.1   |
| AHQ-9-5, 4764 - 4783      | R.VTYCPTPEPGNYIINIK.F                                                   | 1884.14221 | 2 | 2.62E-08 | 0.86 | 3.69   | -     | 446.8   |
| AHQ-9-4, 4610             | R.VTYCPTPEPGNYIINIK.F                                                   | 1884.14221 | 2 | 1.65E-11 | 0.90 | 4.08   | -     | 498.5   |
| AHQ-9-3, 4596             | R.VTYCPTPEPGNYIINIK.F                                                   | 1884.14221 | 2 | 2.20E-04 | 0.85 | 3.26   | -     | 458.4   |
| AHQ-9-4, 4749             | R.VTYCPTPEPGNYIINIK.F                                                   | 1884.14221 | 2 | 9.07E-04 | 0.84 | 3.82   | -     | 350.6   |
| AHQ-9-7, 4682 - 4684      | R.VTYCPTPEPGNYIINIK.F                                                   | 1884.14221 | 2 | 3.91E-04 | 0.72 | 3.01   | -     | 416.0   |
| AHQ-9-6, 4701             | R.VTYCPTPEPGNYIINIK.F                                                   | 1884.14221 | 2 | 9.90E-06 | 0.68 | 3.36   | -     | 275.5   |
| AHQ-9-1, 4916             | R.VTYCPTPEPGNYIINIK.F                                                   | 1884.14221 | 3 | 1.05E-04 | 0.81 | 3.60   | -     | 795.8   |
| AHQ-9-5, 4624 - 4625      | R.VTYCPTPEPGNYIINIK.F                                                   | 1884.14221 | 2 | 9.51E-09 | 0.90 | 4.34   | -     | 467.5   |
| AHQ-9-6, 4563             | R.VTYCPTPEPGNYIINIK.F                                                   | 1884.14221 | 2 | 1.67E-09 | 0.86 | 3.17   | -     | 608.8   |
| AHQ-9-4, 4764 - 4765      | R.VTYCPTPEPGNYIINIK.F                                                   | 1884.14221 | 3 | 5.24E-07 | 0.95 | 5.14   | -     | 1040.0  |
| AHQ-9-2, 4853             | R.VTYCPTPEPGNYIINIK.F                                                   | 1884.14221 | 2 | 3.27E-05 | 0.63 | 2.77   | -     | 309.6   |
| AHQ-9-1, 4903 - 4983      | R.VTYCPTPEPGNYIINIK.F                                                   | 1884.14221 | 2 | 1.01E-05 | 0.77 | 2.99   | -     | 479.5   |
| AHQ-9-4, 4748             | R.VTYTPM'APGSYLSIK.Y                                                    | 1758.07165 | 3 | 3.30E-04 | 0.90 | 3.80   | -     | 1102.9  |
| AHQ-9-6, 5107             | R.VTYTPM'APGSYLSIK.Y                                                    | 1742.07225 | 2 | 2.62E-04 | 0.83 | 3.12   | -     | 611.0   |
| AHQ-9-14, - 4726          | R.VTYTPM'APGSYLSIK.Y                                                    | 1758.07165 | 2 | 3.51E-05 | 0.55 | 2.56   | -     | 297.9   |
| AHQ-9-5, 4759             | R.VTYTPM'APGSYLSIK.Y                                                    | 1758.07165 | 3 | 3.47E-05 | 0.86 | 3.47   | -     | 1150.1  |
| AHQ-9-2, 5287             | R.VTYTPM'APGSYLSIK.Y                                                    | 1742.07225 | 2 | 1.42E-04 | 0.85 | 2.94   | -     | 808.5   |
| AHQ-9-5, 2708             | R.YAPSEAGLHEM'DIR.Y                                                     | 1605.75422 | 2 | 9.05E-04 | 0.85 | 2.97   | -     | 1024.9  |
| AHQ-9-5, 3375             | R.YAPSEAGLHEM'DIR.Y                                                     | 1589.75482 | 2 | 7.84E-04 | 0.70 | 3.00   | -     | 586.4   |
| AHQ-9-2, 3479             | R.YAPSEAGLHEM'DIR.Y                                                     | 1589.75482 | 2 | 9.80E-07 | 0.82 | 2.50   | -     | 918.2   |
| AHQ-9-8, 3330             | R.YAPSEAGLHEM'DIR.Y                                                     | 1589.75482 | 2 | 8.12E-04 | 0.81 | 2.86   | -     | 845.0   |
| AHQ-9-7, 4026 - 4033      | K.YGGDEIFPSPYR.V                                                        | 1401.50466 | 2 | 1.57E-04 | 0.51 | 3.04   | -     | 400.6   |
| AHQ-9-3, 4073             | K.YGGDEIFPSPYR.V                                                        | 1401.50466 | 2 | 8.41E-05 | 0.76 | 2.94   | -     | 671.3   |
| AHQ-9-13, - 3473          | K.YGGPYHIGGSPFK.A                                                       | 1380.53182 | 2 | 1.25E-05 | 0.91 | 3.44   | -     | 1276.3  |
| AHQ-9-8, 3346 - 3351      | K.YGGPYHIGGSPFK.A                                                       | 1380.53182 | 2 | 7.40E-10 | 0.95 | 3.94   | -     | 1403.1  |
| AHQ-9-4, 3384             | K.YGGPYHIGGSPFK.A                                                       | 1380.53182 | 2 | 1.22E-07 | 0.96 | 4.02   | -     | 1466.4  |
| AHQ-9-3, 3412             | K.YGGPYHIGGSPFK.A                                                       | 1380.53182 | 2 | 1.37E-07 | 0.94 | 3.97   | -     | 1315.5  |
| AHQ-9-5, 3400 - 3403      | K.YGGPYHIGGSPFK.A                                                       | 1380.53182 | 2 | 8.48E-11 | 0.96 | 4.42   | -     | 1491.4  |
| AHQ-9-7, 3353             | K.YGGPYHIGGSPFK.A                                                       | 1380.53182 | 2 | 8.50E-04 | 0.95 | 3.64   | -     | 1921.8  |
| AHQ-9-4, 3394             | K.YGGPYHIGGSPFK.A                                                       | 1380.53182 | 3 | 9.40E-05 | 0.84 | 4.02   | -     | 539.8   |
| AHQ-9-5, 3404             | K.YGGPYHIGGSPFK.A                                                       | 1380.53182 | 3 | 3.72E-06 | 0.84 | 3.91   | -     | 432.6   |
| AHQ-9-6, 3375             | K.YGGPYHIGGSPFK.A                                                       | 1380.53182 | 2 | 4.49E-09 | 0.97 | 4.24   | -     | 1629.0  |
| AHQ-9-3, 3072             | K.YGGQVPVNFPSK.L                                                        | 1291.43658 | 2 | 4.19E-04 | 0.91 | 3.60   | -     | 606.5   |
| AHQ-9-1, 3252             | K.YGGQVPVNFPSK.L                                                        | 1291.43658 | 2 | 2.24E-04 | 0.91 | 3.26   | -     | 672.0   |
| AHQ-9-5, 3052 - 3053      | K.YGGQVPVNFPSK.L                                                        | 1291.43658 | 2 | 2.86E-06 | 0.90 | 3.54   | -     | 604.6   |
| AHQ-9-2, 3135             | K.YGGQVPVNFPSK.L                                                        | 1291.43658 | 2 | 3.17E-04 | 0.93 | 3.65   | -     | 711.0   |
| AHQ-9-1, 4480             | K.YKQHVPVGSPPFTAR.V                                                     | 2596.88377 | 3 | 7.01E-04 | 0.82 | 3.41   | -     | 879.9   |
| AHQ-9-8, 2854             | K.YNEQHVPVGSPPFTAR.V                                                    | 1603.71978 | 2 | 2.27E-04 | 0.79 | 3.29   | -     | 392.4   |
| AHQ-9-5, 3072             | K.YNEQHVPVGSPPFTAR.V                                                    | 1603.71978 | 2 | 6.27E-04 | 0.66 | 2.94   | -     | 335.8   |
| AHQ-9-5, 2912             | K.YNEQHVPVGSPPFTAR.V                                                    | 1603.71978 | 3 | 1.66E-05 | 0.88 | 4.05   | -     | 926.8   |
| AHQ-9-4, 2912             | K.YNEQHVPVGSPPFTAR.V                                                    | 1603.71978 | 2 | 1.43E-05 | 0.92 | 3.88   | -     | 548.8   |
| AHQ-9-4, 2917 - 2922      | K.YNEQHVPVGSPPFTAR.V                                                    | 1603.71978 | 3 | 1.81E-06 | 0.94 | 4.62   | -     | 1246.4  |
| AHQ-9-4, 3069             | K.YNEQHVPVGSPPFTAR.V                                                    | 1603.71978 | 2 | 5.30E-05 | 0.74 | 2.85   | -     | 433.2   |
| AHQ-9-3, 2922 - 2942      | K.YNEQHVPVGSPPFTAR.V                                                    | 1603.71978 | 2 | 1.32E-05 | 0.86 | 3.30   | -     | 461.5   |
| AHQ-9-8, 2859             | K.YNEQHVPVGSPPFTAR.V                                                    | 1603.71978 | 3 | 4.62E-04 | 0.83 | 3.55   | -     | 896.1   |
| AHQ-9-1, 3054 - 3132      | K.YNEQHVPVGSPPFTAR.V                                                    | 1603.71978 | 2 | 6.16E-06 | 0.89 | 3.48   | -     | 612.1   |
| AHQ-9-5, 2911             | K.YNEQHVPVGSPPFTAR.V                                                    | 1603.71978 | 2 | 1.37E-07 | 0.81 | 2.81   | -     | 493.0   |
| AHQ-9-12, 2878 - 2938     | K.YNEQHVPVGSPPFTAR.V                                                    | 1603.71978 | 2 | 3.08E-04 | 0.53 | 2.72   | -     | 308.0   |
| AHQ-9-9, 4105             | K.YTPVQQGPVGVNNTYGGDPIPK.S                                              | 2287.55640 | 2 | 1.61E-05 | 0.68 | 2.70   | -     | 593.6   |
| AHQ-9-4, 4321             | K.YTPVQQGPVGVNNTYGGDPIPK.S                                              | 2287.55640 | 2 | 2.18E-04 | 0.89 | 4.02   | -     | 528.9   |
| AHQ-9-2, 4347 - 4405      | K.YTPVQQGPVGVNNTYGGDPIPK.S                                              | 2287.55640 | 2 | 2.21E-09 | 0.93 | 4.53   | -     | 764.2   |
| AHQ-9-3, 4378             | K.YTPVQQGPVGVNNTYGGDPIPK.S                                              | 2287.55640 | 2 | 8.98E-08 | 0.70 | 3.05   | -     | 387.8   |
| AHQ-9-3, 4237 - 4292      | K.YTPVQQGPVGVNNTYGGDPIPK.S                                              | 2287.55640 | 2 | 3.32E-06 | 0.94 | 4.45   | -     | 793.0   |
| AHQ-9-3, 4130             | K.YTPVQQGPVGVNNTYGGDPIPK.S                                              | 2287.55640 | 2 | 1.68E-04 | 0.75 | 3.25   | -     | 486.2   |
| AHQ-9-6, 4249             | K.YTPVQQGPVGVNNTYGGDPIPK.S                                              | 2287.55640 | 2 | 2.75E-04 | 0.94 | 4.49   | -     | 848.0   |
| AHQ-9-2, 4250             | K.YTPVQQGPVGVNNTYGGDPIPK.S                                              | 2287.55640 | 2 | 2.93E-05 | 0.88 | 3.92   | -     | 556.0   |
| AHQ-9-1, 4474             | K.YTPVQQGPVGVNNTYGGDPIPK.S                                              | 2287.55640 | 2 | 6.87E-06 | 0.92 | 4.35   | -     | 730.0   |
| AHQ-9-5, 4307             | K.YTPVQQGPVGVNNTYGGDPIPK.S                                              | 2287.55640 | 2 | 3.58E-07 | 0.90 | 4.10   | -     | 618.4   |
| AHQ-9-7, 4232             | K.YTPVQQGPVGVNNTYGGDPIPK.S                                              | 2287.55640 | 2 | 1.75E-07 | 0.91 | 4.17   | -     | 621.8   |
| AHQ-9-2, 4497 - 4574      | K.YTPVQQGPVGVNNTYGGDPIPK.S                                              | 2287.55640 | 2 | 4.76E-06 | 0.90 | 4.31   | -     | 511.2   |
| AHQ-9-2, 4415             | K.YTPVQQGPVGVNNTYGGDPIPK.S                                              | 2287.55640 | 2 | 1.12E-07 | 0.93 | 4.66   | -     | 641.7   |
| AHQ-9-3, 5977 - 6020      | R.YWPQEAAGEYAVHVLCSNEDIR.L                                              | 2538.73318 | 3 | 2.82E-07 | 0.62 | 3.20   | -     | 307.9   |
| AHQ-9-2, 6137 - 6193      | R.YWPQEAAGEYAVHVLCSNEDIR.L                                              | 2538.73318 | 3 | 7.34E-07 | 0.80 | 3.72   | -     | 353.6   |
| AHQ-9-2, 5885 - 5890      | R.YWPQEAAGEYAVHVLCSNEDIR.L                                              | 2538.73318 | 2 | 3.15E-09 | 0.90 | 3.75   | -     | 743.2   |
| gi4501881 ref NP_001091.1 | alpha 1 actin precursor; alpha skeletal muscle actin [Homo sapiens] [MA |            |   | 1.44E-14 | 7.61 | 110.28 | 22.00 | 42050.8 |
| AHQ-9-8, 2031 - 2091      | K.AGFAGDDAPR.A                                                          | 977.01283  | 2 | 5.93E-05 | 0.85 | 3.04   | -     | 982.6   |
| AHQ-9-12, 3620 - 3629     | R.AVFPSIVGR.P                                                           | 946.12815  | 2 | 2.77E-04 | 0.68 | 2.68   | -     | 450.4   |
| AHQ-9-8, 4204             | R.DLTDYLM.K.I                                                           | 999.16326  | 1 | 2.91E-04 | 0.66 | 2.96   | -     | 647.3   |
| AHQ-9-8, 4200             | R.DLTDYLM.K.I                                                           | 999.16326  | 2 | 1.72E-04 | 0.69 | 2.67   | -     | 395.9   |
| AHQ-9-8, 3568             | R.DLTDYLM.K.I                                                           | 1015.16266 | 2 | 4.43E-04 | 0.67 | 2.67   | -     | 410.2   |
| AHQ-9-8, 3567             | R.DLTDYLM.K.I                                                           | 1015.16266 | 1 | 7.63E-05 | 0.37 | 2.57   | -     | 118.6   |
| AHQ-9-12, 4189            | R.DLTDYLM.K.I                                                           | 999.16326  | 1 | 7.35E-04 | 0.46 | 2.04   | -     | 787.8   |
| AHQ-9-9, 3415             | R.DLTDYLM.K.I                                                           | 1015.16266 | 1 | 8.45E-04 | 0.06 | 1.96   | -     | 107.3   |
| AHQ-9-8, 1810 - 1890      | K.DSYVDGEAQSK.R                                                         | 1199.20634 | 2 | 8.96E-06 | 0.76 | 3.15   | -     | 721.2   |

|                           |                                                               |            |   |          |       |        |       |         |
|---------------------------|---------------------------------------------------------------|------------|---|----------|-------|--------|-------|---------|
| AHQ-9-8, 1567 - 1644      | K.DSYVGDQAQSK.R                                               | 1199.20634 | 2 | 4.80E-05 | 0.45  | 2.54   | -     | 330.9   |
| AHQ-9-8, 1907 - 1968      | K.DSYVGDQAQSK.R                                               | 1199.20634 | 2 | 3.88E-05 | 0.78  | 3.29   | -     | 495.3   |
| AHQ-9-13-, 3086           | K.EITALAPSTM.K.I                                              | 1162.38206 | 1 | 7.95E-04 | 0.11  | 2.09   | -     | 215.1   |
| AHQ-9-9, 2367 - 2368      | K.EITALAPSTM.K.I                                              | 1178.38146 | 2 | 1.18E-04 | 0.78  | 2.95   | -     | 604.5   |
| AHQ-9-9, 2999 - 3039      | K.IWHHTFYNELR.V                                               | 1516.68695 | 2 | 9.54E-04 | 0.60  | 2.80   | -     | 735.3   |
| AHQ-9-9, 3000             | K.IWHHTFYNELR.V                                               | 1516.68695 | 3 | 6.57E-05 | 0.91  | 4.50   | -     | 1306.1  |
| AHQ-9-12, 3301 - 3356     | K.IWHHTFYNELR.V                                               | 1516.68695 | 2 | 3.67E-04 | 0.84  | 3.51   | -     | 1021.1  |
| AHQ-9-12, 3186 - 3240     | K.IWHHTFYNELR.V                                               | 1516.68695 | 2 | 1.54E-06 | 0.85  | 3.14   | -     | 884.7   |
| AHQ-9-8, 2930 - 3002      | K.IWHHTFYNELR.V                                               | 1516.68695 | 2 | 7.33E-06 | 0.73  | 2.98   | -     | 814.5   |
| AHQ-9-8, 3063 - 3130      | K.IWHHTFYNELR.V                                               | 1516.68695 | 2 | 9.05E-06 | 0.80  | 3.40   | -     | 872.7   |
| AHQ-9-8, 3123             | K.IWHHTFYNELR.V                                               | 1516.68695 | 3 | 2.69E-06 | 0.93  | 4.54   | -     | 1468.7  |
| AHQ-9-8, 3202 - 3258      | K.IWHHTFYNELR.V                                               | 1516.68695 | 2 | 2.62E-07 | 0.94  | 3.81   | -     | 1100.9  |
| AHQ-9-5, 4372 - 4437      | K.SYELPDGQVITIGNER.F                                          | 1791.93998 | 2 | 5.56E-09 | 0.88  | 3.18   | -     | 905.8   |
| AHQ-9-4, 4841             | K.SYELPDGQVITIGNER.F                                          | 1791.93998 | 2 | 5.01E-06 | 0.74  | 3.13   | -     | 553.1   |
| AHQ-9-4, 4696 - 4776      | K.SYELPDGQVITIGNER.F                                          | 1791.93998 | 2 | 5.67E-05 | 0.81  | 3.04   | -     | 707.1   |
| AHQ-9-4, 4312 - 4378      | K.SYELPDGQVITIGNER.F                                          | 1791.93998 | 2 | 7.82E-04 | 0.72  | 2.84   | -     | 749.5   |
| AHQ-9-8, 4208 - 4280      | K.SYELPDGQVITIGNER.F                                          | 1791.93998 | 2 | 1.07E-09 | 0.96  | 4.83   | -     | 1098.5  |
| AHQ-9-8, 4266 - 4334      | K.SYELPDGQVITIGNER.F                                          | 1791.93998 | 2 | 6.42E-08 | 0.88  | 3.32   | -     | 791.1   |
| AHQ-9-13-, 4681 - 4692    | K.SYELPDGQVITIGNER.F                                          | 1791.93998 | 2 | 1.80E-10 | 0.96  | 4.65   | -     | 1122.7  |
| AHQ-9-3, 4672             | K.SYELPDGQVITIGNER.F                                          | 1791.93998 | 2 | 1.22E-04 | 0.72  | 2.50   | -     | 779.9   |
| AHQ-9-8, 4390 - 4400      | K.SYELPDGQVITIGNER.F                                          | 1791.93998 | 2 | 1.44E-14 | 0.96  | 4.26   | -     | 1353.8  |
| AHQ-9-13-, 4266 - 4344    | K.SYELPDGQVITIGNER.F                                          | 1791.93998 | 2 | 2.18E-09 | 0.92  | 4.08   | -     | 822.5   |
| AHQ-9-5, 4713 - 4773      | K.SYELPDGQVITIGNER.F                                          | 1791.93998 | 2 | 2.15E-06 | 0.94  | 4.46   | -     | 845.0   |
| AHQ-9-8, 4559 - 4622      | K.SYELPDGQVITIGNER.F                                          | 1791.93998 | 2 | 5.88E-07 | 0.87  | 3.36   | -     | 824.9   |
| AHQ-9-8, 4640             | K.SYELPDGQVITIGNER.F                                          | 1791.93998 | 3 | 2.83E-06 | 0.94  | 4.52   | -     | 1456.7  |
| AHQ-9-8, 4682 - 4740      | K.SYELPDGQVITIGNER.F                                          | 1791.93998 | 2 | 7.73E-11 | 0.94  | 4.19   | -     | 989.2   |
| AHQ-9-7, 4776 - 4857      | K.SYELPDGQVITIGNER.F                                          | 1791.93998 | 2 | 1.26E-04 | 0.72  | 3.02   | -     | 359.7   |
| AHQ-9-8, 4854 - 4926      | K.SYELPDGQVITIGNER.F                                          | 1791.93998 | 2 | 1.33E-11 | 0.97  | 4.65   | -     | 1424.8  |
| AHQ-9-8, 5003             | K.SYELPDGQVITIGNER.F                                          | 1791.93998 | 2 | 7.50E-06 | 0.86  | 3.20   | -     | 712.4   |
| AHQ-9-7, 4638 - 4662      | K.SYELPDGQVITIGNER.F                                          | 1791.93998 | 2 | 8.39E-06 | 0.88  | 3.85   | -     | 754.5   |
| AHQ-9-6, 4790             | K.SYELPDGQVITIGNER.F                                          | 1791.93998 | 2 | 6.02E-07 | 0.59  | 2.82   | -     | 304.9   |
| AHQ-9-6, 4659             | K.SYELPDGQVITIGNER.F                                          | 1791.93998 | 2 | 3.12E-09 | 0.93  | 3.91   | -     | 1061.9  |
| AHQ-9-2, 4943             | K.SYELPDGQVITIGNER.F                                          | 1791.93998 | 2 | 2.16E-08 | 0.91  | 3.70   | -     | 992.6   |
| AHQ-9-9, 4207 - 4265      | K.SYELPDGQVITIGNER.F                                          | 1791.93998 | 2 | 1.01E-06 | 0.87  | 3.80   | -     | 710.3   |
| AHQ-9-9, 4447 - 4503      | K.SYELPDGQVITIGNER.F                                          | 1791.93998 | 2 | 2.66E-11 | 0.98  | 5.63   | -     | 1470.9  |
| AHQ-9-9, 4480             | K.SYELPDGQVITIGNER.F                                          | 1791.93998 | 3 | 1.85E-07 | 0.92  | 4.03   | -     | 1294.3  |
| AHQ-9-9, 4588 - 4660      | K.SYELPDGQVITIGNER.F                                          | 1791.93998 | 2 | 4.66E-08 | 0.96  | 4.70   | -     | 1239.9  |
| AHQ-9-10, 4160 - 4238     | K.SYELPDGQVITIGNER.F                                          | 1791.93998 | 2 | 1.54E-04 | 0.85  | 3.21   | -     | 683.6   |
| AHQ-9-10, 4507 - 4561     | K.SYELPDGQVITIGNER.F                                          | 1791.93998 | 3 | 8.78E-10 | 0.90  | 3.79   | -     | 1065.9  |
| AHQ-9-10, 4517 - 4573     | K.SYELPDGQVITIGNER.F                                          | 1791.93998 | 2 | 8.01E-08 | 0.90  | 3.49   | -     | 933.2   |
| AHQ-9-10, 4658 - 4713     | K.SYELPDGQVITIGNER.F                                          | 1791.93998 | 2 | 2.26E-06 | 0.81  | 2.82   | -     | 661.6   |
| AHQ-9-11, 4270 - 4327     | K.SYELPDGQVITIGNER.F                                          | 1791.93998 | 2 | 8.32E-07 | 0.89  | 3.58   | -     | 846.3   |
| AHQ-9-11, 4597            | K.SYELPDGQVITIGNER.F                                          | 1791.93998 | 3 | 1.13E-06 | 0.90  | 3.96   | -     | 1012.5  |
| AHQ-9-11, 4690 - 4746     | K.SYELPDGQVITIGNER.F                                          | 1791.93998 | 2 | 9.84E-07 | 0.91  | 3.36   | -     | 960.4   |
| AHQ-9-8, 4488 - 4490      | K.SYELPDGQVITIGNER.F                                          | 1791.93998 | 2 | 7.30E-05 | 0.55  | 2.81   | -     | 393.6   |
| AHQ-9-5, 4848             | K.SYELPDGQVITIGNER.F                                          | 1791.93998 | 2 | 1.17E-07 | 0.86  | 3.24   | -     | 845.3   |
| AHQ-9-8, 4318 - 4319      | K.SYELPDGQVITIGNER.F                                          | 1791.93998 | 3 | 1.26E-08 | 0.93  | 4.68   | -     | 1124.1  |
| AHQ-9-1, 4863             | K.SYELPDGQVITIGNER.F                                          | 1791.93998 | 2 | 5.82E-07 | 0.91  | 3.51   | -     | 832.2   |
| AHQ-9-12, 4240 - 4297     | K.SYELPDGQVITIGNER.F                                          | 1791.93998 | 2 | 2.67E-08 | 0.89  | 3.80   | -     | 692.5   |
| AHQ-9-12, 4596 - 4672     | K.SYELPDGQVITIGNER.F                                          | 1791.93998 | 2 | 7.93E-11 | 0.96  | 5.01   | -     | 1181.5  |
| AHQ-9-12, 4729 - 4804     | K.SYELPDGQVITIGNER.F                                          | 1791.93998 | 2 | 1.47E-10 | 0.97  | 4.80   | -     | 1537.6  |
| AHQ-9-13, 4847 - 4851     | K.SYELPDGQVITIGNER.F                                          | 1791.93998 | 2 | 4.31E-07 | 0.93  | 4.13   | -     | 916.8   |
| AHQ-9-13, 4972 - 4988     | K.SYELPDGQVITIGNER.F                                          | 1791.93998 | 2 | 1.30E-05 | 0.90  | 3.64   | -     | 838.2   |
| AHQ-9-13-, 4802           | K.SYELPDGQVITIGNER.F                                          | 1791.93998 | 2 | 2.49E-11 | 0.83  | 3.15   | -     | 589.4   |
| AHQ-9-8, 4800 - 4858      | K.SYELPDGQVITIGNER.F.R.C                                      | 2095.30102 | 2 | 6.24E-04 | 0.74  | 3.25   | -     | 429.3   |
| AHQ-9-8, 4304             | K.YPIEHGIITNWDMEK.I                                           | 1962.17174 | 3 | 6.90E-04 | 0.83  | 3.48   | -     | 1331.1  |
| AHQ-9-8, 4414             | K.YPIEHGIITNWDMEK.I                                           | 1962.17174 | 2 | 1.75E-07 | 0.73  | 3.43   | -     | 449.7   |
| gi4504165 ref NP_000168.1 | gelsolin (amyloidosis, Finnish type); Gelsolin [Homo sapiens] |            |   | 2.28E-14 | 22.01 | 250.34 | 35.70 | 85696.9 |
| AHQ-9-6, 3606 - 3663      | K.AGALNSNDAFVLK.T                                             | 1320.47622 | 2 | 6.90E-04 | 0.77  | 3.36   | -     | 535.6   |
| AHQ-9-5, 3592 - 3651      | K.AGALNSNDAFVLK.T                                             | 1320.47622 | 2 | 2.84E-05 | 0.89  | 3.84   | -     | 679.2   |
| AHQ-9-5, 3277             | K.AGKEPGLQIWR.V                                               | 1255.45060 | 3 | 8.48E-05 | 0.84  | 4.01   | -     | 805.3   |
| AHQ-9-5, 3273             | K.AGKEPGLQIWR.V                                               | 1255.45060 | 2 | 2.49E-07 | 0.72  | 2.91   | -     | 390.5   |
| AHQ-9-8, 5372             | R.AQPVQVAEGSEPDGFWEALGGK.A                                    | 2273.44345 | 2 | 3.14E-06 | 0.93  | 4.80   | -     | 565.4   |
| AHQ-9-5, 5212             | R.AQPVQVAEGSEPDGFWEALGGK.A                                    | 2273.44345 | 2 | 1.10E-07 | 0.94  | 4.86   | -     | 819.0   |
| AHQ-9-5, 5367             | R.AQPVQVAEGSEPDGFWEALGGK.A                                    | 2273.44345 | 2 | 2.39E-05 | 0.94  | 4.91   | -     | 709.5   |
| AHQ-9-7, 5296             | R.AQPVQVAEGSEPDGFWEALGGK.A                                    | 2273.44345 | 2 | 2.05E-05 | 0.95  | 4.93   | -     | 847.0   |
| AHQ-9-6, 5309             | R.AQPVQVAEGSEPDGFWEALGGK.A                                    | 2273.44345 | 2 | 4.70E-06 | 0.95  | 5.20   | -     | 752.4   |
| AHQ-9-6, 5195 - 5249      | R.DPDQTDGLGLSYLSSHIANVER.V                                    | 2388.53285 | 3 | 9.64E-12 | 0.94  | 4.50   | -     | 1357.3  |
| AHQ-9-5, 5251 - 5307      | R.DPDQTDGLGLSYLSSHIANVER.V                                    | 2388.53285 | 3 | 1.13E-10 | 0.93  | 4.50   | -     | 1472.0  |
| AHQ-9-5, 5309             | R.DPDQTDGLGLSYLSSHIANVER.V                                    | 2388.53285 | 2 | 2.71E-07 | 0.71  | 3.12   | -     | 483.6   |
| AHQ-9-8, 2274             | K.DSQEEEEKTEALSAK.R                                           | 1666.72289 | 2 | 7.98E-07 | 0.93  | 3.70   | -     | 1268.7  |
| AHQ-9-13-, 2333           | K.DSQEEEEKTEALSAK.R                                           | 1666.72289 | 2 | 1.66E-05 | 0.85  | 3.42   | -     | 1106.7  |
| AHQ-9-6, 2281 - 2294      | K.DSQEEEEKTEALSAK.R                                           | 1666.72289 | 2 | 8.18E-09 | 0.95  | 3.93   | -     | 1675.6  |
| AHQ-9-5, 2264 - 2336      | K.DSQEEEEKTEALSAK.R                                           | 1666.72289 | 2 | 1.79E-07 | 0.95  | 4.13   | -     | 1561.5  |
| AHQ-9-7, 2292             | K.DSQEEEEKTEALSAK.R                                           | 1666.72289 | 2 | 1.57E-04 | 0.93  | 3.92   | -     | 1466.5  |
| AHQ-9-10, 2272            | K.DSQEEEEKTEALSAK.R                                           | 1666.72289 | 2 | 6.26E-05 | 0.86  | 3.40   | -     | 851.3   |
| AHQ-9-5, 2275 - 2283      | K.DSQEEEEKTEALSAK.R                                           | 1666.72289 | 3 | 3.93E-06 | 0.97  | 5.39   | -     | 1999.8  |
| AHQ-9-5, 5725 - 5783      | R.EVQGFESATFLGYFK.S                                           | 1723.90570 | 2 | 4.21E-06 | 0.94  | 3.47   | -     | 1398.2  |
| AHQ-9-5, 5837 - 5920      | R.EVQGFESATFLGYFK.S                                           | 1723.90570 | 2 | 1.47E-06 | 0.95  | 4.81   | -     | 991.2   |
| AHQ-9-7, 5684 - 5746      | R.EVQGFESATFLGYFK.S                                           | 1723.90570 | 2 | 1.99E-05 | 0.63  | 2.67   | -     | 648.9   |
| AHQ-9-5, 6085             | R.EVQGFESATFLGYFK.S                                           | 1723.90570 | 2 | 1.66E-05 | 0.89  | 3.21   | -     | 907.9   |
| AHQ-9-13-, 5716           | R.EVQGFESATFLGYFK.S                                           | 1723.90570 | 2 | 1.49E-04 | 0.86  | 2.85   | -     | 1072.9  |
| AHQ-9-5, 6419             | K.FDLVPVPTNLGYDFFTGDAYVILK.T                                  | 2706.08359 | 3 | 7.81E-05 | 0.76  | 3.20   | -     | 677.5   |
| AHQ-9-5, 6420             | K.FDLVPVPTNLGYDFFTGDAYVILK.T                                  | 2706.08359 | 2 | 2.49E-10 | 0.87  | 3.92   | -     | 451.3   |
| AHQ-9-5, 2399             | K.HVVPNEVVQR.L                                                | 1276.46981 | 3 | 8.86E-04 | 0.72  | 3.38   | -     | 733.5   |
| AHQ-9-5, 2367 - 2391      | K.HVVPNEVVQR.L                                                | 1276.46981 | 2 | 1.83E-07 | 0.90  | 3.43   | -     | 592.8   |
| AHQ-9-5, 2397             | K.HVVPNEVVQR.L                                                | 1276.46981 | 1 | 2.09E-04 | 0.15  | 1.90   | -     | 265.5   |
| AHQ-9-5, 5751 - 5813      | R.IEGSNKVPVDPATYQGQFYGGDSYIILNYR.H                            | 3401.72499 | 3 | 3.80E-07 | 0.93  | 4.46   | -     | 1173.4  |
| AHQ-9-5, 5303             | K.NWRDPDQTDGLGLSYLSSHIANVER.V                                 | 2845.03323 | 3 | 2.28E-14 | 0.98  | 6.70   | -     | 1952.2  |
| AHQ-9-6, 5245             | K.NWRDPDQTDGLGLSYLSSHIANVER.V                                 | 2845.03323 | 3 | 1.67E-08 | 0.95  | 5.34   | -     | 1096.9  |
| AHQ-9-5, 5068             | K.NWRDPDQTDGLGLSYLSSHIANVER.V                                 | 2845.03323 | 3 | 9.52E-07 | 0.94  | 4.84   | -     | 1136.0  |
| AHQ-9-5, 2532             | K.PALPAGTEDTAKEDAANR.K                                        | 1827.93072 | 3 | 3.59E-10 | 0.66  | 3.02   | -     | 376.1   |
| AHQ-9-5, 3065 - 3127      | K.SEDCFILDHGK.D                                               | 1322.42590 | 2 | 9.09E-05 | 0.86  | 3.10   | -     | 818.6   |
| AHQ-9-6, 3110             | K.SEDCFILDHGK.D                                               | 1322.42590 | 2 | 1.48E-05 | 0.89  | 3.52   | -     | 879.2   |
| AHQ-9-7, 3086             | K.SEDCFILDHGK.D                                               | 1322.42590 | 2 | 1.79E-06 | 0.86  | 3.24   | -     | 793.2   |
| AHQ-9-5, 2836             | K.SEDCFILDHGKDGK.I                                            | 1622.73823 | 2 | 6.93E-06 | 0.85  | 3.17   | -     | 650.9   |
| AHQ-9-10, 2313            | K.TGAQELLR.V                                                  | 888.00387  | 2 | 1.42E-05 | 0.87  | 2.92   | -     | 871.4   |
| AHQ-9-5, 2293 - 2373      | K.TGAQELLR.V                                                  | 888.00387  | 2 | 9.56E-05 | 0.87  | 2.91   | -     | 971.4   |
| AHQ-9-5, 4587             | K.TPSAAYLWVGTAESAEEK.T                                        | 1838.99510 | 2 | 4.01E-05 | 0.79  | 3.28   | -     | 573.2   |
| AHQ-9-6, 4253 - 4309      | K.TPSAAYLWVGTAESAEEK.T                                        | 1838.99510 | 2 | 1.16E-04 | 0.95  | 4.67   | -     | 1069.6  |
| AHQ-9-9, 4091 - 4103      | K.TPSAAYLWVGTAESAEEK.T                                        | 1838.99510 | 2 | 1.05E-04 | 0.83  | 3.26   | -     | 811.3   |
| AHQ-9-5, 4295 - 4351      | K.TPSAAYLWVGTAESAEEK.T                                        | 1838.99510 | 2 | 2.06E-05 | 0.95  | 4.17   | -     | 1294.8  |
| AHQ-9-5, 4199             | K.TPSAAYLWVGTAESAEEK.T                                        | 1838.99510 | 2 | 2.46E-04 | 0.91  | 3.64   | -     | 1009.7  |
| AHQ-9-8, 4270 - 4335      | K.TPSAAYLWVGTAESAEEK.T                                        | 1838.99510 | 2 | 5.90E-04 | 0.94  | 4.41   | -     | 1069.8  |
| AHQ-9-5, 3745             | R.VHVSEEGTEPEAM*LQVLGPK.P                                     | 2167.42570 | 2 | 4.57E-04 | 0.95  | 4.57   | -     | 912.7   |
| AHQ-9-5, 4765             | R.VHVSEEGTEPEAM*LQVLGPK.P                                     | 2151.42630 | 2 | 1.10E-05 | 0.97  | 5.21   | -     | 1215.2  |
| AHQ-9-5, 5007 - 5065      | R.VHVSEEGTEPEAM*LQVLGPKPALPAGTEDTAK.E                         | 3303.68611 | 3 | 2.19E-05 | 0.93  | 5.17   | -     | 699.1   |

|                             |                                                                         |            |   |          |       |        |       |         |
|-----------------------------|-------------------------------------------------------------------------|------------|---|----------|-------|--------|-------|---------|
| AHQ-9-5, 4175               | R.VHVSEEGTEPEAM*LQVLGPKPALPAGTEDTAK.E                                   | 3319.68551 | 3 | 1.58E-06 | 0.95  | 5.70   | -     | 737.5   |
| AHQ-9-6, 3538               | R.VPFDAAATLHTSTAMAAQHGM*DDDGTTGQK.Q                                     | 2891.10081 | 3 | 3.61E-05 | 0.72  | 3.83   | -     | 710.6   |
| AHQ-9-5, 3203 - 3261        | R.VPFDAAATLHTSTAMAAQHGM*DDDGTTGQK.Q                                     | 2907.10021 | 3 | 7.33E-05 | 0.93  | 5.19   | -     | 1008.3  |
| AHQ-9-5, 3925               | R.VPFDAAATLHTSTAMAAQHGMDDDGTTGQK.Q                                      | 2875.10141 | 3 | 1.67E-04 | 0.92  | 4.76   | -     | 872.6   |
| AHQ-9-5, 5965 - 6027        | K.VPVPDPTYGGFYGGDSYIILNYR.H                                             | 2773.04698 | 3 | 6.83E-05 | 0.82  | 3.30   | -     | 905.2   |
| AHQ-9-5, 5091               | K.VSNGAGTM*SVSLVADENPFAQGALK.S                                          | 2480.73680 | 2 | 4.95E-09 | 0.79  | 3.01   | -     | 603.8   |
| AHQ-9-6, 5041 - 5046        | K.VSNGAGTM*SVSLVADENPFAQGALK.S                                          | 2480.73680 | 2 | 1.23E-11 | 0.92  | 4.06   | -     | 867.4   |
| AHQ-9-5, 5100 - 5157        | K.VSNGAGTM*SVSLVADENPFAQGALK.S                                          | 2480.73680 | 3 | 2.05E-08 | 0.86  | 3.92   | -     | 1163.7  |
| AHQ-9-5, 5531 - 5587        | K.VSNGAGTMSVSLVADENPFAQGALK.S                                           | 2464.73740 | 2 | 2.56E-04 | 0.65  | 2.81   | -     | 419.1   |
| gj 6005942 ref NP_009057.1  | valosin-containing protein; yeast Cdc48p homolog; transitional endoplas |            |   | 1.35E-13 | 6.30  | 70.32  | 15.40 | 89321.3 |
| AHQ-9-5, 3731               | R.ELQELVQYVVEHPDK.F                                                     | 1825.01157 | 2 | 2.20E-04 | 0.81  | 3.26   | -     | 664.8   |
| AHQ-9-5, 3756               | K.GVLFYGPGGCGK.T                                                        | 1253.45154 | 2 | 8.25E-06 | 0.84  | 2.79   | -     | 930.6   |
| AHQ-9-5, 6268               | K.LADDVDLEQVANETHGHVGADLAALCSEALQAIR.K                                  | 3675.98140 | 3 | 1.35E-13 | 0.89  | 3.89   | -     | 975.9   |
| AHQ-9-5, 5359               | R.LDQLIYIPLPDEK.S                                                       | 1557.81228 | 2 | 2.20E-08 | 0.91  | 3.71   | -     | 1006.0  |
| AHQ-9-4, 5373               | R.LDQLIYIPLPDEK.S                                                       | 1557.81228 | 2 | 2.86E-07 | 0.89  | 3.25   | -     | 891.5   |
| AHQ-9-5, 4677 - 4747        | R.LIVDEAINEDNSVLSQPK.M                                                  | 2171.39088 | 2 | 1.51E-09 | 0.98  | 6.49   | -     | 1759.1  |
| AHQ-9-4, 6368 - 6370        | K.NAPAIIFIDELDAIAPK.R                                                   | 1812.09907 | 2 | 4.33E-04 | 0.90  | 3.89   | -     | 745.3   |
| AHQ-9-5, 6387 - 6447        | K.NAPAIIFIDELDAIAPK.R                                                   | 1812.09907 | 2 | 4.64E-06 | 0.95  | 4.29   | -     | 1188.4  |
| AHQ-9-6, 6309               | K.NAPAIIFIDELDAIAPK.R                                                   | 1812.09907 | 2 | 5.42E-04 | 0.89  | 2.94   | -     | 1178.7  |
| AHQ-9-5, 3535               | R.WALSQSNPALSALR.E                                                      | 1330.47434 | 2 | 9.04E-04 | 0.92  | 3.57   | -     | 1062.1  |
| gj 4557419 ref NP_000063.1  | CD36 antigen (collagen type I receptor, thrombospondin receptor); CD36  |            |   | 1.45E-13 | 2.72  | 30.24  | 10.20 | 53052.1 |
| AHQ-9-5, 4456               | K.AFASPVENPDNYCFCTEK.I                                                  | 2152.30319 | 2 | 3.72E-04 | 0.92  | 4.24   | -     | 750.1   |
| AHQ-9-6, 4423               | K.AFASPVENPDNYCFCTEK.I                                                  | 2152.30319 | 2 | 4.95E-07 | 0.85  | 3.38   | -     | 540.9   |
| AHQ-9-5, 5243 - 5255        | K.SQVLQFFSSDICR.S                                                       | 1588.76661 | 2 | 4.40E-09 | 0.91  | 3.70   | -     | 1030.6  |
| AHQ-9-6, 5182               | K.SQVLQFFSSDICR.S                                                       | 1588.76661 | 2 | 2.23E-06 | 0.91  | 3.40   | -     | 1400.3  |
| AHQ-9-3, 5198               | K.SQVLQFFSSDICR.S                                                       | 1588.76661 | 2 | 2.96E-04 | 0.77  | 2.92   | -     | 621.3   |
| AHQ-9-7, 5168               | K.SQVLQFFSSDICR.S                                                       | 1588.76661 | 2 | 1.07E-04 | 0.96  | 4.21   | -     | 1681.6  |
| AHQ-9-5, 6307 - 6308        | R.TYLDIOPITGFTLQFAK.R                                                   | 1957.25787 | 2 | 1.45E-13 | 0.96  | 4.70   | -     | 1256.0  |
| AHQ-9-1, 6383 - 6448        | R.TYLDIOPITGFTLQFAK.R                                                   | 1957.25787 | 2 | 7.02E-07 | 0.93  | 4.01   | -     | 934.9   |
| gj 24119203 ref NP_705935.1 | tropomyosin 3 [Homo sapiens]                                            |            |   | 1.77E-13 | 5.41  | 70.31  | 21.80 | 29032.5 |
| AHQ-9-9, 2397 - 2413        | R.AREQEAEEVASLNR.R                                                      | 1544.65218 | 2 | 1.04E-04 | 0.98  | 6.01   | -     | 2985.5  |
| AHQ-9-9, 3435               | R.IQLVEEELDR.A                                                          | 1244.37653 | 1 | 8.15E-05 | 0.22  | 2.58   | -     | 387.0   |
| AHQ-9-9, 3600 - 3601        | R.IQLVEEELDR.A                                                          | 1728.88542 | 2 | 2.08E-04 | 0.52  | 3.68   | -     | 463.7   |
| AHQ-9-9, 2731 - 2747        | K.IQVLQQQADDAEER.A                                                      | 1643.73738 | 2 | 6.45E-10 | 0.98  | 5.03   | -     | 2168.2  |
| AHQ-9-10, 2807              | K.IQVLQQQADDAEER.A                                                      | 1643.73738 | 2 | 4.82E-07 | 0.89  | 2.69   | -     | 1298.1  |
| AHQ-9-9, 2523               | R.KIQVLQQQADDAEER.A                                                     | 1771.91030 | 3 | 3.74E-09 | 0.94  | 4.71   | -     | 1367.3  |
| AHQ-9-9, 2515               | R.KIQVLQQQADDAEER.A                                                     | 1771.91030 | 2 | 1.77E-13 | 0.98  | 6.17   | -     | 1640.6  |
| AHQ-9-9, 3199               | R.RIQLVEEELDR.A                                                         | 1400.56288 | 2 | 9.49E-06 | 0.97  | 4.29   | -     | 1778.7  |
| AHQ-9-9, 3027 - 3032        | K.TIDDELKLC.K                                                           | 1190.32563 | 2 | 1.19E-04 | 0.75  | 2.94   | -     | 586.1   |
| gj 4504349 ref NP_000509.1  | beta globin [Homo sapiens]                                              |            |   | 2.77E-13 | 9.56  | 110.31 | 73.50 | 15998.3 |
| AHQ-9-14, 5301              | R.FFESFGDLSTPDVAVMGNPK.V                                                | 2060.27218 | 2 | 7.79E-07 | 0.88  | 3.86   | -     | 596.6   |
| AHQ-9-13, 4760 - 4822       | R.FFESFGDLSTPDVAVM*GNPK.V                                               | 2076.27158 | 2 | 8.51E-07 | 0.89  | 3.91   | -     | 631.8   |
| AHQ-9-13, 4982 - 5038       | R.FFESFGDLSTPDVAVM*GNPK.V                                               | 2076.27158 | 2 | 6.56E-06 | 0.94  | 4.74   | -     | 715.7   |
| AHQ-9-13, 5376              | R.FFESFGDLSTPDVAVMGNPK.V                                                | 2060.27218 | 2 | 3.42E-06 | 0.94  | 4.51   | -     | 790.8   |
| AHQ-9-13, 5280              | R.FFESFGDLSTPDVAVMGNPK.V                                                | 2060.27218 | 2 | 1.60E-06 | 0.94  | 4.36   | -     | 826.8   |
| AHQ-9-13, 4959              | R.FFESFGDLSTPDVAVM*GNPK.V                                               | 2076.27158 | 3 | 1.04E-04 | 0.70  | 3.22   | -     | 850.7   |
| AHQ-9-13, 5442 - 5511       | R.FFESFGDLSTPDVAVMGNPK.V                                                | 2060.27218 | 2 | 6.34E-08 | 0.92  | 3.99   | -     | 684.0   |
| AHQ-9-13, 3792              | K.GTFATLSELHCDKL                                                        | 1480.62492 | 2 | 3.69E-05 | 0.56  | 2.75   | -     | 446.4   |
| AHQ-9-13, 4821              | K.GTFATLSELHCDKLHVDPENFR.L                                              | 2588.83687 | 3 | 4.68E-09 | 0.88  | 4.29   | -     | 1035.3  |
| AHQ-9-13, 4859              | K.KVLGAFSDGLAHLNLDL.K                                                   | 1799.06362 | 3 | 2.21E-09 | 0.94  | 5.09   | -     | 1005.4  |
| AHQ-9-13, 4673              | K.KVLGAFSDGLAHLNLDL.K                                                   | 1799.06362 | 2 | 1.10E-07 | 0.98  | 5.64   | -     | 1940.8  |
| AHQ-9-13, 4668              | K.KVLGAFSDGLAHLNLDL.K                                                   | 1799.06362 | 3 | 6.11E-09 | 0.97  | 6.21   | -     | 1539.2  |
| AHQ-9-13, 2936              | K.LHVDPENFR.L                                                           | 1127.23455 | 2 | 6.63E-05 | 0.90  | 2.70   | -     | 1330.9  |
| AHQ-9-13, 6152              | R.LLGNVLCVLAHHFGK.E                                                     | 1779.14197 | 3 | 4.71E-05 | 0.81  | 3.32   | -     | 538.7   |
| AHQ-9-13, 3544              | K.SAVTALWKG.V                                                           | 933.08624  | 2 | 3.84E-04 | 0.82  | 2.98   | -     | 669.7   |
| AHQ-9-14, 4965              | K.VLGFASDGLAHLNLDL.K                                                    | 1670.89071 | 2 | 2.77E-13 | 0.96  | 4.76   | -     | 1544.6  |
| AHQ-9-13, 4936              | K.VLGFASDGLAHLNLDL.K                                                    | 1670.89071 | 3 | 3.06E-05 | 0.82  | 3.31   | -     | 547.0   |
| AHQ-9-13, 5095              | K.VLGFASDGLAHLNLDL.K                                                    | 1670.89071 | 2 | 2.18E-11 | 0.97  | 5.47   | -     | 1366.4  |
| AHQ-9-13, 4764              | K.VLGFASDGLAHLNLDL.K                                                    | 1670.89071 | 2 | 6.03E-08 | 0.94  | 3.75   | -     | 1414.4  |
| AHQ-9-13, 4774              | K.VLGFASDGLAHLNLDL.K                                                    | 1670.89071 | 3 | 2.87E-10 | 0.88  | 3.80   | -     | 692.7   |
| AHQ-9-13, 5094 - 5096       | K.VLGFASDGLAHLNLDL.K                                                    | 1670.89071 | 3 | 5.44E-10 | 0.81  | 3.31   | -     | 496.4   |
| AHQ-9-13, 4939              | K.VLGFASDGLAHLNLDL.K                                                    | 1670.89071 | 2 | 6.34E-05 | 0.86  | 3.17   | -     | 1007.1  |
| AHQ-9-13, 4945 - 5000       | K.VLGFASDGLAHLNLDL.K                                                    | 1670.89071 | 2 | 2.69E-08 | 0.95  | 4.84   | -     | 1098.9  |
| AHQ-9-13, 5104              | K.VLGFASDGLAHLNLDL.K                                                    | 1670.89071 | 3 | 3.40E-06 | 0.56  | 3.06   | -     | 386.8   |
| AHQ-9-13, 4944              | K.VLGFASDGLAHLNLDL.K                                                    | 1670.89071 | 3 | 9.31E-10 | 0.73  | 3.11   | -     | 425.8   |
| AHQ-9-14, 4104 - 4143       | K.VNVDEVGGEALGR.L                                                       | 1315.41484 | 2 | 6.78E-05 | 0.95  | 4.12   | -     | 1382.7  |
| AHQ-9-13, 3527 - 3528       | K.VNVDEVGGEALGR.L                                                       | 1315.41484 | 2 | 3.44E-05 | 0.93  | 3.87   | -     | 1250.6  |
| AHQ-9-14, 3279 - 3313       | K.VNVDEVGGEALGR.L                                                       | 1315.41484 | 2 | 5.81E-04 | 0.94  | 3.49   | -     | 1570.8  |
| AHQ-9-13, 2822              | K.VVAGVANALAHK.Y                                                        | 1150.35593 | 2 | 2.02E-05 | 0.91  | 3.08   | -     | 1288.0  |
| AHQ-9-13, 2608              | K.VVAGVANALAHK.Y                                                        | 1150.35593 | 2 | 1.63E-09 | 0.96  | 3.87   | -     | 1745.1  |
| gj 4503689 ref NP_000499.1  | fibrinogen, alpha chain isoform alpha-E preproprotein [Homo sapiens] [M |            |   | 3.19E-13 | 12.16 | 150.25 | 23.90 | 94972.1 |
| AHQ-9-7, 5293               | K.DSDWPFCSDDEDWNYK.C                                                    | 1965.98609 | 2 | 4.01E-05 | 0.94  | 4.29   | -     | 724.1   |
| AHQ-9-6, 5294 - 5299        | K.DSDWPFCSDDEDWNYK.C                                                    | 1965.98609 | 2 | 1.09E-07 | 0.96  | 4.62   | -     | 963.3   |
| AHQ-9-6, 4721 - 4797        | K.DSHSLTTNIM*EILR.G                                                     | 1646.84779 | 2 | 1.56E-05 | 0.95  | 3.66   | -     | 1592.1  |
| AHQ-9-7, 5382               | K.DSHSLTTNIM*EILR.G                                                     | 1630.84839 | 2 | 5.20E-07 | 0.95  | 3.92   | -     | 1208.1  |
| AHQ-9-9, 4535               | K.DSHSLTTNIM*EILR.G                                                     | 1646.84779 | 2 | 7.85E-04 | 0.73  | 2.60   | -     | 857.1   |
| AHQ-9-7, 4690 - 4697        | K.DSHSLTTNIM*EILR.G                                                     | 1646.84779 | 2 | 6.20E-04 | 0.94  | 4.07   | -     | 1259.4  |
| AHQ-9-6, 2419 - 2433        | K.ESSSHHPGIAFFPSR.G                                                     | 1638.72252 | 3 | 3.17E-04 | 0.64  | 3.16   | -     | 783.7   |
| AHQ-9-6, 2665 - 2667        | R.EVDLKYEDQKQ.Q                                                         | 1510.58460 | 2 | 7.51E-10 | 0.83  | 3.30   | -     | 602.9   |
| AHQ-9-8, 2682               | R.EVDLKYEDQKQ.Q                                                         | 1510.58460 | 2 | 2.45E-07 | 0.77  | 2.81   | -     | 694.0   |
| AHQ-9-9, 2556 - 2557        | R.EVDLKYEDQKQ.Q                                                         | 1510.58460 | 2 | 4.55E-10 | 0.93  | 3.91   | -     | 981.6   |
| AHQ-9-7, 2658               | R.EVDLKYEDQKQ.Q                                                         | 1510.58460 | 2 | 8.34E-06 | 0.62  | 2.73   | -     | 548.5   |
| AHQ-9-14, 5759              | K.EVVTSEDDGDCPEAM*DLGTLSGIGTLDGFR.H                                     | 3147.34877 | 3 | 8.74E-04 | 0.87  | 3.63   | -     | 938.0   |
| AHQ-9-8, 1904               | R.GGSTS YGTGSETESPR.N                                                   | 1573.55765 | 2 | 4.76E-06 | 0.40  | 2.60   | -     | 412.7   |
| AHQ-9-6, 1915               | R.GGSTS YGTGSETESPR.N                                                   | 1573.55765 | 2 | 8.37E-04 | 0.61  | 2.75   | -     | 382.9   |
| AHQ-9-7, 4405 - 4409        | K.GLIDEVNDFTNR.I                                                        | 1521.61384 | 2 | 1.03E-08 | 0.96  | 4.65   | -     | 1006.4  |
| AHQ-9-14, 4509 - 4563       | K.GLIDEVNDFTNR.I                                                        | 1521.61384 | 2 | 8.41E-08 | 0.77  | 3.31   | -     | 534.6   |
| AHQ-9-9, 4189 - 4268        | K.GLIDEVNDFTNR.I                                                        | 1521.61384 | 2 | 2.19E-07 | 0.88  | 3.38   | -     | 898.4   |
| AHQ-9-9, 3740 - 3748        | K.GLIDEVNDFTNR.I                                                        | 1521.61384 | 2 | 2.92E-04 | 0.69  | 3.16   | -     | 575.7   |
| AHQ-9-7, 3881               | K.GLIDEVNDFTNR.I                                                        | 1521.61384 | 2 | 1.36E-05 | 0.76  | 2.81   | -     | 641.3   |
| AHQ-9-5, 4479               | K.GLIDEVNDFTNR.I                                                        | 1521.61384 | 2 | 8.05E-07 | 0.81  | 3.05   | -     | 743.3   |
| AHQ-9-3, 4466               | K.GLIDEVNDFTNR.I                                                        | 1521.61384 | 2 | 6.01E-04 | 0.84  | 2.96   | -     | 870.2   |
| AHQ-9-12, 4429              | K.GLIDEVNDFTNR.I                                                        | 1521.61384 | 2 | 5.09E-05 | 0.80  | 2.80   | -     | 784.2   |
| AHQ-9-8, 3942               | K.GLIDEVNDFTNR.I                                                        | 1521.61384 | 2 | 4.39E-06 | 0.85  | 3.44   | -     | 581.8   |
| AHQ-9-6, 2343 - 2405        | R.GSESGIFNTK.E                                                          | 1141.21317 | 2 | 5.08E-05 | 0.83  | 3.13   | -     | 737.6   |
| AHQ-9-13, 3274 - 3282       | R.HPDEAAFFDTASTGK.T                                                     | 1594.66329 | 2 | 1.35E-04 | 0.37  | 2.70   | -     | 305.8   |
| AHQ-9-6, 2733               | R.HRHPDEAAFFDTASTGK.T                                                   | 1887.98954 | 3 | 4.41E-08 | 0.96  | 4.62   | -     | 1701.3  |
| AHQ-9-13, 2889              | R.HRHPDEAAFFDTASTGK.T                                                   | 1887.98954 | 3 | 2.62E-04 | 0.87  | 3.35   | -     | 1313.8  |
| AHQ-9-7, 2261               | R.NPSSAGSWNSGSSGPGSTGNR.N                                               | 1964.94443 | 2 | 8.33E-11 | 0.93  | 4.45   | -     | 894.3   |
| AHQ-9-8, 2275               | R.NPSSAGSWNSGSSGPGSTGNR.N                                               | 1964.94443 | 2 | 1.31E-10 | 0.94  | 4.19   | -     | 943.7   |
| AHQ-9-6, 2243               | R.NPSSAGSWNSGSSGPGSTGNR.N                                               | 1964.94443 | 2 | 3.19E-13 | 0.97  | 4.90   | -     | 1361.2  |
| AHQ-9-8, 2290 - 2291        | R.PGSTGTWNPSSSER.G                                                      | 1433.46515 | 2 | 1.14E-06 | 0.75  | 3.34   | -     | 448.2   |
| AHQ-9-6, 6301               | K.TFPGFFSPMLGEFVSETESR.G                                                | 2266.51432 | 2 | 3.55E-06 | 0.84  | 3.48   | -     | 494.2   |
| AHQ-9-7, 2492               | K.VQHIQLLQK.N                                                           | 1107.33106 | 2 | 4.15E-04 | 0.59  | 2.54   | -     | 481.4   |
| AHQ-9-8, 2460               | K.VQHIQLLQK.N                                                           | 1107.33106 | 2 | 2.71E-04 | 0.78  | 2.76   | -     | 709.1   |
| gj 5803181 ref NP_006810.1  | stress-induced-phosphoprotein 1 (Hsp70/Hsp90-organizing protein) [Homo  |            |   | 7.90E-13 | 0.93  | 10.20  | 3.50  | 62638.9 |
| AHQ-9-6, 5858 - 5859        | K.ALSVGNIDDALQCYSEAIK.L                                                 | 2069.27871 | 2 | 7.90E-13 | 0.93  | 4.10   | -     | 1165.7  |



|                              |                                                        |            |   |          |       |        |       |          |
|------------------------------|--------------------------------------------------------|------------|---|----------|-------|--------|-------|----------|
| AHQ-9-4, 3917 - 3924         | R.VFVGEEDEPEAESVTLR.V                                  | 1777.91007 | 2 | 3.97E-12 | 0.94  | 4.36   | -     | 1269.0   |
| AHQ-9-3, 3905                | R.VFVGEEDEPEAESVTLR.V                                  | 1777.91007 | 2 | 7.55E-05 | 0.81  | 3.29   | -     | 976.5    |
| AHQ-9-13, 4066               | R.VFVGEEDEPEAESVTLR.V                                  | 1777.91007 | 2 | 4.74E-06 | 0.92  | 3.60   | -     | 944.4    |
| AHQ-9-8, 3908                | R.VFVGEEDEPEAESVTLR.V                                  | 1777.91007 | 2 | 3.20E-10 | 0.93  | 4.44   | -     | 1229.4   |
| AHQ-9-1, 4076 - 4090         | R.VFVGEEDEPEAESVTLR.V                                  | 1777.91007 | 2 | 2.25E-06 | 0.84  | 3.68   | -     | 556.1    |
| AHQ-9-6, 2922 - 2965         | R.VTGESHIGVLLK.I                                       | 1310.52448 | 2 | 3.65E-09 | 0.96  | 4.53   | -     | 1502.7   |
| AHQ-9-7, 2917                | R.VTGESHIGVLLK.I                                       | 1310.52448 | 2 | 3.84E-04 | 0.94  | 3.77   | -     | 1566.0   |
| AHQ-9-5, 2952                | R.VTGESHIGVLLK.I                                       | 1310.52448 | 2 | 1.40E-04 | 0.81  | 2.73   | -     | 1284.6   |
| AHQ-9-10, 4538               | K.VVLAGGVAPALFR.G                                      | 1270.54832 | 2 | 1.21E-04 | 0.76  | 2.65   | -     | 872.9    |
| AHQ-9-9, 4441 - 4453         | K.VVLAGGVAPALFR.G                                      | 1270.54832 | 2 | 1.93E-04 | 0.97  | 4.25   | -     | 2254.1   |
| AHQ-9-6, 4609                | K.VVLAGGVAPALFR.G                                      | 1270.54832 | 2 | 2.32E-08 | 0.96  | 4.35   | -     | 1493.8   |
| AHQ-9-5, 4693                | K.VVLAGGVAPALFR.G                                      | 1270.54832 | 2 | 2.39E-06 | 0.97  | 4.62   | -     | 1675.7   |
| AHQ-9-11, 4582 - 4655        | K.VVLAGGVAPALFR.G                                      | 1270.54832 | 2 | 3.64E-05 | 0.91  | 3.67   | -     | 1091.9   |
| AHQ-9-7, 4605                | K.VVLAGGVAPALFR.G                                      | 1270.54832 | 2 | 1.16E-08 | 0.97  | 4.95   | -     | 2006.4   |
| AHQ-9-2, 4813                | K.VVLAGGVAPALFR.G                                      | 1270.54832 | 2 | 4.87E-04 | 0.96  | 3.99   | -     | 1854.6   |
| AHQ-9-4, 4709                | K.VVLAGGVAPALFR.G                                      | 1270.54832 | 2 | 2.64E-05 | 0.94  | 4.09   | -     | 1336.6   |
| AHQ-9-6, 2566 - 2706         | K.YGILADAR.L                                           | 878.99544  | 2 | 9.53E-05 | 0.90  | 2.87   | -     | 867.7    |
| AHQ-9-9, 4911                | K.YYFFDLDPK.T                                          | 1295.42046 | 2 | 1.13E-05 | 0.93  | 3.51   | -     | 762.3    |
| gj14505257[ref][NP_002435.1] | moesin [Homo sapiens]                                  |            |   | 1.14E-12 | 8.99  | 100.29 | 22.40 | 67819.5  |
| AHQ-9-6, 2319 - 2321         | R.ALELEQER.K                                           | 988.07707  | 2 | 5.80E-05 | 0.83  | 3.11   | -     | 1024.4   |
| AHQ-9-6, 2645 - 2646         | K.ALTSLEANAR.D                                         | 1046.15975 | 2 | 4.29E-05 | 0.88  | 3.24   | -     | 687.3    |
| AHQ-9-6, 2415                | K.AQMVGDELEK.T                                         | 1191.33713 | 2 | 7.26E-05 | 0.67  | 2.92   | -     | 449.7    |
| AHQ-9-6, 5593                | R.EVWFFGLQYQDTK.G                                      | 1661.83760 | 2 | 7.55E-09 | 0.93  | 3.77   | -     | 1013.5   |
| AHQ-9-6, 6238 - 6242         | K.FYPEDVSEELIQDITQR.L                                  | 2083.24065 | 3 | 3.18E-07 | 0.96  | 5.21   | -     | 1425.0   |
| AHQ-9-6, 6241 - 6295         | K.FYPEDVSEELIQDITQR.L                                  | 2083.24065 | 2 | 7.56E-07 | 0.88  | 3.65   | -     | 724.9    |
| AHQ-9-6, 5165                | K.IAQDLEM*YGVN*YFSIK.N                                 | 1908.16395 | 2 | 3.81E-06 | 0.94  | 4.69   | -     | 781.4    |
| AHQ-9-6, 2137 - 2215         | R.IQVWHEHR.G                                           | 1234.34835 | 2 | 2.35E-05 | 0.91  | 2.93   | -     | 1442.2   |
| AHQ-9-6, 3054                | K.TAM*STPHVAEPAENEQDEQDENGAEASADLR.A                   | 3330.36796 | 3 | 1.14E-12 | 0.96  | 5.84   | -     | 1663.9   |
| AHQ-9-6, 3185                | K.TAM*STPHVAEPAENEQDEQDENGAEASADLR.A                   | 3330.36796 | 3 | 1.35E-07 | 0.96  | 5.11   | -     | 1799.2   |
| AHQ-9-6, 3342 - 3401         | K.TAM*STPHVAEPAENEQDEQDENGAEASADLR.A                   | 3314.36856 | 3 | 6.44E-12 | 0.96  | 5.84   | -     | 1573.8   |
| AHQ-9-6, 5017                | K.TQEQLALEMELTAR.I                                     | 1704.92727 | 2 | 2.69E-08 | 0.94  | 3.45   | -     | 1518.9   |
| AHQ-9-6, 5030                | K.TQEQLALEMELTAR.I                                     | 1704.92727 | 3 | 5.89E-04 | 0.95  | 4.29   | -     | 1729.2   |
| gj12667788[ref][NP_002464.1] | myosin, heavy polypeptide 9, non-muscle [Homo sapiens] |            |   | 1.21E-12 | 80.02 | 890.36 | 43.10 | 226529.8 |
| AHQ-9-3, 2154                | R.ALEEAQEQ.A                                           | 1049.18068 | 2 | 3.53E-04 | 0.80  | 3.10   | -     | 803.3    |
| AHQ-9-2, 2194                | R.ALEEAQEQ.A                                           | 1049.18068 | 2 | 7.21E-04 | 0.91  | 3.78   | -     | 837.7    |
| AHQ-9-4, 3666 - 3672         | K.ALELDSNLYR.I                                         | 1194.31920 | 2 | 1.70E-06 | 0.95  | 4.21   | -     | 1057.1   |
| AHQ-9-2, 3654                | K.ALELDSNLYR.I                                         | 1194.31920 | 2 | 2.61E-06 | 0.93  | 3.49   | -     | 1297.6   |
| AHQ-9-1, 3858                | K.ALELDSNLYR.I                                         | 1194.31920 | 2 | 1.27E-06 | 0.95  | 4.03   | -     | 1350.1   |
| AHQ-9-5, 3671 - 3732         | K.ALELDSNLYR.I                                         | 1194.31920 | 2 | 4.01E-05 | 0.84  | 2.74   | -     | 892.4    |
| AHQ-9-3, 3665                | K.ALELDSNLYR.I                                         | 1194.31920 | 2 | 1.20E-06 | 0.93  | 3.77   | -     | 1194.0   |
| AHQ-9-2, 3766 - 3771         | K.ALELDSNLYR.I                                         | 1194.31920 | 2 | 5.01E-07 | 0.94  | 3.75   | -     | 1281.3   |
| AHQ-9-3, 2218                | R.ALEQQVEEM*K.T                                        | 1221.36320 | 2 | 5.49E-04 | 0.91  | 3.78   | -     | 1068.5   |
| AHQ-9-5, 2187                | R.ALEQQVEEM*K.T                                        | 1221.36320 | 2 | 5.45E-04 | 0.82  | 2.86   | -     | 818.2    |
| AHQ-9-3, 2936 - 2941         | R.ALEQQVEEMK.T                                         | 1205.36380 | 2 | 2.46E-05 | 0.89  | 3.50   | -     | 1164.2   |
| AHQ-9-6, 2851 - 2911         | R.ALEQQVEEMK.T                                         | 1205.36380 | 2 | 9.21E-05 | 0.87  | 3.37   | -     | 922.7    |
| AHQ-9-2, 3001 - 3015         | R.ALEQQVEEMK.T                                         | 1205.36380 | 2 | 2.23E-05 | 0.89  | 3.73   | -     | 1052.0   |
| AHQ-9-2, 5965                | R.ALEQQVEEM*KTQLEEELEDELQATEDAK.L                      | 3165.38394 | 3 | 3.23E-11 | 0.98  | 6.60   | -     | 2047.4   |
| AHQ-9-1, 5924 - 5986         | R.ALEQQVEEM*KTQLEEELEDELQATEDAK.L                      | 3165.38394 | 3 | 9.78E-09 | 0.92  | 4.63   | -     | 983.1    |
| AHQ-9-3, 5800                | R.ALEQQVEEM*KTQLEEELEDELQATEDAK.L                      | 3165.38394 | 3 | 9.55E-06 | 0.95  | 5.14   | -     | 1734.4   |
| AHQ-9-5, 5877                | R.ALEQQVEEM*KTQLEEELEDELQATEDAK.L                      | 3165.38394 | 3 | 5.87E-07 | 0.95  | 5.28   | -     | 1366.9   |
| AHQ-9-1, 4987                | K.ANLQIQINTDLNLER.S                                    | 1871.04187 | 2 | 1.49E-05 | 0.52  | 2.62   | -     | 540.1    |
| AHQ-9-2, 4849                | K.ANLQIQINTDLNLER.S                                    | 1871.04187 | 2 | 1.45E-09 | 0.96  | 4.87   | -     | 1325.0   |
| AHQ-9-5, 4772                | K.ANLQIQINTDLNLER.S                                    | 1871.04187 | 2 | 1.19E-04 | 0.71  | 2.71   | -     | 711.5    |
| AHQ-9-8, 4750 - 4827         | K.ANLQIQINTDLNLER.S                                    | 1871.04187 | 2 | 4.57E-04 | 0.87  | 3.53   | -     | 1015.7   |
| AHQ-9-1, 4906                | K.ANLQIQINTDLNLER.S                                    | 1871.04187 | 2 | 1.93E-05 | 0.96  | 4.93   | -     | 1293.8   |
| AHQ-9-6, 4705                | K.ANLQIQINTDLNLER.S                                    | 1871.04187 | 2 | 1.85E-06 | 0.95  | 4.64   | -     | 1145.7   |
| AHQ-9-4, 4705 - 4773         | K.ANLQIQINTDLNLER.S                                    | 1871.04187 | 2 | 7.92E-07 | 0.97  | 5.23   | -     | 1346.8   |
| AHQ-9-9, 4543                | K.ANLQIQINTDLNLER.S                                    | 1871.04187 | 2 | 1.84E-05 | 0.94  | 4.36   | -     | 985.8    |
| AHQ-9-3, 4541                | K.ANLQIQINTDLNLER.S                                    | 1871.04187 | 2 | 1.81E-06 | 0.86  | 3.66   | -     | 551.5    |
| AHQ-9-2, 4935 - 5010         | K.ANLQIQINTDLNLER.S                                    | 1871.04187 | 2 | 3.24E-08 | 0.95  | 4.69   | -     | 1064.2   |
| AHQ-9-2, 4665 - 4738         | K.ANLQIQINTDLNLER.S                                    | 1871.04187 | 2 | 2.56E-11 | 0.96  | 5.59   | -     | 922.2    |
| AHQ-9-3, 4722                | K.ANLQIQINTDLNLER.S                                    | 1871.04187 | 2 | 7.21E-09 | 0.95  | 4.55   | -     | 1035.4   |
| AHQ-9-3, 2470                | K.ASITALEAK.I                                          | 904.04321  | 2 | 1.22E-04 | 0.89  | 3.17   | -     | 975.4    |
| AHQ-9-2, 2530                | K.ASITALEAK.I                                          | 904.04321  | 2 | 7.41E-05 | 0.93  | 3.27   | -     | 1235.8   |
| AHQ-9-5, 2441                | K.ASITALEAK.I                                          | 904.04321  | 2 | 5.94E-06 | 0.79  | 2.61   | -     | 694.5    |
| AHQ-9-3, 2190                | R.ASREILAQAK.E                                         | 1216.36955 | 2 | 1.31E-06 | 0.95  | 3.71   | -     | 1770.9   |
| AHQ-9-4, 2164                | R.ASREILAQAK.E                                         | 1216.36955 | 2 | 5.52E-05 | 0.76  | 2.86   | -     | 877.6    |
| AHQ-9-6, 6059 - 6061         | K.DFSALESQLODQTQELLQEEENR.Q                            | 2494.61059 | 3 | 2.96E-06 | 0.92  | 4.27   | -     | 1334.9   |
| AHQ-9-4, 6128 - 6129         | K.DFSALESQLODQTQELLQEEENR.Q                            | 2494.61059 | 3 | 2.40E-06 | 0.98  | 6.28   | -     | 2297.2   |
| AHQ-9-2, 6225 - 6229         | K.DFSALESQLODQTQELLQEEENR.Q                            | 2494.61059 | 3 | 2.49E-06 | 0.91  | 4.54   | -     | 1374.3   |
| AHQ-9-1, 6230                | K.DFSALESQLODQTQELLQEEENR.Q                            | 2494.61059 | 3 | 2.61E-04 | 0.69  | 3.09   | -     | 781.6    |
| AHQ-9-2, 5933                | K.DFSALESQLODQTQELLQEEENRQK.L                          | 2750.91328 | 3 | 5.54E-08 | 0.91  | 4.06   | -     | 1057.1   |
| AHQ-9-2, 2314                | K.DLEAHIDSANK.N                                        | 1213.27938 | 2 | 1.28E-05 | 0.97  | 3.95   | -     | 1934.8   |
| AHQ-9-4, 2233                | K.DLEAHIDSANK.N                                        | 1213.27938 | 2 | 5.69E-05 | 0.96  | 3.32   | -     | 1901.8   |
| AHQ-9-1, 6503                | R.DLGEELKALTELEDLTDSTAAQQELR.S                         | 3019.21860 | 3 | 5.21E-10 | 0.89  | 3.54   | -     | 1223.9   |
| AHQ-9-3, 6356                | R.DLGEELKALTELEDLTDSTAAQQELR.S                         | 3019.21860 | 3 | 9.93E-06 | 0.87  | 3.98   | -     | 1110.1   |
| AHQ-9-3, 3286                | K.DVLLQVDDER.R                                         | 1202.29650 | 2 | 1.61E-05 | 0.86  | 2.82   | -     | 984.3    |
| AHQ-9-2, 3371 - 3377         | K.DVLLQVDDER.R                                         | 1202.29650 | 2 | 3.59E-07 | 0.92  | 3.63   | -     | 959.1    |
| AHQ-9-2, 2121                | R.EEILAQAK.E                                           | 902.02731  | 1 | 1.56E-04 | 0.37  | 2.39   | -     | 304.1    |
| AHQ-9-4, 2816                | R.ELEDATETADAMNR.E                                     | 1566.63006 | 2 | 4.26E-06 | 0.92  | 3.81   | -     | 1078.5   |
| AHQ-9-6, 2815 - 2821         | R.ELEDATETADAMNR.E                                     | 1566.63006 | 2 | 4.72E-08 | 0.94  | 4.31   | -     | 1064.6   |
| AHQ-9-2, 2311                | R.ELEDATETADAM*NR.E                                    | 1582.62946 | 2 | 2.20E-05 | 0.84  | 3.05   | -     | 868.3    |
| AHQ-9-3, 2840                | R.ELEDATETADAMNR.E                                     | 1566.63006 | 2 | 9.40E-08 | 0.93  | 3.69   | -     | 1414.5   |
| AHQ-9-2, 2891 - 2898         | R.ELEDATETADAMNR.E                                     | 1566.63006 | 2 | 4.05E-09 | 0.90  | 3.96   | -     | 1141.6   |
| AHQ-9-5, 2820                | R.ELEDATETADAMNR.E                                     | 1566.63006 | 2 | 2.73E-07 | 0.90  | 3.58   | -     | 1066.2   |
| AHQ-9-5, 5365                | R.ELESQISELQEDLESER.A                                  | 2035.10956 | 2 | 2.71E-06 | 0.93  | 4.17   | -     | 970.1    |
| AHQ-9-2, 5394 - 5453         | R.ELESQISELQEDLESER.A                                  | 2035.10956 | 2 | 1.82E-05 | 0.93  | 4.52   | -     | 1126.2   |
| AHQ-9-4, 5352                | R.ELESQISELQEDLESER.A                                  | 2035.10956 | 2 | 1.55E-12 | 0.97  | 5.99   | -     | 1015.4   |
| AHQ-9-3, 5293                | R.ELESQISELQEDLESER.A                                  | 2035.10956 | 3 | 5.45E-05 | 0.98  | 6.05   | -     | 2316.9   |
| AHQ-9-3, 5256 - 5304         | R.ELESQISELQEDLESER.A                                  | 2035.10956 | 2 | 1.33E-05 | 0.96  | 5.48   | -     | 1055.5   |
| AHQ-9-2, 5129                | R.ELESQISELQEDLESER.A                                  | 2035.10956 | 2 | 6.01E-07 | 0.86  | 3.67   | -     | 600.7    |
| AHQ-9-1, 5467 - 5468         | R.ELESQISELQEDLESER.A                                  | 2035.10956 | 2 | 1.64E-07 | 0.94  | 4.64   | -     | 1032.0   |
| AHQ-9-6, 5293 - 5301         | R.ELESQISELQEDLESER.A                                  | 2035.10956 | 2 | 4.95E-09 | 0.97  | 5.23   | -     | 1220.7   |
| AHQ-9-3, 2310                | R.EMEALEDERK.Q                                         | 1379.47597 | 2 | 7.02E-07 | 0.82  | 3.13   | -     | 773.7    |
| AHQ-9-2, 2358 - 2370         | R.EMEALEDERK.Q                                         | 1379.47597 | 2 | 6.41E-07 | 0.95  | 3.59   | -     | 1815.8   |
| AHQ-9-5, 2272                | R.EMEALEDERK.Q                                         | 1379.47597 | 2 | 3.75E-05 | 0.85  | 3.06   | -     | 998.0    |
| AHQ-9-5, 2476                | R.EQLEEEEEAKHNLEK.Q                                    | 1855.93770 | 2 | 8.99E-04 | 0.80  | 3.67   | -     | 599.1    |
| AHQ-9-2, 2558 - 2559         | R.EQLEEEEEAKHNLEK.Q                                    | 1855.93770 | 2 | 1.32E-07 | 0.87  | 4.23   | -     | 598.3    |
| AHQ-9-2, 3439                | R.FLSNGHVTPGGQDK.D                                     | 1641.80946 | 2 | 4.46E-05 | 0.79  | 2.93   | -     | 613.9    |
| AHQ-9-3, 2997                | K.HEAMITDLEER.L                                        | 1344.47646 | 2 | 4.04E-06 | 0.96  | 3.92   | -     | 1528.1   |
| AHQ-9-2, 3062                | K.HEAMITDLEER.L                                        | 1344.47646 | 2 | 4.72E-06 | 0.95  | 4.03   | -     | 1012.8   |
| AHQ-9-2, 3437                | R.HEM*PPHYAIDTAYR.S                                    | 1932.14884 | 3 | 3.32E-07 | 0.98  | 4.91   | -     | 2415.6   |
| AHQ-9-2, 3690                | R.HEMPPHYAIDTAYR.S                                     | 1916.14944 | 3 | 3.66E-10 | 0.95  | 3.86   | -     | 2057.6   |
| AHQ-9-3, 3370                | R.HEM*PPHYAIDTAYR.S                                    | 1932.14884 | 2 | 8.67E-04 | 0.51  | 2.53   | -     | 356.2    |
| AHQ-9-2, 3443                | R.HEM*PPHYAIDTAYR.S                                    | 1932.14884 | 2 | 2.66E-05 | 0.89  | 3.26   | -     | 767.0    |
| AHQ-9-2, 4465                | K.HSQAVELEAQLEQTK.R                                    | 1840.96940 | 3 | 3.68E-07 | 0.96  | 4.65   | -     | 1984.5   |
| AHQ-9-3, 4353                | K.HSQAVELEAQLEQTK.R                                    | 1840.96940 | 3 | 1.29E-07 | 0.97  | 4.88   | -     | 2606.0   |

|                       |                             |            |   |          |      |      |   |        |
|-----------------------|-----------------------------|------------|---|----------|------|------|---|--------|
| AHQ-9-3, 4356         | K.HSQAVEELAEQLEQTK.R        | 1840.96940 | 2 | 3.54E-09 | 0.98 | 5.86 | - | 2185.6 |
| AHQ-9-4, 4368         | K.HSQAVEELAEQLEQTK.R        | 1840.96940 | 3 | 5.77E-07 | 0.95 | 4.98 | - | 1836.7 |
| AHQ-9-2, 4469         | K.HSQAVEELAEQLEQTK.R        | 1840.96940 | 2 | 1.38E-08 | 0.98 | 5.60 | - | 2203.3 |
| AHQ-9-2, 4158         | K.HSQAVEELAEQLEQTKR.V       | 1997.15575 | 3 | 1.08E-05 | 0.98 | 6.24 | - | 2288.9 |
| AHQ-9-3, 4056         | K.HSQAVEELAEQLEQTKR.V       | 1997.15575 | 3 | 2.96E-07 | 0.96 | 5.22 | - | 1405.0 |
| AHQ-9-3, 4061         | K.HSQAVEELAEQLEQTKR.V       | 1997.15575 | 2 | 1.52E-07 | 0.98 | 6.12 | - | 1608.7 |
| AHQ-9-5, 4071         | K.HSQAVEELAEQLEQTKR.V       | 1997.15575 | 3 | 2.01E-08 | 0.98 | 5.99 | - | 1839.0 |
| AHQ-9-2, 4161         | K.HSQAVEELAEQLEQTKR.V       | 1997.15575 | 2 | 1.19E-05 | 0.99 | 6.60 | - | 2424.0 |
| AHQ-9-4, 4057         | K.HSQAVEELAEQLEQTKR.V       | 1997.15575 | 2 | 1.64E-06 | 0.98 | 5.94 | - | 2094.9 |
| AHQ-9-6, 4039         | K.HSQAVEELAEQLEQTKR.V       | 1997.15575 | 3 | 2.33E-05 | 0.93 | 4.48 | - | 1041.7 |
| AHQ-9-2, 3834         | R.IAEFTTNLTEEEEK.S          | 1654.75371 | 2 | 1.15E-04 | 0.96 | 4.13 | - | 1598.4 |
| AHQ-9-1, 3806         | R.IAEFTTNLTEEEEK.S          | 1654.75371 | 2 | 5.12E-07 | 0.96 | 4.42 | - | 1870.8 |
| AHQ-9-6, 3591 - 3597  | R.IAEFTTNLTEEEEK.S          | 1654.75371 | 2 | 2.37E-10 | 0.98 | 5.25 | - | 2282.2 |
| AHQ-9-2, 3621 - 3678  | R.IAEFTTNLTEEEEK.S          | 1654.75371 | 2 | 2.43E-08 | 0.91 | 3.27 | - | 1101.4 |
| AHQ-9-5, 3632         | R.IAEFTTNLTEEEEK.S          | 1654.75371 | 2 | 5.39E-07 | 0.97 | 4.36 | - | 1903.4 |
| AHQ-9-7, 3588         | R.IAEFTTNLTEEEEK.S          | 1654.75371 | 2 | 1.02E-06 | 0.94 | 3.71 | - | 1563.3 |
| AHQ-9-2, 3737         | R.IAEFTTNLTEEEEK.S          | 1654.75371 | 2 | 6.86E-06 | 0.96 | 4.20 | - | 1747.6 |
| AHQ-9-3, 3744 - 3812  | R.IAEFTTNLTEEEEK.S          | 1654.75371 | 2 | 7.36E-04 | 0.96 | 4.45 | - | 1329.2 |
| AHQ-9-4, 3624 - 3625  | R.IAEFTTNLTEEEEK.S          | 1654.75371 | 2 | 3.55E-06 | 0.97 | 4.88 | - | 1853.1 |
| AHQ-9-3, 3580 - 3636  | R.IAEFTTNLTEEEEK.S          | 1654.75371 | 2 | 4.51E-08 | 0.96 | 4.87 | - | 1553.2 |
| AHQ-9-2, 3477         | R.IAEFTTNLTEEEEK.S.S        | 1870.00428 | 3 | 8.13E-06 | 0.65 | 3.07 | - | 391.1  |
| AHQ-9-5, 4863         | R.IAQLEEELEEEQGNTELINDR.L   | 2473.58969 | 3 | 1.05E-05 | 0.78 | 3.69 | - | 615.6  |
| AHQ-9-3, 5050         | R.IAQLEEELEEEQGNTELINDR.L.K | 2714.92085 | 3 | 2.14E-09 | 0.86 | 4.27 | - | 774.4  |
| AHQ-9-1, 5224 - 5236  | R.IAQLEEELEEEQGNTELINDR.L.K | 2714.92085 | 3 | 5.22E-05 | 0.61 | 3.24 | - | 501.3  |
| AHQ-9-4, 5097         | R.IAQLEEELEEEQGNTELINDR.L.K | 2714.92085 | 3 | 6.60E-11 | 0.86 | 4.09 | - | 706.8  |
| AHQ-9-2, 5201         | R.IAQLEEELEEEQGNTELINDR.L.K | 2714.92085 | 2 | 6.10E-04 | 0.85 | 3.99 | - | 600.6  |
| AHQ-9-3, 3105         | K.IAQLEEQLDNETK.E           | 1531.64695 | 2 | 1.29E-07 | 0.94 | 3.62 | - | 1520.3 |
| AHQ-9-3, 3277 - 3336  | K.IAQLEEQLDNETK.E           | 1531.64695 | 2 | 3.01E-06 | 0.97 | 4.71 | - | 1673.0 |
| AHQ-9-2, 3409         | K.IAQLEEQLDNETK.E           | 1531.64695 | 2 | 3.40E-08 | 0.97 | 4.32 | - | 1752.2 |
| AHQ-9-5, 3327 - 3335  | K.IAQLEEQLDNETK.E           | 1531.64695 | 2 | 9.88E-09 | 0.96 | 4.83 | - | 1567.5 |
| AHQ-9-2, 3011 - 3077  | K.IAQLEEQLDNETK.E           | 1531.64695 | 2 | 6.62E-04 | 0.90 | 3.19 | - | 1140.4 |
| AHQ-9-4, 3030 - 3093  | K.IAQLEEQLDNETK.E           | 1531.64695 | 2 | 2.34E-07 | 0.93 | 3.97 | - | 1169.3 |
| AHQ-9-8, 3298         | K.IAQLEEQLDNETK.E           | 1531.64695 | 2 | 4.39E-05 | 0.95 | 3.67 | - | 1604.2 |
| AHQ-9-6, 3078         | K.IAQLEEQLDNETK.E           | 1531.64695 | 2 | 1.19E-05 | 0.94 | 3.68 | - | 1471.4 |
| AHQ-9-4, 3318         | K.IAQLEEQLDNETK.E           | 1531.64695 | 2 | 2.23E-05 | 0.97 | 4.62 | - | 2006.1 |
| AHQ-9-10, 3258 - 3320 | K.IAQLEEQLDNETK.E           | 1531.64695 | 2 | 4.39E-04 | 0.89 | 2.90 | - | 1147.9 |
| AHQ-9-2, 3169         | K.IAQLEEQLDNETK.E           | 1531.64695 | 2 | 1.55E-09 | 0.97 | 4.21 | - | 2311.7 |
| AHQ-9-11, 3285 - 3286 | K.IAQLEEQLDNETK.E           | 1531.64695 | 2 | 5.44E-10 | 0.97 | 4.83 | - | 1571.6 |
| AHQ-9-6, 3302         | K.IAQLEEQLDNETK.E           | 1531.64695 | 2 | 1.63E-09 | 0.95 | 4.43 | - | 1334.9 |
| AHQ-9-7, 3301         | K.IAQLEEQLDNETK.E           | 1531.64695 | 2 | 4.07E-06 | 0.77 | 2.80 | - | 817.1  |
| AHQ-9-1, 3512 - 3579  | K.IAQLEEQLDNETK.E           | 1531.64695 | 2 | 1.89E-05 | 0.96 | 4.44 | - | 1470.3 |
| AHQ-9-2, 3535         | K.IAQLEEQLDNETKER.Q         | 1816.94784 | 2 | 7.96E-08 | 0.93 | 4.39 | - | 996.4  |
| AHQ-9-2, 4993         | R.IIGLDQVAGM*SETALPGAFK.T   | 2035.35041 | 2 | 4.23E-04 | 0.91 | 3.81 | - | 771.7  |
| AHQ-9-2, 6009 - 6083  | R.IIGLDQVAGM*SETALPGAFK.T   | 2019.35101 | 2 | 4.41E-06 | 0.97 | 5.85 | - | 1324.5 |
| AHQ-9-1, 5360 - 5427  | R.IIGLDQVAGM*SETALPGAFK.T   | 2035.35041 | 2 | 1.17E-04 | 0.96 | 5.48 | - | 804.9  |
| AHQ-9-3, 5856         | R.IIGLDQVAGM*SETALPGAFK.T   | 2019.35101 | 2 | 8.41E-06 | 0.96 | 4.48 | - | 1349.5 |
| AHQ-9-6, 3797         | R.IM*GIPEEQM*GLLR.V         | 1648.92706 | 2 | 3.25E-05 | 0.92 | 3.90 | - | 790.9  |
| AHQ-9-2, 5038         | R.IMGPEEQM*GLLR.V           | 1616.92826 | 2 | 1.23E-04 | 0.75 | 3.08 | - | 392.9  |
| AHQ-9-2, 4481 - 4537  | R.IM*GIPEEQM*GLLR.V         | 1632.92766 | 2 | 8.21E-04 | 0.94 | 3.99 | - | 1016.3 |
| AHQ-9-5, 3843         | R.IM*GIPEEQM*GLLR.V         | 1648.92706 | 2 | 1.52E-04 | 0.90 | 3.75 | - | 771.0  |
| AHQ-9-2, 3930         | R.IM*GIPEEQM*GLLR.V         | 1648.92706 | 2 | 6.83E-07 | 0.91 | 3.76 | - | 774.0  |
| AHQ-9-2, 5410 - 5487  | K.IRELESQISELOEDLESER.A     | 2304.45416 | 3 | 1.78E-08 | 0.97 | 5.99 | - | 1556.9 |
| AHQ-9-2, 5490 - 5509  | K.IRELESQISELOEDLESER.A     | 2304.45416 | 2 | 2.18E-10 | 0.98 | 7.17 | - | 1668.2 |
| AHQ-9-3, 5272 - 5337  | K.IRELESQISELOEDLESER.A     | 2304.45416 | 3 | 1.56E-06 | 0.96 | 5.13 | - | 1597.3 |
| AHQ-9-3, 5340         | K.IRELESQISELOEDLESER.A     | 2304.45416 | 2 | 1.58E-07 | 0.97 | 5.44 | - | 1133.1 |
| AHQ-9-1, 5510 - 5523  | K.IRELESQISELOEDLESER.A     | 2304.45416 | 3 | 3.83E-06 | 0.95 | 5.01 | - | 1446.3 |
| AHQ-9-2, 4919 - 4998  | K.ITDVIIFQACCR.G            | 1555.80136 | 2 | 3.56E-09 | 0.95 | 4.46 | - | 1251.8 |
| AHQ-9-2, 4277         | K.KANLQIDQINTDLNLER.S       | 1999.21478 | 3 | 4.96E-05 | 0.43 | 3.02 | - | 432.4  |
| AHQ-9-2, 4387 - 4457  | K.KANLQIDQINTDLNLER.S       | 1999.21478 | 2 | 7.11E-07 | 0.97 | 5.35 | - | 1437.1 |
| AHQ-9-2, 4453 - 4519  | K.KANLQIDQINTDLNLER.S       | 1999.21478 | 3 | 1.02E-05 | 0.85 | 4.15 | - | 828.1  |
| AHQ-9-3, 4340         | K.KANLQIDQINTDLNLER.S       | 1999.21478 | 3 | 1.41E-05 | 0.82 | 3.65 | - | 1147.1 |
| AHQ-9-3, 2745         | R.KKVEAQLQELQVK.F           | 1541.81761 | 3 | 1.26E-04 | 0.76 | 3.20 | - | 1039.2 |
| AHQ-9-3, 2744 - 2806  | R.KKVEAQLQELQVK.F           | 1541.81761 | 2 | 9.72E-06 | 0.96 | 4.14 | - | 1592.3 |
| AHQ-9-4, 2709         | R.KKVEAQLQELQVK.F           | 1541.81761 | 2 | 2.83E-08 | 0.95 | 4.33 | - | 1322.1 |
| AHQ-9-2, 2778         | R.KKVEAQLQELQVK.F           | 1541.81761 | 2 | 3.23E-07 | 0.97 | 4.80 | - | 1540.3 |
| AHQ-9-5, 3483         | K.KLEEEQIILEDQNCX.L         | 1891.08992 | 2 | 1.23E-05 | 0.93 | 3.99 | - | 1161.3 |
| AHQ-9-2, 3577 - 3619  | K.KLEEEQIILEDQNCX.L         | 1891.08992 | 2 | 1.46E-11 | 0.97 | 5.38 | - | 1383.4 |
| AHQ-9-3, 3418 - 3477  | K.KLEEEQIILEDQNCX.L         | 1891.08992 | 2 | 1.34E-11 | 0.98 | 6.06 | - | 2149.1 |
| AHQ-9-2, 3451 - 3517  | K.KLEEEQIILEDQNCX.L         | 1891.08992 | 2 | 1.25E-05 | 0.98 | 5.17 | - | 2006.6 |
| AHQ-9-3, 3784         | K.KLEEEQIILEDQNCX.LAK.E     | 2203.49930 | 3 | 2.02E-04 | 0.97 | 5.30 | - | 1819.4 |
| AHQ-9-5, 6291 - 6292  | R.KLEGDSTLSDQIAELQAIAELK.M  | 2616.86032 | 3 | 7.47E-05 | 0.91 | 4.71 | - | 896.4  |
| AHQ-9-3, 5564         | R.KLEGDSTLSDQIAELQAIAELK.M  | 2616.86032 | 3 | 8.08E-04 | 0.91 | 3.86 | - | 1391.7 |
| AHQ-9-2, 6315 - 6377  | R.KLEGDSTLSDQIAELQAIAELK.M  | 2616.86032 | 3 | 3.66E-08 | 0.94 | 5.72 | - | 959.9  |
| AHQ-9-1, 6368 - 6382  | R.KLEGDSTLSDQIAELQAIAELK.M  | 2616.86032 | 3 | 3.26E-07 | 0.91 | 4.86 | - | 759.6  |
| AHQ-9-6, 6209         | R.KLEGDSTLSDQIAELQAIAELK.M  | 2616.86032 | 3 | 2.52E-06 | 0.87 | 4.59 | - | 532.1  |
| AHQ-9-3, 6136 - 6212  | R.KLEGDSTLSDQIAELQAIAELK.M  | 2616.86032 | 3 | 2.49E-07 | 0.95 | 5.57 | - | 991.2  |
| AHQ-9-4, 6272         | R.KLEGDSTLSDQIAELQAIAELK.M  | 2616.86032 | 3 | 2.35E-08 | 0.92 | 5.05 | - | 779.8  |
| AHQ-9-2, 6379         | R.KLEGDSTLSDQIAELQAIAELK.M  | 2616.86032 | 2 | 3.49E-08 | 0.98 | 6.27 | - | 1637.4 |
| AHQ-9-2, 2993 - 2999  | K.KLVVWPSDK.S               | 1072.28194 | 2 | 2.42E-04 | 0.93 | 3.52 | - | 1239.0 |
| AHQ-9-2, 3037         | K.KM*EDSVGCLETAEEVKR.K      | 1999.21025 | 2 | 8.03E-11 | 0.93 | 4.17 | - | 872.4  |
| AHQ-9-3, 2973         | K.KM*EDSVGCLETAEEVKR.K      | 1999.21025 | 3 | 9.37E-06 | 0.96 | 4.95 | - | 1845.1 |
| AHQ-9-5, 2953         | K.KM*EDSVGCLETAEEVKR.K      | 1999.21025 | 3 | 2.02E-05 | 0.86 | 3.83 | - | 833.6  |
| AHQ-9-4, 3276         | K.KMEDSVGCLETAEEVKR.K       | 1983.21085 | 3 | 6.51E-07 | 0.87 | 4.01 | - | 806.2  |
| AHQ-9-2, 3373         | K.KMEDSVGCLETAEEVKR.K       | 1983.21085 | 3 | 5.44E-09 | 0.96 | 5.50 | - | 1181.4 |
| AHQ-9-5, 3281         | K.KMEDSVGCLETAEEVKR.K       | 1983.21085 | 3 | 1.07E-11 | 0.80 | 3.75 | - | 746.3  |
| AHQ-9-2, 4698         | K.KM*QNIQELEEEQLEEEESAR.Q   | 2478.63294 | 3 | 5.39E-04 | 0.93 | 4.79 | - | 1104.6 |
| AHQ-9-5, 4011         | K.KQLEEEIICHDLAR.V          | 1771.93036 | 2 | 2.17E-04 | 0.98 | 5.42 | - | 2092.6 |
| AHQ-9-4, 3997 - 4010  | K.KQLEEEIICHDLAR.V          | 1771.93036 | 2 | 5.81E-05 | 0.96 | 4.56 | - | 1513.8 |
| AHQ-9-6, 3969         | K.KQLEEEIICHDLAR.V          | 1771.93036 | 3 | 3.32E-04 | 0.95 | 4.77 | - | 1581.4 |
| AHQ-9-3, 3993         | K.KQLEEEIICHDLAR.V          | 1771.93036 | 3 | 1.87E-04 | 0.95 | 5.32 | - | 1269.9 |
| AHQ-9-3, 3037         | K.KVEAQLQELQVK.F            | 1413.64470 | 2 | 5.27E-04 | 0.96 | 4.14 | - | 1762.1 |
| AHQ-9-2, 3101         | K.KVEAQLQELQVK.F            | 1413.64470 | 2 | 4.12E-07 | 0.96 | 4.49 | - | 1537.0 |
| AHQ-9-4, 3008         | K.KVEAQLQELQVK.F            | 1413.64470 | 2 | 1.26E-04 | 0.95 | 4.28 | - | 1442.8 |
| AHQ-9-5, 3004         | K.KVEAQLQELQVK.F            | 1413.64470 | 2 | 4.35E-07 | 0.96 | 4.52 | - | 1646.6 |
| AHQ-9-2, 3765 - 3822  | K.LEEEQIILEDQNCX.L          | 1762.91700 | 2 | 1.40E-08 | 0.98 | 5.76 | - | 1577.2 |
| AHQ-9-3, 3638 - 3720  | K.LEEEQIILEDQNCX.L          | 1762.91700 | 2 | 5.30E-10 | 0.97 | 5.85 | - | 1049.7 |
| AHQ-9-2, 6429         | K.LEGDSTLSDQIAELQAIAELK.M   | 2488.68740 | 3 | 1.51E-06 | 0.90 | 4.60 | - | 780.3  |
| AHQ-9-2, 2734         | R.LEVNLQAM*K.A              | 1062.26570 | 2 | 1.84E-04 | 0.82 | 3.20 | - | 548.0  |
| AHQ-9-4, 3494         | R.LEVNLQAMK.A               | 1046.26630 | 2 | 3.82E-04 | 0.82 | 2.86 | - | 683.4  |
| AHQ-9-2, 3579 - 3583  | R.LEVNLQAMK.A               | 1046.26630 | 2 | 4.14E-05 | 0.90 | 3.80 | - | 684.0  |
| AHQ-9-2, 3563         | K.LKDVLLQVDDER.R            | 1443.62767 | 2 | 1.28E-10 | 0.95 | 4.21 | - | 1345.5 |
| AHQ-9-3, 3185         | K.LKDVLLQVDDERR.N           | 1599.81402 | 3 | 1.29E-05 | 0.87 | 3.98 | - | 741.6  |
| AHQ-9-2, 3187 - 3254  | K.LKDVLLQVDDERR.N           | 1599.81402 | 2 | 2.58E-04 | 0.59 | 2.82 | - | 627.1  |
| AHQ-9-2, 6558 - 6635  | K.LLQELQDLQAEITELCAEAELR.A  | 2503.72536 | 3 | 4.07E-05 | 0.85 | 3.49 | - | 1259.7 |
| AHQ-9-1, 5726         | R.LQELDDLVLDDHQR.Q          | 1951.12699 | 2 | 3.68E-11 | 0.97 | 5.26 | - | 2026.5 |
| AHQ-9-4, 5596 - 5676  | R.LQELDDLVLDDHQR.Q          | 1951.12699 | 3 | 9.95E-04 | 0.91 | 4.17 | - | 839.0  |
| AHQ-9-4, 5601         | R.LQELDDLVLDDHQR.Q          | 1951.12699 | 2 | 3.57E-09 | 0.97 | 4.81 | - | 1807.6 |

|                       |                              |            |   |          |      |      |   |        |
|-----------------------|------------------------------|------------|---|----------|------|------|---|--------|
| AHQ-9-6, 5539 - 5546  | R.LQELDDLLVLDLHQR.Q          | 1951.12699 | 2 | 5.18E-08 | 0.96 | 4.64 | - | 1579.5 |
| AHQ-9-2, 5327 - 5383  | R.LQELDDLLVLDLHQR.Q          | 1951.12699 | 2 | 5.06E-07 | 0.94 | 4.51 | - | 1093.4 |
| AHQ-9-5, 5619 - 5624  | R.LQELDDLLVLDLHQR.Q          | 1951.12699 | 3 | 2.04E-07 | 0.88 | 3.91 | - | 857.8  |
| AHQ-9-2, 5699 - 5718  | R.LQELDDLLVLDLHQR.Q          | 1951.12699 | 2 | 1.60E-11 | 0.97 | 5.36 | - | 1630.9 |
| AHQ-9-7, 5537         | R.LQELDDLLVLDLHQR.Q          | 1951.12699 | 2 | 2.19E-09 | 0.83 | 3.53 | - | 732.7  |
| AHQ-9-5, 5623         | R.LQELDDLLVLDLHQR.Q          | 1951.12699 | 2 | 9.94E-07 | 0.96 | 5.18 | - | 1311.3 |
| AHQ-9-3, 5546 - 5569  | R.LQELDDLLVLDLHQR.Q          | 1951.12699 | 3 | 4.89E-07 | 0.94 | 5.15 | - | 992.3  |
| AHQ-9-3, 5548         | R.LQELDDLLVLDLHQR.Q          | 1951.12699 | 2 | 5.63E-11 | 0.98 | 5.03 | - | 2539.2 |
| AHQ-9-2, 5697 - 5698  | R.LQELDDLLVLDLHQR.Q          | 1951.12699 | 3 | 2.18E-08 | 0.91 | 4.56 | - | 829.9  |
| AHQ-9-4, 5292 - 5348  | K.LQVELDNVTGLLSQSDSK.S       | 1947.13342 | 2 | 3.62E-05 | 0.97 | 5.48 | - | 1308.4 |
| AHQ-9-7, 5237         | K.LQVELDNVTGLLSQSDSK.S       | 1947.13342 | 2 | 1.90E-04 | 0.91 | 4.16 | - | 671.2  |
| AHQ-9-2, 5415         | K.LQVELDNVTGLLSQSDSK.S       | 1947.13342 | 3 | 2.79E-06 | 0.97 | 6.19 | - | 1691.2 |
| AHQ-9-2, 6574         | K.LQVELDNVTGLLSQSDSK.S       | 1947.13342 | 2 | 2.45E-05 | 0.82 | 3.09 | - | 763.1  |
| AHQ-9-3, 5302 - 5332  | K.LQVELDNVTGLLSQSDSK.S       | 1947.13342 | 2 | 1.29E-05 | 0.96 | 4.73 | - | 1284.0 |
| AHQ-9-4, 5405         | K.LQVELDNVTGLLSQSDSK.S       | 1947.13342 | 2 | 2.27E-05 | 0.94 | 4.54 | - | 894.2  |
| AHQ-9-2, 5386 - 5445  | K.LQVELDNVTGLLSQSDSK.S       | 1947.13342 | 2 | 1.41E-11 | 0.98 | 6.00 | - | 1775.5 |
| AHQ-9-2, 5501         | K.LQVELDNVTGLLSQSDSK.S       | 1947.13342 | 2 | 1.21E-12 | 0.98 | 6.96 | - | 1439.4 |
| AHQ-9-3, 5260         | K.LQVELDNVTGLLSQSDSK.S       | 1947.13342 | 3 | 2.80E-05 | 0.96 | 5.21 | - | 1714.6 |
| AHQ-9-2, 5133         | K.LQVELDNVTGLLSQSDSK.S       | 1947.13342 | 2 | 5.50E-07 | 0.94 | 4.21 | - | 1217.9 |
| AHQ-9-1, 5448         | K.LQVELDNVTGLLSQSDSK.S       | 1947.13342 | 3 | 1.63E-05 | 0.93 | 4.23 | - | 1387.6 |
| AHQ-9-5, 5300 - 5356  | K.LQVELDNVTGLLSQSDSK.S       | 1947.13342 | 2 | 4.96E-06 | 0.96 | 5.21 | - | 1271.0 |
| AHQ-9-3, 5194 - 5249  | K.LQVELDNVTGLLSQSDSK.S       | 1947.13342 | 2 | 3.19E-12 | 0.98 | 6.71 | - | 1651.0 |
| AHQ-9-1, 5180         | K.LQVELDNVTGLLSQSDSK.S       | 1947.13342 | 2 | 9.83E-07 | 0.91 | 3.47 | - | 1178.7 |
| AHQ-9-3, 4941 - 4996  | K.LQVELDNVTGLLSQSDSK.S       | 1947.13342 | 2 | 6.20E-07 | 0.97 | 5.35 | - | 1304.0 |
| AHQ-9-5, 5049         | K.LQVELDNVTGLLSQSDSK.S       | 1947.13342 | 2 | 4.95E-05 | 0.87 | 3.56 | - | 817.9  |
| AHQ-9-2, 5617 - 5689  | K.LQVELDNVTGLLSQSDSK.S       | 1947.13342 | 2 | 1.02E-05 | 0.95 | 4.89 | - | 1012.3 |
| AHQ-9-6, 5230 - 5286  | K.LQVELDNVTGLLSQSDSK.S       | 1947.13342 | 2 | 8.49E-06 | 0.90 | 4.35 | - | 832.7  |
| AHQ-9-1, 5420 - 5446  | K.LQVELDNVTGLLSQSDSK.S       | 1947.13342 | 2 | 4.84E-08 | 0.98 | 5.43 | - | 1960.4 |
| AHQ-9-14-, 5283       | K.LQVELDNVTGLLSQSDSK.S       | 1947.13342 | 2 | 2.67E-08 | 0.92 | 4.16 | - | 1110.5 |
| AHQ-9-2, 3967         | R.LTEM*ETLQSQLMAEK.L         | 1769.03151 | 2 | 8.73E-04 | 0.96 | 3.68 | - | 2218.8 |
| AHQ-9-2, 4811 - 4885  | R.LTEM*ETLQSQLMAEK.L         | 1753.03211 | 2 | 6.91E-07 | 0.97 | 4.14 | - | 2219.6 |
| AHQ-9-3, 3425 - 3490  | R.LTEM*ETLQSQLM*AEK.L        | 1785.03091 | 2 | 5.46E-04 | 0.86 | 3.44 | - | 880.8  |
| AHQ-9-1, 3615         | R.LTEM*ETLQSQLM*AEK.L        | 1785.03091 | 2 | 3.40E-04 | 0.84 | 3.12 | - | 884.0  |
| AHQ-9-2, 3526 - 3585  | R.LTEM*ETLQSQLM*AEK.L        | 1785.03091 | 2 | 3.15E-04 | 0.94 | 4.29 | - | 1100.8 |
| AHQ-9-2, 4407 - 4479  | R.LTEM*ETLQSQLM*AEK.L        | 1769.03151 | 2 | 5.65E-05 | 0.96 | 5.00 | - | 1342.9 |
| AHQ-9-4, 3872         | R.LTEM*ETLQSQLM*AEK.L        | 1769.03151 | 2 | 2.70E-04 | 0.96 | 3.94 | - | 1874.4 |
| AHQ-9-3, 4253 - 4308  | R.LTEM*ETLQSQLM*AEK.L        | 1769.03151 | 2 | 3.00E-05 | 0.83 | 3.18 | - | 908.7  |
| AHQ-9-3, 3226         | K.M*EDSVGCLTEAEVVKR.K        | 1871.03734 | 3 | 2.64E-04 | 0.74 | 3.32 | - | 633.7  |
| AHQ-9-6, 5310         | K.NFINNPLAQADWAAK.K          | 1673.85315 | 2 | 3.18E-06 | 0.89 | 3.25 | - | 1192.6 |
| AHQ-9-7, 4914 - 4968  | K.NFINNPLAQADWAAK.K          | 1673.85315 | 2 | 8.89E-04 | 0.89 | 3.77 | - | 717.4  |
| AHQ-9-1, 5136         | K.NFINNPLAQADWAAK.K          | 1673.85315 | 2 | 2.32E-05 | 0.93 | 4.22 | - | 921.6  |
| AHQ-9-5, 4997         | K.NFINNPLAQADWAAK.K          | 1673.85315 | 2 | 8.64E-06 | 0.96 | 5.00 | - | 1195.3 |
| AHQ-9-2, 5469         | K.NFINNPLAQADWAAK.K          | 1673.85315 | 2 | 5.06E-12 | 0.94 | 4.14 | - | 1048.3 |
| AHQ-9-4, 4986         | K.NFINNPLAQADWAAK.K          | 1673.85315 | 2 | 3.94E-07 | 0.95 | 4.55 | - | 1173.2 |
| AHQ-9-3, 4945         | K.NFINNPLAQADWAAK.K          | 1673.85315 | 2 | 4.41E-07 | 0.95 | 4.80 | - | 1053.2 |
| AHQ-9-6, 4922         | K.NFINNPLAQADWAAK.K          | 1673.85315 | 2 | 6.34E-09 | 0.93 | 4.11 | - | 961.6  |
| AHQ-9-2, 5078 - 5097  | K.NFINNPLAQADWAAK.K          | 1673.85315 | 2 | 9.13E-09 | 0.96 | 4.86 | - | 1152.8 |
| AHQ-9-3, 2777         | K.NKHEAMITDEER.L             | 1586.75247 | 2 | 2.18E-05 | 0.71 | 2.80 | - | 689.4  |
| AHQ-9-2, 2813         | K.NKHEAMITDEER.L             | 1586.75247 | 2 | 5.35E-09 | 0.88 | 3.29 | - | 1035.8 |
| AHQ-9-2, 4939         | K.NLPIYSEEIVEM*YK.G          | 1744.98660 | 2 | 1.48E-06 | 0.95 | 4.34 | - | 886.8  |
| AHQ-9-2, 5433 - 5446  | K.NLPIYSEEIVEM*YK.G          | 1728.98720 | 2 | 1.48E-06 | 0.97 | 4.92 | - | 1168.3 |
| AHQ-9-5, 5336 - 5349  | K.NLPIYSEEIVEM*YK.G          | 1728.98720 | 2 | 1.05E-05 | 0.96 | 4.99 | - | 943.4  |
| AHQ-9-7, 4772 - 4773  | K.NLPIYSEEIVEM*YK.G          | 1744.98660 | 2 | 9.54E-06 | 0.96 | 4.39 | - | 1228.7 |
| AHQ-9-6, 4787         | K.NLPIYSEEIVEM*YK.G          | 1744.98660 | 2 | 2.07E-04 | 0.86 | 3.46 | - | 551.7  |
| AHQ-9-1, 4952 - 5000  | K.NLPIYSEEIVEM*YK.G          | 1744.98660 | 2 | 5.30E-04 | 0.93 | 3.84 | - | 966.6  |
| AHQ-9-4, 4845         | K.NLPIYSEEIVEM*YK.G          | 1744.98660 | 2 | 1.79E-04 | 0.89 | 3.64 | - | 742.5  |
| AHQ-9-3, 4801 - 4821  | K.NLPIYSEEIVEM*YK.G          | 1744.98660 | 2 | 5.03E-07 | 0.89 | 3.39 | - | 731.2  |
| AHQ-9-2, 5438         | K.NLPIYSEEIVEM*YK.G          | 1744.98660 | 2 | 7.89E-04 | 0.78 | 3.20 | - | 401.2  |
| AHQ-9-2, 4883         | K.NM*DPLNDNIATLLHQSSDK.F     | 2143.32109 | 2 | 1.28E-04 | 0.89 | 3.29 | - | 1008.2 |
| AHQ-9-2, 5257         | K.NMDPLNDNIATLLHQSSDK.F      | 2127.32169 | 2 | 3.11E-06 | 0.85 | 3.30 | - | 639.5  |
| AHQ-9-2, 3351         | R.QAQERDELAEIANSSGK.G        | 2090.15168 | 2 | 8.62E-05 | 0.86 | 3.52 | - | 687.1  |
| AHQ-9-2, 3005 - 3075  | K.QIATLHQVADIMK.K            | 1426.66697 | 2 | 8.69E-04 | 0.66 | 2.80 | - | 473.1  |
| AHQ-9-13-, 3624       | R.RGDLPFVPPR.R               | 1156.36217 | 2 | 4.61E-05 | 0.70 | 3.00 | - | 581.4  |
| AHQ-9-2, 3673 - 3689  | R.RGDLPFVPPR.R               | 1156.36217 | 2 | 8.94E-06 | 0.95 | 3.81 | - | 1387.9 |
| AHQ-9-3, 3593         | R.RGDLPFVPPR.R               | 1156.36217 | 2 | 1.75E-05 | 0.94 | 3.78 | - | 1373.3 |
| AHQ-9-4, 3594 - 3654  | R.RGDLPFVPPR.R               | 1156.36217 | 2 | 6.46E-07 | 0.90 | 3.24 | - | 1111.5 |
| AHQ-9-6, 3550         | R.RGDLPFVPPR.R               | 1156.36217 | 2 | 6.62E-06 | 0.94 | 3.75 | - | 1302.4 |
| AHQ-9-11, 3543 - 3561 | R.RGDLPFVPPR.R               | 1156.36217 | 2 | 4.20E-05 | 0.95 | 3.71 | - | 1490.3 |
| AHQ-9-5, 3588         | R.RGDLPFVPPR.R               | 1156.36217 | 2 | 1.32E-05 | 0.96 | 4.02 | - | 1577.1 |
| AHQ-9-7, 3545         | R.RGDLPFVPPR.R               | 1156.36217 | 2 | 1.45E-05 | 0.81 | 2.97 | - | 701.8  |
| AHQ-9-4, 6145         | R.RKLEGDSTLSDQIAELQAQIAELK.M | 2773.04667 | 3 | 5.29E-04 | 0.96 | 6.01 | - | 1623.3 |
| AHQ-9-2, 6234 - 6303  | R.RKLEGDSTLSDQIAELQAQIAELK.M | 2773.04667 | 3 | 1.66E-07 | 0.97 | 5.99 | - | 1737.3 |
| AHQ-9-3, 6065         | R.RKLEGDSTLSDQIAELQAQIAELK.M | 2773.04667 | 3 | 4.39E-06 | 0.83 | 4.19 | - | 953.0  |
| AHQ-9-5, 5777         | K.SGFEPASLKEEVGEEAIVLVENGK.V | 2790.07246 | 3 | 2.09E-07 | 0.77 | 3.48 | - | 650.0  |
| AHQ-9-2, 5730 - 5797  | K.SGFEPASLKEEVGEEAIVLVENGK.V | 2790.07246 | 3 | 4.93E-09 | 0.92 | 5.41 | - | 769.6  |
| AHQ-9-13-, 5673       | K.SGFEPASLKEEVGEEAIVLVENGK.V | 2790.07246 | 3 | 3.19E-06 | 0.79 | 3.61 | - | 605.6  |
| AHQ-9-2, 5853 - 5918  | K.SGFEPASLKEEVGEEAIVLVENGK.V | 2790.07246 | 3 | 8.96E-11 | 0.96 | 5.73 | - | 1328.1 |
| AHQ-9-2, 6483 - 6553  | K.SGFEPASLKEEVGEEAIVLVENGK.V | 2790.07246 | 3 | 8.38E-07 | 0.87 | 4.13 | - | 851.6  |
| AHQ-9-2, 5389 - 5435  | K.SM*EAEM*IQLEELAAEAER.A     | 2066.30004 | 2 | 9.78E-05 | 0.90 | 4.36 | - | 1222.0 |
| AHQ-9-3, 4452         | K.SM*EAEM*IQLEELAAEAER.A     | 2082.29944 | 2 | 1.28E-05 | 0.93 | 4.51 | - | 1063.1 |
| AHQ-9-2, 4567 - 4645  | K.SM*EAEM*IQLEELAAEAER.A     | 2082.29944 | 2 | 7.58E-08 | 0.97 | 5.45 | - | 1623.6 |
| AHQ-9-4, 4468         | K.SM*EAEM*IQLEELAAEAER.A     | 2082.29944 | 2 | 3.15E-08 | 0.95 | 4.35 | - | 1445.0 |
| AHQ-9-4, 3640         | K.TDLLLEPYNK.Y               | 1206.36989 | 2 | 2.20E-06 | 0.91 | 4.00 | - | 1138.8 |
| AHQ-9-5, 3637         | K.TDLLLEPYNK.Y               | 1206.36989 | 2 | 8.45E-05 | 0.92 | 4.02 | - | 1060.5 |
| AHQ-9-1, 3827         | K.TDLLLEPYNK.Y               | 1206.36989 | 2 | 3.59E-05 | 0.91 | 3.77 | - | 963.0  |
| AHQ-9-2, 3733         | K.TDLLLEPYNK.Y               | 1206.36989 | 2 | 1.36E-05 | 0.91 | 3.96 | - | 982.4  |
| AHQ-9-6, 3598         | K.TDLLLEPYNK.Y               | 1206.36989 | 2 | 2.16E-06 | 0.93 | 3.81 | - | 1248.1 |
| AHQ-9-7, 3594 - 3601  | K.TDLLLEPYNK.Y               | 1206.36989 | 2 | 1.54E-04 | 0.87 | 3.54 | - | 900.3  |
| AHQ-9-3, 3640         | K.TDLLLEPYNK.Y               | 1206.36989 | 2 | 1.52E-05 | 0.89 | 3.59 | - | 1019.3 |
| AHQ-9-5, 4101 - 4159  | K.TEEDTLDDSTAAQQELR.S        | 1921.00969 | 2 | 2.79E-07 | 0.97 | 5.07 | - | 1837.5 |
| AHQ-9-2, 4187         | K.TEEDTLDDSTAAQQELR.S        | 1921.00969 | 2 | 8.89E-07 | 0.98 | 5.13 | - | 2413.7 |
| AHQ-9-4, 4066 - 4085  | K.TEEDTLDDSTAAQQELR.S        | 1921.00969 | 2 | 1.44E-04 | 0.52 | 2.90 | - | 628.5  |
| AHQ-9-3, 4076         | K.TEEDTLDDSTAAQQELR.S        | 1921.00969 | 2 | 8.06E-10 | 0.96 | 4.80 | - | 1441.6 |
| AHQ-9-2, 3407         | R.TEMEDLMSKDDVVGK.S          | 1685.85626 | 2 | 4.24E-09 | 0.84 | 3.33 | - | 927.0  |
| AHQ-9-5, 6148         | R.TFHIFYLLSGAGEHLK.T         | 1997.28378 | 3 | 3.84E-05 | 0.73 | 3.16 | - | 664.2  |
| AHQ-9-2, 6350         | R.TFHIFYLLSGAGEHLK.T         | 1997.28378 | 3 | 6.03E-06 | 0.75 | 3.25 | - | 762.7  |
| AHQ-9-3, 2102         | K.VAAYDKLEK.T                | 1037.19123 | 2 | 9.73E-05 | 0.64 | 2.68 | - | 541.2  |
| AHQ-9-2, 5083         | K.VEDM*AEITCLNEASVLHNLK.E    | 2304.58397 | 2 | 3.91E-08 | 0.93 | 4.55 | - | 915.1  |
| AHQ-9-2, 5583         | K.VEDMAEITCLNEASVLHNLK.E     | 2288.58457 | 2 | 4.45E-04 | 0.76 | 3.42 | - | 503.4  |
| AHQ-9-5, 4936 - 5000  | K.VEDM*AEITCLNEASVLHNLK.E    | 2304.58397 | 3 | 4.86E-05 | 0.90 | 4.17 | - | 731.6  |
| AHQ-9-2, 5514 - 5585  | K.VEDMAEITCLNEASVLHNLK.E     | 2288.58457 | 3 | 4.66E-05 | 0.85 | 3.98 | - | 770.7  |
| AHQ-9-2, 2173 - 2326  | R.VEEEEERCQHLQAEK.K          | 1916.01642 | 2 | 1.76E-07 | 0.91 | 3.96 | - | 1042.2 |
| AHQ-9-2, 4001         | K.VIQYLAYVASSHK.S            | 1479.70484 | 2 | 4.04E-04 | 0.95 | 3.68 | - | 1523.3 |
| AHQ-9-5, 3901 - 3911  | K.VIQYLAYVASSHK.S            | 1479.70484 | 2 | 1.12E-05 | 0.94 | 3.92 | - | 1211.8 |
| AHQ-9-3, 3904         | K.VIQYLAYVASSHK.S            | 1479.70484 | 2 | 1.03E-07 | 0.93 | 3.81 | - | 1136.0 |
| AHQ-9-2, 4006         | K.VIQYLAYVASSHK.S            | 1479.70484 | 3 | 2.06E-05 | 0.76 | 3.44 | - | 452.8  |
| AHQ-9-6, 3854 - 3917  | K.VIQYLAYVASSHK.S            | 1479.70484 | 2 | 4.31E-05 | 0.58 | 2.62 | - | 561.1  |



|                           |                                                  |            |   |          |       |        |       |         |
|---------------------------|--------------------------------------------------|------------|---|----------|-------|--------|-------|---------|
| AHQ-9-5, 5919             | R.VISGVLQLGNIVFK.K                               | 1487.81155 | 2 | 7.97E-09 | 0.96  | 3.93   | -     | 1752.4  |
| AHQ-9-2, 5967 - 6021      | R.VISGVLQLGNIVFK.K                               | 1487.81155 | 2 | 5.86E-07 | 0.98  | 5.30   | -     | 1931.4  |
| AHQ-9-3, 5848 - 5858      | R.VISGVLQLGNIVFK.K                               | 1487.81155 | 2 | 1.04E-08 | 0.97  | 4.50   | -     | 1830.6  |
| AHQ-9-6, 5829 - 5842      | R.VISGVLQLGNIVFK.K                               | 1487.81155 | 2 | 4.55E-07 | 0.95  | 4.55   | -     | 1357.2  |
| AHQ-9-7, 5816             | R.VISGVLQLGNIVFK.K                               | 1487.81155 | 2 | 1.46E-06 | 0.96  | 3.95   | -     | 1898.6  |
| AHQ-9-1, 6028 - 6034      | R.VISGVLQLGNIVFK.K                               | 1487.81155 | 2 | 1.25E-06 | 0.97  | 4.62   | -     | 1481.3  |
| AHQ-9-8, 5902 - 5907      | R.VISGVLQLGNIVFK.K                               | 1487.81155 | 2 | 4.21E-07 | 0.97  | 4.99   | -     | 1905.9  |
| AHQ-9-3, 5397 - 5477      | R.VISGVLQLGNIVFK.E                               | 1615.98446 | 2 | 1.40E-04 | 0.89  | 3.48   | -     | 960.6   |
| AHQ-9-4, 5449             | R.VISGVLQLGNIVFK.E                               | 1615.98446 | 2 | 2.58E-05 | 0.94  | 3.60   | -     | 1552.3  |
| AHQ-9-1, 5579             | R.VISGVLQLGNIVFK.E                               | 1615.98446 | 2 | 6.47E-04 | 0.63  | 3.09   | -     | 582.9   |
| AHQ-9-2, 5541             | R.VISGVLQLGNIVFK.E                               | 1615.98446 | 2 | 5.80E-04 | 0.92  | 3.74   | -     | 968.9   |
| AHQ-9-7, 4617             | K.VSHLLGINVDFTR.G                                | 1572.79026 | 2 | 7.59E-06 | 0.96  | 4.57   | -     | 1395.6  |
| AHQ-9-5, 4707 - 4715      | K.VSHLLGINVDFTR.G                                | 1572.79026 | 3 | 3.17E-05 | 0.80  | 3.60   | -     | 910.1   |
| AHQ-9-4, 4681 - 4701      | K.VSHLLGINVDFTR.G                                | 1572.79026 | 2 | 1.07E-06 | 0.90  | 3.81   | -     | 1096.1  |
| AHQ-9-4, 4704             | K.VSHLLGINVDFTR.G                                | 1572.79026 | 3 | 6.27E-05 | 0.88  | 3.73   | -     | 1007.6  |
| AHQ-9-1, 4874             | K.VSHLLGINVDFTR.G                                | 1572.79026 | 2 | 5.43E-09 | 0.96  | 4.62   | -     | 1275.3  |
| AHQ-9-3, 4021             | R.YEILTPNSIPK.G                                  | 1275.47536 | 2 | 9.51E-04 | 0.83  | 2.73   | -     | 1073.5  |
| AHQ-9-2, 3941 - 4015      | R.YEILTPNSIPK.G                                  | 1275.47536 | 2 | 1.04E-05 | 0.91  | 3.69   | -     | 995.6   |
| gj4507357 ref NP_003555.1 | transglutin 2; SM22-alpha homolog [Homo sapiens] |            |   | 1.67E-12 | 11.32 | 130.29 | 64.80 | 2239.3  |
| AHQ-9-11, 5381 - 5437     | R.DDGLFSGDPNWFVK.K                               | 1595.69288 | 2 | 2.12E-04 | 0.93  | 4.09   | -     | 1029.0  |
| AHQ-9-14-, 5450           | R.DDGLFSGDPNWFVK.K                               | 1595.69288 | 2 | 4.42E-06 | 0.96  | 4.23   | -     | 1426.2  |
| AHQ-9-11, 5697            | K.DGTVLCELINALYPEGQAPVK.K                        | 2289.59066 | 2 | 2.19E-05 | 0.74  | 3.39   | -     | 498.2   |
| AHQ-9-11, 6151 - 6213     | K.DGTVLCELINALYPEGQAPVK.K                        | 2417.76357 | 2 | 5.75E-04 | 0.90  | 4.60   | -     | 646.7   |
| AHQ-9-11, 6205 - 6206     | K.DGTVLCELINALYPEGQAPVK.K                        | 2417.76357 | 3 | 2.44E-09 | 0.88  | 4.18   | -     | 818.5   |
| AHQ-9-13-, 6292           | K.DGTVLCELINALYPEGQAPVK.K                        | 2417.76357 | 3 | 1.59E-08 | 0.85  | 3.78   | -     | 798.6   |
| AHQ-9-11, 2214            | R.GASQAGMTGYGM*PR.Q                              | 1400.56672 | 2 | 2.68E-04 | 0.63  | 2.59   | -     | 629.9   |
| AHQ-9-11, 2297            | R.GPAYGLSREVQQK.I                                | 1433.59456 | 2 | 2.35E-04 | 0.81  | 2.93   | -     | 1226.1  |
| AHQ-9-11, 2406 - 2461     | R.NFSDNQLQEQG.K                                  | 1280.32582 | 2 | 6.82E-04 | 0.88  | 3.52   | -     | 841.9   |
| AHQ-9-11, 2395 - 2447     | K.NVIGLQM*GTRN.G                                 | 1219.39691 | 2 | 3.83E-04 | 0.87  | 3.09   | -     | 908.2   |
| AHQ-9-11, 3153            | K.NVIGLQM*GTRN.G                                 | 1203.39751 | 2 | 7.12E-07 | 0.95  | 3.68   | -     | 1726.0  |
| AHQ-9-11, 3250 - 3310     | K.NVIGLQM*GTRN.G                                 | 1203.39751 | 2 | 7.20E-04 | 0.67  | 2.91   | -     | 780.1   |
| AHQ-9-11, 5017 - 5094     | K.QMEIQSOFQAAER.Y                                | 1679.87950 | 2 | 6.60E-07 | 0.95  | 4.42   | -     | 1146.5  |
| AHQ-9-11, 4491            | K.QM*EQISQFLQAAER.Y                              | 1695.87890 | 3 | 7.10E-06 | 0.93  | 3.93   | -     | 1646.3  |
| AHQ-9-11, 5091            | K.QMEIQSOFQAAER.Y                                | 1679.87950 | 3 | 2.04E-05 | 0.97  | 4.76   | -     | 2035.2  |
| AHQ-9-11, 4329 - 4350     | R.TLMNLGGLAVAR.D                                 | 1216.47932 | 2 | 3.37E-05 | 0.87  | 3.76   | -     | 823.1   |
| AHQ-9-11, 4215 - 4275     | R.TLMNLGGLAVAR.D                                 | 1216.47932 | 2 | 1.49E-04 | 0.68  | 2.80   | -     | 834.7   |
| AHQ-9-11, 3790 - 3866     | R.TLM*NLGGLAVAR.D                                | 1232.47872 | 2 | 2.80E-05 | 0.89  | 3.30   | -     | 1077.4  |
| AHQ-9-11, 3581 - 3586     | R.TLM*NLGGLAVAR.D                                | 1232.47872 | 2 | 8.49E-06 | 0.90  | 3.74   | -     | 786.6   |
| AHQ-9-13-, 6224           | R.YGINTTDFIQTVDLWEGK.N                           | 2101.30080 | 2 | 4.46E-10 | 0.97  | 5.34   | -     | 1280.2  |
| AHQ-9-12, 6180 - 6181     | R.YGINTTDFIQTVDLWEGK.N                           | 2101.30080 | 2 | 1.66E-10 | 0.97  | 5.71   | -     | 1086.9  |
| AHQ-9-11, 6074 - 6145     | R.YGINTTDFIQTVDLWEGK.N                           | 2101.30080 | 2 | 1.67E-12 | 0.95  | 5.01   | -     | 824.5   |
| AHQ-9-13, 6310            | R.YGINTTDFIQTVDLWEGK.N                           | 2101.30080 | 2 | 1.02E-10 | 0.95  | 4.79   | -     | 1039.2  |
| gj4501891 ref NP_001093.1 | actinin, alpha 1 [Homo sapiens]                  |            |   | 1.75E-12 | 32.30 | 360.39 | 46.30 | 10305.9 |
| AHQ-9-5, 6424             | R.AAPFNWMM*EGAM*EDLQDTFVHTIEEIQGLTTHAEQFK.A      | 4396.81902 | 3 | 1.32E-06 | 0.94  | 5.50   | -     | 1020.7  |
| AHQ-9-4, 5106             | K.AGTQIENIEDFRDLK.L                              | 1936.06918 | 2 | 3.75E-06 | 0.83  | 4.78   | -     | 683.3   |
| AHQ-9-4, 5953 - 5956      | K.AIMTYVSSFFYHAFSGAQK.A                          | 2009.27323 | 3 | 2.23E-05 | 0.64  | 3.10   | -     | 427.4   |
| AHQ-9-4, 5954             | K.AIMTYVSSFFYHAFSGAQK.A                          | 2009.27323 | 2 | 8.81E-07 | 0.90  | 3.99   | -     | 725.5   |
| AHQ-9-5, 5976 - 5983      | K.AIMTYVSSFFYHAFSGAQK.A                          | 2009.27323 | 3 | 3.35E-04 | 0.75  | 3.51   | -     | 619.6   |
| AHQ-9-4, 5304             | K.AIM*TYVSSFFYHAFSGAQK.A                         | 2025.27263 | 2 | 4.81E-07 | 0.89  | 4.38   | -     | 518.2   |
| AHQ-9-4, 5301 - 5357      | K.AIM*TYVSSFFYHAFSGAQK.A                         | 2025.27263 | 3 | 1.04E-04 | 0.72  | 3.08   | -     | 786.4   |
| AHQ-9-4, 3413 - 3434      | R.ASFNHFDRDHSGLTLPPEFK.A                         | 2292.40855 | 3 | 3.09E-06 | 0.97  | 5.59   | -     | 2440.0  |
| AHQ-9-4, 5172 - 5212      | K.DDPLTNLNTAFDVAEK.Y                             | 1763.88340 | 2 | 1.92E-08 | 0.89  | 4.37   | -     | 705.7   |
| AHQ-9-6, 5197             | K.DDPLTNLNTAFDVAEK.Y                             | 1763.88340 | 2 | 1.87E-07 | 0.83  | 3.24   | -     | 785.3   |
| AHQ-9-7, 5202             | K.DDPLTNLNTAFDVAEK.Y                             | 1763.88340 | 2 | 3.19E-04 | 0.65  | 2.66   | -     | 573.2   |
| AHQ-9-4, 5268             | K.DDPLTNLNTAFDVAEK.Y                             | 1763.88340 | 2 | 9.38E-10 | 0.96  | 4.86   | -     | 1296.2  |
| AHQ-9-5, 5263             | K.DDPLTNLNTAFDVAEK.Y                             | 1763.88340 | 2 | 2.16E-06 | 0.92  | 3.95   | -     | 1073.6  |
| AHQ-9-4, 4664 - 4722      | K.DGLGFCALHR.H                                   | 1260.44730 | 2 | 5.84E-07 | 0.95  | 3.17   | -     | 1921.8  |
| AHQ-9-5, 4680             | K.DGLGFCALHR.H                                   | 1260.44730 | 2 | 5.84E-07 | 0.90  | 2.72   | -     | 1304.5  |
| AHQ-9-5, 3673 - 3680      | K.DYETATLSEIK.A                                  | 1270.36761 | 2 | 1.08E-07 | 0.90  | 3.40   | -     | 1013.5  |
| AHQ-9-4, 3496 - 3552      | R.ELPPDQAEYCIAR.M                                | 1563.71392 | 2 | 5.94E-06 | 0.77  | 2.91   | -     | 686.7   |
| AHQ-9-6, 4199             | R.ETADTDTADQVMASFK.I                             | 1730.83208 | 2 | 1.17E-07 | 0.92  | 3.78   | -     | 1106.8  |
| AHQ-9-6, 3153             | R.ETADTDTADQVM*ASFK.I                            | 1746.83148 | 2 | 1.39E-07 | 0.94  | 3.95   | -     | 1102.2  |
| AHQ-9-4, 2842             | R.ETADTDTADQVM*ASFK.I                            | 1746.83148 | 2 | 3.99E-07 | 0.68  | 2.66   | -     | 713.0   |
| AHQ-9-4, 4166 - 4246      | R.ETADTDTADQVMASFK.I                             | 1730.83208 | 2 | 6.18E-06 | 0.95  | 4.51   | -     | 1011.1  |
| AHQ-9-5, 2340             | K.GISQEQM*NEFR.A                                 | 1355.45931 | 2 | 2.04E-04 | 0.83  | 2.94   | -     | 892.4   |
| AHQ-9-4, 2337             | K.GISQEQM*NEFR.A                                 | 1355.45931 | 2 | 7.32E-05 | 0.88  | 3.21   | -     | 914.3   |
| AHQ-9-6, 2349             | K.GISQEQM*NEFR.A                                 | 1355.45931 | 2 | 9.77E-06 | 0.82  | 3.07   | -     | 746.8   |
| AHQ-9-5, 2961 - 3028      | K.GISQEQMNEFR.A                                  | 1339.45991 | 2 | 1.18E-05 | 0.74  | 2.58   | -     | 920.1   |
| AHQ-9-4, 2716             | K.GISQEQMNEFR.A                                  | 1339.45991 | 2 | 7.26E-09 | 0.87  | 3.28   | -     | 852.8   |
| AHQ-9-4, 2968 - 3028      | K.GISQEQMNEFR.A                                  | 1339.45991 | 2 | 7.17E-08 | 0.82  | 2.98   | -     | 843.3   |
| AHQ-9-5, 2285             | R.HRPELIDYGG.L                                   | 1228.38202 | 2 | 4.56E-05 | 0.79  | 2.83   | -     | 534.7   |
| AHQ-9-4, 2290             | R.HRPELIDYGG.L                                   | 1228.38202 | 2 | 8.53E-04 | 0.90  | 3.83   | -     | 535.4   |
| AHQ-9-5, 4668             | K.ICDQWDLNLGALTQK.R                              | 1663.83349 | 2 | 3.50E-07 | 0.96  | 4.13   | -     | 1886.0  |
| AHQ-9-4, 4884 - 4950      | K.ICDQWDLNLGALTQK.R                              | 1663.83349 | 2 | 2.71E-05 | 0.96  | 3.77   | -     | 2081.4  |
| AHQ-9-4, 4361             | K.ICDQWDLNLGALTQK.R                              | 1663.83349 | 2 | 6.78E-08 | 0.79  | 3.11   | -     | 742.2   |
| AHQ-9-4, 4661             | K.ICDQWDLNLGALTQK.R                              | 1663.83349 | 3 | 3.26E-07 | 0.81  | 4.51   | -     | 477.9   |
| AHQ-9-6, 4545 - 4605      | K.ICDQWDLNLGALTQK.R                              | 1663.83349 | 2 | 2.97E-05 | 0.90  | 3.90   | -     | 1056.1  |
| AHQ-9-7, 4596             | K.ICDQWDLNLGALTQK.R                              | 1663.83349 | 2 | 8.85E-04 | 0.77  | 3.03   | -     | 933.3   |
| AHQ-9-4, 5464 - 5526      | K.IDQLEGDHLQIQEALIFDNK.H                         | 2340.57447 | 3 | 2.24E-07 | 0.95  | 4.96   | -     | 1696.2  |
| AHQ-9-4, 5468 - 5469      | K.IDQLEGDHLQIQEALIFDNK.H                         | 2340.57447 | 2 | 4.42E-07 | 0.96  | 4.81   | -     | 1240.5  |
| AHQ-9-9, 5259 - 5267      | K.IDQLEGDHLQIQEALIFDNK.H                         | 2340.57447 | 3 | 2.94E-04 | 0.88  | 3.70   | -     | 1162.3  |
| AHQ-9-4, 5340 - 5400      | K.IDQLEGDHLQIQEALIFDNK.H                         | 2340.57447 | 3 | 2.66E-05 | 0.95  | 5.06   | -     | 1344.8  |
| AHQ-9-4, 3993 - 4050      | K.ILAGDKNYITMDLRL.R                              | 1753.01353 | 2 | 2.50E-07 | 0.92  | 4.36   | -     | 805.5   |
| AHQ-9-4, 3433 - 3504      | K.ILAGDKNYITM*DELR.R                             | 1769.01293 | 2 | 3.99E-05 | 0.92  | 3.91   | -     | 768.1   |
| AHQ-9-4, 4297             | R.ISIEM*HGTLEDQLSHLR.Q                           | 1996.23437 | 2 | 6.60E-06 | 0.87  | 3.86   | -     | 525.7   |
| AHQ-9-4, 4833             | R.ISIEMHGTLEDQLSHLR.Q                            | 1980.23497 | 3 | 1.75E-12 | 0.87  | 3.92   | -     | 1110.1  |
| AHQ-9-4, 4689             | R.KDDPLTNLNTAFDVAEK.Y                            | 1892.05631 | 2 | 8.86E-07 | 0.95  | 4.61   | -     | 1130.5  |
| AHQ-9-5, 4264             | R.KDDPLTNLNTAFDVAEK.Y                            | 1892.05631 | 2 | 1.92E-04 | 0.82  | 3.27   | -     | 659.0   |
| AHQ-9-5, 4708             | R.KDDPLTNLNTAFDVAEK.Y                            | 1892.05631 | 2 | 4.80E-07 | 0.97  | 5.60   | -     | 1020.8  |
| AHQ-9-6, 4654             | R.KDDPLTNLNTAFDVAEK.Y                            | 1892.05631 | 2 | 7.77E-05 | 0.90  | 4.00   | -     | 657.2   |
| AHQ-9-4, 4264             | R.KDDPLTNLNTAFDVAEK.Y                            | 1892.05631 | 2 | 1.45E-07 | 0.94  | 4.47   | -     | 1111.7  |
| AHQ-9-4, 4294             | R.KQFGAQAANVIGPWQTK.M                            | 1887.17410 | 2 | 3.63E-06 | 0.94  | 4.51   | -     | 1023.5  |
| AHQ-9-4, 4293             | R.KQFGAQAANVIGPWQTK.M                            | 1887.17410 | 3 | 3.26E-04 | 0.90  | 3.64   | -     | 1480.5  |
| AHQ-9-4, 3450 - 3528      | R.LAILGHNVEYSK.I                                 | 1294.52505 | 2 | 1.08E-06 | 0.77  | 3.01   | -     | 761.5   |
| AHQ-9-4, 3661             | R.LAILGHNVEYSK.I                                 | 1294.52505 | 2 | 3.28E-05 | 0.94  | 3.21   | -     | 1372.7  |
| AHQ-9-4, 3756             | R.LAILGHNVEYSK.I                                 | 1294.52505 | 2 | 2.61E-08 | 0.95  | 4.07   | -     | 1285.4  |
| AHQ-9-5, 3425 - 3460      | R.LAILGHNVEYSK.I                                 | 1294.52505 | 2 | 8.71E-08 | 0.93  | 3.37   | -     | 1358.9  |
| AHQ-9-5, 3763             | R.LAILGHNVEYSK.I                                 | 1294.52505 | 2 | 4.23E-06 | 0.88  | 2.88   | -     | 1084.6  |
| AHQ-9-7, 5554             | K.LASDLLEWIR.R                                   | 1216.41115 | 2 | 4.56E-05 | 0.96  | 4.00   | -     | 1669.8  |
| AHQ-9-4, 5612 - 5626      | K.LASDLLEWIR.R                                   | 1216.41115 | 2 | 5.95E-07 | 0.98  | 4.33   | -     | 2491.2  |
| AHQ-9-5, 5636 - 5639      | K.LASDLLEWIR.R                                   | 1216.41115 | 2 | 1.87E-07 | 0.97  | 3.85   | -     | 1970.3  |
| AHQ-9-3, 5912 - 5981      | K.LLETIDQLYLEYAK.R                               | 1712.96427 | 2 | 1.49E-05 | 0.77  | 3.32   | -     | 555.0   |
| AHQ-9-6, 5893 - 5913      | K.LLETIDQLYLEYAK.R                               | 1712.96427 | 2 | 2.37E-06 | 0.96  | 4.05   | -     | 1682.1  |
| AHQ-9-4, 5964 - 5989      | K.LLETIDQLYLEYAK.R                               | 1712.96427 | 2 | 1.90E-07 | 0.96  | 4.38   | -     | 1458.5  |
| AHQ-9-4, 5972 - 5973      | K.LLETIDQLYLEYAK.R                               | 1712.96427 | 3 | 2.56E-06 | 0.96  | 5.23   | -     | 1412.8  |
| AHQ-9-5, 5980             | K.LLETIDQLYLEYAK.R                               | 1712.96427 | 2 | 1.38E-08 | 0.95  | 4.53   | -     | 1178.9  |
| AHQ-9-4, 2285             | R.LSNRPAPM*PSEGR.M                               | 1478.65881 | 3 | 2.85E-05 | 0.66  | 3.21   | -     | 868.3   |

|                            |                                                                         |            |   |          |       |        |       |         |
|----------------------------|-------------------------------------------------------------------------|------------|---|----------|-------|--------|-------|---------|
| AHQ-9-4, 2769              | R.LSNRPAFMPSEGR.M                                                       | 1462.65941 | 3 | 3.43E-05 | 0.82  | 3.39   | -     | 938.0   |
| AHQ-9-4, 3884              | K.MLDAEDIVGTARPDEK.A                                                    | 1760.94769 | 2 | 2.83E-05 | 0.90  | 3.67   | -     | 1127.8  |
| AHQ-9-5, 3545 - 3559       | K.M.LDAEDIVGTARPDEK.A                                                   | 1776.94709 | 2 | 1.30E-05 | 0.86  | 3.43   | -     | 702.4   |
| AHQ-9-6, 3515 - 3526       | K.M.LDAEDIVGTARPDEK.A                                                   | 1776.94709 | 2 | 3.04E-04 | 0.90  | 3.78   | -     | 784.5   |
| AHQ-9-4, 3540 - 3586       | K.M.LDAEDIVGTARPDEK.A                                                   | 1776.94709 | 2 | 1.18E-09 | 0.79  | 3.32   | -     | 559.3   |
| AHQ-9-6, 4847              | R.M.VSDINNAWGCLEQVEK.G                                                  | 2011.22273 | 2 | 7.58E-05 | 0.82  | 3.51   | -     | 537.2   |
| AHQ-9-4, 4952              | R.M.VSDINNAWGCLEQVEK.G                                                  | 1995.22333 | 2 | 5.85E-06 | 0.96  | 4.11   | -     | 1970.7  |
| AHQ-9-5, 5051 - 5061       | R.M.VSDINNAWGCLEQVEK.G                                                  | 2011.22273 | 2 | 8.11E-04 | 0.97  | 5.16   | -     | 1467.2  |
| AHQ-9-6, 4763              | R.M.VSDINNAWGCLEQVEK.G                                                  | 2011.22273 | 2 | 3.34E-04 | 0.92  | 3.85   | -     | 1057.4  |
| AHQ-9-4, 5193              | R.M.VSDINNAWGCLEQVEK.G                                                  | 2011.22273 | 2 | 1.44E-06 | 0.96  | 4.73   | -     | 1403.7  |
| AHQ-9-6, 4979              | R.M.VSDINNAWGCLEQVEK.G                                                  | 2011.22273 | 2 | 5.24E-05 | 0.83  | 3.68   | -     | 454.4   |
| AHQ-9-4, 4888              | R.M.VSDINNAWGCLEQVEK.G                                                  | 2011.22273 | 2 | 1.20E-05 | 0.97  | 5.08   | -     | 1477.6  |
| AHQ-9-4, 5024              | R.M.VSDINNAWGCLEQVEK.G                                                  | 2011.22273 | 2 | 7.41E-05 | 0.77  | 3.32   | -     | 589.5   |
| AHQ-9-4, 3840              | R.TINEVENQILTR.D                                                        | 1430.58898 | 2 | 3.74E-07 | 0.87  | 3.24   | -     | 1026.8  |
| AHQ-9-5, 3468 - 3527       | R.TINEVENQILTR.D                                                        | 1430.58898 | 2 | 1.26E-04 | 0.65  | 2.57   | -     | 519.9   |
| AHQ-9-4, 3964              | R.TINEVENQILTR.D                                                        | 1430.58898 | 2 | 7.47E-04 | 0.94  | 4.11   | -     | 1207.6  |
| AHQ-9-7, 3812              | R.TINEVENQILTR.D                                                        | 1430.58898 | 2 | 8.11E-04 | 0.86  | 3.27   | -     | 857.6   |
| AHQ-9-5, 3856 - 3861       | R.TINEVENQILTR.D                                                        | 1430.58898 | 2 | 1.50E-05 | 0.79  | 3.27   | -     | 646.5   |
| AHQ-9-5, 3980              | R.TINEVENQILTR.D                                                        | 1430.58898 | 2 | 5.70E-04 | 0.83  | 3.46   | -     | 757.7   |
| AHQ-9-6, 3926              | R.TINEVENQILTR.D                                                        | 1430.58898 | 2 | 9.62E-04 | 0.82  | 3.14   | -     | 748.7   |
| AHQ-9-4, 3104              | R.TINEVENQILTR.D                                                        | 1430.58898 | 2 | 4.38E-04 | 0.91  | 3.54   | -     | 976.9   |
| AHQ-9-5, 6251 - 6252       | R.VEQIAIAQELNELDYDPSVSNAR.C                                             | 2810.02233 | 3 | 6.03E-12 | 0.98  | 7.87   | -     | 2009.8  |
| AHQ-9-6, 6171              | R.VEQIAIAQELNELDYDPSVSNAR.C                                             | 2810.02233 | 2 | 1.97E-08 | 0.86  | 3.55   | -     | 632.4   |
| AHQ-9-4, 6236 - 6238       | R.VEQIAIAQELNELDYDPSVSNAR.C                                             | 2810.02233 | 2 | 7.74E-07 | 0.97  | 6.14   | -     | 1187.4  |
| AHQ-9-8, 6086              | R.VGWQEQLLTIAR.T                                                        | 1387.60894 | 2 | 1.45E-07 | 0.93  | 3.55   | -     | 1439.1  |
| AHQ-9-5, 6103              | R.VGWQEQLLTIAR.T                                                        | 1387.60894 | 2 | 1.17E-08 | 0.91  | 3.46   | -     | 1133.6  |
| AHQ-9-7, 5998              | R.VGWQEQLLTIAR.T                                                        | 1387.60894 | 2 | 2.61E-08 | 0.94  | 3.89   | -     | 1358.8  |
| AHQ-9-4, 6088 - 6150       | R.VGWQEQLLTIAR.T                                                        | 1387.60894 | 2 | 5.45E-06 | 0.95  | 4.02   | -     | 1452.2  |
| AHQ-9-6, 6014              | R.VGWQEQLLTIAR.T                                                        | 1387.60894 | 2 | 8.44E-06 | 0.94  | 3.99   | -     | 1242.4  |
| AHQ-9-5, 3452 - 3532       | K.VLAVNQENQLM*EDYEK.L                                                   | 2069.23575 | 2 | 8.67E-06 | 0.93  | 4.69   | -     | 965.5   |
| AHQ-9-4, 3412              | K.VLAVNQENQLM*EDYEK.L                                                   | 2069.23575 | 2 | 7.00E-06 | 0.93  | 4.45   | -     | 730.0   |
| AHQ-9-4, 4281              | K.VLAVNQENQLM*EDYEK.L                                                   | 2053.23635 | 2 | 2.94E-06 | 0.72  | 3.47   | -     | 412.3   |
| AHQ-9-6, 4075 - 4082       | K.VLAVNQENQLM*EDYEK.L                                                   | 2053.23635 | 2 | 2.37E-05 | 0.93  | 4.34   | -     | 976.2   |
| AHQ-9-5, 4053 - 4124       | K.VLAVNQENQLM*EDYEK.L                                                   | 2053.23635 | 2 | 5.28E-06 | 0.96  | 5.09   | -     | 1183.6  |
| AHQ-9-6, 3494              | K.VLAVNQENQLM*EDYEK.L                                                   | 2069.23575 | 2 | 1.31E-04 | 0.91  | 4.31   | -     | 809.7   |
| AHQ-9-4, 4060 - 4108       | K.VLAVNQENQLM*EDYEK.L                                                   | 2053.23635 | 2 | 2.92E-08 | 0.96  | 4.89   | -     | 1322.0  |
| AHQ-9-4, 3521 - 3580       | K.VLAVNQENQLM*EDYEK.L                                                   | 2069.23575 | 2 | 9.40E-06 | 0.93  | 4.39   | -     | 1006.2  |
| AHQ-9-4, 3529              | K.VLAVNQENQLM*EDYEK.L                                                   | 2069.23575 | 3 | 2.00E-12 | 0.94  | 5.23   | -     | 1145.7  |
| AHQ-9-4, 3692              | K.VLAVNQENQLM*EDYEK.L                                                   | 2069.23575 | 2 | 3.25E-10 | 0.96  | 5.02   | -     | 1111.6  |
| gj30151108[ref]XP_301187.1 | similar to actin beta, cytoskeletal - Kenyan clawed frog [Homo sapiens] |            |   | 1.84E-12 | 1.91  | 20.34  | 7.40  | 32164.8 |
| AHQ-9-1, 4824              | K.DLYANTVLSGGTTM*YPGIADR.M                                              | 2232.45624 | 2 | 2.15E-04 | 0.71  | 2.98   | -     | 519.5   |
| AHQ-9-2, 4783              | K.DLYANTVLSGGTTM*YPGIADR.M                                              | 2232.45624 | 2 | 2.25E-04 | 0.93  | 4.61   | -     | 812.2   |
| AHQ-9-3, 4652 - 4662       | K.DLYANTVLSGGTTM*YPGIADR.M                                              | 2232.45624 | 2 | 5.17E-05 | 0.86  | 3.79   | -     | 711.6   |
| AHQ-9-4, 4685              | K.DLYANTVLSGGTTM*YPGIADR.M                                              | 2232.45624 | 2 | 5.21E-05 | 0.94  | 4.56   | -     | 1038.7  |
| AHQ-9-4, 5132              | K.DLYANTVLSGGTTM*YPGIADR.M                                              | 2216.45684 | 2 | 1.19E-04 | 0.73  | 3.07   | -     | 494.7   |
| AHQ-9-5, 4695              | K.DLYANTVLSGGTTM*YPGIADR.M                                              | 2232.45624 | 2 | 2.35E-07 | 0.95  | 4.95   | -     | 948.1   |
| AHQ-9-6, 4633              | K.DLYANTVLSGGTTM*YPGIADR.M                                              | 2232.45624 | 2 | 1.47E-05 | 0.88  | 3.80   | -     | 972.5   |
| AHQ-9-8, 4567 - 4626       | K.DLYANTVLSGGTTM*YPGIADR.M                                              | 2232.45624 | 2 | 2.39E-06 | 0.94  | 4.79   | -     | 924.3   |
| AHQ-9-8, 4686 - 4742       | K.DLYANTVLSGGTTM*YPGIADR.M                                              | 2232.45624 | 2 | 4.67E-07 | 0.95  | 4.99   | -     | 946.6   |
| AHQ-9-8, 4838 - 4903       | K.DLYANTVLSGGTTM*YPGIADR.M                                              | 2232.45624 | 2 | 1.05E-07 | 0.96  | 5.33   | -     | 798.1   |
| AHQ-9-8, 4942 - 4999       | K.DLYANTVLSGGTTM*YPGIADR.M                                              | 2216.45684 | 2 | 2.66E-08 | 0.97  | 5.72   | -     | 1277.2  |
| AHQ-9-8, 5268 - 5340       | K.DLYANTVLSGGTTM*YPGIADR.M                                              | 2216.45684 | 2 | 4.07E-04 | 0.91  | 4.49   | -     | 740.3   |
| AHQ-9-8, 6459 - 6519       | K.DLYANTVLSGGTTM*YPGIADR.M                                              | 2232.45624 | 2 | 2.05E-04 | 0.43  | 2.78   | -     | 437.6   |
| AHQ-9-9, 4351 - 4416       | K.DLYANTVLSGGTTM*YPGIADR.M                                              | 2232.45624 | 2 | 1.07E-04 | 0.81  | 3.79   | -     | 605.0   |
| AHQ-9-9, 4472              | K.DLYANTVLSGGTTM*YPGIADR.M                                              | 2232.45624 | 2 | 4.13E-04 | 0.86  | 3.62   | -     | 736.6   |
| AHQ-9-9, 4737              | K.DLYANTVLSGGTTM*YPGIADR.M                                              | 2216.45684 | 2 | 6.61E-05 | 0.82  | 3.63   | -     | 548.6   |
| AHQ-9-10, 4363 - 4413      | K.DLYANTVLSGGTTM*YPGIADR.M                                              | 2232.45624 | 2 | 1.41E-05 | 0.53  | 2.92   | -     | 385.4   |
| AHQ-9-10, 4483 - 4550      | K.DLYANTVLSGGTTM*YPGIADR.M                                              | 2232.45624 | 2 | 9.74E-05 | 0.95  | 5.16   | -     | 875.3   |
| AHQ-9-10, 4529 - 4606      | K.DLYANTVLSGGTTM*YPGIADR.M                                              | 2232.45624 | 2 | 3.20E-05 | 0.95  | 4.97   | -     | 875.8   |
| AHQ-9-11, 4573             | K.DLYANTVLSGGTTM*YPGIADR.M                                              | 2232.45624 | 2 | 5.01E-05 | 0.82  | 3.66   | -     | 633.5   |
| AHQ-9-12, 4442 - 4524      | K.DLYANTVLSGGTTM*YPGIADR.M                                              | 2232.45624 | 2 | 1.48E-07 | 0.92  | 5.00   | -     | 615.3   |
| AHQ-9-12, 4568 - 4624      | K.DLYANTVLSGGTTM*YPGIADR.M                                              | 2232.45624 | 2 | 1.34E-06 | 0.97  | 5.29   | -     | 1326.5  |
| AHQ-9-12, 4685             | K.DLYANTVLSGGTTM*YPGIADR.M                                              | 2232.45624 | 2 | 6.64E-06 | 0.88  | 3.93   | -     | 582.7   |
| AHQ-9-12, 4708 - 4781      | K.DLYANTVLSGGTTM*YPGIADR.M                                              | 2232.45624 | 2 | 9.61E-04 | 0.93  | 4.35   | -     | 1046.7  |
| AHQ-9-12, 4844 - 4905      | K.DLYANTVLSGGTTM*YPGIADR.M                                              | 2232.45624 | 2 | 6.43E-04 | 0.68  | 3.81   | -     | 290.9   |
| AHQ-9-12, 4857 - 4913      | K.DLYANTVLSGGTTM*YPGIADR.M                                              | 2216.45684 | 2 | 7.02E-07 | 0.83  | 4.06   | -     | 438.8   |
| AHQ-9-12, 5070             | K.DLYANTVLSGGTTM*YPGIADR.M                                              | 2216.45684 | 2 | 6.64E-04 | 0.84  | 4.10   | -     | 491.8   |
| AHQ-9-13, 4682 - 4755      | K.DLYANTVLSGGTTM*YPGIADR.M                                              | 2232.45624 | 2 | 4.91E-07 | 0.94  | 4.56   | -     | 1056.3  |
| AHQ-9-13, 4810 - 4875      | K.DLYANTVLSGGTTM*YPGIADR.M                                              | 2232.45624 | 2 | 1.26E-04 | 0.95  | 5.09   | -     | 929.4   |
| AHQ-9-13, 4984             | K.DLYANTVLSGGTTM*YPGIADR.M                                              | 2232.45624 | 2 | 9.56E-07 | 0.94  | 4.62   | -     | 1034.7  |
| AHQ-9-14, 5311 - 5383      | K.DLYANTVLSGGTTM*YPGIADR.M                                              | 2232.45624 | 2 | 9.94E-07 | 0.97  | 5.53   | -     | 1179.8  |
| AHQ-9-14, 5431 - 5496      | K.DLYANTVLSGGTTM*YPGIADR.M                                              | 2232.45624 | 2 | 1.77E-06 | 0.97  | 5.59   | -     | 1378.4  |
| AHQ-9-14, 5551             | K.DLYANTVLSGGTTM*YPGIADR.M                                              | 2232.45624 | 2 | 3.85E-07 | 0.94  | 4.67   | -     | 923.3   |
| AHQ-9-13-, 4497 - 4521     | K.DLYANTVLSGGTTM*YPGIADR.M                                              | 2232.45624 | 2 | 4.62E-04 | 0.80  | 3.99   | -     | 446.9   |
| AHQ-9-13-, 4589 - 4652     | K.DLYANTVLSGGTTM*YPGIADR.M                                              | 2232.45624 | 2 | 8.88E-04 | 0.96  | 5.51   | -     | 1067.7  |
| AHQ-9-13-, 4805            | K.DLYANTVLSGGTTM*YPGIADR.M                                              | 2232.45624 | 2 | 1.56E-07 | 0.98  | 5.96   | -     | 1551.9  |
| AHQ-9-13-, 4908 - 4965     | K.DLYANTVLSGGTTM*YPGIADR.M                                              | 2216.45684 | 2 | 2.14E-07 | 0.96  | 5.37   | -     | 1138.9  |
| AHQ-9-13-, 5052            | K.DLYANTVLSGGTTM*YPGIADR.M                                              | 2216.45684 | 2 | 3.41E-05 | 0.96  | 4.91   | -     | 1174.4  |
| AHQ-9-13-, 5208            | K.DLYANTVLSGGTTM*YPGIADR.M                                              | 2216.45684 | 2 | 1.62E-06 | 0.94  | 4.51   | -     | 762.9   |
| AHQ-9-14-, 4494 - 4555     | K.DLYANTVLSGGTTM*YPGIADR.M                                              | 2232.45624 | 2 | 1.84E-12 | 0.95  | 4.52   | -     | 979.2   |
| AHQ-9-14-, 4767 - 4822     | K.DLYANTVLSGGTTM*YPGIADR.M                                              | 2232.45624 | 2 | 1.93E-08 | 0.97  | 5.63   | -     | 1088.1  |
| AHQ-9-14-, 4877            | K.DLYANTVLSGGTTM*YPGIADR.M                                              | 2232.45624 | 2 | 3.92E-04 | 0.89  | 3.98   | -     | 768.8   |
| AHQ-9-14-, 4927 - 4994     | K.DLYANTVLSGGTTM*YPGIADR.M                                              | 2216.45684 | 2 | 3.99E-08 | 0.97  | 5.71   | -     | 1456.7  |
| AHQ-9-14-, 5038 - 5093     | K.DLYANTVLSGGTTM*YPGIADR.M                                              | 2216.45684 | 2 | 9.03E-08 | 0.97  | 6.74   | -     | 965.9   |
| gj4501885[ref]NP_001092.1  | beta actin; beta cytoskeletal actin [Homo sapiens]                      |            |   | 2.03E-12 | 10.96 | 120.34 | 39.70 | 41736.5 |
| AHQ-9-13-, 5624 - 5669     | R.CPEALFQPSFLGM*ESCGIHETTFFNSIM*K.C                                     | 3267.67588 | 3 | 1.55E-04 | 0.90  | 4.60   | -     | 703.1   |
| AHQ-9-12, 5596 - 5660      | R.CPEALFQPSFLGM*ESCGIHETTFFNSIM*K.C                                     | 3267.67588 | 3 | 4.72E-04 | 0.75  | 3.72   | -     | 491.8   |
| AHQ-9-8, 5652 - 5707       | R.CPEALFQPSFLGM*ESCGIHETTFFNSIM*K.C                                     | 3267.67588 | 3 | 1.02E-04 | 0.63  | 3.23   | -     | 324.1   |
| AHQ-9-8, 5160 - 5228       | K.EKLCYVALDFEQEM*ATAASSSSLEK.S                                          | 2826.10350 | 3 | 5.68E-07 | 0.86  | 3.81   | -     | 784.9   |
| AHQ-9-8, 6272 - 6278       | K.EKLCYVALDFEQEM*ATAASSSSLEK.S                                          | 2810.10410 | 2 | 1.11E-05 | 0.85  | 3.59   | -     | 709.4   |
| AHQ-9-8, 6458 - 6527       | K.EKLCYVALDFEQEM*ATAASSSSLEK.S                                          | 2826.10350 | 3 | 7.09E-07 | 0.90  | 4.48   | -     | 785.3   |
| AHQ-9-8, 5247 - 5315       | K.EKLCYVALDFEQEM*ATAASSSSLEK.S                                          | 2826.10350 | 3 | 1.68E-07 | 0.89  | 4.32   | -     | 1093.5  |
| AHQ-9-8, 5466              | K.EKLCYVALDFEQEM*ATAASSSSLEK.S                                          | 2826.10350 | 3 | 5.66E-04 | 0.77  | 3.16   | -     | 842.0   |
| AHQ-9-8, 6275 - 6335       | K.EKLCYVALDFEQEM*ATAASSSSLEK.S                                          | 2810.10410 | 3 | 1.79E-04 | 0.90  | 3.74   | -     | 1298.1  |
| AHQ-9-9, 2485              | R.GYSFTTAAER.E                                                          | 1133.19273 | 2 | 5.28E-04 | 0.95  | 3.43   | -     | 1361.3  |
| AHQ-9-6, 2603              | R.GYSFTTAAER.E                                                          | 1133.19273 | 2 | 7.18E-06 | 0.92  | 2.77   | -     | 1214.8  |
| AHQ-9-10, 2521 - 2569      | R.GYSFTTAAER.E                                                          | 1133.19273 | 2 | 1.29E-04 | 0.81  | 2.71   | -     | 786.6   |
| AHQ-9-4, 2609              | R.GYSFTTAAER.E                                                          | 1133.19273 | 2 | 2.89E-05 | 0.89  | 3.03   | -     | 1107.2  |
| AHQ-9-8, 2650 - 2706       | R.GYSFTTAAER.E                                                          | 1133.19273 | 2 | 6.50E-04 | 0.91  | 2.76   | -     | 1151.5  |
| AHQ-9-7, 2604              | R.GYSFTTAAER.E                                                          | 1133.19273 | 2 | 2.01E-04 | 0.88  | 2.60   | -     | 901.0   |
| AHQ-9-5, 2608 - 2609       | R.GYSFTTAAER.E                                                          | 1133.19273 | 2 | 1.47E-04 | 0.92  | 3.07   | -     | 1109.9  |
| AHQ-9-8, 2512 - 2592       | R.GYSFTTAAER.E                                                          | 1133.19273 | 2 | 2.46E-04 | 0.89  | 2.92   | -     | 972.1   |
| AHQ-9-12, 2601 - 2656      | R.GYSFTTAAER.E                                                          | 1133.19273 | 2 | 4.72E-04 | 0.87  | 3.31   | -     | 817.5   |
| AHQ-9-8, 2510 - 2575       | R.GYSFTTAAER.E                                                          | 1133.19273 | 2 | 1.92E-04 | 0.91  | 2.77   | -     | 1052.5  |
| AHQ-9-8, 4500              | R.KDLYANTVLSGGTTM*YPGIADR.M                                             | 2344.62976 | 2 | 4.62E-08 | 0.95  | 4.14   | -     | 1182.2  |
| AHQ-9-8, 4132 - 4175       | R.KDLYANTVLSGGTTM*YPGIADR.M                                             | 2360.62916 | 3 | 6.40E-04 | 0.93  | 4.51   | -     | 1175.8  |
| AHQ-9-14-, 4225 - 4227     | R.KDLYANTVLSGGTTM*YPGIADR.M                                             | 2360.62916 | 3 | 1.25E-04 | 0.95  | 5.70   | -     | 1101.0  |

|                            |                                                                        |            |   |          |       |        |       |         |
|----------------------------|------------------------------------------------------------------------|------------|---|----------|-------|--------|-------|---------|
| AHQ-9-8, 6286 - 6346       | K.LCYVALDFEQEMATAASSSSLEK.S                                            | 2552.81665 | 3 | 1.25E-10 | 0.97  | 6.27   | -     | 1839.8  |
| AHQ-9-8, 6358 - 6398       | K.LCYVALDFEQEM*ATAASSSSLEK.S                                           | 2568.81605 | 2 | 5.30E-06 | 0.95  | 4.22   | -     | 1418.8  |
| AHQ-9-8, 5982 - 6038       | K.LCYVALDFEQEM*ATAASSSSLEK.S                                           | 2568.81605 | 3 | 2.61E-04 | 0.85  | 3.39   | -     | 1553.0  |
| AHQ-9-8, 6452 - 6514       | K.LCYVALDFEQEM*ATAASSSSLEK.S                                           | 2568.81605 | 2 | 1.17E-07 | 0.98  | 5.62   | -     | 2447.6  |
| AHQ-9-8, 6454              | K.LCYVALDFEQEM*ATAASSSSLEK.S                                           | 2568.81605 | 2 | 4.98E-06 | 0.83  | 2.77   | -     | 1486.0  |
| AHQ-9-8, 6466 - 6523       | K.LCYVALDFEQEM*ATAASSSSLEK.S                                           | 2568.81605 | 3 | 6.24E-09 | 0.98  | 6.74   | -     | 2076.2  |
| AHQ-9-8, 6486 - 6487       | K.LCYVALDFEQEMATAASSSSLEK.S                                            | 2552.81665 | 3 | 1.62E-06 | 0.95  | 5.42   | -     | 1853.4  |
| AHQ-9-12, 5254 - 5312      | K.LCYVALDFEQEM*ATAASSSSLEK.S                                           | 2568.81605 | 2 | 5.31E-04 | 0.76  | 2.64   | -     | 950.7   |
| AHQ-9-8, 5312 - 5382       | K.LCYVALDFEQEM*ATAASSSSLEK.S                                           | 2568.81605 | 2 | 6.51E-06 | 0.88  | 3.62   | -     | 992.6   |
| AHQ-9-8, 6450 - 6506       | K.LCYVALDFEQEMATAASSSSLEK.S                                            | 2552.81665 | 2 | 3.51E-04 | 0.81  | 3.18   | -     | 817.7   |
| AHQ-9-8, 6354 - 6414       | K.LCYVALDFEQEMATAASSSSLEKSYELPDGQVITIGNER.F                            | 4325.73403 | 3 | 1.02E-11 | 0.95  | 5.46   | -     | 1131.5  |
| AHQ-9-8, 5359 - 5418       | R.TTGIVM*DSGDGVTHTVPIYEGYALPHAILR.L                                    | 3201.59868 | 3 | 1.17E-04 | 0.90  | 4.70   | -     | 777.5   |
| AHQ-9-8, 5410 - 5470       | R.TTGIVMDSGDGVTHTVPIYEGYALPHAILR.L                                     | 3185.59928 | 3 | 2.79E-12 | 0.97  | 6.22   | -     | 1715.4  |
| AHQ-9-8, 5112 - 5170       | R.TTGIVM*DSGDGVTHTVPIYEGYALPHAILR.L                                    | 3201.59868 | 3 | 5.22E-09 | 0.96  | 6.03   | -     | 1268.2  |
| AHQ-9-8, 5526              | R.TTGIVMDSGDGVTHTVPIYEGYALPHAILR.L                                     | 3185.59928 | 3 | 1.03E-06 | 0.96  | 5.37   | -     | 1385.8  |
| AHQ-9-8, 5076              | R.TTGIVMDSGDGVTHTVPIYEGYALPHAILR.L                                     | 3185.59928 | 3 | 4.96E-06 | 0.86  | 3.83   | -     | 996.5   |
| AHQ-9-13-, 5382 - 5446     | R.TTGIVMDSGDGVTHTVPIYEGYALPHAILR.L                                     | 3185.59928 | 3 | 9.05E-09 | 0.94  | 5.57   | -     | 1014.8  |
| AHQ-9-13-, 5173            | R.TTGIVM*DSGDGVTHTVPIYEGYALPHAILR.L                                    | 3201.59868 | 3 | 1.15E-06 | 0.87  | 4.18   | -     | 927.9   |
| AHQ-9-12, 5345 - 5409      | R.TTGIVMDSGDGVTHTVPIYEGYALPHAILR.L                                     | 3185.59928 | 3 | 2.03E-12 | 0.98  | 6.31   | -     | 1991.5  |
| AHQ-9-12, 5316 - 5377      | R.TTGIVM*DSGDGVTHTVPIYEGYALPHAILR.L                                    | 3201.59868 | 3 | 1.08E-04 | 0.73  | 3.18   | -     | 772.3   |
| AHQ-9-8, 5230 - 5291       | R.TTGIVM*DSGDGVTHTVPIYEGYALPHAILR.L                                    | 3201.59868 | 3 | 8.43E-08 | 0.97  | 6.03   | -     | 2008.1  |
| AHQ-9-7, 5374 - 5429       | R.TTGIVMDSGDGVTHTVPIYEGYALPHAILR.L                                     | 3185.59928 | 3 | 2.07E-04 | 0.69  | 3.38   | -     | 530.7   |
| AHQ-9-7, 5149              | R.TTGIVM*DSGDGVTHTVPIYEGYALPHAILR.L                                    | 3201.59868 | 3 | 4.05E-05 | 0.95  | 5.12   | -     | 1332.9  |
| AHQ-9-12, 5200 - 5256      | R.TTGIVMDSGDGVTHTVPIYEGYALPHAILR.L                                     | 3201.59868 | 3 | 6.03E-09 | 0.96  | 5.83   | -     | 1477.7  |
| AHQ-9-6, 5395              | R.TTGIVMDSGDGVTHTVPIYEGYALPHAILR.L                                     | 3185.59928 | 3 | 1.03E-04 | 0.60  | 3.68   | -     | 386.0   |
| AHQ-9-6, 5170              | R.TTGIVMDSGDGVTHTVPIYEGYALPHAILR.L                                     | 3201.59868 | 3 | 2.45E-05 | 0.93  | 4.58   | -     | 1338.0  |
| AHQ-9-12, 5090 - 5144      | R.TTGIVM*DSGDGVTHTVPIYEGYALPHAILR.L                                    | 3201.59868 | 3 | 8.50E-10 | 0.97  | 5.53   | -     | 2174.8  |
| AHQ-9-3, 5193 - 5196       | R.TTGIVMDSGDGVTHTVPIYEGYALPHAILR.L                                     | 3201.59868 | 3 | 1.64E-05 | 0.93  | 4.99   | -     | 1077.3  |
| AHQ-9-4, 5245              | R.TTGIVM*DSGDGVTHTVPIYEGYALPHAILR.L                                    | 3201.59868 | 3 | 3.13E-06 | 0.95  | 5.20   | -     | 1290.7  |
| AHQ-9-11, 5333             | R.TTGIVMDSGDGVTHTVPIYEGYALPHAILR.L                                     | 3185.59928 | 3 | 4.04E-05 | 0.74  | 3.11   | -     | 712.9   |
| AHQ-9-9, 5092              | R.TTGIVM*DSGDGVTHTVPIYEGYALPHAILR.L                                    | 3201.59868 | 3 | 2.61E-07 | 0.92  | 4.86   | -     | 1198.7  |
| AHQ-9-9, 5220 - 5291       | R.TTGIVMDSGDGVTHTVPIYEGYALPHAILR.L                                     | 3185.59928 | 3 | 8.31E-09 | 0.97  | 6.36   | -     | 1310.1  |
| AHQ-9-1, 5388              | R.TTGIVM*DSGDGVTHTVPIYEGYALPHAILR.L                                    | 3201.59868 | 3 | 7.78E-04 | 0.86  | 3.87   | -     | 934.3   |
| AHQ-9-11, 5107 - 5161      | R.TTGIVMDSGDGVTHTVPIYEGYALPHAILR.L                                     | 3201.59868 | 3 | 5.89E-04 | 0.89  | 4.65   | -     | 897.7   |
| AHQ-9-10, 5062 - 5118      | R.TTGIVM*DSGDGVTHTVPIYEGYALPHAILR.L                                    | 3201.59868 | 3 | 1.09E-05 | 0.92  | 4.40   | -     | 1007.0  |
| AHQ-9-11, 3802 - 3865      | R.VAPEEHVLLTEAPLNPK.A                                                  | 1955.24351 | 3 | 6.89E-04 | 0.36  | 3.07   | -     | 470.4   |
| AHQ-9-11, 3830 - 3837      | R.VAPEEHVLLTEAPLNPK.A                                                  | 1955.24351 | 2 | 5.04E-08 | 0.92  | 4.56   | -     | 827.7   |
| AHQ-9-10, 3778             | R.VAPEEHVLLTEAPLNPK.A                                                  | 1955.24351 | 2 | 1.74E-06 | 0.78  | 3.09   | -     | 537.6   |
| AHQ-9-9, 3621 - 3675       | R.VAPEEHVLLTEAPLNPK.A                                                  | 1955.24351 | 2 | 6.18E-07 | 0.89  | 4.11   | -     | 702.1   |
| AHQ-9-5, 3895              | R.VAPEEHVLLTEAPLNPK.A                                                  | 1955.24351 | 2 | 3.52E-10 | 0.91  | 4.60   | -     | 731.5   |
| AHQ-9-12, 3784 - 3840      | R.VAPEEHVLLTEAPLNPK.A                                                  | 1955.24351 | 2 | 1.49E-04 | 0.91  | 4.27   | -     | 830.3   |
| AHQ-9-12, 3789 - 3845      | R.VAPEEHVLLTEAPLNPK.A                                                  | 1955.24351 | 3 | 3.17E-04 | 0.83  | 4.34   | -     | 727.8   |
| AHQ-9-12, 3896 - 3952      | R.VAPEEHVLLTEAPLNPK.A                                                  | 1955.24351 | 2 | 5.59E-06 | 0.86  | 3.84   | -     | 702.3   |
| AHQ-9-6, 3841              | R.VAPEEHVLLTEAPLNPK.A                                                  | 1955.24351 | 2 | 1.24E-04 | 0.91  | 4.46   | -     | 785.1   |
| AHQ-9-7, 3822              | R.VAPEEHVLLTEAPLNPK.A                                                  | 1955.24351 | 2 | 1.05E-05 | 0.90  | 4.00   | -     | 848.5   |
| AHQ-9-3, 3822 - 3897       | R.VAPEEHVLLTEAPLNPK.A                                                  | 1955.24351 | 2 | 8.96E-05 | 0.84  | 3.57   | -     | 679.8   |
| AHQ-9-8, 3679 - 3738       | R.VAPEEHVLLTEAPLNPK.A                                                  | 1955.24351 | 2 | 2.47E-04 | 0.91  | 4.45   | -     | 805.1   |
| AHQ-9-8, 3690 - 3751       | R.VAPEEHVLLTEAPLNPK.A                                                  | 1955.24351 | 3 | 9.18E-04 | 0.63  | 3.51   | -     | 659.4   |
| AHQ-9-2, 4007              | R.VAPEEHVLLTEAPLNPK.A                                                  | 1955.24351 | 2 | 9.38E-04 | 0.77  | 3.92   | -     | 431.0   |
| AHQ-9-13, 4056             | R.VAPEEHVLLTEAPLNPK.A                                                  | 1955.24351 | 2 | 8.59E-04 | 0.88  | 3.64   | -     | 815.5   |
| AHQ-9-13-, 3910            | R.VAPEEHVLLTEAPLNPK.A                                                  | 1955.24351 | 2 | 1.13E-04 | 0.88  | 3.71   | -     | 734.3   |
| AHQ-9-8, 3768 - 3830       | R.VAPEEHVLLTEAPLNPK.A                                                  | 1955.24351 | 2 | 6.03E-07 | 0.95  | 4.93   | -     | 1005.7  |
| AHQ-9-8, 3972 - 4052       | R.VAPEEHVLLTEAPLNPK.A                                                  | 1955.24351 | 2 | 7.59E-04 | 0.87  | 3.91   | -     | 528.1   |
| AHQ-9-4, 3908              | R.VAPEEHVLLTEAPLNPK.A                                                  | 1955.24351 | 2 | 3.20E-04 | 0.86  | 3.79   | -     | 704.3   |
| AHQ-9-1, 4087              | R.VAPEEHVLLTEAPLNPK.A                                                  | 1955.24351 | 3 | 4.61E-04 | 0.78  | 3.97   | -     | 914.3   |
| gi29741246[ref]XP_294070.1 | similar to Glyceraldehyde 3-phosphate dehydrogenase, liver (GAPDH) [Ho |            |   | 2.34E-12 | 3.52  | 40.30  | 13.40 | 35032.0 |
| AHQ-9-13-, 5088            | K.AENGLKLVINGNPITFQER.D                                                | 2114.39062 | 3 | 4.42E-04 | 0.76  | 3.18   | -     | 917.1   |
| AHQ-9-9, 4893 - 4956       | K.AENGLKLVINGNPITFQER.D                                                | 2114.39062 | 2 | 3.53E-04 | 0.77  | 3.47   | -     | 537.8   |
| AHQ-9-13-, 5316 - 5372     | K.LVINGNPITFQER.D                                                      | 1614.87029 | 2 | 2.34E-12 | 0.93  | 3.77   | -     | 893.5   |
| AHQ-9-9, 5229              | K.LVINGNPITFQER.D                                                      | 1614.87029 | 2 | 3.25E-07 | 0.89  | 3.44   | -     | 811.0   |
| AHQ-9-13, 5466 - 5546      | K.LVINGNPITFQER.D                                                      | 1614.87029 | 2 | 1.43E-08 | 0.89  | 3.50   | -     | 1076.9  |
| AHQ-9-9, 5100 - 5175       | K.LVINGNPITFQER.D                                                      | 1614.87029 | 2 | 9.51E-12 | 0.91  | 3.79   | -     | 953.0   |
| AHQ-9-9, 6079 - 6080       | K.VLHDNFVIGVGLM*TTVHAITATQK.T                                          | 2596.04531 | 3 | 2.88E-10 | 0.93  | 6.06   | -     | 1203.7  |
| AHQ-9-9, 5757 - 5827       | K.VLHDNFVIGVGLM*TTVHAITATQK.T                                          | 2612.04471 | 3 | 4.38E-06 | 0.89  | 5.09   | -     | 1120.5  |
| gi4826898[ref]NP_005013.1  | profilin 1, profilin-1 [Homo sapiens]                                  |            |   | 2.68E-12 | 12.70 | 150.32 | 65.70 | 16054.2 |
| AHQ-9-13-, 1910 - 1974     | K.CYEM*ASHLR.R                                                         | 1184.32794 | 2 | 3.74E-04 | 0.94  | 3.29   | -     | 1249.4  |
| AHQ-9-13-, 2004 - 2061     | K.CYEM*ASHLR.R                                                         | 1184.32794 | 2 | 2.83E-05 | 0.86  | 3.05   | -     | 918.6   |
| AHQ-9-13-, 4017 - 4025     | K.DRSSFYVNGLTGGQK.C                                                    | 1742.91379 | 2 | 2.68E-12 | 0.98  | 6.31   | -     | 1313.0  |
| AHQ-9-13, 4166             | K.DRSSFYVNGLTGGQK.C                                                    | 1742.91379 | 2 | 6.24E-05 | 0.93  | 4.38   | -     | 864.6   |
| AHQ-9-13, 4366             | K.DRSSFYVNGLTGGQK.C                                                    | 1742.91379 | 2 | 3.91E-04 | 0.61  | 2.84   | -     | 450.6   |
| AHQ-9-13-, 4150            | K.DRSSFYVNGLTGGQK.C                                                    | 1742.91379 | 2 | 1.78E-06 | 0.87  | 3.94   | -     | 738.3   |
| AHQ-9-14-, 4514            | R.DSLLDGGEFSM*DLR.T                                                    | 1642.76963 | 2 | 9.03E-09 | 0.95  | 3.64   | -     | 1763.3  |
| AHQ-9-13-, 4564 - 4633     | R.DSLLDGGEFSM*DLR.T                                                    | 1642.76963 | 2 | 3.41E-04 | 0.92  | 3.36   | -     | 1500.5  |
| AHQ-9-13-, 4846 - 4917     | R.DSLLDGGEFSM*DLR.T                                                    | 1642.76963 | 2 | 4.81E-05 | 0.89  | 3.08   | -     | 1396.3  |
| AHQ-9-12, 5108             | R.DSLLDGGEFSM*DLR.T                                                    | 1626.77023 | 2 | 1.20E-04 | 0.96  | 3.11   | -     | 2377.9  |
| AHQ-9-13-, 4937 - 4997     | R.DSLLDGGEFSM*DLR.T                                                    | 1626.77023 | 2 | 7.82E-10 | 0.98  | 4.78   | -     | 2400.9  |
| AHQ-9-14-, 4373            | R.DSLLDGGEFSM*DLR.T                                                    | 1642.76963 | 2 | 9.10E-04 | 0.93  | 3.97   | -     | 1011.0  |
| AHQ-9-13-, 4332 - 4397     | R.DSLLDGGEFSM*DLR.T                                                    | 1642.76963 | 2 | 8.14E-07 | 0.96  | 4.66   | -     | 1571.5  |
| AHQ-9-13-, 4964            | R.DSLLDGGEFSM*DLR.T                                                    | 1642.76963 | 2 | 4.54E-07 | 0.94  | 4.54   | -     | 856.1   |
| AHQ-9-13-, 5037 - 5092     | R.DSLLDGGEFSM*DLR.T                                                    | 1626.77023 | 2 | 2.16E-06 | 0.97  | 4.52   | -     | 2107.5  |
| AHQ-9-13, 4479 - 4534      | R.DSLLDGGEFSM*DLR.T                                                    | 1642.76963 | 2 | 8.50E-05 | 0.95  | 4.16   | -     | 1151.4  |
| AHQ-9-13-, 4452 - 4509     | R.DSLLDGGEFSM*DLR.T                                                    | 1642.76963 | 2 | 5.82E-09 | 0.96  | 4.58   | -     | 1699.7  |
| AHQ-9-14-, 4982            | R.DSLLDGGEFSM*DLR.T                                                    | 1626.77023 | 2 | 1.91E-05 | 0.96  | 3.96   | -     | 1743.8  |
| AHQ-9-13, 4590 - 4650      | R.DSLLDGGEFSM*DLR.T                                                    | 1642.76963 | 2 | 2.24E-09 | 0.97  | 4.70   | -     | 1906.8  |
| AHQ-9-13, 4594 - 4667      | R.DSLLDGGEFSM*DLR.T                                                    | 1642.76963 | 2 | 3.02E-04 | 0.92  | 3.32   | -     | 1430.7  |
| AHQ-9-13, 4706 - 4790      | R.DSLLDGGEFSM*DLR.T                                                    | 1642.76963 | 2 | 9.03E-09 | 0.97  | 4.91   | -     | 1792.5  |
| AHQ-9-13, 5004 - 5058      | R.DSLLDGGEFSM*DLR.T                                                    | 1642.76963 | 2 | 7.10E-04 | 0.76  | 2.98   | -     | 902.3   |
| AHQ-9-13, 5120 - 5198      | R.DSLLDGGEFSM*DLR.T                                                    | 1626.77023 | 2 | 1.20E-10 | 0.95  | 4.30   | -     | 1324.6  |
| AHQ-9-13, 5211 - 5282      | R.DSLLDGGEFSM*DLR.T                                                    | 1626.77023 | 2 | 3.87E-08 | 0.98  | 4.79   | -     | 2246.5  |
| AHQ-9-13, 5338 - 5394      | R.DSLLDGGEFSM*DLR.T                                                    | 1626.77023 | 2 | 2.54E-09 | 0.98  | 4.73   | -     | 2369.5  |
| AHQ-9-13, 5422 - 5495      | R.DSLLDGGEFSM*DLR.T                                                    | 1626.77023 | 2 | 2.86E-07 | 0.98  | 4.25   | -     | 2867.1  |
| AHQ-9-13-, 5077            | R.DSLLDGGEFSM*DLR.T                                                    | 1642.76963 | 2 | 3.72E-06 | 0.90  | 3.65   | -     | 1014.3  |
| AHQ-9-13-, 5148 - 5218     | R.DSLLDGGEFSM*DLR.T                                                    | 1626.77023 | 2 | 3.42E-08 | 0.97  | 4.76   | -     | 2286.7  |
| AHQ-9-13-, 4698            | R.DSLLDGGEFSM*DLR.T                                                    | 1642.76963 | 2 | 1.28E-04 | 0.94  | 3.76   | -     | 1323.2  |
| AHQ-9-13, 3916 - 3994      | K.DSPSVAAPV*PGK.T                                                      | 1214.35211 | 2 | 4.55E-05 | 0.72  | 2.81   | -     | 797.2   |
| AHQ-9-13-, 6085 - 6097     | K.DSPSVAAPV*PGK*TVNITPAEVGVLVGK.D                                      | 2840.26581 | 3 | 3.09E-05 | 0.75  | 3.13   | -     | 1097.2  |
| AHQ-9-13, 4455 - 4514      | R.SSFYVNGLTGGQK.C                                                      | 1471.63957 | 2 | 1.56E-08 | 0.87  | 3.90   | -     | 619.9   |
| AHQ-9-12, 4321 - 4380      | R.SSFYVNGLTGGQK.C                                                      | 1471.63957 | 2 | 1.14E-08 | 0.94  | 3.46   | -     | 1087.5  |
| AHQ-9-13, 4386             | R.SSFYVNGLTGGQK.C                                                      | 1471.63957 | 1 | 5.13E-09 | 0.63  | 2.41   | -     | 578.7   |
| AHQ-9-12, 4384             | R.SSFYVNGLTGGQK.C                                                      | 1471.63957 | 1 | 9.83E-04 | 0.25  | 2.00   | -     | 394.6   |
| AHQ-9-13-, 4348 - 4416     | R.SSFYVNGLTGGQK.C                                                      | 1471.63957 | 1 | 1.89E-07 | 0.44  | 2.76   | -     | 318.0   |
| AHQ-9-13, 4310 - 4383      | R.SSFYVNGLTGGQK.C                                                      | 1471.63957 | 2 | 9.56E-08 | 0.94  | 4.14   | -     | 819.8   |
| AHQ-9-13, 4527 - 4598      | R.SSFYVNGLTGGQK.C                                                      | 1471.63957 | 1 | 3.91E-08 | 0.54  | 2.46   | -     | 456.8   |
| AHQ-9-13, 4570 - 4626      | R.SSFYVNGLTGGQK.C                                                      | 1471.63957 | 2 | 3.95E-08 | 0.97  | 4.42   | -     | 1672.6  |
| AHQ-9-14-, 4447            | R.SSFYVNGLTGGQK.C                                                      | 1471.63957 | 2 | 3.71E-07 | 0.91  | 2.87   | -     | 1345.6  |
| AHQ-9-13-, 4194 - 4269     | R.SSFYVNGLTGGQK.C                                                      | 1471.63957 | 2 | 5.73E-07 | 0.95  | 4.23   | -     | 986.2   |
| AHQ-9-13-, 4220            | R.SSFYVNGLTGGQK.C                                                      | 1471.63957 | 1 | 4.85E-08 | 0.25  | 2.01   | -     | 280.4   |

|                           |                                                                  |            |   |          |       |        |       |         |
|---------------------------|------------------------------------------------------------------|------------|---|----------|-------|--------|-------|---------|
| AHQ-9-13-, 4229           | R.SSFYVNLTLGGQK.C                                                | 1471.63957 | 1 | 8.56E-05 | 0.46  | 2.51   | -     | 368.7   |
| AHQ-9-13-, 4324 - 4392    | R.SSFYVNLTLGGQK.C                                                | 1471.63957 | 2 | 1.59E-05 | 0.93  | 3.73   | -     | 918.3   |
| AHQ-9-13-, 3225           | K.STGGAPTFNVTYK.T                                                | 1380.52843 | 1 | 9.58E-04 | 0.18  | 2.26   | -     | 316.0   |
| AHQ-9-13-, 3188 - 3248    | K.STGGAPTFNVTYK.T                                                | 1380.52843 | 2 | 6.69E-07 | 0.86  | 3.35   | -     | 483.9   |
| AHQ-9-13-, 3084 - 3140    | K.STGGAPTFNVTYK.T                                                | 1380.52843 | 2 | 2.09E-09 | 0.86  | 3.88   | -     | 459.5   |
| AHQ-9-13, 3350 - 3407     | K.STGGAPTFNVTYK.T                                                | 1380.52843 | 2 | 5.30E-06 | 0.88  | 3.61   | -     | 525.8   |
| AHQ-9-13, 3230 - 3290     | K.STGGAPTFNVTYK.T                                                | 1380.52843 | 2 | 3.28E-09 | 0.89  | 3.57   | -     | 585.1   |
| AHQ-9-12, 3206            | K.STGGAPTFNVTYK.T                                                | 1380.52843 | 1 | 3.20E-05 | 0.26  | 2.13   | -     | 429.0   |
| AHQ-9-13-, 3181           | K.STGGAPTFNVTYKTKDK.T                                            | 1724.89354 | 2 | 7.36E-04 | 0.74  | 3.03   | -     | 518.4   |
| AHQ-9-13-, 3058           | K.TDKTLVLLM*GK.E                                                 | 1235.51929 | 2 | 3.32E-04 | 0.89  | 2.97   | -     | 1027.1  |
| AHQ-9-13, 3139 - 3219     | K.TDKTLVLLM*GK.E                                                 | 1235.51929 | 2 | 7.11E-04 | 0.81  | 2.81   | -     | 708.0   |
| AHQ-9-13-, 3689 - 3745    | K.TDKTLVLLM*GK.E                                                 | 1235.51929 | 2 | 1.65E-06 | 0.93  | 3.62   | -     | 1145.3  |
| AHQ-9-13, 5606 - 5682     | K.TFVNITPAEVLVVGK.D                                              | 1644.93630 | 2 | 3.48E-08 | 0.92  | 4.07   | -     | 961.8   |
| AHQ-9-13, 5608 - 5616     | K.TFVNITPAEVLVVGK.D                                              | 1644.93630 | 3 | 8.03E-07 | 0.97  | 5.90   | -     | 1798.1  |
| AHQ-9-13-, 5389 - 5445    | K.TFVNITPAEVLVVGK.D                                              | 1644.93630 | 2 | 8.47E-05 | 0.95  | 5.08   | -     | 902.1   |
| AHQ-9-13-, 5458 - 5465    | K.TFVNITPAEVLVVGK.D                                              | 1644.93630 | 3 | 3.87E-06 | 0.96  | 5.21   | -     | 1613.3  |
| AHQ-9-13-, 5500 - 5568    | K.TFVNITPAEVLVVGK.D                                              | 1644.93630 | 2 | 1.26E-04 | 0.93  | 3.96   | -     | 965.8   |
| AHQ-9-13, 5516 - 5570     | K.TFVNITPAEVLVVGK.D                                              | 1644.93630 | 2 | 1.94E-04 | 0.86  | 3.60   | -     | 622.5   |
| AHQ-9-13-, 5162 - 5220    | K.TFVNITPAEVLVVGKDR.S                                            | 1916.21052 | 2 | 1.60E-06 | 0.90  | 4.66   | -     | 547.5   |
| AHQ-9-12, 5186            | K.TFVNITPAEVLVVGKDR.S                                            | 1916.21052 | 2 | 9.99E-05 | 0.42  | 2.69   | -     | 419.4   |
| AHQ-9-13-, 3820 - 3878    | K.TLVLLM*GK.E                                                    | 875.15478  | 2 | 6.99E-05 | 0.79  | 2.55   | -     | 559.4   |
| AHQ-9-13, 3320 - 3334     | K.TLVLLM*GK.E                                                    | 891.15418  | 2 | 3.21E-04 | 0.82  | 2.58   | -     | 810.7   |
| gj4503715 ref NP_000500.1 | fibrinogen, gamma chain isoform gamma-A precursor [Homo sapiens] |            |   | 3.23E-12 | 12.00 | 140.29 | 49.20 | 49481.2 |
| AHQ-9-13, 4369 - 4385     | K.AIQLYNPDESSKPNMIDAATLK.S                                       | 2521.82886 | 2 | 1.91E-05 | 0.67  | 3.56   | -     | 280.9   |
| AHQ-9-13, 5315            | K.ASTPNGYDNGIIVATWK.T                                            | 1895.06358 | 2 | 1.68E-05 | 0.60  | 2.69   | -     | 533.2   |
| AHQ-9-13-, 5290 - 5332    | K.ASTPNGYDNGIIVATWK.T                                            | 1895.06358 | 2 | 1.37E-07 | 0.80  | 3.32   | -     | 444.8   |
| AHQ-9-7, 2770 - 2838      | K.CHAGHLNGVYVYQGGTYSK.A                                          | 2014.16662 | 2 | 3.23E-12 | 0.97  | 5.71   | -     | 1170.4  |
| AHQ-9-7, 2840 - 2845      | K.CHAGHLNGVYVYQGGTYSK.A                                          | 2014.16662 | 3 | 1.87E-06 | 0.94  | 4.56   | -     | 1162.0  |
| AHQ-9-8, 2772             | K.CHAGHLNGVYVYQGGTYSK.A                                          | 2014.16662 | 2 | 1.15E-05 | 0.94  | 4.46   | -     | 800.3   |
| AHQ-9-7, 2726 - 2785      | K.CHAGHLNGVYVYQGGTYSK.A                                          | 2014.16662 | 3 | 5.58E-05 | 0.79  | 3.54   | -     | 823.9   |
| AHQ-9-7, 3089 - 3106      | R.DNCCILDER.F                                                    | 1197.27847 | 2 | 1.29E-05 | 0.88  | 3.01   | -     | 1047.2  |
| AHQ-9-9, 4820             | K.EGFHLSPTGTTFWLGNEK.I                                           | 2208.37146 | 2 | 1.25E-07 | 0.86  | 3.88   | -     | 572.7   |
| AHQ-9-7, 4956 - 5022      | K.EGFHLSPTGTTFWLGNEK.I                                           | 2208.37146 | 2 | 2.12E-05 | 0.88  | 4.00   | -     | 619.2   |
| AHQ-9-8, 5036             | K.EGFHLSPTGTTFWLGNEK.I                                           | 2208.37146 | 2 | 3.92E-05 | 0.84  | 3.70   | -     | 483.5   |
| AHQ-9-7, 6004 - 6024      | R.FGSYPTTCGIADFLSTYQTK.V                                         | 2420.65656 | 3 | 2.11E-04 | 0.93  | 5.09   | -     | 999.7   |
| AHQ-9-8, 4424             | K.IHLISTQAIYALR.V                                                | 1683.97576 | 2 | 1.52E-07 | 0.94  | 4.23   | -     | 1098.5  |
| AHQ-9-8, 2202             | R.LTIGEGQQHHLGGAK.Q                                              | 1546.71290 | 2 | 1.68E-09 | 0.66  | 2.66   | -     | 651.0   |
| AHQ-9-7, 2184 - 2240      | R.LTIGEGQQHHLGGAK.Q                                              | 1546.71290 | 2 | 7.19E-12 | 0.95  | 4.13   | -     | 1397.5  |
| AHQ-9-7, 3824             | K.QSGLYFIKPLK.A                                                  | 1294.56665 | 2 | 9.10E-04 | 0.60  | 2.74   | -     | 287.0   |
| AHQ-9-7, 3801 - 3808      | K.VAQLEAQCQEPCKDVTQIHIDITGK.D                                    | 2772.06211 | 2 | 1.42E-06 | 0.89  | 4.29   | -     | 387.7   |
| AHQ-9-9, 3819             | K.VAQLEAQCQEPCKDVTQIHIDITGKDCQDIANK.G                            | 3718.05993 | 3 | 7.01E-04 | 0.80  | 3.57   | -     | 776.1   |
| AHQ-9-7, 3148 - 3176      | R.VELLEDWNGR.T                                                   | 1118.18129 | 2 | 1.80E-05 | 0.90  | 3.31   | -     | 1190.0  |
| AHQ-9-8, 3148             | R.VELLEDWNGR.T                                                   | 1118.18129 | 2 | 4.66E-06 | 0.88  | 2.89   | -     | 1061.5  |
| AHQ-9-5, 3113             | K.YEASILTHDSSIR.Y                                                | 1492.61564 | 2 | 3.51E-04 | 0.66  | 2.56   | -     | 564.2   |
| AHQ-9-7, 3017 - 3088      | K.YEASILTHDSSIR.Y                                                | 1492.61564 | 2 | 1.34E-06 | 0.86  | 3.86   | -     | 536.3   |
| AHQ-9-7, 3061             | K.YEASILTHDSSIR.Y                                                | 1492.61564 | 3 | 6.28E-06 | 0.69  | 3.05   | -     | 610.9   |
| AHQ-9-7, 2908             | K.YEASILTHDSSIR.Y                                                | 1492.61564 | 2 | 7.90E-04 | 0.67  | 2.75   | -     | 385.7   |
| AHQ-9-8, 2996             | K.YEASILTHDSSIR.Y                                                | 1492.61564 | 2 | 3.68E-06 | 0.71  | 2.71   | -     | 474.2   |
| AHQ-9-11, 3089            | K.YEASILTHDSSIR.Y                                                | 1492.61564 | 2 | 2.74E-06 | 0.81  | 3.09   | -     | 532.1   |
| AHQ-9-12, 3042 - 3112     | K.YEASILTHDSSIR.Y                                                | 1492.61564 | 2 | 1.48E-05 | 0.88  | 3.19   | -     | 839.9   |
| AHQ-9-7, 2764 - 2820      | R.YLQEIYNSNNQK.I                                                 | 1514.62131 | 2 | 6.24E-08 | 0.96  | 5.05   | -     | 1265.4  |
| AHQ-9-7, 2876 - 2945      | R.YLQEIYNSNNQK.I                                                 | 1514.62131 | 2 | 5.03E-05 | 0.93  | 4.30   | -     | 1061.4  |
| gj4557697 ref NP_000412.1 | keratin 10; Keratin-10 [Homo sapiens]                            |            |   | 3.38E-12 | 13.26 | 160.29 | 31.60 | 57247.1 |
| AHQ-9-1, 2967             | R.ALEESNYELEGK.I                                                 | 1382.45482 | 2 | 4.91E-07 | 0.94  | 3.78   | -     | 1350.4  |
| AHQ-9-7, 2748             | R.ALEESNYELEGK.I                                                 | 1382.45482 | 2 | 2.00E-07 | 0.91  | 3.34   | -     | 1403.7  |
| AHQ-9-8, 2766             | R.ALEESNYELEGK.I                                                 | 1382.45482 | 2 | 7.00E-07 | 0.96  | 4.44   | -     | 1318.0  |
| AHQ-9-3, 2792             | R.ALEESNYELEGK.I                                                 | 1382.45482 | 2 | 2.51E-07 | 0.92  | 3.68   | -     | 1099.1  |
| AHQ-9-6, 2761             | R.ALEESNYELEGK.I                                                 | 1382.45482 | 2 | 1.97E-06 | 0.88  | 3.89   | -     | 882.5   |
| AHQ-9-4, 2757             | R.ALEESNYELEGK.I                                                 | 1382.45482 | 2 | 2.54E-06 | 0.95  | 4.12   | -     | 1225.6  |
| AHQ-9-9, 2655 - 2668      | R.ALEESNYELEGK.I                                                 | 1382.45482 | 2 | 1.20E-04 | 0.79  | 2.97   | -     | 866.8   |
| AHQ-9-14-, 2833           | R.ALEESNYELEGK.I                                                 | 1382.45482 | 2 | 2.44E-05 | 0.89  | 2.92   | -     | 1350.2  |
| AHQ-9-5, 2768             | R.ALEESNYELEGK.I                                                 | 1382.45482 | 2 | 7.23E-07 | 0.95  | 4.13   | -     | 1340.1  |
| AHQ-9-11, 2758 - 2762     | R.ALEESNYELEGK.I                                                 | 1382.45482 | 2 | 2.30E-07 | 0.95  | 3.81   | -     | 1386.6  |
| AHQ-9-2, 2847             | R.ALEESNYELEGK.I                                                 | 1382.45482 | 2 | 2.36E-08 | 0.92  | 3.79   | -     | 938.9   |
| AHQ-9-13-, 2828           | R.ALEESNYELEGK.I                                                 | 1382.45482 | 2 | 5.17E-06 | 0.90  | 3.72   | -     | 875.3   |
| AHQ-9-12, 2754 - 2808     | R.ALEESNYELEGK.I                                                 | 1382.45482 | 2 | 4.55E-05 | 0.72  | 2.92   | -     | 590.8   |
| AHQ-9-4, 2765 - 2768      | R.ALEESNYELEGK.I                                                 | 1382.45482 | 1 | 6.13E-05 | 0.29  | 2.39   | -     | 445.8   |
| AHQ-9-14, 3599            | R.ALEESNYELEGK.I                                                 | 1382.45482 | 2 | 2.25E-05 | 0.70  | 2.74   | -     | 923.3   |
| AHQ-9-14-, 3549           | K.DAEAWFNEK.S                                                    | 1110.15762 | 2 | 3.32E-04 | 0.76  | 2.75   | -     | 700.2   |
| AHQ-9-6, 3434             | K.DAEAWFNEK.S                                                    | 1110.15762 | 2 | 1.56E-04 | 0.73  | 2.57   | -     | 959.4   |
| AHQ-9-2, 3542             | K.DAEAWFNEK.S                                                    | 1110.15762 | 2 | 4.15E-04 | 0.82  | 3.17   | -     | 943.2   |
| AHQ-9-4, 3441             | K.DAEAWFNEK.S                                                    | 1110.15762 | 2 | 7.88E-04 | 0.81  | 3.32   | -     | 872.1   |
| AHQ-9-7, 4973 - 5028      | K.ELTTEIDNNIEQISSYK.S                                            | 1998.13406 | 2 | 3.24E-05 | 0.78  | 3.47   | -     | 835.2   |
| AHQ-9-3, 4313 - 4389      | K.ELTTEIDNNIEQISSYK.S                                            | 1998.13406 | 2 | 1.17E-04 | 0.83  | 3.52   | -     | 489.2   |
| AHQ-9-3, 5040             | K.ELTTEIDNNIEQISSYK.S                                            | 1998.13406 | 2 | 5.12E-09 | 0.87  | 3.82   | -     | 712.4   |
| AHQ-9-7, 4249             | K.ELTTEIDNNIEQISSYK.S                                            | 1998.13406 | 2 | 5.84E-07 | 0.87  | 3.95   | -     | 694.8   |
| AHQ-9-1, 4482             | K.ELTTEIDNNIEQISSYK.S                                            | 1998.13406 | 2 | 1.46E-10 | 0.95  | 4.68   | -     | 967.8   |
| AHQ-9-14, 5711            | K.ELTTEIDNNIEQISSYK.S                                            | 1998.13406 | 2 | 1.08E-05 | 0.70  | 3.17   | -     | 444.5   |
| AHQ-9-8, 5075             | K.ELTTEIDNNIEQISSYK.S                                            | 1998.13406 | 2 | 3.25E-05 | 0.83  | 3.40   | -     | 777.6   |
| AHQ-9-12, 4932 - 5000     | K.ELTTEIDNNIEQISSYK.S                                            | 1998.13406 | 2 | 2.98E-04 | 0.70  | 2.94   | -     | 489.3   |
| AHQ-9-2, 5177 - 5253      | K.ELTTEIDNNIEQISSYK.S                                            | 1998.13406 | 2 | 4.48E-06 | 0.91  | 4.19   | -     | 791.1   |
| AHQ-9-6, 5146             | K.ELTTEIDNNIEQISSYK.S                                            | 1998.13406 | 2 | 3.24E-05 | 0.84  | 3.26   | -     | 736.2   |
| AHQ-9-4, 5078             | K.ELTTEIDNNIEQISSYK.S                                            | 1998.13406 | 3 | 1.43E-07 | 0.75  | 3.35   | -     | 714.3   |
| AHQ-9-4, 5188             | K.ELTTEIDNNIEQISSYK.S                                            | 1998.13406 | 2 | 1.43E-05 | 0.63  | 3.62   | -     | 548.4   |
| AHQ-9-6, 5027             | K.ELTTEIDNNIEQISSYK.S                                            | 1998.13406 | 2 | 9.33E-06 | 0.92  | 3.84   | -     | 950.5   |
| AHQ-9-6, 4271             | K.ELTTEIDNNIEQISSYK.S                                            | 1998.13406 | 2 | 2.45E-04 | 0.80  | 3.64   | -     | 537.6   |
| AHQ-9-13-, 4309           | K.ELTTEIDNNIEQISSYK.S                                            | 1998.13406 | 2 | 2.87E-10 | 0.93  | 4.44   | -     | 796.5   |
| AHQ-9-9, 4868             | K.ELTTEIDNNIEQISSYK.S                                            | 1998.13406 | 2 | 7.95E-05 | 0.41  | 2.63   | -     | 398.9   |
| AHQ-9-9, 4115             | K.ELTTEIDNNIEQISSYK.S                                            | 1998.13406 | 2 | 4.87E-07 | 0.36  | 2.81   | -     | 312.9   |
| AHQ-9-13-, 5164           | K.ELTTEIDNNIEQISSYK.S                                            | 1998.13406 | 2 | 3.10E-10 | 0.88  | 3.49   | -     | 873.6   |
| AHQ-9-14-, 4333           | K.ELTTEIDNNIEQISSYK.S                                            | 1998.13406 | 2 | 1.34E-07 | 0.95  | 4.28   | -     | 1088.9  |
| AHQ-9-5, 4324 - 4337      | K.ELTTEIDNNIEQISSYK.S                                            | 1998.13406 | 2 | 1.47E-08 | 0.92  | 4.52   | -     | 593.4   |
| AHQ-9-5, 5092             | K.ELTTEIDNNIEQISSYK.S                                            | 1998.13406 | 2 | 2.40E-06 | 0.84  | 3.43   | -     | 575.4   |
| AHQ-9-1, 5212             | K.ELTTEIDNNIEQISSYK.S                                            | 1998.13406 | 2 | 3.62E-05 | 0.91  | 4.02   | -     | 1082.3  |
| AHQ-9-7, 5129 - 5154      | K.ELTTEIDNNIEQISSYK.S                                            | 1998.13406 | 2 | 7.27E-04 | 0.12  | 2.51   | -     | 254.5   |
| AHQ-9-9, 3851             | K.GSLGGGFSGGFSGGFSR.G                                            | 1708.76962 | 2 | 9.09E-05 | 0.94  | 4.35   | -     | 1027.2  |
| AHQ-9-6, 4005             | K.GSLGGGFSGGFSGGFSR.G                                            | 1708.76962 | 2 | 9.13E-05 | 0.86  | 3.63   | -     | 745.8   |
| AHQ-9-11, 3974            | K.GSLGGGFSGGFSGGFSR.G                                            | 1708.76962 | 2 | 6.59E-05 | 0.86  | 3.59   | -     | 649.2   |
| AHQ-9-2, 4145 - 4223      | K.GSLGGGFSGGFSGGFSR.G                                            | 1708.76962 | 2 | 7.94E-08 | 0.89  | 3.87   | -     | 704.3   |
| AHQ-9-12, 4014            | K.GSLGGGFSGGFSGGFSR.G                                            | 1708.76962 | 2 | 4.01E-06 | 0.73  | 3.07   | -     | 702.6   |
| AHQ-9-13-, 4009 - 4065    | K.GSLGGGFSGGFSGGFSR.G                                            | 1708.76962 | 2 | 3.70E-08 | 0.93  | 4.89   | -     | 654.2   |
| AHQ-9-8, 4044             | K.GSLGGGFSGGFSGGFSR.G                                            | 1708.76962 | 2 | 5.15E-10 | 0.75  | 3.56   | -     | 523.7   |
| AHQ-9-13, 4156 - 4218     | K.GSLGGGFSGGFSGGFSR.G                                            | 1708.76962 | 2 | 4.68E-06 | 0.86  | 3.58   | -     | 716.9   |
| AHQ-9-1, 4164 - 4210      | K.GSLGGGFSGGFSGGFSR.G                                            | 1708.76962 | 2 | 3.38E-12 | 0.94  | 4.52   | -     | 980.5   |
| AHQ-9-7, 3988             | K.GSLGGGFSGGFSGGFSR.G                                            | 1708.76962 | 2 | 7.81E-07 | 0.78  | 3.38   | -     | 578.1   |
| AHQ-9-14, 4951 - 5008     | K.GSLGGGFSGGFSGGFSR.G                                            | 1708.76962 | 2 | 3.24E-06 | 0.81  | 3.47   | -     | 896.4   |
| AHQ-9-14-, 4074           | K.GSLGGGFSGGFSGGFSR.G                                            | 1708.76962 | 2 | 2.91E-05 | 0.91  | 4.33   | -     | 787.2   |

|                             |                                                                        |            |   |          |       |        |       |         |
|-----------------------------|------------------------------------------------------------------------|------------|---|----------|-------|--------|-------|---------|
| AHQ-9-3, 3965 - 4040        | K.GSLGGGFSSGGFSSGGFSR.G                                                | 1708.76962 | 2 | 1.58E-11 | 0.93  | 4.07   | -     | 906.1   |
| AHQ-9-13-, 3316             | K.IRLNEIQTYR.S                                                         | 1435.61046 | 2 | 4.00E-06 | 0.88  | 3.16   | -     | 1035.5  |
| AHQ-9-3, 3282 - 3353        | K.IRLNEIQTYR.S                                                         | 1435.61046 | 2 | 1.87E-05 | 0.95  | 3.79   | -     | 1710.7  |
| AHQ-9-5, 3196 - 3272        | K.IRLNEIQTYR.S                                                         | 1435.61046 | 2 | 1.44E-05 | 0.96  | 3.85   | -     | 1699.7  |
| AHQ-9-5, 2521               | R.LENEIQTYR.S                                                          | 1166.26586 | 2 | 6.18E-05 | 0.87  | 3.62   | -     | 961.3   |
| AHQ-9-7, 2444 - 2516        | R.LENEIQTYR.S                                                          | 1166.26586 | 2 | 9.37E-04 | 0.68  | 3.01   | -     | 539.3   |
| AHQ-9-2, 2605               | R.LENEIQTYR.S                                                          | 1166.26586 | 2 | 3.07E-05 | 0.87  | 3.69   | -     | 894.6   |
| AHQ-9-13-, 2826             | R.LKYENEVALR.Q                                                         | 1235.41446 | 2 | 8.40E-06 | 0.60  | 2.64   | -     | 402.4   |
| AHQ-9-2, 2837               | R.LKYENEVALR.Q                                                         | 1235.41446 | 2 | 2.94E-04 | 0.75  | 2.79   | -     | 474.2   |
| AHQ-9-4, 2754               | R.LKYENEVALR.Q                                                         | 1235.41446 | 2 | 1.69E-06 | 0.69  | 2.74   | -     | 501.9   |
| AHQ-9-5, 2759               | R.LKYENEVALR.Q                                                         | 1235.41446 | 2 | 3.10E-05 | 0.57  | 2.70   | -     | 368.4   |
| AHQ-9-2, 6101               | K.NQILNLTDDNANILLQIDNAR.L                                              | 2368.63258 | 3 | 1.64E-04 | 0.84  | 3.65   | -     | 1091.3  |
| AHQ-9-2, 5957               | R.NVQALEIELQSLQALK.Q                                                   | 1798.07394 | 2 | 3.31E-04 | 0.51  | 2.96   | -     | 611.7   |
| AHQ-9-13-, 5729 - 5805      | R.NVQALEIELQSLQALK.Q                                                   | 1798.07394 | 2 | 6.51E-04 | 0.90  | 3.76   | -     | 1103.2  |
| AHQ-9-13, 6168 - 6178       | R.NVSTGDVNVEM*NAAPGVDLTQLLNMMR.N                                       | 2890.20063 | 3 | 5.61E-04 | 0.74  | 3.52   | -     | 698.7   |
| AHQ-9-5, 5296 - 5351        | R.NVSTGDVNVEM*NAAPGVDLTQLLNMMR.N                                       | 2906.20003 | 3 | 1.42E-04 | 0.86  | 3.96   | -     | 686.7   |
| AHQ-9-6, 6029               | R.NVSTGDVNVEM*NAAPGVDLTQLLNMMR.N                                       | 2890.20063 | 3 | 4.58E-04 | 0.72  | 3.19   | -     | 1054.0  |
| AHQ-9-2, 6203 - 6206        | R.NVSTGDVNVEM*NAAPGVDLTQLLNMMR.N                                       | 2890.20063 | 3 | 1.84E-05 | 0.95  | 5.39   | -     | 1325.6  |
| AHQ-9-14-, 5295             | R.NVSTGDVNVEM*NAAPGVDLTQLLNMMR.N                                       | 2906.20003 | 3 | 7.34E-04 | 0.88  | 4.17   | -     | 745.3   |
| AHQ-9-13-, 5278             | R.NVSTGDVNVEM*NAAPGVDLTQLLNMMR.N                                       | 2906.20003 | 3 | 1.62E-05 | 0.93  | 5.28   | -     | 1063.4  |
| AHQ-9-4, 6104               | R.NVSTGDVNVEM*NAAPGVDLTQLLNMMR.N                                       | 2890.20063 | 3 | 1.69E-06 | 0.85  | 3.62   | -     | 829.9   |
| AHQ-9-1, 5470 - 5542        | R.NVSTGDVNVEM*NAAPGVDLTQLLNMMR.N                                       | 2906.20003 | 3 | 5.83E-04 | 0.94  | 5.74   | -     | 839.0   |
| AHQ-9-4, 3344               | K.QSLEASLAETGR.Y                                                       | 1391.46648 | 2 | 1.60E-06 | 0.79  | 2.77   | -     | 604.4   |
| AHQ-9-1, 5159               | K.SKELTTEIDNNEIQISSYK.S                                                | 2213.38462 | 2 | 1.11E-04 | 0.63  | 2.90   | -     | 249.2   |
| AHQ-9-1, 4991               | K.SKELTTEIDNNEIQISSYK.S                                                | 2213.38462 | 3 | 3.73E-04 | 0.76  | 3.04   | -     | 850.8   |
| AHQ-9-1, 4918 - 4988        | K.SKELTTEIDNNEIQISSYK.S                                                | 2213.38462 | 2 | 8.02E-08 | 0.93  | 4.66   | -     | 754.0   |
| AHQ-9-4, 4025               | K.SKELTTEIDNNEIQISSYK.S                                                | 2213.38462 | 2 | 1.97E-10 | 0.95  | 4.81   | -     | 1056.6  |
| AHQ-9-7, 4686 - 4768        | K.SKELTTEIDNNEIQISSYK.S                                                | 2213.38462 | 3 | 1.12E-04 | 0.84  | 4.52   | -     | 776.8   |
| AHQ-9-4, 2141               | R.SLLEGESSGGGGR.G                                                      | 1263.29680 | 2 | 3.66E-06 | 0.84  | 3.08   | -     | 950.8   |
| AHQ-9-5, 2136               | R.SLLEGESSGGGGR.G                                                      | 1263.29680 | 2 | 9.24E-05 | 0.80  | 2.91   | -     | 774.9   |
| AHQ-9-6, 6281               | K.TIDDLKNQILNLTDDNANILLQIDNAR.L                                        | 3054.40205 | 3 | 2.78E-04 | 0.76  | 3.97   | -     | 599.0   |
| AHQ-9-5, 2252               | K.VTMQNLLR.L                                                           | 1091.22402 | 2 | 7.69E-06 | 0.82  | 2.74   | -     | 922.2   |
| gij17318569[ref]NP_006112.2 | keratin 1; Keratin-1; cytokeratin 1; hair alpha protein [Homo sapiens] |            |   | 3.56E-12 | 19.37 | 220.31 | 39.60 | 60666.3 |
| AHQ-9-4, 2118               | K.AEAESLYQSK.Y                                                         | 1126.19850 | 2 | 1.28E-07 | 0.83  | 2.72   | -     | 841.2   |
| AHQ-9-5, 2100               | K.AEAESLYQSK.Y                                                         | 1126.19850 | 2 | 1.79E-06 | 0.90  | 3.20   | -     | 929.1   |
| AHQ-9-4, 2085 - 2096        | K.AQYEDIAQK.S                                                          | 1066.14629 | 2 | 1.39E-04 | 0.57  | 3.05   | -     | 358.3   |
| AHQ-9-6, 2090               | K.AQYEDIAQK.S                                                          | 1066.14629 | 2 | 1.16E-04 | 0.57  | 2.69   | -     | 436.7   |
| AHQ-9-4, 2236               | R.GGGGGYSGGGSSYSGGGSSYSGGGGGGGR.G                                      | 2385.27982 | 2 | 1.20E-09 | 0.93  | 5.02   | -     | 684.0   |
| AHQ-9-7, 2265               | R.GGGGGYSGGGSSYSGGGSSYSGGGGGGGR.G                                      | 2385.27982 | 2 | 2.52E-06 | 0.58  | 3.00   | -     | 426.0   |
| AHQ-9-5, 2241               | R.GGGGGYSGGGSSYSGGGSSYSGGGGGGGR.G                                      | 2385.27982 | 2 | 6.21E-06 | 0.55  | 2.59   | -     | 350.5   |
| AHQ-9-3, 2260               | R.GGGGGYSGGGSSYSGGGSSYSGGGGGGGR.G                                      | 2385.27982 | 2 | 1.78E-04 | 0.59  | 3.06   | -     | 261.7   |
| AHQ-9-1, 2434               | R.GGGGGYSGGGSSYSGGGSSYSGGGGGGGR.G                                      | 2385.27982 | 2 | 1.91E-09 | 0.90  | 4.75   | -     | 497.7   |
| AHQ-9-8, 2252               | R.GGGGGYSGGGSSYSGGGSSYSGGGGGGGR.G                                      | 2385.27982 | 2 | 2.75E-04 | 0.54  | 2.57   | -     | 396.2   |
| AHQ-9-4, 2561               | R.GSGGGSSYSGGGSSYSGGGGGHSGYSGSSSGYR.G                                  | 3314.18235 | 3 | 2.93E-07 | 0.91  | 5.10   | -     | 1033.2  |
| AHQ-9-1, 5043               | K.LALDEIATYR.T                                                         | 1278.47925 | 2 | 1.73E-06 | 0.92  | 4.33   | -     | 1420.4  |
| AHQ-9-4, 3841               | K.LNLDLEDALQQAQ.E                                                      | 1358.47963 | 2 | 2.98E-05 | 0.96  | 5.07   | -     | 1618.9  |
| AHQ-9-7, 3734 - 3794        | K.LNLDLEDALQQAQ.E                                                      | 1358.47963 | 2 | 9.53E-08 | 0.97  | 4.69   | -     | 1995.2  |
| AHQ-9-6, 3809               | K.LNLDLEDALQQAQ.E                                                      | 1358.47963 | 2 | 6.24E-05 | 0.95  | 4.46   | -     | 1669.3  |
| AHQ-9-13, 4034              | K.LNLDLEDALQQAQ.E                                                      | 1358.47963 | 2 | 6.26E-04 | 0.89  | 3.78   | -     | 1069.1  |
| AHQ-9-13-, 3873 - 3880      | K.LNLDLEDALQQAQ.E                                                      | 1358.47963 | 2 | 9.69E-04 | 0.96  | 4.35   | -     | 1676.7  |
| AHQ-9-14-, 3910             | K.LNLDLEDALQQAQ.E                                                      | 1358.47963 | 2 | 1.41E-06 | 0.97  | 5.04   | -     | 1867.3  |
| AHQ-9-3, 3844               | K.LNLDLEDALQQAQ.E                                                      | 1358.47963 | 2 | 7.74E-07 | 0.95  | 4.62   | -     | 1412.9  |
| AHQ-9-2, 3945               | K.LNLDLEDALQQAQ.E                                                      | 1358.47963 | 2 | 6.27E-07 | 0.96  | 4.28   | -     | 1870.1  |
| AHQ-9-5, 3793 - 3852        | K.LNLDLEDALQQAQ.E                                                      | 1358.47963 | 2 | 2.76E-05 | 0.98  | 5.14   | -     | 2175.6  |
| AHQ-9-2, 4367               | K.NKLNLEDALQQAQ.E                                                      | 1600.75564 | 2 | 3.01E-09 | 0.97  | 4.89   | -     | 1823.6  |
| AHQ-9-8, 4163 - 4236        | K.NKLNLEDALQQAQ.E                                                      | 1600.75564 | 2 | 1.18E-05 | 0.91  | 3.51   | -     | 1187.3  |
| AHQ-9-4, 4262               | K.NKLNLEDALQQAQ.E                                                      | 1600.75564 | 2 | 5.00E-05 | 0.54  | 2.81   | -     | 486.9   |
| AHQ-9-5, 4263               | K.NKLNLEDALQQAQ.E                                                      | 1600.75564 | 2 | 6.80E-08 | 0.97  | 5.13   | -     | 1722.9  |
| AHQ-9-3, 4254               | K.NKLNLEDALQQAQ.E                                                      | 1600.75564 | 2 | 1.62E-06 | 0.84  | 3.22   | -     | 1047.2  |
| AHQ-9-1, 4434 - 4436        | K.NKLNLEDALQQAQ.E                                                      | 1600.75564 | 2 | 3.56E-12 | 0.97  | 4.71   | -     | 1728.7  |
| AHQ-9-13-, 4277             | K.NKLNLEDALQQAQ.E                                                      | 1600.75564 | 2 | 6.90E-04 | 0.91  | 3.71   | -     | 1042.8  |
| AHQ-9-2, 5771               | K.NKLNLEDALQQAQEDLAR.L                                                 | 2185.38087 | 3 | 5.83E-06 | 0.95  | 4.93   | -     | 1206.8  |
| AHQ-9-6, 5597               | K.NKLNLEDALQQAQEDLAR.L                                                 | 2185.38087 | 3 | 1.76E-08 | 0.93  | 4.52   | -     | 1212.9  |
| AHQ-9-4, 5666               | K.NKLNLEDALQQAQEDLAR.L                                                 | 2185.38087 | 3 | 2.21E-09 | 0.93  | 4.72   | -     | 1094.3  |
| AHQ-9-3, 2897               | K.NMQDM*VEDYR.N                                                        | 1317.43134 | 2 | 9.58E-08 | 0.65  | 2.57   | -     | 753.2   |
| AHQ-9-11, 2805 - 2870       | K.NMQDM*VEDYR.N                                                        | 1317.43134 | 2 | 2.56E-04 | 0.50  | 2.75   | -     | 534.9   |
| AHQ-9-4, 2760 - 2822        | K.NMQDM*VEDYR.N                                                        | 1317.43134 | 2 | 3.14E-05 | 0.71  | 2.78   | -     | 712.0   |
| AHQ-9-5, 2745 - 2823        | K.NMQDM*VEDYR.N                                                        | 1317.43134 | 2 | 1.43E-04 | 0.86  | 3.03   | -     | 913.1   |
| AHQ-9-2, 2911 - 2974        | K.NMQDM*VEDYR.N                                                        | 1317.43134 | 2 | 2.09E-07 | 0.88  | 3.41   | -     | 845.6   |
| AHQ-9-3, 3642               | K.QISNLQQSISDAEQR.G                                                    | 1717.81950 | 2 | 1.95E-05 | 0.80  | 3.25   | -     | 680.7   |
| AHQ-9-1, 3811               | K.QISNLQQSISDAEQR.G                                                    | 1717.81950 | 2 | 3.88E-06 | 0.92  | 3.41   | -     | 1251.9  |
| AHQ-9-14-, 3709             | K.QISNLQQSISDAEQR.G                                                    | 1717.81950 | 2 | 4.11E-06 | 0.75  | 3.02   | -     | 519.5   |
| AHQ-9-5, 3641               | K.QISNLQQSISDAEQR.G                                                    | 1717.81950 | 2 | 2.52E-08 | 0.88  | 3.44   | -     | 919.7   |
| AHQ-9-4, 3633 - 3702        | K.QISNLQQSISDAEQR.G                                                    | 1717.81950 | 2 | 1.41E-07 | 0.91  | 4.29   | -     | 654.9   |
| AHQ-9-8, 3592               | K.QISNLQQSISDAEQR.G                                                    | 1717.81950 | 2 | 3.65E-06 | 0.87  | 3.60   | -     | 682.1   |
| AHQ-9-7, 3602               | K.QISNLQQSISDAEQR.G                                                    | 1717.81950 | 2 | 1.56E-06 | 0.91  | 3.95   | -     | 966.8   |
| AHQ-9-13-, 3684             | K.QISNLQQSISDAEQR.G                                                    | 1717.81950 | 2 | 5.14E-05 | 0.87  | 3.50   | -     | 665.9   |
| AHQ-9-2, 3586               | R.SGGGFSSGSAGIINYQR.R                                                  | 1658.75374 | 2 | 1.87E-06 | 0.95  | 3.82   | -     | 1523.9  |
| AHQ-9-4, 3493               | R.SGGGFSSGSAGIINYQR.R                                                  | 1658.75374 | 2 | 1.37E-05 | 0.89  | 3.36   | -     | 1076.2  |
| AHQ-9-6, 3461               | R.SGGGFSSGSAGIINYQR.R                                                  | 1658.75374 | 2 | 1.03E-06 | 0.94  | 3.90   | -     | 1246.6  |
| AHQ-9-6, 2005               | K.SKAEASLYQSK.Y                                                        | 1341.44907 | 2 | 5.81E-04 | 0.68  | 3.10   | -     | 450.1   |
| AHQ-9-5, 2008               | K.SKAEASLYQSK.Y                                                        | 1341.44907 | 2 | 7.75E-07 | 0.94  | 3.86   | -     | 1071.6  |
| AHQ-9-4, 2026               | K.SKAEASLYQSK.Y                                                        | 1341.44907 | 2 | 5.85E-04 | 0.82  | 3.08   | -     | 587.8   |
| AHQ-9-7, 2024 - 2040        | K.SKAEASLYQSK.Y                                                        | 1341.44907 | 2 | 2.49E-06 | 0.74  | 2.96   | -     | 681.2   |
| AHQ-9-4, 3976               | K.SKAEASLYQSKYEEELQITAGR.H                                             | 2502.71900 | 3 | 1.02E-04 | 0.90  | 3.76   | -     | 1148.8  |
| AHQ-9-5, 5720               | R.SLDLDSIIAEVK.A                                                       | 1303.48388 | 2 | 5.32E-06 | 0.95  | 4.16   | -     | 1178.4  |
| AHQ-9-11, 5550              | R.SLDLDSIIAEVK.A                                                       | 1303.48388 | 2 | 4.14E-06 | 0.94  | 3.52   | -     | 1474.0  |
| AHQ-9-6, 5625               | R.SLDLDSIIAEVK.A                                                       | 1303.48388 | 2 | 5.03E-07 | 0.96  | 4.49   | -     | 1633.7  |
| AHQ-9-1, 5815               | R.SLDLDSIIAEVK.A                                                       | 1303.48388 | 2 | 4.63E-07 | 0.96  | 4.26   | -     | 1671.5  |
| AHQ-9-1, 5722 - 5791        | R.SLDLDSIIAEVK.A                                                       | 1303.48388 | 2 | 6.34E-04 | 0.83  | 2.89   | -     | 748.8   |
| AHQ-9-3, 5557 - 5629        | R.SLDLDSIIAEVK.A                                                       | 1303.48388 | 2 | 3.38E-07 | 0.95  | 4.44   | -     | 1236.4  |
| AHQ-9-8, 5690               | R.SLDLDSIIAEVK.A                                                       | 1303.48388 | 2 | 7.57E-07 | 0.93  | 3.87   | -     | 1201.3  |
| AHQ-9-7, 5533 - 5605        | R.SLDLDSIIAEVK.A                                                       | 1303.48388 | 2 | 8.12E-08 | 0.95  | 4.15   | -     | 1303.9  |
| AHQ-9-12, 5604              | R.SLDLDSIIAEVK.A                                                       | 1303.48388 | 2 | 9.70E-04 | 0.86  | 3.16   | -     | 1028.1  |
| AHQ-9-13, 5779              | R.SLDLDSIIAEVK.A                                                       | 1303.48388 | 2 | 3.64E-07 | 0.95  | 4.18   | -     | 1321.2  |
| AHQ-9-2, 5710 - 5787        | R.SLDLDSIIAEVK.A                                                       | 1303.48388 | 2 | 2.95E-06 | 0.95  | 4.33   | -     | 1207.9  |
| AHQ-9-5, 5635 - 5691        | R.SLDLDSIIAEVK.A                                                       | 1303.48388 | 2 | 3.38E-06 | 0.95  | 4.20   | -     | 1246.2  |
| AHQ-9-7, 5604               | R.SLDLDSIIAEVK.A                                                       | 1303.48388 | 2 | 7.66E-06 | 0.96  | 4.90   | -     | 1279.7  |
| AHQ-9-9, 5456 - 5457        | R.SLDLDSIIAEVK.A                                                       | 1303.48388 | 2 | 3.87E-06 | 0.95  | 3.93   | -     | 1254.4  |
| AHQ-9-5, 4493 - 4561        | K.SLNNQFASFIDK.V                                                       | 1384.51877 | 2 | 6.97E-07 | 0.91  | 3.73   | -     | 954.8   |
| AHQ-9-5, 4320               | K.SLNNQFASFIDK.V                                                       | 1384.51877 | 2 | 6.75E-04 | 0.57  | 2.53   | -     | 537.6   |
| AHQ-9-2, 4834               | K.SLNNQFASFIDK.V                                                       | 1384.51877 | 2 | 3.62E-07 | 0.86  | 3.00   | -     | 810.9   |
| AHQ-9-11, 4413 - 4414       | K.SLNNQFASFIDK.V                                                       | 1384.51877 | 2 | 5.19E-05 | 0.94  | 3.86   | -     | 1364.7  |
| AHQ-9-10, 4379              | K.SLNNQFASFIDK.V                                                       | 1384.51877 | 2 | 4.02E-05 | 0.48  | 2.74   | -     | 417.5   |
| AHQ-9-2, 4593 - 4655        | K.SLNNQFASFIDK.V                                                       | 1384.51877 | 2 | 3.93E-07 | 0.87  | 3.65   | -     | 724.8   |
| AHQ-9-8, 4467 - 4474        | K.SLNNQFASFIDK.V                                                       | 1384.51877 | 2 | 5.58E-07 | 0.80  | 3.47   | -     | 576.3   |
| AHQ-9-14-, 4523 - 4551      | K.SLNNQFASFIDK.V                                                       | 1384.51877 | 2 | 1.72E-06 | 0.77  | 3.03   | -     | 707.4   |

|                            |                                     |            |       |          |       |          |   |        |
|----------------------------|-------------------------------------|------------|-------|----------|-------|----------|---|--------|
| AHQ-9-1, 4879              | K.SLNNQFASFDK.V                     | 1384.51877 | 2     | 3.30E-07 | 0.90  | 3.54     | - | 855.8  |
| AHQ-9-1, 4494              | K.SLNNQFASFDK.V                     | 1384.51877 | 2     | 1.76E-07 | 0.76  | 2.71     | - | 581.3  |
| AHQ-9-1, 5264 - 5267       | K.SLNNQFASFDK.VR.F                  | 1639.83670 | 2     | 1.45E-06 | 0.94  | 3.46     | - | 1487.8 |
| AHQ-9-1, 4314              | R.SLVNLGGGSKSISISVAR.G              | 1688.95071 | 2     | 4.56E-06 | 0.91  | 3.43     | - | 919.4  |
| AHQ-9-3, 4132              | R.SLVNLGGGSKSISISVAR.G              | 1688.95071 | 2     | 1.06E-09 | 0.77  | 3.16     | - | 500.6  |
| AHQ-9-13-, 4138            | R.SLVNLGGGSKSISISVAR.G              | 1688.95071 | 2     | 3.83E-11 | 0.88  | 3.71     | - | 572.0  |
| AHQ-9-2, 4247 - 4258       | R.SLVNLGGGSKSISISVAR.G              | 1688.95071 | 2     | 8.84E-11 | 0.78  | 3.34     | - | 564.5  |
| AHQ-9-5, 6071              | R.THNLEPYFESFINNLR.R                | 1995.18315 | 2     | 1.71E-06 | 0.93  | 4.56     | - | 513.7  |
| AHQ-9-5, 6059 - 6067       | R.THNLEPYFESFINNLR.R                | 1995.18315 | 3     | 6.37E-08 | 0.96  | 5.28     | - | 1545.9 |
| AHQ-9-6, 5977 - 5989       | R.THNLEPYFESFINNLR.R                | 1995.18315 | 3     | 4.56E-04 | 0.96  | 5.72     | - | 1688.4 |
| AHQ-9-2, 6141 - 6175       | R.THNLEPYFESFINNLR.R                | 1995.18315 | 3     | 7.91E-05 | 0.89  | 4.14     | - | 1286.1 |
| AHQ-9-13-, 6040 - 6045     | R.THNLEPYFESFINNLR.R                | 1995.18315 | 3     | 2.23E-05 | 0.95  | 4.76     | - | 1539.3 |
| AHQ-9-4, 6056              | R.THNLEPYFESFINNLR.R                | 1995.18315 | 3     | 6.78E-04 | 0.93  | 4.50     | - | 1332.2 |
| AHQ-9-1, 6188 - 6250       | R.THNLEPYFESFINNLR.R                | 1995.18315 | 3     | 5.36E-07 | 0.96  | 6.12     | - | 1362.5 |
| AHQ-9-1, 5492              | R.THNLEPYFESFINNLR.R                | 1995.18315 | 2     | 1.54E-04 | 0.85  | 3.19     | - | 528.4  |
| AHQ-9-1, 6192 - 6260       | R.THNLEPYFESFINNLR.R                | 1995.18315 | 2     | 1.51E-06 | 0.88  | 3.86     | - | 489.5  |
| AHQ-9-2, 6159              | R.THNLEPYFESFINNLR.R                | 1995.18315 | 2     | 4.02E-09 | 0.92  | 4.12     | - | 627.6  |
| AHQ-9-5, 5353              | R.THNLEPYFESFINNLR.R                | 1995.18315 | 2     | 4.44E-06 | 0.90  | 4.06     | - | 526.3  |
| AHQ-9-7, 5960 - 5964       | R.THNLEPYFESFINNLR.R                | 1995.18315 | 3     | 3.54E-07 | 0.96  | 5.82     | - | 1429.3 |
| AHQ-9-3, 3184              | R.TNAENEFVTIK.K                     | 1266.38219 | 2     | 2.17E-05 | 0.90  | 3.70     | - | 719.4  |
| AHQ-9-7, 3117              | R.TNAENEFVTIK.K                     | 1266.38219 | 2     | 7.63E-05 | 0.86  | 2.97     | - | 894.9  |
| AHQ-9-1, 3358              | R.TNAENEFVTIK.K                     | 1266.38219 | 2     | 1.00E-04 | 0.91  | 3.08     | - | 1001.3 |
| AHQ-9-14-, 3265            | R.TNAENEFVTIK.K                     | 1266.38219 | 2     | 9.60E-06 | 0.78  | 2.81     | - | 732.2  |
| AHQ-9-6, 3351              | R.TNAENEFVTIK.K                     | 1266.38219 | 2     | 5.76E-06 | 0.94  | 3.25     | - | 1466.4 |
| AHQ-9-4, 3158              | R.TNAENEFVTIK.K                     | 1266.38219 | 2     | 1.26E-05 | 0.88  | 3.60     | - | 804.5  |
| AHQ-9-2, 3253              | R.TNAENEFVTIK.K                     | 1266.38219 | 2     | 1.24E-05 | 0.91  | 3.47     | - | 874.8  |
| AHQ-9-6, 3143 - 3151       | R.TNAENEFVTIK.K                     | 1266.38219 | 2     | 8.62E-07 | 0.90  | 3.47     | - | 908.4  |
| AHQ-9-5, 3153 - 3167       | R.TNAENEFVTIK.K                     | 1266.38219 | 2     | 2.55E-05 | 0.88  | 3.31     | - | 765.8  |
| AHQ-9-8, 2696              | R.TNAENEFVTIKK.D                    | 1394.55511 | 2     | 7.66E-04 | 0.51  | 2.74     | - | 473.0  |
| AHQ-9-6, 2685              | R.TNAENEFVTIKK.D                    | 1394.55511 | 2     | 1.63E-04 | 0.80  | 2.87     | - | 785.2  |
| AHQ-9-11, 2691 - 2699      | R.TNAENEFVTIKK.D                    | 1394.55511 | 2     | 7.34E-04 | 0.57  | 2.75     | - | 485.4  |
| AHQ-9-5, 2691              | R.TNAENEFVTIKK.D                    | 1394.55511 | 2     | 4.23E-06 | 0.80  | 2.92     | - | 849.2  |
| AHQ-9-13-, 2765 - 2766     | R.TNAENEFVTIKK.D                    | 1394.55511 | 2     | 1.21E-04 | 0.86  | 3.38     | - | 834.2  |
| AHQ-9-5, 4356 - 4417       | K.WELLQQVDVSTR.T                    | 1476.61621 | 2     | 4.06E-07 | 0.95  | 4.27     | - | 1405.2 |
| AHQ-9-12, 4325 - 4382      | K.WELLQQVDVSTR.T                    | 1476.61621 | 2     | 1.02E-06 | 0.79  | 2.95     | - | 862.8  |
| AHQ-9-6, 4302 - 4371       | K.WELLQQVDVSTR.T                    | 1476.61621 | 2     | 7.36E-07 | 0.94  | 3.74     | - | 1557.7 |
| AHQ-9-7, 4225 - 4290       | K.WELLQQVDVSTR.T                    | 1476.61621 | 2     | 1.58E-08 | 0.92  | 3.87     | - | 1177.8 |
| AHQ-9-2, 4461 - 4530       | K.WELLQQVDVSTR.T                    | 1476.61621 | 2     | 6.22E-08 | 0.92  | 3.75     | - | 1270.4 |
| AHQ-9-9, 4135              | K.WELLQQVDVSTR.T                    | 1476.61621 | 2     | 4.50E-05 | 0.83  | 2.85     | - | 1055.9 |
| AHQ-9-3, 4348 - 4408       | K.WELLQQVDVSTR.T                    | 1476.61621 | 2     | 1.21E-07 | 0.92  | 3.30     | - | 1515.0 |
| AHQ-9-5, 2999 - 3003       | K.YEELQITAGR.H                      | 1180.29253 | 2     | 2.13E-05 | 0.96  | 4.35     | - | 1701.9 |
| AHQ-9-13-, 3072 - 3074     | K.YEELQITAGR.H                      | 1180.29253 | 2     | 2.36E-04 | 0.94  | 3.66     | - | 1642.1 |
| AHQ-9-13, 3242 - 3243      | K.YEELQITAGR.H                      | 1180.29253 | 2     | 3.35E-04 | 0.93  | 3.59     | - | 1433.7 |
| AHQ-9-7, 2985 - 3001       | K.YEELQITAGR.H                      | 1180.29253 | 2     | 8.54E-05 | 0.95  | 3.44     | - | 1796.2 |
| AHQ-9-11, 2998             | K.YEELQITAGR.H                      | 1180.29253 | 2     | 3.84E-04 | 0.95  | 3.78     | - | 1769.3 |
| AHQ-9-4, 3005              | K.YEELQITAGR.H                      | 1180.29253 | 2     | 4.13E-04 | 0.93  | 3.64     | - | 1365.5 |
| AHQ-9-2, 3105              | K.YEELQITAGR.H                      | 1180.29253 | 2     | 3.15E-05 | 0.95  | 3.75     | - | 1639.5 |
| AHQ-9-6, 2987 - 2997       | K.YEELQITAGR.H                      | 1180.29253 | 2     | 6.76E-04 | 0.94  | 3.60     | - | 1435.9 |
| AHQ-9-3, 3041              | K.YEELQITAGR.H                      | 1180.29253 | 2     | 5.01E-04 | 0.96  | 3.97     | - | 1839.3 |
| AHQ-9-1, 3206              | K.YEELQITAGR.H                      | 1180.29253 | 2     | 2.66E-05 | 0.96  | 4.21     | - | 1899.9 |
| AHQ-9-10, 2957             | K.YEELQITAGR.H                      | 1180.29253 | 2     | 9.99E-06 | 0.96  | 3.51     | - | 2058.3 |
| gi 4507877 ref NP_003364.1 | vinculin isoform VCL [Homo sapiens] | 3.72E-12   | 36.99 | 430.29   | 46.50 | 116721.6 |   |        |
| AHQ-9-14-, 6374            | K.AIPDLTAPVAAVQAAVSNLVR.V           | 2077.41342 | 2     | 1.30E-06 | 0.92  | 3.28     | - | 1043.0 |
| AHQ-9-5, 6431              | K.AIPDLTAPVAAVQAAVSNLVR.V           | 2077.41342 | 2     | 3.14E-06 | 0.97  | 5.06     | - | 1321.0 |
| AHQ-9-8, 6424              | K.AIPDLTAPVAAVQAAVSNLVR.V           | 2077.41342 | 2     | 1.04E-05 | 0.88  | 3.48     | - | 624.1  |
| AHQ-9-7, 6272 - 6334       | K.AIPDLTAPVAAVQAAVSNLVR.V           | 2077.41342 | 2     | 4.55E-07 | 0.96  | 4.79     | - | 1044.1 |
| AHQ-9-11, 6198 - 6262      | K.AIPDLTAPVAAVQAAVSNLVR.V           | 2077.41342 | 2     | 1.10E-06 | 0.93  | 4.10     | - | 786.2  |
| AHQ-9-4, 6346 - 6408       | K.AIPDLTAPVAAVQAAVSNLVR.V           | 2077.41342 | 2     | 2.45E-05 | 0.97  | 5.29     | - | 1240.9 |
| AHQ-9-6, 6346              | K.AIPDLTAPVAAVQAAVSNLVR.V           | 2077.41342 | 2     | 5.63E-08 | 0.96  | 4.92     | - | 1038.9 |
| AHQ-9-10, 6295             | K.AIPDLTAPVAAVQAAVSNLVR.V           | 2077.41342 | 2     | 3.27E-05 | 0.95  | 5.00     | - | 729.3  |
| AHQ-9-4, 3293 - 3356       | R.ALASQLQDLSLK.D                    | 1174.32943 | 2     | 4.68E-04 | 0.86  | 3.15     | - | 779.6  |
| AHQ-9-8, 3336              | R.ALASQLQDLSLK.D                    | 1174.32943 | 2     | 1.00E-04 | 0.93  | 3.51     | - | 1101.7 |
| AHQ-9-5, 3363              | R.ALASQLQDLSLK.D                    | 1174.32943 | 2     | 5.62E-05 | 0.93  | 3.61     | - | 1178.4 |
| AHQ-9-3, 3376              | R.ALASQLQDLSLK.D                    | 1174.32943 | 2     | 5.47E-05 | 0.81  | 2.72     | - | 778.8  |
| AHQ-9-7, 3268 - 3332       | R.ALASQLQDLSLK.D                    | 1174.32943 | 2     | 5.04E-04 | 0.71  | 2.85     | - | 553.1  |
| AHQ-9-7, 3512              | K.AQQVSGQLDVLTK.V                   | 1458.64233 | 2     | 2.04E-09 | 0.95  | 4.02     | - | 1343.3 |
| AHQ-9-3, 3553              | K.AQQVSGQLDVLTK.V                   | 1458.64233 | 2     | 3.67E-04 | 0.94  | 3.00     | - | 1499.7 |
| AHQ-9-5, 3505 - 3563       | K.AQQVSGQLDVLTK.V                   | 1458.64233 | 2     | 1.91E-07 | 0.97  | 4.61     | - | 1708.1 |
| AHQ-9-4, 3489 - 3548       | K.AQQVSGQLDVLTK.V                   | 1458.64233 | 2     | 3.75E-08 | 0.97  | 4.78     | - | 1587.2 |
| AHQ-9-8, 3454 - 3524       | K.AQQVSGQLDVLTK.V                   | 1458.64233 | 2     | 3.37E-04 | 0.95  | 4.03     | - | 1479.1 |
| AHQ-9-8, 2507              | K.AVAGNISDPGLQK.S                   | 1270.41721 | 2     | 1.61E-06 | 0.80  | 3.09     | - | 608.9  |
| AHQ-9-5, 2533              | K.AVAGNISDPGLQK.S                   | 1270.41721 | 2     | 3.26E-04 | 0.89  | 3.79     | - | 707.5  |
| AHQ-9-6, 2522 - 2533       | K.AVAGNISDPGLQK.S                   | 1270.41721 | 2     | 4.86E-04 | 0.77  | 3.04     | - | 592.0  |
| AHQ-9-7, 2528              | K.AVAGNISDPGLQK.S                   | 1270.41721 | 2     | 1.23E-04 | 0.55  | 3.10     | - | 368.8  |
| AHQ-9-3, 2566 - 2568       | K.AVAGNISDPGLQK.S                   | 1270.41721 | 2     | 3.83E-05 | 0.87  | 3.80     | - | 647.5  |
| AHQ-9-4, 2536              | K.AVAGNISDPGLQK.S                   | 1270.41721 | 2     | 1.15E-04 | 0.81  | 3.36     | - | 651.6  |
| AHQ-9-5, 5480              | K.CDRVDQLTAQLADLAAR.G               | 1918.12182 | 3     | 1.91E-04 | 0.89  | 4.34     | - | 1197.8 |
| AHQ-9-4, 5462 - 5473       | K.CDRVDQLTAQLADLAAR.G               | 1918.12182 | 2     | 7.05E-04 | 0.96  | 4.55     | - | 1369.3 |
| AHQ-9-6, 5410              | K.CDRVDQLTAQLADLAAR.G               | 1918.12182 | 3     | 7.54E-06 | 0.92  | 4.47     | - | 1246.3 |
| AHQ-9-4, 5460              | K.CDRVDQLTAQLADLAAR.G               | 1918.12182 | 3     | 6.60E-06 | 0.95  | 4.66     | - | 1675.9 |
| AHQ-9-5, 2347              | R.DPSASPGDAGEQAIR.Q                 | 1471.51169 | 2     | 5.56E-07 | 0.83  | 2.95     | - | 638.4  |
| AHQ-9-7, 2305 - 2360       | R.DPSASPGDAGEQAIR.Q                 | 1471.51169 | 2     | 9.21E-07 | 0.78  | 3.43     | - | 459.7  |
| AHQ-9-3, 2378              | R.DPSASPGDAGEQAIR.Q                 | 1471.51169 | 2     | 4.96E-04 | 0.76  | 3.01     | - | 495.0  |
| AHQ-9-4, 2348              | R.DPSASPGDAGEQAIR.Q                 | 1471.51169 | 2     | 2.97E-06 | 0.87  | 3.47     | - | 646.5  |
| AHQ-9-4, 5280 - 5336       | R.EAFQPEPDPFPPPPDLEQLR.L            | 2448.67149 | 3     | 1.80E-04 | 0.89  | 4.04     | - | 891.2  |
| AHQ-9-4, 5528              | K.ELLVPLISAMK.I                     | 1214.54325 | 2     | 4.04E-04 | 0.55  | 2.64     | - | 385.9  |
| AHQ-9-6, 3057              | K.ETVQTTEDQILKR.D                   | 1561.71942 | 2     | 1.31E-05 | 0.84  | 3.23     | - | 867.8  |
| AHQ-9-7, 3036              | K.ETVQTTEDQILKR.D                   | 1561.71942 | 2     | 1.56E-05 | 0.87  | 3.25     | - | 833.3  |
| AHQ-9-4, 3050 - 3056       | K.ETVQTTEDQILKR.D                   | 1561.71942 | 2     | 2.83E-05 | 0.84  | 3.27     | - | 821.9  |
| AHQ-9-5, 3063              | K.ETVQTTEDQILKR.D                   | 1561.71942 | 2     | 5.32E-07 | 0.80  | 3.25     | - | 658.6  |
| AHQ-9-6, 6154 - 6221       | R.GILSGTSDLLLTDFDEAEVR.K            | 2037.25656 | 2     | 4.55E-09 | 0.86  | 4.01     | - | 665.3  |
| AHQ-9-4, 6280              | R.GILSGTSDLLLTDFDEAEVR.K            | 2037.25656 | 2     | 4.19E-07 | 0.97  | 5.59     | - | 1391.4 |
| AHQ-9-3, 6228 - 6230       | R.GILSGTSDLLLTDFDEAEVR.K            | 2037.25656 | 2     | 2.90E-04 | 0.83  | 3.82     | - | 433.1  |
| AHQ-9-5, 6232 - 6301       | R.GILSGTSDLLLTDFDEAEVR.K            | 2037.25656 | 2     | 1.09E-09 | 0.97  | 5.61     | - | 1252.2 |
| AHQ-9-4, 6034              | R.GILSGTSDLLLTDFDEAEVRK.I           | 2165.42947 | 2     | 4.12E-06 | 0.83  | 3.63     | - | 824.9  |
| AHQ-9-4, 6024              | R.GILSGTSDLLLTDFDEAEVRK.I           | 2165.42947 | 3     | 7.10E-05 | 0.82  | 3.61     | - | 822.0  |
| AHQ-9-4, 3520              | K.GWLRDPSASPGDAGEQAIR.Q             | 1984.11876 | 3     | 3.24E-06 | 0.92  | 4.20     | - | 1248.2 |
| AHQ-9-5, 3521              | K.GWLRDPSASPGDAGEQAIR.Q             | 1984.11876 | 3     | 1.18E-04 | 0.88  | 3.78     | - | 1174.0 |
| AHQ-9-4, 2301 - 2370       | K.IAELCDDPKER.D                     | 1347.47690 | 2     | 9.71E-04 | 0.79  | 2.69     | - | 809.0  |
| AHQ-9-5, 3439              | K.IAELCDDPKERDILLR.S                | 1960.15548 | 3     | 1.52E-04 | 0.87  | 3.59     | - | 1207.5 |
| AHQ-9-5, 4136 - 4200       | K.KIDAAQNWLADPNNGGPEGEEQIR.G        | 2509.67332 | 3     | 2.45E-07 | 0.89  | 4.68     | - | 872.9  |
| AHQ-9-7, 4072 - 4136       | K.KIDAAQNWLADPNNGGPEGEEQIR.G        | 2509.67332 | 3     | 7.38E-05 | 0.74  | 3.96     | - | 531.1  |
| AHQ-9-4, 4129 - 4201       | K.KIDAAQNWLADPNNGGPEGEEQIR.G        | 2509.67332 | 2     | 1.11E-05 | 0.91  | 4.29     | - | 458.9  |
| AHQ-9-6, 4085 - 4143       | K.KIDAAQNWLADPNNGGPEGEEQIR.G        | 2509.67332 | 3     | 1.51E-05 | 0.90  | 4.42     | - | 1013.3 |
| AHQ-9-4, 2952              | R.LANVMM*GPYR.Q                     | 1168.41500 | 2     | 1.53E-04 | 0.72  | 3.07     | - | 559.8  |
| AHQ-9-4, 3420              | R.LANVMM*GPYR.Q                     | 1152.41560 | 2     | 5.08E-05 | 0.90  | 3.08     | - | 1004.9 |
| AHQ-9-4, 4082 - 4140       | K.LLAAVAATAPPDAPNREEVFER.A          | 2382.61458 | 3     | 1.05E-07 | 0.87  | 4.28     | - | 796.3  |

|                             |                                                                         |            |   |          |       |        |       |          |
|-----------------------------|-------------------------------------------------------------------------|------------|---|----------|-------|--------|-------|----------|
| AHQ-9-6, 4070 - 4150        | K.LLVAATAPPDAPNREEVDFER.A                                               | 2382.61458 | 3 | 2.01E-05 | 0.75  | 3.30   | -     | 502.2    |
| AHQ-9-4, 4360               | R.LTDELAPPKPLPEGEVPPRPPEEKDEEFPEQK.A                                    | 4028.46845 | 3 | 1.07E-04 | 0.80  | 3.14   | -     | 776.5    |
| AHQ-9-11, 3569              | K.LVQAAQM* <i>LQSDPY</i> SVPAR.D                                        | 1991.25773 | 2 | 5.60E-08 | 0.87  | 3.19   | -     | 677.8    |
| AHQ-9-4, 4362 - 4364        | K.LVQAAQM* <i>LQSDPY</i> SVPAR.D                                        | 1975.25833 | 2 | 3.48E-04 | 0.88  | 3.64   | -     | 692.9    |
| AHQ-9-4, 4370               | K.LVQAAQM* <i>LQSDPY</i> SVPAR.D                                        | 1975.25833 | 3 | 1.55E-04 | 0.88  | 4.07   | -     | 940.6    |
| AHQ-9-4, 3620               | K.LVQAAQM* <i>LQSDPY</i> SVPAR.D                                        | 1991.25773 | 2 | 1.97E-05 | 0.87  | 3.21   | -     | 580.4    |
| AHQ-9-5, 3624               | K.LVQAAQM* <i>LQSDPY</i> SVPAR.D                                        | 1991.25773 | 2 | 8.43E-05 | 0.44  | 2.76   | -     | 346.6    |
| AHQ-9-4, 3630               | K.LVQAAQM* <i>LQSDPY</i> SVPAR.D                                        | 1991.25773 | 3 | 3.72E-10 | 0.98  | 5.74   | -     | 3062.7   |
| AHQ-9-4, 2329 - 2333        | R.M* <i>ALLM</i> * <i>AEM</i> * <i>SR</i> .L                            | 1201.46351 | 2 | 6.25E-06 | 0.92  | 3.02   | -     | 1407.2   |
| AHQ-9-5, 2928               | K.M* <i>LGQM</i> * <i>TQVADLR</i> .A                                    | 1510.71935 | 2 | 6.28E-05 | 0.96  | 3.86   | -     | 2007.1   |
| AHQ-9-6, 3641               | K.M* <i>LGQMTDQVADLR</i> .A                                             | 1494.71995 | 2 | 1.03E-06 | 0.86  | 3.34   | -     | 942.4    |
| AHQ-9-5, 3681               | K.M* <i>LGQMTDQVADLR</i> .A                                             | 1494.71995 | 2 | 4.23E-05 | 0.94  | 3.45   | -     | 1656.1   |
| AHQ-9-4, 2930 - 2932        | K.M* <i>LGQM</i> * <i>TQVADLR</i> .A                                    | 1510.71935 | 2 | 3.35E-05 | 0.97  | 4.56   | -     | 1737.3   |
| AHQ-9-4, 5262 - 5330        | R.MQEAMTQEVSDVFSDDTTPIK.L                                               | 2359.61664 | 2 | 9.27E-05 | 0.51  | 2.80   | -     | 373.1    |
| AHQ-9-4, 3220               | K.M* <i>SAEINEIIR</i> .V                                                | 1192.36823 | 2 | 8.44E-07 | 0.92  | 3.40   | -     | 1132.3   |
| AHQ-9-6, 3213               | K.M* <i>SAEINEIIR</i> .V                                                | 1192.36823 | 2 | 1.18E-05 | 0.95  | 3.43   | -     | 1592.5   |
| AHQ-9-5, 3176 - 3231        | K.M* <i>SAEINEIIR</i> .V                                                | 1192.36823 | 2 | 5.42E-06 | 0.89  | 3.08   | -     | 1001.2   |
| AHQ-9-4, 3682 - 3750        | K.MSAEINEIIR.V                                                          | 1176.36883 | 2 | 8.46E-06 | 0.96  | 3.96   | -     | 2202.8   |
| AHQ-9-6, 3115               | K.M* <i>TGLVDEAIDTK</i> .S                                              | 1309.46876 | 2 | 3.42E-06 | 0.77  | 2.82   | -     | 820.8    |
| AHQ-9-4, 3062 - 3125        | K.M* <i>TGLVDEAIDTK</i> .S                                              | 1309.46876 | 2 | 2.79E-06 | 0.94  | 3.80   | -     | 1149.0   |
| AHQ-9-5, 3059 - 3128        | K.M* <i>TGLVDEAIDTK</i> .S                                              | 1309.46876 | 2 | 2.51E-05 | 0.93  | 3.74   | -     | 1125.4   |
| AHQ-9-4, 3077               | R.NPGNOAAAYEHFETMK.N                                                    | 1737.87437 | 2 | 2.97E-07 | 0.95  | 4.30   | -     | 1242.7   |
| AHQ-9-7, 2942               | K.QVATALQNLQTK.T                                                        | 1315.50112 | 2 | 8.29E-04 | 0.61  | 2.96   | -     | 287.1    |
| AHQ-9-7, 3421               | R.SLGEISALTSK.L                                                         | 1106.25186 | 2 | 1.45E-07 | 0.90  | 3.30   | -     | 851.0    |
| AHQ-9-4, 3456               | R.SLGEISALTSK.L                                                         | 1106.25186 | 2 | 1.22E-05 | 0.94  | 3.72   | -     | 931.9    |
| AHQ-9-3, 3469 - 3470        | R.SLGEISALTSK.L                                                         | 1106.25186 | 2 | 4.29E-05 | 0.94  | 3.71   | -     | 958.8    |
| AHQ-9-6, 3433               | R.SLGEISALTSK.L                                                         | 1106.25186 | 2 | 2.33E-06 | 0.90  | 3.58   | -     | 786.1    |
| AHQ-9-6, 3298 - 3379        | K.SLLDASEEAIK.D                                                         | 1304.47187 | 2 | 4.05E-04 | 0.80  | 2.81   | -     | 866.9    |
| AHQ-9-8, 3275 - 3344        | K.SLLDASEEAIK.D                                                         | 1304.47187 | 2 | 6.32E-06 | 0.82  | 3.02   | -     | 880.5    |
| AHQ-9-4, 2470               | K.STVEGIAQSVK.T                                                         | 1119.25064 | 2 | 3.98E-08 | 0.93  | 3.52   | -     | 1193.9   |
| AHQ-9-4, 4461               | R.TNISDEESEQATEM* <i>LVHNAQNL</i> M* <i>QSVK</i> .E                     | 3080.30897 | 3 | 2.34E-07 | 0.70  | 3.39   | -     | 386.0    |
| AHQ-9-4, 6140 - 6176        | R.TNISDEESEQATEM* <i>LVHNAQNL</i> M* <i>QSVK</i> .E                     | 3064.30957 | 3 | 8.88E-07 | 0.76  | 4.08   | -     | 592.1    |
| AHQ-9-7, 3258               | R.TNLLQVCER.I                                                           | 1134.28859 | 2 | 1.61E-04 | 0.82  | 2.50   | -     | 1021.0   |
| AHQ-9-4, 5201 - 5210        | K.VAMANIOPQM* <i>LVAGATSIAR</i> .R                                      | 2059.44338 | 3 | 1.10E-08 | 0.95  | 5.56   | -     | 1866.0   |
| AHQ-9-4, 5081               | K.VAM* <i>ANIOPQM</i> * <i>LVAGATSIAR</i> .R                            | 2075.44278 | 2 | 8.57E-04 | 0.47  | 2.68   | -     | 464.1    |
| AHQ-9-4, 4680               | K.VAM* <i>ANIOPQM</i> * <i>LVAGATSIAR</i> .R                            | 2075.44278 | 3 | 5.66E-08 | 0.95  | 4.83   | -     | 1873.7   |
| AHQ-9-5, 4685               | K.VAM* <i>ANIOPQM</i> * <i>LVAGATSIAR</i> .R                            | 2075.44278 | 2 | 7.54E-05 | 0.91  | 4.33   | -     | 706.6    |
| AHQ-9-6, 5005               | K.VAM* <i>ANIOPQM</i> * <i>LVAGATSIAR</i> .R                            | 2059.44338 | 2 | 1.56E-07 | 0.92  | 4.53   | -     | 731.1    |
| AHQ-9-4, 5074               | K.VAM* <i>ANIOPQM</i> * <i>LVAGATSIAR</i> .R                            | 2059.44338 | 2 | 5.30E-05 | 0.79  | 3.57   | -     | 624.2    |
| AHQ-9-5, 5052 - 5079        | K.VAM* <i>ANIOPQM</i> * <i>LVAGATSIAR</i> .R                            | 2059.44338 | 2 | 6.82E-04 | 0.75  | 3.63   | -     | 338.2    |
| AHQ-9-4, 4770               | R.VDQLTAQLADLAAR.G                                                      | 1485.66778 | 2 | 5.60E-08 | 0.98  | 5.01   | -     | 2656.2   |
| AHQ-9-5, 4787 - 4793        | R.VDQLTAQLADLAAR.G                                                      | 1485.66778 | 2 | 2.04E-09 | 0.98  | 5.04   | -     | 3148.7   |
| AHQ-9-6, 4722               | R.VDQLTAQLADLAAR.G                                                      | 1485.66778 | 2 | 1.06E-08 | 0.97  | 4.64   | -     | 2285.1   |
| AHQ-9-4, 3201               | R.VGKETVQTEDQILKR.D                                                     | 1846.07546 | 3 | 1.45E-04 | 0.81  | 3.79   | -     | 600.1    |
| AHQ-9-7, 5033               | R.VLQLTSWDEDAWASK.D                                                     | 1749.90156 | 2 | 9.39E-06 | 0.92  | 3.78   | -     | 887.5    |
| AHQ-9-6, 5038 - 5043        | R.VLQLTSWDEDAWASK.D                                                     | 1749.90156 | 2 | 3.72E-12 | 0.96  | 4.52   | -     | 1267.1   |
| AHQ-9-4, 5084 - 5165        | R.VLQLTSWDEDAWASK.D                                                     | 1749.90156 | 2 | 9.78E-11 | 0.98  | 5.62   | -     | 1707.8   |
| AHQ-9-2, 5211               | R.VLQLTSWDEDAWASK.D                                                     | 1749.90156 | 2 | 1.36E-05 | 0.90  | 3.59   | -     | 752.2    |
| AHQ-9-5, 2903 - 2917        | R.WIDNPTVDDR.G                                                          | 1231.29640 | 2 | 4.12E-04 | 0.93  | 3.83   | -     | 1156.8   |
| AHQ-9-6, 2889               | R.WIDNPTVDDR.G                                                          | 1231.29640 | 2 | 9.78E-05 | 0.74  | 3.01   | -     | 556.8    |
| AHQ-9-4, 2889               | R.WIDNPTVDDR.G                                                          | 1231.29640 | 2 | 8.28E-05 | 0.88  | 3.21   | -     | 859.7    |
| gj 7656991 ref NP_055140.1  | coronin, actin binding protein, 1C; coronin, actin-binding protein, 1C; |            |   | 9.38E-12 | 5.40  | 60.30  | 21.30 | 53248.7  |
| AHQ-9-6, 5525               | R.AIFLADGNVFTTGFSR.M                                                    | 1716.91793 | 2 | 6.65E-07 | 0.86  | 2.95   | -     | 939.4    |
| AHQ-9-7, 5397 - 5460        | R.AIFLADGNVFTTGFSR.M                                                    | 1716.91793 | 2 | 7.51E-09 | 0.93  | 4.34   | -     | 846.7    |
| AHQ-9-6, 5406 - 5461        | R.AIFLADGNVFTTGFSR.M                                                    | 1716.91793 | 2 | 9.38E-12 | 0.96  | 4.91   | -     | 1472.2   |
| AHQ-9-6, 6237               | R.KSDLFQDDLYPDATAGPEAALEAEWFEQG.N                                       | 3273.46087 | 3 | 2.25E-04 | 0.96  | 5.90   | -     | 1253.3   |
| AHQ-9-6, 2402 - 2447        | K.SIKDTCNQDER.I                                                         | 1480.58332 | 2 | 1.47E-07 | 0.82  | 2.83   | -     | 1158.5   |
| AHQ-9-6, 3131               | R.VGVVAWHPTAR.N                                                         | 1207.40918 | 3 | 2.77E-04 | 0.84  | 3.31   | -     | 979.4    |
| AHQ-9-7, 4170               | R.VTWDSFCAVNPFR.F                                                       | 1540.68205 | 2 | 1.28E-04 | 0.74  | 2.54   | -     | 823.2    |
| AHQ-9-6, 4179               | R.VTWDSFCAVNPFR.F                                                       | 1540.68205 | 2 | 4.25E-09 | 0.93  | 4.00   | -     | 1134.3   |
| AHQ-9-6, 5557 - 5565        | R.YFEITDESPYVHYLNTFSSK.E                                                | 2441.63258 | 3 | 4.49E-06 | 0.92  | 4.02   | -     | 986.3    |
| AHQ-9-7, 5553               | R.YFEITDESPYVHYLNTFSSK.E                                                | 2441.63258 | 3 | 2.19E-09 | 0.88  | 3.84   | -     | 764.3    |
| gj 29732955 ref XP_291603.1 | similar to glyceralddehyde 3-phosphate dehydrogenase [Homo sapiens] [MA |            |   | 9.88E-12 | 0.94  | 10.23  | 16.80 | 11173.0  |
| AHQ-9-9, 3837 - 3900        | K.NISNASCTTNCIAPLAK.M                                                   | 1838.05353 | 2 | 1.13E-06 | 0.93  | 4.62   | -     | 925.6    |
| AHQ-9-9, 3704 - 3783        | K.NISNASCTTNCIAPLAK.M                                                   | 1838.05353 | 2 | 9.88E-12 | 0.94  | 3.76   | -     | 1361.1   |
| gj 16507237 ref NP_005338.1 | heat shock 70kDa protein 5 (glucose-regulated protein, 78kDa); BIP; he  |            |   | 1.31E-11 | 9.45  | 110.23 | 23.50 | 72332.5  |
| AHQ-9-5, 3140               | K.DAGTIAGLNVM* <i>R</i> .I                                              | 1234.40834 | 2 | 5.22E-04 | 0.73  | 2.94   | -     | 540.8    |
| AHQ-9-5, 5511 - 5512        | R.IEIESFYEGEDFSETLTRA                                                   | 2166.28328 | 2 | 1.21E-05 | 0.85  | 3.42   | -     | 804.8    |
| AHQ-9-6, 5437               | R.IEIESFYEGEDFSETLTRA                                                   | 2166.28328 | 2 | 3.01E-06 | 0.96  | 4.69   | -     | 1206.6   |
| AHQ-9-6, 4522               | K.IEWLESHQDADIEDFK.A                                                    | 1976.08864 | 2 | 2.86E-06 | 0.95  | 4.51   | -     | 1226.7   |
| AHQ-9-6, 4314               | R.IINEPTAAAIYGLDKR.E                                                    | 1817.07894 | 3 | 1.31E-11 | 0.68  | 3.12   | -     | 524.2    |
| AHQ-9-5, 4381               | R.IINEPTAAAIYGLDKR.E                                                    | 1817.07894 | 2 | 3.69E-07 | 0.62  | 3.55   | -     | 645.5    |
| AHQ-9-5, 4375               | R.IINEPTAAAIYGLDKR.E                                                    | 1817.07894 | 3 | 1.17E-06 | 0.66  | 3.27   | -     | 371.7    |
| AHQ-9-5, 3832               | R.ITPSYVAFTPEGER.L                                                      | 1567.72412 | 2 | 4.20E-04 | 0.46  | 2.62   | -     | 469.7    |
| AHQ-9-6, 3790               | R.ITPSYVAFTPEGER.L                                                      | 1567.72412 | 2 | 2.95E-04 | 0.76  | 2.91   | -     | 503.6    |
| AHQ-9-5, 3771 - 3784        | K.KSDIDEIVLGGSTR.I                                                      | 1589.77277 | 2 | 7.10E-06 | 0.97  | 4.59   | -     | 2055.7   |
| AHQ-9-6, 3685 - 3733        | K.KSDIDEIVLGGSTR.I                                                      | 1589.77277 | 2 | 2.10E-05 | 0.93  | 4.01   | -     | 1110.5   |
| AHQ-9-5, 3785               | K.KSDIDEIVLGGSTR.I                                                      | 1589.77277 | 2 | 2.23E-04 | 0.83  | 2.64   | -     | 1205.6   |
| AHQ-9-5, 3500 - 3508        | K.NQLTSPNPNTVFDAK.R                                                     | 1678.78173 | 2 | 2.62E-07 | 0.80  | 4.29   | -     | 539.3    |
| AHQ-9-6, 3670               | K.SQIFSTASDNQPTVTIK.V                                                   | 1838.00865 | 2 | 2.86E-06 | 0.92  | 3.99   | -     | 986.6    |
| AHQ-9-5, 3716               | K.SQIFSTASDNQPTVTIK.V                                                   | 1838.00865 | 2 | 4.78E-09 | 0.93  | 4.63   | -     | 816.6    |
| AHQ-9-6, 3109               | K.TKPYIQVDIGGGQTK.T                                                     | 1605.81703 | 2 | 6.34E-04 | 0.85  | 3.24   | -     | 723.4    |
| AHQ-9-6, 3119               | K.TKPYIQVDIGGGQTK.T                                                     | 1605.81703 | 3 | 9.72E-04 | 0.87  | 3.45   | -     | 1196.5   |
| AHQ-9-5, 3125 - 3129        | R.TWNPSVQDDIK.F                                                         | 1431.53230 | 2 | 3.75E-05 | 0.96  | 4.05   | -     | 1558.9   |
| AHQ-9-5, 3921               | K.VTHAVTVPAYFNDAQR.Q                                                    | 1889.10372 | 3 | 9.88E-04 | 0.86  | 3.51   | -     | 909.0    |
| gj 5031571 ref NP_005713.1  | actin-related protein 2; ARP2 (actin-related protein 2, yeast) homolog  |            |   | 1.43E-11 | 3.44  | 40.20  | 18.50 | 44760.5  |
| AHQ-9-8, 3300               | K.DLM* <i>VGDEASEL</i> .S                                               | 1351.46573 | 2 | 6.80E-07 | 0.94  | 3.66   | -     | 1273.6   |
| AHQ-9-9, 6183 - 6233        | R.FEAPALFQPHLUNVEGVGAELLFNTIQAADIDTR.S                                  | 3940.40927 | 3 | 1.69E-04 | 0.65  | 3.08   | -     | 360.6    |
| AHQ-9-8, 3352               | R.GYAFNHSADFETVR.M                                                      | 1614.69943 | 2 | 1.43E-11 | 0.94  | 3.97   | -     | 1023.6   |
| AHQ-9-8, 4119               | K.HLWDYTFGPEK.L                                                         | 1393.52736 | 2 | 7.47E-07 | 0.91  | 3.80   | -     | 598.2    |
| gj 4507869 ref NP_003361.1  | vasodilator-stimulated phosphoprotein [Homo sapiens]                    |            |   | 1.55E-11 | 0.96  | 10.25  | 3.70  | 39829.4  |
| AHQ-9-8, 5824               | K.VKEEIEAFVQELR.K                                                       | 1703.96061 | 3 | 3.82E-05 | 0.95  | 4.95   | -     | 1614.7   |
| AHQ-9-8, 5811               | K.VKEEIEAFVQELR.K                                                       | 1703.96061 | 2 | 1.55E-11 | 0.96  | 4.56   | -     | 1513.3   |
| gj 4504745 ref NP_000410.1  | integrin alpha 2b precursor [Homo sapiens]                              |            |   | 1.76E-11 | 27.34 | 310.32 | 35.00 | 113374.2 |
| AHQ-9-6, 4943 - 4962        | R.AEGGQCP* <i>SLFLDLR</i> .D                                            | 1564.74505 | 2 | 1.17E-04 | 0.95  | 4.87   | -     | 846.4    |
| AHQ-9-4, 4982 - 5025        | R.AEGGQCP* <i>SLFLDLR</i> .D                                            | 1564.74505 | 2 | 4.42E-04 | 0.80  | 3.26   | -     | 452.0    |
| AHQ-9-3, 4970 - 4981        | R.AEGGQCP* <i>SLFLDLR</i> .D                                            | 1564.74505 | 2 | 2.36E-05 | 0.85  | 3.77   | -     | 607.3    |
| AHQ-9-13-, 5008 - 5012      | R.AEGGQCP* <i>SLFLDLR</i> .D                                            | 1564.74505 | 2 | 2.59E-04 | 0.92  | 3.98   | -     | 793.8    |
| AHQ-9-5, 4945 - 5027        | R.AEGGQCP* <i>SLFLDLR</i> .D                                            | 1564.74505 | 2 | 4.33E-06 | 0.91  | 3.38   | -     | 989.2    |
| AHQ-9-7, 4924 - 4936        | R.AEGGQCP* <i>SLFLDLR</i> .D                                            | 1564.74505 | 2 | 1.01E-08 | 0.95  | 4.18   | -     | 1168.5   |
| AHQ-9-4, 4581               | R.AEGGQCP* <i>SLFLDLR</i> DETR.N                                        | 2066.23814 | 3 | 2.55E-07 | 0.77  | 3.52   | -     | 494.1    |
| AHQ-9-3, 2938               | R.ALSNVEGFER.L                                                          | 1122.21308 | 2 | 1.97E-05 | 0.87  | 2.93   | -     | 1055.3   |
| AHQ-9-4, 2906               | R.ALSNVEGFER.L                                                          | 1122.21308 | 1 | 3.56E-04 | 0.68  | 2.76   | -     | 180.1    |
| AHQ-9-4, 2892               | R.ALSNVEGFER.L                                                          | 1122.21308 | 2 | 1.48E-05 | 0.87  | 2.81   | -     | 1087.9   |
| AHQ-9-4, 4814               | K.ASVQLLQD* <i>SLNPAVK</i> .S                                           | 1682.94293 | 3 | 1.98E-04 | 0.92  | 4.55   | -     | 989.3    |
| AHQ-9-5, 4812 - 4887        | K.ASVQLLQD* <i>SLNPAVK</i> .S                                           | 1682.94293 | 2 | 2.96E-05 | 0.78  | 3.60   | -     | 508.3    |
| AHQ-9-3, 4781 - 4836        | K.ASVQLLQD* <i>SLNPAVK</i> .S                                           | 1682.94293 | 2 | 6.82E-04 | 0.80  | 2.60   | -     | 1095.6   |

|                                                                                           |                                      |            |   |          |      |       |      |          |
|-------------------------------------------------------------------------------------------|--------------------------------------|------------|---|----------|------|-------|------|----------|
| AHQ-9-4, 5644                                                                             | K.ASVQLLVQDLSNPAAVKSCVLPQTK.T        | 2598.01293 | 3 | 1.99E-04 | 0.87 | 3.70  | -    | 1177.9   |
| AHQ-9-4, 3072                                                                             | R.DETRNVGSGTLQTFK.A                  | 1724.85363 | 2 | 7.34E-05 | 0.71 | 3.03  | -    | 707.4    |
| AHQ-9-3, 3696                                                                             | R.DGYNDAVAAPYGGPSGR.G                | 1780.87574 | 2 | 1.81E-05 | 0.76 | 2.91  | -    | 679.0    |
| AHQ-9-5, 3713 - 3749                                                                      | R.DGYNDAVAAPYGGPSGR.G                | 1780.87574 | 2 | 5.84E-05 | 0.80 | 3.59  | -    | 557.6    |
| AHQ-9-4, 3704 - 3752                                                                      | R.DGYNDAVAAPYGGPSGR.G                | 1780.87574 | 2 | 3.91E-07 | 0.93 | 4.39  | -    | 951.7    |
| AHQ-9-4, 3810 - 3886                                                                      | R.DGYNDAVAAPYGGPSGR.G                | 1780.87574 | 2 | 5.52E-07 | 0.77 | 3.57  | -    | 563.7    |
| AHQ-9-4, 4310 - 4344                                                                      | R.FGSAIAPLGDLLDR.D                   | 1332.48700 | 2 | 6.22E-06 | 0.93 | 3.70  | -    | 984.6    |
| AHQ-9-6, 5271 - 5317                                                                      | R.FGSAIAPLGDLLDRDGYNDIAVAAPYGGPSGR.G | 3094.34015 | 3 | 3.40E-04 | 0.87 | 4.11  | -    | 907.9    |
| AHQ-9-5, 5347 - 5352                                                                      | R.FGSAIAPLGDLLDRDGYNDIAVAAPYGGPSGR.G | 3094.34015 | 3 | 4.99E-05 | 0.91 | 4.63  | -    | 799.5    |
| AHQ-9-4, 5493 - 5497                                                                      | R.FGSAIAPLGDLLDRDGYNDIAVAAPYGGPSGR.G | 3094.34015 | 3 | 6.50E-05 | 0.84 | 3.77  | -    | 882.8    |
| AHQ-9-4, 5376 - 5432                                                                      | R.FGSAIAPLGDLLDRDGYNDIAVAAPYGGPSGR.G | 3094.34015 | 3 | 3.12E-06 | 0.94 | 5.27  | -    | 977.8    |
| AHQ-9-4, 5585                                                                             | R.GAVDIDDNGYDPLIVGAYGANQVAVYR.A      | 2827.05458 | 2 | 6.31E-05 | 0.88 | 3.99  | -    | 543.3    |
| AHQ-9-4, 5693                                                                             | R.GAVDIDDNGYDPLIVGAYGANQVAVYR.A      | 2827.05458 | 2 | 1.97E-06 | 0.95 | 4.49  | -    | 959.2    |
| AHQ-9-4, 5794 - 5856                                                                      | R.GAVDIDDNGYDPLIVGAYGANQVAVYR.A      | 2827.05458 | 3 | 3.56E-08 | 0.76 | 3.50  | -    | 772.8    |
| AHQ-9-4, 5572 - 5630                                                                      | R.GAVDIDDNGYDPLIVGAYGANQVAVYR.A      | 2827.05458 | 3 | 6.90E-04 | 0.73 | 3.41  | -    | 632.3    |
| AHQ-9-11, 4745                                                                            | R.GEAQVWTLQLL.R.A                    | 1301.47614 | 2 | 3.11E-07 | 0.89 | 3.31  | -    | 940.6    |
| AHQ-9-10, 4710 - 4771                                                                     | R.GEAQVWTLQLL.R.A                    | 1301.47614 | 2 | 8.77E-05 | 0.68 | 3.10  | -    | 625.1    |
| AHQ-9-4, 5113 - 5182                                                                      | R.GNSFPASLVVAEEGER.E                 | 1733.86053 | 2 | 9.35E-09 | 0.90 | 4.24  | -    | 638.1    |
| AHQ-9-4, 5240 - 5305                                                                      | R.GNSFPASLVVAEEGER.E                 | 1733.86053 | 2 | 3.29E-06 | 0.91 | 3.98  | -    | 864.8    |
| AHQ-9-4, 5857 - 5928                                                                      | R.GNSFPASLVVAEEGEREQNSLDSWGP.K.V     | 2976.16043 | 3 | 5.63E-05 | 0.76 | 3.84  | -    | 372.7    |
| AHQ-9-4, 5726 - 5801                                                                      | R.GNSFPASLVVAEEGEREQNSLDSWGP.K.V     | 2976.16043 | 3 | 1.21E-05 | 0.76 | 3.95  | -    | 395.5    |
| AHQ-9-4, 5984 - 6042                                                                      | R.GNSFPASLVVAEEGEREQNSLDSWGP.K.V     | 2976.16043 | 3 | 9.14E-06 | 0.75 | 3.56  | -    | 424.9    |
| AHQ-9-3, 4953 - 4956                                                                      | R.GPHALGAPSLLLTGTQLYGR.F             | 2023.32431 | 3 | 2.78E-07 | 0.89 | 4.03  | -    | 896.6    |
| AHQ-9-6, 4917                                                                             | R.GPHALGAPSLLLTGTQLYGR.F             | 2023.32431 | 3 | 3.32E-04 | 0.81 | 3.42  | -    | 954.2    |
| AHQ-9-5, 4991                                                                             | R.GPHALGAPSLLLTGTQLYGR.F             | 2023.32431 | 3 | 1.65E-05 | 0.88 | 3.37  | -    | 1514.5   |
| AHQ-9-5, 5001                                                                             | R.GPHALGAPSLLLTGTQLYGR.F             | 2023.32431 | 2 | 6.59E-07 | 0.96 | 5.17  | -    | 897.5    |
| AHQ-9-4, 4964                                                                             | R.GPHALGAPSLLLTGTQLYGR.F             | 2023.32431 | 2 | 3.46E-10 | 0.97 | 5.46  | -    | 1343.4   |
| AHQ-9-4, 4960 - 5021                                                                      | R.GPHALGAPSLLLTGTQLYGR.F             | 2023.32431 | 3 | 1.89E-05 | 0.86 | 3.76  | -    | 1022.5   |
| AHQ-9-6, 4925                                                                             | R.GPHALGAPSLLLTGTQLYGR.F             | 2023.32431 | 2 | 8.44E-06 | 0.92 | 4.32  | -    | 723.6    |
| AHQ-9-3, 4966                                                                             | R.GPHALGAPSLLLTGTQLYGR.F             | 2023.32431 | 2 | 7.07E-04 | 0.94 | 4.63  | -    | 903.2    |
| AHQ-9-4, 4741 - 4808                                                                      | R.GQVLVFLGGSEGLR.S                   | 1503.72793 | 2 | 2.84E-06 | 0.97 | 5.15  | -    | 1657.7   |
| AHQ-9-4, 4844 - 4900                                                                      | R.GQVLVFLGGSEGLR.S                   | 1503.72793 | 2 | 1.09E-04 | 0.90 | 3.65  | -    | 1002.5   |
| AHQ-9-6, 4730 - 4737                                                                      | R.GQVLVFLGGSEGLR.S                   | 1503.72793 | 2 | 2.72E-08 | 0.96 | 3.92  | -    | 1785.4   |
| AHQ-9-5, 4803                                                                             | R.GQVLVFLGGSEGLR.S                   | 1503.72793 | 2 | 1.14E-08 | 0.97 | 4.95  | -    | 1365.9   |
| AHQ-9-4, 3814                                                                             | R.HDLLVGAPLYM.ESR.A                  | 1617.85128 | 3 | 6.36E-04 | 0.83 | 3.72  | -    | 971.5    |
| AHQ-9-4, 4304                                                                             | R.HDLLVGAPLYM.ESR.A                  | 1601.85188 | 3 | 3.92E-05 | 0.91 | 3.74  | -    | 1408.4   |
| AHQ-9-6, 4255                                                                             | K.IVLLDVPYR.A                        | 1024.28196 | 2 | 2.29E-04 | 0.85 | 3.30  | -    | 635.7    |
| AHQ-9-4, 4309                                                                             | K.IVLLDVPYR.A                        | 1024.28196 | 2 | 1.46E-05 | 0.91 | 3.71  | -    | 833.5    |
| AHQ-9-5, 3872 - 3881                                                                      | R.IYVENDFSWDKR.Y                     | 1572.70245 | 2 | 4.66E-04 | 0.90 | 3.91  | -    | 906.7    |
| AHQ-9-3, 3869                                                                             | R.IYVENDFSWDKR.Y                     | 1572.70245 | 2 | 4.11E-06 | 0.96 | 4.28  | -    | 1376.4   |
| AHQ-9-4, 3852 - 3909                                                                      | R.IYVENDFSWDKR.Y                     | 1572.70245 | 2 | 9.24E-06 | 0.88 | 3.86  | -    | 877.1    |
| AHQ-9-4, 4041                                                                             | R.IYVENDFSWDKR.Y                     | 1572.70245 | 2 | 5.01E-06 | 0.92 | 3.47  | -    | 1218.3   |
| AHQ-9-4, 4173                                                                             | K.LSLNAELQLDR.Q                      | 1272.43310 | 2 | 1.32E-07 | 0.90 | 3.83  | -    | 941.6    |
| AHQ-9-6, 5529 - 5586                                                                      | R.SRPSQVLDSPFPTGSAFGFSLR.G           | 2354.60606 | 3 | 6.85E-11 | 0.97 | 6.37  | -    | 1263.0   |
| AHQ-9-7, 5512                                                                             | R.SRPSQVLDSPFPTGSAFGFSLR.G           | 2354.60606 | 3 | 2.04E-04 | 0.94 | 5.15  | -    | 1039.0   |
| AHQ-9-4, 5584 - 5652                                                                      | R.SRPSQVLDSPFPTGSAFGFSLR.G           | 2354.60606 | 3 | 1.76E-11 | 0.95 | 5.81  | -    | 1031.6   |
| AHQ-9-3, 5553 - 5568                                                                      | R.SRPSQVLDSPFPTGSAFGFSLR.G           | 2354.60606 | 3 | 1.31E-07 | 0.96 | 6.19  | -    | 1172.0   |
| AHQ-9-4, 5389                                                                             | R.SRPSQVLDSPFPTGSAFGFSLR.G           | 2354.60606 | 3 | 6.06E-09 | 0.93 | 4.63  | -    | 1204.0   |
| AHQ-9-4, 5490                                                                             | R.SRPSQVLDSPFPTGSAFGFSLR.G           | 2354.60606 | 3 | 5.34E-05 | 0.96 | 5.44  | -    | 1945.7   |
| AHQ-9-4, 5597 - 5598                                                                      | R.SRPSQVLDSPFPTGSAFGFSLR.G           | 2354.60606 | 2 | 6.23E-08 | 0.94 | 5.09  | -    | 635.1    |
| AHQ-9-4, 3657                                                                             | K.TEEAEKTPVGSCLAQPESSGR.R            | 2295.46902 | 2 | 3.67E-04 | 0.94 | 4.64  | -    | 682.0    |
| AHQ-9-4, 3390                                                                             | K.TEEAEKTPVGSCLAQPESSGR.R            | 2451.65537 | 3 | 1.78E-05 | 0.50 | 3.26  | -    | 290.1    |
| AHQ-9-7, 5172                                                                             | R.TLGPSEETGGVFLCPWR.A                | 2036.25364 | 2 | 6.48E-06 | 0.80 | 3.58  | -    | 602.4    |
| AHQ-9-7, 5180                                                                             | R.TLGPSEETGGVFLCPWR.A                | 2036.25364 | 3 | 1.24E-05 | 0.71 | 3.19  | -    | 649.5    |
| AHQ-9-5, 5264                                                                             | R.TLGPSEETGGVFLCPWR.A                | 2036.25364 | 2 | 7.51E-09 | 0.93 | 4.29  | -    | 767.2    |
| AHQ-9-11, 5123 - 5179                                                                     | R.TLGPSEETGGVFLCPWR.A                | 2036.25364 | 2 | 2.34E-06 | 0.86 | 3.60  | -    | 829.3    |
| AHQ-9-13, 5222                                                                            | R.TLGPSEETGGVFLCPWR.A                | 2036.25364 | 2 | 1.95E-04 | 0.93 | 4.47  | -    | 823.2    |
| AHQ-9-4, 5205 - 5264                                                                      | R.TLGPSEETGGVFLCPWR.A                | 2036.25364 | 2 | 1.14E-06 | 0.97 | 5.76  | -    | 1354.4   |
| AHQ-9-4, 5129 - 5208                                                                      | R.TLGPSEETGGVFLCPWR.A                | 2036.25364 | 2 | 7.84E-04 | 0.78 | 3.04  | -    | 587.5    |
| AHQ-9-11, 3566 - 3597                                                                     | K.TPVGSCFLAQPESSGR.R                 | 1607.76993 | 2 | 1.09E-04 | 0.62 | 2.70  | -    | 500.7    |
| AHQ-9-5, 3659                                                                             | K.TPVGSCFLAQPESSGR.R                 | 1607.76993 | 2 | 2.29E-07 | 0.85 | 3.64  | -    | 754.7    |
| AHQ-9-4, 3645 - 3668                                                                      | K.TPVGSCFLAQPESSGR.R                 | 1607.76993 | 2 | 2.04E-07 | 0.95 | 4.59  | -    | 1102.6   |
| AHQ-9-4, 4349 - 4376                                                                      | K.TPVGSCFLAQPESSGR.R                 | 2478.81062 | 3 | 5.89E-09 | 0.96 | 5.17  | -    | 1624.5   |
| AHQ-9-4, 5385                                                                             | R.VLLLGSQQAATLNLDLGGK.H              | 1999.29783 | 2 | 2.06E-06 | 0.90 | 4.30  | -    | 817.4    |
| AHQ-9-4, 5485                                                                             | R.VLLLGSQQAATLNLDLGGK.H              | 1999.29783 | 2 | 1.60E-04 | 0.94 | 3.97  | -    | 1176.2   |
| AHQ-9-5, 4004                                                                             | R.VVLCENPMP.K                        | 1277.53632 | 2 | 9.73E-04 | 0.76 | 2.85  | -    | 576.7    |
| AHQ-9-4, 3316                                                                             | R.VVLCENPMP.K.K                      | 1277.53632 | 2 | 1.25E-05 | 0.93 | 4.22  | -    | 1202.6   |
| AHQ-9-6, 3295                                                                             | R.VVLCENPMP.K.K                      | 1277.53632 | 2 | 6.72E-05 | 0.80 | 2.95  | -    | 844.6    |
| AHQ-9-4, 3985                                                                             | R.VVLCENPMP.K                        | 1261.53692 | 2 | 1.62E-04 | 0.94 | 3.80  | -    | 1297.0   |
| AHQ-9-4, 3602                                                                             | R.VVLCENPMP.K.N                      | 1389.70984 | 2 | 2.16E-05 | 0.90 | 3.12  | -    | 1066.2   |
| AHQ-9-4, 4141                                                                             | R.VYLFQPR.G                          | 1036.25129 | 2 | 1.28E-04 | 0.94 | 3.44  | -    | 1125.3   |
| AHQ-9-3, 4142                                                                             | R.VYLFQPR.G                          | 1036.25129 | 2 | 1.24E-05 | 0.94 | 3.44  | -    | 1368.8   |
| AHQ-9-5, 4147 - 4155                                                                      | R.VYLFQPR.G                          | 1036.25129 | 2 | 1.12E-05 | 0.95 | 3.70  | -    | 1219.7   |
| AHQ-9-4, 4130                                                                             | R.VYLFQPR.G                          | 1036.25129 | 2 | 5.40E-06 | 0.95 | 4.00  | -    | 1150.8   |
| g 13124879 ref NP_002465.1 smooth muscle myosin heavy chain 11 isoform SM1 [Homo sapiens] |                                      |            |   | 1.92E-11 | 7.09 | 80.40 | 4.20 | 227336.7 |
| AHQ-9-2, 4607                                                                             | R.DLGEELAEK.L.T                      | 1117.23151 | 2 | 9.32E-04 | 0.91 | 3.00  | -    | 1048.9   |
| AHQ-9-3, 2952                                                                             | K.FDQLLAEK.N                         | 1093.21165 | 2 | 9.60E-06 | 0.90 | 2.67  | -    | 1501.9   |
| AHQ-9-5, 2929                                                                             | K.FDQLLAEK.N                         | 1093.21165 | 2 | 4.83E-05 | 0.90 | 2.88  | -    | 1408.7   |
| AHQ-9-2, 3014                                                                             | K.FDQLLAEK.N                         | 1093.21165 | 2 | 1.98E-05 | 0.91 | 3.10  | -    | 1469.3   |
| AHQ-9-2, 2566 - 2641                                                                      | K.KEEELQAALAR.L                      | 1258.40643 | 2 | 6.49E-04 | 0.73 | 2.82  | -    | 845.1    |
| AHQ-9-6, 2813 - 2882                                                                      | R.KFDQLLAEK.N                        | 1221.38456 | 2 | 1.18E-04 | 0.85 | 3.11  | -    | 965.6    |
| AHQ-9-3, 2920 - 2994                                                                      | R.KFDQLLAEK.N                        | 1221.38456 | 2 | 4.06E-05 | 0.65 | 2.52  | -    | 761.5    |
| AHQ-9-4, 2890 - 2970                                                                      | R.KFDQLLAEK.N                        | 1221.38456 | 2 | 1.04E-04 | 0.86 | 3.44  | -    | 923.8    |
| AHQ-9-2, 2977 - 3051                                                                      | R.KFDQLLAEK.N                        | 1221.38456 | 2 | 2.25E-04 | 0.56 | 2.92  | -    | 687.4    |
| AHQ-9-2, 5618 - 5650                                                                      | K.LQLFLNHTMFILEQEEYQR.E              | 2468.77258 | 3 | 4.44E-08 | 0.97 | 5.59  | -    | 2259.2   |
| AHQ-9-6, 4957 - 5025                                                                      | K.LQLFLNHTMFILEQEEYQR.E              | 2484.77198 | 3 | 5.32E-05 | 0.78 | 3.63  | -    | 1083.3   |
| AHQ-9-2, 5073 - 5130                                                                      | K.LQLFLNHTMFILEQEEYQR.E              | 2484.77198 | 3 | 8.16E-09 | 0.98 | 8.01  | -    | 2619.8   |
| AHQ-9-2, 5825                                                                             | K.LLQANPILEAFGNAK.T                  | 1727.98540 | 2 | 2.63E-07 | 0.96 | 4.26  | -    | 1231.6   |
| AHQ-9-2, 5926                                                                             | K.LLQANPILEAFGNAK.T                  | 1727.98540 | 2 | 4.21E-07 | 0.78 | 3.31  | -    | 497.1    |
| AHQ-9-2, 5714 - 5769                                                                      | K.LLQANPILEAFGNAK.T                  | 1727.98540 | 2 | 2.99E-08 | 0.96 | 4.63  | -    | 1181.4   |
| AHQ-9-6, 5511 - 5587                                                                      | K.LLQANPILEAFGNAK.T                  | 1727.98540 | 2 | 3.90E-07 | 0.84 | 3.28  | -    | 684.4    |
| AHQ-9-6, 5646 - 5662                                                                      | K.LLQANPILEAFGNAK.T                  | 1727.98540 | 2 | 1.38E-04 | 0.86 | 3.75  | -    | 667.8    |
| AHQ-9-7, 5632                                                                             | K.LLQANPILEAFGNAK.T                  | 1727.98540 | 2 | 2.52E-05 | 0.65 | 2.87  | -    | 493.4    |
| AHQ-9-3, 5768                                                                             | K.LLQANPILEAFGNAK.T                  | 1727.98540 | 2 | 2.57E-06 | 0.88 | 3.63  | -    | 609.9    |
| AHQ-9-1, 5952 - 5956                                                                      | K.LLQANPILEAFGNAK.T                  | 1727.98540 | 2 | 3.93E-04 | 0.85 | 3.32  | -    | 810.5    |
| AHQ-9-3, 5661                                                                             | K.LLQANPILEAFGNAK.T                  | 1727.98540 | 2 | 3.55E-04 | 0.85 | 3.32  | -    | 659.8    |
| AHQ-9-4, 5834                                                                             | K.LLQANPILEAFGNAK.T                  | 1727.98540 | 2 | 9.97E-07 | 0.92 | 3.62  | -    | 928.8    |
| AHQ-9-4, 5725                                                                             | K.LLQANPILEAFGNAK.T                  | 1727.98540 | 2 | 5.91E-07 | 0.92 | 3.68  | -    | 854.9    |
| AHQ-9-4, 5272                                                                             | K.TLQEELEDELOATEDAK.L                | 1963.04334 | 3 | 4.39E-09 | 0.96 | 6.11  | -    | 1032.3   |
| AHQ-9-4, 5237 - 5265                                                                      | K.TLQEELEDELOATEDAK.L                | 1963.04334 | 2 | 2.67E-09 | 0.98 | 6.44  | -    | 1936.0   |
| AHQ-9-5, 5283                                                                             | K.TLQEELEDELOATEDAK.L                | 1963.04334 | 2 | 5.28E-04 | 0.98 | 5.20  | -    | 2322.9   |
| AHQ-9-5, 5292                                                                             | K.TLQEELEDELOATEDAK.L                | 1963.04334 | 3 | 2.34E-05 | 0.91 | 3.98  | -    | 1257.5   |
| AHQ-9-3, 5220 - 5221                                                                      | K.TLQEELEDELOATEDAK.L                | 1963.04334 | 3 | 8.17E-06 | 0.96 | 6.17  | -    | 1126.6   |
| AHQ-9-2, 5365 - 5370                                                                      | K.TLQEELEDELOATEDAK.L                | 1963.04334 | 3 | 6.78E-09 | 0.92 | 4.86  | -    | 862.8    |
| AHQ-9-6, 5215 - 5221                                                                      | K.TLQEELEDELOATEDAK.L                | 1963.04334 | 2 | 1.92E-11 | 0.98 | 6.53  | -    | 2076.1   |
| AHQ-9-2, 5361                                                                             | K.TLQEELEDELOATEDAK.L                | 1963.04334 | 2 | 2.43E-11 | 0.96 | 4.88  | -    | 1404.2   |
| AHQ-9-2, 3931                                                                             | K.TLQEELEDELOATEDAK.L                | 1963.04334 | 2 | 5.63E-06 | 0.97 | 5.00  | -    | 1412.1   |



|                             |                                                                         |            |   |          |      |        |       |         |
|-----------------------------|-------------------------------------------------------------------------|------------|---|----------|------|--------|-------|---------|
| AHQ-9-7, 5209               | K.TQLEEELEDELQATEDAK.L                                                  | 1963.04334 | 2 | 1.88E-05 | 0.97 | 5.12   | -     | 1644.2  |
| AHQ-9-1, 5396 - 5456        | K.TQLEEELEDELQATEDAK.L                                                  | 1963.04334 | 2 | 6.55E-07 | 0.97 | 4.97   | -     | 1552.4  |
| gj 13775198 ref NP_112576.1 | SH3 domain binding glutamic acid-rich protein like 3; SH3BGR3-like pr   |            |   | 2.62E-11 | 2.45 | 30.25  | 31.20 | 10437.7 |
| AHQ-9-13-, 4528             | R.IYQLVDISQDNALR.D                                                      | 1776.97168 | 2 | 2.62E-11 | 0.95 | 4.42   | -     | 1475.4  |
| AHQ-9-13, 4694 - 4750       | R.IYQLVDISQDNALR.D                                                      | 1776.97168 | 2 | 5.38E-07 | 0.96 | 5.00   | -     | 1492.2  |
| AHQ-9-13-, 4389 - 4454      | R.IYQLVDISQDNALRDEM*R.A                                                 | 2324.55691 | 3 | 1.06E-05 | 0.67 | 3.64   | -     | 376.5   |
| AHQ-9-13-, 4258 - 4316      | R.IYQLVDISQDNALRDEM*R.A                                                 | 2324.55691 | 3 | 3.89E-04 | 0.45 | 3.20   | -     | 250.7   |
| AHQ-9-14-, 4345             | R.IYQLVDISQDNALRDEM*R.A                                                 | 2324.55691 | 3 | 6.64E-04 | 0.52 | 3.04   | -     | 340.9   |
| AHQ-9-13-, 1853 - 1917      | R.VYSTSVTGSR.E                                                          | 1057.13940 | 2 | 4.32E-04 | 0.83 | 2.82   | -     | 832.1   |
| gj 4507953 ref NP_003397.1  | tyrosine 3/tryptophan 5-monoxygenase activation protein, zeta polypep   |            |   | 2.62E-11 | 2.66 | 30.22  | 18.40 | 27744.9 |
| AHQ-9-14-, 2426             | K.SVTEQGAELSNEER.N                                                      | 1549.57922 | 2 | 6.23E-08 | 0.88 | 3.15   | -     | 1265.0  |
| AHQ-9-10, 2367 - 2423       | K.SVTEQGAELSNEER.N                                                      | 1549.57922 | 2 | 3.00E-07 | 0.94 | 3.99   | -     | 1273.8  |
| AHQ-9-11, 2382              | K.SVTEQGAELSNEER.N                                                      | 1549.57922 | 2 | 2.62E-11 | 0.89 | 3.46   | -     | 1067.9  |
| AHQ-9-13-, 2428 - 2497      | K.SVTEQGAELSNEER.N                                                      | 1549.57922 | 2 | 1.64E-09 | 0.92 | 3.88   | -     | 1108.3  |
| AHQ-9-9, 2291               | K.SVTEQGAELSNEER.N                                                      | 1549.57922 | 2 | 3.08E-07 | 0.78 | 2.82   | -     | 891.4   |
| AHQ-9-13, 6330              | K.TAFDEAIAELDTLSEESYK.D                                                 | 2133.25160 | 2 | 1.10E-04 | 0.95 | 4.46   | -     | 1186.0  |
| AHQ-9-10, 2092 - 2147       | R.YLAEVAAGDDKK.G                                                        | 1280.40887 | 2 | 4.18E-04 | 0.82 | 3.28   | -     | 833.9   |
| gj 4504345 ref NP_000508.1  | alpha 2 globin [Homo sapiens]                                           |            |   | 2.62E-11 | 3.69 | 40.35  | 50.70 | 15257.4 |
| AHQ-9-13, 4374 - 4380       | K.FLAVSVTLVTSK.Y                                                        | 1253.46970 | 2 | 3.05E-04 | 0.88 | 3.25   | -     | 950.7   |
| AHQ-9-13-, 3997 - 4066      | K.TYFPHFDLSHGSAQVK.G                                                    | 1835.01138 | 3 | 6.70E-08 | 0.87 | 3.98   | -     | 669.0   |
| AHQ-9-13, 4136 - 4190       | K.TYFPHFDLSHGSAQVK.G                                                    | 1835.01138 | 3 | 6.08E-06 | 0.89 | 3.82   | -     | 728.8   |
| AHQ-9-13, 4162              | K.TYFPHFDLSHGSAQVK.G                                                    | 1835.01138 | 2 | 3.82E-04 | 0.66 | 2.87   | -     | 461.7   |
| AHQ-9-13-, 4002             | K.TYFPHFDLSHGSAQVK.G                                                    | 1835.01138 | 2 | 7.01E-05 | 0.80 | 3.44   | -     | 576.6   |
| AHQ-9-13-, 5264 - 5266      | K.VADALTNVAHVHDDM*PNALSALSDLHAHK.L                                      | 3014.31995 | 3 | 7.78E-06 | 0.98 | 7.09   | -     | 1776.3  |
| AHQ-9-13-, 4745             | K.VADALTNVAHVHDDM*PNALSALSDLHAHK.L                                      | 3014.31995 | 3 | 5.76E-05 | 0.93 | 5.37   | -     | 797.1   |
| AHQ-9-13, 3018 - 3083       | K.VGAHAGEYGAEALER.M                                                     | 1530.62397 | 2 | 6.71E-05 | 0.59 | 2.67   | -     | 584.4   |
| AHQ-9-13, 2895 - 2959       | K.VGAHAGEYGAEALER.M                                                     | 1530.62397 | 3 | 9.45E-05 | 0.96 | 5.01   | -     | 2065.6  |
| AHQ-9-13-, 2685 - 2746      | K.VGAHAGEYGAEALER.M                                                     | 1530.62397 | 2 | 2.62E-11 | 0.97 | 4.40   | -     | 1664.9  |
| AHQ-9-13-, 2684 - 2758      | K.VGAHAGEYGAEALER.M                                                     | 1530.62397 | 3 | 2.70E-04 | 0.97 | 5.59   | -     | 2303.3  |
| AHQ-9-13, 2890 - 2962       | K.VGAHAGEYGAEALER.M                                                     | 1530.62397 | 2 | 3.86E-06 | 0.95 | 4.23   | -     | 1107.5  |
| AHQ-9-14-, 2690 - 2691      | K.VGAHAGEYGAEALER.M                                                     | 1530.62397 | 2 | 5.57E-10 | 0.97 | 4.31   | -     | 1953.8  |
| gj 14149734 ref NP_065174.1 | coronin, actin binding protein, 1B [Homo sapiens]                       |            |   | 2.89E-11 | 0.93 | 10.22  | 5.90  | 54234.4 |
| AHQ-9-6, 6177               | R.KSDLFQDDILPDTAGPEAALEAEWVSGR.D                                        | 3211.39431 | 3 | 2.89E-11 | 0.93 | 4.36   | -     | 1144.6  |
| gj 10835063 ref NP_002511.1 | nucleophosmin (nucleolar phosphoprotein B23, numatrin); Nucleophosmin   |            |   | 4.04E-11 | 1.62 | 20.22  | 17.00 | 32574.8 |
| AHQ-9-9, 3289               | K.LAAEDDDDDDEEDDDDDDDDFDEEAEEKAPVK.K                                    | 4120.75940 | 3 | 4.04E-11 | 0.92 | 4.44   | -     | 961.5   |
| AHQ-9-9, 5325 - 5391        | R.M*TDQEAIQDLWQWR.K                                                     | 387.00591  | 2 | 3.60E-04 | 0.70 | 3.13   | -     | 859.3   |
| gj 4505981 ref NP_002695.1  | pro-platelet basic protein (includes platelet basic protein, bet; Pro-p |            |   | 4.12E-11 | 6.12 | 70.30  | 44.50 | 13894.1 |
| AHQ-9-13-, 4550 - 4577      | K.EESLSDSLYAEALR.C                                                      | 1540.61070 | 2 | 8.38E-06 | 0.52 | 2.76   | -     | 408.0   |
| AHQ-9-14, 5391 - 5399       | K.EESLSDSLYAEALR.C                                                      | 1540.61070 | 2 | 2.99E-08 | 0.93 | 4.25   | -     | 871.7   |
| AHQ-9-14-, 4297 - 4355      | K.EESLSDSLYAEALR.C                                                      | 1540.61070 | 2 | 1.03E-10 | 0.89 | 3.50   | -     | 696.9   |
| AHQ-9-14-, 4415             | K.EESLSDSLYAEALR.C                                                      | 1540.61070 | 2 | 6.04E-07 | 0.85 | 3.26   | -     | 636.5   |
| AHQ-9-14-, 4557 - 4627      | K.EESLSDSLYAEALR.C                                                      | 1540.61070 | 2 | 1.97E-06 | 0.93 | 3.88   | -     | 1077.9  |
| AHQ-9-14-, 4519             | K.GKEESLSDSLYAEALR.C                                                    | 1725.83517 | 2 | 2.88E-10 | 0.98 | 5.64   | -     | 2146.7  |
| AHQ-9-13, 4327              | K.GKEESLSDSLYAEALR.C                                                    | 1725.83517 | 3 | 5.08E-04 | 0.87 | 3.78   | -     | 980.8   |
| AHQ-9-13, 4326              | K.GKEESLSDSLYAEALR.C                                                    | 1725.83517 | 2 | 6.67E-08 | 0.98 | 4.82   | -     | 2102.9  |
| AHQ-9-14-, 4278 - 4350      | K.GKEESLSDSLYAEALR.C                                                    | 1725.83517 | 2 | 5.68E-06 | 0.95 | 4.35   | -     | 1364.9  |
| AHQ-9-14-, 4161 - 4221      | K.GKEESLSDSLYAEALR.C                                                    | 1725.83517 | 2 | 7.40E-10 | 0.98 | 5.29   | -     | 2421.0  |
| AHQ-9-11, 4078              | K.GKEESLSDSLYAEALR.C                                                    | 1725.83517 | 2 | 3.99E-04 | 0.89 | 3.27   | -     | 910.1   |
| AHQ-9-14-, 4045 - 4102      | K.GKEESLSDSLYAEALR.C                                                    | 1725.83517 | 2 | 8.36E-08 | 0.98 | 5.64   | -     | 2411.5  |
| AHQ-9-14-, 3937 - 3998      | K.GKEESLSDSLYAEALR.C                                                    | 1725.83517 | 2 | 6.40E-11 | 0.98 | 5.92   | -     | 2634.0  |
| AHQ-9-14, 4824 - 4887       | K.GKEESLSDSLYAEALR.C                                                    | 1725.83517 | 2 | 3.77E-06 | 0.98 | 5.41   | -     | 1985.7  |
| AHQ-9-14, 4947 - 4955       | K.GKEESLSDSLYAEALR.C                                                    | 1725.83517 | 2 | 2.91E-07 | 0.96 | 4.66   | -     | 1740.5  |
| AHQ-9-14, 5063 - 5127       | K.GKEESLSDSLYAEALR.C                                                    | 1725.83517 | 2 | 4.12E-11 | 0.98 | 5.61   | -     | 2194.6  |
| AHQ-9-14, 5069              | K.GKEESLSDSLYAEALR.C                                                    | 1725.83517 | 3 | 6.76E-05 | 0.92 | 4.45   | -     | 1216.1  |
| AHQ-9-14, 5183 - 5248       | K.GKEESLSDSLYAEALR.C                                                    | 1725.83517 | 2 | 8.22E-07 | 0.98 | 4.82   | -     | 2286.5  |
| AHQ-9-14, 5388 - 5461       | K.GKEESLSDSLYAEALR.C                                                    | 1725.83517 | 2 | 3.92E-04 | 0.96 | 4.46   | -     | 1471.2  |
| AHQ-9-14-, 4149 - 4181      | K.GKEESLSDSLYAEALR.C                                                    | 1725.83517 | 3 | 3.89E-06 | 0.90 | 4.22   | -     | 988.6   |
| AHQ-9-6, 4107               | K.GKEESLSDSLYAEALR.C                                                    | 1725.83517 | 2 | 2.19E-05 | 0.88 | 3.66   | -     | 1103.1  |
| AHQ-9-14-, 4869 - 4870      | K.GKEESLSDSLYAEALR.C                                                    | 1725.83517 | 2 | 1.90E-04 | 0.48 | 2.67   | -     | 393.2   |
| AHQ-9-13-, 3572             | K.GTHCNQVEVIATL.K.D                                                     | 1571.78073 | 2 | 2.10E-05 | 0.81 | 3.02   | -     | 714.7   |
| AHQ-9-14, 4409 - 4479       | K.GTHCNQVEVIATL.K.D                                                     | 1571.78073 | 2 | 6.55E-10 | 0.97 | 4.64   | -     | 1704.9  |
| AHQ-9-14, 4507 - 4569       | K.GTHCNQVEVIATL.K.D                                                     | 1571.78073 | 2 | 1.58E-06 | 0.95 | 4.31   | -     | 1438.7  |
| AHQ-9-14, 4648 - 4660       | K.GTHCNQVEVIATL.K.D                                                     | 1571.78073 | 2 | 5.14E-05 | 0.90 | 3.34   | -     | 1026.1  |
| AHQ-9-14-, 3389 - 3459      | K.GTHCNQVEVIATL.K.D                                                     | 1571.78073 | 2 | 8.55E-09 | 0.98 | 4.83   | -     | 2132.7  |
| AHQ-9-14-, 3517             | K.GTHCNQVEVIATL.K.D                                                     | 1571.78073 | 2 | 8.99E-07 | 0.98 | 5.11   | -     | 1864.0  |
| AHQ-9-14-, 3601 - 3626      | K.GTHCNQVEVIATL.K.D                                                     | 1571.78073 | 2 | 8.60E-07 | 0.94 | 4.37   | -     | 1220.1  |
| AHQ-9-13-, 3433 - 3444      | K.GTHCNQVEVIATL.K.D                                                     | 1571.78073 | 2 | 3.43E-06 | 0.96 | 4.33   | -     | 1499.7  |
| AHQ-9-14, 3763 - 3820       | K.ICLDPDAPR.I                                                           | 1058.19059 | 2 | 1.07E-04 | 0.85 | 3.01   | -     | 1006.1  |
| AHQ-9-14-, 2671 - 2729      | R.KICLDPDAPR.I                                                          | 1186.36350 | 2 | 5.91E-05 | 0.91 | 3.28   | -     | 972.7   |
| AHQ-9-14-, 2787 - 2858      | R.KICLDPDAPR.I                                                          | 1186.36350 | 2 | 3.10E-05 | 0.92 | 3.28   | -     | 1190.0  |
| AHQ-9-14, 3535 - 3592       | R.KICLDPDAPR.I                                                          | 1186.36350 | 2 | 4.98E-05 | 0.83 | 3.07   | -     | 826.4   |
| AHQ-9-13-, 2721             | R.KICLDPDAPR.I                                                          | 1186.36350 | 2 | 1.86E-05 | 0.72 | 2.75   | -     | 614.2   |
| AHQ-9-14, 3349 - 3407       | R.KICLDPDAPR.I                                                          | 1186.36350 | 2 | 7.57E-04 | 0.65 | 2.81   | -     | 585.3   |
| AHQ-9-14, 4207 - 4287       | K.NIQSLEVIQK.G                                                          | 1101.27845 | 2 | 1.68E-05 | 0.86 | 3.55   | -     | 649.3   |
| AHQ-9-14-, 4118             | K.NIQSLEVIQK.G                                                          | 1101.27845 | 1 | 8.16E-04 | 0.76 | 2.65   | -     | 685.3   |
| AHQ-9-14-, 3722             | K.NIQSLEVIQK.G                                                          | 1101.27845 | 1 | 1.20E-04 | 0.43 | 2.53   | -     | 477.3   |
| AHQ-9-14, 4343 - 4423       | K.NIQSLEVIQK.G                                                          | 1101.27845 | 2 | 1.29E-06 | 0.89 | 3.62   | -     | 732.6   |
| AHQ-9-14, 4297              | K.NIQSLEVIQK.G                                                          | 1101.27845 | 1 | 9.12E-04 | 0.49 | 2.49   | -     | 269.6   |
| AHQ-9-14-, 3669             | K.TTSGIHPKNIQSLEVIQK.G                                                  | 1923.20305 | 3 | 1.01E-05 | 0.83 | 3.68   | -     | 887.0   |
| gj 4502549 ref NP_001734.1  | calmodulin 2 (phosphorylase kinase, delta); phosphorylase kinase delta  |            |   | 4.35E-11 | 1.73 | 20.22  | 22.10 | 16837.5 |
| AHQ-9-11, 4017 - 4091       | K.EAFSLFDKDGDDGTTTK.E                                                   | 1845.98441 | 3 | 2.24E-04 | 0.80 | 3.49   | -     | 754.4   |
| AHQ-9-11, 4021 - 4077       | K.EAFSLFDKDGDDGTTTK.E                                                   | 1845.98441 | 2 | 2.39E-04 | 0.93 | 4.38   | -     | 1025.3  |
| AHQ-9-11, 3717              | R.VFDKDGNGYISAELR.H                                                     | 1755.90933 | 3 | 4.46E-06 | 0.93 | 3.58   | -     | 2021.2  |
| AHQ-9-12, 3744 - 3782       | R.VFDKDGNGYISAELR.H                                                     | 1755.90933 | 2 | 1.31E-09 | 0.93 | 4.11   | -     | 923.2   |
| AHQ-9-11, 3713 - 3722       | R.VFDKDGNGYISAELR.H                                                     | 1755.90933 | 2 | 4.35E-11 | 0.93 | 4.11   | -     | 922.2   |
| gj 30148492 ref XP_293610.2 | similar to Heat shock cognate 71 kDa protein [Homo sapiens]             |            |   | 5.27E-11 | 1.83 | 20.24  | 4.30  | 72113.4 |
| AHQ-9-6, 2887 - 2962        | R.FDDAVVQSDMK.H                                                         | 1255.37968 | 2 | 1.45E-07 | 0.88 | 3.03   | -     | 853.2   |
| AHQ-9-6, 4211               | R.IINEPTAAAIYGLDKK.V                                                    | 1789.06550 | 2 | 5.27E-11 | 0.95 | 4.77   | -     | 779.0   |
| gj 21361657 ref NP_005304.3 | glucose regulated protein, 58kDa; glucose regulated protein, 58kD [Hom  |            |   | 5.76E-11 | 6.16 | 70.32  | 21.00 | 56782.0 |
| AHQ-9-7, 5318               | R.ELSDFISYLR.E                                                          | 1371.52000 | 2 | 4.62E-05 | 0.95 | 3.53   | -     | 1349.1  |
| AHQ-9-7, 6216               | K.FISDKDASVGFDDSFSEAHSEFLK.A                                            | 2940.16492 | 3 | 5.76E-11 | 0.98 | 6.39   | -     | 2746.8  |
| AHQ-9-7, 4462 - 4517        | R.FLDYFDGNLK.R                                                          | 1360.49568 | 2 | 8.38E-04 | 0.85 | 3.79   | -     | 585.5   |
| AHQ-9-7, 4429               | R.GFTYIYFSPANK.K                                                        | 1342.52349 | 2 | 6.54E-05 | 0.74 | 2.81   | -     | 643.0   |
| AHQ-9-7, 5389 - 5390        | R.KTFSHLSDFGLSTAGEIPVVAIR.T                                             | 2705.01562 | 3 | 9.82E-08 | 0.87 | 4.30   | -     | 657.6   |
| AHQ-9-7, 2450               | K.LSKDPNVIK.M                                                           | 1198.43727 | 2 | 1.87E-06 | 0.89 | 3.19   | -     | 717.0   |
| AHQ-9-7, 3164 - 3166        | K.YGVSGYPTL.I                                                           | 1085.23435 | 2 | 3.50E-04 | 0.87 | 2.90   | -     | 1076.0  |
| gj 13489087 ref NP_109591.1 | serine (or cysteine) proteinase inhibitor, clade B (ovalbumin), member  |            |   | 7.35E-11 | 0.89 | 10.21  | 5.00  | 42741.5 |
| AHQ-9-8, 3918 - 3974        | K.TYGADLASVDFQHASEDAR.K                                                 | 2054.11949 | 2 | 1.29E-08 | 0.90 | 4.07   | -     | 795.1   |
| AHQ-9-8, 3911 - 3966        | K.TYGADLASVDFQHASEDAR.K                                                 | 2054.11949 | 3 | 7.35E-11 | 0.89 | 4.16   | -     | 696.8   |
| gj 4827056 ref NP_005103.1  | WD repeat-containing protein 1 isoform 2 [Homo sapiens]                 |            |   | 8.57E-11 | 9.10 | 110.38 | 36.50 | 58001.9 |
| AHQ-9-6, 4767               | K.AHDGGYIAISWSPDSTHLLSASGDK.T                                           | 2586.75455 | 2 | 3.07E-06 | 0.63 | 2.61   | -     | 620.2   |
| AHQ-9-6, 4739 - 4814        | K.AHDGGYIAISWSPDSTHLLSASGDK.T                                           | 2586.75455 | 3 | 1.34E-04 | 0.91 | 4.00   | -     | 1137.1  |
| AHQ-9-6, 5202               | K.CFSIDNPGYEPVAVHPPGGDTVAIGVDGNVR.L                                     | 3400.67708 | 3 | 3.12E-10 | 0.93 | 4.32   | -     | 994.1   |
| AHQ-9-6, 3794 - 3875        | R.FATASADGQIYYDQK.T                                                     | 1720.86021 | 2 | 9.85E-09 | 0.91 | 3.44   | -     | 1058.5  |
| AHQ-9-6, 4010 - 4015        | R.FATASADGQIYYDQK.T                                                     | 1720.86021 | 2 | 4.19E-05 | 0.62 | 3.05   | -     | 652.2   |
| AHQ-9-6, 5313               | K.FGAVFLWDSGSSVGEITGHNK.V                                               | 2209.40259 | 3 | 5.49E-06 | 0.89 | 4.36   | -     | 990.3   |
| AHQ-9-6, 4414 - 4473        | K.GPVTDVAYSHDGAFLAVCDASK.V                                              | 2282.47194 | 3 | 1.91E-07 | 0.96 | 5.25   | -     | 1694.9  |

|                             |                                                                                 |            |   |          |       |        |       |          |
|-----------------------------|---------------------------------------------------------------------------------|------------|---|----------|-------|--------|-------|----------|
| AHQ-9-6, 4422 - 4483        | K.GPVTDVAYSHDGAFLAVCDASK.V                                                      | 2282.47194 | 2 | 2.29E-07 | 0.98  | 5.98   | -     | 2094.5   |
| AHQ-9-6, 2471               | K.IKIDIAWTEDESKR.I                                                              | 1462.63267 | 2 | 2.47E-05 | 0.81  | 3.23   | -     | 731.3    |
| AHQ-9-7, 5137 - 5174        | R.LATGSDDNCAAFFEGPPFK.F                                                         | 2046.20216 | 2 | 8.90E-06 | 0.67  | 3.13   | -     | 625.5    |
| AHQ-9-6, 5097 - 5159        | R.LATGSDDNCAAFFEGPPFK.F                                                         | 2046.20216 | 2 | 9.46E-09 | 0.93  | 4.46   | -     | 907.9    |
| AHQ-9-6, 5217 - 5273        | R.LATGSDDNCAAFFEGPPFK.F                                                         | 2046.20216 | 2 | 8.57E-11 | 0.96  | 4.99   | -     | 1352.0   |
| AHQ-9-6, 4057 - 4133        | K.SYIYSGSHDGHINYWDESETGENDSFAGK.G                                               | 3138.17570 | 3 | 2.76E-09 | 0.98  | 7.55   | -     | 1957.9   |
| AHQ-9-6, 3533               | K.VFASLQVVER.G                                                                  | 1146.32091 | 2 | 2.83E-04 | 0.57  | 2.50   | -     | 403.4    |
| AHQ-9-6, 3803               | K.YAPSGFYIASGDVSGK.L                                                            | 1619.75589 | 2 | 8.83E-04 | 0.61  | 2.98   | -     | 387.1    |
| AHQ-9-6, 2909 - 2958        | K.YEYQPFAGK.I                                                                   | 1103.20822 | 2 | 5.92E-05 | 0.84  | 2.86   | -     | 663.9    |
| gi 27498267 ref XP_209737.1 | similar to tyrosine 3/tryptophan 5 - monooxygenase activation protein,          |            |   | 8.73E-11 | 1.91  | 20.29  | 31.60 | 11063.6  |
| AHQ-9-11, 6179              | R.DICNDVLSLLEK.F                                                                | 1420.61093 | 2 | 2.11E-05 | 0.93  | 3.47   | -     | 1609.7   |
| AHQ-9-10, 5437              | R.DICNDVLSLLEK.F                                                                | 1420.61093 | 2 | 1.31E-04 | 0.81  | 2.59   | -     | 814.7    |
| AHQ-9-13-, 6257             | R.DICNDVLSLLEK.F                                                                | 1420.61093 | 2 | 2.35E-05 | 0.95  | 3.32   | -     | 1824.7   |
| AHQ-9-10, 4733 - 4745       | K.GIVDQSQAYQEAFAEISK.K                                                          | 2042.19176 | 3 | 3.58E-05 | 0.98  | 5.75   | -     | 2197.8   |
| AHQ-9-11, 4750              | K.GIVDQSQAYQEAFAEISK.K                                                          | 2042.19176 | 2 | 6.78E-07 | 0.93  | 4.35   | -     | 973.4    |
| AHQ-9-10, 4501 - 4509       | K.GIVDQSQAYQEAFAEISK.K                                                          | 2042.19176 | 2 | 3.82E-05 | 0.95  | 4.73   | -     | 1052.9   |
| AHQ-9-9, 4679               | K.GIVDQSQAYQEAFAEISK.K                                                          | 2042.19176 | 3 | 9.60E-04 | 0.83  | 3.25   | -     | 980.2    |
| AHQ-9-13, 5023              | K.GIVDQSQAYQEAFAEISK.K                                                          | 2042.19176 | 2 | 4.93E-05 | 0.94  | 4.31   | -     | 1046.1   |
| AHQ-9-13-, 4845             | K.GIVDQSQAYQEAFAEISK.K                                                          | 2042.19176 | 2 | 1.43E-07 | 0.94  | 4.06   | -     | 1217.8   |
| AHQ-9-9, 4671               | K.GIVDQSQAYQEAFAEISK.K                                                          | 2042.19176 | 2 | 2.78E-04 | 0.68  | 3.09   | -     | 525.0    |
| AHQ-9-14-, 4871 - 4873      | K.GIVDQSQAYQEAFAEISK.K                                                          | 2042.19176 | 2 | 8.73E-11 | 0.98  | 5.67   | -     | 1552.2   |
| gi 29730023 ref XP_291482.1 | similar to 78 kDa glucose-regulated protein precursor (GRP 78) (Immunoglobulin) |            |   | 9.15E-11 | 6.07  | 80.21  | 15.70 | 63563.0  |
| AHQ-9-6, 4257 - 4262        | K.ELEEIVQPIISL.L                                                                | 1398.62680 | 2 | 1.33E-04 | 0.66  | 2.87   | -     | 617.4    |
| AHQ-9-6, 4525               | R.IINKPTAAAIYGLDK.R                                                             | 1659.95097 | 2 | 7.16E-05 | 0.92  | 4.14   | -     | 1254.6   |
| AHQ-9-5, 4595               | R.IINKPTAAAIYGLDK.R                                                             | 1659.95097 | 2 | 9.73E-09 | 0.91  | 4.19   | -     | 1281.4   |
| AHQ-9-7, 4508               | R.IINKPTAAAIYGLDK.R                                                             | 1659.95097 | 2 | 6.22E-08 | 0.91  | 4.04   | -     | 1206.4   |
| AHQ-9-6, 4318               | R.IINKPTAAAIYGLDK.R                                                             | 1816.13732 | 2 | 3.24E-08 | 0.78  | 3.66   | -     | 862.0    |
| AHQ-9-6, 3447 - 3501        | K.LYGSAGPPPTGEEOTAEDKDEL                                                        | 2177.26447 | 2 | 2.97E-04 | 0.90  | 4.04   | -     | 730.6    |
| AHQ-9-5, 3488               | K.LYGSAGPPPTGEEOTAEDKDEL                                                        | 2177.26447 | 2 | 3.71E-05 | 0.89  | 4.20   | -     | 557.1    |
| AHQ-9-6, 3939 - 3958        | R.NELESYAYS.LK.N                                                                | 1317.42597 | 2 | 2.37E-05 | 0.74  | 3.09   | -     | 618.3    |
| AHQ-9-6, 3394 - 3462        | K.NQLTSPNPKTVFADK.R                                                             | 1677.84011 | 2 | 2.04E-06 | 0.80  | 3.87   | -     | 807.8    |
| AHQ-9-5, 4621               | K.TFAPKEISAMV.LTK.M                                                             | 1552.86064 | 2 | 5.04E-04 | 0.54  | 2.75   | -     | 654.3    |
| AHQ-9-5, 5361               | K.TFAPKEISAMV.LTK.M                                                             | 1536.86124 | 2 | 9.15E-11 | 0.75  | 3.26   | -     | 948.4    |
| gi 4507907 ref NP_000543.1  | von Willebrand factor precursor; Coagulation factor VIII VWF (von Wille)        |            |   | 9.34E-11 | 9.97  | 120.32 | 5.60  | 309296.7 |
| AHQ-9-2, 3781 - 3842        | R.CLPSACEVVTGSPR.G                                                              | 1535.72531 | 2 | 4.40E-05 | 0.81  | 3.57   | -     | 576.0    |
| AHQ-9-2, 4071               | R.CLPACTACTI.G                                                                  | 1335.57568 | 2 | 7.20E-05 | 0.62  | 2.71   | -     | 431.5    |
| AHQ-9-3, 4733               | R.EGGPSQIGDALGFVAF.Y                                                            | 1574.71988 | 2 | 2.26E-06 | 0.42  | 2.51   | -     | 482.8    |
| AHQ-9-3, 4561               | K.GLWQCQLL.S                                                                    | 1276.48664 | 2 | 3.05E-05 | 0.77  | 3.18   | -     | 828.7    |
| AHQ-9-2, 2745               | R.ILAGPAGDSNVV.LK                                                               | 1241.41901 | 2 | 7.60E-05 | 0.92  | 3.63   | -     | 1171.3   |
| AHQ-9-1, 3731 - 3794        | R.ILTSDFVDCNK.L                                                                 | 1441.58869 | 2 | 7.45E-06 | 0.87  | 3.18   | -     | 921.8    |
| AHQ-9-3, 3249               | K.LSGEAYGFV.R.I                                                                 | 1170.29934 | 2 | 5.41E-07 | 0.97  | 4.32   | -     | 1840.0   |
| AHQ-9-1, 5218 - 5227        | K.RLPGDIQVPIGVPANVQELER.I                                                       | 2571.91720 | 3 | 9.34E-11 | 0.98  | 6.43   | -     | 2462.6   |
| AHQ-9-2, 5178               | K.RLPGDIQVPIGVPANVQELER.I                                                       | 2571.91720 | 3 | 1.69E-04 | 0.97  | 6.50   | -     | 1726.0   |
| AHQ-9-2, 4490               | R.VTVFPVIGIDR.Y                                                                 | 1174.37426 | 2 | 2.12E-07 | 0.93  | 3.44   | -     | 1095.3   |
| AHQ-9-1, 3572               | R.WTGPCVCTGSSTR.H                                                               | 1575.72645 | 2 | 8.62E-04 | 0.81  | 3.15   | -     | 683.8    |
| AHQ-9-2, 3006               | K.YAGSQVASTSEVLK.Y                                                              | 1440.58064 | 2 | 6.64E-10 | 0.94  | 4.15   | -     | 1117.4   |
| AHQ-9-3, 2945               | K.YAGSQVASTSEVLK.Y                                                              | 1440.58064 | 2 | 4.50E-07 | 0.90  | 3.76   | -     | 745.1    |
| AHQ-9-1, 5658               | K.YTLFQVSK.I                                                                    | 1147.34728 | 2 | 5.21E-06 | 0.91  | 2.73   | -     | 1042.8   |
| AHQ-9-2, 5639               | K.YTLFQVSK.I                                                                    | 1147.34728 | 2 | 6.71E-06 | 0.84  | 2.78   | -     | 570.3    |
| gi 21956645 ref NP_665807.1 | myotrophin; granule cell differentiation protein [Homo sapiens]                 |            |   | 9.62E-11 | 1.84  | 20.27  | 25.40 | 12894.7  |
| AHQ-9-13-, 3940 - 3996      | K.GPDGLTAFEATDNGAIK.A                                                           | 1748.87196 | 2 | 9.62E-11 | 0.95  | 4.36   | -     | 932.7    |
| AHQ-9-13, 4114 - 4170       | K.GPDGLTAFEATDNGAIK.A                                                           | 1748.87196 | 2 | 1.64E-05 | 0.97  | 5.17   | -     | 1434.7   |
| AHQ-9-13, 4226 - 4227       | K.GPDGLTAFEATDNGAIK.A                                                           | 1748.87196 | 2 | 2.74E-07 | 0.93  | 4.32   | -     | 990.4    |
| AHQ-9-14, 4825 - 4859       | K.GPDGLTAFEATDNGAIK.A                                                           | 1748.87196 | 2 | 7.34E-10 | 0.94  | 4.79   | -     | 886.2    |
| AHQ-9-14, 4963 - 4965       | K.GPDGLTAFEATDNGAIK.A                                                           | 1748.87196 | 2 | 4.02E-04 | 0.71  | 3.03   | -     | 581.7    |
| AHQ-9-14-, 3903 - 3977      | K.GPDGLTAFEATDNGAIK.A                                                           | 1748.87196 | 2 | 4.71E-06 | 0.97  | 5.42   | -     | 1444.7   |
| AHQ-9-14-, 4005 - 4082      | K.GPDGLTAFEATDNGAIK.A                                                           | 1748.87196 | 2 | 5.05E-06 | 0.96  | 4.37   | -     | 1474.3   |
| AHQ-9-13-, 4068             | K.GPDGLTAFEATDNGAIK.A                                                           | 1748.87196 | 2 | 7.29E-09 | 0.95  | 4.42   | -     | 1089.2   |
| AHQ-9-14-, 3674             | K.NGDLDEVKDYVAK.G                                                               | 1466.57496 | 2 | 2.76E-08 | 0.90  | 3.59   | -     | 1105.3   |
| AHQ-9-13-, 3649             | K.NGDLDEVKDYVAK.G                                                               | 1466.57496 | 2 | 3.49E-09 | 0.84  | 3.35   | -     | 769.0    |
| AHQ-9-13, 3726              | K.NGDLDEVKDYVAK.G                                                               | 1466.57496 | 2 | 3.27E-06 | 0.84  | 2.81   | -     | 957.0    |
| AHQ-9-14-, 3593             | K.NGDLDEVKDYVAK.G                                                               | 1466.57496 | 2 | 5.22E-10 | 0.89  | 3.37   | -     | 1010.7   |
| gi 5454152 ref NP_006285.1  | ubiquinol-cytochrome c reductase binding protein [Homo sapiens]                 |            |   | 1.05E-10 | 1.80  | 20.23  | 25.20 | 13530.4  |
| AHQ-9-13-, 3529 - 3534      | R.DDTIYEDDVKEAIR.R                                                              | 1811.88169 | 2 | 1.05E-10 | 0.84  | 3.21   | -     | 713.4    |
| AHQ-9-13-, 4980 - 4986      | K.YEENFYLEPYLK.E                                                                | 1737.88601 | 2 | 3.28E-04 | 0.96  | 4.50   | -     | 1463.3   |
| gi 4557305 ref NP_000025.1  | aldolase A; fructose-bisphosphate aldolase; Aldolase A, fructose-bisphospho     |            |   | 1.17E-10 | 3.53  | 40.27  | 18.10 | 39419.7  |
| AHQ-9-8, 4300               | K.FSHEEIAMATV.TALR.R                                                            | 1676.91875 | 2 | 1.17E-10 | 0.96  | 4.26   | -     | 1599.4   |
| AHQ-9-9, 4111               | K.FSHEEIAMATV.TALR.R                                                            | 1676.91875 | 2 | 4.42E-05 | 0.82  | 3.28   | -     | 788.0    |
| AHQ-9-13-, 3024             | K.GILAADESTGSIK.R                                                               | 1333.47008 | 2 | 2.16E-07 | 0.93  | 3.68   | -     | 1070.3   |
| AHQ-9-9, 2827               | K.GILAADESTGSIK.R                                                               | 1333.47008 | 2 | 6.86E-09 | 0.97  | 4.19   | -     | 1723.6   |
| AHQ-9-8, 2895 - 2896        | K.GILAADESTGSIK.R                                                               | 1333.47008 | 2 | 6.11E-10 | 0.97  | 5.46   | -     | 1444.0   |
| AHQ-9-11, 2969 - 2970       | K.GILAADESTGSIK.R                                                               | 1333.47008 | 2 | 2.38E-06 | 0.93  | 3.77   | -     | 1316.4   |
| AHQ-9-8, 2834               | R.QLLLTADDR.V                                                                   | 1045.17176 | 2 | 2.20E-05 | 0.72  | 2.71   | -     | 505.8    |
| AHQ-9-8, 5292 - 5352        | R.YASICQNGVPIPEILPDGDHDLK.R.C                                                   | 3179.54969 | 3 | 1.53E-05 | 0.88  | 4.50   | -     | 900.9    |
| gi 4505735 ref NP_002611.1  | platelet factor 4 variant 1; Platelet factor 4, variant 1 (PF4-like) [H]        |            |   | 1.17E-10 | 0.98  | 10.28  | 14.40 | 11522.6  |
| AHQ-9-14-, 3777 - 3834      | R.AEAEEEDGLQCLVK.T                                                              | 1739.86036 | 2 | 1.17E-10 | 0.98  | 5.53   | -     | 1750.9   |
| gi 4504183 ref NP_000843.1  | glutathione transferase; deafness, X-linked 7; fatty acid ethyl ester s         |            |   | 1.20E-10 | 1.79  | 20.24  | 16.20 | 23355.7  |
| AHQ-9-11, 4555 - 4623       | K.FQDGLTLYQSNTRL.H                                                              | 1885.06701 | 2 | 1.79E-06 | 0.85  | 3.94   | -     | 534.7    |
| AHQ-9-11, 4383 - 4386       | K.YISLIYNYEAGKDDYVK.A                                                           | 2156.37637 | 2 | 1.20E-10 | 0.94  | 4.74   | -     | 660.0    |
| AHQ-9-11, 4378 - 4385       | K.YISLIYNYEAGKDDYVK.A                                                           | 2156.37637 | 3 | 8.08E-04 | 0.74  | 3.22   | -     | 710.9    |
| gi 4505733 ref NP_002610.1  | platelet factor 4 (chemokine (C-X-C motif) ligand 4); platelet factor 4         |            |   | 1.25E-10 | 6.36  | 70.28  | 39.60 | 10844.9  |
| AHQ-9-14, 5087 - 5109       | K.AGPHCPTAQLIATLKN                                                              | 1579.84600 | 2 | 7.27E-06 | 0.83  | 3.42   | -     | 559.2    |
| AHQ-9-14-, 4122             | K.AGPHCPTAQLIATLKN                                                              | 1579.84600 | 2 | 9.55E-07 | 0.85  | 3.33   | -     | 602.2    |
| AHQ-9-14, 4995              | K.AGPHCPTAQLIATLKNGR.K                                                          | 1907.18700 | 3 | 4.39E-08 | 0.96  | 4.92   | -     | 1486.2   |
| AHQ-9-14, 5009              | K.AGPHCPTAQLIATLKNGR.K                                                          | 1907.18700 | 2 | 6.92E-04 | 0.90  | 3.19   | -     | 1008.7   |
| AHQ-9-14-, 3909             | K.AGPHCPTAQLIATLKNGR.K                                                          | 1907.18700 | 2 | 8.13E-10 | 0.95  | 4.59   | -     | 1152.8   |
| AHQ-9-14-, 4111             | K.AGPHCPTAQLIATLKNGR.K                                                          | 1907.18700 | 3 | 1.25E-10 | 0.98  | 5.70   | -     | 2365.3   |
| AHQ-9-14-, 3901             | K.AGPHCPTAQLIATLKNGR.K                                                          | 1907.18700 | 3 | 2.01E-07 | 0.98  | 5.22   | -     | 2558.9   |
| AHQ-9-14-, 4035             | K.AGPHCPTAQLIATLKNGR.K                                                          | 1907.18700 | 2 | 4.00E-07 | 0.96  | 4.85   | -     | 1237.0   |
| AHQ-9-14, 3707 - 3768       | R.HITSLEVIK.A                                                                   | 1040.23825 | 2 | 1.50E-04 | 0.77  | 2.76   | -     | 536.7    |
| AHQ-9-14-, 2706 - 2785      | R.HITSLEVIK.A                                                                   | 1040.23825 | 2 | 1.97E-05 | 0.90  | 3.73   | -     | 530.3    |
| AHQ-9-14, 3623 - 3648       | R.HITSLEVIK.A                                                                   | 1040.23825 | 2 | 1.52E-05 | 0.80  | 3.05   | -     | 455.2    |
| AHQ-9-13, 4896              | K.ICLDLQAPLYK.K                                                                 | 1335.59400 | 2 | 3.96E-05 | 0.96  | 4.18   | -     | 1654.7   |
| AHQ-9-13-, 4724             | K.ICLDLQAPLYK.K                                                                 | 1335.59400 | 2 | 1.48E-05 | 0.96  | 3.94   | -     | 1851.2   |
| AHQ-9-14, 5539              | K.ICLDLQAPLYK.K                                                                 | 1335.59400 | 2 | 3.04E-04 | 0.92  | 3.24   | -     | 1614.6   |
| AHQ-9-14-, 4599             | K.ICLDLQAPLYK.K                                                                 | 1335.59400 | 2 | 5.79E-04 | 0.76  | 2.67   | -     | 775.4    |
| AHQ-9-14-, 4718 - 4721      | K.ICLDLQAPLYK.K                                                                 | 1335.59400 | 2 | 4.57E-05 | 0.97  | 4.62   | -     | 2000.4   |
| AHQ-9-14-, 4285 - 4289      | K.ICLDLQAPLYK.I                                                                 | 1463.76691 | 3 | 3.22E-06 | 0.86  | 3.38   | -     | 1157.3   |
| AHQ-9-13-, 4414             | R.KICLDLQAPLYK.K                                                                | 1463.76691 | 2 | 2.80E-04 | 0.89  | 3.12   | -     | 1234.7   |
| AHQ-9-14-, 4377 - 4433      | R.KICLDLQAPLYK.K                                                                | 1463.76691 | 2 | 4.93E-05 | 0.96  | 4.41   | -     | 1360.9   |
| AHQ-9-14, 5319 - 5320       | R.KICLDLQAPLYK.K                                                                | 1463.76691 | 2 | 1.62E-05 | 0.97  | 4.41   | -     | 1632.8   |
| AHQ-9-14-, 4034             | R.KICLDLQAPLYK.I                                                                | 1591.93982 | 3 | 7.28E-09 | 0.94  | 5.00   | -     | 1457.8   |
| AHQ-9-14-, 4039             | R.KICLDLQAPLYK.I                                                                | 1591.93982 | 2 | 5.25E-04 | 0.97  | 5.01   | -     | 1581.3   |
| gi 17921989 ref NP_005991.1 | tubulin, alpha 1; testis-specific alpha tubulin; tubulin alpha-1 chain          |            |   | 1.40E-10 | 11.48 | 140.24 | 42.40 | 49924.1  |
| AHQ-9-7, 4450 - 4512        | R.AFVHWYVGEQM'EEGEFSEAR.E                                                       | 2347.50435 | 3 | 8.16E-06 | 0.76  | 3.40   | -     | 786.2    |
| AHQ-9-7, 5118               | R.AVCML'SNTTAAEAWAR.L                                                           | 1883.13932 | 2 | 1.63E-06 | 0.93  | 3.59   | -     | 1267.6   |
| AHQ-9-7, 5592               | R.AVCML'SNTTAAEAWAR.L                                                           | 1867.13992 | 2 | 1.93E-09 | 0.93  | 3.73   | -     | 1344.4   |

|                           |                                                   |            |   |          |       |        |       |         |
|---------------------------|---------------------------------------------------|------------|---|----------|-------|--------|-------|---------|
| AHQ-9-13-, 4922 - 4976    | R.AVCM*LSNTTAAIEAWAR.L                            | 1883.13932 | 2 | 3.01E-07 | 0.94  | 3.98   | -     | 1220.2  |
| AHQ-9-7, 4928             | R.AVCM*LSNTTAAIEAWAR.L                            | 1883.13932 | 2 | 9.48E-04 | 0.92  | 3.80   | -     | 1205.9  |
| AHQ-9-13, 5766 - 5768     | R.AVFVDELEPTVIDEIR.N                              | 1716.95615 | 2 | 2.60E-06 | 0.58  | 2.69   | -     | 686.2   |
| AHQ-9-7, 4434             | K.AYHEQLSVAEITNACFEPANQM*VK.C                     | 2769.06010 | 3 | 5.73E-06 | 0.64  | 3.22   | -     | 473.3   |
| AHQ-9-7, 3358             | K.DVNAIAIAIK.T                                    | 986.14745  | 2 | 8.98E-05 | 0.91  | 3.80   | -     | 928.2   |
| AHQ-9-7, 4840 - 4896      | R.IHFPLATYAPVISAEK.A                              | 1758.05310 | 2 | 1.60E-04 | 0.93  | 3.82   | -     | 737.9   |
| AHQ-9-8, 4916             | R.IHFPLATYAPVISAEK.A                              | 1758.05310 | 2 | 4.92E-04 | 0.74  | 2.84   | -     | 473.8   |
| AHQ-9-8, 6255 - 6264      | R.LISQIVSSITASLR.F                                | 1488.75471 | 2 | 1.43E-05 | 0.93  | 3.80   | -     | 1086.4  |
| AHQ-9-7, 6158 - 6160      | R.LISQIVSSITASLR.F                                | 1488.75471 | 2 | 3.68E-08 | 0.96  | 4.83   | -     | 1089.3  |
| AHQ-9-13-, 6190           | R.LISQIVSSITASLR.F                                | 1488.75471 | 2 | 1.98E-05 | 0.92  | 3.09   | -     | 1280.7  |
| AHQ-9-8, 3394             | R.NLDIERPTYTNLNR.L                                | 1719.88022 | 2 | 7.41E-06 | 0.60  | 3.14   | -     | 415.3   |
| AHQ-9-14-, 3545           | R.NLDIERPTYTNLNR.L                                | 1719.88022 | 2 | 3.46E-05 | 0.63  | 2.98   | -     | 479.3   |
| AHQ-9-9, 3275             | R.NLDIERPTYTNLNR.L                                | 1719.88022 | 2 | 3.20E-04 | 0.37  | 2.71   | -     | 297.3   |
| AHQ-9-6, 5370             | R.SIQFVWCPTGFK.V                                  | 1586.79232 | 2 | 1.18E-04 | 0.82  | 2.78   | -     | 961.8   |
| AHQ-9-7, 5332 - 5333      | R.SIQFVWCPTGFK.V                                  | 1586.79232 | 2 | 1.83E-06 | 0.93  | 3.71   | -     | 1056.0  |
| AHQ-9-13, 5527            | R.SIQFVWCPTGFK.V                                  | 1586.79232 | 2 | 6.71E-04 | 0.74  | 2.70   | -     | 693.6   |
| AHQ-9-14-, 5313           | K.TIGGGDDSTFTFFCETGAGK.H                          | 2070.17889 | 2 | 2.52E-08 | 0.81  | 3.75   | -     | 420.0   |
| AHQ-9-11, 5209 - 5210     | K.TIGGGDDSTFTFFCETGAGK.H                          | 2070.17889 | 2 | 2.80E-05 | 0.80  | 3.34   | -     | 471.8   |
| AHQ-9-7, 5218 - 5273      | K.TIGGGDDSTFTFFCETGAGK.H                          | 2070.17889 | 2 | 1.40E-10 | 0.95  | 4.59   | -     | 982.5   |
| AHQ-9-13, 5458            | K.TIGGGDDSTFTFFCETGAGK.H                          | 2070.17889 | 2 | 2.72E-06 | 0.81  | 3.37   | -     | 590.9   |
| AHQ-9-9, 5116             | K.TIGGGDDSTFTFFCETGAGK.H                          | 2070.17889 | 2 | 4.10E-05 | 0.58  | 2.88   | -     | 335.2   |
| AHQ-9-13-, 5308 - 5309    | K.TIGGGDDSTFTFFCETGAGK.H                          | 2070.17889 | 2 | 4.13E-09 | 0.92  | 4.23   | -     | 628.3   |
| AHQ-9-7, 4309             | K.VGINYPPTVPPGGDLAK.V                             | 1826.08584 | 2 | 4.58E-04 | 0.43  | 2.55   | -     | 261.2   |
| AHQ-9-14, 5136            | K.VGINYPPTVPPGGDLAK.V                             | 1826.08584 | 2 | 2.66E-04 | 0.55  | 2.80   | -     | 335.0   |
| AHQ-9-12, 4252 - 4326     | K.VGINYPPTVPPGGDLAK.V                             | 1826.08584 | 2 | 6.99E-04 | 0.70  | 3.11   | -     | 367.5   |
| AHQ-9-11, 4194 - 4249     | K.VGINYPPTVPPGGDLAK.V                             | 1826.08584 | 2 | 8.65E-04 | 0.34  | 2.65   | -     | 255.2   |
| AHQ-9-7, 3832 - 3864      | K.YM*ACCLLYR.G                                    | 1268.50804 | 2 | 5.44E-04 | 0.86  | 2.64   | -     | 667.6   |
| AHQ-9-7, 4258             | K.YMACCLLYR.G                                     | 1252.50864 | 2 | 5.80E-06 | 0.93  | 3.28   | -     | 913.3   |
| gl4502027[ref]NP_000468.1 | albumin precursor; PRO0883 protein [Homo sapiens] |            |   | 1.47E-10 | 32.49 | 370.30 | 70.60 | 69366.4 |
| AHQ-9-6, 2557             | K.AAFTECCQAADK.A                                  | 1374.47927 | 2 | 5.36E-05 | 0.94  | 3.63   | -     | 1391.6  |
| AHQ-9-5, 1876 - 1931      | K.ADDKETCFEAEGKK.L                                | 1629.72754 | 2 | 1.25E-04 | 0.83  | 3.20   | -     | 894.0   |
| AHQ-9-5, 5153             | K.AEFAEVSKLVDLTK.V                                | 1651.88247 | 3 | 1.49E-04 | 0.81  | 3.42   | -     | 520.1   |
| AHQ-9-5, 6379             | K.ALVLIAFAQYLQCCPFEDHVK.L                         | 2492.87697 | 3 | 1.99E-09 | 0.95  | 4.73   | -     | 1130.9  |
| AHQ-9-14-, 5167           | K.AVMDDFAAFVEK.C                                  | 1343.53006 | 2 | 6.12E-06 | 0.94  | 3.76   | -     | 1228.8  |
| AHQ-9-6, 5082 - 5119      | K.AVMDDFAAFVEK.C                                  | 1343.53006 | 2 | 4.82E-07 | 0.95  | 3.97   | -     | 1307.8  |
| AHQ-9-5, 5181 - 5191      | K.AVMDDFAAFVEK.C                                  | 1343.53006 | 2 | 9.13E-10 | 0.97  | 5.01   | -     | 1362.1  |
| AHQ-9-5, 2207             | K.CCAAADPHCEYAK.V                                 | 1556.67999 | 2 | 3.16E-04 | 0.75  | 2.96   | -     | 706.8   |
| AHQ-9-5, 2421 - 2425      | K.CCTESLVNR.R                                     | 1141.25805 | 2 | 7.63E-06 | 0.94  | 3.10   | -     | 1414.0  |
| AHQ-9-1, 6290 - 6314      | K.DVFLGM*FLYEYAR.R                                | 1640.88331 | 2 | 7.01E-05 | 0.95  | 3.55   | -     | 1326.3  |
| AHQ-9-6, 6105 - 6117      | K.DVFLGM*FLYEYAR.R                                | 1640.88331 | 2 | 5.65E-05 | 0.96  | 4.28   | -     | 1108.4  |
| AHQ-9-5, 6191 - 6199      | K.DVFLGM*FLYEYAR.R                                | 1640.88331 | 2 | 1.78E-09 | 0.96  | 4.34   | -     | 1309.8  |
| AHQ-9-5, 2684 - 2687      | R.ETYGEMADCCAK.Q                                  | 1437.55563 | 2 | 8.73E-05 | 0.64  | 2.54   | -     | 404.2   |
| AHQ-9-5, 2772 - 2832      | R.FKDLGEENFK.A                                    | 1227.34766 | 2 | 1.08E-05 | 0.90  | 3.86   | -     | 793.4   |
| AHQ-9-6, 2775             | R.FKDLGEENFK.A                                    | 1227.34766 | 2 | 5.78E-06 | 0.80  | 3.12   | -     | 615.5   |
| AHQ-9-6, 3097 - 3177      | K.FQNALLVR.Y                                      | 961.14282  | 2 | 8.81E-06 | 0.73  | 2.82   | -     | 639.5   |
| AHQ-9-6, 6007             | R.HPYFYAPELLFFAK.R                                | 1744.02658 | 3 | 2.72E-06 | 0.89  | 3.91   | -     | 941.2   |
| AHQ-9-5, 6091 - 6112      | R.HPYFYAPELLFFAK.R                                | 1744.02658 | 3 | 8.68E-04 | 0.72  | 3.74   | -     | 514.5   |
| AHQ-9-5, 2855             | K.KQTALVELVK.H                                    | 1129.37494 | 2 | 4.11E-05 | 0.87  | 2.94   | -     | 903.6   |
| AHQ-9-3, 3578             | K.KVPQVSTPTLVEVSR.N                               | 1640.90605 | 2 | 1.79E-06 | 0.67  | 2.55   | -     | 518.7   |
| AHQ-9-4, 3581             | K.KVPQVSTPTLVEVSR.N                               | 1640.90605 | 2 | 4.72E-04 | 0.83  | 3.34   | -     | 599.9   |
| AHQ-9-5, 3471 - 3551      | K.KVPQVSTPTLVEVSR.N                               | 1640.90605 | 2 | 2.66E-07 | 0.91  | 3.50   | -     | 961.2   |
| AHQ-9-6, 3507 - 3587      | K.KVPQVSTPTLVEVSR.N                               | 1640.90605 | 2 | 5.01E-09 | 0.91  | 3.77   | -     | 764.6   |
| AHQ-9-5, 3547             | K.KVPQVSTPTLVEVSR.N                               | 1640.90605 | 3 | 4.71E-08 | 0.95  | 4.87   | -     | 1368.1  |
| AHQ-9-5, 3583 - 3655      | K.KVPQVSTPTLVEVSR.N                               | 1640.90605 | 2 | 1.31E-06 | 0.92  | 3.74   | -     | 1041.0  |
| AHQ-9-7, 3510             | K.KVPQVSTPTLVEVSR.N                               | 1640.90605 | 2 | 7.23E-07 | 0.82  | 2.77   | -     | 761.8   |
| AHQ-9-6, 3511             | K.KVPQVSTPTLVEVSR.N                               | 1640.90605 | 3 | 1.31E-08 | 0.95  | 4.79   | -     | 1339.0  |
| AHQ-9-5, 2491 - 2492      | K.LKECCEKPLLEK.S                                  | 1549.83503 | 3 | 9.98E-04 | 0.90  | 4.97   | -     | 671.6   |
| AHQ-9-5, 4020             | K.LVAASQAALGL                                     | 1014.20080 | 2 | 2.86E-06 | 0.93  | 3.45   | -     | 1102.0  |
| AHQ-9-5, 3193             | K.LVNEVTEFAK.T                                    | 1150.30633 | 1 | 1.67E-05 | 0.63  | 2.34   | -     | 499.8   |
| AHQ-9-6, 3305             | K.LVNEVTEFAK.T                                    | 1150.30633 | 2 | 1.51E-04 | 0.87  | 3.15   | -     | 665.2   |
| AHQ-9-5, 3324             | K.LVNEVTEFAK.T                                    | 1150.30633 | 2 | 8.01E-06 | 0.93  | 3.64   | -     | 863.0   |
| AHQ-9-5, 3183             | K.LVNEVTEFAK.T                                    | 1150.30633 | 2 | 1.15E-04 | 0.48  | 2.77   | -     | 277.1   |
| AHQ-9-5, 3504             | K.LVNEVTEFAK.T                                    | 1150.30633 | 2 | 1.04E-06 | 0.90  | 3.87   | -     | 622.5   |
| AHQ-9-6, 4610             | R.LVRPEVDVM*CTAFHDNEETFLK.K                       | 2668.98368 | 3 | 1.32E-04 | 0.95  | 4.48   | -     | 1634.2  |
| AHQ-9-5, 4667             | R.LVRPEVDVM*CTAFHDNEETFLK.K                       | 2668.98368 | 3 | 1.47E-10 | 0.97  | 5.98   | -     | 1335.6  |
| AHQ-9-5, 4355 - 4416      | R.LVRPEVDVM*CTAFHDNEETFLK.K                       | 2797.15659 | 3 | 5.95E-05 | 0.69  | 3.65   | -     | 338.6   |
| AHQ-9-5, 6375             | R.M*PCAEDYLSVVLNQLCVLHEK.T                        | 2537.91475 | 3 | 7.14E-06 | 0.93  | 4.68   | -     | 945.7   |
| AHQ-9-5, 3073             | R.NECFLQHKDDNPNLPR.L                              | 1999.15349 | 3 | 7.92E-05 | 0.78  | 3.44   | -     | 743.5   |
| AHQ-9-5, 4829 - 4891      | K.QNCELFEQLGEYF.F                                 | 1659.79847 | 2 | 1.33E-04 | 0.80  | 3.16   | -     | 526.0   |
| AHQ-9-6, 4081             | R.RHPDYSVVLNLR.L                                  | 1468.72842 | 3 | 8.49E-05 | 0.94  | 4.46   | -     | 1647.2  |
| AHQ-9-6, 4030 - 4089      | R.RHPDYSVVLNLR.L                                  | 1468.72842 | 2 | 4.66E-07 | 0.91  | 3.58   | -     | 829.1   |
| AHQ-9-5, 4052 - 4133      | R.RHPDYSVVLNLR.L                                  | 1468.72842 | 2 | 7.39E-09 | 0.95  | 3.58   | -     | 1256.8  |
| AHQ-9-5, 4123 - 4181      | R.RHPDYSVVLNLR.L                                  | 1468.72842 | 3 | 2.05E-04 | 0.97  | 5.00   | -     | 1928.8  |
| AHQ-9-5, 5711 - 5767      | R.RHPYFYAPELFFAK.R                                | 1900.21293 | 3 | 6.63E-08 | 0.98  | 5.74   | -     | 2142.8  |
| AHQ-9-5, 5825             | R.RHPYFYAPELFFAK.R                                | 1900.21293 | 3 | 5.30E-05 | 0.97  | 4.85   | -     | 2091.8  |
| AHQ-9-6, 5647             | R.RHPYFYAPELFFAK.R                                | 1900.21293 | 2 | 2.74E-05 | 0.92  | 3.74   | -     | 941.9   |
| AHQ-9-6, 5641 - 5653      | R.RHPYFYAPELFFAK.R                                | 1900.21293 | 3 | 2.03E-10 | 0.97  | 5.75   | -     | 1899.5  |
| AHQ-9-5, 5652 - 5715      | R.RHPYFYAPELFFAK.R                                | 1900.21293 | 2 | 1.42E-04 | 0.98  | 4.96   | -     | 1971.1  |
| AHQ-9-6, 6261             | K.RM*PCAEDYLSVVLNQLCVLHEK.T                       | 2694.10110 | 3 | 1.46E-05 | 0.94  | 5.52   | -     | 868.5   |
| AHQ-9-5, 6343             | K.RM*PCAEDYLSVVLNQLCVLHEK.T                       | 2694.10110 | 3 | 2.20E-04 | 0.94  | 5.16   | -     | 1072.1  |
| AHQ-9-5, 4524 - 4537      | R.RPCFSALEVDETYVPK.E                              | 1913.14041 | 2 | 2.81E-07 | 0.94  | 4.80   | -     | 727.0   |
| AHQ-9-6, 4486 - 4495      | R.RPCFSALEVDETYVPK.E                              | 1913.14041 | 3 | 3.95E-06 | 0.93  | 4.80   | -     | 1029.0  |
| AHQ-9-6, 4478             | R.RPCFSALEVDETYVPK.E                              | 1913.14041 | 2 | 6.59E-06 | 0.87  | 3.77   | -     | 582.3   |
| AHQ-9-5, 4533 - 4592      | R.RPCFSALEVDETYVPK.E                              | 1913.14041 | 3 | 7.86E-07 | 0.87  | 4.61   | -     | 738.0   |
| AHQ-9-5, 6240             | K.SHCIAEVNDEMPADLPSLAADFVESK.D                    | 2977.22697 | 3 | 2.97E-05 | 0.84  | 3.99   | -     | 579.5   |
| AHQ-9-6, 5773 - 5830      | K.SHCIAEVNDEMPADLPSLAADFVESK.D                    | 2993.22637 | 3 | 1.63E-05 | 0.92  | 4.98   | -     | 855.7   |
| AHQ-9-5, 2801 - 2807      | K.SLHTLFGDK.L                                     | 1018.14800 | 2 | 9.12E-05 | 0.87  | 2.67   | -     | 857.6   |
| AHQ-9-5, 4931             | K.SLHTLFGDKLCTVATLR.E                             | 1934.24913 | 2 | 4.82E-07 | 0.91  | 3.94   | -     | 801.0   |
| AHQ-9-5, 4920 - 4921      | K.SLHTLFGDKLCTVATLR.E                             | 1934.24913 | 3 | 1.40E-06 | 0.83  | 3.67   | -     | 767.4   |
| AHQ-9-5, 1921 - 1960      | K.TCVADESAENCOK.S                                 | 1501.53308 | 2 | 6.40E-07 | 0.96  | 4.15   | -     | 1585.5  |
| AHQ-9-6, 1991             | K.TCVADESAENCOK.S                                 | 1501.53308 | 2 | 6.75E-06 | 0.81  | 2.89   | -     | 828.0   |
| AHQ-9-5, 2049             | K.TCVADESAENCOK.S                                 | 1501.53308 | 2 | 2.00E-06 | 0.90  | 2.99   | -     | 1058.6  |
| AHQ-9-5, 4345             | K.TCVADESAENCOKSLHTLFGDK.L                        | 2500.65848 | 3 | 2.40E-05 | 0.82  | 3.68   | -     | 648.4   |
| AHQ-9-5, 3751             | K.TYETTLEKCAAADPHCEYAK.V                          | 2522.72734 | 3 | 2.41E-07 | 0.89  | 4.45   | -     | 689.7   |
| AHQ-9-7, 5337             | K.VFDEFKPLVEEPQNLIK.Q                             | 2046.35142 | 2 | 2.38E-05 | 0.87  | 4.20   | -     | 384.5   |
| AHQ-9-5, 5423 - 5496      | K.VFDEFKPLVEEPQNLIK.Q                             | 2046.35142 | 3 | 2.42E-05 | 0.95  | 4.61   | -     | 1393.5  |
| AHQ-9-5, 5420 - 5495      | K.VFDEFKPLVEEPQNLIK.Q                             | 2046.35142 | 2 | 3.06E-07 | 0.92  | 4.87   | -     | 434.0   |
| AHQ-9-5, 5316             | K.VFDEFKPLVEEPQNLIK.Q                             | 2046.35142 | 2 | 2.43E-08 | 0.93  | 4.23   | -     | 737.0   |
| AHQ-9-6, 5315 - 5369      | K.VFDEFKPLVEEPQNLIK.Q                             | 2046.35142 | 3 | 4.14E-06 | 0.91  | 4.41   | -     | 787.9   |
| AHQ-9-6, 5347             | K.VFDEFKPLVEEPQNLIK.Q                             | 2046.35142 | 2 | 9.24E-07 | 0.85  | 3.77   | -     | 438.7   |
| AHQ-9-4, 5436             | K.VFDEFKPLVEEPQNLIK.Q                             | 2046.35142 | 3 | 9.22E-06 | 0.95  | 4.35   | -     | 1333.6  |
| AHQ-9-1, 5555             | K.VFDEFKPLVEEPQNLIK.Q                             | 2046.35142 | 3 | 6.64E-05 | 0.91  | 4.34   | -     | 916.9   |
| AHQ-9-5, 3696             | K.VHTECHGDLLECCADDRADLAK.Y                        | 2589.77855 | 2 | 2.05E-04 | 0.77  | 3.21   | -     | 607.8   |
| AHQ-9-6, 3653             | K.VHTECHGDLLECCADDRADLAK.Y                        | 2589.77855 | 3 | 2.93E-06 | 0.94  | 5.44   | -     | 756.1   |
| AHQ-9-6, 3789             | K.VPQVSTPTLVEVSR.N                                | 1512.73313 | 2 | 1.59E-07 | 0.88  | 2.88   | -     | 1028.0  |
| AHQ-9-5, 3757 - 3828      | K.VPQVSTPTLVEVSR.N                                | 1512.73313 | 2 | 4.03E-04 | 0.56  | 2.52   | -     | 361.2   |
| AHQ-9-5, 2384             | K.YICENQDISSK.L                                   | 1445.53420 | 2 | 4.60E-07 | 0.87  | 3.42   | -     | 723.6   |

|                              |                                                                           |            |   |          |       |        |       |          |
|------------------------------|---------------------------------------------------------------------------|------------|---|----------|-------|--------|-------|----------|
| AHQ-9-7, 2396                | K.YICENQDSISSK.L                                                          | 1445.53420 | 2 | 7.13E-05 | 0.82  | 3.36   | -     | 533.7    |
| AHQ-9-5, 2480                | K.YICENQDSISSK.L                                                          | 1445.53420 | 2 | 1.08E-06 | 0.93  | 3.92   | -     | 733.4    |
| AHQ-9-6, 2314 - 2387         | K.YICENQDSISSK.L                                                          | 1445.53420 | 2 | 1.92E-04 | 0.92  | 3.69   | -     | 687.5    |
| gj14501893[ref][NP_001094.1] | actinin, alpha 2 [Homo sapiens]                                           |            |   | 1.92E-10 | 10.12 | 120.27 | 13.30 | 103853.1 |
| AHQ-9-4, 4594                | K.AGTQIENIEEDFRNGLK.L                                                     | 1935.08442 | 2 | 9.05E-04 | 0.55  | 3.49   | -     | 512.7    |
| AHQ-9-6, 4642                | K.CQLEINFNTLQTK.L                                                         | 1610.81373 | 2 | 1.50E-04 | 0.94  | 4.09   | -     | 1280.7   |
| AHQ-9-4, 4678 - 4745         | K.CQLEINFNTLQTK.L                                                         | 1610.81373 | 2 | 1.10E-09 | 0.96  | 4.70   | -     | 1139.8   |
| AHQ-9-4, 4821                | K.CQLEINFNTLQTK.L                                                         | 1610.81373 | 2 | 8.56E-05 | 0.92  | 3.58   | -     | 1047.9   |
| AHQ-9-5, 4701 - 4723         | K.CQLEINFNTLQTK.L                                                         | 1610.81373 | 2 | 3.31E-09 | 0.94  | 4.73   | -     | 880.6    |
| AHQ-9-4, 4541                | K.CQLEINFNTLQTK.L                                                         | 1610.81373 | 2 | 5.15E-06 | 0.90  | 3.69   | -     | 791.8    |
| AHQ-9-6, 4629                | K.EGLLLWCQR.K                                                             | 1176.37031 | 2 | 1.90E-04 | 0.92  | 3.18   | -     | 904.1    |
| AHQ-9-5, 4687 - 4689         | K.EGLLLWCQR.K                                                             | 1176.37031 | 2 | 7.03E-04 | 0.95  | 3.41   | -     | 1408.2   |
| AHQ-9-6, 4033 - 4113         | R.FAIQDISVEETSAK.E                                                        | 1538.68108 | 2 | 3.57E-09 | 0.90  | 3.98   | -     | 757.9    |
| AHQ-9-4, 4069 - 4096         | R.FAIQDISVEETSAK.E                                                        | 1538.68108 | 2 | 1.49E-07 | 0.95  | 4.02   | -     | 1280.4   |
| AHQ-9-5, 4081                | R.FAIQDISVEETSAK.E                                                        | 1538.68108 | 2 | 1.92E-10 | 0.95  | 3.58   | -     | 1406.2   |
| AHQ-9-9, 3887                | R.FAIQDISVEETSAK.E                                                        | 1538.68108 | 2 | 8.35E-05 | 0.90  | 3.38   | -     | 983.1    |
| AHQ-9-3, 4082                | R.FAIQDISVEETSAK.E                                                        | 1538.68108 | 2 | 5.66E-05 | 0.75  | 2.84   | -     | 782.5    |
| AHQ-9-4, 5137                | K.GYEEWLLNEIR.R                                                           | 1422.56701 | 2 | 2.64E-06 | 0.93  | 3.72   | -     | 1235.4   |
| AHQ-9-6, 5093                | K.GYEEWLLNEIR.R                                                           | 1422.56701 | 2 | 1.13E-04 | 0.88  | 2.90   | -     | 956.4    |
| AHQ-9-5, 5584 - 5595         | K.GYEEWLLNEIR.R                                                           | 1422.56701 | 2 | 4.54E-07 | 0.92  | 4.16   | -     | 1003.2   |
| AHQ-9-4, 5552 - 5553         | K.GYEEWLLNEIR.R                                                           | 1422.56701 | 2 | 1.54E-07 | 0.97  | 4.59   | -     | 1688.8   |
| AHQ-9-7, 5505                | K.GYEEWLLNEIR.R                                                           | 1422.56701 | 2 | 1.96E-04 | 0.76  | 2.80   | -     | 879.8    |
| AHQ-9-4, 2410                | K.HEAFESDLAAHQDR.V                                                        | 1626.66861 | 2 | 5.32E-07 | 0.97  | 4.55   | -     | 2013.2   |
| AHQ-9-4, 3842 - 3912         | R.KAGTQIENIEEDFRN.N                                                       | 1650.77152 | 2 | 5.60E-04 | 0.36  | 2.79   | -     | 377.9    |
| AHQ-9-4, 2202                | R.KHEAFESDLAAHQDR.V                                                       | 1754.84152 | 3 | 3.33E-09 | 0.97  | 5.43   | -     | 1792.8   |
| AHQ-9-5, 2201                | R.KHEAFESDLAAHQDR.V                                                       | 1754.84152 | 2 | 2.39E-10 | 0.95  | 4.06   | -     | 1332.2   |
| AHQ-9-4, 2129 - 2208         | R.KHEAFESDLAAHQDR.V                                                       | 1754.84152 | 2 | 5.82E-09 | 0.96  | 4.12   | -     | 1488.3   |
| AHQ-9-4, 3116                | R.KFTTAWCNSHLR.K                                                          | 1522.71309 | 3 | 1.19E-06 | 0.95  | 4.44   | -     | 1346.1   |
| AHQ-9-4, 5700                | K.LM*LLLEVISGER.L                                                         | 1389.68652 | 2 | 1.09E-05 | 0.96  | 4.26   | -     | 1831.3   |
| AHQ-9-5, 3963                | K.LVLSIGAEIVDGNVK.M                                                       | 1543.74400 | 2 | 1.11E-04 | 0.82  | 3.28   | -     | 639.4    |
| AHQ-9-4, 3965 - 4024         | K.LVLSIGAEIVDGNVK.M                                                       | 1543.74400 | 2 | 5.40E-06 | 0.97  | 5.11   | -     | 1658.7   |
| AHQ-9-4, 4202 - 4278         | K.LVLSIGAEIVDGNVK.M                                                       | 1543.74400 | 2 | 1.42E-05 | 0.94  | 3.98   | -     | 1220.4   |
| AHQ-9-4, 4317 - 4397         | K.LVLSIGAEIVDGNVK.M                                                       | 1543.74400 | 2 | 1.41E-05 | 0.93  | 3.62   | -     | 1138.3   |
| AHQ-9-4, 3568 - 3626         | K.TFTAWCNSHLR.K                                                           | 1394.54018 | 2 | 2.89E-04 | 0.62  | 2.65   | -     | 318.8    |
| gj13562114[ref][NP_110400.1] | beta tubulin 1, class VI [Homo sapiens]                                   |            |   | 2.36E-10 | 11.82 | 140.32 | 39.70 | 50326.6  |
| AHQ-9-8, 4399 - 4466         | R.ALSVAELTQQM*FDAR.N                                                      | 1696.90680 | 2 | 6.71E-04 | 0.95  | 4.11   | -     | 1485.1   |
| AHQ-9-7, 5768                | R.ALSVAELTQQM*FDAR.N                                                      | 1680.90740 | 3 | 1.00E-08 | 0.98  | 5.53   | -     | 2506.7   |
| AHQ-9-10, 4377               | R.ALSVAELTQQM*FDAR.N                                                      | 1696.90680 | 2 | 3.11E-04 | 0.88  | 3.30   | -     | 836.7    |
| AHQ-9-9, 5541 - 5619         | R.ALSVAELTQQM*FDAR.N                                                      | 1680.90740 | 2 | 5.39E-05 | 0.93  | 3.80   | -     | 1229.4   |
| AHQ-9-9, 5625                | R.ALSVAELTQQM*FDAR.N                                                      | 1680.90740 | 3 | 7.42E-05 | 0.97  | 4.38   | -     | 2613.3   |
| AHQ-9-8, 5839 - 5880         | R.ALSVAELTQQM*FDAR.N                                                      | 1680.90740 | 2 | 7.27E-05 | 0.92  | 3.74   | -     | 1291.3   |
| AHQ-9-13-, 3540              | K.AVLEEDVEETEEAEM*EPEDKGGH                                                | 2532.58787 | 3 | 1.88E-07 | 0.51  | 3.01   | -     | 417.4    |
| AHQ-9-7, 3468 - 3469         | K.AVLEEDVEETEEAEM*EPEDKGGH                                                | 2532.58787 | 3 | 5.47E-07 | 0.68  | 3.82   | -     | 383.0    |
| AHQ-9-14, 5031               | R.AVLVDLEPGTM*DSIR.S                                                      | 1632.86102 | 2 | 2.76E-05 | 0.85  | 3.18   | -     | 836.5    |
| AHQ-9-14-, 4062 - 4121       | R.AVLVDLEPGTM*DSIR.S                                                      | 1632.86102 | 2 | 2.28E-04 | 0.92  | 4.05   | -     | 871.6    |
| AHQ-9-8, 4076 - 4079         | R.AVLVDLEPGTM*DSIR.S                                                      | 1632.86102 | 2 | 6.17E-04 | 0.76  | 3.12   | -     | 494.3    |
| AHQ-9-14-, 4701              | R.AVLVDLEPGTM*DSIR.S                                                      | 1616.86162 | 2 | 4.45E-07 | 0.90  | 3.44   | -     | 856.4    |
| AHQ-9-7, 3826 - 3840         | R.EIVHQIGCGNGIQAK.F                                                       | 1867.11965 | 2 | 6.94E-04 | 0.49  | 3.04   | -     | 313.3    |
| AHQ-9-8, 6266                | K.GHYTEGAELIENLVVVR.H                                                     | 2029.23935 | 2 | 5.69E-06 | 0.98  | 6.42   | -     | 2405.7   |
| AHQ-9-11, 6117               | K.GHYTEGAELIENLVVVR.H                                                     | 2029.23935 | 3 | 6.97E-07 | 0.86  | 3.29   | -     | 1412.4   |
| AHQ-9-7, 6170 - 6177         | K.GHYTEGAELIENLVVVR.H                                                     | 2029.23935 | 3 | 6.50E-05 | 0.92  | 4.23   | -     | 1732.6   |
| AHQ-9-13-, 6193              | K.GHYTEGAELIENLVVVR.H                                                     | 2029.23935 | 3 | 3.51E-04 | 0.88  | 4.05   | -     | 1480.5   |
| AHQ-9-12, 6149               | K.GHYTEGAELIENLVVVR.H                                                     | 2029.23935 | 2 | 4.13E-06 | 0.98  | 6.27   | -     | 2621.9   |
| AHQ-9-13-, 6194              | K.GHYTEGAELIENLVVVR.H                                                     | 2029.23935 | 2 | 4.49E-08 | 0.98  | 6.26   | -     | 2142.3   |
| AHQ-9-7, 5930 - 5949         | R.GLSM*AATFIGNNTAIQEIFNR.V                                                | 2285.56551 | 2 | 3.04E-05 | 0.92  | 4.85   | -     | 757.5    |
| AHQ-9-7, 3181 - 3188         | R.ISVYVNEAYGR.K                                                           | 1335.44622 | 2 | 8.12E-09 | 0.94  | 3.45   | -     | 1217.8   |
| AHQ-9-8, 3163                | R.ISVYVNEAYGR.K                                                           | 1335.44622 | 2 | 1.79E-05 | 0.90  | 3.36   | -     | 889.0    |
| AHQ-9-11, 3129 - 3186        | R.ISVYVNEAYGR.K                                                           | 1335.44622 | 2 | 7.01E-04 | 0.85  | 2.69   | -     | 1102.8   |
| AHQ-9-14, 4116 - 4179        | R.ISVYVNEAYGR.K                                                           | 1335.44622 | 2 | 3.04E-04 | 0.92  | 3.37   | -     | 1118.8   |
| AHQ-9-7, 4782 - 4842         | K.LGALFQDPFVHGNSGAGNNWAK.G                                                | 2388.58260 | 3 | 2.27E-08 | 0.82  | 4.23   | -     | 767.3    |
| AHQ-9-13, 5119               | K.LGALFQDPFVHGNSGAGNNWAK.G                                                | 2388.58260 | 3 | 2.36E-06 | 0.73  | 3.05   | -     | 580.6    |
| AHQ-9-7, 5476 - 5485         | R.LHFFMPGFAPLTAQGSQQYR.A                                                  | 2297.62284 | 3 | 1.15E-05 | 0.97  | 5.71   | -     | 1934.6   |
| AHQ-9-9, 4795 - 4797         | R.LHFFMPGFAPLTAQGSQQYR.A                                                  | 2313.62224 | 3 | 1.80E-06 | 0.94  | 4.81   | -     | 1227.2   |
| AHQ-9-8, 6186                | K.LTTPTYGDLNHLVSLTM*SGITSLR.F                                             | 2709.06919 | 3 | 2.36E-10 | 0.81  | 3.73   | -     | 767.0    |
| AHQ-9-7, 4992                | R.YLTVACIFRR.G                                                            | 1144.36822 | 2 | 3.24E-05 | 0.83  | 2.91   | -     | 661.8    |
| AHQ-9-9, 4843 - 4848         | R.YLTVACIFRR.G                                                            | 1144.36822 | 2 | 4.03E-04 | 0.91  | 3.05   | -     | 1069.4   |
| gj14502295[ref][NP_001677.1] | ATP synthase, H+ transporting, mitochondrial F1 complex, beta polypeptide |            |   | 3.28E-10 | 8.04  | 90.27  | 26.30 | 57955.2  |
| AHQ-9-7, 5188                | R.AIAELGIYPVDPDLSTSR.I                                                    | 1989.21513 | 2 | 3.31E-05 | 0.80  | 3.29   | -     | 438.4    |
| AHQ-9-7, 6300 - 6364         | R.DQEGDQVLLFIDNIFR.F                                                      | 1923.11524 | 2 | 1.55E-05 | 0.88  | 4.21   | -     | 527.1    |
| AHQ-9-7, 4320                | R.FTQAGSEVSALLGR.I                                                        | 1436.59522 | 2 | 2.22E-06 | 0.91  | 3.46   | -     | 1137.8   |
| AHQ-9-7, 6204                | K.GFQQLIAGYDHLPEQAFYM*VGPIEEAVAK.A                                        | 3368.75991 | 3 | 3.45E-07 | 0.94  | 5.32   | -     | 938.9    |
| AHQ-9-7, 3589                | R.IMDPNIVGSEHYDVAR.G                                                      | 1817.01617 | 2 | 7.48E-07 | 0.84  | 3.42   | -     | 555.5    |
| AHQ-9-7, 3266                | R.IM*DPNIVGSEHYDVAR.G                                                     | 1833.01557 | 2 | 9.20E-05 | 0.91  | 3.67   | -     | 840.0    |
| AHQ-9-7, 4032 - 4089         | R.LVLEVAQGLGSEVTR.T                                                       | 1651.88893 | 2 | 2.78E-09 | 0.96  | 4.28   | -     | 1357.5   |
| AHQ-9-7, 5369                | R.VALTGLTVAEYFR.D                                                         | 1440.66861 | 2 | 3.28E-10 | 0.93  | 3.51   | -     | 1470.1   |
| AHQ-9-7, 4478 - 4545         | K.VLDSGAPIKIPGPETLGR.I                                                    | 1920.24231 | 3 | 2.57E-05 | 0.87  | 3.59   | -     | 1195.6   |
| AHQ-9-7, 4473 - 4474         | K.VLDSGAPIKIPGPETLGR.I                                                    | 1920.24231 | 2 | 8.69E-05 | 0.80  | 3.62   | -     | 305.2    |
| gj15031635[ref][NP_005498.1] | cofilin 1 (non-muscle) [Homo sapiens]                                     |            |   | 3.68E-10 | 4.49  | 50.33  | 31.90 | 18502.4  |
| AHQ-9-13-, 5312              | K.EILVGDVGGQVDDPYATFVK.M                                                  | 2167.40069 | 2 | 7.03E-07 | 0.96  | 5.18   | -     | 1251.8   |
| AHQ-9-11, 5249               | K.EILVGDVGGQVDDPYATFVK.M                                                  | 2167.40069 | 2 | 1.05E-06 | 0.93  | 3.76   | -     | 1047.1   |
| AHQ-9-13, 5444               | K.EILVGDVGGQVDDPYATFVK.M                                                  | 2167.40069 | 2 | 4.20E-08 | 0.97  | 5.32   | -     | 1696.1   |
| AHQ-9-12, 5288               | K.EILVGDVGGQVDDPYATFVK.M                                                  | 2167.40069 | 2 | 6.09E-09 | 0.97  | 5.64   | -     | 1431.1   |
| AHQ-9-14-, 5333              | K.EILVGDVGGQVDDPYATFVK.M                                                  | 2167.40069 | 2 | 4.20E-05 | 0.93  | 4.23   | -     | 945.7    |
| AHQ-9-12, 5994 - 6068        | K.KEDLVFIFWAPESAPLK.S                                                     | 1991.31745 | 2 | 1.35E-05 | 0.94  | 4.70   | -     | 928.9    |
| AHQ-9-14-, 4337 - 4354       | K.LGGSAVISLEGKPL                                                          | 1341.57848 | 2 | 3.56E-05 | 0.84  | 3.69   | -     | 665.0    |
| AHQ-9-11, 4250               | K.LGGSAVISLEGKPL                                                          | 1341.57848 | 2 | 1.20E-05 | 0.92  | 3.77   | -     | 895.3    |
| AHQ-9-12, 4284 - 4356        | K.LGGSAVISLEGKPL                                                          | 1341.57848 | 2 | 1.75E-06 | 0.93  | 4.30   | -     | 1113.4   |
| AHQ-9-13-, 6156              | K.NIILEEGKELVGDVGGQVDDPYATFVK.M                                           | 3064.43208 | 3 | 1.33E-09 | 0.97  | 6.57   | -     | 1427.8   |
| AHQ-9-13-, 3320              | R.YALYDATYETK.E                                                           | 1338.44364 | 2 | 6.10E-07 | 0.94  | 3.62   | -     | 1070.8   |
| AHQ-9-12, 3193 - 3268        | R.YALYDATYETK.E                                                           | 1338.44364 | 2 | 3.44E-04 | 0.95  | 3.71   | -     | 1205.2   |
| AHQ-9-11, 3229 - 3249        | R.YALYDATYETK.E                                                           | 1338.44364 | 2 | 3.43E-06 | 0.94  | 4.20   | -     | 989.8    |
| AHQ-9-12, 3250               | R.YALYDATYETK.E                                                           | 1338.44364 | 1 | 3.68E-10 | 0.67  | 3.12   | -     | 339.7    |
| gj14504447[ref][NP_002128.1] | heterogeneous nuclear ribonucleoprotein A2/B1 isoform A2; heterogeneous   |            |   | 3.76E-10 | 2.28  | 30.22  | 16.40 | 36005.7  |
| AHQ-9-9, 4253 - 4256         | R.GFGFVTFDDHDPVDK.I                                                       | 1696.79721 | 2 | 4.77E-07 | 0.87  | 3.55   | -     | 797.4    |
| AHQ-9-9, 5356 - 5361         | K.LFIGGLSFETTEESLR.N                                                      | 1800.00202 | 2 | 3.76E-10 | 0.95  | 4.40   | -     | 1244.6   |
| AHQ-9-9, 2879                | R.NMGVYGGGNYGPGSGGGYGGGR.S                                                | 2191.24298 | 2 | 1.80E-07 | 0.46  | 2.70   | -     | 407.5    |
| gj12056465[ref][NP_001427.2] | fibriilarin; 34-kD nucleolar scleroderma antigen; RNA, U3 small nucleol   |            |   | 4.21E-10 | 0.81  | 10.13  | 4.00  | 33784.0  |
| AHQ-9-9, 2792                | R.VSISEGDKIEYR.A                                                          | 1511.61573 | 2 | 4.21E-10 | 0.81  | 2.64   | -     | 981.1    |
| gj14506877[ref][NP_002996.1] | selectin P precursor; Selectin P (granulocyte membrane protein, 140kD;    |            |   | 4.60E-10 | 1.78  | 20.21  | 3.70  | 90844.7  |
| AHQ-9-3, 3130                | R.PSGQWTAVTPACR.A                                                         | 1432.58672 | 2 | 2.20E-05 | 0.84  | 3.00   | -     | 853.4    |
| AHQ-9-3, 4544                | K.STCQFCDEGYSLSGPER.L                                                     | 2109.23671 | 2 | 3.06E-08 | 0.90  | 3.73   | -     | 891.8    |
| AHQ-9-4, 4573                | K.STCQFCDEGYSLSGPER.L                                                     | 2109.23671 | 2 | 2.39E-05 | 0.93  | 4.22   | -     | 915.5    |
| AHQ-9-2, 4674 - 4754         | K.STCQFCDEGYSLSGPER.L                                                     | 2109.23671 | 2 | 4.60E-10 | 0.94  | 4.28   | -     | 977.9    |
| gj14503631[ref][NP_000120.1] | coagulation factor XIII A1 subunit precursor; Coagulation factor XIII,    |            |   | 6.76E-10 | 19.23 | 230.25 | 34.30 | 83232.8  |
| AHQ-9-5, 5003 - 5072         | R.AVPPNNSNAEEDDPLTVELQGVVPR.G                                             | 2603.82656 | 2 | 2.92E-06 | 0.76  | 3.72   | -     | 191.0    |
| AHQ-9-5, 2353 - 2379         | R.CGPASVQAIK.H                                                            | 1032.19627 | 2 | 4.48E-04 | 0.74  | 2.76   | -     | 669.2    |
| AHQ-9-5, 2648 - 2652         | K.DGTHVVENVATHIGK.L                                                       | 1692.81163 | 2 | 1.30E-08 | 0.97  | 4.76   | -     | 1675.7   |

|                             |                                                                         |            |   |          |       |        |       |         |
|-----------------------------|-------------------------------------------------------------------------|------------|---|----------|-------|--------|-------|---------|
| AHQ-9-7, 2634               | K.DGTHVVENVDATHIGK.L                                                    | 1692.81163 | 2 | 7.15E-05 | 0.82  | 3.26   | -     | 800.0   |
| AHQ-9-5, 6401 - 6463        | K.EAVLIQAGEYIM*GQLLEQASLHFFVTAR.I                                       | 3039.45415 | 3 | 8.14E-06 | 0.92  | 4.90   | -     | 797.9   |
| AHQ-9-11, 5231 - 5265       | K.ETFVDVTLPLSFK.K                                                       | 1526.71190 | 2 | 1.39E-04 | 0.79  | 2.74   | -     | 787.8   |
| AHQ-9-5, 5383 - 5415        | K.ETFVDVTLPLSFK.K                                                       | 1526.71190 | 2 | 1.04E-04 | 0.87  | 3.61   | -     | 757.7   |
| AHQ-9-7, 5312               | K.ETFVDVTLPLSFK.K                                                       | 1526.71190 | 2 | 5.35E-05 | 0.74  | 2.76   | -     | 775.4   |
| AHQ-9-5, 4757               | R.GTQVVVGSMD*TVTVQFTNPLK.E                                              | 2139.41549 | 2 | 1.75E-09 | 0.94  | 4.54   | -     | 796.5   |
| AHQ-9-5, 5315               | K.GTYIPVPIVSELQSGK.W                                                    | 1688.94594 | 2 | 4.73E-04 | 0.59  | 2.71   | -     | 269.8   |
| AHQ-9-5, 5344               | K.GTYIPVPIVSELQSGK.W                                                    | 1688.94594 | 3 | 1.43E-04 | 0.90  | 3.57   | -     | 1133.9  |
| AHQ-9-11, 6130              | R.GVNLQEFVNVTVSVHLFK.E                                                  | 1946.23831 | 2 | 1.22E-04 | 0.91  | 3.47   | -     | 1046.5  |
| AHQ-9-7, 6196 - 6260        | R.GVNLQEFVNVTVSVHLFK.E                                                  | 1946.23831 | 2 | 6.76E-10 | 0.93  | 4.51   | -     | 833.4   |
| AHQ-9-5, 6296 - 6297        | R.GVNLQEFVNVTVSVHLFK.E                                                  | 1946.23831 | 3 | 1.27E-07 | 0.82  | 3.87   | -     | 834.2   |
| AHQ-9-5, 6295               | R.GVNLQEFVNVTVSVHLFK.E                                                  | 1946.23831 | 2 | 2.58E-07 | 0.96  | 5.05   | -     | 1227.6  |
| AHQ-9-5, 3361 - 3421        | R.HVYGLDVIQQR.R                                                         | 1457.61612 | 2 | 1.83E-09 | 0.92  | 3.67   | -     | 786.9   |
| AHQ-9-5, 2320 - 2335        | K.KDGTHVVENVDATHIGK.L                                                   | 1820.98455 | 2 | 1.00E-06 | 0.86  | 3.11   | -     | 1064.3  |
| AHQ-9-5, 2513               | K.KDGTHVVENVDATHIGK.L                                                   | 1820.98455 | 3 | 8.46E-06 | 0.96  | 4.75   | -     | 2164.7  |
| AHQ-9-5, 4963 - 5044        | K.KETFVDVTLPLSFK.K                                                      | 1654.88482 | 2 | 2.88E-06 | 0.94  | 3.90   | -     | 1182.6  |
| AHQ-9-5, 2849               | R.KLIASMSDDSLR.H                                                        | 1308.53039 | 2 | 2.96E-05 | 0.81  | 2.97   | -     | 892.7   |
| AHQ-9-5, 2011               | K.KPLNTEGVMS.S                                                          | 1117.34452 | 2 | 2.89E-05 | 0.52  | 2.65   | -     | 388.1   |
| AHQ-9-6, 4102               | R.LALETALM*YGAK.K                                                       | 1297.54595 | 2 | 1.65E-07 | 0.91  | 3.29   | -     | 844.8   |
| AHQ-9-5, 4541 - 4544        | R.LALETALM*YGAK.K                                                       | 1281.54655 | 2 | 1.43E-06 | 0.95  | 3.33   | -     | 1905.9  |
| AHQ-9-5, 4143 - 4177        | R.LALETALM*YGAK.K                                                       | 1297.54595 | 2 | 9.97E-07 | 0.96  | 4.08   | -     | 1225.8  |
| AHQ-9-5, 2311               | K.LIASMSDDSLR.H                                                         | 1196.35688 | 2 | 2.65E-04 | 0.94  | 3.31   | -     | 1151.8  |
| AHQ-9-7, 5338               | R.MYVAVWTPYGVLR.T                                                       | 1555.86794 | 2 | 3.19E-04 | 0.44  | 2.58   | -     | 551.7   |
| AHQ-9-7, 5213               | R.M*YVAVWTPYGVLR.T                                                      | 1571.86734 | 2 | 2.20E-07 | 0.93  | 3.70   | -     | 934.6   |
| AHQ-9-5, 6076               | R.NPDTYIILNPWCEDDAVYLDNEKER.E                                           | 3349.53903 | 3 | 9.42E-06 | 0.84  | 3.70   | -     | 936.0   |
| AHQ-9-5, 4589               | R.SNVDM*DFEVENAVLKG.D                                                   | 1783.93809 | 2 | 3.02E-06 | 0.94  | 4.50   | -     | 1088.3  |
| AHQ-9-5, 4399 - 4455        | R.SNVDM*DFEVENAVLKG.D                                                   | 1783.93809 | 2 | 1.36E-07 | 0.95  | 3.97   | -     | 1661.2  |
| AHQ-9-6, 4961               | R.SNVDM*DFEVENAVLKG.D                                                   | 1783.93809 | 2 | 4.81E-06 | 0.92  | 3.67   | -     | 1312.5  |
| AHQ-9-6, 4394               | R.SNVDM*DFEVENAVLKG.D                                                   | 1783.93809 | 2 | 6.09E-08 | 0.94  | 3.54   | -     | 1775.8  |
| AHQ-9-5, 4439               | R.SNVDM*DFEVENAVLKG.D                                                   | 1783.93809 | 2 | 3.84E-08 | 0.96  | 4.67   | -     | 1633.4  |
| AHQ-9-5, 5021               | R.SNVDM*DFEVENAVLKG.D                                                   | 1783.93809 | 2 | 5.72E-08 | 0.94  | 4.30   | -     | 1193.9  |
| AHQ-9-5, 3973               | R.SNVDM*DFEVENAVLKG.D                                                   | 1783.93809 | 2 | 2.05E-08 | 0.74  | 3.26   | -     | 839.1   |
| AHQ-9-13, 5550              | K.STVLTPIIIK.V                                                          | 1327.63485 | 2 | 7.82E-05 | 0.77  | 2.70   | -     | 791.0   |
| AHQ-9-6, 5366 - 5405        | K.STVLTPIIIK.V                                                          | 1327.63485 | 2 | 1.81E-04 | 0.89  | 3.22   | -     | 1063.0  |
| AHQ-9-8, 5447               | K.STVLTPIIIK.V                                                          | 1327.63485 | 2 | 1.76E-04 | 0.73  | 2.90   | -     | 818.5   |
| AHQ-9-5, 2431               | R.VEYVIGR.Y                                                             | 835.97056  | 2 | 7.58E-04 | 0.84  | 2.70   | -     | 724.0   |
| gi 21361198 ref NP_000286.2 | serine (or cysteine) proteinase inhibitor, clade A (alpha-1 antiprotei  |            |   | 8.44E-10 | 1.53  | 20.15  | 5.70  | 46722.2 |
| AHQ-9-7, 6180               | K.ITPNLAEFAFSLYR.Q                                                      | 1642.87896 | 2 | 8.44E-10 | 0.78  | 2.56   | -     | 617.6   |
| AHQ-9-7, 3858               | K.SVLGQLGITK.V                                                          | 1016.21669 | 2 | 1.40E-05 | 0.74  | 2.98   | -     | 539.0   |
| gi 20535366 ref XP_053177.4 | similar to Tubulin alpha-3/alpha-7 chain (Alpha-tubulin 3/7) [Homo sap  |            |   | 9.56E-10 | 2.46  | 30.22  | 9.60  | 49858.2 |
| AHQ-9-11, 3113              | K.DVNAAIATIK.T                                                          | 1016.17355 | 2 | 2.81E-06 | 0.94  | 3.66   | -     | 1325.1  |
| AHQ-9-7, 3093               | K.DVNAAIATIK.T                                                          | 1016.17355 | 2 | 3.66E-04 | 0.88  | 3.61   | -     | 959.5   |
| AHQ-9-8, 4956               | K.TIGGGDDSPNTFFSETGAGK.H                                                | 2009.07549 | 2 | 2.89E-07 | 0.80  | 3.23   | -     | 629.3   |
| AHQ-9-9, 4723 - 4800        | K.TIGGGDDSPNTFFSETGAGK.H                                                | 2009.07549 | 2 | 1.02E-05 | 0.78  | 3.25   | -     | 666.5   |
| AHQ-9-7, 4982 - 5062        | K.TIGGGDDSPNTFFSETGAGK.H                                                | 2009.07549 | 2 | 8.46E-09 | 0.91  | 4.22   | -     | 741.8   |
| AHQ-9-7, 4845 - 4900        | K.TIGGGDDSPNTFFSETGAGK.H                                                | 2009.07549 | 2 | 1.77E-09 | 0.93  | 4.35   | -     | 796.3   |
| AHQ-9-11, 4810              | K.TIGGGDDSPNTFFSETGAGK.H                                                | 2009.07549 | 2 | 7.28E-07 | 0.50  | 2.83   | -     | 299.0   |
| AHQ-9-13, 4868 - 4936       | K.TIGGGDDSPNTFFSETGAGK.H                                                | 2009.07549 | 2 | 1.15E-05 | 0.62  | 3.25   | -     | 392.9   |
| AHQ-9-13, 5099              | K.TIGGGDDSPNTFFSETGAGK.H                                                | 2009.07549 | 2 | 1.11E-05 | 0.90  | 4.14   | -     | 574.5   |
| AHQ-9-14, 5631 - 5679       | K.TIGGGDDSPNTFFSETGAGK.H                                                | 2009.07549 | 2 | 5.04E-05 | 0.73  | 3.28   | -     | 444.1   |
| AHQ-9-14, 4939              | K.TIGGGDDSPNTFFSETGAGK.H                                                | 2009.07549 | 2 | 9.56E-10 | 0.93  | 4.42   | -     | 764.2   |
| AHQ-9-13, 5416              | R.TIQFVDWCPGTFK.V                                                       | 1600.81899 | 2 | 3.23E-06 | 0.92  | 3.75   | -     | 894.3   |
| AHQ-9-11, 5237 - 5318       | R.TIQFVDWCPGTFK.V                                                       | 1600.81899 | 2 | 2.84E-06 | 0.60  | 2.71   | -     | 635.7   |
| AHQ-9-14, 5375 - 5422       | R.TIQFVDWCPGTFK.V                                                       | 1600.81899 | 2 | 2.47E-05 | 0.84  | 2.93   | -     | 776.3   |
| gi 13994151 ref NP_066272.1 | PDZ and LIM domain 1 (elfin); carboxy terminal LIM domain protein 1 [H  |            |   | 9.75E-10 | 8.45  | 100.24 | 40.70 | 36071.5 |
| AHQ-9-13, 6128 - 6133       | K.AALANLCIGDVITAIDGENTSNM*THLEAQR.I                                     | 3331.63807 | 3 | 5.66E-06 | 0.91  | 4.78   | -     | 634.4   |
| AHQ-9-13, 5622              | K.AALANLCIGDVITAIDGENTSNM*THLEAQR.I                                     | 3331.63807 | 3 | 1.43E-09 | 0.88  | 4.30   | -     | 585.1   |
| AHQ-9-11, 3521 - 3522       | K.DFEQPLAIRS.V                                                          | 1176.30388 | 2 | 4.48E-04 | 0.81  | 3.33   | -     | 606.9   |
| AHQ-9-13, 3764              | K.DFEQPLAIRS.V                                                          | 1176.30388 | 2 | 1.82E-05 | 0.91  | 3.57   | -     | 971.8   |
| AHQ-9-14, 3625              | K.DFEQPLAIRS.V                                                          | 1176.30388 | 2 | 3.37E-06 | 0.95  | 4.09   | -     | 1322.1  |
| AHQ-9-13, 3382 - 3458       | K.GCTDNLTLTVAR.S                                                        | 1322.47058 | 2 | 2.43E-04 | 0.62  | 3.06   | -     | 545.5   |
| AHQ-9-9, 3073               | R.IKGCTDNLTLTVAR.S                                                      | 1563.80174 | 2 | 5.01E-06 | 0.86  | 2.99   | -     | 902.5   |
| AHQ-9-13, 3288              | R.IKGCTDNLTLTVAR.S                                                      | 1563.80174 | 2 | 9.75E-10 | 0.91  | 3.57   | -     | 982.1   |
| AHQ-9-13, 3444              | R.IKGCTDNLTLTVAR.S                                                      | 1563.80174 | 2 | 7.68E-07 | 0.88  | 3.27   | -     | 841.6   |
| AHQ-9-11, 3213              | R.IKGCTDNLTLTVAR.S                                                      | 1563.80174 | 2 | 1.98E-06 | 0.82  | 3.09   | -     | 678.7   |
| AHQ-9-14, 3322              | R.IKGCTDNLTLTVAR.S                                                      | 1563.80174 | 2 | 2.75E-09 | 0.88  | 3.46   | -     | 831.8   |
| AHQ-9-13, 3700 - 3764       | R.LVGGKDFEQPLAIRS.V                                                     | 1630.86972 | 2 | 1.21E-05 | 0.95  | 4.23   | -     | 1245.7  |
| AHQ-9-13, 3721              | K.M*NLASEPQEVLIHIGSAHNR.S                                               | 2120.33559 | 2 | 8.40E-05 | 0.83  | 3.38   | -     | 365.5   |
| AHQ-9-13, 6141              | K.QSTSLVQLQELISEEEK.G                                                   | 1981.18977 | 2 | 5.01E-09 | 0.96  | 4.15   | -     | 1518.1  |
| AHQ-9-13, 5782              | K.QSTSLVQLQELISEEEKGDPNPKPSGFR.S                                        | 3037.32681 | 3 | 6.36E-04 | 0.68  | 3.30   | -     | 496.9   |
| AHQ-9-13, 3124              | R.SAMPFTASPASSATTAR.V                                                   | 1583.74859 | 2 | 1.83E-04 | 0.78  | 3.11   | -     | 627.6   |
| AHQ-9-11, 5061 - 5139       | R.VITNQYNNPAGLYSSENIINFNNALESK.T                                        | 3103.30221 | 3 | 7.42E-05 | 0.90  | 4.65   | -     | 555.4   |
| gi 5174539 ref NP_005908.1  | cytosolic malate dehydrogenase; soluble malate dehydrogenase [Homo sapi |            |   | 9.85E-10 | 0.81  | 10.20  | 5.10  | 36425.9 |
| AHQ-9-9, 3425               | K.VIVVGNPANTNCLTASK.S                                                   | 1760.00585 | 2 | 9.85E-10 | 0.81  | 3.06   | -     | 719.6   |
| AHQ-9-9, 3340               | K.VIVVGNPANTNCLTASK.S                                                   | 1760.00585 | 2 | 2.61E-08 | 0.91  | 3.93   | -     | 761.7   |
| gi 7669492 ref NP_002037.2  | glyceraldehyde-3-phosphate dehydrogenase [Homo sapiens]                 |            |   | 1.17E-09 | 4.01  | 60.22  | 28.70 | 36053.0 |
| AHQ-9-9, 3456               | R.GALQNIIPASTGAAK.A                                                     | 1412.61680 | 1 | 4.09E-06 | 0.70  | 3.32   | -     | 357.7   |
| AHQ-9-11, 3582 - 3638       | R.GALQNIIPASTGAAK.A                                                     | 1412.61680 | 2 | 6.51E-04 | 0.84  | 3.97   | -     | 504.7   |
| AHQ-9-9, 3907 - 3963        | K.RVIISAPSADAPM*FVMGVNHEK.Y                                             | 2386.77962 | 3 | 1.89E-04 | 0.68  | 3.73   | -     | 573.1   |
| AHQ-9-11, 5854 - 5910       | K.VIHDFNGIVEGLM*TTVHAITATQK.T                                           | 2612.98634 | 3 | 7.83E-05 | 0.88  | 4.45   | -     | 1412.0  |
| AHQ-9-9, 4229 - 4296        | R.VIISAPSADAPM*FVMGVNHEK.Y                                              | 2230.59327 | 2 | 4.06E-04 | 0.20  | 3.00   | -     | 186.1   |
| AHQ-9-9, 3960 - 3972        | R.VPTANVSVVDLTCR.L                                                      | 1532.74450 | 2 | 6.32E-05 | 0.75  | 2.91   | -     | 625.1   |
| AHQ-9-9, 3807 - 3897        | R.VPTANVSVVDLTCR.L                                                      | 1532.74450 | 2 | 2.03E-07 | 0.95  | 3.97   | -     | 1271.8  |
| AHQ-9-11, 3961              | R.VPTANVSVVDLTCR.L                                                      | 1532.74450 | 2 | 3.21E-07 | 0.82  | 3.25   | -     | 580.5   |
| AHQ-9-6, 3997               | R.VPTANVSVVDLTCR.L                                                      | 1532.74450 | 2 | 1.91E-06 | 0.94  | 4.01   | -     | 1108.6  |
| AHQ-9-13, 4186 - 4246       | R.VPTANVSVVDLTCR.L                                                      | 1532.74450 | 2 | 3.73E-07 | 0.93  | 3.64   | -     | 997.3   |
| AHQ-9-14, 4940              | R.VPTANVSVVDLTCR.L                                                      | 1532.74450 | 2 | 2.40E-07 | 0.78  | 2.82   | -     | 816.9   |
| AHQ-9-13, 4040              | R.VPTANVSVVDLTCR.L                                                      | 1532.74450 | 2 | 2.20E-08 | 0.93  | 3.50   | -     | 1136.5  |
| AHQ-9-14, 4057              | R.VPTANVSVVDLTCR.L                                                      | 1532.74450 | 2 | 1.17E-09 | 0.90  | 3.52   | -     | 845.1   |
| AHQ-9-13, 5237              | K.WGDAGAAYVVESTGVFTTM*EK.A                                              | 2294.47967 | 2 | 2.60E-04 | 0.66  | 3.23   | -     | 450.9   |
| gi 4502201 ref NP_001649.1  | ADP-ribosylation factor 1 [Homo sapiens]                                |            |   | 1.23E-09 | 3.47  | 40.22  | 23.80 | 20696.6 |
| AHQ-9-12, 4448              | R.DAVLLVFANK.Q                                                          | 1090.29726 | 1 | 2.37E-05 | 0.79  | 2.64   | -     | 941.2   |
| AHQ-9-11, 3221              | R.ILM*VGLDAAGK.T                                                        | 1104.34572 | 2 | 1.04E-04 | 0.92  | 2.81   | -     | 1517.0  |
| AHQ-9-12, 6204 - 6208       | R.M*LAEDLDRDAVLLVFANK.Q                                                 | 2064.39175 | 3 | 1.23E-09 | 0.95  | 4.35   | -     | 1904.8  |
| AHQ-9-12, 6209 - 6210       | R.M*LAEDLDRDAVLLVFANK.Q                                                 | 2064.39175 | 2 | 2.78E-06 | 0.68  | 3.04   | -     | 441.6   |
| AHQ-9-12, 4821 - 4832       | K.NISFTYVDVGGQDK.I                                                      | 1566.69621 | 2 | 2.01E-04 | 0.80  | 3.05   | -     | 637.8   |
| gi 4758086 ref NP_004069.1  | cysteine and glycine-rich protein 1; cysteine-rich protein; LIM-domain  |            |   | 1.33E-09 | 3.53  | 40.25  | 36.80 | 20567.3 |
| AHQ-9-11, 4081 - 4099       | K.GFGFQQGAGALVHSE                                                       | 1434.53788 | 2 | 9.67E-05 | 0.93  | 3.63   | -     | 1077.0  |
| AHQ-9-11, 3289              | K.GLESTLADKDGIEYCK.G                                                    | 1902.06957 | 2 | 6.19E-04 | 0.92  | 4.36   | -     | 876.3   |
| AHQ-9-11, 3247 - 3313       | K.GLESTLADKDGIEYCK.G                                                    | 1902.06957 | 3 | 4.14E-04 | 0.74  | 3.68   | -     | 528.6   |
| AHQ-9-11, 3525              | K.GYGYGGGAGTLSTDKGESLGIK.H                                              | 2160.32665 | 2 | 1.33E-09 | 0.94  | 4.95   | -     | 787.0   |
| AHQ-9-13, 3562 - 3617       | K.GYGYGGGAGTLSTDKGESLGIK.H                                              | 2160.32665 | 3 | 5.49E-08 | 0.76  | 3.52   | -     | 530.7   |
| AHQ-9-11, 3475              | K.NLSDSTVAVHGEEIYCK.S                                                   | 1938.10514 | 2 | 6.39E-07 | 0.91  | 3.71   | -     | 758.5   |
| gi 4557703 ref NP_000414.1  | keratin 2a [Homo sapiens]                                               |            |   | 1.40E-09 | 11.69 | 140.31 | 28.40 | 65864.9 |
| AHQ-9-6, 2225               | K.AQYEEIAQR.S                                                           | 1108.18640 | 2 | 2.65E-05 | 0.74  | 2.61   | -     | 868.5   |
| AHQ-9-4, 6216 - 6218        | R.FGGFGGPGGGVGLGGPGFGPGGGYGGIHEVSNQSLQLPQNVK.V                          | 4094.54151 | 3 | 4.75E-08 | 0.96  | 6.12   | -     | 1178.3  |
| AHQ-9-1, 6310               | R.FGGFGGPGGGVGLGGPGFGPGGGYGGIHEVSNQSLQLPQNVK.V                          | 4094.54151 | 3 | 4.73E-05 | 0.64  | 4.06   | -     | 420.8   |



|                             |                                                                             |            |   |          |       |        |       |          |
|-----------------------------|-----------------------------------------------------------------------------|------------|---|----------|-------|--------|-------|----------|
| AHQ-9-14-, 5059             | R.AAVPSGASGTIYEALERL.D                                                      | 1806.00979 | 2 | 5.01E-07 | 0.71  | 2.87   | -     | 317.7    |
| AHQ-9-9, 4116 - 4123        | K.DATNVGDEGGFAPNILENK.E                                                     | 1962.06350 | 2 | 1.75E-04 | 0.91  | 4.42   | -     | 662.4    |
| AHQ-9-7, 4257               | K.DATNVGDEGGFAPNILENK.E                                                     | 1962.06350 | 2 | 6.05E-04 | 0.72  | 3.10   | -     | 601.5    |
| AHQ-9-8, 5612               | R.HIADLAGNSEVILPVPFVINGGSHAGNK.L                                            | 3013.35654 | 3 | 4.76E-06 | 0.87  | 4.58   | -     | 670.2    |
| AHQ-9-8, 2411 - 2480        | R.IGAEVYHNLK.N                                                              | 1144.30502 | 2 | 2.09E-04 | 0.93  | 3.65   | -     | 1457.8   |
| AHQ-9-8, 4630 - 4634        | R.YISPDQLADLYK.S                                                            | 1426.59557 | 2 | 6.26E-07 | 0.94  | 4.22   | -     | 963.3    |
| AHQ-9-8, 4643               | R.YISPDQLADLYK.S                                                            | 1426.59557 | 1 | 2.07E-04 | 0.40  | 2.39   | -     | 626.9    |
| AHQ-9-9, 4464 - 4469        | R.YISPDQLADLYK.S                                                            | 1426.59557 | 2 | 2.29E-09 | 0.88  | 3.21   | -     | 708.4    |
| AHQ-9-11, 4577              | R.YISPDQLADLYK.S                                                            | 1426.59557 | 2 | 8.15E-06 | 0.83  | 2.99   | -     | 630.0    |
| gi 4505763 ref NP_000282.1  | phosphoglycerate kinase 1 [Homo sapiens]                                    |            |   | 2.33E-09 | 3.79  | 40.25  | 15.10 | 44614.4  |
| AHQ-9-8, 5504 - 5506        | K.ACANPAAGSVILLENLR.F                                                       | 1771.03187 | 2 | 2.33E-09 | 0.97  | 4.95   | -     | 1586.6   |
| AHQ-9-12, 5421              | K.ACANPAAGSVILLENLR.F                                                       | 1771.03187 | 2 | 6.17E-06 | 0.73  | 3.30   | -     | 709.6    |
| AHQ-9-8, 5270               | K.ALESPERFLAIGGAK.V                                                         | 1770.06542 | 2 | 8.65E-06 | 0.96  | 4.81   | -     | 1637.6   |
| AHQ-9-8, 5155               | K.ITLPVDFVTADKFDENAK.T                                                      | 2024.25948 | 2 | 2.46E-06 | 0.94  | 4.43   | -     | 757.5    |
| AHQ-9-8, 4172               | K.YSLEPVAVELK.S                                                             | 1248.44991 | 2 | 2.30E-05 | 0.91  | 3.27   | -     | 1091.9   |
| gi 29728393 ref XP_293689.1 | similar to Heterogeneous nuclear ribonucleoprotein A1 (Helix-destabili      |            |   | 2.53E-09 | 0.86  | 10.22  | 4.50  | 37463.6  |
| AHQ-9-9, 4147 - 4148        | R.GFAFVTFDNDHSDVK.I                                                         | 1699.80110 | 2 | 2.53E-09 | 0.86  | 4.35   | -     | 869.9    |
| gi 4506413 ref NP_002875.1  | RAP1A, member of RAS oncogene family; RAS-related protein RAP1A [Homo s     |            |   | 2.53E-09 | 3.54  | 40.24  | 21.70 | 20987.1  |
| AHQ-9-11, 2529              | K.CDELEDERVVGK.E                                                            | 1321.43945 | 2 | 5.66E-04 | 0.74  | 2.69   | -     | 785.6    |
| AHQ-9-11, 5445 - 5446       | K.INVNEIFYDLVR.Q                                                            | 1495.70427 | 2 | 2.04E-04 | 0.77  | 3.12   | -     | 755.0    |
| AHQ-9-11, 6137              | K.INVNEIFYDLVR.Q                                                            | 1495.70427 | 2 | 5.09E-07 | 0.95  | 4.75   | -     | 1077.7   |
| AHQ-9-14-, 5553             | K.INVNEIFYDLVR.Q                                                            | 1495.70427 | 2 | 6.39E-05 | 0.91  | 3.76   | -     | 1005.3   |
| AHQ-9-11, 5685 - 5761       | K.SALTVQFVGQIFVEK.Y                                                         | 1666.94196 | 2 | 1.42E-06 | 0.91  | 4.20   | -     | 891.3    |
| AHQ-9-13-, 5721 - 5777      | K.SALTVQFVGQIFVEK.Y                                                         | 1666.94196 | 2 | 7.25E-04 | 0.80  | 2.84   | -     | 897.4    |
| AHQ-9-11, 5837 - 5914       | K.SKINNVNEIFYDLVR.Q                                                         | 1710.95483 | 2 | 5.66E-06 | 0.85  | 3.53   | -     | 931.8    |
| AHQ-9-11, 5702 - 5703       | K.SKINNVNEIFYDLVR.Q                                                         | 1710.95483 | 3 | 8.46E-06 | 0.96  | 4.65   | -     | 1787.7   |
| AHQ-9-11, 5701              | K.SKINNVNEIFYDLVR.Q                                                         | 1710.95483 | 2 | 2.53E-09 | 0.94  | 4.20   | -     | 1045.4   |
| gi 4885063 ref NP_005156.1  | aldolase C, fructose-bisphosphate; Aldolase C, fructose-bisphosphatase      |            |   | 2.67E-09 | 1.62  | 20.25  | 7.10  | 39455.6  |
| AHQ-9-12, 4352 - 4432       | K.GVVPLAGTDGETTTQGLDGLSER.C                                                 | 2274.42806 | 2 | 2.10E-05 | 0.42  | 3.06   | -     | 322.1    |
| AHQ-9-8, 4320 - 4378        | K.GVVPLAGTDGETTTQGLDGLSER.C                                                 | 2274.42806 | 2 | 1.87E-06 | 0.85  | 4.91   | -     | 612.2    |
| AHQ-9-8, 4090               | K.GVVPLAGTDGETTTQGLDGLSER.C                                                 | 2274.42806 | 2 | 2.67E-09 | 0.86  | 5.03   | -     | 683.9    |
| AHQ-9-8, 4148               | K.VDKGVVPLAGTDGETTTQGLDGLSER.C                                              | 2616.82041 | 3 | 8.34E-06 | 0.76  | 4.04   | -     | 906.2    |
| gi 4507171 ref NP_003109.1  | secreted protein, acidic, cysteine-rich (osteonectin); Osteonectin (sec     |            |   | 2.88E-09 | 1.76  | 20.21  | 4.60  | 34632.0  |
| AHQ-9-8, 3187               | R.LEAGDHPVELLAR.D                                                           | 1420.59579 | 2 | 2.88E-09 | 0.94  | 4.18   | -     | 861.5    |
| AHQ-9-8, 2979               | K.RLEAGDHPVELLAR.D                                                          | 1576.78214 | 3 | 4.03E-06 | 0.82  | 3.28   | -     | 874.0    |
| AHQ-9-8, 2976               | K.RLEAGDHPVELLAR.D                                                          | 1576.78214 | 2 | 5.76E-06 | 0.55  | 2.69   | -     | 360.7    |
| gi 4505813 ref NP_003737.1  | cytoplasmic dynein light polypeptide; dynein, cytoplasmic, light chain      |            |   | 2.99E-09 | 1.57  | 20.14  | 24.70 | 10365.8  |
| AHQ-9-14-, 2546             | R.NFGSYVTHETK.H                                                             | 1283.37131 | 2 | 2.62E-04 | 0.87  | 2.88   | -     | 944.4    |
| AHQ-9-14-, 3665             | K.YNPTVHCIVGR.N                                                             | 1404.57820 | 2 | 2.99E-09 | 0.70  | 2.80   | -     | 368.4    |
| gi 4503747 ref NP_001448.1  | filamin B, beta (actin binding protein 278); beta filamin; filamin 1 (a     |            |   | 3.01E-09 | 3.47  | 40.24  | 1.40  | 278191.4 |
| AHQ-9-2, 3126               | K.DLAEDAPWKK.I                                                              | 1173.29999 | 2 | 2.60E-05 | 0.62  | 2.55   | -     | 781.5    |
| AHQ-9-1, 6031 - 6032        | R.LIALLEVLVSQK.R                                                            | 1227.51852 | 2 | 3.01E-09 | 0.97  | 4.26   | -     | 1461.0   |
| AHQ-9-11, 5765              | R.LIALLEVLVSQK.R                                                            | 1227.51852 | 2 | 1.73E-04 | 0.93  | 3.55   | -     | 897.0    |
| AHQ-9-2, 6007               | R.LIALLEVLVSQK.R                                                            | 1227.51852 | 2 | 1.59E-07 | 0.97  | 4.70   | -     | 1623.5   |
| AHQ-9-8, 5903               | R.LIALLEVLVSQK.R                                                            | 1227.51852 | 2 | 2.59E-06 | 0.92  | 3.47   | -     | 987.3    |
| AHQ-9-3, 5849 - 5850        | R.LIALLEVLVSQK.R                                                            | 1227.51852 | 2 | 4.61E-09 | 0.97  | 4.75   | -     | 1557.3   |
| AHQ-9-4, 5910               | R.LIALLEVLVSQK.R                                                            | 1227.51852 | 2 | 1.38E-07 | 0.98  | 4.89   | -     | 1637.9   |
| AHQ-9-5, 5915               | R.LIALLEVLVSQK.R                                                            | 1227.51852 | 2 | 5.53E-08 | 0.96  | 4.39   | -     | 1331.6   |
| AHQ-9-6, 5834               | R.LIALLEVLVSQK.R                                                            | 1227.51852 | 2 | 2.86E-08 | 0.96  | 4.42   | -     | 1259.7   |
| AHQ-9-7, 5820 - 5829        | R.LIALLEVLVSQK.R                                                            | 1227.51852 | 2 | 5.10E-07 | 0.96  | 3.96   | -     | 1472.2   |
| AHQ-9-13, 6002              | R.LIALLEVLVSQK.R                                                            | 1227.51852 | 2 | 1.50E-04 | 0.96  | 4.09   | -     | 1236.0   |
| AHQ-9-2, 5977               | R.QM*QLENVSALEFLDR.E                                                        | 1909.15348 | 2 | 2.84E-07 | 0.94  | 4.41   | -     | 933.8    |
| AHQ-9-2, 6433 - 6435        | R.QMQLENSVALEFLDR.E                                                         | 1893.15408 | 2 | 1.51E-05 | 0.95  | 4.44   | -     | 1172.4   |
| gi 30147536 ref XP_293762.2 | similar to bridging integrator 2; bridging integrator-2; breast cancer      |            |   | 3.05E-09 | 0.84  | 10.19  | 3.90  | 46870.6  |
| AHQ-9-5, 2897               | R.TSLEVSPNPEPEKPV.R.T                                                       | 1877.08801 | 2 | 3.05E-09 | 0.84  | 3.82   | -     | 420.4    |
| AHQ-9-5, 2893               | R.TSLEVSPNPEPEKPV.R.T                                                       | 1877.08801 | 3 | 1.27E-06 | 0.82  | 3.47   | -     | 687.5    |
| gi 29568101 ref NP_006467.3 | ATP synthase, H+ transporting, mitochondrial F0 complex, subunit g; AT      |            |   | 3.14E-09 | 0.95  | 10.20  | 14.60 | 11400.3  |
| AHQ-9-14-, 3681             | K.TPALVNAAVTYSPK.R.L                                                        | 1588.83283 | 3 | 3.14E-09 | 0.95  | 3.99   | -     | 1372.8   |
| gi 5031677 ref NP_005681.1  | dynamitin 1-like protein isoform 3; dynamitin-like protein [Homo sapiens] [ |            |   | 3.27E-09 | 3.40  | 40.23  | 8.90  | 78060.6  |
| AHQ-9-5, 4635               | K.ALQGASQIAEIR.E                                                            | 1370.57991 | 2 | 1.00E-05 | 0.92  | 3.48   | -     | 1613.2   |
| AHQ-9-14-, 4642 - 4645      | K.ALQGASQIAEIR.E                                                            | 1370.57991 | 2 | 3.27E-09 | 0.91  | 3.90   | -     | 1231.9   |
| AHQ-9-13-, 4626             | K.ALQGASQIAEIR.E                                                            | 1370.57991 | 2 | 1.00E-08 | 0.94  | 3.80   | -     | 1628.4   |
| AHQ-9-13-, 4934             | K.DTLQSELVGLQYK.S                                                           | 1494.67144 | 2 | 1.01E-04 | 0.89  | 3.03   | -     | 1023.8   |
| AHQ-9-5, 4613               | K.SVTDSIRDEYAFLLQK.K                                                        | 1772.93666 | 2 | 3.45E-04 | 0.67  | 2.67   | -     | 836.2    |
| AHQ-9-6, 6290 - 6369        | R.TLESVDPGLGLNTIDILTAIR.N                                                   | 2212.52928 | 2 | 7.03E-06 | 0.92  | 4.30   | -     | 849.4    |
| AHQ-9-5, 6376               | R.TLESVDPGLGLNTIDILTAIR.N                                                   | 2212.52928 | 2 | 4.16E-04 | 0.90  | 4.11   | -     | 615.3    |
| gi 13129150 ref NP_005339.1 | heat shock 90kDa protein 1, alpha; heat shock 90kD protein 1, alpha [H      |            |   | 4.42E-09 | 1.42  | 20.23  | 3.40  | 84659.1  |
| AHQ-9-5, 3907               | R.NPDDITNEEYGEFYK.S                                                         | 1834.87381 | 2 | 4.42E-09 | 0.95  | 4.53   | -     | 1067.1   |
| AHQ-9-7, 3868               | R.NPDDITNEEYGEFYK.S                                                         | 1834.87381 | 2 | 7.47E-09 | 0.84  | 3.78   | -     | 624.7    |
| AHQ-9-6, 3873               | R.NPDDITNEEYGEFYK.S                                                         | 1834.87381 | 2 | 1.82E-04 | 0.76  | 3.07   | -     | 602.5    |
| AHQ-9-5, 3825               | R.NPDDITNEEYGEFYK.S                                                         | 1834.87381 | 2 | 5.50E-07 | 0.95  | 4.47   | -     | 896.2    |
| AHQ-9-5, 4001 - 4069        | R.RAPFDLFENR.K                                                              | 1265.40235 | 2 | 5.17E-07 | 0.47  | 2.90   | -     | 417.6    |
| gi 4758460 ref NP_004479.1  | glycoprotein V (platelet) [Homo sapiens]                                    |            |   | 4.49E-09 | 6.36  | 70.23  | 17.00 | 60958.9  |
| AHQ-9-5, 3823               | R.GVLQSQSFSGM*TVLQR.L                                                       | 1754.98948 | 2 | 1.68E-06 | 0.96  | 4.40   | -     | 1790.9   |
| AHQ-9-5, 4521               | R.GVLQSQSFSGM*TVLQR.L                                                       | 1738.99008 | 2 | 9.74E-07 | 0.95  | 4.40   | -     | 1268.4   |
| AHQ-9-5, 5253 - 5259        | R.LM*ISDSHISAVAPGTFSDLIK.L                                                  | 2219.54375 | 3 | 8.74E-07 | 0.91  | 4.27   | -     | 1121.4   |
| AHQ-9-5, 3912               | R.LTEVLLGHNSWR.C                                                            | 1425.61726 | 2 | 4.49E-09 | 0.92  | 3.01   | -     | 1254.1   |
| AHQ-9-5, 3739               | R.LTEVLLGHNSWR.C                                                            | 1425.61726 | 2 | 8.46E-04 | 0.88  | 2.95   | -     | 1022.5   |
| AHQ-9-6, 6293               | R.LVSLDGLLNSLGAITELQFHR.N                                                   | 2384.71675 | 3 | 8.77E-08 | 0.84  | 3.67   | -     | 908.8    |
| AHQ-9-5, 5901               | K.MVLEQLFLDLHNLAR.G                                                         | 1813.15693 | 3 | 3.99E-04 | 0.95  | 4.59   | -     | 1722.9   |
| AHQ-9-5, 3427               | R.YLGVTLSPR.L                                                               | 1006.18036 | 2 | 2.34E-04 | 0.82  | 3.18   | -     | 1015.6   |
| AHQ-9-6, 3398               | R.YLGVTLSPR.L                                                               | 1006.18036 | 2 | 3.29E-04 | 0.92  | 2.99   | -     | 1318.6   |
| gi 21361478 ref NP_055944.2 | septin 6 isoform B; septin 2 [Homo sapiens]                                 |            |   | 4.51E-09 | 1.85  | 20.32  | 11.10 | 49716.3  |
| AHQ-9-7, 3836               | K.FEGEPATHTPQGVQLQSNITYDLQESNVR.L                                           | 3147.31508 | 3 | 4.51E-09 | 0.98  | 6.42   | -     | 2375.7   |
| AHQ-9-7, 3149               | K.TAAELLQSQGSGAGGSQTLK.R                                                    | 1976.13485 | 2 | 8.11E-05 | 0.87  | 3.88   | -     | 647.8    |
| gi 4885609 ref NP_005408.1  | v-src sarcoma (Schmidt-Ruppin A-2) viral oncogene homolog; Protooncogen     |            |   | 4.93E-09 | 2.66  | 30.19  | 9.50  | 59834.4  |
| AHQ-9-7, 6105               | R.AGPLAGGVTTFVALYDYESR.T                                                    | 2088.30526 | 2 | 1.38E-08 | 0.89  | 3.81   | -     | 786.7    |
| AHQ-9-7, 3872               | K.LFGGFFNSDDTVTSPQR.A                                                       | 1713.82931 | 2 | 1.42E-08 | 0.89  | 3.72   | -     | 720.9    |
| AHQ-9-7, 3708               | K.LFGGFFNSDDTVTSPQR.A                                                       | 1713.82931 | 2 | 7.55E-07 | 0.79  | 3.43   | -     | 596.7    |
| AHQ-9-7, 5806               | R.TQFNLSQLLVAYYSK.H                                                         | 1790.99681 | 2 | 2.55E-08 | 0.79  | 3.16   | -     | 729.0    |
| AHQ-9-7, 5629 - 5641        | R.TQFNLSQLLVAYYSK.H                                                         | 1790.99681 | 2 | 4.93E-09 | 0.88  | 3.81   | -     | 701.1    |
| gi 4507487 ref NP_003238.1  | thrombospondin 2 [Homo sapiens]                                             |            |   | 5.05E-09 | 1.85  | 20.22  | 2.60  | 129954.5 |
| AHQ-9-2, 4921 - 4985        | R.DDDYAGVFVFGYQSSSR.F                                                       | 1814.84582 | 2 | 5.05E-09 | 0.94  | 4.37   | -     | 1176.6   |
| AHQ-9-4, 4810 - 4832        | R.DDDYAGVFVFGYQSSSR.F                                                       | 1814.84582 | 2 | 2.25E-05 | 0.91  | 3.89   | -     | 935.8    |
| AHQ-9-5, 4831 - 4847        | R.DDDYAGVFVFGYQSSSR.F                                                       | 1814.84582 | 2 | 2.79E-05 | 0.75  | 3.16   | -     | 687.2    |
| AHQ-9-6, 4778               | R.DDDYAGVFVFGYQSSSR.F                                                       | 1814.84582 | 2 | 8.85E-06 | 0.84  | 2.96   | -     | 786.1    |
| AHQ-9-5, 2747 - 2808        | R.NALWHTGNTPGQVR.T                                                          | 1551.69124 | 2 | 8.97E-04 | 0.85  | 3.63   | -     | 924.6    |
| AHQ-9-2, 2827 - 2885        | R.NALWHTGNTPGQVR.T                                                          | 1551.69124 | 2 | 2.62E-04 | 0.90  | 3.54   | -     | 1039.0   |
| gi 4557677 ref NP_000203.1  | integrin beta chain, beta 3 precursor; platelet glycoprotein IIIa precu     |            |   | 5.14E-09 | 17.67 | 210.26 | 28.60 | 87185.6  |
| AHQ-9-5, 3069               | R.AKWDTANNPLYK.E                                                            | 1421.58225 | 2 | 1.11E-04 | 0.71  | 2.62   | -     | 680.4    |
| AHQ-9-3, 3084 - 3134        | R.AKWDTANNPLYK.E                                                            | 1421.58225 | 2 | 1.57E-06 | 0.76  | 2.99   | -     | 800.9    |
| AHQ-9-3, 2964               | R.CDLKENLLK.D                                                               | 1134.32850 | 2 | 9.30E-04 | 0.75  | 2.58   | -     | 927.6    |
| AHQ-9-3, 5052               | R.CDLKENLLKDCAPESIEFPVSEAR.V                                                | 2938.23689 | 3 | 7.40E-06 | 0.59  | 3.16   | -     | 655.3    |
| AHQ-9-3, 4958               | R.CDLKENLLKDCAPESIEFPVSEAR.V                                                | 2938.23689 | 3 | 2.35E-05 | 0.83  | 3.66   | -     | 691.0    |
| AHQ-9-4, 4092 - 4100        | R.CGPGWLGSGQCESEEDYRPSQDQCESPR.E                                            | 3380.49342 | 3 | 4.40E-06 | 0.83  | 4.13   | -     | 519.2    |
| AHQ-9-3, 4077               | R.CGPGWLGSGQCESEEDYRPSQDQCESPR.E                                            | 3380.49342 | 3 | 4.75E-06 | 0.79  | 3.71   | -     | 438.4    |
| AHQ-9-6, 4146               | R.DAPEGGFDAM*QATVCDCK.I                                                     | 2072.21656 | 2 | 1.98E-05 | 0.94  | 4.11   | -     | 1080.0   |

|                             |                                                                         |            |   |          |      |       |       |         |
|-----------------------------|-------------------------------------------------------------------------|------------|---|----------|------|-------|-------|---------|
| AHQ-9-7, 4132               | R.DAPEGGFDAIM*QATVCDEK.I                                                | 2072.21656 | 2 | 3.11E-06 | 0.76 | 3.03  | -     | 558.0   |
| AHQ-9-3, 4152 - 4176        | R.DAPEGGFDAIM*QATVCDEK.I                                                | 2072.21656 | 2 | 1.35E-06 | 0.92 | 3.83  | -     | 845.8   |
| AHQ-9-3, 5280 - 5336        | R.DAPEGGFDAIM*QATVCDEK.I                                                | 2056.21716 | 2 | 2.61E-04 | 0.95 | 5.15  | -     | 786.6   |
| AHQ-9-3, 4238               | K.DNCAPESEIEFFVSEAR.V                                                   | 1822.93099 | 2 | 6.63E-05 | 0.84 | 2.65  | -     | 1076.5  |
| AHQ-9-7, 4104 - 4106        | K.DNCAPESEIEFFVSEAR.V                                                   | 1822.93099 | 2 | 2.13E-06 | 0.81 | 2.98  | -     | 752.9   |
| AHQ-9-4, 4164               | K.DNCAPESEIEFFVSEAR.V                                                   | 1822.93099 | 2 | 7.38E-04 | 0.86 | 3.31  | -     | 1003.5  |
| AHQ-9-3, 4140 - 4141        | K.DNCAPESEIEFFVSEAR.V                                                   | 1822.93099 | 2 | 4.34E-08 | 0.91 | 3.28  | -     | 1366.1  |
| AHQ-9-8, 4160               | K.DNCAPESEIEFFVSEAR.V                                                   | 1822.93099 | 2 | 2.03E-04 | 0.84 | 3.06  | -     | 858.0   |
| AHQ-9-6, 4114               | K.DNCAPESEIEFFVSEAR.V                                                   | 1822.93099 | 2 | 7.79E-06 | 0.80 | 3.08  | -     | 1005.5  |
| AHQ-9-4, 3262 - 3329        | K.EATSTFTNITYR.G                                                        | 1404.50685 | 2 | 1.66E-05 | 0.84 | 3.22  | -     | 772.3   |
| AHQ-9-3, 3333 - 3349        | K.EATSTFTNITYR.G                                                        | 1404.50685 | 2 | 1.06E-07 | 0.74 | 3.10  | -     | 483.0   |
| AHQ-9-3, 2409               | R.FQYEDSSGK.S                                                           | 1224.25749 | 2 | 7.30E-05 | 0.72 | 2.58  | -     | 473.5   |
| AHQ-9-5, 3489 - 3492        | R.GECLCGQCVCHSSDFGK.I                                                   | 2006.16137 | 2 | 3.60E-06 | 0.97 | 4.95  | -     | 1796.8  |
| AHQ-9-3, 3476               | R.GECLCGQCVCHSSDFGK.I                                                   | 2006.16137 | 2 | 3.46E-05 | 0.94 | 4.11  | -     | 1332.9  |
| AHQ-9-4, 3484               | R.GECLCGQCVCHSSDFGK.I                                                   | 2006.16137 | 2 | 3.60E-08 | 0.96 | 4.40  | -     | 1690.0  |
| AHQ-9-4, 3486               | R.GECLCGQCVCHSSDFGK.I                                                   | 2006.16137 | 2 | 9.69E-07 | 0.84 | 3.79  | -     | 640.5   |
| AHQ-9-6, 3466 - 3467        | R.GECLCGQCVCHSSDFGK.I                                                   | 2006.16137 | 2 | 7.21E-04 | 0.86 | 3.69  | -     | 915.6   |
| AHQ-9-8, 2790               | K.HVLTLDQVTR.F                                                          | 1283.45912 | 2 | 1.07E-04 | 0.89 | 3.44  | -     | 561.8   |
| AHQ-9-7, 2776               | K.HVLTLDQVTR.F                                                          | 1283.45912 | 2 | 5.85E-04 | 0.40 | 2.76  | -     | 348.3   |
| AHQ-9-3, 3928 - 3986        | K.IGDTSVFSIEAK.V                                                        | 1267.41009 | 2 | 9.73E-06 | 0.94 | 3.56  | -     | 1091.0  |
| AHQ-9-3, 4050               | K.IGDTSVFSIEAK.V                                                        | 1267.41009 | 2 | 6.93E-04 | 0.93 | 3.65  | -     | 982.2   |
| AHQ-9-4, 3990               | K.IGDTSVFSIEAK.V                                                        | 1267.41009 | 2 | 1.92E-07 | 0.86 | 3.32  | -     | 794.5   |
| AHQ-9-3, 4137               | K.IGDTSVFSIEAK.V                                                        | 1267.41009 | 2 | 5.81E-05 | 0.79 | 3.00  | -     | 649.7   |
| AHQ-9-3, 3529               | K.IGDTSVFSIEAK.V                                                        | 1267.41009 | 2 | 2.85E-05 | 0.86 | 2.99  | -     | 846.1   |
| AHQ-9-3, 3540               | K.ITGKYCECDDFSCVR.Y                                                     | 1914.08378 | 2 | 5.25E-07 | 0.69 | 3.36  | -     | 346.7   |
| AHQ-9-3, 3760 - 3824        | R.NDASHLLVFTTDAK.T                                                      | 1532.67977 | 2 | 6.72E-05 | 0.95 | 3.69  | -     | 1513.4  |
| AHQ-9-6, 3779               | R.NDASHLLVFTTDAK.T                                                      | 1532.67977 | 2 | 4.02E-05 | 0.93 | 3.89  | -     | 1058.8  |
| AHQ-9-4, 3764 - 3826        | R.NDASHLLVFTTDAK.T                                                      | 1532.67977 | 2 | 5.25E-05 | 0.94 | 4.18  | -     | 1179.5  |
| AHQ-9-3, 3821               | R.NDASHLLVFTTDAK.T                                                      | 1532.67977 | 2 | 4.33E-06 | 0.93 | 4.12  | -     | 843.8   |
| AHQ-9-1, 4026               | R.NDASHLLVFTTDAK.T                                                      | 1532.67977 | 2 | 2.38E-04 | 0.74 | 2.62  | -     | 851.9   |
| AHQ-9-7, 3770               | R.NDASHLLVFTTDAK.T                                                      | 1532.67977 | 2 | 7.24E-07 | 0.95 | 4.02  | -     | 1407.7  |
| AHQ-9-4, 4185               | R.NDASHLLVFTTDAK.T                                                      | 1532.67977 | 2 | 1.01E-07 | 0.86 | 3.53  | -     | 868.7   |
| AHQ-9-3, 3838               | R.NDASHLLVFTTDAK.T                                                      | 1532.67977 | 3 | 2.89E-08 | 0.95 | 4.80  | -     | 1341.1  |
| AHQ-9-5, 3831               | R.NDASHLLVFTTDAK.T                                                      | 1532.67977 | 2 | 3.71E-04 | 0.66 | 2.63  | -     | 680.5   |
| AHQ-9-6, 4138               | R.NDASHLLVFTTDAK.T                                                      | 1532.67977 | 2 | 3.10E-05 | 0.81 | 3.19  | -     | 873.1   |
| AHQ-9-6, 3451 - 3457        | K.SFTIKPVGFK.D                                                          | 1124.35685 | 2 | 2.42E-05 | 0.87 | 2.77  | -     | 1197.8  |
| AHQ-9-3, 3480 - 3481        | K.SFTIKPVGFK.D                                                          | 1124.35685 | 2 | 7.61E-06 | 0.80 | 2.81  | -     | 949.7   |
| AHQ-9-3, 2913 - 2976        | R.TDTCM*SSNGLLCSGR.G                                                    | 1677.81726 | 2 | 1.42E-08 | 0.89 | 3.98  | -     | 919.2   |
| AHQ-9-4, 2841               | R.TDTCM*SSNGLLCSGR.G                                                    | 1677.81726 | 2 | 4.45E-08 | 0.81 | 2.95  | -     | 874.8   |
| AHQ-9-3, 2780 - 2848        | R.TDTCM*SSNGLLCSGR.G                                                    | 1677.81726 | 2 | 3.63E-07 | 0.92 | 3.62  | -     | 1289.0  |
| AHQ-9-4, 2748               | R.TDTCM*SSNGLLCSGR.G                                                    | 1677.81726 | 2 | 6.11E-06 | 0.47 | 2.65  | -     | 624.2   |
| AHQ-9-3, 3344               | R.TDTCM*SSNGLLCSGR.G                                                    | 1661.81786 | 2 | 1.49E-07 | 0.88 | 2.79  | -     | 1095.6  |
| AHQ-9-4, 2074               | R.VLEDRPLSDK.G                                                          | 1172.31354 | 2 | 1.69E-05 | 0.84 | 3.28  | -     | 912.1   |
| AHQ-9-3, 2088 - 2118        | R.VLEDRPLSDK.G                                                          | 1172.31354 | 2 | 9.73E-06 | 0.93 | 3.50  | -     | 1166.0  |
| AHQ-9-3, 2825 - 2882        | R.VLEDRPLSDKSGDSSQVTQVSPQR.I                                            | 2686.87396 | 3 | 5.14E-09 | 0.93 | 4.85  | -     | 1229.3  |
| AHQ-9-4, 2805               | R.VLEDRPLSDKSGDSSQVTQVSPQR.I                                            | 2686.87396 | 3 | 2.94E-07 | 0.95 | 4.93  | -     | 1200.5  |
| AHQ-9-5, 3308 - 3312        | K.WDTANNPLYK.E                                                          | 1222.33111 | 2 | 1.85E-05 | 0.77 | 2.58  | -     | 733.5   |
| AHQ-9-5, 3507               | K.YCECDDFSCVR.Y                                                         | 1514.59674 | 2 | 4.70E-07 | 0.95 | 3.54  | -     | 1284.1  |
| AHQ-9-3, 3504               | K.YCECDDFSCVR.Y                                                         | 1514.59674 | 2 | 3.00E-07 | 0.94 | 3.82  | -     | 986.7   |
| gi 5031931 ref NP_005585.1  | nascent-polypeptide-associated complex alpha polypeptide [Homo sapiens] |            |   | 5.35E-09 | 1.89 | 20.22 | 13.50 | 23383.7 |
| AHQ-9-9, 3175               | K.IEDLSQAQALAAEK.F                                                      | 1615.76708 | 2 | 5.35E-09 | 0.94 | 4.37  | -     | 1944.9  |
| AHQ-9-9, 3727 - 3733        | K.SPASDITYVIGEAK.I                                                      | 1485.61987 | 2 | 2.75E-08 | 0.95 | 4.24  | -     | 1295.6  |
| gi 4503445 ref NP_001944.1  | endothelial cell growth factor 1 (platelet-derived); thymidine phosphor |            |   | 6.06E-09 | 1.83 | 20.21 | 5.40  | 49952.5 |
| AHQ-9-7, 6085 - 6097        | R.ALPLALVHLELGAGR.S                                                     | 1530.83966 | 2 | 6.06E-09 | 0.95 | 4.10  | -     | 1456.5  |
| AHQ-9-7, 3504               | R.ALQALVLSDR.A                                                          | 1215.38155 | 2 | 7.13E-07 | 0.88 | 3.20  | -     | 1131.5  |
| gi 19923457 ref NP_057447.2 | glycoprotein VI (platelet); platelet glycoprotein VI [Homo sapiens] [M  |            |   | 6.13E-09 | 2.63 | 30.24 | 6.90  | 67308.6 |
| AHQ-9-7, 5264               | K.PSLQALPSSLVPLEKPVTLR.C                                                | 2146.55880 | 3 | 6.13E-09 | 0.94 | 4.83  | -     | 1293.7  |
| AHQ-9-7, 4606               | R.YGDFDQFALYK.E                                                         | 1252.39881 | 2 | 2.64E-07 | 0.92 | 3.33  | -     | 974.8   |
| AHQ-9-7, 4822               | R.YQDQAVLIPAMK.R                                                        | 1524.80902 | 2 | 9.51E-04 | 0.77 | 2.65  | -     | 982.4   |
| gi 8393159 ref NP_059118.1  | calmodulin-like skin protein [Homo sapiens]                             |            |   | 6.16E-09 | 0.80 | 10.19 | 15.80 | 15920.4 |
| AHQ-9-14-, 4899             | K.KAFSAVTDGNGTINAQELGAALK.A                                             | 2264.43486 | 2 | 6.16E-09 | 0.80 | 3.71  | -     | 572.1   |
| gi 4507651 ref NP_003281.1  | tropomyosin 4 [Homo sapiens]                                            |            |   | 6.75E-09 | 3.74 | 40.30 | 15.30 | 28521.6 |
| AHQ-9-9, 3823 - 3827        | R.AEVSELKCGDLEELK.N                                                     | 1851.02256 | 2 | 6.75E-09 | 0.90 | 4.09  | -     | 858.0   |
| AHQ-9-9, 5337 - 5393        | R.AEVSELKCGDLEELKKNVTNNLK.S                                             | 2634.89893 | 3 | 1.69E-08 | 0.97 | 5.99  | -     | 1819.9  |
| AHQ-9-9, 2547               | K.IQALQQQADEAEDR.A                                                      | 1615.68404 | 2 | 2.84E-06 | 0.97 | 4.52  | -     | 1839.7  |
| AHQ-9-11, 2653 - 2655       | K.IQALQQQADEAEDR.A                                                      | 1615.68404 | 2 | 1.09E-08 | 0.97 | 4.21  | -     | 1807.3  |
| AHQ-9-13-, 2729             | K.IQALQQQADEAEDR.A                                                      | 1615.68404 | 2 | 2.24E-06 | 0.91 | 3.11  | -     | 1350.5  |
| AHQ-9-11, 2497              | R.KIQALQQQADEAEDR.A                                                     | 1743.85695 | 2 | 7.38E-07 | 0.90 | 3.62  | -     | 1043.8  |
| AHQ-9-11, 2494 - 2543       | R.KIQALQQQADEAEDR.A                                                     | 1743.85695 | 3 | 2.91E-04 | 0.79 | 3.32  | -     | 985.9   |
| AHQ-9-10, 2483              | R.KIQALQQQADEAEDR.A                                                     | 1743.85695 | 2 | 5.49E-04 | 0.81 | 2.51  | -     | 963.7   |
| AHQ-9-9, 2379               | R.KIQALQQQADEAEDR.A                                                     | 1743.85695 | 3 | 3.55E-06 | 0.95 | 4.54  | -     | 1432.1  |
| gi 21624607 ref NP_066972.1 | coactosin-like 1 [Homo sapiens]                                         |            |   | 7.32E-09 | 0.95 | 10.20 | 8.50  | 15944.9 |
| AHQ-9-13-, 4992             | R.DDGSVIVWTFK.Y                                                         | 1338.49001 | 2 | 7.32E-09 | 0.95 | 4.06  | -     | 1063.4  |
| gi 27477800 ref XP_208313.1 | similar to tropomyosin 4 [Homo sapiens]                                 |            |   | 7.79E-09 | 0.86 | 10.19 | 10.10 | 18426.7 |
| AHQ-9-9, 4704               | K.CGDLEELKKNVTNNLK.S                                                    | 1878.05124 | 3 | 8.75E-06 | 0.87 | 3.00  | -     | 1235.9  |
| AHQ-9-9, 4247               | K.CGDLEELKKNVTNNLK.S                                                    | 1878.05124 | 2 | 7.79E-09 | 0.86 | 3.81  | -     | 841.1   |
| gi 4557597 ref NP_001449.1  | gamma filamin; filamin 2; filamin C, gamma (actin-binding protein-280); |            |   | 7.97E-09 | 1.53 | 20.24 | 1.40  | 28889.4 |
| AHQ-9-2, 4597               | R.GQHVPGPSFQFTVGPLGEGGAHK.V                                             | 2305.53673 | 3 | 2.10E-05 | 0.89 | 4.58  | -     | 628.4   |
| AHQ-9-7, 4356 - 4421        | R.GQHVPGPSFQFTVGPLGEGGAHK.V                                             | 2305.53673 | 3 | 3.20E-05 | 0.84 | 4.11  | -     | 568.5   |
| AHQ-9-4, 4490               | R.GQHVPGPSFQFTVGPLGEGGAHK.V                                             | 2305.53673 | 2 | 2.07E-05 | 0.89 | 4.43  | -     | 669.7   |
| AHQ-9-6, 4393 - 4395        | R.GQHVPGPSFQFTVGPLGEGGAHK.V                                             | 2305.53673 | 3 | 7.97E-09 | 0.83 | 4.03  | -     | 462.1   |
| AHQ-9-1, 4667               | R.GQHVPGPSFQFTVGPLGEGGAHK.V                                             | 2305.53673 | 3 | 8.99E-08 | 0.85 | 3.99  | -     | 724.0   |
| AHQ-9-5, 2004               | K.IECDDKGDGSCDVR.Y                                                      | 1628.67809 | 2 | 1.07E-04 | 0.70 | 2.63  | -     | 773.0   |
| AHQ-9-3, 2048               | K.IECDDKGDGSCDVR.Y                                                      | 1628.67809 | 2 | 4.69E-04 | 0.85 | 3.34  | -     | 772.1   |
| gi 21361322 ref NP_006078.2 | tubulin, beta, 5 [Homo sapiens]                                         |            |   | 8.92E-09 | 0.93 | 10.29 | 6.10  | 49585.5 |
| AHQ-9-7, 5021 - 5026        | K.FWEVISDEHGIDPTGYHGDSDLQLER.I                                          | 3118.27220 | 3 | 8.92E-09 | 0.93 | 5.88  | -     | 637.5   |
| gi 4502303 ref NP_001688.1  | mitochondrial ATP synthase, O subunit; ATP synthase, H+ transporting, m |            |   | 8.97E-09 | 2.29 | 30.18 | 22.10 | 23277.2 |
| AHQ-9-11, 5214              | R.GEVPCTVTSASPLEEATLSELK.T                                              | 2320.55669 | 2 | 6.12E-04 | 0.78 | 3.41  | -     | 523.2   |
| AHQ-9-11, 3659              | K.LVRPPVQVYIEGR.Y                                                       | 1583.85942 | 2 | 9.02E-04 | 0.61 | 2.86  | -     | 286.7   |
| AHQ-9-11, 3334              | K.VAASVNLNPPYK.R                                                        | 1161.37549 | 2 | 8.97E-09 | 0.90 | 3.29  | -     | 802.3   |
| gi 5031973 ref NP_005733.1  | protein disulfide isomerase-related protein [Homo sapiens]              |            |   | 9.27E-09 | 2.58 | 30.17 | 9.50  | 48121.0 |
| AHQ-9-7, 4578 - 4652        | K.GSFSEQGINEFLR.E                                                       | 1484.59520 | 2 | 2.30E-06 | 0.82 | 3.04  | -     | 795.8   |
| AHQ-9-7, 4554               | K.LAAVDATVNOVLASR.Y                                                     | 1528.73579 | 2 | 6.07E-06 | 0.86 | 3.48  | -     | 869.8   |
| AHQ-9-7, 5673 - 5674        | R.TGEAIVDAALSALR.Q                                                      | 1387.58411 | 2 | 9.27E-09 | 0.90 | 3.12  | -     | 1524.3  |
| gi 5453740 ref NP_006462.1  | myosin regulatory light chain MRCL3; myosin, light polypeptide, regulat |            |   | 1.15E-08 | 5.43 | 60.29 | 27.50 | 19794.0 |
| AHQ-9-14-, 5171             | R.ATSNVFAM*FDQSQIEFK.E                                                  | 2108.31681 | 2 | 4.32E-06 | 0.97 | 5.15  | -     | 1393.3  |
| AHQ-9-14, 5831 - 5833       | R.ATSNVFAM*FDQSQIEFK.E                                                  | 2108.31681 | 2 | 1.42E-05 | 0.94 | 4.49  | -     | 1020.2  |
| AHQ-9-12, 5129              | R.ATSNVFAM*FDQSQIEFK.E                                                  | 2108.31681 | 2 | 1.12E-04 | 0.81 | 3.33  | -     | 496.9   |
| AHQ-9-11, 4994 - 5034       | R.ATSNVFAM*FDQSQIEFK.E                                                  | 2108.31681 | 2 | 3.39E-08 | 0.92 | 4.31  | -     | 778.8   |
| AHQ-9-11, 5069 - 5101       | R.ATSNVFAM*FDQSQIEFK.E                                                  | 2108.31681 | 2 | 1.15E-08 | 0.97 | 5.87  | -     | 1284.8  |
| AHQ-9-11, 5154 - 5211       | R.ATSNVFAM*FDQSQIEFK.E                                                  | 2108.31681 | 2 | 1.25E-04 | 0.90 | 4.15  | -     | 667.0   |
| AHQ-9-11, 5581 - 5650       | R.ATSNVFAM*FDQSQIEFK.E                                                  | 2092.31741 | 2 | 7.89E-05 | 0.97 | 5.08  | -     | 1496.7  |
| AHQ-9-13, 5306              | R.ATSNVFAM*FDQSQIEFK.E                                                  | 2108.31681 | 2 | 7.90E-08 | 0.94 | 4.60  | -     | 923.1   |
| AHQ-9-11, 4345              | R.DGFIDKEDLHDM*LASLGG.N                                                 | 2021.23746 | 2 | 6.08E-06 | 0.92 | 3.83  | -     | 1054.7  |
| AHQ-9-11, 5442 - 5463       | R.DGFIDKEDLHDM*LASLGG.N                                                 | 2005.23806 | 3 | 4.08E-06 | 0.88 | 3.67  | -     | 1242.2  |
| AHQ-9-14-, 4179             | K.GNFNIEFTR.I                                                           | 1261.36733 | 2 | 4.85E-05 | 0.80 | 3.43  | -     | 697.7   |
| AHQ-9-11, 4061              | K.GNFNIEFTR.I                                                           | 1261.36733 | 2 | 1.57E-04 | 0.88 | 3.95  | -     | 701.5   |



|                             |                                                                         |            |   |          |      |        |       |          |
|-----------------------------|-------------------------------------------------------------------------|------------|---|----------|------|--------|-------|----------|
| AHQ-9-11, 3594              | K.KGNFYIEFTR.I                                                          | 1389.54025 | 2 | 4.24E-08 | 0.88 | 2.67   | -     | 1073.0   |
| gi 4557361 ref NP_001187.1  | BH3 interacting domain death agonist; BH3-interacting domain death agon |            |   | 1.15E-08 | 0.96 | 10.18  | 6.70  | 21994.6  |
| AHQ-9-11, 2811              | R.IEADSESEQDIIR.N                                                       | 1505.56635 | 2 | 1.15E-08 | 0.96 | 3.63   | -     | 2091.2   |
| gi 5729877 ref NP_006588.1  | heat shock 70kDa protein 8 isoform 1; heat shock cognate protein, 71-kD |            |   | 1.19E-08 | 9.71 | 110.26 | 23.80 | 70897.6  |
| AHQ-9-7, 4268               | R.ARFEELNADLFR.G                                                        | 1481.63768 | 2 | 3.30E-08 | 0.97 | 5.23   | -     | 1408.1   |
| AHQ-9-6, 4293               | R.ARFEELNADLFR.G                                                        | 1481.63768 | 3 | 1.14E-04 | 0.92 | 3.93   | -     | 1239.0   |
| AHQ-9-6, 4242 - 4297        | R.ARFEELNADLFR.G                                                        | 1481.63768 | 2 | 3.84E-08 | 0.95 | 4.32   | -     | 1028.1   |
| AHQ-9-6, 4498 - 4505        | R.FEELNADLFR.G                                                          | 1254.37310 | 2 | 1.03E-06 | 0.93 | 3.79   | -     | 1166.8   |
| AHQ-9-7, 4477               | R.FEELNADLFR.G                                                          | 1254.37310 | 2 | 7.18E-06 | 0.85 | 3.36   | -     | 976.3    |
| AHQ-9-6, 4993               | K.GPAVGDIGLTTYSVCVGFQHGK.V                                              | 2265.53088 | 3 | 8.34E-06 | 0.88 | 4.28   | -     | 652.0    |
| AHQ-9-6, 3474               | K.HWPFM*VVNDAGRPK.V                                                     | 1670.91910 | 3 | 9.14E-05 | 0.84 | 3.23   | -     | 1159.0   |
| AHQ-9-6, 5287               | K.ILDKCNEINWLDK.N                                                       | 1776.04688 | 2 | 2.25E-04 | 0.94 | 3.78   | -     | 1212.8   |
| AHQ-9-6, 3265               | R.M*VNHFAIEFK.R                                                         | 1252.46696 | 2 | 1.87E-05 | 0.94 | 3.52   | -     | 1301.7   |
| AHQ-9-6, 3406               | K.NQVAMNPTNTVFDAK.R                                                     | 1650.83816 | 2 | 5.86E-04 | 0.65 | 2.73   | -     | 391.2    |
| AHQ-9-6, 2265               | R.RFDDAVQSDM*K.H                                                        | 1427.56543 | 2 | 5.59E-05 | 0.82 | 2.57   | -     | 737.9    |
| AHQ-9-6, 6125 - 6129        | K.SINPDEAVAYGAAVQAAIISGDK.S                                             | 2261.47411 | 2 | 1.19E-08 | 0.93 | 4.52   | -     | 802.7    |
| AHQ-9-6, 6126               | K.SINPDEAVAYGAAVQAAIISGDK.S                                             | 2261.47411 | 3 | 4.80E-04 | 0.79 | 3.07   | -     | 1072.9   |
| AHQ-9-6, 3157               | K.SQIHDIVLGGSTR.I                                                       | 1482.66712 | 2 | 2.79E-08 | 0.96 | 3.82   | -     | 1807.7   |
| AHQ-9-6, 4490 - 4569        | K.TVTNAVVTVPAYFNDSSQR.Q                                                 | 1983.17068 | 2 | 4.32E-04 | 0.50 | 2.90   | -     | 197.7    |
| AHQ-9-6, 4365 - 4421        | K.TVTNAVVTVPAYFNDSSQR.Q                                                 | 1983.17068 | 2 | 1.28E-05 | 0.85 | 4.00   | -     | 399.1    |
| gi 4504505 ref NP_000405.1  | hydroxysteroid (17-beta) dehydrogenase 4 [Homo sapiens]                 |            |   | 1.22E-08 | 0.98 | 10.22  | 1.80  | 79685.9  |
| AHQ-9-5, 3256               | R.VVLVTGAGAGLGR.A                                                       | 1170.38715 | 2 | 1.22E-08 | 0.98 | 4.49   | -     | 2185.8   |
| gi 4557032 ref NP_002291.1  | lactate dehydrogenase B [Homo sapiens]                                  |            |   | 1.24E-08 | 6.68 | 80.23  | 31.70 | 36638.3  |
| AHQ-9-9, 4232 - 4235        | K.FIIPQVYK.V                                                            | 958.22198  | 2 | 5.09E-04 | 0.77 | 2.92   | -     | 657.9    |
| AHQ-9-9, 4471               | K.GEMMDLQHGLSLFLTQPK.I                                                  | 1933.24171 | 2 | 4.26E-06 | 0.93 | 4.27   | -     | 986.0    |
| AHQ-9-9, 6090 - 6167        | K.GYTNWAIIGLSVADLIESM*LK.N                                              | 2198.52454 | 2 | 3.16E-06 | 0.92 | 4.62   | -     | 690.7    |
| AHQ-9-9, 2475               | K.IVVVTAGVR.Q                                                           | 914.12760  | 2 | 2.01E-04 | 0.81 | 2.93   | -     | 761.5    |
| AHQ-9-9, 3364 - 3367        | K.LIAPVAEEEEATVPNNK.I                                                   | 1695.89534 | 2 | 1.10E-04 | 0.65 | 2.74   | -     | 479.8    |
| AHQ-9-9, 3613               | K.MVVEAYEVIK.L                                                          | 1268.50463 | 2 | 1.24E-08 | 0.95 | 3.86   | -     | 1220.5   |
| AHQ-9-9, 3383 - 3445        | K.SADTLWDIQLD.K                                                         | 1177.28864 | 2 | 1.27E-04 | 0.69 | 3.06   | -     | 812.9    |
| AHQ-9-13, 6161              | K.SLADELALVDLEDK.L                                                      | 1630.81843 | 2 | 2.91E-06 | 0.96 | 3.97   | -     | 1649.2   |
| gi 29737978 ref XP_290747.1 | similar to Myosin heavy chain, nonmuscle type B (Cellular myosin heavy  |            |   | 1.25E-08 | 3.74 | 40.21  | 1.50  | 191380.7 |
| AHQ-9-3, 3878 - 3881        | K.ADFCIHYAGK.V                                                          | 1296.47641 | 2 | 5.51E-08 | 0.96 | 4.14   | -     | 1383.4   |
| AHQ-9-6, 3842               | K.ADFCIHYAGK.V                                                          | 1296.47641 | 2 | 9.56E-07 | 0.93 | 3.08   | -     | 1306.9   |
| AHQ-9-4, 3877               | K.ADFCIHYAGK.V                                                          | 1296.47641 | 2 | 1.36E-05 | 0.92 | 3.31   | -     | 1108.0   |
| AHQ-9-2, 3977               | K.ADFCIHYAGK.V                                                          | 1296.47641 | 2 | 5.75E-07 | 0.96 | 3.86   | -     | 1457.6   |
| AHQ-9-5, 3879               | K.ADFCIHYAGK.V                                                          | 1296.47641 | 2 | 3.83E-05 | 0.91 | 3.36   | -     | 981.2    |
| AHQ-9-3, 3088               | R.AGVLAAHLEER.D                                                         | 1224.34854 | 2 | 1.88E-06 | 0.95 | 4.22   | -     | 1555.1   |
| AHQ-9-2, 3142               | R.AGVLAAHLEER.D                                                         | 1224.34854 | 2 | 5.10E-06 | 0.94 | 3.95   | -     | 1455.1   |
| AHQ-9-4, 3058               | R.AGVLAAHLEER.D                                                         | 1224.34854 | 2 | 2.75E-06 | 0.95 | 4.14   | -     | 1401.1   |
| AHQ-9-5, 3068               | R.AGVLAAHLEER.D                                                         | 1224.34854 | 2 | 1.45E-06 | 0.96 | 4.14   | -     | 1725.9   |
| AHQ-9-6, 3059 - 3065        | R.AGVLAAHLEER.D                                                         | 1224.34854 | 2 | 2.58E-07 | 0.95 | 4.18   | -     | 1439.6   |
| AHQ-9-7, 3042               | R.AGVLAAHLEER.D                                                         | 1224.34854 | 2 | 6.50E-07 | 0.85 | 3.42   | -     | 877.0    |
| AHQ-9-2, 3777               | K.DKADFCIHYAGK.V                                                        | 1539.73719 | 3 | 1.25E-08 | 0.94 | 4.06   | -     | 1752.7   |
| AHQ-9-2, 3775               | K.DKADFCIHYAGK.V                                                        | 1539.73719 | 2 | 2.56E-07 | 0.95 | 3.70   | -     | 1530.7   |
| AHQ-9-2, 4603               | K.LDPLHLVDQLR.C                                                         | 1319.53460 | 2 | 8.82E-05 | 0.76 | 2.87   | -     | 594.8    |
| AHQ-9-2, 4613               | K.LDPLHLVDQLR.C                                                         | 1319.53460 | 3 | 8.52E-07 | 0.90 | 3.58   | -     | 920.1    |
| gi 4758304 ref NP_004902.1  | protein disulfide isomerase related protein (calcium-binding protein, i |            |   | 1.29E-08 | 2.29 | 30.18  | 5.70  | 72931.9  |
| AHQ-9-6, 3710               | K.FAM*PEEFSDTLR.E                                                       | 1703.80830 | 2 | 1.85E-04 | 0.46 | 2.58   | -     | 298.1    |
| AHQ-9-6, 2915 - 2921        | K.IDATSASVLRAS.F                                                        | 1191.31686 | 2 | 1.29E-08 | 0.93 | 3.53   | -     | 1353.3   |
| AHQ-9-6, 3403               | K.RFVDSGYPTLK.I                                                         | 1283.45758 | 2 | 2.80E-08 | 0.91 | 3.37   | -     | 921.3    |
| gi 24430192 ref NP_005548.2 | keratin 16; keratin, type I cytoskeletal 16; cytokeratin 16 [Homo sapi  |            |   | 1.32E-08 | 3.56 | 40.31  | 12.30 | 51267.5  |
| AHQ-9-7, 3897               | R.GQTGGDQVNVEMDAAPGVDLSR.I                                              | 2089.23032 | 2 | 3.84E-04 | 0.76 | 3.76   | -     | 594.6    |
| AHQ-9-1, 3636 - 3639        | R.GQTGGDQVNVEMDAAPGVDLSR.I                                              | 2105.22972 | 2 | 4.02E-05 | 0.89 | 4.31   | -     | 877.9    |
| AHQ-9-1, 5108 - 5111        | K.IIAATIENAQPIQLIDNAR.L                                                 | 2065.35950 | 3 | 2.73E-07 | 0.98 | 6.28   | -     | 2932.4   |
| AHQ-9-1, 5068 - 5110        | K.IIAATIENAQPIQLIDNAR.L                                                 | 2065.35950 | 2 | 9.17E-04 | 0.89 | 3.75   | -     | 840.9    |
| AHQ-9-1, 6379               | R.TDLEM*QIEGLKEELAYLR.K                                                 | 2168.45360 | 3 | 1.32E-08 | 0.93 | 4.67   | -     | 1088.3   |
| gi 4758984 ref NP_004654.1  | RAB11A, member RAS oncogene family; RAB 11A, member oncogene family [Ho |            |   | 1.36E-08 | 2.59 | 30.28  | 15.70 | 24393.3  |
| AHQ-9-10, 2818              | K.AQIWDTAGQER.Y                                                         | 1275.35241 | 2 | 2.96E-04 | 0.95 | 3.59   | -     | 1415.1   |
| AHQ-9-14, 4959              | R.GAVGALLVYDIAG.H                                                       | 1290.53317 | 2 | 1.36E-08 | 0.95 | 3.41   | -     | 1728.3   |
| AHQ-9-11, 4825 - 4837       | R.GAVGALLVYDIAG.H                                                       | 1290.53317 | 2 | 1.73E-07 | 0.98 | 5.61   | -     | 1857.0   |
| AHQ-9-10, 4798 - 4814       | R.GAVGALLVYDIAG.H                                                       | 1290.53317 | 2 | 2.15E-05 | 0.86 | 3.57   | -     | 887.4    |
| AHQ-9-11, 3142 - 3145       | K.STIGVEFATR.S                                                          | 1081.20410 | 2 | 3.66E-05 | 0.69 | 2.58   | -     | 576.8    |
| gi 4507677 ref NP_003290.1  | tumor rejection antigen (gp96) 1; Tumor rejection antigen-1 (gp96); glu |            |   | 1.42E-08 | 6.33 | 70.26  | 12.20 | 92468.2  |
| AHQ-9-4, 2496               | K.DISTNYASQK.K                                                          | 1290.36061 | 2 | 3.25E-05 | 0.90 | 3.50   | -     | 781.8    |
| AHQ-9-4, 3224               | K.FAFQAEVNR.M                                                           | 1082.19378 | 2 | 6.61E-06 | 0.90 | 3.16   | -     | 986.8    |
| AHQ-9-4, 3904               | R.FQSSHPTDITSLDQYVER.M                                                  | 2261.39276 | 3 | 1.01E-06 | 0.96 | 5.26   | -     | 1657.7   |
| AHQ-9-4, 3896               | K.GVVDSDDLLPLNVSR.E                                                     | 1486.60940 | 2 | 3.22E-04 | 0.93 | 4.04   | -     | 1135.8   |
| AHQ-9-6, 3853               | K.GVVDSDDLLPLNVSR.E                                                     | 1486.60940 | 2 | 8.24E-04 | 0.90 | 3.86   | -     | 913.1    |
| AHQ-9-4, 4733               | R.LISLTDENALSGNEELTVK.I                                                 | 2047.24975 | 2 | 3.90E-06 | 0.82 | 3.72   | -     | 598.4    |
| AHQ-9-5, 4036               | K.SILFVPTAPR.G                                                          | 1188.40094 | 2 | 4.14E-04 | 0.86 | 3.13   | -     | 960.8    |
| AHQ-9-5, 6165 - 6239        | K.YSQFINFPYVWSSK.T                                                      | 1880.13366 | 2 | 1.42E-08 | 0.97 | 4.81   | -     | 1485.8   |
| AHQ-9-4, 6228 - 6229        | K.YSQFINFPYVWSSK.T                                                      | 1880.13366 | 2 | 8.64E-07 | 0.93 | 4.41   | -     | 792.7    |
| gi 10716563 ref NP_001737.1 | calnexin [Homo sapiens]                                                 |            |   | 1.51E-08 | 3.55 | 40.22  | 10.10 | 67567.8  |
| AHQ-9-7, 4661               | K.APVPTGEVYFADSFDR.G                                                    | 1771.90722 | 2 | 4.14E-06 | 0.85 | 3.18   | -     | 849.7    |
| AHQ-9-5, 4731               | K.APVPTGEVYFADSFDR.G                                                    | 1771.90722 | 2 | 1.99E-07 | 0.93 | 3.57   | -     | 1372.6   |
| AHQ-9-6, 4615 - 4689        | K.APVPTGEVYFADSFDR.G                                                    | 1771.90722 | 2 | 1.30E-05 | 0.91 | 3.83   | -     | 988.9    |
| AHQ-9-5, 4353               | R.GTSLGWILSK.A                                                          | 1062.24392 | 2 | 2.29E-05 | 0.83 | 2.85   | -     | 883.7    |
| AHQ-9-5, 3865               | K.IPDPFAVKKPDDWDEDAK.I                                                  | 2109.23496 | 2 | 2.62E-05 | 0.93 | 4.40   | -     | 754.9    |
| AHQ-9-5, 5816               | R.KIPNPFDFEELPFPR.M                                                     | 1865.07739 | 2 | 1.51E-08 | 0.85 | 3.30   | -     | 584.6    |
| AHQ-9-5, 5804               | R.KIPNPFDFEELPFPR.M                                                     | 1865.07739 | 3 | 4.35E-06 | 0.93 | 4.29   | -     | 1706.0   |
| gi 7661818 ref NP_054900.1  | HSPC159 protein [Homo sapiens]                                          |            |   | 1.56E-08 | 1.69 | 20.23  | 19.20 | 19011.6  |
| AHQ-9-11, 6119              | R.GEEQSAIPYFPPIQPFR.V                                                   | 2239.47029 | 2 | 2.30E-06 | 0.75 | 3.55   | -     | 253.0    |
| AHQ-9-13, 6278              | R.GEEQSAIPYFPPIQPFR.V                                                   | 2239.47029 | 2 | 2.23E-04 | 0.24 | 2.53   | -     | 229.6    |
| AHQ-9-13, 6201              | R.GEEQSAIPYFPPIQPFR.V                                                   | 2239.47029 | 2 | 6.17E-04 | 0.80 | 3.30   | -     | 362.8    |
| AHQ-9-11, 4634 - 4641       | R.VFVDGHLQDFVYHR.I                                                      | 1780.96549 | 3 | 1.56E-08 | 0.94 | 4.67   | -     | 972.7    |
| gi 5902134 ref NP_009005.1  | coronin, actin binding protein, 1A; coronin, actin-binding, 1A; coronin |            |   | 1.61E-08 | 3.31 | 40.28  | 15.00 | 51026.0  |
| AHQ-9-7, 2694               | R.DGGLICTSCR.D                                                          | 1141.25805 | 2 | 3.31E-04 | 0.84 | 2.61   | -     | 894.2    |
| AHQ-9-7, 6164               | R.KSDLFQEDLYPPTAGPDPALTAIEWLGG.R                                        | 3175.44994 | 3 | 1.61E-08 | 0.94 | 5.65   | -     | 554.6    |
| AHQ-9-7, 2466 - 2544        | K.LQATVQELQR.R                                                          | 1158.33000 | 2 | 1.29E-04 | 0.80 | 3.25   | -     | 614.4    |
| AHQ-9-7, 6240               | R.YFEITSEAPFLHYLSM*FSSK.E                                               | 2414.71688 | 2 | 9.11E-08 | 0.72 | 2.81   | -     | 424.5    |
| gi 10863977 ref NP_067000.1 | LSM2 homolog, U6 small nuclear RNA associated; U6 snRNA-associated Sm-  |            |   | 1.74E-08 | 0.97 | 10.25  | 20.00 | 10834.5  |
| AHQ-9-14, 5149              | R.YVQLPADEVDTQLLQDAAR.K                                                 | 2146.34311 | 2 | 1.74E-08 | 0.97 | 5.01   | -     | 1503.2   |
| AHQ-9-14, 5803              | R.YVQLPADEVDTQLLQDAAR.K                                                 | 2146.34311 | 2 | 1.18E-07 | 0.87 | 3.37   | -     | 881.1    |
| gi 24797067 ref NP_002107.3 | major histocompatibility complex, class I, A precursor; HLA-A1 class I  |            |   | 1.83E-08 | 2.68 | 30.21  | 13.40 | 40840.5  |
| AHQ-9-8, 3374               | R.DGEDQTQDTELVELTRPAGDGFQK.W                                            | 2638.69666 | 3 | 8.88E-07 | 0.88 | 4.22   | -     | 788.8    |
| AHQ-9-12, 4714 - 4717       | R.FIAGVYVDDTQFVR.F                                                      | 1630.82504 | 2 | 4.34E-04 | 0.79 | 2.85   | -     | 931.4    |
| AHQ-9-8, 4759               | R.FIAGVYVDDTQFVR.F                                                      | 1630.82504 | 2 | 1.83E-08 | 0.97 | 4.26   | -     | 1887.6   |
| AHQ-9-5, 4789               | R.FIAGVYVDDTQFVR.F                                                      | 1630.82504 | 2 | 1.85E-05 | 0.91 | 3.55   | -     | 928.7    |
| AHQ-9-8, 2270               | R.YLENGKETLQR.T                                                         | 1351.49032 | 2 | 7.74E-04 | 0.83 | 2.85   | -     | 916.7    |
| gi 4757756 ref NP_004030.1  | annexin A2; annexin II; annexin II (lipocortin II); calpactin I, heavy  |            |   | 2.00E-08 | 9.14 | 110.25 | 36.30 | 38603.8  |
| AHQ-9-9, 4224 - 4231        | R.AEDGSVIDEYLDQDAR.D                                                    | 1909.98536 | 2 | 1.45E-06 | 0.89 | 3.85   | -     | 775.3    |
| AHQ-9-9, 4219               | K.ALLYLCGGDD                                                            | 1098.20835 | 1 | 1.20E-06 | 0.86 | 3.23   | -     | 737.5    |
| AHQ-9-9, 2963 - 3043        | K.LSLEGDHSTPPSAYGSVK.A                                                  | 1845.98764 | 2 | 7.10E-04 | 0.68 | 3.35   | -     | 389.3    |
| AHQ-9-9, 3911               | R.RAEDGSVIDEYLDQDAR.D                                                   | 2066.17172 |   |          |      |        |       |          |

|                             |                                                                         |            |   |          |       |        |       |          |
|-----------------------------|-------------------------------------------------------------------------|------------|---|----------|-------|--------|-------|----------|
| AHQ-9-9, 4993               | K.SYSPYDMLIESIR.K                                                       | 1461.62182 | 2 | 2.00E-08 | 0.90  | 3.24   | -     | 857.8    |
| AHQ-9-9, 4279               | K.TDLEKDISDTGGDFR.K                                                     | 1812.91282 | 2 | 1.98E-06 | 0.92  | 4.10   | -     | 958.9    |
| AHQ-9-9, 3952 - 3987        | K.TDLEKDISDTGGDFR.K.L                                                   | 1941.08573 | 2 | 5.33E-04 | 0.68  | 3.03   | -     | 728.0    |
| AHQ-9-9, 2235 - 2309        | R.TNQLQEIENR.V                                                          | 1245.32461 | 2 | 5.01E-05 | 0.85  | 3.44   | -     | 988.5    |
| AHQ-9-9, 2329               | K.TPAQYDASELK.A                                                         | 1223.31418 | 2 | 3.44E-04 | 0.53  | 2.68   | -     | 519.5    |
| gi 6681259 ref NP_031377.1  | multimerin [Homo sapiens]                                               |            |   | 2.03E-08 | 14.04 | 160.30 | 21.30 | 138070.8 |
| AHQ-9-3, 2457 - 2525        | R.AQEQQSLIHTNOAESHTAVGR.G                                               | 2306.43830 | 3 | 1.44E-06 | 0.95  | 5.23   | -     | 1296.4   |
| AHQ-9-3, 5726 - 5728        | K.CTSDM*ETILTFIPQFHR.L                                                  | 2114.38778 | 3 | 1.73E-05 | 0.81  | 3.60   | -     | 735.1    |
| AHQ-9-2, 3998               | R.DQALQLQVLSNR.F                                                        | 1385.55144 | 2 | 4.13E-08 | 0.97  | 4.14   | -     | 1878.6   |
| AHQ-9-4, 3890               | R.DQALQLQVLSNR.F                                                        | 1385.55144 | 2 | 6.05E-05 | 0.90  | 3.04   | -     | 1338.7   |
| AHQ-9-3, 3817 - 3882        | R.DQALQLQVLSNR.F                                                        | 1385.55144 | 2 | 9.53E-08 | 0.97  | 4.83   | -     | 1989.3   |
| AHQ-9-2, 5521               | K.FVLVQENRPTLTDIVELR.N                                                  | 2143.47187 | 3 | 1.18E-07 | 0.90  | 4.18   | -     | 820.9    |
| AHQ-9-3, 5373               | K.FVLVQENRPTLTDIVELR.N                                                  | 2143.47187 | 3 | 1.46E-04 | 0.52  | 3.26   | -     | 254.1    |
| AHQ-9-3, 5366 - 5386        | K.FVLVQENRPTLTDIVELR.N                                                  | 2143.47187 | 3 | 2.03E-08 | 0.94  | 4.43   | -     | 1268.3   |
| AHQ-9-6, 5357               | K.FVLVQENRPTLTDIVELR.N                                                  | 2143.47187 | 3 | 1.14E-04 | 0.85  | 3.85   | -     | 705.5    |
| AHQ-9-1, 5727               | K.GLTEFVPEIQIK.T                                                        | 1487.76518 | 2 | 2.93E-06 | 0.87  | 3.38   | -     | 963.0    |
| AHQ-9-3, 5545               | K.GLTEFVPEIQIK.T                                                        | 1487.76518 | 2 | 4.71E-04 | 0.86  | 3.19   | -     | 952.4    |
| AHQ-9-2, 5706 - 5711        | K.GLTEFVPEIQIK.T                                                        | 1487.76518 | 2 | 2.32E-04 | 0.86  | 3.78   | -     | 724.7    |
| AHQ-9-3, 2697               | K.GPCGWTTGGSCPQR.S                                                      | 1422.52885 | 2 | 1.32E-05 | 0.89  | 3.19   | -     | 893.8    |
| AHQ-9-3, 4036               | K.GSVVTNERDQALQLQVLSNR.F                                                | 2228.45212 | 3 | 8.89E-07 | 0.94  | 4.19   | -     | 1605.6   |
| AHQ-9-4, 2461               | R.GVAEQQQQQGGDPEVMQK.M                                                  | 2119.27971 | 2 | 1.44E-04 | 0.77  | 3.33   | -     | 429.6    |
| AHQ-9-3, 4776               | K.IFQNDM*QETVAQLFK.T                                                    | 1829.06683 | 2 | 8.24E-05 | 0.90  | 3.51   | -     | 1111.0   |
| AHQ-9-4, 4820               | K.IFQNDM*QETVAQLFK.T                                                    | 1829.06683 | 2 | 1.78E-04 | 0.91  | 4.11   | -     | 1002.0   |
| AHQ-9-3, 5113               | K.KIENLTSAVNSLNFIIK.E                                                   | 1905.22764 | 2 | 9.15E-08 | 0.91  | 3.52   | -     | 1041.9   |
| AHQ-9-3, 2944               | K.LKEVHEQLLSTEQVSDQK.N                                                  | 2112.32666 | 3 | 7.86E-07 | 0.97  | 5.43   | -     | 1214.0   |
| AHQ-9-3, 2946               | K.LKEVHEQLLSTEQVSDQK.N                                                  | 2112.32666 | 3 | 2.27E-05 | 0.98  | 5.93   | -     | 1640.6   |
| AHQ-9-2, 5390 - 5449        | K.LQNLTLPTNASIKFNPGAESVLSNSTLK.F                                        | 3058.47544 | 3 | 7.58E-04 | 0.60  | 3.40   | -     | 329.8    |
| AHQ-9-2, 3801               | K.LVEENALAPDFSK.G                                                       | 1433.58810 | 2 | 7.84E-05 | 0.90  | 3.17   | -     | 1067.2   |
| AHQ-9-4, 6298 - 6300        | K.M*SEQLNDLTYDM*EILQPLLEQGAASLR.Q                                       | 3041.40062 | 3 | 5.36E-07 | 0.90  | 4.72   | -     | 812.5    |
| AHQ-9-5, 3349 - 3420        | K.TVSSLEDLESTR.Q                                                        | 1424.49324 | 2 | 7.82E-04 | 0.50  | 2.77   | -     | 567.2    |
| AHQ-9-2, 3501               | K.TVSSLEDLESTR.Q                                                        | 1424.49324 | 2 | 2.77E-05 | 0.88  | 3.34   | -     | 1036.2   |
| AHQ-9-2, 4073               | R.YNFVLQVAK.T                                                           | 1082.27683 | 2 | 9.73E-06 | 0.91  | 2.84   | -     | 1038.6   |
| AHQ-9-3, 3952               | R.YNFVLQVAK.T                                                           | 1082.27683 | 2 | 1.65E-06 | 0.86  | 3.11   | -     | 633.5    |
| gi 4507521 ref NP_001055.1  | transketolase [Homo sapiens]                                            |            |   | 2.05E-08 | 1.88  | 20.24  | 5.00  | 67877.3  |
| AHQ-9-6, 4417               | K.ILATPPQEDAPSVDIANIR.M                                                 | 2021.26036 | 2 | 2.05E-08 | 0.95  | 4.72   | -     | 860.2    |
| AHQ-9-6, 5467               | K.LDNLVAILDIR.L                                                         | 1369.59192 | 2 | 5.26E-05 | 0.93  | 3.70   | -     | 1083.1   |
| gi 21361370 ref NP_002853.2 | phosphorylase, glycogen; brain [Homo sapiens]                           |            |   | 2.17E-08 | 2.29  | 30.19  | 4.60  | 96695.3  |
| AHQ-9-5, 3767               | R.GLAGLGDVAEVR.K                                                        | 1157.30210 | 2 | 1.43E-07 | 0.93  | 3.81   | -     | 1057.8   |
| AHQ-9-5, 5381               | K.IVNGWQVEEADDWLR.Y                                                     | 1830.97790 | 2 | 4.28E-04 | 0.62  | 2.78   | -     | 580.3    |
| AHQ-9-5, 5497               | K.LLLPVSDEFFIR.D                                                        | 1401.67552 | 2 | 2.17E-08 | 0.74  | 2.54   | -     | 463.3    |
| gi 27478749 ref XP_208411.1 | similar to L-lactate dehydrogenase A chain (LDH-A) (LDH muscle subunit  |            |   | 2.27E-08 | 0.92  | 10.22  | 6.10  | 25628.5  |
| AHQ-9-9, 4339 - 4340        | K.GEMMDLQHGSFLFR.L                                                      | 1634.90537 | 2 | 2.27E-08 | 0.92  | 4.37   | -     | 821.0    |
| gi 4505641 ref NP_002583.1  | proliferating cell nuclear antigen [Homo sapiens]                       |            |   | 2.78E-08 | 0.80  | 10.16  | 7.30  | 28768.6  |
| AHQ-9-9, 4697 - 4765        | R.AEDNADTLALVFAPNQEK.V                                                  | 2076.20651 | 2 | 2.78E-08 | 0.80  | 3.17   | -     | 755.3    |
| gi 4503971 ref NP_001484.1  | GDP dissociation inhibitor 1; mental retardation, X-linked 41; mental r |            |   | 3.15E-08 | 3.55  | 50.21  | 16.10 | 50582.4  |
| AHQ-9-7, 5206               | K.FLVFANFDENDPK.T                                                       | 1655.83136 | 2 | 1.67E-04 | 0.66  | 2.54   | -     | 776.6    |
| AHQ-9-7, 3702 - 3721        | R.FQLLEGPPESM*GR.G                                                      | 1477.66758 | 2 | 7.58E-04 | 0.70  | 3.13   | -     | 590.6    |
| AHQ-9-7, 2446               | R.KQNDVFGEAEQ                                                           | 1265.31115 | 2 | 9.56E-05 | 0.87  | 3.03   | -     | 1094.6   |
| AHQ-9-7, 4989               | R.NPYYGESSITPLEELYK.R                                                   | 2148.31110 | 2 | 3.15E-08 | 0.86  | 3.63   | -     | 685.8    |
| AHQ-9-7, 4064               | R.TDDYLDQPCLETVNR.I                                                     | 1840.94632 | 2 | 5.50E-04 | 0.45  | 2.69   | -     | 323.1    |
| gi 4503327 ref NP_000389.1  | cytochrome b5 reductase membrane-bound isoform; diaphorase (NADH) [Homo |            |   | 3.24E-08 | 0.94  | 20.14  | 12.30 | 34234.6  |
| AHQ-9-9, 5095               | R.APEAWDYGGQVNEEMIR.D                                                   | 2113.29517 | 2 | 2.91E-06 | 0.70  | 2.86   | -     | 763.5    |
| AHQ-9-9, 4667               | K.SVGMAGGTGITPM*LQVIR.A                                                 | 1918.31483 | 2 | 3.24E-08 | 0.24  | 2.59   | -     | 303.1    |
| gi 7657056 ref NP_055415.1  | EH-domain containing 3; EH domain containing 3 [Homo sapiens]           |            |   | 3.46E-08 | 1.77  | 20.20  | 4.10  | 60886.7  |
| AHQ-9-7, 2388               | K.ADQIETQLM*R.V                                                         | 1349.49621 | 2 | 3.44E-04 | 0.81  | 3.17   | -     | 847.8    |
| AHQ-9-7, 4608               | K.LFEAEQDLFR.D                                                          | 1397.51432 | 2 | 3.46E-08 | 0.96  | 3.98   | -     | 1909.9   |
| gi 21314617 ref NP_000433.2 | platelet/endothelial cell adhesion molecule (CD31 antigen); platelet/e  |            |   | 3.62E-08 | 4.56  | 60.21  | 11.00 | 82449.6  |
| AHQ-9-5, 5656               | R.DQNFVILEFPVEEQDR.V                                                    | 1979.13566 | 2 | 2.52E-05 | 0.62  | 3.11   | -     | 494.0    |
| AHQ-9-3, 5589               | R.DQNFVILEFPVEEQDR.V                                                    | 1979.13566 | 2 | 4.65E-06 | 0.38  | 2.74   | -     | 497.1    |
| AHQ-9-5, 3389 - 3449        | K.EDTIVSQDQFTK.I                                                        | 1512.60049 | 2 | 3.38E-04 | 0.53  | 2.79   | -     | 521.1    |
| AHQ-9-4, 4030 - 4033        | R.ISYDAQFEVIK.G                                                         | 1313.48046 | 2 | 3.62E-08 | 0.93  | 3.48   | -     | 1120.1   |
| AHQ-9-5, 4043 - 4044        | R.ISYDAQFEVIK.G                                                         | 1313.48046 | 2 | 3.37E-06 | 0.91  | 3.24   | -     | 1225.2   |
| AHQ-9-4, 3174 - 3245        | K.SDSGTICTAGIDK.V                                                       | 1489.58698 | 2 | 1.02E-05 | 0.96  | 4.25   | -     | 1636.1   |
| AHQ-9-4, 4016               | K.STESYFIPEVR.I                                                         | 1328.45199 | 2 | 4.21E-05 | 0.84  | 2.93   | -     | 760.5    |
| AHQ-9-4, 5169 - 5180        | K.VIAPVDEQVILSSK.V                                                      | 1698.98227 | 2 | 9.34E-06 | 0.92  | 4.13   | -     | 598.9    |
| gi 13518026 ref NP_004978.2 | LIM and senescent cell antigen-like domains 1 [Homo sapiens]            |            |   | 3.75E-08 | 1.64  | 20.20  | 7.70  | 37251.2  |
| AHQ-9-11, 4358              | K.CHAIDEQPLIFK.N                                                        | 1585.84900 | 2 | 1.01E-04 | 0.73  | 3.06   | -     | 715.5    |
| AHQ-9-11, 3473              | R.VIEGDVVSNLNK.A                                                        | 1244.41966 | 2 | 3.75E-08 | 0.91  | 3.38   | -     | 1000.0   |
| AHQ-9-13-, 3552 - 3616      | R.VIEGDVVSNLNK.A                                                        | 1244.41966 | 2 | 1.76E-07 | 0.92  | 3.21   | -     | 1255.3   |
| AHQ-9-8, 3443               | R.VIEGDVVSNLNK.A                                                        | 1244.41966 | 2 | 4.05E-06 | 0.90  | 3.67   | -     | 792.8    |
| gi 10835187 ref NP_000627.1 | superoxide dismutase 2, mitochondrial [Homo sapiens]                    |            |   | 3.89E-08 | 1.56  | 20.20  | 13.10 | 24733.0  |
| AHQ-9-11, 3739 - 3793       | K.GDVTAQIALQPAKF.F                                                      | 1425.65548 | 2 | 3.16E-06 | 0.91  | 3.99   | -     | 929.1    |
| AHQ-9-11, 3789 - 3855       | K.GDVTAQIALQPAKF.F                                                      | 1425.65548 | 2 | 1.08E-04 | 0.81  | 3.30   | -     | 931.9    |
| AHQ-9-11, 2530              | K.HHAAYVNNLNVTEEK.Y                                                     | 1739.86999 | 2 | 3.89E-08 | 0.64  | 2.76   | -     | 482.7    |
| gi 5902128 ref NP_008880.1  | syntaxin binding protein 2; Hunc18b [Homo sapiens]                      |            |   | 4.00E-08 | 9.59  | 110.24 | 29.80 | 66438.1  |
| AHQ-9-6, 6298               | R.AADPVSPLLHLELTFQAM*AYDLLDIEQDQTYR.Y                                   | 3453.81998 | 3 | 9.76E-04 | 0.91  | 4.38   | -     | 962.1    |
| AHQ-9-6, 5757 - 5777        | K.AAHIFFTDTCPEPLFSELGR.S                                                | 2310.57011 | 3 | 3.81E-06 | 0.91  | 4.69   | -     | 842.8    |
| AHQ-9-6, 5955               | R.EPIPSLEAIYLLSPTK.S                                                    | 1901.18939 | 2 | 5.49E-04 | 0.88  | 3.50   | -     | 699.5    |
| AHQ-9-6, 3367               | R.KGPEDTAQLAHAVLAK.L                                                    | 1649.87303 | 3 | 3.49E-05 | 0.81  | 3.48   | -     | 947.7    |
| AHQ-9-6, 3549 - 3618        | K.LCSVEQDLAM*GSDAEGEK.I                                                 | 1957.08386 | 2 | 4.00E-08 | 0.90  | 3.60   | -     | 1052.0   |
| AHQ-9-6, 6235               | K.M*SDILAEGITIVEDINKR.R                                                 | 2034.32082 | 3 | 8.49E-07 | 0.82  | 3.55   | -     | 786.9    |
| AHQ-9-6, 6247               | K.MSDILAEGITIVEDINKR.R                                                  | 2018.32142 | 3 | 5.56E-04 | 0.78  | 3.52   | -     | 1192.7   |
| AHQ-9-6, 3245 - 3246        | R.NLEQLGGTVTNPGGSGTSSR.L                                                | 1933.02693 | 2 | 9.26E-07 | 0.94  | 4.87   | -     | 656.9    |
| AHQ-9-6, 5127               | R.NLWPFVSDPAPTASSQAASVARS.F                                             | 2273.48981 | 2 | 8.21E-06 | 0.77  | 3.47   | -     | 388.2    |
| AHQ-9-6, 5570               | R.REPIPSLEAIYLLSPTK.S                                                   | 2057.37574 | 2 | 5.88E-07 | 0.94  | 4.81   | -     | 982.8    |
| AHQ-9-6, 5562 - 5563        | R.REPIPSLEAIYLLSPTK.S                                                   | 2057.37574 | 3 | 1.14E-05 | 0.61  | 3.11   | -     | 674.8    |
| AHQ-9-6, 4647               | K.WEVLIGSSHILTPTR.F                                                     | 1709.97007 | 2 | 5.73E-06 | 0.95  | 4.10   | -     | 1286.9   |
| gi 6598323 ref NP_001485.2  | GDP dissociation inhibitor 2; rab GDP-dissociation inhibitor, beta [Hom |            |   | 4.07E-08 | 2.68  | 30.27  | 11.90 | 50662.9  |
| AHQ-9-8, 5079               | R.NPYYGESASITPLEDLYK.R                                                  | 2118.28499 | 2 | 4.07E-08 | 0.91  | 3.70   | -     | 1112.6   |
| AHQ-9-8, 6220               | K.SPYYLPLYGLGELPQGFAR.L                                                 | 2142.44089 | 2 | 2.38E-05 | 0.95  | 4.70   | -     | 876.0    |
| AHQ-9-7, 6125 - 6128        | K.SPYYLPLYGLGELPQGFAR.L                                                 | 2142.44089 | 2 | 3.80E-05 | 0.97  | 5.33   | -     | 1044.4   |
| AHQ-9-8, 3947 - 3948        | R.TDDYLDQPCYETINR.I                                                     | 1904.98887 | 2 | 1.05E-04 | 0.82  | 3.89   | -     | 363.8    |
| gi 4826657 ref NP_004333.1  | caldesmon 1 isoform 3; H-CAD; L-CAD [Homo sapiens]                      |            |   | 4.55E-08 | 3.15  | 40.23  | 12.30 | 62662.9  |
| AHQ-9-6, 4643               | K.EFDPTITDASLSLPSR.R                                                    | 1749.89986 | 2 | 1.42E-05 | 0.93  | 4.36   | -     | 941.4    |
| AHQ-9-6, 2878               | K.SAKPTKPAASDLVPAEAVR.N                                                 | 1992.26539 | 3 | 1.61E-04 | 0.78  | 3.30   | -     | 952.8    |
| AHQ-9-6, 3669               | K.TTTTNTQVEGDDEAAFLER.L                                                 | 2099.15534 | 2 | 4.55E-08 | 0.96  | 4.68   | -     | 1373.3   |
| AHQ-9-6, 2749               | R.YEIEETETVTK.S                                                         | 1342.43060 | 2 | 6.37E-05 | 0.48  | 2.97   | -     | 492.0    |
| gi 4502905 ref NP_001822.1  | clusterin; complement-associated protein SP-40 [Homo sapiens]           |            |   | 4.88E-08 | 1.55  | 20.19  | 8.70  | 52494.3  |
| AHQ-9-9, 2872               | R.EILSVCSTNNPSQAK.L                                                     | 1764.89299 | 2 | 4.88E-08 | 0.73  | 3.18   | -     | 697.8    |
| AHQ-9-9, 3347               | R.VTTVAHTSDSDVPSGVTEVVVK.L                                              | 2315.52008 | 2 | 1.27E-04 | 0.82  | 3.86   | -     | 449.7    |
| gi 7661678 ref NP_056461.1  | RAP1B, member of RAS oncogene family; K-REV; RAS-related protein RAP1B  |            |   | 4.90E-08 | 3.14  | 40.26  | 19.00 | 20824.7  |
| AHQ-9-11, 3909 - 3967       | R.QWNNCAFLESSAK.S                                                       | 1556.68148 | 2 | 4.82E-06 | 0.48  | 2.89   | -     | 237.6    |
| AHQ-9-11, 4075 - 4129       | R.QWNNCAFLESSAK.S                                                       | 1556.68148 | 2 | 1.16E-04 | 0.33  | 2.72   | -     | 209.5    |
| AHQ-9-11, 3765              | R.VKDTDVPMILVGNK.C                                                      | 1644.91497 | 2 | 4.25E-06 | 0.96  | 4.43   | -     | 1615.3   |
| AHQ-9-13-, 3426 - 3484      | R.VKDTDVPMILVGNK.C                                                      | 1660.91437 | 2 | 7.15E-04 | 0.77  | 2.56   | -     | 880.6    |
| AHQ-9-11, 3706 - 3766       | R.VKDTDVPMILVGNK.C                                                      | 1644.91497 | 3 | 2.23E-07 | 0.93  | 3.86   | -     | 1645.7   |
| AHQ-9-13, 4232              | R.VKDTDVPMILVGNKCDEDER.V                                                | 2579.84360 | 3 | 3.62E-04 | 0.90  | 3.76   | -     | 1124.2   |

|                             |                                                                         |            |   |          |      |       |       |          |
|-----------------------------|-------------------------------------------------------------------------|------------|---|----------|------|-------|-------|----------|
| AHQ-9-11, 4013 - 4074       | R.VKDSTDVPM*ILVGNKCDELEDER.V                                            | 2579.84360 | 3 | 4.90E-08 | 0.96 | 5.24  | -     | 2073.5   |
| AHQ-9-13-, 4092 - 4153      | R.VKDSTDVPM*ILVGNKCDELEDER.V                                            | 2579.84360 | 3 | 2.78E-05 | 0.88 | 4.10  | -     | 1131.3   |
| AHQ-9-11, 4130 - 4191       | R.VKDSTDVPM*ILVGNKCDELEDER.V                                            | 2579.84360 | 3 | 3.08E-05 | 0.90 | 4.35  | -     | 977.8    |
| gi 4504517 ref NP_001531.1  | heat shock 27kDa protein 1; heat shock 27kD protein 1 [Homo sapiens] [M |            |   | 5.08E-08 | 1.38 | 20.24 | 13.20 | 22782.3  |
| AHQ-9-13-, 4598 - 4664      | K.LATQSNIEIPIYTFESR.A                                                   | 1907.11412 | 2 | 7.58E-04 | 0.42 | 2.64  | -     | 287.4    |
| AHQ-9-11, 4425              | R.LFDQAFGLPRL.L                                                         | 1164.33793 | 2 | 4.19E-06 | 0.86 | 3.01  | -     | 1124.4   |
| AHQ-9-10, 4390              | R.LFDQAFGLPRL.L                                                         | 1164.33793 | 2 | 5.08E-08 | 0.96 | 3.62  | -     | 1737.4   |
| gi 15723376 ref NP_277050.1 | MacGAP protein [Homo sapiens]                                           |            |   | 5.42E-08 | 0.90 | 10.17 | 2.10  | 70163.1  |
| AHQ-9-5, 3315               | R.FLSQESVAQLTK.K                                                        | 1408.58178 | 2 | 5.42E-08 | 0.90 | 3.46  | -     | 1084.2   |
| gi 16950601 ref NP_005956.2 | myosin light chain kinase isoform 6; myosin light chain kinase [Homo s  |            |   | 5.48E-08 | 1.85 | 20.17 | 2.10  | 110074.8 |
| AHQ-9-5, 3571               | K.LVQCQVDAFEK.A                                                         | 1339.49637 | 2 | 2.42E-04 | 0.93 | 3.29  | -     | 1255.8   |
| AHQ-9-6, 3490               | K.VSDFYDIEER.L                                                          | 1273.33005 | 2 | 1.31E-06 | 0.79 | 2.52  | -     | 907.4    |
| AHQ-9-5, 3516               | K.VSDFYDIEER.L                                                          | 1273.33005 | 2 | 5.48E-08 | 0.92 | 3.38  | -     | 1040.2   |
| gi 4557731 ref NP_000618.1  | latent transforming growth factor beta binding protein 1 precursor [Hom |            |   | 5.58E-08 | 4.40 | 50.21 | 6.50  | 152790.9 |
| AHQ-9-3, 3550               | R.ASGLGDHCEDINECLEDK.S                                                  | 2065.13910 | 2 | 5.48E-04 | 0.95 | 4.20  | -     | 1441.3   |
| AHQ-9-2, 3647 - 3718        | R.ASGLGDHCEDINECLEDK.S                                                  | 2065.13910 | 2 | 4.00E-05 | 0.91 | 4.04  | -     | 1164.4   |
| AHQ-9-2, 3257               | K.EAQPQQSQVSYQGLPVQK.T                                                  | 1945.12244 | 2 | 2.96E-04 | 0.86 | 3.15  | -     | 755.1    |
| AHQ-9-1, 5554               | K.IFGFDPDTFSSCVPDPVISEEKGPCYR.L                                         | 3112.43550 | 3 | 2.03E-04 | 0.84 | 3.90  | -     | 481.6    |
| AHQ-9-1, 2906               | R.TSTDLDVVDVQPKKEE.K                                                    | 1819.90213 | 2 | 6.78E-06 | 0.83 | 3.06  | -     | 913.9    |
| AHQ-9-3, 2737               | R.TSTDLDVVDVQPKKEE.K                                                    | 1819.90213 | 2 | 1.29E-05 | 0.89 | 3.67  | -     | 1064.1   |
| AHQ-9-4, 2722               | R.TSTDLDVVDVQPKKEE.K                                                    | 1819.90213 | 2 | 2.19E-07 | 0.83 | 3.22  | -     | 911.2    |
| AHQ-9-2, 2793               | R.TSTDLDVVDVQPKKEE.K                                                    | 1819.90213 | 2 | 1.52E-04 | 0.92 | 3.72  | -     | 1364.9   |
| AHQ-9-6, 2705               | R.TSTDLDVVDVQPKKEE.K                                                    | 1819.90213 | 2 | 5.58E-08 | 0.89 | 3.11  | -     | 1241.9   |
| AHQ-9-2, 3558               | R.YTCICYEGYR.F                                                          | 1387.51964 | 2 | 3.89E-04 | 0.90 | 2.94  | -     | 818.9    |
| gi 20149594 ref NP_031381.2 | heat shock 90kDa protein 1, beta; heat shock 90kD protein 1, beta; Hea  |            |   | 5.61E-08 | 6.07 | 70.25 | 10.60 | 83263.6  |
| AHQ-9-5, 2524 - 2528        | K.EDQTEYLEER.R                                                          | 1312.32145 | 2 | 2.26E-04 | 0.80 | 3.01  | -     | 659.4    |
| AHQ-9-4, 3134               | R.ELISNASDALD.K.I                                                       | 1276.37539 | 2 | 9.50E-04 | 0.83 | 3.50  | -     | 506.5    |
| AHQ-9-11, 4149              | R.GVVDSEDLPLNISR.E                                                      | 1514.66275 | 2 | 3.70E-04 | 0.72 | 2.61  | -     | 696.7    |
| AHQ-9-5, 3979               | R.NPDDITQEEYGEFYK.S                                                     | 1848.90048 | 2 | 5.68E-08 | 0.98 | 4.97  | -     | 1836.3   |
| AHQ-9-5, 3952               | K.SLTNDWEDHLAVK.H                                                       | 1528.64798 | 2 | 2.96E-06 | 0.88 | 3.54  | -     | 871.2    |
| AHQ-9-5, 4148               | R.TLTLVDTGIGMTK.A                                                       | 1350.60718 | 2 | 5.61E-08 | 0.93 | 3.23  | -     | 1244.6   |
| AHQ-9-5, 3709               | R.TLTLVDTGIGMTK.A                                                       | 1350.60658 | 2 | 2.65E-06 | 0.93 | 3.51  | -     | 1191.3   |
| gi 5453595 ref NP_006358.1  | adenylyl cyclase-associated protein [Homo sapiens]                      |            |   | 5.79E-08 | 6.49 | 80.32 | 25.10 | 51672.7  |
| AHQ-9-7, 2832               | R.ALLVTASQCQQAENK.L                                                     | 1759.96271 | 2 | 9.00E-05 | 0.91 | 3.72  | -     | 940.9    |
| AHQ-9-7, 5822 - 5877        | R.ALLVTASQCQQAENK.LSDLLAPISEQK.E                                        | 3168.60826 | 3 | 9.58E-05 | 0.88 | 4.31  | -     | 863.4    |
| AHQ-9-7, 6404               | K.LGLVFDVVGVIEINSK.D                                                    | 1931.26186 | 2 | 1.00E-06 | 0.98 | 6.42  | -     | 1685.8   |
| AHQ-9-7, 4756 - 4830        | K.LSDLLAPISEQK.E                                                        | 1427.66814 | 2 | 4.64E-04 | 0.87 | 3.52  | -     | 767.7    |
| AHQ-9-7, 3361               | K.NSLDCEIVSAK.S                                                         | 1237.36245 | 2 | 5.25E-05 | 0.89 | 3.33  | -     | 1020.0   |
| AHQ-9-7, 3081               | K.NSLDCEIVSAK.S                                                         | 1237.36245 | 2 | 4.58E-07 | 0.88 | 3.47  | -     | 785.8    |
| AHQ-9-14-, 3186             | K.NSLDCEIVSAK.S                                                         | 1237.36245 | 2 | 5.51E-04 | 0.83 | 2.71  | -     | 982.7    |
| AHQ-9-7, 4321               | R.SALFAQINQGESITHALK.H                                                  | 1929.16615 | 2 | 6.51E-04 | 0.79 | 3.67  | -     | 421.6    |
| AHQ-9-7, 4574               | R.SALFAQINQGESITHALK.H                                                  | 1929.16615 | 2 | 7.14E-06 | 0.68 | 3.68  | -     | 279.3    |
| AHQ-9-7, 5716               | K.SSEM*NVLIPTGGDFNEFPVPEQFK.T                                           | 2829.08749 | 2 | 4.07E-05 | 0.35 | 2.73  | -     | 135.2    |
| AHQ-9-7, 4052               | R.VENQENVSLVIEDTELK.Q                                                   | 2074.23206 | 2 | 1.59E-07 | 0.73 | 3.20  | -     | 539.2    |
| AHQ-9-8, 4548               | R.VENQENVSLVIEDTELK.Q                                                   | 2074.23206 | 2 | 4.39E-04 | 0.90 | 3.86  | -     | 726.3    |
| AHQ-9-12, 4528              | R.VENQENVSLVIEDTELK.Q                                                   | 2074.23206 | 2 | 1.58E-04 | 0.77 | 3.69  | -     | 428.6    |
| AHQ-9-7, 4620 - 4678        | R.VENQENVSLVIEDTELK.Q                                                   | 2074.23206 | 2 | 5.79E-08 | 0.94 | 4.71  | -     | 938.2    |
| AHQ-9-7, 4494 - 4548        | R.VENQENVSLVIEDTELK.Q                                                   | 2074.23206 | 2 | 2.24E-07 | 0.96 | 5.13  | -     | 1186.4   |
| gi 4507231 ref NP_003134.1  | single-stranded DNA binding protein; single-stranded DNA-binding prot   |            |   | 6.86E-08 | 1.85 | 20.20 | 22.30 | 17259.5  |
| AHQ-9-13-, 5676             | R.QATTIADNIIFLSDQTK.E                                                   | 1993.24692 | 2 | 1.22E-06 | 0.92 | 4.00  | -     | 807.1    |
| AHQ-9-13-, 3238 - 3262      | R.SGDSEVYQLGDVYSQK.T                                                    | 1612.67692 | 2 | 6.86E-08 | 0.93 | 3.99  | -     | 1105.4   |
| AHQ-9-13, 3426 - 3436       | R.SGDSEVYQLGDVYSQK.T                                                    | 1612.67692 | 2 | 2.47E-07 | 0.85 | 3.88  | -     | 584.8    |
| gi 4504515 ref NP_002146.1  | heat shock 70kDa protein 6 (HSP70B); heat shock 70kD protein 6 (HSP70B  |            |   | 6.90E-08 | 3.62 | 40.20 | 8.60  | 70854.3  |
| AHQ-9-6, 2529               | K.ATAGDTHLGGEDFDR.L                                                     | 1676.68279 | 2 | 3.88E-04 | 0.85 | 3.59  | -     | 677.9    |
| AHQ-9-6, 4769 - 4773        | R.FEELCSDLFR.S                                                          | 1317.44926 | 2 | 6.90E-08 | 0.92 | 3.42  | -     | 1155.1   |
| AHQ-9-6, 4657               | R.IINEPTAAAIYGLDR.R                                                     | 1688.90603 | 3 | 4.90E-06 | 0.93 | 4.04  | -     | 1680.8   |
| AHQ-9-6, 4646               | R.IINEPTAAAIYGLDR.R                                                     | 1688.90603 | 2 | 9.17E-06 | 0.92 | 3.61  | -     | 1257.2   |
| AHQ-9-6, 4246               | K.LLLQDFNFKELNK.S                                                       | 1566.78249 | 2 | 1.36E-05 | 0.93 | 4.05  | -     | 1395.2   |
| gi 10835143 ref NP_000565.1 | decay accelerating factor for complement (CD55, Cromer blood group sys  |            |   | 7.63E-08 | 0.71 | 10.15 | 5.00  | 41399.9  |
| AHQ-9-5, 4583               | R.EIYCPAPPQIDNGIIGER.D                                                  | 2172.40385 | 2 | 7.63E-08 | 0.71 | 2.93  | -     | 654.8    |
| gi 6857820 ref NP_005019.2  | phosphatidylinositol-4-phosphate 5-kinase type II alpha; 1-phosphatidyl |            |   | 7.68E-08 | 0.79 | 10.16 | 3.40  | 46224.3  |
| AHQ-9-7, 4348               | R.FGIDDDQDFQNSLTR.S                                                     | 1656.73462 | 2 | 1.08E-05 | 0.79 | 3.26  | -     | 766.5    |
| AHQ-9-7, 4149               | R.FGIDDDQDFQNSLTR.S                                                     | 1656.73462 | 2 | 7.68E-08 | 0.79 | 3.27  | -     | 834.2    |
| gi 4758756 ref NP_004528.1  | nucleosome assembly protein 1-like 1; HSP22-like protein interacting pr |            |   | 7.73E-08 | 0.73 | 10.19 | 2.80  | 45373.8  |
| AHQ-9-7, 6248               | K.GIPEFWLTVFK.N                                                         | 1337.58999 | 2 | 7.73E-08 | 0.73 | 2.75  | -     | 254.3    |
| gi 30150354 ref XP_301830.1 | similar to Heterogeneous nuclear ribonucleoprotein A1 (Helix-destabili  |            |   | 8.00E-08 | 1.91 | 20.27 | 6.50  | 29305.3  |
| AHQ-9-9, 4840 - 4851        | R.KLFIGGLSFETTDESRL.S                                                   | 1914.14826 | 2 | 9.21E-05 | 0.93 | 4.05  | -     | 1189.3   |
| AHQ-9-9, 5243 - 5324        | K.LFIGGLSFETTDESRL.S                                                    | 1785.97534 | 2 | 8.00E-08 | 0.97 | 5.48  | -     | 1682.7   |
| gi 14211923 ref NP_115982.1 | PKCI-1-related HIT protein [Homo sapiens]                               |            |   | 8.27E-08 | 1.67 | 20.18 | 22.70 | 17161.6  |
| AHQ-9-13-, 5797             | R.ISQAEEDQQLLGHLLVAK.Q                                                  | 2235.52293 | 3 | 8.27E-08 | 0.78 | 3.02  | -     | 925.6    |
| AHQ-9-13-, 5752             | K.SLPADILYEDQQCLVFR.D                                                   | 2069.32354 | 2 | 3.97E-05 | 0.89 | 3.62  | -     | 891.9    |
| gi 30147105 ref XP_210550.2 | similar to Chain , Aldose Reductase (E.C.1.1.1.21) Mutant With Tyr 48   |            |   | 8.41E-08 | 0.94 | 10.21 | 2.20  | 61339.9  |
| AHQ-9-5, 4108               | K.ADLINNLGTIAK.S                                                        | 1243.43490 | 2 | 1.61E-07 | 0.94 | 4.20  | -     | 1035.9   |
| AHQ-9-5, 4457               | K.ADLINNLGTIAK.S                                                        | 1243.43490 | 2 | 8.41E-08 | 0.94 | 3.89  | -     | 933.6    |
| AHQ-9-5, 3887               | K.ADLINNLGTIAK.S                                                        | 1243.43490 | 2 | 2.38E-06 | 0.77 | 3.47  | -     | 461.9    |
| gi 30157216 ref XP_292133.2 | similar to genethonin 1 [Homo sapiens]                                  |            |   | 8.80E-08 | 0.81 | 10.17 | 4.50  | 39693.8  |
| AHQ-9-13, 4442              | K.TITLEVKPSDTIENVK.A                                                    | 1788.03268 | 2 | 3.62E-05 | 0.76 | 2.80  | -     | 669.1    |
| AHQ-9-14, 5139 - 5151       | K.TITLEVKPSDTIENVK.A                                                    | 1788.03268 | 2 | 8.80E-08 | 0.81 | 3.47  | -     | 472.3    |
| AHQ-9-3, 4285 - 4357        | K.TITLEVKPSDTIENVK.A                                                    | 1788.03268 | 2 | 4.92E-04 | 0.23 | 2.54  | -     | 202.2    |
| gi 30154095 ref XP_293967.2 | similar to gamma actin-like protein [Homo sapiens]                      |            |   | 8.88E-08 | 0.37 | 10.18 | 12.20 | 19259.0  |
| AHQ-9-7, 4625               | K.DLYTSTVLSSGGTMYPGIADR.M                                               | 2235.45690 | 2 | 3.85E-04 | 0.32 | 2.71  | -     | 349.6    |
| AHQ-9-8, 4663               | K.DLYTSTVLSSGGTMYPGIADR.M                                               | 2235.45690 | 2 | 1.26E-05 | 0.40 | 2.96  | -     | 329.6    |
| AHQ-9-9, 4476               | K.DLYTSTVLSSGGTMYPGIADR.M                                               | 2235.45690 | 2 | 1.44E-04 | 0.34 | 2.83  | -     | 327.1    |
| AHQ-9-11, 4583              | K.DLYTSTVLSSGGTMYPGIADR.M                                               | 2235.45690 | 2 | 2.46E-04 | 0.31 | 2.59  | -     | 312.8    |
| AHQ-9-12, 4581 - 4645       | K.DLYTSTVLSSGGTMYPGIADR.M                                               | 2235.45690 | 2 | 4.67E-05 | 0.43 | 2.88  | -     | 317.1    |
| AHQ-9-13, 4687              | K.DLYTSTVLSSGGTMYPGIADR.M                                               | 2235.45690 | 2 | 8.88E-08 | 0.37 | 2.80  | -     | 384.3    |
| AHQ-9-13, 4814              | K.DLYTSTVLSSGGTMYPGIADR.M                                               | 2235.45690 | 2 | 2.72E-04 | 0.30 | 2.84  | -     | 303.6    |
| AHQ-9-14-, 4534             | K.DLYTSTVLSSGGTMYPGIADR.M                                               | 2235.45690 | 2 | 1.50E-05 | 0.75 | 3.61  | -     | 593.7    |
| AHQ-9-14-, 4619 - 4674      | K.DLYTSTVLSSGGTMYPGIADR.M                                               | 2235.45690 | 2 | 2.61E-06 | 0.67 | 3.50  | -     | 384.3    |
| gi 4506723 ref NP_000997.1  | ribosomal protein S3a; 40S ribosomal protein S3a; v-fos transformation  |            |   | 9.15E-08 | 1.58 | 20.18 | 10.20 | 29944.7  |
| AHQ-9-9, 4335 - 4336        | K.ACQSIPLHDFVYR.K                                                       | 1706.94633 | 2 | 1.05E-05 | 0.82 | 3.51  | -     | 539.2    |
| AHQ-9-9, 3928               | K.NCLNTFNHGMDLTR.D                                                      | 1580.77122 | 2 | 9.15E-08 | 0.75 | 2.81  | -     | 850.6    |
| gi 30154839 ref XP_301540.1 | similar to keratin 8; cytokeratin 8; keratin, type II cytoskeletal 8 [  |            |   | 9.41E-08 | 0.92 | 10.18 | 3.40  | 39331.0  |
| AHQ-9-4, 4316               | K.SLNNKFASFDK.V                                                         | 1384.56191 | 2 | 3.24E-04 | 0.74 | 2.74  | -     | 694.3    |
| AHQ-9-4, 4526               | K.SLNNKFASFDK.V                                                         | 1384.56191 | 2 | 5.36E-06 | 0.87 | 3.56  | -     | 751.7    |
| AHQ-9-7, 4361 - 4422        | K.SLNNKFASFDK.V                                                         | 1384.56191 | 2 | 9.41E-08 | 0.92 | 3.55  | -     | 1083.4   |
| AHQ-9-9, 4284 - 4285        | K.SLNNKFASFDK.V                                                         | 1384.56191 | 1 | 3.52E-04 | 0.32 | 2.54  | -     | 338.2    |
| AHQ-9-13, 4688              | K.SLNNKFASFDK.V                                                         | 1384.56191 | 2 | 6.97E-04 | 0.67 | 2.63  | -     | 620.5    |
| AHQ-9-1, 4654 - 4720        | K.SLNNKFASFDK.V                                                         | 1384.56191 | 2 | 1.91E-07 | 0.79 | 3.17  | -     | 536.3    |
| gi 4557675 ref NP_000201.1  | integrin alpha chain, alpha 6 [Homo sapiens]                            |            |   | 9.45E-08 | 3.12 | 40.21 | 5.60  | 119509.5 |
| AHQ-9-10, 4367 - 4373       | R.AFIDVTAANENIR.L                                                       | 1391.55445 | 2 | 5.04E-06 | 0.84 | 2.81  | -     | 1056.0   |
| AHQ-9-6, 3341               | K.FGSCQQGVAATFK.D                                                       | 1503.66172 | 2 | 9.45E-08 | 0.74 | 2.63  | -     | 907.4    |
| AHQ-9-3, 4969               | K.LIATFPDLTYSAYR.E                                                      | 1732.95727 | 2 | 4.48E-04 | 0.61 | 2.71  | -     | 364.0    |
| AHQ-9-3, 4129               | K.LRPIPIASVEIQESSR.R                                                    | 1994.28128 | 2 | 8.35E-04 | 0.93 | 4.1   |       |          |

|                            |                                                                            |            |   |          |      |        |       |          |
|----------------------------|----------------------------------------------------------------------------|------------|---|----------|------|--------|-------|----------|
| AHQ-9-13, 4002 - 4014      | K.TAFQEALDAAGDK.L                                                          | 1337.41728 | 2 | 3.28E-07 | 0.90 | 2.94   | -     | 1350.4   |
| gj5803227[ref]NP_006817.1  | 1] tyrosine 3/tryptophan 5 - monoxygenase activation protein, theta polype |            |   | 1.06E-07 | 0.89 | 10.18  | 5.70  | 27764.1  |
| AHQ-9-10, 2295             | K.AVTEQGAELSNERR.N                                                         | 1533.57979 | 2 | 1.06E-07 | 0.89 | 3.00   | -     | 1275.6   |
| gj4502693[ref]NP_001760.1  | 1] CD9 antigen; motility related protein; leukocyte antigen MIC3; antigen  |            |   | 1.12E-07 | 1.65 | 20.17  | 10.10 | 25415.9  |
| AHQ-9-14-, 3581            | K.KDVLLETFTVYK.S                                                           | 1180.37558 | 2 | 6.59E-04 | 0.67 | 2.81   | -     | 614.4    |
| AHQ-9-11, 3425             | K.KDVLLETFTVYK.S                                                           | 1180.37558 | 2 | 2.25E-05 | 0.86 | 3.42   | -     | 811.6    |
| AHQ-9-11, 3753             | K.KCPDAIKVEVDNKF.F                                                         | 1524.67770 | 2 | 1.12E-07 | 0.79 | 2.64   | -     | 876.4    |
| gj30159310[ref]XP_301899.1 | 1] similar to beta-actin [Homo sapiens]                                    |            |   | 1.13E-07 | 1.99 | 30.17  | 9.60  | 32376.4  |
| AHQ-9-8, 1698 - 1754       | K.KDSYVNEAQSK.R                                                            | 1198.22158 | 2 | 1.77E-05 | 0.59 | 2.76   | -     | 595.4    |
| AHQ-9-8, 1672 - 1954       | K.KDSYVNEAQSK.R                                                            | 1198.22158 | 1 | 1.13E-07 | 0.73 | 2.78   | -     | 468.9    |
| AHQ-9-8, 1836 - 1854       | K.KDSYVNEAQSK.R                                                            | 1354.40793 | 2 | 7.25E-06 | 0.75 | 2.75   | -     | 749.6    |
| AHQ-9-12, 4328 - 4385      | K.KSYKLLDGQVITIGNER.F                                                      | 1807.04092 | 2 | 1.71E-05 | 0.51 | 2.90   | -     | 489.0    |
| AHQ-9-8, 4380 - 4395       | K.KSYKLLDGQVITIGNER.F                                                      | 1807.04092 | 2 | 1.62E-04 | 0.77 | 3.41   | -     | 769.9    |
| gj19557677[ref]NP_002108.3 | 3] major histocompatibility complex, class I, C precursor; HLA class I hi  |            |   | 1.20E-07 | 1.55 | 20.18  | 7.90  | 40994.6  |
| AHQ-9-8, 4955              | R.AYLEGTCVWEVL.R                                                           | 1498.68507 | 2 | 1.20E-07 | 0.69 | 2.64   | -     | 806.6    |
| AHQ-9-8, 3316              | R.YTCHVQHEGLPEPLTLR.W                                                      | 2052.29944 | 3 | 5.67E-06 | 0.86 | 3.61   | -     | 891.9    |
| gj11321601[ref]NP_002618.1 | 1] phosphofruktokinase, platelet; Phosphofruktokinase, platelet type [Hom  |            |   | 1.25E-07 | 1.67 | 20.19  | 4.20  | 85595.6  |
| AHQ-9-5, 5527              | K.EIGWTDVGGWVGQGGSLGTR.R                                                   | 2120.30735 | 2 | 3.24E-05 | 0.91 | 3.77   | -     | 781.4    |
| AHQ-9-5, 3869              | K.ELVTVQLGVDYTR.V                                                          | 1394.55511 | 2 | 1.25E-07 | 0.76 | 2.65   | -     | 511.3    |
| gj21614499[ref]NP_003370.2 | 2] villin 2; Villin-2; cytovillin [Homo sapiens]                           |            |   | 1.26E-07 | 1.49 | 20.22  | 1.90  | 69412.3  |
| AHQ-9-6, 4241              | K.KAPDFVYAPR.L                                                             | 1183.33971 | 2 | 1.26E-07 | 0.96 | 4.46   | -     | 1082.8   |
| AHQ-9-6, 3814              | K.KAPDFVYAPR.L                                                             | 1311.51262 | 2 | 1.26E-04 | 0.53 | 2.51   | -     | 543.7    |
| gj4505839[ref]NP_002645.1  | 1] pyruvate kinase, muscle; Pyruvate kinase-3; Thyroid hormone-binding pro |            |   | 1.33E-07 | 9.54 | 110.31 | 29.80 | 57913.6  |
| AHQ-9-7, 4601 - 4602       | K.DPVQEAWEADVDLR.V                                                         | 1643.73585 | 2 | 3.37E-04 | 0.56 | 2.87   | -     | 620.9    |
| AHQ-9-7, 5492              | R.EAEAAYHLQLFELER.L                                                        | 1933.15326 | 2 | 3.24E-06 | 0.91 | 3.83   | -     | 931.7    |
| AHQ-9-7, 6280 - 6292       | K.FGVEQDQVDMVFASFIR.K                                                      | 1877.10995 | 2 | 2.63E-06 | 0.94 | 4.59   | -     | 978.3    |
| AHQ-9-7, 6282              | K.FGVEQDQVDMVFASFIR.K                                                      | 1877.10995 | 3 | 4.69E-07 | 0.97 | 5.07   | -     | 1736.5   |
| AHQ-9-7, 4820 - 4833       | K.GADFLVTEVENGSSLSGSK.K                                                    | 1780.91396 | 2 | 7.74E-06 | 0.77 | 3.17   | -     | 739.3    |
| AHQ-9-7, 4304 - 4365       | K.GADFLVTEVENGSSLSGSK.K                                                    | 1780.91396 | 2 | 4.57E-06 | 0.93 | 3.88   | -     | 1316.2   |
| AHQ-9-7, 4493 - 4573       | K.GADFLVTEVENGSSLSGSK.K                                                    | 1780.91396 | 2 | 4.31E-05 | 0.91 | 3.83   | -     | 1086.6   |
| AHQ-9-7, 4020              | K.KGVNLPAAVADLPVASEK.D                                                     | 1766.03194 | 3 | 2.25E-05 | 0.94 | 4.60   | -     | 1464.3   |
| AHQ-9-7, 4017 - 4024       | K.KGVNLPAAVADLPVASEK.D                                                     | 1766.03194 | 2 | 5.62E-05 | 0.97 | 6.12   | -     | 1206.7   |
| AHQ-9-7, 5336 - 5392       | R.LAPITSDPTEATAVGAVEASF.K                                                  | 2176.40912 | 2 | 1.33E-07 | 0.95 | 4.75   | -     | 904.8    |
| AHQ-9-7, 5342 - 5348       | R.LAPITSDPTEATAVGAVEASF.K                                                  | 2176.40912 | 3 | 5.80E-04 | 0.93 | 4.85   | -     | 1085.5   |
| AHQ-9-7, 5084 - 5144       | R.LAPITSDPTEATAVGAVEASF.K                                                  | 2176.40912 | 2 | 5.03E-05 | 0.93 | 4.34   | -     | 764.0    |
| AHQ-9-7, 3360 - 3376       | R.LDIDSPPITAR.N                                                            | 1198.35099 | 2 | 4.84E-07 | 0.95 | 3.91   | -     | 1391.7   |
| AHQ-9-7, 3380              | R.NTGICTIGPASR.S                                                           | 1361.54994 | 2 | 1.93E-06 | 0.93 | 3.95   | -     | 1128.3   |
| AHQ-9-6, 3405              | R.NTGICTIGPASR.S                                                           | 1361.54994 | 2 | 6.78E-06 | 0.84 | 3.08   | -     | 1046.1   |
| AHQ-9-7, 4345              | R.RFDELEASDGMVAR.G                                                         | 1839.06325 | 3 | 3.12E-07 | 0.97 | 5.16   | -     | 2020.7   |
| AHQ-9-7, 3996              | R.TATESFASDPILYR.P                                                         | 1571.71277 | 2 | 2.27E-04 | 0.57 | 2.66   | -     | 456.0    |
| AHQ-9-7, 5328 - 5384       | R.TATESFASDPILYRPAVALDTK.G                                                 | 2466.77140 | 3 | 5.15E-04 | 0.85 | 3.93   | -     | 844.5    |
| gj4557871[ref]NP_001054.1  | 1] transferrin [Homo sapiens]                                              |            |   | 1.46E-07 | 3.26 | 40.21  | 7.90  | 77049.5  |
| AHQ-9-5, 4475              | K.DLLFRDDTVCLAK.L                                                          | 1567.78885 | 2 | 3.95E-04 | 0.84 | 3.27   | -     | 864.4    |
| AHQ-9-5, 4003              | R.FDEFFSEGCAPGSK.K                                                         | 1579.66868 | 2 | 8.36E-06 | 0.92 | 3.61   | -     | 1128.1   |
| AHQ-9-5, 3357 - 3416       | K.IECVSAETTEDCIAK.I                                                        | 1728.87748 | 2 | 7.82E-04 | 0.73 | 2.62   | -     | 539.9    |
| AHQ-9-5, 3204              | R.LKCDWEWSVNSVGK.I                                                         | 1523.69293 | 2 | 1.46E-07 | 0.77 | 3.29   | -     | 576.0    |
| gj22059949[ref]XP_114617.2 | 2] similar to tubulin, beta 5 [Homo sapiens]                               |            |   | 1.48E-07 | 1.84 | 20.28  | 18.80 | 22810.8  |
| AHQ-9-7, 5016              | K.FWEVSDHEHIDPTGTYHGDSDLQLDR.I                                             | 3104.24553 | 3 | 1.48E-07 | 0.95 | 5.52   | -     | 1546.5   |
| AHQ-9-7, 2788 - 2864       | R.ISVYYNEATGGK.Y                                                           | 1302.41453 | 2 | 5.32E-06 | 0.89 | 3.46   | -     | 797.2    |
| gj5729887[ref]NP_006624.1  | 1] IQ motif containing GTPase activating protein 2 [Homo sapiens]          |            |   | 1.50E-07 | 2.72 | 30.24  | 3.20  | 180611.0 |
| AHQ-9-4, 4554              | K.LPYDVTTEQALTYPEVK.N                                                      | 1968.19269 | 2 | 1.50E-07 | 0.96 | 4.11   | -     | 2025.9   |
| AHQ-9-3, 4533              | K.LPYDVTTEQALTYPEVK.N                                                      | 1968.19269 | 2 | 4.06E-05 | 0.97 | 4.81   | -     | 1748.0   |
| AHQ-9-4, 4029              | K.VDQVQDQVGTGNPTVIK.M                                                      | 1726.95257 | 2 | 4.18E-04 | 0.83 | 3.22   | -     | 791.5    |
| AHQ-9-3, 5350              | R.VVAVGVINAEIDGNPLR.T                                                      | 1930.15092 | 2 | 5.80E-05 | 0.92 | 4.08   | -     | 1179.5   |
| gj4507725[ref]NP_000362.1  | 1] transthyretin (prealbumin, amyloidosis type I); Transthyretin (prealbum |            |   | 1.52E-07 | 4.27 | 50.31  | 64.60 | 15886.9  |
| AHQ-9-13-, 3792 - 3793     | K.AADDTWEPFASGK.T                                                          | 1395.45529 | 2 | 1.57E-07 | 0.94 | 4.42   | -     | 839.5    |
| AHQ-9-13-, 4449            | K.ALGISPFHEHAEEVFTANDSGPR.R                                                | 2452.66660 | 3 | 2.56E-04 | 0.79 | 3.42   | -     | 1064.8   |
| AHQ-9-13-, 4036 - 4109     | R.GSPAINVAHVFR.K                                                           | 1367.58095 | 2 | 1.52E-07 | 0.87 | 3.52   | -     | 825.9    |
| AHQ-9-13, 4198 - 4278      | R.GSPAINVAHVFR.K                                                           | 1367.58095 | 2 | 7.59E-04 | 0.62 | 2.58   | -     | 559.5    |
| AHQ-9-13-, 5558            | R.RYTIALLSPYSYSTAVVTNPKE                                                   | 2646.97608 | 3 | 9.88E-04 | 0.69 | 3.48   | -     | 515.0    |
| AHQ-9-13-, 5260            | K.TSESELHGLLTTEEFVEGIYK.V                                                  | 2456.60073 | 3 | 2.96E-07 | 0.98 | 6.22   | -     | 2122.4   |
| gj21070997[ref]NP_003147.2 | 2] stromal interaction molecule 1 precursor [Homo sapiens]                 |            |   | 1.52E-07 | 0.94 | 10.17  | 1.50  | 77422.9  |
| AHQ-9-6, 2894 - 2901       | K.YAEELLEQVR.E                                                             | 1266.33905 | 2 | 1.52E-07 | 0.94 | 3.50   | -     | 1556.6   |
| gj4502491[ref]NP_001203.1  | 1] complement component 1, q subcomponent binding protein precursor; hylau |            |   | 1.62E-07 | 1.83 | 20.20  | 12.10 | 31362.0  |
| AHQ-9-9, 4975              | K.AFVDFLSDEIKER.K                                                          | 1698.85455 | 3 | 1.08E-06 | 0.82 | 3.27   | -     | 638.2    |
| AHQ-9-9, 4961 - 4967       | K.AFVDFLSDEIKER.K                                                          | 1698.85455 | 2 | 1.62E-07 | 0.91 | 3.33   | -     | 1266.3   |
| AHQ-9-9, 5271              | K.VEEQEPELSTPNFVVEVIK.N                                                    | 2288.53624 | 2 | 2.44E-05 | 0.92 | 3.91   | -     | 838.0    |
| gj30160191[ref]XP_294035.2 | 2] similar to Pyruvate kinase, M1 isozyme (Pyruvate kinase muscle isozyme  |            |   | 1.67E-07 | 0.96 | 10.23  | 2.80  | 50222.2  |
| AHQ-9-7, 4812              | K.IYVDDGLISLQVK.Q                                                          | 1463.70048 | 2 | 1.67E-07 | 0.96 | 4.54   | -     | 1487.7   |
| gj27498332[ref]XP_212565.1 | 1] similar to tubulin, beta 5 [Homo sapiens]                               |            |   | 1.67E-07 | 3.18 | 40.22  | 6.50  | 49670.5  |
| AHQ-9-7, 3730 - 3793       | R.IMNTFSVVPSPK.V                                                           | 1320.58277 | 2 | 1.83E-05 | 0.96 | 3.85   | -     | 2022.6   |
| AHQ-9-8, 3367              | R.IMNTFSVVPSPK.V                                                           | 1336.58217 | 2 | 1.11E-05 | 0.89 | 3.26   | -     | 1044.8   |
| AHQ-9-7, 3282 - 3362       | R.IMNTFSVVPSPK.V                                                           | 1336.58217 | 2 | 6.73E-06 | 0.42 | 2.82   | -     | 513.9    |
| AHQ-9-7, 6078              | K.M*AVTFIGNSTAIQELFK.R                                                     | 1887.18942 | 2 | 8.49E-05 | 0.92 | 4.09   | -     | 828.9    |
| AHQ-9-7, 5850              | K.M*AVTFIGNSTAIQELFK.R                                                     | 1887.18942 | 2 | 9.26E-07 | 0.92 | 4.23   | -     | 832.7    |
| AHQ-9-12, 6010 - 6086      | K.M*AVTFIGNSTAIQELFK.R                                                     | 1887.18942 | 2 | 6.46E-07 | 0.84 | 3.51   | -     | 621.8    |
| AHQ-9-8, 5940              | K.M*AVTFIGNSTAIQELFK.R                                                     | 1887.18942 | 2 | 7.52E-06 | 0.86 | 3.30   | -     | 669.9    |
| AHQ-9-13-, 6138            | K.M*AVTFIGNSTAIQELFK.R                                                     | 1887.18942 | 2 | 1.67E-07 | 0.94 | 3.98   | -     | 988.3    |
| AHQ-9-7, 4312              | R.YLTVAAVFR.G                                                              | 1040.23994 | 2 | 1.24E-04 | 0.86 | 2.72   | -     | 852.2    |
| gj11968045[ref]NP_071934.1 | 1] hypothetical protein FLJ22056 [Homo sapiens]                            |            |   | 1.78E-07 | 0.87 | 10.19  | 9.50  | 36010.3  |
| AHQ-9-11, 3665             | R.GARPPAAGPGGDEDEEDTAPESALDLSLK.S                                          | 3214.22226 | 3 | 1.78E-07 | 0.87 | 3.84   | -     | 799.6    |
| gj23503239[ref]NP_699160.1 | 1] hypothetical protein MGC10204 [Homo sapiens]                            |            |   | 1.97E-07 | 0.71 | 10.17  | 2.00  | 85113.0  |
| AHQ-9-5, 4039              | R.AWDQEAEGAGPELGLR.V                                                       | 1699.80263 | 2 | 1.97E-07 | 0.71 | 3.32   | -     | 813.7    |
| gj25453472[ref]NP_001951.2 | 2] eukaryotic translation elongation factor 1 delta isoform 2; guanine nu  |            |   | 2.01E-07 | 4.16 | 50.20  | 26.70 | 31121.6  |
| AHQ-9-9, 2881              | R.FYEQMNGPVGASR.Q                                                          | 1527.68672 | 2 | 5.38E-04 | 0.60 | 2.60   | -     | 402.4    |
| AHQ-9-9, 4604              | R.GVVQELQQAISK.L                                                           | 1300.48645 | 2 | 2.01E-07 | 0.94 | 3.78   | -     | 1237.8   |
| AHQ-9-9, 3067              | R.IASLVEVNSLR.G                                                            | 1359.51076 | 2 | 1.26E-05 | 0.87 | 3.03   | -     | 972.4    |
| AHQ-9-9, 4675 - 4705       | R.SIQLDGLVWVASK.L                                                          | 1374.56703 | 2 | 4.35E-05 | 0.92 | 3.63   | -     | 1081.8   |
| AHQ-9-9, 2653 - 2659       | K.SLAGSSGPGASGTSGDHGLVVR.I                                                 | 2186.28259 | 2 | 8.77E-05 | 0.82 | 3.92   | -     | 594.7    |
| gj4557801[ref]NP_000261.1  | 1] purine nucleoside phosphorylase [Homo sapiens]                          |            |   | 2.01E-07 | 3.18 | 40.23  | 16.30 | 32147.7  |
| AHQ-9-9, 3769              | K.HRPQVAICGSLGLLTK.L                                                       | 1981.26589 | 3 | 8.41E-04 | 0.96 | 4.50   | -     | 2247.4   |
| AHQ-9-9, 4509              | K.LGADAVGMSTVPEVIVAR.H                                                     | 1786.08666 | 2 | 3.58E-05 | 0.40 | 2.50   | -     | 414.4    |
| AHQ-9-13-, 4090 - 4118     | K.LGADAVGM*STVPEVIVAR.H                                                    | 1802.08606 | 2 | 6.33E-05 | 0.53 | 2.67   | -     | 436.7    |
| AHQ-9-13, 4276             | K.LGADAVGM*STVPEVIVAR.H                                                    | 1802.08606 | 2 | 2.33E-05 | 0.89 | 3.90   | -     | 606.7    |
| AHQ-9-9, 3919              | K.LGADAVGM*STVPEVIVAR.H                                                    | 1802.08606 | 2 | 9.83E-06 | 0.95 | 4.21   | -     | 1126.6   |
| AHQ-9-9, 4607              | R.VFGFSLTNK.V                                                              | 1126.32960 | 2 | 2.01E-07 | 0.88 | 3.07   | -     | 667.1    |
| gj7705296[ref]NP_057271.1  | 1] bridging integrator 2; bridging integrator-2; breast cancer associated  |            |   | 2.11E-07 | 2.80 | 40.18  | 12.10 | 61746.8  |
| AHQ-9-7, 5566              | K.AIVWNNLLWEDYEEK.L                                                        | 2038.20157 | 2 | 7.47E-05 | 0.78 | 3.18   | -     | 558.0    |
| AHQ-9-5, 5648              | K.AIVWNNLLWEDYEEK.L                                                        | 2038.20157 | 2 | 2.11E-07 | 0.84 | 3.64   | -     | 659.0    |
| AHQ-9-7, 2882              | R.FEQSASNFYQQAEGHK.L                                                       | 2000.07352 | 3 | 1.39E-05 | 0.70 | 3.13   | -     | 584.8    |
| AHQ-9-6, 6077              | R.IGCVYTFIQNISLNR.D                                                        | 1800.07167 | 2 | 2.21E-04 | 0.70 | 3.19   | -     | 524.1    |
| AHQ-9-5, 6163              | R.IGCVYTFIQNISLNR.D                                                        | 1800.07167 | 2 | 3.61E-06 | 0.82 | 3.50   | -     | 595.9    |
| AHQ-9-7, 4060              | R.TATVSSPLTSPSTSLSK.S                                                      | 1976.21467 | 2 | 7.22E-06 | 0.44 | 2.80   | -     | 409.0    |
| gj15431310[ref]NP_000517.2 | 2] keratin 14; cytokeratin 14 [Homo sapiens]                               |            |   | 2.24E-07 | 4.25 | 50.23  | 13.30 | 51621.2  |
| AHQ-9-5, 2908              | R.ALEEANADLEVK.I                                                           | 1302.41284 | 2 | 5.91E-05 | 0.77 | 2.62   | -     | 873.1    |
| AHQ-9-1, 3090              | R.ALEEANADLEVK.I                                                           | 1302.41284 | 2 | 1.46E-06 | 0.95 | 4.09   | -     | 1520.6   |
| AHQ-9-3, 2652              | R.APSTYGGGLSVSSSR.F                                                        | 1426.51406 | 2 | 2.41E-06 | 0.92 | 3.16   | -     | 1110.1   |

|                             |                                                                           |            |   |          |      |       |       |          |
|-----------------------------|---------------------------------------------------------------------------|------------|---|----------|------|-------|-------|----------|
| AHQ-9-7, 2742 - 2758        | K.ASLENSLEETK.G                                                           | 1221.29659 | 2 | 2.19E-05 | 0.60 | 2.88  | -     | 487.2    |
| AHQ-9-1, 3859               | R.GQVGGDVNVEM*DAAPGVDLRS.I                                                | 2103.25697 | 2 | 1.74E-05 | 0.89 | 4.56  | -     | 346.7    |
| AHQ-9-2, 5329               | K.ILTATVDNANVLLQIDNAR.L                                                   | 2055.32148 | 2 | 1.47E-04 | 0.78 | 3.12  | -     | 892.8    |
| AHQ-9-1, 5356               | K.ILTATVDNANVLLQIDNAR.L                                                   | 2055.32148 | 2 | 2.24E-07 | 0.89 | 3.73  | -     | 1012.1   |
| AHQ-9-1, 5354               | K.ILTATVDNANVLLQIDNAR.L                                                   | 2055.32148 | 3 | 9.05E-05 | 0.95 | 4.53  | -     | 1973.9   |
| gi 30149555 ref XP_301154.1 | similar to heat shock protein 86 [Homo sapiens]                           |            |   | 2.37E-07 | 0.90 | 10.22 | 10.60 | 15781.6  |
| AHQ-9-5, 5548 - 5555        | K.HSQFIFYPTLFVEKE                                                         | 1780.05877 | 3 | 2.37E-07 | 0.90 | 4.20  | -     | 866.2    |
| gi 5453599 ref NP_006127.1  | capping protein (actin filament) muscle Z-line, alpha 2; F-actin capping  |            |   | 2.40E-07 | 0.64 | 10.13 | 5.20  | 32948.9  |
| AHQ-9-9, 4863 - 4864        | K.FTITPSTQVVGLK.I                                                         | 1605.90007 | 2 | 2.40E-07 | 0.64 | 2.62  | -     | 393.0    |
| gi 5453603 ref NP_006422.1  | chaperonin containing TCP1, subunit 2 (beta); chaperonin containing t-c   |            |   | 2.48E-07 | 1.62 | 20.17 | 6.40  | 57487.9  |
| AHQ-9-7, 3180               | R.EALLSSAVDHGSDVEK.F                                                      | 1657.76083 | 2 | 2.48E-07 | 0.84 | 3.32  | -     | 885.9    |
| AHQ-9-7, 5630 - 5644        | K.LGGLSLADSYLDEGFLDK.K                                                    | 1914.10189 | 2 | 7.15E-04 | 0.78 | 3.07  | -     | 678.2    |
| gi 4504557 ref NP_000864.1  | intercellular adhesion molecule 2 precursor [Homo sapiens]                |            |   | 2.62E-07 | 0.92 | 10.21 | 5.80  | 30653.1  |
| AHQ-9-7, 6348 - 6413        | R.VPTVEPLDSLTLFLFR.G                                                      | 1848.17455 | 2 | 2.62E-07 | 0.92 | 4.20  | -     | 593.9    |
| gi 20539300 ref XP_088391.4 | similar to tropomyosin 4 [Homo sapiens]                                   |            |   | 2.94E-07 | 1.89 | 20.20 | 6.90  | 18592.1  |
| AHQ-9-9, 3477               | R.KLVILEGELER.A                                                           | 1299.54160 | 3 | 1.26E-04 | 0.85 | 3.19  | -     | 1118.2   |
| AHQ-9-9, 3467 - 3523        | R.KLVILEGELER.A                                                           | 1299.54160 | 2 | 5.82E-06 | 0.95 | 3.95  | -     | 1444.4   |
| AHQ-9-9, 3793               | K.LVILEGELER.A                                                            | 1171.36868 | 2 | 2.94E-07 | 0.94 | 3.58  | -     | 1518.2   |
| gi 9845255 ref NP_000574.1  | group-specific component (vitamin D binding protein); hDBP [Homo sapiens] |            |   | 3.01E-07 | 0.88 | 10.17 | 4.60  | 53049.5  |
| AHQ-9-6, 6394               | K.VPTADELVPLAEDITNLSK.C                                                   | 2367.67804 | 3 | 3.01E-07 | 0.88 | 3.48  | -     | 982.5    |
| gi 4557385 ref NP_000055.1  | complement component 3 precursor; acylation-stimulating protein cleavag   |            |   | 3.06E-07 | 1.87 | 20.25 | 2.30  | 187162.3 |
| AHQ-9-6, 5534               | K.EYVLPSPFVIVPETEK.F                                                      | 1880.12704 | 2 | 7.59E-05 | 0.90 | 3.58  | -     | 790.5    |
| AHQ-9-6, 4353               | R.VPVAVQGEDTVQSLTQGDGVAK.L                                                | 2199.04032 | 2 | 3.06E-07 | 0.97 | 4.94  | -     | 1488.8   |
| gi 4503531 ref NP_001958.1  | eukaryotic translation initiation factor 4A, isoform 2 [Homo sapiens] [   |            |   | 3.09E-07 | 1.58 | 20.18 | 7.40  | 46393.9  |
| AHQ-9-8, 3610               | R.GIYAFGEFKPSAIQQR.A                                                      | 1829.04828 | 2 | 3.09E-07 | 0.88 | 3.69  | -     | 689.2    |
| AHQ-9-8, 2858               | K.GYDVIAQAQSGTGK.T                                                        | 1395.49966 | 2 | 3.35E-05 | 0.70 | 2.57  | -     | 888.2    |
| gi 30147623 ref XP_293669.2 | similar to actinin, alpha 4 [Homo sapiens]                                |            |   | 3.34E-07 | 0.93 | 10.23 | 3.50  | 57794.4  |
| AHQ-9-4, 3949 - 3962        | K.LSGSNPYYTVPQIINSK.W                                                     | 1921.14079 | 2 | 3.34E-07 | 0.93 | 4.55  | -     | 988.7    |
| gi 4885183 ref NP_005210.1  | diaphanous 1; deafness, autosomal dominant 1; hDia1 [Homo sapiens] [MAS   |            |   | 3.51E-07 | 0.77 | 10.16 | 1.00  | 138977.7 |
| AHQ-9-3, 5461               | K.TAQNLSIFLGSFR.M                                                         | 1454.65537 | 2 | 3.51E-07 | 0.77 | 3.16  | -     | 636.4    |
| gi 10834976 ref NP_000572.1 | glutathione peroxidase 1 [Homo sapiens]                                   |            |   | 3.54E-07 | 1.57 | 20.20 | 14.90 | 21909.0  |
| AHQ-9-11, 5153 - 5155       | K.CEVNGAGAHPFAFLR.E                                                       | 1760.99723 | 2 | 3.54E-07 | 0.87 | 3.54  | -     | 780.6    |
| AHQ-9-11, 3826              | R.PLAGEPEVPLGSLR.G                                                        | 1353.54935 | 2 | 7.36E-04 | 0.70 | 3.07  | -     | 712.1    |
| gi 29742827 ref XP_294099.1 | similar to myosin:SUBUNIT=regulatory light chain [Homo sapiens]           |            |   | 3.58E-07 | 1.65 | 20.20 | 14.20 | 17094.0  |
| AHQ-9-11, 3013              | K.EAFNMIDQNR.D                                                            | 1238.35558 | 2 | 1.54E-04 | 0.73 | 2.80  | -     | 618.8    |
| AHQ-9-11, 3542              | R.FTDEEVDELYR.E                                                           | 1416.47127 | 2 | 3.89E-06 | 0.93 | 3.07  | -     | 1357.9   |
| AHQ-9-11, 3721              | R.FTDEEVDELYR.E                                                           | 1416.47127 | 2 | 1.61E-06 | 0.96 | 3.85  | -     | 1602.1   |
| AHQ-9-11, 3735              | R.FTDEEVDELYR.E                                                           | 1416.47127 | 1 | 5.37E-05 | 0.50 | 2.39  | -     | 427.3    |
| AHQ-9-12, 3765 - 3776       | R.FTDEEVDELYR.E                                                           | 1416.47127 | 2 | 1.02E-05 | 0.96 | 3.85  | -     | 1623.9   |
| AHQ-9-13, 3986              | R.FTDEEVDELYR.E                                                           | 1416.47127 | 2 | 3.02E-06 | 0.85 | 2.68  | -     | 1078.0   |
| AHQ-9-14, 4715 - 4721       | R.FTDEEVDELYR.E                                                           | 1416.47127 | 2 | 1.21E-05 | 0.95 | 3.99  | -     | 1472.9   |
| AHQ-9-13-, 3834 - 3904      | R.FTDEEVDELYR.E                                                           | 1416.47127 | 2 | 5.56E-07 | 0.93 | 3.16  | -     | 1660.8   |
| AHQ-9-14-, 3854             | R.FTDEEVDELYR.E                                                           | 1416.47127 | 2 | 3.58E-07 | 0.92 | 3.59  | -     | 995.4    |
| gi 4504073 ref NP_000398.1  | glycoprotein lb beta polypeptide precursor [Homo sapiens]                 |            |   | 3.60E-07 | 2.41 | 30.22 | 15.50 | 21717.6  |
| AHQ-9-6, 4487 - 4499        | R.LLPLYLAEDELR.A                                                          | 1332.52691 | 2 | 3.60E-07 | 0.86 | 3.23  | -     | 542.5    |
| AHQ-9-13-, 4542             | R.LLPLYLAEDELR.A                                                          | 1332.52691 | 2 | 4.67E-06 | 0.84 | 3.24  | -     | 571.0    |
| AHQ-9-13, 4710 - 4714       | R.LLPLYLAEDELR.A                                                          | 1332.52691 | 2 | 8.03E-06 | 0.76 | 2.57  | -     | 535.8    |
| AHQ-9-11, 4433 - 4434       | R.LLPLYLAEDELR.A                                                          | 1332.52691 | 2 | 6.48E-06 | 0.83 | 2.94  | -     | 561.2    |
| AHQ-9-2, 4667               | R.LLPLYLAEDELR.A                                                          | 1332.52691 | 2 | 8.10E-06 | 0.81 | 2.98  | -     | 495.2    |
| AHQ-9-11, 4133 - 4134       | R.LSLTDLPLVAER.A                                                          | 1214.39356 | 2 | 4.47E-05 | 0.96 | 4.33  | -     | 1353.0   |
| AHQ-9-11, 2499 - 2502       | R.TAHLGANPW.R.C                                                           | 1123.24913 | 2 | 4.11E-05 | 0.59 | 2.74  | -     | 431.1    |
| gi 6005854 ref NP_009204.1  | repressor of estrogen receptor activity; B-cell associated protein [Homo  |            |   | 3.81E-07 | 1.35 | 20.24 | 9.70  | 33296.1  |
| AHQ-9-9, 3979 - 3980        | K.LLLLGAAYVGR.V.E                                                         | 1260.51029 | 2 | 3.81E-07 | 0.98 | 4.71  | -     | 2949.1   |
| AHQ-9-9, 3296               | R.VLSRPNQAQLPSMZYQR.L                                                     | 1890.15666 | 2 | 6.51E-04 | 0.37 | 2.76  | -     | 324.0    |
| gi 4505877 ref NP_000436.1  | plectin 1, intermediate filament binding protein 500kDa; plectin 1, int   |            |   | 4.45E-07 | 4.97 | 60.18 | 2.30  | 518488.0 |
| AHQ-9-2, 4917 - 4942        | R.APVPASELLASGVLSR.A                                                      | 1567.81193 | 2 | 1.11E-06 | 0.89 | 3.58  | -     | 727.8    |
| AHQ-9-2, 3271               | K.AYSDPSTGEPATYQELQQR.C                                                   | 2071.14682 | 2 | 5.11E-07 | 0.87 | 3.40  | -     | 589.9    |
| AHQ-9-1, 5686               | K.EQELQQTLLQEQSGLDQLR.G                                                   | 2314.49541 | 3 | 7.52E-04 | 0.80 | 3.16  | -     | 914.8    |
| AHQ-9-3, 5076               | R.IISLETYNLLR.E                                                           | 1335.57394 | 2 | 8.62E-04 | 0.85 | 3.29  | -     | 762.0    |
| AHQ-9-1, 6159               | K.SEEM*QTVQEQQLLQETALQQSFLSEK.D                                           | 3198.46199 | 3 | 4.45E-07 | 0.89 | 3.51  | -     | 1265.6   |
| AHQ-9-2, 4643               | R.SLVPAAELLES.R.V                                                         | 1285.47179 | 2 | 3.37E-05 | 0.66 | 2.80  | -     | 436.5    |
| gi 12025678 ref NP_004915.2 | actinin, alpha 3 [Homo sapiens]                                           |            |   | 4.64E-07 | 3.26 | 40.20 | 7.40  | 104853.3 |
| AHQ-9-4, 4469               | R.ETDTDTADQVIAFK.V                                                        | 1742.81936 | 2 | 4.64E-07 | 0.91 | 3.59  | -     | 1127.1   |
| AHQ-9-4, 2992 - 3053        | K.GISQEQMQR.F.R                                                           | 1353.48658 | 2 | 6.70E-06 | 0.62 | 3.05  | -     | 716.9    |
| AHQ-9-4, 4604               | K.ICDQWDALGSLTHSR.R                                                       | 1760.90926 | 2 | 1.66E-05 | 0.87 | 3.94  | -     | 712.9    |
| AHQ-9-6, 5902 - 5963        | R.VEQIAIAQLNELDYDHSNVNTR.C                                                | 2907.09810 | 3 | 2.05E-04 | 0.87 | 3.92  | -     | 695.0    |
| gi 21464101 ref NP_036611.2 | tyrosine 3-monooxygenase/tryptophan 5-monooxygenase activation protein    |            |   | 4.90E-07 | 0.80 | 10.20 | 5.70  | 28302.4  |
| AHQ-9-11, 3078              | K.NVTENLEPLSNEER.N                                                        | 1644.72215 | 2 | 4.90E-07 | 0.80 | 2.75  | -     | 752.4    |
| AHQ-9-14-, 3174             | K.NVTENLEPLSNEER.N                                                        | 1644.72215 | 2 | 3.15E-06 | 0.93 | 4.07  | -     | 928.0    |
| AHQ-9-10, 3025 - 3026       | K.NVTENLEPLSNEER.N                                                        | 1644.72215 | 2 | 6.04E-05 | 0.78 | 3.62  | -     | 465.1    |
| gi 4757900 ref NP_004334.1  | calreticulin precursor; Sicca syndrome antigen A (autoantigen Ro; calre   |            |   | 5.30E-07 | 3.57 | 40.23 | 15.30 | 48141.1  |
| AHQ-9-7, 5085 - 5141        | R.FYALSAFPSPSNK.G                                                         | 1608.77470 | 2 | 4.98E-04 | 0.93 | 3.69  | -     | 1253.3   |
| AHQ-9-7, 2277               | K.HEQNICDGGGYYK.L                                                         | 1478.56912 | 2 | 5.24E-04 | 0.91 | 3.76  | -     | 794.7    |
| AHQ-9-7, 4886 - 4957        | K.IDNSQVESGSLEDDWDFLPPKK.I                                                | 2520.68965 | 3 | 1.14E-05 | 0.79 | 3.53  | -     | 1083.2   |
| AHQ-9-7, 2560               | K.IKDPDASKPEDWDER.A                                                       | 1801.89173 | 2 | 5.30E-07 | 0.94 | 4.09  | -     | 1074.9   |
| gi 4502107 ref NP_001145.1  | annexin V; endonexin II; anchorin CII; lipocortin V; placental anticoag   |            |   | 5.49E-07 | 1.72 | 20.20 | 6.90  | 35936.5  |
| AHQ-9-9, 5785               | R.DLLDDLKSELTK.G.F                                                        | 1447.61309 | 2 | 5.49E-07 | 0.85 | 3.01  | -     | 934.3    |
| AHQ-9-9, 4427               | R.SEIDLFNIR.K                                                             | 1107.24155 | 2 | 6.38E-05 | 0.88 | 3.03  | -     | 1080.7   |
| gi 20070125 ref NP_000909.2 | prolyl 4-hydroxylase, beta subunit; v-erb-a avian erythroblastic leuke    |            |   | 5.64E-07 | 2.67 | 30.26 | 11.40 | 57115.9  |
| AHQ-9-7, 6289 - 6354        | R.TGPAATTLPDGAAASLVESSEVAVGF.K.D                                          | 2937.24716 | 3 | 5.64E-07 | 0.93 | 5.28  | -     | 1148.2   |
| AHQ-9-7, 3672               | K.VDATEESDLAQQYQV.R.G                                                     | 1781.85882 | 2 | 1.53E-05 | 0.89 | 3.65  | -     | 1068.3   |
| AHQ-9-7, 3980               | K.YQLDKDGVVLFK.K                                                          | 1425.65394 | 2 | 1.49E-06 | 0.85 | 3.16  | -     | 1183.4   |
| gi 30149221 ref XP_291446.2 | similar to Heat shock cognate 71 kDa protein [Homo sapiens]               |            |   | 5.68E-07 | 0.88 | 10.20 | 3.90  | 45688.5  |
| AHQ-9-6, 2507               | R.STAGDTHLGGEDFDNR.M                                                      | 1692.68222 | 2 | 5.68E-07 | 0.88 | 3.91  | -     | 678.0    |
| gi 9507215 ref NP_061816.1  | tubulin, alpha-like 2; tubulin, alpha 8 [Homo sapiens]                    |            |   | 5.72E-07 | 1.85 | 30.22 | 9.60  | 50093.2  |
| AHQ-9-14-, 4713 - 4722      | R.AVM*IDLEPTVVDEVR.A                                                      | 1702.95125 | 2 | 1.50E-05 | 0.95 | 4.46  | -     | 1177.4   |
| AHQ-9-12, 3501              | K.DVNVAIAIK.T                                                             | 1014.20080 | 1 | 8.54E-04 | 0.30 | 2.01  | -     | 577.3    |
| AHQ-9-14-, 5027             | K.INDDDSFTTFFSETGNGK.H                                                    | 1996.03358 | 2 | 5.72E-07 | 0.61 | 2.71  | -     | 405.0    |
| AHQ-9-13-, 5022             | K.INDDDSFTTFFSETGNGK.H                                                    | 1996.03358 | 2 | 3.18E-04 | 0.51 | 2.62  | -     | 344.5    |
| gi 4505667 ref NP_001074.1  | phosphodiesterase 5A isoform 1; cGMP-binding cGMP-specific 3',5'-cyclic   |            |   | 5.86E-07 | 0.94 | 10.22 | 1.70  | 100012.4 |
| AHQ-9-5, 5247               | R.IAELVATEFFDQGDR.E                                                       | 1711.85332 | 2 | 5.86E-07 | 0.94 | 4.36  | -     | 1012.2   |
| AHQ-9-4, 5238               | R.IAELVATEFFDQGDR.E                                                       | 1711.85332 | 2 | 8.83E-07 | 0.93 | 4.12  | -     | 880.9    |
| gi 18570595 ref XP_095590.1 | similar to myosin regulatory light chain [Homo sapiens]                   |            |   | 6.26E-07 | 0.94 | 10.20 | 8.90  | 13951.5  |
| AHQ-9-13, 3346              | K.LNGTDPEDVIR.H                                                           | 1229.32195 | 2 | 2.03E-06 | 0.89 | 3.41  | -     | 786.5    |
| AHQ-9-13-, 3172             | K.LNGTDPEDVIR.H                                                           | 1229.32195 | 2 | 6.26E-07 | 0.94 | 3.66  | -     | 1311.6   |
| AHQ-9-11, 3045 - 3106       | K.LNGTDPEDVIR.H                                                           | 1229.32195 | 2 | 9.27E-07 | 0.94 | 3.97  | -     | 1012.7   |
| gi 4885423 ref NP_005454.1  | heterogeneous nuclear ribonucleoprotein D-like; A+U-rich element RNA bi   |            |   | 6.39E-07 | 0.87 | 10.16 | 2.40  | 46437.2  |
| AHQ-9-9, 3191               | R.FGEVVDCTIK.T                                                            | 1169.32971 | 2 | 6.39E-07 | 0.87 | 2.86  | -     | 820.6    |
| gi 4506077 ref NP_002734.1  | protein kinase C substrate 80K-H; glucosidase II, beta subunit; AGE-bin   |            |   | 7.12E-07 | 1.49 | 20.13 | 4.40  | 59296.0  |
| AHQ-9-5, 3271               | K.AQEQELAADF.K.E                                                          | 1449.54763 | 2 | 7.12E-07 | 0.87 | 2.59  | -     | 1329.5   |
| AHQ-9-5, 3432               | K.LWEEQLAAAK.A                                                            | 1159.31646 | 2 | 3.49E-05 | 0.63 | 2.59  | -     | 499.1    |
| gi 30150022 ref XP_300862.1 | similar to beta-tubulin 4Q [Homo sapiens]                                 |            |   | 7.60E-07 | 3.50 | 40.21 | 11.30 | 33545.2  |
| AHQ-9-7, 3341 - 3396        | R.FPGQLNADLR.K                                                            | 1131.26634 | 2 | 5.53E-05 | 0.88 | 3.16  | -     | 909.6    |
| AHQ-9-13-, 3853             | K.LAVNM*VFPFR.L                                                           | 1160.41420 | 2 | 3.72E-04 | 0.86 | 2.50  | -     | 1113.5   |
| AHQ-9-8, 4367               | K.LAVNM*VFPFR.L                                                           | 1144.41480 | 2 | 3.32E-04 | 0.44 | 2.57  | -     | 348.9    |
| AHQ-9-9, 4164 - 4177        | K.LAVNM*VFPFR.L                                                           | 1144.41480 | 2 | 7.11E-06 | 0.82 | 2.80  | -     | 653.2    |
| AHQ-9-7, 4316               | K.LAVNM*VFPFR.L                                                           | 1144.41480 | 2 | 2.31E-05 | 0.90 | 3.29  | -     | 774.6    |

|                             |                                                                         |            |   |          |      |        |       |         |
|-----------------------------|-------------------------------------------------------------------------|------------|---|----------|------|--------|-------|---------|
| AHQ-9-9, 5299 - 5308        | R.LHFFMPGFAPLTSR.G                                                      | 1621.92962 | 2 | 7.60E-07 | 0.93 | 4.23   | -     | 736.0   |
| AHQ-9-7, 5433 - 5494        | R.LHFFMPGFAPLTSR.G                                                      | 1621.92962 | 2 | 2.41E-04 | 0.93 | 3.87   | -     | 815.0   |
| gi 6005846 ref NP_009215.1  | PTK9L protein tyrosine kinase 9-like (A6-related protein); protein tyro |            |   | 8.08E-07 | 2.53 | 30.17  | 10.30 | 39547.7 |
| AHQ-9-12, 6040              | R.AVLPLDAQQCYLLYR.L                                                     | 2035.39506 | 2 | 8.08E-07 | 0.85 | 3.19   | -     | 579.8   |
| AHQ-9-11, 4023 - 4034       | R.ETIELVHTPTDVAQLPSR.V                                                  | 2136.34822 | 3 | 5.07E-04 | 0.75 | 3.22   | -     | 876.6   |
| AHQ-9-12, 4484 - 4485       | K.VVIEDEQLVLGASQEPVGR.W                                                 | 2039.27568 | 2 | 1.57E-04 | 0.92 | 3.36   | -     | 1619.1  |
| gi 4504077 ref NP_000165.1  | glycoprotein IX (platelet) [Homo sapiens]                               |            |   | 8.38E-07 | 3.56 | 40.18  | 30.50 | 19046.0 |
| AHQ-9-11, 3997 - 4053       | R.ALETM*GLWVDCR.G                                                       | 1468.68075 | 2 | 5.33E-04 | 0.91 | 3.07   | -     | 1155.0  |
| AHQ-9-11, 2777              | R.CASPSLAAHGPLGR.L                                                      | 1395.56962 | 2 | 8.38E-07 | 0.84 | 2.80   | -     | 948.5   |
| AHQ-9-11, 3477              | R.GHGLTALPALPAR.T                                                       | 1274.49706 | 2 | 5.37E-04 | 0.89 | 3.28   | -     | 798.9   |
| AHQ-9-11, 5118              | R.LWLEDRTPELLQVRC                                                       | 1840.11574 | 3 | 1.95E-05 | 0.92 | 3.55   | -     | 1149.8  |
| gi 17986260 ref NP_524147.1 | smooth muscle and non-muscle myosin alkali light chain isoform 2 [Homo  |            |   | 8.61E-07 | 0.80 | 10.21  | 23.30 | 12969.7 |
| AHQ-9-13-, 5254             | K.M*TEEEVEM*LVAGHEDSNGCINYEELVR.M                                       | 3188.42436 | 3 | 8.61E-07 | 0.80 | 4.02   | -     | 729.0   |
| AHQ-9-14-, 5261             | K.M*TEEEVEM*LVAGHEDSNGCINYEELVR.M                                       | 3188.42436 | 3 | 9.20E-05 | 0.88 | 4.17   | -     | 818.8   |
| AHQ-9-13, 5392 - 5398       | K.M*TEEEVEM*LVAGHEDSNGCINYEELVR.M                                       | 3188.42436 | 3 | 8.21E-06 | 0.81 | 3.95   | -     | 635.4   |
| gi 4758606 ref NP_004508.1  | integrin-linked kinase [Homo sapiens]                                   |            |   | 8.62E-07 | 5.82 | 70.20  | 13.90 | 51418.9 |
| AHQ-9-7, 4108 - 4110        | R.EVPFADLSNM*EIGM*K.V                                                   | 1713.95438 | 2 | 1.43E-05 | 0.59 | 2.99   | -     | 350.8   |
| AHQ-9-7, 5285               | K.FDMIVPILEK.M                                                          | 1205.49168 | 2 | 1.88E-05 | 0.88 | 3.50   | -     | 728.2   |
| AHQ-9-7, 4317               | K.FDM*IVPILEK.M                                                         | 1221.49108 | 2 | 8.62E-07 | 0.82 | 2.84   | -     | 911.3   |
| AHQ-9-7, 4974               | R.GM*AFHLTLELPIR.H                                                      | 1611.93301 | 3 | 2.64E-06 | 0.78 | 3.19   | -     | 907.4   |
| AHQ-9-7, 5557               | R.GMAFLHTELELPIR.H                                                      | 1595.93361 | 2 | 1.05E-04 | 0.94 | 4.01   | -     | 1160.5  |
| AHQ-9-7, 4142               | R.M*YAPAWVAPEALQK.K                                                     | 1591.85542 | 2 | 5.30E-04 | 0.91 | 3.32   | -     | 822.9   |
| AHQ-9-7, 4090               | R.SAVVEMLM*R.G                                                          | 1165.45256 | 2 | 7.40E-06 | 0.90 | 3.34   | -     | 1069.9  |
| gi 4759082 ref NP_004648.1  | serum deprivation response protein; serum deprivation response; phospho |            |   | 8.93E-07 | 2.24 | 30.22  | 11.10 | 47172.9 |
| AHQ-9-6, 5798 - 5835        | R.DNSQVNAVTVLTLDDK.L                                                    | 1730.94122 | 2 | 1.77E-04 | 0.92 | 4.31   | -     | 868.6   |
| AHQ-9-7, 5789 - 5825        | R.DNSQVNAVTVLTLDDK.L                                                    | 1730.94122 | 2 | 3.00E-06 | 0.93 | 3.88   | -     | 1187.2  |
| AHQ-9-9, 5635 - 5692        | R.DNSQVNAVTVLTLDDK.L                                                    | 1730.94122 | 2 | 9.47E-04 | 0.93 | 4.32   | -     | 911.7   |
| AHQ-9-12, 5800 - 5841       | R.DNSQVNAVTVLTLDDK.L                                                    | 1730.94122 | 2 | 5.73E-04 | 0.92 | 3.54   | -     | 1194.4  |
| AHQ-9-11, 5713 - 5779       | R.DNSQVNAVTVLTLDDK.L                                                    | 1730.94122 | 2 | 1.27E-06 | 0.96 | 3.76   | -     | 2047.7  |
| AHQ-9-13-, 5877             | R.DNSQVNAVTVLTLDDK.L                                                    | 1730.94122 | 2 | 2.50E-05 | 0.88 | 3.45   | -     | 945.3   |
| AHQ-9-11, 3585 - 3654       | K.LVNMLDAVQENQHK.M                                                      | 1639.85851 | 2 | 1.66E-06 | 0.75 | 3.00   | -     | 636.3   |
| AHQ-9-11, 3587              | K.LVNMLDAVQENQHK.M                                                      | 1639.85851 | 3 | 8.93E-07 | 0.71 | 3.23   | -     | 458.5   |
| AHQ-9-11, 5597              | K.VLIFQEENEIPASVFK.Q                                                    | 1963.26241 | 2 | 4.43E-05 | 0.56 | 2.93   | -     | 367.0   |
| AHQ-9-12, 5652 - 5656       | K.VLIFQEENEIPASVFK.Q                                                    | 1963.26241 | 2 | 8.02E-05 | 0.88 | 3.87   | -     | 648.8   |
| AHQ-9-14-, 5707             | K.VLIFQEENEIPASVFK.Q                                                    | 1963.26241 | 2 | 6.21E-05 | 0.62 | 2.62   | -     | 526.7   |
| gi 16933567 ref NP_005361.2 | mel transforming oncogene; ras-associated protein RAB8 [Homo sapiens]   |            |   | 9.05E-07 | 0.96 | 10.21  | 6.80  | 23668.1 |
| AHQ-9-11, 5403 - 5479       | K.ANINVENAFFTLAR.D                                                      | 1580.76926 | 2 | 9.05E-07 | 0.96 | 4.11   | -     | 1606.2  |
| gi 27481160 ref XP_208217.1 | similar to elongation factor 1 alpha [Homo sapiens]                     |            |   | 9.36E-07 | 0.84 | 10.14  | 2.60  | 50171.6 |
| AHQ-9-9, 3291               | K.YVYTIADAPGHR.D                                                        | 1405.58282 | 2 | 9.36E-07 | 0.84 | 2.78   | -     | 995.2   |
| gi 4757714 ref NP_004291.1  | acid phosphatase 1 isoform c; acid phosphatase of erythrocyte; red cell |            |   | 9.42E-07 | 0.92 | 10.15  | 5.70  | 18042.4 |
| AHQ-9-11, 3343              | R.SPIAEAVFR.K                                                           | 990.13779  | 2 | 9.42E-07 | 0.92 | 2.97   | -     | 1145.4  |
| gi 14251209 ref NP_001279.2 | chloride intracellular channel 1; p64CLCP; chloride channel ABP [Homo   |            |   | 9.55E-07 | 2.72 | 30.27  | 21.60 | 26922.5 |
| AHQ-9-9, 5208 - 5216        | R.EEFASCPDDEEIEIAYEQVAK.A                                               | 2575.69730 | 3 | 9.55E-07 | 0.94 | 4.63   | -     | 1406.2  |
| AHQ-9-13, 3627              | K.GVTFNVTVDYTK.R                                                        | 1282.42476 | 2 | 7.33E-06 | 0.91 | 3.34   | -     | 1213.6  |
| AHQ-9-13-, 3402 - 3462      | K.GVTFNVTVDYTK.R                                                        | 1282.42476 | 2 | 1.67E-05 | 0.94 | 4.07   | -     | 1110.4  |
| AHQ-9-11, 5026 - 5105       | K.LAALNPESNTAGLDIFAK.F                                                  | 1846.07392 | 2 | 8.76E-05 | 0.67 | 3.08   | -     | 371.8   |
| AHQ-9-13-, 5184             | K.LAALNPESNTAGLDIFAK.F                                                  | 1846.07392 | 2 | 2.70E-06 | 0.86 | 3.56   | -     | 602.8   |
| AHQ-9-14-, 5105 - 5122      | K.LAALNPESNTAGLDIFAK.F                                                  | 1846.07392 | 2 | 3.54E-05 | 0.94 | 4.40   | -     | 954.4   |
| AHQ-9-9, 4907 - 4908        | K.LAALNPESNTAGLDIFAK.F                                                  | 1846.07392 | 2 | 2.11E-04 | 0.95 | 5.42   | -     | 695.6   |
| gi 5031573 ref NP_005712.1  | ARP3 actin-related protein 3 homolog; ARP3 (actin-related protein 3, ye |            |   | 1.00E-06 | 2.41 | 30.20  | 11.70 | 47370.9 |
| AHQ-9-8, 6418               | R.DITYFIQQLLR.D                                                         | 1410.64250 | 2 | 1.00E-06 | 0.94 | 3.76   | -     | 1333.5  |
| AHQ-9-8, 3031               | R.DREVGIPEEQSLETAK.A                                                    | 1769.93431 | 2 | 8.94E-04 | 0.91 | 3.94   | -     | 734.2   |
| AHQ-9-8, 5484 - 5556        | K.GVDDLLFFIGDEAIEKPTYATK.W                                              | 2445.66268 | 2 | 4.85E-05 | 0.55 | 2.90   | -     | 577.4   |
| gi 5031597 ref NP_005710.1  | actin related protein 2/3 complex subunit 3; ARP2/3 protein complex sub |            |   | 1.01E-06 | 1.67 | 20.17  | 9.00  | 20546.5 |
| AHQ-9-11, 5958 - 5981       | K.DTDIVDEAIYFFK.A                                                       | 1592.72721 | 2 | 3.47E-04 | 0.93 | 3.29   | -     | 1183.6  |
| AHQ-9-14-, 6103             | K.DTDIVDEAIYFFK.A                                                       | 1592.72721 | 2 | 1.01E-06 | 0.91 | 3.31   | -     | 1209.0  |
| AHQ-9-11, 5541              | R.ETKTDIVDEAIYFFK.A                                                     | 1951.11899 | 2 | 2.33E-05 | 0.76 | 2.74   | -     | 716.7   |
| gi 10835002 ref NP_001166.1 | Rho GDP dissociation inhibitor (GDI) beta; Ly-GDI [Homo sapiens]        |            |   | 1.02E-06 | 2.45 | 30.19  | 27.90 | 22987.8 |
| AHQ-9-10, 2496              | K.APEPHVEEDDDDELDSK.L                                                   | 1940.90995 | 2 | 1.02E-06 | 0.77 | 3.04   | -     | 610.6   |
| AHQ-9-10, 5194              | K.ATFM*VGSYGRPEEYFLTPVEEAPK.G                                           | 2962.27864 | 3 | 2.12E-04 | 0.85 | 3.88   | -     | 795.7   |
| AHQ-9-11, 5217              | K.ATFM*VGSYGRPEEYFLTPVEEAPK.G                                           | 2962.27864 | 3 | 1.27E-04 | 0.86 | 3.58   | -     | 917.3   |
| AHQ-9-10, 3314 - 3370       | K.TLLGDGPVTPDK.A                                                        | 1312.49400 | 2 | 6.80E-04 | 0.82 | 2.97   | -     | 1000.8  |
| gi 4557435 ref NP_001242.1  | CD68 antigen; Macrophage antigen CD68 (microsialin); macrosialin; scave |            |   | 1.10E-06 | 0.89 | 10.21  | 6.20  | 37408.0 |
| AHQ-9-5, 4476               | R.LQAAQLPHTGVFGQSFSCPSDR.S                                              | 2405.63153 | 3 | 1.10E-06 | 0.89 | 4.19   | -     | 822.1   |
| gi 21361122 ref NP_001440.2 | four and a half LIM domains 1; Four-and-a-half LIM domains 1 [Homo sap  |            |   | 1.12E-06 | 1.87 | 20.25  | 9.60  | 31894.7 |
| AHQ-9-9, 2419 - 2428        | K.AIVAGDQNVYK.G                                                         | 1307.43431 | 2 | 1.12E-06 | 0.92 | 3.45   | -     | 1013.5  |
| AHQ-9-9, 3548 - 3551        | R.FVHFQEQVYCPDCAK.K                                                     | 1931.13758 | 2 | 1.11E-05 | 0.95 | 4.95   | -     | 940.7   |
| gi 14724206 ref XP_042500.1 | similar to ribosomal protein S2; 40S ribosomal protein S2 [Homo sapien  |            |   | 1.13E-06 | 1.77 | 20.19  | 12.00 | 25535.7 |
| AHQ-9-9, 4185 - 4257        | K.AFVAIGDYNHGVLGVK.C                                                    | 1717.94906 | 2 | 1.13E-06 | 0.94 | 3.82   | -     | 1417.9  |
| AHQ-9-9, 4572 - 4623        | K.TYSYLPDLWK.E                                                          | 1387.56103 | 2 | 1.54E-05 | 0.83 | 3.01   | -     | 675.7   |
| gi 24497612 ref NP_116262.2 | nm23-phosphorylated unknown substrate; SH3 domain-containing 70 kDa pr  |            |   | 1.20E-06 | 1.79 | 20.21  | 5.70  | 72695.6 |
| AHQ-9-6, 5993               | K.LGCDWVATIFSR.D                                                        | 1426.62208 | 2 | 8.53E-05 | 0.93 | 3.03   | -     | 1299.9  |
| AHQ-9-6, 5077               | R.RPYEDQQLGETTLTIICQPM*QPLR.V                                           | 2932.32204 | 3 | 1.20E-06 | 0.86 | 4.24   | -     | 783.6   |
| gi 4758018 ref NP_004359.1  | calponin 2; Calonin 2 [Homo sapiens]                                    |            |   | 1.20E-06 | 0.81 | 10.18  | 5.50  | 33696.9 |
| AHQ-9-13-, 5916 - 5990      | R.TWIEGLTGLSIGPDFQK.G                                                   | 1863.10294 | 2 | 1.20E-06 | 0.81 | 3.00   | -     | 817.1   |
| AHQ-9-12, 5878              | R.TWIEGLTGLSIGPDFQK.G                                                   | 1863.10294 | 2 | 1.32E-06 | 0.93 | 3.52   | -     | 1131.9  |
| gi 4759300 ref NP_004772.1  | vesicle-associated membrane protein 3 (cellubrevin); vesicle-associated |            |   | 1.22E-06 | 0.94 | 10.22  | 17.00 | 11309.0 |
| AHQ-9-13-, 3573 - 3578      | R.ADALQAGASQFETSAAK.L                                                   | 1666.77095 | 2 | 1.22E-06 | 0.94 | 4.47   | -     | 1002.5  |
| gi 4506925 ref NP_003013.1  | SH3 domain binding glutamic acid-rich protein like; SH3-binding domain  |            |   | 1.23E-06 | 2.61 | 30.27  | 47.40 | 12774.2 |
| AHQ-9-13-, 5833 - 5897      | R.ENNAVYAFGLTAPPGSK.E                                                   | 1850.06426 | 2 | 3.73E-06 | 0.76 | 3.37   | -     | 471.7   |
| AHQ-9-13-, 5608 - 5665      | R.ENNAVYAFGLTAPPGSK.E                                                   | 1850.06426 | 2 | 2.65E-04 | 0.44 | 2.62   | -     | 377.1   |
| AHQ-9-13-, 4744 - 4809      | R.ENVPNSRPATGYLPPQIFNESQYR.G                                            | 3005.24660 | 3 | 1.23E-06 | 0.94 | 5.17   | -     | 937.4   |
| AHQ-9-13-, 4861 - 4921      | R.ENVPNSRPATGYLPPQIFNESQYR.G                                            | 3005.24660 | 3 | 1.58E-05 | 0.93 | 5.43   | -     | 732.2   |
| AHQ-9-13, 5003 - 5059       | R.ENVPNSRPATGYLPPQIFNESQYR.G                                            | 3005.24660 | 3 | 2.57E-05 | 0.88 | 4.37   | -     | 629.4   |
| AHQ-9-13, 4892 - 4954       | R.ENVPNSRPATGYLPPQIFNESQYR.G                                            | 3005.24660 | 3 | 1.16E-04 | 0.90 | 4.82   | -     | 746.6   |
| AHQ-9-13-, 4006 - 4064      | R.GDYDAFFEAR.E                                                          | 1191.23073 | 2 | 9.86E-05 | 0.91 | 3.70   | -     | 963.2   |
| gi 7657431 ref NP_055205.1  | EBNA-2 co-activator (100kD) [Homo sapiens]                              |            |   | 1.24E-06 | 1.78 | 20.21  | 4.50  | 99689.7 |
| AHQ-9-4, 5742               | K.DTNGENIAESLVAGLSTR.R                                                  | 1961.07704 | 2 | 1.24E-06 | 0.94 | 4.10   | -     | 1381.2  |
| AHQ-9-4, 5861               | R.NLPLGLVQEQEPPSEEAFTLK.E                                               | 2307.54125 | 2 | 2.17E-06 | 0.84 | 3.41   | -     | 531.8   |
| gi 4758970 ref NP_004150.1  | proteasome beta 8 subunit isoform E1 proprotein; proteasome subunit, be |            |   | 1.27E-06 | 1.70 | 20.17  | 9.20  | 29769.4 |
| AHQ-9-11, 3342              | R.ASAGSYISALR.V                                                         | 1096.21876 | 2 | 5.67E-05 | 0.79 | 2.54   | -     | 1002.4  |
| AHQ-9-11, 4045 - 4047       | K.VESTDVSLLHQYR.E                                                       | 1662.78230 | 2 | 1.27E-06 | 0.91 | 3.48   | -     | 1243.7  |
| gi 7705849 ref NP_057215.1  | ras-related GTP-binding protein RAB10; ras-related GTP-binding protein  |            |   | 1.29E-06 | 0.95 | 10.21  | 5.50  | 22540.8 |
| AHQ-9-11, 5913 - 5921       | K.AFLTLAEDILR.K                                                         | 1262.47982 | 2 | 1.29E-06 | 0.95 | 4.20   | -     | 1445.4  |
| gi 12408656 ref NP_005177.2 | calpain 1, large subunit; calpain, large polypeptide L1; calcium-activ  |            |   | 1.34E-06 | 9.53 | 110.25 | 18.30 | 81889.4 |
| AHQ-9-6, 4883               | K.APSDLYQIILK.A                                                         | 1261.49183 | 2 | 9.89E-05 | 0.90 | 3.23   | -     | 1287.0  |
| AHQ-9-6, 3589               | R.DFFLANASR.A                                                           | 1041.14166 | 2 | 5.39E-05 | 0.91 | 2.77   | -     | 1370.9  |
| AHQ-9-5, 5811               | R.DM*ETIGFAVYEVPELVGQPAVHLK.R                                           | 2757.15391 | 3 | 2.51E-04 | 0.75 | 3.49   | -     | 528.0   |
| AHQ-9-6, 5550               | R.FRLPPGEYVVVPSSTFEPNKEGDFVLR.F                                         | 2994.39160 | 3 | 2.65E-04 | 0.92 | 4.46   | -     | 1331.8  |
| AHQ-9-6, 4341               | R.KAPSDLYQIILK.A                                                        | 1389.66474 | 2 | 1.33E-05 | 0.90 | 3.47   | -     | 956.2   |
| AHQ-9-6, 6063               | K.LGLVENFILWNR.I                                                        | 1474.73142 | 2 | 1.34E-06 | 0.84 | 3.17   | -     | 813.3   |
| AHQ-9-6, 4542               | R.LPPGEYVVVPSSTFEPNKE                                                   | 1874.12573 | 2 | 2.40E-05 | 0.76 | 3.38   | -     | 467.7   |
| AHQ-9-6, 3897               | K.YLELIIRY                                                              | 1021.23493 | 2 | 3.16E-04 | 0.97 | 3.90   | -     | 2125.9  |
| AHQ-9-6, 4937               | R.NYPATFVWVNPQFK.I                                                      | 1612.81141 | 2 | 6.32E-04 | 0.75 | 2.88   | -     | 622.0   |
| AHQ-9-5, 4449               | K.RPTELLSNPQFIVDGATR.T                                                  | 2015.25904 | 3 | 2.10E-05 | 0.96 | 5.07   | -     | 1616.1  |
| AHQ-9-6, 3229               | R.SEQFINLR.E                                                            | 1007.12521 | 2 | 2.94E-06 | 0.87 | 2.87   | -     | 978.7   |
| gi 30149327 ref XP_293672.2 | similar to ebiP7687 [Homo sapiens]                                      |            |   | 1.39E-06 | 0.91 | 10.15  | 1.90  | 59404.3 |

|                             |                                                                                 |            |   |          |      |       |       |          |
|-----------------------------|---------------------------------------------------------------------------------|------------|---|----------|------|-------|-------|----------|
| AHQ-9-5, 2941               | K.SIYYITGESK.E                                                                  | 1161.28598 | 2 | 1.39E-06 | 0.91 | 2.93  | -     | 1291.6   |
| gi 4759212 ref NP_004598.1  | beta-tubulin cofactor A [Homo sapiens]                                          |            |   | 1.40E-06 | 3.82 | 40.31 | 26.90 | 12854.8  |
| AHQ-9-13-, 3561             | R.ILENEKDLLEEAEYK.E                                                             | 1852.97372 | 2 | 5.73E-05 | 0.93 | 4.15  | -     | 1020.8   |
| AHQ-9-13-, 3404             | R.ILENEKDLLEEAEYK.EAR.L                                                         | 2209.35284 | 3 | 2.02E-06 | 0.98 | 6.20  | -     | 2081.3   |
| AHQ-9-13-, 3657 - 3714      | R.LEAAAYLDLQR.I                                                                 | 1192.34645 | 2 | 5.35E-04 | 0.96 | 4.01  | -     | 1466.7   |
| AHQ-9-13, 3826 - 3884       | R.LEAAAYLDLQR.I                                                                 | 1192.34645 | 2 | 9.65E-04 | 0.96 | 4.09  | -     | 1668.5   |
| AHQ-9-13-, 3489             | R.LEAAAYLDLQR.I                                                                 | 1348.53280 | 2 | 1.40E-06 | 0.95 | 4.42  | -     | 905.9    |
| gi 4557014 ref NP_001743.1  | catalase [Homo sapiens]                                                         |            |   | 1.47E-06 | 5.99 | 70.29 | 19.70 | 59755.8  |
| AHQ-9-7, 2745               | K.ADVLTGAGNVPVGD.K.L                                                            | 1415.53118 | 2 | 4.25E-04 | 0.77 | 2.75  | -     | 1109.8   |
| AHQ-9-7, 4076 - 4084        | R.AFYVNLNVEEQR.K                                                                | 1482.62245 | 2 | 7.76E-06 | 0.95 | 4.37  | -     | 1203.1   |
| AHQ-9-7, 2534 - 2536        | R.FNTANDNNVTVQR.A                                                               | 1494.54849 | 2 | 4.33E-04 | 0.81 | 3.25  | -     | 708.5    |
| AHQ-9-7, 4376 - 4448        | K.GAGAFGYFEVTHDITK.Y                                                            | 1713.87091 | 2 | 5.27E-04 | 0.85 | 3.45  | -     | 852.2    |
| AHQ-9-7, 5792               | R.GPLLVDVVFTEDEMAHFDR.E                                                         | 2190.46422 | 3 | 1.47E-06 | 0.84 | 3.87  | -     | 646.9    |
| AHQ-9-7, 5178               | R.GPLLVDVVFTEDEM*AHFDR.E                                                        | 2206.46362 | 3 | 8.31E-05 | 0.80 | 3.44  | -     | 648.6    |
| AHQ-9-7, 6228               | R.NPVNYFAEVQIADFSPSNM*PPGIEASPK.M                                               | 3194.47350 | 3 | 5.10E-05 | 0.95 | 5.77  | -     | 1140.0   |
| gi 4504521 ref NP_002147.1  | heat shock 60kDa protein 1 (chaperonin); mitochondrial matrix protein P         |            |   | 1.50E-06 | 1.63 | 20.22 | 7.70  | 61024.2  |
| AHQ-9-7, 4146               | R.CIPALDSLTPANEDQK.I                                                            | 1773.94302 | 2 | 6.40E-04 | 0.70 | 3.37  | -     | 390.2    |
| AHQ-9-7, 6376               | R.TALLDAAGVASLLTAEVWVTEIPKEEK.D                                                 | 2870.28530 | 3 | 1.50E-06 | 0.93 | 4.48  | -     | 1389.4   |
| gi 29727317 ref XP_298144.1 | hypothetical protein XP_298144 [Homo sapiens]                                   |            |   | 1.51E-06 | 0.68 | 10.15 | 8.00  | 22108.6  |
| AHQ-9-4, 5886               | K.GEYNTLDTALTSLNLT                                                              | 1753.93165 | 2 | 1.51E-06 | 0.68 | 3.03  | -     | 717.7    |
| gi 29742410 ref XP_291183.1 | similar to TREM-like transcript 1 [Homo sapiens]                                |            |   | 1.52E-06 | 0.67 | 10.16 | 5.10  | 32678.3  |
| AHQ-9-14-, 4259 - 4267      | R.FLPEGCOPLVSSAVDR.R                                                            | 1776.99174 | 2 | 1.52E-06 | 0.67 | 3.27  | -     | 347.0    |
| AHQ-9-13-, 4110             | R.FLPEGCOPLVSSAVDR.R                                                            | 1776.99174 | 2 | 3.01E-05 | 0.52 | 2.60  | -     | 261.3    |
| gi 17986258 ref NP_066299.2 | smooth muscle and non-muscle myosin alkali light chain isoform 1 [Homo sapiens] |            |   | 1.72E-06 | 3.77 | 50.21 | 25.80 | 16930.0  |
| AHQ-9-12, 4082 - 4088       | K.DQGTYYDYVEGLR.V                                                               | 1545.58904 | 2 | 1.72E-06 | 0.86 | 3.31  | -     | 879.0    |
| AHQ-9-13, 4304              | K.DQGTYYDYVEGLR.V                                                               | 1545.58904 | 2 | 1.23E-04 | 0.66 | 2.85  | -     | 614.6    |
| AHQ-9-12, 3916              | K.EAFQLFDR.T                                                                    | 1026.12699 | 1 | 3.60E-05 | 0.29 | 1.89  | -     | 170.8    |
| AHQ-9-13-, 3985             | K.NKDQGTYYDYVEGLR.V                                                             | 1787.86505 | 2 | 3.04E-05 | 0.61 | 3.09  | -     | 602.8    |
| AHQ-9-13, 3894              | K.NKDQGTYYDYVEGLR.V                                                             | 1787.86505 | 2 | 1.32E-05 | 0.77 | 3.21  | -     | 570.3    |
| AHQ-9-12, 3657              | K.NKDQGTYYDYVEGLR.V                                                             | 1787.86505 | 2 | 4.15E-05 | 0.82 | 3.17  | -     | 922.4    |
| AHQ-9-13-, 3752             | K.NKDQGTYYDYVEGLR.V                                                             | 1787.86505 | 2 | 1.42E-05 | 0.89 | 3.83  | -     | 903.3    |
| AHQ-9-14-, 3778             | K.NKDQGTYYDYVEGLR.V                                                             | 1787.86505 | 2 | 6.10E-04 | 0.77 | 2.98  | -     | 730.2    |
| AHQ-9-13-, 5910             | K.VLDFEHLFPLM*LOTVAK.N                                                          | 1905.24957 | 2 | 7.22E-06 | 0.94 | 4.26  | -     | 975.9    |
| AHQ-9-13-, 5900             | K.VLDFEHLFPLM*LOTVAK.N                                                          | 1905.24957 | 3 | 4.80E-04 | 0.88 | 4.08  | -     | 762.2    |
| AHQ-9-12, 6182              | K.VLDFEHLFPLM*LOTVAK.N                                                          | 1889.25017 | 2 | 6.02E-04 | 0.90 | 4.19  | -     | 662.6    |
| gi 5123454 ref NP_005336.2  | heat shock 70kDa protein 1A; heat shock 70kD protein 1A; heat shock-ind         |            |   | 1.76E-06 | 1.53 | 20.20 | 4.20  | 70037.7  |
| AHQ-9-6, 4554               | K.DAGVIAGLNVLR.I                                                                | 1198.39736 | 2 | 1.76E-06 | 0.95 | 3.95  | -     | 1523.1   |
| AHQ-9-7, 3670               | K.NQVALNPQNTVFADK.R                                                             | 1659.82478 | 2 | 7.95E-04 | 0.58 | 2.77  | -     | 449.2    |
| gi 11993943 ref NP_055419.1 | Tax interaction protein 1 [Homo sapiens]                                        |            |   | 1.85E-06 | 0.93 | 10.17 | 13.70 | 13734.6  |
| AHQ-9-13, 4199 - 4212       | R.VSEGGPAEIAAGLQIGDK.I                                                          | 1641.80454 | 2 | 1.85E-06 | 0.93 | 3.43  | -     | 1399.2   |
| gi 4504071 ref NP_000164.1  | platelet glycoprotein Ib alpha polypeptide precursor [Homo sapiens] [MA         |            |   | 1.97E-06 | 5.24 | 60.21 | 12.30 | 68955.0  |
| AHQ-9-3, 3444               | K.AM*TSNVASVQCDNKDFPVYK.Y                                                       | 2379.60939 | 3 | 1.97E-06 | 0.90 | 4.22  | -     | 630.6    |
| AHQ-9-9, 4519               | R.GLGLQLQLYLK.G                                                                 | 1263.46458 | 2 | 7.76E-05 | 0.82 | 3.24  | -     | 770.0    |
| AHQ-9-3, 4712 - 4725        | R.GLGLQLQLYLK.G                                                                 | 1263.46458 | 2 | 1.32E-04 | 0.95 | 3.78  | -     | 1620.2   |
| AHQ-9-13, 4187 - 4202       | R.GQDLLSTVSIR.Y                                                                 | 1189.34410 | 2 | 4.04E-05 | 0.93 | 3.97  | -     | 1118.0   |
| AHQ-9-3, 4000               | R.GQDLLSTVSIR.Y                                                                 | 1189.34410 | 2 | 3.68E-04 | 0.94 | 3.49  | -     | 1436.2   |
| AHQ-9-13-, 4044 - 4062      | R.GQDLLSTVSIR.Y                                                                 | 1189.34410 | 2 | 4.78E-06 | 0.95 | 3.46  | -     | 1580.5   |
| AHQ-9-4, 2225               | R.GVLQGHLESSR.N                                                                 | 1183.29965 | 2 | 6.69E-06 | 0.88 | 2.92  | -     | 1012.2   |
| AHQ-9-3, 4060 - 4062        | R.LTSLPLGALR.G                                                                  | 1041.26938 | 2 | 9.28E-04 | 0.84 | 3.18  | -     | 729.9    |
| AHQ-9-3, 4576 - 4626        | R.WLQDNAENNVYVWK.Q                                                              | 1665.82948 | 2 | 1.78E-04 | 0.90 | 3.66  | -     | 975.1    |
| AHQ-9-3, 4770 - 4797        | R.WLQDNAENNVYVWK.Q                                                              | 1665.82948 | 2 | 5.96E-05 | 0.85 | 3.60  | -     | 797.9    |
| AHQ-9-4, 4636 - 4644        | R.WLQDNAENNVYVWK.Q                                                              | 1665.82948 | 2 | 2.34E-04 | 0.87 | 3.61  | -     | 913.8    |
| gi 24234688 ref NP_004125.3 | heat shock 70kDa protein 9B precursor; heat shock 70kD protein 9; stre          |            |   | 2.04E-06 | 0.48 | 10.14 | 2.80  | 73680.1  |
| AHQ-9-6, 5433               | K.STNGDTFLGGEDFDQALLR.H                                                         | 2057.16328 | 2 | 2.04E-06 | 0.48 | 2.76  | -     | 294.1    |
| gi 4557701 ref NP_000413.1  | keratin 17 [Homo sapiens]                                                       |            |   | 2.16E-06 | 1.86 | 20.19 | 4.60  | 48105.4  |
| AHQ-9-7, 3178 - 3244        | K.TRLQEIATYR.R                                                                  | 1380.53166 | 2 | 5.71E-04 | 0.95 | 3.74  | -     | 1481.3   |
| AHQ-9-1, 3738               | R.VLDELTLAR.A                                                                   | 1030.20023 | 2 | 2.16E-06 | 0.91 | 3.45  | -     | 995.3    |
| gi 20127408 ref NP_000173.2 | hydroxycytl dehydrogenase, subunit A; trifunctional protein, alpha sub          |            |   | 2.19E-06 | 0.90 | 10.21 | 2.20  | 82999.1  |
| AHQ-9-6, 3111               | K.TGIEQSDAGYLCEQSK.F                                                            | 1844.93497 | 2 | 2.19E-06 | 0.90 | 4.10  | -     | 687.6    |
| gi 27500274 ref XP_113950.3 | similar to Munc13-4 protein [Homo sapiens]                                      |            |   | 2.22E-06 | 1.85 | 20.20 | 2.80  | 123281.1 |
| AHQ-9-4, 3445               | R.IQQQAETTSEELGAVTVK.A                                                          | 1933.10674 | 2 | 2.92E-04 | 0.94 | 3.93  | -     | 1241.8   |
| AHQ-9-4, 5130 - 5157        | K.LPAPQLVAEALQR.V                                                               | 1525.73360 | 2 | 2.22E-06 | 0.91 | 3.15  | -     | 1230.6   |
| gi 17986273 ref NP_524144.1 | fast skeletal myosin alkali light chain 1 isoform 1f; A1 catalytic; A2          |            |   | 2.64E-06 | 1.85 | 20.21 | 8.20  | 21145.0  |
| AHQ-9-12, 3340 - 3409       | R.VFDKEGNGTVMGALR.H                                                             | 1723.93228 | 2 | 2.64E-06 | 0.94 | 4.13  | -     | 1242.5   |
| AHQ-9-12, 2714 - 2768       | R.VFDKEGNGTVMGALR.H                                                             | 1739.93168 | 2 | 1.43E-05 | 0.91 | 3.59  | -     | 972.9    |
| gi 28178832 ref NP_002159.2 | isocitrate dehydrogenase 2 (NADP+), mitochondrial precursor; isocitrat          |            |   | 2.70E-06 | 1.84 | 20.17 | 4.90  | 50909.0  |
| AHQ-9-8, 2170 - 2206        | K.TIEAEAAGHTVTR.H                                                               | 1356.46696 | 2 | 2.70E-06 | 0.91 | 3.26  | -     | 939.7    |
| AHQ-9-8, 4138               | K.YFDLGLPNR.D                                                                   | 1095.23246 | 2 | 2.34E-05 | 0.94 | 3.33  | -     | 1400.2   |
| gi 5803036 ref NP_006796.1  | heterogeneous nuclear ribonucleoprotein A0; hnRNA binding protein [Homo         |            |   | 2.70E-06 | 0.92 | 10.18 | 5.20  | 30840.3  |
| AHQ-9-9, 4555 - 4563        | K.LFIGGLNVTSEGLR.S                                                              | 1691.90992 | 2 | 2.70E-06 | 0.92 | 3.60  | -     | 1217.3   |
| gi 19743813 ref NP_002202.2 | integrin beta 1 isoform 1A precursor; integrin VLA-4 beta subunit; fib          |            |   | 2.71E-06 | 2.36 | 30.21 | 6.00  | 88414.9  |
| AHQ-9-3, 4872               | K.LKPEDITIQPQQVLRL.L                                                            | 2020.36187 | 3 | 5.14E-05 | 0.84 | 3.99  | -     | 758.1    |
| AHQ-9-3, 4874               | K.LKPEDITIQPQQVLRL.L                                                            | 2020.36187 | 2 | 2.71E-06 | 0.88 | 4.18  | -     | 616.3    |
| AHQ-9-3, 6244 - 6245        | K.LSENNITFAVTEEFQPYK.E                                                          | 2071.74650 | 2 | 3.07E-06 | 0.81 | 3.49  | -     | 407.1    |
| AHQ-9-3, 3210               | K.WDGTENPIYK.S                                                                  | 1223.31587 | 2 | 2.44E-04 | 0.67 | 2.99  | -     | 532.7    |
| gi 23510338 ref NP_003325.1 | ubiquitin-activating enzyme E1; A1S9T and BN75 temperature sensitivity          |            |   | 2.72E-06 | 1.81 | 20.23 | 2.80  | 117848.1 |
| AHQ-9-4, 5061 - 5062        | R.LAGTQPLEVLEAQR.S                                                              | 1624.86348 | 2 | 2.72E-06 | 0.91 | 4.64  | -     | 505.0    |
| AHQ-9-4, 5934               | K.YFLVGAAPGICELLK.N                                                             | 1612.91436 | 2 | 2.82E-04 | 0.90 | 3.25  | -     | 1108.5   |
| gi 4504045 ref NP_002063.1  | guanine nucleotide binding protein (G protein), q polypeptide [Homo sap         |            |   | 2.86E-06 | 0.77 | 10.17 | 4.20  | 42142.8  |
| AHQ-9-8, 4046 - 4050        | R.VADPAYLPTQQDVLV.R                                                             | 1686.89014 | 2 | 2.86E-06 | 0.77 | 3.40  | -     | 657.7    |
| gi 14249348 ref NP_116120.1 | hypothetical protein MGC14353 [Homo sapiens]                                    |            |   | 3.06E-06 | 0.69 | 10.16 | 11.40 | 13940.7  |
| AHQ-9-13-, 4122             | R.YEEVSVSGFEFHR.A                                                               | 1715.80053 | 2 | 3.06E-06 | 0.69 | 3.12  | -     | 373.2    |
| gi 5031857 ref NP_005557.1  | lactate dehydrogenase A [Homo sapiens]                                          |            |   | 3.07E-06 | 4.08 | 50.20 | 13.60 | 36688.5  |
| AHQ-9-9, 6002               | K.DLADELALVDIEDK.L                                                              | 1658.82864 | 2 | 3.07E-06 | 0.96 | 3.99  | -     | 1777.2   |
| AHQ-9-13-, 6176             | K.DLADELALVDIEDK.L                                                              | 1658.82864 | 2 | 3.19E-04 | 0.96 | 4.07  | -     | 1764.7   |
| AHQ-9-9, 2717               | K.LVIITAGAR.Q                                                                   | 914.12760  | 2 | 6.40E-05 | 0.91 | 2.91  | -     | 1103.1   |
| AHQ-9-9, 3521               | K.QVVESAYEVIK.L                                                                 | 1265.43734 | 2 | 4.59E-05 | 0.85 | 3.07  | -     | 821.2    |
| AHQ-9-9, 3248 - 3260        | K.SADTLWGIQK.E                                                                  | 1119.25233 | 2 | 8.06E-06 | 0.84 | 3.44  | -     | 628.2    |
| AHQ-9-9, 2493               | K.TLHPDLGTDKKKEQWK.E                                                            | 1912.09245 | 2 | 7.66E-04 | 0.51 | 2.88  | -     | 251.2    |
| gi 5031987 ref NP_005720.1  | peptidylprolyl isomerase F (cyclophilin F) [Homo sapiens]                       |            |   | 3.32E-06 | 0.76 | 10.17 | 14.00 | 22040.1  |
| AHQ-9-13, 5042              | K.GSGDPSSSSSSGNPLVYLDVDANGKPLGR.V                                               | 2834.99028 | 3 | 3.32E-06 | 0.76 | 3.39  | -     | 709.0    |
| AHQ-9-11, 4777 - 4849       | K.GSGDPSSSSSSGNPLVYLDVDANGKPLGR.V                                               | 2834.99028 | 3 | 7.72E-05 | 0.82 | 3.36  | -     | 889.9    |
| gi 20127528 ref NP_037459.2 | parvin, beta; CGI-56 protein; beta-parvin [Homo sapiens]                        |            |   | 3.70E-06 | 2.77 | 30.21 | 11.00 | 41714.0  |
| AHQ-9-9, 3299 - 3301        | K.ARPEDVVDLKL.S                                                                 | 1369.54878 | 2 | 3.70E-06 | 0.93 | 4.16  | -     | 937.6    |
| AHQ-9-9, 3497               | K.LNVAEVTQSEIGQK.Q                                                              | 1516.67865 | 2 | 3.50E-05 | 0.92 | 3.67  | -     | 1239.1   |
| AHQ-9-9, 3731               | K.QLEEDLYDQQVLQK.L                                                              | 1678.82164 | 2 | 3.45E-04 | 0.91 | 3.69  | -     | 1061.1   |
| gi 13899317 ref NP_113657.1 | SH3 domain binding glutamic acid-rich protein like 2 [Homo sapiens] [M          |            |   | 4.13E-06 | 2.32 | 30.22 | 23.40 | 13236.0  |
| AHQ-9-14-, 5267             | K.ESNTVFSFLGKPLR.L                                                              | 1595.82383 | 2 | 5.53E-04 | 0.53 | 2.85  | -     | 391.7    |
| AHQ-9-14-, 4310             | R.VFIASSSGFVAIK.K                                                               | 1326.56551 | 2 | 4.13E-06 | 0.97 | 4.38  | -     | 2305.5   |
| AHQ-9-13-, 4298             | R.VFIASSSGFVAIK.K                                                               | 1326.56551 | 2 | 5.68E-06 | 0.97 | 4.11  | -     | 1902.2   |
| AHQ-9-14-, 4326             | R.YCGDYDSFESK.E                                                                 | 1519.57010 | 2 | 7.65E-05 | 0.81 | 2.59  | -     | 869.7    |
| gi 17438583 ref XP_005967.1 | similar to nucleophosmin (nucleolar phosphoprotein B23, numatrin); Nuc          |            |   | 4.24E-06 | 0.38 | 10.13 | 5.10  | 28274.3  |
| AHQ-9-9, 2331               | K.VDNDENEHQLSLR.T                                                               | 1569.61536 | 2 | 4.24E-06 | 0.38 | 2.66  | -     | 308.1    |
| gi 29568111                 |                                                                                 |            |   |          |      |       |       |          |

|                             |                                                                          |            |   |          |      |       |       |          |
|-----------------------------|--------------------------------------------------------------------------|------------|---|----------|------|-------|-------|----------|
| AHQ-9-14-, 3925             | K.GNFNVYVEFTR.I                                                          | 1247.34066 | 2 | 4.36E-06 | 0.77 | 2.61  | -     | 780.5    |
| AHQ-9-11, 3930 - 3939       | K.GNFNVYVEFTR.I                                                          | 1247.34066 | 2 | 2.37E-04 | 0.94 | 3.73  | -     | 1026.1   |
| gi 4506417 ref NP_002877.1  | RAP2B, member of RAS oncogene family [Homo sapiens]                      |            |   | 4.39E-06 | 3.27 | 40.22 | 31.10 | 20494.2  |
| AHQ-9-11, 5735              | K.ASVDFEFAEIVR.Q                                                         | 1349.51434 | 2 | 4.39E-06 | 0.69 | 2.74  | -     | 818.5    |
| AHQ-9-11, 6101              | K.EIEVDSPPSVLELDTAGTEQFASMR.D                                            | 2842.08287 | 3 | 9.30E-06 | 0.90 | 4.38  | -     | 1028.9   |
| AHQ-9-11, 3283 - 3287       | R.VPMILVGNK.V                                                            | 971.24256  | 2 | 8.15E-04 | 0.81 | 2.72  | -     | 781.5    |
| AHQ-9-11, 4085 - 4086       | K.YDPTIEDFYR.K                                                           | 1319.40042 | 2 | 2.98E-04 | 0.87 | 3.12  | -     | 451.5    |
| gi 27597085 ref NP_000357.3 | tropomyosin 1 (alpha) [Homo sapiens]                                     |            |   | 4.59E-06 | 0.85 | 10.18 | 3.90  | 32865.7  |
| AHQ-9-9, 3235               | R.KLVIIESDLER.A                                                          | 1315.54103 | 2 | 4.59E-06 | 0.85 | 2.96  | -     | 1166.3   |
| gi 18491024 ref NP_005691.2 | dipeptidylpeptidase III isoform 1; dipeptidylpeptidase III [Homo sapie   |            |   | 4.80E-06 | 0.92 | 10.19 | 2.30  | 82588.6  |
| AHQ-9-6, 4374               | K.LAQDFLDSQNL SAYNTR.L                                                   | 1957.09009 | 2 | 4.80E-06 | 0.92 | 3.83  | -     | 1209.6   |
| gi 4557241 ref NP_001095.1  | skeletal muscle specific actinin, alpha 3 [Homo sapiens]                 |            |   | 4.96E-06 | 0.75 | 10.13 | 0.90  | 103293.7 |
| AHQ-9-4, 3038               | K.ALDFIASK.G                                                             | 865.00867  | 2 | 4.96E-06 | 0.75 | 2.59  | -     | 463.5    |
| AHQ-9-5, 3047               | K.ALDFIASK.G                                                             | 865.00867  | 1 | 4.83E-04 | 0.50 | 1.82  | -     | 817.2    |
| AHQ-9-4, 2969 - 3041        | K.ALDFIASK.G                                                             | 865.00867  | 1 | 8.85E-04 | 0.52 | 2.45  | -     | 789.6    |
| gi 14591909 ref NP_000960.2 | ribosomal protein L5; 60S ribosomal protein L5 [Homo sapiens]            |            |   | 5.00E-06 | 1.83 | 20.17 | 7.40  | 34362.4  |
| AHQ-9-9, 4100               | R.DIIQAIYAR.I                                                            | 1224.41173 | 2 | 5.00E-06 | 0.95 | 3.34  | -     | 1710.3   |
| AHQ-9-9, 3087 - 3149        | K.HIMGQNVADYMR.Y                                                         | 1435.65746 | 2 | 2.52E-04 | 0.87 | 3.06  | -     | 1283.2   |
| gi 4502101 ref NP_000691.1  | annexin I; annexin I (lipocortin I); lipocortin I [Homo sapiens]         |            |   | 5.05E-06 | 2.43 | 30.16 | 11.60 | 38714.0  |
| AHQ-9-9, 5875 - 5876        | K.GLGTDEDTLIEILASR.T                                                     | 1703.87264 | 2 | 8.30E-06 | 0.74 | 3.23  | -     | 786.2    |
| AHQ-9-9, 5584 - 5588        | K.GVDEATIIDLTK.R                                                         | 1388.58878 | 2 | 9.82E-04 | 0.86 | 3.20  | -     | 974.8    |
| AHQ-9-9, 2975               | K.TPAQFDADIELR.A                                                         | 1263.33840 | 2 | 5.05E-06 | 0.83 | 3.02  | -     | 939.5    |
| gi 18104967 ref NP_000953.2 | prostaglandin-endoperoxide synthase 1 isoform 1 precursor; prostagland   |            |   | 5.14E-06 | 3.45 | 40.21 | 13.50 | 66860.0  |
| AHQ-9-6, 3927               | K.AEHPTWGDQELFQTTR.L                                                     | 1917.02765 | 2 | 5.14E-06 | 0.94 | 4.25  | -     | 988.4    |
| AHQ-9-6, 3845 - 3850        | K.ALGHGVLDLGHYGDNLER.Q                                                   | 1937.10524 | 3 | 1.43E-05 | 0.79 | 3.53  | -     | 818.1    |
| AHQ-9-6, 6195               | K.GLLGNPICSPYWKPFSTFGGEVGFNIVK.T                                         | 3069.47853 | 3 | 1.47E-04 | 0.84 | 4.02  | -     | 528.6    |
| AHQ-9-6, 3207 - 3266        | R.VPDASQDDGPVAERPSTEL                                                    | 1984.06747 | 2 | 6.35E-05 | 0.88 | 3.51  | -     | 820.1    |
| gi 5174447 ref NP_006089.1  | guanine nucleotide binding protein (G protein), beta polypeptide 2-like  |            |   | 5.14E-06 | 1.82 | 20.20 | 6.60  | 35076.5  |
| AHQ-9-9, 3824               | K.DVLSAVFSSDNR.Q                                                         | 1310.39506 | 2 | 5.14E-06 | 0.92 | 3.73  | -     | 906.2    |
| AHQ-9-9, 3304 - 3309        | R.VWQVTIGTR                                                              | 1060.23125 | 2 | 7.00E-04 | 0.90 | 3.26  | -     | 1069.5   |
| gi 21361755 ref NP_004090.3 | stomatin; erythrocyte membrane protein band 7.2 (stomatin) [Homo sapie   |            |   | 5.27E-06 | 2.73 | 30.24 | 11.10 | 31708.5  |
| AHQ-9-13, 4179              | K.EASM*VITESPALQLR.Y                                                     | 1732.98059 | 2 | 1.52E-04 | 0.84 | 3.31  | -     | 815.8    |
| AHQ-9-10, 6243              | K.GPGLFFILPCTDSFIK.V                                                     | 1814.13672 | 2 | 5.27E-06 | 0.95 | 4.39  | -     | 1031.5   |
| AHQ-9-1, 6450 - 6451        | K.GPGLFFILPCTDSFIK.V                                                     | 1814.13672 | 2 | 7.25E-05 | 0.94 | 4.40  | -     | 702.5    |
| AHQ-9-1, 3958               | R.VQNTALAVANITNADSATR.L                                                  | 1931.09731 | 2 | 2.94E-05 | 0.94 | 4.90  | -     | 990.9    |
| gi 24307939 ref NP_036205.1 | chaperonin containing TCP1, subunit 5 (epsilon) [Homo sapiens]           |            |   | 5.63E-06 | 0.91 | 10.18 | 3.00  | 59670.7  |
| AHQ-9-7, 6025               | K.LGFAGLVQEISFGTTK.D                                                     | 1668.91472 | 2 | 5.63E-06 | 0.91 | 3.58  | -     | 1114.9   |
| AHQ-9-6, 6049               | K.LGFAGLVQEISFGTTK.D                                                     | 1668.91472 | 2 | 4.70E-05 | 0.91 | 3.48  | -     | 1017.8   |
| gi 4503551 ref NP_001410.1  | ELAV (embryonic lethal, abnormal vision, Drosophila)-like 1 (Hu antigen  |            |   | 5.76E-06 | 0.91 | 10.19 | 4.30  | 36061.6  |
| AHQ-9-9, 3968               | K.NVALLSQLYHSPAR.R                                                       | 1569.78961 | 2 | 5.76E-06 | 0.91 | 3.72  | -     | 974.6    |
| gi 5901944 ref NP_008977.1  | elastin microfibril interface located protein; TNF? elastin microfibril  |            |   | 5.77E-06 | 4.34 | 50.25 | 9.00  | 106694.7 |
| AHQ-9-4, 3506               | R.APAPASPPGPSEELLR.Q                                                     | 1660.85268 | 2 | 5.77E-06 | 0.73 | 3.30  | -     | 348.6    |
| AHQ-9-4, 2956               | R.GLEEGQAAGQCPSLEGR.L                                                    | 1888.99421 | 2 | 1.11E-04 | 0.82 | 3.26  | -     | 589.5    |
| AHQ-9-3, 3566               | R.LDTVAGGLQGLR.E                                                         | 1200.37012 | 2 | 5.54E-05 | 0.96 | 4.05  | -     | 1918.8   |
| AHQ-9-3, 2950               | R.LVGSGLHTVEAAGEAR.Q                                                     | 1567.72888 | 2 | 1.16E-04 | 0.90 | 3.53  | -     | 1073.0   |
| AHQ-9-3, 3649               | R.PARNPLSGSSAGSPLSGLGGEGPGESEK.V                                         | 2596.74928 | 3 | 1.45E-05 | 0.93 | 4.98  | -     | 1007.1   |
| gi 10863927 ref NP_066953.1 | peptidylprolyl isomerase A (cyclophilin A) [Homo sapiens]                |            |   | 5.78E-06 | 4.03 | 50.28 | 23.00 | 18012.4  |
| AHQ-9-12, 3878 - 3944       | K.FEDENFIK.H                                                             | 1155.28144 | 2 | 8.90E-05 | 0.70 | 2.69  | -     | 564.0    |
| AHQ-9-14-, 3413 - 3417      | K.KITADCGGLE                                                             | 1249.41637 | 2 | 2.13E-04 | 0.89 | 4.18  | -     | 1018.8   |
| AHQ-9-12, 4488 - 4490       | K.SIYGEKFEDENFIK.H                                                       | 1833.03047 | 2 | 5.78E-06 | 0.96 | 5.59  | -     | 1116.3   |
| AHQ-9-12, 4349              | R.VSFELFADK.V                                                            | 1056.19300 | 1 | 3.36E-04 | 0.61 | 2.77  | -     | 674.1    |
| AHQ-9-12, 4458              | R.VSFELFADKVPK.T                                                         | 1060.61317 | 2 | 3.63E-05 | 0.87 | 3.56  | -     | 880.9    |
| gi 6005749 ref NP_009193.1  | RNA-binding protein regulatory subunit; oncogene DJ1 [Homo sapiens] [MA  |            |   | 6.01E-06 | 0.59 | 10.13 | 8.50  | 19849.9  |
| AHQ-9-11, 3225              | K.VTVAGLAGKDPVQCSR.D                                                     | 1659.88952 | 2 | 6.01E-06 | 0.59 | 2.54  | -     | 407.4    |
| gi 18201905 ref NP_000166.2 | glucose phosphate isomerase; neuroleukin; glucose-6-phosphate isomerases |            |   | 6.01E-06 | 0.86 | 10.19 | 3.00  | 63146.7  |
| AHQ-9-7, 5609               | K.TLAQLNPESLFIASK.T                                                      | 1833.11828 | 2 | 6.01E-06 | 0.86 | 3.74  | -     | 502.4    |
| gi 19882251 ref NP_001889.2 | cystatin SN precursor; cystatin I; cystatin SA-I; cysteine proteinase    |            |   | 6.16E-06 | 0.51 | 10.16 | 12.80 | 16387.6  |
| AHQ-9-13, 5082              | R.IIPGGYNADLDEVVQR.A                                                     | 2074.28181 | 2 | 6.16E-06 | 0.51 | 3.11  | -     | 183.8    |
| gi 18543899 ref XP_086916.1 | similar to Phosphatidylethanolamine-binding protein (PEBP) (Prostatic    |            |   | 6.19E-06 | 0.81 | 10.14 | 7.50  | 21265.8  |
| AHQ-9-11, 4225              | K.LYTLVLTDPDAPSR.K                                                       | 1561.76102 | 2 | 6.19E-06 | 0.81 | 2.86  | -     | 851.7    |
| gi 4505185 ref NP_002406.1  | macrophage migration inhibitory factor (glycosylation-inhibiting factor  |            |   | 6.29E-06 | 0.92 | 10.16 | 7.80  | 12476.2  |
| AHQ-9-13-, 4453             | K.LLCCGLAER.L                                                            | 1046.26608 | 2 | 6.29E-06 | 0.92 | 3.12  | -     | 1143.7   |
| AHQ-9-13, 4628              | K.LLCCGLAER.L                                                            | 1046.26608 | 2 | 9.59E-04 | 0.82 | 2.62  | -     | 709.2    |
| gi 5453607 ref NP_006420.1  | chaperonin containing TCP1, subunit 7 (eta); chaperonin containing t-co  |            |   | 6.41E-06 | 1.87 | 20.26 | 6.60  | 59366.3  |
| AHQ-9-7, 4710 - 4786        | K.LPIGDVATYQFADR.D                                                       | 1566.73935 | 2 | 6.41E-06 | 0.91 | 3.89  | -     | 667.5    |
| AHQ-9-7, 6188 - 6189        | K.SQDAEVLGDDGTTLLAAEFLK.Q                                                | 2253.44775 | 2 | 3.47E-05 | 0.96 | 5.12  | -     | 1116.8   |
| gi 20547663 ref XP_166266.1 | similar to Esterase D [Homo sapiens]                                     |            |   | 6.48E-06 | 0.46 | 10.15 | 6.40  | 31462.6  |
| AHQ-9-9, 5641               | K.SVSFAFICNPVLCPPWGK.K                                                   | 2006.33387 | 2 | 6.48E-06 | 0.46 | 2.95  | -     | 222.6    |
| gi 4759274 ref NP_004777.1  | thioredoxin-like, 32kDa; thioredoxin-related 32 kDa protein; thioredoxi  |            |   | 6.67E-06 | 0.95 | 10.19 | 5.20  | 32251.1  |
| AHQ-9-9, 2991               | R.IDQYQGADAVLLEEK.I                                                      | 1636.74162 | 2 | 6.67E-06 | 0.95 | 3.79  | -     | 1933.7   |
| gi 6912638 ref NP_036557.1  | ras suppressor protein 1 [Homo sapiens]                                  |            |   | 6.67E-06 | 2.19 | 30.17 | 24.50 | 31540.1  |
| AHQ-9-10, 5600 - 5671       | R.ALYLSDNDFEILPPDIGK.L                                                   | 2021.25559 | 2 | 2.10E-04 | 0.69 | 3.23  | -     | 323.8    |
| AHQ-9-10, 6255 - 6256       | R.GISNM*LDVNGLFTLSHITQLVLSHNK.L                                          | 2869.28903 | 3 | 6.67E-06 | 0.74 | 3.49  | -     | 748.8    |
| AHQ-9-10, 6173 - 6247       | K.NLEVLN*QVLEELPTQISSLQK.L                                               | 2820.14663 | 3 | 4.98E-04 | 0.76 | 3.27  | -     | 738.4    |
| gi 18104989 ref NP_002822.2 | protein tyrosine phosphatase, non-receptor type 6 isoform 1; protein-t   |            |   | 7.07E-06 | 2.42 | 30.19 | 6.10  | 67560.7  |
| AHQ-9-6, 4617 - 4677        | R.DLSGLDAETLLK.G                                                         | 1275.43053 | 2 | 1.93E-04 | 0.83 | 2.91  | -     | 1201.0   |
| AHQ-9-6, 3234               | K.GLDCDIDIQK.T                                                           | 1178.29500 | 2 | 7.07E-06 | 0.93 | 3.78  | -     | 1028.6   |
| AHQ-9-6, 4294               | R.TLVSPVLDNGLDIR.E                                                       | 1541.73134 | 2 | 1.96E-05 | 0.67 | 2.72  | -     | 591.2    |
| gi 29727204 ref XP_290872.1 | similar to Pyruvate kinase, M2 isozyme [Homo sapiens]                    |            |   | 7.08E-06 | 0.95 | 10.16 | 5.40  | 16297.7  |
| AHQ-9-7, 2484 - 2493        | R.APIAVTR.N                                                              | 841.03348  | 2 | 7.08E-06 | 0.95 | 3.29  | -     | 1326.7   |
| gi 5174727 ref NP_005989.1  | chaperonin containing TCP1, subunit 3 (gamma); TCP1 (t-complex-1) ring   |            |   | 7.56E-06 | 1.64 | 20.19 | 6.30  | 60330.4  |
| AHQ-9-6, 4285               | R.IVSRPEELREDDVGTGAGLLEIK.K                                              | 2497.78703 | 3 | 2.78E-04 | 0.71 | 3.71  | -     | 646.9    |
| AHQ-9-6, 4663               | K.TAVETAVLLLR.I                                                          | 1186.42649 | 2 | 7.56E-06 | 0.93 | 3.67  | -     | 1637.2   |
| gi 4505989 ref NP_000299.1  | protective protein for beta-galactosidase; Protective protein for beta-  |            |   | 7.70E-06 | 0.88 | 10.16 | 2.70  | 54495.8  |
| AHQ-9-11, 3493              | K.YGDSGEQIAGFVK.E                                                        | 1371.47686 | 2 | 7.70E-06 | 0.88 | 3.18  | -     | 968.6    |
| gi 4507383 ref NP_001052.1  | thromboxane A synthase 1 (platelet, cytochrome P450, family 5, subfamil  |            |   | 8.42E-06 | 1.84 | 20.23 | 4.90  | 60675.3  |
| AHQ-9-7, 4154               | R.FQACPETFVPLQLESK.S                                                     | 1877.10807 | 2 | 8.42E-06 | 0.96 | 4.69  | -     | 1281.2   |
| AHQ-9-7, 4396               | K.SVADSVLFLR.D                                                           | 1107.28469 | 2 | 1.85E-04 | 0.88 | 3.28  | -     | 778.0    |
| gi 4757812 ref NP_004880.1  | ATP synthase, H+ transporting, mitochondrial F0 complex, subunit f, iso  |            |   | 8.64E-06 | 1.64 | 20.16 | 11.70 | 10917.8  |
| AHQ-9-14-, 5605             | R.DFSPSGIFGAFQR.G                                                        | 1429.56124 | 2 | 8.64E-06 | 0.78 | 2.57  | -     | 744.7    |
| AHQ-9-14-, 5270             | K.LGELPWSWILMR.D                                                         | 1331.60876 | 2 | 7.41E-05 | 0.86 | 3.12  | -     | 507.6    |
| gi 4507767 ref NP_003326.1  | ubiquitin-activating enzyme E1-like; Ubiquitin-activating enzyme-2; ubi  |            |   | 8.93E-06 | 1.90 | 20.18 | 2.90  | 111719.5 |
| AHQ-9-4, 4550               | R.VDGVAAALDSFQAR.R                                                       | 1420.55265 | 2 | 7.84E-05 | 0.96 | 3.61  | -     | 2066.3   |
| AHQ-9-4, 4450               | R.VLVSLGLQLGAEVAK.N                                                      | 1441.69805 | 2 | 8.93E-06 | 0.94 | 3.53  | -     | 1520.8   |
| gi 4504489 ref NP_000403.1  | histidine-rich glycoprotein precursor; histidine-proline rich glycoprot  |            |   | 9.05E-06 | 0.73 | 10.13 | 2.70  | 59578.0  |
| AHQ-9-5, 6049               | K.DSPVLIDFFDTER.Y                                                        | 1683.79674 | 2 | 9.05E-06 | 0.73 | 2.66  | -     | 728.2    |
| gi 8922804 ref NP_060760.1  | hypothetical protein FLJ10983 [Homo sapiens]                             |            |   | 9.52E-06 | 0.86 | 10.14 | 1.60  | 68268.9  |
| AHQ-9-6, 3465               | R.LDQETAQWLR.V                                                           | 1260.38088 | 2 | 9.52E-06 | 0.86 | 2.90  | -     | 1110.8   |
| gi 4504391 ref NP_000179.1  | hexokinase 1 isoform HK1; brain form hexokinase [Homo sapiens]           |            |   | 9.63E-06 | 1.98 | 30.18 | 5.90  | 102502.4 |
| AHQ-9-4, 5570               | R.AILQLGLNSTCDDSDLVK.T                                                   | 2090.38419 | 2 | 3.48E-04 | 0.35 | 2.65  | -     | 366.7    |
| AHQ-9-4, 5230               | K.GDFIALDLGGSSFR.I                                                       | 1455.59700 | 2 | 2.83E-04 | 0.83 | 2.57  | -     | 1239.2   |
| AHQ-9-4, 5537               | R.TPDGTENGDFLALDLGGTNR.F                                                 | 2211.33051 | 2 | 9.63E-06 | 0.81 | 3.58  | -     | 738.9    |
| gi 4504085 ref NP_000399.1  | glycerol-3-phosphate dehydrogenase 2 (mitochondrial) [Homo sapiens] [MA  |            |   | 9.75E-06 | 1.44 | 20.16 | 3.40  | 80814.1  |
| AHQ-9-6, 5697 - 5705        | R.VIFFLPWQK.M                                                            | 1178.44934 | 2 | 7.89E-04 | 0.86 | 3.04  | -     | 745.0    |
| AHQ-9-6, 5218               | R.YGAATANYM*EVVSLK.K                                                     | 1747.00572 | 2 | 9.75E-06 | 0.59 | 3.11  | -     | 286.9    |
| gi 13637631 ref XP_016625.1 | similar to voltage-dependent anion channel isoform 2 [Homo sapiens] [M   |            |   | 9.97E-06 | 0.92 | 10.16 | 3.40  | 31479.2  |
| AHQ-9-9, 3916               | K.LTLSALVDGK.S                                                           | 1017.20145 | 2 | 9.97E-06 | 0.92 | 3.30  | -     | 1021.6   |







|                             |                                                                         |            |   |          |      |       |       |      |          |
|-----------------------------|-------------------------------------------------------------------------|------------|---|----------|------|-------|-------|------|----------|
| gi 5730118 ref NP_006514.1  | X-prolyl aminopeptidase (aminopeptidase P) 1, soluble; X-prolyl aminope |            |   | 1.02E-04 | 0.80 | 10.16 |       | 2.20 | 69858.4  |
| AHQ-9-6, 5614               | R.VGVDLIPIIDTYWK                                                        | 1616.88141 | 2 | 1.02E-04 | 0.80 | 3.17  | -     | -    | 543.5    |
| gi 27499559 ref XP_026269.7 | similar to lactate dehydrogenase A-like [Homo sapiens]                  |            |   | 1.09E-04 | 0.71 | 10.14 | 5.60  |      | 33375.6  |
| AHQ-9-9, 6149               | K.LIIVSNPVDLTYVAWK.L                                                    | 1945.33337 | 2 | 1.09E-04 | 0.71 | 2.82  | -     | -    | 487.3    |
| gi 29729345 ref XP_290995.1 | similar to speckle-type POZ protein [Homo sapiens]                      |            |   | 1.17E-04 | 1.41 | 20.19 | 10.90 |      | 18703.4  |
| AHQ-9-2, 5702               | K.NRVEINDLDPEVFKEM*MR.F                                                 | 2252.55733 | 2 | 1.17E-04 | 0.60 | 3.31  | -     | -    | 701.8    |
| AHQ-9-3, 5552               | K.NRVEINDLDPEVFKEM*MR.F                                                 | 2252.55733 | 2 | 9.64E-04 | 0.82 | 3.71  | -     | -    | 1040.6   |
| AHQ-9-1, 5736               | K.NRVEINDLDPEVFKEM*MR.F                                                 | 2252.55733 | 2 | 7.31E-04 | 0.84 | 3.11  | -     | -    | 1091.1   |
| gi 21618359 ref NP_004095.3 | fatty acid synthase [Homo sapiens]                                      |            |   | 1.19E-04 | 1.70 | 20.20 | 1.30  |      | 273262.0 |
| AHQ-9-2, 6311               | K.LPEDLLSGLLSDPALK.A                                                    | 1779.06739 | 2 | 1.72E-04 | 0.89 | 3.78  | -     | -    | 734.2    |
| AHQ-9-1, 5056 - 5127        | K.VVVQVLAEEPEAVLK.G                                                     | 1623.91540 | 2 | 1.19E-04 | 0.81 | 3.25  | -     | -    | 841.5    |
| gi 29732170 ref XP_291550.1 | similar to Heat shock protein HSP 90-alpha (HSP 86) [Homo sapiens] [MA  |            |   | 1.26E-04 | 0.91 | 10.26 | 12.70 |      | 13262.9  |
| AHQ-9-5, 4092               | K.HLEINPDHSIETLR.Q                                                      | 1787.99770 | 3 | 1.90E-04 | 0.98 | 5.11  | -     | -    | 2407.1   |
| AHQ-9-5, 4083               | K.HLEINPDHSIETLR.Q                                                      | 1787.99770 | 2 | 1.26E-04 | 0.91 | 3.70  | -     | -    | 883.1    |
| gi 4506117 ref NP_000304.1  | protein S (alpha); Protein S, alpha [Homo sapiens]                      |            |   | 1.26E-04 | 0.85 | 10.16 | 1.60  |      | 75072.2  |
| AHQ-9-4, 3830               | R.SFQTGLFTAAR.Q                                                         | 1199.34068 | 2 | 1.26E-04 | 0.85 | 3.17  | -     | -    | 554.3    |
| gi 30148644 ref XP_293716.2 | similar to Heat shock protein HSP 90-alpha (HSP 86) [Homo sapiens] [MA  |            |   | 1.26E-04 | 0.90 | 10.17 | 1.20  |      | 105150.3 |
| AHQ-9-5, 3608               | R.TLTIVDTGIGM*TK.A                                                      | 1366.60658 | 2 | 1.26E-04 | 0.90 | 3.33  | -     | -    | 1006.0   |
| gi 30153966 ref XP_293932.2 | similar to hypothetical protein BC013073 [Homo sapiens]                 |            |   | 1.29E-04 | 0.75 | 10.18 | 9.00  |      | 21711.3  |
| AHQ-9-4, 3921 - 3977        | R.MIFLFTINVSQDIRRH                                                      | 2073.44997 | 2 | 6.62E-04 | 0.51 | 3.37  | -     | -    | 387.4    |
| AHQ-9-5, 3935 - 3991        | R.MIFLFTINVSQDIRRH                                                      | 2073.44997 | 2 | 1.90E-04 | 0.34 | 3.16  | -     | -    | 281.0    |
| AHQ-9-6, 3903               | R.MIFLFTINVSQDIRRH                                                      | 2073.44997 | 3 | 1.29E-04 | 0.75 | 3.33  | -     | -    | 786.1    |
| AHQ-9-2, 3951 - 4021        | R.MIFLFTINVSQDIRRH                                                      | 2073.44997 | 2 | 3.98E-04 | 0.68 | 3.36  | -     | -    | 553.4    |
| gi 29739002 ref XP_294006.1 | similar to 60S ribosomal protein L6 (TAX-responsive enhancer element b  |            |   | 1.30E-04 | 0.79 | 10.14 | 11.10 |      | 13435.5  |
| AHQ-9-9, 3903               | R.SVFALTNIGYPHK.L                                                       | 1447.66284 | 2 | 1.30E-04 | 0.79 | 2.88  | -     | -    | 736.0    |
| gi 4503821 ref NP_001456.1  | FYN binding protein (FYN-120/130); FYN-binding protein (FYN-120/130) [H |            |   | 1.40E-04 | 0.95 | 10.20 | 1.50  |      | 85450.5  |
| AHQ-9-6, 3659               | K.TTAVEIDYDSLK.L                                                        | 1355.47251 | 2 | 1.40E-04 | 0.95 | 3.98  | -     | -    | 1310.3   |
| gi 22053085 ref XP_087939.3 | similar to tubulin, beta 5 [Homo sapiens]                               |            |   | 1.54E-04 | 0.68 | 10.16 | 16.00 |      | 12104.0  |
| AHQ-9-7, 5657               | K.MAVTFIGNSSAIQELFK.R                                                   | 1857.16334 | 2 | 1.54E-04 | 0.68 | 3.17  | -     | -    | 764.9    |
| gi 4505759 ref NP_002622.1  | phosphogluconate dehydrogenase; 6-phosphogluconate dehydrogenase [Homo  |            |   | 1.54E-04 | 0.77 | 10.19 | 4.30  |      | 53157.7  |
| AHQ-9-8, 6175 - 6231        | K.IKDAFDRNPELQNLDDFFK.S                                                 | 2552.86598 | 3 | 1.54E-04 | 0.77 | 3.74  | -     | -    | 799.7    |
| gi 4508047 ref NP_003452.1  | zyxin [Homo sapiens]                                                    |            |   | 1.56E-04 | 0.86 | 10.19 | 4.40  |      | 61277.0  |
| AHQ-9-8, 3852               | K.LGHPALSGTGSPPPSFYAQQR.E                                               | 2598.81170 | 3 | 1.56E-04 | 0.86 | 3.83  | -     | -    | 826.1    |
| gi 6041669 ref NP_004538.2  | NADH dehydrogenase (ubiquinone) 1 beta subcomplex, 4, 15kDa; NADH dehyd |            |   | 1.60E-04 | 0.44 | 10.13 | 14.00 |      | 15208.5  |
| AHQ-9-13, 4610              | R.TLPETLDPAEYNISPETR.R                                                  | 2047.20831 | 2 | 1.60E-04 | 0.44 | 2.52  | -     | -    | 346.4    |
| gi 20546215 ref XP_115639.1 | similar to leukocyte immunoglobulin-like receptor, subfamily B (with T  |            |   | 1.61E-04 | 0.63 | 10.16 | 4.70  |      | 42748.2  |
| AHQ-9-2, 4627 - 4685        | R.CSREVNREDNLYRVVVK.P                                                   | 2225.47152 | 2 | 1.61E-04 | 0.63 | 3.13  | -     | -    | 736.6    |
| gi 23463289 ref NP_695023.1 | family with sequence similarity 10, member A5 [Homo sapiens]            |            |   | 1.66E-04 | 0.92 | 10.17 | 3.50  |      | 41377.4  |
| AHQ-9-8, 3143               | R.AIEINPDSAQPYK.W                                                       | 1446.58688 | 2 | 1.66E-04 | 0.92 | 3.31  | -     | -    | 986.7    |
| gi 4503291 ref NP_001346.1  | D-dopachrome tautomerase [Homo sapiens]                                 |            |   | 1.67E-04 | 0.83 | 10.14 | 9.30  |      | 12717.7  |
| AHQ-9-14, 5341              | R.FFPLEWQIGK.I                                                          | 1352.56151 | 2 | 1.67E-04 | 0.83 | 2.71  | -     | -    | 526.9    |
| gi 6005826 ref NP_009160.1  | protein kinase C and casein kinase substrate in neurons 2; pascin 2 [Ho |            |   | 1.69E-04 | 0.80 | 10.14 | 2.30  |      | 55904.6  |
| AHQ-9-6, 3891               | K.AYAAQLTEWAR.R                                                         | 1337.46534 | 2 | 1.69E-04 | 0.80 | 2.82  | -     | -    | 1002.0   |
| gi 18558709 ref XP_087572.1 | similar to bA291L22.2 (similar to CDC10 (cell division cycle 10, S, ce  |            |   | 1.72E-04 | 0.93 | 10.15 | 10.90 |      | 9988.5   |
| AHQ-9-8, 3155 - 3159        | K.FEDYLNAE.SR.V                                                         | 1244.29194 | 2 | 1.72E-04 | 0.93 | 3.06  | -     | -    | 1574.4   |
| gi 27477134 ref NP_079199.2 | nucleoporin 210; nuclear pore membrane glycoprotein 210; gp210 [Homo s  |            |   | 1.72E-04 | 0.51 | 10.14 | 1.00  |      | 205108.8 |
| AHQ-9-2, 3862               | R.CDAIVLDIHDIQVITTR.E                                                   | 2071.34097 | 2 | 1.72E-04 | 0.51 | 2.74  | -     | -    | 655.9    |
| gi 22043610 ref XP_171081.1 | similar to ras-related C3 botulinum toxin substrate 1 isoform Rac1; rh  |            |   | 1.84E-04 | 0.71 | 10.17 | 7.80  |      | 21543.1  |
| AHQ-9-11, 3537 - 3538       | K.KLTPITYPQGLAM*AK.E                                                    | 1648.99156 | 2 | 1.84E-04 | 0.71 | 3.40  | -     | -    | 342.5    |
| gi 4504351 ref NP_000510.1  | delta globin [Homo sapiens]                                             |            |   | 1.92E-04 | 1.71 | 20.19 | 21.80 |      | 16055.4  |
| AHQ-9-13, 4880              | R.FFESFGDLSSPDAVM*GNPK.V                                                | 2062.24491 | 2 | 8.98E-04 | 0.66 | 3.06  | -     | -    | 447.4    |
| AHQ-9-13, 4716              | R.FFESFGDLSSPDAVM*GNPK.V                                                | 2062.24491 | 2 | 2.47E-04 | 0.77 | 3.44  | -     | -    | 417.9    |
| AHQ-9-13, 3194              | K.VNVDVAVGGEALGR.L                                                      | 1257.37853 | 2 | 1.92E-04 | 0.94 | 3.83  | -     | -    | 1082.9   |
| AHQ-9-13, 3368              | K.VNVDVAVGGEALGR.L                                                      | 1257.37853 | 2 | 3.07E-04 | 0.94 | 3.81  | -     | -    | 1362.2   |
| gi 20543399 ref XP_116396.1 | similar to peptidylprolyl isomerase A (cyclophilin A) [Homo sapiens] [  |            |   | 1.92E-04 | 0.58 | 10.15 | 5.00  |      | 19852.7  |
| AHQ-9-12, 4336              | R.VSFKLADK.F                                                            | 1055.25138 | 1 | 1.92E-04 | 0.58 | 2.43  | -     | -    | 838.0    |
| gi 4504743 ref NP_002194.1  | integrin alpha 2 precursor; Integrin, alpha-2 (CD49); alpha-2 subunit o |            |   | 2.12E-04 | 0.79 | 10.17 | 1.90  |      | 129294.4 |
| AHQ-9-3, 4724               | R.VDISLENPGTSPALAEYSETAK.V                                              | 2293.46974 | 2 | 2.12E-04 | 0.79 | 3.41  | -     | -    | 516.7    |
| gi 4758208 ref NP_004081.1  | dual specificity phosphatase 3; vaccinia virus phosphatase VH1-related; |            |   | 2.22E-04 | 0.77 | 10.16 | 7.60  |      | 20478.2  |
| AHQ-9-11, 3694 - 3755       | R.IYVGNASVQDIPK.L                                                       | 1475.67136 | 2 | 2.22E-04 | 0.77 | 3.11  | -     | -    | 758.6    |
| gi 4757766 ref NP_004299.1  | Rho GTPase activating protein 1; RhoGAP; p50rhoGAP; CDC42 GTPase-activa |            |   | 2.23E-04 | 0.49 | 10.13 | 4.10  |      | 50435.4  |
| AHQ-9-7, 5577               | K.FLLDHDQELFSPDPSGL                                                     | 1970.17037 | 2 | 2.23E-04 | 0.49 | 2.65  | -     | -    | 477.1    |
| gi 22045984 ref XP_036408.3 | similar to KIAA1228 protein [Homo sapiens]                              |            |   | 2.23E-04 | 0.72 | 10.13 | 1.70  |      | 80295.6  |
| AHQ-9-11, 3945              | K.VLVALASEELAK.G                                                        | 1243.47481 | 2 | 2.23E-04 | 0.72 | 2.67  | -     | -    | 645.0    |
| gi 24307975 ref NP_054733.1 | U5 snRNP-specific protein, 200-KD [Homo sapiens]                        |            |   | 2.35E-04 | 0.61 | 10.18 | 0.90  |      | 207196.0 |
| AHQ-9-11, 5001 - 5058       | K.M*IDKRMWQSMCLRQFR.K                                                   | 2301.76788 | 3 | 2.35E-04 | 0.61 | 3.56  | -     | -    | 577.3    |
| gi 8922599 ref NP_060653.1  | hypothetical protein FLJ10701 [Homo sapiens]                            |            |   | 2.36E-04 | 0.14 | 10.11 | 3.60  |      | 31649.2  |
| AHQ-9-4, 3846               | R.NNKKTALV.K.E                                                          | 1129.37817 | 1 | 2.36E-04 | 0.14 | 2.21  | -     | -    | 383.6    |
| gi 4758076 ref NP_004068.1  | citrate synthase precursor; Citrate synthase, mitochondrial [Homo sapie |            |   | 2.38E-04 | 0.86 | 10.17 | 3.40  |      | 51706.2  |
| AHQ-9-8, 4483               | K.GLVYETSVLDPDEGIR.F                                                    | 1763.92654 | 2 | 2.38E-04 | 0.86 | 3.39  | -     | -    | 673.8    |
| gi 4506005 ref NP_002700.1  | protein phosphatase 1, catalytic subunit, beta isoform [Homo sapiens] [ |            |   | 2.53E-04 | 0.88 | 10.16 | 4.30  |      | 37186.6  |
| AHQ-9-9, 3752               | R.AHQVVEDEGYEYFAK.R                                                     | 1640.77679 | 2 | 2.53E-04 | 0.88 | 3.24  | -     | -    | 836.4    |
| gi 4758038 ref NP_004246.1  | cytochrome c oxidase subunit Va precursor; cytochrome c oxidase polypep |            |   | 2.56E-04 | 0.68 | 10.14 | 10.00 |      | 16774.1  |
| AHQ-9-13, 4140              | K.GINTLTYDYM*VPEPK.I                                                    | 1693.94282 | 2 | 2.56E-04 | 0.68 | 2.55  | -     | -    | 885.9    |
| gi 6912322 ref NP_036208.1  | crumbs homolog 1 [Homo sapiens]                                         |            |   | 2.66E-04 | 0.28 | 10.13 | 1.50  |      | 151412.1 |
| AHQ-9-10, 4415              | K.IDWNHITLENISGSSSLNVK.A                                                | 2228.44735 | 2 | 2.66E-04 | 0.28 | 2.69  | -     | -    | 501.5    |
| gi 29788766 ref NP_064424.2 | tubulin, beta polypeptide 4, member Q [Homo sapiens]                    |            |   | 2.67E-04 | 0.60 | 10.15 | 3.50  |      | 48372.7  |
| AHQ-9-14, 3886 - 3890       | R.AVLVDLEPGTM*DSVR.S                                                    | 1618.83435 | 2 | 2.67E-04 | 0.60 | 2.68  | -     | -    | 434.0    |
| gi 5031599 ref NP_005722.1  | actin related protein 2/3 complex subunit 2; ARP2/3 protein complex sub |            |   | 2.68E-04 | 0.88 | 10.19 | 3.70  |      | 34332.8  |
| AHQ-9-9, 3775               | R.DNTINLIHTR.D                                                          | 1344.50101 | 2 | 2.68E-04 | 0.88 | 3.13  | -     | -    | 895.7    |
| gi 4502011 ref NP_000467.1  | adenylate kinase 1 [Homo sapiens]                                       |            |   | 2.76E-04 | 0.95 | 10.19 | 6.20  |      | 21634.7  |
| AHQ-9-11, 3518 - 3530       | K.IIFVVGPGSGK.G                                                         | 1131.34939 | 2 | 2.76E-04 | 0.95 | 3.83  | -     | -    | 1960.8   |
| gi 14042953 ref NP_114420.1 | FKSG17 [Homo sapiens]                                                   |            |   | 2.84E-04 | 0.85 | 10.16 | 6.10  |      | 23305.9  |
| AHQ-9-9, 4415               | K.NILFVITKPDVYK.S                                                       | 1550.86611 | 2 | 2.84E-04 | 0.85 | 3.28  | -     | -    | 740.6    |
| gi 5803135 ref NP_006852.1  | RAB35, member RAS oncogene family; ras-related protein rab-1c (GTP-bind |            |   | 2.86E-04 | 0.90 | 10.16 | 5.50  |      | 23025.1  |
| AHQ-9-13, 3781 - 3786       | K.LLIIGDSGVGK.S                                                         | 1072.28025 | 2 | 2.86E-04 | 0.90 | 3.14  | -     | -    | 1177.0   |
| gi 5174613 ref NP_005960.1  | nucleosome assembly protein 1-like 4; nucleosome assembly protein 2 [Ho |            |   | 2.87E-04 | 0.89 | 10.15 | 2.70  |      | 42823.1  |
| AHQ-9-7, 2980               | K.FYEEVHDLER.K                                                          | 1337.41897 | 2 | 2.87E-04 | 0.89 | 3.06  | -     | -    | 1039.6   |
| gi 20373153 ref NP_115997.4 | myosin XVIIIb; myosin 18B [Homo sapiens]                                |            |   | 2.88E-04 | 0.91 | 10.20 | 0.70  |      | 285231.7 |
| AHQ-9-7, 6176               | R.ITAAQLQTMLEKSRVAR.Q                                                   | 2030.42494 | 2 | 2.88E-04 | 0.91 | 4.09  | -     | -    | 1281.0   |
| gi 24497438 ref NP_002178.2 | interleukin 12B precursor; natural killer cell stimulatory factor-2; i  |            |   | 2.98E-04 | 0.17 | 10.13 | 5.80  |      | 37168.7  |
| AHQ-9-13, 5884 - 5948       | R.GSSDPQGVTCGAATLSAER.V                                                 | 1865.95741 | 2 | 2.98E-04 | 0.17 | 2.67  | -     | -    | 244.5    |
| gi 4501889 ref NP_001606.1  | actin, gamma 2 propeptide; actin, alpha-3 [Homo sapiens]                |            |   | 3.03E-04 | 0.64 | 10.17 | 5.60  |      | 41876.7  |
| AHQ-9-14, 5428              | K.DLYANNVLSGGTTM*YPGIADR.M                                              | 2245.45502 | 2 | 3.03E-04 | 0.64 | 3.39  | -     | -    | 461.3    |
| gi 16753212 ref NP_003921.2 | src family associated phosphoprotein 2; src kinase-associated phosphop  |            |   | 3.05E-04 | 0.86 | 10.17 | 2.80  |      | 41216.5  |
| AHQ-9-7, 4093               | K.DAEVWVQLK.F                                                           | 1246.35097 | 2 | 3.05E-04 | 0.86 | 3.39  | -     | -    | 1033.7   |
| gi 30158852 ref XP_301583.1 | similar to actin CA15 - sea squirt (Styela clava) (fragments) [Homo sa  |            |   | 3.       |      |       |       |      |          |

|                             |                                                                         |            |   |          |      |       |       |          |
|-----------------------------|-------------------------------------------------------------------------|------------|---|----------|------|-------|-------|----------|
| AHQ-9-5, 3441 - 3444        | K.WTLLQEQTGK.T                                                          | 1204.35723 | 2 | 3.56E-04 | 0.89 | 2.90  | -     | 988.9    |
| AHQ-9-1, 3626               | K.WTLLQEQTGK.T                                                          | 1204.35723 | 2 | 3.45E-04 | 0.93 | 3.67  | -     | 1115.1   |
| gi 29731325 ref XP_293023.1 | similar to peptidyl-Pro cis trans isomerase [Homo sapiens]              |            |   | 3.77E-04 | 0.75 | 10.16 | 6.00  | 28867.8  |
| AHQ-9-12, 3976              | K.AGPNTNGSQFFICTAK.T                                                    | 1714.88050 | 2 | 3.77E-04 | 0.75 | 3.23  | -     | 512.7    |
| gi 10835121 ref NP_000289.1 | pyruvate kinase, liver and RBC; Pyruvate kinase, liver and RBC type [H  |            |   | 3.96E-04 | 0.88 | 10.16 | 1.90  | 61829.8  |
| AHQ-9-7, 3592               | R.GDLGIEIPAEK.V                                                         | 1142.28420 | 2 | 3.96E-04 | 0.88 | 3.22  | -     | 870.7    |
| gi 27498919 ref XP_031992.8 | similar to RRP5 protein homolog [Homo sapiens]                          |            |   | 3.96E-04 | 0.48 | 10.15 | 0.70  | 206898.2 |
| AHQ-9-6, 4641               | R.IPLLLTSLFSFKVLK.H                                                     | 1572.99949 | 2 | 3.96E-04 | 0.48 | 2.94  | -     | 507.2    |
| gi 7705855 ref NP_057226.1  | steroid dehydrogenase homolog; likely ortholog of mouse Kik1 steroid de |            |   | 3.98E-04 | 0.47 | 10.13 | 4.80  | 34323.9  |
| AHQ-9-9, 5629 - 5639        | K.GVVFQSVLPYFVATK.L                                                     | 1655.96078 | 2 | 3.98E-04 | 0.47 | 2.54  | -     | 313.2    |
| gi 23110925 ref NP_002789.1 | proteasome beta 6 subunit; proteasome subunit Y; proteasome subunit be  |            |   | 4.03E-04 | 0.86 | 10.15 | 4.60  | 25357.6  |
| AHQ-9-11, 2538              | R.LAAIAESGVER.Q                                                         | 1116.24998 | 2 | 4.03E-04 | 0.86 | 3.10  | -     | 994.8    |
| gi 7661948 ref NP_055545.1  | KIAA0152 gene product [Homo sapiens]                                    |            |   | 4.04E-04 | 0.88 | 10.17 | 4.50  | 32233.6  |
| AHQ-9-9, 3315 - 3317        | R.SNPEDQILYQTER.Y                                                       | 1593.67683 | 2 | 4.04E-04 | 0.88 | 3.49  | -     | 703.2    |
| gi 29729918 ref XP_294951.1 | hypothetical protein XP_294951 [Homo sapiens]                           |            |   | 4.19E-04 | 0.71 | 10.17 | 20.90 | 9159.6   |
| AHQ-9-6, 4315               | R.RPLQAIVPKVSPVGLCR.P                                                   | 2107.50918 | 2 | 4.19E-04 | 0.71 | 3.41  | -     | 930.8    |
| gi 4505197 ref NP_003473.1  | myeloid/lymphoid or mixed-lineage leukemia 2; ALL1-related gene [Homo s |            |   | 4.36E-04 | 0.45 | 10.16 | 0.50  | 564185.0 |
| AHQ-9-1, 3958               | R.PPPAADASEPRLASVLPVKPKVEEGGR.H                                         | 2898.26376 | 3 | 4.36E-04 | 0.45 | 3.27  | -     | 267.2    |
| gi 19923142 ref NP_002256.2 | karyopherin beta 1; nuclear factor p97; importin 90; importin beta-1 s  |            |   | 4.36E-04 | 1.67 | 20.18 | 3.40  | 97169.7  |
| AHQ-9-4, 6181               | R.AAVENLPTFLVLSR.V                                                      | 1659.90783 | 2 | 4.36E-04 | 0.86 | 3.52  | -     | 559.5    |
| AHQ-9-4, 5341               | R.ESCLEAYTGIVGQLK.G                                                     | 1669.87794 | 2 | 6.16E-04 | 0.81 | 2.61  | -     | 937.8    |
| gi 5803187 ref NP_006746.1  | transaldolase 1; dihydroxyacetone transferase; glycero transferase [H   |            |   | 4.41E-04 | 0.86 | 10.14 | 3.90  | 37539.9  |
| AHQ-9-9, 4448               | K.ALAGCDFLTISP.K.L                                                      | 1394.61830 | 2 | 4.41E-04 | 0.86 | 2.84  | -     | 865.2    |
| gi 9966827 ref NP_065090.1  | PEST-containing nuclear protein [Homo sapiens]                          |            |   | 4.46E-04 | 0.61 | 10.13 | 11.80 | 18924.8  |
| AHQ-9-8, 4803               | K.SQRAAGGPEEEAEKPKVKTK.T                                                | 2141.32810 | 2 | 4.46E-04 | 0.61 | 2.68  | -     | 687.6    |
| gi 4501867 ref NP_001089.1  | aconitase 2 [Homo sapiens]                                              |            |   | 4.54E-04 | 0.84 | 10.18 | 2.10  | 85424.8  |
| AHQ-9-5, 3433               | K.IVYGHLDPAQSEIER.G                                                     | 1842.98698 | 3 | 4.54E-04 | 0.84 | 3.51  | -     | 896.3    |
| gi 7656999 ref NP_004380.1  | catenin (cadherin-associated protein), alpha 2; Catenin, alpha-2 (cadhe |            |   | 4.62E-04 | 0.35 | 10.16 | 2.00  | 105281.3 |
| AHQ-9-14-, 4862             | K.KAHLAASVEQATQNFLEK.G                                                  | 2085.34928 | 2 | 4.62E-04 | 0.35 | 2.69  | -     | 425.8    |
| gi 28395033 ref NP_786886.1 | ras homolog gene family, member C; Aplysia RAS-related homolog 9 (onco  |            |   | 4.79E-04 | 0.61 | 10.13 | 8.80  | 22006.2  |
| AHQ-9-10, 4673 - 4683       | K.QVELALWDTAGQEDYDR.L                                                   | 2010.10662 | 2 | 4.79E-04 | 0.61 | 2.55  | -     | 684.6    |
| gi 29733417 ref XP_294548.1 | similar to hypothetical protein FLJ90396 [Homo sapiens]                 |            |   | 4.90E-04 | 0.16 | 10.10 | 2.10  | 48468.3  |
| AHQ-9-3, 5420               | R.DIPFTNLAK.T                                                           | 1019.17590 | 1 | 4.90E-04 | 0.16 | 1.97  | -     | 400.1    |
| gi 5453832 ref NP_006380.1  | oxygen regulated protein precursor; oxygen regulated protein (150kD) [H |            |   | 4.96E-04 | 0.94 | 10.21 | 1.30  | 111334.8 |
| AHQ-9-3, 5900 - 5901        | R.VEFEEELCADL.FER.V                                                     | 1658.81048 | 2 | 4.96E-04 | 0.94 | 4.25  | -     | 1170.7   |
| gi 30152584 ref XP_305800.1 | hypothetical protein XP_305800 [Homo sapiens]                           |            |   | 5.04E-04 | 0.45 | 10.20 | 8.70  | 24751.1  |
| AHQ-9-14-, 5225             | K.MGKSSLSTPLSMLVM*AWNLR.A                                               | 2239.71147 | 2 | 5.04E-04 | 0.45 | 3.29  | -     | 493.9    |
| AHQ-9-2, 5358 - 5375        | K.MGKSSLSTPLSMLVM*AWNLR.A                                               | 2239.71147 | 2 | 8.13E-04 | 0.61 | 2.98  | -     | 728.7    |
| gi 28557709 ref NP_787082.1 | hypothetical protein LOC221823 [Homo sapiens]                           |            |   | 5.36E-04 | 0.51 | 10.13 | 5.30  | 34839.1  |
| AHQ-9-9, 4751               | R.VYAILTHGIFSGPAISR.I                                                   | 1803.09710 | 2 | 5.36E-04 | 0.51 | 2.54  | -     | 387.0    |
| gi 30155465 ref XP_292801.2 | similar to RIKEN cDNA 2310076L09 [Homo sapiens]                         |            |   | 5.83E-04 | 0.24 | 10.18 | 6.70  | 52773.6  |
| AHQ-9-8, 4663               | R.SLTQELQGTVEALESSVRGLPAGAQEKVAEVR.R                                    | 3354.71438 | 3 | 5.83E-04 | 0.24 | 3.54  | -     | 266.8    |
| gi 4506381 ref NP_002863.1  | ras-related C3 botulinum toxin substrate 2; Ras-related C3 botulinum to |            |   | 5.91E-04 | 0.76 | 10.16 | 7.80  | 21428.7  |
| AHQ-9-11, 4090              | K.KLAPITYPQGLALAK.E                                                     | 1584.92723 | 2 | 5.91E-04 | 0.76 | 3.11  | -     | 463.2    |
| gi 30148728 ref XP_291501.2 | similar to Heterogeneous nuclear ribonucleoprotein A1 (Helix-destabili  |            |   | 5.99E-04 | 0.75 | 10.17 | 6.70  | 26339.3  |
| AHQ-9-9, 4151               | R.GFAFVTFDDHSDVK.I                                                      | 1700.78586 | 3 | 5.99E-04 | 0.75 | 3.34  | -     | 468.7    |
| gi 4504215 ref NP_000848.1  | guanylate cyclase 1, soluble, beta 3 [Homo sapiens]                     |            |   | 6.02E-04 | 0.81 | 10.14 | 1.80  | 70514.1  |
| AHQ-9-6, 4147               | K.LTQLEILTR.L                                                           | 1331.49732 | 2 | 6.02E-04 | 0.81 | 2.90  | -     | 926.8    |
| gi 4503643 ref NP_000121.1  | coagulation factor V precursor; labile factor; factor V Leiden [Homo sa |            |   | 6.10E-04 | 0.94 | 10.25 | 1.10  | 251716.5 |
| AHQ-9-3, 6262               | K.EKPQSTISGLLGPITYAEVGDIIK.V                                            | 2530.89853 | 3 | 6.10E-04 | 0.94 | 4.92  | -     | 1275.8   |
| gi 4759140 ref NP_004243.1  | solute carrier family 9 (sodium/hydrogen exchanger), isoform 3 regulato |            |   | 6.13E-04 | 0.91 | 10.19 | 3.90  | 38868.2  |
| AHQ-9-7, 3700               | R.LLVDPETEDQQLK.L                                                       | 1627.81777 | 2 | 6.13E-04 | 0.91 | 3.88  | -     | 723.6    |
| gi 4506675 ref NP_002941.1  | ribophorin 1 [Homo sapiens]                                             |            |   | 6.18E-04 | 0.63 | 10.15 | 4.10  | 68569.0  |
| AHQ-9-6, 6054 - 6118        | K.THYIVGYNLPSYLYNLGDQYALK.M                                             | 2999.32033 | 3 | 6.18E-04 | 0.63 | 3.01  | -     | 745.5    |
| gi 6005902 ref NP_009043.1  | thrombospondin 3 [Homo sapiens]                                         |            |   | 6.25E-04 | 0.85 | 10.13 | 0.70  | 104200.6 |
| AHQ-9-6, 4429               | R.FYVVMWK.Q                                                             | 973.21547  | 2 | 6.25E-04 | 0.85 | 2.53  | -     | 693.6    |
| gi 24307969 ref NP_055423.1 | cytoplasmic FMR1 interacting protein 1; selective hybridizing clone (m  |            |   | 6.29E-04 | 0.81 | 10.15 | 1.00  | 145181.2 |
| AHQ-9-3, 5169               | R.YLTLDFGDM*FR.E                                                        | 1465.65527 | 2 | 6.29E-04 | 0.81 | 2.93  | -     | 682.4    |
| gi 30149452 ref XP_305804.1 | hypothetical protein XP_305804 [Homo sapiens]                           |            |   | 6.50E-04 | 0.61 | 10.16 | 2.10  | 82533.5  |
| AHQ-9-4, 4880 - 4885        | R.WRDDPELSSGGNGPAGK.A                                                   | 1784.86762 | 3 | 6.50E-04 | 0.61 | 3.16  | -     | 669.0    |
| gi 9910542 ref NP_064535.1  | SAR1a gene homolog 1; SAR1 protein [Homo sapiens]                       |            |   | 6.76E-04 | 0.86 | 10.20 | 11.60 | 22366.6  |
| AHQ-9-11, 6099              | K.VELNALM*TDETISNVPIILGNK.I                                             | 2514.92088 | 3 | 6.76E-04 | 0.86 | 3.91  | -     | 800.7    |
| gi 24432022 ref NP_115956.2 | testis-specific protein NYD-TSP1 [Homo sapiens]                         |            |   | 6.85E-04 | 0.71 | 10.15 | 4.90  | 49458.7  |
| AHQ-9-13, 5106              | K.FNNLLKEIKDILKNN*AGFEEK.I                                              | 2511.92191 | 3 | 6.85E-04 | 0.71 | 3.01  | -     | 1046.9   |
| gi 21361670 ref NP_054782.2 | src homology 3 domain-containing protein HIP-55; HIP-55 protein [Homo   |            |   | 7.43E-04 | 0.70 | 10.14 | 3.70  | 48294.0  |
| AHQ-9-10, 3327 - 3383       | R.FQDVGVPAPVGSVYQK.T                                                    | 1720.90658 | 2 | 7.43E-04 | 0.70 | 2.71  | -     | 599.3    |
| gi 20070272 ref NP_057110.2 | androgen-regulated short-chain dehydrogenase/reductase 1; prostate sho  |            |   | 7.50E-04 | 0.71 | 10.13 | 4.40  | 35414.1  |
| AHQ-9-9, 2595               | K.EIQTTTGNQQLVLR.K                                                      | 1587.76010 | 2 | 7.50E-04 | 0.71 | 2.57  | -     | 731.8    |
| gi 4557321 ref NP_000030.1  | apolipoprotein A-I precursor [Homo sapiens]                             |            |   | 7.57E-04 | 0.91 | 10.21 | 0.00  | 30777.6  |
| AHQ-9-14-, 4995 - 4999      | K.LLDNWDVSTFSL                                                          | 1613.74965 | 2 | 7.57E-04 | 0.91 | 4.19  | -     | 619.1    |
| gi 28372565 ref NP_777604.1 | hypothetical protein LOC283629 [Homo sapiens]                           |            |   | 7.94E-04 | 0.51 | 10.14 | 4.30  | 28953.5  |
| AHQ-9-11, 3813 - 3877       | R.DLKLENLDDK.W                                                          | 1314.55303 | 2 | 7.94E-04 | 0.51 | 2.83  | -     | 586.1    |
| gi 4758440 ref NP_004868.1  | glia maturation factor, gamma [Homo sapiens]                            |            |   | 8.06E-04 | 0.23 | 10.10 | 4.90  | 16801.2  |
| AHQ-9-12, 3024              | R.FVYYSYK.Y                                                             | 906.05925  | 1 | 8.06E-04 | 0.23 | 1.98  | -     | 427.4    |
| gi 30148978 ref XP_291520.2 | similar to Keratin, type I cytoskeletal 18 (Cytokeratin 18) (K18) (CK   |            |   | 8.49E-04 | 0.49 | 10.14 | 2.20  | 68413.1  |
| AHQ-9-11, 4579 - 4594       | R.DWSHYFKTIKDLR.A                                                       | 1709.92863 | 2 | 8.49E-04 | 0.49 | 2.79  | -     | 535.5    |
| gi 11545789 ref NP_071357.1 | hypothetical protein FLJ22794; KIAA1895 protein [Homo sapiens]          |            |   | 8.59E-04 | 0.22 | 10.13 | 12.00 | 18011.3  |
| AHQ-9-3, 5056               | R.SIEFGSTM*ESILLDIKQR.H                                                 | 2197.53808 | 2 | 8.59E-04 | 0.22 | 2.65  | -     | 244.2    |
| gi 15618995 ref NP_258259.1 | keratin 6 irs [Homo sapiens]                                            |            |   | 8.68E-04 | 0.97 | 10.23 | 2.30  | 57291.2  |
| AHQ-9-1, 3383               | R.FLEQQNQVLETK.W                                                        | 1477.64411 | 2 | 8.68E-04 | 0.97 | 4.54  | -     | 2112.8   |
| gi 4504973 ref NP_002292.1  | lactate dehydrogenase C [Homo sapiens]                                  |            |   | 8.71E-04 | 0.82 | 10.16 | 3.60  | 36311.0  |
| AHQ-9-11, 2506              | R.VIGSGCNLDSAR.F                                                        | 1250.36445 | 2 | 8.71E-04 | 0.82 | 3.28  | -     | 651.7    |
| gi 30150422 ref XP_294438.2 | similar to ribosomal protein L5; 60S ribosomal protein L5 [Homo sapien  |            |   | 9.81E-04 | 0.90 | 10.19 | 2.80  | 48674.6  |
| AHQ-9-9, 2599 - 2601        | R.YLMEQDEDAYKK.H                                                        | 1533.68480 | 2 | 9.81E-04 | 0.90 | 3.71  | -     | 1423.1   |
| gi 7706244 ref NP_057005.1  | divalent cation tolerant protein CUTA [Homo sapiens]                    |            |   | 9.91E-04 | 0.53 | 10.14 | 9.00  | 16832.5  |
| AHQ-9-13-, 5349 - 5364      | K.TQSSLVPLDQFVRS                                                        | 1534.73880 | 2 | 9.91E-04 | 0.53 | 2.73  | -     | 239.8    |
| gi 29738713 ref XP_291660.1 | similar to RIKEN cDNA 5730509K17 gene [Homo sapiens]                    |            |   | 9.95E-04 | 0.16 | 10.10 | 0.90  | 91446.4  |
| AHQ-9-8, 3043               | R.IKPITLR.P                                                             | 841.07662  | 1 | 9.95E-04 | 0.16 | 1.85  | -     | 203.3    |

| Reference                  | Peptide                                            | MH+        | z | P (pro)  | Sf    | Score   | Coverage | MW       |
|----------------------------|----------------------------------------------------|------------|---|----------|-------|---------|----------|----------|
| File, Scan(s)              |                                                    |            |   | P (pep)  | Sf    | XC      |          | Sp       |
| gi4501885 ref NP_001092.1  | beta actin; beta cytoskeletal actin [Homo sapiens] |            |   | 3.33E-15 | 11.54 | 130.33  | 36.00    | 41736.5  |
| AHQ-10-13, 5625 - 5680     | R.CPEALFQPSFLGM*ESCGIHETTFNSIM*K.C                 | 3267.67588 | 3 | 2.03E-05 | 0.89  | 4.47    | -        | 538.9    |
| AHQ-10-8, 6018 - 6082      | R.CPEALFQPSFLGM*ESCGIHETTFNSIM*K.C                 | 3251.67648 | 3 | 5.51E-04 | 0.66  | 4.04    | -        | 344.3    |
| AHQ-10-8, 5705 - 5769      | R.CPEALFQPSFLGM*ESCGIHETTFNSIM*K.C                 | 3267.67588 | 3 | 4.33E-06 | 0.85  | 4.00    | -        | 572.0    |
| AHQ-10-8, 6121 - 6193      | R.CPEALFQPSFLGM*ESCGIHETTFNSIM*K.C                 | 3251.67648 | 3 | 6.99E-04 | 0.87  | 4.57    | -        | 586.2    |
| AHQ-10-8, 6443             | K.EKLCYVALDFEQEMATAASSSSLEK.S                      | 2810.10410 | 3 | 1.26E-04 | 0.73  | 3.29    | -        | 821.0    |
| AHQ-10-8, 6426 - 6507      | K.EKLCYVALDFEQEM*ATAASSSSLEK.S                     | 2826.10350 | 3 | 1.87E-05 | 0.93  | 4.97    | -        | 974.3    |
| AHQ-10-8, 5602 - 5679      | K.EKLCYVALDFEQEM*ATAASSSSLEK.S                     | 2826.10350 | 3 | 8.38E-05 | 0.83  | 3.71    | -        | 1131.3   |
| AHQ-10-8, 5369             | K.EKLCYVALDFEQEM*ATAASSSSLEK.S                     | 2826.10350 | 3 | 1.50E-10 | 0.91  | 4.22    | -        | 1187.2   |
| AHQ-10-8, 6322 - 6323      | K.EKLCYVALDFEQEMATAASSSSLEK.S                      | 2810.10410 | 2 | 2.52E-08 | 0.91  | 4.14    | -        | 876.0    |
| AHQ-10-8, 6313 - 6375      | K.EKLCYVALDFEQEMATAASSSSLEK.S                      | 2810.10410 | 3 | 2.96E-07 | 0.89  | 3.99    | -        | 1230.5   |
| AHQ-10-8, 6297 - 6363      | K.EKLCYVALDFEQEM*ATAASSSSLEK.S                     | 2826.10350 | 3 | 1.20E-04 | 0.76  | 3.21    | -        | 1068.4   |
| AHQ-10-8, 5245 - 5314      | K.EKLCYVALDFEQEM*ATAASSSSLEK.S                     | 2826.10350 | 3 | 1.76E-04 | 0.77  | 3.80    | -        | 545.6    |
| AHQ-10-8, 5721 - 5781      | R.FRCPEALFQPSFLGM*ESCGIHETTFNSIM*K.C               | 3571.03693 | 3 | 1.93E-05 | 0.72  | 3.19    | -        | 633.9    |
| AHQ-10-6, 2592             | R.GYSFTTTAER.E                                     | 1133.19273 | 2 | 5.53E-05 | 0.89  | 2.70    | -        | 990.1    |
| AHQ-10-8, 2617 - 2673      | R.GYSFTTTAER.E                                     | 1133.19273 | 2 | 3.96E-06 | 0.92  | 3.22    | -        | 1365.6   |
| AHQ-10-10, 2520 - 2590     | R.GYSFTTTAER.E                                     | 1133.19273 | 2 | 1.87E-05 | 0.91  | 3.25    | -        | 1064.4   |
| AHQ-10-11, 2600 - 2602     | R.GYSFTTTAER.E                                     | 1133.19273 | 2 | 1.07E-05 | 0.93  | 3.46    | -        | 1120.1   |
| AHQ-10-4, 2621             | R.GYSFTTTAER.E                                     | 1133.19273 | 2 | 3.77E-04 | 0.95  | 3.34    | -        | 1477.1   |
| AHQ-10-8, 2498 - 2555      | R.GYSFTTTAER.E                                     | 1133.19273 | 2 | 4.88E-04 | 0.86  | 2.66    | -        | 1097.5   |
| AHQ-10-3, 2645             | R.GYSFTTTAER.E                                     | 1133.19273 | 2 | 8.48E-05 | 0.89  | 2.71    | -        | 1000.3   |
| AHQ-10-8, 4489             | R.KDLYANTVLSGGTTMYPGIADR.M                         | 2344.62976 | 2 | 2.68E-05 | 0.91  | 4.36    | -        | 788.5    |
| AHQ-10-8, 4118 - 4153      | R.KDLYANTVLSGGTTMYPGIADR.M                         | 2360.62916 | 3 | 4.79E-07 | 0.96  | 4.97    | -        | 1871.9   |
| AHQ-10-8, 4453 - 4530      | R.KDLYANTVLSGGTTMYPGIADR.M                         | 2344.62976 | 3 | 4.33E-05 | 0.97  | 6.19    | -        | 1797.3   |
| AHQ-10-8, 6525             | K.LCYVALDFEQEM*ATAASSSSLEK.S                       | 2568.81605 | 2 | 1.14E-04 | 0.82  | 2.79    | -        | 1120.4   |
| AHQ-10-8, 6505 - 6562      | K.LCYVALDFEQEMATAASSSSLEK.S                        | 2552.81665 | 2 | 8.18E-10 | 0.98  | 5.52    | -        | 2120.1   |
| AHQ-10-8, 6485 - 6542      | K.LCYVALDFEQEM*ATAASSSSLEK.S                       | 2568.81605 | 3 | 2.69E-07 | 0.98  | 6.51    | -        | 2683.1   |
| AHQ-10-8, 6413 - 6469      | K.LCYVALDFEQEM*ATAASSSSLEK.S                       | 2568.81605 | 2 | 1.50E-04 | 0.85  | 3.59    | -        | 1141.5   |
| AHQ-10-8, 6405 - 6465      | K.LCYVALDFEQEMATAASSSSLEK.S                        | 2552.81665 | 3 | 7.87E-04 | 0.84  | 4.00    | -        | 988.3    |
| AHQ-10-8, 6385 - 6447      | K.LCYVALDFEQEMATAASSSSLEK.S                        | 2552.81665 | 2 | 8.91E-05 | 0.96  | 4.46    | -        | 1682.0   |
| AHQ-10-8, 6374 - 6429      | K.LCYVALDFEQEM*ATAASSSSLEK.S                       | 2568.81605 | 3 | 8.24E-06 | 0.94  | 4.47    | -        | 1745.2   |
| AHQ-10-8, 6270 - 6341      | K.LCYVALDFEQEMATAASSSSLEK.S                        | 2552.81665 | 3 | 3.83E-09 | 0.97  | 5.94    | -        | 1953.1   |
| AHQ-10-8, 6249 - 6309      | K.LCYVALDFEQEM*ATAASSSSLEK.S                       | 2568.81605 | 3 | 1.06E-04 | 0.96  | 6.00    | -        | 1538.6   |
| AHQ-10-8, 6190 - 6247      | K.LCYVALDFEQEM*ATAASSSSLEK.S                       | 2568.81605 | 2 | 3.80E-08 | 0.92  | 4.21    | -        | 828.7    |
| AHQ-10-8, 5779 - 5821      | R.TTGIVMDSGGDVTHVPIYEGYALPHAILR.L                  | 3185.59928 | 3 | 9.08E-05 | 0.93  | 4.76    | -        | 1259.4   |
| AHQ-10-11, 5295 - 5343     | R.TTGIVMDSGGDVTHVPIYEGYALPHAILR.L                  | 3185.59928 | 3 | 3.48E-06 | 0.95  | 4.99    | -        | 1645.2   |
| AHQ-10-11, 5099 - 5155     | R.TTGIVMDSGGDVTHVPIYEGYALPHAILR.L                  | 3201.59868 | 3 | 8.66E-06 | 0.91  | 5.17    | -        | 670.1    |
| AHQ-10-10, 5287 - 5344     | R.TTGIVMDSGGDVTHVPIYEGYALPHAILR.L                  | 3185.59928 | 3 | 9.13E-04 | 0.95  | 4.77    | -        | 1668.9   |
| AHQ-10-10, 5126 - 5199     | R.TTGIVMDSGGDVTHVPIYEGYALPHAILR.L                  | 3201.59868 | 3 | 1.55E-06 | 0.96  | 6.70    | -        | 1158.9   |
| AHQ-10-8, 5617 - 5678      | R.TTGIVMDSGGDVTHVPIYEGYALPHAILR.L                  | 3185.59928 | 3 | 2.67E-07 | 0.96  | 5.48    | -        | 1616.6   |
| AHQ-10-7, 5117 - 5196      | R.TTGIVMDSGGDVTHVPIYEGYALPHAILR.L                  | 3201.59868 | 3 | 1.00E-04 | 0.90  | 4.56    | -        | 831.3    |
| AHQ-10-6, 5193             | R.TTGIVMDSGGDVTHVPIYEGYALPHAILR.L                  | 3201.59868 | 3 | 3.13E-05 | 0.92  | 5.06    | -        | 749.9    |
| AHQ-10-10, 5042 - 5098     | R.TTGIVMDSGGDVTHVPIYEGYALPHAILR.L                  | 3201.59868 | 3 | 1.26E-05 | 0.87  | 3.98    | -        | 706.6    |
| AHQ-10-4, 5325             | R.TTGIVMDSGGDVTHVPIYEGYALPHAILR.L                  | 3201.59868 | 3 | 8.20E-04 | 0.94  | 5.34    | -        | 1035.3   |
| AHQ-10-8, 5533 - 5613      | R.TTGIVMDSGGDVTHVPIYEGYALPHAILR.L                  | 3185.59928 | 3 | 3.33E-15 | 0.98  | 6.56    | -        | 2233.5   |
| AHQ-10-8, 5418 - 5482      | R.TTGIVMDSGGDVTHVPIYEGYALPHAILR.L                  | 3201.59868 | 3 | 1.22E-05 | 0.91  | 4.74    | -        | 848.1    |
| AHQ-10-8, 5417 - 5477      | R.TTGIVMDSGGDVTHVPIYEGYALPHAILR.L                  | 3185.59928 | 3 | 2.51E-10 | 0.96  | 5.80    | -        | 1424.2   |
| AHQ-10-9, 5243 - 5299      | R.TTGIVMDSGGDVTHVPIYEGYALPHAILR.L                  | 3185.59928 | 3 | 5.47E-11 | 0.95  | 4.88    | -        | 1361.1   |
| AHQ-10-9, 5051             | R.TTGIVMDSGGDVTHVPIYEGYALPHAILR.L                  | 3201.59868 | 3 | 7.15E-05 | 0.83  | 3.38    | -        | 1012.1   |
| AHQ-10-9, 4955 - 5011      | R.TTGIVMDSGGDVTHVPIYEGYALPHAILR.L                  | 3201.59868 | 3 | 3.66E-07 | 0.97  | 6.38    | -        | 1407.7   |
| AHQ-10-8, 5305 - 5361      | R.TTGIVMDSGGDVTHVPIYEGYALPHAILR.L                  | 3201.59868 | 3 | 3.21E-09 | 0.98  | 6.67    | -        | 2420.3   |
| AHQ-10-8, 5169 - 5249      | R.TTGIVMDSGGDVTHVPIYEGYALPHAILR.L                  | 3201.59868 | 3 | 1.60E-06 | 0.96  | 6.31    | -        | 1120.0   |
| AHQ-10-3, 5258             | R.TTGIVMDSGGDVTHVPIYEGYALPHAILR.L                  | 3201.59868 | 3 | 6.39E-04 | 0.91  | 4.59    | -        | 988.8    |
| AHQ-10-9, 3639 - 3696      | R.VAPEEHPVLLTEAPLNPK.A                             | 1955.24351 | 2 | 1.33E-04 | 0.91  | 4.63    | -        | 623.9    |
| AHQ-10-8, 4051             | R.VAPEEHPVLLTEAPLNPK.A                             | 1955.24351 | 2 | 5.29E-04 | 0.76  | 3.17    | -        | 669.2    |
| AHQ-10-5, 3923 - 3952      | R.VAPEEHPVLLTEAPLNPK.A                             | 1955.24351 | 3 | 5.46E-04 | 0.77  | 3.93    | -        | 729.4    |
| AHQ-10-5, 3925             | R.VAPEEHPVLLTEAPLNPK.A                             | 1955.24351 | 2 | 5.35E-04 | 0.91  | 4.47    | -        | 823.8    |
| AHQ-10-8, 3925 - 3990      | R.VAPEEHPVLLTEAPLNPK.A                             | 1955.24351 | 2 | 5.78E-05 | 0.76  | 3.66    | -        | 532.8    |
| AHQ-10-6, 3849             | R.VAPEEHPVLLTEAPLNPK.A                             | 1955.24351 | 2 | 3.87E-04 | 0.92  | 4.07    | -        | 921.6    |
| AHQ-10-8, 3826             | R.VAPEEHPVLLTEAPLNPK.A                             | 1955.24351 | 2 | 3.08E-05 | 0.90  | 4.38    | -        | 651.7    |
| AHQ-10-8, 3825 - 3901      | R.VAPEEHPVLLTEAPLNPK.A                             | 1955.24351 | 3 | 9.09E-04 | 0.84  | 4.43    | -        | 793.6    |
| AHQ-10-4, 3892 - 3951      | R.VAPEEHPVLLTEAPLNPK.A                             | 1955.24351 | 2 | 9.35E-06 | 0.74  | 3.81    | -        | 557.9    |
| AHQ-10-11, 3827            | R.VAPEEHPVLLTEAPLNPK.A                             | 1955.24351 | 2 | 6.61E-04 | 0.91  | 4.28    | -        | 627.4    |
| AHQ-10-8, 3693 - 3753      | R.VAPEEHPVLLTEAPLNPK.A                             | 1955.24351 | 2 | 4.40E-07 | 0.89  | 4.50    | -        | 596.2    |
| AHQ-10-8, 3809 - 3869      | R.VAPEEHPVLLTEAPLNPK.A                             | 1955.24351 | 2 | 7.81E-06 | 0.93  | 4.84    | -        | 856.9    |
| AHQ-10-12, 3834 - 3905     | R.VAPEEHPVLLTEAPLNPK.A                             | 1955.24351 | 2 | 8.98E-04 | 0.93  | 4.74    | -        | 622.7    |
| AHQ-10-12, 3928            | R.VAPEEHPVLLTEAPLNPK.A                             | 1955.24351 | 2 | 6.54E-05 | 0.92  | 4.06    | -        | 1028.3   |
| AHQ-10-13, 4259 - 4283     | R.VAPEEHPVLLTEAPLNPK.A                             | 1955.24351 | 2 | 2.01E-04 | 0.94  | 5.22    | -        | 859.0    |
| AHQ-10-13, 3901            | R.VAPEEHPVLLTEAPLNPK.A                             | 1955.24351 | 2 | 1.96E-05 | 0.90  | 4.41    | -        | 811.5    |
| AHQ-10-9, 3635 - 3717      | R.VAPEEHPVLLTEAPLNPK.A                             | 1955.24351 | 3 | 2.84E-04 | 0.80  | 4.82    | -        | 517.2    |
| AHQ-10-14, 3902            | R.VAPEEHPVLLTEAPLNPK.A                             | 1955.24351 | 2 | 4.45E-09 | 0.84  | 3.73    | -        | 504.4    |
| gi16753233 ref NP_006280.2 | talin 1 [Homo sapiens]                             |            |   | 4.44E-15 | 99.28 | 1130.38 | 53.90    | 269665.3 |
| AHQ-10-5, 3264             | K.AAAFEQEENETVVK.E                                 | 1664.79496 | 2 | 6.14E-05 | 0.95  | 4.32    | -        | 1284.1   |
| AHQ-10-2, 3247 - 3312      | K.AAAFEQEENETVVK.E                                 | 1664.79496 | 2 | 3.12E-08 | 0.96  | 5.43    | -        | 1331.6   |
| AHQ-10-5, 3176 - 3185      | K.AAAFEQEENETVVK.E                                 | 1664.79496 | 2 | 1.19E-05 | 0.89  | 4.53    | -        | 850.5    |
| AHQ-10-1, 3359             | K.AAAFEQEENETVVK.E                                 | 1664.79496 | 2 | 1.02E-08 | 0.97  | 5.19    | -        | 1463.0   |
| AHQ-10-14, 3142            | K.AAAFEQEENETVVK.E                                 | 1664.79496 | 2 | 9.08E-06 | 0.96  | 4.38    | -        | 1519.9   |
| AHQ-10-1, 3459             | K.AAAFEQEENETVVK.E                                 | 1664.79496 | 2 | 3.91E-05 | 0.41  | 2.60    | -        | 362.5    |
| AHQ-10-2, 3400             | K.AAAFEQEENETVVK.E                                 | 1664.79496 | 2 | 8.18E-07 | 0.97  | 4.99    | -        | 1843.5   |
| AHQ-10-6, 3275             | K.AAAFEQEENETVVK.E                                 | 1664.79496 | 2 | 7.23E-05 | 0.29  | 2.60    | -        | 362.5    |
| AHQ-10-4, 2677             | R.AAM*EPIVISA.K.T                                  | 1146.38260 | 1 | 2.85E-04 | 0.21  | 1.99    | -        | 199.6    |
| AHQ-10-4, 2667             | R.AAM*EPIVISA.K.T                                  | 1146.38260 | 1 | 1.53E-05 | 0.91  | 3.10    | -        | 963.9    |
| AHQ-10-7, 4684 - 4740      | K.ACEFAGFQQIQGFPHNEQK.H                            | 2399.60390 | 3 | 5.10E-06 | 0.85  | 4.10    | -        | 587.1    |
| AHQ-10-4, 2035             | K.ADAEGESDLENSR.K                                  | 1393.35296 | 2 | 9.68E-06 | 0.89  | 3.35    | -        | 996.3    |
| AHQ-10-2, 2091             | K.ADAEGESDLENSR.K                                  | 1393.35296 | 2 | 1.72E-07 | 0.90  | 3.25    | -        | 1051.6   |
| AHQ-10-3, 2682 - 2730      | K.AGALQCSPPSDAYTK.K                                | 1470.58689 | 2 | 1.85E-05 | 0.81  | 2.96    | -        | 703.0    |
| AHQ-10-4, 2556             | K.AGALQCSPPSDAYTK.K                                | 1470.58689 | 2 | 7.07E-04 | 0.65  | 2.69    | -        | 692.3    |
| AHQ-10-4, 2655             | K.AGALQCSPPSDAYTK.K                                | 1470.58689 | 2 | 2.69E-05 | 0.82  | 2.96    | -        | 777.5    |
| AHQ-10-3, 2467             | K.AGALQCSPPSDAYTK.K.E                              | 1598.75981 | 2 | 1.21E-04 | 0.50  | 2.52    | -        | 449.7    |
| AHQ-10-8, 5838             | K.AGFLDLKDFLPK.E                                   | 1364.61374 | 2 | 5.28E-04 | 0.90  | 3.74    | -        | 1124.9   |
| AHQ-10-3, 3923             | K.AIAVTQEMVTK.S                                    | 1290.55498 | 2 | 1.01E-04 | 0.93  | 3.94    | -        | 1118.5   |
| AHQ-10-4, 3932             | K.AIAVTQEMVTK.S                                    | 1290.55498 | 2 | 5.28E-05 | 0.95  | 4.39    | -        | 1243.2   |
| AHQ-10-5, 3924             | K.AIAVTQEMVTK.S                                    | 1290.55498 | 2 | 2.36E-05 | 0.95  | 4.06    | -        | 1241.8   |
| AHQ-10-5, 2957             | K.AIAVTQEM*VTK.S                                   | 1306.55438 | 2 | 4.00E-05 | 0.95  | 4.05    | -        | 1079.1   |
| AHQ-10-7, 3845             | K.AIAVTQEMVTK.S                                    | 1290.55498 | 2 | 1.43E-04 | 0.85  | 3.18    | -        | 801.8    |
| AHQ-10-2, 3024             | K.AIAVTQEM*VTK.S                                   | 1306.55438 | 2 | 9.28E-07 | 0.96  | 4.14    | -        | 1274.2   |
| AHQ-10-3, 2979             | K.AIAVTQEM*VTK.S                                   | 1306.55438 | 2 | 5.30E-06 | 0.92  | 3.63    | -        | 822.7    |
| AHQ-10-4, 2539             | K.ALDGAFTEENR.A                                    | 1223.27427 | 2 | 1.88E-06 | 0.95  | 3.80    | -        | 1616.1   |
| AHQ-10-3, 2554 - 2562      | K.ALDGAFTEENR.A                                    | 1223.27427 | 2 | 7.42E-07 | 0.92  | 3.37    | -        | 1110.7   |
| AHQ-10-3, 2742             | K.ALDGAFTEENR.A                                    | 1223.27427 | 2 | 1.88E-07 | 0.95  | 3.36    | -        | 1659.2   |
| AHQ-10-7, 3829             | K.ALDYMYLR.N                                       | 1045.23    |   |          |       |         |          |          |

|                       |                                     |            |   |          |      |      |   |        |
|-----------------------|-------------------------------------|------------|---|----------|------|------|---|--------|
| AHQ-10-5, 2072        | R.ALEATTEHIR.Q                      | 1141.25953 | 2 | 8.26E-06 | 0.82 | 2.70 | - | 1179.5 |
| AHQ-10-6, 2081 - 2091 | R.ALEATTEHIR.Q                      | 1141.25953 | 2 | 5.31E-05 | 0.81 | 2.88 | - | 941.1  |
| AHQ-10-2, 2158        | R.ALEATTEHIR.Q                      | 1141.25953 | 2 | 1.88E-05 | 0.89 | 3.12 | - | 1124.0 |
| AHQ-10-2, 3490        | K.ALGDLSATK.A                       | 989.14811  | 2 | 7.91E-07 | 0.92 | 3.82 | - | 885.9  |
| AHQ-10-3, 3433        | K.ALGDLSATK.A                       | 989.14811  | 2 | 4.63E-05 | 0.80 | 2.78 | - | 722.5  |
| AHQ-10-6, 3375        | K.ALGDLSATK.A                       | 989.14811  | 2 | 2.50E-05 | 0.89 | 3.02 | - | 657.3  |
| AHQ-10-5, 3427 - 3429 | K.ALGDLSATK.A                       | 989.14811  | 2 | 1.10E-05 | 0.92 | 4.32 | - | 789.7  |
| AHQ-10-4, 3433 - 3435 | K.ALGDLSATK.A                       | 989.14811  | 2 | 3.38E-05 | 0.93 | 3.97 | - | 797.3  |
| AHQ-10-6, 2604 - 2687 | K.ALSTDPAAPNLK.S                    | 1198.35099 | 2 | 2.94E-04 | 0.59 | 2.55 | - | 534.0  |
| AHQ-10-3, 2666 - 2722 | K.ALSTDPAAPNLK.S                    | 1198.35099 | 2 | 8.17E-05 | 0.60 | 2.84 | - | 538.2  |
| AHQ-10-4, 2687        | K.ALSTDPAAPNLK.S                    | 1198.35099 | 2 | 7.89E-06 | 0.46 | 2.58 | - | 530.0  |
| AHQ-10-2, 3630        | K.ALSTDPAAPNLKSQLAAAAAR.A           | 1967.21592 | 2 | 2.60E-08 | 0.85 | 3.69 | - | 465.2  |
| AHQ-10-1, 5621 - 5629 | R.ANQAQM*ACQSLGEPGCTQAQVLSAATIVAK.H | 3236.64462 | 3 | 9.53E-04 | 0.80 | 3.88 | - | 580.0  |
| AHQ-10-2, 5778        | K.APGQLECEIAIALNSCLR.D              | 2077.32566 | 3 | 6.15E-04 | 0.46 | 3.00 | - | 630.8  |
| AHQ-10-4, 5788        | K.APGQLECEIAIALNSCLR.D              | 2077.32566 | 2 | 1.46E-05 | 0.84 | 3.33 | - | 873.8  |
| AHQ-10-3, 5082 - 5139 | K.APGQLECEIAIALNSCLR.D              | 2077.32566 | 2 | 2.88E-08 | 0.92 | 4.12 | - | 869.3  |
| AHQ-10-2, 5774        | K.APGQLECEIAIALNSCLR.D              | 2077.32566 | 2 | 1.50E-09 | 0.94 | 4.41 | - | 993.2  |
| AHQ-10-3, 5683        | K.APGQLECEIAIALNSCLR.D              | 2077.32566 | 2 | 7.40E-06 | 0.91 | 4.32 | - | 689.3  |
| AHQ-10-4, 5540        | K.AQEAACGPLEM*DSALSVVQNLK.D         | 2407.66105 | 2 | 1.14E-04 | 0.55 | 2.69 | - | 505.1  |
| AHQ-10-4, 5547 - 5569 | K.AQEAACGPLEM*DSALSVVQNLK.D         | 2407.66105 | 3 | 1.35E-09 | 0.95 | 5.17 | - | 1262.7 |
| AHQ-10-2, 6251        | K.AQEAACGPLEMDSALSVVQNLK.D          | 2391.66165 | 3 | 7.01E-04 | 0.59 | 3.02 | - | 634.2  |
| AHQ-10-4, 6248 - 6249 | K.AQEAACGPLEMDSALSVVQNLK.D          | 2391.66165 | 3 | 3.55E-04 | 0.95 | 5.35 | - | 1294.5 |
| AHQ-10-3, 5462        | K.AQEAACGPLEM*DSALSVVQNLK.D         | 2407.66105 | 3 | 5.65E-08 | 0.93 | 4.65 | - | 1176.8 |
| AHQ-10-3, 6153 - 6158 | K.AQEAACGPLEMDSALSVVQNLK.D          | 2391.66165 | 3 | 6.13E-04 | 0.83 | 3.90 | - | 843.4  |
| AHQ-10-2, 5562 - 5571 | K.AQEAACGPLEM*DSALSVVQNLK.D         | 2407.66105 | 3 | 1.46E-04 | 0.95 | 5.08 | - | 1501.4 |
| AHQ-10-5, 6247        | K.AQEAACGPLEMDSALSVVQNLK.D          | 2391.66165 | 3 | 4.77E-08 | 0.81 | 3.35 | - | 1071.9 |
| AHQ-10-1, 3226        | K.ASAGPQLLVQSQCK.A                  | 1457.67763 | 2 | 2.19E-07 | 0.89 | 3.61 | - | 638.7  |
| AHQ-10-4, 2980        | K.ASAGPQLLVQSQCK.A                  | 1457.67763 | 2 | 3.36E-04 | 0.58 | 2.71 | - | 383.3  |
| AHQ-10-3, 3007 - 3037 | K.ASAGPQLLVQSQCK.A                  | 1457.67763 | 2 | 5.15E-08 | 0.85 | 3.68 | - | 459.6  |
| AHQ-10-2, 3044 - 3106 | K.ASAGPQLLVQSQCK.A                  | 1457.67763 | 2 | 2.55E-12 | 0.85 | 3.63 | - | 398.8  |
| AHQ-10-4, 4108        | K.ASVPTIQDQASAMQLSQCAK.N            | 2136.39332 | 2 | 7.86E-06 | 0.40 | 2.78 | - | 305.6  |
| AHQ-10-5, 3621 - 3623 | K.ASVPTIQDQASAM*QLSQCAK.N           | 2152.39272 | 2 | 2.15E-09 | 0.95 | 4.82 | - | 951.8  |
| AHQ-10-2, 4158        | K.ASVPTIQDQASAMQLSQCAK.N            | 2136.39332 | 2 | 1.08E-07 | 0.93 | 4.45 | - | 740.2  |
| AHQ-10-1, 4238        | K.ASVPTIQDQASAMQLSQCAK.N            | 2136.39332 | 2 | 1.19E-05 | 0.80 | 3.45 | - | 479.9  |
| AHQ-10-6, 4027        | K.ASVPTIQDQASAMQLSQCAK.N            | 2136.39332 | 2 | 2.49E-08 | 0.77 | 2.99 | - | 517.7  |
| AHQ-10-5, 4107        | K.ASVPTIQDQASAMQLSQCAK.N            | 2136.39332 | 2 | 3.43E-08 | 0.92 | 4.68 | - | 579.2  |
| AHQ-10-3, 4087 - 4098 | K.ASVPTIQDQASAMQLSQCAK.N            | 2136.39332 | 2 | 9.13E-09 | 0.94 | 4.93 | - | 798.9  |
| AHQ-10-1, 3777 - 3779 | K.ASVPTIQDQASAM*QLSQCAK.N           | 2152.39272 | 2 | 4.33E-04 | 0.87 | 3.85 | - | 641.6  |
| AHQ-10-6, 3559 - 3563 | K.ASVPTIQDQASAM*QLSQCAK.N           | 2152.39272 | 2 | 5.42E-09 | 0.92 | 4.15 | - | 699.9  |
| AHQ-10-3, 3609        | K.ASVPTIQDQASAM*QLSQCAK.N           | 2152.39272 | 2 | 3.58E-04 | 0.71 | 3.32 | - | 408.1  |
| AHQ-10-4, 3631        | K.ASVPTIQDQASAM*QLSQCAK.N           | 2152.39272 | 2 | 6.90E-06 | 0.89 | 3.74 | - | 654.3  |
| AHQ-10-2, 3679 - 3690 | K.ASVPTIQDQASAM*QLSQCAK.N           | 2152.39272 | 2 | 9.71E-05 | 0.94 | 4.49 | - | 962.3  |
| AHQ-10-6, 4697        | K.AVAEQIPLLQGVYR.G                  | 1493.77619 | 3 | 2.62E-05 | 0.96 | 4.53 | - | 1835.1 |
| AHQ-10-3, 4766        | K.AVAEQIPLLQGVYR.G                  | 1493.77619 | 3 | 3.89E-06 | 0.97 | 5.18 | - | 1991.0 |
| AHQ-10-7, 4677        | K.AVAEQIPLLQGVYR.G                  | 1493.77619 | 2 | 9.56E-06 | 0.78 | 3.17 | - | 483.8  |
| AHQ-10-3, 4751        | K.AVAEQIPLLQGVYR.G                  | 1493.77619 | 2 | 5.56E-05 | 0.70 | 3.01 | - | 412.6  |
| AHQ-10-2, 4838        | K.AVAEQIPLLQGVYR.G                  | 1493.77619 | 3 | 3.91E-06 | 0.96 | 4.69 | - | 1977.0 |
| AHQ-10-4, 4812        | K.AVAEQIPLLQGVYR.G                  | 1493.77619 | 3 | 4.33E-06 | 0.96 | 4.50 | - | 1951.8 |
| AHQ-10-4, 4787        | K.AVAEQIPLLQGVYR.G                  | 1493.77619 | 2 | 9.78E-05 | 0.93 | 3.92 | - | 839.5  |
| AHQ-10-2, 4826 - 4888 | K.AVAEQIPLLQGVYR.G                  | 1493.77619 | 2 | 3.36E-06 | 0.91 | 4.01 | - | 786.0  |
| AHQ-10-5, 4767 - 4773 | K.AVAEQIPLLQGVYR.G                  | 1493.77619 | 2 | 2.46E-06 | 0.93 | 4.20 | - | 692.1  |
| AHQ-10-4, 3803 - 3859 | K.AVASAAAALVLK.A                    | 1085.32216 | 2 | 3.42E-06 | 0.96 | 3.99 | - | 1670.4 |
| AHQ-10-1, 3991        | K.AVASAAAALVLK.A                    | 1085.32216 | 2 | 1.63E-05 | 0.93 | 3.60 | - | 1326.6 |
| AHQ-10-5, 3823        | K.AVASAAAALVLK.A                    | 1085.32216 | 2 | 6.42E-05 | 0.84 | 3.11 | - | 837.1  |
| AHQ-10-8, 3710        | K.AVASAAAALVLK.A                    | 1085.32216 | 2 | 1.44E-06 | 0.96 | 3.59 | - | 1942.8 |
| AHQ-10-7, 3736        | K.AVASAAAALVLK.A                    | 1085.32216 | 2 | 2.81E-07 | 0.96 | 4.17 | - | 1711.9 |
| AHQ-10-2, 3735 - 3794 | K.AVEGCVSASQAATEDGQLLR.G            | 2064.22056 | 2 | 3.40E-08 | 0.95 | 3.98 | - | 1772.3 |
| AHQ-10-2, 3995 - 4054 | K.AVEGCVSASQAATEDGQLLR.G            | 2064.22056 | 2 | 1.50E-09 | 0.93 | 3.86 | - | 1301.8 |
| AHQ-10-6, 3875        | K.AVEGCVSASQAATEDGQLLR.G            | 2064.22056 | 2 | 3.54E-04 | 0.93 | 4.13 | - | 1227.7 |
| AHQ-10-1, 4059        | K.AVEGCVSASQAATEDGQLLR.G            | 2064.22056 | 2 | 5.26E-10 | 0.93 | 3.96 | - | 1135.4 |
| AHQ-10-2, 4112 - 4136 | K.AVEGCVSASQAATEDGQLLR.G            | 2064.22056 | 2 | 7.23E-10 | 0.97 | 5.18 | - | 1507.0 |
| AHQ-10-5, 3957 - 4032 | K.AVEGCVSASQAATEDGQLLR.G            | 2064.22056 | 2 | 7.19E-07 | 0.95 | 4.70 | - | 1283.7 |
| AHQ-10-2, 4646        | K.AVEGCVSASQAATEDGQLLR.G            | 2064.22056 | 2 | 3.59E-04 | 0.89 | 3.50 | - | 1069.6 |
| AHQ-10-2, 4371 - 4439 | K.AVEGCVSASQAATEDGQLLR.G            | 2064.22056 | 2 | 4.44E-05 | 0.82 | 3.47 | - | 779.5  |
| AHQ-10-4, 4056        | K.AVEGCVSASQAATEDGQLLR.G            | 2064.22056 | 2 | 8.03E-06 | 0.91 | 4.14 | - | 981.0  |
| AHQ-10-4, 3672 - 3743 | K.AVEGCVSASQAATEDGQLLR.G            | 2064.22056 | 2 | 2.62E-05 | 0.88 | 3.89 | - | 1117.2 |
| AHQ-10-3, 3939 - 4015 | K.AVEGCVSASQAATEDGQLLR.G            | 2064.22056 | 2 | 7.97E-05 | 0.91 | 3.98 | - | 1178.3 |
| AHQ-10-4, 3959        | K.AVEGCVSASQAATEDGQLLR.G            | 2064.22056 | 2 | 7.05E-07 | 0.96 | 4.95 | - | 1562.2 |
| AHQ-10-7, 6324        | K.AVSSAIAQLLGEVAQGNENYAGIAAR.D      | 2574.83158 | 3 | 8.31E-13 | 0.98 | 6.53 | - | 1914.0 |
| AHQ-10-2, 6414 - 6455 | K.AVSSAIAQLLGEVAQGNENYAGIAAR.D      | 2574.83158 | 3 | 4.94E-14 | 0.98 | 7.23 | - | 2371.5 |
| AHQ-10-3, 5495        | R.AVTDSINQLITMCTQQAPGQK.E           | 2306.60312 | 2 | 1.28E-04 | 0.70 | 2.96 | - | 460.3  |
| AHQ-10-2, 5590        | R.AVTDSINQLITMCTQQAPGQK.E           | 2306.60312 | 2 | 1.85E-04 | 0.50 | 2.73 | - | 318.6  |
| AHQ-10-4, 5221 - 5292 | R.AVTDSINQLITMCTQQAPGQK.E           | 2322.60252 | 2 | 2.07E-05 | 0.52 | 3.07 | - | 239.5  |
| AHQ-10-2, 4535        | R.AVTDSINQLITMCTQQAPGQK.E           | 2306.60312 | 2 | 7.43E-07 | 0.74 | 3.24 | - | 389.3  |
| AHQ-10-2, 5423        | R.AVTDSINQLITMCTQQAPGQK.ECDNALR.E   | 3182.51068 | 3 | 1.74E-09 | 0.91 | 4.67 | - | 857.9  |
| AHQ-10-3, 5565 - 5642 | R.AVTDSINQLITMCTQQAPGQK.ECDNALR.E   | 3166.51128 | 3 | 4.39E-04 | 0.60 | 3.03 | - | 545.6  |
| AHQ-10-4, 5411        | R.AVTDSINQLITMCTQQAPGQK.ECDNALR.E   | 3182.51068 | 3 | 6.04E-10 | 0.90 | 4.30 | - | 937.5  |
| AHQ-10-1, 5458        | R.AVTDSINQLITMCTQQAPGQK.ECDNALR.E   | 3182.51068 | 3 | 1.00E-03 | 0.80 | 3.53 | - | 644.8  |
| AHQ-10-3, 5329 - 5387 | R.AVTDSINQLITMCTQQAPGQK.ECDNALR.E   | 3182.51068 | 3 | 1.91E-04 | 0.89 | 4.93 | - | 654.4  |
| AHQ-10-8, 3495 - 3561 | R.DDLNGSHPVSFDK.A                   | 1544.64741 | 2 | 8.65E-10 | 0.95 | 3.79 | - | 1611.0 |
| AHQ-10-9, 3268 - 3333 | R.DDLNGSHPVSFDK.A                   | 1544.64741 | 2 | 5.31E-04 | 0.74 | 2.68 | - | 784.2  |
| AHQ-10-8, 3402        | R.DDLNGSHPVSFDK.A                   | 1544.64741 | 2 | 6.28E-05 | 0.87 | 3.26 | - | 874.8  |
| AHQ-10-7, 3398 - 3421 | R.DDLNGSHPVSFDK.A                   | 1544.64741 | 2 | 3.31E-09 | 0.94 | 4.01 | - | 1043.5 |
| AHQ-10-8, 3601        | R.DDLNGSHPVSFDK.A                   | 1544.64741 | 2 | 1.77E-05 | 0.91 | 4.07 | - | 1029.6 |
| AHQ-10-7, 3597        | R.DDLNGSHPVSFDK.A                   | 1544.64741 | 2 | 7.74E-11 | 0.95 | 4.26 | - | 1366.6 |
| AHQ-10-3, 3479        | R.DDLNGSHPVSFDK.A                   | 1544.64741 | 2 | 2.48E-04 | 0.47 | 2.59 | - | 352.2  |
| AHQ-10-3, 4943        | R.DKAPGQLECEIAIALNSCLR.D            | 2320.58644 | 2 | 3.90E-06 | 0.88 | 3.39 | - | 894.5  |
| AHQ-10-3, 5529 - 5594 | R.DKAPGQLECEIAIALNSCLR.D            | 2320.58644 | 2 | 2.61E-07 | 0.89 | 3.73 | - | 815.8  |
| AHQ-10-2, 5622 - 5688 | R.DKAPGQLECEIAIALNSCLR.D            | 2320.58644 | 2 | 1.29E-08 | 0.91 | 4.32 | - | 762.0  |
| AHQ-10-2, 5019 - 5036 | R.DKAPGQLECEIAIALNSCLR.D            | 2320.58644 | 2 | 1.40E-10 | 0.93 | 4.10 | - | 1151.9 |
| AHQ-10-2, 5744 - 5814 | R.DKAPGQLECEIAIALNSCLR.D            | 2320.58644 | 3 | 4.70E-05 | 0.84 | 4.19 | - | 770.4  |
| AHQ-10-7, 5505        | R.DKAPGQLECEIAIALNSCLR.D            | 2320.58644 | 2 | 1.14E-08 | 0.86 | 3.48 | - | 757.7  |
| AHQ-10-4, 5627        | R.DKAPGQLECEIAIALNSCLR.D            | 2320.58644 | 2 | 9.34E-07 | 0.94 | 4.56 | - | 1000.8 |
| AHQ-10-2, 4927 - 4986 | R.DLDQASLAAVSQQLAPR.E               | 1783.96422 | 2 | 5.07E-07 | 0.94 | 4.45 | - | 1119.1 |
| AHQ-10-1, 5033 - 5034 | R.DLDQASLAAVSQQLAPR.E               | 1783.96422 | 2 | 3.72E-04 | 0.92 | 3.94 | - | 950.9  |
| AHQ-10-3, 4889        | R.DLDQASLAAVSQQLAPR.E               | 1783.96422 | 3 | 3.22E-05 | 0.97 | 5.01 | - | 2213.3 |
| AHQ-10-3, 4849 - 4905 | R.DLDQASLAAVSQQLAPR.E               | 1783.96422 | 2 | 4.61E-11 | 0.93 | 4.56 | - | 744.1  |
| AHQ-10-4, 4913 - 4967 | R.DLDQASLAAVSQQLAPR.E               | 1783.96422 | 2 | 2.85E-08 | 0.95 | 5.16 | - | 924.2  |
| AHQ-10-2, 4975        | R.DLDQASLAAVSQQLAPR.E               | 1783.96422 | 3 | 1.26E-05 | 0.95 | 4.44 | - | 1938.0 |
| AHQ-10-1, 5050        | R.DLDQASLAAVSQQLAPR.E               | 1783.96422 | 3 | 5.62E-04 | 0.93 | 3.79 | - | 1687.4 |
| AHQ-10-4, 4956        | R.DLDQASLAAVSQQLAPR.E               | 1783.96422 | 3 | 4.64E-05 | 0.93 | 4.31 | - | 1536.4 |
| AHQ-10-6, 4860        | R.DLDQASLAAVSQQLAPR.E               | 1783.96422 | 3 | 3.91E-07 | 0.93 | 4.39 | - | 1630.5 |
| AHQ-10-5, 4953        | R.DLDQASLAAVSQQLAPR.E               | 1783.96422 | 3 | 4.67E-06 | 0.95 | 4.61 | - | 1843.1 |
| AHQ-10-4, 3588        | R.DPPSWSVLGAHRSR.T                  | 1409.53156 | 2 | 1.25E-07 | 0.73 | 2.84 | - | 352.1  |
| AHQ-10-3, 3579 - 3581 | R.DPPSWSVLGAHRSR.T                  | 1409.53156 | 2 | 1.41E-06 | 0.90 | 3.55 | - | 622.0  |
| AHQ-10-2, 3646        | R.DPPSWSVLGAHRSR.T                  | 1409.53156 | 2 | 2.70E-07 | 0.68 | 2.70 | - | 406.5  |
| AHQ-10-3, 3582        | R.DPPSWSVLGAHRSR.T                  | 1409.53156 | 3 | 1.94E-05 | 0.91 | 3.89 | - | 779.7  |

|                        |                                       |            |   |          |      |      |   |        |
|------------------------|---------------------------------------|------------|---|----------|------|------|---|--------|
| AHQ-10-4, 3603         | R.DPPSWSVLGHSR.T                      | 1409.53156 | 3 | 1.46E-06 | 0.87 | 4.09 | - | 581.3  |
| AHQ-10-2, 3658         | R.DPPSWSVLGHSR.T                      | 1409.53156 | 3 | 9.87E-07 | 0.92 | 4.56 | - | 809.6  |
| AHQ-10-1, 3755         | R.DPPSWSVLGHSR.T                      | 1409.53156 | 2 | 3.67E-07 | 0.71 | 2.91 | - | 462.9  |
| AHQ-10-10, 4708        | R.DPVQLNLLVYQAR.D                     | 1529.76539 | 2 | 2.10E-04 | 0.94 | 3.72 | - | 1176.7 |
| AHQ-10-7, 4813 - 4829  | R.DPVQLNLLVYQAR.D                     | 1529.76539 | 2 | 6.09E-06 | 0.95 | 3.95 | - | 1579.8 |
| AHQ-10-9, 4623         | R.DPVQLNLLVYQAR.D                     | 1529.76539 | 2 | 9.18E-05 | 0.94 | 3.65 | - | 1366.3 |
| AHQ-10-3, 4898         | R.DPVQLNLLVYQAR.D                     | 1529.76539 | 2 | 6.17E-08 | 0.96 | 4.19 | - | 1452.9 |
| AHQ-10-8, 4873 - 4887  | R.DPVQLNLLVYQAR.D                     | 1529.76539 | 2 | 9.88E-09 | 0.97 | 5.32 | - | 1459.7 |
| AHQ-10-2, 2611         | K.EAAYHPEVAPDVR.L                     | 1454.56910 | 2 | 1.21E-06 | 0.91 | 3.42 | - | 1040.1 |
| AHQ-10-2, 5583 - 5638  | K.EADESLNFEEQILEAAK.S                 | 1937.05072 | 2 | 2.36E-08 | 0.96 | 4.48 | - | 1649.7 |
| AHQ-10-7, 5229 - 5262  | K.EADESLNFEEQILEAAK.S                 | 1937.05072 | 2 | 2.24E-05 | 0.61 | 3.03 | - | 709.1  |
| AHQ-10-4, 5365 - 5424  | K.EADESLNFEEQILEAAK.S                 | 1937.05072 | 2 | 1.91E-04 | 0.28 | 2.51 | - | 417.5  |
| AHQ-10-4, 5525 - 5583  | K.EADESLNFEEQILEAAK.S                 | 1937.05072 | 2 | 4.40E-07 | 0.96 | 4.92 | - | 1701.9 |
| AHQ-10-7, 5541         | K.EADESLNFEEQILEAAK.S                 | 1937.05072 | 2 | 3.82E-04 | 0.46 | 2.89 | - | 538.8  |
| AHQ-10-1, 5610 - 5673  | K.EADESLNFEEQILEAAK.S                 | 1937.05072 | 2 | 3.82E-07 | 0.97 | 5.17 | - | 1817.9 |
| AHQ-10-13, 5386 - 5444 | K.EADESLNFEEQILEAAK.S                 | 1937.05072 | 2 | 1.78E-07 | 0.88 | 3.53 | - | 1035.7 |
| AHQ-10-3, 5437 - 5505  | K.EADESLNFEEQILEAAK.S                 | 1937.05072 | 2 | 1.69E-07 | 0.96 | 5.31 | - | 1377.9 |
| AHQ-10-3, 5485         | K.EADESLNFEEQILEAAK.S                 | 1937.05072 | 3 | 4.11E-04 | 0.70 | 3.01 | - | 937.7  |
| AHQ-10-4, 5623 - 5681  | K.EADESLNFEEQILEAAK.S                 | 1937.05072 | 2 | 2.40E-05 | 0.95 | 4.85 | - | 1285.8 |
| AHQ-10-3, 5549         | K.EADESLNFEEQILEAAK.S                 | 1937.05072 | 2 | 3.06E-07 | 0.95 | 4.53 | - | 1608.7 |
| AHQ-10-6, 5436 - 5513  | K.EADESLNFEEQILEAAK.S                 | 1937.05072 | 2 | 2.59E-09 | 0.97 | 4.95 | - | 1830.3 |
| AHQ-10-5, 5555 - 5627  | K.EADESLNFEEQILEAAK.S                 | 1937.05072 | 2 | 1.07E-07 | 0.96 | 4.64 | - | 1587.9 |
| AHQ-10-7, 5452 - 5454  | K.EADESLNFEEQILEAAK.S                 | 1937.05072 | 2 | 2.67E-04 | 0.97 | 4.89 | - | 1915.6 |
| AHQ-10-2, 6480         | R.ECANGYLELDDHLLTLQKPSPELK.Q          | 2883.30906 | 3 | 1.62E-08 | 0.96 | 5.39 | - | 1372.6 |
| AHQ-10-2, 6391 - 6416  | R.EGISQEAHLHTQM*LTAVQEISHLIEPLANAAR.A | 3388.79744 | 3 | 6.30E-05 | 0.91 | 4.81 | - | 808.9  |
| AHQ-10-6, 6291         | R.EGISQEAHLHTQM*LTAVQEISHLIEPLANAAR.A | 3388.79744 | 3 | 1.45E-06 | 0.94 | 5.62 | - | 867.9  |
| AHQ-10-4, 6443         | R.EGISQEAHLHTQM*LTAVQEISHLIEPLANAAR.A | 3372.79804 | 3 | 7.61E-04 | 0.53 | 3.46 | - | 522.2  |
| AHQ-10-3, 6227 - 6306  | R.EGISQEAHLHTQM*LTAVQEISHLIEPLANAAR.A | 3388.79744 | 3 | 1.65E-08 | 0.90 | 4.46 | - | 1018.5 |
| AHQ-10-4, 6383         | R.EGISQEAHLHTQM*LTAVQEISHLIEPLANAAR.A | 3388.79744 | 3 | 3.35E-07 | 0.93 | 4.87 | - | 1038.5 |
| AHQ-10-5, 6416         | R.EGISQEAHLHTQM*LTAVQEISHLIEPLANAAR.A | 3388.79744 | 3 | 1.95E-10 | 0.97 | 6.06 | - | 1742.9 |
| AHQ-10-3, 5697 - 5761  | R.ELLENVPQINDM*SYFGCLDSVM*ENSK.V      | 3164.48754 | 3 | 3.88E-06 | 0.92 | 5.18 | - | 553.0  |
| AHQ-10-4, 5753 - 5809  | R.ELLENVPQINDM*SYFGCLDSVM*ENSK.V      | 3164.48754 | 3 | 1.96E-08 | 0.85 | 3.57 | - | 770.2  |
| AHQ-10-3, 6101         | R.ELLENVPQINDM*SYFGCLDSVM*ENSK.V      | 3148.48814 | 3 | 2.31E-04 | 0.62 | 3.18 | - | 309.8  |
| AHQ-10-7, 3116         | R.EQGVEEHETLLLR.R                     | 1553.69898 | 2 | 2.42E-04 | 0.87 | 3.52 | - | 557.4  |
| AHQ-10-7, 5253         | R.ERIEAPAGPPSDFGLFLSDDDPK.K           | 2571.77979 | 3 | 2.60E-10 | 0.98 | 7.59 | - | 2143.3 |
| AHQ-10-14, 5269 - 5274 | R.ERIEAPAGPPSDFGLFLSDDDPK.K           | 2571.77979 | 3 | 2.83E-06 | 0.98 | 6.18 | - | 2091.5 |
| AHQ-10-13, 5201 - 5256 | R.ERIEAPAGPPSDFGLFLSDDDPK.K           | 2571.77979 | 3 | 6.58E-08 | 0.97 | 6.55 | - | 1626.0 |
| AHQ-10-7, 4896         | R.ERIEAPAGPPSDFGLFLSDDDPK.K           | 2699.95270 | 3 | 1.61E-04 | 0.81 | 3.56 | - | 977.6  |
| AHQ-10-8, 4979         | R.ERIEAPAGPPSDFGLFLSDDDPK.K           | 2699.95270 | 3 | 5.05E-14 | 0.98 | 6.62 | - | 2383.9 |
| AHQ-10-2, 2318         | K.EVANSTANLVK.T                       | 1146.27608 | 2 | 5.85E-04 | 0.82 | 2.83 | - | 862.4  |
| AHQ-10-3, 2278         | K.EVANSTANLVK.T                       | 1146.27608 | 2 | 8.05E-05 | 0.69 | 2.78 | - | 547.5  |
| AHQ-10-7, 4460 - 4517  | K.EVIQEWLNTIK.R                       | 1487.68214 | 2 | 2.95E-04 | 0.60 | 2.87 | - | 514.9  |
| AHQ-10-7, 2993         | K.FFYSDQNVDSR.D                       | 1378.42795 | 2 | 2.15E-06 | 0.93 | 3.48 | - | 1087.9 |
| AHQ-10-8, 2971         | K.FFYSDQNVDSR.D                       | 1378.42795 | 2 | 3.44E-06 | 0.91 | 3.37 | - | 918.0  |
| AHQ-10-8, 5593 - 5594  | K.FFYSDQNVDSRDPVQLNLLVYQAR.D          | 2889.17074 | 3 | 4.19E-06 | 0.97 | 5.77 | - | 1963.4 |
| AHQ-10-1, 5846 - 5901  | R.FGQDFSTLEAGVEM*AGQAPSQEDR.A         | 2734.89265 | 3 | 3.25E-05 | 0.84 | 3.74 | - | 846.1  |
| AHQ-10-4, 5821 - 5875  | R.FGQDFSTLEAGVEM*AGQAPSQEDR.A         | 2734.89265 | 3 | 6.48E-06 | 0.91 | 4.35 | - | 887.9  |
| AHQ-10-3, 5725 - 5781  | R.FGQDFSTLEAGVEM*AGQAPSQEDR.A         | 2734.89265 | 3 | 8.70E-07 | 0.88 | 4.43 | - | 873.4  |
| AHQ-10-4, 2875 - 2901  | K.FLPSLRDEH                           | 1243.35032 | 2 | 9.07E-07 | 0.65 | 2.66 | - | 407.3  |
| AHQ-10-6, 4859         | K.GLAGAVSELLR.S                       | 1086.26701 | 2 | 4.34E-04 | 0.88 | 2.63 | - | 1346.3 |
| AHQ-10-3, 4922         | K.GLAGAVSELLR.S                       | 1086.26701 | 2 | 1.59E-06 | 0.98 | 4.64 | - | 2445.2 |
| AHQ-10-1, 5079         | K.GLAGAVSELLR.S                       | 1086.26701 | 2 | 1.00E-06 | 0.96 | 4.11 | - | 1734.3 |
| AHQ-10-4, 4976         | K.GLAGAVSELLR.S                       | 1086.26701 | 2 | 2.01E-06 | 0.97 | 4.62 | - | 2131.6 |
| AHQ-10-5, 4933         | K.GLAGAVSELLR.S                       | 1086.26701 | 2 | 7.97E-08 | 0.97 | 4.02 | - | 1857.4 |
| AHQ-10-2, 4998         | K.GLAGAVSELLR.S                       | 1086.26701 | 2 | 2.44E-06 | 0.97 | 4.25 | - | 2149.4 |
| AHQ-10-5, 6029 - 6100  | R.GSQAQPDSPSAQLLALIAASQSFLQPGGK.M     | 2756.02103 | 3 | 3.31E-04 | 0.81 | 4.05 | - | 603.9  |
| AHQ-10-3, 6025         | R.GSQAQPDSPSAQLLALIAASQSFLQPGGK.M     | 2756.02103 | 2 | 1.61E-04 | 0.89 | 3.18 | - | 1064.9 |
| AHQ-10-3, 5939 - 6011  | R.GSQAQPDSPSAQLLALIAASQSFLQPGGK.M     | 2756.02103 | 3 | 3.03E-04 | 0.83 | 4.23 | - | 674.9  |
| AHQ-10-3, 5738 - 5806  | R.GSQAQPDSPSAQLLALIAASQSFLQPGGK.M     | 2756.02103 | 3 | 2.94E-05 | 0.81 | 3.72 | - | 918.8  |
| AHQ-10-4, 6088 - 6155  | R.GSQAQPDSPSAQLLALIAASQSFLQPGGK.M     | 2756.02103 | 3 | 7.19E-04 | 0.94 | 4.98 | - | 1287.7 |
| AHQ-10-2, 5952 - 6022  | R.GSQAQPDSPSAQLLALIAASQSFLQPGGK.M     | 2756.02103 | 3 | 2.66E-05 | 0.74 | 3.88 | - | 586.3  |
| AHQ-10-6, 5880 - 5951  | R.GSQAQPDSPSAQLLALIAASQSFLQPGGK.M     | 2756.02103 | 3 | 9.95E-05 | 0.75 | 3.82 | - | 715.9  |
| AHQ-10-2, 6538         | K.GTEWVDPEDPTVIAENELGAAAAIEAAK.K      | 3053.32301 | 3 | 7.89E-10 | 0.96 | 5.75 | - | 1426.6 |
| AHQ-10-5, 6516         | K.GTEWVDPEDPTVIAENELGAAAAIEAAK.K      | 3053.32301 | 3 | 1.11E-04 | 0.87 | 4.22 | - | 870.5  |
| AHQ-10-3, 6422 - 6425  | K.GTEWVDPEDPTVIAENELGAAAAIEAAK.K      | 3053.32301 | 3 | 5.22E-06 | 0.97 | 6.07 | - | 1499.4 |
| AHQ-10-4, 6503         | K.GTEWVDPEDPTVIAENELGAAAAIEAAK.K      | 3053.32301 | 3 | 1.57E-07 | 0.96 | 5.59 | - | 1665.1 |
| AHQ-10-7, 6353         | R.GVAALTSDPVAQVILDTASDVLDK.A          | 2470.75835 | 3 | 7.97E-05 | 0.97 | 6.35 | - | 1894.3 |
| AHQ-10-5, 6419         | R.GVAALTSDPVAQVILDTASDVLDK.A          | 2470.75835 | 3 | 5.96E-05 | 0.96 | 5.44 | - | 1674.9 |
| AHQ-10-4, 6407 - 6413  | R.GVAALTSDPVAQVILDTASDVLDK.A          | 2470.75835 | 3 | 2.75E-11 | 0.98 | 6.70 | - | 2847.4 |
| AHQ-10-6, 6296         | R.GVAALTSDPVAQVILDTASDVLDK.A          | 2470.75835 | 3 | 4.23E-09 | 0.98 | 6.39 | - | 3472.6 |
| AHQ-10-8, 6389         | R.GVAALTSDPVAQVILDTASDVLDK.A          | 2470.75835 | 2 | 6.88E-05 | 0.93 | 4.34 | - | 914.5  |
| AHQ-10-1, 6434 - 6513  | R.GVAALTSDPVAQVILDTASDVLDK.A          | 2470.75835 | 3 | 7.09E-07 | 0.98 | 6.76 | - | 3165.3 |
| AHQ-10-4, 6467         | R.GVGAATAVTQALNELLQHVK.A              | 2092.38495 | 2 | 1.83E-07 | 0.92 | 4.57 | - | 737.3  |
| AHQ-10-2, 6490         | R.GVGAATAVTQALNELLQHVK.A              | 2092.38495 | 2 | 6.26E-06 | 0.95 | 5.22 | - | 979.2  |
| AHQ-10-5, 6471         | R.GVGAATAVTQALNELLQHVK.A              | 2092.38495 | 3 | 5.91E-07 | 0.92 | 4.32 | - | 966.0  |
| AHQ-10-4, 6463 - 6541  | R.GVGAATAVTQALNELLQHVK.A              | 2092.38495 | 3 | 6.82E-08 | 0.96 | 5.70 | - | 1250.8 |
| AHQ-10-5, 6473         | R.GVGAATAVTQALNELLQHVK.A              | 2092.38495 | 2 | 8.87E-05 | 0.95 | 5.47 | - | 771.4  |
| AHQ-10-8, 6445         | R.GVGAATAVTQALNELLQHVK.A              | 2092.38495 | 3 | 5.04E-07 | 0.93 | 4.44 | - | 952.8  |
| AHQ-10-2, 5470         | R.GVGAATAVTQALNELLQHVK.A              | 2092.38495 | 2 | 3.47E-08 | 0.91 | 4.11 | - | 823.4  |
| AHQ-10-3, 6391         | R.GVGAATAVTQALNELLQHVK.A              | 2092.38495 | 2 | 2.53E-05 | 0.94 | 4.51 | - | 1267.8 |
| AHQ-10-6, 6353         | R.GVGAATAVTQALNELLQHVK.A              | 2092.38495 | 2 | 4.62E-05 | 0.83 | 4.02 | - | 618.3  |
| AHQ-10-6, 6351         | R.GVGAATAVTQALNELLQHVK.A              | 2092.38495 | 3 | 2.19E-08 | 0.89 | 3.92 | - | 956.3  |
| AHQ-10-3, 6385         | R.GVGAATAVTQALNELLQHVK.A              | 2092.38495 | 3 | 3.89E-08 | 0.91 | 4.42 | - | 985.2  |
| AHQ-10-7, 3525 - 3572  | R.IGITNHDEYSLVR.E                     | 1517.66833 | 2 | 1.03E-04 | 0.86 | 3.22 | - | 955.5  |
| AHQ-10-7, 3253 - 3312  | R.IGITNHDEYSLVR.E                     | 1517.66833 | 2 | 1.63E-09 | 0.91 | 3.44 | - | 1209.1 |
| AHQ-10-13, 3406        | R.IGITNHDEYSLVR.E                     | 1517.66833 | 3 | 2.03E-07 | 0.84 | 3.44 | - | 722.7  |
| AHQ-10-8, 3641 - 3647  | R.IGITNHDEYSLVR.E                     | 1517.66833 | 2 | 8.54E-07 | 0.85 | 2.96 | - | 872.6  |
| AHQ-10-13, 3402        | R.IGITNHDEYSLVR.E                     | 1517.66833 | 2 | 8.84E-10 | 0.94 | 4.03 | - | 1144.7 |
| AHQ-10-8, 3513 - 3573  | R.IGITNHDEYSLVR.E                     | 1517.66833 | 2 | 3.43E-09 | 0.94 | 3.87 | - | 1483.1 |
| AHQ-10-7, 3308 - 3310  | R.IGITNHDEYSLVR.E                     | 1517.66833 | 3 | 2.33E-06 | 0.94 | 4.75 | - | 900.4  |
| AHQ-10-13, 3402        | R.IGITNHDEYSLVR.E                     | 2277.54018 | 3 | 2.35E-04 | 0.45 | 3.10 | - | 412.3  |
| AHQ-10-2, 4284         | R.ILAQATSDLVNAIK.A                    | 1457.69748 | 2 | 2.46E-07 | 0.94 | 3.44 | - | 1397.3 |
| AHQ-10-1, 4933         | R.ILAQATSDLVNAIK.A                    | 1457.69748 | 2 | 4.70E-05 | 0.96 | 4.22 | - | 1553.1 |
| AHQ-10-3, 4785         | R.ILAQATSDLVNAIK.A                    | 1457.69748 | 2 | 5.79E-07 | 0.97 | 4.67 | - | 1998.0 |
| AHQ-10-4, 4043 - 4044  | R.ILAQATSDLVNAIK.A                    | 1457.69748 | 2 | 5.73E-07 | 0.97 | 4.03 | - | 2021.3 |
| AHQ-10-2, 4450 - 4472  | R.ILAQATSDLVNAIK.A                    | 1457.69748 | 2 | 3.30E-05 | 0.88 | 3.39 | - | 970.5  |
| AHQ-10-7, 4720 - 4782  | R.ILAQATSDLVNAIK.A                    | 1457.69748 | 2 | 2.16E-05 | 0.95 | 4.24 | - | 1458.5 |
| AHQ-10-2, 4560         | R.ILAQATSDLVNAIK.A                    | 1457.69748 | 2 | 4.82E-07 | 0.94 | 3.63 | - | 1389.2 |
| AHQ-10-2, 4027 - 4094  | R.ILAQATSDLVNAIK.A                    | 1457.69748 | 2 | 5.24E-06 | 0.97 | 4.59 | - | 2028.7 |
| AHQ-10-6, 3953 - 3963  | R.ILAQATSDLVNAIK.A                    | 1457.69748 | 2 | 9.62E-10 | 0.98 | 4.38 | - | 2673.7 |
| AHQ-10-7, 3930         | R.ILAQATSDLVNAIK.A                    | 1457.69748 | 2 | 5.70E-08 | 0.95 | 3.71 | - | 1465.2 |
| AHQ-10-5, 4795 - 4807  | R.ILAQATSDLVNAIK.A                    | 1457.69748 | 2 | 8.31E-10 | 0.98 | 4.96 | - | 2492.9 |
| AHQ-10-6, 4724 - 4791  | R.ILAQATSDLVNAIK.A                    | 1457.69748 | 2 | 3.06E-09 | 0.98 | 5.09 | - | 2098.4 |
| AHQ-10-4, 4836 - 4847  | R.ILAQATSDLVNAIK.A                    | 1457.69748 | 2 | 1.78E-08 | 0.98 | 5.28 | - | 1770.0 |
| AHQ-10-5, 4036 - 4043  | R.ILAQATSDLVNAIK.A                    | 1457.69748 | 2 | 1.63E-07 | 0.98 | 4.37 | - | 2396.3 |
| AHQ-10-2, 4863         | R.ILAQATSDLVNAIK.A                    | 1457.69748 | 2 | 1.01E-09 | 0.97 | 3.93 | - | 2021.4 |
| AHQ-10-3, 4022         | R.ILAQATSDLVNAIK.A                    | 1457.69748 | 2 | 1.82E-06 | 0.96 | 3.69 | - | 1805.8 |

|                        |                             |            |   |          |      |      |   |        |
|------------------------|-----------------------------|------------|---|----------|------|------|---|--------|
| AHQ-10-13- 5485        | R.IPEAPAGPPSDFGLFLSDDDPK.K  | 2286.47890 | 2 | 3.94E-05 | 0.93 | 3.84 | - | 1092.9 |
| AHQ-10-8, 5502 - 5557  | R.IPEAPAGPPSDFGLFLSDDDPK.K  | 2286.47890 | 2 | 3.00E-06 | 0.93 | 4.29 | - | 981.5  |
| AHQ-10-3, 5214         | R.IPEAPAGPPSDFGLFLSDDDPK.G  | 2414.65181 | 3 | 2.59E-06 | 0.82 | 3.76 | - | 649.9  |
| AHQ-10-8, 5194 - 5259  | R.IPEAPAGPPSDFGLFLSDDDPK.K  | 2414.65181 | 3 | 1.21E-08 | 0.92 | 4.26 | - | 1101.4 |
| AHQ-10-13- 5148 - 5161 | R.IPEAPAGPPSDFGLFLSDDDPK.G  | 2414.65181 | 3 | 5.79E-10 | 0.91 | 4.11 | - | 981.7  |
| AHQ-10-13, 5440 - 5501 | R.IPEAPAGPPSDFGLFLSDDDPK.G  | 2414.65181 | 3 | 4.77E-07 | 0.91 | 4.80 | - | 933.9  |
| AHQ-10-1, 5354         | R.IPEAPAGPPSDFGLFLSDDDPK.G  | 2414.65181 | 3 | 1.75E-06 | 0.90 | 3.74 | - | 1198.9 |
| AHQ-10-8, 2731         | R.KFFYSDQNVDSR.D            | 1506.60087 | 2 | 1.41E-04 | 0.87 | 2.82 | - | 994.6  |
| AHQ-10-7, 2661 - 2734  | R.KFFYSDQNVDSR.D            | 1506.60087 | 2 | 4.38E-05 | 0.88 | 3.62 | - | 740.0  |
| AHQ-10-7, 2736 - 2738  | K.LAQAAQSSVATITR.L          | 1417.59344 | 2 | 6.58E-09 | 0.95 | 3.72 | - | 1815.8 |
| AHQ-10-2, 2850         | K.LAQAAQSSVATITR.L          | 1417.59344 | 2 | 1.69E-06 | 0.94 | 3.65 | - | 1360.6 |
| AHQ-10-8, 2743 - 2754  | K.LAQAAQSSVATITR.L          | 1417.59344 | 2 | 8.56E-05 | 0.68 | 2.88 | - | 740.1  |
| AHQ-10-6, 2743         | K.LAQAAQSSVATITR.L          | 1417.59344 | 2 | 2.97E-06 | 0.94 | 3.77 | - | 1286.9 |
| AHQ-10-6, 2588 - 2595  | K.LAQAAQSSVATITR.L          | 1417.59344 | 2 | 9.74E-06 | 0.97 | 4.81 | - | 1865.1 |
| AHQ-10-1, 2995         | K.LAQAAQSSVATITR.L          | 1417.59344 | 2 | 1.04E-05 | 0.95 | 3.50 | - | 1548.9 |
| AHQ-10-3, 2763 - 2821  | K.LAQAAQSSVATITR.L          | 1417.59344 | 2 | 2.59E-09 | 0.97 | 4.86 | - | 1479.9 |
| AHQ-10-3, 2647         | K.LAQAAQSSVATITR.L          | 1417.59344 | 2 | 7.33E-07 | 0.94 | 3.82 | - | 1403.4 |
| AHQ-10-4, 2767         | K.LAQAAQSSVATITR.L          | 1417.59344 | 2 | 7.79E-09 | 0.96 | 4.20 | - | 1612.4 |
| AHQ-10-2, 2686 - 2726  | K.LAQAAQSSVATITR.L          | 1417.59344 | 2 | 2.18E-04 | 0.89 | 3.42 | - | 898.8  |
| AHQ-10-5, 2775 - 2797  | K.LAQAAQSSVATITR.L          | 1417.59344 | 2 | 1.93E-09 | 0.96 | 4.21 | - | 1357.8 |
| AHQ-10-4, 2620         | K.LAQAAQSSVATITR.L          | 1417.59344 | 2 | 1.37E-05 | 0.95 | 3.69 | - | 1773.9 |
| AHQ-10-6, 3203 - 3265  | R.LASEAKPAVAANEENEEIGSHIK.H | 2236.46779 | 3 | 4.77E-06 | 0.88 | 4.01 | - | 910.2  |
| AHQ-10-2, 3594         | R.LASEAKPAVAANEENEEIGSHIK.H | 2236.46779 | 3 | 1.35E-07 | 0.96 | 4.67 | - | 2177.5 |
| AHQ-10-2, 3362 - 3364  | R.LASEAKPAVAANEENEEIGSHIK.H | 2236.46779 | 3 | 5.89E-07 | 0.96 | 5.40 | - | 1769.1 |
| AHQ-10-3, 3070         | R.LASEAKPAVAANEENEEIGSHIK.H | 2236.46779 | 3 | 4.33E-04 | 0.66 | 3.23 | - | 753.7  |
| AHQ-10-3, 3306         | R.LASEAKPAVAANEENEEIGSHIK.H | 2236.46779 | 2 | 2.61E-06 | 0.88 | 4.06 | - | 502.5  |
| AHQ-10-1, 3486         | R.LASEAKPAVAANEENEEIGSHIK.H | 2236.46779 | 3 | 1.17E-08 | 0.97 | 5.75 | - | 2386.3 |
| AHQ-10-4, 3296         | R.LASEAKPAVAANEENEEIGSHIK.H | 2236.46779 | 3 | 1.70E-04 | 0.95 | 5.04 | - | 1705.1 |
| AHQ-10-5, 5151         | K.LGAASLGAEDPETQVVLINAVK.D  | 2196.48671 | 3 | 8.66E-07 | 0.98 | 5.66 | - | 2526.5 |
| AHQ-10-2, 4967 - 5022  | K.LGAASLGAEDPETQVVLINAVK.D  | 2196.48671 | 2 | 2.38E-07 | 0.94 | 4.96 | - | 686.9  |
| AHQ-10-4, 5296         | K.LGAASLGAEDPETQVVLINAVK.D  | 2196.48671 | 3 | 2.66E-05 | 0.90 | 3.44 | - | 1664.3 |
| AHQ-10-4, 5285         | K.LGAASLGAEDPETQVVLINAVK.D  | 2196.48671 | 2 | 3.09E-11 | 0.89 | 4.42 | - | 603.1  |
| AHQ-10-5, 5144         | K.LGAASLGAEDPETQVVLINAVK.D  | 2196.48671 | 2 | 1.76E-07 | 0.95 | 4.70 | - | 1121.7 |
| AHQ-10-4, 5167         | K.LGAASLGAEDPETQVVLINAVK.D  | 2196.48671 | 3 | 6.27E-09 | 0.98 | 5.61 | - | 2760.3 |
| AHQ-10-1, 5065         | K.LGAASLGAEDPETQVVLINAVK.D  | 2196.48671 | 2 | 4.32E-05 | 0.86 | 3.54 | - | 613.8  |
| AHQ-10-4, 5163         | K.LGAASLGAEDPETQVVLINAVK.D  | 2196.48671 | 2 | 4.75E-04 | 0.95 | 5.18 | - | 826.0  |
| AHQ-10-13- 5044        | K.LGAASLGAEDPETQVVLINAVK.D  | 2196.48671 | 2 | 1.14E-05 | 0.83 | 3.10 | - | 777.6  |
| AHQ-10-4, 4968 - 4975  | K.LGAASLGAEDPETQVVLINAVK.D  | 2196.48671 | 2 | 3.59E-10 | 0.97 | 5.09 | - | 1698.4 |
| AHQ-10-1, 5241 - 5243  | K.LGAASLGAEDPETQVVLINAVK.D  | 2196.48671 | 3 | 3.71E-05 | 0.94 | 4.64 | - | 1430.2 |
| AHQ-10-6, 4835 - 4855  | K.LGAASLGAEDPETQVVLINAVK.D  | 2196.48671 | 2 | 6.00E-06 | 0.87 | 4.12 | - | 586.1  |
| AHQ-10-3, 5222 - 5266  | K.LGAASLGAEDPETQVVLINAVK.D  | 2196.48671 | 2 | 6.16E-04 | 0.75 | 3.57 | - | 393.6  |
| AHQ-10-6, 4857         | K.LGAASLGAEDPETQVVLINAVK.D  | 2196.48671 | 3 | 2.25E-05 | 0.85 | 3.40 | - | 1263.4 |
| AHQ-10-6, 5036 - 5043  | K.LGAASLGAEDPETQVVLINAVK.D  | 2196.48671 | 2 | 5.40E-06 | 0.96 | 5.24 | - | 1053.3 |
| AHQ-10-6, 5169         | K.LGAASLGAEDPETQVVLINAVK.D  | 2196.48671 | 2 | 6.99E-09 | 0.94 | 4.66 | - | 783.3  |
| AHQ-10-1, 5358 - 5381  | K.LGAASLGAEDPETQVVLINAVK.D  | 2196.48671 | 2 | 2.16E-07 | 0.86 | 4.09 | - | 504.9  |
| AHQ-10-3, 5103 - 5106  | K.LGAASLGAEDPETQVVLINAVK.D  | 2196.48671 | 3 | 8.02E-06 | 0.89 | 3.77 | - | 1272.2 |
| AHQ-10-14- 5069        | K.LGAASLGAEDPETQVVLINAVK.D  | 2196.48671 | 2 | 4.10E-05 | 0.90 | 3.97 | - | 753.4  |
| AHQ-10-3, 5097 - 5101  | K.LGAASLGAEDPETQVVLINAVK.D  | 2196.48671 | 2 | 1.38E-05 | 0.96 | 5.35 | - | 1170.2 |
| AHQ-10-2, 5158 - 5215  | K.LGAASLGAEDPETQVVLINAVK.D  | 2196.48671 | 2 | 1.04E-08 | 0.97 | 5.42 | - | 1423.1 |
| AHQ-10-2, 5184 - 5208  | K.LGAASLGAEDPETQVVLINAVK.D  | 2196.48671 | 3 | 1.57E-06 | 0.97 | 5.23 | - | 2431.7 |
| AHQ-10-2, 5310 - 5314  | K.LGAASLGAEDPETQVVLINAVK.D  | 2196.48671 | 3 | 1.06E-04 | 0.89 | 3.95 | - | 1083.8 |
| AHQ-10-5, 5276         | K.LGAASLGAEDPETQVVLINAVK.D  | 2196.48671 | 2 | 2.96E-09 | 0.88 | 4.13 | - | 635.4  |
| AHQ-10-5, 4951         | K.LGAASLGAEDPETQVVLINAVK.D  | 2196.48671 | 2 | 4.84E-11 | 0.91 | 4.14 | - | 869.7  |
| AHQ-10-7, 5037 - 5046  | K.LGAASLGAEDPETQVVLINAVK.D  | 2196.48671 | 2 | 7.63E-05 | 0.97 | 5.27 | - | 1567.4 |
| AHQ-10-2, 5306 - 5307  | K.LGAASLGAEDPETQVVLINAVK.D  | 2196.48671 | 2 | 1.15E-10 | 0.95 | 5.05 | - | 864.8  |
| AHQ-10-3, 4885 - 4951  | K.LGAASLGAEDPETQVVLINAVK.D  | 2196.48671 | 2 | 1.71E-04 | 0.80 | 3.67 | - | 490.6  |
| AHQ-10-8, 3701 - 3703  | K.LHTDDELNLWLDHGR.T         | 1721.81153 | 2 | 1.63E-06 | 0.97 | 5.00 | - | 1962.8 |
| AHQ-10-8, 3702         | K.LHTDDELNLWLDHGR.T         | 1721.81153 | 3 | 5.94E-06 | 0.95 | 5.01 | - | 1365.9 |
| AHQ-10-7, 3741         | K.LHTDDELNLWLDHGR.T         | 1721.81153 | 2 | 5.26E-07 | 0.97 | 4.76 | - | 1837.9 |
| AHQ-10-7, 3744         | K.LHTDDELNLWLDHGR.T         | 1721.81153 | 3 | 2.59E-06 | 0.91 | 4.20 | - | 1055.4 |
| AHQ-10-7, 4949         | K.LLAALLEDEGGSGRPLLOAAK.G   | 2123.43896 | 2 | 5.79E-05 | 0.96 | 5.46 | - | 1065.0 |
| AHQ-10-7, 4941 - 4942  | K.LLAALLEDEGGSGRPLLOAAK.G   | 2123.43896 | 3 | 2.11E-07 | 0.97 | 5.54 | - | 1802.5 |
| AHQ-10-5, 5052         | K.LLAALLEDEGGSGRPLLOAAK.G   | 2123.43896 | 2 | 3.46E-06 | 0.98 | 7.19 | - | 1469.3 |
| AHQ-10-3, 5025         | K.LLAALLEDEGGSGRPLLOAAK.G   | 2123.43896 | 3 | 6.70E-07 | 0.94 | 5.08 | - | 999.4  |
| AHQ-10-3, 5029         | K.LLAALLEDEGGSGRPLLOAAK.G   | 2123.43896 | 2 | 5.02E-09 | 0.97 | 6.19 | - | 1205.4 |
| AHQ-10-6, 4959         | K.LLAALLEDEGGSGRPLLOAAK.G   | 2123.43896 | 3 | 4.40E-08 | 0.93 | 4.66 | - | 1166.0 |
| AHQ-10-6, 4960         | K.LLAALLEDEGGSGRPLLOAAK.G   | 2123.43896 | 2 | 6.20E-08 | 0.98 | 6.68 | - | 1441.2 |
| AHQ-10-2, 5098         | K.LLAALLEDEGGSGRPLLOAAK.G   | 2123.43896 | 2 | 2.20E-11 | 0.98 | 6.57 | - | 1546.4 |
| AHQ-10-8, 4990         | K.LLAALLEDEGGSGRPLLOAAK.G   | 2123.43896 | 2 | 8.84E-07 | 0.97 | 6.13 | - | 1173.5 |
| AHQ-10-4, 5087         | K.LLAALLEDEGGSGRPLLOAAK.G   | 2123.43896 | 3 | 9.75E-09 | 0.97 | 5.75 | - | 1360.6 |
| AHQ-10-2, 5095         | K.LLAALLEDEGGSGRPLLOAAK.G   | 2123.43896 | 3 | 2.00E-08 | 0.97 | 5.76 | - | 1769.5 |
| AHQ-10-5, 5049 - 5051  | K.LLAALLEDEGGSGRPLLOAAK.G   | 2123.43896 | 3 | 8.12E-08 | 0.96 | 5.39 | - | 1396.8 |
| AHQ-10-9, 4755         | K.LLAALLEDEGGSGRPLLOAAK.G   | 2123.43896 | 2 | 1.03E-06 | 0.79 | 3.47 | - | 678.0  |
| AHQ-10-4, 5092 - 5095  | K.LLAALLEDEGGSGRPLLOAAK.G   | 2123.43896 | 2 | 2.15E-08 | 0.98 | 7.17 | - | 1336.3 |
| AHQ-10-8, 4993         | K.LLAALLEDEGGSGRPLLOAAK.G   | 2123.43896 | 3 | 2.18E-09 | 0.97 | 5.60 | - | 1723.0 |
| AHQ-10-1, 5191         | K.LLAALLEDEGGSGRPLLOAAK.G   | 2123.43896 | 2 | 1.13E-06 | 0.97 | 5.50 | - | 1240.4 |
| AHQ-10-9, 4751         | K.LLAALLEDEGGSGRPLLOAAK.G   | 2123.43896 | 3 | 1.13E-06 | 0.93 | 4.54 | - | 1033.9 |
| AHQ-10-1, 5185         | K.LLAALLEDEGGSGRPLLOAAK.G   | 2123.43896 | 3 | 1.33E-08 | 0.94 | 4.46 | - | 1452.6 |
| AHQ-10-2, 4186 - 4243  | R.LLSDSLPPSTGTGFQEAQSR.L    | 2035.20076 | 2 | 3.08E-12 | 0.73 | 3.08 | - | 321.5  |
| AHQ-10-2, 4074 - 4130  | R.LLSDSLPPSTGTGFQEAQSR.L    | 2035.20076 | 2 | 6.44E-08 | 0.92 | 4.56 | - | 429.9  |
| AHQ-10-2, 3944 - 4015  | R.LLSDSLPPSTGTGFQEAQSR.L    | 2035.20076 | 2 | 8.52E-04 | 0.73 | 3.04 | - | 319.3  |
| AHQ-10-3, 4039 - 4095  | R.LLSDSLPPSTGTGFQEAQSR.L    | 2035.20076 | 2 | 5.40E-05 | 0.82 | 3.57 | - | 364.9  |
| AHQ-10-4, 4053 - 4111  | R.LLSDSLPPSTGTGFQEAQSR.L    | 2035.20076 | 2 | 1.92E-08 | 0.91 | 4.32 | - | 413.4  |
| AHQ-10-3, 3953 - 4017  | R.LLSDSLPPSTGTGFQEAQSR.L    | 2035.20076 | 2 | 1.77E-09 | 0.94 | 5.11 | - | 398.3  |
| AHQ-10-4, 3963 - 4028  | R.LLSDSLPPSTGTGFQEAQSR.L    | 2035.20076 | 2 | 5.42E-13 | 0.90 | 4.13 | - | 521.9  |
| AHQ-10-5, 3968 - 4027  | R.LLSDSLPPSTGTGFQEAQSR.L    | 2035.20076 | 2 | 3.11E-12 | 0.94 | 4.07 | - | 721.6  |
| AHQ-10-3, 4154         | R.LLSDSLPPSTGTGFQEAQSR.L    | 2035.20076 | 2 | 6.13E-06 | 0.65 | 3.04 | - | 326.0  |
| AHQ-10-3, 3902 - 3958  | R.LLSDSLPPSTGTGFQEAQSR.L    | 2035.20076 | 2 | 2.25E-06 | 0.25 | 2.64 | - | 159.4  |
| AHQ-10-4, 4176 - 4184  | R.LLSDSLPPSTGTGFQEAQSR.L    | 2035.20076 | 2 | 3.27E-06 | 0.71 | 3.44 | - | 284.5  |
| AHQ-10-3, 5166 - 5221  | R.LNEAAAQLNQAATELVQASR.G    | 2028.21299 | 2 | 7.46E-08 | 0.97 | 5.15 | - | 1545.2 |
| AHQ-10-3, 5343         | R.LNEAAAQLNQAATELVQASR.G    | 2028.21299 | 2 | 8.87E-05 | 0.64 | 2.57 | - | 629.8  |
| AHQ-10-6, 5152         | R.LNEAAAQLNQAATELVQASR.G    | 2028.21299 | 2 | 1.91E-10 | 0.97 | 5.23 | - | 1648.1 |
| AHQ-10-6, 5155         | R.LNEAAAQLNQAATELVQASR.G    | 2028.21299 | 3 | 1.97E-06 | 0.95 | 5.52 | - | 1100.3 |
| AHQ-10-1, 5326         | R.LNEAAAQLNQAATELVQASR.G    | 2028.21299 | 2 | 7.75E-07 | 0.93 | 3.65 | - | 1115.0 |
| AHQ-10-4, 4240         | R.LNEAAAQLNQAATELVQASR.G    | 2028.21299 | 3 | 1.21E-05 | 0.97 | 5.55 | - | 1765.3 |
| AHQ-10-2, 4924         | R.LNEAAAQLNQAATELVQASR.G    | 2028.21299 | 2 | 2.66E-05 | 0.93 | 4.48 | - | 656.6  |
| AHQ-10-2, 4274 - 4354  | R.LNEAAAQLNQAATELVQASR.G    | 2028.21299 | 2 | 7.30E-05 | 0.59 | 3.37 | - | 284.3  |
| AHQ-10-4, 4232         | R.LNEAAAQLNQAATELVQASR.G    | 2028.21299 | 2 | 4.44E-15 | 0.96 | 5.36 | - | 1055.6 |
| AHQ-10-4, 5679         | R.LNEAAAQLNQAATELVQASR.G    | 2028.21299 | 2 | 5.17E-04 | 0.62 | 2.81 | - | 562.4  |
| AHQ-10-4, 5271 - 5289  | R.LNEAAAQLNQAATELVQASR.G    | 2028.21299 | 3 | 1.92E-08 | 0.97 | 6.10 | - | 1690.0 |
| AHQ-10-4, 5272 - 5333  | R.LNEAAAQLNQAATELVQASR.G    | 2028.21299 | 2 | 5.21E-07 | 0.97 | 4.91 | - | 1733.2 |
| AHQ-10-5, 4227         | R.LNEAAAQLNQAATELVQASR.G    | 2028.21299 | 2 | 1.67E-10 | 0.96 | 4.91 | - | 1103.6 |
| AHQ-10-9, 4936         | R.LNEAAAQLNQAATELVQASR.G    | 2028.21299 | 2 | 3.56E-06 | 0.96 | 4.56 | - | 1511.8 |
| AHQ-10-3, 5459         | R.LNEAAAQLNQAATELVQASR.G    | 2028.21299 | 2 | 2.19E-09 | 0.98 | 5.73 | - | 2457.1 |
| AHQ-10-1, 5574         | R.LNEAAAQLNQAATELVQASR.G    | 2028.21299 | 2 | 2.61E-05 | 0.78 | 3.13 | - | 613.1  |
| AHQ-10-7, 5165         | R.LNEAAAQLNQAATELVQASR.G    | 2028.21299 | 3 | 1.82E-04 | 0.98 | 5.94 | - | 2295.5 |
| AHQ-10-7, 5158 - 5160  | R.LNEAAAQLNQAATELVQASR.G    | 2028.21299 | 2 | 3.97E-11 | 0.97 | 5.52 | - | 1513.7 |



|                        |                                   |            |   |          |      |      |   |        |
|------------------------|-----------------------------------|------------|---|----------|------|------|---|--------|
| AHQ-10-4, 5431         | R.LNEAAAGLNQAATELVQASR.G          | 2028.21299 | 2 | 1.20E-11 | 0.97 | 4.53 | - | 1503.9 |
| AHQ-10-2, 5438         | R.LNEAAAGLNQAATELVQASR.G          | 2028.21299 | 2 | 6.30E-06 | 0.96 | 4.66 | - | 1314.5 |
| AHQ-10-3, 5023         | R.LNEAAAGLNQAATELVQASR.G          | 2028.21299 | 2 | 4.22E-04 | 0.87 | 3.30 | - | 851.2  |
| AHQ-10-2, 4280         | R.LNEAAAGLNQAATELVQASR.G          | 2028.21299 | 3 | 1.73E-09 | 0.95 | 4.90 | - | 1494.8 |
| AHQ-10-2, 5543 - 5544  | R.LNEAAAGLNQAATELVQASR.G          | 2028.21299 | 2 | 1.10E-12 | 0.98 | 5.76 | - | 2016.0 |
| AHQ-10-5, 5243 - 5309  | R.LNEAAAGLNQAATELVQASR.G          | 2028.21299 | 2 | 1.11E-14 | 0.97 | 5.72 | - | 1517.7 |
| AHQ-10-2, 5275 - 5346  | R.LNEAAAGLNQAATELVQASR.G          | 2028.21299 | 2 | 6.05E-11 | 0.98 | 6.29 | - | 1601.6 |
| AHQ-10-4, 5541 - 5544  | R.LNEAAAGLNQAATELVQASR.G          | 2028.21299 | 2 | 4.44E-15 | 0.98 | 5.83 | - | 1936.4 |
| AHQ-10-2, 5687         | R.LNEAAAGLNQAATELVQASR.G          | 2028.21299 | 2 | 4.30E-06 | 0.86 | 3.54 | - | 671.5  |
| AHQ-10-2, 5124         | R.LNEAAAGLNQAATELVQASR.G          | 2028.21299 | 3 | 7.63E-05 | 0.71 | 3.39 | - | 548.0  |
| AHQ-10-4, 2129 - 2193  | R.MATNAAAQNAIK.K                  | 1204.38227 | 2 | 6.71E-05 | 0.74 | 3.50 | - | 550.3  |
| AHQ-10-5, 4011 - 4072  | R.M*VAATNNLCEAANAAVQGHASQEK.L     | 2574.79038 | 3 | 1.36E-09 | 0.84 | 4.08 | - | 588.6  |
| AHQ-10-5, 3907         | R.M*VAATNNLCEAANAAVQGHASQEK.L     | 2574.79038 | 3 | 3.35E-09 | 0.87 | 3.82 | - | 697.3  |
| AHQ-10-3, 3997 - 4055  | R.M*VAATNNLCEAANAAVQGHASQEK.L     | 2574.79038 | 3 | 2.09E-12 | 0.93 | 5.19 | - | 850.3  |
| AHQ-10-6, 3932         | R.M*VAATNNLCEAANAAVQGHASQEK.L     | 2574.79038 | 3 | 4.96E-05 | 0.65 | 3.20 | - | 700.5  |
| AHQ-10-3, 3897         | R.M*VAATNNLCEAANAAVQGHASQEK.L     | 2574.79038 | 3 | 2.86E-04 | 0.80 | 3.56 | - | 697.8  |
| AHQ-10-2, 4063 - 4140  | R.M*VAATNNLCEAANAAVQGHASQEK.L     | 2574.79038 | 3 | 6.06E-11 | 0.94 | 4.81 | - | 1123.8 |
| AHQ-10-2, 4044 - 4076  | R.MVAATNNLCEAANAAVQGHASQEK.L      | 2558.79098 | 3 | 3.10E-04 | 0.98 | 5.64 | - | 2496.2 |
| AHQ-10-2, 3966         | R.M*VAATNNLCEAANAAVQGHASQEK.L     | 2574.79038 | 3 | 6.05E-08 | 0.91 | 4.12 | - | 987.8  |
| AHQ-10-4, 4023         | R.M*VAATNNLCEAANAAVQGHASQEK.L     | 2574.79038 | 3 | 2.72E-10 | 0.91 | 4.53 | - | 757.2  |
| AHQ-10-4, 5673         | K.M*VGGIAQIIAAQEEEM*LR.K          | 1863.19287 | 2 | 6.61E-06 | 0.90 | 3.89 | - | 802.7  |
| AHQ-10-1, 5703         | K.M*VGGIAQIIAAQEEEM*LR.K          | 1863.19287 | 2 | 1.18E-08 | 0.91 | 3.34 | - | 1126.1 |
| AHQ-10-5, 5655         | K.M*VGGIAQIIAAQEEEM*LR.K          | 1863.19287 | 3 | 4.73E-06 | 0.97 | 5.41 | - | 1679.0 |
| AHQ-10-4, 6065 - 6144  | K.M*VGGIAQIIAAQEEEM*LR.K          | 1847.19347 | 2 | 1.71E-04 | 0.96 | 4.33 | - | 1704.1 |
| AHQ-10-3, 5507         | K.M*VGGIAQIIAAQEEEM*LR.K          | 1863.19287 | 3 | 4.08E-06 | 0.95 | 4.51 | - | 1478.7 |
| AHQ-10-3, 5583         | K.M*VGGIAQIIAAQEEEM*LR.K          | 1863.19287 | 2 | 3.05E-05 | 0.74 | 3.23 | - | 576.7  |
| AHQ-10-4, 5591 - 5665  | K.M*VGGIAQIIAAQEEEM*LR.K          | 1863.19287 | 3 | 4.38E-08 | 0.97 | 5.74 | - | 2099.0 |
| AHQ-10-14, 5456        | K.M*VGGIAQIIAAQEEEM*LR.K          | 1863.19287 | 3 | 2.82E-05 | 0.82 | 3.76 | - | 986.3  |
| AHQ-10-14, 5462 - 5537 | K.M*VGGIAQIIAAQEEEM*LR.K          | 1863.19287 | 2 | 5.63E-07 | 0.96 | 4.96 | - | 1221.1 |
| AHQ-10-3, 6021 - 6054  | K.M*VGGIAQIIAAQEEEM*LR.K          | 1847.19347 | 2 | 4.87E-05 | 0.91 | 3.73 | - | 1134.7 |
| AHQ-10-2, 5595 - 5668  | K.M*VGGIAQIIAAQEEEM*LR.K          | 1863.19287 | 2 | 1.97E-08 | 0.98 | 6.12 | - | 1597.9 |
| AHQ-10-2, 5599 - 5667  | K.M*VGGIAQIIAAQEEEM*LR.K          | 1863.19287 | 3 | 1.12E-07 | 0.97 | 5.87 | - | 2016.2 |
| AHQ-10-1, 5706         | K.M*VGGIAQIIAAQEEEM*LR.K          | 1863.19287 | 3 | 9.76E-04 | 0.94 | 4.48 | - | 1546.8 |
| AHQ-10-14, 5538        | K.M*VGGIAQIIAAQEEEM*LR.K          | 1863.19287 | 3 | 8.87E-10 | 0.92 | 4.15 | - | 1343.9 |
| AHQ-10-2, 5316         | K.M*VGGIAQIIAAQEEEM*LR.K          | 1991.36578 | 3 | 2.24E-04 | 0.79 | 3.34 | - | 836.1  |
| AHQ-10-4, 5304         | K.M*VGGIAQIIAAQEEEM*LR.K          | 1991.36578 | 3 | 7.06E-04 | 0.86 | 3.65 | - | 786.0  |
| AHQ-10-8, 2391         | K.NCGQMSEIEAK.V                   | 1268.40005 | 2 | 1.05E-04 | 0.92 | 3.10 | - | 1494.9 |
| AHQ-10-2, 4251         | K.NGNLPEFGDAISTASK.A              | 1621.73018 | 2 | 3.17E-06 | 0.67 | 2.72 | - | 477.6  |
| AHQ-10-1, 4455         | K.NGNLPEFGDAISTASK.A              | 1621.73018 | 2 | 5.23E-05 | 0.77 | 3.22 | - | 427.1  |
| AHQ-10-3, 4177 - 4178  | K.NGNLPEFGDAISTASK.A              | 1621.73018 | 2 | 8.59E-06 | 0.82 | 4.01 | - | 334.4  |
| AHQ-10-4, 4113 - 4173  | K.NGNLPEFGDAISTASK.A              | 1621.73018 | 2 | 1.51E-05 | 0.70 | 2.89 | - | 513.8  |
| AHQ-10-4, 4231         | K.NGNLPEFGDAISTASK.A              | 1621.73018 | 2 | 2.04E-05 | 0.72 | 3.28 | - | 364.2  |
| AHQ-10-2, 4148         | K.NGNLPEFGDAISTASK.A              | 1621.73018 | 2 | 3.36E-04 | 0.69 | 2.86 | - | 436.5  |
| AHQ-10-1, 4327         | K.NGNLPEFGDAISTASK.A              | 1621.73018 | 2 | 5.01E-05 | 0.83 | 3.39 | - | 428.1  |
| AHQ-10-2, 4187 - 4195  | K.NLGTALAE.LR.T                   | 1058.21367 | 2 | 6.49E-05 | 0.92 | 3.88 | - | 928.1  |
| AHQ-10-4, 4141         | K.NLGTALAE.LR.T                   | 1058.21367 | 2 | 9.66E-06 | 0.88 | 3.45 | - | 930.5  |
| AHQ-10-3, 4118         | K.NLGTALAE.LR.T                   | 1058.21367 | 2 | 7.24E-06 | 0.94 | 3.25 | - | 1295.1 |
| AHQ-10-1, 4278         | K.NLGTALAE.LR.T                   | 1058.21367 | 2 | 1.04E-04 | 0.88 | 3.23 | - | 1006.8 |
| AHQ-10-2, 4712         | K.NLGTALAE.LR.T                   | 1058.21367 | 2 | 4.87E-05 | 0.83 | 2.91 | - | 957.3  |
| AHQ-10-6, 2799         | K.PAAVAENEEIGSHIK.H               | 1636.78798 | 3 | 9.21E-08 | 0.96 | 4.75 | - | 1729.5 |
| AHQ-10-7, 2780         | K.PAAVAENEEIGSHIK.H               | 1636.78798 | 3 | 2.93E-06 | 0.92 | 4.15 | - | 1464.3 |
| AHQ-10-5, 2829         | K.PAAVAENEEIGSHIK.H               | 1636.78798 | 3 | 1.93E-08 | 0.96 | 4.98 | - | 1701.5 |
| AHQ-10-3, 2857         | K.PAAVAENEEIGSHIK.H               | 1636.78798 | 3 | 5.53E-08 | 0.97 | 5.70 | - | 1869.1 |
| AHQ-10-3, 2859         | K.PAAVAENEEIGSHIK.H               | 1636.78798 | 2 | 1.48E-08 | 0.98 | 5.34 | - | 2128.2 |
| AHQ-10-2, 2816 - 2878  | K.PAAVAENEEIGSHIK.H               | 1636.78798 | 2 | 7.75E-07 | 0.96 | 4.82 | - | 1454.8 |
| AHQ-10-5, 2828         | K.PAAVAENEEIGSHIK.H               | 1636.78798 | 2 | 3.27E-10 | 0.97 | 4.67 | - | 1889.0 |
| AHQ-10-4, 2827         | K.PAAVAENEEIGSHIK.H               | 1636.78798 | 2 | 3.27E-11 | 0.97 | 4.93 | - | 1871.9 |
| AHQ-10-4, 2823 - 2831  | K.PAAVAENEEIGSHIK.H               | 1636.78798 | 3 | 1.79E-10 | 0.97 | 5.90 | - | 1686.1 |
| AHQ-10-2, 2904         | K.PAAVAENEEIGSHIK.H               | 1636.78798 | 3 | 1.40E-07 | 0.97 | 6.17 | - | 1729.9 |
| AHQ-10-6, 3281         | K.QAAASATQITIAAAQHAASSTPK.A       | 1996.17099 | 2 | 1.15E-04 | 0.83 | 3.91 | - | 434.3  |
| AHQ-10-4, 3344         | K.QAAASATQITIAAAQHAASSTPK.A       | 1996.17099 | 2 | 3.61E-08 | 0.92 | 4.44 | - | 766.5  |
| AHQ-10-2, 3402         | K.QAAASATQITIAAAQHAASSTPK.A       | 1996.17099 | 3 | 1.71E-05 | 0.76 | 3.26 | - | 829.9  |
| AHQ-10-5, 3319 - 3320  | K.QAAASATQITIAAAQHAASSTPK.A       | 1996.17099 | 2 | 6.05E-05 | 0.91 | 4.43 | - | 686.0  |
| AHQ-10-2, 3403         | K.QAAASATQITIAAAQHAASSTPK.A       | 1996.17099 | 2 | 1.61E-08 | 0.91 | 4.48 | - | 629.7  |
| AHQ-10-4, 3873 - 3937  | R.QELAVFCSPEPPAK.T                | 1574.77985 | 2 | 2.24E-04 | 0.81 | 3.20 | - | 884.0  |
| AHQ-10-1, 4017 - 4066  | R.QELAVFCSPEPPAK.T                | 1574.77985 | 2 | 3.08E-04 | 0.65 | 2.78 | - | 582.1  |
| AHQ-10-6, 3851         | R.QELAVFCSPEPPAK.T                | 1574.77985 | 2 | 2.38E-07 | 0.93 | 3.71 | - | 1191.1 |
| AHQ-10-2, 3974         | R.QELAVFCSPEPPAK.T                | 1574.77985 | 2 | 4.75E-07 | 0.91 | 3.09 | - | 1118.1 |
| AHQ-10-13, 3736        | K.QVAASTAQLLVACK.V                | 1461.70942 | 2 | 1.39E-05 | 0.84 | 3.25 | - | 632.7  |
| AHQ-10-5, 3735         | K.QVAASTAQLLVACK.V                | 1461.70942 | 2 | 8.60E-06 | 0.84 | 3.26 | - | 644.0  |
| AHQ-10-4, 3273         | R.SGASGPNFQVQSGM*PPAQQITSGQM*HR.G | 2961.19747 | 3 | 2.67E-07 | 0.92 | 4.95 | - | 915.2  |
| AHQ-10-6, 3224         | R.SGASGPNFQVQSGM*PPAQQITSGQM*HR.G | 2961.19747 | 3 | 6.96E-04 | 0.77 | 3.47 | - | 580.6  |
| AHQ-10-2, 3604         | R.SGASGPNFQVQSGM*PPAQQITSGQM*HR.G | 2945.19807 | 3 | 8.81E-05 | 0.82 | 4.34 | - | 451.7  |
| AHQ-10-1, 3447         | R.SGASGPNFQVQSGM*PPAQQITSGQM*HR.G | 2961.19747 | 3 | 2.95E-04 | 0.89 | 4.42 | - | 788.6  |
| AHQ-10-2, 3334         | R.SGASGPNFQVQSGM*PPAQQITSGQM*HR.G | 2961.19747 | 3 | 7.90E-06 | 0.95 | 5.48 | - | 917.4  |
| AHQ-10-3, 3267         | R.SGASGPNFQVQSGM*PPAQQITSGQM*HR.G | 2961.19747 | 3 | 2.85E-05 | 0.87 | 4.31 | - | 756.1  |
| AHQ-10-3, 3533         | R.SGASGPNFQVQSGM*PPAQQITSGQM*HR.G | 2945.19807 | 3 | 7.52E-04 | 0.65 | 3.13 | - | 565.1  |
| AHQ-10-3, 3131         | K.SIAAATSALV.K.A                  | 1032.21612 | 2 | 4.08E-05 | 0.94 | 3.29 | - | 1390.5 |
| AHQ-10-7, 4069 - 4145  | K.SKDFHGLEGDEESTMLEDSVSPK.K       | 2538.68364 | 3 | 5.33E-07 | 0.92 | 4.36 | - | 1513.2 |
| AHQ-10-8, 4167         | K.SKDFHGLEGDEESTMLEDSVSPK.K       | 2538.68364 | 3 | 7.61E-10 | 0.96 | 4.92 | - | 1841.3 |
| AHQ-10-7, 3752         | K.SKDFHGLEGDEESTMLEDSVSPK.K       | 2554.68304 | 3 | 9.77E-05 | 0.93 | 4.14 | - | 1267.2 |
| AHQ-10-4, 4403         | K.SNTSPEELGPLANQLTSDYGR.L         | 2250.36505 | 2 | 1.04E-10 | 0.93 | 4.26 | - | 741.7  |
| AHQ-10-3, 4955 - 5034  | K.SNTSPEELGPLANQLTSDYGR.L         | 2250.36505 | 2 | 1.04E-04 | 0.77 | 3.86 | - | 296.9  |
| AHQ-10-3, 4837 - 4897  | K.SNTSPEELGPLANQLTSDYGR.L         | 2250.36505 | 2 | 1.49E-05 | 0.86 | 3.93 | - | 399.1  |
| AHQ-10-1, 4990 - 5043  | K.SNTSPEELGPLANQLTSDYGR.L         | 2250.36505 | 2 | 1.06E-05 | 0.77 | 3.20 | - | 378.2  |
| AHQ-10-7, 4852         | K.SNTSPEELGPLANQLTSDYGR.L         | 2250.36505 | 2 | 2.23E-08 | 0.72 | 3.04 | - | 374.8  |
| AHQ-10-6, 4995         | K.SNTSPEELGPLANQLTSDYGR.L         | 2250.36505 | 2 | 1.11E-06 | 0.52 | 3.02 | - | 275.0  |
| AHQ-10-3, 4361 - 4366  | K.SNTSPEELGPLANQLTSDYGR.L         | 2250.36505 | 2 | 4.58E-09 | 0.92 | 4.36 | - | 769.1  |
| AHQ-10-6, 4844 - 4845  | K.SNTSPEELGPLANQLTSDYGR.L         | 2250.36505 | 2 | 1.94E-05 | 0.81 | 3.47 | - | 416.2  |
| AHQ-10-2, 4912 - 4970  | K.SNTSPEELGPLANQLTSDYGR.L         | 2250.36505 | 2 | 1.34E-08 | 0.89 | 4.35 | - | 357.2  |
| AHQ-10-5, 4928 - 4939  | K.SNTSPEELGPLANQLTSDYGR.L         | 2250.36505 | 2 | 2.29E-07 | 0.87 | 4.03 | - | 485.4  |
| AHQ-10-2, 5142         | K.SNTSPEELGPLANQLTSDYGR.L         | 2250.36505 | 2 | 3.39E-06 | 0.86 | 3.88 | - | 408.8  |
| AHQ-10-1, 4505         | K.SNTSPEELGPLANQLTSDYGR.L         | 2250.36505 | 2 | 7.18E-05 | 0.68 | 3.21 | - | 341.0  |
| AHQ-10-4, 4944 - 5021  | K.SNTSPEELGPLANQLTSDYGR.L         | 2250.36505 | 2 | 1.02E-05 | 0.84 | 3.87 | - | 405.3  |
| AHQ-10-5, 5077         | K.SNTSPEELGPLANQLTSDYGR.L         | 2250.36505 | 2 | 1.78E-04 | 0.69 | 3.14 | - | 373.5  |
| AHQ-10-5, 4383         | K.SNTSPEELGPLANQLTSDYGR.L         | 2250.36505 | 2 | 8.33E-09 | 0.92 | 4.72 | - | 460.4  |
| AHQ-10-2, 4787 - 4842  | K.SNTSPEELGPLANQLTSDYGR.L         | 2250.36505 | 2 | 6.22E-04 | 0.58 | 2.90 | - | 379.0  |
| AHQ-10-2, 5014 - 5087  | K.SNTSPEELGPLANQLTSDYGR.L         | 2250.36505 | 2 | 2.83E-07 | 0.89 | 4.15 | - | 476.3  |
| AHQ-10-2, 4431 - 4462  | K.SNTSPEELGPLANQLTSDYGR.L         | 2250.36505 | 2 | 2.39E-07 | 0.90 | 4.44 | - | 420.5  |
| AHQ-10-4, 5108 - 5149  | K.SNTSPEELGPLANQLTSDYGR.L         | 2250.36505 | 2 | 4.67E-06 | 0.93 | 4.72 | - | 681.6  |
| AHQ-10-6, 4281 - 4292  | K.SNTSPEELGPLANQLTSDYGR.L         | 2250.36505 | 2 | 3.80E-06 | 0.74 | 3.39 | - | 416.8  |
| AHQ-10-8, 6365         | R.TEDSGLQTQVIAAATQCALSTSQLVACT.V  | 3056.37009 | 3 | 9.91E-04 | 0.89 | 4.32 | - | 1088.4 |
| AHQ-10-8, 4169         | K.TKEVIQEWNLTKI.R                 | 1716.95938 | 2 | 1.64E-07 | 0.96 | 4.64 | - | 1743.4 |
| AHQ-10-7, 4194         | K.TKEVIQEWNLTKI.R                 | 1716.95938 | 2 | 3.09E-04 | 0.96 | 4.86 | - | 1597.5 |
| AHQ-10-11, 4204        | K.TKEVIQEWNLTKI.R                 | 1716.95938 | 2 | 6.03E-06 | 0.85 | 2.97 | - | 896.8  |
| AHQ-10-4, 5987 - 5992  | K.TLAESALQLLYTAK.E                | 1522.76793 | 2 | 8.27E-09 | 0.90 | 3.59 | - | 873.5  |
| AHQ-10-6, 5852         | K.TLAESALQLLYTAK.E                | 1522.76793 | 2 | 4.76E-07 | 0.87 | 3.04 | - | 1008.1 |

|                       |                                    |            |   |          |      |      |   |        |
|-----------------------|------------------------------------|------------|---|----------|------|------|---|--------|
| AHQ-10-3, 5895        | K.TLAESALQLLYTAK.E                 | 1522.76793 | 2 | 4.15E-06 | 0.93 | 3.82 | - | 938.7  |
| AHQ-10-2, 5978 - 5995 | K.TLAESALQLLYTAK.E                 | 1522.76793 | 2 | 2.30E-09 | 0.95 | 4.30 | - | 1011.2 |
| AHQ-10-7, 5892        | K.TLAESALQLLYTAK.E                 | 1522.76793 | 2 | 2.92E-04 | 0.87 | 3.46 | - | 597.9  |
| AHQ-10-3, 5909 - 5910 | K.TLAESALQLLYTAK.E                 | 1522.76793 | 3 | 4.55E-06 | 0.97 | 5.29 | - | 2245.8 |
| AHQ-10-8, 5937        | K.TLAESALQLLYTAK.E                 | 1522.76793 | 2 | 1.40E-07 | 0.82 | 3.29 | - | 697.7  |
| AHQ-10-4, 5999        | K.TLAESALQLLYTAK.E                 | 1522.76793 | 3 | 2.59E-05 | 0.97 | 5.46 | - | 1965.6 |
| AHQ-10-7, 3230        | K.TLSHPQQMALLDQTK.T                | 1711.96464 | 2 | 3.13E-04 | 0.42 | 2.93 | - | 263.8  |
| AHQ-10-3, 3318        | K.TLSHPQQMALLDQTK.T                | 1711.96464 | 3 | 2.68E-05 | 0.91 | 4.40 | - | 1154.5 |
| AHQ-10-4, 3307        | K.TLSHPQQMALLDQTK.T                | 1711.96464 | 2 | 4.52E-05 | 0.92 | 3.96 | - | 704.3  |
| AHQ-10-6, 3257        | K.TLSHPQQMALLDQTK.T                | 1711.96464 | 2 | 4.80E-05 | 0.93 | 4.23 | - | 832.4  |
| AHQ-10-2, 3371 - 3378 | K.TLSHPQQMALLDQTK.T                | 1711.96464 | 2 | 6.77E-09 | 0.95 | 4.87 | - | 848.6  |
| AHQ-10-5, 3297        | K.TLSHPQQMALLDQTK.T                | 1711.96464 | 2 | 1.99E-04 | 0.85 | 3.68 | - | 436.4  |
| AHQ-10-4, 3309 - 3325 | K.TLSHPQQMALLDQTK.T                | 1711.96464 | 3 | 2.47E-08 | 0.95 | 4.46 | - | 1774.6 |
| AHQ-10-2, 3383        | K.TLSHPQQMALLDQTK.T                | 1711.96464 | 3 | 6.63E-06 | 0.95 | 5.15 | - | 1124.5 |
| AHQ-10-4, 4145 - 4207 | K.TMLESAGGLIQTAR.A                 | 1448.67095 | 2 | 1.08E-09 | 0.94 | 4.03 | - | 1500.8 |
| AHQ-10-7, 4080 - 4082 | K.TMLESAGGLIQTAR.A                 | 1448.67095 | 2 | 5.98E-09 | 0.94 | 4.00 | - | 1421.6 |
| AHQ-10-3, 3967        | K.TMLESAGGLIQTAR.A                 | 1448.67095 | 2 | 8.19E-06 | 0.74 | 2.75 | - | 877.5  |
| AHQ-10-5, 3397 - 3468 | K.TM*LESAGGLIQTAR.A                | 1464.67035 | 2 | 6.86E-05 | 0.94 | 4.31 | - | 1288.7 |
| AHQ-10-2, 3510 - 3566 | K.TM*LESAGGLIQTAR.A                | 1464.67035 | 2 | 1.44E-07 | 0.96 | 4.82 | - | 1540.2 |
| AHQ-10-3, 4167        | K.TM*LESAGGLIQTAR.A                | 1464.67035 | 2 | 3.27E-06 | 0.86 | 3.03 | - | 1228.9 |
| AHQ-10-1, 3641        | K.TM*LESAGGLIQTAR.A                | 1464.67035 | 2 | 9.24E-05 | 0.72 | 2.64 | - | 812.9  |
| AHQ-10-2, 4183 - 4242 | K.TMLESAGGLIQTAR.A                 | 1448.67095 | 2 | 9.83E-11 | 0.96 | 4.41 | - | 1648.0 |
| AHQ-10-2, 3526        | K.TM*LESAGGLIQTAR.A                | 1464.67035 | 2 | 3.68E-06 | 0.96 | 4.19 | - | 1470.5 |
| AHQ-10-6, 4096        | K.TMLESAGGLIQTAR.A                 | 1448.67095 | 2 | 1.01E-07 | 0.91 | 3.56 | - | 1390.9 |
| AHQ-10-5, 4139 - 4179 | K.TMLESAGGLIQTAR.A                 | 1448.67095 | 2 | 1.09E-05 | 0.82 | 3.20 | - | 962.3  |
| AHQ-10-2, 4239        | K.TMLESAGGLIQTAR.A                 | 1448.67095 | 3 | 1.63E-06 | 0.94 | 3.67 | - | 1989.7 |
| AHQ-10-4, 3511        | K.TM*LESAGGLIQTAR.A                | 1464.67035 | 2 | 1.46E-07 | 0.97 | 4.59 | - | 2030.1 |
| AHQ-10-3, 4126 - 4153 | K.TMLESAGGLIQTAR.A                 | 1448.67095 | 2 | 7.54E-09 | 0.94 | 3.94 | - | 1764.4 |
| AHQ-10-3, 3455        | K.TM*LESAGGLIQTAR.A                | 1464.67035 | 2 | 1.21E-06 | 0.96 | 4.31 | - | 1347.3 |
| AHQ-10-8, 5045        | K.TYGVSFVLVK.E                     | 1161.37395 | 2 | 1.69E-05 | 0.82 | 3.14 | - | 538.3  |
| AHQ-10-7, 4993 - 4998 | K.TYGVSFVLVK.E                     | 1161.37395 | 2 | 2.11E-05 | 0.83 | 3.07 | - | 665.6  |
| AHQ-10-9, 4808        | K.TYGVSFVLVK.E                     | 1161.37395 | 2 | 5.38E-06 | 0.91 | 2.80 | - | 1036.1 |
| AHQ-10-11, 4947       | K.TYGVSFVLVK.E                     | 1161.37395 | 2 | 1.67E-04 | 0.85 | 2.66 | - | 762.3  |
| AHQ-10-1, 5166        | R.VAGSVTELIQAAEAM*K.G              | 1634.87692 | 2 | 2.03E-05 | 0.63 | 2.51 | - | 674.6  |
| AHQ-10-5, 5884        | R.VAGSVTELIQAAEAM.K.G              | 1618.87752 | 2 | 1.50E-05 | 0.93 | 3.44 | - | 1412.5 |
| AHQ-10-2, 5100        | R.VAGSVTELIQAAEAM*K.G              | 1634.87692 | 2 | 5.49E-06 | 0.92 | 3.06 | - | 1362.0 |
| AHQ-10-4, 5099        | R.VAGSVTELIQAAEAM*K.G              | 1634.87692 | 2 | 6.94E-06 | 0.93 | 3.50 | - | 1349.2 |
| AHQ-10-6, 5771        | R.VAGSVTELIQAAEAM.K.G              | 1618.87752 | 2 | 2.21E-06 | 0.79 | 2.92 | - | 755.5  |
| AHQ-10-6, 4969 - 4971 | R.VAGSVTELIQAAEAM*K.G              | 1634.87692 | 2 | 8.46E-06 | 0.91 | 3.78 | - | 1002.2 |
| AHQ-10-2, 5131        | R.VAGSVTELIQAAEAM*K.G              | 1634.87692 | 3 | 2.00E-07 | 0.92 | 4.33 | - | 1159.8 |
| AHQ-10-4, 5880 - 5935 | R.VAGSVTELIQAAEAM.K.G              | 1618.87752 | 2 | 1.43E-06 | 0.98 | 5.24 | - | 1826.6 |
| AHQ-10-9, 5556        | R.VAGSVTELIQAAEAM.K.G              | 1618.87752 | 2 | 5.60E-04 | 0.86 | 2.87 | - | 1200.2 |
| AHQ-10-1, 5939 - 5951 | R.VAGSVTELIQAAEAM.K.G              | 1618.87752 | 2 | 2.43E-06 | 0.92 | 4.00 | - | 1064.5 |
| AHQ-10-7, 5800        | R.VAGSVTELIQAAEAM.K.G              | 1618.87752 | 2 | 1.38E-04 | 0.95 | 3.90 | - | 1453.0 |
| AHQ-10-5, 5067 - 5135 | R.VAGSVTELIQAAEAM*K.G              | 1634.87692 | 2 | 1.58E-06 | 0.86 | 3.53 | - | 840.9  |
| AHQ-10-2, 5888        | R.VAGSVTELIQAAEAM.K.G              | 1618.87752 | 2 | 3.50E-09 | 0.94 | 4.11 | - | 1314.2 |
| AHQ-10-2, 3772        | K.VEHGSVALPAIMR.S                  | 1380.64144 | 2 | 6.87E-05 | 0.87 | 3.26 | - | 890.2  |
| AHQ-10-3, 5455 - 5509 | K.VGAIPANALDDGQWSQGLISAAR.M        | 2311.53959 | 2 | 4.96E-06 | 0.92 | 4.50 | - | 690.8  |
| AHQ-10-5, 5532 - 5609 | K.VGAIPANALDDGQWSQGLISAAR.M        | 2311.53959 | 2 | 7.14E-10 | 0.96 | 5.51 | - | 1060.4 |
| AHQ-10-4, 5605 - 5609 | K.VGAIPANALDDGQWSQGLISAAR.M        | 2311.53959 | 2 | 7.10E-06 | 0.95 | 4.88 | - | 1105.7 |
| AHQ-10-5, 5361 - 5440 | K.VGAIPANALDDGQWSQGLISAAR.M        | 2311.53959 | 2 | 8.38E-09 | 0.93 | 4.49 | - | 642.6  |
| AHQ-10-3, 5298 - 5378 | K.VGAIPANALDDGQWSQGLISAAR.M        | 2311.53959 | 3 | 1.16E-06 | 0.94 | 4.90 | - | 1263.6 |
| AHQ-10-2, 5454 - 5494 | K.VGAIPANALDDGQWSQGLISAAR.M        | 2311.53959 | 2 | 5.94E-08 | 0.92 | 4.94 | - | 486.5  |
| AHQ-10-6, 5341 - 5407 | K.VGAIPANALDDGQWSQGLISAAR.M        | 2311.53959 | 2 | 4.48E-10 | 0.94 | 5.08 | - | 625.5  |
| AHQ-10-2, 5331 - 5388 | K.VGAIPANALDDGQWSQGLISAAR.M        | 2311.53959 | 2 | 6.69E-07 | 0.94 | 4.69 | - | 849.4  |
| AHQ-10-3, 5259        | K.VGAIPANALDDGQWSQGLISAAR.M        | 2311.53959 | 2 | 7.71E-07 | 0.54 | 2.76 | - | 411.3  |
| AHQ-10-3, 5369        | K.VGAIPANALDDGQWSQGLISAAR.M        | 2311.53959 | 2 | 6.15E-08 | 0.84 | 3.68 | - | 337.4  |
| AHQ-10-1, 5586 - 5649 | K.VGAIPANALDDGQWSQGLISAAR.M        | 2311.53959 | 2 | 2.73E-05 | 0.80 | 3.93 | - | 431.3  |
| AHQ-10-2, 5547 - 5606 | K.VGAIPANALDDGQWSQGLISAAR.M        | 2311.53959 | 2 | 1.99E-08 | 0.96 | 5.82 | - | 892.2  |
| AHQ-10-4, 5531 - 5612 | K.VGAIPANALDDGQWSQGLISAAR.M        | 2311.53959 | 3 | 7.34E-07 | 0.87 | 3.89 | - | 1176.3 |
| AHQ-10-5, 5535 - 5604 | K.VGAIPANALDDGQWSQGLISAAR.M        | 2311.53959 | 3 | 5.63E-07 | 0.94 | 5.18 | - | 1088.7 |
| AHQ-10-4, 5329 - 5369 | K.VGAIPANALDDGQWSQGLISAAR.M        | 2311.53959 | 2 | 1.87E-08 | 0.95 | 5.27 | - | 770.7  |
| AHQ-10-7, 5424        | K.VGAIPANALDDGQWSQGLISAAR.M        | 2311.53959 | 2 | 1.02E-06 | 0.94 | 4.70 | - | 833.7  |
| AHQ-10-4, 5437        | K.VGAIPANALDDGQWSQGLISAAR.M        | 2311.53959 | 2 | 6.08E-10 | 0.90 | 4.34 | - | 471.5  |
| AHQ-10-4, 5528        | K.VGAIPANALDDGQWSQGLISAAR.M        | 2311.53959 | 2 | 9.09E-09 | 0.97 | 5.45 | - | 1375.8 |
| AHQ-10-6, 3691        | K.VGDDPAVWQLK.N                    | 1228.37879 | 2 | 3.79E-06 | 0.91 | 3.79 | - | 851.5  |
| AHQ-10-2, 3755 - 3826 | K.VGDDPAVWQLK.N                    | 1228.37879 | 2 | 6.54E-07 | 0.93 | 3.46 | - | 1046.9 |
| AHQ-10-2, 3774 - 3835 | K.VGDDPAVWQLK.N                    | 1228.37879 | 2 | 6.03E-10 | 0.91 | 3.61 | - | 805.7  |
| AHQ-10-1, 3929        | K.VGDDPAVWQLK.N                    | 1228.37879 | 2 | 1.96E-08 | 0.93 | 3.55 | - | 910.3  |
| AHQ-10-3, 3749        | K.VGDDPAVWQLK.N                    | 1228.37879 | 2 | 8.04E-08 | 0.91 | 3.93 | - | 885.5  |
| AHQ-10-5, 3747        | K.VGDDPAVWQLK.N                    | 1228.37879 | 2 | 6.36E-07 | 0.84 | 3.26 | - | 621.4  |
| AHQ-10-7, 3678        | K.VGDDPAVWQLK.N                    | 1228.37879 | 2 | 1.57E-06 | 0.89 | 3.75 | - | 770.3  |
| AHQ-10-5, 3281        | K.VGDDPAVWQLKNSAK.V                | 1628.81068 | 2 | 3.49E-05 | 0.61 | 2.80 | - | 535.4  |
| AHQ-10-4, 2528        | K.VLGEAM*TGISQNAK.N                | 1435.62901 | 2 | 4.14E-04 | 0.82 | 3.06 | - | 807.4  |
| AHQ-10-2, 2503 - 2574 | K.VLGEAM*TGISQNAK.N                | 1435.62901 | 2 | 6.83E-05 | 0.88 | 3.62 | - | 799.0  |
| AHQ-10-4, 3237 - 3305 | K.VLGEAM*TGISQNAK.N                | 1419.62961 | 2 | 6.26E-06 | 0.96 | 3.45 | - | 1974.7 |
| AHQ-10-4, 2432 - 2435 | K.VLGEAM*TGISQNAK.N                | 1435.62901 | 2 | 1.01E-04 | 0.95 | 4.12 | - | 1147.2 |
| AHQ-10-4, 3093 - 3156 | K.VLGEAM*TGISQNAK.N                | 1419.62961 | 2 | 2.41E-05 | 0.92 | 3.77 | - | 1165.2 |
| AHQ-10-2, 3158 - 3226 | K.VLGEAM*TGISQNAK.N                | 1419.62961 | 2 | 1.78E-07 | 0.96 | 4.25 | - | 1514.2 |
| AHQ-10-2, 4619 - 4678 | K.VLGEAM*TGISQNAKNGNLPFEGAISTASK.A | 3038.33659 | 3 | 3.50E-07 | 0.91 | 5.08 | - | 624.4  |
| AHQ-10-4, 4591 - 4647 | K.VLGEAM*TGISQNAKNGNLPFEGAISTASK.A | 3038.33659 | 3 | 1.97E-09 | 0.95 | 5.52 | - | 1063.8 |
| AHQ-10-1, 4747        | K.VLGEAM*TGISQNAKNGNLPFEGAISTASK.A | 3038.33659 | 3 | 5.72E-04 | 0.50 | 3.16 | - | 241.7  |
| AHQ-10-4, 2009 - 2073 | K.VLVQNAAGSQEK.L                   | 1244.37976 | 2 | 2.82E-06 | 0.81 | 2.98 | - | 690.1  |
| AHQ-10-5, 1752 - 1761 | K.VLVQNAAGSQEK.L                   | 1244.37976 | 2 | 1.10E-07 | 0.88 | 3.61 | - | 720.5  |
| AHQ-10-3, 1891 - 1946 | K.VLVQNAAGSQEK.L                   | 1244.37976 | 2 | 4.75E-08 | 0.93 | 3.72 | - | 929.3  |
| AHQ-10-4, 1893 - 1949 | K.VLVQNAAGSQEK.L                   | 1244.37976 | 2 | 2.26E-07 | 0.92 | 3.74 | - | 732.1  |
| AHQ-10-2, 1884 - 1938 | K.VLVQNAAGSQEK.L                   | 1244.37976 | 2 | 1.03E-05 | 0.93 | 3.73 | - | 1095.3 |
| AHQ-10-2, 1996 - 2067 | K.VLVQNAAGSQEK.L                   | 1244.37976 | 2 | 1.59E-07 | 0.83 | 3.24 | - | 684.6  |
| AHQ-10-4, 1780 - 1853 | K.VLVQNAAGSQEK.L                   | 1244.37976 | 2 | 1.41E-05 | 0.90 | 3.47 | - | 805.1  |
| AHQ-10-5, 1932        | K.VLVQNAAGSQEK.L                   | 1244.37976 | 2 | 7.38E-04 | 0.75 | 2.77 | - | 645.4  |
| AHQ-10-2, 4611        | K.VMVTNVTSLLK.T                    | 1205.49322 | 2 | 5.65E-08 | 0.87 | 3.46 | - | 797.4  |
| AHQ-10-5, 4235        | K.VM*VTNVTSLLK.T                   | 1221.49262 | 2 | 2.41E-04 | 0.73 | 2.97 | - | 600.9  |
| AHQ-10-3, 4215        | K.VM*VTNVTSLLK.T                   | 1221.49262 | 2 | 2.46E-05 | 0.89 | 3.70 | - | 853.3  |
| AHQ-10-3, 4542 - 4543 | K.VMVTNVTSLLK.T                    | 1205.49322 | 2 | 7.69E-06 | 0.91 | 3.99 | - | 875.9  |
| AHQ-10-6, 4435        | K.VMVTNVTSLLK.T                    | 1205.49322 | 2 | 3.94E-05 | 0.79 | 3.06 | - | 704.1  |
| AHQ-10-2, 4290 - 4291 | K.VM*VTNVTSLLK.T                   | 1221.49262 | 2 | 9.05E-04 | 0.85 | 3.27 | - | 793.0  |
| AHQ-10-7, 4117        | K.VM*VTNVTSLLK.T                   | 1221.49262 | 2 | 3.08E-05 | 0.73 | 3.19 | - | 617.1  |
| AHQ-10-4, 4560        | K.VMVTNVTSLLK.T                    | 1205.49322 | 2 | 1.56E-05 | 0.89 | 3.71 | - | 895.7  |
| AHQ-10-1, 4391        | K.VM*VTNVTSLLK.T                   | 1221.49262 | 2 | 3.99E-05 | 0.50 | 2.62 | - | 506.7  |
| AHQ-10-7, 4413        | K.VMVTNVTSLLK.T                    | 1205.49322 | 2 | 1.79E-05 | 0.88 | 3.86 | - | 672.1  |
| AHQ-10-4, 4235 - 4247 | K.VM*VTNVTSLLK.T                   | 1221.49262 | 2 | 1.84E-06 | 0.91 | 3.67 | - | 954.1  |
| AHQ-10-6, 4141        | K.VM*VTNVTSLLK.T                   | 1221.49262 | 2 | 1.78E-04 | 0.73 | 2.81 | - | 670.7  |
| AHQ-10-4, 2879        | R.VOELGHGCAALVTK.A                 | 1484.70307 | 2 | 9.92E-04 | 0.95 | 4.25 | - | 1403.3 |
| AHQ-10-1, 3109 - 3147 | R.VOELGHGCAALVTK.A                 | 1484.70307 | 2 | 1.93E-04 | 0.97 | 4.88 | - | 1422.4 |
| AHQ-10-7, 2848        | R.VOELGHGCAALVTK.A                 | 1484.70307 | 2 | 3.33E-05 | 0.95 | 3.77 | - | 1578.3 |
| AHQ-10-5, 2895        | R.VOELGHGCAALVTK.A                 | 1484.70307 | 2 | 1.91E-04 | 0.96 | 4.54 | - | 1273.0 |
| AHQ-10-6, 2855        | R.VOELGHGCAALVTK.A                 | 1484.70307 | 2 | 2.21E-06 | 0.97 | 4.38 | - | 1767.7 |

|                                                                                         |                                  |            |   |          |       |         |       |          |
|-----------------------------------------------------------------------------------------|----------------------------------|------------|---|----------|-------|---------|-------|----------|
| AHQ-10-2, 2960                                                                          | R.VQELGHGCAALVTK.A               | 1484.70307 | 2 | 4.27E-07 | 0.98  | 4.75    | -     | 2238.7   |
| AHQ-10-3, 2913                                                                          | R.VQELGHGCAALVTK.A               | 1484.70307 | 2 | 2.18E-05 | 0.97  | 4.67    | -     | 1591.5   |
| AHQ-10-2, 2879 - 2939                                                                   | K.VSHVLAALQAGNR.G                | 1336.52525 | 2 | 5.84E-11 | 0.97  | 4.07    | -     | 2261.1   |
| AHQ-10-7, 2813 - 2816                                                                   | K.VSHVLAALQAGNR.G                | 1336.52525 | 2 | 2.19E-06 | 0.95  | 3.70    | -     | 1349.4   |
| AHQ-10-4, 2867                                                                          | K.VSHVLAALQAGNR.G                | 1336.52525 | 2 | 6.36E-10 | 0.97  | 4.53    | -     | 1870.0   |
| AHQ-10-5, 2879                                                                          | K.VSHVLAALQAGNR.G                | 1336.52525 | 2 | 3.20E-10 | 0.97  | 4.47    | -     | 1623.4   |
| AHQ-10-3, 2890 - 2893                                                                   | K.VSHVLAALQAGNR.G                | 1336.52525 | 2 | 5.32E-09 | 0.97  | 4.51    | -     | 1770.3   |
| AHQ-10-5, 6187                                                                          | K.VSQMAQYFEPPLTAAVGAASK.T        | 2183.51313 | 2 | 9.12E-04 | 0.86  | 3.83    | -     | 595.0    |
| AHQ-10-7, 6108                                                                          | K.VSQMAQYFEPPLTAAVGAASK.T        | 2183.51313 | 2 | 2.05E-06 | 0.92  | 4.51    | -     | 651.7    |
| AHQ-10-3, 5449                                                                          | K.VSQM*AQYFEPPLTAAVGAASK.T       | 2199.51253 | 2 | 3.10E-07 | 0.91  | 4.42    | -     | 782.5    |
| AHQ-10-4, 5651                                                                          | K.VSQM*AQYFEPPLTAAVGAASK.T       | 2199.51253 | 2 | 1.19E-04 | 0.55  | 2.66    | -     | 337.8    |
| AHQ-10-4, 5529                                                                          | K.VSQM*AQYFEPPLTAAVGAASK.T       | 2199.51253 | 3 | 7.58E-09 | 0.95  | 4.65    | -     | 1597.1   |
| AHQ-10-5, 6193                                                                          | K.VSQMAQYFEPPLTAAVGAASK.T        | 2183.51313 | 3 | 5.53E-04 | 0.76  | 3.37    | -     | 946.8    |
| AHQ-10-2, 6198                                                                          | K.VSQMAQYFEPPLTAAVGAASK.T        | 2183.51313 | 3 | 5.63E-06 | 0.88  | 3.32    | -     | 1368.3   |
| AHQ-10-4, 5527                                                                          | K.VSQM*AQYFEPPLTAAVGAASK.T       | 2199.51253 | 2 | 8.73E-04 | 0.95  | 4.52    | -     | 1117.0   |
| AHQ-10-5, 5520                                                                          | K.VSQM*AQYFEPPLTAAVGAASK.T       | 2199.51253 | 3 | 5.17E-07 | 0.96  | 3.69    | -     | 2252.1   |
| AHQ-10-1, 6218                                                                          | K.VSQMAQYFEPPLTAAVGAASK.T        | 2183.51313 | 2 | 2.20E-04 | 0.88  | 3.14    | -     | 968.0    |
| AHQ-10-1, 5585                                                                          | K.VSQM*AQYFEPPLTAAVGAASK.T       | 2199.51253 | 3 | 1.21E-05 | 0.88  | 3.20    | -     | 1589.7   |
| AHQ-10-5, 5519 - 5521                                                                   | K.VSQM*AQYFEPPLTAAVGAASK.T       | 2199.51253 | 2 | 1.04E-07 | 0.96  | 5.25    | -     | 1052.0   |
| AHQ-10-1, 5582                                                                          | K.VSQM*AQYFEPPLTAAVGAASK.T       | 2199.51253 | 2 | 9.24E-07 | 0.91  | 3.98    | -     | 922.4    |
| AHQ-10-2, 5539                                                                          | K.VSQM*AQYFEPPLTAAVGAASK.T       | 2199.51253 | 2 | 2.56E-08 | 0.95  | 4.63    | -     | 1009.8   |
| AHQ-10-6, 6071                                                                          | K.VSQMAQYFEPPLTAAVGAASK.T        | 2183.51313 | 3 | 2.52E-04 | 0.87  | 3.59    | -     | 1147.4   |
| AHQ-10-6, 6060                                                                          | K.VSQMAQYFEPPLTAAVGAASK.T        | 2183.51313 | 2 | 3.64E-05 | 0.88  | 4.00    | -     | 546.7    |
| AHQ-10-2, 6146 - 6202                                                                   | K.VSQMAQYFEPPLTAAVGAASK.T        | 2183.51313 | 2 | 9.67E-05 | 0.94  | 4.52    | -     | 792.4    |
| AHQ-10-2, 5548                                                                          | K.VSQM*AQYFEPPLTAAVGAASK.T       | 2199.51253 | 3 | 4.12E-10 | 0.97  | 5.46    | -     | 1812.1   |
| AHQ-10-3, 5450 - 5457                                                                   | K.VSQM*AQYFEPPLTAAVGAASK.T       | 2199.51253 | 3 | 6.60E-12 | 0.97  | 5.34    | -     | 1724.7   |
| AHQ-10-6, 5404                                                                          | K.VSQM*AQYFEPPLTAAVGAASK.T       | 2199.51253 | 2 | 3.12E-07 | 0.94  | 4.71    | -     | 872.7    |
| AHQ-10-1, 4533 - 4541                                                                   | K.VVAPTISPPVCQEQQLVEAGR.L        | 2142.41919 | 2 | 2.22E-07 | 0.95  | 5.18    | -     | 1010.6   |
| AHQ-10-9, 4143 - 4217                                                                   | K.VVAPTISPPVCQEQQLVEAGR.L        | 2142.41919 | 2 | 8.15E-06 | 0.58  | 3.25    | -     | 259.7    |
| AHQ-10-8, 4357                                                                          | K.VVAPTISPPVCQEQQLVEAGR.L        | 2142.41919 | 2 | 1.03E-07 | 0.92  | 4.13    | -     | 600.5    |
| AHQ-10-5, 4319                                                                          | K.VVAPTISPPVCQEQQLVEAGR.L        | 2142.41919 | 2 | 1.04E-08 | 0.94  | 5.11    | -     | 429.1    |
| AHQ-10-5, 4411                                                                          | K.VVAPTISPPVCQEQQLVEAGR.L        | 2142.41919 | 2 | 7.17E-10 | 0.95  | 5.33    | -     | 671.5    |
| AHQ-10-3, 4402                                                                          | K.VVAPTISPPVCQEQQLVEAGR.L        | 2142.41919 | 3 | 1.76E-06 | 0.85  | 3.10    | -     | 984.8    |
| AHQ-10-3, 4311                                                                          | K.VVAPTISPPVCQEQQLVEAGR.L        | 2142.41919 | 2 | 8.21E-05 | 0.81  | 3.41    | -     | 390.4    |
| AHQ-10-2, 4463                                                                          | K.VVAPTISPPVCQEQQLVEAGR.L        | 2142.41919 | 2 | 1.57E-06 | 0.81  | 3.73    | -     | 503.9    |
| AHQ-10-6, 4316 - 4317                                                                   | K.VVAPTISPPVCQEQQLVEAGR.L        | 2142.41919 | 2 | 2.29E-07 | 0.98  | 5.89    | -     | 1510.9   |
| AHQ-10-2, 4372                                                                          | K.VVAPTISPPVCQEQQLVEAGR.L        | 2142.41919 | 2 | 7.69E-07 | 0.92  | 4.47    | -     | 495.7    |
| AHQ-10-4, 4427 - 4431                                                                   | K.VVAPTISPPVCQEQQLVEAGR.L        | 2142.41919 | 2 | 5.79E-06 | 0.96  | 5.62    | -     | 776.2    |
| AHQ-10-4, 4329                                                                          | K.VVAPTISPPVCQEQQLVEAGR.L        | 2142.41919 | 2 | 7.10E-08 | 0.95  | 5.23    | -     | 536.7    |
| AHQ-10-12, 4342                                                                         | K.VVAPTISPPVCQEQQLVEAGR.L        | 2142.41919 | 2 | 1.43E-06 | 0.54  | 2.88    | -     | 321.3    |
| gj4507729[ref]NP_001060.1] tubulin, beta polypeptide [Homo sapiens]                     |                                  |            |   | 4.44E-15 | 7.73  | 90.36   | 32.40 | 4990.7   |
| AHQ-10-13, 4657 - 4662                                                                  | R.AILVDLEPGTMDSVR.S              | 1616.86162 | 2 | 4.25E-07 | 0.84  | 3.38    | -     | 552.6    |
| AHQ-10-13, 5886                                                                         | K.GHYTEGAEVLDSVLDVVR.K           | 1960.13388 | 2 | 4.02E-07 | 0.98  | 5.81    | -     | 2018.2   |
| AHQ-10-9, 5605 - 5680                                                                   | K.GHYTEGAEVLDSVLDVVR.K           | 1960.13388 | 2 | 2.75E-04 | 0.81  | 2.78    | -     | 1069.4   |
| AHQ-10-14, 5912 - 5918                                                                  | K.GHYTEGAEVLDSVLDVVR.K           | 1960.13388 | 2 | 8.07E-07 | 0.98  | 5.51    | -     | 2338.9   |
| AHQ-10-8, 5974                                                                          | K.GHYTEGAEVLDSVLDVVR.K           | 1960.13388 | 2 | 1.19E-07 | 0.99  | 7.10    | -     | 3276.8   |
| AHQ-10-7, 5920                                                                          | K.GHYTEGAEVLDSVLDVVR.K           | 1960.13388 | 3 | 6.23E-04 | 0.89  | 4.28    | -     | 1214.3   |
| AHQ-10-7, 5917                                                                          | K.GHYTEGAEVLDSVLDVVR.K           | 1960.13388 | 2 | 2.63E-13 | 0.98  | 6.27    | -     | 2212.1   |
| AHQ-10-7, 4336                                                                          | R.ISEQFTAMFR.R                   | 1230.41818 | 2 | 2.54E-07 | 0.94  | 3.81    | -     | 1399.1   |
| AHQ-10-11, 4315                                                                         | R.ISEQFTAMFR.R                   | 1230.41818 | 2 | 6.11E-06 | 0.91  | 3.11    | -     | 1168.6   |
| AHQ-10-7, 3540                                                                          | R.ISEQFTAMFR.R                   | 1246.41758 | 2 | 1.16E-06 | 0.87  | 3.11    | -     | 866.9    |
| AHQ-10-13, 4416                                                                         | R.ISEQFTAMFR.R                   | 1230.41818 | 2 | 2.92E-05 | 0.97  | 3.62    | -     | 2127.4   |
| AHQ-10-7, 5706                                                                          | K.LTTPTYGDLNHLVVSATMSGVTTCLR.F   | 2711.06527 | 3 | 1.89E-08 | 0.78  | 3.12    | -     | 1061.5   |
| AHQ-10-7, 6310                                                                          | K.LTTPTYGDLNHLVVSATMSGVTTCLR.F   | 2711.06527 | 2 | 3.49E-11 | 0.94  | 4.76    | -     | 949.5    |
| AHQ-10-7, 6308                                                                          | K.LTTPTYGDLNHLVVSATMSGVTTCLR.F   | 2711.06527 | 3 | 7.68E-05 | 0.77  | 3.71    | -     | 652.4    |
| AHQ-10-7, 2817                                                                          | -M*REIVHIAQGCGCNQIGAK.F          | 2128.42245 | 3 | 1.79E-04 | 0.77  | 3.16    | -     | 846.8    |
| AHQ-10-13, 5673 - 5716                                                                  | K.M*SATFIGNSTAIQELFK.R           | 1875.13550 | 2 | 6.34E-07 | 0.54  | 2.95    | -     | 670.1    |
| AHQ-10-14, 5681                                                                         | K.M*SATFIGNSTAIQELFK.R           | 1875.13550 | 2 | 2.37E-04 | 0.69  | 3.87    | -     | 621.5    |
| AHQ-10-7, 5162 - 5244                                                                   | K.NSSYFVWIPNNVK.T                | 1697.87148 | 2 | 6.24E-06 | 0.88  | 3.82    | -     | 721.9    |
| AHQ-10-13, 5889 - 5953                                                                  | R.SGPFQIIRPDNFVFGQSGAGNNWAK.G    | 2800.03898 | 3 | 4.25E-08 | 0.95  | 5.58    | -     | 1059.0   |
| AHQ-10-13, 5776 - 5832                                                                  | R.SGPFQIIRPDNFVFGQSGAGNNWAK.G    | 2800.03898 | 3 | 6.20E-05 | 0.90  | 4.13    | -     | 1189.3   |
| AHQ-10-7, 5876 - 5936                                                                   | R.SGPFQIIRPDNFVFGQSGAGNNWAK.G    | 2800.03898 | 3 | 4.44E-15 | 0.98  | 7.07    | -     | 1908.6   |
| AHQ-10-11, 5772 - 5828                                                                  | R.SGPFQIIRPDNFVFGQSGAGNNWAK.G    | 2800.03898 | 3 | 3.69E-04 | 0.78  | 3.49    | -     | 751.9    |
| gj4503745[ref]NP_001447.1] filamin 1 (actin-binding protein-280); filamin 1, alpha (act |                                  |            |   | 8.33E-15 | 90.47 | 1040.35 | 52.60 | 280757.4 |
| AHQ-10-2, 2431                                                                          | R.AEFTVETR.S                     | 953.03118  | 2 | 5.47E-05 | 0.92  | 3.32    | -     | 1217.3   |
| AHQ-10-5, 2175                                                                          | K.AEISFEDRK.D                    | 1095.18763 | 2 | 1.48E-04 | 0.86  | 2.92    | -     | 1056.8   |
| AHQ-10-4, 2695                                                                          | K.AFGPGLGGGAGSAGSPAR.F           | 1430.55077 | 2 | 1.53E-06 | 0.93  | 3.36    | -     | 1570.6   |
| AHQ-10-1, 2870 - 2933                                                                   | K.AFGPGLGGGAGSAGSPAR.F           | 1430.55077 | 2 | 1.14E-09 | 0.94  | 3.40    | -     | 1538.9   |
| AHQ-10-5, 2700                                                                          | K.AFGPGLGGGAGSAGSPAR.F           | 1430.55077 | 2 | 1.86E-07 | 0.77  | 2.83    | -     | 866.2    |
| AHQ-10-1, 2915                                                                          | K.AFGPGLGGGAGSAGSPAR.F           | 1430.55077 | 2 | 4.39E-08 | 0.95  | 3.78    | -     | 1491.4   |
| AHQ-10-2, 2767                                                                          | K.AFGPGLGGGAGSAGSPAR.F           | 1430.55077 | 2 | 1.21E-05 | 0.92  | 3.46    | -     | 1114.6   |
| AHQ-10-9, 2588                                                                          | K.AFGPGLGGGAGSAGSPAR.F           | 1430.55077 | 2 | 8.08E-05 | 0.84  | 2.57    | -     | 1144.8   |
| AHQ-10-7, 2669 - 2672                                                                   | K.AFGPGLGGGAGSAGSPAR.F           | 1430.55077 | 2 | 9.68E-06 | 0.92  | 3.24    | -     | 1284.7   |
| AHQ-10-3, 2719                                                                          | K.AFGPGLGGGAGSAGSPAR.F           | 1430.55077 | 2 | 4.27E-06 | 0.90  | 3.05    | -     | 1273.0   |
| AHQ-10-14, 3312                                                                         | K.AGNMMLLVGVHGPRT.T              | 1435.68033 | 3 | 4.33E-07 | 0.92  | 3.89    | -     | 1414.8   |
| AHQ-10-14, 3505                                                                         | K.AGNMMLLVGVHGPRT.T              | 1435.68033 | 2 | 4.82E-06 | 0.66  | 2.71    | -     | 649.9    |
| AHQ-10-14, 2968 - 2989                                                                  | K.AGNMMLLVGVHGPRT.T              | 1451.67973 | 2 | 2.53E-08 | 0.59  | 2.96    | -     | 431.0    |
| AHQ-10-14, 2858 - 2860                                                                  | K.AGNMMLLVGVHGPRT.T              | 1451.67973 | 2 | 3.43E-07 | 0.88  | 3.44    | -     | 829.2    |
| AHQ-10-14, 3506                                                                         | K.AGNMMLLVGVHGPRT.T              | 1435.68033 | 3 | 4.75E-04 | 0.78  | 3.08    | -     | 955.9    |
| AHQ-10-4, 3361                                                                          | K.AGNMMLLVGVHGPRT.T              | 1435.68033 | 3 | 6.83E-06 | 0.93  | 3.66    | -     | 1770.0   |
| AHQ-10-2, 1890                                                                          | R.AGQSAAGAAPGGVDTR.D             | 1443.50471 | 2 | 1.92E-04 | 0.76  | 2.76    | -     | 752.5    |
| AHQ-10-6, 2387                                                                          | K.AGVAPLQVK.V                    | 883.07036  | 2 | 4.24E-05 | 0.82  | 3.05    | -     | 599.2    |
| AHQ-10-4, 2404                                                                          | K.AGVAPLQVK.V                    | 883.07036  | 2 | 4.40E-05 | 0.78  | 2.82    | -     | 557.9    |
| AHQ-10-2, 6540 - 6612                                                                   | K.AHEPTYFTVDCAEAGQGDVSIKIC       | 2567.76960 | 3 | 6.05E-05 | 0.79  | 3.52    | -     | 928.5    |
| AHQ-10-3, 2778                                                                          | K.AHVVPFCFDASK.V                 | 1232.39073 | 1 | 2.99E-04 | 0.20  | 2.28    | -     | 294.7    |
| AHQ-10-1, 2967                                                                          | K.AHVVPFCFDASK.V                 | 1232.39073 | 2 | 1.50E-04 | 0.80  | 2.84    | -     | 616.2    |
| AHQ-10-3, 2765                                                                          | K.AHVVPFCFDASK.V                 | 1232.39073 | 2 | 4.18E-05 | 0.70  | 2.54    | -     | 581.9    |
| AHQ-10-2, 5727 - 5795                                                                   | R.ALGALVDSAPGLCPDWSDWASKPVTNAR.E | 3233.53437 | 3 | 3.42E-06 | 0.90  | 4.79    | -     | 496.0    |
| AHQ-10-5, 5791 - 5849                                                                   | R.ALGALVDSAPGLCPDWSDWASKPVTNAR.E | 3233.53437 | 3 | 9.29E-08 | 0.94  | 5.62    | -     | 682.2    |
| AHQ-10-3, 5702 - 5769                                                                   | R.ALGALVDSAPGLCPDWSDWASKPVTNAR.E | 3233.53437 | 3 | 3.63E-10 | 0.91  | 5.53    | -     | 531.0    |
| AHQ-10-6, 5664 - 5720                                                                   | R.ALGALVDSAPGLCPDWSDWASKPVTNAR.E | 3233.53437 | 3 | 6.36E-07 | 0.91  | 5.05    | -     | 475.4    |
| AHQ-10-4, 5855                                                                          | R.ALGALVDSAPGLCPDWSDWASKPVTNAR.E | 3233.53437 | 3 | 1.11E-10 | 0.86  | 4.05    | -     | 568.2    |
| AHQ-10-2, 5852                                                                          | R.ALGALVDSAPGLCPDWSDWASKPVTNAR.E | 3233.53437 | 3 | 5.18E-09 | 0.90  | 4.43    | -     | 552.0    |
| AHQ-10-7, 5682 - 5745                                                                   | R.ALGALVDSAPGLCPDWSDWASKPVTNAR.E | 3233.53437 | 3 | 6.32E-11 | 0.93  | 5.38    | -     | 718.9    |
| AHQ-10-8, 3278 - 3354                                                                   | R.ANLPQSFQVDTSK.A                | 1435.56409 | 2 | 7.89E-06 | 0.71  | 2.83    | -     | 495.2    |
| AHQ-10-5, 3425                                                                          | R.APSVANVGSCHDLK.I               | 1656.84249 | 2 | 1.34E-04 | 0.81  | 3.41    | -     | 575.5    |
| AHQ-10-4, 1948 - 1980                                                                   | K.ATCAPQHGAAPGGPADASK.V          | 1791.92336 | 2 | 3.66E-04 | 0.92  | 4.15    | -     | 651.4    |
| AHQ-10-2, 3686                                                                          | R.AWGPGLGGVVGK.S                 | 1227.39403 | 2 | 1.55E-05 | 0.86  | 3.20    | -     | 668.7    |
| AHQ-10-1, 3785                                                                          | R.AWGPGLGGVVGK.S                 | 1227.39403 | 2 | 3.70E-06 | 0.95  | 3.83    | -     | 1239.6   |
| AHQ-10-4, 3636 - 3637                                                                   | R.AWGPGLGGVVGK.S                 | 1227.39403 | 2 | 1.63E-07 | 0.90  | 3.61    | -     | 1019.3   |
| AHQ-10-5, 3607                                                                          | R.AWGPGLGGVVGK.S                 | 1227.39403 | 2 | 1.69E-07 | 0.87  | 3.37    | -     | 828.2    |
| AHQ-10-7, 3548                                                                          | R.AWGPGLGGVVGK.S                 | 1227.39403 | 2 | 2.68E-04 | 0.85  | 3.35    | -     | 788.6    |
| AHQ-10-3, 3618                                                                          | R.AWGPGLGGVVGK.S                 | 1227.39403 | 2 | 1.73E-08 | 0.91  | 3.76    | -     | 862.6    |
| AHQ-10-6, 3509 - 3565                                                                   | R.AWGPGLGGVVGK.S                 | 1227.39403 | 2 | 6.53E-04 | 0.92  | 3.62    | -     | 887.9    |
| AHQ-10-3, 2702                                                                          | R.AYGPPIEPTGNMVK.K               | 1450.64214 | 2 | 2.16E-04 | 0.26  | 2.53    | -     | 206.7    |
| AHQ-10-3, 3362                                                                          | R.AYGPPIEPTGNMVK.K               | 1434.64274 | 2 | 2.81E-05 | 0.70  | 2.85    | -     | 599.5    |
| AHQ-10-2, 3430                                                                          | R.AYGPPIEPTGNMVK.K               | 1434.64274 | 2 | 8.32E-05 | 0.67  | 2.70    | -     | 467.6    |

|                        |                                       |            |   |          |      |      |   |        |
|------------------------|---------------------------------------|------------|---|----------|------|------|---|--------|
| AHQ-10-3, 2810         | R.AYGPGEPTGNM*VK.K                    | 1450.64214 | 2 | 4.05E-04 | 0.56 | 2.62 | - | 325.0  |
| AHQ-10-2, 2851         | R.AYGPGEPTGNM*VK.K                    | 1450.64214 | 2 | 7.79E-08 | 0.87 | 3.73 | - | 498.9  |
| AHQ-10-2, 5679         | K.CAPGVVGPAAEADIDFDIIR.N              | 2017.24863 | 3 | 8.27E-10 | 0.96 | 4.85 | - | 1623.0 |
| AHQ-10-4, 5660 - 5675  | K.CAPGVVGPAAEADIDFDIIR.N              | 2017.24863 | 2 | 7.72E-04 | 0.78 | 3.40 | - | 578.7  |
| AHQ-10-1, 5697         | K.CAPGVVGPAAEADIDFDIIR.N              | 2017.24863 | 2 | 5.08E-06 | 0.80 | 3.53 | - | 531.6  |
| AHQ-10-1, 5705         | K.CAPGVVGPAAEADIDFDIIR.N              | 2017.24863 | 3 | 1.23E-06 | 0.89 | 3.47 | - | 1308.1 |
| AHQ-10-3, 5589         | K.CAPGVVGPAAEADIDFDIIR.N              | 2017.24863 | 3 | 3.56E-08 | 0.93 | 4.45 | - | 1196.0 |
| AHQ-10-3, 5573         | K.CAPGVVGPAAEADIDFDIIR.N              | 2017.24863 | 2 | 1.45E-05 | 0.44 | 2.51 | - | 495.5  |
| AHQ-10-7, 5545         | K.CAPGVVGPAAEADIDFDIIR.N              | 2017.24863 | 2 | 6.54E-04 | 0.53 | 2.94 | - | 318.9  |
| AHQ-10-3, 2998 - 2999  | K.CSGPGLSPGMVR.A                      | 1219.41699 | 2 | 2.25E-07 | 0.72 | 2.94 | - | 507.4  |
| AHQ-10-2, 4436         | R.DAEMPAEKDLAEDAPWK.K                 | 2018.19047 | 2 | 9.83E-07 | 0.86 | 3.55 | - | 792.3  |
| AHQ-10-8, 3778         | K.DAGEGGLSLAIEGSPK.A                  | 1501.62084 | 2 | 6.41E-07 | 0.87 | 3.73 | - | 860.4  |
| AHQ-10-4, 3852 - 3917  | K.DAGEGGLSLAIEGSPK.A                  | 1501.62084 | 2 | 1.74E-04 | 0.78 | 3.31 | - | 778.2  |
| AHQ-10-1, 3975         | K.DAGEGGLSLAIEGSPK.A                  | 1501.62084 | 2 | 1.35E-05 | 0.73 | 3.12 | - | 851.7  |
| AHQ-10-5, 3835 - 3899  | K.DAGEGGLSLAIEGSPK.A                  | 1501.62084 | 2 | 1.80E-05 | 0.93 | 4.30 | - | 1344.6 |
| AHQ-10-11, 3758 - 3828 | K.DAGEGGLSLAIEGSPK.A                  | 1501.62084 | 2 | 3.16E-06 | 0.64 | 2.87 | - | 663.9  |
| AHQ-10-6, 3716 - 3772  | K.DAGEGGLSLAIEGSPK.A                  | 1501.62084 | 2 | 5.04E-04 | 0.66 | 2.92 | - | 630.5  |
| AHQ-10-1, 4718         | K.DAGEGLLAVQITDPEGK.P                 | 1713.86752 | 2 | 4.29E-06 | 0.93 | 4.18 | - | 1187.3 |
| AHQ-10-2, 4652         | K.DAGEGLLAVQITDPEGK.P                 | 1713.86752 | 2 | 3.59E-05 | 0.84 | 3.19 | - | 936.5  |
| AHQ-10-6, 4148 - 4153  | K.DAGEGLLAVQITDPEGKPK.K               | 1939.15612 | 2 | 4.01E-05 | 0.95 | 4.49 | - | 1429.5 |
| AHQ-10-8, 4154         | K.DAGEGLLAVQITDPEGKPK.K               | 1939.15612 | 2 | 1.03E-07 | 0.95 | 4.55 | - | 1168.4 |
| AHQ-10-5, 4232 - 4247  | K.DAGEGLLAVQITDPEGKPK.K               | 1939.15612 | 2 | 2.46E-06 | 0.94 | 4.47 | - | 1047.6 |
| AHQ-10-2, 4240 - 4310  | K.DAGEGLLAVQITDPEGKPK.K               | 1939.15612 | 2 | 2.00E-06 | 0.94 | 4.44 | - | 1160.6 |
| AHQ-10-9, 3975         | K.DAGEGLLAVQITDPEGKPK.K               | 1939.15612 | 2 | 2.25E-04 | 0.87 | 3.69 | - | 881.4  |
| AHQ-10-7, 4125         | K.DAGEGLLAVQITDPEGKPK.K               | 1939.15612 | 2 | 1.03E-06 | 0.95 | 4.12 | - | 1504.1 |
| AHQ-10-2, 4498         | K.DAGEGLLAVQITDPEGKPK.K               | 1939.15612 | 2 | 5.48E-05 | 0.85 | 3.59 | - | 791.9  |
| AHQ-10-1, 4377         | K.DAGEGLLAVQITDPEGKPK.K               | 1939.15612 | 2 | 6.26E-06 | 0.95 | 4.54 | - | 1342.1 |
| AHQ-10-2, 4403         | K.DAGEGLLAVQITDPEGKPK.K               | 1939.15612 | 2 | 1.55E-05 | 0.84 | 3.61 | - | 945.8  |
| AHQ-10-11, 4122        | K.DAGEGLLAVQITDPEGKPK.K               | 1939.15612 | 2 | 1.09E-05 | 0.91 | 3.97 | - | 907.1  |
| AHQ-10-3, 4221         | K.DAGEGLLAVQITDPEGKPK.K               | 1939.15612 | 2 | 9.36E-08 | 0.96 | 4.67 | - | 1405.1 |
| AHQ-10-2, 4294         | K.DAGEGLLAVQITDPEGKPK.K               | 1939.15612 | 3 | 1.71E-07 | 0.90 | 3.41 | - | 1134.7 |
| AHQ-10-6, 4228 - 4231  | R.DAGYGGLSLSIEGSPK.V                  | 1551.67986 | 2 | 7.38E-09 | 0.95 | 4.22 | - | 1366.6 |
| AHQ-10-1, 4421         | R.DAGYGGLSLSIEGSPK.V                  | 1551.67986 | 2 | 9.70E-06 | 0.84 | 3.26 | - | 986.0  |
| AHQ-10-5, 4301 - 4363  | R.DAGYGGLSLSIEGSPK.V                  | 1551.67986 | 2 | 7.31E-04 | 0.86 | 3.13 | - | 1113.8 |
| AHQ-10-4, 4480         | R.DAGYGGLSLSIEGSPK.V                  | 1551.67986 | 2 | 2.14E-05 | 0.91 | 3.88 | - | 1010.9 |
| AHQ-10-4, 4321 - 4348  | R.DAGYGGLSLSIEGSPK.V                  | 1551.67986 | 2 | 5.61E-05 | 0.82 | 3.33 | - | 725.7  |
| AHQ-10-3, 4294         | R.DAGYGGLSLSIEGSPK.V                  | 1551.67986 | 2 | 7.30E-06 | 0.86 | 2.65 | - | 1060.5 |
| AHQ-10-8, 4255         | R.DAGYGGLSLSIEGSPK.V                  | 1551.67986 | 2 | 1.28E-07 | 0.90 | 3.71 | - | 1015.8 |
| AHQ-10-2, 4367 - 4375  | R.DAGYGGLSLSIEGSPK.V                  | 1551.67986 | 2 | 5.90E-09 | 0.92 | 3.99 | - | 1198.3 |
| AHQ-10-5, 4461         | R.DAGYGGLSLSIEGSPK.V                  | 1551.67986 | 2 | 4.94E-05 | 0.91 | 4.06 | - | 737.2  |
| AHQ-10-1, 5483         | R.DAGYGGLSLSIEGSPKVDINTELEDGTCR.V     | 3171.35009 | 3 | 1.60E-04 | 0.88 | 4.23 | - | 667.5  |
| AHQ-10-4, 2041         | R.DAPQDFHPRD.V                        | 1198.22650 | 2 | 6.28E-06 | 0.74 | 2.81 | - | 580.5  |
| AHQ-10-6, 2033         | R.DAPQDFHPRD.V                        | 1198.22650 | 2 | 3.43E-04 | 0.74 | 2.62 | - | 892.7  |
| AHQ-10-2, 2082         | R.DAPQDFHPRD.V                        | 1198.22650 | 2 | 2.01E-06 | 0.88 | 3.05 | - | 861.1  |
| AHQ-10-5, 4535 - 4597  | K.DGSCGVAYVQEPGDYEVSVK.F              | 2260.41990 | 2 | 1.36E-05 | 0.86 | 4.11 | - | 563.5  |
| AHQ-10-3, 4509 - 4510  | K.DGSCGVAYVQEPGDYEVSVK.F              | 2260.41990 | 2 | 1.39E-06 | 0.80 | 3.84 | - | 466.4  |
| AHQ-10-4, 4555         | K.DGSCGVAYVQEPGDYEVSVK.F              | 2260.41990 | 2 | 2.12E-05 | 0.89 | 4.67 | - | 518.7  |
| AHQ-10-2, 4594         | K.DGSCGVAYVQEPGDYEVSVK.F              | 2260.41990 | 2 | 2.16E-04 | 0.68 | 3.19 | - | 507.4  |
| AHQ-10-8, 4482 - 4501  | K.DGSCGVAYVQEPGDYEVSVK.F              | 2260.41990 | 2 | 1.66E-05 | 0.82 | 3.83 | - | 463.7  |
| AHQ-10-5, 2565         | K.DKGEYTLVVK.W                        | 1152.32223 | 2 | 1.90E-06 | 0.70 | 2.87 | - | 530.0  |
| AHQ-10-14, 2581        | K.DKGEYTLVVK.W                        | 1152.32223 | 2 | 2.42E-05 | 0.70 | 3.00 | - | 562.7  |
| AHQ-10-1, 2797         | K.DKGEYTLVVK.W                        | 1152.32223 | 2 | 4.68E-07 | 0.73 | 2.56 | - | 566.7  |
| AHQ-10-3, 2606         | K.DKGEYTLVVK.W                        | 1152.32223 | 2 | 9.85E-04 | 0.65 | 2.58 | - | 543.5  |
| AHQ-10-14, 2588        | K.DKGEYTLVVK.W                        | 1152.32223 | 1 | 7.57E-07 | 0.28 | 2.26 | - | 507.4  |
| AHQ-10-5, 3169         | K.DNNGTYSYVPR.K                       | 1591.64109 | 2 | 4.86E-08 | 0.74 | 2.80 | - | 750.6  |
| AHQ-10-4, 3187         | K.DNNGTYSYVPR.K                       | 1591.64109 | 2 | 1.81E-05 | 0.84 | 3.00 | - | 889.6  |
| AHQ-10-1, 3331 - 3334  | K.DNNGTYSYVPR.K                       | 1591.64109 | 2 | 3.39E-06 | 0.47 | 2.50 | - | 544.3  |
| AHQ-10-1, 3261 - 3295  | R.DVDIIDHDNTYTVK.Y                    | 1785.89230 | 2 | 2.42E-04 | 0.92 | 3.32 | - | 1178.9 |
| AHQ-10-5, 3093         | R.DVDIIDHDNTYTVK.Y                    | 1785.89230 | 2 | 6.60E-06 | 0.81 | 2.99 | - | 794.0  |
| AHQ-10-1, 3294         | R.DVDIIDHDNTYTVK.Y                    | 1785.89230 | 3 | 1.67E-04 | 0.71 | 3.31 | - | 453.5  |
| AHQ-10-4, 3100         | R.DVDIIDHDNTYTVK.Y                    | 1785.89230 | 2 | 1.07E-04 | 0.71 | 2.81 | - | 616.2  |
| AHQ-10-6, 3061         | R.DVDIIDHDNTYTVK.Y                    | 1785.89230 | 3 | 1.70E-04 | 0.56 | 3.08 | - | 575.5  |
| AHQ-10-4, 3107         | R.DVDIIDHDNTYTVK.Y                    | 1785.89230 | 3 | 7.80E-05 | 0.72 | 3.26 | - | 404.5  |
| AHQ-10-2, 3171         | R.DVDIIDHDNTYTVK.Y                    | 1785.89230 | 2 | 6.47E-08 | 0.95 | 4.61 | - | 1186.4 |
| AHQ-10-3, 3113 - 3174  | R.DVDIIDHDNTYTVK.Y                    | 1785.89230 | 2 | 8.05E-06 | 0.92 | 3.96 | - | 862.2  |
| AHQ-10-3, 3114         | R.DVDIIDHDNTYTVK.Y                    | 1785.89230 | 3 | 1.08E-05 | 0.59 | 3.03 | - | 445.0  |
| AHQ-10-9, 3180         | R.EAGAGGLAIAVEGSPK.A                  | 1427.58510 | 2 | 2.93E-07 | 0.92 | 3.07 | - | 1442.2 |
| AHQ-10-1, 3557         | R.EAGAGGLAIAVEGSPK.A                  | 1427.58510 | 2 | 1.00E-06 | 0.94 | 4.11 | - | 1263.0 |
| AHQ-10-7, 3300         | R.EAGAGGLAIAVEGSPK.A                  | 1427.58510 | 2 | 3.51E-06 | 0.92 | 3.47 | - | 1248.5 |
| AHQ-10-5, 3373 - 3436  | R.EAGAGGLAIAVEGSPK.A                  | 1427.58510 | 2 | 3.84E-04 | 0.96 | 4.37 | - | 1596.0 |
| AHQ-10-6, 3325         | R.EAGAGGLAIAVEGSPK.A                  | 1427.58510 | 2 | 4.25E-05 | 0.91 | 3.54 | - | 1082.3 |
| AHQ-10-2, 3450         | R.EAGAGGLAIAVEGSPK.A                  | 1427.58510 | 2 | 1.10E-06 | 0.89 | 3.00 | - | 1047.2 |
| AHQ-10-8, 3326 - 3331  | R.EAGAGGLAIAVEGSPK.A                  | 1427.58510 | 2 | 8.84E-05 | 0.88 | 3.14 | - | 1073.1 |
| AHQ-10-4, 3379         | R.EAGAGGLAIAVEGSPK.A                  | 1427.58510 | 2 | 1.40E-04 | 0.89 | 3.31 | - | 1314.1 |
| AHQ-10-6, 2649 - 2659  | R.EATTEFSVDAR.A                       | 1226.27493 | 2 | 7.97E-06 | 0.69 | 2.68 | - | 517.5  |
| AHQ-10-1, 2877         | R.EATTEFSVDAR.A                       | 1226.27493 | 2 | 3.41E-06 | 0.87 | 3.00 | - | 872.2  |
| AHQ-10-4, 5793 - 5851  | R.EEGPYEVEVTDGVPVPGSPFFLEAVAPT.KPSK.V | 3487.85286 | 3 | 1.60E-04 | 0.83 | 4.15 | - | 553.0  |
| AHQ-10-3, 5829 - 5906  | R.EEGPYEVEVTDGVPVPGSPFFLEAVAPT.KPSK.V | 3487.85286 | 3 | 3.08E-04 | 0.93 | 5.05 | - | 787.7  |
| AHQ-10-1, 5806 - 5873  | R.EEGPYEVEVTDGVPVPGSPFFLEAVAPT.KPSK.V | 3487.85286 | 3 | 4.32E-05 | 0.94 | 5.41 | - | 887.2  |
| AHQ-10-1, 5929         | R.EEGPYEVEVTDGVPVPGSPFFLEAVAPT.KPSK.V | 3487.85286 | 3 | 3.43E-05 | 0.85 | 3.78 | - | 716.5  |
| AHQ-10-5, 5833 - 5887  | R.EEGPYEVEVTDGVPVPGSPFFLEAVAPT.KPSK.V | 3487.85286 | 3 | 2.08E-10 | 0.95 | 5.74 | - | 962.6  |
| AHQ-10-3, 5703 - 5757  | R.EEGPYEVEVTDGVPVPGSPFFLEAVAPT.KPSK.V | 3487.85286 | 3 | 1.46E-07 | 0.94 | 4.84 | - | 1257.1 |
| AHQ-10-3, 5795 - 5849  | R.EEGPYEVEVTDGVPVPGSPFFLEAVAPT.KPSK.V | 3487.85286 | 3 | 8.33E-15 | 0.97 | 6.91 | - | 981.5  |
| AHQ-10-7, 5744         | R.EEGPYEVEVTDGVPVPGSPFFLEAVAPT.KPSK.V | 3487.85286 | 3 | 2.50E-07 | 0.84 | 4.09 | - | 562.3  |
| AHQ-10-4, 5896 - 5955  | R.EEGPYEVEVTDGVPVPGSPFFLEAVAPT.KPSK.V | 3487.85286 | 3 | 3.47E-04 | 0.89 | 4.61 | - | 620.5  |
| AHQ-10-2, 5786 - 5842  | R.EEGPYEVEVTDGVPVPGSPFFLEAVAPT.KPSK.V | 3487.85286 | 3 | 3.71E-07 | 0.94 | 5.55 | - | 844.2  |
| AHQ-10-2, 4802 - 4859  | R.EGPYSISVLVGDDEEVRP.S                | 1911.05809 | 2 | 1.60E-04 | 0.90 | 3.81 | - | 842.5  |
| AHQ-10-6, 4728         | R.EGPYSISVLVGDDEEVRP.S                | 1911.05809 | 2 | 2.92E-05 | 0.51 | 2.58 | - | 591.0  |
| AHQ-10-9, 4523         | R.EGPYSISVLVGDDEEVRP.S                | 1911.05809 | 2 | 2.06E-06 | 0.79 | 3.03 | - | 782.0  |
| AHQ-10-8, 4761 - 4786  | R.EGPYSISVLVGDDEEVRP.S                | 1911.05809 | 2 | 9.40E-07 | 0.86 | 3.36 | - | 776.5  |
| AHQ-10-5, 4816         | R.EGPYSISVLVGDDEEVRP.S                | 1911.05809 | 2 | 7.48E-11 | 0.87 | 3.54 | - | 806.6  |
| AHQ-10-7, 4713         | R.EGPYSISVLVGDDEEVRP.S                | 1911.05809 | 2 | 3.11E-05 | 0.62 | 3.18 | - | 510.4  |
| AHQ-10-4, 4771 - 4840  | R.EGPYSISVLVGDDEEVRP.S                | 1911.05809 | 2 | 1.19E-06 | 0.76 | 3.45 | - | 537.5  |
| AHQ-10-4, 4855 - 4856  | R.EGPYSISVLVGDDEEVRP.S                | 1911.05809 | 2 | 1.69E-08 | 0.92 | 3.89 | - | 965.8  |
| AHQ-10-6, 4744         | R.EGPYSISVLVGDDEEVRP.S                | 1911.05809 | 3 | 1.58E-06 | 0.78 | 3.65 | - | 1049.3 |
| AHQ-10-1, 4853 - 4930  | R.EGPYSISVLVGDDEEVRP.S                | 1911.05809 | 2 | 1.51E-04 | 0.71 | 3.34 | - | 688.1  |
| AHQ-10-4, 3493         | K.FADQHVPGSPFVK.V                     | 1516.68203 | 3 | 8.10E-07 | 0.92 | 3.71 | - | 1322.2 |
| AHQ-10-2, 3484 - 3563  | K.FADQHVPGSPFVK.V                     | 1516.68203 | 2 | 5.42E-06 | 0.78 | 3.12 | - | 428.9  |
| AHQ-10-7, 3406         | K.FADQHVPGSPFVK.V                     | 1516.68203 | 2 | 1.59E-04 | 0.60 | 2.70 | - | 355.7  |
| AHQ-10-6, 3417         | K.FADQHVPGSPFVK.V                     | 1516.68203 | 3 | 3.79E-05 | 0.92 | 3.70 | - | 1328.2 |
| AHQ-10-1, 3665         | K.FADQHVPGSPFVK.V                     | 1516.68203 | 3 | 8.12E-07 | 0.94 | 3.87 | - | 1490.2 |
| AHQ-10-3, 3491         | K.FADQHVPGSPFVK.V                     | 1516.68203 | 3 | 1.08E-06 | 0.96 | 4.91 | - | 1373.0 |
| AHQ-10-5, 3469         | K.FADQHVPGSPFVK.V                     | 1516.68203 | 3 | 8.45E-06 | 0.89 | 3.57 | - | 948.3  |
| AHQ-10-1, 3658 - 3682  | K.FADQHVPGSPFVK.V                     | 1516.68203 | 2 | 2.63E-05 | 0.71 | 2.88 | - | 411.5  |
| AHQ-10-13, 5110        | R.FGGEHVPNSPFQVTLAGDQPSVQPPLR.S       | 2947.25342 | 3 | 5.72E-05 | 0.92 | 4.47 | - | 960.8  |
| AHQ-10-1, 5274 - 5346  | R.FGGEHVPNSPFQVTLAGDQPSVQPPLR.S       | 2947.25342 | 3 | 5.57E-09 | 0.91 | 4.77 | - | 684.0  |
| AHQ-10-8, 5181         | R.FGGEHVPNSPFQVTLAGDQPSVQPPLR.S       | 2947.25342 | 3 | 1.25E-06 | 0.91 | 4.39 | - | 928.9  |

|                        |                                  |            |   |          |      |      |   |        |
|------------------------|----------------------------------|------------|---|----------|------|------|---|--------|
| AHQ-10-2, 5222 - 5278  | R.FGGEHVPNSPFQVTLAAGDQPSVOPPLR.S | 2947.25342 | 3 | 4.28E-05 | 0.90 | 4.53 | - | 683.6  |
| AHQ-10-6, 5079 - 5135  | R.FGGEHVPNSPFQVTLAAGDQPSVOPPLR.S | 2947.25342 | 3 | 2.25E-04 | 0.91 | 4.17 | - | 1018.2 |
| AHQ-10-5, 5149 - 5207  | R.FGGEHVPNSPFQVTLAAGDQPSVOPPLR.S | 2947.25342 | 3 | 3.32E-05 | 0.90 | 4.26 | - | 786.2  |
| AHQ-10-2, 5335         | R.FGGEHVPNSPFQVTLAAGDQPSVOPPLR.S | 2947.25342 | 3 | 8.43E-09 | 0.84 | 3.68 | - | 661.0  |
| AHQ-10-4, 5201 - 5259  | R.FGGEHVPNSPFQVTLAAGDQPSVOPPLR.S | 2947.25342 | 3 | 1.61E-08 | 0.91 | 4.45 | - | 900.5  |
| AHQ-10-4, 4940         | K.FNEEHIPDPSFVVPVVASPSGDAR.R     | 2468.66280 | 2 | 1.14E-05 | 0.75 | 3.32 | - | 488.2  |
| AHQ-10-3, 4899         | K.FNEEHIPDPSFVVPVVASPSGDAR.R     | 2468.66280 | 2 | 5.55E-04 | 0.63 | 2.65 | - | 451.8  |
| AHQ-10-6, 4837         | K.FNEEHIPDPSFVVPVVASPSGDAR.R     | 2468.66280 | 2 | 9.26E-08 | 0.68 | 2.99 | - | 383.4  |
| AHQ-10-2, 4988         | K.FNEEHIPDPSFVVPVVASPSGDAR.R     | 2468.66280 | 2 | 6.17E-06 | 0.57 | 2.98 | - | 297.0  |
| AHQ-10-4, 3765 - 3823  | K.FNGTHIPGSPFK.I                 | 1302.46259 | 2 | 5.05E-06 | 0.68 | 2.97 | - | 467.7  |
| AHQ-10-5, 2451         | R.FVPAEM*GHTVSVK.Y               | 1519.74761 | 2 | 4.58E-07 | 0.60 | 2.86 | - | 172.1  |
| AHQ-10-7, 3018         | R.FVPAEMGHTVSVK.Y                | 1503.74821 | 2 | 8.94E-09 | 0.82 | 3.28 | - | 417.4  |
| AHQ-10-4, 2459         | R.FVPAEM*GHTVSVK.Y               | 1519.74761 | 2 | 7.88E-04 | 0.60 | 2.79 | - | 312.1  |
| AHQ-10-5, 3088         | R.FVPAEMGHTVSVK.Y                | 1503.74821 | 2 | 3.63E-13 | 0.80 | 2.93 | - | 523.2  |
| AHQ-10-4, 3099         | R.FVPAEMGHTVSVK.Y                | 1503.74821 | 2 | 1.22E-10 | 0.81 | 2.83 | - | 506.1  |
| AHQ-10-2, 2540         | R.FVPAEM*GHTVSVK.Y               | 1519.74761 | 2 | 7.97E-04 | 0.46 | 2.51 | - | 246.0  |
| AHQ-10-11, 3320        | R.GAGTGGLGLAVEGPEAK.M            | 1571.71430 | 2 | 7.45E-04 | 0.79 | 2.85 | - | 822.7  |
| AHQ-10-8, 3313         | R.GAGTGGLGLAVEGPEAK.M            | 1571.71430 | 2 | 1.06E-05 | 0.86 | 3.12 | - | 829.8  |
| AHQ-10-1, 3493 - 3545  | R.GAGTGGLGLAVEGPEAK.M            | 1571.71430 | 2 | 1.25E-05 | 0.89 | 3.54 | - | 866.9  |
| AHQ-10-7, 3284 - 3286  | R.GAGTGGLGLAVEGPEAK.M            | 1571.71430 | 2 | 2.59E-04 | 0.90 | 3.94 | - | 679.7  |
| AHQ-10-4, 3368         | R.GAGTGGLGLAVEGPEAK.M            | 1571.71430 | 2 | 5.23E-06 | 0.85 | 3.34 | - | 689.3  |
| AHQ-10-5, 3361         | R.GAGTGGLGLAVEGPEAK.M            | 1571.71430 | 2 | 2.29E-07 | 0.90 | 3.64 | - | 899.3  |
| AHQ-10-6, 3313         | R.GAGTGGLGLAVEGPEAK.M            | 1571.71430 | 2 | 4.39E-06 | 0.87 | 3.79 | - | 599.9  |
| AHQ-10-3, 3458 - 3519  | K.GKLDVQFSLTK.G                  | 1293.49392 | 2 | 7.49E-05 | 0.90 | 3.70 | - | 1014.7 |
| AHQ-10-3, 4653 - 4702  | K.GLVEPVDVVDNADGTQTVNYPVSR.E     | 2545.74387 | 2 | 6.38E-06 | 0.94 | 4.63 | - | 917.0  |
| AHQ-10-5, 4657 - 4715  | K.GLVEPVDVVDNADGTQTVNYPVSR.E     | 2545.74387 | 2 | 9.36E-05 | 0.90 | 3.94 | - | 861.1  |
| AHQ-10-2, 4914         | K.GLVEPVDVVDNADGTQTVNYPVSR.E     | 2545.74387 | 2 | 1.23E-05 | 0.75 | 2.74 | - | 901.4  |
| AHQ-10-2, 4779 - 4851  | K.GLVEPVDVVDNADGTQTVNYPVSR.E     | 2545.74387 | 2 | 2.18E-08 | 0.97 | 6.30 | - | 1268.0 |
| AHQ-10-3, 4502 - 4582  | K.GLVEPVDVVDNADGTQTVNYPVSR.E     | 2545.74387 | 2 | 4.57E-04 | 0.66 | 2.78 | - | 632.6  |
| AHQ-10-2, 4564 - 4628  | K.GLVEPVDVVDNADGTQTVNYPVSR.E     | 2545.74387 | 2 | 6.51E-09 | 0.94 | 4.73 | - | 850.9  |
| AHQ-10-2, 4674 - 4734  | K.GLVEPVDVVDNADGTQTVNYPVSR.E     | 2545.74387 | 2 | 7.66E-04 | 0.64 | 2.88 | - | 611.0  |
| AHQ-10-1, 4722 - 4789  | K.GLVEPVDVVDNADGTQTVNYPVSR.E     | 2545.74387 | 2 | 2.65E-04 | 0.83 | 3.35 | - | 658.5  |
| AHQ-10-4, 4625 - 4703  | K.GLVEPVDVVDNADGTQTVNYPVSR.E     | 2545.74387 | 2 | 5.91E-07 | 0.95 | 5.33 | - | 913.8  |
| AHQ-10-7, 4601 - 4629  | K.GLVEPVDVVDNADGTQTVNYPVSR.E     | 2545.74387 | 2 | 4.31E-04 | 0.52 | 2.59 | - | 314.6  |
| AHQ-10-4, 2311 - 2325  | K.GTVEPQLEAR.G                   | 1100.20741 | 2 | 1.48E-04 | 0.75 | 2.56 | - | 595.8  |
| AHQ-10-2, 2378         | K.GTVEPQLEAR.G                   | 1100.20741 | 2 | 6.89E-05 | 0.84 | 3.44 | - | 459.9  |
| AHQ-10-2, 2332 - 2390  | K.GTVEPQLEAR.G                   | 1100.20741 | 2 | 1.76E-04 | 0.82 | 2.63 | - | 602.3  |
| AHQ-10-3, 2341         | K.GTVEPQLEAR.G                   | 1100.20741 | 2 | 3.57E-04 | 0.72 | 2.93 | - | 423.2  |
| AHQ-10-1, 2535         | K.GTVEPQLEAR.G                   | 1100.20741 | 2 | 1.64E-05 | 0.87 | 3.42 | - | 604.8  |
| AHQ-10-3, 4902         | K.HTAM*VSWGVSIPNSPFR.V           | 1960.20541 | 2 | 1.37E-06 | 0.96 | 4.60 | - | 1442.1 |
| AHQ-10-2, 4978         | K.HTAM*VSWGVSIPNSPFR.V           | 1960.20541 | 2 | 3.84E-05 | 0.91 | 3.92 | - | 1048.2 |
| AHQ-10-3, 4903         | K.HTAM*VSWGVSIPNSPFR.V           | 1960.20541 | 3 | 1.94E-04 | 0.88 | 3.88 | - | 1138.7 |
| AHQ-10-7, 4002 - 4008  | R.IANLQTDLSGGLR.L                | 1416.56231 | 2 | 2.58E-04 | 0.76 | 2.92 | - | 701.9  |
| AHQ-10-6, 4041         | R.IANLQTDLSGGLR.L                | 1416.56231 | 2 | 9.23E-04 | 0.96 | 4.08 | - | 1480.2 |
| AHQ-10-2, 4058         | R.IANLQTDLSGGLR.L                | 1416.56231 | 2 | 3.71E-06 | 0.83 | 3.16 | - | 679.2  |
| AHQ-10-2, 3767 - 3822  | R.IANLQTDLSGGLR.L                | 1416.56231 | 2 | 7.15E-06 | 0.93 | 3.98 | - | 1062.3 |
| AHQ-10-2, 3919         | R.IANLQTDLSGGLR.L                | 1416.56231 | 2 | 5.20E-07 | 0.95 | 3.94 | - | 1251.1 |
| AHQ-10-1, 4139         | R.IANLQTDLSGGLR.L                | 1416.56231 | 2 | 4.00E-04 | 0.86 | 3.14 | - | 773.4  |
| AHQ-10-4, 3764         | R.IANLQTDLSGGLR.L                | 1416.56231 | 2 | 1.56E-05 | 0.93 | 3.70 | - | 1084.0 |
| AHQ-10-5, 3745         | R.IANLQTDLSGGLR.L                | 1416.56231 | 2 | 3.28E-06 | 0.91 | 3.78 | - | 785.5  |
| AHQ-10-2, 4170         | R.IANLQTDLSGGLR.L                | 1416.56231 | 2 | 1.50E-04 | 0.94 | 3.94 | - | 1220.8 |
| AHQ-10-10, 3962 - 3966 | R.IANLQTDLSGGLR.L                | 1416.56231 | 2 | 8.07E-04 | 0.85 | 2.92 | - | 780.9  |
| AHQ-10-1, 4254         | R.IANLQTDLSGGLR.L                | 1416.56231 | 2 | 3.14E-08 | 0.95 | 4.32 | - | 1188.9 |
| AHQ-10-12, 4076        | R.IANLQTDLSGGLR.L                | 1416.56231 | 2 | 6.18E-06 | 0.92 | 3.71 | - | 1084.9 |
| AHQ-10-3, 4101         | R.IANLQTDLSGGLR.L                | 1416.56231 | 2 | 2.23E-05 | 0.91 | 3.50 | - | 946.3  |
| AHQ-10-3, 3734         | R.IANLQTDLSGGLR.L                | 1416.56231 | 2 | 4.60E-06 | 0.96 | 4.49 | - | 1335.1 |
| AHQ-10-5, 4116         | R.IANLQTDLSGGLR.L                | 1416.56231 | 2 | 3.95E-05 | 0.91 | 3.47 | - | 930.0  |
| AHQ-10-4, 4135 - 4139  | R.IANLQTDLSGGLR.L                | 1416.56231 | 2 | 2.06E-06 | 0.94 | 4.69 | - | 1125.0 |
| AHQ-10-1, 3901 - 3902  | R.IANLQTDLSGGLR.L                | 1416.56231 | 2 | 3.07E-06 | 0.96 | 4.76 | - | 1360.7 |
| AHQ-10-6, 3685         | R.IANLQTDLSGGLR.L                | 1416.56231 | 2 | 4.66E-07 | 0.67 | 2.65 | - | 629.8  |
| AHQ-10-11, 4006        | R.IANLQTDLSGGLR.L                | 1416.56231 | 2 | 8.70E-07 | 0.84 | 3.81 | - | 583.2  |
| AHQ-10-3, 3918 - 3991  | K.IPEISIQDM*TAQVTSPPSGK.T        | 2019.26301 | 2 | 4.94E-06 | 0.97 | 4.52 | - | 1945.6 |
| AHQ-10-2, 5218         | K.IPEISIQDM*TAQVTSPPSGK.T        | 2003.26361 | 2 | 1.30E-10 | 0.96 | 4.76 | - | 1238.5 |
| AHQ-10-5, 4604         | K.IPEISIQDM*TAQVTSPPSGK.T        | 2003.26361 | 2 | 3.48E-09 | 0.94 | 4.40 | - | 1013.0 |
| AHQ-10-4, 5197 - 5203  | K.IPEISIQDM*TAQVTSPPSGK.T        | 2003.26361 | 2 | 9.78E-10 | 0.98 | 6.24 | - | 1771.7 |
| AHQ-10-4, 5207 - 5209  | K.IPEISIQDM*TAQVTSPPSGK.T        | 2003.26361 | 3 | 4.94E-05 | 0.92 | 5.18 | - | 712.7  |
| AHQ-10-1, 5261         | K.IPEISIQDM*TAQVTSPPSGK.T        | 2003.26361 | 2 | 3.64E-07 | 0.95 | 4.39 | - | 1230.8 |
| AHQ-10-6, 5075         | K.IPEISIQDM*TAQVTSPPSGK.T        | 2003.26361 | 2 | 5.83E-14 | 0.97 | 5.56 | - | 1582.1 |
| AHQ-10-4, 3979         | K.IPEISIQDM*TAQVTSPPSGK.T        | 2019.26301 | 2 | 1.41E-06 | 0.97 | 5.00 | - | 1511.2 |
| AHQ-10-3, 5145         | K.IPEISIQDM*TAQVTSPPSGK.T        | 2003.26361 | 3 | 7.68E-07 | 0.75 | 3.67 | - | 799.7  |
| AHQ-10-1, 5266         | K.IPEISIQDM*TAQVTSPPSGK.T        | 2003.26361 | 3 | 1.06E-04 | 0.84 | 3.37 | - | 1104.7 |
| AHQ-10-7, 5077         | K.IPEISIQDM*TAQVTSPPSGK.T        | 2003.26361 | 2 | 8.63E-10 | 0.95 | 4.54 | - | 1121.5 |
| AHQ-10-6, 3899         | K.IPEISIQDM*TAQVTSPPSGK.T        | 2019.26301 | 2 | 1.12E-08 | 0.97 | 5.18 | - | 1804.7 |
| AHQ-10-5, 5168         | K.IPEISIQDM*TAQVTSPPSGK.T        | 2003.26361 | 2 | 2.04E-09 | 0.96 | 4.74 | - | 1131.5 |
| AHQ-10-1, 4105         | K.IPEISIQDM*TAQVTSPPSGK.T        | 2019.26301 | 2 | 5.83E-05 | 0.95 | 4.47 | - | 1109.6 |
| AHQ-10-3, 5135         | K.IPEISIQDM*TAQVTSPPSGK.T        | 2003.26361 | 2 | 6.19E-07 | 0.95 | 4.61 | - | 1158.1 |
| AHQ-10-5, 3969 - 4028  | K.IPEISIQDM*TAQVTSPPSGK.T        | 2019.26301 | 2 | 1.48E-08 | 0.98 | 5.24 | - | 2030.7 |
| AHQ-10-8, 5127         | K.IPEISIQDM*TAQVTSPPSGK.T        | 2003.26361 | 2 | 1.44E-09 | 0.98 | 5.69 | - | 1817.7 |
| AHQ-10-2, 4038         | K.IPEISIQDM*TAQVTSPPSGK.T        | 2019.26301 | 2 | 6.77E-04 | 0.96 | 4.47 | - | 1477.1 |
| AHQ-10-7, 3882 - 3914  | K.IPEISIQDM*TAQVTSPPSGK.T        | 2019.26301 | 2 | 3.90E-06 | 0.96 | 4.78 | - | 1281.5 |
| AHQ-10-5, 2607         | K.IVGPSSGAAVPCV.V                | 1157.36530 | 2 | 3.30E-06 | 0.85 | 2.96 | - | 784.9  |
| AHQ-10-4, 2592         | K.IVGPSSGAAVPCV.V                | 1157.36530 | 2 | 1.09E-05 | 0.91 | 3.37 | - | 857.1  |
| AHQ-10-3, 2607 - 2613  | K.IVGPSSGAAVPCV.V                | 1157.36530 | 2 | 2.14E-04 | 0.83 | 3.08 | - | 704.3  |
| AHQ-10-2, 2663         | K.IVGPSSGAAVPCV.V                | 1157.36530 | 2 | 1.95E-05 | 0.79 | 2.65 | - | 711.7  |
| AHQ-10-3, 4025         | K.IVGPSSGAAVPCVPEPLGADNSVVR.F    | 2451.78478 | 2 | 2.37E-06 | 0.75 | 3.65 | - | 312.0  |
| AHQ-10-5, 4041         | K.IVGPSSGAAVPCVPEPLGADNSVVR.F    | 2451.78478 | 3 | 6.12E-04 | 0.82 | 4.32 | - | 737.2  |
| AHQ-10-3, 4018 - 4019  | K.IVGPSSGAAVPCVPEPLGADNSVVR.F    | 2451.78478 | 3 | 3.37E-05 | 0.90 | 4.32 | - | 1066.9 |
| AHQ-10-6, 3967 - 3993  | K.IVGPSSGAAVPCVPEPLGADNSVVR.F    | 2451.78478 | 3 | 1.36E-04 | 0.93 | 4.56 | - | 1211.7 |
| AHQ-10-1, 4185         | K.IVGPSSGAAVPCVPEPLGADNSVVR.F    | 2451.78478 | 2 | 9.79E-05 | 0.65 | 3.30 | - | 277.0  |
| AHQ-10-3, 4115         | K.IVGPSSGAAVPCVPEPLGADNSVVR.F    | 2451.78478 | 3 | 1.58E-09 | 0.93 | 4.48 | - | 1243.4 |
| AHQ-10-1, 4175 - 4255  | K.IVGPSSGAAVPCVPEPLGADNSVVR.F    | 2451.78478 | 3 | 2.42E-08 | 0.94 | 4.59 | - | 1422.1 |
| AHQ-10-4, 4073         | K.IVGPSSGAAVPCVPEPLGADNSVVR.F    | 2451.78478 | 2 | 1.65E-05 | 0.51 | 2.56 | - | 289.8  |
| AHQ-10-4, 4039 - 4115  | K.IVGPSSGAAVPCVPEPLGADNSVVR.F    | 2451.78478 | 3 | 2.25E-09 | 0.89 | 4.33 | - | 1040.8 |
| AHQ-10-1, 4329 - 4402  | R.KDGSQVAVYVQEPGDYEVSVK.F        | 2388.59282 | 3 | 8.99E-06 | 0.91 | 5.09 | - | 725.9  |
| AHQ-10-8, 4163         | K.KNGQHVASSPIVVISQSEIGDASR.V     | 2577.83547 | 3 | 4.07E-06 | 0.91 | 4.41 | - | 453.2  |
| AHQ-10-3, 4257 - 4261  | K.KNGQHVASSPIVVISQSEIGDASR.V     | 2577.83547 | 3 | 4.71E-12 | 0.97 | 5.94 | - | 2023.7 |
| AHQ-10-5, 4159 - 4236  | K.KNGQHVASSPIVVISQSEIGDASR.V     | 2577.83547 | 3 | 1.02E-08 | 0.96 | 5.25 | - | 1697.7 |
| AHQ-10-8, 4086 - 4155  | K.KNGQHVASSPIVVISQSEIGDASR.V     | 2577.83547 | 3 | 7.01E-10 | 0.97 | 6.18 | - | 1659.1 |
| AHQ-10-4, 4248         | K.KNGQHVASSPIVVISQSEIGDASR.V     | 2577.83547 | 3 | 5.21E-10 | 0.97 | 5.56 | - | 1740.7 |
| AHQ-10-1, 4399         | K.KNGQHVASSPIVVISQSEIGDASR.V     | 2577.83547 | 3 | 1.18E-11 | 0.96 | 5.68 | - | 1758.7 |
| AHQ-10-5, 4243 - 4244  | K.KNGQHVASSPIVVISQSEIGDASR.V     | 2577.83547 | 2 | 6.27E-07 | 0.95 | 4.86 | - | 952.9  |
| AHQ-10-4, 3457         | K.KTHIQDNHDGTYTVAVYVDPVDTGR.Y    | 2588.77367 | 3 | 4.48E-06 | 0.78 | 3.63 | - | 649.1  |
| AHQ-10-1, 3623 - 3695  | K.KTHIQDNHDGTYTVAVYVDPVDTGR.Y    | 2588.77367 | 3 | 1.15E-04 | 0.89 | 4.23 | - | 754.2  |
| AHQ-10-2, 3506 - 3568  | K.KTHIQDNHDGTYTVAVYVDPVDTGR.Y    | 2588.77367 | 3 | 9.30E-06 | 0.87 | 3.90 | - | 831.1  |
| AHQ-10-4, 3559         | K.KTHIQDNHDGTYTVAVYVDPVDTGR.Y    | 2588.77367 | 3 | 8.29E-04 | 0.67 | 3.00 | - | 675.9  |
| AHQ-10-3, 3443 - 3503  | K.KTHIQDNHDGTYTVAVYVDPVDTGR.Y    | 2588.77367 | 3 | 4.44E-06 | 0.87 | 4.24 | - | 924.0  |
| AHQ-10-3, 3846         | K.LDVQFSLTK.G                    | 1108.26945 | 1 | 4.04E-04 | 0.36 | 2.36 | - | 290.9  |

|                        |                                 |            |   |          |      |      |   |        |
|------------------------|---------------------------------|------------|---|----------|------|------|---|--------|
| AHQ-10-3, 3839         | K.LDVQFSGLTK.G                  | 1108.26945 | 2 | 7.98E-07 | 0.95 | 4.01 | - | 968.6  |
| AHQ-10-2, 3920         | K.LDVQFSGLTK.G                  | 1108.26945 | 2 | 1.20E-04 | 0.91 | 3.25 | - | 981.2  |
| AHQ-10-1, 4009         | K.LDVQFSGLTK.G                  | 1108.26945 | 2 | 1.05E-04 | 0.91 | 3.35 | - | 926.4  |
| AHQ-10-4, 3867         | K.LDVQFSGLTK.G                  | 1108.26945 | 2 | 1.69E-04 | 0.93 | 3.82 | - | 909.3  |
| AHQ-10-2, 6266         | R.LLGVWQNKLPQLPITNFSR.D         | 2239.64761 | 3 | 7.76E-05 | 0.93 | 4.53 | - | 1086.2 |
| AHQ-10-1, 4794         | K.LPQLPITNFSR.D                 | 1286.50461 | 2 | 5.44E-05 | 0.79 | 2.66 | - | 557.2  |
| AHQ-10-5, 4817         | K.LPQLPITNFSR.D                 | 1286.50461 | 2 | 5.87E-06 | 0.81 | 3.29 | - | 577.1  |
| AHQ-10-3, 4805         | K.LPQLPITNFSR.D                 | 1286.50461 | 2 | 1.44E-06 | 0.76 | 2.99 | - | 443.5  |
| AHQ-10-4, 4692 - 4704  | K.LPQLPITNFSR.D                 | 1286.50461 | 2 | 1.27E-05 | 0.93 | 3.11 | - | 1125.5 |
| AHQ-10-3, 4647         | K.LPQLPITNFSR.D                 | 1286.50461 | 2 | 2.43E-06 | 0.82 | 3.05 | - | 495.5  |
| AHQ-10-2, 4718         | K.LPQLPITNFSR.D                 | 1286.50461 | 2 | 1.35E-05 | 0.90 | 2.94 | - | 1011.5 |
| AHQ-10-2, 5108 - 5166  | K.LQVEPAVDTSGVQCYGPGIEGGQVFR.E  | 2766.03597 | 2 | 3.91E-05 | 0.81 | 3.31 | - | 590.5  |
| AHQ-10-6, 5011         | K.LQVEPAVDTSGVQCYGPGIEGGQVFR.E  | 2766.03597 | 2 | 4.49E-06 | 0.90 | 3.86 | - | 653.9  |
| AHQ-10-7, 5001         | K.LQVEPAVDTSGVQCYGPGIEGGQVFR.E  | 2766.03597 | 2 | 8.39E-07 | 0.84 | 3.70 | - | 535.9  |
| AHQ-10-4, 5123 - 5131  | K.LQVEPAVDTSGVQCYGPGIEGGQVFR.E  | 2766.03597 | 3 | 5.53E-06 | 0.97 | 5.27 | - | 2228.6 |
| AHQ-10-1, 5135 - 5194  | K.LQVEPAVDTSGVQCYGPGIEGGQVFR.E  | 2766.03597 | 3 | 3.73E-08 | 0.97 | 6.33 | - | 1377.2 |
| AHQ-10-1, 5190         | K.LQVEPAVDTSGVQCYGPGIEGGQVFR.E  | 2766.03597 | 2 | 3.93E-06 | 0.89 | 3.76 | - | 636.2  |
| AHQ-10-5, 5107         | K.LQVEPAVDTSGVQCYGPGIEGGQVFR.E  | 2766.03597 | 2 | 1.57E-05 | 0.88 | 3.86 | - | 603.6  |
| AHQ-10-4, 5127         | K.LQVEPAVDTSGVQCYGPGIEGGQVFR.E  | 2766.03597 | 2 | 1.54E-10 | 0.94 | 4.64 | - | 886.4  |
| AHQ-10-3, 5061         | K.LQVEPAVDTSGVQCYGPGIEGGQVFR.E  | 2766.03597 | 2 | 1.10E-04 | 0.87 | 4.06 | - | 620.4  |
| AHQ-10-5, 3141         | R.LRNGHVGISFVPE.K               | 1424.67564 | 3 | 3.96E-05 | 0.88 | 3.29 | - | 1454.3 |
| AHQ-10-5, 3240         | R.LRNGHVGISFVPE.K               | 1424.67564 | 3 | 7.10E-06 | 0.88 | 3.18 | - | 1679.1 |
| AHQ-10-3, 3275         | R.LRNGHVGISFVPE.K               | 1424.67564 | 3 | 6.14E-05 | 0.83 | 3.54 | - | 1045.9 |
| AHQ-10-3, 3434 - 3437  | R.LSPFM*ADIR.D                  | 1066.25604 | 2 | 4.19E-04 | 0.66 | 2.56 | - | 530.1  |
| AHQ-10-1, 3613         | R.LTVSSLQESGLK.V                | 1262.43499 | 2 | 3.93E-04 | 0.86 | 3.35 | - | 691.5  |
| AHQ-10-8, 3373         | R.LTVSSLQESGLK.V                | 1262.43499 | 2 | 1.53E-08 | 0.84 | 2.78 | - | 889.4  |
| AHQ-10-5, 3431         | R.LTVSSLQESGLK.V                | 1262.43499 | 2 | 4.37E-08 | 0.76 | 2.87 | - | 603.0  |
| AHQ-10-5, 4320         | R.LVSNHSLHETSSVFDLSLK.A         | 2201.42190 | 3 | 1.64E-04 | 0.78 | 3.41 | - | 509.8  |
| AHQ-10-1, 4275         | R.LVSNHSLHETSSVFDLSLK.A         | 2201.42190 | 3 | 1.09E-04 | 0.83 | 3.14 | - | 1018.5 |
| AHQ-10-8, 4230         | R.LVSNHSLHETSSVFDLSLK.A         | 2201.42190 | 2 | 1.18E-08 | 0.93 | 3.74 | - | 1205.9 |
| AHQ-10-4, 4133         | R.LVSNHSLHETSSVFDLSLK.A         | 2201.42190 | 3 | 1.46E-04 | 0.96 | 4.73 | - | 1525.9 |
| AHQ-10-13, 4085 - 4146 | R.LVSNHSLHETSSVFDLSLK.A         | 2201.42190 | 3 | 1.46E-09 | 0.96 | 5.27 | - | 1692.1 |
| AHQ-10-5, 4096 - 4164  | R.LVSNHSLHETSSVFDLSLK.A         | 2201.42190 | 3 | 6.73E-04 | 0.90 | 3.70 | - | 1035.9 |
| AHQ-10-4, 4137         | R.LVSNHSLHETSSVFDLSLK.A         | 2201.42190 | 2 | 3.25E-06 | 0.94 | 4.30 | - | 970.1  |
| AHQ-10-5, 4104         | R.LVSNHSLHETSSVFDLSLK.A         | 2201.42190 | 2 | 2.88E-05 | 0.94 | 5.11 | - | 808.7  |
| AHQ-10-4, 2273         | K.M*DCQCEPEGYR.V                | 1463.55315 | 2 | 3.09E-07 | 0.91 | 3.38 | - | 896.0  |
| AHQ-10-8, 4470         | K.NGOHVASSPIPVISQSEIGDASR.V     | 2449.66256 | 2 | 4.29E-08 | 0.95 | 4.38 | - | 1052.4 |
| AHQ-10-5, 4531         | K.NGOHVASSPIPVISQSEIGDASR.V     | 2449.66256 | 2 | 5.99E-08 | 0.95 | 4.65 | - | 1036.1 |
| AHQ-10-2, 2215         | K.RAEFTVETR.S                   | 1109.21754 | 2 | 1.72E-06 | 0.92 | 3.24 | - | 1130.4 |
| AHQ-10-5, 2067 - 2129  | K.RAEFTVETR.S                   | 1109.21754 | 2 | 5.19E-07 | 0.83 | 2.65 | - | 771.7  |
| AHQ-10-4, 3148         | R.RAPSVANVGSCHDSLK.I            | 1813.02884 | 2 | 3.83E-04 | 0.96 | 4.42 | - | 1425.7 |
| AHQ-10-1, 3347         | R.RAPSVANVGSCHDSLK.I            | 1813.02884 | 3 | 7.94E-09 | 0.95 | 4.99 | - | 1444.6 |
| AHQ-10-5, 3123         | R.RAPSVANVGSCHDSLK.I            | 1813.02884 | 3 | 5.19E-05 | 0.94 | 4.79 | - | 1435.5 |
| AHQ-10-4, 3143 - 3205  | R.RAPSVANVGSCHDSLK.I            | 1813.02884 | 3 | 4.13E-04 | 0.96 | 4.99 | - | 1792.5 |
| AHQ-10-1, 3374         | R.RLTVSSLQESGLK.V               | 1418.62134 | 2 | 7.02E-05 | 0.98 | 5.05 | - | 2731.5 |
| AHQ-10-2, 6507 - 6564  | K.SADFVVEAIGDDVDTLGFVSGVGSQAQ.I | 2696.90399 | 3 | 4.93E-04 | 0.92 | 4.96 | - | 1022.9 |
| AHQ-10-4, 6511 - 6545  | K.SADFVVEAIGDDVDTLGFVSGVGSQAQ.I | 2696.90399 | 3 | 1.37E-04 | 0.84 | 3.58 | - | 875.6  |
| AHQ-10-2, 6523 - 6588  | K.SADFVVEAIGDDVDTLGFVSGVGSQAQ.I | 2696.90399 | 2 | 2.44E-04 | 0.90 | 3.70 | - | 1059.7 |
| AHQ-10-5, 6323 - 6384  | K.SADFVVEAIGDDVDTLGFVSGVGSQAQ.I | 2696.90399 | 2 | 7.12E-06 | 0.89 | 3.57 | - | 881.9  |
| AHQ-10-3, 6513         | K.SADFVVEAIGDDVDTLGFVSGVGSQAQ.I | 2696.90399 | 3 | 7.87E-04 | 0.77 | 3.40 | - | 762.7  |
| AHQ-10-2, 6406 - 6470  | K.SADFVVEAIGDDVDTLGFVSGVGSQAQ.I | 2696.90399 | 3 | 1.65E-04 | 0.90 | 4.15 | - | 1223.6 |
| AHQ-10-2, 3914         | R.SAGQGEVLLVYVEDPAGHQEEAK.V     | 2314.45074 | 2 | 4.57E-07 | 0.91 | 4.12 | - | 750.9  |
| AHQ-10-1, 4005         | R.SAGQGEVLLVYVEDPAGHQEEAK.V     | 2314.45074 | 3 | 3.23E-10 | 0.96 | 5.03 | - | 1635.8 |
| AHQ-10-5, 3848         | R.SAGQGEVLLVYVEDPAGHQEEAK.V     | 2314.45074 | 2 | 3.98E-07 | 0.88 | 4.34 | - | 513.7  |
| AHQ-10-3, 3841         | R.SAGQGEVLLVYVEDPAGHQEEAK.V     | 2314.45074 | 3 | 4.03E-07 | 0.80 | 3.47 | - | 661.4  |
| AHQ-10-3, 3842         | R.SAGQGEVLLVYVEDPAGHQEEAK.V     | 2314.45074 | 2 | 4.45E-06 | 0.87 | 3.64 | - | 580.6  |
| AHQ-10-2, 3912 - 3979  | R.SAGQGEVLLVYVEDPAGHQEEAK.V     | 2314.45074 | 3 | 4.82E-07 | 0.90 | 3.68 | - | 1193.4 |
| AHQ-10-1, 4006         | R.SAGQGEVLLVYVEDPAGHQEEAK.V     | 2314.45074 | 2 | 7.47E-06 | 0.90 | 4.22 | - | 654.7  |
| AHQ-10-6, 3784         | R.SAGQGEVLLVYVEDPAGHQEEAK.V     | 2314.45074 | 2 | 1.68E-06 | 0.91 | 4.40 | - | 637.2  |
| AHQ-10-6, 3776         | R.SAGQGEVLLVYVEDPAGHQEEAK.V     | 2314.45074 | 3 | 3.56E-07 | 0.90 | 3.76 | - | 1220.4 |
| AHQ-10-5, 3847 - 3855  | R.SAGQGEVLLVYVEDPAGHQEEAK.V     | 2314.45074 | 3 | 5.72E-09 | 0.93 | 4.67 | - | 1090.3 |
| AHQ-10-4, 3871         | R.SAGQGEVLLVYVEDPAGHQEEAK.V     | 2314.45074 | 2 | 5.24E-05 | 0.88 | 4.31 | - | 549.5  |
| AHQ-10-7, 3764         | R.SAGQGEVLLVYVEDPAGHQEEAK.V     | 2314.45074 | 2 | 5.91E-07 | 0.92 | 4.25 | - | 638.3  |
| AHQ-10-1, 3590         | K.SPFEVYVDK.S                   | 1084.20321 | 2 | 1.48E-05 | 0.90 | 3.05 | - | 1017.4 |
| AHQ-10-3, 3415         | K.SPFEVYVDK.S                   | 1084.20321 | 2 | 8.69E-06 | 0.93 | 3.54 | - | 1135.3 |
| AHQ-10-5, 3409         | K.SPFEVYVDK.S                   | 1084.20321 | 1 | 2.09E-04 | 0.86 | 2.69 | - | 1224.9 |
| AHQ-10-5, 3403 - 3404  | K.SPFEVYVDK.S                   | 1084.20321 | 2 | 4.34E-06 | 0.95 | 3.16 | - | 1302.1 |
| AHQ-10-2, 3474         | K.SPFEVYVDK.S                   | 1084.20321 | 2 | 3.24E-06 | 0.92 | 3.14 | - | 1084.8 |
| AHQ-10-4, 3424         | K.SPFEVYVDK.S                   | 1084.20321 | 2 | 7.62E-07 | 0.92 | 3.18 | - | 1195.8 |
| AHQ-10-2, 3486         | K.SPFEVYVDK.S                   | 1084.20321 | 1 | 3.47E-05 | 0.87 | 3.08 | - | 1034.0 |
| AHQ-10-4, 3427         | K.SPFEVYVDK.S                   | 1084.20321 | 1 | 5.60E-04 | 0.66 | 2.37 | - | 869.5  |
| AHQ-10-1, 3598         | K.SPFEVYVDK.S                   | 1084.20321 | 1 | 3.80E-04 | 0.74 | 2.67 | - | 919.7  |
| AHQ-10-2, 4719 - 4774  | K.SPFSVAVSPSLDLSK.I             | 1534.73557 | 2 | 1.35E-05 | 0.87 | 3.22 | - | 998.3  |
| AHQ-10-5, 4637 - 4716  | K.SPFSVAVSPSLDLSK.I             | 1534.73557 | 2 | 1.19E-05 | 0.89 | 3.58 | - | 919.2  |
| AHQ-10-2, 4626         | K.SPFSVAVSPSLDLSK.I             | 1534.73557 | 2 | 2.91E-05 | 0.82 | 3.11 | - | 412.0  |
| AHQ-10-4, 4680 - 4739  | K.SPFSVAVSPSLDLSK.I             | 1534.73557 | 2 | 7.75E-06 | 0.88 | 3.61 | - | 958.1  |
| AHQ-10-3, 4554 - 4634  | K.SPFSVAVSPSLDLSK.I             | 1534.73557 | 2 | 8.88E-07 | 0.88 | 3.30 | - | 915.2  |
| AHQ-10-3, 4686 - 4754  | K.SPFSVAVSPSLDLSK.I             | 1534.73557 | 2 | 3.46E-06 | 0.89 | 3.95 | - | 823.6  |
| AHQ-10-1, 3546         | R.SPYTIVTGGACNPSACR.A           | 1871.04208 | 2 | 6.84E-04 | 0.92 | 4.36 | - | 558.0  |
| AHQ-10-6, 3277 - 3335  | R.SPYTIVTGGACNPSACR.A           | 1871.04208 | 2 | 4.49E-06 | 0.85 | 3.55 | - | 401.7  |
| AHQ-10-5, 3375 - 3384  | R.SPYTIVTGGACNPSACR.A           | 1871.04208 | 2 | 2.00E-06 | 0.93 | 4.29 | - | 585.4  |
| AHQ-10-7, 3317         | R.SPYTIVTGGACNPSACR.A           | 1871.04208 | 2 | 7.92E-05 | 0.82 | 3.31 | - | 435.5  |
| AHQ-10-3, 3346 - 3401  | R.SPYTIVTGGACNPSACR.A           | 1871.04208 | 2 | 5.07E-07 | 0.82 | 3.48 | - | 445.4  |
| AHQ-10-1, 4981         | R.TFSVWVYVPEVTGTHK.V            | 1751.96228 | 3 | 1.37E-05 | 0.64 | 3.06 | - | 386.1  |
| AHQ-10-2, 4902 - 4907  | R.TFSVWVYVPEVTGTHK.V            | 1751.96228 | 3 | 3.64E-06 | 0.75 | 3.37 | - | 557.2  |
| AHQ-10-6, 3072         | K.TGVAVNKPAEFTVDAK.H            | 1647.85391 | 2 | 6.07E-04 | 0.85 | 3.59 | - | 502.5  |
| AHQ-10-5, 3099         | K.TGVAVNKPAEFTVDAK.H            | 1647.85391 | 2 | 4.48E-04 | 0.91 | 3.87 | - | 798.0  |
| AHQ-10-3, 3130         | K.TGVAVNKPAEFTVDAK.H            | 1647.85391 | 3 | 5.76E-07 | 0.86 | 3.67 | - | 770.7  |
| AHQ-10-4, 3119         | K.TGVAVNKPAEFTVDAK.H            | 1647.85391 | 3 | 1.70E-06 | 0.91 | 3.97 | - | 926.4  |
| AHQ-10-1, 3317         | K.TGVAVNKPAEFTVDAK.H            | 1647.85391 | 3 | 6.33E-07 | 0.92 | 3.79 | - | 1106.0 |
| AHQ-10-2, 3050 - 3130  | R.TGVELGKPTHFTVNAK.A            | 1699.93205 | 3 | 6.77E-06 | 0.84 | 4.50 | - | 574.4  |
| AHQ-10-1, 3206 - 3265  | R.TGVELGKPTHFTVNAK.A            | 1699.93205 | 2 | 6.99E-05 | 0.90 | 4.11 | - | 591.8  |
| AHQ-10-2, 3047 - 3126  | R.TGVELGKPTHFTVNAK.A            | 1699.93205 | 2 | 3.34E-05 | 0.93 | 4.34 | - | 774.6  |
| AHQ-10-3, 3139         | K.THEAIEVEGENHTYCI.R.F          | 2060.19046 | 3 | 4.93E-06 | 0.90 | 3.85 | - | 1057.7 |
| AHQ-10-6, 3080         | K.THEAIEVEGENHTYCI.R.F          | 2060.19046 | 3 | 4.65E-09 | 0.94 | 4.23 | - | 1331.7 |
| AHQ-10-6, 3077 - 3085  | K.THEAIEVEGENHTYCI.R.F          | 2060.19046 | 2 | 6.39E-04 | 0.97 | 4.69 | - | 2229.2 |
| AHQ-10-1, 3314         | K.THEAIEVEGENHTYCI.R.F          | 2060.19046 | 3 | 3.41E-07 | 0.93 | 4.46 | - | 1051.5 |
| AHQ-10-1, 3430         | K.THEAIEVEGENHTYCI.R.F          | 2060.19046 | 3 | 6.95E-09 | 0.84 | 3.59 | - | 633.3  |
| AHQ-10-4, 3259         | K.THEAIEVEGENHTYCI.R.F          | 2060.19046 | 3 | 2.59E-07 | 0.95 | 4.37 | - | 1405.2 |
| AHQ-10-5, 3101         | K.THEAIEVEGENHTYCI.R.F          | 2060.19046 | 2 | 2.87E-05 | 0.98 | 5.23 | - | 1885.7 |
| AHQ-10-5, 3220         | K.THEAIEVEGENHTYCI.R.F          | 2060.19046 | 3 | 2.62E-09 | 0.90 | 3.94 | - | 1123.9 |
| AHQ-10-4, 3085 - 3151  | K.THEAIEVEGENHTYCI.R.F          | 2060.19046 | 3 | 9.06E-13 | 0.96 | 5.22 | - | 1277.3 |
| AHQ-10-2, 3198         | K.THEAIEVEGENHTYCI.R.F          | 2060.19046 | 3 | 1.14E-07 | 0.92 | 4.33 | - | 1108.6 |
| AHQ-10-2, 3754         | K.THIQDNHDGTYTVAYVDPVTGR.Y      | 2460.60076 | 2 | 1.46E-07 | 0.80 | 3.16 | - | 448.9  |
| AHQ-10-4, 3159         | R.TPCEEILVK.H                   | 1090.27249 | 2 | 2.21E-04 | 0.81 | 3.03 | - | 717.2  |
| AHQ-10-3, 3175 - 3247  | R.TPCEEILVK.H                   | 1090.27249 | 2 | 3.54E-06 | 0.86 | 2.94 | - | 742.2  |
| AHQ-10-14, 3154        | R.TPCEEILVK.H                   | 1090.27249 | 1 | 3.62E-06 | 0.57 | 2.61 | - | 414.7  |

|                         |                                         |            |   |          |      |      |   |        |
|-------------------------|-----------------------------------------|------------|---|----------|------|------|---|--------|
| AHQ-10-14-, 3140 - 3169 | R.TPCEEILVK.H                           | 1090.27249 | 2 | 3.03E-04 | 0.85 | 2.60 | - | 950.7  |
| AHQ-10-5, 3149          | R.TPCEEILVK.H                           | 1090.27249 | 2 | 1.52E-05 | 0.89 | 3.42 | - | 747.8  |
| AHQ-10-11, 3110         | R.TPCEEILVK.H                           | 1090.27249 | 2 | 5.23E-05 | 0.80 | 2.92 | - | 661.6  |
| AHQ-10-1, 3354          | R.TPCEEILVK.H                           | 1090.27249 | 2 | 1.78E-05 | 0.90 | 3.40 | - | 824.4  |
| AHQ-10-2, 3186          | R.VANPSGNLTETYVQDR.G                    | 1764.87462 | 2 | 3.44E-07 | 0.90 | 3.53 | - | 824.9  |
| AHQ-10-4, 3127          | R.VANPSGNLTETYVQDR.G                    | 1764.87462 | 2 | 8.69E-06 | 0.73 | 2.72 | - | 731.3  |
| AHQ-10-7, 3216          | R.VANPSGNLTETYVQDR.G                    | 1764.87462 | 2 | 7.39E-05 | 0.86 | 3.55 | - | 522.9  |
| AHQ-10-5, 3261 - 3329   | R.VANPSGNLTETYVQDR.G                    | 1764.87462 | 2 | 3.33E-13 | 0.92 | 4.39 | - | 600.0  |
| AHQ-10-3, 3382          | R.VANPSGNLTETYVQDR.G                    | 1764.87462 | 2 | 6.46E-04 | 0.68 | 2.92 | - | 416.9  |
| AHQ-10-2, 3315 - 3374   | R.VANPSGNLTETYVQDR.G                    | 1764.87462 | 2 | 7.98E-12 | 0.93 | 4.31 | - | 902.6  |
| AHQ-10-3, 3265 - 3341   | R.VANPSGNLTETYVQDR.G                    | 1764.87462 | 2 | 2.44E-10 | 0.95 | 4.65 | - | 948.4  |
| AHQ-10-1, 3453 - 3509   | R.VANPSGNLTETYVQDR.G                    | 1764.87462 | 2 | 1.53E-11 | 0.97 | 5.05 | - | 1414.7 |
| AHQ-10-6, 3220 - 3301   | R.VANPSGNLTETYVQDR.G                    | 1764.87462 | 2 | 2.35E-11 | 0.95 | 4.56 | - | 1016.3 |
| AHQ-10-4, 3284 - 3359   | R.VANPSGNLTETYVQDR.G                    | 1764.87462 | 2 | 4.17E-07 | 0.85 | 3.60 | - | 639.4  |
| AHQ-10-2, 3434 - 3494   | R.VANPSGNLTETYVQDR.G                    | 1764.87462 | 2 | 9.76E-11 | 0.95 | 4.64 | - | 954.0  |
| AHQ-10-5, 2675          | K.VAQPTITDNKDGTVTVR.Y                   | 1816.00621 | 2 | 8.69E-07 | 0.92 | 4.18 | - | 703.1  |
| AHQ-10-8, 2809          | K.VAQPTITDNKDGTVTVR.Y                   | 1816.00621 | 2 | 8.35E-04 | 0.84 | 3.48 | - | 554.3  |
| AHQ-10-5, 2864          | K.VAQPTITDNKDGTVTVR.Y                   | 1816.00621 | 2 | 5.14E-06 | 0.80 | 3.31 | - | 611.8  |
| AHQ-10-4, 2852          | K.VAQPTITDNKDGTVTVR.Y                   | 1816.00621 | 2 | 3.62E-07 | 0.91 | 3.97 | - | 725.5  |
| AHQ-10-3, 2706          | K.VAQPTITDNKDGTVTVR.Y                   | 1816.00621 | 2 | 2.14E-05 | 0.77 | 3.04 | - | 568.4  |
| AHQ-10-2, 2958          | K.VAQPTITDNKDGTVTVR.Y                   | 1816.00621 | 2 | 4.38E-05 | 0.89 | 3.39 | - | 763.7  |
| AHQ-10-4, 2660          | K.VAQPTITDNKDGTVTVR.Y                   | 1816.00621 | 2 | 3.39E-07 | 0.92 | 3.85 | - | 961.0  |
| AHQ-10-4, 3255          | K.VDINTEDLEDGTGR.V                      | 1638.69283 | 2 | 6.55E-06 | 0.78 | 2.91 | - | 1045.1 |
| AHQ-10-13-, 3490        | K.VDINTEDLEDGTGR.V                      | 1638.69283 | 2 | 2.88E-06 | 0.75 | 2.57 | - | 827.5  |
| AHQ-10-7, 3433          | K.VDINTEDLEDGTGR.V                      | 1638.69283 | 2 | 3.62E-05 | 0.84 | 3.09 | - | 966.6  |
| AHQ-10-5, 3236 - 3316   | K.VDINTEDLEDGTGR.V                      | 1638.69283 | 2 | 3.51E-07 | 0.94 | 3.85 | - | 1250.6 |
| AHQ-10-6, 3431          | K.VDINTEDLEDGTGR.V                      | 1638.69283 | 2 | 2.58E-06 | 0.85 | 3.31 | - | 879.2  |
| AHQ-10-4, 3515 - 3572   | K.VDINTEDLEDGTGR.V                      | 1638.69283 | 2 | 2.71E-06 | 0.94 | 4.22 | - | 1334.8 |
| AHQ-10-8, 3217 - 3282   | K.VDINTEDLEDGTGR.V                      | 1638.69283 | 2 | 9.41E-06 | 0.77 | 2.95 | - | 769.1  |
| AHQ-10-5, 3437 - 3495   | K.VDINTEDLEDGTGR.V                      | 1638.69283 | 2 | 4.91E-05 | 0.95 | 4.31 | - | 1169.3 |
| AHQ-10-4, 3436 - 3507   | K.VDINTEDLEDGTGR.V                      | 1638.69283 | 2 | 3.79E-05 | 0.80 | 3.07 | - | 577.0  |
| AHQ-10-1, 3643          | K.VDINTEDLEDGTGR.V                      | 1638.69283 | 2 | 3.91E-06 | 0.93 | 4.42 | - | 926.2  |
| AHQ-10-2, 3560          | K.VDINTEDLEDGTGR.V                      | 1638.69283 | 2 | 1.54E-06 | 0.92 | 3.78 | - | 1121.6 |
| AHQ-10-6, 3199 - 3272   | K.VDINTEDLEDGTGR.V                      | 1638.69283 | 2 | 5.63E-08 | 0.93 | 3.75 | - | 1287.3 |
| AHQ-10-4, 3349          | K.VDINTEDLEDGTGR.V                      | 1638.69283 | 2 | 1.85E-04 | 0.64 | 2.57 | - | 676.1  |
| AHQ-10-1, 3410          | K.VDINTEDLEDGTGR.V                      | 1638.69283 | 2 | 9.89E-07 | 0.94 | 3.70 | - | 1329.3 |
| AHQ-10-3, 2671          | K.VDVGKQDEFTVK.S                        | 1365.51377 | 2 | 2.92E-08 | 0.90 | 3.51 | - | 718.1  |
| AHQ-10-2, 2719          | K.VDVGKQDEFTVK.S                        | 1365.51377 | 2 | 2.59E-08 | 0.95 | 4.08 | - | 1049.7 |
| AHQ-10-6, 2627          | K.VDVGKQDEFTVK.S                        | 1365.51377 | 2 | 3.33E-06 | 0.80 | 2.98 | - | 652.9  |
| AHQ-10-7, 2625          | K.VDVGKQDEFTVK.S                        | 1365.51377 | 2 | 4.80E-08 | 0.59 | 2.60 | - | 463.4  |
| AHQ-10-1, 2867          | K.VDVGKQDEFTVK.S                        | 1365.51377 | 2 | 6.40E-09 | 0.87 | 3.29 | - | 656.0  |
| AHQ-10-4, 2647          | K.VDVGKQDEFTVK.S                        | 1365.51377 | 2 | 2.21E-08 | 0.89 | 3.50 | - | 783.2  |
| AHQ-10-5, 2773          | K.VEPGLGADNSVVR.F                       | 1313.44209 | 2 | 1.88E-05 | 0.60 | 2.55 | - | 268.8  |
| AHQ-10-1, 2987          | K.VEPGLGADNSVVR.F                       | 1313.44209 | 2 | 4.75E-06 | 0.80 | 3.18 | - | 241.7  |
| AHQ-10-1, 5829 - 5831   | K.VEYTPYEEGLHSVDVTDGSPVSPFPQVPTGCDPSR.V | 4300.57494 | 3 | 5.39E-04 | 0.91 | 5.00 | - | 706.2  |
| AHQ-10-3, 5654 - 5709   | K.VEYTPYEEGLHSVDVTDGSPVSPFPQVPTGCDPSR.V | 4300.57494 | 3 | 3.19E-04 | 0.91 | 5.05 | - | 735.4  |
| AHQ-10-2, 5794 - 5872   | K.VEYTPYEEGLHSVDVTDGSPVSPFPQVPTGCDPSR.V | 4300.57494 | 3 | 1.79E-08 | 0.96 | 6.36 | - | 891.0  |
| AHQ-10-5, 6428          | K.VGSAADIPINISSETDL.SLLTATVPPSGR.E      | 2895.25495 | 2 | 8.85E-08 | 0.94 | 5.13 | - | 743.3  |
| AHQ-10-5, 6369 - 6427   | K.VGSAADIPINISSETDL.SLLTATVPPSGR.E      | 2895.25495 | 3 | 6.70E-04 | 0.86 | 4.51 | - | 471.6  |
| AHQ-10-2, 6450          | K.VGSAADIPINISSETDL.SLLTATVPPSGR.E      | 2895.25495 | 3 | 9.65E-08 | 0.83 | 4.28 | - | 386.9  |
| AHQ-10-5, 4248          | K.VHSPSGALEECYVTEIDQDK.Y                | 2279.42322 | 2 | 5.45E-10 | 0.97 | 5.55 | - | 1521.1 |
| AHQ-10-4, 4288          | K.VHSPSGALEECYVTEIDQDK.Y                | 2279.42322 | 2 | 1.65E-04 | 0.95 | 4.89 | - | 1044.0 |
| AHQ-10-4, 4251 - 4292   | K.VHSPSGALEECYVTEIDQDK.Y                | 2279.42322 | 3 | 5.12E-05 | 0.94 | 4.54 | - | 1618.0 |
| AHQ-10-5, 4241          | K.VHSPSGALEECYVTEIDQDK.Y                | 2279.42322 | 3 | 7.21E-09 | 0.96 | 4.60 | - | 2197.2 |
| AHQ-10-7, 4153          | K.VHSPSGALEECYVTEIDQDK.Y                | 2279.42322 | 2 | 8.87E-08 | 0.96 | 5.39 | - | 1096.8 |
| AHQ-10-3, 4262          | K.VHSPSGALEECYVTEIDQDK.Y                | 2279.42322 | 2 | 1.47E-05 | 0.87 | 3.76 | - | 864.1  |
| AHQ-10-1, 4397          | K.VHSPSGALEECYVTEIDQDK.Y                | 2279.42322 | 3 | 3.58E-05 | 0.91 | 3.88 | - | 1477.2 |
| AHQ-10-2, 4647          | K.VHSPSGALEECYVTEIDQDKYAVR.F            | 2768.99349 | 3 | 3.22E-09 | 0.84 | 3.98 | - | 486.1  |
| AHQ-10-5, 4544          | K.VHSPSGALEECYVTEIDQDKYAVR.F            | 2768.99349 | 3 | 3.53E-09 | 0.83 | 4.47 | - | 471.9  |
| AHQ-10-4, 4549 - 4616   | K.VHSPSGALEECYVTEIDQDKYAVR.F            | 2768.99349 | 3 | 1.45E-08 | 0.85 | 4.10 | - | 535.0  |
| AHQ-10-3, 4566          | K.VHSPSGALEECYVTEIDQDKYAVR.F            | 2768.99349 | 3 | 9.68E-11 | 0.81 | 3.76 | - | 520.9  |
| AHQ-10-8, 4495          | K.VHSPSGALEECYVTEIDQDKYAVR.F            | 2768.99349 | 3 | 9.05E-05 | 0.87 | 3.98 | - | 619.4  |
| AHQ-10-4, 3664 - 3723   | K.VNQPASFAVSLNGAK.G                     | 1503.68480 | 2 | 1.85E-06 | 0.90 | 3.99 | - | 539.1  |
| AHQ-10-5, 3776 - 3843   | K.VNQPASFAVSLNGAK.G                     | 1503.68480 | 2 | 3.64E-08 | 0.86 | 3.55 | - | 607.6  |
| AHQ-10-3, 3653 - 3710   | K.VNQPASFAVSLNGAK.G                     | 1503.68480 | 2 | 3.76E-08 | 0.86 | 3.66 | - | 549.3  |
| AHQ-10-8, 3599          | K.VNQPASFAVSLNGAK.G                     | 1503.68480 | 2 | 1.09E-06 | 0.76 | 2.98 | - | 573.4  |
| AHQ-10-7, 3582 - 3640   | K.VNQPASFAVSLNGAK.G                     | 1503.68480 | 2 | 8.07E-05 | 0.77 | 3.28 | - | 428.2  |
| AHQ-10-2, 3736          | K.VNQPASFAVSLNGAK.G                     | 1503.68480 | 2 | 5.83E-07 | 0.83 | 3.11 | - | 475.1  |
| AHQ-10-5, 3651 - 3711   | K.VNQPASFAVSLNGAK.G                     | 1503.68480 | 2 | 2.99E-08 | 0.91 | 4.08 | - | 607.9  |
| AHQ-10-4, 3797 - 3855   | K.VNQPASFAVSLNGAK.G                     | 1503.68480 | 2 | 1.05E-08 | 0.89 | 3.82 | - | 562.0  |
| AHQ-10-1, 3818 - 3873   | K.VNQPASFAVSLNGAK.G                     | 1503.68480 | 2 | 9.81E-09 | 0.93 | 4.08 | - | 791.5  |
| AHQ-10-6, 3592 - 3651   | K.VNQPASFAVSLNGAK.G                     | 1503.68480 | 2 | 5.29E-08 | 0.90 | 3.94 | - | 693.9  |
| AHQ-10-3, 1807          | K.VPVDVTDASK.V                          | 1168.28175 | 2 | 4.33E-07 | 0.84 | 2.87 | - | 876.9  |
| AHQ-10-2, 1816          | K.VPVDVTDASK.V                          | 1168.28175 | 2 | 2.71E-06 | 0.91 | 3.33 | - | 923.4  |
| AHQ-10-3, 3931 - 3989   | R.VQVQDNEGPCVEALVK.D                    | 1786.98493 | 2 | 3.40E-05 | 0.91 | 4.12 | - | 770.0  |
| AHQ-10-1, 4143 - 4218   | R.VQVQDNEGPCVEALVK.D                    | 1786.98493 | 2 | 5.94E-06 | 0.93 | 4.28 | - | 1002.8 |
| AHQ-10-5, 4004          | R.VQVQDNEGPCVEALVK.D                    | 1786.98493 | 2 | 8.48E-06 | 0.93 | 4.08 | - | 972.5  |
| AHQ-10-2, 4056 - 4126   | R.VQVQDNEGPCVEALVK.D                    | 1786.98493 | 2 | 2.05E-06 | 0.96 | 4.76 | - | 1292.8 |
| AHQ-10-4, 3952 - 4027   | R.VQVQDNEGPCVEALVK.D                    | 1786.98493 | 2 | 4.47E-05 | 0.97 | 4.89 | - | 1473.3 |
| AHQ-10-2, 4894 - 4950   | R.VQVQDNEGPCVEALVKDNGNGTYSYVPR.K        | 3359.60342 | 3 | 1.99E-07 | 0.94 | 4.85 | - | 1445.6 |
| AHQ-10-3, 4813 - 4869   | R.VQVQDNEGPCVEALVKDNGNGTYSYVPR.K        | 3359.60342 | 3 | 1.58E-08 | 0.95 | 5.34 | - | 1478.8 |
| AHQ-10-1, 4953 - 5009   | R.VQVQDNEGPCVEALVKDNGNGTYSYVPR.K        | 3359.60342 | 3 | 5.54E-08 | 0.95 | 5.39 | - | 1346.2 |
| AHQ-10-3, 4657          | R.VSGQGLHEGHTFPAEFIIDTR.D               | 2441.64058 | 3 | 1.74E-09 | 0.96 | 5.47 | - | 1359.9 |
| AHQ-10-8, 4558          | R.VSGQGLHEGHTFPAEFIIDTR.D               | 2441.64058 | 3 | 1.31E-09 | 0.97 | 5.95 | - | 1570.4 |
| AHQ-10-8, 4562          | R.VSGQGLHEGHTFPAEFIIDTR.D               | 2441.64058 | 2 | 2.79E-04 | 0.84 | 3.96 | - | 406.1  |
| AHQ-10-6, 4556          | R.VSGQGLHEGHTFPAEFIIDTR.D               | 2441.64058 | 3 | 8.77E-07 | 0.92 | 4.73 | - | 989.2  |
| AHQ-10-5, 4615 - 4675   | R.VSGQGLHEGHTFPAEFIIDTR.D               | 2441.64058 | 3 | 1.36E-07 | 0.96 | 5.41 | - | 1204.0 |
| AHQ-10-5, 4623 - 4660   | R.VSGQGLHEGHTFPAEFIIDTR.D               | 2441.64058 | 2 | 2.97E-04 | 0.91 | 4.48 | - | 590.9  |
| AHQ-10-2, 4730          | R.VSGQGLHEGHTFPAEFIIDTR.D               | 2441.64058 | 3 | 1.20E-05 | 0.91 | 4.37 | - | 885.7  |
| AHQ-10-1, 4805 - 4862   | R.VSGQGLHEGHTFPAEFIIDTR.D               | 2441.64058 | 3 | 2.88E-06 | 0.96 | 5.31 | - | 1447.5 |
| AHQ-10-1, 2961          | K.VTAQGPGLPESGNIANK.T                   | 1653.81855 | 2 | 7.22E-05 | 0.81 | 3.72 | - | 457.9  |
| AHQ-10-2, 2803 - 2868   | K.VTAQGPGLPESGNIANK.T                   | 1653.81855 | 2 | 1.16E-05 | 0.91 | 4.93 | - | 446.2  |
| AHQ-10-4, 2740 - 2809   | K.VTAQGPGLPESGNIANK.T                   | 1653.81855 | 2 | 2.07E-04 | 0.90 | 4.35 | - | 485.8  |
| AHQ-10-5, 2861 - 2935   | K.VTAQGPGLPESGNIANK.T                   | 1653.81855 | 2 | 2.09E-04 | 0.63 | 3.64 | - | 302.0  |
| AHQ-10-5, 2725 - 2795   | K.VTAQGPGLPESGNIANK.T                   | 1653.81855 | 2 | 3.46E-05 | 0.91 | 4.59 | - | 572.5  |
| AHQ-10-2, 2926          | K.VTAQGPGLPESGNIANK.T                   | 1653.81855 | 2 | 4.36E-09 | 0.80 | 3.80 | - | 444.7  |
| AHQ-10-3, 2881          | K.VTAQGPGLPESGNIANK.T                   | 1653.81855 | 2 | 4.74E-05 | 0.82 | 3.44 | - | 512.2  |
| AHQ-10-2, 3375 - 3382   | K.VTVLFAQQHIAK.S                        | 1284.53185 | 2 | 5.21E-06 | 0.92 | 3.44 | - | 1045.8 |
| AHQ-10-2, 3384          | K.VTVLFAQQHIAK.S                        | 1284.53185 | 3 | 2.63E-05 | 0.84 | 3.46 | - | 912.5  |
| AHQ-10-4, 3313 - 3385   | K.VTVLFAQQHIAK.S                        | 1284.53185 | 2 | 2.71E-06 | 0.92 | 3.47 | - | 992.1  |
| AHQ-10-5, 3295 - 3365   | K.VTVLFAQQHIAK.S                        | 1284.53185 | 2 | 1.76E-05 | 0.92 | 3.83 | - | 831.6  |
| AHQ-10-7, 3217          | K.VTVLFAQQHIAK.S                        | 1284.53185 | 2 | 9.39E-06 | 0.85 | 3.54 | - | 604.6  |
| AHQ-10-4, 4951          | R.VTYCPTPEPGNYIIK.F                     | 1884.14221 | 2 | 7.85E-04 | 0.56 | 2.72 | - | 248.6  |
| AHQ-10-4, 4823          | R.VTYCPTPEPGNYIIK.F                     | 1884.14221 | 2 | 1.31E-04 | 0.89 | 3.83 | - | 532.7  |
| AHQ-10-3, 4774 - 4775   | R.VTYCPTPEPGNYIIK.F                     | 1884.14221 | 2 | 2.28E-05 | 0.93 | 4.51 | - | 592.2  |
| AHQ-10-2, 4722          | R.VTYCPTPEPGNYIIK.F                     | 1884.14221 | 2 | 1.38E-06 | 0.73 | 3.10 | - | 356.7  |
| AHQ-10-1, 4917          | R.VTYCPTPEPGNYIIK.F                     | 1884.14221 | 2 | 8.05E-04 | 0.83 | 3.33 | - | 384.3  |

|                            |                                                        |            |   |          |       |        |       |          |
|----------------------------|--------------------------------------------------------|------------|---|----------|-------|--------|-------|----------|
| AHQ-10-5, 4756 - 4815      | R.VTYCPTPEPGNYIINIK.F                                  | 1884.14221 | 2 | 3.30E-08 | 0.88  | 3.95   | -     | 415.3    |
| AHQ-10-1, 4770             | R.VTYCPTPEPGNYIINIK.F                                  | 1884.14221 | 2 | 2.42E-11 | 0.81  | 3.10   | -     | 406.5    |
| AHQ-10-4, 4848             | R.VTYCPTPEPGNYIINIK.F                                  | 1884.14221 | 3 | 4.40E-07 | 0.94  | 4.58   | -     | 1138.1   |
| AHQ-10-2, 4854 - 4858      | R.VTYCPTPEPGNYIINIK.F                                  | 1884.14221 | 2 | 1.47E-04 | 0.68  | 2.93   | -     | 338.8    |
| AHQ-10-6, 4572             | R.VTYCPTPEPGNYIINIK.F                                  | 1884.14221 | 2 | 1.10E-06 | 0.79  | 3.23   | -     | 355.4    |
| AHQ-10-3, 4639 - 4718      | R.VTYCPTPEPGNYIINIK.F                                  | 1884.14221 | 2 | 2.40E-08 | 0.82  | 3.67   | -     | 431.1    |
| AHQ-10-5, 4896 - 4931      | R.VTYCPTPEPGNYIINIK.F                                  | 1884.14221 | 2 | 1.16E-09 | 0.89  | 3.91   | -     | 451.3    |
| AHQ-10-4, 4677             | R.VTYCPTPEPGNYIINIK.F                                  | 1884.14221 | 2 | 5.80E-12 | 0.85  | 3.76   | -     | 446.5    |
| AHQ-10-6, 4695 - 4696      | R.VTYTPM'APGSYLSIK.Y                                   | 1758.07165 | 2 | 9.38E-04 | 0.74  | 3.19   | -     | 361.0    |
| AHQ-10-11, 5042 - 5043     | R.VTYTPM'APGSYLSIK.Y                                   | 1742.07225 | 2 | 8.78E-04 | 0.76  | 3.26   | -     | 518.7    |
| AHQ-10-6, 5127             | R.VTYTPM'APGSYLSIK.Y                                   | 1742.07225 | 2 | 6.51E-05 | 0.83  | 3.02   | -     | 698.5    |
| AHQ-10-7, 5121             | R.VTYTPM'APGSYLSIK.Y                                   | 1742.07225 | 2 | 3.84E-04 | 0.55  | 2.56   | -     | 462.4    |
| AHQ-10-3, 5185             | R.VTYTPM'APGSYLSIK.Y                                   | 1742.07225 | 2 | 2.29E-05 | 0.81  | 3.26   | -     | 740.2    |
| AHQ-10-13, 5138            | R.VTYTPM'APGSYLSIK.Y                                   | 1742.07225 | 2 | 4.19E-04 | 0.79  | 2.69   | -     | 650.2    |
| AHQ-10-4, 5240 - 5247      | R.VTYTPM'APGSYLSIK.Y                                   | 1742.07225 | 2 | 1.15E-05 | 0.89  | 3.29   | -     | 951.1    |
| AHQ-10-2, 5282             | R.VTYTPM'APGSYLSIK.Y                                   | 1742.07225 | 2 | 3.80E-04 | 0.77  | 3.00   | -     | 594.5    |
| AHQ-10-5, 3392             | R.YAPSEAGLHEMDIR.Y                                     | 1589.75482 | 2 | 1.99E-04 | 0.45  | 2.66   | -     | 564.0    |
| AHQ-10-8, 3334 - 3341      | R.YAPSEAGLHEMDIR.Y                                     | 1589.75482 | 2 | 1.74E-04 | 0.91  | 3.64   | -     | 928.4    |
| AHQ-10-3, 2745 - 2750      | R.YAPSEAGLHEM'DIR.Y                                    | 1605.75422 | 2 | 4.38E-05 | 0.86  | 3.18   | -     | 952.5    |
| AHQ-10-5, 2719 - 2789      | R.YAPSEAGLHEM'DIR.Y                                    | 1605.75422 | 2 | 9.35E-05 | 0.70  | 2.78   | -     | 661.4    |
| AHQ-10-1, 4261 - 4263      | K.YGGDEIFPSPYR.V                                       | 1401.50466 | 2 | 1.26E-06 | 0.71  | 3.03   | -     | 478.2    |
| AHQ-10-8, 4078 - 4081      | K.YGGDEIFPSPYR.V                                       | 1401.50466 | 2 | 3.98E-05 | 0.77  | 3.34   | -     | 483.8    |
| AHQ-10-10, 3323 - 3331     | K.YGGPYHIGGSPFK.A                                      | 1380.53182 | 2 | 2.52E-05 | 0.54  | 2.82   | -     | 533.2    |
| AHQ-10-6, 3379             | K.YGGPYHIGGSPFK.A                                      | 1380.53182 | 2 | 7.30E-08 | 0.97  | 4.53   | -     | 1898.5   |
| AHQ-10-8, 3347             | K.YGGPYHIGGSPFK.A                                      | 1380.53182 | 2 | 1.18E-07 | 0.97  | 4.29   | -     | 1889.4   |
| AHQ-10-4, 3447             | K.YGGPYHIGGSPFK.A                                      | 1380.53182 | 3 | 1.06E-06 | 0.87  | 4.11   | -     | 523.9    |
| AHQ-10-5, 3412             | K.YGGPYHIGGSPFK.A                                      | 1380.53182 | 2 | 6.20E-07 | 0.95  | 3.77   | -     | 1595.4   |
| AHQ-10-1, 3617             | K.YGGPYHIGGSPFK.A                                      | 1380.53182 | 2 | 1.17E-08 | 0.98  | 4.47   | -     | 2340.9   |
| AHQ-10-11, 3360            | K.YGGPYHIGGSPFK.A                                      | 1380.53182 | 3 | 1.46E-06 | 0.89  | 3.98   | -     | 597.0    |
| AHQ-10-5, 3417             | K.YGGPYHIGGSPFK.A                                      | 1380.53182 | 3 | 4.38E-05 | 0.71  | 3.27   | -     | 455.8    |
| AHQ-10-13, 3456            | K.YGGPYHIGGSPFK.A                                      | 1380.53182 | 2 | 6.54E-07 | 0.86  | 3.30   | -     | 905.9    |
| AHQ-10-4, 3440             | K.YGGPYHIGGSPFK.A                                      | 1380.53182 | 2 | 6.75E-06 | 0.96  | 3.93   | -     | 1654.6   |
| AHQ-10-3, 3439             | K.YGGPYHIGGSPFK.A                                      | 1380.53182 | 2 | 1.05E-07 | 0.93  | 3.47   | -     | 1180.8   |
| AHQ-10-2, 3147 - 3150      | K.YGGQV'PNFNSK.L                                       | 1291.43658 | 1 | 1.85E-04 | 0.33  | 2.25   | -     | 366.0    |
| AHQ-10-4, 3079             | K.YGGQV'PNFNSK.L                                       | 1291.43658 | 2 | 6.35E-06 | 0.89  | 3.38   | -     | 547.3    |
| AHQ-10-1, 3267             | K.YGGQV'PNFNSK.L                                       | 1291.43658 | 2 | 5.93E-04 | 0.91  | 3.45   | -     | 598.2    |
| AHQ-10-3, 3089             | K.YGGQV'PNFNSK.L                                       | 1291.43658 | 2 | 3.28E-07 | 0.92  | 3.80   | -     | 635.6    |
| AHQ-10-5, 3067             | K.YGGQV'PNFNSK.L                                       | 1291.43658 | 2 | 1.98E-05 | 0.65  | 2.75   | -     | 250.4    |
| AHQ-10-2, 3138             | K.YGGQV'PNFNSK.L                                       | 1291.43658 | 2 | 4.72E-07 | 0.94  | 4.06   | -     | 762.0    |
| AHQ-10-5, 4256 - 4257      | K.YKGQHV'GSPFOFTV'GPLGEGGAHK.V                         | 2596.88377 | 3 | 9.51E-08 | 0.88  | 4.18   | -     | 774.5    |
| AHQ-10-3, 4310             | K.YKGQHV'GSPFOFTV'GPLGEGGAHK.V                         | 2596.88377 | 3 | 7.10E-04 | 0.88  | 3.50   | -     | 1117.7   |
| AHQ-10-4, 4296             | K.YKGQHV'GSPFOFTV'GPLGEGGAHK.V                         | 2596.88377 | 3 | 5.37E-05 | 0.77  | 3.64   | -     | 805.6    |
| AHQ-10-2, 3015             | K.YNEQH'VPGSPFTAR.V                                    | 1603.71978 | 2 | 1.75E-06 | 0.82  | 3.46   | -     | 421.8    |
| AHQ-10-4, 2932             | K.YNEQH'VPGSPFTAR.V                                    | 1603.71978 | 2 | 9.68E-06 | 0.90  | 3.08   | -     | 739.8    |
| AHQ-10-1, 3143             | K.YNEQH'VPGSPFTAR.V                                    | 1603.71978 | 2 | 1.60E-07 | 0.86  | 3.11   | -     | 659.6    |
| AHQ-10-1, 3153 - 3154      | K.YNEQH'VPGSPFTAR.V                                    | 1603.71978 | 3 | 2.11E-05 | 0.88  | 4.23   | -     | 785.1    |
| AHQ-10-6, 2899             | K.YNEQH'VPGSPFTAR.V                                    | 1603.71978 | 2 | 2.58E-04 | 0.86  | 3.04   | -     | 661.8    |
| AHQ-10-5, 2923             | K.YNEQH'VPGSPFTAR.V                                    | 1603.71978 | 2 | 2.97E-05 | 0.88  | 3.20   | -     | 851.5    |
| AHQ-10-3, 2955             | K.YNEQH'VPGSPFTAR.V                                    | 1603.71978 | 2 | 1.16E-05 | 0.87  | 3.28   | -     | 639.3    |
| AHQ-10-8, 2834             | K.YNEQH'VPGSPFTAR.V                                    | 1603.71978 | 2 | 8.43E-04 | 0.68  | 2.74   | -     | 385.6    |
| AHQ-10-8, 2837             | K.YNEQH'VPGSPFTAR.V                                    | 1603.71978 | 3 | 5.74E-07 | 0.91  | 4.19   | -     | 998.9    |
| AHQ-10-4, 2935             | K.YNEQH'VPGSPFTAR.V                                    | 1603.71978 | 3 | 1.03E-07 | 0.95  | 4.98   | -     | 1265.9   |
| AHQ-10-5, 3092             | K.YNEQH'VPGSPFTAR.V                                    | 1603.71978 | 3 | 5.62E-04 | 0.88  | 3.71   | -     | 1022.1   |
| AHQ-10-3, 4281 - 4338      | K.YTPVQQ'G'PVGVNNTY'GGDPIPK.S                          | 2287.55640 | 2 | 2.12E-06 | 0.95  | 4.49   | -     | 1206.0   |
| AHQ-10-3, 4419             | K.YTPVQQ'G'PVGVNNTY'GGDPIPK.S                          | 2287.55640 | 2 | 9.75E-08 | 0.85  | 3.71   | -     | 665.9    |
| AHQ-10-5, 4353 - 4355      | K.YTPVQQ'G'PVGVNNTY'GGDPIPK.S                          | 2287.55640 | 2 | 2.23E-06 | 0.91  | 4.47   | -     | 475.2    |
| AHQ-10-2, 4496             | K.YTPVQQ'G'PVGVNNTY'GGDPIPK.S                          | 2287.55640 | 2 | 2.57E-07 | 0.91  | 4.28   | -     | 530.4    |
| AHQ-10-1, 4422 - 4477      | K.YTPVQQ'G'PVGVNNTY'GGDPIPK.S                          | 2287.55640 | 2 | 4.34E-05 | 0.94  | 4.75   | -     | 753.4    |
| AHQ-10-4, 4471             | K.YTPVQQ'G'PVGVNNTY'GGDPIPK.S                          | 2287.55640 | 2 | 2.16E-04 | 0.86  | 3.83   | -     | 532.3    |
| AHQ-10-6, 4261             | K.YTPVQQ'G'PVGVNNTY'GGDPIPK.S                          | 2287.55640 | 2 | 4.97E-06 | 0.90  | 4.00   | -     | 574.6    |
| AHQ-10-4, 4309 - 4363      | K.YTPVQQ'G'PVGVNNTY'GGDPIPK.S                          | 2287.55640 | 2 | 5.67E-06 | 0.94  | 4.54   | -     | 802.0    |
| AHQ-10-2, 4212 - 4254      | K.YTPVQQ'G'PVGVNNTY'GGDPIPK.S                          | 2287.55640 | 2 | 1.32E-06 | 0.91  | 4.11   | -     | 551.8    |
| AHQ-10-2, 4347 - 4410      | K.YTPVQQ'G'PVGVNNTY'GGDPIPK.S                          | 2287.55640 | 2 | 1.31E-08 | 0.96  | 4.94   | -     | 958.6    |
| AHQ-10-1, 4598             | K.YTPVQQ'G'PVGVNNTY'GGDPIPK.S                          | 2287.55640 | 2 | 1.76E-05 | 0.71  | 3.05   | -     | 330.3    |
| AHQ-10-1, 4478             | K.YTPVQQ'G'PVGVNNTY'GGDPIPK.S                          | 2287.55640 | 3 | 5.65E-05 | 0.86  | 3.67   | -     | 1051.4   |
| AHQ-10-7, 4246 - 4252      | K.YTPVQQ'G'PVGVNNTY'GGDPIPK.S                          | 2287.55640 | 2 | 5.25E-06 | 0.94  | 4.82   | -     | 756.9    |
| AHQ-10-1, 4313             | K.YTPVQQ'G'PVGVNNTY'GGDPIPK.S                          | 2287.55640 | 2 | 6.27E-04 | 0.65  | 2.91   | -     | 297.0    |
| AHQ-10-2, 6163             | R.YWPQEA'GEYAVH'VLCNS'EDIR.L                           | 2538.73318 | 2 | 6.45E-08 | 0.69  | 3.10   | -     | 452.0    |
| AHQ-10-2, 6139 - 6196      | R.YWPQEA'GEYAVH'VLCNS'EDIR.L                           | 2538.73318 | 3 | 2.07E-07 | 0.62  | 3.10   | -     | 537.4    |
| AHQ-10-2, 5816 - 5870      | R.YWPQEA'GEYAVH'VLCNS'EDIR.L                           | 2538.73318 | 2 | 1.85E-07 | 0.70  | 2.75   | -     | 607.8    |
| gij1266778[ref]NP_002464.1 | myosin, heavy polypeptide 9, non-muscle [Homo sapiens] |            |   | 8.33E-15 | 82.67 | 940.35 | 41.70 | 226529.8 |
| AHQ-10-5, 2091             | R.ALEEA'EQK.A                                          | 1049.18068 | 2 | 5.72E-04 | 0.78  | 2.71   | -     | 780.7    |
| AHQ-10-2, 2188             | R.ALEEA'EQK.A                                          | 1049.18068 | 2 | 5.72E-04 | 0.80  | 3.15   | -     | 660.6    |
| AHQ-10-5, 3691             | K.ALELDS'NLYR.I                                        | 1194.31920 | 2 | 1.89E-06 | 0.92  | 3.36   | -     | 1192.0   |
| AHQ-10-2, 3766 - 3770      | K.ALELDS'NLYR.I                                        | 1194.31920 | 2 | 1.82E-06 | 0.94  | 3.77   | -     | 1273.2   |
| AHQ-10-4, 3715             | K.ALELDS'NLYR.I                                        | 1194.31920 | 2 | 2.02E-06 | 0.90  | 3.53   | -     | 952.9    |
| AHQ-10-3, 3689             | K.ALELDS'NLYR.I                                        | 1194.31920 | 2 | 1.57E-06 | 0.96  | 4.04   | -     | 1406.6   |
| AHQ-10-2, 3650             | K.ALELDS'NLYR.I                                        | 1194.31920 | 2 | 8.41E-08 | 0.96  | 4.02   | -     | 1777.5   |
| AHQ-10-1, 3861 - 3865      | K.ALELDS'NLYR.I                                        | 1194.31920 | 2 | 1.34E-07 | 0.95  | 3.99   | -     | 1273.6   |
| AHQ-10-4, 2200             | R.ALEQQ'VEEM'K.T                                       | 1221.36320 | 2 | 6.08E-05 | 0.79  | 3.14   | -     | 751.9    |
| AHQ-10-5, 2928             | R.ALEQQ'VEEM'K.T                                       | 1205.36380 | 2 | 3.94E-05 | 0.87  | 3.27   | -     | 1012.4   |
| AHQ-10-3, 2873 - 2945      | R.ALEQQ'VEEM'K.T                                       | 1205.36380 | 2 | 4.15E-04 | 0.75  | 2.94   | -     | 720.0    |
| AHQ-10-4, 2933             | R.ALEQQ'VEEM'K.T                                       | 1205.36380 | 2 | 1.82E-04 | 0.89  | 3.35   | -     | 1105.2   |
| AHQ-10-2, 2995             | R.ALEQQ'VEEM'K.T                                       | 1205.36380 | 2 | 2.71E-05 | 0.91  | 3.24   | -     | 1320.9   |
| AHQ-10-2, 2258 - 2259      | R.ALEQQ'VEEM'K.T                                       | 1221.36320 | 2 | 3.90E-06 | 0.84  | 3.81   | -     | 692.8    |
| AHQ-10-6, 2896             | R.ALEQQ'VEEM'K.T                                       | 1205.36380 | 2 | 4.88E-06 | 0.89  | 3.68   | -     | 947.9    |
| AHQ-10-3, 5870 - 5950      | R.ALEQQ'VEEM'K'TQLEEELEDELQATEDAK.L                    | 3165.38394 | 3 | 1.34E-05 | 0.98  | 6.96   | -     | 2082.2   |
| AHQ-10-4, 5895 - 5963      | R.ALEQQ'VEEM'K'TQLEEELEDELQATEDAK.L                    | 3165.38394 | 3 | 4.95E-06 | 0.95  | 5.15   | -     | 1355.4   |
| AHQ-10-2, 5954 - 5998      | R.ALEQQ'VEEM'K'TQLEEELEDELQATEDAK.L                    | 3165.38394 | 3 | 4.31E-11 | 0.97  | 6.46   | -     | 1656.2   |
| AHQ-10-2, 5043             | K.ANLQIDQ'INTDLNLER.S                                  | 1871.04187 | 2 | 1.33E-06 | 0.96  | 4.36   | -     | 1365.3   |
| AHQ-10-7, 4708             | K.ANLQIDQ'INTDLNLER.S                                  | 1871.04187 | 2 | 5.07E-06 | 0.95  | 4.32   | -     | 1230.3   |
| AHQ-10-2, 4582 - 4659      | K.ANLQIDQ'INTDLNLER.S                                  | 1871.04187 | 2 | 6.39E-12 | 0.97  | 5.78   | -     | 1210.4   |
| AHQ-10-3, 4782             | K.ANLQIDQ'INTDLNLER.S                                  | 1871.04187 | 3 | 5.50E-05 | 0.97  | 5.74   | -     | 2120.4   |
| AHQ-10-1, 4921             | K.ANLQIDQ'INTDLNLER.S                                  | 1871.04187 | 2 | 3.66E-08 | 0.93  | 4.38   | -     | 814.2    |
| AHQ-10-2, 4702             | K.ANLQIDQ'INTDLNLER.S                                  | 1871.04187 | 2 | 7.70E-04 | 0.94  | 4.24   | -     | 953.8    |
| AHQ-10-6, 4656 - 4723      | K.ANLQIDQ'INTDLNLER.S                                  | 1871.04187 | 2 | 2.31E-04 | 0.94  | 4.08   | -     | 1100.6   |
| AHQ-10-2, 4850             | K.ANLQIDQ'INTDLNLER.S                                  | 1871.04187 | 2 | 6.26E-04 | 0.96  | 4.43   | -     | 1516.2   |
| AHQ-10-3, 4499 - 4578      | K.ANLQIDQ'INTDLNLER.S                                  | 1871.04187 | 2 | 4.93E-08 | 0.96  | 5.04   | -     | 1034.6   |
| AHQ-10-8, 4763             | K.ANLQIDQ'INTDLNLER.S                                  | 1871.04187 | 2 | 6.83E-05 | 0.97  | 5.25   | -     | 1416.8   |
| AHQ-10-2, 4954             | K.ANLQIDQ'INTDLNLER.S                                  | 1871.04187 | 2 | 4.81E-06 | 0.97  | 5.45   | -     | 1538.2   |
| AHQ-10-3, 4875             | K.ANLQIDQ'INTDLNLER.S                                  | 1871.04187 | 2 | 1.75E-04 | 0.94  | 4.23   | -     | 1099.7   |
| AHQ-10-4, 4829 - 4831      | K.ANLQIDQ'INTDLNLER.S                                  | 1871.04187 | 2 | 9.17E-05 | 0.97  | 5.19   | -     | 1257.5   |
| AHQ-10-4, 4636             | K.ANLQIDQ'INTDLNLER.S                                  | 1871.04187 | 2 | 1.46E-08 | 0.94  | 4.61   | -     | 805.5    |
| AHQ-10-3, 4983             | K.ANLQIDQ'INTDLNLER.S                                  | 1871.04187 | 2 | 3.75E-04 | 0.73  | 3.09   | -     | 578.1    |
| AHQ-10-1, 4731             | K.ANLQIDQ'INTDLNLER.S                                  | 1871.04187 | 2 | 1.23E-09 | 0.89  | 3.51   | -     | 868.7    |
| AHQ-10-3, 4729 - 4773      | K.ANLQIDQ'INTDLNLER.S                                  | 1871.04187 | 2 | 1.83E-08 | 0.97  | 5.60   | -     | 1401.8   |
| AHQ-10-3, 2486 - 2494      | K.ASITALEAK.I                                          | 904.04321  | 2 | 2.81E-05 | 0.92  | 3.25   | -     | 1110.5   |



|                       |                              |            |   |          |      |      |   |        |
|-----------------------|------------------------------|------------|---|----------|------|------|---|--------|
| AHQ-10-2, 2527        | K.ASITALEAK.I                | 904.04321  | 2 | 1.19E-05 | 0.89 | 3.14 | - | 884.6  |
| AHQ-10-5, 2432        | K.ASITALEAK.I                | 904.04321  | 2 | 5.86E-06 | 0.92 | 3.30 | - | 1016.2 |
| AHQ-10-4, 2453        | K.ASITALEAK.I                | 904.04321  | 2 | 2.16E-05 | 0.91 | 3.13 | - | 977.7  |
| AHQ-10-2, 2232        | R.ASREEILAAQ.E               | 1216.36955 | 2 | 2.11E-04 | 0.90 | 3.41 | - | 1238.6 |
| AHQ-10-3, 2202        | R.ASREEILAAQ.E               | 1216.36955 | 2 | 3.91E-06 | 0.92 | 3.88 | - | 1239.2 |
| AHQ-10-4, 2760        | R.DELADEIANSSGK.G            | 1349.38323 | 2 | 4.07E-04 | 0.89 | 3.38 | - | 1085.1 |
| AHQ-10-2, 2815        | R.DELADEIANSSGK.G            | 1349.38323 | 2 | 5.11E-04 | 0.93 | 3.58 | - | 1248.1 |
| AHQ-10-2, 3196        | R.DELADEIANSSGK.G            | 1349.38323 | 2 | 1.92E-06 | 0.96 | 4.11 | - | 1484.7 |
| AHQ-10-6, 6087 - 6096 | K.DFSALESQLODQTQELLQEENR.Q   | 2494.61059 | 3 | 3.13E-05 | 0.92 | 4.38 | - | 1140.4 |
| AHQ-10-4, 5915        | K.DFSALESQLODQTQELLQEENR.Q   | 2494.61059 | 3 | 9.07E-05 | 0.84 | 3.37 | - | 1207.2 |
| AHQ-10-1, 6241 - 6242 | K.DFSALESQLODQTQELLQEENR.Q   | 2494.61059 | 3 | 5.52E-05 | 0.97 | 5.67 | - | 2231.5 |
| AHQ-10-4, 6216        | K.DFSALESQLODQTQELLQEENR.Q   | 2494.61059 | 3 | 2.13E-06 | 0.96 | 4.90 | - | 1509.1 |
| AHQ-10-3, 5791 - 5845 | K.DFSALESQLODQTQELLQEENRQK.L | 2750.91328 | 3 | 6.28E-07 | 0.86 | 4.08 | - | 614.5  |
| AHQ-10-2, 5820 - 5876 | K.DFSALESQLODQTQELLQEENRQK.L | 2750.91328 | 3 | 1.77E-04 | 0.76 | 3.54 | - | 437.8  |
| AHQ-10-3, 2258        | K.DLEAHIDSANK.N              | 1213.27938 | 2 | 1.06E-06 | 0.94 | 3.49 | - | 1505.9 |
| AHQ-10-2, 2298        | K.DLEAHIDSANK.N              | 1213.27938 | 2 | 7.31E-08 | 0.97 | 4.22 | - | 2068.6 |
| AHQ-10-4, 6483        | R.DLGEELKTELEDLTDSTAAQQLR.S  | 3019.21860 | 3 | 9.08E-07 | 0.90 | 4.08 | - | 1110.0 |
| AHQ-10-3, 6331 - 6406 | R.DLGEELKTELEDLTDSTAAQQLR.S  | 3019.21860 | 3 | 8.47E-05 | 0.89 | 4.24 | - | 1170.7 |
| AHQ-10-2, 6518        | R.DLGEELKTELEDLTDSTAAQQLR.S  | 3019.21860 | 3 | 9.09E-09 | 0.93 | 4.33 | - | 1463.9 |
| AHQ-10-3, 3314        | K.DVLLQVDDER.R               | 1202.29650 | 2 | 2.17E-07 | 0.91 | 3.24 | - | 1079.1 |
| AHQ-10-2, 2944 - 3022 | K.DVLLQVDDER.N               | 1358.48286 | 2 | 4.52E-04 | 0.55 | 2.74 | - | 556.2  |
| AHQ-10-1, 3038        | R.ELEDATETADAMNR.E           | 1566.63006 | 2 | 3.99E-07 | 0.83 | 3.01 | - | 890.1  |
| AHQ-10-5, 2839        | R.ELEDATETADAMNR.E           | 1566.63006 | 2 | 2.28E-07 | 0.89 | 3.37 | - | 971.9  |
| AHQ-10-3, 2275 - 2343 | R.ELEDATETADAMNR.E           | 1582.62946 | 2 | 8.68E-04 | 0.85 | 3.16 | - | 898.9  |
| AHQ-10-3, 2773 - 2847 | R.ELEDATETADAMNR.E           | 1566.63006 | 2 | 1.73E-08 | 0.87 | 2.97 | - | 969.6  |
| AHQ-10-2, 2251 - 2306 | R.ELEDATETADAMNR.E           | 1582.62946 | 2 | 1.63E-06 | 0.90 | 3.77 | - | 749.3  |
| AHQ-10-4, 2833        | R.ELEDATETADAMNR.E           | 1566.63006 | 2 | 5.45E-06 | 0.90 | 3.22 | - | 1144.7 |
| AHQ-10-3, 5297 - 5355 | R.ELESQISELQEDLESER.A        | 2035.10956 | 3 | 1.34E-04 | 0.97 | 5.99 | - | 2143.4 |
| AHQ-10-3, 5350        | R.ELESQISELQEDLESER.A        | 2035.10956 | 2 | 5.84E-07 | 0.96 | 5.00 | - | 1230.1 |
| AHQ-10-8, 5395        | R.ELESQISELQEDLESER.A        | 2035.10956 | 2 | 4.96E-05 | 0.88 | 4.05 | - | 627.4  |
| AHQ-10-1, 5414 - 5486 | R.ELESQISELQEDLESER.A        | 2035.10956 | 2 | 1.75E-04 | 0.95 | 5.26 | - | 1155.3 |
| AHQ-10-2, 5123        | R.ELESQISELQEDLESER.A        | 2035.10956 | 2 | 8.79E-05 | 0.89 | 4.32 | - | 485.5  |
| AHQ-10-2, 5664 - 5746 | R.ELESQISELQEDLESER.A        | 2035.10956 | 2 | 2.90E-07 | 0.72 | 2.88 | - | 648.5  |
| AHQ-10-6, 5312        | R.ELESQISELQEDLESER.A        | 2035.10956 | 2 | 2.40E-06 | 0.94 | 4.96 | - | 805.3  |
| AHQ-10-4, 5444        | R.ELESQISELQEDLESER.A        | 2035.10956 | 3 | 2.52E-04 | 0.98 | 5.90 | - | 2308.5 |
| AHQ-10-4, 5439        | R.ELESQISELQEDLESER.A        | 2035.10956 | 2 | 4.70E-10 | 0.95 | 4.22 | - | 1214.5 |
| AHQ-10-2, 5370 - 5442 | R.ELESQISELQEDLESER.A        | 2035.10956 | 2 | 2.84E-07 | 0.95 | 4.86 | - | 1001.3 |
| AHQ-10-5, 5427        | R.ELESQISELQEDLESER.A        | 2035.10956 | 2 | 2.07E-06 | 0.94 | 4.60 | - | 933.4  |
| AHQ-10-3, 2317        | R.EMEALEDERK.Q               | 1379.47597 | 2 | 4.18E-04 | 0.91 | 3.43 | - | 1165.3 |
| AHQ-10-5, 2263        | R.EMEALEDERK.Q               | 1379.47597 | 2 | 6.62E-05 | 0.93 | 3.24 | - | 1411.3 |
| AHQ-10-7, 4157        | K.EQADFAIEALAK.A             | 1306.44632 | 2 | 7.57E-04 | 0.82 | 2.99 | - | 590.0  |
| AHQ-10-3, 2506        | R.EQLEEEEEAKHNLEK.Q          | 1855.93770 | 2 | 1.72E-05 | 0.82 | 3.89 | - | 543.7  |
| AHQ-10-2, 2556        | R.EQLEEEEEAKHNLEK.Q          | 1855.93770 | 2 | 1.21E-04 | 0.83 | 3.53 | - | 613.3  |
| AHQ-10-3, 3009        | K.HEAMITDLEER.L              | 1344.47646 | 2 | 8.19E-05 | 0.95 | 3.94 | - | 1228.4 |
| AHQ-10-2, 3048        | K.HEAMITDLEER.L              | 1344.47646 | 2 | 9.61E-06 | 0.96 | 3.80 | - | 1201.6 |
| AHQ-10-2, 3451        | R.HEM*PPHYAIDTAYR.S          | 1932.14884 | 2 | 2.43E-05 | 0.79 | 2.99 | - | 586.9  |
| AHQ-10-7, 3296        | R.HEM*PPHYAIDTAYR.S          | 1932.14884 | 3 | 4.71E-04 | 0.93 | 3.81 | - | 1538.0 |
| AHQ-10-5, 3364        | R.HEM*PPHYAIDTAYR.S          | 1932.14884 | 3 | 5.76E-04 | 0.97 | 4.12 | - | 2349.3 |
| AHQ-10-2, 3675        | R.HEMPPHYAIDTAYR.S           | 1916.14944 | 3 | 5.33E-10 | 0.96 | 4.21 | - | 2125.0 |
| AHQ-10-3, 4403        | K.HSQAVEELAEQLEQTK.R         | 1840.96940 | 2 | 7.68E-09 | 0.98 | 5.68 | - | 1752.0 |
| AHQ-10-2, 4467        | K.HSQAVEELAEQLEQTK.R         | 1840.96940 | 3 | 2.34E-07 | 0.95 | 4.64 | - | 1596.9 |
| AHQ-10-4, 4443        | K.HSQAVEELAEQLEQTK.R         | 1840.96940 | 3 | 2.22E-06 | 0.97 | 5.01 | - | 2007.0 |
| AHQ-10-2, 4466        | K.HSQAVEELAEQLEQTK.R         | 1840.96940 | 2 | 6.31E-09 | 0.98 | 6.16 | - | 2105.4 |
| AHQ-10-3, 4405        | K.HSQAVEELAEQLEQTK.R         | 1840.96940 | 3 | 2.40E-08 | 0.96 | 5.55 | - | 1627.8 |
| AHQ-10-4, 4445        | K.HSQAVEELAEQLEQTK.R         | 1840.96940 | 2 | 1.09E-13 | 0.98 | 5.94 | - | 2023.6 |
| AHQ-10-2, 4163        | K.HSQAVEELAEQLEQTKR.V        | 1997.15575 | 2 | 2.68E-09 | 0.98 | 6.44 | - | 2119.9 |
| AHQ-10-3, 4102        | K.HSQAVEELAEQLEQTKR.V        | 1997.15575 | 2 | 7.39E-08 | 0.99 | 6.39 | - | 3320.6 |
| AHQ-10-1, 4262        | K.HSQAVEELAEQLEQTKR.V        | 1997.15575 | 3 | 1.12E-10 | 0.95 | 4.79 | - | 1217.2 |
| AHQ-10-4, 4129 - 4183 | K.HSQAVEELAEQLEQTKR.V        | 1997.15575 | 3 | 2.64E-09 | 0.96 | 5.33 | - | 1505.6 |
| AHQ-10-3, 4097        | K.HSQAVEELAEQLEQTKR.V        | 1997.15575 | 3 | 1.17E-05 | 0.97 | 6.18 | - | 1650.5 |
| AHQ-10-2, 4162 - 4190 | K.HSQAVEELAEQLEQTKR.V        | 1997.15575 | 3 | 7.57E-07 | 0.97 | 6.28 | - | 1353.0 |
| AHQ-10-2, 3786 - 3844 | R.IAEFTNLTEEEK.S             | 1654.75371 | 2 | 9.50E-06 | 0.94 | 4.27 | - | 1088.1 |
| AHQ-10-1, 3813 - 3871 | R.IAEFTNLTEEEK.S             | 1654.75371 | 2 | 2.08E-06 | 0.96 | 4.34 | - | 1602.5 |
| AHQ-10-3, 3559 - 3613 | R.IAEFTNLTEEEK.S             | 1654.75371 | 2 | 1.65E-05 | 0.94 | 3.45 | - | 1346.5 |
| AHQ-10-13, 3661       | R.IAEFTNLTEEEK.S             | 1654.75371 | 2 | 2.08E-04 | 0.87 | 2.96 | - | 1184.3 |
| AHQ-10-2, 3911        | R.IAEFTNLTEEEK.S             | 1654.75371 | 2 | 2.87E-06 | 0.97 | 4.14 | - | 2005.8 |
| AHQ-10-5, 3659        | R.IAEFTNLTEEEK.S             | 1654.75371 | 2 | 4.29E-07 | 0.95 | 4.28 | - | 1490.2 |
| AHQ-10-2, 3683 - 3743 | R.IAEFTNLTEEEK.S             | 1654.75371 | 2 | 1.52E-09 | 0.97 | 4.86 | - | 1843.0 |
| AHQ-10-3, 3834        | R.IAEFTNLTEEEK.S             | 1654.75371 | 2 | 2.80E-08 | 0.96 | 3.94 | - | 1685.5 |
| AHQ-10-2, 3539        | R.IAEFTNLTEEEK.S             | 1654.75371 | 2 | 2.68E-06 | 0.77 | 2.76 | - | 957.2  |
| AHQ-10-3, 3751        | R.IAEFTNLTEEEK.S             | 1654.75371 | 2 | 9.15E-07 | 0.96 | 4.14 | - | 1844.6 |
| AHQ-10-7, 3588        | R.IAEFTNLTEEEK.S             | 1654.75371 | 2 | 1.41E-04 | 0.94 | 3.97 | - | 1331.9 |
| AHQ-10-3, 3669        | R.IAEFTNLTEEEK.S             | 1654.75371 | 2 | 6.65E-07 | 0.96 | 4.37 | - | 1679.1 |
| AHQ-10-6, 3596 - 3664 | R.IAEFTNLTEEEK.S             | 1654.75371 | 2 | 2.35E-07 | 0.91 | 3.75 | - | 1405.4 |
| AHQ-10-4, 3669        | R.IAEFTNLTEEEK.S             | 1654.75371 | 2 | 3.51E-05 | 0.93 | 3.74 | - | 1501.6 |
| AHQ-10-2, 3424 - 3491 | R.IAEFTNLTEEEKSK.S           | 1870.00428 | 3 | 1.29E-04 | 0.60 | 3.13 | - | 461.1  |
| AHQ-10-3, 4810 - 4865 | R.IAQLEEELEEEQGNTELINDR.L    | 2473.58969 | 3 | 3.54E-06 | 0.88 | 4.43 | - | 804.8  |
| AHQ-10-2, 4939        | R.IAQLEEELEEEQGNTELINDR.L    | 2473.58969 | 3 | 5.87E-06 | 0.92 | 5.31 | - | 868.3  |
| AHQ-10-2, 5182 - 5207 | R.IAQLEEELEEEQGNTELINDR.L.K  | 2714.92085 | 3 | 8.09E-05 | 0.89 | 4.00 | - | 912.4  |
| AHQ-10-6, 3069        | K.IAQLEEQLDNETK.E            | 1531.64695 | 2 | 1.36E-05 | 0.89 | 3.43 | - | 945.3  |
| AHQ-10-2, 3759        | K.IAQLEEQLDNETK.E            | 1531.64695 | 2 | 1.95E-05 | 0.96 | 4.39 | - | 1465.6 |
| AHQ-10-4, 3367 - 3392 | K.IAQLEEQLDNETK.E            | 1531.64695 | 2 | 1.22E-08 | 0.95 | 4.43 | - | 1330.9 |
| AHQ-10-6, 3299        | K.IAQLEEQLDNETK.E            | 1531.64695 | 2 | 3.94E-07 | 0.94 | 3.61 | - | 1409.2 |
| AHQ-10-5, 3105        | K.IAQLEEQLDNETK.E            | 1531.64695 | 2 | 2.44E-08 | 0.96 | 4.06 | - | 1825.0 |
| AHQ-10-5, 3340        | K.IAQLEEQLDNETK.E            | 1531.64695 | 2 | 1.19E-06 | 0.97 | 4.69 | - | 1711.1 |
| AHQ-10-9, 3153 - 3155 | K.IAQLEEQLDNETK.E            | 1531.64695 | 2 | 1.38E-05 | 0.97 | 4.69 | - | 1665.5 |
| AHQ-10-2, 3414        | K.IAQLEEQLDNETK.E            | 1531.64695 | 2 | 1.31E-08 | 0.96 | 4.28 | - | 1433.9 |
| AHQ-10-1, 3526        | K.IAQLEEQLDNETK.E            | 1531.64695 | 2 | 9.44E-09 | 0.97 | 4.61 | - | 1836.4 |
| AHQ-10-3, 3349        | K.IAQLEEQLDNETK.E            | 1531.64695 | 2 | 4.10E-04 | 0.96 | 4.68 | - | 1503.2 |
| AHQ-10-2, 3502        | K.IAQLEEQLDNETK.E            | 1531.64695 | 2 | 2.24E-04 | 0.95 | 4.06 | - | 1224.5 |
| AHQ-10-2, 3174        | K.IAQLEEQLDNETK.E            | 1531.64695 | 2 | 1.55E-09 | 0.96 | 4.29 | - | 1594.5 |
| AHQ-10-7, 3282        | K.IAQLEEQLDNETK.E            | 1531.64695 | 2 | 1.12E-05 | 0.93 | 3.85 | - | 1206.4 |
| AHQ-10-3, 3118        | K.IAQLEEQLDNETK.E            | 1531.64695 | 2 | 2.86E-11 | 0.92 | 3.62 | - | 1138.7 |
| AHQ-10-10, 3254       | K.IAQLEEQLDNETK.E            | 1531.64695 | 2 | 1.13E-05 | 0.95 | 3.78 | - | 1405.3 |
| AHQ-10-2, 3543        | K.IAQLEEQLDNETKER.Q          | 1816.94784 | 2 | 5.86E-08 | 0.87 | 3.38 | - | 838.4  |
| AHQ-10-3, 5922        | R.IIGLDQVAGMSETALPGAFAK.T    | 2019.35101 | 2 | 1.03E-06 | 0.80 | 3.14 | - | 528.9  |
| AHQ-10-2, 5955 - 6011 | R.IIGLDQVAGMSETALPGAFAK.T    | 2019.35101 | 2 | 4.38E-06 | 0.97 | 5.42 | - | 1371.7 |
| AHQ-10-2, 5480 - 5518 | R.IIGLDQVAGMSETALPGAFAK.T    | 2019.35101 | 2 | 4.60E-07 | 0.83 | 3.57 | - | 778.9  |
| AHQ-10-4, 6001 - 6003 | R.IIGLDQVAGMSETALPGAFAK.T    | 2019.35101 | 2 | 1.27E-06 | 0.95 | 5.00 | - | 861.7  |
| AHQ-10-3, 5265 - 5293 | R.IIGLDQVAGM*SETALPGAFAK.T   | 2035.35041 | 2 | 3.13E-05 | 0.93 | 4.69 | - | 769.9  |
| AHQ-10-6, 5799 - 5868 | R.IIGLDQVAGMSETALPGAFAK.T    | 2019.35101 | 2 | 5.31E-05 | 0.92 | 4.31 | - | 987.3  |
| AHQ-10-2, 5003        | R.IIGLDQVAGM*SETALPGAFAK.T   | 2035.35041 | 2 | 3.91E-05 | 0.89 | 3.93 | - | 732.6  |
| AHQ-10-5, 6007        | R.IIGLDQVAGMSETALPGAFAK.T    | 2019.35101 | 3 | 2.16E-04 | 0.85 | 3.55 | - | 1042.9 |
| AHQ-10-5, 6001 - 6003 | R.IIGLDQVAGMSETALPGAFAK.T    | 2019.35101 | 3 | 4.47E-07 | 0.97 | 6.33 | - | 1305.8 |
| AHQ-10-1, 5967 - 6041 | R.IIGLDQVAGMSETALPGAFAK.T    | 2019.35101 | 2 | 3.00E-04 | 0.80 | 3.60 | - | 392.9  |
| AHQ-10-7, 5906        | R.IIGLDQVAGMSETALPGAFAK.T    | 2019.35101 | 2 | 5.23E-04 | 0.94 | 4.39 | - | 1105.6 |
| AHQ-10-5, 3872        | R.IM*GIPEEQM*GLLR.V          | 1648.92706 | 2 | 2.02E-07 | 0.61 | 2.61 | - | 405.3  |

|                       |                             |            |   |          |      |      |   |        |
|-----------------------|-----------------------------|------------|---|----------|------|------|---|--------|
| AHQ-10-2, 3928 - 3951 | R.IM*GPIPEEQM*GLLR.V        | 1648.92706 | 2 | 2.23E-04 | 0.92 | 3.41 | - | 952.2  |
| AHQ-10-2, 5484        | K.IRELESQISELOEDLESER.A     | 2304.45416 | 2 | 1.39E-05 | 0.97 | 6.15 | - | 821.5  |
| AHQ-10-5, 5476        | K.IRELESQISELOEDLESER.A     | 2304.45416 | 2 | 4.10E-04 | 0.95 | 5.09 | - | 812.0  |
| AHQ-10-3, 5401        | K.IRELESQISELOEDLESER.A     | 2304.45416 | 2 | 3.05E-05 | 0.98 | 6.53 | - | 1330.7 |
| AHQ-10-6, 5305 - 5359 | K.IRELESQISELOEDLESER.A     | 2304.45416 | 3 | 3.46E-07 | 0.95 | 4.93 | - | 1424.4 |
| AHQ-10-2, 5179        | K.ITDVIIFQAACCR.G           | 1555.80136 | 2 | 1.19E-05 | 0.77 | 2.63 | - | 824.4  |
| AHQ-10-2, 5315 - 5324 | K.ITDVIIFQAACCR.G           | 1555.80136 | 2 | 1.85E-06 | 0.65 | 3.01 | - | 535.9  |
| AHQ-10-3, 4331 - 4390 | K.KANLQIDQINTDLNLER.S       | 1999.21478 | 2 | 1.02E-06 | 0.93 | 4.91 | - | 942.1  |
| AHQ-10-1, 4531        | K.KANLQIDQINTDLNLER.S       | 1999.21478 | 3 | 8.88E-07 | 0.89 | 4.47 | - | 885.6  |
| AHQ-10-6, 4307        | K.KANLQIDQINTDLNLER.S       | 1999.21478 | 2 | 9.41E-04 | 0.95 | 5.06 | - | 1024.9 |
| AHQ-10-9, 4115        | K.KANLQIDQINTDLNLER.S       | 1999.21478 | 2 | 4.46E-04 | 0.92 | 3.92 | - | 1027.5 |
| AHQ-10-2, 4454 - 4455 | K.KANLQIDQINTDLNLER.S       | 1999.21478 | 3 | 9.70E-08 | 0.83 | 4.25 | - | 688.8  |
| AHQ-10-2, 2730 - 2790 | R.KKVEAQLQELQVK.F           | 1541.81761 | 2 | 2.48E-08 | 0.97 | 5.24 | - | 1655.2 |
| AHQ-10-2, 2794        | R.KKVEAQLQELQVK.F           | 1541.81761 | 3 | 1.83E-04 | 0.86 | 3.66 | - | 986.1  |
| AHQ-10-6, 2696        | R.KKVEAQLQELQVK.F           | 1541.81761 | 2 | 1.65E-05 | 0.93 | 3.95 | - | 1266.5 |
| AHQ-10-3, 2741        | R.KKVEAQLQELQVK.F           | 1541.81761 | 2 | 3.88E-07 | 0.96 | 4.95 | - | 1266.9 |
| AHQ-10-4, 2707        | R.KKVEAQLQELQVK.F           | 1541.81761 | 2 | 5.82E-07 | 0.97 | 5.18 | - | 1672.7 |
| AHQ-10-5, 2732        | R.KKVEAQLQELQVK.F           | 1541.81761 | 2 | 3.48E-08 | 0.97 | 4.89 | - | 1788.0 |
| AHQ-10-3, 3514        | K.KLEEEQIILEDQNK.L          | 1891.08992 | 3 | 2.60E-08 | 0.89 | 4.35 | - | 1033.0 |
| AHQ-10-2, 3572        | K.KLEEEQIILEDQNK.L          | 1891.08992 | 2 | 3.22E-11 | 0.98 | 5.93 | - | 2047.6 |
| AHQ-10-1, 3626        | K.KLEEEQIILEDQNK.L          | 1891.08992 | 2 | 2.41E-05 | 0.95 | 4.54 | - | 1114.3 |
| AHQ-10-2, 3448 - 3515 | K.KLEEEQIILEDQNK.L          | 1891.08992 | 2 | 2.06E-05 | 0.98 | 6.10 | - | 1864.2 |
| AHQ-10-3, 3390 - 3445 | K.KLEEEQIILEDQNK.L          | 1891.08992 | 2 | 9.61E-05 | 0.98 | 5.82 | - | 1941.6 |
| AHQ-10-4, 3463 - 3532 | K.KLEEEQIILEDQNK.L          | 1891.08992 | 2 | 5.03E-09 | 0.98 | 6.16 | - | 1493.6 |
| AHQ-10-3, 3505        | K.KLEEEQIILEDQNK.L          | 1891.08992 | 2 | 9.62E-12 | 0.97 | 5.27 | - | 1194.2 |
| AHQ-10-2, 3511 - 3586 | K.KLEEEQIILEDQNK.L          | 1891.08992 | 3 | 5.73E-04 | 0.85 | 4.11 | - | 935.9  |
| AHQ-10-2, 3879        | K.KLEEEQIILEDQNK.LAK.E      | 2203.49930 | 2 | 2.35E-07 | 0.94 | 5.00 | - | 948.7  |
| AHQ-10-1, 6374        | R.KLEGDSTDLSDQIAELQAIAELK.M | 2616.86032 | 3 | 2.70E-07 | 0.91 | 4.73 | - | 990.3  |
| AHQ-10-5, 6355        | R.KLEGDSTDLSDQIAELQAIAELK.M | 2616.86032 | 3 | 2.69E-07 | 0.91 | 4.88 | - | 768.2  |
| AHQ-10-6, 6231        | R.KLEGDSTDLSDQIAELQAIAELK.M | 2616.86032 | 3 | 1.68E-06 | 0.88 | 4.40 | - | 727.5  |
| AHQ-10-3, 6269        | R.KLEGDSTDLSDQIAELQAIAELK.M | 2616.86032 | 2 | 2.83E-04 | 0.90 | 3.94 | - | 944.4  |
| AHQ-10-2, 6375        | R.KLEGDSTDLSDQIAELQAIAELK.M | 2616.86032 | 2 | 3.22E-10 | 0.96 | 5.35 | - | 1272.7 |
| AHQ-10-3, 6265        | R.KLEGDSTDLSDQIAELQAIAELK.M | 2616.86032 | 3 | 6.33E-06 | 0.95 | 5.85 | - | 1145.2 |
| AHQ-10-2, 6307 - 6374 | R.KLEGDSTDLSDQIAELQAIAELK.M | 2616.86032 | 3 | 5.02E-09 | 0.94 | 6.00 | - | 842.8  |
| AHQ-10-2, 5718        | R.KLEGDSTDLSDQIAELQAIAELK.M | 2616.86032 | 3 | 1.51E-06 | 0.93 | 4.44 | - | 1476.1 |
| AHQ-10-6, 2889 - 2895 | K.KLVWVWVSDK.S              | 1072.28194 | 2 | 5.51E-05 | 0.71 | 2.89 | - | 630.8  |
| AHQ-10-2, 2994        | K.KLVWVWVSDK.S              | 1072.28194 | 2 | 3.85E-06 | 0.89 | 3.16 | - | 1000.7 |
| AHQ-10-2, 3616        | K.KMEDSVGCLETAEEVK.R        | 1827.02450 | 2 | 1.35E-04 | 0.81 | 2.96 | - | 1150.1 |
| AHQ-10-2, 3380        | K.KMEDSVGCLETAEEVK.R        | 1983.21085 | 3 | 1.86E-06 | 0.96 | 5.67 | - | 1088.2 |
| AHQ-10-2, 3032        | K.KM*EDSVGCLETAEEVKR.K      | 1999.21025 | 3 | 1.23E-09 | 0.95 | 4.83 | - | 1462.5 |
| AHQ-10-4, 3328        | K.KMEDSVGCLETAEEVKR.K       | 1983.21085 | 3 | 1.46E-04 | 0.96 | 5.60 | - | 1222.3 |
| AHQ-10-3, 2983        | K.KM*EDSVGCLETAEEVKR.K      | 1999.21025 | 3 | 1.10E-06 | 0.98 | 5.88 | - | 2005.6 |
| AHQ-10-4, 2984        | K.KM*EDSVGCLETAEEVKR.K      | 1999.21025 | 3 | 3.38E-04 | 0.92 | 4.79 | - | 814.1  |
| AHQ-10-5, 2960        | K.KM*EDSVGCLETAEEVKR.K      | 1999.21025 | 3 | 1.88E-05 | 0.76 | 3.35 | - | 805.2  |
| AHQ-10-2, 4639 - 4694 | K.KM*QNIQEELQLEEEESAR.Q     | 2478.63294 | 3 | 1.61E-05 | 0.91 | 4.60 | - | 919.1  |
| AHQ-10-1, 4763 - 4769 | K.KM*QNIQEELQLEEEESAR.Q     | 2478.63294 | 3 | 5.03E-04 | 0.60 | 3.27 | - | 737.0  |
| AHQ-10-2, 4703        | K.KM*QNIQEELQLEEEESAR.Q     | 2478.63294 | 2 | 1.83E-04 | 0.77 | 3.31 | - | 315.5  |
| AHQ-10-6, 3979        | K.KQLEEEIICHDLAR.V          | 1771.93036 | 3 | 7.53E-06 | 0.95 | 5.15 | - | 1535.5 |
| AHQ-10-1, 4198        | K.KQLEEEIICHDLAR.V          | 1771.93036 | 3 | 3.13E-06 | 0.94 | 4.84 | - | 1439.6 |
| AHQ-10-2, 4096        | K.KQLEEEIICHDLAR.V          | 1771.93036 | 2 | 3.07E-05 | 0.97 | 5.01 | - | 1755.7 |
| AHQ-10-2, 3095 - 3098 | K.KVEAQLQELQVK.F            | 1413.64470 | 2 | 2.59E-05 | 0.96 | 5.15 | - | 1448.1 |
| AHQ-10-3, 3047 - 3057 | K.KVEAQLQELQVK.F            | 1413.64470 | 2 | 1.91E-04 | 0.96 | 4.78 | - | 1512.0 |
| AHQ-10-6, 2979 - 2985 | K.KVEAQLQELQVK.F            | 1413.64470 | 2 | 8.92E-05 | 0.90 | 3.04 | - | 1306.0 |
| AHQ-10-4, 3721 - 3791 | K.LEEEQIILEDQNK.L           | 1762.91700 | 2 | 1.85E-07 | 0.93 | 3.98 | - | 1021.2 |
| AHQ-10-1, 3853 - 3930 | K.LEEEQIILEDQNK.L           | 1762.91700 | 2 | 2.74E-06 | 0.88 | 3.48 | - | 958.5  |
| AHQ-10-2, 3763 - 3834 | K.LEEEQIILEDQNK.L           | 1762.91700 | 2 | 3.10E-09 | 0.97 | 5.58 | - | 1152.1 |
| AHQ-10-2, 3818        | K.LEEEQIILEDQNK.L           | 1762.91700 | 2 | 7.99E-09 | 0.97 | 4.99 | - | 1673.7 |
| AHQ-10-3, 6309        | K.LEGDSTDLSDQIAELQAIAELK.M  | 2488.68740 | 3 | 2.22E-08 | 0.92 | 4.79 | - | 1078.3 |
| AHQ-10-2, 6423        | K.LEGDSTDLSDQIAELQAIAELK.M  | 2488.68740 | 3 | 1.14E-04 | 0.93 | 4.37 | - | 1290.1 |
| AHQ-10-2, 3583        | R.LEVNLQAMK.A               | 1046.26630 | 2 | 9.73E-06 | 0.78 | 3.19 | - | 584.9  |
| AHQ-10-4, 3528        | R.LEVNLQAMK.A               | 1046.26630 | 2 | 6.19E-04 | 0.79 | 3.24 | - | 483.7  |
| AHQ-10-2, 2735        | R.LEVNLQAM*K.A              | 1062.26570 | 2 | 4.23E-04 | 0.84 | 3.34 | - | 542.2  |
| AHQ-10-3, 2703        | R.LEVNLQAM*K.A              | 1062.26570 | 2 | 2.30E-05 | 0.76 | 2.81 | - | 550.3  |
| AHQ-10-3, 3507        | K.LKDVLLQVDDER.R            | 1443.62767 | 2 | 1.86E-09 | 0.97 | 5.01 | - | 1739.6 |
| AHQ-10-2, 3570        | K.LKDVLLQVDDER.R            | 1443.62767 | 2 | 8.81E-08 | 0.94 | 3.35 | - | 1647.3 |
| AHQ-10-2, 3578        | K.LKDVLLQVDDER.R            | 1443.62767 | 2 | 4.11E-08 | 0.97 | 4.65 | - | 1738.9 |
| AHQ-10-4, 3199        | K.LKDVLLQVDDERR.N           | 1599.81402 | 2 | 1.07E-04 | 0.55 | 2.68 | - | 613.0  |
| AHQ-10-2, 3254 - 3318 | K.LKDVLLQVDDERR.N           | 1599.81402 | 2 | 1.28E-04 | 0.93 | 4.02 | - | 1119.4 |
| AHQ-10-2, 3255 - 3276 | K.LKDVLLQVDDERR.N           | 1599.81402 | 3 | 1.52E-04 | 0.89 | 3.60 | - | 929.8  |
| AHQ-10-3, 3201        | K.LKDVLLQVDDERR.N           | 1599.81402 | 2 | 1.50E-04 | 0.95 | 3.77 | - | 1985.3 |
| AHQ-10-2, 6570 - 6627 | K.LLQELQQAETELCAEAELR.A     | 2503.72536 | 2 | 6.92E-07 | 0.71 | 2.70 | - | 539.6  |
| AHQ-10-6, 5561        | R.LQQLDLDLVLDDHQ.R.Q        | 1951.12699 | 3 | 1.79E-05 | 0.86 | 3.83 | - | 769.6  |
| AHQ-10-5, 5695        | R.LQQLDLDLVLDDHQ.R.Q        | 1951.12699 | 2 | 2.74E-10 | 0.97 | 5.16 | - | 1486.7 |
| AHQ-10-7, 5582        | R.LQQLDLDLVLDDHQ.R.Q        | 1951.12699 | 2 | 2.92E-06 | 0.85 | 3.86 | - | 818.5  |
| AHQ-10-3, 5239        | R.LQQLDLDLVLDDHQ.R.Q        | 1951.12699 | 3 | 7.35E-04 | 0.74 | 3.34 | - | 551.1  |
| AHQ-10-1, 5738        | R.LQQLDLDLVLDDHQ.R.Q        | 1951.12699 | 2 | 1.64E-05 | 0.80 | 3.24 | - | 772.7  |
| AHQ-10-2, 5694 - 5720 | R.LQQLDLDLVLDDHQ.R.Q        | 1951.12699 | 3 | 7.91E-07 | 0.91 | 4.48 | - | 956.5  |
| AHQ-10-2, 5696 - 5748 | R.LQQLDLDLVLDDHQ.R.Q        | 1951.12699 | 2 | 8.33E-15 | 0.97 | 5.37 | - | 1383.3 |
| AHQ-10-2, 5318        | R.LQQLDLDLVLDDHQ.R.Q        | 1951.12699 | 3 | 3.06E-05 | 0.95 | 5.23 | - | 1083.5 |
| AHQ-10-6, 5564        | R.LQQLDLDLVLDDHQ.R.Q        | 1951.12699 | 2 | 1.19E-11 | 0.96 | 4.56 | - | 1327.3 |
| AHQ-10-4, 5707 - 5779 | R.LQQLDLDLVLDDHQ.R.Q        | 1951.12699 | 3 | 5.53E-06 | 0.87 | 3.89 | - | 757.9  |
| AHQ-10-4, 5709        | R.LQQLDLDLVLDDHQ.R.Q        | 1951.12699 | 2 | 2.37E-11 | 0.98 | 5.91 | - | 1898.1 |
| AHQ-10-3, 5606 - 5613 | R.LQQLDLDLVLDDHQ.R.Q        | 1951.12699 | 2 | 1.76E-09 | 0.97 | 5.16 | - | 1741.1 |
| AHQ-10-2, 5255 - 5319 | R.LQQLDLDLVLDDHQ.R.Q        | 1951.12699 | 2 | 2.69E-11 | 0.91 | 4.12 | - | 994.9  |
| AHQ-10-2, 5127        | K.LQVELDNVTGLLSQSDSK.S      | 1947.13342 | 2 | 2.56E-07 | 0.95 | 4.41 | - | 1354.4 |
| AHQ-10-3, 5382 - 5439 | K.LQVELDNVTGLLSQSDSK.S      | 1947.13342 | 2 | 3.85E-08 | 0.95 | 5.13 | - | 913.3  |
| AHQ-10-7, 5276        | K.LQVELDNVTGLLSQSDSK.S      | 1947.13342 | 2 | 2.03E-06 | 0.97 | 5.23 | - | 1410.2 |
| AHQ-10-1, 5450        | K.LQVELDNVTGLLSQSDSK.S      | 1947.13342 | 3 | 3.36E-06 | 0.96 | 4.62 | - | 1525.7 |
| AHQ-10-4, 5641        | K.LQVELDNVTGLLSQSDSK.S      | 1947.13342 | 2 | 5.27E-06 | 0.94 | 4.14 | - | 1151.6 |
| AHQ-10-3, 5322        | K.LQVELDNVTGLLSQSDSK.S      | 1947.13342 | 3 | 7.59E-10 | 0.97 | 5.88 | - | 1893.5 |
| AHQ-10-1, 5533        | K.LQVELDNVTGLLSQSDSK.S      | 1947.13342 | 2 | 2.95E-04 | 0.83 | 3.70 | - | 607.5  |
| AHQ-10-2, 5380 - 5452 | K.LQVELDNVTGLLSQSDSK.S      | 1947.13342 | 2 | 7.01E-13 | 0.98 | 6.41 | - | 1612.2 |
| AHQ-10-4, 5125        | K.LQVELDNVTGLLSQSDSK.S      | 1947.13342 | 2 | 2.88E-07 | 0.97 | 5.21 | - | 1325.4 |
| AHQ-10-2, 5414        | K.LQVELDNVTGLLSQSDSK.S      | 1947.13342 | 3 | 1.37E-04 | 0.96 | 5.25 | - | 1465.7 |
| AHQ-10-2, 5510 - 5511 | K.LQVELDNVTGLLSQSDSK.S      | 1947.13342 | 2 | 2.07E-11 | 0.97 | 5.77 | - | 1466.1 |
| AHQ-10-2, 6626        | K.LQVELDNVTGLLSQSDSK.S      | 1947.13342 | 2 | 9.04E-07 | 0.91 | 3.34 | - | 1096.5 |
| AHQ-10-3, 5294 - 5365 | K.LQVELDNVTGLLSQSDSK.S      | 1947.13342 | 2 | 1.27E-06 | 0.96 | 4.63 | - | 1468.3 |
| AHQ-10-3, 5043 - 5115 | K.LQVELDNVTGLLSQSDSK.S      | 1947.13342 | 2 | 2.06E-07 | 0.97 | 5.24 | - | 1600.2 |
| AHQ-10-2, 5612 - 5690 | K.LQVELDNVTGLLSQSDSK.S      | 1947.13342 | 2 | 1.47E-04 | 0.83 | 3.61 | - | 543.8  |
| AHQ-10-5, 5352 - 5377 | K.LQVELDNVTGLLSQSDSK.S      | 1947.13342 | 2 | 8.33E-09 | 0.97 | 5.57 | - | 1396.0 |
| AHQ-10-6, 5267        | K.LQVELDNVTGLLSQSDSK.S      | 1947.13342 | 2 | 1.05E-05 | 0.90 | 3.96 | - | 762.1  |
| AHQ-10-14, 5288       | K.LQVELDNVTGLLSQSDSK.S      | 1947.13342 | 2 | 1.87E-06 | 0.95 | 5.01 | - | 1115.8 |
| AHQ-10-2, 4412        | R.LTEMETLQSQML*AEK.L        | 1769.03151 | 2 | 5.24E-07 | 0.95 | 4.89 | - | 1094.0 |
| AHQ-10-2, 4366 - 4422 | R.LTEMETLQSQML*AEK.L        | 1769.03151 | 2 | 7.79E-08 | 0.97 | 5.10 | - | 1564.7 |
| AHQ-10-2, 4862 - 4896 | R.LTEMETLQSQML*AEK.L        | 1753.03211 | 2 | 2.11E-04 | 0.79 | 2.91 | - | 824.4  |
| AHQ-10-3, 3890        | R.LTEM*ETLQSQML*AEK.L       | 1769.03151 | 2 | 3.66E-05 | 0.95 | 3.81 | - | 2011.0 |
| AHQ-10-3, 3459 - 3522 | R.LTEM*ETLQSQML*AEK.L       | 1785.03091 | 2 | 1.21E-04 | 0.94 | 4.09 | - | 1323.9 |

|                        |                                |            |   |          |      |      |   |        |
|------------------------|--------------------------------|------------|---|----------|------|------|---|--------|
| AHQ-10-2, 3962         | R.LTEM*ETLQSQLMAEK.L           | 1769.03151 | 2 | 6.67E-05 | 0.96 | 4.21 | - | 2052.1 |
| AHQ-10-2, 3591         | R.LTEM*ETLQSQLM*AEK.L          | 1785.03091 | 2 | 2.58E-05 | 0.95 | 4.34 | - | 1202.0 |
| AHQ-10-2, 3468 - 3534  | R.LTEM*ETLQSQLM*AEK.L          | 1785.03091 | 2 | 3.95E-06 | 0.94 | 3.99 | - | 1105.9 |
| AHQ-10-2, 3548 - 3607  | K.M*EDSVGCLETAEEVKR.K          | 1714.85099 | 2 | 4.41E-06 | 0.96 | 4.46 | - | 1430.3 |
| AHQ-10-2, 3574         | K.MEDSVGCLETAEEVKR.K           | 1855.03794 | 3 | 2.15E-07 | 0.66 | 3.46 | - | 361.1  |
| AHQ-10-5, 3232         | K.M*EDSVGCLETAEEVKR.K          | 1871.03734 | 3 | 5.60E-06 | 0.86 | 3.61 | - | 792.3  |
| AHQ-10-5, 3201 - 3247  | K.MEDSVGCLETAEEVKR.K           | 1855.03794 | 3 | 1.14E-04 | 0.74 | 3.28 | - | 821.7  |
| AHQ-10-3, 3246         | K.M*EDSVGCLETAEEVKR.K          | 1871.03734 | 3 | 6.07E-04 | 0.87 | 3.71 | - | 914.2  |
| AHQ-10-3, 3242         | K.M*EDSVGCLETAEEVKR.K          | 1871.03734 | 2 | 3.62E-07 | 0.85 | 3.39 | - | 702.8  |
| AHQ-10-2, 3310         | K.M*EDSVGCLETAEEVKR.K          | 1871.03734 | 2 | 4.26E-08 | 0.82 | 3.28 | - | 534.6  |
| AHQ-10-2, 4930 - 5002  | K.M*QQNIQLEELQEEEEESAR.Q       | 2350.46003 | 3 | 4.08E-06 | 0.88 | 4.04 | - | 1037.7 |
| AHQ-10-4, 4995         | K.M*QQNIQLEELQEEEEESAR.Q       | 2350.46003 | 3 | 3.45E-07 | 0.93 | 4.10 | - | 1534.7 |
| AHQ-10-1, 5146 - 5149  | K.NFINNPLAQADWAAK.K            | 1673.85315 | 2 | 8.93E-06 | 0.93 | 4.32 | - | 971.2  |
| AHQ-10-2, 5074 - 5139  | K.NFINNPLAQADWAAK.K            | 1673.85315 | 2 | 1.69E-07 | 0.95 | 4.90 | - | 974.0  |
| AHQ-10-7, 4921         | K.NFINNPLAQADWAAK.K            | 1673.85315 | 2 | 2.29E-04 | 0.95 | 4.55 | - | 1062.4 |
| AHQ-10-3, 5001 - 5002  | K.NFINNPLAQADWAAK.K            | 1673.85315 | 2 | 1.24E-04 | 0.96 | 5.26 | - | 1053.0 |
| AHQ-10-13, 5329        | K.NFINNPLAQADWAAK.K            | 1673.85315 | 2 | 8.62E-06 | 0.88 | 3.74 | - | 734.8  |
| AHQ-10-2, 5466         | K.NFINNPLAQADWAAK.K            | 1673.85315 | 2 | 3.87E-12 | 0.94 | 4.32 | - | 871.6  |
| AHQ-10-14, 4965        | K.NFINNPLAQADWAAK.K            | 1673.85315 | 2 | 9.79E-07 | 0.91 | 4.31 | - | 815.3  |
| AHQ-10-5, 5449         | K.NFINNPLAQADWAAK.K            | 1673.85315 | 2 | 6.81E-08 | 0.92 | 3.70 | - | 981.4  |
| AHQ-10-6, 4935         | K.NFINNPLAQADWAAK.K            | 1673.85315 | 2 | 9.89E-09 | 0.91 | 3.82 | - | 974.5  |
| AHQ-10-5, 5028         | K.NFINNPLAQADWAAK.K            | 1673.85315 | 2 | 1.04E-10 | 0.96 | 5.14 | - | 1243.6 |
| AHQ-10-13, 5225 - 5279 | K.NFINNPLAQADWAAK.K            | 1673.85315 | 2 | 3.34E-04 | 0.92 | 4.04 | - | 978.4  |
| AHQ-10-3, 2783         | K.NKHEAMITDEER.L               | 1586.75247 | 3 | 7.00E-05 | 0.90 | 3.86 | - | 1107.6 |
| AHQ-10-3, 2775         | K.NKHEAMITDEER.L               | 1586.75247 | 2 | 2.32E-08 | 0.92 | 3.08 | - | 1208.3 |
| AHQ-10-1, 5003         | K.NLPIYSEEIVEM*YK.G            | 1744.98660 | 2 | 2.25E-06 | 0.95 | 3.95 | - | 1160.0 |
| AHQ-10-9, 4595         | K.NLPIYSEEIVEM*YK.G            | 1744.98660 | 2 | 3.86E-04 | 0.61 | 2.63 | - | 421.7  |
| AHQ-10-4, 4919         | K.NLPIYSEEIVEM*YK.G            | 1744.98660 | 2 | 4.39E-04 | 0.88 | 3.42 | - | 598.1  |
| AHQ-10-5, 5392 - 5407  | K.NLPIYSEEIVEM*YK.G            | 1728.98720 | 2 | 1.42E-04 | 0.88 | 3.42 | - | 573.1  |
| AHQ-10-7, 5308         | K.NLPIYSEEIVEM*YK.G            | 1728.98720 | 2 | 4.67E-04 | 0.91 | 3.52 | - | 717.2  |
| AHQ-10-5, 4888         | K.NLPIYSEEIVEM*YK.G            | 1744.98660 | 2 | 1.65E-07 | 0.95 | 4.87 | - | 821.7  |
| AHQ-10-3, 5345         | K.NLPIYSEEIVEM*YK.G            | 1728.98720 | 2 | 4.56E-04 | 0.56 | 2.62 | - | 342.3  |
| AHQ-10-2, 4940 - 4942  | K.NLPIYSEEIVEM*YK.G            | 1744.98660 | 2 | 1.90E-04 | 0.97 | 4.89 | - | 1295.2 |
| AHQ-10-3, 4857 - 4858  | K.NLPIYSEEIVEM*YK.G            | 1744.98660 | 2 | 4.53E-08 | 0.95 | 4.23 | - | 1346.0 |
| AHQ-10-2, 5427 - 5430  | K.NLPIYSEEIVEM*YK.G            | 1728.98720 | 2 | 9.92E-09 | 0.89 | 3.79 | - | 653.7  |
| AHQ-10-4, 5427 - 5428  | K.NLPIYSEEIVEM*YK.G            | 1728.98720 | 2 | 2.13E-05 | 0.93 | 3.99 | - | 844.5  |
| AHQ-10-2, 5247         | K.NM*DPLNDNIATLLHQSSDK.F       | 2143.32109 | 3 | 2.20E-05 | 0.64 | 3.07 | - | 639.0  |
| AHQ-10-2, 4880         | K.NM*DPLNDNIATLLHQSSDK.F       | 2143.32109 | 2 | 1.91E-06 | 0.92 | 3.61 | - | 1124.6 |
| AHQ-10-2, 4876 - 4883  | K.NM*DPLNDNIATLLHQSSDK.F       | 2143.32109 | 3 | 5.07E-07 | 0.83 | 3.46 | - | 934.4  |
| AHQ-10-2, 3287         | R.QAQQRDELADAEIANSSGK.G        | 2090.15168 | 3 | 4.37E-05 | 0.89 | 4.21 | - | 738.6  |
| AHQ-10-2, 3355         | R.QAQQRDELADAEIANSSGK.G        | 2090.15168 | 2 | 8.12E-05 | 0.59 | 3.16 | - | 360.8  |
| AHQ-10-3, 2883         | R.QAQQRDELADAEIANSSGK.G        | 2090.15168 | 2 | 2.03E-04 | 0.76 | 3.57 | - | 341.5  |
| AHQ-10-2, 2931         | R.QAQQRDELADAEIANSSGK.G        | 2090.15168 | 3 | 4.95E-04 | 0.89 | 4.19 | - | 1031.5 |
| AHQ-10-2, 2930         | R.QAQQRDELADAEIANSSGK.G        | 2090.15168 | 2 | 1.65E-04 | 0.76 | 3.37 | - | 472.5  |
| AHQ-10-2, 2454         | K.QIATLHAQVADM*K.K             | 1442.66637 | 2 | 5.62E-04 | 0.79 | 3.25 | - | 481.4  |
| AHQ-10-2, 2152         | R.QLEEAEEEAQR.A                | 1332.35590 | 2 | 6.93E-06 | 0.75 | 3.10 | - | 591.5  |
| AHQ-10-2, 3020 - 3064  | K.QLTENERGELANEVK.V            | 1730.85818 | 2 | 8.14E-04 | 0.71 | 3.41 | - | 421.9  |
| AHQ-10-6, 3560         | R.RGDLPFVVPV.R                 | 1156.36217 | 2 | 3.40E-05 | 0.90 | 3.26 | - | 996.8  |
| AHQ-10-8, 3501         | R.RGDLPFVVPV.R                 | 1156.36217 | 2 | 2.11E-05 | 0.91 | 3.23 | - | 1222.9 |
| AHQ-10-11, 3534        | R.RGDLPFVVPV.R                 | 1156.36217 | 2 | 1.24E-04 | 0.90 | 3.58 | - | 1073.8 |
| AHQ-10-4, 3619         | R.RGDLPFVVPV.R                 | 1156.36217 | 2 | 1.97E-04 | 0.92 | 3.68 | - | 1135.8 |
| AHQ-10-12, 3618        | R.RGDLPFVVPV.R                 | 1156.36217 | 2 | 1.00E-04 | 0.89 | 3.40 | - | 839.1  |
| AHQ-10-3, 3617 - 3633  | R.RGDLPFVVPV.R                 | 1156.36217 | 2 | 1.96E-06 | 0.95 | 3.92 | - | 1160.9 |
| AHQ-10-13, 3621 - 3700 | R.RGDLPFVVPV.R                 | 1156.36217 | 2 | 4.09E-05 | 0.89 | 3.23 | - | 912.2  |
| AHQ-10-13, 4019        | R.RGDLPFVVPV.R                 | 1156.36217 | 2 | 2.89E-05 | 0.70 | 2.62 | - | 610.2  |
| AHQ-10-1, 3807         | R.RGDLPFVVPV.R                 | 1156.36217 | 2 | 7.05E-07 | 0.95 | 3.87 | - | 1306.1 |
| AHQ-10-5, 3603 - 3613  | R.RGDLPFVVPV.R                 | 1156.36217 | 2 | 1.04E-04 | 0.93 | 3.41 | - | 1264.3 |
| AHQ-10-3, 6161         | R.RKLEGDSTDLSDQIAELQAIK.M      | 2773.04667 | 3 | 3.34E-06 | 0.96 | 5.75 | - | 1538.3 |
| AHQ-10-2, 6230 - 6302  | R.RKLEGDSTDLSDQIAELQAIK.M      | 2773.04667 | 3 | 4.59E-08 | 0.94 | 5.55 | - | 945.7  |
| AHQ-10-13, 5696        | K.SGFEPASLKKEVEGEEAIVLVENGKK.V | 2790.07246 | 3 | 1.81E-08 | 0.88 | 3.76 | - | 1035.4 |
| AHQ-10-2, 5704 - 5764  | K.SGFEPASLKKEVEGEEAIVLVENGKK.V | 2790.07246 | 3 | 2.80E-09 | 0.95 | 5.28 | - | 1180.8 |
| AHQ-10-4, 4552         | K.SM*EAEM*1QLQEELAAAER.A       | 2082.29944 | 2 | 1.08E-10 | 0.98 | 6.28 | - | 1776.0 |
| AHQ-10-2, 5392 - 5450  | K.SM*EAEM*1QLQEELAAAER.A       | 2066.30004 | 2 | 7.11E-07 | 0.96 | 5.69 | - | 1695.2 |
| AHQ-10-1, 5467         | K.SM*EAEM*1QLQEELAAAER.A       | 2066.30004 | 2 | 1.13E-04 | 0.83 | 3.88 | - | 1123.8 |
| AHQ-10-5, 4503         | K.SM*EAEM*1QLQEELAAAER.A       | 2082.29944 | 2 | 8.65E-08 | 0.96 | 5.22 | - | 1672.1 |
| AHQ-10-2, 4563 - 4642  | K.SM*EAEM*1QLQEELAAAER.A       | 2082.29944 | 2 | 3.52E-09 | 0.98 | 5.73 | - | 1845.3 |
| AHQ-10-6, 4425         | K.SM*EAEM*1QLQEELAAAER.A       | 2082.29944 | 2 | 1.24E-05 | 0.91 | 4.17 | - | 951.8  |
| AHQ-10-1, 4623         | K.SM*EAEM*1QLQEELAAAER.A       | 2082.29944 | 2 | 2.67E-08 | 0.95 | 5.06 | - | 1271.5 |
| AHQ-10-3, 4491         | K.SM*EAEM*1QLQEELAAAER.A       | 2082.29944 | 2 | 4.93E-07 | 0.92 | 4.47 | - | 1028.2 |
| AHQ-10-4, 3679 - 3680  | K.TDLLLEPYNK.Y                 | 1206.36989 | 2 | 3.76E-05 | 0.93 | 4.09 | - | 1197.7 |
| AHQ-10-7, 3586         | K.TDLLLEPYNK.Y                 | 1206.36989 | 2 | 1.54E-04 | 0.76 | 3.29 | - | 779.9  |
| AHQ-10-1, 3830         | K.TDLLLEPYNK.Y                 | 1206.36989 | 2 | 2.08E-05 | 0.85 | 3.38 | - | 922.5  |
| AHQ-10-5, 3655         | K.TDLLLEPYNK.Y                 | 1206.36989 | 2 | 4.13E-05 | 0.95 | 4.21 | - | 1282.4 |
| AHQ-10-2, 3734         | K.TDLLLEPYNK.Y                 | 1206.36989 | 2 | 2.55E-05 | 0.94 | 4.15 | - | 1336.1 |
| AHQ-10-3, 3663 - 3670  | K.TDLLLEPYNK.Y                 | 1206.36989 | 2 | 4.13E-05 | 0.91 | 4.23 | - | 934.2  |
| AHQ-10-2, 3884         | K.TDLLLEPYNK.YR.F              | 1525.73037 | 2 | 4.31E-06 | 0.83 | 3.39 | - | 579.9  |
| AHQ-10-4, 4157         | K.TELEDLTDSTAAQQELR.S          | 1921.00969 | 2 | 4.84E-08 | 0.97 | 4.49 | - | 1955.3 |
| AHQ-10-6, 4063         | K.TELEDLTDSTAAQQELR.S          | 1921.00969 | 2 | 5.54E-05 | 0.83 | 3.08 | - | 1305.9 |
| AHQ-10-5, 4144 - 4216  | K.TELEDLTDSTAAQQELR.S          | 1921.00969 | 2 | 5.76E-06 | 0.75 | 3.41 | - | 734.9  |
| AHQ-10-2, 4194         | K.TELEDLTDSTAAQQELR.S          | 1921.00969 | 2 | 4.40E-08 | 0.97 | 5.03 | - | 1842.7 |
| AHQ-10-3, 4117         | K.TELEDLTDSTAAQQELR.S          | 1921.00969 | 2 | 4.23E-09 | 0.95 | 4.63 | - | 1373.4 |
| AHQ-10-1, 4259         | K.TELEDLTDSTAAQQELR.S          | 1921.00969 | 2 | 4.44E-05 | 0.95 | 3.78 | - | 1950.1 |
| AHQ-10-2, 6119 - 6174  | R.TFHIFYLLSGAGEHLK.T           | 1997.28378 | 3 | 7.45E-06 | 0.96 | 5.09 | - | 1404.2 |
| AHQ-10-2, 6258 - 6328  | R.TFHIFYLLSGAGEHLK.T           | 1997.28378 | 3 | 2.72E-05 | 0.96 | 4.57 | - | 1911.3 |
| AHQ-10-6, 4944 - 5004  | K.VEDM*AELTCLNEASVLHNLK.E      | 2304.58397 | 3 | 2.86E-07 | 0.86 | 4.36 | - | 628.7  |
| AHQ-10-2, 5584         | K.VEDM*AELTCLNEASVLHNLK.E      | 2288.58457 | 2 | 9.29E-09 | 0.88 | 4.23 | - | 527.7  |
| AHQ-10-13, 5188 - 5255 | K.VEDM*AELTCLNEASVLHNLK.E      | 2304.58397 | 3 | 1.31E-04 | 0.89 | 3.87 | - | 1039.6 |
| AHQ-10-5, 5027 - 5091  | K.VEDM*AELTCLNEASVLHNLK.E      | 2304.58397 | 3 | 3.52E-06 | 0.89 | 4.59 | - | 585.2  |
| AHQ-10-2, 5075         | K.VEDM*AELTCLNEASVLHNLK.E      | 2304.58397 | 2 | 3.12E-07 | 0.82 | 3.85 | - | 477.2  |
| AHQ-10-2, 5027 - 5104  | K.VEDM*AELTCLNEASVLHNLK.E      | 2304.58397 | 3 | 3.18E-07 | 0.91 | 4.41 | - | 964.0  |
| AHQ-10-2, 2162         | R.VEEEEERCQHLQAEK.K            | 1916.01642 | 2 | 4.06E-05 | 0.94 | 4.08 | - | 1264.5 |
| AHQ-10-3, 2135         | R.VEEEEERCQHLQAEK.K            | 1916.01642 | 3 | 7.43E-05 | 0.84 | 3.93 | - | 640.6  |
| AHQ-10-5, 3935         | K.VIQLYAYVASSHK.S              | 1479.70484 | 2 | 4.15E-06 | 0.91 | 3.40 | - | 1017.9 |
| AHQ-10-1, 4098         | K.VIQLYAYVASSHK.S              | 1479.70484 | 2 | 1.71E-04 | 0.90 | 3.41 | - | 1121.6 |
| AHQ-10-5, 3932         | K.VIQLYAYVASSHK.S              | 1479.70484 | 3 | 2.36E-06 | 0.81 | 3.32 | - | 718.4  |
| AHQ-10-10, 3795        | K.VIQLYAYVASSHK.S              | 1479.70484 | 2 | 2.55E-06 | 0.82 | 2.69 | - | 702.7  |
| AHQ-10-2, 3998         | K.VIQLYAYVASSHK.S              | 1479.70484 | 2 | 4.42E-06 | 0.95 | 3.93 | - | 1322.7 |
| AHQ-10-2, 4003         | K.VIQLYAYVASSHK.S              | 1479.70484 | 3 | 1.40E-05 | 0.85 | 3.95 | - | 619.8  |
| AHQ-10-4, 3957         | K.VIQLYAYVASSHK.S              | 1479.70484 | 3 | 3.52E-05 | 0.66 | 3.18 | - | 526.7  |
| AHQ-10-8, 5949 - 5950  | R.VISGVQLGNIVFK.K              | 1487.81155 | 2 | 1.11E-07 | 0.97 | 5.28 | - | 1490.7 |
| AHQ-10-3, 5917 - 5921  | R.VISGVQLGNIVFK.K              | 1487.81155 | 2 | 4.68E-05 | 0.92 | 3.41 | - | 1228.3 |
| AHQ-10-4, 6005 - 6007  | R.VISGVQLGNIVFK.K              | 1487.81155 | 2 | 3.16E-04 | 0.73 | 2.82 | - | 837.4  |
| AHQ-10-2, 6020         | R.VISGVQLGNIVFK.K              | 1487.81155 | 3 | 1.92E-06 | 0.97 | 4.77 | - | 2597.2 |
| AHQ-10-1, 6033         | R.VISGVQLGNIVFK.K              | 1487.81155 | 2 | 6.26E-07 | 0.95 | 3.82 | - | 1462.3 |
| AHQ-10-7, 5900 - 5901  | R.VISGVQLGNIVFK.K              | 1487.81155 | 2 | 2.33E-08 | 0.98 | 5.87 | - | 1706.5 |
| AHQ-10-2, 6030         | R.VISGVQLGNIVFK.K              | 1487.81155 | 2 | 5.76E-08 | 0.96 | 4.38 | - | 1454.3 |
| AHQ-10-6, 5865         | R.VISGVQLGNIVFK.K              | 1487.81155 | 2 | 1.40E-06 | 0.91 | 3.30 | - | 1146.8 |

|                                                                         |                                           |            |   |          |       |        |       |         |
|-------------------------------------------------------------------------|-------------------------------------------|------------|---|----------|-------|--------|-------|---------|
| AHQ-10-2, 5920 - 6000                                                   | R.VISGLVQLGNIVFK.K                        | 1487.81155 | 2 | 6.98E-05 | 0.96  | 4.42   | -     | 1547.2  |
| AHQ-10-2, 5538 - 5542                                                   | R.VISGLVQLGNIVFK.E                        | 1615.98446 | 2 | 8.52E-08 | 0.94  | 4.35   | -     | 1061.2  |
| AHQ-10-3, 5383 - 5458                                                   | R.VISGLVQLGNIVFK.E                        | 1615.98446 | 2 | 1.20E-04 | 0.84  | 3.37   | -     | 717.5   |
| AHQ-10-5, 5513                                                          | R.VISGLVQLGNIVFK.E                        | 1615.98446 | 2 | 1.21E-04 | 0.92  | 4.15   | -     | 905.4   |
| AHQ-10-2, 2552                                                          | K.VKPLQVSR.Q                              | 1040.28462 | 1 | 3.70E-04 | 0.31  | 2.44   | -     | 291.3   |
| AHQ-10-1, 4841 - 4885                                                   | K.VSHLLGINVDFTR.G                         | 1572.79026 | 2 | 1.24E-08 | 0.89  | 3.31   | -     | 1043.5  |
| AHQ-10-4, 4741 - 4777                                                   | K.VSHLLGINVDFTR.G                         | 1572.79026 | 2 | 4.22E-06 | 0.93  | 3.39   | -     | 1433.1  |
| AHQ-10-5, 4725 - 4753                                                   | K.VSHLLGINVDFTR.G                         | 1572.79026 | 2 | 9.01E-11 | 0.96  | 4.45   | -     | 1604.0  |
| AHQ-10-7, 4638                                                          | K.VSHLLGINVDFTR.G                         | 1572.79026 | 2 | 2.24E-08 | 0.88  | 3.56   | -     | 1028.1  |
| AHQ-10-3, 4685 - 4734                                                   | K.VSHLLGINVDFTR.G                         | 1572.79026 | 2 | 3.25E-07 | 0.93  | 3.73   | -     | 1241.7  |
| AHQ-10-3, 4735                                                          | K.VSHLLGINVDFTR.G                         | 1572.79026 | 3 | 9.72E-06 | 0.95  | 4.44   | -     | 1648.5  |
| AHQ-10-6, 4657                                                          | K.VSHLLGINVDFTR.G                         | 1572.79026 | 3 | 1.84E-07 | 0.91  | 4.17   | -     | 1056.6  |
| AHQ-10-5, 3227 - 3228                                                   | R.VVFQEFR.Q                               | 925.06580  | 2 | 9.46E-05 | 0.75  | 2.74   | -     | 474.5   |
| AHQ-10-5, 3880 - 3953                                                   | R.YEILTPNSIPK.G                           | 1275.47536 | 2 | 8.07E-06 | 0.93  | 3.73   | -     | 1183.7  |
| AHQ-10-5, 4076                                                          | R.YEILTPNSIPK.G                           | 1275.47536 | 2 | 5.38E-05 | 0.95  | 3.22   | -     | 1694.1  |
| AHQ-10-3, 3866 - 3937                                                   | R.YEILTPNSIPK.G                           | 1275.47536 | 2 | 1.90E-04 | 0.87  | 3.54   | -     | 804.9   |
| AHQ-10-3, 4062                                                          | R.YEILTPNSIPK.G                           | 1275.47536 | 2 | 6.36E-05 | 0.75  | 2.94   | -     | 784.7   |
| AHQ-10-2, 3938 - 4011                                                   | R.YEILTPNSIPK.G                           | 1275.47536 | 2 | 1.88E-06 | 0.83  | 3.07   | -     | 970.3   |
| AHQ-10-4, 4087                                                          | R.YEILTPNSIPK.G                           | 1275.47536 | 2 | 9.00E-05 | 0.72  | 2.71   | -     | 728.4   |
| AHQ-10-4, 3887 - 3961                                                   | R.YEILTPNSIPK.G                           | 1275.47536 | 2 | 5.02E-07 | 0.92  | 3.51   | -     | 1047.0  |
| gj[4557705]ref[NP_000217.1] keratin 9 [Homo sapiens]                    |                                           |            |   | 1.11E-14 | 10.44 | 120.35 | 36.80 | 61986.9 |
| AHQ-10-14, 5893                                                         | K.DIENQYETQIQIEHEVSSSGQEVQSSAK.E          | 3266.38667 | 3 | 2.41E-05 | 0.87  | 4.07   | -     | 898.2   |
| AHQ-10-14, 5452                                                         | K.DIENQYETQIQIEHEVSSSGQEVQSSAK.E          | 3266.38667 | 3 | 2.36E-09 | 0.91  | 4.25   | -     | 1142.8  |
| AHQ-10-4, 5919 - 5928                                                   | K.DIENQYETQIQIEHEVSSSGQEVQSSAK.E          | 3266.38667 | 3 | 7.96E-10 | 0.98  | 7.07   | -     | 2043.3  |
| AHQ-10-3, 5758 - 5825                                                   | K.DIENQYETQIQIEHEVSSSGQEVQSSAK.E          | 3266.38667 | 3 | 2.16E-05 | 0.97  | 5.91   | -     | 1521.9  |
| AHQ-10-5, 5571                                                          | K.DIENQYETQIQIEHEVSSSGQEVQSSAK.E          | 3266.38667 | 3 | 3.11E-07 | 0.84  | 3.76   | -     | 811.5   |
| AHQ-10-5, 6004                                                          | K.DIENQYETQIQIEHEVSSSGQEVQSSAK.E          | 3266.38667 | 3 | 1.60E-06 | 0.87  | 4.28   | -     | 723.4   |
| AHQ-10-6, 5779 - 5781                                                   | K.DIENQYETQIQIEHEVSSSGQEVQSSAK.E          | 3266.38667 | 3 | 3.62E-06 | 0.97  | 5.47   | -     | 1655.3  |
| AHQ-10-1, 5619                                                          | K.DIENQYETQIQIEHEVSSSGQEVQSSAK.E          | 3266.38667 | 3 | 4.85E-07 | 0.85  | 3.83   | -     | 703.6   |
| AHQ-10-1, 5941                                                          | K.DIENQYETQIQIEHEVSSSGQEVQSSAK.E          | 3266.38667 | 3 | 1.56E-06 | 0.98  | 5.96   | -     | 2195.9  |
| AHQ-10-7, 5816                                                          | K.DIENQYETQIQIEHEVSSSGQEVQSSAK.E          | 3266.38667 | 3 | 4.74E-10 | 0.97  | 5.43   | -     | 1660.6  |
| AHQ-10-11, 5690                                                         | K.DIENQYETQIQIEHEVSSSGQEVQSSAK.E          | 3266.38667 | 3 | 8.42E-04 | 0.89  | 3.84   | -     | 1088.9  |
| AHQ-10-13, 5458                                                         | K.DIENQYETQIQIEHEVSSSGQEVQSSAK.E          | 3266.38667 | 3 | 9.49E-04 | 0.73  | 3.29   | -     | 638.2   |
| AHQ-10-2, 5915 - 5918                                                   | K.DIENQYETQIQIEHEVSSSGQEVQSSAK.E          | 3266.38667 | 3 | 1.11E-14 | 0.97  | 5.87   | -     | 1615.8  |
| AHQ-10-13, 6003 - 6007                                                  | K.DIENQYETQIQIEHEVSSSGQEVQSSAK.E          | 3266.38667 | 3 | 4.43E-04 | 0.94  | 5.10   | -     | 1175.3  |
| AHQ-10-2, 4423 - 4484                                                   | K.EIETYHNLLEGGQEDFESSGAGK.I               | 2511.59648 | 3 | 2.83E-05 | 0.95  | 4.88   | -     | 1744.9  |
| AHQ-10-1, 4554                                                          | K.EIETYHNLLEGGQEDFESSGAGK.I               | 2511.59648 | 2 | 1.85E-04 | 0.76  | 3.02   | -     | 590.7   |
| AHQ-10-3, 4406                                                          | K.EIETYHNLLEGGQEDFESSGAGK.I               | 2511.59648 | 3 | 5.38E-07 | 0.96  | 5.29   | -     | 1658.6  |
| AHQ-10-14, 4358                                                         | K.EIETYHNLLEGGQEDFESSGAGK.I               | 2511.59648 | 2 | 1.13E-06 | 0.92  | 4.57   | -     | 791.0   |
| AHQ-10-7, 4310                                                          | K.EIETYHNLLEGGQEDFESSGAGK.I               | 2511.59648 | 3 | 5.91E-04 | 0.79  | 3.70   | -     | 899.7   |
| AHQ-10-5, 4404 - 4405                                                   | K.EIETYHNLLEGGQEDFESSGAGK.I               | 2511.59648 | 3 | 7.38E-06 | 0.94  | 5.25   | -     | 1486.7  |
| AHQ-10-14, 4770                                                         | R.GGGGSFGYSYGGGSGGGFASSSLGGGFGGGS.R       | 2706.73770 | 2 | 7.98E-11 | 0.93  | 4.50   | -     | 947.9   |
| AHQ-10-5, 4869 - 4871                                                   | R.GGGGSFGYSYGGGSGGGFASSSLGGGFGGGS.R       | 2706.73770 | 2 | 2.89E-07 | 0.90  | 4.57   | -     | 734.7   |
| AHQ-10-1, 4954                                                          | R.GGGGSFGYSYGGGSGGGFASSSLGGGFGGGS.R       | 2706.73770 | 2 | 1.29E-04 | 0.71  | 2.80   | -     | 569.9   |
| AHQ-10-13, 2560                                                         | R.GSGSGSHGGSGFGGSGSGSYGGEEASGSGGYYGGSGK.S | 3225.08711 | 3 | 1.75E-04 | 0.83  | 4.42   | -     | 841.6   |
| AHQ-10-14, 2538                                                         | R.GSGSGSHGGSGFGGSGSGSYGGEEASGSGGYYGGSGK.S | 3225.08711 | 3 | 5.92E-07 | 0.88  | 4.13   | -     | 876.0   |
| AHQ-10-5, 4992                                                          | R.HGVQLEIEIQSLK.K                         | 1839.03978 | 3 | 1.35E-04 | 0.81  | 3.63   | -     | 1121.7  |
| AHQ-10-1, 5122 - 5174                                                   | R.HGVQLEIEIQSLK.K                         | 1839.03978 | 2 | 1.05E-04 | 0.91  | 4.03   | -     | 1032.6  |
| AHQ-10-3, 4982                                                          | R.HGVQLEIEIQSLK.K                         | 1839.03978 | 3 | 3.10E-06 | 0.88  | 4.59   | -     | 1016.6  |
| AHQ-10-1, 5117                                                          | R.HGVQLEIEIQSLK.K                         | 1839.03978 | 3 | 9.37E-06 | 0.92  | 4.61   | -     | 1158.8  |
| AHQ-10-7, 4892                                                          | R.HGVQLEIEIQSLK.K                         | 1839.03978 | 3 | 2.56E-04 | 0.88  | 4.56   | -     | 958.1   |
| AHQ-10-14, 4824                                                         | R.LASYLQVQALEEANNLENK.I                   | 2378.57787 | 3 | 6.19E-08 | 0.96  | 5.16   | -     | 1771.6  |
| AHQ-10-3, 4874                                                          | R.LASYLQVQALEEANNLENK.I                   | 2378.57787 | 3 | 1.99E-05 | 0.93  | 4.61   | -     | 1490.6  |
| AHQ-10-7, 6305                                                          | K.NYSPYYNTIDDLKQIVDLTVGNK.T               | 2904.13412 | 2 | 3.05E-08 | 0.82  | 3.64   | -     | 419.3   |
| AHQ-10-1, 6355 - 6393                                                   | K.NYSPYYNTIDDLKQIVDLTVGNK.T               | 2904.13412 | 3 | 4.68E-10 | 0.83  | 3.96   | -     | 498.7   |
| AHQ-10-7, 6304                                                          | K.NYSPYYNTIDDLKQIVDLTVGNK.T               | 2904.13412 | 3 | 1.10E-08 | 0.90  | 4.51   | -     | 505.2   |
| AHQ-10-2, 6395                                                          | K.NYSPYYNTIDDLKQIVDLTVGNK.T               | 2904.13412 | 3 | 2.41E-09 | 0.85  | 4.13   | -     | 375.2   |
| AHQ-10-6, 6252 - 6303                                                   | K.NYSPYYNTIDDLKQIVDLTVGNK.T               | 2904.13412 | 3 | 9.36E-09 | 0.87  | 4.32   | -     | 530.9   |
| AHQ-10-2, 6263 - 6318                                                   | K.SDLEM*QYETLQEELM*ALK.K                  | 2204.46135 | 2 | 9.52E-07 | 0.82  | 3.88   | -     | 818.2   |
| AHQ-10-4, 6264 - 6291                                                   | K.SDLEM*QYETLQEELM*ALK.K                  | 2204.46135 | 2 | 9.16E-05 | 0.65  | 3.14   | -     | 687.3   |
| AHQ-10-7, 6193                                                          | K.SDLEM*QYETLQEELM*ALK.K                  | 2204.46135 | 2 | 3.20E-07 | 0.95  | 4.49   | -     | 1322.3  |
| AHQ-10-13, 6137                                                         | K.SDLEM*QYETLQEELM*ALK.K                  | 2204.46135 | 2 | 6.14E-06 | 0.68  | 2.79   | -     | 843.0   |
| AHQ-10-5, 6204 - 6261                                                   | K.SDLEM*QYETLQEELM*ALK.K                  | 2204.46135 | 2 | 2.07E-04 | 0.61  | 3.01   | -     | 584.4   |
| AHQ-10-3, 6165 - 6234                                                   | K.SDLEM*QYETLQEELM*ALK.K                  | 2204.46135 | 2 | 4.03E-06 | 0.95  | 4.53   | -     | 1425.6  |
| AHQ-10-5, 5995                                                          | K.SDLEM*QYETLQEELM*ALK.K                  | 2316.63487 | 3 | 1.78E-04 | 0.75  | 3.19   | -     | 667.1   |
| AHQ-10-1, 3389                                                          | K.TLLDIDNTR.M                             | 1061.17119 | 2 | 7.69E-05 | 0.73  | 3.00   | -     | 534.5   |
| AHQ-10-3, 3205                                                          | K.TLLDIDNTR.M                             | 1061.17119 | 2 | 1.29E-04 | 0.67  | 2.58   | -     | 596.8   |
| AHQ-10-2, 3267                                                          | K.TLLDIDNTR.M                             | 1061.17119 | 2 | 2.42E-06 | 0.74  | 2.95   | -     | 610.9   |
| AHQ-10-5, 3187                                                          | K.TLLDIDNTR.M                             | 1061.17119 | 2 | 4.40E-05 | 0.83  | 3.09   | -     | 728.2   |
| AHQ-10-6, 3151 - 3176                                                   | K.TLLDIDNTR.M                             | 1061.17119 | 2 | 3.23E-04 | 0.65  | 2.75   | -     | 582.6   |
| AHQ-10-14, 3197                                                         | K.TLLDIDNTR.M                             | 1061.17119 | 2 | 1.22E-05 | 0.80  | 2.76   | -     | 661.2   |
| AHQ-10-14, 4682                                                         | K.TLNDMROEYEQLIQ.N                        | 1853.08996 | 2 | 6.95E-04 | 0.62  | 3.09   | -     | 549.1   |
| AHQ-10-8, 3001                                                          | K.VQALEEANNLENK.I                         | 1587.67060 | 2 | 1.04E-04 | 0.95  | 3.47   | -     | 1758.6  |
| AHQ-10-3, 3061                                                          | K.VQALEEANNLENK.I                         | 1587.67060 | 2 | 2.43E-06 | 0.98  | 5.37   | -     | 1776.7  |
| AHQ-10-2, 3332                                                          | K.VQALEEANNLENK.I                         | 1587.67060 | 2 | 6.43E-05 | 0.72  | 3.05   | -     | 695.4   |
| AHQ-10-7, 2985                                                          | K.VQALEEANNLENK.I                         | 1587.67060 | 2 | 2.82E-05 | 0.97  | 5.05   | -     | 1829.8  |
| AHQ-10-13, 3065                                                         | K.VQALEEANNLENK.I                         | 1587.67060 | 2 | 4.15E-05 | 0.96  | 4.24   | -     | 1532.7  |
| AHQ-10-2, 3120                                                          | K.VQALEEANNLENK.I                         | 1587.67060 | 2 | 8.33E-09 | 0.97  | 5.44   | -     | 1724.0  |
| AHQ-10-7, 2617 - 2677                                                   | K.VQALEEANNLENK.I                         | 1587.67060 | 2 | 3.08E-08 | 0.93  | 4.15   | -     | 1248.1  |
| AHQ-10-2, 3114                                                          | K.VQALEEANNLENK.I                         | 1587.67060 | 3 | 5.83E-04 | 0.86  | 3.04   | -     | 1378.4  |
| AHQ-10-3, 3067                                                          | K.VQALEEANNLENK.I                         | 1587.67060 | 3 | 8.03E-07 | 0.90  | 4.07   | -     | 1145.4  |
| AHQ-10-6, 3009                                                          | K.VQALEEANNLENK.I                         | 1587.67060 | 2 | 3.76E-08 | 0.95  | 4.35   | -     | 1293.6  |
| AHQ-10-3, 2673                                                          | K.VQALEEANNLENK.I                         | 1587.67060 | 2 | 1.41E-09 | 0.93  | 4.26   | -     | 1311.0  |
| AHQ-10-6, 2629                                                          | K.VQALEEANNLENK.I                         | 1587.67060 | 2 | 7.42E-11 | 0.90  | 3.84   | -     | 911.6   |
| AHQ-10-5, 3033 - 3036                                                   | K.VQALEEANNLENK.I                         | 1587.67060 | 2 | 4.77E-11 | 0.98  | 5.75   | -     | 2205.0  |
| AHQ-10-1, 3367 - 3442                                                   | K.VQALEEANNLENK.I                         | 1587.67060 | 2 | 4.24E-04 | 0.81  | 2.99   | -     | 896.8   |
| AHQ-10-1, 3242                                                          | K.VQALEEANNLENK.I                         | 1587.67060 | 2 | 4.32E-08 | 0.97  | 4.61   | -     | 1801.3  |
| gj[4505257]ref[NP_002435.1] moesin [Homo sapiens]                       |                                           |            |   | 1.11E-14 | 8.61  | 100.30 | 23.70 | 67819.5 |
| AHQ-10-6, 4017                                                          | R.EDAVLEYLK.I                             | 1080.21287 | 1 | 2.80E-04 | 0.17  | 1.94   | -     | 331.3   |
| AHQ-10-6, 6289                                                          | K.EGILNDDIYCPPEAVLLASVAVQSK.Y             | 2869.19288 | 3 | 2.03E-07 | 0.93  | 5.21   | -     | 844.0   |
| AHQ-10-6, 5568 - 5623                                                   | R.EVWFFGLQYQDIT.G                         | 1661.83760 | 2 | 1.34E-05 | 0.97  | 4.43   | -     | 1544.0  |
| AHQ-10-6, 6255                                                          | K.FYPEDVSEELIQDITQR.L                     | 2083.24065 | 3 | 6.89E-07 | 0.95  | 4.65   | -     | 1642.9  |
| AHQ-10-6, 6259                                                          | K.FYPEDVSEELIQDITQR.L                     | 2083.24065 | 2 | 2.03E-11 | 0.96  | 5.18   | -     | 1192.9  |
| AHQ-10-6, 5116 - 5183                                                   | K.IAQDLEM*YGVNYSIK.N                      | 1908.16395 | 2 | 9.79E-06 | 0.95  | 4.54   | -     | 1149.3  |
| AHQ-10-6, 2115 - 2184                                                   | R.IQVWHEHR.G                              | 1234.34835 | 2 | 9.12E-04 | 0.90  | 2.88   | -     | 1286.3  |
| AHQ-10-6, 4551 - 4561                                                   | K.KTQEQALEMAELTAR.I                       | 1833.10018 | 2 | 1.28E-04 | 0.82  | 3.56   | -     | 589.6   |
| AHQ-10-6, 4547 - 4553                                                   | K.KTQEQALEMAELTAR.I                       | 1833.10018 | 3 | 8.58E-04 | 0.90  | 4.11   | -     | 1530.1  |
| AHQ-10-6, 3468 - 3481                                                   | K.TAMSTPHVAEPAENEQDEQDENGAEASADLR.A       | 3314.36856 | 3 | 1.14E-06 | 0.95  | 5.34   | -     | 1033.6  |
| AHQ-10-6, 3352 - 3411                                                   | K.TAMSTPHVAEPAENEQDEQDENGAEASADLR.A       | 3314.36856 | 3 | 1.11E-14 | 0.97  | 5.55   | -     | 1922.9  |
| AHQ-10-6, 3183                                                          | K.TAM*STPHVAEPAENEQDEQDENGAEASADLR.A      | 3330.36796 | 3 | 4.89E-09 | 0.93  | 5.11   | -     | 1106.9  |
| AHQ-10-6, 3051 - 3111                                                   | K.TAM*STPHVAEPAENEQDEQDENGAEASADLR.A      | 3330.36796 | 3 | 3.94E-14 | 0.97  | 6.09   | -     | 1936.6  |
| AHQ-10-6, 5045                                                          | K.TQEQALEMAELTAR.I                        | 1704.92727 | 3 | 1.34E-06 | 0.96  | 5.10   | -     | 2053.9  |
| AHQ-10-6, 5035                                                          | K.TQEQALEMAELTAR.I                        | 1704.92727 | 2 | 1.03E-04 | 0.96  | 4.20   | -     | 1697.7  |
| gj[8393159]ref[NP_059118.1] calmodulin-like skin protein [Homo sapiens] |                                           |            |   | 2.89E-14 | 0.97  | 10.30  | 15.80 | 15920.4 |
| AHQ-10-3, 4946                                                          | K.AFSAVDTDGNGTINAQELGAALK.A               | 2264.43486 | 2 | 4.91E-07 | 0.49  | 2.94   | -     | 422.0   |
| AHQ-10-14, 5463 - 5524                                                  | K.AFSAVDTDGNGTINAQELGAALK.A               | 2264.43486 | 2 | 2.15E-08 | 0.97  | 5.45   | -     | 1539.1  |
| AHQ-10-14, 4848 - 4904                                                  | K.AFSAVDTDGNGTINAQELGAALK.A               | 2264.43486 | 2 | 2.89E-14 | 0.97  | 6.00   | -     | 1316.0  |

|                                                             |                                    |            |   |          |       |        |       |          |
|-------------------------------------------------------------|------------------------------------|------------|---|----------|-------|--------|-------|----------|
| AHQ-10-14-, 4964                                            | K.AFSAVDTDNGNTINAQELGAALK.A        | 2264.43486 | 2 | 3.40E-06 | 0.95  | 5.23   | -     | 830.2    |
| AHQ-10-1, 5077                                              | K.AFSAVDTDNGNTINAQELGAALK.A        | 2264.43486 | 2 | 2.27E-05 | 0.86  | 3.69   | -     | 647.0    |
| gi 4507485 ref NP_003237.1  thrombospondin 1 [Homo sapiens] |                                    |            |   | 6.88E-14 | 28.96 | 340.32 | 33.40 | 129351.8 |
| AHQ-10-2, 4060                                              | K.AGTLDDLSTLVGK.Q                  | 1303.48711 | 2 | 1.21E-04 | 0.94  | 4.22   | -     | 1395.3   |
| AHQ-10-6, 3905 - 3965                                       | K.AGTLDDLSTLVGK.Q                  | 1303.48711 | 2 | 4.14E-05 | 0.95  | 4.16   | -     | 1512.6   |
| AHQ-10-2, 3952 - 3999                                       | K.AGTLDDLSTLVGK.Q                  | 1303.48711 | 2 | 2.97E-04 | 0.80  | 3.14   | -     | 691.7    |
| AHQ-10-6, 2689 - 2767                                       | R.AQLYDCEK.M                       | 1141.27636 | 2 | 1.16E-04 | 0.87  | 2.95   | -     | 770.6    |
| AHQ-10-5, 2793                                              | R.AQLYDCEK.M                       | 1141.27636 | 2 | 2.69E-04 | 0.78  | 2.66   | -     | 702.3    |
| AHQ-10-6, 2765                                              | R.AQLYDCEK.M                       | 1141.27636 | 2 | 3.40E-04 | 0.80  | 3.00   | -     | 611.1    |
| AHQ-10-3, 2817                                              | R.AQLYDCEK.M                       | 1141.27636 | 2 | 5.07E-04 | 0.72  | 2.54   | -     | 546.1    |
| AHQ-10-2, 5626 - 5682                                       | R.AQLYDCEK.M*ENAELDVPIQSVFTR.D     | 2988.33923 | 3 | 4.22E-07 | 0.96  | 6.01   | -     | 929.0    |
| AHQ-10-4, 5604 - 5680                                       | R.AQLYDCEK.M*ENAELDVPIQSVFTR.D     | 2988.33923 | 3 | 7.30E-05 | 0.91  | 5.04   | -     | 666.8    |
| AHQ-10-6, 5467 - 5528                                       | R.AQLYDCEK.M*ENAELDVPIQSVFTR.D     | 2988.33923 | 3 | 1.07E-07 | 0.96  | 6.49   | -     | 1042.7   |
| AHQ-10-2, 3807 - 3810                                       | R.CENTDPGYNCLPCPPR.F               | 1954.10800 | 2 | 1.33E-08 | 0.92  | 3.93   | -     | 700.1    |
| AHQ-10-3, 3675 - 3737                                       | R.CENTDPGYNCLPCPPR.F               | 1954.10800 | 2 | 2.36E-05 | 0.81  | 3.33   | -     | 574.9    |
| AHQ-10-4, 3644                                              | R.CENTDPGYNCLPCPPR.F               | 1954.10800 | 2 | 3.50E-09 | 0.94  | 4.25   | -     | 694.5    |
| AHQ-10-2, 3698 - 3704                                       | R.CENTDPGYNCLPCPPR.F               | 1954.10800 | 2 | 2.31E-11 | 0.92  | 4.65   | -     | 615.6    |
| AHQ-10-3, 3610 - 3682                                       | R.CENTDPGYNCLPCPPR.F               | 1954.10800 | 2 | 2.91E-06 | 0.91  | 3.88   | -     | 560.9    |
| AHQ-10-5, 3749                                              | R.CENTDPGYNCLPCPPR.F               | 1954.10800 | 2 | 9.28E-05 | 0.70  | 2.93   | -     | 412.2    |
| AHQ-10-3, 3787                                              | K.CNYLGHYSDFPMYR.C                 | 1677.84222 | 2 | 3.61E-04 | 0.79  | 3.37   | -     | 509.2    |
| AHQ-10-4, 3820                                              | K.CNYLGHYSDFPMYR.C                 | 1677.84222 | 2 | 4.17E-05 | 0.83  | 2.79   | -     | 711.1    |
| AHQ-10-2, 3863                                              | K.CNYLGHYSDFPMYR.C                 | 1677.84222 | 2 | 5.89E-06 | 0.80  | 2.80   | -     | 587.4    |
| AHQ-10-3, 3217                                              | K.DCVGDVTENIGCNK.Q                 | 1654.75869 | 2 | 5.03E-07 | 0.74  | 2.56   | -     | 646.0    |
| AHQ-10-2, 3283 - 3284                                       | K.DCVGDVTENIGCNK.Q                 | 1654.75869 | 2 | 5.96E-07 | 0.97  | 4.86   | -     | 1314.1   |
| AHQ-10-4, 3241                                              | K.DCVGDVTENIGCNK.Q                 | 1654.75869 | 2 | 4.06E-06 | 0.91  | 3.78   | -     | 793.6    |
| AHQ-10-5, 3213                                              | K.DCVGDVTENIGCNK.Q                 | 1654.75869 | 2 | 5.98E-04 | 0.75  | 3.00   | -     | 707.4    |
| AHQ-10-2, 3060 - 3082                                       | K.DHSGQVFSVVSNGK.A                 | 1461.56164 | 2 | 9.54E-05 | 0.72  | 3.08   | -     | 488.2    |
| AHQ-10-3, 2834                                              | K.DHSGQVFSVVSNGK.A                 | 1461.56164 | 2 | 2.12E-05 | 0.90  | 3.71   | -     | 956.2    |
| AHQ-10-4, 2865                                              | K.DHSGQVFSVVSNGK.A                 | 1461.56164 | 2 | 3.82E-07 | 0.85  | 3.17   | -     | 757.2    |
| AHQ-10-3, 3154 - 3155                                       | R.DNCQYVYNVDQR.D                   | 1575.64166 | 2 | 5.45E-07 | 0.90  | 3.96   | -     | 957.8    |
| AHQ-10-4, 3133 - 3176                                       | R.DNCQYVYNVDQR.D                   | 1575.64166 | 2 | 3.34E-05 | 0.88  | 3.05   | -     | 1292.9   |
| AHQ-10-3, 3035                                              | R.DNCQYVYNVDQR.D                   | 1575.64166 | 2 | 8.79E-04 | 0.85  | 3.10   | -     | 869.5    |
| AHQ-10-6, 2995                                              | R.DNCQYVYNVDQR.D                   | 1575.64166 | 2 | 1.04E-04 | 0.84  | 3.31   | -     | 780.8    |
| AHQ-10-2, 3214                                              | R.DNCQYVYNVDQR.D                   | 1575.64166 | 2 | 3.35E-05 | 0.93  | 3.87   | -     | 1078.5   |
| AHQ-10-7, 2988                                              | R.DNCQYVYNVDQR.D                   | 1575.64166 | 2 | 1.40E-05 | 0.87  | 2.95   | -     | 1262.3   |
| AHQ-10-7, 3112                                              | R.DNCQYVYNVDQR.D                   | 1575.64166 | 2 | 4.54E-04 | 0.74  | 2.92   | -     | 772.7    |
| AHQ-10-2, 3091                                              | R.DNCQYVYNVDQR.D                   | 1575.64166 | 2 | 3.25E-06 | 0.91  | 3.91   | -     | 956.2    |
| AHQ-10-5, 3028                                              | R.DNCQYVYNVDQR.D                   | 1575.64166 | 2 | 5.30E-05 | 0.77  | 3.34   | -     | 811.9    |
| AHQ-10-5, 3153                                              | R.DNCQYVYNVDQR.D                   | 1575.64166 | 2 | 6.70E-05 | 0.78  | 3.25   | -     | 772.2    |
| AHQ-10-4, 3047                                              | R.DNCQYVYNVDQR.D                   | 1575.64166 | 2 | 8.52E-07 | 0.93  | 3.50   | -     | 1199.1   |
| AHQ-10-6, 3112                                              | R.DNCQYVYNVDQR.D                   | 1575.64166 | 2 | 9.08E-04 | 0.86  | 3.15   | -     | 886.4    |
| AHQ-10-5, 3624                                              | R.DTDM*DGVGDDQDCNCPLEHNPQLDSDSDR.I | 3340.31822 | 3 | 2.55E-08 | 0.84  | 3.59   | -     | 980.1    |
| AHQ-10-3, 3487 - 3567                                       | R.DTDM*DGVGDDQDCNCPLEHNPQLDSDSDR.I | 3340.31822 | 3 | 6.70E-08 | 0.90  | 4.66   | -     | 644.5    |
| AHQ-10-3, 3570 - 3630                                       | R.DTDM*DGVGDDQDCNCPLEHNPQLDSDSDR.I | 3340.31822 | 3 | 6.88E-14 | 0.93  | 5.08   | -     | 741.5    |
| AHQ-10-3, 3929 - 3946                                       | R.DTDM*DGVGDDQDCNCPLEHNPQLDSDSDR.I | 3324.31882 | 3 | 5.65E-07 | 0.91  | 4.72   | -     | 655.7    |
| AHQ-10-2, 3795                                              | R.DTDM*DGVGDDQDCNCPLEHNPQLDSDSDR.I | 3340.31822 | 3 | 7.63E-08 | 0.76  | 3.68   | -     | 436.8    |
| AHQ-10-6, 3540 - 3599                                       | R.DTDM*DGVGDDQDCNCPLEHNPQLDSDSDR.I | 3340.31822 | 3 | 5.87E-11 | 0.90  | 4.52   | -     | 752.0    |
| AHQ-10-2, 3714                                              | R.DTDM*DGVGDDQDCNCPLEHNPQLDSDSDR.I | 3340.31822 | 3 | 1.30E-10 | 0.93  | 4.72   | -     | 990.8    |
| AHQ-10-4, 3628 - 3668                                       | R.DTDM*DGVGDDQDCNCPLEHNPQLDSDSDR.I | 3340.31822 | 3 | 6.75E-10 | 0.93  | 5.09   | -     | 702.3    |
| AHQ-10-7, 3876                                              | R.DTDM*DGVGDDQDCNCPLEHNPQLDSDSDR.I | 3324.31882 | 3 | 4.38E-09 | 0.88  | 4.41   | -     | 466.5    |
| AHQ-10-2, 3651                                              | K.FQDLVDAV.R.A                     | 1063.18877 | 2 | 2.75E-06 | 0.91  | 3.25   | -     | 1115.8   |
| AHQ-10-2, 4218 - 4223                                       | R.FQMPILDPK.G                      | 1089.33277 | 2 | 4.98E-04 | 0.90  | 3.53   | -     | 913.6    |
| AHQ-10-6, 2912                                              | R.FTGSQPPFQQGVEHATANK.Q            | 1877.00666 | 2 | 3.81E-06 | 0.84  | 3.64   | -     | 575.3    |
| AHQ-10-3, 3063                                              | R.FTGSQPPFQQGVEHATANK.Q            | 1877.00666 | 2 | 2.22E-05 | 0.82  | 3.49   | -     | 493.5    |
| AHQ-10-5, 2908 - 2943                                       | R.FTGSQPPFQQGVEHATANK.Q            | 1877.00666 | 3 | 3.48E-06 | 0.76  | 3.46   | -     | 694.9    |
| AHQ-10-5, 2959                                              | R.FTGSQPPFQQGVEHATANK.Q            | 1877.00666 | 2 | 2.37E-06 | 0.94  | 4.88   | -     | 610.3    |
| AHQ-10-3, 2957 - 2959                                       | R.FTGSQPPFQQGVEHATANK.Q            | 1877.00666 | 3 | 2.08E-06 | 0.74  | 3.37   | -     | 565.3    |
| AHQ-10-2, 3006                                              | R.FTGSQPPFQQGVEHATANK.Q            | 1877.00666 | 2 | 1.33E-06 | 0.83  | 3.62   | -     | 598.4    |
| AHQ-10-7, 2888                                              | R.FTGSQPPFQQGVEHATANK.Q            | 1877.00666 | 2 | 3.61E-05 | 0.89  | 4.28   | -     | 436.9    |
| AHQ-10-4, 2877 - 2939                                       | R.FTGSQPPFQQGVEHATANK.Q            | 1877.00666 | 2 | 8.54E-07 | 0.68  | 3.36   | -     | 375.6    |
| AHQ-10-7, 2896                                              | R.FTGSQPPFQQGVEHATANK.Q            | 1877.00666 | 3 | 1.98E-07 | 0.79  | 3.47   | -     | 530.7    |
| AHQ-10-3, 2878 - 2953                                       | R.FTGSQPPFQQGVEHATANK.Q            | 1877.00666 | 2 | 4.17E-06 | 0.87  | 3.91   | -     | 528.4    |
| AHQ-10-8, 2841                                              | R.FTGSQPPFQQGVEHATANK.Q            | 1877.00666 | 2 | 5.69E-07 | 0.81  | 3.72   | -     | 378.7    |
| AHQ-10-5, 5221 - 5223                                       | R.FVFGTTPEDILR.N                   | 1395.58470 | 2 | 8.05E-04 | 0.83  | 3.12   | -     | 664.3    |
| AHQ-10-3, 5181                                              | R.FVFGTTPEDILR.N                   | 1395.58470 | 2 | 5.16E-04 | 0.77  | 2.83   | -     | 594.4    |
| AHQ-10-1, 5323                                              | R.FVFGTTPEDILR.N                   | 1395.58470 | 2 | 5.41E-04 | 0.73  | 2.52   | -     | 544.1    |
| AHQ-10-6, 5120 - 5124                                       | R.FVFGTTPEDILR.N                   | 1395.58470 | 2 | 4.88E-05 | 0.82  | 3.03   | -     | 668.3    |
| AHQ-10-6, 5243                                              | K.GFLLLASLR.Q                      | 990.22407  | 2 | 9.73E-05 | 0.97  | 3.64   | -     | 2055.1   |
| AHQ-10-3, 5313 - 5314                                       | K.GFLLLASLR.Q                      | 990.22407  | 2 | 4.13E-06 | 0.97  | 4.39   | -     | 2090.5   |
| AHQ-10-11, 5160                                             | K.GFLLLASLR.Q                      | 990.22407  | 2 | 5.03E-04 | 0.96  | 3.18   | -     | 2134.1   |
| AHQ-10-4, 5379                                              | K.GFLLLASLR.Q                      | 990.22407  | 2 | 1.56E-04 | 0.97  | 3.83   | -     | 2000.5   |
| AHQ-10-1, 5457                                              | K.GFLLLASLR.Q                      | 990.22407  | 2 | 4.30E-05 | 0.95  | 3.05   | -     | 1985.9   |
| AHQ-10-9, 5024 - 5032                                       | K.GFLLLASLR.Q                      | 990.22407  | 2 | 1.15E-04 | 0.97  | 3.46   | -     | 2207.6   |
| AHQ-10-2, 5390                                              | K.GFLLLASLR.Q                      | 990.22407  | 2 | 7.64E-05 | 0.97  | 3.92   | -     | 2076.2   |
| AHQ-10-7, 5245                                              | K.GFLLLASLR.Q                      | 990.22407  | 2 | 3.82E-04 | 0.94  | 3.36   | -     | 1655.8   |
| AHQ-10-10, 5119                                             | K.GFLLLASLR.Q                      | 990.22407  | 2 | 3.96E-06 | 0.94  | 3.44   | -     | 1617.0   |
| AHQ-10-5, 5348                                              | K.GFLLLASLR.Q                      | 990.22407  | 2 | 2.19E-04 | 0.97  | 3.91   | -     | 2167.4   |
| AHQ-10-5, 4568                                              | K.GGVNDFQGVQLQVNR.F                | 1617.74799 | 2 | 1.14E-05 | 0.69  | 3.17   | -     | 646.3    |
| AHQ-10-2, 4224                                              | K.GGVNDFQGVQLQVNR.F                | 1617.74799 | 2 | 7.81E-05 | 0.86  | 3.61   | -     | 769.0    |
| AHQ-10-2, 4370 - 4430                                       | K.GGVNDFQGVQLQVNR.F                | 1617.74799 | 2 | 4.01E-10 | 0.94  | 4.37   | -     | 1222.9   |
| AHQ-10-6, 4223 - 4283                                       | K.GGVNDFQGVQLQVNR.F                | 1617.74799 | 2 | 1.92E-06 | 0.91  | 4.42   | -     | 795.5    |
| AHQ-10-10, 4138 - 4194                                      | K.GGVNDFQGVQLQVNR.F                | 1617.74799 | 2 | 3.20E-05 | 0.90  | 3.89   | -     | 908.8    |
| AHQ-10-5, 4297 - 4367                                       | K.GGVNDFQGVQLQVNR.F                | 1617.74799 | 2 | 4.13E-05 | 0.91  | 4.30   | -     | 933.7    |
| AHQ-10-3, 4453 - 4457                                       | K.GGVNDFQGVQLQVNR.F                | 1617.74799 | 2 | 2.72E-05 | 0.82  | 3.78   | -     | 762.6    |
| AHQ-10-8, 4247                                              | K.GGVNDFQGVQLQVNR.F                | 1617.74799 | 2 | 2.99E-04 | 0.86  | 3.88   | -     | 702.3    |
| AHQ-10-7, 4200 - 4260                                       | K.GGVNDFQGVQLQVNR.F                | 1617.74799 | 2 | 3.31E-04 | 0.93  | 4.24   | -     | 1065.4   |
| AHQ-10-3, 4297 - 4357                                       | K.GGVNDFQGVQLQVNR.F                | 1617.74799 | 2 | 4.18E-08 | 0.92  | 4.25   | -     | 964.7    |
| AHQ-10-1, 4449 - 4507                                       | K.GGVNDFQGVQLQVNR.F                | 1617.74799 | 2 | 4.88E-04 | 0.70  | 3.72   | -     | 360.4    |
| AHQ-10-9, 4047 - 4104                                       | K.GGVNDFQGVQLQVNR.F                | 1617.74799 | 2 | 7.71E-06 | 0.93  | 4.37   | -     | 1091.3   |
| AHQ-10-5, 4459 - 4471                                       | K.GGVNDFQGVQLQVNR.F                | 1617.74799 | 2 | 5.18E-05 | 0.87  | 4.08   | -     | 752.8    |
| AHQ-10-4, 4164 - 4241                                       | K.GGVNDFQGVQLQVNR.F                | 1617.74799 | 2 | 2.53E-04 | 0.55  | 3.15   | -     | 466.3    |
| AHQ-10-4, 4320 - 4399                                       | K.GGVNDFQGVQLQVNR.F                | 1617.74799 | 2 | 4.31E-06 | 0.93  | 4.58   | -     | 957.6    |
| AHQ-10-4, 4612                                              | K.GGVNDFQGVQLQVNR.F                | 1617.74799 | 2 | 1.07E-05 | 0.88  | 3.69   | -     | 813.1    |
| AHQ-10-5, 2208                                              | K.GPDPSSPAFR.I                     | 1031.10364 | 2 | 2.36E-04 | 0.65  | 2.63   | -     | 549.9    |
| AHQ-10-6, 2217 - 2227                                       | K.GPDPSSPAFR.I                     | 1031.10364 | 2 | 7.37E-05 | 0.82  | 2.90   | -     | 677.7    |
| AHQ-10-3, 2267                                              | K.GPDPSSPAFR.I                     | 1031.10364 | 2 | 3.73E-04 | 0.73  | 2.77   | -     | 550.3    |
| AHQ-10-2, 2302                                              | K.GPDPSSPAFR.I                     | 1031.10364 | 2 | 4.69E-05 | 0.69  | 2.61   | -     | 533.7    |
| AHQ-10-3, 3183                                              | R.GTLALER.K                        | 873.03234  | 2 | 8.01E-04 | 0.87  | 3.04   | -     | 914.0    |
| AHQ-10-6, 3119                                              | R.GTLALER.K                        | 873.03234  | 2 | 1.69E-04 | 0.88  | 3.46   | -     | 878.4    |
| AHQ-10-9, 2984                                              | R.GTLALER.K                        | 873.03234  | 2 | 8.47E-04 | 0.81  | 2.74   | -     | 758.4    |
| AHQ-10-10, 3091                                             | R.GTLALER.K                        | 873.03234  | 2 | 4.51E-04 | 0.86  | 2.81   | -     | 1035.7   |
| AHQ-10-4, 3164 - 3168                                       | R.GTLALER.K                        | 873.03234  | 2 | 3.62E-04 | 0.87  | 3.28   | -     | 910.2    |
| AHQ-10-4, 2871                                              | K.GTSQNDPNWVVR.H                   | 1373.45608 | 2 | 9.53E-04 | 0.28  | 2.59   | -     | 467.5    |
| AHQ-10-5, 5999 - 6061                                       | R.IEDANLIPYPDDKFQDLVDAV.R.A        | 2580.87450 | 3 | 1.61E-07 | 0.88  | 4.46   | -     | 496.5    |
| AHQ-10-14-, 5900 - 5964                                     | R.IEDANLIPYPDDKFQDLVDAV.R.A        | 2580.87450 | 3 | 3.75E-05 | 0.67  | 3.22   | -     | 319.1    |
| AHQ-10-3, 5926 - 5985                                       | R.IEDANLIPYPDDKFQDLVDAV.R.A        | 2580.87450 | 3 | 3.13E-05 | 0.87  | 4.32   | -     | 504.4    |
| AHQ-10-6, 5861 - 5915                                       | R.IEDANLIPYPDDKFQDLVDAV.R.A        | 2580.87450 | 3 | 4.49E-05 | 0.54  | 3.17   | -     | 281.9    |

|                                                             |                              |            |   |          |       |        |       |          |
|-------------------------------------------------------------|------------------------------|------------|---|----------|-------|--------|-------|----------|
| AHQ-10-7, 5921                                              | R.IEDANLIPPVDDKFQDLVDAVR.A   | 2580.87450 | 2 | 5.12E-06 | 0.78  | 3.28   | -     | 343.7    |
| AHQ-10-13, 6107 - 6123                                      | R.IEDANLIPPVDDKFQDLVDAVR.A   | 2580.87450 | 3 | 5.57E-05 | 0.84  | 4.34   | -     | 318.4    |
| AHQ-10-4, 5995 - 6032                                       | R.IEDANLIPPVDDKFQDLVDAVR.A   | 2580.87450 | 3 | 2.17E-09 | 0.85  | 4.36   | -     | 539.8    |
| AHQ-10-1, 6049 - 6113                                       | R.IEDANLIPPVDDKFQDLVDAVR.A   | 2580.87450 | 3 | 7.10E-06 | 0.57  | 3.10   | -     | 294.9    |
| AHQ-10-2, 6014 - 6078                                       | R.IEDANLIPPVDDKFQDLVDAVR.A   | 2580.87450 | 3 | 2.07E-08 | 0.93  | 5.08   | -     | 727.1    |
| AHQ-10-6, 5971 - 5996                                       | R.IEDANLIPPVDDKFQDLVDAVR.A   | 2580.87450 | 3 | 1.45E-05 | 0.67  | 3.31   | -     | 563.0    |
| AHQ-10-7, 2660                                              | K.IMADSGPIYDK.T              | 1210.38204 | 2 | 1.18E-06 | 0.87  | 3.09   | -     | 740.2    |
| AHQ-10-6, 2660                                              | K.IMADSGPIYDK.T              | 1210.38204 | 2 | 1.37E-05 | 0.92  | 3.42   | -     | 811.3    |
| AHQ-10-11, 2670                                             | K.IMADSGPIYDK.T              | 1210.38204 | 2 | 1.67E-05 | 0.81  | 3.19   | -     | 573.7    |
| AHQ-10-2, 2766                                              | K.IMADSGPIYDK.T              | 1210.38204 | 2 | 3.92E-06 | 0.93  | 3.69   | -     | 926.2    |
| AHQ-10-2, 6330 - 6331                                       | R.IPESGGDINSVDFIFELTGAAR.K   | 2196.35899 | 2 | 2.46E-11 | 0.97  | 5.66   | -     | 1157.6   |
| AHQ-10-11, 6099                                             | R.IPESGGDINSVDFIFELTGAAR.K   | 2196.35899 | 2 | 2.18E-04 | 0.89  | 4.28   | -     | 606.1    |
| AHQ-10-7, 6233                                              | R.IPESGGDINSVDFIFELTGAAR.K   | 2196.35899 | 2 | 2.43E-10 | 0.94  | 4.73   | -     | 899.3    |
| AHQ-10-13, 6359                                             | R.IPESGGDINSVDFIFELTGAAR.K   | 2196.35899 | 2 | 3.05E-06 | 0.93  | 4.54   | -     | 774.7    |
| AHQ-10-3, 6229                                              | R.IPESGGDINSVDFIFELTGAAR.K   | 2196.35899 | 2 | 7.66E-14 | 0.96  | 5.70   | -     | 974.6    |
| AHQ-10-13, 6172 - 6178                                      | R.IPESGGDINSVDFIFELTGAAR.K   | 2196.35899 | 2 | 1.73E-08 | 0.95  | 5.01   | -     | 1103.1   |
| AHQ-10-3, 6235 - 6239                                       | R.IPESGGDINSVDFIFELTGAAR.K   | 2196.35899 | 3 | 3.95E-04 | 0.80  | 3.63   | -     | 875.0    |
| AHQ-10-5, 6273 - 6315                                       | R.IPESGGDINSVDFIFELTGAAR.K   | 2196.35899 | 2 | 1.43E-09 | 0.97  | 6.01   | -     | 1388.3   |
| AHQ-10-5, 6320                                              | R.IPESGGDINSVDFIFELTGAAR.K   | 2196.35899 | 3 | 4.92E-05 | 0.81  | 3.72   | -     | 860.8    |
| AHQ-10-4, 6308                                              | R.IPESGGDINSVDFIFELTGAAR.K   | 2196.35899 | 2 | 8.91E-04 | 0.76  | 2.98   | -     | 623.7    |
| AHQ-10-14, 6209 - 6212                                      | R.IPESGGDINSVDFIFELTGAAR.K   | 2196.35899 | 2 | 1.45E-11 | 0.93  | 4.70   | -     | 846.6    |
| AHQ-10-6, 6183                                              | R.IPESGGDINSVDFIFELTGAAR.K   | 2196.35899 | 2 | 8.64E-09 | 0.96  | 5.28   | -     | 1079.8   |
| AHQ-10-2, 6335                                              | R.IPESGGDINSVDFIFELTGAAR.K   | 2196.35899 | 3 | 1.99E-06 | 0.82  | 4.05   | -     | 601.1    |
| AHQ-10-9, 2352                                              | R.KDHSQGVFVSVVSNKG.A         | 1589.73455 | 2 | 4.49E-05 | 0.68  | 2.72   | -     | 699.9    |
| AHQ-10-4, 2468                                              | R.KDHSQGVFVSVVSNKG.A         | 1589.73455 | 3 | 2.63E-05 | 0.88  | 3.88   | -     | 1056.9   |
| AHQ-10-2, 2595                                              | R.KDHSQGVFVSVVSNKG.A         | 1589.73455 | 2 | 7.27E-09 | 0.74  | 3.00   | -     | 707.9    |
| AHQ-10-2, 2554                                              | R.KVTEENKELANELR.R           | 1673.84976 | 2 | 7.44E-07 | 0.93  | 4.65   | -     | 1100.8   |
| AHQ-10-6, 2447 - 2509                                       | R.KVTEENKELANELR.R           | 1673.84976 | 2 | 5.47E-06 | 0.92  | 4.31   | -     | 1218.9   |
| AHQ-10-3, 2505                                              | R.KVTEENKELANELR.R           | 1673.84976 | 2 | 6.91E-10 | 0.94  | 4.75   | -     | 1176.5   |
| AHQ-10-3, 2509                                              | R.KVTEENKELANELR.R           | 1673.84976 | 3 | 1.27E-07 | 0.66  | 3.28   | -     | 491.5    |
| AHQ-10-8, 2422                                              | R.KVTEENKELANELR.R           | 1673.84976 | 2 | 4.78E-06 | 0.85  | 3.69   | -     | 1012.6   |
| AHQ-10-4, 2472                                              | R.KVTEENKELANELR.R           | 1673.84976 | 2 | 5.95E-08 | 0.92  | 4.07   | -     | 1395.2   |
| AHQ-10-2, 2550                                              | R.KVTEENKELANELR.R           | 1673.84976 | 3 | 2.04E-05 | 0.67  | 3.48   | -     | 567.2    |
| AHQ-10-7, 2448                                              | R.KVTEENKELANELR.R           | 1673.84976 | 2 | 1.20E-10 | 0.93  | 4.60   | -     | 1071.3   |
| AHQ-10-5, 2467                                              | R.KVTEENKELANELR.R           | 1673.84976 | 2 | 6.49E-11 | 0.93  | 4.23   | -     | 1312.3   |
| AHQ-10-2, 2619                                              | R.LCNSPSPQMNKPKCEGEAR.E      | 2135.34557 | 2 | 2.67E-04 | 0.76  | 3.63   | -     | 451.0    |
| AHQ-10-4, 2547                                              | R.LCNSPSPQMNKPKCEGEAR.E      | 2135.34557 | 3 | 2.15E-07 | 0.87  | 3.70   | -     | 955.8    |
| AHQ-10-2, 2284                                              | R.LCNSPSPQMNKPKCEGEAR.E      | 2151.34497 | 2 | 3.84E-06 | 0.91  | 4.02   | -     | 689.2    |
| AHQ-10-5, 2548                                              | R.LCNSPSPQMNKPKCEGEAR.E      | 2135.34557 | 3 | 1.38E-04 | 0.87  | 3.83   | -     | 867.5    |
| AHQ-10-5, 2201                                              | R.LCNSPSPQMNKPKCEGEAR.E      | 2151.34497 | 3 | 8.10E-04 | 0.49  | 3.17   | -     | 409.8    |
| AHQ-10-11, 4932                                             | K.M*ENALDVPQISVFTFR.D        | 1866.08547 | 2 | 1.26E-05 | 0.70  | 3.12   | -     | 394.2    |
| AHQ-10-6, 4997                                              | K.M*ENALDVPQISVFTFR.D        | 1866.08547 | 2 | 4.72E-04 | 0.65  | 3.02   | -     | 398.4    |
| AHQ-10-4, 5083 - 5157                                       | K.M*ENALDVPQISVFTFR.D        | 1866.08547 | 2 | 9.83E-08 | 0.95  | 4.66   | -     | 825.5    |
| AHQ-10-5, 3121                                              | K.QVTQSYWDTNPNTR.A           | 1596.68241 | 2 | 1.72E-05 | 0.81  | 3.16   | -     | 612.1    |
| AHQ-10-2, 3195                                              | K.QVTQSYWDTNPNTR.A           | 1596.68241 | 2 | 3.17E-07 | 0.87  | 3.62   | -     | 649.9    |
| AHQ-10-4, 3135                                              | K.QVTQSYWDTNPNTR.A           | 1596.68241 | 2 | 2.75E-07 | 0.90  | 3.38   | -     | 830.9    |
| AHQ-10-3, 3141 - 3158                                       | K.QVTQSYWDTNPNTR.A           | 1596.68241 | 2 | 3.06E-06 | 0.90  | 3.65   | -     | 937.1    |
| AHQ-10-11, 3071 - 3086                                      | K.QVTQSYWDTNPNTR.A           | 1596.68241 | 2 | 1.09E-05 | 0.58  | 2.77   | -     | 438.2    |
| AHQ-10-7, 3070                                              | K.QVTQSYWDTNPNTR.A           | 1596.68241 | 2 | 3.30E-06 | 0.77  | 3.34   | -     | 569.8    |
| AHQ-10-6, 3088                                              | K.QVTQSYWDTNPNTR.A           | 1596.68241 | 2 | 6.09E-07 | 0.78  | 3.07   | -     | 611.3    |
| AHQ-10-5, 2892                                              | R.RPPLCYHNGVQYR.N            | 1661.86889 | 3 | 6.06E-05 | 0.92  | 3.92   | -     | 1146.5   |
| AHQ-10-5, 2889                                              | R.RPPLCYHNGVQYR.N            | 1661.86889 | 2 | 7.87E-07 | 0.75  | 2.77   | -     | 559.2    |
| AHQ-10-2, 2964                                              | R.RPPLCYHNGVQYR.N            | 1661.86889 | 2 | 4.80E-05 | 0.63  | 2.82   | -     | 508.5    |
| AHQ-10-2, 2370                                              | R.SCDSLNRCGSSVQTR.T          | 1973.04966 | 2 | 1.84E-08 | 0.52  | 2.70   | -     | 318.0    |
| AHQ-10-3, 3794 - 3814                                       | K.SITLQVQEDR.A               | 1208.34588 | 2 | 1.71E-06 | 0.96  | 4.10   | -     | 1702.3   |
| AHQ-10-5, 3791                                              | K.SITLQVQEDR.A               | 1208.34588 | 2 | 2.45E-05 | 0.92  | 3.50   | -     | 1267.3   |
| AHQ-10-6, 3728                                              | K.SITLQVQEDR.A               | 1208.34588 | 2 | 4.12E-07 | 0.93  | 3.08   | -     | 1459.8   |
| AHQ-10-11, 3715                                             | K.SITLQVQEDR.A               | 1208.34588 | 2 | 1.38E-05 | 0.89  | 3.17   | -     | 1044.8   |
| AHQ-10-1, 3983                                              | K.SITLQVQEDR.A               | 1208.34588 | 2 | 5.98E-05 | 0.88  | 3.15   | -     | 844.3    |
| AHQ-10-13, 3816                                             | K.SITLQVQEDR.A               | 1208.34588 | 2 | 3.23E-07 | 0.91  | 2.94   | -     | 1346.1   |
| AHQ-10-2, 3872                                              | K.SITLQVQEDR.A               | 1208.34588 | 2 | 4.71E-05 | 0.95  | 3.92   | -     | 1515.2   |
| AHQ-10-4, 3811                                              | K.SITLQVQEDR.A               | 1208.34588 | 2 | 2.71E-05 | 0.89  | 3.07   | -     | 1028.7   |
| AHQ-10-9, 3560                                              | K.SITLQVQEDR.A               | 1208.34588 | 2 | 1.18E-05 | 0.88  | 3.06   | -     | 1073.8   |
| AHQ-10-2, 4376 - 4392                                       | R.TIVTTLQDSIR.K              | 1247.42355 | 2 | 8.34E-08 | 0.97  | 4.58   | -     | 1663.7   |
| AHQ-10-9, 4055 - 4071                                       | R.TIVTTLQDSIR.K              | 1247.42355 | 2 | 1.03E-06 | 0.97  | 3.84   | -     | 2075.4   |
| AHQ-10-5, 3341                                              | R.TIVTTLQDSIR.K              | 1247.42355 | 2 | 2.81E-05 | 0.95  | 3.30   | -     | 1588.1   |
| AHQ-10-7, 4204 - 4205                                       | R.TIVTTLQDSIR.K              | 1247.42355 | 2 | 4.89E-07 | 0.96  | 4.05   | -     | 1573.7   |
| AHQ-10-3, 4309                                              | R.TIVTTLQDSIR.K              | 1247.42355 | 2 | 2.83E-07 | 0.97  | 3.76   | -     | 2212.3   |
| AHQ-10-1, 4463                                              | R.TIVTTLQDSIR.K              | 1247.42355 | 2 | 1.41E-06 | 0.95  | 3.77   | -     | 1269.8   |
| AHQ-10-5, 4307 - 4328                                       | R.TIVTTLQDSIR.K              | 1247.42355 | 2 | 2.45E-07 | 0.97  | 4.01   | -     | 2189.9   |
| AHQ-10-6, 4229 - 4236                                       | R.TIVTTLQDSIR.K              | 1247.42355 | 2 | 5.72E-06 | 0.96  | 3.84   | -     | 1606.3   |
| AHQ-10-4, 3369                                              | R.TIVTTLQDSIR.K              | 1247.42355 | 2 | 8.53E-06 | 0.96  | 3.68   | -     | 1993.0   |
| AHQ-10-6, 3295                                              | R.TIVTTLQDSIR.K              | 1247.42355 | 2 | 6.45E-04 | 0.97  | 3.99   | -     | 2480.4   |
| AHQ-10-2, 5890                                              | K.TKDLQAICIGISDELSSM*VLELR.G | 2658.02070 | 3 | 5.59E-08 | 0.95  | 4.42   | -     | 1619.3   |
| AHQ-10-6, 5747 - 5767                                       | K.TKDLQAICIGISDELSSM*VLELR.G | 2658.02070 | 3 | 4.14E-05 | 0.91  | 4.43   | -     | 1078.6   |
| AHQ-10-4, 2684                                              | K.VTEENKELANELR.R            | 1545.67685 | 2 | 2.91E-09 | 0.93  | 4.12   | -     | 1163.4   |
| AHQ-10-3, 2709                                              | K.VTEENKELANELR.R            | 1545.67685 | 2 | 5.94E-07 | 0.75  | 3.53   | -     | 583.1    |
| AHQ-10-5, 2685 - 2689                                       | K.VTEENKELANELR.R            | 1545.67685 | 2 | 1.36E-08 | 0.91  | 3.77   | -     | 899.3    |
| AHQ-10-5, 2688                                              | K.VTEENKELANELR.R            | 1545.67685 | 3 | 3.19E-07 | 0.84  | 3.72   | -     | 950.3    |
| AHQ-10-6, 2655 - 2656                                       | K.VTEENKELANELR.R            | 1545.67685 | 2 | 1.65E-07 | 0.89  | 4.03   | -     | 868.3    |
| AHQ-10-2, 2754 - 2764                                       | K.VTEENKELANELR.R            | 1545.67685 | 2 | 1.98E-07 | 0.85  | 3.44   | -     | 875.2    |
| gi 4501891 ref NP_001093.1  actinin, alpha 1 [Homo sapiens] |                              |            |   | 7.61E-14 | 29.03 | 340.34 | 41.40 | 103056.9 |
| AHQ-10-5, 5179                                              | K.AGTQIENIEEDFRDGLK.L        | 1936.06918 | 2 | 1.44E-05 | 0.75  | 4.10   | -     | 620.3    |
| AHQ-10-4, 5212 - 5215                                       | K.AGTQIENIEEDFRDGLK.L        | 1936.06918 | 2 | 3.56E-06 | 0.88  | 4.71   | -     | 887.1    |
| AHQ-10-5, 5413 - 5420                                       | K.AIMTYVSSFYHAFSGAQK.A       | 2025.27263 | 2 | 6.49E-04 | 0.82  | 3.87   | -     | 579.1    |
| AHQ-10-8, 6023                                              | K.AIMTYVSSFYHAFSGAQK.A       | 2009.27323 | 2 | 3.25E-05 | 0.21  | 2.56   | -     | 158.2    |
| AHQ-10-5, 6056                                              | K.AIMTYVSSFYHAFSGAQK.A       | 2009.27323 | 2 | 7.06E-04 | 0.88  | 3.99   | -     | 702.7    |
| AHQ-10-4, 5408                                              | K.AIMTYVSSFYHAFSGAQK.A       | 2025.27263 | 2 | 4.54E-07 | 0.87  | 3.82   | -     | 627.9    |
| AHQ-10-4, 6085                                              | K.AIMTYVSSFYHAFSGAQK.A       | 2009.27323 | 2 | 9.22E-06 | 0.78  | 3.32   | -     | 506.6    |
| AHQ-10-4, 3467                                              | R.ASFNFHFRDHSGLGPEEFK.A      | 2292.40855 | 3 | 1.58E-07 | 0.93  | 3.86   | -     | 1747.7   |
| AHQ-10-6, 2343                                              | K.ASIHEAWTDGK.E              | 1215.29697 | 2 | 8.61E-04 | 0.38  | 2.53   | -     | 506.4    |
| AHQ-10-5, 5327 - 5328                                       | K.DDPLTNLNTAFDVAEK.Y         | 1763.88340 | 2 | 4.04E-09 | 0.95  | 5.23   | -     | 1051.1   |
| AHQ-10-4, 4827                                              | K.DDPLTNLNTAFDVAEK.Y         | 1763.88340 | 2 | 1.17E-06 | 0.94  | 4.16   | -     | 974.1    |
| AHQ-10-6, 5215 - 5233                                       | K.DDPLTNLNTAFDVAEK.Y         | 1763.88340 | 2 | 7.80E-04 | 0.49  | 2.92   | -     | 354.0    |
| AHQ-10-4, 5327                                              | K.DDPLTNLNTAFDVAEK.Y         | 1763.88340 | 2 | 6.04E-08 | 0.94  | 4.87   | -     | 877.2    |
| AHQ-10-5, 4712                                              | K.DGLGFCALIHR.H              | 1260.44730 | 2 | 2.24E-07 | 0.93  | 2.73   | -     | 1736.5   |
| AHQ-10-4, 4748                                              | K.DGLGFCALIHR.H              | 1260.44730 | 2 | 6.98E-07 | 0.93  | 3.55   | -     | 1302.4   |
| AHQ-10-4, 2617 - 2631                                       | R.DHSGTLGPEEFK.A             | 1317.38606 | 2 | 2.19E-05 | 0.94  | 3.98   | -     | 1034.9   |
| AHQ-10-6, 2603                                              | R.DHSGTLGPEEFK.A             | 1317.38606 | 2 | 1.72E-06 | 0.72  | 2.73   | -     | 620.5    |
| AHQ-10-5, 3695                                              | K.DYETATLSEIK.A              | 1270.36761 | 2 | 2.05E-05 | 0.90  | 3.00   | -     | 1191.8   |
| AHQ-10-4, 3207                                              | R.ETADTDTADQVM*ASFK.I        | 1746.83148 | 2 | 8.91E-08 | 0.93  | 4.67   | -     | 837.3    |
| AHQ-10-6, 4219                                              | R.ETADTDTADQVM*ASFK.I        | 1730.83208 | 2 | 1.14E-07 | 0.93  | 4.01   | -     | 1005.9   |
| AHQ-10-13, 4265 - 4268                                      | R.ETADTDTADQVM*ASFK.I        | 1730.83208 | 2 | 7.42E-05 | 0.73  | 3.02   | -     | 592.7    |
| AHQ-10-5, 3195                                              | R.ETADTDTADQVM*ASFK.I        | 1746.83148 | 2 | 8.54E-06 | 0.92  | 3.99   | -     | 836.6    |
| AHQ-10-4, 2736                                              | K.GISQEQMNEFR.A              | 1339.45991 | 2 | 2.30E-06 | 0.88  | 3.36   | -     | 999.4    |
| AHQ-10-4, 3053 - 3132                                       | K.GISQEQMNEFR.A              | 1339.45991 | 2 | 3.64E-06 | 0.88  | 3.34   | -     | 917.5    |
| AHQ-10-4, 3203                                              | K.GISQEQMNEFR.A              | 1339.45991 | 2 | 5.82E-05 | 0.82  | 2.99   | -     | 952.2    |

|                                                                   |                           |            |   |          |       |        |       |         |
|-------------------------------------------------------------------|---------------------------|------------|---|----------|-------|--------|-------|---------|
| AHQ-10-4, 2351                                                    | K.GISQEQM*NEFR.A          | 1355.45931 | 2 | 1.68E-05 | 0.79  | 3.17   | -     | 620.2   |
| AHQ-10-6, 2333                                                    | K.GISQEQM*NEFR.A          | 1355.45931 | 2 | 1.08E-07 | 0.61  | 2.78   | -     | 404.4   |
| AHQ-10-5, 2336                                                    | K.GISQEQM*NEFR.A          | 1355.45931 | 2 | 3.29E-05 | 0.89  | 3.26   | -     | 937.2   |
| AHQ-10-4, 2300                                                    | R.HRPELIDYGG.L            | 1228.38202 | 2 | 6.00E-04 | 0.90  | 3.38   | -     | 651.2   |
| AHQ-10-5, 4699 - 4752                                             | K.ICDQWDNLGALTKQ.R        | 1663.83349 | 2 | 3.54E-08 | 0.96  | 3.64   | -     | 2123.8  |
| AHQ-10-6, 4617 - 4619                                             | K.ICDQWDNLGALTKQ.R        | 1663.83349 | 2 | 3.69E-10 | 0.97  | 5.27   | -     | 1915.0  |
| AHQ-10-6, 5440                                                    | K.IDQLEGDHQLQIQUALIFDNK.H | 2340.57447 | 2 | 1.69E-04 | 0.79  | 2.85   | -     | 741.1   |
| AHQ-10-5, 5552 - 5612                                             | K.IDQLEGDHQLQIQUALIFDNK.H | 2340.57447 | 2 | 1.62E-04 | 0.68  | 2.64   | -     | 564.7   |
| AHQ-10-6, 5364 - 5441                                             | K.IDQLEGDHQLQIQUALIFDNK.H | 2340.57447 | 3 | 4.78E-05 | 0.93  | 5.04   | -     | 1043.5  |
| AHQ-10-4, 5435 - 5497                                             | K.IDQLEGDHQLQIQUALIFDNK.H | 2340.57447 | 3 | 8.87E-12 | 0.97  | 5.99   | -     | 1706.1  |
| AHQ-10-4, 4103                                                    | K.ILAGDKNYITMDELR.R       | 1753.01353 | 2 | 2.13E-04 | 0.94  | 4.78   | -     | 852.6   |
| AHQ-10-4, 3485 - 3545                                             | K.ILAGDKNYITMDELR.R       | 1753.01353 | 3 | 9.64E-06 | 0.76  | 3.45   | -     | 463.8   |
| AHQ-10-4, 3543                                                    | K.ILAGDKNYITMDELR.R       | 1753.01353 | 2 | 4.53E-04 | 0.93  | 4.02   | -     | 722.0   |
| AHQ-10-4, 4107                                                    | K.ILAGDKNYITMDELR.R       | 1753.01353 | 3 | 6.11E-06 | 0.86  | 4.63   | -     | 730.0   |
| AHQ-10-5, 4739 - 4757                                             | R.KDDPLTNLNTAFDVAEK.Y     | 1892.05631 | 2 | 7.61E-08 | 0.97  | 5.23   | -     | 1283.9  |
| AHQ-10-4, 4767                                                    | R.KDDPLTNLNTAFDVAEK.Y     | 1892.05631 | 2 | 2.21E-06 | 0.97  | 5.44   | -     | 1184.8  |
| AHQ-10-5, 4304                                                    | R.KDDPLTNLNTAFDVAEK.Y     | 1892.05631 | 2 | 1.19E-05 | 0.68  | 2.88   | -     | 377.6   |
| AHQ-10-4, 3707                                                    | R.LAILGIHNEVSK.I          | 1294.52505 | 2 | 1.06E-08 | 0.96  | 3.92   | -     | 1387.7  |
| AHQ-10-6, 3423 - 3459                                             | R.LAILGIHNEVSK.I          | 1294.52505 | 2 | 1.45E-06 | 0.84  | 3.00   | -     | 752.5   |
| AHQ-10-7, 3390                                                    | R.LAILGIHNEVSK.I          | 1294.52505 | 2 | 3.03E-04 | 0.75  | 2.61   | -     | 636.1   |
| AHQ-10-4, 3477                                                    | R.LAILGIHNEVSK.I          | 1294.52505 | 2 | 6.70E-07 | 0.95  | 3.64   | -     | 1407.7  |
| AHQ-10-5, 5703                                                    | K.LASDLLEWIR.R            | 1216.41115 | 2 | 4.43E-07 | 0.97  | 4.50   | -     | 2233.9  |
| AHQ-10-6, 5576                                                    | K.LASDLLEWIR.R            | 1216.41115 | 2 | 1.45E-07 | 0.94  | 3.54   | -     | 1546.7  |
| AHQ-10-7, 5592                                                    | K.LASDLLEWIR.R            | 1216.41115 | 2 | 2.55E-04 | 0.96  | 3.68   | -     | 1799.6  |
| AHQ-10-6, 5925 - 5931                                             | K.LLETIDQLYLEYAK.R        | 1712.96427 | 2 | 4.91E-09 | 0.97  | 5.02   | -     | 1536.6  |
| AHQ-10-4, 6063 - 6071                                             | K.LLETIDQLYLEYAK.R        | 1712.96427 | 2 | 1.23E-08 | 0.96  | 4.69   | -     | 1259.0  |
| AHQ-10-4, 6072 - 6073                                             | K.LLETIDQLYLEYAK.R        | 1712.96427 | 3 | 2.18E-06 | 0.98  | 5.82   | -     | 2134.5  |
| AHQ-10-5, 6053 - 6080                                             | K.LLETIDQLYLEYAK.R        | 1712.96427 | 2 | 2.85E-07 | 0.97  | 4.42   | -     | 1620.4  |
| AHQ-10-7, 5972 - 5974                                             | K.LLETIDQLYLEYAK.R        | 1712.96427 | 2 | 3.60E-09 | 0.97  | 5.75   | -     | 1349.2  |
| AHQ-10-3, 5983 - 5994                                             | K.LLETIDQLYLEYAK.R        | 1712.96427 | 2 | 2.76E-04 | 0.92  | 3.88   | -     | 1034.0  |
| AHQ-10-2, 6067 - 6086                                             | K.LLETIDQLYLEYAK.R        | 1712.96427 | 2 | 7.31E-04 | 0.95  | 3.99   | -     | 1390.4  |
| AHQ-10-8, 2742                                                    | R.LSNRPFAMPSEGR.M         | 1462.65941 | 2 | 3.36E-04 | 0.69  | 3.11   | -     | 572.8   |
| AHQ-10-4, 3583                                                    | K.M*LD AEDIVGTARPDEK.A    | 1776.94709 | 2 | 3.14E-05 | 0.88  | 3.35   | -     | 701.0   |
| AHQ-10-6, 3523                                                    | K.M*LD AEDIVGTARPDEK.A    | 1776.94709 | 2 | 2.49E-04 | 0.57  | 2.81   | -     | 418.4   |
| AHQ-10-4, 3947 - 3948                                             | K.MLDAEDIVGTARPDEK.A      | 1760.94769 | 2 | 2.95E-04 | 0.86  | 3.84   | -     | 782.7   |
| AHQ-10-4, 5275 - 5331                                             | R.M*VSDINNAWGCLEQVEK.G    | 2011.22273 | 2 | 8.07E-07 | 0.89  | 3.80   | -     | 870.4   |
| AHQ-10-5, 4864                                                    | R.M*VSDINNAWGCLEQVEK.G    | 2011.22273 | 2 | 1.39E-04 | 0.79  | 3.60   | -     | 426.5   |
| AHQ-10-4, 4984                                                    | R.M*VSDINNAWGCLEQVEK.G    | 2011.22273 | 2 | 1.77E-06 | 0.97  | 4.51   | -     | 1624.8  |
| AHQ-10-5, 4955                                                    | R.M*VSDINNAWGCLEQVEK.G    | 2011.22273 | 2 | 1.30E-05 | 0.89  | 4.01   | -     | 660.6   |
| AHQ-10-6, 4999                                                    | R.M*VSDINNAWGCLEQVEK.G    | 2011.22273 | 2 | 2.91E-07 | 0.88  | 3.60   | -     | 702.2   |
| AHQ-10-4, 4883 - 4952                                             | R.M*VSDINNAWGCLEQVEK.G    | 2011.22273 | 2 | 4.26E-05 | 0.85  | 3.93   | -     | 560.1   |
| AHQ-10-4, 5129                                                    | R.M*VSDINNAWGCLEQVEK.G    | 2011.22273 | 2 | 1.38E-04 | 0.94  | 4.09   | -     | 1163.2  |
| AHQ-10-5, 4632                                                    | K.NVNIQNFIHSWK.D          | 1500.68583 | 2 | 4.02E-07 | 0.97  | 4.08   | -     | 1923.4  |
| AHQ-10-4, 4691                                                    | K.NVNIQNFIHSWK.D          | 1500.68583 | 2 | 1.73E-08 | 0.96  | 4.20   | -     | 1340.5  |
| AHQ-10-5, 4887                                                    | K.QFGAQANVIGPWIQTK.M      | 1759.00118 | 2 | 5.35E-04 | 0.90  | 3.90   | -     | 827.1   |
| AHQ-10-4, 4908                                                    | K.QFGAQANVIGPWIQTK.M      | 1759.00118 | 2 | 1.26E-04 | 0.64  | 2.83   | -     | 526.0   |
| AHQ-10-4, 3233                                                    | R.QKDYETATLSIEK.A         | 1526.67030 | 2 | 9.10E-04 | 0.55  | 2.54   | -     | 480.5   |
| AHQ-10-6, 3825                                                    | R.TINEVENQILTR.D          | 1430.58898 | 2 | 5.60E-07 | 0.95  | 4.47   | -     | 1522.5  |
| AHQ-10-5, 3883                                                    | R.TINEVENQILTR.D          | 1430.58898 | 2 | 1.20E-07 | 0.79  | 2.83   | -     | 820.5   |
| AHQ-10-4, 3901 - 3903                                             | R.TINEVENQILTR.D          | 1430.58898 | 2 | 4.31E-07 | 0.96  | 4.26   | -     | 1524.6  |
| AHQ-10-6, 3083                                                    | R.TINEVENQILTR.D          | 1430.58898 | 2 | 1.97E-07 | 0.83  | 2.75   | -     | 986.5   |
| AHQ-10-4, 3499                                                    | R.TINEVENQILTR.D          | 1430.58898 | 2 | 1.24E-05 | 0.66  | 2.94   | -     | 502.2   |
| AHQ-10-7, 3812 - 3813                                             | R.TINEVENQILTR.D          | 1430.58898 | 2 | 1.77E-04 | 0.86  | 3.73   | -     | 817.1   |
| AHQ-10-4, 4031 - 4048                                             | R.TINEVENQILTR.D          | 1430.58898 | 2 | 1.48E-06 | 0.94  | 4.34   | -     | 951.6   |
| AHQ-10-5, 6319                                                    | R.VEQIAIAQELNELDYDPSVNR.C | 2810.02233 | 3 | 3.18E-08 | 0.98  | 6.83   | -     | 2296.8  |
| AHQ-10-4, 6319                                                    | R.VEQIAIAQELNELDYDPSVNR.C | 2810.02233 | 2 | 3.73E-07 | 0.96  | 5.47   | -     | 1001.3  |
| AHQ-10-6, 6192 - 6193                                             | R.VEQIAIAQELNELDYDPSVNR.C | 2810.02233 | 3 | 9.25E-12 | 0.97  | 6.76   | -     | 1552.2  |
| AHQ-10-4, 5755                                                    | R.VEQIAIAQELNELDYDPSVNR.C | 2810.02233 | 3 | 1.25E-05 | 0.77  | 3.32   | -     | 658.0   |
| AHQ-10-6, 6208                                                    | R.VEQIAIAQELNELDYDPSVNR.C | 2810.02233 | 2 | 1.50E-04 | 0.69  | 2.68   | -     | 534.1   |
| AHQ-10-7, 6240                                                    | R.VEQIAIAQELNELDYDPSVNR.C | 2810.02233 | 3 | 1.18E-04 | 0.96  | 5.61   | -     | 1309.0  |
| AHQ-10-4, 6315                                                    | R.VEQIAIAQELNELDYDPSVNR.C | 2810.02233 | 2 | 1.56E-04 | 0.72  | 2.50   | -     | 868.4   |
| AHQ-10-5, 6179                                                    | R.VGWQEQLLTIAR.T          | 1387.60894 | 2 | 9.47E-09 | 0.92  | 3.47   | -     | 1149.5  |
| AHQ-10-11, 5971                                                   | R.VGWQEQLLTIAR.T          | 1387.60894 | 2 | 2.13E-04 | 0.83  | 2.94   | -     | 815.8   |
| AHQ-10-7, 6109 - 6114                                             | R.VGWQEQLLTIAR.T          | 1387.60894 | 2 | 7.56E-07 | 0.95  | 4.16   | -     | 1350.7  |
| AHQ-10-4, 6195 - 6269                                             | R.VGWQEQLLTIAR.T          | 1387.60894 | 2 | 2.06E-07 | 0.95  | 4.05   | -     | 1482.7  |
| AHQ-10-8, 6141 - 6146                                             | R.VGWQEQLLTIAR.T          | 1387.60894 | 2 | 1.42E-06 | 0.95  | 4.01   | -     | 1205.3  |
| AHQ-10-4, 3725 - 3751                                             | K.VLAVNQENEQLM*EDYEK.L    | 2069.23575 | 2 | 1.02E-07 | 0.97  | 5.72   | -     | 1375.9  |
| AHQ-10-6, 4260                                                    | K.VLAVNQENEQLM*EDYEK.L    | 2053.23635 | 2 | 7.24E-07 | 0.88  | 3.79   | -     | 620.8   |
| AHQ-10-4, 4191                                                    | K.VLAVNQENEQLM*EDYEK.L    | 2053.23635 | 3 | 1.55E-04 | 0.90  | 3.86   | -     | 1021.6  |
| AHQ-10-7, 3497 - 3502                                             | K.VLAVNQENEQLM*EDYEK.L    | 2069.23575 | 2 | 4.30E-04 | 0.79  | 3.25   | -     | 691.7   |
| AHQ-10-6, 4087                                                    | K.VLAVNQENEQLM*EDYEK.L    | 2053.23635 | 2 | 9.66E-08 | 0.95  | 5.05   | -     | 994.1   |
| AHQ-10-7, 4074                                                    | K.VLAVNQENEQLM*EDYEK.L    | 2053.23635 | 2 | 2.86E-06 | 0.93  | 4.57   | -     | 1126.6  |
| AHQ-10-4, 4127 - 4187                                             | K.VLAVNQENEQLM*EDYEK.L    | 2053.23635 | 2 | 8.56E-08 | 0.96  | 5.33   | -     | 1097.8  |
| AHQ-10-6, 3495                                                    | K.VLAVNQENEQLM*EDYEK.L    | 2069.23575 | 2 | 2.38E-05 | 0.95  | 4.34   | -     | 1308.1  |
| AHQ-10-4, 3575 - 3647                                             | K.VLAVNQENEQLM*EDYEK.L    | 2069.23575 | 3 | 1.22E-05 | 0.95  | 4.88   | -     | 1584.1  |
| AHQ-10-4, 3571 - 3648                                             | K.VLAVNQENEQLM*EDYEK.L    | 2069.23575 | 2 | 4.72E-09 | 0.95  | 4.88   | -     | 1157.0  |
| AHQ-10-4, 3460                                                    | K.VLAVNQENEQLM*EDYEK.L    | 2069.23575 | 2 | 4.72E-05 | 0.87  | 3.47   | -     | 742.9   |
| AHQ-10-8, 4106                                                    | K.VLAVNQENEQLM*EDYEK.L    | 2053.23635 | 2 | 4.53E-06 | 0.91  | 4.18   | -     | 858.4   |
| AHQ-10-5, 3551 - 3628                                             | K.VLAVNQENEQLM*EDYEK.L    | 2069.23575 | 2 | 1.74E-08 | 0.93  | 4.47   | -     | 909.1   |
| AHQ-10-4, 4315 - 4375                                             | K.VLAVNQENEQLM*EDYEK.L    | 2053.23635 | 2 | 7.61E-14 | 0.96  | 4.90   | -     | 1248.6  |
| AHQ-10-5, 4119                                                    | K.VLAVNQENEQLM*EDYEK.L    | 2053.23635 | 2 | 1.09E-10 | 0.94  | 4.65   | -     | 891.2   |
| AHQ-10-4, 3916 - 3989                                             | K.VLAVNQENEQLM*EDYEK.L    | 2069.23575 | 2 | 1.51E-10 | 0.93  | 4.67   | -     | 771.3   |
| gj4557697[ref][NP_000412.1] keratin 10; Keratin-10 [Homo sapiens] |                           |            |   | 1.17E-13 | 13.27 | 150.30 | 28.70 | 57247.1 |
| AHQ-10-1, 2989                                                    | R.ALEESNYELEGK.I          | 1382.45482 | 2 | 9.86E-10 | 0.95  | 4.08   | -     | 1285.5  |
| AHQ-10-11, 2752 - 2754                                            | R.ALEESNYELEGK.I          | 1382.45482 | 2 | 1.56E-06 | 0.92  | 3.47   | -     | 1120.7  |
| AHQ-10-10, 2736                                                   | R.ALEESNYELEGK.I          | 1382.45482 | 2 | 2.80E-06 | 0.68  | 2.72   | -     | 568.7   |
| AHQ-10-9, 2657                                                    | R.ALEESNYELEGK.I          | 1382.45482 | 2 | 2.93E-07 | 0.89  | 3.19   | -     | 928.7   |
| AHQ-10-12, 2850                                                   | R.ALEESNYELEGK.I          | 1382.45482 | 2 | 2.55E-05 | 0.78  | 2.98   | -     | 804.4   |
| AHQ-10-8, 2746                                                    | R.ALEESNYELEGK.I          | 1382.45482 | 2 | 5.70E-06 | 0.86  | 3.27   | -     | 848.6   |
| AHQ-10-13, 3195                                                   | R.ALEESNYELEGK.I          | 1382.45482 | 2 | 2.75E-06 | 0.87  | 3.40   | -     | 800.1   |
| AHQ-10-2, 2854                                                    | R.ALEESNYELEGK.I          | 1382.45482 | 2 | 4.16E-09 | 0.94  | 4.04   | -     | 1444.7  |
| AHQ-10-7, 2744                                                    | R.ALEESNYELEGK.I          | 1382.45482 | 2 | 4.14E-07 | 0.90  | 3.80   | -     | 987.7   |
| AHQ-10-6, 2747                                                    | R.ALEESNYELEGK.I          | 1382.45482 | 2 | 1.85E-05 | 0.88  | 3.12   | -     | 1015.7  |
| AHQ-10-5, 2779                                                    | R.ALEESNYELEGK.I          | 1382.45482 | 2 | 5.78E-08 | 0.94  | 4.11   | -     | 1139.2  |
| AHQ-10-4, 2780                                                    | R.ALEESNYELEGK.I          | 1382.45482 | 2 | 2.13E-06 | 0.94  | 3.97   | -     | 1216.5  |
| AHQ-10-13, 2817 - 2878                                            | R.ALEESNYELEGK.I          | 1382.45482 | 2 | 3.24E-04 | 0.86  | 3.51   | -     | 810.7   |
| AHQ-10-14, 2793                                                   | R.ALEESNYELEGK.I          | 1382.45482 | 2 | 2.33E-06 | 0.91  | 3.67   | -     | 931.5   |
| AHQ-10-13, 3504                                                   | K.DAEAWFNEK.S             | 1110.15762 | 2 | 1.98E-05 | 0.91  | 3.42   | -     | 825.3   |
| AHQ-10-1, 3654                                                    | K.DAEAWFNEK.S             | 1110.15762 | 2 | 2.48E-04 | 0.82  | 3.03   | -     | 889.8   |
| AHQ-10-3, 3486                                                    | K.DAEAWFNEK.S             | 1110.15762 | 1 | 1.90E-04 | 0.17  | 1.96   | -     | 466.3   |
| AHQ-10-3, 3475                                                    | K.DAEAWFNEK.S             | 1110.15762 | 2 | 1.11E-04 | 0.90  | 3.31   | -     | 853.6   |
| AHQ-10-6, 3440 - 3444                                             | K.DAEAWFNEK.S             | 1110.15762 | 2 | 6.89E-04 | 0.69  | 2.82   | -     | 809.8   |
| AHQ-10-1, 5221 - 5298                                             | K.ELTTEIDNNEIQISSYK.S     | 1998.13406 | 2 | 2.21E-05 | 0.82  | 3.75   | -     | 453.7   |
| AHQ-10-1, 4490 - 4491                                             | K.ELTTEIDNNEIQISSYK.S     | 1998.13406 | 2 | 4.62E-12 | 0.95  | 4.70   | -     | 983.4   |
| AHQ-10-13, 4313                                                   | K.ELTTEIDNNEIQISSYK.S     | 1998.13406 | 2 | 1.88E-06 | 0.80  | 3.44   | -     | 445.1   |
| AHQ-10-14, 5165 - 5221                                            | K.ELTTEIDNNEIQISSYK.S     | 1998.13406 | 2 | 7.07E-11 | 0.88  | 3.77   | -     | 583.7   |
| AHQ-10-12, 5012 - 5018                                            | K.ELTTEIDNNEIQISSYK.S     | 1998.13406 | 2 | 3.53E-06 | 0.80  | 3.70   | -     | 624.5   |

|                            |                                                               |            |   |          |       |        |       |         |
|----------------------------|---------------------------------------------------------------|------------|---|----------|-------|--------|-------|---------|
| AHQ-10-3, 5087             | K.ELTTEIDNNEIQISSYK.S                                         | 1998.13406 | 2 | 2.76E-07 | 0.75  | 3.33   | -     | 619.6   |
| AHQ-10-14, 5061            | K.ELTTEIDNNEIQISSYK.S                                         | 1998.13406 | 2 | 1.39E-10 | 0.95  | 5.18   | -     | 888.2   |
| AHQ-10-2, 5176             | K.ELTTEIDNNEIQISSYK.S                                         | 1998.13406 | 2 | 8.35E-09 | 0.91  | 3.90   | -     | 849.5   |
| AHQ-10-7, 5048             | K.ELTTEIDNNEIQISSYK.S                                         | 1998.13406 | 2 | 4.03E-06 | 0.95  | 4.93   | -     | 971.8   |
| AHQ-10-4, 5181             | K.ELTTEIDNNEIQISSYK.S                                         | 1998.13406 | 2 | 1.70E-09 | 0.94  | 4.78   | -     | 822.4   |
| AHQ-10-2, 4424             | K.ELTTEIDNNEIQISSYK.S                                         | 1998.13406 | 2 | 7.79E-09 | 0.91  | 4.28   | -     | 548.4   |
| AHQ-10-5, 4368             | K.ELTTEIDNNEIQISSYK.S                                         | 1998.13406 | 2 | 4.40E-08 | 0.91  | 3.85   | -     | 960.5   |
| AHQ-10-7, 4262             | K.ELTTEIDNNEIQISSYK.S                                         | 1998.13406 | 2 | 3.85E-08 | 0.87  | 3.79   | -     | 677.4   |
| AHQ-10-5, 5136             | K.ELTTEIDNNEIQISSYK.S                                         | 1998.13406 | 2 | 6.61E-07 | 0.87  | 3.56   | -     | 780.0   |
| AHQ-10-5, 5268             | K.ELTTEIDNNEIQISSYK.S                                         | 1998.13406 | 2 | 1.39E-05 | 0.89  | 3.72   | -     | 616.5   |
| AHQ-10-14, 5004 - 5064     | K.ELTTEIDNNEIQISSYK.S                                         | 1998.13406 | 2 | 6.59E-05 | 0.82  | 4.27   | -     | 814.6   |
| AHQ-10-13, 5340            | K.ELTTEIDNNEIQISSYK.S                                         | 1998.13406 | 2 | 3.98E-04 | 0.82  | 3.34   | -     | 742.8   |
| AHQ-10-13, 5058            | K.ELTTEIDNNEIQISSYK.S                                         | 1998.13406 | 2 | 3.19E-07 | 0.94  | 4.79   | -     | 858.5   |
| AHQ-10-6, 5048             | K.ELTTEIDNNEIQISSYK.S                                         | 1998.13406 | 2 | 2.08E-07 | 0.94  | 4.46   | -     | 869.1   |
| AHQ-10-11, 4891 - 4952     | K.ELTTEIDNNEIQISSYK.S                                         | 1998.13406 | 2 | 4.19E-06 | 0.92  | 4.38   | -     | 793.4   |
| AHQ-10-2, 4147 - 4150      | K.GSLGGGFSSGGFSGGSFSR.G                                       | 1708.76962 | 2 | 2.04E-09 | 0.92  | 4.20   | -     | 893.5   |
| AHQ-10-1, 4217             | K.GSLGGGFSSGGFSGGSFSR.G                                       | 1708.76962 | 2 | 1.52E-06 | 0.76  | 3.05   | -     | 657.4   |
| AHQ-10-13, 4001 - 4064     | K.GSLGGGFSSGGFSGGSFSR.G                                       | 1708.76962 | 2 | 5.70E-07 | 0.95  | 5.05   | -     | 855.7   |
| AHQ-10-8, 3966 - 4041      | K.GSLGGGFSSGGFSGGSFSR.G                                       | 1708.76962 | 2 | 4.18E-08 | 0.88  | 3.62   | -     | 818.2   |
| AHQ-10-7, 3984 - 4050      | K.GSLGGGFSSGGFSGGSFSR.G                                       | 1708.76962 | 2 | 8.54E-06 | 0.90  | 3.69   | -     | 865.1   |
| AHQ-10-12, 4044            | K.GSLGGGFSSGGFSGGSFSR.G                                       | 1708.76962 | 2 | 1.02E-05 | 0.80  | 3.06   | -     | 603.5   |
| AHQ-10-14, 4016            | K.GSLGGGFSSGGFSGGSFSR.G                                       | 1708.76962 | 2 | 9.00E-07 | 0.92  | 3.93   | -     | 1017.8  |
| AHQ-10-13, 4416 - 4427     | K.GSLGGGFSSGGFSGGSFSR.G                                       | 1708.76962 | 2 | 8.57E-06 | 0.89  | 3.75   | -     | 783.0   |
| AHQ-10-3, 4070 - 4134      | K.GSLGGGFSSGGFSGGSFSR.G                                       | 1708.76962 | 2 | 8.47E-08 | 0.82  | 3.40   | -     | 558.5   |
| AHQ-10-6, 3943 - 4020      | K.GSLGGGFSSGGFSGGSFSR.G                                       | 1708.76962 | 2 | 6.21E-07 | 0.74  | 3.12   | -     | 613.0   |
| AHQ-10-7, 3213 - 3221      | K.IRLENEIQTYR.S                                               | 1435.61046 | 2 | 3.68E-08 | 0.97  | 4.40   | -     | 1926.4  |
| AHQ-10-13, 3308            | K.IRLENEIQTYR.S                                               | 1435.61046 | 2 | 2.70E-07 | 0.97  | 3.99   | -     | 2371.9  |
| AHQ-10-6, 2504             | R.LENEIQTYR.S                                                 | 1166.26586 | 2 | 3.78E-05 | 0.89  | 3.63   | -     | 1089.5  |
| AHQ-10-3, 2551 - 2553      | R.LENEIQTYR.S                                                 | 1166.26586 | 2 | 3.09E-05 | 0.86  | 3.96   | -     | 916.9   |
| AHQ-10-3, 2790             | R.LKYENEVALR.Q                                                | 1235.41446 | 2 | 1.92E-05 | 0.52  | 2.52   | -     | 360.4   |
| AHQ-10-7, 2720 - 2721      | R.LKYENEVALR.Q                                                | 1235.41446 | 2 | 6.39E-07 | 0.81  | 2.88   | -     | 646.1   |
| AHQ-10-11, 2747            | R.LKYENEVALR.Q                                                | 1235.41446 | 2 | 5.60E-05 | 0.60  | 2.52   | -     | 464.1   |
| AHQ-10-13, 2818            | R.LKYENEVALR.Q                                                | 1235.41446 | 2 | 2.08E-05 | 0.74  | 2.84   | -     | 472.6   |
| AHQ-10-13, 2745 - 2820     | R.LKYENEVALR.Q                                                | 1235.41446 | 2 | 8.82E-08 | 0.68  | 2.97   | -     | 390.9   |
| AHQ-10-8, 2725             | R.LKYENEVALR.Q                                                | 1235.41446 | 2 | 3.75E-07 | 0.78  | 3.25   | -     | 480.1   |
| AHQ-10-1, 6110             | K.NQILNLTDDANILLQIDNAR.L                                      | 2368.63258 | 3 | 1.64E-05 | 0.95  | 4.13   | -     | 1900.6  |
| AHQ-10-7, 5984             | K.NQILNLTDDANILLQIDNAR.L                                      | 2368.63258 | 3 | 2.44E-04 | 0.93  | 4.19   | -     | 1550.8  |
| AHQ-10-12, 5252            | R.NVSTGDVNVEM"NAAPGVDLTQLLNMM"R.N                             | 2906.20003 | 3 | 2.60E-04 | 0.84  | 3.51   | -     | 953.5   |
| AHQ-10-7, 6097             | R.NVSTGDVNVEM"NAAPGVDLTQLLNMM"R.N                             | 2890.20063 | 3 | 2.55E-06 | 0.92  | 5.07   | -     | 807.9   |
| AHQ-10-2, 5444             | R.NVSTGDVNVEM"NAAPGVDLTQLLNMM"R.N                             | 2906.20003 | 3 | 7.60E-05 | 0.82  | 3.34   | -     | 881.9   |
| AHQ-10-8, 6149             | R.NVSTGDVNVEM"NAAPGVDLTQLLNMM"R.N                             | 2890.20063 | 3 | 5.74E-06 | 0.84  | 3.34   | -     | 1036.7  |
| AHQ-10-6, 5295             | R.NVSTGDVNVEM"NAAPGVDLTQLLNMM"R.N                             | 2906.20003 | 3 | 2.92E-04 | 0.90  | 4.20   | -     | 945.7   |
| AHQ-10-13, 5292            | R.NVSTGDVNVEM"NAAPGVDLTQLLNMM"R.N                             | 2906.20003 | 2 | 9.52E-05 | 0.60  | 3.15   | -     | 255.8   |
| AHQ-10-2, 6210             | R.NVSTGDVNVEM"NAAPGVDLTQLLNMM"R.N                             | 2890.20063 | 3 | 3.26E-04 | 0.91  | 4.50   | -     | 1135.5  |
| AHQ-10-3, 5267 - 5349      | R.NVSTGDVNVEM"NAAPGVDLTQLLNMM"R.N                             | 2906.20003 | 3 | 3.71E-07 | 0.96  | 6.07   | -     | 1320.1  |
| AHQ-10-14, 5689            | R.NVSTGDVNVEM"NAAPGVDLTQLLNMM"R.N                             | 2906.20063 | 2 | 9.44E-04 | 0.81  | 3.51   | -     | 430.9   |
| AHQ-10-3, 3377 - 3381      | K.QSLEASLAETEGR.Y                                             | 1391.46648 | 2 | 2.37E-06 | 0.69  | 3.28   | -     | 320.1   |
| AHQ-10-8, 3330             | K.QSLEASLAETEGR.Y                                             | 1391.46648 | 2 | 1.51E-06 | 0.61  | 2.75   | -     | 350.3   |
| AHQ-10-3, 4798 - 4853      | K.SKELTTEIDNNEIQISSYK.S                                       | 2213.38462 | 2 | 7.59E-09 | 0.94  | 4.70   | -     | 1011.8  |
| AHQ-10-2, 4138             | K.SKELTTEIDNNEIQISSYK.S                                       | 2213.38462 | 3 | 5.97E-06 | 0.88  | 4.16   | -     | 965.8   |
| AHQ-10-5, 4801 - 4875      | K.SKELTTEIDNNEIQISSYK.S                                       | 2213.38462 | 2 | 6.53E-06 | 0.89  | 3.94   | -     | 1077.4  |
| AHQ-10-3, 4057             | K.SKELTTEIDNNEIQISSYK.S                                       | 2213.38462 | 2 | 1.17E-13 | 0.96  | 4.87   | -     | 1196.4  |
| AHQ-10-2, 4871 - 4931      | K.SKELTTEIDNNEIQISSYK.S                                       | 2213.38462 | 2 | 1.01E-04 | 0.82  | 3.65   | -     | 776.2   |
| AHQ-10-2, 2214             | R.SLLEGESSGGGGGR.G                                            | 1263.29680 | 2 | 5.71E-06 | 0.87  | 3.13   | -     | 952.8   |
| AHQ-10-3, 2166             | R.SLLEGESSGGGGGR.G                                            | 1263.29680 | 2 | 4.61E-04 | 0.74  | 2.77   | -     | 588.6   |
| AHQ-10-7, 6360             | K.TIDDLKNQILNLTDDANILLQIDNAR.L                                | 3054.40205 | 3 | 2.25E-05 | 0.94  | 5.39   | -     | 1154.9  |
| AHQ-10-3, 6338             | K.TIDDLKNQILNLTDDANILLQIDNAR.L                                | 3054.40205 | 3 | 1.29E-04 | 0.78  | 3.43   | -     | 713.4   |
| gi 5031987 ref NP_005720.1 | peptidylprolyl isomerase F (cyclophilin F) [Homo sapiens]     |            |   | 1.22E-13 | 1.47  | 20.21  | 18.40 | 22040.1 |
| AHQ-10-12, 3797 - 3861     | R.FPDENFLK.H                                                  | 1111.22866 | 2 | 6.69E-04 | 0.59  | 2.67   | -     | 419.9   |
| AHQ-10-12, 4814 - 4868     | K.GSGDPSSSSSSGNPLVYLDVDANGKPLGR.V                             | 2834.99028 | 3 | 1.22E-13 | 0.89  | 4.22   | -     | 740.6   |
| AHQ-10-11, 4796 - 4856     | K.GSGDPSSSSSSGNPLVYLDVDANGKPLGR.V                             | 2834.99028 | 3 | 4.68E-08 | 0.89  | 4.06   | -     | 803.3   |
| gi 4504165 ref NP_000168.1 | gelsolin (amyloidosis, Finnish type); Gelsolin [Homo sapiens] |            |   | 1.67E-13 | 19.16 | 210.32 | 31.70 | 85696.9 |
| AHQ-10-5, 3819             | K.AGALNSNDAFLVK.T                                             | 1320.47622 | 2 | 2.15E-07 | 0.85  | 3.84   | -     | 491.4   |
| AHQ-10-5, 3289 - 3303      | K.AGKEPGLQIWR.V                                               | 1255.45060 | 3 | 3.09E-04 | 0.91  | 3.98   | -     | 1271.1  |
| AHQ-10-5, 3287             | K.AGKEPGLQIWR.V                                               | 1255.45060 | 2 | 1.90E-06 | 0.79  | 2.99   | -     | 569.7   |
| AHQ-10-6, 5324 - 5327      | R.AQPVQVAEGSEPDGFWEALGGK.A                                    | 2273.44345 | 2 | 5.65E-08 | 0.95  | 5.13   | -     | 621.1   |
| AHQ-10-5, 5431 - 5487      | R.AQPVQVAEGSEPDGFWEALGGK.A                                    | 2273.44345 | 2 | 5.99E-06 | 0.97  | 5.87   | -     | 902.6   |
| AHQ-10-7, 5340             | R.AQPVQVAEGSEPDGFWEALGGK.A                                    | 2273.44345 | 2 | 1.18E-06 | 0.86  | 3.84   | -     | 574.4   |
| AHQ-10-5, 5220 - 5292      | R.AQPVQVAEGSEPDGFWEALGGK.A                                    | 2273.44345 | 2 | 7.89E-08 | 0.96  | 5.75   | -     | 742.5   |
| AHQ-10-5, 5457             | R.DPDQTDGLGLSYLSSHIANVER.V                                    | 2388.53285 | 3 | 9.85E-08 | 0.89  | 3.66   | -     | 1435.0  |
| AHQ-10-5, 5299 - 5367      | R.DPDQTDGLGLSYLSSHIANVER.V                                    | 2388.53285 | 3 | 3.75E-09 | 0.94  | 4.65   | -     | 1372.7  |
| AHQ-10-6, 5225 - 5279      | R.DPDQTDGLGLSYLSSHIANVER.V                                    | 2388.53285 | 3 | 8.08E-06 | 0.93  | 3.98   | -     | 1611.7  |
| AHQ-10-7, 2285             | K.DSQEEEEKTEALTSAK.R                                          | 1666.72289 | 3 | 5.02E-05 | 0.87  | 3.18   | -     | 1427.0  |
| AHQ-10-7, 2281             | K.DSQEEEEKTEALTSAK.R                                          | 1666.72289 | 2 | 8.48E-07 | 0.84  | 3.55   | -     | 841.1   |
| AHQ-10-5, 2268 - 2337      | K.DSQEEEEKTEALTSAK.R                                          | 1666.72289 | 3 | 1.66E-06 | 0.97  | 4.58   | -     | 2278.7  |
| AHQ-10-8, 2281             | K.DSQEEEEKTEALTSAK.R                                          | 1666.72289 | 2 | 5.43E-07 | 0.71  | 2.91   | -     | 903.2   |
| AHQ-10-10, 2267            | K.DSQEEEEKTEALTSAK.R                                          | 1666.72289 | 2 | 2.79E-07 | 0.85  | 3.27   | -     | 931.7   |
| AHQ-10-6, 2276             | K.DSQEEEEKTEALTSAK.R                                          | 1666.72289 | 3 | 1.20E-04 | 0.93  | 3.78   | -     | 1837.5  |
| AHQ-10-6, 2271 - 2327      | K.DSQEEEEKTEALTSAK.R                                          | 1666.72289 | 2 | 1.02E-05 | 0.95  | 3.91   | -     | 1593.4  |
| AHQ-10-5, 2267 - 2335      | K.DSQEEEEKTEALTSAK.R                                          | 1666.72289 | 2 | 3.94E-08 | 0.93  | 3.91   | -     | 1236.7  |
| AHQ-10-8, 5825 - 5833      | R.EVQGFESATFLGYFK.S                                           | 1723.90570 | 2 | 9.70E-05 | 0.59  | 2.86   | -     | 567.7   |
| AHQ-10-11, 5587 - 5658     | R.EVQGFESATFLGYFK.S                                           | 1723.90570 | 2 | 5.03E-06 | 0.38  | 2.72   | -     | 350.4   |
| AHQ-10-5, 5947 - 6005      | R.EVQGFESATFLGYFK.S                                           | 1723.90570 | 2 | 2.01E-07 | 0.97  | 4.46   | -     | 1635.2  |
| AHQ-10-7, 5742 - 5753      | R.EVQGFESATFLGYFK.S                                           | 1723.90570 | 2 | 8.77E-04 | 0.91  | 3.77   | -     | 928.0   |
| AHQ-10-5, 6211             | R.EVQGFESATFLGYFK.S                                           | 1723.90570 | 2 | 1.87E-04 | 0.77  | 2.94   | -     | 595.2   |
| AHQ-10-5, 6076 - 6136      | R.EVQGFESATFLGYFK.S                                           | 1723.90570 | 2 | 1.33E-06 | 0.84  | 3.56   | -     | 583.5   |
| AHQ-10-5, 5817 - 5891      | R.EVQGFESATFLGYFK.S                                           | 1723.90570 | 2 | 1.08E-08 | 0.95  | 4.25   | -     | 1324.2  |
| AHQ-10-13, 5712            | R.EVQGFESATFLGYFK.S                                           | 1723.90570 | 2 | 5.50E-04 | 0.84  | 2.88   | -     | 915.3   |
| AHQ-10-8, 2385             | K.HVVPNEVVQR.L                                                | 1276.46981 | 2 | 2.24E-04 | 0.93  | 3.20   | -     | 918.5   |
| AHQ-10-5, 2376 - 2435      | K.HVVPNEVVQR.L                                                | 1276.46981 | 2 | 1.84E-08 | 0.93  | 3.55   | -     | 748.8   |
| AHQ-10-5, 5863 - 5933      | R.IEGSNKVPDPATYGGQFYGGDSYIILNYR.H                             | 3401.72499 | 3 | 1.40E-04 | 0.96  | 5.82   | -     | 1424.3  |
| AHQ-10-6, 5273             | K.NWRDPDQTDGLGLSYLSSHIANVER.V                                 | 2845.03323 | 3 | 8.32E-08 | 0.97  | 6.22   | -     | 1648.2  |
| AHQ-10-5, 5363 - 5411      | K.NWRDPDQTDGLGLSYLSSHIANVER.V                                 | 2845.03323 | 3 | 3.98E-07 | 0.98  | 6.34   | -     | 2011.3  |
| AHQ-10-5, 2553             | K.PALPAGTEDITAKEDAANR.K                                       | 1827.93072 | 2 | 1.67E-13 | 0.94  | 4.79   | -     | 556.8   |
| AHQ-10-7, 3066             | K.SEDCFILDHGK.D                                               | 1322.42590 | 2 | 2.58E-05 | 0.89  | 3.20   | -     | 874.5   |
| AHQ-10-6, 3101 - 3107      | K.SEDCFILDHGK.D                                               | 1322.42590 | 2 | 6.79E-07 | 0.94  | 3.54   | -     | 1138.1  |
| AHQ-10-5, 3137             | K.SEDCFILDHGK.D                                               | 1322.42590 | 3 | 7.23E-05 | 0.87  | 3.45   | -     | 722.4   |
| AHQ-10-5, 3125 - 3139      | K.SEDCFILDHGK.D                                               | 1322.42590 | 2 | 6.90E-07 | 0.92  | 3.67   | -     | 1029.8  |
| AHQ-10-5, 3012             | K.SEDCFILDHGK.D                                               | 1322.42590 | 2 | 6.51E-04 | 0.83  | 3.36   | -     | 841.6   |
| AHQ-10-5, 2865             | K.SEDCFILDHGKDGK.I                                            | 1622.73823 | 2 | 1.06E-05 | 0.87  | 3.47   | -     | 962.0   |
| AHQ-10-8, 2302             | K.TGAQELLR.V                                                  | 888.00387  | 2 | 1.56E-05 | 0.66  | 2.91   | -     | 607.2   |
| AHQ-10-5, 2287             | K.TGAQELLR.V                                                  | 888.00387  | 2 | 1.23E-05 | 0.89  | 2.91   | -     | 1211.1  |
| AHQ-10-10, 2314            | K.TGAQELLR.V                                                  | 888.00387  | 2 | 7.77E-05 | 0.89  | 2.84   | -     | 1078.3  |
| AHQ-10-8, 4266             | K.TPSAAYLWVGTGASEAEK.T                                        | 1838.99510 | 2 | 2.41E-05 | 0.94  | 3.88   | -     | 1273.7  |
| AHQ-10-5, 4351 - 4425      | K.TPSAAYLWVGTGASEAEK.T                                        | 1838.99510 | 2 | 3.48E-10 | 0.97  | 5.50   | -     | 1276.5  |
| AHQ-10-6, 4263             | K.TPSAAYLWVGTGASEAEK.T                                        | 1838.99510 | 2 | 4.22E-04 | 0.88  | 3.61   | -     | 736.1   |
| AHQ-10-5, 4339             | K.TPSAAYLWVGTGASEAEK.T                                        | 1838.99510 | 2 | 1.25E-05 | 0.96  | 4.38   | -     | 1571.3  |



|                            |                                                                         |            |   |          |       |        |       |         |
|----------------------------|-------------------------------------------------------------------------|------------|---|----------|-------|--------|-------|---------|
| AHQ-10-5, 3757 - 3785      | R.VHVSEEGTEPEAM*LQVLGPK.P                                               | 2167.42570 | 2 | 1.21E-05 | 0.97  | 5.35   | -     | 1176.1  |
| AHQ-10-5, 4769             | R.VHVSEEGTEPEAM*LQVLGPK.P                                               | 2151.42630 | 2 | 3.60E-06 | 0.97  | 5.50   | -     | 1205.8  |
| AHQ-10-5, 5060             | R.VHVSEEGTEPEAM*LQVLGPKPALPAGTEDTAK.E                                   | 3303.68611 | 3 | 4.27E-10 | 0.93  | 5.20   | -     | 862.4   |
| AHQ-10-5, 4228             | R.VHVSEEGTEPEAM*LQVLGPKPALPAGTEDTAK.E                                   | 3319.68551 | 3 | 7.08E-05 | 0.92  | 4.85   | -     | 688.1   |
| AHQ-10-5, 3579 - 3640      | R.VPFDAAHLHTSTAMAAQHGM*DDDDGTGQK.Q                                      | 2891.10081 | 3 | 2.97E-04 | 0.92  | 5.31   | -     | 1341.4  |
| AHQ-10-6, 3525             | R.VPFDAAHLHTSTAMAAQHGM*DDDDGTGQK.Q                                      | 2891.10081 | 3 | 9.90E-04 | 0.98  | 6.37   | -     | 2272.2  |
| AHQ-10-7, 3873             | R.VPFDAAHLHTSTAMAAQHGM*DDDDGTGQK.Q                                      | 2875.10141 | 3 | 4.20E-06 | 0.95  | 4.98   | -     | 1287.1  |
| AHQ-10-5, 6067 - 6079      | K.VPVPDPATYGGFYGGDSYIILYNYR.H                                           | 2773.04698 | 3 | 8.65E-08 | 0.61  | 3.11   | -     | 702.7   |
| gi 4507651 ref NP_003281.1 | tropomyosin 4 [Homo sapiens]                                            |            |   | 1.99E-13 | 3.78  | 40.26  | 15.30 | 28521.6 |
| AHQ-10-9, 3831             | R.AEVSELKCGDLEELK.N                                                     | 1851.02256 | 3 | 5.90E-06 | 0.91  | 4.52   | -     | 898.5   |
| AHQ-10-9, 3753 - 3827      | R.AEVSELKCGDLEELK.N                                                     | 1851.02256 | 2 | 3.81E-05 | 0.86  | 3.81   | -     | 646.5   |
| AHQ-10-9, 5316 - 5371      | R.AEVSELKCGDLEELK.NVTNNLK.S                                             | 2634.89893 | 3 | 1.65E-07 | 0.96  | 5.20   | -     | 1554.0  |
| AHQ-10-9, 2545             | K.IQALQQQADEAEDR.A                                                      | 1615.68404 | 2 | 6.38E-07 | 0.97  | 4.48   | -     | 1913.1  |
| AHQ-10-13, 2717            | K.IQALQQQADEAEDR.A                                                      | 1615.68404 | 2 | 3.95E-07 | 0.95  | 3.67   | -     | 1652.2  |
| AHQ-10-10, 2636            | K.IQALQQQADEAEDR.A                                                      | 1615.68404 | 2 | 1.93E-07 | 0.94  | 3.57   | -     | 1286.7  |
| AHQ-10-11, 2652            | K.IQALQQQADEAEDR.A                                                      | 1615.68404 | 2 | 3.06E-06 | 0.94  | 3.79   | -     | 1218.3  |
| AHQ-10-9, 2391             | R.KIQALQQQADEAEDR.A                                                     | 1743.85695 | 3 | 1.99E-13 | 0.96  | 5.03   | -     | 1730.0  |
| AHQ-10-11, 2498            | R.KIQALQQQADEAEDR.A                                                     | 1743.85695 | 2 | 2.61E-06 | 0.93  | 4.26   | -     | 1214.2  |
| gi 4557677 ref NP_000203.1 | integrin beta chain, beta 3 precursor; platelet glycoprotein IIIa precu |            |   | 4.81E-13 | 20.73 | 240.24 | 31.50 | 87185.6 |
| AHQ-10-3, 3099 - 3151      | R.AKWDTANNPLYK.E                                                        | 1421.58225 | 2 | 9.51E-05 | 0.82  | 3.31   | -     | 779.6   |
| AHQ-10-4, 3101 - 3181      | R.AKWDTANNPLYK.E                                                        | 1421.58225 | 2 | 6.10E-06 | 0.91  | 3.71   | -     | 860.9   |
| AHQ-10-3, 5006 - 5066      | R.CDLKENLLKDNCAPESEIEFPVSEAR.V                                          | 2938.23689 | 3 | 9.20E-07 | 0.90  | 4.46   | -     | 966.0   |
| AHQ-10-4, 5120             | R.CDLKENLLKDNCAPESEIEFPVSEAR.V                                          | 2938.23689 | 3 | 7.91E-07 | 0.90  | 4.30   | -     | 912.1   |
| AHQ-10-4, 4168             | R.CGPGWLGSGQCESEEDYRPSQQDECSPR.E                                        | 3380.49342 | 3 | 2.71E-08 | 0.84  | 4.01   | -     | 514.5   |
| AHQ-10-5, 4145             | R.CGPGWLGSGQCESEEDYRPSQQDECSPR.E                                        | 3380.49342 | 3 | 3.14E-06 | 0.68  | 3.42   | -     | 330.7   |
| AHQ-10-3, 4129 - 4190      | R.CGPGWLGSGQCESEEDYRPSQQDECSPR.E                                        | 3380.49342 | 3 | 4.05E-11 | 0.84  | 4.22   | -     | 579.0   |
| AHQ-10-4, 4268             | R.DAPEGGFDAIM*QATVCDEK.I                                                | 2072.21656 | 2 | 4.69E-06 | 0.92  | 4.00   | -     | 869.1   |
| AHQ-10-6, 4151             | R.DAPEGGFDAIM*QATVCDEK.I                                                | 2072.21656 | 2 | 1.77E-04 | 0.80  | 3.00   | -     | 607.2   |
| AHQ-10-7, 5333             | R.DAPEGGFDAIM*QATVCDEK.I                                                | 2056.21716 | 2 | 2.80E-04 | 0.88  | 3.43   | -     | 844.2   |
| AHQ-10-4, 5432             | R.DAPEGGFDAIM*QATVCDEK.I                                                | 2056.21716 | 2 | 3.09E-08 | 0.71  | 2.94   | -     | 481.1   |
| AHQ-10-4, 4177 - 4244      | R.DAPEGGFDAIM*QATVCDEK.I                                                | 2072.21656 | 2 | 1.43E-04 | 0.56  | 3.40   | -     | 223.4   |
| AHQ-10-5, 4223             | R.DAPEGGFDAIM*QATVCDEK.I                                                | 2072.21656 | 2 | 3.34E-05 | 0.88  | 3.51   | -     | 858.0   |
| AHQ-10-1, 4343             | R.DAPEGGFDAIM*QATVCDEK.I                                                | 2072.21656 | 2 | 2.30E-05 | 0.94  | 4.18   | -     | 950.2   |
| AHQ-10-6, 4584             | K.DDLWSIQNLGTLK.L                                                       | 1390.52332 | 2 | 5.48E-06 | 0.90  | 3.58   | -     | 941.2   |
| AHQ-10-4, 4695             | K.DDLWSIQNLGTLK.L                                                       | 1390.52332 | 2 | 4.13E-04 | 0.76  | 2.57   | -     | 804.4   |
| AHQ-10-4, 4332             | K.DNCAPESEIEFPVSEAR.V                                                   | 1822.93099 | 2 | 8.31E-05 | 0.53  | 2.51   | -     | 531.6   |
| AHQ-10-9, 3963 - 3964      | K.DNCAPESEIEFPVSEAR.V                                                   | 1822.93099 | 2 | 6.19E-05 | 0.73  | 3.06   | -     | 688.6   |
| AHQ-10-7, 4116             | K.DNCAPESEIEFPVSEAR.V                                                   | 1822.93099 | 2 | 5.74E-06 | 0.82  | 3.03   | -     | 919.6   |
| AHQ-10-8, 4149             | K.DNCAPESEIEFPVSEAR.V                                                   | 1822.93099 | 2 | 2.36E-04 | 0.72  | 2.76   | -     | 792.7   |
| AHQ-10-6, 4127 - 4140      | K.DNCAPESEIEFPVSEAR.V                                                   | 1822.93099 | 2 | 2.26E-06 | 0.83  | 3.24   | -     | 772.0   |
| AHQ-10-5, 4209 - 4219      | K.DNCAPESEIEFPVSEAR.V                                                   | 1822.93099 | 2 | 1.69E-04 | 0.94  | 3.63   | -     | 1298.1  |
| AHQ-10-3, 4182 - 4189      | K.DNCAPESEIEFPVSEAR.V                                                   | 1822.93099 | 2 | 5.55E-06 | 0.92  | 3.71   | -     | 1146.1  |
| AHQ-10-4, 3371             | K.EATSTFTNITYR.G                                                        | 1404.50685 | 2 | 1.39E-04 | 0.67  | 2.86   | -     | 498.3   |
| AHQ-10-6, 3315             | K.EATSTFTNITYR.G                                                        | 1404.50685 | 2 | 2.92E-05 | 0.86  | 3.06   | -     | 890.9   |
| AHQ-10-3, 2423             | R.FQYEDSSGK.S                                                           | 1224.25749 | 2 | 8.74E-08 | 0.81  | 3.19   | -     | 463.8   |
| AHQ-10-5, 3508             | R.GECLCGQCVCHSSDFGK.I                                                   | 2006.16137 | 2 | 1.37E-04 | 0.91  | 4.09   | -     | 848.2   |
| AHQ-10-3, 3506             | R.GECLCGQCVCHSSDFGK.I                                                   | 2006.16137 | 3 | 2.52E-06 | 0.91  | 4.08   | -     | 1017.8  |
| AHQ-10-6, 3467             | R.GECLCGQCVCHSSDFGK.I                                                   | 2006.16137 | 2 | 9.35E-05 | 0.74  | 3.10   | -     | 634.4   |
| AHQ-10-3, 3502 - 3513      | R.GECLCGQCVCHSSDFGK.I                                                   | 2006.16137 | 2 | 1.52E-05 | 0.96  | 4.27   | -     | 1634.7  |
| AHQ-10-4, 3537 - 3540      | R.GECLCGQCVCHSSDFGK.I                                                   | 2006.16137 | 2 | 3.82E-05 | 0.95  | 4.04   | -     | 1610.8  |
| AHQ-10-5, 1971             | K.GSGDSSQVTVSPQR.I                                                      | 1533.58302 | 2 | 2.04E-05 | 0.76  | 3.01   | -     | 756.2   |
| AHQ-10-3, 2839             | K.HVLTLDQVTR.F                                                          | 1283.45912 | 2 | 5.03E-06 | 0.89  | 3.41   | -     | 665.9   |
| AHQ-10-8, 2771             | K.HVLTLDQVTR.F                                                          | 1283.45912 | 2 | 6.69E-04 | 0.68  | 2.65   | -     | 632.5   |
| AHQ-10-4, 2803 - 2816      | K.HVLTLDQVTR.F                                                          | 1283.45912 | 2 | 6.34E-08 | 0.91  | 3.49   | -     | 760.8   |
| AHQ-10-6, 2741 - 2776      | K.HVLTLDQVTR.F                                                          | 1283.45912 | 2 | 1.89E-04 | 0.84  | 2.66   | -     | 609.5   |
| AHQ-10-5, 2815             | K.HVLTLDQVTR.F                                                          | 1283.45912 | 2 | 5.03E-07 | 0.80  | 2.81   | -     | 566.5   |
| AHQ-10-3, 3998 - 4063      | K.IGDTVSFSEAK.V                                                         | 1267.41009 | 2 | 2.43E-04 | 0.92  | 3.63   | -     | 1076.1  |
| AHQ-10-3, 3563             | K.ITGKYCECDDFSCVR.Y                                                     | 1914.08378 | 2 | 5.67E-04 | 0.62  | 2.77   | -     | 479.9   |
| AHQ-10-3, 3867             | R.NDASHLLVFTTDAK.T                                                      | 1532.67977 | 3 | 1.30E-05 | 0.96  | 4.79   | -     | 1698.2  |
| AHQ-10-4, 3799 - 3875      | R.NDASHLLVFTTDAK.T                                                      | 1532.67977 | 2 | 4.60E-05 | 0.95  | 4.32   | -     | 1172.4  |
| AHQ-10-4, 4236             | R.NDASHLLVFTTDAK.T                                                      | 1532.67977 | 2 | 4.14E-10 | 0.93  | 4.10   | -     | 925.8   |
| AHQ-10-3, 4023 - 4082      | R.NDASHLLVFTTDAK.T                                                      | 1532.67977 | 2 | 8.08E-05 | 0.88  | 3.31   | -     | 946.9   |
| AHQ-10-3, 3869             | R.NDASHLLVFTTDAK.T                                                      | 1532.67977 | 2 | 3.21E-07 | 0.96  | 4.01   | -     | 1658.2  |
| AHQ-10-3, 3785 - 3853      | R.NDASHLLVFTTDAK.T                                                      | 1532.67977 | 2 | 1.24E-10 | 0.94  | 4.47   | -     | 963.3   |
| AHQ-10-4, 3885             | R.NDASHLLVFTTDAK.T                                                      | 1532.67977 | 3 | 1.43E-10 | 0.96  | 4.82   | -     | 1805.4  |
| AHQ-10-6, 3792             | R.NDASHLLVFTTDAK.T                                                      | 1532.67977 | 2 | 5.39E-09 | 0.96  | 4.72   | -     | 1240.7  |
| AHQ-10-7, 3766             | R.NDASHLLVFTTDAK.T                                                      | 1532.67977 | 2 | 1.40E-06 | 0.95  | 3.95   | -     | 1314.3  |
| AHQ-10-3, 4202 - 4263      | R.NDASHLLVFTTDAK.T                                                      | 1532.67977 | 2 | 3.69E-10 | 0.95  | 4.18   | -     | 1243.6  |
| AHQ-10-6, 3443             | K.SFTIKPVGFK.D                                                          | 1124.35685 | 2 | 1.15E-04 | 0.85  | 2.61   | -     | 1232.8  |
| AHQ-10-4, 3496             | K.SFTIKPVGFK.D                                                          | 1124.35685 | 2 | 7.84E-06 | 0.84  | 2.82   | -     | 958.3   |
| AHQ-10-4, 4249 - 4252      | K.SILYVVEPECPK.G                                                        | 1564.78173 | 2 | 6.03E-05 | 0.84  | 3.46   | -     | 631.2   |
| AHQ-10-3, 2791 - 2865      | R.TDTCM*SSNGLLCSGR.G                                                    | 1677.81726 | 2 | 1.72E-10 | 0.94  | 4.08   | -     | 1408.7  |
| AHQ-10-3, 3461 - 3525      | R.TDTCM*SSNGLLCSGR.G                                                    | 1661.81786 | 2 | 1.03E-08 | 0.87  | 3.21   | -     | 966.2   |
| AHQ-10-3, 2946             | R.TDTCM*SSNGLLCSGR.G                                                    | 1677.81726 | 2 | 2.29E-05 | 0.91  | 3.60   | -     | 1127.1  |
| AHQ-10-4, 2776 - 2855      | R.TDTCM*SSNGLLCSGR.G                                                    | 1677.81726 | 2 | 1.45E-09 | 0.93  | 3.78   | -     | 1151.8  |
| AHQ-10-5, 2777             | R.TDTCM*SSNGLLCSGR.G                                                    | 1677.81726 | 2 | 1.18E-08 | 0.93  | 3.51   | -     | 1184.4  |
| AHQ-10-4, 2937             | R.TDTCM*SSNGLLCSGR.G                                                    | 1677.81726 | 2 | 1.05E-08 | 0.94  | 3.87   | -     | 1468.6  |
| AHQ-10-4, 3480 - 3552      | R.TDTCM*SSNGLLCSGR.G                                                    | 1661.81786 | 2 | 1.03E-08 | 0.81  | 2.88   | -     | 950.7   |
| AHQ-10-4, 3340 - 3401      | R.TDTCM*SSNGLLCSGR.G                                                    | 1661.81786 | 2 | 2.37E-06 | 0.58  | 3.00   | -     | 752.0   |
| AHQ-10-3, 2103             | R.VLEDRPLSDK.G                                                          | 1172.31354 | 2 | 2.05E-06 | 0.90  | 3.47   | -     | 958.3   |
| AHQ-10-4, 2061 - 2079      | R.VLEDRPLSDK.G                                                          | 1172.31354 | 2 | 1.01E-04 | 0.90  | 3.28   | -     | 969.1   |
| AHQ-10-4, 2813             | R.VLEDRPLSDKSGDSSQVTVSPQR.I                                             | 2686.87396 | 3 | 3.84E-08 | 0.93  | 4.89   | -     | 1136.4  |
| AHQ-10-9, 2679             | R.VLEDRPLSDKSGDSSQVTVSPQR.I                                             | 2686.87396 | 3 | 2.77E-04 | 0.86  | 3.51   | -     | 1131.4  |
| AHQ-10-5, 2825             | R.VLEDRPLSDKSGDSSQVTVSPQR.I                                             | 2686.87396 | 3 | 3.78E-09 | 0.92  | 4.27   | -     | 1253.1  |
| AHQ-10-3, 2837             | R.VLEDRPLSDKSGDSSQVTVSPQR.I                                             | 2686.87396 | 3 | 4.81E-13 | 0.93  | 4.68   | -     | 1208.2  |
| AHQ-10-3, 3329             | K.WDTANNPLYK.E                                                          | 1222.33111 | 2 | 3.86E-04 | 0.76  | 2.74   | -     | 760.1   |
| AHQ-10-3, 3471 - 3530      | K.YCECDFSCVR.Y                                                          | 1514.59674 | 2 | 6.79E-07 | 0.97  | 4.61   | -     | 1300.1  |
| AHQ-10-7, 3476             | K.YCECDFSCVR.Y                                                          | 1514.59674 | 2 | 4.72E-05 | 0.93  | 3.42   | -     | 1078.5  |
| AHQ-10-4, 3487 - 3556      | K.YCECDFSCVR.Y                                                          | 1514.59674 | 2 | 1.24E-04 | 0.92  | 3.74   | -     | 828.4   |
| AHQ-10-2, 3596             | K.YCECDFSCVR.Y                                                          | 1514.59674 | 2 | 2.11E-06 | 0.91  | 3.14   | -     | 1077.6  |
| AHQ-10-4, 2376             | R.YCRDEIESVK.E                                                          | 1300.42023 | 2 | 8.84E-06 | 0.94  | 3.73   | -     | 1615.9  |
| AHQ-10-3, 2399             | R.YCRDEIESVK.E                                                          | 1300.42023 | 2 | 2.33E-05 | 0.83  | 3.14   | -     | 804.4   |
| gi 4505879 ref NP_002655.1 | pleckstrin; p47 [Homo sapiens]                                          |            |   | 6.51E-13 | 5.73  | 60.39  | 22.60 | 40082.5 |
| AHQ-10-8, 5391             | R.EDPAYLHYDDPAGAEPLGAIHLR.G                                             | 2684.89982 | 3 | 1.83E-12 | 0.98  | 6.37   | -     | 2260.7  |
| AHQ-10-12, 5284            | R.EDPAYLHYDDPAGAEPLGAIHLR.G                                             | 2684.89982 | 3 | 1.68E-05 | 0.92  | 4.13   | -     | 1680.9  |
| AHQ-10-11, 5262            | R.EDPAYLHYDDPAGAEPLGAIHLR.G                                             | 2684.89982 | 3 | 9.57E-05 | 0.94  | 5.07   | -     | 1027.7  |
| AHQ-10-13, 5332            | R.EDPAYLHYDDPAGAEPLGAIHLR.G                                             | 2684.89982 | 3 | 2.99E-07 | 0.97  | 5.45   | -     | 1788.2  |
| AHQ-10-8, 2461             | R.GCVVTSVESNSNGR.K                                                      | 1467.54464 | 2 | 1.54E-04 | 0.94  | 3.66   | -     | 1553.4  |
| AHQ-10-8, 6446 - 6453      | R.KSEENLFEIITAEVHYFLQAATPK.E                                            | 3024.32650 | 3 | 8.04E-08 | 0.98  | 7.76   | -     | 2739.4  |
| AHQ-10-10, 6235            | R.KSEENLFEIITAEVHYFLQAATPK.E                                            | 3024.32650 | 3 | 1.18E-06 | 0.94  | 4.72   | -     | 1222.6  |
| AHQ-10-8, 6061             | R.LPETIDLALYLSMK.D                                                      | 1664.98779 | 2 | 2.40E-04 | 0.96  | 3.90   | -     | 1895.0  |
| AHQ-10-8, 5443 - 5514      | R.LPETIDLALYLSMK.D                                                      | 1680.98719 | 2 | 2.02E-05 | 0.95  | 4.72   | -     | 1030.3  |
| AHQ-10-10, 6272            | K.SSEENLFEIITAEVHYFLQAATPK.E                                            | 2896.15359 | 3 | 1.40E-05 | 0.84  | 3.61   | -     | 853.5   |
| AHQ-10-11, 6304            | K.SSEENLFEIITAEVHYFLQAATPK.E                                            | 2896.15359 | 3 | 1.47E-06 | 0.73  | 3.47   | -     | 558.6   |
| AHQ-10-8, 6489             | K.SSEENLFEIITAEVHYFLQAATPK.E                                            | 2896.15359 | 2 | 1.09E-04 | 0.74  | 3.62   | -     | 450.1   |
| AHQ-10-8, 6486             | K.SSEENLFEIITAEVHYFLQAATPK.E                                            | 2896.15359 | 3 | 6.51E-13 | 0.92  | 4.32   | -     | 1242.5  |
| AHQ-10-9, 6061 - 6190      | K.SSEENLFEIITAEVHYFLQAATPK.E                                            | 2896.15359 | 3 | 6.08E-06 | 0.68  | 3.36   | -     | 472.6   |



|                            |                                                                         |            |   |          |       |        |       |         |
|----------------------------|-------------------------------------------------------------------------|------------|---|----------|-------|--------|-------|---------|
| AHQ-10-10, 4514 - 4570     | K.SYELPDGQVITIGNER.F                                                    | 1791.93998 | 2 | 1.46E-12 | 0.96  | 4.89   | -     | 1148.2  |
| AHQ-10-10, 4540 - 4548     | K.SYELPDGQVITIGNER.F                                                    | 1791.93998 | 3 | 1.48E-07 | 0.93  | 4.19   | -     | 1348.9  |
| AHQ-10-10, 4647 - 4690     | K.SYELPDGQVITIGNER.F                                                    | 1791.93998 | 2 | 7.26E-09 | 0.95  | 4.24   | -     | 997.1   |
| AHQ-10-8, 3729 - 3789      | R.VAPEEHPTLLTEAPLNPK.A                                                  | 1957.21627 | 2 | 1.47E-05 | 0.90  | 4.72   | -     | 531.8   |
| AHQ-10-9, 4079 - 4147      | K.YPIEHGIITNWDDMEK.I                                                    | 1962.17174 | 2 | 3.11E-04 | 0.81  | 3.81   | -     | 748.6   |
| AHQ-10-8, 4849             | K.YPIEHGIITNWDDMEK.I                                                    | 1962.17174 | 2 | 2.08E-04 | 0.78  | 3.66   | -     | 471.0   |
| AHQ-10-11, 4279            | K.YPIEHGIITNWDDMEK.I                                                    | 1962.17174 | 3 | 1.21E-04 | 0.76  | 3.78   | -     | 812.1   |
| AHQ-10-8, 4429 - 4434      | K.YPIEHGIITNWDDM*EK.I                                                   | 1978.17114 | 2 | 6.65E-04 | 0.51  | 2.99   | -     | 455.1   |
| AHQ-10-8, 4405 - 4406      | K.YPIEHGIITNWDDMEK.I                                                    | 1962.17174 | 3 | 1.62E-04 | 0.86  | 4.46   | -     | 771.0   |
| AHQ-10-8, 4362 - 4421      | K.YPIEHGIITNWDDMEK.I                                                    | 1962.17174 | 2 | 5.07E-06 | 0.93  | 4.61   | -     | 762.5   |
| AHQ-10-8, 4142 - 4201      | K.YPIEHGIITNWDDMEK.I                                                    | 1962.17174 | 2 | 5.19E-04 | 0.89  | 4.05   | -     | 909.0   |
| AHQ-10-8, 4079             | K.YPIEHGIITNWDDM*EK.I                                                   | 1978.17114 | 3 | 7.04E-04 | 0.73  | 3.30   | -     | 1118.4  |
| AHQ-10-8, 4057             | K.YPIEHGIITNWDDMEK.I                                                    | 1962.17174 | 2 | 1.56E-05 | 0.91  | 4.20   | -     | 921.7   |
| AHQ-10-8, 4029 - 4110      | K.YPIEHGIITNWDDM*EK.I                                                   | 1978.17114 | 2 | 5.47E-04 | 0.91  | 4.07   | -     | 805.4   |
| AHQ-10-10, 4164 - 4235     | K.YPIEHGIITNWDDMEK.I                                                    | 1962.17174 | 2 | 3.47E-05 | 0.67  | 3.20   | -     | 599.2   |
| AHQ-10-8, 4553             | K.YPIEHGIITNWDDMEK.I                                                    | 1962.17174 | 2 | 2.35E-04 | 0.86  | 3.93   | -     | 572.0   |
| gj13775198 ref NP_112576.1 | SH3 domain binding glutamic acid-rich protein like 3; SH3BGL3-like pr   |            |   |          |       |        |       |         |
| AHQ-10-14, 4529            | R.IQYQLVDSQDNALR.D                                                      | 1776.97168 | 2 | 4.29E-12 | 0.97  | 4.75   | -     | 1739.5  |
| AHQ-10-13, 4863 - 4933     | R.IQYQLVDSQDNALR.D                                                      | 1776.97168 | 2 | 5.38E-11 | 0.96  | 4.59   | -     | 1509.3  |
| AHQ-10-14, 5263            | R.IQYQLVDSQDNALR.D                                                      | 1776.97168 | 2 | 7.06E-06 | 0.91  | 3.70   | -     | 1137.5  |
| AHQ-10-13, 4524 - 4596     | R.IQYQLVDSQDNALR.D                                                      | 1776.97168 | 2 | 2.38E-12 | 0.97  | 5.11   | -     | 1568.4  |
| AHQ-10-13, 4157 - 4160     | R.IQYQLVDSQDNALRDEM*R.A                                                 | 2324.55691 | 3 | 2.37E-05 | 0.85  | 3.51   | -     | 845.0   |
| AHQ-10-13, 4270            | R.IQYQLVDSQDNALRDEM*R.A                                                 | 2324.55691 | 3 | 7.70E-06 | 0.65  | 3.06   | -     | 431.2   |
| AHQ-10-13, 1993 - 2061     | R.VYSTSVTGSR.E                                                          | 1057.13940 | 2 | 9.23E-05 | 0.80  | 2.94   | -     | 829.0   |
| AHQ-10-13, 1861 - 1920     | R.VYSTSVTGSR.E                                                          | 1057.13940 | 2 | 1.40E-05 | 0.93  | 3.52   | -     | 1210.5  |
| AHQ-10-13, 1746 - 1805     | R.VYSTSVTGSR.E                                                          | 1057.13940 | 2 | 7.39E-05 | 0.90  | 2.90   | -     | 1070.5  |
| AHQ-10-13, 2280 - 2335     | R.VYSTSVTGSR.E                                                          | 1057.13940 | 2 | 2.80E-04 | 0.87  | 3.05   | -     | 931.7   |
| gj30148492 ref XP_293610.2 | similar to Heat shock cognate 71 kDa protein [Homo sapiens]             |            |   |          |       |        |       |         |
| AHQ-10-6, 2955             | R.FDDAVVQSDMK.H                                                         | 1255.37968 | 2 | 2.15E-07 | 0.90  | 3.14   | -     | 1036.1  |
| AHQ-10-6, 4532 - 4533      | R.IINEPTAAAIYGLDK.K                                                     | 1660.89259 | 2 | 1.09E-09 | 0.94  | 5.55   | -     | 1045.0  |
| AHQ-10-6, 4221             | R.IINEPTAAAIYGLDK.V                                                     | 1789.06550 | 2 | 2.38E-12 | 0.94  | 4.11   | -     | 942.3   |
| gj18860900 ref NP_002834.2 | protein tyrosine phosphatase, receptor type, J precursor; protein tyro  |            |   |          |       |        |       |         |
| AHQ-10-1, 5481             | K.AVSIPTNVLITWK.S                                                       | 1529.80530 | 2 | 4.55E-05 | 0.60  | 2.57   | -     | 422.5   |
| AHQ-10-1, 4315             | K.AYAVILTTGEAGHPSADVLK.Y                                                | 2014.26782 | 3 | 2.90E-07 | 0.94  | 3.97   | -     | 1549.8  |
| AHQ-10-1, 4246 - 4321      | K.AYAVILTTGEAGHPSADVLK.Y                                                | 2014.26782 | 2 | 3.17E-07 | 0.97  | 5.12   | -     | 1799.6  |
| AHQ-10-1, 3166             | K.GDPLGTGGDLASNTER.S                                                    | 1689.71978 | 2 | 3.49E-12 | 0.77  | 2.74   | -     | 786.3   |
| AHQ-10-1, 4958             | K.GLIDGAEYSVFSR.Y                                                       | 1501.62253 | 2 | 1.14E-04 | 0.94  | 3.46   | -     | 1618.5  |
| AHQ-10-1, 5114             | K.SPDGASEYVYHLVIESK.H                                                   | 1895.05866 | 2 | 7.84E-04 | 0.77  | 3.21   | -     | 688.2   |
| AHQ-10-1, 5111             | K.SPDGASEYVYHLVIESK.H                                                   | 1895.05866 | 3 | 4.03E-07 | 0.95  | 4.39   | -     | 1571.5  |
| AHQ-10-1, 4423             | R.VENFEAYFK.K                                                           | 1147.26100 | 2 | 1.54E-05 | 0.78  | 3.34   | -     | 529.3   |
| AHQ-10-1, 4233             | K.VITEPIPVSDLR.V                                                        | 1339.56259 | 2 | 7.86E-06 | 0.73  | 2.87   | -     | 450.6   |
| AHQ-10-1, 3870 - 3938      | R.VLLESIGSHEELTQDSR.L                                                   | 1914.06352 | 2 | 3.11E-05 | 0.84  | 3.53   | -     | 687.1   |
| AHQ-10-1, 3883             | R.VLLESIGSHEELTQDSR.L                                                   | 1914.06352 | 3 | 4.22E-04 | 0.85  | 3.69   | -     | 910.0   |
| gj4502295 ref NP_001677.1  | ATP synthase, H+ transporting, mitochondrial F1 complex, beta polypepti |            |   |          |       |        |       |         |
| AHQ-10-7, 5232 - 5293      | R.AIAELGIYPAVDPLDSTSR.I                                                 | 1989.21513 | 2 | 6.50E-04 | 0.86  | 3.94   | -     | 441.4   |
| AHQ-10-7, 5345             | R.FLSQPFQVAEFTGHH*GK.L                                                  | 2040.33044 | 3 | 1.31E-05 | 0.71  | 3.02   | -     | 677.2   |
| AHQ-10-7, 4329             | R.FTQAGSEVSALLGR.I                                                      | 1436.59522 | 2 | 8.65E-09 | 0.93  | 4.12   | -     | 909.5   |
| AHQ-10-7, 6294 - 6296      | K.GFQQLAGELYHLPEQAFYM*VGPIEEAVAK.A                                      | 3368.75991 | 3 | 3.58E-12 | 0.97  | 6.97   | -     | 1408.0  |
| AHQ-10-7, 3590             | R.IMDPNIVGSEHYDVAR.G                                                    | 1817.01617 | 2 | 2.28E-04 | 0.80  | 3.02   | -     | 658.7   |
| AHQ-10-7, 4092             | R.LVLEVAQHGLGESTVR.T                                                    | 1651.88893 | 2 | 1.85E-07 | 0.95  | 3.69   | -     | 1384.0  |
| AHQ-10-7, 4100             | R.LVLEVAQHGLGESTVR.T                                                    | 1651.88893 | 3 | 9.22E-09 | 0.89  | 3.61   | -     | 725.4   |
| AHQ-10-7, 5413             | R.VALTGLTVAEYFR.D                                                       | 1440.66861 | 2 | 2.88E-05 | 0.90  | 3.57   | -     | 1004.0  |
| AHQ-10-7, 3445             | K.VALVYGGQMQPPGAR.A                                                     | 1601.85511 | 2 | 5.27E-06 | 0.89  | 3.66   | -     | 765.9   |
| AHQ-10-7, 4509             | K.VLDSGAPKIPVGPETLGR.I                                                  | 1920.24231 | 2 | 8.37E-09 | 0.88  | 3.58   | -     | 506.5   |
| gj4504349 ref NP_000509.1  | beta globin [Homo sapiens]                                              |            |   |          |       |        |       |         |
| AHQ-10-14, 3180 - 3198     | K.EFTPPVQAAYQK.V                                                        | 1379.54213 | 2 | 1.77E-04 | 0.89  | 3.58   | -     | 874.1   |
| AHQ-10-13, 3202            | K.EFTPPVQAAYQK.V                                                        | 1379.54213 | 1 | 1.91E-04 | 0.16  | 2.22   | -     | 168.0   |
| AHQ-10-13, 5113            | R.FFESFGDLSTPDVAVMGNPK.V                                                | 2060.27218 | 2 | 4.73E-05 | 0.90  | 3.73   | -     | 761.2   |
| AHQ-10-13, 4900            | R.FFESFGDLSTPDVAVM*GNPK.V                                               | 2076.27158 | 2 | 6.15E-04 | 0.90  | 4.51   | -     | 576.4   |
| AHQ-10-13, 5139            | R.FFESFGDLSTPDVAVM*GNPK.V                                               | 2076.27158 | 3 | 2.21E-05 | 0.96  | 4.41   | -     | 1932.3  |
| AHQ-10-13, 5231 - 5276     | R.FFESFGDLSTPDVAVM*GNPK.V                                               | 2076.27158 | 2 | 1.72E-04 | 0.93  | 4.34   | -     | 782.3   |
| AHQ-10-13, 4798            | R.FFESFGDLSTPDVAVM*GNPK.V                                               | 2076.27158 | 3 | 7.66E-06 | 0.88  | 4.03   | -     | 1033.8  |
| AHQ-10-13, 5023 - 5089     | R.FFESFGDLSTPDVAVM*GNPK.V                                               | 2076.27158 | 2 | 7.67E-04 | 0.90  | 4.05   | -     | 684.1   |
| AHQ-10-13, 4788 - 4844     | R.FFESFGDLSTPDVAVM*GNPK.V                                               | 2076.27158 | 2 | 1.05E-06 | 0.90  | 4.49   | -     | 594.0   |
| AHQ-10-14, 5467 - 5471     | R.FFESFGDLSTPDVAVM*GNPK.V                                               | 2076.27158 | 2 | 4.32E-05 | 0.88  | 3.59   | -     | 632.7   |
| AHQ-10-13, 5388            | R.FFESFGDLSTPDVAVMGNPK.V                                                | 2060.27218 | 2 | 4.94E-08 | 0.91  | 3.88   | -     | 851.6   |
| AHQ-10-14, 4814 - 4882     | R.FFESFGDLSTPDVAVM*GNPK.V                                               | 2076.27158 | 2 | 1.93E-06 | 0.91  | 4.65   | -     | 578.2   |
| AHQ-10-14, 4797            | R.FFESFGDLSTPDVAVM*GNPK.V                                               | 2076.27158 | 2 | 1.45E-05 | 0.50  | 2.90   | -     | 410.9   |
| AHQ-10-13, 5583 - 5589     | R.FFESFGDLSTPDVAVMGNPK.V                                                | 2060.27218 | 2 | 7.05E-07 | 0.86  | 3.54   | -     | 662.9   |
| AHQ-10-14, 5313            | R.FFESFGDLSTPDVAVMGNPK.V                                                | 2060.27218 | 2 | 1.23E-05 | 0.87  | 3.21   | -     | 774.3   |
| AHQ-10-13, 5288            | R.FFESFGDLSTPDVAVMGNPK.V                                                | 2060.27218 | 2 | 2.59E-08 | 0.94  | 4.71   | -     | 862.4   |
| AHQ-10-13, 3617            | K.GTFATLSELHCDK.L                                                       | 1480.62492 | 2 | 1.82E-06 | 0.84  | 3.30   | -     | 735.0   |
| AHQ-10-13, 4822 - 4824     | K.GTFATLSELHCDKHLVDPENFR.L                                              | 2588.83687 | 3 | 1.06E-09 | 0.94  | 4.61   | -     | 1258.7  |
| AHQ-10-13, 4469 - 4470     | K.KVLGAFSDGLAHLDNLK.G                                                   | 1799.06362 | 3 | 3.79E-09 | 0.97  | 6.13   | -     | 2026.0  |
| AHQ-10-13, 4668            | K.KVLGAFSDGLAHLDNLK.G                                                   | 1799.06362 | 3 | 1.78E-09 | 0.97  | 5.67   | -     | 1699.8  |
| AHQ-10-13, 4670            | K.KVLGAFSDGLAHLDNLK.G                                                   | 1799.06362 | 2 | 1.21E-05 | 0.97  | 5.17   | -     | 1261.7  |
| AHQ-10-13, 5033            | K.KVLGAFSDGLAHLDNLK.G                                                   | 1799.06362 | 3 | 2.53E-07 | 0.94  | 4.62   | -     | 1122.9  |
| AHQ-10-13, 5252            | K.KVLGAFSDGLAHLDNLK.G                                                   | 1670.89071 | 2 | 3.13E-09 | 0.95  | 4.44   | -     | 1478.8  |
| AHQ-10-13, 4550            | K.KVLGAFSDGLAHLDNLK.G                                                   | 1670.89071 | 2 | 1.19E-11 | 0.93  | 4.47   | -     | 1202.9  |
| AHQ-10-13, 5111            | K.KVLGAFSDGLAHLDNLK.G                                                   | 1670.89071 | 2 | 6.85E-06 | 0.90  | 3.51   | -     | 1010.2  |
| AHQ-10-13, 4945 - 5002     | K.KVLGAFSDGLAHLDNLK.G                                                   | 1670.89071 | 2 | 3.92E-12 | 0.98  | 5.76   | -     | 2003.9  |
| AHQ-10-13, 5104            | K.KVLGAFSDGLAHLDNLK.G                                                   | 1670.89071 | 3 | 1.87E-04 | 0.80  | 3.34   | -     | 526.0   |
| AHQ-10-14, 4954            | K.KVLGAFSDGLAHLDNLK.G                                                   | 1670.89071 | 2 | 3.12E-10 | 0.96  | 4.65   | -     | 1364.8  |
| AHQ-10-13, 4776            | K.KVLGAFSDGLAHLDNLK.G                                                   | 1670.89071 | 2 | 2.09E-10 | 0.97  | 5.06   | -     | 1679.7  |
| AHQ-10-14, 5623            | K.KVLGAFSDGLAHLDNLK.G                                                   | 1670.89071 | 2 | 7.36E-07 | 0.74  | 2.57   | -     | 760.3   |
| AHQ-10-13, 3264 - 3326     | K.VNVDEVGGEALGR.L                                                       | 1315.41484 | 2 | 9.71E-05 | 0.98  | 4.48   | -     | 2511.1  |
| AHQ-10-14, 3249            | K.VNVDEVGGEALGR.L                                                       | 1315.41484 | 2 | 5.28E-06 | 0.97  | 4.46   | -     | 2212.2  |
| AHQ-10-6, 3236             | K.VNVDEVGGEALGR.L                                                       | 1315.41484 | 2 | 9.74E-05 | 0.94  | 4.00   | -     | 1149.0  |
| AHQ-10-14, 3991 - 3993     | K.VNVDEVGGEALGR.L                                                       | 1315.41484 | 2 | 8.22E-04 | 0.91  | 3.77   | -     | 974.6   |
| AHQ-10-13, 3274            | K.VNVDEVGGEALGR.L                                                       | 1315.41484 | 1 | 3.38E-07 | 0.14  | 1.83   | -     | 290.0   |
| AHQ-10-13, 2186 - 2244     | K.VVAGVANALAHK.Y                                                        | 1150.35593 | 2 | 5.59E-05 | 0.85  | 2.74   | -     | 1074.3  |
| AHQ-10-13, 2506 - 2584     | K.VVAGVANALAHK.Y                                                        | 1150.35593 | 2 | 4.24E-05 | 0.94  | 3.29   | -     | 1448.2  |
| gj17318569 ref NP_006112.2 | keratin 1; Keratin-1; cytokeratin 1; hair alpha protein [Homo sapiens]  |            |   |          |       |        |       |         |
| AHQ-10-7, 2125             | K.AEAESLYQSK.Y                                                          | 1126.19850 | 2 | 4.19E-12 | 18.75 | 220.26 | 39.00 | 60606.6 |
| AHQ-10-6, 2111 - 2112      | K.AEAESLYQSK.Y                                                          | 1126.19850 | 2 | 9.94E-04 | 0.75  | 2.91   | -     | 577.4   |
| AHQ-10-14, 2118            | K.AQYEDIAQK.S                                                           | 1066.14629 | 2 | 6.90E-05 | 0.66  | 2.55   | -     | 496.3   |
| AHQ-10-7, 2092 - 2162      | K.AQYEDIAQK.S                                                           | 1066.14629 | 2 | 8.96E-05 | 0.69  | 2.56   | -     | 453.0   |
| AHQ-10-6, 2080             | K.AQYEDIAQK.S                                                           | 1066.14629 | 2 | 8.75E-05 | 0.48  | 2.64   | -     | 358.8   |
| AHQ-10-7, 2246             | R.GGGGGYGGSSSSYSGGGSSYSGGGGGGGR.G                                       | 2385.27982 | 2 | 5.56E-04 | 0.75  | 3.39   | -     | 545.1   |
| AHQ-10-5, 2236             | R.GGGGGYGGSSSSYSGGGSSYSGGGGGGGR.G                                       | 2385.27982 | 2 | 4.51E-07 | 0.31  | 2.67   | -     | 272.5   |
| AHQ-10-14, 2577            | R.GSYGGSSYSGGGSSYSGGGGGHGSYSGSSSSGGR.G                                  | 3314.18235 | 3 | 9.81E-07 | 0.91  | 4.82   | -     | 1293.2  |
| AHQ-10-1, 5055             | K.LALDLEIATYR.T                                                         | 1278.47925 | 2 | 5.33E-09 | 0.97  | 4.26   | -     | 2088.4  |
| AHQ-10-1, 4023             | K.LNLDLEDALQQAQ.E                                                       | 1358.47963 | 2 | 3.91E-08 | 0.97  | 4.93   | -     | 1724.0  |
| AHQ-10-6, 3764 - 3823      | K.LNLDLEDALQQAQ.E                                                       | 1358.47963 | 2 | 1.01E-05 | 0.97  | 4.73   | -     | 1911.1  |
| AHQ-10-5, 3827 - 3887      | K.LNLDLEDALQQAQ.E                                                       | 1358.47963 | 2 | 1.73E-07 | 0.98  | 5.07   | -     | 2325.4  |
| AHQ-10-3, 3865             | K.LNLDLEDALQQAQ.E                                                       | 1358.47963 | 2 | 3.93E-06 | 0.96  | 4.70   | -     | 1616.7  |
| AHQ-10-4, 3905             | K.LNLDLEDALQQAQ.E                                                       | 1358.47963 | 2 | 1.64E-08 | 0.95  | 4.17   | -     | 1496.0  |

|                            |                                                                         |            |   |          |      |       |       |         |
|----------------------------|-------------------------------------------------------------------------|------------|---|----------|------|-------|-------|---------|
| AHQ-10-14-, 3852           | K.LNLDLEDALQQAQ.E                                                       | 1358.47963 | 2 | 1.85E-05 | 0.97 | 5.24  | -     | 1953.5  |
| AHQ-10-14, 4672            | K.LNLDLEDALQQAQ.E                                                       | 1358.47963 | 2 | 2.51E-04 | 0.90 | 2.83  | -     | 1918.2  |
| AHQ-10-11, 3776            | K.LNLDLEDALQQAQ.E                                                       | 1358.47963 | 2 | 2.76E-05 | 0.98 | 4.74  | -     | 2665.9  |
| AHQ-10-13-, 3880           | K.LNLDLEDALQQAQ.E                                                       | 1358.47963 | 2 | 1.72E-06 | 0.96 | 4.55  | -     | 1819.5  |
| AHQ-10-2, 3946 - 3947      | K.LNLDLEDALQQAQ.E                                                       | 1358.47963 | 2 | 1.83E-05 | 0.95 | 4.07  | -     | 1666.5  |
| AHQ-10-2, 4378             | K.NKLNLDLEDALQQAQ.E                                                     | 1600.75564 | 2 | 1.75E-06 | 0.96 | 4.43  | -     | 1720.8  |
| AHQ-10-13, 4613            | K.NKLNLDLEDALQQAQ.E                                                     | 1600.75564 | 2 | 1.15E-04 | 0.89 | 3.61  | -     | 761.5   |
| AHQ-10-13-, 4272 - 4281    | K.NKLNLDLEDALQQAQ.E                                                     | 1600.75564 | 2 | 4.80E-07 | 0.95 | 3.90  | -     | 1548.8  |
| AHQ-10-3, 4293             | K.NKLNLDLEDALQQAQ.E                                                     | 1600.75564 | 2 | 4.13E-04 | 0.95 | 4.54  | -     | 1208.8  |
| AHQ-10-5, 4296             | K.NKLNLDLEDALQQAQ.E                                                     | 1600.75564 | 2 | 4.31E-10 | 0.97 | 4.54  | -     | 2027.1  |
| AHQ-10-1, 4425 - 4441      | K.NKLNLDLEDALQQAQ.E                                                     | 1600.75564 | 2 | 1.57E-05 | 0.91 | 3.45  | -     | 1249.4  |
| AHQ-10-3, 4298             | K.NKLNLDLEDALQQAQ.E                                                     | 1600.75564 | 3 | 1.16E-06 | 0.97 | 4.94  | -     | 2316.5  |
| AHQ-10-5, 2843 - 2903      | K.NMQDM*VEDYR.N                                                         | 1317.43134 | 2 | 8.85E-06 | 0.92 | 3.55  | -     | 940.6   |
| AHQ-10-3, 2914 - 2937      | K.NMQDM*VEDYR.N                                                         | 1317.43134 | 2 | 5.82E-04 | 0.84 | 3.01  | -     | 799.3   |
| AHQ-10-11, 2795 - 2855     | K.NMQDM*VEDYR.N                                                         | 1317.43134 | 2 | 7.18E-04 | 0.91 | 3.36  | -     | 1116.9  |
| AHQ-10-3, 3641 - 3673      | K.QISNLQQSISDAEQR.G                                                     | 1717.81950 | 2 | 8.84E-07 | 0.93 | 4.29  | -     | 781.9   |
| AHQ-10-6, 3605             | K.QISNLQQSISDAEQR.G                                                     | 1717.81950 | 2 | 1.45E-05 | 0.85 | 3.35  | -     | 626.3   |
| AHQ-10-5, 3667             | K.QISNLQQSISDAEQR.G                                                     | 1717.81950 | 2 | 8.64E-07 | 0.88 | 3.70  | -     | 643.3   |
| AHQ-10-8, 3611             | K.QISNLQQSISDAEQR.G                                                     | 1717.81950 | 2 | 5.20E-07 | 0.84 | 3.58  | -     | 724.1   |
| AHQ-10-1, 3826             | K.QISNLQQSISDAEQR.G                                                     | 1717.81950 | 2 | 6.31E-05 | 0.88 | 3.66  | -     | 762.3   |
| AHQ-10-7, 3601             | K.QISNLQQSISDAEQR.G                                                     | 1717.81950 | 2 | 1.07E-07 | 0.82 | 3.30  | -     | 688.0   |
| AHQ-10-14-, 3653           | K.QISNLQQSISDAEQR.G                                                     | 1717.81950 | 2 | 6.83E-06 | 0.95 | 4.27  | -     | 1194.7  |
| AHQ-10-11, 3578 - 3583     | K.QISNLQQSISDAEQR.G                                                     | 1717.81950 | 2 | 5.24E-07 | 0.88 | 4.07  | -     | 594.5   |
| AHQ-10-2, 3744             | K.QISNLQQSISDAEQR.G                                                     | 1717.81950 | 2 | 2.24E-05 | 0.79 | 3.24  | -     | 579.3   |
| AHQ-10-14-, 3441 - 3521    | R.SGGFFSSGSAGIINYQR.R                                                   | 1658.75374 | 2 | 7.57E-05 | 0.87 | 3.38  | -     | 1073.4  |
| AHQ-10-1, 3689             | R.SGGFFSSGSAGIINYQR.R                                                   | 1658.75374 | 2 | 4.95E-05 | 0.80 | 2.84  | -     | 1027.9  |
| AHQ-10-5, 3515             | R.SGGFFSSGSAGIINYQR.R                                                   | 1658.75374 | 2 | 2.03E-07 | 0.91 | 3.55  | -     | 1227.1  |
| AHQ-10-11, 3438            | R.SGGFFSSGSAGIINYQR.R                                                   | 1658.75374 | 2 | 8.70E-05 | 0.81 | 2.60  | -     | 1139.4  |
| AHQ-10-13-, 2045           | K.SKAEASLYQSK.Y                                                         | 1341.44907 | 2 | 1.36E-05 | 0.92 | 3.20  | -     | 1151.6  |
| AHQ-10-5, 1952 - 1959      | K.SKAEASLYQSK.Y                                                         | 1341.44907 | 2 | 4.53E-07 | 0.91 | 3.41  | -     | 961.4   |
| AHQ-10-2, 2088             | K.SKAEASLYQSK.Y                                                         | 1341.44907 | 2 | 1.05E-08 | 0.92 | 3.75  | -     | 829.9   |
| AHQ-10-3, 2058 - 2063      | K.SKAEASLYQSK.Y                                                         | 1341.44907 | 2 | 1.85E-08 | 0.93 | 3.61  | -     | 1048.8  |
| AHQ-10-6, 2005             | K.SKAEASLYQSK.Y                                                         | 1341.44907 | 2 | 6.12E-08 | 0.91 | 3.60  | -     | 926.7   |
| AHQ-10-7, 1962 - 2028      | K.SKAEASLYQSK.Y                                                         | 1341.44907 | 2 | 1.24E-08 | 0.86 | 3.63  | -     | 612.2   |
| AHQ-10-5, 4016             | K.SKAEASLYQSKYEELQITAGR.H                                               | 2502.71900 | 3 | 4.19E-12 | 0.94 | 5.08  | -     | 1030.2  |
| AHQ-10-3, 4005             | K.SKAEASLYQSKYEELQITAGR.H                                               | 2502.71900 | 3 | 3.89E-08 | 0.92 | 4.26  | -     | 1186.6  |
| AHQ-10-9, 5360 - 5431      | R.SLDLDSIAEVK.A                                                         | 1303.48388 | 2 | 4.86E-06 | 0.93 | 3.69  | -     | 1140.5  |
| AHQ-10-10, 5514            | R.SLDLDSIAEVK.A                                                         | 1303.48388 | 2 | 5.54E-05 | 0.90 | 2.92  | -     | 1245.4  |
| AHQ-10-8, 5717             | R.SLDLDSIAEVK.A                                                         | 1303.48388 | 2 | 2.13E-07 | 0.94 | 3.75  | -     | 1332.9  |
| AHQ-10-7, 5656             | R.SLDLDSIAEVK.A                                                         | 1303.48388 | 2 | 9.12E-07 | 0.94 | 4.04  | -     | 1400.3  |
| AHQ-10-2, 5782 - 5858      | R.SLDLDSIAEVK.A                                                         | 1303.48388 | 2 | 9.40E-08 | 0.96 | 4.70  | -     | 1233.7  |
| AHQ-10-13, 5923 - 5924     | R.SLDLDSIAEVK.A                                                         | 1303.48388 | 2 | 8.45E-07 | 0.97 | 5.14  | -     | 1799.9  |
| AHQ-10-6, 5639 - 5651      | R.SLDLDSIAEVK.A                                                         | 1303.48388 | 2 | 2.42E-06 | 0.96 | 4.84  | -     | 1194.6  |
| AHQ-10-11, 5558 - 5580     | R.SLDLDSIAEVK.A                                                         | 1303.48388 | 2 | 1.33E-06 | 0.94 | 3.83  | -     | 1320.2  |
| AHQ-10-7, 4444             | K.SLNNQFASFDK.V                                                         | 1384.51877 | 2 | 1.35E-05 | 0.88 | 3.20  | -     | 933.7   |
| AHQ-10-4, 4592 - 4609      | K.SLNNQFASFDK.V                                                         | 1384.51877 | 2 | 5.22E-05 | 0.91 | 3.86  | -     | 860.8   |
| AHQ-10-13-, 4525 - 4532    | K.SLNNQFASFDK.V                                                         | 1384.51877 | 2 | 2.24E-07 | 0.88 | 3.57  | -     | 675.1   |
| AHQ-10-1, 4902             | K.SLNNQFASFDK.V                                                         | 1384.51877 | 2 | 5.96E-06 | 0.86 | 3.42  | -     | 729.4   |
| AHQ-10-1, 4657 - 4702      | K.SLNNQFASFDK.V                                                         | 1384.51877 | 2 | 1.82E-06 | 0.92 | 4.05  | -     | 834.3   |
| AHQ-10-1, 4498             | K.SLNNQFASFDK.V                                                         | 1384.51877 | 2 | 4.38E-04 | 0.73 | 2.93  | -     | 646.7   |
| AHQ-10-11, 4400            | K.SLNNQFASFDK.V                                                         | 1384.51877 | 2 | 2.39E-05 | 0.79 | 3.06  | -     | 647.3   |
| AHQ-10-14-, 4510           | K.SLNNQFASFDK.V                                                         | 1384.51877 | 2 | 1.77E-04 | 0.64 | 2.66  | -     | 606.8   |
| AHQ-10-8, 4487             | K.SLNNQFASFDK.V                                                         | 1384.51877 | 2 | 1.62E-06 | 0.88 | 3.69  | -     | 692.9   |
| AHQ-10-3, 5126             | K.SLNNQFASFDKVR.F                                                       | 1639.83670 | 3 | 9.55E-05 | 0.85 | 3.22  | -     | 911.0   |
| AHQ-10-3, 5122             | K.SLNNQFASFDKVR.F                                                       | 1639.83670 | 2 | 1.27E-07 | 0.73 | 3.09  | -     | 507.8   |
| AHQ-10-3, 2514 - 2519      | R.SLVNLGGSK.S                                                           | 875.00510  | 1 | 7.80E-04 | 0.17 | 2.26  | -     | 228.7   |
| AHQ-10-5, 2473             | R.SLVNLGGSK.S                                                           | 875.00510  | 2 | 6.38E-04 | 0.66 | 2.65  | -     | 484.4   |
| AHQ-10-1, 4322             | R.SLVNLGGSKSISISVAR.G                                                   | 1688.95071 | 2 | 6.18E-04 | 0.81 | 3.32  | -     | 608.2   |
| AHQ-10-3, 4175 - 4191      | R.SLVNLGGSKSISISVAR.G                                                   | 1688.95071 | 2 | 2.11E-11 | 0.86 | 3.44  | -     | 718.6   |
| AHQ-10-1, 5490             | R.THNLEPYFESFINNLR.R                                                    | 1995.18315 | 3 | 4.26E-04 | 0.61 | 3.13  | -     | 551.3   |
| AHQ-10-1, 5487             | R.THNLEPYFESFINNLR.R                                                    | 1995.18315 | 2 | 5.65E-05 | 0.67 | 2.80  | -     | 408.6   |
| AHQ-10-13-, 6024 - 6049    | R.THNLEPYFESFINNLR.R                                                    | 1995.18315 | 3 | 9.11E-04 | 0.88 | 4.03  | -     | 1009.6  |
| AHQ-10-6, 6016 - 6017      | R.THNLEPYFESFINNLR.R                                                    | 1995.18315 | 3 | 1.84E-04 | 0.95 | 5.18  | -     | 1425.7  |
| AHQ-10-2, 6155 - 6215      | R.THNLEPYFESFINNLR.R                                                    | 1995.18315 | 2 | 2.96E-04 | 0.81 | 3.50  | -     | 449.1   |
| AHQ-10-1, 6209 - 6265      | R.THNLEPYFESFINNLR.R                                                    | 1995.18315 | 3 | 8.92E-06 | 0.90 | 4.39  | -     | 1204.6  |
| AHQ-10-3, 6085             | R.THNLEPYFESFINNLR.R                                                    | 1995.18315 | 3 | 4.29E-06 | 0.94 | 4.71  | -     | 1416.0  |
| AHQ-10-8, 6109             | R.THNLEPYFESFINNLR.R                                                    | 1995.18315 | 3 | 7.23E-06 | 0.94 | 4.63  | -     | 1437.5  |
| AHQ-10-5, 6143             | R.THNLEPYFESFINNLR.R                                                    | 1995.18315 | 3 | 1.48E-04 | 0.93 | 4.52  | -     | 1559.0  |
| AHQ-10-4, 3195             | R.TNAENEFVTK.K                                                          | 1266.38219 | 2 | 2.53E-05 | 0.93 | 3.70  | -     | 995.4   |
| AHQ-10-2, 3260             | R.TNAENEFVTK.K                                                          | 1266.38219 | 2 | 4.48E-06 | 0.92 | 3.39  | -     | 1027.1  |
| AHQ-10-1, 3381 - 3390      | R.TNAENEFVTK.K                                                          | 1266.38219 | 2 | 1.53E-05 | 0.95 | 3.73  | -     | 1237.4  |
| AHQ-10-10, 3103            | R.TNAENEFVTK.K                                                          | 1266.38219 | 2 | 1.99E-05 | 0.85 | 3.45  | -     | 605.0   |
| AHQ-10-13-, 3213           | R.TNAENEFVTK.K                                                          | 1266.38219 | 2 | 3.19E-05 | 0.92 | 3.06  | -     | 1309.3  |
| AHQ-10-7, 3258 - 3325      | R.TNAENEFVTK.K                                                          | 1266.38219 | 2 | 6.00E-04 | 0.87 | 2.88  | -     | 1046.3  |
| AHQ-10-8, 3066             | R.TNAENEFVTK.K                                                          | 1266.38219 | 2 | 5.23E-07 | 0.85 | 3.04  | -     | 816.4   |
| AHQ-10-6, 3136             | R.TNAENEFVTK.K                                                          | 1266.38219 | 2 | 1.76E-05 | 0.93 | 3.49  | -     | 1097.5  |
| AHQ-10-5, 3167 - 3173      | R.TNAENEFVTK.K                                                          | 1266.38219 | 2 | 7.44E-05 | 0.93 | 3.62  | -     | 1029.9  |
| AHQ-10-3, 3193 - 3213      | R.TNAENEFVTK.K                                                          | 1266.38219 | 2 | 1.26E-04 | 0.94 | 3.65  | -     | 1136.2  |
| AHQ-10-7, 3106             | R.TNAENEFVTK.K                                                          | 1266.38219 | 2 | 1.50E-04 | 0.84 | 3.03  | -     | 734.4   |
| AHQ-10-13-, 2752           | R.TNAENEFVTKK.D                                                         | 1394.55511 | 2 | 1.02E-04 | 0.92 | 3.57  | -     | 1100.4  |
| AHQ-10-5, 2699             | R.TNAENEFVTKK.D                                                         | 1394.55511 | 2 | 1.10E-07 | 0.90 | 3.38  | -     | 1075.2  |
| AHQ-10-3, 2726             | R.TNAENEFVTKK.D                                                         | 1394.55511 | 2 | 4.08E-06 | 0.78 | 2.70  | -     | 986.8   |
| AHQ-10-6, 4321 - 4379      | K.WELLQQVDSTR.T                                                         | 1476.61621 | 2 | 7.12E-08 | 0.93 | 3.33  | -     | 1662.4  |
| AHQ-10-1, 4530             | K.WELLQQVDSTR.T                                                         | 1476.61621 | 2 | 2.56E-08 | 0.96 | 3.84  | -     | 2094.7  |
| AHQ-10-7, 4214 - 4296      | K.WELLQQVDSTR.T                                                         | 1476.61621 | 2 | 1.89E-08 | 0.93 | 4.33  | -     | 1041.2  |
| AHQ-10-3, 4393 - 4454      | K.WELLQQVDSTR.T                                                         | 1476.61621 | 2 | 5.29E-07 | 0.96 | 4.17  | -     | 1802.4  |
| AHQ-10-14, 5127 - 5196     | K.WELLQQVDSTR.T                                                         | 1476.61621 | 2 | 6.88E-05 | 0.79 | 2.81  | -     | 934.0   |
| AHQ-10-2, 4468 - 4530      | K.WELLQQVDSTR.T                                                         | 1476.61621 | 2 | 1.20E-05 | 0.93 | 4.03  | -     | 1386.2  |
| AHQ-10-11, 4266 - 4326     | K.WELLQQVDSTR.T                                                         | 1476.61621 | 2 | 5.30E-05 | 0.83 | 3.24  | -     | 939.1   |
| AHQ-10-10, 4232            | K.WELLQQVDSTR.T                                                         | 1476.61621 | 2 | 1.49E-05 | 0.74 | 2.75  | -     | 844.0   |
| AHQ-10-8, 4307 - 4377      | K.WELLQQVDSTR.T                                                         | 1476.61621 | 2 | 6.42E-06 | 0.74 | 3.23  | -     | 791.6   |
| AHQ-10-5, 4396 - 4475      | K.WELLQQVDSTR.T                                                         | 1476.61621 | 2 | 6.31E-07 | 0.89 | 3.66  | -     | 1162.4  |
| AHQ-10-7, 2972             | K.YEELQITAGR.H                                                          | 1180.29253 | 2 | 2.66E-05 | 0.96 | 3.78  | -     | 2149.1  |
| AHQ-10-6, 2992             | K.YEELQITAGR.H                                                          | 1180.29253 | 2 | 2.17E-04 | 0.95 | 3.78  | -     | 1979.8  |
| AHQ-10-13, 3479            | K.YEELQITAGR.H                                                          | 1180.29253 | 2 | 3.20E-05 | 0.96 | 4.23  | -     | 2036.7  |
| AHQ-10-3, 3041             | K.YEELQITAGR.H                                                          | 1180.29253 | 2 | 5.02E-07 | 0.94 | 4.23  | -     | 1448.2  |
| AHQ-10-11, 2986            | K.YEELQITAGR.H                                                          | 1180.29253 | 2 | 4.91E-04 | 0.93 | 3.54  | -     | 1539.1  |
| AHQ-10-4, 3039             | K.YEELQITAGR.H                                                          | 1180.29253 | 2 | 1.47E-04 | 0.95 | 3.56  | -     | 1775.0  |
| AHQ-10-1, 3233             | K.YEELQITAGR.H                                                          | 1180.29253 | 2 | 1.71E-05 | 0.96 | 4.21  | -     | 1775.3  |
| AHQ-10-2, 3100             | K.YEELQITAGR.H                                                          | 1180.29253 | 2 | 8.20E-04 | 0.95 | 3.90  | -     | 1572.8  |
| gi 4505981 ref NP_002695.1 | pro-platelet basic protein (includes platelet basic protein, bet; Pro-P |            |   |          |      |       |       |         |
| AHQ-10-13-, 4564 - 4581    | K.EESLSDLYAELR.C                                                        | 1540.61070 | 2 | 4.38E-12 | 7.85 | 90.31 | 53.90 | 13894.1 |
| AHQ-10-14, 5280 - 5349     | K.EESLSDLYAELR.C                                                        | 1540.61070 | 2 | 6.05E-07 | 0.75 | 2.79  | -     | 755.6   |
| AHQ-10-14-, 4254 - 4325    | K.EESLSDLYAELR.C                                                        | 1540.61070 | 2 | 1.18E-06 | 0.87 | 3.59  | -     | 700.0   |
| AHQ-10-14-, 4520 - 4576    | K.EESLSDLYAELR.C                                                        | 1540.61070 | 2 | 4.13E-07 | 0.75 | 3.03  | -     | 473.9   |
| AHQ-10-13, 4519 - 4521     | K.GKEESLSDLYAELR.C                                                      | 1540.61070 | 2 | 4.04E-08 | 0.95 | 4.19  | -     | 1315.4  |
| AHQ-10-14-, 4485           | K.GKEESLSDLYAELR.C                                                      | 1725.83517 | 3 | 7.22E-04 | 0.81 | 3.95  | -     | 694.8   |
|                            |                                                                         | 1725.83517 | 2 | 8.48E-09 | 0.97 | 5.27  | -     | 1816.0  |

|                                                       |                           |            |   |          |       |        |       |          |
|-------------------------------------------------------|---------------------------|------------|---|----------|-------|--------|-------|----------|
| AHQ-10-13, 4515 - 4517                                | K.GKEESLSDSYAELR.C        | 1725.83517 | 2 | 1.09E-09 | 0.98  | 6.26   | -     | 2606.0   |
| AHQ-10-14, 4246                                       | K.GKEESLSDSYAELR.C        | 1725.83517 | 2 | 1.15E-06 | 0.97  | 5.06   | -     | 1880.2   |
| AHQ-10-14, 4120 - 4190                                | K.GKEESLSDSYAELR.C        | 1725.83517 | 2 | 9.26E-11 | 0.98  | 6.08   | -     | 2476.8   |
| AHQ-10-14, 3996 - 4064                                | K.GKEESLSDSYAELR.C        | 1725.83517 | 2 | 6.88E-12 | 0.98  | 5.67   | -     | 2604.1   |
| AHQ-10-14, 3885 - 3941                                | K.GKEESLSDSYAELR.C        | 1725.83517 | 3 | 1.06E-04 | 0.92  | 4.42   | -     | 1068.8   |
| AHQ-10-9, 3928 - 3952                                 | K.GKEESLSDSYAELR.C        | 1725.83517 | 2 | 1.63E-06 | 0.98  | 5.29   | -     | 2168.8   |
| AHQ-10-14, 4635 - 4692                                | K.GKEESLSDSYAELR.C        | 1725.83517 | 2 | 2.50E-05 | 0.97  | 4.92   | -     | 1419.1   |
| AHQ-10-14, 3884 - 3946                                | K.GKEESLSDSYAELR.C        | 1725.83517 | 2 | 4.38E-12 | 0.98  | 5.49   | -     | 2074.2   |
| AHQ-10-14, 4751 - 4807                                | K.GKEESLSDSYAELR.C        | 1725.83517 | 2 | 3.21E-05 | 0.95  | 4.81   | -     | 1276.8   |
| AHQ-10-14, 3757 - 3830                                | K.GKEESLSDSYAELR.C        | 1725.83517 | 2 | 6.02E-08 | 0.97  | 5.25   | -     | 1681.0   |
| AHQ-10-14, 4948 - 5023                                | K.GKEESLSDSYAELR.C        | 1725.83517 | 2 | 4.13E-08 | 0.98  | 5.21   | -     | 2254.4   |
| AHQ-10-14, 4956 - 4960                                | K.GKEESLSDSYAELR.C        | 1725.83517 | 3 | 3.37E-04 | 0.91  | 4.21   | -     | 1086.5   |
| AHQ-10-14, 5080 - 5143                                | K.GKEESLSDSYAELR.C        | 1725.83517 | 2 | 2.32E-08 | 0.97  | 4.82   | -     | 1979.5   |
| AHQ-10-14, 5181                                       | K.GKEESLSDSYAELR.C        | 1725.83517 | 2 | 2.88E-05 | 0.80  | 3.10   | -     | 770.5    |
| AHQ-10-14, 5269 - 5275                                | K.GKEESLSDSYAELR.C        | 1725.83517 | 2 | 2.48E-08 | 0.98  | 5.10   | -     | 2433.5   |
| AHQ-10-14, 4633 - 4695                                | K.GKEESLSDSYAELR.C        | 1725.83517 | 2 | 4.54E-11 | 0.98  | 5.50   | -     | 1753.6   |
| AHQ-10-14, 5824 - 5885                                | K.GKEESLSDSYAELR.C        | 1725.83517 | 2 | 5.05E-04 | 0.82  | 3.30   | -     | 892.5    |
| AHQ-10-13, 4188                                       | K.GKEESLSDSYAELR.C        | 1725.83517 | 3 | 6.49E-07 | 0.83  | 3.64   | -     | 850.1    |
| AHQ-10-13, 4036                                       | K.GKEESLSDSYAELR.C        | 1725.83517 | 2 | 3.81E-06 | 0.96  | 4.14   | -     | 1511.9   |
| AHQ-10-13, 4166                                       | K.GKEESLSDSYAELR.C        | 1725.83517 | 2 | 3.17E-09 | 0.97  | 4.96   | -     | 2079.1   |
| AHQ-10-14, 4737                                       | K.GKEESLSDSYAELR.C        | 1725.83517 | 2 | 3.89E-05 | 0.79  | 2.91   | -     | 845.1    |
| AHQ-10-13, 3448                                       | K.GTHCNQVEVIATL.K.D       | 1571.78073 | 2 | 3.92E-08 | 0.96  | 3.73   | -     | 1659.0   |
| AHQ-10-14, 4223 - 4279                                | K.GTHCNQVEVIATL.K.D       | 1571.78073 | 2 | 2.13E-08 | 0.97  | 4.33   | -     | 1575.4   |
| AHQ-10-14, 4339 - 4396                                | K.GTHCNQVEVIATL.K.D       | 1571.78073 | 2 | 5.57E-06 | 0.97  | 4.94   | -     | 1741.1   |
| AHQ-10-14, 4451 - 4508                                | K.GTHCNQVEVIATL.K.D       | 1571.78073 | 2 | 2.54E-05 | 0.97  | 4.97   | -     | 1609.3   |
| AHQ-10-14, 3617                                       | K.GTHCNQVEVIATL.K.D       | 1571.78073 | 2 | 2.78E-09 | 0.97  | 4.87   | -     | 1573.9   |
| AHQ-10-14, 3449 - 3504                                | K.GTHCNQVEVIATL.K.D       | 1571.78073 | 2 | 2.06E-10 | 0.98  | 5.01   | -     | 2031.3   |
| AHQ-10-14, 4680 - 4744                                | K.GTHCNQVEVIATL.K.D       | 1571.78073 | 2 | 1.73E-04 | 0.92  | 2.96   | -     | 1518.6   |
| AHQ-10-14, 3306 - 3385                                | K.GTHCNQVEVIATL.K.D       | 1571.78073 | 2 | 1.98E-10 | 0.97  | 4.51   | -     | 1845.9   |
| AHQ-10-14, 3137                                       | K.GTHCNQVEVIATL.KDGR.K    | 1900.10650 | 2 | 1.30E-05 | 0.97  | 5.36   | -     | 1358.3   |
| AHQ-10-14, 3228                                       | K.GTHCNQVEVIATL.KDGR.K    | 1900.10650 | 2 | 9.06E-07 | 0.97  | 4.83   | -     | 1552.3   |
| AHQ-10-14, 3181 - 3242                                | K.GTHCNQVEVIATL.KDGR.K    | 1900.10650 | 3 | 1.24E-04 | 0.96  | 4.59   | -     | 1549.6   |
| AHQ-10-14, 2913 - 2990                                | K.ICLDPDAPR.I             | 1058.19059 | 2 | 1.98E-05 | 0.82  | 2.99   | -     | 923.1    |
| AHQ-10-9, 2792                                        | K.ICLDPDAPR.I             | 1058.19059 | 2 | 1.41E-04 | 0.79  | 2.54   | -     | 864.6    |
| AHQ-10-14, 2672 - 2740                                | R.ICLDPDAPR.I             | 1186.36350 | 2 | 5.05E-05 | 0.94  | 3.68   | -     | 1234.1   |
| AHQ-10-14, 2801 - 2857                                | R.ICLDPDAPR.I             | 1186.36350 | 2 | 1.01E-06 | 0.87  | 2.94   | -     | 940.9    |
| AHQ-10-14, 3188 - 3235                                | R.ICLDPDAPR.I             | 1186.36350 | 2 | 5.64E-05 | 0.80  | 3.24   | -     | 696.0    |
| AHQ-10-14, 3403 - 3435                                | R.ICLDPDAPR.I             | 1186.36350 | 2 | 8.45E-05 | 0.92  | 3.39   | -     | 1059.0   |
| AHQ-10-14, 1400 - 1467                                | K.KLAGDESAD               | 905.92969  | 1 | 6.09E-05 | 0.51  | 2.15   | -     | 478.4    |
| AHQ-10-14, 3693                                       | K.NIQSLEVIQK.G            | 1101.27845 | 1 | 2.59E-04 | 0.42  | 2.58   | -     | 428.5    |
| AHQ-10-14, 4187 - 4251                                | K.NIQSLEVIQK.G            | 1101.27845 | 2 | 6.41E-07 | 0.89  | 3.79   | -     | 735.7    |
| AHQ-10-14, 4062                                       | K.NIQSLEVIQK.G            | 1101.27845 | 1 | 5.75E-05 | 0.57  | 2.14   | -     | 694.2    |
| AHQ-10-14, 4893                                       | K.NIQSLEVIQK.G            | 1101.27845 | 1 | 1.68E-04 | 0.24  | 2.09   | -     | 430.7    |
| AHQ-10-14, 3684 - 3698                                | K.NIQSLEVIQK.G            | 1101.27845 | 2 | 6.81E-06 | 0.89  | 2.62   | -     | 1288.0   |
| AHQ-10-14, 3642                                       | K.TTSGIHPKNIQSLEVIQK.G    | 1923.20305 | 2 | 2.21E-07 | 0.80  | 3.75   | -     | 459.8    |
| AHQ-10-14, 3641                                       | K.TTSGIHPKNIQSLEVIQK.G    | 1923.20305 | 3 | 4.10E-09 | 0.89  | 4.49   | -     | 841.2    |
| glj6681259[ref NP_031377.1] multimerin [Homo sapiens] |                           |            |   | 5.63E-12 | 16.77 | 200.30 | 21.20 | 138078.0 |
| AHQ-10-3, 2466                                        | R.AQEQQSLIHTNOAESHTAVGR.G | 2306.43830 | 2 | 1.38E-06 | 0.95  | 4.75   | -     | 883.7    |
| AHQ-10-3, 5786                                        | K.CTSDM*ETILFIPQFHR.L     | 2114.38778 | 3 | 8.28E-05 | 0.73  | 3.33   | -     | 644.8    |
| AHQ-10-3, 3843 - 3905                                 | R.DQALQLQVLSNR.F          | 1385.55144 | 2 | 1.71E-08 | 0.97  | 4.88   | -     | 1632.8   |
| AHQ-10-3, 4027 - 4050                                 | R.DQALQLQVLSNR.F          | 1385.55144 | 2 | 6.34E-07 | 0.94  | 3.67   | -     | 1470.3   |
| AHQ-10-4, 3945                                        | R.DQALQLQVLSNR.F          | 1385.55144 | 2 | 5.52E-06 | 0.85  | 3.60   | -     | 931.7    |
| AHQ-10-4, 5509                                        | K.FVLVQENRPTLTDIVELR.N    | 2143.47187 | 3 | 2.60E-05 | 0.91  | 4.04   | -     | 1036.0   |
| AHQ-10-2, 5522                                        | K.FVLVQENRPTLTDIVELR.N    | 2143.47187 | 3 | 1.97E-07 | 0.89  | 4.14   | -     | 846.9    |
| AHQ-10-3, 5426 - 5491                                 | K.FVLVQENRPTLTDIVELR.N    | 2143.47187 | 3 | 1.20E-10 | 0.93  | 4.32   | -     | 1119.2   |
| AHQ-10-3, 5433                                        | K.FVLVQENRPTLTDIVELR.N    | 2143.47187 | 2 | 2.07E-06 | 0.86  | 4.29   | -     | 508.0    |
| AHQ-10-5, 5680                                        | K.GLTEFVPEIQIK.T          | 1487.76518 | 2 | 1.42E-05 | 0.87  | 3.43   | -     | 895.5    |
| AHQ-10-3, 5601                                        | K.GLTEFVPEIQIK.T          | 1487.76518 | 2 | 1.47E-07 | 0.95  | 4.24   | -     | 1169.0   |
| AHQ-10-4, 5687 - 5688                                 | K.GLTEFVPEIQIK.T          | 1487.76518 | 2 | 2.05E-04 | 0.90  | 3.46   | -     | 1053.5   |
| AHQ-10-2, 5703                                        | K.GLTEFVPEIQIK.T          | 1487.76518 | 2 | 2.01E-05 | 0.80  | 2.88   | -     | 797.3    |
| AHQ-10-3, 2694                                        | K.GPCGWTTGGSCPQR.S        | 1422.52885 | 2 | 9.27E-04 | 0.88  | 3.20   | -     | 936.5    |
| AHQ-10-3, 3821 - 3883                                 | K.HSLPDIQLLQK.G           | 1292.50915 | 2 | 4.68E-05 | 0.87  | 3.32   | -     | 697.6    |
| AHQ-10-4, 3843 - 3861                                 | K.HSLPDIQLLQK.G           | 1292.50915 | 2 | 3.56E-05 | 0.81  | 2.90   | -     | 691.9    |
| AHQ-10-3, 5486                                        | K.IENLTSAVNSLNFIIK.E      | 1777.05472 | 2 | 2.09E-04 | 0.83  | 3.77   | -     | 599.3    |
| AHQ-10-3, 6063 - 6073                                 | K.IENLTSAVNSLNFIIK.E      | 1777.05472 | 2 | 3.55E-06 | 0.95  | 4.48   | -     | 1151.9   |
| AHQ-10-4, 6047                                        | K.IFQNDMGETVAQLFK.T       | 1813.06743 | 2 | 3.42E-07 | 0.91  | 3.75   | -     | 996.2    |
| AHQ-10-10, 5075                                       | R.IPYLVGVYVFK.Y           | 1199.46532 | 2 | 4.70E-06 | 0.90  | 3.45   | -     | 886.4    |
| AHQ-10-3, 5673                                        | K.KIENLTSAVNSLNFIIK.E     | 1905.22764 | 2 | 8.85E-05 | 0.94  | 4.44   | -     | 943.3    |
| AHQ-10-3, 5162                                        | K.KIENLTSAVNSLNFIIK.E     | 1905.22764 | 2 | 5.98E-07 | 0.81  | 3.15   | -     | 881.3    |
| AHQ-10-10, 3718                                       | K.LAFESENINSEIHCDR.V      | 1936.04933 | 2 | 4.72E-04 | 0.72  | 2.56   | -     | 705.9    |
| AHQ-10-5, 2948                                        | K.LKEVHEQLLSTEQVSDQK.N    | 2112.32666 | 3 | 5.81E-06 | 0.97  | 5.21   | -     | 2248.6   |
| AHQ-10-3, 2954                                        | K.LKEVHEQLLSTEQVSDQK.N    | 2112.32666 | 2 | 2.01E-07 | 0.98  | 6.02   | -     | 1657.7   |
| AHQ-10-3, 2901 - 2961                                 | K.LKEVHEQLLSTEQVSDQK.N    | 2112.32666 | 3 | 5.63E-12 | 0.97  | 5.31   | -     | 2397.2   |
| AHQ-10-2, 3802                                        | K.LVEENALAPDFS.K          | 1433.58810 | 2 | 1.13E-04 | 0.93  | 3.82   | -     | 853.6    |
| AHQ-10-3, 2427                                        | K.M*TDQVNYQAMK.L          | 1345.52783 | 2 | 1.07E-07 | 0.92  | 3.76   | -     | 1127.1   |
| AHQ-10-3, 2263                                        | K.QTHLEGALEQEHRS.R        | 1635.72018 | 2 | 1.69E-05 | 0.70  | 2.72   | -     | 422.8    |
| AHQ-10-3, 6313                                        | K.TM*TIINNAIDFIQDNYALK.E  | 2215.51196 | 3 | 1.36E-06 | 0.71  | 3.02   | -     | 692.5    |
| AHQ-10-3, 5694 - 5770                                 | K.TM*TIINNAIDFIQDNYALK.E  | 2215.51196 | 2 | 2.65E-04 | 0.83  | 3.84   | -     | 437.0    |
| AHQ-10-4, 3461                                        | K.TVSSLEDLESTR.Q          | 1424.49324 | 2 | 1.15E-04 | 0.85  | 2.97   | -     | 997.8    |
| AHQ-10-6, 3387                                        | K.TVSSLEDLESTR.Q          | 1424.49324 | 2 | 9.55E-04 | 0.85  | 2.94   | -     | 916.9    |
| AHQ-10-5, 3432                                        | K.TVSSLEDLESTR.Q          | 1424.49324 | 2 | 7.06E-06 | 0.67  | 2.80   | -     | 689.5    |
| AHQ-10-2, 3508                                        | K.TVSSLEDLESTR.Q          | 1424.49324 | 2 | 3.06E-05 | 0.77  | 3.13   | -     | 571.6    |
| AHQ-10-3, 4907                                        | R.VTQTLPYYSVK.K           | 1525.81342 | 2 | 1.16E-04 | 0.45  | 2.76   | -     | 268.8    |
| AHQ-10-2, 4064                                        | R.YNFVLQVAK.T             | 1082.27683 | 2 | 4.58E-06 | 0.81  | 2.66   | -     | 669.8    |
| AHQ-10-3, 3977                                        | R.YNFVLQVAK.T             | 1082.27683 | 2 | 1.87E-06 | 0.91  | 3.26   | -     | 871.9    |
| glj4826898[ref NP_005013.1] profilin 1 [Homo sapiens] |                           |            |   | 5.73E-12 | 14.31 | 160.26 | 67.10 | 15054.2  |
| AHQ-10-13, 1882 - 1941                                | K.CYEM*ASHLR.R            | 1184.32794 | 2 | 1.03E-05 | 0.88  | 2.78   | -     | 1254.7   |
| AHQ-10-13, 2524 - 2590                                | K.CYEMASHLR.R             | 1168.32854 | 2 | 4.87E-05 | 0.94  | 2.73   | -     | 1922.6   |
| AHQ-10-13, 1790 - 1857                                | K.CYEM*ASHLR.R            | 1184.32794 | 2 | 6.50E-04 | 0.86  | 3.11   | -     | 1129.8   |
| AHQ-10-13, 2459 - 2508                                | K.CYEM*ASHLR.R            | 1184.32794 | 2 | 1.37E-05 | 0.81  | 2.64   | -     | 1081.5   |
| AHQ-10-13, 4153                                       | K.DRSSFYVNGLTGGQK.C       | 1742.91379 | 2 | 5.73E-12 | 0.96  | 4.97   | -     | 1050.1   |
| AHQ-10-13, 4012                                       | K.DRSSFYVNGLTGGQK.C       | 1742.91379 | 2 | 3.15E-09 | 0.94  | 4.84   | -     | 748.9    |
| AHQ-10-13, 4375                                       | K.DRSSFYVNGLTGGQK.C       | 1742.91379 | 2 | 1.11E-06 | 0.96  | 4.38   | -     | 1219.1   |
| AHQ-10-13, 4861 - 4864                                | R.DSLLDGDFSMDLR.T         | 1626.77023 | 2 | 2.09E-04 | 0.94  | 3.82   | -     | 1296.1   |
| AHQ-10-13, 4305 - 4360                                | R.DSLLDGDFSM*DLR.T        | 1642.76963 | 2 | 3.16E-08 | 0.94  | 4.03   | -     | 1103.0   |
| AHQ-10-13, 5074 - 5146                                | R.DSLLDGDFSMDLR.T         | 1626.77023 | 2 | 4.19E-09 | 0.98  | 5.14   | -     | 2032.5   |
| AHQ-10-13, 4960 - 5016                                | R.DSLLDGDFSMDLR.T         | 1626.77023 | 2 | 2.67E-05 | 0.97  | 4.15   | -     | 2257.1   |
| AHQ-10-14, 4470 - 4484                                | R.DSLLDGDFSM*DLR.T        | 1642.76963 | 2 | 9.00E-07 | 0.97  | 4.23   | -     | 1956.2   |
| AHQ-10-13, 4608 - 4682                                | R.DSLLDGDFSM*DLR.T        | 1642.76963 | 2 | 2.77E-07 | 0.94  | 3.61   | -     | 1715.1   |
| AHQ-10-12, 5057 - 5113                                | R.DSLLDGDFSMDLR.T         | 1626.77023 | 2 | 7.36E-08 | 0.93  | 3.30   | -     | 1400.8   |
| AHQ-10-12, 4413 - 4469                                | R.DSLLDGDFSM*DLR.T        | 1642.76963 | 2 | 8.23E-07 | 0.93  | 3.78   | -     | 1246.4   |
| AHQ-10-13, 4680 - 4736                                | R.DSLLDGDFSM*DLR.T        | 1642.76963 | 2 | 9.36E-05 | 0.87  | 2.96   | -     | 1083.8   |
| AHQ-10-13, 4428 - 4484                                | R.DSLLDGDFSM*DLR.T        | 1642.76963 | 2 | 6.69E-09 | 0.96  | 3.93   | -     | 1775.5   |
| AHQ-10-13, 4700                                       | R.DSLLDGDFSM*DLR.T        | 1642.76963 | 2 | 7.96E-09 | 0.95  | 4.50   | -     | 1141.1   |
| AHQ-10-14, 5232                                       | R.DSLLDGDFSM*DLR.T        | 1642.76963 | 2 | 1.73E-04 | 0.81  | 2.87   | -     | 1005.1   |
| AHQ-10-13, 4788 - 4847                                | R.DSLLDGDFSM*DLR.T        | 1642.76963 | 2 | 4.55E-09 | 0.97  | 4.68   | -     | 2038.0   |
| AHQ-10-13, 4903 - 4972                                | R.DSLLDGDFSM*DLR.T        | 1642.76963 | 2 | 7.08E-04 | 0.89  | 3.61   | -     | 1095.9   |

|                           |                                                                         |            |   |          |       |        |       |          |
|---------------------------|-------------------------------------------------------------------------|------------|---|----------|-------|--------|-------|----------|
| AHQ-10-13, 5377 - 5452    | R.DSLLQDGEFSMDLR.T                                                      | 1626.77023 | 2 | 2.76E-09 | 0.97  | 4.61   | -     | 2175.3   |
| AHQ-10-13, 5507 - 5563    | R.DSLLQDGEFSMDLR.T                                                      | 1626.77023 | 2 | 1.27E-05 | 0.97  | 4.05   | -     | 2556.1   |
| AHQ-10-14, 4976 - 4978    | R.DSLLQDGEFSMDLR.T                                                      | 1626.77023 | 2 | 1.41E-04 | 0.89  | 3.04   | -     | 1093.3   |
| AHQ-10-13, 3979 - 4056    | K.DSPSWAAV/PK.T                                                         | 1214.35211 | 2 | 4.89E-05 | 0.85  | 2.93   | -     | 1035.1   |
| AHQ-10-13, 3565 - 3624    | K.DSPSWAAV/PK.T                                                         | 1214.35211 | 2 | 2.85E-04 | 0.93  | 3.58   | -     | 1133.3   |
| AHQ-10-13, 6076           | K.DSPSWAAV/PKTFVNITPAEVLGVGK.D                                          | 2840.26581 | 3 | 2.23E-05 | 0.92  | 3.73   | -     | 1723.1   |
| AHQ-10-13, 4712 - 4777    | R.SSFYVNLGLTGGQK.C                                                      | 1471.63957 | 1 | 2.50E-07 | 0.64  | 2.75   | -     | 460.3    |
| AHQ-10-13, 4692 - 4747    | R.SSFYVNLGLTGGQK.C                                                      | 1471.63957 | 2 | 2.05E-09 | 0.96  | 4.33   | -     | 1511.3   |
| AHQ-10-13, 4588           | R.SSFYVNLGLTGGQK.C                                                      | 1471.63957 | 1 | 3.33E-09 | 0.27  | 2.29   | -     | 433.7    |
| AHQ-10-13, 4575 - 4641    | R.SSFYVNLGLTGGQK.C                                                      | 1471.63957 | 2 | 2.44E-08 | 0.94  | 4.11   | -     | 916.1    |
| AHQ-10-13, 4218 - 4280    | R.SSFYVNLGLTGGQK.C                                                      | 1471.63957 | 2 | 2.76E-07 | 0.95  | 4.48   | -     | 1056.8   |
| AHQ-10-13, 4352 - 4420    | R.SSFYVNLGLTGGQK.C                                                      | 1471.63957 | 1 | 2.23E-09 | 0.63  | 2.70   | -     | 491.1    |
| AHQ-10-13, 4224           | R.SSFYVNLGLTGGQK.C                                                      | 1471.63957 | 1 | 6.83E-08 | 0.54  | 2.42   | -     | 510.4    |
| AHQ-10-14, 4229           | R.SSFYVNLGLTGGQK.C                                                      | 1471.63957 | 2 | 1.18E-08 | 0.86  | 3.05   | -     | 782.7    |
| AHQ-10-13, 4330 - 4388    | R.SSFYVNLGLTGGQK.C                                                      | 1471.63957 | 1 | 1.24E-04 | 0.90  | 3.38   | -     | 834.5    |
| AHQ-10-13, 3453 - 3511    | K.STGGAPTFNVTVK.T                                                       | 1380.52843 | 2 | 1.38E-08 | 0.87  | 3.45   | -     | 532.7    |
| AHQ-10-13, 3168 - 3238    | K.STGGAPTFNVTVK.T                                                       | 1380.52843 | 2 | 1.62E-08 | 0.86  | 3.55   | -     | 500.2    |
| AHQ-10-13, 3581 - 3649    | K.STGGAPTFNVTVK.T                                                       | 1380.52843 | 2 | 2.72E-05 | 0.74  | 2.93   | -     | 397.4    |
| AHQ-10-13, 3062 - 3120    | K.STGGAPTFNVTVK.T                                                       | 1380.52843 | 2 | 5.88E-07 | 0.92  | 4.17   | -     | 529.9    |
| AHQ-10-13, 3695 - 3733    | K.STGGAPTFNVTVK.T                                                       | 1380.52843 | 2 | 5.71E-05 | 0.78  | 3.14   | -     | 404.0    |
| AHQ-10-13, 3169           | K.STGGAPTFNVTVKTKDK.T                                                   | 1724.89354 | 2 | 4.66E-05 | 0.82  | 3.54   | -     | 508.2    |
| AHQ-10-13, 3460 - 3499    | K.TDKTLVLM/GK.E                                                         | 1235.51929 | 2 | 1.96E-04 | 0.88  | 2.87   | -     | 974.0    |
| AHQ-10-13, 3680 - 3744    | K.TDKTLVLM/GK.E                                                         | 1219.51989 | 2 | 1.48E-05 | 0.91  | 3.62   | -     | 950.3    |
| AHQ-10-13, 3040           | K.TDKTLVLM/GK.E                                                         | 1235.51929 | 2 | 8.19E-05 | 0.86  | 3.39   | -     | 848.4    |
| AHQ-10-13, 4079 - 4147    | K.TDKTLVLM/GK.E                                                         | 1219.51989 | 2 | 1.33E-06 | 0.94  | 3.38   | -     | 1481.4   |
| AHQ-10-12, 5374 - 5452    | K.TFVNITPAEVLGVGK.D                                                     | 1644.93630 | 2 | 3.36E-04 | 0.93  | 4.25   | -     | 717.2    |
| AHQ-10-13, 5663 - 5727    | K.TFVNITPAEVLGVGK.D                                                     | 1644.93630 | 2 | 1.33E-05 | 0.85  | 3.74   | -     | 604.2    |
| AHQ-10-13, 5783 - 5859    | K.TFVNITPAEVLGVGK.D                                                     | 1644.93630 | 2 | 2.10E-05 | 0.93  | 4.43   | -     | 1006.3   |
| AHQ-10-13, 5508 - 5569    | K.TFVNITPAEVLGVGK.D                                                     | 1644.93630 | 2 | 3.71E-08 | 0.91  | 3.94   | -     | 877.9    |
| AHQ-10-12, 5454 - 5456    | K.TFVNITPAEVLGVGK.D                                                     | 1644.93630 | 3 | 1.89E-04 | 0.75  | 3.15   | -     | 911.2    |
| AHQ-10-13, 5396 - 5453    | K.TFVNITPAEVLGVGK.D                                                     | 1644.93630 | 2 | 1.69E-04 | 0.93  | 4.61   | -     | 787.8    |
| AHQ-10-13, 5408 - 5455    | K.TFVNITPAEVLGVGKDR.S                                                   | 1916.21052 | 3 | 2.90E-04 | 0.58  | 3.09   | -     | 472.6    |
| AHQ-10-13, 5512 - 5513    | K.TFVNITPAEVLGVGKDR.S                                                   | 1916.21052 | 3 | 9.91E-08 | 0.80  | 3.59   | -     | 687.7    |
| AHQ-10-13, 5176 - 5234    | K.TFVNITPAEVLGVGKDR.S                                                   | 1916.21052 | 2 | 1.24E-08 | 0.93  | 4.74   | -     | 638.9    |
| AHQ-10-13, 2934 - 2957    | R.KTSTGGAPTFNVTVK.T                                                     | 1609.80568 | 2 | 5.69E-05 | 0.86  | 3.53   | -     | 670.1    |
| AHQ-10-13, 3320           | R.KTSTGGAPTFNVTVK.T                                                     | 1609.80568 | 2 | 6.91E-04 | 0.71  | 2.92   | -     | 489.8    |
| AHQ-10-13, 3808 - 3837    | K.TLVLM/GK.E                                                            | 875.15478  | 2 | 3.80E-05 | 0.65  | 2.64   | -     | 489.5    |
| gi4507357 ref NP_003555.1 | transgelin 2; SM22-alpha homolog [Homo sapiens]                         |            |   | 7.64E-12 | 11.59 | 130.27 | 53.30 | 2239.3   |
| AHQ-10-11, 5271 - 5331    | R.DDGLFSGDPNWWFPK.K                                                     | 1595.69288 | 2 | 8.36E-06 | 0.94  | 3.71   | -     | 1290.2   |
| AHQ-10-11, 5498 - 5568    | R.DDGLFSGDPNWWFPK.K                                                     | 1595.69288 | 2 | 6.25E-06 | 0.87  | 3.93   | -     | 718.2    |
| AHQ-10-14, 5449 - 5460    | R.DDGLFSGDPNWWFPK.K                                                     | 1595.69288 | 2 | 7.70E-05 | 0.94  | 4.15   | -     | 1071.5   |
| AHQ-10-13, 5440           | R.DDGLFSGDPNWWFPK.K                                                     | 1595.69288 | 2 | 1.82E-08 | 0.96  | 4.45   | -     | 1426.5   |
| AHQ-10-12, 5362 - 5416    | R.DDGLFSGDPNWWFPK.K                                                     | 1595.69288 | 2 | 2.39E-04 | 0.82  | 3.29   | -     | 827.1    |
| AHQ-10-11, 5386 - 5444    | R.DDGLFSGDPNWWFPK.K                                                     | 1595.69288 | 2 | 6.85E-05 | 0.95  | 3.79   | -     | 1419.6   |
| AHQ-10-11, 4738           | R.DDGLFSGDPNWWFPK.S                                                     | 1723.86579 | 2 | 1.83E-05 | 0.91  | 4.39   | -     | 677.9    |
| AHQ-10-11, 5720           | K.DGTVLCELINALYPEGQAPVK.K                                               | 2289.59066 | 2 | 2.11E-04 | 0.90  | 4.02   | -     | 616.0    |
| AHQ-10-11, 5327 - 5340    | K.DGTVLCELINALYPEGQAPVK.I                                               | 2417.76357 | 2 | 3.02E-06 | 0.77  | 3.30   | -     | 468.0    |
| AHQ-10-11, 5491           | K.DGTVLCELINALYPEGQAPVK.I                                               | 2417.76357 | 3 | 6.72E-08 | 0.59  | 3.22   | -     | 414.3    |
| AHQ-10-11, 6219 - 6226    | K.DGTVLCELINALYPEGQAPVK.I                                               | 2417.76357 | 3 | 5.16E-08 | 0.91  | 4.46   | -     | 845.5    |
| AHQ-10-11, 2208 - 2210    | R.GASQAGM*TYGYM*PR.Q                                                    | 1400.56672 | 2 | 1.29E-05 | 0.89  | 3.13   | -     | 1026.6   |
| AHQ-10-11, 1770 - 1771    | R.GASQAGM*TYGYM*PR.Q                                                    | 1416.56612 | 2 | 8.31E-04 | 0.53  | 2.58   | -     | 589.2    |
| AHQ-10-11, 2310 - 2314    | R.GASQAGM*TYGYM*PR.Q                                                    | 1400.56672 | 2 | 1.27E-04 | 0.86  | 3.39   | -     | 679.9    |
| AHQ-10-11, 2442           | K.NVIGLQM*GTRN.G                                                        | 1219.39691 | 2 | 2.23E-06 | 0.95  | 3.77   | -     | 1170.1   |
| AHQ-10-11, 2523 - 2532    | K.NVIGLQM*GTRN.G                                                        | 1219.39691 | 2 | 4.97E-05 | 0.90  | 2.94   | -     | 962.2    |
| AHQ-10-11, 4490           | K.QM*EQISQFLQAAER.Y                                                     | 1695.87890 | 3 | 1.97E-06 | 0.96  | 4.51   | -     | 2162.0   |
| AHQ-10-11, 5619 - 5699    | K.QMEQISQFLQAAER.Y                                                      | 1679.87950 | 2 | 3.69E-05 | 0.50  | 2.62   | -     | 489.0    |
| AHQ-10-11, 5090           | K.QMEQISQFLQAAER.Y                                                      | 1679.87950 | 3 | 4.04E-07 | 0.97  | 5.15   | -     | 2455.4   |
| AHQ-10-11, 5023 - 5078    | K.QMEQISQFLQAAER.Y                                                      | 1679.87950 | 2 | 1.55E-08 | 0.92  | 3.99   | -     | 994.2    |
| AHQ-10-12, 4409           | R.TLMNLGGLAVAR.D                                                        | 1216.47932 | 2 | 3.32E-04 | 0.73  | 2.91   | -     | 718.0    |
| AHQ-10-11, 3579 - 3582    | R.TLMNLGGLAVAR.D                                                        | 1232.47872 | 2 | 2.49E-05 | 0.93  | 3.83   | -     | 1044.9   |
| AHQ-10-13, 4440           | R.TLMNLGGLAVAR.D                                                        | 1216.47932 | 2 | 1.58E-05 | 0.69  | 2.69   | -     | 885.1    |
| AHQ-10-11, 3800 - 3854    | R.TLMNLGGLAVAR.D                                                        | 1232.47872 | 2 | 9.46E-05 | 0.91  | 3.60   | -     | 909.8    |
| AHQ-10-11, 4338           | R.TLMNLGGLAVAR.D                                                        | 1216.47932 | 2 | 1.22E-06 | 0.91  | 3.88   | -     | 1007.5   |
| AHQ-10-11, 6090 - 6162    | R.YGINTTDIFQTVDLWEGK.N                                                  | 2101.30080 | 2 | 9.52E-11 | 0.96  | 5.34   | -     | 1058.2   |
| AHQ-10-14, 6268           | R.YGINTTDIFQTVDLWEGK.N                                                  | 2101.30080 | 2 | 1.23E-06 | 0.81  | 3.22   | -     | 702.0    |
| AHQ-10-13, 6225           | R.YGINTTDIFQTVDLWEGK.N                                                  | 2101.30080 | 2 | 7.64E-12 | 0.96  | 5.15   | -     | 1232.0   |
| gi5454152 ref NP_006285.1 | ubiquinol-cytochrome c reductase binding protein [Homo sapiens]         |            |   | 8.60E-12 | 0.82  | 10.20  | 13.50 | 13530.4  |
| AHQ-10-13, 3522           | R.DDTIYEDDEVKPAIR.R                                                     | 1811.88169 | 2 | 8.60E-12 | 0.82  | 3.97   | -     | 415.0    |
| gi4557305 ref NP_000025.1 | aldolase A; fructose-bisphosphate aldolase; Aldolase A, fructose-bispho |            |   | 9.94E-12 | 8.44  | 100.24 | 41.50 | 39419.7  |
| AHQ-10-9, 2240            | R.ALANSLACOGK.Y                                                         | 1134.28859 | 2 | 2.06E-04 | 0.60  | 2.65   | -     | 647.2    |
| AHQ-10-8, 4353 - 4409     | R.ALANSLACOGKYTPSGQAGAAASESLFVSNHAY                                     | 3344.61352 | 3 | 4.34E-08 | 0.73  | 3.58   | -     | 496.9    |
| AHQ-10-8, 4390 - 4466     | R.ALANSLACOGKYTPSGQAGAAASESLFVSNHAY                                     | 3344.61352 | 3 | 1.08E-05 | 0.59  | 3.22   | -     | 421.7    |
| AHQ-10-8, 4263            | K.FSHEEIAMATVTLR.R                                                      | 1676.91875 | 2 | 8.75E-09 | 0.94  | 4.03   | -     | 1314.3   |
| AHQ-10-14, 2988           | K.GILAADESTGSIAR.R                                                      | 1333.47008 | 2 | 1.16E-05 | 0.95  | 4.06   | -     | 1202.2   |
| AHQ-10-13, 2942 - 3018    | K.GILAADESTGSIAR.R                                                      | 1333.47008 | 2 | 8.18E-07 | 0.86  | 3.32   | -     | 784.9    |
| AHQ-10-8, 2874            | K.GILAADESTGSIAR.R                                                      | 1333.47008 | 1 | 2.05E-04 | 0.60  | 2.74   | -     | 328.8    |
| AHQ-10-8, 2867            | K.GILAADESTGSIAR.R                                                      | 1333.47008 | 2 | 9.94E-12 | 0.97  | 4.55   | -     | 1495.5   |
| AHQ-10-8, 4089            | K.GVVPVLAGTNGETTTQGLDGLSER.C                                            | 2273.44329 | 2 | 8.52E-10 | 0.88  | 4.74   | -     | 899.7    |
| AHQ-10-9, 5000            | K.IGEHTPSALAIMENANVLAR.Y                                                | 2108.40788 | 2 | 1.68E-05 | 0.87  | 3.61   | -     | 658.6    |
| AHQ-10-8, 5251            | K.IGEHTPSALAIMENANVLAR.Y                                                | 2108.40788 | 2 | 2.04E-04 | 0.90  | 3.94   | -     | 634.9    |
| AHQ-10-8, 5538            | R.VNPCIQGVILFHETYLQK.A                                                  | 2090.43072 | 2 | 1.74E-08 | 0.95  | 4.68   | -     | 1006.4   |
| AHQ-10-8, 5595 - 5657     | R.YASICQQNGIVPIVEPEILPDGDHDLKR.R                                        | 3023.36334 | 3 | 4.66E-05 | 0.82  | 4.43   | -     | 475.5    |
| AHQ-10-9, 5047 - 5116     | R.YASICQQNGIVPIVEPEILPDGDHDLKR.C                                        | 3179.54969 | 3 | 2.80E-04 | 0.75  | 3.74   | -     | 645.8    |
| AHQ-10-8, 5326 - 5383     | R.YASICQQNGIVPIVEPEILPDGDHDLKR.C                                        | 3179.54969 | 3 | 9.61E-08 | 0.90  | 4.81   | -     | 651.2    |
| AHQ-10-8, 4353 - 4409     | K.YTPSGQAGAAASESLFVSNHAY                                                | 2229.34753 | 2 | 5.84E-09 | 0.77  | 3.62   | -     | 519.3    |
| AHQ-10-8, 4130            | K.YTPSGQAGAAASESLFVSNHAY                                                | 2229.34753 | 2 | 3.31E-04 | 0.40  | 2.69   | -     | 330.6    |
| AHQ-10-8, 4390 - 4466     | K.YTPSGQAGAAASESLFVSNHAY                                                | 2229.34753 | 2 | 5.00E-06 | 0.78  | 3.59   | -     | 430.5    |
| gi4504745 ref NP_000410.1 | integrin alpha 2b precursor [Homo sapiens]                              |            |   | 1.02E-11 | 26.51 | 290.33 | 34.30 | 113374.2 |
| AHQ-10-4, 5072 - 5101     | R.AEGGQCPSSLFLDLR.D                                                     | 1564.74505 | 2 | 4.82E-05 | 0.90  | 3.30   | -     | 914.3    |
| AHQ-10-3, 5017 - 5031     | R.AEGGQCPSSLFLDLR.D                                                     | 1564.74505 | 2 | 3.18E-06 | 0.95  | 3.95   | -     | 1225.7   |
| AHQ-10-13, 5012 - 5014    | R.AEGGQCPSSLFLDLR.D                                                     | 1564.74505 | 2 | 3.30E-05 | 0.95  | 4.38   | -     | 1149.4   |
| AHQ-10-11, 4870           | R.AEGGQCPSSLFLDLR.D                                                     | 1564.74505 | 2 | 5.11E-04 | 0.70  | 2.90   | -     | 528.4    |
| AHQ-10-7, 4937            | R.AEGGQCPSSLFLDLR.D                                                     | 1564.74505 | 2 | 2.42E-04 | 0.74  | 2.62   | -     | 651.2    |
| AHQ-10-5, 5056            | R.AEGGQCPSSLFLDLR.D                                                     | 1564.74505 | 2 | 2.14E-06 | 0.92  | 3.38   | -     | 1048.0   |
| AHQ-10-6, 4956 - 4957     | R.AEGGQCPSSLFLDLR.D                                                     | 1564.74505 | 2 | 2.83E-06 | 0.90  | 4.02   | -     | 738.4    |
| AHQ-10-4, 4652            | R.AEGGQCPSSLFLDLR.DETR.N                                                | 2066.23814 | 3 | 6.62E-07 | 0.81  | 3.58   | -     | 763.8    |
| AHQ-10-6, 2817 - 2892     | R.ALSNVGFER.L                                                           | 1122.21308 | 2 | 6.99E-05 | 0.89  | 3.30   | -     | 944.9    |
| AHQ-10-4, 2911            | R.ALSNVGFER.L                                                           | 1122.21308 | 2 | 8.78E-07 | 0.86  | 3.28   | -     | 816.8    |
| AHQ-10-4, 3239            | R.ALSNVGFER.L                                                           | 1122.21308 | 2 | 4.02E-05 | 0.93  | 3.27   | -     | 1118.2   |
| AHQ-10-5, 2921 - 2927     | R.ALSNVGFER.L                                                           | 1122.21308 | 2 | 3.93E-05 | 0.83  | 3.26   | -     | 629.4    |
| AHQ-10-5, 4837 - 4916     | K.ASVQLLVQDSLNPVAVK.S                                                   | 1682.94293 | 2 | 1.07E-05 | 0.62  | 3.08   | -     | 536.3    |
| AHQ-10-6, 4753 - 4755     | K.ASVQLLVQDSLNPVAVK.S                                                   | 1682.94293 | 2 | 2.41E-04 | 0.95  | 4.83   | -     | 1320.4   |
| AHQ-10-4, 4688 - 4724     | K.ASVQLLVQDSLNPVAVK.S                                                   | 1682.94293 | 2 | 6.90E-04 | 0.84  | 3.64   | -     | 720.9    |
| AHQ-10-4, 4867 - 4933     | K.ASVQLLVQDSLNPVAVK.S                                                   | 1682.94293 | 2 | 6.43E-07 | 0.92  | 4.70   | -     | 781.1    |
| AHQ-10-4, 4889            | K.ASVQLLVQDSLNPVAVK.S                                                   | 1682.94293 | 3 | 2.05E-06 | 0.95  | 5.01   | -     | 1461.4   |
| AHQ-10-4, 3104            | R.DETRNVGSQTLQTFK.A                                                     | 1724.85363 | 2 | 3.42E-04 | 0.96  | 3.81   | -     | 1852.9   |
| AHQ-10-4, 3839            | R.DGYNDAIAAAYGGSPGR.G                                                   | 1780.87574 | 2 | 8.77E-09 | 0.86  | 3.59   | -     | 745.9    |

|                                                                                              |                                       |            |   |          |       |        |       |         |
|----------------------------------------------------------------------------------------------|---------------------------------------|------------|---|----------|-------|--------|-------|---------|
| AHQ-10-6, 3676                                                                               | R.DGYNDIAVAAPYGGPSGR.G                | 1780.87574 | 2 | 2.35E-06 | 0.84  | 3.02   | -     | 841.5   |
| AHQ-10-4, 3940                                                                               | R.DGYNDIAVAAPYGGPSGR.G                | 1780.87574 | 2 | 4.83E-09 | 0.92  | 4.06   | -     | 950.8   |
| AHQ-10-5, 3764                                                                               | R.DGYNDIAVAAPYGGPSGR.G                | 1780.87574 | 2 | 3.16E-04 | 0.72  | 2.89   | -     | 551.1   |
| AHQ-10-4, 3747 - 3772                                                                        | R.DGYNDIAVAAPYGGPSGR.G                | 1780.87574 | 2 | 1.39E-09 | 0.92  | 4.35   | -     | 779.1   |
| AHQ-10-4, 5317 - 5387                                                                        | R.FGSAIAPLGDLLDRDGYNDIAVAAPYGGPSGR.G  | 3094.34015 | 3 | 6.27E-09 | 0.93  | 5.24   | -     | 764.8   |
| AHQ-10-4, 5443 - 5503                                                                        | R.FGSAIAPLGDLLDRDGYNDIAVAAPYGGPSGR.G  | 3094.34015 | 3 | 1.02E-11 | 0.95  | 5.79   | -     | 871.3   |
| AHQ-10-7, 5400                                                                               | R.FGSAIAPLGDLLDRDGYNDIAVAAPYGGPSGR.G  | 3094.34015 | 3 | 9.46E-04 | 0.43  | 3.12   | -     | 451.2   |
| AHQ-10-5, 5508                                                                               | R.FGSAIAPLGDLLDRDGYNDIAVAAPYGGPSGR.G  | 3094.34015 | 3 | 1.90E-05 | 0.49  | 3.03   | -     | 554.1   |
| AHQ-10-5, 5419 - 5423                                                                        | R.FGSAIAPLGDLLDRDGYNDIAVAAPYGGPSGR.G  | 3094.34015 | 3 | 4.23E-06 | 0.88  | 4.35   | -     | 952.6   |
| AHQ-10-5, 5593                                                                               | R.FGSAIAPLGDLLDRDGYNDIAVAAPYGGPSGR.G  | 3094.34015 | 3 | 4.51E-04 | 0.57  | 3.04   | -     | 745.1   |
| AHQ-10-4, 5883 - 5944                                                                        | R.GAVDIDDNGYPLDIVGAYGANQVAVYR.A       | 2827.05458 | 3 | 5.07E-08 | 0.79  | 3.57   | -     | 642.5   |
| AHQ-10-4, 5737 - 5792                                                                        | R.GAVDIDDNGYPLDIVGAYGANQVAVYR.A       | 2827.05458 | 3 | 1.86E-06 | 0.88  | 4.00   | -     | 1090.0  |
| AHQ-10-4, 5664                                                                               | R.GAVDIDDNGYPLDIVGAYGANQVAVYR.A       | 2827.05458 | 2 | 1.65E-06 | 0.82  | 3.42   | -     | 432.9   |
| AHQ-10-1, 5069                                                                               | R.GEAQVWTQLLR.A                       | 1301.47614 | 2 | 2.10E-04 | 0.92  | 3.68   | -     | 958.2   |
| AHQ-10-11, 4750                                                                              | R.GEAQVWTQLLR.A                       | 1301.47614 | 2 | 9.23E-07 | 0.86  | 3.51   | -     | 848.5   |
| AHQ-10-10, 4688 - 4696                                                                       | R.GEAQVWTQLLR.A                       | 1301.47614 | 2 | 3.37E-06 | 0.95  | 4.25   | -     | 1173.3  |
| AHQ-10-4, 5291 - 5315                                                                        | R.GNSFPASLVVAEEGER.E                  | 1733.86053 | 2 | 6.13E-07 | 0.91  | 3.70   | -     | 803.2   |
| AHQ-10-4, 5168 - 5231                                                                        | R.GNSFPASLVVAEEGER.E                  | 1733.86053 | 2 | 5.71E-10 | 0.91  | 4.21   | -     | 743.8   |
| AHQ-10-4, 6179                                                                               | R.GNSFPASLVVAEEGEREQNSLDSWGP.K.V      | 2976.16043 | 3 | 2.27E-08 | 0.75  | 3.39   | -     | 366.8   |
| AHQ-10-4, 5848 - 5904                                                                        | R.GNSFPASLVVAEEGEREQNSLDSWGP.K.V      | 2976.16043 | 3 | 4.40E-04 | 0.65  | 3.59   | -     | 370.9   |
| AHQ-10-4, 6067 - 6124                                                                        | R.GNSFPASLVVAEEGEREQNSLDSWGP.K.V      | 2976.16043 | 3 | 1.96E-10 | 0.92  | 4.79   | -     | 593.7   |
| AHQ-10-6, 4928                                                                               | R.GPHALGAPSLLLTGTOLYGR.F              | 2023.32431 | 3 | 8.78E-04 | 0.87  | 3.67   | -     | 1295.7  |
| AHQ-10-4, 5044 - 5045                                                                        | R.GPHALGAPSLLLTGTOLYGR.F              | 2023.32431 | 2 | 1.06E-06 | 0.97  | 5.74   | -     | 1197.4  |
| AHQ-10-6, 4939                                                                               | R.GPHALGAPSLLLTGTOLYGR.F              | 2023.32431 | 2 | 2.50E-09 | 0.95  | 4.76   | -     | 935.1   |
| AHQ-10-7, 4900 - 4901                                                                        | R.GPHALGAPSLLLTGTOLYGR.F              | 2023.32431 | 2 | 7.30E-05 | 0.97  | 5.34   | -     | 1046.7  |
| AHQ-10-5, 5009 - 5025                                                                        | R.GPHALGAPSLLLTGTOLYGR.F              | 2023.32431 | 3 | 2.63E-05 | 0.94  | 4.56   | -     | 1201.3  |
| AHQ-10-5, 5013                                                                               | R.GPHALGAPSLLLTGTOLYGR.F              | 2023.32431 | 2 | 4.53E-07 | 0.97  | 5.55   | -     | 1086.5  |
| AHQ-10-4, 4853 - 4924                                                                        | R.GQVLVFLGQSEGLR.S                    | 1503.72793 | 2 | 4.23E-09 | 0.97  | 4.85   | -     | 1493.8  |
| AHQ-10-5, 4825                                                                               | R.GQVLVFLGQSEGLR.S                    | 1503.72793 | 2 | 1.11E-08 | 0.96  | 4.69   | -     | 1417.7  |
| AHQ-10-7, 4737                                                                               | R.GQVLVFLGQSEGLR.S                    | 1503.72793 | 2 | 7.36E-05 | 0.95  | 3.69   | -     | 1499.6  |
| AHQ-10-4, 3849                                                                               | R.HDLLVGPALYIM*ESR.A                  | 1617.85128 | 2 | 5.29E-04 | 0.95  | 4.10   | -     | 1107.3  |
| AHQ-10-6, 4264 - 4265                                                                        | K.IVLLDVPYR.A                         | 1024.28196 | 2 | 3.08E-04 | 0.90  | 3.78   | -     | 781.2   |
| AHQ-10-5, 4356                                                                               | K.IVLLDVPYR.A                         | 1024.28196 | 2 | 1.70E-05 | 0.85  | 3.18   | -     | 744.6   |
| AHQ-10-11, 4240                                                                              | K.IVLLDVPYR.A                         | 1024.28196 | 2 | 9.07E-04 | 0.90  | 3.53   | -     | 794.2   |
| AHQ-10-4, 4345                                                                               | K.IVLLDVPYR.A                         | 1024.28196 | 2 | 6.51E-04 | 0.85  | 2.96   | -     | 741.2   |
| AHQ-10-7, 3809                                                                               | R.IYVENDFSWDKR.Y                      | 1572.70245 | 2 | 2.11E-06 | 0.79  | 2.70   | -     | 817.1   |
| AHQ-10-4, 3915                                                                               | R.IYVENDFSWDKR.Y                      | 1572.70245 | 3 | 6.99E-08 | 0.64  | 3.08   | -     | 488.1   |
| AHQ-10-4, 4017                                                                               | R.IYVENDFSWDKR.Y                      | 1572.70245 | 2 | 5.45E-10 | 0.96  | 4.25   | -     | 1584.8  |
| AHQ-10-4, 4409                                                                               | K.LSLNAELQLDR.Q                       | 1272.43310 | 2 | 4.70E-04 | 0.95  | 3.57   | -     | 1675.9  |
| AHQ-10-4, 4091                                                                               | K.LSLNAELQLDR.Q                       | 1272.43310 | 2 | 1.53E-05 | 0.86  | 3.28   | -     | 969.9   |
| AHQ-10-4, 4300 - 4313                                                                        | K.LSLNAELQLDR.Q                       | 1272.43310 | 2 | 4.03E-05 | 0.73  | 2.88   | -     | 759.7   |
| AHQ-10-6, 2916                                                                               | R.NVGSQTLQTFK.A                       | 1223.36055 | 2 | 2.70E-04 | 0.86  | 3.03   | -     | 580.4   |
| AHQ-10-11, 2911 - 2918                                                                       | R.NVGSQTLQTFK.A                       | 1223.36055 | 2 | 8.17E-06 | 0.92  | 3.61   | -     | 649.3   |
| AHQ-10-7, 2892 - 2901                                                                        | R.NVGSQTLQTFK.A                       | 1223.36055 | 2 | 4.96E-04 | 0.88  | 3.53   | -     | 594.2   |
| AHQ-10-5, 5683                                                                               | R.SRPSQVLDSPFPTGSAFGFSLR.G            | 2354.60606 | 3 | 8.60E-08 | 0.94  | 5.61   | -     | 1095.3  |
| AHQ-10-4, 5472 - 5548                                                                        | R.SRPSQVLDSPFPTGSAFGFSLR.G            | 2354.60606 | 3 | 2.10E-04 | 0.97  | 5.66   | -     | 1987.5  |
| AHQ-10-4, 5683 - 5704                                                                        | R.SRPSQVLDSPFPTGSAFGFSLR.G            | 2354.60606 | 3 | 1.08E-06 | 0.92  | 4.98   | -     | 910.4   |
| AHQ-10-3, 5617                                                                               | R.SRPSQVLDSPFPTGSAFGFSLR.G            | 2354.60606 | 3 | 6.15E-05 | 0.91  | 4.85   | -     | 1031.6  |
| AHQ-10-5, 5460                                                                               | R.SRPSQVLDSPFPTGSAFGFSLR.G            | 2354.60606 | 3 | 3.27E-05 | 0.95  | 4.66   | -     | 1516.6  |
| AHQ-10-6, 5552 - 5567                                                                        | R.SRPSQVLDSPFPTGSAFGFSLR.G            | 2354.60606 | 3 | 6.58E-05 | 0.98  | 6.56   | -     | 1868.4  |
| AHQ-10-4, 3700                                                                               | K.TEEAEKTPYVGSCLAQPESEGR.R            | 2295.46902 | 2 | 6.71E-08 | 0.87  | 4.13   | -     | 415.9   |
| AHQ-10-4, 3695 - 3719                                                                        | K.TEEAEKTPYVGSCLAQPESEGR.R            | 2295.46902 | 3 | 8.48E-07 | 0.89  | 4.57   | -     | 805.8   |
| AHQ-10-4, 5224 - 5295                                                                        | R.TLPGSQEETGGVFLCPWR.A                | 2036.25364 | 2 | 8.83E-06 | 0.90  | 4.23   | -     | 523.9   |
| AHQ-10-4, 5351 - 5384                                                                        | R.TLPGSQEETGGVFLCPWR.A                | 2036.25364 | 2 | 1.66E-06 | 0.96  | 4.90   | -     | 983.5   |
| AHQ-10-9, 4996                                                                               | R.TLPGSQEETGGVFLCPWR.A                | 2036.25364 | 2 | 1.65E-04 | 0.70  | 3.19   | -     | 510.2   |
| AHQ-10-7, 5216 - 5218                                                                        | R.TLPGSQEETGGVFLCPWR.A                | 2036.25364 | 2 | 4.38E-07 | 0.95  | 4.79   | -     | 789.8   |
| AHQ-10-6, 5208 - 5257                                                                        | R.TLPGSQEETGGVFLCPWR.A                | 2036.25364 | 2 | 2.10E-06 | 0.95  | 5.47   | -     | 696.6   |
| AHQ-10-13, 5228 - 5240                                                                       | R.TLPGSQEETGGVFLCPWR.A                | 2036.25364 | 2 | 3.75E-06 | 0.90  | 4.15   | -     | 753.3   |
| AHQ-10-5, 3684                                                                               | K.TPVGSCFLAQPESEGR.R                  | 1607.76993 | 2 | 2.61E-07 | 0.90  | 3.95   | -     | 619.0   |
| AHQ-10-4, 3833                                                                               | K.TPVGSCFLAQPESEGR.R                  | 1607.76993 | 2 | 1.74E-05 | 0.84  | 3.59   | -     | 843.8   |
| AHQ-10-7, 3573 - 3613                                                                        | K.TPVGSCFLAQPESEGR.R                  | 1607.76993 | 2 | 3.12E-04 | 0.72  | 3.23   | -     | 453.1   |
| AHQ-10-11, 3570 - 3598                                                                       | K.TPVGSCFLAQPESEGR.R                  | 1607.76993 | 2 | 3.35E-05 | 0.75  | 2.97   | -     | 593.1   |
| AHQ-10-6, 3619                                                                               | K.TPVGSCFLAQPESEGR.R                  | 1607.76993 | 2 | 3.29E-06 | 0.81  | 3.14   | -     | 679.6   |
| AHQ-10-4, 3677 - 3699                                                                        | K.TPVGSCFLAQPESEGR.R                  | 1607.76993 | 2 | 1.74E-07 | 0.91  | 3.86   | -     | 771.7   |
| AHQ-10-4, 4408 - 4411                                                                        | K.TPVSCFNQM*CVGATGHNIPQK.L            | 2478.81062 | 3 | 1.78E-04 | 0.96  | 4.78   | -     | 2023.3  |
| AHQ-10-5, 4388 - 4393                                                                        | K.TPVSCFNQM*CVGATGHNIPQK.L            | 2478.81062 | 3 | 5.64E-04 | 0.92  | 4.02   | -     | 1455.0  |
| AHQ-10-4, 2683                                                                               | R.VAIVVGA.P.T                         | 882.08560  | 2 | 6.02E-06 | 0.94  | 3.47   | -     | 1381.3  |
| AHQ-10-7, 2657                                                                               | R.VAIVVGA.P.T                         | 882.08560  | 2 | 6.69E-04 | 0.94  | 3.27   | -     | 1463.7  |
| AHQ-10-4, 6548                                                                               | R.VLLGSGQAAGTTLNLDLGGK.H              | 1999.29783 | 2 | 1.22E-04 | 0.88  | 3.82   | -     | 625.3   |
| AHQ-10-4, 5967 - 6044                                                                        | R.VLLGSGQAAGTTLNLDLGGK.H              | 1999.29783 | 2 | 4.96E-04 | 0.80  | 3.65   | -     | 448.0   |
| AHQ-10-4, 5308 - 5367                                                                        | R.VLLGSGQAAGTTLNLDLGGK.H              | 1999.29783 | 2 | 5.34E-08 | 0.97  | 6.19   | -     | 1395.6  |
| AHQ-10-4, 3347                                                                               | R.VVLCELGNPM*K.K                      | 1277.53632 | 2 | 1.32E-05 | 0.91  | 3.50   | -     | 1205.1  |
| AHQ-10-4, 4035 - 4052                                                                        | R.VVLCELGNPM*K.K                      | 1261.53692 | 2 | 1.69E-06 | 0.97  | 4.57   | -     | 1552.8  |
| AHQ-10-6, 3293                                                                               | R.VVLCELGNPM*K.K                      | 1277.53632 | 2 | 3.99E-05 | 0.84  | 3.04   | -     | 875.0   |
| AHQ-10-4, 3635 - 3641                                                                        | R.VVLCELGNPMK.N                       | 1389.70984 | 2 | 7.39E-09 | 0.89  | 3.23   | -     | 959.7   |
| AHQ-10-6, 4101                                                                               | R.VVYLQPR.G                           | 1036.25129 | 2 | 2.97E-04 | 0.93  | 3.23   | -     | 1212.3  |
| gi 4503715 ref NP_000500.1  fibrinogen, gamma chain isoform gamma-A precursor [Homo sapiens] |                                       |            |   |          |       |        |       |         |
| AHQ-10-7, 4497                                                                               | K.AIQLTYNPDESSKPNMIDAATL.K.S          | 2521.82886 | 2 | 1.07E-11 | 16.02 | 190.30 | 62.90 | 49481.2 |
| AHQ-10-7, 3933 - 4012                                                                        | K.AIQLTYNPDESSKPNMIDAATL.K.S          | 2521.82886 | 2 | 2.89E-04 | 0.80  | 4.01   | -     | 475.2   |
| AHQ-10-7, 6017 - 6076                                                                        | K.ANQQLFLYCEIDSGNGWTVFQK.R            | 2663.90221 | 3 | 2.69E-05 | 0.68  | 3.20   | -     | 583.4   |
| AHQ-10-7, 5997 - 6074                                                                        | K.ANQQLFLYCEIDSGNGWTVFQK.R            | 2663.90221 | 3 | 3.31E-04 | 0.54  | 3.39   | -     | 542.4   |
| AHQ-10-7, 5890 - 5905                                                                        | K.ANQQLFLYCEIDSGNGWTVFQK.R            | 2663.90221 | 2 | 1.07E-11 | 0.91  | 3.97   | -     | 758.4   |
| AHQ-10-7, 5180 - 5240                                                                        | K.ASTPNGYDNGIIVATWK.T                 | 1895.06358 | 2 | 5.48E-07 | 0.89  | 4.05   | -     | 643.2   |
| AHQ-10-13, 5158                                                                              | K.ASTPNGYDNGIIVATWK.T                 | 1895.06358 | 2 | 7.44E-10 | 0.88  | 3.55   | -     | 706.3   |
| AHQ-10-7, 5296 - 5306                                                                        | K.ASTPNGYDNGIIVATWK.T                 | 1895.06358 | 2 | 9.03E-06 | 0.85  | 3.31   | -     | 695.3   |
| AHQ-10-14, 5150 - 5205                                                                       | K.ASTPNGYDNGIIVATWK.T                 | 1895.06358 | 2 | 7.72E-06 | 0.74  | 3.06   | -     | 454.3   |
| AHQ-10-7, 2756 - 2825                                                                        | K.CHAGHLNGVYQGGTYSK.A                 | 2014.16662 | 2 | 1.18E-07 | 0.81  | 3.29   | -     | 667.1   |
| AHQ-10-9, 2675                                                                               | K.CHAGHLNGVYQGGTYSK.A                 | 2014.16662 | 2 | 1.26E-08 | 0.98  | 5.90   | -     | 1449.6  |
| AHQ-10-7, 2690 - 2758                                                                        | K.CHAGHLNGVYQGGTYSK.A                 | 2014.16662 | 2 | 2.06E-04 | 0.60  | 2.82   | -     | 328.2   |
| AHQ-10-7, 3072 - 3133                                                                        | R.DNCCILDER.F                         | 1197.27847 | 3 | 9.57E-08 | 0.97  | 5.03   | -     | 2353.4  |
| AHQ-10-9, 2972 - 3036                                                                        | R.DNCCILDER.F                         | 1197.27847 | 2 | 9.25E-05 | 0.78  | 3.01   | -     | 618.7   |
| AHQ-10-9, 4783 - 4852                                                                        | R.DNCCILDER.F                         | 1197.27847 | 2 | 3.18E-05 | 0.87  | 3.12   | -     | 853.2   |
| AHQ-10-7, 5060                                                                               | K.EGFHLSPTGTTFEFLWGNEK.I              | 2208.37146 | 2 | 3.76E-07 | 0.92  | 4.50   | -     | 712.4   |
| AHQ-10-7, 5904 - 5914                                                                        | K.EGFHLSPTGTTFEFLWGNEK.I              | 2208.37146 | 2 | 8.80E-04 | 0.90  | 4.16   | -     | 710.2   |
| AHQ-10-7, 6094 - 6158                                                                        | R.FGSPCTTCGIADFLSTYQTK.V              | 2420.65656 | 2 | 4.14E-05 | 0.70  | 3.34   | -     | 377.1   |
| AHQ-10-7, 4366 - 4425                                                                        | R.FGSPCTTCGIADFLSTYQTK.V              | 2420.65656 | 2 | 6.81E-08 | 0.86  | 3.74   | -     | 516.0   |
| AHQ-10-6, 4436                                                                               | K.IHILISTQSAIYALR.V                   | 1683.97576 | 2 | 8.18E-05 | 0.91  | 3.56   | -     | 1073.5  |
| AHQ-10-7, 2137                                                                               | K.IHILISTQSAIYALR.V                   | 1683.97576 | 2 | 6.42E-05 | 0.74  | 3.16   | -     | 599.4   |
| AHQ-10-14, 2254                                                                              | R.LDGSVDFK.N                          | 1009.13788 | 2 | 5.55E-04 | 0.68  | 2.59   | -     | 614.2   |
| AHQ-10-8, 2205                                                                               | R.LTIGEGQQHHLGGAK.Q                   | 1546.71290 | 2 | 6.15E-05 | 0.57  | 2.58   | -     | 797.9   |
| AHQ-10-7, 2173 - 2228                                                                        | R.LTIGEGQQHHLGGAK.Q                   | 1546.71290 | 2 | 4.59E-07 | 0.69  | 2.63   | -     | 650.4   |
| AHQ-10-7, 5970 - 6037                                                                        | R.LTIGEGQQHHLGGAK.Q                   | 1546.71290 | 2 | 7.71E-08 | 0.88  | 3.69   | -     | 889.4   |
| AHQ-10-7, 3820                                                                               | R.LTYAYFAGGDAGDAFDGDFGDDPSDK.F        | 2835.88415 | 2 | 3.54E-05 | 0.86  | 3.85   | -     | 720.1   |
| AHQ-10-7, 2337                                                                               | K.QSGLYFIKPLK.A                       | 1294.56665 | 2 | 5.79E-05 | 0.77  | 3.03   | -     | 394.6   |
| AHQ-10-7, 3788                                                                               | K.RLDGSDVDFK.K                        | 1037.15132 | 2 | 1.72E-04 | 0.81  | 3.17   | -     | 461.1   |
| AHQ-10-9, 3811                                                                               | K.VAQLEAQCQPECKDVTVQIHDITGK.D         | 2772.06211 | 3 | 6.14E-06 | 0.89  | 4.21   | -     | 710.3   |
| AHQ-10-7, 3902 - 3960                                                                        | K.VAQLEAQCQPECKDVTVQIHDITGKDCQDIANK.G | 3718.05993 | 3 | 6.30E-04 | 0.82  | 3.77   | -     | 835.8   |
|                                                                                              | K.VAQLEAQCQPECKDVTVQIHDITGKDCQDIANK.G | 3718.05993 | 3 | 7.86E-05 | 0.94  | 4.93   | -     | 966.5   |

|                                                                 |                                               |            |   |          |       |        |       |          |
|-----------------------------------------------------------------|-----------------------------------------------|------------|---|----------|-------|--------|-------|----------|
| AHQ-10-7, 3220 - 3276                                           | R.VELEDWNGR.T                                 | 1118.18129 | 2 | 4.86E-05 | 0.83  | 2.94   | -     | 919.4    |
| AHQ-10-7, 3136                                                  | R.VELEDWNGR.T                                 | 1118.18129 | 2 | 1.12E-04 | 0.84  | 3.04   | -     | 1007.2   |
| AHQ-10-4, 3139 - 3217                                           | K.YEASILTHDSSIR.Y                             | 1492.61564 | 2 | 5.73E-07 | 0.59  | 3.15   | -     | 603.4    |
| AHQ-10-7, 3032 - 3100                                           | K.YEASILTHDSSIR.Y                             | 1492.61564 | 2 | 1.92E-08 | 0.81  | 3.13   | -     | 604.3    |
| AHQ-10-11, 3078                                                 | K.YEASILTHDSSIR.Y                             | 1492.61564 | 2 | 4.09E-06 | 0.81  | 3.04   | -     | 610.1    |
| AHQ-10-8, 2990 - 2999                                           | K.YEASILTHDSSIR.Y                             | 1492.61564 | 2 | 2.27E-06 | 0.89  | 3.79   | -     | 702.6    |
| AHQ-10-9, 2940 - 2951                                           | K.YEASILTHDSSIR.Y                             | 1492.61564 | 3 | 9.67E-05 | 0.80  | 3.25   | -     | 694.3    |
| AHQ-10-11, 2759 - 2816                                          | R.YLQEIYNSNNQK.I                              | 1514.62131 | 2 | 7.40E-04 | 0.91  | 4.04   | -     | 870.2    |
| AHQ-10-9, 2708 - 2721                                           | R.YLQEIYNSNNQK.I                              | 1514.62131 | 2 | 2.44E-04 | 0.91  | 3.68   | -     | 1284.1   |
| gi 4557703 ref NP_000414.1  keratin 2a [Homo sapiens]           |                                               |            |   | 1.11E-11 | 17.63 | 200.31 | 37.10 | 65864.9  |
| AHQ-10-7, 2212                                                  | K.AQYEEIAQR.S                                 | 1108.18640 | 2 | 8.30E-05 | 0.64  | 2.80   | -     | 664.2    |
| AHQ-10-3, 3466                                                  | R.DYQELMNVK.L                                 | 1140.29181 | 2 | 2.27E-04 | 0.85  | 3.27   | -     | 791.4    |
| AHQ-10-6, 6160                                                  | R.FGGFGGPGGVLGGPGGFGPGGYPGGIHEVSNQSLQLPLNVK.V | 4094.54151 | 3 | 3.48E-04 | 0.86  | 4.46   | -     | 571.2    |
| AHQ-10-4, 6292                                                  | R.FGGFGGPGGVLGGPGGFGPGGYPGGIHEVSNQSLQLPLNVK.V | 4094.54151 | 3 | 1.08E-04 | 0.88  | 4.34   | -     | 766.9    |
| AHQ-10-3, 6210                                                  | R.FGGFGGPGGVLGGPGGFGPGGYPGGIHEVSNQSLQLPLNVK.V | 4094.54151 | 3 | 1.98E-04 | 0.94  | 5.59   | -     | 909.1    |
| AHQ-10-7, 6205                                                  | R.FGGFGGPGGVLGGPGGFGPGGYPGGIHEVSNQSLQLPLNVK.V | 4094.54151 | 3 | 2.00E-10 | 0.95  | 5.54   | -     | 1241.1   |
| AHQ-10-5, 6295                                                  | R.FGGFGGPGGVLGGPGGFGPGGYPGGIHEVSNQSLQLPLNVK.V | 4094.54151 | 3 | 1.58E-04 | 0.94  | 5.45   | -     | 878.6    |
| AHQ-10-6, 3016                                                  | R.FLEQQNQVLQTK.W                              | 1476.65935 | 2 | 6.62E-07 | 0.97  | 4.72   | -     | 2231.6   |
| AHQ-10-13, 3455 - 3467                                          | R.FLEQQNQVLQTK.W                              | 1476.65935 | 2 | 6.69E-06 | 0.96  | 4.36   | -     | 1871.8   |
| AHQ-10-2, 3295                                                  | R.FLEQQNQVLQTK.W                              | 1476.65935 | 2 | 2.08E-04 | 0.91  | 4.22   | -     | 1478.2   |
| AHQ-10-13, 3073 - 3084                                          | R.FLEQQNQVLQTK.W                              | 1476.65935 | 2 | 9.52E-07 | 0.97  | 4.73   | -     | 1888.0   |
| AHQ-10-7, 2984 - 3062                                           | R.FLEQQNQVLQTK.W                              | 1476.65935 | 2 | 5.48E-08 | 0.97  | 4.75   | -     | 2030.7   |
| AHQ-10-12, 3088 - 3100                                          | R.FLEQQNQVLQTK.W                              | 1476.65935 | 2 | 4.61E-06 | 0.96  | 4.94   | -     | 1649.9   |
| AHQ-10-8, 2973                                                  | R.FLEQQNQVLQTK.W                              | 1476.65935 | 2 | 5.66E-06 | 0.96  | 3.94   | -     | 2081.8   |
| AHQ-10-3, 3065                                                  | R.FLEQQNQVLQTK.W                              | 1476.65935 | 2 | 1.09E-06 | 0.97  | 5.09   | -     | 2063.3   |
| AHQ-10-11, 3156                                                 | R.FLEQQNQVLQTK.W                              | 1476.65935 | 2 | 6.71E-05 | 0.92  | 3.52   | -     | 1259.8   |
| AHQ-10-5, 3048 - 3124                                           | R.FLEQQNQVLQTK.W                              | 1476.65935 | 2 | 2.27E-08 | 0.98  | 5.55   | -     | 2519.0   |
| AHQ-10-2, 3127                                                  | R.FLEQQNQVLQTK.W                              | 1476.65935 | 2 | 5.77E-07 | 0.98  | 4.66   | -     | 2661.7   |
| AHQ-10-3, 3226                                                  | R.FLEQQNQVLQTK.W                              | 1476.65935 | 2 | 2.29E-06 | 0.97  | 5.03   | -     | 2070.0   |
| AHQ-10-14, 3048 - 3056                                          | R.FLEQQNQVLQTK.W                              | 1476.65935 | 2 | 1.63E-08 | 0.97  | 5.12   | -     | 2265.2   |
| AHQ-10-4, 3065 - 3068                                           | R.FLEQQNQVLQTK.W                              | 1476.65935 | 2 | 8.47E-08 | 0.98  | 6.15   | -     | 2403.9   |
| AHQ-10-5, 3212 - 3221                                           | R.FLEQQNQVLQTK.W                              | 1476.65935 | 2 | 2.85E-04 | 0.94  | 3.83   | -     | 1611.9   |
| AHQ-10-9, 2891 - 2892                                           | R.FLEQQNQVLQTK.W                              | 1476.65935 | 2 | 1.78E-07 | 0.96  | 4.98   | -     | 1718.0   |
| AHQ-10-1, 3179 - 3253                                           | R.FLEQQNQVLQTK.W                              | 1476.65935 | 2 | 2.51E-06 | 0.97  | 4.54   | -     | 2401.5   |
| AHQ-10-3, 2335                                                  | R.FGSSGSAVSVGGSR.R                            | 1255.31950 | 2 | 1.59E-04 | 0.95  | 4.22   | -     | 1321.6   |
| AHQ-10-3, 2247                                                  | R.HGGGGGFGGGGFGSR.S                           | 1321.34296 | 2 | 6.04E-06 | 0.95  | 4.11   | -     | 1097.4   |
| AHQ-10-5, 2915                                                  | K.IEISELNR.V                                  | 974.09353  | 2 | 1.38E-04 | 0.78  | 2.74   | -     | 672.4    |
| AHQ-10-10, 2862                                                 | K.IEISELNR.V                                  | 974.09353  | 2 | 4.34E-04 | 0.81  | 2.78   | -     | 759.3    |
| AHQ-10-11, 2878                                                 | K.IEISELNR.V                                  | 974.09353  | 2 | 7.72E-04 | 0.76  | 2.83   | -     | 606.2    |
| AHQ-10-7, 4016                                                  | K.LNDLEEAALQQAQ.E                             | 1372.50630 | 2 | 1.36E-04 | 0.96  | 4.53   | -     | 1554.8   |
| AHQ-10-8, 4039 - 4071                                           | K.LNDLEEAALQQAQ.E                             | 1372.50630 | 2 | 1.91E-06 | 0.94  | 3.73   | -     | 1638.0   |
| AHQ-10-3, 4103                                                  | K.LNDLEEAALQQAQ.E                             | 1372.50630 | 2 | 2.50E-05 | 0.97  | 5.12   | -     | 1674.6   |
| AHQ-10-6, 4043                                                  | K.LNDLEEAALQQAQ.E                             | 1372.50630 | 2 | 3.18E-06 | 0.96  | 4.94   | -     | 1372.6   |
| AHQ-10-3, 4474                                                  | R.NKLNDEEAALQQAQ.E                            | 1614.78232 | 2 | 1.56E-05 | 0.93  | 3.42   | -     | 1373.4   |
| AHQ-10-11, 5556 - 5562                                          | R.NLDLDSIAEVK.A                               | 1330.50933 | 2 | 5.38E-07 | 0.95  | 4.24   | -     | 1146.1   |
| AHQ-10-8, 5715                                                  | R.NLDLDSIAEVK.A                               | 1330.50933 | 2 | 3.65E-05 | 0.96  | 4.67   | -     | 1237.4   |
| AHQ-10-5, 5759                                                  | R.NLDLDSIAEVK.A                               | 1330.50933 | 2 | 3.43E-06 | 0.96  | 4.70   | -     | 1159.2   |
| AHQ-10-2, 5783                                                  | R.NLDLDSIAEVK.A                               | 1330.50933 | 2 | 2.04E-07 | 0.96  | 4.57   | -     | 1256.0   |
| AHQ-10-7, 5658 - 5665                                           | R.NLDLDSIAEVK.A                               | 1330.50933 | 2 | 5.58E-07 | 0.97  | 4.76   | -     | 1495.9   |
| AHQ-10-13, 5925                                                 | R.NLDLDSIAEVK.A                               | 1330.50933 | 2 | 1.59E-06 | 0.95  | 4.29   | -     | 1260.2   |
| AHQ-10-4, 5780                                                  | R.NLDLDSIAEVK.A                               | 1330.50933 | 2 | 2.76E-06 | 0.95  | 4.20   | -     | 1100.9   |
| AHQ-10-13, 5644 - 5648                                          | R.NLDLDSIAEVK.A                               | 1330.50933 | 2 | 4.23E-06 | 0.97  | 5.37   | -     | 1362.6   |
| AHQ-10-3, 5678                                                  | R.NLDLDSIAEVK.A                               | 1330.50933 | 2 | 6.44E-08 | 0.94  | 4.19   | -     | 1115.8   |
| AHQ-10-14, 5652                                                 | R.NLDLDSIAEVK.A                               | 1330.50933 | 2 | 5.12E-06 | 0.97  | 4.75   | -     | 1557.0   |
| AHQ-10-1, 5805                                                  | R.NLDLDSIAEVK.A                               | 1330.50933 | 2 | 1.06E-04 | 0.94  | 4.16   | -     | 1015.5   |
| AHQ-10-6, 5636 - 5656                                           | R.NLDLDSIAEVK.A                               | 1330.50933 | 2 | 9.26E-07 | 0.94  | 4.10   | -     | 1131.4   |
| AHQ-10-9, 5435                                                  | R.NLDLDSIAEVK.A                               | 1330.50933 | 2 | 5.18E-04 | 0.92  | 3.55   | -     | 1116.3   |
| AHQ-10-14, 3168                                                 | K.NVQDAIADAQR.G                               | 1330.38637 | 2 | 2.85E-08 | 0.96  | 4.04   | -     | 1807.9   |
| AHQ-10-6, 3140                                                  | K.NVQDAIADAQR.G                               | 1330.38637 | 2 | 1.94E-07 | 0.94  | 3.84   | -     | 1468.6   |
| AHQ-10-2, 3246                                                  | K.NVQDAIADAQR.G                               | 1330.38637 | 2 | 4.47E-08 | 0.93  | 3.93   | -     | 948.5    |
| AHQ-10-7, 3130 - 3204                                           | K.NVQDAIADAQR.G                               | 1330.38637 | 2 | 3.79E-04 | 0.85  | 2.86   | -     | 1143.3   |
| AHQ-10-11, 3118                                                 | K.NVQDAIADAQR.G                               | 1330.38637 | 2 | 9.75E-07 | 0.90  | 3.11   | -     | 1267.7   |
| AHQ-10-3, 3179 - 3198                                           | K.NVQDAIADAQR.G                               | 1330.38637 | 2 | 1.42E-07 | 0.94  | 4.32   | -     | 1150.7   |
| AHQ-10-13, 3180                                                 | K.NVQDAIADAQR.G                               | 1330.38637 | 2 | 1.73E-05 | 0.79  | 3.19   | -     | 784.9    |
| AHQ-10-8, 3141                                                  | K.NVQDAIADAQR.G                               | 1330.38637 | 2 | 6.03E-04 | 0.90  | 3.70   | -     | 901.0    |
| AHQ-10-5, 3179                                                  | K.NVQDAIADAQR.G                               | 1330.38637 | 2 | 6.53E-07 | 0.88  | 3.60   | -     | 1069.4   |
| AHQ-10-2, 3271                                                  | R.TAAENDFVTLK.K                               | 1209.33064 | 2 | 2.08E-04 | 0.82  | 2.77   | -     | 929.3    |
| AHQ-10-3, 2734                                                  | R.TAAENDFVTLK.D                               | 1337.50356 | 2 | 3.14E-06 | 0.72  | 2.77   | -     | 845.7    |
| AHQ-10-14, 4888                                                 | R.TSQNSSELNMQDLVEDYK.K                        | 2129.24808 | 2 | 1.32E-07 | 0.88  | 3.86   | -     | 843.7    |
| AHQ-10-14, 4465                                                 | R.TSQNSSELNMQDLVEDYK.K                        | 2257.42100 | 3 | 2.05E-04 | 0.84  | 3.45   | -     | 1028.1   |
| AHQ-10-3, 4513 - 4519                                           | R.TSQNSSELNMQDLVEDYK.K                        | 2257.42100 | 3 | 5.99E-09 | 0.83  | 3.50   | -     | 958.3    |
| AHQ-10-3, 3185                                                  | R.TSQNSSELNM*QDLVEDYK.K                       | 2273.42040 | 3 | 3.59E-07 | 0.81  | 3.12   | -     | 955.7    |
| AHQ-10-3, 5561 - 5610                                           | K.VDLLNQIEIFLK.V                              | 1461.68459 | 2 | 2.18E-08 | 0.95  | 5.08   | -     | 1026.2   |
| AHQ-10-7, 5533                                                  | K.VDLLNQIEIFLK.V                              | 1461.68459 | 2 | 1.20E-05 | 0.95  | 4.39   | -     | 1177.2   |
| AHQ-10-8, 5586                                                  | K.VDLLNQIEIFLK.V                              | 1461.68459 | 2 | 1.96E-06 | 0.92  | 4.10   | -     | 903.6    |
| AHQ-10-1, 5694                                                  | K.VDLLNQIEIFLK.V                              | 1461.68459 | 2 | 1.17E-06 | 0.90  | 3.87   | -     | 832.3    |
| AHQ-10-11, 5375 - 5434                                          | K.VDLLNQIEIFLK.V                              | 1461.68459 | 2 | 1.25E-04 | 0.84  | 3.43   | -     | 734.5    |
| AHQ-10-14, 5529 - 5532                                          | K.VDLLNQIEIFLK.V                              | 1461.68459 | 2 | 1.10E-06 | 0.93  | 4.50   | -     | 803.2    |
| AHQ-10-4, 5656                                                  | K.VDLLNQIEIFLK.V                              | 1461.68459 | 2 | 9.04E-04 | 0.78  | 2.66   | -     | 957.2    |
| AHQ-10-2, 5663 - 5666                                           | K.VDLLNQIEIFLK.V                              | 1461.68459 | 2 | 3.75E-09 | 0.94  | 4.61   | -     | 915.7    |
| AHQ-10-13, 5799                                                 | K.VDLLNQIEIFLK.V                              | 1461.68459 | 2 | 7.41E-06 | 0.79  | 3.35   | -     | 696.4    |
| AHQ-10-13, 5514 - 5525                                          | K.VDLLNQIEIFLK.V                              | 1461.68459 | 2 | 2.66E-05 | 0.92  | 3.62   | -     | 1268.8   |
| AHQ-10-5, 5645 - 5651                                           | K.VDLLNQIEIFLK.V                              | 1461.68459 | 2 | 1.67E-06 | 0.92  | 4.18   | -     | 777.6    |
| AHQ-10-6, 5515                                                  | K.VDLLNQIEIFLK.V                              | 1461.68459 | 2 | 2.48E-07 | 0.90  | 4.17   | -     | 670.6    |
| AHQ-10-3, 5389 - 5445                                           | K.VLYDAEISQIHQSVTDTNVILSM*DNSR.N              | 3066.34680 | 3 | 4.39E-04 | 0.84  | 4.23   | -     | 661.5    |
| AHQ-10-13, 5334                                                 | K.VLYDAEISQIHQSVTDTNVILSM*DNSR.N              | 3066.34680 | 3 | 9.42E-05 | 0.92  | 4.29   | -     | 1141.5   |
| AHQ-10-2, 5482                                                  | K.VLYDAEISQIHQSVTDTNVILSM*DNSR.N              | 3066.34680 | 3 | 6.33E-04 | 0.87  | 3.97   | -     | 863.3    |
| AHQ-10-14, 5301 - 5341                                          | K.VLYDAEISQIHQSVTDTNVILSM*DNSR.N              | 3066.34680 | 3 | 1.11E-11 | 0.89  | 3.77   | -     | 979.5    |
| AHQ-10-6, 5344                                                  | K.VLYDAEISQIHQSVTDTNVILSM*DNSR.N              | 3066.34680 | 3 | 4.91E-06 | 0.85  | 3.73   | -     | 954.8    |
| AHQ-10-3, 3169                                                  | K.YEELQVTVGR.H                                | 1194.31920 | 2 | 1.59E-06 | 0.97  | 3.68   | -     | 2167.5   |
| AHQ-10-13, 3170                                                 | K.YEELQVTVGR.H                                | 1194.31920 | 2 | 9.55E-06 | 0.93  | 3.58   | -     | 1309.2   |
| AHQ-10-6, 3124                                                  | K.YEELQVTVGR.H                                | 1194.31920 | 2 | 7.54E-06 | 0.97  | 4.02   | -     | 2042.2   |
| AHQ-10-7, 3113 - 3181                                           | K.YEELQVTVGR.H                                | 1194.31920 | 2 | 5.35E-05 | 0.91  | 2.82   | -     | 1523.7   |
| AHQ-10-14, 3148                                                 | K.YEELQVTVGR.H                                | 1194.31920 | 2 | 1.04E-05 | 0.95  | 3.48   | -     | 1599.4   |
| AHQ-10-3, 3002                                                  | R.YLDGLTAER.T                                 | 1038.13608 | 2 | 7.28E-06 | 0.91  | 3.32   | -     | 831.2    |
| AHQ-10-6, 2947                                                  | R.YLDGLTAER.T                                 | 1038.13608 | 2 | 3.40E-04 | 0.89  | 3.01   | -     | 1032.4   |
| gi 4507877 ref NP_003364.1  vinculin isoform VCL [Homo sapiens] |                                               |            |   | 1.44E-11 | 34.35 | 400.32 | 42.00 | 116721.6 |
| AHQ-10-4, 2644 - 2659                                           | K.AGEVINQPM*MM*AAAR.Q                         | 1551.83812 | 2 | 4.71E-05 | 0.68  | 4.01   | -     | 458.6    |
| AHQ-10-2, 6511                                                  | K.AIPDLTAPVAQAASNLVR.V                        | 2077.41342 | 2 | 5.74E-09 | 0.95  | 4.70   | -     | 950.2    |
| AHQ-10-12, 6308                                                 | K.AIPDLTAPVAQAASNLVR.V                        | 2077.41342 | 2 | 4.93E-06 | 0.92  | 3.38   | -     | 951.9    |
| AHQ-10-11, 6275                                                 | K.AIPDLTAPVAQAASNLVR.V                        | 2077.41342 | 2 | 1.75E-08 | 0.97  | 4.62   | -     | 1302.1   |
| AHQ-10-10, 6247                                                 | K.AIPDLTAPVAQAASNLVR.V                        | 2077.41342 | 2 | 1.51E-08 | 0.96  | 4.41   | -     | 1198.1   |
| AHQ-10-9, 6081 - 6166                                           | K.AIPDLTAPVAQAASNLVR.V                        | 2077.41342 | 2 | 8.37E-07 | 0.90  | 3.43   | -     | 865.8    |
| AHQ-10-4, 6472                                                  | K.AIPDLTAPVAQAASNLVR.V                        | 2077.41342 | 2 | 3.41E-11 | 0.96  | 5.20   | -     | 1014.3   |
| AHQ-10-5, 6488 - 6544                                           | K.AIPDLTAPVAQAASNLVR.V                        | 2077.41342 | 2 | 1.44E-11 | 0.95  | 4.52   | -     | 1005.1   |
| AHQ-10-8, 6398 - 6463                                           | K.AIPDLTAPVAQAASNLVR.V                        | 2077.41342 | 2 | 5.29E-07 | 0.93  | 4.47   | -     | 832.8    |
| AHQ-10-3, 6399                                                  | K.AIPDLTAPVAQAASNLVR.V                        | 2077.41342 | 2 | 1.88E-04 | 0.91  | 3.61   | -     | 968.7    |



|                           |                                                                         |            |   |          |      |       |       |         |
|---------------------------|-------------------------------------------------------------------------|------------|---|----------|------|-------|-------|---------|
| AHQ-10-7, 6416 - 6432     | K.AIPDLTAPVAAVQAAVSNLVR.V                                               | 2077.41342 | 2 | 7.77E-08 | 0.97 | 5.33  | -     | 1116.4  |
| AHQ-10-6, 6364            | K.AIPDLTAPVAAVQAAVSNLVR.V                                               | 2077.41342 | 2 | 4.16E-11 | 0.96 | 5.00  | -     | 1012.6  |
| AHQ-10-14, 6380 - 6381    | K.AIPDLTAPVAAVQAAVSNLVR.V                                               | 2077.41342 | 2 | 9.91E-07 | 0.94 | 4.16  | -     | 945.7   |
| AHQ-10-6, 3331            | R.ALASQLQDSSLK.D                                                        | 1174.32943 | 2 | 2.43E-04 | 0.89 | 3.36  | -     | 1033.4  |
| AHQ-10-3, 3405 - 3406     | R.ALASQLQDSSLK.D                                                        | 1174.32943 | 2 | 4.58E-05 | 0.86 | 3.53  | -     | 697.2   |
| AHQ-10-4, 3363 - 3397     | R.ALASQLQDSSLK.D                                                        | 1174.32943 | 2 | 9.73E-04 | 0.85 | 2.94  | -     | 712.0   |
| AHQ-10-5, 3383 - 3396     | R.ALASQLQDSSLK.D                                                        | 1174.32943 | 2 | 8.80E-05 | 0.95 | 3.55  | -     | 1526.9  |
| AHQ-10-9, 3361 - 3365     | K.AQQVSQLDLVLTAK.V                                                      | 1458.64233 | 2 | 1.06E-05 | 0.94 | 3.55  | -     | 1271.0  |
| AHQ-10-6, 3519 - 3579     | K.AQQVSQLDLVLTAK.V                                                      | 1458.64233 | 2 | 1.12E-07 | 0.96 | 4.70  | -     | 1397.9  |
| AHQ-10-4, 3591            | K.AQQVSQLDLVLTAK.V                                                      | 1458.64233 | 2 | 6.76E-10 | 0.96 | 4.57  | -     | 1346.4  |
| AHQ-10-4, 3453 - 3535     | K.AQQVSQLDLVLTAK.V                                                      | 1458.64233 | 2 | 3.51E-05 | 0.94 | 3.98  | -     | 1325.7  |
| AHQ-10-1, 3763            | K.AQQVSQLDLVLTAK.V                                                      | 1458.64233 | 2 | 4.77E-04 | 0.88 | 2.77  | -     | 1016.2  |
| AHQ-10-5, 3575 - 3637     | K.AQQVSQLDLVLTAK.V                                                      | 1458.64233 | 2 | 8.08E-11 | 0.95 | 4.02  | -     | 1253.1  |
| AHQ-10-5, 2539            | K.AVAGNISDPGLQK.S                                                       | 1270.41721 | 2 | 2.08E-05 | 0.81 | 3.33  | -     | 628.3   |
| AHQ-10-3, 2577            | K.AVAGNISDPGLQK.S                                                       | 1270.41721 | 2 | 3.15E-06 | 0.88 | 3.15  | -     | 855.8   |
| AHQ-10-4, 2552            | K.AVAGNISDPGLQK.S                                                       | 1270.41721 | 2 | 1.66E-06 | 0.91 | 3.90  | -     | 801.1   |
| AHQ-10-4, 2467 - 2535     | K.AVAGNISDPGLQK.S                                                       | 1270.41721 | 2 | 5.86E-04 | 0.83 | 3.11  | -     | 739.2   |
| AHQ-10-8, 2501            | K.AVAGNISDPGLQK.S                                                       | 1270.41721 | 2 | 6.90E-04 | 0.85 | 3.63  | -     | 607.5   |
| AHQ-10-5, 5553            | K.CDRVDQLTAQLADLAAR.G                                                   | 1918.12182 | 3 | 8.41E-06 | 0.87 | 3.78  | -     | 1158.5  |
| AHQ-10-4, 5553            | K.CDRVDQLTAQLADLAAR.G                                                   | 1918.12182 | 3 | 9.20E-06 | 0.94 | 5.25  | -     | 1129.0  |
| AHQ-10-3, 2387            | R.DPSASPGDAGEQAIR.Q                                                     | 1471.51169 | 2 | 3.96E-07 | 0.84 | 3.38  | -     | 582.5   |
| AHQ-10-6, 2339            | R.DPSASPGDAGEQAIR.Q                                                     | 1471.51169 | 2 | 4.39E-09 | 0.81 | 2.99  | -     | 607.0   |
| AHQ-10-4, 2359            | R.DPSASPGDAGEQAIR.Q                                                     | 1471.51169 | 2 | 5.74E-08 | 0.89 | 3.72  | -     | 662.9   |
| AHQ-10-5, 2347 - 2348     | R.DPSASPGDAGEQAIR.Q                                                     | 1471.51169 | 2 | 3.83E-08 | 0.95 | 4.47  | -     | 846.9   |
| AHQ-10-4, 5419 - 5475     | R.EAFQPQEPDFPPPPDLEQLR.L                                                | 2448.67149 | 3 | 5.03E-04 | 0.63 | 3.02  | -     | 1004.8  |
| AHQ-10-4, 5297 - 5363     | R.EAFQPQEPDFPPPPDLEQLR.L                                                | 2448.67149 | 3 | 6.45E-07 | 0.83 | 3.94  | -     | 884.3   |
| AHQ-10-8, 2707 - 2775     | R.ELTPQVVSAAAR.I                                                        | 1171.32878 | 2 | 1.20E-04 | 0.84 | 2.61  | -     | 991.5   |
| AHQ-10-5, 3085            | K.ETVQTTEDQILK.R                                                        | 1561.71942 | 2 | 1.03E-04 | 0.78 | 2.82  | -     | 612.4   |
| AHQ-10-7, 3014            | K.ETVQTTEDQILK.R                                                        | 1561.71942 | 2 | 3.49E-04 | 0.52 | 2.79  | -     | 624.9   |
| AHQ-10-7, 6222 - 6293     | R.GILSGTSDLLLTDFEAEVR.K                                                 | 2037.25656 | 2 | 9.83E-08 | 0.97 | 5.23  | -     | 1142.3  |
| AHQ-10-5, 6303 - 6368     | R.GILSGTSDLLLTDFEAEVR.K                                                 | 2037.25656 | 2 | 6.66E-08 | 0.95 | 5.10  | -     | 953.0   |
| AHQ-10-3, 6222 - 6281     | R.GILSGTSDLLLTDFEAEVR.K                                                 | 2037.25656 | 2 | 1.68E-05 | 0.88 | 4.15  | -     | 648.3   |
| AHQ-10-4, 6303 - 6368     | R.GILSGTSDLLLTDFEAEVR.K                                                 | 2037.25656 | 2 | 4.95E-08 | 0.98 | 6.44  | -     | 1256.4  |
| AHQ-10-11, 6152           | R.GILSGTSDLLLTDFEAEVR.K                                                 | 2037.25656 | 2 | 3.08E-04 | 0.90 | 4.01  | -     | 701.9   |
| AHQ-10-6, 6175 - 6243     | R.GILSGTSDLLLTDFEAEVR.K                                                 | 2037.25656 | 2 | 6.58E-05 | 0.92 | 4.76  | -     | 683.0   |
| AHQ-10-4, 3561            | K.GWLWRDPSASPGDAGEQAIR.Q                                                | 1984.11876 | 3 | 1.28E-06 | 0.96 | 4.69  | -     | 1661.2  |
| AHQ-10-4, 3568            | K.GWLWRDPSASPGDAGEQAIR.Q                                                | 1984.11876 | 2 | 1.88E-04 | 0.87 | 4.14  | -     | 577.1   |
| AHQ-10-4, 2315            | K.IAELCDDPKER.D                                                         | 1347.47690 | 2 | 7.05E-06 | 0.69 | 2.94  | -     | 594.7   |
| AHQ-10-10, 3098           | R.IPTISTQLK.I                                                           | 1001.20202 | 2 | 1.91E-05 | 0.86 | 2.62  | -     | 1045.6  |
| AHQ-10-6, 4091 - 4169     | K.KIDAAQNWLADPNNGPEGEQIR.G                                              | 2509.67332 | 3 | 3.05E-06 | 0.94 | 5.33  | -     | 1117.6  |
| AHQ-10-5, 4171 - 4233     | K.KIDAAQNWLADPNNGPEGEQIR.G                                              | 2509.67332 | 3 | 1.44E-07 | 0.95 | 5.58  | -     | 1017.5  |
| AHQ-10-5, 2313            | R.LANVM*MM*GPYR.Q                                                       | 1184.41440 | 2 | 1.47E-04 | 0.89 | 3.59  | -     | 809.2   |
| AHQ-10-4, 3459            | R.LANVM*MM*GPYR.Q                                                       | 1152.41560 | 2 | 5.27E-05 | 0.94 | 3.55  | -     | 1098.7  |
| AHQ-10-5, 2963            | R.LANVM*MM*GPYR.Q                                                       | 1168.41500 | 2 | 7.82E-06 | 0.59 | 2.76  | -     | 528.5   |
| AHQ-10-6, 2308            | R.LANVM*MM*GPYR.Q                                                       | 1184.41440 | 2 | 1.67E-04 | 0.90 | 3.49  | -     | 761.4   |
| AHQ-10-4, 4200 - 4265     | K.LLVAATAPPDAPNREEVFDER.A                                               | 2382.61458 | 3 | 1.09E-06 | 0.83 | 3.91  | -     | 616.9   |
| AHQ-10-6, 4083 - 4161     | K.LLVAATAPPDAPNREEVFDER.A                                               | 2382.61458 | 3 | 1.70E-05 | 0.73 | 3.36  | -     | 688.1   |
| AHQ-10-4, 4112 - 4171     | K.LLVAATAPPDAPNREEVFDER.A                                               | 2382.61458 | 3 | 6.84E-08 | 0.84 | 3.77  | -     | 743.1   |
| AHQ-10-4, 3655            | K.LVQAAQM*LQSDPYSVPAR.D                                                 | 1991.25773 | 2 | 5.70E-04 | 0.87 | 3.47  | -     | 825.1   |
| AHQ-10-4, 3661 - 3667     | K.LVQAAQM*LQSDPYSVPAR.D                                                 | 1991.25773 | 3 | 1.38E-06 | 0.98 | 5.40  | -     | 2820.3  |
| AHQ-10-4, 2944            | K.M*LGQM*TDQVADLR.A                                                     | 1510.71935 | 2 | 2.39E-06 | 0.93 | 3.41  | -     | 1569.7  |
| AHQ-10-6, 3639            | K.M*LGQM*TDQVADLR.A                                                     | 1494.71995 | 2 | 2.02E-05 | 0.92 | 3.49  | -     | 1323.4  |
| AHQ-10-5, 3692 - 3704     | K.M*LGQM*TDQVADLR.A                                                     | 1494.71995 | 2 | 1.76E-05 | 0.97 | 4.09  | -     | 2198.1  |
| AHQ-10-4, 3717            | K.M*LGQM*TDQVADLR.A                                                     | 1494.71995 | 2 | 3.15E-04 | 0.90 | 3.48  | -     | 1069.2  |
| AHQ-10-5, 2939            | K.M*LGQM*TDQVADLR.A                                                     | 1510.71935 | 2 | 6.29E-06 | 0.95 | 3.36  | -     | 1784.5  |
| AHQ-10-7, 3632            | K.M*LGQM*TDQVADLR.A                                                     | 1494.71995 | 2 | 4.01E-05 | 0.65 | 2.71  | -     | 833.1   |
| AHQ-10-4, 3311            | K.M*LGQM*TDQVADLR.A                                                     | 1494.71995 | 2 | 4.15E-06 | 0.91 | 3.56  | -     | 1181.6  |
| AHQ-10-5, 3245 - 3255     | K.M*SAEINIEIR.V                                                         | 1192.36823 | 2 | 9.88E-07 | 0.91 | 3.03  | -     | 1044.7  |
| AHQ-10-6, 3213            | K.M*SAEINIEIR.V                                                         | 1192.36823 | 2 | 3.03E-06 | 0.83 | 2.54  | -     | 896.7   |
| AHQ-10-6, 3115            | K.M*GLVDEAIDTK.S                                                        | 1309.46876 | 2 | 9.10E-05 | 0.90 | 3.16  | -     | 1233.8  |
| AHQ-10-4, 3563 - 3567     | K.M*GLVDEAIDTK.S                                                        | 1293.46936 | 2 | 7.20E-08 | 0.97 | 4.30  | -     | 1666.3  |
| AHQ-10-4, 3145            | K.M*GLVDEAIDTK.S                                                        | 1309.46876 | 2 | 2.32E-07 | 0.88 | 2.92  | -     | 971.3   |
| AHQ-10-4, 3012            | K.NQWIDNVEK.M                                                           | 1146.23464 | 1 | 5.07E-04 | 0.26 | 2.00  | -     | 292.1   |
| AHQ-10-5, 2965            | K.QVATALQNLQTK.T                                                        | 1315.50112 | 2 | 2.04E-06 | 0.91 | 3.31  | -     | 776.2   |
| AHQ-10-4, 2908 - 2972     | K.QVATALQNLQTK.T                                                        | 1315.50112 | 2 | 5.11E-05 | 0.86 | 3.69  | -     | 528.9   |
| AHQ-10-7, 2934            | K.QVATALQNLQTK.T                                                        | 1315.50112 | 2 | 6.53E-04 | 0.55 | 2.77  | -     | 365.3   |
| AHQ-10-4, 2991            | K.SFLDSGYR.I                                                            | 945.01074  | 2 | 1.72E-04 | 0.78 | 2.71  | -     | 607.5   |
| AHQ-10-4, 3420 - 3489     | R.SLGEISALTSK.L                                                         | 1106.25186 | 2 | 3.89E-08 | 0.95 | 3.96  | -     | 1060.6  |
| AHQ-10-7, 3412            | R.SLGEISALTSK.L                                                         | 1106.25186 | 2 | 1.01E-05 | 0.88 | 3.47  | -     | 787.5   |
| AHQ-10-8, 3349 - 3370     | K.SLLDASEEAIK.D                                                         | 1304.47187 | 2 | 2.87E-04 | 0.82 | 3.00  | -     | 996.2   |
| AHQ-10-5, 3351 - 3411     | K.SLLDASEEAIK.D                                                         | 1304.47187 | 2 | 1.25E-06 | 0.77 | 2.83  | -     | 690.6   |
| AHQ-10-3, 2515            | K.STVEGIAQSVK.T                                                         | 1119.25064 | 2 | 5.00E-05 | 0.89 | 3.12  | -     | 879.6   |
| AHQ-10-5, 6219 - 6283     | R.TNISDEESEQATEM*LVHNAQNLMSQVK.E                                        | 3064.30957 | 3 | 4.95E-05 | 0.43 | 3.04  | -     | 467.0   |
| AHQ-10-4, 6263            | R.TNISDEESEQATEM*LVHNAQNLMSQVK.E                                        | 3064.30957 | 3 | 8.76E-04 | 0.78 | 3.88  | -     | 575.6   |
| AHQ-10-4, 5636 - 5691     | R.TNISDEESEQATEM*LVHNAQNLMSQVK.E                                        | 3064.30957 | 3 | 2.15E-05 | 0.72 | 4.34  | -     | 537.3   |
| AHQ-10-5, 3308            | R.TNLLQVCER.I                                                           | 1134.28859 | 2 | 1.29E-04 | 0.84 | 2.80  | -     | 904.5   |
| AHQ-10-4, 4740            | K.VAM*ANIOPQM*LVAGATSIAR.R                                              | 2075.44278 | 3 | 1.79E-04 | 0.97 | 5.40  | -     | 2210.9  |
| AHQ-10-4, 4732            | K.VAM*ANIOPQM*LVAGATSIAR.R                                              | 2075.44278 | 2 | 2.04E-07 | 0.85 | 4.24  | -     | 482.8   |
| AHQ-10-6, 5020            | K.VAM*ANIOPQM*LVAGATSIAR.R                                              | 2059.44338 | 2 | 4.96E-04 | 0.82 | 3.88  | -     | 604.3   |
| AHQ-10-4, 5145            | K.VAM*ANIOPQM*LVAGATSIAR.R                                              | 2059.44338 | 3 | 1.54E-04 | 0.91 | 4.29  | -     | 1997.7  |
| AHQ-10-5, 4720            | K.VAM*ANIOPQM*LVAGATSIAR.R                                              | 2075.44278 | 3 | 2.49E-04 | 0.85 | 3.51  | -     | 1208.3  |
| AHQ-10-4, 4839            | R.VDQLTAQLADLAAR.G                                                      | 1485.66778 | 2 | 3.97E-08 | 0.98 | 4.28  | -     | 3396.1  |
| AHQ-10-6, 4732 - 4735     | R.VDQLTAQLADLAAR.G                                                      | 1485.66778 | 2 | 2.07E-07 | 0.97 | 4.99  | -     | 1890.2  |
| AHQ-10-5, 4819 - 4820     | R.VDQLTAQLADLAAR.G                                                      | 1485.66778 | 2 | 6.62E-08 | 0.99 | 5.66  | -     | 3520.4  |
| AHQ-10-4, 3256            | R.VGKQTTEDQILK.R                                                        | 1689.88910 | 2 | 2.86E-04 | 0.87 | 3.35  | -     | 1056.4  |
| AHQ-10-5, 5101 - 5155     | R.VLQTSWDEDAWASK.D                                                      | 1749.90156 | 2 | 9.06E-08 | 0.95 | 4.53  | -     | 971.7   |
| AHQ-10-4, 5073            | R.VLQTSWDEDAWASK.D                                                      | 1749.90156 | 2 | 1.28E-05 | 0.92 | 3.42  | -     | 1072.7  |
| AHQ-10-4, 5179            | R.VLQTSWDEDAWASK.D                                                      | 1749.90156 | 2 | 6.14E-07 | 0.96 | 4.39  | -     | 1517.1  |
| AHQ-10-3, 5114            | R.VLQTSWDEDAWASK.D                                                      | 1749.90156 | 2 | 7.30E-06 | 0.69 | 2.65  | -     | 618.7   |
| AHQ-10-6, 5055 - 5056     | R.VLQTSWDEDAWASK.D                                                      | 1749.90156 | 2 | 5.16E-07 | 0.96 | 4.57  | -     | 1255.0  |
| AHQ-10-7, 5056 - 5130     | R.VLQTSWDEDAWASK.D                                                      | 1749.90156 | 2 | 2.12E-04 | 0.91 | 3.75  | -     | 973.3   |
| AHQ-10-5, 2884 - 2929     | R.WIDNPTVDDR.G                                                          | 1231.29640 | 2 | 1.01E-04 | 0.94 | 3.58  | -     | 1491.6  |
| AHQ-10-6, 2872 - 2879     | R.WIDNPTVDDR.G                                                          | 1231.29640 | 2 | 4.93E-04 | 0.94 | 3.66  | -     | 1275.5  |
| AHQ-10-4, 2907 - 2931     | R.WIDNPTVDDR.G                                                          | 1231.29640 | 2 | 4.02E-06 | 0.93 | 4.05  | -     | 1042.9  |
| AHQ-10-7, 2881            | R.WIDNPTVDDR.G                                                          | 1231.29640 | 2 | 1.06E-04 | 0.90 | 3.14  | -     | 954.5   |
| AHQ-10-3, 2942            | R.WIDNPTVDDR.G                                                          | 1231.29640 | 2 | 1.19E-04 | 0.89 | 3.24  | -     | 876.1   |
| gi4502549[ref]NP_001734.1 | calmodulin 2 (phosphorylase kinase, delta); phosphorylase kinase delta  |            |   | 1.51E-11 | 1.85 | 30.22 | 30.90 | 16837.5 |
| AHQ-10-12, 3542 - 3596    | K.DTDEEIEIRAFR.V                                                        | 1597.62234 | 2 | 1.43E-06 | 0.42 | 2.75  | -     | 299.0   |
| AHQ-10-12, 4084 - 4149    | K.EAFSLFDKGGDGTITTK.E                                                   | 1845.98441 | 3 | 5.70E-05 | 0.87 | 3.82  | -     | 884.0   |
| AHQ-10-12, 4077 - 4132    | K.EAFSLFDKGGDGTITTK.E                                                   | 1845.98441 | 2 | 1.59E-04 | 0.68 | 3.14  | -     | 406.0   |
| AHQ-10-11, 4023 - 4058    | K.EAFSLFDKGGDGTITTK.E                                                   | 1845.98441 | 2 | 5.08E-05 | 0.51 | 2.62  | -     | 475.0   |
| AHQ-10-12, 3776 - 3832    | R.VFDKDGNGYISAELR.H                                                     | 1755.90933 | 2 | 1.51E-11 | 0.93 | 4.35  | -     | 857.8   |
| AHQ-10-12, 3649           | R.VFDKDGNGYISAELR.H                                                     | 1755.90933 | 2 | 1.79E-06 | 0.77 | 2.70  | -     | 749.2   |
| gi4503971[ref]NP_001484.1 | GDP dissociation inhibitor 1; mental retardation, X-linked 41; mental r |            |   | 1.90E-11 | 2.68 | 30.26 | 14.50 | 50582.4 |
| AHQ-10-7, 4982 - 5009     | R.NPYVGGSSITPLEELYK.R                                                   | 2148.31110 | 2 | 1.48E-07 | 0.88 | 4.26  | -     | 636.1   |
| AHQ-10-7, 4070 - 4136     | R.TDDYLDOPCLLETVNR.I                                                    | 1840.94632 | 2 | 9.56E-08 | 0.86 | 3.86  | -     | 518.6   |
| AHQ-10-7, 6244 - 6246     | K.YIAIASTTVETDPEKEVEPALELLEPIDQK.F                                      | 3444.82460 | 3 | 1.90E-11 | 0.94 | 5.15  | -     | 771.8   |



|                             |                                                                         |            |   |          |      |       |       |         |
|-----------------------------|-------------------------------------------------------------------------|------------|---|----------|------|-------|-------|---------|
| AHQ-10-14-, 2776 - 2832     | R.HITSLEVIK.A                                                           | 1040.23825 | 2 | 4.25E-04 | 0.83 | 3.11  | -     | 524.0   |
| AHQ-10-14-, 2660 - 2720     | R.HITSLEVIK.A                                                           | 1040.23825 | 2 | 2.63E-08 | 0.94 | 3.95  | -     | 912.9   |
| AHQ-10-13, 3228 - 3275      | R.HITSLEVIK.A                                                           | 1040.23825 | 2 | 3.89E-05 | 0.65 | 2.54  | -     | 578.9   |
| AHQ-10-13, 5077             | K.ICLDLQAPLYK.K                                                         | 1335.59400 | 2 | 7.65E-06 | 0.94 | 3.60  | -     | 1455.9  |
| AHQ-10-14-, 4716 - 4718     | K.ICLDLQAPLYK.K                                                         | 1335.59400 | 2 | 9.39E-07 | 0.98 | 4.96  | -     | 2262.2  |
| AHQ-10-14, 5428             | K.ICLDLQAPLYK.K                                                         | 1335.59400 | 2 | 9.62E-08 | 0.95 | 3.55  | -     | 1940.8  |
| AHQ-10-13-, 4724            | K.ICLDLQAPLYK.K                                                         | 1335.59400 | 2 | 6.25E-06 | 0.96 | 4.05  | -     | 1666.2  |
| AHQ-10-9, 4491              | K.ICLDLQAPLYK.K                                                         | 1335.59400 | 2 | 9.31E-04 | 0.94 | 3.68  | -     | 1468.6  |
| AHQ-10-14-, 4729            | K.ICLDLQAPLYK.K                                                         | 1335.59400 | 1 | 2.24E-07 | 0.70 | 3.21  | -     | 484.2   |
| AHQ-10-14-, 4262 - 4328     | K.ICLDLQAPLYK.I                                                         | 1463.76691 | 2 | 3.05E-04 | 0.84 | 3.15  | -     | 1258.2  |
| AHQ-10-14-, 4396 - 4472     | R.KICLDLQAPLYK.K                                                        | 1463.76691 | 2 | 8.43E-05 | 0.97 | 4.89  | -     | 1425.9  |
| AHQ-10-14-, 4401 - 4428     | R.KICLDLQAPLYK.K                                                        | 1463.76691 | 3 | 3.44E-06 | 0.91 | 3.77  | -     | 1542.5  |
| AHQ-10-13, 4693 - 4759      | R.KICLDLQAPLYK.K                                                        | 1463.76691 | 2 | 6.66E-04 | 0.91 | 4.34  | -     | 539.6   |
| AHQ-10-14-, 3992 - 4005     | R.KICLDLQAPLYK.I                                                        | 1591.93982 | 3 | 7.41E-07 | 0.91 | 4.56  | -     | 1002.8  |
| AHQ-10-14-, 3998            | R.KICLDLQAPLYK.I                                                        | 1591.93982 | 2 | 8.70E-05 | 0.93 | 4.06  | -     | 1233.6  |
| gi 4503689 ref NP_000499.1  | fibrinogen, alpha chain isoform alpha-E preproprotein [Homo sapiens] [M |            |   |          |      |       |       |         |
| AHQ-10-7, 5329              | K.DSDWPFCSDEDWNYK.C                                                     | 1965.98609 | 2 | 1.27E-05 | 0.93 | 3.86  | -     | 705.6   |
| AHQ-10-6, 4731 - 4795       | K.DSHSLTTNIM*EILR.G                                                     | 1646.84779 | 2 | 5.88E-04 | 0.91 | 3.74  | -     | 1034.6  |
| AHQ-10-5, 2692              | R.EVDLKDYEQQK.Q                                                         | 1510.58460 | 2 | 2.79E-07 | 0.61 | 2.58  | -     | 607.1   |
| AHQ-10-7, 2652              | R.EVDLKDYEQQK.Q                                                         | 1510.58460 | 2 | 7.24E-05 | 0.71 | 2.95  | -     | 498.7   |
| AHQ-10-8, 2665              | R.EVDLKDYEQQK.Q                                                         | 1510.58460 | 2 | 2.32E-08 | 0.91 | 3.53  | -     | 930.7   |
| AHQ-10-9, 2557              | R.EVDLKDYEQQK.Q                                                         | 1510.58460 | 2 | 1.10E-04 | 0.54 | 2.61  | -     | 504.9   |
| AHQ-10-6, 2651              | R.EVDLKDYEQQK.Q                                                         | 1510.58460 | 2 | 4.86E-06 | 0.84 | 3.21  | -     | 697.5   |
| AHQ-10-10, 2642 - 2704      | R.EVDLKDYEQQK.Q                                                         | 1510.58460 | 2 | 2.83E-07 | 0.84 | 3.19  | -     | 648.0   |
| AHQ-10-6, 1888 - 1924       | R.GGTSYGTGSETESPR.N                                                     | 1573.55765 | 2 | 4.72E-06 | 0.55 | 2.70  | -     | 481.9   |
| AHQ-10-8, 1897              | R.GGTSYGTGSETESPR.N                                                     | 1573.55765 | 2 | 1.35E-05 | 0.66 | 2.94  | -     | 485.6   |
| AHQ-10-6, 3895 - 3897       | K.GLIDEVNDQFTNR.I                                                       | 1521.61384 | 2 | 1.89E-05 | 0.75 | 3.19  | -     | 537.5   |
| AHQ-10-9, 4305 - 4365       | K.GLIDEVNDQFTNR.I                                                       | 1521.61384 | 2 | 2.48E-04 | 0.91 | 3.42  | -     | 1269.7  |
| AHQ-10-9, 4175 - 4247       | K.GLIDEVNDQFTNR.I                                                       | 1521.61384 | 2 | 1.48E-06 | 0.91 | 3.59  | -     | 963.2   |
| AHQ-10-9, 3692 - 3748       | K.GLIDEVNDQFTNR.I                                                       | 1521.61384 | 2 | 4.61E-05 | 0.87 | 3.63  | -     | 561.8   |
| AHQ-10-10, 4338             | K.GLIDEVNDQFTNR.I                                                       | 1521.61384 | 2 | 8.36E-04 | 0.78 | 3.39  | -     | 627.3   |
| AHQ-10-11, 4384 - 4387      | K.GLIDEVNDQFTNR.I                                                       | 1521.61384 | 2 | 6.30E-06 | 0.85 | 3.64  | -     | 629.0   |
| AHQ-10-8, 4481              | K.GLIDEVNDQFTNR.I                                                       | 1521.61384 | 2 | 4.07E-07 | 0.94 | 4.17  | -     | 1080.6  |
| AHQ-10-7, 4420 - 4421       | K.GLIDEVNDQFTNR.I                                                       | 1521.61384 | 2 | 3.23E-07 | 0.96 | 4.68  | -     | 1144.1  |
| AHQ-10-13, 4828             | K.GLIDEVNDQFTNR.I                                                       | 1521.61384 | 2 | 5.43E-05 | 0.89 | 3.30  | -     | 970.9   |
| AHQ-10-3, 4427 - 4505       | K.GLIDEVNDQFTNR.I                                                       | 1521.61384 | 2 | 5.33E-05 | 0.88 | 3.40  | -     | 988.5   |
| AHQ-10-14-, 4460 - 4469     | K.GLIDEVNDQFTNR.I                                                       | 1521.61384 | 2 | 6.42E-08 | 0.94 | 4.23  | -     | 1054.3  |
| AHQ-10-1, 4642              | K.GLIDEVNDQFTNR.I                                                       | 1521.61384 | 2 | 4.40E-06 | 0.81 | 2.83  | -     | 826.4   |
| AHQ-10-6, 3179              | R.HPDEAAFFDTASTGK.T                                                     | 1594.66329 | 2 | 7.45E-05 | 0.83 | 3.38  | -     | 543.9   |
| AHQ-10-7, 3166              | R.HPDEAAFFDTASTGK.T                                                     | 1594.66329 | 2 | 4.33E-05 | 0.63 | 2.65  | -     | 369.0   |
| AHQ-10-6, 2709 - 2772       | R.HRHPDEAAFFDTASTGK.T                                                   | 1887.98954 | 3 | 8.16E-05 | 0.97 | 4.56  | -     | 2086.8  |
| AHQ-10-9, 2632              | R.HRHPDEAAFFDTASTGK.T                                                   | 1887.98954 | 3 | 7.83E-05 | 0.83 | 3.22  | -     | 1134.9  |
| AHQ-10-7, 3912              | K.MKPPVLDVPGNFK.S                                                       | 1442.75114 | 2 | 9.13E-06 | 0.62 | 2.53  | -     | 405.4   |
| AHQ-10-7, 2238              | R.NPSSAGSWNSGSSGPGSTGNR.N                                               | 1964.94443 | 2 | 4.43E-08 | 0.90 | 4.04  | -     | 776.3   |
| AHQ-10-6, 2231              | R.NPSSAGSWNSGSSGPGSTGNR.N                                               | 1964.94443 | 2 | 4.31E-09 | 0.96 | 4.50  | -     | 1391.1  |
| AHQ-10-8, 2255              | R.NPSSAGSWNSGSSGPGSTGNR.N                                               | 1964.94443 | 2 | 9.47E-11 | 0.94 | 4.36  | -     | 1100.7  |
| AHQ-10-6, 2867              | K.NSLFEYQK.N                                                            | 1029.12765 | 2 | 7.69E-04 | 0.67 | 2.73  | -     | 576.1   |
| AHQ-10-6, 2291              | R.PGSTGTWNPSSER.G                                                       | 1433.46515 | 2 | 4.13E-06 | 0.65 | 2.89  | -     | 454.6   |
| AHQ-10-7, 4433 - 4504       | R.PNNPDWGTFFEEVSGNVSPGTR.R                                              | 2261.34962 | 2 | 2.45E-04 | 0.79 | 3.84  | -     | 386.9   |
| AHQ-10-12, 6077 - 6120      | K.TFPGFFSPM*LGEFVSETESR.G                                               | 2282.51372 | 2 | 1.57E-04 | 0.86 | 3.78  | -     | 301.0   |
| AHQ-10-11, 6094             | K.TFPGFFSPM*LGEFVSETESR.G                                               | 2282.51372 | 2 | 3.97E-04 | 0.61 | 2.88  | -     | 262.2   |
| AHQ-10-7, 6385              | K.TFPGFFSPM*LGEFVSETESR.G                                               | 2266.51432 | 2 | 7.51E-05 | 0.81 | 3.60  | -     | 337.1   |
| AHQ-10-7, 6236              | K.TFPGFFSPM*LGEFVSETESR.G                                               | 2282.51372 | 2 | 1.41E-05 | 0.56 | 2.90  | -     | 190.5   |
| AHQ-10-9, 2399              | K.VQHIQLLQK.N                                                           | 1107.33106 | 2 | 4.06E-04 | 0.82 | 2.70  | -     | 764.6   |
| AHQ-10-8, 2459              | K.VQHIQLLQK.N                                                           | 1107.33106 | 2 | 2.25E-04 | 0.81 | 2.70  | -     | 823.4   |
| AHQ-10-7, 2484              | K.VQHIQLLQK.N                                                           | 1107.33106 | 1 | 4.51E-04 | 0.44 | 2.19  | -     | 610.7   |
| AHQ-10-9, 2401              | K.VQHIQLLQK.N                                                           | 1107.33106 | 1 | 2.52E-04 | 0.38 | 2.47  | -     | 529.5   |
| gi 20070158 ref NP_003567.2 | serine/threonine kinase 24 (STE20 homolog, yeast); STE20-like kinase 3  |            |   |          |      |       |       |         |
| AHQ-10-7, 3754              | K.SQACGGNLSGIEELR.G                                                     | 1592.71366 | 2 | 9.66E-11 | 0.88 | 2.15  | 3.40  | 49307.6 |
| gi 5902128 ref NP_008880.1  | syntaxin binding protein 2; Hunc18b [Homo sapiens]                      |            |   |          |      |       |       |         |
| AHQ-10-6, 6319              | R.AADPVSLHLELTFQAM*AYDLLIEQDQTYR.Y                                      | 3453.81998 | 3 | 2.04E-05 | 0.85 | 4.06  | -     | 667.7   |
| AHQ-10-6, 5991              | R.EPIPSLEAIYLLSPTK.S                                                    | 1901.18939 | 2 | 3.03E-07 | 0.77 | 2.87  | -     | 557.4   |
| AHQ-10-6, 3355              | R.KGPEDTAQLAHAVLAK.L                                                    | 1649.87303 | 3 | 2.20E-07 | 0.95 | 4.80  | -     | 1641.7  |
| AHQ-10-6, 6256              | K.M*SDILAEGITIVEDINKR.R                                                 | 2034.32082 | 3 | 9.86E-11 | 0.84 | 3.43  | -     | 855.4   |
| AHQ-10-6, 3244 - 3248       | R.NLEQLGGTQVTPGSSGTSSR.L                                                | 1933.02693 | 2 | 6.15E-05 | 0.96 | 5.23  | -     | 956.0   |
| AHQ-10-6, 5149              | R.NLWPFVSDPAPTASSQAASAR.F                                               | 2273.48981 | 2 | 1.78E-04 | 0.65 | 3.10  | -     | 306.5   |
| AHQ-10-6, 5592              | R.REPIPSLEAIYLLSPTK.S                                                   | 2057.37574 | 2 | 7.51E-09 | 0.97 | 5.54  | -     | 1415.6  |
| AHQ-10-6, 5585              | R.REPIPSLEAIYLLSPTK.S                                                   | 2057.37574 | 3 | 8.93E-07 | 0.75 | 3.46  | -     | 852.8   |
| gi 5031973 ref NP_005733.1  | protein disulfide isomerase-related protein [Homo sapiens]              |            |   |          |      |       |       |         |
| AHQ-10-7, 6280              | R.DGELPVEDDIDSLDVELDDLKDEL                                              | 2759.86565 | 2 | 1.01E-10 | 4.12 | 50.24 | 16.10 | 4812.0  |
| AHQ-10-7, 3908              | R.GSTAPVGGGAFFTIVER.E                                                   | 1616.79990 | 2 | 2.41E-05 | 0.70 | 2.81  | -     | 904.8   |
| AHQ-10-7, 4580              | K.LAAVDATVNVQLASR.Y                                                     | 1528.73579 | 2 | 4.72E-07 | 0.96 | 4.22  | -     | 1536.3  |
| AHQ-10-7, 4222              | K.NLEPEWAAAASEVK.E                                                      | 1515.64921 | 2 | 8.89E-05 | 0.59 | 2.84  | -     | 280.4   |
| AHQ-10-7, 5724              | R.TGEAIVDAALSALR.Q                                                      | 1387.56411 | 2 | 5.46E-05 | 0.92 | 2.59  | -     | 1990.9  |
| gi 5031635 ref NP_005498.1  | cofilin 1 (non-muscle) [Homo sapiens]                                   |            |   |          |      |       |       |         |
| AHQ-10-12, 3572 - 3597      | K.AVLFCLSEDKK.N                                                         | 1311.52930 | 2 | 4.79E-04 | 0.78 | 3.08  | -     | 730.1   |
| AHQ-10-13-, 5320 - 5324     | K.EILVGDVGQTVDDPYATFVK.M                                                | 2167.40069 | 2 | 1.08E-10 | 0.97 | 5.65  | -     | 1115.3  |
| AHQ-10-11, 5266             | K.EILVGDVGQTVDDPYATFVK.M                                                | 2167.40069 | 2 | 5.71E-04 | 0.61 | 2.71  | -     | 479.2   |
| AHQ-10-12, 5241 - 5296      | K.EILVGDVGQTVDDPYATFVK.M                                                | 2167.40069 | 2 | 4.08E-09 | 0.97 | 5.58  | -     | 1363.5  |
| AHQ-10-14-, 5344            | K.EILVGDVGQTVDDPYATFVK.M                                                | 2167.40069 | 2 | 3.02E-07 | 0.96 | 4.78  | -     | 1242.3  |
| AHQ-10-12, 2640 - 2641      | K.HELQANCYEEVKDR.C                                                      | 1792.90812 | 3 | 5.69E-05 | 0.97 | 5.38  | -     | 1455.3  |
| AHQ-10-12, 3206             | K.KAVLFCLESDKK.N                                                        | 1439.70221 | 3 | 3.67E-05 | 0.91 | 3.66  | -     | 1212.7  |
| AHQ-10-11, 4255             | K.LGGSAVISLEGKPL                                                        | 1341.57848 | 2 | 6.82E-04 | 0.83 | 3.09  | -     | 838.1   |
| AHQ-10-12, 4296 - 4369      | K.LGGSAVISLEGKPL                                                        | 1341.57848 | 2 | 3.29E-08 | 0.97 | 4.94  | -     | 1568.2  |
| AHQ-10-14-, 4324 - 4332     | K.LGGSAVISLEGKPL                                                        | 1341.57848 | 2 | 2.51E-05 | 0.92 | 3.82  | -     | 1214.7  |
| AHQ-10-13-, 4329 - 4342     | K.LGGSAVISLEGKPL                                                        | 1341.57848 | 2 | 4.10E-05 | 0.95 | 4.49  | -     | 1138.0  |
| AHQ-10-12, 3305             | R.YALYDATYETK.E                                                         | 1338.44364 | 1 | 4.28E-05 | 0.70 | 2.96  | -     | 458.9   |
| AHQ-10-12, 3253 - 3312      | R.YALYDATYETK.E                                                         | 1338.44364 | 2 | 2.59E-07 | 0.97 | 4.52  | -     | 1304.9  |
| AHQ-10-13-, 3304            | R.YALYDATYETK.E                                                         | 1338.44364 | 2 | 1.43E-04 | 0.95 | 3.72  | -     | 1124.6  |
| AHQ-10-11, 3230             | R.YALYDATYETK.E                                                         | 1338.44364 | 2 | 1.09E-06 | 0.93 | 3.11  | -     | 1334.0  |
| gi 17921989 ref NP_005991.1 | tubulin, alpha 1; testis-specific alpha tubulin; tubulin alpha-1 chain  |            |   |          |      |       |       |         |
| AHQ-10-7, 4946 - 4952       | R.AVCM*LSNNTTAAIEAWAR.L                                                 | 1883.13932 | 2 | 2.82E-09 | 0.97 | 4.78  | -     | 1885.9  |
| AHQ-10-7, 5636              | R.AVCM*LSNNTTAAIEAWAR.L                                                 | 1867.13992 | 2 | 4.19E-09 | 0.92 | 3.79  | -     | 1049.3  |
| AHQ-10-14-, 5644            | R.AVCM*LSNNTTAAIEAWAR.L                                                 | 1867.13992 | 2 | 3.18E-04 | 0.83 | 3.35  | -     | 987.2   |
| AHQ-10-13-, 5629            | R.AVCM*LSNNTTAAIEAWAR.L                                                 | 1867.13992 | 2 | 8.44E-07 | 0.92 | 3.80  | -     | 1391.5  |
| AHQ-10-11, 4876             | R.AVCM*LSNNTTAAIEAWAR.L                                                 | 1883.13932 | 2 | 1.55E-06 | 0.92 | 3.62  | -     | 1147.9  |
| AHQ-10-13, 5833 - 5904      | R.AVFDLEPTVIDEIR.N                                                      | 1716.95615 | 2 | 2.85E-06 | 0.66 | 2.88  | -     | 744.9   |
| AHQ-10-7, 5653 - 5660       | R.AVFDLEPTVIDEIR.N                                                      | 1716.95615 | 2 | 4.09E-09 | 0.91 | 3.90  | -     | 1256.3  |
| AHQ-10-7, 5118              | K.AYHEQLSVAEITNACFEPANQMVK.C                                            | 2753.06070 | 3 | 6.73E-04 | 0.83 | 3.56  | -     | 707.4   |
| AHQ-10-7, 3345              | K.DVNAIAIAIK.T                                                          | 986.14745  | 1 | 3.16E-04 | 0.28 | 2.06  | -     | 547.1   |
| AHQ-10-7, 3444              | K.EIIDPVLDI                                                             | 1070.22122 | 2 | 2.72E-05 | 0.70 | 2.77  | -     | 478.7   |
| AHQ-10-8, 4918 - 4935       | R.IHFPLATYAPVISAIAEK.A                                                  | 1758.05310 | 2 | 3.51E-05 | 0.92 | 3.85  | -     | 656.6   |
| AHQ-10-14-, 4985            | R.IHFPLATYAPVISAIAEK.A                                                  | 1758.05310 | 2 | 4.02E-05 | 0.86 | 3.05  | -     | 726.1   |
| AHQ-10-10, 4744 - 4823      | R.IHFPLATYAPVISAIAEK.A                                                  | 1758.05310 | 2 | 1.25E-04 | 0.79 | 3.42  | -     | 425.2   |
| AHQ-10-11, 6127             | R.LISQIVSSITASLR.F                                                      | 1488.75471 | 2 | 1.58E-05 | 0.89 | 3.04  | -     | 1043.0  |
| AHQ-10-7, 5558              | R.LISQIVSSITASLR.F                                                      | 1488.75471 | 2 | 4.93E-04 | 0.79 | 2.74  | -     | 910.4   |
| AHQ-10-8, 6303              | R.LISQIVSSITASLR.F                                                      | 1488.75471 | 2 | 1.16E-06 | 0.95 | 4.14  | -     | 974.4   |

|                             |                                                                        |            |   |          |      |       |       |          |
|-----------------------------|------------------------------------------------------------------------|------------|---|----------|------|-------|-------|----------|
| AHQ-10-7, 6258              | R.LISQIVSSITASLR.F                                                     | 1488.75471 | 2 | 2.18E-07 | 0.94 | 3.84  | -     | 1179.3   |
| AHQ-10-13, 6185             | R.LISQIVSSITASLR.F                                                     | 1488.75471 | 2 | 2.57E-08 | 0.91 | 3.62  | -     | 938.5    |
| AHQ-10-14, 6224             | R.LISQIVSSITASLR.F                                                     | 1488.75471 | 2 | 3.26E-05 | 0.95 | 3.72  | -     | 1318.8   |
| AHQ-10-8, 3421 - 3422       | R.NLDIERPTYTNLNR.L                                                     | 1719.88022 | 2 | 6.46E-07 | 0.45 | 2.83  | -     | 303.4    |
| AHQ-10-13, 3501 - 3512      | R.NLDIERPTYTNLNR.L                                                     | 1719.88022 | 2 | 4.56E-05 | 0.75 | 3.26  | -     | 498.4    |
| AHQ-10-14, 5388             | R.SIQFVWCPTGFK.V                                                       | 1586.79232 | 2 | 6.17E-04 | 0.73 | 2.71  | -     | 699.4    |
| AHQ-10-11, 5290 - 5298      | R.SIQFVWCPTGFK.V                                                       | 1586.79232 | 2 | 9.16E-07 | 0.88 | 3.66  | -     | 771.9    |
| AHQ-10-7, 5380              | R.SIQFVWCPTGFK.V                                                       | 1586.79232 | 2 | 2.47E-04 | 0.73 | 3.01  | -     | 632.6    |
| AHQ-10-13, 5385             | R.SIQFVWCPTGFK.V                                                       | 1586.79232 | 2 | 5.84E-07 | 0.85 | 3.33  | -     | 845.7    |
| AHQ-10-13, 5619             | K.TIGGGDDSFSTFFCETGAGK.H                                               | 2070.17889 | 2 | 1.08E-10 | 0.57 | 2.95  | -     | 360.6    |
| AHQ-10-12, 5274             | K.TIGGGDDSFSTFFCETGAGK.H                                               | 2070.17889 | 2 | 3.38E-06 | 0.31 | 2.72  | -     | 287.6    |
| AHQ-10-14, 5256 - 5312      | K.TIGGGDDSFSTFFCETGAGK.H                                               | 2070.17889 | 2 | 5.24E-07 | 0.83 | 3.45  | -     | 555.0    |
| AHQ-10-13, 5312             | K.TIGGGDDSFSTFFCETGAGK.H                                               | 2070.17889 | 2 | 8.69E-08 | 0.89 | 3.99  | -     | 711.7    |
| AHQ-10-11, 5215 - 5218      | K.TIGGGDDSFSTFFCETGAGK.H                                               | 2070.17889 | 2 | 3.80E-10 | 0.87 | 4.04  | -     | 583.9    |
| AHQ-10-7, 5260 - 5316       | K.TIGGGDDSFSTFFCETGAGK.H                                               | 2070.17889 | 2 | 1.15E-09 | 0.90 | 4.05  | -     | 633.3    |
| AHQ-10-7, 4237              | K.VGINYQPPTVPPGGDLAK.V                                                 | 1826.08584 | 3 | 1.58E-04 | 0.81 | 4.00  | -     | 678.6    |
| AHQ-10-13, 4253 - 4273      | K.VGINYQPPTVPPGGDLAK.V                                                 | 1826.08584 | 2 | 1.95E-04 | 0.74 | 2.95  | -     | 408.8    |
| AHQ-10-12, 4210 - 4280      | K.VGINYQPPTVPPGGDLAK.V                                                 | 1826.08584 | 2 | 3.59E-07 | 0.91 | 4.13  | -     | 520.3    |
| AHQ-10-6, 4259              | K.VGINYQPPTVPPGGDLAK.V                                                 | 1826.08584 | 2 | 1.25E-05 | 0.73 | 3.13  | -     | 352.1    |
| AHQ-10-7, 3832              | K.YM*ACCLLYR.G                                                         | 1268.50804 | 2 | 5.98E-04 | 0.84 | 2.63  | -     | 704.2    |
| AHQ-10-7, 4257              | K.YM*ACCLLYR.G                                                         | 1252.50864 | 2 | 4.38E-05 | 0.92 | 2.96  | -     | 951.7    |
| gi 20535366 ref XP_053177.4 | similar to Tubulin alpha-3/alpha-7 chain (Alpha-tubulin 3/7) [Homo sap |            |   | 1.22E-10 | 2.65 | 30.26 | 9.60  | 49858.2  |
| AHQ-10-7, 3081              | K.DVNAAIATIK.T                                                         | 1016.17355 | 2 | 6.96E-05 | 0.90 | 3.65  | -     | 954.9    |
| AHQ-10-7, 3086              | K.DVNAAIATIK.T                                                         | 1016.17355 | 1 | 3.77E-04 | 0.28 | 2.32  | -     | 231.3    |
| AHQ-10-13, 3162 - 3165      | K.DVNAAIATIK.T                                                         | 1016.17355 | 2 | 4.06E-04 | 0.86 | 3.75  | -     | 763.7    |
| AHQ-10-11, 3102             | K.DVNAAIATIK.T                                                         | 1016.17355 | 2 | 4.65E-04 | 0.82 | 3.22  | -     | 813.5    |
| AHQ-10-7, 5086              | K.TIGGGDDSFSTFFSETGAGK.H                                               | 2009.07549 | 2 | 2.07E-08 | 0.88 | 4.07  | -     | 563.1    |
| AHQ-10-7, 4860 - 4917       | K.TIGGGDDSFSTFFSETGAGK.H                                               | 2009.07549 | 2 | 1.23E-07 | 0.89 | 3.41  | -     | 936.0    |
| AHQ-10-11, 4811 - 4880      | K.TIGGGDDSFSTFFSETGAGK.H                                               | 2009.07549 | 2 | 7.41E-05 | 0.69 | 3.22  | -     | 430.9    |
| AHQ-10-12, 4900             | K.TIGGGDDSFSTFFSETGAGK.H                                               | 2009.07549 | 2 | 5.48E-04 | 0.58 | 2.99  | -     | 397.0    |
| AHQ-10-13, 5268             | K.TIGGGDDSFSTFFSETGAGK.H                                               | 2009.07549 | 2 | 1.41E-05 | 0.82 | 3.60  | -     | 546.5    |
| AHQ-10-14, 5511 - 5579      | K.TIGGGDDSFSTFFSETGAGK.H                                               | 2009.07549 | 2 | 1.58E-07 | 0.74 | 3.45  | -     | 373.1    |
| AHQ-10-7, 4521              | K.TIGGGDDSFSTFFSETGAGK.H                                               | 2009.07549 | 2 | 1.29E-07 | 0.87 | 4.09  | -     | 507.3    |
| AHQ-10-13, 4569             | K.TIGGGDDSFSTFFSETGAGK.H                                               | 2009.07549 | 2 | 1.42E-04 | 0.75 | 3.33  | -     | 380.2    |
| AHQ-10-13, 4882 - 4941      | K.TIGGGDDSFSTFFSETGAGK.H                                               | 2009.07549 | 2 | 2.10E-07 | 0.69 | 3.21  | -     | 460.6    |
| AHQ-10-14, 5100             | K.TIGGGDDSFSTFFSETGAGK.H                                               | 2009.07549 | 2 | 1.22E-10 | 0.90 | 3.95  | -     | 722.0    |
| AHQ-10-14, 4554             | K.TIGGGDDSFSTFFSETGAGK.H                                               | 2009.07549 | 2 | 2.12E-10 | 0.89 | 4.36  | -     | 488.9    |
| AHQ-10-14, 4817 - 4890      | K.TIGGGDDSFSTFFSETGAGK.H                                               | 2009.07549 | 2 | 7.34E-07 | 0.89 | 4.00  | -     | 658.6    |
| AHQ-10-14, 4916 - 4948      | K.TIGGGDDSFSTFFSETGAGK.H                                               | 2009.07549 | 2 | 1.74E-10 | 0.96 | 5.20  | -     | 1000.5   |
| AHQ-10-14, 4953             | K.TIGGGDDSFSTFFSETGAGK.H                                               | 2009.07549 | 2 | 7.42E-04 | 0.74 | 3.35  | -     | 447.7    |
| AHQ-10-14, 5420 - 5492      | R.TIQFVWCPTGFK.V                                                       | 1600.81899 | 2 | 3.13E-04 | 0.49 | 2.62  | -     | 385.6    |
| AHQ-10-13, 5420             | R.TIQFVWCPTGFK.V                                                       | 1600.81899 | 2 | 1.08E-04 | 0.85 | 3.05  | -     | 845.9    |
| gi 29741246 ref XP_294070.1 | similar to Glyceraldehyde 3-phosphate dehydrogenase, liver (GAPDH) [Ho |            |   | 1.31E-10 | 2.84 | 30.27 | 11.80 | 35302.0  |
| AHQ-10-9, 5203 - 5205       | K.LVINGNPITIFQER.D                                                     | 1614.87029 | 2 | 1.66E-09 | 0.94 | 3.96  | -     | 1011.3   |
| AHQ-10-13, 5436             | K.LVINGNPITIFQER.D                                                     | 1614.87029 | 2 | 3.21E-06 | 0.92 | 3.45  | -     | 931.6    |
| AHQ-10-13, 5309 - 5376      | K.LVINGNPITIFQER.D                                                     | 1614.87029 | 2 | 1.31E-10 | 0.92 | 3.92  | -     | 912.9    |
| AHQ-10-11, 5192 - 5248      | K.LVINGNPITIFQER.D                                                     | 1614.87029 | 2 | 4.64E-04 | 0.81 | 2.86  | -     | 780.0    |
| AHQ-10-13, 5607 - 5664      | K.LVINGNPITIFQER.D                                                     | 1614.87029 | 2 | 4.79E-06 | 0.91 | 3.04  | -     | 1057.3   |
| AHQ-10-14, 5923             | K.LVINGNPITIFQER.D                                                     | 1614.87029 | 2 | 1.03E-04 | 0.58 | 2.51  | -     | 493.5    |
| AHQ-10-14, 5333             | K.LVINGNPITIFQER.D                                                     | 1614.87029 | 2 | 4.69E-08 | 0.89 | 3.30  | -     | 750.7    |
| AHQ-10-9, 5719 - 5783       | K.VLHDNFGIVKGLM*TTVHAITATQK.T                                          | 2612.04471 | 3 | 4.10E-04 | 0.97 | 5.40  | -     | 2071.1   |
| AHQ-10-9, 6057 - 6069       | K.VLHDNFGIVKGLM*TTVHAITATQK.T                                          | 2596.04531 | 3 | 3.71E-09 | 0.94 | 4.62  | -     | 1190.5   |
| gi 29568101 ref NP_006467.3 | ATP synthase, H+ transporting, mitochondrial F0 complex, subunit g, AT |            |   | 1.54E-10 | 0.97 | 10.27 | 14.60 | 11400.3  |
| AHQ-10-14, 3668             | K.TPALVNAAVTYSKPR.L                                                    | 1588.83283 | 3 | 1.54E-10 | 0.97 | 5.31  | -     | 2005.8   |
| gi 13124879 ref NP_002465.1 | smooth muscle myosin heavy chain 11 isoform SM1 [Homo sapiens]         |            |   | 1.69E-10 | 6.20 | 80.36 | 4.20  | 227336.7 |
| AHQ-10-5, 2763              | R.EDQSILCTGEGSAGK.T                                                    | 1553.63107 | 2 | 3.79E-04 | 0.70 | 2.87  | -     | 614.7    |
| AHQ-10-5, 2941              | K.FDQLLAEK.N                                                           | 1093.21165 | 2 | 1.87E-06 | 0.88 | 2.87  | -     | 1188.4   |
| AHQ-10-2, 3016              | K.FDQLLAEK.N                                                           | 1093.21165 | 2 | 3.87E-06 | 0.90 | 3.07  | -     | 1327.7   |
| AHQ-10-3, 2962              | K.FDQLLAEK.N                                                           | 1093.21165 | 2 | 3.16E-05 | 0.91 | 2.94  | -     | 1479.8   |
| AHQ-10-2, 2988 - 2992       | R.KFDQLLAEK.N                                                          | 1221.38456 | 1 | 8.73E-06 | 0.37 | 2.91  | -     | 510.1    |
| AHQ-10-2, 2984              | R.KFDQLLAEK.N                                                          | 1221.38456 | 3 | 9.01E-06 | 0.73 | 3.30  | -     | 792.3    |
| AHQ-10-6, 2827 - 2875       | R.KFDQLLAEK.N                                                          | 1221.38456 | 2 | 2.55E-05 | 0.86 | 3.29  | -     | 946.1    |
| AHQ-10-2, 5644              | K.LQLLNFHTM*FILEQEYQR.E                                                | 2468.77258 | 3 | 9.65E-04 | 0.90 | 3.62  | -     | 1479.5   |
| AHQ-10-2, 5054 - 5115       | K.LQLLNFHTM*FILEQEYQR.E                                                | 2484.77198 | 3 | 6.79E-09 | 0.98 | 7.19  | -     | 2314.4   |
| AHQ-10-2, 5234              | K.LQLLNFHTM*FILEQEYQR.E                                                | 2484.77198 | 3 | 5.03E-08 | 0.95 | 4.45  | -     | 1923.7   |
| AHQ-10-3, 4989              | K.LQLLNFHTM*FILEQEYQR.E                                                | 2484.77198 | 3 | 2.14E-05 | 0.92 | 4.41  | -     | 1219.9   |
| AHQ-10-2, 4546              | R.NWQWRR.L                                                             | 976.07459  | 1 | 1.65E-04 | 0.44 | 2.02  | -     | 250.1    |
| AHQ-10-2, 5714 - 5770       | K.QLLQANPILEAFGNAK.T                                                   | 1727.98540 | 2 | 3.24E-08 | 0.96 | 4.54  | -     | 1171.9   |
| AHQ-10-2, 5826              | K.QLLQANPILEAFGNAK.T                                                   | 1727.98540 | 2 | 6.40E-05 | 0.95 | 4.51  | -     | 1015.9   |
| AHQ-10-2, 5914              | K.QLLQANPILEAFGNAK.T                                                   | 1727.98540 | 2 | 6.87E-04 | 0.82 | 3.28  | -     | 563.3    |
| AHQ-10-1, 5789 - 5849       | K.QLLQANPILEAFGNAK.T                                                   | 1727.98540 | 2 | 1.17E-04 | 0.90 | 3.93  | -     | 545.3    |
| AHQ-10-5, 5739 - 5795       | K.QLLQANPILEAFGNAK.T                                                   | 1727.98540 | 2 | 1.69E-10 | 0.97 | 5.17  | -     | 1065.9   |
| AHQ-10-10, 5495 - 5554      | K.QLLQANPILEAFGNAK.T                                                   | 1727.98540 | 2 | 4.48E-04 | 0.76 | 2.81  | -     | 695.9    |
| AHQ-10-4, 5927              | K.QLLQANPILEAFGNAK.T                                                   | 1727.98540 | 2 | 1.92E-06 | 0.84 | 3.35  | -     | 662.9    |
| AHQ-10-4, 5752 - 5820       | K.QLLQANPILEAFGNAK.T                                                   | 1727.98540 | 2 | 2.00E-07 | 0.96 | 4.27  | -     | 1583.0   |
| AHQ-10-3, 5657 - 5730       | K.QLLQANPILEAFGNAK.T                                                   | 1727.98540 | 2 | 4.30E-09 | 0.96 | 4.78  | -     | 1089.0   |
| AHQ-10-6, 5613 - 5673       | K.QLLQANPILEAFGNAK.T                                                   | 1727.98540 | 2 | 1.90E-08 | 0.97 | 4.83  | -     | 1214.1   |
| AHQ-10-4, 5371              | K.TQLEELEDELOATEDAK.L                                                  | 1963.04334 | 3 | 6.45E-07 | 0.97 | 5.99  | -     | 1480.7   |
| AHQ-10-3, 5277 - 5289       | K.TQLEELEDELOATEDAK.L                                                  | 1963.04334 | 3 | 7.44E-07 | 0.97 | 5.60  | -     | 1792.8   |
| AHQ-10-3, 5275              | K.TQLEELEDELOATEDAK.L                                                  | 1963.04334 | 2 | 3.52E-06 | 0.98 | 5.33  | -     | 2240.0   |
| AHQ-10-2, 5362              | K.TQLEELEDELOATEDAK.L                                                  | 1963.04334 | 3 | 4.68E-08 | 0.96 | 5.39  | -     | 1425.1   |
| AHQ-10-2, 5358 - 5418       | K.TQLEELEDELOATEDAK.L                                                  | 1963.04334 | 2 | 4.16E-06 | 0.95 | 4.90  | -     | 1209.0   |
| AHQ-10-5, 5263 - 5335       | K.TQLEELEDELOATEDAK.L                                                  | 1963.04334 | 2 | 5.29E-04 | 0.89 | 3.93  | -     | 614.3    |
| AHQ-10-5, 5347              | K.TQLEELEDELOATEDAK.L                                                  | 1963.04334 | 2 | 1.00E-08 | 0.98 | 6.59  | -     | 2244.5   |
| AHQ-10-2, 3930              | K.TQLEELEDELOATEDAK.L                                                  | 1963.04334 | 2 | 4.61E-07 | 0.96 | 4.95  | -     | 1114.7   |
| AHQ-10-1, 5406              | K.TQLEELEDELOATEDAK.L                                                  | 1963.04334 | 3 | 9.28E-05 | 0.93 | 4.00  | -     | 1510.3   |
| AHQ-10-6, 5235 - 5315       | K.TQLEELEDELOATEDAK.L                                                  | 1963.04334 | 2 | 7.01E-06 | 0.97 | 5.26  | -     | 1707.9   |
| AHQ-10-6, 5241              | K.TQLEELEDELOATEDAK.L                                                  | 1963.04334 | 3 | 5.86E-04 | 0.86 | 4.13  | -     | 711.1    |
| AHQ-10-4, 5361              | K.TQLEELEDELOATEDAK.L                                                  | 1963.04334 | 2 | 2.47E-09 | 0.98 | 5.89  | -     | 1844.8   |
| AHQ-10-7, 5226 - 5252       | K.TQLEELEDELOATEDAK.L                                                  | 1963.04334 | 2 | 4.40E-08 | 0.97 | 5.49  | -     | 1589.3   |
| AHQ-10-1, 5401              | K.TQLEELEDELOATEDAK.L                                                  | 1963.04334 | 2 | 7.83E-10 | 0.97 | 4.83  | -     | 1834.9   |
| gi 27498267 ref XP_209737.1 | similar to tyrosine 3/tryptophan 5 - monooxygenase activation protein, |            |   | 1.83E-10 | 1.90 | 20.35 | 31.60 | 11063.6  |
| AHQ-10-10, 5434             | R.DICNDVLSLLEK.F                                                       | 1420.61093 | 2 | 3.16E-06 | 0.94 | 3.53  | -     | 1597.1   |
| AHQ-10-11, 6196             | R.DICNDVLSLLEK.F                                                       | 1420.61093 | 2 | 6.02E-07 | 0.92 | 3.49  | -     | 1431.6   |
| AHQ-10-10, 4714 - 4787      | K.GIVDQSQQAYQEAFEISK.K                                                 | 2042.19176 | 3 | 4.27E-10 | 0.98 | 6.95  | -     | 2302.6   |
| AHQ-10-10, 4710 - 4766      | K.GIVDQSQQAYQEAFEISK.K                                                 | 2042.19176 | 2 | 1.83E-10 | 0.98 | 4.94  | -     | 2029.1   |
| AHQ-10-11, 4547             | K.GIVDQSQQAYQEAFEISK.K                                                 | 2042.19176 | 2 | 1.87E-04 | 0.71 | 3.13  | -     | 466.4    |
| AHQ-10-11, 4758             | K.GIVDQSQQAYQEAFEISK.K                                                 | 2042.19176 | 2 | 6.42E-06 | 0.94 | 4.69  | -     | 867.3    |
| AHQ-10-10, 4491             | K.GIVDQSQQAYQEAFEISK.K                                                 | 2042.19176 | 2 | 9.76E-04 | 0.57 | 2.63  | -     | 483.3    |
| AHQ-10-9, 4640 - 4688       | K.GIVDQSQQAYQEAFEISK.K                                                 | 2042.19176 | 2 | 9.92E-08 | 0.96 | 4.67  | -     | 1263.4   |
| AHQ-10-12, 4840             | K.GIVDQSQQAYQEAFEISK.K                                                 | 2042.19176 | 2 | 3.44E-04 | 0.97 | 5.33  | -     | 1715.3   |
| AHQ-10-13, 5183             | K.GIVDQSQQAYQEAFEISK.K                                                 | 2042.19176 | 2 | 2.58E-06 | 0.96 | 4.41  | -     | 1487.2   |
| AHQ-10-13, 4857             | K.GIVDQSQQAYQEAFEISK.K                                                 | 2042.19176 | 2 | 1.98E-10 | 0.97 | 5.64  | -     | 1410.3   |
| AHQ-10-14, 4860             | K.GIVDQSQQAYQEAFEISK.K                                                 | 2042.19176 | 2 | 5.13E-09 | 0.97 | 5.01  | -     | 1541.0   |
| gi 4759212 ref NP_004598.1  | beta-tubulin cofactor A [Homo sapiens]                                 |            |   | 2.26E-10 | 1.94 | 20.29 | 25.90 | 12854.8  |
| AHQ-10-13, 3394             | R.ILENEKDLLEEAEYKEAR.L                                                 | 2209.35284 | 2 | 5.84E-07 | 0.95 | 4.57  | -     | 1180.7   |
| AHQ-10-13, 3386             | R.ILENEKDLLEEAEYKEAR.L                                                 | 2209.35284 | 3 | 2.26E-10 | 0.97 | 5.69  | -     | 1997.0   |

|                             |                                                                        |            |   |          |        |      |   |        |
|-----------------------------|------------------------------------------------------------------------|------------|---|----------|--------|------|---|--------|
| AHQ-10-13, 3719 - 3775      | R.ILENEKDELEEAEYKEAR.L                                                 | 2209.35284 | 3 | 4.84E-09 | 0.96   | 5.77 | - | 1310.1 |
| AHQ-10-13-, 3648 - 3705     | R.LEAAYLDLQR.I                                                         | 1192.34645 | 2 | 3.60E-06 | 0.96   | 4.02 | - | 1557.4 |
| AHQ-10-13, 4096             | R.LEAAYLDLQR.I                                                         | 1192.34645 | 2 | 5.50E-05 | 0.95   | 3.20 | - | 1720.6 |
| gi 29739414 ref XP_294015.1 | similar to Glyceraldehyde 3-phosphate dehydrogenase, liver (GAPDH) [Ho |            |   |          |        |      |   |        |
| AHQ-10-9, 3711 - 3779       | K.IISNASCTTNCNLAFLAK.V                                                 | 1837.10868 | 2 | 2.31E-05 | 0.91   | 4.30 | - | 1209.2 |
| AHQ-10-11, 4064             | K.IISNASCTTNCNLAFLAK.V                                                 | 1837.10868 | 2 | 3.92E-05 | 0.51   | 2.76 | - | 657.3  |
| AHQ-10-11, 3759             | K.IISNASCTTNCNLAFLAK.V                                                 | 1837.10868 | 2 | 2.21E-07 | 0.58   | 2.95 | - | 837.5  |
| AHQ-10-10, 3800 - 3858      | K.IISNASCTTNCNLAFLAK.V                                                 | 1837.10868 | 2 | 3.80E-07 | 0.85   | 3.82 | - | 1222.7 |
| AHQ-10-9, 4493 - 4551       | K.LISWYDNEFGYSNR.V                                                     | 1764.87478 | 2 | 5.68E-09 | 0.96   | 4.95 | - | 1187.8 |
| AHQ-10-11, 4683             | K.LISWYDNEFGYSNR.V                                                     | 1764.87478 | 2 | 3.84E-09 | 0.97   | 4.82 | - | 1420.6 |
| AHQ-10-13, 5155             | K.LISWYDNEFGYSNR.V                                                     | 1764.87478 | 2 | 3.26E-07 | 0.95   | 4.24 | - | 1277.3 |
| AHQ-10-13-, 4817 - 4873     | K.LISWYDNEFGYSNR.V                                                     | 1764.87478 | 2 | 2.12E-06 | 0.75   | 3.28 | - | 523.1  |
| AHQ-10-14-, 4705 - 4784     | K.LISWYDNEFGYSNR.V                                                     | 1764.87478 | 2 | 2.30E-10 | 0.95   | 4.45 | - | 1033.3 |
| AHQ-10-9, 4608 - 4663       | K.LISWYDNEFGYSNR.V                                                     | 1764.87478 | 2 | 8.00E-08 | 0.91   | 4.06 | - | 646.0  |
| gi 4827056 ref NP_005103.1  | WD repeat-containing protein 1 isoform 2 [Homo sapiens]                |            |   |          |        |      |   |        |
| AHQ-10-6, 4769 - 4832       | K.AHDGGIYAIWSPDSTHLLSASGDK.T                                           | 2586.75455 | 3 | 1.80E-07 | 0.96   | 5.44 | - | 1682.5 |
| AHQ-10-7, 4773              | K.AHDGGIYAIWSPDSTHLLSASGDK.T                                           | 2586.75455 | 3 | 1.37E-04 | 0.96   | 4.89 | - | 1883.3 |
| AHQ-10-6, 5217              | K.CFSIDNPGYEPVAVHPGGDTVAIGGVDGNVR.L                                    | 3400.67708 | 3 | 1.53E-09 | 0.84   | 3.86 | - | 742.6  |
| AHQ-10-7, 5166 - 5236       | K.CFSIDNPGYEPVAVHPGGDTVAIGGVDGNVR.L                                    | 3400.67708 | 3 | 5.33E-04 | 0.74   | 3.22 | - | 734.9  |
| AHQ-10-6, 3793 - 3865       | R.FATASADGGIYIDGK.T                                                    | 1720.86021 | 2 | 1.29E-07 | 0.91   | 3.76 | - | 969.5  |
| AHQ-10-6, 3688              | R.FATASADGGIYIDGK.T                                                    | 1720.86021 | 2 | 2.56E-04 | 0.82   | 3.05 | - | 760.4  |
| AHQ-10-6, 4001 - 4060       | R.FATASADGGIYIDGK.T                                                    | 1720.86021 | 2 | 2.98E-08 | 0.87   | 3.69 | - | 849.4  |
| AHQ-10-6, 4405 - 4483       | K.GPVTDVAYSHDGFLAVCDASK.V                                              | 2282.47194 | 3 | 1.81E-04 | 0.95   | 4.56 | - | 1515.9 |
| AHQ-10-6, 4432 - 4492       | K.GPVTDVAYSHDGFLAVCDASK.V                                              | 2282.47194 | 3 | 9.38E-05 | 0.97   | 5.17 | - | 1448.5 |
| AHQ-10-6, 2697              | K.IKIDIAWTEDESK.R                                                      | 1306.44632 | 2 | 4.08E-05 | 0.94   | 3.72 | - | 1290.9 |
| AHQ-10-6, 2460 - 2513       | K.IKIDIAWTEDESK.R                                                      | 1462.63267 | 2 | 6.52E-04 | 0.83   | 3.18 | - | 793.1  |
| AHQ-10-6, 2465              | K.IKIDIAWTEDESK.R                                                      | 1462.63267 | 3 | 1.38E-04 | 0.77   | 3.61 | - | 681.0  |
| AHQ-10-7, 5189              | R.LATGSDDNCAAFFEGPPFK.F                                                | 2046.20216 | 2 | 4.27E-04 | 0.77   | 3.25 | - | 634.2  |
| AHQ-10-6, 5104 - 5175       | R.LATGSDDNCAAFFEGPPFK.F                                                | 2046.20216 | 2 | 2.39E-10 | 0.94   | 4.99 | - | 1020.8 |
| AHQ-10-6, 5229 - 5309       | R.LATGSDDNCAAFFEGPPFK.F                                                | 2046.20216 | 2 | 6.52E-10 | 0.96   | 5.24 | - | 1278.1 |
| AHQ-10-6, 4147              | R.M*TVDESQQLISCSMDTVR.Y                                                | 2162.36305 | 2 | 8.55E-09 | 0.93   | 4.44 | - | 571.5  |
| AHQ-10-6, 2152              | K.SIQLCTVHKNGGK.S                                                      | 1443.65418 | 2 | 3.86E-04 | 0.53   | 2.71 | - | 676.3  |
| AHQ-10-6, 4071              | K.SIYISGSHDGHINWDSSETGENDSFAGK.G                                       | 3138.17570 | 3 | 6.31E-07 | 0.98   | 6.66 | - | 2136.3 |
| AHQ-10-6, 4157              | K.SIYISGSHDGHINWDSSETGENDSFAGK.G                                       | 3138.17570 | 3 | 1.77E-06 | 0.97   | 6.19 | - | 1343.3 |
| AHQ-10-6, 3539 - 3541       | K.VFASLPQVER.G                                                         | 1146.32091 | 2 | 9.64E-04 | 0.81   | 2.86 | - | 587.5  |
| AHQ-10-9, 3668              | K.YAPSGFYAISGDVSGK.L                                                   | 1619.75589 | 2 | 1.30E-04 | 0.74   | 2.76 | - | 496.6  |
| AHQ-10-6, 2900 - 2965       | K.YEYQPFAGK.I                                                          | 1103.20822 | 2 | 5.19E-05 | 0.87   | 2.70 | - | 694.2  |
| gi 28626504 ref NP_113659.3 | UNC-112 related protein 2 [Homo sapiens]                               |            |   |          |        |      |   |        |
| AHQ-10-6, 3347              | K.AGDALWLRF.F                                                          | 902.03223  | 2 | 1.70E-04 | 0.89   | 3.33 | - | 1211.1 |
| AHQ-10-6, 6235              | R.ASFSQLFOAVAAICR.L                                                    | 1768.02967 | 2 | 5.18E-10 | 0.82   | 3.30 | - | 704.6  |
| AHQ-10-3, 6189 - 6194       | R.ASFSQLFOAVAAICR.L                                                    | 1768.02967 | 2 | 4.68E-05 | 0.94   | 4.03 | - | 903.8  |
| AHQ-10-7, 6176              | R.ASFSQLFOAVAAICR.L                                                    | 1768.02967 | 2 | 2.19E-05 | 0.95   | 4.29 | - | 1056.6 |
| AHQ-10-11, 6046 - 6050      | R.ASFSQLFOAVAAICR.L                                                    | 1768.02967 | 2 | 2.05E-06 | 0.89   | 3.60 | - | 747.1  |
| AHQ-10-8, 6207 - 6221       | R.ASFSQLFOAVAAICR.L                                                    | 1768.02967 | 2 | 1.55E-06 | 0.93   | 4.27 | - | 792.1  |
| AHQ-10-6, 6052 - 6112       | R.ASFSQLFOAVAAICR.L                                                    | 1768.02967 | 2 | 8.58E-09 | 0.95   | 4.23 | - | 908.1  |
| AHQ-10-5, 6259              | R.ASFSQLFOAVAAICR.L                                                    | 1768.02967 | 2 | 5.92E-04 | 0.77   | 2.78 | - | 491.5  |
| AHQ-10-9, 5910 - 5916       | R.ASFSQLFOAVAAICR.L                                                    | 1768.02967 | 2 | 1.43E-04 | 0.85   | 3.08 | - | 798.9  |
| AHQ-10-6, 6116 - 6120       | R.ASFSQLFOAVAAICR.L                                                    | 1768.02967 | 3 | 1.22E-07 | 0.96   | 5.45 | - | 1186.2 |
| AHQ-10-6, 3545 - 3617       | K.EKEPEEELYDLSK.V                                                      | 1609.71294 | 2 | 7.69E-07 | 0.70   | 2.96 | - | 416.2  |
| AHQ-10-6, 6217              | R.FIQAWQSLPDPFGISYVM*VR.F                                              | 2274.62593 | 3 | 3.69E-06 | 0.89   | 4.09 | - | 987.0  |
| AHQ-10-6, 3147 - 3207       | K.GCEVVPDNNVSGQK.F                                                     | 1489.63335 | 2 | 8.86E-10 | 0.91   | 3.03 | - | 1019.0 |
| AHQ-10-11, 3190 - 3195      | K.GCEVVPDNNVSGQK.F                                                     | 1489.63335 | 2 | 4.93E-06 | 0.76   | 3.03 | - | 592.9  |
| AHQ-10-6, 6251              | R.GEELDEDLFLQTTGGHEAF                                                  | 2121.24574 | 2 | 1.95E-07 | 0.88   | 3.88 | - | 761.4  |
| AHQ-10-6, 3177              | R.GM*PAHFSDSAQTEACYHM*LSR.P                                            | 2430.63997 | 3 | 4.88E-09 | 0.96   | 4.87 | - | 1747.7 |
| AHQ-10-6, 3765              | R.IDLAVGDVVK.T                                                         | 1029.21223 | 1 | 2.74E-05 | 0.58   | 2.93 | - | 460.3  |
| AHQ-10-9, 3599 - 3600       | R.IDLAVGDVVK.T                                                         | 1029.21223 | 2 | 1.89E-04 | 0.91   | 3.37 | - | 1260.5 |
| AHQ-10-12, 4358             | R.ILEAHQNVQLSLAEQAQLR.F                                                | 2105.38372 | 2 | 5.76E-05 | 0.97   | 5.12 | - | 1603.0 |
| AHQ-10-9, 4145              | R.ILEAHQNVQLSLAEQAQLR.F                                                | 2105.38372 | 2 | 7.83E-10 | 0.98   | 5.47 | - | 1851.3 |
| AHQ-10-6, 4319              | R.ILEAHQNVQLSLAEQAQLR.F                                                | 2105.38372 | 2 | 4.12E-07 | 0.98   | 6.22 | - | 1645.2 |
| AHQ-10-9, 2615              | R.KDEILGIANNR.L                                                        | 1243.39499 | 2 | 4.61E-04 | 0.84   | 2.65 | - | 980.5  |
| AHQ-10-6, 2703 - 2760       | R.KDEILGIANNR.L                                                        | 1243.39499 | 2 | 2.72E-07 | 0.95   | 4.39 | - | 1457.0 |
| AHQ-10-6, 3996              | R.KQDWSHDHAIWWEQK.R                                                    | 1858.00504 | 3 | 4.76E-08 | 0.96   | 5.10 | - | 1452.0 |
| AHQ-10-6, 6044 - 6099       | K.LEGSAPTDLVDSLTIPELK.D                                                | 2100.35256 | 2 | 1.12E-06 | 0.95   | 5.13 | - | 808.6  |
| AHQ-10-6, 5947              | K.LEGSAPTDLVDSLTIPELK.D                                                | 2100.35256 | 2 | 6.01E-04 | 0.92   | 3.94 | - | 977.0  |
| AHQ-10-6, 5684 - 5737       | K.LEGSAPTDLVDSLTIPELK.D                                                | 2100.35256 | 2 | 1.79E-04 | 0.86   | 3.82 | - | 601.2  |
| AHQ-10-7, 6089              | K.LEGSAPTDLVDSLTIPELK.D                                                | 2100.35256 | 2 | 5.31E-07 | 0.92   | 4.38 | - | 746.3  |
| AHQ-10-6, 2645 - 2647       | R.LFFGQPQHR.P                                                          | 1002.15349 | 2 | 4.05E-04 | 0.54   | 2.64 | - | 485.9  |
| AHQ-10-6, 4528 - 4596       | K.LLVSPPEGM*SEIYLR.C                                                   | 1721.01141 | 2 | 1.51E-06 | 0.75   | 3.01 | - | 325.1  |
| AHQ-10-6, 5707 - 5715       | K.LSQSGGEVGEPAAGTDPGLDLDLVALSNLEVK.L                                   | 3027.24073 | 3 | 1.29E-05 | 0.94   | 4.88 | - | 1299.1 |
| AHQ-10-8, 6285 - 6287       | K.LSQSGGEVGEPAAGTDPGLDLDLVALSNLEVK.L                                   | 3027.24073 | 3 | 2.68E-06 | 0.90   | 4.03 | - | 1463.0 |
| AHQ-10-7, 6241              | K.LSQSGGEVGEPAAGTDPGLDLDLVALSNLEVK.L                                   | 3027.24073 | 3 | 3.72E-08 | 0.96   | 5.51 | - | 1693.9 |
| AHQ-10-3, 6237 - 6293       | K.LSQSGGEVGEPAAGTDPGLDLDLVALSNLEVK.L                                   | 3027.24073 | 3 | 2.21E-04 | 0.87   | 4.54 | - | 781.6  |
| AHQ-10-9, 5974              | K.LSQSGGEVGEPAAGTDPGLDLDLVALSNLEVK.L                                   | 3027.24073 | 3 | 6.65E-05 | 0.89   | 3.80 | - | 1288.8 |
| AHQ-10-2, 6343              | K.LSQSGGEVGEPAAGTDPGLDLDLVALSNLEVK.L                                   | 3027.24073 | 3 | 5.86E-05 | 0.90   | 4.08 | - | 1075.3 |
| AHQ-10-6, 6191              | K.LSQSGGEVGEPAAGTDPGLDLDLVALSNLEVK.L                                   | 3027.24073 | 3 | 2.24E-09 | 0.90   | 4.33 | - | 1092.9 |
| AHQ-10-7, 2442              | R.LTLQYEQAR.W                                                          | 1122.25622 | 2 | 5.62E-06 | 0.93   | 3.44 | - | 1543.1 |
| AHQ-10-6, 2435 - 2455       | R.LTLQYEQAR.W                                                          | 1122.25622 | 2 | 1.16E-06 | 0.91   | 3.66 | - | 915.0  |
| AHQ-10-11, 3922             | K.SQDEAPGDPIQQLNLK.G                                                   | 1753.89174 | 2 | 6.07E-06 | 0.46   | 3.18 | - | 346.2  |
| AHQ-10-6, 3892 - 3947       | K.SQDEAPGDPIQQLNLK.G                                                   | 1753.89174 | 2 | 3.15E-09 | 0.89   | 3.96 | - | 517.4  |
| AHQ-10-6, 4075 - 4092       | K.TASGDYIDSSWELR.V                                                     | 1600.66783 | 2 | 1.61E-06 | 0.83   | 3.00 | - | 695.4  |
| AHQ-10-9, 4024 - 4025       | K.TASGDYIDSSWELR.V                                                     | 1600.66783 | 2 | 2.78E-09 | 0.91   | 3.45 | - | 1168.2 |
| AHQ-10-7, 4172              | K.TASGDYIDSSWELR.V                                                     | 1600.66783 | 2 | 4.08E-06 | 0.93   | 3.84 | - | 1000.5 |
| AHQ-10-6, 4191 - 4255       | K.TASGDYIDSSWELR.V                                                     | 1600.66783 | 2 | 1.09E-09 | 0.95   | 3.87 | - | 1306.4 |
| AHQ-10-6, 3928 - 3985       | R.TGSGGPGNHPGPDASAEGLNPNYGLVAPR.F                                      | 2783.95312 | 3 | 2.22E-05 | 0.95   | 5.90 | - | 1069.1 |
| AHQ-10-6, 3824              | R.TGSGGPGNHPGPDASAEGLNPNYGLVAPR.F                                      | 2783.95312 | 3 | 1.37E-08 | 0.97   | 5.68 | - | 1776.9 |
| AHQ-10-6, 3828              | R.TGSGGPGNHPGPDASAEGLNPNYGLVAPR.F                                      | 2783.95312 | 2 | 1.55E-06 | 0.93   | 4.86 | - | 566.7  |
| AHQ-10-6, 6367              | R.TM*ADSSYTSVEQAILAFLSLQR.T                                            | 2448.73471 | 3 | 2.04E-07 | 0.95   | 4.92 | - | 1561.4 |
| AHQ-10-6, 3867              | R.VFVGEEDPEAESVTLR.V                                                   | 1777.91007 | 3 | 1.74E-04 | 0.93   | 3.99 | - | 1483.8 |
| AHQ-10-6, 3844              | R.VFVGEEDPEAESVTLR.V                                                   | 1777.91007 | 2 | 6.93E-05 | 0.92   | 3.65 | - | 1348.5 |
| AHQ-10-14-, 3896 - 3938     | R.VFVGEEDPEAESVTLR.V                                                   | 1777.91007 | 2 | 6.59E-09 | 0.93   | 4.03 | - | 1031.9 |
| AHQ-10-11, 3844             | R.VFVGEEDPEAESVTLR.V                                                   | 1777.91007 | 2 | 5.21E-06 | 0.85   | 3.84 | - | 786.0  |
| AHQ-10-5, 3947              | R.VFVGEEDPEAESVTLR.V                                                   | 1777.91007 | 2 | 5.65E-08 | 0.94   | 4.35 | - | 1174.7 |
| AHQ-10-12, 3909             | R.VFVGEEDPEAESVTLR.V                                                   | 1777.91007 | 2 | 5.88E-06 | 0.74   | 2.75 | - | 782.5  |
| AHQ-10-9, 3705              | R.VFVGEEDPEAESVTLR.V                                                   | 1777.91007 | 2 | 2.09E-05 | 0.85   | 3.38 | - | 954.9  |
| AHQ-10-7, 3850 - 3856       | R.VFVGEEDPEAESVTLR.V                                                   | 1777.91007 | 2 | 2.49E-10 | 0.96   | 4.72 | - | 1372.0 |
| AHQ-10-8, 3914              | R.VFVGEEDPEAESVTLR.V                                                   | 1777.91007 | 2 | 1.79E-05 | 0.90   | 3.27 | - | 1482.7 |
| AHQ-10-3, 3935              | R.VFVGEEDPEAESVTLR.V                                                   | 1777.91007 | 2 | 5.25E-08 | 0.86   | 3.23 | - | 1011.7 |
| AHQ-10-4, 3965              | R.VFVGEEDPEAESVTLR.V                                                   | 1777.91007 | 2 | 2.97E-09 | 0.92   | 4.02 | - | 1047.4 |
| AHQ-10-9, 2811              | R.VTGESHIGVLLK.I                                                       | 1310.52448 | 2 | 2.17E-07 | 0.88   | 3.02 | - | 1391.4 |
| AHQ-10-14-, 2998            | R.VTGESHIGVLLK.I                                                       | 1310.52448 | 2 | 1.58E-04 | 0.75   | 2.81 | - | 949.5  |
| AHQ-10-7, 2902              | R.VTGESHIGVLLK.I                                                       | 1310.52448 | 2 | 1.56E-06 | 0.91   | 3.19 | - | 1583.8 |
| AHQ-10-6, 2935              | R.VTGESHIGVLLK.I                                                       | 1310.52448 | 1 | 6.76E-04 | 0.74   | 2.82 | - | 820.7  |
| AHQ-10-6, 2915 - 2972       | R.VTGESHIGVLLK.I                                                       | 1310.52448 | 2 | 5.13E-06 | 0.94   | 3.97 | - | 1419.2 |
| AHQ-10-5, 4733              | K.VVLAGGVAPALFR.G                                                      | 1270.54832 | 2 | 1.03E-07 | 0.97</ |      |   |        |



|                             |                                                                         |            |   |          |       |        |       |         |
|-----------------------------|-------------------------------------------------------------------------|------------|---|----------|-------|--------|-------|---------|
| AHQ-10-12, 3949 - 3961      | K.NKDQGTEDYVEGLR.V                                                      | 1787.86505 | 2 | 1.78E-05 | 0.79  | 3.17   | -     | 702.6   |
| AHQ-10-12, 3696             | K.NKDQGTEDYVEGLR.V                                                      | 1787.86505 | 2 | 3.68E-06 | 0.71  | 2.70   | -     | 678.2   |
| AHQ-10-14, 4519 - 4524      | K.NKDQGTEDYVEGLR.V                                                      | 1787.86505 | 2 | 5.00E-05 | 0.62  | 2.96   | -     | 551.1   |
| AHQ-10-14, 3670 - 3721      | K.NKDQGTEDYVEGLR.V                                                      | 1787.86505 | 2 | 2.28E-05 | 0.90  | 3.80   | -     | 905.1   |
| AHQ-10-13, 3745             | K.NKDQGTEDYVEGLR.V                                                      | 1787.86505 | 2 | 4.49E-05 | 0.93  | 4.25   | -     | 1219.6  |
| AHQ-10-13, 3753             | K.NKDQGTEDYVEGLR.V                                                      | 1787.86505 | 3 | 3.18E-05 | 0.94  | 4.41   | -     | 1472.9  |
| AHQ-10-14, 3716             | K.NKDQGTEDYVEGLR.V                                                      | 1787.86505 | 3 | 1.00E-04 | 0.94  | 4.12   | -     | 1601.3  |
| AHQ-10-13, 3366             | R.VFDKEGNGTVMGAEIR.H                                                    | 1723.93228 | 2 | 3.78E-10 | 0.84  | 3.43   | -     | 766.8   |
| AHQ-10-14, 5922 - 5924      | K.VLDFEHFLPM*LTQVAK.N                                                   | 1905.24957 | 3 | 2.20E-07 | 0.88  | 4.19   | -     | 784.8   |
| AHQ-10-12, 6096 - 6177      | K.VLDFEHFLPMLQTVAK.N                                                    | 1889.25017 | 2 | 1.67E-09 | 0.95  | 5.26   | -     | 897.7   |
| gi 4504183 ref NP_000843.1  | glutathione transferase; deafness, X-linked 7; fatty acid ethyl ester s |            |   | 4.18E-10 | 3.23  | 40.25  | 30.50 | 23355.7 |
| AHQ-10-11, 5059             | K.ALPGQLKPFTELLSQNGGK.T                                                 | 2127.42930 | 2 | 2.49E-05 | 0.83  | 3.72   | -     | 385.4   |
| AHQ-10-11, 3238             | K.ASCLYGQLPK.F                                                          | 1138.31884 | 2 | 1.19E-04 | 0.84  | 2.95   | -     | 777.1   |
| AHQ-10-10, 3207             | K.ASCLYGQLPK.F                                                          | 1138.31884 | 2 | 1.37E-05 | 0.76  | 2.64   | -     | 579.0   |
| AHQ-10-11, 4658 - 4615      | K.FQDGLTLQSNLTLR.H                                                      | 1885.06701 | 2 | 1.87E-04 | 0.68  | 3.60   | -     | 369.1   |
| AHQ-10-11, 4382             | K.YISLIYTNYEAGKDDYVK.A                                                  | 2156.37637 | 2 | 4.18E-10 | 0.95  | 5.00   | -     | 828.1   |
| AHQ-10-10, 4336             | K.YISLIYTNYEAGKDDYVK.A                                                  | 2156.37637 | 2 | 2.54E-04 | 0.65  | 2.90   | -     | 419.7   |
| gi 4885165 ref NP_005204.1  | cystatin A; stefin A; cystatin AS [Homo sapiens]                        |            |   | 4.37E-10 | 3.23  | 40.20  | 57.10 | 11006.4 |
| AHQ-10-14, 3673 - 3682      | K.PATPEIQEIVDK.V                                                        | 1340.50421 | 2 | 2.07E-06 | 0.77  | 2.76   | -     | 519.1   |
| AHQ-10-14, 4458             | K.SLPGQNDLVLTYGVQDK.N                                                   | 1977.16121 | 2 | 1.22E-09 | 0.56  | 3.03   | -     | 167.2   |
| AHQ-10-14, 4306 - 4364      | K.SLPGQNDLVLTYGVQDK.N                                                   | 1977.16121 | 2 | 2.66E-06 | 0.88  | 3.94   | -     | 326.0   |
| AHQ-10-14, 5115             | K.SLPGQNDLVLTYGVQDK.N                                                   | 1977.16121 | 2 | 4.37E-10 | 0.70  | 3.13   | -     | 274.2   |
| AHQ-10-3, 4418              | K.SLPGQNDLVLTYGVQDK.N                                                   | 1977.16121 | 2 | 1.51E-04 | 0.66  | 3.35   | -     | 199.7   |
| AHQ-10-14, 2982             | K.TNETYGLKLEAVQYK.T                                                     | 1644.80688 | 2 | 3.56E-06 | 0.85  | 3.09   | -     | 1015.8  |
| AHQ-10-13, 3160             | K.TQVVAGTNYIYK.V                                                        | 1357.53647 | 2 | 1.47E-05 | 0.90  | 3.51   | -     | 1203.9  |
| gi 4758606 ref NP_004508.1  | integrin-linked kinase [Homo sapiens]                                   |            |   | 4.55E-10 | 8.28  | 100.23 | 19.70 | 51418.9 |
| AHQ-10-7, 4878              | R.EVFPADLSNMIEGM*K.V                                                    | 1697.95498 | 2 | 1.05E-04 | 0.53  | 2.77   | -     | 374.9   |
| AHQ-10-7, 4112 - 4122       | R.EVFPADLSNM*EIGM*K.V                                                   | 1713.95438 | 2 | 2.06E-04 | 0.80  | 3.23   | -     | 587.7   |
| AHQ-10-7, 4328              | K.FDM*IVPILEK.M                                                         | 1221.49108 | 2 | 2.55E-04 | 0.89  | 3.29   | -     | 762.4   |
| AHQ-10-7, 5317              | K.FDMIVPILEK.M                                                          | 1205.49168 | 2 | 1.37E-04 | 0.87  | 3.19   | -     | 724.7   |
| AHQ-10-7, 2253              | R.GDDTPLHLAASHGHR.D                                                     | 1584.67809 | 2 | 4.55E-10 | 0.92  | 3.30   | -     | 1389.0  |
| AHQ-10-7, 5610              | R.GMAFLHLEPLIPR.H                                                       | 1595.93361 | 3 | 1.09E-05 | 0.88  | 3.46   | -     | 1165.1  |
| AHQ-10-7, 5608              | R.GMAFLHLEPLIPR.H                                                       | 1595.93361 | 2 | 1.93E-04 | 0.85  | 3.36   | -     | 781.3   |
| AHQ-10-7, 4148              | R.M*YAPAWVAPEALQK.K                                                     | 1591.85542 | 2 | 8.33E-04 | 0.87  | 3.52   | -     | 547.7   |
| AHQ-10-7, 4533 - 4610       | R.MYAPAWVAPEALQK.K                                                      | 1575.85602 | 2 | 8.16E-07 | 0.91  | 3.57   | -     | 999.2   |
| AHQ-10-13, 4248             | R.M*YAPAWVAPEALQK.K                                                     | 1591.85542 | 2 | 6.82E-04 | 0.90  | 3.10   | -     | 871.6   |
| AHQ-10-7, 4105              | R.SAVVEMLIM*R.G                                                         | 1165.45256 | 2 | 4.91E-06 | 0.88  | 2.68   | -     | 1324.4  |
| AHQ-10-7, 3008              | R.SVMIDEDMTAR.I                                                         | 1268.44340 | 2 | 4.22E-04 | 0.71  | 2.90   | -     | 677.7   |
| gi 21361122 ref NP_001440.2 | four and a half LIM domains 1; Four-and-a-half LIM domains 1 [Homo sap  |            |   | 4.72E-10 | 2.74  | 30.23  | 14.30 | 31894.7 |
| AHQ-10-9, 2423 - 2425       | K.AIVAGDQNVVEYK.G                                                       | 1307.43431 | 2 | 3.00E-09 | 0.95  | 4.58   | -     | 1180.5  |
| AHQ-10-9, 3552 - 3565       | R.FVFHQEQVYCPDCAK.K                                                     | 1931.13758 | 3 | 2.61E-04 | 0.80  | 3.49   | -     | 993.0   |
| AHQ-10-9, 3553              | R.FVFHQEQVYCPDCAK.K                                                     | 1931.13758 | 2 | 7.87E-06 | 0.93  | 3.39   | -     | 1390.3  |
| AHQ-10-13, 3784             | R.FVFHQEQVYCPDCAK.K                                                     | 1931.13758 | 2 | 5.85E-05 | 0.97  | 4.64   | -     | 1673.6  |
| AHQ-10-9, 2931 - 3012       | K.GEDFYCVTCHTK.F                                                        | 1648.75260 | 2 | 4.72E-10 | 0.85  | 3.10   | -     | 806.7   |
| gi 4758018 ref NP_004359.1  | calponin 2; Calonin 2 [Homo sapiens]                                    |            |   | 4.85E-10 | 0.94  | 10.20  | 5.50  | 33696.9 |
| AHQ-10-12, 5868 - 5872      | R.TWIEGLTGLSIGPDFQK.G                                                   | 1863.10294 | 2 | 1.13E-04 | 0.85  | 3.27   | -     | 818.3   |
| AHQ-10-13, 5838 - 5918      | R.TWIEGLTGLSIGPDFQK.G                                                   | 1863.10294 | 2 | 4.85E-10 | 0.94  | 4.07   | -     | 1185.6  |
| AHQ-10-11, 5762 - 5842      | R.TWIEGLTGLSIGPDFQK.G                                                   | 1863.10294 | 2 | 6.11E-06 | 0.58  | 2.78   | -     | 528.9   |
| gi 21956645 ref NP_665807.1 | myotrophin; granule cell differentiation protein [Homo sapiens]         |            |   | 6.92E-10 | 1.91  | 20.31  | 25.40 | 12894.7 |
| AHQ-10-13, 4228 - 4295      | K.GPDGLTAFEATDNQAIK.A                                                   | 1748.87196 | 2 | 3.99E-04 | 0.83  | 3.16   | -     | 832.1   |
| AHQ-10-13, 4352 - 4419      | K.GPDGLTAFEATDNQAIK.A                                                   | 1748.87196 | 2 | 1.33E-05 | 0.95  | 4.48   | -     | 1081.3  |
| AHQ-10-13, 4066             | K.GPDGLTAFEATDNQAIK.A                                                   | 1748.87196 | 2 | 1.16E-06 | 0.97  | 4.71   | -     | 1824.6  |
| AHQ-10-13, 3928 - 4008      | K.GPDGLTAFEATDNQAIK.A                                                   | 1748.87196 | 2 | 1.27E-08 | 0.98  | 6.27   | -     | 1233.2  |
| AHQ-10-14, 3870 - 3924      | K.GPDGLTAFEATDNQAIK.A                                                   | 1748.87196 | 2 | 3.65E-05 | 0.97  | 4.68   | -     | 1907.6  |
| AHQ-10-14, 3558             | K.NGDLDEKDYVAK.G                                                        | 1466.57496 | 2 | 6.92E-10 | 0.93  | 4.09   | -     | 1054.5  |
| AHQ-10-13, 3558 - 3636      | K.NGDLDEKDYVAK.G                                                        | 1466.57496 | 2 | 9.77E-08 | 0.91  | 3.28   | -     | 1317.5  |
| AHQ-10-13, 3948 - 4029      | K.NGDLDEKDYVAK.G                                                        | 1466.57496 | 2 | 1.32E-05 | 0.78  | 2.99   | -     | 713.5   |
| gi 4502027 ref NP_000468.1  | albumin precursor; PRO0883 protein [Homo sapiens]                       |            |   | 6.99E-10 | 37.46 | 430.35 | 63.70 | 69366.4 |
| AHQ-10-6, 2539 - 2569       | K.AAFTECCQAADK.A                                                        | 1374.47927 | 2 | 1.67E-05 | 0.92  | 3.36   | -     | 1277.1  |
| AHQ-10-5, 2557 - 2628       | K.AAFTECCQAADK.A                                                        | 1374.47927 | 2 | 4.87E-06 | 0.89  | 3.55   | -     | 883.5   |
| AHQ-10-5, 2577              | K.AAFTECCQAADK.A                                                        | 1374.47927 | 1 | 3.05E-06 | 0.80  | 3.34   | -     | 612.6   |
| AHQ-10-6, 1923 - 2003       | K.ADDKETCFAEEGKK.L                                                      | 1629.72754 | 2 | 4.54E-04 | 0.36  | 2.58   | -     | 534.4   |
| AHQ-10-5, 1817 - 1888       | K.ADDKETCFAEEGKK.L                                                      | 1629.72754 | 2 | 6.96E-05 | 0.93  | 3.87   | -     | 1148.8  |
| AHQ-10-5, 1860 - 1916       | K.ADDKETCFAEEGKK.L                                                      | 1629.72754 | 3 | 2.23E-04 | 0.88  | 4.13   | -     | 967.7   |
| AHQ-10-7, 2025              | K.AEFAEVSK.L                                                            | 880.96496  | 1 | 7.58E-05 | 0.10  | 1.86   | -     | 293.4   |
| AHQ-10-6, 2009 - 2085       | K.AEFAEVSK.L                                                            | 880.96496  | 2 | 5.61E-04 | 0.58  | 2.69   | -     | 328.5   |
| AHQ-10-5, 5189              | K.AEFAEVSKLVLDTLK.V                                                     | 1651.88247 | 2 | 1.26E-05 | 0.81  | 3.01   | -     | 819.9   |
| AHQ-10-13, 5170             | K.AVMDDFAAFAVEK.C                                                       | 1343.53006 | 2 | 2.00E-07 | 0.94  | 3.81   | -     | 1272.9  |
| AHQ-10-5, 4419 - 4480       | K.AVMDDFAAFAVEK.C                                                       | 1359.52946 | 2 | 5.82E-04 | 0.92  | 3.39   | -     | 900.5   |
| AHQ-10-6, 5099 - 5161       | K.AVMDDFAAFAVEK.C                                                       | 1343.53006 | 2 | 5.46E-07 | 0.95  | 3.64   | -     | 1325.2  |
| AHQ-10-14, 5160 - 5161      | K.AVMDDFAAFAVEK.C                                                       | 1343.53006 | 2 | 1.27E-09 | 0.95  | 4.18   | -     | 1358.8  |
| AHQ-10-5, 5228 - 5232       | K.AVMDDFAAFAVEK.C                                                       | 1343.53006 | 2 | 1.31E-08 | 0.96  | 4.55   | -     | 1344.0  |
| AHQ-10-10, 5026             | K.AVMDDFAAFAVEK.C                                                       | 1343.53006 | 2 | 1.54E-05 | 0.91  | 3.24   | -     | 1086.9  |
| AHQ-10-5, 2196 - 2204       | K.CCAAADPHCEYAK.V                                                       | 1556.67999 | 2 | 2.60E-08 | 0.82  | 3.12   | -     | 773.9   |
| AHQ-10-5, 2152              | K.CCKADDKETCFAEEGKK.L                                                   | 2080.26010 | 3 | 7.73E-06 | 0.92  | 3.89   | -     | 1336.9  |
| AHQ-10-5, 2411 - 2489       | K.CCTESLVNR.R                                                           | 1141.25805 | 2 | 9.84E-08 | 0.92  | 3.05   | -     | 1645.5  |
| AHQ-10-3, 6193              | K.DVFLGM*FLYEYAR.R                                                      | 1640.88331 | 2 | 1.75E-04 | 0.92  | 3.51   | -     | 950.0   |
| AHQ-10-7, 6217              | K.DVFLGM*FLYEYAR.R                                                      | 1640.88331 | 2 | 7.22E-04 | 0.91  | 3.21   | -     | 872.4   |
| AHQ-10-1, 6294 - 6301       | K.DVFLGM*FLYEYAR.R                                                      | 1640.88331 | 2 | 9.42E-04 | 0.96  | 4.17   | -     | 1383.7  |
| AHQ-10-6, 6136 - 6143       | K.DVFLGM*FLYEYAR.R                                                      | 1640.88331 | 2 | 6.32E-04 | 0.84  | 3.15   | -     | 804.0   |
| AHQ-10-2, 6288              | K.DVFLGM*FLYEYAR.R                                                      | 1640.88331 | 2 | 3.05E-05 | 0.90  | 3.43   | -     | 808.8   |
| AHQ-10-5, 6268 - 6269       | K.DVFLGM*FLYEYAR.R                                                      | 1640.88331 | 2 | 7.24E-06 | 0.96  | 4.49   | -     | 1320.6  |
| AHQ-10-6, 2757 - 2819       | R.FKDLGEENFK.A                                                          | 1227.34766 | 2 | 1.10E-05 | 0.85  | 3.06   | -     | 796.3   |
| AHQ-10-13, 2844             | R.FKDLGEENFK.A                                                          | 1227.34766 | 2 | 3.87E-07 | 0.90  | 3.10   | -     | 887.1   |
| AHQ-10-5, 2737 - 2801       | R.FKDLGEENFK.A                                                          | 1227.34766 | 2 | 6.63E-05 | 0.82  | 3.40   | -     | 607.1   |
| AHQ-10-14, 2813             | R.FKDLGEENFK.A                                                          | 1227.34766 | 2 | 2.50E-07 | 0.81  | 3.10   | -     | 745.7   |
| AHQ-10-10, 3054             | K.FQNALLLR.V                                                            | 961.14282  | 2 | 5.09E-05 | 0.80  | 2.81   | -     | 812.1   |
| AHQ-10-5, 4569              | R.HPDYSVLLLR.L                                                          | 1312.54206 | 2 | 1.97E-06 | 0.56  | 2.63   | -     | 331.3   |
| AHQ-10-6, 6047              | R.HPHYFYAPPELLFFAK.R                                                    | 1744.02658 | 3 | 1.35E-09 | 0.93  | 4.33   | -     | 1104.7  |
| AHQ-10-5, 6175 - 6199       | R.HPHYFYAPPELLFFAK.R                                                    | 1744.02658 | 3 | 1.09E-08 | 0.96  | 5.16   | -     | 1427.0  |
| AHQ-10-5, 3703              | K.KLVAASQAALGL                                                          | 1142.37371 | 2 | 1.46E-04 | 0.90  | 3.22   | -     | 917.2   |
| AHQ-10-5, 2855 - 2916       | K.KQTALVELVK.H                                                          | 1129.37494 | 2 | 5.43E-05 | 0.89  | 3.32   | -     | 978.4   |
| AHQ-10-2, 3680 - 3748       | K.KVPQVSTPTLVEYSR.N                                                     | 1640.90605 | 2 | 3.76E-08 | 0.83  | 2.79   | -     | 750.4   |
| AHQ-10-7, 3514              | K.KVPQVSTPTLVEYSR.N                                                     | 1640.90605 | 3 | 3.23E-08 | 0.93  | 4.72   | -     | 1294.0  |
| AHQ-10-7, 3508              | K.KVPQVSTPTLVEYSR.N                                                     | 1640.90605 | 2 | 7.81E-09 | 0.92  | 3.83   | -     | 781.6   |
| AHQ-10-3, 3601 - 3677       | K.KVPQVSTPTLVEYSR.N                                                     | 1640.90605 | 2 | 3.57E-05 | 0.81  | 3.06   | -     | 506.7   |
| AHQ-10-5, 3615 - 3681       | K.KVPQVSTPTLVEYSR.N                                                     | 1640.90605 | 2 | 6.43E-09 | 0.88  | 3.21   | -     | 747.5   |
| AHQ-10-5, 3563 - 3620       | K.KVPQVSTPTLVEYSR.N                                                     | 1640.90605 | 3 | 7.09E-08 | 0.94  | 4.48   | -     | 1418.8  |
| AHQ-10-6, 3305              | K.KVPQVSTPTLVEYSR.N                                                     | 1640.90605 | 2 | 3.55E-08 | 0.83  | 3.36   | -     | 527.7   |
| AHQ-10-11, 3519 - 3584      | K.KVPQVSTPTLVEYSR.N                                                     | 1640.90605 | 2 | 2.28E-04 | 0.68  | 3.05   | -     | 603.2   |
| AHQ-10-6, 3511 - 3585       | K.KVPQVSTPTLVEYSR.N                                                     | 1640.90605 | 2 | 2.11E-06 | 0.76  | 2.97   | -     | 444.7   |
| AHQ-10-5, 3964 - 4009       | K.KVPQVSTPTLVEYSRNLGK.V                                                 | 2053.39186 | 3 | 2.94E-05 | 0.89  | 4.06   | -     | 831.0   |
| AHQ-10-5, 3815              | K.KVPQVSTPTLVEYSRNLGK.V                                                 | 2053.39186 | 3 | 7.22E-07 | 0.76  | 3.60   | -     | 665.3   |
| AHQ-10-5, 2808              | K.KYLYEIAR.R                                                            | 1056.23937 | 2 | 3.34E-04 | 0.88  | 2.61   | -     | 767.1   |
| AHQ-10-5, 2447 - 2511       | K.LKECKEKLLEK.S                                                         | 1549.83503 | 3 | 5.73E-04 | 0.92  | 4.56   | -     | 1043.4  |
| AHQ-10-6, 2476 - 2488       | K.LKECKEKLLEK.S                                                         | 1549.83503 | 3 | 3.85E-04 | 0.91  | 4.05   | -     | 1159.8  |
| AHQ-10-5, 4053              | K.LVAASQAALGL                                                           | 1014.20080 | 2 | 8.86E-05 | 0.94  | 3.19   | -     | 1568.9  |

|                             |                                                                         |            |   |          |      |       |       |          |
|-----------------------------|-------------------------------------------------------------------------|------------|---|----------|------|-------|-------|----------|
| AHQ-10-11, 3300 - 3303      | K.LVNEVTEFAK.T                                                          | 1150.30633 | 2 | 6.05E-06 | 0.93 | 3.89  | -     | 788.3    |
| AHQ-10-5, 3211              | K.LVNEVTEFAK.T                                                          | 1150.30633 | 1 | 6.55E-05 | 0.75 | 2.58  | -     | 584.9    |
| AHQ-10-5, 3339 - 3352       | K.LVNEVTEFAK.T                                                          | 1150.30633 | 2 | 1.05E-06 | 0.81 | 3.34  | -     | 577.6    |
| AHQ-10-6, 3300              | K.LVNEVTEFAK.T                                                          | 1150.30633 | 2 | 2.96E-05 | 0.87 | 3.09  | -     | 670.3    |
| AHQ-10-3, 3375              | K.LVNEVTEFAK.T                                                          | 1150.30633 | 2 | 1.04E-06 | 0.83 | 3.22  | -     | 612.6    |
| AHQ-10-5, 3525 - 3540       | K.LVNEVTEFAK.T                                                          | 1150.30633 | 2 | 2.66E-05 | 0.86 | 3.33  | -     | 546.7    |
| AHQ-10-5, 3537              | K.LVNEVTEFAK.T                                                          | 1150.30633 | 1 | 4.38E-05 | 0.82 | 2.94  | -     | 870.2    |
| AHQ-10-5, 4688              | R.LVRPEVDVM*CTAFHDNEETFLK.K                                             | 2668.98368 | 3 | 4.75E-06 | 0.96 | 4.97  | -     | 1703.9   |
| AHQ-10-6, 4620 - 4621       | R.LVRPEVDVM*CTAFHDNEETFLK.K                                             | 2668.98368 | 3 | 5.61E-09 | 0.96 | 5.78  | -     | 1222.0   |
| AHQ-10-5, 5501              | R.LVRPEVDVM*CTAFHDNEETFLK.K                                             | 2652.98428 | 3 | 8.21E-06 | 0.98 | 7.02  | -     | 2190.5   |
| AHQ-10-6, 4244 - 4308       | R.LVRPEVDVM*CTAFHDNEETFLK.K.Y                                           | 2797.15659 | 3 | 5.40E-05 | 0.89 | 4.40  | -     | 954.2    |
| AHQ-10-5, 5241              | R.LVRPEVDVM*CTAFHDNEETFLK.K.Y                                           | 2781.15719 | 3 | 9.18E-09 | 0.98 | 6.57  | -     | 1908.3   |
| AHQ-10-5, 6435              | R.M*PCAEYDLSVVLNQLCVLHEK.T                                              | 2537.91475 | 3 | 3.90E-07 | 0.94 | 4.85  | -     | 1079.7   |
| AHQ-10-5, 3083              | R.NECFLQHKDDNPNLPR.L                                                    | 1999.15349 | 3 | 6.49E-06 | 0.80 | 3.86  | -     | 687.7    |
| AHQ-10-6, 4095              | R.RHPDYSVVLLLR.L                                                        | 1468.72842 | 3 | 5.31E-04 | 0.97 | 5.09  | -     | 2057.6   |
| AHQ-10-5, 4163 - 4220       | R.RHPDYSVVLLLR.L                                                        | 1468.72842 | 3 | 2.15E-05 | 0.95 | 4.68  | -     | 1902.9   |
| AHQ-10-5, 5796              | R.RHPYFYAPELFFAK.R                                                      | 1900.21293 | 2 | 1.11E-04 | 0.97 | 4.76  | -     | 1545.9   |
| AHQ-10-5, 5787 - 5848       | R.RHPYFYAPELFFAK.R                                                      | 1900.21293 | 3 | 1.15E-07 | 0.97 | 5.82  | -     | 1838.1   |
| AHQ-10-6, 5683 - 5687       | R.RHPYFYAPELFFAK.R                                                      | 1900.21293 | 3 | 8.76E-10 | 0.97 | 5.53  | -     | 2052.5   |
| AHQ-10-6, 6283              | K.RM*PCAEYDLSVVLNQLCVLHEK.T                                             | 2694.10110 | 3 | 1.78E-04 | 0.95 | 5.13  | -     | 1312.8   |
| AHQ-10-5, 6407              | K.RM*PCAEYDLSVVLNQLCVLHEK.T                                             | 2694.10110 | 3 | 2.16E-05 | 0.94 | 5.41  | -     | 1071.8   |
| AHQ-10-6, 4384              | R.RPCFSALEVDVETYPK.E                                                    | 1913.14041 | 2 | 4.42E-04 | 0.84 | 4.24  | -     | 451.4    |
| AHQ-10-6, 4381              | R.RPCFSALEVDVETYPK.E                                                    | 1913.14041 | 3 | 1.50E-07 | 0.67 | 3.29  | -     | 688.9    |
| AHQ-10-6, 4479 - 4487       | R.RPCFSALEVDVETYPK.E                                                    | 1913.14041 | 3 | 3.30E-06 | 0.91 | 4.85  | -     | 798.5    |
| AHQ-10-5, 4460              | R.RPCFSALEVDVETYPK.E                                                    | 1913.14041 | 3 | 2.65E-04 | 0.56 | 3.13  | -     | 619.9    |
| AHQ-10-5, 4611              | R.RPCFSALEVDVETYPK.E                                                    | 1913.14041 | 2 | 3.00E-06 | 0.94 | 4.55  | -     | 724.1    |
| AHQ-10-5, 4555 - 4580       | R.RPCFSALEVDVETYPK.E                                                    | 1913.14041 | 3 | 3.32E-07 | 0.93 | 4.65  | -     | 1044.0   |
| AHQ-10-6, 4480 - 4499       | R.RPCFSALEVDVETYPK.E                                                    | 1913.14041 | 2 | 1.21E-04 | 0.94 | 4.50  | -     | 869.8    |
| AHQ-10-5, 4476 - 4553       | R.RPCFSALEVDVETYPK.E                                                    | 1913.14041 | 2 | 1.98E-05 | 0.94 | 4.44  | -     | 881.2    |
| AHQ-10-7, 5797              | K.SHCIAEVNDEM*PADLPSLAADFVESK.D                                         | 2993.22637 | 3 | 6.00E-04 | 0.92 | 4.91  | -     | 690.7    |
| AHQ-10-7, 6229              | K.SHCIAEVNDEM*PADLPSLAADFVESK.D                                         | 2977.22697 | 3 | 5.30E-04 | 0.93 | 5.07  | -     | 803.8    |
| AHQ-10-5, 5919 - 5975       | K.SHCIAEVNDEM*PADLPSLAADFVESK.D                                         | 2993.22637 | 3 | 1.83E-07 | 0.95 | 5.77  | -     | 794.9    |
| AHQ-10-6, 5739 - 5795       | K.SHCIAEVNDEM*PADLPSLAADFVESK.D                                         | 2993.22637 | 3 | 2.28E-05 | 0.89 | 5.07  | -     | 568.3    |
| AHQ-10-5, 4948 - 5005       | K.SHLTLFGDKLCTVATLR.E                                                   | 1934.24913 | 2 | 6.64E-04 | 0.93 | 4.15  | -     | 994.0    |
| AHQ-10-5, 1897              | K.TCVADESAENC DK.S                                                      | 1501.53308 | 2 | 6.99E-10 | 0.96 | 4.11  | -     | 1597.5   |
| AHQ-10-6, 1964 - 1976       | K.TCVADESAENC DK.S                                                      | 1501.53308 | 2 | 3.70E-06 | 0.98 | 5.03  | -     | 2782.0   |
| AHQ-10-5, 4391              | K.TCVADESAENC DK.SHLTLFGDK.L                                            | 2500.65848 | 3 | 8.04E-09 | 0.90 | 4.89  | -     | 600.9    |
| AHQ-10-5, 3783              | K.TYETTLLEKCCAAADPHCEYAK.V                                              | 2522.72734 | 3 | 2.86E-05 | 0.87 | 4.41  | -     | 534.6    |
| AHQ-10-9, 5171              | K.VFDEFKPLVEEPQNLK.Q                                                    | 2046.35142 | 2 | 3.28E-04 | 0.77 | 2.87  | -     | 460.8    |
| AHQ-10-9, 5169              | K.VFDEFKPLVEEPQNLK.Q                                                    | 2046.35142 | 3 | 1.12E-06 | 0.74 | 3.13  | -     | 633.3    |
| AHQ-10-6, 5375              | K.VFDEFKPLVEEPQNLK.Q                                                    | 2046.35142 | 2 | 1.28E-04 | 0.90 | 4.47  | -     | 414.3    |
| AHQ-10-5, 5212 - 5225       | K.VFDEFKPLVEEPQNLK.Q                                                    | 2046.35142 | 2 | 2.57E-07 | 0.88 | 3.90  | -     | 463.6    |
| AHQ-10-5, 5369              | K.VFDEFKPLVEEPQNLK.Q                                                    | 2046.35142 | 2 | 1.79E-06 | 0.74 | 3.38  | -     | 340.2    |
| AHQ-10-5, 5375              | K.VFDEFKPLVEEPQNLK.Q                                                    | 2046.35142 | 3 | 4.75E-05 | 0.89 | 4.07  | -     | 990.5    |
| AHQ-10-5, 5572              | K.VFDEFKPLVEEPQNLK.Q                                                    | 2046.35142 | 3 | 1.35E-06 | 0.93 | 4.75  | -     | 846.1    |
| AHQ-10-5, 5480 - 5493       | K.VFDEFKPLVEEPQNLK.Q                                                    | 2046.35142 | 3 | 4.90E-06 | 0.96 | 4.88  | -     | 1432.7   |
| AHQ-10-4, 5515              | K.VFDEFKPLVEEPQNLK.Q                                                    | 2046.35142 | 3 | 4.58E-08 | 0.95 | 4.75  | -     | 1461.4   |
| AHQ-10-3, 5435 - 5443       | K.VFDEFKPLVEEPQNLK.Q                                                    | 2046.35142 | 3 | 9.49E-07 | 0.92 | 4.77  | -     | 946.4    |
| AHQ-10-2, 5530              | K.VFDEFKPLVEEPQNLK.Q                                                    | 2046.35142 | 2 | 9.14E-06 | 0.92 | 4.48  | -     | 541.2    |
| AHQ-10-2, 5506 - 5532       | K.VFDEFKPLVEEPQNLK.Q                                                    | 2046.35142 | 3 | 2.70E-05 | 0.90 | 3.79  | -     | 1088.9   |
| AHQ-10-5, 5492              | K.VFDEFKPLVEEPQNLK.Q                                                    | 2046.35142 | 3 | 3.50E-05 | 0.89 | 4.17  | -     | 405.4    |
| AHQ-10-7, 5386              | K.VFDEFKPLVEEPQNLK.Q                                                    | 2046.35142 | 3 | 6.34E-06 | 0.94 | 4.80  | -     | 1063.7   |
| AHQ-10-1, 5565              | K.VFDEFKPLVEEPQNLK.Q                                                    | 2046.35142 | 3 | 2.15E-07 | 0.85 | 3.98  | -     | 729.6    |
| AHQ-10-5, 3144              | K.VHTECCHGDLLECCADDR.A                                                  | 2091.20307 | 2 | 2.78E-07 | 0.97 | 4.84  | -     | 2108.7   |
| AHQ-10-6, 3109              | K.VHTECCHGDLLECCADDR.A                                                  | 2091.20307 | 2 | 1.58E-08 | 0.97 | 5.28  | -     | 1584.9   |
| AHQ-10-5, 3713              | K.VHTECCHGDLLECCADDRADLAK.Y                                             | 2589.77855 | 3 | 5.46E-04 | 0.90 | 4.78  | -     | 647.6    |
| AHQ-10-7, 3645              | K.VHTECCHGDLLECCADDRADLAK.Y                                             | 2589.77855 | 3 | 1.24E-04 | 0.86 | 4.10  | -     | 801.6    |
| AHQ-10-5, 3728              | K.VHTECCHGDLLECCADDRADLAK.Y                                             | 2589.77855 | 2 | 7.71E-04 | 0.81 | 3.17  | -     | 746.1    |
| AHQ-10-5, 3824              | K.VHTECCHGDLLECCADDRADLAK.Y                                             | 2589.77855 | 3 | 1.61E-04 | 0.75 | 3.58  | -     | 543.9    |
| AHQ-10-6, 3787              | K.VPQVSTPTLVEVSR.N                                                      | 1512.73313 | 2 | 1.97E-05 | 0.87 | 2.98  | -     | 863.2    |
| AHQ-10-7, 3782              | K.VPQVSTPTLVEVSR.N                                                      | 1512.73313 | 2 | 1.05E-06 | 0.90 | 3.12  | -     | 944.4    |
| AHQ-10-5, 2479 - 2540       | K.YICENQDSISSK.L                                                        | 1445.53420 | 2 | 1.39E-06 | 0.93 | 4.05  | -     | 794.1    |
| AHQ-10-5, 2383              | K.YICENQDSISSK.L                                                        | 1445.53420 | 2 | 2.23E-06 | 0.92 | 3.91  | -     | 677.5    |
| AHQ-10-3, 2431              | K.YICENQDSISSK.L                                                        | 1445.53420 | 2 | 1.08E-04 | 0.80 | 3.01  | -     | 540.2    |
| AHQ-10-7, 2386              | K.YICENQDSISSK.L                                                        | 1445.53420 | 2 | 1.59E-08 | 0.92 | 3.85  | -     | 767.2    |
| AHQ-10-6, 2472              | K.YICENQDSISSK.L                                                        | 1445.53420 | 2 | 8.13E-05 | 0.90 | 3.48  | -     | 865.1    |
| gi 29730023 ref XP_291482.1 | similar to 78 kDa glucose-regulated protein precursor (GRP 78) [Immu    |            |   | 7.18E-10 | 5.81 | 70.24 | 13.10 | 63563.0  |
| AHQ-10-6, 4271 - 4272       | K.ELEEIVQPIISK.L                                                        | 1398.62680 | 2 | 9.59E-05 | 0.93 | 4.01  | -     | 973.6    |
| AHQ-10-5, 4621              | R.IINKPTAAAIYGLDK.R                                                     | 1659.95097 | 2 | 7.18E-10 | 0.84 | 4.05  | -     | 913.4    |
| AHQ-10-7, 4537              | R.IINKPTAAAIYGLDK.R                                                     | 1659.95097 | 2 | 8.60E-07 | 0.84 | 3.95  | -     | 924.7    |
| AHQ-10-6, 4329              | R.IINKPTAAAIYGLDKR.E                                                    | 1816.13732 | 2 | 3.19E-07 | 0.82 | 4.01  | -     | 915.2    |
| AHQ-10-5, 4417 - 4485       | R.IINKPTAAAIYGLDKR.E                                                    | 1816.13732 | 2 | 2.50E-06 | 0.80 | 4.14  | -     | 727.4    |
| AHQ-10-5, 3503 - 3531       | K.LYGSAGPPPTGEEOTAEDKDEL                                                | 2177.26447 | 2 | 7.69E-05 | 0.81 | 3.92  | -     | 394.5    |
| AHQ-10-6, 3448 - 3503       | K.LYGSAGPPPTGEEOTAEDKDEL                                                | 2177.26447 | 2 | 2.77E-06 | 0.94 | 4.71  | -     | 835.6    |
| AHQ-10-6, 3940              | R.NELESYASLK.N                                                          | 1317.42597 | 2 | 7.17E-04 | 0.83 | 3.41  | -     | 774.6    |
| AHQ-10-6, 4567 - 4641       | K.TFAPKEISAM*VLTK.M                                                     | 1552.86064 | 2 | 4.93E-07 | 0.84 | 2.96  | -     | 1108.0   |
| AHQ-10-5, 5421 - 5436       | K.TFAPKEISAM*VLTK.M                                                     | 1536.86124 | 2 | 2.08E-04 | 0.61 | 2.64  | -     | 845.8    |
| gi 5453603 ref NP_006422.1  | chaperonin containing TCP1, subunit 2 (beta); chaperonin containing t-c |            |   | 7.33E-10 | 1.74 | 20.24 | 7.10  | 57487.9  |
| AHQ-10-7, 3174              | R.EALLSSAVDHGSDDEVK.F                                                   | 1657.76083 | 2 | 4.60E-04 | 0.78 | 3.25  | -     | 786.0    |
| AHQ-10-7, 6270              | R.VQDDEVGDGTVSVTLAAELLR.E                                               | 2289.48263 | 2 | 7.33E-10 | 0.96 | 4.71  | -     | 1238.3   |
| gi 27500274 ref XP_113950.3 | similar to Munc13-4 protein [Homo sapiens]                              |            |   | 7.98E-10 | 3.23 | 40.20 | 6.10  | 123281.1 |
| AHQ-10-4, 4620              | K.HSTSAVDLSTCFAQISHAR.Q                                                 | 2191.36726 | 3 | 1.08E-04 | 0.86 | 3.33  | -     | 1000.6   |
| AHQ-10-4, 5159 - 5236       | K.LPAQLAWAELEQR.V                                                       | 1525.73360 | 2 | 9.79E-04 | 0.62 | 2.55  | -     | 557.1    |
| AHQ-10-4, 6423              | R.LPLTYPAPNGDPIQLLEGR.K                                                 | 2178.51621 | 2 | 7.98E-10 | 0.89 | 4.09  | -     | 587.7    |
| AHQ-10-4, 4047              | R.SVFLPSVSDSPAR.L                                                       | 1362.51311 | 2 | 1.10E-05 | 0.86 | 2.98  | -     | 1050.7   |
| gi 4503327 ref NP_000389.1  | cytochrome b5 reductase membrane-bound isoform; diaphorase (NADH) [Homo |            |   | 9.09E-10 | 1.45 | 20.23 | 12.00 | 34234.6  |
| AHQ-10-9, 4287 - 4292       | R.STPAITLESPIKYLPLR.L                                                   | 1902.18061 | 2 | 9.09E-10 | 0.93 | 4.54  | -     | 706.0    |
| AHQ-10-9, 4636              | K.SVGMIAAGTGITPM*LQVIR.A                                                | 1918.31483 | 2 | 7.42E-06 | 0.51 | 2.56  | -     | 530.4    |
| gi 4757952 ref NP_001782.1  | cell division cycle 42 isoform 1; cell division cycle 42 (GTP-binding p |            |   | 9.68E-10 | 1.85 | 20.25 | 14.70 | 21258.5  |
| AHQ-10-11, 2390 - 2412      | K.CVVVGDGAVGK.T                                                         | 1062.22237 | 2 | 1.18E-04 | 0.91 | 3.13  | -     | 1249.7   |
| AHQ-10-11, 6136             | K.NVFEDEALALEPPEPK.K                                                    | 1854.09282 | 3 | 9.68E-10 | 0.94 | 5.04  | -     | 960.0    |
| gi 10863977 ref NP_067000.1 | LSM2 homolog, U6 small nuclear RNA associated; U6 snRNA-associated Sm-  |            |   | 9.86E-10 | 0.97 | 10.25 | 20.00 | 10834.5  |
| AHQ-10-14, 5154             | R.YVQLPADEVDTQLLQDAAR.K                                                 | 2146.34311 | 2 | 9.86E-10 | 0.97 | 5.08  | -     | 1505.7   |
| gi 4505735 ref NP_002611.1  | platelet factor 4 variant 1; Platelet factor 4, variant 1 (PF4-like) [H |            |   | 1.16E-09 | 1.86 | 20.25 | 25.00 | 11552.6  |
| AHQ-10-14, 3678 - 3750      | R.AEAEEEDGDLQCLCVK.T                                                    | 1739.86036 | 2 | 1.16E-09 | 0.95 | 4.40  | -     | 1098.6   |
| AHQ-10-14, 3809             | R.AEAEEEDGDLQCLCVK.T                                                    | 1739.86036 | 2 | 2.56E-06 | 0.93 | 3.42  | -     | 1314.6   |
| AHQ-10-14, 4571 - 4575      | R.AEAEEEDGDLQCLCVK.T                                                    | 1739.86036 | 2 | 4.24E-06 | 0.96 | 4.93  | -     | 1339.9   |
| AHQ-10-14, 5894             | K.ICLDLQALLYK.K                                                         | 1351.63656 | 2 | 2.97E-05 | 0.91 | 3.32  | -     | 990.0    |
| gi 29732955 ref XP_291603.1 | similar to glyceraldehyde 3-phosphate dehydrogenase [Homo sapiens] [MA  |            |   | 1.17E-09 | 0.86 | 10.20 | 16.80 | 11173.0  |
| AHQ-10-9, 3837 - 3915       | K.NISNASCCTNCIAPLAK.M                                                   | 1838.05353 | 2 | 1.17E-09 | 0.86 | 3.91  | -     | 1116.9   |
| AHQ-10-9, 3923 - 3988       | K.NISNASCCTNCIAPLAK.M                                                   | 1838.05353 | 2 | 1.04E-07 | 0.81 | 3.97  | -     | 987.0    |
| AHQ-10-10, 3719             | K.NISNASCCTNCIAPLAK.M                                                   | 1838.05353 | 2 | 4.11E-07 | 0.61 | 2.81  | -     | 935.1    |
| AHQ-10-10, 4015 - 4016      | K.NISNASCCTNCIAPLAK.M                                                   | 1838.05353 | 2 | 6.21E-09 | 0.44 | 3.08  | -     | 565.8    |
| AHQ-10-11, 3848             | K.NISNASCCTNCIAPLAK.M                                                   | 1838.05353 | 2 | 6.62E-05 | 0.74 | 3.31  | -     | 621.6    |
| AHQ-10-9, 3612 - 3673       | K.NISNASCCTNCIAPLAK.M                                                   | 1838.05353 | 2 | 3.22E-07 | 0.73 | 3.62  | -     | 912.3    |
| gi 30159310 ref XP_301899.1 | similar to beta-actin [Homo sapiens]                                    |            |   | 1.28E-09 | 1.51 | 20.20 | 9.20  | 32376.4  |
| AHQ-10-8, 1566 - 1943       | K.DSYVGNEAQSQR                                                          | 1198.22158 | 1 | 1.28E-09 | 0.58 | 2.80  | -     | 321.0    |



|                             |                                                                         |            |   |          |      |       |       |          |
|-----------------------------|-------------------------------------------------------------------------|------------|---|----------|------|-------|-------|----------|
| AHQ-10-8, 4913 - 4965       | K.SYKLLDGGVITIGNER.F                                                    | 1807.04092 | 2 | 4.29E-04 | 0.82 | 3.28  | -     | 626.1    |
| AHQ-10-8, 4358 - 4413       | K.SYKLLDGGVITIGNER.F                                                    | 1807.04092 | 2 | 2.01E-06 | 0.93 | 4.04  | -     | 968.0    |
| gi 4507171 ref NP_003109.1  | secreted protein, acidic, cysteine-rich (osteonectin); Osteonectin (sec |            |   | 1.43E-09 | 1.79 | 20.20 | 7.60  | 34632.0  |
| AHQ-10-8, 3198              | R.LEAGDHPVELLAR.D                                                       | 1420.59579 | 2 | 1.43E-09 | 0.95 | 3.96  | -     | 1205.5   |
| AHQ-10-8, 3385              | K.LHLDYIGPCK.Y                                                          | 1217.41920 | 2 | 1.98E-04 | 0.83 | 3.00  | -     | 670.7    |
| gi 30160191 ref XP_294035.2 | similar to Pyruvate kinase, M1 isozyme (Pyruvate kinase muscle isozyme  |            |   | 1.43E-09 | 0.96 | 10.25 | 2.80  | 50222.2  |
| AHQ-10-7, 4828              | K.IYVDDGLISLQVK.Q                                                       | 1463.70048 | 2 | 5.73E-09 | 0.98 | 4.98  | -     | 2325.2   |
| AHQ-10-7, 4836              | K.IYVDDGLISLQVK.Q                                                       | 1463.70048 | 1 | 6.03E-05 | 0.76 | 3.15  | -     | 758.4    |
| AHQ-10-11, 4798             | K.IYVDDGLISLQVK.Q                                                       | 1463.70048 | 2 | 3.16E-04 | 0.88 | 3.46  | -     | 1001.0   |
| AHQ-10-7, 4717              | K.IYVDDGLISLQVK.Q                                                       | 1463.70048 | 2 | 1.43E-09 | 0.96 | 4.15  | -     | 2038.5   |
| gi 4501893 ref NP_001094.1  | actinin, alpha 2 [Homo sapiens]                                         |            |   | 1.49E-09 | 7.55 | 90.23 | 10.50 | 103853.1 |
| AHQ-10-5, 4389              | K.AGTQIENIEEDFR.N                                                       | 1522.59861 | 2 | 1.90E-05 | 0.82 | 3.35  | -     | 623.0    |
| AHQ-10-6, 5085              | K.AGTQIENIEEDFRNLK.L                                                    | 1935.08442 | 2 | 4.19E-07 | 0.35 | 3.32  | -     | 424.7    |
| AHQ-10-4, 4903              | K.CQLEINFNTLQTK.L                                                       | 1610.81373 | 2 | 2.16E-07 | 0.93 | 4.01  | -     | 1044.3   |
| AHQ-10-6, 4644 - 4660       | K.CQLEINFNTLQTK.L                                                       | 1610.81373 | 2 | 2.73E-04 | 0.93 | 4.30  | -     | 889.7    |
| AHQ-10-4, 4747 - 4760       | K.CQLEINFNTLQTK.L                                                       | 1610.81373 | 2 | 5.26E-07 | 0.95 | 3.96  | -     | 1131.7   |
| AHQ-10-4, 4615              | K.CQLEINFNTLQTK.L                                                       | 1610.81373 | 2 | 1.50E-08 | 0.93 | 3.80  | -     | 1102.3   |
| AHQ-10-5, 4732 - 4751       | K.CQLEINFNTLQTK.L                                                       | 1610.81373 | 2 | 1.13E-04 | 0.94 | 4.25  | -     | 958.8    |
| AHQ-10-4, 4749              | K.EGLLLWCQR.K                                                           | 1176.37031 | 2 | 9.62E-06 | 0.93 | 3.30  | -     | 1151.7   |
| AHQ-10-5, 4711              | K.EGLLLWCQR.K                                                           | 1176.37031 | 2 | 1.08E-05 | 0.89 | 3.40  | -     | 738.7    |
| AHQ-10-8, 4065 - 4067       | R.FAIQDISVEETSAAK.E                                                     | 1538.68108 | 2 | 1.35E-06 | 0.86 | 3.50  | -     | 708.1    |
| AHQ-10-4, 4123 - 4156       | R.FAIQDISVEETSAAK.E                                                     | 1538.68108 | 2 | 4.82E-04 | 0.95 | 3.79  | -     | 1367.8   |
| AHQ-10-3, 4113              | R.FAIQDISVEETSAAK.E                                                     | 1538.68108 | 2 | 3.09E-05 | 0.62 | 2.63  | -     | 501.6    |
| AHQ-10-6, 4045 - 4109       | R.FAIQDISVEETSAAK.E                                                     | 1538.68108 | 2 | 1.27E-05 | 0.74 | 2.73  | -     | 666.2    |
| AHQ-10-5, 4120              | R.FAIQDISVEETSAAK.E                                                     | 1538.68108 | 2 | 1.03E-08 | 0.96 | 4.33  | -     | 1357.7   |
| AHQ-10-10, 3974 - 3978      | R.FAIQDISVEETSAAK.E                                                     | 1538.68108 | 2 | 1.01E-07 | 0.84 | 3.56  | -     | 660.1    |
| AHQ-10-4, 5663 - 5676       | K.GYEEWLLNEIR.R                                                         | 1422.56701 | 2 | 3.34E-04 | 0.95 | 4.03  | -     | 1326.8   |
| AHQ-10-4, 5235              | K.GYEEWLLNEIR.R                                                         | 1422.56701 | 2 | 4.23E-06 | 0.89 | 2.92  | -     | 1280.4   |
| AHQ-10-6, 5525 - 5527       | K.GYEEWLLNEIR.R                                                         | 1422.56701 | 2 | 4.90E-06 | 0.95 | 4.57  | -     | 1169.9   |
| AHQ-10-5, 5647 - 5648       | K.GYEEWLLNEIR.R                                                         | 1422.56701 | 2 | 8.94E-06 | 0.90 | 3.69  | -     | 1007.3   |
| AHQ-10-6, 5107              | K.GYEEWLLNEIR.R                                                         | 1422.56701 | 2 | 5.09E-05 | 0.90 | 2.86  | -     | 1192.5   |
| AHQ-10-7, 5548              | K.GYEEWLLNEIR.R                                                         | 1422.56701 | 2 | 3.98E-04 | 0.87 | 2.94  | -     | 1289.2   |
| AHQ-10-4, 2216 - 2280       | R.KHEAFESDLAAHQDR.V                                                     | 1754.84152 | 2 | 1.49E-09 | 0.96 | 4.19  | -     | 1363.6   |
| AHQ-10-4, 4287 - 4367       | K.LVSGIAEEIVDGNVK.M                                                     | 1543.74400 | 2 | 1.32E-04 | 0.92 | 3.86  | -     | 1112.8   |
| AHQ-10-4, 4436 - 4508       | K.LVSGIAEEIVDGNVK.M                                                     | 1543.74400 | 2 | 6.63E-07 | 0.86 | 3.35  | -     | 932.1    |
| AHQ-10-6, 4168              | K.LVSGIAEEIVDGNVK.M                                                     | 1543.74400 | 2 | 7.95E-05 | 0.90 | 3.81  | -     | 1109.3   |
| AHQ-10-4, 4005 - 4067       | K.LVSGIAEEIVDGNVK.M                                                     | 1543.74400 | 2 | 4.36E-06 | 0.94 | 3.91  | -     | 1094.7   |
| AHQ-10-5, 3999 - 4075       | K.LVSGIAEEIVDGNVK.M                                                     | 1543.74400 | 2 | 3.11E-04 | 0.92 | 4.04  | -     | 874.2    |
| AHQ-10-4, 3627 - 3632       | K.TFTAWCNHLR.K                                                          | 1394.54018 | 2 | 4.28E-05 | 0.86 | 2.91  | -     | 804.1    |
| gi 29742827 ref XP_294099.1 | similar to myosin:SUBUNIT=regulatory light chain [Homo sapiens]         |            |   | 1.56E-09 | 0.96 | 10.22 | 7.40  | 17094.0  |
| AHQ-10-11, 3719 - 3724      | R.FTDEEVDELRY.E                                                         | 1416.47127 | 2 | 3.39E-09 | 0.97 | 4.39  | -     | 1576.9   |
| AHQ-10-12, 3726 - 3802      | R.FTDEEVDELRY.E                                                         | 1416.47127 | 2 | 7.23E-07 | 0.94 | 3.09  | -     | 1688.6   |
| AHQ-10-13, 4203 - 4212      | R.FTDEEVDELRY.E                                                         | 1416.47127 | 2 | 4.10E-06 | 0.96 | 3.80  | -     | 1776.3   |
| AHQ-10-13, 3828 - 3900      | R.FTDEEVDELRY.E                                                         | 1416.47127 | 2 | 4.92E-09 | 0.97 | 4.25  | -     | 1714.0   |
| AHQ-10-14, 3805             | R.FTDEEVDELRY.E                                                         | 1416.47127 | 2 | 1.56E-09 | 0.96 | 3.56  | -     | 1733.4   |
| AHQ-10-11, 3536             | R.FTDEEVDELRY.E                                                         | 1416.47127 | 2 | 3.81E-05 | 0.76 | 2.61  | -     | 696.4    |
| gi 4503571 ref NP_001419.1  | enolase 1; phosphopyruvate hydratase; MYC promoter-binding protein 1; n |            |   | 1.83E-09 | 7.02 | 80.28 | 23.30 | 47168.7  |
| AHQ-10-9, 4833              | R.AAVPSGASTGIYEALELR.D                                                  | 1806.00979 | 2 | 9.73E-04 | 0.66 | 2.72  | -     | 277.4    |
| AHQ-10-13, 5060             | R.AAVPSGASTGIYEALELR.D                                                  | 1806.00979 | 2 | 3.43E-05 | 0.93 | 4.36  | -     | 515.3    |
| AHQ-10-14, 5057 - 5076      | R.AAVPSGASTGIYEALELR.D                                                  | 1806.00979 | 2 | 2.70E-09 | 0.96 | 5.60  | -     | 626.1    |
| AHQ-10-8, 4137              | R.GNPTVEVDLFTSK.G                                                       | 1407.55065 | 2 | 8.43E-04 | 0.67 | 3.11  | -     | 538.7    |
| AHQ-10-8, 5637              | R.HIADLAGNSEVILPVPFNVINGGSHAGNK.L                                       | 3013.35654 | 3 | 2.94E-08 | 0.88 | 4.44  | -     | 785.5    |
| AHQ-10-8, 2409              | R.IGAEVYHNLK.N                                                          | 1144.30502 | 2 | 2.36E-05 | 0.95 | 4.28  | -     | 1161.9   |
| AHQ-10-8, 5694              | K.LAM*QEFMILPVGAAANFR.E                                                 | 1925.30752 | 2 | 2.42E-05 | 0.86 | 3.55  | -     | 834.7    |
| AHQ-10-8, 5866 - 5870       | K.LAMQEFM*ILPVGAAANFR.E                                                 | 1925.30752 | 2 | 4.26E-04 | 0.93 | 4.88  | -     | 817.0    |
| AHQ-10-10, 4682             | K.VVIGM*DVAASEFFR.S                                                     | 1557.79584 | 2 | 9.65E-05 | 0.84 | 2.79  | -     | 942.0    |
| AHQ-10-11, 4591             | R.YISPDQLADLYK.S                                                        | 1426.59557 | 2 | 9.89E-06 | 0.86 | 2.69  | -     | 833.4    |
| AHQ-10-8, 4629              | R.YISPDQLADLYK.S                                                        | 1426.59557 | 2 | 1.83E-09 | 0.94 | 4.01  | -     | 787.6    |
| AHQ-10-9, 4440              | R.YISPDQLADLYK.S                                                        | 1426.59557 | 2 | 6.15E-08 | 0.90 | 3.37  | -     | 889.1    |
| AHQ-10-10, 4530 - 4532      | R.YISPDQLADLYK.S                                                        | 1426.59557 | 2 | 5.65E-05 | 0.79 | 3.00  | -     | 581.4    |
| gi 4557871 ref NP_001054.1  | transferrin [Homo sapiens]                                              |            |   | 1.84E-09 | 5.31 | 60.23 | 12.90 | 77049.5  |
| AHQ-10-5, 3604              | K.EGYYGYTGAFR.C                                                         | 1284.35776 | 2 | 6.20E-04 | 0.69 | 2.60  | -     | 521.2    |
| AHQ-10-5, 4035 - 4044       | R.FDEFFSEGCAPGSK.K                                                      | 1579.66868 | 2 | 1.84E-09 | 0.97 | 4.64  | -     | 1437.2   |
| AHQ-10-5, 3371 - 3372       | K.IECVSAETTEDCIAK.I                                                     | 1728.87748 | 2 | 7.15E-07 | 0.94 | 4.29  | -     | 908.6    |
| AHQ-10-5, 4515 - 4565       | K.M*YLGYYVTAIR.N                                                        | 1495.72451 | 2 | 1.16E-06 | 0.92 | 3.48  | -     | 1117.7   |
| AHQ-10-5, 6335 - 6404       | R.SAGWNPIGLLYCDLPEPR.K                                                  | 2173.47658 | 2 | 8.51E-06 | 0.90 | 4.25  | -     | 455.7    |
| AHQ-10-5, 4700              | K.SDNCEDTPEAGYFAVAVK.K                                                  | 2074.21067 | 2 | 8.10E-09 | 0.91 | 4.42  | -     | 427.0    |
| gi 4506413 ref NP_002875.1  | RAP1A, member of RAS oncogene family; RAS-related protein RAP1A [Homo s |            |   | 1.92E-09 | 5.72 | 70.25 | 42.90 | 20987.1  |
| AHQ-10-11, 6204             | R.DLYM*KNQGQFALVYSITAQSTFNDLQDLR.E                                      | 3326.68143 | 3 | 2.60E-04 | 0.90 | 4.31  | -     | 930.4    |
| AHQ-10-11, 6150 - 6151      | K.INVNEIFYDLVR.Q                                                        | 1495.70427 | 2 | 3.88E-08 | 0.97 | 4.99  | -     | 1661.3   |
| AHQ-10-14, 6260             | K.INVNEIFYDLVR.Q                                                        | 1495.70427 | 2 | 3.35E-08 | 0.94 | 4.13  | -     | 1079.9   |
| AHQ-10-14, 5557             | K.INVNEIFYDLVR.Q                                                        | 1495.70427 | 2 | 9.02E-05 | 0.79 | 3.01  | -     | 629.7    |
| AHQ-10-13, 6224 - 6244      | K.INVNEIFYDLVR.Q                                                        | 1495.70427 | 2 | 6.19E-05 | 0.84 | 3.59  | -     | 612.6    |
| AHQ-10-11, 6051             | K.INVNEIFYDLVR.Q                                                        | 1495.70427 | 2 | 9.99E-05 | 0.88 | 3.42  | -     | 1009.1   |
| AHQ-10-13, 2897             | K.LVVLGSGGVGK.S                                                         | 986.19059  | 1 | 4.68E-04 | 0.74 | 2.43  | -     | 972.4    |
| AHQ-10-11, 2810 - 2874      | K.LVVLGSGGVGK.S                                                         | 986.19059  | 2 | 3.76E-04 | 0.92 | 3.67  | -     | 1038.1   |
| AHQ-10-14, 5745             | K.SALTQVQVGGIFVEK.Y                                                     | 1666.94196 | 2 | 5.79E-06 | 0.91 | 3.30  | -     | 1174.7   |
| AHQ-10-11, 5870 - 5935      | K.SALTQVQVGGIFVEK.Y                                                     | 1666.94196 | 2 | 1.54E-06 | 0.64 | 2.88  | -     | 601.6    |
| AHQ-10-11, 5996 - 6052      | K.SALTQVQVGGIFVEK.Y                                                     | 1666.94196 | 2 | 7.86E-04 | 0.54 | 2.55  | -     | 736.3    |
| AHQ-10-13, 5718 - 5726      | K.SALTQVQVGGIFVEK.Y                                                     | 1666.94196 | 2 | 8.26E-04 | 0.96 | 4.34  | -     | 1690.7   |
| AHQ-10-11, 5426 - 5443      | K.SALTQVQVGGIFVEK.Y                                                     | 1666.94196 | 2 | 2.11E-06 | 0.84 | 3.59  | -     | 643.7    |
| AHQ-10-11, 5852 - 5928      | K.SKINVNEIFYDLVR.Q                                                      | 1710.95483 | 2 | 9.28E-08 | 0.93 | 4.39  | -     | 911.7    |
| AHQ-10-11, 5847             | K.SKINVNEIFYDLVR.Q                                                      | 1710.95483 | 3 | 6.60E-07 | 0.95 | 4.44  | -     | 1608.1   |
| AHQ-10-11, 5000 - 5004      | K.SKINVNEIFYDLVR.Q                                                      | 1710.95483 | 2 | 6.80E-06 | 0.90 | 3.53  | -     | 1002.7   |
| AHQ-10-11, 5707 - 5714      | K.SKINVNEIFYDLVR.Q                                                      | 1710.95483 | 3 | 1.72E-08 | 0.95 | 4.51  | -     | 1605.7   |
| AHQ-10-11, 5706             | K.SKINVNEIFYDLVR.Q                                                      | 1710.95483 | 2 | 1.92E-09 | 0.94 | 4.31  | -     | 953.0    |
| AHQ-10-11, 5202             | K.SKINVNEIFYDLVR.Q                                                      | 1710.95483 | 2 | 1.46E-05 | 0.78 | 3.45  | -     | 547.6    |
| AHQ-10-13, 2846 - 2901      | K.YDPTIEDSYR.K                                                          | 1259.30338 | 2 | 8.04E-06 | 0.79 | 2.73  | -     | 426.6    |
| AHQ-10-11, 2794 - 2862      | K.YDPTIEDSYR.K                                                          | 1259.30338 | 2 | 3.73E-04 | 0.60 | 2.72  | -     | 277.4    |
| AHQ-10-14, 2866 - 2877      | K.YDPTIEDSYR.K                                                          | 1259.30338 | 2 | 2.01E-07 | 0.79 | 2.73  | -     | 466.0    |
| AHQ-10-11, 2471             | K.YDPTIEDSYR.Q                                                          | 1387.47629 | 2 | 9.57E-05 | 0.59 | 2.58  | -     | 318.1    |
| gi 4506877 ref NP_002996.1  | selectin P precursor; Selectin P (granulocyte membrane protein, 140KD;  |            |   | 2.18E-09 | 1.88 | 20.24 | 3.40  | 90844.7  |
| AHQ-10-2, 4670              | K.STCQFCDEGYSLSGPER.L                                                   | 2109.23671 | 2 | 2.18E-09 | 0.93 | 4.10  | -     | 902.3    |
| AHQ-10-4, 4655              | K.STCQFCDEGYSLSGPER.L                                                   | 2109.23671 | 2 | 1.28E-07 | 0.92 | 4.20  | -     | 905.5    |
| AHQ-10-3, 4586              | K.STCQFCDEGYSLSGPER.L                                                   | 2109.23671 | 2 | 4.86E-09 | 0.95 | 4.48  | -     | 1061.1   |
| AHQ-10-5, 4620              | K.STCQFCDEGYSLSGPER.L                                                   | 2109.23671 | 2 | 7.77E-09 | 0.95 | 4.71  | -     | 966.5    |
| AHQ-10-3, 2977 - 2991       | R.YTDLVAIQNK.N                                                          | 1165.32100 | 2 | 5.25E-07 | 0.95 | 3.78  | -     | 1191.4   |
| AHQ-10-2, 3040              | R.YTDLVAIQNK.N                                                          | 1165.32100 | 2 | 2.29E-06 | 0.95 | 3.79  | -     | 1424.3   |
| gi 5031571 ref NP_005713.1  | actin-related protein 2; ARP2 (actin-related protein 2, yeast) homolog  |            |   | 2.31E-09 | 4.46 | 50.21 | 12.70 | 44760.5  |
| AHQ-10-8, 3650              | K.DLMVGDASELR.S                                                         | 1335.46633 | 2 | 2.56E-07 | 0.96 | 4.23  | -     | 1321.1   |
| AHQ-10-8, 3317              | K.DLM*VGDASELR.S                                                        | 1351.46573 | 2 | 7.41E-08 | 0.89 | 3.06  | -     | 1165.6   |
| AHQ-10-8, 3365 - 3435       | R.GYAFNHASADFTRV.M                                                      | 1614.69943 | 2 | 2.31E-09 | 0.94 | 4.17  | -     | 1251.4   |
| AHQ-10-8, 4113              | K.HLWDDYTFGPEK.L                                                        | 1393.52736 | 2 | 3.55E-07 | 0.90 | 3.64  | -     | 715.2    |
| AHQ-10-9, 3932              | K.HLWDDYTFGPEK.L                                                        | 1393.52736 | 2 | 1.37E-05 | 0.69 | 2.77  | -     | 442.2    |
| AHQ-10-9, 3543              | K.LCYVGYNIEQEQK.L                                                       | 1645.81494 | 2 | 1.27E-06 | 0.78 | 2.72  | -     | 535.0    |
| AHQ-10-8, 3681              | K.LCYVGYNIEQEQK.L                                                       | 1645.81494 | 2 | 1.08E-05 | 0.94 | 3.58  | -     | 1353.6   |
| gi 16751921 ref NP_444513.1 | dermcidin precursor; AIDD protein [Homo sapiens]                        |            |   | 2.31E-09 | 1.71 | 20.20 | 12.70 | 11283.8  |

|                            |                                                                         |            |   |          |      |      |   |        |
|----------------------------|-------------------------------------------------------------------------|------------|---|----------|------|------|---|--------|
| AHQ-10-14-, 3608           | K.DAVEDLESVGK.G                                                         | 1162.22915 | 2 | 4.14E-05 | 0.77 | 3.21 | - | 703.3  |
| AHQ-10-6, 3575             | K.DAVEDLESVGK.G                                                         | 1162.22915 | 2 | 4.01E-06 | 0.79 | 2.79 | - | 926.6  |
| AHQ-10-13-, 3626           | K.DAVEDLESVGK.G                                                         | 1162.22915 | 2 | 6.09E-04 | 0.73 | 2.84 | - | 738.4  |
| AHQ-10-2, 3692             | K.DAVEDLESVGK.G                                                         | 1162.22915 | 2 | 5.76E-05 | 0.76 | 2.73 | - | 824.4  |
| AHQ-10-13, 4108            | K.LGKDAVEDLESVGK.G                                                      | 1460.61186 | 3 | 3.52E-05 | 0.85 | 3.40 | - | 1475.8 |
| AHQ-10-14-, 3714           | K.LGKDAVEDLESVGK.G                                                      | 1460.61186 | 2 | 2.31E-09 | 0.93 | 3.95 | - | 1225.3 |
| AHQ-10-14-, 3720           | K.LGKDAVEDLESVGK.G                                                      | 1460.61186 | 3 | 5.33E-05 | 0.95 | 3.90 | - | 2428.0 |
| AHQ-10-3, 3725             | K.LGKDAVEDLESVGK.G                                                      | 1460.61186 | 2 | 8.54E-07 | 0.90 | 3.78 | - | 1114.8 |
| gj16507237 ref NP_005338.1 | heat shock 70kDa protein 5 (glucose-regulated protein, 78kDa); BIP; he  |            |   |          |      |      |   |        |
| AHQ-10-6, 4105             | R.AKFEELNM*DLFR.S                                                       | 1529.74249 | 2 | 9.29E-06 | 0.90 | 3.67 | - | 840.6  |
| AHQ-10-6, 4817             | R.AKFEELNMDLFR.S                                                        | 1513.74309 | 2 | 2.33E-09 | 0.83 | 2.91 | - | 656.9  |
| AHQ-10-6, 5460 - 5533      | R.IEIESFYEGEDFSETLTRA                                                   | 2166.28328 | 2 | 5.13E-06 | 0.92 | 4.03 | - | 904.7  |
| AHQ-10-6, 4523             | K.IEWLESHQDADIEDFK.A                                                    | 1976.08864 | 2 | 1.87E-06 | 0.96 | 5.39 | - | 1122.5 |
| AHQ-10-6, 3791             | R.ITPSYVAFTPEGER.L                                                      | 1567.72412 | 2 | 8.45E-09 | 0.83 | 3.36 | - | 521.1  |
| AHQ-10-5, 3859 - 3867      | R.ITPSYVAFTPEGER.L                                                      | 1567.72412 | 2 | 1.43E-05 | 0.82 | 3.32 | - | 546.9  |
| AHQ-10-6, 3743             | K.KSDIDEIVLVGGSTR.I                                                     | 1589.77277 | 3 | 1.25E-04 | 0.80 | 3.51 | - | 1024.4 |
| AHQ-10-6, 3689 - 3740      | K.KSDIDEIVLVGGSTR.I                                                     | 1589.77277 | 2 | 6.72E-06 | 0.90 | 3.30 | - | 1188.2 |
| AHQ-10-5, 3811             | K.KSDIDEIVLVGGSTR.I                                                     | 1589.77277 | 2 | 1.26E-08 | 0.97 | 4.93 | - | 1921.0 |
| AHQ-10-5, 3679 - 3739      | K.SQIFSTASDNQPTVTIK.V                                                   | 1838.00865 | 2 | 8.62E-06 | 0.88 | 3.51 | - | 810.9  |
| AHQ-10-6, 3675             | K.SQIFSTASDNQPTVTIK.V                                                   | 1838.00865 | 2 | 2.41E-08 | 0.94 | 4.40 | - | 1080.9 |
| AHQ-10-6, 3103             | K.TKPYQVQDIQGGQTK.T                                                     | 1605.81703 | 2 | 7.97E-07 | 0.79 | 2.74 | - | 770.2  |
| AHQ-10-5, 3948             | K.VTHAVVTVPAYFNDAQR.Q                                                   | 1889.10372 | 3 | 2.60E-04 | 0.91 | 4.55 | - | 848.7  |
| gj4503105 ref NP_001313.1  | cystatin SA precursor; cystatin 2; cystatin S5; salivary cysteine (thio |            |   |          |      |      |   |        |
| AHQ-10-13-, 3620 - 3690    | R.ALHFVISEYNK.A                                                         | 1321.50582 | 2 | 7.68E-04 | 0.92 | 3.43 | - | 1073.4 |
| AHQ-10-13-, 3752           | R.IIEGGYDADLNDER.V                                                      | 1693.79317 | 2 | 2.37E-09 | 0.97 | 4.76 | - | 1354.2 |
| AHQ-10-13, 4127 - 4207     | R.IIEGGYDADLNDER.V                                                      | 1693.79317 | 2 | 9.31E-08 | 0.95 | 4.90 | - | 990.7  |
| gj10716563 ref NP_001737.1 | calnexin [Homo sapiens]                                                 |            |   |          |      |      |   |        |
| AHQ-10-5, 2416 - 2456      | K.AEEDEILNR.S                                                           | 1089.13826 | 2 | 5.34E-05 | 0.89 | 3.27 | - | 1192.7 |
| AHQ-10-7, 4692             | K.APVPTGEVYFADSFDR.G                                                    | 1771.90722 | 2 | 4.70E-09 | 0.82 | 2.91 | - | 802.6  |
| AHQ-10-5, 4759             | K.APVPTGEVYFADSFDR.G                                                    | 1771.90722 | 2 | 3.58E-06 | 0.91 | 3.56 | - | 1085.4 |
| AHQ-10-12, 4685            | K.APVPTGEVYFADSFDR.G                                                    | 1771.90722 | 2 | 4.82E-05 | 0.38 | 2.60 | - | 656.5  |
| AHQ-10-11, 4624            | K.APVPTGEVYFADSFDR.G                                                    | 1771.90722 | 2 | 2.52E-09 | 0.84 | 2.95 | - | 816.9  |
| AHQ-10-5, 3891             | K.IPDPPEAVKPDWDDEDAPAK.I                                                | 2109.23496 | 2 | 4.46E-06 | 0.91 | 4.36 | - | 579.3  |
| AHQ-10-5, 3889             | K.IPDPPEAVKPDWDDEDAPAK.I                                                | 2109.23496 | 3 | 1.57E-07 | 0.89 | 3.88 | - | 878.7  |
| AHQ-10-5, 5868             | R.KIPNPDFEDELPEFR.M                                                     | 1865.07739 | 3 | 3.46E-06 | 0.96 | 4.75 | - | 2134.5 |
| gj14149734 ref NP_065174.1 | coronin, actin binding protein, 1B [Homo sapiens]                       |            |   |          |      |      |   |        |
| AHQ-10-6, 6204             | R.KSDLFQDDLYPDTAGPEAALEAEWVSGR.D                                        | 3211.39431 | 3 | 2.70E-09 | 0.92 | 4.72 | - | 915.9  |
| gj13994151 ref NP_066272.1 | PDZ and LIM domain 1 (elfin); carboxy terminal LIM domain protein 1 [H  |            |   |          |      |      |   |        |
| AHQ-10-13-, 4381           | K.CGTVGIVGFVK.L                                                         | 1138.36198 | 2 | 1.46E-05 | 0.92 | 3.15 | - | 1235.0 |
| AHQ-10-13-, 3577           | K.DFEQPLAIR.V                                                           | 1176.30388 | 2 | 6.24E-05 | 0.85 | 2.62 | - | 1049.9 |
| AHQ-10-11, 3523            | K.DFEQPLAIR.V                                                           | 1176.30388 | 2 | 7.94E-07 | 0.93 | 3.63 | - | 1128.8 |
| AHQ-10-13, 3992            | K.DFEQPLAIR.V                                                           | 1176.30388 | 2 | 1.36E-05 | 0.92 | 3.48 | - | 923.7  |
| AHQ-10-14-, 3594 - 3606    | K.DFEQPLAIR.V                                                           | 1176.30388 | 2 | 1.51E-04 | 0.92 | 3.56 | - | 930.0  |
| AHQ-10-13-, 3370           | K.GCTDNLLTVAR.S                                                         | 1322.47058 | 2 | 5.61E-04 | 0.80 | 3.01 | - | 742.1  |
| AHQ-10-9, 3769             | K.GHFFVEDQIYCEK.H                                                       | 1673.82684 | 2 | 1.12E-05 | 0.82 | 3.08 | - | 610.3  |
| AHQ-10-14-, 3913 - 3956    | K.GHFFVEDQIYCEK.H                                                       | 1673.82684 | 2 | 7.40E-06 | 0.93 | 3.88 | - | 902.9  |
| AHQ-10-11, 3894            | K.GHFFVEDQIYCEK.H                                                       | 1673.82684 | 2 | 8.06E-04 | 0.73 | 3.25 | - | 400.4  |
| AHQ-10-12, 3964 - 3969     | K.GHFFVEDQIYCEK.H                                                       | 1673.82684 | 2 | 6.29E-06 | 0.95 | 4.27 | - | 1159.7 |
| AHQ-10-14-, 3248           | R.IKGGTNDLTLTVAR.S                                                      | 1563.80174 | 2 | 5.18E-09 | 0.91 | 4.07 | - | 877.8  |
| AHQ-10-13-, 3276           | R.IKGGTNDLTLTVAR.S                                                      | 1563.80174 | 2 | 1.73E-08 | 0.94 | 4.05 | - | 1000.2 |
| AHQ-10-13, 3676            | R.IKGGTNDLTLTVAR.S                                                      | 1563.80174 | 2 | 2.78E-09 | 0.95 | 4.52 | - | 1081.0 |
| AHQ-10-12, 3278 - 3281     | R.IKGGTNDLTLTVAR.S                                                      | 1563.80174 | 2 | 2.93E-07 | 0.93 | 4.08 | - | 821.1  |
| AHQ-10-9, 3009 - 3076      | R.IKGGTNDLTLTVAR.S                                                      | 1563.80174 | 2 | 1.73E-05 | 0.82 | 3.42 | - | 693.4  |
| AHQ-10-14-, 4613           | K.LPMDCKCGTGVGFVK.L                                                     | 1900.27298 | 2 | 5.26E-04 | 0.76 | 2.80 | - | 649.1  |
| AHQ-10-14-, 4622           | K.LPMDCKCGTGVGFVK.L                                                     | 1900.27298 | 3 | 3.25E-04 | 0.85 | 3.51 | - | 895.4  |
| AHQ-10-14-, 3752           | R.LVGGKDFEQPLAIR.V                                                      | 1630.86972 | 2 | 6.93E-06 | 0.94 | 4.33 | - | 1115.6 |
| AHQ-10-13, 4119            | R.LVGGKDFEQPLAIR.V                                                      | 1630.86972 | 2 | 8.16E-05 | 0.79 | 3.49 | - | 621.8  |
| AHQ-10-13-, 3760           | R.LVGGKDFEQPLAIR.V                                                      | 1630.86972 | 2 | 6.30E-06 | 0.95 | 4.38 | - | 1265.2 |
| AHQ-10-12, 6100            | K.QSTSFVLVQELIESEEEK.G                                                  | 1981.18977 | 2 | 1.45E-04 | 0.82 | 3.11 | - | 815.9  |
| AHQ-10-13-, 5770 - 5782    | K.QSTSFVLVQELIESEEEK.G                                                  | 3037.32681 | 3 | 2.17E-07 | 0.76 | 3.55 | - | 590.1  |
| AHQ-10-13-, 2521           | R.SAM*PFTASPASSTTAR.V                                                   | 1599.74799 | 2 | 2.61E-05 | 0.53 | 2.72 | - | 606.8  |
| AHQ-10-13-, 3281           | K.VWSPLVTEEGKR.H                                                        | 1401.59247 | 2 | 1.80E-04 | 0.90 | 3.13 | - | 1007.7 |
| AHQ-10-11, 3214 - 3215     | K.VWSPLVTEEGKR.H                                                        | 1401.59247 | 2 | 5.50E-06 | 0.78 | 2.80 | - | 617.6  |
| gj5123454 ref NP_005336.2  | heat shock 70kDa protein 1A; heat shock 70kD protein 1A; heat shock-ind |            |   |          |      |      |   |        |
| AHQ-10-6, 3328 - 3391      | K.AQIHDLVLVGGSTR.I                                                      | 1466.66769 | 2 | 1.38E-08 | 0.97 | 4.86 | - | 1548.6 |
| AHQ-10-6, 4563 - 4564      | K.DAGVIAGLNLVLR.L                                                       | 1198.39736 | 2 | 3.63E-06 | 0.97 | 4.56 | - | 1873.0 |
| AHQ-10-6, 5648 - 5716      | K.ELEQVCNPIISGLYQAGGPGPGGGAQPK.G                                        | 3058.37100 | 3 | 4.12E-04 | 0.97 | 5.55 | - | 2053.5 |
| AHQ-10-6, 3987             | K.NQVALNPQNTVFDKAR.R                                                    | 1659.82478 | 2 | 3.24E-09 | 0.88 | 3.46 | - | 771.8  |
| AHQ-10-6, 3687             | K.NQVALNPQNTVFDKAR.R                                                    | 1659.82478 | 2 | 2.86E-07 | 0.95 | 4.29 | - | 856.6  |
| AHQ-10-6, 6139 - 6180      | K.SINPDEAVAYGAAVQAAIILM*GDK.S                                           | 2321.59293 | 2 | 5.36E-06 | 0.64 | 2.99 | - | 565.8  |
| gj21314617 ref NP_000433.2 | platelet/endothelial cell adhesion molecule (CD31 antigen); platelet/e  |            |   |          |      |      |   |        |
| AHQ-10-4, 5959             | K.CTIQVTHLAQEFPEIIQK.D                                                  | 2270.63371 | 3 | 2.21E-06 | 0.90 | 3.72 | - | 1168.5 |
| AHQ-10-3, 5655 - 5723      | R.DQNFVILEFPVEEQDR.V                                                    | 1979.13566 | 2 | 2.57E-04 | 0.81 | 3.38 | - | 738.2  |
| AHQ-10-1, 5779             | R.DQNFVILEFPVEEQDR.V                                                    | 1979.13566 | 2 | 4.25E-05 | 0.71 | 3.01 | - | 808.9  |
| AHQ-10-4, 5868             | R.DQNFVILEFPVEEQDR.V                                                    | 1979.13566 | 2 | 3.48E-05 | 0.46 | 2.63 | - | 401.4  |
| AHQ-10-4, 5745             | R.DQNFVILEFPVEEQDR.V                                                    | 1979.13566 | 3 | 6.80E-05 | 0.87 | 4.05 | - | 858.7  |
| AHQ-10-4, 5731             | R.DQNFVILEFPVEEQDR.V                                                    | 1979.13566 | 2 | 7.46E-04 | 0.74 | 3.23 | - | 629.6  |
| AHQ-10-5, 5723 - 5736      | R.DQNFVILEFPVEEQDR.V                                                    | 1979.13566 | 2 | 7.91E-08 | 0.78 | 3.94 | - | 594.0  |
| AHQ-10-4, 4092             | R.ISYDAQFEVIK.G                                                         | 1313.48046 | 2 | 1.61E-08 | 0.94 | 3.37 | - | 1322.9 |
| AHQ-10-5, 4084             | R.ISYDAQFEVIK.G                                                         | 1313.48046 | 2 | 4.16E-09 | 0.82 | 3.09 | - | 765.0  |
| AHQ-10-4, 4204 - 4205      | K.SELVTVFESFSTPK.F                                                      | 1525.68231 | 2 | 9.22E-04 | 0.64 | 2.94 | - | 491.2  |
| AHQ-10-4, 4072             | K.STESYFPEVR.I                                                          | 1328.45199 | 2 | 7.49E-04 | 0.86 | 2.89 | - | 696.0  |
| AHQ-10-4, 5227 - 5276      | K.VIAPVDEVQISILSSK.V                                                    | 1698.98227 | 2 | 2.57E-05 | 0.68 | 2.88 | - | 329.7  |
| gj15723376 ref NP_277050.1 | MacGAP protein [Homo sapiens]                                           |            |   |          |      |      |   |        |
| AHQ-10-5, 3331             | R.FLSQESVAQTLK.K                                                        | 1408.58178 | 2 | 4.45E-09 | 0.95 | 3.68 | - | 1726.8 |
| gj19743813 ref NP_002202.2 | integrin beta 1 isoform 1A precursor; integrin VLA-4 beta subunit; fib  |            |   |          |      |      |   |        |
| AHQ-10-3, 4919             | K.LKPEDITQIQPQLVLR.L                                                    | 2020.36187 | 2 | 4.59E-09 | 0.92 | 4.50 | - | 701.5  |
| AHQ-10-3, 4917             | K.LKPEDITQIQPQLVLR.L                                                    | 2020.36187 | 3 | 5.20E-05 | 0.80 | 3.89 | - | 703.7  |
| AHQ-10-3, 6294 - 6329      | K.LSENNIQTIFAITEEFOPVYK.E                                               | 2471.74650 | 2 | 3.60E-07 | 0.75 | 2.89 | - | 518.5  |
| AHQ-10-3, 6226 - 6295      | K.LSENNIQTIFAITEEFOPVYK.E                                               | 2471.74650 | 3 | 1.83E-05 | 0.86 | 3.60 | - | 1131.9 |
| gj4507109 ref NP_000336.1  | alpha-synuclein isoform NACP140; non A4 component of amyloid precursor  |            |   |          |      |      |   |        |
| AHQ-10-12, 4181            | K.TKEQVTNVGGAVVTGVTAVAQK.T                                              | 2158.44170 | 2 | 7.35E-06 | 0.88 | 3.68 | - | 867.8  |
| AHQ-10-13-, 4106           | K.TVEGAGSIAAATGFVK.K                                                    | 1479.66001 | 2 | 4.97E-09 | 0.72 | 2.92 | - | 676.8  |
| gj13562114 ref NP_110400.1 | beta tubulin 1, class VI [Homo sapiens]                                 |            |   |          |      |      |   |        |
| AHQ-10-8, 5879 - 5951      | R.ALSVAELTQQMFDAR.N                                                     | 1680.90740 | 2 | 2.61E-04 | 0.73 | 2.85 | - | 848.7  |
| AHQ-10-7, 5749 - 5829      | R.ALSVAELTQQMFDAR.N                                                     | 1680.90740 | 2 | 4.69E-06 | 0.94 | 4.54 | - | 1307.3 |
| AHQ-10-7, 5830             | R.ALSVAELTQQMFDAR.N                                                     | 1680.90740 | 2 | 8.87E-04 | 0.83 | 3.03 | - | 1175.6 |
| AHQ-10-14-, 4037           | R.AVLVLEPQGT*DSIR.S                                                     | 1632.86102 | 2 | 1.79E-04 | 0.65 | 2.54 | - | 647.2  |
| AHQ-10-14-, 4636 - 4692    | R.AVLVLEPQGT*DSIR.S                                                     | 1616.86162 | 2 | 4.59E-07 | 0.90 | 4.12 | - | 597.3  |
| AHQ-10-8, 6306             | K.GHYTEGALIEVLEVV.R.H                                                   | 2029.23935 | 2 | 1.58E-07 | 0.98 | 6.84 | - | 2565.7 |
| AHQ-10-11, 6063 - 6132     | K.GHYTEGALIEVLEVV.R.H                                                   | 2029.23935 | 2 | 5.50E-05 | 0.89 | 3.82 | - | 1072.7 |
| AHQ-10-13-, 6192           | K.GHYTEGALIEVLEVV.R.H                                                   | 2029.23935 | 3 | 2.50E-04 | 0.89 | 4.01 | - | 1689.2 |
| AHQ-10-13-, 6193 - 6194    | K.GHYTEGALIEVLEVV.R.H                                                   | 2029.23935 | 2 | 2.20E-05 | 0.98 | 6.58 | - | 2258.7 |
| AHQ-10-7, 6272             | K.GHYTEGALIEVLEVV.R.H                                                   | 2029.23935 | 2 | 5.79E-09 | 0.98 | 6.67 | - | 2169.2 |
| AHQ-10-14-, 6002 - 6036    | R.GLSM*AATFIGNNTAIQEIFNR.V                                              | 2285.56551 | 2 | 1.83E-04 | 0.94 | 4.66 | - | 827.3  |
| AHQ-10-7, 6012             | R.GLSM*AATFIGNNTAIQEIFNR.V                                              | 2285.56551 | 2 | 7.21E-04 | 0.69 | 2.80 | - | 535.4  |
| AHQ-10-7, 3834 - 3906      | R.IMNSFVMPSPK.V                                                         | 1338.62160 | 2 | 1.37E-04 | 0.46 | 2.53 | - | 505.3  |

|                             |                                                                          |            |   |          |       |        |       |          |
|-----------------------------|--------------------------------------------------------------------------|------------|---|----------|-------|--------|-------|----------|
| AHQ-10-7, 3168 - 3172       | R.ISVYYNEAYGR.K                                                          | 1335.44622 | 2 | 3.32E-07 | 0.92  | 3.37   | -     | 939.6    |
| AHQ-10-10, 3154             | R.ISVYYNEAYGR.K                                                          | 1335.44622 | 2 | 3.63E-05 | 0.82  | 2.62   | -     | 888.4    |
| AHQ-10-13, 3248 - 3300      | R.ISVYYNEAYGR.K                                                          | 1335.44622 | 2 | 7.17E-06 | 0.94  | 3.53   | -     | 1211.0   |
| AHQ-10-7, 4954              | K.LGALFQPDPSFVHNGSGAGNNWAK.G                                             | 2388.58260 | 3 | 3.98E-08 | 0.80  | 3.78   | -     | 647.4    |
| AHQ-10-7, 5553              | R.LHFFMPGFAPLTAQGSQQYR.A                                                 | 2297.62284 | 2 | 5.27E-06 | 0.82  | 3.41   | -     | 510.8    |
| AHQ-10-7, 4944              | R.LHFFM*PGFAPLTAQGSQQYR.A                                                | 2313.62224 | 3 | 5.62E-04 | 0.77  | 3.29   | -     | 1233.3   |
| AHQ-10-7, 4953              | R.LHFFM*PGFAPLTAQGSQQYR.A                                                | 2313.62224 | 2 | 2.35E-04 | 0.93  | 4.08   | -     | 839.5    |
| AHQ-10-11, 5446             | R.LHFFMPGFAPLTAQGSQQYR.A                                                 | 2297.62284 | 3 | 4.22E-05 | 0.87  | 3.55   | -     | 1511.7   |
| AHQ-10-7, 6194              | K.LTTPPTYGDLNHLVSLTM*SGITSLR.F                                           | 2709.06919 | 3 | 2.97E-05 | 0.91  | 4.58   | -     | 946.1    |
| AHQ-10-12, 6080 - 6082      | K.LTTPPTYGDLNHLVSLTM*SGITSLR.F                                           | 2709.06919 | 3 | 4.54E-05 | 0.61  | 3.02   | -     | 721.3    |
| AHQ-10-7, 6213 - 6278       | K.LTTPPTYGDLNHLVSLTM*SGITSLR.F                                           | 2693.06979 | 3 | 8.21E-04 | 0.81  | 3.17   | -     | 1069.2   |
| AHQ-10-8, 6409              | K.LTTPPTYGDLNHLVSLTM*SGITSLR.F                                           | 2693.06979 | 3 | 1.09E-06 | 0.91  | 4.01   | -     | 1172.7   |
| AHQ-10-9, 4817 - 4879       | R.NSSCFVEWIPNNVK.V                                                       | 1695.87718 | 2 | 3.58E-04 | 0.79  | 3.42   | -     | 576.2    |
| AHQ-10-7, 3161              | R.VSEHFSAMFK.R                                                           | 1183.36152 | 2 | 3.06E-04 | 0.82  | 2.61   | -     | 924.0    |
| gi 7669492 ref NP_002037.2  | glyceraldehyde-3-phosphate dehydrogenase [Homo sapiens]                  |            |   | 7.29E-09 | 1.80  | 20.21  | 10.70 | 36053.0  |
| AHQ-10-9, 3912 - 3989       | K.RVIISAPSADAMPVM*GVNHEK.Y                                               | 2386.77962 | 3 | 7.32E-04 | 0.86  | 4.15   | -     | 1044.9   |
| AHQ-10-9, 3820              | R.VPTANVSVVDLTCR.L                                                       | 1532.74450 | 3 | 3.86E-05 | 0.87  | 3.82   | -     | 1228.9   |
| AHQ-10-9, 3887 - 3943       | R.VPTANVSVVDLTCR.L                                                       | 1532.74450 | 2 | 1.00E-06 | 0.95  | 3.79   | -     | 1434.4   |
| AHQ-10-9, 3783 - 3843       | R.VPTANVSVVDLTCR.L                                                       | 1532.74450 | 2 | 1.42E-08 | 0.92  | 4.05   | -     | 849.5    |
| AHQ-10-6, 4005              | R.VPTANVSVVDLTCR.L                                                       | 1532.74450 | 2 | 9.37E-06 | 0.84  | 3.38   | -     | 628.1    |
| AHQ-10-10, 3919 - 3984      | R.VPTANVSVVDLTCR.L                                                       | 1532.74450 | 2 | 1.67E-07 | 0.93  | 3.34   | -     | 1136.3   |
| AHQ-10-11, 3962 - 3968      | R.VPTANVSVVDLTCR.L                                                       | 1532.74450 | 2 | 7.29E-09 | 0.93  | 4.01   | -     | 1030.5   |
| AHQ-10-13, 4391 - 4451      | R.VPTANVSVVDLTCR.L                                                       | 1532.74450 | 2 | 5.37E-04 | 0.54  | 2.57   | -     | 505.8    |
| AHQ-10-14, 4819             | R.VPTANVSVVDLTCR.L                                                       | 1532.74450 | 2 | 6.60E-05 | 0.73  | 2.74   | -     | 601.2    |
| AHQ-10-13, 4041             | R.VPTANVSVVDLTCR.L                                                       | 1532.74450 | 2 | 3.40E-08 | 0.91  | 3.80   | -     | 793.5    |
| AHQ-10-14, 4028 - 4030      | R.VPTANVSVVDLTCR.L                                                       | 1532.74450 | 2 | 9.58E-08 | 0.96  | 4.21   | -     | 1270.6   |
| gi 10863927 ref NP_066953.1 | peptidylprolyl isomerase A (cyclophilin A) [Homo sapiens]                |            |   | 7.76E-09 | 3.79  | 50.26  | 30.90 | 18012.4  |
| AHQ-10-12, 3929             | K.FEDENFLK.H                                                             | 1155.28144 | 2 | 2.95E-04 | 0.65  | 3.10   | -     | 503.0    |
| AHQ-10-14, 3332             | K.KITADCGQLE                                                             | 1249.41637 | 2 | 5.59E-04 | 0.87  | 3.79   | -     | 1091.1   |
| AHQ-10-12, 4512             | K.SIYGEKFEDENFLK.H                                                       | 1833.03047 | 2 | 7.76E-09 | 0.97  | 5.20   | -     | 1612.1   |
| AHQ-10-13, 4565             | K.SIYGEKFEDENFLK.H                                                       | 1833.03047 | 2 | 1.38E-05 | 0.92  | 4.28   | -     | 883.6    |
| AHQ-10-14, 4557             | K.SIYGEKFEDENFLK.H                                                       | 1833.03047 | 2 | 3.40E-07 | 0.95  | 4.71   | -     | 1101.0   |
| AHQ-10-12, 2649 - 2717      | K.VKEGMNIVEAM*ER.F                                                       | 1522.77330 | 2 | 7.88E-04 | 0.78  | 2.76   | -     | 950.4    |
| AHQ-10-14, 4525             | R.VSFLFADKVPK.P                                                          | 1380.61317 | 2 | 1.24E-04 | 0.81  | 2.97   | -     | 814.2    |
| AHQ-10-12, 4484             | R.VSFLFADKVPK.P                                                          | 1380.61317 | 2 | 4.38E-06 | 0.89  | 3.57   | -     | 905.0    |
| AHQ-10-12, 4493             | R.VSFLFADKVPK.P                                                          | 1380.61317 | 3 | 1.82E-07 | 0.51  | 3.19   | -     | 335.0    |
| gi 4506925 ref NP_003013.1  | SH3 domain binding glutamic acid-rich protein like; SH3-binding domain   |            |   | 7.79E-09 | 2.78  | 30.26  | 50.00 | 12774.2  |
| AHQ-10-13, 5840 - 5896      | R.ENNAVYAFGLTAPPGSK.E                                                    | 1850.06426 | 2 | 1.19E-05 | 0.95  | 4.73   | -     | 1111.0   |
| AHQ-10-13, 5895 - 5953      | R.ENNAVYAFGLTAPPGSK.E                                                    | 1850.06426 | 2 | 2.01E-04 | 0.90  | 4.36   | -     | 653.7    |
| AHQ-10-13, 4872 - 4948      | R.ENVPENSRPATGYPLPPQIFNESQYR.G                                           | 3005.24660 | 3 | 2.89E-07 | 0.90  | 4.58   | -     | 679.0    |
| AHQ-10-13, 4748 - 4814      | R.ENVPENSRPATGYPLPPQIFNESQYR.G                                           | 3005.24660 | 3 | 7.79E-09 | 0.92  | 5.20   | -     | 869.0    |
| AHQ-10-13, 2422 - 2485      | R.VYIASSSGSTAIK.K                                                        | 1284.44065 | 2 | 4.72E-05 | 0.91  | 3.55   | -     | 1596.5   |
| gi 27498332 ref XP_212565.1 | similar to tubulin, beta 5 [Homo sapiens]                                |            |   | 8.27E-09 | 3.20  | 40.26  | 9.90  | 49670.5  |
| AHQ-10-8, 5401              | R.ALTVPQLTQQVDAK.N                                                       | 1660.89259 | 2 | 4.14E-05 | 0.72  | 2.92   | -     | 377.6    |
| AHQ-10-11, 5250             | R.ALTVPQLTQQVDAK.N                                                       | 1660.89259 | 2 | 9.05E-04 | 0.70  | 2.89   | -     | 543.7    |
| AHQ-10-8, 3382              | R.IM*NTFSVSPK.V                                                          | 1336.58217 | 2 | 1.19E-04 | 0.87  | 3.36   | -     | 979.9    |
| AHQ-10-9, 3588 - 3641       | R.IM*NTFSVSPK.V                                                          | 1320.58277 | 2 | 3.15E-06 | 0.69  | 2.62   | -     | 983.6    |
| AHQ-10-7, 3358              | R.IM*NTFSVSPK.V                                                          | 1336.58217 | 2 | 1.32E-04 | 0.61  | 2.54   | -     | 718.1    |
| AHQ-10-8, 5999              | K.M*AVTFIGNSTAIQELFK.R                                                   | 1887.18942 | 2 | 7.54E-06 | 0.92  | 3.84   | -     | 774.5    |
| AHQ-10-8, 6226              | K.M*AVTFIGNSTAIQELFK.R                                                   | 1887.18942 | 2 | 3.36E-04 | 0.75  | 3.06   | -     | 567.2    |
| AHQ-10-7, 6180              | K.M*AVTFIGNSTAIQELFK.R                                                   | 1887.18942 | 2 | 4.77E-08 | 0.96  | 5.23   | -     | 855.6    |
| AHQ-10-7, 5866 - 5937       | K.M*AVTFIGNSTAIQELFK.R                                                   | 1887.18942 | 2 | 1.92E-04 | 0.96  | 4.85   | -     | 1346.3   |
| AHQ-10-11, 6060 - 6131      | K.M*AVTFIGNSTAIQELFK.R                                                   | 1887.18942 | 2 | 4.89E-04 | 0.33  | 2.71   | -     | 318.0    |
| AHQ-10-12, 6084             | K.M*AVTFIGNSTAIQELFK.R                                                   | 1887.18942 | 2 | 8.30E-04 | 0.71  | 3.08   | -     | 458.7    |
| AHQ-10-13, 6175 - 6247      | K.M*AVTFIGNSTAIQELFK.R                                                   | 1887.18942 | 2 | 1.90E-05 | 0.93  | 4.12   | -     | 984.1    |
| AHQ-10-13, 6312             | K.M*AVTFIGNSTAIQELFK.R                                                   | 1887.18942 | 2 | 1.78E-05 | 0.94  | 4.47   | -     | 868.6    |
| AHQ-10-13, 5990 - 6056      | K.M*AVTFIGNSTAIQELFK.R                                                   | 1887.18942 | 2 | 4.65E-04 | 0.70  | 3.52   | -     | 478.2    |
| AHQ-10-14, 5921             | K.M*AVTFIGNSTAIQELFK.R                                                   | 1887.18942 | 2 | 1.79E-08 | 0.90  | 3.59   | -     | 881.9    |
| AHQ-10-14, 6101 - 6169      | K.M*AVTFIGNSTAIQELFK.R                                                   | 1887.18942 | 2 | 8.27E-09 | 0.92  | 4.32   | -     | 701.6    |
| gi 4557385 ref NP_000055.1  | complement component 3 precursor; acylation-stimulating protein cleavage |            |   | 8.45E-09 | 2.84  | 30.28  | 3.10  | 187162.3 |
| AHQ-10-6, 5560              | K.EYVLPSEFVIVPEK.F                                                       | 1880.12704 | 2 | 2.89E-06 | 0.94  | 4.59   | -     | 889.2    |
| AHQ-10-6, 3573              | R.IPIEDSGSEVLSR.K                                                        | 1471.63788 | 2 | 8.45E-09 | 0.93  | 3.34   | -     | 1199.3   |
| AHQ-10-6, 4365              | R.VPVAQQEDTVQSLTQGDGVAK.L                                                | 2199.40432 | 2 | 2.75E-04 | 0.97  | 5.65   | -     | 949.9    |
| gi 4503631 ref NP_000120.1  | coagulation factor XIII A1 subunit precursor; Coagulation factor XIII,   |            |   | 8.73E-09 | 14.74 | 170.29 | 24.60 | 83232.8  |
| AHQ-10-6, 2635              | K.DGTHVVENVATHIGK.L                                                      | 1692.81163 | 2 | 3.66E-04 | 0.75  | 2.93   | -     | 803.9    |
| AHQ-10-5, 2663              | K.DGTHVVENVATHIGK.L                                                      | 1692.81163 | 2 | 1.08E-05 | 0.93  | 4.20   | -     | 968.3    |
| AHQ-10-7, 2637              | K.DGTHVVENVATHIGK.L                                                      | 1692.81163 | 3 | 1.02E-05 | 0.91  | 3.55   | -     | 1349.6   |
| AHQ-10-5, 2659 - 2661       | K.DGTHVVENVATHIGK.L                                                      | 1692.81163 | 3 | 1.72E-08 | 0.95  | 4.66   | -     | 1301.2   |
| AHQ-10-5, 6495 - 6565       | K.EAVLIQAEYIM*GQLLEQASLHFFVTAR.I                                         | 3039.45415 | 3 | 7.26E-06 | 0.91  | 4.42   | -     | 841.2    |
| AHQ-10-7, 5349              | K.ETFVDVLEPLSFK.K                                                        | 1526.71190 | 2 | 7.69E-06 | 0.87  | 3.52   | -     | 767.8    |
| AHQ-10-5, 4804              | R.GTQVVGSDM*TVTVQFTNPLK.E                                                | 2139.41549 | 2 | 1.07E-06 | 0.93  | 4.62   | -     | 767.1    |
| AHQ-10-6, 5271 - 5351       | K.GTYIPVPIVSELQSGK.W                                                     | 1688.94594 | 2 | 2.67E-05 | 0.58  | 2.83   | -     | 247.1    |
| AHQ-10-11, 5196 - 5198      | K.GTYIPVPIVSELQSGK.W                                                     | 1688.94594 | 2 | 6.45E-05 | 0.71  | 3.58   | -     | 243.8    |
| AHQ-10-5, 5473 - 5475       | K.GTYIPVPIVSELQSGK.W                                                     | 1688.94594 | 2 | 2.17E-04 | 0.67  | 3.37   | -     | 258.4    |
| AHQ-10-5, 5383 - 5415       | K.GTYIPVPIVSELQSGK.W                                                     | 1688.94594 | 2 | 2.33E-08 | 0.83  | 3.01   | -     | 543.1    |
| AHQ-10-11, 6146             | R.GVNLQEFLNVTSVHLFK.E                                                    | 1946.23831 | 2 | 6.08E-06 | 0.92  | 3.70   | -     | 1008.7   |
| AHQ-10-7, 6292 - 6350       | R.GVNLQEFLNVTSVHLFK.E                                                    | 1946.23831 | 2 | 3.72E-06 | 0.88  | 4.04   | -     | 749.0    |
| AHQ-10-6, 6241              | R.GVNLQEFLNVTSVHLFK.E                                                    | 1946.23831 | 2 | 8.73E-09 | 0.94  | 4.53   | -     | 1038.2   |
| AHQ-10-5, 6364              | R.GVNLQEFLNVTSVHLFK.E                                                    | 1946.23831 | 2 | 5.74E-07 | 0.97  | 5.34   | -     | 1272.1   |
| AHQ-10-7, 2328              | K.KDGHVVENVDATHIGK.L                                                     | 1820.98455 | 3 | 1.28E-05 | 0.94  | 4.75   | -     | 1270.0   |
| AHQ-10-5, 2340              | K.KDGHVVENVDATHIGK.L                                                     | 1820.98455 | 3 | 6.90E-08 | 0.98  | 5.72   | -     | 2264.5   |
| AHQ-10-5, 2525              | K.KDGHVVENVDATHIGK.L                                                     | 1820.98455 | 2 | 2.73E-04 | 0.77  | 2.77   | -     | 871.4    |
| AHQ-10-5, 2853              | R.KLIASMSDLSR.H                                                          | 1308.53039 | 2 | 6.97E-05 | 0.94  | 3.73   | -     | 1322.5   |
| AHQ-10-5, 4581              | R.LALETALMYGAK.K                                                         | 1281.54655 | 2 | 6.99E-07 | 0.96  | 4.23   | -     | 1687.3   |
| AHQ-10-7, 4488              | R.LALETALMYGAK.K                                                         | 1281.54655 | 2 | 2.41E-06 | 0.96  | 4.10   | -     | 1388.6   |
| AHQ-10-7, 4085              | R.LALETALMYGAK.K                                                         | 1297.54595 | 2 | 6.37E-04 | 0.87  | 3.36   | -     | 750.9    |
| AHQ-10-6, 4504 - 4505       | R.LALETALMYGAK.K                                                         | 1281.54655 | 2 | 1.88E-08 | 0.88  | 3.25   | -     | 1047.3   |
| AHQ-10-5, 4183 - 4217       | R.LALETALMYGAK.K                                                         | 1297.54595 | 2 | 2.55E-08 | 0.94  | 4.00   | -     | 1081.1   |
| AHQ-10-5, 2304              | K.LIASM*SSDLSR.H                                                         | 1196.35688 | 2 | 4.92E-05 | 0.93  | 3.57   | -     | 846.6    |
| AHQ-10-5, 1917 - 1933       | R.LSIQSSPK.C                                                             | 859.99043  | 2 | 6.96E-04 | 0.63  | 2.73   | -     | 567.5    |
| AHQ-10-5, 3463              | K.QIGGDGM*MDITDTYK.F                                                     | 1661.83636 | 2 | 4.20E-04 | 0.40  | 2.69   | -     | 481.0    |
| AHQ-10-5, 2891 - 2893       | K.QIGGDGM*MDITDTYK.F                                                     | 1677.83576 | 2 | 2.68E-07 | 0.84  | 3.90   | -     | 479.9    |
| AHQ-10-5, 5063              | R.SNVDMDFEVENAVLGK.D                                                     | 1767.93869 | 2 | 2.83E-08 | 0.97  | 5.50   | -     | 1934.8   |
| AHQ-10-5, 4433 - 4499       | R.SNVDMDFEVENAVLGK.D                                                     | 1767.93869 | 2 | 2.20E-07 | 0.97  | 4.76   | -     | 2017.6   |
| AHQ-10-6, 4975 - 4983       | R.SNVDMDFEVENAVLGK.D                                                     | 1767.93869 | 2 | 8.71E-07 | 0.92  | 4.04   | -     | 1188.4   |
| AHQ-10-5, 2423              | R.VEYVIGR.Y                                                              | 835.97056  | 2 | 4.78E-04 | 0.83  | 2.51   | -     | 766.4    |
| gi 5803011 ref NP_001966.1  | enolase 2; enolase-2, gamma, neuronal; neurone-specific enolase; neuron  |            |   | 8.75E-09 | 1.67  | 20.19  | 7.10  | 47263.8  |
| AHQ-10-8, 3991              | K.VNIQGSVTEAIQACK.L                                                      | 1619.82216 | 2 | 8.75E-09 | 0.78  | 3.00   | -     | 658.2    |
| AHQ-10-8, 6094 - 6105       | R.YITDQLGALYQDFVFR.D                                                     | 1860.05915 | 2 | 4.05E-07 | 0.89  | 3.77   | -     | 941.9    |
| gi 4507521 ref NP_001055.1  | transketolase [Homo sapiens]                                             |            |   | 8.82E-09 | 2.41  | 30.23  | 7.20  | 68777.3  |
| AHQ-10-6, 4429              | K.ILATPPQEDAPSVDIANIR.M                                                  | 2021.26036 | 3 | 7.72E-08 | 0.96  | 4.60   | -     | 1595.1   |
| AHQ-10-6, 4419              | K.ILATPPQEDAPSVDIANIR.M                                                  | 2021.26036 | 2 | 8.82E-09 | 0.86  | 3.51   | -     | 556.9    |
| AHQ-10-6, 5480              | K.LDNLVAIDINR.L                                                          | 1369.59192 | 2 | 9.38E-07 | 0.91  | 3.60   | -     | 953.6    |
| AHQ-10-6, 6279              | R.TVPFCSTFAAFFTR.A                                                       | 1653.88190 | 2 | 9.05E-08 | 0.64  | 2.59   | -     | 352.9    |
| gi 4507487 ref NP_003238.1  | thrombospondin 2 [Homo sapiens]                                          |            |   | 8.99E-09 | 1.72  | 20.20  | 2.60  | 129554.5 |
| AHQ-10-2, 4915 - 4971       | R.DDDYAGVFVGYQSSSR.F                                                     | 1814.84582 | 2 | 1.14E-08 | 0.95  | 4.07   | -     | 1228.7   |
| AHQ-10-7, 4764              | R.DDDYAGVFVGYQSSSR.F                                                     | 1814.84582 | 2 | 3.84E-08 | 0.88  | 3.46   | -     | 762.6    |

|                             |                                                                         |            |   |          |      |       |       |          |
|-----------------------------|-------------------------------------------------------------------------|------------|---|----------|------|-------|-------|----------|
| AHQ-10-3, 4842 - 4901       | R.DDDYAGVFVGYQSSSR.F                                                    | 1814.84582 | 2 | 7.85E-04 | 0.91 | 3.74  | -     | 1040.1   |
| AHQ-10-4, 4899 - 4961       | R.DDDYAGVFVGYQSSSR.F                                                    | 1814.84582 | 2 | 8.99E-09 | 0.89 | 3.06  | -     | 1240.1   |
| AHQ-10-1, 4955              | R.DDDYAGVFVGYQSSSR.F                                                    | 1814.84582 | 2 | 1.50E-04 | 0.89 | 2.97  | -     | 1165.4   |
| AHQ-10-7, 2945              | R.NALWHTGNTPGQVR.T                                                      | 1551.69124 | 2 | 4.14E-06 | 0.83 | 2.78  | -     | 912.9    |
| AHQ-10-4, 2732 - 2807       | R.NALWHTGNTPGQVR.T                                                      | 1551.69124 | 2 | 1.93E-04 | 0.70 | 2.69  | -     | 825.1    |
| AHQ-10-3, 2838              | R.NALWHTGNTPGQVR.T                                                      | 1551.69124 | 2 | 9.14E-06 | 0.85 | 2.72  | -     | 1164.5   |
| AHQ-10-13, 2866             | R.NALWHTGNTPGQVR.T                                                      | 1551.69124 | 2 | 2.84E-05 | 0.59 | 2.61  | -     | 631.3    |
| gi 4885609 ref NP_005408.1  | v-src sarcoma (Schmidt-Ruppin A-2) viral oncogene homolog; Protooncogen |            |   | 9.11E-09 | 3.45 | 40.23 | 10.40 | 59834.4  |
| AHQ-10-7, 2316              | R.EVLQDQVER.G                                                           | 988.07707  | 2 | 8.88E-04 | 0.82 | 2.64  | -     | 985.6    |
| AHQ-10-7, 3878              | K.LFGGFNSDVTVTSPQR.A                                                    | 1713.82931 | 2 | 9.27E-07 | 0.83 | 3.49  | -     | 744.4    |
| AHQ-10-7, 2640 - 2648       | R.LTTVCPTSPKPTQGLAK.D                                                   | 1832.11198 | 2 | 3.10E-05 | 0.84 | 3.31  | -     | 601.0    |
| AHQ-10-7, 5889              | R.TQFNLSLQQLVAYYSK.H                                                    | 1790.99681 | 2 | 9.11E-09 | 0.96 | 4.51  | -     | 1334.8   |
| gi 29737978 ref XP_290747.1 | similar to Myosin heavy chain, nonmuscle type B (Cellular myosin heavy  |            |   | 1.02E-08 | 3.56 | 40.25 | 1.50  | 191380.7 |
| AHQ-10-1, 4073              | K.ADFCIIHYAGK.V                                                         | 1296.47641 | 2 | 1.16E-07 | 0.90 | 3.30  | -     | 992.8    |
| AHQ-10-3, 3909 - 3951       | K.ADFCIIHYAGK.V                                                         | 1296.47641 | 2 | 5.11E-06 | 0.91 | 3.46  | -     | 837.7    |
| AHQ-10-5, 3909 - 3911       | K.ADFCIIHYAGK.V                                                         | 1296.47641 | 2 | 2.51E-07 | 0.93 | 3.58  | -     | 1040.7   |
| AHQ-10-6, 3820 - 3847       | K.ADFCIIHYAGK.V                                                         | 1296.47641 | 2 | 1.24E-06 | 0.92 | 3.90  | -     | 954.6    |
| AHQ-10-2, 3975 - 3988       | K.ADFCIIHYAGK.V                                                         | 1296.47641 | 2 | 3.48E-06 | 0.96 | 3.48  | -     | 1750.4   |
| AHQ-10-4, 3931              | K.ADFCIIHYAGK.V                                                         | 1296.47641 | 2 | 2.05E-06 | 0.94 | 4.06  | -     | 1007.3   |
| AHQ-10-3, 3098              | R.AGVLALHEEER.D                                                         | 1224.34854 | 2 | 4.24E-08 | 0.94 | 3.91  | -     | 1371.0   |
| AHQ-10-2, 3146 - 3166       | R.AGVLALHEEER.D                                                         | 1224.34854 | 2 | 6.67E-07 | 0.96 | 4.61  | -     | 1448.2   |
| AHQ-10-4, 3096              | R.AGVLALHEEER.D                                                         | 1224.34854 | 2 | 2.38E-06 | 0.93 | 3.81  | -     | 1368.0   |
| AHQ-10-2, 3155              | R.AGVLALHEEER.D                                                         | 1224.34854 | 3 | 1.47E-05 | 0.60 | 3.03  | -     | 429.9    |
| AHQ-10-6, 3056              | R.AGVLALHEEER.D                                                         | 1224.34854 | 2 | 1.02E-08 | 0.96 | 4.37  | -     | 1786.7   |
| AHQ-10-5, 3071              | R.AGVLALHEEER.D                                                         | 1224.34854 | 2 | 2.35E-07 | 0.86 | 3.72  | -     | 884.9    |
| AHQ-10-6, 3640              | K.DKADFCIIHYAGK.V                                                       | 1539.73719 | 2 | 4.62E-07 | 0.94 | 3.78  | -     | 1418.9   |
| AHQ-10-2, 3784              | K.DKADFCIIHYAGK.V                                                       | 1539.73719 | 2 | 2.35E-05 | 0.97 | 5.00  | -     | 1945.0   |
| AHQ-10-2, 3775              | K.DKADFCIIHYAGK.V                                                       | 1539.73719 | 3 | 1.67E-06 | 0.94 | 4.33  | -     | 1410.9   |
| AHQ-10-5, 4539              | K.LDPHLVDQLR.C                                                          | 1319.53460 | 2 | 5.32E-06 | 0.76 | 2.76  | -     | 597.2    |
| AHQ-10-2, 4618              | K.LDPHLVDQLR.C                                                          | 1319.53460 | 3 | 1.32E-05 | 0.89 | 3.43  | -     | 969.3    |
| AHQ-10-6, 4457              | K.LDPHLVDQLR.C                                                          | 1319.53460 | 2 | 6.97E-04 | 0.69 | 2.73  | -     | 545.9    |
| AHQ-10-4, 4584              | K.LDPHLVDQLR.C                                                          | 1319.53460 | 2 | 9.12E-05 | 0.75 | 2.74  | -     | 391.2    |
| gi 4757810 ref NP_004037.1  | ATP synthase, H+ transporting, mitochondrial F1 complex, alpha subunit, |            |   | 1.06E-08 | 8.10 | 90.22 | 17.90 | 59750.3  |
| AHQ-10-7, 3560              | K.GIRPAINVGLSVSR.V                                                      | 1439.68861 | 2 | 9.34E-05 | 0.95 | 4.45  | -     | 958.1    |
| AHQ-10-7, 5174              | K.GM*SLNLEPDPNVGVVFGNDK.L                                               | 2121.35703 | 2 | 2.02E-07 | 0.92 | 4.47  | -     | 439.9    |
| AHQ-10-7, 5581              | K.GMSLNLEPDPNVGVVFGNDK.L                                                | 2105.35763 | 2 | 5.61E-06 | 0.69 | 2.96  | -     | 493.1    |
| AHQ-10-7, 2946              | R.GYLDKLEPSK.I                                                          | 1150.30633 | 2 | 1.92E-05 | 0.87 | 3.14  | -     | 1019.4   |
| AHQ-10-7, 3536 - 3537       | K.HALIYDDLKSK.Q                                                         | 1288.47413 | 2 | 1.06E-08 | 0.95 | 3.24  | -     | 1332.4   |
| AHQ-10-7, 3624 - 3686       | R.ILGADTSDVLEETGR.V                                                     | 1576.68772 | 2 | 3.10E-07 | 0.95 | 3.75  | -     | 1616.1   |
| AHQ-10-7, 5008              | R.TGAIVDVPPVGEELLGR.V                                                   | 1625.84824 | 2 | 5.50E-04 | 0.92 | 3.94  | -     | 823.5    |
| AHQ-10-7, 2680              | K.TGTAEM*SSILEER.I                                                      | 1440.55928 | 2 | 8.75E-06 | 0.94 | 3.69  | -     | 1528.2   |
| AHQ-10-7, 3729              | K.TGTAEMSSILEER.I                                                       | 1424.55988 | 2 | 4.33E-05 | 0.92 | 3.34  | -     | 1466.6   |
| gi 5453740 ref NP_006462.1  | myosin regulatory light chain MRCL3; myosin, light polypeptide, regulat |            |   | 1.07E-08 | 4.49 | 50.27 | 26.90 | 19794.0  |
| AHQ-10-14, 5777 - 5778      | R.ATSNVFMFDQSQIQEFK.E                                                   | 2092.31741 | 2 | 1.04E-04 | 0.98 | 5.39  | -     | 1865.5   |
| AHQ-10-13, 5769             | R.ATSNVFMFDQSQIQEFK.E                                                   | 2092.31741 | 2 | 7.54E-06 | 0.97 | 4.25  | -     | 1981.6   |
| AHQ-10-13, 5180             | R.ATSNVFM*FQDSQIQEFK.E                                                  | 2108.31681 | 2 | 1.07E-07 | 0.97 | 5.03  | -     | 1569.9   |
| AHQ-10-11, 4994 - 5058      | R.ATSNVFM*FQDSQIQEFK.E                                                  | 2108.31681 | 2 | 6.41E-07 | 0.97 | 5.05  | -     | 1331.8   |
| AHQ-10-11, 5176 - 5254      | R.ATSNVFM*FQDSQIQEFK.E                                                  | 2108.31681 | 2 | 1.07E-08 | 0.96 | 4.91  | -     | 1161.6   |
| AHQ-10-14, 5743 - 5748      | R.ATSNVFM*FQDSQIQEFK.E                                                  | 2108.31681 | 2 | 1.59E-05 | 0.95 | 4.61  | -     | 1324.9   |
| AHQ-10-13, 5472 - 5527      | R.ATSNVFM*FQDSQIQEFK.E                                                  | 2108.31681 | 2 | 2.12E-05 | 0.74 | 2.92  | -     | 762.9    |
| AHQ-10-11, 5538 - 5595      | R.ATSNVFMFDQSQIQEFK.E                                                   | 2092.31741 | 2 | 6.68E-04 | 0.82 | 3.72  | -     | 461.2    |
| AHQ-10-11, 5655             | R.ATSNVFMFDQSQIQEFK.E                                                   | 2092.31741 | 2 | 3.63E-06 | 0.93 | 3.39  | -     | 1358.8   |
| AHQ-10-14, 5169             | R.ATSNVFM*FQDSQIQEFK.E                                                  | 2108.31681 | 2 | 2.05E-07 | 0.97 | 4.96  | -     | 1581.9   |
| AHQ-10-12, 5637 - 5704      | R.ATSNVFMFDQSQIQEFK.E                                                   | 2092.31741 | 2 | 9.15E-06 | 0.77 | 2.90  | -     | 709.5    |
| AHQ-10-11, 5459             | R.DGFIDKEDLHMDLALSLGK.N                                                 | 2005.23806 | 2 | 1.89E-05 | 0.91 | 3.40  | -     | 1258.7   |
| AHQ-10-11, 5454 - 5455      | R.DGFIDKEDLHMDLALSLGK.N                                                 | 2005.23806 | 3 | 3.32E-08 | 0.96 | 4.51  | -     | 1620.3   |
| AHQ-10-11, 4346             | R.DGFIDKEDLHMDLALSLGK.N                                                 | 2021.23746 | 2 | 1.10E-05 | 0.84 | 3.38  | -     | 845.1    |
| AHQ-10-11, 4212             | K.GNFNYIFTR.I                                                           | 1261.36733 | 2 | 1.64E-04 | 0.82 | 2.86  | -     | 899.2    |
| AHQ-10-14, 4102 - 4165      | K.GNFNYIFTR.I                                                           | 1261.36733 | 2 | 1.18E-05 | 0.80 | 3.23  | -     | 672.4    |
| AHQ-10-12, 4137 - 4140      | K.GNFNYIFTR.I                                                           | 1261.36733 | 2 | 9.96E-05 | 0.83 | 3.05  | -     | 835.0    |
| AHQ-10-13, 4555             | K.GNFNYIFTR.I                                                           | 1261.36733 | 2 | 1.94E-04 | 0.85 | 2.75  | -     | 1145.7   |
| AHQ-10-11, 4043 - 4059      | K.GNFNYIFTR.I                                                           | 1261.36733 | 2 | 7.79E-04 | 0.74 | 3.16  | -     | 699.3    |
| gi 4503725 ref NP_000792.1  | FK506-binding protein 1A; FK506-binding protein 1; FK506-binding protei |            |   | 1.10E-08 | 1.87 | 20.27 | 13.00 | 11950.6  |
| AHQ-10-13, 3077             | R.GWEEGVAQM*SVGQR.A                                                     | 1550.67866 | 2 | 1.76E-07 | 0.90 | 3.62  | -     | 948.3    |
| AHQ-10-13, 3860             | R.GWEEGVAQM*SVGQR.A                                                     | 1534.67926 | 2 | 1.10E-08 | 0.98 | 5.33  | -     | 1657.9   |
| AHQ-10-14, 3838             | R.GWEEGVAQM*SVGQR.A                                                     | 1534.67926 | 2 | 3.83E-07 | 0.94 | 3.94  | -     | 1177.8   |
| AHQ-10-13, 3476 - 3488      | R.GWEEGVAQM*SVGQR.A                                                     | 1550.67866 | 2 | 1.10E-04 | 0.80 | 3.04  | -     | 900.7    |
| gi 4758460 ref NP_004479.1  | glycoprotein V (platelet) [Homo sapiens]                                |            |   | 1.13E-08 | 4.51 | 50.23 | 10.20 | 60958.9  |
| AHQ-10-5, 3851              | R.GVLQSQSFGSM*TVLQR.L                                                   | 1754.98948 | 2 | 3.53E-06 | 0.96 | 4.62  | -     | 1372.1   |
| AHQ-10-6, 3783              | R.GVLQSQSFGSM*TVLQR.L                                                   | 1754.98948 | 2 | 1.13E-08 | 0.80 | 3.20  | -     | 784.6    |
| AHQ-10-6, 4472              | R.GVLQSQSFGSM*TVLQR.L                                                   | 1738.99008 | 2 | 2.06E-07 | 0.92 | 3.52  | -     | 1330.9   |
| AHQ-10-5, 5323              | R.LM*ISDSHISAVAPGTFSDLIK.L                                              | 2219.54375 | 2 | 5.51E-06 | 0.95 | 4.54  | -     | 1105.4   |
| AHQ-10-5, 5313 - 5321       | R.LM*ISDSHISAVAPGTFSDLIK.L                                              | 2219.54375 | 3 | 1.47E-05 | 0.89 | 4.30  | -     | 995.1    |
| AHQ-10-5, 4525              | R.LPNLSSLTLSR.N                                                         | 1201.39802 | 2 | 3.46E-05 | 0.92 | 3.40  | -     | 1441.2   |
| AHQ-10-5, 3447              | R.YLGVTLSPR.L                                                           | 1006.18036 | 2 | 1.58E-04 | 0.92 | 3.83  | -     | 1168.6   |
| gi 6005942 ref NP_009057.1  | valosin-containing protein; yeast Cdc48p homolog; transitional endoplas |            |   | 1.14E-08 | 4.32 | 50.27 | 10.00 | 89321.3  |
| AHQ-10-5, 4481              | K.DVDLEFLAK.M                                                           | 1050.18677 | 2 | 7.69E-05 | 0.86 | 3.23  | -     | 866.0    |
| AHQ-10-5, 4707 - 4781       | R.LIVDEAINEDNSVLSQPK.M                                                  | 2171.39088 | 2 | 1.14E-08 | 0.96 | 5.31  | -     | 1256.3   |
| AHQ-10-5, 6447              | K.NAPAIIFIDELDAIPK.R                                                    | 1812.09907 | 2 | 1.93E-05 | 0.96 | 4.56  | -     | 1507.0   |
| AHQ-10-5, 6451 - 6521       | K.NAPAIIFIDELDAIPK.R                                                    | 1812.09907 | 3 | 4.00E-06 | 0.92 | 3.99  | -     | 1442.3   |
| AHQ-10-5, 5496              | K.NVFIIGATNRPDIIDPAILRPGR.L                                             | 2519.93026 | 3 | 9.40E-04 | 0.69 | 3.73  | -     | 419.8    |
| AHQ-10-5, 3553              | R.WALSQSNPSALR.E                                                        | 1330.47434 | 2 | 5.72E-04 | 0.88 | 3.06  | -     | 1245.6   |
| gi 4557731 ref NP_000618.1  | latent transforming growth factor beta binding protein 1 precursor [Hom |            |   | 1.22E-08 | 6.27 | 80.27 | 8.40  | 152790.9 |
| AHQ-10-2, 3639              | R.ASLGDLHCECLEDK.S                                                      | 2065.13910 | 3 | 1.54E-08 | 0.95 | 4.77  | -     | 1392.7   |
| AHQ-10-3, 3569              | R.ASLGDLHCECLEDK.S                                                      | 2065.13910 | 3 | 1.35E-05 | 0.88 | 4.30  | -     | 909.6    |
| AHQ-10-3, 3501 - 3566       | R.ASLGDLHCECLEDK.S                                                      | 2065.13910 | 2 | 1.04E-05 | 0.97 | 5.39  | -     | 1708.7   |
| AHQ-10-3, 3942              | K.CVDIDECTQVQHLCSQGR.C                                                  | 2209.38110 | 2 | 2.49E-06 | 0.87 | 3.79  | -     | 763.9    |
| AHQ-10-4, 2173              | K.DQCEDIDECQHR.H                                                        | 1607.61898 | 2 | 2.74E-04 | 0.48 | 2.57  | -     | 499.7    |
| AHQ-10-14, 3164             | K.EAQPQQSQVSYQGLPVQK.T                                                  | 1945.12244 | 2 | 1.51E-04 | 0.84 | 3.40  | -     | 561.6    |
| AHQ-10-2, 5531              | K.IGFPGDPTFSSCVDPVPPVISEEKGPCYR.L                                       | 3112.43550 | 3 | 1.53E-04 | 0.79 | 3.77  | -     | 381.9    |
| AHQ-10-4, 2889              | R.TSTDLDVVDVQPK.E                                                       | 1433.50014 | 2 | 2.51E-05 | 0.84 | 2.97  | -     | 835.3    |
| AHQ-10-4, 2720              | R.TSTDLDVVDVQPK.EE.K                                                    | 1819.90213 | 2 | 1.12E-07 | 0.90 | 3.80  | -     | 1137.2   |
| AHQ-10-2, 2802              | R.TSTDLDVVDVQPK.EE.K                                                    | 1819.90213 | 2 | 6.90E-06 | 0.90 | 3.66  | -     | 1227.9   |
| AHQ-10-5, 2733              | R.TSTDLDVVDVQPK.EE.K                                                    | 1819.90213 | 2 | 1.22E-08 | 0.63 | 2.83  | -     | 729.8    |
| AHQ-10-3, 2746 - 2747       | R.TSTDLDVVDVQPK.EE.K                                                    | 1819.90213 | 2 | 7.08E-06 | 0.88 | 3.64  | -     | 1189.7   |
| AHQ-10-5, 3491              | R.YTCICYGYR.F                                                           | 1387.51964 | 2 | 1.09E-04 | 0.75 | 2.69  | -     | 599.5    |
| AHQ-10-4, 3520              | R.YTCICYGYR.F                                                           | 1387.51964 | 2 | 3.94E-05 | 0.87 | 2.93  | -     | 721.8    |
| gi 20539300 ref XP_088391.4 | similar to tropomyosin 4 [Homo sapiens]                                 |            |   | 1.22E-08 | 2.53 | 30.23 | 9.40  | 18592.1  |
| AHQ-10-9, 3483 - 3485       | R.KLVILEGELER.A                                                         | 1299.54160 | 3 | 3.50E-05 | 0.96 | 4.63  | -     | 2054.2   |
| AHQ-10-11, 3668             | R.KLVILEGELER.A                                                         | 1299.54160 | 2 | 9.49E-07 | 0.94 | 4.00  | -     | 1246.5   |
| AHQ-10-9, 3475 - 3548       | R.KLVILEGELER.A                                                         | 1299.54160 | 2 | 1.22E-08 | 0.97 | 4.47  | -     | 1812.1   |
| AHQ-10-9, 3791              | R.KLVILEGELERAER.A                                                      | 1785.03525 | 2 | 5.38E-04 | 0.78 | 3.35  | -     | 695.8    |
| AHQ-10-9, 3787 - 3788       | R.KLVILEGELERAER.A                                                      | 1785.03525 | 3 | 7.19E-07 | 0.63 | 3.34  | -     | 521.7    |
| AHQ-10-9, 3793              | KLVILEGELER.A                                                           | 1171.36868 | 2 | 2.78E-05 | 0.93 | 3.00  | -     | 1585.8   |
| gi 5729997 ref NP_004154.2  | RAB27B, member RAS oncogene family [Homo sapiens]                       |            |   | 1.23E-08 | 2.62 | 30.19 | 19.30 | 24607.7  |
| AHQ-10-11, 5392             | K.AVETLLDLM*K.R                                                         | 1262.54151 | 2 | 1.84E-04 | 0.78 | 3.09  | -     | 626.1    |
| AHQ-10-13, 3786             | K.VHLQLWDTAGQER.F                                                       | 1553.70390 | 2 | 9.42E-04 | 0.90 | 3.25  | -     | 889.7    |

|                             |                                                                         |            |   |          |      |       |       |          |
|-----------------------------|-------------------------------------------------------------------------|------------|---|----------|------|-------|-------|----------|
| AHQ-10-11, 4243 - 4318      | K.YGIPYFETSAATGQNVK.A                                                   | 1976.13177 | 2 | 7.48E-07 | 0.59 | 2.75  | -     | 549.5    |
| AHQ-10-10, 4212 - 4287      | K.YGIPYFETSAATGQNVK.A                                                   | 1976.13177 | 2 | 1.23E-08 | 0.94 | 3.83  | -     | 1074.1   |
| gi 21361370 ref NP_002853.2 | phosphorylase, glycogen; brain [Homo sapiens]                           |            |   | 1.33E-08 | 1.83 | 20.23 | 2.80  | 96695.3  |
| AHQ-10-5, 3788              | R.GLAGLGDVAEVR.K                                                        | 1157.30210 | 2 | 1.87E-07 | 0.97 | 4.61  | -     | 1848.8   |
| AHQ-10-5, 5567 - 5568       | K.LLPLVSDVEFVR.D                                                        | 1401.67552 | 2 | 1.33E-08 | 0.86 | 2.93  | -     | 741.1    |
| gi 4503747 ref NP_001448.1  | filamin B, beta (actin binding protein 278); beta filamin; filamin 1 (a |            |   | 1.35E-08 | 3.61 | 40.22 | 1.30  | 278191.4 |
| AHQ-10-1, 6035              | R.LIALLEVLVSQK.R                                                        | 1227.51852 | 2 | 7.09E-07 | 0.97 | 4.27  | -     | 1504.0   |
| AHQ-10-9, 5648              | R.LIALLEVLVSQK.R                                                        | 1227.51852 | 2 | 8.98E-08 | 0.96 | 3.74  | -     | 1329.4   |
| AHQ-10-7, 5897              | R.LIALLEVLVSQK.R                                                        | 1227.51852 | 2 | 6.49E-06 | 0.96 | 4.09  | -     | 1294.6   |
| AHQ-10-6, 5864              | R.LIALLEVLVSQK.R                                                        | 1227.51852 | 2 | 3.96E-08 | 0.97 | 4.42  | -     | 1224.5   |
| AHQ-10-5, 5980              | R.LIALLEVLVSQK.R                                                        | 1227.51852 | 2 | 4.37E-07 | 0.95 | 3.88  | -     | 1089.1   |
| AHQ-10-2, 5999              | R.LIALLEVLVSQK.R                                                        | 1227.51852 | 2 | 1.80E-07 | 0.96 | 4.26  | -     | 1403.0   |
| AHQ-10-4, 6004              | R.LIALLEVLVSQK.R                                                        | 1227.51852 | 2 | 1.35E-08 | 0.97 | 4.40  | -     | 1457.4   |
| AHQ-10-3, 5913              | R.LIALLEVLVSQK.R                                                        | 1227.51852 | 2 | 6.95E-08 | 0.95 | 4.13  | -     | 1211.3   |
| AHQ-10-11, 5778 - 5780      | R.LIALLEVLVSQK.R                                                        | 1227.51852 | 2 | 1.52E-07 | 0.96 | 4.19  | -     | 1414.7   |
| AHQ-10-2, 3742 - 3762       | R.LLGWIQNK.I                                                            | 972.16560  | 2 | 6.14E-04 | 0.90 | 3.84  | -     | 629.3    |
| AHQ-10-5, 3672              | R.LLGWIQNK.I                                                            | 972.16560  | 2 | 8.17E-04 | 0.85 | 3.16  | -     | 697.9    |
| AHQ-10-2, 5966 - 5967       | R.QM*QLENVSVALEFLDR.E                                                   | 1909.15348 | 2 | 7.08E-06 | 0.89 | 4.25  | -     | 826.0    |
| AHQ-10-1, 6421 - 6422       | R.QM*QLENVSVALEFLDR.E                                                   | 1893.15408 | 2 | 5.80E-05 | 0.85 | 3.14  | -     | 992.3    |
| AHQ-10-2, 5983              | R.QM*QLENVSVALEFLDR.E                                                   | 1909.15348 | 3 | 8.70E-06 | 0.85 | 3.28  | -     | 973.4    |
| AHQ-10-3, 5893              | R.QM*QLENVSVALEFLDR.E                                                   | 1909.15348 | 2 | 1.24E-05 | 0.90 | 3.90  | -     | 837.7    |
| gi 1105061 ref NP_066932.1  | thymosin, beta 4 [Homo sapiens]                                         |            |   | 1.37E-08 | 0.75 | 10.19 | 29.50 | 5052.6   |
| AHQ-10-14, 2522             | K.NPLPSKETIEQEK.Q                                                       | 1513.67476 | 2 | 1.37E-08 | 0.75 | 3.00  | -     | 425.6    |
| gi 20149594 ref NP_031381.2 | heat shock 90kDa protein 1, beta; heat shock 90kD protein 1, beta; Hea  |            |   | 1.38E-08 | 5.40 | 60.25 | 8.70  | 83263.6  |
| AHQ-10-5, 2531              | K.EDQTEYLEER.R                                                          | 1312.32145 | 2 | 3.05E-04 | 0.77 | 2.81  | -     | 482.5    |
| AHQ-10-4, 3165              | R.ELISNASDALDK.I                                                        | 1276.37539 | 2 | 2.35E-04 | 0.86 | 3.33  | -     | 697.1    |
| AHQ-10-5, 3955 - 4031       | R.NPDDITQEYGEFYK.S                                                      | 1848.90048 | 2 | 2.02E-06 | 0.97 | 5.04  | -     | 1345.2   |
| AHQ-10-6, 3955              | R.NPDDITQEYGEFYK.S                                                      | 1848.90048 | 2 | 6.47E-07 | 0.95 | 4.70  | -     | 1099.8   |
| AHQ-10-5, 3980              | K.SLTNDWEDHLAVK.H                                                       | 1528.64798 | 2 | 1.38E-08 | 0.93 | 4.28  | -     | 1028.7   |
| AHQ-10-5, 3897              | K.SLTNDWEDHLAVK.H                                                       | 1528.64798 | 2 | 4.95E-07 | 0.91 | 3.64  | -     | 948.0    |
| AHQ-10-5, 4192 - 4195       | R.TLTLVDTGIGMTR.A                                                       | 1350.60718 | 2 | 3.53E-07 | 0.95 | 4.02  | -     | 1046.6   |
| AHQ-10-5, 3632 - 3636       | R.TLTLVDTGIGMTR.A                                                       | 1366.60658 | 2 | 6.42E-05 | 0.94 | 3.61  | -     | 1261.0   |
| gi 4758950 ref NP_000933.1  | peptidylprolyl isomerase B (cyclophilin B) [Homo sapiens]               |            |   | 1.44E-08 | 1.80 | 20.20 | 12.50 | 23742.0  |
| AHQ-10-12, 3145             | R.DKPLKDVIIADCGK.I                                                      | 1573.83653 | 3 | 1.19E-04 | 0.78 | 3.14  | -     | 962.0    |
| AHQ-10-11, 3068             | R.DKPLKDVIIADCGK.I                                                      | 1573.83653 | 2 | 1.44E-08 | 0.93 | 3.97  | -     | 939.4    |
| AHQ-10-11, 4098 - 4154      | K.DTNGSQFFITVK.T                                                        | 1458.59766 | 2 | 3.11E-06 | 0.87 | 3.46  | -     | 924.1    |
| gi 4502201 ref NP_001649.1  | ADP-ribosylation factor 1 [Homo sapiens]                                |            |   | 1.52E-08 | 1.58 | 20.26 | 21.50 | 20966.6  |
| AHQ-10-13, 5928             | K.LGEIVTTITIGFNVETVEYK.N                                                | 2324.65485 | 2 | 1.24E-05 | 0.61 | 3.35  | -     | 207.9    |
| AHQ-10-12, 6202             | R.M*LAEDELRDVLLVFNK.Q                                                   | 2064.39175 | 3 | 1.52E-08 | 0.97 | 5.28  | -     | 1956.5   |
| gi 10835002 ref NP_001166.1 | Rho GDP dissociation inhibitor (GDI) beta; Ly-GDI [Homo sapiens]        |            |   | 1.62E-08 | 0.97 | 10.27 | 8.50  | 22987.8  |
| AHQ-10-10, 2502 - 2503      | K.APEPHVEEDDDDELDSK.L                                                   | 1940.90995 | 2 | 1.62E-08 | 0.97 | 5.42  | -     | 1380.2   |
| gi 4502167 ref NP_000475.1  | amyloid beta (A4) precursor protein (protease nexin-II, Alzheimer disea |            |   | 1.64E-08 | 1.81 | 20.21 | 3.90  | 86942.6  |
| AHQ-10-4, 5632 - 5693       | R.LALENYITALQAVPPRRP.H                                                  | 2023.36745 | 3 | 1.64E-08 | 0.87 | 3.77  | -     | 826.1    |
| AHQ-10-4, 2737 - 2769       | K.VESLEQEAANER.Q                                                        | 1375.42391 | 2 | 5.17E-04 | 0.94 | 4.25  | -     | 1254.9   |
| gi 4759082 ref NP_004648.1  | serum deprivation response protein; serum deprivation response; phospho |            |   | 1.73E-08 | 3.39 | 40.26 | 14.60 | 47172.9  |
| AHQ-10-9, 5671 - 5733       | R.DNSQVNAVTVLTLDDK.L                                                    | 1730.94122 | 2 | 2.54E-05 | 0.96 | 4.87  | -     | 1317.0   |
| AHQ-10-13, 5869             | R.DNSQVNAVTVLTLDDK.L                                                    | 1730.94122 | 2 | 5.01E-05 | 0.95 | 4.40  | -     | 1214.1   |
| AHQ-10-12, 5788 - 5834      | R.DNSQVNAVTVLTLDDK.L                                                    | 1730.94122 | 2 | 3.05E-06 | 0.96 | 4.72  | -     | 1397.9   |
| AHQ-10-11, 5728 - 5810      | R.DNSQVNAVTVLTLDDK.L                                                    | 1730.94122 | 2 | 2.41E-06 | 0.87 | 3.13  | -     | 974.4    |
| AHQ-10-14, 5889 - 5958      | R.DNSQVNAVTVLTLDDK.L                                                    | 1730.94122 | 2 | 3.84E-04 | 0.73 | 3.07  | -     | 605.3    |
| AHQ-10-9, 5559 - 5615       | R.DNSQVNAVTVLTLDDK.L                                                    | 1730.94122 | 2 | 2.77E-04 | 0.64 | 3.00  | -     | 676.7    |
| AHQ-10-9, 3416              | K.LVNLMDAVQENQHK.M                                                      | 1639.85851 | 2 | 4.08E-04 | 0.88 | 3.57  | -     | 847.0    |
| AHQ-10-9, 3701              | R.QEKPSPPSPM*PSSTPSPSLNLNGTTEAIR.D                                      | 3056.30877 | 3 | 2.51E-04 | 0.71 | 3.06  | -     | 672.7    |
| AHQ-10-11, 5598 - 5606      | K.VLIFQEENEIPASVFKV.Q                                                   | 1963.26241 | 2 | 5.24E-05 | 0.95 | 5.11  | -     | 938.2    |
| AHQ-10-9, 5405 - 5467       | K.VLIFQEENEIPASVFKV.Q                                                   | 1963.26241 | 2 | 1.73E-08 | 0.93 | 4.35  | -     | 911.9    |
| AHQ-10-13, 5692             | K.VLIFQEENEIPASVFKV.Q                                                   | 1963.26241 | 2 | 2.20E-05 | 0.85 | 3.76  | -     | 567.2    |
| AHQ-10-7, 5704              | K.VLIFQEENEIPASVFKV.Q                                                   | 1963.26241 | 2 | 4.94E-05 | 0.91 | 4.17  | -     | 643.9    |
| AHQ-10-6, 5685              | K.VLIFQEENEIPASVFKV.Q                                                   | 1963.26241 | 2 | 8.86E-04 | 0.89 | 3.44  | -     | 850.0    |
| AHQ-10-9, 5499              | K.VLIFQEENEIPASVFKV.Q                                                   | 1963.26241 | 2 | 8.72E-07 | 0.69 | 3.05  | -     | 481.4    |
| gi 4557675 ref NP_000201.1  | integrin alpha chain, alpha 6 [Homo sapiens]                            |            |   | 1.74E-08 | 3.48 | 40.20 | 5.50  | 119509.5 |
| AHQ-10-4, 3404              | K.FGSCQQGVAATFTK.D                                                      | 1503.66172 | 2 | 4.58E-06 | 0.93 | 3.82  | -     | 1153.9   |
| AHQ-10-5, 5581              | R.NSYPPDVAVGLSDSVTIFR.S                                                 | 2028.20822 | 2 | 7.29E-07 | 0.91 | 4.08  | -     | 666.6    |
| AHQ-10-4, 5423              | K.SEDEVGSLIEYFR.V                                                       | 1673.75872 | 2 | 1.74E-08 | 0.93 | 3.58  | -     | 1130.0   |
| AHQ-10-4, 3215 - 3295       | R.TGGLYSCDITAR.G                                                        | 1315.43490 | 2 | 5.23E-05 | 0.72 | 3.10  | -     | 572.1    |
| gi 5803181 ref NP_006810.1  | stress-induced-phosphoprotein 1 (Hsp70/Hsp90-organizing protein) [Homo  |            |   | 1.84E-08 | 1.78 | 20.21 | 5.90  | 62638.9  |
| AHQ-10-6, 5891              | K.ALSVGNIDDLQCYSEAIK.L                                                  | 2069.27871 | 2 | 1.84E-08 | 0.91 | 4.26  | -     | 644.5    |
| AHQ-10-6, 4369              | R.LAYINPDLALEEK.N                                                       | 1489.69480 | 2 | 1.58E-06 | 0.88 | 3.76  | -     | 793.2    |
| gi 5453595 ref NP_006358.1  | adenylyl cyclase-associated protein [Homo sapiens]                      |            |   | 1.89E-08 | 5.73 | 70.26 | 16.00 | 51672.7  |
| AHQ-10-8, 2813              | R.ALLVTASQCQQPAENK.L                                                    | 1759.96271 | 2 | 3.82E-04 | 0.93 | 3.97  | -     | 959.9    |
| AHQ-10-7, 6122 - 6184       | R.ALLVTASQCQQPAENK.LSDLLAPISEQIK.E                                      | 3168.60826 | 3 | 1.89E-08 | 0.78 | 3.80  | -     | 849.1    |
| AHQ-10-7, 4776 - 4833       | K.LSDLLAPISEQIK.E                                                       | 1427.66814 | 2 | 1.48E-04 | 0.71 | 2.80  | -     | 684.6    |
| AHQ-10-7, 3362              | K.NSLDCEIVSAK.S                                                         | 1237.36245 | 1 | 7.77E-04 | 0.42 | 2.21  | -     | 382.0    |
| AHQ-10-7, 3196 - 3252       | K.NSLDCEIVSAK.S                                                         | 1237.36245 | 2 | 1.78E-04 | 0.77 | 2.62  | -     | 705.0    |
| AHQ-10-7, 3005 - 3068       | K.NSLDCEIVSAK.S                                                         | 1237.36245 | 2 | 6.70E-04 | 0.92 | 3.35  | -     | 1064.9   |
| AHQ-10-14, 3132 - 3206      | K.NSLDCEIVSAK.S                                                         | 1237.36245 | 2 | 6.17E-04 | 0.89 | 3.07  | -     | 844.8    |
| AHQ-10-8, 4598              | R.SALFAQINQGESITHALK.H                                                  | 1929.16615 | 2 | 1.07E-06 | 0.91 | 4.55  | -     | 667.5    |
| AHQ-10-7, 4756              | R.SALFAQINQGESITHALK.H                                                  | 1929.16615 | 2 | 4.10E-06 | 0.66 | 3.41  | -     | 471.4    |
| AHQ-10-7, 4530 - 4592       | R.SALFAQINQGESITHALK.H                                                  | 1929.16615 | 2 | 2.27E-06 | 0.94 | 4.94  | -     | 721.8    |
| AHQ-10-7, 6104              | K.SSEMNVLIPTGGDFNEFPVPEQFK.T                                            | 2813.08809 | 2 | 5.92E-04 | 0.72 | 3.27  | -     | 225.4    |
| AHQ-10-7, 4056 - 4132       | R.VENQENVSNLVIEDTELK.Q                                                  | 2074.23206 | 2 | 2.89E-04 | 0.82 | 3.22  | -     | 768.3    |
| AHQ-10-8, 4569              | R.VENQENVSNLVIEDTELK.Q                                                  | 2074.23206 | 2 | 4.55E-05 | 0.89 | 4.14  | -     | 607.3    |
| AHQ-10-7, 4526              | R.VENQENVSNLVIEDTELK.Q                                                  | 2074.23206 | 2 | 1.19E-06 | 0.93 | 4.12  | -     | 888.2    |
| AHQ-10-7, 4622 - 4698       | R.VENQENVSNLVIEDTELK.Q                                                  | 2074.23206 | 2 | 8.90E-08 | 0.92 | 4.41  | -     | 781.2    |
| AHQ-10-9, 4357              | R.VENQENVSNLVIEDTELK.Q                                                  | 2074.23206 | 2 | 2.43E-06 | 0.86 | 3.16  | -     | 790.5    |
| AHQ-10-11, 4482             | R.VENQENVSNLVIEDTELK.Q                                                  | 2074.23206 | 2 | 6.38E-05 | 0.83 | 3.47  | -     | 567.3    |
| AHQ-10-7, 4536 - 4540       | R.VENQENVSNLVIEDTELK.Q                                                  | 2074.23206 | 3 | 2.49E-06 | 0.89 | 4.56  | -     | 831.1    |
| gi 21618359 ref NP_004095.3 | fatty acid synthase [Homo sapiens]                                      |            |   | 1.99E-08 | 1.83 | 20.24 | 1.70  | 273262.0 |
| AHQ-10-3, 5531              | R.LFDHPESPPTNPTEPLFLAQAEVYK.E                                           | 2842.15075 | 3 | 8.14E-04 | 0.86 | 4.10  | -     | 779.5    |
| AHQ-10-1, 6317              | K.LPEDPILLSGLLSPALK.A                                                   | 1779.06739 | 2 | 1.99E-08 | 0.97 | 4.88  | -     | 1779.5   |
| gi 21361755 ref NP_004090.3 | stomatin; erythrocyte membrane protein band 7.2 (stomatins) [Homo sapie |            |   | 2.08E-08 | 4.46 | 50.26 | 14.90 | 31708.5  |
| AHQ-10-1, 4214              | K.EASM*VITESPAALQLR.Y                                                   | 1732.98059 | 2 | 4.98E-07 | 0.91 | 3.94  | -     | 829.5    |
| AHQ-10-10, 4351             | K.EASM*VITESPAALQLR.Y                                                   | 1716.98119 | 2 | 5.19E-06 | 0.91 | 3.18  | -     | 1224.8   |
| AHQ-10-10, 2446             | R.LLAQTTLR.N                                                            | 916.10035  | 2 | 8.47E-04 | 0.80 | 2.66  | -     | 555.1    |
| AHQ-10-1, 4061              | R.VQNTLAVANITNADSATR.L                                                  | 1931.09731 | 2 | 5.72E-05 | 0.78 | 3.27  | -     | 508.7    |
| AHQ-10-1, 4438              | R.VQNTLAVANITNADSATR.L                                                  | 1931.09731 | 2 | 5.06E-07 | 0.83 | 3.56  | -     | 599.4    |
| AHQ-10-2, 3896              | R.VQNTLAVANITNADSATR.L                                                  | 1931.09731 | 2 | 5.79E-06 | 0.94 | 4.75  | -     | 726.3    |
| AHQ-10-1, 3973              | R.VQNTLAVANITNADSATR.L                                                  | 1931.09731 | 2 | 3.61E-06 | 0.96 | 4.48  | -     | 1448.5   |
| AHQ-10-1, 3843              | R.VQNTLAVANITNADSATR.L                                                  | 1931.09731 | 2 | 7.58E-06 | 0.95 | 5.22  | -     | 1029.0   |
| AHQ-10-10, 3568             | R.VQNTLAVANITNADSATR.L                                                  | 1931.09731 | 2 | 4.07E-05 | 0.63 | 2.56  | -     | 478.0    |
| AHQ-10-10, 3679             | R.VQNTLAVANITNADSATR.L                                                  | 1931.09731 | 2 | 2.08E-08 | 0.90 | 3.64  | -     | 897.5    |
| AHQ-10-10, 4150             | R.VQNTLAVANITNADSATR.L                                                  | 1931.09731 | 2 | 9.48E-05 | 0.81 | 2.76  | -     | 797.3    |
| AHQ-10-13, 3821             | R.YLQTLTTIAAEK.N                                                        | 1352.55813 | 2 | 2.30E-04 | 0.95 | 3.81  | -     | 1478.2   |
| AHQ-10-1, 3978              | R.YLQTLTTIAAEK.N                                                        | 1352.55813 | 2 | 5.08E-04 | 0.90 | 3.70  | -     | 964.6    |
| gi 5031573 ref NP_005712.1  | ARP3 actin-related protein 3 homolog; ARP3 (actin-related protein 3, ye |            |   | 2.09E-08 | 7.49 | 90.31 | 36.60 | 47370.9  |
| AHQ-10-8, 4818              | R.AEPEDHYLLTPEPLNTPENR.E                                                | 2483.67423 | 2 | 1.26E-06 | 0.89 | 3.51  | -     | 749.8    |
| AHQ-10-8, 6457              | R.DITYFIQQLLR.D                                                         | 1410.64250 | 2 | 6.39E-06 | 0.92 | 3.16  | -     | 1238.5   |
| AHQ-10-8, 3122              | R.DREVGIPPEQSLETAK.A                                                    | 1769.93431 | 2 | 6.38E-04 | 0.92 | 3.62  | -     | 817.8    |

|                             |                                                                             |            |   |          |      |       |       |         |
|-----------------------------|-----------------------------------------------------------------------------|------------|---|----------|------|-------|-------|---------|
| AHQ-10-8, 3450              | K.DYEEIGPSICR.H                                                             | 1340.44122 | 2 | 1.86E-06 | 0.89 | 3.26  | -     | 976.4   |
| AHQ-10-8, 5498              | K.GVDDLDFFIGDEAIEKPTYATK.W                                                  | 2445.66268 | 2 | 2.09E-08 | 0.71 | 3.15  | -     | 492.2   |
| AHQ-10-8, 5789              | K.LGYAGNTEPQFIIPSCIAIK.E                                                    | 2194.53570 | 2 | 8.71E-05 | 0.58 | 3.21  | -     | 371.1   |
| AHQ-10-7, 5841              | K.LGYAGNTEPQFIIPSCIAIK.E                                                    | 2194.53570 | 2 | 9.13E-05 | 0.40 | 2.76  | -     | 425.1   |
| AHQ-10-8, 3910              | K.NIVLSGGSTMFRR.D                                                           | 1282.49463 | 2 | 4.31E-05 | 0.83 | 3.18  | -     | 970.0   |
| AHQ-10-8, 6021 - 6033       | R.TLTGTVIDSDGQVTHIPVAEYVIGSCIK.H                                            | 3061.45302 | 3 | 3.81E-04 | 0.96 | 6.20  | -     | 1362.2  |
| AHQ-10-8, 3653 - 3698       | R.YSYVCPDLVK.E                                                              | 1245.42618 | 2 | 4.29E-04 | 0.78 | 2.67  | -     | 883.9   |
| gi 17986001 ref NP_005505.2 | major histocompatibility complex, class I, B; HLA class I histocompati      |            |   | 2.16E-08 | 1.71 | 20.19 | 9.40  | 40459.8 |
| AHQ-10-8, 2687 - 2765       | R.DGEDQTQDELVELTRPAGDR.T                                                    | 2233.24975 | 3 | 1.53E-06 | 0.78 | 3.70  | -     | 781.1   |
| AHQ-10-8, 4749              | R.FISVGYVDDTQVFR.F                                                          | 1646.82447 | 2 | 2.16E-08 | 0.94 | 3.65  | -     | 1394.8  |
| gi 21735621 ref NP_005909.2 | mitochondrial malate dehydrogenase precursor [Homo sapiens]                 |            |   | 2.41E-08 | 3.07 | 40.19 | 22.50 | 35503.0 |
| AHQ-10-9, 5461 - 5531       | K.GYLGPEQLPDCLKGDVVIPAGVPR.K                                                | 2813.24211 | 3 | 7.16E-05 | 0.44 | 3.00  | -     | 366.7   |
| AHQ-10-9, 4845              | K.IFGVTTLDIVR.A                                                             | 1234.46961 | 2 | 3.65E-07 | 0.88 | 3.04  | -     | 1050.6  |
| AHQ-10-9, 5183              | R.LTLYDIAHTPGVAADLSHIETK.A                                                  | 2366.65506 | 3 | 1.55E-06 | 0.88 | 3.71  | -     | 1301.5  |
| AHQ-10-9, 5027 - 5036       | K.SQETECTYFSTPLLLGK.K                                                       | 1976.19328 | 2 | 2.41E-08 | 0.88 | 3.69  | -     | 765.9   |
| gi 4504351 ref NP_000510.1  | delta globin [Homo sapiens]                                                 |            |   | 2.44E-08 | 0.94 | 10.23 | 8.80  | 16055.4 |
| AHQ-10-13, 3186             | K.VNVDVAVGGEALGR.L                                                          | 1257.37853 | 2 | 2.44E-08 | 0.94 | 4.52  | -     | 1063.5  |
| gi 28827809 ref NP_789797.1 | nucleoside diphosphate kinase B-like [Homo sapiens]                         |            |   | 2.44E-08 | 0.74 | 10.15 | 12.40 | 15529.0 |
| AHQ-10-12, 2824 - 2829      | R.VM*LGETNPADSKPGTIR.G                                                      | 1803.03091 | 3 | 2.44E-08 | 0.74 | 3.04  | -     | 752.2   |
| AHQ-10-12, 2812             | R.VM*LGETNPADSKPGTIR.G                                                      | 1803.03091 | 2 | 9.10E-04 | 0.37 | 2.67  | -     | 348.8   |
| gi 5901922 ref NP_008996.1  | CDC37 homolog [Homo sapiens]                                                |            |   | 2.55E-08 | 0.88 | 10.17 | 5.60  | 44468.0 |
| AHQ-10-8, 6162              | R.LGPGGLDPVEVYSLPEELQK.C                                                    | 2270.52091 | 2 | 2.55E-08 | 0.88 | 3.38  | -     | 554.8   |
| gi 6598323 ref NP_001485.2  | GDP dissociation inhibitor 2; rab GDP-dissociation inhibitor, beta [Hom     |            |   | 2.66E-08 | 2.83 | 30.28 | 11.90 | 50662.9 |
| AHQ-10-8, 5101              | R.NPYVGGESASITPLEDLYK.R                                                     | 2118.28499 | 2 | 4.70E-04 | 0.94 | 4.30  | -     | 1283.4  |
| AHQ-10-8, 6265              | K.SPYLYPLYGLGELPQGFAR.L                                                     | 2142.44089 | 2 | 1.69E-06 | 0.97 | 4.96  | -     | 1330.9  |
| AHQ-10-7, 6224 - 6225       | K.SPYLYPLYGLGELPQGFAR.L                                                     | 2142.44089 | 2 | 5.08E-07 | 0.97 | 5.69  | -     | 1220.6  |
| AHQ-10-8, 3946 - 3947       | R.TDDYLDOPCYETINR.I                                                         | 1904.98887 | 2 | 2.66E-08 | 0.91 | 4.16  | -     | 560.9   |
| gi 4757812 ref NP_004880.1  | ATP synthase, H+ transporting, mitochondrial F0 complex, subunit f, iso     |            |   | 2.74E-08 | 1.63 | 20.23 | 25.50 | 10917.8 |
| AHQ-10-13, 5608 - 5616      | R.DFSPSGIFGAFQR.G                                                           | 1429.56124 | 2 | 7.57E-07 | 0.96 | 4.64  | -     | 1131.8  |
| AHQ-10-14, 5612             | R.DFSPSGIFGAFQR.G                                                           | 1429.56124 | 2 | 2.74E-08 | 0.81 | 3.24  | -     | 494.2   |
| AHQ-10-13, 5900             | R.DFSPSGIFGAFQR.G                                                           | 1429.56124 | 2 | 8.01E-04 | 0.75 | 2.64  | -     | 646.1   |
| AHQ-10-14, 5268             | K.LGELPSWILM*R.D                                                            | 1331.60876 | 2 | 6.45E-05 | 0.82 | 3.25  | -     | 477.0   |
| gi 4503531 ref NP_001958.1  | eukaryotic translation initiation factor 4A, isoform 2 [Homo sapiens] [     |            |   | 2.79E-08 | 1.80 | 20.19 | 7.40  | 46393.9 |
| AHQ-10-8, 3639              | R.GIAYGFKEPSAIQQR.A                                                         | 1829.04828 | 2 | 2.79E-08 | 0.91 | 3.72  | -     | 751.7   |
| AHQ-10-8, 2842              | K.GYDVIAQAQSGTGK.T                                                          | 1395.49996 | 2 | 6.84E-04 | 0.89 | 3.13  | -     | 1244.4  |
| gi 4507677 ref NP_003290.1  | tumor rejection antigen (gp96) 1; Tumor rejection antigen-1 (gp96); glu     |            |   | 3.20E-08 | 5.30 | 60.27 | 11.70 | 92468.0 |
| AHQ-10-5, 3243              | K.FAFAQAEVNR.M                                                              | 1082.19378 | 2 | 5.15E-04 | 0.91 | 3.15  | -     | 1161.0  |
| AHQ-10-4, 3264              | K.FAFAQAEVNR.M                                                              | 1082.19378 | 2 | 2.04E-04 | 0.91 | 3.25  | -     | 1074.8  |
| AHQ-10-4, 3968              | R.FQSSHHTDITSLDQYVER.M                                                      | 2261.39276 | 3 | 2.76E-06 | 0.97 | 5.49  | -     | 1983.3  |
| AHQ-10-5, 3940              | R.FQSSHHTDITSLDQYVER.M                                                      | 2261.39276 | 3 | 1.09E-07 | 0.97 | 5.43  | -     | 1723.6  |
| AHQ-10-4, 3936              | K.GVVDSDDLPLNVSR.E                                                          | 1486.60940 | 2 | 6.91E-06 | 0.94 | 4.30  | -     | 1036.1  |
| AHQ-10-6, 3857              | K.GVVDSDDLPLNVSR.E                                                          | 1486.60940 | 2 | 6.59E-06 | 0.93 | 4.60  | -     | 910.8   |
| AHQ-10-5, 6267              | K.GYEVILTEPVDEYCIQAPEFDGKR.F                                                | 3107.43557 | 3 | 5.47E-04 | 0.67 | 3.11  | -     | 546.0   |
| AHQ-10-5, 4065              | K.SILFVPTAPR.G                                                              | 1188.40094 | 2 | 2.69E-04 | 0.87 | 3.46  | -     | 844.7   |
| AHQ-10-5, 6311 - 6316       | K.YSQFINFPYVWSSK.T                                                          | 1880.13366 | 2 | 3.20E-08 | 0.95 | 4.71  | -     | 941.5   |
| AHQ-10-4, 6313              | K.YSQFINFPYVWSSK.T                                                          | 1880.13366 | 2 | 1.56E-05 | 0.96 | 4.96  | -     | 1123.0  |
| gi 4504073 ref NP_000398.1  | glycoprotein Ib beta polypeptide precursor [Homo sapiens]                   |            |   | 3.20E-08 | 2.44 | 30.18 | 15.50 | 21717.6 |
| AHQ-10-1, 4733              | R.LLPLAEDELR.A                                                              | 1332.52691 | 2 | 4.12E-06 | 0.82 | 3.18  | -     | 443.1   |
| AHQ-10-2, 4660              | R.LLPLAEDELR.A                                                              | 1332.52691 | 2 | 1.06E-06 | 0.72 | 2.96  | -     | 311.1   |
| AHQ-10-3, 4590              | R.LLPLAEDELR.A                                                              | 1332.52691 | 2 | 8.91E-06 | 0.84 | 3.09  | -     | 677.8   |
| AHQ-10-4, 4637              | R.LLPLAEDELR.A                                                              | 1332.52691 | 2 | 7.60E-05 | 0.73 | 2.59  | -     | 357.0   |
| AHQ-10-8, 4506 - 4515       | R.LLPLAEDELR.A                                                              | 1332.52691 | 2 | 1.28E-05 | 0.70 | 2.52  | -     | 506.3   |
| AHQ-10-13, 4542 - 4549      | R.LLPLAEDELR.A                                                              | 1332.52691 | 2 | 3.20E-08 | 0.82 | 2.91  | -     | 452.4   |
| AHQ-10-10, 4374 - 4390      | R.LLPLAEDELR.A                                                              | 1332.52691 | 2 | 1.89E-06 | 0.90 | 3.48  | -     | 597.5   |
| AHQ-10-11, 4430 - 4455      | R.LLPLAEDELR.A                                                              | 1332.52691 | 2 | 1.78E-06 | 0.87 | 2.80  | -     | 631.9   |
| AHQ-10-10, 4082 - 4084      | R.LSLTDPLVAER.A                                                             | 1214.39356 | 2 | 8.33E-05 | 0.81 | 2.83  | -     | 884.6   |
| AHQ-10-11, 4130             | R.LSLTDPLVAER.A                                                             | 1214.39356 | 2 | 4.79E-04 | 0.93 | 3.57  | -     | 1183.6  |
| AHQ-10-11, 2492 - 2494      | R.TAHLGANPWR.C                                                              | 1123.24913 | 2 | 1.25E-05 | 0.81 | 3.08  | -     | 542.3   |
| gi 4506365 ref NP_002856.1  | RAB2, member RAS oncogene family [Homo sapiens]                             |            |   | 3.40E-08 | 1.89 | 20.23 | 13.70 | 23545.4 |
| AHQ-10-11, 4048 - 4103      | K.IQEGVFDINNEANGIK.I                                                        | 1761.91387 | 2 | 2.48E-06 | 0.92 | 3.89  | -     | 920.7   |
| AHQ-10-11, 4250 - 4259      | K.LQIWDTAGGESFR.S                                                           | 1551.68478 | 2 | 3.40E-08 | 0.97 | 4.50  | -     | 1740.3  |
| gi 17986260 ref NP_524147.1 | smooth muscle and non-muscle myosin alkali light chain isoform 2 [Homo      |            |   | 3.51E-08 | 0.97 | 10.27 | 23.30 | 12969.7 |
| AHQ-10-14, 5270             | K.M*TEEEVEM*LVAGHEDSNGCINYEELVR.M                                           | 3188.42436 | 3 | 3.51E-08 | 0.97 | 5.40  | -     | 1773.8  |
| AHQ-10-12, 5220 - 5277      | K.M*TEEEVEM*LVAGHEDSNGCINYEELVR.M                                           | 3188.42436 | 3 | 1.56E-05 | 0.95 | 5.40  | -     | 1301.8  |
| gi 4505763 ref NP_000282.1  | phosphoglycerate kinase 1 [Homo sapiens]                                    |            |   | 3.54E-08 | 4.52 | 50.27 | 18.70 | 44614.4 |
| AHQ-10-8, 5522              | K.ACANPAAGSVILLENLR.F                                                       | 1771.03187 | 2 | 2.69E-06 | 0.92 | 4.09  | -     | 877.2   |
| AHQ-10-8, 5310              | K.ALESPEPFLAIGGAK.V                                                         | 1770.06542 | 2 | 1.30E-07 | 0.97 | 5.40  | -     | 1523.8  |
| AHQ-10-8, 4533              | K.DVLFKDCVGPVEVEK.A                                                         | 1750.00620 | 2 | 3.54E-08 | 0.94 | 4.18  | -     | 1061.6  |
| AHQ-10-8, 5189 - 5197       | K.ITLPPDVFDTADKFDENAK.T                                                     | 2024.25948 | 2 | 1.04E-05 | 0.84 | 4.01  | -     | 494.2   |
| AHQ-10-8, 4157              | K.YSLEPVAVELK.S                                                             | 1248.44991 | 2 | 8.57E-05 | 0.86 | 3.26  | -     | 776.6   |
| gi 19913424 ref NP_001681.2 | ATPase, H+ transporting, lysosomal 70kD, V1 subunit A, isoform 1; V-AT      |            |   | 3.54E-08 | 0.78 | 10.17 | 2.80  | 68303.7 |
| AHQ-10-6, 4115              | R.LAEMPADSGYPAYLGAR.L                                                       | 1782.99819 | 2 | 3.54E-08 | 0.78 | 3.32  | -     | 591.0   |
| gi 4507649 ref NP_003280.1  | tropomyosin 2 (beta) [Homo sapiens]                                         |            |   | 3.56E-08 | 0.90 | 10.16 | 4.60  | 32989.6 |
| AHQ-10-9, 2661              | K.ATDAEADVASLNR.R                                                           | 1333.38703 | 2 | 3.56E-08 | 0.90 | 3.28  | -     | 1188.6  |
| gi 24430192 ref NP_005548.2 | keratin 16; keratin, type I cytoskeletal 16; cytokeratin 16 [Homo sapi      |            |   | 3.56E-08 | 2.57 | 30.32 | 11.40 | 51267.5 |
| AHQ-10-5, 2645              | R.APSTYGGGLSVSSR.F                                                          | 1339.43640 | 2 | 3.56E-08 | 0.87 | 3.33  | -     | 717.9   |
| AHQ-10-5, 3505              | R.GQTGGDNNVEM*DAAPGVDSL.R.I                                                 | 2105.22972 | 2 | 5.30E-04 | 0.72 | 3.99  | -     | 496.8   |
| AHQ-10-5, 5012              | K.IIAATIENAQPLIQIDNAR.L                                                     | 2065.35950 | 3 | 8.54E-05 | 0.98 | 6.35  | -     | 1802.6  |
| gi 5031677 ref NP_005681.1  | dynamitin 1-like protein isoform 3; dynamitin-like protein [Homo sapiens] [ |            |   | 3.93E-08 | 3.69 | 40.21 | 7.60  | 78060.6 |
| AHQ-10-13, 4979             | K.ALQGGASQIAEIR.E                                                           | 1370.57991 | 2 | 5.42E-04 | 0.63 | 2.74  | -     | 753.4   |
| AHQ-10-13, 4625             | K.ALQGGASQIAEIR.E                                                           | 1370.57991 | 2 | 3.93E-08 | 0.94 | 3.84  | -     | 1666.6  |
| AHQ-10-5, 4665              | K.ALQGGASQIAEIR.E                                                           | 1370.57991 | 2 | 2.61E-06 | 0.96 | 3.47  | -     | 2500.6  |
| AHQ-10-6, 5821              | K.IFSPNVNLTLDVLPGM*TK.V                                                     | 2075.45768 | 2 | 2.85E-04 | 0.88 | 3.94  | -     | 735.8   |
| AHQ-10-5, 6340              | K.IFSPNVNLTLDVLPGM*TK.V                                                     | 2075.45768 | 2 | 1.70E-07 | 0.91 | 3.54  | -     | 1028.6  |
| AHQ-10-5, 5956              | K.IFSPNVNLTLDVLPGM*TK.V                                                     | 2075.45768 | 2 | 6.88E-05 | 0.91 | 3.87  | -     | 925.7   |
| AHQ-10-6, 6311              | R.TLESVDPLGGLNTIDILTAIR.N                                                   | 2212.52928 | 2 | 5.73E-04 | 0.93 | 4.28  | -     | 903.1   |
| gi 4759300 ref NP_004772.1  | vesicle-associated membrane protein 3 (cellubrevin); vesicle-associated     |            |   | 4.26E-08 | 1.90 | 20.24 | 33.00 | 11309.0 |
| AHQ-10-13, 3569             | R.ADALQAGASQFETSAAK.L                                                       | 1666.77095 | 2 | 2.67E-05 | 0.95 | 4.75  | -     | 987.4   |
| AHQ-10-13, 3689             | R.LQQTQNGQVDEVVDIM*R.V                                                      | 1933.13344 | 2 | 4.26E-08 | 0.95 | 4.09  | -     | 1268.4  |
| AHQ-10-13, 4061             | R.LQQTQNGQVDEVVDIM*R.V                                                      | 1933.13344 | 2 | 1.98E-04 | 0.55 | 2.76  | -     | 413.4   |
| gi 30147623 ref XP_293669.2 | similar to actinin, alpha 4 [Homo sapiens]                                  |            |   | 4.28E-08 | 0.91 | 10.20 | 3.50  | 57794.4 |
| AHQ-10-4, 3987              | K.LSGSNPYYTTPQIINSK.W                                                       | 1921.14079 | 2 | 4.28E-08 | 0.91 | 3.97  | -     | 1009.3  |
| gi 7657056 ref NP_005415.1  | EH-domain containing 3; EH domain containing 3 [Homo sapiens]               |            |   | 4.43E-08 | 4.69 | 50.34 | 17.60 | 60886.7 |
| AHQ-10-7, 2889              | K.ADQIETQQLMR.V                                                             | 1333.49681 | 2 | 1.55E-04 | 0.87 | 3.45  | -     | 1290.1  |
| AHQ-10-7, 6397              | R.FVCAQLPNPVLESISVIDTPGILSGEK.Q                                             | 2886.30971 | 2 | 4.22E-07 | 0.97 | 5.51  | -     | 1367.6  |
| AHQ-10-7, 5280              | K.GGAFEGTLHGPGFHGYGEGAGEGIDDAEVPVVAR.D                                      | 3317.48513 | 3 | 3.62E-04 | 0.98 | 6.87  | -     | 2709.3  |
| AHQ-10-7, 5116              | K.LDISDEFSEVIK.A                                                            | 1395.53664 | 2 | 4.43E-08 | 0.90 | 3.56  | -     | 998.5   |
| AHQ-10-7, 4624              | K.LFEAEQDLFR.D                                                              | 1397.51432 | 2 | 2.51E-06 | 0.97 | 4.34  | -     | 1930.6  |
| gi 5031839 ref NP_005545.1  | keratin 6A; Keratin-6A; keratin, epidermal type II, K6A; cytokeratin 6A     |            |   | 4.79E-08 | 0.85 | 10.16 | 2.10  | 60044.6 |
| AHQ-10-5, 5125 - 5137       | K.ADTLTDINFLR.A                                                             | 1408.53864 | 2 | 4.79E-08 | 0.85 | 3.28  | -     | 932.8   |
| AHQ-10-3, 5086 - 5095       | K.ADTLTDINFLR.A                                                             | 1408.53864 | 2 | 5.17E-06 | 0.84 | 3.15  | -     | 1081.4  |
| gi 19923457 ref NP_057447.2 | glycoprotein VI (platelet); platelet glycoprotein VI [Homo sapiens] [M      |            |   | 4.85E-08 | 1.79 | 20.23 | 7.10  | 67308.6 |
| AHQ-10-7, 5313              | K.PSLQALPSSLVPLEKPVTLR.C                                                    | 2146.55880 | 3 | 3.93E-07 | 0.93 | 4.54  | -     | 1097.7  |
| AHQ-10-7, 3621              | K.PSLSAQPGPAVSSGGVDTLQCQTR.Y                                                | 2415.62303 | 2 | 4.85E-08 | 0.87 | 3.50  | -     | 572.1   |
| gi 18570595 ref XP_095590.1 | similar to myosin regulatory light chain [Homo sapiens]                     |            |   | 5.29E-08 | 0.93 | 10.20 | 8.90  | 13951.5 |
| AHQ-10-12, 3188 - 3189      | K.LNGTDPEDVIR.H                                                             | 1229.32195 | 2 | 1.12E-05 | 0.93 | 3.96  | -     | 1014.3  |
| AHQ-10-13, 3086 - 3157      | K.LNGTDPEDVIR.H                                                             | 1229.32195 | 2 | 1.88E-04 | 0.79 | 3.03  | -     | 815.7   |

|                            |                                                                         |            |   |          |      |        |       |          |
|----------------------------|-------------------------------------------------------------------------|------------|---|----------|------|--------|-------|----------|
| AHQ-10-11, 3038 - 3098     | K.LNGTDPEDVIR.H                                                         | 1229.32195 | 2 | 5.29E-08 | 0.93 | 3.84   | -     | 1085.6   |
| gi4507953 ref NP_003397.1  | tyrosine 3/tryptophan 5-monoxygenase activation protein, zeta polypep   |            |   | 5.36E-08 | 4.45 | 50.28  | 27.30 | 27744.9  |
| AHQ-10-10, 3192 - 3246     | K.FLIPNASQAESK.V                                                        | 1305.46156 | 2 | 1.31E-05 | 0.81 | 3.09   | -     | 538.3    |
| AHQ-10-10, 2359 - 2427     | K.SVTEQGAELSNEER.N                                                      | 1549.57922 | 2 | 1.63E-05 | 0.83 | 2.82   | -     | 1095.1   |
| AHQ-10-14, 2349 - 2404     | K.SVTEQGAELSNEER.N                                                      | 1549.57922 | 2 | 4.52E-04 | 0.80 | 2.88   | -     | 966.7    |
| AHQ-10-13, 2404            | K.SVTEQGAELSNEER.N                                                      | 1549.57922 | 2 | 5.36E-08 | 0.88 | 3.68   | -     | 1040.9   |
| AHQ-10-11, 2376 - 2443     | K.SVTEQGAELSNEER.N                                                      | 1549.57922 | 2 | 1.57E-04 | 0.90 | 3.31   | -     | 1256.2   |
| AHQ-10-14, 6280            | K.TAFDEAIAELDLTSEESYK.D                                                 | 2133.25160 | 2 | 6.23E-06 | 0.97 | 5.51   | -     | 1450.8   |
| AHQ-10-10, 6254 - 6322     | K.TAFDEAIAELDLTSEESYKDSLIM*QLLR.D                                       | 3320.66704 | 3 | 1.06E-05 | 0.82 | 3.53   | -     | 958.0    |
| AHQ-10-10, 2083 - 2138     | R.YLAEVAAGDDKK.G                                                        | 1280.40887 | 2 | 1.11E-06 | 0.96 | 4.01   | -     | 1721.2   |
| AHQ-10-10, 2119 - 2124     | R.YLAEVAAGDDKK.G                                                        | 1280.40887 | 3 | 1.37E-04 | 0.92 | 3.44   | -     | 1389.2   |
| gi4507725 ref NP_000362.1  | transthyretin (prealbumin, amyloidosis type I); Transthyretin (prealbum |            |   | 5.43E-08 | 3.50 | 40.29  | 33.30 | 15886.9  |
| AHQ-10-13, 3782            | K.AADDTWEPFASGK.T                                                       | 1395.45529 | 2 | 1.37E-04 | 0.88 | 2.71   | -     | 1039.3   |
| AHQ-10-13, 4189            | K.AADDTWEPFASGK.T                                                       | 1395.45529 | 2 | 3.62E-06 | 0.71 | 2.82   | -     | 635.7    |
| AHQ-10-13, 3941 - 4021     | R.GSPAINVAHVFR.K                                                        | 1367.58095 | 2 | 3.30E-04 | 0.95 | 4.27   | -     | 1133.5   |
| AHQ-10-13, 3364            | R.KAADDTWEPFASGK.T                                                      | 1523.62820 | 2 | 6.26E-05 | 0.94 | 3.62   | -     | 1379.5   |
| AHQ-10-13, 5268            | K.TSESGELHGLTTEEEFVEGIYK.V                                              | 2456.60073 | 2 | 5.43E-08 | 0.89 | 3.86   | -     | 908.1    |
| AHQ-10-13, 5266            | K.TSESGELHGLTTEEEFVEGIYK.V                                              | 2456.60073 | 3 | 9.43E-07 | 0.97 | 5.77   | -     | 1880.1   |
| gi13518026 ref NP_004978.2 | LIM and senescent cell antigen-like domains 1 [Homo sapiens]            |            |   | 5.44E-08 | 2.78 | 30.22  | 11.10 | 37251.2  |
| AHQ-10-8, 4366             | K.CHAIDEQPLIFK.N                                                        | 1585.84900 | 2 | 7.83E-04 | 0.89 | 3.57   | -     | 948.7    |
| AHQ-10-9, 4199             | K.CHAIDEQPLIFK.N                                                        | 1585.84900 | 2 | 6.47E-06 | 0.94 | 4.03   | -     | 1293.9   |
| AHQ-10-9, 4204 - 4205      | K.CHAIDEQPLIFK.N                                                        | 1585.84900 | 3 | 3.70E-04 | 0.79 | 4.02   | -     | 757.0    |
| AHQ-10-9, 3583 - 3585      | K.FVEFDMPKPVCK.K                                                        | 1401.67594 | 2 | 6.06E-04 | 0.88 | 3.49   | -     | 1266.4   |
| AHQ-10-9, 3324 - 3347      | R.VIEGDVVSALNK.A                                                        | 1244.41966 | 2 | 1.78E-06 | 0.95 | 4.38   | -     | 1171.3   |
| AHQ-10-11, 3396 - 3466     | R.VIEGDVVSALNK.A                                                        | 1244.41966 | 2 | 5.44E-08 | 0.96 | 4.11   | -     | 1587.7   |
| AHQ-10-13, 3947            | R.VIEGDVVSALNK.A                                                        | 1244.41966 | 2 | 3.56E-07 | 0.93 | 3.44   | -     | 1116.7   |
| AHQ-10-8, 3467 - 3490      | R.VIEGDVVSALNK.A                                                        | 1244.41966 | 2 | 6.69E-07 | 0.89 | 3.49   | -     | 854.2    |
| gi24797067 ref NP_002107.3 | major histocompatibility complex, class I, A precursor; HLA-A1 class I  |            |   | 5.59E-08 | 5.52 | 60.23  | 22.70 | 40840.5  |
| AHQ-10-8, 4810             | R.APWIEQEGPEYWDQETR.N                                                   | 2135.23420 | 2 | 7.05E-06 | 0.92 | 4.05   | -     | 698.7    |
| AHQ-10-8, 2685             | R.DGEDQTQDTELVELTR.P                                                    | 1736.73008 | 2 | 2.32E-04 | 0.94 | 3.61   | -     | 2124.8   |
| AHQ-10-8, 3391             | R.DGEDQTQDTELVELTRPAGDGFQK.W                                            | 2638.69666 | 3 | 4.90E-05 | 0.85 | 3.84   | -     | 801.3    |
| AHQ-10-14, 4760            | R.FIAVGYVDDTQFVR.F                                                      | 1630.82504 | 2 | 2.32E-07 | 0.96 | 4.09   | -     | 1607.9   |
| AHQ-10-8, 4770             | R.FIAVGYVDDTQFVR.F                                                      | 1630.82504 | 2 | 2.28E-07 | 0.97 | 4.54   | -     | 1869.6   |
| AHQ-10-1, 4946             | R.FIAVGYVDDTQFVR.F                                                      | 1630.82504 | 2 | 9.94E-05 | 0.95 | 3.89   | -     | 1506.9   |
| AHQ-10-8, 2273             | R.YLENGKETLQR.T                                                         | 1351.49032 | 2 | 2.94E-06 | 0.90 | 3.34   | -     | 1063.0   |
| AHQ-10-8, 3327             | R.YTCHVQHEGLPKPLTR.W                                                    | 2051.35781 | 2 | 5.59E-08 | 0.95 | 4.53   | -     | 1442.3   |
| gi4507383 ref NP_001052.1  | thromboxane A synthase 1 (platelet, cytochrome P450, family 5, subfam   |            |   | 5.74E-08 | 1.89 | 20.20  | 5.80  | 60675.3  |
| AHQ-10-7, 4162             | R.FQACPETQVPLQLESK.S                                                    | 1877.10807 | 2 | 1.72E-06 | 0.95 | 4.08   | -     | 1109.7   |
| AHQ-10-7, 3978             | R.HSASPMGVQDFDVR.D                                                      | 1659.84828 | 2 | 5.74E-08 | 0.94 | 3.97   | -     | 1086.9   |
| gi13489087 ref NP_109591.1 | serine (or cysteine) proteinase inhibitor, clade B (ovalbumin), member  |            |   | 5.85E-08 | 0.88 | 10.21  | 5.00  | 42741.5  |
| AHQ-10-8, 3969             | K.TYGADLASVDFQHA SEDAR.K                                                | 2054.11949 | 3 | 3.93E-07 | 0.91 | 4.21   | -     | 716.1    |
| AHQ-10-8, 3922 - 3979      | K.TYGADLASVDFQHA SEDAR.K                                                | 2054.11949 | 2 | 5.85E-08 | 0.88 | 3.96   | -     | 759.5    |
| gi30150022 ref XP_300862.1 | similar to beta-tubulin 4Q [Homo sapiens]                               |            |   | 6.25E-08 | 2.77 | 30.22  | 18.50 | 33545.2  |
| AHQ-10-7, 5716             | K.EAESDCDCLQGFLTHSLGGTGSGMGLTLLK.I                                      | 3315.65550 | 3 | 1.11E-06 | 0.91 | 4.43   | -     | 1242.4   |
| AHQ-10-8, 4350             | K.LAVNMVPPFR.L                                                          | 1144.41480 | 2 | 3.95E-05 | 0.89 | 3.65   | -     | 679.7    |
| AHQ-10-9, 4171             | K.LAVNMVPPFR.L                                                          | 1144.41480 | 2 | 6.25E-08 | 0.95 | 4.03   | -     | 895.9    |
| AHQ-10-11, 4322            | K.LAVNMVPPFR.L                                                          | 1144.41480 | 2 | 2.15E-04 | 0.77 | 2.89   | -     | 580.6    |
| AHQ-10-7, 4324 - 4325      | K.LAVNMVPPFR.L                                                          | 1144.41480 | 2 | 1.82E-05 | 0.87 | 3.66   | -     | 516.5    |
| AHQ-10-11, 4771            | R.LHFFM*PGFAPLTSR.G                                                     | 1637.92902 | 3 | 3.66E-04 | 0.83 | 3.25   | -     | 1107.4   |
| AHQ-10-11, 4759            | R.LHFFM*PGFAPLTSR.G                                                     | 1637.92902 | 2 | 6.05E-05 | 0.91 | 3.21   | -     | 916.7    |
| gi4758304 ref NP_004902.1  | protein disulfide isomerase related protein (calcium-binding protein, i |            |   | 6.36E-08 | 4.40 | 50.23  | 10.10 | 72931.9  |
| AHQ-10-6, 3715             | K.FAM*EPEEFDSDLTR.E                                                     | 1703.80830 | 2 | 9.11E-07 | 0.73 | 2.84   | -     | 537.7    |
| AHQ-10-6, 3628             | R.FDVSQYPTIK.I                                                          | 1127.27123 | 2 | 8.96E-04 | 0.94 | 3.47   | -     | 1251.7   |
| AHQ-10-6, 3811             | K.GESDPAYQQYQDAANNLR.E                                                  | 2041.08081 | 2 | 2.05E-05 | 0.85 | 3.70   | -     | 729.7    |
| AHQ-10-6, 2911             | K.IDATSASVLA SR.F                                                       | 1191.31686 | 2 | 6.36E-08 | 0.96 | 3.85   | -     | 1833.3   |
| AHQ-10-6, 3409             | K.RFDVSGVYTLK.I                                                         | 1283.45758 | 2 | 4.64E-05 | 0.93 | 3.54   | -     | 1348.8   |
| gi12025678 ref NP_004915.2 | actinin, alpha 4 [Homo sapiens]                                         |            |   | 6.75E-08 | 7.60 | 100.26 | 17.50 | 104853.3 |
| AHQ-10-4, 4512             | K.AGTQIENIDEDFRDGLK.L                                                   | 1922.04251 | 2 | 6.75E-08 | 0.63 | 2.79   | -     | 618.2    |
| AHQ-10-4, 3551             | R.DYETATLSDIK.A                                                         | 1256.34094 | 2 | 1.00E-04 | 0.95 | 3.61   | -     | 1674.1   |
| AHQ-10-4, 4559             | R.ETTTDTADQVIASFV.V                                                     | 1742.81936 | 2 | 8.59E-07 | 0.95 | 4.15   | -     | 1323.9   |
| AHQ-10-4, 3015 - 3083      | K.GISGEQMQEFR.A                                                         | 1353.48658 | 2 | 1.86E-06 | 0.47 | 2.80   | -     | 458.7    |
| AHQ-10-4, 4683 - 4755      | K.ICDQWDALGSLTHSR.R                                                     | 1760.90926 | 2 | 7.99E-06 | 0.93 | 3.92   | -     | 1184.7   |
| AHQ-10-4, 4813             | R.ISIEM*NGTLEQLSLK.Q                                                    | 1945.18413 | 3 | 2.13E-04 | 0.62 | 3.14   | -     | 581.2    |
| AHQ-10-4, 3775             | K.M*LDAEIVNTARPEK.A                                                     | 1833.99864 | 2 | 4.36E-04 | 0.85 | 3.41   | -     | 628.5    |
| AHQ-10-4, 4536 - 4541      | R.QFASQANVVGPIWQTK.M                                                    | 1775.00061 | 2 | 1.16E-04 | 0.53 | 2.97   | -     | 318.1    |
| AHQ-10-6, 5929             | R.VEQIAIAAQLNELDYD SHNVNTR.C                                            | 2907.09810 | 3 | 2.72E-05 | 0.96 | 5.13   | -     | 1317.4   |
| AHQ-10-4, 3923             | K.VLAGDKNFITAEELR.R                                                     | 1676.89525 | 2 | 1.84E-04 | 0.70 | 3.49   | -     | 607.9    |
| gi8923579 ref NP_060377.1  | hypothalin protein FLJ20625 [Homo sapiens]                              |            |   | 6.84E-08 | 0.79 | 10.17  | 18.60 | 17744.7  |
| AHQ-10-14, 5944            | K.LPPLSLTSQPQHVLA SEPIFSDLQVSR.I                                        | 3283.72259 | 3 | 6.84E-08 | 0.79 | 3.31   | -     | 627.0    |
| gi1389317 ref NP_113657.1  | SH3 domain binding glutamic acid-rich protein like 2 [Homo sapiens] [M  |            |   | 6.92E-08 | 1.58 | 20.25  | 25.20 | 12326.0  |
| AHQ-10-14, 5262            | K.ESNTVFSFLGLKPR.L                                                      | 1595.82383 | 2 | 6.92E-08 | 0.60 | 3.00   | -     | 358.6    |
| AHQ-10-13, 5270            | K.ESNTVFSFLGLKPR.L                                                      | 1595.82383 | 2 | 3.06E-05 | 0.63 | 2.58   | -     | 477.8    |
| AHQ-10-13, 5575            | K.ESNTVFSFLGLKPR.L                                                      | 1595.82383 | 2 | 4.47E-04 | 0.36 | 2.62   | -     | 300.9    |
| AHQ-10-14, 4300            | R.VFIASSSGFVAIK.K                                                       | 1326.56551 | 2 | 3.47E-05 | 0.98 | 4.97   | -     | 3082.7   |
| AHQ-10-13, 4301            | R.VFIASSSGFVAIK.K                                                       | 1326.56551 | 2 | 1.36E-05 | 0.98 | 4.59   | -     | 3457.4   |
| gi22042381 ref XP_065237.3 | similar to FKSG30 [Homo sapiens]                                        |            |   | 7.43E-08 | 1.21 | 20.17  | 8.30  | 42016.0  |
| AHQ-10-8, 2866 - 2929      | K.QEYDESGPSIVHR.K                                                       | 1517.58206 | 2 | 2.70E-05 | 0.55 | 3.07   | -     | 533.4    |
| AHQ-10-14, 2484            | K.QEYDESGPSIVHR.K                                                       | 1517.58206 | 2 | 7.43E-08 | 0.65 | 2.74   | -     | 302.6    |
| AHQ-10-8, 2421 - 2483      | K.QEYDESGPSIVHR.K                                                       | 1517.58206 | 2 | 2.22E-07 | 0.70 | 3.14   | -     | 354.2    |
| AHQ-10-8, 3706 - 3755      | R.VAPEEHPIILLTEAPLNPK.A                                                 | 1969.27019 | 2 | 9.75E-04 | 0.56 | 2.85   | -     | 339.0    |
| gi4502905 ref NP_001822.1  | clusterin; complement-associated protein SP-40 [Homo sapiens]           |            |   | 7.54E-08 | 1.77 | 20.19  | 6.00  | 52493.3  |
| AHQ-10-9, 2863             | R.EILSVDCSTNNPSQAK.L                                                    | 1764.89299 | 2 | 7.54E-08 | 0.90 | 3.88   | -     | 749.2    |
| AHQ-10-9, 2860 - 2869      | R.ELDESQVAER.L                                                          | 1289.37416 | 2 | 5.86E-04 | 0.86 | 3.06   | -     | 1071.8   |
| gi27482573 ref XP_208709.1 | similar to Ubiquitin-conjugating enzyme E2-18 kDa UbcH7 (Ubiquitin-pro  |            |   | 7.98E-08 | 0.94 | 10.22  | 14.30 | 17875.4  |
| AHQ-10-12, 6144            | K.TDQVIQSLIALVNDPQPEHPLR.A                                              | 2484.79318 | 3 | 7.98E-08 | 0.94 | 4.43   | -     | 1077.5   |
| gi6005846 ref NP_009215.1  | PTK9L protein tyrosine kinase 9-like (A6-related protein); protein tyro |            |   | 8.32E-08 | 2.79 | 30.22  | 15.80 | 39547.7  |
| AHQ-10-14, 6110            | R.AVLPDLLAQPCYLLYR.L                                                    | 2035.39506 | 2 | 1.04E-04 | 0.86 | 2.95   | -     | 878.4    |
| AHQ-10-12, 6040            | R.AVLPDLLAQPCYLLYR.L                                                    | 2035.39506 | 2 | 8.32E-08 | 0.91 | 3.97   | -     | 778.2    |
| AHQ-10-13, 6082            | R.AVLPDLLAQPCYLLYR.L                                                    | 2035.39506 | 2 | 1.62E-06 | 0.84 | 3.28   | -     | 821.0    |
| AHQ-10-11, 4030            | R.ETIELVHTEPTDVAQLPSR.V                                                 | 2136.34822 | 2 | 1.07E-05 | 0.92 | 4.18   | -     | 768.8    |
| AHQ-10-12, 4500            | K.VVIEDEQLVLGASQEPVGR.W                                                 | 2039.27568 | 2 | 3.03E-04 | 0.97 | 4.32   | -     | 1980.2   |
| gi4504517 ref NP_001531.1  | heat shock 27kDa protein 1; heat shock 27kD protein 1 [Homo sapiens] [M |            |   | 8.89E-08 | 2.75 | 30.27  | 21.00 | 22782.3  |
| AHQ-10-11, 4516 - 4594     | K.LATQSNIEITIPVFESR.A                                                   | 1907.11412 | 2 | 9.06E-06 | 0.81 | 3.62   | -     | 349.1    |
| AHQ-10-14, 4606 - 4678     | K.LATQSNIEITIPVFESR.A                                                   | 1907.11412 | 2 | 5.62E-05 | 0.51 | 2.98   | -     | 234.9    |
| AHQ-10-10, 4366            | R.LFDQAQGLPR.L                                                          | 1164.33793 | 2 | 1.23E-06 | 0.96 | 3.43   | -     | 1806.7   |
| AHQ-10-14, 4526            | R.LFDQAQGLPR.L                                                          | 1164.33793 | 2 | 5.15E-05 | 0.92 | 3.25   | -     | 1273.9   |
| AHQ-10-11, 4422            | R.LFDQAQGLPR.L                                                          | 1164.33793 | 2 | 4.40E-07 | 0.96 | 4.39   | -     | 1554.0   |
| AHQ-10-13, 4680            | R.VSLDWNHFAPDELTVK.T                                                    | 1784.99058 | 2 | 2.83E-06 | 0.92 | 4.21   | -     | 959.8    |
| AHQ-10-13, 4462 - 4526     | R.VSLDWNHFAPDELTVK.T                                                    | 1784.99058 | 2 | 8.89E-08 | 0.97 | 5.42   | -     | 1570.8   |
| AHQ-10-10, 4524            | R.VSLDWNHFAPDELTVK.T                                                    | 1784.99058 | 2 | 2.81E-06 | 0.91 | 3.04   | -     | 1271.3   |
| AHQ-10-11, 4428            | R.VSLDWNHFAPDELTVK.T                                                    | 1784.99058 | 2 | 1.08E-05 | 0.90 | 3.67   | -     | 1033.3   |
| gi4885063 ref NP_005156.1  | aldolase C, fructose-bisphosphate; Aldolase C, fructose-bisphosphatase  |            |   | 8.95E-08 | 0.95 | 10.25  | 6.30  | 39455.6  |
| AHQ-10-9, 3904             | K.GVVPLAGTDGTTTTQGLDGLSER.C                                             | 2274.42806 | 2 | 7.23E-05 | 0.45 | 2.92   | -     | 564.4    |

|                             |                                                                                  |            |   |          |      |       |       |          |
|-----------------------------|----------------------------------------------------------------------------------|------------|---|----------|------|-------|-------|----------|
| AHQ-10-1, 4141              | R.CLPTACTIQLR.G                                                                  | 1335.57568 | 2 | 2.22E-06 | 0.50 | 2.56  | -     | 393.5    |
| AHQ-10-3, 4779              | R.EGGSQIGDALGFVAVR.Y                                                             | 1574.71988 | 2 | 1.98E-05 | 0.67 | 3.37  | -     | 379.4    |
| AHQ-10-1, 4082              | K.EQDLLEVLHNGACSPGAR.Q                                                           | 1968.13770 | 2 | 1.96E-07 | 0.77 | 3.17  | -     | 698.7    |
| AHQ-10-2, 3238 - 3243       | R.HIVTFDQGNFK.L                                                                  | 1306.45124 | 2 | 7.01E-06 | 0.53 | 3.04  | -     | 277.3    |
| AHQ-10-1, 4029              | R.IALLLM*ASGEQOR.M                                                               | 1486.76229 | 2 | 3.58E-04 | 0.88 | 2.93  | -     | 1126.2   |
| AHQ-10-1, 6443              | R.IGWPNALIQDFETLPR.E                                                             | 2081.40223 | 2 | 4.23E-05 | 0.61 | 2.69  | -     | 466.6    |
| AHQ-10-1, 2885              | R.ILAGPAGDSNVVK.L                                                                | 1241.41901 | 2 | 3.58E-07 | 0.94 | 3.74  | -     | 1343.4   |
| AHQ-10-1, 3806              | R.ILTSDFVDFDCNK.L                                                                | 1441.58869 | 2 | 9.08E-08 | 0.90 | 3.25  | -     | 1010.1   |
| AHQ-10-2, 3723              | R.ILTSDFVDFDCNK.L                                                                | 1441.58869 | 2 | 1.37E-05 | 0.84 | 2.80  | -     | 740.0    |
| AHQ-10-1, 6327 - 6399       | R.LLDLVFLDGGSSR.L                                                                | 1448.68905 | 2 | 1.26E-06 | 0.95 | 4.08  | -     | 1409.5   |
| AHQ-10-1, 4215              | R.LSEAEFELVKA.I                                                                  | 1165.31777 | 2 | 1.72E-06 | 0.86 | 3.50  | -     | 858.3    |
| AHQ-10-4, 3267              | K.LSGEAYGFVAR.I                                                                  | 1170.29934 | 2 | 3.16E-07 | 0.97 | 4.58  | -     | 1986.7   |
| AHQ-10-1, 4165              | K.LTGSQSYVLFQNK.E                                                                | 1518.71629 | 2 | 2.88E-06 | 0.90 | 3.93  | -     | 750.9    |
| AHQ-10-2, 4091              | K.LTGSQSYVLFQNK.E                                                                | 1518.71629 | 2 | 2.96E-04 | 0.88 | 3.60  | -     | 698.0    |
| AHQ-10-1, 5225 - 5283       | K.RLPDGDIQVVIQVGPANVQELER.I                                                      | 2571.91720 | 3 | 3.19E-07 | 0.98 | 6.35  | -     | 2215.2   |
| AHQ-10-1, 4791              | K.SVGSQWASPENPCLINECVR.V                                                         | 2306.51832 | 2 | 2.35E-05 | 0.82 | 3.43  | -     | 400.7    |
| AHQ-10-3, 2523              | R.VKVEEVIQQR.N                                                                   | 1276.46658 | 2 | 3.43E-04 | 0.73 | 2.54  | -     | 735.4    |
| AHQ-10-2, 4492              | R.VTVFPIGIDR.Y                                                                   | 1174.37426 | 2 | 2.83E-07 | 0.94 | 4.06  | -     | 935.3    |
| AHQ-10-1, 4558              | R.VTVFPIGIDR.Y                                                                   | 1174.37426 | 2 | 3.09E-04 | 0.92 | 3.22  | -     | 1111.8   |
| AHQ-10-2, 3010              | K.YAGSQVASTSEVLK.Y                                                               | 1440.58064 | 2 | 1.23E-04 | 0.93 | 4.04  | -     | 925.8    |
| AHQ-10-4, 2941              | K.YAGSQVASTSEVLK.Y                                                               | 1440.58064 | 2 | 6.73E-05 | 0.55 | 2.57  | -     | 443.3    |
| AHQ-10-3, 2947              | K.YAGSQVASTSEVLK.Y                                                               | 1440.58064 | 2 | 3.42E-07 | 0.92 | 3.47  | -     | 1020.9   |
| AHQ-10-1, 3129              | K.YAGSQVASTSEVLK.Y                                                               | 1440.58064 | 2 | 1.71E-07 | 0.90 | 3.08  | -     | 1043.1   |
| AHQ-10-2, 5635              | K.YTLFQIFSK.I                                                                    | 1147.34728 | 2 | 2.62E-04 | 0.93 | 2.85  | -     | 1226.4   |
| AHQ-10-1, 5667              | K.YTLFQIFSK.I                                                                    | 1147.34728 | 2 | 5.35E-05 | 0.91 | 2.67  | -     | 1090.8   |
| gi 11321601 ref NP_002618.1 | phosphofruktokinase, platelet; Phosphofruktokinase, platelet type [Homo sapiens] |            |   | 9.32E-08 | 5.42 | 60.24 | 12.60 | 85595.6  |
| AHQ-10-5, 4765              | K.ASYDVSDDGLEHVQPWSV                                                             | 2105.20640 | 2 | 7.04E-07 | 0.89 | 4.24  | -     | 419.6    |
| AHQ-10-5, 3509              | R.DLQSNVHEITEK.M                                                                 | 1413.51529 | 2 | 1.93E-05 | 0.79 | 3.16  | -     | 577.7    |
| AHQ-10-5, 5595 - 5596       | K.EIGWTDVGGVGTGGGSIILGTR.K                                                       | 2120.30735 | 2 | 1.59E-05 | 0.95 | 4.83  | -     | 902.5    |
| AHQ-10-5, 3895              | K.ELVVTQLGVDTR.V                                                                 | 1394.55511 | 2 | 1.51E-07 | 0.94 | 3.66  | -     | 1220.6   |
| AHQ-10-5, 4584              | K.FTTDDSIQVGLGSK.R                                                               | 1557.74760 | 2 | 4.10E-07 | 0.92 | 3.66  | -     | 913.2    |
| AHQ-10-5, 5923              | R.GITNLCVIGDGSGLTGANLFR.K                                                        | 2137.40264 | 2 | 9.32E-08 | 0.93 | 4.40  | -     | 764.7    |
| gi 4758012 ref NP_004850.1  | clathrin heavy chain; clathrin, heavy polypeptide-like 2 [Homo sapiens]          |            |   | 9.74E-08 | 5.22 | 60.23 | 5.10  | 191612.6 |
| AHQ-10-3, 4937 - 5014       | R.ISGETIFVTAPHEATAGIIGVNR.K                                                      | 2354.64751 | 3 | 1.16E-07 | 0.92 | 4.63  | -     | 923.5    |
| AHQ-10-3, 3606              | K.IVLDNSVSEHR.N                                                                  | 1416.56400 | 2 | 4.52E-06 | 0.59 | 2.63  | -     | 634.0    |
| AHQ-10-3, 5787              | R.NLNLNLLITAIK.A                                                                 | 1354.66353 | 2 | 6.12E-06 | 0.96 | 4.51  | -     | 1632.1   |
| AHQ-10-3, 4642 - 4707       | R.TSIDAYDNFNDISLAQR.L                                                            | 1944.04818 | 2 | 9.74E-08 | 0.86 | 3.34  | -     | 1073.3   |
| AHQ-10-3, 3257              | K.VANVELYR.A                                                                     | 1127.27446 | 2 | 2.80E-05 | 0.93 | 3.42  | -     | 1265.9   |
| AHQ-10-3, 3714              | R.VVGMALQYSVDR.K                                                                 | 1338.55819 | 2 | 1.85E-04 | 0.95 | 4.44  | -     | 1376.3   |
| gi 8922673 ref NP_006092.1  | parvin, alpha; alpha-parvin; actopaxin [Homo sapiens]                            |            |   | 1.00E-07 | 1.73 | 20.22 | 5.60  | 42244.3  |
| AHQ-10-9, 4197 - 4275       | R.DAFDFTLFDHAPDK.L                                                               | 1492.57096 | 2 | 1.00E-07 | 0.96 | 4.38  | -     | 1299.9   |
| AHQ-10-9, 3849 - 3851       | R.VLYNLFTK.Y                                                                     | 998.19983  | 2 | 2.03E-04 | 0.77 | 2.90  | -     | 374.5    |
| gi 7661818 ref NP_054900.1  | HSPC159 protein [Homo sapiens]                                                   |            |   | 1.03E-07 | 2.22 | 30.19 | 32.00 | 19011.6  |
| AHQ-10-13, 6200 - 6201      | R.GEEQSAIPYFFPIPDQPFV.V                                                          | 2239.47029 | 2 | 3.89E-05 | 0.84 | 3.76  | -     | 322.9    |
| AHQ-10-11, 6134             | R.GEEQSAIPYFFPIPDQPFV.V                                                          | 2239.47029 | 2 | 4.76E-05 | 0.77 | 3.27  | -     | 365.7    |
| AHQ-10-12, 6150             | R.GEEQSAIPYFFPIPDQPFV.V                                                          | 2239.47029 | 2 | 3.63E-06 | 0.55 | 3.27  | -     | 255.5    |
| AHQ-10-14, 6244             | R.GEEQSAIPYFFPIPDQPFV.V                                                          | 2239.47029 | 2 | 2.00E-04 | 0.49 | 2.53  | -     | 175.9    |
| AHQ-10-11, 4655 - 4710      | K.LDDGHLLNLSLSPVQADVYFPR.L                                                       | 2445.62923 | 3 | 1.27E-04 | 0.84 | 3.39  | -     | 1346.5   |
| AHQ-10-11, 4646             | R.VFVDGHLQDFVYHR.I                                                               | 1780.96540 | 3 | 1.03E-07 | 0.83 | 3.53  | -     | 548.5    |
| gi 17986283 ref NP_006000.2 | tubulin, alpha 3; tubulin, alpha, brain-specific; hum-a-tub1; hum-a-tu           |            |   | 1.03E-07 | 0.94 | 10.24 | 3.30  | 50135.3  |
| AHQ-10-11, 5270 - 5276      | R.AVFVDELEPTVIDEVR.T                                                             | 1702.92947 | 2 | 9.22E-05 | 0.83 | 3.55  | -     | 711.5    |
| AHQ-10-14, 5931 - 5935      | R.AVFVDELEPTVIDEVR.T                                                             | 1702.92947 | 2 | 1.21E-07 | 0.85 | 3.54  | -     | 645.3    |
| AHQ-10-14, 5090             | R.AVFVDELEPTVIDEVR.T                                                             | 1702.92947 | 2 | 1.14E-04 | 0.92 | 4.00  | -     | 807.3    |
| AHQ-10-7, 5344 - 5346       | R.AVFVDELEPTVIDEVR.T                                                             | 1702.92947 | 2 | 1.03E-07 | 0.94 | 4.77  | -     | 972.5    |
| gi 5729887 ref NP_006624.1  | IQ motif containing GTPase activating protein 2 [Homo sapiens]                   |            |   | 1.13E-07 | 0.97 | 10.25 | 1.00  | 180611.0 |
| AHQ-10-5, 4068              | K.VDQVQDITGNTPTVIK.M                                                             | 1726.95257 | 2 | 1.13E-07 | 0.97 | 4.93  | -     | 1642.4   |
| gi 7661948 ref NP_055545.1  | KIAA0152 gene product [Homo sapiens]                                             |            |   | 1.25E-07 | 0.92 | 10.19 | 4.50  | 32233.6  |
| AHQ-10-9, 3312 - 3313       | R.SNPEDQLYQTER.Y                                                                 | 1593.67683 | 2 | 1.25E-07 | 0.92 | 3.85  | -     | 848.0    |
| gi 27500115 ref XP_208901.1 | similar to ubiquitin-conjugating enzyme E2M; UBC12 homolog, yeast [Homo sapiens] |            |   | 1.26E-07 | 0.69 | 10.14 | 8.70  | 20964.0  |
| AHQ-10-11, 5596             | K.TCDSIFSDPDDLNFKL.L                                                             | 1889.02935 | 2 | 1.26E-07 | 0.69 | 2.84  | -     | 567.3    |
| gi 18104967 ref NP_000953.2 | prostaglandin-endoperoxide synthase 1 isoform 1 precursor; prostagland           |            |   | 1.29E-07 | 4.37 | 50.24 | 15.90 | 68686.0  |
| AHQ-10-6, 3927              | K.AEHPWTGDEQLFQTRR.L                                                             | 1917.02765 | 2 | 6.03E-06 | 0.93 | 3.64  | -     | 982.6    |
| AHQ-10-6, 3852              | K.ALGHGVDLGHYGDNLER.Q                                                            | 1937.10524 | 3 | 2.98E-05 | 0.88 | 3.93  | -     | 853.1    |
| AHQ-10-6, 6379              | K.IVIEEYVQLSGYFLQLK.F                                                            | 2171.52045 | 3 | 1.17E-04 | 0.93 | 3.78  | -     | 1345.6   |
| AHQ-10-6, 3260              | R.VPDASQDDGPAVERPSTEL                                                            | 1984.06747 | 2 | 1.29E-07 | 0.89 | 3.84  | -     | 666.3    |
| AHQ-10-6, 5077              | K.YQLVDGEMYPSPVEEAPVLM*HYPR.G                                                    | 2838.20739 | 3 | 1.86E-04 | 0.75 | 3.27  | -     | 895.4    |
| gi 21281689 ref NP_079209.1 | hypothetical protein FLJ12056 [Homo sapiens]                                     |            |   | 1.29E-07 | 0.17 | 10.15 | 9.10  | 23261.9  |
| AHQ-10-6, 2821              | R.LPGGGQLERAGAEAAAREAR.R                                                         | 1981.16278 | 3 | 1.29E-07 | 0.17 | 3.08  | -     | 421.4    |
| gi 1988251 ref NP_001889.2  | cystatin SN precursor; cystatin 1; cystatin SA-I; cysteine proteinase            |            |   | 1.35E-07 | 1.62 | 20.17 | 20.60 | 16387.6  |
| AHQ-10-13, 3465 - 3466      | R.ALHFAISEYKN.A                                                                  | 1293.45247 | 2 | 2.62E-04 | 0.89 | 2.71  | -     | 1171.7   |
| AHQ-10-13, 4924 - 4929      | R.IIPGGIYNADLNDEWVQR.A                                                           | 2074.28181 | 3 | 1.04E-04 | 0.67 | 3.27  | -     | 944.7    |
| AHQ-10-13, 4862 - 4920      | R.IIPGGIYNADLNDEWVQR.A                                                           | 2074.28181 | 2 | 1.35E-07 | 0.73 | 2.95  | -     | 261.5    |
| gi 4758208 ref NP_004081.1  | dual specificity phosphatase 3; vaccinia virus phosphatase VH1-related;          |            |   | 1.35E-07 | 1.73 | 20.18 | 15.10 | 20478.2  |
| AHQ-10-11, 5139             | K.ANDTQEFNLSAYFER.A                                                              | 1805.88207 | 2 | 1.35E-07 | 0.86 | 3.61  | -     | 888.8    |
| AHQ-10-11, 3468             | K.LGITHVLNAEAGR.S                                                                | 1351.53669 | 3 | 3.58E-04 | 0.86 | 3.48  | -     | 1236.5   |
| gi 7661678 ref NP_056461.1  | RAP1B, member of RAS oncogene family; K-REV; RAS-related protein RAP1B           |            |   | 1.53E-07 | 4.02 | 50.26 | 19.00 | 20824.7  |
| AHQ-10-11, 3904 - 3966      | R.QWNNAFLLESSAK.S                                                                | 1556.68148 | 2 | 2.74E-06 | 0.67 | 3.07  | -     | 297.9    |
| AHQ-10-11, 4078 - 4120      | R.QWNNAFLLESSAK.S                                                                | 1556.68148 | 2 | 3.11E-04 | 0.74 | 2.95  | -     | 368.0    |
| AHQ-10-11, 3720 - 3775      | R.VKDTRDDVPMILVGNK.C                                                             | 1644.91497 | 3 | 6.77E-06 | 0.92 | 4.04  | -     | 1522.5   |
| AHQ-10-11, 3706 - 3767      | R.VKDTRDDVPMILVGNK.C                                                             | 1644.91497 | 2 | 1.53E-07 | 0.97 | 4.75  | -     | 2003.8   |
| AHQ-10-13, 3450             | R.VKDTRDDVPM*ILVGNK.C                                                            | 1660.91437 | 2 | 2.81E-04 | 0.94 | 4.19  | -     | 1159.7   |
| AHQ-10-11, 3378             | R.VKDTRDDVPM*ILVGNK.C                                                            | 1660.91437 | 3 | 8.30E-04 | 0.76 | 3.75  | -     | 870.0    |
| AHQ-10-11, 3311 - 3366      | R.VKDTRDDVPM*ILVGNK.C                                                            | 1660.91437 | 2 | 7.49E-04 | 0.95 | 4.00  | -     | 1407.0   |
| AHQ-10-11, 4234 - 4295      | R.VKDTRDDVPMILVGNKCDLEDER.V                                                      | 2563.84420 | 3 | 6.46E-05 | 0.89 | 3.93  | -     | 1049.2   |
| AHQ-10-11, 3982 - 4056      | R.VKDTRDDVPM*ILVGNKCDLEDER.V                                                     | 2579.84360 | 3 | 1.16E-05 | 0.95 | 5.25  | -     | 1568.6   |
| AHQ-10-11, 3988             | R.VKDTRDDVPM*ILVGNKCDLEDER.V                                                     | 2579.84360 | 2 | 8.91E-06 | 0.55 | 2.63  | -     | 335.9    |
| AHQ-10-13, 4084 - 4093      | R.VKDTRDDVPM*ILVGNKCDLEDER.V                                                     | 2579.84360 | 3 | 3.56E-04 | 0.93 | 4.99  | -     | 1064.1   |
| gi 20357552 ref NP_005222.2 | cortactin isoform a; oncogene EMS1 [Homo sapiens]                                |            |   | 1.54E-07 | 4.88 | 60.26 | 16.20 | 61585.7  |
| AHQ-10-14, 4688             | K.ASAGHAVSIAQDDAGADWETDPDFVNDVSEK.E                                              | 3334.37643 | 3 | 1.61E-07 | 0.93 | 5.19  | -     | 858.4    |
| AHQ-10-13, 3952 - 3954      | R.LPSSPVYEDAASFKA.S                                                              | 1511.65733 | 2 | 7.52E-06 | 0.87 | 3.36  | -     | 606.5    |
| AHQ-10-11, 3850 - 3868      | R.LPSSPVYEDAASFKA.S                                                              | 1511.65733 | 2 | 1.28E-04 | 0.71 | 2.70  | -     | 686.1    |
| AHQ-10-14, 3841             | K.NASTFEDVTQVSSAYQK.T                                                            | 1875.97061 | 2 | 1.54E-07 | 0.96 | 4.42  | -     | 1442.6   |
| AHQ-10-14, 4599             | K.NASTFEDVTQVSSAYQK.T                                                            | 1875.97061 | 2 | 2.88E-04 | 0.65 | 3.01  | -     | 427.6    |
| AHQ-10-13, 4220             | K.NASTFEDVTQVSSAYQK.T                                                            | 1875.97061 | 2 | 8.19E-04 | 0.84 | 3.09  | -     | 761.6    |
| AHQ-10-11, 2435             | K.TQTPPVSPAPQPTTEER.L                                                            | 1735.87642 | 2 | 4.88E-04 | 0.50 | 2.53  | -     | 421.6    |
| AHQ-10-13, 2978             | K.VDKSAVGFYEQGK.T                                                                | 1428.57155 | 2 | 2.23E-06 | 0.76 | 3.07  | -     | 627.2    |
| AHQ-10-14, 2957             | R.VDQSAVGFYEQGK.T                                                                | 1428.52841 | 2 | 1.29E-06 | 0.86 | 3.61  | -     | 679.0    |
| gi 29731460 ref XP_293027.1 | similar to ADP,ATP carrier protein, fibroblast isoform (ADP/ATP trans)           |            |   | 1.69E-07 | 0.96 | 10.17 | 6.10  | 23572.2  |
| AHQ-10-10, 4314             | K.DFLAGGVAIAISK.M                                                                | 1220.39980 | 2 | 1.69E-07 | 0.96 | 3.41  | -     | 2228.0   |
| gi 4504515 ref NP_002146.1  | heat shock 70kDa protein 6 (HSP70B); heat shock 70kDa protein 6 (HSP70B)         |            |   | 1.86E-07 | 2.55 | 30.19 | 6.10  | 70853.0  |
| AHQ-10-6, 4784              | R.FEELCSDLFR.S                                                                   | 1317.44926 | 2 | 8.91E-06 | 0.70 | 2.76  | -     | 601.5    |
| AHQ-10-6, 4653              | R.IINEPTAAAIYGLDR.R                                                              | 1688.90603 | 2 | 1.86E-07 | 0.92 | 3.89  | -     | 986.0    |
| AHQ-10-6, 4257              | K.LLQDFNFKELNLS.S                                                                | 1566.78249 | 2 | 4.33E-05 | 0.93 | 3.75  | -     | 1328.0   |
| gi 24497612 ref NP_116262.2 | nm23-phosphorylated unknown substrate; SH3 domain-containing 70 kDa pr           |            |   | 2.24E-07 | 1.56 | 20.18 | 3.90  | 72695.6  |
| AHQ-10-6, 5981 - 6037       | K.LGCDVVATIFSR.D                                                                 | 1426.62208 | 2 | 2.24E-07 | 0.94 | 3.51  | -     | 1136.1   |
| AHQ-10-6, 3901              | K.LVSESYDTYISR.S                                                                 | 1532.67654 | 2 | 1.70E-06 | 0.62 | 2.67  | -     | 649.0    |
| gi 30154095 ref XP_293967.2 | similar to gamma actin-like protein [Homo sapiens]                               |            |   | 2.29E-07 | 1.23 | 20.18 | 12.20 | 19259.0  |



|                             |                                                                         |            |   |          |      |        |       |          |
|-----------------------------|-------------------------------------------------------------------------|------------|---|----------|------|--------|-------|----------|
| AHQ-10-9, 4328              | K.DLYTSTVLSGGTTM*YPGIADR.M                                              | 2235.45690 | 2 | 1.53E-04 | 0.31 | 2.61   | -     | 421.9    |
| AHQ-10-13, 4928 - 5007      | K.DLYTSTVLSGGTTM*YPGIADR.M                                              | 2235.45690 | 2 | 4.45E-05 | 0.28 | 2.65   | -     | 388.3    |
| AHQ-10-14, 5449             | K.DLYTSTVLSGGTTM*YPGIADR.M                                              | 2235.45690 | 2 | 2.57E-05 | 0.62 | 3.20   | -     | 493.9    |
| AHQ-10-13, 4528             | K.DLYTSTVLSGGTTM*YPGIADR.M                                              | 2235.45690 | 2 | 2.07E-04 | 0.80 | 3.68   | -     | 650.4    |
| AHQ-10-13, 4660             | K.DLYTSTVLSGGTTM*YPGIADR.M                                              | 2235.45690 | 2 | 2.29E-07 | 0.48 | 2.98   | -     | 406.0    |
| AHQ-10-14, 4617 - 4677      | K.DLYTSTVLSGGTTM*YPGIADR.M                                              | 2235.45690 | 2 | 1.23E-06 | 0.74 | 3.54   | -     | 503.4    |
| AHQ-10-8, 4957              | K.DLYTSTVLSGGTTM*YPGIADR.M                                              | 2219.45750 | 2 | 2.46E-05 | 0.75 | 3.37   | -     | 525.0    |
| gi 4507767 ref NP_003326.1  | ubiquitin-activating enzyme E1-like; Ubiquitin-activating enzyme-2; ubi |            |   | 2.35E-07 | 3.50 | 40.20  | 7.60  | 111719.5 |
| AHQ-10-4, 6363              | R.GLNPDVLQIPLYPLDPTTEHIYGDNFFSR.V                                       | 3434.79811 | 3 | 6.13E-06 | 0.84 | 3.84   | -     | 589.2    |
| AHQ-10-4, 4632              | R.VDGVAAALDSFQAR.R                                                      | 1420.55265 | 2 | 2.35E-07 | 0.94 | 3.80   | -     | 1488.5   |
| AHQ-10-4, 4124              | R.VTELVQQLTGQAPAPGQR.V                                                  | 1894.12181 | 2 | 2.59E-07 | 0.90 | 4.05   | -     | 877.7    |
| AHQ-10-4, 4528              | R.YDQGIAVFAGFQEK.L                                                      | 1630.78190 | 2 | 4.12E-04 | 0.82 | 2.80   | -     | 751.0    |
| gi 30159830 ref XP_302246.1 | similar to HSPC280 [Homo sapiens]                                       |            |   | 2.38E-07 | 1.85 | 20.22  | 3.90  | 45644.4  |
| AHQ-10-14, 6325             | K.CANLFEALVGLTK.A                                                       | 1437.68632 | 2 | 5.04E-06 | 0.90 | 3.57   | -     | 934.6    |
| AHQ-10-14, 6284 - 6285      | R.DDKCANLFEALVGLTK.A                                                    | 1796.03496 | 2 | 2.38E-07 | 0.96 | 4.38   | -     | 1448.5   |
| gi 21361547 ref NP_002930.2 | ribonuclease/angiogenin inhibitor; Placental ribonuclease inhibitor [H  |            |   | 2.43E-07 | 0.86 | 10.14  | 3.30  | 49973.3  |
| AHQ-10-7, 3480              | K.ELSLAGNELGDEGAR.L                                                     | 1531.60704 | 2 | 2.43E-07 | 0.86 | 2.81   | -     | 1084.8   |
| gi 4503109 ref NP_001890.1  | cystatin S precursor; cystatin 4 [Homo sapiens]                         |            |   | 2.48E-07 | 0.79 | 10.24  | 12.80 | 16214.3  |
| AHQ-10-13, 5098             | R.IIPGGIYDADLNDVWVQR.A                                                  | 2075.26658 | 2 | 7.77E-05 | 0.60 | 3.30   | -     | 436.4    |
| AHQ-10-13, 5359 - 5428      | R.IIPGGIYDADLNDVWVQR.A                                                  | 2075.26658 | 2 | 2.48E-07 | 0.79 | 4.75   | -     | 446.7    |
| gi 4557032 ref NP_002291.1  | lactate dehydrogenase B [Homo sapiens]                                  |            |   | 2.84E-07 | 3.66 | 40.30  | 10.20 | 36638.3  |
| AHQ-10-9, 2476              | K.IVVVTAGV.R                                                            | 914.12760  | 2 | 2.86E-04 | 0.90 | 3.13   | -     | 985.1    |
| AHQ-10-9, 3311 - 3371       | K.LIAPVAEEATVPNNK.I                                                     | 1695.89534 | 2 | 8.40E-04 | 0.92 | 3.60   | -     | 1160.9   |
| AHQ-10-9, 3456 - 3469       | K.SADTLWDIQK.D                                                          | 1177.28864 | 2 | 1.49E-05 | 0.86 | 3.33   | -     | 847.1    |
| AHQ-10-13, 6344             | K.SLADELALVDVLEDK.L                                                     | 1630.81843 | 2 | 1.21E-06 | 0.94 | 3.66   | -     | 1307.8   |
| AHQ-10-13, 6161 - 6166      | K.SLADELALVDVLEDK.L                                                     | 1630.81843 | 2 | 2.84E-07 | 0.98 | 5.90   | -     | 2207.1   |
| AHQ-10-14, 6198             | K.SLADELALVDVLEDK.L                                                     | 1630.81843 | 2 | 5.50E-04 | 0.79 | 2.69   | -     | 965.4    |
| AHQ-10-11, 6095             | K.SLADELALVDVLEDK.L                                                     | 1630.81843 | 2 | 5.81E-05 | 0.84 | 2.96   | -     | 1035.4   |
| gi 4557321 ref NP_000030.1  | apolipoprotein A1- precursor [Homo sapiens]                             |            |   | 3.03E-07 | 1.87 | 20.23  | 4.90  | 30776.6  |
| AHQ-10-10, 4222 - 4226      | R.DYVSQFEGSALGK.Q                                                       | 1401.50297 | 2 | 3.03E-07 | 0.97 | 4.63   | -     | 1314.8   |
| AHQ-10-14, 4986             | K.LLDNWDVSTSTFSK.L                                                      | 1613.74965 | 2 | 7.85E-04 | 0.90 | 3.85   | -     | 819.6    |
| gi 5031857 ref NP_005557.1  | lactate dehydrogenase A [Homo sapiens]                                  |            |   | 3.07E-07 | 2.67 | 30.25  | 10.50 | 36688.5  |
| AHQ-10-14, 6216             | K.DLADELALVDVIEDK.L                                                     | 1658.82864 | 2 | 4.12E-07 | 0.86 | 2.55   | -     | 1422.5   |
| AHQ-10-13, 6355             | K.DLADELALVDVIEDK.L                                                     | 1658.82864 | 2 | 2.25E-04 | 0.87 | 3.14   | -     | 1066.3   |
| AHQ-10-13, 6176 - 6177      | K.DLADELALVDVIEDK.L                                                     | 1658.82864 | 2 | 4.70E-07 | 0.98 | 5.00   | -     | 2417.7   |
| AHQ-10-9, 2728 - 2732       | K.LVIIITAGAR.Q                                                          | 914.12760  | 2 | 2.43E-06 | 0.85 | 3.06   | -     | 749.7    |
| AHQ-10-9, 3533              | K.QVVESAYEVIK.L                                                         | 1265.43734 | 2 | 3.07E-07 | 0.96 | 3.87   | -     | 1625.7   |
| gi 4504071 ref NP_000164.1  | platelet glycoprotein Ib alpha polypeptide precursor [Homo sapiens] [MA |            |   | 3.21E-07 | 6.23 | 70.25  | 14.40 | 68955.0  |
| AHQ-10-4, 3495              | K.AM*TSNVASVQCDNSDKFPVYK.Y                                              | 2379.60939 | 3 | 7.16E-05 | 0.85 | 3.82   | -     | 685.0    |
| AHQ-10-4, 3625              | K.AM*TSNVASVQCDNSDKFPVYK.Y                                              | 2379.60939 | 3 | 2.59E-06 | 0.76 | 3.09   | -     | 715.4    |
| AHQ-10-3, 4761              | R.GLGLQLQELYLK.G                                                        | 1263.46458 | 2 | 1.00E-05 | 0.96 | 4.06   | -     | 1596.6   |
| AHQ-10-12, 4008 - 4022      | R.GQDLLSTVSR.Y                                                          | 1189.34410 | 2 | 8.07E-06 | 0.96 | 3.93   | -     | 1266.2   |
| AHQ-10-4, 4055              | R.GQDLLSTVSR.Y                                                          | 1189.34410 | 2 | 3.06E-05 | 0.94 | 3.56   | -     | 1316.4   |
| AHQ-10-3, 4037 - 4041       | R.GQDLLSTVSR.Y                                                          | 1189.34410 | 2 | 7.06E-06 | 0.94 | 3.43   | -     | 1420.5   |
| AHQ-10-13, 4408             | R.GQDLLSTVSR.Y                                                          | 1189.34410 | 2 | 1.67E-04 | 0.88 | 2.95   | -     | 1205.9   |
| AHQ-10-13, 4037 - 4045      | R.GQDLLSTVSR.Y                                                          | 1189.34410 | 2 | 3.21E-07 | 0.96 | 3.75   | -     | 1879.9   |
| AHQ-10-14, 4009 - 4017      | R.GQDLLSTVSR.Y                                                          | 1189.34410 | 2 | 2.87E-06 | 0.95 | 4.04   | -     | 1384.3   |
| AHQ-10-1, 4199              | R.GQDLLSTVSR.Y                                                          | 1189.34410 | 2 | 1.16E-05 | 0.94 | 3.54   | -     | 1353.3   |
| AHQ-10-3, 2257 - 2259       | R.GVLQGHLESSR.N                                                         | 1183.29965 | 2 | 3.55E-05 | 0.82 | 2.78   | -     | 741.8    |
| AHQ-10-3, 3629              | R.LTQLNLDRCCLTK.L                                                       | 1605.83862 | 2 | 1.50E-05 | 0.89 | 3.55   | -     | 873.2    |
| AHQ-10-4, 3601 - 3639       | R.LTQLNLDRCCLTK.L                                                       | 1605.83862 | 2 | 2.37E-04 | 0.72 | 3.36   | -     | 586.8    |
| AHQ-10-3, 4105              | R.LTSLPLGALR.G                                                          | 1041.26938 | 2 | 6.90E-05 | 0.87 | 3.16   | -     | 853.2    |
| AHQ-10-4, 4713 - 4715       | R.WLQDNAENVVYWK.Q                                                       | 1665.82948 | 2 | 5.13E-07 | 0.97 | 4.92   | -     | 1815.5   |
| AHQ-10-3, 4662 - 4663       | R.WLQDNAENVVYWK.Q                                                       | 1665.82948 | 2 | 1.91E-04 | 0.97 | 4.40   | -     | 1775.3   |
| gi 29729616 ref XP_292963.1 | similar to peptidylprolyl isomerase A (cyclophilin A) [Homo sapiens] [  |            |   | 3.29E-07 | 0.86 | 10.25  | 16.40 | 18025.4  |
| AHQ-10-14, 4696             | K.HTGPGILSM*ANAGPNTNGSOFFICTAK.S                                        | 2810.11545 | 3 | 2.48E-04 | 0.93 | 4.98   | -     | 898.3    |
| AHQ-10-12, 4606 - 4660      | K.HTGPGILSM*ANAGPNTNGSOFFICTAK.S                                        | 2810.11545 | 3 | 3.29E-07 | 0.86 | 4.39   | -     | 776.6    |
| gi 6041669 ref NP_004538.2  | NADH dehydrogenase (ubiquinone) 1 beta subcomplex, 4, 15kDa; NADH dehyd |            |   | 3.30E-07 | 0.67 | 10.13  | 14.00 | 15208.5  |
| AHQ-10-13, 4616             | R.TLPETLDPAEYNIISPETR.R                                                 | 2047.20831 | 2 | 3.30E-07 | 0.67 | 2.67   | -     | 539.3    |
| gi 30150448 ref XP_293066.2 | similar to Stress-70 protein, mitochondrial precursor (75 kDa glucose   |            |   | 3.45E-07 | 1.72 | 20.21  | 5.10  | 58788.2  |
| AHQ-10-6, 3848              | K.DAQISLGLNVLV.R                                                        | 1243.39499 | 2 | 2.79E-05 | 0.79 | 3.22   | -     | 670.3    |
| AHQ-10-6, 4392 - 4445       | R.VINEPTAAALAYGLDK.S                                                    | 1646.86592 | 2 | 3.45E-07 | 0.93 | 4.13   | -     | 727.8    |
| gi 4504973 ref NP_002292.1  | lactate dehydrogenase C [Homo sapiens]                                  |            |   | 3.56E-07 | 0.92 | 10.20  | 3.60  | 36311.0  |
| AHQ-10-9, 2405 - 2417       | R.VIGSGCNLDSAR.F                                                        | 1250.36445 | 2 | 3.56E-07 | 0.92 | 3.92   | -     | 716.3    |
| gi 4502051 ref NP_000688.1  | arachidonate 12-lipoxygenase; 12(S)-lipoxygenase [Homo sapiens]         |            |   | 3.97E-07 | 4.90 | 60.19  | 12.10 | 75721.8  |
| AHQ-10-6, 4589              | R.AAAQLTYCSLCPDLDLADR.G                                                 | 2140.33708 | 2 | 3.97E-07 | 0.73 | 2.99   | -     | 415.4    |
| AHQ-10-6, 2471              | K.AVSTGGGGHVQLLR.R                                                      | 1352.52468 | 2 | 1.46E-06 | 0.82 | 3.62   | -     | 701.4    |
| AHQ-10-6, 3127 - 3193       | R.EITEVGLCQAQDR.G                                                       | 1520.64745 | 2 | 4.96E-04 | 0.86 | 3.29   | -     | 726.9    |
| AHQ-10-6, 5221              | R.GLLGLPGALYAHDALR.L                                                    | 1637.90708 | 2 | 1.59E-04 | 0.71 | 2.70   | -     | 505.7    |
| AHQ-10-6, 4809              | R.ITVQGPACAEVAFPCYR.W                                                   | 1999.25659 | 2 | 4.75E-05 | 0.92 | 3.39   | -     | 1478.3   |
| AHQ-10-6, 4752              | R.WVQGEDILSPEGTAR.L                                                     | 1771.95190 | 2 | 6.12E-04 | 0.86 | 3.83   | -     | 828.6    |
| gi 16933567 ref NP_005361.2 | mel transforming oncogene; ras-associated protein RAB8 [Homo sapiens]   |            |   | 4.08E-07 | 0.72 | 10.18  | 6.80  | 23668.1  |
| AHQ-10-11, 5411 - 5478      | K.ANINVENAFFTLAR.D                                                      | 1580.76926 | 2 | 5.53E-05 | 0.91 | 3.53   | -     | 1068.3   |
| AHQ-10-11, 4895             | K.ANINVENAFFTLAR.D                                                      | 1580.76926 | 2 | 4.08E-07 | 0.72 | 2.71   | -     | 569.7    |
| gi 6005727 ref NP_006576.1  | chaperonin containing TCP1, subunit 8 (theta); T-complex protein 1, the |            |   | 4.10E-07 | 1.64 | 20.18  | 4.40  | 59662.4  |
| AHQ-10-7, 3898              | K.FAEAFEIPR.A                                                           | 1151.29602 | 2 | 4.10E-07 | 0.95 | 3.60   | -     | 1383.5   |
| AHQ-10-7, 2952              | K.HEKEDGAISTIVLR.G                                                      | 1568.75678 | 2 | 1.17E-05 | 0.70 | 3.10   | -     | 513.2    |
| gi 4507951 ref NP_003396.1  | tyrosine 3/tryptophan 5-monoxygenase activation protein, eta polypept   |            |   | 4.12E-07 | 0.91 | 10.20  | 5.70  | 28218.5  |
| AHQ-10-10, 2951 - 3006      | K.AVTELNEPLSNEDR.N                                                      | 1587.67060 | 2 | 4.12E-07 | 0.91 | 3.92   | -     | 802.8    |
| gi 30154839 ref XP_301540.1 | similar to keratin 8; cytokeratin 8; keratin, type II cytoskeletal 8 [  |            |   | 4.17E-07 | 0.86 | 10.19  | 3.40  | 39331.0  |
| AHQ-10-2, 4590 - 4631       | K.SLNNKFASFIDK.V                                                        | 1384.56191 | 2 | 2.98E-05 | 0.54 | 2.93   | -     | 462.2    |
| AHQ-10-3, 4363              | K.SLNNKFASFIDK.V                                                        | 1384.56191 | 2 | 7.07E-05 | 0.88 | 3.42   | -     | 777.7    |
| AHQ-10-3, 4527              | K.SLNNKFASFIDK.V                                                        | 1384.56191 | 2 | 6.45E-05 | 0.80 | 3.03   | -     | 606.7    |
| AHQ-10-3, 4750 - 4759       | K.SLNNKFASFIDK.V                                                        | 1384.56191 | 2 | 2.08E-06 | 0.92 | 3.83   | -     | 1017.2   |
| AHQ-10-5, 4529 - 4551       | K.SLNNKFASFIDK.V                                                        | 1384.56191 | 2 | 4.02E-04 | 0.86 | 3.34   | -     | 757.7    |
| AHQ-10-6, 4463 - 4475       | K.SLNNKFASFIDK.V                                                        | 1384.56191 | 2 | 7.99E-07 | 0.79 | 3.40   | -     | 642.2    |
| AHQ-10-10, 4360             | K.SLNNKFASFIDK.V                                                        | 1384.56191 | 2 | 1.20E-06 | 0.78 | 2.85   | -     | 695.6    |
| AHQ-10-13, 4873 - 4877      | K.SLNNKFASFIDK.V                                                        | 1384.56191 | 2 | 1.63E-05 | 0.89 | 3.71   | -     | 679.3    |
| AHQ-10-14, 5295 - 5299      | K.SLNNKFASFIDK.V                                                        | 1384.56191 | 2 | 4.17E-07 | 0.86 | 3.15   | -     | 808.1    |
| gi 20149545 ref NP_002717.2 | prolyl endopeptidase [Homo sapiens]                                     |            |   | 4.43E-07 | 1.54 | 20.17  | 4.80  | 80733.0  |
| AHQ-10-6, 5121              | K.ICDPYAWLEDPDSEQTK.A                                                   | 2069.19089 | 2 | 1.39E-04 | 0.65 | 2.99   | -     | 425.7    |
| AHQ-10-6, 5489              | R.VFLDPNLSDDGTVALR.G                                                    | 1846.07392 | 2 | 4.43E-07 | 0.89 | 3.48   | -     | 1010.8   |
| gi 30149221 ref XP_291446.2 | similar to Heat shock cognate 71 kDa protein [Homo sapiens]             |            |   | 4.59E-07 | 0.90 | 10.18  | 3.90  | 45688.5  |
| AHQ-10-6, 2487              | R.STAGDTHLGGEDFDR.N                                                     | 1692.68222 | 2 | 4.59E-07 | 0.90 | 3.58   | -     | 1011.9   |
| gi 12408656 ref NP_005177.2 | calpain 1, large subunit; calpain, large polypeptide L1; calcium-activ  |            |   | 5.16E-07 | 7.99 | 100.21 | 16.10 | 81889.4  |
| AHQ-10-6, 4899              | K.APSDLYQILK.A                                                          | 1261.49183 | 2 | 5.33E-07 | 0.84 | 2.60   | -     | 975.1    |
| AHQ-10-6, 3587              | R.DFFLANASR.A                                                           | 1041.14166 | 2 | 2.04E-05 | 0.86 | 2.58   | -     | 1223.8   |
| AHQ-10-6, 5573              | R.FRLPPGYVVVVPSTFEPNKEGDFVLR.F                                          | 2994.39160 | 3 | 5.55E-04 | 0.87 | 4.22   | -     | 834.2    |
| AHQ-10-6, 4332 - 4352       | R.KAPSDLYQILK.A                                                         | 1389.66474 | 2 | 8.34E-06 | 0.80 | 2.93   | -     | 672.8    |
| AHQ-10-6, 6107              | K.LGLVEFNILWNR.I                                                        | 1474.73142 | 2 | 5.16E-07 | 0.78 | 3.14   | -     | 750.1    |
| AHQ-10-6, 5363              | R.LPPGYVVVVPSTFEPNKEGDFVLR.F                                            | 2691.03055 | 3 | 2.71E-04 | 0.72 | 3.23   | -     | 389.2    |
| AHQ-10-6, 5941              | K.LVVFVHSAEGNEFWASALLEK.A                                               | 2177.44364 | 3 | 6.18E-04 | 0.71 | 3.15   | -     | 582.8    |
| AHQ-10-6, 3908              | K.LYELIIR.Y                                                             | 1021.23493 | 2 | 4.54E-04 | 0.91 | 3.57   | -     | 1103.1   |
| AHQ-10-6, 4393              | K.RPTELLSNPQFIVDGATR.T                                                  | 2015.25904 | 3 | 1.40E-04 | 0.92 | 3.97   | -     | 1259.9   |
| AHQ-10-6, 4233              | K.WNTTLYEGTWR.R                                                         | 1427.54534 | 2 | 1.85E-04 | 0.58 | 2.61   | -     | 520.0    |
| gi 4826657 ref NP_004333.1  | caldesmon 1 isoform 3; H-CAD; L-CAD [Homo sapiens]                      |            |   | 5.33E-07 | 3.48 | 40.23  | 11.30 | 62662.9  |
| AHQ-10-6, 4652 - 4655       | K.EFDPTITDASLSLPSR.R                                                    | 1749.89986 | 2 | 5.33E-07 | 0.87 | 3.50   | -     | 771.9    |

|                            |                                                                                                                  |            |   |          |      |       |       |          |
|----------------------------|------------------------------------------------------------------------------------------------------------------|------------|---|----------|------|-------|-------|----------|
| AHQ-10-6, 2628             | K.GNVFSSPTAAGTPNK.E                                                                                              | 1448.56286 | 2 | 2.81E-04 | 0.88 | 3.48  | -     | 822.9    |
| AHQ-10-6, 3671 - 3732      | K.TTTTNTQVEGDDAAFLER.L                                                                                           | 2099.15534 | 2 | 2.74E-06 | 0.92 | 4.59  | -     | 590.3    |
| AHQ-10-6, 2739             | R.YEIEETETVTK.S                                                                                                  | 1342.43060 | 2 | 3.86E-04 | 0.81 | 3.28  | -     | 656.2    |
| gi10835187 ref NP_000627.1 | superoxide dismutase 2, mitochondrial [Homo sapiens]                                                             |            |   | 5.54E-07 | 2.49 | 30.22 | 19.40 | 24733.0  |
| AHQ-10-11, 5684            | K.AIWNVINWENWTER.Y                                                                                               | 1744.93137 | 3 | 1.78E-05 | 0.93 | 4.50  | -     | 1159.1   |
| AHQ-10-11, 5616 - 5678     | K.AIWNVINWENWTER.Y                                                                                               | 1744.93137 | 2 | 1.38E-05 | 0.94 | 4.39  | -     | 1198.8   |
| AHQ-10-13, 5780            | K.AIWNVINWENWTER.Y                                                                                               | 1744.93137 | 2 | 5.54E-07 | 0.85 | 3.34  | -     | 725.1    |
| AHQ-10-11, 3772 - 3847     | K.GDVTAQIALQPALK.F                                                                                               | 1425.65548 | 2 | 4.21E-05 | 0.78 | 3.14  | -     | 812.8    |
| AHQ-10-14, 3850            | K.GDVTAQIALQPALK.F                                                                                               | 1425.65548 | 2 | 5.97E-04 | 0.77 | 2.95  | -     | 922.2    |
| AHQ-10-11, 2527            | K.HHAAYVNNLNVTEEK.Y                                                                                              | 1739.86999 | 2 | 2.07E-06 | 0.86 | 3.29  | -     | 699.8    |
| gi4557597 ref NP_001449.1  | gamma filamin; filamin 2; filamin C, gamma (actin-binding protein-280);                                          |            |   | 5.73E-07 | 0.81 | 10.24 | 0.90  | 288897.4 |
| AHQ-10-5, 4501             | R.GQHVPGSPFQFTVGPLGEGGAHK.V                                                                                      | 2305.53673 | 2 | 8.90E-07 | 0.76 | 3.87  | -     | 263.9    |
| AHQ-10-6, 4407             | R.GQHVPGSPFQFTVGPLGEGGAHK.V                                                                                      | 2305.53673 | 3 | 2.64E-05 | 0.86 | 4.21  | -     | 476.0    |
| AHQ-10-7, 4372             | R.GQHVPGSPFQFTVGPLGEGGAHK.V                                                                                      | 2305.53673 | 3 | 1.92E-06 | 0.90 | 4.90  | -     | 550.6    |
| AHQ-10-3, 4466 - 4522      | R.GQHVPGSPFQFTVGPLGEGGAHK.V                                                                                      | 2305.53673 | 3 | 5.73E-07 | 0.81 | 3.99  | -     | 417.6    |
| gi29731857 ref XP_293042.1 | similar to ribosomal protein S12; 40S ribosomal protein S12 [Homo sapiens]                                       |            |   | 6.00E-07 | 0.95 | 10.21 | 8.90  | 19543.6  |
| AHQ-10-13, 4457            | K.LVEALCAEHQINLIK.V                                                                                              | 1753.05645 | 2 | 6.00E-07 | 0.95 | 4.21  | -     | 1759.3   |
| gi30149555 ref XP_301154.1 | similar to heat shock protein 86 [Homo sapiens]                                                                  |            |   | 6.27E-07 | 0.97 | 10.25 | 10.60 | 15781.6  |
| AHQ-10-5, 5620 - 5623      | K.HSQFIGYPTLTFVEK.E                                                                                              | 1780.05877 | 3 | 6.27E-07 | 0.97 | 5.08  | -     | 2144.3   |
| gi30147105 ref XP_210550.2 | similar to Chain , Aldose Reductase (E.C.1.1.1.21) Mutant With Tyr 48                                            |            |   | 6.38E-07 | 0.87 | 10.20 | 2.20  | 61339.9  |
| AHQ-10-5, 4151             | K.ADLINNLGTIAK.S                                                                                                 | 1243.43490 | 2 | 9.39E-06 | 0.92 | 3.93  | -     | 921.7    |
| AHQ-10-5, 4505             | K.ADLINNLGTIAK.S                                                                                                 | 1243.43490 | 2 | 6.38E-07 | 0.87 | 3.38  | -     | 793.4    |
| AHQ-10-5, 3915             | K.ADLINNLGTIAK.S                                                                                                 | 1243.43490 | 2 | 1.81E-04 | 0.84 | 3.26  | -     | 486.6    |
| gi21361657 ref NP_005304.3 | glucose regulated protein, 58kDa; glucose regulated protein, 58kD [Homo sapiens]                                 |            |   | 7.00E-07 | 6.09 | 70.25 | 16.60 | 56780.2  |
| AHQ-10-13, 5380            | R.ELSDIFSYLQR.E                                                                                                  | 1371.52000 | 2 | 1.31E-05 | 0.97 | 3.71  | -     | 1937.0   |
| AHQ-10-7, 4484             | R.FLDQYFDGDLK.R                                                                                                  | 1360.49568 | 2 | 1.41E-04 | 0.92 | 3.50  | -     | 1276.6   |
| AHQ-10-7, 4361             | R.FLDQYFDGDLK.R                                                                                                  | 1360.49568 | 2 | 4.37E-05 | 0.75 | 3.01  | -     | 717.4    |
| AHQ-10-7, 4440             | R.GFPTIYFSPANK.K                                                                                                 | 1342.52349 | 2 | 1.46E-05 | 0.81 | 2.78  | -     | 828.8    |
| AHQ-10-7, 5446             | R.KTFSHELSDFGLESTAGEIPVVAIR.T                                                                                    | 2705.01562 | 3 | 7.00E-07 | 0.82 | 3.76  | -     | 593.5    |
| AHQ-10-7, 3077             | K.M*DATANDVPSPYEVR.G                                                                                             | 1681.80586 | 2 | 1.27E-06 | 0.89 | 3.50  | -     | 600.2    |
| AHQ-10-7, 5785             | K.TFSELSDFGLESTAGEIPVVAIR.T                                                                                      | 2576.84271 | 2 | 2.42E-06 | 0.97 | 5.00  | -     | 1698.9   |
| AHQ-10-7, 5776             | K.TFSELSDFGLESTAGEIPVVAIR.T                                                                                      | 2576.84271 | 3 | 1.42E-04 | 0.73 | 3.50  | -     | 609.9    |
| AHQ-10-7, 3149             | K.YGVSGYPTLK.I                                                                                                   | 1085.23435 | 2 | 1.76E-06 | 0.87 | 2.66  | -     | 734.5    |
| gi30158489 ref XP_301421.1 | similar to Chloride intracellular channel protein 1 (Nuclear chloride channel) [Homo sapiens]                    |            |   | 7.15E-07 | 0.32 | 10.13 | 6.60  | 28267.5  |
| AHQ-10-9, 5416 - 5440      | K.FLNGNELTLADCNLLPK.L                                                                                            | 1934.20276 | 2 | 7.15E-07 | 0.32 | 2.51  | -     | 531.2    |
| gi7705704 ref NP_057001.1  | glutathione S-transferase subunit 13 homolog [Homo sapiens]                                                      |            |   | 7.57E-07 | 1.60 | 20.18 | 13.30 | 25496.7  |
| AHQ-10-11, 2736            | K.AGM*SAEQAGLLEK.I                                                                                               | 1449.61254 | 2 | 1.59E-05 | 0.78 | 2.55  | -     | 1224.5   |
| AHQ-10-11, 4379            | R.NEDITEPQSILAAEK.A                                                                                              | 1729.86695 | 2 | 7.57E-07 | 0.82 | 3.59  | -     | 405.3    |
| gi28466991 ref NP_775771.2 | tau-tubulin kinase [Homo sapiens]                                                                                |            |   | 8.59E-07 | 0.94 | 10.22 | 0.70  | 182465.3 |
| AHQ-10-13, 4876 - 4885     | K.LALDKIATYR.K                                                                                                   | 1277.53762 | 2 | 8.59E-07 | 0.94 | 4.37  | -     | 1747.9   |
| AHQ-10-2, 5028             | K.LALDKIATYR.K                                                                                                   | 1277.53762 | 2 | 2.41E-06 | 0.91 | 3.34  | -     | 1750.6   |
| gi4502219 ref NP_001856.1  | ras homolog gene family, member G (rho G); RhoG [Homo sapiens]                                                   |            |   | 8.66E-07 | 0.79 | 10.18 | 9.90  | 21338.4  |
| AHQ-10-11, 4668            | K.EYIPTVFDNYSQAQSAVDGR.T                                                                                         | 2133.25975 | 2 | 8.66E-07 | 0.79 | 3.55  | -     | 436.8    |
| gi4503481 ref NP_001395.1  | eukaryotic translation elongation factor 1 gamma; elongation factor 1-gamma [Homo sapiens]                       |            |   | 8.67E-07 | 1.81 | 20.21 | 6.20  | 50118.5  |
| AHQ-10-8, 3074             | K.ALIAAQYSGAQVR.V                                                                                                | 1348.53280 | 2 | 1.10E-04 | 0.97 | 4.22  | -     | 1761.4   |
| AHQ-10-8, 2718             | R.KLDPGSEETQLVLR.E                                                                                               | 1573.73020 | 2 | 8.67E-07 | 0.84 | 3.78  | -     | 375.6    |
| gi21536452 ref NP_002762.2 | mesotrypsin preproprotein; trypsin 4, brain; protease, serine, 4; mesotrypsin [Homo sapiens]                     |            |   | 9.20E-07 | 0.94 | 10.18 | 5.30  | 26697.2  |
| AHQ-10-4, 3244 - 3304      | K.VLEGNQFQINAAK.I                                                                                                | 1433.59133 | 2 | 9.20E-07 | 0.94 | 3.67  | -     | 1206.2   |
| gi13129018 ref NP_076956.1 | hypothetical protein MGC3077 [Homo sapiens]                                                                      |            |   | 9.49E-07 | 0.83 | 10.16 | 5.30  | 21007.6  |
| AHQ-10-11, 3812            | K.VSEIEIDIIK.K                                                                                                   | 1175.31097 | 2 | 9.49E-07 | 0.83 | 3.11  | -     | 826.4    |
| gi16933542 ref NP_002017.1 | fibronectin 1 isoform 1 preproprotein; cold-insoluble globulin [Homo sapiens]                                    |            |   | 9.52E-07 | 1.55 | 20.22 | 1.60  | 259222.8 |
| AHQ-10-2, 5684             | R.NTFAEVTGLSPGVTYFYK.V                                                                                           | 1995.21983 | 2 | 6.82E-05 | 0.59 | 3.00  | -     | 320.8    |
| AHQ-10-1, 5713 - 5714      | R.NTFAEVTGLSPGVTYFYK.V                                                                                           | 1995.21983 | 2 | 9.52E-07 | 0.91 | 3.61  | -     | 930.7    |
| AHQ-10-2, 4486 - 4558      | R.SSPVVIDASTAIDAFSNLR.F                                                                                          | 1914.10666 | 2 | 7.01E-04 | 0.64 | 2.75  | -     | 748.9    |
| gi5453597 ref NP_006126.1  | F-actin capping protein alpha-1 subunit; Cap Z [Homo sapiens]                                                    |            |   | 9.85E-07 | 0.94 | 10.20 | 5.60  | 32922.5  |
| AHQ-10-9, 2685 - 2740      | K.DVQDSLTVSNEAQAQK.E                                                                                             | 1706.79025 | 2 | 9.85E-07 | 0.94 | 4.08  | -     | 1197.4   |
| gi4557801 ref NP_000261.1  | purine nucleoside phosphorylase [Homo sapiens]                                                                   |            |   | 1.03E-06 | 4.11 | 50.23 | 21.50 | 32147.7  |
| AHQ-10-9, 4164             | R.DHINLPGFSGQNPLR.G                                                                                              | 1665.83425 | 2 | 5.92E-04 | 0.76 | 3.40  | -     | 324.6    |
| AHQ-10-9, 4537             | K.FEVDGIM*LR.D                                                                                                   | 1209.44039 | 2 | 1.11E-04 | 0.82 | 2.54  | -     | 947.6    |
| AHQ-10-13, 4109 - 4112     | K.LGADAVGM*STVPEVIVAR.H                                                                                          | 1802.08606 | 2 | 9.33E-05 | 0.95 | 4.51  | -     | 1155.6   |
| AHQ-10-13, 4459 - 4507     | K.LGADAVGM*STVPEVIVAR.H                                                                                          | 1802.08606 | 2 | 2.46E-04 | 0.82 | 3.51  | -     | 593.0    |
| AHQ-10-9, 3908 - 3911      | K.LGADAVGM*STVPEVIVAR.H                                                                                          | 1802.08606 | 2 | 4.17E-04 | 0.95 | 4.18  | -     | 1239.5   |
| AHQ-10-9, 4652             | R.LVFGFLNGR.A                                                                                                    | 1023.21261 | 2 | 3.06E-04 | 0.72 | 2.53  | -     | 714.9    |
| AHQ-10-13, 4860            | R.VFGFSLITNK.V                                                                                                   | 1126.32960 | 2 | 5.25E-04 | 0.74 | 2.89  | -     | 485.0    |
| AHQ-10-9, 4591             | R.VFGFSLITNK.V                                                                                                   | 1126.32960 | 2 | 1.03E-06 | 0.87 | 2.98  | -     | 716.5    |
| gi4504085 ref NP_000399.1  | glycerol-3-phosphate dehydrogenase 2 (mitochondrial) [Homo sapiens] [MA]                                         |            |   | 1.16E-06 | 3.88 | 50.20 | 7.80  | 80814.1  |
| AHQ-10-6, 6232             | R.ANLLIAPHLAPLPIMLPYYK.W                                                                                         | 2417.93800 | 3 | 4.89E-05 | 0.81 | 3.32  | -     | 848.3    |
| AHQ-10-6, 3343             | R.NYLSCDVEVR.R                                                                                                   | 1256.36746 | 2 | 6.89E-05 | 0.80 | 3.09  | -     | 803.4    |
| AHQ-10-6, 5725             | R.VIFFLPWQK.M                                                                                                    | 1178.44934 | 2 | 1.38E-04 | 0.90 | 3.14  | -     | 881.7    |
| AHQ-10-6, 5727 - 5769      | R.YGAATANYMEVLSLLK.K                                                                                             | 1731.00632 | 2 | 1.16E-06 | 0.81 | 3.42  | -     | 722.7    |
| AHQ-10-6, 5231 - 5301      | R.YGAATANYMEVLSLLK.K                                                                                             | 1747.00572 | 2 | 1.62E-06 | 0.57 | 2.84  | -     | 466.8    |
| gi7706497 ref NP_057392.1  | UMP-CMP kinase [Homo sapiens]                                                                                    |            |   | 1.22E-06 | 0.72 | 10.17 | 5.70  | 25854.7  |
| AHQ-10-11, 3810 - 3864     | K.YGYTHLSAGELLR.D                                                                                                | 1480.64969 | 2 | 1.22E-06 | 0.72 | 2.61  | -     | 723.0    |
| gi10834976 ref NP_000572.1 | glutathione peroxidase 1 [Homo sapiens]                                                                          |            |   | 1.22E-06 | 1.88 | 20.24 | 15.40 | 21909.0  |
| AHQ-10-11, 3826            | R.PLAGGEPVFLSGLR.G                                                                                               | 1353.54935 | 2 | 1.22E-06 | 0.93 | 3.89  | -     | 1070.7   |
| AHQ-10-11, 4808 - 4822     | K.YVRPGGFEPNFM*LFKE.C                                                                                            | 2005.28455 | 3 | 6.54E-06 | 0.95 | 4.75  | -     | 1415.5   |
| gi4507231 ref NP_003134.1  | single-stranded DNA binding protein; single-stranded DNA-binding protein [Homo sapiens]                          |            |   | 1.23E-06 | 1.63 | 20.21 | 22.30 | 17259.5  |
| AHQ-10-13, 5677            | R.QATTIADNIIFLSDQTK.E                                                                                            | 1993.24692 | 2 | 3.57E-06 | 0.89 | 3.90  | -     | 710.4    |
| AHQ-10-13, 3182 - 3242     | R.SGDSEVYQLGDVSKQ.T                                                                                              | 1612.67692 | 2 | 1.94E-05 | 0.93 | 4.19  | -     | 968.8    |
| AHQ-10-13, 3657            | R.SGDSEVYQLGDVSKQ.T                                                                                              | 1612.67692 | 2 | 1.23E-06 | 0.74 | 3.12  | -     | 826.6    |
| gi15431310 ref NP_000517.2 | keratin 14; cytokeratin 14 [Homo sapiens]                                                                        |            |   | 1.23E-06 | 0.94 | 10.19 | 2.50  | 51621.2  |
| AHQ-10-3, 2941             | R.ALEEANADLEVK.I                                                                                                 | 1302.41284 | 2 | 1.23E-06 | 0.94 | 3.73  | -     | 1631.9   |
| AHQ-10-5, 2919 - 2997      | R.ALEEANADLEVK.I                                                                                                 | 1302.41284 | 2 | 4.34E-06 | 0.86 | 3.03  | -     | 979.8    |
| AHQ-10-2, 2996             | R.ALEEANADLEVK.I                                                                                                 | 1302.41284 | 2 | 3.37E-04 | 0.83 | 2.72  | -     | 1167.7   |
| gi9507215 ref NP_061816.1  | tubulin, alpha-ii2; tubulin, alpha 8 [Homo sapiens]                                                              |            |   | 1.26E-06 | 1.54 | 20.18 | 6.90  | 50093.2  |
| AHQ-10-13, 4983 - 5040     | R.AVM*IDLEPTVVDEVR.A                                                                                             | 1702.95125 | 2 | 1.30E-04 | 0.73 | 3.13  | -     | 803.5    |
| AHQ-10-13, 4708            | R.AVM*IDLEPTVVDEVR.A                                                                                             | 1702.95125 | 2 | 1.26E-06 | 0.92 | 3.67  | -     | 1117.9   |
| AHQ-10-14, 4713            | R.AVM*IDLEPTVVDEVR.A                                                                                             | 1702.95125 | 2 | 4.49E-06 | 0.75 | 3.05  | -     | 859.4    |
| AHQ-10-7, 5352             | R.IHFPLVTPYPIIAEK.A                                                                                              | 1800.13312 | 2 | 1.06E-04 | 0.63 | 2.79  | -     | 426.0    |
| gi27481160 ref XP_208217.1 | similar to elongation factor 1 alpha [Homo sapiens]                                                              |            |   | 1.32E-06 | 1.46 | 20.14 | 4.30  | 50171.6  |
| AHQ-10-10, 3130            | R.LPLQDVYK.I                                                                                                     | 976.15102  | 2 | 4.19E-05 | 0.75 | 2.67  | -     | 580.1    |
| AHQ-10-7, 3429 - 3442      | K.YYVTIADAPGHR.D                                                                                                 | 1405.58282 | 2 | 1.32E-06 | 0.71 | 2.76  | -     | 578.4    |
| gi5802966 ref NP_006861.1  | desmin (actin depolymerizing factor); desmin [Homo sapiens]                                                      |            |   | 1.32E-06 | 0.90 | 10.14 | 6.70  | 18505.6  |
| AHQ-10-12, 3764            | R.YALYDASFETK.E                                                                                                  | 1308.41754 | 2 | 1.32E-06 | 0.90 | 2.77  | -     | 1249.5   |
| gi4504743 ref NP_002194.1  | integrin alpha 2 precursor; Integrin, alpha-2 (CD49b); alpha-2 subunit of alpha-2 beta-1 integrin [Homo sapiens] |            |   | 1.35E-06 | 1.03 | 20.14 | 3.00  | 129294.4 |
| AHQ-10-3, 3598             | K.AGDISCNADINPLK.I                                                                                               | 1489.63335 | 2 | 1.35E-06 | 0.72 | 2.79  | -     | 746.8    |
| AHQ-10-3, 4777             | R.VDISLENPGTSPALAEYSETAK.V                                                                                       | 2293.46974 | 2 | 2.69E-04 | 0.31 | 2.59  | -     | 371.3    |
| gi22060072 ref XP_088293.2 | similar to cytochrome c [Homo sapiens]                                                                           |            |   | 1.39E-06 | 0.88 | 10.15 | 10.50 | 11887.8  |
| AHQ-10-13, 3674            | K.TGPNLHGLFGR.K                                                                                                  | 1169.31780 | 2 | 1.39E-06 | 0.88 | 2.69  | -     | 861.6    |
| gi4502021 ref NP_003680.1  | aldo-keto reductase family 7, member A2 (aflatoxin aldehyde reductase);                                          |            |   | 1.40E-06 | 1.58 | 20.22 | 10.30 | 36648.3  |
| AHQ-10-9, 3592             | K.ALQAAAYGASAPSVTSAALR.W                                                                                         | 1806.01302 | 2 | 1.40E-06 | 0.63 | 2.86  | -     | 523.9    |
| AHQ-10-9, 5079 - 5091      | R.FYAYNPLAGLLTGK.Y                                                                                               | 1585.82741 | 2 | 7.75E-04 | 0.95 | 4.40  | -     | 1025.0   |
| gi11993943 ref NP_055419.1 | Tax interaction protein 1 [Homo sapiens]                                                                         |            |   | 1.42E-06 | 0.94 | 10.20 | 13.70 | 13734.6  |
| AHQ-10-13, 4052            | R.VSEGGPAEIAGLQIGDK.I                                                                                            | 1641.80454 | 2 | 1.42E-06 | 0.94 | 3.93  | -     | 1427.3   |
| AHQ-10-13, 4411            | R.VSEGGPAEIAGLQIGDK.I                                                                                            | 1641.80454 | 2 | 4.40E-05 | 0.66 | 2.83  | -     | 669.4    |
| gi17986273 ref NP_524144.1 | fast skeletal myosin alkali light chain 1 isoform 1f; A1 catalytic; A2                                           |            |   | 1.46E-06 | 0.93 | 10.21 | 8.20  | 21145.0  |
| AHQ-10-12, 3332 - 3388     | R.VFDKGNNGTVMGAELR.H                                                                                             | 1723.93228 | 2 | 1.46E-06 | 0.93 | 4.17  | -     | 1343.6   |



|                             |                                                                         |            |   |          |      |       |       |          |
|-----------------------------|-------------------------------------------------------------------------|------------|---|----------|------|-------|-------|----------|
| AHQ-10-13-, 4124            | K.LVIPSELGYGER.G                                                        | 1333.51491 | 2 | 4.13E-06 | 0.78 | 2.93  | -     | 408.5    |
| gi 5901944 ref NP_008977.1  | elastin microfibril interface located protein; TNF? elastin microfibril |            |   | 4.14E-06 | 2.42 | 30.26 | 6.10  | 106694.7 |
| AHQ-10-4, 2987              | R.GLEEGQAAGQCPSLEGR.L                                                   | 1888.99421 | 2 | 9.32E-05 | 0.66 | 2.69  | -     | 409.4    |
| AHQ-10-3, 2985              | R.GLEEGQAAGQCPSLEGR.L                                                   | 1888.99421 | 2 | 4.09E-05 | 0.92 | 3.73  | -     | 1045.9   |
| AHQ-10-3, 5081              | R.LQESCVCVLAGLDGFR.R                                                    | 1815.01843 | 2 | 1.10E-05 | 0.57 | 2.63  | -     | 571.2    |
| AHQ-10-3, 3674              | R.PARNLGGSSAGSPLSLGLGEGPGESEK.V                                         | 2596.74928 | 3 | 4.14E-06 | 0.94 | 5.14  | -     | 852.4    |
| gi 4504931 ref NP_002272.1  | keratin, hair, basic, 1; hard keratin, type II, 1 [Homo sapiens]        |            |   | 4.37E-06 | 0.90 | 10.18 | 2.20  | 54971.1  |
| AHQ-10-14-, 3288            | R.ATAENEFVALK.K                                                         | 1193.33121 | 2 | 4.37E-06 | 0.90 | 3.52  | -     | 1556.6   |
| gi 5453832 ref NP_006380.1  | oxygen regulated protein precursor; oxygen regulated protein (150kD) [H |            |   | 4.44E-06 | 1.84 | 20.23 | 3.20  | 111334.8 |
| AHQ-10-3, 5970              | R.VEFEELCADLFR.V                                                        | 1658.81048 | 2 | 8.17E-05 | 0.89 | 2.86  | -     | 971.4    |
| AHQ-10-3, 5878              | K.VLQLINDNTATLSYGVFR.R                                                  | 2096.37206 | 2 | 4.44E-06 | 0.95 | 4.60  | -     | 1221.6   |
| gi 5453549 ref NP_006397.1  | thioredoxin peroxidase; thioredoxin peroxidase (antioxidant enzyme) [Ho |            |   | 4.48E-06 | 1.85 | 20.21 | 12.90 | 30539.7  |
| AHQ-10-10, 3624             | K.DYGVYLEDSDGHTLR.G                                                     | 1625.72052 | 2 | 4.36E-05 | 0.91 | 3.20  | -     | 1056.3   |
| AHQ-10-10, 3155 - 3167      | R.TREECHFYAGGQVYPGEASR.V                                                | 2445.56624 | 3 | 4.48E-06 | 0.94 | 4.25  | -     | 1577.7   |
| gi 12707570 ref NP_004083.2 | mitochondrial short-chain enoyl-coenzyme A hydratase 1 precursor [Homo  |            |   | 4.51E-06 | 0.88 | 10.18 | 6.20  | 31372.2  |
| AHQ-10-10, 4622 - 4686      | K.IFEEDPAVGAIVLTGGDK.A                                                  | 1832.04401 | 2 | 4.51E-06 | 0.88 | 3.55  | -     | 1181.2   |
| gi 5902134 ref NP_009005.1  | coronin, actin binding protein, 1A; coronin, actin-binding, 1A; coronin |            |   | 4.53E-06 | 4.18 | 50.27 | 17.40 | 51026.0  |
| AHQ-10-7, 2029 - 2098       | R.AAPEASGTPSSDAVSR.L                                                    | 1503.55369 | 2 | 1.53E-04 | 0.70 | 2.56  | -     | 810.7    |
| AHQ-10-7, 2122 - 2165       | K.ADQCYEDVR.V                                                           | 1157.19275 | 2 | 3.54E-04 | 0.82 | 3.11  | -     | 780.4    |
| AHQ-10-7, 2688              | R.DGGLICTSCR.D                                                          | 1141.25805 | 2 | 6.70E-06 | 0.81 | 2.57  | -     | 849.4    |
| AHQ-10-7, 6253              | R.KSDLFQEDLYPPTAGDPALTAEEWLGGR.D                                        | 3175.44994 | 3 | 4.53E-06 | 0.95 | 5.39  | -     | 819.1    |
| AHQ-10-7, 3968 - 4028       | R.VSQTTWDSGFVANPK.F                                                     | 1798.95426 | 2 | 8.05E-06 | 0.91 | 3.97  | -     | 822.4    |
| gi 4503447 ref NP_001389.1  | peroxisomal enoyl-coenzyme A hydratase-like protein; delta3,5-delta2,4- |            |   | 4.58E-06 | 0.88 | 10.13 | 3.40  | 35994.1  |
| AHQ-10-9, 3944              | R.YCAQDAFFQVK.E                                                         | 1378.53429 | 2 | 4.58E-06 | 0.88 | 2.68  | -     | 954.0    |
| gi 4557894 ref NP_000230.1  | lysozyme precursor [Homo sapiens]                                       |            |   | 4.59E-06 | 0.87 | 10.18 | 8.10  | 16537.0  |
| AHQ-10-13, 4504             | R.STDYGFQINSR.Y                                                         | 1401.50620 | 2 | 4.59E-06 | 0.87 | 3.59  | -     | 607.8    |
| gi 7705849 ref NP_057215.1  | ras-related GTP-binding protein RAB10; ras-related GTP-binding protein  |            |   | 4.66E-06 | 0.93 | 10.19 | 5.50  | 22548.0  |
| AHQ-10-13-, 6032            | K.AFLTAEIDLK.K                                                          | 1262.47982 | 2 | 4.37E-04 | 0.95 | 3.79  | -     | 1800.1   |
| AHQ-10-14-, 6046            | K.AFLTAEIDLK.K                                                          | 1262.47982 | 2 | 5.14E-06 | 0.93 | 3.41  | -     | 1341.5   |
| AHQ-10-11, 5926             | K.AFLTAEIDLK.K                                                          | 1262.47982 | 2 | 4.66E-06 | 0.93 | 3.61  | -     | 1249.3   |
| gi 20127408 ref NP_000173.2 | hydroxyacyl dehydrogenase, subunit A; trifunctional protein, alpha sub  |            |   | 4.73E-06 | 2.39 | 30.23 | 6.30  | 82999.1  |
| AHQ-10-6, 3572              | K.GFYIQEYV.R                                                            | 1204.35569 | 2 | 2.02E-04 | 0.85 | 2.58  | -     | 685.3    |
| AHQ-10-6, 3100 - 3105       | K.TGIEQSGDAGYLCESEK.F                                                   | 1844.93497 | 2 | 4.73E-06 | 0.95 | 4.61  | -     | 994.2    |
| AHQ-10-6, 5519 - 5577       | K.TVLGTPEVLLGALPGAGGTQR.L                                               | 2008.30795 | 2 | 7.08E-04 | 0.59 | 3.23  | -     | 298.7    |
| gi 4506417 ref NP_002877.1  | RAP2B, member of RAS oncogene family [Homo sapiens]                     |            |   | 4.76E-06 | 0.83 | 10.19 | 14.20 | 20494.2  |
| AHQ-10-11, 6118             | K.EIEVSSPSVLELDTAGTEQFASMR.D                                            | 2842.08287 | 3 | 4.76E-06 | 0.83 | 3.74  | -     | 751.7    |
| gi 20547107 ref XP_114482.1 | similar to HEAT SHOCK 70 KDA PROTEIN 4 (HEAT SHOCK 70-RELATED PROTEIN   |            |   | 5.01E-06 | 1.30 | 20.23 | 3.90  | 94330.3  |
| AHQ-10-4, 6236              | R.EFSITDVPYPISLR.W                                                      | 1736.98906 | 2 | 6.20E-06 | 0.39 | 2.59  | -     | 192.7    |
| AHQ-10-4, 6053              | K.SNLAYDVLQPLTGLTIK.V                                                   | 1904.19651 | 2 | 5.01E-06 | 0.91 | 4.58  | -     | 669.1    |
| gi 21361478 ref NP_055944.2 | septin 6 isoform B; septin 2 [Homo sapiens]                             |            |   | 5.14E-06 | 0.92 | 10.24 | 4.60  | 49716.3  |
| AHQ-10-7, 4840 - 4868       | R.TVPLAGHVGFDSLQDLVNNK.S                                                | 2108.38284 | 2 | 5.14E-06 | 0.92 | 4.88  | -     | 575.6    |
| gi 5174613 ref NP_005960.1  | nucleosome assembly protein 1-like 4; nucleosome assembly protein 2 [Ho |            |   | 5.29E-06 | 0.95 | 10.18 | 2.70  | 42823.1  |
| AHQ-10-7, 2964              | K.FYEEVHDLER.K                                                          | 1337.41897 | 2 | 5.29E-06 | 0.95 | 3.68  | -     | 1411.7   |
| gi 8922712 ref NP_060713.1  | hypothetical protein FLJ10849 [Homo sapiens]                            |            |   | 5.47E-06 | 1.33 | 20.16 | 9.10  | 49397.9  |
| AHQ-10-7, 2629              | K.AAAQLLQSQQAQSQGAQQT.K                                                 | 1958.12276 | 2 | 1.89E-05 | 0.83 | 3.26  | -     | 792.6    |
| AHQ-10-7, 6237              | K.STSQGFCFNILCVGETGIGK.S                                                | 2178.42845 | 2 | 5.47E-06 | 0.50 | 3.06  | -     | 380.0    |
| gi 19913441 ref NP_002140.2 | hippocalcin-like 1; visinin-like protein 3; calcium-binding protein BD  |            |   | 5.66E-06 | 0.91 | 10.15 | 6.70  | 22313.1  |
| AHQ-10-11, 3648 - 3656      | R.TFDTNGDGTDFR.E                                                        | 1459.49937 | 2 | 5.66E-06 | 0.91 | 3.08  | -     | 1039.3   |
| gi 4504521 ref NP_002147.1  | heat shock 60kDa protein 1 (chaperonin); mitochondrial matrix protein P |            |   | 5.71E-06 | 1.80 | 20.20 | 5.90  | 61024.2  |
| AHQ-10-14-, 6272            | R.ALM*LGQVDLLADAVAVTM*GPK.G                                             | 2146.55768 | 3 | 4.48E-04 | 0.96 | 4.04  | -     | 2293.9   |
| AHQ-10-7, 5309              | K.TLNDELEIEGMM.F                                                        | 1505.71604 | 2 | 5.71E-06 | 0.84 | 3.17  | -     | 759.9    |
| gi 4885183 ref NP_005210.1  | diaphanous 1; deafness, autosomal dominant 1; hDia1 [Homo sapiens] [MAS |            |   | 5.79E-06 | 3.43 | 40.23 | 4.70  | 138977.7 |
| AHQ-10-3, 4490              | R.LGLHQVLQDLR.E                                                         | 1292.51238 | 2 | 5.79E-06 | 0.66 | 2.67  | -     | 572.7    |
| AHQ-10-3, 4862              | K.LVAEDLSQDCFWTK.V                                                      | 1713.88927 | 2 | 1.76E-04 | 0.87 | 3.26  | -     | 837.9    |
| AHQ-10-3, 5341              | K.QDLEAEVSLQTEVAK.L                                                     | 1717.85617 | 2 | 1.32E-05 | 0.95 | 4.56  | -     | 1193.5   |
| AHQ-10-3, 4678              | R.VQLNVFDEQEEDSYDLK.G                                                   | 2129.22304 | 2 | 6.70E-06 | 0.95 | 4.34  | -     | 1497.2   |
| gi 6912238 ref NP_036226.1  | peroxiredoxin 5; antioxidant enzyme B166 [Homo sapiens]                 |            |   | 5.80E-06 | 0.95 | 10.24 | 7.90  | 22026.2  |
| AHQ-10-12, 6192             | K.ETDLLLLDLSVIFGNR.R                                                    | 1908.09888 | 2 | 5.80E-06 | 0.95 | 4.75  | -     | 1058.2   |
| gi 9257257 ref NP_059830.1  | WD repeat-containing protein 1 isoform 1 [Homo sapiens]                 |            |   | 5.82E-06 | 0.87 | 10.21 | 3.80  | 66193.1  |
| AHQ-10-6, 4873 - 4952       | K.VVTVFSVADVYSENNVYGHAK.I                                               | 2541.75861 | 3 | 5.82E-06 | 0.87 | 4.15  | -     | 659.0    |
| gi 30158844 ref XP_292513.2 | similar to KIAA1879 protein [Homo sapiens]                              |            |   | 6.14E-06 | 1.73 | 20.23 | 1.20  | 203894.8 |
| AHQ-10-7, 3329              | K.AVDSLVPGR.G                                                           | 1027.19957 | 2 | 9.87E-06 | 0.80 | 2.83  | -     | 685.3    |
| AHQ-10-7, 4034              | K.TSIAIDITINQK.H                                                        | 1317.51378 | 2 | 6.14E-06 | 0.93 | 4.51  | -     | 1022.4   |
| gi 5174727 ref NP_005989.1  | chaperonin containing TCP1, subunit 3 (gamma); TCP1 (t-complex-1) ring  |            |   | 6.14E-06 | 0.93 | 10.20 | 2.00  | 60330.4  |
| AHQ-10-6, 3789              | R.AVAQALEVPR.T                                                          | 1167.38326 | 2 | 6.14E-06 | 0.93 | 4.04  | -     | 1283.3   |
| gi 7705296 ref NP_057271.1  | bridging integrator 2; bridging integrator-2; breast cancer associated  |            |   | 6.87E-06 | 3.36 | 40.24 | 11.30 | 61746.8  |
| AHQ-10-5, 5712 - 5755       | K.AIVWNNLLWEDYEEL.L                                                     | 2038.20157 | 2 | 5.65E-04 | 0.84 | 3.23  | -     | 863.4    |
| AHQ-10-7, 6157 - 6164       | R.IGCVYTFIQNSLR.D                                                       | 1800.07167 | 2 | 8.19E-06 | 0.93 | 4.76  | -     | 851.0    |
| AHQ-10-5, 6241 - 6249       | R.IGCVYTFIQNSLR.D                                                       | 1800.07167 | 2 | 1.55E-04 | 0.82 | 3.82  | -     | 647.2    |
| AHQ-10-7, 4073              | R.TATVSSPLTSPSTLSLK.S                                                   | 1976.21467 | 2 | 6.87E-06 | 0.65 | 2.92  | -     | 442.7    |
| AHQ-10-5, 4185              | R.TATVSSPLTSPSTLSLK.S                                                   | 1976.21467 | 2 | 9.09E-06 | 0.75 | 3.36  | -     | 596.3    |
| AHQ-10-5, 4445 - 4453       | R.TM*EIVYAFSEI.K                                                        | 2605.80793 | 2 | 6.60E-05 | 0.93 | 4.10  | -     | 933.8    |
| gi 29740132 ref XP_299177.1 | hypothetical protein XP_299177 [Homo sapiens]                           |            |   | 7.09E-06 | 0.55 | 10.17 | 2.70  | 114488.9 |
| AHQ-10-3, 4919              | R.RCHEEKPLSAGTASHKQASAPITPR.Q                                           | 3030.36879 | 3 | 7.09E-06 | 0.55 | 3.44  | -     | 366.2    |
| gi 27481323 ref XP_208234.1 | similar to unactive progesterone receptor, 23 kD; likely ortholog of m  |            |   | 7.15E-06 | 0.90 | 10.14 | 8.10  | 18694.3  |
| AHQ-10-11, 4320             | K.LTFSCLGSDNF.K                                                         | 1447.59493 | 2 | 7.15E-06 | 0.90 | 2.88  | -     | 1049.7   |
| gi 4504391 ref NP_000179.1  | hexokinase 1 isoform HKI; brain form hexokinase [Homo sapiens]          |            |   | 7.22E-06 | 1.73 | 20.22 | 3.50  | 102502.4 |
| AHQ-10-4, 3381              | K.GAALITAVGVR.L                                                         | 1028.23070 | 2 | 7.22E-06 | 0.97 | 3.97  | -     | 2311.0   |
| AHQ-10-4, 5624              | R.TPDGTENGDFLALDLGGTNR.V                                                | 2211.33051 | 2 | 3.94E-05 | 0.76 | 3.14  | -     | 880.1    |
| gi 7706675 ref NP_057661.1  | RAB6B, member RAS oncogene family; small GTPase RAB6B [Homo sapiens] [M |            |   | 7.40E-06 | 2.64 | 30.20 | 16.30 | 23461.5  |
| AHQ-10-11, 4554             | R.GSDVIIMLVGNK.T                                                        | 1246.50220 | 2 | 7.40E-06 | 0.95 | 4.01  | -     | 1856.6   |
| AHQ-10-13-, 3524            | R.LQLWDTAGCF.F                                                          | 1317.43243 | 2 | 8.74E-05 | 0.78 | 3.03  | -     | 592.4    |
| AHQ-10-11, 3571 - 3628      | K.LVFLGEQSVGK.T                                                         | 1177.37492 | 2 | 1.15E-04 | 0.90 | 3.29  | -     | 998.2    |
| gi 7657431 ref NP_055205.1  | EBNA-2 co-activator (100kD) [Homo sapiens]                              |            |   | 7.61E-06 | 0.80 | 10.18 | 2.40  | 99689.7  |
| AHQ-10-5, 5939              | R.NLPLGVQEGEPFSEEAATLFTK.E                                              | 2307.54125 | 2 | 7.88E-05 | 0.75 | 3.23  | -     | 266.0    |
| AHQ-10-4, 5952              | R.NLPLGVQEGEPFSEEAATLFTK.E                                              | 2307.54125 | 2 | 7.61E-06 | 0.80 | 3.70  | -     | 321.3    |
| gi 4757712 ref NP_004026.1  | acyl-Coenzyme A oxidase isoform a; acyl-coenzyme A oxidase 1 [Homo sapi |            |   | 7.62E-06 | 1.31 | 20.19 | 5.80  | 74745.4  |
| AHQ-10-6, 5839              | R.INEGIGQDLSLPELHALTAGLK.A                                              | 2476.76782 | 3 | 7.62E-06 | 0.85 | 3.87  | -     | 706.3    |
| AHQ-10-6, 5835              | R.YDGNVYENLFEWAK.N                                                      | 1748.87212 | 2 | 7.52E-05 | 0.46 | 2.64  | -     | 279.7    |
| gi 21614544 ref NP_002955.2 | S100 calcium-binding protein A8; cystic fibrosis antigen; calgranulin   |            |   | 7.75E-06 | 0.87 | 10.15 | 11.80 | 10834.4  |
| AHQ-10-14-, 3677            | K.ALNSIIDVYHK.Y                                                         | 1273.46270 | 2 | 7.75E-06 | 0.87 | 3.07  | -     | 649.7    |
| gi 9966825 ref NP_065089.1  | HEF like Protein [Homo sapiens]                                         |            |   | 8.00E-06 | 0.96 | 10.26 | 2.80  | 86969.2  |
| AHQ-10-13-, 4154            | K.AISAFHGLSSSQPAIITQSK.L                                                | 2260.48935 | 2 | 8.00E-06 | 0.96 | 5.14  | -     | 1175.0   |
| gi 4557435 ref NP_001242.1  | CD68 antigen; Macrophage antigen CD68 (microsialin); macrosialin; scave |            |   | 8.01E-06 | 0.94 | 10.24 | 6.20  | 37408.0  |
| AHQ-10-5, 4520              | R.LQAAQLPHTGVFGQSFSCPSDR.S                                              | 2405.63153 | 3 | 8.01E-06 | 0.94 | 4.72  | -     | 1176.1   |
| gi 5453607 ref NP_006420.1  | chaperonin containing TCP1, subunit 7 (eta); chaperonin containing t-co |            |   | 8.52E-06 | 1.84 | 20.21 | 6.60  | 59366.3  |
| AHQ-10-7, 4805              | K.LPIGDVATQYFADR.D                                                      | 1566.73935 | 2 | 3.68E-05 | 0.93 | 3.43  | -     | 1042.0   |
| AHQ-10-7, 6281              | K.SQDAEVDGDTTSVTLAAEFLK.Q                                               | 2253.44875 | 2 | 8.52E-06 | 0.91 | 4.24  | -     | 729.4    |
| gi 27480104 ref XP_208215.1 | similar to triosephosphate isomerase 1 [Homo sapiens]                   |            |   | 8.67E-06 | 3.01 | 40.19 | 22.50 | 26942.6  |
| AHQ-10-10, 3026             | R.HVFGESEDLIGQK.V                                                       | 1459.58565 | 2 | 6.93E-04 | 0.80 | 3.05  | -     | 453.7    |
| AHQ-10-10, 2152 - 2170      | K.SNVSDAVAQSTR.I                                                        | 1235.28659 | 2 | 8.67E-06 | 0.94 | 3.74  | -     | 1775.6   |
| AHQ-10-11, 4128             | K.VTNGAFTGEISPMGIK.D                                                    | 1622.86786 | 2 | 1.76E-04 | 0.67 | 2.51  | -     | 704.4    |
| AHQ-10-11, 5106             | K.VVLAEPVVAIGTGK.T                                                      | 1603.88587 | 2 | 1.02E-05 | 0.61 | 2.66  | -     | 443.8    |
| gi 4502011 ref NP_000467.1  | adenylate kinase 1 [Homo sapiens]                                       |            |   | 8.67E-06 | 0.80 | 10.18 | 10.30 | 21634.7  |
| AHQ-10-11, 5007             | R.IGQPTLLLYVDAGPETM*TOR.L                                               | 2220.53174 | 2 | 8.67E-06 | 0.80 | 3.31  | -     | 677.9    |
| gi 23510338 ref NP_003325.2 | ubiquitin-activating enzyme E1; A1S9T and BN75 temperature sensitivity  |            |   | 9.58E-06 | 2.50 | 30.18 | 4.60  | 117848.1 |
| AHQ-10-4, 4472              | R.ALPAVQNNLDELDIR.K                                                     | 1810.00167 | 2 | 9.58E-06 | 0.69 | 3.17  | -     | 342.1    |

|                            |                                                                          |            |   |          |      |       |       |          |
|----------------------------|--------------------------------------------------------------------------|------------|---|----------|------|-------|-------|----------|
| AHQ-10-4, 5505             | R.NEEDAAELVALAQAVNAR.A                                                   | 1885.02541 | 2 | 8.00E-04 | 0.92 | 3.64  | -     | 1492.1   |
| AHQ-10-4, 3955             | R.YDGVAVFVGGSDLQLEK.L                                                    | 1656.77453 | 2 | 3.18E-05 | 0.90 | 3.20  | -     | 1105.8   |
| gi4759044 ref NP_004841.1  | Rho-associated, coiled-coil containing protein kinase 2 [Homo sapiens]   |            |   | 9.76E-06 | 1.79 | 20.20 | 1.90  | 160883.4 |
| AHQ-10-3, 5547             | K.ELQDQLEAEQYFSTLYK.T                                                    | 2106.27421 | 2 | 1.63E-05 | 0.90 | 3.96  | -     | 636.3    |
| AHQ-10-3, 5591             | K.NLICAFLTDR.E                                                           | 1224.41173 | 2 | 9.76E-06 | 0.89 | 3.32  | -     | 889.0    |
| gi29568111 ref NP_006088.2 | myosin, light polypeptide 9, regulatory; myosin regulatory light chain   |            |   | 9.81E-06 | 1.68 | 20.17 | 6.40  | 19827.1  |
| AHQ-10-13, 2837            | R.FTDEEVDEM*YR.E                                                         | 1450.50949 | 2 | 2.67E-05 | 0.93 | 3.37  | -     | 1343.2   |
| AHQ-10-13, 3897            | K.GNFNVYEFTR.I                                                           | 1247.34066 | 2 | 1.66E-05 | 0.46 | 2.60  | -     | 360.0    |
| AHQ-10-14, 3877            | K.GNFNVYEFTR.I                                                           | 1247.34066 | 2 | 9.81E-06 | 0.75 | 2.73  | -     | 549.1    |
| AHQ-10-11, 3782            | K.GNFNVYEFTR.I                                                           | 1247.34066 | 2 | 4.45E-05 | 0.85 | 2.80  | -     | 868.9    |
| gi30153966 ref XP_293932.2 | similar to hypothetical protein BC013073 [Homo sapiens]                  |            |   | 9.83E-06 | 0.48 | 10.19 | 9.00  | 21711.3  |
| AHQ-10-3, 3602             | R.MIFTLFTINVSKDIRHH                                                      | 2073.44997 | 3 | 9.83E-06 | 0.48 | 3.04  | -     | 626.7    |
| AHQ-10-3, 3957 - 3959      | R.MIFTLFTINVSKDIRHH                                                      | 2073.44997 | 3 | 8.92E-04 | 0.73 | 3.70  | -     | 745.5    |
| AHQ-10-4, 4003 - 4065      | R.MIFTLFTINVSKDIRHH                                                      | 2073.44997 | 2 | 1.58E-04 | 0.44 | 2.93  | -     | 405.2    |
| AHQ-10-8, 3955             | R.MIFTLFTINVSKDIRHH                                                      | 2073.44997 | 2 | 8.30E-04 | 0.43 | 3.04  | -     | 466.1    |
| AHQ-10-2, 4023             | R.MIFTLFTINVSKDIRHH                                                      | 2073.44997 | 3 | 5.34E-04 | 0.82 | 3.72  | -     | 983.5    |
| gi4506713 ref NP_002945.1  | ubiquitin and ribosomal protein S27a precursor; ubiquitin carboxyl exte  |            |   | 1.03E-05 | 0.29 | 10.17 | 10.30 | 17964.8  |
| AHQ-10-14, 4944            | K.TITLEVEPSDTEIENVK.A                                                    | 1788.97431 | 2 | 1.03E-05 | 0.29 | 2.63  | -     | 285.9    |
| gi8922804 ref NP_060760.1  | hypothetical protein FLJ10983 [Homo sapiens]                             |            |   | 1.03E-05 | 1.62 | 20.16 | 3.40  | 68268.9  |
| AHQ-10-6, 2409             | R.IVLANDPDR.L                                                            | 1199.29585 | 2 | 1.07E-04 | 0.87 | 3.12  | -     | 1107.4   |
| AHQ-10-6, 3471             | R.LDQETAQWL.R.W                                                          | 1260.38088 | 2 | 1.03E-05 | 0.74 | 2.75  | -     | 791.7    |
| gi14149680 ref NP_056107.1 | KIAA0747 protein [Homo sapiens]                                          |            |   | 1.07E-05 | 0.85 | 10.16 | 1.20  | 122855.6 |
| AHQ-10-4, 5732             | R.ALTLGALLPLAR.L                                                         | 1310.61075 | 2 | 1.07E-05 | 0.85 | 2.88  | -     | 980.4    |
| gi4757766 ref NP_004299.1  | Rho GTPase activating protein 1; RhoGAP; p50rhoGAP; CDC42 GTPase-activa  |            |   | 1.08E-05 | 2.20 | 30.18 | 11.40 | 50435.4  |
| AHQ-10-7, 5630             | K.FLLDHQGELFPSPDPSGL                                                     | 1970.17037 | 2 | 1.08E-05 | 0.67 | 3.00  | -     | 472.9    |
| AHQ-10-7, 4037 - 4106      | K.NPEQEPIVLR.E                                                           | 1405.62426 | 2 | 3.24E-05 | 0.67 | 2.84  | -     | 520.1    |
| AHQ-10-7, 5710             | R.VPATLQVLTPLPEENYQVLR.F                                                 | 2312.65053 | 2 | 4.38E-05 | 0.87 | 3.62  | -     | 800.4    |
| gi9910542 ref NP_064535.1  | SAR1A gene homolog 1; SAR1 protein [Homo sapiens]                        |            |   | 1.14E-05 | 0.80 | 10.18 | 11.60 | 22366.6  |
| AHQ-10-11, 6114            | K.VELNALM*TDTEISNVPIILGNK.I                                              | 2514.92088 | 3 | 1.14E-05 | 0.80 | 3.41  | -     | 703.5    |
| gi24308149 ref NP_060035.1 | hypothetical protein DKFZp434F2322 [Homo sapiens]                        |            |   | 1.14E-05 | 0.65 | 10.14 | 2.00  | 61404.2  |
| AHQ-10-4, 5595 - 5603      | K.PSGVHLKVLRF.F                                                          | 1219.50454 | 2 | 1.14E-05 | 0.65 | 2.85  | -     | 655.6    |
| gi9845297 ref NP_063940.1  | second mitochondria-derived activator of caspase isoform Smac-alpha, pr  |            |   | 1.16E-05 | 0.91 | 10.18 | 4.20  | 27130.6  |
| AHQ-10-11, 3259            | K.LAEAIQIELR.Q                                                           | 1172.31354 | 2 | 1.16E-05 | 0.91 | 3.52  | -     | 1168.2   |
| gi4757996 ref NP_004060.1  | adaptor-related protein complex 2, sigma 1 subunit isoform AP17; clathr  |            |   | 1.23E-05 | 0.94 | 10.21 | 10.60 | 17017.6  |
| AHQ-10-13, 5046            | K.VYTVVDEM*FLAGEIR.E                                                     | 1759.01650 | 2 | 1.23E-05 | 0.94 | 4.13  | -     | 1144.1   |
| gi4505813 ref NP_003737.1  | cytoplasmic dynein light polypeptide; dynein, cytoplasmic, light chain   |            |   | 1.24E-05 | 1.54 | 20.17 | 24.70 | 10365.8  |
| AHQ-10-14, 2441 - 2502     | R.NFGSVYTHETK.H                                                          | 1283.37131 | 2 | 1.24E-05 | 0.86 | 3.33  | -     | 815.7    |
| AHQ-10-14, 3625            | K.YNPYTHCIVGR.N                                                          | 1404.57820 | 2 | 1.33E-05 | 0.68 | 2.61  | -     | 370.3    |
| gi4506353 ref NP_002854.1  | phosphorylase, glycogen; liver (Hers disease, glycogen storage disease   |            |   | 1.34E-05 | 0.93 | 10.17 | 1.70  | 97147.8  |
| AHQ-10-5, 5215             | K.LVIDQIDNGFFSPK.Q                                                       | 1593.80471 | 2 | 1.34E-05 | 0.93 | 3.37  | -     | 1391.3   |
| gi20543399 ref XP_116396.1 | similar to peptidylprolyl isomerase A (cyclophilin A) [Homo sapiens] [   |            |   | 1.42E-05 | 0.80 | 10.14 | 5.00  | 19852.7  |
| AHQ-10-12, 4361            | R.VSFKLFDK.F                                                             | 1055.25138 | 2 | 1.42E-05 | 0.80 | 2.78  | -     | 908.7    |
| gi25306267 ref NP_001700.2 | brain-derived neurotrophic factor isoform a preproprotein [Homo sapien   |            |   | 1.44E-05 | 0.91 | 10.18 | 6.10  | 27817.8  |
| AHQ-10-13, 3633            | K.TAVDMSGGTVVLEK.V                                                       | 1508.71993 | 2 | 1.44E-05 | 0.91 | 3.69  | -     | 1138.3   |
| gi4507789 ref NP_003338.1  | ubiquitin-conjugating enzyme E2L 3 [Homo sapiens]                        |            |   | 1.49E-05 | 0.91 | 10.18 | 9.70  | 17861.5  |
| AHQ-10-12, 5014            | R.IEINFPAYPFPPK.I                                                        | 1791.08155 | 2 | 1.49E-05 | 0.91 | 3.67  | -     | 960.8    |
| gi4504077 ref NP_000165.1  | glycoprotein IX (platelet) [Homo sapiens]                                |            |   | 1.51E-05 | 1.71 | 20.17 | 7.30  | 19046.0  |
| AHQ-10-14, 2820            | R.CASPSLAHGLGR.L                                                         | 1395.56962 | 2 | 2.04E-04 | 0.84 | 2.90  | -     | 906.5    |
| AHQ-10-12, 3553 - 3621     | R.GHGLTALPALPAR.T                                                        | 1274.49706 | 2 | 1.93E-04 | 0.79 | 2.54  | -     | 654.0    |
| AHQ-10-11, 3475            | R.GHGLTALPALPAR.T                                                        | 1274.49706 | 3 | 1.51E-05 | 0.88 | 3.39  | -     | 1049.5   |
| AHQ-10-11, 3471            | R.GHGLTALPALPAR.T                                                        | 1274.49706 | 2 | 1.04E-04 | 0.92 | 3.29  | -     | 813.7    |
| gi9966867 ref NP_065123.1  | eIF-5A2 protein; eIF5AII [Homo sapiens]                                  |            |   | 1.58E-05 | 0.94 | 10.19 | 7.80  | 16793.1  |
| AHQ-10-12, 4693 - 4696     | K.VHLVGDIFTGK.K                                                          | 1299.54329 | 2 | 1.58E-05 | 0.94 | 3.72  | -     | 1157.0   |
| gi4758988 ref NP_004152.1  | RAB1A, member RAS oncogene family; RAB1, member RAS oncogene family [Ho  |            |   | 1.59E-05 | 1.52 | 20.17 | 17.10 | 22677.0  |
| AHQ-10-11, 5711 - 5756     | K.EFADSLGIPPLETSAK.N                                                     | 1725.91990 | 2 | 2.09E-05 | 0.66 | 3.09  | -     | 380.3    |
| AHQ-10-14, 5569            | R.FADDTYTESYISTIGVDFK.I                                                  | 2173.31742 | 2 | 6.93E-04 | 0.76 | 3.21  | -     | 436.8    |
| AHQ-10-11, 5274            | R.FADDTYTESYISTIGVDFK.I                                                  | 2173.31742 | 2 | 1.59E-05 | 0.86 | 3.38  | -     | 874.6    |
| gi4502171 ref NP_000476.1  | adenine phosphoribosyltransferase; AMP pyrophosphorylase; AMP diphospho  |            |   | 1.60E-05 | 0.95 | 10.19 | 5.60  | 19607.6  |
| AHQ-10-11, 3543 - 3563     | R.IDYIAGLDSR.G                                                           | 1123.24098 | 2 | 1.60E-05 | 0.95 | 3.73  | -     | 1475.3   |
| gi6996010 ref NP_002038.1  | glycyl-tRNA synthetase; GlyRS; glycine tRNA ligase [Homo sapiens]        |            |   | 1.62E-05 | 0.86 | 10.17 | 1.90  | 77530.3  |
| AHQ-10-5, 6207             | R.TFFSPVAVPFK.C                                                          | 1458.72722 | 2 | 1.62E-05 | 0.86 | 3.37  | -     | 508.0    |
| gi20270259 ref NP_620061.1 | phosphoglycerate kinase 2; phosphoglycerate kinase 1, pseudogene 2 [Ho   |            |   | 1.62E-05 | 0.92 | 10.17 | 3.60  | 44895.0  |
| AHQ-10-8, 3486             | K.LGDVYVNDVAFGTAHR.A                                                     | 1635.76178 | 2 | 1.62E-05 | 0.92 | 3.47  | -     | 1058.5   |
| gi4826659 ref NP_004921.1  | F-actin capping protein beta subunit; Cap Z [Homo sapiens]               |            |   | 1.70E-05 | 1.38 | 20.16 | 8.80  | 30628.5  |
| AHQ-10-9, 2819             | K.SGSGTMLGGSLTR.Q                                                        | 1338.47345 | 2 | 3.08E-04 | 0.65 | 2.58  | -     | 605.9    |
| AHQ-10-9, 3492             | R.STLNEYIFGK.T                                                           | 1172.31200 | 2 | 1.70E-05 | 0.73 | 2.75  | -     | 592.5    |
| gi475714 ref NP_004291.1   | acid phosphatase 1 isoform c; acid phosphatase of erythrocyte; red cell  |            |   | 1.76E-05 | 0.89 | 10.18 | 5.70  | 18042.4  |
| AHQ-10-11, 3339            | R.SPIAEAVFR.K                                                            | 990.13779  | 2 | 1.76E-05 | 0.89 | 3.29  | -     | 723.6    |
| gi29732170 ref XP_291550.1 | similar to Heat shock protein HSP 90-alpha (HSP 86) [Homo sapiens] [MA   |            |   | 1.80E-05 | 0.96 | 10.26 | 12.70 | 13262.9  |
| AHQ-10-5, 4128             | K.HLEINPDHSIETLR.Q                                                       | 1787.99770 | 3 | 1.80E-05 | 0.96 | 5.12  | -     | 1709.7   |
| gi4505093 ref NP_000889.1  | monoamine oxidase B [Homo sapiens]                                       |            |   | 1.81E-05 | 0.58 | 10.14 | 3.10  | 58762.6  |
| AHQ-10-7, 4410             | K.VLGSLEALEPHYEYEEK.N                                                    | 1814.02869 | 2 | 1.81E-05 | 0.58 | 2.80  | -     | 456.4    |
| gi29742410 ref XP_291183.1 | similar to TREM-like transcript 1 [Homo sapiens]                         |            |   | 1.83E-05 | 0.90 | 10.18 | 0.00  | 32678.3  |
| AHQ-10-13, 4220            | R.FLPEGCOPVSSAVDR.R                                                      | 1776.99174 | 2 | 1.83E-05 | 0.90 | 3.57  | -     | 683.5    |
| gi1858709 ref XP_087572.1  | similar to bA291L22.2 (similar to CDC10 (cell division cycle 10, S. ce   |            |   | 1.87E-05 | 0.94 | 10.18 | 10.90 | 9988.5   |
| AHQ-10-8, 3165             | K.FEDYLNRESR.V                                                           | 1244.29194 | 2 | 1.87E-05 | 0.94 | 3.64  | -     | 1339.3   |
| gi5031595 ref NP_005709.1  | actin related protein 2/3 complex subunit 4; Arp2/3 protein complex sub  |            |   | 1.97E-05 | 1.89 | 20.17 | 11.30 | 19666.9  |
| AHQ-10-11, 4292            | R.AENFFILR.R                                                             | 1010.17070 | 2 | 3.50E-04 | 0.96 | 3.43  | -     | 1961.3   |
| AHQ-10-11, 3250            | K.VLIEGSINSVR.V                                                          | 1187.37134 | 2 | 1.97E-05 | 0.94 | 3.08  | -     | 1561.8   |
| gi6005786 ref NP_009214.1  | monoglyceride lipase; lysophospholipase-like [Homo sapiens]              |            |   | 2.00E-05 | 0.77 | 10.14 | 4.50  | 34292.3  |
| AHQ-10-14, 5729 - 5744     | K.LTVPFLLQGSADR.L                                                        | 1530.79329 | 2 | 2.00E-05 | 0.77 | 2.88  | -     | 658.5    |
| gi20373153 ref NP_115997.4 | myosin XVIIIIB; myosin 18B [Homo sapiens]                                |            |   | 2.01E-05 | 0.89 | 10.22 | 0.70  | 285231.7 |
| AHQ-10-8, 6307             | R.ITAALQLTMLLEKSRVAR.Q                                                   | 2030.42494 | 2 | 2.01E-05 | 0.89 | 4.33  | -     | 1150.2   |
| gi18201905 ref NP_000166.2 | glucose phosphate isomerase; neuroleukin; glucose-6-phosphate isomerases |            |   | 2.03E-05 | 1.56 | 20.22 | 7.90  | 63146.7  |
| AHQ-10-7, 4790             | K.KIEPELDGSAQVTSHDASTNGLINFIK.Q                                          | 2886.16347 | 3 | 4.53E-04 | 0.66 | 3.10  | -     | 724.3    |
| AHQ-10-7, 5664             | K.TLAQLNPESLFIASK.T                                                      | 1833.11828 | 2 | 2.03E-05 | 0.91 | 4.32  | -     | 480.5    |
| gi10880136 ref NP_004032.2 | arrestin beta 1 isoform A [Homo sapiens]                                 |            |   | 2.18E-05 | 0.94 | 10.24 | 4.80  | 47065.3  |
| AHQ-10-7, 4129             | K.CPVAMEEADDTVAPSSTFK.V                                                  | 2218.42489 | 2 | 2.18E-05 | 0.94 | 4.82  | -     | 769.9    |
| gi29736026 ref XP_085123.3 | similar to Ras-related protein Rab-15 [Homo sapiens]                     |            |   | 2.24E-05 | 0.90 | 10.20 | 5.30  | 23517.8  |
| AHQ-10-11, 3414 - 3415     | R.IQIWDTAGQER.Y                                                          | 1317.43243 | 2 | 2.24E-05 | 0.90 | 4.04  | -     | 781.6    |
| gi11496885 ref NP_005442.2 | enigma protein; LIM domain protein [Homo sapiens]                        |            |   | 2.28E-05 | 0.89 | 10.16 | 2.60  | 49844.4  |
| AHQ-10-13, 4693 - 4746     | K.VVLEGPAPWGFR.L                                                         | 1328.54318 | 2 | 2.28E-05 | 0.89 | 3.16  | -     | 973.5    |
| gi5031569 ref NP_005727.1  | ARP1 actin-related protein 1 homolog A, centractin alpha; ARP1 (actin-r  |            |   | 2.34E-05 | 0.91 | 10.19 | 4.30  | 42613.4  |
| AHQ-10-8, 6266             | R.TLFSNIVLSSGSLTFK.G                                                     | 1684.95729 | 2 | 2.34E-05 | 0.91 | 3.67  | -     | 908.1    |
| gi14210536 ref NP_115914.1 | similar to chicken tubulin beta 5 [Homo sapiens]                         |            |   | 2.45E-05 | 0.65 | 10.18 | 3.80  | 49858.6  |
| AHQ-10-13, 5857 - 5913     | K.M*ASTFIGNSTAIQELFK.R                                                   | 1875.13550 | 2 | 2.45E-05 | 0.65 | 3.53  | -     | 662.0    |
| AHQ-10-7, 5686             | K.M*ASTFIGNSTAIQELFK.R                                                   | 1875.13550 | 2 | 2.96E-05 | 0.72 | 3.53  | -     | 758.9    |
| gi18426915 ref NP_004386.2 | drebrin 1 isoform a; drebrin E; drebrin-1; drebrin E2 [Homo sapiens] [   |            |   | 2.46E-05 | 0.68 | 10.16 | 2.80  | 71438.9  |
| AHQ-10-8, 2782             | R.SPSSDASTPVAEQIER.A                                                     | 1862.93023 | 2 | 2.46E-05 | 0.68 | 3.23  | -     | 303.8    |
| gi4503901 ref NP_003765.1  | polypeptide N-acetylgalactosaminyltransferase 4; UDP-N-acetyl-alpha-D-g  |            |   | 2.49E-05 | 0.61 | 10.18 | 3.60  | 66775.7  |
| AHQ-10-5, 4552             | R.ISRIDPIRPTM*AGGLFAVSK.K                                                | 2233.62002 | 2 | 2.49E-05 | 0.61 | 3.53  | -     | 400.8    |
| gi5902016 ref NP_008939.1  | reticulin 4; neuroendocrine-specific protein C like (foocen) [Homo sapi  |            |   | 2.54E-05 | 0.85 | 10.18 | 8.00  | 22395.3  |
| AHQ-10-1, 5229             |                                                                          |            |   |          |      |       |       |          |
